# Supplementary material
Source: PubMed Central journal article supplement (PMC2788555)
Supplement: NIHMS92035-supplement-1.pdf [file NIHMS92035-supplement-1.pdf]

Type of file: table

Label: Zhang-Table-S3

Filename: Zhang-2005-Cell-Supp2.xls

| Intergenic name                  | chr       | start         | gene name(s) | HTZ1          | subty       | 725.1      | 1038      | 2966         | 140          |              |          |
|----------------------------------|-----------|---------------|--------------|---------------|-------------|------------|-----------|--------------|--------------|--------------|----------|
|                                  |           |               |              |               |             | #N/A       | ABF1_     | FKH1_        | PHO4_        | 'REB1_YPD    |          |
| How many HTZ1 occupied genes (to |           |               |              | 80            | 37          | 21         | 38        |              |              |              |          |
| iYMR182C-1                       | 13        | 626069        | 12231        | YMR18         | <b>0.12</b> | Sgl        | Pi        | 0.797        | 0.318        | 0.678        | 0        |
| iYMR185W                         | 13        | 631962        | 12234        | YMR18         | <b>0.12</b> | Sgl        | Pi        | 0.772        | 0.864        | 0.59         | 0        |
| iYPR074C                         | 16        | 694820        | 13678        | YPR07         | <b>0.16</b> | Sgl        | Pi        | 0.853        | 0.837        | 0.977        | 0        |
| <b>iYEL013W</b>                  | <b>5</b>  | <b>130560</b> | <b>8845</b>  | <b>YEL012</b> | <b>0.22</b> | <b>Sgl</b> | <b>Pi</b> | <b>0.683</b> | <b>0.442</b> | <b>0.598</b> | <b>0</b> |
| iYNL111C                         | 14        | 417295        | 12488        | YNL11         | <b>0.28</b> | Sgl        | Pi        | 0.003        | 0.327        | NaN          | 0        |
| iYLR388W                         | 12        | 898806        |              | 11828         | <b>0.28</b> | Non        | F         | 0.421        | 0.918        | 0.394        | 0        |
| iYMR182C-0                       | 13        | 625153        | 12230        | YMR18         | <b>0.29</b> | Sgl        | Pi        | 0.741        | 0.83         | 0.221        | 0        |
| <b>iSNR190</b>                   | <b>10</b> | <b>139644</b> | <b>7062</b>  | <b>YJL148</b> | <b>0.3</b>  | <b>Sgl</b> | <b>Pi</b> | <b>0.68</b>  | <b>0.159</b> | <b>0.466</b> | <b>0</b> |
| iYOL006C                         | 15        | 315377        | 12785        | YOL00         | <b>0.31</b> | Sgl        | Pi        | 0.852        | 0.61         | 0.607        | 0        |
| iYGL089C                         | 7         | 345141        | 9649         | YGL089        | <b>0.33</b> | Dbl        | Pi        | 0.7          | 0.846        | 0.571        | 0        |
| iYJR090C                         | 10        | 594027        | 10985        | YJR09         | <b>0.34</b> | Sgl        | Pi        | 0.544        | 0.251        | 0.646        | 0        |
| iYKL104C                         | 11        | 245021        | 11167        | YKL10         | <b>0.38</b> | Sgl        | Pi        | 0.769        | 0.398        | 0.629        | 0        |
| iYKR015C                         | 11        | 468300        | 11308        | YKR01         | <b>0.38</b> | Dbl        | Pi        | 0.005        | 0.886        | 0.185        | 0        |
| iYGL192W                         | 7         | 144083        | 9748         | YGL191        | <b>0.39</b> | Sgl        | Pi        | 0.689        | 0.198        | 0.547        | 0        |
| iYOR186W                         | 15        | 683544        | 13132        | YOR18         | <b>0.4</b>  | Sgl        | Pi        | 0.699        | 0.457        | 0.926        | 0        |
| <b>iSNR70</b>                    | <b>16</b> | <b>719071</b> | <b>7097</b>  | <b>snr41</b>  | <b>0.42</b> | <b>Non</b> | <b>F</b>  | <b>0.52</b>  | <b>0.595</b> | <b>0.303</b> | <b>0</b> |
| iYKL082C                         | 11        | 281976        | 11144        | YKL08         | <b>0.43</b> | Dbl        | Pi        | 0.781        | 0.143        | 0.263        | 0        |
| iYDL138W                         | 4         | 215632        | 8193         | YDL137        | <b>0.45</b> | Sgl        | Pi        | 0.358        | 0.274        | 0.45         | 0        |
| iYOR128C                         | 15        | 566193        | 13077        | YOR12         | <b>0.45</b> | Sgl        | Pi        | 0.599        | 0.603        | 0.175        | 0        |
| iYDL046W                         | 4         | 371748        | 8105         | YDL045        | <b>0.47</b> | Sgl        | Pi        | 0.501        | 0.063        | 0.473        | 0        |
| iYML120C                         | 13        | 29810         | 12031        | YML12         | <b>0.49</b> | Dbl        | Pi        | 0.373        | 0.374        | 0.993        | 0        |
| iYMR280C                         | 13        | 831326        | 12329        | YMR28         | <b>0.51</b> | Dbl        | Pi        | 0.003        | 0.572        | 0.477        | 0        |
| iYKL148C                         | 11        | 171128        | 11204        | YKL14         | <b>0.54</b> | Sgl        | Pi        | 0.776        | 0.674        | 0.855        | 0        |
| iYDL140C                         | 4         | 210559        | 8195         | YDL140        | <b>0.55</b> | Sgl        | Pi        | 0.762        | 0.293        | 0.068        | 0        |
| iYDR257C                         | 4         | 971466        | 8548         | YDR257        | <b>0.57</b> | Sgl        | Pi        | 0.588        | 0.645        | 0.322        | 0        |
| <b>iSNR189</b>                   | <b>3</b>  | <b>178800</b> | <b>7061</b>  | <b>YCR031</b> | <b>0.58</b> | <b>Dbl</b> | <b>Pi</b> | <b>0.681</b> | <b>0.89</b>  | <b>0.43</b>  | <b>0</b> |
| iYMR188C                         | 13        | 636994        | 12237        | YMR18         | <b>0.59</b> | Dbl        | Pi        | 0.545        | 0.418        | 0.142        | 0        |
| iYIL149C                         | 9         | 68062         | 10618        | YIL149        | <b>0.59</b> | Dbl        | Pi        | 0.867        | 0.648        | 0.114        | 0        |
| <b>iYJR100C</b>                  | <b>10</b> | <b>617015</b> | <b>10997</b> | <b>YJR10</b>  | <b>0.62</b> | <b>Dbl</b> | <b>Pi</b> | <b>0.509</b> | <b>0.604</b> | <b>0.188</b> | <b>0</b> |
| iYPR100W                         | 16        | 730222        | 13697        | YPR10         | <b>0.67</b> | Sgl        | Pi        | 0.536        | 0.379        | 0.4          | 0        |
| iYDR029W                         | 4         | 501398        |              | 8332          | <b>0.68</b> | Non        | F         | <b>2E-04</b> | 0.545        | 0.289        | 0        |
| iYLR379W                         | 12        | 877300        | 11819        | YLR38         | <b>0.68</b> | Sgl        | Pi        | 0.578        | 0.058        | 0.11         | 0        |
| iYNL169C                         | 14        | 317673        | 12544        | YNL16         | <b>0.68</b> | Sgl        | Pi        | 0.738        | 0.756        | 0.998        | 0        |
| iYDR313C                         | 4         | 1090056       | 8600         | YDR313        | <b>0.69</b> | Sgl        | Pi        | 0.527        | 0.013        | 0.61         | 0        |
| iYDR323C                         | 4         | 1114030       | 8609         | YDR323        | <b>0.7</b>  | Sgl        | Pi        | 0.5          | 0.04         | 0.323        | 0        |
| iYPL206C                         | 16        | 163596        | 13526        | YPL20         | <b>0.72</b> | Sgl        | Pi        | 0.31         | 0.366        | 0.257        | 0        |
| iYPR181C                         | 16        | 899660        | 13770        | YPR18         | <b>0.74</b> | Dbl        | Pi        | 0.085        | 0.169        | 0.949        | <b>0</b> |
| iYGR184C                         | 7         | 865734        | 10057        | YGR18         | <b>0.75</b> | Sgl        | Pi        | 0.348        | 0.868        | 0.718        | 0        |
| iYNL008C                         | 14        | 618237        | 12394        | YNL00         | <b>0.75</b> | Sgl        | Pi        | 0.674        | 0.718        | 0.593        | 0        |
| iYBL059W                         | 2         | 111252        | 7557         | YBL058        | <b>0.75</b> | Sgl        | Pi        | 0.659        | 0.585        | 0.672        | 0        |
| iYIL113W                         | 9         | 151197        | 10582        | YIL112        | <b>0.77</b> | Sgl        | Pi        | 0.669        | 0.487        | 0.267        | 0        |
| iYNL162W                         | 14        | 332154        | 12537        | YNL16         | <b>0.78</b> | Sgl        | Pi        | 0.547        | 0.916        | 0.082        | 0        |
| <b>itQ(UUG)E2</b>                | <b>5</b>  | <b>131150</b> | <b>7284</b>  | <b>YEL012</b> | <b>0.78</b> | <b>Sgl</b> | <b>Pi</b> | <b>0.544</b> | <b>0.479</b> | <b>NaN</b>   | <b>0</b> |
| iYGL120C                         | 7         | 283929        | 9680         | YGL120        | <b>0.79</b> | Dbl        | Pi        | 0.649        | 0.167        | 0.906        | 0        |
| iYGL152C                         | 7         | 217375        | 9709         | YGL152        | <b>0.79</b> | Dbl        | Pi        | 0.761        | 0.598        | 0.539        | 0        |
| iYIR002C                         | 9         | 360383        | 10652        | YIR002        | <b>0.79</b> | Dbl        | Pi        | 0.652        | 0.062        | 0.129        | 0        |
| iYNL115C                         | 14        | 412038        | 12491        | YNL11         | <b>0.79</b> | Sgl        | Pi        | 0.002        | 0.206        | 0.614        | 0        |
| iYIL023C                         | 9         | 310426        | 10500        | YIL023        | <b>0.8</b>  | Dbl        | Pi        | 0.932        | 0.58         | 0.348        | <b>0</b> |

|            |    |         |       |        |      |       |    |       |       |       |   |
|------------|----|---------|-------|--------|------|-------|----|-------|-------|-------|---|
| iYIL075C   | 9  | 220707  | 10548 | YIL075 | 0.8  | Sgl   | Pi | 0.574 | 0.092 | 0.437 | 0 |
| iYFL006W   | 6  | 129917  | 9294  | YFL005 | 0.81 | Sgl   | Pi | 0.582 | 0.293 | 0.364 | 0 |
| iYOR335C   | 15 | 949088  | 13267 | YOR33  | 0.82 | Dbl   | Pi | 0.545 | 0.87  | 0.067 | 0 |
| iYOR116C   | 15 | 544147  | 13066 | YOR11  | 0.82 | Dbl   | Pi | 4E-04 | 0.621 | 0.713 | 0 |
| iYJL002C   | 10 | 434328  | 10703 | YJL00  | 0.83 | Dbl   | Pi | 0.549 | 0.117 | 0.557 | 0 |
| iYNL284C   | 14 | 104085  | 12642 | YNL28  | 0.84 | Sgl   | Pi | 0.609 | 0.494 | 0.376 | 0 |
| iYOL005C   | 15 | 316190  | 12784 | YOL00  | 0.85 | Dbl   | Pi | 0.725 | 0.594 | 0.582 | 0 |
| iYMR221C   | 13 | 715459  | 12271 | YMR22  | 0.85 | Sgl   | Pi | 0.569 | 0.345 | 0.487 | 0 |
| iYOR074C   | 15 | 467594  | 13028 | YOR07  | 0.86 | Dbl   | Pi | 0.478 | 0.633 | 0.165 | 0 |
| iYML002W   | 13 | 266749  | 11922 | YML00  | 0.87 | Sgl   | Pi | 0.445 | 0.534 | 0.106 | 0 |
| iYGL182C   | 7  | 157606  | 9738  | YGL182 | 0.87 | Dbl   | Pi | 0.726 | 0.488 | 0.552 | 0 |
| iYMR213W   | 13 | 695143  | 12263 | YMR21  | 0.88 | Sgl   | Pi | 0.677 | 0.567 | 0.672 | 0 |
| iYCR093W   | 3  | 286426  | 8039  | YCR094 | 0.88 | Sgl   | Pi | 0.572 | 0.372 | 0.456 | 0 |
| iYKR068C   | 11 | 570535  | 11356 | YKR06  | 0.88 | Dbl   | Pi | 0.002 | 0.546 | 0.396 | 0 |
| iYHR039C-B | 8  | 187676  | 10274 | YHR03  | 0.89 | Dbl   | Pi | 0.552 | 0.676 | 0.261 | 0 |
| iYKL073W   | 11 | 298737  | 11136 | YKL07  | 0.9  | Sgl   | Pi | 0.637 | 0.244 | 0.976 | 0 |
| iYKL059C   | 11 | 329088  | 11122 | YKL05  | 0.9  | Dbl   | Pi | 0.737 | 0.422 | 0.583 | 0 |
| iYJL106W-0 | 10 | 223042  | 10791 | YJL10  | 0.9  | Sgl   | Pi | 0.796 | 0.017 | 0.995 | 0 |
| iYNL091W   | 14 | 456137  | 12470 | YNL09  | 0.91 | Sgl   | Pi | 0.765 | 0.614 | 0.525 | 0 |
| iYNL092W   | 14 | 452092  | 12471 | YNL09  | 0.91 | Sgl   | Pi | 0.641 | 1E-05 | 0.628 | 0 |
| iYMR039C   | 13 | 349524  | 12091 | YMR03  | 0.91 | Dbl   | Pi | 0.811 | 0.165 | 0.998 | 0 |
| iYLL040C   | 12 | 63648   | 11443 | YLL04  | 0.92 | Sgl   | Pi | 0.537 | 0.875 | 0.447 | 0 |
| iYPR054W   | 16 | 667442  | 13659 | YPR05  | 0.92 | Sgl   | Pi | 0.664 | 0.6   | NaN   | 0 |
| iYER156C   | 5  | 484340  | 9177  | YER15  | 0.93 | Dbl   | Pi | 0.678 | 0.725 | 0.509 | 0 |
| iYJR098C   | 10 | 614841  | 10995 | YJR09  | 0.94 | Dbl   | Pi | 0.511 | 0.153 | 2E-04 | 0 |
| iYMR117C   | 13 | 501892  | 12164 | YMR11  | 0.95 | Sgl   | Pi | 0.681 | 2E-04 | 0.476 | 0 |
| iSNR8      | 15 | 832523  | 7099  | YOR27  | 0.95 | Dbl   | Pi | 0.56  | 0.64  | 0.596 | 0 |
| iYDL188C   | 4  | 124984  | 8236  | YDL188 | 0.95 | Sgl   | Pi | 0.609 | 0.778 | 0.727 | 0 |
| iYPR066W   | 16 | 682114  | 13670 | YPR06  | 0.96 | Sgl   | Pi | 0.559 | 0.572 | NaN   | 0 |
| iYPR163C   | 16 | 869938  | 13754 | YPR16  | 0.97 | Dbl   | Pi | 0.53  | 0.658 | 0.958 | 0 |
| iYOR149C   | 15 | 611390  | 13095 | YOR14  | 0.97 | Dbl   | Pi | 0.62  | 0.581 | 0.049 | 0 |
| iYGR147C   | 7  | 786912  | 10026 | YGR14  | 0.98 | Sgl   | Pi | 0.602 | 0.636 | 0.263 | 0 |
| iYNR039C   | 14 | 699417  | 12739 | YNR03  | 0.98 | Dbl   | Pi | 0.638 | 0.495 | 0.347 | 0 |
| iYML129C   | 13 | 14746   | 12040 | YML12  | 0.99 | Sgl   | Pi | 0.526 | 0.18  | 0.096 | 0 |
| iYDR465C   | 4  | 1394567 | 8740  | YDR46  | 0.99 | Dbl   | Pi | 0.472 | 0.563 | 0.384 | 0 |
| iYAL031C   | 1  | 87046   | 7404  | YAL031 | 1    | Dbl   | Pi | 0.19  | 0.568 | 0.43  | 0 |
| iYDL226C   | 4  | 52173   | 8275  | YDL226 | 1    | Dbl   | Pi | 0.735 | 0.113 | 0.064 | 0 |
| iYGR011W   | 7  | 512815  | 9898  | YGR01  | 0.93 | Sgl   | Pi | 0.702 | 0.77  | 0.427 | 0 |
| iYJL158C   | 10 | 122641  | 10837 | YJL15  | 0.32 | Sgl   | Pi | 0.921 | 0.069 | 0.998 | 0 |
| iYNL263C   | 14 | 147844  | 12624 | YNL26  | 0.99 | Dbl   | Pi | 0.742 | 0.468 | 0.374 | 0 |
| iYBL014C   | 2  | 201712  | 7513  | YBL014 | 0.99 | Dbl   | Pi | 0.741 | 0.159 | 0.075 | 0 |
| iYKL146W   | 11 | 173859  | 11203 | YKL14  | 0.7  | Sgl   | Pi | 0.643 | 0.515 | 0.327 | 0 |
| iCEN4      | 4  | 449820  |       | 7004   | 0.75 | Non F |    | 0.89  | 0.1   | 0.627 | 0 |
| iYDL213C   | 4  | 77957   | 8263  | YDL213 | 0.85 | Dbl   | Pi | 0.631 | 0.495 | 0.068 | 0 |
| iYDR155C   | 4  | 768998  | 8453  | YDR15  | 0.11 | Dbl   | Pi | 0.544 | 0.428 | 0.511 | 0 |
| iYGL098W   | 7  | 318063  | 9660  | YGL097 | 0.12 | Sgl   | Pi | 0.731 | 0.71  | 0.089 | 0 |
| iYGL098W   | 7  | 318063  | 9660  | YGL097 | 0.12 | Sgl   | Pi | 0.731 | 0.71  | 0.089 | 0 |
| iYER039C-A | 5  | 229465  | 8957  | YER03  | 0.97 | Dbl   | Pi | 0.712 | 0.387 | 0.604 | 0 |
| iYOR325W   | 15 | 925073  | 13259 | YOR32  | 0.81 | Sgl   | Pi | 0.367 | 0.837 | 0.405 | 0 |
| iYLR366W   | 12 | 855854  | 11809 | YLR36  | 0.14 | Sgl   | Pi | 0.025 | 0.097 | 0.481 | 0 |
| iYER048W-A | 5  | 250991  | 8969  | YER04  | 0.47 | Sgl   | Pi | 0.68  | 0.423 | 0.38  | 0 |

|              |    |         |                         |        |             |        |       |       |       |      |
|--------------|----|---------|-------------------------|--------|-------------|--------|-------|-------|-------|------|
| iYFR050C     | 6  | 249851  | 9530                    | YFR050 | <b>0.83</b> | Sgl Pi | 0.752 | 0.832 | 0.547 | 0    |
| iYOR318C     | 15 | 912413  | 13253                   | YOR31  | <b>0.92</b> | Dbl Pi | 0.88  | 0.606 | 0.872 | 0    |
| itS(AGA)D1   | 4  | 437836  | 7304                    | YDL007 | <b>0.57</b> | Sgl Pi | 0.726 | 0.742 | 0.742 | 0    |
| iCEN13       | 13 | 268152  |                         | 6998   | <b>0.33</b> | Non F  | 0.852 | 0.821 | 0.442 | 0    |
| iYER012W     | 5  | 178448  | 8931                    | YER013 | <b>0.96</b> | Sgl Pi | 0.591 | 0.504 | 0.366 | 0    |
| iYKL220C-1   | 11 | 12309   | 11280                   | YKL22  | <b>0.56</b> | Dbl Pi | 0.602 | 0.712 | 0.302 | 0    |
| itM(CAU)E    | 5  | 100206  | 7245                    | YEL027 | <b>0.24</b> | Sgl Pi | 0.011 | 0.954 | 0.788 | 0    |
| iYKL078W     | 11 | 290689  | 11140                   | YKL07  | <b>0.9</b>  | Sgl Pi | 0.623 | 0.183 | 0.634 | 0    |
| iYNL280C     | 14 | 110406  | 12638                   | YNL28  | <b>0.32</b> | Dbl Pi | 0.567 | 0.016 | 0.417 | 0    |
| iYJR128W     | 10 | 662986  |                         | 11023  | <b>0.2</b>  | Non F  | 8E-04 | 0.037 | 0.384 | 0    |
| iYFL024C     | 6  | 90334   | 9330                    | YFL024 | <b>0.24</b> | Dbl Pi | 0.02  | 0.588 | 0.745 | 0    |
| iYMR001C     | 13 | 271125  | 12051                   | YMR00  | <b>0.35</b> | Dbl Pi | 0.016 | 0.332 | 0.016 | 0    |
| iYOR157C     | 15 | 631742  | 13104                   | YOR15  | <b>0.78</b> | Dbl Pi | 0.005 | 0.618 | 0.847 | 0    |
| iYKL143W     | 11 | 178176  | 11200                   | YKL14  | <b>0.28</b> | Sgl Pi | 0.623 | 0.455 | 5E-04 | 0    |
| iYGL200C     | 7  | 123308  | 9754                    | YGL200 | <b>0.93</b> | Sgl Pi | 0.73  | 0.102 | 0.965 | 0    |
| itW(CCA)G2   | 7  | 878800  | 7361                    | YGR18  | <b>0.46</b> | Sgl Pi | 0.741 | 0.748 | 0.124 | 0    |
| itQ(UUG)E1   | 5  | 250345  | 7283                    | YER04  | <b>0.49</b> | Dbl Pi | 0.475 | 0.623 | 0.776 | 0    |
| iYIL126W     | 9  | 122072  | 10596                   | YIL125 | <b>0.8</b>  | Sgl Pi | 0.665 | 0.698 | 0.076 | 0    |
| iYPL212C     | 16 | 153216  | 13532                   | YPL21  | <b>0.98</b> | Dbl Pi | 0.114 | 0.822 | 0.577 | 0    |
| iYGL070C     | 7  | 374817  | 9632                    | YGL070 | <b>0.98</b> | Sgl Pi | 0.802 | 0.588 | 0.393 | 0    |
| iYLR171W     | 12 | 501130  | promoter for ylr170c/ap |        | <b>0.62</b> | Non F  | 0.545 | 0.785 | 0.77  | 0    |
| iYLR274W     | 12 | 693880  | 11731                   | YLR27  | <b>0.79</b> | Sgl Pi | 0.64  | 0.598 | 0.107 | 0    |
| iYHL031C     | 8  | 39495   | 10208                   | YHL03  | <b>0.67</b> | Dbl Pi | 0.76  | 0.557 | 0.357 | 0    |
| iYGR179C     | 7  | 854878  | 10053                   | YGR17  | <b>0.94</b> | Sgl Pi | 0.604 | 0.113 | 0.147 | 0    |
| iYNL244C     | 14 | 187542  | 12607                   | YNL24  | <b>0.44</b> | Dbl Pi | 2E-04 | 0.012 | 0.372 | 0    |
| iYBR179C     | 2  | 589069  | 7781                    | YBR17  | <b>0.85</b> | Dbl Pi | 0.339 | 0.424 | 0.525 | 0    |
| iYBRCdelta18 | 2  | 643952  | 7894                    | YBR210 | <b>0.73</b> | Sgl Pi | 0.473 | 0.098 | 0.392 | 0    |
| iYGL159W     | 7  | 203841  | 9715                    | YGL158 | <b>0.41</b> | Sgl Pi | 0.883 | 0.588 | 0.581 | 0    |
| iYNR013C     | 14 | 651709  | 12711                   | YNR01  | <b>0.12</b> | Dbl Pi | 0.819 | 0.917 | 0.658 | 0    |
| iYKL203C     | 11 | 63358   | 11259                   | YKL20  | <b>0.73</b> | Dbl Pi | 0.687 | 0.911 | 0.565 | 0    |
| iYDL233W     | 4  | 38181   | 8283                    | YDL232 | <b>0.85</b> | Sgl Pi | 0.618 | 0.696 | 0.321 | 0    |
| iYER069W     | 5  | 298017  | 9007                    | YER070 | <b>0.68</b> | Sgl Pi | 0.652 | 1E-07 | 0.507 | 0    |
| iYOR043W     | 15 | 412316  | 12996                   | YOR04  | <b>0.6</b>  | Sgl Pi | 0.563 | 0.957 | 0.285 | 0    |
| iYML124C     | 13 | 23676   | 12035                   | YML12  | <b>0.87</b> | Sgl Pi | 0.474 | 0.03  | 0.609 | 0    |
| iYOR151C     | 15 | 616657  | 13097                   | YOR15  | <b>0.78</b> | Sgl Pi | 0.016 | 0.716 | 0.518 | 0    |
| iYLR114C     | 12 | 377226  | 11581                   | YLR11  | <b>0.9</b>  | Dbl Pi | 0.283 | 0.004 | 0.761 | 0    |
| iYNL308C     | 14 | 55886   | 12664                   | YNL30  | <b>0.64</b> | Sgl Pi | 0.607 | 0.664 | 0.414 | 0    |
| iYDR325W     | 4  | 1120230 |                         | 8611   | <b>0.32</b> | Non F  | 0.003 | 0.53  | 0.663 | 0    |
| iYJR137C     | 10 | 682973  | 11032                   | YJR13  | <b>0.44</b> | Dbl Pi | 5E-04 | 0.124 | 0.938 | 0    |
| iYOR148C     | 15 | 609184  | 13094                   | YOR14  | <b>0.92</b> | Sgl Pi | 0.09  | 0.923 | 0.133 | 0    |
| iYOR048C     | 15 | 421652  | 13001                   | YOR04  | <b>0.85</b> | Sgl Pi | 0.784 | 0.701 | 0.194 | 0.01 |
| iYNR016C-1   | 14 | 662143  | 12715                   | YNR01  | <b>0.13</b> | Dbl Pi | 0.186 | 0.529 | 0.999 | 0.01 |
| iYJL196C     | 10 | 68793   | 10871                   | YJL19  | <b>0.25</b> | Sgl Pi | 0.929 | 0.06  | 0.833 | 0.01 |
| iYNRCdelta8  | 14 | 726934  | 12777                   | YNR05  | <b>0.89</b> | Sgl Pi | 0.601 | 0.557 | 0.784 | 0.01 |
| iYOR353C     | 15 | 1000832 | 13284                   | YOR35  | <b>0.83</b> | Sgl Pi | 0.747 | 0.633 | 0.389 | 0.01 |
| iYHR169W     | 8  | 443461  | 10404                   | YHR17  | <b>0.73</b> | Sgl Pi | 0.753 | 0.459 | 0.709 | 0.01 |
| iYBR162W-A   | 2  | 565382  | 7766                    | YBR163 | <b>0.92</b> | Sgl Pi | 0.402 | 1E-06 | 0.307 | 0.01 |
| iYGR235C     | 7  | 962046  | 10104                   | YGR23  | <b>0.97</b> | Sgl Pi | 0.618 | 0.673 | 0.758 | 0.01 |
| iYMR047C     | 13 | 366713  | 12098                   | YMR04  | <b>0.98</b> | Dbl Pi | 0.478 | 0.677 | 0.042 | 0.01 |
| iYGR172C     | 7  | 843585  | 10047                   | YGR17  | <b>0.75</b> | Dbl Pi | 0.555 | 0.125 | 0.263 | 0.01 |
| iYGR078C     | 7  | 640357  | 9957                    | YGR078 | <b>0.28</b> | Dbl Pi | 0.719 | 0.727 | 0.551 | 0.01 |

|            |    |               |              |             |             |        |              |              |              |             |
|------------|----|---------------|--------------|-------------|-------------|--------|--------------|--------------|--------------|-------------|
| iYDR372C   | 4  | 1222131       | 8657         | YDR372      | <b>0.84</b> | Dbl Pi | 0.045        | 0.2          | 0.705        | 0.01        |
| iYGR059W   | 7  | 609116        | 9942         | YGR060      | <b>0.12</b> | Sgl Pi | 0.576        | 0.928        | 0.476        | 0.01        |
| iYDR370C   | 4  | 1219099       | 8655         | YDR370      | <b>0.89</b> | Dbl Pi | 0.559        | 0.008        | 0.864        | 0.01        |
| iYKR075C-1 | 11 | 581166        | 11364        | YKR075      | <b>0.67</b> | Dbl Pi | 0.048        | 0.562        | 0.349        | 0.01        |
| iYBR164C   | 2  | 568394        | 7768         | YBR164      | <b>0.68</b> | Dbl Pi | 0.487        | 0.079        | 0.499        | 0.01        |
| iYKL052C   | 11 | 340186        | 11115        | YKL052      | <b>0.13</b> | Dbl Pi | 0.877        | 0.136        | 0.618        | 0.01        |
| iYOR340C   | 15 | 960178        | 13272        | YOR340      | <b>0.54</b> | Dbl Pi | 0.603        | 0.136        | 0.557        | 0.01        |
| itT(AGU)J2 | 9  | <b>325813</b> | <b>7327</b>  | YIL015C     | <b>0.62</b> | Dbl Pi | <b>0.569</b> | <b>0.57</b>  | NaN          | <b>0.01</b> |
| iYEL005C   | 5  | 146750        | 8837         | YEL005      | <b>0.68</b> | Dbl Pi | 0.174        | 0.632        | 0.472        | 0.01        |
| iYER105C   | 5  | 372004        | 9081         | YER105      | <b>0.82</b> | Dbl Pi | 0.711        | 0.69         | 0.232        | 0.01        |
| iYNL118C   | 14 | 405552        | 12494        | YNL118      | <b>0.9</b>  | Dbl Pi | <b>6E-05</b> | 0.83         | 0.929        | 0.01        |
| iYJL004C   | 10 | 431886        | 10705        | YJL004      | <b>0.87</b> | Dbl Pi | 0.003        | 0.089        | 0.327        | 0.01        |
| iYPR067W   | 16 | 682782        |              | 13671       | <b>0.41</b> | Non F  | 0.524        | 0.736        | 0.883        | 0.01        |
| iYER007C-A | 5  | <b>166887</b> | <b>8924</b>  | YER007      | <b>0.45</b> | Sgl Pi | <b>0.028</b> | <b>0.959</b> | <b>0.194</b> | <b>0.01</b> |
| iYBR222C   | 2  | 668315        | 7822         | YBR222      | <b>0.51</b> | Sgl Pi | 0.005        | 0.564        | 0.976        | 0.01        |
| iYDR282C   | 4  | 1024743       | 8571         | YDR282      | <b>0.8</b>  | Sgl Pi | 0.351        | 0.092        | NaN          | 0.01        |
| iYOR196C   | 15 | 716833        | 13143        | YOR196      | <b>0.94</b> | Dbl Pi | 0.709        | 0.589        | 0.266        | 0.01        |
| iYGR231C   | 7  | 953482        | 10100        | YGR231      | <b>0.97</b> | Dbl Pi | <b>5E-04</b> | 0.405        | 0.118        | 0.01        |
| iYML007W   | 13 | 255797        |              | 11927       | <b>0.18</b> | Non F  | 0.588        | 0.604        | 0.569        | 0.01        |
| iSNR57     | 12 | <b>795021</b> |              | <b>7082</b> | <b>0.12</b> | Non F  | <b>4E-04</b> | <b>0.83</b>  | <b>0.403</b> | <b>0.01</b> |
| iYGR134W   | 7  | 761123        | 10014        | YGR134      | <b>0.9</b>  | Sgl Pi | 0.647        | 0.591        | 0.846        | 0.01        |
| iYLR083C   | 12 | 296095        | 11552        | YLR083      | <b>0.72</b> | Sgl Pi | 0.802        | 0.536        | 0.771        | 0.01        |
| iYOR236W   | 15 | 781545        | 13177        | YOR236      | <b>0.98</b> | Sgl Pi | 0.238        | 0.8          | 0.003        | 0.01        |
| iYDR498C   | 4  | 1447011       | 8771         | YDR498      | <b>0.74</b> | Dbl Pi | 0.738        | 0.61         | 0.258        | 0.01        |
| iYEL023C   | 5  | 110549        | 8855         | YEL023      | <b>0.86</b> | Dbl Pi | 0.682        | 0.935        | 0.529        | 0.01        |
| iYGR133W   | 7  | 757428        | 10013        | YGR133      | <b>0.92</b> | Sgl Pi | 0.657        | 0.251        | 0.011        | 0.01        |
| iYJR006W   | 10 | 450364        | 10916        | YJR006      | <b>0.74</b> | Sgl Pi | 0.492        | 0.616        | 0.648        | 0.01        |
| iYPL071C   | 16 | 420506        | 13402        | YPL071      | <b>0.64</b> | Dbl Pi | 0.348        | 0.747        | 0.376        | 0.01        |
| iYPR029C   | 16 | 626958        | 13641        | YPR029      | <b>0.88</b> | Dbl Pi | 0.736        | 0.761        | 0.481        | 0.01        |
| itK(CUU)J  | 10 | <b>414735</b> | <b>7213</b>  | YJL011C     | <b>0.9</b>  | Sgl Pi | <b>0.002</b> | <b>0.727</b> | <b>0.522</b> | <b>0.01</b> |
| iYOR264W   | 15 | 820196        | 13202        | YOR264      | <b>0.79</b> | Sgl Pi | 0.345        | 0.25         | 0.125        | 0.01        |
| iYOR222W   | 15 | <b>759237</b> | <b>13164</b> | YOR222      | <b>0.6</b>  | Sgl Pi | <b>0.652</b> | <b>0.803</b> | <b>0.392</b> | <b>0.01</b> |
| iYDL184C   | 4  | 130490        | 8233         | YDL184      | <b>0.07</b> | Sgl Pi | 0.651        | 0.547        | 0.561        | 0.01        |
| iYEL026W   | 5  | 102339        |              | 8858        | <b>0.2</b>  | Non F  | 0.675        | 0.763        | 0.669        | 0.01        |
| iYDR183W   | 4  | 830281        |              | 8483        | <b>0.41</b> | Non F  | 0.569        | 0.423        | 0.541        | 0.01        |
| iYBR095C   | 2  | 435717        | 7703         | YBR095      | <b>0.74</b> | Dbl Pi | 0.501        | 0.634        | 0.405        | 0.01        |
| itK(UUU)G1 | 7  | <b>115589</b> | <b>7218</b>  | YGL203      | <b>0.19</b> | Dbl Pi | <b>0.769</b> | <b>0.955</b> | <b>0.547</b> | <b>0.01</b> |
| iYBL060W   | 2  | 109979        | 7558         | YBL059      | <b>0.63</b> | Sgl Pi | 0.407        | 0.036        | 0.054        | 0.01        |
| iYGL119W   | 7  | <b>285955</b> |              | <b>9679</b> | <b>0.6</b>  | Non F  | <b>0.761</b> | <b>0.949</b> | <b>0.578</b> | <b>0.01</b> |
| iYKL139W   | 11 | 184557        |              | 11196       | <b>0.68</b> | Non F  | 0.587        | 0.255        | 6E-04        | 0.01        |
| iYJL112W   | 10 | 207138        | 10797        | YJL112      | <b>0.7</b>  | Sgl Pi | <b>3E-04</b> | 0.685        | 0.41         | 0.01        |
| iYDL209C   | 4  | 87224         | 8257         | YDL209      | <b>0.78</b> | Dbl Pi | <b>7E-04</b> | 0.464        | 0.579        | 0.01        |
| iYBL051C   | 2  | 124726        | 7550         | YBL051      | <b>0.98</b> | Dbl Pi | 0.039        | 0.48         | 0.248        | 0.01        |
| iYML081C-A | 13 | 104159        | 11996        | YML081      | <b>0.94</b> | Dbl Pi | <b>1E-03</b> | 0.173        | 0.826        | 0.01        |
| iYGL135W   | 7  | 255288        | 9693         | YGL134      | <b>0.27</b> | Sgl Pi | 0.546        | 0.467        | 0.911        | 0.01        |
| iYDL045W-A | 4  | 372536        |              | 8104        | <b>0.23</b> | Non F  | 0.494        | 0.634        | 0.729        | 0.01        |
| iYDR030C   | 4  | 503265        | 8333         | YDR030      | <b>0.92</b> | Dbl Pi | 0.343        | 0.422        | 0.591        | 0.02        |
| iYDR284C   | 4  | 1031403       | 8573         | YDR284      | <b>0.52</b> | Dbl Pi | 0.001        | 0.009        | 0.422        | 0.02        |
| iYDR378C   | 4  | 1229697       | 8663         | YDR378      | <b>0.72</b> | Dbl Pi | 0.31         | 0.003        | 0.756        | 0.02        |
| iYDL185W   | 4  | 130010        |              | 8234        | <b>0.05</b> | Non F  | 0.835        | 0.985        | 0.917        | 0.02        |
| iYOR020C-1 | 15 | 371829        | 12974        | YOR020      | <b>0.38</b> | Sgl Pi | 0.671        | 0.528        | 0.345        | 0.02        |

|              |    |                |              |                   |             |       |    |              |              |              |             |
|--------------|----|----------------|--------------|-------------------|-------------|-------|----|--------------|--------------|--------------|-------------|
| iYIR001C     | 9  | 356887         | 10651        | YIR001            | <b>0.58</b> | Sgl   | Pi | 0.679        | 0.638        | 0.039        | 0.02        |
| iYDR456W     | 4  | 1369375        | 8731         | YDR457            | <b>0.74</b> | Sgl   | Pi | 0.712        | 0.459        | 0.35         | 0.02        |
| iYKL040C     | 11 | 361473         | 11103        | YKL040            | <b>0.74</b> | Dbl   | Pi | 0.007        | 0.527        | 0.759        | 0.02        |
| iYLL034C     | 12 | 73140          | 11439        | YLL034            | <b>0.99</b> | Dbl   | Pi | <b>8E-05</b> | 0.249        | 0.06         | 0.02        |
| iYEL027W     | 5  | 101250         | 8859         | YEL026            | <b>0.33</b> | Sgl   | Pi | 0.644        | 0.996        | 0.006        | 0.02        |
| iYDLWtau1    | 4  | <b>437570</b>  | <b>8305</b>  | YDL007            | <b>0.08</b> | Sgl   | Pi | <b>0.591</b> | <b>0.528</b> | <b>0.573</b> | <b>0.02</b> |
| iYDR063W     | 4  | 579112         | 8370         | YDR064            | <b>0.22</b> | Sgl   | Pi | 0.415        | 0.837        | 0.653        | 0.02        |
| iYOL024W     | 15 | 277606         | 12804        | YOL020            | <b>0.87</b> | Sgl   | Pi | 0.568        | <b>3E-06</b> | 0.578        | 0.02        |
| iYDR179C     | 4  | 819174         | 8478         | YDR179            | <b>0.57</b> | Dbl   | Pi | 0.75         | 0.001        | 0.55         | 0.02        |
| iYJL046W     | 10 | <b>353304</b>  | <b>10738</b> | YJL046            | <b>0.11</b> | Sgl   | Pi | <b>0.712</b> | <b>0.907</b> | <b>0.125</b> | <b>0.02</b> |
| iYGR075C     | 7  | 636863         | 9954         | YGR075            | <b>0.6</b>  | Sgl   | Pi | 0.59         | 0.597        | 0.365        | 0.02        |
| iYHR170W     | 8  | 445372         | 10405        | YHR170            | <b>0.71</b> | Sgl   | Pi | 0.742        | 0.731        | 0.373        | 0.02        |
| iYGL196W     | 7  | 131056         | 9751         | YGL195            | <b>0.99</b> | Sgl   | Pi | <b>2E-04</b> | 0.062        | 0.717        | 0.02        |
| iYLR149C     | 12 | 439812         | 11613        | YLR149            | <b>0.49</b> | Dbl   | Pi | 0.566        | 0.121        | 0.281        | 0.02        |
| iYERWdelta12 | 5  | 353726         | 9268         | YER097            | <b>0.71</b> | Sgl   | Pi | 0.478        | 0.056        | 0.721        | 0.02        |
| iYLR112W     | 12 | 371227         | 11579        | YLR112            | <b>0.13</b> | Sgl   | Pi | 0.844        | 0.005        | 0.121        | 0.02        |
| iYPL267W     | 16 | 38798          | 13585        | YPL267            | <b>0.93</b> | Sgl   | Pi | 0.792        | 0.604        | 0.325        | 0.02        |
| iYERCdelta14 | 5  | 431805         | 9245         | YER132            | <b>0.85</b> | Dbl   | Pi | 0.648        | 0.591        | 0.348        | 0.02        |
| iYBR167C     | 2  | 571847         | 7771         | YBR167            | <b>0.54</b> | Dbl   | Pi | 0.675        | 0.401        | 0.858        | 0.02        |
| iYMR010W-0   | 13 | 286304         | 12060        | YMR010            | <b>0.24</b> | Sgl   | Pi | 0.521        | 0.192        | 0.51         | 0.02        |
| iYDR527W-0   | 4  | 1492401        | 8796         | YDR527            | <b>0.62</b> | Sgl   | Pi | 0.592        | 0.183        | 0.928        | 0.02        |
| iYMR271C     | 13 | <b>807535</b>  | <b>12320</b> | YMR271            | <b>0.58</b> | Sgl   | Pi | <b>0.653</b> | <b>0.969</b> | <b>0.548</b> | <b>0.02</b> |
| iYIL105C     | 9  | 169696         | 10574        | YIL105            | <b>0.82</b> | Sgl   | Pi | 0.63         | 0.622        | 0.216        | 0.02        |
| iYNL197C     | 14 | 269585         | 12567        | YNL197            | <b>0.72</b> | Sgl   | Pi | 0.63         | 0.092        | 0.066        | 0.02        |
| iYDR306C     | 4  | <b>1075147</b> | <b>8593</b>  | YDR306            | <b>0.76</b> | Dbl   | Pi | <b>0.325</b> | <b>0.79</b>  | <b>0.186</b> | <b>0.02</b> |
| iYNL001W     | 14 | 628605         |              | 12387             | <b>0.29</b> | Non F |    | 0.157        | 0.545        | 0.095        | 0.02        |
| iYELCdelta4  | 5  | 135945         | 8913         | YEL010            | <b>0.59</b> | Sgl   | Pi | 0.651        | 0.44         | 0.261        | 0.02        |
| iYJR096W     | 10 | 611728         | 10993        | YJR096            | <b>0.94</b> | Sgl   | Pi | 0.698        | 0.164        | 0.148        | 0.02        |
| iYER020W     | 5  | 196531         | 8939         | YER021            | <b>0.42</b> | Sgl   | Pi | 0.831        | 0.555        | NaN          | 0.02        |
| iYKL201C     | 11 | 65542          |              | 11258             | <b>0.25</b> | Non F |    | 0.248        | 0.025        | 0.596        | 0.02        |
| iYHR155W     | 8  | 410794         | snr71        |                   | <b>0.35</b> | Non F |    | 0.593        | 0.669        | 0.477        | 0.02        |
| iYGR037C     | 7  | 559983         | 9920         | YGR037            | <b>0.55</b> | Dbl   | Pi | 0.645        | 0.008        | 0.819        | 0.02        |
| iYMR018W     | 13 | 311800         | 12071        | YMR018            | <b>0.98</b> | Sgl   | Pi | 0.2          | 0.599        | 0.578        | 0.02        |
| iYGR265W     | 7  | 1022061        | 10135        | YGR265            | <b>0.88</b> | Sgl   | Pi | 0.013        | 0.525        | 0.616        | 0.02        |
| iYLR143W     | 12 | 429372         |              | 11608             | <b>0.09</b> | Non F |    | 0.453        | 0.685        | 0.233        | 0.02        |
| iYGL087C     | 7  | 346904         | 9647         | YGL087            | <b>0.8</b>  | Dbl   | Pi | 0.582        | 0.185        | 0.496        | 0.02        |
| iYNL289W-0   | 14 | 88723          | 12646        | YNL289            | <b>0.31</b> | Sgl   | Pi | 0.63         | 0.636        | 0.534        | 0.02        |
| iYEL014C     | 5  | 128614         | 8846         | YEL014            | <b>0.81</b> | Dbl   | Pi | 0.506        | 0.624        | 0.713        | 0.02        |
| iYML008C     | 13 | 252979         | 11928        | YML008            | <b>0.22</b> | Dbl   | Pi | 0.841        | 0.089        | 0.88         | 0.02        |
| iYBR143C     | 2  | 532143         | 7745         | YBR143            | <b>0.57</b> | Sgl   | Pi | 0.433        | 0.497        | 0.308        | 0.02        |
| iYJL020C     | 10 | 402095         | 10716        | YJL020            | <b>0.95</b> | Dbl   | Pi | 0.391        | 0.011        | 0.248        | 0.03        |
| iYMR311C     | 13 | 897610         | 12359        | YMR311            | <b>0.77</b> | Dbl   | Pi | 0.687        | 0.58         | 0.603        | 0.03        |
| iYBR049C     | 2  | 336764         | 7654         | YBR049            | <b>0.72</b> | Sgl   | Pi | 0.524        | 0.042        | 0.033        | 0.03        |
| iYOL021C     | 15 | 285412         | 12801        | YOL021            | <b>0.19</b> | Dbl   | Pi | 0.278        | 0.643        | 0.706        | 0.03        |
| iYER067W     | 5  | 292550         | 9003         | YER067            | <b>0.81</b> | Sgl   | Pi | 0.538        | 0.402        | 0.72         | 0.03        |
| iYBR065C     | 2  | 369646         | 7670         | YBR065            | <b>0.87</b> | Sgl   | Pi | 0.414        | 0.43         | 0.008        | 0.03        |
| iYJL061W     | 10 | 321847         | 10752        | YJL061            | <b>0.45</b> | Sgl   | Pi | 0.515        | 0.325        | 0.067        | 0.03        |
| iYBR035C     | 2  | <b>306908</b>  | <b>7640</b>  | YBR035            | <b>0.63</b> | Sgl   | Pi | <b>0.541</b> | <b>0.543</b> | <b>0.179</b> | <b>0.03</b> |
| iYNR004W     | 14 | 636398         |              | 12703             | <b>0.7</b>  | Non F |    | 0.479        | 0.428        | 0.872        | 0.03        |
| iYFR051C     | 6  | 251776         | 9532         | YFR051            | <b>0.99</b> | Dbl   | Pi | 0.761        | <b>5E-05</b> | 0.97         | 0.03        |
| iYLR230W     | 12 | <b>604893</b>  | <b>11694</b> | ylr229/cdc42 prot | <b>0.7</b>  | Non F |    | <b>1E-03</b> | <b>0.648</b> | <b>0.509</b> | <b>0.03</b> |



|             |    |         |       |         |      |       |    |       |       |       |      |
|-------------|----|---------|-------|---------|------|-------|----|-------|-------|-------|------|
| itW(CCA)J   | 10 | 415728  | 7362  | YJL0110 | 0.5  | Sgl   | Pi | 0.055 | 0.625 | NaN   | 0.03 |
| iYDR173C    | 4  | 811616  | 8472  | YDR173  | 0.41 | Dbl   | Pi | 0.542 | 0.387 | 0.453 | 0.03 |
| iYOR344C-1  | 15 | 979142  | 13277 | YOR344  | 0.44 | Sgl   | Pi | 0.849 | 0.302 | 0.517 | 0.03 |
| iYMR246W    | 13 | 761897  |       | 12296   | 0.2  | Non F |    | 0.698 | 0.672 | 0.592 | 0.03 |
| iYGR140W    | 7  | 770286  | 10019 | YGR140  | 0.94 | Sgl   | Pi | 0.363 | 0.038 | 0.357 | 0.03 |
| iYCR095C-0  | 3  | 289251  | 8041  | YCR095  | 0.67 | Sgl   | Pi | 0.643 | 0.679 | 0.04  | 0.03 |
| iYPL121C    | 16 | 321640  | 13446 | YPL121  | 0.71 | Dbl   | Pi | 0.608 | 0.566 | 0.449 | 0.03 |
| iYIL139C    | 9  | 88712   | 10609 | YIL139  | 0.38 | Sgl   | Pi | 0.615 | 0.884 | 0.067 | 0.03 |
| iYOR209C    | 15 | 737726  | 13152 | YOR209  | 0.74 | Dbl   | Pi | 0.013 | 0.265 | 0.504 | 0.03 |
| iYER024W    | 5  | 204963  | 8943  | YER025  | 0.92 | Sgl   | Pi | 0.847 | 0.341 | 0.337 | 0.03 |
| iYPR144C    | 16 | 821415  | 13737 | YPR144  | 0.69 | Dbl   | Pi | 0.583 | 0.753 | 0.07  | 0.03 |
| iYGR272C    | 7  | 1038492 | 10141 | YGR272  | 0.5  | Sgl   | Pi | 0.626 | 0.728 | 0.379 | 0.03 |
| iYIL015C-A  | 9  | 325510  | 10491 | YIL015  | 0.66 | Dbl   | Pi | 0.644 | 0.469 | 0.089 | 0.03 |
| iYDR188W    | 4  | 838107  | 8487  | YDR188  | 0.7  | Sgl   | Pi | 0.465 | 0.604 | NaN   | 0.03 |
| iYOR257W    | 15 | 811475  | 13196 | YOR257  | 0.64 | Sgl   | Pi | 0.394 | 0.665 | 0.47  | 0.03 |
| iYDR004W    | 4  | 456588  |       | 8309    | 0.16 | Non F |    | 0.657 | 0.565 | 0.633 | 0.03 |
| iYPRWsigma4 | 16 | 880729  |       | 13804   | 0.64 | Non F |    | 0.812 | 0.843 | 0.95  | 0.03 |
| iYPL283C-1  | 16 | 6970    | 13603 | YPL283  | 0.16 | Sgl   | Pi | 0.003 | 0.752 | 0.587 | 0.03 |
| iYDL102W    | 4  | 280163  |       | 8157    | 0.09 | Non F |    | 0.411 | 0.337 | NaN   | 0.03 |
| iYNL147W    | 14 | 351392  | 12522 | YNL147  | 0.96 | Sgl   | Pi | 0.424 | 0.275 | 0.593 | 0.03 |
| iYDR064W    | 4  | 580428  | 8371  | YDR064  | 0.35 | Sgl   | Pi | 0.616 | 0.799 | 0.664 | 0.03 |
| iYLL015W    | 12 | 121095  | 11420 | YLL015  | 0.82 | Sgl   | Pi | 0.655 | 0.669 | 0.514 | 0.03 |
| iYPL160W    | 16 | 250258  |       | 13483   | 0.13 | Non F |    | 0.702 | 0.758 | 0.001 | 0.03 |
| iYIL049W    | 9  | 260926  | 10525 | YIL049  | 0.74 | Sgl   | Pi | 5E-04 | 0.467 | 0.532 | 0.03 |
| iYIL049W    | 9  | 260926  | 10525 | YIL049  | 0.74 | Sgl   | Pi | 5E-04 | 0.467 | 0.532 | 0.03 |
| iYDL133W    | 4  | 223728  | 8188  | YDL132  | 0.83 | Sgl   | Pi | 0.556 | 0.102 | 0.36  | 0.04 |
| iYGR187C    | 7  | 871461  | 10060 | YGR187  | 0.91 | Sgl   | Pi | 0.009 | 0.904 | 0.411 | 0.04 |
| itW(CCA)K-1 | 11 | 303716  | 7364  | YKL071  | 0.21 | Sgl   | Pi | 0.775 | 0.406 | 0.389 | 0.04 |
| iSNR44      | 12 | 856904  | 7069  | YLR368  | 0.33 | Sgl   | Pi | 0.637 | 0.2   | 0.634 | 0.04 |
| iYOR298C-A  | 15 | 877388  | 13233 | YOR298  | 0.28 | Dbl   | Pi | 0.657 | 0.6   | 0.149 | 0.04 |
| iYMR064W    | 13 | 399449  | 12112 | YMR064  | 0.6  | Sgl   | Pi | 0.564 | 0.047 | 0.226 | 0.04 |
| iYMR106C    | 13 | 480174  | 12153 | YMR106  | 0.73 | Dbl   | Pi | 0.742 | 0.699 | 0.359 | 0.04 |
| iYMR015C    | 13 | 302506  | 12067 | YMR015  | 0.36 | Sgl   | Pi | 0.368 | 0.025 | 0.646 | 0.04 |
| iYBR017C    | 2  | 273647  | 7623  | YBR017  | 0.62 | Sgl   | Pi | 0.835 | 0.65  | NaN   | 0.04 |
| iYBR017C    | 2  | 273647  | 7623  | YBR017  | 0.62 | Sgl   | Pi | 0.835 | 0.65  | NaN   | 0.04 |
| iYGR220C    | 7  | 936878  | 10091 | YGR220  | 0.93 | Sgl   | Pi | 0.666 | 0.06  | 0.728 | 0.04 |
| iYCR042C    | 3  | 205395  | 7999  | YCR042  | 0.67 | Sgl   | Pi | 0.704 | 0.673 | 0.295 | 0.04 |
| iYML043C    | 13 | 191759  | 11960 | YML043  | 0.67 | Dbl   | Pi | 0.783 | 0.939 | 0.899 | 0.04 |
| iYGL177W-1  | 7  | 169071  | 9732  | YGL178  | 0.06 | Sgl   | Pi | 0.689 | 0.335 | 0.548 | 0.04 |
| itH(GUG)K   | 11 | 313107  | 7183  | YKL067  | 0.63 | Sgl   | Pi | 0.617 | 0.644 | 0.285 | 0.04 |
| iYGL248W    | 7  | 36766   | 9837  | YGL247  | 0.84 | Sgl   | Pi | 0.52  | 0.054 | 0.877 | 0.04 |
| iYDL044C    | 4  | 375276  | 8102  | YDL044  | 0.57 | Sgl   | Pi | 0.395 | 0.116 | 0.8   | 0.04 |
| iYLR292C    | 12 | 720370  | 11747 | YLR292  | 0.54 | Sgl   | Pi | 0.002 | 0.478 | 0.655 | 0.04 |
| iYJL225C-1  | 10 | 7458    | 10900 | YJL225  | 0.11 | Sgl   | Pi | 0.008 | 0.58  | 0.584 | 0.04 |
| itW(CCA)K-0 | 11 | 302652  | 7363  | YKL071  | 0.57 | Sgl   | Pi | 0.651 | 0.371 | 0.331 | 0.04 |
| itW(CCA)K-0 | 11 | 302652  | 7363  | YKL071  | 0.57 | Sgl   | Pi | 0.651 | 0.371 | 0.331 | 0.04 |
| iYOR100C    | 15 | 514284  | 13052 | YOR100  | 0.46 | Dbl   | Pi | 0.857 | 0.073 | 0.469 | 0.04 |
| iYGL161C    | 7  | 200136  | 9717  | YGL161  | 0.98 | Dbl   | Pi | 0.744 | 0.152 | 0.559 | 0.04 |
| iYDR415C    | 4  | 1298149 | 8697  | YDR415  | 0.48 | Dbl   | Pi | 0.546 | 0.779 | 0.39  | 0.04 |
| iYNL168C    | 14 | 318805  | 12543 | YNL168  | 0.7  | Sgl   | Pi | 0.677 | 0.709 | 0.208 | 0.04 |
| iYMR258C    | 13 | 784312  | 12307 | YMR258  | 0.74 | Sgl   | Pi | 0.841 | 0.205 | 0.392 | 0.04 |

|             |    |              |        |             |        |       |       |       |      |
|-------------|----|--------------|--------|-------------|--------|-------|-------|-------|------|
| iYOR015W    | 15 | 360336       | 12968  | <b>0.2</b>  | Non F  | 0.555 | 0.47  | 0.421 | 0.04 |
| iYOR198C    | 15 | 720066 13145 | YOR19  | <b>0.44</b> | Dbl Pi | NaN   | 0.64  | 0.517 | 0.04 |
| iYJR140C    | 10 | 695387 11035 | YJR14  | <b>0.91</b> | Dbl Pi | 0.507 | 0.267 | 0.468 | 0.04 |
| iYGR132C    | 7  | 756479 10012 | YGR13  | <b>0.85</b> | Dbl Pi | 0.606 | 0.208 | 0.648 | 0.04 |
| iYPR201W-0  | 16 | 941119 13792 | YPR20  | <b>0.41</b> | Sgl Pi | 0.425 | 0.23  | 0.711 | 0.04 |
| iYNL177C    | 14 | 304597 12548 | YNL17  | <b>0.66</b> | Sgl Pi | 0.725 | 0.427 | 0.244 | 0.04 |
| iYDL084W    | 4  | 306628       | 8141   | <b>0.2</b>  | Non F  | 0.617 | 0.677 | 0.675 | 0.04 |
| iYEL028W    | 5  | 99116 8860   | YEL027 | <b>0.91</b> | Sgl Pi | 0.456 | 0.767 | 0.528 | 0.04 |
| iYCR028C    | 3  | 172426 7987  | YCR028 | <b>0.93</b> | Sgl Pi | 0.207 | 0.518 | 0.308 | 0.04 |
| iYKR011C    | 11 | 462325 11305 | YKR01  | <b>0.82</b> | Sgl Pi | 0.734 | 0.005 | 0.993 | 0.05 |
| iYML077W    | 13 | 112349       | 11992  | <b>0.13</b> | Non F  | 0.325 | 0.589 | 0.342 | 0.05 |
| iYLR309C    | 12 | 751783 11762 | YLR30  | <b>0.83</b> | Sgl Pi | 0.266 | 0.382 | 0.526 | 0.05 |
| iYNL145W    | 14 | 352572       | 12520  | <b>0.62</b> | Non F  | 0.659 | 0.474 | 0.53  | 0.05 |
| it(AGU)N2   | 14 | 560769       | 7330   | <b>0.59</b> | Non F  | 0.647 | 0.995 | 0.876 | 0.05 |
| iYHR135C    | 8  | 374322 10369 | YHR13  | <b>0.96</b> | Sgl Pi | 0.563 | 0.103 | 0.857 | 0.05 |
| iYMR105C    | 13 | 477616 12152 | YMR10  | <b>0.76</b> | Sgl Pi | 0.709 | 0.024 | 0.691 | 0.05 |
| iYOR210W    | 15 | 738544       | 13153  | <b>0.47</b> | Non F  | 0.209 | 0.918 | 0.635 | 0.05 |
| iYBR216C    | 2  | 657561 7817  | YBR216 | <b>0.84</b> | Dbl Pi | 0.496 | 0.26  | 0.472 | 0.05 |
| iYLR303W    | 12 | 733867       | 11756  | <b>0.42</b> | Non F  | 0.745 | 0.691 | 0.445 | 0.05 |
| iYLR262C    | 12 | 668886 11720 | YLR26  | <b>0.67</b> | Sgl Pi | 0.41  | 0.518 | NaN   | 0.05 |
| iYLR435W    | 12 | 1007022      | 11871  | <b>0.28</b> | Non F  | 0.718 | 0.697 | 0.042 | 0.05 |
| iSNR71      | 8  | 411294       | 7098   | <b>0.08</b> | Non F  | 0.481 | 0.578 | 0.514 | 0.05 |
| iYJL109C    | 10 | 217011 10794 | YJL109 | <b>0.58</b> | Sgl Pi | 0.85  | 0.628 | 0.6   | 0.05 |
| iYGL084C    | 7  | 352285 9644  | YGL084 | <b>0.75</b> | Dbl Pi | 0.686 | 0.361 | 0.046 | 0.05 |
| iYDR294C    | 4  | 1052215 8581 | YDR294 | <b>0.63</b> | Sgl Pi | 0.544 | 0.743 | 7E-04 | 0.05 |
| iYGL136C    | 7  | 253871 9694  | YGL136 | <b>0.42</b> | Dbl Pi | 0.619 | 0.635 | 0.409 | 0.05 |
| iYGL088W    | 7  | 346194       | 9648   | <b>0.17</b> | Non F  | 0.511 | 0.582 | 0.718 | 0.05 |
| iYLL030C    | 12 | 80701 11435  | YLL030 | <b>0.43</b> | Dbl Pi | 0.611 | 0.579 | 0.115 | 0.05 |
| iYLL055W    | 12 | 31708        | 11455  | <b>0.2</b>  | Non F  | 0.642 | 0.827 | 0.3   | 0.06 |
| iYGL134W    | 7  | 256987 9692  | YGL133 | <b>0.5</b>  | Sgl Pi | 0.793 | 0.74  | 5E-04 | 0.06 |
| iYOR150W    | 15 | 612513       | 13096  | <b>0.09</b> | Non F  | 0.774 | 0.701 | 0.09  | 0.06 |
| iYLR287C    | 12 | 712082 11741 | YLR28  | <b>0.18</b> | Sgl Pi | 0.6   | 0.669 | 0.092 | 0.06 |
| iYDR062W    | 4  | 578166 8369  | YDR062 | <b>0.43</b> | Sgl Pi | 0.672 | 0.871 | 0.322 | 0.06 |
| YERWdelta21 | 5  | 444849 14055 | YER13  | <b>0.03</b> | T      | 0.252 | 0.17  | 0.984 | 0.06 |
| iYLR129W    | 12 | 402493       | 11596  | <b>0.04</b> | Non F  | 0.482 | 0.587 | 0.254 | 0.06 |
| it(AGU)H    | 8  | 116178 7325  | YHR005 | <b>0.33</b> | Dbl Pi | 0.211 | 0.617 | 0.948 | 0.06 |
| iYHR011W    | 8  | 129144 10245 | YHR01  | <b>0.84</b> | Sgl Pi | 0.518 | 0.271 | 0.582 | 0.06 |
| iYLR214W    | 12 | 570626       | 11680  | <b>0.15</b> | Non F  | 0.314 | 0.775 | 0.486 | 0.06 |
| iYDL193W    | 4  | 115800 8241  | YDL192 | <b>0.51</b> | Sgl Pi | 0.411 | 0.12  | 0.414 | 0.06 |
| iYPR108W    | 16 | 743739 13704 | YPR10  | <b>0.19</b> | Sgl Pi | 0.438 | 0.603 | NaN   | 0.06 |
| iYLR105C    | 12 | 348181 11572 | YLR10  | <b>0.33</b> | Sgl Pi | 0.611 | 0.648 | 0.483 | 0.06 |
| iYIL156W    | 9  | 51315        | 10625  | <b>0.14</b> | Non F  | 0.856 | 0.514 | 0.545 | 0.06 |
| iYDL163W    | 4  | 167264       | 8213   | <b>0.72</b> | Non F  | 0.532 | 0.727 | 0.537 | 0.06 |
| iYGL246C    | 7  | 38793 9833   | YGL246 | <b>0.6</b>  | Dbl Pi | 0.731 | 0.415 | 0.381 | 0.06 |
| iYDL191W    | 4  | 118508       | 8239   | <b>0.17</b> | Non F  | 0.446 | 0.605 | 0.368 | 0.06 |
| iYNL102W    | 14 | 434494 12481 | YNL10  | <b>0.79</b> | Sgl Pi | 0.46  | 0.046 | 0.266 | 0.06 |
| iYDL134C    | 4  | 220776 8189  | YDL134 | <b>0.54</b> | Sgl Pi | 0.082 | 0.712 | 0.377 | 0.06 |
| iYGR045C    | 7  | 584299 9928  | YGR045 | <b>0.66</b> | Dbl Pi | 0.65  | 0.524 | 0.645 | 0.06 |
| iYOL014W    | 15 | 300096 12794 | YOL01  | <b>0.47</b> | Sgl Pi | 0.787 | 0.934 | 0.735 | 0.06 |
| iYEL072W-0  | 5  | 14416 8902   | YEL071 | <b>0.55</b> | Sgl Pi | 0.84  | 0.914 | 0.168 | 0.06 |
| iYMR013C-0  | 13 | 296731 12064 | YMR01  | <b>0.25</b> | Dbl Pi | 0.851 | 0.51  | 0.749 | 0.06 |



|               |    |         |       |        |             |     |    |       |       |       |      |
|---------------|----|---------|-------|--------|-------------|-----|----|-------|-------|-------|------|
| iYDR388W      | 4  | 1251638 | 8673  | YDR388 | <b>0.28</b> | Sgl | Pi | 0.742 | 0.067 | 0.997 | 0.06 |
| iYDL141W      | 4  | 205124  |       | 8196   | <b>0.03</b> | Non | F  | 0.611 | 0.578 | 0.444 | 0.06 |
| iYDL149W      | 4  | 187909  |       | 8204   | <b>0.2</b>  | Non | F  | 0.256 | 0.555 | 0.852 | 0.06 |
| iYGR026W      | 7  | 533800  |       | 9909   | <b>0.23</b> | Non | F  | 0.531 | 0.678 | 0.539 | 0.06 |
| iYNL233W      | 14 | 214602  | 12597 | YNL23  | <b>0.77</b> | Sgl | Pi | 0.651 | 0.651 | 0.459 | 0.06 |
| iYOR021C      | 15 | 373446  | 12975 | YOR02  | <b>0.8</b>  | Sgl | Pi | 0.583 | 0.794 | 0.441 | 0.06 |
| iYDR286C      | 4  | 1035551 | 8575  | YDR286 | <b>0.93</b> | Dbl | Pi | 0.562 | 0.179 | 0.5   | 0.06 |
| itV(AAC)L     | 12 | 687918  | 7351  | YLR272 | <b>0.33</b> | Sgl | Pi | 0.473 | 0.824 | 0.581 | 0.06 |
| iYKR027W      | 11 | 493340  | 11320 | YKR02  | <b>0.74</b> | Sgl | Pi | 0.71  | 0.878 | 0.011 | 0.06 |
| iYIL122W      | 9  | 131656  | 10592 | YIL121 | <b>0.48</b> | Sgl | Pi | 0.699 | 0.664 | 9E-05 | 0.06 |
| iYDR086C      | 4  | 617152  | 8393  | YDR086 | <b>0.34</b> | Sgl | Pi | 0.743 | 0.33  | 0.206 | 0.06 |
| iYOR072W-1    | 15 | 463120  | 13026 | YOR07  | <b>0.57</b> | Sgl | Pi | 0.816 | 0.502 | 0.407 | 0.06 |
| iYBR081C      | 2  | 405211  | 7686  | YBR081 | <b>0.36</b> | Sgl | Pi | 0.87  | 0.995 | 0.46  | 0.07 |
| iYLR212C      | 12 | 566295  | 11678 | YLR21  | <b>0.71</b> | Sgl | Pi | 0.601 | 0.779 | 0.195 | 0.07 |
| iYER135C      | 5  | 438325  | 9139  | YER135 | <b>0.4</b>  | Dbl | Pi | 0.539 | 0.669 | 0.334 | 0.07 |
| iYBL029W      | 2  | 167234  |       | 7528   | <b>0.29</b> | Non | F  | 0.834 | 0.73  | 0.569 | 0.07 |
| iYMR259C      | 13 | 788867  | 12308 | YMR25  | <b>0.73</b> | Sgl | Pi | 0.493 | 0.476 | NaN   | 0.07 |
| iYNL007C      | 14 | 619626  | 12393 | YNL00  | <b>0.74</b> | Dbl | Pi | 0.737 | 0.911 | 0.532 | 0.07 |
| iYDR036C      | 4  | 524700  | 8343  | YDR036 | <b>0.77</b> | Dbl | Pi | 0.816 | 0.026 | 0.921 | 0.07 |
| iYKL179C      | 11 | 112497  | 11237 | YKL17  | <b>0.84</b> | Sgl | Pi | 0.001 | 0.567 | 0.919 | 0.07 |
| iYCRCdelta6-0 | 3  | 124446  | 8056  | YCR006 | <b>0.36</b> | Sgl | Pi | 0.054 | 0.151 | 0.444 | 0.07 |
| iYDR190C      | 4  | 841972  | 8489  | YDR190 | <b>0.76</b> | Dbl | Pi | 0.793 | 0.355 | 0.371 | 0.07 |
| iYER074W      | 5  | 307187  |       | 9017   | <b>0.59</b> | Non | F  | 0.814 | 0.32  | 0.41  | 0.07 |
| iYPL262W      | 16 | 48792   |       | 13580  | <b>0.78</b> | Non | F  | 0.493 | 0.665 | 0.424 | 0.07 |
| iYOR206W      | 15 | 729646  |       | 13149  | <b>0.24</b> | Non | F  | 0.539 | 0.7   | NaN   | 0.07 |
| iYKR062W      | 11 | 560276  |       | 11350  | <b>0.18</b> | Non | F  | 0.2   | 0.232 | 0.384 | 0.07 |
| iYGL142C      | 7  | 238110  | 9700  | YGL142 | <b>0.69</b> | Dbl | Pi | 0.713 | 0.271 | 0.197 | 0.07 |
| iYHRWdelta7   | 8  | 133997  | 10473 | YHR01  | <b>0.44</b> | Sgl | Pi | 0.785 | 0.95  | 0.932 | 0.07 |
| iYGL096W-1    | 7  | 327023  |       | 9657   | <b>0.27</b> | Non | F  | NaN   | 0.193 | NaN   | 0.07 |
| itE(CUC)I     | 9  | 197649  |       | 7130   | <b>0.46</b> | Non | F  | 0.77  | 0.796 | 0.91  | 0.07 |
| iYMR187C      | 13 | 635973  | 12236 | YMR18  | <b>0.43</b> | Sgl | Pi | 0.55  | 0.944 | 0.511 | 0.07 |
| iYGR198W      | 7  | 897170  | 10070 | YGR19  | <b>0.56</b> | Sgl | Pi | 0.904 | 0.916 | 0.447 | 0.07 |
| itW(CCA)M     | 13 | 379395  | 7365  | YMR05  | <b>0.76</b> | Dbl | Pi | 0.318 | 0.723 | 0.624 | 0.07 |
| iYDR422C      | 4  | 1317906 | 8703  | YDR422 | <b>0.77</b> | Sgl | Pi | 1E-04 | 0.53  | 0.536 | 0.07 |
| iYBL027W      | 2  | 169362  | 7526  | YBL026 | <b>0.59</b> | Sgl | Pi | NaN   | 0.849 | 0.612 | 0.07 |
| iYGL170C      | 7  | 185387  | 9724  | YGL170 | <b>0.53</b> | Dbl | Pi | 0.068 | 0.627 | 0.577 | 0.07 |
| iYOR123C      | 15 | 554594  | 13072 | YOR12  | <b>0.88</b> | Sgl | Pi | 0.392 | 0.523 | 0.53  | 0.07 |
| iYDR016C      | 4  | 478757  | 8320  | YDR016 | <b>0.96</b> | Sgl | Pi | 0.561 | 0.237 | 0.551 | 0.07 |
| iYDR393W      | 4  | 1261253 | 8678  | YDR394 | <b>0.77</b> | Sgl | Pi | 0.088 | 0.692 | 0.739 | 0.07 |
| iYJR088C      | 10 | 587050  | 10983 | YJR08  | <b>0.95</b> | Dbl | Pi | 0.01  | 0.022 | 0.097 | 0.07 |
| iYOR295W      | 15 | 869878  | 13230 | YOR29  | <b>0.7</b>  | Sgl | Pi | 0.616 | 0.61  | 0.48  | 0.07 |
| iYMR289W      | 13 | 849811  |       | 12337  | <b>0.06</b> | Non | F  | 0.548 | 0.551 | 0.338 | 0.07 |
| iYLR363C      | 12 | 853154  | 11807 | YLR36  | <b>0.68</b> | Dbl | Pi | 0.178 | 0.486 | 0.265 | 0.07 |
| iSNR54        | 13 | 163618  |       | 7079   | <b>0.31</b> | Non | F  | 0.709 | 0.525 | 0.978 | 0.07 |
| iYKR102W-1    | 11 | 650560  | 11395 | YKR10  | <b>0.11</b> | Sgl | Pi | 0.407 | 0.14  | 1E-08 | 0.07 |
| iYNL049C      | 14 | 537916  | 12431 | YNL04  | <b>0.97</b> | Dbl | Pi | 0.493 | 0.333 | 0.568 | 0.07 |
| iYKLCdelta5   | 11 | 302285  | 11290 | YKL07  | <b>0.45</b> | Sgl | Pi | 0.751 | 0.879 | 0.532 | 0.07 |
| iYMR124W      | 13 | 517297  | 12172 | YMR12  | <b>0.86</b> | Sgl | Pi | 0.002 | 0.357 | 0.355 | 0.07 |
| iYDR185C      | 4  | 832477  | 8485  | YDR185 | <b>0.48</b> | Sgl | Pi | 0.506 | 0.51  | 0.635 | 0.07 |
| iYLR362W      | 12 | 852003  |       | 11806  | <b>0.14</b> | Non | F  | 0.573 | 0.612 | 0.498 | 0.07 |
| iYDR193W      | 4  | 844934  |       | 8491   | <b>0.62</b> | Non | F  | 0.415 | 0.357 | 0.115 | 0.07 |

|               |    |         |        |        |             |     |    |       |       |       |      |
|---------------|----|---------|--------|--------|-------------|-----|----|-------|-------|-------|------|
| iYDR443C      | 4  | 1349928 | 8721   | YDR443 | <b>0.71</b> | Dbl | Pi | 0.566 | 0.546 | 0.405 | 0.08 |
| iYIL145C      | 9  | 77381   | 10614  | YIL145 | <b>0.71</b> | Dbl | Pi | 0.003 | 0.035 | 0.051 | 0.08 |
| iYOLCdelta2   | 15 | 18545   | 12943  | YOL15  | <b>0.43</b> | Sgl | Pi | 0.879 | 0.819 | 0.886 | 0.08 |
| iYGLWdelta3   | 7  | 115276  | 9879   | YGL203 | <b>0.04</b> | Dbl | Pi | 0.788 | 0.889 | 0.54  | 0.08 |
| iYLR035C-A-0  | 12 | 218907  | 11505  | YLR03  | <b>0.08</b> | Sgl | Pi | 0.477 | 0.107 | 0.88  | 0.08 |
| itS(UGA)P     | 16 | 689628  | 7321   | YPR072 | <b>0.46</b> | Sgl | Pi | 0.855 | 0.511 | 0.864 | 0.08 |
| iYNL222W      | 14 | 229708  | snr19? |        | <b>0.41</b> | Non | F  | 0.703 | 0.781 | 0.893 | 0.08 |
| iYDR159W      | 4  | 775800  | 8455   | YDR16C | <b>0.86</b> | Sgl | Pi | 0.674 | 0.8   | 0.379 | 0.08 |
| iYLR390W      | 12 | 903401  | 11830  | YLR39  | <b>0.5</b>  | Sgl | Pi | 0.754 | 0.005 | 0.582 | 0.08 |
| iYPR072W      | 16 | 691791  |        | 13676  | <b>0.17</b> | Non | F  | 0.651 | 0.774 | 0.81  | 0.08 |
| iYDL232W      | 4  | 38653   |        | 8282   | <b>0.68</b> | Non | F  | 0.534 | 0.536 | 0.789 | 0.08 |
| iYDR144C      | 4  | 746098  | 8444   | YDR144 | <b>0.91</b> | Dbl | Pi | 0.006 | 0.034 | 0.121 | 0.08 |
| iYDLCdelta1-1 | 4  | 435931  | 8304   | YDL007 | <b>0.41</b> | Sgl | Pi | 0.769 | 0.959 | 0.048 | 0.08 |
| iYLR029C      | 12 | 202577  | 11498  | YLR02  | <b>0.86</b> | Dbl | Pi | 0.005 | 0.681 | 0.808 | 0.08 |
| iYAR053W      | 1  | 208634  |        | 7482   | <b>0.57</b> | Non | F  | 0.478 | 0.119 | 0.962 | 0.08 |
| iYDL130W-A    | 4  | 229437  | 8184   | YDL130 | <b>0.33</b> | Sgl | Pi | 0.484 | 0.758 | 0.648 | 0.08 |
| iYER044C      | 5  | 238000  | 8962   | YER044 | <b>0.19</b> | Sgl | Pi | 0.638 | 0.592 | 0.39  | 0.08 |
| iYGR221C      | 7  | 938999  | 10092  | YGR22  | <b>0.43</b> | Dbl | Pi | 0.465 | 0.092 | 0.565 | 0.08 |
| iYKL219W-1    | 11 | 16535   |        | 11278  | <b>0.25</b> | Non | F  | 0.724 | 0.557 | 0.589 | 0.08 |
| iYGL059W      | 7  | 393551  | 9622   | YGL058 | <b>0.83</b> | Sgl | Pi | 0.702 | 0.594 | 1E-04 | 0.08 |
| iYML103C      | 13 | 67552   | 12014  | YML1C  | <b>0.5</b>  | Dbl | Pi | 0.501 | 0.095 | 0.74  | 0.08 |
| iYNR050C      | 14 | 715414  | 12749  | YNR05  | <b>0.29</b> | Sgl | Pi | 0.541 | 0.449 | 0.68  | 0.08 |
| iYHR028C      | 8  | 167410  | 10262  | YHR02  | <b>0.47</b> | Sgl | Pi | 0.334 | 0.074 | 0.634 | 0.08 |
| iYNR038W      | 14 | 697476  |        | 12738  | <b>0.07</b> | Non | F  | 0.487 | 0.608 | 0.535 | 0.08 |
| iYCL056C      | 3  | 27357   | 7939   | YCL056 | <b>0.56</b> | Dbl | Pi | 0.77  | 0.012 | 0.452 | 0.08 |
| iYJR101W      | 10 | 618728  |        | 10998  | <b>0.23</b> | Non | F  | 0.47  | 0.471 | 0.292 | 0.08 |
| iYMR270C      | 13 | 806412  | 12319  | YMR27  | <b>0.73</b> | Sgl | Pi | 0.743 | 0.526 | 0.444 | 0.08 |
| iYDR418W      | 4  | 1302106 | 8699   | YDR418 | <b>0.35</b> | Sgl | Pi | 0.759 | 0.274 | 0.271 | 0.08 |
| iYGR155W      | 7  | 800056  | 10032  | YGR15  | <b>0.87</b> | Sgl | Pi | 0.755 | 0.696 | 0.48  | 0.08 |
| iYDL036C      | 4  | 388898  | 8095   | YDL036 | <b>0.39</b> | Sgl | Pi | 0.305 | 0.443 | 0.808 | 0.08 |
| iYPLCtau2     | 16 | 443093  | 13605  | YPL06  | <b>0.72</b> | Dbl | Pi | 0.715 | 0.57  | 0.388 | 0.08 |
| iYCR067C      | 3  | 236333  | 8017   | YCR067 | <b>0.63</b> | Dbl | Pi | NaN   | 0.408 | 0.021 | 0.08 |
| iYNL229C      | 14 | 220185  | 12593  | YNL22  | <b>0.69</b> | Dbl | Pi | 0.643 | 0.775 | 0.839 | 0.08 |
| iYOR361C      | 15 | 1017646 | 13293  | YOR36  | <b>0.32</b> | Sgl | Pi | 0.662 | 0.743 | 0.342 | 0.09 |
| iYOR361C      | 15 | 1017646 | 13293  | YOR36  | <b>0.32</b> | Sgl | Pi | 0.662 | 0.743 | 0.342 | 0.09 |
| iYPL079W      | 16 | 407522  |        | 13409  | <b>0.14</b> | Non | F  | 0.654 | 0.995 | 0.75  | 0.09 |
| iYDR316W      | 4  | 1095179 | 8603   | YDR316 | <b>0.04</b> | Sgl | Pi | 0.581 | 0.673 | 0.622 | 0.09 |
| iYHR208W      | 8  | 518718  | 10440  | YHR20  | <b>0.43</b> | Sgl | Pi | 0.646 | 0.158 | 0.283 | 0.09 |
| iYER087W      | 5  | 332299  |        | 9043   | <b>0.52</b> | Non | F  | 0.568 | 0.524 | 0.653 | 0.09 |
| iYKL220C-0    | 11 | 11223   | 11279  | YKL22  | <b>0.51</b> | Dbl | Pi | 0.53  | 0.543 | 0.539 | 0.09 |
| iYDR130C      | 4  | 716631  | 8432   | YDR13C | <b>0.99</b> | Sgl | Pi | 2E-04 | 0.053 | 0.523 | 0.09 |
| iYLR458W      | 12 | 1056828 | 11893  | YLR45  | <b>0.74</b> | Sgl | Pi | 0.804 | 0.058 | 0.435 | 0.09 |
| isnR14        | 5  | 167573  | 7060   | YER007 | <b>0.61</b> | Sgl | Pi | 2E-04 | 0.777 | 0.352 | 0.09 |
| iYIL090W      | 9  | 195066  | 10558  | YIL089 | <b>0.31</b> | Sgl | Pi | 0.851 | 0.847 | 0.055 | 0.09 |
| iYHRCdelta4   | 8  | 117054  | 10470  | YHR0C  | <b>0.6</b>  | Dbl | Pi | 0.552 | 0.536 | 0.714 | 0.09 |
| iYOR260W      | 15 | 815769  |        | 13199  | <b>0.05</b> | Non | F  | 0.451 | 0.627 | 0.406 | 0.09 |
| iYJL044C      | 10 | 359373  | 10736  | YJL04  | <b>0.69</b> | Dbl | Pi | 0.778 | 0.761 | 0.95  | 0.09 |
| iSNR62        | 15 | 409881  | 7088   | YOR043 | <b>0.33</b> | Sgl | Pi | 0.361 | 0.916 | 0.503 | 0.09 |
| iYBL011W      | 2  | 205777  |        | 7511   | <b>0.25</b> | Non | F  | 0.601 | 0.732 | 0.336 | 0.09 |
| iYKL133C      | 11 | 193063  | 11191  | YKL13  | <b>0.74</b> | Sgl | Pi | 0.555 | 0.466 | 0.516 | 0.09 |
| iYKR079C      | 11 | 588937  | 11368  | YKR07  | <b>0.6</b>  | Dbl | Pi | 0.439 | 0.674 | 0.172 | 0.09 |

|              |    |              |        |             |        |              |       |       |      |
|--------------|----|--------------|--------|-------------|--------|--------------|-------|-------|------|
| iYGR145W     | 7  | 783912       | 10024  | <b>0.38</b> | Non F  | 0.238        | 0.75  | 0.549 | 0.09 |
| iYGR173W     | 7  | 844975       | 10048  | <b>0.32</b> | Non F  | 0.586        | 0.114 | NaN   | 0.09 |
| iCEN6        | 6  | 148608 7006  | YFR001 | <b>0.5</b>  | Sgl Pi | 0.752        | 0.983 | 0.505 | 0.09 |
| iYDR244W     | 4  | 952399 8535  | YDR245 | <b>0.5</b>  | Sgl Pi | <b>1E-04</b> | 0.555 | 0.412 | 0.09 |
| iYDR160W     | 4  | 778700 8456  | YDR161 | <b>0.78</b> | Sgl Pi | 0.59         | 0.924 | 0.291 | 0.09 |
| iCEN9        | 9  | 355758       | 7010   | <b>0.34</b> | Non F  | 0.804        | 0.746 | 0.223 | 0.09 |
| iYDL143W     | 4  | 201572       | 8198   | <b>0.01</b> | Non F  | 0.259        | 0.616 | 0.402 | 0.09 |
| iYDR314C     | 4  | 1092496 8601 | YDR314 | <b>0.86</b> | Sgl Pi | 0.298        | 0.637 | 0.648 | 0.09 |
| iYGRWdelta32 | 7  | 931997 10178 | YGR21  | <b>0.65</b> | Sgl Pi | 0.599        | 0.568 | 0.322 | 0.09 |
| iYDL176W     | 4  | 144218       | 8224   | <b>0.12</b> | Non F  | 0.685        | 0.72  | 0.544 | 0.09 |
| itV(CAC)D    | 4  | 1075535 7356 | YDR306 | <b>0.51</b> | Dbl Pi | 0.523        | 0.778 | 0.767 | 0.09 |
| iYKL015W     | 11 | 411122       | 11081  | <b>0.18</b> | Non F  | 0.37         | 0.422 | 0.483 | 0.09 |
| iYPL226W     | 16 | 125342 13546 | YPL22  | <b>0.78</b> | Sgl Pi | 0.614        | 0.922 | 0.525 | 0.09 |
| iYER181C     | 5  | 551799 9227  | YER181 | <b>0.2</b>  | Dbl Pi | 0.516        | 0.471 | 0.376 | 0.09 |
| iYDL179W     | 4  | 139211 8227  | YDL178 | <b>0.54</b> | Sgl Pi | 0.637        | 0.55  | 0.387 | 0.09 |
| iSNR48       | 7  | 609695 7073  | YGR060 | <b>0.01</b> | Sgl Pi | 0.636        | 0.778 | 0.981 | 0.1  |
| itR(UCU)K    | 11 | 162550 7300  | YKL153 | <b>0.5</b>  | Sgl Pi | 0.76         | 0.81  | 0.205 | 0.1  |
| iYOR023C     | 15 | 377715 12977 | YOR02  | <b>0.74</b> | Dbl Pi | 0.452        | 0.254 | 0.288 | 0.1  |
| iYMR291W     | 13 | 854417 12339 | YMR29  | <b>0.9</b>  | Sgl Pi | 0.723        | 0.825 | 0.51  | 0.1  |
| iYLR131C     | 12 | 406823 11598 | YLR13  | <b>0.55</b> | Sgl Pi | 0.009        | 5E-05 | 0.541 | 0.1  |
| iYDR146C     | 4  | 750741 8446  | YDR146 | <b>0.49</b> | Dbl Pi | 0.604        | 0.017 | 0.087 | 0.1  |
| iYOL052C     | 15 | 233634 12828 | YOL05  | <b>0.65</b> | Dbl Pi | 0.013        | 0.694 | 0.939 | 0.1  |
| iYER175C     | 5  | 540404 9215  | YER175 | <b>0.79</b> | Dbl Pi | 0.786        | 0.313 | 0.82  | 0.1  |
| iYDR361C     | 4  | 1196237 8646 | YDR361 | <b>0.6</b>  | Sgl Pi | <b>1E-04</b> | 0.944 | 0.456 | 0.1  |
| itH(GUG)M    | 13 | 363126       | 7184   | <b>0.15</b> | Non F  | 0.661        | 0.459 | 0.625 | 0.1  |
| iYDL030W     | 4  | 399141 8091  | YDL029 | <b>0.76</b> | Sgl Pi | 0.594        | 0.384 | 0.461 | 0.1  |
| itW(CCA)G1   | 7  | 287485       | 7360   | <b>0.35</b> | Non F  | 0.442        | 0.623 | 0.848 | 0.1  |
| iYGR224W     | 7  | 944649 10095 | YGR22  | <b>0.95</b> | Sgl Pi | 0.688        | 0.011 | 0.337 | 0.1  |
| iYJLWdelta9  | 10 | 416727 10909 | YJL01  | <b>0.75</b> | Sgl Pi | 0.587        | 0.092 | 0.996 | 0.1  |
| iYNL330C     | 14 | 19306 12682  | YNL33  | <b>0.99</b> | Sgl Pi | 0.565        | 0.648 | 0.135 | 0.1  |
| iYMR118C     | 13 | 502721 12165 | YMR1   | <b>0.25</b> | Dbl Pi | 0.594        | 0.618 | 0.542 | 0.1  |
| iYGL229C     | 7  | 66944 9807   | YGL229 | <b>0.93</b> | Dbl Pi | <b>7E-04</b> | 0.014 | 0.026 | 0.1  |
| iYDR101C     | 4  | 657467 8406  | YDR101 | <b>0.43</b> | Sgl Pi | 0.527        | 0.788 | 0.748 | 0.1  |
| iYOL124C     | 15 | 86749 12898  | YOL12  | <b>0.38</b> | Dbl Pi | 0.895        | 0.63  | 0.198 | 0.1  |
| iYLR332W-1   | 12 | 792682       | 11782  | <b>0.57</b> | Non F  | 0.776        | 0.574 | 0.576 | 0.1  |
| iYIL035C     | 9  | 288917 10511 | YIL035 | <b>0.92</b> | Sgl Pi | 0.002        | 0.354 | 0.355 | 0.1  |
| iYGR043C-1   | 7  | 582197 9927  | YGR043 | <b>0.31</b> | Sgl Pi | 0.809        | 0.803 | 0.499 | 0.1  |
| iYKL126W     | 11 | 207409 11185 | YKL12  | <b>0.52</b> | Sgl Pi | 0.667        | NaN   | NaN   | 0.1  |
| iYER062C     | 5  | 280669 8993  | YER062 | <b>0.44</b> | Dbl Pi | 0.012        | 0.088 | 0.934 | 0.1  |
| iYGL044C     | 7  | 417037 9608  | YGL044 | <b>0.87</b> | Dbl Pi | 0.693        | 0.542 | 0.525 | 0.1  |
| iYDR477W     | 4  | 1414247 8752 | YDR478 | <b>0.74</b> | Sgl Pi | 0.886        | 0.615 | 0.716 | 0.11 |
| iYOR238W     | 15 | 784587 13179 | YOR23  | <b>0.57</b> | Sgl Pi | 0.571        | 0.003 | 0.279 | 0.11 |
| iYPL216W     | 16 | 147119 13536 | YPL21  | <b>0.94</b> | Sgl Pi | 0.533        | 0.557 | 0.094 | 0.11 |
| iYOL143C     | 15 | 55087 12916  | YOL14  | <b>0.98</b> | Dbl Pi | 0.585        | 0.561 | 0.02  | 0.11 |
| iYOR046C     | 15 | 415901 12999 | YOR04  | <b>0.59</b> | Sgl Pi | 0.567        | 0.947 | 0.37  | 0.11 |
| iYPL183C     | 16 | 202539 13505 | YPL18  | <b>0.54</b> | Sgl Pi | 0.538        | 0.06  | 0.103 | 0.11 |
| iYLRCdelta5  | 12 | 366154       | 11906  | <b>0.33</b> | Non F  | 0.433        | 0.546 | NaN   | 0.11 |
| iYOR152C-0   | 15 | 618289 13098 | YOR15  | <b>0.45</b> | Dbl Pi | 0.731        | 0.725 | 0.413 | 0.11 |
| iYIL062C     | 9  | 244448 10536 | YIL062 | <b>0.66</b> | Sgl Pi | 0.643        | 0.185 | 0.832 | 0.11 |
| iCEN2        | 2  | 238319 7002  | YBL001 | <b>0.82</b> | Sgl Pi | 0.41         | 0.885 | 0.586 | 0.11 |
| iYOR284W     | 15 | 849203 13219 | YOR28  | <b>0.94</b> | Sgl Pi | 0.52         | 0.777 | 0.114 | 0.11 |

|             |    |         |                         |        |             |        |       |       |       |      |
|-------------|----|---------|-------------------------|--------|-------------|--------|-------|-------|-------|------|
| iYPL127C    | 16 | 309594  | 13452                   | YPL12  | <b>0.32</b> | Dbl Pi | 0.229 | 0.129 | 0.03  | 0.11 |
| itH(GUG)G2  | 7  | 319865  | 7181                    | YGL097 | <b>0.96</b> | Sgl Pi | 0.662 | 0.381 | 0.856 | 0.11 |
| iYHR144C    | 8  | 388735  | 10380                   | YHR14  | <b>0.33</b> | Sgl Pi | 0.534 | 0.537 | 0.547 | 0.11 |
| iYDL090C    | 4  | 296317  | 8147                    | YDL090 | <b>0.71</b> | Dbl Pi | 0.413 | 0.099 | 0.281 | 0.11 |
| iYFLWdelta1 | 6  | 100903  | 9426                    | YFL019 | <b>0.82</b> | Sgl Pi | 0.767 | 0.936 | 0.547 | 0.11 |
| iYDR151C    | 4  | 765134  | 8450                    | YDR151 | <b>0.53</b> | Dbl Pi | 0.599 | 0.565 | 0.153 | 0.11 |
| iYJR157W-0  | 10 | 730581  | 11055                   | YJR15  | <b>0.35</b> | Sgl Pi | 0.62  | 0.681 | 0.185 | 0.11 |
| iYOR287C    | 15 | 851841  | 13222                   | YOR28  | <b>0.72</b> | Sgl Pi | 0.618 | 0.709 | 0.412 | 0.11 |
| iYHR073W    | 8  | 245560  | 10310                   | YHR07  | <b>0.8</b>  | Sgl Pi | 0.024 | 0.696 | 0.421 | 0.11 |
| iYDL093W    | 4  | 292135  | 8150                    | YDL092 | <b>0.98</b> | Sgl Pi | 0.012 | 0.146 | 0.343 | 0.11 |
| iYIL147C    | 9  | 73438   | 10616                   | YIL147 | <b>0.69</b> | Sgl Pi | 0.75  | 0.433 | 0.009 | 0.11 |
| iYMR266W    | 13 | 801406  | 12315                   | YMR26  | <b>0.64</b> | Sgl Pi | 0.67  | 0.483 | 3E-05 | 0.11 |
| iYMR228W    | 13 | 725642  |                         | 12278  | <b>0.18</b> | Non F  | 0.63  | 0.516 | 0.383 | 0.11 |
| iYLR408C    | 12 | 934238  | 11847                   | YLR40  | <b>0.67</b> | Sgl Pi | 0.662 | 0.006 | 0.523 | 0.11 |
| iYGR009C    | 7  | 510983  | 9897                    | YGR00  | <b>0.83</b> | Dbl Pi | 0.77  | 0.221 | 0.285 | 0.11 |
| iYDR106W    | 4  | 667836  | ti(aau)d/delta elements |        | <b>0.4</b>  | Non F  | 0.34  | 0.377 | 0.439 | 0.11 |
| iYNL211C    | 14 | 250308  | 12577                   | YNL21  | <b>0.42</b> | Dbl Pi | 0.636 | 0.597 | 0.871 | 0.11 |
| iYPL086C    | 16 | 386441  | 13416                   | YPL08  | <b>0.92</b> | Dbl Pi | 0.39  | 0.5   | 0.615 | 0.11 |
| iYOR003W    | 15 | 332880  | 12956                   | YOR0   | <b>0.82</b> | Sgl Pi | 0.387 | 0.576 | 0.439 | 0.11 |
| iSNR13      | 4  | 1403040 | 7059                    | YDR472 | <b>0.46</b> | Sgl Pi | 0.384 | 0.503 | 0.455 | 0.11 |
| iYMR125W    | 13 | 520436  |                         | 12173  | <b>0.36</b> | Non F  | 0.545 | 0.015 | 0.473 | 0.11 |
| isnR128     | 10 | 139381  | 7058                    | YJL148 | <b>0.01</b> | Sgl Pi | 0.656 | 0.493 | 0.84  | 0.11 |
| iYLR082C    | 12 | 293573  | 11551                   | YLR08  | <b>0.56</b> | Sgl Pi | 0.35  | 0.671 | 0.05  | 0.11 |
| iYKR058W    | 11 | 554246  | 11346                   | YKR05  | <b>0.46</b> | Sgl Pi | 6E-04 | 2E-07 | 0.695 | 0.11 |
| iYCL065W-1  | 3  | 14956   |                         | 7946   | <b>0.1</b>  | Non F  | 0.925 | 0.576 | 0.827 | 0.11 |
| iYPL192C    | 16 | 183044  | 13514                   | YPL19  | <b>0.83</b> | Sgl Pi | 0.755 | 0.188 | 0.58  | 0.12 |
| iYMR116C    | 13 | 500708  | 12163                   | YMR1   | <b>0.23</b> | Sgl Pi | 0.835 | 0.604 | 0.557 | 0.12 |
| iYNL025C    | 14 | 585305  | 12409                   | YNL02  | <b>0.27</b> | Sgl Pi | 0.745 | 0.294 | 0.73  | 0.12 |
| iYPR179C    | 16 | 895766  | 13768                   | YPR17  | <b>0.62</b> | Dbl Pi | 0.458 | 0.805 | 0.28  | 0.12 |
| iYHR085W    | 8  | 277756  | 10323                   | YHR0   | <b>0.94</b> | Sgl Pi | 0.727 | 0.005 | 0.695 | 0.12 |
| iYDR138W    | 4  | 732856  |                         | 8438   | <b>0.36</b> | Non F  | 0.592 | 0.27  | 0.224 | 0.12 |
| itT(UGU)H   | 8  | 467064  | 7335                    | YHR181 | <b>0.23</b> | Sgl Pi | 0.365 | 0.713 | 0.673 | 0.12 |
| iYCR030C    | 3  | 176417  | 7989                    | YCR03  | <b>0.52</b> | Sgl Pi | 0.062 | 0.825 | 0.662 | 0.12 |
| iYNL192W    | 14 | 279886  | 12562                   | YNL19  | <b>0.52</b> | Sgl Pi | 0.666 | 0.878 | 0.279 | 0.12 |
| iYNR054C-1  | 14 | 725216  | 12754                   | YNR0   | <b>0.2</b>  | Sgl Pi | 0.756 | 0.77  | 0.021 | 0.12 |
| iYPR073C    | 16 | 692446  | 13677                   | YPR07  | <b>0.53</b> | Sgl Pi | 0.481 | 0.63  | 0.661 | 0.12 |
| iYOR310C    | 15 | 898344  | 13244                   | YOR3   | <b>0.6</b>  | Sgl Pi | 9E-04 | 0.003 | 0.585 | 0.12 |
| iYER138W-A  | 5  | 449580  |                         | 9143   | <b>0.25</b> | Non F  | 0.816 | 0.051 | 0.853 | 0.12 |
| iYLL010C    | 12 | 130619  | 11415                   | YLL01  | <b>0.89</b> | Sgl Pi | 0.185 | 0.282 | 0.029 | 0.12 |
| iYPR158W    | 16 | 844007  | 13749                   | YPR1   | <b>0.41</b> | Sgl Pi | 0.578 | 0.037 | 0.63  | 0.12 |
| iYJL144W    | 10 | 146385  | 10825                   | YJL14  | <b>0.96</b> | Sgl Pi | 0.797 | 0.729 | 0.999 | 0.12 |
| iYDL227C-2  | 4  | 50096   | 8278                    | YDL227 | <b>0.32</b> | Sgl Pi | 0.759 | 0.433 | 0.114 | 0.12 |
| iYPL283C-0  | 16 | 5998    | 13602                   | YPL28  | <b>0.16</b> | Sgl Pi | 0.036 | 0.195 | 0.857 | 0.12 |
| iYNL165W    | 14 | 325058  |                         | 12540  | <b>0.15</b> | Non F  | 0.665 | 0.706 | 0.49  | 0.12 |
| iYOL083W-0  | 15 | 166953  | 12858                   | YOL08  | <b>0.79</b> | Sgl Pi | 0.668 | 0.402 | 0.24  | 0.12 |
| iYOR360C    | 15 | 1014800 | 13292                   | YOR3   | <b>0.41</b> | Sgl Pi | 0.035 | 0.816 | 0.64  | 0.12 |
| iYMR192W    | 13 | 649291  | 12241                   | YMR1   | <b>0.54</b> | Sgl Pi | 0.6   | 0.688 | 0.492 | 0.13 |
| iYIR013C    | 9  | 380372  | 10663                   | YIR01  | <b>0.82</b> | Dbl Pi | 0.643 | 0.555 | 0.62  | 0.13 |
| iYPR195C-1  | 16 | 929322  | 13785                   | YPR1   | <b>0.18</b> | Dbl Pi | 0.644 | 0.447 | 0.003 | 0.13 |
| iYJL006C    | 10 | 423793  | 10707                   | YJL00  | <b>0.41</b> | Dbl Pi | 0.589 | 0.566 | 0.377 | 0.13 |
| iYCR094W    | 3  | 287930  |                         | 8040   | <b>0.12</b> | Non F  | 0.209 | 8E-04 | 0.445 | 0.13 |

|              |    |              |          |             |        |       |       |       |      |
|--------------|----|--------------|----------|-------------|--------|-------|-------|-------|------|
| iYDR049W     | 4  | 555197       | 8357     | <b>0.15</b> | Non F  | 0.582 | 0.075 | 0.189 | 0.13 |
| iYGL003C     | 7  | 494161 9566  | YGL003   | <b>0.81</b> | Dbl Pi | 0.609 | 0.566 | NaN   | 0.13 |
| iYOR017W     | 15 | 363815 12970 | YOR01    | <b>0.82</b> | Sgl Pi | 0.77  | 0.527 | 0.525 | 0.13 |
| iYOR034C     | 15 | 397097 12988 | YOR03    | <b>0.58</b> | Sgl Pi | 0.694 | 0.68  | 0.808 | 0.13 |
| iYLR342W     | 12 | 815631 11789 | YLR34    | <b>0.07</b> | Sgl Pi | 0.686 | 0.644 | 0.205 | 0.13 |
| iYDL219W     | 4  | 65788 8269   | YDL218   | <b>0.99</b> | Sgl Pi | 0.586 | 0.315 | 0.041 | 0.13 |
| iYNL013C     | 14 | 609555 12399 | YNL01    | <b>0.39</b> | Dbl Pi | 0.802 | 0.226 | 0.679 | 0.13 |
| itT(UGU)P    | 16 | 744341 7336  | YPR109   | <b>0.48</b> | Sgl Pi | 0.419 | 0.648 | 0.556 | 0.13 |
| iYLR142W     | 12 | 426629 11607 | YLR14    | <b>0.37</b> | Sgl Pi | 0.719 | 0.924 | 0.407 | 0.13 |
| iYDR541C-0   | 4  | 1520691 8813 | YDR541   | <b>0.75</b> | Dbl Pi | 0.292 | 0.578 | 0.424 | 0.13 |
| iYDR297W     | 4  | 1057596      | 8584     | <b>0.18</b> | Non F  | 0.645 | 0.756 | 0.071 | 0.13 |
| iSNR51       | 16 | 718793       | 7075     | <b>0.04</b> | Non F  | 0.499 | 0.545 | 0.606 | 0.13 |
| iYEL001C     | 5  | 151002 8833  | YEL001   | <b>0.82</b> | Dbl Pi | 0.684 | 0.419 | 0.002 | 0.13 |
| itQ(CUG)M    | 13 | 808312 7277  | YMR27    | <b>0.34</b> | Sgl Pi | 0.751 | 0.575 | 0.575 | 0.13 |
| iYDR495C     | 4  | 1441176 8768 | YDR495   | <b>0.39</b> | Sgl Pi | 0.745 | 0.686 | 0.455 | 0.13 |
| iYJLCdelta7  | 10 | 377561 10904 | YJL036   | <b>0.66</b> | Sgl Pi | 0.621 | 0.879 | 0.442 | 0.13 |
| itL(CAA)D    | 4  | 1461819 7225 | YDR506   | <b>0.17</b> | Sgl Pi | 0.784 | 0.994 | 0.741 | 0.13 |
| iYGR002C     | 7  | 499890 9890  | YGR002   | <b>0.87</b> | Dbl Pi | 0.49  | 0.054 | 0.626 | 0.13 |
| iYKR102W-2   | 11 | 651627 11396 | YKR10    | <b>0.08</b> | Sgl Pi | 0.614 | 0.107 | 0.333 | 0.13 |
| itL(CAA)G2   | 7  | 423227 7227  | YGL040   | <b>0.52</b> | Dbl Pi | 0.002 | 0.828 | 0.349 | 0.14 |
| iYGL076C     | 7  | 365997 9636  | snr39 YC | <b>0.51</b> | Sgl Pi | 0.697 | 0.683 | 0.403 | 0.14 |
| iYMR265C     | 13 | 797917 12314 | YMR26    | <b>0.48</b> | Dbl Pi | 0.856 | 0.087 | 0.993 | 0.14 |
| itY(GUA)J2   | 10 | 542731 7372  | YJR056   | <b>0.25</b> | Dbl Pi | 0.686 | 0.922 | 0.536 | 0.14 |
| itA(AGC)K1   | 11 | 219622 7104  | YKL117   | <b>0.77</b> | Sgl Pi | 0.858 | 0.569 | 0.744 | 0.14 |
| iYLR351C     | 12 | 830348 11797 | YLR35    | <b>0.94</b> | Dbl Pi | 0.013 | 0.018 | 0.989 | 0.14 |
| iYNL212W     | 14 | 249828       | 12578    | <b>0.38</b> | Non F  | 0.572 | 0.502 | 0.401 | 0.14 |
| iYFL025C     | 6  | 87219 9332   | YFL025   | <b>0.42</b> | Sgl Pi | 0.733 | 0.794 | 0.66  | 0.14 |
| iYDL054C     | 4  | 361284 8113  | YDL054   | <b>0.59</b> | Sgl Pi | 0.81  | 0.367 | 0.03  | 0.14 |
| iYOL003C     | 15 | 322983 12782 | YOL00    | <b>0.84</b> | Sgl Pi | 0.742 | 0.31  | 0.432 | 0.14 |
| iYKL068W     | 11 | 312720 11131 | YKL06    | <b>0.15</b> | Sgl Pi | 0.496 | 0.093 | 0.033 | 0.14 |
| iYDL156W     | 4  | 176487 8209  | YDL155   | <b>0.52</b> | Sgl Pi | 0.31  | 0.637 | 0.506 | 0.14 |
| iYBR155W     | 2  | 550871       | 7757     | <b>0.12</b> | Non F  | 0.608 | 0.521 | NaN   | 0.14 |
| iYDRWdelta31 | 4  | 1518787 8832 | YDR540   | <b>0.35</b> | Sgl Pi | 0.859 | 0.765 | 0.045 | 0.14 |
| iYDR056C     | 4  | 565627 8363  | YDR056   | <b>0.89</b> | Dbl Pi | 0.62  | 0.237 | 0.252 | 0.14 |
| iYOR293W     | 15 | 867869 13228 | YOR29    | <b>0.8</b>  | Sgl Pi | 0.447 | 0.866 | 0.18  | 0.14 |
| iYNL198C     | 14 | 266811 12568 | YNL19    | <b>0.22</b> | Sgl Pi | 0.867 | 0.829 | 0.286 | 0.14 |
| iYDR468C     | 4  | 1398677 8742 | YDR468   | <b>0.63</b> | Dbl Pi | 0.662 | 0.489 | 0.478 | 0.14 |
| iYER131W     | 5  | 424295       | 9131     | <b>0.17</b> | Non F  | 0.157 | 0.781 | 0.483 | 0.14 |
| iYHR079C-B   | 8  | 262574 10317 | YHR07    | <b>0.42</b> | Sgl Pi | 0.125 | 0.571 | 0.517 | 0.14 |
| iYPR199C     | 16 | 939012 13790 | YPR19    | <b>0.51</b> | Sgl Pi | 0.468 | 0.661 | 0.482 | 0.14 |
| iYBR275C     | 2  | 757088 7865  | YBR275   | <b>0.66</b> | Sgl Pi | 0.556 | 0.119 | 0.76  | 0.14 |
| iYEL004W     | 5  | 147980 8836  | YEL003   | <b>0.79</b> | Sgl Pi | 0.81  | 0.236 | 0.663 | 0.14 |
| iYLR418C     | 12 | 958077 11857 | YLR41    | <b>0.88</b> | Dbl Pi | 0.733 | 0.934 | 0.517 | 0.14 |
| iYDR506C     | 4  | 1461567 8778 | YDR506   | <b>0.75</b> | Sgl Pi | 0.481 | 0.645 | 0.55  | 0.14 |
| iYML003W     | 13 | 264344 11923 | YML00    | <b>0.19</b> | Sgl Pi | 0.715 | 0.405 | 0.506 | 0.15 |
| iYDL177C     | 4  | 141707 8225  | YDL177   | <b>0.88</b> | Dbl Pi | 0.541 | 0.729 | 0.318 | 0.15 |
| iYCR026C     | 3  | 166360 7985  | YCR026   | <b>0.44</b> | Sgl Pi | 0.789 | 0.558 | 0.547 | 0.15 |
| iYBR014C     | 2  | 267300 7620  | YBR014   | <b>0.2</b>  | Sgl Pi | NaN   | 0.093 | 0.52  | 0.15 |
| iYKL166C-1   | 11 | 136805 11226 | YKL16    | <b>0.47</b> | Sgl Pi | 0.738 | 0.803 | 0.572 | 0.15 |
| iYPR182W     | 16 | 900455 13771 | YPR18    | <b>0.68</b> | Sgl Pi | 0.487 | 0.591 | 0.943 | 0.15 |
| iYBR006W     | 2  | 248291 7612  | YBR007   | <b>0.37</b> | Sgl Pi | 0.666 | 0.838 | 0.531 | 0.15 |



|              |    |              |          |             |        |       |       |       |      |
|--------------|----|--------------|----------|-------------|--------|-------|-------|-------|------|
| iYDL006W     | 4  | 440759       | 8072     | <b>0.09</b> | Non F  | 0.515 | 0.789 | 0.057 | 0.15 |
| iYPL069C     | 16 | 423880 13400 | YPL06    | <b>0.72</b> | Sgl Pi | 0.603 | 0.752 | 0.274 | 0.15 |
| iYJL091C     | 10 | 262257 10777 | YJL09    | <b>0.51</b> | Sgl Pi | 0.298 | 0.269 | 0.579 | 0.15 |
| iYIR004W     | 9  | 364516 10654 | YIR00    | <b>0.68</b> | Sgl Pi | 0.942 | 0.579 | 0.294 | 0.15 |
| iYDR494W     | 4  | 1437777      | 8767     | <b>0.13</b> | Non F  | 0.292 | 0.509 | 0.276 | 0.15 |
| iYMRWdelta17 | 13 | 504664 12381 | YMR1     | <b>0.51</b> | Dbl Pi | 0.335 | 0.951 | 0.566 | 0.15 |
| iYDR098C     | 4  | 645041 8403  | YDR09    | <b>0.32</b> | Sgl Pi | 0.3   | 0.599 | NaN   | 0.15 |
| iYDR328C     | 4  | 1126000 8613 | YDR32    | <b>0.97</b> | Sgl Pi | 0.093 | 0.456 | 0.037 | 0.15 |
| iYGR053C     | 7  | 595832 9936  | YGR05    | <b>0.88</b> | Dbl Pi | 0.002 | 0.529 | 0.534 | 0.15 |
| iYNL009W     | 14 | 616083       | 12395    | <b>0.29</b> | Non F  | NaN   | 0.612 | NaN   | 0.15 |
| itT(AGU)N1   | 14 | 104862 7329  | YNL284   | <b>0.4</b>  | Sgl Pi | 0.714 | 5E-04 | 0.821 | 0.15 |
| iYLR358C     | 12 | 844038 11803 | YLR35    | <b>0.66</b> | Dbl Pi | 0.698 | 0.679 | 0.855 | 0.15 |
| iYDR087C     | 4  | 618301 8394  | YDR087   | <b>0.58</b> | Sgl Pi | 0.548 | 0.441 | 0.513 | 0.15 |
| iYGL040C-1   | 7  | 421826 9605  | YGL040   | <b>0.81</b> | Dbl Pi | 0.041 | 0.639 | 0.438 | 0.15 |
| iYGR027C     | 7  | 534439 9910  | YGR027   | <b>0.09</b> | Dbl Pi | 0.723 | 0.993 | 0.556 | 0.15 |
| itQ(UUG)B    | 2  | 350844       | 7278     | <b>0.7</b>  | Non F  | NaN   | 0.544 | 0.706 | 0.15 |
| iYNL251C     | 14 | 174304 12612 | YNL25    | <b>0.74</b> | Dbl Pi | 0.002 | 0.795 | 0.43  | 0.15 |
| iYPR198W-1   | 16 | 936903       | 13789    | <b>0.55</b> | Non F  | 0.721 | 0.02  | NaN   | 0.15 |
| iYER183C-1   | 5  | 555113 9233  | YER18    | <b>0.07</b> | Sgl Pi | 0.618 | 0.798 | 0.589 | 0.15 |
| iYPL161C     | 16 | 246234 13484 | YPL16    | <b>0.84</b> | Dbl Pi | 0.009 | 0.588 | 0.004 | 0.15 |
| iYGR199W     | 7  | 899761       | 10071    | <b>0.1</b>  | Non F  | 0.4   | 0.649 | 0.536 | 0.16 |
| iYPRWdelta14 | 16 | 776409 13800 | YPR12    | <b>0.58</b> | Dbl Pi | 0.717 | 0.603 | 0.899 | 0.16 |
| iYMR044W     | 13 | 356806       | 12096    | <b>0.04</b> | Non F  | 0.441 | 0.52  | 0.877 | 0.16 |
| iYJL050W     | 10 | 345416 10742 | YJL04    | <b>0.6</b>  | Sgl Pi | 0.792 | 0.624 | 0.041 | 0.16 |
| iYGL030W     | 7  | 439636 9593  | YGL029   | <b>0.34</b> | Sgl Pi | 0.506 | 0.907 | 0.628 | 0.16 |
| iYGR056W     | 7  | 604439       | 9939     | <b>0.1</b>  | Non F  | 0.566 | 0.553 | 0.347 | 0.16 |
| iYJR152W     | 10 | 720994 11049 | YJR15    | <b>0.56</b> | Sgl Pi | 0.553 | 0.532 | 0.058 | 0.16 |
| iYDL225W     | 4  | 54106        | 8274     | <b>0.04</b> | Non F  | 0.44  | 0.658 | 0.38  | 0.16 |
| iYJR050W     | 10 | 529109 10952 | YJR05    | <b>0.53</b> | Sgl Pi | 0.802 | 0.819 | 0.491 | 0.16 |
| iYER087C-A   | 5  | 332812 9041  | YER087   | <b>0.9</b>  | Sgl Pi | 0.705 | 0.347 | 0.014 | 0.16 |
| iYLR344W     | 12 | 820149 11791 | YLR34    | <b>0.49</b> | Sgl Pi | 0.477 | 0.684 | 0.604 | 0.16 |
| iYMR126C     | 13 | 521791 12174 | YMR1     | <b>0.79</b> | Sgl Pi | 0.707 | 0.567 | 0.639 | 0.16 |
| iYGR080W     | 7  | 642991       | 9959     | <b>0.2</b>  | Non F  | 0.521 | 0.778 | 0.399 | 0.16 |
| iYBR040W     | 2  | 317808 7645  | YBR041   | <b>0.78</b> | Sgl Pi | 0.531 | 0.923 | 0.25  | 0.16 |
| iYBR040W     | 2  | 317808 7645  | YBR041   | <b>0.78</b> | Sgl Pi | 0.531 | 0.923 | 0.25  | 0.16 |
| iYKL069W     | 11 | 307472 11132 | YKL06    | <b>0.56</b> | Sgl Pi | 0.533 | 5E-04 | 0.061 | 0.16 |
| iYER040W     | 5  | 231971 8958  | YER041   | <b>0.39</b> | Sgl Pi | 0.848 | 0.987 | 0.556 | 0.16 |
| iYGR170W     | 7  | 840548       | 10045    | <b>0.45</b> | Non F  | 0.009 | 0.065 | 0.85  | 0.16 |
| iYKR094C     | 11 | 618383 11384 | YKR0     | <b>0.65</b> | Dbl Pi | 0.654 | 0.378 | 0.924 | 0.16 |
| iYKR093W     | 11 | 617170       | 11383    | <b>0.07</b> | Non F  | 0.728 | 0.857 | 0.562 | 0.16 |
| iYOR277C     | 15 | 841815 13214 | YOR27    | <b>0.25</b> | Dbl Pi | 0.717 | 0.21  | 0.593 | 0.16 |
| iYOLCdelta3  | 15 | 113634       | 12944    | <b>0.27</b> | Non F  | 0.391 | 0.6   | 0.472 | 0.16 |
| iYERCdelta10 | 5  | 288057 9243  | YER06    | <b>0.35</b> | Dbl Pi | 0.813 | 0.466 | 0.982 | 0.16 |
| iYOR187W     | 15 | 685336 13133 | YOR1     | <b>0.67</b> | Sgl Pi | 0.675 | 0.608 | 0.376 | 0.16 |
| iYLR220W     | 12 | 577820       | 11685    | <b>0.17</b> | Non F  | 0.77  | 0.095 | 0.282 | 0.16 |
| itG(CCC)D    | 4  | 1257060 7157 | YDR39    | <b>0.15</b> | Sgl Pi | NaN   | 0.695 | 0.377 | 0.16 |
| iYGL078C     | 7  | 361845 9638  | YGL078   | <b>0.5</b>  | Sgl Pi | 0.056 | 0.891 | 0.423 | 0.16 |
| iYBR042C     | 2  | 321572 7647  | YBR042   | <b>0.74</b> | Sgl Pi | 0.655 | 0.564 | 0.095 | 0.16 |
| iYCR027C     | 3  | 167998 7986  | tq(uug)c | <b>0.7</b>  | Sgl Pi | 0.588 | 0.37  | 0.763 | 0.16 |
| iYGR089W-0   | 7  | 659760 9969  | YGR09    | <b>0.4</b>  | Sgl Pi | 0.649 | 0.121 | 0.097 | 0.16 |
| iYLRCdelta24 | 12 | 963530 11903 | YLR42    | <b>0.45</b> | Sgl Pi | 0.514 | 0.621 | 0.524 | 0.16 |

|              |    |         |       |        |             |       |     |       |       |       |      |
|--------------|----|---------|-------|--------|-------------|-------|-----|-------|-------|-------|------|
| iYKL081W     | 11 | 284111  | 11143 | YKL08  | <b>0.54</b> | Sgl   | Pi  | 0.696 | 0.062 | 0.776 | 0.16 |
| itE(CUC)D-1  | 4  | 1018340 | 7129  | YDR27E | <b>0.66</b> | Dbl   | Pi  | 0.396 | 0.169 | 0.198 | 0.16 |
| iYDR150W     | 4  | 763852  |       | 8449   | <b>0.28</b> | Non F |     | 0.491 | 0.614 | 0.662 | 0.16 |
| iYKR087C     | 11 | 603766  | 11376 | YKR08  | <b>0.87</b> | Sgl   | Pi  | 0.606 | 0.833 | 0.107 | 0.17 |
| iYMR080C     | 13 | 429619  | 12128 | YMR08  | <b>0.86</b> | Sgl   | Pi  | 0.323 | 0.607 | 0.462 | 0.17 |
| iYFL009W     | 6  | 118479  | 9300  | YFL008 | <b>0.95</b> | Sgl   | Pi  | 0.079 | 0.139 | 0.359 | 0.17 |
| iYIL111W     | 9  | 155763  | 10580 | YIL11C | <b>0.85</b> | Sgl   | Pi  | 0.728 | 0.526 | 0.609 | 0.17 |
| iYMRWdelta21 | 13 | 837751  | 12385 | YMR2E  | <b>0.29</b> | Dbl   | Pi  | 0.494 | 0.459 | 0.688 | 0.17 |
| iYLR353W     | 12 | 836198  |       | 11799  | <b>0.04</b> | Non F | NaN | 0.6   | 0.977 | 0.17  |      |
| iYML083C     | 13 | 101046  | 11999 | YML08  | <b>0.81</b> | Dbl   | Pi  | 0.676 | 0.104 | 0.952 | 0.17 |
| iYPL122C     | 16 | 320773  | 13447 | YPL12  | <b>0.6</b>  | Sgl   | Pi  | 0.763 | 0.568 | 0.252 | 0.17 |
| iYOL160W-1   | 15 | 15965   |       | 12935  | <b>0.61</b> | Non F |     | 0.61  | 0.797 | 0.478 | 0.17 |
| iYER183C-0   | 5  | 553991  | 9231  | YER18E | <b>0.41</b> | Sgl   | Pi  | 0.482 | 0.179 | 0.349 | 0.17 |
| iYOL101C     | 15 | 127939  | 12876 | YOL10  | <b>0.63</b> | Dbl   | Pi  | 0.015 | 0.466 | 0.274 | 0.17 |
| iYOR265W     | 15 | 820783  | 13203 | YOR2E  | <b>0.64</b> | Sgl   | Pi  | 0.594 | 0.472 | 0.512 | 0.17 |
| iYFL008W     | 6  | 123109  | 9298  | YFL007 | <b>0.84</b> | Sgl   | Pi  | 0.609 | 0.87  | 0.5   | 0.17 |
| iYBL075C     | 2  | 86428   | 7569  | YBL075 | <b>0.04</b> | Sgl   | Pi  | 0.449 | 0.633 | NaN   | 0.17 |
| iYPR104C     | 16 | 736415  | 13701 | YPR1C  | <b>0.89</b> | Sgl   | Pi  | 8E-04 | 4E-04 | 0.36  | 0.17 |
| iYGRctau3    | 7  | 931519  | 10172 | YGR2   | <b>0.37</b> | Sgl   | Pi  | 0.479 | 0.624 | NaN   | 0.17 |
| iYHR197W     | 8  | 496193  |       | 10429  | <b>0.08</b> | Non F |     | 0.55  | 0.238 | 0.179 | 0.17 |
| iYKR010C     | 11 | 460881  | 11304 | YKR01  | <b>0.88</b> | Sgl   | Pi  | 0.511 | 0.244 | 0.664 | 0.17 |
| YGRCTy1-2A   | 7  | 562219  |       | 14073  | <b>0.04</b> | Non F |     | 0.557 | 0.811 | 0.9   | 0.17 |
| iYHR027C     | 8  | 164717  | 10261 | YHR02  | <b>0.98</b> | Sgl   | Pi  | NaN   | 0.647 | 0.526 | 0.17 |
| iYDR362C     | 4  | 1198682 | 8647  | YDR362 | <b>0.92</b> | Dbl   | Pi  | 0.369 | 0.22  | 0.534 | 0.17 |
| iYOR283W     | 15 | 848146  | 13218 | YOR2E  | <b>0.62</b> | Sgl   | Pi  | 0.71  | 0.814 | 0.235 | 0.17 |
| iYBR199W     | 2  | 620267  | 7800  | YBR20C | <b>0.48</b> | Sgl   | Pi  | 0.568 | 0.947 | 0.1   | 0.17 |
| iYKL053C-A   | 11 | 339069  | 11116 | YKL05  | <b>0.28</b> | Dbl   | Pi  | 0.528 | 0.536 | 0.513 | 0.17 |
| YGLctau3     | 7  | 320375  | 14066 | YGL09  | <b>0.59</b> | Sgl   | Pi  | 0.823 | 0.583 | 0.486 | 0.17 |
| iYGR055W     | 7  | 601122  | 9938  | YGR05E | <b>0.42</b> | Sgl   | Pi  | 7E-04 | 0.858 | 0.139 | 0.17 |
| iYNL070W     | 14 | 493551  |       | 0      | <b>0.33</b> | Non F |     | 0.602 | 0.698 | 0.614 | 0.17 |
| iYPLCdelta1  | 16 | 55853   | 13604 | YPL25  | <b>0.41</b> | Dbl   | Pi  | 0.285 | 0.435 | 0.066 | 0.18 |
| iYOL041C     | 15 | 252630  | 12819 | YOL04  | <b>0.52</b> | Sgl   | Pi  | 0.015 | 0.962 | 0.589 | 0.18 |
| itF(GAA)N    | 14 | 374967  | 7154  | YNL133 | <b>0.93</b> | Dbl   | Pi  | 0.677 | 0.402 | 0.441 | 0.18 |
| iYBRWdelta16 | 2  | 327663  | 7896  | YBR044 | <b>0.55</b> | Sgl   | Pi  | 0.456 | 0.616 | 0.404 | 0.18 |
| iYEL031W     | 5  | 93907   | 8863  | YEL030 | <b>0.58</b> | Sgl   | Pi  | 0.642 | 0.105 | 0.285 | 0.18 |
| itT(AGU)J    | 10 | 59172   | 7328  | YJL200 | <b>0.73</b> | Sgl   | Pi  | 0.47  | 0.501 | 0.886 | 0.18 |
| iYDR135C     | 4  | 727540  | 8436  | YDR13E | <b>0.84</b> | Sgl   | Pi  | 0.481 | 0.67  | 0.717 | 0.18 |
| iYKL009W     | 11 | 426593  |       | 11075  | <b>0.28</b> | Non F |     | 0.65  | 0.541 | 0.409 | 0.18 |
| iYDR402C     | 4  | 1273687 | 8685  | YDR402 | <b>0.55</b> | Dbl   | Pi  | 0.812 | 0.03  | 0.521 | 0.18 |
| iYML035C     | 13 | 208865  | 11954 | YML03  | <b>0.38</b> | Sgl   | Pi  | 0.395 | 0.378 | 0.934 | 0.18 |
| iYOLCdelta1  | 15 | 3211    | 12942 | YOL16  | <b>0.78</b> | Dbl   | Pi  | 0.45  | 0.279 | 0.462 | 0.18 |
| iYNL127W     | 14 | 386842  | 12502 | YNL12  | <b>0.69</b> | Sgl   | Pi  | 0.608 | 0.703 | 0.169 | 0.18 |
| iYDL208W     | 4  | 87975   | 8256  | YDL207 | <b>0.78</b> | Sgl   | Pi  | 0.533 | 0.717 | 0.357 | 0.18 |
| iYML070W     | 13 | 135234  | 11984 | YML06  | <b>0.88</b> | Sgl   | Pi  | 0.419 | 0.588 | 0.003 | 0.18 |
| iYBR173C     | 2  | 582137  | 7777  | YBR17E | <b>0.81</b> | Sgl   | Pi  | 0.474 | 0.443 | 0.259 | 0.18 |
| iYML133C-0   | 13 | 4672    | 12045 | YML13  | <b>0.33</b> | Dbl   | Pi  | 0.067 | 0.864 | 0.792 | 0.18 |
| iYBR163W     | 2  | 567468  |       | 7767   | <b>0.13</b> | Non F |     | 0.793 | 0.591 | 0.336 | 0.18 |
| iYNL026W     | 14 | 583382  |       | 12410  | <b>0.08</b> | Non F |     | 0.68  | 0.631 | 0.414 | 0.18 |
| iYKL106W     | 11 | 238522  |       | 11169  | <b>0.14</b> | Non F |     | 0.907 | 0.836 | 0.443 | 0.18 |
| iYKL106W     | 11 | 238522  |       | 11169  | <b>0.14</b> | Non F |     | 0.907 | 0.836 | 0.443 | 0.18 |
| iYGR097W     | 7  | 682135  |       | 9978   | <b>0.13</b> | Non F |     | 0.678 | 0.874 | 0.374 | 0.18 |

|              |    |         |       |        |             |       |     |              |              |              |             |
|--------------|----|---------|-------|--------|-------------|-------|-----|--------------|--------------|--------------|-------------|
| iYGL117W     | 7  | 289319  | 9677  | YGL116 | <b>0.51</b> | Sgl   | Pi  | 0.779        | 1E-05        | 0.499        | 0.18        |
| iYDL237W     | 4  | 31830   | 8287  | YDL236 | <b>0.91</b> | Sgl   | Pi  | 0.713        | 0.101        | 0.388        | 0.18        |
| iYPL076W-1   | 16 | 412049  | 13406 | YPL07  | <b>0.15</b> | Sgl   | Pi  | 0.231        | 0.165        | 0.341        | 0.18        |
| iYJL207C     | 10 | 47418   | 10881 | YJL207 | <b>0.59</b> | Sgl   | Pi  | 0.521        | 0.41         | 0.669        | 0.18        |
| itD(GUC)G2   | 7  | 544639  |       | 7119   | <b>0.18</b> | Non F |     | <b>0.721</b> | <b>0.912</b> | <b>0.989</b> | <b>0.18</b> |
| iYLR305C     | 12 | 743864  | 11758 | YLR30  | <b>0.78</b> | Dbl   | Pi  | 0.77         | 0.525        | 0.079        | 0.18        |
| iYLR394W     | 12 | 909404  |       | 11833  | <b>0.35</b> | Non F |     | 0.526        | 0.476        | 0.391        | 0.18        |
| iYORWdelta14 | 15 | 600719  |       | 13329  | <b>0.31</b> | Non F |     | 0.794        | 0.584        | 0.307        | 0.18        |
| iYGL180W     | 7  | 162801  |       | 9736   | <b>0.26</b> | Non F |     | 0.913        | 0.983        | 0.067        | 0.18        |
| iYPL179W     | 16 | 209807  | 13502 | YPL17  | <b>0.12</b> | Sgl   | Pi  | <b>0.636</b> | <b>0.841</b> | <b>0.056</b> | <b>0.18</b> |
| iYJL102W     | 10 | 233456  |       | 10787  | <b>0.12</b> | Non F |     | <b>0.78</b>  | <b>0.925</b> | <b>0.833</b> | <b>0.18</b> |
| iYBL030C-0   | 2  | 163947  | 7529  | YBL030 | <b>0.4</b>  | Dbl   | Pi  | 0.253        | 0.675        | 0.954        | 0.18        |
| iYGR128C     | 7  | 750072  | 10008 | YGR128 | <b>0.75</b> | Dbl   | Pi  | <b>2E-04</b> | 0.755        | 0.504        | 0.19        |
| itP(UGG)M    | 13 | 196188  | 7271  | YML041 | <b>0.27</b> | Dbl   | Pi  | <b>0.798</b> | <b>0.792</b> | <b>0.626</b> | <b>0.19</b> |
| iYDR403W     | 4  | 1276210 |       | 8686   | <b>0.37</b> | Non F |     | 0.024        | 0.98         | 0.454        | 0.19        |
| iYAL001C     | 1  | 151181  | 7376  | YAL001 | <b>0.64</b> | Dbl   | Pi  | 0.656        | 0.214        | 0.968        | 0.19        |
| iYCR095C-1   | 3  | 290312  | 8042  | YCR095 | <b>0.27</b> | Sgl   | Pi  | 0.738        | 0.783        | 1E-06        | 0.19        |
| iYKL125W     | 11 | 209789  | 11184 | YKL12  | <b>0.65</b> | Sgl   | Pi  | 0.043        | 0.094        | 0.709        | 0.19        |
| iYPL239W     | 16 | 100090  |       | 13558  | <b>0.5</b>  | Non F |     | 0.232        | 0.502        | 0.217        | 0.19        |
| iYIL106W     | 9  | 167426  |       | 10575  | <b>0.01</b> | Non F |     | 0.349        | 0.896        | 0.543        | 0.19        |
| iYMR220W     | 13 | 713675  |       | 12270  | <b>0.14</b> | Non F |     | 0.542        | 0.461        | NaN          | 0.19        |
| iYELCtau1    | 5  | 118549  |       | 8914   | <b>0.01</b> | Non F | NaN |              | 0.485        | NaN          | 0.19        |
| iYHR003C     | 8  | 111300  | 10236 | YHR003 | <b>0.49</b> | Sgl   | Pi  | 0.624        | 0.318        | 0.773        | 0.19        |
| iYDR419W     | 4  | 1305047 | 8700  | YDR420 | <b>0.11</b> | Sgl   | Pi  | <b>0.702</b> | <b>0.853</b> | <b>0.167</b> | <b>0.19</b> |
| iYNL210W     | 14 | 251746  | 12576 | YNL20  | <b>0.58</b> | Sgl   | Pi  | 0.002        | 0.588        | 0.061        | 0.19        |
| iYML107C     | 13 | 56453   | 12018 | YML107 | <b>0.4</b>  | Dbl   | Pi  | 0.189        | 0.855        | 0.578        | 0.19        |
| iYGL251C     | 7  | 31046   | 9843  | YGL251 | <b>0.49</b> | Dbl   | Pi  | 0.028        | 0.684        | 0.012        | 0.19        |
| isnR37       | 10 | 228289  |       | 7065   | <b>0.48</b> | Non F |     | <b>0.716</b> | <b>0.536</b> | <b>0.277</b> | <b>0.19</b> |
| iYIL001W     | 9  | 355455  |       | 10476  | <b>0.54</b> | Non F |     | 0.122        | 0.538        | 0.478        | 0.19        |
| iYDR040C     | 4  | 538455  | 8347  | YDR040 | <b>0.57</b> | Dbl   | Pi  | 0.414        | 0.538        | 0.794        | 0.19        |
| YBRCdelta19  | 2  | 644329  | 14016 | YBR21  | <b>0.68</b> | Sgl   | Pi  | 0.431        | 0.821        | 0.975        | 0.19        |
| iYDR521W     | 4  | 1483475 |       | 8790   | <b>0.99</b> | Non F |     | 0.58         | 0.544        | 0.559        | 0.19        |
| iYKL004W     | 11 | 436422  |       | 11069  | <b>0.21</b> | Non F |     | 0.385        | 0.807        | 0.516        | 0.19        |
| iYOR274W     | 15 | 838949  |       | 13212  | <b>0.04</b> | Non F |     | 0.62         | 0.559        | 0.116        | 0.19        |
| iYIL003W     | 9  | 350033  |       | 10478  | <b>0.85</b> | Non F |     | 0.307        | 0.822        | 0.477        | 0.19        |
| iYDR041W     | 4  | 540414  |       | 8348   | <b>0.06</b> | Non F |     | 0.535        | 0.587        | 0.513        | 0.19        |
| iYILCtau1    | 9  | 197007  |       | 10650  | <b>0.47</b> | Non F |     | 0.652        | 0.445        | 0.359        | 0.19        |
| iYKR034W     | 11 | 507346  | 11324 | YKR034 | <b>0.84</b> | Sgl   | Pi  | 0.398        | 0.674        | 0.451        | 0.19        |
| iYBL054W     | 2  | 119123  | 7552  | YBL053 | <b>0.21</b> | Sgl   | Pi  | 0.222        | 0.607        | 0.108        | 0.19        |
| iYMR230W     | 13 | 733138  | 12280 | YMR230 | <b>0.37</b> | Sgl   | Pi  | 0.447        | 0.969        | 0.4          | 0.19        |
| iYKL221W-0   | 11 | 7558    |       | 11282  | <b>0.96</b> | Non F |     | 0.796        | 0.887        | 0.374        | 0.19        |
| iYCR024C     | 3  | 162216  | 7982  | YCR024 | <b>0.06</b> | Sgl   | Pi  | 0.824        | 0.843        | 0.934        | 0.19        |
| iYBR156C     | 2  | 553163  | 7758  | YBR156 | <b>0.37</b> | Sgl   | Pi  | 0.503        | 0.588        | 0.026        | 0.19        |
| iYOR143C     | 15 | 602335  | 13090 | YOR143 | <b>0.85</b> | Sgl   | Pi  | 0.797        | 0.511        | 0.422        | 0.19        |
| iYBR075W     | 2  | 389199  | 7680  | YBR076 | <b>0.39</b> | Sgl   | Pi  | 0.631        | 0.53         | 0.423        | 0.2         |
| iYDR292C     | 4  | 1045011 | 8579  | YDR292 | <b>0.34</b> | Sgl   | Pi  | 0.737        | 0.61         | 0.586        | 0.2         |
| iYDR020C     | 4  | 486435  | 8324  | YDR020 | <b>0.77</b> | Dbl   | Pi  | 0.616        | 0.655        | 0.491        | 0.2         |
| iYBL045C     | 2  | 135507  | 7545  | YBL045 | <b>0.47</b> | Dbl   | Pi  | 0.468        | 0.215        | 0.437        | 0.2         |
| iYMR155W     | 13 | 570178  |       | 12202  | <b>0.04</b> | Non F | NaN |              | 0.451        | 0.512        | 0.2         |
| iYGL005C     | 7  | 490546  | 9568  | YGL005 | <b>0.52</b> | Sgl   | Pi  | 0.68         | 0.751        | 0.717        | 0.2         |
| iYPR031W     | 16 | 633745  | 13643 | YPR031 | <b>0.44</b> | Sgl   | Pi  | 0.691        | 0.957        | 0.332        | 0.2         |

|              |    |               |        |             |        |       |       |       |      |
|--------------|----|---------------|--------|-------------|--------|-------|-------|-------|------|
| iYGR271W     | 7  | 1037690       | 10140  | <b>0.26</b> | Non F  | 0.484 | 0.305 | 0.401 | 0.2  |
| iYAL027W     | 1  | 95462         | 7400   | <b>0.01</b> | Non F  | NaN   | 0.637 | 0.435 | 0.2  |
| iYJL104W     | 10 | 227481        | 10789  | <b>0.26</b> | Non F  | 0.635 | 0.262 | 0.931 | 0.2  |
| iYMR022W     | 13 | 319181        | 12075  | <b>0.34</b> | Non F  | 0.555 | 0.586 | 0.466 | 0.2  |
| iYKL144C     | 11 | 176487 11201  | YKL14  | <b>0.91</b> | Dbl Pi | 5E-04 | 0.675 | 0.159 | 0.2  |
| YBLCsigma1   | 2  | 197669        | 14005  | <b>0.37</b> | Non F  | 0.81  | 0.007 | 0.967 | 0.2  |
| iYHR153C     | 8  | 402677 10388  | YHR15  | <b>0.75</b> | Dbl Pi | 0.68  | 0.307 | 0.422 | 0.2  |
| iYGL121C     | 7  | 281188 9681   | YGL121 | <b>0.56</b> | Sgl Pi | 0.311 | 0.618 | 0.57  | 0.2  |
| iYBL087C     | 2  | 60746 7579    | YBL087 | <b>0.09</b> | Sgl Pi | 0.732 | 0.983 | 0.205 | 0.2  |
| iYGR284C     | 7  | 1061583 10153 | YGR28  | <b>0.56</b> | Sgl Pi | 0.734 | 0.173 | 0.306 | 0.2  |
| iYLR125W     | 12 | 393884        | 11592  | <b>0.27</b> | Non F  | 0.687 | 0.182 | 0.385 | 0.2  |
| iYMR237W     | 13 | 745930 12287  | YMR23  | <b>0.86</b> | Sgl Pi | 0.734 | 0.973 | 0.448 | 0.2  |
| YDRCTy1-2B   | 4  | 879768 14033  | YDR21  | <b>0.02</b> | Sgl Pi | 0.543 | 0.28  | 1     | 0.2  |
| iYML094W     | 13 | 82854 12007   | YML09  | <b>0.83</b> | Sgl Pi | 0.728 | 0.537 | 0.449 | 0.2  |
| iYNL191W     | 14 | 281507 12561  | YNL19  | <b>0.15</b> | Sgl Pi | 0.705 | 0.541 | 0.853 | 0.2  |
| iYDR058C     | 4  | 568695 8365   | YDR05  | <b>0.38</b> | Sgl Pi | 0.679 | 0.662 | 0.759 | 0.2  |
| iYGR255C     | 7  | 1003943 10126 | YGR25  | <b>0.52</b> | Dbl Pi | 0.492 | 0.783 | 0.995 | 0.2  |
| iYOR159C     | 15 | 633565 13106  | YOR15  | <b>0.95</b> | Dbl Pi | 0.744 | 0.439 | 0.671 | 0.2  |
| iYDL147W     | 4  | 192250 8202   | YDL146 | <b>0.47</b> | Sgl Pi | 0.71  | 0.184 | 0.591 | 0.2  |
| iYOR056C     | 15 | 431612 13007  | YOR05  | <b>0.79</b> | Dbl Pi | 4E-04 | 0.139 | 0.125 | 0.2  |
| iSNR47       | 4  | 541643 7072   | YDR042 | <b>0.37</b> | Sgl Pi | 0.013 | 0.404 | 0.248 | 0.2  |
| iYOR366W     | 15 | 1025616 13296 | YOR36  | <b>0.41</b> | Sgl Pi | 0.563 | 0.852 | 0.542 | 0.2  |
| iYOL107W     | 15 | 113114 12881  | YOL10  | <b>0.06</b> | Sgl Pi | 0.577 | 0.496 | 0.521 | 0.2  |
| iYHR156C     | 8  | 412406 10391  | YHR15  | <b>0.63</b> | Dbl Pi | 0.514 | 0.789 | 0.256 | 0.2  |
| itN(GUU)O1   | 15 | 228391 7261   | YOL055 | <b>0.45</b> | Dbl Pi | 0.703 | 0.706 | 0.339 | 0.2  |
| iYFR041C     | 6  | 238228 9514   | YFR041 | <b>0.9</b>  | Dbl Pi | 0.584 | 0.167 | NaN   | 0.2  |
| iYBLCsigma1  | 2  | 198002        | 7603   | <b>0.47</b> | Non F  | 0.754 | 0.658 | 0.426 | 0.2  |
| iYBLCsigma1  | 2  | 198002        | 7603   | <b>0.47</b> | Non F  | 0.754 | 0.658 | 0.426 | 0.2  |
| iYJR082C     | 10 | 581948 10979  | YJR08  | <b>0.77</b> | Sgl Pi | 0.74  | 0.573 | 0.67  | 0.2  |
| itK(CUU)M    | 13 | 480700 7215   | YMR10  | <b>0.74</b> | Dbl Pi | 0.738 | 0.361 | 0.298 | 0.21 |
| iYBR255W     | 2  | 726493        | 7849   | <b>0.82</b> | Non F  | 0.692 | 0.563 | 0.524 | 0.21 |
| iYOL159C     | 15 | 17785 12933   | YOL15  | <b>0.86</b> | Sgl Pi | 0.785 | 0.893 | 0.505 | 0.21 |
| iYGR149W     | 7  | 790333        | 10028  | <b>0.11</b> | Non F  | 0.154 | 0.554 | 0.504 | 0.21 |
| iYBRCdelta19 | 2  | 644568 7895   | YBR210 | <b>0.77</b> | Sgl Pi | 0.418 | 0.078 | 0.879 | 0.21 |
| iYDL048C-1   | 4  | 368991 8108   | YDL048 | <b>0.22</b> | Dbl Pi | 0.031 | 0.096 | 0.185 | 0.21 |
| iYMR207C     | 13 | 683571 12257  | YMR20  | <b>0.97</b> | Dbl Pi | 0.528 | 0.277 | 0.021 | 0.21 |
| iYNL126W     | 14 | 389765        | 12501  | <b>0.13</b> | Non F  | 0.712 | 0.812 | 0.391 | 0.21 |
| iYLR324W     | 12 | 780774        | 11774  | <b>0.27</b> | Non F  | 0.73  | 0.92  | 0.502 | 0.21 |
| iYFL052W     | 6  | 29621         | 9386   | <b>0.54</b> | Non F  | 0.417 | 0.699 | 0.744 | 0.21 |
| itM(CAU)O2   | 15 | 976474 7251   | YOR34  | <b>0.09</b> | Sgl Pi | 0.744 | 0.423 | 0.516 | 0.21 |
| iYAL064W     | 1  | 21854         | 7443   | <b>0.48</b> | Non F  | 0.622 | 0.04  | 0.398 | 0.21 |
| iYFL055W-0   | 6  | 18676         | 9394   | <b>0.4</b>  | Non F  | 0.788 | 0.688 | 0.374 | 0.21 |
| iYOL017W     | 15 | 294659        | 12797  | <b>0.18</b> | Non F  | 0.627 | 0.763 | 0.562 | 0.21 |
| iYKLCdelta4  | 11 | 219371 11289  | YKL11  | <b>0.16</b> | Sgl Pi | 0.738 | 0.699 | 0.796 | 0.21 |
| iYKLCdelta4  | 11 | 219371 11289  | YKL11  | <b>0.16</b> | Sgl Pi | 0.738 | 0.699 | 0.796 | 0.21 |
| iYDL045C     | 4  | 373638 8103   | YDL045 | <b>0.81</b> | Sgl Pi | 0.635 | 0.156 | 0.549 | 0.21 |
| iYFR009W     | 6  | 164732 9446   | YFR010 | <b>0.39</b> | Sgl Pi | 0.001 | 0.94  | 0.012 | 0.21 |
| iYIL116W     | 9  | 144135        | 10585  | <b>0.14</b> | Non F  | 0.347 | 0.706 | NaN   | 0.21 |
| iYFL039C     | 6  | 54701 9360    | YFL039 | <b>0.04</b> | Sgl Pi | 0.143 | 0.213 | 0.72  | 0.21 |
| itH(GUG)E1   | 5  | 207413        | 7178   | <b>0.23</b> | Non F  | 0.663 | 0.483 | NaN   | 0.21 |
| iYFR039C     | 6  | 233517 9510   | YFR039 | <b>0.83</b> | Dbl Pi | 0.65  | 0.492 | 0.593 | 0.21 |

|                     |           |               |              |               |             |        |              |              |              |             |
|---------------------|-----------|---------------|--------------|---------------|-------------|--------|--------------|--------------|--------------|-------------|
| iYGRWdelta19        | 7         | 701410        | 10174        | YGR10         | <b>0.44</b> | Dbl Pi | 0.62         | 0.003        | 0.224        | 0.21        |
| iYMR274C            | 13        | 815347        | 12323        | YMR27         | <b>0.44</b> | Sgl Pi | 0.884        | 0.173        | 0.419        | 0.21        |
| iYDR496C            | 4         | 1443399       | 8769         | YDR496        | <b>0.62</b> | Sgl Pi | 0.667        | 0.763        | 0.467        | 0.21        |
| TEL15R-6            | 15        | 1089891       |              | 13960         | <b>0.08</b> | Non F  | 0.893        | 0.157        | 0.998        | 0.21        |
| iYBL008W            | 2         | 212139        |              | 7508          | <b>0.23</b> | Non F  | 0.909        | 0.991        | 0.516        | 0.21        |
| iYOR232W            | 15        | 775286        | 13173        | YOR23         | <b>0.64</b> | Sgl Pi | 0.582        | 0.157        | 0.419        | 0.21        |
| iYIL103W-0          | 9         | 173025        |              | 10571         | <b>0.65</b> | Non F  | 0.035        | 0.162        | 0.137        | 0.21        |
| iYGL139W            | 7         | 248131        |              | 9697          | <b>0.16</b> | Non F  | 0.423        | 0.647        | 0.909        | 0.21        |
| iYLR277C            | 12        | 699541        | 11734        | YLR27         | <b>0.72</b> | Sgl Pi | 0.698        | 0.634        | 0.47         | 0.22        |
| iYOR195W            | 15        | 715328        |              | 13142         | <b>0.11</b> | Non F  | 0.625        | 0.582        | NaN          | 0.22        |
| iYPR042C            | 16        | 653674        | 13651        | YPR04         | <b>0.69</b> | Dbl Pi | 0.701        | 0.609        | 0.529        | 0.22        |
| iYFR018C            | 6         | 184207        | 9464         | YFR018        | <b>0.82</b> | Dbl Pi | 0.323        | <b>3E-04</b> | 0.293        | 0.22        |
| iYPR167C            | 16        | 877625        | 13758        | YPR16         | <b>0.79</b> | Dbl Pi | 0.617        | 0.74         | 0.904        | 0.22        |
| iYGL066W            | 7         | 379591        |              | 9629          | <b>0.01</b> | Non F  | 0.424        | 0.718        | 0.228        | 0.22        |
| iYGL066W            | 7         | 379591        |              | 9629          | <b>0.01</b> | Non F  | 0.424        | 0.718        | 0.228        | 0.22        |
| iYDR336W            | 4         | 1146038       | 8621         | YDR337        | <b>0.91</b> | Sgl Pi | 0.548        | 0.371        | 0.377        | 0.22        |
| iYKL167C            | 11        | 134135        | 11227        | YKL16         | <b>0.81</b> | Sgl Pi | <b>8E-04</b> | 0.057        | NaN          | 0.22        |
| YARCdelta8          | 1         | 209434        |              | 14003         | <b>0.48</b> | Non F  | 0.818        | 0.976        | 0.813        | 0.22        |
| iYDR067C            | 4         | 583474        | 8374         | YDR067        | <b>0.9</b>  | Dbl Pi | 0.78         | 0.582        | 0.406        | 0.22        |
| <b>iYKL154W</b>     | <b>11</b> | <b>162362</b> | <b>11209</b> | <b>YKL15</b>  | <b>0.15</b> | Sgl Pi | <b>0.287</b> | NaN          | <b>0.455</b> | <b>0.22</b> |
| iYBR166C            | 2         | 571148        | 7770         | YBR166        | <b>0.84</b> | Sgl Pi | 0.126        | 0.511        | NaN          | 0.22        |
| iYFL046W            | 6         | 43429         |              | 9372          | <b>0.14</b> | Non F  | 0.551        | 0.689        | 0.442        | 0.22        |
| <b>itL(CAA)G3</b>   | <b>7</b>  | <b>857473</b> | <b>7228</b>  | <b>YGR180</b> | <b>0.75</b> | Dbl Pi | <b>0.595</b> | <b>0.678</b> | <b>0.392</b> | <b>0.22</b> |
| iYHR148W            | 8         | 394093        |              | 10383         | <b>0.26</b> | Non F  | 0.777        | 0.648        | 0.54         | 0.22        |
| <b>iYKL165C</b>     | <b>11</b> | <b>140678</b> | <b>11224</b> | <b>YKL16</b>  | <b>0.55</b> | Sgl Pi | <b>0.062</b> | <b>0.518</b> | <b>0.548</b> | <b>0.22</b> |
| iYHRWtau3           | 8         | 147190        |              | 10475         | <b>0.48</b> | Non F  | 0.572        | 0.496        | 0.016        | 0.22        |
| iYPL202C            | 16        | 169362        | 13523        | YPL20         | <b>0.32</b> | Sgl Pi | 0.536        | 0.602        | 0.954        | 0.22        |
| iYLR196W            | 12        | 545703        | 11665        | YLR19         | <b>0.6</b>  | Sgl Pi | 0.375        | 0.923        | 0.634        | 0.22        |
| iYDLCdelta1-0       | 4         | 434733        | 8303         | YDL007        | <b>0.62</b> | Sgl Pi | 0.779        | 0.573        | 0.379        | 0.22        |
| iYMR143W            | 13        | 552897        | 12191        | YMR14         | <b>0.75</b> | Sgl Pi | 0.574        | 2E-05        | 0.52         | 0.22        |
| <b>itL(UAG)J</b>    | <b>10</b> | <b>617696</b> | <b>7240</b>  | <b>YJR100</b> | <b>0.65</b> | Dbl Pi | <b>0.426</b> | <b>0.493</b> | NaN          | <b>0.22</b> |
| iYLR263W            | 12        | 672864        | 11722        | YLR26         | <b>0.37</b> | Sgl Pi | 0.004        | 0.798        | NaN          | 0.22        |
| iYMR267W            | 13        | 802716        |              | 12316         | <b>0.11</b> | Non F  | 0.531        | 0.731        | 0.406        | 0.22        |
| iYLR076C            | 12        | 283701        | 11545        | YLR07         | <b>0.27</b> | Dbl Pi | 0.183        | 0.549        | 0.548        | 0.22        |
| iYKL191W            | 11        | 82647         | 11249        | YKL19         | <b>0.67</b> | Sgl Pi | <b>2E-04</b> | 0.476        | 0.326        | 0.22        |
| iYMR154C            | 13        | 568166        | 12201        | YMR15         | <b>0.78</b> | Dbl Pi | 0.765        | 0.504        | 0.579        | 0.22        |
| iYKL087C            | 11        | 277523        | 11148        | YKL08         | <b>0.84</b> | Dbl Pi | 0.747        | 0.734        | 0.269        | 0.22        |
| iYER016W            | 5         | 189295        |              | 8935          | <b>0.13</b> | Non F  | 0.651        | 0.343        | 0.827        | 0.22        |
| iYKL021C            | 11        | 398365        | 11087        | YKL02         | <b>0.06</b> | Sgl Pi | 0.715        | 0.705        | 0.47         | 0.22        |
| iYNL159C            | 14        | 339335        | 12533        | YNL15         | <b>0.99</b> | Dbl Pi | 0.079        | 0.016        | 0.74         | 0.22        |
| iYDL224C            | 4         | 56362         | 8273         | YDL224        | <b>0.61</b> | Sgl Pi | 0.628        | 0.197        | 0.677        | 0.22        |
| <b>itV(AAC)G3-0</b> | <b>7</b>  | <b>73888</b>  | <b>7343</b>  | <b>YGL225</b> | <b>0.58</b> | Sgl Pi | <b>0.262</b> | <b>0.355</b> | <b>0.841</b> | <b>0.22</b> |
| iYLR352W            | 12        | 833547        | 11798        | YLR35         | <b>0.63</b> | Sgl Pi | 0.335        | 1E-05        | NaN          | 0.22        |
| iYPR081C            | 16        | 703959        | 13683        | YPR08         | <b>0.55</b> | Sgl Pi | 0.39         | 0.556        | 0.721        | 0.22        |
| iYHR017W            | 8         | 139845        |              | 10251         | <b>0.11</b> | Non F  | 0.331        | 0.636        | 0.351        | 0.22        |
| iYGL096W-0          | 7         | 326156        |              | 9656          | <b>0.39</b> | Non F  | 0.724        | 0.533        | 0.597        | 0.22        |
| iYKL062W            | 11        | 324747        | 11125        | YKL06         | <b>0.46</b> | Sgl Pi | 0.497        | 0.635        | 0.504        | 0.22        |
| iYJL204C            | 10        | 53144         | 10878        | YJL20         | <b>0.69</b> | Dbl Pi | 0.351        | 0.148        | 0.406        | 0.22        |
| iYOR261C            | 15        | 816926        | 13200        | YOR26         | <b>0.84</b> | Dbl Pi | <b>1E-04</b> | 0.569        | 0.079        | 0.23        |
| iYBR146W            | 2         | 536061        | 7748         | YBR147        | <b>0.69</b> | Sgl Pi | 0.584        | 0.919        | 0.03         | 0.23        |
| iYKL014C            | 11        | 416550        | 11080        | YKL01         | <b>0.69</b> | Sgl Pi | <b>4E-04</b> | 0.969        | 0.674        | 0.23        |



|               |    |              |        |      |       |       |       |       |      |
|---------------|----|--------------|--------|------|-------|-------|-------|-------|------|
| iYMR284W      | 13 | 839990       | 12332  | 0.11 | Non F | NaN   | 0.445 | 0.408 | 0.23 |
| iSNR42        | 11 | 558990 7068  | YKR062 | 0.79 | Sgl P | 0.725 | 0.536 | 0.739 | 0.23 |
| iYOL023W      | 15 | 280089       | 12803  | 0.09 | Non F | 0.816 | 0.586 | NaN   | 0.23 |
| iYDL247W      | 4  | 7808         | 8300   | 0.86 | Non F | 0.749 | 0.14  | 0.597 | 0.23 |
| iYBR295W      | 2  | 796443       | 7885   | 0.58 | Non F | NaN   | 0.702 | 0.649 | 0.23 |
| iYPR159W      | 16 | 859735 13750 | YPR16  | 0.21 | Sgl P | 0.886 | 0.581 | 1     | 0.23 |
| iYMR193W      | 13 | 650802       | 12242  | 0.24 | Non F | 0.66  | 0.682 | 0.336 | 0.23 |
| iYGR120C      | 7  | 730844 9999  | YGR120 | 0.21 | Sgl P | 0.766 | 0.857 | 0.582 | 0.23 |
| iYBL002W      | 2  | 236857       | 7502   | 0.21 | Non F | 0.533 | 0.697 | 0.63  | 0.23 |
| iYIL151C      | 9  | 60697 10620  | YIL151 | 0.97 | Sgl P | 0.547 | 0.332 | 0.22  | 0.23 |
| iYDR034C-A    | 4  | 520689 8340  | YDR034 | 0.58 | Dbl P | 0.772 | 0.844 | 0.631 | 0.23 |
| iYBR206W      | 2  | 634880 7807  | YBR207 | 0.35 | Sgl P | 0.742 | 0.179 | 0.709 | 0.23 |
| iYOL031C      | 15 | 267533 12811 | YOL03  | 0.63 | Dbl P | 0.603 | 2E-05 | 0.448 | 0.23 |
| iYFR054C-2    | 6  | 261675 9546  | YFR054 | 0.68 | Sgl P | 0.625 | 0.537 | 0.378 | 0.23 |
| iYOL116W      | 15 | 100957 12890 | YOL11  | 0.74 | Sgl P | 0.64  | 0.845 | 0.687 | 0.23 |
| iYDL160C      | 4  | 171950 8211  | YDL160 | 0.28 | Dbl P | 4E-04 | 0.905 | 0.477 | 0.23 |
| iYHR083W      | 8  | 273608 10321 | YHR08  | 0.79 | Sgl P | 0.792 | 9E-05 | 0.595 | 0.23 |
| iYGR178C      | 7  | 853196 10052 | YGR17  | 0.57 | Sgl P | 0.634 | 0.627 | 0.656 | 0.23 |
| iYNL214W      | 14 | 246203       | 12580  | 0.3  | Non F | 0.411 | 0.566 | 0.426 | 0.23 |
| iYHR119W      | 8  | 349288 10356 | YHR12  | 0.63 | Sgl P | 0.334 | 0.023 | 0.113 | 0.23 |
| iYDL005C      | 4  | 442301 8071  | YDL005 | 0.76 | Dbl P | 0.039 | 0.09  | 1E-04 | 0.23 |
| iYBR198C      | 2  | 618468 7799  | YBR198 | 0.89 | Dbl P | 0.002 | 0.383 | 0.793 | 0.23 |
| iYPL232W      | 16 | 108134 13552 | YPL23  | 0.21 | Sgl P | 0.703 | 0.44  | 0.607 | 0.23 |
| iYJL029C      | 10 | 390537 10723 | YJL029 | 0.83 | Dbl P | 0.659 | 0.745 | 0.656 | 0.23 |
| iYLR381W      | 12 | 881916       | 11821  | 0    | Non F | 0.237 | 0.054 | 0.524 | 0.23 |
| iYPL066W      | 16 | 427666 13397 | YPL06  | 0.8  | Sgl P | 0.668 | 0.97  | 0.496 | 0.23 |
| iYDL014W      | 4  | 428372 8078  | YDL013 | 0.89 | Sgl P | 0.032 | 0.843 | 0.009 | 0.23 |
| iYJL090C      | 10 | 264756 10776 | YJL090 | 0.31 | Dbl P | 0.904 | 0.69  | 0.649 | 0.23 |
| iYMRWdelta16  | 13 | 503385 12380 | YMR17  | 0.64 | Dbl P | 0.892 | 0.671 | 0.456 | 0.24 |
| iYML104C      | 13 | 62329 12015  | YML10  | 0.88 | Sgl P | 0.589 | 0.005 | 0.733 | 0.24 |
| iYHR025W      | 8  | 160488 10259 | YHR02  | 0.84 | Sgl P | 0.698 | 0.623 | 0.927 | 0.24 |
| iYOR321W      | 15 | 918305       | 13256  | 0.11 | Non F | 0.643 | 0.488 | 0.21  | 0.24 |
| iYIL135C      | 9  | 96366 10605  | YIL135 | 0.41 | Dbl P | 9E-04 | 0.689 | 0.49  | 0.24 |
| iYOL130W      | 15 | 76965 12904  | YOL12  | 0.62 | Sgl P | 0.48  | 0.923 | 0.441 | 0.24 |
| iYMR227C      | 13 | 724382 12277 | YMR22  | 0.82 | Dbl P | 0.661 | 0.33  | 0.479 | 0.24 |
| iYBR056W      | 2  | 349371       | 7661   | 0.72 | Non F | 0.912 | 0.097 | 0.48  | 0.24 |
| iYJL001W      | 10 | 435618 10702 | YJR00  | 0.3  | Sgl P | 0.905 | 0.952 | 0.268 | 0.24 |
| iYNLCdelta1-1 | 14 | 98249        | 12694  | 0.02 | Non F | 0.538 | 0.594 | 0.259 | 0.24 |
| iYPL146C      | 16 | 277513 13469 | YPL14  | 0.42 | Sgl P | 0.003 | 0.955 | 0.368 | 0.24 |
| iYKL066W      | 11 | 315377       | 11130  | 0.51 | Non F | 0.665 | 0.672 | 0.266 | 0.24 |
| iYGL027C      | 7  | 446139 9590  | YGL027 | 0.61 | Sgl P | 0.677 | 0.946 | 0.413 | 0.24 |
| iYNL050C      | 14 | 535006 12432 | YNL05  | 0.66 | Sgl P | 0.89  | 0.584 | NaN   | 0.24 |
| itK(CUU)G1    | 7  | 122333 7208  | YGL201 | 0.24 | Sgl P | 0.754 | 0.719 | 0.71  | 0.24 |
| iYNR023W      | 14 | 672100 12722 | YNR02  | 0.78 | Sgl P | 0.629 | 0.47  | 0.241 | 0.24 |
| iYMR110C      | 13 | 491976 12157 | YMR17  | 0.53 | Sgl P | 0.733 | 0.885 | 0.365 | 0.24 |
| iYBR256C      | 2  | 728057 7850  | YBR256 | 0.7  | Dbl P | NaN   | 0.21  | 0.668 | 0.24 |
| iYGL156W      | 7  | 213670 9712  | YGL155 | 0.78 | Sgl P | 0.713 | 0.797 | 0.395 | 0.24 |
| iYIL070C      | 9  | 231092 10543 | YIL070 | 0.43 | Sgl P | 0.743 | 0.9   | 0.349 | 0.24 |
| iYJL012C      | 10 | 413097 10711 | YJL012 | 0.64 | Sgl P | 0.781 | 0.756 | 0.65  | 0.24 |
| iYPL214C      | 16 | 150184 13534 | YPL21  | 0.94 | Dbl P | 0.298 | 0.934 | 0.739 | 0.24 |
| iYCR016W      | 3  | 0            | 7971   | 0.15 | Non F | 0.641 | 0.831 | 0.263 | 0.24 |

|            |           |               |             |              |             |       |    |              |              |              |             |
|------------|-----------|---------------|-------------|--------------|-------------|-------|----|--------------|--------------|--------------|-------------|
| iYGL101W   | 7         | 312843        | 9663        | YGL100       | <b>0.65</b> | Sgl   | Pi | 0.536        | 0.048        | 0.559        | 0.24        |
| iYMR079W   | 13        | 426067        |             | 12127        | <b>0.34</b> | Non F |    | 0.461        | 0.44         | 0.862        | 0.24        |
| iYPR112C   | 16        | 751922        | 13708       | YPR11        | <b>0.6</b>  | Dbl   | Pi | 0.028        | 0.165        | 0.511        | 0.24        |
| iYJL124C   | 10        | 187335        | 10806       | YJL12        | <b>0.68</b> | Sgl   | Pi | 0.826        | 0.635        | 0.49         | 0.24        |
| iYNL221C   | 14        | 233681        | 12587       | YNL22        | <b>0.36</b> | Dbl   | Pi | 0.773        | 0.162        | 0.539        | 0.24        |
| iYFR055W-1 | 6         | 266492        | 9552        | YFR057       | <b>0.27</b> | Sgl   | Pi | 0.639        | 0.442        | 0.648        | 0.24        |
| iYDL004W   | 4         | 443499        | 8070        | YDL003       | <b>0.56</b> | Sgl   | Pi | 0.817        | 0.066        | 0.54         | 0.24        |
| iYBR168W   | 2         | 573562        |             | 7772         | <b>0.24</b> | Non F |    | 0.419        | 0.8          | 0.242        | 0.24        |
| iYNL130C   | 14        | 381141        | 12505       | YNL13        | <b>0.46</b> | Dbl   | Pi | 0.513        | 0.366        | 0.461        | 0.24        |
| iYEL062W   | 5         | 36258         |             | 8891         | <b>0.18</b> | Non F |    | 0.313        | 0.612        | 0.543        | 0.24        |
| itV(UAC)B  | <b>2</b>  | <b>326815</b> | <b>7358</b> | YBR044       | <b>0.61</b> | Sgl   | Pi | <b>0.775</b> | <b>0.725</b> | <b>0.981</b> | <b>0.24</b> |
| iYMR049C-1 | 13        | 371484        | 12101       | YMR04        | <b>0.47</b> | Sgl   | Pi | 0.675        | 0.764        | 0.907        | 0.24        |
| iYGL002W   | 7         | 495163        |             | 9565         | <b>0.37</b> | Non F |    | 0.515        | 0.669        | 0.305        | 0.24        |
| iYMR167W   | 13        | 597198        |             | 12215        | <b>0.07</b> | Non F |    | 0.393        | 0.388        | 0.585        | 0.24        |
| iYBLWtau1  | <b>2</b>  | <b>36204</b>  |             | <b>7606</b>  | <b>0.49</b> | Non F |    | <b>0.757</b> | <b>0.669</b> | <b>0.922</b> | <b>0.24</b> |
| iYNL113W   | 14        | 413199        | 12490       | YNL11        | <b>0.48</b> | Sgl   | Pi | 0.008        | 0.645        | 0.133        | 0.24        |
| itP(UGG)O2 | <b>15</b> | <b>464541</b> | <b>7275</b> | YOR073       | <b>0.94</b> | Sgl   | Pi | <b>0.688</b> | <b>0.012</b> | <b>0.985</b> | <b>0.24</b> |
| iYMR122C-1 | 13        | 512322        | 12170       | YMR12        | <b>0.74</b> | Dbl   | Pi | 0.781        | 0.145        | NaN          | 0.24        |
| iYNL307C   | 14        | 57584         | 12663       | YNL30        | <b>0.96</b> | Dbl   | Pi | <b>4E-05</b> | 0.175        | 0.948        | 0.24        |
| iYLR163C   | 12        | 493263        | 11634       | YLR16        | <b>0.89</b> | Dbl   | Pi | 0.007        | 0.327        | 0.813        | 0.24        |
| itC(GCA)B  | <b>2</b>  | <b>643023</b> | <b>7113</b> | YBR210       | <b>0.27</b> | Sgl   | Pi | <b>0.758</b> | <b>0.435</b> | <b>0.542</b> | <b>0.24</b> |
| iYFR011C   | <b>6</b>  | <b>167236</b> | <b>9450</b> | YFR011       | <b>0.68</b> | Dbl   | Pi | <b>0.313</b> | <b>0.477</b> | <b>0.657</b> | <b>0.24</b> |
| iYAL003W   | 1         | 143189        | 7378        | YAL002       | <b>0.62</b> | Sgl   | Pi | NaN          | 0.674        | 0.963        | 0.24        |
| iYGR125W   | 7         | 745417        | 10005       | YGR12        | <b>0.67</b> | Sgl   | Pi | 0.451        | 0.182        | NaN          | 0.24        |
| iYLL031C   | 12        | 80189         | 11436       | YLL03        | <b>0.74</b> | Sgl   | Pi | 0.621        | 0.505        | NaN          | 0.24        |
| iYBR292C-1 | 2         | 786004        | 7882        | YBR292       | <b>0.88</b> | Dbl   | Pi | 0.004        | 0.657        | 0.213        | 0.24        |
| iYEL052W   | 5         | 58171         | 8881        | YEL051       | <b>0.75</b> | Sgl   | Pi | 0.849        | 0.471        | 0.288        | 0.24        |
| iYFL056C-1 | 6         | 16214         | 9400        | YFL056       | <b>0.75</b> | Dbl   | Pi | 0.625        | 0.5          | 0.384        | 0.24        |
| iYDL146W   | 4         | 194211        |             | 8201         | <b>0.25</b> | Non F |    | 0.561        | 0.258        | NaN          | 0.24        |
| iYNL295W   | 14        | 78511         |             | 12653        | <b>0.11</b> | Non F |    | 0.552        | 0.59         | 0.43         | 0.24        |
| itF(GAA)F  | <b>6</b>  | <b>157996</b> | <b>7148</b> | YFR007       | <b>0.19</b> | Sgl   | Pi | <b>0.815</b> | <b>0.587</b> | <b>0.704</b> | <b>0.24</b> |
| iYDL152W   | 4         | 183173        |             | 8206         | <b>0.62</b> | Non F |    | 0.329        | 0.715        | 0.59         | 0.24        |
| iYMR199W   | 13        | 664283        | 12249       | YMR20        | <b>0.68</b> | Sgl   | Pi | <b>6E-04</b> | 0.921        | 0.358        | 0.24        |
| iYGL001C   | 7         | 496499        | 9564        | YGL001       | <b>0.4</b>  | Sgl   | Pi | 0.671        | 0.428        | 0.637        | 0.25        |
| iYBL091C-A | 2         | 46855         | 7584        | YBL091       | <b>0.57</b> | Sgl   | Pi | 0.015        | 0.558        | 0.413        | 0.25        |
| iYCR054C   | 3         | 220046        | 8009        | YCR054       | <b>0.39</b> | Sgl   | Pi | 0.412        | 0.795        | 0.174        | 0.25        |
| iYNL281W   | 14        | 108924        |             | 12639        | <b>0.16</b> | Non F |    | 0.764        | 0.592        | 0.448        | 0.25        |
| iYDR140W   | 4         | 734797        |             | 8440         | <b>0.18</b> | Non F |    | 0.609        | 0.629        | 0.849        | 0.25        |
| iYMR308C   | 13        | 892224        | 12356       | YMR30        | <b>0.51</b> | Sgl   | Pi | 0.802        | 0.572        | 0.368        | 0.25        |
| iYDR021W   | 4         | 487984        |             | 8325         | <b>0.18</b> | Non F |    | 0.112        | 0.515        | 0.667        | 0.25        |
| iYNL021W   | 14        | 595331        |             | 12405        | <b>0.08</b> | Non F |    | 0.659        | 0.707        | 0.453        | 0.25        |
| iYPR171W   | 16        | 885567        | 13762       | YPR17        | <b>0.66</b> | Sgl   | Pi | 0.145        | 0.643        | 0.228        | 0.25        |
| iYOR020C-0 | 15        | 370834        | 12973       | YOR02        | <b>0.69</b> | Sgl   | Pi | 0.004        | 0.839        | 0.336        | 0.25        |
| iYLR113W   | <b>12</b> | <b>372929</b> |             | <b>11580</b> | <b>0.51</b> | Non F |    | <b>0.925</b> | <b>0.005</b> | <b>0.024</b> | <b>0.25</b> |
| iYDL190C   | 4         | 121581        | 8238        | YDL190       | <b>0.94</b> | Dbl   | Pi | <b>4E-04</b> | 0.729        | 0.722        | 0.25        |
| iYGL201C   | 7         | 120894        | 9755        | YGL201       | <b>0.6</b>  | Sgl   | Pi | 0.769        | 0.8          | 0.446        | 0.25        |
| iYOL011W   | 15        | 307421        | 12790       | YOL01        | <b>0.9</b>  | Sgl   | Pi | 0.571        | 0.686        | 0.134        | 0.25        |
| iYKR057W   | 11        | 551880        | 11345       | YKR05        | <b>0.64</b> | Sgl   | Pi | 0.49         | 0.223        | 0.403        | 0.25        |
| iYJR011C   | 10        | 459113        | 10923       | YJR01        | <b>0.78</b> | Sgl   | Pi | 0.673        | 0.643        | 0.408        | 0.25        |
| iYLL014W   | 12        | 121633        |             | 11419        | <b>0.29</b> | Non F |    | 0.877        | 0.962        | 0.445        | 0.25        |
| iYLR262C-A | 12        | 669659        | 11721       | YLR26        | <b>0.43</b> | Dbl   | Pi | 0.04         | 0.167        | 0.663        | 0.25        |

|             |    |         |       |         |      |       |    |       |       |       |      |
|-------------|----|---------|-------|---------|------|-------|----|-------|-------|-------|------|
| iSNR60      | 10 | 348927  | 7086  | YJL0480 | 0.44 | Sgl   | Pi | 0.73  | 0.76  | 0.844 | 0.25 |
| iYJR053W    | 10 | 535435  | 10955 | YJR05   | 0.51 | Sgl   | Pi | 0.677 | 0.14  | 0.719 | 0.25 |
| iYKL071W    | 11 | 305521  | 11134 | YKL07   | 0.12 | Sgl   | Pi | 0.492 | 0.748 | 0.235 | 0.25 |
| iYGR166W    | 7  | 832187  | 10041 | YGR16   | 0.95 | Sgl   | Pi | 0.06  | 0.745 | 0.004 | 0.25 |
| iYLR225C    | 12 | 588948  | 11690 | YLR22   | 0.66 | Dbl   | Pi | 0.501 | 0.626 | 0.527 | 0.25 |
| iYHR181W    | 8  | 467905  | 10415 | YHR18   | 0.63 | Sgl   | Pi | 0.715 | 0.631 | 0.519 | 0.25 |
| iYIL050W    | 9  | 259786  | 10526 | YIL049  | 0.6  | Sgl   | Pi | 0.764 | 0.764 | NaN   | 0.25 |
| iYIL050W    | 9  | 259786  | 10526 | YIL049  | 0.6  | Sgl   | Pi | 0.764 | 0.764 | NaN   | 0.25 |
| itG(GCC)J1  | 10 | 396481  | 7169  | YJL0240 | 0.45 | Sgl   | Pi | 0.878 | 0.954 | 0.918 | 0.25 |
| iSNR59      | 16 | 173894  | 7084  | YPL199  | 0.16 | Dbl   | Pi | 0.531 | 0.573 | 0.138 | 0.25 |
| iYHR179W    | 8  | 463704  | 10413 | YHR18   | 0.41 | Sgl   | Pi | 0.646 | 0.769 | 0.308 | 0.25 |
| iYLR030W    | 12 | 204087  | 11499 | YLR03   | 0.18 | Sgl   | Pi | 0.478 | 0.75  | 0.444 | 0.25 |
| iYLR298C    | 12 | 725433  | 11752 | YLR29   | 0.09 | Dbl   | Pi | 0.662 | 0.748 | 0.058 | 0.25 |
| iYBR122C    | 2  | 484509  | 7726  | YBR122  | 0.78 | Sgl   | Pi | 0.005 | 0.588 | 0.444 | 0.25 |
| iYPR133C    | 16 | 797208  | 13727 | YPR13   | 0.83 | Dbl   | Pi | 0.658 | 0.428 | 0.139 | 0.25 |
| iYBR033W    | 2  | 304667  |       | 7638    | 0.11 | Non F |    | 0.842 | 0.7   | 0.578 | 0.25 |
| iYDR364C    | 4  | 1204195 | 8650  | YDR364  | 0.66 | Sgl   | Pi | 0.57  | 0.661 | 0.312 | 0.25 |
| iYHL049C-1  | 8  | 5460    | 10228 | YHL04   | 0.4  | Dbl   | Pi | 0.112 | 0.155 | 0.963 | 0.25 |
| iYKR026C    | 11 | 489293  | 11319 | YKR02   | 0.92 | Dbl   | Pi | 0.732 | 0.681 | 0.519 | 0.25 |
| iYNRCdelta9 | 14 | 727658  | 12778 | YNR05   | 0.68 | Sgl   | Pi | 0.68  | 0.65  | 0.028 | 0.25 |
| iYOL132W    | 15 | 72715   | 12906 | YOL13   | 0.34 | Sgl   | Pi | 0.649 | 0.517 | 0.503 | 0.25 |
| iYOL049W    | 15 | 240108  |       | 12826   | 0.03 | Non F |    | 0.051 | 0.646 | 0.584 | 0.25 |
| iYJL139C    | 10 | 152692  | 10821 | YJL139  | 0.32 | Sgl   | Pi | 0.787 | 0.927 | 0.878 | 0.25 |
| iYNR054C-0  | 14 | 724305  | 12753 | YNR05   | 0.54 | Sgl   | Pi | 0.399 | 0.459 | 0.179 | 0.25 |
| iYGL190C    | 7  | 147484  | 9746  | YGL190  | 0.24 | Sgl   | Pi | 0.16  | 0.625 | 0.666 | 0.25 |
| iYGL167C    | 7  | 190508  | 9722  | YGL167  | 0.72 | Dbl   | Pi | 0.366 | 0.546 | 0.117 | 0.25 |
| iYDR014W-0  | 4  | 475985  |       | 8317    | 0.36 | Non F |    | 0.69  | 0.069 | 0.424 | 0.26 |
| iYKL048C    | 11 | 348762  | 11111 | YKL04   | 0.97 | Dbl   | Pi | 0.007 | 0.543 | 0.071 | 0.26 |
| iYGL172W    | 7  | 182120  | 9726  | YGL171  | 0.86 | Sgl   | Pi | 0.766 | 0.758 | 0.409 | 0.26 |
| iYBL020W    | 2  | 184091  | 7519  | YBL019  | 0.36 | Sgl   | Pi | 0.49  | 0.495 | 0.166 | 0.26 |
| iYOL081W    | 15 | 180293  |       | 12856   | 0.21 | Non F |    | 0.628 | 0.085 | NaN   | 0.26 |
| iYGL057C    | 7  | 395817  | 9620  | YGL057  | 0.02 | Sgl   | Pi | 0.65  | 0.486 | 0.476 | 0.26 |
| iYML066C    | 13 | 141520  | 11980 | YML06   | 0.91 | Dbl   | Pi | 0.688 | 0.766 | 0.009 | 0.26 |
| iYER154W    | 5  | 476222  |       | 9173    | 0.12 | Non F |    | 0.297 | 0.603 | 0.424 | 0.26 |
| iYBR025C    | 2  | 291811  | 7631  | YBR025  | 0.74 | Sgl   | Pi | NaN   | 0.443 | 0.88  | 0.26 |
| iYOR057W    | 15 | 433421  |       | 13008   | 0.14 | Non F |    | 0.612 | 0.651 | NaN   | 0.26 |
| iYLR150W    | 12 | 441307  |       | 11614   | 0.39 | Non F |    | 0.833 | 0.796 | 0.299 | 0.26 |
| iYDR363W-A  | 4  | 1202377 |       | 8649    | 0.24 | Non F |    | 0.057 | 0.897 | 0.193 | 0.26 |
| iCEN12      | 12 | 150955  |       | 6997    | 0.47 | Non F |    | 0.854 | 0.981 | 0.266 | 0.26 |
| iYLR027C    | 12 | 198127  | 11496 | YLR02   | 0.24 | Sgl   | Pi | 0.015 | 0.176 | 0.974 | 0.26 |
| iYIL134W    | 9  | 98305   |       | 10604   | 0.11 | Non F |    | 0.18  | 0.415 | 0.166 | 0.26 |
| iYNL182C    | 14 | 297615  | 12553 | YNL18   | 0.95 | Dbl   | Pi | 0.566 | 0.767 | 0.021 | 0.26 |
| iSNR4       | 5  | 424868  |       | 7066    | 0.17 | Non F |    | 0.477 | 0.688 | 0.542 | 0.26 |
| iYLR252W    | 12 | 642276  | 11712 | YLR25   | 0.7  | Sgl   | Pi | 0.657 | 0.658 | 0.44  | 0.26 |
| iYML114C    | 13 | 43575   | 12025 | YML11   | 0.72 | Dbl   | Pi | 0.773 | 0.102 | 0.013 | 0.26 |
| iYBR285W    | 2  | 774304  | 7874  | YBR286  | 0.76 | Sgl   | Pi | 0.001 | 0.494 | 0.044 | 0.26 |
| iYHR001W    | 8  | 107348  | 10233 | YHR00   | 0.63 | Sgl   | Pi | 0.826 | 0.484 | 0.553 | 0.26 |
| iYKR030W    | 11 | 500740  |       | 11322   | 0.19 | Non F |    | 0.511 | 0.679 | 0.448 | 0.26 |
| iYKR073C    | 11 | 578129  | 11361 | YKR07   | 0.45 | Dbl   | Pi | 0.445 | 0.481 | 0.415 | 0.26 |
| iYOR019W    | 15 | 370317  |       | 12972   | 0.42 | Non F |    | 0.336 | 0.564 | 0.593 | 0.26 |
| iYHR005C-A  | 8  | 115905  | 10239 | YHR00   | 0.22 | Dbl   | Pi | 0.039 | 0.631 | NaN   | 0.26 |

|              |           |                |              |               |             |     |    |              |              |              |             |
|--------------|-----------|----------------|--------------|---------------|-------------|-----|----|--------------|--------------|--------------|-------------|
| iYFR001W     | 6         | 149718         | 9430         | YFR002        | <b>0.75</b> | Sgl | Pi | 0.687        | 0.245        | NaN          | 0.26        |
| iYNL161W-0   | 14        | 334864         | 12535        | YNL16         | <b>0.43</b> | Sgl | Pi | 0.704        | 0.599        | 0.005        | 0.26        |
| iYBR203W     | 2         | 631901         |              | 7805          | <b>0.31</b> | Non | F  | 0.784        | 0.188        | NaN          | 0.26        |
| iYPL210C     | 16        | 156243         | 13530        | YPL21         | <b>0.67</b> | Sgl | Pi | 0.27         | 0.244        | 0.468        | 0.26        |
| iYHRCsigma2  | <b>8</b>  | <b>146648</b>  |              | <b>10472</b>  | <b>0.26</b> | Non | F  | <b>0.559</b> | <b>0.162</b> | <b>0.43</b>  | <b>0.26</b> |
| itS(AGA)G    | <b>7</b>  | <b>561742</b>  |              | <b>7308</b>   | <b>0.18</b> | Non | F  | <b>0.608</b> | <b>0.602</b> | <b>0.465</b> | <b>0.26</b> |
| iYER165W     | 5         | 512111         | 9195         | YER166        | <b>0.61</b> | Sgl | Pi | 0.008        | 0.864        | 0.017        | 0.26        |
| iYDR333C     | 4         | 1135448        | 8618         | YDR333        | <b>0.47</b> | Dbl | Pi | NaN          | 0.092        | 0.808        | 0.26        |
| iYDL192W     | 4         | 116877         | 8240         | YDL191        | <b>0.1</b>  | Sgl | Pi | 0.755        | 0.97         | 0.192        | 0.26        |
| iYPRCdelta19 | <b>16</b> | <b>810552</b>  |              | <b>13797</b>  | <b>0.18</b> | Non | F  | <b>0.717</b> | <b>0.54</b>  | <b>0.627</b> | <b>0.26</b> |
| iYDRWdelta26 | <b>4</b>  | <b>1175641</b> | <b>8830</b>  | <b>YDR349</b> | <b>0.4</b>  | Sgl | Pi | <b>0.602</b> | <b>0.476</b> | <b>0.836</b> | <b>0.26</b> |
| iYNL207W     | 14        | 256643         |              | 12573         | <b>0.09</b> | Non | F  | 0.428        | 0.654        | 0.872        | 0.26        |
| iYLR461W-1   | 12        | 1064602        | 11898        | YLR46         | <b>0.28</b> | Sgl | Pi | 0.08         | 0.679        | 0.973        | 0.26        |
| iYDR081C     | 4         | 610062         | 8388         | YDR081        | <b>0.95</b> | Dbl | Pi | 0.209        | 0.539        | 0.947        | 0.26        |
| iYGL115W     | 7         | 293004         | 9675         | YGL114        | <b>0.72</b> | Sgl | Pi | 0.372        | 0.096        | 0.272        | 0.26        |
| iYDR317W     | 4         | 1103423        | 8604         | YDR317        | <b>0.61</b> | Sgl | Pi | 0.6          | 0.74         | 0.799        | 0.26        |
| iYGR001C     | 7         | 497796         | 9889         | YGR001        | <b>0.5</b>  | Sgl | Pi | 0.791        | 0.115        | 0.499        | 0.26        |
| iYDR125C     | 4         | 702757         | 8427         | YDR125        | <b>0.57</b> | Dbl | Pi | 0.801        | 0.613        | 0.672        | 0.26        |
| iYDL062W     | 4         | 340279         |              | 8122          | <b>0.31</b> | Non | F  | 0.123        | 0.806        | 0.48         | 0.27        |
| iYGL032C     | 7         | 436841         | 9595         | YGL032        | <b>0.43</b> | Sgl | Pi | 0.71         | 0.451        | 0.466        | 0.27        |
| iYDR211W     | 4         | 886855         | 8506         | YDR212        | <b>0.86</b> | Sgl | Pi | 0.636        | 0.554        | 0.287        | 0.27        |
| iYEL010W     | 5         | 136645         |              | 8842          | <b>0.8</b>  | Non | F  | 0.742        | 0.222        | 0.285        | 0.27        |
| iYCR088W     | 3         | 266832         | 8034         | YCR088        | <b>0.52</b> | Sgl | Pi | 0.763        | 0.003        | 0.477        | 0.27        |
| iYPL011C     | 16        | 534683         | 13346        | YPL01         | <b>0.98</b> | Dbl | Pi | 0.444        | 0.432        | 0.432        | 0.27        |
| iYNR052C     | 14        | 720637         | 12751        | YNR052        | <b>0.5</b>  | Sgl | Pi | 0.002        | 0.776        | 0.42         | 0.27        |
| iYKLWdelta3  | 11        | 163165         | 11293        | YKL15         | <b>0.69</b> | Sgl | Pi | 0.687        | 0.652        | 0.923        | 0.27        |
| iYDR310C     | 4         | 1084307        | 8597         | YDR310        | <b>0.69</b> | Dbl | Pi | 0.049        | 0.489        | 0.275        | 0.27        |
| iYDR061W     | 4         | 575777         | 8368         | YDR062        | <b>0.63</b> | Sgl | Pi | 0.794        | 0.745        | 0.011        | 0.27        |
| iYHL023C     | <b>8</b>  | <b>62565</b>   | <b>10200</b> | <b>YHL02</b>  | <b>0.9</b>  | Sgl | Pi | <b>0.445</b> | <b>0.185</b> | <b>0.678</b> | <b>0.27</b> |
| iYER010C-0   | 5         | 173328         | 8928         | YER010        | <b>0.65</b> | Dbl | Pi | 0.685        | 0.642        | 0.382        | 0.27        |
| iYKL065C     | 11        | 316699         | 11129        | YKL06         | <b>0.78</b> | Dbl | Pi | 0.468        | 0.74         | 0.256        | 0.27        |
| iYKL065C     | 11        | 316699         | 11129        | YKL06         | <b>0.78</b> | Dbl | Pi | 0.468        | 0.74         | 0.256        | 0.27        |
| iYOR369C     | 15        | 1028641        | 13299        | YOR369        | <b>0.1</b>  | Sgl | Pi | 0.747        | 0.027        | 0.267        | 0.27        |
| iYOR094W     | 15        | 503344         |              | 13046         | <b>0.25</b> | Non | F  | 0.682        | 0.704        | 0.461        | 0.27        |
| iYOR249C     | 15        | 800737         | 13188        | YOR249        | <b>0.75</b> | Sgl | Pi | 0.616        | 0.554        | 0.734        | 0.27        |
| iYIL162W     | 9         | 39016          | 10630        | YIL161        | <b>0.68</b> | Sgl | Pi | 0.856        | 0.792        | NaN          | 0.27        |
| iYNL213C     | 14        | 247100         | 12579        | YNL21         | <b>0.97</b> | Dbl | Pi | <b>2E-04</b> | 0.001        | 0.764        | 0.27        |
| iYNR025C     | 14        | 673056         | 12723        | YNR02         | <b>0.16</b> | Sgl | Pi | 0.796        | 0.783        | 0.413        | 0.27        |
| iSNR50       | <b>15</b> | <b>259590</b>  | <b>7074</b>  | <b>YOL035</b> | <b>0.63</b> | Dbl | Pi | <b>0.008</b> | <b>0.282</b> | <b>0.427</b> | <b>0.27</b> |
| iYBR084W     | 2         | 413961         |              | 7691          | <b>0.15</b> | Non | F  | 0.582        | 0.298        | 0.891        | 0.27        |
| iYHR147C     | 8         | 393278         | 10382        | YHR14         | <b>0.88</b> | Dbl | Pi | 0.552        | 0.769        | 0.466        | 0.27        |
| iYEL019C     | 5         | 121289         | 8851         | YEL019        | <b>0.75</b> | Dbl | Pi | 0.62         | 0.222        | NaN          | 0.27        |
| iYMR123W     | 13        | 513945         | 12171        | YMR123        | <b>0.49</b> | Sgl | Pi | 0.753        | 0.533        | 0.264        | 0.27        |
| iYPL087W     | 16        | 384413         |              | 13417         | <b>0.32</b> | Non | F  | 0.862        | 0.91         | 0.348        | 0.27        |
| iYKL070W     | 11        | 306363         | 11133        | YKL06         | <b>0.6</b>  | Sgl | Pi | 0.025        | 3E-06        | 0.413        | 0.27        |
| iYMR146C     | 13        | 558516         | 12194        | YMR146        | <b>0.35</b> | Dbl | Pi | 0.432        | 0.288        | 0.685        | 0.27        |
| iYKL135C     | 11        | 188643         | 11193        | YKL13         | <b>0.89</b> | Sgl | Pi | <b>7E-04</b> | 0.754        | 0.543        | 0.27        |
| iYMR171C     | 13        | 605535         | 12219        | YMR171        | <b>0.39</b> | Dbl | Pi | 0.716        | 0.832        | 0.836        | 0.27        |
| iYOR322C     | 15        | 921040         | 13257        | YOR322        | <b>0.9</b>  | Sgl | Pi | 0.003        | 0.564        | 0.047        | 0.27        |
| iYML132W-1   | 13        | 9284           | 12044        | YML132        | <b>0.64</b> | Sgl | Pi | 0.737        | 0.035        | 0.116        | 0.27        |
| iYDR091C     | 4         | 628512         | 8398         | YDR091        | <b>0.69</b> | Dbl | Pi | 0.043        | 0.414        | NaN          | 0.27        |

|                |    |         |       |        |             |     |    |       |       |       |      |
|----------------|----|---------|-------|--------|-------------|-----|----|-------|-------|-------|------|
| iYMRCtau1      | 13 | 290228  | 12377 | YMR07  | <b>0.65</b> | Sgl | Pi | 0.521 | 0.975 | 0.449 | 0.27 |
| iYJL052W       | 10 | 338962  | 10744 | YJL052 | <b>0.49</b> | Sgl | Pi | 0.797 | 0.569 | 1E-04 | 0.27 |
| iYDR182W       | 4  | 829082  | 8482  | YDR182 | <b>0.68</b> | Sgl | Pi | 0.612 | 0.562 | 0.299 | 0.27 |
| iYJL039C       | 10 | 373480  | 10732 | YJL039 | <b>0.71</b> | Sgl | Pi | 0.823 | 0.642 | 0.928 | 0.27 |
| iYNL249C       | 14 | 181020  | 12611 | YNL249 | <b>0.48</b> | Sgl | Pi | 0.542 | 0.775 | 0.796 | 0.27 |
| iYBR278W       | 2  | 760846  | 7867  | YBR278 | <b>0.8</b>  | Sgl | Pi | 0.014 | 0.661 | 0.664 | 0.27 |
| iYPRCtau3      | 16 | 881826  |       | 13799  | <b>0.73</b> | Non | F  | 0.4   | 0.848 | 0.35  | 0.27 |
| iYJL146W       | 10 | 144405  | 10827 | YJL146 | <b>0.47</b> | Sgl | Pi | 0.567 | 0.91  | 0.242 | 0.27 |
| iYBR182C       | 2  | 594815  | 7784  | YBR182 | <b>0.36</b> | Dbl | Pi | 0.548 | 0.807 | 0.067 | 0.27 |
| iYJR035W       | 10 | 500294  |       | 10939  | <b>0.05</b> | Non | F  | 0.526 | 0.416 | 0.831 | 0.27 |
| iYJR030C       | 10 | 485889  | 10934 | YJR030 | <b>0.62</b> | Sgl | Pi | 0.421 | 0.522 | 0.005 | 0.27 |
| iYDR102C       | 4  | 657970  | 8407  | YDR102 | <b>0.47</b> | Dbl | Pi | 0.645 | 0.843 | 0.2   | 0.27 |
| iYML067C       | 13 | 140199  | 11981 | YML067 | <b>0.8</b>  | Sgl | Pi | 0.655 | 0.529 | 0.087 | 0.27 |
| iYOR103C       | 15 | 516854  | 13054 | YOR103 | <b>0.58</b> | Dbl | Pi | 0.692 | 0.011 | 0.383 | 0.28 |
| iYELCdelta3    | 5  | 99661   | 8912  | YEL027 | <b>0.41</b> | Sgl | Pi | 0.663 | 0.947 | 0.872 | 0.28 |
| iYOL022C       | 15 | 281484  | 12802 | YOL022 | <b>0.67</b> | Sgl | Pi | 0.877 | 0.582 | 0.952 | 0.28 |
| iYKL158W       | 11 | 155285  | 11213 | YKL158 | <b>0.62</b> | Sgl | Pi | 0.578 | 7E-07 | 0.36  | 0.28 |
| iYGR215W       | 7  | 922503  |       | 10087  | <b>0.25</b> | Non | F  | 0.446 | 0.633 | 0.538 | 0.28 |
| iYOLWdelta10-1 | 15 | 355759  | 12948 | YOR010 | <b>0.72</b> | Sgl | Pi | 0.887 | 0.413 | 0.039 | 0.28 |
| iYMR203W       | 13 | 669652  |       | 12253  | <b>0.16</b> | Non | F  | 0.645 | 0.795 | 0.081 | 0.28 |
| itL(UAA)B2     | 2  | 347632  | 7235  | YBR055 | <b>0.13</b> | Dbl | Pi | 0.733 | 0.793 | 0.38  | 0.28 |
| iYDL210W       | 4  | 85961   |       | 8258   | <b>0.3</b>  | Non | F  | 0.092 | 0.793 | 0.443 | 0.28 |
| iYPL229W       | 16 | 117681  | 13549 | YPL229 | <b>0.76</b> | Sgl | Pi | 3E-04 | 0.182 | 0.372 | 0.28 |
| iYNL132W       | 14 | 378477  | 12507 | YNL132 | <b>0.82</b> | Sgl | Pi | 0.084 | 0.784 | 0.39  | 0.28 |
| iYJL143W       | 10 | 147277  |       | 10824  | <b>0.44</b> | Non | F  | 0.602 | 0.636 | 0.809 | 0.28 |
| iYMR075C-A     | 13 | 416056  | 12123 | YMR075 | <b>0.29</b> | Sgl | Pi | 0.614 | 0.801 | 0.523 | 0.28 |
| iYNL006W       | 14 | 620979  |       | 12392  | <b>0.17</b> | Non | F  | 0.561 | 0.724 | 0.323 | 0.28 |
| iYNL258C       | 14 | 160359  | 12619 | YNL258 | <b>0.95</b> | Sgl | Pi | 3E-04 | 0.934 | 0.397 | 0.28 |
| iYIL169C-1     | 9  | 27568   | 10637 | YIL169 | <b>0.32</b> | Dbl | Pi | 0.699 | 0.692 | 0.283 | 0.28 |
| itl(AAU)L2     | 12 | 1052147 | 7194  | YLR455 | <b>0.15</b> | Sgl | Pi | 0.527 | 0.459 | 0.468 | 0.28 |
| iYBL061C       | 2  | 107354  | 7559  | YBL061 | <b>0.76</b> | Dbl | Pi | 0.553 | 0.204 | 0.308 | 0.28 |
| iYGR023W       | 7  | 530909  |       | 9908   | <b>0.34</b> | Non | F  | 0.667 | 0.849 | 0.38  | 0.28 |
| iYNL146W       | 14 | 352012  | 12521 | YNL146 | <b>0.44</b> | Sgl | Pi | 0.769 | 9E-04 | 0.319 | 0.28 |
| iYPL219W       | 16 | 138237  | 13539 | YPL219 | <b>0.81</b> | Sgl | Pi | 0.362 | 0.503 | 0.587 | 0.28 |
| iYOL008W       | 15 | 310925  |       | 12787  | <b>0.3</b>  | Non | F  | 0.709 | 0.673 | 0.406 | 0.28 |
| iYNL272C       | 14 | 129079  | 12631 | YNL272 | <b>0.83</b> | Sgl | Pi | 0.574 | 0.008 | 0.409 | 0.28 |
| iYDL150W       | 4  | 184603  | 8205  | YDL149 | <b>0.8</b>  | Sgl | Pi | 0.745 | 0.351 | NaN   | 0.28 |
| iYDR295C       | 4  | 1054666 | 8582  | YDR295 | <b>0.64</b> | Dbl | Pi | 3E-04 | 0.581 | 0.73  | 0.28 |
| iYPL197C       | 16 | 174761  | 13519 | YPL197 | <b>0.56</b> | Dbl | Pi | 0.517 | 0.787 | 0.48  | 0.28 |
| iYBR137W       | 2  | 513526  |       | 7739   | <b>0.23</b> | Non | F  | 0.523 | 0.537 | 0.277 | 0.28 |
| iYOR156C       | 15 | 630539  | 13103 | YOR156 | <b>0.69</b> | Sgl | Pi | 0.614 | 0.59  | 0.476 | 0.28 |
| iYAL025C       | 1  | 101136  | 7398  | YAL025 | <b>0.76</b> | Sgl | Pi | 0.324 | 0.931 | 0.348 | 0.28 |
| iYNL005C       | 14 | 622415  | 12391 | YNL005 | <b>0.56</b> | Dbl | Pi | 0.003 | 0.147 | 0.712 | 0.28 |
| iYOL121C       | 15 | 92846   | 12895 | YOL121 | <b>0.04</b> | Sgl | Pi | 0.722 | 0.359 | 0.541 | 0.28 |
| iYLR147C       | 12 | 434463  | 11611 | YLR147 | <b>0.7</b>  | Dbl | Pi | 0.382 | 0.629 | 0.483 | 0.28 |
| iYOR297C       | 15 | 875338  | 13232 | YOR297 | <b>0.83</b> | Dbl | Pi | 0.647 | 0.018 | 0.419 | 0.28 |
| iYOR270C       | 15 | 830566  | 13208 | YOR270 | <b>0.67</b> | Sgl | Pi | 0.049 | 0.504 | 0.243 | 0.28 |
| iYIL160C       | 9  | 41444   | 10629 | YIL160 | <b>0.69</b> | Dbl | Pi | 0.813 | 0.027 | 0.856 | 0.28 |
| iYBR053C-0     | 2  | 340695  | 7657  | YBR053 | <b>0.44</b> | Dbl | Pi | 0.655 | 0.511 | 0.501 | 0.28 |
| iYPR133W-A     | 16 | 797706  | 13728 | YPR133 | <b>0.65</b> | Sgl | Pi | 0.608 | 0.908 | 0.525 | 0.28 |
| iYDR479C       | 4  | 1416874 | 8753  | YDR479 | <b>0.78</b> | Dbl | Pi | 0.621 | 0.044 | 0.028 | 0.29 |



|                 |          |              |             |               |             |            |           |              |              |              |             |
|-----------------|----------|--------------|-------------|---------------|-------------|------------|-----------|--------------|--------------|--------------|-------------|
| iYCR033W        | 3        | 190168       | 7992        | YCR034        | <b>0.5</b>  | Sgl        | Pi        | 0.793        | 0.166        | 0.702        | 0.29        |
| iYJR010C-A      | 10       | 458053       | 10921       | YJR01         | <b>0.84</b> | Sgl        | Pi        | 0.682        | 0.01         | 0.407        | 0.29        |
| iYJL034W        | 10       | 383057       | 10727       | YJL034        | <b>0.78</b> | Sgl        | Pi        | 0.389        | 0.956        | 0.406        | 0.29        |
| iYNL186W        | 14       | 291860       |             | 12556         | <b>0.3</b>  | Non F      |           | 0.727        | 0.652        | 0.468        | 0.29        |
| iYIL021W        | 9        | 313854       |             | 10498         | <b>0</b>    | Non F      |           | 0.685        | 0.627        | 0.809        | 0.29        |
| iYDR280W        | 4        | 1021660      |             | 8569          | <b>0.2</b>  | Non F      |           | 0.604        | 0.923        | 0.338        | 0.29        |
| iYOR193W        | 15       | 711579       |             | 13140         | <b>0.03</b> | Non F      |           | 0.367        | NaN          | 0.526        | 0.29        |
| iYEL032W        | 5        | 89848        | 8864        | YEL031        | <b>0.88</b> | Sgl        | Pi        | 0.16         | 0.555        | 0.03         | 0.29        |
| iCEN11          | 11       | 439890       | 6996        | YKL001        | <b>0.49</b> | Sgl        | Pi        | 0.673        | 0.678        | 0.443        | 0.29        |
| iYPL237W        | 16       | 101349       |             | 13557         | <b>0.28</b> | Non F      |           | 0.56         | 0.599        | NaN          | 0.29        |
| iYNR049C        | 14       | 713646       | 12748       | YNR04         | <b>0.59</b> | Sgl        | Pi        | 0.576        | 0.954        | 0.373        | 0.29        |
| iYGL138C        | 7        | 249522       | 9696        | YGL138        | <b>0.86</b> | Dbl        | Pi        | 0.079        | 0.647        | 0.543        | 0.29        |
| iYNL079C        | 14       | 479169       | 12459       | YNL07         | <b>0.41</b> | Dbl        | Pi        | 0.767        | 0.212        | 0.07         | 0.29        |
| iYKR081C        | 11       | 592177       | 11370       | YKR08         | <b>0.96</b> | Dbl        | Pi        | <b>9E-05</b> | 0.479        | 0.274        | 0.29        |
| iYGL080W        | 7        | 359025       | 9640        | YGL079        | <b>0.69</b> | Sgl        | Pi        | 0.691        | 0.955        | 4E-06        | 0.29        |
| iYMR215W        | 13       | 698369       |             | 12265         | <b>0.18</b> | Non F      |           | 0.756        | 0.417        | 0.396        | 0.29        |
| iYAR003W        | 1        | 156338       |             | 7457          | <b>0.2</b>  | Non F      |           | 0.601        | 0.277        | 0.323        | 0.29        |
| <b>iYEL050C</b> | <b>5</b> | <b>60836</b> | <b>8879</b> | <b>YEL050</b> | <b>0.61</b> | <b>Dbl</b> | <b>Pi</b> | <b>0.725</b> | <b>0.617</b> | <b>0.073</b> | <b>0.29</b> |
| iYMR093W        | 13       | 455543       | 12141       | YMR09         | <b>0.73</b> | Sgl        | Pi        | 0.537        | 0.773        | 0.531        | 0.29        |
| iYMR283C        | 13       | 836854       | 12331       | YMR28         | <b>0.93</b> | Dbl        | Pi        | 0.398        | 0.44         | 0.339        | 0.29        |
| iYDL231C        | 4        | 42250        | 8281        | YDL231        | <b>0.97</b> | Dbl        | Pi        | 0.656        | 0.005        | 0.648        | 0.29        |
| iYGR057C        | 7        | 605508       | 9940        | YGR057        | <b>0.76</b> | Dbl        | Pi        | 0.376        | 0.767        | 0.297        | 0.29        |
| iYER100W        | 5        | 360303       |             | 9071          | <b>0.11</b> | Non F      |           | 0.405        | 0.552        | NaN          | 0.29        |
| iYGL141W        | 7        | 241092       |             | 9699          | <b>0</b>    | Non F      |           | 0.783        | 0.84         | NaN          | 0.29        |
| iYGL197W        | 7        | 129156       | 9752        | YGL196        | <b>0.32</b> | Sgl        | Pi        | 0.653        | 0.161        | 0.447        | 0.29        |
| iYBR195C        | 2        | 611825       | 7796        | YBR195        | <b>0.75</b> | Sgl        | Pi        | 0.672        | 0.932        | 0.6          | 0.29        |
| iYBR253W        | 2        | 723579       |             | 7847          | <b>0.39</b> | Non F      |           | 0.611        | 0.472        | 0.895        | 0.29        |
| iYNL254C        | 14       | 169239       | 12615       | YNL25         | <b>0.57</b> | Dbl        | Pi        | 0.542        | 0.674        | 0.577        | 0.29        |
| iYDR075W        | 4        | 598077       | 8382        | YDR075        | <b>0.38</b> | Sgl        | Pi        | 0.695        | 0.927        | 0.594        | 0.29        |
| iYNL067W        | 14       | 500248       | 12447       | YNL06         | <b>0.08</b> | Sgl        | Pi        | 0.747        | 0.536        | 0.564        | 0.29        |
| iYGR280C        | 7        | 1051712      | 10149       | YGR28         | <b>0.6</b>  | Dbl        | Pi        | 0.793        | 0.08         | 0.456        | 0.29        |
| iYGL123W        | 7        | 278445       |             | 9683          | <b>0.16</b> | Non F      |           | 0.422        | 0.718        | 0.723        | 0.29        |
| iYDL234C        | 4        | 36474        | 8284        | YDL234        | <b>0.98</b> | Dbl        | Pi        | 0.652        | 0.569        | 0.503        | 0.29        |
| iYPR033C        | 16       | 639019       | 13645       | YPR03         | <b>0.69</b> | Dbl        | Pi        | 0.036        | 0.002        | 0.192        | 0.29        |
| iYLR054C        | 12       | 250284       | 11525       | YLR05         | <b>0.32</b> | Sgl        | Pi        | 0.465        | 0.643        | 0.317        | 0.3         |
| iYOR339C        | 15       | 958835       | 13271       | YOR33         | <b>0.43</b> | Sgl        | Pi        | 0.662        | 0.866        | 0.518        | 0.3         |
| iYBL052C        | 2        | 121867       | 7551        | YBL052        | <b>0.67</b> | Sgl        | Pi        | 0.585        | 0.655        | 0.68         | 0.3         |
| iYPL236C        | 16       | 102695       | 13556       | YPL23         | <b>0.87</b> | Dbl        | Pi        | 0.493        | 0.192        | 0.277        | 0.3         |
| iYNL268W        | 14       | 140369       | 12628       | YNL26         | <b>0.48</b> | Sgl        | Pi        | <b>3E-04</b> | 0.534        | 0.111        | 0.3         |
| iYERCdelta24    | 5        | 498426       | 9251        | YER159        | <b>0.26</b> | Sgl        | Pi        | 0.49         | 0.038        | 0.673        | 0.3         |
| iYNL129W        | 14       | 382194       | 12504       | YNL12         | <b>0.3</b>  | Sgl        | Pi        | 0.828        | 0.605        | 0.394        | 0.3         |
| iYDR341C        | 4        | 1153613      | 8625        | YDR341        | <b>0.61</b> | Sgl        | Pi        | 0.684        | 0.208        | 0.883        | 0.3         |
| iYFL021W-1      | 6        | 98362        |             | 9324          | <b>0.6</b>  | Non F      |           | 0.798        | 0.247        | 0.657        | 0.3         |
| iYDR532C        | 4        | 1500541      | 8802        | YDR532        | <b>0.56</b> | Sgl        | Pi        | 0.554        | 0.522        | 0.709        | 0.3         |
| iYDL022W        | 4        | 412985       | 8085        | YDL021        | <b>0.57</b> | Sgl        | Pi        | 0.654        | 0.437        | 0.649        | 0.3         |
| iYNL248C        | 14       | 182607       | 12610       | YNL24         | <b>0.91</b> | Dbl        | Pi        | 0.482        | 0.552        | 0.464        | 0.3         |
| iYGL061C        | 7        | 389694       | 9624        | YGL061        | <b>0.86</b> | Dbl        | Pi        | 0.391        | 0.292        | 0.256        | 0.3         |
| iYIL144W        | 9        | 80153        |             | 10613         | <b>0.08</b> | Non F      |           | 0.679        | 0.582        | 0.777        | 0.3         |
| iYDL116W        | 4        | 253732       |             | 8170          | <b>0.19</b> | Non F      |           | 0.328        | 0.722        | 0.366        | 0.3         |
| iYHL039W        | 8        | 23522        |             | 10216         | <b>0.16</b> | Non F      |           | 0.379        | 0.408        | 0.524        | 0.3         |
| iYNL101W        | 14       | 437127       | 12480       | YNL10         | <b>0.68</b> | Sgl        | Pi        | 0.62         | 0.001        | 0.296        | 0.3         |

|                |    |               |        |             |        |       |       |       |      |
|----------------|----|---------------|--------|-------------|--------|-------|-------|-------|------|
| iYER051W       | 5  | 256132        | 8972   | <b>0.25</b> | Non F  | 0.524 | 0.636 | 0.359 | 0.3  |
| iYLR026C       | 12 | 196489 11495  | YLR02  | <b>0.72</b> | Sgl Pi | 0.439 | 0.462 | 0.335 | 0.3  |
| iYDR158W       | 4  | 771449 8454   | YDR158 | <b>0.95</b> | Sgl Pi | 0.52  | 0.706 | 0.041 | 0.3  |
| itV(AAC)E2     | 5  | 469511        | 7339   | <b>0.08</b> | Non F  | 0.774 | 0.853 | 0.609 | 0.3  |
| iYGR162W       | 7  | 826897 10039  | YGR162 | <b>0.62</b> | Sgl Pi | 0.844 | 0.8   | 0.556 | 0.3  |
| iYLR455W       | 12 | 1054531 11891 | YLR455 | <b>0.46</b> | Sgl Pi | 0.764 | 0.641 | 0.641 | 0.3  |
| iYMR239C       | 13 | 749671 12289  | YMR239 | <b>0.79</b> | Sgl Pi | 0.543 | 0.479 | 0.46  | 0.3  |
| iYDR238C       | 4  | 940792 8531   | YDR238 | <b>0.82</b> | Sgl Pi | 0.621 | 0.06  | 0.562 | 0.3  |
| iYPR176C       | 16 | 892067 13766  | YPR176 | <b>0.89</b> | Sgl Pi | 2E-04 | 0.696 | 0.137 | 0.3  |
| iYER172C       | 5  | 536014 9209   | YER172 | <b>0.98</b> | Dbl Pi | 0.172 | 0.723 | 0.479 | 0.3  |
| iYHL049C-0     | 8  | 4528 10227    | YHL049 | <b>0.23</b> | Dbl Pi | 0.031 | 0.633 | 0.53  | 0.3  |
| iYMR002W       | 13 | 272688 12052  | YMR002 | <b>0.68</b> | Sgl Pi | 0.718 | 0.546 | 0.689 | 0.3  |
| iYKL141W       | 11 | 180263 11198  | YKL141 | <b>0.7</b>  | Sgl Pi | 0.97  | 0.791 | 0.506 | 0.3  |
| iYNL068C       | 14 | 498282 12448  | YNL068 | <b>0.16</b> | Dbl Pi | 0.771 | 0.454 | 0.573 | 0.3  |
| iYDR170C       | 4  | 802227 8467   | YDR170 | <b>0.6</b>  | Dbl Pi | 0.743 | 0.957 | 0.444 | 0.3  |
| iYLR074C       | 12 | 282449 11544  | YLR074 | <b>0.27</b> | Dbl Pi | 0.778 | 0.696 | 0.467 | 0.3  |
| iYKL195W       | 11 | 77027         | 11253  | <b>0.18</b> | Non F  | 0.359 | 0.898 | 0.673 | 0.3  |
| iYMR224C       | 13 | 720654 12274  | YMR224 | <b>0.66</b> | Sgl Pi | 0.584 | 0.428 | 0.215 | 0.3  |
| iYOL117W       | 15 | 99486 12891   | YOL117 | <b>0.93</b> | Sgl Pi | 1E-04 | 0.242 | 0.661 | 0.3  |
| iYDR302W       | 4  | 1068433       | 8589   | <b>0.32</b> | Non F  | 0.44  | 0.553 | 0.332 | 0.3  |
| itF(GAA)G      | 7  | 440800        | 7150   | <b>0.09</b> | Non F  | 0.871 | 0.846 | 0.665 | 0.3  |
| iYLR238W       | 12 | 616178        | 11699  | <b>0.09</b> | Non F  | 0.364 | 0.511 | 0.44  | 0.3  |
| iYKR104W       | 11 | 657397        | 11398  | <b>0.67</b> | Non F  | 0.908 | 0.746 | 0.153 | 0.3  |
| itK(UUU)O      | 15 | 438743 7222   | YOR058 | <b>0.09</b> | Sgl Pi | 0.632 | 0.638 | NaN   | 0.3  |
| iYHR081W       | 8  | 268081        | 10319  | <b>0.09</b> | Non F  | 0.533 | 0.835 | 0.413 | 0.3  |
| iYKR064W       | 11 | 564776        | 11352  | <b>0.1</b>  | Non F  | 0.257 | 0.442 | 0.357 | 0.3  |
| itR(UCU)G2     | 7  | 828781 7297   | YGR165 | <b>0.52</b> | Sgl Pi | 0.782 | 0.885 | 0.314 | 0.3  |
| iYDL121C       | 4  | 245579 8174   | YDL121 | <b>0.97</b> | Dbl Pi | 0.012 | 0.182 | 0.047 | 0.3  |
| iYGR110W       | 7  | 715049 9991   | YGR110 | <b>0.64</b> | Sgl Pi | 0.837 | 0.832 | 0.523 | 0.3  |
| iYAL059W       | 1  | 37163 7430    | YAL058 | <b>0.85</b> | Sgl Pi | 0.699 | 0.586 | 0.635 | 0.3  |
| iYAR023C       | 1  | 179824 7468   | YAR023 | <b>0.62</b> | Dbl Pi | 0.602 | 0.526 | 0.648 | 0.3  |
| iYML082W       | 13 | 103808        | 11998  | <b>0.44</b> | Non F  | 0.017 | 0.562 | 0.317 | 0.3  |
| iYLR028C       | 12 | 201318 11497  | YLR028 | <b>0.35</b> | Sgl Pi | 0.793 | 0.798 | 0.64  | 0.3  |
| iYOLCdelta7    | 15 | 228168 12945  | YOL055 | <b>0.35</b> | Dbl Pi | 0.617 | 0.693 | 0.631 | 0.31 |
| iSNR52         | 5  | 431217 7076   | YER132 | <b>0.19</b> | Dbl Pi | 0.714 | 0.485 | 0.621 | 0.31 |
| iYJL062W       | 10 | 319466 10753  | YJL062 | <b>0.55</b> | Sgl Pi | 0.528 | 0.807 | 0.395 | 0.31 |
| iYNL189W       | 14 | 285885 12559  | YNL189 | <b>0.6</b>  | Sgl Pi | 0.755 | 0.964 | 0.268 | 0.31 |
| iYBR191W       | 2  | 607103 7792   | YBR192 | <b>0.46</b> | Sgl Pi | 0.538 | 0.581 | 0.473 | 0.31 |
| iYERWdelta21-0 | 5  | 445135 9272   | YER137 | <b>0.02</b> | Sgl Pi | 0.609 | 0.04  | 0.96  | 0.31 |
| iYNR051C       | 14 | 718310 12750  | YNR051 | <b>0.49</b> | Sgl Pi | 0.852 | 0.92  | 0.49  | 0.31 |
| iYGL040C-0     | 7  | 420549 9604   | YGL040 | <b>0.56</b> | Dbl Pi | 0.662 | 0.645 | 0.107 | 0.31 |
| iYJL138C       | 10 | 154402 10820  | YJL138 | <b>0.47</b> | Sgl Pi | 0.15  | 0.551 | 0.15  | 0.31 |
| iYHL042W       | 8  | 16121 10219   | YHL042 | <b>0.56</b> | Sgl Pi | 0.793 | 0.152 | 0.73  | 0.31 |
| iYER021W       | 5  | 198503 8940   | YER022 | <b>0.73</b> | Sgl Pi | 0.663 | 0.235 | 0.5   | 0.31 |
| iYMR210W       | 13 | 688876 12260  | YMR210 | <b>0.69</b> | Sgl Pi | 0.741 | 0.471 | NaN   | 0.31 |
| iYIL073C       | 9  | 225609 10546  | YIL073 | <b>0.54</b> | Dbl Pi | 0.279 | 0.367 | 0.682 | 0.31 |
| iYOR153W       | 15 | 624384 13100  | YOR153 | <b>0.42</b> | Sgl Pi | 0.921 | 0.761 | NaN   | 0.31 |
| iYNL230C       | 14 | 218658 12594  | YNL230 | <b>0.48</b> | Sgl Pi | 0.678 | 0.92  | 0.001 | 0.31 |
| iYJL107C       | 10 | 219700 10793  | YJL107 | <b>0.56</b> | Dbl Pi | 0.923 | 0.492 | 0.915 | 0.31 |
| iYER027C       | 5  | 210241 8946   | YER027 | <b>0.89</b> | Sgl Pi | NaN   | 0.597 | 0.513 | 0.31 |
| iYOR095C       | 15 | 504319 13047  | YOR095 | <b>0.3</b>  | Dbl Pi | 0.76  | 0.002 | 0.929 | 0.31 |

|             |    |              |        |             |        |       |       |       |      |
|-------------|----|--------------|--------|-------------|--------|-------|-------|-------|------|
| iYNL119W    | 14 | 402507       | 12495  | <b>0.01</b> | Non F  | 0.378 | 0.631 | 0.477 | 0.31 |
| iYKR083C    | 11 | 596463 11372 | YKR08  | <b>0.46</b> | Sgl Pi | 0.554 | 0.553 | 0.1   | 0.31 |
| iYGL249W    | 7  | 35201 9839   | YGL248 | <b>0.51</b> | Sgl Pi | 0.565 | 0.589 | 0.44  | 0.31 |
| iYOL097C    | 15 | 137826 12873 | YOL09  | <b>0.76</b> | Sgl Pi | NaN   | 0.612 | 0.088 | 0.31 |
| iYBR282W    | 2  | 768647       | 7871   | <b>0.32</b> | Non F  | 0.287 | 0.38  | 0.394 | 0.31 |
| itK(UUU)K   | 11 | 578697 7220  | YKR073 | <b>0.81</b> | Dbl Pi | 0.492 | 0.75  | 0.515 | 0.31 |
| iYKL100C    | 11 | 255097 11163 | YKL10  | <b>0.5</b>  | Sgl Pi | 0.533 | 0.636 | 0.072 | 0.31 |
| iYARWsigma1 | 1  | 182935 7500  | YAR023 | <b>0.01</b> | Dbl Pi | 0.576 | 0.65  | 0.42  | 0.31 |
| itS(UGA)E-0 | 5  | 288527 7316  | YER065 | <b>0.62</b> | Dbl Pi | 0.75  | 0.565 | 0.923 | 0.31 |
| iYBR145W    | 2  | 534773 7747  | YBR146 | <b>0.87</b> | Sgl Pi | 2E-04 | 0.928 | 0.624 | 0.31 |
| itE(UUC)E1  | 5  | 177183 7133  | YER012 | <b>0.71</b> | Sgl Pi | 0.662 | 0.827 | 0.152 | 0.31 |
| iYKL033W    | 11 | 378213       | 11097  | <b>0.67</b> | Non F  | 0.8   | 0.056 | 0.765 | 0.31 |
| iYNL306W    | 14 | 58805        | 12662  | <b>0.02</b> | Non F  | NaN   | 0.567 | 0.513 | 0.31 |
| iYLL046C    | 12 | 47459 11448  | YLL046 | <b>0.19</b> | Sgl Pi | 0.003 | 0.724 | 0.727 | 0.31 |
| itI(UAU)L   | 12 | 605422       | 7199   | <b>0.6</b>  | Non F  | 0.282 | 0.677 | 0.693 | 0.31 |
| iYPR069C    | 16 | 685444 13673 | YPR06  | <b>0.57</b> | Dbl Pi | 0.641 | 0.647 | 0.598 | 0.31 |
| iYDR387C    | 4  | 1249816 8672 | YDR387 | <b>0.85</b> | Dbl Pi | 0.554 | 0.067 | 0.54  | 0.31 |
| iYDR013W    | 4  | 473783 8316  | YDR014 | <b>0.61</b> | Sgl Pi | 0.601 | 0.745 | 0.467 | 0.31 |
| iYGL256W-0  | 7  | 16299 9853   | YGL255 | <b>0.53</b> | Sgl Pi | 0.739 | 0.593 | 0.518 | 0.31 |
| iYLR093C    | 12 | 327274 11562 | YLR09  | <b>0.53</b> | Sgl Pi | 0.749 | 0.496 | 0.407 | 0.31 |
| iYLR221C    | 12 | 579009 11686 | YLR22  | <b>0.64</b> | Sgl Pi | 0.228 | 0.977 | 0.537 | 0.31 |
| iYEL048C    | 5  | 65160 8877   | YEL048 | <b>0.48</b> | Sgl Pi | 0.391 | 0.322 | 0.899 | 0.31 |
| iYNL089C    | 14 | 457169 12469 | YNL08  | <b>0.71</b> | Dbl Pi | 0.723 | 0.247 | 0.626 | 0.32 |
| iYPL116W    | 16 | 331684       | 13441  | <b>0.23</b> | Non F  | 0.092 | 0.856 | 0.204 | 0.32 |
| iYKL222C    | 11 | 5606 11284   | YKL22  | <b>0.76</b> | Dbl Pi | 0.627 | 0.958 | 0.557 | 0.32 |
| iYKL089W    | 11 | 274670 11150 | YKL08  | <b>0.78</b> | Sgl Pi | 0.591 | 0.533 | 0.136 | 0.32 |
| iYJR012C    | 10 | 460107 10924 | YJR01  | <b>0.62</b> | Dbl Pi | 0.553 | 0.56  | 0.323 | 0.32 |
| iYDR065W    | 4  | 581783       | 8372   | <b>0.16</b> | Non F  | 0.449 | 0.584 | 0.431 | 0.32 |
| iYOL012C    | 15 | 303987 12791 | YOL01  | <b>0.45</b> | Dbl Pi | 0.206 | 0.291 | 0.841 | 0.32 |
| iYNL288W    | 14 | 91413 12645  | YNL28  | <b>0.61</b> | Sgl Pi | 2E-04 | 0.388 | 0.353 | 0.32 |
| iYBR176W    | 2  | 584623       | 7779   | <b>0.14</b> | Non F  | 0.334 | 0.513 | 0.556 | 0.32 |
| iYIL071C    | 9  | 229996 10544 | YIL071 | <b>0.69</b> | Sgl Pi | 0.71  | 0.465 | 0.544 | 0.32 |
| YGRCTy1-2C  | 7  | 564781       | 14075  | <b>0.04</b> | Non F  | 0.64  | 0.417 | 0.576 | 0.32 |
| itF(GAA)P1  | 16 | 560282       | 7155   | <b>0.25</b> | Non F  | 0.847 | 0.726 | 0.536 | 0.32 |
| iYGL058W    | 7  | 394489       | 9621   | <b>0.23</b> | Non F  | 0.317 | 0.489 | 0.527 | 0.32 |
| iYER017C    | 5  | 191772 8936  | YER017 | <b>0.79</b> | Sgl Pi | 0.007 | 0.579 | 0.891 | 0.32 |
| iYFR008W    | 6  | 161199 9444  | YFR009 | <b>0.42</b> | Sgl Pi | 0.78  | 0.457 | 0.7   | 0.32 |
| iYBR100W    | 2  | 443534       | 7706   | <b>0.11</b> | Non F  | 0.251 | 0.584 | 0.879 | 0.32 |
| iYGR129W    | 7  | 751043       | 10009  | <b>0.22</b> | Non F  | 0.619 | 0.447 | NaN   | 0.32 |
| iYDR379W    | 4  | 1233177 8664 | YDR38C | <b>0.46</b> | Sgl Pi | 0.786 | 0.783 | 0.992 | 0.32 |
| iYLR165C    | 12 | 495275 11636 | YLR16  | <b>0.42</b> | Sgl Pi | 0.508 | 0.568 | 0.647 | 0.32 |
| iYBL041W    | 2  | 141919       | 7541   | <b>0.01</b> | Non F  | 0.469 | 0.511 | 0.518 | 0.32 |
| itA(AGC)F   | 6  | 204980 7101  | YFR025 | <b>0.68</b> | Sgl Pi | 0.775 | 0.858 | 0.795 | 0.32 |
| iYIL096C    | 9  | 183115 I     |        | <b>0.82</b> | Dbl Pi | 0.74  | 0.752 | 0.875 | 0.32 |
| iYJR142W    | 10 | 697847       | 11037  | <b>0.13</b> | Non F  | 0.364 | 0.532 | 0.475 | 0.32 |
| iYGL060W    | 7  | 392009 9623  | YGL059 | <b>0.74</b> | Sgl Pi | 0.637 | 0.558 | 0.445 | 0.32 |
| iYKR017C    | 11 | 472993 11310 | YKR01  | <b>0.76</b> | Sgl Pi | 0.597 | 0.743 | 0.103 | 0.32 |
| iYJL030W    | 10 | 387959       | 10724  | <b>0.12</b> | Non F  | 0.563 | 0.609 | 0.456 | 0.32 |
| iYNR076W    | 14 | 782273       | 12776  | <b>0.07</b> | Non F  | 0.168 | 0.009 | 0.474 | 0.32 |
| iYIL117C    | 9  | 141561 10586 | YIL117 | <b>0.21</b> | Dbl Pi | 0.711 | 0.506 | 0.676 | 0.32 |
| iYDR066C    | 4  | 582495 8373  | YDR066 | <b>0.55</b> | Sgl Pi | 0.398 | 0.702 | 0.341 | 0.32 |

|              |    |                    |        |             |        |       |       |       |      |
|--------------|----|--------------------|--------|-------------|--------|-------|-------|-------|------|
| iYIR041W     | 9  | 434305             | 10696  | <b>0.35</b> | Non F  | 0.459 | 0.987 | 0.533 | 0.32 |
| iYNL160W     | 14 | 337592             | 12534  | <b>0.49</b> | Non F  | 0.685 | 0.415 | 1E-04 | 0.32 |
| iYDL167C     | 4  | 163159 8216        | YDL167 | <b>0.67</b> | Sgl Pi | 0.606 | 0.799 | 0.398 | 0.32 |
| iYJR089W     | 10 | 590280             | 10984  | <b>0.15</b> | Non F  | 0.589 | 0.052 | NaN   | 0.32 |
| iYDL129W     | 4  | 231927 8182        | YDL128 | <b>0.37</b> | Sgl Pi | 0.707 | 0.719 | 0.912 | 0.32 |
| iYLR312W-A   | 12 | 760227             | 11765  | <b>0.17</b> | Non F  | 0.605 | 0.358 | 0.421 | 0.32 |
| iYGL067W     | 7  | 377270 9630        | YGL066 | <b>0.89</b> | Sgl Pi | 0.476 | 0.719 | 0.384 | 0.32 |
| iYGL067W     | 7  | 377270 9630        | YGL066 | <b>0.89</b> | Sgl Pi | 0.476 | 0.719 | 0.384 | 0.32 |
| iYNL178W     | 14 | 303453             | 12549  | <b>0.19</b> | Non F  | 0.591 | 0.588 | 0.33  | 0.32 |
| iYER071C     | 5  | 302317 9011        | YER071 | <b>0.57</b> | Dbl Pi | 0.002 | 0.008 | 0.286 | 0.32 |
| iYLR199C     | 12 | 548534 11667       | YLR19  | <b>0.81</b> | Dbl Pi | 0.477 | 0.582 | 0.023 | 0.32 |
| iYGR165W     | 7  | 830152 10040       | YGR16  | <b>0.83</b> | Sgl Pi | 0.636 | 0.937 | 0.249 | 0.32 |
| iYOR354C-1   | 15 | 1004174 13286      | YOR35  | <b>0.14</b> | Dbl Pi | 0.882 | 0.622 | 0.414 | 0.33 |
| iYNL223W     | 14 | 228841 12589       | YNL22  | <b>0.96</b> | Sgl Pi | 0.582 | 0.618 | 0.531 | 0.33 |
| iYPR187W     | 16 | 911793             | 13776  | <b>0.22</b> | Non F  | 0.267 | 0.369 | 0.453 | 0.33 |
| iYMRWdelta15 | 13 | 481808 12379       | YMR10  | <b>0.83</b> | Dbl Pi | 0.652 | 0.501 | 0.043 | 0.33 |
| iYIL104C     | 9  | 171508 10573       | YIL104 | <b>0.87</b> | Dbl Pi | 0.776 | 0.803 | 0.221 | 0.33 |
| iYOL146W     | 15 | 49421              | 12918  | <b>0.03</b> | Non F  | 0.382 | 0.607 | 0.193 | 0.33 |
| iYLL063C     | 12 | 16089 11464        | YLL06  | <b>0.78</b> | Sgl Pi | 0.018 | 0.026 | 0.156 | 0.33 |
| iYKL177W     | 11 | 114711             | 11236  | <b>0.44</b> | Non F  | 0.575 | 0.363 | 0.426 | 0.33 |
| iYPR028W     | 16 | 624202             | 13640  | <b>0.14</b> | Non F  | 0.585 | 0.864 | 0.826 | 0.33 |
| iYKR059W     | 11 | 555809 11347       | YKR06  | <b>0.56</b> | Sgl Pi | 0.653 | 0.577 | 0.375 | 0.33 |
| iYOR136W     | 15 | 581362             | 13084  | <b>0.22</b> | Non F  | 0.517 | 0.843 | 0.484 | 0.33 |
| iYOR129C     | 15 | 569544 13078       | YOR12  | <b>0.9</b>  | Sgl Pi | 0.48  | 0.39  | 0.697 | 0.33 |
| iYDL211C-0   | 4  | 80398 8259         | YDL211 | <b>0.59</b> | Dbl Pi | 0.732 | 0.501 | 0.047 | 0.33 |
| iYDL083C     | 4  | 307780 8140        | YDL083 | <b>0.01</b> | Dbl Pi | 0.883 | 0.756 | 0.224 | 0.33 |
| iYOR376W-1   | 15 | 1044883 13307      | YOR37  | <b>0.42</b> | Sgl Pi | 0.721 | 0.386 | 0.608 | 0.33 |
| iYDL217C     | 4  | 68593 8267         | YDL217 | <b>0.88</b> | Sgl Pi | 0.343 | 0.685 | 0.38  | 0.33 |
| iYOR290C     | 15 | 860248 13225       | YOR29  | <b>0.84</b> | Dbl Pi | 0.064 | 0.785 | 0.917 | 0.33 |
| iYEL065W     | 5  | 29546              | 8894   | <b>0.45</b> | Non F  | 0.67  | 0.778 | 0.431 | 0.33 |
| iYKL120W     | 11 | 217957             | 11180  | <b>0.22</b> | Non F  | 0.761 | 0.28  | 0.866 | 0.33 |
| iYCR032W     | 3  | 0 7991             | YCR03  | <b>0.84</b> | Sgl Pi | 0.058 | 0.649 | 0.307 | 0.33 |
| iYOR036W     | 15 | 401208 12990       | YOR03  | <b>0.65</b> | Sgl Pi | 0.651 | 0.62  | 0.503 | 0.33 |
| iYGR099W     | 7  | 689962 9980        | YGR10  | <b>0.86</b> | Sgl Pi | 0.589 | 0.755 | 0.43  | 0.33 |
| iYMR194W     | 13 | 651974 12244 snr11 |        | <b>0.22</b> | Non F  | 0.735 | 0.954 | 0.929 | 0.33 |
| itK(CUU)E2   | 5  | 435815             | 7204   | <b>0.64</b> | Non F  | 0.322 | 0.634 | 0.485 | 0.33 |
| iYDR473C-0   | 4  | 1405840 8747       | YDR47  | <b>0.57</b> | Sgl Pi | 0.572 | 0.459 | 0.424 | 0.33 |
| itR(ACG)D-1  | 4  | 621058 7288        | YDR08  | <b>0.3</b>  | Dbl Pi | 0.726 | 0.032 | 0.546 | 0.33 |
| iYER145C     | 5  | 461728 9157        | YER14  | <b>0.37</b> | Dbl Pi | 0.854 | 0.546 | 0.983 | 0.33 |
| iYJL194W     | 10 | 70898 10870        | YJL19  | <b>0.96</b> | Sgl Pi | 0.747 | 0.792 | 0.601 | 0.33 |
| iYNL062C     | 14 | 510209 12442       | YNL06  | <b>0.98</b> | Dbl Pi | 0.362 | 0.671 | 0.336 | 0.33 |
| iYGR036C     | 7  | 558868 9919        | YGR03  | <b>0.62</b> | Sgl Pi | 0.66  | 0.522 | 0.205 | 0.33 |
| iYLR440C     | 12 | 1017699 11877      | YLR44  | <b>0.44</b> | Sgl Pi | 0.823 | 0.907 | 0.233 | 0.33 |
| iYOL139C     | 15 | 61012 12912        | YOL13  | <b>0.61</b> | Sgl Pi | 0.649 | 0.527 | 0.056 | 0.33 |
| iYDR204W     | 4  | 859129 8500        | YDR20  | <b>0.92</b> | Sgl Pi | 0.092 | 0.744 | 0.113 | 0.33 |
| iYDL241W-1   | 4  | 21917 8292         | YDL240 | <b>0.84</b> | Sgl Pi | 0.635 | 0.004 | 0.032 | 0.33 |
| iYCL065W-0   | 3  | 14154              | 7945   | <b>0.17</b> | Non F  | 0.278 | 0.299 | 0.475 | 0.33 |
| iYNL245C     | 14 | 186890 12608       | YNL24  | <b>0.53</b> | Sgl Pi | 0.436 | 0.364 | 0.359 | 0.33 |
| iYMR163C     | 13 | 586395 12211       | YMR16  | <b>0.79</b> | Sgl Pi | 0.593 | 0.287 | 0.577 | 0.33 |
| iYDR050C     | 4  | 556501 8358        | YDR05  | <b>0.17</b> | Sgl Pi | 0.551 | 0.243 | 0.998 | 0.34 |
| iYOR097C     | 15 | 507491 13049       | YOR09  | <b>0.53</b> | Sgl Pi | 0.681 | 0.226 | 0.953 | 0.34 |

|                     |           |               |              |               |             |     |    |              |              |              |             |
|---------------------|-----------|---------------|--------------|---------------|-------------|-----|----|--------------|--------------|--------------|-------------|
| iYHR203C            | 8         | 505514        | 10435        | YHR2C         | <b>0.24</b> | Dbl | Pi | 0.827        | 0.69         | 0.253        | 0.34        |
| iYDL166C            | 4         | 164029        | 8215         | YDL166        | <b>0.52</b> | Dbl | Pi | 0.183        | 0.69         | 0.523        | 0.34        |
| iYNL184C            | 14        | 292878        | 12555        | YNL18         | <b>0.48</b> | Sgl | Pi | 0.592        | 0.786        | 0.487        | 0.34        |
| iYHR035W            | 8         | 180113        | 10269        | YHR03         | <b>0.97</b> | Sgl | Pi | 0.28         | 0.789        | 0.448        | 0.34        |
| iYLR209C            | 12        | 561732        | 11675        | YLR20         | <b>0.82</b> | Dbl | Pi | 0.799        | <b>1E-04</b> | NaN          | 0.34        |
| <b>iYCR062W</b>     | <b>3</b>  | <b>227436</b> |              | <b>8013</b>   | <b>0.26</b> | Non | F  | <b>0.756</b> | <b>0.582</b> | <b>0.873</b> | <b>0.34</b> |
| iYDR122W            | 4         | 697890        |              | 8424          | <b>0.07</b> | Non | F  | 0.622        | 0.588        | 0.695        | 0.34        |
| iYJL022W            | 10        | 398117        |              | 10717         | <b>0.76</b> | Non | F  | 0.344        | 0.912        | 0.435        | 0.34        |
| <b>iYIL102C</b>     | <b>9</b>  | <b>174869</b> | <b>10570</b> | <b>YIL102</b> | <b>0.13</b> | Sgl | Pi | <b>0.41</b>  | <b>0.56</b>  | <b>0.786</b> | <b>0.34</b> |
| iYAL030W            | 1         | 87755         |              | 7403          | <b>0</b>    | Non | F  | 0.172        | 0.55         | 0.459        | 0.34        |
| iYBR180W            | 2         | 591490        |              | 7782          | <b>0.05</b> | Non | F  | 0.339        | 0.472        | 0.711        | 0.34        |
| iYCR020C            | 3         | 154648        | 7976         | YCR02C        | <b>0.58</b> | Sgl | Pi | 0.568        | 0.58         | 0.336        | 0.34        |
| iYCR020C            | 3         | 154648        | 7976         | YCR02C        | <b>0.58</b> | Sgl | Pi | 0.568        | 0.58         | 0.336        | 0.34        |
| iYAL018C            | 1         | 119537        | 7391         | YAL018        | <b>0.96</b> | Dbl | Pi | 0.976        | 0.215        | 0.397        | 0.34        |
| iYBR228W            | 2         | 676187        |              | 7824          | <b>0</b>    | Non | F  | 0.566        | 0.514        | 0.77         | 0.34        |
| iYKL101W            | 11        | 253104        |              | 11164         | <b>0.04</b> | Non | F  | 0.503        | 0.752        | 0.508        | 0.34        |
| iYGL104C            | 7         | 310175        | 9665         | YGL104        | <b>0.51</b> | Dbl | Pi | 0.826        | 0.553        | 0.448        | 0.34        |
| iYGL104C            | 7         | 310175        | 9665         | YGL104        | <b>0.51</b> | Dbl | Pi | 0.826        | 0.553        | 0.448        | 0.34        |
| iYDRWdelta14        | 4         | 877785        | 8827         | YDR21C        | <b>0.48</b> | Sgl | Pi | 0.818        | 0.981        | 0.995        | 0.34        |
| iYAR008W            | 1         | 159784        |              | 7459          | <b>0.41</b> | Non | F  | 0.704        | 0.254        | 0.104        | 0.34        |
| iYBR169C            | 2         | 575958        | 7773         | YBR16C        | <b>0.47</b> | Sgl | Pi | 0.036        | 0.974        | 0.758        | 0.34        |
| iYDR319C            | 4         | 1105823       | 8605         | YDR31C        | <b>0.4</b>  | Sgl | Pi | 0.556        | 0.787        | 0.51         | 0.34        |
| iYDR398W            | 4         | 1269380       | 8682         | YDR39C        | <b>0.21</b> | Sgl | Pi | 0.615        | 0.48         | 0.677        | 0.34        |
| <b>itQ(UUG)D2</b>   | <b>4</b>  | <b>645211</b> | <b>7281</b>  | <b>YDR09E</b> | <b>0.37</b> | Sgl | Pi | <b>0.827</b> | <b>0.144</b> | <b>0.99</b>  | <b>0.34</b> |
| <b>itQ(UUG)H</b>    | <b>8</b>  | <b>134372</b> | <b>7285</b>  | <b>YHR01E</b> | <b>0.21</b> | Sgl | Pi | <b>0.59</b>  | <b>0.526</b> | <b>0.614</b> | <b>0.34</b> |
| iYIL085C            | 9         | 202052        | 10555        | YIL08E        | <b>0.67</b> | Sgl | Pi | 0.611        | 0.92         | 0.568        | 0.34        |
| iYHR121W            | 8         | 353320        | 10358        | YHR12         | <b>0.77</b> | Sgl | Pi | 0.699        | 0.698        | 0.703        | 0.34        |
| iYDR139C            | 4         | 733906        | 8439         | YDR13C        | <b>0.72</b> | Dbl | Pi | 0.358        | 0.145        | 0.154        | 0.34        |
| iYNL066W            | 14        | 502775        | 12446        | YNL06         | <b>0.03</b> | Sgl | Pi | 0.848        | 0.493        | 0.62         | 0.34        |
| iYDR389W            | 4         | 1254493       |              | 8674          | <b>0.07</b> | Non | F  | 0.742        | 0.813        | 0.317        | 0.34        |
| <b>iYLR035C</b>     | <b>12</b> | <b>214457</b> | <b>11504</b> | <b>YLR03</b>  | <b>0.74</b> | Sgl | Pi | <b>0.771</b> | <b>0.871</b> | <b>0.414</b> | <b>0.34</b> |
| iYNL255C            | 14        | 167775        | 12616        | YNL25         | <b>0.56</b> | Sgl | Pi | <b>3E-04</b> | 0.636        | 0.397        | 0.34        |
| iYNL261W            | 14        | 156548        |              | 12622         | <b>0.3</b>  | Non | F  | 0.726        | 0.447        | 0.58         | 0.34        |
| iYGL258W            | 7         | 11723         |              | 9863          | <b>0.49</b> | Non | F  | 0.615        | 0.707        | 0.195        | 0.34        |
| <b>iYORCdelta25</b> | <b>15</b> | <b>980576</b> | <b>13328</b> | <b>YOR34</b>  | <b>0.31</b> | Sgl | Pi | <b>0.797</b> | <b>0.726</b> | <b>0.525</b> | <b>0.34</b> |
| iYNL131W            | 14        | 379263        |              | 12506         | <b>0.24</b> | Non | F  | 0.772        | 0.639        | 0.281        | 0.34        |
| iYML081W            | 13        | 108541        | 11997        | YML08         | <b>0.98</b> | Sgl | Pi | 0.491        | 0.462        | 0.561        | 0.34        |
| iYPL091W            | 16        | 376973        |              | 13421         | <b>0.32</b> | Non | F  | 0.576        | 0.907        | 6E-04        | 0.34        |
| iYDR261C-0          | 4         | 979209        | 8552         | YDR261        | <b>0.68</b> | Dbl | Pi | 0.758        | 0.134        | 0.451        | 0.34        |
| iYBL038W            | 2         | 146841        | 7538         | YBL037        | <b>0.73</b> | Sgl | Pi | 0.275        | 0.179        | 0.908        | 0.34        |
| iYBR086C            | 2         | 423012        | 7695         | YBR08C        | <b>0.48</b> | Dbl | Pi | 0.604        | 0.466        | 0.422        | 0.34        |
| iYLRCdelta9         | 12        | 593040        | 11908        | YLR22         | <b>0.45</b> | Dbl | Pi | 0.196        | 0.635        | 0.152        | 0.34        |
| iYDR069C            | 4         | 587709        | 8376         | YDR06C        | <b>0.98</b> | Sgl | Pi | 0.61         | 0.469        | 0.138        | 0.34        |
| iYLR412W-0          | 12        | 949224        | 11851        | YLR41         | <b>0.26</b> | Sgl | Pi | 0.401        | 0.046        | 0.41         | 0.34        |
| iYKL011C            | 11        | 420903        | 11077        | YKL01         | <b>0.31</b> | Sgl | Pi | 0.568        | 0.663        | 0.419        | 0.34        |
| iYMR108W            | 13        | 486133        | 12155        | YMR1C         | <b>0.68</b> | Sgl | Pi | 0.577        | 0.761        | 0.309        | 0.34        |
| iYEL051W            | 5         | 59147         |              | 8880          | <b>0.37</b> | Non | F  | 0.746        | 0.576        | 0.581        | 0.35        |
| iYDR476C            | 4         | 1411099       | 8751         | YDR47C        | <b>0.76</b> | Dbl | Pi | 0.29         | 0.179        | 0.164        | 0.35        |
| iYGRCdelta16        | 7         | 567749        | 10167        | YGR03         | <b>0.6</b>  | Dbl | Pi | 0.945        | 0.589        | 0.553        | 0.35        |
| iYDR411C            | 4         | 1294370       | 8694         | YDR411        | <b>0.99</b> | Dbl | Pi | 0.281        | 0.472        | <b>6E-04</b> | 0.35        |
| iYGR246C            | 7         | 984257        | 10114        | YGR24         | <b>0.94</b> | Dbl | Pi | 0.638        | 0.748        | 0.12         | 0.35        |



|                 |           |               |              |               |             |            |           |              |              |              |             |
|-----------------|-----------|---------------|--------------|---------------|-------------|------------|-----------|--------------|--------------|--------------|-------------|
| iYJL008C        | 10        | 421359        | 10708        | YJL008        | <b>0.8</b>  | Sgl        | Pi        | <b>3E-04</b> | 0.373        | 0.955        | 0.35        |
| iYMR099C        | 13        | 464826        | 12146        | YMR099        | <b>0.58</b> | Dbl        | Pi        | 0.73         | 0.788        | 0.712        | 0.35        |
| iYNL164C        | 14        | 326303        | 12539        | YNL164        | <b>0.93</b> | Sgl        | Pi        | 0.464        | 0.455        | 0.532        | 0.35        |
| iYGR152C        | 7         | 795486        | 10030        | YGR152        | <b>0.85</b> | Dbl        | Pi        | 0.51         | 0.939        | 0.347        | 0.35        |
| iYLR249W        | 12        | 639910        | 11710        | YLR249        | <b>0.67</b> | Sgl        | Pi        | 0.596        | 0.615        | 0.419        | 0.35        |
| iYMR091C        | 13        | 451349        | 12139        | YMR091        | <b>0.7</b>  | Sgl        | Pi        | 0.629        | 0.145        | 0.289        | 0.35        |
| iYJL110C        | 10        | 211295        | 10795        | YJL110        | <b>0.52</b> | Sgl        | Pi        | 0.004        | 0.727        | NaN          | 0.35        |
| iYOR005C        | 15        | 337356        | 12958        | YOR005        | <b>0.47</b> | Sgl        | Pi        | 0.711        | 0.51         | 0.014        | 0.35        |
| iYOL105C        | 15        | 115799        | 12880        | YOL105        | <b>0.35</b> | Sgl        | Pi        | 0.813        | 0.885        | 0.475        | 0.35        |
| iYER094C        | 5         | 349353        | 9061         | YER094        | <b>0.65</b> | Dbl        | Pi        | 0.433        | 0.002        | 0.078        | 0.35        |
| iYDL165W        | 4         | 164870        |              | 8214          | <b>0.17</b> | Non        | F         | 0.406        | 0.588        | 0.574        | 0.35        |
| iYJR124C        | 10        | 653916        | 11020        | YJR124        | <b>0.44</b> | Sgl        | Pi        | 0.837        | 0.695        | 0.076        | 0.35        |
| iYPL243W        | 16        | 90301         |              | 13562         | <b>0.26</b> | Non        | F         | 0.792        | 0.796        | 0.525        | 0.35        |
| iYCR017C        | 3         | 147624        | 7972         | YCR017        | <b>0.84</b> | Sgl        | Pi        | 0.819        | 0.828        | 0.491        | 0.35        |
| iYLR215C        | 12        | 571862        | 11681        | YLR215        | <b>0.64</b> | Sgl        | Pi        | 0.698        | 0.631        | 0.703        | 0.35        |
| iYLR057W        | 12        | 257854        |              | 11528         | <b>0.09</b> | Non        | F         | 0.463        | 0.585        | NaN          | 0.35        |
| iYLL050C        | 12        | 40409         | 11451        | YLL050        | <b>0.96</b> | Dbl        | Pi        | 0.667        | 0.262        | 0.487        | 0.35        |
| iYDRWdelta12    | 4         | 945649        | 8826         | YDR242        | <b>0.56</b> | Sgl        | Pi        | 0.559        | 0.854        | 0.103        | 0.35        |
| iYFL040W        | 6         | 52977         |              | 9362          | <b>0.32</b> | Non        | F         | 0.496        | 0.709        | 0.702        | 0.35        |
| iYJR159W        | 10        | 736796        |              | 11059         | <b>0.91</b> | Non        | F         | 0.639        | 0.606        | 0.174        | 0.35        |
| iYKR082W        | 11        | 595914        |              | 11371         | <b>0.2</b>  | Non        | F         | 0.425        | 0.504        | 0.193        | 0.35        |
| iYHR077C        | 8         | 255637        | 10314        | YHR077        | <b>0.91</b> | Dbl        | Pi        | <b>2E-04</b> | 0.942        | 0.159        | 0.35        |
| iYPR011C        | 16        | 584033        | 13621        | YPR011        | <b>0.67</b> | Dbl        | Pi        | 0.557        | 0.422        | 0.132        | 0.35        |
| iYGR150C        | 7         | 793059        | 10029        | YGR150        | <b>0.71</b> | Sgl        | Pi        | 0.734        | 0.562        | 0.483        | 0.35        |
| iYGR168C        | 7         | 834464        | 10043        | YGR168        | <b>0.64</b> | Sgl        | Pi        | 0.531        | 0.007        | 0.72         | 0.35        |
| iCEN1           | 1         | 151588        | 6994         | YAL001        | <b>0.51</b> | Dbl        | Pi        | 0.669        | 0.944        | 0.447        | 0.35        |
| iYCR023C        | 3         | 160357        | 7981         | YCR023        | <b>0.61</b> | Sgl        | Pi        | 0.453        | 0.67         | 0.024        | 0.35        |
| iYNL247W        | 14        | 185186        | 12609        | YNL247        | <b>0.56</b> | Sgl        | Pi        | 0.586        | 0.602        | 0.506        | 0.35        |
| iYJR004C        | 10        | 444551        | 10914        | YJR004        | <b>0.54</b> | Dbl        | Pi        | 0.627        | 0.584        | 9E-05        | 0.35        |
| <b>iSNR65</b>   | <b>3</b>  | <b>0</b>      | <b>7091</b>  | <b>YCR030</b> | <b>0.21</b> | <b>Sgl</b> | <b>Pi</b> | <b>0.801</b> | <b>0.752</b> | <b>0.906</b> | <b>0.35</b> |
| iYJL036W        | 10        | 379795        |              | 10729         | <b>0.25</b> | Non        | F         | 0.576        | 0.664        | 0.361        | 0.35        |
| iYMR177W        | 13        | 618088        | 12225        | YMR177        | <b>0.84</b> | Sgl        | Pi        | 0.289        | 0.52         | 0.54         | 0.35        |
| iYDR509W        | 4         | 1468578       | 8780         | YDR510        | <b>0.18</b> | Sgl        | Pi        | 0.739        | 0.463        | 0.997        | 0.35        |
| iYHR089C        | 8         | 283312        | 10327        | YHR089        | <b>0.6</b>  | Sgl        | Pi        | 0.651        | 0.682        | 0.734        | 0.35        |
| iYGL090W        | 7         | 344589        |              | 9650          | <b>0.25</b> | Non        | F         | 0.654        | 0.694        | 0.829        | 0.35        |
| iYOR044W        | 15        | 413483        | 12997        | YOR044        | <b>0.61</b> | Sgl        | Pi        | <b>3E-04</b> | 0.552        | 0.244        | 0.35        |
| iYGL106W        | 7         | 307012        | 9667         | YGL105        | <b>0.54</b> | Sgl        | Pi        | 0.032        | 0.782        | 0.012        | 0.35        |
| iYIL076W        | 9         | 217538        |              | 10549         | <b>0.11</b> | Non        | F         | 0.689        | 0.972        | 0.449        | 0.35        |
| iYOR304W        | 15        | 887877        |              | 13239         | <b>0.4</b>  | Non        | F         | 0.748        | 0.616        | 0.197        | 0.35        |
| iYNR021W        | 14        | 669592        |              | 12720         | <b>0.26</b> | Non        | F         | 0.556        | 0.59         | 0.396        | 0.35        |
| iYBR211C        | 2         | 647078        | 7812         | YBR211        | <b>0.71</b> | Dbl        | Pi        | <b>2E-04</b> | 0.57         | 0.368        | 0.36        |
| iYKL026C        | 11        | 389556        | 11092        | YKL026        | <b>0.47</b> | Sgl        | Pi        | 0.466        | 0.8          | 0.612        | 0.36        |
| iYKL092C        | 11        | 269106        | 11153        | YKL092        | <b>0.91</b> | Sgl        | Pi        | 0.48         | 0.562        | 0.315        | 0.36        |
| iYBL005W        | 2         | 220366        | 7505         | YBL005        | <b>0.18</b> | Sgl        | Pi        | NaN          | 0.622        | 0.441        | 0.36        |
| iYBR141C        | 2         | 527992        | 7743         | YBR141        | <b>0.7</b>  | Dbl        | Pi        | 0.398        | 0.595        | 0.402        | 0.36        |
| <b>iYOR235W</b> | <b>15</b> | <b>780187</b> | <b>13176</b> | <b>YOR235</b> | <b>0.28</b> | <b>Sgl</b> | <b>Pi</b> | <b>0.195</b> | <b>0.854</b> | <b>0.371</b> | <b>0.36</b> |
| iYDR232W        | 4         | 929083        |              | 8525          | <b>0.12</b> | Non        | F         | 0.873        | 0.155        | NaN          | 0.36        |
| iYMR049C-0      | 13        | 370536        | 12100        | YMR049        | <b>0.73</b> | Sgl        | Pi        | 0.733        | 0.885        | 0.195        | 0.36        |
| iYLR355C        | 12        | 839256        | 11801        | YLR355        | <b>0.25</b> | Dbl        | Pi        | 0.621        | 0.535        | 0.994        | 0.36        |
| iYKR014C        | 11        | 465738        | 11307        | YKR014        | <b>0.73</b> | Sgl        | Pi        | 0.411        | 0.009        | 0.864        | 0.36        |
| iYMLWdelta6     | 13        | 202234        |              | 12050         | <b>0.36</b> | Non        | F         | 0.735        | 0.929        | 0.852        | 0.36        |

|              |    |         |       |        |             |      |    |              |       |       |      |
|--------------|----|---------|-------|--------|-------------|------|----|--------------|-------|-------|------|
| iYOL002C     | 15 | 324389  | 12781 | YOL00  | <b>0.55</b> | Dbl  | Pi | 0.569        | 0.492 | 0.234 | 0.36 |
| iYNL084C     | 14 | 471088  | 12464 | YNL08  | <b>0.95</b> | Dbl  | Pi | 0.009        | 0.703 | 0.235 | 0.36 |
| iYLR445W     | 12 | 1024590 | 11881 | YLR44  | <b>0.59</b> | Sgl  | Pi | 0.685        | 0.845 | 0.106 | 0.36 |
| iYDL028C     | 4  | 403292  | 8089  | YDL028 | <b>0.95</b> | Sgl  | Pi | 0.006        | 0.147 | 0.481 | 0.36 |
| iYOR286W     | 15 | 850725  |       | 13221  | <b>0.31</b> | Non  | F  | 0.691        | 0.49  | 0.229 | 0.36 |
| iYHRCdelta11 | 8  | 389897  | 10459 | YHR14  | <b>0.99</b> | Dbl  | Pi | 0.705        | 0.646 | 0.471 | 0.36 |
| iYDR404C     | 4  | 1277164 | 8687  | YDR404 | <b>0.96</b> | Dbl  | Pi | <b>2E-04</b> | 0.493 | 0.555 | 0.36 |
| iYER107C     | 5  | 374546  | 9085  | YER107 | <b>0.68</b> | Sgl  | Pi | 0.45         | 0.593 | 0.225 | 0.36 |
| iYOR089C     | 15 | 490813  | 13041 | YOR08  | <b>0.43</b> | Sgl  | Pi | 0.075        | 0.496 | 0.482 | 0.36 |
| itN(GUU)K    | 11 | 74689   | 7257  | YKL197 | <b>0.31</b> | Sgl  | Pi | 0.372        | 0.838 | 0.537 | 0.36 |
| itA(AGC)M1   | 13 | 321212  | 7105  | YMR020 | <b>0.85</b> | Dbl  | Pi | 0.765        | 0.522 | 0.924 | 0.36 |
| itH(GUG)G1   | 7  | 110693  |       | 7179   | <b>0.26</b> | Non  | F  | 0.613        | 0.52  | 0.827 | 0.36 |
| iYLL007C     | 12 | 136286  | 11412 | YLL007 | <b>0.83</b> | Dbl  | Pi | 0.684        | 0.344 | 0.343 | 0.36 |
| iYMR302C     | 13 | 872616  | 12350 | YMR302 | <b>0.98</b> | Sgl  | Pi | 0.01         | 0.452 | 0.998 | 0.36 |
| iYBR024W     | 2  | 290310  |       | 7630   | <b>0.18</b> | Non  | F  | 0.444        | 0.051 | 0.703 | 0.36 |
| iYDL135C     | 4  | 219298  | 8190  | YDL135 | <b>0.52</b> | Sgl  | Pi | 0.446        | 0.481 | 0.227 | 0.36 |
| iYDR363W     | 4  | 1200546 | 8648  | YDR363 | <b>0.07</b> | Sgl  | Pi | 0.462        | 0.855 | 0.272 | 0.36 |
| iYLR124W-0   | 12 | 391963  | 11590 | YLR124 | <b>0.39</b> | Sgl  | Pi | 0.411        | 0.43  | 0.206 | 0.36 |
| iYMR131C     | 13 | 534698  | 12179 | YMR131 | <b>0.67</b> | Sgl  | Pi | 0.551        | 0.258 | 0.474 | 0.36 |
| iYOR086C     | 15 | 486787  | 13039 | YOR086 | <b>0.87</b> | Dbl  | Pi | 0.003        | 0.967 | 0.384 | 0.36 |
| iYBR151W     | 2  | 545940  | 7753  | YBR152 | <b>0.46</b> | Sgl  | Pi | 0.72         | 0.379 | 1E-04 | 0.36 |
| iYOL091W     | 15 | 147152  | 12867 | YOL091 | <b>0.97</b> | Sgl  | Pi | 0.698        | 0.64  | 0.387 | 0.36 |
| iYDL131W     | 4  | 228743  | 8185  | YDL130 | <b>0.79</b> | Sgl  | Pi | <b>7E-04</b> | 0.811 | 0.487 | 0.36 |
| iYOR158W     | 15 | 633145  |       | 13105  | <b>0.42</b> | Non  | F  | 0.554        | 0.492 | NaN   | 0.36 |
| iYMR158C-B   | 13 | 573320  | 12205 | YMR158 | <b>0.24</b> | Dbl  | Pi | 0.709        | 0.819 | 0.428 | 0.37 |
| iYIL014W     | 9  | 327997  |       | 10490  | <b>0.09</b> | Non  | F  | 0.632        | 0.567 | 0.417 | 0.37 |
| iYGR193C     | 7  | 885739  | 10065 | YGR193 | <b>0.81</b> | Sgl  | Pi | 0.583        | 0.901 | 0.417 | 0.37 |
| iYOR184W     | 15 | 680556  | 13130 | snr36  | <b>0.23</b> | Non  | F  | 0.902        | 0.997 | 0.67  | 0.37 |
| itS(AGA)M    | 13 | 259250  | 7311  | YML006 | <b>0.54</b> | Dbl  | Pi | 0.723        | 0.508 | 0.229 | 0.37 |
| iYDR044W     | 4  | 547633  |       | 8353   | <b>0.32</b> | Non  | F  | 0.519        | 0.715 | 0.435 | 0.37 |
| iYEL017W     | 5  | 124645  |       | 8849   | <b>0.14</b> | Non  | F  | 0.058        | NaN   | 0.591 | 0.37 |
| iYPL007C     | 16 | 543839  | 13342 | YPL007 | <b>0.87</b> | Dbl  | Pi | 0.534        | 0.525 | 0.693 | 0.37 |
| iYBR286W     | 2  | 776272  | 7875  | YBR287 | <b>0.62</b> | Sgl  | Pi | 0.576        | 0.638 | 0.32  | 0.37 |
| iYDR047W     | 4  | 552921  |       | 8356   | <b>0.21</b> | Non  | F  | 0.604        | 0.603 | 0.6   | 0.37 |
| iYNL103W     | 14 | 429791  | 12482 | YNL103 | <b>0.69</b> | Sgl  | Pi | 0.875        | 0.8   | NaN   | 0.37 |
| itE(UUC)E2   | 5  | 354996  | 7134  | YER097 | <b>0.16</b> | Sgl  | Pi | 0.63         | 0.447 | 0.64  | 0.37 |
| iYOL166C     | 15 | 1347    | 12941 | YOL166 | <b>0.25</b> | Sgl  | Pi | 0.638        | 0.463 | 0.934 | 0.37 |
| iYOR356W     | 15 | 1009098 |       | 13288  | <b>0.01</b> | Non  | F  | 0.224        | 0.656 | 0.531 | 0.37 |
| itG(UCC)N    | 14 | 96316   | 7176  | YNL285 | <b>0.45</b> | Sgl  | Pi | 0.49         | 0.514 | 0.669 | 0.37 |
| iYDL109C     | 4  | 267206  | 8163  | YDL109 | <b>0.48</b> | Dbl  | Pi | 0.601        | 0.799 | 0.917 | 0.37 |
| iYOR079C     | 15 | 474412  | 13033 | YOR079 | <b>0.53</b> | Dbl  | Pi | 0.293        | 0.523 | 0.453 | 0.37 |
| iYGR230W     | 7  | 952291  |       | 10099  | <b>0.23</b> | Non  | F  | 0.481        | 0.596 | 0.463 | 0.37 |
| iYDR207C     | 4  | 867513  | 8503  | YDR207 | <b>0.86</b> | Dbl  | Pi | 0.001        | 0.145 | 0.119 | 0.37 |
| iYMR141C     | 13 | 550072  | 12189 | YMR141 | <b>0.08</b> | Sgl  | Pi | 0.665        | 0.482 | 0.726 | 0.37 |
| YILCdelta2   | 9  | 246210  | 14095 | YIL061 | <b>0.46</b> | Dbl  | Pi | 0.877        | 0.582 | 0.565 | 0.37 |
| iYLR055C     | 12 | 253067  | 11526 | YLR055 | <b>0.34</b> | Dbl  | Pi | <b>3E-04</b> | 0.449 | 0.559 | 0.37 |
| iYOL153C-0   | 15 | 38571   |       | #N/A   | <b>0.58</b> | #N/A |    | 0.587        | 0.613 | 0.019 | 0.37 |
| iYOR212W     | 15 | 744169  |       | 13155  | <b>0.17</b> | Non  | F  | 0.641        | 0.468 | 0.652 | 0.37 |
| iYOR275C     | 15 | 841050  | 13213 | YOR275 | <b>0.86</b> | Dbl  | Pi | 0.794        | 0.595 | 0.087 | 0.37 |
| iYDR377W     | 4  | 1228900 |       | 8662   | <b>0.41</b> | Non  | F  | 0.852        | 0.859 | 0.435 | 0.37 |
| iYML085C     | 13 | 99393   | 12000 | YML085 | <b>0.85</b> | Dbl  | Pi | 0.492        | 0.638 | 0.537 | 0.37 |

|              |    |                     |             |             |        |              |              |              |             |
|--------------|----|---------------------|-------------|-------------|--------|--------------|--------------|--------------|-------------|
| YPLCtau1     | 16 | 436911              | 14152       | <b>0.61</b> | Non F  | 0.748        | 0.847        | 0.813        | 0.37        |
| iYLL048C     | 12 | 46271 11449         | YLL048      | <b>0.88</b> | Dbl Pi | 0.56         | 0.631        | 0.407        | 0.37        |
| iYOL142W     | 15 | 56309 12915         | YOL14       | <b>0.71</b> | Sgl Pi | 0.499        | 0.647        | 0.441        | 0.37        |
| iYLR325C     | 12 | 781365 11775        | YLR32       | <b>0.62</b> | Dbl Pi | 0.765        | 0.899        | 0.702        | 0.37        |
| itT(UGU)G2   | 7  | <b>1004278 7334</b> | YGR255      | <b>0.69</b> | Dbl Pi | <b>0.399</b> | <b>0.151</b> | <b>0.665</b> | <b>0.37</b> |
| iYFR048W     | 6  | 248119 9526         | YFR049      | <b>0.87</b> | Sgl Pi | 0.583        | 0.895        | 0.356        | 0.37        |
| iYNL294C     | 14 | 80249 12652         | YNL29       | <b>0.93</b> | Dbl Pi | 0.304        | 0.395        | 0.12         | 0.37        |
| iYKLCdelta6  | 11 | 313554 11291        | YKL06       | <b>0.57</b> | Sgl Pi | 0.681        | 0.481        | 0.367        | 0.37        |
| iYPL270W     | 16 | 32802 13588         | YPL26       | <b>0.99</b> | Sgl Pi | 0.665        | 0.633        | 0.466        | 0.37        |
| itQ(UUG)D1   | 4  | <b>521031 7280</b>  | YDR034      | <b>0.63</b> | Dbl Pi | <b>0.078</b> | <b>0.593</b> | <b>0.568</b> | <b>0.37</b> |
| iYDR226W     | 4  | 917139 8520         | YDR227      | <b>0.58</b> | Sgl Pi | 0.024        | 0.822        | 0.316        | 0.37        |
| iYGR048W     | 7  | 590924 9931         | YGR049      | <b>0.34</b> | Sgl Pi | 0.737        | 0.695        | 0.528        | 0.38        |
| iYOL019W     | 15 | 290541              | 12799       | <b>0.08</b> | Non F  | 0.837        | 0.995        | 0.647        | 0.38        |
| iYDR223W     | 4  | 913485              | 8517        | <b>0.6</b>  | Non F  | 0.28         | 0.938        | 0.481        | 0.38        |
| iYGR186W     | 7  | 870004              | 10059       | <b>0.09</b> | Non F  | 0.453        | 0.769        | 0.726        | 0.38        |
| YPLCTy4-1E   | 16 | 441868 14157        | YPL05       | <b>0.51</b> | Sgl Pi | 0.744        | 0.914        | 0.72         | 0.38        |
| iYBL071C     | 2  | 90524 7566          | YBL071      | <b>0.41</b> | Sgl Pi | 0.447        | 0.302        | 0.128        | 0.38        |
| iYNL093W     | 14 | 450532 12472        | YNL09       | <b>0.99</b> | Sgl Pi | 0.778        | 0.508        | 0.366        | 0.38        |
| iYGR003W     | 7  | 502346 9891         | YGR004      | <b>0.53</b> | Sgl Pi | 0.64         | 0.381        | 0.32         | 0.38        |
| iYKL193C     | 11 | 79885 11251         | YKL19       | <b>0.67</b> | Sgl Pi | 0.512        | 0.793        | 0.466        | 0.38        |
| iYPL164C     | 16 | 241487 13487        | YPL16       | <b>0.8</b>  | Sgl Pi | 0.472        | 0.213        | 0.303        | 0.38        |
| iYJR107W     | 10 | 628005 11004        | YJR10       | <b>0.6</b>  | Sgl Pi | 0.587        | 0.553        | 0.208        | 0.38        |
| iYJR149W     | 10 | 708079              | 11043       | <b>0.27</b> | Non F  | 0.704        | 0.924        | 0.132        | 0.38        |
| iYGL206C     | 7  | 107491 9765         | YGL206      | <b>0.9</b>  | Dbl Pi | 0.716        | 0.622        | 0.388        | 0.38        |
| iYGL114W     | 7  | 295688 9674         | YGL113      | <b>0.66</b> | Sgl Pi | 0.366        | 0.621        | 0.501        | 0.38        |
| iYPR134W     | 16 | 798859 13729        | YPR13       | <b>0.62</b> | Sgl Pi | 0.624        | 0.636        | 0.464        | 0.38        |
| iYDR405W     | 4  | 1278417 8688        | YDR406      | <b>0.51</b> | Sgl Pi | 0.424        | 0.376        | 0.157        | 0.38        |
| iYJL057C     | 10 | 329818 10749        | YJL057      | <b>0.64</b> | Sgl Pi | 0.695        | 0.615        | NaN          | 0.38        |
| iYER174C     | 5  | 539165 9213         | YER174      | <b>0.54</b> | Sgl Pi | 0.776        | 0.51         | 0.682        | 0.38        |
| iYPL184C     | 16 | 197777 13507        | YPL18       | <b>0.58</b> | Dbl Pi | 0.776        | 0.07         | 0.885        | 0.38        |
| iYMRWdelta12 | 13 | 379199 12378        | YMR09       | <b>0.5</b>  | Dbl Pi | 0.411        | 0.578        | 0.535        | 0.38        |
| iYOR090C     | 15 | 492829 13042        | YOR09       | <b>0.7</b>  | Dbl Pi | 0.144        | 0.899        | 0.377        | 0.38        |
| iYJL167W     | 10 | 106049 10847        | YJL167      | <b>0.48</b> | Sgl Pi | 0.711        | 0.755        | 0.46         | 0.38        |
| iYLR267W     | 12 | 679912 11726        | YLR26       | <b>0.87</b> | Sgl Pi | 0.69         | 0.215        | 0.756        | 0.38        |
| iYHR060W     | 8  | 221321              | 10297       | <b>0.2</b>  | Non F  | 0.491        | 0.804        | 0.373        | 0.38        |
| iYDR078C     | 4  | 602866 8385         | YDR078      | <b>0.37</b> | Dbl Pi | 0.548        | 0.636        | 0.543        | 0.38        |
| iYOR029W-1   | 15 | 385878 12983        | YOR03       | <b>0.81</b> | Sgl Pi | 0.041        | 0.085        | 0.061        | 0.38        |
| iYMR119W-A   | 13 | 507354              | 12166       | <b>0.12</b> | Non F  | 0.597        | 0.759        | 0.47         | 0.38        |
| itV(AAC)O    | 15 | <b>663871</b>       | <b>7355</b> | <b>0.29</b> | Non F  | <b>0.639</b> | <b>0.537</b> | <b>0.474</b> | <b>0.38</b> |
| iYDR170W-A-0 | 4  | 804516 8468         | YDR171      | <b>0.04</b> | Sgl Pi | 0.569        | 0.6          | 0.385        | 0.38        |
| iYCR034W     | 3  | 191622              | 7993        | <b>0.05</b> | Non F  | 0.097        | 0.424        | 0.772        | 0.38        |
| iYKR101W-0   | 11 | 642143 11391        | YKR10       | <b>0.74</b> | Sgl Pi | 0.722        | 0.62         | 0.968        | 0.38        |
| iYDL211C-1   | 4  | 81459 8260          | YDL211      | <b>0.28</b> | Dbl Pi | 0.665        | 0.622        | 0.202        | 0.38        |
| iYER098W     | 5  | 357789              | 9067        | <b>0.24</b> | Non F  | 0.81         | 0.613        | 0.722        | 0.38        |
| iYFR054C-0   | 6  | 259453 9542         | YFR054      | <b>0.64</b> | Sgl Pi | 0.563        | 0.428        | 0.495        | 0.38        |
| iYMR032W     | 13 | 337353 12084        | YMR03       | <b>0.9</b>  | Sgl Pi | <b>6E-04</b> | 0.433        | 0.455        | 0.38        |
| iYPLWdelta6  | 16 | 63018 13607         | YPL25       | <b>0.82</b> | Dbl Pi | 0.453        | 0.436        | 0.306        | 0.38        |
| iYIL009W     | 9  | 341432 10485        | YIL008      | <b>0.67</b> | Sgl Pi | 0.764        | 0.938        | 0.295        | 0.38        |
| iYBL033C     | 2  | 159649 7533         | YBL033      | <b>0.85</b> | Dbl Pi | 0.005        | 0.886        | 0.972        | 0.38        |
| iYDR500C     | 4  | 1450868 8773        | YDR500      | <b>0.15</b> | Dbl Pi | 0.535        | 0.002        | 0.404        | 0.38        |
| iYERWdelta7  | 5  | <b>176842 9280</b>  | YER012      | <b>0.64</b> | Sgl Pi | <b>0.742</b> | <b>0.883</b> | <b>0.623</b> | <b>0.39</b> |

|              |    |               |        |             |        |              |       |              |      |
|--------------|----|---------------|--------|-------------|--------|--------------|-------|--------------|------|
| iYNL012W     | 14 | 611660        | 12398  | <b>0.29</b> | Non F  | 0.617        | 0.433 | 0.531        | 0.39 |
| iYDR126W     | 4  | 704246 8428   | YDR127 | <b>0.29</b> | Sgl Pi | 0.634        | 0.671 | 0.494        | 0.39 |
| iYDR439W-1   | 4  | 1341595 8718  | YDR440 | <b>0.61</b> | Sgl Pi | 0.552        | 0.473 | 0.007        | 0.39 |
| iYBL013W     | 2  | 203192        | 7512   | <b>0.47</b> | Non F  | 0.016        | 0.59  | 0.886        | 0.39 |
| iYEL030W     | 5  | 96619         | 8862   | <b>0.17</b> | Non F  | 0.644        | 0.494 | 0.343        | 0.39 |
| iYLR070C     | 12 | 275204 11540  | YLR07  | <b>0.3</b>  | Sgl Pi | 0.482        | 0.714 | 0.526        | 0.39 |
| iYML123C     | 13 | 25795 12034   | YML12  | <b>0.44</b> | Sgl Pi | 0.516        | 0.211 | 0.761        | 0.39 |
| iYMR263W     | 13 | 795532 12312  | YMR26  | <b>0.79</b> | Sgl Pi | 0.588        | 0.005 | 0.081        | 0.39 |
| iYDR011W     | 4  | 470405 8314   | YDR012 | <b>0.41</b> | Sgl Pi | 0.496        | 0.683 | 0.463        | 0.39 |
| iYLR127C     | 12 | 398312 11594  | YLR12  | <b>0.77</b> | Dbl Pi | 0.409        | 0.525 | 0.366        | 0.39 |
| iYPR004C     | 16 | 565040 13614  | YPR00  | <b>0.64</b> | Sgl Pi | 0.568        | 0.248 | 0.005        | 0.39 |
| iYER102W     | 5  | 363744 9075   | YER103 | <b>0.6</b>  | Sgl Pi | 0.746        | 0.37  | 0.613        | 0.39 |
| iYDR071C     | 4  | 589386 8378   | YDR071 | <b>0.49</b> | Sgl Pi | 0.021        | 0.666 | 0.325        | 0.39 |
| iYJL137C     | 10 | 155818 10819  | YJL137 | <b>0.59</b> | Sgl Pi | 0.189        | 0.278 | 0.459        | 0.39 |
| iYKR070W     | 11 | 574282        | 11358  | <b>0.11</b> | Non F  | 0.551        | 0.692 | 0.236        | 0.39 |
| iYJL013C     | 10 | 410728 10712  | YJL013 | <b>0.38</b> | Sgl Pi | 0.533        | 0.345 | 0.777        | 0.39 |
| iYNL289W-1   | 14 | 89515 12647   | YNL28  | <b>0.75</b> | Sgl Pi | 0.572        | 0.363 | 0.539        | 0.39 |
| iYPL118W     | 16 | 327648        | 13443  | <b>0.22</b> | Non F  | 0.364        | 0.582 | 0.447        | 0.39 |
| iYERWdelta22 | 5  | 488167        | 9278   | <b>0.74</b> | Non F  | 0.576        | 0.736 | 0.078        | 0.39 |
| iYLR328W     | 12 | 786124 11778  | YLR32  | <b>0.29</b> | Sgl Pi | 0.593        | 0.369 | 0.855        | 0.39 |
| iYNL045W     | 14 | 544979 12427  | YNL04  | <b>0.85</b> | Sgl Pi | 0.005        | 0.46  | 0.447        | 0.39 |
| iYAR047C-1   | 1  | 202572 7480   | YAR047 | <b>0.14</b> | Dbl Pi | NaN          | 0.022 | 0.452        | 0.39 |
| iYKL061W     | 11 | 325788        | 11124  | <b>0.29</b> | Non F  | 0.359        | 0.56  | 0.835        | 0.39 |
| iYER126C     | 5  | 414166 9121   | YER126 | <b>0.69</b> | Dbl Pi | 0.108        | 0.045 | 0.453        | 0.39 |
| iYIR042C     | 9  | 435983 10697  | YIR042 | <b>0.74</b> | Sgl Pi | 0.762        | 0.88  | 0.029        | 0.39 |
| iYOR355W     | 15 | 1006704 13287 | YOR35  | <b>0.27</b> | Sgl Pi | 0.705        | 0.626 | 0.886        | 0.39 |
| iYBL043W     | 2  | 137427        | 7543   | <b>0.68</b> | Non F  | 0.843        | 0.675 | 0.02         | 0.39 |
| iYNL309W     | 14 | 53930         | 12665  | <b>0.15</b> | Non F  | 0.356        | 0.763 | 0.57         | 0.39 |
| iYGR033C     | 7  | 554961 9916   | YGR033 | <b>0.07</b> | Dbl Pi | 0.76         | 0.953 | 0.617        | 0.39 |
| iYPR107C     | 16 | 742073 13703  | YPR10  | <b>0.75</b> | Dbl Pi | 0.02         | 0.099 | 0.467        | 0.39 |
| iYDR124W     | 4  | 701290        | 8426   | <b>0.1</b>  | Non F  | 0.36         | 0.692 | 0.516        | 0.39 |
| iYNL059C     | 14 | 514936 12440  | YNL05  | <b>0.7</b>  | Sgl Pi | <b>3E-04</b> | 0.033 | 0.002        | 0.39 |
| iYLR333C     | 12 | 795884 11783  | YLR33  | <b>0.04</b> | Sgl Pi | 0.162        | 0.96  | 0.075        | 0.39 |
| iY(GUA)M2    | 13 | 838007 7374   | YMR28  | <b>0.69</b> | Dbl Pi | 0.507        | 0.447 | 0.747        | 0.39 |
| iYDL098C     | 4  | 285170 8153   | YDL098 | <b>0.64</b> | Sgl Pi | 0.611        | 0.378 | 0.594        | 0.39 |
| iYHL001W     | 8  | 105088 10180  | YHR00  | <b>0.25</b> | Sgl Pi | 0.361        | 0.761 | 0.462        | 0.39 |
| iYDR164C     | 4  | 784217 8460   | YDR164 | <b>0.94</b> | Dbl Pi | 0.304        | 0.584 | <b>5E-04</b> | 0.39 |
| iYKR067W     | 11 | 569770        | 11355  | <b>0.12</b> | Non F  | 0.534        | 0.648 | 0.346        | 0.39 |
| iYJL128C-0   | 10 | 179787 10810  | YJL128 | <b>0.67</b> | Sgl Pi | NaN          | 0.497 | 0.458        | 0.39 |
| iYOL033W     | 15 | 265112 12813  | YOL03  | <b>0.58</b> | Sgl Pi | 0.798        | 0.646 | 0.453        | 0.39 |
| iYDL058W     | 4  | 351023 8118   | YDL057 | <b>0.46</b> | Sgl Pi | 0.704        | 0.636 | 0.433        | 0.39 |
| iYFL005W     | 6  | 130961 9292   | YFL004 | <b>0.52</b> | Sgl Pi | 0.638        | 0.936 | 0.5          | 0.39 |
| iYER066W     | 5  | 290799        | 9001   | <b>0.86</b> | Non F  | 0.7          | 0.284 | 0.581        | 0.39 |
| iYMR233W     | 13 | 739856 12283  | YMR23  | <b>0.77</b> | Sgl Pi | 0.413        | 0.072 | 0.602        | 0.39 |
| iYAL029C     | 1  | 92268 7402    | YAL029 | <b>0.9</b>  | Dbl Pi | 0.835        | 0.251 | 0.436        | 0.39 |
| iYHR090C     | 8  | 284616 10328  | YHR09  | <b>0.9</b>  | Sgl Pi | <b>2E-04</b> | 0.001 | NaN          | 0.39 |
| YFLWdelta1   | 6  | 100583 14060  | YFL02  | <b>0.75</b> | Sgl Pi | 0.651        | 0.779 | 0.331        | 0.39 |
| iYDR254W     | 4  | 966486        | 8545   | <b>0.18</b> | Non F  | 0.557        | 0.644 | 0.242        | 0.39 |
| YCRWdelta11  | 3  | 169574 14027  | YCR02  | <b>0.71</b> | Sgl Pi | 0.728        | 0.289 | 0.797        | 0.4  |
| iYKL006C-A   | 11 | 430257 11071  | YKL00  | <b>0.06</b> | Dbl Pi | 0.739        | 0.953 | 0.418        | 0.4  |
| iYIL079C     | 9  | 212000 10552  | YIL079 | <b>0.89</b> | Dbl Pi | 0.013        | 0.746 | 0.458        | 0.4  |

|             |    |         |       |        |      |        |       |       |       |     |
|-------------|----|---------|-------|--------|------|--------|-------|-------|-------|-----|
| i{k(CUU)E1  | 5  | 135486  | 7203  | YEL010 | 0.3  | Sgl Pi | 0.743 | 0.728 | 0.999 | 0.4 |
| iYLR276C    | 12 | 696828  | 11733 | YLR27  | 0.94 | Sgl Pi | 0.358 | 0.579 | 0.236 | 0.4 |
| iYAL019W    | 1  | 118337  |       | 7392   | 0.2  | Non F  | 0.783 | 0.381 | 0.477 | 0.4 |
| iYLR369W    | 12 | 861513  |       | 11811  | 0.25 | Non F  | 0.473 | 0.513 | 0.41  | 0.4 |
| iYGR202C    | 7  | 904729  | 10074 | YGR20  | 0.25 | Dbl Pi | 0.106 | 0.928 | 0.369 | 0.4 |
| iYNL004W    | 14 | 624627  |       | 12390  | 0.27 | Non F  | 0.051 | 0.472 | 0.493 | 0.4 |
| iYLL028W    | 12 | 86555   | 11433 | YLL02  | 0.38 | Sgl Pi | 0.837 | 0.452 | 0.364 | 0.4 |
| iYML086C    | 13 | 97367   | 12001 | YML08  | 0.66 | Sgl Pi | 0.79  | 0.575 | 0.353 | 0.4 |
| iSNR7-S     | 7  | 939661  | 7096  | YGR22  | 0.75 | Dbl Pi | 0.021 | 0.528 | 0.542 | 0.4 |
| iYPL163C    | 16 | 242699  | 13486 | YPL16  | 0.28 | Sgl Pi | 0.612 | 0.028 | 0.416 | 0.4 |
| iYIL150C    | 9  | 62729   | 10619 | YIL150 | 0.73 | Sgl Pi | 0.606 | 0.625 | 0.411 | 0.4 |
| iYLR010C    | 12 | 167794  | 11481 | YLR01  | 0.63 | Dbl Pi | 0.483 | 0.622 | 0.344 | 0.4 |
| iYOR338W    | 15 | 957977  |       | 13270  | 0.71 | Non F  | 0.746 | 0.352 | 0.414 | 0.4 |
| iYGR195W    | 7  | 889608  |       | 10067  | 0.18 | Non F  | 0.515 | 0.505 | 0.459 | 0.4 |
| iYPL148C    | 16 | 272811  | 13471 | YPL14  | 0.68 | Dbl Pi | 0.719 | 0.052 | 0.468 | 0.4 |
| iYDR367W    | 4  | 1213600 | 8652  | YDR36  | 0.79 | Sgl Pi | 0.783 | 0.594 | 0.571 | 0.4 |
| iYBR297W    | 2  | 801875  |       | 7888   | 0.54 | Non F  | 0.621 | 0.876 | 0.572 | 0.4 |
| iYNL300W    | 14 | 66038   | 12657 | YNL29  | 0.92 | Sgl Pi | 0.577 | 0.92  | 0.999 | 0.4 |
| iYKR060W    | 11 | 556982  | 11348 | YKR06  | 0.72 | Sgl Pi | 0.631 | 0.173 | 0.542 | 0.4 |
| iYLR088W    | 12 | 317937  |       | 11557  | 0.09 | Non F  | 0.599 | 0.654 | 0.297 | 0.4 |
| iYEL073C-2  | 5  | 10019   | 8906  | YEL073 | 0.59 | Dbl Pi | 0.762 | 0.328 | 0.064 | 0.4 |
| iYHLCdelta1 | 8  | 92106   |       | 10230  | 0.36 | Non F  | 0.337 | 0.309 | 0.595 | 0.4 |
| iYJL148W    | 10 | 140829  |       | 10829  | 0.05 | Non F  | 0.838 | 0.714 | 0.462 | 0.4 |
| iYPR002W    | 16 | 559925  |       | 13612  | 0.74 | Non F  | 0.669 | 0.578 | 0.534 | 0.4 |
| iYNL259C    | 14 | 157878  | 12620 | YNL25  | 0.38 | Sgl Pi | 0.459 | 0.313 | 0.468 | 0.4 |
| iYFL034C-A  | 6  | 64931   | 9348  | YFL034 | 0.55 | Dbl Pi | 0.489 | 0.741 | 0.823 | 0.4 |
| iYDR493W    | 4  | 1436580 | 8766  | YDR494 | 0.9  | Sgl Pi | 0.116 | 0.111 | 0.192 | 0.4 |
| iYNL271C    | 14 | 135386  | 12630 | YNL27  | 0.9  | Sgl Pi | 0.739 | 0.229 | 0.002 | 0.4 |
| iYOL035C    | 15 | 259105  | 12815 | YOL03  | 0.39 | Dbl Pi | 0.217 | 0.849 | 0.465 | 0.4 |
| iYLR287C-A  | 12 | 713162  | 11742 | YLR28  | 0.42 | Sgl Pi | 0.902 | 0.511 | 0.572 | 0.4 |
| iYGL050W    | 7  | 406593  |       | 9614   | 0.19 | Non F  | 0.562 | 0.705 | 0.444 | 0.4 |
| iYCR020C-A  | 3  | 155097  | 7977  | YCR020 | 0.88 | Dbl Pi | 0.625 | 0.58  | NaN   | 0.4 |
| i{r(UCU)J2  | 10 | 374259  | 7299  | YJL039 | 0.35 | Sgl Pi | 0.697 | 0.632 | 0.997 | 0.4 |
| iYDR142C    | 4  | 741606  | 8442  | YDR142 | 0.48 | Sgl Pi | 0.297 | 0.047 | 0.028 | 0.4 |
| iYNL313C    | 14 | 48035   | 12668 | YNL31  | 0.93 | Dbl Pi | 3E-04 | 0.334 | 0.443 | 0.4 |
| iYBL018C    | 2  | 186422  | 7517  | YBL018 | 0.74 | Sgl Pi | 0.021 | 0.593 | 0.537 | 0.4 |
| iYER026C    | 5  | 208519  | 8945  | YER026 | 0.6  | Sgl Pi | 0.002 | 0.6   | 0.179 | 0.4 |
| iYIL125W    | 9  | 125721  | 10595 | YIL124 | 0.76 | Sgl Pi | 0.571 | 0.916 | 0.423 | 0.4 |
| iYBL063W    | 2  | 105184  | 7560  | YBL062 | 0.05 | Sgl Pi | 0.444 | 0.349 | NaN   | 0.4 |
| iYLR425W    | 12 | 986826  | 11864 | YLR42  | 0.76 | Sgl Pi | 0.726 | 0.748 | 0.491 | 0.4 |
| iYPR156C    | 16 | 839766  | 13747 | YPR15  | 0.24 | Dbl Pi | 0.836 | 0.467 | 0.514 | 0.4 |
| iYALCdelta2 | 1  | 139006  | 7453  | YAL007 | 0.39 | Dbl Pi | 0.615 | 0.595 | 0.903 | 0.4 |
| iYLLCdelta1 | 12 | 92375   | 11471 | YLL02  | 0.38 | Sgl Pi | 0.677 | 0.772 | 0.524 | 0.4 |
| i{E(UUC)G1  | 7  | 328703  |       | 7138   | 0.21 | Non F  | 0.753 | 0.487 | NaN   | 0.4 |
| iYOR188W    | 15 | 689167  | 13134 | YOR18  | 0.67 | Sgl Pi | 0.666 | 0.902 | 0.067 | 0.4 |
| i{C(GCA)P1  | 16 | 435945  |       | 7114   | 0.2  | Non F  | 0.722 | 0.637 | 0.545 | 0.4 |
| iYOL083W-1  | 15 | 167843  | 12859 | YOL08  | 0.59 | Sgl Pi | 0.621 | 0.332 | 0.628 | 0.4 |
| iYJR132W    | 10 | 672351  | 11027 | YJR13  | 0.8  | Sgl Pi | 0.716 | 0.049 | 0.689 | 0.4 |
| iYPL209C    | 16 | 157588  | 13529 | YPL20  | 0.93 | Dbl Pi | 0.615 | 0.187 | 0.225 | 0.4 |
| iYLR270W    | 12 | 682244  | 11727 | YLR27  | 0.51 | Sgl Pi | 0.744 | 0.463 | 0.461 | 0.4 |
| iYOR045W    | 15 | 414037  |       | 12998  | 0.25 | Non F  | 0.058 | 0.207 | 0.959 | 0.4 |



|              |    |         |       |        |             |        |       |       |       |      |
|--------------|----|---------|-------|--------|-------------|--------|-------|-------|-------|------|
| iYNR007C     | 14 | 640122  | 12705 | YNR00  | <b>0.88</b> | Dbl Pi | 0.59  | 0.622 | 0.227 | 0.4  |
| itL(UAA)J    | 10 | 424198  | 7237  | YJL006 | <b>0.62</b> | Dbl Pi | 0.74  | 0.634 | 0.748 | 0.4  |
| iYPR061C     | 16 | 676878  | 13665 | YPR06  | <b>0.99</b> | Dbl Pi | 0.647 | 0.578 | NaN   | 0.41 |
| iYPL211W     | 16 | 154039  |       | 13531  | <b>0.33</b> | Non F  | 0.405 | 0.079 | 0.277 | 0.41 |
| iYFR053C-2   | 6  | 257583  | 9540  | YFR053 | <b>0.39</b> | Sgl Pi | 0.699 | 0.198 | 0.445 | 0.41 |
| iYDR012W     | 4  | 472983  | 8315  | YDR013 | <b>0.12</b> | Sgl Pi | 0.694 | 0.547 | 0.821 | 0.41 |
| iYOR218C     | 15 | 751925  | 13160 | YOR21  | <b>0.03</b> | Sgl Pi | 0.31  | 0.7   | 0.337 | 0.41 |
| iYDRWdelta25 | 4  | 1151362 |       | 8829   | <b>0.41</b> | Non F  | 0.869 | 0.168 | 0.967 | 0.41 |
| iYFR032C     | 6  | 222940  | 9494  | YFR032 | <b>0.32</b> | Sgl Pi | 0.725 | 0.459 | 0.951 | 0.41 |
| iYDR079W     | 4  | 603419  | 8386  | YDR08C | <b>0.82</b> | Sgl Pi | 0.609 | 0.834 | 0.98  | 0.41 |
| iYPR188C     | 16 | 912466  | 13777 | YPR18  | <b>0.63</b> | Dbl Pi | 0.402 | 0.574 | 0.341 | 0.41 |
| iYOL098C     | 15 | 135824  | 12874 | YOL09  | <b>0.63</b> | Sgl Pi | 0.584 | 0.539 | 0.337 | 0.41 |
| iYJR150C-1   | 10 | 710686  | 11045 | YJR15  | <b>0.77</b> | Sgl Pi | 0.743 | 0.498 | 0.436 | 0.41 |
| iYNL039W     | 14 | 556842  | 12422 | YNL03  | <b>0.02</b> | Sgl Pi | 0.271 | 0.736 | 0.628 | 0.41 |
| itN(GUU)N1   | 14 | 102776  | 7259  | YNL284 | <b>0.37</b> | Sgl Pi | 0.847 | 0.748 | 0.969 | 0.41 |
| iYHR185C     | 8  | 475330  | 10419 | YHR18  | <b>0.1</b>  | Sgl Pi | 0.563 | 0.495 | 0.772 | 0.41 |
| iYBR175W     | 2  | 583309  | 7778  | YBR176 | <b>0.65</b> | Sgl Pi | 0.406 | 0.747 | 0.558 | 0.41 |
| iYJL202C     | 10 | 54278   | 10877 | YJL20  | <b>0.66</b> | Dbl Pi | 1E-04 | 0.314 | NaN   | 0.41 |
| itY(GUA)D    | 4  | 946382  | 7366  | YDR242 | <b>0.38</b> | Sgl Pi | 0.627 | 0.1   | 0.959 | 0.41 |
| itY(GUA)D    | 4  | 946382  | 7366  | YDR242 | <b>0.38</b> | Sgl Pi | 0.627 | 0.1   | 0.959 | 0.41 |
| iYOR132W     | 15 | 574843  | 13081 | YOR13  | <b>0.59</b> | Sgl Pi | 0.75  | 0.345 | 0.433 | 0.41 |
| iYAL008W     | 1  | 137512  |       | 7381   | <b>0.23</b> | Non F  | 0.776 | 0.564 | 0.41  | 0.41 |
| itE(UUC)K    | 11 | 141091  | 7142  | YKL165 | <b>0.39</b> | Sgl Pi | 0.717 | 0.883 | 0.852 | 0.41 |
| iYNR060W     | 14 | 742095  |       | 12759  | <b>0.55</b> | Non F  | 0.755 | 0.807 | 0.224 | 0.41 |
| iYGR137W     | 7  | 763242  |       | 10016  | <b>0.26</b> | Non F  | 0.708 | 0.046 | 0.097 | 0.41 |
| iYGR130C     | 7  | 753836  | 10010 | YGR13  | <b>0.87</b> | Dbl Pi | 0.475 | 0.106 | 0.917 | 0.41 |
| iYGR251W     | 7  | 996224  | 10121 | YGR25  | <b>0.85</b> | Sgl Pi | 0.001 | 0.562 | 0.504 | 0.41 |
| iYLR336C     | 12 | 802389  | 11785 | YLR33  | <b>0.7</b>  | Sgl Pi | 0.773 | 0.405 | 0.287 | 0.41 |
| iYNR037C     | 14 | 695319  | 12737 | YNR03  | <b>0.99</b> | Dbl Pi | 2E-04 | 0.705 | 0.993 | 0.41 |
| iYFR031C     | 6  | 220142  | 9490  | YFR031 | <b>0.58</b> | Sgl Pi | 0.49  | 0.091 | 0.826 | 0.41 |
| iYJL094C     | 10 | 254123  | 10780 | YJL09  | <b>0.66</b> | Sgl Pi | 0.595 | 0.295 | 0.345 | 0.41 |
| iYNR029C     | 14 | 678471  | 12727 | YNR02  | <b>0.81</b> | Dbl Pi | 0.796 | 0.703 | 0.547 | 0.41 |
| iYERCtau2    | 5  | 354724  | 9262  | YER097 | <b>0.41</b> | Sgl Pi | 0.718 | 0.574 | 0.764 | 0.41 |
| iYBR279W     | 2  | 762557  |       | 7868   | <b>0.17</b> | Non F  | 0.124 | 0.533 | 0.481 | 0.41 |
| iYGR079W     | 7  | 641852  | 9958  | YGR08C | <b>0.57</b> | Sgl Pi | 0.015 | 0.577 | 0.472 | 0.41 |
| iYDL077C     | 4  | 320128  | 8134  | YDL077 | <b>0.7</b>  | Sgl Pi | 0.483 | 0.845 | 0.537 | 0.41 |
| iYNL153C     | 14 | 346061  | 12527 | YNL15  | <b>0.84</b> | Dbl Pi | 0.076 | 0.592 | 0.523 | 0.41 |
| iYMR097C     | 13 | 460535  | 12144 | YMR09  | <b>0.76</b> | Sgl Pi | 0.565 | 0.676 | 0.36  | 0.41 |
| iYGR207C     | 7  | 911610  | 10079 | YGR20  | <b>0.67</b> | Dbl Pi | 0.544 | 0.728 | 0.529 | 0.41 |
| iYPL030W     | 16 | 495227  | 13364 | YPL02  | <b>0.87</b> | Sgl Pi | 0.516 | 0.383 | 0.376 | 0.41 |
| iYGR034W     | 7  | 556652  |       | 9917   | <b>0.17</b> | Non F  | 0.764 | 0.608 | 0.36  | 0.41 |
| iYEL011W     | 5  | 135240  | 8843  | YEL010 | <b>0.27</b> | Sgl Pi | 0.602 | 0.583 | 0.621 | 0.41 |
| iYKL091C     | 11 | 270283  | 11152 | YKL09  | <b>0.54</b> | Dbl Pi | 0.718 | 0.442 | 0.345 | 0.41 |
| iYDR374C     | 4  | 1224380 | 8659  | YDR374 | <b>0.95</b> | Sgl Pi | NaN   | 0.779 | 0.694 | 0.41 |
| iYML022W     | 13 | 229498  |       | 11942  | <b>0.26</b> | Non F  | 0.437 | 0.463 | 0.493 | 0.41 |
| iYEL029C     | 5  | 97813   | 8861  | YEL029 | <b>0.67</b> | Dbl Pi | 0.6   | 0.307 | 0.868 | 0.41 |
| iYOR314W     | 15 | 903356  | 13248 | YOR31  | <b>0.28</b> | Sgl Pi | 0.836 | 2E-06 | 0.593 | 0.41 |
| iYBR298C     | 2  | 804440  | 7889  | YBR298 | <b>0.89</b> | Dbl Pi | 0.595 | 0.421 | 0.499 | 0.41 |
| iYER092W     | 5  | 343228  |       | 9055   | <b>0.51</b> | Non F  | 0.003 | 0.501 | 0.454 | 0.41 |
| iYMR005W     | 13 | 277210  |       | 12055  | <b>0.19</b> | Non F  | 0.564 | 0.875 | 0.32  | 0.41 |
| iYOR181W     | 15 | 677845  |       | 13127  | <b>0.21</b> | Non F  | 0.664 | 0.714 | 0.577 | 0.41 |

|            |    |         |       |        |             |        |              |              |              |             |
|------------|----|---------|-------|--------|-------------|--------|--------------|--------------|--------------|-------------|
| iYBR011C   | 2  | 257927  | 7618  | YBR011 | <b>0.63</b> | Sgl Pi | <b>2E-04</b> | 0.349        | 0.494        | 0.41        |
| iYGL259W-1 | 7  | 10023   | 9867  | YGL258 | <b>0.85</b> | Sgl Pi | 0.803        | 0.655        | 0.006        | 0.41        |
| iYDR539W-2 | 4  | 1515961 |       | 8811   | <b>0.79</b> | Non F  | 0.642        | 0.157        | 0.348        | 0.41        |
| iYMR128W   | 13 | 527484  | 12176 | YMR12  | <b>0.99</b> | Sgl Pi | <b>5E-04</b> | 0.406        | NaN          | 0.41        |
| iYPR096C   | 16 | 725136  | 13694 | YPR09  | <b>0.78</b> | Dbl Pi | 0.519        | 0.512        | 0.422        | 0.41        |
| iYOR126C   | 15 | 560680  | 13075 | YOR12  | <b>0.58</b> | Dbl Pi | 0.66         | 0.694        | 0.01         | 0.41        |
| iYKL079W   | 11 | 288201  | 11141 | YKL07  | <b>0.82</b> | Sgl Pi | <b>5E-04</b> | 0.649        | 0.091        | 0.41        |
| iYBL024W   | 2  | 174557  |       | 7523   | <b>0.12</b> | Non F  | 0.625        | 0.749        | NaN          | 0.41        |
| iYBL024W   | 2  | 174557  |       | 7523   | <b>0.12</b> | Non F  | 0.625        | 0.749        | NaN          | 0.41        |
| iYER185W   | 5  | 560374  |       | 9237   | <b>0.86</b> | Non F  | 0.59         | 0.307        | 0.535        | 0.41        |
| iYDR527W-1 | 4  | 1493499 | 8797  | YDR52  | <b>0.6</b>  | Sgl Pi | NaN          | 0.361        | 0.753        | 0.41        |
| iYPL220W   | 16 | 136454  | 13540 | YPL21  | <b>0.58</b> | Sgl Pi | 0.528        | 0.59         | 0.613        | 0.41        |
| itC(GCA)P2 | 16 | 775822  | 7115  | YPR12  | <b>0.44</b> | Dbl Pi | <b>0.86</b>  | <b>0.863</b> | <b>0.712</b> | <b>0.41</b> |
| iYBR128C   | 2  | 494058  | 7731  | YBR12  | <b>0.88</b> | Sgl Pi | 0.537        | 0.64         | 0.322        | 0.41        |
| iYPR132W   | 16 | 795747  |       | 13726  | <b>0.28</b> | Non F  | 0.169        | 0.84         | 0.773        | 0.41        |
| iYMR048W   | 13 | 367920  |       | 12099  | <b>0.27</b> | Non F  | 0.612        | 0.462        | 0.318        | 0.41        |
| iYDR169C-1 | 4  | 795032  | 8466  | YDR16  | <b>0.88</b> | Sgl Pi | 0.7          | 0.67         | 0.041        | 0.41        |
| iYOL064C   | 15 | 207172  | 12841 | YOL06  | <b>0.68</b> | Sgl Pi | 0.586        | 0.478        | 0.558        | 0.42        |
| iYHR204W   | 8  | 508709  | 10436 | YHR20  | <b>0.74</b> | Sgl Pi | 0.794        | 0.757        | 0.338        | 0.42        |
| iYGL130W   | 7  | 267521  |       | 9689   | <b>0.09</b> | Non F  | 0.676        | 0.548        | 0.567        | 0.42        |
| iYKL171W   | 11 | 130261  | 11230 | YKL17  | <b>0.89</b> | Sgl Pi | 0.546        | 0.006        | 0.743        | 0.42        |
| iYIL084C   | 9  | 203255  | 10554 | YIL084 | <b>0.8</b>  | Sgl Pi | 0.626        | 0.572        | 0.398        | 0.42        |
| iYGL004C   | 7  | 491952  | 9567  | YGL004 | <b>0.55</b> | Sgl Pi | 0.74         | 0.224        | 0.463        | 0.42        |
| iYPR186C   | 16 | 911003  | 13775 | YPR18  | <b>0.97</b> | Dbl Pi | <b>6E-04</b> | 0.402        | 0.538        | 0.42        |
| iYCR037C   | 3  | 197179  | 7996  | YCR037 | <b>0.49</b> | Sgl Pi | 0.465        | NaN          | 0.549        | 0.42        |
| iYCR037C   | 3  | 197179  | 7996  | YCR037 | <b>0.49</b> | Sgl Pi | 0.465        | NaN          | 0.549        | 0.42        |
| iYMR180C   | 13 | 623223  | 12228 | YMR18  | <b>0.3</b>  | Sgl Pi | 0.685        | 0.868        | 0.333        | 0.42        |
| iYJR007W   | 10 | 451621  | 10917 | YJR00  | <b>0.43</b> | Sgl Pi | 0.576        | 0.723        | 0.429        | 0.42        |
| iYGL145W   | 7  | 232352  |       | 9703   | <b>0.03</b> | Non F  | 0.561        | 0.597        | 0.468        | 0.42        |
| iYDR042C   | 4  | 541190  | 8349  | YDR042 | <b>0.14</b> | Sgl Pi | <b>0.672</b> | <b>0.606</b> | <b>0.596</b> | <b>0.42</b> |
| iYIL016W   | 9  | 321945  | 10493 | YIL015 | <b>0.36</b> | Sgl Pi | 0.709        | 3E-04        | 0.078        | 0.42        |
| iYML042W   | 13 | 194795  |       | 11959  | <b>0.25</b> | Non F  | 0.712        | 0.547        | 0.373        | 0.42        |
| iYPR019W   | 16 | 599551  | 13631 | YPR02  | <b>0.49</b> | Sgl Pi | 0.392        | 0.754        | 0.359        | 0.42        |
| iYBR110W   | 2  | 460185  |       | 7716   | <b>0.69</b> | Non F  | 0.549        | 0.41         | 0.991        | 0.42        |
| iYDR285W   | 4  | 1035066 |       | 8574   | <b>0.28</b> | Non F  | 0.145        | 0.544        | 0.68         | 0.42        |
| iYDR283C   | 4  | 1030046 | 8572  | YDR283 | <b>0.92</b> | Sgl Pi | <b>7E-05</b> | 0.479        | 0.001        | 0.42        |
| iYGR016W   | 7  | 522816  | 9903  | YGR017 | <b>0.65</b> | Sgl Pi | 0.686        | 0.568        | 0.305        | 0.42        |
| iYCR097W   | 3  | 294327  |       | 8044   | <b>0.29</b> | Non F  | 0.161        | 0.476        | 0.374        | 0.42        |
| iYDR045C   | 4  | 548290  | 8354  | YDR045 | <b>0.6</b>  | Sgl Pi | 0.747        | 0.821        | 0.013        | 0.42        |
| iYPL147W   | 16 | 275854  |       | 13470  | <b>0.31</b> | Non F  | 0.405        | 0.847        | 0.442        | 0.42        |
| iYMR183C   | 13 | 627816  | 12232 | YMR18  | <b>0.97</b> | Dbl Pi | 0.726        | <b>1E-07</b> | 0.182        | 0.42        |
| iYFL055W-1 | 6  | 19807   |       | 9396   | <b>0.33</b> | Non F  | 0.693        | 0.794        | 0.363        | 0.42        |
| iYOR240W   | 15 | 786748  | 13180 | YOR24  | <b>0.64</b> | Sgl Pi | 0.452        | 0.745        | 0.534        | 0.42        |
| iYOL013W-A | 15 | 300990  |       | 12793  | <b>0.16</b> | Non F  | <b>0.602</b> | <b>0.915</b> | <b>0.689</b> | <b>0.42</b> |
| iYERCtau3  | 5  | 436605  |       | 9264   | <b>0.2</b>  | Non F  | 0.815        | 0.804        | 0.004        | 0.42        |
| itE(UUC)B  | 2  | 645185  | 7131  | YBR210 | <b>0.84</b> | Sgl Pi | <b>0.459</b> | <b>0.469</b> | <b>0.704</b> | <b>0.42</b> |
| iYPL107W   | 16 | 349845  |       | 13434  | <b>0.16</b> | Non F  | 0.47         | 0.633        | 0.398        | 0.42        |
| iYOR133W   | 15 | 577632  |       |        | <b>0.47</b> | Sgl Pi | 0.722        | 0.979        | 0.435        | 0.42        |
| iYMR029C   | 13 | 330225  | 12081 | YMR02  | <b>0.94</b> | Dbl Pi | 0.619        | 0.94         | 0.143        | 0.42        |
| iYPR040W   | 16 | 648371  | 13649 | YPR04  | <b>0.66</b> | Sgl Pi | 0.681        | 0.357        | 0.5          | 0.42        |
| iYMR014W   | 13 | 300415  |       | 12066  | <b>0.19</b> | Non F  | 0.745        | 0.787        | 0.435        | 0.42        |

#N/A

|             |    |         |       |         |             |     |    |       |       |       |      |
|-------------|----|---------|-------|---------|-------------|-----|----|-------|-------|-------|------|
| iYPL191C    | 16 | 184674  | 13513 | YPL19   | <b>0.15</b> | Sgl | Pi | 0.717 | 0.562 | 0.491 | 0.42 |
| iYDR001C    | 4  | 452463  | 8306  | YDR001  | <b>0.46</b> | Dbl | Pi | 0.004 | 0.649 | NaN   | 0.42 |
| itK(CUU)D2  | 4  | 1352523 | 7202  | YDR445  | <b>0.04</b> | Dbl | Pi | 0.574 | 0.647 | 0.492 | 0.42 |
| iYML010C-B  | 13 | 251006  | 11930 | YML01   | <b>0.77</b> | Sgl | Pi | 0.212 | 0.627 | 0.646 | 0.42 |
| iYNR055C    | 14 | 730186  | 12755 | YNR05   | <b>0.58</b> | Sgl | Pi | 0.815 | 0.605 | 0.38  | 0.42 |
| iYOLWsigma2 | 15 | 354452  | 12951 | YOR01   | <b>0.6</b>  | Sgl | Pi | 0.887 | NaN   | NaN   | 0.42 |
| itP(UGG)L-0 | 12 | 92647   | 7269  | YLL025' | <b>0.56</b> | Sgl | Pi | 0.881 | 0.445 | 0.972 | 0.42 |
| iYPR062W    | 16 | 677622  |       | 13666   | <b>0.37</b> | Non | F  | 0.628 | 0.335 | NaN   | 0.42 |
| iYJL199C    | 10 | 60179   | 10874 | YJL199  | <b>0.96</b> | Dbl | Pi | 0.764 | 0.031 | 0.577 | 0.42 |
| iYAR002W    | 1  | 153869  |       | 7456    | <b>0.09</b> | Non | F  | 0.698 | 0.667 | 0.7   | 0.42 |
| iYNL183C    | 14 | 295509  | 12554 | YNL18   | <b>0.84</b> | Sgl | Pi | 9E-04 | 0.454 | 0.047 | 0.42 |
| iYML087C    | 13 | 95367   | 12002 | YML08   | <b>0.74</b> | Sgl | Pi | 0.462 | 0.136 | 0.46  | 0.43 |
| iYGL256W-2  | 7  | 18659   | 9857  | YGL255  | <b>0.58</b> | Sgl | Pi | 0.682 | 0.74  | 0.125 | 0.43 |
| iYOR121C    | 15 | 552111  | 13070 | YOR12   | <b>0.02</b> | Sgl | Pi | 0.604 | 0.678 | 0.025 | 0.43 |
| iYJR153W-0  | 10 | 723578  | 11050 | YJR15   | <b>0.68</b> | Sgl | Pi | 0.759 | 0.511 | 0.059 | 0.43 |
| itA(UGC)L   | 12 | 214956  | 7112  | YLR035  | <b>0.07</b> | Sgl | Pi | 0.478 | 0.668 | 0.737 | 0.43 |
| iYNR059W    | 14 | 738540  | 12758 | YNR05   | <b>0.55</b> | Sgl | Pi | 0.488 | 0.595 | 0.211 | 0.43 |
| iYNL167C    | 14 | 321350  | 12542 | YNL16   | <b>0.66</b> | Sgl | Pi | 0.821 | 0.821 | 0.753 | 0.43 |
| iYBR220C    | 2  | 664636  | 7820  | YBR22C  | <b>0.78</b> | Sgl | Pi | 0.784 | 0.507 | 0.469 | 0.43 |
| iYDR339C    | 4  | 1150497 | 8624  | YDR335  | <b>0.38</b> | Dbl | Pi | 7E-04 | 0.445 | 0.789 | 0.43 |
| iYNLWdelta4 | 14 | 525049  | 12699 | YNL05   | <b>0.98</b> | Sgl | Pi | 0.64  | 0.475 | 0.519 | 0.43 |
| iYNR010W    | 14 | 644188  |       | 12708   | <b>0.21</b> | Non | F  | 0.342 | 0.467 | 0.359 | 0.43 |
| iYLR106C    | 12 | 363739  | 11573 | YLR10   | <b>0.88</b> | Dbl | Pi | 0.764 | 0.888 | 0.062 | 0.43 |
| iYML106W    | 13 | 57442   |       | 12017   | <b>0.14</b> | Non | F  | 0.69  | 0.971 | 0.171 | 0.43 |
| iTLC1       | 2  | 308840  | 7242  | YBR035  | <b>0.15</b> | Sgl | Pi | 0.685 | 0.649 | 0.265 | 0.43 |
| iYKL022C    | 11 | 396874  | 11088 | YKL02   | <b>0.25</b> | Sgl | Pi | 0.04  | 0.596 | 0.462 | 0.43 |
| iYNL337W    | 14 | 7425    | 12690 | YNL33   | <b>0.43</b> | Sgl | Pi | 0.256 | 0.171 | 0.751 | 0.43 |
| iYMR176W    | 13 | 615959  | 12224 | YMR17   | <b>0.74</b> | Sgl | Pi | 0.751 | 0.313 | 0.108 | 0.43 |
| iYPL106C    | 16 | 352302  | 13433 | YPL10   | <b>0.46</b> | Sgl | Pi | 0.649 | 0.589 | 0.317 | 0.43 |
| iYMR325W    | 13 | 923011  |       | 12374   | <b>0.26</b> | Non | F  | 0.476 | 0.818 | 0.255 | 0.43 |
| iYDR231C    | 4  | 926889  | 8524  | YDR231  | <b>0.52</b> | Dbl | Pi | 0.821 | 0.123 | 0.928 | 0.43 |
| YALCdelta2  | 1  | 138859  | 14001 | YAL00   | <b>0.47</b> | Dbl | Pi | 0.496 | 0.658 | 0.521 | 0.43 |
| itL(UAA)B1  | 2  | 9653    |       | 7234    | <b>0.26</b> | Non | F  | 0.531 | 0.655 | 0.967 | 0.43 |
| iYGL077C    | 7  | 363903  | 9637  | YGL077  | <b>0.34</b> | Sgl | Pi | 0.009 | 0.89  | 0.371 | 0.43 |
| iYKR063C    | 11 | 561939  | 11351 | YKR06   | <b>0.9</b>  | Dbl | Pi | 0.551 | 0.712 | 0.356 | 0.43 |
| itG(GCC)G1  | 7  | 845704  |       | 7167    | <b>0.62</b> | Non | F  | 0.47  | 0.574 | 0.744 | 0.43 |
| itM(CAU)P   | 16 | 338921  | 7252  | YPL112  | <b>0.06</b> | Dbl | Pi | 0.02  | 0.012 | 0.999 | 0.43 |
| iYGL047W    | 7  | 412166  | 9611  | YGL046  | <b>0.3</b>  | Sgl | Pi | NaN   | 0.516 | 0.299 | 0.43 |
| iYPR155C    | 16 | 837421  | 13746 | YPR15   | <b>0.58</b> | Sgl | Pi | 0.752 | 0.608 | 0.236 | 0.43 |
| iYOL077C    | 15 | 186729  | 12853 | YOL07   | <b>0.97</b> | Dbl | Pi | 2E-04 | 0.274 | 0.816 | 0.43 |
| iYNL318C    | 14 | 40313   | 12672 | YNL31   | <b>0.62</b> | Dbl | Pi | 0.427 | 0.595 | 0.333 | 0.43 |
| iYPL028W    | 16 | 499289  | 13362 | YPL02   | <b>0.48</b> | Sgl | Pi | 0.562 | 0.59  | 0.004 | 0.43 |
| iYEL073C-4  | 5  | 12470   | 8908  | YEL073  | <b>0.75</b> | Dbl | Pi | 0.541 | 0.608 | 0.849 | 0.43 |
| iYPL038W    | 16 | 481134  |       | 13370   | <b>0.68</b> | Non | F  | 0.531 | 0.746 | 0.773 | 0.43 |
| iYJR157W-1  | 10 | 731353  | 11056 | YJR15   | <b>0.26</b> | Sgl | Pi | 0.843 | 0.926 | 0.507 | 0.43 |
| iYGL029W    | 7  | 440453  |       | 9592    | <b>0.24</b> | Non | F  | 0.68  | 0.745 | 0.451 | 0.43 |
| iYOR385W    | 15 | 1065912 | 13318 | YOR38   | <b>0.52</b> | Sgl | Pi | 0.789 | 0.755 | 0.347 | 0.43 |
| iYLR172C    | 12 | 502149  | 11641 | YLR17   | <b>0.88</b> | Dbl | Pi | 0.451 | 0.502 | 0.481 | 0.43 |
| iYMR320W    | 13 | 917036  |       | 12369   | <b>0.61</b> | Non | F  | 0.597 | 0.453 | 0.792 | 0.43 |
| iYOR242C    | 15 | 789858  | 13182 | YOR24   | <b>0.18</b> | Sgl | Pi | 0.678 | 0.417 | 0.368 | 0.43 |
| iYNL237W    | 14 | 206557  | 12600 | YNL23   | <b>0.62</b> | Sgl | Pi | 0.827 | 0.373 | 0.258 | 0.43 |

|              |    |              |        |             |        |       |       |       |      |
|--------------|----|--------------|--------|-------------|--------|-------|-------|-------|------|
| iYKL221W-1   | 11 | 8338         | 11283  | <b>0.48</b> | Non F  | 0.632 | 0.711 | 0.577 | 0.43 |
| iYCR066W     | 3  | 232943       | 8016   | <b>0.09</b> | Non F  | 0.583 | 0.545 | 0.912 | 0.43 |
| iCEN8        | 8  | 105705 7009  | YHR001 | <b>0.57</b> | Sgl Pi | 0.823 | 0.207 | 0.783 | 0.43 |
| iYER068W     | 5  | 294809 9005  | YER069 | <b>0.09</b> | Sgl Pi | 0.135 | 0.335 | 0.499 | 0.43 |
| iYBL023C     | 2  | 177517 7522  | YBL023 | <b>0.54</b> | Sgl Pi | 0.685 | 0.445 | 0.62  | 0.43 |
| iYLR288C     | 12 | 714905 11743 | YLR28  | <b>0.91</b> | Dbl Pi | 0.518 | 0.639 | 0.478 | 0.43 |
| iYJLCdelta3  | 10 | 203827 10901 | YJL11  | <b>0.38</b> | Sgl Pi | 0.862 | 0.994 | 0.996 | 0.43 |
| iYAR007C     | 1  | 158604 7458  | YAR007 | <b>0.95</b> | Dbl Pi | 0.477 | 0.167 | 0.315 | 0.43 |
| iYDL236W     | 4  | 33238        | 8286   | <b>0.11</b> | Non F  | 0.339 | 0.38  | 0.461 | 0.43 |
| iYGL099W     | 7  | 316551 9661  | YGL098 | <b>0.38</b> | Sgl Pi | 0.671 | 0.452 | 0.366 | 0.43 |
| iYGL099W     | 7  | 316551 9661  | YGL098 | <b>0.38</b> | Sgl Pi | 0.671 | 0.452 | 0.366 | 0.43 |
| iYEL006W     | 5  | 145382       | 8838   | <b>0.19</b> | Non F  | 0.775 | 0.443 | 0.726 | 0.43 |
| iYFRCdelta9  | 6  | 191874 9558  | YFR020 | <b>0.5</b>  | Sgl Pi | 0.448 | 0.27  | 0.139 | 0.43 |
| iYNL080C     | 14 | 478021 12460 | YNL08  | <b>0.6</b>  | Sgl Pi | 0.807 | 0.362 | 0.118 | 0.43 |
| iYLL066C-0   | 12 | 9832 11467   | YLL06  | <b>0.32</b> | Dbl Pi | 0.678 | 0.492 | 0.834 | 0.43 |
| iYPL257W     | 16 | 63861        | 13576  | <b>0.47</b> | Non F  | 0.72  | 0.648 | 0.243 | 0.43 |
| iYOR192C-1   | 15 | 702013 13139 | YOR19  | <b>0.48</b> | Dbl Pi | 0.64  | 0.638 | 0.377 | 0.43 |
| iYKL028W     | 11 | 386841 11094 | YKL02  | <b>0.48</b> | Sgl Pi | 0.546 | 0.623 | 0.994 | 0.43 |
| iYFL016C     | 6  | 106215 9314  | YFL016 | <b>0.24</b> | Sgl Pi | 0.532 | 0.717 | 0.091 | 0.44 |
| iYCR100C     | 3  | 302223 8047  | YCR100 | <b>0.28</b> | Sgl Pi | 0.516 | 0.664 | 0.365 | 0.44 |
| iS(UGA)E-1   | 5  | 289384 7318  | YER065 | <b>0.24</b> | Dbl Pi | 0.63  | 0.011 | 0.842 | 0.44 |
| iYNR066C     | 14 | 755033 12765 | YNR06  | <b>0.8</b>  | Sgl Pi | 0.74  | 0.852 | 0.515 | 0.44 |
| iYFL038C     | 6  | 55977 9358   | YFL038 | <b>0.93</b> | Dbl Pi | 0.06  | 8E-04 | 0.139 | 0.44 |
| iYDL111C     | 4  | 264094 8165  | YDL111 | <b>0.81</b> | Sgl Pi | 0.491 | 0.721 | 0.023 | 0.44 |
| iYLR116W     | 12 | 382238       | 11583  | <b>0.04</b> | Non F  | 0.69  | 0.426 | 0.898 | 0.44 |
| iYML131W     | 13 | 11277        | 12042  | <b>0.04</b> | Non F  | 0.554 | 0.785 | 0.391 | 0.44 |
| iYOL145C     | 15 | 52775 12917  | YOL14  | <b>0.98</b> | Dbl Pi | 0.84  | 0.699 | 0.588 | 0.44 |
| iYOR237W     | 15 | 783334 13178 | YOR23  | <b>0.37</b> | Sgl Pi | 0.787 | 0.798 | 0.585 | 0.44 |
| iYMR153C-A   | 13 | 565895 12200 | YMR15  | <b>0.13</b> | Sgl Pi | 0.453 | 0.619 | 0.669 | 0.44 |
| YPLCTy4-1A   | 16 | 436555       | 14153  | <b>0.34</b> | Non F  | 0.808 | 0.766 | 0.597 | 0.44 |
| iYGR249W-1   | 7  | 990279       | 10118  | <b>0.83</b> | Non F  | 0.844 | 0.491 | 0.58  | 0.44 |
| iYHR067W     | 8  | 231814 10304 | YHR06  | <b>0.59</b> | Sgl Pi | 0.602 | 0.487 | 0.146 | 0.44 |
| iYDR143C     | 4  | 743860 8443  | YDR143 | <b>0.71</b> | Sgl Pi | 0.615 | 0.989 | 0.908 | 0.44 |
| iYER015W     | 5  | 186779 8934  | YER016 | <b>0.58</b> | Sgl Pi | 0.71  | 0.696 | 0.079 | 0.44 |
| iYJR158W-0   | 10 | 733843 11057 | YJR15  | <b>0.66</b> | Sgl Pi | 0.752 | 0.088 | 0.029 | 0.44 |
| iYDL137W     | 4  | 217091 8192  | YDL136 | <b>0.07</b> | Sgl Pi | 0.21  | 0.072 | 0.358 | 0.44 |
| iYEL021W     | 5  | 116955 8853  | YEL020 | <b>0.51</b> | Sgl Pi | 0.611 | 0.887 | 0.593 | 0.44 |
| iYNL282W     | 14 | 108270 12640 | YNL28  | <b>0.37</b> | Sgl Pi | 0.755 | 0.815 | 0.47  | 0.44 |
| iYMR136W     | 13 | 542888       | 12184  | <b>0.29</b> | Non F  | 0.708 | 0.477 | 0.191 | 0.44 |
| iYNL151C     | 14 | 348517 12525 | YNL15  | <b>0.95</b> | Dbl Pi | 0.4   | 0.532 | NaN   | 0.44 |
| iYDL087C     | 4  | 300987 8144  | YDL087 | <b>0.98</b> | Dbl Pi | 0.785 | 0.158 | 0.262 | 0.44 |
| iYERCdelta20 | 5  | 449363 9249  | YER137 | <b>0.46</b> | Dbl Pi | 0.817 | 0.093 | 0.843 | 0.44 |
| iYJL005W     | 10 | 430914       | 10706  | <b>0.18</b> | Non F  | 0.595 | 0.868 | 0.662 | 0.44 |
| iYGR076C     | 7  | 637575 9955  | YGR076 | <b>0.43</b> | Sgl Pi | 0.347 | 0.447 | 0.362 | 0.44 |
| iYDR210W     | 4  | 871294       | 8505   | <b>0.45</b> | Non F  | 0.738 | 0.502 | 0.889 | 0.44 |
| iYOL038W     | 15 | 256188       | 12816  | <b>0.48</b> | Non F  | 2E-04 | 0.887 | 0.486 | 0.44 |
| iYOR088W     | 15 | 489719       | 13040  | <b>0.16</b> | Non F  | 0.522 | 0.989 | 0.641 | 0.44 |
| iYJL131C     | 10 | 165049 10814 | YJL13  | <b>0.87</b> | Sgl Pi | 0.135 | 0.442 | 0.425 | 0.44 |
| iYPL047W     | 16 | 466260       | 13378  | <b>0.55</b> | Non F  | 0.602 | 0.831 | 0.341 | 0.44 |
| iYHR005C     | 8  | 114895 10238 | YHR00  | <b>0.16</b> | Sgl Pi | 0.832 | 0.032 | 0.841 | 0.44 |
| iYKL049C     | 11 | 346117 11112 | YKL04  | <b>0.7</b>  | Sgl Pi | 0.777 | 0.536 | 0.121 | 0.44 |

|                |    |               |             |             |        |              |              |              |             |
|----------------|----|---------------|-------------|-------------|--------|--------------|--------------|--------------|-------------|
| iYER182W       | 5  | 553237        | 9229        | <b>0.01</b> | Non F  | 0.458        | 0.585        | 0.526        | 0.44        |
| iYJR063W       | 10 | 555255 10964  | YJR06       | <b>0.85</b> | Sgl Pi | 0.004        | 0.936        | 0.645        | 0.44        |
| iYDR234W       | 4  | 933205 8527   | YDR23E      | <b>0.75</b> | Sgl Pi | 0.748        | 0.452        | NaN          | 0.44        |
| iYIL072W       | 9  | 228401        | 10545       | <b>0.2</b>  | Non F  | 0.376        | 0.779        | 0.424        | 0.44        |
| iYOR245C       | 15 | 795326 13185  | YOR24       | <b>0.72</b> | Sgl Pi | 0.537        | 0.438        | 0.466        | 0.44        |
| iYMR222C       | 13 | 716295 12272  | YMR22       | <b>0.81</b> | Dbl Pi | 0.655        | 0.774        | <b>9E-04</b> | 0.44        |
| iYER106W       | 5  | 373237        | 9083        | <b>0.35</b> | Non F  | 0.598        | 0.687        | 0.387        | 0.44        |
| iYGR212W       | 7  | 918435        | 10084       | <b>0.23</b> | Non F  | 0.576        | 0.596        | 0.554        | 0.44        |
| iYPL133C       | 16 | 301274 13458  | YPL13       | <b>0.52</b> | Dbl Pi | 0.594        | 0.166        | 6E-04        | 0.44        |
| iYOL102C       | 15 | 126695 12877  | YOL10       | <b>0.74</b> | Sgl Pi | 0.638        | 0.583        | 0.353        | 0.44        |
| iYML126C       | 13 | 20536 12037   | YML12       | <b>0.37</b> | Sgl Pi | 0.747        | 0.622        | 0.785        | 0.44        |
| itR(ACG)J      | 10 | <b>233696</b> | <b>7289</b> | <b>0.32</b> | Non F  | <b>0.631</b> | <b>0.974</b> | <b>0.921</b> | <b>0.44</b> |
| iYML121W       | 13 | 27866         | 12032       | <b>0.15</b> | Non F  | 0.881        | 0.297        | 2E-06        | 0.44        |
| iYKR021W       | 11 | 481631        | 11314       | <b>0.05</b> | Non F  | 0.548        | 0.6          | 0.522        | 0.44        |
| itY(GUA)M1     | 13 | 168894 7373   | YML054      | <b>0.08</b> | Sgl Pi | 0.648        | 0.464        | 0.845        | 0.44        |
| iYOR185C       | 15 | 682090 13131  | YOR18       | <b>0.91</b> | Dbl Pi | 0.665        | 0.721        | 0.455        | 0.44        |
| iYHR066W       | 8  | 230703 10303  | YHR06       | <b>0.37</b> | Sgl Pi | 0.301        | 0.845        | 0.373        | 0.44        |
| iYGL175C       | 7  | 174314 9729   | YGL175      | <b>0.76</b> | Dbl Pi | 0.545        | 0.06         | 0.64         | 0.44        |
| iYER170W       | 5  | 526644 9205   | YER171      | <b>0.8</b>  | Sgl Pi | 0.24         | 0.746        | 0.19         | 0.44        |
| iYBR290W       | 2  | 783498        | 7879        | <b>0.11</b> | Non F  | 0.248        | 0.439        | 0.537        | 0.44        |
| iYNL253W       | 14 | 171293        | 12614       | <b>0.09</b> | Non F  | 0.55         | 0.469        | 0.471        | 0.44        |
| iYPL009C       | 16 | 538930 13344  | YPL00       | <b>0.74</b> | Dbl Pi | 0.595        | 0.822        | 0.172        | 0.44        |
| iYHR151C       | 8  | 400855 10386  | YHR15       | <b>0.83</b> | Dbl Pi | 0.806        | 0.043        | 0.97         | 0.44        |
| iYCR024C-A     | 3  | 163063 7983   | YCR024      | <b>0.09</b> | Sgl Pi | 0.846        | 0.044        | 0.729        | 0.44        |
| iYGR083C       | 7  | 646812 9962   | YGR083      | <b>0.68</b> | Sgl Pi | 0.726        | 0.14         | 0.801        | 0.44        |
| iYPL109C       | 16 | 347200 13435  | YPL10       | <b>0.59</b> | Dbl Pi | 0.689        | 0.56         | 0.408        | 0.44        |
| iYDR060W       | 4  | 573749 8367   | YDR061      | <b>0.19</b> | Sgl Pi | 0.542        | 0.347        | 0.262        | 0.44        |
| iYJL133W       | 10 | 161261 10816  | YJL133      | <b>0.4</b>  | Sgl Pi | 0.595        | 0.511        | 0.22         | 0.44        |
| iYDR330W       | 4  | 1129365 8615  | YDR331      | <b>0.86</b> | Sgl Pi | 0.628        | 0.004        | 0.034        | 0.44        |
| iYER032W       | 5  | 217697        | 8951        | <b>0.18</b> | Non F  | 0.649        | 0.779        | 0.592        | 0.44        |
| iYPR080W       | 16 | 701978        | 13682       | <b>0.02</b> | Non F  | 0.398        | 0.538        | 0.416        | 0.44        |
| iYDRCSigma1    | 4  | 651492 8822   | YDR09E      | <b>0.44</b> | Dbl Pi | 0.388        | 0.677        | 0.341        | 0.44        |
| iYGR256W       | 7  | 1006090       | 10127       | <b>0.28</b> | Non F  | 0.337        | 0.671        | 0.58         | 0.44        |
| iYAL011W       | 1  | 134091        | 7384        | <b>0.52</b> | Non F  | 0.674        | 0.45         | 0.914        | 0.44        |
| iYPL194W       | 16 | 181120 13516  | YPL19       | <b>0.75</b> | Sgl Pi | 0.624        | 0.54         | 0.27         | 0.45        |
| iYNL002C       | 14 | 627161 12388  | YNL00       | <b>0.58</b> | Dbl Pi | 0.038        | 0.705        | 0.567        | 0.45        |
| iYNL226W       | 14 | 222637        | 12592       | <b>0.31</b> | Non F  | 0.383        | 0.446        | 0.391        | 0.45        |
| iYPL008W       | 16 | 541954        | 13343       | <b>0.03</b> | Non F  | 0.263        | 0.589        | 0.387        | 0.45        |
| iYBR294W       | 2  | 791756 7884   | YBR29E      | <b>0.72</b> | Sgl Pi | 0.196        | 0.853        | 0.315        | 0.45        |
| iYIL036W       | 9  | 287444        | 10512       | <b>0.06</b> | Non F  | 0.457        | 0.903        | 0.458        | 0.45        |
| iYFR007W       | 6  | 160340 9442   | YFR008      | <b>0.71</b> | Sgl Pi | 0.5          | 0.416        | 0.632        | 0.45        |
| iYPL157W       | 16 | 255764        | 13480       | <b>0.28</b> | Non F  | 0.427        | 0.674        | 0.616        | 0.45        |
| iYBR188C       | 2  | 604056 7790   | YBR18E      | <b>0.85</b> | Dbl Pi | 0.694        | 0.717        | 0.555        | 0.45        |
| iYBR079C       | 2  | 398227 7684   | YBR07E      | <b>0.66</b> | Sgl Pi | 0.245        | 0.351        | 0.195        | 0.45        |
| iYERWdelta21-1 | 5  | 446424 9274   | YER137      | <b>0.03</b> | Sgl Pi | 0.657        | 0.084        | 0.8          | 0.45        |
| iYNL326C       | 14 | 28373 12678   | YNL32       | <b>0.63</b> | Sgl Pi | 0.806        | 0.857        | 0.43         | 0.45        |
| iYER117W       | 5  | 397708        | 9105        | <b>0.19</b> | Non F  | 0.65         | 0.444        | 0.435        | 0.45        |
| iYOL099C       | 15 | 132503 12875  | YOL09       | <b>0.07</b> | Sgl Pi | 0.407        | 0.58         | 0.344        | 0.45        |
| iYIL095W       | 9  | 186365        | 10563       | <b>0.1</b>  | Non F  | 0.551        | 0.576        | 0.538        | 0.45        |
| iYJR160C-1     | 10 | 741018 11061  | YJR16       | <b>0.15</b> | Sgl Pi | 0.551        | 0.893        | 0.496        | 0.45        |
| iYDL085W       | 4  | 304835 8142   | YDL084      | <b>0.77</b> | Sgl Pi | 0.003        | 1E-04        | 0.711        | 0.45        |



|                     |           |               |              |               |             |            |           |              |              |              |             |
|---------------------|-----------|---------------|--------------|---------------|-------------|------------|-----------|--------------|--------------|--------------|-------------|
| iYOL118C            | 15        | 96909         | 12892        | YOL11         | <b>0.47</b> | Dbl        | Pi        | 0.615        | 0.66         | 0.604        | 0.45        |
| iYOR098C            | 15        | 511174        | 13050        | YOR09         | <b>0.78</b> | Dbl        | Pi        | 0.002        | 0.006        | 0.57         | 0.45        |
| iYML095C            | 13        | 82109         | 12008        | YML09         | <b>0.2</b>  | Sgl        | Pi        | 0.399        | 0.617        | NaN          | 0.45        |
| iYNL219C            | 14        | 237648        | 12585        | YNL21         | <b>0.87</b> | Dbl        | Pi        | 0.577        | 0.002        | 0.642        | 0.45        |
| iYKL042W            | 11        | 359211        | 11105        | YKL04         | <b>0.72</b> | Sgl        | Pi        | 0.002        | 0.872        | 0.938        | 0.45        |
| iYOL093W            | 15        | 143687        | 12869        | YOL09         | <b>0.72</b> | Sgl        | Pi        | 0.719        | NaN          | 0.331        | 0.45        |
| iYDR236C            | 4         | 935871        | 8529         | YDR236        | <b>0.93</b> | Dbl        | Pi        | 0.505        | 0.05         | 0.374        | 0.45        |
| iYDR449C            | 4         | 1358886       | 8725         | YDR449        | <b>0.37</b> | Dbl        | Pi        | 0.725        | 0.821        | 0.791        | 0.45        |
| iYGR126W            | 7         | 746512        | 10006        | YGR126        | <b>0.57</b> | Sgl        | Pi        | 0.67         | 0.611        | 0.627        | 0.45        |
| iYOR004W            | 15        | 334343        |              | 12957         | <b>0.07</b> | Non        | F         | 0.415        | 0.563        | 0.469        | 0.45        |
| iYDR248C            | 4         | 958337        | 8539         | YDR248        | <b>0.48</b> | Sgl        | Pi        | 0.633        | 0.45         | 0.685        | 0.45        |
| iYBR187W            | 2         | 603438        |              | 7789          | <b>0.16</b> | Non        | F         | 0.491        | 0.697        | 0.28         | 0.45        |
| iYMR107W            | 13        | 483372        | 12154        | YMR107        | <b>0.08</b> | Sgl        | Pi        | 0.623        | 0.843        | 0.678        | 0.45        |
| iYHRCdelta12        | 8         | 464140        | 10460        | YHR12         | <b>0.78</b> | Sgl        | Pi        | 0.426        | 0.718        | 0.063        | 0.45        |
| iYOR146W            | 15        | 606186        | 13092        | YOR146        | <b>0.39</b> | Sgl        | Pi        | 0.001        | 0.843        | 0.494        | 0.45        |
| iYML024W            | 13        | 226730        |              | 11944         | <b>0.63</b> | Non        | F         | 0.677        | 0.594        | 0.486        | 0.45        |
| iYER059W            | 5         | 273889        | 8985         | YER059        | <b>0.56</b> | Sgl        | Pi        | 0.712        | 0.387        | 0.737        | 0.45        |
| iYOL054W            | 15        | 229841        | 12831        | YOL054        | <b>0.35</b> | Sgl        | Pi        | 0.579        | 0.691        | 0.35         | 0.45        |
| iYPR021C            | 16        | 603383        | 13633        | YPR021        | <b>0.59</b> | Sgl        | Pi        | 0.623        | 0.806        | 0.546        | 0.45        |
| iYLR069C            | 12        | 273918        | 11539        | YLR069        | <b>0.74</b> | Sgl        | Pi        | 0.624        | 0.333        | 0.455        | 0.45        |
| iYJL037W            | 10        | 377034        | 10730        | YJL037        | <b>0.7</b>  | Sgl        | Pi        | 0.684        | 0.659        | 0.452        | 0.45        |
| itl(AAU)P1          | 16        | 819585        |              | 7197          | <b>0.01</b> | Non        | F         | 0.678        | 0.683        | 0.449        | 0.45        |
| iYDL018C            | 4         | 423491        | 8081         | YDL018        | <b>0.89</b> | Dbl        | Pi        | 0.157        | <b>5E-04</b> | 0.312        | 0.45        |
| iYOL123W            | 15        | 89453         |              | 12897         | <b>0.29</b> | Non        | F         | 0.719        | 0.584        | 0.517        | 0.45        |
| iYPL061W            | 16        | 434092        | 13393        | YPL061        | <b>0.58</b> | Sgl        | Pi        | 0.662        | 0.707        | 0.398        | 0.45        |
| iYML074C-0          | 13        | 121319        | 11988        | YML074        | <b>0.54</b> | Sgl        | Pi        | 0.537        | 0.797        | 0.067        | 0.45        |
| iYNL081C            | 14        | 476618        | 12461        | YNL081        | <b>0.97</b> | Sgl        | Pi        | 0.133        | 0.254        | 0.655        | 0.45        |
| iYGL010W            | 7         | 476050        |              | 9574          | <b>0.25</b> | Non        | F         | 0.531        | 0.547        | 0.711        | 0.45        |
| iYGR263C            | 7         | 1019230       | 10134        | YGR263        | <b>0.51</b> | Sgl        | Pi        | 0.586        | 0.245        | 0.761        | 0.45        |
| <b>iYJRWdelta17</b> | <b>10</b> | <b>538118</b> | <b>11064</b> | <b>YJR05</b>  | <b>0.29</b> | <b>Sgl</b> | <b>Pi</b> | <b>0.615</b> | <b>0.636</b> | <b>0.579</b> | <b>0.45</b> |
| iYPLWdelta8         | 16        | 211884        | 13609        | YPL17         | <b>0.92</b> | Sgl        | Pi        | 0.817        | 0.802        | 0.035        | 0.45        |
| iYKL115C            | 11        | 222920        | 11178        | YKL115        | <b>0.55</b> | Sgl        | Pi        | 0.268        | 0.564        | 0.646        | 0.45        |
| iYNL077W            | 14        | 482973        | 12457        | YNL077        | <b>0.87</b> | Sgl        | Pi        | 0.524        | 0.476        | 0.215        | 0.45        |
| iYHRCdelta5         | 8         | 133437        | 10471        | YHR01         | <b>0.15</b> | Sgl        | Pi        | 0.675        | 0.564        | 0.292        | 0.46        |
| iYJL093C            | 10        | 256520        | 10779        | YJL093        | <b>1</b>    | Dbl        | Pi        | 0.364        | 0.021        | 0.617        | 0.46        |
| iYKR016W            | 11        | 470965        |              | 11309         | <b>0.14</b> | Non        | F         | 0.497        | 0.695        | 0.719        | 0.46        |
| iYLR138W            | 12        | 421370        |              | 11605         | <b>0.16</b> | Non        | F         | 0.358        | 0.662        | 0.723        | 0.46        |
| iYDR263C            | 4         | 995515        | 8555         | YDR263        | <b>0.26</b> | Sgl        | Pi        | 0.68         | <b>2E-06</b> | 0.435        | 0.46        |
| iYBR080C            | 2         | 400872        | 7685         | YBR080        | <b>0.83</b> | Sgl        | Pi        | <b>6E-04</b> | 0.403        | 0.296        | 0.46        |
| iYJR092W            | 10        | 602777        |              | 10987         | <b>0.13</b> | Non        | F         | 0.479        | 0.705        | 0.502        | 0.46        |
| iYKL130C            | 11        | 196050        | 11189        | YKL130        | <b>0.7</b>  | Sgl        | Pi        | 0.879        | 0.566        | 0.145        | 0.46        |
| iYPL242C            | 16        | 95104         | 13561        | YPL242        | <b>0.71</b> | Sgl        | Pi        | <b>3E-04</b> | 0.431        | 0.393        | 0.46        |
| iYGR233C-0          | 7         | 958192        | 10101        | YGR233        | <b>0.43</b> | Dbl        | Pi        | 0.783        | 0.058        | 0.468        | 0.46        |
| iYDR197W            | 4         | 852383        |              | 8495          | <b>0.01</b> | Non        | F         | 0.643        | 0.537        | 0.401        | 0.46        |
| iYMR062C            | 13        | 396373        | 12110        | YMR062        | <b>0.83</b> | Dbl        | Pi        | 0.015        | 0.359        | 0.004        | 0.46        |
| <b>iYOL055C</b>     | <b>15</b> | <b>226068</b> | <b>12832</b> | <b>YOL055</b> | <b>0.81</b> | <b>Dbl</b> | <b>Pi</b> | <b>0.684</b> | <b>0.979</b> | <b>0.565</b> | <b>0.46</b> |
| iYJR067C            | 10        | 567152        | 10968        | YJR067        | <b>0.89</b> | Dbl        | Pi        | 0.433        | 0.794        | 0.523        | 0.46        |
| iYDR385W            | 4         | 1245735       | 8670         | YDR385        | <b>0.33</b> | Sgl        | Pi        | 0.588        | 0.901        | 0.463        | 0.46        |
| <b>itV(UAC)D</b>    | <b>4</b>  | <b>488860</b> | <b>7359</b>  | <b>YDR022</b> | <b>0.25</b> | <b>Dbl</b> | <b>Pi</b> | <b>0.743</b> | <b>0.879</b> | <b>0.109</b> | <b>0.46</b> |
| iYBR235W            | 2         | 690227        |              | 7830          | <b>0.11</b> | Non        | F         | 0.531        | 0.578        | 0.649        | 0.46        |
| iYKL063C-0          | 11        | 321149        | 11126        | YKL063        | <b>0.49</b> | Dbl        | Pi        | 0.186        | 0.005        | 0.853        | 0.46        |

|              |    |         |       |           |             |       |     |       |       |       |      |
|--------------|----|---------|-------|-----------|-------------|-------|-----|-------|-------|-------|------|
| iYGR142W     | 7  | 773686  | 10021 | YGR14     | <b>0.26</b> | Sgl   | Pi  | 0.898 | 0.952 | 0.536 | 0.46 |
| itA(UGC)A    | 1  | 166328  | 7108  | YAR01C    | <b>0.19</b> | Sgl   | Pi  | NaN   | 0.84  | 0.972 | 0.46 |
| iYBR124W     | 2  | 486823  |       | 7727      | <b>0.19</b> | Non F |     | 0.714 | 0.05  | 0.717 | 0.46 |
| iYDL092W     | 4  | 293209  |       | 8149      | <b>0.22</b> | Non F |     | 0.561 | 0.545 | NaN   | 0.46 |
| iYPL041C     | 16 | 475773  | 13373 | YPL04     | <b>0.5</b>  | Sgl   | Pi  | 0.577 | 0.489 | 0.628 | 0.46 |
| iYDL032W     | 4  | 394002  | 8093  | YDL031    | <b>0.95</b> | Sgl   | Pi  | 0.482 | 0.467 | 0.686 | 0.46 |
| iYDR369C     | 4  | 1217597 | 8654  | YDR369    | <b>0.25</b> | Sgl   | Pi  | 0.527 | 0.539 | 0.56  | 0.46 |
| iYDL180W     | 4  | 137546  | 8228  | YDL179    | <b>0.89</b> | Sgl   | Pi  | 0.652 | 0.532 | 0.01  | 0.46 |
| iYHR205W     | 8  | 511834  | 10437 | YHR2C     | <b>0.55</b> | Sgl   | Pi  | 0.8   | 0.714 | 0.063 | 0.46 |
| iYNL038W     | 14 | 557658  |       | 12421     | <b>0.2</b>  | Non F |     | 0.519 | 0.564 | 0.498 | 0.46 |
| itS(AGA)J    | 10 | 523790  |       | 7310      | <b>0.5</b>  | Non F |     | 0.438 | 0.926 | 0.004 | 0.46 |
| iYMR282C     | 13 | 835103  | 12330 | YMR28     | <b>0.97</b> | Sgl   | Pi  | 0.511 | 0.58  | 0.595 | 0.46 |
| iYDR423C     | 4  | 1319268 | 8704  | YDR423    | <b>0.39</b> | Sgl   | Pi  | NaN   | 0.588 | 0.533 | 0.46 |
| iYOR252W     | 15 | 804208  | 13191 | YOR25     | <b>0.86</b> | Sgl   | Pi  | 0.5   | 0.602 | NaN   | 0.46 |
| iYLR047C     | 12 | 241433  | 11518 | YLR04     | <b>0.14</b> | Dbl   | Pi  | 0.787 | 0.501 | 0.551 | 0.46 |
| iYBR293W     | 2  | 788393  | 7883  | YBR294    | <b>0.52</b> | Sgl   | Pi  | 0.649 | 0.967 | 0.035 | 0.46 |
| iYMR003W     | 13 | 273774  | 12053 | YMR00     | <b>0.91</b> | Sgl   | Pi  | 0.484 | 0.492 | 0.652 | 0.46 |
| iYDL050C     | 4  | 364838  | 8110  | YDL050    | <b>0.37</b> | Sgl   | Pi  | NaN   | 0.485 | 0.153 | 0.46 |
| iYLR208W     | 12 | 560467  |       | 11674     | <b>0.31</b> | Non F |     | 0.847 | 0.795 | 0.739 | 0.46 |
| iYNL265C     | 14 | 145276  | 12626 | YNL26     | <b>0.81</b> | Sgl   | Pi  | 0.565 | 0.844 | 0.677 | 0.46 |
| iYPL126W     | 16 | 312896  | 13451 | YPL12     | <b>0.8</b>  | Sgl   | Pi  | 0.419 | 0.769 | 0.068 | 0.46 |
| iYMR067C     | 13 | 405568  | 12115 | YMR06     | <b>0.72</b> | Dbl   | Pi  | 0.56  | 0.723 | 0.496 | 0.46 |
| iYPRCdelta13 | 16 | 572153  | 13795 | YPR0C     | <b>0.49</b> | Dbl   | Pi  | 0.77  | 0.604 | 0.938 | 0.46 |
| iYLR067C     | 12 | 270712  | 11537 | YLR06     | <b>0.98</b> | Dbl   | Pi  | 0.639 | 0.797 | NaN   | 0.46 |
| iYLL067C-0   | 12 | 4296    | 11469 | YLL06     | <b>0.32</b> | Sgl   | Pi  | 0.728 | 0.585 | 0.832 | 0.46 |
| iYPL120W     | 16 | 323728  |       | 13445     | <b>0.41</b> | Non F |     | 0.683 | 0.862 | 0.373 | 0.46 |
| iYPR076W     | 16 | 696847  |       | 13679     | <b>0.89</b> | Non F |     | 0.788 | 4E-05 | 0.287 | 0.46 |
| iYOR381W-0   | 15 | 1057681 | 13313 | YOR38     | <b>0.47</b> | Sgl   | Pi  | 0.731 | 0.791 | 0.194 | 0.46 |
| iYDR027C     | 4  | 497316  | 8330  | YDR027    | <b>0.68</b> | Sgl   | Pi  | 0.003 | 2E-04 | 0.524 | 0.46 |
| iYER150W     | 5  | 468844  | 9167  | tv(aac)ε2 | <b>0.6</b>  | Non F |     | 0.732 | 0.841 | 0.61  | 0.46 |
| iYDR074W     | 4  | 596573  | 8381  | YDR075    | <b>0.76</b> | Sgl   | Pi  | 0.775 | 0.829 | 0.45  | 0.46 |
| iYLR283W     | 12 | 706123  |       | 11737     | <b>0.24</b> | Non F | NaN |       | 0.615 | 0.522 | 0.47 |
| iYDR147W     | 4  | 753240  |       | 8447      | <b>0.39</b> | Non F |     | 0.202 | 0.604 | 0.988 | 0.47 |
| iYOR386W     | 15 | 1068515 |       | 13319     | <b>0.29</b> | Non F |     | 0.648 | 0.754 | 0.149 | 0.47 |
| iYDL026W     | 4  | 405086  |       | 8088      | <b>0.49</b> | Non F |     | 0.418 | 0.669 | 0.465 | 0.47 |
| iYJRWdelta14 | 10 | 517776  | 11063 | YJR04     | <b>0.67</b> | Sgl   | Pi  | 0.673 | 0.096 | 0.547 | 0.47 |
| iYLR227C     | 12 | 592047  | 11691 | YLR22     | <b>0.54</b> | Dbl   | Pi  | 0.573 | 0.933 | 0.076 | 0.47 |
| iYJL140W     | 10 | 151338  |       | 10822     | <b>0.01</b> | Non F | NaN |       | 0.637 | 0.421 | 0.47 |
| iYOR033C     | 15 | 394544  | 12987 | YOR03     | <b>0.61</b> | Sgl   | Pi  | 0.702 | 0.842 | 0.295 | 0.47 |
| iYLL008W     | 12 | 133971  |       | 11413     | <b>0.17</b> | Non F |     | 0.668 | 0.772 | 0.344 | 0.47 |
| iYLR356W     | 12 | 840914  | 11802 | YLR35     | <b>0.85</b> | Sgl   | Pi  | 0.648 | 0.129 | 0.108 | 0.47 |
| iYNL202W     | 14 | 260484  |       | 12571     | <b>0.19</b> | Non F |     | 0.393 | 0.521 | NaN   | 0.47 |
| iYOR042W     | 15 | 409645  | 12995 | YOR04     | <b>0.12</b> | Sgl   | Pi  | 0.45  | 0.526 | 0.543 | 0.47 |
| iYNL123W     | 14 | 397660  |       | 12498     | <b>0.35</b> | Non F |     | 0.574 | 0.432 | 0.356 | 0.47 |
| iYDR090C     | 4  | 625976  | 8397  | YDR09C    | <b>0.52</b> | Sgl   | Pi  | 0.697 | 0.279 | 0.466 | 0.47 |
| iYBR292C-0   | 2  | 785015  | 7881  | YBR292    | <b>0.65</b> | Dbl   | Pi  | 0.484 | 0.546 | 0.954 | 0.47 |
| iYER178W     | 5  | 548059  | 9221  | YER17C    | <b>0.14</b> | Sgl   | Pi  | 0.568 | 0.749 | 0.735 | 0.47 |
| iYBL047C     | 2  | 132000  | 7547  | YBL047    | <b>0.96</b> | Dbl   | Pi  | 0.379 | 0.229 | 0.153 | 0.47 |
| iYMR212C     | 13 | 693033  | 12262 | YMR21     | <b>0.93</b> | Dbl   | Pi  | 0.688 | 0.047 | 0.996 | 0.47 |
| iYBR045C     | 2  | 330083  | 7650  | YBR045    | <b>0.38</b> | Sgl   | Pi  | 0.518 | 0.756 | 0.591 | 0.47 |
| iYCL069W     | 3  | 11080   |       | 7949      | <b>0.45</b> | Non F | NaN |       | 0.001 | 0.64  | 0.47 |

|             |    |               |        |             |        |       |       |       |      |
|-------------|----|---------------|--------|-------------|--------|-------|-------|-------|------|
| iYNL112W    | 14 | 416263        | 12489  | <b>0.32</b> | Non F  | 0.58  | 0.804 | 0.331 | 0.47 |
| iYMR071C    | 13 | 411284 12119  | YMR07  | <b>0.52</b> | Dbl Pi | 0.552 | 0.536 | 0.531 | 0.47 |
| iYDL195W    | 4  | 111033 8243   | YDL194 | <b>0.92</b> | Sgl Pi | 0.666 | 0.433 | 0.464 | 0.47 |
| iYGL042C    | 7  | 418596 9607   | YGL042 | <b>0.53</b> | Sgl Pi | 0.679 | 0.57  | 0.498 | 0.47 |
| iYKR086W    | 11 | 602700        | 11375  | <b>0.11</b> | Non F  | 0.625 | 0.845 | 0.442 | 0.47 |
| itS(GCU)O   | 15 | 274768 7315   | YOL026 | <b>0.49</b> | Dbl Pi | 0.328 | 0.571 | 0.737 | 0.47 |
| itM(CAU)C   | 3  | 149981 7243   | YCR018 | <b>0.18</b> | Sgl Pi | 0.708 | 0.057 | 0.492 | 0.47 |
| itM(CAU)C   | 3  | 149981 7243   | YCR018 | <b>0.18</b> | Sgl Pi | 0.708 | 0.057 | 0.492 | 0.47 |
| iYBL105C    | 2  | 17691 7595    | YBL105 | <b>0.94</b> | Sgl Pi | 0.603 | 0.27  | 0.673 | 0.47 |
| iYBL102W    | 2  | 24727         | 7592   | <b>0.15</b> | Non F  | 0.308 | 0.655 | 0.509 | 0.47 |
| iYLL002W    | 12 | 147585 11407  | YLL00  | <b>0.8</b>  | Sgl Pi | 0.543 | 0.018 | 0.622 | 0.47 |
| iYFL029C    | 6  | 79153 9340    | YFL029 | <b>0.9</b>  | Sgl Pi | 0.521 | 0.301 | 0.733 | 0.47 |
| iYGL081W    | 7  | 358356 9641   | YGL080 | <b>0.77</b> | Sgl Pi | 0.696 | 0.934 | 0.437 | 0.47 |
| iYGL081W    | 7  | 358356 9641   | YGL080 | <b>0.77</b> | Sgl Pi | 0.696 | 0.934 | 0.437 | 0.47 |
| iYER123W    | 5  | 406436        | 9115   | <b>0.28</b> | Non F  | 0.685 | 0.794 | 0.43  | 0.47 |
| iYDR153C    | 4  | 767960 8452   | YDR153 | <b>0.13</b> | Sgl Pi | 0.684 | 0.711 | 0.78  | 0.47 |
| iYDR501W    | 4  | 1452942       | 8774   | <b>0.15</b> | Non F  | 0.395 | 0.449 | 0.453 | 0.47 |
| iYOR040W    | 15 | 407912        | 12994  | <b>0.49</b> | Non F  | 0.356 | 0.442 | 0.735 | 0.47 |
| iYAL063C-0  | 1  | 27973 7434    | YAL063 | <b>0.4</b>  | Dbl Pi | NaN   | 0.199 | NaN   | 0.47 |
| iYBL098W    | 2  | 40511 7589    | YBL097 | <b>0.78</b> | Sgl Pi | 0.271 | 0.003 | 0.529 | 0.47 |
| iYGR211W    | 7  | 916700 10083  | YGR21  | <b>0.23</b> | Sgl Pi | 0.82  | 0.918 | 0.959 | 0.47 |
| iYML098W    | 13 | 77762         | 12010  | <b>0.3</b>  | Non F  | 0.363 | 0.114 | 0.736 | 0.47 |
| iYOR059C    | 15 | 440251 13011  | YOR05  | <b>0.04</b> | Sgl Pi | 0.241 | 0.496 | 0.804 | 0.47 |
| iYDR275W    | 4  | 1012950       | 8565   | <b>0.12</b> | Non F  | 0.654 | 0.243 | 0.475 | 0.47 |
| iYPR070W    | 16 | 687601 13674  | YPR07  | <b>0.34</b> | Sgl Pi | 0.681 | 0.511 | 0.731 | 0.47 |
| iYOR223W    | 15 | 760646        | 13165  | <b>0.29</b> | Non F  | 0.29  | 0.717 | 0.483 | 0.47 |
| iYJL163C    | 10 | 113340 10843  | YJL163 | <b>0.66</b> | Sgl Pi | 0.237 | 0.803 | 0.256 | 0.47 |
| iYOR220W    | 15 | 756109        | 13162  | <b>0.1</b>  | Non F  | 0.559 | 0.737 | 0.329 | 0.47 |
| iYOR047C    | 15 | 417667 13000  | YOR04  | <b>0.45</b> | Sgl Pi | 0.831 | 0.464 | 0.62  | 0.47 |
| YDRWdelta23 | 4  | 1095750 14038 | YDR31  | <b>0.44</b> | T      | 0.862 | 0.974 | 0.993 | 0.47 |
| iYDL220C    | 4  | 65014 8270    | YDL220 | <b>0.94</b> | Dbl Pi | 0.532 | 0.841 | 0.044 | 0.47 |
| iYNR034W-0  | 14 | 691283        | 12733  | <b>0.71</b> | Non F  | 0.675 | 0.177 | 0.437 | 0.47 |
| iYOL152W    | 15 | 42643 12923   | YOL15  | <b>0.55</b> | Sgl Pi | 0.667 | 0.733 | 0.335 | 0.47 |
| iYLR175W    | 12 | 507582        | 11644  | <b>0.36</b> | Non F  | 0.642 | 0.845 | 0.187 | 0.47 |
| iYJR062C    | 10 | 554540 10963  | YJR06  | <b>0.92</b> | Dbl Pi | 8E-04 | 0.713 | 0.461 | 0.47 |
| iYGL224C    | 7  | 78863 9795    | YGL224 | <b>0.59</b> | Sgl Pi | 0.551 | 0.365 | 0.249 | 0.47 |
| iYNL234W    | 14 | 211509 12598  | YNL23  | <b>0.6</b>  | Sgl Pi | 0.54  | 0.607 | 7E-04 | 0.47 |
| iYKL006W    | 11 | 432392        | 11072  | <b>0.22</b> | Non F  | 0.703 | 0.837 | 0.415 | 0.47 |
| iYPR139C    | 16 | 814055 13733  | YPR13  | <b>0.7</b>  | Dbl Pi | 0.653 | 0.589 | 0.529 | 0.47 |
| iYLR248W    | 12 | 636083 11709  | YLR24  | <b>0.13</b> | Sgl Pi | 0.436 | 0.581 | 0.647 | 0.47 |
| itS(AGA)D3  | 4  | 1305687 7306  | YDR42C | <b>0.19</b> | Sgl Pi | 0.803 | 0.716 | 0.5   | 0.47 |
| iYHR074W    | 8  | 248347        | 10311  | <b>0.02</b> | Non F  | 0.464 | 0.587 | 0.561 | 0.47 |
| iYCR052W    | 3  | 216448 8007   | YCR053 | <b>0.72</b> | Sgl Pi | 8E-04 | 0.714 | 0.435 | 0.48 |
| iYIR043C    | 9  | 437727 10698  | YIR043 | <b>0.63</b> | Sgl Pi | 0.675 | 0.539 | 0.778 | 0.48 |
| iYMR268C    | 13 | 804207 12317  | YMR26  | <b>0.72</b> | Dbl Pi | 0.703 | 0.32  | 0.551 | 0.48 |
| iYEL073C-1  | 5  | 8778 8905     | YEL073 | <b>0.68</b> | Dbl Pi | 0.701 | 0.147 | 0.031 | 0.48 |
| iYJR102C    | 10 | 619470 10999  | YJR10  | <b>0.5</b>  | Dbl Pi | 0.85  | 0.993 | 0.326 | 0.48 |
| iYFL018C    | 6  | 103124 9318   | YFL018 | <b>0.53</b> | Dbl Pi | 6E-04 | 0.613 | 0.119 | 0.48 |
| iYER005W    | 5  | 162441 8922   | YER006 | <b>0.69</b> | Sgl Pi | 0.096 | 0.703 | 0.165 | 0.48 |
| iYKL161C-0  | 11 | 150686 11216  | YKL16  | <b>0.38</b> | Dbl Pi | 0.746 | 0.139 | 0.401 | 0.48 |
| iYKL182W    | 11 | 106816 11240  | YKL18  | <b>0.42</b> | Sgl Pi | 0.61  | 0.892 | 0.263 | 0.48 |

|              |    |         |       |        |             |     |    |              |              |       |      |
|--------------|----|---------|-------|--------|-------------|-----|----|--------------|--------------|-------|------|
| iYPL076W-0   | 16 | 411275  | 13405 | YPL07  | <b>0.6</b>  | Sgl | Pi | 0.045        | 0.109        | 0.269 | 0.48 |
| iYOL043C     | 15 | 249545  | 12821 | YOL04  | <b>0.76</b> | Dbl | Pi | 0.592        | 0.244        | 0.427 | 0.48 |
| iYGL124C     | 7  | 276700  | 9684  | YGL124 | <b>0.31</b> | Dbl | Pi | 0.134        | 0.571        | 0.896 | 0.48 |
| iYPR003C     | 16 | 563762  | 13613 | YPR0C  | <b>0.46</b> | Sgl | Pi | 0.617        | 0.825        | 0.465 | 0.48 |
| iYER124C     | 5  | 409073  | 9117  | YER124 | <b>0.86</b> | Dbl | Pi | 0.001        | <b>1E-06</b> | 0.27  | 0.48 |
| iYDR454C     | 4  | 1366803 | 8730  | YDR454 | <b>0.85</b> | Sgl | Pi | <b>5E-04</b> | 0.661        | 0.33  | 0.48 |
| YELCdelta4   | 5  | 135608  | 14044 | YEL01  | <b>0.44</b> | Sgl | Pi | 0.876        | 0.765        | 0.993 | 0.48 |
| iYBR121C     | 2  | 483317  | 7725  | YBR121 | <b>0.53</b> | Sgl | Pi | 0.027        | 0.039        | 0.739 | 0.48 |
| iYPL260W     | 16 | 50966   |       | 13579  | <b>0.16</b> | Non | F  | 0.657        | 0.667        | 0.668 | 0.48 |
| iYDR037W     | 4  | 527194  |       | 8344   | <b>0.16</b> | Non | F  | 0.621        | 0.549        | 0.544 | 0.48 |
| iYGL122C     | 7  | 280522  | 9682  | YGL122 | <b>0.68</b> | Sgl | Pi | 0.006        | 0.196        | 0.871 | 0.48 |
| iYJR135C     | 10 | 676459  | 11030 | YJR13  | <b>0.78</b> | Dbl | Pi | 0.675        | 0.353        | 0.672 | 0.48 |
| iYJR123W     | 10 | 652272  |       | 11019  | <b>0.41</b> | Non | F  | 0.513        | 0.753        | 0.746 | 0.48 |
| iYJL128C-1   | 10 | 180899  | 10811 | YJL128 | <b>0.64</b> | Sgl | Pi | 0.814        | 0.203        | 0.477 | 0.48 |
| iYIL056W     | 9  | 251896  |       | 10532  | <b>0.05</b> | Non | F  | NaN          | 0.832        | 0.829 | 0.48 |
| iYIL056W     | 9  | 251896  |       | 10532  | <b>0.05</b> | Non | F  | NaN          | 0.832        | 0.829 | 0.48 |
| iYBL039C     | 2  | 145675  | 7539  | YBL039 | <b>0.66</b> | Dbl | Pi | <b>4E-04</b> | 0.584        | 0.437 | 0.48 |
| iYBR044C     | 2  | 326040  | 7649  | YBR044 | <b>0.58</b> | Sgl | Pi | 0.659        | 0.855        | 0.922 | 0.48 |
| iYJR095W     | 10 | 610441  | 10992 | YJR09  | <b>0.78</b> | Sgl | Pi | 0.591        | 0.83         | 0.528 | 0.48 |
| itl(AAU)N2   | 14 | 602379  | 7196  | YNL017 | <b>0.26</b> | Sgl | Pi | 0.795        | 0.8          | 0.887 | 0.48 |
| iYJR055W     | 10 | 538944  |       | 10957  | <b>0.47</b> | Non | F  | 0.667        | 0.232        | 0.445 | 0.48 |
| iYERWdelta9  | 5  | 249775  | 9281  | YER048 | <b>0.39</b> | Dbl | Pi | 0.795        | 0.733        | 0.396 | 0.48 |
| itE(UUC)G3   | 7  | 541904  | 7139  | YGR028 | <b>0.93</b> | Sgl | Pi | 0.647        | 0.824        | 0.313 | 0.48 |
| iYPL140C     | 16 | 289036  | 13464 | YPL14  | <b>0.9</b>  | Sgl | Pi | 0.785        | <b>8E-05</b> | 0.364 | 0.48 |
| iYMR156C     | 13 | 571007  | 12203 | YMR15  | <b>0.78</b> | Sgl | Pi | 0.584        | 0.638        | 0.331 | 0.48 |
| iYDL142C     | 4  | 202588  | 8197  | YDL142 | <b>0.8</b>  | Dbl | Pi | 0.435        | 0.034        | 0.126 | 0.48 |
| iYGL177W-0   | 7  | 167897  | 9731  | YGL178 | <b>0.12</b> | Sgl | Pi | 0.682        | 0.509        | 0.955 | 0.48 |
| itM(CAU)J1   | 10 | 390812  | 7246  | YJL029 | <b>0.54</b> | Dbl | Pi | 0.693        | 0.763        | 0.898 | 0.48 |
| iYML080W     | 13 | 110062  | 11995 | YML07  | <b>0.48</b> | Sgl | Pi | 0.578        | 0.247        | 0.427 | 0.48 |
| iYOL065C     | 15 | 205870  | 12842 | YOL06  | <b>0.91</b> | Sgl | Pi | 0.411        | 0.682        | 0.54  | 0.48 |
| iYGR174C     | 7  | 846432  | 10049 | YGR17  | <b>0.6</b>  | Sgl | Pi | 0.774        | 0.477        | 0.977 | 0.48 |
| iYGR239C     | 7  | 970043  | 10108 | YGR23  | <b>0.54</b> | Sgl | Pi | 0.779        | 0.157        | 0.953 | 0.48 |
| iYCL044C     | 3  | 48367   | 7928  | YCL044 | <b>0.84</b> | Sgl | Pi | 0.011        | 0.693        | 0.774 | 0.48 |
| iYHR112C     | 8  | 335670  | 10350 | YHR11  | <b>0.85</b> | Dbl | Pi | 0.563        | 0.076        | 0.242 | 0.48 |
| iYFL002C     | 6  | 146926  | 9286  | YFL002 | <b>0.83</b> | Dbl | Pi | 0.548        | 0.723        | 0.475 | 0.48 |
| iYKL218C-0   | 11 | 18336   | 11274 | YKL21  | <b>0.51</b> | Dbl | Pi | 0.047        | 0.778        | 0.665 | 0.48 |
| iYMR120C     | 13 | 509283  | 12167 | YMR12  | <b>0.49</b> | Sgl | Pi | 0.689        | 0.031        | 0.901 | 0.48 |
| iYCRWdelta11 | 3  | 169865  | 8061  | YCR027 | <b>0.49</b> | Sgl | Pi | 0.863        | 0.658        | 0.686 | 0.48 |
| iYCRWdelta11 | 3  | 169865  | 8061  | YCR027 | <b>0.49</b> | Sgl | Pi | 0.863        | 0.658        | 0.686 | 0.48 |
| iYFR055W-0   | 6  | 265211  | 9550  | YFR057 | <b>0.31</b> | Sgl | Pi | 0.741        | 0.565        | 0.061 | 0.48 |
| iYLL032C     | 12 | 76744   | 11437 | YLL032 | <b>0.75</b> | Sgl | Pi | 0.485        | 0.575        | 0.526 | 0.48 |
| itl(AAU)E1   | 5  | 443278  | 7186  | YER137 | <b>0.29</b> | Sgl | Pi | NaN          | 0.533        | 0.977 | 0.48 |
| iYPR018W     | 16 | 596276  | 13630 | YPR01  | <b>0.74</b> | Sgl | Pi | 0.536        | 0.435        | 0.614 | 0.48 |
| iYDL235C     | 4  | 33936   | 8285  | YDL235 | <b>0.81</b> | Sgl | Pi | 0.84         | 0.643        | 0.616 | 0.48 |
| iYMR074C     | 13 | 413477  | 12122 | YMR07  | <b>0.51</b> | Dbl | Pi | 0.62         | 0.753        | 0.961 | 0.48 |
| itV(AAC)M2   | 13 | 420655  | 7353  | YMR076 | <b>0.42</b> | Sgl | Pi | 0.76         | 0.972        | 0.83  | 0.48 |
| iYOR204W     | 15 | 724709  |       | 13147  | <b>0.03</b> | Non | F  | 0.916        | 0.633        | NaN   | 0.48 |
| iYBR060C-0   | 2  | 362468  | 7665  | YBR06C | <b>0.54</b> | Sgl | Pi | 0.539        | 0.174        | 0.294 | 0.48 |
| iYDL031W     | 4  | 397247  | 8092  | YDL030 | <b>0.82</b> | Sgl | Pi | 0.588        | 0.531        | 0.06  | 0.48 |
| iYGR285C     | 7  | 1063141 | 10154 | YGR28  | <b>0.61</b> | Sgl | Pi | 0.867        | 0.591        | 0.395 | 0.48 |
| iYJLWdelta1  | 10 | 59783   | 10905 | YJL200 | <b>0.87</b> | Sgl | Pi | NaN          | 0.56         | 0.178 | 0.49 |

|               |    |         |       |        |      |       |     |       |       |       |      |
|---------------|----|---------|-------|--------|------|-------|-----|-------|-------|-------|------|
| iYLRWdelta6-0 | 12 | 449040  | 11918 | YLR15  | 0.13 | Sgl   | Pi  | 0.832 | 0.542 | 0.277 | 0.49 |
| iYOR320C      | 15 | 915071  | 13255 | YOR32  | 0.84 | Dbl   | Pi  | 0.615 | 0.229 | 0.321 | 0.49 |
| iYGR104C      | 7  | 698350  | 9985  | YGR104 | 0.83 | Dbl   | Pi  | 0.378 | 0.644 | 0.694 | 0.49 |
| iYOR008C      | 15 | 342443  | 12961 | YOR00  | 0.47 | Sgl   | Pi  | 0.757 | 0.543 | 0.707 | 0.49 |
| iYPL275W-1    | 16 | 20358   | 13595 | YPL27  | 0.29 | Sgl   | Pi  | 0.619 | 0.301 | 0.339 | 0.49 |
| iYMR216C      | 13 | 701034  | 12266 | YMR21  | 0.46 | Dbl   | Pi  | 0.001 | 0.065 | 0.74  | 0.49 |
| iYCL054W      | 3  | 33961   |       | 7936   | 0.04 | Non F | NaN | 0.045 | 0.047 | 0.49  |      |
| iYIL006W      | 9  | 345183  | 10481 | YIL005 | 0.58 | Sgl   | Pi  | 0.766 | 0.565 | 0.243 | 0.49 |
| iYMR138W      | 13 | 545728  | 12186 | YMR13  | 0.98 | Sgl   | Pi  | 0.619 | 0.164 | 0.186 | 0.49 |
| iYKR101W-2    | 11 | 644686  | 11393 | YKR10  | 0.37 | Sgl   | Pi  | 0.825 | 0.615 | 0.811 | 0.49 |
| iYLR259C      | 12 | 664987  | 11718 | YLR25  | 0.15 | Dbl   | Pi  | 0.003 | 0.573 | 0.686 | 0.49 |
| iYFRWdelta7   | 6  | 158729  | 9562  | YFR007 | 0.56 | Sgl   | Pi  | 0.623 | 0.116 | 0.769 | 0.49 |
| iYBL068W      | 2  | 93400   |       | 7564   | 0.17 | Non F |     | 0.633 | 0.22  | 0.423 | 0.49 |
| iYEL024W      | 5  | 107897  |       | 8856   | 0.06 | Non F |     | 0.928 | 0.959 | 0.663 | 0.49 |
| iYDL081C      | 4  | 310122  | 8138  | YDL081 | 0.44 | Sgl   | Pi  | 0.005 | 0.448 | 0.141 | 0.49 |
| iYPL081W      | 16 | 406042  |       | 13411  | 0.14 | Non F |     | 0.498 | 0.742 | 0.653 | 0.49 |
| iYPL131W      | 16 | 304015  | 13456 | YPL13  | 0.17 | Sgl   | Pi  | 0.789 | 0.98  | 0.558 | 0.49 |
| iYHR068W      | 8  | 233295  |       | 10305  | 0.14 | Non F |     | 0.682 | 0.634 | 0.28  | 0.49 |
| iYHR065C      | 8  | 229155  | 10302 | YHR06  | 0.91 | Dbl   | Pi  | 0.005 | 0.64  | 0.27  | 0.49 |
| iYIL128W      | 9  | 116905  |       | 10598  | 0.11 | Non F |     | 0.42  | 0.448 | 0.2   | 0.49 |
| iYOR387C-1    | 15 | 1071009 | 13321 | YOR38  | 0.76 | Sgl   | Pi  | 0.658 | 0.764 | 0.124 | 0.49 |
| iYOR144C      | 15 | 605091  | 13091 | YOR14  | 0.61 | Sgl   | Pi  | 0.415 | 0.573 | 0.463 | 0.49 |
| iYDL016C      | 4  | 425857  | 8080  | YDL016 | 0.23 | Sgl   | Pi  | 0.147 | 0.443 | 0.422 | 0.49 |
| iYGR069W      | 7  | 627399  | 9950  | YGR070 | 0.45 | Sgl   | Pi  | 0.64  | 0.923 | 0.619 | 0.49 |
| iYIL107C      | 9  | 165760  | 10576 | YIL107 | 0.44 | Dbl   | Pi  | 0.48  | 0.256 | 0.544 | 0.49 |
| iYLR085C      | 12 | 301975  | 11554 | YLR08  | 0.98 | Dbl   | Pi  | 0.43  | 0.046 | 0.688 | 0.49 |
| iYPL281C      | 16 | 10873   | 13600 | YPL28  | 0.89 | Dbl   | Pi  | 0.66  | 0.217 | NaN   | 0.49 |
| iYKR009C      | 11 | 456687  | 11303 | YKR00  | 0.51 | Sgl   | Pi  | 0.481 | 0.263 | 0.941 | 0.49 |
| iYOR307C      | 15 | 894075  | 13242 | YOR30  | 0.59 | Sgl   | Pi  | 0.635 | 0.62  | 0.629 | 0.49 |
| iYDL086W      | 4  | 302230  | 8143  | YDL085 | 0.78 | Sgl   | Pi  | 0.193 | 0.434 | 0.74  | 0.49 |
| iYDL086W      | 4  | 302230  | 8143  | YDL085 | 0.78 | Sgl   | Pi  | 0.193 | 0.434 | 0.74  | 0.49 |
| iYDR174W      | 4  | 812844  |       | 8473   | 0.06 | Non F |     | 0.589 | 0.601 | 0.581 | 0.49 |
| iYMR024W      | 13 | 323043  | 12077 | YMR02  | 0.63 | Sgl   | Pi  | 0.714 | 0.356 | 0.54  | 0.49 |
| iYER022W      | 5  | 200861  | 8941  | YER023 | 0.81 | Sgl   | Pi  | 0.134 | 0.353 | 0.219 | 0.49 |
| iYDR299W      | 4  | 1061227 |       | 8586   | 0.19 | Non F |     | 0.69  | 0.129 | 0.131 | 0.49 |
| iYLR134W      | 12 | 412401  | 11601 | YLR13  | 0.76 | Sgl   | Pi  | 0.894 | 0.987 | 0.501 | 0.49 |
| iYORWdelta16  | 15 | 664463  |       | 13330  | 0.78 | Non F |     | 0.677 | 0.553 | 0.935 | 0.49 |
| iYIL120W      | 9  | 136100  |       | 10590  | 0.17 | Non F |     | 0.905 | 0.873 | 0.096 | 0.49 |
| iYDL227C-0    | 4  | 48047   | 8276  | YDL227 | 0.32 | Sgl   | Pi  | 0.619 | 0.265 | 0.026 | 0.49 |
| iYHL011C      | 8  | 81596   | 10188 | YHL01  | 0.52 | Sgl   | Pi  | 0.051 | 0.515 | 0.375 | 0.49 |
| iYEL037C      | 5  | 82606   | 8867  | YEL037 | 0.45 | Sgl   | Pi  | 2E-04 | 0.757 | 0.932 | 0.49 |
| iYHR015W      | 8  | 136529  |       | 10249  | 0.35 | Non F |     | 0.909 | 0.812 | 0.369 | 0.49 |
| iYKL050C      | 11 | 345270  | 11113 | YKL05  | 0.29 | Sgl   | Pi  | 0.565 | 0.621 | 0.067 | 0.49 |
| iYPL224C      | 16 | 128084  | 13544 | YPL22  | 0.76 | Sgl   | Pi  | 0.343 | 0.487 | 0.18  | 0.49 |
| iYOL028C      | 15 | 271371  | 12808 | YOL02  | 0.35 | Sgl   | Pi  | 0.751 | 0.543 | 0.63  | 0.49 |
| iYMR076C      | 13 | 420021  | 12124 | YMR07  | 0.66 | Sgl   | Pi  | 0.327 | 2E-04 | 0.857 | 0.49 |
| iYER091C-A    | 5  | 342593  | 9053  | YER091 | 0.27 | Dbl   | Pi  | 0.455 | 0.877 | 0.252 | 0.49 |
| iYOR137C      | 15 | 583692  | 13085 | YOR13  | 0.41 | Sgl   | Pi  | 0.845 | 0.397 | 0.027 | 0.49 |
| iYPL052W      | 16 | 459694  | 13383 | YPL05  | 0.85 | Sgl   | Pi  | 0.689 | 0.523 | 0.762 | 0.49 |
| iYBR007C-1    | 2  | 251734  | 7614  | YBR007 | 0.47 | Sgl   | Pi  | 0.75  | 0.637 | 0.323 | 0.49 |
| iYBR007C-1    | 2  | 251734  | 7614  | YBR007 | 0.47 | Sgl   | Pi  | 0.75  | 0.637 | 0.323 | 0.49 |



|              |    |         |       |        |             |     |    |       |       |       |      |
|--------------|----|---------|-------|--------|-------------|-----|----|-------|-------|-------|------|
| iYFL050C     | 6  | 35851   | 9380  | YFL050 | <b>0.78</b> | Dbl | Pi | 0.533 | 0.73  | 0.315 | 0.49 |
| iYKR105C     | 11 | 660083  | 11399 | YKR10  | <b>0.41</b> | Dbl | Pi | 0.682 | 0.947 | 0.31  | 0.49 |
| iYDL241W-0   | 4  | 21012   | 8291  | YDL240 | <b>0.74</b> | Sgl | Pi | 0.603 | 0.271 | 0.649 | 0.49 |
| iYCL036W     | 3  | 60732   |       | 7924   | <b>0.37</b> | Non | F  | 0.718 | 0.573 | 0.699 | 0.49 |
| iYHR029C     | 8  | 168541  | 10263 | YHR02  | <b>0.43</b> | Sgl | Pi | 0.753 | 0.722 | 0.141 | 0.49 |
| iYDR082W     | 4  | 611928  | 8389  | YDR08  | <b>0.42</b> | Sgl | Pi | 0.011 | 0.579 | 0.913 | 0.49 |
| iYPL141C     | 16 | 286058  | 13465 | YPL14  | <b>0.46</b> | Sgl | Pi | 0.807 | 7E-06 | 0.255 | 0.49 |
| iYGR004W     | 7  | 504340  |       | 9892   | <b>0.17</b> | Non | F  | 0.633 | 0.651 | 0.207 | 0.49 |
| iYIL124W     | 9  | 127083  | 10594 | YIL12  | <b>0.31</b> | Sgl | Pi | NaN   | 0.072 | 0.058 | 0.49 |
| iYMR053C     | 13 | 382904  | 12102 | YMR0   | <b>0.58</b> | Dbl | Pi | 0.709 | 0.172 | 0.666 | 0.49 |
| iYJLWdelta8  | 10 | 416400  | 10908 | YJL01  | <b>0.67</b> | Sgl | Pi | 0.18  | 0.652 | 0.758 | 0.49 |
| iYFL044C     | 6  | 45556   | 9368  | YFL04  | <b>0.46</b> | Sgl | Pi | 0.472 | 0.578 | 0.461 | 0.49 |
| iYGR287C     | 7  | 1069001 | 10157 | YGR2   | <b>0.82</b> | Dbl | Pi | 0.766 | 0.788 | 0.786 | 0.49 |
| iYMR218C     | 13 | 706898  | 12268 | YMR2   | <b>0.88</b> | Dbl | Pi | 0.578 | 0.04  | 0.522 | 0.49 |
| iYPR135W     | 16 | 802026  |       | 13730  | <b>0.69</b> | Non | F  | 0.004 | 0.59  | 0.367 | 0.49 |
| iYDR524C     | 4  | 1489001 | 8793  | YDR52  | <b>0.19</b> | Dbl | Pi | 0.2   | 0.583 | 0.959 | 0.49 |
| YMRctau1     | 13 | 290048  | 14132 | YMR0   | <b>0.62</b> | Sgl | Pi | 0.82  | 0.537 | 0.818 | 0.49 |
| iYDR326C     | 4  | 1124962 | 8612  | YDR3   | <b>0.99</b> | Dbl | Pi | 2E-04 | 0.138 | 0.514 | 0.49 |
| iYDR264C     | 4  | 998304  | 8556  | YDR2   | <b>0.8</b>  | Dbl | Pi | 0.182 | 0.11  | 0.402 | 0.5  |
| iYML108W     | 13 | 55123   |       | 12019  | <b>0.01</b> | Non | F  | 0.414 | 0.457 | 0.437 | 0.5  |
| iYPR007C     | 16 | 571361  | 13617 | YPR0   | <b>0.37</b> | Dbl | Pi | 0.846 | 0.93  | 0.842 | 0.5  |
| iYEL058W     | 5  | 44920   |       | 8887   | <b>0.63</b> | Non | F  | 0.705 | 0.488 | 0.542 | 0.5  |
| iYBR058C     | 2  | 356044  | 7663  | YBR0   | <b>0.93</b> | Sgl | Pi | 0.012 | 0.516 | 0.257 | 0.5  |
| iYLR456W     | 12 | 1055676 |       | 11892  | <b>0.13</b> | Non | F  | NaN   | 0.735 | NaN   | 0.5  |
| iYMR242C     | 13 | 753775  | 12292 | YMR2   | <b>0.07</b> | Sgl | Pi | 0.566 | 0.919 | 0.189 | 0.5  |
| iYLR373C     | 12 | 871369  | 11815 | YLR3   | <b>0.95</b> | Sgl | Pi | 0.002 | 0.322 | 0.899 | 0.5  |
| iYAL041W     | 1  | 65458   |       | 7415   | <b>0.04</b> | Non | F  | 0.138 | 0.556 | 0.596 | 0.5  |
| iYJR161C     | 10 | 743709  | 11062 | YJR1   | <b>0.38</b> | Sgl | Pi | 0.291 | 0.308 | 0.916 | 0.5  |
| iYPR141C     | 16 | 817910  | 13735 | YPR1   | <b>0.89</b> | Sgl | Pi | 0.293 | 0.529 | 0.442 | 0.5  |
| iYHR018C     | 8  | 141380  | 10252 | YHR0   | <b>0.25</b> | Sgl | Pi | 0.87  | 0.832 | 0.182 | 0.5  |
| iYGR144W     | 7  | 781366  | 10023 | YGR1   | <b>0.99</b> | Sgl | Pi | 0.731 | 0.975 | 0.096 | 0.5  |
| iYDL015C     | 4  | 426918  | 8079  | YDL0   | <b>0.52</b> | Dbl | Pi | 0.041 | 0.728 | 0.661 | 0.5  |
| iYHL040C     | 8  | 20975   | 10217 | YHL0   | <b>0.85</b> | Dbl | Pi | 0.501 | 0.381 | NaN   | 0.5  |
| iYCR081W     | 3  | 258642  | 8028  | YCR0   | <b>0.84</b> | Sgl | Pi | 1E-04 | 0.414 | 0.875 | 0.5  |
| iYJRWdelta20 | 10 | 543449  | 11065 | YJR0   | <b>0.58</b> | Dbl | Pi | 0.74  | 0.715 | 0.392 | 0.5  |
| iYPL277C     | 16 | 16854   | 13597 | YPL2   | <b>0.58</b> | Dbl | Pi | 0.829 | 0.833 | 0.396 | 0.5  |
| iYIL129C     | 9  | 113229  | 10599 | YIL1   | <b>0.96</b> | Dbl | Pi | 0.074 | 0.225 | 0.795 | 0.5  |
| iYDR298C     | 4  | 1058803 | 8585  | YDR2   | <b>0.83</b> | Dbl | Pi | 0.663 | 0.71  | 0.887 | 0.5  |
| iYGR111W     | 7  | 717016  | 9992  | YGR1   | <b>0.74</b> | Sgl | Pi | 0.419 | 0.725 | NaN   | 0.5  |
| iYDR104C     | 4  | 664924  | 8408  | YDR1   | <b>0.66</b> | Sgl | Pi | 0.506 | 0.826 | 0.369 | 0.5  |
| iYIL022W     | 9  | 312450  | 10499 | YIL0   | <b>0.42</b> | Sgl | Pi | 0.616 | 0.466 | 0.49  | 0.5  |
| iYDR116C     | 4  | 683569  | 8418  | YDR1   | <b>0.77</b> | Sgl | Pi | 0.692 | 0.595 | 0.613 | 0.5  |
| iYMR092C     | 13 | 453484  | 12140 | YMR0   | <b>0.78</b> | Dbl | Pi | 5E-04 | 0.706 | 0.499 | 0.5  |
| iYKL204W     | 11 | 55599   |       | 11260  | <b>0.16</b> | Non | F  | 0.653 | 0.003 | 0.488 | 0.5  |
| iYJL066C     | 10 | 314577  | 10756 | YJL0   | <b>0.71</b> | Sgl | Pi | 0.125 | 0.473 | 0.251 | 0.5  |
| iYOL095C     | 15 | 141341  | 12871 | YOL0   | <b>0.69</b> | Sgl | Pi | 0.708 | NaN   | 0.138 | 0.5  |
| iYDR003W     | 4  | 454735  | 8308  | YDR0   | <b>0.46</b> | Sgl | Pi | 0.82  | 0.58  | 0.136 | 0.5  |
| iYDL106C     | 4  | 271887  | 8160  | YDL1   | <b>0.97</b> | Dbl | Pi | 5E-04 | 0.735 | 0.293 | 0.5  |
| iYDR304C     | 4  | 1072555 | 8591  | YDR3   | <b>0.57</b> | Sgl | Pi | 0.477 | 0.61  | 0.418 | 0.5  |
| iYLR009W     | 12 | 167130  |       | 11480  | <b>0.1</b>  | Non | F  | 0.434 | 0.663 | 0.374 | 0.5  |
| iYJR080C     | 10 | 581306  | 10978 | YJR0   | <b>0.72</b> | Sgl | Pi | 0.77  | 0.149 | 0.399 | 0.5  |

|              |    |                    |               |             |        |              |              |              |            |
|--------------|----|--------------------|---------------|-------------|--------|--------------|--------------|--------------|------------|
| iYKL023W     | 11 | 394198             | 11089         | <b>0.09</b> | Non F  | 0.427        | 0.715        | 0.393        | 0.5        |
| iYKL216W     | 11 | 26164              | 11272         | <b>0.11</b> | Non F  | 0.668        | 0.138        | 0.475        | 0.5        |
| iYBR078W     | 2  | 394826             | 7683          | <b>0.15</b> | Non F  | 0.779        | 0.733        | 0.822        | 0.5        |
| iYMR204C     | 13 | 671350 12254       | YMR20         | <b>0.6</b>  | Sgl Pi | 0.372        | 0.637        | 0.554        | 0.5        |
| iYDR184C     | 4  | 831506 8484        | YDR184        | <b>0.65</b> | Sgl Pi | 0.224        | 0.643        | 0.409        | 0.5        |
| iYBR085W-0   | 2  | 416860             | 7692          | <b>0.66</b> | Non F  | 0.674        | 0.642        | 0.283        | 0.5        |
| iYNL331C     | 14 | 17241 12683        | YNL33         | <b>0.57</b> | Sgl Pi | 0.629        | 0.867        | 0.316        | 0.5        |
| iYDL136W     | 4  | 218358             | 8191          | <b>0.14</b> | Non F  | 0.394        | 0.29         | 0.302        | 0.5        |
| iYDL136W     | 4  | 218358             | 8191          | <b>0.14</b> | Non F  | 0.394        | 0.29         | 0.302        | 0.5        |
| iYMR004W     | 13 | 275551 12054       | YMR00         | <b>0.96</b> | Sgl Pi | <b>4E-04</b> | 0.648        | 0.458        | 0.5        |
| iYIL061C     | 9  | 245555 10535       | YIL061        | <b>0.77</b> | Dbl Pi | 0.662        | 0.572        | 0.657        | 0.5        |
| iYNL292W     | 14 | 84002              | 12650         | <b>0.08</b> | Non F  | 0.561        | 0.662        | 0.357        | 0.5        |
| iYPR117W     | 16 | 767477 13713       | YPR11         | <b>0.65</b> | Sgl Pi | 0.714        | 0.603        | NaN          | 0.5        |
| itG(UCC)O    | 15 | <b>111028</b>      | <b>7177</b>   | <b>0.21</b> | Non F  | <b>0.769</b> | <b>0.985</b> | <b>0.372</b> | <b>0.5</b> |
| iYGL125W     | 7  | 274347             | 9685          | <b>0.06</b> | Non F  | 0.635        | 0.829        | 0.444        | 0.5        |
| iYMR057C     | 13 | 388742 12106       | YMR05         | <b>0.34</b> | Dbl Pi | 0.514        | NaN          | 0.249        | 0.5        |
| iYHL044W     | 8  | 14256 10221        | YHL04         | <b>0.36</b> | Sgl Pi | 0.75         | 0.322        | 0.443        | 0.5        |
| iYGL235W     | 7  | 55801 9817         | YGL234        | <b>0.68</b> | Sgl Pi | 0.025        | 0.35         | 0.972        | 0.5        |
| iYJLCdelta6  | 10 | 374648 10903       | YJL03         | <b>0.36</b> | Sgl Pi | 0.454        | NaN          | 0.693        | 0.5        |
| iYDR437W     | 4  | 1337758 8715       | YDR43         | <b>0.47</b> | Sgl Pi | 0.537        | 0.539        | 0.172        | 0.5        |
| iYBR105C     | 2  | 451935 7711        | YBR105        | <b>0.07</b> | Dbl Pi | 0.285        | 0.031        | 0.817        | 0.5        |
| itK(CUU)K    | 11 | <b>202732 7214</b> | <b>YKL128</b> | <b>0.51</b> | Dbl Pi | <b>0.669</b> | <b>0.448</b> | <b>0.574</b> | <b>0.5</b> |
| iYER130C     | 5  | 422463 9129        | YER130        | <b>0.26</b> | Dbl Pi | 0.576        | 0.658        | 0.752        | 0.5        |
| iYHL041W     | 8  | 17848              | 10218         | <b>0.45</b> | Non F  | 0.737        | 0.173        | 0.657        | 0.5        |
| iYHL024W     | 8  | 58785              | 10201         | <b>0.35</b> | Non F  | 0.729        | 0.737        | 0.176        | 0.5        |
| iYDR349C     | 4  | 1174168 8636       | YDR34         | <b>0.82</b> | Sgl Pi | 0.694        | 0.354        | 0.164        | 0.5        |
| iYDR351W     | 4  | 1181241 8638       | YDR352        | <b>0.46</b> | Sgl Pi | 0.661        | 0.232        | 0.354        | 0.5        |
| iYHL037C     | 8  | 26182 10214        | YHL03         | <b>0.67</b> | Dbl Pi | 0.151        | NaN          | NaN          | 0.5        |
| iYNL043C     | 14 | 545890 12426       | YNL04         | <b>0.53</b> | Dbl Pi | 0.666        | 0.175        | 0.608        | 0.5        |
| iYDR084C     | 4  | 614002 8391        | YDR084        | <b>0.77</b> | Sgl Pi | 0.484        | 0.009        | 0.468        | 0.5        |
| iYHR020W     | 8  | <b>146038</b>      | <b>10254</b>  | <b>0.03</b> | Non F  | <b>0.724</b> | <b>0.678</b> | <b>0.285</b> | <b>0.5</b> |
| iYER006W     | 5  | 164293 8923        | YER007        | <b>0.4</b>  | Sgl Pi | 0.45         | 0.612        | 0.697        | 0.5        |
| iYNL200C     | 14 | 264481 12569       | YNL20         | <b>0.65</b> | Sgl Pi | 0.594        | 0.927        | 0.562        | 0.5        |
| iYPL048W     | 16 | 465649 13379       | YPL04         | <b>0.58</b> | Sgl Pi | 0.602        | 0.643        | 0.253        | 0.5        |
| iYLR246W     | 12 | <b>628206</b>      | <b>11707</b>  | <b>0.03</b> | Non F  | <b>0.745</b> | <b>0.623</b> | <b>0.539</b> | <b>0.5</b> |
| itN(GUU)G    | 7  | <b>731198 7256</b> | <b>YGR120</b> | <b>0.6</b>  | Sgl Pi | <b>0.626</b> | <b>0.642</b> | <b>0.736</b> | <b>0.5</b> |
| iYJL058C     | 10 | 327602 10750       | YJL05         | <b>0.64</b> | Sgl Pi | 0.464        | 0.641        | 0.665        | 0.5        |
| iYFR044C     | 6  | 241421 9518        | YFR044        | <b>0.84</b> | Dbl Pi | 0.171        | 0.002        | <b>2E-04</b> | 0.5        |
| iYLR285W     | 12 | 708134             | 11739         | <b>0.28</b> | Non F  | 0.534        | 0.519        | 0.385        | 0.5        |
| itL(UAA)L    | 12 | <b>963042 7239</b> | <b>YLR420</b> | <b>0.09</b> | Sgl Pi | <b>0.852</b> | <b>0.626</b> | <b>0.638</b> | <b>0.5</b> |
| itV(AAC)K1-0 | 11 | <b>307850 7348</b> | <b>YKL068</b> | <b>0.27</b> | Sgl Pi | <b>0.515</b> | <b>0.031</b> | <b>0.103</b> | <b>0.5</b> |
| iYDR518W     | 4  | 1480194 8788       | YDR51         | <b>0.79</b> | Sgl Pi | 0.63         | 0.414        | 0.345        | 0.5        |
| iYGR158C     | 7  | 806054 10035       | YGR1          | <b>0.91</b> | Sgl Pi | 0.385        | 0.827        | 0.794        | 0.5        |
| iYJL095W     | 10 | 251381             | 10781         | <b>0.05</b> | Non F  | 0.307        | 0.541        | 0.342        | 0.5        |
| iYOL084W     | 15 | 165331 12860       | YOL08         | <b>0.73</b> | Sgl Pi | 0.717        | 0.864        | 0.451        | 0.5        |
| iYGR066C     | 7  | 621815 9948        | YGR06         | <b>0.78</b> | Sgl Pi | 0.628        | 0.562        | 0.356        | 0.51       |
| iYMR197C     | 13 | 659192 12247       | YMR1          | <b>0.92</b> | Dbl Pi | <b>5E-04</b> | <b>1E-08</b> | 0.688        | 0.51       |
| iYAL010C     | 1  | 135653 7383        | YAL010        | <b>0.94</b> | Dbl Pi | 0.61         | 0.652        | 0.402        | 0.51       |
| iYLL027W     | 12 | 88158 11432        | YLL02         | <b>0.61</b> | Sgl Pi | 0.819        | 0.796        | 0.137        | 0.51       |
| iYER161C     | 5  | 500350 9185        | YER161        | <b>0.88</b> | Sgl Pi | 0.011        | 0.704        | 0.566        | 0.51       |
| iYDR032C-0   | 4  | 504681 8335        | YDR032        | <b>0.74</b> | Dbl Pi | 0.671        | 0.86         | 0.935        | 0.51       |

|                    |           |                    |               |             |               |              |              |              |             |
|--------------------|-----------|--------------------|---------------|-------------|---------------|--------------|--------------|--------------|-------------|
| iYOL161C-1         | 15        | 13116              | #N/A          | <b>0.45</b> | #N/A          | 0.858        | 0.382        | 0.003        | 0.51        |
| iYBR097W           | 2         | 441318 7705        | YBR098        | <b>0.46</b> | Sgl Pi        | 0.461        | 0.534        | NaN          | 0.51        |
| iYMR298W           | 13        | 864284             | 12346         | <b>0.27</b> | Non F         | 0.156        | 0.492        | 0.478        | 0.51        |
| iYCR043C           | 3         | 206640 8000        | YCR043        | <b>0.84</b> | Sgl Pi        | 0.599        | 0.61         | 0.476        | 0.51        |
| iYNL011C           | 14        | 613152 12397       | YNL011        | <b>0.67</b> | Dbl Pi        | 0.765        | 0.344        | 0.575        | 0.51        |
| iYNL071W           | 14        | 492970 12451       | YNL071        | <b>0.59</b> | Sgl Pi        | 0.107        | 0.533        | 0.511        | 0.51        |
| iYGL250W           | 7         | 32676 9841         | YGL249        | <b>0.55</b> | Sgl Pi        | 0.726        | 0.379        | 0.465        | 0.51        |
| iYNR032W           | 14        | 687122             | 12731         | <b>0.01</b> | Non F         | 0.365        | 0.425        | NaN          | 0.51        |
| iYLL019C           | 12        | 107905 11425       | YLL019        | <b>0.13</b> | Sgl Pi        | 0.352        | 0.322        | 0.937        | 0.51        |
| iYBR008C           | 2         | 254166 7615        | YBR008        | <b>0.39</b> | Sgl Pi        | 0.679        | 0.521        | 0.522        | 0.51        |
| iYER009W           | 5         | 172490             | 8927          | <b>0.07</b> | Non F         | 0.076        | 0.54         | 0.437        | 0.51        |
| iYBR254C           | 2         | 724217 7848        | YBR254        | <b>0.96</b> | Dbl Pi        | NaN          | 0.05         | NaN          | 0.51        |
| iYDR085C           | 4         | 616133 8392        | YDR085        | <b>0.5</b>  | Sgl Pi        | 0.695        | 4E-05        | 0.458        | 0.51        |
| iYKL162C           | 11        | 148830 11218       | YKL162        | <b>0.71</b> | Sgl Pi        | 0.604        | 0.22         | 0.051        | 0.51        |
| iYLR081W           | 12        | 291924             | 11550         | <b>0.42</b> | Non F         | 0.585        | 0.758        | 0.609        | 0.51        |
| iYLL039C           | 12        | 65222 11442        | YLL039        | <b>0.43</b> | Sgl Pi        | 0.067        | 0.84         | 0.808        | 0.51        |
| iYGR058W           | 7         | 607136 9941        | YGR058        | <b>0.61</b> | Sgl Pi        | <b>2E-04</b> | 0.893        | 0.017        | 0.51        |
| iYGR291C           | 7         | 1076506 10161      | YGR291        | <b>0.53</b> | Dbl Pi        | 0.441        | 0.757        | 0.355        | 0.51        |
| iYOR315W           | 15        | 905794             | 13249         | <b>0.25</b> | Non F         | 0.412        | 0.544        | 0.403        | 0.51        |
| iYKR022C           | 11        | 482772 11315       | YKR022        | <b>0.99</b> | Dbl Pi        | 0.565        | 0.77         | 0.971        | 0.51        |
| iYAR002C-A         | 1         | 154714 7455        | YAR002        | <b>0.96</b> | Dbl Pi        | 0.636        | 0.518        | 0.386        | 0.51        |
| iYGR223C           | 7         | 942194 10094       | YGR223        | <b>0.65</b> | Dbl Pi        | 0.712        | 0.158        | 0.02         | 0.51        |
| iYDR383C           | 4         | 1240711 8668       | YDR383        | <b>0.32</b> | Sgl Pi        | 0.634        | 0.531        | 0.73         | 0.51        |
| iYOR125C           | 15        | 559863 13074       | YOR125        | <b>0.1</b>  | Sgl Pi        | 0.381        | 0.475        | 0.533        | 0.51        |
| <b>iYKL209C</b>    | <b>11</b> | <b>46296 11265</b> | <b>YKL209</b> | <b>0.3</b>  | <b>Dbl Pi</b> | <b>0.85</b>  | <b>0.022</b> | <b>0.803</b> | <b>0.51</b> |
| iYGR290W           | 7         | 1075927            | 10160         | <b>0.98</b> | Non F         | 0.515        | 0.469        | 0.221        | 0.51        |
| iYLR423C           | 12        | 973154 11862       | YLR423        | <b>0.95</b> | Dbl Pi        | 0.449        | 0.172        | 0.483        | 0.51        |
| iYDL074C           | 4         | 326138 8131        | YDL074        | <b>0.91</b> | Dbl Pi        | 0.004        | 0.666        | 0.489        | 0.51        |
| iYDL128W           | 4         | 233884 8181        | YDL127        | <b>0.33</b> | Sgl Pi        | 0.525        | 0.388        | 0.906        | 0.51        |
| TEL15R-2           | 15        | 1084630            | 13956         | <b>0.25</b> | Non F         | 0.599        | 0.987        | 0.984        | 0.51        |
| iYDR035W           | 4         | 522925             | 8342          | <b>0.14</b> | Non F         | 0.365        | 0.661        | 0.493        | 0.51        |
| iYBR162C           | 2         | 564534 7765        | YBR162        | <b>0.17</b> | Dbl Pi        | 0.177        | 0.083        | 0.086        | 0.51        |
| <b>itR(ACG)O</b>   | <b>15</b> | <b>340364 7292</b> | <b>YOR007</b> | <b>0.22</b> | <b>Sgl Pi</b> | <b>0.885</b> | <b>0.713</b> | <b>0.844</b> | <b>0.51</b> |
| iYBL028C           | 2         | 167796 7527        | YBL028        | <b>0.01</b> | Dbl Pi        | NaN          | 0.438        | 0.9          | 0.51        |
| iYMR033W           | 13        | 339276             | 12085         | <b>0.15</b> | Non F         | 0.174        | 0.361        | 0.909        | 0.51        |
| iYGL140C           | 7         | 245008 9698        | YGL140        | <b>0.77</b> | #N/A          | 0.636        | 0.213        | 0.008        | 0.51        |
| iYPL264C           | 16        | 44338 13582        | YPL264        | <b>0.51</b> | Sgl Pi        | 0.672        | 0.622        | 0.402        | 0.51        |
| iYMR225C           | 13        | 721432 12275       | YMR225        | <b>0.59</b> | Sgl Pi        | 0.173        | 0.536        | 0.48         | 0.51        |
| iYJL098W           | 10        | 245028 10783       | YJL098        | <b>0.65</b> | Sgl Pi        | 0.66         | 0.433        | 0.59         | 0.51        |
| iYBR233W           | 2         | 684669             | 7828          | <b>0.92</b> | Non F         | 0.725        | 0.485        | 0.432        | 0.51        |
| iYGR092W           | 7         | 669916 9973        | YGR092        | <b>0.66</b> | Sgl Pi        | 0.768        | 0.569        | 0.23         | 0.51        |
| iYLR265C           | 12        | 675478 11724       | YLR265        | <b>0.62</b> | Sgl Pi        | 0.25         | 0.564        | NaN          | 0.51        |
| iYOR171C           | 15        | 653868 13115       | YOR171        | <b>0.98</b> | Dbl Pi        | 0.449        | 0.443        | 0.339        | 0.51        |
| <b>iYER132C</b>    | <b>5</b>  | <b>430455 9133</b> | <b>YER132</b> | <b>0.36</b> | <b>Dbl Pi</b> | <b>0.697</b> | <b>0.975</b> | <b>0.034</b> | <b>0.51</b> |
| iYPL115C           | 16        | 335484 13440       | YPL115        | <b>0.86</b> | Dbl Pi        | 0.623        | 0.16         | 0.534        | 0.51        |
| iYLR018C           | 12        | 179591 11488       | YLR018        | <b>0.78</b> | Dbl Pi        | 0.416        | 0.779        | 0.256        | 0.51        |
| iYMR319C-1         | 13        | 915640 12368       | YMR319        | <b>0.19</b> | Dbl Pi        | 0.565        | 0.829        | 0.604        | 0.51        |
| <b>itR(ACG)D-0</b> | <b>4</b>  | <b>620024 7287</b> | <b>YDR085</b> | <b>0.52</b> | <b>Dbl Pi</b> | <b>0.801</b> | <b>0.363</b> | <b>0.785</b> | <b>0.51</b> |
| iYLR402W           | 12        | 925081 11841       | YLR402        | <b>0.43</b> | Sgl Pi        | 0.05         | 0.786        | NaN          | 0.51        |
| iYER063W           | 5         | 282368             | 8995          | <b>0.11</b> | Non F         | 0.581        | 6E-05        | 0.786        | 0.52        |
| iYPL010W           | 16        | 535586             | 13345         | <b>0.29</b> | Non F         | 0.692        | 0.596        | 0.064        | 0.52        |

|             |    |               |        |             |        |       |       |       |      |
|-------------|----|---------------|--------|-------------|--------|-------|-------|-------|------|
| iYGR167W    | 7  | 833140        | 10042  | <b>0.2</b>  | Non F  | 0.574 | 0.725 | 0.64  | 0.52 |
| iYNL082W    | 14 | 476004        | 12462  | <b>0.21</b> | Non F  | 0.348 | 0.527 | 0.332 | 0.52 |
| iYBR258C    | 2  | 730120 7851   | YBR258 | <b>0.71</b> | Dbl Pi | 0.779 | 0.427 | 0.631 | 0.52 |
| iYML030W    | 13 | 216908 11950  | YML02  | <b>0.7</b>  | Sgl Pi | 0.701 | 0.765 | 0.01  | 0.52 |
| iYML018C    | 13 | 235948 11938  | YML01  | <b>0.7</b>  | Dbl Pi | 0.71  | 0.991 | 0.791 | 0.52 |
| iYMR111C    | 13 | 493786 12158  | YMR1   | <b>0.6</b>  | Sgl Pi | 0.525 | 0.588 | 0.336 | 0.52 |
| iYDR171W    | 4  | 807737 8470   | YDR172 | <b>0.76</b> | Sgl Pi | 0.012 | 0.916 | 0.458 | 0.52 |
| iYLR097C    | 12 | 337260 11566  | YLR09  | <b>0.97</b> | Sgl Pi | 0.432 | 0.582 | 0.495 | 0.52 |
| iYJL145W    | 10 | 145732 10826  | YJL14  | <b>0.35</b> | Sgl Pi | 0.466 | 0.564 | 0.838 | 0.52 |
| iYOR280C    | 15 | 845794 13216  | YOR28  | <b>0.53</b> | Sgl Pi | 0.575 | 0.434 | 0.271 | 0.52 |
| iYJL187C    | 10 | 79260 10864   | YJL18  | <b>0.41</b> | Dbl Pi | NaN   | 0.273 | 0.088 | 0.52 |
| iYMR086C-A  | 13 | 442356 12135  | YMR08  | <b>0.33</b> | Dbl Pi | 0.697 | 0.216 | 0.528 | 0.52 |
| iYGR276C    | 7  | 1045464 10145 | YGR27  | <b>0.77</b> | Sgl Pi | 0.418 | 0.448 | 0.343 | 0.52 |
| iYJR091C    | 10 | 598035 10986  | YJR09  | <b>0.52</b> | Dbl Pi | 0.32  | 6E-06 | 0.298 | 0.52 |
| YGRCTy1-2D  | 7  | 566287        | 14076  | <b>0.44</b> | Non F  | 0.788 | 0.218 | 0.9   | 0.52 |
| iYBR229C    | 2  | 679192 7825   | YBR229 | <b>0.98</b> | Sgl Pi | 0.675 | 0.555 | 0.035 | 0.52 |
| iYMR200W    | 13 | 665530        | 12250  | <b>0.11</b> | Non F  | 0.69  | 0.743 | 0.483 | 0.52 |
| iYJL214W-0  | 10 | 28604 10887   | YJL21  | <b>0.54</b> | Sgl Pi | 0.515 | 0.904 | 0.924 | 0.52 |
| iYLL036C    | 12 | 68251 11441   | YLL03  | <b>0.89</b> | Dbl Pi | 0.37  | 0.02  | 0.421 | 0.52 |
| iYLR019W    | 12 | 181483        | 11489  | <b>0.26</b> | Non F  | 0.719 | 0.583 | NaN   | 0.52 |
| iYNR063W    | 14 | 748762        | 12763  | <b>0.08</b> | Non F  | 0.636 | 0.802 | 0.561 | 0.52 |
| iYLR449W    | 12 | 1032005 11885 | YLR45  | <b>0.94</b> | Sgl Pi | 0.247 | 0.013 | 0.89  | 0.52 |
| iYPR161C    | 16 | 866421 13752  | YPR16  | <b>0.83</b> | Sgl Pi | 0.586 | 0.59  | 0.979 | 0.52 |
| iYDR253C    | 4  | 964583 8544   | YDR253 | <b>0.8</b>  | Dbl Pi | 0.734 | 0.384 | 0.866 | 0.52 |
| iYDR253C    | 4  | 964583 8544   | YDR253 | <b>0.8</b>  | Dbl Pi | 0.734 | 0.384 | 0.866 | 0.52 |
| itD(GUC)J2  | 10 | 355223 7122   | YJL045 | <b>0.43</b> | Sgl Pi | 0.762 | 0.225 | 1     | 0.52 |
| iYHR131C    | 8  | 367859 10365  | YHR13  | <b>0.97</b> | Sgl Pi | 0.447 | 0.688 | 1E-05 | 0.52 |
| iYBR234C    | 2  | 686536 7829   | YBR234 | <b>0.9</b>  | Dbl Pi | 0.488 | 0.602 | 0.26  | 0.52 |
| itV(AAC)E1  | 5  | 438755 7337   | YER135 | <b>0.31</b> | Dbl Pi | 0.622 | 0.017 | 0.613 | 0.52 |
| iYPL064C    | 16 | 429613 13396  | YPL06  | <b>0.64</b> | Dbl Pi | 0.624 | 0.853 | 0.175 | 0.52 |
| iYDL099W    | 4  | 284433        | 8154   | <b>0.13</b> | Non F  | 0.584 | 0.388 | 0.275 | 0.52 |
| iYDL196W    | 4  | 107074 8244   | YDL195 | <b>0.93</b> | Sgl Pi | 0.006 | 0.293 | 0.698 | 0.52 |
| iYKR095W    | 11 | 625066 11385  | YKR09  | <b>0.6</b>  | Sgl Pi | 0.795 | 0.107 | 0.921 | 0.52 |
| iYLRCsigma1 | 12 | 168428 11909  | YLR01  | <b>0.92</b> | Dbl Pi | 0.813 | 0.006 | 0.616 | 0.52 |
| iYHL038C    | 8  | 25492 10215   | YHL03  | <b>0.77</b> | Sgl Pi | 0.467 | 0.107 | 0.618 | 0.52 |
| YJRWdelta20 | 10 | 543132 14112  | YJR05  | <b>0.4</b>  | Dbl Pi | 0.807 | 0.813 | 0.867 | 0.52 |
| iYDR097C    | 4  | 643835 8402   | YDR097 | <b>0.74</b> | Sgl Pi | 0.699 | 0.553 | 0.436 | 0.52 |
| iYJL072C    | 10 | 305575 10761  | YJL07  | <b>0.86</b> | Dbl Pi | 0.687 | 0.615 | 0.329 | 0.52 |
| iYKR102W-0  | 11 | 649498 11394  | YKR10  | <b>0.83</b> | Sgl Pi | 0.679 | 0.064 | 0.419 | 0.52 |
| iYJL081C    | 10 | 284966 10769  | YJL08  | <b>0.91</b> | Sgl Pi | 0.539 | 0.637 | 0.541 | 0.52 |
| iYIL038C    | 9  | 282636 10514  | YIL038 | <b>0.99</b> | Sgl Pi | 0.211 | 0.685 | 0.457 | 0.52 |
| iYNR006W    | 14 | 638854        | 12704  | <b>0.27</b> | Non F  | 0.787 | 0.539 | 0.046 | 0.52 |
| iYBL094C    | 2  | 44076 7587    | YBL094 | <b>0.11</b> | Sgl Pi | 0.614 | 0.742 | 0.538 | 0.52 |
| iYDR120C    | 4  | 693256 8422   | YDR120 | <b>0.75</b> | Dbl Pi | 0.003 | 0.565 | 0.409 | 0.52 |
| iYGR292W-0  | 7  | 1078343       | 10162  | <b>0.72</b> | Non F  | 0.021 | 0.45  | 0.554 | 0.52 |
| iYBL093C    | 2  | 44917 7586    | YBL093 | <b>0.19</b> | Dbl Pi | 0.602 | 0.874 | 0.563 | 0.52 |
| iYNL275W    | 14 | 120995        | 12634  | <b>0.01</b> | Non F  | 0.748 | 0.635 | 0.514 | 0.52 |
| iYIR028W    | 9  | 410375 10682  | YIR028 | <b>0.86</b> | Sgl Pi | 0.687 | 0.479 | 0.349 | 0.52 |
| iYJR125C    | 10 | 655643 11021  | YJR12  | <b>0.9</b>  | Sgl Pi | 0.121 | 0.176 | 0.526 | 0.52 |
| iYNR009W    | 14 | 643434 12707  | YNR01  | <b>0.64</b> | Sgl Pi | 0.664 | 0.76  | 0.503 | 0.52 |
| iYCR092C    | 3  | 279893 8038   | YCR092 | <b>0.77</b> | Dbl Pi | 0.002 | 1E-05 | 0.368 | 0.52 |

|            |    |         |       |        |             |        |       |              |              |      |
|------------|----|---------|-------|--------|-------------|--------|-------|--------------|--------------|------|
| iYDL118W   | 4  | 247687  | 8172  | YDL117 | <b>0.57</b> | Sgl Pi | 0.67  | 0.653        | 0.027        | 0.52 |
| iYPR055W   | 16 | 670853  | 13660 | YPR05  | <b>0.7</b>  | Sgl Pi | 0.529 | 0.906        | 0.66         | 0.52 |
| iYOR140W   | 15 | 589272  |       | 13087  | <b>0.16</b> | Non F  | 0.705 | 0.833        | 0.449        | 0.52 |
| iYOR164C   | 15 | 644320  | 13111 | YOR16  | <b>0.88</b> | Dbl Pi | 0.549 | 0.537        | <b>1E-04</b> | 0.52 |
| iYPR183W   | 16 | 901559  | 13772 | YPR18  | <b>0.35</b> | Sgl Pi | 0.009 | 0.907        | 0.361        | 0.52 |
| iYLR310C   | 12 | 756998  | 11763 | YLR31  | <b>0.87</b> | Sgl Pi | 0.626 | 0.66         | NaN          | 0.52 |
| iYJL213W   | 10 | 33162   |       | 10886  | <b>0.24</b> | Non F  | NaN   | 0.849        | 0.527        | 0.52 |
| iYGR098C   | 7  | 687437  | 9979  | YGR09  | <b>0.94</b> | Dbl Pi | 0.702 | <b>5E-07</b> | 0.878        | 0.52 |
| iYJL018W   | 10 | 404647  | 10715 | YJL01  | <b>0.76</b> | Sgl Pi | 0.666 | 0.903        | 0.733        | 0.53 |
| iYDR344C   | 4  | 1162439 | 8630  | YDR344 | <b>0.82</b> | Sgl Pi | 0.772 | 0.456        | 0.348        | 0.53 |
| iYFL051C-0 | 6  | 30537   | 9382  | YFL051 | <b>0.3</b>  | Sgl Pi | 0.731 | 0.155        | 0.5          | 0.53 |
| iYHR122W   | 8  | 354323  | 10359 | YHR12  | <b>0.59</b> | Sgl Pi | 0.429 | 0.439        | 0.428        | 0.53 |
| iYPL203W   | 16 | 167399  |       | 13524  | <b>0.11</b> | Non F  | 0.643 | 0.693        | 0.142        | 0.53 |
| iYKR050W   | 11 | 530125  | 11338 | YKR05  | <b>0.78</b> | Sgl Pi | 0.737 | 0.736        | 0.441        | 0.53 |
| iYGR122W   | 7  | 735135  |       | 10002  | <b>0.08</b> | Non F  | 0.701 | 0.752        | 0.483        | 0.53 |
| itS(AGA)B  | 2  | 227104  | 7303  | YBL004 | <b>0.93</b> | Sgl Pi | 0.832 | 0.755        | 0.453        | 0.53 |
| itS(AGA)B  | 2  | 227104  | 7303  | YBL004 | <b>0.93</b> | Sgl Pi | 0.832 | 0.755        | 0.453        | 0.53 |
| iSNR69     | 11 | 364518  | 7095  | YKL038 | <b>0.46</b> | Sgl Pi | 0.578 | 0.11         | 0.944        | 0.53 |
| iYNR016C-0 | 14 | 661356  | 12714 | YNR01  | <b>0.09</b> | Dbl Pi | 0.401 | 0.144        | 0.785        | 0.53 |
| iYJL147C   | 10 | 142255  | 10828 | YJL14  | <b>0.87</b> | Dbl Pi | 0.624 | 0.023        | 0.494        | 0.53 |
| iYGL094C   | 7  | 334464  | 9654  | YGL094 | <b>0.94</b> | Dbl Pi | 0.51  | 0.724        | 0.139        | 0.53 |
| iYGL094C   | 7  | 334464  | 9654  | YGL094 | <b>0.94</b> | Dbl Pi | 0.51  | 0.724        | 0.139        | 0.53 |
| iYPL006W   | 16 | 548165  | 13341 | YPL00  | <b>0.73</b> | Sgl Pi | 0.612 | 0.69         | 0.291        | 0.53 |
| iYKL018W   | 11 | 404719  |       | 11084  | <b>0.22</b> | Non F  | 0.172 | 0.62         | 0.395        | 0.53 |
| iYLR389C   | 12 | 902647  | 11829 | YLR38  | <b>0.76</b> | Dbl Pi | 0.711 | 0.289        | 0.871        | 0.53 |
| iYOR026W   | 15 | 380811  | 12979 | YOR02  | <b>0.38</b> | Sgl Pi | 0.003 | 0.88         | 0.528        | 0.53 |
| iYDR426C   | 4  | 1322005 | 8706  | YDR42  | <b>0.92</b> | Dbl Pi | 0.3   | 0.621        | NaN          | 0.53 |
| iYOR175C   | 15 | 661665  | 13119 | YOR17  | <b>0.94</b> | Dbl Pi | 0.529 | 0.031        | 0.207        | 0.53 |
| iYNR028W   | 14 | 677105  |       | 12726  | <b>0.01</b> | Non F  | 0.299 | 0.457        | 0.747        | 0.53 |
| iYEL025C   | 5  | 106135  | 8857  | YEL025 | <b>0.66</b> | Dbl Pi | 0.656 | 0.833        | 0.428        | 0.53 |
| iYOL140W   | 15 | 60015   |       | #N/A   | <b>0.17</b> | #N/A   | 0.77  | 0.933        | 0.376        | 0.53 |
| iYGR196C   | 7  | 892182  | 10068 | YGR19  | <b>0.98</b> | Sgl Pi | 0.695 | 0.424        | 0.538        | 0.53 |
| iYFL068W   | 6  | 523     | 9422  | YFL067 | <b>0.04</b> | Sgl Pi | 0.693 | 0.041        | 0.698        | 0.53 |
| itN(GUU)N2 | 14 | 632661  | 7260  | YNR001 | <b>0.67</b> | Sgl Pi | 0.513 | 0.718        | 0.652        | 0.53 |
| iYDR424C   | 4  | 1319819 | 8705  | YDR424 | <b>0.79</b> | Dbl Pi | 0.74  | 0.365        | 0.785        | 0.53 |
| itD(GUC)L2 | 12 | 793981  |       | 7126   | <b>0.26</b> | Non F  | 0.867 | 0.558        | 0.52         | 0.53 |
| iYLR017W   | 12 | 178614  |       | 11487  | <b>0.11</b> | Non F  | 0.562 | 0.531        | 0.438        | 0.53 |
| iYLL062C   | 12 | 17604   | 11463 | YLL06  | <b>0.59</b> | Dbl Pi | 0.622 | 0.61         | 0.392        | 0.53 |
| iYBL055C   | 2  | 116779  | 7553  | YBL055 | <b>0.71</b> | Dbl Pi | 0.735 | 0.334        | 0.575        | 0.53 |
| iYJR056C   | 10 | 542181  | 10958 | YJR05  | <b>0.7</b>  | Dbl Pi | 0.635 | 0.783        | 0.547        | 0.53 |
| iYER036C   | 5  | 225194  | 8955  | YER03  | <b>0.09</b> | Dbl Pi | 0.197 | 0.516        | 0.267        | 0.53 |
| iYGR160W   | 7  | 807670  |       | 10036  | <b>0.55</b> | Non F  | 0.678 | 0.59         | 0.76         | 0.53 |
| iYDL183C-0 | 4  | 131834  | 8231  | YDL183 | <b>0.57</b> | Dbl Pi | 0.577 | 0.139        | 0.933        | 0.53 |
| YILWTy3-1A | 9  | 205591  | 14098 | YIL08  | <b>0.14</b> | Dbl Pi | 0.64  | 0.363        | 0.342        | 0.53 |
| iYLR260W   | 12 | 667905  |       | 11719  | <b>0.18</b> | Non F  | 0.622 | 0.749        | 0.111        | 0.53 |
| iYMR179W   | 13 | 622128  |       | 12227  | <b>0.25</b> | Non F  | NaN   | 0.636        | NaN          | 0.53 |
| iYBR149W   | 2  | 540992  |       | 7751   | <b>0.36</b> | Non F  | 0.644 | 0.916        | 0.801        | 0.53 |
| iYGL015C   | 7  | 465423  | 9579  | YGL015 | <b>0.37</b> | Dbl Pi | 0.017 | 0.892        | 0.403        | 0.53 |
| iYBL001C   | 2  | 237421  | 7501  | YBL001 | <b>0.43</b> | Sgl Pi | 0.333 | 0.694        | 0.676        | 0.53 |
| iYBR192W   | 2  | 608743  |       | 7793   | <b>0.12</b> | Non F  | 0.621 | 0.79         | 0.741        | 0.53 |
| itP(UGG)N2 | 14 | 568216  |       | 7273   | <b>0.5</b>  | Non F  | 0.875 | 0.832        | 0.476        | 0.53 |



|              |    |         |       |       |             |       |    |       |       |       |      |
|--------------|----|---------|-------|-------|-------------|-------|----|-------|-------|-------|------|
| iYLR146C     | 12 | 433737  | 11610 | YLR14 | <b>0.93</b> | Sgl   | Pi | 0.423 | 0.547 | 0.379 | 0.53 |
| iYMR151W     | 13 | 562929  | 12198 | YMR15 | <b>0.45</b> | Sgl   | Pi | 0.508 | 0.651 | 0.479 | 0.53 |
| iYOR119C     | 15 | 550248  | 13069 | YOR11 | <b>0.6</b>  | Dbl   | Pi | 0.75  | 0.554 | 0.54  | 0.53 |
| iYDR410C     | 4  | 1293088 | 8693  | YDR41 | <b>0.8</b>  | Sgl   | Pi | 0.001 | 0.824 | 0.882 | 0.53 |
| iYJR109C     | 10 | 632626  | 11006 | YJR10 | <b>0.81</b> | Dbl   | Pi | 0.698 | 0.477 | 0.038 | 0.53 |
| itG(GCC)P2   | 16 | 860434  | 7174  | YPR16 | <b>0.65</b> | Sgl   | Pi | 0.783 | 0.265 | 0.999 | 0.53 |
| iYHL016C     | 8  | 74235   | 10193 | YHL01 | <b>0.54</b> | Dbl   | Pi | 0.761 | 0.714 | 0.538 | 0.53 |
| iYLR191W     | 12 | 538436  |       | 11660 | <b>0.12</b> | Non F |    | 0.736 | 0.045 | 0.157 | 0.53 |
| iYFR019W     | 6  | 191313  | 9466  | YFR02 | <b>0.23</b> | Sgl   | Pi | 0.564 | 0.913 | 0.459 | 0.53 |
| iYLR247C     | 12 | 633360  | 11708 | YLR24 | <b>0.85</b> | Dbl   | Pi | 0.691 | 0.652 | 0.436 | 0.53 |
| iYBR120C     | 2  | 480888  | 7724  | YBR12 | <b>0.56</b> | Sgl   | Pi | 0.557 | 0.047 | 0.535 | 0.53 |
| iYFL017C     | 6  | 104467  | 9316  | YFL01 | <b>0.48</b> | Sgl   | Pi | 0.569 | 0.627 | 0.221 | 0.53 |
| iYMR300C     | 13 | 867089  | 12348 | YMR30 | <b>0.62</b> | Sgl   | Pi | 0.758 | 0.424 | 0.354 | 0.53 |
| iYGL055W     | 7  | 400161  |       | 9618  | <b>0.14</b> | Non F |    | 0.469 | 0.803 | 0.937 | 0.53 |
| iYGL055W     | 7  | 400161  |       | 9618  | <b>0.14</b> | Non F |    | 0.469 | 0.803 | 0.937 | 0.53 |
| iYNR062C-1   | 14 | 746123  | 12762 | YNR06 | <b>0.8</b>  | Dbl   | Pi | 0.661 | 0.873 | 0.147 | 0.53 |
| iYMR058W     | 13 | 390732  | 12107 | YMR05 | <b>0.71</b> | Sgl   | Pi | 0.388 | 0.827 | 0.381 | 0.53 |
| iYPR113W     | 16 | 752930  | 13709 | YPR11 | <b>0.54</b> | Sgl   | Pi | 0.87  | 0.521 | NaN   | 0.53 |
| iYFL067W     | 6  | 1367    |       | 9420  | <b>0.04</b> | Non F |    | 0.793 | 0.115 | 0.711 | 0.53 |
| iYAR044W-0   | 1  | 196173  |       | 7475  | <b>0.2</b>  | Non F |    | 0.762 | 0.935 | 0.253 | 0.53 |
| iYKR001C     | 11 | 442347  | 11295 | YKR00 | <b>0.97</b> | Dbl   | Pi | 0.691 | 0.61  | 0.818 | 0.53 |
| iYKL164C-1   | 11 | 143607  | 11223 | YKL16 | <b>0.41</b> | Dbl   | Pi | 0.728 | 0.64  | 0.8   | 0.53 |
| iYER055C     | 5  | 265769  | 8977  | YER05 | <b>0.07</b> | Sgl   | Pi | 0.486 | 0.544 | 0.375 | 0.53 |
| iYBR047W     | 2  | 332304  | 7652  | YBR04 | <b>0.05</b> | Sgl   | Pi | NaN   | 0.588 | 0.555 | 0.53 |
| iYIL093C     | 9  | 188767  | 10561 | YIL09 | <b>0.86</b> | Dbl   | Pi | 0.686 | 0.79  | 0.102 | 0.53 |
| iYPR049C     | 16 | 664657  | 13657 | YPR04 | <b>0.71</b> | Sgl   | Pi | 0.538 | 0.749 | 0.537 | 0.53 |
| iYGL022W     | 7  | 454557  | 9586  | YGL02 | <b>0.2</b>  | Sgl   | Pi | 0.59  | 0.642 | 0.186 | 0.53 |
| iYPL045W     | 16 | 469681  |       | 13376 | <b>0.57</b> | Non F |    | 0.519 | 0.931 | 0.495 | 0.53 |
| iYDR222W     | 4  | 911299  | 8516  | YDR22 | <b>0.71</b> | Sgl   | Pi | 0.626 | 0.523 | 0.203 | 0.53 |
| iYGRWdelta26 | 7  | 793539  | 10176 | YGR15 | <b>0.17</b> | Sgl   | Pi | 0.746 | 0.758 | 0.233 | 0.53 |
| iYJR010W     | 10 | 457470  |       | 10922 | <b>0.51</b> | Non F |    | 0.619 | 0.697 | 0.39  | 0.53 |
| iYNL142W     | 14 | 358957  | 12516 | YNL14 | <b>0.94</b> | Sgl   | Pi | 0.931 | 0.927 | 0.996 | 0.53 |
| iYHL008C     | 8  | 94494   | 10185 | YHL00 | <b>0.34</b> | Sgl   | Pi | 0.339 | 0.439 | 0.754 | 0.53 |
| iYNL299W     | 14 | 68385   | 12656 | YNL29 | <b>0.41</b> | Sgl   | Pi | 0.595 | 0.108 | 0.821 | 0.53 |
| itE(UUC)E3   | 5  | 487437  |       | 7136  | <b>0.94</b> | Non F |    | 0.75  | 0.883 | 0.12  | 0.53 |
| iYOR194C     | 15 | 712551  | 13141 | YOR19 | <b>0.98</b> | Dbl   | Pi | 0.064 | 0.526 | 0.234 | 0.53 |
| iYJR065C     | 10 | 558854  | 10966 | YJR06 | <b>0.93</b> | Dbl   | Pi | 0.457 | 0.74  | 0.477 | 0.53 |
| iYKR054C     | 11 | 547555  | 11342 | YKR05 | <b>0.99</b> | Dbl   | Pi | 0.414 | 2E-08 | 0.892 | 0.53 |
| iYCR087C-A   | 3  | 264447  | 8033  | YCR08 | <b>0.92</b> | Dbl   | Pi | 0.65  | 0.095 | 0.802 | 0.53 |
| iYCR035C     | 3  | 193010  | 7994  | YCR03 | <b>0.94</b> | Dbl   | Pi | 0.019 | 0.734 | 0.706 | 0.53 |
| iYKL220C-2   | 11 | 13390   | 11281 | YKL22 | <b>0.57</b> | Dbl   | Pi | 0.747 | 0.031 | 0.649 | 0.53 |
| iYDR510W     | 4  | 1469713 | 8781  | YDR51 | <b>0.49</b> | Sgl   | Pi | 0.607 | 0.555 | 0.195 | 0.53 |
| iYJL154C     | 10 | 133640  | 10833 | YJL15 | <b>0.6</b>  | Sgl   | Pi | 0.761 | 0.528 | 0.548 | 0.53 |
| iYKR056W     | 11 | 550940  | 11344 | YKR05 | <b>0.29</b> | Sgl   | Pi | 0.004 | 0.038 | 0.789 | 0.53 |
| iCEN10       | 10 | 436143  | 6995  | YJR00 | <b>0.67</b> | Sgl   | Pi | 0.631 | 0.68  | 0.334 | 0.54 |
| iYIL027C     | 9  | 304096  | 10503 | YIL02 | <b>0.78</b> | Sgl   | Pi | 0.459 | 0.456 | 0.142 | 0.54 |
| iYGL260W     | 7  | 7076    | 9869  | YGL25 | <b>0.59</b> | Sgl   | Pi | 0.782 | 0.602 | 0.444 | 0.54 |
| itI(UAU)D    | 4  | 884470  | 7198  | YDR21 | <b>0.59</b> | Sgl   | Pi | 0.661 | 0.936 | 0.5   | 0.54 |
| iYPL020C     | 16 | 514174  | 13354 | YPL02 | <b>0.9</b>  | Sgl   | Pi | 0.573 | 0.9   | 0.544 | 0.54 |
| iYIL169C-0   | 9  | 26108   | 10636 | YIL16 | <b>0.14</b> | Dbl   | Pi | 0.75  | 0.148 | 0.646 | 0.54 |
| iYFL013W-A   | 6  | 110171  | 9308  | YFL01 | <b>0.95</b> | Sgl   | Pi | 0.198 | 0.747 | 0.252 | 0.54 |

|              |    |         |       |        |             |        |              |       |       |      |
|--------------|----|---------|-------|--------|-------------|--------|--------------|-------|-------|------|
| iYJR093C     | 10 | 603910  | 10988 | YJR09  | <b>0.99</b> | Sgl Pi | <b>8E-04</b> | 0.444 | 0.246 | 0.54 |
| iYLR409C     | 12 | 937247  | 11848 | YLR40  | <b>0.65</b> | Dbl Pi | 0.717        | 0.347 | 0.566 | 0.54 |
| iYGL247W     | 7  | 37516   |       | 9835   | <b>0.12</b> | Non F  | 0.302        | 0.502 | 0.528 | 0.54 |
| iYBR060C-1   | 2  | 363604  | 7666  | YBR06C | <b>0.13</b> | Sgl Pi | NaN          | 0.578 | 0.455 | 0.54 |
| iYJL047C     | 10 | 351794  | 10739 | YJL047 | <b>0.51</b> | Dbl Pi | 0.614        | 0.651 | 0.548 | 0.54 |
| iYBR207W     | 2  | 636493  |       | 7808   | <b>0.11</b> | Non F  | 0.535        | 0.455 | 0.716 | 0.54 |
| iYBR150C     | 2  | 544445  | 7752  | YBR15C | <b>0.65</b> | Dbl Pi | 0.762        | 0.797 | 0.69  | 0.54 |
| iYFL047W     | 6  | 42552   | 9374  | YFL046 | <b>0.59</b> | Sgl Pi | 0.593        | 0.63  | 0.362 | 0.54 |
| iYPL138C     | 16 | 292416  | 13462 | YPL13  | <b>0.9</b>  | Sgl Pi | 0.763        | 0.137 | 0.234 | 0.54 |
| iYLR422W     | 12 | 971676  |       | 11861  | <b>0.18</b> | Non F  | 0.671        | 0.601 | 0.36  | 0.54 |
| iYPL077C     | 16 | 410086  | 13407 | YPL07  | <b>0.85</b> | Dbl Pi | 0.665        | 0.705 | 0.16  | 0.54 |
| iYPL053C     | 16 | 458447  | 13384 | YPL05  | <b>0.84</b> | Dbl Pi | 0.53         | 0.89  | 0.519 | 0.54 |
| iYKL093W     | 11 | 265451  |       | 11154  | <b>0.62</b> | Non F  | 0.736        | 0.628 | 0.353 | 0.54 |
| iYBL056W     | 2  | 115134  |       | 7554   | <b>0.13</b> | Non F  | 0.557        | 0.641 | 0.377 | 0.54 |
| iYPL225W     | 16 | 126434  |       | 13545  | <b>0.35</b> | Non F  | 0.523        | 0.54  | 0.58  | 0.54 |
| iYGRCDelta30 | 7  | 823294  | 10171 | YGR16  | <b>0.17</b> | Dbl Pi | 0.58         | 0.712 | 0.531 | 0.54 |
| iYHR183W     | 8  | 472416  | 10417 | YHR18  | <b>0.24</b> | Sgl Pi | 0.702        | 0.837 | 0.479 | 0.54 |
| iYBL065W     | 2  | 100254  |       | 7562   | <b>0.29</b> | Non F  | 0.028        | 0.463 | 0.622 | 0.54 |
| iYJL185C     | 10 | 82982   | 10862 | YJL185 | <b>0.79</b> | Dbl Pi | 0.023        | 0.066 | 0.972 | 0.54 |
| iYCRWdelta8  | 3  | 149800  | 8064  | YCR018 | <b>0.08</b> | Sgl Pi | 0.689        | 0.023 | 0.385 | 0.54 |
| iYCRWdelta8  | 3  | 149800  | 8064  | YCR018 | <b>0.08</b> | Sgl Pi | 0.689        | 0.023 | 0.385 | 0.54 |
| iYOL138C     | 15 | 65343   | 12911 | YOL13  | <b>0.97</b> | Dbl Pi | 0.674        | 0.597 | 0.442 | 0.54 |
| iYAR071W     | 1  | 226912  | 7491  | YAR073 | <b>0.52</b> | Sgl Pi | 0.664        | 0.453 | 0.472 | 0.54 |
| iYDR025W     | 4  | 492322  |       | 8328   | <b>0.18</b> | Non F  | 0.628        | 0.471 | 0.673 | 0.54 |
| iYDR467C     | 4  | 1397893 | 8741  | YDR467 | <b>0.05</b> | Sgl Pi | 0.362        | 0.578 | 0.52  | 0.54 |
| iYDR252W     | 4  | 963856  |       | 8543   | <b>0.33</b> | Non F  | 0.615        | 0.641 | 0.025 | 0.54 |
| iYPL273W     | 16 | 26058   |       | 13592  | <b>0.79</b> | Non F  | 0.685        | 0.708 | 0.549 | 0.54 |
| iYPL259C     | 16 | 52665   | 13578 | YPL25  | <b>0.63</b> | Sgl Pi | 0.078        | 0.593 | 0.325 | 0.54 |
| iYOR248W     | 15 | 798317  |       | 13187  | <b>0.07</b> | Non F  | 0.592        | 0.491 | 0.522 | 0.54 |
| iYJL106W-1   | 10 | 223879  | 10792 | YJL106 | <b>0.29</b> | Sgl Pi | 0.827        | 0.004 | 0.708 | 0.54 |
| iYFL028C     | 6  | 80224   | 9338  | YFL028 | <b>0.69</b> | Sgl Pi | 0.642        | 0.559 | 0.302 | 0.54 |
| iYGR288W-1   | 7  | 1072840 |       | 10159  | <b>0.92</b> | Non F  | 0.555        | 0.818 | 0.062 | 0.54 |
| iYLR213C     | 12 | 567925  | 11679 | YLR21  | <b>0.65</b> | Dbl Pi | 0.779        | 0.614 | 0.545 | 0.54 |
| iYER030W     | 5  | 213907  |       | 8949   | <b>0.12</b> | Non F  | 0.734        | 0.483 | 0.427 | 0.54 |
| iYDR080W     | 4  | 606983  |       | 8387   | <b>0.15</b> | Non F  | 0.862        | 0.82  | 0.354 | 0.54 |
| iYGR006W     | 7  | 506723  | 9894  | YGR007 | <b>0.8</b>  | Sgl Pi | 0.088        | 0.42  | 0.144 | 0.54 |
| iYBR004C     | 2  | 245634  | 7610  | YBR004 | <b>0.66</b> | Dbl Pi | NaN          | 0.643 | 0.52  | 0.54 |
| iYOL063C     | 15 | 210254  | 12840 | YOL06  | <b>0.95</b> | Sgl Pi | 0.638        | 0.119 | 0.502 | 0.54 |
| iYDR322W     | 4  | 1111712 |       | 8608   | <b>0.77</b> | Non F  | 0.533        | 0.65  | 0.279 | 0.54 |
| iYAL063C-1   | 1  | 29174   | 7435  | YAL063 | <b>0.65</b> | Dbl Pi | 0.254        | 0.4   | NaN   | 0.54 |
| iYBR073W     | 2  | 385940  | 7678  | YBR074 | <b>0.62</b> | Sgl Pi | 0.714        | 0.696 | 0.45  | 0.54 |
| iYPL168W     | 16 | 232486  |       | 13490  | <b>0.09</b> | Non F  | 0.149        | 0.551 | 0.408 | 0.54 |
| iYHR152W     | 8  | 401956  |       | 10387  | <b>0.1</b>  | Non F  | 0.669        | 0.55  | 0.319 | 0.54 |
| iYMR232W     | 13 | 739028  | 12282 | YMR23  | <b>0.32</b> | Sgl Pi | NaN          | 0.588 | 0.476 | 0.55 |
| iYLR240W     | 12 | 620161  | 11701 | YLR24  | <b>0.82</b> | Sgl Pi | 0.739        | 0.721 | 0.432 | 0.55 |
| iYBR062C     | 2  | 366294  | 7668  | YBR062 | <b>0.57</b> | Sgl Pi | 0.587        | 0.715 | 0.657 | 0.55 |
| iYLR377C     | 12 | 874786  | 11818 | YLR37  | <b>0.59</b> | Sgl Pi | 0.624        | 0.684 | 0.288 | 0.55 |
| iYPR085C     | 16 | 709850  | 13687 | YPR08  | <b>0.98</b> | Dbl Pi | 0.446        | 0.378 | 0.372 | 0.55 |
| iYKL090W     | 11 | 272860  | 11151 | YKL08  | <b>0.66</b> | Sgl Pi | 0.622        | 0.719 | 0.337 | 0.55 |
| iYKL035W     | 11 | 371023  | 11100 | YKL03  | <b>0.69</b> | Sgl Pi | 0.652        | 0.469 | 0.655 | 0.55 |
| iYOL009C     | 15 | 310133  | 12788 | YOL00  | <b>0.66</b> | Dbl Pi | 0.693        | 0.59  | 0.491 | 0.55 |

|             |    |         |       |         |             |     |    |              |              |       |      |
|-------------|----|---------|-------|---------|-------------|-----|----|--------------|--------------|-------|------|
| iYNR036C    | 14 | 694824  | 12736 | YNR036C | <b>0.95</b> | Sgl | Pi | 0.04         | 0.355        | 0.777 | 0.55 |
| iYIL118W    | 9  | 140453  |       | 10587   | <b>0.04</b> | Non | F  | 0.668        | 0.825        | 0.861 | 0.55 |
| iYLR421C    | 12 | 965566  | 11860 | YLR421C | <b>0.93</b> | Dbl | Pi | 0.021        | 0.798        | 0.345 | 0.55 |
| iYIR039C    | 9  | 432113  | 10694 | YIR039C | <b>0.64</b> | Sgl | Pi | 0.786        | 0.811        | 0.949 | 0.55 |
| iYJL156C    | 10 | 128656  | 10835 | YJL156C | <b>0.78</b> | Sgl | Pi | 0.879        | 0.047        | 0.79  | 0.55 |
| iYBR074W    | 2  | 387493  | 7679  | YBR074W | <b>0.04</b> | Sgl | Pi | 0.555        | 0.6          | 0.776 | 0.55 |
| iYNL321W    | 14 | 37426   | 12674 | YNL321W | <b>0.91</b> | Sgl | Pi | 0.445        | 0.508        | 0.435 | 0.55 |
| iYMR214W    | 13 | 696480  | 12264 | YMR214W | <b>0.89</b> | Sgl | Pi | 0.735        | <b>3E-04</b> | 0.87  | 0.55 |
| iYNL064C    | 14 | 507097  | 12444 | YNL064C | <b>0.68</b> | Dbl | Pi | 0.002        | 0.977        | 0.125 | 0.55 |
| iYOR243C    | 15 | 792234  | 13183 | YOR243C | <b>0.93</b> | Dbl | Pi | 0.413        | 0.742        | 0.238 | 0.55 |
| iYER007W    | 5  | 166068  |       | 8925    | <b>0.25</b> | Non | F  | 0.582        | 0.611        | 0.752 | 0.55 |
| iYBR271W    | 2  | 746065  |       | 7861    | <b>0.15</b> | Non | F  | NaN          | 0.464        | 0.802 | 0.55 |
| iYLR094C    | 12 | 329224  | 11563 | YLR094C | <b>0.53</b> | Sgl | Pi | 0.481        | 0.821        | 0.58  | 0.55 |
| iYIL132C    | 9  | 100494  | 10602 | YIL132C | <b>0.48</b> | Sgl | Pi | 0.624        | 0.706        | 0.252 | 0.55 |
| iYML069W    | 13 | 137220  | 11983 | YML069W | <b>0.48</b> | Sgl | Pi | 0.663        | 0.23         | 0.214 | 0.55 |
| iYDR536W    | 4  | 1509714 |       | 8807    | <b>0.63</b> | Non | F  | 0.661        | 0.002        | 0.256 | 0.55 |
| iYDR279W    | 4  | 1020436 | 8568  | YDR279W | <b>0.91</b> | Sgl | Pi | <b>1E-04</b> | 0.532        | 0.256 | 0.55 |
| iYIR008C    | 9  | 374291  | 10658 | YIR008C | <b>0.91</b> | Dbl | Pi | 0.399        | 0.589        | 0.329 | 0.55 |
| iYDL113C    | 4  | 258545  | 8167  | YDL113C | <b>0.89</b> | Dbl | Pi | 0.253        | 0.593        | 0.074 | 0.55 |
| iYDL113C    | 4  | 258545  | 8167  | YDL113C | <b>0.89</b> | Dbl | Pi | 0.253        | 0.593        | 0.074 | 0.55 |
| iYDL002C    | 4  | 447586  | 8068  | YDL002C | <b>0.45</b> | Dbl | Pi | 0.755        | 0.368        | 0.418 | 0.55 |
| iYBR059C    | 2  | 360157  | 7664  | YBR059C | <b>0.81</b> | Sgl | Pi | 0.948        | 0.139        | 0.696 | 0.55 |
| YILCdelta5  | 9  | 336720  | 14097 | YIL009C | <b>0.04</b> | Dbl | Pi | 0.575        | 0.764        | 0.482 | 0.55 |
| iYJL125C    | 10 | 186382  | 10807 | YJL125C | <b>0.59</b> | Sgl | Pi | 0.625        | 0.68         | NaN   | 0.55 |
| iYCL061C    | 3  | 21386   | 7942  | YCL061C | <b>0.4</b>  | Sgl | Pi | 0.705        | 0.416        | 0.755 | 0.55 |
| iYBR010W    | 2  | 256683  |       | 7617    | <b>0.4</b>  | Non | F  | 0.726        | 0.881        | 0.558 | 0.55 |
| iYCLWdelta5 | 3  | 90760   | 7954  | YCL018C | <b>0.16</b> | Sgl | Pi | 0.618        | 0.74         | 0.809 | 0.55 |
| iYBR036C    | 2  | 310269  | 7641  | YBR036C | <b>0.89</b> | Sgl | Pi | 0.56         | 0.578        | 0.456 | 0.55 |
| iYIL008W    | 9  | 342818  |       | 10483   | <b>0.19</b> | Non | F  | 0.645        | 0.475        | 0.13  | 0.55 |
| iYEL041W    | 5  | 77434   | 8871  | YEL040C | <b>0.36</b> | Sgl | Pi | 0.886        | 0.012        | 0.019 | 0.55 |
| itP(UGG)A   | 1  | 139250  | 7266  | YAL007C | <b>0.16</b> | Dbl | Pi | 0.648        | 0.856        | 0.888 | 0.55 |
| iYBR243C    | 2  | 706756  | 7838  | YBR243C | <b>0.73</b> | Dbl | Pi | 0.749        | 0.11         | 0.081 | 0.55 |
| iYKL218C-2  | 11 | 20930   | 11276 | YKL218C | <b>0.33</b> | Dbl | Pi | 0.041        | 0.004        | 0.763 | 0.55 |
| iYLR045C    | 12 | 237708  | 11516 | YLR045C | <b>0.74</b> | Sgl | Pi | 0.05         | 0.719        | 0.528 | 0.55 |
| iYFL045C    | 6  | 44389   | 9370  | YFL045C | <b>0.63</b> | Sgl | Pi | 0.206        | 0.707        | 0.356 | 0.55 |
| iYDR088C    | 4  | 619644  | 8395  | YDR088C | <b>0.61</b> | Dbl | Pi | 0.768        | 0.878        | 0.897 | 0.55 |
| iYNL336W-1  | 14 | 10485   | 12689 | YNL336W | <b>0.74</b> | Sgl | Pi | 0.773        | 0.601        | 0.211 | 0.55 |
| iYKR098C    | 11 | 634813  | 11388 | YKR098C | <b>0.94</b> | Dbl | Pi | 0.111        | 0.214        | 0.43  | 0.55 |
| iYDR121W    | 4  | 694162  | 8423  | YDR121W | <b>0.82</b> | Sgl | Pi | 0.616        | 0.531        | 0.848 | 0.55 |
| iYGR131W    | 7  | 755251  |       | 10011   | <b>0.23</b> | Non | F  | 0.722        | 0.573        | NaN   | 0.55 |
| iYCR090C-1  | 3  | 273622  | 8036  | YCR090C | <b>0.73</b> | Dbl | Pi | 0.518        | 0.572        | 0.142 | 0.55 |
| iYHL022C    | 8  | 64147   | 10199 | YHL022C | <b>0.62</b> | Sgl | Pi | 0.486        | 0.697        | 0.24  | 0.55 |
| iYJR048W    | 10 | 526358  |       | 10950   | <b>0.35</b> | Non | F  | 0.903        | 0.68         | 0.255 | 0.55 |
| iYPL095C    | 16 | 369421  | 13425 | YPL095C | <b>0.42</b> | Sgl | Pi | 0.742        | 0.732        | 0.432 | 0.55 |
| iYOR341W    | 15 | 965975  |       | 13273   | <b>0.21</b> | Non | F  | 0.685        | 0.892        | 0.461 | 0.55 |
| iYER058W    | 5  | 272078  | 8983  | YER058W | <b>0.63</b> | Sgl | Pi | 0.678        | 0.512        | 0.801 | 0.55 |
| iYOL087C    | 15 | 158702  | 12863 | YOL087C | <b>0.84</b> | Sgl | Pi | 0.736        | 0.512        | 0.916 | 0.55 |
| itE(UUC)M   | 13 | 290866  | 7144  | YMR012C | <b>0.3</b>  | Sgl | Pi | 0.776        | 0.95         | 0.724 | 0.55 |
| itM(CAU)D   | 4  | 1175884 | 7244  | YDR349C | <b>0.18</b> | Sgl | Pi | 0.626        | 0.003        | 0.544 | 0.55 |
| iYOR007C    | 15 | 339967  | 12960 | YOR007C | <b>0.37</b> | Sgl | Pi | 0.866        | 0.947        | 0.273 | 0.55 |
| iYDL227C-1  | 4  | 49057   | 8277  | YDL227C | <b>0.7</b>  | Sgl | Pi | 0.765        | 0.56         | 0.041 | 0.55 |

|               |    |         |       |        |             |     |    |       |       |       |      |
|---------------|----|---------|-------|--------|-------------|-----|----|-------|-------|-------|------|
| iYKR071C      | 11 | 575612  | 11359 | YKR07  | <b>0.41</b> | Sgl | Pi | 0.941 | 0.856 | 0.216 | 0.55 |
| iYIR030C      | 9  | 412789  | 10684 | YIR030 | <b>0.45</b> | Sgl | Pi | 0.746 | 0.417 | 0.351 | 0.55 |
| iYHR063C      | 8  | 225192  | 10300 | YHR06  | <b>0.35</b> | Sgl | Pi | 0.255 | 0.393 | 0.238 | 0.55 |
| iYIR006C      | 9  | 369921  | 10656 | YIR006 | <b>0.76</b> | Dbl | Pi | 0.81  | 0.605 | 0.428 | 0.55 |
| iYGL020C      | 7  | 457862  | 9584  | YGL020 | <b>0.87</b> | Dbl | Pi | 0.629 | 0.283 | 0.052 | 0.55 |
| iYGL039W      | 7  | 425010  |       | 9603   | <b>0.09</b> | Non | F  | 0.612 | 0.906 | 0.47  | 0.55 |
| YKRCdelta11   | 11 | 513178  | 14118 | YKR03  | <b>0.46</b> | Dbl | Pi | 0.808 | 0.577 | 0.812 | 0.55 |
| iYML012W      | 13 | 246746  |       | 11932  | <b>0.03</b> | Non | F  | 0.132 | 0.599 | 0.61  | 0.55 |
| iYPL005W      | 16 | 550322  |       | 13340  | <b>0.09</b> | Non | F  | 0.682 | 0.901 | 0.461 | 0.55 |
| iYIL002C      | 9  | 353435  | 10477 | YIL002 | <b>0.56</b> | Dbl | Pi | 0.657 | 0.195 | 0.13  | 0.55 |
| iYBR021W      | 2  | 283313  | 7627  | YBR022 | <b>0.75</b> | Sgl | Pi | 0.676 | 0.419 | 0.71  | 0.55 |
| iYKL205W      | 11 | 53360   | 11261 | YKL20  | <b>0.94</b> | Sgl | Pi | 0.058 | 0.98  | 0.61  | 0.55 |
| iYLR228C-0    | 12 | 602455  | 11692 | YLR22  | <b>0.44</b> | Sgl | Pi | 0.383 | 0.104 | 0.824 | 0.55 |
| iYPL178W      | 16 | 212871  |       | 13501  | <b>0.05</b> | Non | F  | 0.454 | 0.637 | 0.368 | 0.55 |
| iYMR104C      | 13 | 475438  | 12151 | YMR10  | <b>0.76</b> | Sgl | Pi | 0.326 | 0.977 | 0.492 | 0.55 |
| iYNL136W      | 14 | 371628  |       | 12511  | <b>0.25</b> | Non | F  | 0.642 | 0.928 | 0.009 | 0.56 |
| iYHL003C      | 8  | 101872  | 10182 | YHL00  | <b>0.66</b> | Dbl | Pi | 0.009 | 0.852 | 0.369 | 0.56 |
| iYPL195W      | 16 | 179021  | 13517 | YPL19  | <b>0.88</b> | Sgl | Pi | 0.569 | 0.696 | 0.451 | 0.56 |
| iYBL010C      | 2  | 206905  | 7510  | YBL010 | <b>0.91</b> | Dbl | Pi | 0.537 | 0.521 | 0.661 | 0.56 |
| iYAL026C      | 1  | 99699   | 7399  | YAL026 | <b>0.74</b> | Sgl | Pi | 0.585 | 0.991 | 0.228 | 0.56 |
| iYCR079W      | 3  | 254153  | 8027  | YCR081 | <b>0.55</b> | Sgl | Pi | NaN   | 0.57  | 0.35  | 0.56 |
| iYGR081C      | 7  | 643769  | 9960  | YGR081 | <b>0.82</b> | Dbl | Pi | 0.55  | 0.199 | 0.581 | 0.56 |
| iYIL153W      | 9  | 56406   | 10622 | YIL152 | <b>0.6</b>  | Sgl | Pi | 0.659 | 0.245 | 0.625 | 0.56 |
| iYOR190W      | 15 | 692037  | 13136 | YOR19  | <b>0.83</b> | Sgl | Pi | 0.529 | 0.297 | 0.338 | 0.56 |
| iYCL059C      | 3  | 23368   | 7941  | YCL059 | <b>0.93</b> | Sgl | Pi | 0.585 | 0.545 | 0.397 | 0.56 |
| iYLR295C      | 12 | 722361  | 11749 | YLR29  | <b>0.57</b> | Dbl | Pi | 0.01  | 0.814 | 0.35  | 0.56 |
| iYMR314W      | 13 | 902412  | 12362 | YMR31  | <b>0.51</b> | Sgl | Pi | 0.823 | 0.76  | 0.626 | 0.56 |
| iYARCdelta8-0 | 1  | 209770  |       | 7493   | <b>0.49</b> | Non | F  | 0.766 | 0.431 | NaN   | 0.56 |
| iYLR086W      | 12 | 306505  |       | 11555  | <b>0.1</b>  | Non | F  | 0.798 | 0.516 | 0.397 | 0.56 |
| itG(UCC)G     | 7  | 779671  | 7175  | YGR142 | <b>0.66</b> | Sgl | Pi | 0.002 | 0.786 | 0.478 | 0.56 |
| iYOR039W      | 15 | 406556  | 12993 | YOR02  | <b>0.35</b> | Sgl | Pi | 0.744 | 0.753 | 0.337 | 0.56 |
| iYLR022C      | 12 | 184926  | 11491 | YLR02  | <b>0.3</b>  | Sgl | Pi | 0.937 | 0.597 | NaN   | 0.56 |
| iYPL103C      | 16 | 359392  | 13430 | YPL10  | <b>0.91</b> | Sgl | Pi | 0.557 | 0.78  | 0.444 | 0.56 |
| iYLR186W      | 12 | 524395  | 11655 | YLR18  | <b>0.68</b> | Sgl | Pi | 0.587 | 0.479 | 0.619 | 0.56 |
| iYKL138C      | 11 | 185673  | 11195 | YKL13  | <b>0.55</b> | Dbl | Pi | 0.146 | 0.593 | 0.463 | 0.56 |
| iYML011C      | 13 | 247422  | 11931 | YML01  | <b>0.95</b> | Dbl | Pi | 0.395 | 0.574 | 0.393 | 0.56 |
| iYLR118C      | 12 | 385403  | 11585 | YLR11  | <b>0.7</b>  | Dbl | Pi | 0.46  | 0.543 | 0.307 | 0.56 |
| iYIL127C      | 9  | 117634  | 10597 | YIL127 | <b>0.97</b> | Dbl | Pi | 0.682 | 0.359 | 0.167 | 0.56 |
| iYHL014C      | 8  | 77297   | 10191 | YHL01  | <b>0.73</b> | Sgl | Pi | 0.546 | 0.997 | 0.702 | 0.56 |
| iYOR244W      | 15 | 793878  |       | 13184  | <b>0.13</b> | Non | F  | 0.366 | 0.527 | 0.441 | 0.56 |
| iYKL017C      | 11 | 406864  | 11083 | YKL01  | <b>0.36</b> | Sgl | Pi | 0.662 | 0.564 | 0.555 | 0.56 |
| iYPL151C      | 16 | 267523  | 13474 | YPL15  | <b>0.98</b> | Dbl | Pi | 0.087 | 0.635 | 0.534 | 0.56 |
| iYGR070W      | 7  | 631255  |       | 9951   | <b>0.03</b> | Non | F  | 0.458 | 0.714 | 0.478 | 0.56 |
| iYOR311C      | 15 | 899915  | 13245 | YOR31  | <b>0.77</b> | Sgl | Pi | 0.389 | 0.625 | 0.655 | 0.56 |
| iYFR020W      | 6  | 193429  | 9468  | YFR021 | <b>0.8</b>  | Sgl | Pi | 0.551 | 0.801 | 0.012 | 0.56 |
| iYMR020W      | 13 | 316916  |       | 12073  | <b>0.26</b> | Non | F  | 0.144 | 0.634 | 0.289 | 0.56 |
| iYDR480W      | 4  | 1418359 |       | 8754   | <b>0.24</b> | Non | F  | 0.263 | 0.583 | NaN   | 0.56 |
| iYGR258C-0    | 7  | 1010785 | 10129 | YGR25  | <b>0.44</b> | Sgl | Pi | 0.713 | 0.227 | 0.893 | 0.56 |
| iYGRWdelta14  | 7  | 541674  | 10173 | YGR02  | <b>0.01</b> | Sgl | Pi | 0.772 | 0.772 | 0.401 | 0.56 |
| iYDL009C      | 4  | 433255  | 8075  | YDL009 | <b>0.72</b> | Dbl | Pi | 0.457 | 0.609 | 0.511 | 0.56 |
| YERWdelta9    | 5  | 249444  | 14057 | YER04  | <b>0.38</b> | Dbl | Pi | 0.856 | 0.54  | 0.945 | 0.56 |

|               |    |              |        |             |       |       |       |       |            |
|---------------|----|--------------|--------|-------------|-------|-------|-------|-------|------------|
| iYJR084W      | 10 | 584681       | 10981  | <b>0.21</b> | Non F | NaN   | 0.582 | 0.719 | 0.56       |
| iYER082C      | 5  | 325934 9033  | YER082 | <b>0.59</b> | Sgl   | Pi    | 0.706 | 0.69  | 0.318 0.56 |
| itQ(UUG)D3    | 4  | 802792 7282  | YDR17C | <b>0.1</b>  | Dbl   | Pi    | 0.552 | 0.698 | 0.436 0.56 |
| iYDL228C      | 4  | 45956 8279   | YDL228 | <b>0.28</b> | Sgl   | Pi    | 0.663 | 0.64  | 0.524 0.56 |
| iYKL215C      | 11 | 30675 11271  | YKL21  | <b>0.76</b> | Sgl   | Pi    | 0.724 | 0.189 | 0.391 0.56 |
| iYCLWomega2-0 | 3  | 4313         | 7955   | <b>0.06</b> | Non F | NaN   | 0.049 | 0.002 | 0.56       |
| iYMR223W      | 13 | 718129       | 12273  | <b>0.17</b> | Non F | 0.831 | 0.899 | 0.245 | 0.56       |
| iYCR059C      | 3  | 224211 8011  | YCR05C | <b>0.75</b> | Dbl   | Pi    | 0.505 | 0.52  | 0.689 0.56 |
| iYDR089W      | 4  | 624718       | 8396   | <b>0.12</b> | Non F | 0.695 | 0.391 | 0.641 | 0.56       |
| iYOR271C      | 15 | 832033 13209 | YOR27  | <b>0.19</b> | Dbl   | Pi    | 0.569 | 0.474 | 0.852 0.56 |
| iYJL168C      | 10 | 104407 10848 | YJL16C | <b>0.87</b> | Dbl   | Pi    | 0.286 | 0.566 | 0.309 0.56 |
| iYMR055C      | 13 | 387009 12104 | YMR05  | <b>0.69</b> | Sgl   | Pi    | 0.515 | 0.328 | 0.467 0.56 |
| iYAL037W      | 1  | 74826        | 7410   | <b>0.32</b> | Non F | 0.641 | 0.719 | 0.489 | 0.56       |
| iYJR110W      | 10 | 635367       | 11007  | <b>0.13</b> | Non F | 0.221 | 0.439 | 0.286 | 0.56       |
| iYCR075C      | 3  | 248793 8024  | YCR07C | <b>0.96</b> | Sgl   | Pi    | 0.636 | 4E-08 | 0.998 0.56 |
| iYDL155W      | 4  | 178064 8208  | YDL154 | <b>0.07</b> | Sgl   | Pi    | 0.692 | 0.668 | 0.586 0.57 |
| iYHR092C      | 8  | 288800 10330 | YHR09  | <b>0.43</b> | Dbl   | Pi    | 0.842 | 0.458 | 0.693 0.57 |
| iYLR273C      | 12 | 691016 11730 | YLR27  | <b>0.79</b> | Dbl   | Pi    | 0.704 | 0.015 | 0.302 0.57 |
| iYMR129W      | 13 | 531831 12177 | YMR13  | <b>0.79</b> | Sgl   | Pi    | 0.431 | 0.74  | 0.605 0.57 |
| iYILCdelta5-0 | 9  | 336895 10648 | YIL00C | <b>0.74</b> | Dbl   | Pi    | 0.572 | 0.447 | 0.597 0.57 |
| iYDR179W-A    | 4  | 820816 8479  | YDR18C | <b>0.95</b> | Sgl   | Pi    | 0.755 | 0.497 | NaN 0.57   |
| iYDR329C      | 4  | 1127586 8614 | YDR32C | <b>0.96</b> | Dbl   | Pi    | 2E-04 | 0.149 | 0.816 0.57 |
| iYKR025W      | 11 | 488267       | 11318  | <b>0.18</b> | Non F | 0.474 | 0.555 | 0.463 | 0.57       |
| iYMR226C      | 13 | 722444 12276 | YMR22  | <b>0.5</b>  | Sgl   | Pi    | 0.141 | 0.62  | 0.539 0.57 |
| iYEL063C      | 5  | 33451 8892   | YEL063 | <b>0.66</b> | Dbl   | Pi    | 0.653 | 0.328 | 0.768 0.57 |
| iYJL070C      | 10 | 310337 10759 | YJL07C | <b>0.66</b> | Sgl   | Pi    | NaN   | 0.743 | 0.49 0.57  |
| iYLRWdelta4   | 12 | 221265 11917 | YLR03  | <b>0.24</b> | Sgl   | Pi    | 0.775 | 0.476 | 0.561 0.57 |
| iYEL049W      | 5  | 64099        | 8878   | <b>0.22</b> | Non F | 0.75  | 0.506 | 0.837 | 0.57       |
| itL(GAG)G     | 7  | 700752 7233  | YGR10C | <b>0.1</b>  | Dbl   | Pi    | 0.544 | 0.706 | 0.423 0.57 |
| iYNR022C      | 14 | 670201 12721 | YNR02  | <b>0.95</b> | Dbl   | Pi    | 0.62  | 0.538 | 0.365 0.57 |
| YPRCdelta22   | 16 | 850374 14163 | YPR15  | <b>0.41</b> | Sgl   | Pi    | 0.362 | 0.606 | 0.435 0.57 |
| iYIL015W      | 9  | 324107       | 10492  | <b>0.33</b> | Non F | 0.56  | 0.506 | 0.514 | 0.57       |
| iYER128W      | 5  | 416459 9125  | YER12C | <b>0.8</b>  | Sgl   | Pi    | 0.684 | 0.246 | 1E-06 0.57 |
| iYML118W      | 13 | 33883 12029  | YML11  | <b>0.86</b> | Sgl   | Pi    | 0.659 | 0.501 | 0.632 0.57 |
| iYBR247C      | 2  | 714399 7841  | YBR247 | <b>0.72</b> | Sgl   | Pi    | 0.682 | 0.674 | 0.344 0.57 |
| iYMR041C      | 13 | 351980 12093 | YMR04  | <b>0.38</b> | Dbl   | Pi    | 0.673 | 0.662 | 0.78 0.57  |
| itR(ACG)JL    | 12 | 374418       | 7291   | <b>0.11</b> | Non F | 0.721 | 0.658 | 0.848 | 0.57       |
| iYOR189W      | 15 | 690003 13135 | YOR19  | <b>0.73</b> | Sgl   | Pi    | 0.659 | 0.8   | 0.325 0.57 |
| iYHR120W      | 8  | 352440 10357 | YHR12  | <b>0.76</b> | Sgl   | Pi    | 0.335 | 0.57  | 0.143 0.57 |
| iYNR048W      | 14 | 712816       | 12747  | <b>0.31</b> | Non F | 0.734 | 0.706 | 0.727 | 0.57       |
| iYMR241W      | 13 | 752890       | 12291  | <b>0.15</b> | Non F | 0.644 | 0.858 | 0.472 | 0.57       |
| iYJL122W      | 10 | 189930       | 10804  | <b>0.33</b> | Non F | 0.33  | 0.448 | 0.546 | 0.57       |
| iYCL050C      | 3  | 38787 7933   | YCL050 | <b>0.83</b> | Sgl   | Pi    | 0.87  | 0.466 | 0.855 0.57 |
| iYKL157W      | 11 | 158172 11212 | YKL15  | <b>0.28</b> | Sgl   | Pi    | 0.654 | 0.38  | 0.378 0.57 |
| iYPL154C      | 16 | 260928 13477 | YPL15  | <b>0.5</b>  | Sgl   | Pi    | 0.732 | 0.719 | 0.184 0.57 |
| iYJL151C      | 10 | 136488 10831 | YJL15  | <b>0.26</b> | Dbl   | Pi    | 0.111 | 0.627 | 0.635 0.57 |
| iYOR279C      | 15 | 844615 13215 | YOR27  | <b>0.85</b> | Sgl   | Pi    | 0.758 | 0.765 | 0.261 0.57 |
| iYEL057C      | 5  | 45707 8886   | YEL057 | <b>0.69</b> | Dbl   | Pi    | 0.729 | 0.545 | 0.826 0.57 |
| iYIL004C      | 9  | 348490 10479 | YIL004 | <b>0.78</b> | Dbl   | Pi    | 0.004 | 0.31  | 0.287 0.57 |
| iYOR016C      | 15 | 361073 12969 | YOR01  | <b>0.79</b> | Dbl   | Pi    | 0.863 | 0.116 | 0.639 0.57 |
| iYLR062C      | 12 | 263930 11532 | YLR06  | <b>0.42</b> | Dbl   | Pi    | 0.582 | 0.722 | 0.651 0.57 |



|              |    |               |              |              |             |        |              |              |              |             |
|--------------|----|---------------|--------------|--------------|-------------|--------|--------------|--------------|--------------|-------------|
| iYML004C     | 13 | 262684        | 11924        | YML00        | <b>0.77</b> | Dbl Pi | 0.7          | 0.035        | 0.033        | 0.57        |
| iYCL031C     | 3  | 65559         | 7920         | YCL031       | <b>0.7</b>  | Sgl Pi | <b>3E-04</b> | 0.423        | 0.289        | 0.57        |
| iYCRCdelta14 | 3  | 296200        |              | 8055         | <b>0.33</b> | Non F  | 0.731        | 0.929        | 0.069        | 0.57        |
| iYEL054C     | 5  | 53206         | 8883         | YEL054       | <b>0.06</b> | Sgl Pi | 0.842        | 0.219        | 0.527        | 0.57        |
| iYELWdelta5  | 5  | 137639        |              | 8916         | <b>0.38</b> | Non F  | 0.71         | 0.782        | 0.99         | 0.57        |
| iYJL157C     | 10 | 126026        | 10836        | YJL157       | <b>0.35</b> | Sgl Pi | NaN          | 0.083        | 0.479        | 0.57        |
| iYCRWomega3  | 3  | 292146        | 8066         | YCR09E       | <b>0.19</b> | Sgl Pi | 0.482        | 0.64         | 0.427        | 0.57        |
| iYCRWomega3  | 3  | 292146        | 8066         | YCR09E       | <b>0.19</b> | Sgl Pi | 0.482        | 0.64         | 0.427        | 0.57        |
| iYIL009C-A   | 9  | <b>336217</b> | <b>10484</b> | YIL009       | <b>0.58</b> | Dbl Pi | <b>0.467</b> | <b>0.383</b> | <b>0.851</b> | <b>0.57</b> |
| iYPL149W     | 16 | 272190        |              | 13472        | <b>0.28</b> | Non F  | 0.28         | 0.669        | 0.625        | 0.57        |
| iYBR109C     | 2  | 458343        | 7715         | YBR109       | <b>0.66</b> | Dbl Pi | <b>5E-04</b> | <b>3E-04</b> | 0.942        | 0.57        |
| iYNLCdelta6  | 14 | <b>567983</b> |              | <b>12698</b> | <b>0.47</b> | Non F  | <b>0.524</b> | <b>0.413</b> | <b>0.83</b>  | <b>0.57</b> |
| iYGL034C-1   | 7  | 434409        | 9598         | YGL034       | <b>0.5</b>  | Dbl Pi | 0.622        | 0.777        | 0.03         | 0.57        |
| iYDR166C     | 4  | 789212        | 8462         | YDR166       | <b>0.89</b> | Dbl Pi | 0.513        | 0.63         | 0.08         | 0.57        |
| iYPL070W     | 16 | 422766        |              | 13401        | <b>0.17</b> | Non F  | 0.634        | 0.566        | 0.52         | 0.57        |
| iYMR063W     | 13 | 397809        | 12111        | YMR063       | <b>0.55</b> | Sgl Pi | 0.013        | 0.59         | 0.414        | 0.57        |
| iYNL003C     | 14 | 625865        | 12389        | YNL003       | <b>0.42</b> | Sgl Pi | 0.705        | 0.465        | 0.324        | 0.57        |
| iYCL058C     | 3  | 23966         | 7940         | YCL058       | <b>0.61</b> | Dbl Pi | 0.126        | 0.047        | 0.508        | 0.58        |
| iYGL064C     | 7  | 383243        | 9627         | YGL064       | <b>0.95</b> | Dbl Pi | 0.015        | 0.671        | 0.226        | 0.58        |
| iYMR140W     | 13 | 549174        |              | 12188        | <b>0.12</b> | Non F  | 0.637        | 0.779        | 0.25         | 0.58        |
| iYLL011W     | 12 | 128986        |              | 11416        | <b>0.04</b> | Non F  | 0.503        | 0.819        | 0.818        | 0.58        |
| iYBR212W     | 2  | 649883        | 7813         | YBR212       | <b>0.46</b> | Sgl Pi | 0.752        | 0.942        | 0.433        | 0.58        |
| iYPR045C     | 16 | 656553        | 13653        | YPR045       | <b>0.81</b> | Dbl Pi | 0.001        | 0.003        | 0.221        | 0.58        |
| iYPL208W     | 16 | 159605        | 13528        | YPL208       | <b>0.72</b> | Sgl Pi | 0.647        | 0.059        | 0.213        | 0.58        |
| iYOL026C     | 15 | <b>274338</b> | <b>12806</b> | YOL026       | <b>0.53</b> | Dbl Pi | <b>0.006</b> | <b>0.646</b> | <b>0.836</b> | <b>0.58</b> |
| iYKL099C     | 11 | 256116        | 11162        | YKL099       | <b>0.97</b> | Dbl Pi | 0.002        | 0.169        | 0.284        | 0.58        |
| iYBR250W     | 2  | 720566        | 7844         | YBR251       | <b>0.95</b> | Sgl Pi | 0.63         | 0.674        | 0.056        | 0.58        |
| iYNL339C     | 14 | 6083          | 12692        | YNL339       | <b>0.18</b> | Dbl Pi | 0.239        | 0.987        | 0.974        | 0.58        |
| iYIR038C-1   | 9  | 425353        | 10693        | YIR038       | <b>0.95</b> | Sgl Pi | 0.433        | 0.807        | 0.293        | 0.58        |
| iYMR286W     | 13 | 842193        |              | 12334        | <b>0.71</b> | Non F  | 0.49         | 0.81         | 0.157        | 0.58        |
| iYHR103W     | 8  | 322985        | 10341        | YHR103       | <b>0.52</b> | Sgl Pi | 0.828        | 0.167        | 0.657        | 0.58        |
| iYBR268W     | 2  | 741577        |              | 7858         | <b>0.45</b> | Non F  | 0.621        | 0.435        | 0.456        | 0.58        |
| iYGR119C     | 7  | 729651        | 9998         | YGR119       | <b>0.86</b> | Sgl Pi | <b>3E-04</b> | 0.033        | 0.254        | 0.58        |
| iYGR088W     | 7  | 656301        | 9968         | YGR088       | <b>0.82</b> | Sgl Pi | 0.116        | 0.664        | 0.715        | 0.58        |
| iYMR240C     | 13 | 751224        | 12290        | YMR240       | <b>0.65</b> | Dbl Pi | 0.786        | 0.586        | 0.48         | 0.58        |
| iYPR047W     | 16 | 658925        | 13655        | YPR047       | <b>0.9</b>  | Sgl Pi | 0.529        | 0.526        | 0.531        | 0.58        |
| iYGR102C     | 7  | 695116        | 9983         | YGR102       | <b>0.83</b> | Dbl Pi | 0.015        | 0.536        | 0.612        | 0.58        |
| iYLR180W     | 12 | 516418        |              | 11649        | <b>0.1</b>  | Non F  | 0.482        | 0.218        | 0.714        | 0.58        |
| iYEL073C-0   | 5  | 7560          | 8904         | YEL073       | <b>0.43</b> | Dbl Pi | 0.833        | 0.605        | 0.277        | 0.58        |
| iYOR228C     | 15 | 767782        | 13169        | YOR228       | <b>0.88</b> | Dbl Pi | 0.407        | 0.507        | 0.432        | 0.58        |
| iYOL025W     | 15 | 276943        | 12805        | YOL025       | <b>0.25</b> | Sgl Pi | 0.657        | 0.403        | 0.106        | 0.58        |
| iYOL096C     | 15 | 139051        | 12872        | YOL096       | <b>0.8</b>  | Sgl Pi | 0.353        | 0.543        | 0.335        | 0.58        |
| iYOL061W     | 15 | 213724        |              | 12838        | <b>0.08</b> | Non F  | 0.661        | 0.874        | 0.597        | 0.58        |
| iYIL083C     | 9  | 204636        | 10553        | YIL083       | <b>0.84</b> | Dbl Pi | 0.585        | 0.587        | 0.27         | 0.58        |
| iYFL041W     | 6  | 50994         | 9364         | YFL040       | <b>0.19</b> | Sgl Pi | 0.687        | 0.888        | 0.266        | 0.58        |
| iYPR088C     | 16 | 713011        | 13689        | YPR088       | <b>0.99</b> | Dbl Pi | 0.233        | 0.299        | 0.14         | 0.58        |
| iYKR090W     | 11 | 610702        | 11379        | YKR090       | <b>0.41</b> | Sgl Pi | 0.741        | 0.917        | 0.257        | 0.58        |
| iYLR044C     | 12 | 234088        | 11515        | YLR044       | <b>0.06</b> | Sgl Pi | 0.737        | 0.146        | 0.319        | 0.58        |
| iYNL329C     | 14 | 22648         | 12681        | YNL329       | <b>0.56</b> | Sgl Pi | 0.547        | 0.699        | 0.396        | 0.58        |
| iYLR034C     | 12 | 211926        | 11503        | YLR034       | <b>0.74</b> | Sgl Pi | 0.88         | 0.468        | 0.515        | 0.58        |
| iYPL185W     | 16 | 195662        |              | 13508        | <b>0.49</b> | Non F  | 0.628        | 0.571        | 0.544        | 0.58        |

|                  |           |               |              |               |             |     |    |              |              |              |             |
|------------------|-----------|---------------|--------------|---------------|-------------|-----|----|--------------|--------------|--------------|-------------|
| iYLR003C         | 12        | 157768        | 11474        | YLR00         | <b>0.7</b>  | Sgl | Pi | 0.001        | 0.663        | 0.441        | 0.58        |
| iYDR338C         | 4         | 1149457       | 8623         | YDR33E        | <b>0.86</b> | Sgl | Pi | 0.309        | 0.413        | 0.521        | 0.58        |
| iYMR169C         | 13        | 600866        | 12217        | YMR16         | <b>0.84</b> | Sgl | Pi | 0.636        | 0.362        | 0.887        | 0.58        |
| iYLR317W         | 12        | 766130        | 11768        | YLR31         | <b>0.79</b> | Sgl | Pi | 0.893        | 0.065        | 0.703        | 0.58        |
| iYOL050C         | 15        | 238197        | 12827        | YOL05         | <b>0.9</b>  | Dbl | Pi | 0.451        | 0.462        | 0.204        | 0.58        |
| iYMR189W         | 13        | 640589        |              | 12238         | <b>0.1</b>  | Non | F  | 0.752        | 0.896        | 0.392        | 0.58        |
| iYKR046C         | 11        | 524707        | 11335        | YKR04         | <b>0.59</b> | Dbl | Pi | 0.005        | 0.73         | 0.543        | 0.58        |
| iYOL057W         | 15        | 222915        | 12834        | YOL05         | <b>0.75</b> | Sgl | Pi | 0.68         | 0.759        | 0.085        | 0.58        |
| itN(GUU)P        | 16        | 810732        |              | 7263          | <b>0.15</b> | Non | F  | 0.732        | 0.556        | 0.482        | 0.58        |
| iYOL120C         | 15        | 94398         | 12894        | YOL12         | <b>0.08</b> | Sgl | Pi | 0.85         | 0.585        | 0.272        | 0.58        |
| iYGL207W         | 7         | 102084        |              | 9767          | <b>0.06</b> | Non | F  | 0.616        | 0.696        | 0.668        | 0.58        |
| iYER101C         | 5         | 361777        | 9073         | YER101        | <b>0.49</b> | Dbl | Pi | 0.669        | 0.464        | 0.815        | 0.58        |
| iYAR020C-1       | 1         | 178134        | 7467         | YAR02C        | <b>0.17</b> | Sgl | Pi | 0.501        | 0.373        | 0.142        | 0.58        |
| iYBR299W         | 2         | 807069        |              | 7890          | <b>0.56</b> | Non | F  | 0.191        | 0.552        | 0.266        | 0.58        |
| iYDR433W         | 4         | 1330029       | 8711         | YDR434        | <b>0.27</b> | Sgl | Pi | 0.322        | 0.945        | 0.653        | 0.58        |
| iYGR061C         | 7         | 615965        | 9944         | YGR06'        | <b>0.44</b> | Sgl | Pi | 0.551        | 0.63         | 0.467        | 0.58        |
| iYDL041W         | 4         | 378457        |              | 8100          | <b>0.53</b> | Non | F  | 0.78         | 0.523        | 0.952        | 0.58        |
| iYKR013W         | 11        | 464594        |              | 11306         | <b>0.44</b> | Non | F  | 0.645        | 0.217        | 0.773        | 0.58        |
| iYPRCdelta22     | 16        | 850514        | 13798        | YPR1E         | <b>0.49</b> | Sgl | Pi | 0.595        | 0.398        | NaN          | 0.58        |
| iYDR538W         | 4         | 1511634       | 8808         | YDR53E        | <b>0.49</b> | Sgl | Pi | 0.435        | 0.405        | 0.04         | 0.58        |
| iYLL026W         | 12        | 91369         | 11431        | YLL02!        | <b>0.48</b> | Sgl | Pi | 0.951        | 0.002        | 0.655        | 0.58        |
| iYML009C         | 13        | 251514        | 11929        | YML0C         | <b>0.85</b> | Sgl | Pi | 0.13         | 0.564        | 0.447        | 0.58        |
| iYKL008C         | 11        | 428180        | 11074        | YKL00         | <b>0.19</b> | Dbl | Pi | <b>8E-04</b> | 0.48         | 0.213        | 0.58        |
| iYOL112W         | 15        | 108195        |              | 12886         | <b>0.04</b> | Non | F  | 0.069        | 0.585        | 0.643        | 0.58        |
| iYPR170C         | 16        | 883311        | 13761        | YPR17         | <b>0.72</b> | Dbl | Pi | 0.488        | 0.438        | 0.44         | 0.58        |
| iYLR384C         | 12        | 892903        | 11824        | YLR38         | <b>0.64</b> | Sgl | Pi | 0.34         | 0.478        | 0.304        | 0.58        |
| iYNR020C         | 14        | 668204        | 12719        | YNR02         | <b>0.86</b> | Dbl | Pi | 0.001        | 0.623        | 0.601        | 0.58        |
| iYDR472W         | 4         | 1404164       |              | 8746          | <b>0.44</b> | Non | F  | 0.343        | 0.353        | 0.128        | 0.58        |
| iYDR350C         | 4         | 1178161       | 8637         | YDR35C        | <b>0.86</b> | Dbl | Pi | 0.016        | 0.697        | 0.387        | 0.58        |
| iYIL170W-1       | 9         | 22169         |              | 10639         | <b>0.13</b> | Non | F  | NaN          | 0.317        | 0.673        | 0.58        |
| iYER011W         | 5         | 176035        | 8930         | YER012        | <b>0.47</b> | Sgl | Pi | 0.647        | 0.673        | 0.461        | 0.58        |
| <b>iYMR247C</b>  | <b>13</b> | <b>768026</b> | <b>12297</b> | <b>YMR2'</b>  | <b>0.53</b> | Dbl | Pi | <b>0.814</b> | <b>0.979</b> | <b>0.782</b> | <b>0.58</b> |
| iYDL104C         | 4         | 274886        | 8159         | YDL104        | <b>0.55</b> | Sgl | Pi | 0.583        | 0.388        | 0.585        | 0.58        |
| iYMR011W         | 13        | 289717        | 12062        | YMR0'         | <b>0.66</b> | Sgl | Pi | 0.632        | 0.671        | 0.319        | 0.58        |
| iYKR006C         | 11        | 450878        | 11300        | YKR0C         | <b>0.95</b> | Dbl | Pi | 0.535        | 0.55         | 0.695        | 0.58        |
| iYER118C         | 5         | 399062        | 9107         | YER11E        | <b>0.8</b>  | Sgl | Pi | 0.58         | 0.232        | 0.209        | 0.58        |
| iYKL164C-0       | 11        | 142833        | 11222        | YKL16         | <b>0.37</b> | Dbl | Pi | 0.768        | 0.941        | 0.167        | 0.58        |
| iYKL140W         | 11        | 182429        | 11197        | YKL13         | <b>0.64</b> | Sgl | Pi | 0.909        | 0.872        | 0.226        | 0.59        |
| iYNL327W         | 14        | 27211         |              | 12679         | <b>0.03</b> | Non | F  | 0.522        | 0.633        | 0.414        | 0.59        |
| iYOR317W         | 15        | 911439        |              | 13252         | <b>0.32</b> | Non | F  | 0.593        | 0.333        | 0.35         | 0.59        |
| iYPR157W         | 16        | 842656        | 13748        | YPR1E         | <b>0.36</b> | Sgl | Pi | 0.918        | 0.062        | 0.69         | 0.59        |
| iYDL242W         | 4         | 19309         | 8293         | YDL241        | <b>0.43</b> | Sgl | Pi | 0.607        | 0.425        | 0.583        | 0.59        |
| iYLR126C         | 12        | 395569        | 11593        | YLR12         | <b>0.49</b> | Sgl | Pi | 0.539        | 0.271        | 0.219        | 0.59        |
| iYNL291C         | 14        | 85799         | 12649        | YNL29         | <b>0.75</b> | Dbl | Pi | 0.665        | 0.735        | 0.178        | 0.59        |
| <b>itL(UAA)D</b> | <b>4</b>  | <b>519809</b> | <b>7236</b>  | <b>YDR034</b> | <b>0.76</b> | Sgl | Pi | <b>0.465</b> | <b>0.461</b> | <b>0.596</b> | <b>0.59</b> |
| iYPR048W         | 16        | 661034        |              | 13656         | <b>0.03</b> | Non | F  | 0.462        | 0.585        | 0.395        | 0.59        |
| iYDL053C         | 4         | 362242        | 8112         | YDL053        | <b>0.57</b> | Sgl | Pi | 0.246        | 0.609        | 0.03         | 0.59        |
| iYDL230W         | 4         | 43693         | 8280         | YDL229        | <b>0.14</b> | Sgl | Pi | 0.006        | 0.872        | 0.697        | 0.59        |
| iYDR541C-1       | 4         | 1522018       | 8814         | YDR541        | <b>0.41</b> | Dbl | Pi | 0.568        | 0.708        | 0.081        | 0.59        |
| iYHR076W         | 8         | 252226        |              | 10313         | <b>0.1</b>  | Non | F  | 0.418        | 0.446        | 0.519        | 0.59        |
| <b>iYDL024C</b>  | <b>4</b>  | <b>409839</b> | <b>8086</b>  | <b>YDL024</b> | <b>0.45</b> | Sgl | Pi | <b>0.682</b> | <b>0.791</b> | <b>0.869</b> | <b>0.59</b> |

|               |    |              |        |      |        |       |       |       |      |
|---------------|----|--------------|--------|------|--------|-------|-------|-------|------|
| itV(AAC)K2    | 11 | 379396       | 7350   | 0.14 | Non F  | 0.759 | 0.249 | 0.938 | 0.59 |
| iYAL039C-0    | 1  | 69519 7412   | YAL039 | 0.34 | Dbl Pi | NaN   | 0.449 | 0.774 | 0.59 |
| iYIL034C      | 9  | 290092 10510 | YIL034 | 0.72 | Sgl Pi | 0.666 | 0.84  | 0.556 | 0.59 |
| iYJR153W-1    | 10 | 724534 11051 | YJR15  | 0.72 | Sgl Pi | 0.63  | 0.551 | 0.305 | 0.59 |
| iYMR148W      | 13 | 560802 12196 | YMR14  | 0.56 | Sgl Pi | 0.634 | 0.73  | 0.559 | 0.59 |
| iYKL043W      | 11 | 357484 11106 | YKL04  | 0.43 | Sgl Pi | 0.527 | 0.055 | 0.674 | 0.59 |
| iYDL207W      | 4  | 89885 8255   | YDL206 | 0.71 | Sgl Pi | 0.631 | 0.53  | 0.446 | 0.59 |
| iYEL073C-3    | 5  | 11240 8907   | YEL073 | 0.56 | Dbl Pi | NaN   | 0.462 | 0.223 | 0.59 |
| iYCL038C      | 3  | 56553 7926   | YCL038 | 0.38 | Sgl Pi | 0.794 | 0.821 | 0.892 | 0.59 |
| iYPL244C      | 16 | 88024 13563  | YPL24  | 0.9  | Dbl Pi | 0.012 | 0.107 | 0.487 | 0.59 |
| iYPR093C      | 16 | 720472 13691 | YPR09  | 0.3  | Dbl Pi | 0.408 | 0.588 | 0.389 | 0.59 |
| iYGL234W      | 7  | 58902 9815   | YGL233 | 0.75 | Sgl Pi | 0.632 | 0.607 | 0.648 | 0.59 |
| iYDR272W      | 4  | 1009812 8562 | YDR27  | 0.5  | Sgl Pi | 0.659 | 0.49  | 0.33  | 0.59 |
| iYOR155C      | 15 | 627968 13102 | YOR15  | 0.75 | Sgl Pi | 0.695 | 0.811 | 0.635 | 0.59 |
| iYER115C      | 5  | 394866 9101  | YER115 | 0.71 | Sgl Pi | 0.78  | 0.497 | 0.117 | 0.59 |
| iYBR138C      | 2  | 515279 7740  | YBR138 | 0.64 | Dbl Pi | 0.564 | 2E-05 | 0.734 | 0.59 |
| iYNL137C      | 14 | 370037 12512 | YNL13  | 0.84 | Dbl Pi | 0.396 | 0.387 | 0.142 | 0.59 |
| iYHR118C      | 8  | 345617 10355 | YHR11  | 0.98 | Dbl Pi | 0.743 | 2E-04 | 0.45  | 0.59 |
| iYDR288W      | 4  | 1038096      | 8577   | 0.1  | Non F  | 0.643 | 0.649 | 0.768 | 0.59 |
| iYLL016W      | 12 | 116022 11421 | YLL01  | 0.8  | Sgl Pi | 0.806 | 0.886 | 0.498 | 0.59 |
| iYBR264C      | 2  | 738378 7855  | YBR264 | 0.73 | Dbl Pi | 0.339 | 0.593 | 0.815 | 0.59 |
| iYGR123C      | 7  | 738183 10003 | YGR12  | 0.6  | Dbl Pi | 0.68  | 0.771 | 0.957 | 0.59 |
| iYPL158C      | 16 | 254325 13481 | YPL15  | 0.8  | Dbl Pi | 0.595 | 0.537 | 0.213 | 0.59 |
| iYNL139C      | 14 | 365707 12514 | YNL13  | 0.83 | Dbl Pi | 0.004 | 0.001 | 0.115 | 0.59 |
| iYBL034C      | 2  | 158336 7534  | YBL034 | 0.96 | Sgl Pi | 0.598 | 0.252 | 0.524 | 0.59 |
| iYDL211C-2    | 4  | 82491 8261   | YDL211 | 0.44 | Dbl Pi | 0.749 | 0.773 | 0.482 | 0.59 |
| iYHR012W      | 8  | 130445       | 10246  | 0.44 | Non F  | 0.687 | 0.785 | 0.432 | 0.59 |
| iYDR514C      | 4  | 1473024 8784 | YDR514 | 0.72 | Dbl Pi | 0.81  | 0.766 | 0.238 | 0.59 |
| iYGR205W      | 7  | 910084 10077 | YGR20  | 0.66 | Sgl Pi | 0.736 | 0.979 | 0.459 | 0.59 |
| iYLR182W      | 12 | 520346       | 11651  | 0.14 | Non F  | 0.398 | 0.748 | 0.327 | 0.59 |
| iYMR178W      | 13 | 619293 12226 | YMR17  | 0.77 | Sgl Pi | 0.78  | 0.536 | 0.307 | 0.59 |
| iYHRWdelta9   | 8  | 359375       | 10474  | 0.65 | Non F  | 0.836 | 0.475 | NaN   | 0.59 |
| iYER180C      | 5  | 550508 9225  | YER180 | 0.47 | Sgl Pi | 0.682 | 0.593 | 0.394 | 0.59 |
| iYGR188C      | 7  | 875103 10061 | YGR18  | 0.9  | Sgl Pi | 0.687 | 1E-03 | 0.344 | 0.59 |
| iYKL046C      | 11 | 352261 11109 | YKL04  | 0.91 | Dbl Pi | 0.626 | 0.797 | 0.406 | 0.59 |
| iYFR032C-A    | 6  | 223410 9496  | YFR032 | 0.06 | Sgl Pi | 0.761 | 0.895 | 0.719 | 0.59 |
| iYIL089W      | 9  | 196226       | 10557  | 0.75 | Non F  | 0.611 | 0.759 | 0.148 | 0.59 |
| itD(GUC)JM    | 13 | 463640 7127  | YMR09  | 0.32 | Sgl Pi | 0.781 | 0.635 | 0.761 | 0.59 |
| iYERComega1-0 | 5  | 564013 9256  | YER18  | 0.39 | Dbl Pi | 0.8   | 0.302 | 0.248 | 0.59 |
| iYEL035C      | 5  | 85542 8865   | YEL035 | 0.07 | Dbl Pi | 0.241 | 0.665 | 0.619 | 0.59 |
| iYPL060W      | 16 | 435759       | 13392  | 0.24 | Non F  | 0.538 | 0.573 | 0.648 | 0.59 |
| iYDR315C      | 4  | 1093575 8602 | YDR31  | 0.76 | Dbl Pi | 0.424 | 0.658 | 0.394 | 0.59 |
| iYLR016C      | 12 | 177422 11486 | YLR01  | 0.91 | Dbl Pi | 0.71  | 0.593 | 0.47  | 0.59 |
| iYBR048W      | 2  | 333797       | 7653   | 0.07 | Non F  | NaN   | 0.446 | 0.351 | 0.6  |
| iYJR039W      | 10 | 507056 10941 | YJR04  | 0.85 | Sgl Pi | 0.425 | 0.486 | 0.605 | 0.6  |
| iYGL028C      | 7  | 442890 9591  | YGL028 | 0.73 | Sgl Pi | NaN   | 2E-04 | 0.195 | 0.6  |
| iYDR473C-1    | 4  | 1406650 8748 | YDR47  | 0.13 | Sgl Pi | 0.643 | 0.537 | 3E-04 | 0.6  |
| iYMR292W      | 13 | 855286       | 12340  | 0.04 | Non F  | 0.421 | 0.583 | 0.792 | 0.6  |
| itG(GCC)F1    | 6  | 162284 7163  | YFR009 | 0.35 | Sgl Pi | 0.748 | 0.646 | 0.99  | 0.6  |
| iYMR101C      | 13 | 469481 12148 | YMR10  | 0.14 | Sgl Pi | 0.657 | 0.788 | 0.484 | 0.6  |
| iYLR043C      | 12 | 232051 11514 | YLR04  | 0.49 | Sgl Pi | 0.223 | 0.562 | 0.479 | 0.6  |

|              |    |         |       |        |             |     |    |       |       |       |      |
|--------------|----|---------|-------|--------|-------------|-----|----|-------|-------|-------|------|
| YILWTy3-1C   | 9  | 207923  | 14100 | YIL082 | <b>0.1</b>  | Sgl | Pi | 0.655 | 0.432 | 0.535 | 0.6  |
| iYOR380W-0   | 15 | 1052949 | 13311 | YOR38  | <b>0.41</b> | Sgl | Pi | 0.879 | 0.784 | 0.488 | 0.6  |
| iYDR390C     | 4  | 1256825 | 8675  | YDR39C | <b>0.81</b> | Sgl | Pi | 0.484 | 0.282 | 0.999 | 0.6  |
| iYMR065W     | 13 | 401214  | 12113 | YMR06  | <b>0.91</b> | Sgl | Pi | 0.009 | 0.731 | 0.362 | 0.6  |
| iYOR246C     | 15 | 796786  | 13186 | YOR24  | <b>0.53</b> | Dbl | Pi | 0.731 | 0.272 | 0.972 | 0.6  |
| iYJL214W-1   | 10 | 29771   | 10888 | YJL21: | <b>0.4</b>  | Sgl | Pi | 0.464 | 0.908 | 0.57  | 0.6  |
| iYDL007W     | 4  | 439354  | 8073  | YDL006 | <b>0.37</b> | Sgl | Pi | 0.603 | 0.869 | 0.524 | 0.6  |
| iYER053C-0   | 5  | 259632  | 8974  | YER053 | <b>0.27</b> | Sgl | Pi | 0.777 | 0.55  | 0.616 | 0.6  |
| iYDR119W     | 4  | 690523  |       | 8421   | <b>0.45</b> | Non | F  | 0.393 | 0.489 | 0.483 | 0.6  |
| iYDR031W     | 4  | 503851  |       | 8334   | <b>0.41</b> | Non | F  | 0.5   | 0.581 | 7E-05 | 0.6  |
| iYMR147W     | 13 | 559854  | 12195 | YMR14  | <b>0.49</b> | Sgl | Pi | 0.651 | 0.616 | 0.358 | 0.6  |
| iYHR167W     | 8  | 440130  | 10402 | YHR16  | <b>0.54</b> | Sgl | Pi | 0.544 | 0.574 | 0.503 | 0.6  |
| iYKR101W-1   | 11 | 643417  | 11392 | YKR10  | <b>0.21</b> | Sgl | Pi | 0.717 | 0.359 | 0.52  | 0.6  |
| iYDR033W     | 4  | 509088  |       | 8338   | <b>0.19</b> | Non | F  | 0.919 | 0.751 | 0.679 | 0.6  |
| iYPL024W     | 16 | 504229  |       | 13358  | <b>0.25</b> | Non | F  | 0.241 | 0.586 | 0.342 | 0.6  |
| iYNL018C     | 14 | 601767  | 12402 | YNL01  | <b>0.14</b> | Sgl | Pi | 0.696 | 0.227 | 0.101 | 0.6  |
| iYOR371C     | 15 | 1034181 | 13301 | YOR37  | <b>0.87</b> | Sgl | Pi | 0.521 | 0.848 | 0.434 | 0.6  |
| iYNL188W     | 14 | 287610  | 12558 | YNL18  | <b>0.78</b> | Sgl | Pi | 0.599 | 0.621 | 0.283 | 0.6  |
| iYOR387C-0   | 15 | 1070239 | 13320 | YOR38  | <b>0.8</b>  | Sgl | Pi | 0.768 | 0.79  | 0.128 | 0.6  |
| iYDL025C     | 4  | 407199  | 8087  | YDL025 | <b>0.76</b> | Sgl | Pi | 0.443 | 0.597 | 0.138 | 0.6  |
| iYGR065C     | 7  | 619855  | 9947  | YGR06  | <b>0.79</b> | Sgl | Pi | 0.369 | 0.705 | 0.167 | 0.6  |
| iSNR67       | 5  | 61453   | 7093  | YEL050 | <b>0.2</b>  | Dbl | Pi | 0.835 | 0.546 | 0.59  | 0.6  |
| iYDR198C     | 4  | 853953  | 8496  | YDR19  | <b>0.49</b> | Dbl | Pi | 0.57  | 0.763 | 0.485 | 0.6  |
| iYNR072W     | 14 | 774340  |       | 12772  | <b>0.97</b> | Non | F  | 0.684 | 0.9   | 0.657 | 0.6  |
| iYJL017W     | 10 | 406246  | 10714 | YJL01  | <b>0.35</b> | Sgl | Pi | 0.409 | 0.533 | 0.396 | 0.6  |
| iYDR127W     | 4  | 709291  | 8429  | YDR12  | <b>0.26</b> | Sgl | Pi | 0.528 | 0.393 | 0.604 | 0.6  |
| iYOL160W-0   | 15 | 14658   |       | 12934  | <b>0.72</b> | Non | F  | 0.845 | 0.467 | 0.084 | 0.6  |
| iYNL286W     | 14 | 96090   | 12643 | YNL28  | <b>0.31</b> | Sgl | Pi | 0.026 | 0.591 | 0.524 | 0.6  |
| iYDL202W     | 4  | 99230   | 8250  | YDL201 | <b>0.85</b> | Sgl | Pi | 0.563 | 0.637 | 0.314 | 0.6  |
| iYGL112C     | 7  | 299734  | 9672  | YGL112 | <b>0.97</b> | Dbl | Pi | 0.615 | 0.582 | 0.542 | 0.6  |
| iYDR243C     | 4  | 950275  | 8534  | YDR24  | <b>0.64</b> | Dbl | Pi | 0.595 | 0.2   | 0.588 | 0.6  |
| iYER047C     | 5  | 246508  | 8967  | YER047 | <b>0.76</b> | Sgl | Pi | 0.758 | 0.84  | 0.373 | 0.6  |
| iYDL169C     | 4  | 158722  | 8218  | YDL169 | <b>0.73</b> | Dbl | Pi | 0.537 | 0.998 | 0.77  | 0.6  |
| TEL15R-5     | 15 | 1088578 |       | 13959  | <b>0.04</b> | Non | F  | 0.786 | 0.199 | 0.972 | 0.6  |
| iYDR300C     | 4  | 1062773 | 8587  | YDR30C | <b>0.97</b> | Dbl | Pi | 0.026 | 0.51  | 0.045 | 0.6  |
| iE(UUC)J     | 10 | 116010  | 7141  | YJL162 | <b>0.73</b> | Dbl | Pi | NaN   | 0.622 | 0.051 | 0.6  |
| iYNL083W     | 14 | 472863  | 12463 | YNL08  | <b>0.39</b> | Sgl | Pi | 0.69  | 0.607 | 0.371 | 0.6  |
| iYPL279C     | 16 | 14348   | 13598 | YPL27  | <b>0.98</b> | Sgl | Pi | 0.116 | 0.536 | NaN   | 0.6  |
| iYKL213C     | 11 | 34155   | 11269 | YKL21  | <b>0.8</b>  | Dbl | Pi | 0.65  | 0.319 | 0.533 | 0.6  |
| iYJL038C     | 10 | 375456  | 10731 | YJL03  | <b>0.72</b> | Dbl | Pi | 0.477 | 0.948 | 0.535 | 0.6  |
| iR(CCU)J     | 10 | 538309  | 7294  | YJR055 | <b>0.71</b> | Sgl | Pi | 0.82  | 0.579 | 0.566 | 0.6  |
| iYHR013C     | 8  | 131428  | 10247 | YHR01  | <b>0.68</b> | Dbl | Pi | 0.603 | 0.866 | 0.8   | 0.6  |
| iYOR231W     | 15 | 774132  | 13172 | YOR23  | <b>0.95</b> | Sgl | Pi | 0.168 | 0.105 | 0.251 | 0.6  |
| iYLR380W     | 12 | 879496  | 11820 | YLR38  | <b>0.72</b> | Sgl | Pi | 0.432 | 0.746 | 0.738 | 0.6  |
| iYDR129C     | 4  | 715367  | 8431  | YDR12  | <b>0.55</b> | Sgl | Pi | 0.367 | 0.24  | 0.819 | 0.61 |
| iYPL255W     | 16 | 68884   | 13574 | YPL25  | <b>0.93</b> | Sgl | Pi | 0.129 | 0.616 | 0.493 | 0.61 |
| iYLR035C-A-1 | 12 | 219776  | 11506 | YLR03  | <b>0.49</b> | Sgl | Pi | 0.648 | 0.29  | 0.972 | 0.61 |
| iYDL186W     | 4  | 126437  | 8235  | YDL185 | <b>0.94</b> | Sgl | Pi | 0.559 | 0.454 | 0.585 | 0.61 |
| iYHR111W     | 8  | 334381  |       | 10349  | <b>0.09</b> | Non | F  | 0.264 | 0.52  | 0.419 | 0.61 |
| iYHR134W     | 8  | 372567  |       | 10368  | <b>0.14</b> | Non | F  | 0.653 | 0.634 | 0.471 | 0.61 |
| iYIL138C     | 9  | 89700   | 10608 | YIL13  | <b>0.66</b> | Sgl | Pi | 7E-04 | 0.717 | 0.535 | 0.61 |

|               |    |         |       |        |             |        |       |       |       |      |
|---------------|----|---------|-------|--------|-------------|--------|-------|-------|-------|------|
| iYER008C      | 5  | 171825  | 8926  | YER008 | <b>0.95</b> | Dbl Pi | 0.285 | 0.541 | 0.389 | 0.61 |
| iYKR106W-0    | 11 | 662927  |       | 11400  | <b>0.06</b> | Non F  | 0.716 | 0.117 | 0.114 | 0.61 |
| iYOL155C-0    | 15 | 31605   | 12927 | YOL15  | <b>0.15</b> | Dbl Pi | 0.7   | 0.689 | 0.565 | 0.61 |
| iYDR216W      | 4  | 898992  |       | 8511   | <b>0.29</b> | Non F  | 0.62  | 0.766 | 0.318 | 0.61 |
| iYLL051C      | 12 | 39466   | 11452 | YLL05  | <b>0.64</b> | Sgl Pi | 0.699 | 0.586 | 0.776 | 0.61 |
| iYNL225C      | 14 | 224456  | 12591 | YNL22  | <b>0.65</b> | Sgl Pi | 0.666 | 0.64  | 0.631 | 0.61 |
| iYKL088W      | 11 | 276642  |       | 11149  | <b>0.21</b> | Non F  | 0.532 | 0.78  | 0.36  | 0.61 |
| iYLR050C      | 12 | 246078  | 11521 | YLR05  | <b>0.56</b> | Sgl Pi | 0.767 | 0.592 | 0.176 | 0.61 |
| iYDR303C      | 4  | 1071374 | 8590  | YDR303 | <b>0.91</b> | Sgl Pi | 0.184 | 0.236 | 0.287 | 0.61 |
| iYKL190W      | 11 | 83543   | 11248 | YKL18  | <b>0.18</b> | Sgl Pi | 0.248 | 0.442 | 0.62  | 0.61 |
| iYGR113W      | 7  | 719886  |       | 9994   | <b>0.54</b> | Non F  | 0.353 | 0.909 | 0.733 | 0.61 |
| iYOR167C      | 15 | 649007  | 13114 | YOR16  | <b>0.51</b> | Dbl Pi | 0.004 | 0.55  | 0.519 | 0.61 |
| iYGR277C      | 7  | 1046546 | 10146 | YGR27  | <b>0.78</b> | Dbl Pi | 0.583 | 0.68  | 0.091 | 0.61 |
| iYLL033W      | 12 | 74110   |       | 11438  | <b>0.08</b> | Non F  | 0.479 | 0.582 | NaN   | 0.61 |
| iE(UUC)I      | 9  | 370474  | 7140  | YIR006 | <b>0.42</b> | Dbl Pi | 0.536 | 0.837 | 0.236 | 0.61 |
| iYDR018C      | 4  | 483849  | 8322  | YDR018 | <b>0.4</b>  | Sgl Pi | 0.778 | 0.463 | 0.687 | 0.61 |
| iYDR107C      | 4  | 671013  | 8411  | YDR107 | <b>0.91</b> | Dbl Pi | 0.528 | 3E-04 | 0.229 | 0.61 |
| iYMR061W      | 13 | 394837  |       | 12109  | <b>0.19</b> | Non F  | 0.28  | 0.633 | 0.432 | 0.61 |
| iYKL055C      | 11 | 335809  | 11118 | YKL05  | <b>0.38</b> | Sgl Pi | 0.693 | 0.562 | 0.264 | 0.61 |
| iYGL162W      | 7  | 199030  |       | 9718   | <b>0</b>    | Non F  | 0.501 | 0.586 | 0.807 | 0.61 |
| iYBL067C      | 2  | 95873   | 7563  | YBL067 | <b>0.34</b> | Sgl Pi | 0.228 | 0.402 | 0.18  | 0.61 |
| iYBR183W      | 2  | 597087  | 7785  | YBR184 | <b>0.21</b> | Sgl Pi | 0.545 | 0.659 | 0.472 | 0.61 |
| iYER164W      | 5  | 509823  | 9193  | YER165 | <b>0.3</b>  | Sgl Pi | 0.002 | 0.805 | 0.045 | 0.61 |
| iYHR104W      | 8  | 324380  | 10342 | YHR10  | <b>0.84</b> | Sgl Pi | 0.671 | 0.489 | 0.188 | 0.61 |
| iYGR283C      | 7  | 1060041 | 10152 | YGR28  | <b>0.56</b> | Sgl Pi | 0.553 | 0.367 | 0.27  | 0.61 |
| iYCL026C-A    | 3  | 75276   | 7915  | YCL026 | <b>0.81</b> | Sgl Pi | 0.6   | 0.826 | 0.106 | 0.61 |
| iYER090W      | 5  | 339459  |       | 9049   | <b>0.19</b> | Non F  | 0.61  | 0.837 | 0.486 | 0.61 |
| iYPR166C      | 16 | 876637  | 13757 | YPR16  | <b>0.75</b> | Sgl Pi | 0.457 | 0.566 | 0.459 | 0.61 |
| iYDR281C      | 4  | 1022323 | 8570  | YDR281 | <b>0.65</b> | Sgl Pi | 0.531 | 0.014 | 9E-10 | 0.61 |
| iYER079W      | 5  | 319553  | 9027  | YER080 | <b>0.73</b> | Sgl Pi | 0.632 | 0.955 | 0.52  | 0.61 |
| iYNR074C      | 14 | 778737  | 12774 | YNR07  | <b>0.63</b> | Dbl Pi | 0.746 | 0.724 | 0.118 | 0.61 |
| iYOR068C      | 15 | 454225  | 13020 | YOR06  | <b>0.1</b>  | Dbl Pi | 0.651 | 0.339 | 0.528 | 0.61 |
| iYOR233W      | 15 | 778310  |       | 13174  | <b>0.34</b> | Non F  | 0.407 | 0.593 | 0.337 | 0.61 |
| iYDR167W      | 4  | 790061  | 8463  | YDR168 | <b>0.8</b>  | Sgl Pi | 0.552 | 0.646 | 0.266 | 0.61 |
| iYAL015C      | 1  | 128098  | 7388  | YAL015 | <b>0.21</b> | Sgl Pi | NaN   | 0.498 | 0.445 | 0.61 |
| iYNR003C      | 14 | 635293  | 12702 | YNR00  | <b>0.85</b> | Dbl Pi | 0.848 | 0.291 | 0.01  | 0.61 |
| iYGL071W      | 7  | 374093  |       | 9633   | <b>0.26</b> | Non F  | 0.71  | 0.739 | 0.102 | 0.61 |
| iYCR082W      | 3  | 259268  | 8029  | YCR083 | <b>0.76</b> | Sgl Pi | 0.19  | 0.686 | 0.518 | 0.61 |
| iYNL296W      | 14 | 76588   | 12654 | YNL29  | <b>0.96</b> | Sgl Pi | 0.511 | 0.319 | 0.795 | 0.61 |
| iYKRWdelta10  | 11 | 490433  | 11405 | YKR02  | <b>0.32</b> | Dbl Pi | 0.809 | 0.713 | 0.323 | 0.61 |
| iYIL024C      | 9  | 309168  | 10501 | YIL024 | <b>0.38</b> | Sgl Pi | 0.666 | 0.547 | 0.628 | 0.61 |
| iYPL234C      | 16 | 105459  | 13554 | YPL23  | <b>0.64</b> | Dbl Pi | 0.448 | 0.039 | 0.942 | 0.61 |
| iYKL188C      | 11 | 88794   | 11246 | YKL18  | <b>0.75</b> | Sgl Pi | 0.775 | 0.918 | 0.691 | 0.61 |
| iYGL007W-1    | 7  | 484779  | 9571  | YGL006 | <b>0.6</b>  | Sgl Pi | 0.816 | 0.524 | 0.482 | 0.61 |
| iYBL040C      | 2  | 142836  | 7540  | YBL040 | <b>0.71</b> | Sgl Pi | 0.535 | 0.827 | 0.283 | 0.61 |
| iYCR044C      | 3  | 207941  | 8001  | YCR044 | <b>0.91</b> | Sgl Pi | 0.521 | 0.46  | 0.692 | 0.61 |
| iYOR010C-1    | 15 | 348306  | 12965 | YOR01  | <b>0.85</b> | Dbl Pi | 0.369 | 0.469 | NaN   | 0.61 |
| iYOR172W      | 15 | 656561  | 13116 | YOR17  | <b>0.4</b>  | Sgl Pi | 0.654 | 0.96  | 0.183 | 0.61 |
| iYILCdelta5-1 | 9  | 338116  | 10649 | YIL009 | <b>0.33</b> | Dbl Pi | 0.631 | 0.243 | 0.011 | 0.61 |
| iYKL189W      | 11 | 85929   |       | 11247  | <b>0.17</b> | Non F  | 0.751 | 0.684 | 0.483 | 0.61 |
| iYDR459C      | 4  | 1383428 | 8734  | YDR459 | <b>0.8</b>  | Dbl Pi | 0.622 | 0.196 | 0.2   | 0.61 |



|              |    |         |       |         |             |        |              |       |       |      |
|--------------|----|---------|-------|---------|-------------|--------|--------------|-------|-------|------|
| iYKL155C     | 11 | 161348  | 11210 | YKL15   | <b>0.94</b> | Dbl Pi | 0.595        | 0.555 | 0.147 | 0.61 |
| iYGR201C     | 7  | 903327  | 10073 | YGR20   | <b>0.22</b> | Sgl Pi | 0.432        | 0.553 | 0.558 | 0.61 |
| iYMR083W     | 13 | 435919  | 12132 | YMR08   | <b>0.83</b> | Sgl Pi | 0.713        | 0.648 | 0.221 | 0.61 |
| iYPL042C     | 16 | 474704  | 13374 | YPL04   | <b>0.3</b>  | Sgl Pi | 0.579        | 0.692 | 0.482 | 0.61 |
| iYBL101C     | 2  | 28171   |       | 7591    | <b>0.48</b> | Non F  | 0.689        | 0.535 | 0.625 | 0.61 |
| iYDR452W     | 4  | 1364911 |       | 8728    | <b>0.1</b>  | Non F  | 0.489        | 0.474 | 0.297 | 0.61 |
| iYMR026C     | 13 | 325433  | 12078 | YMR02   | <b>0.7</b>  | Dbl Pi | 0.314        | 0.611 | 0.18  | 0.62 |
| iYJR051W     | 10 | 531054  | 10953 | YJR05   | <b>0.02</b> | Sgl Pi | 0.511        | 0.607 | 0.523 | 0.62 |
| iYNL096C     | 14 | 444338  | 12475 | YNL09   | <b>0.06</b> | Sgl Pi | 0.774        | 0.818 | 0.467 | 0.62 |
| iYGL016W     | 7  | 464904  |       | 9580    | <b>0.04</b> | Non F  | 0.329        | 0.674 | 0.61  | 0.62 |
| iYGR095C     | 7  | 676439  | 9976  | YGR09   | <b>0.76</b> | Dbl Pi | 0.752        | 0.563 | 0.307 | 0.62 |
| iYBR089W     | 2  | 425749  |       | 7697    | <b>0.53</b> | Non F  | 0.642        | 0.566 | 0.455 | 0.62 |
| iYGR185C     | 7  | 867521  | 10058 | YGR18   | <b>0.99</b> | Dbl Pi | <b>3E-04</b> | 0.661 | 0.54  | 0.62 |
| iYKR099W     | 11 | 637923  |       | 11389   | <b>0.12</b> | Non F  | 0.754        | 0.182 | 0.998 | 0.62 |
| iYGL038C     | 7  | 426827  | 9602  | YGL038  | <b>0.43</b> | Sgl Pi | 0.024        | 0.899 | 0.987 | 0.62 |
| iYOR173W     | 15 | 658309  | 13117 | YOR17   | <b>0.9</b>  | Sgl Pi | 0.55         | 0.487 | 0.208 | 0.62 |
| iYPR056W     | 16 | 672138  | 13661 | YPR05   | <b>0.47</b> | Sgl Pi | 0.521        | 0.372 | NaN   | 0.62 |
| iYLR200W     | 12 | 549355  |       | 11668   | <b>0.2</b>  | Non F  | 0.641        | 0.762 | 0.361 | 0.62 |
| iYGL095C     | 7  | 330596  | 9655  | YGL095  | <b>0.7</b>  | Sgl Pi | 0.571        | 0.347 | 0.365 | 0.62 |
| iYBL080C     | 2  | 74675   | 7573  | YBL080  | <b>0.89</b> | Dbl Pi | <b>6E-04</b> | 0.03  | 0.601 | 0.62 |
| iYER070W     | 5  | 301603  |       | 9009    | <b>0.51</b> | Non F  | 0.422        | 0.16  | 0.167 | 0.62 |
| iYIL010W     | 9  | 335530  |       | 10486   | <b>0.21</b> | Non F  | 0.635        | 0.375 | 0.258 | 0.62 |
| iYPL271W     | 16 | 30262   | 13589 | YPL27   | <b>0.46</b> | Sgl Pi | 0.429        | 0.482 | 0.412 | 0.62 |
| iYPL271W     | 16 | 30262   | 13589 | YPL27   | <b>0.46</b> | Sgl Pi | 0.429        | 0.482 | 0.412 | 0.62 |
| iYPL002C     | 16 | 554322  | 13337 | YPL00   | <b>0.92</b> | Dbl Pi | 0.001        | 0.508 | 0.603 | 0.62 |
| iYKL174C     | 11 | 122223  | 11233 | YKL17   | <b>0.82</b> | Dbl Pi | 0.49         | 0.334 | NaN   | 0.62 |
| iYDR034W-B   | 4  | 521471  | 8341  | YDR03   | <b>0.52</b> | Sgl Pi | 0.004        | 0.685 | 0.482 | 0.62 |
| iYDR181C     | 4  | 827332  | 8481  | YDR181  | <b>0.96</b> | Dbl Pi | 0.494        | 0.028 | 0.519 | 0.62 |
| iYNL095C     | 14 | 446843  | 12474 | YNL09   | <b>0.91</b> | Dbl Pi | 0.703        | 0.064 | 0.304 | 0.62 |
| iYGL218W     | 7  | 84307   |       | 9785    | <b>0.87</b> | Non F  | 0.847        | 0.545 | 0.466 | 0.62 |
| iYBR158W     | 2  | 558146  | 7761  | YBR15   | <b>0.83</b> | Sgl Pi | 0.63         | 0.22  | 0.589 | 0.62 |
| iYML063W     | 13 | 147331  |       | 11977   | <b>0.2</b>  | Non F  | NaN          | 0.464 | 0.004 | 0.62 |
| iYKR055W     | 11 | 548745  | 11343 | YKR05   | <b>0.5</b>  | Sgl Pi | <b>2E-04</b> | 0.859 | 0.649 | 0.62 |
| iYGR292W-1   | 7  | 1079123 |       | 10163   | <b>0.57</b> | Non F  | 0.639        | 0.42  | 0.178 | 0.62 |
| iYFL027C     | 6  | 81904   | 9336  | YFL027  | <b>0.96</b> | Dbl Pi | 0.459        | 0.132 | 0.629 | 0.62 |
| iYOL122C     | 15 | 91474   | 12896 | YOL12   | <b>0.58</b> | Sgl Pi | 0.765        | 0.423 | 0.147 | 0.62 |
| iti(AAU)I1   | 9  | 183502  | 7191  | YIL096C | <b>0.84</b> | Dbl Pi | 0.678        | 0.955 | 0.058 | 0.62 |
| iYMRCdelta13 | 13 | 463445  | 12376 | YMR09   | <b>0.09</b> | Sgl Pi | 0.493        | 0.696 | 0.651 | 0.62 |
| iYIL164C-0   | 9  | 34674   | 10632 | YIL164  | <b>0.65</b> | Sgl Pi | 0.833        | 0.059 | 0.68  | 0.62 |
| iYMR043W     | 13 | 354721  | 12095 | YMR04   | <b>0.26</b> | Sgl Pi | 0.178        | 0.087 | 0.886 | 0.62 |
| iYCR084C     | 3  | 262444  | 8031  | YCR084  | <b>0.82</b> | Dbl Pi | 0.03         | 0.026 | 0.695 | 0.62 |
| iYDR163W     | 4  | 781929  |       | 8459    | <b>0.21</b> | Non F  | 0.456        | 0.622 | 0.453 | 0.62 |
| iYOR154W     | 15 | 626467  |       | 13101   | <b>0.11</b> | Non F  | 0.437        | 0.418 | 0.425 | 0.62 |
| iYGR012W     | 7  | 514382  | 9899  | YGR01   | <b>0.64</b> | Sgl Pi | 0.411        | 0.298 | 0.42  | 0.62 |
| iYFL051C-1   | 6  | 31894   | 9384  | YFL051  | <b>0.41</b> | Sgl Pi | 0.71         | 0.661 | 0.365 | 0.62 |
| iYBR092C     | 2  | 429072  | 7700  | YBR092  | <b>0.34</b> | Sgl Pi | 0.907        | 0.42  | 0.553 | 0.62 |
| iYDR019C     | 4  | 485354  | 8323  | YDR01   | <b>0.27</b> | Sgl Pi | 0.642        | 0.485 | 0.132 | 0.62 |
| iYDR420W     | 4  | 1311651 | 8701  | YDR421  | <b>0.66</b> | Sgl Pi | 0.675        | 0.56  | 0.57  | 0.62 |
| YFRWdelta10  | 6  | 206909  | 14063 | YFR02   | <b>0.78</b> | Dbl Pi | 0.602        | 0.695 | 0.583 | 0.62 |
| iYLR014C     | 12 | 174981  | 11485 | YLR01   | <b>0.57</b> | Dbl Pi | 0.706        | 0.568 | NaN   | 0.62 |
| iYGR237C     | 7  | 965667  | 10106 | YGR23   | <b>0.81</b> | Sgl Pi | 0.477        | 0.661 | 0.678 | 0.62 |

|              |    |         |       |        |             |     |    |              |              |              |             |
|--------------|----|---------|-------|--------|-------------|-----|----|--------------|--------------|--------------|-------------|
| iYGR008C     | 7  | 508368  | 9896  | YGR008 | <b>0.52</b> | Sgl | Pi | 0.764        | 0.949        | 0.785        | 0.62        |
| iYGR030C     | 7  | 546141  | 9913  | YGR030 | <b>0.47</b> | Dbl | Pi | 0.53         | 0.592        | 0.457        | 0.62        |
| iYML061C     | 13 | 151524  | 11975 | YML061 | <b>0.91</b> | Dbl | Pi | 0.857        | 0.539        | 0.157        | 0.62        |
| iYGR269W     | 7  | 1026957 | 10138 | YGR269 | <b>0.84</b> | Sgl | Pi | <b>3E-04</b> | <b>2E-04</b> | 0.479        | 0.62        |
| iYOL062C     | 15 | 211980  | 12839 | YOL062 | <b>0.99</b> | Dbl | Pi | 0.601        | 0.508        | 0.328        | 0.62        |
| iYPL085W     | 16 | 393660  | 13415 | YPL085 | <b>0.7</b>  | Sgl | Pi | 0.606        | 0.612        | 0.71         | 0.62        |
| iYER023W     | 5  | 201929  | 8942  | YER023 | <b>0.71</b> | Sgl | Pi | 0.707        | 0.727        | 0.529        | 0.62        |
| iYOL066C     | 15 | 204462  | 12843 | YOL066 | <b>0.91</b> | Sgl | Pi | 0.506        | NaN          | 0.408        | 0.62        |
| iYIR025W     | 9  | 404759  |       | 10679  | <b>0.27</b> | Non | F  | 0.403        | 0.652        | 0.573        | 0.62        |
| iYBR172C     | 2  | 581470  | 7776  | YBR172 | <b>0.41</b> | Sgl | Pi | 0.784        | 0.499        | 0.763        | 0.62        |
| iYDR247W     | 4  | 957391  |       | 8538   | <b>0.05</b> | Non | F  | 0.695        | 0.632        | 0.457        | 0.62        |
| iYDR196C     | 4  | 850993  | 8494  | YDR196 | <b>0.81</b> | Dbl | Pi | 0.383        | 0.483        | 0.546        | 0.62        |
| iYCL075W     | 3  | 2558    | 7952  | YCL074 | <b>0.02</b> | Sgl | Pi | 0.602        | 0.102        | 0.567        | 0.62        |
| iYDL168W     | 4  | 160780  |       | 8217   | <b>0.01</b> | Non | F  | 0.659        | 0.758        | 0.606        | 0.63        |
| iYDR239C     | 4  | 943397  | 8532  | YDR239 | <b>0.89</b> | Sgl | Pi | 0.657        | 0.637        | 0.693        | 0.63        |
| iYOL154W     | 15 | 35408   |       | 12926  | <b>0.45</b> | Non | F  | 0.915        | 0.964        | 0.238        | 0.63        |
| itD(GUC)K    | 11 | 513039  | 7124  | YKR038 | <b>0.32</b> | Dbl | Pi | <b>0.027</b> | <b>0.654</b> | <b>0.831</b> | <b>0.63</b> |
| iYGR171C     | 7  | 842532  | 10046 | YGR171 | <b>0.81</b> | Sgl | Pi | 0.657        | <b>8E-04</b> | 0.536        | 0.63        |
| iYGR177C     | 7  | 850436  | 10051 | YGR177 | <b>0.35</b> | Sgl | Pi | 0.808        | 0.495        | 0.365        | 0.63        |
| iYEL022W     | 5  | 115802  | 8854  | YEL021 | <b>0.47</b> | Sgl | Pi | 0.751        | 0.911        | 0.381        | 0.63        |
| iYKL003C     | 11 | 437136  | 11068 | YKL003 | <b>0.7</b>  | Dbl | Pi | 0.502        | 0.658        | 0.436        | 0.63        |
| iYLL057C     | 12 | 27000   | 11458 | YLL057 | <b>0.49</b> | Sgl | Pi | 0.64         | 0.469        | 0.148        | 0.63        |
| iYDR436W     | 4  | 1336952 | 8714  | YDR437 | <b>0.58</b> | Sgl | Pi | 0.783        | 0.806        | 0.395        | 0.63        |
| iYJR071W     | 10 | 570454  |       | 10971  | <b>0.38</b> | Non | F  | 0.484        | 0.734        | 0.431        | 0.63        |
| iYBR039W     | 2  | 316476  | 7644  | YBR040 | <b>0.48</b> | Sgl | Pi | 0.737        | 0.915        | 0.353        | 0.63        |
| iYOR066W     | 15 | 451342  |       | 13018  | <b>0.16</b> | Non | F  | 0.58         | 0.199        | 0.946        | 0.63        |
| iYKL142W     | 11 | 179161  | 11199 | YKL142 | <b>0.52</b> | Sgl | Pi | 0.386        | 0.421        | 0.982        | 0.63        |
| iYMR202W     | 13 | 668192  | 12252 | YMR202 | <b>0.85</b> | Sgl | Pi | 0.011        | 0.647        | 0.822        | 0.63        |
| iYGR214W     | 7  | 921771  | 10086 | YGR214 | <b>1</b>    | Sgl | Pi | 0.002        | 0.11         | 0.797        | 0.63        |
| iYIL121W     | 9  | 133875  | 10591 | YIL120 | <b>0.24</b> | Sgl | Pi | 0.775        | 0.777        | 0.394        | 0.63        |
| iYOR215C     | 15 | 747270  | 13158 | YOR215 | <b>0.43</b> | Sgl | Pi | 0.292        | 0.607        | 0.763        | 0.63        |
| iYBR214W     | 2  | 652974  | 7815  | YBR215 | <b>0.98</b> | Sgl | Pi | 0.732        | 0.726        | 0.565        | 0.63        |
| iYMR170C     | 13 | 603081  | 12218 | YMR170 | <b>0.66</b> | Sgl | Pi | 0.532        | 0.121        | 0.628        | 0.63        |
| iYER099C     | 5  | 359054  | 9069  | YER099 | <b>0.96</b> | Dbl | Pi | 0.501        | 0.065        | 0.377        | 0.63        |
| iYDL055C-1   | 4  | 358172  | 8115  | YDL055 | <b>0.55</b> | Sgl | Pi | <b>0.717</b> | <b>0.751</b> | <b>0.309</b> | <b>0.63</b> |
| iYJR130C     | 10 | 666834  | 11025 | YJR130 | <b>0.83</b> | Dbl | Pi | 0.641        | 0.517        | 0.521        | 0.63        |
| iYEL047C     | 5  | 66796   | 8876  | YEL047 | <b>0.3</b>  | Sgl | Pi | 0.79         | 0.892        | 0.575        | 0.63        |
| iYPL180W     | 16 | 207640  | 13503 | YPL177 | <b>0.62</b> | Sgl | Pi | 0.002        | 0.006        | 0.992        | 0.63        |
| iYGL108C     | 7  | 304055  | 9669  | YGL108 | <b>0.52</b> | Sgl | Pi | 0.298        | 0.258        | 0.531        | 0.63        |
| iYOL162W     | 15 | 10781   |       | 12938  | <b>0.17</b> | Non | F  | 0.719        | 0.599        | 0.152        | 0.63        |
| iYMR113W     | 13 | 496265  |       | 12160  | <b>0.37</b> | Non | F  | 0.403        | 0.611        | 0.549        | 0.63        |
| iYJL096W     | 10 | 246657  | 10782 | YJL096 | <b>0.78</b> | Sgl | Pi | 0.678        | 0.199        | 0.532        | 0.63        |
| iYHR193C     | 8  | 488237  | 10425 | YHR193 | <b>0.86</b> | Dbl | Pi | 0.346        | 0.109        | 0.893        | 0.63        |
| iYFR049W     | 6  | 248871  |       | 9528   | <b>0</b>    | Non | F  | 0.414        | 0.796        | 0.415        | 0.63        |
| iYPL021W     | 16 | 511691  |       | 13355  | <b>0.62</b> | Non | F  | 0.696        | 0.911        | 0.21         | 0.63        |
| iYFRWdelta10 | 6  | 207126  | 9560  | YFR026 | <b>0.88</b> | Dbl | Pi | 0.581        | 0.138        | 0.067        | 0.63        |
| iYGR294W     | 7  | 1080670 |       | 10164  | <b>0.85</b> | Non | F  | 0.728        | 0.976        | 0.751        | 0.63        |
| iYPL152W     | 16 | 266100  |       | 13475  | <b>0.15</b> | Non | F  | 0.457        | 0.604        | 0.602        | 0.63        |
| iYPL249C     | 16 | 79344   | 13568 | YPL249 | <b>0.65</b> | Sgl | Pi | 0.745        | 0.487        | 0.469        | 0.63        |
| iYMR264W     | 13 | 796417  |       | 12313  | <b>0.28</b> | Non | F  | 0.956        | 0.568        | 0.776        | 0.63        |
| iYJL084C     | 10 | 277688  | 10772 | YJL084 | <b>0.75</b> | Dbl | Pi | 0.767        | 0.59         | 0.376        | 0.63        |

|                |    |         |       |        |             |      |    |              |       |              |      |
|----------------|----|---------|-------|--------|-------------|------|----|--------------|-------|--------------|------|
| iYHL045W       | 8  | 12852   | 10222 | YHL04  | <b>0.75</b> | Sgl  | Pi | 0.746        | 0.733 | 0.215        | 0.63 |
| iYKR024C       | 11 | 486995  | 11317 | YKR02  | <b>1</b>    | Dbl  | Pi | 0.751        | 0.659 | 0.626        | 0.63 |
| iYOR058C-1     | 15 | 437255  | 13010 | YOR05  | <b>0.77</b> | Sgl  | Pi | 0.612        | 0.128 | NaN          | 0.63 |
| itP(AGG)N      | 14 | 631911  | 7265  | YNR001 | <b>0.24</b> | Sgl  | Pi | 0.616        | 0.563 | 0.828        | 0.63 |
| iYKL005C       | 11 | 434542  | 11070 | YKL00  | <b>0.9</b>  | Dbl  | Pi | <b>3E-04</b> | 0.789 | 0.36         | 0.63 |
| Q0020          | 17 | 66102   |       | 13811  | <b>0.17</b> | 0    |    | 0.564        | 0.527 | 0.444        | 0.63 |
| Q0020          | 17 | 66102   |       | 13811  | <b>0.17</b> | 0    |    | 0.564        | 0.527 | 0.444        | 0.63 |
| iYDR354W       | 4  | 1185864 |       | 8641   | <b>0.7</b>  | Non  | F  | 0.06         | 0.651 | 0.795        | 0.63 |
| iYIL037C       | 9  | 285002  | 10513 | YIL037 | <b>0.84</b> | Dbl  | Pi | <b>8E-04</b> | 0.469 | <b>7E-05</b> | 0.63 |
| iYDR321W       | 4  | 1109845 | 8607  | YDR322 | <b>0.71</b> | Sgl  | Pi | 0.6          | 0.955 | 0.363        | 0.63 |
| iYNL161W-1     | 14 | 335719  | 12536 | YNL16  | <b>0.37</b> | Sgl  | Pi | 0.669        | 0.113 | 0.724        | 0.63 |
| iYLR286C       | 12 | 710182  | 11740 | YLR28  | <b>0.34</b> | Sgl  | Pi | 0.765        | 0.002 | 0.162        | 0.63 |
| iYPL153C       | 16 | 264184  | 13476 | YPL15  | <b>0.72</b> | Dbl  | Pi | 0.523        | 0.587 | 0.434        | 0.63 |
| iYGR273C       | 7  | 1039242 | 10142 | YGR27  | <b>0.19</b> | Sgl  | Pi | 0.796        | 0.971 | 7E-04        | 0.63 |
| iYJL206C       | 10 | 49925   | 10879 | YJL206 | <b>0.82</b> | Sgl  | Pi | 0.644        | 0.531 | NaN          | 0.63 |
| iYMR287C       | 13 | 845331  | 12335 | YMR28  | <b>0.89</b> | Dbl  | Pi | 0.556        | 0.485 | 0.455        | 0.63 |
| iYLR250W       | 12 | 641016  | 11711 | YLR25  | <b>0.47</b> | Sgl  | Pi | 0.514        | 0.387 | 0.329        | 0.63 |
| iYBR054W       | 2  | 344089  |       | 7659   | <b>0.99</b> | Non  | F  | 0.784        | 0.742 | 0.527        | 0.63 |
| iYGR077C       | 7  | 639523  | 9956  | YGR077 | <b>0.74</b> | Sgl  | Pi | 0.764        | 0.774 | 0.576        | 0.63 |
| iYER060W-A     | 5  | 278152  |       | 8989   | <b>0.3</b>  | Non  | F  | 0.697        | 0.528 | 0.474        | 0.63 |
| iYFR036W       | 6  | 227311  |       | 9504   | <b>0.35</b> | Non  | F  | 0.614        | 0.366 | 0.836        | 0.63 |
| iYMR035W       | 13 | 341661  |       | 12087  | <b>0.23</b> | Non  | F  | 0.536        | 0.425 | 0.616        | 0.63 |
| iYGL026C       | 7  | 448538  | 9589  | YGL026 | <b>0.48</b> | Sgl  | Pi | 0.712        | 0.816 | 0.418        | 0.63 |
| iYHL015W       | 8  | 75774   |       | 10192  | <b>0.07</b> | Non  | F  | 0.68         | 0.617 | 0.541        | 0.63 |
| iYPL172C       | 16 | 225759  | 13494 | YPL17  | <b>0.68</b> | Sgl  | Pi | NaN          | 0.204 | 0.578        | 0.63 |
| iYJR072C       | 10 | 571847  | 10972 | YJR07  | <b>0.92</b> | Sgl  | Pi | 0.64         | 0.61  | 0.319        | 0.64 |
| iYBR113W       | 2  | 466002  | 7718  | YBR114 | <b>0.22</b> | Sgl  | Pi | 0.47         | 0.308 | 0.982        | 0.64 |
| iYJL170C       | 10 | 101696  | 10849 | YJL170 | <b>0.42</b> | Dbl  | Pi | 0.696        | 0.028 | 0.431        | 0.64 |
| iYMR009W       | 13 | 284680  | 12059 | YMR00  | <b>0.66</b> | Sgl  | Pi | 0.023        | 0.58  | 0.316        | 0.64 |
| iYNR073C       | 14 | 776317  |       | #N/A   | <b>0.35</b> | #N/A |    | 0.656        | 0.682 | 0.451        | 0.64 |
| iYOR384W       | 15 | 1063641 | 13317 | YOR38  | <b>0.63</b> | Sgl  | Pi | 0.531        | 0.558 | 0.045        | 0.64 |
| iYOR384W       | 15 | 1063641 | 13317 | YOR38  | <b>0.63</b> | Sgl  | Pi | 0.531        | 0.558 | 0.045        | 0.64 |
| iYJL115W       | 10 | 196810  | 10799 | YJL114 | <b>0.35</b> | Sgl  | Pi | 0.732        | 0.709 | 0.57         | 0.64 |
| iYDR287W       | 4  | 1036860 | 8576  | YDR28E | <b>0.81</b> | Sgl  | Pi | 0.651        | 0.488 | 0.508        | 0.64 |
| iYDR287W       | 4  | 1036860 | 8576  | YDR28E | <b>0.81</b> | Sgl  | Pi | 0.651        | 0.488 | 0.508        | 0.64 |
| itR(UCU)E      | 5  | 138725  |       | 7295   | <b>0.19</b> | Non  | F  | 0.815        | 0.686 | 0.973        | 0.64 |
| iYBR202W       | 2  | 628272  | 7804  | YBR203 | <b>0.27</b> | Sgl  | Pi | 0.775        | 0.103 | 0.784        | 0.64 |
| iYPL075W       | 16 | 415354  | 13404 | YPL07  | <b>0.53</b> | Sgl  | Pi | 0.557        | 0.109 | 0.276        | 0.64 |
| iYGL157W       | 7  | 210053  | 9713  | YGL156 | <b>0.5</b>  | Sgl  | Pi | 0.555        | 0.949 | 0.434        | 0.64 |
| iYBR241C       | 2  | 704023  | 7836  | YBR241 | <b>0.69</b> | Dbl  | Pi | 0.677        | 0.427 | 0.961        | 0.64 |
| iYBR126C       | 2  | 490370  | 7729  | YBR126 | <b>0.62</b> | Sgl  | Pi | 0.604        | 0.568 | 0.6          | 0.64 |
| iYKL103C       | 11 | 247314  | 11166 | YKL10  | <b>0.43</b> | Sgl  | Pi | 0.75         | 0.943 | 0.688        | 0.64 |
| iYPR164W       | 16 | 874962  | 13755 | YPR16  | <b>0.78</b> | Sgl  | Pi | 0.003        | 0.018 | 0.632        | 0.64 |
| iYNL094W       | 14 | 449388  | 12473 | YNL09  | <b>0.39</b> | Sgl  | Pi | 0.736        | 1E-05 | 0.064        | 0.64 |
| iYJL099W       | 10 | 241346  | 10784 | YJL098 | <b>0.51</b> | Sgl  | Pi | 0.745        | 0.058 | 0.4          | 0.64 |
| iYHR164C       | 8  | 429187  | 10399 | YHR16  | <b>0.67</b> | Sgl  | Pi | 0.716        | 0.052 | 0.388        | 0.64 |
| iYDR413C       | 4  | 1295389 | 8695  | YDR413 | <b>0.15</b> | Sgl  | Pi | 0.367        | 0.548 | 0.283        | 0.64 |
| iYKL169C       | 11 | 131066  | 11229 | YKL16  | <b>0.25</b> | Sgl  | Pi | 0.56         | 0.515 | 0.628        | 0.64 |
| iYMR114C       | 13 | 497441  | 12161 | YMR11  | <b>0.97</b> | Dbl  | Pi | 0.639        | 0.201 | 0.017        | 0.64 |
| iYPL269W       | 16 | 34934   | 13587 | YPL26  | <b>0.82</b> | Sgl  | Pi | 0.72         | 0.719 | 0.365        | 0.64 |
| iYMRWdelta19-0 | 13 | 768874  | 12382 | YMR24  | <b>0.38</b> | Dbl  | Pi | 0.425        | 0.71  | 0.003        | 0.64 |

|            |    |         |       |        |             |     |    |              |              |       |      |
|------------|----|---------|-------|--------|-------------|-----|----|--------------|--------------|-------|------|
| iYER122C   | 5  | 404334  | 9113  | YER122 | <b>0.91</b> | Dbl | Pi | 0.053        | <b>8E-04</b> | 0.416 | 0.64 |
| iYDR407C   | 4  | 1287926 | 8690  | YDR407 | <b>0.89</b> | Sgl | Pi | 0.084        | 0.028        | 0.787 | 0.64 |
| iYGR194C   | 7  | 887873  | 10066 | YGR194 | <b>0.53</b> | Dbl | Pi | 0.782        | 0.413        | 0.372 | 0.64 |
| iYAL017W   | 1  | 124279  | 7390  | YAL016 | <b>0.92</b> | Sgl | Pi | 0.003        | 0.48         | 0.481 | 0.64 |
| iYKL218C-1 | 11 | 19628   | 11275 | YKL21  | <b>0.28</b> | Dbl | Pi | 0.339        | 0.215        | 0.536 | 0.64 |
| iYPL171C   | 16 | 227361  | 13493 | YPL17  | <b>0.58</b> | Dbl | Pi | 0.853        | 0.332        | 0.325 | 0.64 |
| iYMR082C-0 | 13 | 432109  | 12130 | YMR082 | <b>0.47</b> | Dbl | Pi | 0.764        | 0.412        | 0.175 | 0.64 |
| iYCL052C   | 3  | 35394   | 7935  | YCL052 | <b>0.87</b> | Dbl | Pi | 0.593        | 0.012        | 0.188 | 0.64 |
| iYPR172W   | 16 | 886387  |       | 13763  | <b>0.13</b> | Non | F  | 0.392        | 0.576        | 0.508 | 0.64 |
| iYNL078W   | 14 | 480991  | 12458 | YNL07  | <b>0.64</b> | Sgl | Pi | 0.461        | 0.739        | 0.109 | 0.64 |
| iYOR301W   | 15 | 882274  | 13236 | YOR301 | <b>0.02</b> | Sgl | Pi | 0.701        | 0.528        | 0.92  | 0.64 |
| iYOR282W   | 15 | 847294  | 13217 | YOR282 | <b>0.62</b> | Sgl | Pi | 0.612        | 0.565        | 0.282 | 0.64 |
| iYHR101C   | 8  | 315961  | 10339 | YHR101 | <b>0.98</b> | Dbl | Pi | 0.059        | 0.001        | 0.263 | 0.64 |
| iYKL127W   | 11 | 204883  | 11186 | YKL12  | <b>0.81</b> | Sgl | Pi | 0.567        | 0.55         | 0.52  | 0.64 |
| iYML031W   | 13 | 216161  | 11951 | YML03  | <b>0.88</b> | Sgl | Pi | 0.623        | 0.464        | 0.008 | 0.64 |
| iYOL131W   | 15 | 73370   | 12905 | YOL13  | <b>0.76</b> | Sgl | Pi | 0.628        | 0.8          | 0.233 | 0.64 |
| iYLR245C   | 12 | 626915  | 11706 | YLR24  | <b>0.64</b> | Dbl | Pi | 0.534        | 0.452        | 0.573 | 0.64 |
| iYMR168C   | 13 | 599188  | 12216 | YMR168 | <b>0.7</b>  | Sgl | Pi | 0.539        | 0.399        | NaN   | 0.64 |
| iYDR440W   | 4  | 1344237 |       | 8719   | <b>0.15</b> | Non | F  | 0.319        | 0.663        | 0.562 | 0.64 |
| iYGR122C-A | 7  | 735773  | 10001 | YGR122 | <b>0.5</b>  | Sgl | Pi | 0.421        | 0.438        | 0.643 | 0.65 |
| iTG(GCC)O2 | 15 | 282243  | 7172  | YOL022 | <b>0.22</b> | Sgl | Pi | 0.757        | 0.893        | 0.945 | 0.65 |
| iYNL260C   | 14 | 157439  | 12621 | YNL26  | <b>0.49</b> | Sgl | Pi | 0.358        | 0.289        | NaN   | 0.65 |
| iYDL194W   | 4  | 114253  | 8242  | YDL193 | <b>0.69</b> | Sgl | Pi | <b>6E-04</b> | 0.399        | 0.357 | 0.65 |
| iYBR117C   | 2  | 476387  | 7721  | YBR117 | <b>0.25</b> | Dbl | Pi | 0.756        | 0.582        | 0.754 | 0.65 |
| iYBR227C   | 2  | 675078  | 7823  | YBR227 | <b>0.48</b> | Dbl | Pi | 0.503        | 0.54         | 0.507 | 0.65 |
| iYNL316C   | 14 | 43179   | 12671 | YNL31  | <b>0.36</b> | Sgl | Pi | 0.471        | 0.791        | 0.632 | 0.65 |
| iYLR451W   | 12 | 1038750 |       | 11887  | <b>0.1</b>  | Non | F  | 0.74         | 0.249        | 4E-05 | 0.65 |
| iYLR078C   | 12 | 286562  | 11547 | YLR07  | <b>0.74</b> | Dbl | Pi | 0.626        | 0.307        | 0.458 | 0.65 |
| iYBR018C   | 2  | 275476  | 7624  | YBR018 | <b>0.82</b> | Sgl | Pi | 0.402        | 0.488        | 0.903 | 0.65 |
| iYNL027W   | 14 | 581597  | 12411 | YNL02  | <b>0.88</b> | Sgl | Pi | 0.595        | 0.77         | 0.411 | 0.65 |
| iYPL132W   | 16 | 302626  | 13457 | YPL13  | <b>0.24</b> | Sgl | Pi | 0.755        | 0.707        | 0.076 | 0.65 |
| iYBR029C   | 2  | 297699  | 7634  | YBR029 | <b>0.84</b> | Dbl | Pi | <b>9E-04</b> | <b>4E-07</b> | 0.901 | 0.65 |
| iYBR029C   | 2  | 297699  | 7634  | YBR029 | <b>0.84</b> | Dbl | Pi | <b>9E-04</b> | <b>4E-07</b> | 0.901 | 0.65 |
| iYMR317W   | 13 | 910794  |       | 12365  | <b>0.58</b> | Non | F  | 0.55         | 0.608        | 0.387 | 0.65 |
| iYDR485C   | 4  | 1427234 | 8759  | YDR485 | <b>0.61</b> | Sgl | Pi | 0.727        | 0.545        | 0.477 | 0.65 |
| iYOL027C   | 15 | 273710  | 12807 | YOL02  | <b>0.94</b> | Sgl | Pi | 0.153        | 0.225        | 0.626 | 0.65 |
| iYNL061W   | 14 | 512383  |       | 12441  | <b>0.1</b>  | Non | F  | 0.369        | 0.186        | 0.874 | 0.65 |
| iYHR162W   | 8  | 423455  |       | #N/A   | <b>0.73</b> | Sgl | Pi | 0.819        | 0.732        | 0.364 | 0.65 |
| iYOR001W   | 15 | 329024  | 12954 | YOR001 | <b>0.61</b> | Sgl | Pi | 0.642        | 0.843        | 0.434 | 0.65 |
| iYPR193C   | 16 | 923368  | 13782 | YPR193 | <b>0.53</b> | Sgl | Pi | 0.709        | 0.562        | 0.352 | 0.65 |
| iYLL042C   | 12 | 52575   | 11445 | YLL042 | <b>0.42</b> | Sgl | Pi | 0.521        | 0.796        | 0.361 | 0.65 |
| iYFL048C   | 6  | 40181   | 9376  | YFL048 | <b>0.96</b> | Dbl | Pi | <b>1E-04</b> | 0.654        | 0.477 | 0.65 |
| iYHR163W   | 8  | 424467  |       | 10398  | <b>0.15</b> | Non | F  | 0.232        | 0.464        | 0.688 | 0.65 |
| iYDR408C   | 4  | 1288849 | 8691  | YDR408 | <b>0.61</b> | Dbl | Pi | 0.003        | 0.569        | 0.097 | 0.65 |
| iYNL097C   | 14 | 442341  | 12476 | YNL09  | <b>0.56</b> | Sgl | Pi | 0.564        | 0.638        | 0.351 | 0.65 |
| iYOL147C   | 15 | 48636   | 12919 | YOL14  | <b>0.27</b> | Dbl | Pi | 0.261        | 0.458        | 0.43  | 0.65 |
| iYPR122W   | 16 | 785660  |       | 13719  | <b>0.36</b> | Non | F  | 0.845        | 0.845        | 0.861 | 0.65 |
| iYEL007W   | 5  | 143911  | 8839  | YEL006 | <b>0.34</b> | Sgl | Pi | 0.164        | 0.706        | 0.368 | 0.65 |
| iM(CAU)O1  | 15 | 710264  | 7250  | YOR192 | <b>0.38</b> | Dbl | Pi | 0.48         | 0.767        | 0.513 | 0.65 |
| iYOL133W   | 15 | 70693   | 12907 | YOL13  | <b>0.39</b> | Sgl | Pi | 0.545        | 0.73         | 0.351 | 0.65 |
| iD(GUC)J1  | 10 | 204499  | 7121  | YJL112 | <b>0.61</b> | Sgl | Pi | 0.613        | 0.067        | 0.725 | 0.65 |

|                   |           |                |              |               |             |               |              |              |              |             |
|-------------------|-----------|----------------|--------------|---------------|-------------|---------------|--------------|--------------|--------------|-------------|
| iYPL162C          | 16        | 244028         | 13485        | YPL16         | <b>0.74</b> | Sgl Pi        | 0.62         | 0.645        | 0.324        | 0.65        |
| iYBR153W          | 2         | 548154         |              | 7755          | <b>0.23</b> | Non F         | 0.65         | 0.574        | NaN          | 0.65        |
| iYPL128C          | 16        | 308213         | 13453        | YPL12         | <b>0.63</b> | Sgl Pi        | 0.655        | 0.533        | 0.055        | 0.65        |
| iYMR290W-A        | 13        | 851760         | 12338        | YMR29         | <b>0.22</b> | Sgl Pi        | 0.534        | 0.487        | 0.969        | 0.65        |
| iYFL033C          | 6         | 74417          | 9346         | YFL033        | <b>0.38</b> | Dbl Pi        | 0.064        | 0.033        | 0.968        | 0.65        |
| iYPR059C          | 16        | 674680         | 13663        | YPR059        | <b>0.05</b> | Sgl Pi        | 0.548        | 0.609        | NaN          | 0.65        |
| iYLR188W          | 12        | 530375         |              | 11657         | <b>0.21</b> | Non F         | 0.474        | 0.897        | 0.427        | 0.65        |
| iYDR229W          | 4         | 926140         | 8523         | YDR230        | <b>0.21</b> | Sgl Pi        | 0.81         | 0.548        | NaN          | 0.65        |
| iYBR136W          | 2         | 512734         | 7738         | YBR137        | <b>0.85</b> | Sgl Pi        | 0.763        | 0.35         | 0.455        | 0.65        |
| iYER042W          | 5         | 235486         |              | 8960          | <b>0.18</b> | Non F         | 0.864        | 0.821        | 0.76         | 0.65        |
| <b>iYLR454W</b>   | <b>12</b> | <b>1051903</b> | <b>11890</b> | <b>YLR45</b>  | <b>0.25</b> | <b>Sgl Pi</b> | <b>0.576</b> | <b>0.695</b> | <b>0.525</b> | <b>0.65</b> |
| iYBR185C          | 2         | 599929         | 7787         | YBR185        | <b>0.95</b> | Dbl Pi        | 0.722        | 0.781        | 0.408        | 0.65        |
| iYDR320C          | 4         | 1108078        | 8606         | YDR320        | <b>0.81</b> | Dbl Pi        | 0.585        | 0.645        | 0.375        | 0.65        |
| iYBR194W          | 2         | 610372         |              | 7795          | <b>0.17</b> | Non F         | 0.577        | 0.732        | 0.137        | 0.65        |
| iYLR038C          | 12        | 225189         | 11510        | YLR03         | <b>0.59</b> | Sgl Pi        | 0.671        | 0.634        | 0.051        | 0.65        |
| iYML072C          | 13        | 129353         | 11986        | YML07         | <b>0.34</b> | Sgl Pi        | 0.677        | 0.093        | 0.291        | 0.65        |
| iYKL039W          | 11        | 363875         | 11102        | YKL03         | <b>0.33</b> | Sgl Pi        | 0.596        | 0.004        | 0.795        | 0.66        |
| iYOR179C-0        | 15        | 672395         | 13124        | YOR17         | <b>0.77</b> | Sgl Pi        | 0.782        | 0.453        | 0.11         | 0.66        |
| iYPR079W          | 16        | 700025         | 13681        | YPR08         | <b>0.15</b> | Sgl Pi        | 0.78         | 0.741        | 0.999        | 0.66        |
| iYML027W          | 13        | 222583         |              | 11947         | <b>0.29</b> | Non F         | 0.715        | 0.88         | 0.02         | 0.66        |
| iYOL078W          | 15        | 185269         | 12854        | YOL07         | <b>0.89</b> | Sgl Pi        | 0.405        | 0.467        | 0.033        | 0.66        |
| iYLR102C          | 12        | 343806         | 11569        | YLR10         | <b>0.69</b> | Sgl Pi        | 0.431        | 0.77         | 0.589        | 0.66        |
| iYOL079W          | 15        | 181453         | 12855        | YOL07         | <b>0.98</b> | Sgl Pi        | 0.598        | 0.365        | 0.803        | 0.66        |
| iYLL018C          | 12        | 111569         | 11423        | YLL018        | <b>0.97</b> | Dbl Pi        | 0.566        | 0.689        | 0.542        | 0.66        |
| iYPL003W          | 16        | 553406         |              | 13338         | <b>0.43</b> | Non F         | 0.55         | 0.746        | 0.531        | 0.66        |
| iYGR127W          | 7         | 747735         |              | 10007         | <b>0.03</b> | Non F         | 0.635        | 0.744        | NaN          | 0.66        |
| iYML014W          | 13        | 244050         | 11934        | YML01         | <b>0.81</b> | Sgl Pi        | 0.017        | 0.51         | 0.767        | 0.66        |
| YOLCdelta2        | 15        | 18308          | 14139        | YOL15         | <b>0.53</b> | Sgl Pi        | 0.926        | 0.696        | 0.765        | 0.66        |
| <b>itG(GCC)J2</b> | <b>10</b> | <b>531587</b>  | <b>7170</b>  | <b>YJR052</b> | <b>0.36</b> | <b>Sgl Pi</b> | <b>0.811</b> | <b>0.588</b> | <b>0.791</b> | <b>0.66</b> |
| iYHR114W          | 8         | 339981         |              | 10352         | <b>0.22</b> | Non F         | 0.257        | 0.416        | 0.468        | 0.66        |
| iYBR034C          | 2         | 305942         | 7639         | YBR034        | <b>0.56</b> | Sgl Pi        | 0.625        | 0.671        | 0.648        | 0.66        |
| iYDL222C          | 4         | 61789          | 8271         | YDL222        | <b>0.9</b>  | Dbl Pi        | 0.011        | 0.671        | 0.429        | 0.66        |
| iYBR038W          | 2         | 314758         | 7643         | YBR038        | <b>0.55</b> | Sgl Pi        | NaN          | 0.615        | 0.329        | 0.66        |
| iYPL183W-A        | 16        | 199350         |              | 13506         | <b>0.56</b> | Non F         | 0.631        | 0.533        | 0.673        | 0.66        |
| iYIL068C          | 9         | 235488         | 10541        | YIL068        | <b>0.84</b> | Sgl Pi        | 0.548        | 0.599        | 0.195        | 0.66        |
| <b>iYJR043C</b>   | <b>10</b> | <b>517192</b>  | <b>10945</b> | <b>YJR04</b>  | <b>0.85</b> | <b>Sgl Pi</b> | <b>0.804</b> | <b>0.69</b>  | <b>0.478</b> | <b>0.66</b> |
| iYJR114W          | 10        | 638753         | 11010        | YJR11         | <b>0.46</b> | Sgl Pi        | 0.577        | 0.557        | 0.125        | 0.66        |
| iYMR305C          | 13        | 880235         | 12353        | YMR305        | <b>0.36</b> | Dbl Pi        | 0.866        | 0.007        | 0.107        | 0.66        |
| YDRCTy1-2D        | 4         | 882745         | 14035        | YDR21         | <b>0.46</b> | Sgl Pi        | 0.796        | 0.136        | 0.956        | 0.66        |
| iYBR239C          | 2         | 699893         | 7834         | YBR239        | <b>0.69</b> | Sgl Pi        | 0.589        | 0.881        | 0.556        | 0.66        |
| iYPL217C          | 16        | 143164         | 13537        | YPL21         | <b>0.78</b> | Dbl Pi        | 0.659        | 0.153        | 6E-04        | 0.66        |
| iYJR156C          | 10        | 729291         | 11054        | YJR15         | <b>0.95</b> | Dbl Pi        | 0.684        | 0.849        | 0.749        | 0.66        |
| iYAL056W          | 1         | 41793          | 7428         | YAL055        | <b>0.61</b> | Sgl Pi        | 0.855        | 0.933        | NaN          | 0.66        |
| iYPL099C          | 16        | 364084         | 13428        | YPL09         | <b>0.51</b> | Sgl Pi        | 0.749        | 0.805        | 0.621        | 0.66        |
| iYEL061C          | 5         | 39644          | 8890         | YEL061        | <b>0.8</b>  | Sgl Pi        | 0.084        | 0.022        | 0.414        | 0.66        |
| iYMR162C          | 13        | 583968         | 12210        | YMR162        | <b>0.81</b> | Sgl Pi        | 0.605        | 0.555        | 0.403        | 0.66        |
| iYGL065C          | 7         | 381270         | 9628         | YGL065        | <b>0.36</b> | Sgl Pi        | 0.551        | 0.41         | 0.373        | 0.66        |
| iYJL184W          | 10        | 83808          | 10861        | YJL184        | <b>0.95</b> | Sgl Pi        | <b>2E-04</b> | 0.173        | 0.968        | 0.66        |
| iYMR205C          | 13        | 674765         | 12255        | YMR205        | <b>0.68</b> | Dbl Pi        | 0.048        | 0.473        | 0.116        | 0.66        |
| iYLR447C          | 12        | 1027873        | 11883        | YLR44         | <b>0.34</b> | Dbl Pi        | 0.013        | 0.946        | 0.733        | 0.66        |
| iYBL072C          | 2         | 89107          | 7567         | YBL072        | <b>0.4</b>  | Sgl Pi        | 0.79         | 0.62         | 0.806        | 0.66        |



|             |    |         |       |        |             |     |    |       |       |       |      |
|-------------|----|---------|-------|--------|-------------|-----|----|-------|-------|-------|------|
| iYOR006C    | 15 | 338607  | 12959 | YOR006 | <b>0.63</b> | Sgl | Pi | 0.853 | 0.772 | 0.558 | 0.66 |
| iYLR237W    | 12 | 614156  | 11698 | YLR237 | <b>0.77</b> | Sgl | Pi | 0.755 | 0.571 | 0.235 | 0.66 |
| iYMR157C    | 13 | 572028  | 12204 | YMR157 | <b>0.95</b> | Dbl | Pi | 0.503 | 0.318 | 0.473 | 0.66 |
| iYDL244W    | 4  | 17211   |       | 8295   | <b>0.69</b> | Non | F  | 0.741 | 0.471 | 0.345 | 0.66 |
| iYDR492W    | 4  | 1435863 | 8765  | YDR492 | <b>0.69</b> | Sgl | Pi | 0.834 | 0.997 | 0.576 | 0.66 |
| iYOL089C    | 15 | 153497  | 12865 | YOL089 | <b>0.67</b> | Sgl | Pi | 0.8   | 0.762 | 0.148 | 0.66 |
| iYGR189C    | 7  | 878184  | 10062 | YGR189 | <b>0.32</b> | Sgl | Pi | 0.207 | 0.477 | 0.506 | 0.66 |
| iYGR169C    | 7  | 835906  | 10044 | YGR169 | <b>0.23</b> | Dbl | Pi | 0.881 | 0.283 | 0.257 | 0.66 |
| iYBR265W    | 2  | 739508  |       | 7856   | <b>0.57</b> | Non | F  | 0.492 | 0.713 | 0.958 | 0.66 |
| iYNL042W    | 14 | 549290  |       | 12425  | <b>0.16</b> | Non | F  | 0.44  | 0.409 | 0.448 | 0.66 |
| iYGR029W    | 7  | 544184  |       | 9912   | <b>0.41</b> | Non | F  | 0.765 | 0.886 | 0.865 | 0.66 |
| iYMR073C    | 13 | 412854  | 12121 | YMR073 | <b>0.85</b> | Sgl | Pi | 0.097 | 0.818 | 0.437 | 0.66 |
| iYDR458C    | 4  | 1382033 | 8733  | YDR458 | <b>0.71</b> | Sgl | Pi | 0.506 | 0.715 | 0.34  | 0.66 |
| iYGR112W    | 7  | 718528  | 9993  | YGR112 | <b>0.97</b> | Sgl | Pi | 0.529 | 0.083 | 0.021 | 0.66 |
| iYBR200W    | 2  | 622489  | 7801  | YBR200 | <b>0.74</b> | Sgl | Pi | 0.686 | 0.124 | 0.376 | 0.66 |
| iYDR095C    | 4  | 636514  | 8400  | YDR095 | <b>0.51</b> | Dbl | Pi | 0.54  | 0.749 | 0.433 | 0.66 |
| iYBL086C    | 2  | 62595   | 7578  | YBL086 | <b>0.41</b> | Dbl | Pi | 0.711 | 0.497 | 0.492 | 0.66 |
| iYKL085W    | 11 | 279779  | 11146 | YKL085 | <b>0.24</b> | Sgl | Pi | 0.898 | 0.058 | 2E-04 | 0.66 |
| iYPR095C    | 16 | 724712  | 13693 | YPR095 | <b>0.56</b> | Sgl | Pi | 0.245 | 0.473 | 0.493 | 0.66 |
| iYDR218C    | 4  | 905028  | 8513  | YDR218 | <b>0.32</b> | Sgl | Pi | 0.719 | 0.643 | 0.495 | 0.66 |
| iYGR229C    | 7  | 950895  | 10098 | YGR229 | <b>0.61</b> | Dbl | Pi | 0.881 | 0.394 | 0.1   | 0.66 |
| iYER143W    | 5  | 457588  |       | 9153   | <b>0.15</b> | Non | F  | 0.732 | 0.727 | 0.425 | 0.66 |
| iYCR073C    | 3  | 246567  | 8022  | YCR073 | <b>1</b>    | Dbl | Pi | 0.534 | 0.098 | 0.976 | 0.67 |
| iYNL121C    | 14 | 400546  | 12496 | YNL121 | <b>0.82</b> | Sgl | Pi | 1E-04 | 0.742 | 0.574 | 0.67 |
| iYBR261C    | 2  | 735479  | 7854  | YBR261 | <b>0.81</b> | Sgl | Pi | 0.677 | 0.188 | 0.43  | 0.67 |
| iYBR144C    | 2  | 533497  | 7746  | YBR144 | <b>0.55</b> | Dbl | Pi | 0.526 | 0.733 | 0.524 | 0.67 |
| iYER121W    | 5  | 402706  |       | 9111   | <b>0.24</b> | Non | F  | 0.349 | 0.659 | 0.401 | 0.67 |
| iYLR092W    | 12 | 326216  |       | 11561  | <b>0.19</b> | Non | F  | 0.589 | 0.602 | 0.446 | 0.67 |
| iYJL100W    | 10 | 238773  | 10785 | YJL100 | <b>0.59</b> | Sgl | Pi | 0.299 | 0.59  | 0.547 | 0.67 |
| iYHL002W    | 8  | 103964  | 10181 | YHL002 | <b>0.38</b> | Sgl | Pi | 0.397 | 0.906 | 0.752 | 0.67 |
| iYNR046W    | 14 | 708203  | 12745 | YNR046 | <b>0.96</b> | Sgl | Pi | 0.048 | 0.424 | 0.067 | 0.67 |
| iYMR149W    | 13 | 561830  |       | 12197  | <b>0.4</b>  | Non | F  | 0.201 | 0.462 | 0.687 | 0.67 |
| iYER086W    | 5  | 330215  | 9039  | YER086 | <b>0.59</b> | Sgl | Pi | 0.23  | 0.005 | 0.451 | 0.67 |
| iYKR065C    | 11 | 565519  | 11353 | YKR065 | <b>0.96</b> | Sgl | Pi | 0.063 | 0.339 | 0.019 | 0.67 |
| iYAR019C-0  | 1  | 175114  | 7464  | YAR019 | <b>0.97</b> | Sgl | Pi | 0.649 | 0.316 | 9E-04 | 0.67 |
| iYDR544C    | 4  | 1525512 | 8817  | YDR544 | <b>0.25</b> | Dbl | Pi | 0.358 | 0.921 | 0.888 | 0.67 |
| iYKR002W    | 11 | 444618  | 11296 | YKR002 | <b>0.44</b> | Sgl | Pi | 0.539 | 0.567 | 0.47  | 0.67 |
| iV(AAC)G2   | 7  | 823572  | 7342  | YGR161 | <b>0.08</b> | Dbl | Pi | 0.158 | 0.91  | 0.966 | 0.67 |
| iYNL100W    | 14 | 438317  |       | 12479  | <b>0.18</b> | Non | F  | 0.577 | 0.618 | 0.665 | 0.67 |
| iYGR107W    | 7  | 703133  | 9988  | YGR107 | <b>0.2</b>  | Sgl | Pi | 0.701 | 0.584 | 0.436 | 0.67 |
| iYOR272W    | 15 | 834181  |       | 13210  | <b>0.06</b> | Non | F  | 0.54  | 0.602 | 0.414 | 0.67 |
| iYDR258C    | 4  | 974238  | 8549  | YDR258 | <b>0.54</b> | Sgl | Pi | 0.792 | 0.61  | 0.34  | 0.67 |
| iYMR244W    | 13 | 758311  |       | 12294  | <b>0.35</b> | Non | F  | 0.698 | 0.733 | 0.451 | 0.67 |
| iYMR027W    | 13 | 327310  | 12079 | YMR027 | <b>0.4</b>  | Sgl | Pi | 0.572 | 0.708 | 0.439 | 0.67 |
| iYPR130C    | 16 | 793786  | 13724 | YPR130 | <b>0.19</b> | Sgl | Pi | 0.244 | NaN   | 0.412 | 0.67 |
| iYMR209C    | 13 | 687285  | 12259 | YMR209 | <b>0.84</b> | Dbl | Pi | 0.483 | 0.644 | 0.387 | 0.67 |
| iYBR284W    | 2  | 773595  | 7873  | YBR284 | <b>0.55</b> | Sgl | Pi | 0.644 | 0.447 | 0.165 | 0.67 |
| iYARCdelta5 | 1  | 166152  | 7492  | YAR010 | <b>0.25</b> | Sgl | Pi | 0.826 | 0.651 | 0.969 | 0.67 |
| iYGL209W    | 7  | 97004   | 9771  | YGL209 | <b>0.54</b> | Sgl | Pi | 0.395 | 0.436 | 0.084 | 0.67 |
| iYOR207C    | 15 | 733449  | 13150 | YOR207 | <b>0.97</b> | Dbl | Pi | 0.001 | 0.264 | 0.145 | 0.67 |
| iYML023C    | 13 | 228668  | 11943 | YML023 | <b>0.63</b> | Dbl | Pi | 0.619 | 0.63  | 0.576 | 0.67 |

|                |    |         |       |        |             |     |    |       |       |       |      |
|----------------|----|---------|-------|--------|-------------|-----|----|-------|-------|-------|------|
| iYGR250C-0     | 7  | 993503  | 10119 | YGR250 | <b>0.54</b> | Dbl | Pi | 0.406 | 0.442 | 0.772 | 0.67 |
| iYNL264C       | 14 | 146611  | 12625 | YNL264 | <b>0.88</b> | Sgl | Pi | 0.706 | 0.55  | NaN   | 0.67 |
| iYHR142W       | 8  | 384478  | 10377 | YHR142 | <b>0.67</b> | Sgl | Pi | 0.799 | 7E-08 | 0.048 | 0.67 |
| iYJL177W       | 10 | 91722   |       | 10855  | <b>0.17</b> | Non | F  | 0.67  | 0.611 | 0.459 | 0.67 |
| iYML020W       | 13 | 233139  | 11940 | YML01  | <b>0.86</b> | Sgl | Pi | 0.607 | 0.671 | 0.489 | 0.67 |
| iYBR276C       | 2  | 760015  | 7866  | YBR276 | <b>0.71</b> | Sgl | Pi | 0.44  | 0.572 | 0.319 | 0.67 |
| iYDR358W       | 4  | 1191708 |       | 8644   | <b>0.07</b> | Non | F  | 0.534 | 0.588 | 0.422 | 0.67 |
| iYKL208W       | 11 | 47979   | 11264 | YKL20  | <b>0.81</b> | Sgl | Pi | 0.013 | 0.621 | 0.848 | 0.67 |
| iYJLWdelta15   | 10 | 531366  | 10906 | YJR05  | <b>0.12</b> | Sgl | Pi | 0.788 | 0.8   | 0.48  | 0.67 |
| iYNL224C       | 14 | 227084  | 12590 | YNL22  | <b>0.82</b> | Dbl | Pi | 0.658 | 0.415 | 0.407 | 0.67 |
| iYBR083W       | 2  | 410594  | 7689  | YBR084 | <b>0.32</b> | Sgl | Pi | 0.717 | 0.305 | 0.443 | 0.67 |
| iYGR087C-0     | 7  | 652960  | 9966  | YGR087 | <b>0.75</b> | Dbl | Pi | 0.695 | 0.095 | 0.982 | 0.67 |
| iYGR261C       | 7  | 1016755 | 10132 | YGR261 | <b>0.87</b> | Sgl | Pi | 0.66  | 0.581 | 0.915 | 0.67 |
| iYNL022C       | 14 | 592881  | 12406 | YNL02  | <b>0.76</b> | Dbl | Pi | 0.623 | 0.535 | 0.405 | 0.67 |
| iYNL293W       | 14 | 82544   | 12651 | YNL29  | <b>0.79</b> | Sgl | Pi | 0.731 | 0.776 | 0.17  | 0.67 |
| itT(UGU)G1     | 7  | 661829  | 7333  | YGR090 | <b>0.3</b>  | Sgl | Pi | 0.754 | 0.342 | 0.592 | 0.67 |
| iYBL032W       | 2  | 161286  | 7532  | YBL031 | <b>0.72</b> | Sgl | Pi | 0.555 | 0.292 | 0.404 | 0.67 |
| iYFL058W       | 6  | 13942   |       | 9402   | <b>0.69</b> | Non | F  | 0.688 | 0.649 | 0.018 | 0.67 |
| iYER089C       | 5  | 337329  | 9047  | YER089 | <b>0.51</b> | Dbl | Pi | 0.007 | 0.875 | 0.631 | 0.67 |
| iYMR316C-A     | 13 | 905957  | 12364 | YMR316 | <b>0.45</b> | Sgl | Pi | 0.486 | 0.812 | 0.631 | 0.67 |
| iYKL113C       | 11 | 225520  | 11176 | YKL11  | <b>0.45</b> | Dbl | Pi | 0.074 | 0.093 | 0.309 | 0.67 |
| iYHRCdelta14-0 | 8  | 530377  |       | 10461  | <b>0.5</b>  | Non | F  | 0.816 | 0.704 | 0.638 | 0.67 |
| iYAL055W       | 1  | 42713   |       | 7427   | <b>0.01</b> | Non | F  | 0.666 | 0.388 | 0.372 | 0.67 |
| iYLR073C       | 12 | 281614  | 11543 | YLR07  | <b>0.5</b>  | Sgl | Pi | 0.678 | 0.772 | 0.902 | 0.68 |
| iYDR051C       | 4  | 558040  | 8359  | YDR051 | <b>0.45</b> | Sgl | Pi | 0.607 | 0.34  | 0.105 | 0.68 |
| iYJR151C-2     | 10 | 718058  | 11048 | YJR15  | <b>0.51</b> | Dbl | Pi | 0.658 | 0.748 | 0.028 | 0.68 |
| iYNL023C       | 14 | 591165  | 12407 | YNL02  | <b>0.84</b> | Sgl | Pi | 0.633 | 0.588 | 0.685 | 0.68 |
| iYAL009W       | 1  | 136624  | 7382  | YAL008 | <b>0.79</b> | Sgl | Pi | 0.653 | 0.219 | 0.4   | 0.68 |
| iYMR255W       | 13 | 778569  |       | 12304  | <b>0.22</b> | Non | F  | 0.674 | 0.473 | 0.94  | 0.68 |
| iYNR058W       | 14 | 735733  | 12757 | YNR058 | <b>0.84</b> | Sgl | Pi | 0.721 | 0.13  | 0.435 | 0.68 |
| iYGL034C-0     | 7  | 433560  | 9597  | YGL034 | <b>0.86</b> | Dbl | Pi | 0.388 | 0.552 | 0.379 | 0.68 |
| iYGL034C-0     | 7  | 433560  | 9597  | YGL034 | <b>0.86</b> | Dbl | Pi | 0.388 | 0.552 | 0.379 | 0.68 |
| iYPL265W       | 16 | 42873   |       | 13583  | <b>0.35</b> | Non | F  | 0.794 | 0.637 | 0.38  | 0.68 |
| iYPL080C       | 16 | 406498  | 13410 | YPL08  | <b>0.08</b> | Dbl | Pi | 0.611 | 0.733 | 0.835 | 0.68 |
| iYGL031C       | 7  | 437915  |       | 0      | <b>0.05</b> | Dbl | Pi | 0.698 | 0.892 | 0.763 | 0.68 |
| iYGL100W       | 7  | 314269  | 9662  | YGL099 | <b>0.89</b> | Sgl | Pi | 0.755 | 0.532 | 3E-05 | 0.68 |
| iYER127W       | 5  | 415558  | 9123  | YER128 | <b>0.76</b> | Sgl | Pi | 0.332 | 0.738 | 0.215 | 0.68 |
| iYGR267C       | 7  | 1025721 | 10137 | YGR267 | <b>0.65</b> | Sgl | Pi | 0.333 | 0.565 | 0.791 | 0.68 |
| iYEL042W       | 5  | 75327   | 8872  | YEL041 | <b>0.54</b> | Sgl | Pi | 0.742 | 0.689 | 0.056 | 0.68 |
| iYBR072W       | 2  | 382639  | 7677  | YBR073 | <b>0.88</b> | Sgl | Pi | 0.668 | 0.036 | 0.987 | 0.68 |
| iYOR166C       | 15 | 648492  | 13113 | YOR166 | <b>0.5</b>  | Sgl | Pi | 0.264 | 0.825 | 0.067 | 0.68 |
| itI(AAU)N1     | 14 | 569948  | 7195  | YNL035 | <b>0.12</b> | Dbl | Pi | 0.772 | 0.259 | 0.433 | 0.68 |
| iYORWdelta22   | 15 | 969420  | 13332 | YOR34  | <b>0.65</b> | Sgl | Pi | 0.002 | 0.256 | 0.068 | 0.68 |
| iYLL018C-A     | 12 | 108960  | 11424 | YLL018 | <b>0.63</b> | Sgl | Pi | 0.139 | 0.269 | 0.62  | 0.68 |
| iYCRCtau1      | 3  | 151073  | 8060  | YCR018 | <b>0.44</b> | Sgl | Pi | 0.128 | 0.671 | NaN   | 0.68 |
| iYCRCtau1      | 3  | 151073  | 8060  | YCR018 | <b>0.44</b> | Sgl | Pi | 0.128 | 0.671 | NaN   | 0.68 |
| iYMR256C       | 13 | 779137  | 12305 | YMR256 | <b>0.26</b> | Sgl | Pi | 0.915 | 0.64  | 0.095 | 0.68 |
| iYBR283C       | 2  | 770371  | 7872  | YBR283 | <b>0.83</b> | Dbl | Pi | 2E-04 | 0.498 | 0.067 | 0.68 |
| iYNL144C-1     | 14 | 355907  | 12519 | YNL14  | <b>0.42</b> | Sgl | Pi | 0.588 | 0.135 | 1     | 0.68 |
| iYGR250C-1     | 7  | 994562  | 10120 | YGR250 | <b>0.7</b>  | Dbl | Pi | 0.672 | 0.578 | 0.483 | 0.68 |
| iYKR004C       | 11 | 447321  | 11298 | YKR00  | <b>0.56</b> | Sgl | Pi | 0.899 | 0.715 | 0.579 | 0.68 |

|               |    |         |       |        |             |     |    |       |       |       |      |
|---------------|----|---------|-------|--------|-------------|-----|----|-------|-------|-------|------|
| iYER076C      | 5  | 313509  | 9021  | YER076 | <b>0.66</b> | Sgl | Pi | 0.854 | 0.859 | 0.068 | 0.68 |
| iYOR030W      | 15 | 388690  | 12984 | YOR030 | <b>0.19</b> | Sgl | Pi | 0.657 | 0.592 | 0.446 | 0.68 |
| iYHR174W      | 8  | 452623  | 10408 | YHR174 | <b>0.3</b>  | Sgl | Pi | 0.729 | 0.667 | 0.928 | 0.68 |
| iYLR005W      | 12 | 161437  |       | 11476  | <b>0.2</b>  | Non | F  | 0.406 | 0.811 | 0.388 | 0.68 |
| iYIL164C-1    | 9  | 35792   | 10633 | YIL164 | <b>0.55</b> | Sgl | Pi | 0.797 | 0.102 | 0.262 | 0.68 |
| iYHR165C      | 8  | 436953  | 10400 | YHR165 | <b>0.92</b> | Sgl | Pi | 0.028 | 0.616 | 0.236 | 0.68 |
| iYJL127C      | 10 | 183916  | 10809 | YJL127 | <b>0.78</b> | Dbl | Pi | 0.695 | 0.594 | 0.378 | 0.68 |
| iYOL094C      | 15 | 142560  | 12870 | YOL094 | <b>0.63</b> | Dbl | Pi | 0.74  | 0.797 | 0.141 | 0.68 |
| iYDL003W      | 4  | 446408  |       | 8069   | <b>0.22</b> | Non | F  | 0.81  | 0.601 | 0.042 | 0.68 |
| iYBL079W      | 2  | 79763   |       | 7572   | <b>0.3</b>  | Non | F  | 0.915 | 0.521 | 0.32  | 0.68 |
| iYJL166W      | 10 | 106712  |       | 10846  | <b>0.21</b> | Non | F  | NaN   | 0.563 | 0.525 | 0.68 |
| iYKL152C      | 11 | 164382  | 11208 | YKL152 | <b>0.05</b> | Sgl | Pi | 0.661 | 0.575 | 0.235 | 0.68 |
| iYDR267C      | 4  | 1003488 | 8559  | YDR267 | <b>0.83</b> | Dbl | Pi | 0.594 | 0.321 | 0.139 | 0.68 |
| iYHR159W      | 8  | 419067  |       | 10394  | <b>0.11</b> | Non | F  | 0.296 | 0.648 | 0.537 | 0.68 |
| iYAR028W      | 1  | 185581  | 7470  | YAR028 | <b>0.55</b> | Sgl | Pi | NaN   | 0.933 | 0.795 | 0.68 |
| iYNL052W      | 14 | 532185  | 12434 | YNL052 | <b>0.55</b> | Sgl | Pi | 0.764 | 0.389 | NaN   | 0.68 |
| iYIL166C      | 9  | 32567   | 10634 | YIL166 | <b>0.68</b> | Sgl | Pi | 0.838 | 0.189 | 0.203 | 0.68 |
| iYER136W      | 5  | 440971  |       | 9141   | <b>0.25</b> | Non | F  | 0.452 | 0.846 | 0.673 | 0.68 |
| iYLL001W      | 12 | 150183  |       | 11406  | <b>0.73</b> | Non | F  | 0.777 | 0.745 | 0.39  | 0.68 |
| iYOR330C      | 15 | 943441  | 13264 | YOR330 | <b>0.98</b> | Sgl | Pi | 0.363 | NaN   | 0.344 | 0.68 |
| iYHR186C      | 8  | 480671  | 10420 | YHR186 | <b>0.92</b> | Dbl | Pi | 0.288 | 0.37  | 0.775 | 0.68 |
| iYIR027C      | 9  | 407635  | 10681 | YIR027 | <b>0.66</b> | Dbl | Pi | 0.794 | 0.62  | 0.012 | 0.68 |
| iYOR388C      | 15 | 1072902 | 13322 | YOR388 | <b>0.5</b>  | Dbl | Pi | 0.765 | 0.867 | 0.217 | 0.68 |
| iYCR072C      | 3  | 242332  | 8021  | YCR072 | <b>0.94</b> | Sgl | Pi | 0.75  | 0.573 | 0.475 | 0.68 |
| iYGR182C      | 7  | 858887  | 10055 | YGR182 | <b>0.26</b> | Sgl | Pi | 0.658 | 0.593 | 0.968 | 0.68 |
| iYMR095C      | 13 | 457943  | 12142 | YMR095 | <b>0.37</b> | Dbl | Pi | 0.491 | 0.581 | 0.634 | 0.68 |
| iYEL039C      | 5  | 79972   | 8869  | YEL039 | <b>0.93</b> | Dbl | Pi | 0.682 | 0.678 | 0.083 | 0.68 |
| iYNR067C      | 14 | 759098  | 12766 | YNR067 | <b>0.81</b> | Sgl | Pi | 0.784 | 0.627 | 0.438 | 0.68 |
| iYLR441C      | 12 | 1018889 | 11878 | YLR441 | <b>0.11</b> | Sgl | Pi | 0.86  | 0.754 | 0.869 | 0.68 |
| iYAL007C      | 1  | 138328  | 7380  | YAL007 | <b>0.92</b> | Dbl | Pi | 0.107 | 0.487 | 0.723 | 0.68 |
| iYER056C      | 5  | 268207  | 8978  | YER056 | <b>0.03</b> | Sgl | Pi | 0.084 | 0.712 | 0.305 | 0.69 |
| iYJL024C      | 10 | 396291  | 10718 | YJL024 | <b>0.38</b> | Sgl | Pi | 0.434 | 0.702 | 0.618 | 0.69 |
| iYNLCdelta1-3 | 14 | 100862  |       | 12696  | <b>0.38</b> | Non | F  | 0.744 | 0.241 | 0.99  | 0.69 |
| iYBR301W      | 2  | 809380  |       | 7891   | <b>0.79</b> | Non | F  | 0.78  | 0.902 | 0.643 | 0.69 |
| iYOR221C      | 15 | 757828  | 13163 | YOR221 | <b>0.29</b> | Dbl | Pi | 0.604 | 0.438 | 0.813 | 0.69 |
| iYGR200C      | 7  | 902296  | 10072 | YGR200 | <b>0.71</b> | Sgl | Pi | 0.496 | 0.572 | 0.511 | 0.69 |
| iYBR104W      | 2  | 450600  |       | 7710   | <b>0.11</b> | Non | F  | 0.478 | 0.712 | 0.433 | 0.69 |
| iYIL115C      | 9  | 148743  | 10584 | YIL115 | <b>1</b>    | Sgl | Pi | 0.031 | 0.709 | 0.194 | 0.69 |
| iYHR202W      | 8  | 504181  |       | 10434  | <b>0.6</b>  | Non | F  | 0.763 | 0.762 | 0.053 | 0.69 |
| iYPL039W      | 16 | 480178  | 13371 | YPL039 | <b>0.65</b> | Sgl | Pi | 0.655 | 0.47  | 0.735 | 0.69 |
| iSCR1         | 5  | 442415  | 7056  | YER137 | <b>0.68</b> | Sgl | Pi | 0.773 | 0.535 | 0.998 | 0.69 |
| iYLR392C      | 12 | 906291  | 11832 | YLR392 | <b>0.84</b> | Dbl | Pi | 0.723 | 0.265 | 0.134 | 0.69 |
| iYHR160C      | 8  | 420090  | 10395 | YHR160 | <b>0.13</b> | Sgl | Pi | 0.561 | 0.481 | 0.41  | 0.69 |
| iYML037C      | 13 | 205403  | 11956 | YML037 | <b>0.75</b> | Dbl | Pi | 0.586 | 0.556 | 0.577 | 0.69 |
| iYOR142W      | 15 | 594044  |       | 13089  | <b>0.24</b> | Non | F  | 0.674 | 0.649 | 0.193 | 0.69 |
| iYPL094C      | 16 | 370673  | 13424 | YPL094 | <b>0.79</b> | Dbl | Pi | 0.397 | 0.693 | 0.626 | 0.69 |
| iYKL044W      | 11 | 356287  | 11107 | YKL044 | <b>0.16</b> | Sgl | Pi | 0.43  | 0.82  | 0.811 | 0.69 |
| iYER095W      | 5  | 351163  | 9063  | YER095 | <b>0.21</b> | Sgl | Pi | 0.787 | 0.814 | 0.388 | 0.69 |
| iYDRWdelta30  | 4  | 1353222 | 8831  | YDR445 | <b>0.94</b> | Dbl | Pi | 0.539 | 0.852 | 0.372 | 0.69 |
| itR(CCG)L     | 12 | 818670  | 7293  | YLR344 | <b>0.13</b> | Sgl | Pi | 0.705 | 0.128 | 0.726 | 0.69 |
| iYDR224C      | 4  | 914707  | 8518  | YDR224 | <b>0.26</b> | Dbl | Pi | 0.717 | 0.863 | 0.175 | 0.69 |

|               |           |               |              |        |             |     |     |              |              |              |             |
|---------------|-----------|---------------|--------------|--------|-------------|-----|-----|--------------|--------------|--------------|-------------|
| iYGR270W      | 7         | 1031493       | 10139        | YGR27  | <b>0.8</b>  | Sgl | Pi  | 0.524        | 0.551        | 0.305        | 0.69        |
| iYIRCdelta6-1 | 9         | 427776        | 10700        | YIR03  | <b>0.54</b> | Sgl | Pi  | 0.329        | 0.443        | 0.406        | 0.69        |
| iYHR191C      | 8         | 486624        | 10424        | YHR19  | <b>0.68</b> | Dbl | Pi  | 0.468        | 0.692        | 0.419        | 0.69        |
| iYBL104C      | 2         | 21079         | 7594         | YBL104 | <b>0.73</b> | Sgl | Pi  | 0.04         | 0.788        | 0.524        | 0.69        |
| itY(GUA)F2    | <b>6</b>  | <b>210692</b> | <b>7369</b>  | YFR028 | <b>0.91</b> | Dbl | Pi  | <b>0.329</b> | <b>0.594</b> | <b>0.967</b> | <b>0.69</b> |
| iYLR217W      | 12        | 573217        |              | 11682  | <b>0.72</b> | Non | F   | 0.786        | 0.808        | 0.613        | 0.69        |
| iYNL056W      | 14        | 517827        |              | 12438  | <b>0.17</b> | Non | F   | 0.224        | 0.683        | 0.138        | 0.69        |
| iYMR166C      | 13        | 594461        | 12214        | YMR16  | <b>0.65</b> | Dbl | Pi  | 0.401        | 0.078        | 0.215        | 0.69        |
| iYOR055W      | 15        | 429898        |              | 13006  | <b>0.57</b> | Non | F   | 0.671        | 0.653        | 0.547        | 0.69        |
| iYKL163W      | 11        | 145392        |              | 11221  | <b>0.63</b> | Non | F   | 0.578        | 0.659        | 0.304        | 0.69        |
| iYIL143C      | 9         | 83031         | 10612        | YIL143 | <b>0.96</b> | Dbl | Pi  | 0.019        | 0.623        | 0.453        | 0.69        |
| iYHR113W      | 8         | 337814        | 10351        | YHR11  | <b>0.66</b> | Sgl | Pi  | 0.426        | 0.576        | 0.93         | 0.69        |
| iYAR015W      | 1         | 170289        |              | 7462   | <b>0.17</b> | Non | F   | 0.36         | 0.606        | 0.913        | 0.69        |
| iYJL217W      | 10        | 23740         |              | 10892  | <b>0.38</b> | Non | F   | 0.762        | 0.95         | 0.469        | 0.69        |
| iYOR117W      | 15        | 546345        | 13067        | YOR11  | <b>0.8</b>  | Sgl | Pi  | 0.532        | 0.985        | 0.86         | 0.69        |
| iYMR160W      | 13        | 577531        | 12208        | YMR16  | <b>0.82</b> | Sgl | Pi  | 0.516        | 0.533        | 0.448        | 0.69        |
| iYLL061W      | 12        | 19692         |              | 11462  | <b>0.59</b> | Non | F   | 0.771        | 0.736        | 0.057        | 0.69        |
| iYDR414C      | 4         | 1296677       | 8696         | YDR414 | <b>0.69</b> | Sgl | Pi  | 0.725        | 0.669        | 0.211        | 0.69        |
| iYBL046W      | 2         | 133704        |              | 7546   | <b>0.14</b> | Non | F   | 0.527        | 0.608        | 0.597        | 0.69        |
| iYML046W      | <b>13</b> | <b>183393</b> | <b>11961</b> | YML04  | <b>0.42</b> | Sgl | Pi  | <b>0.653</b> | <b>0.337</b> | <b>0.523</b> | <b>0.69</b> |
| iYBR289W      | 2         | 782373        | 7878         | YBR290 | <b>0.52</b> | Sgl | Pi  | 0.004        | 0.588        | 0.202        | 0.69        |
| iYER053C-1    | 5         | 260845        | 8975         | YER053 | <b>0.17</b> | Sgl | Pi  | 0.78         | 0.697        | 0.131        | 0.69        |
| iYMR243C      | 13        | 756151        | 12293        | YMR24  | <b>0.38</b> | Dbl | Pi  | 0.535        | 0.738        | 0.467        | 0.69        |
| iYBR108W      | 2         | 457335        |              | 7714   | <b>0.17</b> | Non | F   | 0.518        | 0.275        | 0.997        | 0.69        |
| iYNR034W-1    | 14        | 692160        |              | 12734  | <b>0.56</b> | Non | F   | 0.673        | 0.206        | 0.026        | 0.69        |
| iYNL099C      | 14        | 439280        | 12478        | YNL09  | <b>0.72</b> | Sgl | Pi  | 0.865        | 0.148        | 0.727        | 0.69        |
| iYOLCdelta9   | 15        | 340942        | 12946        | YOR00  | <b>0.12</b> | Sgl | Pi  | 0.78         | 0.694        | 0.548        | 0.69        |
| iYAL004W      | 1         | 141400        | 7379         | YAL005 | <b>0.23</b> | Dbl | Pi  | NaN          | 0.72         | 0.884        | 0.69        |
| iYLL012W      | 12        | 127241        | 11417        | YLL01  | <b>0.95</b> | Sgl | Pi  | 0.004        | 0.892        | 0.379        | 0.7         |
| iYJR151C-1    | 10        | 716749        | 11047        | YJR15  | <b>0.96</b> | Dbl | Pi  | 0.272        | 0.256        | 0.529        | 0.7         |
| iYGL187C      | 7         | 150175        | 9743         | YGL187 | <b>0.16</b> | Sgl | Pi  | 0.705        | 0.181        | 0.09         | 0.7         |
| iYOR051C      | 15        | 426080        | 13004        | YOR05  | <b>0.17</b> | Sgl | Pi  | 0.878        | 0.688        | 0.644        | 0.7         |
| iYOR138C      | 15        | 586308        | 13086        | YOR13  | <b>0.78</b> | Sgl | Pi  | 0.155        | 0.12         | 0.38         | 0.7         |
| itP(UGG)N1    | <b>14</b> | <b>547189</b> | <b>7272</b>  | YNL043 | <b>0.5</b>  | Dbl | Pi  | <b>0.68</b>  | <b>0.591</b> | <b>0.646</b> | <b>0.7</b>  |
| iYORWtau3     | <b>15</b> | <b>710102</b> | <b>13335</b> | YOR19  | <b>0.08</b> | Dbl | Pi  | <b>0.727</b> | <b>0.651</b> | <b>0.58</b>  | <b>0.7</b>  |
| Q0025         | 17        | 0             |              | 13813  | <b>0.11</b> | 0   |     | 0.714        | 0.346        | 0.841        | 0.7         |
| Q0025         | 17        | 0             |              | 13813  | <b>0.11</b> | 0   |     | 0.714        | 0.346        | 0.841        | 0.7         |
| iYER187W      | 5         | 566655        | 9241         | YER188 | <b>0.78</b> | Sgl | Pi  | 0.625        | 0.215        | 0.503        | 0.7         |
| iYPL139C      | 16        | 291062        | 13463        | YPL13  | <b>0.83</b> | Sgl | Pi  | 0.674        | <b>5E-05</b> | 0.442        | 0.7         |
| iYFL021W-0    | 6         | 97501         |              | 9322   | <b>0.78</b> | Non | F   | 0.746        | 0.72         | 0.339        | 0.7         |
| iYJR005W      | 10        | 447704        | 10915        | YJR00  | <b>0.39</b> | Sgl | Pi  | 0.002        | 0.661        | 0.309        | 0.7         |
| iYNL143C      | 14        | 357207        | 12517        | YNL14  | <b>0.47</b> | Dbl | Pi  | 0.737        | 0.59         | 0.897        | 0.7         |
| iYKR084C      | 11        | 598512        | 11373        | YKR08  | <b>0.88</b> | Sgl | Pi  | 0.388        | 0.607        | <b>1E-04</b> | 0.7         |
| iYDR438W      | 4         | 1339363       | 8716         | YDR439 | <b>0.58</b> | Sgl | Pi  | 0.839        | 0.759        | 0.105        | 0.7         |
| iYER031C      | 5         | 214741        | 8950         | YER031 | <b>0.93</b> | Dbl | Pi  | 0.789        | <b>4E-04</b> | 0.724        | 0.7         |
| Q0015         | 17        | 64593         |              | 13809  | <b>0.25</b> | 0   | NaN | 0.596        | 0.555        | 0.7          |             |
| Q0015         | 17        | 64593         |              | 13809  | <b>0.25</b> | 0   | NaN | 0.596        | 0.555        | 0.7          |             |
| iYOR393W      | 15        | 1081584       | 13326        | YOR39  | <b>0.33</b> | Sgl | Pi  | 0.697        | 0.319        | 0.631        | 0.7         |
| iYCR057C      | 3         | 223214        | 8010         | YCR057 | <b>0.96</b> | Sgl | Pi  | 0.623        | 0.671        | 0.271        | 0.7         |
| iYOL044W      | 15        | 248284        |              | 12822  | <b>0.12</b> | Non | F   | 0.683        | 0.395        | 0.463        | 0.7         |
| iYBR251W      | 2         | 722272        | 7845         | YBR252 | <b>0.62</b> | Sgl | Pi  | NaN          | 0.016        | 0.943        | 0.7         |

|              |    |         |       |        |             |       |    |              |       |       |      |
|--------------|----|---------|-------|--------|-------------|-------|----|--------------|-------|-------|------|
| iYER061C     | 5  | 279609  | 8991  | YER061 | <b>0.51</b> | Sgl   | Pi | 0.422        | 0.649 | 0.001 | 0.7  |
| iYLR011W     | 12 | 169680  |       | 11482  | <b>0.45</b> | Non F |    | 0.781        | 0.652 | 0.471 | 0.7  |
| iYAL058C-A   | 1  | 39095   | 7429  | YAL058 | <b>0.47</b> | Dbl   | Pi | 0.614        | 0.545 | 0.723 | 0.7  |
| iYLR400W     | 12 | 922531  |       | 11839  | <b>0.19</b> | Non F |    | 0.497        | 0.562 | 0.428 | 0.7  |
| iYLL056C-0   | 12 | 28325   | 11456 | YLL056 | <b>0.76</b> | Dbl   | Pi | 0.745        | 0.886 | 0.734 | 0.7  |
| iYPL129W     | 16 | 306132  |       | 13454  | <b>0.11</b> | Non F |    | 0.782        | 0.95  | 0.346 | 0.7  |
| iYIR015W     | 9  | 382387  | 10665 | YIR015 | <b>0.17</b> | Sgl   | Pi | 0.558        | 0.275 | 0.601 | 0.7  |
| iYOR035C     | 15 | 400099  | 12989 | YOR035 | <b>0.94</b> | Dbl   | Pi | 0.026        | 0.576 | 0.384 | 0.7  |
| iYML016C     | 13 | 241539  | 11936 | YML016 | <b>0.54</b> | Sgl   | Pi | 0.084        | 0.857 | 0.512 | 0.7  |
| iYPR180W     | 16 | 897017  |       | 13769  | <b>0.08</b> | Non F |    | 0.295        | 0.761 | 0.548 | 0.7  |
| iYLR207W     | 12 | 559321  | 11673 | YLR207 | <b>0.85</b> | Sgl   | Pi | 0.575        | 0.611 | 0.15  | 0.7  |
| iYDL215C     | 4  | 73916   | 8265  | YDL215 | <b>0.97</b> | Sgl   | Pi | 0.191        | 0.037 | 0.063 | 0.7  |
| iYPL013C     | 16 | 529334  | 13348 | YPL013 | <b>0.7</b>  | Dbl   | Pi | <b>9E-04</b> | 0.974 | 0.004 | 0.7  |
| iYGR101W     | 7  | 694401  |       | 9982   | <b>0.2</b>  | Non F |    | 0.577        | 0.904 | 0.428 | 0.7  |
| iYMR206W     | 13 | 676848  |       | 12256  | <b>0.62</b> | Non F |    | 0.293        | 0.785 | 0.261 | 0.7  |
| iYKL180W     | 11 | 110178  |       | 11238  | <b>0.27</b> | Non F |    | 0.554        | 0.789 | 0.501 | 0.7  |
| iYKR097W     | 11 | 632424  |       | 11387  | <b>0.43</b> | Non F |    | 0.604        | 0.681 | NaN   | 0.7  |
| iYIL055C     | 9  | 253925  | 10531 | YIL055 | <b>0.47</b> | Dbl   | Pi | NaN          | 0.609 | 0.423 | 0.7  |
| iYIL055C     | 9  | 253925  | 10531 | YIL055 | <b>0.47</b> | Dbl   | Pi | NaN          | 0.609 | 0.423 | 0.7  |
| iYCR018C-A   | 3  | 151859  | 7974  | YCR018 | <b>0.61</b> | Dbl   | Pi | 0.706        | 0.132 | 0.919 | 0.7  |
| iYILCdelta3  | 9  | 300710  | 10647 | YIL03C | <b>0.02</b> | Sgl   | Pi | 0.043        | 0.639 | 0.41  | 0.7  |
| iYGL223C     | 7  | 80352   | 9793  | YGL223 | <b>0.4</b>  | Sgl   | Pi | 0.676        | 0.56  | 0.193 | 0.7  |
| iYNL156C     | 14 | 341954  | 12530 | YNL156 | <b>0.67</b> | Dbl   | Pi | 0.684        | 0.098 | 0.78  | 0.7  |
| iYKR005C     | 11 | 449561  | 11299 | YKR005 | <b>0.38</b> | Sgl   | Pi | 0.726        | 0.433 | 0.242 | 0.7  |
| iYGR028W     | 7  | 543286  | 9911  | YGR028 | <b>0.7</b>  | Sgl   | Pi | 0.697        | 0.761 | 0.376 | 0.7  |
| iYJL129C     | 10 | 177029  | 10812 | YJL129 | <b>0.56</b> | Sgl   | Pi | 0.091        | 0.806 | 0.823 | 0.7  |
| iYLR254C     | 12 | 644975  | 11714 | YLR254 | <b>0.88</b> | Sgl   | Pi | 0.003        | 0.746 | 0.571 | 0.7  |
| iYGR062C     | 7  | 617274  | 9945  | YGR062 | <b>0.55</b> | Sgl   | Pi | 0.578        | 0.826 | 0.366 | 0.7  |
| iSNR66       | 14 | 586166  | 7092  | YNL025 | <b>0.81</b> | Sgl   | Pi | 0.655        | 0.459 | 0.228 | 0.7  |
| iYPL123C     | 16 | 318946  | 13448 | YPL123 | <b>0.93</b> | Sgl   | Pi | 0.627        | 0.703 | 0.319 | 0.7  |
| iYLR258W     | 12 | 662818  |       | 11717  | <b>0.26</b> | Non F |    | 0.349        | 0.079 | 0.594 | 0.7  |
| iYBR028C     | 2  | 295954  | 7633  | YBR028 | <b>0.49</b> | Sgl   | Pi | 0.61         | 0.923 | 0.495 | 0.7  |
| iYBR020W     | 2  | 280571  | 7626  | YBR021 | <b>0.53</b> | Sgl   | Pi | 0.469        | 0.559 | 0.898 | 0.71 |
| iYIL159W     | 9  | 45957   | 10628 | YIL159 | <b>0.56</b> | Sgl   | Pi | 0.775        | 5E-04 | NaN   | 0.71 |
| iYPL058C-1   | 16 | 451137  | 13390 | YPL058 | <b>0.17</b> | Sgl   | Pi | 0.621        | 0.378 | 0.598 | 0.71 |
| iYGL259W-0   | 7  | 8974    | 9865  | YGL258 | <b>0.48</b> | Sgl   | Pi | 0.681        | 0.404 | 0.029 | 0.71 |
| iYDR497C     | 4  | 1445478 | 8770  | YDR497 | <b>0.6</b>  | Sgl   | Pi | 0.75         | 0.729 | 0.332 | 0.71 |
| iYCR083W     | 3  | 259967  |       | 8030   | <b>0.16</b> | Non F |    | 0.395        | 0.87  | 0.879 | 0.71 |
| iYER159C     | 5  | 491942  | 9183  | YER159 | <b>0.09</b> | Sgl   | Pi | 0.122        | 0.942 | 0.688 | 0.71 |
| iYDR026C     | 4  | 494264  | 8329  | YDR026 | <b>0.84</b> | Sgl   | Pi | 0.548        | 0.587 | 0.419 | 0.71 |
| iYIL112W     | 9  | 154835  | 10581 | YIL111 | <b>0.5</b>  | Sgl   | Pi | 0.793        | 0.895 | 0.919 | 0.71 |
| iYPL125W     | 16 | 316470  | 13450 | YPL125 | <b>0.67</b> | Sgl   | Pi | 0.924        | 0.652 | 0.445 | 0.71 |
| iYJL045W     | 10 | 357639  |       | 10737  | <b>0.41</b> | Non F |    | 0.578        | 0.392 | 0.249 | 0.71 |
| iYML062C     | 13 | 148709  | 11976 | YML062 | <b>0.81</b> | Sgl   | Pi | 0.787        | 0.433 | 0.545 | 0.71 |
| iYCR103C     | 3  | 307581  | 8051  | YCR104 | <b>0.29</b> | Dbl   | Pi | 0.651        | 0.48  | 0.756 | 0.71 |
| iYCR103C     | 3  | 307581  | 8051  | YCR104 | <b>0.29</b> | Dbl   | Pi | 0.651        | 0.48  | 0.756 | 0.71 |
| iYDL239C     | 4  | 28771   | 8289  | YDL239 | <b>0.12</b> | Sgl   | Pi | 0.487        | 0.577 | 0.127 | 0.71 |
| iYPRWdelta16 | 16 | 778139  | 13801 | YPR12  | <b>0.3</b>  | Dbl   | Pi | 0.532        | 0.845 | 0.311 | 0.71 |
| iYKL217W     | 11 | 24075   | 11273 | YKL217 | <b>0.58</b> | Sgl   | Pi | 0.613        | 0.49  | 0.119 | 0.71 |
| itV(AAC)M3   | 13 | 586704  | 7354  | YMR163 | <b>0.07</b> | Sgl   | Pi | 0.773        | 0.488 | 0.185 | 0.71 |
| iYJR129C     | 10 | 664712  | 11024 | YJR129 | <b>0.44</b> | Sgl   | Pi | 0.531        | 0.694 | 0.677 | 0.71 |



|             |    |         |       |        |             |     |    |              |       |       |      |
|-------------|----|---------|-------|--------|-------------|-----|----|--------------|-------|-------|------|
| iYNL040W    | 14 | 554738  | 12423 | YNL03  | <b>0.91</b> | Sgl | Pi | 0.745        | 0.592 | 0.601 | 0.71 |
| iYMR208W    | 13 | 685785  |       | 12258  | <b>0.08</b> | Non | F  | 0.676        | 0.583 | 0.855 | 0.71 |
| iYGR236C    | 7  | 962806  | 10105 | YGR23  | <b>0.67</b> | Sgl | Pi | 0.591        | 0.683 | 0.754 | 0.71 |
| iYAR044W-3  | 1  | 200150  |       | 7478   | <b>0.3</b>  | Non | F  | 0.815        | 0.172 | 0.68  | 0.71 |
| iYGL147C    | 7  | 228340  | 9705  | YGL147 | <b>0.05</b> | Sgl | Pi | 0.747        | 0.471 | 0.188 | 0.71 |
| iYNL328C    | 14 | 23276   | 12680 | YNL32  | <b>0.47</b> | Dbl | Pi | 0.711        | 0.22  | 0.726 | 0.71 |
| iYOLWdelta5 | 15 | 123615  | 12949 | YOL10  | <b>0.61</b> | Dbl | Pi | 0.601        | 0.755 | 0.363 | 0.71 |
| iYBL017C    | 2  | 191554  | 7516  | YBL017 | <b>0.58</b> | Dbl | Pi | 0.614        | 0.788 | 0.546 | 0.71 |
| iYER169W    | 5  | 525762  | 9203  | YER17C | <b>0.63</b> | Sgl | Pi | 0.452        | 0.589 | 0.277 | 0.71 |
| iYGR288W-0  | 7  | 1071716 |       | 10158  | <b>0.5</b>  | Non | F  | 0.443        | 0.296 | 0.31  | 0.71 |
| iYJR131W    | 10 | 668971  | 11026 | YJR13  | <b>0.59</b> | Sgl | Pi | 0.721        | 0.32  | 0.529 | 0.71 |
| iYFR053C-1  | 6  | 256310  | 9538  | YFR053 | <b>0.67</b> | Sgl | Pi | 0.769        | 0.5   | 0.46  | 0.71 |
| iYPR098C    | 16 | 729269  | 13696 | YPR09  | <b>0.82</b> | Sgl | Pi | 0.466        | 0.815 | 0.079 | 0.71 |
| iYFR038W    | 6  | 231688  |       | 9508   | <b>0.09</b> | Non | F  | 0.707        | 0.57  | 0.022 | 0.71 |
| iYML048W    | 13 | 179641  | 11963 | YML04  | <b>0.18</b> | Sgl | Pi | 0.817        | 0.812 | 0.568 | 0.71 |
| iYAL060W    | 1  | 36289   | 7431  | YAL059 | <b>0.39</b> | Sgl | Pi | 0.631        | 0.639 | 0.334 | 0.71 |
| iYDL040C    | 4  | 381441  | 8099  | YDL040 | <b>0.86</b> | Sgl | Pi | NaN          | 0.192 | 0.407 | 0.71 |
| iYIR024C    | 9  | 403478  | 10678 | YIR024 | <b>0.89</b> | Dbl | Pi | 0.295        | 0.379 | 0.686 | 0.71 |
| iYPR190C    | 16 | 919043  | 13779 | YPR19  | <b>0.69</b> | Dbl | Pi | 0.001        | 0.557 | 0.342 | 0.71 |
| iYGL255W    | 7  | 22101   | 9851  | YGL254 | <b>0.67</b> | Sgl | Pi | 0.536        | 0.669 | 0.258 | 0.71 |
| iYDRCsigma2 | 4  | 668416  |       | 8823   | <b>0.01</b> | Non | F  | 0.498        | 0.626 | 0.414 | 0.71 |
| iYOR255W    | 15 | 808090  |       | 13194  | <b>0.22</b> | Non | F  | 0.377        | 0.577 | NaN   | 0.71 |
| iYIL047C    | 9  | 267817  | 10523 | YIL047 | <b>0.65</b> | Dbl | Pi | NaN          | 0.446 | 0.229 | 0.71 |
| iYIL047C    | 9  | 267817  | 10523 | YIL047 | <b>0.65</b> | Dbl | Pi | NaN          | 0.446 | 0.229 | 0.71 |
| iYLR297W    | 12 | 724419  |       | 11751  | <b>0.2</b>  | Non | F  | 0.488        | 0.854 | 0.349 | 0.71 |
| iYPL228W    | 16 | 120006  |       | 13548  | <b>0.05</b> | Non | F  | 0.254        | 0.811 | 0.3   | 0.71 |
| iYHL035C    | 8  | 32744   | 10212 | YHL03  | <b>0.42</b> | Sgl | Pi | 0.694        | 0.603 | NaN   | 0.71 |
| iYOL047C    | 15 | 242488  | 12824 | YOL04  | <b>0.58</b> | Sgl | Pi | 0.766        | 0.47  | 0.3   | 0.71 |
| iYLR036C    | 12 | 222118  | 11507 | YLR03  | <b>0.7</b>  | Sgl | Pi | 0.825        | 0.08  | 0.259 | 0.71 |
| iYPL263C    | 16 | 46500   | 13581 | YPL26  | <b>0.66</b> | Dbl | Pi | 0.645        | 0.793 | 0.861 | 0.71 |
| iYGL181W    | 7  | 159100  | 9737  | YGL180 | <b>0.71</b> | Sgl | Pi | 0.763        | 0.79  | 0.732 | 0.71 |
| iYDL037C-0  | 4  | 385583  | 8096  | YDL037 | <b>0.5</b>  | Sgl | Pi | 0.579        | 0.453 | 0.853 | 0.71 |
| iYDR017C    | 4  | 482247  | 8321  | YDR017 | <b>0.35</b> | Sgl | Pi | 0.632        | 0.73  | 0.659 | 0.71 |
| iYOL150C    | 15 | 44789   | 12922 | YOL15  | <b>0.96</b> | Dbl | Pi | 0.579        | 0.61  | 0.238 | 0.71 |
| iYLL044W    | 12 | 48694   | 11447 | YLL044 | <b>0.75</b> | Sgl | Pi | 0.216        | 0.859 | 0.648 | 0.71 |
| iYJL215C    | 10 | 26767   | 10890 | YJL215 | <b>0.29</b> | Dbl | Pi | 0.491        | 0.778 | 0.474 | 0.71 |
| iYKL151C    | 11 | 165972  | 11207 | YKL15  | <b>0.61</b> | Dbl | Pi | 0.364        | 0.08  | 0.003 | 0.71 |
| iYOR351C    | 15 | 996498  | 13282 | YOR351 | <b>0.74</b> | Dbl | Pi | 0.716        | 0.095 | 0.739 | 0.71 |
| iYDR117C    | 4  | 685639  | 8419  | YDR117 | <b>0.9</b>  | Dbl | Pi | 0.648        | 0.698 | 0.291 | 0.71 |
| iYDL199C    | 4  | 103355  | 8247  | YDL199 | <b>0.83</b> | Sgl | Pi | 0.565        | 0.572 | 0.144 | 0.71 |
| iYOL015W    | 15 | 298844  | 12795 | YOL01  | <b>0.46</b> | Sgl | Pi | 0.778        | 0.758 | 0.233 | 0.71 |
| iYNL187W    | 14 | 289059  | 12557 | YNL18  | <b>0.17</b> | Sgl | Pi | 0.014        | 0.634 | 0.009 | 0.71 |
| iYHR069C    | 8  | 234665  | 10306 | YHR069 | <b>0.71</b> | Dbl | Pi | 0.077        | 0.602 | 0.263 | 0.71 |
| iYLR244C    | 12 | 626319  | 11705 | YLR24  | <b>0.06</b> | Sgl | Pi | 0.783        | 0.712 | 0.452 | 0.71 |
| iYPL190C    | 16 | 187709  | 13512 | YPL19  | <b>0.5</b>  | Dbl | Pi | 0.674        | 0.342 | 0.766 | 0.72 |
| iYPL230W    | 16 | 116485  | 13550 | YPL22  | <b>0.77</b> | Sgl | Pi | 0.602        | 0.222 | 0.912 | 0.72 |
| iYHR123W    | 8  | 356070  | 10360 | YHR12  | <b>0.06</b> | Sgl | Pi | 0.814        | 0.796 | 0.946 | 0.72 |
| iYIL032C    | 9  | 292304  | 10508 | YIL032 | <b>0.79</b> | Dbl | Pi | <b>3E-04</b> | 0.726 | 0.189 | 0.72 |
| iYKR031C    | 11 | 506017  | 11323 | YKR031 | <b>0.96</b> | Dbl | Pi | 0.052        | 0.331 | 0.329 | 0.72 |
| iYDR474C    | 4  | 1409141 | 8749  | YDR474 | <b>0.21</b> | Sgl | Pi | 0.605        | 0.204 | 0.24  | 0.72 |
| iYPL014W    | 16 | 528681  |       | 13349  | <b>0.18</b> | Non | F  | 0.679        | 0.729 | 0.06  | 0.72 |

|                     |           |                     |              |             |               |              |              |              |             |
|---------------------|-----------|---------------------|--------------|-------------|---------------|--------------|--------------|--------------|-------------|
| iYMLWdelta4         | 13        | 190088              | 12049        | <b>0.06</b> | Non F         | 0.633        | 0.497        | 0.464        | 0.72        |
| YPLCTy4-1B          | 16        | 438120              | 14154        | <b>0.09</b> | Non F         | 0.638        | 0.549        | 0.133        | 0.72        |
| iYLR056W            | 12        | 254963 11527        | YLR05        | <b>0.92</b> | Sgl Pi        | 0.53         | 0.48         | 0.657        | 0.72        |
| iYMR088C            | 13        | 445099 12136        | YMR08        | <b>0.66</b> | Sgl Pi        | 0.568        | 0.11         | 0.872        | 0.72        |
| iYBR248C            | 2         | 716447 7842         | YBR248       | <b>0.33</b> | Sgl Pi        | 0.63         | 0.849        | 0.706        | 0.72        |
| iYMR313C            | 13        | 901303 12361        | YMR31        | <b>0.91</b> | Dbl Pi        | 0.667        | 0.492        | 0.089        | 0.72        |
| iYNR053C            | 14        | 723103 12752        | YNR05        | <b>0.38</b> | Sgl Pi        | 0.001        | 0.717        | 0.464        | 0.72        |
| iYGL023C            | 7         | 452086 9587         | YGL023       | <b>0.99</b> | Dbl Pi        | 0.371        | 0.551        | 0.56         | 0.72        |
| iYGL023C            | 7         | 452086 9587         | YGL023       | <b>0.99</b> | Dbl Pi        | 0.371        | 0.551        | 0.56         | 0.72        |
| iYGL222C            | 7         | 81170 9791          | YGL222       | <b>0.81</b> | Sgl Pi        | <b>2E-04</b> | 0.263        | 0.667        | 0.72        |
| iYNL041C            | 14        | 551984 12424        | YNL04        | <b>0.85</b> | Dbl Pi        | 0.117        | 0.484        | 0.379        | 0.72        |
| iYPR065W            | 16        | 680798 13669        | YPR06        | <b>0.46</b> | Sgl Pi        | 0.644        | 0.414        | NaN          | 0.72        |
| iYLRWdelta15        | 12        | 657777 11913        | YLR25        | <b>0.16</b> | Sgl Pi        | 0.017        | 0.003        | 0.534        | 0.72        |
| iYGL013C            | 7         | 472283 9577         | YGL013       | <b>0.77</b> | Dbl Pi        | 0.718        | 0.074        | 0.746        | 0.72        |
| iYGL068W            | 7         | 375682 9631         | YGL067       | <b>0.64</b> | Sgl Pi        | 0.458        | 0.846        | 0.434        | 0.72        |
| iYIL146C            | 9         | 75770 10615         | YIL146       | <b>0.59</b> | Sgl Pi        | 0.661        | 0.108        | 0.668        | 0.72        |
| iYML110C            | 13        | 50957 12021         | YML11        | <b>0.76</b> | Dbl Pi        | 0.825        | 0.533        | 0.456        | 0.72        |
| iYDR212W            | 4         | 888893 8507         | YDR212       | <b>0.71</b> | Sgl Pi        | 0.829        | 0.871        | 0.438        | 0.72        |
| iYBL069W            | 2         | 91711 7565          | YBL068       | <b>0.74</b> | Sgl Pi        | 0.689        | 0.088        | 0.04         | 0.72        |
| <b>iYML006C</b>     | <b>13</b> | <b>258432 11926</b> | <b>YML0C</b> | <b>0.32</b> | <b>Dbl Pi</b> | <b>0.76</b>  | <b>0.015</b> | <b>0.519</b> | <b>0.72</b> |
| iYERWdelta21-2      | 5         | 447701 9276         | YER137       | <b>0.37</b> | Sgl Pi        | 0.791        | 0.005        | 0.992        | 0.72        |
| iYAL051W            | 1         | 51760               | 7424         | <b>0.01</b> | Non F         | NaN          | 0.332        | NaN          | 0.72        |
| iYHR059W            | 8         | 220497 10296        | YHR05        | <b>0.77</b> | Sgl Pi        | 0.626        | 0.007        | 0.491        | 0.72        |
| iYDR360W            | 4         | 1194970             | 8645         | <b>0.46</b> | Non F         | 0.004        | 0.784        | 0.949        | 0.72        |
| <b>itF(GAA)B</b>    | <b>2</b>  | <b>36483</b>        | <b>7146</b>  | <b>0.18</b> | <b>Non F</b>  | <b>0.662</b> | <b>0.949</b> | <b>0.478</b> | <b>0.72</b> |
| iYBL050W            | 2         | 126082 7549         | YBL049       | <b>0.3</b>  | Sgl Pi        | 0.606        | 0.203        | 0.28         | 0.72        |
| iYBR269C            | 2         | 742542 7859         | YBR269       | <b>0.33</b> | Sgl Pi        | 0.475        | 0.471        | 0.852        | 0.72        |
| iYCR105W            | 3         | 310180 8053         | YCR105       | <b>0.88</b> | Sgl Pi        | 0.489        | 0.774        | 0.567        | 0.72        |
| iYGL011C            | 7         | 475231 9575         | YGL011       | <b>0.94</b> | Dbl Pi        | 0.005        | 0.371        | 0.778        | 0.72        |
| iYER163C-1          | 5         | 504586 9191         | YER163       | <b>0.29</b> | Dbl Pi        | 0.732        | 0.939        | 0.034        | 0.72        |
| iYBR260C            | 2         | 734582 7853         | YBR260       | <b>0.99</b> | Sgl Pi        | 0.659        | 0.615        | 0.908        | 0.72        |
| iYDL012C            | 4         | 431517 8076         | YDL012       | <b>0.78</b> | Sgl Pi        | <b>4E-04</b> | 0.669        | 0.922        | 0.72        |
| iYKL172W            | 11        | 127029 11231        | YKL17        | <b>0.82</b> | Sgl Pi        | 0.573        | 0.201        | 0.601        | 0.72        |
| iYPL282C            | 16        | 8423 13601          | YPL28        | <b>0.34</b> | Sgl Pi        | 0.753        | 0.809        | 0.889        | 0.72        |
| iYPL282C            | 16        | 8423 13601          | YPL28        | <b>0.34</b> | Sgl Pi        | 0.753        | 0.809        | 0.889        | 0.72        |
| iYDR100W            | 4         | 655442              | 8405         | <b>0.2</b>  | Non F         | 0.604        | 0.768        | 0.503        | 0.72        |
| iYOR377W-0          | 15        | 1047787 13308       | YOR37        | <b>0.42</b> | Sgl Pi        | 0.624        | 0.183        | 0.472        | 0.72        |
| iYPR124W            | 16        | 787418 13720        | YPR12        | <b>0.61</b> | Sgl Pi        | 0.519        | 0.543        | 0.105        | 0.72        |
| <b>iYKLWdelta1</b>  | <b>11</b> | <b>74526 11292</b>  | <b>YKL19</b> | <b>0.18</b> | <b>Sgl Pi</b> | <b>0.049</b> | <b>0.539</b> | <b>0.336</b> | <b>0.72</b> |
| iYBR016W            | 2         | 270591              | 7622         | <b>0.31</b> | Non F         | 0.788        | 0.657        | 0.863        | 0.72        |
| iYBR016W            | 2         | 270591              | 7622         | <b>0.31</b> | Non F         | 0.788        | 0.657        | 0.863        | 0.72        |
| <b>iYGRCDelta25</b> | <b>7</b>  | <b>779502 10170</b> | <b>YGR14</b> | <b>0.41</b> | <b>Sgl Pi</b> | <b>0.444</b> | <b>0.702</b> | <b>0.212</b> | <b>0.72</b> |
| iYGLWdelta10        | 7         | 412718 9878         | YGL046       | <b>0.72</b> | Sgl Pi        | 0.529        | 0.509        | 0.884        | 0.72        |
| iYDR032C-2          | 4         | 506974 8337         | YDR032       | <b>0.21</b> | Dbl Pi        | 0.854        | 0.342        | 0.335        | 0.72        |
| iYOL153C-1          | 15        | 39698 12925         | YOL15        | <b>0.73</b> | Dbl Pi        | 0.655        | 0.403        | 0.221        | 0.72        |
| iYIL098C            | 9         | 180227 10566        | YIL098       | <b>0.93</b> | Dbl Pi        | 0.88         | 0.596        | 0.665        | 0.72        |
| iYOR025W            | 15        | 379595 12978        | YOR02        | <b>0.49</b> | Sgl Pi        | 0.578        | 0.504        | 0.539        | 0.72        |
| iYDL115C            | 4         | 254738 8169         | YDL115       | <b>0.76</b> | Dbl Pi        | 0.676        | 0.716        | 0.248        | 0.72        |
| iYOR350C            | 15        | 994840 13281        | YOR35        | <b>0.85</b> | Sgl Pi        | 0.538        | 0.529        | NaN          | 0.72        |
| iYOR350C            | 15        | 994840 13281        | YOR35        | <b>0.85</b> | Sgl Pi        | 0.538        | 0.529        | NaN          | 0.72        |
| iYPL187W            | 16        | 194140              | 13509        | <b>0.35</b> | Non F         | 0.7          | 0.484        | 0.66         | 0.72        |

|              |    |         |       |        |             |     |    |       |       |       |      |
|--------------|----|---------|-------|--------|-------------|-----|----|-------|-------|-------|------|
| iYKR048C     | 11 | 526271  | 11336 | YKR04  | <b>0.93</b> | Sgl | Pi | 0.644 | 0.665 | 0.93  | 0.72 |
| iYOL161C-0   | 15 | 11916   | 12936 | YOL16  | <b>0.29</b> | Dbl | Pi | 0.81  | 0.261 | 0.888 | 0.72 |
| iYMR310C     | 13 | 896657  | 12358 | YMR31  | <b>0.98</b> | Sgl | Pi | 0.053 | 0.342 | 0.654 | 0.72 |
| iYCL047C     | 3  | 44458   | 7930  | YCL047 | <b>0.5</b>  | Sgl | Pi | 0.466 | 0.559 | 0.468 | 0.72 |
| iYKL176C     | 11 | 117991  | 11235 | YKL17  | <b>0.82</b> | Dbl | Pi | 0.456 | 0.187 | 0.912 | 0.72 |
| iYKR039W     | 11 | 516514  |       | 11329  | <b>0.31</b> | Non | F  | 0.858 | 0.788 | 0.798 | 0.73 |
| iYPL054W     | 16 | 456666  |       | 13385  | <b>0.38</b> | Non | F  | 0.687 | 0.863 | 0.708 | 0.73 |
| iYKL105C     | 11 | 242233  | 11168 | YKL10  | <b>0.66</b> | Sgl | Pi | 0.584 | 0.5   | 0.543 | 0.73 |
| iYNR014W     | 14 | 653098  | 12712 | YNR01  | <b>0.93</b> | Sgl | Pi | 0.664 | 0.728 | 0.447 | 0.73 |
| iYDR141C     | 4  | 739977  | 8441  | YDR141 | <b>0.8</b>  | Sgl | Pi | 0.62  | 0.833 | 0.385 | 0.73 |
| iYDL013W     | 4  | 430918  |       | 8077   | <b>0.48</b> | Non | F  | 0.05  | 0.617 | 0.358 | 0.73 |
| iYBR057C     | 2  | 353259  | 7662  | YBR057 | <b>0.48</b> | Sgl | Pi | 0.608 | 0.357 | 0.464 | 0.73 |
| iYIL088C     | 9  | 199393  | 10556 | YIL088 | <b>0.91</b> | Sgl | Pi | 0.568 | 0.13  | 0.365 | 0.73 |
| iYNL243W     | 14 | 190948  | 12606 | YNL24  | <b>0.89</b> | Sgl | Pi | 0.51  | 0.625 | 0.516 | 0.73 |
| iYER054C     | 5  | 263697  | 8976  | YER054 | <b>0.48</b> | Sgl | Pi | 0.715 | 0.715 | 0.307 | 0.73 |
| iYJL164C     | 10 | 111141  | 10844 | YJL164 | <b>0.77</b> | Sgl | Pi | 0.673 | 0.261 | 0.527 | 0.73 |
| iYNL208W     | 14 | 255017  | 12574 | YNL20  | <b>0.92</b> | Sgl | Pi | 0.003 | 0.58  | 0.071 | 0.73 |
| iYDR148C     | 4  | 755045  | 8448  | YDR148 | <b>0.91</b> | Sgl | Pi | 0.032 | 0.156 | 0.138 | 0.73 |
| iYCR046C     | 3  | 210403  | 8003  | YCR046 | <b>0.9</b>  | Sgl | Pi | 0.729 | 0.646 | 0.272 | 0.73 |
| itD(GUC)B    | 2  | 405984  | 7116  | YBR081 | <b>0.38</b> | Sgl | Pi | 0.811 | 0.852 | 1     | 0.73 |
| iYJR009C-0   | 10 | 454372  | 10919 | YJR00  | <b>0.26</b> | Dbl | Pi | 0.657 | 0.038 | 0.846 | 0.73 |
| iYBR076W     | 2  | 391357  |       | 7681   | <b>0.42</b> | Non | F  | 0.738 | 0.148 | 0.939 | 0.73 |
| iYNL141W     | 14 | 360631  |       | 12515  | <b>0.21</b> | Non | F  | 0.669 | 0.92  | 0.905 | 0.73 |
| iYDR386W     | 4  | 1247970 |       | 8671   | <b>0.05</b> | Non | F  | 0.005 | 0.545 | 0.923 | 0.73 |
| iYJR111C     | 10 | 636390  | 11008 | YJR11  | <b>0.66</b> | Dbl | Pi | 0.774 | 0.005 | 0.146 | 0.73 |
| iYJL132W     | 10 | 163868  |       | 10815  | <b>0.23</b> | Non | F  | 0.62  | 0.464 | 0.458 | 0.73 |
| iSNR64       | 11 | 38926   | 7090  | YKL211 | <b>0.84</b> | Dbl | Pi | 0.139 | 0.762 | 0.486 | 0.73 |
| iYPL268W     | 16 | 37847   | 13586 | YPL26  | <b>0.62</b> | Sgl | Pi | 0.64  | 0.318 | 0.516 | 0.73 |
| iYOL129W     | 15 | 78116   |       | 12903  | <b>0.41</b> | Non | F  | 0.577 | 0.655 | 0.485 | 0.73 |
| iYBR270C     | 2  | 744344  | 7860  | YBR270 | <b>0.93</b> | Dbl | Pi | 0.772 | 0.204 | 0.497 | 0.73 |
| iYAL033W     | 1  | 83214   |       | 7406   | <b>0.01</b> | Non | F  | 0.531 | 0.519 | 0.195 | 0.73 |
| iYPL135W     | 16 | 298050  |       | 13460  | <b>0.09</b> | Non | F  | 0.741 | 0.646 | 0.428 | 0.73 |
| iYGR014W     | 7  | 520875  |       | 9901   | <b>0.23</b> | Non | F  | 0.418 | 0.449 | 0.445 | 0.73 |
| iYHR133C     | 8  | 371593  | 10367 | YHR133 | <b>0.56</b> | Dbl | Pi | 0.47  | 0.416 | NaN   | 0.73 |
| iYKL117W     | 11 | 220612  |       | 11179  | <b>0.13</b> | Non | F  | 0.742 | 0.616 | 0.947 | 0.73 |
| iYLR323C     | 12 | 778944  | 11773 | YLR32  | <b>0.2</b>  | Dbl | Pi | 0.587 | 0.595 | 0.306 | 0.73 |
| iYLR347C     | 12 | 826414  | 11794 | YLR34  | <b>0.4</b>  | Sgl | Pi | 0.001 | 0.829 | 0.803 | 0.73 |
| iYDL139C     | 4  | 212121  | 8194  | YDL139 | <b>0.36</b> | Dbl | Pi | 0.49  | 0.449 | 0.078 | 0.73 |
| iYML034W     | 13 | 211541  |       | 11953  | <b>0</b>    | Sgl | Pi | 0.416 | 0.61  | 0.443 | 0.73 |
| iYGR183C     | 7  | 859472  | 10056 | YGR183 | <b>0.68</b> | Sgl | Pi | 2E-04 | 0.229 | 0.693 | 0.73 |
| iYDR517W     | 4  | 1478363 | 8787  | YDR517 | <b>0.75</b> | Sgl | Pi | 0.58  | 0.661 | 0.549 | 0.73 |
| iYDRWdelta24 | 4  | 1101669 | 8828  | YDR317 | <b>0.39</b> | Sgl | Pi | 0.907 | 0.949 | 0.365 | 0.73 |
| iYDR178W     | 4  | 818473  |       | 8477   | <b>0.26</b> | Non | F  | 0.516 | 0.141 | 0.468 | 0.73 |
| iYBR077C     | 2  | 392257  | 7682  | YBR077 | <b>0.03</b> | Dbl | Pi | 4E-04 | 1E-03 | 0.438 | 0.73 |
| iYLR281C     | 12 | 704974  | 11736 | YLR28  | <b>0.78</b> | Sgl | Pi | NaN   | 0.59  | 0.483 | 0.73 |
| iYOL018C     | 15 | 292073  | 12798 | YOL01  | <b>0.84</b> | Dbl | Pi | 0.638 | 0.641 | 0.696 | 0.73 |
| iYIL028W     | 9  | 302492  |       | 10504  | <b>0.26</b> | Non | F  | 0.19  | 0.524 | 0.591 | 0.73 |
| iYJL208C     | 10 | 41171   | 10882 | YJL208 | <b>0.66</b> | Sgl | Pi | 0.697 | 0.445 | 0.41  | 0.73 |
| iYKL024C     | 11 | 392780  | 11090 | YKL02  | <b>0.84</b> | Dbl | Pi | 0.642 | 0.19  | 0.434 | 0.73 |
| iYJL014W     | 10 | 408864  |       | 10713  | <b>0.15</b> | Non | F  | 0.499 | 0.197 | 0.503 | 0.73 |
| iYER168C     | 5  | 522665  | 9201  | YER168 | <b>0.64</b> | Dbl | Pi | 0.754 | 0.864 | 0.265 | 0.73 |

|              |    |         |       |        |             |     |    |       |       |       |      |
|--------------|----|---------|-------|--------|-------------|-----|----|-------|-------|-------|------|
| iYNL069C     | 14 | 495004  | 12449 | YNL06  | <b>0.16</b> | Sgl | Pi | 0.737 | 0.68  | 0.791 | 0.73 |
| iYGL009C     | 7  | 478642  | 9573  | YGL009 | <b>0.16</b> | Sgl | Pi | 0.766 | 0.632 | 0.787 | 0.73 |
| iYDR261C-1   | 4  | 980078  | 8553  | YDR261 | <b>0.77</b> | Dbl | Pi | 0.583 | 0.974 | 0.926 | 0.73 |
| iYIL103W-1   | 9  | 173789  |       | 10572  | <b>0.61</b> | Non | F  | 0.106 | 0.153 | 0.425 | 0.73 |
| iYERCdelta26 | 5  | 552266  | 9253  | YER181 | <b>0.9</b>  | Dbl | Pi | 0.57  | 0.681 | 0.542 | 0.73 |
| iYGL045W     | 7  | 415710  |       | 9609   | <b>0.15</b> | Non | F  | 0.4   | 0.617 | 0.457 | 0.73 |
| iYGL045W     | 7  | 415710  |       | 9609   | <b>0.15</b> | Non | F  | 0.4   | 0.617 | 0.457 | 0.73 |
| iYOL053W     | 15 | 231258  |       | 12830  | <b>0.37</b> | Non | F  | 0.724 | 0.621 | 0.003 | 0.73 |
| iYDR205W     | 4  | 861513  | 8501  | YDR205 | <b>0.84</b> | Sgl | Pi | 0.066 | 0.395 | 0.591 | 0.73 |
| iYFL053W-0   | 6  | 25186   | 9388  | YFL052 | <b>0.38</b> | Sgl | Pi | 0.821 | 0.759 | 0.177 | 0.73 |
| iYDR128W     | 4  | 712975  |       | 8430   | <b>0.16</b> | Non | F  | 0.56  | 0.094 | 0.806 | 0.73 |
| iYDR533C     | 4  | 1502156 | 8803  | YDR533 | <b>0.41</b> | Sgl | Pi | 0.89  | 0.103 | 0.07  | 0.73 |
| iYDR262W     | 4  | 993941  |       | 8554   | <b>0.14</b> | Non | F  | 0.669 | 0.587 | 0.212 | 0.73 |
| iYDR262W     | 4  | 993941  |       | 8554   | <b>0.14</b> | Non | F  | 0.669 | 0.587 | 0.212 | 0.73 |
| iYOL068C     | 15 | 201892  | 12845 | YOL06  | <b>0.48</b> | Sgl | Pi | 2E-04 | 0.584 | 0.682 | 0.73 |
| iYMR250W     | 13 | 772563  | 12298 | YMR25  | <b>0.53</b> | Sgl | Pi | 0.583 | 0.926 | 0.33  | 0.73 |
| iYLR080W     | 12 | 289238  | 11549 | YLR08  | <b>0.84</b> | Sgl | Pi | 0.806 | 0.728 | 0.825 | 0.73 |
| iYMR021C     | 13 | 318428  | 12074 | YMR02  | <b>0.97</b> | Dbl | Pi | 0.594 | 0.603 | 0.401 | 0.73 |
| iYDR256C     | 4  | 969661  | 8547  | YDR256 | <b>0.08</b> | Sgl | Pi | 0.551 | 0.763 | 0.39  | 0.73 |
| iYKL121W     | 11 | 216342  | 11181 | YKL12  | <b>0.06</b> | Sgl | Pi | 0.713 | 0.338 | 0.439 | 0.73 |
| iYLR065C     | 12 | 266923  | 11535 | YLR06  | <b>0.99</b> | Dbl | Pi | 0.614 | 0.653 | NaN   | 0.74 |
| iYNL125C     | 14 | 392149  | 12500 | YNL12  | <b>0.82</b> | Dbl | Pi | 0.831 | 0.658 | 0.248 | 0.74 |
| iYJL073W     | 10 | 304804  |       | 10762  | <b>0.1</b>  | Non | F  | 0.132 | 0.809 | 0.328 | 0.74 |
| iYEL068C     | 5  | 26005   | 8896  | YEL068 | <b>0.44</b> | Sgl | Pi | 0.575 | 0.46  | 0.452 | 0.74 |
| iYPL084W     | 16 | 396563  |       | 13414  | <b>0</b>    | Non | F  | 0.509 | 0.528 | 0.545 | 0.74 |
| iYMR254C     | 13 | 777939  | 12303 | YMR25  | <b>0.29</b> | Dbl | Pi | NaN   | 0.6   | 0.535 | 0.74 |
| iYDL171C     | 4  | 155633  | 8220  | YDL171 | <b>0.54</b> | Dbl | Pi | 0.731 | 0.901 | 0.276 | 0.74 |
| iYIL020C     | 9  | 314823  | 10497 | YIL020 | <b>0.9</b>  | Dbl | Pi | 0.335 | 0.352 | 0.27  | 0.74 |
| iYNL166C     | 14 | 323552  | 12541 | YNL16  | <b>0.94</b> | Dbl | Pi | 0.692 | 0.261 | 0.227 | 0.74 |
| iYNL333W     | 14 | 14155   | 12685 | YNL33  | <b>0.94</b> | Sgl | Pi | 0.595 | 0.6   | 0.452 | 0.74 |
| iYKL160W     | 11 | 153696  |       | 11215  | <b>0.36</b> | Non | F  | 0.588 | 0.565 | 0.401 | 0.74 |
| iYDL214C     | 4  | 76576   | 8264  | YDL214 | <b>0.2</b>  | Sgl | Pi | 0.512 | 0.803 | 0.021 | 0.74 |
| iYDR301W     | 4  | 1067403 | 8588  | YDR302 | <b>0.78</b> | Sgl | Pi | 0.618 | 0.729 | 0.781 | 0.74 |
| iYDR301W     | 4  | 1067403 | 8588  | YDR302 | <b>0.78</b> | Sgl | Pi | 0.618 | 0.729 | 0.781 | 0.74 |
| iYOR131C     | 15 | 572822  | 13080 | YOR13  | <b>0.82</b> | Dbl | Pi | 0.416 | 0.779 | 0.019 | 0.74 |
| iYML079W     | 13 | 110837  | 11994 | YML07  | <b>0.02</b> | Sgl | Pi | 0.624 | 0.483 | 0.7   | 0.74 |
| iYNL278W     | 14 | 116436  | 12636 | YNL27  | <b>0.42</b> | Sgl | Pi | 0.858 | 0.742 | 0.74  | 0.74 |
| iYGR286C-1   | 7  | 1066080 | 10156 | YGR28  | <b>0.66</b> | Sgl | Pi | 0.624 | 0.265 | 0.325 | 0.74 |
| iYPL040C     | 16 | 478994  | 13372 | YPL04  | <b>0.98</b> | Dbl | Pi | 0.559 | 0.46  | 0.808 | 0.74 |
| iYBL109W-1   | 2  | 7145    | 7600  | YBL108 | <b>0.29</b> | Sgl | Pi | 0.653 | 0.33  | 0.124 | 0.74 |
| iYMR273C     | 13 | 813986  | 12322 | YMR27  | <b>0.58</b> | Sgl | Pi | 0.576 | 0.702 | 0.088 | 0.74 |
| iYOL113W     | 15 | 106283  | 12887 | YOL11  | <b>0.79</b> | Sgl | Pi | 0.599 | 0.745 | 0.544 | 0.74 |
| iYGR138C     | 7  | 765588  | 10017 | YGR13  | <b>0.01</b> | Dbl | Pi | 0.623 | 0.789 | 0.319 | 0.74 |
| iYER140W     | 5  | 453228  | 9147  | YER141 | <b>0.56</b> | Sgl | Pi | 0.336 | 0.166 | 0.476 | 0.74 |
| iYGR135W     | 7  | 762166  | 10015 | YGR13  | <b>0.29</b> | Sgl | Pi | 0.791 | 0.371 | 0.445 | 0.74 |
| iYGL158W     | 7  | 208592  | 9714  | YGL157 | <b>0.73</b> | Sgl | Pi | 0.883 | 0.918 | 0.452 | 0.74 |
| iYNL216W     | 14 | 244156  | 12582 | YNL21  | <b>0.83</b> | Sgl | Pi | 0.545 | 0.367 | 0.494 | 0.74 |
| iYDL097C     | 4  | 286682  | 8152  | YDL097 | <b>0.68</b> | Sgl | Pi | 0.126 | 0.581 | 0.872 | 0.74 |
| iT(CGU)K     | 11 | 46792   | 7332  | YKL209 | <b>0.54</b> | Dbl | Pi | 0.772 | 0.567 | 0.845 | 0.74 |
| iYCR069W     | 3  | 240011  |       | 8019   | <b>0.47</b> | Non | F  | 0.345 | 0.356 | 0.135 | 0.74 |
| iYER139C     | 5  | 451229  | 9145  | YER139 | <b>0.74</b> | Dbl | Pi | 0.699 | 0.476 | 0.703 | 0.74 |

|            |    |               |                   |             |        |              |              |              |             |
|------------|----|---------------|-------------------|-------------|--------|--------------|--------------|--------------|-------------|
| iYKL186C   | 11 | 93312 11244   | YKL18             | <b>0.51</b> | Dbl Pi | 0.047        | 0.695        | 0.653        | 0.74        |
| iYDR525W-A | 4  | 1490844       | 8795              | <b>0.15</b> | Non F  | 0.003        | 0.553        | 0.59         | 0.74        |
| iYDR070C   | 4  | 588405 8377   | YDR07C            | <b>0.54</b> | Sgl Pi | 0.486        | 0.682        | 0.003        | 0.74        |
| iYPR165W   | 16 | 875995        | 13756             | <b>0.14</b> | Non F  | 0.646        | 0.698        | 0.978        | 0.74        |
| iYJL063C   | 10 | 316165 10754  | YJL06:            | <b>0.98</b> | Dbl Pi | <b>8E-04</b> | 0.072        | 0.735        | 0.74        |
| iYDR421W   | 4  | 1314886       | 8702              | <b>0.14</b> | Non F  | 0.573        | 0.498        | 0.327        | 0.74        |
| iYCL074W   | 3  | 3735          | 7951              | <b>0.02</b> | Non F  | 0.508        | 0.093        | 0.955        | 0.74        |
| iYBL088C   | 2  | 59361 7580    | YBL088            | <b>0.43</b> | Sgl Pi | 0.492        | 0.687        | 0.121        | 0.74        |
| iYNL065W   | 14 | 505479        | 12445             | <b>0.06</b> | Non F  | 0.848        | 0.845        | 0.374        | 0.74        |
| iYMR236W   | 13 | 743431 12286  | YMR2:             | <b>0.86</b> | Sgl Pi | 0.023        | 0.341        | 0.182        | 0.74        |
| iYOR375C   | 15 | 1043035 13305 | YOR37             | <b>0.04</b> | Dbl Pi | 0.696        | 0.526        | 0.537        | 0.74        |
| iYOR375C   | 15 | 1043035 13305 | YOR37             | <b>0.04</b> | Dbl Pi | 0.696        | 0.526        | 0.537        | 0.74        |
| iYDR221W   | 4  | 909418 8515   | YDR222            | <b>0.24</b> | Sgl Pi | 0.014        | 0.474        | 0.441        | 0.74        |
| iYGR031W   | 7  | 547514 9914   | YGR032            | <b>0.39</b> | Sgl Pi | 0.023        | 0.552        | 0.795        | 0.74        |
| iYLR006C   | 12 | 163888 11477  | YLR00             | <b>0.92</b> | Dbl Pi | 0.673        | 0.755        | 0.16         | 0.74        |
| iYDR265W   | 4  | 999856        | 8557              | <b>0.13</b> | Non F  | 0.636        | 0.426        | 0.595        | 0.74        |
| iYBR291C   | 2  | 784523 7880   | YBR291            | <b>0.37</b> | Sgl Pi | 0.158        | 0.518        | 0.472        | 0.74        |
| iYLR205C   | 12 | 553554 11671  | YLR20             | <b>0.82</b> | Dbl Pi | 0.664        | 0.071        | 0.01         | 0.74        |
| iYMR319C-0 | 13 | 914522 12367  | YMR3:             | <b>0.43</b> | Dbl Pi | 0.886        | 0.577        | 0.522        | 0.74        |
| iYIR016W   | 9  | 383401        | 10666             | <b>0.26</b> | Non F  | 0.592        | 0.568        | 0.622        | 0.74        |
| iYPL093W   | 16 | 372922 13423  | YPL09             | <b>0.51</b> | Sgl Pi | 0.609        | 0.609        | 0.504        | 0.74        |
| iYML075C   | 13 | 118892 11990  | YML07             | <b>0.42</b> | Sgl Pi | 0.684        | 0.728        | 0.467        | 0.75        |
| iYDL117W   | 4  | 251242 8171   | YDL116            | <b>0.92</b> | Sgl Pi | <b>2E-04</b> | 0.797        | 0.341        | 0.75        |
| iYDR353W   | 4  | 1184234 8640  | YDR354            | <b>0.38</b> | Sgl Pi | 0.736        | 0.827        | 0.272        | 0.75        |
| iYJR074W   | 10 | 573428 10974  | YJR07             | <b>0.64</b> | Sgl Pi | 0.731        | 0.614        | 0.528        | 0.75        |
| iYDR068W   | 4  | 584628        | 8375              | <b>0.19</b> | Non F  | 0.392        | 0.822        | 0.019        | 0.75        |
| iYML058W   | 13 | 159700 11972  | promoter for yml0 | <b>0.26</b> | Non F  | 0.545        | 0.477        | 0.908        | 0.75        |
| itD(GUC)D  | 4  | 569021 7117   | YDR058            | <b>0.41</b> | Sgl Pi | <b>0.565</b> | <b>0.867</b> | <b>0.937</b> | <b>0.75</b> |
| iYOR108W   | 15 | 524835 13058  | YOR1C             | <b>0.51</b> | Sgl Pi | 0.791        | 0.566        | 0.609        | 0.75        |
| iYOR070C-0 | 15 | 457806 13022  | YOR07             | <b>0.84</b> | Sgl Pi | 0.567        | 0.583        | 0.927        | 0.75        |
| iYNL057W   | 14 | 516719 12439  | YNL05             | <b>0.71</b> | Sgl Pi | 0.625        | 0.053        | 0.271        | 0.75        |
| iYOR382W   | 15 | 1059976       | 13315             | <b>0.51</b> | Non F  | 0.581        | 0.575        | 0.033        | 0.75        |
| iYPR103W   | 16 | 733209        | 13700             | <b>0.05</b> | Non F  | 0.54         | 0.721        | 0.463        | 0.75        |
| iYOL001W   | 15 | 326161 12780  | YOR0C             | <b>0.86</b> | Sgl Pi | 0.614        | 0.633        | 0.446        | 0.75        |
| iYNL086W   | 14 | 466625 12466  | YNL08             | <b>0.95</b> | Sgl Pi | <b>3E-04</b> | 0.46         | 0.615        | 0.75        |
| iYLR396C   | 12 | 912310 11835  | YLR39             | <b>0.57</b> | Sgl Pi | <b>4E-04</b> | 0.738        | 0.53         | 0.75        |
| iYNL034W   | 14 | 572296 12417  | YNL03             | <b>0.25</b> | Sgl Pi | 0.687        | 0.316        | 0.211        | 0.75        |
| iYER004W   | 5  | 160281 8921   | YER005            | <b>0.63</b> | Sgl Pi | 0.517        | 0.322        | 0.856        | 0.75        |
| iYPL092W   | 16 | 375189 13422  | YPL09             | <b>0.74</b> | Sgl Pi | 0.38         | 0.795        | 0.403        | 0.75        |
| iYJL223C-0 | 10 | 9131 10897    | YJL22:            | <b>0.34</b> | Dbl Pi | 0.503        | 0.562        | 0.579        | 0.75        |
| iYPL101W   | 16 | 361592 13429  | YPL10             | <b>0.97</b> | Sgl Pi | 0.634        | 0.808        | 0.208        | 0.75        |
| iYMR078C   | 13 | 424728 12126  | YMR07             | <b>0.94</b> | Dbl Pi | 0.008        | <b>3E-04</b> | 0.916        | 0.75        |
| iYKL159C   | 11 | 154453 11214  | YKL15             | <b>0.97</b> | Dbl Pi | 0.568        | 0.358        | 0.511        | 0.75        |
| iYDL020C   | 4  | 416690 8083   | YDL020            | <b>0.62</b> | Sgl Pi | 0.004        | 0.81         | 0.587        | 0.75        |
| iYMR201C   | 13 | 667036 12251  | YMR2C             | <b>0.43</b> | Dbl Pi | 0.416        | 0.726        | 0.467        | 0.75        |
| iYHR061C   | 8  | 222464 10298  | YHR06             | <b>0.55</b> | Sgl Pi | 0.035        | 0.011        | 0.805        | 0.75        |
| iYMR278W   | 13 | 824638        | 12327             | <b>0.25</b> | Non F  | 0.236        | 0.603        | 0.375        | 0.75        |
| iYGR209C   | 7  | 913213 10081  | YGR2C             | <b>0.65</b> | Sgl Pi | 0.744        | 0.66         | 0.576        | 0.75        |
| iYGR108W   | 7  | 705031        | 9989              | <b>0.27</b> | Non F  | 0.488        | 0.669        | 0.456        | 0.75        |
| iYFR047C   | 6  | 245151 9524   | YFR047            | <b>0.71</b> | Dbl Pi | 0.627        | 0.18         | 0.584        | 0.75        |
| iYGL082W   | 7  | 356973 9642   | YGL081            | <b>0.52</b> | Sgl Pi | 0.701        | 0.712        | 0.347        | 0.75        |



|                     |           |               |              |                |             |            |           |              |              |              |             |
|---------------------|-----------|---------------|--------------|----------------|-------------|------------|-----------|--------------|--------------|--------------|-------------|
| iYGL082W            | 7         | 356973        | 9642         | YGL081         | <b>0.52</b> | Sgl        | Pi        | 0.701        | 0.712        | 0.347        | 0.75        |
| iYDR347W            | 4         | 1170130       |              | 8634           | <b>0.11</b> | Non        | F         | 0.506        | 0.566        | 0.446        | 0.75        |
| iYOR256C            | 15        | 810689        | 13195        | YOR25          | <b>0.79</b> | Dbl        | Pi        | NaN          | 0.49         | 0.436        | 0.75        |
| iYCL035C            | 3         | 61170         | 7923         | YCL035         | <b>0.93</b> | Dbl        | Pi        | 0.069        | 0.057        | <b>4E-05</b> | 0.75        |
| iYGL126W            | 7         | 272139        | 9686         | YGL125         | <b>0.06</b> | Sgl        | Pi        | NaN          | 0.446        | 0.94         | 0.75        |
| iYJL198W            | 10        | 63494         | 10873        | YJL197         | <b>0.78</b> | Sgl        | Pi        | 0.655        | 0.586        | 0.364        | 0.75        |
| iYML053C            | 13        | 169751        | 11968        | YML052         | <b>0.3</b>  | Dbl        | Pi        | 0.788        | 0.013        | 0.998        | 0.75        |
| <b>iYGRWdelta22</b> | <b>7</b>  | <b>774143</b> | <b>10175</b> | <b>YGR14</b>   | <b>0.21</b> | <b>Sgl</b> | <b>Pi</b> | <b>0.902</b> | <b>0.643</b> | <b>0.964</b> | <b>0.75</b> |
| iYKR044W            | 11        | 522972        |              | 11333          | <b>0.39</b> | Non        | F         | 0.373        | 0.57         | 0.535        | 0.75        |
| iYLR001C            | 12        | 153979        | 11472        | YLR000         | <b>0.42</b> | Sgl        | Pi        | 0.707        | 0.648        | 0.435        | 0.75        |
| iYOR071C            | 15        | 461276        | 13024        | YOR070         | <b>0.44</b> | Dbl        | Pi        | 0.507        | 0.814        | 0.333        | 0.75        |
| iYDRCdelta9-0       | 4         | 651980        | 8820         | YDR095         | <b>0.92</b> | Dbl        | Pi        | 0.393        | 0.172        | 0.797        | 0.76        |
| iYCR102W-A          | 3         | 306929        |              | 8050           | <b>0.35</b> | Non        | F         | 0.806        | 0.863        | 0.737        | 0.76        |
| iYPR001W            | 16        | 557838        | 13610        | YPR000         | <b>0.66</b> | Sgl        | Pi        | 0.67         | 0.924        | 0.599        | 0.76        |
| iYIL063C            | 9         | 243770        | 10537        | YIL062         | <b>0.47</b> | Sgl        | Pi        | 0.775        | 0.678        | 0.838        | 0.76        |
| iYMR174C            | 13        | 610365        | 12222        | YMR173         | <b>0.65</b> | Dbl        | Pi        | 0.612        | 0.561        | 0.12         | 0.76        |
| iYLR330W            | 12        | 789688        |              | 11780          | <b>0.08</b> | Non        | F         | 0.147        | 0.934        | 0.36         | 0.76        |
| iYIL017C            | 9         | 320974        | 10494        | YIL017         | <b>0.99</b> | Dbl        | Pi        | 0.052        | 0.119        | 0.935        | 0.76        |
| iYOR313C            | 15        | 902871        | 13247        | YOR312         | <b>0.04</b> | Dbl        | Pi        | 0.247        | 0.548        | 0.535        | 0.76        |
| iYLR401C            | 12        | 924459        | 11840        | YLR400         | <b>0.26</b> | Dbl        | Pi        | 0.005        | 0.374        | 0.736        | 0.76        |
| iYJR069C            | 10        | 569087        | 10970        | YJR068         | <b>0.36</b> | Sgl        | Pi        | 0.52         | 0.701        | 0.462        | 0.76        |
| iYIR020W-B-0        | 9         | 395141        | 10673        | YIR020         | <b>0.16</b> | Sgl        | Pi        | 0.719        | 0.248        | 0.016        | 0.76        |
| iYGR154C            | 7         | 797856        | 10031        | YGR153         | <b>0.2</b>  | Dbl        | Pi        | 0.595        | 0.413        | 0.235        | 0.76        |
| iYLR404W            | 12        | 929589        | 11843        | YLR403         | <b>0.35</b> | Sgl        | Pi        | 0.757        | 0.501        | 0.457        | 0.76        |
| iYOLWdelta6         | 15        | 227295        | 12950        | YOL055         | <b>0.73</b> | Dbl        | Pi        | 0.964        | 0.761        | 2E-04        | 0.76        |
| iYMR089C            | 13        | 448102        | 12137        | YMR088         | <b>0.54</b> | Dbl        | Pi        | 0.593        | 0.047        | 0.336        | 0.76        |
| iYBR160W            | 2         | 560958        | 7763         | YBR160         | <b>0.44</b> | Sgl        | Pi        | 0.068        | 0.093        | 0.434        | 0.76        |
| iYKL184W            | 11        | 98164         | 11242        | YKL183         | <b>0.34</b> | Sgl        | Pi        | 0.714        | 0.674        | 0.375        | 0.76        |
| <b>itG(GCC)F2</b>   | <b>6</b>  | <b>181030</b> | <b>7165</b>  | <b>YFR016</b>  | <b>0.33</b> | <b>Sgl</b> | <b>Pi</b> | <b>0.795</b> | <b>0.11</b>  | <b>0.249</b> | <b>0.76</b> |
| iYAL021C            | 1         | 113370        | 7394         | YAL021         | <b>0.84</b> | Sgl        | Pi        | 0.485        | 0.648        | 0.3          | 0.76        |
| iYKL196C            | 11        | 75528         | 11254        | YKL195         | <b>0.96</b> | Dbl        | Pi        | <b>1E-04</b> | 0.009        | 0.419        | 0.76        |
| iYDR118W            | 4         | 687827        | 8420         | YDR117         | <b>0.47</b> | Sgl        | Pi        | 0.63         | 0.502        | 0.964        | 0.76        |
| iYCR101C            | 3         | 303023        | 8048         | YCR101         | <b>0.8</b>  | Sgl        | Pi        | 0.734        | 0.787        | 0.691        | 0.76        |
| iYLR322W            | 12        | 777950        |              | 11772          | <b>0.93</b> | Non        | F         | 0.545        | 0.505        | 0.185        | 0.76        |
| iYLR329W            | 12        | 787319        | 11779        | YLR332         | <b>0.8</b>  | Sgl        | Pi        | <b>6E-04</b> | 0.161        | 0.13         | 0.76        |
| iYOL164W            | 15        | 8123          | 12939        | YOL163         | <b>0.59</b> | Sgl        | Pi        | 0.832        | 0.076        | 0.809        | 0.76        |
| iYNL311C            | 14        | 51691         | 12666        | YNL310         | <b>0.5</b>  | Sgl        | Pi        | 0.548        | 0.294        | 0.604        | 0.76        |
| iYNL239W            | 14        | 201941        | 12602        | YNL238         | <b>0.66</b> | Sgl        | Pi        | 0.782        | 0.491        | 0.007        | 0.76        |
| iYKL206C            | 11        | 49814         | 11262        | YKL205         | <b>0.86</b> | Dbl        | Pi        | 0.616        | 0.533        | 0.422        | 0.76        |
| iYIR014W            | 9         | 381799        | 10664        | YIR013         | <b>0.42</b> | Sgl        | Pi        | 0.501        | 0.574        | 0.492        | 0.76        |
| iYJR154W            | 10        | 726522        | 11052        | YJR153         | <b>0.22</b> | Sgl        | Pi        | 0.665        | 0.552        | 0.099        | 0.76        |
| iYHR024C            | 8         | 159168        | 10258        | YHR023         | <b>0.87</b> | Dbl        | Pi        | 0.634        | 0.587        | 0.007        | 0.76        |
| iYGL257C            | 7         | 14154         | 9861         | YGL257         | <b>0.63</b> | Dbl        | Pi        | 0.18         | 2E-06        | 0.074        | 0.76        |
| iYHRCdelta16-0      | 8         | 549627        | 10467        | YHR210         | <b>0.64</b> | Dbl        | Pi        | NaN          | 0.329        | 0.405        | 0.76        |
| iYAL053W            | 1         | 48249         | 7425         | YAL051         | <b>0.52</b> | Sgl        | Pi        | NaN          | 0.58         | 0.054        | 0.76        |
| <b>itV(AAC)J</b>    | <b>10</b> | <b>378115</b> | <b>7347</b>  | <b>YJL036\</b> | <b>0.69</b> | <b>Sgl</b> | <b>Pi</b> | <b>0.67</b>  | <b>0.741</b> | <b>0.309</b> | <b>0.76</b> |
| iYDL057W            | 4         | 352443        | 8117         | YDL056         | <b>0.94</b> | Sgl        | Pi        | 0.619        | 0.656        | 0.083        | 0.76        |
| iYGL083W            | 7         | 355464        | 9643         | YGL082         | <b>0.74</b> | Sgl        | Pi        | 0.424        | 0.67         | 0.192        | 0.76        |
| iYNL279W            | 14        | 112885        | 12637        | YNL278         | <b>0.84</b> | Sgl        | Pi        | 0.533        | 0.565        | 0.344        | 0.76        |
| iYIL114C            | 9         | 149970        | 10583        | YIL114         | <b>0.73</b> | Dbl        | Pi        | 0.804        | 0.535        | 0.998        | 0.76        |
| iYCR068W            | 3         | 238484        | 8018         | YCR067         | <b>0.97</b> | Sgl        | Pi        | 0.836        | 0.522        | 0.679        | 0.76        |

|            |    |         |       |        |             |        |       |       |       |      |
|------------|----|---------|-------|--------|-------------|--------|-------|-------|-------|------|
| iYOL060C   | 15 | 216147  | 12837 | YOL06  | <b>0.32</b> | Dbl Pi | 0.059 | 0.694 | 0.078 | 0.76 |
| iYER048C   | 5  | 248156  | 8968  | YER048 | <b>0.58</b> | Dbl Pi | 0.863 | 0.334 | 0.506 | 0.76 |
| iYPL023C   | 16 | 506314  | 13357 | YPL02  | <b>0.87</b> | Dbl Pi | 0.442 | 0.116 | 0.227 | 0.76 |
| iYOR163W   | 15 | 643293  |       | 13110  | <b>0.35</b> | Non F  | 0.024 | 0.672 | 0.655 | 0.76 |
| iYER103W   | 5  | 366519  | 9077  | YER104 | <b>0.96</b> | Sgl Pi | 0.76  | 0.156 | 0.124 | 0.76 |
| itG(GCC)D2 | 4  | 992885  | 7161  | YDR261 | <b>0.62</b> | Dbl Pi | 0.238 | 0.539 | 0.98  | 0.76 |
| iYLR046C   | 12 | 238823  | 11517 | YLR04  | <b>0.38</b> | Sgl Pi | 0.337 | 0.271 | 0.055 | 0.76 |
| iYBR249C   | 2  | 717937  | 7843  | YBR249 | <b>0.32</b> | Dbl Pi | 0.478 | 0.849 | 0.013 | 0.76 |
| iYIR029W   | 9  | 411866  |       | 10683  | <b>0.16</b> | Non F  | 0.747 | 0.317 | 0.401 | 0.76 |
| iYOR018W   | 15 | 366868  | 12971 | YOR01  | <b>0.55</b> | Sgl Pi | 0.741 | 0.972 | 0.498 | 0.76 |
| iYGR253C-0 | 7  | 999159  | 10123 | YGR25  | <b>0.56</b> | Dbl Pi | 8E-04 | 0.798 | 0.002 | 0.76 |
| itR(ACG)K  | 11 | 490666  | 7290  | YKR026 | <b>0.61</b> | Dbl Pi | 0.29  | 0.895 | 0.123 | 0.76 |
| iYOR214C   | 15 | 746308  | 13157 | YOR21  | <b>0.23</b> | Sgl Pi | 0.588 | 0.455 | 0.505 | 0.76 |
| iYFR012W   | 6  | 168487  | 9452  | YFR013 | <b>0.78</b> | Sgl Pi | 0.369 | 0.481 | 0.029 | 0.76 |
| iSNR61     | 12 | 794574  |       | 7087   | <b>0.23</b> | Non F  | 0.276 | 0.591 | 0.385 | 0.76 |
| iYGR007W   | 7  | 507937  |       | 9895   | <b>0.27</b> | Non F  | 0.651 | 0.652 | 0.701 | 0.76 |
| iYJL216C   | 10 | 26077   | 10891 | YJL216 | <b>0.51</b> | Sgl Pi | 0.696 | 0.296 | 0.523 | 0.76 |
| iYKL029C   | 11 | 384366  | 11095 | YKL02  | <b>0.39</b> | Dbl Pi | 4E-04 | 0.244 | 0.839 | 0.76 |
| iYJL190C   | 10 | 75303   | 10866 | YJL190 | <b>0.01</b> | Dbl Pi | 0.929 | 2E-06 | 0.856 | 0.76 |
| iYKL019W   | 11 | 403157  | 11085 | YKL01  | <b>0.98</b> | Sgl Pi | 0.514 | 0.533 | 0.648 | 0.77 |
| iYHR058C   | 8  | 219884  | 10295 | YHR05  | <b>0.68</b> | Dbl Pi | 0.558 | 0.417 | 0.605 | 0.77 |
| iYJL178C   | 10 | 89871   | 10856 | YJL178 | <b>0.22</b> | Dbl Pi | 0.702 | 0.295 | 0.97  | 0.77 |
| itA(AGC)G  | 7  | 774407  | 7103  | YGR143 | <b>0.4</b>  | Sgl Pi | 0.887 | 0.502 | 0.195 | 0.77 |
| iYPR147C   | 16 | 826560  | 13738 | YPR14  | <b>0.76</b> | Sgl Pi | 0.516 | 0.683 | 0.895 | 0.77 |
| iYGR249W-0 | 7  | 989423  |       | 10117  | <b>0.68</b> | Non F  | 0.48  | 0.306 | 0.397 | 0.77 |
| iYDL145C   | 4  | 198182  | 8200  | YDL145 | <b>0.98</b> | Sgl Pi | 7E-04 | 0.093 | 0.721 | 0.77 |
| iYNL155W   | 14 | 343341  |       | 12529  | <b>0.11</b> | Non F  | 0.653 | 0.73  | 0.434 | 0.77 |
| iYHL032C   | 8  | 38510   | 10209 | YHL03  | <b>0.93</b> | Sgl Pi | 0.774 | 0.854 | 0.12  | 0.77 |
| iYGL097W-0 | 7  | 323255  | 9658  | YGL096 | <b>0.17</b> | Sgl Pi | 0.891 | 0.059 | 0.898 | 0.77 |
| iYAL049C   | 1  | 52606   | 7423  | YAL049 | <b>0.63</b> | Sgl Pi | 0.649 | 0.502 | 0.388 | 0.77 |
| TEL15R-4   | 15 | 1087244 |       | 13958  | <b>0.42</b> | Non F  | 0.753 | 0.041 | 0.819 | 0.77 |
| iYGL220W   | 7  | 82722   |       | 9787   | <b>0.42</b> | Non F  | 0.279 | 0.695 | 0.601 | 0.77 |
| iYKL060C   | 11 | 327154  | 11123 | YKL06  | <b>0.07</b> | Sgl Pi | 7E-04 | 0.533 | 0.963 | 0.77 |
| iYKL075C   | 11 | 293948  | 11138 | YKL07  | <b>0.92</b> | Sgl Pi | 0.599 | 0.606 | 0.79  | 0.77 |
| iYDR213W   | 4  | 892493  | 8508  | YDR214 | <b>0.47</b> | Sgl Pi | 0.868 | 0.796 | 0.199 | 0.77 |
| iYGL051W   | 7  | 404374  | 9615  | YGL050 | <b>0.93</b> | Sgl Pi | 0.692 | 0.506 | 0.49  | 0.77 |
| iYKL134C   | 11 | 191465  | 11192 | YKL13  | <b>0.45</b> | Sgl Pi | 0.343 | 0.595 | 0.814 | 0.77 |
| iYJR094W-A | 10 | 608556  | 10991 | YJR09  | <b>0.46</b> | Sgl Pi | 0.671 | 0.543 | 0.706 | 0.77 |
| iYHR198C   | 8  | 497276  | 10430 | YHR19  | <b>0.72</b> | Sgl Pi | 0.345 | 0.523 | 0.595 | 0.77 |
| iYCL037C   | 3  | 58759   | 7925  | YCL037 | <b>0.63</b> | Dbl Pi | 0.746 | 0.564 | 0.756 | 0.77 |
| iYJL206C-A | 10 | 50443   | 10880 | YJL206 | <b>0.5</b>  | Sgl Pi | 0.568 | 0.519 | 0.779 | 0.77 |
| iYPR203W   | 16 | 944193  | 13794 | YPR20  | <b>0.57</b> | Sgl Pi | 0.761 | 0.003 | 0.903 | 0.77 |
| iYER113C   | 5  | 390054  | 9097  | YER113 | <b>0.56</b> | Sgl Pi | 0.695 | 0.521 | 0.056 | 0.77 |
| iYBL022C   | 2  | 181236  | 7521  | YBL022 | <b>0.67</b> | Sgl Pi | 0.853 | 0.173 | 0.472 | 0.77 |
| iYGR156W   | 7  | 801833  | 10033 | YGR15  | <b>0.11</b> | Sgl Pi | 0.763 | 0.938 | 0.16  | 0.77 |
| iYMR142C   | 13 | 551218  | 12190 | YMR14  | <b>0.03</b> | Dbl Pi | 0.677 | 0.947 | 0.842 | 0.77 |
| iYPR160W   | 16 | 864014  |       | 13751  | <b>0.31</b> | Non F  | 0.535 | 0.141 | 0.596 | 0.77 |
| iYLR204W   | 12 | 552590  |       | 11670  | <b>0.35</b> | Non F  | 0.365 | 0.671 | 0.363 | 0.77 |
| iYFL056C-0 | 6  | 15438   | 9398  | YFL056 | <b>0.21</b> | Dbl Pi | 0.627 | 0.428 | 0.228 | 0.77 |
| iYBR237W   | 2  | 694480  |       | 7832   | <b>0.08</b> | Non F  | 0.588 | 0.468 | 0.418 | 0.77 |
| iYOL007C   | 15 | 312352  | 12786 | YOL00  | <b>0.5</b>  | Sgl Pi | 0.721 | 0.566 | 0.328 | 0.77 |

|                   |           |                     |               |             |        |              |              |              |             |
|-------------------|-----------|---------------------|---------------|-------------|--------|--------------|--------------|--------------|-------------|
| iYJL064W          | 10        | 315266              | 10755         | <b>0.86</b> | Non F  | 0.332        | 0.83         | 0.66         | 0.77        |
| iYGL189C          | 7         | 148577 9745         | YGL189        | <b>0.03</b> | Sgl Pi | 0.829        | 0.603        | 0.658        | 0.77        |
| iYPL258C          | 16        | 55150 13577         | YPL25         | <b>0.54</b> | Dbl Pi | 0.49         | 0.298        | 0.033        | 0.77        |
| iYPL258C          | 16        | 55150 13577         | YPL25         | <b>0.54</b> | Dbl Pi | 0.49         | 0.298        | 0.033        | 0.77        |
| <b>iYCR031C</b>   | <b>3</b>  | <b>178214 7990</b>  | <b>YCR031</b> | <b>0.12</b> | Dbl Pi | <b>0.501</b> | <b>0.498</b> | <b>0.7</b>   | <b>0.77</b> |
| iYLR119W          | 12        | 386181              | 11586         | <b>0.13</b> | Non F  | 0.669        | 0.528        | 0.759        | 0.77        |
| iYMR070W          | 13        | 410640              | 12118         | <b>0.18</b> | Non F  | 0.392        | 0.563        | 0.793        | 0.77        |
| iYER033C          | 5         | 221289 8952         | YER033        | <b>0.47</b> | Dbl Pi | 0.845        | 0.084        | 0.009        | 0.77        |
| iYNL315C          | 14        | 44291 12670         | YNL31         | <b>0.79</b> | Dbl Pi | 0.513        | 0.294        | 0.445        | 0.77        |
| iYML033W          | 13        | 212156              | 11952         | <b>0.08</b> | Non F  | 0.596        | 0.81         | 0.206        | 0.77        |
| iYGL107C          | 7         | 306277 9668         | YGL107        | <b>0.91</b> | Dbl Pi | <b>4E-04</b> | 0.666        | 0.24         | 0.77        |
| iYBL099W          | 2         | 38709 7590          | YBL098        | <b>0.41</b> | Sgl Pi | 0.528        | 0.141        | 0.495        | 0.77        |
| iYOR070C-1        | 15        | 458655 13023        | YOR07         | <b>0.37</b> | Sgl Pi | 0.703        | 0.606        | 0.459        | 0.77        |
| iYKR088C          | 11        | 605059 11377        | YKR08         | <b>0.52</b> | Sgl Pi | 0.28         | 0.761        | 0.444        | 0.77        |
| iYPL199C          | 16        | 172749 13520        | YPL19         | <b>0.53</b> | Dbl Pi | 0.727        | 0.548        | 0.473        | 0.77        |
| iYPL029W          | 16        | 497730 13363        | YPL02         | <b>0.82</b> | Sgl Pi | 0.025        | 0.042        | 0.998        | 0.77        |
| iYOR211C          | 15        | 741636 13154        | YOR21         | <b>0.37</b> | Dbl Pi | 0.446        | 0.369        | 0.448        | 0.77        |
| iYKL109W          | 11        | 233540 11172        | YKL10         | <b>0.6</b>  | Sgl Pi | 0.585        | 0.516        | 0.685        | 0.77        |
| iYNL117W          | 14        | 408017 12493        | YNL11         | <b>1</b>    | Sgl Pi | <b>4E-04</b> | 0.41         | 0.52         | 0.77        |
| iYDL108W          | 4         | 268711 8162         | YDL107        | <b>0.43</b> | Sgl Pi | 0.52         | 0.644        | 0.348        | 0.77        |
| iYFLCdelta6       | 6         | 144829              | 9424          | <b>0.23</b> | Non F  | 0.628        | 0.854        | 0.339        | 0.77        |
| iYDR348C          | 4         | 1171805 8635        | YDR348        | <b>0.48</b> | Sgl Pi | 0.015        | 0.706        | 0.413        | 0.77        |
| iYHR210C-0        | 8         | 521737 10442        | YHR21         | <b>0.88</b> | Dbl Pi | 0.271        | 0.143        | 0.001        | 0.77        |
| iYNL238W          | 14        | 204859 12601        | YNL23         | <b>0.26</b> | Sgl Pi | 0.674        | 0.614        | 0.253        | 0.77        |
| iYLR314C          | 12        | 764124 11767        | YLR31         | <b>0.63</b> | Dbl Pi | 0.02         | 0.042        | 0.958        | 0.77        |
| iYEL044W          | 5         | 70244 8874          | YEL043        | <b>0.94</b> | Sgl Pi | 0.804        | 0.609        | 0.36         | 0.78        |
| iYOR262W          | 15        | 818337              | 13201         | <b>0.81</b> | Non F  | 0.645        | 0.412        | 0.653        | 0.78        |
| iYBR032W          | 2         | 301788 7637         | YBR033        | <b>0.59</b> | Sgl Pi | 0.794        | 0.707        | 0.494        | 0.78        |
| iYOR370C          | 15        | 1030991 13300       | YOR37         | <b>0.27</b> | Sgl Pi | 0.864        | 0.968        | 0.166        | 0.78        |
| <b>iYPR120C</b>   | <b>16</b> | <b>775165 13716</b> | <b>YPR12</b>  | <b>0.23</b> | Dbl Pi | <b>0.767</b> | <b>0.816</b> | <b>0.94</b>  | <b>0.78</b> |
| iYDL144C          | 4         | 199745 8199         | YDL144        | <b>0.96</b> | Dbl Pi | NaN          | 0.074        | 0.223        | 0.78        |
| <b>itA(AGC)P</b>  | <b>16</b> | <b>857016 7107</b>  | <b>YPR159</b> | <b>0.18</b> | Sgl Pi | <b>0.557</b> | <b>0.54</b>  | <b>0.888</b> | <b>0.78</b> |
| iYNL283C          | 14        | 106698 12641        | YNL28         | <b>0.39</b> | Dbl Pi | 0.848        | 0.496        | 0.462        | 0.78        |
| iYBL106C          | 2         | 13889 7596          | YBL106        | <b>0.12</b> | Sgl Pi | 0.525        | 0.914        | 0.724        | 0.78        |
| iYDL065C          | 4         | 337304 8124         | YDL065        | <b>0.76</b> | Dbl Pi | 0.704        | 0.069        | 0.648        | 0.78        |
| iYOR052C          | 15        | 427253 13005        | YOR05         | <b>0.66</b> | Dbl Pi | 0.8          | 0.768        | 0.664        | 0.78        |
| iYDL216C          | 4         | 70392 8266          | YDL216        | <b>0.31</b> | Sgl Pi | 0.585        | 0.791        | 0.517        | 0.78        |
| iYDL080C          | 4         | 312479 8137         | YDL080        | <b>0.63</b> | Sgl Pi | 0.647        | 0.687        | 0.247        | 0.78        |
| iYNR043W          | 14        | 703067 12742        | YNR04         | <b>0.44</b> | Sgl Pi | 0.702        | 0.293        | 0.196        | 0.78        |
| iYML122C          | 13        | 26415 12033         | YML12         | <b>0.44</b> | Dbl Pi | 0.691        | 0.578        | 0.071        | 0.78        |
| iYKR085C          | 11        | 599305 11374        | YKR08         | <b>0.91</b> | Dbl Pi | 0.41         | 0.734        | 0.636        | 0.78        |
| iYML105C          | 13        | 58682 12016         | YML10         | <b>0.71</b> | Sgl Pi | 0.795        | 0.679        | 0.363        | 0.78        |
| iYMR181C          | 13        | 624071 12229        | YMR18         | <b>0.28</b> | Sgl Pi | 0.673        | 0.257        | 0.954        | 0.78        |
| <b>itI(AAU)I2</b> | <b>9</b>  | <b>210723</b>       | <b>7192</b>   | <b>0.07</b> | Non F  | <b>0.171</b> | <b>0.649</b> | <b>0.433</b> | <b>0.78</b> |
| iYOL141W          | 15        | 58534 12914         | YOL14         | <b>0.15</b> | Sgl Pi | 0.668        | 0.509        | 0.532        | 0.78        |
| iYPL119C          | 16        | 326252 13444        | YPL11         | <b>0.98</b> | Dbl Pi | 0.137        | 0.801        | 0.331        | 0.78        |
| iYJL155C          | 10        | 130343 10834        | YJL155        | <b>0.53</b> | Sgl Pi | 0.747        | 0.603        | 0.456        | 0.78        |
| iYBR129C          | 2         | 495283 7732         | YBR129        | <b>0.93</b> | Sgl Pi | <b>7E-04</b> | 0.33         | 0.478        | 0.78        |
| iYGR258C-1        | 7         | 1011658 10130       | YGR25         | <b>0.37</b> | Sgl Pi | 0.739        | 0.093        | 0.654        | 0.78        |
| iYIL074C          | 9         | 222491 10547        | YIL074        | <b>0.48</b> | Sgl Pi | 0.71         | 0.94         | 0.17         | 0.78        |
| iYOR357C          | 15        | 1009706 13289       | YOR35         | <b>0.93</b> | Dbl Pi | 0.004        | <b>8E-04</b> | 0.463        | 0.78        |

|             |    |              |        |      |        |       |       |       |      |
|-------------|----|--------------|--------|------|--------|-------|-------|-------|------|
| iYOL156W-1  | 15 | 27864        | 12930  | 0.1  | Non F  | 0.931 | 0.713 | 0.897 | 0.78 |
| itT(AGU)C   | 3  | 295534       | 7323   | 0.54 | Non F  | 0.713 | 0.814 | 0.999 | 0.78 |
| iSNR63      | 4  | 323475       | 7089   | 0.29 | Non F  | 0.426 | 0.58  | 0.679 | 0.78 |
| iSNR63      | 4  | 323475       | 7089   | 0.29 | Non F  | 0.426 | 0.58  | 0.679 | 0.78 |
| iYLL064C    | 12 | 13445 11465  | YLL064 | 0.42 | Sgl Pi | 0.729 | 0.325 | 0.089 | 0.78 |
| iYDR162C    | 4  | 781087 8458  | YDR162 | 0.8  | Dbl Pi | 0.564 | 0.68  | 0.118 | 0.78 |
| iYBL007C    | 2  | 216338 7507  | YBL007 | 0.62 | Sgl Pi | 1E-04 | 0.695 | 0.415 | 0.78 |
| iYBR230C    | 2  | 680009 7826  | YBR230 | 0.44 | Sgl Pi | 0.696 | 0.292 | 0.289 | 0.78 |
| iYKL114C    | 11 | 224087 11177 | YKL114 | 0.68 | Sgl Pi | 0.768 | 0.43  | 0.929 | 0.78 |
| iYOLWtau1-0 | 15 | 3989 12952   | YOL162 | 0.73 | Dbl Pi | 0.796 | 0.011 | 0.975 | 0.78 |
| iYOR192C-0  | 15 | 700551 13138 | YOR192 | 0.82 | Dbl Pi | 0.58  | 0.672 | 0.637 | 0.78 |
| iYJL123C    | 10 | 189131 10805 | YJL123 | 0.76 | Dbl Pi | 0.065 | 0.623 | 0.466 | 0.78 |
| iYOR130C    | 15 | 570801 13079 | YOR130 | 0.63 | Sgl Pi | 0.757 | 0.59  | 0.227 | 0.78 |
| iYLR007W    | 12 | 165397       | 11478  | 0.16 | Non F  | 0.691 | 0.764 | 0.453 | 0.78 |
| itA(UGC)E   | 5  | 312081 7109  | YER075 | 0.37 | Sgl Pi | 0.791 | 0.323 | 0.502 | 0.78 |
| iYMR195W    | 13 | 654420 12245 | YMR195 | 0.57 | Sgl Pi | 0.742 | 0.677 | 0.521 | 0.78 |
| iYHR177W    | 8  | 457950 10411 | YHR177 | 0.29 | Sgl Pi | 0.684 | 0.152 | 0.009 | 0.78 |
| iYLR103C    | 12 | 345927 11570 | YLR103 | 0.91 | Dbl Pi | 0.802 | 0.456 | 0.261 | 0.79 |
| iYHR115C    | 8  | 341362 10353 | YHR115 | 0.99 | Dbl Pi | 5E-04 | 0.045 | 0.417 | 0.79 |
| iYER060W    | 5  | 276153 8987  | YER060 | 0.16 | Sgl Pi | 0.648 | 0.188 | 1     | 0.79 |
| iYBL108W    | 2  | 8486 7598    | YBL107 | 0.69 | Sgl Pi | 0.552 | 0.065 | 0.066 | 0.79 |
| iYMR275C    | 13 | 818573 12324 | YMR275 | 0.95 | Dbl Pi | 0.502 | 0.599 | 0.471 | 0.79 |
| iYJL048C    | 10 | 348320 10740 | YJL048 | 0.33 | Sgl Pi | 0.92  | 0.217 | 0.996 | 0.79 |
| iYFL062W-1  | 6  | 8576 9412    | YFL061 | 0.74 | Sgl Pi | 0.758 | 0.88  | 0.228 | 0.79 |
| iYJL130C    | 10 | 172052 10813 | YJL130 | 0.25 | Sgl Pi | 0.596 | 0.953 | 0.361 | 0.79 |
| iYPL019C    | 16 | 517017 13353 | YPL019 | 0.82 | Dbl Pi | 0.354 | 0.015 | 0.022 | 0.79 |
| iYPL083C    | 16 | 398100 13413 | YPL083 | 0.5  | Sgl Pi | 0.735 | 0.689 | 0.648 | 0.79 |
| iYDL059C    | 4  | 344938 8119  | YDL059 | 0.82 | Dbl Pi | 0.557 | 0.967 | 0.559 | 0.79 |
| iYMR034C    | 13 | 340717 12086 | YMR034 | 0.89 | Dbl Pi | 0.706 | 0.088 | 0.498 | 0.79 |
| iYOL114C    | 15 | 103925 12888 | YOL114 | 0.68 | Dbl Pi | 0.785 | 6E-05 | 0.412 | 0.79 |
| iYFL020C    | 6  | 99600 9320   | YFL020 | 0.78 | Sgl Pi | 0.654 | 0.272 | 0.265 | 0.79 |
| iYMR219W    | 13 | 712109 12269 | YMR219 | 0.41 | Sgl Pi | 0.791 | 0.53  | 0.708 | 0.79 |
| iYHR105W    | 8  | 325416 10343 | YHR105 | 0.69 | Sgl Pi | 0.585 | 0.607 | 0.653 | 0.79 |
| iYNR075W    | 14 | 781020 12775 | YNR075 | 0.31 | Sgl Pi | 0.836 | 0.546 | 0.972 | 0.79 |
| iYPL027W    | 16 | 500389       | 13361  | 0.23 | Non F  | 0.352 | 0.398 | 0.371 | 0.79 |
| iYBL009W    | 2  | 209191 7509  | YBL008 | 0.86 | Sgl Pi | 0.639 | 0.825 | 0.739 | 0.79 |
| iYJR117W    | 10 | 643037       | 11013  | 0.05 | Non F  | 0.216 | 0.878 | 0.583 | 0.79 |
| iYAL022C    | 1  | 110417 7395  | YAL022 | 0.3  | Sgl Pi | 0.732 | 0.44  | 0.295 | 0.79 |
| iYLR406C    | 12 | 931744 11845 | YLR406 | 0.23 | Dbl Pi | 0.281 | 4E-04 | 0.549 | 0.79 |
| iYHR194W    | 8  | 490383 10426 | YHR194 | 0.88 | Sgl Pi | 0.223 | 0.567 | 0.939 | 0.79 |
| iYIL030C    | 9  | 299993 10506 | YIL030 | 0.97 | Sgl Pi | 0.011 | 0.617 | 0.341 | 0.79 |
| iYKR106W-1  | 11 | 664004       | 11401  | 0.06 | Non F  | 0.616 | 0.561 | 0.377 | 0.79 |
| iYPL235W    | 16 | 104699       | 13555  | 0.77 | Non F  | 0.745 | 0.585 | 0.744 | 0.79 |
| iYPL215W    | 16 | 148403       | 13535  | 0.14 | Non F  | 0.455 | 0.587 | 0.343 | 0.79 |
| iYNR070W    | 14 | 769373       | 12770  | 0.84 | Non F  | 0.356 | 0.605 | 0.412 | 0.79 |
| iYCL028W    | 3  | 71369 7917   | YCL027 | 0.6  | Sgl Pi | 0.426 | 0.004 | 0.23  | 0.79 |
| iYGL127C    | 7  | 270786 9687  | YGL127 | 0.92 | Dbl Pi | 0.345 | 0.754 | 0.896 | 0.79 |
| iYLR327C    | 12 | 783380 11777 | YLR327 | 0.64 | Dbl Pi | 0.756 | 0.538 | 0.994 | 0.79 |
| iYML026C    | 13 | 223830       | #N/A   | 0.11 | #N/A   | 0.486 | 0.897 | 0.695 | 0.79 |
| iYER149C    | 5  | 467476 9165  | YER149 | 0.72 | Dbl Pi | 0.797 | 0.475 | 0.639 | 0.79 |
| iYLR152C    | 12 | 444715 11616 | YLR152 | 0.51 | Sgl Pi | 0.68  | 0.241 | 2E-08 | 0.79 |

|                  |           |               |              |               |             |               |              |              |              |             |
|------------------|-----------|---------------|--------------|---------------|-------------|---------------|--------------|--------------|--------------|-------------|
| iYJR047C         | 10        | 525080        | 10949        | YJR04         | <b>0.17</b> | Dbl Pi        | 0.05         | 0.608        | 0.655        | 0.79        |
| iYOR013W         | 15        | 357210        | 12967        | YOR01         | <b>0.89</b> | Sgl Pi        | 0.777        | 0.726        | 0.759        | 0.79        |
| iYMR277W         | 13        | 822443        | 12326        | YMR27         | <b>0.45</b> | Sgl Pi        | 0.512        | 0.922        | 0.056        | 0.79        |
| iYJR058C         | 10        | 544861        | 10959        | YJR05         | <b>0.73</b> | Dbl Pi        | 0.009        | 0.217        | 0.01         | 0.79        |
| iYALWdelta1      | 1         | 22540         |              | 7454          | <b>0.56</b> | Non F         | NaN          | 0.811        | 0.631        | 0.79        |
| iYMLCdelta1      | 13        | 132316        | 12047        | YML07         | <b>0.86</b> | Dbl Pi        | 0.644        | 0.848        | 0.324        | 0.79        |
| iYML064C         | 13        | 145871        | 11978        | YML06         | <b>0.05</b> | Dbl Pi        | 0.883        | 0.009        | 0.82         | 0.79        |
| iYPL201C         | 16        | 171150        | 13522        | YPL20         | <b>0.11</b> | Dbl Pi        | 0.637        | 0.784        | 0.427        | 0.79        |
| iYNL324W         | 14        | 31459         | 12677        | YNL32         | <b>0.98</b> | Sgl Pi        | 0.621        | 0.462        | 0.775        | 0.79        |
| iYAL042W         | 1         | 62572         | 7416         | YAL041        | <b>0.97</b> | Sgl Pi        | <b>4E-04</b> | 0.664        | 0.175        | 0.79        |
| iYMR017W         | 13        | 308674        | 12070        | YMR01         | <b>0.33</b> | Sgl Pi        | 0.705        | 0.144        | 0.326        | 0.79        |
| iYNL176C         | 14        | 306970        | 12547        | YNL17         | <b>0.79</b> | Sgl Pi        | 0.728        | 5E-04        | 0.592        | 0.79        |
| iYNL194C         | 14        | 273605        | 12564        | YNL19         | <b>0.86</b> | Dbl Pi        | 0.663        | 0.728        | 0.549        | 0.79        |
| iYLR219W         | 12        | 576338        | 11684        | YLR22         | <b>0.31</b> | Sgl Pi        | 0.84         | 0.704        | 0.905        | 0.79        |
| <b>iYKL128C</b>  | <b>11</b> | <b>201400</b> | <b>11187</b> | <b>YKL12</b>  | <b>0.5</b>  | <b>Dbl Pi</b> | <b>0.733</b> | <b>0.579</b> | <b>0.899</b> | <b>0.79</b> |
| iYJR018W         | 10        | 466832        |              | 10929         | <b>0.31</b> | Non F         | 0.136        | 0.446        | 0.539        | 0.79        |
| iYPL249C-A       | 16        | 76235         | 13569        | YPL24         | <b>0.16</b> | Sgl Pi        | 0.833        | 0.648        | 0.806        | 0.79        |
| iYJR160C-0       | 10        | 739528        | 11060        | YJR16         | <b>0.62</b> | Sgl Pi        | 0.78         | 0.45         | 0.431        | 0.79        |
| iYLR008C         | 12        | 166080        | 11479        | YLR00         | <b>0.7</b>  | Dbl Pi        | 0.712        | 0.77         | 0.001        | 0.79        |
| iYPL246C         | 16        | 85293         | 13565        | YPL24         | <b>0.75</b> | Dbl Pi        | 0.638        | 0.298        | 0.307        | 0.79        |
| iYNL217W         | 14        | 241311        | 12583        | YNL21         | <b>0.76</b> | Sgl Pi        | 0.657        | 0.048        | 0.477        | 0.79        |
| iYER186C         | 5         | 562624        | 9239         | YER186        | <b>0.89</b> | Dbl Pi        | 0.834        | 0.713        | 0.222        | 0.79        |
| iYOR031W         | 15        | 389421        |              | 12985         | <b>0.47</b> | Non F         | 0.711        | 0.554        | 0.896        | 0.79        |
| iYKLWdelta7      | 11        | 314152        | 11294        | YKL06         | <b>0.86</b> | Sgl Pi        | 0.594        | 0.211        | 0.175        | 0.8         |
| iYLR053C         | 12        | 248436        | 11524        | YLR05         | <b>0.82</b> | Sgl Pi        | 0.493        | 0.634        | 0.387        | 0.8         |
| <b>itF(GAA)M</b> | <b>13</b> | <b>352355</b> | <b>7153</b>  | <b>YMR04</b>  | <b>0.43</b> | <b>Dbl Pi</b> | <b>0.715</b> | <b>0.688</b> | <b>0.481</b> | <b>0.8</b>  |
| iYIR005W         | 9         | 365337        |              | 10655         | <b>0.2</b>  | Non F         | 0.218        | 0.49         | 0.48         | 0.8         |
| iYJL160C-0       | 10        | 118822        | 10839        | YJL160        | <b>0.77</b> | Dbl Pi        | 0.643        | 0.179        | 0.697        | 0.8         |
| iYKL211C         | 11        | 38140         | 11267        | YKL21         | <b>0.4</b>  | Dbl Pi        | 0.025        | 0.402        | 0.255        | 0.8         |
| iYGR286C-0       | 7         | 1064937       | 10155        | YGR28         | <b>0.84</b> | Sgl Pi        | 0.624        | 0.817        | 0.028        | 0.8         |
| iYDR077W         | 4         | 601811        |              | 8384          | <b>0.11</b> | Non F         | 0.719        | 0.799        | 0.915        | 0.8         |
| iYPL275W-2       | 16        | 21659         | 13596        | YPL27         | <b>0.43</b> | Sgl Pi        | 0.627        | 0.475        | 0.951        | 0.8         |
| iYJL141C         | 10        | 150102        | 10823        | YJL141        | <b>0.8</b>  | Dbl Pi        | 0.229        | 0.476        | 0.965        | 0.8         |
| iYGR216C         | 7         | 924460        | 10088        | YGR21         | <b>0.88</b> | Dbl Pi        | 0.539        | 0.125        | 0.257        | 0.8         |
| iYMR297W         | 13        | 863532        | 12345        | YMR29         | <b>0.84</b> | Sgl Pi        | 0.776        | 0.574        | 0.43         | 0.8         |
| iYKL056C         | 11        | 334563        | 11119        | YKL05         | <b>0.4</b>  | Sgl Pi        | 0.7          | 0.898        | 0.451        | 0.8         |
| <b>itE(UUC)L</b> | <b>12</b> | <b>797238</b> | <b>7143</b>  | <b>YLR334</b> | <b>0.39</b> | <b>Dbl Pi</b> | <b>0.443</b> | <b>0.299</b> | <b>0.42</b>  | <b>0.8</b>  |
| iYHR097C         | 8         | 298599        | 10335        | YHR09         | <b>0.39</b> | Sgl Pi        | 0.818        | 0.38         | 0.431        | 0.8         |
| iYOR300W         | 15        | 880875        | 13235        | YOR30         | <b>0.66</b> | Sgl Pi        | 0.518        | 0.253        | 0.534        | 0.8         |
| iYHR043C         | 8         | 193582        | 10278        | YHR04         | <b>0.79</b> | Sgl Pi        | 0.672        | 0.195        | 0.958        | 0.8         |
| iYJR049C         | 10        | 528158        | 10951        | YJR04         | <b>0.81</b> | Dbl Pi        | 0.33         | 0.631        | 0.534        | 0.8         |
| iYCR050C         | 3         | 213760        | 8005         | YCR050        | <b>0.97</b> | Dbl Pi        | 0.575        | 0.464        | 0.241        | 0.8         |
| iYDL103C         | 4         | 276587        | 8158         | YDL103        | <b>0.81</b> | Dbl Pi        | 0.635        | 0.404        | 0.748        | 0.8         |
| iYDL182W         | 4         | 134717        | 8230         | YDL181        | <b>0.48</b> | Sgl Pi        | 0.748        | 0.413        | 0.831        | 0.8         |
| iYMR296C         | 13        | 860894        | 12344        | YMR29         | <b>0.59</b> | Dbl Pi        | <b>7E-04</b> | 0.591        | 0.611        | 0.8         |
| iYNL046W         | 14        | 542803        | 12428        | YNL04         | <b>0.62</b> | Sgl Pi        | 0.417        | 0.532        | 0.794        | 0.8         |
| iYJR041C         | 10        | 513440        | 10943        | YJR04         | <b>0.92</b> | Dbl Pi        | 0.35         | 0.598        | 0.517        | 0.8         |
| iYDR368W         | 4         | 1214816       |              | 8653          | <b>0.18</b> | Non F         | 0.532        | 0.482        | 0.919        | 0.8         |
| iYFL066C         | 6         | 2600          | 9418         | YFL066        | <b>0.57</b> | Sgl Pi        | 0.754        | 0.053        | 0.825        | 0.8         |
| iYPL174C         | 16        | 222762        | 13496        | YPL17         | <b>0.9</b>  | Dbl Pi        | 0.462        | 0.241        | 0.899        | 0.8         |
| iYJR119C         | 10        | 646189        | 11015        | YJR11         | <b>0.75</b> | Dbl Pi        | 0.037        | 0.056        | 0.42         | 0.8         |



|              |           |               |             |               |             |       |    |              |              |              |             |
|--------------|-----------|---------------|-------------|---------------|-------------|-------|----|--------------|--------------|--------------|-------------|
| iYOR182C     | 15        | 678783        | 13128       | YOR18         | <b>0.02</b> | Dbl   | Pi | 0.833        | 0.734        | 0.502        | 0.8         |
| iYKL094W     | 11        | 263917        | 11155       | YKL09         | <b>0.3</b>  | Sgl   | Pi | 0.596        | 0.897        | 0.549        | 0.8         |
| iYOL040C     | 15        | 253576        | 12818       | YOL04         | <b>0.01</b> | Dbl   | Pi | 0.836        | 0.769        | 0.474        | 0.8         |
| iYCRWdelta13 | <b>3</b>  | <b>295329</b> |             | <b>8063</b>   | <b>0.13</b> | Non F |    | <b>0.64</b>  | <b>0.759</b> | <b>0.746</b> | <b>0.8</b>  |
| iYNR032C-A   | 14        | 687472        | 12730       | YNR03         | <b>0.8</b>  | Dbl   | Pi | 0.214        | 0.286        | 0.426        | 0.8         |
| iYLR257W     | 12        | 659780        | 11716       | YLR25         | <b>0.68</b> | Sgl   | Pi | 0.328        | 0.701        | 0.818        | 0.8         |
| iYBR001C     | 2         | 241242        | 7607        | YBR001        | <b>0.37</b> | Sgl   | Pi | 0.856        | 0.871        | 0.515        | 0.8         |
| iYKR020W     | 11        | 478477        | 11313       | YKR02         | <b>0.71</b> | Sgl   | Pi | 0.633        | 0.221        | 0.879        | 0.8         |
| iYIR022W     | 9         | 399227        | 10676       | YIR02         | <b>0.88</b> | Sgl   | Pi | <b>2E-04</b> | 0.485        | 0.56         | 0.8         |
| iYBR189W     | 2         | 605458        | 7791        | YBR19C        | <b>0.29</b> | Sgl   | Pi | 0.757        | 0.717        | 0.961        | 0.8         |
| iYGL053W     | 7         | 403303        | 9616        | YGL052        | <b>0.46</b> | Sgl   | Pi | 0.689        | 0.511        | 0.851        | 0.8         |
| iYJL053W     | 10        | 336724        | 10745       | YJL05         | <b>0.66</b> | Sgl   | Pi | 0.835        | 0.61         | 0.867        | 0.8         |
| iYML089C     | 13        | 91405         | 12004       | YML08         | <b>0.33</b> | Dbl   | Pi | 0.752        | 0.155        | 0.949        | 0.8         |
| iYLR132C     | 12        | 408157        | 11599       | YLR13         | <b>0.96</b> | Dbl   | Pi | 0.585        | 0.442        | 0.434        | 0.8         |
| iYLR098C     | 12        | 339465        | 11567       | YLR09         | <b>0.75</b> | Sgl   | Pi | 0.614        | 0.066        | 0.384        | 0.8         |
| iYNL262W     | 14        | 154865        | 12623       | YNL26         | <b>0.7</b>  | Sgl   | Pi | 0.687        | 0.349        | NaN          | 0.8         |
| iYGR274C     | 7         | 1043080       | 10143       | YGR27         | <b>0.68</b> | Dbl   | Pi | 0.357        | 0.576        | 0.457        | 0.8         |
| iYMR321C     | 13        | 917901        | 12370       | YMR32         | <b>0.56</b> | Sgl   | Pi | 0.843        | 0.367        | 0.548        | 0.8         |
| iYCR045C     | 3         | 209601        | 8002        | YCR045        | <b>0.68</b> | Sgl   | Pi | 0.752        | 0.828        | 0.859        | 0.8         |
| iYOL086C     | 15        | 160606        | 12862       | YOL08         | <b>0.24</b> | Sgl   | Pi | 0.7          | 0.594        | 0.68         | 0.8         |
| iYKL038W     | 11        | 368760        | 11101       | YKL03         | <b>0.55</b> | Sgl   | Pi | 0.781        | 0.374        | 0.946        | 0.8         |
| iYJR037W     | 10        | 503170        |             | 10940         | <b>0.96</b> | Non F |    | 0.589        | 0.527        | 0.517        | 0.81        |
| iYDR453C     | 4         | 1365639       | 8729        | YDR453        | <b>0.88</b> | Sgl   | Pi | 0.659        | 0.766        | 0.618        | 0.81        |
| iYOL137W     | 15        | 67116         |             | 12910         | <b>0.06</b> | Non F |    | 0.734        | 0.907        | 0.499        | 0.81        |
| iYGR089W-1   | <b>7</b>  | <b>660753</b> | <b>9970</b> | <b>YGR09C</b> | <b>0.39</b> | Sgl   | Pi | <b>0.809</b> | <b>0.459</b> | <b>0.007</b> | <b>0.81</b> |
| iYKL096W     | 11        | 261493        | 11157       | YKL09         | <b>0.7</b>  | Sgl   | Pi | 0.801        | 0.547        | 0.329        | 0.81        |
| iYKL096W     | 11        | 261493        | 11157       | YKL09         | <b>0.7</b>  | Sgl   | Pi | 0.801        | 0.547        | 0.329        | 0.81        |
| iYPR149W     | 16        | 830420        | 13741       | YPR15         | <b>0.16</b> | Sgl   | Pi | 0.71         | 0.462        | 0.832        | 0.81        |
| iYMR276W     | 13        | 819944        | 12325       | YMR27         | <b>0.86</b> | Sgl   | Pi | 0.616        | 0.084        | 0.905        | 0.81        |
| iYIL011W     | 9         | 334623        | 10487       | YIL01C        | <b>0.33</b> | Sgl   | Pi | 0.434        | 0.525        | 0.961        | 0.81        |
| iYDL124W     | 4         | 241181        | 8177        | YDL123        | <b>0.9</b>  | Sgl   | Pi | 0.628        | 0.698        | 0.165        | 0.81        |
| iYGR117C     | 7         | 726476        | 9996        | YGR117        | <b>0.06</b> | Dbl   | Pi | 0.745        | 0.833        | 0.356        | 0.81        |
| iYHL019C     | 8         | 69546         | 10196       | YHL01         | <b>0.77</b> | Dbl   | Pi | 0.638        | 0.425        | 0.429        | 0.81        |
| iYMR315W     | 13        | 903836        | 12363       | YMR31         | <b>0.79</b> | Sgl   | Pi | 0.694        | 0.548        | 0.181        | 0.81        |
| iYOL073C     | 15        | 194802        | 12850       | YOL07         | <b>0.98</b> | Dbl   | Pi | 0.58         | 0.574        | 0.202        | 0.81        |
| iYNL028W     | 14        | 578999        | 12412       | YNL02         | <b>0.94</b> | Sgl   | Pi | 0.508        | 0.326        | <b>1E-05</b> | 0.81        |
| iYNL073W     | 14        | 490121        | 12453       | YNL07         | <b>0.53</b> | Sgl   | Pi | 0.511        | 0.683        | 0.519        | 0.81        |
| iYIL097W     | 9         | 181959        |             | 10565         | <b>0.13</b> | Non F |    | 0.684        | 0.604        | 0.576        | 0.81        |
| iYJL116C     | 10        | 194584        | 10800       | YJL116        | <b>0.45</b> | Dbl   | Pi | 0.78         | 0.757        | 0.47         | 0.81        |
| iYLL059C     | 12        | 22987         | 11460       | YLL059        | <b>0.8</b>  | Dbl   | Pi | 0.637        | 0.285        | 0.018        | 0.81        |
| iYFL054C     | 6         | 22772         | 9392        | YFL054        | <b>0.91</b> | Dbl   | Pi | 0.81         | 0.887        | 0.492        | 0.81        |
| iYLR460C-1   | 12        | 1061900       | 11896       | YLR46         | <b>0.37</b> | Dbl   | Pi | 0.79         | 0.34         | 0.975        | 0.81        |
| iYOR294W     | 15        | 868947        | 13229       | YOR29         | <b>0.38</b> | Sgl   | Pi | 0.663        | 0.784        | 0.628        | 0.81        |
| iYEL009C     | 5         | 139771        | 8841        | YEL009        | <b>0.15</b> | Dbl   | Pi | 0.972        | 0.945        | 0.357        | 0.81        |
| iYLR023C     | 12        | 187132        | 11492       | YLR02         | <b>0.29</b> | Sgl   | Pi | 0.005        | 0.106        | 0.284        | 0.81        |
| iYOL045W     | 15        | 246798        | 12823       | YOL04         | <b>0.94</b> | Sgl   | Pi | 0.655        | 0.294        | 0.264        | 0.81        |
| iYKRCdelta12 | <b>11</b> | <b>517415</b> |             | <b>11403</b>  | <b>0.24</b> | Non F |    | <b>0.819</b> | <b>0.636</b> | <b>0.785</b> | <b>0.81</b> |
| iYGR257C     | 7         | 1007325       | 10128       | YGR25         | <b>0.84</b> | Sgl   | Pi | 0.181        | 0.094        | 0.282        | 0.81        |
| iYCR028C-A   | 3         | 0             | 7988        | YCR028        | <b>0.63</b> | Sgl   | Pi | 0.82         | 0.89         | 0.654        | 0.81        |
| iYDL148C     | 4         | 190592        | 8203        | YDL148        | <b>0.81</b> | Dbl   | Pi | 0.602        | 0.583        | NaN          | 0.81        |
| iYDL148C     | 4         | 190592        | 8203        | YDL148        | <b>0.81</b> | Dbl   | Pi | 0.602        | 0.583        | NaN          | 0.81        |

|            |          |               |             |        |             |        |              |              |              |             |
|------------|----------|---------------|-------------|--------|-------------|--------|--------------|--------------|--------------|-------------|
| iYNL218W   | 14       | 240002        | 12584       | YNL21  | <b>0.58</b> | Sgl Pi | 0.38         | 0.352        | 0.701        | 0.81        |
| iYLR397C   | 12       | 914923        | 11836       | YLR39  | <b>0.52</b> | Sgl Pi | 0.677        | 0.599        | 2E-06        | 0.81        |
| iYJL222W   | 10       | 16109         |             | 10896  | <b>0.54</b> | Non F  | 0.67         | 0.998        | 0.055        | 0.81        |
| iYDR489W   | 4        | 1431889       |             | 8763   | <b>0.27</b> | Non F  | 0.358        | 0.639        | 0.338        | 0.81        |
| iYOR002W   | 15       | 331094        | 12955       | YOR00  | <b>0.45</b> | Sgl Pi | 0.717        | 0.78         | 0.312        | 0.81        |
| iYDR073W   | 4        | 592943        | 8380        | YDR074 | <b>0.55</b> | Sgl Pi | 0.769        | 0.934        | 0.759        | 0.81        |
| iYER144C   | 5        | 460209        | 9155        | YER144 | <b>0.72</b> | Sgl Pi | 0.638        | 0.049        | 0.31         | 0.81        |
| iYOR328W   | 15       | 936499        |             | 13262  | <b>0.19</b> | Non F  | 0.779        | NaN          | 0.337        | 0.81        |
| iYHR110W   | 8        | 332956        | 10348       | YHR11  | <b>0.84</b> | Sgl Pi | 0.019        | 0.625        | 0.54         | 0.81        |
| iYOR336W   | 15       | 953866        | 13268       | YOR336 | <b>0.61</b> | Sgl Pi | 0.734        | 0.844        | 2E-04        | 0.81        |
| iYOL165C   | 15       | 2072          | 12940       | YOL16  | <b>0.64</b> | Dbl Pi | 0.538        | 0.003        | 0.881        | 0.81        |
| iYPL155C   | 16       | 259322        | 13478       | YPL15  | <b>0.81</b> | Sgl Pi | 0.452        | <b>6E-04</b> | 0.391        | 0.81        |
| iYOL119C   | 15       | 96349         | 12893       | YOL11  | <b>0.33</b> | Sgl Pi | 0.827        | 0.677        | 0.642        | 0.81        |
| iLSR1      | <b>2</b> | <b>681816</b> | <b>7011</b> | YBR230 | <b>0.3</b>  | Sgl Pi | <b>0.029</b> | <b>0.731</b> | <b>0.347</b> | <b>0.81</b> |
| iYJR103W   | 10       | 622130        |             | 11000  | <b>0.37</b> | Non F  | 0.552        | 0.503        | 0.945        | 0.81        |
| iYDR416W   | 4        | 1301018       |             | 8698   | <b>0.15</b> | Non F  | 0.757        | 0.751        | 0.162        | 0.81        |
| iYGR040W   | 7        | 576501        | 9923        | YGR040 | <b>0.1</b>  | Sgl Pi | 0.879        | 4E-04        | 0.925        | 0.81        |
| iYBR052C   | 2        | 339313        | 7656        | YBR052 | <b>0.82</b> | Sgl Pi | 0.73         | 0.699        | 0.375        | 0.81        |
| iYBR052C   | 2        | 339313        | 7656        | YBR052 | <b>0.82</b> | Sgl Pi | 0.73         | 0.699        | 0.375        | 0.81        |
| iYKL197C   | 11       | 73869         | 11255       | YKL19  | <b>0.85</b> | Sgl Pi | 0.631        | 0.635        | 0.46         | 0.81        |
| iYBL025W   | 2        | 171878        | 7524        | YBL024 | <b>0.5</b>  | Sgl Pi | 0.066        | 0.054        | 0.827        | 0.81        |
| iYBL025W   | 2        | 171878        | 7524        | YBL024 | <b>0.5</b>  | Sgl Pi | 0.066        | 0.054        | 0.827        | 0.81        |
| iYIL157C   | 9        | 47553         | 10626       | YIL157 | <b>0.91</b> | Dbl Pi | 0.732        | 0.106        | 0.849        | 0.81        |
| iYOR342C   | 15       | 967625        | 13274       | YOR342 | <b>0.06</b> | Sgl Pi | 0.727        | 0.583        | 0.545        | 0.81        |
| iYKR049C   | 11       | 526864        | 11337       | YKR04  | <b>0.88</b> | Dbl Pi | 0.555        | 0.707        | 0.924        | 0.82        |
| iYKL108W   | 11       | 235428        | 11171       | YKL10  | <b>0.28</b> | Sgl Pi | 0.594        | 0.862        | 0.082        | 0.82        |
| iYJR126C   | 10       | 658395        | 11022       | YJR12  | <b>0.62</b> | Sgl Pi | 0.589        | 0.514        | 0.359        | 0.82        |
| iYJL083W   | 10       | 280356        | 10771       | YJL083 | <b>0.41</b> | Sgl Pi | 0.656        | 0.922        | 0.446        | 0.82        |
| iYBR231C   | 2        | 683044        | 7827        | YBR231 | <b>0.62</b> | Sgl Pi | 0.547        | 0.307        | 0.136        | 0.82        |
| iYNL072W   | 14       | 491237        | 12452       | YNL07  | <b>0.7</b>  | Sgl Pi | 0.087        | 0.471        | 0.493        | 0.82        |
| iYPR174C   | 16       | 888706        | 13765       | YPR17  | <b>0.82</b> | Dbl Pi | 0.628        | 0.574        | 0.273        | 0.82        |
| iYMR082C-1 | 13       | 433464        | 12131       | YMR08  | <b>0.34</b> | Dbl Pi | 0.115        | 0.019        | 0.745        | 0.82        |
| iYLR072W   | 12       | 280929        |             | 11542  | <b>0.05</b> | Non F  | 0.547        | 0.481        | 0.52         | 0.82        |
| iYHR109W   | 8        | 332054        | 10347       | YHR11  | <b>0.7</b>  | Sgl Pi | 0.537        | 0.466        | 0.462        | 0.82        |
| iYMR077C   | 13       | 422141        | 12125       | YMR07  | <b>0.87</b> | Sgl Pi | 0.454        | 0.273        | 0.564        | 0.82        |
| iYNL124W   | 14       | 394405        | 12499       | YNL12  | <b>0.36</b> | Sgl Pi | 0.346        | 0.856        | 0.458        | 0.82        |
| iYOL135C   | 15       | 70029         | 12908       | YOL13  | <b>0.72</b> | Sgl Pi | 0.009        | 0.553        | 0.669        | 0.82        |
| iYLR117C   | 12       | 384522        | 11584       | YLR11  | <b>0.9</b>  | Sgl Pi | 0.002        | 0.621        | 0.366        | 0.82        |
| iYMR303C   | 13       | 874360        | 12351       | YMR30  | <b>0.86</b> | Dbl Pi | 0.57         | 0.371        | 0.448        | 0.82        |
| iYIL054W   | 9        | 254846        | 10530       | YIL053 | <b>0.05</b> | Sgl Pi | 0.19         | 0.561        | 0.678        | 0.82        |
| iYIL054W   | 9        | 254846        | 10530       | YIL053 | <b>0.05</b> | Sgl Pi | 0.19         | 0.561        | 0.678        | 0.82        |
| iYGR192C   | 7        | 883799        | 10064       | YGR19  | <b>0.01</b> | Sgl Pi | 0.689        | 0.063        | 0.038        | 0.82        |
| iYOR329C   | 15       | 939326        | 13263       | YOR32  | <b>0.93</b> | Sgl Pi | 0.498        | 0.659        | 0.219        | 0.82        |
| iYNL196C   | 14       | 271205        | 12566       | YNL19  | <b>0.36</b> | Sgl Pi | 0.567        | 0.806        | 0.975        | 0.82        |
| iYAR068W   | 1        | 222883        |             | 7488   | <b>0.64</b> | Non F  | 0.749        | 0.724        | 0.486        | 0.82        |
| iYHR016C   | 8        | 138442        | 10250       | YHR01  | <b>0.82</b> | Dbl Pi | 0.743        | 0.686        | 0.631        | 0.82        |
| iYCL048W   | 3        | 43544         |             | 7931   | <b>0.16</b> | Non F  | 0.598        | 0.273        | 0.969        | 0.82        |
| iYHL013C   | 8        | 78397         | 10190       | YHL01  | <b>0.6</b>  | Dbl Pi | 0.58         | 0.295        | 0.04         | 0.82        |
| iYLR087C   | 12       | 315729        | 11556       | YLR08  | <b>0.97</b> | Dbl Pi | 0.479        | 0.425        | 0.288        | 0.82        |
| iYDR450W   | 4        | 1360801       |             | 8726   | <b>0.33</b> | Non F  | 0.72         | 0.834        | 0.748        | 0.82        |
| iYKL033W-A | 11       | 374311        | 11098       | YKL03  | <b>0.49</b> | Sgl Pi | 0.573        | 0.209        | 0.25         | 0.82        |

|             |    |         |       |        |             |       |    |              |              |       |      |
|-------------|----|---------|-------|--------|-------------|-------|----|--------------|--------------|-------|------|
| iYLR037C-0  | 12 | 223054  | 11508 | YLR03  | <b>0.62</b> | Sgl   | Pi | 0.775        | 0.839        | 0.029 | 0.82 |
| iYIL067C    | 9  | 237742  | 10540 | YIL067 | <b>0.97</b> | Sgl   | Pi | 0.525        | 0.448        | 0.852 | 0.82 |
| iYPL274W    | 16 | 24691   | 13593 | YPL27  | <b>0.31</b> | Sgl   | Pi | 0.828        | 0.375        | 0.529 | 0.82 |
| iYLL005C    | 12 | 140538  | 11410 | YLL005 | <b>0.65</b> | Dbl   | Pi | 0.857        | 0.193        | 0.541 | 0.82 |
| iYPL247C    | 16 | 84192   | 13566 | YPL24  | <b>0.9</b>  | Sgl   | Pi | 0.478        | 0.744        | 0.547 | 0.82 |
| iYBL057C    | 2  | 113402  | 7555  | YBL057 | <b>0.94</b> | Dbl   | Pi | 0.007        | <b>1E-04</b> | 0.887 | 0.82 |
| iYER018C    | 5  | 192614  | 8937  | YER018 | <b>0.77</b> | Dbl   | Pi | 0.822        | 0.329        | 0.668 | 0.82 |
| iYOR008C-A  | 15 | 343083  | 12962 | YOR008 | <b>0.33</b> | Dbl   | Pi | 0.622        | 0.043        | 0.565 | 0.82 |
| iYIR021W    | 9  | 398368  | 10675 | YIR021 | <b>0.94</b> | Sgl   | Pi | 0.37         | 0.371        | 0.045 | 0.82 |
| iYPL046C    | 16 | 466966  | 13377 | YPL04  | <b>0.8</b>  | Dbl   | Pi | 0.448        | 0.451        | 0.493 | 0.82 |
| iYPL098C    | 16 | 364707  | 13427 | YPL09  | <b>0.8</b>  | Dbl   | Pi | 0.693        | 0.885        | 0.714 | 0.82 |
| iYBR209W    | 2  | 642844  | 7810  | YBR210 | <b>0.31</b> | Sgl   | Pi | 0.722        | 0.471        | 0.786 | 0.82 |
| iYNR047W    | 14 | 711189  | 12746 | YNR04  | <b>0.75</b> | Sgl   | Pi | 0.498        | 0.618        | 0.431 | 0.82 |
| iYNL209W    | 14 | 253889  | 12575 | YNL20  | <b>0.44</b> | Sgl   | Pi | 0.534        | 0.55         | 0.678 | 0.82 |
| iYNR027W    | 14 | 675873  | 12725 | YNR02  | <b>0.34</b> | Sgl   | Pi | 0.725        | 0.443        | 0.556 | 0.82 |
| iYELWdelta2 | 5  | 62459   | 8915  | YEL050 | <b>0.53</b> | Dbl   | Pi | 0.694        | 0.123        | 0.606 | 0.82 |
| iYPL280W    | 16 | 12603   |       | 13599  | <b>0.57</b> | Non F |    | 0.762        | 0.123        | 0.502 | 0.82 |
| iYDR380W    | 4  | 1236120 | 8665  | YDR381 | <b>0.22</b> | Sgl   | Pi | 0.735        | 0.511        | 0.999 | 0.82 |
| iYIL123W    | 9  | 129579  | 10593 | YIL122 | <b>0.13</b> | Sgl   | Pi | 0.684        | 0.856        | 0.195 | 0.82 |
| iYDR274C    | 4  | 1011940 | 8564  | YDR274 | <b>0.23</b> | Dbl   | Pi | 0.236        | 0.616        | 0.997 | 0.82 |
| iYDR137W    | 4  | 730232  | 8437  | YDR137 | <b>0.93</b> | Sgl   | Pi | 0.029        | 0.07         | 0.821 | 0.82 |
| iYML015C    | 13 | 243029  | 11935 | YML01  | <b>0.97</b> | Dbl   | Pi | 0.511        | 0.587        | 0.383 | 0.82 |
| iYJR122W    | ## | #N/A    | #N/A  |        | <b>0.05</b> | #N/A  |    | 0.17         | 0.092        | 0.356 | 0.82 |
| iYGL012W    | 7  | 474276  |       | 9576   | <b>0.3</b>  | Non F |    | 0.475        | 0.608        | 0.913 | 0.82 |
| iYER114C    | 5  | 393716  | 9099  | YER114 | <b>0.69</b> | Sgl   | Pi | 0.772        | 0.598        | 0.142 | 0.82 |
| iYCR047C    | 3  | 211522  | 8004  | YCR047 | <b>0.96</b> | Sgl   | Pi | 0.797        | 0.376        | 0.695 | 0.82 |
| iYER151C    | 5  | 472430  | 9169  | YER151 | <b>0.86</b> | Sgl   | Pi | 0.531        | 0.639        | 0.551 | 0.82 |
| iYMR102C    | 13 | 472336  | 12149 | YMR10  | <b>0.22</b> | Sgl   | Pi | 0.762        | 0.906        | 0.009 | 0.82 |
| iYMR096W    | 13 | 459297  |       | 12143  | <b>0.2</b>  | Non F |    | 0.527        | 0.623        | 0.361 | 0.83 |
| iYAL061W    | 1  | 34687   | 7432  | YAL060 | <b>0.37</b> | Sgl   | Pi | NaN          | 0.025        | 0.601 | 0.83 |
| iYPR151C    | 16 | 831663  | 13742 | YPR15  | <b>0.57</b> | Sgl   | Pi | 0.795        | 0.037        | 0.598 | 0.83 |
| iYPL241C    | 16 | 96253   | 13560 | YPL24  | <b>0.67</b> | Sgl   | Pi | 0.588        | 0.589        | 0.339 | 0.83 |
| iYOR306C    | 15 | 891413  | 13241 | YOR30  | <b>0.23</b> | Sgl   | Pi | 0.856        | 0.532        | 0.385 | 0.83 |
| iYOR250C    | 15 | 802305  | 13189 | YOR25  | <b>0.84</b> | Sgl   | Pi | 0.694        | 0.659        | NaN   | 0.83 |
| iYDR490C    | 4  | 1434292 | 8764  | YDR49  | <b>0.78</b> | Sgl   | Pi | 0.602        | 0.168        | 0.886 | 0.83 |
| iYGR279C    | 7  | 1049959 | 10148 | YGR27  | <b>0.13</b> | Sgl   | Pi | 0.864        | 0.333        | 0.929 | 0.83 |
| iYMR231W    | 13 | 736641  | 12281 | YMR23  | <b>0.26</b> | Sgl   | Pi | 0.679        | 0.002        | 0.683 | 0.83 |
| iYDR233C    | 4  | 930343  | 8526  | YDR23  | <b>0.14</b> | Dbl   | Pi | <b>8E-04</b> | 0.103        | 0.382 | 0.83 |
| iYOR216C    | 15 | 748991  | 13159 | YOR21  | <b>0.83</b> | Dbl   | Pi | 0.588        | 0.018        | 0.386 | 0.83 |
| iYLR194C    | 12 | 541560  | 11663 | YLR19  | <b>0.73</b> | Sgl   | Pi | 0.538        | 0.676        | 0.835 | 0.83 |
| iYNL033W    | 14 | 573858  | 12416 | YNL03  | <b>0.71</b> | Sgl   | Pi | 0.754        | 0.333        | 0.23  | 0.83 |
| iYJL069C    | 10 | 312393  | 10758 | YJL06  | <b>0.84</b> | Sgl   | Pi | 0.002        | 0.575        | 0.137 | 0.83 |
| iYNR057C    | 14 | 734068  | 12756 | YNR05  | <b>0.86</b> | Dbl   | Pi | 0.722        | 0.689        | 0.146 | 0.83 |
| iYBR208C    | 2  | 642153  | 7809  | YBR20  | <b>0.69</b> | Dbl   | Pi | 0.819        | 0.121        | 0.513 | 0.83 |
| iYMR279C    | 13 | 826346  | 12328 | YMR27  | <b>0.18</b> | Sgl   | Pi | 0.859        | 0.844        | 0.731 | 0.83 |
| iYJR024C    | 10 | 470667  | 10932 | YJR02  | <b>0.57</b> | Sgl   | Pi | 0.351        | 0.63         | 0.586 | 0.83 |
| iYOL030W    | 15 | 269627  |       | 12810  | <b>0.16</b> | Non F |    | 0.565        | 0.67         | 0.606 | 0.83 |
| iYOR230W    | 15 | 772108  | 13171 | YOR23  | <b>0.93</b> | Sgl   | Pi | 0.007        | 0.288        | 0.083 | 0.83 |
| iYLR039C    | 12 | 228589  | 11511 | YLR03  | <b>0.47</b> | Sgl   | Pi | 0.624        | 0.648        | 0.597 | 0.83 |
| iYDL223C    | 4  | 60396   | 8272  | YDL223 | <b>0.55</b> | Sgl   | Pi | 0.508        | 0.47         | 0.73  | 0.83 |
| iYJR094C-0  | 10 | 605346  | 10989 | YJR09  | <b>0.33</b> | Dbl   | Pi | 0.868        | 0.001        | 0.068 | 0.83 |

|              |    |         |       |        |             |        |       |       |              |      |
|--------------|----|---------|-------|--------|-------------|--------|-------|-------|--------------|------|
| iYJR031C     | 10 | 490494  | 10935 | YJR03  | <b>0.89</b> | Dbl Pi | 0.64  | 0.016 | 0.293        | 0.83 |
| iYDR175C     | 4  | 814130  | 8474  | YDR175 | <b>0.67</b> | Dbl Pi | 0.061 | 0.543 | 0.07         | 0.83 |
| iYDR214W     | 4  | 893904  |       | 8509   | <b>0.14</b> | Non F  | 0.024 | 0.756 | 0.753        | 0.83 |
| iYPL156C     | 16 | 256752  | 13479 | YPL15  | <b>0.32</b> | Sgl Pi | 0.017 | 0.497 | 0.365        | 0.83 |
| iYNL138W     | 14 | 368304  |       | 12513  | <b>0.15</b> | Non F  | 0.52  | 0.75  | 0.635        | 0.83 |
| iYLR178C     | 12 | 513820  | 11647 | YLR17  | <b>0.54</b> | Sgl Pi | 0.291 | 0.623 | 0.853        | 0.83 |
| iYHR213W-0   | 8  | 539735  | 10448 | YHR21  | <b>0.4</b>  | Sgl Pi | 0.744 | 0.428 | 0.001        | 0.83 |
| iYGR252W     | 7  | 998196  |       | 10122  | <b>0.07</b> | Non F  | 0.473 | 0.707 | 0.576        | 0.83 |
| iYNL201C     | 14 | 263207  | 12570 | YNL20  | <b>0.59</b> | Sgl Pi | 0.649 | 0.682 | 0.835        | 0.83 |
| iYGL037C     | 7  | 427982  | 9601  | YGL037 | <b>0.5</b>  | Dbl Pi | 0.25  | 0.654 | 0.885        | 0.83 |
| iYJL219W     | 10 | 21185   | 10894 | YJL219 | <b>0.64</b> | Sgl Pi | 0.057 | 0.963 | 0.633        | 0.83 |
| iYHR046C     | 8  | 198269  | 10281 | YHR04  | <b>0.63</b> | Sgl Pi | 0.802 | 0.15  | 0.731        | 0.83 |
| iYGL252C     | 7  | 27479   | 9845  | YGL252 | <b>0.94</b> | Sgl Pi | 0.535 | 0.324 | 0.226        | 0.83 |
| iYGL056C     | 7  | 397620  | 9619  | YGL056 | <b>0.2</b>  | Dbl Pi | 0.116 | 0.305 | 0.987        | 0.83 |
| iYPR184W     | 16 | 906640  | 13773 | YPR18  | <b>0.98</b> | Sgl Pi | 0.659 | 0.529 | 0.409        | 0.83 |
| iYPL188W     | 16 | 192643  | 13510 | YPL18  | <b>0.26</b> | Sgl Pi | 0.84  | 0.127 | 0.598        | 0.83 |
| iYER142C     | 5  | 456035  | 9151  | YER142 | <b>0.76</b> | Dbl Pi | 0.424 | 0.769 | 0.354        | 0.83 |
| iYPL068C     | 16 | 425107  | 13399 | YPL06  | <b>0.47</b> | Sgl Pi | 0.211 | 0.728 | 0.62         | 0.83 |
| iYIR031C     | 9  | 414686  | 10685 | YIR031 | <b>0.86</b> | Sgl Pi | 0.696 | 0.456 | 0.735        | 0.83 |
| iYPL050C     | 16 | 461984  | 13381 | YPL05  | <b>0.24</b> | Sgl Pi | 0.853 | 0.401 | 0.016        | 0.83 |
| iYML054C     | 13 | 167308  | 11969 | YML05  | <b>0.42</b> | Sgl Pi | 0.688 | 0.654 | 0.54         | 0.83 |
| iYMR161W     | 13 | 578406  |       | 12209  | <b>0.14</b> | Non F  | 0.864 | 0.915 | 0.272        | 0.83 |
| iYMR019W     | 13 | 314989  | 12072 | YMR01  | <b>0.56</b> | Sgl Pi | 0.652 | 0.411 | 0.284        | 0.83 |
| iYLR382C     | 12 | 884751  | 11822 | YLR38  | <b>0.85</b> | Dbl Pi | 0.704 | 0.602 | <b>4E-04</b> | 0.83 |
| iYKR035W-A   | 11 | 508184  | 11325 | YKR03  | <b>0.14</b> | Sgl Pi | 0.509 | 0.627 | 0.435        | 0.83 |
| iYNL174W     | 14 | 308640  |       | 12546  | <b>0.76</b> | Non F  | 0.679 | 0.711 | 0.389        | 0.83 |
| iYOR141C     | 15 | 592579  | 13088 | YOR14  | <b>0.95</b> | Dbl Pi | 0.01  | 0.419 | 0.352        | 0.83 |
| iYOL082W     | 15 | 169973  | 12857 | YOL08  | <b>0.65</b> | Sgl Pi | 0.787 | 0.461 | 0.696        | 0.83 |
| iYKR075C-0   | 11 | 580371  | 11363 | YKR07  | <b>0.19</b> | Dbl Pi | 0.007 | 0.703 | 0.819        | 0.83 |
| iYGR035C     | 7  | 557415  | 9918  | YGR035 | <b>0.08</b> | Sgl Pi | 0.657 | 0.682 | 0.889        | 0.84 |
| iYAR044W-1   | 1  | 197485  |       | 7476   | <b>0.32</b> | Non F  | 0.848 | 0.817 | 0.487        | 0.84 |
| iYJR105W     | 10 | 624321  | 11002 | YJR10  | <b>0.73</b> | Sgl Pi | 0.514 | 0.329 | 0.32         | 0.84 |
| iYBR273C     | 2  | 749328  | 7863  | YBR273 | <b>0.98</b> | Dbl Pi | 0.489 | 0.181 | 0.687        | 0.84 |
| iYPL150W     | 16 | 270884  | 13473 | YPL14  | <b>0.77</b> | Sgl Pi | 0.697 | 0.578 | 0.332        | 0.84 |
| iYNR069C-0   | 14 | 762599  | 12768 | YNR06  | <b>0.47</b> | Dbl Pi | 0.825 | 0.619 | 0.462        | 0.84 |
| iYAR020C-0   | 1  | 177014  | 7466  | YAR02C | <b>0.32</b> | Sgl Pi | 0.667 | 0.058 | 0.613        | 0.84 |
| iYBR204C     | 2  | 633328  | 7806  | YBR204 | <b>0.96</b> | Dbl Pi | 0.645 | 0.467 | 0.102        | 0.84 |
| iYBR127C     | 2  | 492777  | 7730  | YBR127 | <b>0.79</b> | Sgl Pi | 0.66  | 0.267 | 0.316        | 0.84 |
| iYLR181C     | 12 | 517657  | 11650 | YLR18  | <b>0.96</b> | Dbl Pi | 0.675 | 0.603 | 0.949        | 0.84 |
| iYDL240W     | 4  | 25887   |       | 8290   | <b>0.16</b> | Non F  | 0.636 | 0.912 | 0.102        | 0.84 |
| iYML112W     | 13 | 45964   | 12023 | YML11  | <b>0.47</b> | Sgl Pi | 0.542 | 0.329 | 0.403        | 0.84 |
| iYJL080C     | 10 | 288911  | 10768 | YJL080 | <b>0.57</b> | Sgl Pi | 0.825 | 0.317 | 0.134        | 0.84 |
| iYDR276C     | 4  | 1013632 | 8566  | YDR276 | <b>0.19</b> | Sgl Pi | 0.54  | 0.39  | 0.48         | 0.84 |
| iYDR276C     | 4  | 1013632 | 8566  | YDR276 | <b>0.19</b> | Sgl Pi | 0.54  | 0.39  | 0.48         | 0.84 |
| iYKR019C     | 11 | 477688  | 11312 | YKR01  | <b>0.87</b> | Dbl Pi | 0.612 | 0.012 | 0.709        | 0.84 |
| iYKL097W-A-0 | 11 | 259198  | 11159 | YKL09  | <b>0.16</b> | Sgl Pi | 0.814 | 0.864 | 0.49         | 0.84 |
| iYMR262W     | 13 | 794674  | 12311 | YMR26  | <b>0.9</b>  | Sgl Pi | 0.643 | 0.161 | 0.631        | 0.84 |
| iYJL082W     | 10 | 283061  |       | 10770  | <b>0.08</b> | Non F  | 0.53  | 0.71  | 0.137        | 0.84 |
| iYNL053W     | 14 | 531401  | 12435 | YNL05  | <b>0.69</b> | Sgl Pi | 0.729 | 0.124 | 0.863        | 0.84 |
| iYKL192C     | 11 | 80535   | 11250 | YKL19  | <b>0.97</b> | Dbl Pi | 0.007 | 0.436 | 0.221        | 0.84 |
| iYDR448W     | 4  | 1357343 |       | 8724   | <b>0.16</b> | Non F  | 0.657 | 0.785 | 0.437        | 0.84 |

|              |    |        |       |        |             |       |     |       |       |       |      |
|--------------|----|--------|-------|--------|-------------|-------|-----|-------|-------|-------|------|
| iYBR082C-0   | 2  | 407127 | 7687  | YBR082 | <b>0.35</b> | Dbl   | Pi  | 0.855 | 0.602 | 0.861 | 0.84 |
| iYKR066C     | 11 | 566840 | 11354 | YKR066 | <b>0.96</b> | Dbl   | Pi  | 0.746 | 0.619 | 0.851 | 0.84 |
| iYDR105C     | 4  | 666748 | 8409  | YDR105 | <b>0.98</b> | Dbl   | Pi  | 0.501 | 0.387 | 0.599 | 0.84 |
| iYLR427W     | 12 | 990427 |       | 11866  | <b>0.52</b> | Non F |     | 0.375 | 0.712 | 0.544 | 0.84 |
| iYOR316C-0   | 15 | 907554 | 13250 | YOR316 | <b>0.53</b> | Dbl   | Pi  | 0.848 | 0.041 | 0.648 | 0.84 |
| iYOR334W     | 15 | 945989 |       | 13266  | <b>0.2</b>  | Non F |     | 0.691 | 0.457 | 0.124 | 0.84 |
| iYLR120C     | 12 | 388231 | 11587 | YLR120 | <b>0.61</b> | Sgl   | Pi  | 0.825 | 0.141 | 0.447 | 0.84 |
| iYJL161W     | 10 | 117788 |       | 10841  | <b>0.84</b> | Non F |     | 0.683 | 0.124 | 0.704 | 0.84 |
| iYOL070C     | 15 | 198737 | 12847 | YOL070 | <b>0.83</b> | Dbl   | Pi  | 0.508 | 0.654 | 0.171 | 0.84 |
| iYMR007W     | 13 | 280338 |       | 12057  | <b>0.29</b> | Non F |     | 0.574 | 0.628 | 0.144 | 0.84 |
| iYKR069W     | 11 | 573042 | 11357 | YKR069 | <b>0.39</b> | Sgl   | Pi  | 0.31  | 0.572 | 0.234 | 0.84 |
| iYNL020C     | 14 | 597520 | 12404 | YNL020 | <b>0.77</b> | Sgl   | Pi  | 0.639 | 0.58  | 0.399 | 0.84 |
| iYHR034C     | 8  | 177998 | 10268 | YHR034 | <b>0.91</b> | Dbl   | Pi  | 0.214 | 0.588 | 0.873 | 0.84 |
| iYIL154C     | 9  | 55013  | 10623 | YIL154 | <b>0.96</b> | Dbl   | Pi  | 0.809 | 0.643 | 0.556 | 0.84 |
| iYGR161C-1   | 7  | 810444 | 10038 | YGR161 | <b>0.49</b> | Dbl   | Pi  | 0.445 | 0.469 | 0.657 | 0.84 |
| iYFR054C-3   | 6  | 262799 | 9548  | YFR054 | <b>0.5</b>  | Sgl   | Pi  | 0.828 | 0.681 | 0.785 | 0.84 |
| iYMR324C     | 13 | 922439 | 12373 | YMR324 | <b>0.24</b> | Dbl   | Pi  | 0.774 | 0.468 | 0.89  | 0.84 |
| iYLR144C     | 12 | 432007 | 11609 | YLR144 | <b>0.75</b> | Dbl   | Pi  | 0.445 | 0.652 | 0.247 | 0.84 |
| iYPR114W     | 16 | 754244 | 13710 | YPR114 | <b>0.46</b> | Sgl   | Pi  | 0.804 | 0.07  | 0.507 | 0.84 |
| iYFR024C-A   | 6  | 203427 | 9476  | YFR024 | <b>0.74</b> | Sgl   | Pi  | 0.783 | 0.036 | 0.018 | 0.84 |
| iYIR034C     | 9  | 420728 | 10688 | YIR034 | <b>0.46</b> | Sgl   | Pi  | 0.706 | 0.572 | 0.405 | 0.84 |
| iYNL098C     | 14 | 440553 | 12477 | YNL098 | <b>0.24</b> | Sgl   | Pi  | 0.52  | 0.028 | 0.805 | 0.84 |
| iYLR319C     | 12 | 771669 | 11770 | YLR319 | <b>0.92</b> | Dbl   | Pi  | 0.505 | 0.444 | 0.244 | 0.84 |
| iYAL034C     | 1  | 82093  | 7407  | YAL034 | <b>0.77</b> | Dbl   | Pi  | 0.616 | 0.155 | 0.104 | 0.84 |
| iYLR183C     | 12 | 522005 | 11652 | YLR183 | <b>0.72</b> | Dbl   | Pi  | 0.589 | 0.645 | 0.503 | 0.85 |
| iYLR058C     | 12 | 259408 | 11529 | YLR058 | <b>0.21</b> | Sgl   | Pi  | 0.603 | 0.461 | NaN   | 0.85 |
| iYPL204W     | 16 | 165764 | 13525 | YPL204 | <b>0.79</b> | Sgl   | Pi  | 0.639 | 0.213 | 0.265 | 0.85 |
| iYIR040C     | 9  | 433724 | 10695 | YIR040 | <b>0.29</b> | Dbl   | Pi  | 0.793 | 0.74  | 0.868 | 0.85 |
| iYMR285C     | 13 | 841712 | 12333 | YMR285 | <b>0.98</b> | Dbl   | Pi  | 0.078 | 0.613 | 0.521 | 0.85 |
| iYOL158C     | 15 | 21312  | 12932 | YOL158 | <b>0.53</b> | Sgl   | Pi  | 0.884 | 0.778 | 0.472 | 0.85 |
| iYOR234C     | 15 | 779392 | 13175 | YOR234 | <b>0.01</b> | Dbl   | Pi  | 0.734 | 0.925 | 0.946 | 0.85 |
| iYGRCdelta20 | 7  | 713405 | 10169 | YGR100 | <b>0.89</b> | Dbl   | Pi  | 0.567 | 0.57  | 0.413 | 0.85 |
| iYLR304C     | 12 | 737572 | 11757 | YLR304 | <b>0.17</b> | Sgl   | Pi  | 0.871 | 0.824 | 0.998 | 0.85 |
| iYER046W     | 5  | 243642 |       | 8966   | <b>0.26</b> | Non F |     | 0.489 | 0.449 | 0.676 | 0.85 |
| iYKL162C-A-0 | 11 | 146079 | 11219 | YKL162 | <b>0.77</b> | Sgl   | Pi  | 0.661 | 0.307 | 0.13  | 0.85 |
| iYBL048W     | 2  | 127562 |       | 7548   | <b>0.4</b>  | Non F |     | 0.573 | 0.52  | 0.255 | 0.85 |
| iYER014W     | 5  | 184238 | 8933  | YER014 | <b>0.91</b> | Sgl   | Pi  | 0.706 | 0.513 | 0.022 | 0.85 |
| iYER056C-A   | 5  | 270181 | 8979  | YER056 | <b>0.1</b>  | Sgl   | Pi  | 0.7   | 0.601 | 0.894 | 0.85 |
| iYNL135C     | 14 | 372229 | 12510 | YNL135 | <b>0.72</b> | Sgl   | Pi  | 0.624 | 0.329 | 0.2   | 0.85 |
| iYKL194C     | 11 | 78640  | 11252 | YKL194 | <b>1</b>    | Sgl   | Pi  | 0.852 | 0.205 | 0.371 | 0.85 |
| iYIL142W     | 9  | 84893  | 10611 | YIL142 | <b>0.23</b> | Sgl   | Pi  | 0.619 | 0.664 | 0.731 | 0.85 |
| iYNL019C     | 14 | 599216 | 12403 | YNL019 | <b>0.24</b> | Sgl   | Pi  | 0.771 | 0.366 | 0.058 | 0.85 |
| iYNL335W     | 14 | 12138  |       | 12687  | <b>0.48</b> | Non F | NaN |       | 0.43  | 0.386 | 0.85 |
| iYNR042W     | 14 | 701667 | 12741 | YNR042 | <b>0.61</b> | Sgl   | Pi  | 0.642 | 0.686 | 0.351 | 0.85 |
| iYHR094C     | 8  | 292667 | 10332 | YHR094 | <b>0.28</b> | Dbl   | Pi  | 0.866 | 3E-04 | 0.335 | 0.85 |
| iYJR120W     | 10 | 647173 | 11016 | YJR120 | <b>0.23</b> | Sgl   | Pi  | 0.256 | 0.649 | 0.466 | 0.85 |
| iYER073W     | 5  | 305583 | 9015  | YER073 | <b>0.03</b> | Sgl   | Pi  | 0.77  | 0.792 | 0.498 | 0.85 |
| iYKR051W     | 11 | 531869 |       | 11339  | <b>0.12</b> | Non F |     | 0.568 | 0.298 | 0.758 | 0.85 |
| iYPR013C-1   | 16 | 586382 | 13624 | YPR013 | <b>0.32</b> | Sgl   | Pi  | 0.696 | 0.737 | 0.913 | 0.85 |
| iYDR092W     | 4  | 630591 | 8399  | YDR092 | <b>0.3</b>  | Sgl   | Pi  | 0.742 | 0.858 | 0.535 | 0.85 |
| iYKL185W     | 11 | 96290  | 11243 | YKL185 | <b>0.5</b>  | Sgl   | Pi  | 0.747 | 0.912 | 0.126 | 0.85 |



|              |    |         |       |        |             |     |    |              |       |       |      |
|--------------|----|---------|-------|--------|-------------|-----|----|--------------|-------|-------|------|
| iYCR060W     | 3  | 224718  | 8012  | YCR061 | <b>0.21</b> | Sgl | Pi | 0.767        | 0.366 | 0.877 | 0.85 |
| iYDR099W     | 4  | 654409  | 8404  | YDR100 | <b>0.35</b> | Sgl | Pi | 0.766        | 0.628 | 0.564 | 0.85 |
| iYLR130C     | 12 | 404052  | 11597 | YLR13  | <b>0.44</b> | Sgl | Pi | 0.57         | 0.362 | 0.875 | 0.85 |
| iYER108C     | 5  | 376991  | 9087  | YER107 | <b>0.11</b> | Sgl | Pi | 0.519        | 0.166 | 0.492 | 0.85 |
| iYGR021W     | 7  | 528499  |       | 9907   | <b>0.67</b> | Non | F  | 0.484        | 0.012 | 0.366 | 0.85 |
| iYPL097W     | 16 | 366416  | 13426 | YPL09  | <b>0.86</b> | Sgl | Pi | 0.579        | 0.317 | 0.031 | 0.85 |
| iYBR213W     | 2  | 651154  | 7814  | YBR214 | <b>0.92</b> | Sgl | Pi | 0.011        | 0.443 | 0.876 | 0.85 |
| iYOR292C     | 15 | 866570  | 13227 | YOR29  | <b>0.3</b>  | Dbl | Pi | 0.69         | 0.975 | 0.862 | 0.85 |
| iYHR004C     | 8  | 113095  | 10237 | YHR00  | <b>0.41</b> | Sgl | Pi | 0.807        | 0.633 | 0.476 | 0.85 |
| iYER162C     | 5  | 502911  | 9187  | YER162 | <b>0.8</b>  | Sgl | Pi | 0.554        | 0.459 | 0.501 | 0.85 |
| iYDR481C     | 4  | 1420246 | 8755  | YDR481 | <b>0.6</b>  | Sgl | Pi | 0.667        | 0.706 | 0.814 | 0.85 |
| iYLR312C     | 12 | 758834  | 11764 | YLR31  | <b>0.84</b> | Dbl | Pi | 0.806        | 0.054 | 0.996 | 0.85 |
| iYLR162W-0   | 12 | 489930  |       | 11631  | <b>0.28</b> | Non | F  | 0.928        | 0.258 | 0.697 | 0.85 |
| iYHR182W     | 8  | 470558  | 10416 | YHR18  | <b>0.53</b> | Sgl | Pi | 0.763        | 3E-04 | 0.972 | 0.85 |
| iYNL240C     | 14 | 199977  | 12603 | YNL24  | <b>0.93</b> | Dbl | Pi | 0.436        | 0.604 | 0.973 | 0.85 |
| iYDR245W     | 4  | 953966  | 8536  | YDR24  | <b>0.54</b> | Sgl | Pi | 0.735        | 0.568 | 0.807 | 0.85 |
| iYOR201C     | 15 | 721705  | 13146 | YOR20  | <b>0.3</b>  | Dbl | Pi | 0.304        | 0.129 | 0.222 | 0.85 |
| iYLR135W     | 12 | 415528  |       | 11602  | <b>0.68</b> | Non | F  | 0.695        | 0.669 | 0.099 | 0.85 |
| iYIR032C     | 9  | 415599  | 10686 | YIR03  | <b>0.99</b> | Dbl | Pi | 0.115        | 0.117 | 0.546 | 0.85 |
| iYOR343C     | 15 | 968470  | 13275 | YOR34  | <b>0.53</b> | Sgl | Pi | 0.39         | 0.47  | 0.998 | 0.85 |
| iYDR110W     | 4  | 677799  |       | 8414   | <b>0.32</b> | Non | F  | 0.751        | 0.967 | 0.236 | 0.85 |
| iYPL167C     | 16 | 237110  | 13489 | YPL16  | <b>0.9</b>  | Dbl | Pi | 0.451        | 0.622 | 0.688 | 0.85 |
| iYER093C     | 5  | 347612  | 9057  | YER09  | <b>0.97</b> | Sgl | Pi | 0.687        | 0.788 | 0.385 | 0.85 |
| iYER019C-A   | 5  | 194531  | 8938  | YER01  | <b>0.76</b> | Dbl | Pi | 0.749        | 0.126 | 0.535 | 0.85 |
| iYOR112W     | 15 | 533778  | 13062 | YOR11  | <b>0.76</b> | Sgl | Pi | 0.475        | 0.542 | 0.545 | 0.85 |
| iYGR282C     | 7  | 1058723 | 10151 | YGR28  | <b>0.18</b> | Sgl | Pi | 0.002        | 0.868 | 0.438 | 0.85 |
| iYAL023C     | 1  | 108550  | 7396  | YAL023 | <b>0.84</b> | Sgl | Pi | <b>4E-04</b> | 0.661 | 0.09  | 0.85 |
| iCEN16       | 16 | 556074  | 7001  | YPR001 | <b>0.93</b> | Sgl | Pi | 0.543        | 0.84  | 0.637 | 0.85 |
| iYIR018W-1   | 9  | 386747  |       | 10669  | <b>0.34</b> | Non | F  | 0.81         | 0.005 | 0.812 | 0.85 |
| iYOR267C     | 15 | 824863  | 13205 | YOR26  | <b>0.45</b> | Sgl | Pi | 0.548        | 0.908 | 0.617 | 0.86 |
| iYAR033W     | 1  | 188806  | 7472  | YAR03  | <b>0.93</b> | Sgl | Pi | 0.683        | 0.693 | 0.524 | 0.86 |
| iYPR154W     | 16 | 835219  |       | 13745  | <b>0.26</b> | Non | F  | 0.796        | 0.531 | 0.189 | 0.86 |
| iYPL256C     | 16 | 66609   | 13575 | YPL25  | <b>0.52</b> | Dbl | Pi | 0.671        | 0.621 | 0.659 | 0.86 |
| iYNL305C     | 14 | 59777   | 12661 | YNL30  | <b>0.92</b> | Dbl | Pi | 0.48         | 0.07  | 0.836 | 0.86 |
| iYDR034C     | 4  | 512097  | 8339  | YDR034 | <b>0.63</b> | Sgl | Pi | 0.021        | 0.567 | 0.349 | 0.86 |
| iYLR071C     | 12 | 278628  | 11541 | YLR07  | <b>1</b>    | Dbl | Pi | 0.492        | 0.626 | 0.711 | 0.86 |
| iYCR098C-0   | 3  | 298587  | 8045  | YCR09  | <b>0.91</b> | Sgl | Pi | 0.534        | 0.703 | 0.818 | 0.86 |
| iYJL103C     | 10 | 230605  | 10788 | YJL10  | <b>0.9</b>  | Dbl | Pi | 0.73         | 0.01  | 0.008 | 0.86 |
| iYNL173C     | 14 | 310050  | 12545 | YNL17  | <b>0.74</b> | Dbl | Pi | 0.771        | 0.035 | 0.98  | 0.86 |
| iYLR037C-1   | 12 | 223988  | 11509 | YLR03  | <b>0.67</b> | Sgl | Pi | 0.719        | 0.478 | 0.62  | 0.86 |
| iYER072W     | 5  | 303198  | 9013  | YER07  | <b>0.04</b> | Sgl | Pi | 0.813        | 0.197 | 0.593 | 0.86 |
| iYDR177W     | 4  | 817522  | 8476  | YDR17  | <b>0.87</b> | Sgl | Pi | 0.694        | 0.116 | 0.501 | 0.86 |
| iYJL074C     | 10 | 302534  | 10763 | YJL07  | <b>0.95</b> | Dbl | Pi | 0.41         | 0.622 | 0.485 | 0.86 |
| iYJR064W     | 10 | 557320  |       | 10965  | <b>0.12</b> | Non | F  | 0.701        | 0.552 | 0.838 | 0.86 |
| iYORWdelta17 | 15 | 665153  |       | 13331  | <b>0.79</b> | Non | F  | 0.863        | 0.948 | 0.163 | 0.86 |
| iYBR296C-1   | 2  | 799491  | 7887  | YBR29  | <b>0.73</b> | Dbl | Pi | 0.697        | 0.792 | 0.728 | 0.86 |
| iti(AAU)G    | 7  | 739202  | 7190  | YGR12  | <b>0.37</b> | Dbl | Pi | 0.047        | 0.25  | 0.869 | 0.86 |
| iYDR470C     | 4  | 1401190 | 8744  | YDR47  | <b>0.34</b> | Dbl | Pi | 0.853        | 0.509 | 0.962 | 0.86 |
| iYLR414C     | 12 | 954135  | 11854 | YLR41  | <b>0.09</b> | Sgl | Pi | 0.725        | 0.747 | 0.29  | 0.86 |
| iYGL163C-0   | 7  | 196393  | 9719  | YGL163 | <b>0.67</b> | Dbl | Pi | 0.551        | 0.236 | 0.849 | 0.86 |
| iYPL251W     | 16 | 73915   |       | 13571  | <b>0.33</b> | Non | F  | 0.689        | 0.804 | 0.453 | 0.86 |

|                 |           |               |              |              |             |               |              |              |              |             |
|-----------------|-----------|---------------|--------------|--------------|-------------|---------------|--------------|--------------|--------------|-------------|
| iYGR121C        | 7         | 732932        | 10000        | YGR12        | <b>0.54</b> | Dbl Pi        | 0.344        | 0.365        | 0.097        | 0.86        |
| iYMR318C        | 13        | 912145        | 12366        | YMR3         | <b>0.43</b> | Sgl Pi        | 0.771        | 0.648        | 0.058        | 0.86        |
| iYDL123W        | 4         | 241841        | 8176         | YDL122       | <b>0.51</b> | Sgl Pi        | <b>3E-04</b> | 0.471        | 0.131        | 0.86        |
| iYDR250C        | 4         | 960339        | 8541         | YDR250       | <b>0.47</b> | Dbl Pi        | 0.624        | 0.556        | 0.641        | 0.86        |
| iYOR288C        | 15        | 853082        | 13223        | YOR28        | <b>0.91</b> | Dbl Pi        | 0.656        | 0.714        | 0.513        | 0.86        |
| iYOL111C        | 15        | 108924        | 12885        | YOL11        | <b>0.53</b> | Dbl Pi        | 0.52         | 0.626        | 0.6          | 0.86        |
| iYIL077C        | 9         | 215948        | 10550        | YIL077       | <b>0.79</b> | Dbl Pi        | 0.179        | 2E-05        | 0.008        | 0.86        |
| iYLR179C        | 12        | 514746        | 11648        | YLR17        | <b>0.18</b> | Dbl Pi        | 0.001        | 0.933        | 0.905        | 0.86        |
| iYDL170W        | 4         | 157898        |              | 8219         | <b>0.18</b> | Non F         | 0.44         | 0.684        | 0.228        | 0.86        |
| iYOR213C        | 15        | 745267        | 13156        | YOR2         | <b>0.88</b> | Sgl Pi        | 0.007        | 0.636        | 0.601        | 0.86        |
| iYFR014C        | 6         | 173871        | 9456         | YFR014       | <b>0.74</b> | Sgl Pi        | 0.591        | 0.865        | 0.013        | 0.86        |
| iYDR006C        | 4         | 461250        | 8311         | YDR006       | <b>0.64</b> | Dbl Pi        | 0.821        | 0.213        | 0.544        | 0.86        |
| iYIR020W-B-1    | 9         | 396229        | 10674        | YIR02        | <b>0.8</b>  | Sgl Pi        | 0.712        | 0.645        | 0.884        | 0.86        |
| iYNL105W        | 14        | 424582        |              | 12484        | <b>0.8</b>  | Non F         | 0.038        | 0.318        | 0.835        | 0.86        |
| iYLL041C        | 12        | 53951         | 11444        | YLL04        | <b>0.63</b> | Sgl Pi        | 0.4          | 0.71         | 0.883        | 0.86        |
| iYER166W        | 5         | 517457        | 9197         | YER167       | <b>0.34</b> | Sgl Pi        | 0.699        | 0.475        | 0.307        | 0.86        |
| iYCL011C        | 3         | 103354        | 7907         | YCL011       | <b>0.93</b> | Sgl Pi        | <b>2E-04</b> | 0.63         | 0.943        | 0.86        |
| iYGR213C        | 7         | 919452        | 10085        | YGR2         | <b>0.25</b> | Dbl Pi        | 0.76         | 0.093        | 0.952        | 0.86        |
| iYJL117W        | 10        | 193185        |              | 10801        | <b>0.6</b>  | Non F         | 0.864        | 0.773        | 0.375        | 0.86        |
| iYBR005W        | 2         | 246507        | 7611         | YBR006       | <b>0.66</b> | Sgl Pi        | NaN          | 0.825        | 0.821        | 0.86        |
| iYOR327C        | 15        | 931074        | 13261        | YOR32        | <b>0.48</b> | Dbl Pi        | 0.367        | 0.808        | 0.059        | 0.86        |
| iYHL026C        | 8         | 54010         | 10203        | YHL02        | <b>0.44</b> | Dbl Pi        | 0.163        | 0.162        | 0.491        | 0.86        |
| iYCR025C        | 3         | 163835        | 7984         | YCR025       | <b>0.42</b> | Sgl Pi        | 0.023        | 0.008        | 0.983        | 0.86        |
| iYKRCdelta11    | 11        | 513497        | 11402        | YKR03        | <b>0.84</b> | Dbl Pi        | 0.692        | 0.634        | 0.615        | 0.86        |
| iYML051W        | 13        | 172896        | 11966        | YML05        | <b>0.66</b> | Sgl Pi        | 0.587        | 0.084        | 0.985        | 0.86        |
| iYHR056C        | 8         | 217669        | 10293        | YHR05        | <b>0.88</b> | Sgl Pi        | 0.034        | 0.222        | 0.191        | 0.86        |
| iYLR107W        | 12        | 365316        |              | 11574        | <b>0.41</b> | Non F         | 0.933        | 0.918        | 0.262        | 0.86        |
| iYHL028W        | 8         | 50563         | 10205        | YHL02        | <b>0.52</b> | Sgl Pi        | <b>6E-04</b> | 0.724        | 0.11         | 0.86        |
| iYNL037C        | 14        | 558983        | 12420        | YNL03        | <b>0.29</b> | Dbl Pi        | <b>2E-04</b> | 0.575        | 0.873        | 0.86        |
| iYIR011C        | 9         | 378235        | 10661        | YIR01        | <b>0.96</b> | Dbl Pi        | 0.571        | 0.421        | 0.384        | 0.86        |
| iYHL021C        | 8         | 65842         | 10198        | YHL02        | <b>0.32</b> | Sgl Pi        | 0.768        | 0.477        | 0.794        | 0.86        |
| iYBR053C-1      | 2         | 341886        | 7658         | YBR053       | <b>0.5</b>  | Dbl Pi        | 0.636        | 0.566        | 0.455        | 0.86        |
| iYNL322C        | 14        | 34223         | 12675        | YNL32        | <b>0.9</b>  | Dbl Pi        | <b>3E-04</b> | 0.552        | 0.857        | 0.87        |
| iYAL039C-1      | 1         | 70657         | 7413         | YAL039       | <b>0.01</b> | Dbl Pi        | NaN          | 0.242        | 0.526        | 0.87        |
| iYKL224C        | 11        | 2184          | 11286        | YKL22        | <b>0.27</b> | Dbl Pi        | 0.724        | 0.503        | 0.835        | 0.87        |
| <b>iYPL112C</b> | <b>16</b> | <b>338606</b> | <b>13438</b> | <b>YPL11</b> | <b>0.61</b> | <b>Dbl Pi</b> | <b>0.49</b>  | <b>0.357</b> | <b>0.575</b> | <b>0.87</b> |
| iYPL016W        | 16        | 524943        |              | 13351        | <b>0.22</b> | Non F         | 0.723        | 0.325        | 0.098        | 0.87        |
| iYGL261C        | 7         | 6656          | 9871         | YGL261       | <b>0.32</b> | Dbl Pi        | 0.792        | 0.878        | 0.771        | 0.87        |
| iYKL207W        | 11        | 48876         |              | 11263        | <b>0.2</b>  | Non F         | 0.482        | 0.443        | 0.713        | 0.87        |
| iYNL195C        | 14        | 272297        | 12565        | YNL19        | <b>0.58</b> | Sgl Pi        | 0.62         | 0.417        | 0.212        | 0.87        |
| iYER035W        | 5         | 223060        |              | 8954         | <b>0.24</b> | Non F         | 0.779        | 0.477        | 0.174        | 0.87        |
| iYBR193C        | 2         | 609715        | 7794         | YBR193       | <b>0.44</b> | Dbl Pi        | 0.56         | 0.796        | 0.003        | 0.87        |
| iYGL256W-1      | 7         | 17475         | 9855         | YGL255       | <b>0.67</b> | Sgl Pi        | 0.384        | 6E-04        | 0.295        | 0.87        |
| iYER116C        | 5         | 396159        | 9103         | YER116       | <b>0.49</b> | Dbl Pi        | 0.778        | 0.459        | 0.346        | 0.87        |
| iYIL101C        | 9         | 177227        | 10569        | YIL101       | <b>0.77</b> | Dbl Pi        | 0.432        | 0.441        | 0.583        | 0.87        |
| iYDL110C        | 4         | 264948        | 8164         | YDL110       | <b>0.55</b> | Sgl Pi        | 0.651        | 0.408        | 0.098        | 0.87        |
| iYNL269W        | 14        | 138108        | 12629        | YNL26        | <b>0.28</b> | Sgl Pi        | 0.039        | 0.24         | 0.629        | 0.87        |
| iYHR116W        | 8         | 342124        | 10354        | YHR11        | <b>0.83</b> | Sgl Pi        | 0.219        | <b>3E-04</b> | 0.524        | 0.87        |
| iYKR053C        | 11        | 534912        | 11341        | YKR05        | <b>0.36</b> | Sgl Pi        | 0.802        | 0.814        | 0.848        | 0.87        |
| iYDR169C-0      | 4         | 793867        | 8465         | YDR169       | <b>0.8</b>  | Sgl Pi        | 0.11         | 0.218        | 0.701        | 0.87        |
| iYBR288C        | 2         | 779426        | 7877         | YBR288       | <b>0.92</b> | Dbl Pi        | 0.281        | 0.012        | 0.702        | 0.87        |

|              |    |               |        |             |        |              |              |              |             |
|--------------|----|---------------|--------|-------------|--------|--------------|--------------|--------------|-------------|
| iYDR053W     | 4  | 560651        | 8360   | <b>0.5</b>  | Non F  | 0.837        | 0.567        | 0.64         | 0.87        |
| iYNL332W     | 14 | 15879         | 12684  | <b>0.58</b> | Non F  | 0.636        | 0.375        | 0.038        | 0.87        |
| iYPR083W     | 16 | 706613 13685  | YPR08  | <b>0.87</b> | Sgl Pi | 0.526        | 0.182        | 0.373        | 0.87        |
| iYER163C-0   | 5  | 503782 9189   | YER163 | <b>0.43</b> | Dbl Pi | 0.693        | 0.351        | 0.008        | 0.87        |
| iYOR358W     | 15 | 1010885 13290 | YOR35  | <b>0.69</b> | Sgl Pi | 0.702        | 0.698        | 0.683        | 0.87        |
| iYGR064W     | 7  | 617964        | 9946   | <b>0.01</b> | Non F  | 0.636        | 0.553        | 0.518        | 0.87        |
| iYPL227C     | 16 | 121173 13547  | YPL22  | <b>0.89</b> | Dbl Pi | 0.741        | <b>9E-04</b> | 0.447        | 0.87        |
| iYML125C     | 13 | 21698 12036   | YML12  | <b>0.66</b> | Sgl Pi | 0.656        | 0.12         | 0.639        | 0.87        |
| iYOR084W     | 15 | 481779 13037  | YOR08  | <b>0.98</b> | Sgl Pi | 0.078        | 0.585        | 0.825        | 0.87        |
| iYOR373W     | 15 | 1039377 13303 | YOR37  | <b>0.77</b> | Sgl Pi | 0.525        | 0.342        | 0.974        | 0.87        |
| iYHL025W     | 8  | 55838 10202   | YHL02  | <b>0.41</b> | Sgl Pi | 0.022        | 0.001        | 0.973        | 0.87        |
| iYER003C     | 5  | 159117 8920   | YER003 | <b>0.93</b> | Dbl Pi | 0.484        | 0.144        | 0.998        | 0.87        |
| iYOR219C     | 15 | 754994 13161  | YOR21  | <b>0.76</b> | Dbl Pi | 0.365        | 0.687        | 0.46         | 0.87        |
| iYNL108C     | 14 | 419831 12486  | YNL10  | <b>0.94</b> | Dbl Pi | 0.591        | 0.493        | 0.712        | 0.87        |
| iYOR226C     | 15 | 762087 13167  | YOR22  | <b>0.55</b> | Dbl Pi | 0.671        | 0.319        | 0.974        | 0.87        |
| iYPL213W     | 16 | 151314        | 13533  | <b>0.23</b> | Non F  | 0.609        | 0.674        | 0.518        | 0.87        |
| iYGR096W     | 7  | 677546 9977   | YGR097 | <b>0.14</b> | Sgl Pi | 0.805        | 0.104        | 0.999        | 0.87        |
| iYOR032C     | 15 | 391070 12986  | YOR03  | <b>0.29</b> | Sgl Pi | 0.623        | 0.622        | 0.822        | 0.87        |
| iYJR151C-0   | 10 | 715428 11046  | YJR15  | <b>0.55</b> | Dbl Pi | 0.068        | 0.041        | 0.069        | 0.87        |
| iYMR272C     | 13 | 810779 12321  | YMR27  | <b>0.34</b> | Sgl Pi | 0.801        | 0.111        | 0.379        | 0.87        |
| iYDL037C-1   | 4  | 386574 8097   | YDL037 | <b>0.14</b> | Sgl Pi | 0.84         | 0.01         | 0.906        | 0.87        |
| iYCR077C     | 3  | 252628 8026   | YCR077 | <b>0.99</b> | Dbl Pi | 0.6          | 0.002        | 0.781        | 0.88        |
| iYIR036C     | 9  | 422857 10690  | YIR036 | <b>0.99</b> | Dbl Pi | 0.597        | 0.305        | 0.73         | 0.88        |
| iYPL176C     | 16 | 218375 13498  | YPL17  | <b>0.98</b> | Dbl Pi | 0.645        | 0.875        | 0.878        | 0.88        |
| iYDR249C     | 4  | 959779 8540   | YDR249 | <b>0.69</b> | Sgl Pi | 0.787        | 0.258        | 0.531        | 0.88        |
| iYNR002C     | 14 | 633851 12701  | YNR00  | <b>0.44</b> | Sgl Pi | 0.537        | 0.204        | 0.997        | 0.88        |
| itA(AGC)JD   | 4  | 410456 7100   | YDL024 | <b>0.19</b> | Sgl Pi | <b>0.861</b> | <b>0.574</b> | <b>0.461</b> | <b>0.88</b> |
| iYPL266W     | 16 | 40063 13584   | YPL26  | <b>0.07</b> | Sgl Pi | 0.813        | 0.776        | 0.978        | 0.88        |
| iYLR385C     | 12 | 893394 11825  | YLR38  | <b>0.99</b> | Dbl Pi | 0.433        | 0.156        | 0.441        | 0.88        |
| iYAL020C     | 1  | 114606 7393   | YAL020 | <b>0.98</b> | Dbl Pi | 0.651        | 0.191        | 0.884        | 0.88        |
| iYFR026C     | 6  | 206237 9480   | YFR026 | <b>0.45</b> | Dbl Pi | 0.643        | 0.138        | <b>3E-04</b> | 0.88        |
| iYDR311W     | 4  | 1086991 8598  | YDR312 | <b>0.92</b> | Sgl Pi | <b>3E-04</b> | 0.613        | 0.036        | 0.88        |
| iYML041C     | 13 | 195759 11958  | YML04  | <b>0.85</b> | Dbl Pi | 0.589        | 0.792        | 0.998        | 0.88        |
| iYBR132C     | 2  | 501387 7735   | YBR132 | <b>0.15</b> | Sgl Pi | 0.592        | 0.706        | 0.633        | 0.88        |
| iYOL108C     | 15 | 111900 12882  | YOL10  | <b>0.69</b> | Dbl Pi | 0.626        | 0.472        | 0.11         | 0.88        |
| iYDL076C     | 4  | 321537 8133   | YDL076 | <b>0.16</b> | Dbl Pi | 0.628        | 0.98         | 0.985        | 0.88        |
| iYHR054C     | 8  | 214238 10291  | YHR05  | <b>0.48</b> | Sgl Pi | 0.848        | 0.998        | 0.006        | 0.88        |
| iYIL136W     | 9  | 94804         | 10606  | <b>0.08</b> | Non F  | 0.647        | 0.84         | 0.856        | 0.88        |
| iYML128C     | 13 | 16663 12039   | YML12  | <b>0.91</b> | Dbl Pi | 0.508        | 0.015        | 0.292        | 0.88        |
| iYOL136C     | 15 | 68744 12909   | YOL13  | <b>0.17</b> | Sgl Pi | 0.81         | 0.973        | 0.247        | 0.88        |
| iYML021C     | 13 | 230818 11941  | YML02  | <b>0.79</b> | Dbl Pi | 0.584        | 0.585        | 0.521        | 0.88        |
| iYBR082C-1   | 2  | 408140 7688   | YBR082 | <b>0.03</b> | Dbl Pi | 0.871        | 0.058        | 0.984        | 0.88        |
| iYCR051W     | 3  | 214723 8006   | YCR052 | <b>0.89</b> | Sgl Pi | 0.508        | 0.515        | 0.526        | 0.88        |
| iYBR221C     | 2  | 666209 7821   | YBR221 | <b>0.63</b> | Sgl Pi | 0.657        | 0.101        | 0.966        | 0.88        |
| iYAL064C-A-5 | 1  | 20231 7442    | YAL064 | <b>0.46</b> | Dbl Pi | 0.907        | 0.223        | 0.619        | 0.88        |
| iYHR195W     | 8  | 491722 10427  | YHR19  | <b>0.95</b> | Sgl Pi | 0.027        | 0.392        | 0.089        | 0.88        |
| iYKL095W     | 11 | 262754 11156  | YKL09  | <b>0.61</b> | Sgl Pi | 0.003        | 0.312        | 0.778        | 0.88        |
| iYLR176C     | 12 | 510254 11645  | YLR17  | <b>0.96</b> | Dbl Pi | 0.545        | 0.22         | 0.666        | 0.88        |
| iYJR025C     | 10 | 471368 10933  | YJR02  | <b>0.44</b> | Dbl Pi | 0.36         | 0.603        | 0.581        | 0.88        |
| iYDR346C     | 4  | 1168664 8633  | YDR346 | <b>0.81</b> | Dbl Pi | 0.126        | 0.655        | 0.436        | 0.88        |
| iYGR244C     | 7  | 979313 10112  | YGR24  | <b>0.53</b> | Sgl Pi | 0.737        | 0.463        | 0.261        | 0.88        |

|            |    |        |       |        |             |       |              |              |              |              |             |
|------------|----|--------|-------|--------|-------------|-------|--------------|--------------|--------------|--------------|-------------|
| iYIL133C   | 9  | 99419  | 10603 | YIL133 | <b>0.03</b> | Sgl   | Pi           | 0.715        | 0.793        | 0.723        | 0.88        |
| iYNL302C   | 14 | 62931  | 12659 | YNL30  | <b>0.03</b> | Sgl   | Pi           | 0.795        | 0.856        | 0.644        | 0.88        |
| iYLR399C   | 12 | 921593 | 11838 | YLR39  | <b>0.1</b>  | Dbl   | Pi           | <b>8E-04</b> | 1E-05        | 0.999        | 0.88        |
| iYNL290W   | 14 | 87264  | 12648 | YNL28  | <b>0.52</b> | Sgl   | Pi           | 0.861        | 0.047        | 0.539        | 0.88        |
| iYLR153C   | 12 | 447586 | 11617 | YLR15  | <b>0.08</b> | Sgl   | Pi           | 0.69         | 0.788        | 0.208        | 0.88        |
| iYNR071C   | 14 | 771462 | 12771 | YNR07  | <b>0.19</b> | Dbl   | Pi           | 0.832        | 0.925        | 0.431        | 0.88        |
| iYML047C   | 13 | 181080 | 11962 | YML04  | <b>0.7</b>  | Dbl   | Pi           | 0.486        | 0.17         | 0.482        | 0.88        |
| iYBR186W   | 2  | 602117 | 7788  | YBR187 | <b>0.34</b> | Sgl   | Pi           | 0.72         | 0.083        | 0.819        | 0.88        |
| iYDR054C   | 4  | 562326 | 8361  | YDR054 | <b>0.54</b> | Dbl   | Pi           | 0.825        | 0.506        | 0.472        | 0.88        |
| iYOL128C   | 15 | 79478  | 12902 | YOL12  | <b>0.4</b>  | Dbl   | Pi           | 0.689        | 0.935        | 0.11         | 0.88        |
| iYNL274C   | 14 | 122170 | 12633 | YNL27  | <b>0.95</b> | Dbl   | Pi           | 0.655        | 0.567        | 0.157        | 0.88        |
| itL(CAA)A  | 1  | 181238 | 7223  | YAR023 | <b>0.71</b> | Dbl   | Pi           | <b>0.63</b>  | <b>0.851</b> | <b>0.629</b> | <b>0.88</b> |
| iYGL210W   | 7  | 94454  | 9773  | YGL209 | <b>0.22</b> | Sgl   | Pi           | 0.718        | 0.271        | 0.776        | 0.88        |
| iYAL036C   | 1  | 76156  | 7409  | YAL036 | <b>0.98</b> | Dbl   | Pi           | 0.378        | 0.622        | 0.926        | 0.88        |
| iYLR049C   | 12 | 245166 | 11520 | YLR04  | <b>0.78</b> | Sgl   | Pi           | 0.798        | 0.587        | 0.141        | 0.88        |
| iYLL060C   | 12 | 21828  | 11461 | YLL060 | <b>0.4</b>  | Sgl   | Pi           | 0.591        | 0.556        | 0.638        | 0.88        |
| itG(GCC)D1 | 4  | 83634  | 7160  | YDL211 | <b>0.8</b>  | Dbl   | Pi           | <b>0.751</b> | <b>0.763</b> | 1            | <b>0.88</b> |
| itS(GCU)L  | 12 | 784439 | 7314  | YLR327 | <b>0.13</b> | Dbl   | Pi           | <b>0.781</b> | <b>0.917</b> | <b>0.575</b> | <b>0.88</b> |
| iYMR145C   | 13 | 556496 | 12193 | YMR14  | <b>0.03</b> | Sgl   | Pi           | 0.224        | 0.469        | 0.946        | 0.88        |
| iYLR084C   | 12 | 300263 | 11553 | YLR08  | <b>0.32</b> | Sgl   | Pi           | 0.777        | 0.622        | 0.716        | 0.89        |
| iYDL243C   | 4  | 18551  | 8294  | YDL243 | <b>0.5</b>  | Dbl   | Pi           | 0.614        | 0.119        | 0.726        | 0.89        |
| iYHR158C   | 8  | 417173 | 10393 | YHR15  | <b>0.95</b> | Dbl   | Pi           | 0.137        | 0.077        | 0.028        | 0.89        |
| iYDL055C-0 | 4  | 356771 | 8114  | YDL055 | <b>0.37</b> | Sgl   | Pi           | 0.68         | 0.309        | 0.88         | 0.89        |
| iYDR134C   | 4  | 721478 | 8435  | YDR134 | <b>0.06</b> | Sgl   | Pi           | 0.922        | 0.096        | 0.863        | 0.89        |
| iYFL053W-1 | 6  | 26724  | 9390  | YFL052 | <b>0.85</b> | Sgl   | Pi           | 0.704        | 0.097        | 0.022        | 0.89        |
| iYDL034W   | 4  | 392113 |       | 8094   | <b>0.64</b> | Non F | <b>8E-04</b> | 0.087        | 0.434        | 0.89         |             |
| iYEL060C   | 5  | 41975  | 8889  | YEL060 | <b>0.6</b>  | Sgl   | Pi           | 0.906        | 0.539        | 0.862        | 0.89        |
| iYFR029W   | 6  | 212971 | 9486  | YFR030 | <b>0.64</b> | Sgl   | Pi           | 0.735        | 0.703        | 0.46         | 0.89        |
| iYDL218W   | 4  | 67451  |       | 8268   | <b>0.2</b>  | Non F | 0.734        | 0.676        | 0.356        | 0.89         |             |
| iYLR398C   | 12 | 919042 | 11837 | YLR39  | <b>0.44</b> | Sgl   | Pi           | 0.029        | 0.854        | 0.405        | 0.89        |
| iYGL185C   | 7  | 154297 | 9741  | YGL185 | <b>0.79</b> | Sgl   | Pi           | 0.65         | 0.51         | 0.689        | 0.89        |
| iYIL163C   | 9  | 37264  | 10631 | YIL163 | <b>0.24</b> | Dbl   | Pi           | 0.813        | 0.443        | 0.754        | 0.89        |
| iYMR253C   | 13 | 777177 | 12302 | YMR25  | <b>0.55</b> | Sgl   | Pi           | 0.652        | 0.829        | 0.47         | 0.89        |
| iYJR158W-1 | 10 | 734812 | 11058 | YJR15  | <b>0.75</b> | Sgl   | Pi           | 0.921        | 0.798        | 0.102        | 0.89        |
| iYGL072C   | 7  | 371345 | 9634  | YGL072 | <b>0.27</b> | Dbl   | Pi           | 0.805        | 0.857        | 0.954        | 0.89        |
| iYBL003C   | 2  | 235743 | 7503  | YBL003 | <b>0.13</b> | Dbl   | Pi           | 0.653        | 0.912        | 0.601        | 0.89        |
| iYIL094C   | 9  | 187621 | 10562 | YIL094 | <b>0.51</b> | Sgl   | Pi           | 0.717        | 0.745        | 0.181        | 0.89        |
| iYGL146C   | 7  | 229678 | 9704  | YGL146 | <b>0.86</b> | Dbl   | Pi           | 0.725        | 0.344        | 0.339        | 0.89        |
| iYKR100C   | 11 | 639609 | 11390 | YKR10  | <b>0.94</b> | Dbl   | Pi           | 0.722        | 0.298        | 0.381        | 0.89        |
| iYMR016C-0 | 13 | 305581 | 12068 | YMR01  | <b>0.1</b>  | Dbl   | Pi           | 0.884        | 0.725        | 0.962        | 0.89        |
| iYHR199C   | 8  | 498418 | 10431 | YHR19  | <b>0.57</b> | Dbl   | Pi           | <b>2E-04</b> | 6E-05        | 0.844        | 0.89        |
| iYBL103C   | 2  | 23515  | 7593  | YBL103 | <b>0.81</b> | Dbl   | Pi           | 0.6          | 0.84         | 0.835        | 0.89        |
| iYGL203C   | 7  | 114670 | 9759  | YGL203 | <b>0.64</b> | Dbl   | Pi           | 0.63         | 0.729        | 0.474        | 0.89        |
| iYDR260C   | 4  | 977223 | 8551  | YDR260 | <b>0.91</b> | Sgl   | Pi           | 0.089        | 0.851        | 0.286        | 0.89        |
| iYBR103W   | 2  | 449282 | 7709  | YBR104 | <b>0.64</b> | Sgl   | Pi           | 0.481        | 1E-05        | 0.72         | 0.89        |
| iYKL072W   | 11 | 301530 | 11135 | YKL07  | <b>0.18</b> | Sgl   | Pi           | 0.576        | 0.586        | 0.785        | 0.89        |
| iYAL032C   | 1  | 84479  | 7405  | YAL032 | <b>0.95</b> | Sgl   | Pi           | 0.298        | 0.357        | 0.174        | 0.89        |
| iYPL057C   | 16 | 453054 | 13388 | YPL05  | <b>0.07</b> | Sgl   | Pi           | 0.804        | 0.427        | 0.418        | 0.89        |
| iYGL198W   | 7  | 124384 | 9753  | YGL197 | <b>0.71</b> | Sgl   | Pi           | 0.762        | 0.612        | 0.629        | 0.89        |
| iYOR027W   | 15 | 382849 |       | 12980  | <b>0.11</b> | Non F | 0.891        | 0.995        | 0.575        | 0.89         |             |
| iYGR204W   | 7  | 908754 | 10076 | YGR20  | <b>0.62</b> | Sgl   | Pi           | 0.748        | 0.967        | 0.14         | 0.89        |

|               |    |         |       |        |             |       |     |       |       |       |      |
|---------------|----|---------|-------|--------|-------------|-------|-----|-------|-------|-------|------|
| iYERComega1-1 | 5  | 565119  | 9258  | YER186 | <b>0.66</b> | Dbl   | Pi  | 0.651 | 0.024 | 0.367 | 0.89 |
| iYKL051W      | 11 | 342011  |       | 11114  | <b>0.25</b> | Non F |     | 0.705 | 0.643 | 0.065 | 0.89 |
| iYPL058C-0    | 16 | 450357  | 13389 | YPL05  | <b>0.04</b> | Sgl   | Pi  | 0.783 | 0.847 | 0.328 | 0.89 |
| iYLR099C      | 12 | 340916  | 11568 | YLR09  | <b>0.43</b> | Dbl   | Pi  | 0.689 | 0.481 | 0.549 | 0.89 |
| iYGL186C      | 7  | 152780  | 9742  | YGL186 | <b>0.91</b> | Sgl   | Pi  | 0.689 | 0.565 | 0.323 | 0.89 |
| iYLR004C      | 12 | 159505  | 11475 | YLR00  | <b>0.88</b> | Dbl   | Pi  | 0.544 | 0.741 | 0.047 | 0.89 |
| iYEL038W      | 5  | 81147   |       | 8868   | <b>0.23</b> | Non F |     | 0.237 | 0.569 | 0.232 | 0.89 |
| iYJR112W      | 10 | 637331  |       | 11009  | <b>0.78</b> | Non F |     | 0.608 | 0.63  | 0.04  | 0.89 |
| itY(GUA)O     | 15 | 288271  | 7375  | YOL019 | <b>0.38</b> | Sgl   | Pi  | 0.796 | 0.418 | 0.631 | 0.89 |
| iYPL233W      | 16 | 106847  | 13553 | YPL23  | <b>0.22</b> | Sgl   | Pi  | 1E-03 | 0.226 | 0.166 | 0.89 |
| iYFR053C-0    | 6  | 255024  | 9536  | YFR053 | <b>0.72</b> | Sgl   | Pi  | 0.861 | 0.11  | 0.89  | 0.89 |
| iYOL016C      | 15 | 296114  | 12796 | YOL01  | <b>0.88</b> | Dbl   | Pi  | 0.803 | 0.645 | 0.69  | 0.89 |
| iYPR148C-0    | 16 | 828126  | 13739 | YPR14  | <b>0.25</b> | Dbl   | Pi  | 0.006 | 0.466 | 0.984 | 0.89 |
| iYIL046W      | 9  | 270575  | 10522 | YIL046 | <b>0.67</b> | Sgl   | Pi  | 0.751 | 0.59  | 0.408 | 0.89 |
| iYGR180C      | 7  | 856300  | 10054 | YGR180 | <b>0.23</b> | Dbl   | Pi  | 0.873 | 0.017 | 0.947 | 0.89 |
| iYMR081C      | 13 | 431084  | 12129 | YMR081 | <b>0.42</b> | Sgl   | Pi  | 0.848 | 0.813 | 0.957 | 0.9  |
| iYHR139C      | 8  | 379190  | 10373 | YHR139 | <b>0.8</b>  | Sgl   | Pi  | 0.566 | 0.191 | 0.999 | 0.9  |
| iYCL029C      | 3  | 69931   | 7918  | YCL029 | <b>0.83</b> | Dbl   | Pi  | 0.491 | 0.711 | 0.374 | 0.9  |
| iYBL015W      | 2  | 195669  |       | 7514   | <b>0.68</b> | Non F | NaN |       | 0.624 | 0.939 | 0.9  |
| iYHR019C      | 8  | 143552  | 10253 | YHR019 | <b>0.51</b> | Dbl   | Pi  | 0.007 | 0.567 | 0.265 | 0.9  |
| iYMR306C-A    | 13 | 886576  | 12354 | YMR306 | <b>0.26</b> | Dbl   | Pi  | 0.943 | 0.624 | 0.84  | 0.9  |
| iYPL222W      | 16 | 132214  | 13542 | YPL22  | <b>0.19</b> | Sgl   | Pi  | 0.727 | 0.34  | 0.808 | 0.9  |
| iYLR187W      | 12 | 527938  | 11656 | YLR187 | <b>0.62</b> | Sgl   | Pi  | 0.593 | 0.803 | 0.343 | 0.9  |
| iYGR247W      | 7  | 985666  | 10115 | YGR247 | <b>0.74</b> | Sgl   | Pi  | 0.468 | 0.755 | 0.788 | 0.9  |
| iYKR018C      | 11 | 475533  | 11311 | YKR018 | <b>0.84</b> | Sgl   | Pi  | 0.639 | 0.515 | 0.633 | 0.9  |
| iYJL136C      | 10 | 156967  | 10818 | YJL136 | <b>0.1</b>  | Dbl   | Pi  | 0.834 | 0.741 | 0.977 | 0.9  |
| iYGR238C      | 7  | 968701  | 10107 | YGR238 | <b>0.72</b> | Sgl   | Pi  | 0.704 | 0.909 | 0.38  | 0.9  |
| iYER158C      | 5  | 490560  | 9181  | YER158 | <b>0.42</b> | Sgl   | Pi  | 0.003 | 0.707 | 0.517 | 0.9  |
| iYER078C      | 5  | 318336  | 9025  | YER078 | <b>0.74</b> | Dbl   | Pi  | 0.841 | 0.157 | 4E-09 | 0.9  |
| iYLR255C      | 12 | 645939  | 11715 | YLR255 | <b>0.08</b> | Dbl   | Pi  | 0.592 | 0.561 | 1     | 0.9  |
| iYKR092C-0    | 11 | 613505  | 11381 | YKR092 | <b>0.1</b>  | Dbl   | Pi  | 0.758 | 0.111 | 0.783 | 0.9  |
| iYBL082C      | 2  | 71143   | 7575  | YBL082 | <b>0.92</b> | Dbl   | Pi  | 0.781 | 3E-07 | 0.963 | 0.9  |
| iYBR071W      | 2  | 381020  | 7676  | YBR072 | <b>0.56</b> | Sgl   | Pi  | 0.753 | 0.565 | 0.703 | 0.9  |
| iYBR240C      | 2  | 701796  | 7835  | YBR240 | <b>0.77</b> | Sgl   | Pi  | 0.552 | 0.496 | 0.714 | 0.9  |
| iYNR031C      | 14 | 685435  | 12729 | YNR031 | <b>0.97</b> | Dbl   | Pi  | 0.703 | 0.024 | 0.541 | 0.9  |
| iYLR141W      | 12 | 424769  | 11606 | YLR141 | <b>0.45</b> | Sgl   | Pi  | 0.635 | 0.467 | 0.983 | 0.9  |
| iYHR050W      | 8  | 209334  | 10287 | YHR050 | <b>0.53</b> | Sgl   | Pi  | 5E-04 | 0.647 | 0.942 | 0.9  |
| iYJR150C-0    | 10 | 709395  | 11044 | YJR150 | <b>0.63</b> | Sgl   | Pi  | 0.616 | 0.027 | 0.026 | 0.9  |
| iYJL186W      | 10 | 81899   |       | 10863  | <b>0.31</b> | Non F |     | 0.142 | 0.719 | 0.651 | 0.9  |
| iYCL030C      | 3  | 68323   | 7919  | YCL030 | <b>0.09</b> | Sgl   | Pi  | 0.852 | 0.8   | 0.95  | 0.9  |
| iYOR381W-1    | 15 | 1058586 | 13314 | YOR381 | <b>0.91</b> | Sgl   | Pi  | 0.663 | 0.726 | 0.48  | 0.9  |
| iYDL205C      | 4  | 93738   | 8253  | YDL205 | <b>0.9</b>  | Dbl   | Pi  | 0.771 | 0.345 | 0.833 | 0.9  |
| iYNR008W      | 14 | 642368  | 12706 | YNR008 | <b>0.35</b> | Sgl   | Pi  | 0.849 | 0.176 | 0.276 | 0.9  |
| iYDR356W      | 4  | 1188931 |       | 8642   | <b>0.21</b> | Non F |     | 0.378 | 0.619 | 0.533 | 0.9  |
| iYOR161C      | 15 | 638553  | 13108 | YOR161 | <b>0.25</b> | Sgl   | Pi  | 0.673 | 0.725 | 0.598 | 0.9  |
| iYNL144C-0    | 14 | 355025  | 12518 | YNL144 | <b>0.34</b> | Sgl   | Pi  | 0.225 | 0.264 | 0.785 | 0.9  |
| iYEL012W      | 5  | 132540  | 8844  | YEL011 | <b>0.78</b> | Sgl   | Pi  | 0.703 | 0.522 | 0.689 | 0.9  |
| iYDL079C      | 4  | 314732  | 8136  | YDL079 | <b>0.99</b> | Sgl   | Pi  | 0.763 | 0.723 | 0.46  | 0.9  |
| iYER052C      | 5  | 257942  | 8973  | YER052 | <b>0.3</b>  | Sgl   | Pi  | 0.811 | 0.965 | 0.083 | 0.9  |
| iYDR225W      | 4  | 915923  | 8519  | YDR225 | <b>0.29</b> | Sgl   | Pi  | 0.654 | 0.807 | 0.958 | 0.9  |
| iYNL204C      | 14 | 259270  | 12572 | YNL204 | <b>0.47</b> | Sgl   | Pi  | 0.21  | 0.462 | 0.231 | 0.9  |



|                 |          |               |             |               |             |            |           |              |              |              |             |
|-----------------|----------|---------------|-------------|---------------|-------------|------------|-----------|--------------|--------------|--------------|-------------|
| iYNL074C        | 14       | 488107        | 12454       | YNL07         | <b>0.69</b> | Dbl        | Pi        | 0.729        | 0.787        | 0.918        | 0.9         |
| iYMR235C        | 13       | 742731        | 12285       | YMR23         | <b>0.97</b> | Dbl        | Pi        | 0.001        | 0.119        | 0.595        | 0.9         |
| iYDL183C-1      | 4        | 132641        | 8232        | YDL183        | <b>0.19</b> | Dbl        | Pi        | 0.792        | 0.852        | 0.726        | 0.91        |
| iYIR038C-0      | 9        | 424497        | 10692       | YIR038        | <b>1</b>    | Sgl        | Pi        | 0.57         | 0.399        | 0.708        | 0.91        |
| iYAL044C        | 1        | 58486         | 7418        | YAL044        | <b>0.22</b> | Sgl        | Pi        | 0.241        | 0.543        | 0.438        | 0.91        |
| iYNL334C        | 14       | 12882         | 12686       | YNL33         | <b>0.92</b> | Dbl        | Pi        | 0.321        | 0.754        | 0.001        | 0.91        |
| <b>iYER075C</b> | <b>5</b> | <b>311213</b> | <b>9019</b> | <b>YER075</b> | <b>0.25</b> | <b>Sgl</b> | <b>Pi</b> | <b>0.827</b> | <b>0.06</b>  | <b>0.962</b> | <b>0.91</b> |
| iYOL104C        | 15       | 117458        | 12879       | YOL10         | <b>0.64</b> | Dbl        | Pi        | 0.013        | 0.783        | 0.48         | 0.91        |
| iYPR131C        | 16       | 794667        | 13725       | YPR13         | <b>0.03</b> | Dbl        | Pi        | 0.63         | 0.716        | 0.423        | 0.91        |
| iYER045C-1      | 5        | 242358        | 8965        | YER045        | <b>0.5</b>  | Dbl        | Pi        | 0.825        | 0.002        | 0.263        | 0.91        |
| iYFL042C        | 6        | 47737         | 9366        | YFL042        | <b>0.66</b> | Dbl        | Pi        | 0.745        | 0.13         | 0.273        | 0.91        |
| iYHL007C        | 8        | 97937         | 10184       | YHL00         | <b>0.43</b> | Sgl        | Pi        | 0.008        | 0.622        | 0.517        | 0.91        |
| iYLR110C        | 12       | 370101        | 11577       | YLR11         | <b>0.02</b> | Dbl        | Pi        | 0.561        | 0.661        | 0.995        | 0.91        |
| iYLR090W        | 12       | 322066        | 11559       | YLR09         | <b>0.55</b> | Sgl        | Pi        | 0.428        | 0.516        | 0.47         | 0.91        |
| iYBR238C        | 2        | 697256        | 7833        | YBR238        | <b>0.45</b> | Sgl        | Pi        | 0.731        | 0.985        | 0.048        | 0.91        |
| iYER041W        | 5        | 234742        | 8959        | YER042        | <b>0.57</b> | Sgl        | Pi        | 0.371        | 0.224        | 0.506        | 0.91        |
| iYER155C        | 5        | 482847        | 9175        | YER155        | <b>0.34</b> | Sgl        | Pi        | 0.796        | 0.058        | 0.235        | 0.91        |
| iYHR102W        | 8        | 319801        | 10340       | YHR10         | <b>0.45</b> | Sgl        | Pi        | 0.747        | 0.003        | 0.285        | 0.91        |
| iYPL145C        | 16       | 279683        | 13468       | YPL14         | <b>0.41</b> | Dbl        | Pi        | 0.744        | 0.117        | 0.265        | 0.91        |
| iYDR384C        | 4        | 1242008       | 8669        | YDR384        | <b>0.02</b> | Dbl        | Pi        | <b>6E-04</b> | 0.075        | 0.883        | 0.91        |
| iYLR059C        | 12       | 260534        | 11530       | YLR05         | <b>0.73</b> | Dbl        | Pi        | 0.018        | 0.612        | 0.513        | 0.91        |
| iYDR376W        | 4        | 1228277       | 8661        | YDR377        | <b>0.45</b> | Sgl        | Pi        | 0.625        | 0.685        | 0.736        | 0.91        |
| iYMR010W-1      | 13       | 287193        | 12061       | YMR01         | <b>0.28</b> | Sgl        | Pi        | 0.681        | 0.914        | 0.132        | 0.91        |
| iYJL165C        | 10       | 109438        | 10845       | YJL165        | <b>0.89</b> | Sgl        | Pi        | 0.759        | 0.818        | 0.238        | 0.91        |
| iYNL047C        | 14       | 541876        | 12429       | YNL04         | <b>0.96</b> | Dbl        | Pi        | 0.561        | 0.472        | 0.892        | 0.91        |
| iYBR009C        | 2        | 255658        | 7616        | YBR009        | <b>0.13</b> | Dbl        | Pi        | 0.754        | 0.003        | 0.657        | 0.91        |
| iYHR041C        | 8        | 189850        | 10276       | YHR04         | <b>0.94</b> | Dbl        | Pi        | 0.004        | 0.041        | 0.969        | 0.91        |
| iYHR087W        | 8        | 281154        | 10325       | YHR08         | <b>0.93</b> | Sgl        | Pi        | 0.214        | 0.018        | 0.948        | 0.91        |
| iYDL048C-0      | 4        | 368204        | 8107        | YDL048        | <b>0.3</b>  | Dbl        | Pi        | 0.809        | 0.207        | 0.899        | 0.91        |
| iYPR115W        | 16       | 758141        | 13711       | YPR11         | <b>0.54</b> | Sgl        | Pi        | 0.516        | 0.4          | 0.354        | 0.91        |
| iYOR372C        | 15       | 1036470       | 13302       | YOR37         | <b>0.98</b> | Dbl        | Pi        | 0.708        | 0.098        | 0.024        | 0.91        |
| iYLR410W        | 12       | 940964        | 11849       | YLR41         | <b>0.51</b> | Sgl        | Pi        | 0.799        | 0.548        | 0.709        | 0.91        |
| iYIL052C        | 9        | 257050        | 10528       | YIL052        | <b>0.03</b> | Sgl        | Pi        | NaN          | 0.601        | 0.599        | 0.91        |
| iYIL052C        | 9        | 257050        | 10528       | YIL052        | <b>0.03</b> | Sgl        | Pi        | NaN          | 0.601        | 0.599        | 0.91        |
| iYAR031W        | 1        | 187726        | 7471        | YAR033        | <b>0.81</b> | Sgl        | Pi        | 0.566        | 0.706        | 0.063        | 0.91        |
| iYPL004C        | 16       | 551650        | 13339       | YPL00         | <b>0.42</b> | Dbl        | Pi        | 0.691        | 0.3          | 0.882        | 0.91        |
| iYJL120W        | 10       | 191046        |             | 10803         | <b>0.7</b>  | Non        | F         | 0.731        | 0.476        | 0.445        | 0.91        |
| iYOR162C        | 15       | 641999        | 13109       | YOR16         | <b>0.88</b> | Dbl        | Pi        | 0.458        | 0.141        | <b>3E-04</b> | 0.91        |
| iYOR348C        | 15       | 988781        | 13280       | YOR34         | <b>0.17</b> | Dbl        | Pi        | 0.519        | 0.115        | 0.982        | 0.91        |
| iYIL033C        | 9        | 291668        | 10509       | YIL033        | <b>0.59</b> | Sgl        | Pi        | 0.167        | 0.588        | 0.585        | 0.91        |
| iYCR102C        | 3        | 305452        | 8049        | YCR102        | <b>0.73</b> | Dbl        | Pi        | 0.597        | 0.671        | 0.642        | 0.91        |
| iYLR349W        | 12       | 828021        | 11795       | YLR35         | <b>0.4</b>  | Sgl        | Pi        | 0.556        | 0.452        | 0.932        | 0.91        |
| iYPR128C        | 16       | 792208        | 13723       | YPR12         | <b>0.95</b> | Dbl        | Pi        | <b>6E-04</b> | 0.416        | 0.611        | 0.91        |
| iYML052W        | 13       | 171310        | 11967       | YML05         | <b>0.64</b> | Sgl        | Pi        | 0.798        | 0.553        | 0.635        | 0.91        |
| <b>iYFR035C</b> | <b>6</b> | <b>226451</b> | <b>9502</b> | <b>YFR035</b> | <b>0.22</b> | <b>Dbl</b> | <b>Pi</b> | <b>0.58</b>  | <b>0.477</b> | <b>0.537</b> | <b>0.91</b> |
| iYGR197C        | 7        | 894128        | 10069       | YGR19         | <b>0.69</b> | Dbl        | Pi        | 0.723        | 0.215        | 0.055        | 0.91        |
| iYNL024C        | 14       | 587840        | 12408       | YNL02         | <b>0.48</b> | Sgl        | Pi        | 0.804        | 0.697        | 0.124        | 0.91        |
| iYDR043C-2      | 4        | 545552        | 8352        | YDR043        | <b>0.85</b> | Dbl        | Pi        | 0.469        | 0.163        | 0.932        | 0.91        |
| iYBR051W        | 2        | 338304        |             | 7655          | <b>0.89</b> | Non        | F         | 0.697        | 0.018        | 0.562        | 0.91        |
| iYBR051W        | 2        | 338304        |             | 7655          | <b>0.89</b> | Non        | F         | 0.697        | 0.018        | 0.562        | 0.91        |
| iYPL170W        | 16       | 228769        |             | 13492         | <b>0.2</b>  | Non        | F         | 0.369        | 0.545        | 0.591        | 0.91        |

|            |    |         |       |        |             |     |    |              |              |       |      |
|------------|----|---------|-------|--------|-------------|-----|----|--------------|--------------|-------|------|
| iYOL110W   | 15 | 109883  | 12884 | YOL10  | <b>0.01</b> | Sgl | Pi | 0.804        | 0.522        | 0.791 | 0.91 |
| iYLR228C-1 | 12 | 603343  | 11693 | YLR22  | <b>0.54</b> | Sgl | Pi | 0.614        | 0.125        | 0.852 | 0.91 |
| iYIR035C   | 9  | 421808  | 10689 | YIR035 | <b>0.68</b> | Sgl | Pi | 0.708        | 0.537        | 0.435 | 0.91 |
| iYOL157C   | 15 | 24289   | 12931 | YOL15  | <b>0.65</b> | Dbl | Pi | 0.92         | 0.679        | 0.632 | 0.91 |
| iYIL091C   | 9  | 193189  | 10559 | YIL091 | <b>0.99</b> | Dbl | Pi | 0.162        | 0.614        | 0.037 | 0.91 |
| iYBR019C   | 2  | 278300  | 7625  | YBR019 | <b>0.89</b> | Dbl | Pi | 0.878        | 0.921        | 0.859 | 0.91 |
| iYDR010C   | 4  | 465368  | 8313  | YDR010 | <b>0.14</b> | Dbl | Pi | 0.928        | 0.626        | 1     | 0.91 |
| iYJR021C   | 10 | 469268  | 10931 | YJR02  | <b>0.57</b> | Dbl | Pi | 0.349        | 0.47         | 0.478 | 0.91 |
| iYJR077C   | 10 | 577874  | 10977 | YJR07  | <b>0.5</b>  | Dbl | Pi | 0.497        | 0.568        | 0.756 | 0.91 |
| iYDR277C   | 4  | 1015699 | 8567  | YDR277 | <b>0.24</b> | Sgl | Pi | 0.809        | 0.113        | 0.115 | 0.92 |
| iYGL075C   | 7  | 368092  | 9635  | YGL075 | <b>0.77</b> | Sgl | Pi | 0.716        | 0.002        | 0.097 | 0.92 |
| iYPR063C   | 16 | 678315  | 13667 | YPR063 | <b>0.83</b> | Dbl | Pi | 0.004        | 0.473        | NaN   | 0.92 |
| iYLR370C   | 12 | 862249  | 11812 | YLR37  | <b>0.88</b> | Dbl | Pi | 0.001        | 0.14         | 0.61  | 0.92 |
| iYGR141W   | 7  | 771971  | 10020 | YGR141 | <b>0.48</b> | Sgl | Pi | 0.787        | 0.972        | 0.956 | 0.92 |
| iYNL134C   | 14 | 373568  | 12509 | YNL13  | <b>0.55</b> | Sgl | Pi | 0.885        | 0.097        | 0.46  | 0.92 |
| iYNL054W   | 14 | 529577  | 12436 | YNL05  | <b>0.53</b> | Sgl | Pi | 0.739        | 0.021        | 0.597 | 0.92 |
| iYHR166C   | 8  | 439046  | 10401 | YHR166 | <b>0.83</b> | Dbl | Pi | 0.596        | 0.616        | 0.07  | 0.92 |
| iYMR245W   | 13 | 759185  | 12295 | YMR245 | <b>0.3</b>  | Sgl | Pi | 0.755        | 0.726        | 0.948 | 0.92 |
| iYER028C   | 5  | 211885  | 8947  | YER028 | <b>0.22</b> | Sgl | Pi | 0.795        | 0.267        | 0.352 | 0.92 |
| iYJR148W   | 10 | 706555  | 11042 | YJR14  | <b>0.1</b>  | Sgl | Pi | 0.416        | 0.322        | 0.846 | 0.92 |
| iYIL007C   | 9  | 343645  | 10482 | YIL007 | <b>0.9</b>  | Dbl | Pi | 0.565        | 0.326        | 0.593 | 0.92 |
| iYDL130W   | 4  | 230516  | 8183  | YDL129 | <b>0.7</b>  | Sgl | Pi | 0.755        | 0.596        | 1     | 0.92 |
| iYDR529C   | 4  | 1496551 | 8799  | YDR529 | <b>0.62</b> | Sgl | Pi | 0.68         | 0.526        | 0.959 | 0.92 |
| iYJR059W   | 10 | 547956  | 10960 | YJR06  | <b>0.36</b> | Sgl | Pi | 0.692        | 0.942        | 0.166 | 0.92 |
| iYML025C   | 13 | 225359  | 11945 | YML02  | <b>0.36</b> | Dbl | Pi | 0.526        | 0.807        | 0.864 | 0.92 |
| iYIL041W   | 9  | 277489  | 10517 | YIL040 | <b>0.21</b> | Sgl | Pi | 0.693        | 0.545        | 0.479 | 0.92 |
| iYKL013C   | 11 | 417659  | 11079 | YKL01  | <b>0.92</b> | Dbl | Pi | 0.005        | 0.402        | 0.409 | 0.92 |
| iYGL049C   | 7  | 409587  | 9613  | YGL049 | <b>0.59</b> | Sgl | Pi | 0.808        | 0.094        | 0.157 | 0.92 |
| iYPL165C   | 16 | 239084  | 13488 | YPL16  | <b>0.63</b> | Sgl | Pi | 0.557        | 0.305        | 0.514 | 0.92 |
| iYPR017C   | 16 | 593917  | 13629 | YPR01  | <b>0.87</b> | Dbl | Pi | <b>2E-04</b> | 0.133        | 0.284 | 0.92 |
| iYBL042C   | 2  | 140215  | 7542  | YBL042 | <b>0.19</b> | Dbl | Pi | 0.002        | 0.944        | 0.773 | 0.92 |
| iYHR106W   | 8  | 326613  |       | 10344  | <b>0.12</b> | Non | F  | 0.574        | 0.516        | 0.301 | 0.92 |
| iYLL052C   | 12 | 36375   | 11453 | YLL052 | <b>0.35</b> | Sgl | Pi | 0.817        | 0.793        | 0.467 | 0.92 |
| iYJL175W   | 10 | 94574   | 10854 | YJL175 | <b>0.98</b> | Sgl | Pi | <b>8E-05</b> | 0.259        | 0.593 | 0.92 |
| iYFR003C   | 6  | 153103  | 9434  | YFR003 | <b>0.83</b> | Dbl | Pi | 0.391        | <b>8E-07</b> | 0.98  | 0.92 |
| iYHR100C   | 8  | 314693  | 10338 | YHR100 | <b>0.72</b> | Sgl | Pi | 0.538        | 0.605        | 0.04  | 0.92 |
| iYOR323C   | 15 | 922904  | 13258 | YOR323 | <b>0.7</b>  | Sgl | Pi | 0.678        | 0.175        | 0.496 | 0.92 |
| iYDL078C   | 4  | 316374  | 8135  | YDL078 | <b>0.75</b> | Sgl | Pi | 0.729        | 0.93         | 0.181 | 0.92 |
| iYIL044C   | 9  | 273855  | 10520 | YIL044 | <b>0.89</b> | Sgl | Pi | 0.061        | 0.638        | 0.25  | 0.92 |
| iYLR095C   | 12 | 332127  | 11564 | YLR09  | <b>1</b>    | Dbl | Pi | <b>1E-04</b> | 0.728        | 0.748 | 0.92 |
| iYPL026C   | 16 | 502170  | 13360 | YPL02  | <b>0.07</b> | Sgl | Pi | 0.79         | 0.782        | 0.312 | 0.92 |
| iYPL082C   | 16 | 404077  | 13412 | YPL08  | <b>0.2</b>  | Dbl | Pi | 0.63         | 0.265        | 0.997 | 0.92 |
| iYJL027C   | 10 | 391930  | 10721 | YJL027 | <b>0.74</b> | Dbl | Pi | 0.757        | 0.363        | 0.473 | 0.92 |
| iYGR005C   | 7  | 505839  | 9893  | YGR005 | <b>0.92</b> | Dbl | Pi | 0.712        | 0.441        | 0.531 | 0.92 |
| iYKL198C   | 11 | 70224   | 11256 | YKL19  | <b>0.44</b> | Sgl | Pi | 0.612        | 0.364        | 0.07  | 0.92 |
| iYIL019W   | 9  | 316117  | 10496 | YIL018 | <b>0.07</b> | Sgl | Pi | 0.885        | 0.917        | 0.722 | 0.92 |
| iYEL017C-A | 5  | 122914  | 8848  | YEL017 | <b>0.31</b> | Dbl | Pi | <b>7E-04</b> | 0.006        | 0.575 | 0.92 |
| iYJL134W   | 10 | 159144  | 10817 | YJL134 | <b>0.08</b> | Sgl | Pi | 0.027        | 0.679        | 0.943 | 0.93 |
| iYKL200C   | 11 | 67090   |       | 11257  | <b>0.1</b>  | Non | F  | 0.74         | 0.217        | 0.823 | 0.93 |
| iYLR266C   | 12 | 677717  | 11725 | YLR26  | <b>0.89</b> | Dbl | Pi | 0.69         | 0.014        | 0.002 | 0.93 |
| iYGR087C-1 | 7  | 653781  | 9967  | YGR087 | <b>0.64</b> | Dbl | Pi | 0.792        | 0.145        | 0.598 | 0.93 |

|            |    |         |       |        |             |        |       |       |              |      |
|------------|----|---------|-------|--------|-------------|--------|-------|-------|--------------|------|
| iYOR060C   | 15 | 441167  | 13012 | YOR060 | <b>0.54</b> | Dbl Pi | 0.372 | 0.564 | 0.711        | 0.93 |
| iYJR116W   | 10 | 641359  | 11012 | YJR116 | <b>0.77</b> | Sgl Pi | 0.58  | 0.648 | 0.224        | 0.93 |
| iYMR042W   | 13 | 353121  | 12094 | YMR042 | <b>0.12</b> | Sgl Pi | 0.909 | 0.156 | 0.997        | 0.93 |
| iYAL046C   | 1  | 57374   | 7420  | YAL046 | <b>0.08</b> | Sgl Pi | 0.593 | 0.619 | 0.365        | 0.93 |
| iYDL125C   | 4  | 239596  | 8178  | YDL125 | <b>0.38</b> | Dbl Pi | 0.162 | 0.513 | 0.255        | 0.93 |
| iYOR254C   | 15 | 807006  | 13193 | YOR254 | <b>0.91</b> | Dbl Pi | 0.28  | 0.632 | 0.535        | 0.93 |
| iYKR045C   | 11 | 523634  | 11334 | YKR045 | <b>0.83</b> | Sgl Pi | 0.613 | 0.557 | 0.355        | 0.93 |
| iYDR534C-0 | 4  | 1504888 | 8804  | YDR534 | <b>0.24</b> | Sgl Pi | 0.782 | 0.505 | 0.007        | 0.93 |
| iYMR068W   | 13 | 407568  | 12116 | YMR068 | <b>0.24</b> | Sgl Pi | 0.038 | 0.478 | 0.837        | 0.93 |
| iYOR312C   | 15 | 901195  | 13246 | YOR312 | <b>0.08</b> | Sgl Pi | 0.868 | 4E-04 | 0.804        | 0.93 |
| iYJL173C   | 10 | 96512   | 10852 | YJL173 | <b>0.92</b> | Dbl Pi | 0.608 | 0.583 | <b>1E-04</b> | 0.93 |
| iYCR021C   | 3  | 157087  | 7979  | YCR021 | <b>0.78</b> | Sgl Pi | 0.845 | 0.56  | 0.501        | 0.93 |
| iYOR326W   | 15 | 930441  |       | 13260  | <b>0.62</b> | Non F  | 0.479 | 0.511 | 0.593        | 0.93 |
| iYJL160C-1 | 10 | 119629  | 10840 | YJL160 | <b>0.44</b> | Dbl Pi | 0.079 | 0.079 | 0.899        | 0.93 |
| iYIR018W-0 | 9  | 385336  |       | 10668  | <b>0.17</b> | Non F  | 0.897 | 0.401 | 0.878        | 0.93 |
| iYLR239C   | 12 | 617314  | 11700 | YLR239 | <b>0.92</b> | Dbl Pi | 0.626 | 0.533 | 0.213        | 0.93 |
| iYCL049C   | 3  | 40719   | 7932  | YCL049 | <b>0.71</b> | Dbl Pi | 0.846 | 0.224 | 0.705        | 0.93 |
| iYGR175C   | 7  | 848421  | 10050 | YGR175 | <b>0.17</b> | Dbl Pi | 0.206 | 0.449 | 0.959        | 0.93 |
| iYGR139W   | 7  | 766076  | 10018 | YGR139 | <b>0.44</b> | Sgl Pi | 0.813 | 0.454 | 0.91         | 0.93 |
| iYOL155C-1 | 15 | 33144   | 12928 | YOL155 | <b>0.61</b> | Dbl Pi | 0.865 | 0.425 | 0.52         | 0.93 |
| iYOL067C   | 15 | 202524  | 12844 | YOL067 | <b>0.41</b> | Sgl Pi | 0.157 | 0.648 | 0.608        | 0.93 |
| iYAL047C   | 1  | 56849   | 7421  | YAL047 | <b>0.04</b> | Sgl Pi | 0.436 | 0.507 | 0.484        | 0.93 |
| iYHR207C   | 8  | 516479  | 10439 | YHR207 | <b>0.33</b> | Dbl Pi | 0.776 | 0.197 | 0.006        | 0.93 |
| iYBR046C   | 2  | 331470  | 7651  | YBR046 | <b>0.56</b> | Dbl Pi | 0.547 | 0.61  | 0.422        | 0.93 |
| iYKL086W   | 11 | 278300  | 11147 | YKL086 | <b>0.65</b> | Sgl Pi | 0.639 | 0.768 | 0.61         | 0.93 |
| iYGL097W-1 | 7  | 324281  | 9659  | YGL096 | <b>0.24</b> | Sgl Pi | 0.861 | 0.366 | 0.816        | 0.93 |
| iYHR021C   | 8  | 148681  | 10255 | YHR021 | <b>0.02</b> | Dbl Pi | 0.844 | 0.744 | 0.359        | 0.93 |
| iYAR019C-1 | 1  | 175982  | 7465  | YAR019 | <b>0.44</b> | Sgl Pi | 0.826 | 0.188 | 0.427        | 0.93 |
| iYER057C   | 5  | 271112  | 8981  | YER057 | <b>0.79</b> | Dbl Pi | 0.714 | 0.052 | 0.959        | 0.93 |
| iYDR246W   | 4  | 955006  | 8537  | YDR247 | <b>0.48</b> | Sgl Pi | 0.822 | 0.044 | 0.959        | 0.93 |
| iYJR016C   | 10 | 465896  | 10928 | YJR016 | <b>0.2</b>  | Sgl Pi | 0.762 | 0.231 | 0.698        | 0.93 |
| iYGL008C   | 7  | 482707  | 9572  | YGL008 | <b>0.01</b> | Dbl Pi | 0.824 | 0.062 | 0.718        | 0.93 |
| iYLR109W   | 12 | 369360  |       | 11576  | <b>0.46</b> | Non F  | 0.807 | 0.633 | 0.969        | 0.93 |
| iYKR096W   | 11 | 630026  | 11386 | YKR096 | <b>0.89</b> | Sgl Pi | 0.954 | 0.445 | 0.795        | 0.93 |
| iYLR278C   | 12 | 704014  | 11735 | YLR278 | <b>0.19</b> | Dbl Pi | 0.109 | 0.605 | 0.539        | 0.93 |
| iYER176W   | 5  | 545061  | 9217  | YER177 | <b>0.03</b> | Sgl Pi | 0.932 | 0.017 | 0.973        | 0.93 |
| iYGR013W   | 7  | 516409  | 9900  | YGR013 | <b>0.08</b> | Sgl Pi | 0.82  | 0.251 | 0.728        | 0.93 |
| iYNR062C-0 | 14 | 745345  | 12761 | YNR062 | <b>0.08</b> | Dbl Pi | 0.759 | 0.797 | 0.491        | 0.93 |
| iYPR005C   | 16 | 566675  | 13615 | YPR005 | <b>0.45</b> | Sgl Pi | 0.681 | 0.284 | 0.881        | 0.93 |
| iYDR540C   | 4  | 1517703 | 8812  | YDR540 | <b>0.76</b> | Sgl Pi | 0.792 | 0.547 | 0.655        | 0.93 |
| iYNL104C   | 14 | 426748  | 12483 | YNL104 | <b>0.3</b>  | Dbl Pi | 0.568 | 0.002 | 0.491        | 0.93 |
| iYGR091W   | 7  | 667814  | 9972  | YGR092 | <b>0.2</b>  | Sgl Pi | 0.823 | 1E-05 | 0.551        | 0.93 |
| itP(UGG)O1 | 15 | 301232  |       | 7274   | <b>0.13</b> | Non F  | 0.946 | 0.312 | 0.885        | 0.93 |
| iYOR064C   | 15 | 446726  | 13016 | YOR064 | <b>0.35</b> | Dbl Pi | 0.669 | 0.793 | 0.998        | 0.93 |
| iYCL064C   | 3  | 16874   | 7944  | YCL064 | <b>0.71</b> | Dbl Pi | 0.642 | 2E-04 | 4E-04        | 0.93 |
| iYHR008C   | 8  | 123572  | 10242 | YHR008 | <b>0.31</b> | Sgl Pi | 0.812 | 0.05  | 0.153        | 0.93 |
| iYIL042C   | 9  | 276288  | 10518 | YIL042 | <b>0.98</b> | Dbl Pi | 0.014 | 0.426 | 0.415        | 0.93 |
| iYKL102C   | 11 | 248006  | 11165 | YKL102 | <b>0.86</b> | Dbl Pi | 0.84  | 0.31  | 0.415        | 0.93 |
| iYHR178W   | 8  | 461534  | 10412 | YHR178 | <b>0.42</b> | Sgl Pi | 0.349 | 0.07  | 0.087        | 0.93 |
| iYJL101C   | 10 | 236078  | 10786 | YJL101 | <b>0.49</b> | Dbl Pi | 0.831 | 0.001 | 0.724        | 0.93 |
| iYCR022C   | 3  | 157746  | 7980  | YCR022 | <b>0.52</b> | Sgl Pi | 0.811 | 0.299 | 0.822        | 0.93 |

|              |    |         |       |        |      |       |    |       |       |       |      |
|--------------|----|---------|-------|--------|------|-------|----|-------|-------|-------|------|
| iSNR58       | 15 | 136192  | 7083  | YOL098 | 0.42 | Sgl   | Pi | 0.681 | 0.598 | 0.532 | 0.93 |
| iYOR029W-0   | 15 | 384940  | 12982 | YOR03  | 0.34 | Sgl   | Pi | 0.87  | 0.387 | 0.999 | 0.93 |
| iYDR109C     | 4  | 675645  | 8413  | YDR109 | 0.9  | Dbl   | Pi | 0.584 | 0.378 | 0.46  | 0.93 |
| iYOR376W-0   | 15 | 1043556 | 13306 | YOR37  | 0.67 | Sgl   | Pi | 0.703 | 0.09  | 0.307 | 0.93 |
| iYGL163C-1   | 7  | 197259  | 9720  | YGL163 | 0.11 | Dbl   | Pi | 0.633 | 0.303 | 0.959 | 0.93 |
| iYBR084C-A   | 2  | 415205  | 7690  | YBR084 | 0.28 | Dbl   | Pi | 0.809 | 0.759 | 0.927 | 0.93 |
| iYER084W     | 5  | 327439  |       | 9035   | 0.5  | Non F |    | 0.543 | 0.595 | 0.703 | 0.94 |
| iYHR032W     | 8  | 175083  | 10266 | YHR03  | 0.06 | Sgl   | Pi | 0.707 | 0.807 | 0.795 | 0.94 |
| iYDL198C     | 4  | 104562  | 8246  | YDL198 | 0.4  | Sgl   | Pi | 0.618 | 0.499 | 0.474 | 0.94 |
| iYBR085W-2   | 2  | 419051  |       | 7694   | 0.41 | Non F |    | 0.876 | 0.757 | 0.394 | 0.94 |
| iYDR435C     | 4  | 1333957 | 8713  | YDR435 | 0.85 | Dbl   | Pi | 0.606 | 0.517 | 0.112 | 0.94 |
| iYML099C     | 13 | 77029   | 12011 | YML09  | 0.49 | Dbl   | Pi | 0.778 | 0.094 | 0.683 | 0.94 |
| iYDR268W     | 4  | 1005129 |       | 8560   | 0.53 | Non F |    | 0.55  | 0.54  | 0.066 | 0.94 |
| iYHR189W     | 8  | 484595  | 10423 | YHR18  | 0.43 | Sgl   | Pi | 0.807 | 0.229 | 0.797 | 0.94 |
| iYNR017W     | 14 | 663567  | 12716 | YNR01  | 0.07 | Sgl   | Pi | 0.945 | 0.017 | 0.753 | 0.94 |
| iYMR008C     | 13 | 282589  | 12058 | YMR00  | 0.53 | Dbl   | Pi | 0.697 | 0.752 | 0.75  | 0.94 |
| iYIL137C     | 9  | 92793   | 10607 | YIL137 | 0.84 | Dbl   | Pi | 0.693 | 0.386 | 5E-04 | 0.94 |
| iYOR347C     | 15 | 986448  | 13279 | YOR34  | 0.8  | Sgl   | Pi | 0.562 | 0.372 | 0.447 | 0.94 |
| iYLR089C     | 12 | 320019  | 11558 | YLR08  | 0.56 | Dbl   | Pi | 0.827 | 0.641 | 0.595 | 0.94 |
| iYDR475C     | 4  | 1410074 | 8750  | YDR475 | 0.53 | Sgl   | Pi | 0.707 | 0.432 | 0.873 | 0.94 |
| iYDR123C     | 4  | 699463  | 8425  | YDR123 | 0.46 | Dbl   | Pi | 0.605 | 0.6   | 0.726 | 0.94 |
| iYJL035C     | 10 | 380702  | 10728 | YJL035 | 0.8  | Dbl   | Pi | 0.854 | 0.537 | 0.655 | 0.94 |
| iYDR507C     | 4  | 1465777 | 8779  | YDR507 | 0.19 | Sgl   | Pi | 0.816 | 0.552 | 0.271 | 0.94 |
| iYLR173W     | 12 | 504280  | 11642 | YLR17  | 0.93 | Sgl   | Pi | 5E-04 | 0.487 | 0.997 | 0.94 |
| iYBL016W     | 2  | 193478  | 7515  | YBL015 | 0.74 | Sgl   | Pi | NaN   | 0.276 | 0.891 | 0.94 |
| iYPR023C     | 16 | 610011  | 13635 | YPR02  | 0.96 | Dbl   | Pi | 0.05  | 0.394 | 0.111 | 0.94 |
| iYML028W     | 13 | 220729  | 11948 | YML02  | 0.31 | Sgl   | Pi | 0.629 | 0.514 | 0.477 | 0.94 |
| iYJL192C     | 10 | 73416   | 10868 | YJL192 | 0.3  | Dbl   | Pi | 0.455 | 0.651 | 0.38  | 0.94 |
| iYLR436C     | 12 | 1011228 | 11872 | YLR43  | 0.37 | Sgl   | Pi | 0.796 | 0.818 | 0.904 | 0.94 |
| iYGR086C     | 7  | 650626  | 9965  | YGR086 | 0.12 | Sgl   | Pi | 0.882 | 0.043 | 0.894 | 0.94 |
| iYLR136C     | 12 | 416651  | 11603 | YLR13  | 0.97 | Dbl   | Pi | 0.617 | 0.52  | 0.906 | 0.94 |
| iYMR031W-A   | 13 | 335023  | 12083 | YMR03  | 0.37 | Sgl   | Pi | 0.847 | 0.664 | 0.326 | 0.94 |
| iYFL015C     | 6  | 106951  | 9312  | YFL015 | 0.49 | Dbl   | Pi | 0.823 | 0.632 | 0.328 | 0.94 |
| iYDR200C     | 4  | 856081  | 8497  | YDR200 | 0.88 | Dbl   | Pi | 0.506 | 0.132 | 0.613 | 0.94 |
| iYGL035C     | 7  | 433054  | 9599  | YGL035 | 0.4  | Sgl   | Pi | 0.626 | 0.775 | 0.809 | 0.94 |
| iYGL035C     | 7  | 433054  | 9599  | YGL035 | 0.4  | Sgl   | Pi | 0.626 | 0.775 | 0.809 | 0.94 |
| iYNL149C     | 14 | 349750  | 12524 | YNL14  | 0.52 | Sgl   | Pi | 4E-04 | 0.43  | NaN   | 0.94 |
| iYERWdelta11 | 5  | 312434  | 9266  | YER075 | 0.2  | Sgl   | Pi | 0.384 | 0.487 | 0.579 | 0.94 |
| iYBL064C     | 2  | 101102  | 7561  | YBL064 | 0.85 | Dbl   | Pi | 0.105 | 0.058 | 0.798 | 0.94 |
| iYBR085W-1   | 2  | 417947  |       | 7693   | 0.45 | Non F |    | 0.905 | 0.75  | 0.6   | 0.94 |
| iYOR383C     | 15 | 1061034 | 13316 | YOR38  | 0.12 | Dbl   | Pi | 0.711 | 0.823 | 0.221 | 0.94 |
| iYOL127W     | 15 | 81279   |       |        | 0.1  | #N/A  |    | 0.546 | 0.79  | 0.423 | 0.94 |
| iYOR380W-1   | 15 | 1054230 | 13312 | YOR38  | 0.65 | Sgl   | Pi | 0.805 | 0.981 | 0.313 | 0.94 |
| iYOL126C     | 15 | 83054   | 12900 | YOL12  | 0.62 | Dbl   | Pi | 0.183 | 0.854 | 0.839 | 0.94 |
| iYPL134C     | 16 | 299508  | 13459 | YPL13  | 0.42 | Sgl   | Pi | 0.649 | 0.197 | 0.806 | 0.94 |
| iYPR105C     | 16 | 739551  | 13702 | YPR10  | 0.83 | Dbl   | Pi | 0.465 | 0.058 | 0.005 | 0.94 |
| iYMR085W     | 13 | 438792  | 12134 | YMR08  | 0.45 | Sgl   | Pi | 0.273 | 1E-05 | 0.756 | 0.94 |
| iYLRWdelta17 | 12 | 688677  | 11914 | YLR27  | 0.29 | Sgl   | Pi | 0.982 | 0.561 | 0.251 | 0.94 |
| iYDR259C     | 4  | 975758  | 8550  | YDR259 | 0.16 | Sgl   | Pi | 0.918 | 0.004 | 0.97  | 0.94 |
| iYPL063W     | 16 | 431349  | 13395 | YPL06  | 0.29 | Sgl   | Pi | 0.12  | 0.598 | 0.731 | 0.94 |
| iYAL013W     | 1  | 130341  | 7386  | YAL012 | 0.23 | Sgl   | Pi | 0.767 | 0.358 | 0.873 | 0.94 |

|            |    |         |       |         |             |        |              |       |              |      |
|------------|----|---------|-------|---------|-------------|--------|--------------|-------|--------------|------|
| iYGR109C   | 7  | 706497  | 9990  | YGR109C | <b>0.73</b> | Dbl Pi | 0.833        | 0.835 | 0.015        | 0.94 |
| iYBR157C-0 | 2  | 554272  | 7759  | YBR157  | <b>0.14</b> | Dbl Pi | 0.833        | 0.045 | 0.694        | 0.95 |
| iYBL044W   | 2  | 136313  | 7544  | YBL043  | <b>0.75</b> | Sgl Pi | 0.048        | 0.168 | 0.922        | 0.95 |
| iYDR391C   | 4  | 1258043 | 8676  | YDR391  | <b>0.88</b> | Dbl Pi | 0.681        | 0.517 | 0.02         | 0.95 |
| iYHL027W   | 8  | 52978   |       | 10204   | <b>0.09</b> | Non F  | 0.151        | 0.358 | 0.977        | 0.95 |
| iYDR486C   | 4  | 1428193 | 8760  | YDR486  | <b>0.43</b> | Sgl Pi | 0.736        | 0.95  | 0.333        | 0.95 |
| iYKL110C-0 | 11 | 229510  | 11173 | YKL11   | <b>0.27</b> | Dbl Pi | 0.576        | 0.054 | 0.389        | 0.95 |
| iYBR015C   | 2  | 269475  | 7621  | YBR015  | <b>0.71</b> | Dbl Pi | 0.778        | 0.452 | 0.971        | 0.95 |
| iYGR054W   | 7  | 598601  | 9937  | YGR054  | <b>0.03</b> | Sgl Pi | 0.83         | 0.568 | 0.53         | 0.95 |
| iYFL010C   | 6  | 115727  | 9302  | YFL010  | <b>0.86</b> | Dbl Pi | 0.759        | 0.553 | <b>3E-04</b> | 0.95 |
| iYFR021W   | 6  | 196296  | 9470  | YFR022  | <b>0.79</b> | Sgl Pi | 0.69         | 0.117 | 0.706        | 0.95 |
| iYDR535C   | 4  | 1507360 | 8806  | YDR535  | <b>0.47</b> | Dbl Pi | 0.793        | 0.555 | 0.984        | 0.95 |
| iYOL156W-0 | 15 | 26971   |       | 12929   | <b>0.57</b> | Non F  | 0.716        | 0.545 | 0.592        | 0.95 |
| iYMR023C   | 13 | 320991  | 12076 | YMR023  | <b>0.49</b> | Dbl Pi | 0.767        | 0.536 | 0.523        | 0.95 |
| iYDL126C   | 4  | 238652  | 8179  | YDL126  | <b>0.53</b> | Sgl Pi | 0.58         | 0.067 | 0.888        | 0.95 |
| iYDL126C   | 4  | 238652  | 8179  | YDL126  | <b>0.53</b> | Sgl Pi | 0.58         | 0.067 | 0.888        | 0.95 |
| iYOR134W   | 15 | 579798  |       | 13083   | <b>0.76</b> | Non F  | 0.805        | 0.648 | 0.509        | 0.95 |
| iYKL187C   | 11 | 91526   | 11245 | YKL18   | <b>0.64</b> | Sgl Pi | 0.604        | 0.822 | 0.819        | 0.95 |
| iYGR067C   | 7  | 624765  | 9949  | YGR067  | <b>0.23</b> | Sgl Pi | 0.01         | 0.493 | 0.608        | 0.95 |
| iYNL193W   | 14 | 276063  | 12563 | YNL19   | <b>0.5</b>  | Sgl Pi | 0.711        | 0.145 | 0.842        | 0.95 |
| iYLR091W   | 12 | 323180  | 11560 | YLR09   | <b>0.76</b> | Sgl Pi | 0.695        | 0.008 | 0.394        | 0.95 |
| iYER120W   | 5  | 401863  | 9109  | YER121  | <b>0.76</b> | Sgl Pi | 0.679        | 0.208 | 0.171        | 0.95 |
| iYJL220W   | 10 | 18684   | 10895 | YJL219  | <b>0.75</b> | Sgl Pi | 0.925        | 0.19  | 0.673        | 0.95 |
| iYIR020C   | 9  | 394548  | 10672 | YIR020  | <b>0.09</b> | Dbl Pi | 0.908        | 0.899 | 0.758        | 0.95 |
| iYJL056C   | 10 | 332755  | 10748 | YJL056  | <b>0.92</b> | Dbl Pi | 0.037        | 0.62  | 0.734        | 0.95 |
| iYLR437C   | 12 | 1012005 | 11873 | YLR43   | <b>0.12</b> | Dbl Pi | 0.86         | 0.322 | 0.987        | 0.95 |
| iYFR033C   | 6  | 224745  | 9498  | YFR033  | <b>0.07</b> | Sgl Pi | 0.401        | 0.472 | 0.918        | 0.95 |
| iYDR345C-0 | 4  | 1164636 | 8631  | YDR345  | <b>0.11</b> | Sgl Pi | 0.744        | 0.305 | 0.752        | 0.95 |
| iYPR126C   | 16 | 789369  | 13721 | YPR12   | <b>0.52</b> | Dbl Pi | 0.83         | 0.906 | 0.05         | 0.95 |
| iYPL031C   | 16 | 493046  | 13365 | YPL03   | <b>0.96</b> | Dbl Pi | 0.242        | 0.73  | 0.506        | 0.95 |
| iYOR049C   | 15 | 423723  | 13002 | YOR04   | <b>0.12</b> | Sgl Pi | 0.808        | 0.086 | 0.904        | 0.95 |
| iYOL059W   | 15 | 218440  | 12836 | YOL05   | <b>0.3</b>  | Sgl Pi | 0.01         | 0.911 | 0.585        | 0.95 |
| iYOR273C   | 15 | 836412  | 13211 | YOR27   | <b>0.43</b> | Dbl Pi | 0.527        | 0.18  | 0.003        | 0.95 |
| iYDR008C   | 4  | 462639  | 8312  | YDR008  | <b>0.65</b> | Dbl Pi | 0.736        | 0.446 | 1            | 0.95 |
| iYDR397C   | 4  | 1266874 | 8681  | YDR397  | <b>0.63</b> | Dbl Pi | 0.003        | 0.678 | 0.519        | 0.95 |
| iYLL017W   | 12 | 112529  | 11422 | YLL016  | <b>0.14</b> | Sgl Pi | 0.671        | 0.561 | 0.634        | 0.95 |
| iYJL028W   | 10 | 391344  |       | 10722   | <b>0.16</b> | Non F  | 0.726        | 0.604 | 0.681        | 0.95 |
| iYLL056C-1 | 12 | 29207   | 11457 | YLL056  | <b>0.9</b>  | Dbl Pi | 0.791        | 0.731 | 0.087        | 0.95 |
| iYHR136C   | 8  | 375099  | 10370 | YHR13   | <b>0.51</b> | Dbl Pi | 0.696        | 0.917 | 0.937        | 0.95 |
| iYNL235C   | 14 | 209973  | 12599 | YNL23   | <b>0.89</b> | Dbl Pi | 0.602        | 0.987 | 0.841        | 0.95 |
| iYNR001C   | 14 | 631054  | 12700 | YNR001  | <b>0.53</b> | Sgl Pi | 0.858        | 0.084 | 1            | 0.96 |
| iYOR229W   | 15 | 769817  | 13170 | YOR22   | <b>0.16</b> | Sgl Pi | 0.828        | 0.617 | 0.487        | 0.96 |
| iYML029W   | 13 | 219864  | 11949 | YML02   | <b>0.54</b> | Sgl Pi | 0.801        | 0.479 | 0.422        | 0.96 |
| iYPR006C   | 16 | 568989  | 13616 | YPR00   | <b>0.64</b> | Sgl Pi | 0.692        | 0.378 | 0.259        | 0.96 |
| iYPL231W   | 16 | 114326  | 13551 | YPL23   | <b>0.58</b> | Sgl Pi | 0.06         | 0.018 | 0.959        | 0.96 |
| iYJR115W   | 10 | 640149  | 11011 | YJR11   | <b>0.86</b> | Sgl Pi | <b>6E-04</b> | 0.552 | 0.93         | 0.96 |
| iYGL024W   | 7  | 450121  |       | 9588    | <b>0.11</b> | Non F  | 0.012        | 0.349 | 0.306        | 0.96 |
| iYGL024W   | 7  | 450121  |       | 9588    | <b>0.11</b> | Non F  | 0.012        | 0.349 | 0.306        | 0.96 |
| iYGL256W-3 | 7  | 19796   | 9859  | YGL255  | <b>0.52</b> | Sgl Pi | 0.861        | 0.702 | 0.847        | 0.96 |
| iYHR080C   | 8  | 266860  | 10318 | YHR08   | <b>0.76</b> | Dbl Pi | 0.002        | 0.556 | 0.478        | 0.96 |
| iYAR035W   | 1  | 192240  | 7473  | YAR042  | <b>0.66</b> | Sgl Pi | 0.573        | 0.671 | 0.41         | 0.96 |



|              |    |         |       |        |             |     |    |       |       |       |      |
|--------------|----|---------|-------|--------|-------------|-----|----|-------|-------|-------|------|
| iYIL065C     | 9  | 241774  | 10538 | YIL065 | <b>0.94</b> | Dbl | Pi | 0.594 | 0.595 | 0.892 | 0.96 |
| iYML101C     | 13 | 70076   | 12013 | YML101 | <b>0.58</b> | Dbl | Pi | 0.017 | 3E-04 | 0.974 | 0.96 |
| iYPL067C     | 16 | 425827  | 13398 | YPL067 | <b>0.39</b> | Dbl | Pi | 0.557 | 0.843 | 0.946 | 0.96 |
| iYKL183W     | 11 | 99637   | 11241 | YKL183 | <b>0.02</b> | Sgl | Pi | 0.004 | 0.779 | 0.984 | 0.96 |
| iYPL248C     | 16 | 82344   | 13567 | YPL248 | <b>0.66</b> | Sgl | Pi | 0.54  | 0.695 | 0.486 | 0.96 |
| iYPL248C     | 16 | 82344   | 13567 | YPL248 | <b>0.66</b> | Sgl | Pi | 0.54  | 0.695 | 0.486 | 0.96 |
| iYLR111W     | 12 | 370732  | 11578 | YLR111 | <b>0.02</b> | Sgl | Pi | 0.323 | 0.549 | 0.923 | 0.96 |
| iYKL097W-A-1 | 11 | 259966  | 11160 | YKL097 | <b>0.03</b> | Sgl | Pi | 0.816 | 0.143 | 0.914 | 0.96 |
| iYKL020C     | 11 | 401703  | 11086 | YKL020 | <b>0.91</b> | Dbl | Pi | 0.001 | 0.154 | 0.532 | 0.96 |
| iYBR069C     | 2  | 378390  | 7674  | YBR069 | <b>0.1</b>  | Sgl | Pi | 0.786 | 0.259 | 0.727 | 0.96 |
| iYDR525W     | 4  | 1490252 | 8794  | YDR525 | <b>0.03</b> | Sgl | Pi | 0.111 | 0.142 | 0.996 | 0.96 |
| iYCR020W-B   | 3  | 155540  |       | 7978   | <b>0.41</b> | Non | F  | 0.904 | 0.749 | 0.827 | 0.96 |
| iYDR482C     | 4  | 1420812 | 8756  | YDR482 | <b>0.68</b> | Dbl | Pi | 0.026 | 0.49  | 0.672 | 0.96 |
| iYCR063W     | 3  | 228785  | 8014  | YCR063 | <b>0.07</b> | Sgl | Pi | 0.445 | 0.57  | 0.998 | 0.96 |
| iYGR051C     | 7  | 593214  | 9934  | YGR051 | <b>0.65</b> | Dbl | Pi | 0.58  | 0.581 | 0.427 | 0.96 |
| iYGL254W     | 7  | 23206   | 9849  | YGL253 | <b>0.23</b> | Sgl | Pi | 0.002 | 0.352 | 0.924 | 0.96 |
| iYDR516C     | 4  | 1476474 | 8786  | YDR516 | <b>0.87</b> | Dbl | Pi | 0.422 | 0.486 | 0.411 | 0.96 |
| iYMR172C-A   | 13 | 608213  | 12220 | YMR172 | <b>0.42</b> | Dbl | Pi | 0.931 | 0.126 | 0.178 | 0.96 |
| iYDR273W     | 4  | 1011257 |       | 8563   | <b>0.53</b> | Non | F  | 0.064 | 0.568 | 0.349 | 0.96 |
| iYOR009W     | 15 | 345864  |       | 12963  | <b>0.43</b> | Non | F  | 0.786 | 0.53  | 0.558 | 0.96 |
| iYLR236C     | 12 | 612119  | 11697 | YLR236 | <b>0.39</b> | Dbl | Pi | 0.699 | 0.623 | 0.632 | 0.96 |
| iYLR121C     | 12 | 390273  | 11588 | YLR121 | <b>0.57</b> | Sgl | Pi | 0.617 | 0.537 | 0.854 | 0.96 |
| iYDR505C     | 4  | 1459217 | 8777  | YDR505 | <b>0.45</b> | Sgl | Pi | 0.639 | 0.744 | 0.426 | 0.96 |
| iYPL049C     | 16 | 463828  | 13380 | YPL049 | <b>0.34</b> | Dbl | Pi | 0.638 | 0.004 | 0.93  | 0.96 |
| iYNL055C     | 14 | 518834  | 12437 | YNL055 | <b>0.37</b> | Dbl | Pi | 0.671 | 0.512 | 0.588 | 0.96 |
| iYJL079C     | 10 | 290476  | 10767 | YJL079 | <b>0.3</b>  | Sgl | Pi | 0.698 | 0.404 | 0.84  | 0.96 |
| iYOL053C-A   | 15 | 231763  | 12829 | YOL053 | <b>0.46</b> | Sgl | Pi | 0.905 | 0.881 | 0.945 | 0.96 |
| iYNL179C-1   | 14 | 301879  | 12551 | YNL179 | <b>0.38</b> | Dbl | Pi | 0.923 | 0.564 | 0.997 | 0.96 |
| iYBR007C-0   | 2  | 250969  | 7613  | YBR007 | <b>0.32</b> | Sgl | Pi | 0.477 | 0.06  | 0.921 | 0.96 |
| iYBR007C-0   | 2  | 250969  | 7613  | YBR007 | <b>0.32</b> | Sgl | Pi | 0.477 | 0.06  | 0.921 | 0.96 |
| iYML115C     | 13 | 41788   | 12026 | YML115 | <b>0.89</b> | Sgl | Pi | 0.497 | 0.322 | 0.207 | 0.96 |
| iYARWdelta7  | 1  | 189733  | 7499  | YAR035 | <b>0.31</b> | Sgl | Pi | 0.148 | 0.631 | 0.875 | 0.96 |
| iYBR196C     | 2  | 613852  | 7797  | YBR196 | <b>0.04</b> | Sgl | Pi | 0.505 | 0.482 | 0.207 | 0.96 |
| iYOR050C     | 15 | 424607  | 13003 | YOR050 | <b>0.2</b>  | Sgl | Pi | 0.841 | 0.655 | 0.755 | 0.96 |
| iYNL016W     | 14 | 604268  | 12401 | YNL016 | <b>0.49</b> | Sgl | Pi | 0.105 | 0.589 | 0.568 | 0.97 |
| iYER088C     | 5  | 335173  | 9045  | YER088 | <b>0.21</b> | Sgl | Pi | 0.56  | 0.121 | 0.228 | 0.97 |
| iYDR112W     | 4  | 679845  |       | 8415   | <b>0.55</b> | Non | F  | 0.821 | 0.786 | 0.918 | 0.97 |
| iYPR153W     | 16 | 834227  | 13744 | YPR153 | <b>0.84</b> | Sgl | Pi | 0.002 | 0.098 | 0.029 | 0.97 |
| iYOR377W-1   | 15 | 1048651 | 13309 | YOR377 | <b>0.57</b> | Sgl | Pi | 0.801 | 0.36  | 0.945 | 0.97 |
| iYFR031C-A   | 6  | 221409  | 9492  | YFR031 | <b>0.09</b> | Sgl | Pi | 0.783 | 0.397 | 0.057 | 0.97 |
| iYDL067C     | 4  | 334390  | 8126  | YDL067 | <b>0.73</b> | Dbl | Pi | 0.715 | 0.488 | 0.448 | 0.97 |
| iYOR337W     | 15 | 956616  | 13269 | YOR337 | <b>0.15</b> | Sgl | Pi | 0.768 | 0.791 | 0.662 | 0.97 |
| iYLR232W     | 12 | 607187  |       | 11695  | <b>0.46</b> | Non | F  | 0.274 | 0.603 | 0.405 | 0.97 |
| iYCR106W     | 3  | 313455  | 8054  | YCR106 | <b>0.13</b> | Sgl | Pi | 0.92  | 0.974 | 0.212 | 0.97 |
| iYBL030C-1   | 2  | 165022  | 7530  | YBL030 | <b>0.08</b> | Dbl | Pi | 0.905 | 0.114 | 0.839 | 0.97 |
| iYER153C     | 5  | 474799  | 9171  | YER153 | <b>0.85</b> | Dbl | Pi | 0.576 | 0.031 | 0.631 | 0.97 |
| iYIR017C     | 9  | 384103  | 10667 | YIR017 | <b>0.34</b> | Dbl | Pi | 0.223 | 0.837 | 0.441 | 0.97 |
| iYGR146C     | 7  | 784841  | 10025 | YGR146 | <b>0.24</b> | Sgl | Pi | 0.253 | 0.149 | 0.908 | 0.97 |
| iYDR043C-0   | 4  | 543363  | 8350  | YDR043 | <b>0.28</b> | Dbl | Pi | 0.918 | 0.46  | 0.482 | 0.97 |
| iYJR020W     | 10 | 468018  |       | 10930  | <b>0.49</b> | Non | F  | 0.505 | 0.344 | 0.772 | 0.97 |
| iYPL062W     | 16 | 432302  | 13394 | YPL062 | <b>0.1</b>  | Sgl | Pi | 0.543 | 0.457 | 0.927 | 0.97 |

|            |    |         |       |         |             |     |    |       |       |       |      |
|------------|----|---------|-------|---------|-------------|-----|----|-------|-------|-------|------|
| iYCR104W   | 3  | 308172  | 8052  | YCR10E  | <b>0.18</b> | Sgl | Pi | 0.967 | 0.986 | 0.715 | 0.97 |
| iYHR049C-A | 8  | 207514  | 10286 | YHR04   | <b>0.31</b> | Dbl | Pi | 0.49  | 0.427 | 0.614 | 0.97 |
| iYIL100W   | 9  | 177722  | 10568 | YIL09E  | <b>0.37</b> | Sgl | Pi | 0.624 | 0.577 | 0.989 | 0.97 |
| iYER010C-1 | 5  | 174295  | 8929  | YER01C  | <b>0.62</b> | Dbl | Pi | 0.771 | 0.728 | 0.777 | 0.97 |
| iYLR296W   | 12 | 723313  | 11750 | YLR29   | <b>0.36</b> | Sgl | Pi | 0.611 | 0.447 | 0.611 | 0.97 |
| iYNL231C   | 14 | 217030  | 12595 | YNL23   | <b>0.13</b> | Sgl | Pi | 0.046 | 0.636 | 0.988 | 0.97 |
| iYPL253C   | 16 | 72998   | 13572 | YPL25   | <b>0.64</b> | Sgl | Pi | 0.189 | 0.196 | 5E-07 | 0.97 |
| iYJR045C   | 10 | 521297  | 10947 | YJR04   | <b>0.68</b> | Dbl | Pi | 0.004 | 0.747 | 0.983 | 0.97 |
| iYJL078C   | 10 | 293668  | 10766 | YJL07E  | <b>0.19</b> | Sgl | Pi | 0.731 | 0.001 | 0.901 | 0.97 |
| iYBR066C   | 2  | 370648  | 7671  | YBR06E  | <b>0.24</b> | Sgl | Pi | 0.863 | 0.099 | 0.454 | 0.97 |
| iYLR438C-A | 12 | 1014165 | 11874 | YLR43   | <b>0.88</b> | Dbl | Pi | 0.243 | 0.087 | 6E-05 | 0.97 |
| iYPL136W   | 16 | 296652  | 13461 | YPL13   | <b>0.2</b>  | Sgl | Pi | 0.236 | 0.541 | 0.493 | 0.97 |
| iYMR251W   | 13 | 774035  | 12299 | YMR2E   | <b>0.27</b> | Sgl | Pi | 0.744 | 0.467 | 0.831 | 0.97 |
| iYML117W-A | 13 | 37784   | 12028 | YML11   | <b>0.34</b> | Sgl | Pi | 0.665 | 0.419 | 0.976 | 0.97 |
| iYHR048W   | 8  | 206132  | 10285 | YHR04   | <b>0.5</b>  | Sgl | Pi | 0.018 | 0.003 | 0.927 | 0.97 |
| iYKL045W   | 11 | 354719  | 11108 | YKL04   | <b>0.04</b> | Sgl | Pi | 0.879 | 0.611 | 0.663 | 0.97 |
| iYMR069W   | 13 | 408563  | 12117 | YMR07   | <b>0.03</b> | Sgl | Pi | 0.038 | 0.636 | 0.997 | 0.97 |
| iYEL008W   | 5  | 140877  | 8840  | YEL007  | <b>0.01</b> | Sgl | Pi | 0.826 | 0.062 | 0.999 | 0.97 |
| iYKL110C-1 | 11 | 230695  | 11174 | YKL11   | <b>0.06</b> | Dbl | Pi | 0.893 | 0.465 | 0.888 | 0.97 |
| iYFR017C   | 6  | 182842  | 9462  | YFR017  | <b>0.79</b> | Sgl | Pi | 0.031 | 0.002 | 0.351 | 0.97 |
| iYOR268C   | 15 | 825913  | 13206 | YOR2E   | <b>0.73</b> | Dbl | Pi | 0.301 | 0.064 | 0.995 | 0.97 |
| iYMR056C   | 13 | 388228  | 12105 | YMR0E   | <b>0.15</b> | Sgl | Pi | 0.522 | 0.385 | 0.386 | 0.97 |
| iYIL013C   | 9  | 332446  | 10489 | YIL01E  | <b>0.19</b> | Dbl | Pi | 0.614 | 0.077 | 0.967 | 0.97 |
| iYBR067C   | 2  | 372679  | 7672  | YBR067  | <b>0.14</b> | Sgl | Pi | 0.875 | 0.658 | 0.743 | 0.97 |
| iYAR042W   | 1  | 193382  | 7474  | YAR044  | <b>0.05</b> | Sgl | Pi | 0.512 | 0.694 | 0.527 | 0.97 |
| iYAR014C   | 1  | 168869  | 7461  | YAR014  | <b>0.95</b> | Dbl | Pi | NaN   | 0.005 | 0.005 | 0.97 |
| iYBR181C   | 2  | 592727  | 7783  | YBR181  | <b>0.33</b> | Sgl | Pi | 0.743 | 0.484 | 0.151 | 0.97 |
| iYDR296W   | 4  | 1055874 | 8583  | YDR297  | <b>0.34</b> | Sgl | Pi | 0.605 | 0.479 | 0.952 | 0.97 |
| iYIL066C   | 9  | 240705  | 10539 | YIL06E  | <b>0.84</b> | Sgl | Pi | 0.851 | 0.39  | 0.487 | 0.97 |
| iYDR441C   | 4  | 1345061 | 8720  | YDR441  | <b>0.16</b> | Dbl | Pi | 0.919 | 0.73  | 0.9   | 0.97 |
| iYPL177C-0 | 16 | 213976  | 13499 | YPL17   | <b>0.02</b> | Sgl | Pi | 0.19  | 0.079 | 0.918 | 0.97 |
| iYLL054C   | 12 | 35210   | 11454 | YLL05E  | <b>0.83</b> | Sgl | Pi | 0.758 | 0.442 | 0.16  | 0.97 |
| iYKR052C   | 11 | 533111  | 11340 | YKR05   | <b>0.63</b> | Sgl | Pi | 0.852 | 0.454 | 0.978 | 0.97 |
| iYKL032C   | 11 | 381503  | 11096 | YKL03   | <b>0.08</b> | Dbl | Pi | 0.529 | 0.112 | 0.993 | 0.97 |
| iYLR299W   | 12 | 728051  | 11753 | YLR30   | <b>0.1</b>  | Sgl | Pi | 0.89  | 1E-05 | 0.974 | 0.98 |
| iYMR251W-A | 13 | 774940  |       | 12300   | <b>0.35</b> | Non | F  | 0.759 | 0.681 | 0.057 | 0.98 |
| iYAL040C   | 1  | 67519   | 7414  | YAL040  | <b>0.09</b> | Sgl | Pi | 0.389 | 0.203 | 0.939 | 0.98 |
| iYJR144W   | 10 | 701390  |       | 11039   | <b>0.28</b> | Non | F  | 0.877 | 0.509 | 0.404 | 0.98 |
| iYAL054C   | 1  | 45027   | 7426  | YAL054  | <b>0.67</b> | Dbl | Pi | 8E-05 | 0.014 | 0.484 | 0.98 |
| iYPR195C-0 | 16 | 928302  | 13784 | YPR1E   | <b>0.15</b> | Dbl | Pi | 0.814 | 3E-07 | 0.993 | 0.98 |
| iYHR188C   | 8  | 483839  | 10422 | YHR1E   | <b>0.92</b> | Dbl | Pi | 0.73  | 0.591 | 0.833 | 0.98 |
| iYCL040W   | 3  | 52335   | 7927  | YCL039  | <b>0.99</b> | Sgl | Pi | 0.07  | 0.724 | 0.43  | 0.98 |
| itS(UGA)I  | 9  | 248914  | 7320  | YIL057C | <b>0.06</b> | Dbl | Pi | 0.921 | 0.776 | 0.998 | 0.98 |
| itS(UGA)I  | 9  | 248914  | 7320  | YIL057C | <b>0.06</b> | Dbl | Pi | 0.921 | 0.776 | 0.998 | 0.98 |
| iYIL012W   | 9  | 333406  | 10488 | YIL011  | <b>0.44</b> | Sgl | Pi | 0.183 | 0.027 | 0.358 | 0.98 |
| iYAL062W   | 1  | 32926   | 7433  | YAL061  | <b>0.62</b> | Sgl | Pi | 0.289 | 0.183 | 0.346 | 0.98 |
| iYOR178C-0 | 15 | 670241  | 13122 | YOR17   | <b>0.4</b>  | Sgl | Pi | 0.88  | 0.815 | 0.214 | 0.98 |
| iYLR326W   | 12 | 782891  |       | 11776   | <b>0.38</b> | Non | F  | 0.587 | 0.781 | 0.494 | 0.98 |
| iYBR068C   | 2  | 375640  | 7673  | YBR06E  | <b>0.03</b> | Sgl | Pi | 0.912 | 0.01  | 0.982 | 0.98 |
| iYKR043C   | 11 | 521336  | 11332 | YKR04   | <b>0.83</b> | Dbl | Pi | 0.722 | 0.297 | 0.953 | 0.98 |
| iYHL029C   | 8  | 47975   | 10206 | YHL02   | <b>0.1</b>  | Dbl | Pi | 9E-04 | 0.021 | 0.996 | 0.98 |

|               |    |         |       |        |             |     |    |       |       |       |      |
|---------------|----|---------|-------|--------|-------------|-----|----|-------|-------|-------|------|
| iYMR198W      | 13 | 661533  | 12248 | YMR19  | <b>0.19</b> | Sgl | Pi | 0.821 | 0.008 | 0.888 | 0.98 |
| iYDR343C      | 4  | 1161296 | 8629  | YDR343 | <b>0.53</b> | Sgl | Pi | 0.628 | 0.73  | 0.465 | 0.98 |
| iYOR316C-1    | 15 | 908444  | 13251 | YOR31  | <b>0.06</b> | Dbl | Pi | 0.305 | 0.346 | 0.933 | 0.98 |
| iYKL063C-1    | 11 | 322023  | 11127 | YKL06  | <b>0.25</b> | Dbl | Pi | 0.023 | 0.315 | 0.807 | 0.98 |
| iYBR157C-1    | 2  | 555390  | 7760  | YBR157 | <b>0.04</b> | Dbl | Pi | 0.913 | 0.001 | 0.36  | 0.98 |
| iYDR186C      | 4  | 835478  | 8486  | YDR186 | <b>0.26</b> | Sgl | Pi | 0.015 | 0.057 | 0.995 | 0.98 |
| iYNR064C      | 14 | 750009  | 12764 | YNR06  | <b>0.25</b> | Sgl | Pi | 0.188 | 0.659 | 0.244 | 0.98 |
| iYJR104C      | 10 | 622690  | 11001 | YJR10  | <b>0.32</b> | Dbl | Pi | 0.001 | 0.731 | 0.779 | 0.98 |
| iYDR076W      | 4  | 599683  | 8383  | YDR077 | <b>0.03</b> | Sgl | Pi | 0.385 | 0.588 | 0.987 | 0.98 |
| iYMR261C      | 13 | 793372  | 12310 | YMR26  | <b>0.89</b> | Dbl | Pi | 0.668 | 0.003 | 0.679 | 0.98 |
| iYDR005C      | 4  | 458100  | 8310  | YDR005 | <b>0.69</b> | Sgl | Pi | 0.736 | 0.778 | 0.983 | 0.98 |
| iYLR108C      | 12 | 368129  | 11575 | YLR10  | <b>0.27</b> | Dbl | Pi | 0.814 | 0.23  | 1     | 0.98 |
| iCEN5         | 5  | 152098  | 7005  | YEL001 | <b>0.36</b> | Dbl | Pi | 0.898 | 0.733 | 0.953 | 0.98 |
| iYOL085C      | 15 | 162008  | 12861 | YOL08  | <b>0.7</b>  | Dbl | Pi | 0.869 | 0.617 | 0.095 | 0.98 |
| iYPR013C-0    | 16 | 585583  | 13623 | YPR01  | <b>0.3</b>  | Sgl | Pi | 0.73  | 0.002 | 1     | 0.98 |
| iYKR041W      | 11 | 518575  | 11330 | YKR04  | <b>0.01</b> | Sgl | Pi | 0.88  | 0.051 | 0.984 | 0.99 |
| iYAL014C      | 1  | 129004  | 7387  | YAL014 | <b>0.86</b> | Dbl | Pi | 0.729 | 0.524 | 0.434 | 0.99 |
| iYKL097C      | 11 | 258549  | 11158 | YKL09  | <b>0.04</b> | Dbl | Pi | 0.951 | 1E-04 | 0.999 | 0.99 |
| iYGL228W      | 7  | 69327   | 9805  | YGL227 | <b>0.72</b> | Sgl | Pi | 0.682 | 0.657 | 0.115 | 0.99 |
| iYFL014W      | 6  | 107564  |       | 9310   | <b>0.25</b> | Non | F  | 0.631 | 0.521 | 0.018 | 0.99 |
| iYJL212C      | 10 | 36254   | 10885 | YJL21  | <b>0.53</b> | Sgl | Pi | 0.803 | 0.002 | 0.956 | 0.99 |
| iYCL025C      | 3  | 77912   | 7914  | YCL025 | <b>0.07</b> | Sgl | Pi | 0.879 | 0.899 | 0.997 | 0.99 |
| iYAR027W      | 1  | 184463  | 7469  | YAR028 | <b>0.83</b> | Sgl | Pi | NaN   | 0.828 | 0.514 | 0.99 |
| iYPL025C      | 16 | 503035  | 13359 | YPL02  | <b>0.54</b> | Dbl | Pi | 0.865 | 0.003 | 0.926 | 0.99 |
| iYMR194C-A    | 13 | 653127  | 12243 | YMR19  | <b>0.09</b> | Dbl | Pi | 0.308 | 0.523 | 0.988 | 0.99 |
| iYER184C      | 5  | 558667  | 9235  | YER184 | <b>0.93</b> | Dbl | Pi | 0.428 | 0.585 | 0.74  | 0.99 |
| iYJR145C      | 10 | 702750  | 11040 | YJR14  | <b>0.03</b> | Dbl | Pi | 0.015 | 0.019 | 0.979 | 0.99 |
| iYPL056C      | 16 | 453727  | 13387 | YPL05  | <b>0.07</b> | Sgl | Pi | 0.854 | 0.703 | 0.956 | 0.99 |
| iYGR050C      | 7  | 592427  | 9933  | YGR050 | <b>0.18</b> | Sgl | Pi | 0.921 | 7E-06 | 0.987 | 0.99 |
| iYPL015C      | 16 | 526866  | 13350 | YPL01  | <b>0.4</b>  | Dbl | Pi | 0.757 | 0.585 | 0.922 | 0.99 |
| iYIL119C-0    | 9  | 137913  | 10588 | YIL119 | <b>0.09</b> | Dbl | Pi | 0.964 | 0.706 | 0.588 | 0.99 |
| iYFR015C      | 6  | 176394  | 9458  | YFR015 | <b>0.56</b> | Sgl | Pi | 0.677 | 0.041 | 0.533 | 0.99 |
| iYOR178C-1    | 15 | 671037  | 13123 | YOR17  | <b>0.16</b> | Sgl | Pi | 0.942 | 0.314 | 0.93  | 0.99 |
| iYJL089W      | 10 | 268096  | 10775 | YJL089 | <b>0.02</b> | Sgl | Pi | NaN   | 0.526 | 0.454 | 0.99 |
| iYGR248W      | 7  | 986730  | 10116 | YGR24  | <b>0.44</b> | Sgl | Pi | 0.94  | 0.591 | 0.936 | 0.99 |
| iYGR161C-0    | 7  | 809400  | 10037 | YGR16  | <b>0.16</b> | Dbl | Pi | 0.354 | 0.585 | 0.646 | 1    |
| iYHR070W      | 8  | 236412  | 10307 | YHR07  | <b>0.11</b> | Sgl | Pi | 0.067 | 0.528 | 0.447 | 1    |
| iYGL007W-0    | 7  | 483630  | 9570  | YGL006 | <b>0.13</b> | Sgl | Pi | 0.968 | 0.007 | 0.863 | 1    |
| iYEL045C      | 5  | 69256   | 8875  | YEL045 | <b>0.02</b> | Dbl | Pi | 0.954 | 0.338 | 0.987 | 1    |
| iYER045C-0    | 5  | 241497  | 8964  | YER045 | <b>0.29</b> | Dbl | Pi | 0.933 | 0.111 | 0.694 | 1    |
| iYKR092C-1    | 11 | 614445  | 11382 | YKR09  | <b>0.01</b> | Dbl | Pi | 0.789 | 0.002 | 0.993 | 1    |
| iYDR309C      | 4  | 1080193 | 8596  | YDR309 | <b>0.1</b>  | Sgl | Pi | 0.536 | 0.119 | 0.998 | 1    |
| iYMR135W-A    | 13 | 540446  | 12183 | YMR13  | <b>0.04</b> | Sgl | Pi | 0.898 | 0.217 | 0.999 | 1    |
| iYNL241C      | 14 | 197927  | 12604 | YNL24  | <b>0.26</b> | Sgl | Pi | 0.837 | 0.016 | 0.009 | 1    |
| iYDR228C      | 4  | 923782  | 8522  | YDR228 | <b>0.77</b> | Dbl | Pi | NaN   | 0.427 | 0.228 | NaN  |
| iYDR228C      | 4  | 923782  | 8522  | YDR228 | <b>0.77</b> | Dbl | Pi | NaN   | 0.427 | 0.228 | NaN  |
| iYMR012W      | 13 | 295005  |       | 12063  | <b>0.01</b> | Non | F  | NaN   | 0.568 | 0.313 | NaN  |
| iYDR335W      | 4  | 1144836 | 8620  | YDR335 | <b>0.54</b> | Sgl | Pi | NaN   | 0.263 | 0.314 | NaN  |
| iYPR168W      | 16 | 878547  | 13759 | YPR16  | <b>0.02</b> | Sgl | Pi | NaN   | 0.468 | 0.463 | NaN  |
| iYOL032W      | 15 | 266157  |       | 12812  | <b>0.01</b> | Non | F  | 0.971 | 0.545 | 0.683 | NaN  |
| iYCLWomega2-1 | 3  | 0       |       | 7956   | <b>0.05</b> | Non | F  | 0.42  | 0.512 | 0.814 | NaN  |

|            |    |         |       |        |             |       |    |              |       |       |      |
|------------|----|---------|-------|--------|-------------|-------|----|--------------|-------|-------|------|
| iYCR085W   | 3  | 263260  | 8032  | YCR086 | <b>0.61</b> | Sgl   | Pi | NaN          | 0.016 | 0.904 | NaN  |
| iYCR085W   | 3  | 263260  | 8032  | YCR086 | <b>0.61</b> | Sgl   | Pi | NaN          | 0.016 | 0.904 | NaN  |
| iYCR071C   | 3  | 240540  | 8020  | YCR071 | <b>0.99</b> | Sgl   | Pi | NaN          | 0.58  | NaN   | NaN  |
| iYCR071C   | 3  | 240540  | 8020  | YCR071 | <b>0.99</b> | Sgl   | Pi | NaN          | 0.58  | NaN   | NaN  |
| iYMR060C   | 13 | 392520  | 12108 | YMR060 | <b>#N/A</b> | Dbl   | Pi | <b>7E-05</b> | 0.474 | 0.227 | 0.44 |
| iYBR101C   | 2  | 444686  | 7707  | YBR101 | <b>#N/A</b> | Sgl   | Pi | <b>1E-04</b> | 0.573 | 0.443 | 0.5  |
| iYKR029C   | 11 | 499469  | 11321 | YKR029 | <b>#N/A</b> | Dbl   | Pi | <b>1E-04</b> | 0.01  | 0.501 | 0.75 |
| iYAL043C   | 1  | 61045   | 7417  | YAL043 | <b>#N/A</b> | Sgl   | Pi | <b>1E-04</b> | 0.196 | 0.832 | 0.97 |
| iYKL173W   | 11 | 125542  | 11232 | YKL173 | <b>#N/A</b> | Sgl   | Pi | <b>1E-04</b> | 0.582 | NaN   | 0.21 |
| iYLR024C   | 12 | 193268  | 11493 | YLR024 | <b>#N/A</b> | Dbl   | Pi | <b>2E-04</b> | 0.531 | 0.271 | 0.5  |
| iYMR260C   | 13 | 789827  | 12309 | YMR260 | <b>#N/A</b> | Sgl   | Pi | <b>2E-04</b> | 0.509 | 0.751 | 0.01 |
| iYIR009W   | 9  | 374861  | 10659 | YIR009 | <b>#N/A</b> | Sgl   | Pi | <b>2E-04</b> | 0.724 | 0.78  | 0.48 |
| iYNR045W   | 14 | 707590  | 12744 | YNR045 | <b>#N/A</b> | Sgl   | Pi | <b>2E-04</b> | 5E-04 | 0.696 | 0.79 |
| iYPL037C   | 16 | 481891  | 13369 | YPL037 | <b>#N/A</b> | Dbl   | Pi | <b>3E-04</b> | 0.116 | 0.662 | 0.2  |
| iYPL159C   | 16 | 251687  | 13482 | YPL159 | <b>#N/A</b> | Sgl   | Pi | <b>3E-04</b> | 0.507 | 0.12  | 0.14 |
| iYNL190W   | 14 | 283008  | 12560 | YNL190 | <b>#N/A</b> | Sgl   | Pi | <b>4E-04</b> | 0.985 | 0.103 | 0.3  |
| iYHR064C   | 8  | 227251  | 10301 | YHR064 | <b>#N/A</b> | Sgl   | Pi | <b>4E-04</b> | 0.824 | 0.328 | 0.22 |
| iYDR194C   | 4  | 847937  | 8492  | YDR194 | <b>#N/A</b> | Dbl   | Pi | <b>4E-04</b> | 0.982 | 0.703 | 0.78 |
| iYHR161C   | 8  | 422289  | 10396 | YHR161 | <b>#N/A</b> | Dbl   | Pi | <b>5E-04</b> | 0.602 | 0.951 | 0.87 |
| iYLR293C   | 12 | 721416  | 11748 | YLR293 | <b>#N/A</b> | Sgl   | Pi | <b>5E-04</b> | 0.84  | 0.422 | 0.51 |
| iYLR222C   | 12 | 581756  | 11687 | YLR222 | <b>#N/A</b> | Sgl   | Pi | <b>5E-04</b> | 0.747 | 0.621 | 0.38 |
| itK(CUU)D1 | 4  | 1201805 | 7201  | YDR363 | <b>#N/A</b> | Sgl   | Pi | <b>6E-04</b> | 0.809 | 0.546 | 0.36 |
| iYOR205C   | 15 | 727235  | 13148 | YOR205 | <b>#N/A</b> | Dbl   | Pi | <b>7E-04</b> | 0.533 | 0.321 | 0.26 |
| iYGL194C   | 7  | 141716  | 9749  | YGL194 | <b>#N/A</b> | Sgl   | Pi | <b>7E-04</b> | 0.19  | 0.763 | 0.36 |
| iYKL016C   | 11 | 407618  | 11082 | YKL016 | <b>#N/A</b> | Dbl   | Pi | <b>8E-04</b> | 0.405 | 0.887 | 0.67 |
| iYDR462W   | 4  | 1386492 | 8737  | YDR462 | <b>#N/A</b> | Sgl   | Pi | <b>9E-04</b> | 0.671 | 0.381 | 0.49 |
| iYML013C-A | 13 | 245917  | 11933 | YML013 | <b>#N/A</b> | Dbl   | Pi | <b>9E-04</b> | 0.387 | 0.531 | 0.93 |
| iYNR035C   | 14 | 694030  | 12735 | YNR035 | <b>#N/A</b> | Sgl   | Pi | 0.001        | 0.043 | 0.965 | 0.93 |
| iYER111C   | 5  | 385864  | 9093  | YER111 | <b>#N/A</b> | Dbl   | Pi | 0.001        | 0.493 | 0.371 | 0.02 |
| iYGR203W   | 7  | 905678  | 10075 | YGR203 | <b>#N/A</b> | Sgl   | Pi | 0.001        | 0.729 | 1     | 0.68 |
| iYLR192C   | 12 | 539576  | 11661 | YLR192 | <b>#N/A</b> | Sgl   | Pi | 0.001        | 0.784 | 0.262 | 0.26 |
| iYGR240C   | 7  | 973725  | 10109 | YGR240 | <b>#N/A</b> | Sgl   | Pi | 0.001        | 0.609 | 0.395 | 0.57 |
| iYOR354C-0 | 15 | 1003229 | 13285 | YOR354 | <b>#N/A</b> | Dbl   | Pi | 0.002        | 0.086 | 0.869 | 0.18 |
| iYOR224C   | 15 | 761251  | 13166 | YOR224 | <b>#N/A</b> | Dbl   | Pi | 0.002        | 0.59  | 0.345 | 0.53 |
| iYIL026C   | 9  | 307925  | 10502 | YIL026 | <b>#N/A</b> | Sgl   | Pi | 0.002        | 0.644 | 0.386 | 0.9  |
| iYDL072C   | 4  | 330457  | 8129  | YDL072 | <b>#N/A</b> | Sgl   | Pi | 0.003        | 0.337 | 0.554 | 0.1  |
| iYDL052C   | 4  | 363574  | 8111  | YDL052 | <b>#N/A</b> | Dbl   | Pi | 0.003        | 0.51  | 0.068 | 0.55 |
| iYGL173C   | 7  | 180105  | 9727  | YGL173 | <b>#N/A</b> | Dbl   | Pi | 0.003        | 0.426 | 0.291 | 0.53 |
| iYLR453C   | 12 | 1042967 | 11889 | YLR453 | <b>#N/A</b> | Dbl   | Pi | 0.003        | 0.044 | 0.215 | 0.16 |
| iYKR038C   | 11 | 512887  | 11328 | YKR038 | <b>#N/A</b> | Dbl   | Pi | 0.003        | 0.559 | 0.501 | 0.73 |
| iYDR365C   | 4  | 1206368 | 8651  | YDR365 | <b>#N/A</b> | Dbl   | Pi | 0.003        | 0.294 | 0.304 | 0.52 |
| iYJL105W   | 10 | 226419  | 10790 | YJL105 | <b>#N/A</b> | Sgl   | Pi | 0.003        | 0.142 | 0.756 | 0.22 |
| iYCL046W   | 3  | 46948   |       | 7929   | <b>#N/A</b> | Non F |    | 0.004        | 0.583 | 0.944 | 0.57 |
| iYDR266C   | 4  | 1002002 | 8558  | YDR266 | <b>#N/A</b> | Sgl   | Pi | 0.004        | 0.751 | 0.49  | 0.55 |
| iYLL013C   | 12 | 124704  | 11418 | YLL013 | <b>#N/A</b> | Dbl   | Pi | 0.004        | 0.906 | 0.892 | 0.21 |
| iYLR203C   | 12 | 551963  | 11669 | YLR203 | <b>#N/A</b> | Dbl   | Pi | 0.005        | 0.513 | 0.095 | 0.85 |
| iYJL153C   | 10 | 135699  | 10832 | YJL153 | <b>#N/A</b> | Dbl   | Pi | 0.005        | 0.694 | 0.573 | 0.75 |
| itK(CUU)G2 | 7  | 185777  | 7210  | YGL170 | <b>#N/A</b> | Dbl   | Pi | 0.005        | 0.779 | 0.891 | 0.31 |
| iYDR431W   | 4  | 1328681 | 8710  | YDR432 | <b>#N/A</b> | Sgl   | Pi | 0.006        | 0.65  | 0.384 | 0.6  |
| iYDR471W   | 4  | 1402550 | 8745  | YDR472 | <b>#N/A</b> | Sgl   | Pi | 0.006        | 0.51  | 0.532 | 0.07 |
| iYJR094C-1 | 10 | 606671  | 10990 | YJR094 | <b>#N/A</b> | Dbl   | Pi | 0.006        | 0.46  | 0.349 | 0.61 |

|              |    |         |       |         |      |     |    |       |       |       |      |
|--------------|----|---------|-------|---------|------|-----|----|-------|-------|-------|------|
| iYDR461W     | 4  | 1385268 | 8736  | YDR462  | #N/A | Sgl | Pi | 0.006 | 0.661 | 0.911 | 0.9  |
| iYOL115W     | 15 | 103236  |       | 12889   | #N/A | Non | F  | 0.008 | 0.23  | 0.538 | 0.3  |
| iYJL054W     | 10 | 335410  | 10746 | YJL054  | #N/A | Sgl | Pi | 0.009 | 0.58  | NaN   | 0.25 |
| iYPL105C     | 16 | 355405  | 13432 | YPL10   | #N/A | Dbl | Pi | 0.01  | 0.099 | 0.435 | 0.92 |
| iYML133C-1   | 13 | 5963    | 12046 | YML13   | #N/A | Dbl | Pi | 0.011 | 0.51  | 0.742 | 0.05 |
| iSNR45       | 16 | 821901  | 7070  | YPR144  | #N/A | Dbl | Pi | 0.011 | 0.114 | 0.995 | 0.82 |
| iYOR107W     | 15 | 522277  | 13057 | YOR107  | #N/A | Sgl | Pi | 0.011 | 0.529 | 0.315 | 0.6  |
| iYBR281C     | 2  | 767567  | 7870  | YBR281  | #N/A | Dbl | Pi | 0.012 | 0.419 | 0.054 | 0.43 |
| itK(CUU)I    | 9  | 300284  | 7212  | YIL030C | #N/A | Sgl | Pi | 0.012 | 0.651 | 0.913 | 0.8  |
| iYERCdelta15 | 5  | 435447  |       | 9247    | #N/A | Non | F  | 0.014 | 0.191 | 0.506 | 0.31 |
| iYBR030W     | 2  | 299929  | 7635  | YBR031  | #N/A | Sgl | Pi | 0.016 | 0.798 | 0.365 | 0.4  |
| iYBR030W     | 2  | 299929  | 7635  | YBR031  | #N/A | Sgl | Pi | 0.016 | 0.798 | 0.365 | 0.4  |
| iYMR309C     | 13 | 895426  | 12357 | YMR309  | #N/A | Sgl | Pi | 0.016 | 0.412 | 0.406 | 0.45 |
| iYIR012W     | 9  | 379770  |       | 10662   | #N/A | Non | F  | 0.017 | 0.764 | 0.321 | 0.48 |
| iYGR106C     | 7  | 699769  | 9987  | YGR106  | #N/A | Dbl | Pi | 0.018 | 0.684 | 0.003 | 0.15 |
| iYPL240C     | 16 | 98611   | 13559 | YPL240  | #N/A | Dbl | Pi | 0.018 | 0.56  | 0.587 | 0.69 |
| iYDL061C     | 4  | 340782  | 8121  | YDL061  | #N/A | Dbl | Pi | 0.019 | 0.986 | 0.392 | 0.12 |
| iYBR013C     | 2  | 265831  | 7619  | YBR013  | #N/A | Sgl | Pi | 0.022 | 0.436 | 0.555 | 0.31 |
| iYGR254W     | 7  | 1002221 |       | 10125   | #N/A | Non | F  | 0.022 | 0.567 | 0.42  | 0.65 |
| iYFL037W     | 6  | 57709   | 9356  | YFL036  | #N/A | Sgl | Pi | 0.023 | 0.183 | 0.44  | 0.82 |
| iYBR139W     | 2  | 517160  |       | 7741    | #N/A | Non | F  | 0.024 | 0.659 | 0.402 | 0.46 |
| iYHR143W     | 8  | 386495  | 10378 | YHR143  | #N/A | Sgl | Pi | 0.025 | 0.817 | 0.514 | 0.26 |
| iYOR062C     | 15 | 443543  | 13014 | YOR062  | #N/A | Dbl | Pi | 0.029 | 0.376 | 0.602 | 0.76 |
| iYIL152W     | 9  | 57246   |       | 10621   | #N/A | Non | F  | 0.03  | 0.315 | 0.844 | 0.6  |
| iYOR077W     | 15 | 472589  | 13031 | YOR077  | #N/A | Sgl | Pi | 0.03  | 0.482 | 0.813 | 0.59 |
| iYGR295C-1   | 7  | 1083783 | 10166 | YGR295  | #N/A | Dbl | Pi | 0.032 | 0.801 | 0.773 | 0.2  |
| iYKR007W     | 11 | 451628  | 11301 | YKR007  | #N/A | Sgl | Pi | 0.04  | 0.538 | 0.57  | 0.77 |
| iYJL077C     | 10 | 294746  | 10765 | YJL077  | #N/A | Dbl | Pi | 0.041 | 0.12  | 0.2   | 0.42 |
| iYPL130W     | 16 | 305076  | 13455 | YPL12   | #N/A | Sgl | Pi | 0.044 | 0.534 | 0.405 | 0.36 |
| iYKL054C     | 11 | 338406  |       | #N/A    | #N/A | Sgl | Pi | 0.045 | 0.982 | 0.149 | 0.9  |
| iYKL054C     | 11 | 338406  |       | #N/A    | #N/A | Sgl | Pi | 0.045 | 0.982 | 0.149 | 0.9  |
| iYIL018W     | 9  | 317932  |       | 10495   | #N/A | Non | F  | 0.049 | 0.613 | 0.55  | 0.55 |
| iYPR035W     | 16 | 643331  | 13647 | YPR035  | #N/A | Sgl | Pi | 0.049 | 0.932 | 0.009 | 0.28 |
| iYORCdelta11 | 15 | 438473  | 13327 | YOR035  | #N/A | Sgl | Pi | 0.053 | 0.719 | NaN   | 0.19 |
| iYLR185W     | 12 | 523337  | 11654 | YLR185  | #N/A | Sgl | Pi | 0.053 | 0.87  | 0.363 | 0.78 |
| iYGL171W     | 7  | 184080  |       | 9725    | #N/A | Non | F  | 0.054 | 0.551 | 0.945 | 0.46 |
| iYJR085C     | 10 | 585115  | 10982 | YJR085  | #N/A | Dbl | Pi | 0.056 | 0.251 | NaN   | 0    |
| iYGR072W     | 7  | 635456  |       | 9953    | #N/A | Non | F  | 0.057 | 0.626 | 0.581 | 0.49 |
| iYAL012W     | 1  | 131979  | 7385  | YAL011  | #N/A | Sgl | Pi | 0.063 | 0.566 | 0.356 | 0.77 |
| iYJL225C-0   | 10 | 6118    | 10899 | YJL225  | #N/A | Sgl | Pi | 0.065 | 0.777 | 0.552 | 0.31 |
| iYDR176W     | 4  | 816553  | 8475  | YDR177  | #N/A | Sgl | Pi | 0.065 | 0.464 | 0.855 | 0.15 |
| iYKL107W     | 11 | 236711  | 11170 | YKL107  | #N/A | Sgl | Pi | 0.066 | 0.749 | 0.147 | 0.59 |
| iYPL272C-1   | 16 | 29110   | 13591 | YPL272  | #N/A | Dbl | Pi | 0.067 | 0.736 | 0.49  | 0.47 |
| iYOR389W     | 15 | 1076090 | 13323 | YOR389  | #N/A | Sgl | Pi | 0.069 | 0.9   | 0.006 | 0.59 |
| iYNL116W     | 14 | 409891  |       | 12492   | #N/A | Non | F  | 0.069 | 0.658 | 0.621 | 0.23 |
| iYLR335W     | 12 | 799569  |       | 11784   | #N/A | Non | F  | 0.072 | 0.478 | 0.361 | 0.17 |
| iYLRWdelta20 | 12 | 797073  | 11915 | YLR335  | #N/A | Dbl | Pi | 0.072 | 0.66  | 0.451 | 0.37 |
| iYGR049W     | 7  | 591858  |       | 9932    | #N/A | Non | F  | 0.076 | 0.471 | 0.493 | 0.35 |
| iYPR110C     | 16 | 746835  | 13706 | YPR110  | #N/A | Dbl | Pi | 0.078 | 0.019 | NaN   | 0.63 |
| iYER034W     | 5  | 222387  | 8953  | YER034  | #N/A | Sgl | Pi | 0.081 | 0.639 | 0.39  | 0.96 |
| iYPR034W     | 16 | 640946  | 13646 | YPR034  | #N/A | Sgl | Pi | 0.085 | 1E-04 | 0.856 | 0.12 |



|                |    |                |           |         |      |        |       |       |       |      |
|----------------|----|----------------|-----------|---------|------|--------|-------|-------|-------|------|
| iYDL060W       | 4  | 343970         |           | 8120    | #N/A | Non F  | 0.091 | 0.493 | 0.493 | 0.73 |
| iYDL060W       | 4  | 343970         |           | 8120    | #N/A | Non F  | 0.091 | 0.493 | 0.493 | 0.73 |
| iYKL012W       | 11 | 419684         |           | 11078   | #N/A | Non F  | 0.092 | 0.593 | 0.615 | 0.62 |
| iYAL004W + iYB | ## | #N/A           | #N/A      |         | #N/A | #N/A   | 0.092 | NaN   | NaN   | 0.52 |
| iYGL208W       | 7  | 98590 9769     |           | YGL207  | #N/A | Sgl Pi | 0.095 | 0.649 | 0.876 | 0.42 |
| iYBL073W       | 2  | 87960          |           | 7568    | #N/A | Non F  | 0.1   | 0.47  | 0.799 | 0.4  |
| iYIL005W       | 9  | 347784         |           | 10480   | #N/A | Non F  | 0.104 | 0.664 | 0.39  | 0.41 |
| iYJL043W       | 10 | 360603 10735   |           | YJL043  | #N/A | Sgl Pi | 0.105 | 0.533 | 0.92  | 0.64 |
| 9S rRNA        | ## | #N/A           | #N/A      |         | #N/A | #N/A   | 0.106 | 0.535 | 0.366 | 0.59 |
| 9S rRNA        | ## | #N/A           | #N/A      |         | #N/A | #N/A   | 0.106 | 0.535 | 0.366 | 0.59 |
| iYBL037W       | 2  | 150235         |           | 7537    | #N/A | Non F  | 0.106 | 0.562 | 0.571 | 0.57 |
| iYDL064W       | 4  | 338076         |           | 8123    | #N/A | Non F  | 0.106 | 0.686 | 0.367 | 0.17 |
| iYOR344C-0     | 15 | 978073 13276   |           | YOR344  | #N/A | Sgl Pi | 0.107 | 0.016 | 0.991 | 0.99 |
| iYLR195C       | 12 | 543317 11664   |           | YLR195  | #N/A | Dbl Pi | 0.108 | 0.931 | 0.211 | 0.31 |
| Q0050          | 17 | 69210 3634 A11 | 17 W 1381 | #N/A    |      | 0      | 0.108 | 0.59  | NaN   | 0.59 |
| Q0050          | 17 | 69210 3634 A11 | 17 W 1381 | #N/A    |      | 0      | 0.108 | 0.59  | NaN   | 0.59 |
| iYMR109W       | 13 | 490234         |           | 12156   | #N/A | Non F  | 0.108 | 0.55  | 0.645 | 0.78 |
| iYJR121W       | 10 | 648843 11017   |           | YJR121  | #N/A | Sgl Pi | 0.11  | 0.813 | 0.754 | 0.45 |
| iYLR051C       | 12 | 246971 11522   |           | YLR051  | #N/A | Dbl Pi | 0.111 | 0.46  | 0.402 | 0.81 |
| iYCR076C       | 3  | 250049 8025    |           | YCR076  | #N/A | Sgl Pi | 0.113 | 0.571 | 0.857 | 0.6  |
| iYBL035C       | 2  | 153575 7535    |           | YBL035  | #N/A | Sgl Pi | 0.117 | 0.143 | 0.669 | 0.52 |
| iYDL075W       | 4  | 322972         |           | 8132    | #N/A | Non F  | 0.118 | 0.612 | 0.432 | 0.25 |
| iYDR487C       | 4  | 1428968 8761   |           | YDR487  | #N/A | Sgl Pi | 0.118 | 0.201 | 0.784 | 0.84 |
| iYDR463W       | 4  | 1388371 8738   |           | YDR463  | #N/A | Sgl Pi | 0.123 | 0.975 | 0.672 | 0.48 |
| iYBRCdelta11   | 2  | 258919 7892    |           | YBR011  | #N/A | Sgl Pi | 0.124 | 0.506 | 0.051 | 0.11 |
| iYBL076C       | 2  | 84264 7570     |           | YBL076  | #N/A | Sgl Pi | 0.126 | 0.355 | 0.581 | 0.05 |
| iYGR206W       | 7  | 910728         |           | 10078   | #N/A | Non F  | 0.126 | 0.578 | 0.493 | 0.48 |
| iYGR118W       | 7  | 727713         |           | 9997    | #N/A | Non F  | 0.126 | 0.887 | 0.542 | 0.1  |
| iYHR184W       | 8  | 474442         |           | 10418   | #N/A | Non F  | 0.127 | 0.239 | 0.884 | 0.28 |
| iYKR072C       | 11 | 577759 11360   |           | YKR072  | #N/A | Sgl Pi | 0.131 | 0.452 | 0.402 | 0.74 |
| iYKL149C       | 11 | 168835 11205   |           | YKL149  | #N/A | Sgl Pi | 0.132 | 0.011 | 0.268 | 0.54 |
| iYJL071W       | 10 | 307550         |           | 10760   | #N/A | Non F  | 0.133 | 0.464 | 0.165 | 0.59 |
| iYMR238W       | 13 | 747732         |           | 12288   | #N/A | Non F  | 0.135 | 0.564 | 0.743 | 0.63 |
| iYDL197C       | 4  | 106497 8245    |           | YDL197  | #N/A | Dbl Pi | 0.137 | 0.225 | 0.573 | 0.75 |
| iYDR189W       | 4  | 840386         |           | 8488    | #N/A | Non F  | 0.14  | 0.603 | 0.593 | 0.7  |
| iYHR196W       | 8  | 493682 10428   |           | YHR196  | #N/A | Sgl Pi | 0.142 | 0.708 | 0.877 | 0.22 |
| iYMR030W       | 13 | 331923         |           | 12082   | #N/A | Non F  | 0.145 | 0.739 | 0.534 | 0.46 |
| iYDR028C       | 4  | 500870 8331    |           | YDR028  | #N/A | Dbl Pi | 0.152 | 0.633 | 0.463 | 0.06 |
| iYJL051W       | 10 | 341986 10743   |           | YJL051  | #N/A | Sgl Pi | 0.153 | 0.614 | 0.532 | 0.66 |
| iYAL053W + iYB | ## | #N/A           | #N/A      |         | #N/A | #N/A   | 0.155 | NaN   | NaN   | 0.88 |
| iYMR054W       | 13 | 385955         |           | 12103   | #N/A | Non F  | 0.156 | 0.64  | 0.336 | 0.75 |
| iYNL320W       | 14 | 38538 12673    |           | YNL31   | #N/A | Sgl Pi | 0.16  | 0.748 | 0.528 | 0.46 |
| iYLR411W       | 12 | 947980 11850   |           | YLR411  | #N/A | Sgl Pi | 0.162 | 0.155 | NaN   | 0.03 |
| iYLR439W       | 12 | 1015434        |           | 11876   | #N/A | Non F  | 0.166 | 0.464 | 0.416 | 0.86 |
| iYLR416C       | 12 | 954890 11855   |           | YLR416  | #N/A | Dbl Pi | 0.168 | 1     | 0.225 | 0.92 |
| iYPR016C       | 16 | 593051 13628   |           | YPR016  | #N/A | Sgl Pi | 0.171 | 0.352 | 0.929 | 0.92 |
| iYDR293C       | 4  | 1049418 8580   |           | YDR293  | #N/A | Sgl Pi | 0.171 | 0.607 | 0.47  | 0.38 |
| iYHL034C       | 8  | 34076 10211    |           | YHL034  | #N/A | Sgl Pi | 0.171 | 0.689 | 0.625 | 0.72 |
| iM(CAU)J2      | 10 | 422694 7247    |           | YJL0076 | #N/A | Sgl Pi | 0.173 | 0.669 | NaN   | 0.13 |
| iYDR429C       | 4  | 1325303 8709   |           | YDR429  | #N/A | Sgl Pi | 0.174 | 0.496 | NaN   | 0.42 |
| iYPL124W       | 16 | 317528         |           | 13449   | #N/A | Non F  | 0.179 | 0.634 | 0.231 | 0.55 |

|               |    |               |        |      |        |       |       |       |      |
|---------------|----|---------------|--------|------|--------|-------|-------|-------|------|
| iYKL210W      | 11 | 42213         | 11266  | #N/A | Non F  | 0.182 | 0.601 | 0.39  | 0.42 |
| iYGL243W      | 7  | 44487         | 9827   | #N/A | Non F  | 0.185 | 0.495 | NaN   | 0.38 |
| iYIR010W      | 9  | 377172        | 10660  | #N/A | Non F  | 0.185 | 0.617 | 0.522 | 0.72 |
| iYDR373W      | 4  | 1223323       | 8658   | #N/A | Non F  | 0.191 | 0.53  | NaN   | 0.34 |
| iYMR234W      | 13 | 741322        | 12284  | #N/A | Non F  | 0.195 | 0.618 | 0.454 | 0.39 |
| iYMR304W      | 13 | 878682        | 12352  | #N/A | Non F  | 0.198 | 0.619 | 0.979 | 0.29 |
| iYDL066W      | 4  | 336124        | 8125   | #N/A | Non F  | 0.198 | 0.531 | 0.53  | 0.5  |
| iYJLWtau4     | 10 | 422002 10910  | YJL008 | #N/A | Sgl Pi | 0.201 | 0.122 | 0.514 | 0.83 |
| iYMR229C      | 13 | 731115 12279  | YMR229 | #N/A | Dbl Pi | 0.202 | 0.671 | 0.109 | 0.09 |
| iYLL025W      | 12 | 95122         | 11430  | #N/A | Non F  | 0.203 | 0.897 | 0.992 | 0.69 |
| iYKL027W      | 11 | 388529        | 11093  | #N/A | Non F  | 0.204 | 0.05  | 0.513 | 0.08 |
| iYBR147W      | 2  | 537427 7749   | YBR148 | #N/A | Sgl Pi | 0.205 | 0.675 | 0.468 | 0.91 |
| iYNL181W      | 14 | 299541        | 12552  | #N/A | Non F  | 0.207 | 0.55  | 0.525 | 0.51 |
| iYDL172C      | 4  | 149077 8221   | YDL172 | #N/A | Sgl Pi | 0.207 | 0.644 | 0.317 | 0.41 |
| iYFR004W      | 6  | 154331        | 9436   | #N/A | Non F  | 0.207 | 0.502 | 0.687 | 0.3  |
| iYOR285W      | 15 | 850073 13220  | YOR285 | #N/A | Sgl Pi | 0.21  | 0.549 | 0.242 | 0.5  |
| iYCL033C      | 3  | 63285 7922    | YCL033 | #N/A | Dbl Pi | 0.21  | 0.562 | 0.67  | 0.87 |
| iYBL091C      | 2  | 48608 7583    | YBL091 | #N/A | Dbl Pi | 0.215 | 0.611 | 0.536 | 0.51 |
| iYOR127W      | 15 | 564236        | 13076  | #N/A | Non F  | 0.215 | 0.598 | 0.419 | 0.31 |
| iYML038C      | 13 | 204103 11957  | YML038 | #N/A | Sgl Pi | 0.218 | 0.7   | 0.328 | 0.5  |
| iYNL314W      | 14 | 45230         | 12669  | #N/A | Non F  | 0.218 | 0.66  | 0.623 | 0.56 |
| iYDR235W      | 4  | 935118        | 8528   | #N/A | Non F  | 0.219 | 0.486 | 0.194 | 0.51 |
| iYJL126W      | 10 | 185117        | 10808  | #N/A | Non F  | 0.219 | 0.473 | 0.446 | 0.52 |
| iYHLComega1   | 8  | 8209          | 10231  | #N/A | Non F  | 0.221 | 0.319 | 0.904 | 0.36 |
| iYDR513W      | 4  | 1471453       | 8783   | #N/A | Non F  | 0.223 | 0.428 | 0.354 | 0.36 |
| iYKLCdelta2   | 11 | 84105 11288   | YKL18  | #N/A | Sgl Pi | 0.226 | 0.756 | 0.605 | 0.34 |
| iYIRCdelta6-2 | 9  | 429150 10701  | YIR038 | #N/A | Sgl Pi | 0.227 | 0.957 | 0.259 | 0.75 |
| iYBL085W      | 2  | 66803         | 7577   | #N/A | Non F  | 0.229 | 0.404 | 0.415 | 0.26 |
| iYHR036W      | 8  | 181757 10270  | YHR036 | #N/A | Sgl Pi | 0.23  | 0.928 | 0.553 | 0.68 |
| iYLL035W      | 12 | 70485         | 11440  | #N/A | Non F  | 0.23  | 0.561 | 0.477 | 0.33 |
| iYDL091C      | 4  | 294774 8148   | YDL091 | #N/A | Sgl Pi | 0.23  | 0.573 | 0.379 | 0.33 |
| iYFR002W      | 6  | 152517        | 9432   | #N/A | Non F  | 0.231 | 0.613 | 0.564 | 0.44 |
| iYPL078C      | 16 | 408746 13408  | YPL078 | #N/A | Sgl Pi | 0.233 | 0.469 | 0.521 | 0.01 |
| iYGL118C      | 7  | 288442 9678   | YGL118 | #N/A | Dbl Pi | 0.234 | 0.605 | 0.286 | 0.24 |
| iYDR406W      | 4  | 1283779       | 8689   | #N/A | Non F  | 0.234 | 0.477 | 0.45  | 0.17 |
| iYFL064C      | 6  | 3834 9416     | YFL064 | #N/A | Dbl Pi | 0.235 | 0.831 | 0.474 | 0.45 |
| iYOR362C      | 15 | 1018724 13294 | YOR362 | #N/A | Sgl Pi | 0.235 | 0.416 | 0.871 | 0.48 |
| iV(AAC)M1     | 13 | 372563 7352   | YMR049 | #N/A | Sgl Pi | 0.236 | 0.595 | 0.441 | 0.48 |
| iYPL193W      | 16 | 182554        | 13515  | #N/A | Non F  | 0.239 | 0.741 | 0.439 | 0.34 |
| iYLR417W      | 12 | 956710        | 11856  | #N/A | Non F  | 0.242 | 0.615 | 0.541 | 0.4  |
| iYER167W      | 5  | 520794        | 9199   | #N/A | Non F  | 0.242 | 0.886 | 0.455 | 0.39 |
| iYLR115W      | 12 | 380559 11582  | YLR115 | #N/A | Sgl Pi | 0.246 | 0.09  | 0.738 | 0.23 |
| iYPR192W      | 16 | 922773        | 13781  | #N/A | Non F  | 0.246 | 0.651 | 0.461 | 0.77 |
| iYER129W      | 5  | 420694        | 9127   | #N/A | Non F  | 0.246 | 0.579 | 0.607 | 0.57 |
| iYLR025W      | 12 | 195222        | 11494  | #N/A | Non F  | 0.247 | 0.53  | 0.326 | 0.32 |
| iYLR224W      | 12 | 587564        | 11689  | #N/A | Non F  | 0.247 | 0.739 | 0.591 | 0.23 |
| iYDL175C      | 4  | 145525 8223   | YDL175 | #N/A | Sgl Pi | 0.249 | 0.875 | 0.258 | 0.15 |
| iYBL097W      | 2  | 43081         | 7588   | #N/A | Non F  | 0.25  | 0.62  | 0.413 | 0.47 |
| iYGR260W      | 7  | 1014128       | 10131  | #N/A | Non F  | 0.252 | 0.416 | 0.472 | 0.37 |
| iYNL256W      | 14 | 167082        | 12617  | #N/A | Non F  | 0.252 | 0.777 | 0.61  | 0.61 |
| iYBR242W      | 2  | 705343        | 7837   | #N/A | Non F  | 0.254 | 0.634 | 0.522 | 0.74 |

|                |    |         |       |       |      |        |       |       |       |      |
|----------------|----|---------|-------|-------|------|--------|-------|-------|-------|------|
| iYDR206W       | 4  | 864784  |       | 8502  | #N/A | Non F  | 0.255 | 0.652 | 0.545 | 0.86 |
| iYMR299C       | 13 | 865381  | 12347 | YMR29 | #N/A | Sgl Pi | 0.257 | 0.571 | 0.467 | 0.52 |
| iYPL017C       | 16 | 520274  | 13352 | YPL01 | #N/A | Dbl Pi | 0.262 | 0.302 | 0.989 | 0.87 |
| iYAL028W + iYB | ## | #N/A    | #N/A  |       | #N/A | #N/A   | 0.262 | NaN   | NaN   | 0.31 |
| iYOR147W       | 15 | 608501  |       | 13093 | #N/A | Non F  | 0.264 | 0.533 | 0.495 | 0.33 |
| iYPL250C       | 16 | 74747   | 13570 | YPL25 | #N/A | Sgl Pi | 0.267 | 0.159 | 0.978 | 0.69 |
| Q0280A         | 17 | 36540   |       | 13877 | #N/A | 0      | 0.267 | 0.798 | 0.542 | 0.39 |
| Q0280A         | 17 | 36540   |       | 13877 | #N/A | 0      | 0.267 | 0.798 | 0.542 | 0.39 |
| iYDL201W       | 4  | 100407  |       | 8249  | #N/A | Non F  | 0.269 | 0.543 | NaN   | 0.5  |
| iYBR178W       | 2  | 586405  |       | 7780  | #N/A | Non F  | 0.27  | 0.544 | 0.549 | 0.66 |
| iYNR040W       | 14 | 700444  |       | 12740 | #N/A | Non F  | 0.271 | 0.639 | 0.47  | 0.37 |
| 21S rRNA0      | ## | #N/A    | #N/A  |       | #N/A | #N/A   | 0.272 | 0.141 | 0.34  | 0.23 |
| 21S rRNA0      | ## | #N/A    | #N/A  |       | #N/A | #N/A   | 0.272 | 0.141 | 0.34  | 0.23 |
| iYLR438W       | 12 | 1013777 |       | 11875 | #N/A | Non F  | 0.272 | 0.661 | 0.773 | 0.89 |
| iYGR295C-0     | 7  | 1082736 | 10165 | YGR29 | #N/A | Dbl Pi | 0.273 | 0.553 | 0.829 | 0.53 |
| iYKL058W       | 11 | 330199  |       | 11121 | #N/A | Non F  | 0.275 | 0.628 | 0.825 | 0.36 |
| iYDL178W       | 4  | 141121  |       | 8226  | #N/A | Non F  | 0.275 | 0.53  | 0.426 | 0.48 |
| iYER112W       | 5  | 387767  |       | 9095  | #N/A | Non F  | 0.275 | 0.503 | 0.647 | 0.7  |
| iYML092C       | 13 | 86746   | 12005 | YML09 | #N/A | Sgl Pi | 0.279 | 0.139 | 0.2   | 0.37 |
| iYDR043C-1     | 4  | 544451  | 8351  | YDR04 | #N/A | Dbl Pi | 0.279 | 0.403 | 0.45  | 0.52 |
| iYHR171W       | 8  | 447608  | 10406 | YHR17 | #N/A | Sgl Pi | 0.28  | 0.593 | 0.495 | 0.03 |
| iYJR014W       | 10 | 462128  | 10926 | YJR01 | #N/A | Sgl Pi | 0.28  | 0.56  | 0.818 | 0.7  |
| itQ(UUG)C      | 3  | 0       | 7279  | YCR02 | #N/A | Sgl Pi | 0.282 | 0.199 | 0.665 | 0.29 |
| iYNL323W       | 14 | 33167   |       | 12676 | #N/A | Non F  | 0.283 | 0.624 | 0.741 | 0.52 |
| iYCR019W       | 3  | 153922  |       | 7975  | #N/A | Non F  | 0.284 | 0.544 | NaN   | 0.43 |
| iYDL021W       | 4  | 414878  |       | 8084  | #N/A | Non F  | 0.284 | 0.621 | 0.375 | 0.22 |
| iYOR253W       | 15 | 804906  |       | 13192 | #N/A | Non F  | 0.286 | 0.532 | 0.535 | 0.2  |
| iYGL105W       | 7  | 308550  |       | 9666  | #N/A | Non F  | 0.289 | 0.843 | 0.447 | 0.41 |
| iYNL257C       | 14 | 164340  | 12618 | YNL25 | #N/A | Dbl Pi | 0.29  | 0.634 | 0.392 | 0.52 |
| iYOL103W       | 15 | 125828  |       | 12878 | #N/A | Non F  | 0.291 | 0.493 | 0.464 | 0.42 |
| iYHR079C       | 8  | 261581  | 10316 | YHR07 | #N/A | Sgl Pi | 0.296 | 0.98  | 0.381 | 0.29 |
| iSNR55         | 12 | 794797  |       | 7080  | #N/A | Non F  | 0.3   | 0.442 | 0.429 | 0.33 |
| iYDL008W       | 4  | 433992  | 8074  | YDL00 | #N/A | Sgl Pi | 0.3   | 0.569 | 0.515 | 0.22 |
| Q0185H         | 17 | 26315   |       | 13851 | #N/A | 0      | 0.302 | 0.546 | NaN   | 0.76 |
| Q0185H         | 17 | 26315   |       | 13851 | #N/A | 0      | 0.302 | 0.546 | NaN   | 0.76 |
| iYPR140W       | 16 | 815517  |       | 13734 | #N/A | Non F  | 0.302 | 0.472 | 0.789 | 0.66 |
| iYHL036W       | 8  | 27865   |       | 10213 | #N/A | Non F  | 0.304 | 0.65  | 0.415 | 0.53 |
| iYLR253W       | 12 | 644338  |       | 11713 | #N/A | Non F  | 0.304 | 0.589 | 0.651 | 0.5  |
| iYDR469W       | 4  | 1399578 |       | 8743  | #N/A | Non F  | 0.306 | 0.574 | 0.66  | 0.4  |
| itG(GCC)C      | 3  | 142750  | 7159  | YCR01 | #N/A | Dbl Pi | 0.306 | 0.544 | 0.546 | 0.65 |
| iYOR118W       | 15 | 548561  |       | 13068 | #N/A | Non F  | 0.31  | 0.899 | 0.809 | 0.35 |
| iYDL189W       | 4  | 123595  |       | 8237  | #N/A | Non F  | 0.311 | 0.622 | 0.396 | 0.21 |
| iYGL263W       | 7  | 3918    | 9875  | YGL26 | #N/A | Sgl Pi | 0.312 | 0.58  | 0.426 | 0.59 |
| iYGR041W       | 7  | 579125  | 9924  | YGR04 | #N/A | Sgl Pi | 0.312 | 0.532 | NaN   | 0.15 |
| iYGL116W       | 7  | 291649  | 9676  | YGL11 | #N/A | Sgl Pi | 0.312 | 0.926 | 0.433 | 0.81 |
| iYDL070W       | 4  | 332930  |       | 8128  | #N/A | Non F  | 0.312 | 0.706 | 0.483 | 0.43 |
| iYDR345C-1     | 4  | 1165914 | 8632  | YDR34 | #N/A | Sgl Pi | 0.313 | 0.633 | 0.414 | 0.56 |
| Q0295          | 17 | 41124   |       | 13887 | #N/A | 0      | 0.313 | 0.209 | 0.445 | 0.82 |
| Q0295          | 17 | 41124   |       | 13887 | #N/A | 0      | 0.313 | 0.209 | 0.445 | 0.82 |
| iYDR083W       | 4  | 613211  |       | 8390  | #N/A | Non F  | 0.314 | 0.431 | NaN   | 0.49 |
| iYDR161W       | 4  | 780258  |       | 8457  | #N/A | Non F  | 0.315 | 0.462 | 0.446 | 0.08 |

|              |    |                  |        |      |        |       |       |       |      |
|--------------|----|------------------|--------|------|--------|-------|-------|-------|------|
| itG(CCC)O    | 15 | 594419           | 7158   | #N/A | Non F  | 0.315 | 0.564 | 0.8   | 0.52 |
| iYLR383W     | 12 | 888665           | 11823  | #N/A | Non F  | 0.316 | 0.556 | 0.383 | 0.47 |
| iYNR012W     | 14 | 648932           | 12710  | #N/A | Non F  | 0.317 | NaN   | 0.278 | 0.52 |
| iYDL107W     | 4  | 269981           | 8161   | #N/A | Non F  | 0.317 | 0.817 | 0.404 | 0.12 |
| iYCL027W     | 3  | 73342            | 7916   | #N/A | Non F  | 0.318 | 0.601 | 0.485 | 0.6  |
| iYFL034W     | 6  | 68724            | 9350   | #N/A | Non F  | 0.318 | 0.714 | 0.533 | 0.44 |
| itK(CUU)P    | 16 | 582124 7216      | YPR01C | #N/A | Sgl Pi | 0.318 | 0.476 | 0.636 | 0.49 |
| iYDL112W     | 4  | 263227           | 8166   | #N/A | Non F  | 0.324 | 0.625 | 0.406 | 0.34 |
| iYOR269W     | 15 | 827850           | 13207  | #N/A | Non F  | 0.324 | 0.632 | 0.753 | 0.48 |
| iYAL034W-A   | 1  | 80594            | 7408   | #N/A | Non F  | 0.325 | 0.5   | 0.165 | 0.94 |
| iYLR241W     | 12 | 622798           | 11702  | #N/A | Non F  | 0.326 | 0.608 | 0.537 | 0.58 |
| IntQ0185C    | 17 | 20043            | 7016   | #N/A | 0      | 0.327 | 0.127 | 0.643 | 0.79 |
| IntQ0185C    | 17 | 20043            | 7016   | #N/A | 0      | 0.327 | 0.127 | 0.643 | 0.79 |
| iYGL092W     | 7  | 341884           | 9652   | #N/A | Non F  | 0.327 | 0.534 | 0.631 | 0.58 |
| iYCR018C     | 3  | 148900 7973      | YCR01E | #N/A | Sgl Pi | 0.327 | 0.594 | NaN   | 0.55 |
| iYCR018C     | 3  | 148900 7973      | YCR01E | #N/A | Sgl Pi | 0.327 | 0.594 | NaN   | 0.55 |
| iYDR255C     | 4  | 967817 8546      | YDR25E | #N/A | Sgl Pi | 0.328 | 0.617 | 0.44  | 0.84 |
| iYBL031W     | 2  | 162696           | 7531   | #N/A | Non F  | 0.329 | 0.674 | 0.76  | 0.82 |
| iYML049C     | 13 | 178290 11964     | YML04  | #N/A | Dbl Pi | 0.33  | 0.391 | 0.711 | 0.9  |
| iYML068W     | 13 | 138950           | 11982  | #N/A | Non F  | 0.33  | 0.709 | 0.561 | 0.62 |
| iYMR211W     | 13 | 690495           | 12261  | #N/A | Non F  | 0.33  | 0.433 | 0.609 | 0.3  |
| Q0005        | 17 | 63870            | 250039 | #N/A | 0      | 0.331 | 0.433 | 0.541 | 0.76 |
| Q0005        | 17 | 63870            | 250039 | #N/A | 0      | 0.331 | 0.433 | 0.541 | 0.76 |
| iYNL036W     | 14 | 560465 tt(agu)n2 |        | #N/A | Non F  | 0.334 | 0.551 | 0.674 | 0.13 |
| iYKL077W     | 11 | 292286           | 11139  | #N/A | Non F  | 0.335 | 0.562 | 0.02  | 0.14 |
| iYLR371W     | 12 | 866772 11813     | YLR37  | #N/A | Sgl Pi | 0.336 | 0.105 | 0.55  | 0.16 |
| iYOR303W     | 15 | 884175 13237     | YOR3C  | #N/A | Sgl Pi | 0.338 | 0.451 | 0.464 | 0.13 |
| itH(GUG)H    | 8  | 62814 7182       | YHL023 | #N/A | Sgl Pi | 0.339 | 0.599 | 0.401 | 0.63 |
| iYGL213C     | 7  | 91251 9779       | YGL213 | #N/A | Dbl Pi | 0.341 | 0.47  | 0.365 | 0.64 |
| Q0155        | 17 | 0                | 13831  | #N/A | 0      | 0.341 | 0.554 | 0.537 | 0.3  |
| Q0155        | 17 | 0                | 13831  | #N/A | 0      | 0.341 | 0.554 | 0.537 | 0.3  |
| iYBR287W     | 2  | 777807           | 7876   | #N/A | Non F  | 0.343 | 0.614 | 0.32  | 0.17 |
| iYGR047C     | 7  | 589494 9930      | YGR047 | #N/A | Dbl Pi | 0.344 | 0.248 | 0.302 | 0.61 |
| iYCL032W     | 3  | 64475            | 7921   | #N/A | Non F  | 0.346 | 0.626 | 0.056 | 0.5  |
| iYBL058W     | 2  | 112671           | 7556   | #N/A | Non F  | 0.347 | 0.442 | 0.117 | 0.55 |
| iYJR068W     | 10 | 568385           | 10969  | #N/A | Non F  | 0.35  | 0.448 | 0.712 | 0.63 |
| iYJLWdelta19 | 10 | 541122           | 10907  | #N/A | Non F  | 0.35  | 0.688 | 0.529 | 0.57 |
| iYNL148C     | 14 | 350665 12523     | YNL14  | #N/A | Dbl Pi | 0.352 | 0.541 | 0.305 | 0.51 |
| iYFL035C-A   | 6  | 64012 9352       | YFL034 | #N/A | Sgl Pi | 0.352 | 0.421 | 0.489 | 0.21 |
| iYOR122C     | 15 | 552889 13071     | YOR12  | #N/A | Sgl Pi | 0.352 | 0.684 | 0.48  | 0    |
| iYML127W     | 13 | 18809            | 12038  | #N/A | Non F  | 0.353 | 0.541 | 0.433 | 0.11 |
| iYDL114W     | 4  | 256515           | 8168   | #N/A | Non F  | 0.353 | 0.643 | 0.486 | 0.6  |
| itS(AGA)H    | 8  | 133111 7309      | YHR01E | #N/A | Sgl Pi | 0.354 | 0.604 | 0.626 | 0.42 |
| iYPR046W     | 16 | 657325 13654     | YPR04  | #N/A | Sgl Pi | 0.356 | 0.696 | 0.528 | 0.48 |
| iYNL158W     | 14 | 340198 12532     | YNL15  | #N/A | Sgl Pi | 0.356 | 0.385 | 0.026 | 0.01 |
| iYKL150W     | 11 | 167444           | 11206  | #N/A | Non F  | 0.357 | 0.594 | 0.531 | 0.56 |
| iYPR185W     | 16 | 909432           | 13774  | #N/A | Non F  | 0.357 | 0.671 | 0.393 | 0.49 |
| iYDR392W     | 4  | 1259704 8677     | YDR39E | #N/A | Sgl Pi | 0.357 | 0.576 | 0.378 | 0.2  |
| iYDR046C     | 4  | 550574 8355      | YDR04E | #N/A | Dbl Pi | 0.357 | 0.472 | 0.834 | 0.95 |
| iYHR007C     | 8  | 121676 10241     | YHR0C  | #N/A | Sgl Pi | 0.358 | 0.615 | 0.829 | 0.98 |
| iYGR243W     | 7  | 977757           | 10111  | #N/A | Non F  | 0.363 | 0.933 | 0.599 | 0.69 |

|               |    |               |        |      |        |       |       |       |      |
|---------------|----|---------------|--------|------|--------|-------|-------|-------|------|
| iYJR075W      | 10 | 574871        | 10975  | #N/A | Non F  | 0.364 | 0.581 | 0.428 | 0.28 |
| iYBR064W      | 2  | 368156        | 7669   | #N/A | Non F  | 0.364 | 0.541 | 0.818 | 0.61 |
| iYDL127W      | 4  | 235769        | 8180   | #N/A | Non F  | 0.365 | 0.671 | 0.846 | 0.48 |
| iYOR058C-0    | 15 | 436347 13009  | YOR05  | #N/A | Sgl Pi | 0.366 | 0.589 | 0.158 | 0.38 |
| iYDL122W      | 4  | 244995        | 8175   | #N/A | Non F  | 0.367 | 0.597 | 0.349 | 0.49 |
| itN(GUU)O2    | 15 | 487502 7262   | YOR08  | #N/A | DbI Pi | 0.367 | 0.637 | 0.468 | 0.58 |
| iYPL245W      | 16 | 86936         | 13564  | #N/A | Non F  | 0.367 | 0.617 | 0.518 | 0.71 |
| iYNL312W      | 14 | 49233         | 12667  | #N/A | Non F  | 0.368 | 0.627 | NaN   | 0.14 |
| iYHR038W      | 8  | 184738        | 10272  | #N/A | Non F  | 0.368 | 0.745 | 0.472 | 0.4  |
| iYDR096W      | 4  | 639812        | 8401   | #N/A | Non F  | 0.368 | 0.692 | 0.64  | 0.29 |
| iYKL137W      | 11 | 186296 11194  | YKL13  | #N/A | Sgl Pi | 0.368 | 0.655 | 0.457 | 0.32 |
| iYFR046C      | 6  | 244131 9522   | YFR046 | #N/A | Sgl Pi | 0.368 | 0.179 | NaN   | 0.55 |
| iYJL183W      | 10 | 85337         | 10860  | #N/A | Non F  | 0.369 | 0.502 | 0.447 | 0.65 |
| iYLR318W      | 12 | 769204        | 11769  | #N/A | Non F  | 0.371 | 0.592 | 0.515 | 0.61 |
| iYHR045W      | 8  | 197216        | 10280  | #N/A | Non F  | 0.373 | 0.484 | 0.836 | 0.04 |
| iYNR011C      | 14 | 646948 12709  | YNR01  | #N/A | DbI Pi | 0.374 | 0.811 | 0.339 | 0    |
| iYFR030W      | 6  | 216431        | 9488   | #N/A | Non F  | 0.374 | 0.598 | 0.476 | 0.75 |
| iYFR028C      | 6  | 210043 9484   | YFR028 | #N/A | DbI Pi | 0.374 | 0.677 | 0.64  | 0.55 |
| iYBR140C      | 2  | 526571 7742   | YBR14C | #N/A | Sgl Pi | 0.375 | 0.562 | 0.787 | 0.78 |
| iYOR076C      | 15 | 471621 13030  | YOR07  | #N/A | DbI Pi | 0.375 | 0.529 | 0.311 | 0    |
| iYDR242W      | 4  | 948451        | 8533   | #N/A | Non F  | 0.376 | 0.662 | 0.28  | 0.25 |
| iYNL242W      | 14 | 196087        | 12605  | #N/A | Non F  | 0.378 | 0.488 | 0.447 | 0.87 |
| iYLR210W      | 12 | 563394        | 11676  | #N/A | Non F  | 0.378 | 0.684 | 0.181 | 0.88 |
| iYOR346W      | 15 | 984797        | 13278  | #N/A | Non F  | 0.378 | 0.478 | NaN   | 0.53 |
| iYBR184W      | 2  | 598882        | 7786   | #N/A | Non F  | 0.38  | 0.464 | 0.336 | 0.22 |
| iYJR066W      | 10 | 566525        | 10967  | #N/A | Non F  | 0.38  | 0.625 | 0.418 | 0.39 |
| iYCR091W      | 3  | 276579        | 8037   | #N/A | Non F  | 0.381 | 0.575 | 0.445 | 0.09 |
| iYKL074C      | 11 | 295823 11137  | YKL07  | #N/A | DbI Pi | 0.381 | 0.538 | NaN   | 0.69 |
| iYJR106W      | 10 | 626714 11003  | YJR10  | #N/A | Sgl Pi | 0.381 | 0.745 | 0.302 | 0.4  |
| iYHR157W      | 8  | 413450        | 10392  | #N/A | Non F  | 0.382 | 0.459 | 0.228 | 0.48 |
| iYAR047C-0    | 1  | 201760 7479   | YAR047 | #N/A | DbI Pi | 0.382 | 0.135 | NaN   | 0.54 |
| iYMR028W      | 13 | 328566        | 12080  | #N/A | Non F  | 0.384 | 0.569 | 0.41  | 0.35 |
| iYBR280C      | 2  | 764694 7869   | YBR28C | #N/A | Sgl Pi | 0.384 | 0.684 | 0.151 | 0.56 |
| iYOL056W      | 15 | 224198        | 12833  | #N/A | Non F  | 0.385 | 0.564 | 0.241 | 0.63 |
| iYLL043W      | 12 | 51942         | 11446  | #N/A | Non F  | 0.386 | 0.447 | 0.498 | 0.97 |
| iYLR450W      | 12 | 1035775 11886 | YLR45  | #N/A | Sgl Pi | 0.386 | 0.494 | 0.757 | 0.84 |
| iYLR368W      | 12 | 859333 11810  | YLR36  | #N/A | Sgl Pi | 0.386 | 0.267 | 0.449 | 0.24 |
| iYLL021W      | 12 | 105347        | 11426  | #N/A | Non F  | 0.387 | 0.611 | 0.614 | 0.36 |
| iYBR218C      | 2  | 662193 7819   | YBR218 | #N/A | Sgl Pi | 0.387 | 0.441 | 0.546 | 0.11 |
| itT(AGU)D     | 4  | 434333 7324   | YDL007 | #N/A | Sgl Pi | 0.388 | 0.579 | 0.767 | 0.21 |
| iYOR298W      | 15 | 877019        | 13234  | #N/A | Non F  | 0.388 | 0.569 | NaN   | 0.63 |
| iYFR034C      | 6  | 225937 9500   | YFR034 | #N/A | Sgl Pi | 0.389 | 0.598 | 0.742 | 0.91 |
| iYBL092W      | 2  | 46427         | 7585   | #N/A | Non F  | 0.389 | 0.553 | 0.486 | 0.44 |
| iYPL113C      | 16 | 337183 13439  | YPL11  | #N/A | Sgl Pi | 0.39  | 0.461 | 0.288 | 0.51 |
| iYPR127W      | 16 | 791102        | 13722  | #N/A | Non F  | 0.39  | 0.622 | 0.508 | 0.76 |
| iYGLWomega1-C | 7  | 1070 9884     | YGL263 | #N/A | Sgl Pi | 0.393 | 0.458 | 0.448 | 0.55 |
| iYDR400W      | 4  | 1272059 8684  | YDR401 | #N/A | Sgl Pi | 0.393 | 0.609 | 0.036 | 0.72 |
| iYNR015W      | 14 | 654542        | 12713  | #N/A | Non F  | 0.394 | 0.627 | 0.542 | 0.24 |
| iYGL111W      | 7  | 301371        | 9671   | #N/A | Non F  | 0.394 | 0.62  | 0.438 | 0.33 |
| iYER091C      | 5  | 342156 9051   | YER091 | #N/A | Sgl Pi | 0.394 | 0.852 | 0.504 | 0.85 |
| iYDR515W      | 4  | 1474822       | 8785   | #N/A | Non F  | 0.394 | 0.649 | 0.454 | 0.68 |



|                  |    |                |      |           |      |        |       |       |       |      |
|------------------|----|----------------|------|-----------|------|--------|-------|-------|-------|------|
| iYPL200W         | 16 | 171961         |      | 13521     | #N/A | Non F  | 0.394 | 0.617 | 0.507 | 0.46 |
| iYDR331W         | 4  | 1130824 8616   |      | YDR332    | #N/A | Sgl Pi | 0.395 | 0.586 | NaN   | 0.72 |
| iYHR091C         | 8  | 286762 10329   |      | YHR09     | #N/A | Sgl Pi | 0.396 | 0.629 | 0.759 | 0.73 |
| iYJL068C         | 10 | 313611 10757   |      | YJL068    | #N/A | Dbl Pi | 0.397 | 0.634 | 0.388 | 0.9  |
| iYDL043C         | 4  | 376518 8101    |      | YDL043    | #N/A | Sgl Pi | 0.399 | 0.397 | 0.589 | 0.26 |
| Q0010            | 17 | 0 3648         |      | 17 W 3952 | #N/A | 0      | 0.399 | 0.404 | 0.385 | 0.52 |
| Q0010            | 17 | 0 3648         |      | 17 W 3952 | #N/A | 0      | 0.399 | 0.404 | 0.385 | 0.52 |
| iYMR130W         | 13 | 533016         |      | 12178     | #N/A | Non F  | 0.399 | 0.557 | 0.32  | 0.19 |
| iYJR032W         | 10 | 491955         |      | 10936     | #N/A | Non F  | 0.399 | 0.601 | 0.444 | 0.58 |
| iYBL078C         | 2  | 80777 7571     |      | YBL078    | #N/A | Dbl Pi | 0.401 | 0.559 | NaN   | 0.5  |
| iYDL047W         | 4  | 370690 8106    |      | YDL046    | #N/A | Sgl Pi | 0.401 | 0.337 | 0.98  | 0.56 |
| iYLR174W         | 12 | 505872 11643   |      | YLR17     | #N/A | Sgl Pi | 0.401 | 0.7   | 0.525 | 0.37 |
| iYDR395W         | 4  | 1266147 8680   |      | YDR395    | #N/A | Sgl Pi | 0.402 | 0.611 | 0.845 | 0.37 |
| iYAL039C-0 + iYI | ## | #N/A           | #N/A |           | #N/A | #N/A   | 0.402 | NaN   | NaN   | 0.66 |
| itD(GUC)L1       | 12 | 427195 7125    |      | YLR143    | #N/A | Sgl Pi | 0.402 | 0.685 | 0.679 | 0.41 |
| iYDR201W         | 4  | 856783         |      | 8498      | #N/A | Non F  | 0.403 | 0.636 | 0.519 | 0.34 |
| iYDRCdelta3      | 4  | 513559 8818    |      | YDR034    | #N/A | Sgl Pi | 0.404 | 0.6   | 0.471 | 0.43 |
| itM(CAU)J3       | 10 | 517567 7248    |      | YJR043    | #N/A | Sgl Pi | 0.405 | 0.612 | NaN   | 0.6  |
| iYHR176W         | 8  | 455355 10410   |      | YHR17     | #N/A | Sgl Pi | 0.406 | 0.581 | 0.651 | 0.29 |
| iYDRCdelta9-1    | 4  | 652772 8821    |      | YDR098    | #N/A | Dbl Pi | 0.407 | 0.707 | 0.528 | 0.49 |
| iYKR037C         | 11 | 511427 11327   |      | YKR037    | #N/A | Sgl Pi | 0.411 | 0.536 | 0.424 | 0.71 |
| iYGL110C         | 7  | 303399 9670    |      | YGL110    | #N/A | Dbl Pi | 0.411 | 0.653 | 0.41  | 0.28 |
| Q0105            | 17 | 78084 3647 COB |      | 17 W 364  | #N/A | 0      | 0.414 | 0.628 | 0.374 | 0.56 |
| Q0105            | 17 | 78084 3647 COB |      | 17 W 364  | #N/A | 0      | 0.414 | 0.628 | 0.374 | 0.56 |
| iYLR308W         | 12 | 748880         |      | 11761     | #N/A | Non F  | 0.414 | 0.548 | 0.289 | 0.26 |
| itK(UUU)D        | 4  | 359715         | #N/A |           | #N/A | #N/A   | 0.414 | 0.962 | 0.599 | 0.58 |
| iYDL133C-A       | 4  | 221793 8187    |      | YDL133    | #N/A | Dbl Pi | 0.417 | 0.352 | 0.482 | 0.76 |
| iYBR171W         | 2  | 578956         |      | 7775      | #N/A | Non F  | 0.417 | 0.812 | 0.746 | 0.31 |
| iYJR139C         | 10 | 690243 11034   |      | YJR13     | #N/A | Sgl Pi | 0.417 | 0.46  | 0.663 | 0.51 |
| iYBR119W         | 2  | 480284         |      | 7723      | #N/A | Non F  | 0.418 | 0.416 | 0.43  | 0.28 |
| iYPR010C         | 16 | 581176 13620   |      | YPR01     | #N/A | Sgl Pi | 0.418 | 0.497 | 0.15  | 0.22 |
| iYLR372W         | 12 | 868379         |      | 11814     | #N/A | Non F  | 0.419 | 0.658 | 0.779 | 0.19 |
| iYER081W         | 5  | 324091         |      | 9031      | #N/A | Non F  | 0.419 | 0.782 | 0.404 | 0.32 |
| iYMR159C         | 13 | 574934 12207   |      | YMR159    | #N/A | Dbl Pi | 0.42  | 0.604 | 0.538 | 0.82 |
| iYDRCdelta5      | 4  | 519636 8819    |      | YDR034    | #N/A | Sgl Pi | 0.421 | 0.756 | 0.608 | 0.43 |
| itD(GUC)G1       | 7  | 531705         |      | 7118      | #N/A | Non F  | 0.421 | 0.558 | 0.852 | 0.77 |
| iYHR040W         | 8  | 189012         |      | 10275     | #N/A | Non F  | 0.421 | 0.728 | 0.655 | 0.73 |
| Q0315            | 17 | 48191          |      | 13890     | #N/A | 0      | 0.422 | 0.479 | 0.418 | 0.29 |
| iYLR060W         | 12 | 262840 11531   |      | YLR06     | #N/A | Sgl Pi | 0.426 | 0.774 | 0.136 | 0.1  |
| iYGRWdelta31     | 7  | 876265 10177   |      | YGR18     | #N/A | Sgl Pi | 0.427 | 0.481 | 0.653 | 0.17 |
| iYHR187W         | 8  | 481907         |      | 10421     | #N/A | Non F  | 0.427 | 0.575 | 0.649 | 0.36 |
| iYGL174W         | 7  | 175335         |      | 9728      | #N/A | Non F  | 0.428 | 0.681 | 0.546 | 0.38 |
| iYOL090W         | 15 | 150278         |      | 12866     | #N/A | Non F  | 0.429 | 0.467 | 0.557 | 0.63 |
| iYKL168C         | 11 | 133484 11228   |      | YKL16     | #N/A | Sgl Pi | 0.43  | 0.499 | 0.614 | 0.62 |
| iYDR219C         | 4  | 906829 8514    |      | YDR219    | #N/A | Sgl Pi | 0.43  | 0.663 | 0.537 | 0    |
| iYOR078W         | 15 | 473358         |      | 13032     | #N/A | Non F  | 0.432 | 0.618 | 0.311 | 0.23 |
| iYOR081C         | 15 | 479186 13035   |      | YOR081    | #N/A | Sgl Pi | 0.432 | 0.564 | 0.558 | 0.39 |
| iYMR072W         | 13 | 412123         |      | 12120     | #N/A | Non F  | 0.432 | 0.511 | 0.723 | 0.68 |
| iYERCsigma3      | 5  | 434970         |      | 9260      | #N/A | Non F  | 0.433 | 0.544 | 0.435 | 0.27 |
| iYPR084W         | 16 | 708351         |      | 13686     | #N/A | Non F  | 0.433 | 0.623 | 0.391 | 0.53 |
| iYMR121C         | 13 | 510350 12168   |      | YMR121    | #N/A | Sgl Pi | 0.433 | 0.05  | NaN   | 0    |

|                    |      |               |         |      |        |       |       |       |      |
|--------------------|------|---------------|---------|------|--------|-------|-------|-------|------|
| iSNR46             | 7    | 545574        | 7071    | #N/A | Non F  | 0.435 | 0.946 | 0.637 | 0.42 |
| iYMR090W           | 13   | 449922        | 12138   | #N/A | Non F  | 0.436 | 0.523 | 0.354 | 0.68 |
| iYLR066W           | 12   | 267729        | 11536   | #N/A | Non F  | 0.436 | 0.466 | 0.579 | NaN  |
| iYMR196W           | 13   | 658345        | 12246   | #N/A | Non F  | 0.436 | 0.623 | 0.632 | 0.71 |
| iYKR077W           | 11   | 584371 11366  | YKR07   | #N/A | Sgl Pi | 0.44  | 0.606 | 0.453 | 0.35 |
| iYDL157C           | 4    | 174588 8210   | YDL157  | #N/A | Dbl Pi | 0.442 | 0.717 | 0.043 | 0.46 |
| iYJR138W           | 10   | 689009        | 11033   | #N/A | Non F  | 0.442 | 0.663 | NaN   | 0.45 |
| iYKR078W           | 11   | 586327        | 11367   | #N/A | Non F  | 0.442 | 0.649 | 0.17  | 0.22 |
| iYOR359W           | 15   | 1012755       | 13291   | #N/A | Non F  | 0.442 | 0.569 | 0.382 | 0.36 |
| iYGR032W           | 7    | 553968        | 9915    | #N/A | Non F  | 0.442 | 0.823 | 0.326 | 0.52 |
| iYDL238C           | 4    | 30443 8288    | YDL238  | #N/A | Dbl Pi | 0.443 | 0.7   | 0.47  | 0.58 |
| iYER096W           | 5    | 353241 9065   | YER097  | #N/A | Sgl Pi | 0.444 | 0.555 | 0.629 | 0.35 |
| iYKR080W           | 11   | 590983        | 11369   | #N/A | Non F  | 0.444 | 0.64  | 0.343 | 0.13 |
| IntQ0280E          | 17   | 42646         | 7028    | #N/A | 0      | 0.445 | 0.564 | 0.591 | 0.65 |
| IntQ0280E          | 17   | 42646         | 7028    | #N/A | 0      | 0.445 | 0.564 | 0.591 | 0.65 |
| iYDR399W           | 4    | 1270729 8683  | YDR40C  | #N/A | Sgl Pi | 0.446 | 0.744 | 0.803 | 0.37 |
| iYLRCdelta18       | 12   | 731995        | 11900   | #N/A | Non F  | 0.446 | 0.84  | 0.546 | 0.51 |
| iYOR379C           | 15   | 1051053 13310 | YOR37   | #N/A | Dbl Pi | 0.446 | 0.542 | 0.484 | 0.86 |
| itL(CAA)L          | 12   | 628502        | 7230    | #N/A | Non F  | 0.446 | 0.61  | 0.638 | 0.26 |
| IntQ0185D          | 17   | 23321         | 7018    | #N/A | 0      | 0.448 | 0.535 | NaN   | 0.65 |
| IntQ0185D          | 17   | 23321         | 7018    | #N/A | 0      | 0.448 | 0.535 | NaN   | 0.65 |
| iYIL140W           | 9    | 87824         | 10610   | #N/A | Non F  | 0.448 | 0.567 | 0.557 | 0.34 |
| iYBR135W           | 2    | 505293 7737   | YBR136  | #N/A | Sgl Pi | 0.448 | 0.46  | 0.624 | 0.86 |
| itK(UUU)L          | 12   | 875496 7221   | YLR377  | #N/A | Sgl Pi | 0.448 | 0.835 | 0.721 | 0.64 |
| iYHL048W           | 8    | 7534          | 10226   | #N/A | Non F  | 0.449 | 0.544 | 0.366 | 0.48 |
| iYBL089W           | 2    | 50942         | 7581    | #N/A | Non F  | 0.449 | 0.633 | 0.506 | 0.5  |
| iYOR075W           | 15   | 469262        | 13029   | #N/A | Non F  | 0.449 | 0.473 | 0.467 | 0.15 |
| iYOR083W           | 15   | 480427 13036  | YOR08   | #N/A | Sgl Pi | 0.449 | 0.463 | 0.625 | 0.97 |
| iYPL218W           | 16   | 139383        | 13538   | #N/A | Non F  | 0.449 | 0.76  | 0.606 | 0.4  |
| iYJL162C           | 10   | 115659 10842  | YJL16:  | #N/A | Dbl Pi | 0.45  | 0.533 | 0.517 | 0.16 |
| iYCR053W           | 3    | 218208        | 8008    | #N/A | Non F  | 0.45  | 0.242 | 0.587 | 0.69 |
| iYCR053W           | 3    | 218208        | 8008    | #N/A | Non F  | 0.45  | 0.242 | 0.587 | 0.69 |
| iYPL207W           | 16   | 162404        | 13527   | #N/A | Non F  | 0.451 | 0.615 | 0.376 | 0.53 |
| iYNL273W           | 14   | 126622        | 12632   | #N/A | Non F  | 0.451 | 0.539 | 0.59  | 0.49 |
| iYJL055W           | 10   | 333798 10747  | YJL05:  | #N/A | Sgl Pi | 0.452 | 0.577 | 0.628 | 0.64 |
| iYLR291C           | 12   | 719466 11746  | YLR29   | #N/A | Sgl Pi | 0.452 | 0.42  | 0.236 | 0.56 |
| iYFL004W           | 6    | 134301        | 9290    | #N/A | Non F  | 0.452 | 0.723 | 0.515 | 0.14 |
| iYGL240W           | 7    | 49356         | 9823    | #N/A | Non F  | 0.452 | NaN   | NaN   | 0.01 |
| iYGL211W           | 7    | 93095 9775    | YGL210  | #N/A | Sgl Pi | 0.453 | 0.398 | 0.124 | 0.71 |
| iYBR197C           | 2    | 615821 7798   | YBR197  | #N/A | Sgl Pi | 0.453 | 0.49  | 0.802 | 0.92 |
| iYLR077W           | 12   | 285622        | 11546   | #N/A | Non F  | 0.454 | 0.608 | 0.154 | 0.41 |
| iYPR051W           | 16   | 665473        | 13658   | #N/A | Non F  | 0.455 | 0.57  | 0.481 | 0.63 |
| iYER147C           | 5    | 464823 9161   | YER147  | #N/A | Dbl Pi | 0.455 | 0.1   | 0.165 | 0.46 |
| iYKL212W           | 11   | 36415         | 11268   | #N/A | Non F  | 0.455 | 0.49  | 0.648 | 0.53 |
| iSNR68             | 9    | 97247 7094    | YIL135C | #N/A | Dbl Pi | 0.455 | 0.672 | 0.816 | 0.7  |
| iYOR093C           | 15   | 502456 13045  | YOR09   | #N/A | Dbl Pi | 0.456 | 0.706 | 0.249 | 0    |
| itA(UGC)A + iYB ## | #N/A | #N/A          | #N/A    | #N/A | #N/A   | 0.456 | NaN   | NaN   | 0.39 |
| iYDL212W           | 4    | 79068         | 8262    | #N/A | Non F  | 0.457 | 0.682 | 0.477 | 0.58 |
| iYPR169W           | 16   | 880141        | 13760   | #N/A | Non F  | 0.458 | 0.649 | 0.468 | 0.49 |
| iYAR027W + iYB ##  | #N/A | #N/A          | #N/A    | #N/A | #N/A   | 0.459 | NaN   | NaN   | 0.65 |
| iYML109W           | 13   | 54474 12020   | YML1C   | #N/A | Sgl Pi | 0.46  | 0.592 | 0.508 | 0.27 |

|              |    |         |       |          |      |     |    |       |       |       |       |
|--------------|----|---------|-------|----------|------|-----|----|-------|-------|-------|-------|
| iYOR363C     | 15 | 1023223 | 13295 | YOR363   | #N/A | Dbl | Pi | 0.461 | 0.445 | 0.408 | 0.61  |
| Q0167        | 17 | 0       |       | 13833    | #N/A |     |    | 0     | 0.462 | 0.778 | 0.536 |
| Q0167        | 17 | 0       |       | 13833    | #N/A |     |    | 0     | 0.462 | 0.778 | 0.536 |
| iYKL161C-1   | 11 | 151968  | 11217 | YKL16    | #N/A | Dbl | Pi | 0.463 | 0.613 | 0.206 | 0.51  |
| iYLR223C     | 12 | 585479  | 11688 | YLR22    | #N/A | Dbl | Pi | 0.463 | 0.347 | 0.401 | 0     |
| iYGL014W     | 7  | 468824  |       | 9578     | #N/A | Non | F  | 0.464 | 0.683 | 0.363 | 0.51  |
| itS(AGA)D2   | 4  | 981036  | 7305  | YDR261   | #N/A | Dbl | Pi | 0.464 | 0.853 | 0.808 | 0.43  |
| iYLRWdelta23 | 12 | 947133  | 11916 | YLR41    | #N/A | Sgl | Pi | 0.465 | 0.701 | 0.604 | 0.54  |
| iYAL024C     | 1  | 105872  | 7397  | YAL024   | #N/A | Sgl | Pi | 0.466 | 0.819 | 0.334 | 0.46  |
| iYMR293C     | 13 | 856783  | 12341 | YMR293   | #N/A | Dbl | Pi | 0.466 | 0.591 | 0.389 | 0.68  |
| iYGL019W     | 7  | 458980  |       | 9583     | #N/A | Non | F  | 0.466 | 0.714 | 0.483 | 0.72  |
| iYHL018W     | 8  | 70074   | 10195 | YHL01    | #N/A | Sgl | Pi | 0.466 | 0.404 | 0.241 | 0.74  |
| iYKL064W     | 11 | 320313  |       | 11128    | #N/A | Non | F  | 0.467 | 0.428 | 0.486 | 0.19  |
| iYLR096W     | 12 | 336040  |       | 11565    | #N/A | Non | F  | 0.468 | 0.695 | 0.558 | 0.54  |
| iYOL071W     | 15 | 196997  |       | 12848    | #N/A | Non | F  | 0.468 | 0.507 | 0.528 | 0.77  |
| iYBR031W     | 2  | 301255  | 7636  | YBR032   | #N/A | Sgl | Pi | 0.468 | 0.274 | 0.791 | 0.33  |
| iYNL267W     | 14 | 144073  | 12627 | YNL26    | #N/A | Sgl | Pi | 0.468 | 0.5   | 0.416 | 0.61  |
| iYEL040W     | 5  | 79456   |       | 8870     | #N/A | Non | F  | 0.471 | 0.672 | 0.464 | 0.53  |
| iYGR266W     | 7  | 1024822 |       | 10136    | #N/A | Non | F  | 0.471 | 0.466 | NaN   | 0.09  |
| iYGL102C     | 7  | 311925  | 9664  | YGL102   | #N/A | Dbl | Pi | 0.471 | 0.285 | 0.683 | 0.49  |
| iYPL043W     | 16 | 472013  |       | 13375    | #N/A | Non | F  | 0.472 | 0.866 | 0.411 | 0.3   |
| iYHR206W     | 8  | 514592  |       | 10438    | #N/A | Non | F  | 0.473 | 0.608 | 0.669 | 0.54  |
| iYLR420W     | 12 | 964860  |       | 11859    | #N/A | Non | F  | 0.473 | 0.519 | 0.576 | 0.36  |
| iYPL223C     | 16 | 129130  | 13543 | YPL22    | #N/A | Dbl | Pi | 0.473 | 0.043 | 0.438 | 0.7   |
| iYGL143C     | 7  | 235961  | 9701  | YGL143   | #N/A | Sgl | Pi | 0.474 | 0.551 | 0.266 | 0.84  |
| iSNR34       | 12 | 899547  |       | 7064     | #N/A | Non | F  | 0.475 | 0.641 | 0.536 | 0.29  |
| iYNL107W     | 14 | 420784  |       | 12485    | #N/A | Non | F  | 0.475 | 0.623 | NaN   | 0.82  |
| iYOL034W     | 15 | 263249  | 12814 | YOL03    | #N/A | Sgl | Pi | 0.475 | 0.689 | 0.451 | 0.27  |
| iYGR103W     | 7  | 697234  |       | 9984     | #N/A | Non | F  | 0.475 | 0.754 | 0.651 | 0.27  |
| iYPL175W     | 16 | 220083  |       | 13497    | #N/A | Non | F  | 0.475 | 0.266 | 0.777 | 0.43  |
| Q0075        | 17 | 71440   | 3640  | AI5_BETA | 17   | W   | :  | #N/A  | 0     | 0.475 | 0.472 |
| Q0075        | 17 | 71440   | 3640  | AI5_BETA | 17   | W   | :  | #N/A  | 0     | 0.475 | 0.472 |
| YGRCTy1-2B   | 7  | 563310  |       | 14074    | #N/A | Non | F  | 0.475 | 0.318 | 0.992 | 0.21  |
| iYLR338W     | 12 | 805231  |       | 11786    | #N/A | Non | F  | 0.476 | 0.974 | 0.612 | 0.61  |
| iYDR251W     | 4  | 963106  | 8542  | YDR252   | #N/A | Sgl | Pi | 0.476 | 0.278 | 0.623 | 0.58  |
| Q0310        | 17 | 46744   |       | 13889    | #N/A |     |    | 0     | 0.477 | 0.566 | 0.238 |
| iYIR033W     | 9  | 419439  |       | 10687    | #N/A | Non | F  | 0.478 | 0.559 | 0.394 | 0.55  |
| iYFL036W     | 6  | 62831   |       | 9354     | #N/A | Non | F  | 0.478 | 0.469 | 0.417 | 0.45  |
| iSNR56       | 2  | 88268   |       | 7081     | #N/A | Non | F  | 0.478 | 0.725 | 0.417 | 0.5   |
| iYGR208W     | 7  | 912800  |       | 10080    | #N/A | Non | F  | 0.479 | 0.615 | 0.697 | 0.75  |
| iYJL118W     | 10 | 192000  | 10802 | YJL118   | #N/A | Sgl | Pi | 0.479 | 0.225 | 0.683 | 0.7   |
| iYLR452C     | 12 | 1041372 | 11888 | YLR45    | #N/A | Sgl | Pi | 0.48  | 0.487 | 0.448 | 0.34  |
| itM(CAU)M    | 13 | 572949  |       | 7249     | #N/A | Non | F  | 0.48  | 0.759 | 0.548 | 0.28  |
| iYKRCdelta8  | 11 | 458107  | 11404 | YKR0C    | #N/A | Sgl | Pi | 0.48  | 0.562 | NaN   | 0.39  |
| iYJR034W     | 10 | 496699  | 10938 | YJR03    | #N/A | Sgl | Pi | 0.481 | 0.74  | 0.788 | 0.86  |
| iYJR133W     | 10 | 673320  |       | 11028    | #N/A | Non | F  | 0.482 | 0.352 | 0.611 | 0.55  |
| IntQ0185A    | 17 | 16347   |       | 7012     | #N/A |     |    | 0     | 0.482 | 0.432 | 0.496 |
| IntQ0185A    | 17 | 16347   |       | 7012     | #N/A |     |    | 0     | 0.482 | 0.432 | 0.496 |
| iYGR218W     | 7  | 935792  | 10090 | YGR218   | #N/A | Sgl | Pi | 0.483 | 0.836 | NaN   | 0.28  |
| iYFR027W     | 6  | 208266  |       | 9482     | #N/A | Non | F  | 0.483 | 0.593 | 0.474 | 0.63  |
| iYNL110C     | 14 | 418474  | 12487 | YNL11    | #N/A | Dbl | Pi | 0.484 | 0.372 | 0.632 | 0.65  |

|            |    |         |       |        |      |        |       |       |       |      |
|------------|----|---------|-------|--------|------|--------|-------|-------|-------|------|
| iYNL076W   | 14 | 485292  | 12456 | YNL07  | #N/A | Sgl Pi | 0.484 | 0.949 | 0.404 | 0.18 |
| iYPR057W   | 16 | 673504  | 13662 | YPR05  | #N/A | Sgl Pi | 0.485 | 0.26  | 0.931 | 0.62 |
| iYKL131W   | 11 | 194994  |       | 11190  | #N/A | Non F  | 0.485 | 0.865 | 0.527 | 0.76 |
| iYKL131W   | 11 | 194994  |       | 11190  | #N/A | Non F  | 0.485 | 0.865 | 0.527 | 0.76 |
| iYGR060W   | 7  | 611545  |       | 9943   | #N/A | Non F  | 0.485 | 0.873 | 0.62  | 0.61 |
| iYBR210W   | 2  | 645932  |       | 7811   | #N/A | Non F  | 0.485 | 0.512 | 0.566 | 0.25 |
| iYDL204W   | 4  | 95795   |       | 8252   | #N/A | Non F  | 0.485 | 0.598 | 0.384 | 0.56 |
| iYHR014W   | 8  | 132898  | 10248 | YHR01  | #N/A | Sgl Pi | 0.485 | 0.566 | 0.531 | 0.46 |
| iYPL055C   | 16 | 454988  | 13386 | YPL05  | #N/A | Dbl Pi | 0.486 | 0.809 | 0.734 | 0.41 |
| iYGL183C   | 7  | 157074  | 9739  | YGL183 | #N/A | Sgl Pi | 0.486 | 0.721 | 0.453 | 0.1  |
| iYLR364W   | 12 | 854377  | 11808 | YLR36  | #N/A | Sgl Pi | 0.486 | 0.42  | 0.488 | 0.51 |
| iYKL057C   | 11 | 333620  | 11120 | YKL05  | #N/A | Sgl Pi | 0.487 | 0.786 | 0.736 | 0.04 |
| iYER173W   | 5  | 538288  |       | 9211   | #N/A | Non F  | 0.487 | 0.575 | 0.444 | 0.51 |
| iYPR094W   | 16 | 720935  |       | 13692  | #N/A | Non F  | 0.487 | 0.582 | 0.464 | 0.44 |
| iYPR138C   | 16 | 812437  | 13732 | YPR13  | #N/A | Sgl Pi | 0.487 | 0.172 | 0.27  | 0.75 |
| iYLR460C-0 | 12 | 1060877 | 11895 | YLR46  | #N/A | Dbl Pi | 0.487 | 0.196 | 0.982 | 0.8  |
| iYIL045W   | 9  | 272763  |       | 10521  | #N/A | Non F  | 0.488 | 0.826 | 0.429 | 0.41 |
| iYPR101W   | 16 | 731063  |       | 13698  | #N/A | Non F  | 0.488 | 0.7   | 0.443 | 0.39 |
| iYML050W   | 13 | 174084  |       | 11965  | #N/A | Non F  | 0.488 | 0.646 | 0.706 | 0.3  |
| iYOR266W   | 15 | 822300  |       | 13204  | #N/A | Non F  | 0.488 | 0.644 | 0.076 | 0.54 |
| iYDR464W   | 4  | 1393180 |       | 8739   | #N/A | Non F  | 0.488 | 0.668 | 0.476 | 0.5  |
| iYGL129C   | 7  | 269197  | 9688  | YGL129 | #N/A | Sgl Pi | 0.489 | 0.602 | 0.074 | 0.56 |
| iYDR502C   | 4  | 1454464 | 8775  | YDR502 | #N/A | Sgl Pi | 0.489 | 0.623 | 0.414 | 0.5  |
| iYLR079W   | 12 | 287681  | 11548 | YLR08  | #N/A | Sgl Pi | 0.489 | 0.478 | 0.453 | 0.45 |
| iYJL060W   | 10 | 324467  | 10751 | YJL05  | #N/A | Sgl Pi | 0.49  | 0.452 | 0.66  | 0.17 |
| iYGR105W   | 7  | 698849  |       | 9986   | #N/A | Non F  | 0.49  | 0.624 | 0.553 | 0.37 |
| iYNR030W   | 14 | 680456  |       | 12728  | #N/A | Non F  | 0.49  | 0.723 | 0.454 | 0.56 |
| iCEN7      | 7  | 497028  | 7008  | YGL001 | #N/A | Sgl Pi | 0.49  | 0.744 | 0.542 | 0.36 |
| iYHL012W   | 8  | 80418   |       | 10189  | #N/A | Non F  | 0.491 | 0.569 | 0.106 | 0.22 |
| iYLR242C   | 12 | 623875  | 11703 | YLR24  | #N/A | Dbl Pi | 0.491 | 0.281 | 0.446 | 0.51 |
| iYBR159W   | 2  | 559694  | 7762  | YBR16C | #N/A | Sgl Pi | 0.491 | 0.195 | 0.29  | 0.35 |
| iYAR044W-2 | 1  | 198816  |       | 7477   | #N/A | Non F  | 0.491 | 0.396 | 0.596 | 0.83 |
| iYML001W   | 13 | 267832  |       | 11921  | #N/A | Non F  | 0.491 | 0.546 | NaN   | 0.07 |
| iK(CUU)F   | 6  | 226749  | 7206  | YFR035 | #N/A | Dbl Pi | 0.492 | 0.774 | 0.922 | 0.4  |
| iYKL025C   | 11 | 391967  | 11091 | YKL02  | #N/A | Sgl Pi | 0.492 | 0.495 | 0.58  | 0.02 |
| iYMR158W   | 13 | 572701  |       | 12206  | #N/A | Non F  | 0.492 | 0.797 | 0.481 | 0.32 |
| iYOL092W   | 15 | 145160  | 12868 | YOL09  | #N/A | Sgl Pi | 0.493 | 0.685 | 0.441 | 0.49 |
| iYHR042W   | 8  | 192610  |       | 10277  | #N/A | Non F  | 0.493 | 0.504 | 0.659 | 0.91 |
| Q0210      | 17 | 24250   |       | 13863  | #N/A | 0      | 0.493 | 0.6   | NaN   | 0.48 |
| Q0210      | 17 | 24250   |       | 13863  | #N/A | 0      | 0.493 | 0.6   | NaN   | 0.48 |
| iYDR055W   | 4  | 564873  |       | 8362   | #N/A | Non F  | 0.493 | 0.545 | 0.555 | 0.73 |
| iYLR444C   | 12 | 1023973 | 11880 | YLR44  | #N/A | Dbl Pi | 0.494 | 0.526 | 0.481 | 0.36 |
| iYFR045W   | 6  | 242990  |       | 9520   | #N/A | Non F  | 0.495 | 0.481 | NaN   | 0.34 |
| iYIL099W   | 9  | 179657  |       | 10567  | #N/A | Non F  | 0.495 | 0.462 | 0.813 | 0.69 |
| iYGL113W   | 7  | 297936  |       | 9673   | #N/A | Non F  | 0.495 | 0.647 | 0.343 | 0.31 |
| iYJL085W   | 10 | 274397  |       | 10773  | #N/A | Non F  | 0.496 | 0.562 | 0.309 | 0.48 |
| iYNR019W   | 14 | 667255  |       | 12718  | #N/A | Non F  | 0.496 | 0.553 | 0.481 | 0.51 |
| iYDL154W   | 4  | 181045  |       | 8207   | #N/A | Non F  | 0.497 | 0.315 | 0.468 | 0.05 |
| YOLWdelta6 | 15 | 227095  | 14142 | YOL05  | #N/A | Dbl Pi | 0.497 | 0.761 | 0.535 | 0.67 |
| iYLR405W   | 12 | 930917  |       | 11844  | #N/A | Non F  | 0.497 | 0.558 | NaN   | 0.31 |
| iYFL023W   | 6  | 93375   |       | 9328   | #N/A | Non F  | 0.497 | 0.719 | 0.797 | 0.52 |

|                    |      |         |           |           |      |       |    |       |       |       |       |      |
|--------------------|------|---------|-----------|-----------|------|-------|----|-------|-------|-------|-------|------|
| iL(UAA)K           | 11   | 84282   | 7238      | YKL189    | #N/A | Sgl   | Pi | 0.498 | 0.582 | 0.933 | 0.8   |      |
| iYBL107C           | 2    | 10536   | 7597      | YBL107    | #N/A | Sgl   | Pi | 0.498 | 0.536 | 0.433 | 0.6   |      |
| iYER141W           | 5    | 454953  |           | 9149      | #N/A | Non F |    | 0.499 | 0.625 | 0.382 | 0.06  |      |
| iYDR522C           | 4    | 1485318 | 8791      | YDR522    | #N/A | Sgl   | Pi | 0.499 | 0.514 | NaN   | 0.95  |      |
| iYDR195W           | 4    | 850179  |           | 8493      | #N/A | Non F |    | 0.499 | 0.585 | 0.378 | 0.39  |      |
| iYIL092W           | 9    | 190949  |           | 10560     | #N/A | Non F |    | 0.5   | 0.559 | 0.313 | 0.41  |      |
| iYPR090W           | 16   | 715927  |           | 13690     | #N/A | Non F |    | 0.501 | 0.695 | 0.394 | 0.21  |      |
| Q0045              | 17   | 68319   | 3639 COX1 | 17 W 13   | #N/A |       |    | 0     | 0.501 | 0.261 | 0.495 | 0.43 |
| Q0045              | 17   | 68319   | 3639 COX1 | 17 W 13   | #N/A |       |    | 0     | 0.501 | 0.261 | 0.495 | 0.43 |
| iYDR394W           | 4    | 1262951 | 8679      | YDR394    | #N/A | Sgl   | Pi | 0.503 | 0.199 | 0.336 | 0.77  |      |
| iYPR173C           | 16   | 887819  | 13764     | YPR17     | #N/A | Sgl   | Pi | 0.503 | 0.356 | 0.318 | 0.7   |      |
| iYBR041W           | 2    | 320196  |           | 7646      | #N/A | Non F |    | 0.506 | 0.493 | 0.521 | 0.8   |      |
| iYBR041W           | 2    | 320196  |           | 7646      | #N/A | Non F |    | 0.506 | 0.493 | 0.521 | 0.8   |      |
| iYGR157W           | 7    | 805039  |           | 10034     | #N/A | Non F |    | 0.508 | 0.7   | 0.602 | 0.57  |      |
| iYDR022C           | 4    | 488653  | 8326      | YDR022    | #N/A | Dbl   | Pi | 0.508 | 0.626 | 0.617 | 0.37  |      |
| iYJL209W           | 10   | 39964   |           | 10883     | #N/A | Non F |    | 0.508 | 0.374 | 0.964 | 0.39  |      |
| iYDR484W           | 4    | 1424672 |           | 8758      | #N/A | Non F |    | 0.509 | 0.567 | 0.768 | 0.66  |      |
| iYGR233C-1         | 7    | 959046  | 10102     | YGR233    | #N/A | Dbl   | Pi | 0.509 | 0.148 | 0.604 | 0.93  |      |
| iYGR093W           | 7    | 671967  | 9974      | YGR093    | #N/A | Sgl   | Pi | 0.509 | 0.118 | 0.55  | 0.42  |      |
| iYIL031W           | 9    | 295739  |           | 10507     | #N/A | Non F |    | 0.511 | 0.614 | 0.606 | 0.54  |      |
| iYBR142W           | 2    | 530596  |           | 7744      | #N/A | Non F |    | 0.511 | 0.691 | 0.502 | 0.13  |      |
| iYJR141W           | 10   | 696639  | 11036     | YJR14     | #N/A | Sgl   | Pi | 0.511 | 0.611 | 0.255 | 0.71  |      |
| iYHL030W           | 8    | 45682   |           | 10207     | #N/A | Non F |    | 0.511 | 0.437 | 0.192 | 0.05  |      |
| iYLR332W-0         | 12   | 791807  |           | 11781     | #N/A | Non F |    | 0.511 | 0.549 | 0.021 | 0.57  |      |
| iYBL026W           | 2    | 171007  | 7525      | YBL025    | #N/A | Sgl   | Pi | 0.511 | 0.349 | 0.618 | 0.09  |      |
| iYGL176C           | 7    | 173076  | 9730      | YGL176    | #N/A | Sgl   | Pi | 0.512 | 0.434 | 0.423 | 0.64  |      |
| iYER077C           | 5    | 316589  | 9023      | YER077    | #N/A | Sgl   | Pi | 0.512 | 0.613 | 0.333 | 0.48  |      |
| iYLR041W           | 12   | 229714  |           | 11512     | #N/A | Non F |    | 0.513 | 0.607 | 0.448 | 0.96  |      |
| iYEL002C           | 5    | 150006  | 8834      | YEL002    | #N/A | Sgl   | Pi | 0.513 | 0.819 | 0.487 | 0.37  |      |
| iYBR130C           | 2    | 496816  | 7733      | YBR130    | #N/A | Dbl   | Pi | 0.513 | 0.439 | 0.033 | 0.02  |      |
| iYPR068C           | 16   | 684349  | 13672     | YPR068    | #N/A | Sgl   | Pi | 0.513 | 0.53  | 0.349 | 0.75  |      |
| iYPR086W           | 16   | 711119  | 13688     | YPR086    | #N/A | Sgl   | Pi | 0.514 | 0.731 | 0.458 | 0.68  |      |
| iYLR151C           | 12   | 442743  | 11615     | YLR151    | #N/A | Sgl   | Pi | 0.514 | 0.724 | 0.569 | 0.36  |      |
| iYPR082C           | 16   | 704659  | 13684     | YPR082    | #N/A | Dbl   | Pi | 0.515 | 0.33  | 0.342 | 0.55  |      |
| iYEL003W           | 5    | 148585  |           | 8835      | #N/A | Non F |    | 0.516 | 0.569 | 0.656 | 0.63  |      |
| Q0283              | 17   | 37832   |           | 13883     | #N/A |       |    | 0     | 0.516 | 0.769 | 0.414 | 0.58 |
| Q0283              | 17   | 37832   |           | 13883     | #N/A |       |    | 0     | 0.516 | 0.769 | 0.414 | 0.58 |
| iYML097C           | 13   | 79689   | 12009     | YML097    | #N/A | Dbl   | Pi | 0.518 | 0.187 | 0.657 | 0.58  |      |
| iYGR262C           | 7    | 1017741 | 10133     | YGR262    | #N/A | Sgl   | Pi | 0.518 | 0.449 | 0.356 | 0.47  |      |
| iYOR115C           | 15   | 539465  | 13065     | YOR115    | #N/A | Sgl   | Pi | 0.518 | 0.577 | 0.735 | 0.05  |      |
| iYKL041W           | 11   | 360465  |           | 11104     | #N/A | Non F |    | 0.518 | 0.996 | 0.592 | 0.34  |      |
| iYLR395C           | 12   | 909990  | 11834     | YLR395    | #N/A | Sgl   | Pi | 0.518 | 0.332 | 0.449 | 0.38  |      |
| iYPR012W           | 16   | 584561  |           | 13622     | #N/A | Non F |    | 0.518 | 0.562 | 0.396 | 0.49  |      |
| Q0055              | 17   | 69298   | 3635 AI2  | 17 W 1381 | #N/A |       |    | 0     | 0.519 | 0.481 | 0.782 | 0.61 |
| Q0055              | 17   | 69298   | 3635 AI2  | 17 W 1381 | #N/A |       |    | 0     | 0.519 | 0.481 | 0.782 | 0.61 |
| iYMR040W           | 13   | 350865  |           | 12092     | #N/A | Non F |    | 0.519 | 0.478 | 0.634 | 0.24  |      |
| iYOR114W           | 15   | 538468  |           | 13064     | #N/A | Non F |    | 0.519 | 0.583 | 0.55  | 0.52  |      |
| iYAL039C-1 + iYI## | #N/A | #N/A    | #N/A      | #N/A      | #N/A |       |    | 0.52  | NaN   | NaN   | 0.73  |      |
| iYGR278W           | 7    | 1048498 |           | 10147     | #N/A | Non F |    | 0.52  | 0.337 | 0.485 | 0.81  |      |
| iYJL092W           | 10   | 260636  |           | 10778     | #N/A | Non F |    | 0.52  | 0.677 | 0.486 | 0.32  |      |
| iYKL156W           | 11   | 159221  |           | 11211     | #N/A | Non F |    | 0.52  | 0.487 | 0.39  | 0.49  |      |



|            |    |         |                        |        |      |        |       |       |       |      |
|------------|----|---------|------------------------|--------|------|--------|-------|-------|-------|------|
| iYKR076W   | 11 | 583019  | 11365                  | YKR07  | #N/A | Sgl Pi | 0.522 | 0.644 | 0.52  | 0.95 |
| iYLR284C   | 12 | 707049  | 11738                  | YLR28  | #N/A | Dbl Pi | 0.523 | 0.958 | 0.432 | 0.81 |
| iYLR190W   | 12 | 536677  | 11659                  | YLR19  | #N/A | Sgl Pi | 0.524 | 0.536 | 0.462 | 0.46 |
| iYFR025C   | 6  | 204771  | 9478                   | YFR025 | #N/A | Sgl Pi | 0.524 | 0.73  | 0.491 | 0.62 |
| iYKR003W   | 11 | 446357  |                        | 11297  | #N/A | Non F  | 0.524 | 0.442 | 0.689 | 0.82 |
| iYMR139W   | 13 | 547231  | 12187                  | YMR14  | #N/A | Sgl Pi | 0.525 | 0.315 | 0.992 | 0.65 |
| iYBR272C   | 2  | 747762  | 7862                   | YBR272 | #N/A | Sgl Pi | 0.525 | 0.47  | 0.47  | 0.67 |
| iYER025W   | 5  | 206847  | 8944 possible promoter |        | #N/A | Non F  | 0.525 | 0.664 | 0.513 | 0.38 |
| iYNL232W   | 14 | 215786  |                        | 12596  | #N/A | Non F  | 0.525 | 0.449 | 0.286 | 0.37 |
| iYNL179C-0 | 14 | 301102  | 12550                  | YNL17  | #N/A | Dbl Pi | 0.525 | 0.647 | 0.319 | 0.78 |
| iYER134C   | 5  | 437807  | 9137                   | YER134 | #N/A | Sgl Pi | 0.525 | 0.522 | 0.631 | 0.75 |
| iYOL075C   | 15 | 193554  | 12851                  | YOL07  | #N/A | Sgl Pi | 0.526 | 0.189 | 0.87  | 0.59 |
| iYGL226W   | 7  | 73702   | 9801                   | YGL225 | #N/A | Sgl Pi | 0.526 | 0.577 | 0.151 | 0.56 |
| iYGL227W   | 7  | 72550   |                        | 9803   | #N/A | Non F  | 0.526 | 0.368 | 0.19  | 0.32 |
| iYBL036C   | 2  | 151185  | 7536                   | YBL036 | #N/A | Sgl Pi | 0.526 | 0.838 | 0.454 | 0    |
| iYDR191W   | 4  | 843444  |                        | 8490   | #N/A | Non F  | 0.526 | 0.631 | 0.43  | 0.4  |
| iYNL063W   | 14 | 508673  |                        | 12443  | #N/A | Non F  | 0.527 | 0.698 | 0.399 | 0.65 |
| iYBR002C   | 2  | 242517  | 7608                   | YBR002 | #N/A | Dbl Pi | 0.527 | 0.61  | 0.456 | 0.53 |
| iYEL056W   | 5  | 48384   |                        | 8885   | #N/A | Non F  | 0.527 | 0.764 | 0.521 | 0.33 |
| iYFR013W   | 6  | 172261  |                        | 9454   | #N/A | Non F  | 0.527 | 0.567 | 0.523 | 0.28 |
| iYPR109W   | 16 | 745585  |                        | 13705  | #N/A | Non F  | 0.528 | 0.663 | 0.332 | 0.07 |
| iYGL144C   | 7  | 234522  | 9702                   | YGL144 | #N/A | Sgl Pi | 0.528 | 0.211 | 0.339 | 0.34 |
| 15S rRNA1  | ## | #N/A    | #N/A                   | #N/A   | #N/A |        | 0.528 | 0.433 | 0.599 | 0.5  |
| 15S rRNA1  | ## | #N/A    | #N/A                   | #N/A   | #N/A |        | 0.528 | 0.433 | 0.599 | 0.5  |
| iYML088W   | 13 | 94239   |                        | 12003  | #N/A | Non F  | 0.528 | 0.437 | 0.83  | 0.35 |
| iYBR107C   | 2  | 454482  | 7713                   | YBR107 | #N/A | Dbl Pi | 0.528 | 0.138 | 0.393 | 0.59 |
| Q0325      | 17 | 49070   |                        | 13891  | #N/A | 0      | 0.528 | 0.634 | 0.273 | 0.69 |
| iYGL205W   | 7  | 110413  | th(gug)g1              |        | #N/A | Non F  | 0.528 | 0.424 | 0.737 | 0.54 |
| iYPR032W   | 16 | 637233  |                        | 13644  | #N/A | Non F  | 0.528 | 0.582 | 0.382 | 0.73 |
| iYLL004W   | 12 | 142914  | 11409                  | YLL00: | #N/A | Sgl Pi | 0.528 | 0.714 | 0.447 | 0.53 |
| iYHR143W-A | 8  | 387442  |                        | 10379  | #N/A | Non F  | 0.528 | 0.986 | 0.613 | 0.31 |
| iYLL023C   | 12 | 98820   | 11428                  | YLL02: | #N/A | Sgl Pi | 0.529 | 0.811 | 0.871 | 0.8  |
| iYFR005C   | 6  | 155862  | 9438                   | YFR005 | #N/A | Dbl Pi | 0.529 | 0.134 | NaN   | 0.86 |
| iYCR098C-1 | 3  | 299706  | 8046                   | YCR098 | #N/A | Sgl Pi | 0.53  | 0.847 | 0.259 | 0.53 |
| iYLR167W   | 12 | 499440  |                        | 11638  | #N/A | Non F  | 0.53  | 0.876 | 0.725 | 0.09 |
| iYER044C-A | 5  | 239768  | 8963                   | YER044 | #N/A | Sgl Pi | 0.53  | 0.815 | 0.207 | 0.83 |
| iYBR246W   | 2  | 712706  |                        | 7840   | #N/A | Non F  | 0.531 | 0.724 | 0.428 | 0.52 |
| iYML100W   | 13 | 73944   | 12012                  | YML10  | #N/A | Sgl Pi | 0.531 | 0.566 | 0.52  | 0.67 |
| iYBR118W   | 2  | 479078  | 7722                   | YBR118 | #N/A | Sgl Pi | 0.531 | 0.576 | 0.772 | 0.17 |
| iYHR057C   | 8  | 218852  | 10294                  | YHR057 | #N/A | Sgl Pi | 0.531 | 0.827 | 0.285 | 0.85 |
| iYJL026W   | 10 | 393308  | 10720                  | YJL026 | #N/A | Sgl Pi | 0.531 | 0.733 | 0.335 | 0.82 |
| iYHR107C   | 8  | 328023  | 10345                  | YHR107 | #N/A | Dbl Pi | 0.532 | 0.43  | 0.096 | 0.78 |
| iYLR264W   | 12 | 673320  |                        | 11723  | #N/A | Non F  | 0.533 | 0.418 | 0.807 | 0.61 |
| iYPL001W   | 16 | 555713  | 13336                  | YPR001 | #N/A | Sgl Pi | 0.533 | 0.702 | 0.549 | 0.61 |
| iYPL074W   | 16 | 418030  |                        | 13403  | #N/A | Non F  | 0.533 | 0.013 | 0.497 | 0.17 |
| iYHR075C   | 8  | 249646  | 10312                  | YHR075 | #N/A | Dbl Pi | 0.534 | 0.609 | 0.437 | 0.26 |
| iYJR136C   | 10 | 678426  | 11031                  | YJR136 | #N/A | Sgl Pi | 0.534 | 0.784 | 0.611 | 0.55 |
| iYER038C   | 5  | 228252  | 8956                   | YER038 | #N/A | Sgl Pi | 0.534 | 0.652 | 0.243 | 0.71 |
| iYMR288W   | 13 | 848497  | 12336                  | YMR288 | #N/A | Sgl Pi | 0.535 | 0.665 | 0.395 | 0.7  |
| iYLR137W   | 12 | 418144  | 11604                  | YLR137 | #N/A | Sgl Pi | 0.535 | 0.561 | 0.284 | 0.65 |
| iYDR332W   | 4  | 1133047 |                        | 8617   | #N/A | Non F  | 0.536 | 0.574 | 0.359 | 0.56 |

|               |    |         |          |           |      |     |    |       |       |       |       |      |
|---------------|----|---------|----------|-----------|------|-----|----|-------|-------|-------|-------|------|
| iYFR043C      | 6  | 239834  | 9516     | YFR043    | #N/A | Sgl | Pi | 0.536 | 0.569 | NaN   | 0.75  |      |
| iYIL069C      | 9  | 232378  | 10542    | YIL069    | #N/A | Sgl | Pi | 0.536 | 0.096 | 0.965 | 0.94  |      |
| iYNL133C      | 14 | 374687  | 12508    | YNL13     | #N/A | Dbl | Pi | 0.537 | 0.443 | 0.666 | 0.49  |      |
| iYOR289W      | 15 | 854114  |          | 13224     | #N/A | Non | F  | 0.537 | 0.685 | 0.596 | 0.53  |      |
| iYNLCdelta1-0 | 14 | 96925   |          | 12693     | #N/A | Non | F  | 0.537 | 0.583 | 0.842 | 0.3   |      |
| iYBR161W      | 2  | 562718  |          | 7764      | #N/A | Non | F  | 0.537 | 0.472 | 0.761 | 0.82  |      |
| iYJR040W      | 10 | 509782  |          | 10942     | #N/A | Non | F  | 0.538 | 0.637 | NaN   | 0.09  |      |
| Q0170         | 17 | 9368    |          | 13835     | #N/A |     |    | 0     | 0.538 | 0.437 | 0.683 | 0.5  |
| Q0170         | 17 | 9368    |          | 13835     | #N/A |     |    | 0     | 0.538 | 0.437 | 0.683 | 0.5  |
| iYDR217C      | 4  | 903473  | 8512     | YDR217    | #N/A | Sgl | Pi | 0.538 | 0.367 | 0.481 | 0.45  |      |
| iYKL007W      | 11 | 429752  |          | 11073     | #N/A | Non | F  | 0.538 | 0.578 | 0.464 | 0.58  |      |
| iYFL022C      | 6  | 95008   | 9326     | YFL022    | #N/A | Dbl | Pi | 0.538 | 0.001 | 0.991 | 0.69  |      |
| iYGL155W      | 7  | 215199  |          | 9711      | #N/A | Non | F  | 0.539 | 0.475 | 0.537 | 0.49  |      |
| iYLR198C      | 12 | 547639  | 11666    | YLR19     | #N/A | Sgl | Pi | 0.539 | 0.732 | 0.416 | 0.61  |      |
| iYGR116W      | 7  | 724756  |          | 9995      | #N/A | Non | F  | 0.539 | 0.624 | 0.463 | 0.48  |      |
| iYIL029C      | 9  | 301255  | 10505    | YIL029    | #N/A | Dbl | Pi | 0.54  | 0.611 | 0.504 | 0.67  |      |
| iYLRWdelta14  | 12 | 656730  | 11912    | YLR25     | #N/A | Sgl | Pi | 0.54  | 0.733 | 0.004 | 0.71  |      |
| iYJL088W      | 10 | 269506  |          | 10774     | #N/A | Non | F  | 0.54  | 0.603 | 0.304 | 0.48  |      |
| iYLRWdelta11  | 12 | 599069  |          | 11911     | #N/A | Non | F  | 0.54  | 0.762 | 0.456 | 0.04  |      |
| itT(AGU)O1    | 15 | 113859  |          | 7331      | #N/A | Non | F  | 0.541 | 0.752 | 0.541 | 0.27  |      |
| iYOL069W      | 15 | 200290  |          | 12846     | #N/A | Non | F  | 0.541 | 0.788 | 0.533 | 0.59  |      |
| Q0065         | 17 | 70161   | 3637 A14 | 17 W 1381 | #N/A |     |    | 0     | 0.541 | 0.449 | 0.657 | 0.74 |
| Q0065         | 17 | 70161   | 3637 A14 | 17 W 1381 | #N/A |     |    | 0     | 0.541 | 0.449 | 0.657 | 0.74 |
| iYGL195W      | 7  | 139544  |          | 9750      | #N/A | Non | F  | 0.541 | 0.49  | 0.519 | 0.1   |      |
| iYBR106W      | 2  | 453185  |          | 7712      | #N/A | Non | F  | 0.542 | 0.048 | 0.993 | 0.66  |      |
| iYNL252C      | 14 | 172278  | 12613    | YNL25     | #N/A | Sgl | Pi | 0.542 | 0.556 | 0.798 | 0.72  |      |
| iYDL100C      | 4  | 283186  | 8155     | YDL100    | #N/A | Dbl | Pi | 0.542 | 0.048 | 0.536 | 0.22  |      |
| iYDL100C      | 4  | 283186  | 8155     | YDL100    | #N/A | Dbl | Pi | 0.542 | 0.048 | 0.536 | 0.22  |      |
| iYIR037W      | 9  | 423615  |          | 10691     | #N/A | Non | F  | 0.543 | 0.372 | 0.527 | 0.95  |      |
| iYGR071C      | 7  | 634046  | 9952     | YGR071    | #N/A | Dbl | Pi | 0.543 | 0.805 | 0.517 | 0.65  |      |
| iYPL012W      | 16 | 533405  |          | 13347     | #N/A | Non | F  | 0.543 | 0.496 | 0.658 | 0.36  |      |
| iYCL051W      | 3  | 37632   |          | 7934      | #N/A | Non | F  | 0.543 | 0.272 | 0.33  | 0.48  |      |
| iYBR061C      | 2  | 365698  | 7667     | YBR061    | #N/A | Sgl | Pi | 0.543 | 0.501 | 0.596 | 0.37  |      |
| iYDR451C      | 4  | 1362183 | 8727     | YDR451    | #N/A | Dbl | Pi | 0.544 | 3E-04 | 1     | 0.85  |      |
| iYOR304C-A    | 15 | 888737  | 13238    | YOR304    | #N/A | Dbl | Pi | 0.544 | 0.234 | NaN   | 0.81  |      |
| iYKL111C      | 11 | 228438  | 11175    | YKL111    | #N/A | Sgl | Pi | 0.544 | 0.475 | 0.864 | 0.13  |      |
| iYHR180W      | 8  | 465671  | 10414    | YHR180    | #N/A | Sgl | Pi | 0.545 | 0.011 | 0.643 | 0.43  |      |
| iYOR258W      | 15 | 812324  |          | 13197     | #N/A | Non | F  | 0.545 | 0.342 | NaN   | 0.44  |      |
| iYOL072W      | 15 | 196321  | 12849    | YOL072    | #N/A | Sgl | Pi | 0.545 | 0.45  | 0.865 | 0.81  |      |
| iYGL245W      | 7  | 41175   | 9831     | YGL244    | #N/A | Sgl | Pi | 0.545 | 0.253 | NaN   | 0     |      |
| iYDR014W-1    | 4  | 476889  |          | 8318      | #N/A | Non | F  | 0.545 | 0.562 | 0.441 | 0.48  |      |
| iYEL016C      | 5  | 126215  | 8847     | YEL016    | #N/A | Dbl | Pi | 0.545 | 5E-05 | 0.654 | 0.42  |      |
| iYMR137C      | 13 | 544961  | 12185    | YMR137    | #N/A | Dbl | Pi | 0.546 | 0.385 | 0.946 | 0.75  |      |
| itL(UAG)L1    | 12 | 592607  | 7241     | YLR227    | #N/A | Dbl | Pi | 0.546 | 0.631 | 0.483 | 0.31  |      |
| iYHL017W      | 8  | 71866   |          | 10194     | #N/A | Non | F  | 0.547 | 0.436 | 0.273 | 0.39  |      |
| iYDR305C      | 4  | 1073482 | 8592     | YDR305    | #N/A | Sgl | Pi | 0.547 | 0.577 | 0.468 | 0.49  |      |
| iYOR296W      | 15 | 874081  |          | 13231     | #N/A | Non | F  | 0.548 | 0.933 | 0.257 | 0.05  |      |
| iYJL180C      | 10 | 88558   | 10858    | YJL180    | #N/A | Dbl | Pi | 0.549 | 0.476 | 0.383 | 0.34  |      |
| iYER085C      | 5  | 328152  | 9037     | YER085    | #N/A | Dbl | Pi | 0.549 | 0.794 | 2E-04 | 0.48  |      |
| iYML074C-1    | 13 | 122315  | 11989    | YML074    | #N/A | Sgl | Pi | 0.55  | 0.384 | 0.12  | 0.5   |      |
| iYHL004W      | 8  | 100399  |          | 10183     | #N/A | Non | F  | 0.55  | 0.653 | 0.496 | 0.39  |      |

|              |    |         |           |          |      |        |       |       |       |      |
|--------------|----|---------|-----------|----------|------|--------|-------|-------|-------|------|
| iYGR100W     | 7  | 693087  | 9981      | YGR100   | #N/A | Sgl Pi | 0.55  | 0.067 | 0.702 | 0.74 |
| iYPL169C     | 16 | 230824  | 13491     | YPL16    | #N/A | Dbl Pi | 0.551 | 0.691 | 0.19  | 0.25 |
| iYBR165W     | 2  | 569673  |           | 7769     | #N/A | Non F  | 0.551 | 0.552 | 0.402 | 0.36 |
| iYMR190C     | 13 | 645259  | 12239     | YMR19    | #N/A | Dbl Pi | 0.551 | 0.608 | 0.455 | 0.28 |
| iYOL125W     | 15 | 85282   |           | 12899    | #N/A | Non F  | 0.552 | 0.596 | 0.484 | 0.53 |
| iYOL148C     | 15 | 47587   | 12920     | YOL14    | #N/A | Sgl Pi | 0.552 | 0.784 | 3E-05 | 0.12 |
| iYBR274W     | 2  | 751128  |           | 7864     | #N/A | Non F  | 0.553 | 0.741 | 0.441 | 0.57 |
| iYJL113W     | 10 | 203036  | 10798     | YJL11    | #N/A | Sgl Pi | 0.553 | 0.682 | 0.572 | 0.56 |
| iYFR055W-2   | 6  | 267765  | 9554      | YFR05    | #N/A | Sgl Pi | 0.553 | 0.726 | 0.149 | 0.73 |
| iYHR051W     | 8  | 210138  | 10288     | YHR05    | #N/A | Sgl Pi | 0.554 | 0.834 | 0.594 | 0.34 |
| iYDR499W     | 4  | 1450076 |           | 8772     | #N/A | Non F  | 0.554 | 0.716 | 0.474 | 0.16 |
| iYLR376C     | 12 | 873556  | 11817     | YLR37    | #N/A | Sgl Pi | 0.554 | 0.748 | 0.806 | 0.56 |
| iYMR269W     | 13 | 805115  |           | 12318    | #N/A | Non F  | 0.554 | 0.813 | 0.539 | 0.2  |
| YHLComega1   | 8  | 7984    |           | 14079    | #N/A | Non F  | 0.555 | 0.409 | 0.695 | 0.64 |
| iYJL214W-2   | 10 | 30959   | 10889     | YJL21    | #N/A | Sgl Pi | 0.555 | 0.622 | 0.467 | 0.67 |
| iYJL031C     | 10 | 386939  | 10725     | YJL03    | #N/A | Dbl Pi | 0.555 | 0.964 | 0.58  | 0.54 |
| Q0130        | 17 | 0       | 3650 OLI1 | 17 W 467 | #N/A | 0      | 0.556 | 0.537 | 0.413 | 0.6  |
| Q0130        | 17 | 0       | 3650 OLI1 | 17 W 467 | #N/A | 0      | 0.556 | 0.537 | 0.413 | 0.6  |
| iYGL036W     | 7  | 431318  |           | 9600     | #N/A | Non F  | 0.556 | 0.555 | 0.248 | 0.63 |
| iYLR166C     | 12 | 498053  | 11637     | YLR16    | #N/A | Dbl Pi | 0.556 | 0.253 | 0.901 | 0.01 |
| iYDR539W-1   | 4  | 1514766 |           | 8810     | #N/A | Non F  | 0.557 | 0.465 | 0.028 | 0.49 |
| iYLR233C     | 12 | 609522  | 11696     | YLR23    | #N/A | Dbl Pi | 0.557 | 0.129 | 0.399 | 0.52 |
| Q0257        | 17 | 30916   |           | 13873    | #N/A | 0      | 0.558 | 0.384 | 0.493 | 0.51 |
| Q0257        | 17 | 30916   |           | 13873    | #N/A | 0      | 0.558 | 0.384 | 0.493 | 0.51 |
| iYBR148W     | 2  | 539648  | 7750      | YBR14    | #N/A | Sgl Pi | 0.559 | 0.696 | 0.209 | 0.31 |
| iYER179W     | 5  | 549521  |           | 9223     | #N/A | Non F  | 0.559 | 0.471 | 0.687 | 0.57 |
| iYLR407W     | 12 | 933640  |           | 11846    | #N/A | Non F  | 0.56  | 0.299 | 0.227 | 0.56 |
| iYHR002W     | 8  | 109866  |           | 10235    | #N/A | Non F  | 0.56  | 0.439 | 0.645 | 0.56 |
| iYKL145W     | 11 | 175646  |           | 11202    | #N/A | Non F  | 0.56  | 0.676 | 0.452 | 0.16 |
| iYBLWdelta3  | 2  | 9524    |           | 7605     | #N/A | Non F  | 0.56  | 0.678 | 0.61  | 0.25 |
| iYML036W     | 13 | 206219  |           | 11955    | #N/A | Non F  | 0.56  | 0.794 | 0.558 | 0.69 |
| iYOR096W     | 15 | 506803  |           | 13048    | #N/A | Non F  | 0.56  | 0.667 | 0.423 | 0.22 |
| iYDR145W     | 4  | 748365  |           | 8445     | #N/A | Non F  | 0.56  | 0.856 | 0.657 | 0.25 |
| iYGL154C     | 7  | 216095  | 9710      | YGL15    | #N/A | Dbl Pi | 0.561 | 0.563 | 0.404 | 0.43 |
| iYNL035C     | 14 | 569682  | 12418     | YNL03    | #N/A | Dbl Pi | 0.561 | NaN   | 0.652 | 0.65 |
| iYJR097W     | 10 | 612629  |           | 10994    | #N/A | Non F  | 0.561 | 7E-04 | 0.52  | 0.05 |
| iYORWdelta24 | 15 | 976221  | 13333     | YOR3     | #N/A | Sgl Pi | 0.561 | 0.427 | 0.638 | 0.57 |
| iYBR096W     | 2  | 436673  | 7704      | YBR09    | #N/A | Sgl Pi | 0.561 | 0.583 | 0.407 | 0.33 |
| iYKL122C     | 11 | 212628  | 11182     | YKL12    | #N/A | Dbl Pi | 0.562 | 0.086 | 0.533 | 0    |
| iYOR176W     | 15 | 663584  |           | 13120    | #N/A | Non F  | 0.562 | 0.697 | 0.593 | 0.52 |
| iYLL029W     | 12 | 83705   | 11434     | YLL02    | #N/A | Sgl Pi | 0.562 | 0.779 | 0.544 | 0.81 |
| iYNR033W     | 14 | 690018  | 12732     | YNR03    | #N/A | Sgl Pi | 0.562 | 0.432 | 0.488 | 0.96 |
| YDRCTy1-2A   | 4  | 878677  | 14032     | YDR21    | #N/A | Sgl Pi | 0.563 | 0.739 | 0.999 | 0.17 |
| Q0205        | 17 | 22403   |           | 13861    | #N/A | 0      | 0.563 | 0.563 | NaN   | 0.52 |
| Q0205        | 17 | 22403   |           | 13861    | #N/A | 0      | 0.563 | 0.563 | NaN   | 0.52 |
| iYBR134W     | 2  | 504591  | 7736      | YBR13    | #N/A | Sgl Pi | 0.563 | 0.289 | 0.539 | 0.21 |
| iYHR044C     | 8  | 194791  | 10279     | YHR04    | #N/A | Dbl Pi | 0.564 | 0.157 | 0.624 | 0.17 |
| iYBR252W     | 2  | 723024  | 7846      | YBR25    | #N/A | Sgl Pi | 0.564 | 0.076 | 0.48  | 0.5  |
| iSNR6        | 12 | 366351  |           | 7085     | #N/A | Non F  | 0.565 | 0.635 | NaN   | 0.01 |
| iYMR191W     | 13 | 646765  | 12240     | YMR19    | #N/A | Sgl Pi | 0.565 | 0.531 | 0.07  | 0.55 |
| iYDL068W     | 4  | 333837  |           | 8127     | #N/A | Non F  | 0.566 | 0.699 | 0.339 | 0.68 |

|              |    |                           |        |      |        |       |       |       |      |
|--------------|----|---------------------------|--------|------|--------|-------|-------|-------|------|
| iYHR128W     | 8  | 362770                    | 10363  | #N/A | Non F  | 0.566 | 0.667 | 0.395 | 0.1  |
| iYIL048W     | 9  | 264893                    | 10524  | #N/A | Non F  | 0.566 | 0.635 | 0.775 | 0.65 |
| iYIL048W     | 9  | 264893                    | 10524  | #N/A | Non F  | 0.566 | 0.635 | 0.775 | 0.65 |
| iYCR073W-A   | 3  | 247890                    | 8023   | #N/A | Non F  | 0.566 | 0.501 | 0.409 | 0.86 |
| iYPR044C     | 16 | 654962 13652              | YPR04  | #N/A | Sgl Pi | 0.566 | 0.581 | 0.494 | 0.57 |
| iYFL049W     | 6  | 38672                     | 9378   | #N/A | Non F  | 0.566 | 0.567 | 0.405 | 0.49 |
| iYGLWtau2    | 7  | 205326 9888               | YGL158 | #N/A | Sgl Pi | 0.567 | 0.963 | 0.434 | 0.17 |
| iYBR087W     | 2  | 424770                    | 7696   | #N/A | Non F  | 0.567 | 0.595 | 0.736 | 0.43 |
| iYGL018C     | 7  | 459659 9582               | YGL018 | #N/A | Dbl Pi | 0.568 | 0.681 | 0.04  | 0.95 |
| iYER110C     | 5  | 382198 9091               | YER11C | #N/A | Sgl Pi | 0.568 | 0.158 | 0.463 | 0.81 |
| iYNRCtau3    | 14 | 632474 12779              | YNR0C  | #N/A | Sgl Pi | 0.569 | 0.608 | 1     | 0.36 |
| iYGL091C     | 7  | 343031 9651               | YGL091 | #N/A | Dbl Pi | 0.569 | 0.826 | 0.475 | 0.56 |
| Q0070        | 17 | 70822 3638 AI5_ALPHA 17 W | #N/A   | 0    | 0.569  | 0.42  | 0.302 | 0.26  |      |
| Q0070        | 17 | 70822 3638 AI5_ALPHA 17 W | #N/A   | 0    | 0.569  | 0.42  | 0.302 | 0.26  |      |
| iYPL254W     | 16 | 70957                     | 13573  | #N/A | Non F  | 0.571 | NaN   | 0.452 | 0.48 |
| iYJL049W     | 10 | 347011                    | 10741  | #N/A | Non F  | 0.571 | 0.483 | NaN   | 0.68 |
| iYBR022W     | 2  | 284230                    | 7628   | #N/A | Non F  | 0.571 | 0.717 | 0.537 | 0.14 |
| iYLR386W     | 12 | 896275                    | 11826  | #N/A | Non F  | 0.572 | 0.523 | 0.323 | 0.44 |
| itP(UGG)F    | 6  | 101464 7267               | YFL019 | #N/A | Sgl Pi | 0.573 | 0.659 | 0.438 | 0.55 |
| iYLR341W     | 12 | 808809 11788              | YLR34  | #N/A | Sgl Pi | 0.574 | 0.793 | 0.937 | 0.93 |
| iYJL174W     | 10 | 95925                     | 10853  | #N/A | Non F  | 0.574 | 0.763 | 0.443 | 0.68 |
| iYOR069W     | 15 | 455796                    | 13021  | #N/A | Non F  | 0.574 | 0.466 | 0.516 | 0.42 |
| iYPL196W     | 16 | 175848 13518              | YPL19  | #N/A | Sgl Pi | 0.574 | 0.581 | 0.405 | 0.38 |
| Q0183B       | 17 | 15174                     | 13841  | #N/A | 0      | 0.575 | 0.621 | 0.456 | 0.66 |
| Q0183B       | 17 | 15174                     | 13841  | #N/A | 0      | 0.575 | 0.621 | 0.456 | 0.66 |
| iYCRWdelta12 | 3  | 291690 8062               | YCR09E | #N/A | Sgl Pi | 0.575 | 0.593 | 0.458 | 0.11 |
| iYJR108W     | 10 | 628766                    | 11005  | #N/A | Non F  | 0.575 | 0.219 | 0.34  | 0.63 |
| iYGR046W     | 7  | 586079                    | 9929   | #N/A | Non F  | 0.578 | 0.66  | 0.364 | 0.45 |
| iYLR375W     | 12 | 872714                    | 11816  | #N/A | Non F  | 0.578 | 0.478 | 0.451 | 0.68 |
| iYGR084C     | 7  | 648122 9963               | YGR084 | #N/A | Sgl Pi | 0.578 | 0.643 | 0.519 | 0.03 |
| Q0220        | 17 | 27679                     | 13865  | #N/A | 0      | 0.579 | 0.209 | 0.427 | 0.57 |
| Q0220        | 17 | 27679                     | 13865  | #N/A | 0      | 0.579 | 0.209 | 0.427 | 0.57 |
| iYNL087W     | 14 | 465947 12467              | YNL08  | #N/A | Sgl Pi | 0.579 | 0.587 | 0.679 | 0.36 |
| itV(AAC)G3-1 | 7  | 75385 7345                | YGL225 | #N/A | Sgl Pi | 0.58  | 0.58  | 0.463 | 0.5  |
| iYGL046W     | 7  | 414896 9610               | YGL045 | #N/A | Sgl Pi | 0.58  | 0.715 | 0.264 | 0.6  |
| iYGL046W     | 7  | 414896 9610               | YGL045 | #N/A | Sgl Pi | 0.58  | 0.715 | 0.264 | 0.6  |
| itA(UGC)G    | 7  | 794477 7111               | YGR15C | #N/A | Sgl Pi | 0.58  | 0.607 | 0.763 | 0.66 |
| iYJR042W     | 10 | 515979                    | 10944  | #N/A | Non F  | 0.581 | 0.684 | 0.637 | 0.41 |
| iYBR131W     | 2  | 499239                    | 7734   | #N/A | Non F  | 0.581 | 0.713 | 0.503 | 0.84 |
| iYDRCTy1-2   | 4  | 884199 8824               | YDR211 | #N/A | Sgl Pi | 0.581 | 0.689 | 0.727 | 0.62 |
| iYPL181W     | 16 | 204951 13504              | YPL18  | #N/A | Sgl Pi | 0.581 | 0.443 | 0.633 | 0    |
| iYJL149W     | 10 | 139064 10830              | YJL149 | #N/A | Sgl Pi | 0.582 | 0.473 | NaN   | 0.5  |
| IntQ0185B    | 17 | 0                         | 7014   | #N/A | 0      | 0.582 | 0.692 | 0.441 | 0.57 |
| IntQ0185B    | 17 | 0                         | 7014   | #N/A | 0      | 0.582 | 0.692 | 0.441 | 0.57 |
| iYLR068W     | 12 | 271475                    | 11538  | #N/A | Non F  | 0.583 | 0.571 | NaN   | 0.24 |
| iYHR137W     | 8  | 377248                    | 10371  | #N/A | Non F  | 0.583 | 0.539 | NaN   | 0.69 |
| iYOR067C     | 15 | 453483 13019              | YOR06  | #N/A | Sgl Pi | 0.583 | 0.642 | 0.743 | 0.87 |
| iYJL011C     | 10 | 414466 10710              | YJL011 | #N/A | Sgl Pi | 0.583 | 0.605 | 0.533 | 0.34 |
| itL(CAA)N    | 14 | 443125 7232               | YNL097 | #N/A | Sgl Pi | 0.584 | 0.406 | 0.358 | 0.67 |
| iYHR062C     | 8  | 223744 10299              | YHR06  | #N/A | Sgl Pi | 0.584 | 0.763 | 0.218 | 0.38 |
| iYBL019W     | 2  | 185887                    | 7518   | #N/A | Non F  | 0.584 | 0.614 | 0.394 | 0.49 |

|                     |          |                     |               |             |               |              |              |              |             |
|---------------------|----------|---------------------|---------------|-------------|---------------|--------------|--------------|--------------|-------------|
| iYER146W            | 5        | 462856              | 9159          | #N/A        | Non F         | 0.585        | 0.682        | 0.283        | 0.7         |
| iYDR381W            | 4        | 1238041 8666        | YDR382        | #N/A        | Sgl Pi        | 0.586        | 0.64         | 0.553        | 0.47        |
| iYMRWdelta19-1      | 13       | 769824 12383        | YMR24         | #N/A        | Dbl Pi        | 0.586        | 0.449        | 0.497        | 0.71        |
| iYDL082W            | 4        | 309400              | 8139          | #N/A        | Non F         | 0.586        | 0.99         | 0.886        | 0.47        |
| iYJR076C            | 10       | 576299 10976        | YJR07         | #N/A        | Sgl Pi        | 0.587        | 0.232        | 0.616        | 0.34        |
| <b>iYER157W</b>     | <b>5</b> | <b>487170</b>       | <b>9179</b>   | <b>#N/A</b> | <b>Non F</b>  | <b>0.587</b> | <b>0.55</b>  | <b>0.331</b> | <b>0.57</b> |
| iYLR343W            | 12       | 817809 11790        | YLR34         | #N/A        | Sgl Pi        | 0.587        | 0.708        | 0.427        | 0.45        |
| iYOR367W            | 15       | 1026605 13297       | YOR36         | #N/A        | Sgl Pi        | 0.588        | 0.511        | 0.522        | 0.49        |
| iYBR244W            | 2        | 707978              | 7839          | #N/A        | Non F         | 0.588        | 0.576        | 0.509        | 0.37        |
| iYDR382W            | 4        | 1239788             | 8667          | #N/A        | Non F         | 0.589        | 0.578        | 0.772        | 0.24        |
| iYOL039W            | 15       | 254609 12817        | YOL03         | #N/A        | Sgl Pi        | 0.589        | 0.911        | 0.719        | 0.52        |
| iYIR023W            | 9        | 402671              | 10677         | #N/A        | Non F         | 0.589        | 0.746        | 0.343        | 0.44        |
| Q0290               | 17       | 39376               | 13885         | #N/A        | 0             | 0.589        | 0.558        | 0.69         | 0.51        |
| Q0290               | 17       | 39376               | 13885         | #N/A        | 0             | 0.589        | 0.558        | 0.69         | 0.51        |
| iYFL007W            | 6        | 128887 9296         | YFL006        | #N/A        | Sgl Pi        | 0.589        | 0.365        | 0.419        | 0.53        |
| iYHR010W            | 8        | 127485 10244        | YHR01         | #N/A        | Sgl Pi        | 0.59         | 0.847        | 0.621        | 0.53        |
| iYGL225W            | 7        | 77914               | 9797          | #N/A        | Non F         | 0.59         | 0.57         | 0.801        | 0.25        |
| iYHR132C            | 8        | 369792 10366        | YHR13         | #N/A        | Sgl Pi        | 0.59         | 0.862        | 0.249        | 0.29        |
| iYML113W            | 13       | 44779 12024         | YML11         | #N/A        | Sgl Pi        | 0.59         | 0.495        | 0.549        | 0.55        |
| iYDR428C            | 4        | 1324227 8708        | YDR428        | #N/A        | Sgl Pi        | 0.59         | 0.562        | 0.578        | 0.47        |
| <b>iYBRCdelta14</b> | <b>2</b> | <b>266218 7893</b>  | <b>YBR013</b> | <b>#N/A</b> | <b>Sgl Pi</b> | <b>0.591</b> | <b>0.572</b> | <b>0.356</b> | <b>0.35</b> |
| iYAL045C            | 1        | 57801 7419          | YAL045        | #N/A        | Sgl Pi        | 0.591        | 0.425        | 0.659        | 0.86        |
| iYLR446W            | 12       | 1026514             | 11882         | #N/A        | Non F         | 0.591        | 0.634        | 0.462        | 0.09        |
| iYMR217W            | 13       | 703406              | 12267         | #N/A        | Non F         | 0.592        | 0.569        | 0.356        | 0.39        |
| iYGL062W            | 7        | 388728              | 9625          | #N/A        | Non F         | 0.593        | 0.724        | 0.397        | 0.51        |
| iYML119W            | 13       | 31672 12030         | YML11         | #N/A        | Sgl Pi        | 0.593        | 0.432        | 0.087        | 0.4         |
| <b>iti(AAU)E2</b>   | <b>5</b> | <b>551340 7188</b>  | <b>YER18C</b> | <b>#N/A</b> | <b>Sgl Pi</b> | <b>0.593</b> | <b>0.652</b> | <b>0.636</b> | <b>0.4</b>  |
| iYHR108W            | 8        | 330061 10346        | YHR1C         | #N/A        | Sgl Pi        | 0.593        | 0.695        | 0.354        | 0.46        |
| <b>iYIL057C</b>     | <b>9</b> | <b>248423 10533</b> | <b>YIL057</b> | <b>#N/A</b> | <b>Dbl Pi</b> | <b>0.593</b> | <b>0.567</b> | <b>NaN</b>   | <b>0.73</b> |
| <b>iYIL057C</b>     | <b>9</b> | <b>248423 10533</b> | <b>YIL057</b> | <b>#N/A</b> | <b>Dbl Pi</b> | <b>0.593</b> | <b>0.567</b> | <b>NaN</b>   | <b>0.73</b> |
| iYBR236C            | 2        | 691657 7831         | YBR236        | #N/A        | Dbl Pi        | 0.593        | 0.702        | 0.416        | 0           |
| iYEL020C            | 5        | 120303 8852         | YEL020        | #N/A        | Sgl Pi        | 0.594        | 0.55         | 0.531        | 0.47        |
| iYDR180W            | 4        | 825759              | 8480          | #N/A        | Non F         | 0.594        | 0.266        | 0.542        | 0.13        |
| iYMRCdelta10        | 13       | 378606 12375        | YMR04         | #N/A        | Dbl Pi        | 0.594        | 0.637        | 0.771        | 0.3         |
| iYCR036W            | 3        | 194275              | 7995          | #N/A        | Non F         | 0.595        | 0.546        | 0.533        | 0.57        |
| iYHR072W            | 8        | 241300 10309        | YHR07         | #N/A        | Sgl Pi        | 0.595        | 0.542        | 0.401        | 0.49        |
| iYHR154W            | 8        | 406208 10389        | YHR15         | #N/A        | Sgl Pi        | 0.595        | 0.6          | 0.199        | 0.02        |
| Q0242               | 17       | 0                   | 13871         | #N/A        | 0             | 0.595        | 0.531        | 0.539        | 0.62        |
| Q0242               | 17       | 0                   | 13871         | #N/A        | 0             | 0.595        | 0.531        | 0.539        | 0.62        |
| iYJR118C            | 10       | 643809 11014        | YJR11         | #N/A        | Sgl Pi        | 0.596        | 0.59         | 0.491        | 0.64        |
| iYKL010C            | 11       | 425514 11076        | YKL01         | #N/A        | Dbl Pi        | 0.596        | 0.934        | 0.278        | 0.09        |
| iYOR160W            | 15       | 636742              | 13107         | #N/A        | Non F         | 0.597        | NaN          | 0.52         | 0.55        |
| iYJL201W            | 10       | 56201               | 10876         | #N/A        | Non F         | 0.597        | 0.576        | NaN          | 0.29        |
| iYDL029W            | 4        | 400638              | 8090          | #N/A        | Non F         | 0.597        | 0.55         | 0.107        | 0.44        |
| iYDR334W            | 4        | 1140471 8619        | YDR335        | #N/A        | Sgl Pi        | 0.598        | 0.039        | 0.944        | 0.71        |
| iYBR267W            | 2        | 740987 7857         | YBR268        | #N/A        | Sgl Pi        | 0.599        | 0.548        | 0.983        | 0.81        |
| iYGL164C            | 7        | 193305 9721         | YGL164        | #N/A        | Sgl Pi        | 0.599        | 0.645        | 0.486        | 0.11        |
| iYGR234W            | 7        | 961084              | 10103         | #N/A        | Non F         | 0.599        | 0.635        | 0.519        | 0.3         |
| iYLR320W            | 12       | 776354              | 11771         | #N/A        | Non F         | 0.599        | 0.666        | NaN          | 0.44        |
| iYHL010C            | 8        | 83706 10187         | YHL01         | #N/A        | Sgl Pi        | 0.6          | 0.472        | 0.439        | 0.3         |
| iYGL212W            | 7        | 92381 9777          | YGL211        | #N/A        | Sgl Pi        | 0.6          | 0.711        | 0.384        | 0.47        |



|              |    |         |       |        |      |        |       |       |       |      |
|--------------|----|---------|-------|--------|------|--------|-------|-------|-------|------|
| iYKR036C     | 11 | 510345  | 11326 | YKR03  | #N/A | Sgl Pi | 0.6   | 0.557 | 0.362 | 0.14 |
| iYER050C     | 5  | 254585  | 8971  | YER05C | #N/A | Dbl Pi | 0.6   | 0.542 | 0.368 | 0.14 |
| iYHR026W     | 8  | 161478  |       | 10260  | #N/A | Non F  | 0.601 | 0.615 | 0.45  | 0.78 |
| iYILCdelta1  | 9  | 197477  |       | 10646  | #N/A | Non F  | 0.601 | 0.651 | 0.444 | 0.27 |
| iYML093W     | 13 | 85796   |       | 12006  | #N/A | Non F  | 0.601 | 0.646 | NaN   | 0.33 |
| iYHR129C     | 8  | 364148  | 10364 | YHR12  | #N/A | Sgl Pi | 0.601 | 0.052 | 0.273 | 0.3  |
| iYOL149W     | 15 | 45625   |       | 12921  | #N/A | Non F  | 0.601 | 0.593 | 0.397 | 0.7  |
| iYDL089W     | 4  | 298269  |       | 8146   | #N/A | Non F  | 0.601 | 0.442 | 0.54  | 0.51 |
| iYBR217W     | 2  | 658374  |       | 7818   | #N/A | Non F  | 0.601 | 0.583 | NaN   | 0.33 |
| iYPR189W     | 16 | 916958  |       | 13778  | #N/A | Non F  | 0.602 | 0.752 | 0.512 | 0.46 |
| itL(CAA)K    | 11 | 458337  | 7229  | YKR00C | #N/A | Sgl Pi | 0.602 | 0.508 | 0.805 | 0.21 |
| iYML005W     | 13 | 261584  |       | 11925  | #N/A | Non F  | 0.602 | 0.408 | 0.545 | 0.38 |
| iYPR027C     | 16 | 621251  | 13639 | YPR02  | #N/A | Dbl Pi | 0.602 | 0.605 | 0.248 | 0.23 |
| iYPR162C     | 16 | 868299  | 13753 | YPR16  | #N/A | Sgl Pi | 0.602 | 0.823 | 0.697 | 0.12 |
| iYGR227W     | 7  | 948987  | 10097 | YGR22  | #N/A | Sgl Pi | 0.602 | 0.463 | 0.53  | 0.45 |
| iYDR215C     | 4  | 894554  | 8510  | YDR21E | #N/A | Dbl Pi | 0.602 | 0.545 | 0.195 | 0.66 |
| iYDR023W     | 4  | 490889  | 8327  | YDR024 | #N/A | Sgl Pi | 0.602 | 0.565 | 0.534 | 0.62 |
| iYBR152W     | 2  | 547214  | 7754  | YBR153 | #N/A | Sgl Pi | 0.603 | 0.373 | 0.247 | 0.68 |
| iYGR217W     | 7  | 930812  | 10089 | YGR21  | #N/A | Sgl Pi | 0.603 | 0.907 | 0.809 | 0.48 |
| iYHR023W     | 8  | 157495  |       | 10257  | #N/A | Non F  | 0.603 | 0.761 | 0.332 | 0.14 |
| iYOR073W     | 15 | 466554  |       | 13027  | #N/A | Non F  | 0.603 | 0.564 | 0.667 | 0.12 |
| iYDR446W     | 4  | 1354626 |       | 8722   | #N/A | Non F  | 0.604 | 0.67  | 0.534 | 0.23 |
| iYOR291W     | 15 | 865568  |       | 13226  | #N/A | Non F  | 0.604 | 0.526 | 0.521 | 0.28 |
| iYDR113C     | 4  | 681596  | 8416  | YDR113 | #N/A | Sgl Pi | 0.604 | 0.002 | 0.47  | 0.33 |
| iYERWdelta17 | 5  | 443043  | 9270  | YER137 | #N/A | Sgl Pi | 0.604 | 0.704 | 0.829 | 0.55 |
| iYIL148W     | 9  | 69522   |       | 10617  | #N/A | Non F  | 0.604 | 0.748 | 0.588 | 0.06 |
| iYPL272C-0   | 16 | 28168   | 13590 | YPL27  | #N/A | Dbl Pi | 0.605 | 0.605 | 0.494 | 0.76 |
| iYJL179W     | 10 | 89110   |       | 10857  | #N/A | Non F  | 0.606 | 0.62  | 0.515 | 0.57 |
| iYLR013W     | 12 | 171766  |       | 11484  | #N/A | Non F  | 0.606 | 0.158 | 0.175 | 0.61 |
| iYDR371W     | 4  | 1220940 |       | 8656   | #N/A | Non F  | 0.606 | 0.521 | 0.57  | 0.22 |
| iYDR057W     | 4  | 567587  |       | 8364   | #N/A | Non F  | 0.607 | 0.455 | 0.566 | 0.46 |
| iYGL086W     | 7  | 349351  | 9646  | YGL085 | #N/A | Sgl Pi | 0.609 | 0.612 | 0.538 | 0.4  |
| iYAL038W     | 1  | 73282   | 7411  | YAL037 | #N/A | Sgl Pi | 0.609 | 0.646 | 0.56  | 0.27 |
| iYDR409W     | 4  | 1292103 |       | 8692   | #N/A | Non F  | 0.61  | 0.537 | 0.569 | 0.55 |
| iYKR023W     | 11 | 484635  |       | 11316  | #N/A | Non F  | 0.61  | 0.843 | 0.389 | 0.63 |
| iYLR184W     | 12 | 522466  | 11653 | YLR18  | #N/A | Sgl Pi | 0.61  | 0.609 | 0.52  | 0.62 |
| iYHR150W     | 8  | 398976  |       | 10385  | #N/A | Non F  | 0.61  | 0.625 | 0.028 | 0.59 |
| iYDR337W     | 4  | 1147154 |       | 8622   | #N/A | Non F  | 0.611 | 0.509 | 0.466 | 0.7  |
| iYHR140W     | 8  | 381322  |       | 10375  | #N/A | Non F  | 0.611 | 0.647 | 0.899 | 0.18 |
| Q0185F       | 17 | 23621   |       | 13849  | #N/A | 0      | 0.611 | 0.632 | NaN   | 0.33 |
| Q0185F       | 17 | 23621   |       | 13849  | #N/A | 0      | 0.611 | 0.632 | NaN   | 0.33 |
| IntQ0185G    | 17 | 0       |       | 7022   | #N/A | 0      | 0.612 | 0.265 | 0.374 | 0.54 |
| IntQ0185G    | 17 | 0       |       | 7022   | #N/A | 0      | 0.612 | 0.265 | 0.374 | 0.54 |
| iYER104W     | 5  | 367425  |       | 9079   | #N/A | Non F  | 0.612 | 0.028 | 0.456 | 0.65 |
| iYGL021W     | 7  | 457066  |       | 9585   | #N/A | Non F  | 0.612 | 0.536 | 0.539 | 0.65 |
| iYIL040W     | 9  | 278129  | 10516 | YIL03E | #N/A | Sgl Pi | 0.613 | 0.723 | 0.403 | 0.83 |
| iYKR061W     | 11 | 558582  | 11349 | YKR06  | #N/A | Sgl Pi | 0.613 | 0.636 | NaN   | 0.35 |
| iYJL111W     | 10 | 209277  |       | 10796  | #N/A | Non F  | 0.613 | 0.811 | 0.581 | 0.27 |
| iYBR201W-1   | 2  | 624936  | 7803  | YBR202 | #N/A | Sgl Pi | 0.614 | 0.425 | NaN   | 0.6  |
| iYPL173W     | 16 | 224045  |       | 13495  | #N/A | Non F  | 0.615 | 0.785 | 0.595 | 0.32 |
| iYOL013C     | 15 | 303040  | 12792 | YOL01  | #N/A | Sgl Pi | 0.615 | 0.553 | 0.558 | 0.78 |

|             |    |         |          |           |      |        |       |       |       |      |
|-------------|----|---------|----------|-----------|------|--------|-------|-------|-------|------|
| iYFR022W    | 6  | 199028  | 9472     | YFR023    | #N/A | Sgl Pi | 0.615 | 4E-06 | 0.027 | 0.06 |
| iYOLWtau1-1 | 15 | 5079    | 12953    | YOL16     | #N/A | Dbl Pi | 0.615 | 0.275 | 0.409 | 0.74 |
| iYPR116W    | 16 | 759476  | 13712    | YPR11     | #N/A | Sgl Pi | 0.615 | 0.071 | 0.313 | 0.89 |
| iYLR289W    | 12 | 717002  |          | 11744     | #N/A | Non F  | 0.615 | 0.486 | 0.334 | 0.24 |
| iYJR134C    | 10 | 675557  | 11029    | YJR13     | #N/A | Sgl Pi | 0.616 | 0.703 | 0.697 | 0.89 |
| iYNL010W    | 14 | 614376  | 12396    | YNL00     | #N/A | Sgl Pi | 0.616 | 0.542 | 0.006 | 0.33 |
| iYNL122C    | 14 | 398395  | 12497    | YNL12     | #N/A | Sgl Pi | 0.616 | 0.687 | 0.542 | 0.35 |
| iYNLCdelta2 | 14 | 102538  | 12697    | YNL28     | #N/A | Sgl Pi | 0.617 | 0.503 | 0.627 | 0.56 |
| iYFR010W    | 6  | 166553  |          | 9448      | #N/A | Non F  | 0.617 | 0.707 | 0.498 | 0.1  |
| YMRCdelta11 | 13 | 378734  | 14130    | YMR09     | #N/A | Dbl Pi | 0.617 | 0.787 | 0.582 | 0.15 |
| iYGL079W    | 7  | 360089  |          | 9639      | #N/A | Non F  | 0.617 | 0.612 | 0.18  | 0.24 |
| iYIR007W    | 9  | 372981  |          | 10657     | #N/A | Non F  | 0.618 | 0.444 | 0.421 | 0.84 |
| iYHR201C    | 8  | 501132  | 10433    | YHR20     | #N/A | Dbl Pi | 0.618 | 0.622 | 0.082 | 0.47 |
| iYIR019C    | 9  | 393677  | 10671    | YIR019    | #N/A | Sgl Pi | 0.618 | 0.192 | 0.104 | 0.68 |
| iYHR033W    | 8  | 176816  |          | 10267     | #N/A | Non F  | 0.618 | 0.679 | 0.523 | 0.78 |
| iYPL110C    | 16 | 344766  | 13436    | YPL11     | #N/A | Sgl Pi | 0.618 | 0.65  | 0.461 | 0.48 |
| iYLR442C    | 12 | 1022242 | 11879    | YLR44     | #N/A | Dbl Pi | 0.619 | 0.809 | 0.15  | 0.64 |
| Q0090       | 17 | 74607   |          | 13821     | #N/A | 0      | 0.619 | 0.568 | 0.392 | 0.23 |
| Q0090       | 17 | 74607   |          | 13821     | #N/A | 0      | 0.619 | 0.568 | 0.392 | 0.23 |
| iYLR033W    | 12 | 210277  |          | 11502     | #N/A | Non F  | 0.62  | 0.47  | 0.481 | 0.05 |
| iYDR108W    | 4  | 673357  |          | 8412      | #N/A | Non F  | 0.62  | 0.554 | 0.469 | 0.71 |
| iYJR155W    | 10 | 727971  |          | 11053     | #N/A | Non F  | 0.62  | 0.353 | 0.032 | 0.71 |
| iYHR022C    | 8  | 150329  | 10256    | YHR02     | #N/A | Dbl Pi | 0.62  | 0.331 | 0.344 | 0.13 |
| iYPR148C-1  | 16 | 829016  | 13740    | YPR14     | #N/A | Dbl Pi | 0.621 | 0.516 | 0.991 | 0.52 |
| iYBL090W    | 2  | 49352   | 7582     | YBL089    | #N/A | Sgl Pi | 0.621 | 0.715 | 0.059 | 0.44 |
| iYDR172W    | 4  | 810382  |          | 8471      | #N/A | Non F  | 0.621 | 0.614 | 0.471 | 0.38 |
| Q0110       | 17 | 78538   | 3644 BI2 | 17 W 3654 | #N/A | 0      | 0.621 | 0.256 | 0.462 | 0.46 |
| Q0110       | 17 | 78538   | 3644 BI2 | 17 W 3654 | #N/A | 0      | 0.621 | 0.256 | 0.462 | 0.46 |
| iYJR073C    | 10 | 572613  | 10973    | YJR07     | #N/A | Dbl Pi | 0.621 | 0.305 | 0.144 | 0.88 |
| iYPR118W    | 16 | 769007  | 13714    | YPR11     | #N/A | Sgl Pi | 0.621 | 0.607 | NaN   | 0.35 |
| iYOL010W    | 15 | 309097  |          | 12789     | #N/A | Non F  | 0.621 | 0.229 | 0.663 | 0.49 |
| Q0060       | 17 | 69841   | 3636 AI3 | 17 W 1381 | #N/A | 0      | 0.622 | 0.382 | 0.475 | 0.48 |
| Q0060       | 17 | 69841   | 3636 AI3 | 17 W 1381 | #N/A | 0      | 0.622 | 0.382 | 0.475 | 0.48 |
| iYPR152C    | 16 | 833448  | 13743    | YPR15     | #N/A | Dbl Pi | 0.622 | 0.014 | 0.476 | 0.83 |
| iYPR009W    | 16 | 577345  |          | 13619     | #N/A | Non F  | 0.622 | 0.692 | 0.642 | 0.43 |
| iYHR078W    | 8  | 258019  |          | 10315     | #N/A | Non F  | 0.622 | 0.542 | 0.528 | 0.2  |
| iYHR175W    | 8  | 453427  | #N/A     |           | #N/A | #N/A   | 0.622 | 0.98  | 0.806 | 0.66 |
| 21S rRNA1   | ## | #N/A    | #N/A     |           | #N/A | #N/A   | 0.622 | 0.338 | 0.433 | 0.18 |
| iYBR094W    | 2  | 434246  |          | 7702      | #N/A | Non F  | 0.623 | 0.58  | 0.621 | 0.47 |
| iYOR259C    | 15 | 813715  | 13198    | YOR25     | #N/A | Dbl Pi | 0.623 | 0.416 | 0.937 | 0.6  |
| YPLWdelta11 | 16 | 436601  |          | 14158     | #N/A | Non F  | 0.624 | 0.398 | 0.997 | 0.59 |
| iYDR015C    | 4  | 478195  | 8319     | YDR015    | #N/A | Sgl Pi | 0.624 | 0.177 | 0.232 | 0.1  |
| iYGL017W    | 7  | 461351  | 9581     | YGL016    | #N/A | Sgl Pi | 0.624 | 0.641 | 0.426 | 0.41 |
| iYPR030W    | 16 | 631250  | 13642    | YPR03     | #N/A | Sgl Pi | 0.625 | 0.4   | 0.537 | 0.35 |
| iYLR413W    | 12 | 953195  |          | 11853     | #N/A | Non F  | 0.625 | 0.726 | 0.208 | 0.56 |
| iYPR020W    | 16 | 600216  |          | 13632     | #N/A | Non F  | 0.626 | 0.963 | 0.831 | 0.33 |
| iYGL233W    | 7  | 61904   | 9813     | YGL232    | #N/A | Sgl Pi | 0.626 | 0.729 | 0.264 | 0.43 |
| iYDR523C    | 4  | 1487042 | 8792     | YDR523    | #N/A | Sgl Pi | 0.627 | 0.566 | 0.664 | 0.47 |
| iYPR060C    | 16 | 675630  | 13664    | YPR06     | #N/A | Sgl Pi | 0.627 | 0.701 | 0.577 | 0.08 |
| iYJR061W    | 10 | 552997  |          | 10962     | #N/A | Non F  | 0.627 | 0.707 | 0.416 | 0.69 |

|                 |    |         |       |        |      |        |       |       |       |      |
|-----------------|----|---------|-------|--------|------|--------|-------|-------|-------|------|
| iYNL220W        | 14 | 235700  |       | 12586  | #N/A | Non F  | 0.627 | 0.494 | 0.683 | 0.66 |
| iYMR184W        | 13 | 628769  | 12233 | YMR184 | #N/A | Sgl Pi | 0.628 | 0.337 | 0.171 | 0.1  |
| iYHL047C-0      | 8  | 10219   | 10224 | YHL047 | #N/A | Sgl Pi | 0.628 | 0.688 | 0.045 | 0.5  |
| iYMR134W        | 13 | 538549  |       | 12182  | #N/A | Non F  | 0.628 | 0.816 | 0.564 | 0.95 |
| Q0200           | 17 | 21032   |       | 13859  | #N/A | 0      | 0.628 | 0.462 | 0.495 | 0.75 |
| Q0200           | 17 | 21032   |       | 13859  | #N/A | 0      | 0.628 | 0.462 | 0.495 | 0.75 |
| 15S rRNA2       | ## | #N/A    |       |        | #N/A | #N/A   | 0.628 | 0.107 | 0.842 | 0.81 |
| 15S rRNA2       | ## | #N/A    |       |        | #N/A | #N/A   | 0.628 | 0.107 | 0.842 | 0.81 |
| iYNL287W        | 14 | 94787   | 12644 | YNL287 | #N/A | Sgl Pi | 0.629 | 0.884 | 0.252 | 0.24 |
| iYLL009C        | 12 | 131410  | 11414 | YLL009 | #N/A | Dbl Pi | 0.629 | 0.864 | 0.146 | 0.11 |
| iYNL152W        | 14 | 347532  |       | 12526  | #N/A | Non F  | 0.629 | 0.639 | NaN   | 0.75 |
| iYAL016W + itT( | ## | #N/A    |       |        | #N/A | #N/A   | 0.63  | NaN   | NaN   | 0.16 |
| iYLL049W        | 12 | 41189   |       | 11450  | #N/A | Non F  | 0.631 | 0.554 | 0.668 | 0.71 |
| iYIRCdelta6-0   | 9  | 426411  | 10699 | YIR036 | #N/A | Sgl Pi | 0.632 | 0.874 | 0.615 | 0.84 |
| iYJL041W        | 10 | 368083  |       | 10733  | #N/A | Non F  | 0.632 | 0.535 | 0.54  | 0.46 |
| iYKL002W        | 11 | 438184  |       | 11067  | #N/A | Non F  | 0.632 | 0.677 | 0.6   | 0.78 |
| iYER125W        | 5  | 412617  |       | 9119   | #N/A | Non F  | 0.632 | 0.919 | 0.311 | 0.31 |
| iYDR528W        | 4  | 1495876 |       | 8798   | #N/A | Non F  | 0.632 | 0.537 | 0.575 | 0.55 |
| iYPR196W        | 16 | 932813  |       | 13787  | #N/A | Non F  | 0.633 | 0.341 | 0.004 | 0.58 |
| iYGR191W        | 7  | 882214  |       | 10063  | #N/A | Non F  | 0.633 | 0.993 | 0.964 | 0.26 |
| iYIL078W        | 9  | 214748  |       | 10551  | #N/A | Non F  | 0.633 | 0.725 | 0.546 | 0.48 |
| iYHR173C        | 8  | 451147  | 10407 | YHR173 | #N/A | Dbl Pi | 0.633 | 0.715 | 0.585 | 0.86 |
| iYDL132W        | 4  | 226755  | 8186  | YDL131 | #N/A | Sgl Pi | 0.633 | 0.107 | 0.329 | 0.56 |
| iYEL064C        | 5  | 31249   | 8893  | YEL064 | #N/A | Sgl Pi | 0.633 | 0.33  | 0.678 | 0.2  |
| iYGL226C-A      | 7  | 73180   | 9799  | YGL226 | #N/A | Dbl Pi | 0.634 | 0.484 | 0.362 | 0.53 |
| iYDR342C-1      | 4  | 1157131 | 8627  | YDR342 | #N/A | Sgl Pi | 0.634 | 0.478 | 0.836 | 0.53 |
| iYBL021C        | 2  | 182057  | 7520  | YBL021 | #N/A | Dbl Pi | 0.635 | 0.32  | 0.087 | 0.69 |
| iYGLWomega1-1   | 7  | 1925    | 9886  | YGL263 | #N/A | Sgl Pi | 0.635 | 0.642 | 0.518 | 0.91 |
| iYER064C        | 5  | 284209  | 8997  | YER064 | #N/A | Sgl Pi | 0.636 | 0.005 | 0.96  | 0.82 |
| iYGL131C        | 7  | 265847  | 9690  | YGL131 | #N/A | Dbl Pi | 0.636 | 0.395 | 0.007 | 0.52 |
| iYMLCdelta2     | 13 | 168676  | 12048 | YML055 | #N/A | Sgl Pi | 0.636 | 0.618 | NaN   | 0.44 |
| iYNLCdelta1-2   | 14 | 99550   |       | 12695  | #N/A | Non F  | 0.636 | 0.264 | 0.448 | 0.48 |
| iYLR124W-1      | 12 | 392723  | 11591 | YLR124 | #N/A | Sgl Pi | 0.636 | 0.035 | 0.218 | 0.37 |
| iYML017W        | 13 | 238733  |       | 11937  | #N/A | Non F  | 0.637 | 0.86  | 0.534 | 0.77 |
| iYLR104W        | 12 | 346960  |       | 11571  | #N/A | Non F  | 0.637 | 0.659 | 0.527 | 0.58 |
| iYGL179C-1      | 7  | 166218  | 9735  | YGL179 | #N/A | Dbl Pi | 0.637 | 0.582 | 0.452 | 0.52 |
| iYOR011W        | 15 | 353847  | 12966 | YOR011 | #N/A | Sgl Pi | 0.637 | 0.645 | 0.546 | 0.12 |
| iYBR111C        | 2  | 461835  | 7717  | YBR111 | #N/A | Sgl Pi | 0.637 | 0.459 | 0.452 | 0.83 |
| iYBR023C        | 2  | 287872  | 7629  | YBR023 | #N/A | Dbl Pi | 0.637 | 0.097 | 0.734 | 0.8  |
| iYOR110W        | 15 | 530234  | 13060 | YOR110 | #N/A | Sgl Pi | 0.638 | 0.177 | NaN   | 0.47 |
| YDRCTy1-2C      | 4  | 881242  | 14034 | YDR211 | #N/A | Sgl Pi | 0.638 | 0.226 | 0.62  | 0.31 |
| itR(UCU)M2      | 13 | 131884  | 7302  | YML071 | #N/A | Dbl Pi | 0.638 | 0.597 | 0.426 | 0.23 |
| iYML111W        | 13 | 49724   |       | 12022  | #N/A | Non F  | 0.639 | 0.769 | 0.449 | 0.62 |
| iYGL160W        | 7  | 202263  | 9716  | YGL159 | #N/A | Sgl Pi | 0.639 | 0.722 | 0.394 | 0.13 |
| iYJR001W        | 10 | 438299  | 10911 | YJR001 | #N/A | Sgl Pi | 0.639 | 0.612 | 0.258 | 0.77 |
| iYJR033C        | 10 | 496159  | 10937 | YJR033 | #N/A | Dbl Pi | 0.639 | 0.537 | 0.388 | 0.7  |
| iYPL051W        | 16 | 460549  |       | 13382  | #N/A | Non F  | 0.64  | 0.668 | 0.252 | 0.32 |
| Q0280F          | 17 | 43318   |       | 13881  | #N/A | 0      | 0.64  | 0.695 | 0.47  | 0.47 |
| Q0280F          | 17 | 43318   |       | 13881  | #N/A | 0      | 0.64  | 0.695 | 0.47  | 0.47 |
| iYKL214C        | 11 | 31695   | 11270 | YKL214 | #N/A | Sgl Pi | 0.64  | 0.549 | 0.699 | 0.8  |
| iYBL004W        | 2  | 235111  |       | 7504   | #N/A | Non F  | 0.641 | 0.671 | 0.435 | 0.3  |

|                  |    |                 |      |         |      |        |       |       |       |      |
|------------------|----|-----------------|------|---------|------|--------|-------|-------|-------|------|
| iYBL004W         | 2  | 235111          |      | 7504    | #N/A | Non F  | 0.641 | 0.671 | 0.435 | 0.3  |
| iYPR041W         | 16 | 649957          |      | 13650   | #N/A | Non F  | 0.641 | 0.702 | 0.615 | 0.69 |
| iYOR092W         | 15 | 496967          |      | 13044   | #N/A | Non F  | 0.642 | 0.863 | 0.417 | 0.24 |
| iYAL063C-0 + iYI | ## | #N/A            | #N/A |         | #N/A | #N/A   | 0.642 | NaN   | NaN   | 0.48 |
| iYOL042W         | 15 | 250930          |      | 12820   | #N/A | Non F  | 0.644 | 0.609 | 0.544 | 0.21 |
| iYOR305W         | 15 | 889721          | #N/A |         | #N/A | Non F  | 0.644 | 0.64  | 0.665 | 0.39 |
| iYEL055C         | 5  | 51585 8884      |      | YEL055  | #N/A | Sgl Pi | 0.644 | 0.032 | 0.458 | 0.15 |
| iYOR227W         | 15 | 766568          |      | 13168   | #N/A | Non F  | 0.644 | 0.645 | 0.205 | 0.32 |
| iYPR015C         | 16 | 591048 13627    |      | YPR01   | #N/A | Sgl Pi | 0.644 | 0.192 | 0.555 | 0.9  |
| iYGL063W         | 7  | 384754 9626     |      | YGL062  | #N/A | Sgl Pi | 0.644 | 0.359 | 0.975 | 0.89 |
| iYHR099W         | 8  | 314008          |      | 10337   | #N/A | Non F  | 0.645 | 0.48  | 0.609 | 0.68 |
| iYER080W         | 5  | 321867 9029     |      | YER081  | #N/A | Sgl Pi | 0.645 | 0.49  | 0.471 | 0.58 |
| Q0140            | 17 | 85035 3651 VAR1 |      | 17 W 48 | #N/A | 0      | 0.646 | 0.508 | 0.506 | 0.77 |
| Q0140            | 17 | 85035 3651 VAR1 |      | 17 W 48 | #N/A | 0      | 0.646 | 0.508 | 0.506 | 0.77 |
| iYGR039W         | 7  | 575197 9922     |      | YGR040  | #N/A | Sgl Pi | 0.646 | 0.501 | NaN   | 0.37 |
| iYER133W         | 5  | 433960          |      | 9135    | #N/A | Non F  | 0.647 | 0.357 | 0.48  | 0.17 |
| iYPR097W         | 16 | 728646          |      | 13695   | #N/A | Non F  | 0.647 | 0.579 | 0.443 | 0.67 |
| iYPL032C         | 16 | 491360 13366    |      | YPL03   | #N/A | Sgl Pi | 0.648 | 5E-05 | 0.765 | 0.79 |
| iYML116W         | 13 | 39862           |      | 12027   | #N/A | Non F  | 0.648 | 0.234 | 0.969 | 0.94 |
| iYDL120W         | 4  | 246448          |      | 8173    | #N/A | Non F  | 0.648 | 0.609 | 0.239 | 0.38 |
| iYGL033W         | 7  | 436352          |      | 9596    | #N/A | Non F  | 0.648 | 0.613 | 0.079 | 0.32 |
| iYLR361C         | 12 | 849141 11805    |      | YLR36   | #N/A | Dbl Pi | 0.649 | 0.264 | 0.979 | 0.82 |
| iYBR114W         | 2  | 469553          |      | 7719    | #N/A | Non F  | 0.649 | 0.643 | 0.37  | 0.83 |
| iYJL181W         | 10 | 87493           |      | 10859   | #N/A | Non F  | 0.649 | 0.451 | 0.398 | 0.72 |
| iYFRCdelta8      | 6  | 162119 9556     |      | YFR009  | #N/A | Sgl Pi | 0.649 | 0.82  | NaN   | 0.34 |
| iYDR511W         | 4  | 1470424         |      | 8782    | #N/A | Non F  | 0.649 | 0.453 | 0.916 | 0.38 |
| iYJR060W         | 10 | 549495 10961    |      | YJR06   | #N/A | Sgl Pi | 0.649 | 0.515 | 0.082 | 0.49 |
| iYHRCdelta10     | 8  | 389503 10458    |      | YHR14   | #N/A | Dbl Pi | 0.649 | 0.655 | 0.455 | 0.66 |
| iYPR198W-0       | 16 | 935665          |      | 13788   | #N/A | Non F  | 0.65  | 0.239 | 0.049 | 0.01 |
| iYLR031W         | 12 | 204821 11500    |      | YLR03   | #N/A | Sgl Pi | 0.65  | 0.536 | 0.736 | 0.22 |
| iYER148W         | 5  | 466070          |      | 9163    | #N/A | Non F  | 0.65  | 0.567 | 0.35  | 0.43 |
| iYLRCdelta26     | 12 | 981685 11904    |      | YLR42   | #N/A | Sgl Pi | 0.65  | 0.791 | 0.078 | 0.42 |
| itK(CUU)C        | 3  | 151345 7200     |      | YCR018  | #N/A | Sgl Pi | 0.652 | 0.533 | 0.548 | 0.56 |
| itK(CUU)C        | 3  | 151345 7200     |      | YCR018  | #N/A | Sgl Pi | 0.652 | 0.533 | 0.548 | 0.56 |
| iYDR203W         | 4  | 857994 8499     |      | YDR204  | #N/A | Sgl Pi | 0.653 | 0.583 | 0.599 | 0.83 |
| iYDR375C         | 4  | 1226532 8660    |      | YDR375  | #N/A | Dbl Pi | 0.653 | 0.167 | 0.539 | 0.24 |
| YBLWdelta6       | 2  | 35609           |      | 14009   | #N/A | Non F  | 0.654 | 0.174 | 0.822 | 0.67 |
| iYIL158W         | 9  | 46800           |      | 10627   | #N/A | Non F  | 0.655 | 0.536 | 0.592 | 0.36 |
| iYDR519W         | 4  | 1480842         |      | 8789    | #N/A | Non F  | 0.655 | 0.564 | 0.081 | 0.7  |
| iYPR022C         | 16 | 607293 13634    |      | YPR02   | #N/A | Sgl Pi | 0.655 | 0.447 | 0.444 | 0.25 |
| iYBL081W         | 2  | 72952           |      | 7574    | #N/A | Non F  | 0.655 | 0.57  | 0.545 | 0.52 |
| iYDR115W         | 4  | 682480          |      | 8417    | #N/A | Non F  | 0.655 | 0.564 | 0.082 | 0.45 |
| iYDL056W         | 4  | 355392          |      | 8116    | #N/A | Non F  | 0.655 | 0.82  | 0.421 | 0.57 |
| iYGR275W         | 7  | 1043729         |      | 10144   | #N/A | Non F  | 0.656 | 0.951 | 0.041 | 0.46 |
| Q0030            | 17 | 67071           |      | 13815   | #N/A | 0      | 0.656 | 0.583 | NaN   | 0.42 |
| Q0030            | 17 | 67071           |      | 13815   | #N/A | 0      | 0.656 | 0.583 | NaN   | 0.42 |
| iYNL128W         | 14 | 383667 12503    |      | YNL12   | #N/A | Sgl Pi | 0.656 | 0.91  | 0.796 | 0.81 |
| iYLR052W         | 12 | 247939          |      | 11523   | #N/A | Non F  | 0.656 | 0.602 | 0.483 | 0.6  |
| iYEL069C-1       | 5  | 24423 8898      |      | YEL069  | #N/A | Sgl Pi | 0.656 | 0.598 | 0.609 | 0.32 |
| Q0350            | 17 | 61196           |      | 13892   | #N/A | 0      | 0.657 | 0.478 | 0.474 | 0.42 |
| iYMR295C         | 13 | 858885 12343    |      | YMR295  | #N/A | Sgl Pi | 0.657 | 0.609 | 0.464 | 0.92 |

|            |    |         |       |         |      |     |       |       |       |       |      |
|------------|----|---------|-------|---------|------|-----|-------|-------|-------|-------|------|
| iYHL043W   | 8  | 15408   | 10220 | YHL04   | #N/A | Sgl | Pi    | 0.657 | 0.725 | NaN   | 0.21 |
| iYML065W   | 13 | 144952  |       | 11979   | #N/A | Non | F     | 0.658 | 0.577 | 0.233 | 0.82 |
| iYGR042W   | 7  | 580273  |       | 9925    | #N/A | Non | F     | 0.658 | 0.314 | 0.672 | 0.63 |
| iYDR357C   | 4  | 1189554 | 8643  | YDR357  | #N/A | Dbl | Pi    | 0.658 | 0.547 | 0.532 | 0.49 |
| iYMR164C   | 13 | 589553  | 12212 | YMR164  | #N/A | Sgl | Pi    | 0.658 | 0.22  | 0.514 | 0.86 |
| iYER002W   | 5  | 157486  |       | 8919    | #N/A | Non | F     | 0.658 | 0.669 | 0.481 | 0.4  |
| iYGR020C   | 7  | 527317  | 9906  | YGR020  | #N/A | Dbl | Pi    | 0.658 | 0.643 | 0.161 | 0.58 |
| iYHR098C   | 8  | 301936  | 10336 | YHR098  | #N/A | Dbl | Pi    | 0.659 | 0.458 | 0.254 | 0.82 |
| iYPR195C-2 | 16 | 930339  | 13786 | YPR195  | #N/A | Dbl | Pi    | 0.66  | 0.155 | 0.395 | 0.58 |
| Q0190B     | 17 | 17675   |       | 13855   | #N/A | 0   | 0.66  | 0.714 | 0.895 | 0.76  |      |
| Q0190B     | 17 | 17675   |       | 13855   | #N/A | 0   | 0.66  | 0.714 | 0.895 | 0.76  |      |
| iYOR183W   | 15 | 679264  | 13129 | YOR183  | #N/A | Sgl | Pi    | 0.66  | 0.719 | 0.575 | 0.62 |
| itT(AGU)I1 | 9  | 175103  | 7326  | YIL102C | #N/A | Sgl | Pi    | 0.66  | 0.781 | 0.82  | 0.22 |
| iYDR434W   | 4  | 1332842 |       | 8712    | #N/A | Non | F     | 0.661 | 0.731 | 0.394 | 0.43 |
| iYPL089C   | 16 | 381130  | 13419 | YPL089  | #N/A | Dbl | Pi    | 0.661 | 0.488 | 0.162 | 0.78 |
| iYPR024W   | 16 | 612749  |       | 13636   | #N/A | Non | F     | 0.661 | 0.322 | 0.348 | 0.32 |
| itL(CAA)M  | 13 | 505016  | 7231  | YMR118  | #N/A | Dbl | Pi    | 0.661 | 0.699 | 0.695 | 0.09 |
| iYLR206W   | 12 | 556431  | 11672 | YLR206  | #N/A | Sgl | Pi    | 0.661 | 0.546 | 0.527 | 0.94 |
| iYMR115W   | 13 | 499213  |       | 12162   | #N/A | Non | F     | 0.661 | 0.729 | 0.555 | 0.62 |
| iYJL171C   | 10 | 100897  | 10850 | YJL171  | #N/A | Sgl | Pi    | 0.661 | 0.476 | 0.396 | 0.81 |
| iYMR312W   | 13 | 899234  |       | 12360   | #N/A | Non | F     | 0.661 | 0.896 | 0.497 | 0.74 |
| iYLR020C   | 12 | 183406  | 11490 | YLR020  | #N/A | Dbl | Pi    | 0.662 | 0.45  | NaN   | 0.49 |
| iYDR503C   | 4  | 1455885 | 8776  | YDR503  | #N/A | Sgl | Pi    | 0.662 | 0.894 | 0.233 | 0.25 |
| iYOR374W   | 15 | 1041390 |       | 13304   | #N/A | Non | F     | 0.662 | 0.647 | 0.34  | 0.92 |
| iYMR144W   | 13 | 554436  |       | 12192   | #N/A | Non | F     | 0.663 | 0.907 | 0.955 | 0.57 |
| iYLR164W   | 12 | 494391  |       | 11635   | #N/A | Non | F     | 0.663 | 0.262 | 0.673 | 0.87 |
| iYOR105W   | 15 | 518505  | 13055 | YOR105  | #N/A | Sgl | Pi    | 0.663 | 0.501 | 0.858 | 0.06 |
| itK(CUU)G3 | 7  | 876451  | 7211  | YGR188  | #N/A | Sgl | Pi    | 0.663 | 0.881 | 0.857 | 0.43 |
| iYOR197W   | 15 | 718391  |       | 13144   | #N/A | Non | F     | 0.663 | 0.562 | NaN   | 0.25 |
| iYPR200C   | 16 | 939675  | 13791 | YPR200  | #N/A | Dbl | Pi    | 0.664 | 0.649 | NaN   | 0.17 |
| iYFR037C   | 6  | 229157  | 9506  | YFR037  | #N/A | Dbl | Pi    | 0.664 | 0.232 | 0.823 | 0.87 |
| iYER171W   | 5  | 529414  |       | 9207    | #N/A | Non | F     | 0.664 | 0.687 | 0.444 | 0.5  |
| Q0183A     | 17 | 14000   |       | 13839   | #N/A | 0   | 0.664 | 0.539 | 0.784 | 0.78  |      |
| Q0183A     | 17 | 14000   |       | 13839   | #N/A | 0   | 0.664 | 0.539 | 0.784 | 0.78  |      |
| iYBR003W   | 2  | 244200  |       | 7609    | #N/A | Non | F     | 0.665 | 0.61  | 0.418 | 0.43 |
| iYOR319W   | 15 | 913445  |       | 13254   | #N/A | Non | F     | 0.665 | 0.473 | 0.228 | 0.07 |
| iYHR047C-1 | 8  | 202403  | 10283 | YHR047  | #N/A | Dbl | Pi    | 0.665 | 0.431 | 0.67  | 0.76 |
| iYCL055W-1 | 3  | 30205   | 7938  | YCL054  | #N/A | Sgl | Pi    | 0.665 | 0.369 | 0.454 | 0.38 |
| iYDL088C   | 4  | 300003  | 8145  | YDL088  | #N/A | Sgl | Pi    | 0.665 | 0.849 | 0.203 | 0.45 |
| iYEL066W   | 5  | 27205   | 8895  | YEL065  | #N/A | Sgl | Pi    | 0.666 | 0.535 | 0.978 | 0.95 |
| iYOR085W   | 15 | 483071  |       | 13038   | #N/A | Non | F     | 0.666 | 0.6   | 0.382 | 0.63 |
| iYLR048W   | 12 | 243348  |       | 11519   | #N/A | Non | F     | 0.666 | 0.649 | 0.656 | 0.43 |
| iYOR124C   | 15 | 558629  | 13073 | YOR124  | #N/A | Sgl | Pi    | 0.667 | 0.457 | 0.468 | 0.43 |
| iYPL088W   | 16 | 383047  | 13418 | YPL088  | #N/A | Sgl | Pi    | 0.667 | 0.126 | 0.608 | 0.88 |
| iYPL144W   | 16 | 280914  | 13467 | YPL144  | #N/A | Sgl | Pi    | 0.667 | 0.621 | 0.278 | 0.47 |
| iYLR189C   | 12 | 534388  | 11658 | YLR189  | #N/A | Dbl | Pi    | 0.667 | 0.022 | 0.715 | 0.72 |
| iYLR424W   | 12 | 975502  | 11863 | YLR424  | #N/A | Sgl | Pi    | 0.668 | 0.986 | 0.41  | 0.12 |
| iYIL167W   | 9  | 30049   |       | 10635   | #N/A | Non | F     | 0.669 | 0.474 | 0.263 | 0.19 |
| IntQ0280D  | 17 | 42250   |       | 7026    | #N/A | 0   | 0.669 | 0.587 | 0.615 | 0.68  |      |
| IntQ0280D  | 17 | 42250   |       | 7026    | #N/A | 0   | 0.669 | 0.587 | 0.615 | 0.68  |      |
| iYDR271C   | 4  | 1008780 | 8561  | YDR271  | #N/A | Dbl | Pi    | 0.669 | 0.41  | 0.445 | 0.29 |



|                |    |         |           |          |      |       |       |       |       |       |      |
|----------------|----|---------|-----------|----------|------|-------|-------|-------|-------|-------|------|
| iYJL033W       | 10 | 385845  | 10726     | YJL033   | #N/A | Sgl   | Pi    | 0.67  | 0.497 | 0.604 | 0.48 |
| iYMR100W       | 13 | 468159  |           | 12147    | #N/A | Non   | F     | 0.671 | 0.748 | 0.388 | 0.25 |
| iYOR251C       | 15 | 803452  | 13190     | YOR251   | #N/A | Dbl   | Pi    | 0.671 | 0.163 | 0.489 | 0.41 |
| iYOR101W       | 15 | 516182  | 13053     | YOR101   | #N/A | Sgl   | Pi    | 0.672 | 0.349 | 0.644 | 0.05 |
| iYBR154C       | 2  | 548952  | 7756      | YBR154   | #N/A | Dbl   | Pi    | 0.672 | 0.378 | 0.445 | 0.28 |
| iYLR243W       | 12 | 625010  |           | 11704    | #N/A | Non   | F     | 0.672 | 0.64  | 0.178 | 0.22 |
| iYLR345W       | 12 | 822044  |           | 11792    | #N/A | Non   | F     | 0.672 | 0.566 | 0.457 | 0.2  |
| iYLR211C       | 12 | 564202  | 11677     | YLR211   | #N/A | Sgl   | Pi    | 0.672 | 0.21  | 0.459 | 0.09 |
| iYML078W       | 13 | 111535  | 11993     | YML078   | #N/A | Sgl   | Pi    | 0.672 | 0.082 | 0.539 | 0.12 |
| itV(AAC)K1-1   | 11 | 308852  | 7349      | YKL068   | #N/A | Sgl   | Pi    | 0.672 | 0.133 | 0.264 | 0.31 |
| iYGL253W       | 7  | 25410   |           | 9847     | #N/A | Non   | F     | 0.673 | 0.832 | 0.642 | 0.74 |
| iYOR038C       | 15 | 405378  | 12992     | YOR038   | #N/A | Dbl   | Pi    | 0.673 | 0.073 | 0.526 | 0.65 |
| iYDL174C       | 4  | 147588  | 8222      | YDL174   | #N/A | Dbl   | Pi    | 0.674 | 0.117 | 0.24  | 0.02 |
| itV(AAC)G1     | 7  | 412360  | 7341      | YGL046   | #N/A | Sgl   | Pi    | 0.674 | 0.476 | NaN   | 0.23 |
| iYML057W       | 13 | 162022  |           | 11971    | #N/A | Non   | F     | 0.675 | 0.561 | 0.456 | 0.51 |
| iYGL202W       | 7  | 117556  |           | 9757     | #N/A | Non   | F     | 0.676 | 0.746 | 0.425 | 0.45 |
| iYAL027W + iYB | ## | #N/A    | #N/A      | #N/A     | #N/A | 0.676 | NaN   | NaN   | NaN   | 0.85  |      |
| iYNR026C       | 14 | 674689  | 12724     | YNR026   | #N/A | Dbl   | Pi    | 0.676 | 0.721 | 0.814 | 0.6  |
| iYAL003W + iYB | ## | #N/A    | #N/A      | #N/A     | #N/A | 0.676 | NaN   | NaN   | NaN   | 0.29  |      |
| iYHR088W       | 8  | 282410  |           | 10326    | #N/A | Non   | F     | 0.676 | 0.191 | 0.583 | 0.4  |
| iYLR063W       | 12 | 265246  | 11533     | YLR063   | #N/A | Sgl   | Pi    | 0.676 | 0.586 | NaN   | 0.63 |
| iYOL029C       | 15 | 270406  | 12809     | YOL029   | #N/A | Sgl   | Pi    | 0.677 | 0.044 | 0.412 | 0.85 |
| iYAL002W       | 1  | 147503  |           | 7377     | #N/A | Non   | F     | 0.678 | 0.547 | 0.424 | 0.71 |
| iYPR137W       | 16 | 804069  |           | 13731    | #N/A | Non   | F     | 0.678 | 0.633 | 0.195 | 0.6  |
| iYGL151W       | 7  | 220910  |           | 9708     | #N/A | Non   | F     | 0.678 | 0.492 | 0.177 | 0.13 |
| iYKR091W       | 11 | 611889  |           | 11380    | #N/A | Non   | F     | 0.678 | 0.52  | 0.473 | 0.45 |
| iYMR013C-1     | 13 | 297810  | 12065     | YMR013   | #N/A | Dbl   | Pi    | 0.678 | 0.78  | 0.62  | 0.02 |
| iYMR186W       | 13 | 634475  |           | 12235    | #N/A | Non   | F     | 0.679 | 0.103 | 0.417 | 0    |
| iYDR291W       | 4  | 1042957 |           | 8578     | #N/A | Non   | F     | 0.679 | NaN   | 0.474 | 0.64 |
| iYPR014C-1     | 16 | 588891  | 13626     | YPR014   | #N/A | Sgl   | Pi    | 0.679 | 0.489 | 0.706 | 0.82 |
| Q0225          | 17 | 0       |           | 13867    | #N/A | 0     | 0.679 | 0.088 | 0.489 | 0.67  |      |
| Q0225          | 17 | 0       |           | 13867    | #N/A | 0     | 0.679 | 0.088 | 0.489 | 0.67  |      |
| iYFR052W       | 6  | 253338  |           | 9534     | #N/A | Non   | F     | 0.679 | 0.851 | 0.408 | 0.45 |
| iYDR488C       | 4  | 1430763 | 8762      | YDR488   | #N/A | Dbl   | Pi    | 0.68  | 0.002 | 0.774 | 0.88 |
| iYMRWdelta20   | 13 | 809233  | 12384     | YMR20    | #N/A | Sgl   | Pi    | 0.68  | 0.659 | 0.482 | 0.42 |
| iYER109C       | 5  | 377613  | 9089      | YER109   | #N/A | Sgl   | Pi    | 0.681 | 0.063 | 0.909 | 0.71 |
| iYPL111W       | 16 | 340930  |           | 13437    | #N/A | Non   | F     | 0.681 | 0.539 | 0.464 | 0.72 |
| iYGR015C       | 7  | 522074  | 9902      | YGR015   | #N/A | Dbl   | Pi    | 0.681 | 0.747 | 0.331 | 0.89 |
| iYLR272C       | 12 | 687191  | 11729     | YLR272   | #N/A | Sgl   | Pi    | 0.681 | 0.001 | 0.468 | 0.34 |
| iYML060W       | 13 | 153016  |           | 11974    | #N/A | Non   | F     | 0.682 | 0.717 | 0.476 | 0.86 |
| iYLR387C       | 12 | 897666  | 11827     | YLR387   | #N/A | Dbl   | Pi    | 0.682 | 0.95  | 0.165 | 0.42 |
| iYPLWdelta11   | 16 | 436721  |           | 13606    | #N/A | Non   | F     | 0.682 | 0.651 | 0.52  | 0.41 |
| iYGL262W       | 7  | 5826    |           | 9873     | #N/A | Non   | F     | 0.683 | 0.643 | 0.443 | 0.97 |
| iYJR052W       | 10 | 533474  | 10954     | YJR052   | #N/A | Sgl   | Pi    | 0.683 | 0.032 | 0.226 | 0.63 |
| Q0080          | 17 | 72627   | 3641 AAP1 | 17 W 270 | #N/A | 0     | 0.683 | 0.465 | 0.417 | 0.5   |      |
| Q0080          | 17 | 72627   | 3641 AAP1 | 17 W 270 | #N/A | 0     | 0.683 | 0.465 | 0.417 | 0.5   |      |
| iYMR127C       | 13 | 523341  | 12175     | YMR127   | #N/A | Dbl   | Pi    | 0.683 | 0.071 | NaN   | 0.12 |
| iYDR152W       | 4  | 766517  |           | 8451     | #N/A | Non   | F     | 0.683 | 0.531 | 0.712 | 0.33 |
| iYHL047C-1     | 8  | 11073   | 10225     | YHL047   | #N/A | Sgl   | Pi    | 0.684 | 0.175 | 0.6   | 0.38 |
| iYGR245C       | 7  | 982060  | 10113     | YGR245   | #N/A | Sgl   | Pi    | 0.684 | 0.591 | 0.225 | 0.21 |
| iYKL098W       | 11 | 257491  |           | 11161    | #N/A | Non   | F     | 0.684 | 0.02  | 0.185 | 0.84 |

|                   |    |               |      |        |      |        |       |       |       |      |
|-------------------|----|---------------|------|--------|------|--------|-------|-------|-------|------|
| iYOR099W          | 15 | 513006        |      | 13051  | #N/A | Non F  | 0.684 | 0.64  | 0.589 | 0.48 |
| iYGL048C          | 7  | 411272 9612   |      | YGL048 | #N/A | Dbl Pi | 0.685 | 0.46  | 0.612 | 0.71 |
| iYGL041C          | 7  | 419208 9606   |      | YGL041 | #N/A | Sgl Pi | 0.685 | 0.623 | 0.638 | 0.13 |
| iYLR123C          | 12 | 391400 11589  |      | YLR12  | #N/A | Dbl Pi | 0.686 | 0.434 | 0.326 | 0.94 |
| iYAL051W + iYB ## |    | #N/A          | #N/A |        | #N/A | #N/A   | 0.686 | NaN   | NaN   | 0.92 |
| iYGR019W          | 7  | 526640        |      | 9905   | #N/A | Non F  | 0.686 | 0.676 | 0.288 | 0.6  |
| iYBR043C          | 2  | 323915 7648   |      | YBR043 | #N/A | Sgl Pi | 0.686 | 0.459 | 0.27  | 0.89 |
| iYKL219W-0        | 11 | 15698         |      | 11277  | #N/A | Non F  | 0.687 | 0.067 | 0.823 | 0.78 |
| iYJR008W          | 10 | 453134        |      | 10918  | #N/A | Non F  | 0.687 | 0.709 | 0.495 | 0.44 |
| iYOR174W          | 15 | 659605        |      | 13118  | #N/A | Non F  | 0.687 | 0.722 | 0.486 | 0.42 |
| iYKR042W          | 11 | 520249        |      | 11331  | #N/A | Non F  | 0.687 | 0.773 | 0.681 | 0.86 |
| iYMR257C          | 13 | 782028 12306  |      | YMR257 | #N/A | Sgl Pi | 0.687 | 0.508 | NaN   | 0.09 |
| itF(GAA)H1        | 8  | 237928 7151   |      | YHR072 | #N/A | Sgl Pi | 0.689 | 0.824 | 0.411 | 0.1  |
| iYGLWdelta4       | 7  | 318852 9881   |      | YGL097 | #N/A | Sgl Pi | 0.689 | 0.649 | NaN   | 0.18 |
| iYDL203C          | 4  | 97942 8251    |      | YDL203 | #N/A | Dbl Pi | 0.691 | 0.252 | 0.788 | 0.66 |
| iYIR026C          | 9  | 405954 10680  |      | YIR026 | #N/A | Sgl Pi | 0.691 | 0.626 | 0.389 | 0.72 |
| iYOR152C-1        | 15 | 619053 13099  |      | YOR152 | #N/A | Dbl Pi | 0.692 | 0.695 | 0.45  | 0.91 |
| iYOR028C          | 15 | 384420 12981  |      | YOR028 | #N/A | Dbl Pi | 0.692 | 0.563 | 0.355 | 0.93 |
| iYLR430W          | 12 | 1000122       |      | 11868  | #N/A | Non F  | 0.692 | 0.761 | 0.99  | 0.84 |
| iYDR531W          | 4  | 1499335       |      | 8801   | #N/A | Non F  | 0.692 | 0.603 | NaN   | 0.29 |
| itE(UUC)P         | 16 | 210278 7145   |      | YPL178 | #N/A | Sgl Pi | 0.692 | 0.729 | 0.807 | 0.81 |
| iYLR032W          | 12 | 208503 11501  |      | YLR032 | #N/A | Sgl Pi | 0.693 | 0.819 | 0.488 | 0.21 |
| iYDR483W          | 4  | 1422481 8757  |      | YDR484 | #N/A | Sgl Pi | 0.694 | 0.461 | 0.244 | 0.54 |
| iYLR426W          | 12 | 988095 11865  |      | YLR426 | #N/A | Sgl Pi | 0.694 | 0.539 | 0.048 | 0.8  |
| iYER013W          | 5  | 182333 8932   |      | YER014 | #N/A | Sgl Pi | 0.694 | 0.65  | 0.462 | 0.68 |
| iYNL276C          | 14 | 118809 12635  |      | YNL276 | #N/A | Dbl Pi | 0.695 | 0.84  | 0.621 | 0.77 |
| iYBR170C          | 2  | 578045 7774   |      | YBR170 | #N/A | Dbl Pi | 0.695 | 0.561 | 0.339 | 0.1  |
| iYJR009C-1        | 10 | 455173 10920  |      | YJR009 | #N/A | Dbl Pi | 0.695 | 0.516 | 0.404 | 0.86 |
| iYOR191W          | 15 | 697335        |      | 13137  | #N/A | Non F  | 0.695 | 0.664 | 0.418 | 0.53 |
| iYDR308C          | 4  | 1078435 8595  |      | YDR308 | #N/A | Sgl Pi | 0.695 | 0.901 | 0.468 | 0.19 |
| iYIL053W          | 9  | 255917        |      | 10529  | #N/A | Non F  | 0.696 | 0.689 | 0.665 | 0.26 |
| iYIL053W          | 9  | 255917        |      | 10529  | #N/A | Non F  | 0.696 | 0.689 | 0.665 | 0.26 |
| iYOR241W          | 15 | 788645        |      | 13181  | #N/A | Non F  | 0.696 | 0.523 | 0.444 | 0.52 |
| iYFL026W          | 6  | 83874         |      | 9334   | #N/A | Non F  | 0.696 | 0.804 | 0.75  | 0.25 |
| iYPL033C          | 16 | 488227 13367  |      | YPL033 | #N/A | Sgl Pi | 0.696 | 0.856 | 0.323 | 0.68 |
| iYLRCdelta27      | 12 | 1052618 11905 |      | YLR45  | #N/A | Sgl Pi | 0.696 | 0.156 | 0.878 | 0.16 |
| iYGLCtau3         | 7  | 320690 9877   |      | YGL097 | #N/A | Sgl Pi | 0.696 | 0.776 | NaN   | 0.15 |
| YGRCdelta12       | 7  | 535618 14071  |      | YGR027 | #N/A | Dbl Pi | 0.696 | 0.58  | 0.554 | 0.51 |
| iYJL042W          | 10 | 365167 10734  |      | YJL042 | #N/A | Sgl Pi | 0.697 | 0.751 | 0.577 | 0.51 |
| iYDL019C          | 4  | 421510 8082   |      | YDL019 | #N/A | Sgl Pi | 0.697 | 0.049 | 0.41  | 0.51 |
| iYGR253C-1        | 7  | 1000022 10124 |      | YGR253 | #N/A | Dbl Pi | 0.697 | 0.389 | 0.555 | 0.94 |
| iYOR061W          | 15 | 442558        |      | 13013  | #N/A | Non F  | 0.698 | 0.683 | 0.719 | 0.79 |
| iYIL039W          | 9  | 279848        |      | 10515  | #N/A | Non F  | 0.699 | 0.777 | 0.36  | 0.63 |
| iYDR447C          | 4  | 1355535 8723  |      | YDR447 | #N/A | Dbl Pi | 0.699 | 0.711 | 0.17  | 0.86 |
| iYOR332W          | 15 | 944344        |      | 13265  | #N/A | Non F  | 0.699 | 0.55  | 0.232 | 0.59 |
| iYLR391W-A        | 12 | 904451        |      | 11831  | #N/A | Non F  | 0.7   | 0.634 | 0.543 | 0.47 |
| iYLR193C          | 12 | 540547 11662  |      | YLR193 | #N/A | Sgl Pi | 0.7   | 0.836 | 0.083 | 0.95 |
| iYCL063W          | 3  | 18566         |      | 7943   | #N/A | Non F  | 0.7   | 0.641 | 0.591 | 0.22 |
| iYLR177W          | 12 | 512935        |      | 11646  | #N/A | Non F  | 0.701 | 0.837 | 0.414 | 0.73 |
| YERCdelta8        | 5  | 249129 14049  |      | YER04  | #N/A | Dbl Pi | 0.701 | 0.666 | 0.783 | 0.52 |
| iYLR448W          | 12 | 1029793 11884 |      | YLR448 | #N/A | Sgl Pi | 0.702 | 0.123 | 0.268 | 0.41 |

|              |    |         |       |        |      |        |       |       |       |      |
|--------------|----|---------|-------|--------|------|--------|-------|-------|-------|------|
| itF(GAA)P2   | 16 | 622623  | 7156  | YPR027 | #N/A | Dbl Pi | 0.702 | 0.783 | 0.091 | 0.24 |
| itD(GUC)J4   | 10 | 541262  |       | 7123   | #N/A | Non F  | 0.702 | 0.546 | 0.513 | 0.65 |
| iYERCdelta8  | 5  | 249316  | 9255  | YER048 | #N/A | Dbl Pi | 0.702 | 0.652 | 0.437 | 0.63 |
| iYNL301C     | 14 | 64556   | 12658 | YNL30  | #N/A | Dbl Pi | 0.702 | 0.846 | 0.981 | 0.4  |
| iYGR226C     | 7  | 946979  | 10096 | YGR22  | #N/A | Dbl Pi | 0.703 | 0.783 | 0.412 | 0.4  |
| iYNL215W     | 14 | 245433  | 12581 | YNL21  | #N/A | Sgl Pi | 0.704 | 0.642 | 0.461 | 0.57 |
| iYDRWdelta10 | 4  | 668780  |       | 8825   | #N/A | Non F  | 0.705 | 0.579 | 0.153 | 0.61 |
| Q0180        | 17 | 13804   |       | 13837  | #N/A | 0      | 0.706 | 0.543 | 0.753 | 0.7  |
| Q0180        | 17 | 13804   |       | 13837  | #N/A | 0      | 0.706 | 0.543 | 0.753 | 0.7  |
| iYLR128W     | 12 | 399423  | 11595 | YLR12  | #N/A | Sgl Pi | 0.706 | 0.361 | 0.716 | 0.38 |
| iYHR037W     | 8  | 183695  | 10271 | YHR03  | #N/A | Sgl Pi | 0.706 | 0.88  | 0.539 | 0.42 |
| iYDL161W     | 4  | 169083  |       | 8212   | #N/A | Non F  | 0.707 | 0.661 | 0.384 | 0.61 |
| itR(UCU)G1   | 7  | 405539  | 7296  | YGL050 | #N/A | Sgl Pi | 0.707 | 0.55  | 0.669 | 0.25 |
| iYHLWdelta2  | 8  | 92384   |       | 10232  | #N/A | Non F  | 0.707 | 0.477 | 0.486 | 0.7  |
| iYFL031W     | 6  | 75769   | 9344  | YFL030 | #N/A | Sgl Pi | 0.708 | 0.731 | 0.925 | 0.52 |
| itN(GUU)F    | 6  | 137540  | 7254  | YFL003 | #N/A | Dbl Pi | 0.708 | 0.687 | 0.656 | 0.26 |
| iYIL109C     | 9  | 160147  | 10578 | YIL109 | #N/A | Dbl Pi | 0.708 | 0.406 | 0.483 | 0    |
| iYMR036C     | 13 | 343523  | 12088 | YMR03  | #N/A | Sgl Pi | 0.71  | 0.012 | 0.481 | 0.23 |
| iYGL216W     | 7  | 87285   | 9783  | YGL215 | #N/A | Sgl Pi | 0.71  | 0.472 | 0.598 | 0.39 |
| iYLR133W     | 12 | 410199  | 11600 | YLR13  | #N/A | Sgl Pi | 0.71  | 0.261 | 0.025 | 0.73 |
| iYHR031C     | 8  | 172946  | 10265 | YHR03  | #N/A | Dbl Pi | 0.711 | 0.035 | 0.391 | 0.91 |
| iYHR139C-A   | 8  | 380417  | 10374 | YHR13  | #N/A | Dbl Pi | 0.711 | 0.607 | 0.448 | 0.13 |
| iYJR002W     | 10 | 440337  |       | 10912  | #N/A | Non F  | 0.711 | 0.146 | 0.173 | 0.29 |
| iYOL004W     | 15 | 321594  |       | 12783  | #N/A | Non F  | 0.712 | 0.691 | 0.262 | 0.06 |
| iYNL075W     | 14 | 486491  |       | 12455  | #N/A | Non F  | 0.712 | 0.803 | 0.368 | 0.37 |
| iYOL048C     | 15 | 240525  | 12825 | YOL04  | #N/A | Sgl Pi | 0.712 | 0.694 | 0.118 | 0.38 |
| iYLR419W     | 12 | 962750  | 11858 | YLR42  | #N/A | Sgl Pi | 0.713 | 0.928 | 0.667 | 0.38 |
| iYOR113W     | 15 | 536831  | 13063 | YOR11  | #N/A | Sgl Pi | 0.714 | 0.063 | 0.753 | 0.64 |
| iYJL010C     | 10 | 419277  | 10709 | YJL010 | #N/A | Dbl Pi | 0.715 | 0.897 | 0.547 | 0.79 |
| iYDR460W     | 4  | 1384770 | 8735  | YDR461 | #N/A | Sgl Pi | 0.716 | 0.467 | 0.543 | 0.49 |
| iYJL003W     | 10 | 432706  |       | 10704  | #N/A | Non F  | 0.716 | 0.732 | 0.102 | 0.38 |
| iYDR439W-0   | 4  | 1340714 | 8717  | YDR44C | #N/A | Sgl Pi | 0.716 | 0.564 | 0.088 | 0.39 |
| iYIL130W     | 9  | 105688  |       | 10600  | #N/A | Non F  | 0.717 | 0.027 | 0.103 | 0.37 |
| itV(CAC)H    | 8  | 475787  | 7357  | YHR185 | #N/A | Sgl Pi | 0.717 | 0.793 | 0.846 | 0.44 |
| iYDR307W     | 4  | 1077859 |       | 8594   | #N/A | Non F  | 0.717 | 0.548 | 0.639 | 0.45 |
| iYGR090W     | 7  | 666110  | 9971  | YGR091 | #N/A | Sgl Pi | 0.717 | 0.588 | 0.52  | 0.46 |
| iYEL069C-0   | 5  | 23216   | 8897  | YEL069 | #N/A | Sgl Pi | 0.717 | 0.803 | 0.153 | 0.89 |
| iYLR012C     | 12 | 170335  | 11483 | YLR01  | #N/A | Dbl Pi | 0.717 | 0.156 | NaN   | 0.14 |
| iYER049W     | 5  | 253657  |       | 8970   | #N/A | Non F  | 0.718 | 0.566 | 0.469 | 0.45 |
| iYPL221W     | 16 | 135426  | 13541 | YPL22  | #N/A | Sgl Pi | 0.718 | 0.651 | 0.863 | 0.65 |
| irpr1        | 5  | 118023  | masep |        | #N/A | Non F  | 0.719 | 0.366 | 0.88  | 0.54 |
| iYPR025C     | 16 | 614549  | 13637 | YPR02  | #N/A | Dbl Pi | 0.719 | 0.738 | 0.007 | 0    |
| iYLRCdelta19 | 12 | 734656  |       | 11901  | #N/A | Non F  | 0.719 | 0.667 | 0.528 | 0.56 |
| itR(UCU)G3   | 7  | 736393  | 7298  | YGR122 | #N/A | Sgl Pi | 0.72  | 0.568 | 0.68  | 0.53 |
| itI(AAU)B    | 2  | 197515  |       | 7185   | #N/A | Non F  | 0.721 | 0.467 | 0.39  | 0.49 |
| itI(AAU)B    | 2  | 197515  |       | 7185   | #N/A | Non F  | 0.721 | 0.467 | 0.39  | 0.49 |
| iYPRCdelta15 | 16 | 776857  | 13796 | YPR12  | #N/A | Dbl Pi | 0.722 | 0.603 | 0.511 | 0.27 |
| iYER029C     | 5  | 213193  | 8948  | YER029 | #N/A | Dbl Pi | 0.722 | 0.615 | 0.264 | 0.6  |
| iYJR046W     | 10 | 523530  |       | 10948  | #N/A | Non F  | 0.723 | 0.658 | 0.41  | 0.73 |
| iYGL231C     | 7  | 63622   | 9811  | YGL231 | #N/A | Sgl Pi | 0.725 | 0.509 | 0.551 | 0.82 |
| iYLR306W     | 12 | 744853  | 11759 | YLR30  | #N/A | Sgl Pi | 0.725 | 0.888 | 0.186 | 0.21 |

|              |    |         |       |        |      |     |    |       |       |       |      |
|--------------|----|---------|-------|--------|------|-----|----|-------|-------|-------|------|
| iYMR152W     | 13 | 564181  | 12199 | YMR15  | #N/A | Sgl | Pi | 0.725 | 0.711 | 0.723 | 0.11 |
| iYER093C-A   | 5  | 348390  | 9059  | YER093 | #N/A | Sgl | Pi | 0.725 | 0.488 | 0.573 | 0.69 |
| iYHR146W     | 8  | 391701  |       | 10381  | #N/A | Non | F  | 0.726 | 0.373 | 0.463 | 0.49 |
| iYPL104W     | 16 | 357708  |       | 13431  | #N/A | Non | F  | 0.726 | 0.799 | 0.425 | 0.65 |
| iYJR147W     | 10 | 704960  | 11041 | YJR14  | #N/A | Sgl | Pi | 0.726 | 0.586 | 0.459 | 0.97 |
| iYGR018C     | 7  | 524699  | 9904  | YGR018 | #N/A | Dbl | Pi | 0.727 | 0.659 | 0.905 | 0.9  |
| iYJL172W     | 10 | 99462   |       | 10851  | #N/A | Non | F  | 0.727 | 0.653 | 0.529 | 0.56 |
| iYHL050C     | 8  | 3295    | 10229 | YHL05  | #N/A | Sgl | Pi | 0.728 | 0.238 | 0.862 | 0.89 |
| Q0190A       | 17 | 16476   |       | 13853  | #N/A | 0   |    | 0.728 | 0.605 | 0.413 | 0.78 |
| Q0190A       | 17 | 16476   |       | 13853  | #N/A | 0   |    | 0.728 | 0.605 | 0.413 | 0.78 |
| iYGR082W     | 7  | 644596  |       | 9961   | #N/A | Non | F  | 0.728 | 0.614 | 0.954 | 0.82 |
| iYDR072C     | 4  | 591333  | 8379  | YDR072 | #N/A | Dbl | Pi | 0.729 | 0.633 | 0.965 | 0.08 |
| Q0195        | 17 | 19072   |       | 13857  | #N/A | 0   |    | 0.729 | 0.601 | 0.758 | 0.78 |
| Q0195        | 17 | 19072   |       | 13857  | #N/A | 0   |    | 0.729 | 0.601 | 0.758 | 0.78 |
| iYNR044W     | 14 | 705931  | 12743 | YNR04  | #N/A | Sgl | Pi | 0.729 | 0.795 | 0.27  | 0.88 |
| iYFLWdelta5  | 6  | 143955  |       | 9428   | #N/A | Non | F  | 0.729 | 0.805 | 0.477 | 0.5  |
| itG(GCC)M    | 13 | 183954  | 7171  | YML045 | #N/A | Sgl | Pi | 0.73  | 0.71  | 0.972 | 0.54 |
| iYJL193W     | 10 | 72558   |       | 10869  | #N/A | Non | F  | 0.73  | 0.637 | 0.465 | 0.27 |
| iYJR083C     | 10 | 583232  | 10980 | YJR08  | #N/A | Dbl | Pi | 0.73  | 0.591 | 0.524 | 0.46 |
| iYFR006W     | 6  | 157745  | 9440  | YFR007 | #N/A | Sgl | Pi | 0.731 | 0.625 | 0.739 | 0.35 |
| iYMR307W     | 13 | 888674  |       | 12355  | #N/A | Non | F  | 0.731 | 0.68  | 0.355 | 0.64 |
| iYGL137W     | 7  | 252742  |       | 9695   | #N/A | Non | F  | 0.732 | 0.688 | 0.965 | 0.57 |
| TEL15R-3     | 15 | 1085936 |       | 13957  | #N/A | Non | F  | 0.732 | 0.208 | 0.836 | 0.75 |
| iYGL006W     | 7  | 489429  |       | 9569   | #N/A | Non | F  | 0.732 | 0.25  | 0.788 | 0.78 |
| iYDR352W     | 4  | 1182747 | 8639  | YDR352 | #N/A | Sgl | Pi | 0.733 | 0.707 | 0.899 | 0.83 |
| iYOR091W     | 15 | 494458  | 13043 | YOR09  | #N/A | Sgl | Pi | 0.733 | 0.754 | 0.381 | 0.16 |
| YPRWdelta14  | 16 | 776101  | 14165 | YPR12  | #N/A | Dbl | Pi | 0.733 | 0.935 | 0.814 | 0.29 |
| iYFR016C     | 6  | 180730  | 9460  | YFR016 | #N/A | Sgl | Pi | 0.734 | 0.635 | 0.433 | 0.31 |
| iYPR078C     | 16 | 698245  | 13680 | YPR07  | #N/A | Dbl | Pi | 0.735 | 0.63  | 0.929 | 0.48 |
| YORWdelta19  | 15 | 703597  | 14148 | YOR19  | #N/A | Dbl | Pi | 0.735 | 0.533 | 0.861 | 0.57 |
| iYJR015W     | 10 | 463931  |       | 10927  | #N/A | Non | F  | 0.736 | 0.549 | 0.519 | 0.68 |
| iYPL059W     | 16 | 445020  |       | 13391  | #N/A | Non | F  | 0.736 | 0.446 | 0.38  | 0.44 |
| iYLR301W     | 12 | 731554  |       | 11755  | #N/A | Non | F  | 0.736 | 0.001 | 0.792 | 0.77 |
| iYPR191W     | 16 | 920480  | 13780 | YPR19  | #N/A | Sgl | Pi | 0.736 | 0.712 | 0.567 | 0.85 |
| iYBR091C     | 2  | 427442  | 7699  | YBR091 | #N/A | Sgl | Pi | 0.737 | 0.648 | 0.548 | 0.48 |
| Q0095        | 17 | 0       |       | 13823  | #N/A | 0   |    | 0.737 | 0.541 | 0.839 | 0.79 |
| Q0095        | 17 | 0       |       | 13823  | #N/A | 0   |    | 0.737 | 0.541 | 0.839 | 0.79 |
| iYJL218W     | 10 | 22562   | 10893 | YJL21  | #N/A | Sgl | Pi | 0.738 | 0.32  | 0.687 | 0.76 |
| iYLR290C     | 12 | 717970  | 11745 | YLR29  | #N/A | Sgl | Pi | 0.739 | 0.597 | 0.386 | 0.52 |
| iYDR170W-A-1 | 4  | 805568  | 8469  | YDR171 | #N/A | Sgl | Pi | 0.739 | 0.885 | 0.873 | 0.75 |
| iYDL206W     | 4  | 92522   |       | 8254   | #N/A | Non | F  | 0.739 | 0.51  | 0.127 | 0.54 |
| iYDR208W     | 4  | 870540  | 8504  | YDR210 | #N/A | Sgl | Pi | 0.739 | 0.487 | 0.24  | 0.9  |
| iYLL003W     | 12 | 146069  | 11408 | YLL00  | #N/A | Sgl | Pi | 0.739 | 0.542 | 0.437 | 0.27 |
| iYLR431C     | 12 | 1001683 | 11869 | YLR43  | #N/A | Dbl | Pi | 0.74  | 0.928 | 0.019 | 0.32 |
| iYAR018C     | 1  | 171708  | 7463  | YAR018 | #N/A | Sgl | Pi | 0.741 | 0.897 | 0.112 | 0.82 |
| iYGL188C     | 7  | 149526  | 9744  | YGL188 | #N/A | Sgl | Pi | 0.742 | 0.669 | NaN   | 0.5  |
| iYMR175W     | 13 | 611252  | 12223 | YMR17  | #N/A | Sgl | Pi | 0.742 | 0.008 | 0.035 | 0.86 |
| iYOL020W     | 15 | 287949  | 12800 | YOL01  | #N/A | Sgl | Pi | 0.742 | 0.85  | 0.761 | 0.54 |
| iYNL032W     | 14 | 575352  |       | 12415  | #N/A | Non | F  | 0.742 | 0.73  | 0.951 | 0.64 |
| iYKL223W     | 11 | 2719    |       | 11285  | #N/A | Non | F  | 0.742 | 0.786 | 0.691 | 0.72 |
| YDRWdelta12  | 4  | 945333  | 14037 | YDR24  | #N/A | Dbl | Pi | 0.742 | 0.274 | 0.982 | 0.68 |

|                |    |         |          |           |      |     |    |       |       |       |      |
|----------------|----|---------|----------|-----------|------|-----|----|-------|-------|-------|------|
| YBRCdelta11    | 2  | 258650  | 14014    | YBR01     | #N/A | Sgl | Pi | 0.743 | 0.453 | 0.914 | 0.54 |
| iYLR432W       | 12 | 1004124 |          | 11870     | #N/A | Non | F  | 0.743 | 0.761 | 0.473 | 0.45 |
| iYHL046C       | 8  | 12277   | 10223    | YHL04     | #N/A | Dbl | Pi | 0.743 | 0.344 | 0.931 | 0.79 |
| iYDR132C       | 4  | 720307  | 8434     | YDR132    | #N/A | Sgl | Pi | 0.744 | 0.841 | 0.558 | 0.79 |
| iYNL336W-0     | 14 | 9499    | 12688    | YNL33     | #N/A | Sgl | Pi | 0.744 | 0.634 | 0.433 | 0.57 |
| iYPL022W       | 16 | 510009  | 13356    | YPL02     | #N/A | Sgl | Pi | 0.744 | 0.95  | 0.282 | 0.38 |
| iYBR125C       | 2  | 488334  | 7728     | YBR125    | #N/A | Sgl | Pi | 0.744 | 0.172 | 0.573 | 0.52 |
| iYIL155C       | 9  | 53717   | 10624    | YIL155    | #N/A | Sgl | Pi | 0.744 | 0.592 | 0.923 | 0.8  |
| iYDR237W       | 4  | 937485  |          | 8530      | #N/A | Non | F  | 0.744 | 0.443 | 0.445 | 0.43 |
| iYOR109W       | 15 | 528586  | 13059    | YOR109    | #N/A | Sgl | Pi | 0.745 | 0.617 | 0.03  | 0.49 |
| iYHR001W-A     | 8  | 108118  | 10234    | YHR001    | #N/A | Sgl | Pi | 0.745 | 0.475 | 0.512 | 0.5  |
| iYLR300W       | 12 | 730307  | 11754    | YLR300    | #N/A | Sgl | Pi | 0.747 | 0.883 | 0.615 | 0.57 |
| iYIL131C       | 9  | 102239  | 10601    | YIL131    | #N/A | Dbl | Pi | 0.748 | 0.608 | 0.207 | 0.86 |
| iYML071C       | 13 | 131559  | 11985    | YML071    | #N/A | Dbl | Pi | 0.748 | 0.587 | 0.963 | 0.41 |
| iYOR063W       | 15 | 445873  |          | 13015     | #N/A | Non | F  | 0.748 | 0.473 | 0.631 | 0.36 |
| Q0185A         | 17 | 13836   |          | 13843     | #N/A | 0   |    | 0.749 | 0.631 | 0.48  | 0.58 |
| Q0185A         | 17 | 13836   |          | 13843     | #N/A | 0   |    | 0.749 | 0.631 | 0.48  | 0.58 |
| itR(UCU)M1     | 13 | 747953  |          | 7301      | #N/A | Non | F  | 0.749 | 0.916 | 0.827 | 0.3  |
| iYBL084C       | 2  | 69441   | 7576     | YBL084    | #N/A | Sgl | Pi | 0.749 | 0.568 | 0.354 | 0.53 |
| iYGR038W       | 7  | 561361  |          | 9921      | #N/A | Non | F  | 0.749 | 0.778 | 0.506 | 0.4  |
| iYKL129C       | 11 | 200157  | 11188    | YKL129    | #N/A | Sgl | Pi | 0.75  | 0.574 | 0.518 | 0.12 |
| iYOR368W       | 15 | 1028039 |          | 13298     | #N/A | Non | F  | 0.75  | 0.859 | 0.6   | 0.29 |
| iYPR119W       | 16 | 773116  |          | 13715     | #N/A | Non | F  | 0.75  | 0.798 | 0.579 | 0.17 |
| iYDL181W       | 4  | 135448  | 8229     | YDL180    | #N/A | Sgl | Pi | 0.75  | 0.9   | 0.577 | 0.58 |
| iYKL166C-0     | 11 | 135704  | 11225    | YKL166    | #N/A | Sgl | Pi | 0.752 | 0.29  | 0.804 | 0.79 |
| iYGL093W       | 7  | 337637  | 9653     | YGL092    | #N/A | Sgl | Pi | 0.752 | 4E-07 | 0.269 | 0.71 |
| iYGL093W       | 7  | 337637  | 9653     | YGL092    | #N/A | Sgl | Pi | 0.752 | 4E-07 | 0.269 | 0.71 |
| iYHR030C       | 8  | 170328  | 10264    | YHR030    | #N/A | Sgl | Pi | 0.752 | 0.944 | 0.961 | 0.82 |
| itY(GUA)J1     | 10 | 354019  | 7371     | YJL0451   | #N/A | Sgl | Pi | 0.753 | 0.796 | 0.805 | 0.36 |
| iYDL038C       | 4  | 384063  | 8098     | YDL038    | #N/A | Sgl | Pi | 0.753 | 0.037 | 0.87  | 0.52 |
| iYOLWdelta10-0 | 15 | 354958  | 12947    | YOR010    | #N/A | Sgl | Pi | 0.753 | 0.475 | NaN   | 0.57 |
| Q0120          | 17 | 0       | 3646 BI4 | 17 W 3654 | #N/A | 0   |    | 0.754 | 0.073 | 0.608 | 0.79 |
| Q0120          | 17 | 0       | 3646 BI4 | 17 W 3654 | #N/A | 0   |    | 0.754 | 0.073 | 0.608 | 0.79 |
| iYDR002W       | 4  | 453635  | 8307     | YDR002    | #N/A | Sgl | Pi | 0.754 | 7E-04 | 0.192 | 0.02 |
| iYGL242C       | 7  | 45182   | 9825     | YGL242    | #N/A | Dbl | Pi | 0.755 | 0.331 | NaN   | 0.46 |
| YJLWdelta9     | 10 | 416607  | 14109    | YJL010    | #N/A | Sgl | Pi | 0.755 | 0.558 | 0.626 | 0.54 |
| iYBR055C       | 2  | 347246  | 7660     | YBR055    | #N/A | Dbl | Pi | 0.755 | 0.909 | 0.032 | 0.47 |
| iYLL024C       | 12 | 97496   | 11429    | YLL024    | #N/A | Sgl | Pi | 0.757 | 0.693 | 0.55  | 0.68 |
| iYJR044C       | 10 | 518879  | 10946    | YJR044    | #N/A | Sgl | Pi | 0.758 | 0.376 | 0.869 | 0.97 |
| iYNR018W       | 14 | 664932  | 12717    | YNR018    | #N/A | Sgl | Pi | 0.758 | 0.738 | 0.682 | 0.78 |
| iYOL076W       | 15 | 189428  |          | 12852     | #N/A | Non | F  | 0.759 | 0.532 | 0.394 | 0.67 |
| iYER177W       | 5  | 546394  | 9219     | YER177    | #N/A | Sgl | Pi | 0.759 | 0.201 | 0.647 | 0.3  |
| iYLL058W       | 12 | 25282   |          | 11459     | #N/A | Non | F  | 0.76  | 0.726 | 0.162 | 0.75 |
| Q0280D         | 17 | 40891   |          | 13879     | #N/A | 0   |    | 0.76  | 0.473 | 0.985 | 0.67 |
| Q0280D         | 17 | 40891   |          | 13879     | #N/A | 0   |    | 0.76  | 0.473 | 0.985 | 0.67 |
| iYMR006C       | 13 | 279676  | 12056    | YMR006    | #N/A | Dbl | Pi | 0.76  | 0.506 | 0.671 | 0.92 |
| Q0035          | 17 | 67308   |          | 13817     | #N/A | 0   |    | 0.761 | 0.532 | 0.481 | 0.63 |
| Q0035          | 17 | 67308   |          | 13817     | #N/A | 0   |    | 0.761 | 0.532 | 0.481 | 0.63 |
| YERWdelta25    | 5  | 551460  | 14056    | YER188    | #N/A | T   |    | 0.762 | 0.771 | 0.835 | 0.31 |
| iYCL022C       | 3  | 82085   | 7913     | YCL022    | #N/A | Dbl | Pi | 0.762 | 0.702 | 0.519 | 0.67 |
| itP(UGG)O3     | 15 | 980772  | 7276     | YOR344    | #N/A | Sgl | Pi | 0.763 | 0.296 | NaN   | 0.41 |



|              |    |         |           |         |      |     |    |       |       |       |      |
|--------------|----|---------|-----------|---------|------|-----|----|-------|-------|-------|------|
| iYJL210W     | 10 | 37742   | 10884     | YJL209  | #N/A | Sgl | Pi | 0.763 | 0.108 | 0.514 | 0.8  |
| iYLR459W     | 12 | 1058541 |           | 11894   | #N/A | Non | F  | 0.763 | 0.734 | 0.465 | 0.65 |
| Q0040        | 17 | 67466   |           | 13819   | #N/A | 0   |    | 0.763 | NaN   | NaN   | 0.71 |
| Q0040        | 17 | 67466   |           | 13819   | #N/A | 0   |    | 0.763 | NaN   | NaN   | 0.71 |
| iYOL109W     | 15 | 110622  |           | 12883   | #N/A | Non | F  | 0.764 | 0.94  | 0.177 | 0.71 |
| iYGLWdelta7  | 7  | 402291  | 9883      | YGL054  | #N/A | Dbl | Pi | 0.764 | 0.595 | 0.828 | 0.52 |
| iYML132W-0   | 13 | 8409    | 12043     | YML13   | #N/A | Sgl | Pi | 0.764 | 0.857 | 0.055 | 0.32 |
| iYORWsigma3  | 15 | 854628  |           | 13334   | #N/A | Non | F  | 0.765 | 0.599 | 0.594 | 0.85 |
| iCEN14       | 14 | 628860  |           | 6999    | #N/A | Non | F  | 0.766 | 0.479 | 0.644 | 0.52 |
| iYGL148W     | 7  | 227530  |           | 9706    | #N/A | Non | F  | 0.766 | 0.622 | 0.375 | 0.64 |
| iYLL022C     | 12 | 100185  | 11427     | YLL02   | #N/A | Dbl | Pi | 0.767 | 0.039 | 0.899 | 0.53 |
| iYNL015W     | 14 | 605603  | 12400     | YNL01   | #N/A | Sgl | Pi | 0.767 | 0.201 | 0.32  | 0.8  |
| iYBR215W     | 2  | 655265  |           | 7816    | #N/A | Non | F  | 0.767 | 0.436 | 0.633 | 0.41 |
| iYMR098C     | 13 | 462604  | 12145     | YMR09   | #N/A | Sgl | Pi | 0.768 | 0.57  | 0.213 | 0.31 |
| iYPL189W     | 16 | 191001  | 13511     | YPL18   | #N/A | Sgl | Pi | 0.768 | 0.04  | 0.472 | 0.47 |
| Q0275        | 17 | 35379   | 3659 COX3 | 17 W 79 | #N/A | 0   |    | 0.768 | 0.102 | 0.501 | 0.36 |
| Q0275        | 17 | 35379   | 3659 COX3 | 17 W 79 | #N/A | 0   |    | 0.768 | 0.102 | 0.501 | 0.36 |
| iYOL058W     | 15 | 220475  | 12835     | YOL05   | #N/A | Sgl | Pi | 0.769 | 0.62  | 0.16  | 0.73 |
| iYDL200C     | 4  | 101134  | 8248      | YDL200  | #N/A | Sgl | Pi | 0.769 | 0.529 | 0.861 | 0.48 |
| iYDR324C     | 4  | 1116757 | 8610      | YDR324  | #N/A | Dbl | Pi | 0.769 | 2E-08 | 0.396 | 0.26 |
| iYML073C     | 13 | 124174  | 11987     | YML07   | #N/A | Sgl | Pi | 0.77  | 0.864 | 0.905 | 0.57 |
| iYOR180C     | 15 | 675151  | 13126     | YOR18   | #N/A | Dbl | Pi | 0.77  | 0.862 | 0.015 | 0.32 |
| iYJR003C     | 10 | 442291  | 10913     | YJR00   | #N/A | Sgl | Pi | 0.771 | 0.795 | 0.334 | 0.15 |
| iYML076C     | 13 | 115367  | 11991     | YML07   | #N/A | Sgl | Pi | 0.772 | 0.58  | 0.948 | 0.68 |
| iYGL177W-2   | 7  | 170235  | 9733      | YGL176  | #N/A | Sgl | Pi | 0.772 | 0.099 | 0.815 | 0.05 |
| YHLCsigma1   | 8  | 85383   | 14080     | YHL00   | #N/A | Dbl | Pi | 0.774 | 0.224 | 0.84  | 0.49 |
| YGLWdelta6   | 7  | 327928  |           | 14069   | #N/A | Non | F  | 0.776 | 0.964 | 0.995 | 0.36 |
| iYFR054C-1   | 6  | 260548  | 9544      | YFR054  | #N/A | Sgl | Pi | 0.777 | 0.7   | 0.713 | 0.09 |
| iYIR018W-2   | 9  | 388166  |           | 10670   | #N/A | Non | F  | 0.778 | 0.603 | 0.338 | 0.79 |
| iYML130C     | 13 | 13166   | 12041     | YML13   | #N/A | Sgl | Pi | 0.778 | 0.536 | 0.43  | 0.24 |
| iYLR002C     | 12 | 156330  | 11473     | YLR00   | #N/A | Sgl | Pi | 0.778 | 0.506 | 0.256 | 0.53 |
| iYEL070W     | 5  | 21107   |           | 8899    | #N/A | Non | F  | 0.778 | 0.885 | 0.655 | 0.7  |
| iYJR013W     | 10 | 461284  | 10925     | YJR01   | #N/A | Sgl | Pi | 0.778 | 0.276 | 0.353 | 0.54 |
| iYJL200C     | 10 | 58813   | 10875     | YJL200  | #N/A | Sgl | Pi | 0.779 | 0.897 | 0.004 | 0.24 |
| iYDR342C-2   | 4  | 1158362 | 8628      | YDR342  | #N/A | Sgl | Pi | 0.779 | 0.155 | 9E-04 | 0.72 |
| iYIL058W     | 9  | 247206  |           | 10534   | #N/A | Non | F  | 0.779 | 0.004 | 0.679 | 0.36 |
| iYDR539W-0   | 4  | 1513621 |           | 8809    | #N/A | Non | F  | 0.779 | 0.228 | 0.276 | 0.12 |
| iYAL048C     | 1  | 54820   | 7422      | YAL048  | #N/A | Sgl | Pi | 0.78  | 0.577 | NaN   | 0.41 |
| iYGL184C     | 7  | 156012  | 9740      | YGL184  | #N/A | Sgl | Pi | 0.78  | 0.784 | 0.58  | 0.73 |
| iYDR059C     | 4  | 569761  | 8366      | YDR059  | #N/A | Dbl | Pi | 0.78  | 0.953 | 0.086 | 0.14 |
| iYJL025W     | 10 | 395213  |           | 10719   | #N/A | Non | F  | 0.781 | 0.786 | 0.087 | 0.58 |
| iYBLWdelta10 | 2  | 226904  | 7604      | YBL004  | #N/A | Sgl | Pi | 0.781 | 0.704 | 0.517 | 0.44 |
| iYLR412W-1   | 12 | 950155  | 11852     | YLR41   | #N/A | Sgl | Pi | 0.782 | 0.306 | 0.394 | 0.8  |
| iYELWdelta6  | 5  | 138538  |           | 8917    | #N/A | Non | F  | 0.782 | 0.755 | 0.415 | 0.24 |
| iYEL072W-1   | 5  | 15390   | 8903      | YEL071  | #N/A | Sgl | Pi | 0.782 | 0.313 | 0.608 | 0.7  |
| iYFL011W     | 6  | 113982  | 9304      | YFL010  | #N/A | Sgl | Pi | 0.782 | 0.97  | 2E-05 | 0.79 |
| iYIR003W     | 9  | 362961  | 10653     | YIR003  | #N/A | Sgl | Pi | 0.782 | 0.472 | 0.166 | 0.66 |
| iYHR084W     | 8  | 276273  | 10322     | YHR08   | #N/A | Sgl | Pi | 0.783 | 0.429 | 0.252 | 0.2  |
| Q0085        | 17 | 73803   | 3642 ATP6 | 17 W 28 | #N/A | 0   |    | 0.784 | 0.596 | 0.384 | 0.6  |
| Q0085        | 17 | 73803   | 3642 ATP6 | 17 W 28 | #N/A | 0   |    | 0.784 | 0.596 | 0.384 | 0.6  |
| iYPR026W     | 16 | 619058  |           | 13638   | #N/A | Non | F  | 0.784 | 0.958 | 0.111 | 0.04 |

|                    |      |              |      |        |      |        |       |       |       |      |
|--------------------|------|--------------|------|--------|------|--------|-------|-------|-------|------|
| iYBR259W           | 2    | 732416       |      | 7852   | #N/A | Non F  | 0.785 | 0.371 | 0.426 | 0.45 |
| iYAR014C + iYBI ## | #N/A |              | #N/A |        | #N/A | #N/A   | 0.785 | NaN   | NaN   | 0.94 |
| iSNR53             | 5    | 61801 7078   |      | YEL050 | #N/A | Dbl Pi | 0.785 | 0.613 | 0.712 | 0.43 |
| iYAR028W + iYB ##  | #N/A |              | #N/A |        | #N/A | #N/A   | 0.786 | NaN   | NaN   | 0.77 |
| iYNL154C           | 14   | 345261 12528 |      | YNL15  | #N/A | Sgl Pi | 0.786 | 0.6   | 0.947 | 0.65 |
| iYNR068C           | 14   | 760867 12767 |      | YNR06  | #N/A | Sgl Pi | 0.786 | 0.759 | 0.429 | 0.67 |
| iYHR006W           | 8    | 119443       |      | 10240  | #N/A | Non F  | 0.787 | 0.689 | 0.706 | 0.21 |
| iYEL053C           | 5    | 56092 8882   |      | YEL053 | #N/A | Dbl Pi | 0.787 | 0.113 | 0.372 | 0.82 |
| iYGL238W           | 7    | 52444        |      | 9821   | #N/A | Non F  | 0.787 | 0.606 | NaN   | 0.4  |
| iYNL085W           | 14   | 469658       |      | 12465  | #N/A | Non F  | 0.787 | 0.59  | 0.331 | 0.35 |
| iYNL157W           | 14   | 340878       |      | 12531  | #N/A | Non F  | 0.787 | 0.583 | NaN   | 0.48 |
| iYKL001C           | 11   | 439031 11066 |      | YKL00  | #N/A | Sgl Pi | 0.787 | 0.006 | 0.815 | 0.75 |
| iYFL003C           | 6    | 137151 9288  |      | YFL003 | #N/A | Dbl Pi | 0.788 | 0.993 | 0.514 | 0.36 |
| iYAL015C + iYBF ## | #N/A |              | #N/A |        | #N/A | #N/A   | 0.788 | NaN   | NaN   | 0.67 |
| iYBR102C           | 2    | 447269 7708  |      | YBR102 | #N/A | Dbl Pi | 0.788 | 0.633 | 0.754 | 0.84 |
| iYGL237C           | 7    | 53524 9819   |      | YGL237 | #N/A | Sgl Pi | 0.789 | 0.164 | 0.747 | 0.01 |
| iYMR112C           | 13   | 494489 12159 |      | YMR11  | #N/A | Dbl Pi | 0.789 | 0.331 | 0.484 | 0.56 |
| iYKL034W           | 11   | 373792 11099 |      | YKL03  | #N/A | Sgl Pi | 0.79  | 0.623 | 0.782 | 0.38 |
| iYPL142C           | 16   | 283089 13466 |      | YPL14  | #N/A | Sgl Pi | 0.79  | 0.621 | 0.353 | 0.24 |
| Q0100              | 17   | 77440        |      | 13825  | #N/A | 0      | 0.79  | 0.39  | 0.598 | 0    |
| Q0100              | 17   | 77440        |      | 13825  | #N/A | 0      | 0.79  | 0.39  | 0.598 | 0    |
| itF(GAA)D          | 4    | 1095462 7147 |      | YDR316 | #N/A | Sgl Pi | 0.79  | 0.081 | 0.442 | 0.49 |
| itA(AGC)M2         | 13   | 768430 7106  |      | YMR247 | #N/A | Dbl Pi | 0.791 | 0.632 | 0.845 | 0.45 |
| iYJL223C-1         | 10   | 10312 10898  |      | YJL223 | #N/A | Dbl Pi | 0.792 | 0.801 | 0.747 | 0.83 |
| iYGR052W           | 7    | 594738       |      | 9935   | #N/A | Non F  | 0.792 | 0.523 | 0.822 | 0.8  |
| iYKL047W           | 11   | 350649       |      | 11110  | #N/A | Non F  | 0.793 | 0.798 | 0.301 | 0.47 |
| iYMR103C           | 13   | 473251 12150 |      | YMR10  | #N/A | Sgl Pi | 0.793 | 0.669 | 0.88  | 0.99 |
| iYOR072W-0         | 15   | 461825 13025 |      | YOR07  | #N/A | Sgl Pi | 0.793 | 0.009 | 0.888 | 0.81 |
| iYFR023W           | 6    | 201692       |      | 9474   | #N/A | Non F  | 0.793 | 0.548 | 0.275 | 0.6  |
| iYPLWdelta7        | 16   | 210800 13608 |      | YPL17  | #N/A | Sgl Pi | 0.794 | 0.761 | 0.065 | 0.19 |
| itY(GUA)F1         | 6    | 167508 7367  |      | YFR011 | #N/A | Dbl Pi | 0.795 | 0.93  | 0.767 | 0.27 |
| iYEL018W           | 5    | 122317       |      | 8850   | #N/A | Non F  | 0.795 | 0.758 | 0.611 | 0.56 |
| iYMR301C           | 13   | 869628 12349 |      | YMR30  | #N/A | Sgl Pi | 0.795 | 0.125 | 0.069 | 0.57 |
| iYMR133W           | 13   | 537610 12181 |      | YMR13  | #N/A | Sgl Pi | 0.795 | 0.119 | 0.309 | 0.3  |
| iYMR016C-1         | 13   | 306530 12069 |      | YMR01  | #N/A | Dbl Pi | 0.796 | 0.678 | 0.999 | 0.14 |
| iYCR065W           | 3    | 230886 8015  |      | YCR06  | #N/A | Sgl Pi | 0.796 | 0.48  | 2E-06 | 0.51 |
| iYER065C           | 5    | 286902 8999  |      | YER06  | #N/A | Dbl Pi | 0.797 | 0.459 | 0.448 | 0.36 |
| iYGR124W           | 7    | 741651 10004 |      | YGR12  | #N/A | Sgl Pi | 0.798 | 0.626 | 0.055 | 0.79 |
| iYHR047C-2         | 8    | 203504 10284 |      | YHR04  | #N/A | Dbl Pi | 0.798 | 0.476 | 0.294 | 0.85 |
| iYML019W           | 13   | 234463       |      | 11939  | #N/A | Non F  | 0.798 | 0.743 | 0.456 | 0.58 |
| iYHL020C           | 8    | 67462 10197  |      | YHL02  | #N/A | Sgl Pi | 0.798 | 0.641 | 0.836 | 0.73 |
| iYLRCdelta21       | 12   | 818416 11902 |      | YLR34  | #N/A | Sgl Pi | 0.799 | 0.563 | 0.712 | 0.49 |
| iYCR096C           | 3    | 293522 8043  |      | YCR09  | #N/A | Dbl Pi | 0.8   | 0.544 | 0.484 | 0.87 |
| iYJR143C           | 10   | 700318 11038 |      | YJR14  | #N/A | Dbl Pi | 0.801 | 0.649 | 0.536 | 0.73 |
| iYHR126C           | 8    | 360184 10361 |      | YHR12  | #N/A | Dbl Pi | 0.801 | 0.801 | 0.15  | 0.05 |
| iYPR002C-A         | 16   | 560758 13611 |      | YPR00  | #N/A | Sgl Pi | 0.801 | 0.896 | 0.898 | 0.25 |
| iYGR281W           | 7    | 1057264      |      | 10150  | #N/A | Non F  | 0.802 | 0.743 | 0.503 | 0.46 |
| iYOR106W           | 15   | 519967 13056 |      | YOR10  | #N/A | Sgl Pi | 0.802 | 0.1   | NaN   | 0.94 |
| iYMR122C-0         | 13   | 511071 12169 |      | YMR12  | #N/A | Dbl Pi | 0.802 | 0.211 | 0.986 | 0.73 |
| iYDR530C           | 4    | 1497775 8800 |      | YDR53  | #N/A | Dbl Pi | 0.804 | 0.529 | 0.554 | 0.75 |
| iYPR102C           | 16   | 731731 13699 |      | YPR10  | #N/A | Dbl Pi | 0.805 | 0.954 | 0.233 | 0.43 |

|                  |    |        |       |         |      |      |      |       |       |       |       |      |
|------------------|----|--------|-------|---------|------|------|------|-------|-------|-------|-------|------|
| iYBR201W-0       | 2  | 624173 | 7802  | YBR202  | #N/A | Sgl  | Pi   | 0.807 | 0.281 | 0.024 | 0.84  |      |
| iYOR308C         | 15 | 896380 | 13243 | YOR30   | #N/A | Sgl  | Pi   | 0.808 | 0.772 | 0.309 | 0.78  |      |
| iYER043C         | 5  | 237122 | 8961  | YER043  | #N/A | Sgl  | Pi   | 0.808 | 0.637 | 0.111 | 0.71  |      |
| iYJL075C         | 10 | 298612 | 10764 | YJL075  | #N/A | Sgl  | Pi   | 0.808 | 0.304 | 0.667 | 0.87  |      |
| iYDL101C         | 4  | 281839 | 8156  | YDL101  | #N/A | Sgl  | Pi   | 0.809 | 0.038 | 0.467 | 0.31  |      |
| iYGR143W         | 7  | 777499 | 10022 | YGR143  | #N/A | Sgl  | Pi   | 0.81  | 0.004 | 0.29  | 0.29  |      |
| iYBR093C         | 2  | 430914 | 7701  | YBR093  | #N/A | Dbl  | Pi   | 0.81  | 0.505 | 0.181 | 0.58  |      |
| iYFL012W         | 6  | 111099 | 9306  | YFL012  | #N/A | Sgl  | Pi   | 0.81  | 0.464 | 0.054 | 0.36  |      |
| iYOR208W         | 15 | 736168 |       | 13151   | #N/A | Non  | F    | 0.811 | 0.761 | 0.595 | 0.05  |      |
| iYGRWsigma5      | 7  | 712526 | 10179 | YGR105  | #N/A | Dbl  | Pi   | 0.812 | 0.822 | 0.248 | 0.42  |      |
| iYPL090C         | 16 | 378402 | 13420 | YPL090  | #N/A | Sgl  | Pi   | 0.813 | 0.472 | 0.965 | 0.87  |      |
| iYPRWsigma2-0    | 16 | 769641 | 13802 | YPR110  | #N/A | Sgl  | Pi   | 0.813 | 0.449 | 0.658 | 0     |      |
| iYEL071W-1       | 5  | 18720  | 8901  | YEL070  | #N/A | Sgl  | Pi   | 0.814 | 0.748 | 0.039 | 0.76  |      |
| itD(GUC)I2       | 9  | 336412 | 7120  | YIL009C | #N/A | Dbl  | Pi   | 0.814 | 0.781 | 0.512 | 0.47  |      |
| iYNL088W         | 14 | 461993 | 12468 | YNL088  | #N/A | Sgl  | Pi   | 0.814 | 0.112 | 0.661 | 0.41  |      |
| iYALWdelta1 + i\ | ## | #N/A   | #N/A  | YAL008  | #N/A | #N/A | #N/A | 0.815 | NaN   | NaN   | 0.36  |      |
| iYLR042C         | 12 | 230453 | 11513 | YLR042  | #N/A | Sgl  | Pi   | 0.817 | 0.485 | 0.916 | 0.45  |      |
| iYLR354C         | 12 | 837371 | 11800 | YLR354  | #N/A | Sgl  | Pi   | 0.817 | 0.108 | 0.611 | 0.63  |      |
| iYPR121W-0       | 16 | 780281 | 13717 | YPR121  | #N/A | Sgl  | Pi   | 0.817 | 0.947 | 0.464 | 0.62  |      |
| iYHL033C         | 8  | 36059  | 10210 | YHL033  | #N/A | Sgl  | Pi   | 0.818 | 0.635 | 0.644 | 0.38  |      |
| Q0150            | 17 | 725    |       | 13829   | #N/A |      |      | 0     | 0.818 | 0.547 | 0.631 | 0.76 |
| Q0150            | 17 | 725    |       | 13829   | #N/A |      |      | 0     | 0.818 | 0.547 | 0.631 | 0.76 |
| iYOR177C         | 15 | 667164 | 13121 | YOR177  | #N/A | Sgl  | Pi   | 0.818 | 0.479 | 0.452 | 0.88  |      |
| iYPR111W         | 16 | 748998 |       | 13707   | #N/A | Non  | F    | 0.818 | 0.739 | NaN   | 0.03  |      |
| iYGL204C         | 7  | 111995 | 9761  | YGL204  | #N/A | Sgl  | Pi   | 0.819 | 0.809 | 0.067 | 0.75  |      |
| iYOL088C         | 15 | 154747 | 12864 | YOL088  | #N/A | Sgl  | Pi   | 0.821 | 0.834 | 0.396 | 0.56  |      |
| iYHR127W         | 8  | 361652 | 10362 | YHR127  | #N/A | Sgl  | Pi   | 0.822 | 0.784 | 0.942 | 0.65  |      |
| iYPR121W-1       | 16 | 781170 | 13718 | YPR121  | #N/A | Sgl  | Pi   | 0.822 | 0.098 | 0.363 | 0.54  |      |
| iYPR071W         | 16 | 688795 | 13675 | YPR071  | #N/A | Sgl  | Pi   | 0.822 | 0.942 | 0.854 | 0.33  |      |
| iYOR065W         | 15 | 448356 | 13017 | YOR065  | #N/A | Sgl  | Pi   | 0.823 | 0.709 | 0.336 | 0.85  |      |
| iYMRWtau2        | 13 | 504135 | 12386 | YMR107  | #N/A | Dbl  | Pi   | 0.823 | 0.75  | 0.448 | 0.47  |      |
| iYHR047C-0       | 8  | 201306 | 10282 | YHR047  | #N/A | Dbl  | Pi   | 0.825 | 0.145 | 0.253 | 0.53  |      |
| iYEL036C         | 5  | 84554  | 8866  | YEL036  | #N/A | Sgl  | Pi   | 0.825 | 0.159 | 0.541 | 0.97  |      |
| iYMR165C         | 13 | 592615 | 12213 | YMR165  | #N/A | Sgl  | Pi   | 0.826 | 0.015 | 0.857 | 0.93  |      |
| iYGL149W         | 7  | 225887 | 9707  | YGL149  | #N/A | Sgl  | Pi   | 0.827 | 0.598 | 0.511 | 0.67  |      |
| itG(GCC)E        | 5  | 61951  | 7162  | YEL050  | #N/A | Dbl  | Pi   | 0.827 | 0.546 | 0.826 | 0.56  |      |
| iYOR111W         | 15 | 531128 | 13061 | YOR111  | #N/A | Sgl  | Pi   | 0.828 | 0.597 | 0.44  | 0.32  |      |
| iYHR149C         | 8  | 396658 | 10384 | YHR149  | #N/A | Dbl  | Pi   | 0.831 | 0.788 | 0.643 | 0.89  |      |
| iYGRCdelta18     | 7  | 574686 | 10168 | YGR003  | #N/A | Dbl  | Pi   | 0.831 | 0.245 | 0.806 | 0.74  |      |
| iYBR070C         | 2  | 379881 | 7675  | YBR070  | #N/A | Dbl  | Pi   | 0.831 | 0.006 | 0.51  | 0.95  |      |
| iYGL179C-0       | 7  | 165100 | 9734  | YGL179  | #N/A | Dbl  | Pi   | 0.831 | 0.553 | 0.751 | 0.93  |      |
| iYHR168W         | 8  | 441886 | 10403 | YHR168  | #N/A | Sgl  | Pi   | 0.833 | 0.454 | 0.411 | 0.71  |      |
| iYGR210C         | 7  | 914722 | 10082 | YGR210  | #N/A | Dbl  | Pi   | 0.834 | 0.877 | 0.998 | 0.93  |      |
| iYBR115C         | 2  | 473904 | 7720  | YBR115  | #N/A | Sgl  | Pi   | 0.834 | 0.565 | 0.941 | 0.68  |      |
| iYGR148C         | 7  | 787759 | 10027 | YGR148  | #N/A | Dbl  | Pi   | 0.834 | 0.746 | 0.85  | 0.51  |      |
| iYKL181W         | 11 | 108601 | 11239 | YKL181  | #N/A | Sgl  | Pi   | 0.834 | 0.935 | 0.971 | 0.83  |      |
| iYJL197W         | 10 | 67557  |       | 10872   | #N/A | Non  | F    | 0.836 | 0.848 | 0.626 | 0.33  |      |
| iYNR061C         | 14 | 743551 | 12760 | YNR061  | #N/A | Sgl  | Pi   | 0.836 | 0.974 | 0.204 | 0.49  |      |
| iYLR148W         | 12 | 437416 |       | 11612   | #N/A | Non  | F    | 0.836 | 0.555 | 0.286 | 0.68  |      |
| itL(CAA)G1       | 7  | 205642 | 7226  | YGL158  | #N/A | Sgl  | Pi   | 0.837 | 0.954 | 0.195 | 0.66  |      |
| iYHR096C         | 8  | 296434 | 10334 | YHR096  | #N/A | Sgl  | Pi   | 0.838 | 0.054 | 0.786 | 0.89  |      |

|             |    |         |          |          |      |     |    |       |       |       |       |     |
|-------------|----|---------|----------|----------|------|-----|----|-------|-------|-------|-------|-----|
| iYEL071W-0  | 5  | 17859   | 8900     | YEL070   | #N/A | Sgl | Pi | 0.838 | 0.874 | 0.118 | 0.18  |     |
| iYJLCdelta5 | 10 | 354873  | 10902    | YJL04    | #N/A | Sgl | Pi | 0.839 | 0.675 | 0.582 | 0.66  |     |
| itP(UGG)L-1 | 12 | 93700   | 7270     | YLL025   | #N/A | Sgl | Pi | 0.839 | 0.193 | 0.846 | 0.77  |     |
| iYHL009C    | 8  | 85048   | 10186    | YHL00    | #N/A | Dbl | Pi | 0.84  | 0.553 | 0.546 | 0.25  |     |
| iYJL191W    | 10 | 74615   |          | 10867    | #N/A | Non | F  | 0.841 | 0.761 | 0.806 | 0.45  |     |
| iYLR218C    | 12 | 573922  | 11683    | YLR21    | #N/A | Dbl | Pi | 0.841 | 0.481 | 0.427 | 0.68  |     |
| iYDR032C-1  | 4  | 505831  | 8336     | YDR032   | #N/A | Dbl | Pi | 0.841 | 0.56  | 0.268 | 0.47  |     |
| iYLR429W    | 12 | 992751  | 11867    | YLR43    | #N/A | Sgl | Pi | 0.842 | 0.872 | 0.133 | 0.68  |     |
| iYPR036W    | 16 | 645281  |          | 13648    | #N/A | Non | F  | 0.842 | 0.725 | 0.901 | 0.9   |     |
| iYKL080W    | 11 | 285940  | 11142    | YKL07    | #N/A | Sgl | Pi | 0.846 | 0.535 | 0.692 | 0.31  |     |
| iYMR038C    | 13 | 348253  | 12090    | YMR03    | #N/A | Sgl | Pi | 0.846 | 0.592 | 0.684 | 0.68  |     |
| iYOR010C-0  | 15 | 346934  | 12964    | YOR01    | #N/A | Dbl | Pi | 0.849 | 0.222 | 0.626 | 0.84  |     |
| iYOR179C-1  | 15 | 673389  | 13125    | YOR17    | #N/A | Sgl | Pi | 0.849 | 0.445 | 0.159 | 0.97  |     |
| iYLR307W    | 12 | 746519  | 11760    | YLR30    | #N/A | Sgl | Pi | 0.85  | 0.111 | 0.497 | 0.01  |     |
| iYMR046W-A  | 13 | 362828  |          | 12097    | #N/A | Non | F  | 0.85  | 0.946 | 0.995 | 0.19  |     |
| itN(GUU)L   | 12 | 976050  | 7258     | YLR425   | #N/A | Sgl | Pi | 0.851 | 0.893 | 0.31  | 0.47  |     |
| iYHR093W    | 8  | 289692  |          | 10331    | #N/A | Non | F  | 0.851 | 0.088 | 0.994 | 0.8   |     |
| iYLR340W    | 12 | 806818  | 11787    | YLR34    | #N/A | Sgl | Pi | 0.855 | 0.713 | 0.7   | 0.13  |     |
| itS(AGA)E   | 5  | 86671   | 7307     | YEL032   | #N/A | Sgl | Pi | 0.855 | 0.719 | 0.352 | 0.81  |     |
| Q0115       | 17 | 79232   | 3645 BI3 | 17 W 365 | #N/A |     |    | 0     | 0.855 | 0.57  | 0.802 | 0.4 |
| Q0115       | 17 | 79232   | 3645 BI3 | 17 W 365 | #N/A |     |    | 0     | 0.855 | 0.57  | 0.802 | 0.4 |
| iYGR242W    | 7  | 976724  | 10110    | YGR24    | #N/A | Sgl | Pi | 0.856 | 0.353 | 0.633 | 0     |     |
| iYEL059W    | 5  | 42969   | 8888     | YEL058   | #N/A | Sgl | Pi | 0.856 | 0.129 | 0.43  | 0.79  |     |
| iYGL054C    | 7  | 401270  | 9617     | YGL054   | #N/A | Dbl | Pi | 0.857 | 0.339 | 0.664 | 0.17  |     |
| iYGL054C    | 7  | 401270  | 9617     | YGL054   | #N/A | Dbl | Pi | 0.857 | 0.339 | 0.664 | 0.17  |     |
| iYPR008W    | 16 | 575098  | 13618    | YPR00    | #N/A | Sgl | Pi | 0.858 | 0.003 | 0.167 | 0.86  |     |
| iYDR457W    | 4  | 1379589 |          | 8732     | #N/A | Non | F  | 0.859 | 0.754 | 0.523 | 0.89  |     |
| iYGR085C    | 7  | 648899  | 9964     | YGR085   | #N/A | Sgl | Pi | 0.859 | 0.666 | 0.869 | 0.19  |     |
| iYNL163C    | 14 | 330066  | 12538    | YNL16    | #N/A | Dbl | Pi | 0.859 | 0.546 | 0.638 | 0.45  |     |
| iYOR165W    | 15 | 646926  |          | 13112    | #N/A | Non | F  | 0.861 | 0.574 | 0.555 | 0.51  |     |
| iYNR069C-1  | 14 | 763980  | 12769    | YNR06    | #N/A | Dbl | Pi | 0.862 | 0.919 | 0.429 | 0.56  |     |
| iYML059C    | 13 | 158253  | 11973    | YML05    | #N/A | Dbl | Pi | 0.863 | 0.358 | 0.39  | 0.79  |     |
| YJLWdelta16 | 10 | 537459  | 14107    | YJR05    | #N/A | Sgl | Pi | 0.864 | 0.676 | 0.958 | 0.65  |     |
| iYBR090C    | 2  | 427004  | 7698     | YBR090   | #N/A | Sgl | Pi | 0.864 | 0.474 | 0.629 | 0.59  |     |
| iYNL031C    | 14 | 576049  | 12414    | YNL03    | #N/A | Dbl | Pi | 0.864 | 0.579 | 0.846 | 0.81  |     |
| itI(AAU)L1  | 12 | 734860  |          | 7193     | #N/A | Non | F  | 0.866 | 0.304 | 0.343 | 0.59  |     |
| iYPL117C    | 16 | 328719  | 13442    | YPL11    | #N/A | Dbl | Pi | 0.868 | 2E-04 | 0.453 | 0.13  |     |
| iYGR043C-0  | 7  | 581415  | 9926     | YGR043   | #N/A | Sgl | Pi | 0.868 | 0.823 | 0.804 | 0.34  |     |
| iYPR014C-0  | 16 | 587504  | 13625    | YPR01    | #N/A | Sgl | Pi | 0.868 | 0.061 | 0.461 | 0.95  |     |
| iYEL043W    | 5  | 73348   | 8873     | YEL042   | #N/A | Sgl | Pi | 0.869 | 0.813 | 0.745 | 0.45  |     |
| YBLWdelta1  | 2  | 8842    | 14006    | YBL10    | #N/A | Sgl | Pi | 0.87  | 0.9   | 0.696 | 0.39  |     |
| iYCR090C-0  | 3  | 272852  | 8035     | YCR090   | #N/A | Dbl | Pi | 0.871 | 0.62  | 0.881 | 0.46  |     |
| iYHR082C    | 8  | 271544  | 10320    | YHR08    | #N/A | Dbl | Pi | 0.872 | 0.456 | 0.17  | 0.21  |     |
| iYDR342C-0  | 4  | 1155904 | 8626     | YDR342   | #N/A | Sgl | Pi | 0.874 | 0.069 | 0.417 | 0.93  |     |
| iYDR227W    | 4  | 921673  |          | 8521     | #N/A | Non | F  | 0.874 | 0.353 | 0.309 | 0.3   |     |
| iYMR037C    | 13 | 346536  | 12089    | YMR03    | #N/A | Sgl | Pi | 0.876 | 0.032 | 1     | 0.95  |     |
| iYGL191W    | 7  | 145205  |          | 9747     | #N/A | Non | F  | 0.877 | 0.795 | 0.983 | 0.56  |     |
| iYPL275W-0  | 16 | 19078   | 13594    | YPL27    | #N/A | Sgl | Pi | 0.877 | 0.728 | NaN   | 0.61  |     |
| iYJL188C    | 10 | 76507   | 10865    | YJL188   | #N/A | Sgl | Pi | 0.879 | 0.228 | 0.911 | 0.83  |     |
| iYKR008W    | 11 | 453736  |          | 11302    | #N/A | Non | F  | 0.879 | 0.877 | 0.608 | 0.23  |     |
| Q0125       | 17 | 0       |          | 13827    | #N/A |     |    | 0     | 0.881 | 0.126 | 0.866 | 0.8 |

|               |    |         |       |        |      |       |       |       |       |       |      |
|---------------|----|---------|-------|--------|------|-------|-------|-------|-------|-------|------|
| Q0125         | 17 | 0       | 13827 | #N/A   | 0    | 0.881 | 0.126 | 0.866 | 0.8   |       |      |
| iYKR089C      | 11 | 607987  | 11378 | YKR08  | #N/A | Dbl   | Pi    | 0.886 | 0.966 | 0.015 | 0.45 |
| iYJR054W      | 10 | 537231  | 10956 | YJR05  | #N/A | Sgl   | Pi    | 0.886 | 0.811 | 0.337 | 0.17 |
| iYHR095W      | 8  | 293390  |       | 10333  | #N/A | Non   | F     | 0.888 | 0.093 | 0.689 | 0.87 |
| iYGL230C      | 7  | 64212   | 9809  | YGL230 | #N/A | Sgl   | Pi    | 0.889 | 0.883 | 0.272 | 0.1  |
| iYHR039C      | 8  | 186836  | 10273 | YHR03  | #N/A | Sgl   | Pi    | 0.891 | 0.865 | 0.675 | 0.52 |
| iYDL049C      | 4  | 365894  | 8109  | YDL049 | #N/A | Sgl   | Pi    | 0.892 | 0.008 | 0.769 | 0.93 |
| iYKL162C-A-1  | 11 | 146869  | 11220 | YKL16  | #N/A | Sgl   | Pi    | 0.897 | 0.228 | 0.322 | 0.61 |
| Q0230         | 17 | 28532   |       | 13869  | #N/A | 0     | 0.898 | 0.109 | 0.701 | 0.71  |      |
| Q0230         | 17 | 28532   |       | 13869  | #N/A | 0     | 0.898 | 0.109 | 0.701 | 0.71  |      |
| iYHR086W      | 8  | 279710  | 10324 | YHR08  | #N/A | Sgl   | Pi    | 0.899 | 0.243 | NaN   | 0.75 |
| iYLR359W      | 12 | 845815  | 11804 | YLR36  | #N/A | Sgl   | Pi    | 0.901 | 0.441 | 0.292 | 0.55 |
| itG(GCC)G2    | 7  | 931002  | 7168  | YGR21  | #N/A | Sgl   | Pi    | 0.905 | 0.468 | 0.891 | 0.3  |
| iYHR141C      | 8  | 382791  | 10376 | YHR14  | #N/A | Dbl   | Pi    | 0.907 | 0.122 | 0.923 | 0.85 |
| iYMR132C      | 13 | 535596  | 12180 | YMR13  | #N/A | Dbl   | Pi    | 0.909 | 0.915 | 0.529 | 0.64 |
| iYPR194C      | 16 | 926959  | 13783 | YPR19  | #N/A | Sgl   | Pi    | 0.913 | 0.035 | 0.831 | 0.96 |
| itG(GCC)P1    | 16 | 572370  | 7173  | YPR007 | #N/A | Dbl   | Pi    | 0.917 | 0.457 | 0.967 | 0.82 |
| iYPR064W      | 16 | 679365  | 13668 | YPR06  | #N/A | Sgl   | Pi    | 0.918 | 0.943 | 0.937 | 0.97 |
| iYIL119C-1    | 9  | 138819  | 10589 | YIL11  | #N/A | Dbl   | Pi    | 0.918 | 0.526 | 0.686 | 0.8  |
| iYBLCdelta7   | 2  | 197281  |       | 7602   | #N/A | Non   | F     | 0.93  | 0.645 | 0.931 | 0.41 |
| iYGL215W      | 7  | 89324   | 9781  | YGL214 | #N/A | Sgl   | Pi    | 0.931 | 0.958 | 0.581 | 0.09 |
| iYDL001W      | 4  | 449264  |       | 8067   | #N/A | Non   | F     | 0.931 | 0.453 | 0.49  | 0.12 |
| iYDR168W      | 4  | 791859  |       | 8464   | #N/A | Non   | F     | 0.931 | 0.584 | 0.259 | 0.44 |
| iYLR346C      | 12 | 822580  | 11793 | YLR34  | #N/A | Sgl   | Pi    | 0.932 | 0.539 | 0.027 | 0.93 |
| iYPRWsigma2-1 | 16 | 770646  | 13803 | YPR11  | #N/A | Sgl   | Pi    | 0.935 | 5E-05 | 0.269 | 0    |
| iYNL298W      | 14 | 71428   |       | 12655  | #N/A | Non   | F     | 0.937 | 0.901 | 0.349 | 0.23 |
| Q0185D        | 17 | 20532   |       | 13845  | #N/A | 0     | 0.941 | 0.69  | 0.776 | 0.72  |      |
| Q0185D        | 17 | 20532   |       | 13845  | #N/A | 0     | 0.941 | 0.69  | 0.776 | 0.72  |      |
| iYPL036W      | 16 | 485720  |       | 13368  | #N/A | Non   | F     | 0.947 | 0.834 | 0.33  | 0.96 |
| Q0185E        | 17 | 22021   |       | 13847  | #N/A | 0     | 0.95  | 0.466 | 0.54  | 0.26  |      |
| Q0185E        | 17 | 22021   |       | 13847  | #N/A | 0     | 0.95  | 0.466 | 0.54  | 0.26  |      |
| iYDR131C      | 4  | 718455  | 8433  | YDR131 | #N/A | Sgl   | Pi    | 0.955 | 0.561 | 0.764 | 0.89 |
| iYPRWtau4     | 16 | 933424  |       | 13805  | #N/A | Non   | F     | 0.956 | 0.631 | NaN   | 0.74 |
| iYCL055W-0    | 3  | 29021   | 7937  | YCL054 | #N/A | Sgl   | Pi    | 0.957 | 1E-07 | 0.336 | 0.44 |
| iYMR252C      | 13 | 775724  | 12301 | YMR25  | #N/A | Sgl   | Pi    | 0.957 | 0.614 | 0.391 | 0.86 |
| iYLR403W      | 12 | 927668  | 11842 | YLR40  | #N/A | Sgl   | Pi    | 0.962 | 0.529 | 0.925 | 0.52 |
| iYER001W      | 5  | 155793  | 8918  | YER002 | #N/A | Sgl   | Pi    | 0.972 | 0.72  | 0.081 | 0.07 |
| itE(CUC)D-0   | 4  | 1017284 | 7128  | YDR27  | #N/A | Dbl   | Pi    | 0.975 | 0.927 | 0.038 | 0.12 |
| iYHR138C      | 8  | 377727  | 10372 | YHR13  | #N/A | Sgl   | Pi    | 0.98  | 0.794 | 0.208 | 0.91 |
| iYAL016W      | 1  | 126761  |       | 7389   | #N/A | Non   | F     | NaN   | 0.543 | 0.637 | 0.6  |
| iYAL028W      | 1  | 94497   | 7401  | YAL027 | #N/A | Sgl   | Pi    | NaN   | 0.783 | 0.519 | 0.17 |
| iYAL063C-2    | 1  | 30352   | 7436  | YAL063 | #N/A | Dbl   | Pi    | NaN   | 0.063 | NaN   | 0.31 |
| itT(AGU)B     | 2  | 266398  | 7322  | YBR013 | #N/A | Sgl   | Pi    | NaN   | 0.709 | NaN   | 0.22 |
| iYBL006C      | 2  | 217081  | 7506  | YBL006 | #N/A | Dbl   | Pi    | NaN   | 0.575 | 0.556 | 0.69 |
| iYBR027C      | 2  | 294320  | 7632  | YBR027 | #N/A | Sgl   | Pi    | NaN   | 0.553 | 0.475 | 0.09 |
| iYBR037C      | 2  | 311407  | 7642  | YBR037 | #N/A | Dbl   | Pi    | NaN   | 0.159 | 0.933 | 0.77 |
| iYBR296C-0    | 2  | 798473  | 7886  | YBR296 | #N/A | Dbl   | Pi    | NaN   | 0.999 | 0.188 | 0.7  |
| iYBRWdelta17  | 2  | 350696  |       | 7897   | #N/A | Non   | F     | NaN   | 0.7   | NaN   | 0.17 |
| iYCRWdelta9   | 3  | 150555  | 8065  | YCR01  | #N/A | Sgl   | Pi    | NaN   | 0.145 | 0.497 | 0.53 |
| iYCRWdelta9   | 3  | 150555  | 8065  | YCR01  | #N/A | Sgl   | Pi    | NaN   | 0.145 | 0.497 | 0.53 |
| iYDL073W      | 4  | 329569  |       | 8130   | #N/A | Non   | F     | NaN   | 0.564 | 0.768 | 0.69 |



|             |    |              |        |      |       |     |       |       |      |
|-------------|----|--------------|--------|------|-------|-----|-------|-------|------|
| iYDL095W    | 4  | 289513       | 8151   | #N/A | Non F | NaN | 0.452 | NaN   | 0.46 |
| iYDR165W    | 4  | 786191       | 8461   | #N/A | Non F | NaN | 0.584 | 0.232 | 0.07 |
| iYDR312W    | 4  | 1088922      | 8599   | #N/A | Non F | NaN | 0.458 | 0.54  | 0.51 |
| iYDR312W    | 4  | 1088922      | 8599   | #N/A | Non F | NaN | 0.458 | 0.54  | 0.51 |
| iYDR427W    | 4  | 1323360      | 8707   | #N/A | Non F | NaN | 0.48  | 0.608 | 0.36 |
| itS(GCU)F   | 6  | 191600 7312  | YFR020 | #N/A | Sgl P | NaN | 0.624 | 0.579 | 0.48 |
| iYFL030W    | 6  | 77983        | 9342   | #N/A | Non F | NaN | 0.63  | 0.397 | 0.49 |
| iYFR040W    | 6  | 237223       | 9512   | #N/A | Non F | NaN | 0.449 | 0.548 | 0.44 |
| iYGL085W    | 7  | 350441       | 9645   | #N/A | Non F | NaN | 0.66  | 0.461 | 0.22 |
| iYGL133W    | 7  | 261490 9691  | YGL132 | #N/A | Sgl P | NaN | 0.512 | 0.436 | 0.72 |
| iYGL169W    | 7  | 187356 9723  | YGL168 | #N/A | Sgl P | NaN | 0.518 | 0.509 | 0.45 |
| iYGL221C    | 7  | 82303 9789   | YGL221 | #N/A | Dbl P | NaN | 0.601 | 0.419 | 0.54 |
| iYGL244W    | 7  | 43177 9829   | YGL243 | #N/A | Sgl P | NaN | 0.34  | NaN   | 0.59 |
| iYGLWdelta6 | 7  | 328237       | 9882   | #N/A | Non F | NaN | 0.66  | 0.547 | 0.41 |
| iYGR094W    | 7  | 675539       | 9975   | #N/A | Non F | NaN | 0.645 | 0.307 | 0.55 |
| iYGR222W    | 7  | 940786       | 10093  | #N/A | Non F | NaN | 0.561 | 0.443 | 0.6  |
| iYHR009C    | 8  | 125679 10243 | YHR0C  | #N/A | Dbl P | NaN | 0.642 | 0.74  | NaN  |
| iYHR071W    | 8  | 237741 10308 | YHR07  | #N/A | Sgl P | NaN | 0.562 | 0.236 | 0.51 |
| iYHR200W    | 8  | 499880       | 10432  | #N/A | Non F | NaN | 0.451 | 0.484 | 0.52 |
| iYIL043C    | 9  | 275048 10519 | YIL043 | #N/A | Sgl P | NaN | 0.478 | 0.401 | NaN  |
| iYIL051C    | 9  | 258290 10527 | YIL051 | #N/A | Dbl P | NaN | 0.104 | 0.495 | 0.91 |
| iYIL051C    | 9  | 258290 10527 | YIL051 | #N/A | Dbl P | NaN | 0.104 | 0.495 | 0.91 |
| iYIL108W    | 9  | 163065       | 10577  | #N/A | Non F | NaN | 0.734 | NaN   | 0.7  |
| iYIL110W    | 9  | 157184       | 10579  | #N/A | Non F | NaN | 0.863 | 0.582 | 0.35 |
| iYJL159W    | 10 | 121402       | 10838  | #N/A | Non F | NaN | 0.542 | 0.836 | 0.36 |
| iYJR099W    | 10 | 615964       | 10996  | #N/A | Non F | NaN | 0.407 | 0.369 | 0.24 |
| iYKL084W    | 11 | 280488 11145 | YKL08  | #N/A | Sgl P | NaN | 0.617 | NaN   | 0.26 |
| iYKL084W    | 11 | 280488 11145 | YKL08  | #N/A | Sgl P | NaN | 0.617 | NaN   | 0.26 |
| iYKL123W    | 11 | 212054       | 11183  | #N/A | Non F | NaN | NaN   | NaN   | NaN  |
| iYKL175W    | 11 | 120292       | 11234  | #N/A | Non F | NaN | 0.495 | NaN   | 0.22 |
| iYKR074W    | 11 | 579315       | 11362  | #N/A | Non F | NaN | 0.552 | 0.547 | 0.6  |
| iYKR103W    | 11 | 656359 11397 | YKR1C  | #N/A | Sgl P | NaN | 0.539 | 0.516 | 0.51 |
| iYLL006W    | 12 | 137840       | 11411  | #N/A | Non F | NaN | 0.585 | 0.443 | 0.3  |
| iYLR064W    | 12 | 266273       | 11534  | #N/A | Non F | NaN | 0.707 | NaN   | 0.35 |
| iYLR168C    | 12 | 500269 11639 | YLR16  | #N/A | Dbl P | NaN | 0.504 | 0.408 | 0.69 |
| iYLR271W    | 12 | 683546       | 11728  | #N/A | Non F | NaN | 0.362 | 0.451 | 0.11 |
| iYLR275W    | 12 | 694863       | 11732  | #N/A | Non F | NaN | 0.583 | 0.527 | 0.28 |
| iYLR313C    | 12 | 762407 11766 | YLR31  | #N/A | Sgl P | NaN | 0.7   | 0.994 | 0.7  |
| iYLR350W    | 12 | 829367       | 11796  | #N/A | Non F | NaN | 0.55  | NaN   | 0.4  |
| iYLRctau1   | 12 | 599890       | 11910  | #N/A | Non F | NaN | 0.468 | 0.322 | 0.73 |
| iYML055W    | 13 | 165361       | 11970  | #N/A | Non F | NaN | 0.638 | 0.482 | 0.28 |
| iYMR066W    | 13 | 404230       | 12114  | #N/A | Non F | NaN | 0.543 | 0.403 | 0.28 |
| iYMR084W    | 13 | 437426 12133 | YMR08  | #N/A | Sgl P | NaN | 0.386 | 0.937 | 0.78 |
| iYMR173W-A  | 13 | 610091       | 12221  | #N/A | Non F | NaN | 0.489 | NaN   | 0.53 |
| iYMR294W    | 13 | 858084 12342 | YMR29  | #N/A | Sgl P | NaN | 0.634 | 0.616 | 0.28 |
| iYNL030W    | 14 | 577077       | 12413  | #N/A | Non F | NaN | 0.554 | 0.494 | 0.36 |
| iYNL048W    | 14 | 539808       | 12430  | #N/A | Non F | NaN | 0.603 | 0.545 | 0.43 |
| iYNL051W    | 14 | 533902       | 12433  | #N/A | Non F | NaN | 0.581 | 0.725 | 0.41 |
| iYNL303W    | 14 | 61831        | 12660  | #N/A | Non F | NaN | 0.588 | NaN   | 0.25 |
| iCEN15      | 15 | 326722 7000  | YOR001 | #N/A | Sgl P | NaN | 0.565 | 0.476 | 0.23 |
| iYOR022C    | 15 | 375902 12976 | YOR02  | #N/A | Sgl P | NaN | 0.462 | 0.052 | 0.47 |

|            |    |        |       |       |      |       |     |       |       |      |
|------------|----|--------|-------|-------|------|-------|-----|-------|-------|------|
| iYOR037W   | 15 | 402662 |       | 12991 | #N/A | Non F | NaN | 0.489 | 0.477 | 0.48 |
| iYOR080W   | 15 | 476795 |       | 13034 | #N/A | Non F | NaN | 0.444 | 0.388 | 0.09 |
| iYOR352W   | 15 | 998238 |       | 13283 | #N/A | Non F | NaN | 0.398 | NaN   | NaN  |
| iYPL177C-1 | 16 | 214975 | 13500 | YPL17 | #N/A | Sgl P | NaN | 7E-06 | 0.866 | 0.08 |
| iYPR143W   | 16 | 819055 |       | 13736 | #N/A | Non F | NaN | 0.595 | 0.452 | 0.55 |
| iYPR178W   | 16 | 893712 |       | 13767 | #N/A | Non F | NaN | 0.654 | 0.504 | 0.52 |
| IntQ0185E  | 17 | 23752  |       | 7020  | #N/A | 0     | NaN | 0.435 | NaN   | NaN  |
| IntQ0185E  | 17 | 23752  |       | 7020  | #N/A | 0     | NaN | 0.435 | NaN   | NaN  |
| IntQ0280A  | 17 | 36940  |       | 7024  | #N/A | 0     | NaN | 0.446 | 0.505 | 0.23 |
| IntQ0280A  | 17 | 36940  |       | 7024  | #N/A | 0     | NaN | 0.446 | 0.505 | 0.23 |
| Q0270      | 17 | 34041  |       | 13875 | #N/A | 0     | NaN | 0.588 | 0.467 | 0.4  |
| Q0270      | 17 | 34041  |       | 13875 | #N/A | 0     | NaN | 0.588 | 0.467 | 0.4  |
| 21S rRNA2  | ## | #N/A   | #N/A  |       | #N/A | #N/A  | NaN | NaN   | 0.195 | NaN  |

|                          | <b>p value</b>                 |
|--------------------------|--------------------------------|
| <b>ABF1</b>              | <b>6.63 x 10<sup>-15</sup></b> |
| <b>FKH1</b>              | <b>1.27 x 10<sup>-4</sup></b>  |
| <b>REB1</b>              | <b>6.77 x 10<sup>-6</sup></b>  |
| <b>PHO4 (p&lt;0.001)</b> | <b>7.51 x 10<sup>-3</sup></b>  |
| <b>PHO4 (p&lt;0.005)</b> | <b>2.16 x 10<sup>-3</sup></b>  |

Supplemental Table 3. List of Genomic Loci Co-occupied by Htz1 and Relative Transcription Regulators.

(Transcription regulator occupancy cutoff, P&lt;0.001; Htz1 occupancy cutoff, MPR&gt;80%.)

| Intergenic name                                | Chrom | Start   | Gene name(s)                      | Subtype      |
|------------------------------------------------|-------|---------|-----------------------------------|--------------|
| <b>Segments occupied by both ABF1 and Htz1</b> |       |         |                                   |              |
| iYAL023C                                       | 1     | 108550  | YAL023C (PMT2)                    | Sgl Promoter |
| iYAL042W                                       | 1     | 62572   | YAL041W (CDC24)                   | Sgl Promoter |
| iYBL080C                                       | 2     | 74675   | YBL080C (PET112) YBL079W (NUP170) | Dbi Promoter |
| iYBR029C                                       | 2     | 297699  | YBR029C (CDS1) YBR030W            | Dbi Promoter |
| iYBR029C                                       | 2     | 297699  | YBR029C (CDS1) YBR030W            | Dbi Promoter |
| iYBR080C                                       | 2     | 400872  | YBR080C (SEC18)                   | Sgl Promoter |
| iYBR129C                                       | 2     | 495283  | YBR129C (OPY1)                    | Sgl Promoter |
| iYBR145W                                       | 2     | 534773  | YBR146W (MRPS9)                   | Sgl Promoter |
| iYBR283C                                       | 2     | 770371  | YBR283C (SSH1) YBR284W            | Dbi Promoter |
| iYCL011C                                       | 3     | 103354  | YCL011C (GBP2)                    | Sgl Promoter |
| iYCR081W                                       | 3     | 258642  | YCR082W                           | Sgl Promoter |
| iYDL106C                                       | 4     | 271887  | YDL106C (PHO2) YDL105W (QRI2)     | Dbi Promoter |
| iYDL117W                                       | 4     | 251242  | YDL116W (NUP84)                   | Sgl Promoter |
| iYDL145C                                       | 4     | 198182  | YDL145C (COP1)                    | Sgl Promoter |
| iYDL190C                                       | 4     | 121581  | YDL190C (UFD2) YDL189W            | Dbi Promoter |
| iYDR130C                                       | 4     | 716631  | YDR130C (FIN1)                    | Sgl Promoter |
| iYDR279W                                       | 4     | 1020436 | YDR280W (RRP45)                   | Sgl Promoter |
| iYDR283C                                       | 4     | 1030046 | YDR283C (GCN2)                    | Sgl Promoter |
| iYDR311W                                       | 4     | 1086991 | YDR312W (SSF2)                    | Sgl Promoter |
| iYDR326C                                       | 4     | 1124962 | YDR326C YDR327W                   | Dbi Promoter |
| iYDR329C                                       | 4     | 1127586 | YDR329C (PEX3) YDR330W            | Dbi Promoter |
| iYDR404C                                       | 4     | 1277164 | YDR404C (RPB7) YDR405W (MRP20)    | Dbi Promoter |
| iYDR454C                                       | 4     | 1366803 | YDR454C (GUK1)                    | Sgl Promoter |
| iYFL048C                                       | 6     | 40181   | YFL048C (EMP47) YFL047W (RGD2)    | Dbi Promoter |
| iYGL107C                                       | 7     | 306277  | YGL107C YGL106W (MLC1)            | Dbi Promoter |
| iYGL196W                                       | 7     | 131056  | YGL195W (GCN1)                    | Sgl Promoter |
| iYGL222C                                       | 7     | 81170   | YGL222C (EDC1)                    | Sgl Promoter |
| iYGL229C                                       | 7     | 66944   | YGL229C (SAP4) YGL228W (SHE10)    | Dbi Promoter |
| iYGR119C                                       | 7     | 729651  | YGR119C (NUP57)                   | Sgl Promoter |
| iYGR185C                                       | 7     | 867521  | YGR185C (TYS1) YGR186W (TFG1)     | Dbi Promoter |
| iYGR231C                                       | 7     | 953482  | YGR231C (PHB2) YGR232W (NAS6)     | Dbi Promoter |
| iYGR269W                                       | 7     | 1026957 | YGR270W (YTA7)                    | Sgl Promoter |
| iYHR077C                                       | 8     | 255637  | YHR077C (NMD2) YHR078W            | Dbi Promoter |
| iYHR090C                                       | 8     | 284616  | YHR090C (YNG2)                    | Sgl Promoter |
| iYHR115C                                       | 8     | 341362  | YHR115C YHR116W                   | Dbi Promoter |
| iYIL037C                                       | 9     | 285002  | YIL037C (PRM2) YIL036W (CST6)     | Dbi Promoter |
| iYIR022W                                       | 9     | 399227  | YIR023W (DAL81)                   | Sgl Promoter |
| iYJL008C                                       | 10    | 421359  | YJL008C (CCT8)                    | Sgl Promoter |
| iYJL063C                                       | 10    | 316165  | YJL063C (MRPL8) YJL062W (LAS21)   | Dbi Promoter |
| iYJL175W                                       | 10    | 94574   | YJL174W (KRE9)                    | Sgl Promoter |
| iYJL184W                                       | 10    | 83808   | YJL183W (MNN11)                   | Sgl Promoter |
| iYJR062C                                       | 10    | 554540  | YJR062C (NTA1) YJR063W (RPA12)    | Dbi Promoter |
| iYJR093C                                       | 10    | 603910  | YJR093C (FIP1)                    | Sgl Promoter |
| iYJR115W                                       | 10    | 640149  | YJR116W                           | Sgl Promoter |
| iYKL005C                                       | 11    | 434542  | YKL005C YKL004W (AUR1)            | Dbi Promoter |
| iYKL079W                                       | 11    | 288201  | YKL078W                           | Sgl Promoter |
| iYKL135C                                       | 11    | 188643  | YKL135C (APL2)                    | Sgl Promoter |
| iYKL144C                                       | 11    | 176487  | YKL144C (RPC25) YKL143W (LTV1)    | Dbi Promoter |
| iYKL167C                                       | 11    | 134135  | YKL167C (MRP49)                   | Sgl Promoter |
| iYKL196C                                       | 11    | 75528   | YKL196C (YKT6) YKL195W            | Dbi Promoter |
| iYKR081C                                       | 11    | 592177  | YKR081C (RPF2) YKR082W (NUP133)   | Dbi Promoter |
| iYLL034C                                       | 12    | 73140   | YLL034C YLL033W                   | Dbi Promoter |
| iYLR095C                                       | 12    | 332127  | YLR095C (IOC2) YLR096W (KIN2)     | Dbi Promoter |
| iYLR173W                                       | 12    | 504280  | YLR174W (IDP2)                    | Sgl Promoter |
| iYLR329W                                       | 12    | 787319  | YLR330W (CHS5)                    | Sgl Promoter |
| iYML081C-A                                     | 13    | 104159  | YML081C-A (ATP18) YML081W         | Dbi Promoter |
| iYMR004W                                       | 13    | 275551  | YMR005W (MPT1)                    | Sgl Promoter |
| iYMR032W                                       | 13    | 337353  | YMR033W (ARP9)                    | Sgl Promoter |
| iYMR128W                                       | 13    | 527484  | YMR129W (POM152)                  | Sgl Promoter |
| iYMR197C                                       | 13    | 659192  | YMR197C (VTI1) YMR198W (CIK1)     | Dbi Promoter |
| iYNL086W                                       | 14    | 466625  | YNL085W (MKT1)                    | Sgl Promoter |
| iYNL117W                                       | 14    | 408017  | YNL116W                           | Sgl Promoter |
| iYNL118C                                       | 14    | 405552  | YNL118C (DCP2) YNL117W (MLS1)     | Dbi Promoter |
| iYNL121C                                       | 14    | 400546  | YNL121C (TOM70)                   | Sgl Promoter |
| iYNL183C                                       | 14    | 295509  | YNL183C (NPR1)                    | Sgl Promoter |
| iYNL213C                                       | 14    | 247100  | YNL213C YNL212W (VID27)           | Dbi Promoter |
| iYNL258C                                       | 14    | 160359  | YNL258C (DSL1)                    | Sgl Promoter |
| iYNL307C                                       | 14    | 57584   | YNL307C (MCK1) YNL306W (MRPS18)   | Dbi Promoter |

|          |    |        |         |                        |              |
|----------|----|--------|---------|------------------------|--------------|
| iYNL313C | 14 | 48035  | YNL313C | YNL312W (RFA2)         | Dbl Promoter |
| iYNL322C | 14 | 34223  | YNL322C | (KRE1) YNL321W         | Dbl Promoter |
| iYNR037C | 14 | 695319 | YNR037C | (RSM19) YNR038W (DBP6) | Dbl Promoter |
| iYOL077C | 15 | 186729 | YOL077C | (BRX1) YOL076W (MDM20) | Dbl Promoter |
| iYOL117W | 15 | 99486  | YOL116W | (MSN1)                 | Sgl Promoter |
| iYOR116C | 15 | 544147 | YOR116C | (RPO31) YOR117W (RPT5) | Dbl Promoter |
| iYOR261C | 15 | 816926 | YOR261C | (RPN8) YOR262W         | Dbl Promoter |
| iYPR017C | 16 | 593917 | YPR017C | (DSS4) YPR018W (RLF2)  | Dbl Promoter |
| iYPR104C | 16 | 736415 | YPR104C | (FHL1)                 | Sgl Promoter |
| iYPR128C | 16 | 792208 | YPR128C | (ANT1) YPR129W (SCD6)  | Dbl Promoter |
| iYPR176C | 16 | 892067 | YPR176C | (BET2)                 | Sgl Promoter |
| iYPR186C | 16 | 911003 | YPR186C | (PZF1) YPR187W (RPO26) | Dbl Promoter |

**Segments occupied by both Fkh1 and Htz1**

|            |    |         |         |                         |              |
|------------|----|---------|---------|-------------------------|--------------|
| iYBL057C   | 2  | 113402  | YBL057C | YBL056W (PTC3)          | Dbl Promoter |
| iYBL082C   | 2  | 71143   | YBL082C | (RHK1) YBL081W          | Dbl Promoter |
| iYBR029C   | 2  | 297699  | YBR029C | (CDS1) YBR030W          | Dbl Promoter |
| iYBR029C   | 2  | 297699  | YBR029C | (CDS1) YBR030W          | Dbl Promoter |
| iYBR162W-A | 2  | 565382  | YBR163W | (DEM1)                  | Sgl Promoter |
| iYCR075C   | 3  | 248793  | YCR075C | (ERS1)                  | Sgl Promoter |
| iYDL018C   | 4  | 423491  | YDL018C | (ERP3) YDL017W (CDC7)   | Dbl Promoter |
| iYDR107C   | 4  | 671013  | YDR107C | YDR108W (GSG1)          | Dbl Promoter |
| iYER031C   | 5  | 214741  | YER031C | (YPT31) YER032W (FIR1)  | Dbl Promoter |
| iYER122C   | 5  | 404334  | YER122C | (GLO3) YER123W (YCK3)   | Dbl Promoter |
| iYER124C   | 5  | 409073  | YER124C | (DSE1) YER125W (RSP5)   | Dbl Promoter |
| iYFL038C   | 6  | 55977   | YFL038C | (YPT1) YFL037W (TUB2)   | Dbl Promoter |
| iYFR003C   | 6  | 153103  | YFR003C | YFR004W (RPN11)         | Dbl Promoter |
| iYFR018C   | 6  | 184207  | YFR018C | YFR019W (FAB1)          | Dbl Promoter |
| iYFR051C   | 6  | 251776  | YFR051C | (RET2) YFR052W (RPN12)  | Dbl Promoter |
| iYGR098C   | 7  | 687437  | YGR098C | (ESP1) YGR099W (TEL2)   | Dbl Promoter |
| iYGR171C   | 7  | 842532  | YGR171C | (MSM1)                  | Sgl Promoter |
| iYGR188C   | 7  | 875103  | YGR188C | (BUB1)                  | Sgl Promoter |
| iYGR269W   | 7  | 1026957 | YGR270W | (YTA7)                  | Sgl Promoter |
| iYHR116W   | 8  | 342124  | YHR117W | (TOM71)                 | Sgl Promoter |
| iYHR118C   | 8  | 345617  | YHR118C | (ORC6) YHR119W (SET1)   | Dbl Promoter |
| iYKR054C   | 11 | 547555  | YKR054C | (DYN1) YKR055W (RHO4)   | Dbl Promoter |
| iYLR209C   | 12 | 561732  | YLR209C | (PNP1) YLR210W (CLB4)   | Dbl Promoter |
| iYMR078C   | 13 | 424728  | YMR078C | (CTF18) YMR079W (SEC14) | Dbl Promoter |
| iYMR117C   | 13 | 501892  | YMR117C | (SPC24)                 | Sgl Promoter |
| iYMR183C   | 13 | 627816  | YMR183C | (SSO2) YMR184W          | Dbl Promoter |
| iYMR197C   | 13 | 659192  | YMR197C | (VTI1) YMR198W (CIK1)   | Dbl Promoter |
| iYMR214W   | 13 | 696480  | YMR215W |                         | Sgl Promoter |
| iYNL092W   | 14 | 452092  | YNL091W |                         | Sgl Promoter |
| iYOL024W   | 15 | 277606  | YOL023W | (IFM1)                  | Sgl Promoter |
| iYOR357C   | 15 | 1009706 | YOR357C | (GRD19) YOR358W (HAP5)  | Dbl Promoter |
| iYPL139C   | 16 | 291062  | YPL139C | (UME1)                  | Sgl Promoter |
| iYPL140C   | 16 | 289036  | YPL140C | (MKK2)                  | Sgl Promoter |
| iYPL155C   | 16 | 259322  | YPL155C | (KIP2)                  | Sgl Promoter |
| iYPL227C   | 16 | 121173  | YPL227C | (ALG5) YPL226W (NEW1)   | Dbl Promoter |
| iYPR076W   | 16 | 696847  | YPR075C |                         | Non Promoter |
| iYPR104C   | 16 | 736415  | YPR104C | (FHL1)                  | Sgl Promoter |

**Segments occupied by both Reb1 and Htz1**

|            |    |         |           |                        |              |
|------------|----|---------|-----------|------------------------|--------------|
| iSNR8      | 15 | 832523  | YOR271C   | YOR272W (YTM1)         | Dbl Promoter |
| iYAL031C   | 1  | 87046   | YAL031C   | (FUN21) YAL030W (SNC1) | Dbl Promoter |
| iYCR093W   | 3  | 286426  | YCR094W   | (CDC50)                | Sgl Promoter |
| iYDL188C   | 4  | 124984  | YDL188C   | (PPH22)                | Sgl Promoter |
| iYDL226C   | 4  | 52173   | YDL226C   | (GCS1) YDL225W (SHS1)  | Dbl Promoter |
| iYDR465C   | 4  | 1394567 | YDR465C   | (RMT2) YDR466W         | Dbl Promoter |
| iYER156C   | 5  | 484340  | YER156C   | YER157W (SEC34)        | Dbl Promoter |
| iYFL006W   | 6  | 129917  | YFL005W   | (SEC4)                 | Sgl Promoter |
| iYGL182C   | 7  | 157606  | YGL182C   | YGL181W (GTS1)         | Dbl Promoter |
| iYGR147C   | 7  | 786912  | YGR147C   | (NAT2)                 | Sgl Promoter |
| iYHR039C-B | 8  | 187676  | YHR039C-A | (VMA10) YHR040W        | Dbl Promoter |
| iYIL023C   | 9  | 310426  | YIL023C   | YIL022W (TIM44)        | Dbl Promoter |
| iYIL075C   | 9  | 220707  | YIL075C   | (RPN2)                 | Sgl Promoter |
| iYJL002C   | 10 | 434328  | YJL002C   | (OST1) YJL001W (PRE3)  | Dbl Promoter |
| iYJL106W-0 | 10 | 223042  | YJL105W   | (SET4)                 | Sgl Promoter |
| iYJR098C   | 10 | 614841  | YJR098C   | YJR099W (YUH1)         | Dbl Promoter |
| iYKL059C   | 11 | 329088  | YKL059C   | YKL058W (TOA2)         | Dbl Promoter |
| iYKL073W   | 11 | 298737  | YKL072W   | (STB6)                 | Sgl Promoter |
| iYKR068C   | 11 | 570535  | YKR068C   | (BET3) YKR069W (MET1)  | Dbl Promoter |
| iYLL040C   | 12 | 63648   | YLL040C   | (VPS13)                | Sgl Promoter |
| iYML002W   | 13 | 266749  | YML001W   | (YPT7)                 | Sgl Promoter |
| iYML129C   | 13 | 14746   | YML129C   | (COX14)                | Sgl Promoter |
| iYMR039C   | 13 | 349524  | YMR039C   | (SUB1) YMR040W         | Dbl Promoter |
| iYMR117C   | 13 | 501892  | YMR117C   | (SPC24)                | Sgl Promoter |



|          |    |        |                                 |              |
|----------|----|--------|---------------------------------|--------------|
| iYMR213W | 13 | 695143 | YMR214W (SCJ1)                  | Sgl Promoter |
| iYMR221C | 13 | 715459 | YMR221C                         | Sgl Promoter |
| iYNL091W | 14 | 456137 | YNL090W (RHO2)                  | Sgl Promoter |
| iYNL092W | 14 | 452092 | YNL091W                         | Sgl Promoter |
| iYNL284C | 14 | 104085 | YNL284C (MRPL10)                | Sgl Promoter |
| iYNR039C | 14 | 699417 | YNR039C (ZRG17) YNR040W         | Dbl Promoter |
| iYOL005C | 15 | 316190 | YOL005C (RPB11) YOL004W (SIN3)  | Dbl Promoter |
| iYOR074C | 15 | 467594 | YOR074C (CDC21) YOR075W (UFE1)  | Dbl Promoter |
| iYOR116C | 15 | 544147 | YOR116C (RPO31) YOR117W (RPT5)  | Dbl Promoter |
| iYOR149C | 15 | 611390 | YOR149C (SMP3) YOR150W (MRPL23) | Dbl Promoter |
| iYOR335C | 15 | 949088 | YOR335C (ALA1) YOR336W (KRE5)   | Dbl Promoter |
| iYPR054W | 16 | 667442 | YPR055W (SEC8)                  | Sgl Promoter |
| iYPR066W | 16 | 682114 | YPR067W (ISA2)                  | Sgl Promoter |
| iYPR163C | 16 | 869938 | YPR163C (TIF3) YPR164W (MMS1)   | Dbl Promoter |

**Segments occupied by both Pho4 and Htz1**

|            |    |         |                                  |              |
|------------|----|---------|----------------------------------|--------------|
| iYAR019C-0 | 1  | 175114  | YAR019C (CDC15)                  | Sgl Promoter |
| iYCL035C   | 3  | 61170   | YCL035C (GRX1) YCL034W (LSB5)    | Dbl Promoter |
| iYDR164C   | 4  | 784217  | YDR164C (SEC1) YDR165W           | Dbl Promoter |
| iYDR411C   | 4  | 1294370 | YDR411C YDR412W                  | Dbl Promoter |
| iYER128W   | 5  | 416459  | YER129W (PAK1)                   | Sgl Promoter |
| iYFL010C   | 6  | 115727  | YFL010C (WWM1) YFL009W (CDC4)    | Dbl Promoter |
| iYFR044C   | 6  | 241421  | YFR044C YFR045W                  | Dbl Promoter |
| iYGL059W   | 7  | 393551  | YGL058W (RAD6)                   | Sgl Promoter |
| iYGL100W   | 7  | 314269  | YGL099W (KRE35)                  | Sgl Promoter |
| iYHR131C   | 8  | 367859  | YHR131C                          | Sgl Promoter |
| iYIL037C   | 9  | 285002  | YIL037C (PRM2) YIL036W (CST6)    | Dbl Promoter |
| iYIL137C   | 9  | 92793   | YIL137C YIL136W (OM45)           | Dbl Promoter |
| iYJL173C   | 10 | 96512   | YJL173C (RFA3) YJL172W (CPS1)    | Dbl Promoter |
| iYJR098C   | 10 | 614841  | YJR098C YJR099W (YUH1)           | Dbl Promoter |
| iYKR084C   | 11 | 598512  | YKR084C (HBS1)                   | Sgl Promoter |
| iYLR382C   | 12 | 884751  | YLR382C (NAM2) YLR383W (RHC18)   | Dbl Promoter |
| iYLR438C-A | 12 | 1014165 | YLR438C-A (LSM3) YLR439W (MRPL4) | Dbl Promoter |
| iYMR222C   | 13 | 716295  | YMR222C YMR223W (UBP8)           | Dbl Promoter |
| iYNL028W   | 14 | 578999  | YNL027W (CRZ1)                   | Sgl Promoter |
| iYOR162C   | 15 | 641999  | YOR162C (YRR1) YOR163W (DDP1)    | Dbl Promoter |
| iYOR164C   | 15 | 644320  | YOR164C YOR165W                  | Dbl Promoter |

Type of file: table

Label: Zhang-Table-S4

Filename: Zhang-2005-S4.xls

| UniGeneID    | Promoter-gene          | chromosome | dist from left end 1 |
|--------------|------------------------|------------|----------------------|
| 18S          |                        | 12         | 456307               |
| 5S           |                        | 12         | 458700               |
| ACO1prom     |                        | 12         | 738020               |
| ACT1         |                        | 6          | 54116                |
| ACT1-2       |                        | 6          | 54339                |
| CEN10        | YJR001W                | 10         | 435996               |
| CEN11        | YKL001C (MET14)        | 11         | 439777               |
| CEN12        |                        | 12         | 150827               |
| CEN13        |                        | 13         | 268031               |
| CEN14        |                        | 14         | 628757               |
| CEN15        | YOR001W (RRP6)         | 15         | 326584               |
| CEN16        | YPR001W (CIT3)         | 16         | 555952               |
| CEN2         | YBL001C (ECM15)        | 2          | 238165               |
| CEN3         | YCR001W                | 3          | 113982               |
| CEN4         |                        | 4          | 449752               |
| CEN5         | YEL001C YER001W (MNN1) | 5          | 151960               |
| CEN6         | YFR001W (LOC1)         | 6          | 148503               |
| CEN7         | YGL001C (ERG26)        | 7          | 496914               |
| CEN8         | YHR001W (OSH7)         | 8          | 105579               |
| CEN9         |                        | 9          | 355626               |
| CLN2down     |                        | 16         | 63776                |
| CLN2ds       |                        | 16         | 64989                |
| CLN2prom     |                        | 16         | 67338                |
| CLN2promlb   |                        | 16         | 66859                |
| CTS1prom2    |                        | 12         | 710871               |
| CTS1promcc'2 |                        | 12         | 710830               |
| CWP1         |                        | 11         | 261378               |
| CWP1prom     |                        | 11         | 260527               |
| CWP2         |                        | 11         | 259167               |
| DPM1prom     |                        | 16         | 900745               |
| EGT2prom     |                        | 14         | 24097                |
| f650HO2      |                        | 4          | 48859                |
| f658SOD1     |                        | 10         | 623044               |
| FBP1         |                        | 12         | 875092               |
| FLO9         |                        | #N/A       |                      |
| FUN19        |                        | 1          | 81731                |
| FUN21        |                        | 1          | 86812                |
| FUS1prom     |                        | 3          | 71782                |
| GAL10        |                        | 2          | 278545               |
| GAL10ds      |                        | 2          | 276599               |
| GAL10prom1   |                        | 2          | 278690               |
| GAL10prom2   |                        | 2          | 278663               |
| GAL1prom     |                        | 2          | 279006               |
| GAL3dse      |                        | 4          | 465027               |
| GAL3prom     |                        | 4          | 463274               |
| GAL7prom     |                        | 2          | 275814               |
| GDH3orf-1    |                        | 1          | 32184                |
| GDH3orf-2    |                        | 1          | 32879                |
| GDH3prom     |                        | 1          | 31462                |
| HAM1         |                        | 10         | 569442               |

|               |                                |      |         |
|---------------|--------------------------------|------|---------|
| HAP3prom      |                                | 2    | 182315  |
| HHT1prom2     |                                | 2    | 256068  |
| HHT1tata      |                                | 2    | 256313  |
| HHT2prom      |                                | 14   | 576498  |
| HOurs1        |                                | 4    | 49507   |
| HOurs2        |                                | 4    | 48763   |
| HOurs2-2      |                                | 4    | 56714   |
| HSP150prom    |                                | 10   | 120428  |
| HSP30prom1    |                                | 3    | 157470  |
| HSP30prom2    |                                | 3    | 157778  |
| HTB1prom      |                                | #N/A |         |
| HTB2prom      |                                | 2    | 236199  |
| HTL1prom      |                                | 3    | 155357  |
| iCEN1         | YAL001C (TFC3) YAR002W (NUP60) | 1    | 151596  |
| iCEN10        | YJR001W                        | 10   | 436112  |
| iCEN11        | YKL001C (MET14)                | 11   | 439891  |
| iCEN12        |                                | 12   | 150946  |
| iCEN13        |                                | 13   | 268141  |
| iCEN15        | YOR001W (RRP6)                 | 15   | 326702  |
| iCEN16        | YPR001W (CIT3)                 | 16   | 556069  |
| iCEN2         | YBL001C (ECM15)                | 2    | 238281  |
| iCEN3         | YCR001W                        | 3    | 114094  |
| iCEN4         |                                | 4    | 449863  |
| iCEN5         | YEL001C YER001W (MNN1)         | 5    | 152113  |
| iCEN6         | YFR001W (LOC1)                 | 6    | 148621  |
| iCEN7         | YGL001C (ERG26)                | 7    | 497032  |
| iCEN8         | YHR001W (OSH7)                 | 8    | 105696  |
| iCEN9         |                                | 9    | 355743  |
| iCWP2         |                                | 11   | 259792  |
| IDH2prom      |                                | 15   | 580094  |
| iLSR1         | YBR230C                        | 2    | 681817  |
| INO1orf       |                                | 10   | 134731  |
| INO1prom      |                                | 10   | 136010  |
| IntYBL087C    | YBL088C (TEL1)                 | 2    | 60182   |
| IntYBR048W    | YBR048W (RPS11B)               | 2    | 332833  |
| IntYBR084C-A  |                                | 2    | 414708  |
| IntYCR097W-A2 | YCR096C (HMRA2) YCR097W (HMRA) | 3    | 292962  |
| IntYDL191W    | YDL191W (RPL35A)               | 4    | 117668  |
| IntYDR064W    | YDR064W (RPS13)                | 4    | 579520  |
| IntYDR381W    | YDR381W (YRA1)                 | 4    | 1236878 |
| IntYER133W    | YER132C (PMD1) YER133W (GLC7)  | 5    | 432670  |
| IntYGL103W    | YGL104C YGL103W (RPL28)        | 7    | 311014  |
| IntYGL178W    | YGL177W YGL178W (MPT5)         | 7    | 167359  |
| IntYHR010W    | YHR009C YHR010W (RPL27A)       | 8    | 126544  |
| IntYHR021C    |                                | 8    | 148108  |
| IntYJR079W    | YJR079W                        | 10   | 580037  |
| IntYNL112W    | YNL112W (DBP2)                 | 14   | 414912  |
| IntYNL302C    |                                | 14   | 62371   |
| IntYNR053C    | YNR052C (POP2)                 | 14   | 721779  |
| IntYPL081W    | YPL082C (MOT1) YPL081W (RPS9A) | 16   | 404953  |
| IntYPL143W    | YPL143W (RPL33A)               | 16   | 282141  |

|                    |                                 |    |         |
|--------------------|---------------------------------|----|---------|
| <b>iPOP5/FUN19</b> |                                 | 1  | 82512   |
| <b>IRA1</b>        |                                 | 2  | 516339  |
| <b>iRDN37-1</b>    | YLR154C                         | 12 | 458433  |
| <b>iRDN5-1</b>     | YLR154C                         | 12 | 459797  |
| <b>iRDN5-2</b>     | YLR154C                         | 12 | 468930  |
| <b>iRDN5-3</b>     |                                 | 12 | 472582  |
| <b>irpr1</b>       |                                 | 5  | 118035  |
| <b>iSCR1</b>       | YER137C ti(aau)e1               | 5  | 442412  |
| <b>isnR128</b>     | YJL148W (RPA34)                 | 10 | 139390  |
| <b>iSNR13</b>      | YDR472W (TRS31)                 | 4  | 1403076 |
| <b>isnR14</b>      | YER007C-A                       | 5  | 167585  |
| <b>iSNR189</b>     | YCR031C (RPS14A) YCR032W (BPH1) | 3  | 177526  |
| <b>iSNR190</b>     | YJL148W (RPA34)                 | 10 | 139648  |
| <b>iSNR33</b>      | YCR015C YCR016W                 | 3  | 142145  |
| <b>iSNR34</b>      |                                 | 12 | 899535  |
| <b>isnR37</b>      |                                 | 10 | 228297  |
| <b>iSNR4</b>       |                                 | 5  | 424880  |
| <b>iSNR42</b>      | YKR062W (TFA2)                  | 11 | 559005  |
| <b>iSNR44</b>      | YLR368W                         | 12 | 856918  |
| <b>iSNR46</b>      |                                 | 7  | 545559  |
| <b>iSNR47</b>      | YDR042C                         | 4  | 541701  |
| <b>iSNR48</b>      | YGR060W (ERG25)                 | 7  | 609690  |
| <b>iSNR50</b>      | YOL035C YOL034W                 | 15 | 259578  |
| <b>iSNR51</b>      |                                 | 16 | 718803  |
| <b>iSNR52</b>      | YER132C (PMD1) YER133W (GLC7)   | 5  | 431217  |
| <b>iSNR53</b>      | YEL050C (RML2) YEL049W (PAU2)   | 5  | 61789   |
| <b>iSNR54</b>      |                                 | 13 | 163620  |
| <b>iSNR55</b>      |                                 | 12 | 794793  |
| <b>iSNR56</b>      |                                 | 2  | 88268   |
| <b>iSNR57</b>      |                                 | 12 | 795023  |
| <b>iSNR58</b>      | YOL098C                         | 15 | 136182  |
| <b>iSNR59</b>      | YPL199C YPL198W (RPL7B)         | 16 | 173903  |
| <b>iSNR6</b>       |                                 | 12 | 366347  |
| <b>iSNR60</b>      | YJL048C                         | 10 | 348929  |
| <b>iSNR61</b>      |                                 | 12 | 794574  |
| <b>iSNR62</b>      | YOR043W (WHI2)                  | 15 | 409863  |
| <b>iSNR63</b>      |                                 | 4  | 323470  |
| <b>iSNR64</b>      | YKL211C (TRP3) YKL210W (UBA1)   | 11 | 38912   |
| <b>iSNR65</b>      | YCR030C                         | 3  | 176006  |
| <b>iSNR66</b>      | YNL025C (SSN8)                  | 14 | 586173  |
| <b>iSNR67</b>      | YEL050C (RML2) YEL049W (PAU2)   | 5  | 61433   |
| <b>iSNR68</b>      | YIL135C YIL134W (FLX1)          | 9  | 97246   |
| <b>iSNR69</b>      | YKL038W (RGT1)                  | 11 | 364518  |
| <b>iSNR70</b>      |                                 | 16 | 719048  |
| <b>iSNR71</b>      |                                 | 8  | 411317  |
| <b>iSNR7-S</b>     | YGR221C (TOS2) YGR222W (PET54)  | 7  | 939665  |
| <b>iSNR8</b>       | YOR271C YOR272W (YTM1)          | 15 | 832516  |
| <b>itA(AGC)D</b>   | YDL024C (DIA3)                  | 4  | 410492  |
| <b>itA(AGC)F</b>   | YFR025C (HIS2)                  | 6  | 204983  |
| <b>itA(AGC)G</b>   | YGR143W (SKN1)                  | 7  | 774415  |
| <b>itA(AGC)K1</b>  | YKL117W (SBA1)                  | 11 | 219613  |



|             |                                 |    |         |
|-------------|---------------------------------|----|---------|
| itA(AGC)M1  | YMR023C (MSS1) YMR024W (MRPL3)  | 13 | 321218  |
| itA(AGC)M2  | YMR247C YMR250W (GAD1)          | 13 | 768440  |
| itA(AGC)P   | YPR159W (KRE6)                  | 16 | 856969  |
| itA(UGC)A   | YAR010C                         | 1  | 166340  |
| itA(UGC)E   | YER075C (PTP3)                  | 5  | 312091  |
| itA(UGC)G   | YGR150C                         | 7  | 794483  |
| itA(UGC)L   | YLR035C (MLH2)                  | 12 | 214956  |
| itC(GCA)B   | YBR210W                         | 2  | 643033  |
| itC(GCA)P1  |                                 | 16 | 435959  |
| itC(GCA)P2  | YPR120C (CLB5) YPR121W (THI22)  | 16 | 775833  |
| itD(GUC)B   | YBR081C (SPT7)                  | 2  | 405985  |
| itD(GUC)D   | YDR058C (TGL2)                  | 4  | 569075  |
| itD(GUC)G1  |                                 | 7  | 531675  |
| itD(GUC)G2  |                                 | 7  | 544642  |
| itD(GUC)I2  | YIL009C-A (EST3) YIL009W (FAA3) | 9  | 336417  |
| itD(GUC)J1  | YJL112W (MDV1)                  | 10 | 204503  |
| itD(GUC)J2  | YJL045W                         | 10 | 355223  |
| itD(GUC)J4  |                                 | 10 | 541267  |
| itD(GUC)K   | YKR038C YKR039W (GAP1)          | 11 | 513043  |
| itD(GUC)L1  | YLR143W                         | 12 | 427204  |
| itD(GUC)L2  |                                 | 12 | 793988  |
| itD(GUC)M   | YMR098C                         | 13 | 463624  |
| itE(CUC)D-0 | YDR278C YDR279W                 | 4  | 1017314 |
| itE(CUC)D-1 | YDR278C YDR279W                 | 4  | 1018359 |
| itE(CUC)I   |                                 | 9  | 197660  |
| itE(UUC)B   | YBR210W                         | 2  | 645193  |
| itE(UUC)C   | YCL022C YCL020W                 | 3  | 82495   |
| itE(UUC)E1  | YER012W (PRE1)                  | 5  | 177169  |
| itE(UUC)E2  | YER097W                         | 5  | 355001  |
| itE(UUC)E3  |                                 | 5  | 487398  |
| itE(UUC)G1  |                                 | 7  | 328652  |
| itE(UUC)G3  | YGR028W (MSP1)                  | 7  | 541915  |
| itE(UUC)I   | YIR006C (PAN1) YIR007W          | 9  | 370485  |
| itE(UUC)J   | YJL162C YJL161W                 | 10 | 116004  |
| itE(UUC)K   | YKL165C (MCD4)                  | 11 | 141094  |
| itE(UUC)L   | YLR334C YLR335W (NUP2)          | 12 | 797248  |
| itE(UUC)M   | YMR012W (CLU1)                  | 13 | 290871  |
| itE(UUC)P   | YPL178W (CBC2)                  | 16 | 210262  |
| itF(GAA)B   |                                 | 2  | 36476   |
| itF(GAA)D   | YDR316W-A                       | 4  | 1095498 |
| itF(GAA)F   | YFR007W                         | 6  | 158000  |
| itF(GAA)G   |                                 | 7  | 440803  |
| itF(GAA)H2  | YHR125W                         | 8  | 358571  |
| itF(GAA)M   | YMR041C YMR042W (ARG80)         | 13 | 352369  |
| itF(GAA)N   | YNL133C (FYV6) YNL132W (KRE33)  | 14 | 374958  |
| itF(GAA)P1  |                                 | 16 | 560284  |
| itG(CCC)D   | YDR390C (UBA2)                  | 4  | 1257113 |
| itG(GCC)D1  | YDL211C YDL210W (UGA4)          | 4  | 83619   |
| itG(GCC)D2  | YDR261C-C YDR262W               | 4  | 992938  |
| itG(GCC)E   | YEL050C (RML2) YEL049W (PAU2)   | 5  | 61960   |
| itG(GCC)F1  | YFR009W (GCN20)                 | 6  | 162291  |

|            |                                |    |         |
|------------|--------------------------------|----|---------|
| itG(GCC)F2 | YFR016C                        | 6  | 181035  |
| itG(GCC)G1 |                                | 7  | 845713  |
| itG(GCC)G2 | YGR218W (CRM1)                 | 7  | 931015  |
| itG(GCC)J1 | YJL024C (APS3)                 | 10 | 396492  |
| itG(GCC)J2 | YJR052W (RAD7)                 | 10 | 531586  |
| itG(GCC)M  | YML045W-A                      | 13 | 183968  |
| itG(GCC)O2 | YOL022C                        | 15 | 282234  |
| itG(GCC)P2 | YPR160W (GPH1)                 | 16 | 860444  |
| itG(UCC)G  | YGR144W (THI4)                 | 7  | 779681  |
| itG(UCC)N  | YNL285W                        | 14 | 96310   |
| itG(UCC)O  |                                | 15 | 111032  |
| itH(GUG)E1 |                                | 5  | 207427  |
| itH(GUG)G1 |                                | 7  | 110698  |
| itH(GUG)G2 | YGL097W (SRM1)                 | 7  | 319850  |
| itH(GUG)H  | YHL023C                        | 8  | 62823   |
| itH(GUG)K  | YKL067W (YNK1)                 | 11 | 313117  |
| itH(GUG)M  |                                | 13 | 363134  |
| itI(AAU)E1 | YER137C                        | 5  | 443272  |
| itI(AAU)E2 | YER180C (ISC10)                | 5  | 551354  |
| itI(AAU)G  | YGR123C (PPT1) YGR124W (ASN2)  | 7  | 739189  |
| itI(AAU)I1 | YIL096C YIL095W (PRK1)         | 9  | 183510  |
| itI(AAU)I2 |                                | 9  | 210735  |
| itI(AAU)L1 |                                | 12 | 734875  |
| itI(AAU)L2 | YLR455W                        | 12 | 1052139 |
| itI(AAU)N1 | YNL035C YNL034W                | 14 | 569938  |
| itI(AAU)N2 | YNL017C                        | 14 | 602383  |
| itI(AAU)P1 |                                | 16 | 819597  |
| itI(UAU)D  | YDR211W (GCD6)                 | 4  | 884530  |
| itI(UAU)L  |                                | 12 | 605432  |
| itK(CUU)C  | YCR018C (SRD1)                 | 3  | 151062  |
| itK(CUU)D1 | YDR363W-A (SEM1)               | 4  | 1201856 |
| itK(CUU)D2 | YDR445C YDR446W (ECM11)        | 4  | 1352572 |
| itK(CUU)E1 | YEL010W                        | 5  | 135497  |
| itK(CUU)E2 |                                | 5  | 435821  |
| itK(CUU)G1 | YGL201C (MCM6)                 | 7  | 122343  |
| itK(CUU)G2 | YGL170C (SPO74) YGL169W (SUA5) | 7  | 185790  |
| itK(CUU)G3 | YGR188C (BUB1)                 | 7  | 876460  |
| itK(CUU)I  | YIL030C (SSM4)                 | 9  | 300298  |
| itK(CUU)J  | YJL011C                        | 10 | 414726  |
| itK(CUU)K  | YKL128C (PMU1) YKL127W (PGM1)  | 11 | 202717  |
| itK(CUU)M  | YMR106C (YKU80) YMR107W        | 13 | 480692  |
| itK(UUU)D  |                                | 4  | 359671  |
| itK(UUU)G1 | YGL203C (KEX1) YGL202W (ARO8)  | 7  | 115585  |
| itK(UUU)K  | YKR073C YKR074W                | 11 | 578699  |
| itK(UUU)L  | YLR377C (FBP1)                 | 12 | 875469  |
| itK(UUU)O  | YOR058C (ASE1)                 | 15 | 438739  |
| itL(CAA)A  | YAR023C YAR027W (UIP3)         | 1  | 181249  |
| itL(CAA)C  | YCL018W (LEU2)                 | 3  | 90587   |
| itL(CAA)D  | YDR506C                        | 4  | 1461877 |
| itL(CAA)G2 | YGL040C (HEM2) YGL039W         | 7  | 423202  |
| itL(CAA)G3 | YGR180C (RNR4) YGR181W (TIM13) | 7  | 857485  |

|             |                               |    |         |
|-------------|-------------------------------|----|---------|
| itL(CAA)K   | YKR009C (FOX2)                | 11 | 458311  |
| itL(CAA)L   |                               | 12 | 628497  |
| itL(CAA)M   | YMR118C YMR119W (ASI1)        | 13 | 505007  |
| itL(GAG)G   | YGR106C YGR107W               | 7  | 700750  |
| itL(UAA)B1  |                               | 2  | 9666    |
| itL(UAA)B2  | YBR055C (PRP6) YBR056W        | 2  | 347642  |
| itL(UAA)D   | YDR034C (LYS14)               | 4  | 519865  |
| itL(UAA)J   | YJL006C (CTK2) YJL005W (CYR1) | 10 | 424203  |
| itL(UAA)K   | YKL189W (HYM1)                | 11 | 84296   |
| itL(UAA)L   | YLR420W (URA4)                | 12 | 963049  |
| itL(UAG)J   | YJR100C YJR101W (RSM26)       | 10 | 617707  |
| itL(UAG)L1  | YLR227C (ADY4) YLR227W-A      | 12 | 592619  |
| itL(C1)     | YBR035C (PDX3)                | 2  | 308843  |
| itM(CAU)C   | YCR018C (SRD1)                | 3  | 149697  |
| itM(CAU)D   | YDR349C (YPS7)                | 4  | 1175936 |
| itM(CAU)E   | YEL027W (CUP5)                | 5  | 100204  |
| itM(CAU)J1  | YJL029C (VPS53) YJL028W       | 10 | 390811  |
| itM(CAU)J2  | YJL007C                       | 10 | 422697  |
| itM(CAU)J3  | YJR043C (POL32)               | 10 | 517572  |
| itM(CAU)M   |                               | 13 | 572954  |
| itM(CAU)O1  | YOR192C YOR193W               | 15 | 710270  |
| itM(CAU)O2  | YOR343C                       | 15 | 976484  |
| itM(CAU)P   | YPL112C YPL111W (CAR1)        | 16 | 338918  |
| itN(GUU)C   | YCR007C YCR008W (SAT4)        | 3  | 127390  |
| itN(GUU)F   | YFL003C (MSH4) YFL002W-B      | 6  | 137553  |
| itN(GUU)G   | YGR120C (SEC35)               | 7  | 731204  |
| itN(GUU)K   | YKL197C (PEX1)                | 11 | 74702   |
| itN(GUU)L   | YLR425W (TUS1)                | 12 | 976050  |
| itN(GUU)N1  | YNL284C-A                     | 14 | 102787  |
| itN(GUU)N2  | YNR001C (CIT1)                | 14 | 632671  |
| itN(GUU)O1  | YOL055C (THI20) YOL054W       | 15 | 228402  |
| itN(GUU)O2  | YOR086C YOR087W               | 15 | 487512  |
| itN(GUU)P   |                               | 16 | 810744  |
| itP(AGG)C   | YCR006C                       | 3  | 123249  |
| itP(AGG)N   | YNR001C (CIT1)                | 14 | 631916  |
| itP(UGG)A   | YAL007C (ERP2) YAL004W        | 1  | 139257  |
| itP(UGG)F   | YFL019C                       | 6  | 101472  |
| itP(UGG)L-0 | YLL025W                       | 12 | 92649   |
| itP(UGG)M   | YML041C YML040W               | 13 | 196170  |
| itP(UGG)N1  | YNL043C YNL042W (BOP3)        | 14 | 547194  |
| itP(UGG)N2  |                               | 14 | 568215  |
| itP(UGG)O1  |                               | 15 | 301198  |
| itP(UGG)O2  | YOR073W                       | 15 | 464551  |
| itQ(CUG)M   | YMR271C (URA10)               | 13 | 808317  |
| itQ(UUG)B   |                               | 2  | 350854  |
| itQ(UUG)C   | YCR027C (RHB1)                | 3  | 168086  |
| itQ(UUG)D1  | YDR034C-A YDR034W-B           | 4  | 521082  |
| itQ(UUG)D2  | YDR098C (GRX3)                | 4  | 645262  |
| itQ(UUG)D3  | YDR170C (SEC7) YDR170W-A      | 4  | 802840  |
| itQ(UUG)E1  | YER048C (CAJ1) YER048W-A      | 5  | 250356  |
| itQ(UUG)E2  | YEL012W (UBC8)                | 5  | 131153  |

|             |                                  |    |         |
|-------------|----------------------------------|----|---------|
| itQ(UUG)H   | YHR015W (MIP6)                   | 8  | 134383  |
| itQ(UUG)L   | YLR154C                          | 12 | 448722  |
| itR(ACG)D-0 | YDR088C (SLU7) YDR089W           | 4  | 620079  |
| itR(ACG)D-1 | YDR088C (SLU7) YDR089W           | 4  | 621114  |
| itR(ACG)J   |                                  | 10 | 233708  |
| itR(ACG)K   | YKR026C (GCN3) YKR027W           | 11 | 490681  |
| itR(ACG)L   |                                  | 12 | 374428  |
| itR(ACG)O   | YOR007C (SGT2)                   | 15 | 340371  |
| itR(CCG)L   | YLR344W (RPL26A)                 | 12 | 818679  |
| itR(CCU)J   | YJR055W (HIT1)                   | 10 | 538314  |
| itR(UCU)E   |                                  | 5  | 138737  |
| itR(UCU)G1  | YGL050W                          | 7  | 405538  |
| itR(UCU)G2  | YGR165W                          | 7  | 828788  |
| itR(UCU)J2  | YJL039C (NUP192)                 | 10 | 374273  |
| itR(UCU)K   | YKL153W                          | 11 | 162563  |
| itR(UCU)M1  |                                  | 13 | 747962  |
| itR(UCU)M2  | YML071C (DOR1) YML070W (DAK1)    | 13 | 131896  |
| itS(AGA)B   | YBL004W                          | 2  | 227115  |
| itS(AGA)D1  | YDL007W (RPT2)                   | 4  | 437894  |
| itS(AGA)D2  | YDR261C (EXG2) YDR261W-A         | 4  | 981091  |
| itS(AGA)D3  | YDR420W (HKR1)                   | 4  | 1305746 |
| itS(AGA)E   | YEL032W (MCM3)                   | 5  | 86685   |
| itS(AGA)G   |                                  | 7  | 561737  |
| itS(AGA)H   | YHR015W (MIP6)                   | 8  | 133098  |
| itS(AGA)J   |                                  | 10 | 523781  |
| itS(AGA)M   | YML006C (GIS4) YML005W           | 13 | 259239  |
| itS(GCU)F   | YFR020W                          | 6  | 191600  |
| itS(GCU)L   | YLR327C YLR328W                  | 12 | 784452  |
| itS(GCU)O   | YOL026C YOL025W (LAG2)           | 15 | 274773  |
| itS(UGA)E-0 | YER065C (ICL1) YER066W           | 5  | 288522  |
| itS(UGA)E-1 | YER065C (ICL1) YER066W           | 5  | 289381  |
| itS(UGA)I   | YIL057C YIL056W                  | 9  | 248928  |
| itS(UGA)P   | YPR072W (NOT5)                   | 16 | 689641  |
| itT(AGU)B   | YBR013C                          | 2  | 266406  |
| itT(AGU)C   |                                  | 3  | 294278  |
| itT(AGU)D   | YDL007W (RPT2)                   | 4  | 434377  |
| itT(AGU)H   | YHR005C-A (MRS11) YHR006W (STP2) | 8  | 116172  |
| itT(AGU)I1  | YIL102C                          | 9  | 175100  |
| itT(AGU)I2  | YIL015C-A YIL014W (MNT3)         | 9  | 325818  |
| itT(AGU)J   | YJL200C                          | 10 | 59172   |
| itT(AGU)N1  | YNL284C (MRPL10)                 | 14 | 104875  |
| itT(AGU)N2  |                                  | 14 | 560763  |
| itT(AGU)O1  |                                  | 15 | 113873  |
| itT(CGU)K   | YKL209C (STE6) YKL208W (CBT1)    | 11 | 46807   |
| itT(UGU)G1  | YGR090W                          | 7  | 661814  |
| itT(UGU)G2  | YGR255C (COQ6) YGR256W (GND2)    | 7  | 1004283 |
| itT(UGU)H   | YHR181W                          | 8  | 467056  |
| itT(UGU)P   | YPR109W                          | 16 | 744352  |
| itV(AAC)E1  | YER135C YER136W (GDI1)           | 5  | 438770  |
| itV(AAC)E2  |                                  | 5  | 469526  |
| itV(AAC)G1  | YGL046W                          | 7  | 412364  |

|              |                                |    |         |
|--------------|--------------------------------|----|---------|
| itV(AAC)G2   | YGR161C-C YGR162W (TIF4631)    | 7  | 823549  |
| itV(AAC)G3-0 | YGL225W (VRG4)                 | 7  | 73900   |
| itV(AAC)J    | YJL036W (SNX4)                 | 10 | 378129  |
| itV(AAC)K1-0 | YKL068W (NUP100)               | 11 | 307862  |
| itV(AAC)K2   |                                | 11 | 379394  |
| itV(AAC)L    | YLR272C (YCS4)                 | 12 | 687932  |
| itV(AAC)M1   | YMR049C (ERB1)                 | 13 | 372517  |
| itV(AAC)M2   | YMR076C (PDS5)                 | 13 | 420660  |
| itV(AAC)M3   | YMR163C                        | 13 | 586708  |
| itV(AAC)O    |                                | 15 | 663883  |
| itV(CAC)D    | YDR306C YDR307W                | 4  | 1075580 |
| itV(UAC)B    | YBR044C (TCM62)                | 2  | 326822  |
| itV(UAC)D    | YDR022C (CIS1) YDR023W (SES1)  | 4  | 488910  |
| itW(CCA)G1   |                                | 7  | 287456  |
| itW(CCA)G2   | YGR189C (CRH1)                 | 7  | 878809  |
| itW(CCA)J    | YJL011C                        | 10 | 415724  |
| itW(CCA)K-0  | YKL071W                        | 11 | 302668  |
| itW(CCA)K-1  | YKL071W                        | 11 | 303713  |
| itW(CCA)M    | YMR051C YMR052W (FAR3)         | 13 | 379407  |
| itY(GUA)D    | YDR242W (AMD2)                 | 4  | 946436  |
| itY(GUA)F1   | YFR011C YFR012W                | 6  | 167517  |
| itY(GUA)F2   | YFR028C (CDC14) YFR029W (PTR3) | 6  | 210694  |
| itY(GUA)J1   | YJL045W                        | 10 | 354028  |
| itY(GUA)J2   | YJR056C YJR057W (CDC8)         | 10 | 542732  |
| itY(GUA)M1   | YML054C (CYB2)                 | 13 | 168883  |
| itY(GUA)M2   | YMR283C (RIT1) YMR284W (YKU70) | 13 | 838016  |
| itY(GUA)O    | YOL019W (TOS7)                 | 15 | 288280  |
| iYAL001C     | YAL001C (TFC3) YAR002W (NUP60) | 1  | 151168  |
| iYAL002W     |                                | 1  | 147533  |
| iYAL003W     | YAL002W (VPS8)                 | 1  | 143163  |
| iYAL004W     | YAL005C (SSA1) YAL003W (EFB1)  | 1  | 141410  |
| iYAL007C     | YAL007C (ERP2) YAL004W         | 1  | 138348  |
| iYAL008W     |                                | 1  | 137513  |
| iYAL009W     | YAL008W (FUN14)                | 1  | 136636  |
| iYAL010C     | YAL010C (MDM10) YAL009W (SPO7) | 1  | 135668  |
| iYAL011W     |                                | 1  | 134080  |
| iYAL013W     | YAL012W (CYS3)                 | 1  | 130361  |
| iYAL014C     | YAL014C (UIP2) YAL013W (DEP1)  | 1  | 129022  |
| iYAL015C     | YAL015C (NTG1)                 | 1  | 128106  |
| iYAL016W     |                                | 1  | 126790  |
| iYAL017W     | YAL016W (TPD3)                 | 1  | 124299  |
| iYAL018C     | YAL018C YAL017W (FUN31)        | 1  | 119545  |
| iYAL019W     |                                | 1  | 118318  |
| iYAL020C     | YAL020C (ATS1) YAL019W (FUN30) | 1  | 114619  |
| iYAL021C     | YAL021C (CCR4)                 | 1  | 113363  |
| iYAL022C     | YAL022C (FUN26)                | 1  | 110434  |
| iYAL023C     | YAL023C (PMT2)                 | 1  | 108555  |
| iYAL025C     | YAL025C (MAK16)                | 1  | 101152  |
| iYAL026C     | YAL026C (DRS2)                 | 1  | 99704   |
| iYAL027W     |                                | 1  | 95479   |
| iYAL028W     | YAL027W                        | 1  | 94493   |



|              |                                  |   |        |
|--------------|----------------------------------|---|--------|
| iYAL029C     | YAL029C (MYO4) YAL028W           | 1 | 92277  |
| iYAL030W     |                                  | 1 | 87759  |
| iYAL031C     | YAL031C (FUN21) YAL030W (SNC1)   | 1 | 87038  |
| iYAL032C     | YAL032C (PRP45)                  | 1 | 84481  |
| iYAL033W     |                                  | 1 | 83234  |
| iYAL034C     | YAL034C (FUN19) YAL033W (POP5)   | 1 | 82108  |
| iYAL034W-A   |                                  | 1 | 80594  |
| iYAL036C     | YAL036C (FUN11) YAL035W (FUN12)  | 1 | 76159  |
| iYAL037W     |                                  | 1 | 74830  |
| iYAL038W     | YAL037W                          | 1 | 73295  |
| iYAL039C-0   | YAL039C (CYC3) YAL038W (CDC19)   | 1 | 69532  |
| iYAL039C-1   | YAL039C (CYC3) YAL038W (CDC19)   | 1 | 70662  |
| iYAL040C     | YAL040C (CLN3)                   | 1 | 67527  |
| iYAL041W     |                                  | 1 | 65411  |
| iYAL042W     | YAL041W (CDC24)                  | 1 | 62570  |
| iYAL043C     | YAL043C (PTA1)                   | 1 | 61059  |
| iYAL044C     | YAL044C (GCV3)                   | 1 | 58490  |
| iYAL045C     | YAL045C                          | 1 | 57803  |
| iYAL046C     | YAL046C                          | 1 | 57392  |
| iYAL047C     | YAL047C (SPC72)                  | 1 | 56864  |
| iYAL048C     | YAL048C                          | 1 | 54796  |
| iYAL049C     | YAL049C                          | 1 | 52602  |
| iYAL051W     |                                  | 1 | 51757  |
| iYAL053W     | YAL051W (OAF1)                   | 1 | 48255  |
| iYAL054C     | YAL054C (ACS1) YAL053W           | 1 | 45027  |
| iYAL055W     |                                  | 1 | 42724  |
| iYAL056W     | YAL055W (PEX22)                  | 1 | 41808  |
| iYAL058C-A   | YAL058C-A (KRE20) YAL056W (KRH1) | 1 | 39052  |
| iYAL059W     | YAL058W (CNE1)                   | 1 | 37153  |
| iYAL060W     | YAL059W (ECM1)                   | 1 | 36309  |
| iYAL061W     | YAL060W (BDH1)                   | 1 | 34707  |
| iYAL062W     | YAL061W                          | 1 | 32946  |
| iYAL063C-0   | YAL063C (FLO9) YAL062W (GDH3)    | 1 | 27969  |
| iYAL063C-1   | YAL063C (FLO9) YAL062W (GDH3)    | 1 | 29170  |
| iYAL064C-A-0 | YAL064C-A YAL064W                | 1 | 13744  |
| iYAL064C-A-1 | YAL064C-A YAL064W                | 1 | 15041  |
| iYAL064C-A-2 | YAL064C-A YAL064W                | 1 | 16338  |
| iYAL064C-A-3 | YAL064C-A YAL064W                | 1 | 17635  |
| iYAL064C-A-4 | YAL064C-A YAL064W                | 1 | 18932  |
| iYAL064C-A-5 | YAL064C-A YAL064W                | 1 | 20229  |
| iYAL064W     |                                  | 1 | 21852  |
| iYAL065C     | YAL065C YAL064W-B                | 1 | 11952  |
| iYAL066W     |                                  | 1 | 10400  |
| iYAL067C     | YAL067C (SEO1) YAL066W           | 1 | 9017   |
| iYAL068C-0   | YAL068C                          | 1 | 2169   |
| iYAL068C-2   | YAL068C                          | 1 | 4701   |
| iYAL069W     |                                  | 1 | 649    |
| iYALCdelta2  | YAL007C (ERP2) YAL004W           | 1 | 138995 |
| iYALWdelta1  |                                  | 1 | 22554  |
| iYAR002C-A   | YAR002C-A (ERP1) YAR003W (SWD1   | 1 | 154726 |
| iYAR002W     |                                  | 1 | 153878 |

|               |                                      |   |        |
|---------------|--------------------------------------|---|--------|
| iYAR003W      |                                      | 1 | 156287 |
| iYAR007C      | YAR007C (RFA1) YAR008W (SEN34)       | 1 | 158621 |
| iYAR008W      |                                      | 1 | 159794 |
| iYAR009C      | YAR009C                              | 1 | 164188 |
| iYAR014C      | YAR014C (BUD14) YAR015W (ADE1)       | 1 | 168867 |
| iYAR015W      |                                      | 1 | 170291 |
| iYAR019C-0    | YAR019C (CDC15)                      | 1 | 175134 |
| iYAR019C-1    | YAR019C (CDC15)                      | 1 | 175994 |
| iYAR020C-0    | YAR020C (PAU7)                       | 1 | 177022 |
| iYAR020C-1    | YAR020C (PAU7)                       | 1 | 178151 |
| iYAR023C      | YAR023C tl(caa)a/ts(aga)a YAR027W (l | 1 | 179819 |
| iYAR027W      | YAR028W                              | 1 | 184472 |
| iYAR028W      | YAR029W                              | 1 | 185591 |
| iYAR031W      | YAR033W                              | 1 | 187727 |
| iYAR033W      | YAR035W (YAT1)                       | 1 | 188806 |
| iYAR035W      | YAR042W (SWH1)                       | 1 | 192251 |
| iYAR042W      | YAR044W (OSH1)                       | 1 | 193384 |
| iYAR044W-0    |                                      | 1 | 196179 |
| iYAR044W-1    |                                      | 1 | 197499 |
| iYAR044W-2    |                                      | 1 | 198819 |
| iYAR044W-3    |                                      | 1 | 200139 |
| iYAR047C-0    | YAR047C YAR050W (FLO1)               | 1 | 201780 |
| iYAR047C-1    | YAR047C YAR050W (FLO1)               | 1 | 202587 |
| iYAR050W      | YAR053W                              | 1 | 208007 |
| iYAR053W      |                                      | 1 | 208654 |
| iYAR060C      | YAR060C YAR061W                      | 1 | 217484 |
| iYAR061W      | YAR062W                              | 1 | 218335 |
| iYAR062W      | YAR064W                              | 1 | 219137 |
| iYAR064W      | YAR066W                              | 1 | 220489 |
| iYAR066W      | YAR068W                              | 1 | 221652 |
| iYAR068W      |                                      | 1 | 222883 |
| iYAR069C      | YAR069C                              | 1 | 224296 |
| iYAR070C      | YAR070C YAR071W (PHO11)              | 1 | 224854 |
| iYAR071W      | YAR073W (IMD1)                       | 1 | 226855 |
| iYARCdelta5   | YAR010C                              | 1 | 166163 |
| iYARCdelta8-0 |                                      | 1 | 209769 |
| iYARCdelta8-1 |                                      | 1 | 211245 |
| iYARCdelta8-2 |                                      | 1 | 212721 |
| iYARCdelta8-3 |                                      | 1 | 214197 |
| iYARCdelta8-4 |                                      | 1 | 215673 |
| iYARWdelta6   | YAR023C YAR027W (UIP3)               | 1 | 183469 |
| iYARWdelta7   | YAR035W (YAT1)                       | 1 | 189752 |
| iYARWsigma1   | YAR023C YAR027W (UIP3)               | 1 | 182954 |
| iYBL001C      | YBL001C (ECM15)                      | 2 | 237425 |
| iYBL002W      |                                      | 2 | 236846 |
| iYBL003C      | YBL003C (HTA2) YBL002W (HTB2)        | 2 | 235751 |
| iYBL004W      |                                      | 2 | 235076 |
| iYBL005W      | YBL005W-A                            | 2 | 220359 |
| iYBL006C      | YBL006C YBL005W (PDR3)               | 2 | 217088 |
| iYBL007C      | YBL007C (SLA1)                       | 2 | 216324 |
| iYBL008W      |                                      | 2 | 212133 |

|                   |                                 |   |        |
|-------------------|---------------------------------|---|--------|
| <b>iYBL009W</b>   | YBL008W (HIR1)                  | 2 | 209182 |
| <b>iYBL010C</b>   | YBL010C YBL009W                 | 2 | 206907 |
| <b>iYBL011W</b>   |                                 | 2 | 205775 |
| <b>iYBL013W</b>   |                                 | 2 | 203196 |
| <b>iYBL014C</b>   | YBL014C (RRN6) YBL013W (FMT1)   | 2 | 201707 |
| <b>iYBL015W</b>   |                                 | 2 | 195661 |
| <b>iYBL016W</b>   | YBL015W (ACH1)                  | 2 | 193471 |
| <b>iYBL017C</b>   | YBL017C (PEP1) YBL016W (FUS3)   | 2 | 191542 |
| <b>iYBL018C</b>   | YBL018C (POP8)                  | 2 | 186433 |
| <b>iYBL019W</b>   |                                 | 2 | 185874 |
| <b>iYBL020W</b>   | YBL019W (APN2)                  | 2 | 184084 |
| <b>iYBL022C</b>   | YBL022C (PIM1)                  | 2 | 181234 |
| <b>iYBL023C</b>   | YBL023C (MCM2)                  | 2 | 177485 |
| <b>iYBL024W</b>   |                                 | 2 | 174547 |
| <b>iYBL025W</b>   | YBL024W (NCL1)                  | 2 | 171877 |
| <b>iYBL026W</b>   | YBL025W (RRN10)                 | 2 | 170997 |
| <b>iYBL027W</b>   | YBL026W (LSM2)                  | 2 | 169335 |
| <b>iYBL028C</b>   | YBL028C YBL027W (RPL19B)        | 2 | 167797 |
| <b>iYBL029W</b>   |                                 | 2 | 167223 |
| <b>iYBL030C-0</b> | YBL030C (PET9) YBL029W          | 2 | 163956 |
| <b>iYBL030C-1</b> | YBL030C (PET9) YBL029W          | 2 | 165024 |
| <b>iYBL031W</b>   |                                 | 2 | 162674 |
| <b>iYBL032W</b>   | YBL031W (SHE1)                  | 2 | 161288 |
| <b>iYBL033C</b>   | YBL033C (RIB1) YBL032W          | 2 | 159652 |
| <b>iYBL034C</b>   | YBL034C (STU1)                  | 2 | 158348 |
| <b>iYBL035C</b>   | YBL035C (POL12)                 | 2 | 153569 |
| <b>iYBL036C</b>   | YBL036C                         | 2 | 151179 |
| <b>iYBL037W</b>   |                                 | 2 | 150245 |
| <b>iYBL038W</b>   | YBL037W (APL3)                  | 2 | 146844 |
| <b>iYBL039C</b>   | YBL039C (URA7) YBL038W (MRPL16) | 2 | 145687 |
| <b>iYBL040C</b>   | YBL040C (ERD2)                  | 2 | 142827 |
| <b>iYBL041W</b>   |                                 | 2 | 141931 |
| <b>iYBL042C</b>   | YBL042C (FUI1) YBL041W (PRE7)   | 2 | 140219 |
| <b>iYBL043W</b>   |                                 | 2 | 137420 |
| <b>iYBL044W</b>   | YBL043W (ECM13)                 | 2 | 136325 |
| <b>iYBL045C</b>   | YBL045C (COR1) YBL044W          | 2 | 135475 |
| <b>iYBL046W</b>   |                                 | 2 | 133708 |
| <b>iYBL047C</b>   | YBL047C (EDE1) YBL046W          | 2 | 131999 |
| <b>iYBL048W</b>   |                                 | 2 | 127569 |
| <b>iYBL050W</b>   | YBL049W                         | 2 | 126078 |
| <b>iYBL051C</b>   | YBL051C (PIN4) YBL050W (SEC17)  | 2 | 124718 |
| <b>iYBL052C</b>   | YBL052C (SAS3)                  | 2 | 121833 |
| <b>iYBL054W</b>   | YBL053W                         | 2 | 119125 |
| <b>iYBL055C</b>   | YBL055C YBL054W                 | 2 | 116788 |
| <b>iYBL056W</b>   |                                 | 2 | 115127 |
| <b>iYBL057C</b>   | YBL057C YBL056W (PTC3)          | 2 | 113403 |
| <b>iYBL058W</b>   |                                 | 2 | 112666 |
| <b>iYBL059W</b>   | YBL058W (SHP1)                  | 2 | 111202 |
| <b>iYBL060W</b>   | YBL059W                         | 2 | 109953 |
| <b>iYBL061C</b>   | YBL061C (SKT5) YBL060W          | 2 | 107364 |
| <b>iYBL063W</b>   | YBL062W                         | 2 | 105179 |

|                     |                                  |   |        |
|---------------------|----------------------------------|---|--------|
| <b>iYBL064C</b>     | YBL064C YBL063W (KIP1)           | 2 | 101114 |
| <b>iYBL065W</b>     |                                  | 2 | 100265 |
| <b>iYBL067C</b>     | YBL067C (UBP13)                  | 2 | 95877  |
| <b>iYBL068W</b>     |                                  | 2 | 93389  |
| <b>iYBL069W</b>     | YBL068W (PRS4)                   | 2 | 91718  |
| <b>iYBL071C</b>     | YBL071C                          | 2 | 90522  |
| <b>iYBL072C</b>     | YBL072C (RPS8A)                  | 2 | 89116  |
| <b>iYBL073W</b>     |                                  | 2 | 87948  |
| <b>iYBL075C</b>     | YBL075C (SSA3)                   | 2 | 86439  |
| <b>iYBL076C</b>     | YBL076C (ILS1)                   | 2 | 84252  |
| <b>iYBL078C</b>     | YBL078C (AUT7) YBL077W           | 2 | 80721  |
| <b>iYBL079W</b>     |                                  | 2 | 79757  |
| <b>iYBL080C</b>     | YBL080C (PET112) YBL079W (NUP17) | 2 | 74685  |
| <b>iYBL081W</b>     |                                  | 2 | 72962  |
| <b>iYBL082C</b>     | YBL082C (RHK1) YBL081W           | 2 | 71117  |
| <b>iYBL084C</b>     | YBL084C (CDC27)                  | 2 | 69435  |
| <b>iYBL085W</b>     |                                  | 2 | 66808  |
| <b>iYBL086C</b>     | YBL086C YBL085W (BOI1)           | 2 | 62592  |
| <b>iYBL087C</b>     | YBL087C (RPL23A)                 | 2 | 60728  |
| <b>iYBL088C</b>     | YBL088C (TEL1)                   | 2 | 59372  |
| <b>iYBL091C</b>     | YBL091C (MAP2) YBL090W (MRP21)   | 2 | 48618  |
| <b>iYBL091C-A</b>   | YBL091C-A                        | 2 | 46854  |
| <b>iYBL092W</b>     |                                  | 2 | 46360  |
| <b>iYBL093C</b>     | YBL093C (ROX3) YBL092W (RPL32)   | 2 | 44908  |
| <b>iYBL094C</b>     | YBL094C                          | 2 | 44087  |
| <b>iYBL097W</b>     |                                  | 2 | 43085  |
| <b>iYBL098W</b>     | YBL097W (BRN1)                   | 2 | 40515  |
| <b>iYBL099W</b>     | YBL098W                          | 2 | 38678  |
| <b>iYBL101C</b>     |                                  | 2 | 28174  |
| <b>iYBL102W</b>     |                                  | 2 | 24740  |
| <b>iYBL103C</b>     | YBL103C (RTG3) YBL102W (SFT2)    | 2 | 23530  |
| <b>iYBL104C</b>     | YBL104C                          | 2 | 21094  |
| <b>iYBL105C</b>     | YBL105C (PKC1)                   | 2 | 17696  |
| <b>iYBL106C</b>     | YBL106C (SRO77)                  | 2 | 13879  |
| <b>iYBL108W</b>     | YBL107W-A                        | 2 | 8482   |
| <b>iYBL109W-0</b>   | YBL108W                          | 2 | 6125   |
| <b>iYBL109W-1</b>   | YBL108W                          | 2 | 7151   |
| <b>iYBL111C</b>     | YBL111C YBL109W                  | 2 | 5009   |
| <b>iYBLCdelta7</b>  |                                  | 2 | 197279 |
| <b>iYBLCsigma1</b>  |                                  | 2 | 198013 |
| <b>iYBLWdelta10</b> | YBL004W                          | 2 | 226911 |
| <b>iYBLWdelta3</b>  |                                  | 2 | 9518   |
| <b>iYBLWtau1</b>    |                                  | 2 | 36209  |
| <b>iYBR001C</b>     | YBR001C (NTH2)                   | 2 | 241241 |
| <b>iYBR002C</b>     | YBR002C (RER2) YBR003W (COQ1)    | 2 | 242526 |
| <b>iYBR003W</b>     |                                  | 2 | 244188 |
| <b>iYBR004C</b>     | YBR004C YBR005W                  | 2 | 245625 |
| <b>iYBR005W</b>     | YBR006W (UGA2)                   | 2 | 246505 |
| <b>iYBR006W</b>     | YBR007C                          | 2 | 248275 |
| <b>iYBR007C-0</b>   | YBR007C                          | 2 | 250973 |
| <b>iYBR007C-1</b>   | YBR007C                          | 2 | 251746 |

|                   |                                |   |        |
|-------------------|--------------------------------|---|--------|
| <b>iYBR008C</b>   | YBR008C (FLR1)                 | 2 | 254166 |
| <b>iYBR009C</b>   | YBR009C (HHF1) YBR010W (HHT1)  | 2 | 255638 |
| <b>iYBR010W</b>   |                                | 2 | 256695 |
| <b>iYBR011C</b>   | YBR011C (IPP1)                 | 2 | 257929 |
| <b>iYBR013C</b>   | YBR013C                        | 2 | 265835 |
| <b>iYBR014C</b>   | YBR014C                        | 2 | 267292 |
| <b>iYBR015C</b>   | YBR015C (MNN2) YBR016W         | 2 | 269459 |
| <b>iYBR016W</b>   |                                | 2 | 270589 |
| <b>iYBR017C</b>   | YBR017C (KAP104)               | 2 | 273659 |
| <b>iYBR018C</b>   | YBR018C (GAL7)                 | 2 | 275483 |
| <b>iYBR019C</b>   | YBR019C (GAL10) YBR020W (GAL1) | 2 | 278308 |
| <b>iYBR020W</b>   | YBR021W (FUR4)                 | 2 | 280563 |
| <b>iYBR021W</b>   | YBR022W                        | 2 | 283300 |
| <b>iYBR022W</b>   |                                | 2 | 284227 |
| <b>iYBR024W</b>   |                                | 2 | 290306 |
| <b>iYBR025C</b>   | YBR025C                        | 2 | 291821 |
| <b>iYBR027C</b>   | YBR027C                        | 2 | 294312 |
| <b>iYBR028C</b>   | YBR028C                        | 2 | 295958 |
| <b>iYBR029C</b>   | YBR029C (CDS1) YBR030W         | 2 | 297698 |
| <b>iYBR031W</b>   | YBR032W                        | 2 | 301210 |
| <b>iYBR032W</b>   | YBR033W (EDS1)                 | 2 | 301777 |
| <b>iYBR033W</b>   |                                | 2 | 304659 |
| <b>iYBR034C</b>   | YBR034C (HMT1)                 | 2 | 305932 |
| <b>iYBR035C</b>   | YBR035C (PDX3) tlc1            | 2 | 306911 |
| <b>iYBR036C</b>   | YBR036C (CSG2)                 | 2 | 310269 |
| <b>iYBR037C</b>   | YBR037C (SCO1) YBR038W (CHS2)  | 2 | 311407 |
| <b>iYBR038W</b>   | YBR039W (ATP3)                 | 2 | 314744 |
| <b>iYBR039W</b>   | YBR040W (FIG1)                 | 2 | 316466 |
| <b>iYBR040W</b>   | YBR041W (FAT1)                 | 2 | 317820 |
| <b>iYBR042C</b>   | YBR042C                        | 2 | 321567 |
| <b>iYBR043C</b>   | YBR043C                        | 2 | 323903 |
| <b>iYBR044C</b>   | YBR044C (TCM62) tv(uac)b       | 2 | 326016 |
| <b>iYBR045C</b>   | YBR045C (GIP1)                 | 2 | 330048 |
| <b>iYBR046C</b>   | YBR046C (ZTA1) YBR047W         | 2 | 331467 |
| <b>iYBR047W</b>   | YBR048W (RPS11B)               | 2 | 332316 |
| <b>iYBR048W</b>   |                                | 2 | 333768 |
| <b>iYBR049C</b>   | YBR049C (REB1)                 | 2 | 336774 |
| <b>iYBR051W</b>   |                                | 2 | 338294 |
| <b>iYBR052C</b>   | YBR052C                        | 2 | 339308 |
| <b>iYBR053C-0</b> | YBR053C YBR054W (YRO2)         | 2 | 340707 |
| <b>iYBR053C-1</b> | YBR053C YBR054W (YRO2)         | 2 | 341882 |
| <b>iYBR054W</b>   |                                | 2 | 344091 |
| <b>iYBR056W</b>   |                                | 2 | 349340 |
| <b>iYBR057C</b>   | YBR057C (MUM2)                 | 2 | 353249 |
| <b>iYBR058C</b>   | YBR058C (UBP14)                | 2 | 356039 |
| <b>iYBR059C</b>   | YBR059C (AKL1)                 | 2 | 360143 |
| <b>iYBR060C-0</b> | YBR060C (ORC2)                 | 2 | 362470 |
| <b>iYBR060C-1</b> | YBR060C (ORC2)                 | 2 | 363606 |
| <b>iYBR062C</b>   | YBR062C                        | 2 | 366279 |
| <b>iYBR064W</b>   |                                | 2 | 368148 |
| <b>iYBR065C</b>   | YBR065C (ECM2)                 | 2 | 369635 |



|            |                                  |   |        |
|------------|----------------------------------|---|--------|
| iYBR066C   | YBR066C (NRG2)                   | 2 | 370656 |
| iYBR067C   | YBR067C (TIP1)                   | 2 | 372691 |
| iYBR068C   | YBR068C (BAP2)                   | 2 | 375646 |
| iYBR069C   | YBR069C (TAT1)                   | 2 | 378389 |
| iYBR070C   | YBR070C YBR071W                  | 2 | 379889 |
| iYBR071W   | YBR072W (HSP26)                  | 2 | 381001 |
| iYBR072W   | YBR073W (RDH54)                  | 2 | 382629 |
| iYBR073W   | YBR074W                          | 2 | 385941 |
| iYBR074W   | YBR075W                          | 2 | 387480 |
| iYBR075W   | YBR076W (ECM8)                   | 2 | 389171 |
| iYBR076W   |                                  | 2 | 391348 |
| iYBR077C   | YBR077C YBR078W (ECM33)          | 2 | 392247 |
| iYBR078W   |                                  | 2 | 394814 |
| iYBR079C   | YBR079C (RPG1)                   | 2 | 398231 |
| iYBR080C   | YBR080C (SEC18)                  | 2 | 400844 |
| iYBR081C   | YBR081C (SPT7) td(guc)b/tr(ucu)b | 2 | 405205 |
| iYBR082C-0 | YBR082C (UBC4) YBR083W (TEC1)    | 2 | 407123 |
| iYBR082C-1 | YBR082C (UBC4) YBR083W (TEC1)    | 2 | 408123 |
| iYBR083W   | YBR084W (MIS1)                   | 2 | 410583 |
| iYBR084C-A | YBR084C-A (RPL19A) YBR085W (AAC) | 2 | 415215 |
| iYBR084W   |                                  | 2 | 413935 |
| iYBR085W-0 |                                  | 2 | 416860 |
| iYBR085W-1 |                                  | 2 | 417958 |
| iYBR085W-2 |                                  | 2 | 419056 |
| iYBR086C   | YBR086C (IST2) YBR087W (RFC5)    | 2 | 422995 |
| iYBR087W   |                                  | 2 | 424783 |
| iYBR089W   |                                  | 2 | 425736 |
| iYBR090C   | YBR090C                          | 2 | 427012 |
| iYBR091C   | YBR091C (MRS5)                   | 2 | 427438 |
| iYBR092C   | YBR092C (PHO3)                   | 2 | 429055 |
| iYBR094W   |                                  | 2 | 434251 |
| iYBR095C   | YBR095C YBR096W                  | 2 | 435721 |
| iYBR096W   | YBR097W (VPS15)                  | 2 | 436667 |
| iYBR097W   | YBR098W (MMS4)                   | 2 | 441269 |
| iYBR100W   |                                  | 2 | 443545 |
| iYBR101C   | YBR101C                          | 2 | 444648 |
| iYBR102C   | YBR102C (EXO84) YBR103W (SIF2)   | 2 | 447278 |
| iYBR103W   | YBR104W (YMC2)                   | 2 | 449271 |
| iYBR104W   |                                  | 2 | 450611 |
| iYBR105C   | YBR105C (VID24) YBR106W (PHO88)  | 2 | 451924 |
| iYBR108W   |                                  | 2 | 457323 |
| iYBR109C   | YBR109C (CMD1) YBR110W (ALG1)    | 2 | 458316 |
| iYBR110W   |                                  | 2 | 460175 |
| iYBR113W   | YBR114W (RAD16)                  | 2 | 466002 |
| iYBR114W   |                                  | 2 | 469574 |
| iYBR115C   | YBR115C (LYS2)                   | 2 | 473880 |
| iYBR117C   | YBR117C (TKL2) YBR118W (TEF2)    | 2 | 476391 |
| iYBR119W   |                                  | 2 | 480277 |
| iYBR120C   | YBR120C (CBP6)                   | 2 | 480877 |
| iYBR121C   | YBR121C (GRS1)                   | 2 | 483321 |
| iYBR122C   | YBR122C (MRPL36)                 | 2 | 484514 |

|                   |                                 |   |        |
|-------------------|---------------------------------|---|--------|
| <b>iYBR124W</b>   |                                 | 2 | 486820 |
| <b>iYBR126C</b>   | YBR126C (TPS1)                  | 2 | 490346 |
| <b>iYBR127C</b>   | YBR127C (VMA2)                  | 2 | 492776 |
| <b>iYBR128C</b>   | YBR128C (APG14)                 | 2 | 494069 |
| <b>iYBR129C</b>   | YBR129C (OPY1)                  | 2 | 495293 |
| <b>iYBR130C</b>   | YBR130C (SHE3) YBR131W (CCZ1)   | 2 | 496823 |
| <b>iYBR132C</b>   | YBR132C (AGP2)                  | 2 | 501396 |
| <b>iYBR134W</b>   | YBR135W (CKS1)                  | 2 | 504598 |
| <b>iYBR136W</b>   | YBR137W                         | 2 | 512728 |
| <b>iYBR137W</b>   |                                 | 2 | 513537 |
| <b>iYBR138C</b>   | YBR138C (HDR1) YBR139W          | 2 | 515290 |
| <b>iYBR139W</b>   |                                 | 2 | 517144 |
| <b>iYBR140C</b>   | YBR140C (IRA1)                  | 2 | 526582 |
| <b>iYBR141C</b>   | YBR141C YBR142W (MAK5)          | 2 | 527992 |
| <b>iYBR142W</b>   |                                 | 2 | 530592 |
| <b>iYBR143C</b>   | YBR143C (SUP45)                 | 2 | 532136 |
| <b>iYBR144C</b>   | YBR144C YBR145W (ADH5)          | 2 | 533503 |
| <b>iYBR145W</b>   | YBR146W (MRPS9)                 | 2 | 534771 |
| <b>iYBR146W</b>   | YBR147W                         | 2 | 536050 |
| <b>iYBR147W</b>   | YBR148W (YSW1)                  | 2 | 537419 |
| <b>iYBR148W</b>   | YBR149W (ARA1)                  | 2 | 539659 |
| <b>iYBR149W</b>   |                                 | 2 | 540975 |
| <b>iYBR150C</b>   | YBR150C (TBS1) YBR151W (APD1)   | 2 | 544447 |
| <b>iYBR151W</b>   | YBR152W (SPP381)                | 2 | 545932 |
| <b>iYBR152W</b>   | YBR153W (RIB7)                  | 2 | 547205 |
| <b>iYBR153W</b>   |                                 | 2 | 548148 |
| <b>iYBR154C</b>   | YBR154C (RPB5) YBR155W (CNS1)   | 2 | 548963 |
| <b>iYBR155W</b>   |                                 | 2 | 550882 |
| <b>iYBR156C</b>   | YBR156C (SLI15)                 | 2 | 553154 |
| <b>iYBR157C-0</b> | YBR157C (ICS2) YBR158W (CST13)  | 2 | 554263 |
| <b>iYBR157C-1</b> | YBR157C (ICS2) YBR158W (CST13)  | 2 | 555382 |
| <b>iYBR158W</b>   | YBR159W                         | 2 | 558151 |
| <b>iYBR159W</b>   | YBR160W (CDC28)                 | 2 | 559681 |
| <b>iYBR160W</b>   | YBR161W                         | 2 | 560927 |
| <b>iYBR161W</b>   |                                 | 2 | 562718 |
| <b>iYBR162C</b>   | YBR162C (TOS1) YBR162W-A (YSY6) | 2 | 564524 |
| <b>iYBR162W-A</b> | YBR163W (DEM1)                  | 2 | 565382 |
| <b>iYBR163W</b>   |                                 | 2 | 567434 |
| <b>iYBR164C</b>   | YBR164C (ARL1) YBR165W (UBS1)   | 2 | 568380 |
| <b>iYBR165W</b>   |                                 | 2 | 569639 |
| <b>iYBR166C</b>   | YBR166C (TYR1)                  | 2 | 571154 |
| <b>iYBR167C</b>   | YBR167C (POP7) YBR168W          | 2 | 571844 |
| <b>iYBR168W</b>   |                                 | 2 | 573566 |
| <b>iYBR169C</b>   | YBR169C (SSE2)                  | 2 | 575950 |
| <b>iYBR170C</b>   | YBR170C (NPL4) YBR171W (SEC66)  | 2 | 578040 |
| <b>iYBR171W</b>   |                                 | 2 | 578938 |
| <b>iYBR172C</b>   | YBR172C (SMY2)                  | 2 | 581476 |
| <b>iYBR173C</b>   | YBR173C (UMP1)                  | 2 | 582126 |
| <b>iYBR175W</b>   | YBR176W (ECM31)                 | 2 | 583309 |
| <b>iYBR176W</b>   |                                 | 2 | 584612 |
| <b>iYBR178W</b>   |                                 | 2 | 586399 |

|          |                                 |   |        |
|----------|---------------------------------|---|--------|
| iYBR179C | YBR179C (FZO1) YBR180W (DTR1)   | 2 | 589068 |
| iYBR180W |                                 | 2 | 591413 |
| iYBR181C | YBR181C (RPS6B)                 | 2 | 592728 |
| iYBR182C | YBR182C (SMP1) YBR183W (YPC1)   | 2 | 594818 |
| iYBR183W | YBR184W                         | 2 | 597019 |
| iYBR184W |                                 | 2 | 598888 |
| iYBR185C | YBR185C (MBA1) YBR186W (PCH2)   | 2 | 599913 |
| iYBR186W | YBR187W                         | 2 | 602117 |
| iYBR187W |                                 | 2 | 603430 |
| iYBR188C | YBR188C (NTC20) YBR189W (RPS9B) | 2 | 604061 |
| iYBR189W | YBR190W                         | 2 | 605462 |
| iYBR191W | YBR192W (RIM2)                  | 2 | 607094 |
| iYBR192W |                                 | 2 | 608739 |
| iYBR193C | YBR193C (MED8) YBR194W          | 2 | 609707 |
| iYBR194W |                                 | 2 | 610363 |
| iYBR195C | YBR195C (MSI1)                  | 2 | 611836 |
| iYBR196C | YBR196C (PGI1)                  | 2 | 613854 |
| iYBR197C | YBR197C                         | 2 | 615810 |
| iYBR198C | YBR198C (TAF90) YBR199W (KTR4)  | 2 | 618477 |
| iYBR199W | YBR200W (BEM1)                  | 2 | 620257 |
| iYBR200W | YBR201W (DER1)                  | 2 | 622481 |
| iYBR202W | YBR203W                         | 2 | 628264 |
| iYBR203W |                                 | 2 | 631897 |
| iYBR204C | YBR204C YBR205W (KTR3)          | 2 | 633336 |
| iYBR206W | YBR207W (FTH1)                  | 2 | 634879 |
| iYBR207W |                                 | 2 | 636498 |
| iYBR208C | YBR208C (DUR1,2) YBR209W        | 2 | 642165 |
| iYBR209W | YBR210W tc(gca)b                | 2 | 642855 |
| iYBR210W |                                 | 2 | 645933 |
| iYBR211C | YBR211C (AME1) YBR212W (NGR1)   | 2 | 647087 |
| iYBR212W | YBR213W (MET8)                  | 2 | 649859 |
| iYBR213W | YBR214W (SDS24)                 | 2 | 651147 |
| iYBR214W | YBR215W (HPC2)                  | 2 | 652953 |
| iYBR215W |                                 | 2 | 655272 |
| iYBR216C | YBR216C YBR217W (APG12)         | 2 | 657555 |
| iYBR217W |                                 | 2 | 658347 |
| iYBR218C | YBR218C (PYC2)                  | 2 | 662204 |
| iYBR220C | YBR220C                         | 2 | 664632 |
| iYBR221C | YBR221C (PDB1)                  | 2 | 666208 |
| iYBR222C | YBR222C (FAT2)                  | 2 | 668306 |
| iYBR227C | YBR227C (MCX1) YBR228W (SLX1)   | 2 | 675089 |
| iYBR228W |                                 | 2 | 676182 |
| iYBR229C | YBR229C (ROT2)                  | 2 | 679176 |
| iYBR230C | YBR230C Isr1/snr20              | 2 | 680005 |
| iYBR231C | YBR231C (AOR1)                  | 2 | 683045 |
| iYBR233W |                                 | 2 | 684624 |
| iYBR234C | YBR234C (ARC40) YBR235W         | 2 | 686547 |
| iYBR235W |                                 | 2 | 690218 |
| iYBR236C | YBR236C (ABD1) YBR237W (PRP5)   | 2 | 691648 |
| iYBR237W |                                 | 2 | 694473 |
| iYBR238C | YBR238C                         | 2 | 697257 |

|            |                                 |   |        |
|------------|---------------------------------|---|--------|
| iYBR239C   | YBR239C                         | 2 | 699898 |
| iYBR240C   | YBR240C (THI2)                  | 2 | 701797 |
| iYBR241C   | YBR241C YBR242W                 | 2 | 704010 |
| iYBR242W   |                                 | 2 | 705341 |
| iYBR243C   | YBR243C (ALG7) YBR244W (GPX2)   | 2 | 706748 |
| iYBR244W   |                                 | 2 | 707971 |
| iYBR246W   |                                 | 2 | 712709 |
| iYBR247C   | YBR247C (ENP1)                  | 2 | 714410 |
| iYBR248C   | YBR248C (HIS7)                  | 2 | 716420 |
| iYBR249C   | YBR249C (ARO4) YBR250W          | 2 | 717949 |
| iYBR250W   | YBR251W (MRPS5)                 | 2 | 720559 |
| iYBR251W   | YBR252W (DUT1)                  | 2 | 722268 |
| iYBR252W   | YBR253W (SRB6)                  | 2 | 723009 |
| iYBR253W   |                                 | 2 | 723590 |
| iYBR254C   | YBR254C (TRS20) YBR255W         | 2 | 724218 |
| iYBR255W   |                                 | 2 | 726495 |
| iYBR256C   | YBR256C (RIB5) YBR257W (POP4)   | 2 | 728057 |
| iYBR258C   | YBR258C (SHG1) YBR259W          | 2 | 730117 |
| iYBR259W   |                                 | 2 | 732408 |
| iYBR260C   | YBR260C (RGD1)                  | 2 | 734594 |
| iYBR261C   | YBR261C                         | 2 | 735485 |
| iYBR264C   | YBR264C (YPT10) YBR265W (TSC10) | 2 | 738381 |
| iYBR265W   |                                 | 2 | 739499 |
| iYBR267W   | YBR268W (MRPL37)                | 2 | 740979 |
| iYBR268W   |                                 | 2 | 741573 |
| iYBR269C   | YBR269C                         | 2 | 742531 |
| iYBR270C   | YBR270C YBR271W                 | 2 | 744353 |
| iYBR271W   |                                 | 2 | 746066 |
| iYBR272C   | YBR272C (HSM3)                  | 2 | 747758 |
| iYBR273C   | YBR273C YBR274W (CHK1)          | 2 | 749326 |
| iYBR274W   |                                 | 2 | 751132 |
| iYBR275C   | YBR275C (RIF1)                  | 2 | 757061 |
| iYBR276C   | YBR276C (PPS1)                  | 2 | 759999 |
| iYBR278W   | YBR279W (PAF1)                  | 2 | 760855 |
| iYBR279W   |                                 | 2 | 762550 |
| iYBR280C   | YBR280C                         | 2 | 764668 |
| iYBR281C   | YBR281C YBR282W (MRPL27)        | 2 | 767562 |
| iYBR282W   |                                 | 2 | 768636 |
| iYBR283C   | YBR283C (SSH1) YBR284W          | 2 | 770371 |
| iYBR284W   | YBR285W                         | 2 | 773588 |
| iYBR285W   | YBR286W (APE3)                  | 2 | 774312 |
| iYBR286W   | YBR287W                         | 2 | 776269 |
| iYBR287W   |                                 | 2 | 777810 |
| iYBR288C   | YBR288C (APM3) YBR289W (SNF5)   | 2 | 779419 |
| iYBR289W   | YBR290W (BSD2)                  | 2 | 782340 |
| iYBR290W   |                                 | 2 | 783512 |
| iYBR291C   | YBR291C (CTP1)                  | 2 | 784528 |
| iYBR292C-0 | YBR292C YBR293W                 | 2 | 785029 |
| iYBR292C-1 | YBR292C YBR293W                 | 2 | 785995 |
| iYBR293W   | YBR294W (SUL1)                  | 2 | 788385 |
| iYBR294W   | YBR295W (PCA1)                  | 2 | 791769 |

|                     |                                 |   |        |
|---------------------|---------------------------------|---|--------|
| <b>iYBR295W</b>     |                                 | 2 | 796453 |
| <b>iYBR296C-0</b>   | YBR296C (PHO89) YBR297W (MAL33) | 2 | 798476 |
| <b>iYBR296C-1</b>   | YBR296C (PHO89) YBR297W (MAL33) | 2 | 799476 |
| <b>iYBR297W</b>     |                                 | 2 | 801883 |
| <b>iYBR298C</b>     | YBR298C (MAL31) YBR299W (MAL32) | 2 | 804429 |
| <b>iYBR299W</b>     |                                 | 2 | 807059 |
| <b>iYBR301W</b>     |                                 | 2 | 809373 |
| <b>iYBRCdelta11</b> | YBR011C (IPP1)                  | 2 | 258930 |
| <b>iYBRCdelta14</b> | YBR013C                         | 2 | 266212 |
| <b>iYBRCdelta18</b> | YBR210W                         | 2 | 643957 |
| <b>iYBRCdelta19</b> | YBR210W                         | 2 | 644558 |
| <b>iYBRWdelta16</b> | YBR044C (TCM62)                 | 2 | 327661 |
| <b>iYBRWdelta17</b> |                                 | 2 | 350707 |
| <b>iYCL001W</b>     | YCL001W-A                       | 3 | 112086 |
| <b>iYCL001W-A</b>   | YCR001W                         | 3 | 113145 |
| <b>iYCL002C</b>     | YCL002C YCL001W (RER1)          | 3 | 110906 |
| <b>iYCL004W</b>     |                                 | 3 | 109963 |
| <b>iYCL005W</b>     | YCL004W (PGS1)                  | 3 | 108395 |
| <b>iYCL007C</b>     | YCL007C (CWH36)                 | 3 | 106977 |
| <b>iYCL008C</b>     | YCL008C (STP22)                 | 3 | 106464 |
| <b>iYCL009C</b>     | YCL009C (ILV6)                  | 3 | 105159 |
| <b>iYCL010C</b>     | YCL010C (SGF29)                 | 3 | 103961 |
| <b>iYCL011C</b>     | YCL011C (GBP2)                  | 3 | 102969 |
| <b>iYCL012W</b>     |                                 | 3 | 100808 |
| <b>iYCL014W</b>     | YCL005W                         | 3 | 100001 |
| <b>iYCL016C</b>     | YCL016C (DCC1) YCL014W (BUD3)   | 3 | 95166  |
| <b>iYCL017C</b>     | YCL017C (NFS1)                  | 3 | 93885  |
| <b>iYCL018W</b>     |                                 | 3 | 92033  |
| <b>iYCL022C</b>     | YCL022C YCL020W                 | 3 | 82047  |
| <b>iYCL025C</b>     | YCL025C (AGP1)                  | 3 | 77886  |
| <b>iYCL026C-A</b>   | YCL026C-A (FRM2)                | 3 | 75253  |
| <b>iYCL028W</b>     | YCL027W (FUS1)                  | 3 | 71339  |
| <b>iYCL029C</b>     | YCL029C (BIK1) YCL028W (RNQ1)   | 3 | 69893  |
| <b>iYCL030C</b>     | YCL030C (HIS4)                  | 3 | 68305  |
| <b>iYCL031C</b>     | YCL031C (RRP7)                  | 3 | 65540  |
| <b>iYCL032W</b>     |                                 | 3 | 64453  |
| <b>iYCL033C</b>     | YCL033C YCL032W (STE50)         | 3 | 63254  |
| <b>iYCL035C</b>     | YCL035C (GRX1) YCL034W (LSB5)   | 3 | 61146  |
| <b>iYCL036W</b>     |                                 | 3 | 60699  |
| <b>iYCL037C</b>     | YCL037C (SRO9) YCL036W (GFD2)   | 3 | 58747  |
| <b>iYCL038C</b>     | YCL038C (AUT4)                  | 3 | 56501  |
| <b>iYCL040W</b>     | YCL039W                         | 3 | 52314  |
| <b>iYCL044C</b>     | YCL044C                         | 3 | 48341  |
| <b>iYCL046W</b>     |                                 | 3 | 46940  |
| <b>iYCL047C</b>     | YCL047C                         | 3 | 44414  |
| <b>iYCL048W</b>     |                                 | 3 | 43533  |
| <b>iYCL049C</b>     | YCL049C YCL048W                 | 3 | 40701  |
| <b>iYCL050C</b>     | YCL050C (APA1)                  | 3 | 38777  |
| <b>iYCL051W</b>     |                                 | 3 | 37604  |
| <b>iYCL052C</b>     | YCL052C (PBN1) YCL051W (LRE1)   | 3 | 35376  |
| <b>iYCL054W</b>     |                                 | 3 | 33957  |



|                      |                                 |   |        |
|----------------------|---------------------------------|---|--------|
| <b>iYCL055W-0</b>    | YCL054W (SPB1)                  | 3 | 28919  |
| <b>iYCL055W-1</b>    | YCL054W (SPB1)                  | 3 | 30175  |
| <b>iYCL056C</b>      | YCL056C YCL055W (KAR4)          | 3 | 27342  |
| <b>iYCL058C</b>      | YCL058C (FYV5) YCL057W (PRD1)   | 3 | 23964  |
| <b>iYCL059C</b>      | YCL059C (KRR1)                  | 3 | 23362  |
| <b>iYCL061C</b>      | YCL061C (MRC1)                  | 3 | 21360  |
| <b>iYCL063W</b>      |                                 | 3 | 18544  |
| <b>iYCL064C</b>      | YCL064C (CHA1) YCL063W          | 3 | 16869  |
| <b>iYCL065W-0</b>    |                                 | 3 | 14108  |
| <b>iYCL065W-1</b>    |                                 | 3 | 14947  |
| <b>iYCL067C</b>      | YCL067C (HMLALPHA2) YCL066W (HI | 3 | 13007  |
| <b>iYCL068C</b>      | YCL068C                         | 3 | 12065  |
| <b>iYCL069W</b>      |                                 | 3 | 11072  |
| <b>iYCL073C</b>      | YCL073C YCL069W                 | 3 | 8317   |
| <b>iYCL074W</b>      |                                 | 3 | 3742   |
| <b>iYCL075W</b>      | YCL074W                         | 3 | 2558   |
| <b>iYCLCdelta1</b>   | YCL022C YCL020W                 | 3 | 82814  |
| <b>iYCLWdelta5</b>   | YCL018W (LEU2)                  | 3 | 90384  |
| <b>iYCLWomega2-0</b> |                                 | 3 | 4314   |
| <b>iYCLWomega2-1</b> |                                 | 3 | 5392   |
| <b>iYCR001W</b>      |                                 | 3 | 115600 |
| <b>iYCR002C</b>      | YCR002C (CDC10) YCR003W (MRPL3  | 3 | 117949 |
| <b>iYCR003W</b>      |                                 | 3 | 118772 |
| <b>iYCR004C</b>      | YCR004C (YCP4)                  | 3 | 119919 |
| <b>iYCR005C</b>      | YCR005C (CIT2)                  | 3 | 121929 |
| <b>iYCR006C</b>      | YCR006C tp(agg)c                | 3 | 122604 |
| <b>iYCR007C</b>      | YCR007C tn(guu)c YCR008W (SAT4) | 3 | 126331 |
| <b>iYCR008W</b>      |                                 | 3 | 129881 |
| <b>iYCR009C</b>      | YCR009C (RVS161)                | 3 | 131142 |
| <b>iYCR010C</b>      | YCR010C (ADY2)                  | 3 | 132724 |
| <b>iYCR011C</b>      | YCR011C (ADP1) YCR012W (PGK1)   | 3 | 136472 |
| <b>iYCR014C</b>      | YCR014C (POL4)                  | 3 | 140532 |
| <b>iYCR015C</b>      | YCR015C YCR016W                 | 3 | 141769 |
| <b>iYCR016W</b>      |                                 | 3 | 144211 |
| <b>iYCR017C</b>      | YCR017C (CWH43)                 | 3 | 147339 |
| <b>iYCR018C-A</b>    | YCR018C-A YCR019W (MAK32)       | 3 | 151568 |
| <b>iYCR019W</b>      |                                 | 3 | 153633 |
| <b>iYCR020C</b>      | YCR020C (PET18)                 | 3 | 154364 |
| <b>iYCR020C-A</b>    | YCR020C-A (MAK31) YCR020W-B (HT | 3 | 154801 |
| <b>iYCR020W-B</b>    |                                 | 3 | 155261 |
| <b>iYCR021C</b>      | YCR021C (HSP30)                 | 3 | 156815 |
| <b>iYCR022C</b>      | YCR022C                         | 3 | 157473 |
| <b>iYCR023C</b>      | YCR023C                         | 3 | 160081 |
| <b>iYCR024C</b>      | YCR024C                         | 3 | 161930 |
| <b>iYCR024C-A</b>    | YCR024C-A (PMP1)                | 3 | 162775 |
| <b>iYCR025C</b>      | YCR025C                         | 3 | 163564 |
| <b>iYCR026C</b>      | YCR026C                         | 3 | 166050 |
| <b>iYCR027C</b>      | YCR027C (RHB1)                  | 3 | 167713 |
| <b>iYCR028C</b>      | YCR028C (FEN2)                  | 3 | 171113 |
| <b>iYCR028C-A</b>    | YCR028C-A (RIM1)                | 3 | 172166 |
| <b>iYCR030C</b>      | YCR030C                         | 3 | 175163 |

|            |                                 |   |        |
|------------|---------------------------------|---|--------|
| iYCR031C   | YCR031C (RPS14A) YCR032W (BPH1  | 3 | 176944 |
| iYCR032W   | YCR033W (SNT1)                  | 3 | 184752 |
| iYCR033W   | YCR034W (FEN1)                  | 3 | 188898 |
| iYCR034W   |                                 | 3 | 190364 |
| iYCR035C   | YCR035C (RRP43) YCR036W (RBK1)  | 3 | 191747 |
| iYCR036W   |                                 | 3 | 193027 |
| iYCR037C   | YCR037C (PHO87)                 | 3 | 195914 |
| iYCR038C   | YCR038C (BUD5)                  | 3 | 197966 |
| iYCR039C   | YCR039C (MATALPHA2) YCR040W (M  | 3 | 198908 |
| iYCR042C   | YCR042C (TSM1)                  | 3 | 204127 |
| iYCR043C   | YCR043C                         | 3 | 205375 |
| iYCR044C   | YCR044C (PER1)                  | 3 | 206681 |
| iYCR045C   | YCR045C                         | 3 | 208341 |
| iYCR046C   | YCR046C (IMG1)                  | 3 | 209154 |
| iYCR047C   | YCR047C (BUD23)                 | 3 | 210276 |
| iYCR050C   | YCR050C YCR051W                 | 3 | 212503 |
| iYCR051W   | YCR052W (RSC6)                  | 3 | 213469 |
| iYCR052W   | YCR053W (THR4)                  | 3 | 215175 |
| iYCR053W   |                                 | 3 | 216971 |
| iYCR054C   | YCR054C (CTR86)                 | 3 | 218797 |
| iYCR057C   | YCR057C (PWP2)                  | 3 | 221958 |
| iYCR059C   | YCR059C (YIH1) YCR060W          | 3 | 222959 |
| iYCR060W   | YCR061W                         | 3 | 223463 |
| iYCR062W   |                                 | 3 | 226182 |
| iYCR063W   | YCR065W (HCM1)                  | 3 | 227515 |
| iYCR065W   | YCR066W (RAD18)                 | 3 | 229631 |
| iYCR066W   |                                 | 3 | 231689 |
| iYCR067C   | YCR067C (SED4) YCR068W (CVT17)  | 3 | 235048 |
| iYCR068W   | YCR069W (CPR4)                  | 3 | 237229 |
| iYCR069W   |                                 | 3 | 238736 |
| iYCR071C   | YCR071C (IMG2)                  | 3 | 239267 |
| iYCR072C   | YCR072C                         | 3 | 241075 |
| iYCR073C   | YCR073C (SSK22) YCR073W-A (SOL2 | 3 | 245308 |
| iYCR073W-A |                                 | 3 | 246635 |
| iYCR075C   | YCR075C (ERS1)                  | 3 | 247538 |
| iYCR076C   | YCR076C                         | 3 | 248768 |
| iYCR077C   | YCR077C (PAT1) YCR079W          | 3 | 251354 |
| iYCR079W   | YCR081W (SRB8)                  | 3 | 252878 |
| iYCR081W   | YCR082W                         | 3 | 257377 |
| iYCR082W   | YCR083W (TRX3)                  | 3 | 257992 |
| iYCR083W   |                                 | 3 | 258684 |
| iYCR084C   | YCR084C (TUP1) YCR085W          | 3 | 261175 |
| iYCR085W   | YCR086W (CSM1)                  | 3 | 261992 |
| iYCR087C-A | YCR087W YCR088W (ABP1)          | 3 | 263190 |
| iYCR088W   | YCR089W (FIG2)                  | 3 | 265569 |
| iYCR090C-1 | YCR090C YCR091W (KIN82)         | 3 | 272356 |
| iYCR091W   |                                 | 3 | 275307 |
| iYCR092C   | YCR092C (MSH3) YCR093W (CDC39)  | 3 | 278629 |
| iYCR093W   | YCR094W (CDC50)                 | 3 | 285165 |
| iYCR094W   |                                 | 3 | 286659 |
| iYCR095C-0 | YCR095C                         | 3 | 287980 |

|                      |                                |   |        |
|----------------------|--------------------------------|---|--------|
| <b>iYCR095C-1</b>    | YCR095C                        | 3 | 289037 |
| <b>iYCR096C</b>      | YCR096C (HMRA2) YCR097W (HMRA) | 3 | 292260 |
| <b>iYCR097W</b>      |                                | 3 | 293043 |
| <b>iYCR098C-0</b>    | YCR098C (GIT1)                 | 3 | 297327 |
| <b>iYCR100C</b>      | YCR100C                        | 3 | 300943 |
| <b>iYCR101C</b>      | YCR101C                        | 3 | 301752 |
| <b>iYCR102C</b>      | YCR102C YCR102W-A              | 3 | 304189 |
| <b>iYCR102W-A</b>    |                                | 3 | 305652 |
| <b>iYCR103C</b>      | YCR104W (PAU3)                 | 3 | 306310 |
| <b>iYCR104W</b>      | YCR105W                        | 3 | 306893 |
| <b>iYCR105W</b>      | YCR106W                        | 3 | 308874 |
| <b>iYCR106W</b>      | YCR107W (AAD3)                 | 3 | 312175 |
| <b>iYCRCdelta14</b>  |                                | 3 | 294912 |
| <b>iYCRCdelta6-0</b> | YCR006C                        | 3 | 124066 |
| <b>iYCRCdelta6-A</b> | YCR006C                        | 3 | 124066 |
| <b>iYCRCdelta6-B</b> | YCR006C                        | 3 | 124839 |
| <b>iYCRCdelta7</b>   | YCR015C YCR016W                | 3 | 142785 |
| <b>iYCRCtau1</b>     | YCR018C (SRD1)                 | 3 | 150761 |
| <b>iYCRWdelta11</b>  | YCR027C (RHB1)                 | 3 | 168579 |
| <b>iYCRWdelta12</b>  | YCR095C                        | 3 | 290434 |
| <b>iYCRWdelta13</b>  |                                | 3 | 294052 |
| <b>iYCRWdelta8</b>   | YCR018C (SRD1)                 | 3 | 149515 |
| <b>iYCRWdelta9</b>   | YCR018C (SRD1)                 | 3 | 150257 |
| <b>iYCRWomega3</b>   | YCR095C                        | 3 | 290889 |
| <b>iYDL001W</b>      |                                | 4 | 449317 |
| <b>iYDL002C</b>      | YDL002C (NHP10) YDL001W        | 4 | 447619 |
| <b>iYDL003W</b>      |                                | 4 | 446424 |
| <b>iYDL004W</b>      | YDL003W (MCD1)                 | 4 | 443552 |
| <b>iYDL005C</b>      | YDL005C (MED2) YDL004W (ATP16) | 4 | 442350 |
| <b>iYDL006W</b>      |                                | 4 | 440795 |
| <b>iYDL007W</b>      | YDL006W (PTC1)                 | 4 | 439401 |
| <b>iYDL008W</b>      | YDL007W (RPT2)                 | 4 | 434035 |
| <b>iYDL009C</b>      | YDL009C YDL008W (APC11)        | 4 | 433289 |
| <b>iYDL012C</b>      | YDL012C                        | 4 | 431558 |
| <b>iYDL013W</b>      |                                | 4 | 430967 |
| <b>iYDL014W</b>      | YDL013W (HEX3)                 | 4 | 428388 |
| <b>iYDL015C</b>      | YDL015C (TSC13) YDL014W (NOP1) | 4 | 426975 |
| <b>iYDL016C</b>      | YDL016C                        | 4 | 425913 |
| <b>iYDL018C</b>      | YDL018C (ERP3) YDL017W (CDC7)  | 4 | 423551 |
| <b>iYDL020C</b>      | YDL020C (RPN4)                 | 4 | 416749 |
| <b>iYDL021W</b>      |                                | 4 | 414929 |
| <b>iYDL022W</b>      | YDL021W (GPM2)                 | 4 | 413041 |
| <b>iYDL024C</b>      | YDL024C (DIA3) ta(agc)d        | 4 | 409898 |
| <b>iYDL025C</b>      | YDL025C                        | 4 | 407247 |
| <b>iYDL026W</b>      |                                | 4 | 405101 |
| <b>iYDL028C</b>      | YDL028C (MPS1)                 | 4 | 403332 |
| <b>iYDL029W</b>      |                                | 4 | 400679 |
| <b>iYDL030W</b>      | YDL029W (ARP2)                 | 4 | 399170 |
| <b>iYDL031W</b>      | YDL030W (PRP9)                 | 4 | 397245 |
| <b>iYDL032W</b>      | YDL031W (DBP10)                | 4 | 394042 |
| <b>iYDL034W</b>      |                                | 4 | 392168 |

|                   |                                  |   |        |
|-------------------|----------------------------------|---|--------|
| <b>iYDL036C</b>   | YDL036C                          | 4 | 388942 |
| <b>iYDL037C-0</b> | YDL037C                          | 4 | 385628 |
| <b>iYDL037C-1</b> | YDL037C                          | 4 | 386591 |
| <b>iYDL040C</b>   | YDL040C (NAT1)                   | 4 | 381479 |
| <b>iYDL041W</b>   |                                  | 4 | 378496 |
| <b>iYDL043C</b>   | YDL043C (PRP11)                  | 4 | 376521 |
| <b>iYDL044C</b>   | YDL044C (MTF2)                   | 4 | 375330 |
| <b>iYDL045C</b>   | YDL045C (FAD1)                   | 4 | 373649 |
| <b>iYDL045W-A</b> |                                  | 4 | 372576 |
| <b>iYDL046W</b>   | YDL045W-A (MRP10)                | 4 | 371802 |
| <b>iYDL048C-0</b> | YDL048C (STP4) YDL047W (SIT4)    | 4 | 368255 |
| <b>iYDL048C-1</b> | YDL048C (STP4) YDL047W (SIT4)    | 4 | 369034 |
| <b>iYDL050C</b>   | YDL050C                          | 4 | 364816 |
| <b>iYDL052C</b>   | YDL052C (SLC1) YDL051W (LHP1)    | 4 | 363582 |
| <b>iYDL053C</b>   | YDL053C                          | 4 | 362255 |
| <b>iYDL054C</b>   | YDL054C (MCH1)                   | 4 | 361284 |
| <b>iYDL055C-0</b> | YDL055C (PSA1)                   | 4 | 356758 |
| <b>iYDL055C-1</b> | YDL055C (PSA1)                   | 4 | 358167 |
| <b>iYDL056W</b>   |                                  | 4 | 355377 |
| <b>iYDL057W</b>   | YDL056W (MBP1)                   | 4 | 352419 |
| <b>iYDL058W</b>   | YDL057W                          | 4 | 351036 |
| <b>iYDL059C</b>   | YDL059C (RAD59) YDL058W (USO1)   | 4 | 344952 |
| <b>iYDL060W</b>   |                                  | 4 | 343984 |
| <b>iYDL061C</b>   | YDL061C (RPS29B) YDL060W (TSR1)  | 4 | 340797 |
| <b>iYDL062W</b>   |                                  | 4 | 340281 |
| <b>iYDL064W</b>   |                                  | 4 | 338069 |
| <b>iYDL065C</b>   | YDL065C (PEX19) YDL064W (UBC9)   | 4 | 337300 |
| <b>iYDL066W</b>   |                                  | 4 | 336120 |
| <b>iYDL067C</b>   | YDL067C (COX9) YDL066W (IDP1)    | 4 | 334395 |
| <b>iYDL068W</b>   |                                  | 4 | 333828 |
| <b>iYDL070W</b>   |                                  | 4 | 332940 |
| <b>iYDL072C</b>   | YDL072C                          | 4 | 330446 |
| <b>iYDL073W</b>   |                                  | 4 | 329566 |
| <b>iYDL074C</b>   | YDL074C (BRE1) YDL073W           | 4 | 326148 |
| <b>iYDL075W</b>   |                                  | 4 | 322987 |
| <b>iYDL076C</b>   | YDL076C YDL075W (RPL31A)         | 4 | 321551 |
| <b>iYDL077C</b>   | YDL077C (VAM6)                   | 4 | 320119 |
| <b>iYDL078C</b>   | YDL078C (MDH3)                   | 4 | 316387 |
| <b>iYDL079C</b>   | YDL079C (MRK1)                   | 4 | 314747 |
| <b>iYDL080C</b>   | YDL080C (THI3)                   | 4 | 312470 |
| <b>iYDL081C</b>   | YDL081C (RPP1A)                  | 4 | 310121 |
| <b>iYDL082W</b>   |                                  | 4 | 309387 |
| <b>iYDL083C</b>   | YDL083C (RPS16B) YDL082W (RPL13) | 4 | 307788 |
| <b>iYDL084W</b>   |                                  | 4 | 306576 |
| <b>iYDL085W</b>   | YDL084W (SUB2)                   | 4 | 304847 |
| <b>iYDL086W</b>   | YDL085W                          | 4 | 302233 |
| <b>iYDL087C</b>   | YDL087C (LUC7) YDL086W           | 4 | 300998 |
| <b>iYDL088C</b>   | YDL088C (ASM4)                   | 4 | 300002 |
| <b>iYDL089W</b>   |                                  | 4 | 298273 |
| <b>iYDL090C</b>   | YDL090C (RAM1) YDL089W           | 4 | 296328 |
| <b>iYDL091C</b>   | YDL091C                          | 4 | 294758 |

|                   |                               |   |        |
|-------------------|-------------------------------|---|--------|
| <b>iYDL092W</b>   |                               | 4 | 293220 |
| <b>iYDL093W</b>   | YDL092W (SRP14)               | 4 | 292139 |
| <b>iYDL095W</b>   |                               | 4 | 289511 |
| <b>iYDL097C</b>   | YDL097C (RPN6)                | 4 | 286694 |
| <b>iYDL098C</b>   | YDL098C (SNU23)               | 4 | 285164 |
| <b>iYDL099W</b>   |                               | 4 | 284443 |
| <b>iYDL100C</b>   | YDL100C YDL099W               | 4 | 283175 |
| <b>iYDL101C</b>   | YDL101C (DUN1)                | 4 | 281847 |
| <b>iYDL102W</b>   |                               | 4 | 280164 |
| <b>iYDL103C</b>   | YDL103C (QRI1) YDL102W (CDC2) | 4 | 276580 |
| <b>iYDL104C</b>   | YDL104C (QRI7)                | 4 | 274875 |
| <b>iYDL106C</b>   | YDL106C (PHO2) YDL105W (QRI2) | 4 | 271900 |
| <b>iYDL107W</b>   |                               | 4 | 269975 |
| <b>iYDL108W</b>   | YDL107W (MSS2)                | 4 | 268698 |
| <b>iYDL109C</b>   | YDL109C YDL108W (KIN28)       | 4 | 267200 |
| <b>iYDL110C</b>   | YDL110C                       | 4 | 264963 |
| <b>iYDL111C</b>   | YDL111C (RRP42)               | 4 | 264109 |
| <b>iYDL112W</b>   |                               | 4 | 263224 |
| <b>iYDL113C</b>   | YDL113C YDL112W (TRM3)        | 4 | 258554 |
| <b>iYDL114W</b>   |                               | 4 | 256529 |
| <b>iYDL115C</b>   | YDL115C (IWR1) YDL114W        | 4 | 254716 |
| <b>iYDL116W</b>   |                               | 4 | 253745 |
| <b>iYDL117W</b>   | YDL116W (NUP84)               | 4 | 251237 |
| <b>iYDL118W</b>   | YDL117W (CYK3)                | 4 | 247681 |
| <b>iYDL120W</b>   |                               | 4 | 246446 |
| <b>iYDL121C</b>   | YDL121C YDL120W (YFH1)        | 4 | 245581 |
| <b>iYDL122W</b>   |                               | 4 | 244980 |
| <b>iYDL123W</b>   | YDL122W (UBP1)                | 4 | 241839 |
| <b>iYDL124W</b>   | YDL123W (SNA4)                | 4 | 241196 |
| <b>iYDL125C</b>   | YDL125C (HNT1) YDL124W        | 4 | 239605 |
| <b>iYDL126C</b>   | YDL126C (CDC48)               | 4 | 238663 |
| <b>iYDL127W</b>   |                               | 4 | 235766 |
| <b>iYDL128W</b>   | YDL127W (PCL2)                | 4 | 233887 |
| <b>iYDL129W</b>   | YDL128W (VCX1)                | 4 | 231899 |
| <b>iYDL130W</b>   | YDL129W                       | 4 | 230527 |
| <b>iYDL130W-A</b> | YDL130W (RPP1B)               | 4 | 229431 |
| <b>iYDL131W</b>   | YDL130W-A (STF1)              | 4 | 228715 |
| <b>iYDL133C-A</b> | YDL133C-A (RPL41B) YDL133W    | 4 | 221801 |
| <b>iYDL133W</b>   | YDL132W (CDC53)               | 4 | 223740 |
| <b>iYDL134C</b>   | YDL134C (PPH21)               | 4 | 220771 |
| <b>iYDL135C</b>   | YDL135C (RDI1)                | 4 | 219288 |
| <b>iYDL136W</b>   |                               | 4 | 218367 |
| <b>iYDL137W</b>   | YDL136W (RPL35B)              | 4 | 217074 |
| <b>iYDL138W</b>   | YDL137W (ARF2)                | 4 | 215643 |
| <b>iYDL139C</b>   | YDL139C (SCM3) YDL138W (RGT2) | 4 | 212119 |
| <b>iYDL140C</b>   | YDL140C (RPO21)               | 4 | 210562 |
| <b>iYDL141W</b>   |                               | 4 | 205112 |
| <b>iYDL142C</b>   | YDL142C (CRD1) YDL141W (BPL1) | 4 | 202571 |
| <b>iYDL143W</b>   |                               | 4 | 201583 |
| <b>iYDL144C</b>   | YDL144C YDL143W (CCT4)        | 4 | 199742 |
| <b>iYDL145C</b>   | YDL145C (COP1)                | 4 | 198177 |



|            |                                |   |        |
|------------|--------------------------------|---|--------|
| iYDL146W   |                                | 4 | 194226 |
| iYDL147W   | YDL146W                        | 4 | 192262 |
| iYDL148C   | YDL148C (NOP14) YDL147W (RPN5) | 4 | 190587 |
| iYDL149W   |                                | 4 | 187919 |
| iYDL150W   | YDL149W (APG9)                 | 4 | 184612 |
| iYDL152W   |                                | 4 | 183188 |
| iYDL154W   |                                | 4 | 181040 |
| iYDL155W   | YDL154W (MSH5)                 | 4 | 178057 |
| iYDL156W   | YDL155W (CLB3)                 | 4 | 176487 |
| iYDL160C   | YDL160C (DHH1) YDL159W (STE7)  | 4 | 171931 |
| iYDL163W   |                                | 4 | 167259 |
| iYDL165W   |                                | 4 | 164866 |
| iYDL166C   | YDL166C (FAP7) YDL165W (CDC36) | 4 | 164043 |
| iYDL167C   | YDL167C (NRP1)                 | 4 | 163155 |
| iYDL168W   |                                | 4 | 160765 |
| iYDL169C   | YDL169C (UGX2) YDL168W (SFA1)  | 4 | 158736 |
| iYDL170W   |                                | 4 | 157905 |
| iYDL171C   | YDL171C (GLT1) YDL170W (UGA3)  | 4 | 155641 |
| iYDL172C   | YDL172C                        | 4 | 149087 |
| iYDL175C   | YDL175C                        | 4 | 145519 |
| iYDL176W   |                                | 4 | 144224 |
| iYDL177C   | YDL177C YDL176W                | 4 | 141722 |
| iYDL178W   |                                | 4 | 141115 |
| iYDL179W   | YDL178W (DLD2)                 | 4 | 139206 |
| iYDL180W   | YDL179W (PCL9)                 | 4 | 137540 |
| iYDL181W   | YDL180W                        | 4 | 135437 |
| iYDL182W   | YDL181W (INH1)                 | 4 | 134724 |
| iYDL183C-0 | YDL183C YDL182W (LYS20)        | 4 | 131834 |
| iYDL183C-1 | YDL183C YDL182W (LYS20)        | 4 | 132636 |
| iYDL184C   | YDL184C (RPL41A)               | 4 | 130485 |
| iYDL185W   |                                | 4 | 130003 |
| iYDL186W   | YDL185W (TFP1)                 | 4 | 126450 |
| iYDL188C   | YDL188C (PPH22)                | 4 | 124999 |
| iYDL189W   |                                | 4 | 123590 |
| iYDL190C   | YDL190C (UFD2) YDL189W         | 4 | 121593 |
| iYDL191W   |                                | 4 | 118518 |
| iYDL192W   | YDL191W (RPL35A)               | 4 | 116867 |
| iYDL193W   | YDL192W (ARF1)                 | 4 | 115800 |
| iYDL194W   | YDL193W                        | 4 | 114235 |
| iYDL195W   | YDL194W (SNF3)                 | 4 | 111030 |
| iYDL196W   | YDL195W (SEC31)                | 4 | 107071 |
| iYDL197C   | YDL197C (ASF2) YDL196W         | 4 | 106495 |
| iYDL198C   | YDL198C (YHM1)                 | 4 | 104552 |
| iYDL199C   | YDL199C                        | 4 | 103354 |
| iYDL200C   | YDL200C (MGT1)                 | 4 | 101122 |
| iYDL202W   | YDL201W                        | 4 | 99225  |
| iYDL203C   | YDL203C YDL202W (MRPL11)       | 4 | 97954  |
| iYDL204W   |                                | 4 | 95787  |
| iYDL205C   | YDL205C (HEM3) YDL204W         | 4 | 93746  |
| iYDL206W   |                                | 4 | 92465  |
| iYDL207W   | YDL206W                        | 4 | 89865  |

|                      |                                 |   |        |
|----------------------|---------------------------------|---|--------|
| <b>iYDL208W</b>      | YDL207W (GLE1)                  | 4 | 87983  |
| <b>iYDL209C</b>      | YDL209C YDL208W (NHP2)          | 4 | 87227  |
| <b>iYDL210W</b>      |                                 | 4 | 85986  |
| <b>iYDL211C-0</b>    | YDL211C YDL210W (UGA4)          | 4 | 80413  |
| <b>iYDL211C-1</b>    | YDL211C YDL210W (UGA4)          | 4 | 81458  |
| <b>iYDL211C-2</b>    | YDL211C YDL210W (UGA4)          | 4 | 82503  |
| <b>iYDL212W</b>      |                                 | 4 | 79059  |
| <b>iYDL213C</b>      | YDL213C (FYV14) YDL212W (SHR3)  | 4 | 77967  |
| <b>iYDL214C</b>      | YDL214C (PRR2)                  | 4 | 76546  |
| <b>iYDL215C</b>      | YDL215C (GDH2)                  | 4 | 73919  |
| <b>iYDL216C</b>      | YDL216C (RRI1)                  | 4 | 70365  |
| <b>iYDL217C</b>      | YDL217C (TIM22)                 | 4 | 68607  |
| <b>iYDL218W</b>      |                                 | 4 | 67447  |
| <b>iYDL219W</b>      | YDL218W                         | 4 | 65766  |
| <b>iYDL220C</b>      | YDL220C (CDC13) YDL219W         | 4 | 65019  |
| <b>iYDL222C</b>      | YDL222C YDL221W                 | 4 | 61802  |
| <b>iYDL223C</b>      | YDL223C                         | 4 | 60406  |
| <b>iYDL224C</b>      | YDL224C (WHI4)                  | 4 | 56347  |
| <b>iYDL225W</b>      |                                 | 4 | 54101  |
| <b>iYDL226C</b>      | YDL226C (GCS1) YDL225W (SHS1)   | 4 | 52174  |
| <b>iYDL227C-0</b>    | YDL227C (HO)                    | 4 | 48032  |
| <b>iYDL227C-1</b>    | YDL227C (HO)                    | 4 | 49060  |
| <b>iYDL227C-2</b>    | YDL227C (HO)                    | 4 | 50088  |
| <b>iYDL228C</b>      | YDL228C                         | 4 | 45919  |
| <b>iYDL230W</b>      | YDL229W (SSB1)                  | 4 | 43708  |
| <b>iYDL231C</b>      | YDL231C (BRE4) YDL230W (PTP1)   | 4 | 42245  |
| <b>iYDL232W</b>      |                                 | 4 | 38598  |
| <b>iYDL233W</b>      | YDL232W (OST4)                  | 4 | 38174  |
| <b>iYDL234C</b>      | YDL234C (GYP7) YDL233W          | 4 | 36478  |
| <b>iYDL235C</b>      | YDL235C (YPD1)                  | 4 | 33918  |
| <b>iYDL236W</b>      |                                 | 4 | 33234  |
| <b>iYDL237W</b>      | YDL236W (PHO13)                 | 4 | 31829  |
| <b>iYDL238C</b>      | YDL238C YDL237W                 | 4 | 30454  |
| <b>iYDL239C</b>      | YDL239C (ADY3)                  | 4 | 28775  |
| <b>iYDL240W</b>      |                                 | 4 | 25876  |
| <b>iYDL241W-0</b>    | YDL240W (LRG1)                  | 4 | 21006  |
| <b>iYDL241W-1</b>    | YDL240W (LRG1)                  | 4 | 21914  |
| <b>iYDL242W</b>      | YDL241W                         | 4 | 19312  |
| <b>iYDL243C</b>      | YDL243C (AAD4) YDL242W          | 4 | 18566  |
| <b>iYDL244W</b>      |                                 | 4 | 17226  |
| <b>iYDL245C-0</b>    | YDL245C (HXT15) YDL244W (THI13) | 4 | 13360  |
| <b>iYDL245C-1</b>    | YDL245C (HXT15) YDL244W (THI13) | 4 | 14782  |
| <b>iYDL246C-0</b>    | YDL246C                         | 4 | 9756   |
| <b>iYDL246C-1</b>    | YDL246C                         | 4 | 10706  |
| <b>iYDL247W</b>      |                                 | 4 | 7814   |
| <b>iYDL248W-0</b>    | YDL247W                         | 4 | 2953   |
| <b>iYDL248W-1</b>    | YDL247W                         | 4 | 4469   |
| <b>iYDLCdelta1-0</b> | YDL007W (RPT2)                  | 4 | 434780 |
| <b>iYDLCdelta1-1</b> | YDL007W (RPT2)                  | 4 | 435985 |
| <b>iYDLWtau1</b>     | YDL007W (RPT2)                  | 4 | 437559 |
| <b>iYDR001C</b>      | YDR001C (NTH1) YDR002W (YRB1)   | 4 | 452516 |

|            |                                   |   |        |
|------------|-----------------------------------|---|--------|
| iYDR002W   | YDR003W                           | 4 | 453691 |
| iYDR003W   | YDR004W (RAD57)                   | 4 | 454795 |
| iYDR004W   |                                   | 4 | 456624 |
| iYDR005C   | YDR005C (MAF1)                    | 4 | 458144 |
| iYDR006C   | YDR006C (SOK1) YDR007W (TRP1)     | 4 | 461288 |
| iYDR008C   | YDR008C YDR009W (GAL3)            | 4 | 462643 |
| iYDR010C   | YDR010C YDR011W (SNQ2)            | 4 | 465424 |
| iYDR011W   | YDR012W (RPL4B)                   | 4 | 470465 |
| iYDR012W   | YDR013W                           | 4 | 472982 |
| iYDR013W   | YDR014W (RAD61)                   | 4 | 473824 |
| iYDR014W-0 |                                   | 4 | 476030 |
| iYDR016C   | YDR016C (DAD1)                    | 4 | 478798 |
| iYDR017C   | YDR017C (KCS1)                    | 4 | 482307 |
| iYDR018C   | YDR018C                           | 4 | 483900 |
| iYDR019C   | YDR019C (GCV1)                    | 4 | 485405 |
| iYDR020C   | YDR020C YDR021W (FAL1)            | 4 | 486484 |
| iYDR021W   |                                   | 4 | 488043 |
| iYDR022C   | YDR022C (CIS1) tv(uac)dYDR023W (S | 4 | 488702 |
| iYDR023W   | YDR024W (FYV1)                    | 4 | 490936 |
| iYDR025W   |                                   | 4 | 492364 |
| iYDR026C   | YDR026C                           | 4 | 494308 |
| iYDR027C   | YDR027C (LUV1)                    | 4 | 497358 |
| iYDR028C   | YDR028C (REG1) YDR029W            | 4 | 500919 |
| iYDR029W   |                                   | 4 | 501454 |
| iYDR030C   | YDR030C (RAD28) YDR031W           | 4 | 503313 |
| iYDR031W   |                                   | 4 | 503891 |
| iYDR032C-0 | YDR032C (PST2) YDR033W (MRH1)     | 4 | 504734 |
| iYDR032C-2 | YDR032C (PST2) YDR033W (MRH1)     | 4 | 507034 |
| iYDR033W   |                                   | 4 | 509148 |
| iYDR034C   | YDR034C (LYS14)                   | 4 | 512148 |
| iYDR034C-A | YDR034C-A YDR034W-B               | 4 | 520731 |
| iYDR034W-B | YDR035W (ARO3)                    | 4 | 521508 |
| iYDR035W   |                                   | 4 | 522967 |
| iYDR036C   | YDR036C YDR037W (KRS1)            | 4 | 524752 |
| iYDR037W   |                                   | 4 | 527254 |
| iYDR038C   | YDR038C (ENA5)                    | 4 | 530736 |
| iYDR040C   | YDR040C (ENA1) YDR041W (RSM10)    | 4 | 538506 |
| iYDR041W   |                                   | 4 | 540453 |
| iYDR042C   | YDR042C                           | 4 | 541242 |
| iYDR043C-0 | YDR043C (NRG1) YDR044W (HEM13)    | 4 | 543409 |
| iYDR043C-2 | YDR043C (NRG1) YDR044W (HEM13)    | 4 | 545591 |
| iYDR044W   |                                   | 4 | 547668 |
| iYDR045C   | YDR045C (RPC11)                   | 4 | 548350 |
| iYDR047W   |                                   | 4 | 552988 |
| iYDR049W   |                                   | 4 | 555192 |
| iYDR050C   | YDR050C (TPI1)                    | 4 | 556512 |
| iYDR051C   | YDR051C                           | 4 | 558100 |
| iYDR053W   |                                   | 4 | 560684 |
| iYDR054C   | YDR054C (CDC34) YDR055W (PST1)    | 4 | 562367 |
| iYDR055W   |                                   | 4 | 564901 |
| iYDR056C   | YDR056C YDR057W                   | 4 | 565680 |

|          |                                 |   |        |
|----------|---------------------------------|---|--------|
| iYDR057W |                                 | 4 | 567595 |
| iYDR058C | YDR058C (TGL2) tr(ucu)d/tdguc)d | 4 | 568743 |
| iYDR060W | YDR061W                         | 4 | 573765 |
| iYDR061W | YDR062W (LCB2)                  | 4 | 575822 |
| iYDR062W | YDR063W                         | 4 | 578198 |
| iYDR063W | YDR064W (RPS13)                 | 4 | 579152 |
| iYDR064W | YDR065W                         | 4 | 580492 |
| iYDR065W |                                 | 4 | 581824 |
| iYDR066C | YDR066C                         | 4 | 582538 |
| iYDR067C | YDR067C YDR068W (DOS2)          | 4 | 583505 |
| iYDR068W |                                 | 4 | 584685 |
| iYDR069C | YDR069C (DOA4)                  | 4 | 587759 |
| iYDR070C | YDR070C                         | 4 | 588419 |
| iYDR071C | YDR071C                         | 4 | 589442 |
| iYDR073W | YDR074W (TPS2)                  | 4 | 592987 |
| iYDR074W | YDR075W (PPH3)                  | 4 | 596622 |
| iYDR075W | YDR076W (RAD55)                 | 4 | 598121 |
| iYDR076W | YDR077W (SED1)                  | 4 | 599727 |
| iYDR077W |                                 | 4 | 601848 |
| iYDR078C | YDR078C (SHU2) YDR079W (PET100) | 4 | 602908 |
| iYDR079W | YDR080W (VPS41)                 | 4 | 603438 |
| iYDR080W |                                 | 4 | 607025 |
| iYDR081C | YDR081C (PDC2) YDR082W (STN1)   | 4 | 610120 |
| iYDR082W | YDR083W (RRP8)                  | 4 | 611964 |
| iYDR083W |                                 | 4 | 613263 |
| iYDR084C | YDR084C                         | 4 | 614042 |
| iYDR085C | YDR085C (AFR1)                  | 4 | 616188 |
| iYDR086C | YDR086C (SSS1)                  | 4 | 617208 |
| iYDR087C | YDR087C (RRP1)                  | 4 | 618344 |
| iYDR088C | YDR088C (SLU7) YDR089W          | 4 | 619683 |
| iYDR089W |                                 | 4 | 624759 |
| iYDR090C | YDR090C                         | 4 | 626036 |
| iYDR091C | YDR091C (RLI1) YDR092W (UBC13)  | 4 | 628572 |
| iYDR092W | YDR093W (DNF2)                  | 4 | 630643 |
| iYDR095C | YDR095C YDR096W (GIS1)          | 4 | 636565 |
| iYDR096W |                                 | 4 | 639861 |
| iYDR097C | YDR097C (MSH6)                  | 4 | 643875 |
| iYDR098C | YDR098C (GRX3)                  | 4 | 645073 |
| iYDR099W | YDR100W                         | 4 | 654466 |
| iYDR100W |                                 | 4 | 655482 |
| iYDR101C | YDR101C                         | 4 | 657505 |
| iYDR102C | YDR102C YDR103W (STE5)          | 4 | 658018 |
| iYDR104C | YDR104C (SPO71)                 | 4 | 664948 |
| iYDR105C | YDR105C YDR106W (ARP10)         | 4 | 666808 |
| iYDR106W |                                 | 4 | 667896 |
| iYDR107C | YDR107C YDR108W (GSG1)          | 4 | 671072 |
| iYDR109C | YDR109C YDR110W (FOB1)          | 4 | 675705 |
| iYDR110W |                                 | 4 | 677840 |
| iYDR112W |                                 | 4 | 679890 |
| iYDR113C | YDR113C (PDS1)                  | 4 | 681655 |
| iYDR115W |                                 | 4 | 682530 |

|                     |                                   |   |        |
|---------------------|-----------------------------------|---|--------|
| <b>iYDR116C</b>     | YDR116C                           | 4 | 683619 |
| <b>iYDR117C</b>     | YDR117C YDR118W (APC4)            | 4 | 685681 |
| <b>iYDR118W</b>     | YDR119W                           | 4 | 687878 |
| <b>iYDR119W</b>     |                                   | 4 | 690571 |
| <b>iYDR120C</b>     | YDR120C (TRM1) YDR121W (DPB4)     | 4 | 693299 |
| <b>iYDR121W</b>     | YDR122W (KIN1)                    | 4 | 694213 |
| <b>iYDR122W</b>     |                                   | 4 | 697932 |
| <b>iYDR123C</b>     | YDR123C (INO2) YDR124W            | 4 | 699506 |
| <b>iYDR124W</b>     |                                   | 4 | 701327 |
| <b>iYDR125C</b>     | YDR125C (ECM18) YDR126W (PSL10)   | 4 | 702796 |
| <b>iYDR126W</b>     | YDR127W (ARO1)                    | 4 | 704282 |
| <b>iYDR127W</b>     | YDR128W                           | 4 | 709288 |
| <b>iYDR128W</b>     |                                   | 4 | 713033 |
| <b>iYDR129C</b>     | YDR129C (SAC6)                    | 4 | 715417 |
| <b>iYDR130C</b>     | YDR130C (FIN1)                    | 4 | 716660 |
| <b>iYDR131C</b>     | YDR131C                           | 4 | 718498 |
| <b>iYDR134C</b>     | YDR134C                           | 4 | 721519 |
| <b>iYDR135C</b>     | YDR135C (YCF1)                    | 4 | 727589 |
| <b>iYDR137W</b>     | YDR138W (HPR1)                    | 4 | 730288 |
| <b>iYDR138W</b>     |                                   | 4 | 732874 |
| <b>iYDR139C</b>     | YDR139C (RUB1) YDR140W (FYV9)     | 4 | 733962 |
| <b>iYDR140W</b>     |                                   | 4 | 734841 |
| <b>iYDR141C</b>     | YDR141C (DOP1)                    | 4 | 740035 |
| <b>iYDR142C</b>     | YDR142C (PEX7)                    | 4 | 741638 |
| <b>iYDR143C</b>     | YDR143C (SAN1)                    | 4 | 743912 |
| <b>iYDR144C</b>     | YDR144C (MKC7) YDR145W (TAF61)    | 4 | 746139 |
| <b>iYDR145W</b>     |                                   | 4 | 748395 |
| <b>iYDR146C</b>     | YDR146C (SWI5) YDR147W (EKI1)     | 4 | 750780 |
| <b>iYDR147W</b>     |                                   | 4 | 753273 |
| <b>iYDR148C</b>     | YDR148C (KGD2)                    | 4 | 755104 |
| <b>iYDR150W</b>     |                                   | 4 | 763912 |
| <b>iYDR151C</b>     | YDR151C (CTH1) YDR152W            | 4 | 765193 |
| <b>iYDR152W</b>     |                                   | 4 | 766541 |
| <b>iYDR153C</b>     | YDR153C                           | 4 | 768009 |
| <b>iYDR155C</b>     | YDR155C (CPR1) YDR156W (RPA14)    | 4 | 769038 |
| <b>iYDR158W</b>     | YDR159W (SAC3)                    | 4 | 771492 |
| <b>iYDR159W</b>     | YDR160W (SSY1)                    | 4 | 775820 |
| <b>iYDR160W</b>     | YDR161W (TCI1)                    | 4 | 778759 |
| <b>iYDR161W</b>     |                                   | 4 | 780244 |
| <b>iYDR162C</b>     | YDR162C (NBP2) YDR163W            | 4 | 781138 |
| <b>iYDR163W</b>     |                                   | 4 | 781988 |
| <b>iYDR164C</b>     | YDR164C (SEC1) YDR165W            | 4 | 784253 |
| <b>iYDR165W</b>     |                                   | 4 | 786243 |
| <b>iYDR166C</b>     | YDR166C (SEC5) YDR167W (TAF25)    | 4 | 789259 |
| <b>iYDR167W</b>     | YDR168W (CDC37)                   | 4 | 790107 |
| <b>iYDR169C-0</b>   | YDR169C (STB3)                    | 4 | 793927 |
| <b>iYDR169C-1</b>   | YDR169C (STB3)                    | 4 | 795079 |
| <b>iYDR170C</b>     | YDR170C tq(uug)d3 (SEC7) YDR170W- | 4 | 802260 |
| <b>iYDR170W-A-0</b> | YDR171W (HSP42)                   | 4 | 804555 |
| <b>iYDR171W</b>     | YDR172W (SUP35)                   | 4 | 807786 |
| <b>iYDR172W</b>     |                                   | 4 | 810419 |



|            |                                |   |        |
|------------|--------------------------------|---|--------|
| iYDR173C   | YDR173C (ARG82) YDR174W (HMO1) | 4 | 811670 |
| iYDR174W   |                                | 4 | 812888 |
| iYDR175C   | YDR175C (RSM24) YDR176W (NGG1) | 4 | 814190 |
| iYDR176W   | YDR177W (UBC1)                 | 4 | 816598 |
| iYDR177W   | YDR178W (SDH4)                 | 4 | 817563 |
| iYDR178W   |                                | 4 | 818533 |
| iYDR179C   | YDR179C YDR179W-A              | 4 | 819234 |
| iYDR179W-A | YDR180W (SCC2)                 | 4 | 820861 |
| iYDR180W   |                                | 4 | 825813 |
| iYDR181C   | YDR181C (SAS4) YDR182W (CDC1)  | 4 | 827392 |
| iYDR182W   | YDR183W (PLP1)                 | 4 | 829094 |
| iYDR183W   |                                | 4 | 830314 |
| iYDR184C   | YDR184C (ATC1)                 | 4 | 831550 |
| iYDR185C   | YDR185C                        | 4 | 832510 |
| iYDR186C   | YDR186C                        | 4 | 835529 |
| iYDR188W   | YDR189W (SLY1)                 | 4 | 838098 |
| iYDR189W   |                                | 4 | 840429 |
| iYDR190C   | YDR190C (RVB1) YDR191W (HST4)  | 4 | 842032 |
| iYDR191W   |                                | 4 | 843486 |
| iYDR193W   |                                | 4 | 844989 |
| iYDR195W   |                                | 4 | 850237 |
| iYDR196C   | YDR196C YDR197W (CBS2)         | 4 | 851036 |
| iYDR197W   |                                | 4 | 852434 |
| iYDR198C   | YDR198C YDR199W                | 4 | 854009 |
| iYDR200C   | YDR200C YDR201W (SPC19)        | 4 | 856130 |
| iYDR201W   |                                | 4 | 856851 |
| iYDR203W   | YDR204W (COQ4)                 | 4 | 858036 |
| iYDR204W   | YDR205W (MSC2)                 | 4 | 859181 |
| iYDR205W   | YDR206W (EBS1)                 | 4 | 861557 |
| iYDR206W   |                                | 4 | 864745 |
| iYDR207C   | YDR207C (UME6) YDR208W (MSS4)  | 4 | 867559 |
| iYDR210W   |                                | 4 | 871338 |
| iYDR211W   | YDR212W (TCP1)                 | 4 | 886902 |
| iYDR212W   | YDR213W (UPC2)                 | 4 | 888948 |
| iYDR213W   | YDR214W (AHA1)                 | 4 | 892529 |
| iYDR214W   |                                | 4 | 893964 |
| iYDR215C   | YDR215C YDR216W (ADR1)         | 4 | 894538 |
| iYDR216W   |                                | 4 | 899042 |
| iYDR217C   | YDR217C (RAD9)                 | 4 | 903516 |
| iYDR218C   | YDR218C (SPR28)                | 4 | 905088 |
| iYDR219C   | YDR219C                        | 4 | 906888 |
| iYDR221W   | YDR222W                        | 4 | 909474 |
| iYDR222W   | YDR223W                        | 4 | 911337 |
| iYDR223W   |                                | 4 | 913538 |
| iYDR224C   | YDR224C (HTB1) YDR225W (HTA1)  | 4 | 914748 |
| iYDR225W   | YDR226W (ADK1)                 | 4 | 915964 |
| iYDR226W   | YDR227W (SIR4)                 | 4 | 917190 |
| iYDR227W   |                                | 4 | 921683 |
| iYDR228C   | YDR228C (PCF11) YDR229W        | 4 | 923842 |
| iYDR229W   | YDR230W                        | 4 | 926182 |
| iYDR231C   | YDR231C (COX20) YDR232W (HEM1) | 4 | 926946 |

|            |                                |   |         |
|------------|--------------------------------|---|---------|
| iYDR232W   |                                | 4 | 929134  |
| iYDR233C   | YDR233C YDR234W (LYS4)         | 4 | 930393  |
| iYDR234W   | YDR235W (PRP42)                | 4 | 933246  |
| iYDR235W   |                                | 4 | 935174  |
| iYDR236C   | YDR236C (FMN1) YDR237W (MRPL7) | 4 | 935928  |
| iYDR237W   |                                | 4 | 937529  |
| iYDR238C   | YDR238C (SEC26)                | 4 | 940852  |
| iYDR239C   | YDR239C                        | 4 | 943456  |
| iYDR242W   |                                | 4 | 948492  |
| iYDR243C   | YDR243C (PRP28) YDR244W (PEX5) | 4 | 950320  |
| iYDR244W   | YDR245W (MNN10)                | 4 | 952437  |
| iYDR245W   | YDR246W (TRS23)                | 4 | 954017  |
| iYDR246W   | YDR247W                        | 4 | 954983  |
| iYDR247W   |                                | 4 | 957434  |
| iYDR248C   | YDR248C                        | 4 | 958375  |
| iYDR249C   | YDR249C                        | 4 | 959838  |
| iYDR250C   | YDR250C YDR251W (PAM1)         | 4 | 960397  |
| iYDR252W   |                                | 4 | 963897  |
| iYDR253C   | YDR253C (MET32) YDR254W (CHL4) | 4 | 964601  |
| iYDR254W   |                                | 4 | 966525  |
| iYDR255C   | YDR255C                        | 4 | 967858  |
| iYDR256C   | YDR256C (CTA1)                 | 4 | 969716  |
| iYDR257C   | YDR257C (RMS1)                 | 4 | 971510  |
| iYDR258C   | YDR258C (HSP78)                | 4 | 974279  |
| iYDR259C   | YDR259C (YAP6)                 | 4 | 975818  |
| iYDR260C   | YDR260C (SWM1)                 | 4 | 977265  |
| iYDR261C-0 | YDR261C (EXG2) YDR261W-A       | 4 | 979245  |
| iYDR261C-1 | YDR261C (EXG2) YDR261W-A       | 4 | 980127  |
| iYDR262W   |                                | 4 | 993988  |
| iYDR263C   | YDR263C (DIN7)                 | 4 | 995570  |
| iYDR264C   | YDR264C (AKR1) YDR265W (PEX10) | 4 | 998359  |
| iYDR265W   |                                | 4 | 999913  |
| iYDR267C   | YDR267C YDR268W (MSW1)         | 4 | 1003538 |
| iYDR268W   |                                | 4 | 1005179 |
| iYDR271C   | YDR271C YDR272W (GLO2)         | 4 | 1008802 |
| iYDR272W   | YDR273W (DON1)                 | 4 | 1009870 |
| iYDR273W   |                                | 4 | 1011309 |
| iYDR274C   | YDR274C YDR275W                | 4 | 1011996 |
| iYDR275W   |                                | 4 | 1012995 |
| iYDR276C   | YDR276C (PMP3)                 | 4 | 1013679 |
| iYDR277C   | YDR277C (MTH1)                 | 4 | 1015738 |
| iYDR279W   | YDR280W (RRP45)                | 4 | 1020456 |
| iYDR280W   |                                | 4 | 1021700 |
| iYDR281C   | YDR281C (PHM6)                 | 4 | 1022357 |
| iYDR282C   | YDR282C                        | 4 | 1024791 |
| iYDR283C   | YDR283C (GCN2)                 | 4 | 1030085 |
| iYDR284C   | YDR284C (DPP1) YDR285W (ZIP1)  | 4 | 1031455 |
| iYDR285W   |                                | 4 | 1035099 |
| iYDR286C   | YDR286C YDR287W                | 4 | 1035611 |
| iYDR287W   | YDR288W                        | 4 | 1036909 |
| iYDR288W   |                                | 4 | 1038142 |

|            |                               |   |         |
|------------|-------------------------------|---|---------|
| iYDR291W   |                               | 4 | 1042997 |
| iYDR292C   | YDR292C (SRP101)              | 4 | 1045047 |
| iYDR294C   | YDR294C (DPL1)                | 4 | 1052264 |
| iYDR295C   | YDR295C (PLO2) YDR296W (MHR1) | 4 | 1054683 |
| iYDR296W   | YDR297W (SUR2)                | 4 | 1055928 |
| iYDR297W   |                               | 4 | 1057636 |
| iYDR298C   | YDR298C (ATP5) YDR299W (BFR2) | 4 | 1058850 |
| iYDR299W   |                               | 4 | 1061267 |
| iYDR300C   | YDR300C (PRO1) YDR301W (CFT1) | 4 | 1062827 |
| iYDR301W   | YDR302W (GPI11)               | 4 | 1067461 |
| iYDR302W   |                               | 4 | 1068426 |
| iYDR303C   | YDR303C (RSC3)                | 4 | 1071422 |
| iYDR304C   | YDR304C (CPR5)                | 4 | 1072593 |
| iYDR305C   | YDR305C (HNT2)                | 4 | 1073524 |
| iYDR306C   | YDR306C tv(cac)d YDR307W      | 4 | 1075207 |
| iYDR307W   |                               | 4 | 1077889 |
| iYDR308C   | YDR308C (SRB7)                | 4 | 1078485 |
| iYDR309C   | YDR309C (GIC2)                | 4 | 1080235 |
| iYDR310C   | YDR310C (SUM1) YDR311W (TFB1) | 4 | 1084352 |
| iYDR311W   | YDR312W (SSF2)                | 4 | 1087030 |
| iYDR313C   | YDR313C (PIB1)                | 4 | 1090116 |
| iYDR314C   | YDR314C                       | 4 | 1092548 |
| iYDR315C   | YDR315C (IPK1) YDR316W        | 4 | 1093623 |
| iYDR316W   | YDR316W-A                     | 4 | 1095215 |
| iYDR317W   | YDR318W (MCM21)               | 4 | 1103465 |
| iYDR319C   | YDR319C                       | 4 | 1105864 |
| iYDR320C   | YDR320C (SWA2) YDR321W (ASP1) | 4 | 1108138 |
| iYDR321W   | YDR322W (MRPL35)              | 4 | 1109884 |
| iYDR322W   |                               | 4 | 1111729 |
| iYDR323C   | YDR323C (PEP7)                | 4 | 1114064 |
| iYDR324C   | YDR324C YDR325W (YCG1)        | 4 | 1116800 |
| iYDR325W   |                               | 4 | 1120269 |
| iYDR326C   | YDR326C YDR327W               | 4 | 1124961 |
| iYDR328C   | YDR328C (SKP1)                | 4 | 1126054 |
| iYDR329C   | YDR329C (PEX3) YDR330W        | 4 | 1127631 |
| iYDR330W   | YDR331W (GPI8)                | 4 | 1129410 |
| iYDR332W   |                               | 4 | 1133106 |
| iYDR333C   | YDR333C YDR334W (SWR1)        | 4 | 1135467 |
| iYDR335W   | YDR336W                       | 4 | 1144877 |
| iYDR336W   | YDR337W (MRPS28)              | 4 | 1146071 |
| iYDR337W   |                               | 4 | 1147214 |
| iYDR338C   | YDR338C                       | 4 | 1149501 |
| iYDR339C   | YDR339C tx(xx)d YDR340W       | 4 | 1150555 |
| iYDR341C   | YDR341C                       | 4 | 1153661 |
| iYDR342C-0 | YDR342C (HXT7)                | 4 | 1155963 |
| iYDR342C-1 | YDR342C (HXT7)                | 4 | 1157189 |
| iYDR342C-2 | YDR342C (HXT7)                | 4 | 1158415 |
| iYDR343C   | YDR343C (HXT6)                | 4 | 1161355 |
| iYDR344C   | YDR344C                       | 4 | 1162484 |
| iYDR345C-0 | YDR345C (HXT3)                | 4 | 1164695 |
| iYDR346C   | YDR346C YDR347W (MRP1)        | 4 | 1168694 |

|            |                                |   |         |
|------------|--------------------------------|---|---------|
| iYDR347W   |                                | 4 | 1170178 |
| iYDR348C   | YDR348C                        | 4 | 1171860 |
| iYDR349C   | YDR349C (YPS7)                 | 4 | 1174211 |
| iYDR350C   | YDR350C (TCM10) YDR351W (SBE2) | 4 | 1178208 |
| iYDR351W   | YDR352W                        | 4 | 1181294 |
| iYDR352W   | YDR353W (TRR1)                 | 4 | 1182788 |
| iYDR353W   | YDR354W (TRP4)                 | 4 | 1184292 |
| iYDR354W   |                                | 4 | 1185923 |
| iYDR356W   |                                | 4 | 1188975 |
| iYDR358W   |                                | 4 | 1191766 |
| iYDR360W   |                                | 4 | 1195019 |
| iYDR361C   | YDR361C (BCP1)                 | 4 | 1196297 |
| iYDR362C   | YDR362C (TFC6) YDR363W (ESC2)  | 4 | 1198731 |
| iYDR363W   | YDR363W-A (SEM1)               | 4 | 1200587 |
| iYDR363W-A |                                | 4 | 1202431 |
| iYDR364C   | YDR364C (CDC40)                | 4 | 1204244 |
| iYDR365C   | YDR365C YDR365W-A              | 4 | 1206417 |
| iYDR367W   | YDR368W (YPR1)                 | 4 | 1213648 |
| iYDR368W   |                                | 4 | 1214876 |
| iYDR369C   | YDR369C (XRS2)                 | 4 | 1217614 |
| iYDR370C   | YDR370C YDR371W (CTS2)         | 4 | 1219144 |
| iYDR371W   |                                | 4 | 1220982 |
| iYDR372C   | YDR372C YDR373W (FRQ1)         | 4 | 1222183 |
| iYDR373W   |                                | 4 | 1223365 |
| iYDR374C   | YDR374C                        | 4 | 1224428 |
| iYDR375C   | YDR375C (BCS1) YDR376W (ARH1)  | 4 | 1226570 |
| iYDR376W   | YDR377W (ATP17)                | 4 | 1228337 |
| iYDR377W   |                                | 4 | 1228950 |
| iYDR378C   | YDR378C (LSM6) YDR379W (RGA2)  | 4 | 1229754 |
| iYDR379W   | YDR380W (ARO10)                | 4 | 1233230 |
| iYDR380W   | YDR381W (YRA1)                 | 4 | 1236159 |
| iYDR382W   |                                | 4 | 1239858 |
| iYDR383C   | YDR383C                        | 4 | 1240752 |
| iYDR384C   | YDR384C YDR385W (EFT2)         | 4 | 1242065 |
| iYDR385W   | YDR386W (MUS81)                | 4 | 1245792 |
| iYDR386W   |                                | 4 | 1248016 |
| iYDR387C   | YDR387C YDR388W (RVS167)       | 4 | 1249855 |
| iYDR388W   | YDR389W (SAC7)                 | 4 | 1251668 |
| iYDR389W   |                                | 4 | 1254535 |
| iYDR390C   | YDR390C (UBA2)                 | 4 | 1256881 |
| iYDR391C   | YDR391C YDR392W (SPT3)         | 4 | 1258090 |
| iYDR392W   | YDR393W (SHE9)                 | 4 | 1259743 |
| iYDR393W   | YDR394W (RPT3)                 | 4 | 1261305 |
| iYDR394W   | YDR395W (SXM1)                 | 4 | 1263001 |
| iYDR395W   | YDR396W                        | 4 | 1266192 |
| iYDR397C   | YDR397C (NCB2) YDR398W         | 4 | 1266932 |
| iYDR398W   | YDR399W (HPT1)                 | 4 | 1269436 |
| iYDR399W   | YDR400W (URH1)                 | 4 | 1270767 |
| iYDR400W   | YDR401W                        | 4 | 1272119 |
| iYDR402C   | YDR402C (DIT2) YDR403W (DIT1)  | 4 | 1273737 |
| iYDR403W   |                                | 4 | 1276246 |

|            |                                 |   |         |
|------------|---------------------------------|---|---------|
| iYDR404C   | YDR404C (RPB7) YDR405W (MRP20)  | 4 | 1277203 |
| iYDR405W   | YDR406W (PDR15)                 | 4 | 1278471 |
| iYDR406W   |                                 | 4 | 1283833 |
| iYDR407C   | YDR407C (TRS120)                | 4 | 1287972 |
| iYDR408C   | YDR408C (ADE8) YDR409W (SIZ1)   | 4 | 1288893 |
| iYDR409W   |                                 | 4 | 1292154 |
| iYDR410C   | YDR410C (STE14)                 | 4 | 1293125 |
| iYDR411C   | YDR411C YDR412W                 | 4 | 1294428 |
| iYDR413C   | YDR413C                         | 4 | 1295445 |
| iYDR414C   | YDR414C (ERD1)                  | 4 | 1296720 |
| iYDR415C   | YDR415C YDR416W (SYF1)          | 4 | 1298195 |
| iYDR416W   |                                 | 4 | 1301045 |
| iYDR418W   | YDR419W (RAD30)                 | 4 | 1302147 |
| iYDR419W   | YDR420W (HKR1)                  | 4 | 1305106 |
| iYDR420W   | YDR421W (ARO80)                 | 4 | 1311709 |
| iYDR421W   |                                 | 4 | 1314926 |
| iYDR422C   | YDR422C (SIP1)                  | 4 | 1317951 |
| iYDR423C   | YDR423C (CAD1)                  | 4 | 1319309 |
| iYDR424C   | YDR424C (DYN2) YDR425W          | 4 | 1319875 |
| iYDR426C   | YDR426C YDR427W (RPN9)          | 4 | 1322040 |
| iYDR427W   |                                 | 4 | 1323420 |
| iYDR429C   | YDR429C (TIF35)                 | 4 | 1325335 |
| iYDR431W   | YDR432W (NPL3)                  | 4 | 1328735 |
| iYDR433W   | YDR434W (GPI17)                 | 4 | 1330074 |
| iYDR434W   |                                 | 4 | 1332875 |
| iYDR435C   | YDR435C (PPM1) YDR436W (PPZ2)   | 4 | 1334003 |
| iYDR436W   | YDR437W                         | 4 | 1336987 |
| iYDR437W   | YDR438W                         | 4 | 1337808 |
| iYDR438W   | YDR439W (LRS4)                  | 4 | 1339420 |
| iYDR439W-1 | YDR440W (DOT1)                  | 4 | 1341640 |
| iYDR440W   |                                 | 4 | 1344275 |
| iYDR441C   | YDR441C (APT2) YDR442W          | 4 | 1345096 |
| iYDR443C   | YDR443C (SSN2) YDR444W          | 4 | 1349972 |
| iYDR447C   | YDR447C (RPS17B) YDR448W (ADA2) | 4 | 1355587 |
| iYDR448W   |                                 | 4 | 1357403 |
| iYDR449C   | YDR449C YDR450W (RPS18A)        | 4 | 1358936 |
| iYDR450W   |                                 | 4 | 1360832 |
| iYDR452W   |                                 | 4 | 1364936 |
| iYDR453C   | YDR453C                         | 4 | 1365696 |
| iYDR454C   | YDR454C (GUK1)                  | 4 | 1366861 |
| iYDR456W   | YDR457W (TOM1)                  | 4 | 1369420 |
| iYDR458C   | YDR458C                         | 4 | 1382080 |
| iYDR459C   | YDR459C YDR460W (TFB3)          | 4 | 1383477 |
| iYDR462W   | YDR463W (STP1)                  | 4 | 1386550 |
| iYDR464W   |                                 | 4 | 1393213 |
| iYDR465C   | YDR465C (RMT2) YDR466W          | 4 | 1394608 |
| iYDR467C   | YDR467C                         | 4 | 1397943 |
| iYDR468C   | YDR468C (TLG1) YDR469W (SDC1)   | 4 | 1398734 |
| iYDR469W   |                                 | 4 | 1399576 |
| iYDR470C   | YDR470C (UGO1) YDR471W (RPL27B) | 4 | 1401248 |
| iYDR471W   | YDR472W (TRS31)                 | 4 | 1402598 |



|                   |                                 |   |         |
|-------------------|---------------------------------|---|---------|
| <b>iYDR472W</b>   |                                 | 4 | 1404207 |
| <b>iYDR473C-0</b> | YDR473C (PRP3)                  | 4 | 1405888 |
| <b>iYDR473C-1</b> | YDR473C (PRP3)                  | 4 | 1406693 |
| <b>iYDR474C</b>   | YDR474C                         | 4 | 1409165 |
| <b>iYDR475C</b>   | YDR475C                         | 4 | 1410126 |
| <b>iYDR476C</b>   | YDR476C YDR477W (SNF1)          | 4 | 1411159 |
| <b>iYDR477W</b>   | YDR478W (SNM1)                  | 4 | 1414306 |
| <b>iYDR479C</b>   | YDR479C YDR480W (DIG2)          | 4 | 1416906 |
| <b>iYDR480W</b>   |                                 | 4 | 1418402 |
| <b>iYDR481C</b>   | YDR481C (PHO8)                  | 4 | 1420282 |
| <b>iYDR482C</b>   | YDR482C YDR483W (KRE2)          | 4 | 1420870 |
| <b>iYDR483W</b>   | YDR484W (SAC2)                  | 4 | 1422517 |
| <b>iYDR484W</b>   |                                 | 4 | 1424720 |
| <b>iYDR485C</b>   | YDR485C                         | 4 | 1427284 |
| <b>iYDR486C</b>   | YDR486C (VPS60)                 | 4 | 1428251 |
| <b>iYDR487C</b>   | YDR487C (RIB3)                  | 4 | 1429012 |
| <b>iYDR488C</b>   | YDR488C (PAC11) YDR489W         | 4 | 1430821 |
| <b>iYDR489W</b>   |                                 | 4 | 1431928 |
| <b>iYDR490C</b>   | YDR490C (PKH1)                  | 4 | 1434300 |
| <b>iYDR492W</b>   | YDR493W                         | 4 | 1435906 |
| <b>iYDR493W</b>   | YDR494W (RSM28)                 | 4 | 1436620 |
| <b>iYDR494W</b>   |                                 | 4 | 1437828 |
| <b>iYDR495C</b>   | YDR495C (VPS3)                  | 4 | 1441198 |
| <b>iYDR496C</b>   | YDR496C (PUF6)                  | 4 | 1443451 |
| <b>iYDR497C</b>   | YDR497C (ITR1)                  | 4 | 1445515 |
| <b>iYDR498C</b>   | YDR498C (SEC20) YDR499W (LCD1)  | 4 | 1447042 |
| <b>iYDR499W</b>   |                                 | 4 | 1450121 |
| <b>iYDR500C</b>   | YDR500C (RPL37B) YDR501W (PLM2) | 4 | 1450901 |
| <b>iYDR501W</b>   |                                 | 4 | 1452966 |
| <b>iYDR503C</b>   | YDR503C (LPP1)                  | 4 | 1455914 |
| <b>iYDR505C</b>   | YDR505C (PSP1)                  | 4 | 1459268 |
| <b>iYDR506C</b>   | YDR506C                         | 4 | 1461602 |
| <b>iYDR507C</b>   | YDR507C (GIN4)                  | 4 | 1465834 |
| <b>iYDR509W</b>   | YDR510W (SMT3)                  | 4 | 1468621 |
| <b>iYDR510W</b>   | YDR511W (ACN9)                  | 4 | 1469753 |
| <b>iYDR511W</b>   |                                 | 4 | 1470466 |
| <b>iYDR513W</b>   |                                 | 4 | 1471496 |
| <b>iYDR514C</b>   | YDR514C YDR515W (SLF1)          | 4 | 1473047 |
| <b>iYDR515W</b>   |                                 | 4 | 1474820 |
| <b>iYDR516C</b>   | YDR516C YDR517W (GRH1)          | 4 | 1476524 |
| <b>iYDR517W</b>   | YDR518W (EUG1)                  | 4 | 1478405 |
| <b>iYDR518W</b>   | YDR519W (FPR2)                  | 4 | 1480209 |
| <b>iYDR521W</b>   |                                 | 4 | 1483524 |
| <b>iYDR522C</b>   | YDR522C (SPS2)                  | 4 | 1485351 |
| <b>iYDR523C</b>   | YDR523C (SPS1)                  | 4 | 1487086 |
| <b>iYDR524C</b>   | YDR524C (AGE1) YDR525W          | 4 | 1489038 |
| <b>iYDR525W</b>   | YDR525W-A (SNA2)                | 4 | 1490282 |
| <b>iYDR525W-A</b> |                                 | 4 | 1490883 |
| <b>iYDR527W-0</b> | YDR528W (HLR1)                  | 4 | 1492461 |
| <b>iYDR527W-1</b> | YDR528W (HLR1)                  | 4 | 1493547 |
| <b>iYDR528W</b>   |                                 | 4 | 1495905 |

|                      |                               |   |         |
|----------------------|-------------------------------|---|---------|
| <b>iYDR529C</b>      | YDR529C (QCR7)                | 4 | 1496596 |
| <b>iYDR530C</b>      | YDR530C (APA2) YDR531W        | 4 | 1497816 |
| <b>iYDR531W</b>      |                               | 4 | 1499383 |
| <b>iYDR532C</b>      | YDR532C (KRE28)               | 4 | 1500601 |
| <b>iYDR533C</b>      | YDR533C                       | 4 | 1502208 |
| <b>iYDR534C-0</b>    | YDR534C (FIT1)                | 4 | 1504947 |
| <b>iYDR534C-1</b>    | YDR534C (FIT1)                | 4 | 1505800 |
| <b>iYDR535C</b>      | YDR535C YDR536W (STL1)        | 4 | 1507409 |
| <b>iYDR536W</b>      |                               | 4 | 1509761 |
| <b>iYDR538W</b>      | YDR539W                       | 4 | 1511676 |
| <b>iYDR539W-0</b>    |                               | 4 | 1513651 |
| <b>iYDR539W-2</b>    |                               | 4 | 1516001 |
| <b>iYDR540C</b>      | YDR540C                       | 4 | 1517715 |
| <b>iYDR541C-0</b>    | YDR541C YDR542W               | 4 | 1520738 |
| <b>iYDR541C-1</b>    | YDR541C YDR542W               | 4 | 1522014 |
| <b>iYDR542W</b>      |                               | 4 | 1523652 |
| <b>iYDR543C</b>      | YDR543C                       | 4 | 1524974 |
| <b>iYDR544C</b>      | YDR544C YDR545W (YRF1-1)      | 4 | 1525564 |
| <b>iYDRCdelta3</b>   | YDR034C (LYS14)               | 4 | 513629  |
| <b>iYDRCdelta5</b>   | YDR034C (LYS14)               | 4 | 519686  |
| <b>iYDRCdelta9-0</b> | YDR098C-A YDR099W (BMH2)      | 4 | 652018  |
| <b>iYDRCsigma1</b>   | YDR098C-A YDR099W (BMH2)      | 4 | 651541  |
| <b>iYDRCsigma2</b>   |                               | 4 | 668474  |
| <b>iYDRCTy1-2</b>    | YDR211W (GCD6)                | 4 | 884257  |
| <b>iYDRWdelta10</b>  |                               | 4 | 668822  |
| <b>iYDRWdelta12</b>  | YDR242W (AMD2)                | 4 | 945709  |
| <b>iYDRWdelta14</b>  | YDR210W-D                     | 4 | 877816  |
| <b>iYDRWdelta24</b>  | YDR317W                       | 4 | 1101729 |
| <b>iYDRWdelta25</b>  |                               | 4 | 1151403 |
| <b>iYDRWdelta26</b>  | YDR349C (YPS7)                | 4 | 1175682 |
| <b>iYDRWdelta30</b>  | YDR445C YDR446W (ECM11)       | 4 | 1353260 |
| <b>iYDRWdelta31</b>  | YDR540C                       | 4 | 1518847 |
| <b>iYEL001C</b>      | YEL001C YER001W (MNN1)        | 5 | 150977  |
| <b>iYEL003W</b>      |                               | 5 | 148598  |
| <b>iYEL004W</b>      | YEL003W (GIM4)                | 5 | 147978  |
| <b>iYEL005C</b>      | YEL005C (VAB2) YEL004W (YEA4) | 5 | 146754  |
| <b>iYEL006W</b>      |                               | 5 | 145333  |
| <b>iYEL007W</b>      | YEL006W                       | 5 | 143891  |
| <b>iYEL008W</b>      | YEL007W (TOS9)                | 5 | 140892  |
| <b>iYEL009C</b>      | YEL009C (GCN4) YEL008W        | 5 | 139763  |
| <b>iYEL010W</b>      |                               | 5 | 136629  |
| <b>iYEL011W</b>      | YEL010W                       | 5 | 135234  |
| <b>iYEL012W</b>      | YEL011W (GLC3)                | 5 | 132551  |
| <b>iYEL013W</b>      | YEL012W (UBC8)                | 5 | 130561  |
| <b>iYEL014C</b>      | YEL014C YEL013W (VAC8)        | 5 | 128608  |
| <b>iYEL016C</b>      | YEL016C YEL015W               | 5 | 126218  |
| <b>iYEL017C-A</b>    | YEL017C-A (PMP2) YEL017W      | 5 | 122929  |
| <b>iYEL017W</b>      |                               | 5 | 124670  |
| <b>iYEL018W</b>      |                               | 5 | 122310  |
| <b>iYEL019C</b>      | YEL019C (MMS21) YEL018W       | 5 | 121301  |
| <b>iYEL020C</b>      | YEL020C                       | 5 | 120299  |

|                    |                                |   |        |
|--------------------|--------------------------------|---|--------|
| <b>iYEL021W</b>    | YEL020C                        | 5 | 116970 |
| <b>iYEL022W</b>    | YEL021W (URA3)                 | 5 | 115800 |
| <b>iYEL023C</b>    | YEL023C YEL022W (GEA2)         | 5 | 110552 |
| <b>iYEL024W</b>    |                                | 5 | 107907 |
| <b>iYEL025C</b>    | YEL025C (SRI1) YEL024W (RIP1)  | 5 | 106147 |
| <b>iYEL026W</b>    |                                | 5 | 102323 |
| <b>iYEL027W</b>    | YEL026W (SNU13)                | 5 | 101251 |
| <b>iYEL028W</b>    | YEL027W (CUP5)                 | 5 | 99129  |
| <b>iYEL029C</b>    | YEL029C (BUD16) YEL028W        | 5 | 97796  |
| <b>iYEL030W</b>    |                                | 5 | 96578  |
| <b>iYEL031W</b>    | YEL030W (ECM10)                | 5 | 93905  |
| <b>iYEL032W</b>    | YEL031W (SPF1)                 | 5 | 89852  |
| <b>iYEL035C</b>    | YEL035C (UTR5) YEL034W (HYP2)  | 5 | 85545  |
| <b>iYEL037C</b>    | YEL037C (RAD23)                | 5 | 82603  |
| <b>iYEL038W</b>    |                                | 5 | 81145  |
| <b>iYEL039C</b>    | YEL039C (CYC7) YEL038W (UTR4)  | 5 | 79977  |
| <b>iYEL040W</b>    |                                | 5 | 79456  |
| <b>iYEL041W</b>    | YEL040W (UTR2)                 | 5 | 77431  |
| <b>iYEL042W</b>    | YEL041W                        | 5 | 75327  |
| <b>iYEL043W</b>    | YEL042W (GDA1)                 | 5 | 73348  |
| <b>iYEL044W</b>    | YEL043W                        | 5 | 70257  |
| <b>iYEL045C</b>    | YEL045C YEL044W (IES6)         | 5 | 69265  |
| <b>iYEL047C</b>    | YEL047C                        | 5 | 66797  |
| <b>iYEL048C</b>    | YEL048C                        | 5 | 65167  |
| <b>iYEL049W</b>    |                                | 5 | 64090  |
| <b>iYEL050C</b>    | YEL050C (RML2) YEL049W (PAU2)  | 5 | 60851  |
| <b>iYEL051W</b>    |                                | 5 | 59148  |
| <b>iYEL052W</b>    | YEL051W (VMA8)                 | 5 | 58100  |
| <b>iYEL053C</b>    | YEL053C (MAK10) YEL052W (AFG1) | 5 | 56102  |
| <b>iYEL054C</b>    | YEL054C (RPL12A)               | 5 | 53218  |
| <b>iYEL055C</b>    | YEL055C (POL5)                 | 5 | 51539  |
| <b>iYEL056W</b>    |                                | 5 | 48373  |
| <b>iYEL057C</b>    | YEL057C YEL056W (HAT2)         | 5 | 45721  |
| <b>iYEL058W</b>    |                                | 5 | 44925  |
| <b>iYEL059W</b>    | YEL058W (PCM1)                 | 5 | 42960  |
| <b>iYEL060C</b>    | YEL060C (PRB1)                 | 5 | 41953  |
| <b>iYEL061C</b>    | YEL061C (CIN8)                 | 5 | 39651  |
| <b>iYEL062W</b>    |                                | 5 | 36254  |
| <b>iYEL063C</b>    | YEL063C (CAN1) YEL062W (NPR2)  | 5 | 33466  |
| <b>iYEL065W</b>    |                                | 5 | 29543  |
| <b>iYEL068C</b>    | YEL068C                        | 5 | 25978  |
| <b>iYEL072W-0</b>  | YEL071W (DLD3)                 | 5 | 14415  |
| <b>iYEL073C-0</b>  | YEL073C YEL072W                | 5 | 7553   |
| <b>iYEL073C-1</b>  | YEL073C YEL072W                | 5 | 8786   |
| <b>iYEL073C-2</b>  | YEL073C YEL072W                | 5 | 10019  |
| <b>iYEL073C-3</b>  | YEL073C YEL072W                | 5 | 11252  |
| <b>iYEL073C-4</b>  | YEL073C YEL072W                | 5 | 12485  |
| <b>iYEL074W</b>    |                                | 5 | 6464   |
| <b>iYEL075C</b>    | YEL075C YEL074W                | 5 | 5713   |
| <b>iYEL077C</b>    | YEL077C                        | 5 | 4097   |
| <b>iYELCdelta3</b> | YEL027W (CUP5) tM(CAU)E        | 5 | 99664  |

|                    |                                 |   |        |
|--------------------|---------------------------------|---|--------|
| <b>iYELCdelta4</b> | YEL010W                         | 5 | 135939 |
| <b>iYELCtau1</b>   |                                 | 5 | 118551 |
| <b>iYELWdelta2</b> | YEL050C (RML2) YEL049W (PAU2)   | 5 | 62474  |
| <b>iYELWdelta5</b> |                                 | 5 | 137639 |
| <b>iYELWdelta6</b> |                                 | 5 | 138553 |
| <b>iYER002W</b>    |                                 | 5 | 157497 |
| <b>iYER003C</b>    | YER003C (PMI40) YER004W         | 5 | 159117 |
| <b>iYER004W</b>    | YER005W (YND1)                  | 5 | 160274 |
| <b>iYER005W</b>    | YER006W (NUG1)                  | 5 | 162441 |
| <b>iYER006W</b>    | YER007W (PAC2)                  | 5 | 164284 |
| <b>iYER007C-A</b>  | YER007C-A                       | 5 | 166884 |
| <b>iYER007W</b>    |                                 | 5 | 166082 |
| <b>iYER008C</b>    | YER008C (SEC3) YER009W (NTF2)   | 5 | 171817 |
| <b>iYER009W</b>    |                                 | 5 | 172491 |
| <b>iYER010C-0</b>  | YER010C YER011W (TIR1)          | 5 | 173337 |
| <b>iYER010C-1</b>  | YER010C YER011W (TIR1)          | 5 | 174292 |
| <b>iYER011W</b>    | YER012W (PRE1)                  | 5 | 176011 |
| <b>iYER012W</b>    | YER013W (PRP22)                 | 5 | 178430 |
| <b>iYER013W</b>    | YER014W (HEM14)                 | 5 | 182277 |
| <b>iYER014W</b>    | YER015W (FAA2)                  | 5 | 184218 |
| <b>iYER015W</b>    | YER016W (BIM1)                  | 5 | 186774 |
| <b>iYER016W</b>    |                                 | 5 | 189310 |
| <b>iYER017C</b>    | YER017C (AFG3)                  | 5 | 191787 |
| <b>iYER018C</b>    | YER018C (SPC25) YER019W (ISC1)  | 5 | 192623 |
| <b>iYER019C-A</b>  | YER019C-A (SBH2) YER020W (GPA2) | 5 | 194538 |
| <b>iYER020W</b>    | YER021W (RPN3)                  | 5 | 196516 |
| <b>iYER021W</b>    | YER022W (SRB4)                  | 5 | 198518 |
| <b>iYER022W</b>    | YER023W (PRO3)                  | 5 | 200874 |
| <b>iYER023W</b>    | YER024W (YAT2)                  | 5 | 201935 |
| <b>iYER024W</b>    | YER025W (GCD11)                 | 5 | 204962 |
| <b>iYER025W</b>    |                                 | 5 | 206833 |
| <b>iYER026C</b>    | YER026C (CHO1)                  | 5 | 208473 |
| <b>iYER027C</b>    | YER027C (GAL83)                 | 5 | 210231 |
| <b>iYER028C</b>    | YER028C                         | 5 | 211875 |
| <b>iYER029C</b>    | YER029C (SMB1) YER030W          | 5 | 213176 |
| <b>iYER030W</b>    |                                 | 5 | 213897 |
| <b>iYER031C</b>    | YER031C (YPT31) YER032W (FIR1)  | 5 | 214746 |
| <b>iYER032W</b>    |                                 | 5 | 217692 |
| <b>iYER033C</b>    | YER033C (ZRG8) YER034W          | 5 | 221286 |
| <b>iYER034W</b>    | YER035W (EDC2)                  | 5 | 222402 |
| <b>iYER035W</b>    |                                 | 5 | 223075 |
| <b>iYER036C</b>    | YER036C (KRE30) YER037W (PHM8)  | 5 | 225198 |
| <b>iYER038C</b>    | YER038C (KRE29)                 | 5 | 228251 |
| <b>iYER039C-A</b>  | YER039C-A YER040W (GLN3)        | 5 | 229480 |
| <b>iYER040W</b>    | YER041W (YEN1)                  | 5 | 231986 |
| <b>iYER041W</b>    | YER042W (MXR1)                  | 5 | 234739 |
| <b>iYER042W</b>    |                                 | 5 | 235490 |
| <b>iYER043C</b>    | YER043C (SAH1)                  | 5 | 237118 |
| <b>iYER044C</b>    | YER044C (ERG28)                 | 5 | 238015 |
| <b>iYER044C-A</b>  | YER044C-A (MEI4)                | 5 | 239773 |
| <b>iYER045C-0</b>  | YER045C (ACA1) YER046W (SPO73)  | 5 | 241500 |

|                   |                                 |   |        |
|-------------------|---------------------------------|---|--------|
| <b>iYER045C-1</b> | YER045C (ACA1) YER046W (SPO73)  | 5 | 242339 |
| <b>iYER046W</b>   |                                 | 5 | 243610 |
| <b>iYER047C</b>   | YER047C (SAP1)                  | 5 | 246502 |
| <b>iYER048C</b>   | YER048C (CAJ1) YER048W-A        | 5 | 248156 |
| <b>iYER048W-A</b> | YER049W                         | 5 | 251001 |
| <b>iYER049W</b>   |                                 | 5 | 253661 |
| <b>iYER050C</b>   | YER050C (RSM18) YER051W         | 5 | 254578 |
| <b>iYER051W</b>   |                                 | 5 | 256133 |
| <b>iYER052C</b>   | YER052C (HOM3)                  | 5 | 257957 |
| <b>iYER053C-0</b> | YER053C                         | 5 | 259638 |
| <b>iYER053C-1</b> | YER053C                         | 5 | 260844 |
| <b>iYER054C</b>   | YER054C (GIP2)                  | 5 | 263697 |
| <b>iYER055C</b>   | YER055C (HIS1)                  | 5 | 265784 |
| <b>iYER056C</b>   | YER056C (FCY2)                  | 5 | 268112 |
| <b>iYER056C-A</b> | YER056C-A (RPL34A)              | 5 | 270183 |
| <b>iYER057C</b>   | YER057C (HMF1) YER058W (PET117) | 5 | 271124 |
| <b>iYER058W</b>   | YER059W (PCL6)                  | 5 | 272089 |
| <b>iYER059W</b>   | YER060W (FCY21)                 | 5 | 273884 |
| <b>iYER060W</b>   | YER060W-A (FCY22)               | 5 | 276151 |
| <b>iYER060W-A</b> |                                 | 5 | 278162 |
| <b>iYER061C</b>   | YER061C (CEM1)                  | 5 | 279624 |
| <b>iYER062C</b>   | YER062C (HOR2) YER063W (THO1)   | 5 | 280680 |
| <b>iYER063W</b>   |                                 | 5 | 282364 |
| <b>iYER066W</b>   |                                 | 5 | 290797 |
| <b>iYER067W</b>   | YER068W (MOT2)                  | 5 | 292549 |
| <b>iYER068W</b>   | YER069W (ARG5,6)                | 5 | 294811 |
| <b>iYER069W</b>   | YER070W (RNR1)                  | 5 | 297999 |
| <b>iYER070W</b>   |                                 | 5 | 301614 |
| <b>iYER071C</b>   | YER071C YER072W (VTC1)          | 5 | 302325 |
| <b>iYER072W</b>   | YER073W (ALD5)                  | 5 | 303193 |
| <b>iYER073W</b>   | YER074W (RPS24A)                | 5 | 305589 |
| <b>iYER074W</b>   |                                 | 5 | 307192 |
| <b>iYER075C</b>   | YER075C (PTP3)                  | 5 | 311195 |
| <b>iYER076C</b>   | YER076C                         | 5 | 313494 |
| <b>iYER077C</b>   | YER077C                         | 5 | 316596 |
| <b>iYER078C</b>   | YER078C YER079W                 | 5 | 318338 |
| <b>iYER079W</b>   | YER080W                         | 5 | 319548 |
| <b>iYER081W</b>   |                                 | 5 | 324091 |
| <b>iYER082C</b>   | YER082C (KRE31)                 | 5 | 325932 |
| <b>iYER084W</b>   |                                 | 5 | 327447 |
| <b>iYER085C</b>   | YER085C YER086W (ILV1)          | 5 | 328136 |
| <b>iYER086W</b>   | YER087W                         | 5 | 330203 |
| <b>iYER087C-A</b> | YER087C-A (SBH1)                | 5 | 332826 |
| <b>iYER087W</b>   |                                 | 5 | 332302 |
| <b>iYER088C</b>   | YER088C (DOT6)                  | 5 | 335184 |
| <b>iYER089C</b>   | YER089C (PTC2) YER090W (TRP2)   | 5 | 337336 |
| <b>iYER090W</b>   |                                 | 5 | 339468 |
| <b>iYER091C</b>   | YER091C (MET6)                  | 5 | 342163 |
| <b>iYER091C-A</b> | YER091C-A YER092W (IES5)        | 5 | 342607 |
| <b>iYER092W</b>   |                                 | 5 | 343228 |
| <b>iYER093C</b>   | YER093C                         | 5 | 347608 |

|                   |                                 |   |        |
|-------------------|---------------------------------|---|--------|
| <b>iYER093C-A</b> | YER093C-A                       | 5 | 348396 |
| <b>iYER094C</b>   | YER094C (PUP3) YER095W (RAD51)  | 5 | 349342 |
| <b>iYER095W</b>   | YER096W (SHC1)                  | 5 | 351178 |
| <b>iYER096W</b>   | YER097W                         | 5 | 353232 |
| <b>iYER098W</b>   |                                 | 5 | 357726 |
| <b>iYER099C</b>   | YER099C (PRS2) YER100W (UBC6)   | 5 | 359057 |
| <b>iYER100W</b>   |                                 | 5 | 360310 |
| <b>iYER101C</b>   | YER101C (AST2) YER102W (RPS8B)  | 5 | 361790 |
| <b>iYER102W</b>   | YER103W (SSA4)                  | 5 | 363698 |
| <b>iYER103W</b>   | YER104W (RTT105)                | 5 | 366513 |
| <b>iYER104W</b>   |                                 | 5 | 367424 |
| <b>iYER105C</b>   | YER105C (NUP157) YER106W (MAM1) | 5 | 372009 |
| <b>iYER106W</b>   |                                 | 5 | 373230 |
| <b>iYER107C</b>   | YER107C (GLE2)                  | 5 | 374541 |
| <b>iYER108C</b>   | YER107C (GLE2)                  | 5 | 376995 |
| <b>iYER111C</b>   | YER111C (SWI4) YER112W (LSM4)   | 5 | 385872 |
| <b>iYER112W</b>   |                                 | 5 | 387791 |
| <b>iYER113C</b>   | YER113C                         | 5 | 390048 |
| <b>iYER114C</b>   | YER114C (BOI2)                  | 5 | 393708 |
| <b>iYER115C</b>   | YER115C (SPR6)                  | 5 | 394863 |
| <b>iYER116C</b>   | YER116C (SLX8) YER117W (RPL23B) | 5 | 396168 |
| <b>iYER117W</b>   |                                 | 5 | 397649 |
| <b>iYER118C</b>   | YER118C (SHO1)                  | 5 | 399051 |
| <b>iYER120W</b>   | YER121W                         | 5 | 401865 |
| <b>iYER121W</b>   |                                 | 5 | 402715 |
| <b>iYER122C</b>   | YER122C (GLO3) YER123W (YCK3)   | 5 | 404348 |
| <b>iYER123W</b>   |                                 | 5 | 406428 |
| <b>iYER124C</b>   | YER124C (DSE1) YER125W (RSP5)   | 5 | 409060 |
| <b>iYER125W</b>   |                                 | 5 | 412615 |
| <b>iYER126C</b>   | YER126C (NSA2) YER127W (LCP5)   | 5 | 414176 |
| <b>iYER127W</b>   | YER128W                         | 5 | 415551 |
| <b>iYER128W</b>   | YER129W (PAK1)                  | 5 | 416467 |
| <b>iYER129W</b>   |                                 | 5 | 420706 |
| <b>iYER130C</b>   | YER130C YER131W (RPS26B)        | 5 | 422443 |
| <b>iYER131W</b>   |                                 | 5 | 424308 |
| <b>iYER132C</b>   | YER132C (PMD1) YER133W (GLC7)   | 5 | 430446 |
| <b>iYER134C</b>   | YER134C                         | 5 | 437800 |
| <b>iYER135C</b>   | YER135C ti(aau)e1YER136W (GDI1) | 5 | 438341 |
| <b>iYER136W</b>   |                                 | 5 | 440968 |
| <b>iYER138W-A</b> |                                 | 5 | 449575 |
| <b>iYER139C</b>   | YER139C YER140W                 | 5 | 451239 |
| <b>iYER140W</b>   | YER141W (COX15)                 | 5 | 453231 |
| <b>iYER142C</b>   | YER142C (MAG1) YER143W (DDI1)   | 5 | 456032 |
| <b>iYER143W</b>   |                                 | 5 | 457601 |
| <b>iYER144C</b>   | YER144C (UBP5)                  | 5 | 460219 |
| <b>iYER145C</b>   | YER145C (FTR1) YER146W (LSM5)   | 5 | 461736 |
| <b>iYER146W</b>   |                                 | 5 | 462862 |
| <b>iYER147C</b>   | YER147C (SCC4) YER148W (SPT15)  | 5 | 464838 |
| <b>iYER148W</b>   |                                 | 5 | 466021 |
| <b>iYER149C</b>   | YER149C (PEA2) YER150W (SPI1)   | 5 | 467466 |
| <b>iYER150W</b>   |                                 | 5 | 468812 |



|                      |                                 |   |        |
|----------------------|---------------------------------|---|--------|
| <b>iYER151C</b>      | YER151C (UBP3)                  | 5 | 472420 |
| <b>iYER153C</b>      | YER153C (PET122) YER154W (OXA1) | 5 | 474801 |
| <b>iYER154W</b>      |                                 | 5 | 476224 |
| <b>iYER155C</b>      | YER155C (BEM2)                  | 5 | 482844 |
| <b>iYER156C</b>      | YER156C YER157W (SEC34)         | 5 | 484337 |
| <b>iYER157W</b>      |                                 | 5 | 487189 |
| <b>iYER158C</b>      | YER158C                         | 5 | 490574 |
| <b>iYER159C</b>      | YER159C (BUR6)                  | 5 | 491954 |
| <b>iYER161C</b>      | YER161C (SPT2)                  | 5 | 500344 |
| <b>iYER162C</b>      | YER162C (RAD4)                  | 5 | 502890 |
| <b>iYER163C-0</b>    | YER163C YER164W (CHD1)          | 5 | 503778 |
| <b>iYER163C-1</b>    | YER163C YER164W (CHD1)          | 5 | 504583 |
| <b>iYER164W</b>      | YER165W (PAB1)                  | 5 | 509794 |
| <b>iYER165W</b>      | YER166W (DNF1)                  | 5 | 512102 |
| <b>iYER166W</b>      | YER167W (BCK2)                  | 5 | 517455 |
| <b>iYER167W</b>      |                                 | 5 | 520767 |
| <b>iYER168C</b>      | YER168C (CCA1) YER169W (RPH1)   | 5 | 522665 |
| <b>iYER169W</b>      | YER170W (ADK2)                  | 5 | 525755 |
| <b>iYER170W</b>      | YER171W (RAD3)                  | 5 | 526647 |
| <b>iYER171W</b>      |                                 | 5 | 529414 |
| <b>iYER172C</b>      | YER172C (BRR2) YER173W (RAD24)  | 5 | 536017 |
| <b>iYER173W</b>      |                                 | 5 | 538275 |
| <b>iYER174C</b>      | YER174C (GRX4)                  | 5 | 539164 |
| <b>iYER175C</b>      | YER175C (TMT1) YER176W (ECM32)  | 5 | 540359 |
| <b>iYER176W</b>      | YER177W (BMH1)                  | 5 | 545051 |
| <b>iYER177W</b>      | YER178W (PDA1)                  | 5 | 546410 |
| <b>iYER178W</b>      | YER179W (DMC1)                  | 5 | 548075 |
| <b>iYER179W</b>      |                                 | 5 | 549513 |
| <b>iYER180C</b>      | YER180C (ISC10)                 | 5 | 550523 |
| <b>iYER181C</b>      | YER181C YER182W                 | 5 | 551792 |
| <b>iYER182W</b>      |                                 | 5 | 553255 |
| <b>iYER183C-0</b>    | YER183C (FAU1)                  | 5 | 553965 |
| <b>iYER183C-1</b>    | YER183C (FAU1)                  | 5 | 555128 |
| <b>iYER184C</b>      | YER184C YER185W                 | 5 | 558676 |
| <b>iYER185W</b>      |                                 | 5 | 560361 |
| <b>iYER186C</b>      | YER186C YER187W                 | 5 | 562621 |
| <b>iYER187W</b>      | YER188W                         | 5 | 566651 |
| <b>iYERCdelta10</b>  | YER065C (ICL1) YER066W          | 5 | 288060 |
| <b>iYERCdelta14</b>  | YER132C (PMD1) YER133W (GLC7)   | 5 | 431819 |
| <b>iYERCdelta20</b>  | YER137C-A YER138W-A             | 5 | 449317 |
| <b>iYERCdelta24</b>  | YER159C-A                       | 5 | 498417 |
| <b>iYERCdelta26</b>  | YER181C YER182W                 | 5 | 552263 |
| <b>iYERCdelta8</b>   | YER048C (CAJ1) YER048W-A        | 5 | 249330 |
| <b>iYERComega1-0</b> | YER186C YER187W                 | 5 | 564020 |
| <b>iYERComega1-1</b> | YER186C YER187W                 | 5 | 565123 |
| <b>iYERCsigma3</b>   |                                 | 5 | 434968 |
| <b>iYERCtau2</b>     | YER097W                         | 5 | 354726 |
| <b>iYERCtau3</b>     |                                 | 5 | 436602 |
| <b>iYERWdelta11</b>  | YER075C (PTP3)                  | 5 | 312441 |
| <b>iYERWdelta12</b>  | YER097W                         | 5 | 353731 |
| <b>iYERWdelta17</b>  | YER137C                         | 5 | 443069 |

|                       |                                  |   |        |
|-----------------------|----------------------------------|---|--------|
| <b>iYERWdelta21-0</b> | YER137C                          | 5 | 445136 |
| <b>iYERWdelta21-1</b> | YER137C                          | 5 | 446417 |
| <b>iYERWdelta21-2</b> | YER137C                          | 5 | 447698 |
| <b>iYERWdelta22</b>   |                                  | 5 | 488161 |
| <b>iYERWdelta7</b>    | YER012W (PRE1)                   | 5 | 176855 |
| <b>iYERWdelta9</b>    | YER048C (CAJ1) YER048W-A         | 5 | 249751 |
| <b>iYERWomega2-0</b>  | YER189W                          | 5 | 569020 |
| <b>iYFL002C</b>       | YFL002C (SPB4) YFL001W (DEG1)    | 6 | 146928 |
| <b>iYFL003C</b>       | YFL003C (MSH4) tn(guu)fYFL002W-B | 6 | 137151 |
| <b>iYFL004W</b>       |                                  | 6 | 134290 |
| <b>iYFL005W</b>       | YFL004W (VTC2)                   | 6 | 130975 |
| <b>iYFL006W</b>       | YFL005W (SEC4)                   | 6 | 129904 |
| <b>iYFL007W</b>       | YFL006W                          | 6 | 128888 |
| <b>iYFL008W</b>       | YFL007W (BLM3)                   | 6 | 123101 |
| <b>iYFL009W</b>       | YFL008W (SMC1)                   | 6 | 118478 |
| <b>iYFL010C</b>       | YFL010C (WWM1) YFL009W (CDC4)    | 6 | 115737 |
| <b>iYFL011W</b>       | YFL010W-A (AUA1)                 | 6 | 113979 |
| <b>iYFL013W-A</b>     | YFL012W                          | 6 | 110178 |
| <b>iYFL014W</b>       |                                  | 6 | 107579 |
| <b>iYFL015C</b>       | YFL015C YFL014W (HSP12)          | 6 | 106957 |
| <b>iYFL016C</b>       | YFL016C (MDJ1)                   | 6 | 106230 |
| <b>iYFL017C</b>       | YFL017C (GNA1)                   | 6 | 104456 |
| <b>iYFL018C</b>       | YFL018C (LPD1) YFL017W-A (SMX2)  | 6 | 103121 |
| <b>iYFL020C</b>       | YFL020C (PAU5)                   | 6 | 99593  |
| <b>iYFL021W-0</b>     |                                  | 6 | 97496  |
| <b>iYFL021W-1</b>     |                                  | 6 | 98360  |
| <b>iYFL023W</b>       |                                  | 6 | 93374  |
| <b>iYFL024C</b>       | YFL024C (EPL1) YFL023W (FYV11)   | 6 | 90343  |
| <b>iYFL025C</b>       | YFL025C (BST1)                   | 6 | 87232  |
| <b>iYFL026W</b>       |                                  | 6 | 83873  |
| <b>iYFL027C</b>       | YFL027C (GYP8) YFL026W (STE2)    | 6 | 81910  |
| <b>iYFL028C</b>       | YFL028C (CAF16)                  | 6 | 80211  |
| <b>iYFL029C</b>       | YFL029C (CAK1)                   | 6 | 79159  |
| <b>iYFL030W</b>       |                                  | 6 | 77986  |
| <b>iYFL033C</b>       | YFL033C (RIM15) YFL032W          | 6 | 74426  |
| <b>iYFL034C-A</b>     | YFL034C-A (RPL22B) YFL034W       | 6 | 64932  |
| <b>iYFL034W</b>       |                                  | 6 | 68697  |
| <b>iYFL035C-A</b>     | YFL034C-B (MOB2)                 | 6 | 63993  |
| <b>iYFL036W</b>       |                                  | 6 | 62837  |
| <b>iYFL038C</b>       | YFL038C (YPT1) YFL037W (TUB2)    | 6 | 55986  |
| <b>iYFL039C</b>       | YFL039C (ACT1)                   | 6 | 54696  |
| <b>iYFL040W</b>       |                                  | 6 | 52973  |
| <b>iYFL041W</b>       | YFL040W                          | 6 | 51008  |
| <b>iYFL042C</b>       | YFL042C YFL041W (FET5)           | 6 | 47745  |
| <b>iYFL044C</b>       | YFL044C                          | 6 | 45560  |
| <b>iYFL045C</b>       | YFL045C (SEC53)                  | 6 | 44392  |
| <b>iYFL046W</b>       |                                  | 6 | 43438  |
| <b>iYFL047W</b>       | YFL046W                          | 6 | 42565  |
| <b>iYFL048C</b>       | YFL048C (EMP47) YFL047W (RGD2)   | 6 | 40180  |
| <b>iYFL049W</b>       |                                  | 6 | 38674  |
| <b>iYFL050C</b>       | YFL050C (ALR2) YFL049W           | 6 | 35848  |

|                    |                               |   |        |
|--------------------|-------------------------------|---|--------|
| <b>iYFL051C-0</b>  | YFL051C                       | 6 | 30540  |
| <b>iYFL051C-1</b>  | YFL051C                       | 6 | 31906  |
| <b>iYFL052W</b>    |                               | 6 | 29629  |
| <b>iYFL053W-0</b>  | YFL052W                       | 6 | 25198  |
| <b>iYFL053W-1</b>  | YFL052W                       | 6 | 26715  |
| <b>iYFL054C</b>    | YFL054C YFL053W (DAK2)        | 6 | 22787  |
| <b>iYFL055W-0</b>  |                               | 6 | 18680  |
| <b>iYFL055W-1</b>  |                               | 6 | 19763  |
| <b>iYFL056C-0</b>  | YFL056C (AAD6) YFL055W (AGP3) | 6 | 15431  |
| <b>iYFL056C-1</b>  | YFL056C (AAD6) YFL055W (AGP3) | 6 | 16217  |
| <b>iYFL058W</b>    |                               | 6 | 13951  |
| <b>iYFL059W</b>    | YFL058W (THI5)                | 6 | 12259  |
| <b>iYFL060C</b>    | YFL060C (SNO3) YFL059W (SNZ3) | 6 | 10969  |
| <b>iYFL061W</b>    |                               | 6 | 10222  |
| <b>iYFL062W-0</b>  | YFL061W                       | 6 | 7565   |
| <b>iYFL062W-1</b>  | YFL061W                       | 6 | 8555   |
| <b>iYFL063W</b>    | YFL062W (COS4)                | 6 | 5521   |
| <b>iYFL066C</b>    | YFL066C                       | 6 | 2615   |
| <b>iYFL067W</b>    |                               | 6 | 1363   |
| <b>iYFL068W</b>    | YFL067W                       | 6 | 535    |
| <b>iYFLCdelta6</b> |                               | 6 | 144816 |
| <b>iYFLWdelta1</b> | YFL019C                       | 6 | 100895 |
| <b>iYFLWdelta5</b> |                               | 6 | 143941 |
| <b>iYFR001W</b>    | YFR002W (NIC96)               | 6 | 149718 |
| <b>iYFR002W</b>    |                               | 6 | 152529 |
| <b>iYFR003C</b>    | YFR003C YFR004W (RPN11)       | 6 | 153118 |
| <b>iYFR004W</b>    |                               | 6 | 154307 |
| <b>iYFR005C</b>    | YFR005C (SAD1) YFR006W        | 6 | 155867 |
| <b>iYFR006W</b>    | YFR007W                       | 6 | 157745 |
| <b>iYFR007W</b>    | YFR008W                       | 6 | 160353 |
| <b>iYFR008W</b>    | YFR009W (GCN20)               | 6 | 161193 |
| <b>iYFR009W</b>    | YFR010W (UBP6)                | 6 | 164739 |
| <b>iYFR010W</b>    |                               | 6 | 166558 |
| <b>iYFR011C</b>    | YFR011C ty(gua)f1 YFR012W     | 6 | 167250 |
| <b>iYFR012W</b>    | YFR013W (IOC3)                | 6 | 168488 |
| <b>iYFR013W</b>    |                               | 6 | 172276 |
| <b>iYFR014C</b>    | YFR014C (CMK1)                | 6 | 173868 |
| <b>iYFR015C</b>    | YFR015C (GSY1)                | 6 | 176382 |
| <b>iYFR016C</b>    | YFR016C tg(gcc)f2             | 6 | 180734 |
| <b>iYFR017C</b>    | YFR017C                       | 6 | 182848 |
| <b>iYFR018C</b>    | YFR018C YFR019W (FAB1)        | 6 | 184209 |
| <b>iYFR019W</b>    | YFR020W ts(gcu)f              | 6 | 191325 |
| <b>iYFR020W</b>    | YFR021W (AUT10)               | 6 | 193423 |
| <b>iYFR021W</b>    | YFR022W                       | 6 | 196301 |
| <b>iYFR022W</b>    | YFR023W (PES4)                | 6 | 199021 |
| <b>iYFR023W</b>    |                               | 6 | 201696 |
| <b>iYFR024C-A</b>  | YFR024C-A (LSB3)              | 6 | 203420 |
| <b>iYFR025C</b>    | YFR025C (HIS2)                | 6 | 204737 |
| <b>iYFR026C</b>    | YFR026C YFR027W (ECO1)        | 6 | 206244 |
| <b>iYFR027W</b>    |                               | 6 | 208284 |
| <b>iYFR029W</b>    | YFR030W (MET10)               | 6 | 212960 |

|                     |                                  |   |        |
|---------------------|----------------------------------|---|--------|
| <b>iYFR030W</b>     |                                  | 6 | 216406 |
| <b>iYFR031C</b>     | YFR031C (SMC2)                   | 6 | 220093 |
| <b>iYFR031C-A</b>   | YFR031C-A (RPL2A)                | 6 | 221405 |
| <b>iYFR032C</b>     | YFR032C                          | 6 | 222946 |
| <b>iYFR032C-A</b>   | YFR032C-A (RPL29)                | 6 | 223424 |
| <b>iYFR033C</b>     | YFR033C (QCR6)                   | 6 | 224756 |
| <b>iYFR034C</b>     | YFR034C (PHO4)                   | 6 | 225945 |
| <b>iYFR035C</b>     | YFR035C tk(cuu)f YFR036W (CDC26) | 6 | 226452 |
| <b>iYFR036W</b>     |                                  | 6 | 227323 |
| <b>iYFR037C</b>     | YFR037C (RSC8) YFR038W           | 6 | 229172 |
| <b>iYFR038W</b>     |                                  | 6 | 231702 |
| <b>iYFR039C</b>     | YFR039C YFR040W (SAP155)         | 6 | 233531 |
| <b>iYFR040W</b>     |                                  | 6 | 237238 |
| <b>iYFR041C</b>     | YFR041C YFR042W                  | 6 | 238243 |
| <b>iYFR043C</b>     | YFR043C                          | 6 | 239815 |
| <b>iYFR044C</b>     | YFR044C YFR045W                  | 6 | 241425 |
| <b>iYFR045W</b>     |                                  | 6 | 242986 |
| <b>iYFR046C</b>     | YFR046C                          | 6 | 244146 |
| <b>iYFR047C</b>     | YFR047C YFR048W                  | 6 | 245153 |
| <b>iYFR048W</b>     | YFR049W (YMR31)                  | 6 | 248121 |
| <b>iYFR049W</b>     |                                  | 6 | 248881 |
| <b>iYFR050C</b>     | YFR050C (PRE4)                   | 6 | 249853 |
| <b>iYFR051C</b>     | YFR051C (RET2) YFR052W (RPN12)   | 6 | 251791 |
| <b>iYFR052W</b>     |                                  | 6 | 253317 |
| <b>iYFR053C-0</b>   | YFR053C (HXK1)                   | 6 | 255037 |
| <b>iYFR053C-1</b>   | YFR053C (HXK1)                   | 6 | 256305 |
| <b>iYFR053C-2</b>   | YFR053C (HXK1)                   | 6 | 257573 |
| <b>iYFR054C-0</b>   | YFR054C                          | 6 | 259421 |
| <b>iYFR054C-2</b>   | YFR054C                          | 6 | 261683 |
| <b>iYFR054C-3</b>   | YFR054C                          | 6 | 262814 |
| <b>iYFR055W-0</b>   | YFR057W                          | 6 | 265214 |
| <b>iYFR055W-1</b>   | YFR057W                          | 6 | 266492 |
| <b>iYFRCdelta8</b>  | YFR009W (GCN20)                  | 6 | 162128 |
| <b>iYFRCdelta9</b>  | YFR020W                          | 6 | 191841 |
| <b>iYFRWdelta10</b> | YFR026C YFR027W (ECO1)           | 6 | 207125 |
| <b>iYFRWdelta7</b>  | YFR007W                          | 6 | 158679 |
| <b>iYGL001C</b>     | YGL001C (ERG26)                  | 7 | 496497 |
| <b>iYGL002W</b>     |                                  | 7 | 495162 |
| <b>iYGL003C</b>     | YGL003C (CDH1) YGL002W (ERP6)    | 7 | 494169 |
| <b>iYGL004C</b>     | YGL004C                          | 7 | 491951 |
| <b>iYGL005C</b>     | YGL005C (COD5)                   | 7 | 490542 |
| <b>iYGL006W</b>     |                                  | 7 | 489437 |
| <b>iYGL007W-0</b>   | YGL006W (PMC1)                   | 7 | 483633 |
| <b>iYGL007W-1</b>   | YGL006W (PMC1)                   | 7 | 484774 |
| <b>iYGL008C</b>     | YGL008C (PMA1) YGL007W           | 7 | 482662 |
| <b>iYGL009C</b>     | YGL009C (LEU1)                   | 7 | 478648 |
| <b>iYGL010W</b>     |                                  | 7 | 476065 |
| <b>iYGL011C</b>     | YGL011C (SCL1) YGL010W           | 7 | 475243 |
| <b>iYGL012W</b>     |                                  | 7 | 474272 |
| <b>iYGL013C</b>     | YGL013C (PDR1) YGL012W (ERG4)    | 7 | 472294 |
| <b>iYGL014W</b>     |                                  | 7 | 468803 |

|                   |                                |   |        |
|-------------------|--------------------------------|---|--------|
| <b>iYGL015C</b>   | YGL015C YGL014W (PUF4)         | 7 | 465431 |
| <b>iYGL016W</b>   |                                | 7 | 464907 |
| <b>iYGL017W</b>   | YGL016W (KAP122)               | 7 | 461361 |
| <b>iYGL018C</b>   | YGL018C (JAC1) YGL017W (ATE1)  | 7 | 459660 |
| <b>iYGL019W</b>   |                                | 7 | 458988 |
| <b>iYGL020C</b>   | YGL020C YGL019W (CKB1)         | 7 | 457866 |
| <b>iYGL021W</b>   |                                | 7 | 457063 |
| <b>iYGL022W</b>   | YGL021W (ALK1)                 | 7 | 454556 |
| <b>iYGL023C</b>   | YGL023C (PIB2) YGL022W (STT3)  | 7 | 452100 |
| <b>iYGL024W</b>   |                                | 7 | 450119 |
| <b>iYGL026C</b>   | YGL026C (TRP5)                 | 7 | 448531 |
| <b>iYGL027C</b>   | YGL027C (CWH41)                | 7 | 446139 |
| <b>iYGL028C</b>   | YGL028C (SCW11)                | 7 | 442905 |
| <b>iYGL029W</b>   |                                | 7 | 440421 |
| <b>iYGL030W</b>   | YGL029W (CGR1)                 | 7 | 439634 |
| <b>iYGL031C</b>   |                                | 7 | 437930 |
| <b>iYGL032C</b>   | YGL032C (AGA2)                 | 7 | 436829 |
| <b>iYGL033W</b>   |                                | 7 | 436347 |
| <b>iYGL034C-0</b> | YGL034C YGL033W (HOP2)         | 7 | 433575 |
| <b>iYGL034C-1</b> | YGL034C YGL033W (HOP2)         | 7 | 434411 |
| <b>iYGL035C</b>   | YGL035C (MIG1)                 | 7 | 433058 |
| <b>iYGL036W</b>   |                                | 7 | 431326 |
| <b>iYGL037C</b>   | YGL037C (PNC1) YGL036W         | 7 | 427944 |
| <b>iYGL038C</b>   | YGL038C (OCH1)                 | 7 | 426801 |
| <b>iYGL039W</b>   |                                | 7 | 425004 |
| <b>iYGL040C-0</b> | YGL040C (HEM2) YGL039W         | 7 | 420552 |
| <b>iYGL040C-1</b> | YGL040C (HEM2) YGL039W         | 7 | 421820 |
| <b>iYGL041C</b>   | YGL041C                        | 7 | 419222 |
| <b>iYGL042C</b>   | YGL042C                        | 7 | 418588 |
| <b>iYGL044C</b>   | YGL044C (RNA15) YGL043W (DST1) | 7 | 417031 |
| <b>iYGL045W</b>   |                                | 7 | 415725 |
| <b>iYGL046W</b>   | YGL045W                        | 7 | 414888 |
| <b>iYGL047W</b>   | YGL046W                        | 7 | 412157 |
| <b>iYGL048C</b>   | YGL048C (RPT6) YGL047W         | 7 | 411283 |
| <b>iYGL049C</b>   | YGL049C (TIF4632)              | 7 | 409601 |
| <b>iYGL050W</b>   |                                | 7 | 406594 |
| <b>iYGL051W</b>   | YGL050W                        | 7 | 404388 |
| <b>iYGL053W</b>   | YGL052W                        | 7 | 403299 |
| <b>iYGL054C</b>   | YGL054C (ERV14) YGL053W (PRM8) | 7 | 401284 |
| <b>iYGL055W</b>   |                                | 7 | 400157 |
| <b>iYGL056C</b>   | YGL056C (SDS23) YGL055W (OLE1) | 7 | 397618 |
| <b>iYGL057C</b>   | YGL057C                        | 7 | 395829 |
| <b>iYGL058W</b>   |                                | 7 | 394504 |
| <b>iYGL059W</b>   | YGL058W (RAD6)                 | 7 | 393560 |
| <b>iYGL060W</b>   | YGL059W                        | 7 | 391990 |
| <b>iYGL061C</b>   | YGL061C (DUO1) YGL060W         | 7 | 389709 |
| <b>iYGL062W</b>   |                                | 7 | 388730 |
| <b>iYGL064C</b>   | YGL064C YGL063W (PUS2)         | 7 | 383206 |
| <b>iYGL065C</b>   | YGL065C (ALG2)                 | 7 | 381269 |
| <b>iYGL066W</b>   |                                | 7 | 379580 |
| <b>iYGL067W</b>   | YGL066W (SGF73)                | 7 | 377253 |

|                   |                                 |   |        |
|-------------------|---------------------------------|---|--------|
| <b>iYGL068W</b>   | YGL067W (NPY1)                  | 7 | 375669 |
| <b>iYGL070C</b>   | YGL070C (RPB9)                  | 7 | 374825 |
| <b>iYGL071W</b>   |                                 | 7 | 374082 |
| <b>iYGL072C</b>   | YGL072C YGL071W (RCS1)          | 7 | 371360 |
| <b>iYGL075C</b>   | YGL075C (MPS2)                  | 7 | 368086 |
| <b>iYGL076C</b>   | YGL076C (RPL7A)                 | 7 | 365994 |
| <b>iYGL077C</b>   | YGL077C (HNM1)                  | 7 | 363914 |
| <b>iYGL078C</b>   | YGL078C (DBP3)                  | 7 | 361857 |
| <b>iYGL079W</b>   |                                 | 7 | 360098 |
| <b>iYGL080W</b>   | YGL079W                         | 7 | 359026 |
| <b>iYGL081W</b>   | YGL080W                         | 7 | 358337 |
| <b>iYGL082W</b>   | YGL081W                         | 7 | 356970 |
| <b>iYGL083W</b>   | YGL082W                         | 7 | 355470 |
| <b>iYGL084C</b>   | YGL084C (GUP1) YGL083W (SCY1)   | 7 | 352296 |
| <b>iYGL085W</b>   |                                 | 7 | 350438 |
| <b>iYGL087C</b>   | YGL087C (MMS2) YGL086W (MAD1)   | 7 | 346902 |
| <b>iYGL088W</b>   |                                 | 7 | 346199 |
| <b>iYGL089C</b>   | YGL089C (MF(ALPHA)2) YGL088W    | 7 | 345151 |
| <b>iYGL090W</b>   |                                 | 7 | 344582 |
| <b>iYGL092W</b>   |                                 | 7 | 341857 |
| <b>iYGL093W</b>   | YGL092W (NUP145)                | 7 | 337637 |
| <b>iYGL094C</b>   | YGL094C (PAN2) YGL093W (SPC105) | 7 | 334463 |
| <b>iYGL095C</b>   | YGL095C (VPS45)                 | 7 | 330605 |
| <b>iYGL096W-0</b> |                                 | 7 | 326159 |
| <b>iYGL096W-1</b> |                                 | 7 | 327030 |
| <b>iYGL097W-0</b> | YGL096W (TOS8)                  | 7 | 323228 |
| <b>iYGL097W-1</b> | YGL096W (TOS8)                  | 7 | 324278 |
| <b>iYGL098W</b>   | YGL097W (SRM1)                  | 7 | 318077 |
| <b>iYGL099W</b>   | YGL098W                         | 7 | 316551 |
| <b>iYGL100W</b>   | YGL099W (KRE35)                 | 7 | 314281 |
| <b>iYGL101W</b>   | YGL100W (SEH1)                  | 7 | 312838 |
| <b>iYGL102C</b>   | YGL102C YGL101W                 | 7 | 311931 |
| <b>iYGL104C</b>   | YGL104C YGL103W (RPL28)         | 7 | 310171 |
| <b>iYGL105W</b>   |                                 | 7 | 308565 |
| <b>iYGL106W</b>   | YGL105W (ARC1)                  | 7 | 307007 |
| <b>iYGL107C</b>   | YGL107C YGL106W (MLC1)          | 7 | 306271 |
| <b>iYGL108C</b>   | YGL108C                         | 7 | 304069 |
| <b>iYGL110C</b>   | YGL110C YGL109W                 | 7 | 303409 |
| <b>iYGL111W</b>   |                                 | 7 | 301367 |
| <b>iYGL112C</b>   | YGL112C (TAF60) YGL111W (NSA1)  | 7 | 299726 |
| <b>iYGL114W</b>   | YGL113W (SLD3)                  | 7 | 295635 |
| <b>iYGL115W</b>   | YGL114W                         | 7 | 292999 |
| <b>iYGL116W</b>   | YGL115W (SNF4)                  | 7 | 291639 |
| <b>iYGL117W</b>   | YGL116W (CDC20)                 | 7 | 289310 |
| <b>iYGL118C</b>   | YGL118C YGL117W                 | 7 | 288452 |
| <b>iYGL119W</b>   |                                 | 7 | 285948 |
| <b>iYGL120C</b>   | YGL120C (PRP43) YGL119W (ABC1)  | 7 | 283938 |
| <b>iYGL121C</b>   | YGL121C                         | 7 | 281158 |
| <b>iYGL122C</b>   | YGL122C (NAB2)                  | 7 | 280524 |
| <b>iYGL123W</b>   |                                 | 7 | 278382 |
| <b>iYGL124C</b>   | YGL124C (MON1) YGL123W (RPS2)   | 7 | 276715 |



|                   |                                |   |        |
|-------------------|--------------------------------|---|--------|
| <b>iYGL125W</b>   |                                | 7 | 274323 |
| <b>iYGL126W</b>   | YGL125W (MET13)                | 7 | 272143 |
| <b>iYGL127C</b>   | YGL127C (SOH1) YGL126W (SCS3)  | 7 | 270779 |
| <b>iYGL129C</b>   | YGL129C (RSM23)                | 7 | 269192 |
| <b>iYGL130W</b>   |                                | 7 | 267527 |
| <b>iYGL131C</b>   | YGL131C YGL130W (CEG1)         | 7 | 265862 |
| <b>iYGL133W</b>   | YGL132W                        | 7 | 261504 |
| <b>iYGL134W</b>   | YGL133W (ITC1)                 | 7 | 256967 |
| <b>iYGL135W</b>   | YGL134W (PCL10)                | 7 | 255297 |
| <b>iYGL136C</b>   | YGL136C YGL135W (RPL1B)        | 7 | 253862 |
| <b>iYGL137W</b>   |                                | 7 | 252741 |
| <b>iYGL138C</b>   | YGL138C YGL137W (SEC27)        | 7 | 249534 |
| <b>iYGL139W</b>   |                                | 7 | 248127 |
| <b>iYGL140C</b>   | YGL140C YGL139W                | 7 | 245015 |
| <b>iYGL141W</b>   |                                | 7 | 241088 |
| <b>iYGL142C</b>   | YGL142C (GPI10) YGL141W (HUL5) | 7 | 238122 |
| <b>iYGL143C</b>   | YGL143C (MRF1)                 | 7 | 235961 |
| <b>iYGL144C</b>   | YGL144C                        | 7 | 234510 |
| <b>iYGL145W</b>   |                                | 7 | 232351 |
| <b>iYGL146C</b>   | YGL146C YGL145W (TIP20)        | 7 | 229689 |
| <b>iYGL147C</b>   | YGL147C (RPL9A)                | 7 | 228332 |
| <b>iYGL148W</b>   |                                | 7 | 227532 |
| <b>iYGL151W</b>   |                                | 7 | 220925 |
| <b>iYGL152C</b>   | YGL152C YGL151W (NUT1)         | 7 | 217372 |
| <b>iYGL156W</b>   | YGL155W (CDC43)                | 7 | 213670 |
| <b>iYGL157W</b>   | YGL156W (AMS1)                 | 7 | 210052 |
| <b>iYGL158W</b>   | YGL157W                        | 7 | 208574 |
| <b>iYGL159W</b>   | YGL158W (RCK1)                 | 7 | 203837 |
| <b>iYGL160W</b>   | YGL159W                        | 7 | 202277 |
| <b>iYGL161C</b>   | YGL161C YGL160W                | 7 | 200146 |
| <b>iYGL162W</b>   |                                | 7 | 199041 |
| <b>iYGL163C-0</b> | YGL163C (RAD54) YGL162W (SUT1) | 7 | 196407 |
| <b>iYGL163C-1</b> | YGL163C (RAD54) YGL162W (SUT1) | 7 | 197274 |
| <b>iYGL164C</b>   | YGL164C                        | 7 | 193304 |
| <b>iYGL167C</b>   | YGL167C (PMR1) YGL166W (CUP2)  | 7 | 190472 |
| <b>iYGL169W</b>   | YGL168W                        | 7 | 187343 |
| <b>iYGL170C</b>   | YGL170C (SPO74) YGL169W (SUA5) | 7 | 185398 |
| <b>iYGL171W</b>   |                                | 7 | 184088 |
| <b>iYGL172W</b>   | YGL171W (ROK1)                 | 7 | 182122 |
| <b>iYGL174W</b>   |                                | 7 | 175349 |
| <b>iYGL175C</b>   | YGL175C (SAE2) YGL174W (BUD13) | 7 | 174326 |
| <b>iYGL177W-0</b> | YGL178W (MPT5)                 | 7 | 167910 |
| <b>iYGL177W-1</b> | YGL178W (MPT5)                 | 7 | 169079 |
| <b>iYGL180W</b>   |                                | 7 | 162762 |
| <b>iYGL181W</b>   | YGL180W (APG1)                 | 7 | 159100 |
| <b>iYGL182C</b>   | YGL182C YGL181W (GTS1)         | 7 | 157600 |
| <b>iYGL185C</b>   | YGL185C                        | 7 | 154310 |
| <b>iYGL186C</b>   | YGL186C                        | 7 | 152780 |
| <b>iYGL187C</b>   | YGL187C (COX4)                 | 7 | 150175 |
| <b>iYGL188C</b>   | YGL188C                        | 7 | 149520 |
| <b>iYGL189C</b>   | YGL189C (RPS26A)               | 7 | 148592 |

|                   |                                |   |        |
|-------------------|--------------------------------|---|--------|
| <b>iYGL190C</b>   | YGL190C (CDC55)                | 7 | 147393 |
| <b>iYGL192W</b>   | YGL191W (COX13)                | 7 | 144052 |
| <b>iYGL194C</b>   | YGL194C (HOS2)                 | 7 | 141730 |
| <b>iYGL195W</b>   |                                | 7 | 139547 |
| <b>iYGL196W</b>   | YGL195W (GCN1)                 | 7 | 131050 |
| <b>iYGL197W</b>   | YGL196W                        | 7 | 129164 |
| <b>iYGL198W</b>   | YGL197W (MDS3)                 | 7 | 124379 |
| <b>iYGL200C</b>   | YGL200C (EMP24)                | 7 | 123308 |
| <b>iYGL201C</b>   | YGL201C (MCM6)                 | 7 | 120909 |
| <b>iYGL202W</b>   |                                | 7 | 117563 |
| <b>iYGL203C</b>   | YGL203C (KEX1) YGL202W (ARO8)  | 7 | 114666 |
| <b>iYGL204C</b>   | YGL204C                        | 7 | 112007 |
| <b>iYGL206C</b>   | YGL206C (CHC1) YGL205W (POX1)  | 7 | 107506 |
| <b>iYGL207W</b>   |                                | 7 | 102078 |
| <b>iYGL209W</b>   | YGL208W (SIP2)                 | 7 | 97008  |
| <b>iYGL210W</b>   | YGL209W (MIG2)                 | 7 | 94463  |
| <b>iYGL213C</b>   | YGL213C (SKI8) YGL212W (VAM7)  | 7 | 91250  |
| <b>iYGL216W</b>   | YGL215W (CLG1)                 | 7 | 87300  |
| <b>iYGL218W</b>   |                                | 7 | 84298  |
| <b>iYGL220W</b>   |                                | 7 | 82734  |
| <b>iYGL221C</b>   | YGL221C (NIF3) YGL220W         | 7 | 82290  |
| <b>iYGL222C</b>   | YGL222C (EDC1)                 | 7 | 81184  |
| <b>iYGL223C</b>   | YGL223C (COD3)                 | 7 | 80363  |
| <b>iYGL224C</b>   | YGL224C (SDT1)                 | 7 | 78855  |
| <b>iYGL225W</b>   |                                | 7 | 77905  |
| <b>iYGL226C-A</b> | YGL226C-A (OST5) YGL226W       | 7 | 73156  |
| <b>iYGL226W</b>   | YGL225W (VRG4)                 | 7 | 73709  |
| <b>iYGL227W</b>   |                                | 7 | 72546  |
| <b>iYGL228W</b>   | YGL227W (VID30)                | 7 | 69330  |
| <b>iYGL229C</b>   | YGL229C (SAP4) YGL228W (SHE10) | 7 | 66958  |
| <b>iYGL230C</b>   | YGL230C                        | 7 | 64214  |
| <b>iYGL231C</b>   | YGL231C                        | 7 | 63619  |
| <b>iYGL233W</b>   | YGL232W                        | 7 | 61853  |
| <b>iYGL234W</b>   | YGL233W (SEC15)                | 7 | 58889  |
| <b>iYGL235W</b>   | YGL234W (ADE5,7)               | 7 | 55814  |
| <b>iYGL237C</b>   | YGL237C (HAP2)                 | 7 | 53528  |
| <b>iYGL238W</b>   |                                | 7 | 52434  |
| <b>iYGL240W</b>   |                                | 7 | 49365  |
| <b>iYGL242C</b>   | YGL242C YGL241W (KAP114)       | 7 | 45197  |
| <b>iYGL243W</b>   |                                | 7 | 44509  |
| <b>iYGL244W</b>   | YGL243W (TAD1)                 | 7 | 43174  |
| <b>iYGL245W</b>   | YGL244W (RTF1)                 | 7 | 41149  |
| <b>iYGL246C</b>   | YGL246C (RAI1) YGL245W         | 7 | 38780  |
| <b>iYGL247W</b>   |                                | 7 | 37526  |
| <b>iYGL248W</b>   | YGL247W                        | 7 | 36762  |
| <b>iYGL249W</b>   | YGL248W (PDE1)                 | 7 | 35212  |
| <b>iYGL250W</b>   | YGL249W (ZIP2)                 | 7 | 32635  |
| <b>iYGL251C</b>   | YGL251C (HFM1) YGL250W         | 7 | 31061  |
| <b>iYGL252C</b>   | YGL252C (RTG2)                 | 7 | 27484  |
| <b>iYGL253W</b>   |                                | 7 | 25395  |
| <b>iYGL254W</b>   | YGL253W (HXK2)                 | 7 | 23203  |

|                      |                                |   |        |
|----------------------|--------------------------------|---|--------|
| <b>iYGL255W</b>      | YGL254W (FZF1)                 | 7 | 22108  |
| <b>iYGL256W-0</b>    | YGL255W (ZRT1)                 | 7 | 16307  |
| <b>iYGL256W-1</b>    | YGL255W (ZRT1)                 | 7 | 17474  |
| <b>iYGL256W-2</b>    | YGL255W (ZRT1)                 | 7 | 18641  |
| <b>iYGL256W-3</b>    | YGL255W (ZRT1)                 | 7 | 19808  |
| <b>iYGL257C</b>      | YGL257C (MNT2) YGL256W (ADH4)  | 7 | 14157  |
| <b>iYGL258W</b>      |                                | 7 | 11730  |
| <b>iYGL259W-0</b>    | YGL258W                        | 7 | 8967   |
| <b>iYGL259W-1</b>    | YGL258W                        | 7 | 10038  |
| <b>iYGL260W</b>      | YGL259W (YPS5)                 | 7 | 7090   |
| <b>iYGL261C</b>      | YGL261C YGL260W                | 7 | 6652   |
| <b>iYGL262W</b>      |                                | 7 | 5839   |
| <b>iYGL263W</b>      | YGL262W                        | 7 | 3932   |
| <b>iYGLWdelta10</b>  | YGL046W                        | 7 | 412721 |
| <b>iYGLWdelta3</b>   | YGL203C (KEX1) YGL202W (ARO8)  | 7 | 115271 |
| <b>iYGLWdelta4</b>   | YGL097W (SRM1)                 | 7 | 318858 |
| <b>iYGLWdelta6</b>   |                                | 7 | 328222 |
| <b>iYGLWdelta7</b>   | YGL054C (ERV14) YGL053W (PRM8) | 7 | 402287 |
| <b>iYGLWomega1-0</b> | YGL263W (COS12)                | 7 | 1079   |
| <b>iYGLWtau2</b>     | YGL158W (RCK1)                 | 7 | 205341 |
| <b>iYGR001C</b>      | YGR001C                        | 7 | 497802 |
| <b>iYGR002C</b>      | YGR002C YGR003W                | 7 | 499901 |
| <b>iYGR003W</b>      | YGR004W                        | 7 | 502361 |
| <b>iYGR004W</b>      |                                | 7 | 504321 |
| <b>iYGR005C</b>      | YGR005C (TFG2) YGR006W (PRP18) | 7 | 505854 |
| <b>iYGR006W</b>      | YGR007W (MUQ1)                 | 7 | 506724 |
| <b>iYGR007W</b>      |                                | 7 | 507934 |
| <b>iYGR008C</b>      | YGR008C (STF2)                 | 7 | 508358 |
| <b>iYGR009C</b>      | YGR009C (SEC9) YGR010W         | 7 | 510996 |
| <b>iYGR011W</b>      | YGR012W                        | 7 | 512817 |
| <b>iYGR012W</b>      | YGR013W (SNU71)                | 7 | 514334 |
| <b>iYGR013W</b>      | YGR014W (MSB2)                 | 7 | 516410 |
| <b>iYGR014W</b>      |                                | 7 | 520857 |
| <b>iYGR015C</b>      | YGR015C YGR016W                | 7 | 522070 |
| <b>iYGR016W</b>      | YGR017W                        | 7 | 522827 |
| <b>iYGR018C</b>      | YGR018C YGR019W (UGA1)         | 7 | 524688 |
| <b>iYGR019W</b>      |                                | 7 | 526638 |
| <b>iYGR020C</b>      | YGR020C (VMA7) YGR021W         | 7 | 527323 |
| <b>iYGR021W</b>      |                                | 7 | 528498 |
| <b>iYGR023W</b>      |                                | 7 | 530913 |
| <b>iYGR026W</b>      |                                | 7 | 533815 |
| <b>iYGR027C</b>      | YGR027C (RPS25A) YGR027W-A     | 7 | 534452 |
| <b>iYGR028W</b>      | YGR029W (ERV1)                 | 7 | 543285 |
| <b>iYGR029W</b>      |                                | 7 | 544199 |
| <b>iYGR030C</b>      | YGR030C (POP6) YGR031W         | 7 | 546151 |
| <b>iYGR031W</b>      | YGR032W (GSC2)                 | 7 | 547463 |
| <b>iYGR032W</b>      |                                | 7 | 553945 |
| <b>iYGR033C</b>      | YGR033C YGR034W (RPL26B)       | 7 | 554961 |
| <b>iYGR034W</b>      |                                | 7 | 556666 |
| <b>iYGR035C</b>      | YGR035C                        | 7 | 557416 |
| <b>iYGR036C</b>      | YGR036C (CAX4)                 | 7 | 558862 |

|                   |                               |   |        |
|-------------------|-------------------------------|---|--------|
| <b>iYGR037C</b>   | YGR037C (ACB1) YGR038W (ORM1) | 7 | 559988 |
| <b>iYGR038W</b>   |                               | 7 | 561344 |
| <b>iYGR039W</b>   | YGR040W (KSS1)                | 7 | 575193 |
| <b>iYGR040W</b>   | YGR041W (BUD9)                | 7 | 576498 |
| <b>iYGR041W</b>   | YGR042W                       | 7 | 579124 |
| <b>iYGR043C-1</b> | YGR043C                       | 7 | 582207 |
| <b>iYGR045C</b>   | YGR045C YGR046W               | 7 | 584290 |
| <b>iYGR046W</b>   |                               | 7 | 586046 |
| <b>iYGR047C</b>   | YGR047C (TFC4) YGR048W (UFD1) | 7 | 589463 |
| <b>iYGR048W</b>   | YGR049W (SCM4)                | 7 | 590905 |
| <b>iYGR049W</b>   |                               | 7 | 591871 |
| <b>iYGR050C</b>   | YGR050C                       | 7 | 592436 |
| <b>iYGR051C</b>   | YGR051C YGR052W               | 7 | 593223 |
| <b>iYGR052W</b>   |                               | 7 | 594699 |
| <b>iYGR053C</b>   | YGR053C YGR054W               | 7 | 595831 |
| <b>iYGR054W</b>   | YGR055W (MUP1)                | 7 | 598615 |
| <b>iYGR055W</b>   | YGR056W (RSC1)                | 7 | 601135 |
| <b>iYGR056W</b>   |                               | 7 | 604441 |
| <b>iYGR057C</b>   | YGR057C (LST7) YGR058W        | 7 | 605504 |
| <b>iYGR058W</b>   | YGR059W (SPR3)                | 7 | 607137 |
| <b>iYGR059W</b>   | YGR060W (ERG25)               | 7 | 609095 |
| <b>iYGR060W</b>   |                               | 7 | 611487 |
| <b>iYGR061C</b>   | YGR061C (ADE6)                | 7 | 615959 |
| <b>iYGR062C</b>   | YGR062C (COX18)               | 7 | 617272 |
| <b>iYGR064W</b>   |                               | 7 | 617983 |
| <b>iYGR065C</b>   | YGR065C (VHT1)                | 7 | 619852 |
| <b>iYGR066C</b>   | YGR066C                       | 7 | 621793 |
| <b>iYGR067C</b>   | YGR067C                       | 7 | 624780 |
| <b>iYGR069W</b>   | YGR070W (ROM1)                | 7 | 627412 |
| <b>iYGR070W</b>   |                               | 7 | 631267 |
| <b>iYGR071C</b>   | YGR071C YGR072W (UPF3)        | 7 | 634057 |
| <b>iYGR072W</b>   |                               | 7 | 635461 |
| <b>iYGR075C</b>   | YGR075C (PRP38)               | 7 | 636869 |
| <b>iYGR076C</b>   | YGR076C (MRPL25)              | 7 | 637571 |
| <b>iYGR077C</b>   | YGR077C (PEX8)                | 7 | 639507 |
| <b>iYGR078C</b>   | YGR078C (PAC10) YGR079W       | 7 | 640365 |
| <b>iYGR079W</b>   | YGR080W (TWF1)                | 7 | 641826 |
| <b>iYGR080W</b>   |                               | 7 | 643002 |
| <b>iYGR081C</b>   | YGR081C YGR082W (TOM20)       | 7 | 643774 |
| <b>iYGR082W</b>   |                               | 7 | 644589 |
| <b>iYGR083C</b>   | YGR083C (GCD2)                | 7 | 646809 |
| <b>iYGR085C</b>   | YGR085C (RPL11B)              | 7 | 648901 |
| <b>iYGR086C</b>   | YGR086C                       | 7 | 650611 |
| <b>iYGR087C-0</b> | YGR087C (PDC6) YGR088W (CTT1) | 7 | 652975 |
| <b>iYGR087C-1</b> | YGR087C (PDC6) YGR088W (CTT1) | 7 | 653785 |
| <b>iYGR088W</b>   | YGR089W                       | 7 | 656316 |
| <b>iYGR089W-0</b> | YGR090W                       | 7 | 659764 |
| <b>iYGR089W-1</b> | YGR090W                       | 7 | 660753 |
| <b>iYGR090W</b>   | YGR091W (PRP31)               | 7 | 666065 |
| <b>iYGR091W</b>   | YGR092W (DBF2)                | 7 | 667819 |
| <b>iYGR092W</b>   | YGR093W                       | 7 | 669901 |

|            |                                    |   |        |
|------------|------------------------------------|---|--------|
| iYGR094W   |                                    | 7 | 675494 |
| iYGR095C   | YGR095C (RRP46) YGR096W            | 7 | 676435 |
| iYGR096W   | YGR097W (ASK10)                    | 7 | 677559 |
| iYGR097W   |                                    | 7 | 682129 |
| iYGR098C   | YGR098C (ESP1) YGR099W (TEL2)      | 7 | 687452 |
| iYGR099W   | YGR100W (MDR1)                     | 7 | 689959 |
| iYGR100W   | YGR101W                            | 7 | 693091 |
| iYGR101W   |                                    | 7 | 694397 |
| iYGR102C   | YGR102C YGR103W (NOP7)             | 7 | 695129 |
| iYGR103W   |                                    | 7 | 697228 |
| iYGR104C   | YGR104C (SRB5) YGR105W (VMA21)     | 7 | 698362 |
| iYGR105W   |                                    | 7 | 698826 |
| iYGR106C   | YGR106C tl(gag)g/tk(uuu)g2 YGR107W | 7 | 699780 |
| iYGR107W   | YGR108W (CLB1)                     | 7 | 703110 |
| iYGR108W   |                                    | 7 | 705045 |
| iYGR109C   | YGR109C (CLB6) YGR110W             | 7 | 706495 |
| iYGR110W   | YGR111W                            | 7 | 715040 |
| iYGR111W   | YGR112W (SHY1)                     | 7 | 717024 |
| iYGR112W   | YGR113W (DAM1)                     | 7 | 718521 |
| iYGR113W   |                                    | 7 | 719894 |
| iYGR116W   |                                    | 7 | 724757 |
| iYGR117C   | YGR117C YGR118W (RPS23A)           | 7 | 726472 |
| iYGR118W   |                                    | 7 | 727724 |
| iYGR119C   | YGR119C (NUP57)                    | 7 | 729665 |
| iYGR120C   | YGR120C (SEC35)                    | 7 | 730854 |
| iYGR121C   | YGR121C (MEP1) YGR122W             | 7 | 732921 |
| iYGR122C-A | YGR122C-A                          | 7 | 735752 |
| iYGR122W   |                                    | 7 | 735137 |
| iYGR123C   | YGR123C (PPT1)tr(ucu)g3 YGR124W (  | 7 | 738197 |
| iYGR124W   | YGR125W                            | 7 | 741656 |
| iYGR125W   | YGR126W                            | 7 | 745429 |
| iYGR126W   | YGR127W                            | 7 | 746521 |
| iYGR127W   |                                    | 7 | 747730 |
| iYGR128C   | YGR128C YGR129W (SYF2)             | 7 | 750085 |
| iYGR129W   |                                    | 7 | 751041 |
| iYGR130C   | YGR130C YGR131W                    | 7 | 753838 |
| iYGR131W   |                                    | 7 | 755244 |
| iYGR132C   | YGR132C (PHB1) YGR133W (PEX4)      | 7 | 756446 |
| iYGR133W   | YGR134W (CAF130)                   | 7 | 757441 |
| iYGR134W   | YGR135W (PRE9)                     | 7 | 761132 |
| iYGR135W   | YGR136W (LSB1)                     | 7 | 762162 |
| iYGR137W   |                                    | 7 | 763256 |
| iYGR138C   | YGR138C (TPO2) YGR139W             | 7 | 765600 |
| iYGR139W   | YGR140W (CBF2)                     | 7 | 766058 |
| iYGR140W   | YGR141W                            | 7 | 770293 |
| iYGR141W   | YGR142W (BTN2)                     | 7 | 771966 |
| iYGR142W   | YGR143W (SKN1)                     | 7 | 773680 |
| iYGR144W   | YGR145W                            | 7 | 781373 |
| iYGR145W   |                                    | 7 | 783884 |
| iYGR146C   | YGR146C                            | 7 | 784852 |
| iYGR147C   | YGR147C (NAT2)                     | 7 | 786914 |

|                   |                                |   |        |
|-------------------|--------------------------------|---|--------|
| <b>iYGR149W</b>   |                                | 7 | 790323 |
| <b>iYGR150C</b>   | YGR150C                        | 7 | 793047 |
| <b>iYGR152C</b>   | YGR152C (RSR1) YGR153W (TOS10) | 7 | 795486 |
| <b>iYGR154C</b>   | YGR154C YGR155W (CYS4)         | 7 | 797862 |
| <b>iYGR155W</b>   | YGR156W (PTI1)                 | 7 | 800060 |
| <b>iYGR156W</b>   | YGR157W (CHO2)                 | 7 | 801817 |
| <b>iYGR157W</b>   |                                | 7 | 805043 |
| <b>iYGR158C</b>   | YGR158C (MTR3)                 | 7 | 806015 |
| <b>iYGR160W</b>   |                                | 7 | 807678 |
| <b>iYGR161C-0</b> | YGR161C YGR161W-A              | 7 | 809414 |
| <b>iYGR161C-1</b> | YGR161C YGR161W-A              | 7 | 810427 |
| <b>iYGR162W</b>   | YGR163W (GTR2)                 | 7 | 826911 |
| <b>iYGR165W</b>   | YGR166W (KRE11)                | 7 | 830147 |
| <b>iYGR166W</b>   | YGR167W (CLC1)                 | 7 | 832191 |
| <b>iYGR167W</b>   |                                | 7 | 833151 |
| <b>iYGR168C</b>   | YGR168C                        | 7 | 834476 |
| <b>iYGR169C</b>   | YGR169C (PUS6) YGR170W (PSD2)  | 7 | 835897 |
| <b>iYGR170W</b>   |                                | 7 | 840552 |
| <b>iYGR171C</b>   | YGR171C (MSM1)                 | 7 | 842545 |
| <b>iYGR172C</b>   | YGR172C (YIP1) YGR173W         | 7 | 843585 |
| <b>iYGR173W</b>   |                                | 7 | 844954 |
| <b>iYGR174C</b>   | YGR174C (CBP4)                 | 7 | 846399 |
| <b>iYGR175C</b>   | YGR175C (ERG1) YGR176W         | 7 | 848417 |
| <b>iYGR177C</b>   | YGR177C (ATF2)                 | 7 | 850430 |
| <b>iYGR178C</b>   | YGR178C (PBP1)                 | 7 | 853209 |
| <b>iYGR179C</b>   | YGR179C (OKP1)                 | 7 | 854889 |
| <b>iYGR180C</b>   | YGR180C (RNR4) YGR181W (TIM13) | 7 | 856295 |
| <b>iYGR182C</b>   | YGR182C                        | 7 | 858898 |
| <b>iYGR183C</b>   | YGR183C (QCR9)                 | 7 | 859470 |
| <b>iYGR184C</b>   | YGR184C (UBR1)                 | 7 | 865747 |
| <b>iYGR185C</b>   | YGR185C (TYS1) YGR186W (TFG1)  | 7 | 867514 |
| <b>iYGR186W</b>   |                                | 7 | 869975 |
| <b>iYGR187C</b>   | YGR187C (HGH1)                 | 7 | 871410 |
| <b>iYGR188C</b>   | YGR188C (BUB1)                 | 7 | 875103 |
| <b>iYGR189C</b>   | YGR189C (CRH1)                 | 7 | 878186 |
| <b>iYGR191W</b>   |                                | 7 | 882225 |
| <b>iYGR192C</b>   | YGR192C (TDH3)                 | 7 | 883804 |
| <b>iYGR193C</b>   | YGR193C (PDX1)                 | 7 | 885735 |
| <b>iYGR194C</b>   | YGR194C (XKS1) YGR195W (SKI6)  | 7 | 887869 |
| <b>iYGR195W</b>   |                                | 7 | 889616 |
| <b>iYGR196C</b>   | YGR196C (FYV8)                 | 7 | 892180 |
| <b>iYGR197C</b>   | YGR197C (SNG1) YGR198W         | 7 | 894134 |
| <b>iYGR198W</b>   | YGR199W (PMT6)                 | 7 | 897140 |
| <b>iYGR199W</b>   |                                | 7 | 899775 |
| <b>iYGR200C</b>   | YGR200C (ELP2)                 | 7 | 902264 |
| <b>iYGR201C</b>   | YGR201C                        | 7 | 903338 |
| <b>iYGR202C</b>   | YGR202C (PCT1) YGR203W         | 7 | 904742 |
| <b>iYGR204W</b>   | YGR205W                        | 7 | 908768 |
| <b>iYGR205W</b>   | YGR206W                        | 7 | 910079 |
| <b>iYGR206W</b>   |                                | 7 | 910731 |
| <b>iYGR207C</b>   | YGR207C YGR208W (SER2)         | 7 | 911622 |



|            |                                 |   |         |
|------------|---------------------------------|---|---------|
| iYGR208W   |                                 | 7 | 912806  |
| iYGR209C   | YGR209C (TRX2)                  | 7 | 913221  |
| iYGR210C   | YGR210C YGR211W (ZPR1)          | 7 | 914732  |
| iYGR211W   | YGR212W                         | 7 | 916695  |
| iYGR212W   |                                 | 7 | 918440  |
| iYGR213C   | YGR213C (RTA1) YGR214W (RPS0A)  | 7 | 919459  |
| iYGR214W   | YGR215W (RSM27)                 | 7 | 921782  |
| iYGR215W   |                                 | 7 | 922501  |
| iYGR216C   | YGR216C (GPI1) YGR217W (CCH1)   | 7 | 924456  |
| iYGR217W   | YGR218W (CRM1)                  | 7 | 930807  |
| iYGR218W   | YGR219W                         | 7 | 935787  |
| iYGR220C   | YGR220C (MRPL9)                 | 7 | 936875  |
| iYGR221C   | YGR221C (TOS2) YGR222W (PET54)  | 7 | 938984  |
| iYGR222W   |                                 | 7 | 940796  |
| iYGR223C   | YGR223C YGR224W (AZR1)          | 7 | 942207  |
| iYGR224W   | YGR225W (AMA1)                  | 7 | 944639  |
| iYGR226C   | YGR226C YGR227W (DIE2)          | 7 | 946992  |
| iYGR227W   | YGR228W                         | 7 | 948988  |
| iYGR229C   | YGR229C (SMI1) YGR230W (BNS1)   | 7 | 950890  |
| iYGR230W   |                                 | 7 | 952298  |
| iYGR231C   | YGR231C (PHB2) YGR232W (NAS6)   | 7 | 953472  |
| iYGR233C-0 | YGR233C (PHO81) YGR234W (YHB1)  | 7 | 958202  |
| iYGR234W   |                                 | 7 | 961096  |
| iYGR235C   | YGR235C                         | 7 | 962054  |
| iYGR236C   | YGR236C (SPG1)                  | 7 | 962811  |
| iYGR237C   | YGR237C                         | 7 | 965650  |
| iYGR238C   | YGR238C (KEL2)                  | 7 | 968682  |
| iYGR239C   | YGR239C (PEX21)                 | 7 | 970048  |
| iYGR243W   |                                 | 7 | 977771  |
| iYGR244C   | YGR244C (LSC2)                  | 7 | 979314  |
| iYGR245C   | YGR245C (SDA1)                  | 7 | 982063  |
| iYGR246C   | YGR246C (BRF1) YGR247W (CPD1)   | 7 | 984267  |
| iYGR247W   | YGR248W (SOL4)                  | 7 | 985680  |
| iYGR248W   | YGR249W (MGA1)                  | 7 | 986734  |
| iYGR249W-0 |                                 | 7 | 989414  |
| iYGR249W-1 |                                 | 7 | 990292  |
| iYGR250C-0 | YGR250C YGR251W                 | 7 | 993516  |
| iYGR250C-1 | YGR250C YGR251W                 | 7 | 994575  |
| iYGR251W   | YGR252W (GCN5)                  | 7 | 996224  |
| iYGR252W   |                                 | 7 | 998183  |
| iYGR253C-0 | YGR253C (PUP2) YGR254W (ENO1)   | 7 | 999135  |
| iYGR255C   | YGR255C (COQ6)tT(ugu)g2 YGR256W | 7 | 1003957 |
| iYGR256W   |                                 | 7 | 1006098 |
| iYGR257C   | YGR257C                         | 7 | 1007301 |
| iYGR258C-0 | YGR258C (RAD2)                  | 7 | 1010762 |
| iYGR258C-1 | YGR258C (RAD2)                  | 7 | 1011619 |
| iYGR260W   |                                 | 7 | 1014085 |
| iYGR261C   | YGR261C (APL6)                  | 7 | 1016746 |
| iYGR262C   | YGR262C (BUD32)                 | 7 | 1017755 |
| iYGR263C   | YGR263C                         | 7 | 1019237 |
| iYGR265W   | YGR266W                         | 7 | 1022054 |

|                     |                                   |   |         |
|---------------------|-----------------------------------|---|---------|
| <b>iYGR266W</b>     |                                   | 7 | 1024757 |
| <b>iYGR267C</b>     | YGR267C (FOL2)                    | 7 | 1025731 |
| <b>iYGR269W</b>     | YGR270W (YTA7)                    | 7 | 1026958 |
| <b>iYGR270W</b>     | YGR271W (SLH1)                    | 7 | 1031505 |
| <b>iYGR271W</b>     |                                   | 7 | 1037690 |
| <b>iYGR272C</b>     | YGR272C                           | 7 | 1038496 |
| <b>iYGR273C</b>     | YGR273C                           | 7 | 1039234 |
| <b>iYGR274C</b>     | YGR274C (TAF145) YGR275W (RTT1C   | 7 | 1043091 |
| <b>iYGR275W</b>     |                                   | 7 | 1043745 |
| <b>iYGR276C</b>     | YGR276C (RNH70)                   | 7 | 1045476 |
| <b>iYGR277C</b>     | YGR277C YGR278W                   | 7 | 1046557 |
| <b>iYGR278W</b>     |                                   | 7 | 1048460 |
| <b>iYGR279C</b>     | YGR279C (SCW4)                    | 7 | 1049954 |
| <b>iYGR280C</b>     | YGR280C YGR281W (YOR1)            | 7 | 1051721 |
| <b>iYGR281W</b>     |                                   | 7 | 1057253 |
| <b>iYGR282C</b>     | YGR282C (BGL2)                    | 7 | 1058720 |
| <b>iYGR283C</b>     | YGR283C                           | 7 | 1060036 |
| <b>iYGR284C</b>     | YGR284C (ERV29)                   | 7 | 1061586 |
| <b>iYGR285C</b>     | YGR285C (ZUO1)                    | 7 | 1063149 |
| <b>iYGR286C-0</b>   | YGR286C (BIO2)                    | 7 | 1064936 |
| <b>iYGR286C-1</b>   | YGR286C (BIO2)                    | 7 | 1066077 |
| <b>iYGR287C</b>     | YGR287C YGR288W (MAL13)           | 7 | 1068987 |
| <b>iYGR288W-0</b>   |                                   | 7 | 1071710 |
| <b>iYGR288W-1</b>   |                                   | 7 | 1072834 |
| <b>iYGR290W</b>     |                                   | 7 | 1075921 |
| <b>iYGR291C</b>     | YGR291C YGR292W (MAL12)           | 7 | 1076500 |
| <b>iYGR292W-0</b>   |                                   | 7 | 1078349 |
| <b>iYGR292W-1</b>   |                                   | 7 | 1079115 |
| <b>iYGR294W</b>     |                                   | 7 | 1080664 |
| <b>iYGRCdelta16</b> | YGR038C-A YGR039W                 | 7 | 567754  |
| <b>iYGRCdelta18</b> | YGR038C-A YGR039W                 | 7 | 574694  |
| <b>iYGRCdelta20</b> | YGR109C (CLB6) YGR110W            | 7 | 713378  |
| <b>iYGRCdelta25</b> | YGR144W (THI4)                    | 7 | 779509  |
| <b>iYGRCdelta30</b> | YGR161C-C YGR162W (TIF4631)       | 7 | 823300  |
| <b>iYGRCtau3</b>    | YGR218W (CRM1)                    | 7 | 931532  |
| <b>iYGRWdelta14</b> | YGR028W (MSP1)                    | 7 | 541679  |
| <b>iYGRWdelta19</b> | YGR106C YGR107W                   | 7 | 701344  |
| <b>iYGRWdelta22</b> | YGR143W (SKN1)                    | 7 | 774156  |
| <b>iYGRWdelta26</b> | YGR150C                           | 7 | 793553  |
| <b>iYGRWdelta31</b> | YGR188C (BUB1)                    | 7 | 876273  |
| <b>iYGRWdelta32</b> | YGR218W (CRM1)                    | 7 | 932011  |
| <b>iYGRWsigma5</b>  | YGR109C (CLB6) YGR110W            | 7 | 712539  |
| <b>iYHL001W</b>     | YHR001W (OSH7)                    | 8 | 105084  |
| <b>iYHL002W</b>     | YHL001W (RPL14B)                  | 8 | 103963  |
| <b>iYHL003C</b>     | YHL003C (LAG1) YHL002W            | 8 | 101877  |
| <b>iYHL004W</b>     |                                   | 8 | 100397  |
| <b>iYHL007C</b>     | YHL007C (STE20)                   | 8 | 97932   |
| <b>iYHL008C</b>     | YHL008C                           | 8 | 94505   |
| <b>iYHL009C</b>     | YHL009C tv(AAC)H (YAP3) YHL009W-A | 8 | 85055   |
| <b>iYHL010C</b>     | YHL010C                           | 8 | 83716   |
| <b>iYHL011C</b>     | YHL011C (PRS3)                    | 8 | 81611   |

|                    |                                  |   |        |
|--------------------|----------------------------------|---|--------|
| <b>iYHL012W</b>    |                                  | 8 | 80412  |
| <b>iYHL013C</b>    | YHL013C YHL012W                  | 8 | 78349  |
| <b>iYHL014C</b>    | YHL014C (YLF2)                   | 8 | 77310  |
| <b>iYHL015W</b>    |                                  | 8 | 75773  |
| <b>iYHL016C</b>    | YHL016C (DUR3) YHL015W (RPS20)   | 8 | 74240  |
| <b>iYHL017W</b>    |                                  | 8 | 71870  |
| <b>iYHL019C</b>    | YHL019C (APM2) YHL018W           | 8 | 69544  |
| <b>iYHL020C</b>    | YHL020C (OPI1)                   | 8 | 67452  |
| <b>iYHL021C</b>    | YHL021C                          | 8 | 65855  |
| <b>iYHL022C</b>    | YHL022C (SPO11)                  | 8 | 64154  |
| <b>iYHL023C</b>    | YHL023C th(gug)h                 | 8 | 62560  |
| <b>iYHL024W</b>    |                                  | 8 | 58787  |
| <b>iYHL025W</b>    | YHL024W (RIM4)                   | 8 | 55846  |
| <b>iYHL026C</b>    | YHL026C YHL025W (SNF6)           | 8 | 54023  |
| <b>iYHL027W</b>    |                                  | 8 | 52986  |
| <b>iYHL028W</b>    | YHL027W (RIM101)                 | 8 | 50578  |
| <b>iYHL029C</b>    | YHL029C YHL028W (WSC4)           | 8 | 47966  |
| <b>iYHL030W</b>    |                                  | 8 | 45688  |
| <b>iYHL031C</b>    | YHL031C (GOS1) YHL030W (ECM29)   | 8 | 39484  |
| <b>iYHL032C</b>    | YHL032C (GUT1)                   | 8 | 38506  |
| <b>iYHL033C</b>    | YHL033C (RPL8A)                  | 8 | 36023  |
| <b>iYHL035C</b>    | YHL035C                          | 8 | 32754  |
| <b>iYHL036W</b>    |                                  | 8 | 27879  |
| <b>iYHL037C</b>    | YHL037C YHL036W (MUP3)           | 8 | 26177  |
| <b>iYHL038C</b>    | YHL038C (CBP2)                   | 8 | 25506  |
| <b>iYHL039W</b>    |                                  | 8 | 23537  |
| <b>iYHL040C</b>    | YHL040C (ARN1) YHL039W           | 8 | 20968  |
| <b>iYHL041W</b>    |                                  | 8 | 17839  |
| <b>iYHL042W</b>    | YHL041W                          | 8 | 16117  |
| <b>iYHL043W</b>    | YHL042W                          | 8 | 15411  |
| <b>iYHL044W</b>    | YHL043W (ECM34)                  | 8 | 14270  |
| <b>iYHL045W</b>    | YHL044W                          | 8 | 12847  |
| <b>iYHL046C</b>    | YHL046C YHL045W                  | 8 | 12283  |
| <b>iYHL047C-0</b>  | YHL047C (TAF1)                   | 8 | 10211  |
| <b>iYHL047C-1</b>  | YHL047C (TAF1)                   | 8 | 11066  |
| <b>iYHL048W</b>    |                                  | 8 | 7545   |
| <b>iYHL049C-0</b>  | YHL049C YHL048W (COS8)           | 8 | 4540   |
| <b>iYHL049C-1</b>  | YHL049C YHL048W (COS8)           | 8 | 5470   |
| <b>iYHLCdelta1</b> |                                  | 8 | 92094  |
| <b>iYHLComega1</b> |                                  | 8 | 8224   |
| <b>iYHLWdelta2</b> |                                  | 8 | 92385  |
| <b>iYHR001W</b>    | YHR001W-A (QCR10)                | 8 | 107361 |
| <b>iYHR002W</b>    |                                  | 8 | 109878 |
| <b>iYHR003C</b>    | YHR003C                          | 8 | 111310 |
| <b>iYHR004C</b>    | YHR004C (NEM1)                   | 8 | 113087 |
| <b>iYHR005C</b>    | YHR005C (GPA1)                   | 8 | 114910 |
| <b>iYHR005C-A</b>  | YHR005C-A (MRS11) YHR006W (STP2) | 8 | 115894 |
| <b>iYHR008C</b>    | YHR008C (SOD2)                   | 8 | 123583 |
| <b>iYHR011W</b>    | YHR012W (VPS29)                  | 8 | 129112 |
| <b>iYHR012W</b>    |                                  | 8 | 130440 |
| <b>iYHR013C</b>    | YHR013C (ARD1) YHR014W (SPO13)   | 8 | 131438 |

|            |                                  |   |        |
|------------|----------------------------------|---|--------|
| iYHR015W   |                                  | 8 | 136524 |
| iYHR016C   | YHR016C (YSC84) YHR017W (YSC83)  | 8 | 138446 |
| iYHR017W   |                                  | 8 | 139842 |
| iYHR018C   | YHR018C (ARG4)                   | 8 | 141393 |
| iYHR019C   | YHR019C (DED81) YHR020W          | 8 | 143549 |
| iYHR020W   |                                  | 8 | 146053 |
| iYHR021C   | YHR021C (RPS27B) YHR021W-A (ECM) | 8 | 148660 |
| iYHR023W   |                                  | 8 | 157443 |
| iYHR024C   | YHR024C (MAS2) YHR025W (THR1)    | 8 | 159183 |
| iYHR025W   | YHR026W (PPA1)                   | 8 | 160502 |
| iYHR026W   |                                  | 8 | 161476 |
| iYHR027C   | YHR027C (RPN1)                   | 8 | 164702 |
| iYHR028C   | YHR028C (DAP2)                   | 8 | 167425 |
| iYHR029C   | YHR029C                          | 8 | 168552 |
| iYHR032W   | YHR033W                          | 8 | 175080 |
| iYHR033W   |                                  | 8 | 176810 |
| iYHR034C   | YHR034C YHR035W                  | 8 | 177990 |
| iYHR035W   | YHR036W                          | 8 | 180102 |
| iYHR038W   |                                  | 8 | 184749 |
| iYHR039C   | YHR039C (MSC7)                   | 8 | 186800 |
| iYHR039C-B | YHR039C-A (VMA10) YHR040W        | 8 | 187670 |
| iYHR040W   |                                  | 8 | 189015 |
| iYHR041C   | YHR041C (SRB2) YHR042W (NCP1)    | 8 | 189855 |
| iYHR042W   |                                  | 8 | 192609 |
| iYHR043C   | YHR043C (DOG2)                   | 8 | 193536 |
| iYHR045W   |                                  | 8 | 197224 |
| iYHR046C   | YHR046C                          | 8 | 198276 |
| iYHR048W   | YHR049W                          | 8 | 206142 |
| iYHR049C-A | YHR049C-A YHR050W (SMF2)         | 8 | 207522 |
| iYHR050W   | YHR051W (COX6)                   | 8 | 209295 |
| iYHR053C   | YHR053C (CUP1-1)                 | 8 | 212720 |
| iYHR054C   | YHR054C                          | 8 | 214249 |
| iYHR055C   | YHR055C (CUP1-2)                 | 8 | 214718 |
| iYHR056C   | YHR056C (RSC30)                  | 8 | 217681 |
| iYHR058C   | YHR058C (MED6) YHR059W (FYV4)    | 8 | 219885 |
| iYHR059W   | YHR060W (VMA22)                  | 8 | 220501 |
| iYHR060W   |                                  | 8 | 221271 |
| iYHR061C   | YHR061C (GIC1)                   | 8 | 222479 |
| iYHR062C   | YHR062C (RPP1)                   | 8 | 223759 |
| iYHR063C   | YHR063C (PAN5)                   | 8 | 225170 |
| iYHR064C   | YHR064C (SSZ1)                   | 8 | 227244 |
| iYHR065C   | YHR065C (RRP3) YHR066W (SSF1)    | 8 | 229164 |
| iYHR066W   | YHR067W                          | 8 | 230697 |
| iYHR067W   | YHR068W (DYS1)                   | 8 | 231813 |
| iYHR068W   |                                  | 8 | 233297 |
| iYHR069C   | YHR069C (RRP4) YHR070W (TRM5)    | 8 | 234659 |
| iYHR070W   | YHR071W (PCL5)                   | 8 | 236381 |
| iYHR071W   | YHR072W (ERG7)                   | 8 | 237694 |
| iYHR073W   | YHR074W (QNS1)                   | 8 | 245573 |
| iYHR074W   |                                  | 8 | 248338 |
| iYHR076W   |                                  | 8 | 252226 |

|                   |                                 |   |        |
|-------------------|---------------------------------|---|--------|
| <b>iYHR077C</b>   | YHR077C (NMD2) YHR078W          | 8 | 255650 |
| <b>iYHR078W</b>   |                                 | 8 | 258019 |
| <b>iYHR079C-B</b> | YHR079C-A (SAE3)                | 8 | 262554 |
| <b>iYHR080C</b>   | YHR080C YHR081W                 | 8 | 266839 |
| <b>iYHR081W</b>   |                                 | 8 | 268093 |
| <b>iYHR083W</b>   | YHR084W (STE12)                 | 8 | 273617 |
| <b>iYHR085W</b>   | YHR086W (NAM8)                  | 8 | 277769 |
| <b>iYHR087W</b>   | YHR088W (RPF1)                  | 8 | 281156 |
| <b>iYHR088W</b>   |                                 | 8 | 282383 |
| <b>iYHR089C</b>   | YHR089C (GAR1)                  | 8 | 283299 |
| <b>iYHR090C</b>   | YHR090C (YNG2)                  | 8 | 284626 |
| <b>iYHR092C</b>   | YHR092C (HXT4) YHR093W (AHT1)   | 8 | 288813 |
| <b>iYHR094C</b>   | YHR094C (HXT1) YHR095W          | 8 | 292627 |
| <b>iYHR097C</b>   | YHR097C                         | 8 | 298611 |
| <b>iYHR099W</b>   |                                 | 8 | 313997 |
| <b>iYHR100C</b>   | YHR100C                         | 8 | 314675 |
| <b>iYHR101C</b>   | YHR101C (BIG1) YHR102W (KIC1)   | 8 | 315970 |
| <b>iYHR102W</b>   | YHR103W (SBE22)                 | 8 | 319816 |
| <b>iYHR103W</b>   | YHR104W (GRE3)                  | 8 | 322974 |
| <b>iYHR104W</b>   | YHR105W                         | 8 | 324394 |
| <b>iYHR105W</b>   | YHR106W (TRR2)                  | 8 | 325412 |
| <b>iYHR106W</b>   |                                 | 8 | 326628 |
| <b>iYHR107C</b>   | YHR107C (CDC12) YHR108W (GGA2)  | 8 | 328038 |
| <b>iYHR108W</b>   | YHR109W (CTM1)                  | 8 | 330062 |
| <b>iYHR109W</b>   | YHR110W (ERP5)                  | 8 | 332069 |
| <b>iYHR110W</b>   | YHR111W                         | 8 | 332922 |
| <b>iYHR111W</b>   |                                 | 8 | 334396 |
| <b>iYHR112C</b>   | YHR112C YHR113W                 | 8 | 335665 |
| <b>iYHR113W</b>   | YHR114W (BZZ1)                  | 8 | 337811 |
| <b>iYHR114W</b>   |                                 | 8 | 339986 |
| <b>iYHR115C</b>   | YHR115C YHR116W                 | 8 | 341361 |
| <b>iYHR116W</b>   | YHR117W (TOM71)                 | 8 | 342122 |
| <b>iYHR118C</b>   | YHR118C (ORC6) YHR119W (SET1)   | 8 | 345630 |
| <b>iYHR119W</b>   | YHR120W (MSH1)                  | 8 | 349287 |
| <b>iYHR120W</b>   | YHR121W                         | 8 | 352455 |
| <b>iYHR121W</b>   | YHR122W                         | 8 | 353321 |
| <b>iYHR122W</b>   | YHR123W (EPT1)                  | 8 | 354322 |
| <b>iYHR123W</b>   | YHR124W (NDT80)                 | 8 | 356083 |
| <b>iYHR128W</b>   |                                 | 8 | 362767 |
| <b>iYHR131C</b>   | YHR131C                         | 8 | 367864 |
| <b>iYHR133C</b>   | YHR133C YHR134W (WSS1)          | 8 | 371597 |
| <b>iYHR134W</b>   |                                 | 8 | 372558 |
| <b>iYHR135C</b>   | YHR135C (YCK1)                  | 8 | 374310 |
| <b>iYHR136C</b>   | YHR136C (SPL2) YHR137W (ARO9)   | 8 | 375100 |
| <b>iYHR137W</b>   |                                 | 8 | 377250 |
| <b>iYHR139C</b>   | YHR139C (SPS100)                | 8 | 379199 |
| <b>iYHR141C</b>   | YHR141C (RPL42B) YHR142W (CHS7) | 8 | 382751 |
| <b>iYHR142W</b>   | YHR143W (DSE2)                  | 8 | 384488 |
| <b>iYHR144C</b>   | YHR144C (DCD1) suf8trna         | 8 | 388726 |
| <b>iYHR147C</b>   | YHR147C (MRPL6) YHR148W (IMP3)  | 8 | 393283 |
| <b>iYHR148W</b>   |                                 | 8 | 394085 |

|          |                                 |   |        |
|----------|---------------------------------|---|--------|
| iYHR149C | YHR149C YHR150W                 | 8 | 396659 |
| iYHR150W |                                 | 8 | 398990 |
| iYHR151C | YHR151C YHR152W (SPO12)         | 8 | 400848 |
| iYHR152W |                                 | 8 | 401955 |
| iYHR153C | YHR153C (SPO16) YHR154W (ESC4)  | 8 | 402682 |
| iYHR155W |                                 | 8 | 410789 |
| iYHR156C | YHR156C (LIN1) YHR157W (REC104) | 8 | 412406 |
| iYHR157W |                                 | 8 | 413455 |
| iYHR158C | YHR158C (KEL1) YHR159W          | 8 | 417179 |
| iYHR159W |                                 | 8 | 419063 |
| iYHR160C | YHR160C (PEX18)                 | 8 | 420072 |
| iYHR162W |                                 | 8 | 423461 |
| iYHR163W |                                 | 8 | 424472 |
| iYHR164C | YHR164C (DNA2)                  | 8 | 429177 |
| iYHR165C | YHR165C (PRP8)                  | 8 | 436947 |
| iYHR166C | YHR166C (CDC23) YHR167W (THP2)  | 8 | 439049 |
| iYHR167W | YHR168W                         | 8 | 440126 |
| iYHR168W | YHR169W (DBP8)                  | 8 | 441875 |
| iYHR169W | YHR170W (NMD3)                  | 8 | 443474 |
| iYHR170W | YHR171W (APG7)                  | 8 | 445382 |
| iYHR171W | YHR172W (SPC97)                 | 8 | 447602 |
| iYHR173C | YHR173C YHR174W (ENO2)          | 8 | 451150 |
| iYHR174W | YHR175W (CTR2)                  | 8 | 452637 |
| iYHR177W | YHR178W (STB5)                  | 8 | 457947 |
| iYHR178W | YHR179W (OYE2)                  | 8 | 461525 |
| iYHR179W | YHR180W                         | 8 | 463699 |
| iYHR181W | YHR182W                         | 8 | 467909 |
| iYHR182W | YHR183W (GND1)                  | 8 | 470571 |
| iYHR183W | YHR184W (SSP1)                  | 8 | 472424 |
| iYHR184W |                                 | 8 | 474454 |
| iYHR185C | YHR185C (PFS1)                  | 8 | 475335 |
| iYHR186C | YHR186C YHR187W (IKI1)          | 8 | 480667 |
| iYHR187W |                                 | 8 | 481914 |
| iYHR188C | YHR188C (GPI16) YHR189W         | 8 | 483832 |
| iYHR189W | YHR190W (ERG9)                  | 8 | 484595 |
| iYHR191C | YHR191C (CTF8) YHR192W          | 8 | 486626 |
| iYHR193C | YHR193C (EGD2) YHR194W          | 8 | 488231 |
| iYHR194W | YHR195W (NVJ1)                  | 8 | 490391 |
| iYHR195W | YHR196W                         | 8 | 491707 |
| iYHR196W | YHR197W                         | 8 | 493653 |
| iYHR197W |                                 | 8 | 496182 |
| iYHR198C | YHR198C                         | 8 | 497275 |
| iYHR199C | YHR199C YHR200W (RPN10)         | 8 | 498417 |
| iYHR200W |                                 | 8 | 499880 |
| iYHR202W |                                 | 8 | 504191 |
| iYHR203C | YHR203C (RPS4B) YHR204W (MNL1)  | 8 | 505525 |
| iYHR204W | YHR205W (SCH9)                  | 8 | 508704 |
| iYHR205W | YHR206W (SKN7)                  | 8 | 511832 |
| iYHR207C | YHR207C (SET5) YHR208W (BAT1)   | 8 | 516480 |
| iYHR208W | YHR209W                         | 8 | 518708 |
| iYHR209W |                                 | 8 | 520307 |



|                       |                                      |   |        |
|-----------------------|--------------------------------------|---|--------|
| <b>iYHR210C-0</b>     | YHR210C YHR211W (FLO5)               | 8 | 521732 |
| <b>iYHR210C-A</b>     | YHR210C YHR211W (FLO5)               | 8 | 521732 |
| <b>iYHR210C-B</b>     | YHR210C YHR211W (FLO5)               | 8 | 522952 |
| <b>iYHR211W</b>       |                                      | 8 | 528614 |
| <b>iYHR212C</b>       | YHR212C YHR213W                      | 8 | 538089 |
| <b>iYHR213W-0</b>     | YHR214W                              | 8 | 539742 |
| <b>iYHR213W-A</b>     | YHR214W                              | 8 | 539742 |
| <b>iYHR213W-B</b>     | YHR214W                              | 8 | 540694 |
| <b>iYHR214W</b>       | YHR214W-A                            | 8 | 542257 |
| <b>iYHR214W-A</b>     |                                      | 8 | 543488 |
| <b>iYHR215W</b>       | YHR216W (IMD2)                       | 8 | 553497 |
| <b>iYHR216W</b>       |                                      | 8 | 555962 |
| <b>iYHR217C</b>       | YHR217C YHR218W                      | 8 | 557037 |
| <b>iYHR218W</b>       | YHR219W                              | 8 | 559919 |
| <b>iYHR219W</b>       | YIL177C                              | 8 | 561138 |
| <b>iYHRCdelta10</b>   | YHR145C YHR146W (CRP1)               | 8 | 389509 |
| <b>iYHRCdelta11</b>   | YHR145C YHR146W (CRP1)               | 8 | 389845 |
| <b>iYHRCdelta12</b>   | YHR180W                              | 8 | 464142 |
| <b>iYHRCdelta14-0</b> |                                      | 8 | 530374 |
| <b>iYHRCdelta14-A</b> |                                      | 8 | 530374 |
| <b>iYHRCdelta14-B</b> |                                      | 8 | 531874 |
| <b>iYHRCdelta14-C</b> |                                      | 8 | 533374 |
| <b>iYHRCdelta16-0</b> | YHR214C-B YHR215W (PHO12)            | 8 | 549632 |
| <b>iYHRCdelta16-A</b> | YHR214C-B YHR215W (PHO12)            | 8 | 549632 |
| <b>iYHRCdelta16-B</b> | YHR214C-B YHR215W (PHO12)            | 8 | 550864 |
| <b>iYHRCdelta4</b>    | YHR005C-A (MRS11) YHR006W (STP2)     | 8 | 117054 |
| <b>iYHRCdelta5</b>    | YHR015W (MIP6)                       | 8 | 133433 |
| <b>iYHRCsigma2</b>    |                                      | 8 | 146662 |
| <b>iYHRWdelta7</b>    | YHR015W (MIP6)                       | 8 | 134000 |
| <b>iYHRWdelta9</b>    |                                      | 8 | 359374 |
| <b>iYHRWtau3</b>      |                                      | 8 | 147105 |
| <b>iYIL001W</b>       |                                      | 9 | 355478 |
| <b>iYIL002C</b>       | YIL002C (INP51) YIL001W              | 9 | 353428 |
| <b>iYIL003W</b>       |                                      | 9 | 350000 |
| <b>iYIL004C</b>       | YIL004C (BET1) YIL003W (DRE3)        | 9 | 348502 |
| <b>iYIL006W</b>       | YIL005W (EPS1)                       | 9 | 345180 |
| <b>iYIL007C</b>       | YIL007C YIL006W                      | 9 | 343653 |
| <b>iYIL008W</b>       |                                      | 9 | 342832 |
| <b>iYIL009C-A</b>     | YIL009C-A (EST3) td(guc)i2YIL009W (F | 9 | 336209 |
| <b>iYIL009W</b>       | YIL008W (URM1)                       | 9 | 341425 |
| <b>iYIL010W</b>       |                                      | 9 | 335526 |
| <b>iYIL011W</b>       | YIL010W (DOT5)                       | 9 | 334533 |
| <b>iYIL012W</b>       | YIL011W (TIR3)                       | 9 | 333401 |
| <b>iYIL013C</b>       | YIL013C (PDR11) YIL012W              | 9 | 332440 |
| <b>iYIL014W</b>       |                                      | 9 | 327993 |
| <b>iYIL015C-A</b>     | YIL015C-A YIL014W (MNT3)             | 9 | 325524 |
| <b>iYIL015W</b>       |                                      | 9 | 324103 |
| <b>iYIL016W</b>       | YIL015W (BAR1)                       | 9 | 321931 |
| <b>iYIL017C</b>       | YIL017C (VID28) YIL016W (SNL1)       | 9 | 320963 |
| <b>iYIL019W</b>       | YIL018W (RPL2B)                      | 9 | 316131 |
| <b>iYIL020C</b>       | YIL020C (HIS6) YIL019W               | 9 | 314818 |

|          |                                |   |        |
|----------|--------------------------------|---|--------|
| iYIL021W |                                | 9 | 313859 |
| iYIL022W | YIL021W (RPB3)                 | 9 | 312458 |
| iYIL023C | YIL023C YIL022W (TIM44)        | 9 | 310424 |
| iYIL024C | YIL024C                        | 9 | 309169 |
| iYIL026C | YIL026C (IRR1)                 | 9 | 307927 |
| iYIL027C | YIL027C (KRE27)                | 9 | 304102 |
| iYIL028W |                                | 9 | 302496 |
| iYIL030C | YIL030C (SSM4)                 | 9 | 300008 |
| iYIL031W |                                | 9 | 295736 |
| iYIL032C | YIL032C YIL031W (ULP2)         | 9 | 292316 |
| iYIL033C | YIL033C (BCY1)                 | 9 | 291668 |
| iYIL034C | YIL034C (CAP2)                 | 9 | 290088 |
| iYIL035C | YIL035C (CKA1)                 | 9 | 288907 |
| iYIL036W |                                | 9 | 287428 |
| iYIL037C | YIL037C (PRM2) YIL036W (CST6)  | 9 | 284998 |
| iYIL038C | YIL038C (NOT3)                 | 9 | 282651 |
| iYIL039W |                                | 9 | 279846 |
| iYIL041W | YIL040W                        | 9 | 277504 |
| iYIL042C | YIL042C YIL041W                | 9 | 276291 |
| iYIL044C | YIL044C (AGE2)                 | 9 | 273845 |
| iYIL045W |                                | 9 | 272776 |
| iYIL046W | YIL045W (PIG2)                 | 9 | 270572 |
| iYIL047C | YIL047C (SYG1) YIL046W (MET30) | 9 | 267822 |
| iYIL048W |                                | 9 | 264891 |
| iYIL049W | YIL048W (NEO1)                 | 9 | 260918 |
| iYIL050W | YIL049W (DFG10)                | 9 | 259769 |
| iYIL051C | YIL051C (MMF1) YIL050W (PCL7)  | 9 | 258279 |
| iYIL052C | YIL052C (RPL34B)               | 9 | 257061 |
| iYIL053W |                                | 9 | 255865 |
| iYIL054W | YIL053W (RHR2)                 | 9 | 254858 |
| iYIL055C | YIL055C YIL054W (FYV2)         | 9 | 253923 |
| iYIL056W |                                | 9 | 251911 |
| iYIL058W |                                | 9 | 247195 |
| iYIL061C | YIL061C (SNP1) YIL060W         | 9 | 245556 |
| iYIL062C | YIL062C (ARC15)                | 9 | 244459 |
| iYIL063C | YIL063C (YRB2)                 | 9 | 243741 |
| iYIL065C | YIL065C (FIS1) YIL064W         | 9 | 241772 |
| iYIL066C | YIL066C (RNR3)                 | 9 | 240705 |
| iYIL067C | YIL067C                        | 9 | 237757 |
| iYIL068C | YIL068C (SEC6)                 | 9 | 235471 |
| iYIL069C | YIL069C (RPS24B)               | 9 | 232366 |
| iYIL070C | YIL070C (MAM33)                | 9 | 231069 |
| iYIL071C | YIL071C (PCI8)                 | 9 | 229991 |
| iYIL072W |                                | 9 | 228416 |
| iYIL073C | YIL073C (SPO22) YIL072W (HOP1) | 9 | 225594 |
| iYIL074C | YIL074C (SER33)                | 9 | 222487 |
| iYIL075C | YIL075C (RPN2)                 | 9 | 220697 |
| iYIL076W |                                | 9 | 217545 |
| iYIL077C | YIL077C YIL076W (SEC28)        | 9 | 215950 |
| iYIL078W |                                | 9 | 214700 |
| iYIL079C | YIL079C YIL078W (THS1)         | 9 | 212002 |

|                   |                                |   |        |
|-------------------|--------------------------------|---|--------|
| <b>iYIL083C</b>   | YIL083C YIL082W                | 9 | 204650 |
| <b>iYIL084C</b>   | YIL084C (SDS3)                 | 9 | 203256 |
| <b>iYIL085C</b>   | YIL085C (KTR7)                 | 9 | 202040 |
| <b>iYIL088C</b>   | YIL088C                        | 9 | 199400 |
| <b>iYIL089W</b>   |                                | 9 | 196213 |
| <b>iYIL090W</b>   | YIL089W                        | 9 | 195067 |
| <b>iYIL091C</b>   | YIL091C YIL090W                | 9 | 193192 |
| <b>iYIL092W</b>   |                                | 9 | 190964 |
| <b>iYIL093C</b>   | YIL093C (RSM25) YIL092W        | 9 | 188781 |
| <b>iYIL094C</b>   | YIL094C (LYS12)                | 9 | 187629 |
| <b>iYIL095W</b>   |                                | 9 | 186366 |
| <b>iYIL096C</b>   |                                | 9 | 183124 |
| <b>iYIL097W</b>   |                                | 9 | 181974 |
| <b>iYIL098C</b>   | YIL098C (FMC1) YIL097W (FYV10) | 9 | 180236 |
| <b>iYIL099W</b>   |                                | 9 | 179650 |
| <b>iYIL100W</b>   | YIL099W (SGA1)                 | 9 | 177723 |
| <b>iYIL101C</b>   | YIL101C (XBP1) YIL100W         | 9 | 177247 |
| <b>iYIL102C</b>   | YIL102C                        | 9 | 174884 |
| <b>iYIL103W-0</b> |                                | 9 | 173025 |
| <b>iYIL103W-1</b> |                                | 9 | 173802 |
| <b>iYIL104C</b>   | YIL104C YIL103W                | 9 | 171502 |
| <b>iYIL105C</b>   | YIL105C                        | 9 | 169638 |
| <b>iYIL106W</b>   |                                | 9 | 167441 |
| <b>iYIL107C</b>   | YIL107C (PFK26) YIL106W (MOB1) | 9 | 165758 |
| <b>iYIL110W</b>   |                                | 9 | 157175 |
| <b>iYIL111W</b>   | YIL110W                        | 9 | 155762 |
| <b>iYIL112W</b>   | YIL111W (COX5B)                | 9 | 154843 |
| <b>iYIL113W</b>   | YIL112W                        | 9 | 151185 |
| <b>iYIL114C</b>   | YIL114C (POR2) YIL113W         | 9 | 149985 |
| <b>iYIL115C</b>   | YIL115C (NUP159)               | 9 | 148706 |
| <b>iYIL116W</b>   |                                | 9 | 144082 |
| <b>iYIL117C</b>   | YIL117C (PRM5) YIL116W (HIS5)  | 9 | 141566 |
| <b>iYIL118W</b>   |                                | 9 | 140444 |
| <b>iYIL119C-0</b> | YIL119C (RPI1) YIL118W (RHO3)  | 9 | 137874 |
| <b>iYIL120W</b>   |                                | 9 | 136105 |
| <b>iYIL121W</b>   | YIL120W (QDR1)                 | 9 | 133869 |
| <b>iYIL122W</b>   | YIL121W                        | 9 | 131662 |
| <b>iYIL123W</b>   | YIL122W                        | 9 | 129578 |
| <b>iYIL124W</b>   | YIL123W (SIM1)                 | 9 | 127097 |
| <b>iYIL125W</b>   | YIL124W (AYR1)                 | 9 | 125733 |
| <b>iYIL126W</b>   | YIL125W (KGD1)                 | 9 | 122071 |
| <b>iYIL127C</b>   | YIL127C YIL126W (STH1)         | 9 | 117644 |
| <b>iYIL128W</b>   |                                | 9 | 116904 |
| <b>iYIL129C</b>   | YIL129C (TAO3) YIL128W (MET18) | 9 | 113237 |
| <b>iYIL131C</b>   | YIL131C (FKH1) YIL130W (GIN1)  | 9 | 102235 |
| <b>iYIL132C</b>   | YIL132C (CSM2)                 | 9 | 100501 |
| <b>iYIL133C</b>   | YIL133C (RPL16A)               | 9 | 99416  |
| <b>iYIL134W</b>   |                                | 9 | 98330  |
| <b>iYIL135C</b>   | YIL135C YIL134W (FLX1)         | 9 | 96375  |
| <b>iYIL136W</b>   |                                | 9 | 94800  |
| <b>iYIL137C</b>   | YIL137C YIL136W (OM45)         | 9 | 92788  |

|                      |                                 |   |        |
|----------------------|---------------------------------|---|--------|
| <b>iYIL138C</b>      | YIL138C (TPM2)                  | 9 | 89715  |
| <b>iYIL139C</b>      | YIL139C (REV7)                  | 9 | 88716  |
| <b>iYIL140W</b>      |                                 | 9 | 87837  |
| <b>iYIL142W</b>      | YIL141W                         | 9 | 84885  |
| <b>iYIL143C</b>      | YIL143C (SSL2) YIL142W (CCT2)   | 9 | 83041  |
| <b>iYIL144W</b>      |                                 | 9 | 80149  |
| <b>iYIL145C</b>      | YIL145C (PAN6) YIL144W (TID3)   | 9 | 77391  |
| <b>iYIL146C</b>      | YIL146C (ECM37)                 | 9 | 75773  |
| <b>iYIL147C</b>      | YIL147C (SLN1)                  | 9 | 73453  |
| <b>iYIL148W</b>      |                                 | 9 | 69528  |
| <b>iYIL149C</b>      | YIL149C (MLP2) YIL148W (RPL40A) | 9 | 68067  |
| <b>iYIL150C</b>      | YIL150C (DNA43)                 | 9 | 62728  |
| <b>iYIL151C</b>      | YIL151C                         | 9 | 60694  |
| <b>iYIL152W</b>      |                                 | 9 | 57252  |
| <b>iYIL153W</b>      | YIL152W                         | 9 | 56379  |
| <b>iYIL154C</b>      | YIL154C (IMP2') YIL153W (RRD1)  | 9 | 55021  |
| <b>iYIL155C</b>      | YIL155C (GUT2)                  | 9 | 53708  |
| <b>iYIL156W</b>      |                                 | 9 | 51306  |
| <b>iYIL157C</b>      | YIL157C YIL156W (UBP7)          | 9 | 47542  |
| <b>iYIL158W</b>      |                                 | 9 | 46815  |
| <b>iYIL159W</b>      | YIL158W                         | 9 | 45952  |
| <b>iYIL160C</b>      | YIL160C (POT1) YIL159W (BNR1)   | 9 | 41444  |
| <b>iYIL162W</b>      | YIL161W                         | 9 | 38983  |
| <b>iYIL163C</b>      | YIL163C YIL162W (SUC2)          | 9 | 37252  |
| <b>iYIL164C-0</b>    | YIL164C (NIT1)                  | 9 | 34686  |
| <b>iYIL164C-1</b>    | YIL164C (NIT1)                  | 9 | 35792  |
| <b>iYIL166C</b>      | YIL166C                         | 9 | 32566  |
| <b>iYIL167W</b>      |                                 | 9 | 30048  |
| <b>iYIL169C-0</b>    | YIL169C YIL168W (SDL1)          | 9 | 26106  |
| <b>iYIL169C-1</b>    | YIL169C YIL168W (SDL1)          | 9 | 27569  |
| <b>iYIL170W-0</b>    |                                 | 9 | 21220  |
| <b>iYIL170W-1</b>    |                                 | 9 | 22169  |
| <b>iYIL172C</b>      | YIL172C YIL171W (HXT12)         | 9 | 18553  |
| <b>iYIL173W</b>      |                                 | 9 | 16141  |
| <b>iYIL174W-0</b>    | YIL173W (VTH1)                  | 9 | 9696   |
| <b>iYIL174W-1</b>    | YIL173W (VTH1)                  | 9 | 10594  |
| <b>iYIL177C-1</b>    | YIL177C                         | 9 | 7470   |
| <b>iYILCdelta1</b>   |                                 | 9 | 197485 |
| <b>iYILCdelta3</b>   | YIL030C (SSM4)                  | 9 | 300725 |
| <b>iYILCdelta5-0</b> | YIL009C-A (EST3) YIL009W (FAA3) | 9 | 336894 |
| <b>iYILCdelta5-1</b> | YIL009C-A (EST3) YIL009W (FAA3) | 9 | 338117 |
| <b>iYILCtau1</b>     |                                 | 9 | 197020 |
| <b>iYIR001C</b>      | YIR001C (SGN1)                  | 9 | 356892 |
| <b>iYIR002C</b>      | YIR002C (MPH1) YIR003W          | 9 | 360393 |
| <b>iYIR003W</b>      | YIR004W (DJP1)                  | 9 | 362921 |
| <b>iYIR004W</b>      | YIR005W (IST3)                  | 9 | 364516 |
| <b>iYIR005W</b>      |                                 | 9 | 365332 |
| <b>iYIR006C</b>      | YIR006C te(uuc)i (PAN1) YIR007W | 9 | 369905 |
| <b>iYIR007W</b>      |                                 | 9 | 372995 |
| <b>iYIR008C</b>      | YIR008C (PRI1) YIR009W (MSL1)   | 9 | 374303 |
| <b>iYIR010W</b>      |                                 | 9 | 377158 |

|               |                                     |    |        |
|---------------|-------------------------------------|----|--------|
| iYIR011C      | YIR011C (STS1) YIR012W (SQT1)       | 9  | 378243 |
| iYIR012W      |                                     | 9  | 379778 |
| iYIR013C      | YIR013C (GAT4) YIR014W              | 9  | 380381 |
| iYIR014W      | YIR015W (RPR2)                      | 9  | 381811 |
| iYIR015W      | YIR016W                             | 9  | 382379 |
| iYIR016W      |                                     | 9  | 383422 |
| iYIR017C      | YIR017C (MET28) YIR018W (YAP5)      | 9  | 384116 |
| iYIR018W-0    |                                     | 9  | 385343 |
| iYIR018W-1    |                                     | 9  | 386751 |
| iYIR020C      | YIR020C YIR020W-B                   | 9  | 394554 |
| iYIR020W-B-0  | YIR021W (MRS1)                      | 9  | 395156 |
| iYIR020W-B-1  | YIR021W (MRS1)                      | 9  | 396223 |
| iYIR021W      | YIR022W (SEC11)                     | 9  | 398382 |
| iYIR022W      | YIR023W (DAL81)                     | 9  | 399233 |
| iYIR023W      |                                     | 9  | 402686 |
| iYIR024C      | YIR024C (GIF1) YIR025W (MND2)       | 9  | 403488 |
| iYIR025W      |                                     | 9  | 404762 |
| iYIR026C      | YIR026C (YVH1)                      | 9  | 405964 |
| iYIR027C      | YIR027C (DAL1) YIR028W (DAL4)       | 9  | 407639 |
| iYIR028W      | YIR029W (DAL2)                      | 9  | 410372 |
| iYIR029W      |                                     | 9  | 411835 |
| iYIR030C      | YIR030C (DCG1)                      | 9  | 412767 |
| iYIR031C      | YIR031C (DAL7)                      | 9  | 414676 |
| iYIR032C      | YIR032C (DAL3) YIR033W (MGA2)       | 9  | 415614 |
| iYIR033W      |                                     | 9  | 419462 |
| iYIR034C      | YIR034C (LYS1)                      | 9  | 420733 |
| iYIR035C      | YIR035C                             | 9  | 421787 |
| iYIR036C      | YIR036C YIR037W (HYR1)              | 9  | 422862 |
| iYIR037W      |                                     | 9  | 423616 |
| iYIR038C-0    | YIR038C (GTT1)                      | 9  | 424510 |
| iYIR038C-1    | YIR038C (GTT1)                      | 9  | 425354 |
| iYIR039C      | YIR039C (YPS6)                      | 9  | 432107 |
| iYIR040C      | YIR040C YIR041W                     | 9  | 433717 |
| iYIR041W      |                                     | 9  | 434299 |
| iYIR042C      | YIR042C                             | 9  | 435980 |
| iYIR043C      | YIR043C                             | 9  | 437732 |
| iYIRCdelta6-1 | YIR038C (GTT1)                      | 9  | 427779 |
| iYJL001W      | YJR001W                             | 10 | 435614 |
| iYJL002C      | YJL002C (OST1) YJL001W (PRE3)       | 10 | 434339 |
| iYJL003W      |                                     | 10 | 432688 |
| iYJL004C      | YJL004C (SYS1) YJL003W              | 10 | 431888 |
| iYJL005W      |                                     | 10 | 430925 |
| iYJL006C      | YJL006C (CTK2) tl(uaa)j YJL005W (CY | 10 | 423797 |
| iYJL008C      | YJL008C (CCT8)                      | 10 | 421351 |
| iYJL010C      | YJL010C YJL009W                     | 10 | 419250 |
| iYJL011C      | YJL011C                             | 10 | 414458 |
| iYJL012C      | YJL012C (VTC4)                      | 10 | 413087 |
| iYJL013C      | YJL013C (MAD3)                      | 10 | 410729 |
| iYJL014W      |                                     | 10 | 408851 |
| iYJL017W      | YJL016W                             | 10 | 406256 |
| iYJL018W      | YJL017W                             | 10 | 404636 |

|          |                                      |    |        |
|----------|--------------------------------------|----|--------|
| iYJL020C | YJL020C (BBC1) YJL019W               | 10 | 402102 |
| iYJL022W |                                      | 10 | 398113 |
| iYJL024C | YJL024C (APS3)                       | 10 | 396288 |
| iYJL025W |                                      | 10 | 395207 |
| iYJL026W | YJL025W (RRN7)                       | 10 | 393299 |
| iYJL027C | YJL027C YJL026W (RNR2)               | 10 | 391945 |
| iYJL028W |                                      | 10 | 391342 |
| iYJL029C | YJL029C (VPS53) tm(cau)j1 YJL028W    | 10 | 390549 |
| iYJL030W |                                      | 10 | 387943 |
| iYJL031C | YJL031C (BET4) YJL030W (MAD2)        | 10 | 386936 |
| iYJL033W | YJL032W                              | 10 | 385845 |
| iYJL034W | YJL033W (HCA4)                       | 10 | 383071 |
| iYJL035C | YJL035C (TAD2) YJL034W (KAR2)        | 10 | 380697 |
| iYJL036W |                                      | 10 | 379792 |
| iYJL037W | YJL036W (SNX4)                       | 10 | 377032 |
| iYJL038C | YJL038C YJL037W                      | 10 | 375470 |
| iYJL039C | YJL039C (NUP192) td(guc)j3/tr(ucu)j2 | 10 | 373495 |
| iYJL044C | YJL044C (GYP6) YJL043W               | 10 | 359372 |
| iYJL045W |                                      | 10 | 357624 |
| iYJL046W | YJL045W                              | 10 | 353311 |
| iYJL047C | YJL047C (RTT101) YJL046W             | 10 | 351804 |
| iYJL048C | YJL048C                              | 10 | 348333 |
| iYJL049W |                                      | 10 | 347021 |
| iYJL050W | YJL049W                              | 10 | 345439 |
| iYJL052W | YJL051W                              | 10 | 338965 |
| iYJL053W | YJL052W (TDH1)                       | 10 | 336733 |
| iYJL054W | YJL053W (PEP8)                       | 10 | 335397 |
| iYJL055W | YJL054W (TIM54)                      | 10 | 333790 |
| iYJL056C | YJL056C (ZAP1) YJL055W               | 10 | 332769 |
| iYJL057C | YJL057C (IKS1)                       | 10 | 329817 |
| iYJL058C | YJL058C                              | 10 | 327569 |
| iYJL060W | YJL059W (YHC3)                       | 10 | 324416 |
| iYJL061W | YJL060W                              | 10 | 321853 |
| iYJL062W | YJL061W (NUP82)                      | 10 | 319472 |
| iYJL063C | YJL063C (MRPL8) YJL062W (LAS21)      | 10 | 316171 |
| iYJL064W |                                      | 10 | 315266 |
| iYJL066C | YJL066C (MPM1)                       | 10 | 314568 |
| iYJL068C | YJL068C YJL067W                      | 10 | 313611 |
| iYJL069C | YJL069C                              | 10 | 312402 |
| iYJL070C | YJL070C                              | 10 | 310333 |
| iYJL071W |                                      | 10 | 307552 |
| iYJL072C | YJL072C YJL071W (ARG2)               | 10 | 305558 |
| iYJL073W |                                      | 10 | 304814 |
| iYJL074C | YJL074C (SMC3) YJL073W (JEM1)        | 10 | 302545 |
| iYJL075C | YJL075C                              | 10 | 298572 |
| iYJL077C | YJL077C (ICS3) YJL076W (NET1)        | 10 | 294757 |
| iYJL078C | YJL078C (PRY3)                       | 10 | 293677 |
| iYJL079C | YJL079C (PRY1)                       | 10 | 290470 |
| iYJL080C | YJL080C (SCP160)                     | 10 | 288922 |
| iYJL081C | YJL081C (ARP4)                       | 10 | 284967 |
| iYJL082W |                                      | 10 | 283076 |



|            |                                |    |        |
|------------|--------------------------------|----|--------|
| iYJL083W   | YJL082W (IML2)                 | 10 | 280351 |
| iYJL084C   | YJL084C YJL083W                | 10 | 277698 |
| iYJL085W   |                                | 10 | 274394 |
| iYJL088W   |                                | 10 | 269511 |
| iYJL089W   | YJL088W (ARG3)                 | 10 | 268111 |
| iYJL090C   | YJL090C (DPB11) YJL089W (SIP4) | 10 | 264747 |
| iYJL091C   | YJL091C                        | 10 | 262272 |
| iYJL092W   |                                | 10 | 260643 |
| iYJL093C   | YJL093C (TOK1) YJL092W (HPR5)  | 10 | 256508 |
| iYJL094C   | YJL094C (KHA1)                 | 10 | 254138 |
| iYJL095W   |                                | 10 | 251387 |
| iYJL096W   | YJL095W (BCK1)                 | 10 | 246672 |
| iYJL098W   | YJL097W                        | 10 | 244955 |
| iYJL099W   | YJL098W (SAP185)               | 10 | 241351 |
| iYJL100W   | YJL099W (CHS6)                 | 10 | 238783 |
| iYJL101C   | YJL101C (GSH1) YJL100W (LSB6)  | 10 | 236053 |
| iYJL102W   |                                | 10 | 233457 |
| iYJL103C   | YJL103C YJL102W (MEF2)         | 10 | 230578 |
| iYJL104W   |                                | 10 | 227473 |
| iYJL106W-0 | YJL105W (SET4)                 | 10 | 223024 |
| iYJL106W-1 | YJL105W (SET4)                 | 10 | 223888 |
| iYJL107C   | YJL107C YJL106W (IME2)         | 10 | 219713 |
| iYJL109C   | YJL109C                        | 10 | 217006 |
| iYJL110C   | YJL110C (GZF3)                 | 10 | 211274 |
| iYJL111W   |                                | 10 | 209226 |
| iYJL112W   | YJL111W (CCT7)                 | 10 | 207146 |
| iYJL113W   | YJL112W (MDV1)                 | 10 | 203026 |
| iYJL115W   | YJL114W                        | 10 | 196825 |
| iYJL116C   | YJL116C (NCA3) YJL115W (ASF1)  | 10 | 194573 |
| iYJL117W   |                                | 10 | 193166 |
| iYJL118W   | YJL117W (PHO86)                | 10 | 191998 |
| iYJL120W   |                                | 10 | 191045 |
| iYJL122W   |                                | 10 | 189943 |
| iYJL123C   | YJL123C YJL122W                | 10 | 189140 |
| iYJL124C   | YJL124C (LSM1)                 | 10 | 187344 |
| iYJL125C   | YJL125C (GCD14)                | 10 | 186378 |
| iYJL126W   |                                | 10 | 185123 |
| iYJL127C   | YJL127C (SPT10) YJL126W (NIT2) | 10 | 183919 |
| iYJL128C-0 | YJL128C (PBS2)                 | 10 | 179801 |
| iYJL128C-1 | YJL128C (PBS2)                 | 10 | 180899 |
| iYJL129C   | YJL129C (TRK1)                 | 10 | 177004 |
| iYJL130C   | YJL130C (URA2)                 | 10 | 172065 |
| iYJL131C   | YJL131C                        | 10 | 165046 |
| iYJL132W   |                                | 10 | 163864 |
| iYJL133W   | YJL132W                        | 10 | 161261 |
| iYJL134W   | YJL133W (MRS3)                 | 10 | 159115 |
| iYJL136C   | YJL136C (RPS21B) YJL135W       | 10 | 156971 |
| iYJL137C   | YJL137C (GLG2)                 | 10 | 155825 |
| iYJL138C   | YJL138C (TIF2)                 | 10 | 154389 |
| iYJL139C   | YJL139C (YUR1)                 | 10 | 152697 |
| iYJL140W   |                                | 10 | 151324 |

|            |                                  |    |        |
|------------|----------------------------------|----|--------|
| iYJL141C   | YJL141C (YAK1) YJL140W (RPB4)    | 10 | 150088 |
| iYJL143W   |                                  | 10 | 147275 |
| iYJL144W   | YJL143W (TIM17)                  | 10 | 146371 |
| iYJL145W   | YJL144W                          | 10 | 145742 |
| iYJL146W   | YJL145W                          | 10 | 144399 |
| iYJL147C   | YJL147C YJL146W (IDS2)           | 10 | 142265 |
| iYJL148W   |                                  | 10 | 140836 |
| iYJL149W   | YJL148W (RPA34) snr190/snr128    | 10 | 139068 |
| iYJL151C   | YJL151C (SNA3) YJL150W           | 10 | 136471 |
| iYJL153C   | YJL153C (INO1) YJL152W           | 10 | 135697 |
| iYJL154C   | YJL154C (VPS35)                  | 10 | 133633 |
| iYJL155C   | YJL155C (FBP26)                  | 10 | 130341 |
| iYJL156C   | YJL156C (SSY5)                   | 10 | 128650 |
| iYJL157C   | YJL157C (FAR1)                   | 10 | 126025 |
| iYJL158C   | YJL158C (CIS3)                   | 10 | 122645 |
| iYJL159W   |                                  | 10 | 121376 |
| iYJL160C-0 | YJL160C YJL159W (HSP150)         | 10 | 118820 |
| iYJL160C-1 | YJL160C YJL159W (HSP150)         | 10 | 119632 |
| iYJL161W   |                                  | 10 | 117781 |
| iYJL163C   | YJL163C                          | 10 | 113327 |
| iYJL164C   | YJL164C (TPK1)                   | 10 | 111151 |
| iYJL165C   | YJL165C (HAL5)                   | 10 | 109453 |
| iYJL166W   |                                  | 10 | 106710 |
| iYJL167W   | YJL166W (QCR8)                   | 10 | 106064 |
| iYJL168C   | YJL168C (SET2) YJL167W (ERG20)   | 10 | 104420 |
| iYJL170C   | YJL170C (ASG7) YJL169W           | 10 | 101694 |
| iYJL171C   | YJL171C                          | 10 | 100887 |
| iYJL172W   |                                  | 10 | 99460  |
| iYJL173C   | YJL173C (RFA3) YJL172W (CPS1)    | 10 | 96526  |
| iYJL174W   |                                  | 10 | 95919  |
| iYJL175W   | YJL174W (KRE9)                   | 10 | 94558  |
| iYJL177W   |                                  | 10 | 91654  |
| iYJL178C   | YJL178C YJL177W (RPL17B)         | 10 | 89870  |
| iYJL179W   |                                  | 10 | 89114  |
| iYJL180C   | YJL180C (ATP12) YJL179W (PFD1)   | 10 | 88558  |
| iYJL181W   |                                  | 10 | 87493  |
| iYJL183W   |                                  | 10 | 85334  |
| iYJL184W   | YJL183W (MNN11)                  | 10 | 83817  |
| iYJL185C   | YJL185C YJL184W                  | 10 | 82974  |
| iYJL186W   |                                  | 10 | 81913  |
| iYJL187C   | YJL187C (SWE1) YJL186W (MNN5)    | 10 | 79261  |
| iYJL188C   | YJL188C (BUD19)                  | 10 | 76509  |
| iYJL190C   | YJL190C (RPS22A) YJL189W (RPL39) | 10 | 75301  |
| iYJL191W   |                                  | 10 | 74610  |
| iYJL192C   | YJL192C YJL191W (RPS14B)         | 10 | 73413  |
| iYJL193W   |                                  | 10 | 72573  |
| iYJL194W   | YJL193W                          | 10 | 70878  |
| iYJL196C   | YJL196C (ELO1)                   | 10 | 68781  |
| iYJL197W   |                                  | 10 | 67568  |
| iYJL198W   | YJL197W (UBP12)                  | 10 | 63488  |
| iYJL199C   | YJL199C YJL198W (PHO90)          | 10 | 60181  |

|              |                                |    |        |
|--------------|--------------------------------|----|--------|
| iYJL200C     | YJL200C                        | 10 | 58813  |
| iYJL201W     |                                | 10 | 56178  |
| iYJL202C     | YJL202C YJL201W (ECM25)        | 10 | 54290  |
| iYJL204C     | YJL204C (RCY1) YJL203W (PRP21) | 10 | 53151  |
| iYJL206C     | YJL206C                        | 10 | 49935  |
| iYJL206C-A   | YJL205C-A (NCE101)             | 10 | 50443  |
| iYJL207C     | YJL207C                        | 10 | 47433  |
| iYJL208C     | YJL208C (NUC1)                 | 10 | 41183  |
| iYJL209W     |                                | 10 | 39969  |
| iYJL210W     | YJL209W (CBP1)                 | 10 | 37734  |
| iYJL212C     | YJL212C (OPT1)                 | 10 | 36249  |
| iYJL213W     |                                | 10 | 33158  |
| iYJL214W-0   | YJL213W                        | 10 | 28596  |
| iYJL214W-1   | YJL213W                        | 10 | 29785  |
| iYJL215C     | YJL215C YJL214W (HXT8)         | 10 | 26771  |
| iYJL216C     | YJL216C                        | 10 | 26086  |
| iYJL217W     |                                | 10 | 23729  |
| iYJL218W     | YJL217W                        | 10 | 22563  |
| iYJL219W     | YJL218W                        | 10 | 21200  |
| iYJL220W     | YJL219W (HXT9)                 | 10 | 18695  |
| iYJL222W     |                                | 10 | 16124  |
| iYJL223C-0   | YJL223C (PAU1) YJL222W (VTH2)  | 10 | 9138   |
| iYJL225C-1   | YJL225C                        | 10 | 7453   |
| iYJLCdelta3  | YJL112W (MDV1)                 | 10 | 203815 |
| iYJLCdelta5  | YJL045W                        | 10 | 354871 |
| iYJLCdelta6  | YJL039C (NUP192)               | 10 | 374631 |
| iYJLCdelta7  | YJL036W (SNX4)                 | 10 | 377566 |
| iYJLWdelta1  | YJL200C                        | 10 | 59783  |
| iYJLWdelta15 | YJR052W (RAD7)                 | 10 | 531363 |
| iYJLWdelta19 |                                | 10 | 541115 |
| iYJLWdelta8  | YJL011C                        | 10 | 416338 |
| iYJLWdelta9  | YJL011C                        | 10 | 416714 |
| iYJLWtau4    | YJL008C (CCT8)                 | 10 | 421984 |
| iYJR001W     | YJR002W (MPP10)                | 10 | 438298 |
| iYJR002W     |                                | 10 | 440333 |
| iYJR003C     | YJR003C                        | 10 | 442300 |
| iYJR004C     | YJR004C (SAG1) YJR005W (APL1)  | 10 | 444548 |
| iYJR005W     | YJR006W (HYS2)                 | 10 | 447712 |
| iYJR006W     | YJR007W (SUI2)                 | 10 | 450352 |
| iYJR007W     | YJR008W                        | 10 | 451621 |
| iYJR008W     |                                | 10 | 453133 |
| iYJR009C-0   | YJR009C (TDH2) YJR010W (MET3)  | 10 | 454368 |
| iYJR010C-A   | YJR010C-A (SPC1)               | 10 | 458048 |
| iYJR010W     |                                | 10 | 457461 |
| iYJR011C     | YJR011C                        | 10 | 459113 |
| iYJR012C     | YJR012C YJR013W                | 10 | 460105 |
| iYJR013W     | YJR014W                        | 10 | 461281 |
| iYJR014W     | YJR015W                        | 10 | 462113 |
| iYJR015W     |                                | 10 | 463941 |
| iYJR016C     | YJR016C (ILV3)                 | 10 | 465896 |
| iYJR018W     |                                | 10 | 466836 |

|                 |                                  |    |        |
|-----------------|----------------------------------|----|--------|
| <b>iYJR020W</b> |                                  | 10 | 468021 |
| <b>iYJR021C</b> | YJR021C (REC107) YJR022W (LSM8)  | 10 | 469267 |
| <b>iYJR024C</b> | YJR024C                          | 10 | 470652 |
| <b>iYJR025C</b> | YJR025C (BNA1) YJR026W           | 10 | 471359 |
| <b>iYJR030C</b> | YJR030C                          | 10 | 485884 |
| <b>iYJR031C</b> | YJR031C (GEA1) YJR032W (CPR7)    | 10 | 490500 |
| <b>iYJR032W</b> |                                  | 10 | 491950 |
| <b>iYJR034W</b> | YJR035W (RAD26)                  | 10 | 496697 |
| <b>iYJR035W</b> |                                  | 10 | 500300 |
| <b>iYJR037W</b> |                                  | 10 | 503173 |
| <b>iYJR039W</b> | YJR040W (GEF1)                   | 10 | 506989 |
| <b>iYJR040W</b> |                                  | 10 | 509773 |
| <b>iYJR041C</b> | YJR041C YJR042W (NUP85)          | 10 | 513451 |
| <b>iYJR042W</b> |                                  | 10 | 515977 |
| <b>iYJR043C</b> | YJR043C (POL32)                  | 10 | 517201 |
| <b>iYJR044C</b> | YJR044C                          | 10 | 518873 |
| <b>iYJR045C</b> | YJR045C (SSC1) YJR046W (TAH11)   | 10 | 521290 |
| <b>iYJR046W</b> |                                  | 10 | 523550 |
| <b>iYJR047C</b> | YJR047C (ANB1) YJR048W (CYC1)    | 10 | 525069 |
| <b>iYJR048W</b> |                                  | 10 | 526352 |
| <b>iYJR049C</b> | YJR049C (UTR1) YJR050W (ISY1)    | 10 | 528164 |
| <b>iYJR050W</b> | YJR051W (OSM1)                   | 10 | 529092 |
| <b>iYJR051W</b> | YJR052W (RAD7)                   | 10 | 531054 |
| <b>iYJR053W</b> | YJR054W                          | 10 | 535439 |
| <b>iYJR054W</b> | YJR055W (HIT1)                   | 10 | 537237 |
| <b>iYJR055W</b> |                                  | 10 | 538954 |
| <b>iYJR056C</b> | YJR056C ty(gua)j2 YJR057W (CDC8) | 10 | 542190 |
| <b>iYJR058C</b> | YJR058C (APS2) YJR059W (PTK2)    | 10 | 544863 |
| <b>iYJR059W</b> | YJR060W (CBF1)                   | 10 | 547931 |
| <b>iYJR060W</b> | YJR061W                          | 10 | 549502 |
| <b>iYJR061W</b> |                                  | 10 | 553006 |
| <b>iYJR062C</b> | YJR062C (NTA1) YJR063W (RPA12)   | 10 | 554537 |
| <b>iYJR063W</b> | YJR064W (CCT5)                   | 10 | 555260 |
| <b>iYJR064W</b> |                                  | 10 | 557290 |
| <b>iYJR065C</b> | YJR065C (ARP3) YJR066W (TOR1)    | 10 | 558846 |
| <b>iYJR066W</b> |                                  | 10 | 566516 |
| <b>iYJR067C</b> | YJR067C (YAE1) YJR068W (RFC2)    | 10 | 567132 |
| <b>iYJR068W</b> |                                  | 10 | 568392 |
| <b>iYJR069C</b> | YJR069C (HAM1)                   | 10 | 569087 |
| <b>iYJR071W</b> |                                  | 10 | 570461 |
| <b>iYJR072C</b> | YJR072C                          | 10 | 571812 |
| <b>iYJR073C</b> | YJR073C (OPI3) YJR074W (MOG1)    | 10 | 572623 |
| <b>iYJR074W</b> | YJR075W (HOC1)                   | 10 | 573439 |
| <b>iYJR075W</b> |                                  | 10 | 574859 |
| <b>iYJR077C</b> | YJR077C (MIR1) YJR078W           | 10 | 577878 |
| <b>iYJR080C</b> | YJR080C                          | 10 | 581304 |
| <b>iYJR082C</b> | YJR082C                          | 10 | 581943 |
| <b>iYJR083C</b> | YJR083C YJR084W                  | 10 | 583225 |
| <b>iYJR084W</b> |                                  | 10 | 584692 |
| <b>iYJR085C</b> | YJR085C YJR086W (STE18)          | 10 | 585125 |
| <b>iYJR088C</b> | YJR088C YJR089W (BIR1)           | 10 | 587061 |

|                   |                                   |    |        |
|-------------------|-----------------------------------|----|--------|
| <b>iYJR089W</b>   |                                   | 10 | 590270 |
| <b>iYJR090C</b>   | YJR090C (GRR1)                    | 10 | 594015 |
| <b>iYJR091C</b>   | YJR091C (JSN1) YJR092W (BUD4)     | 10 | 598024 |
| <b>iYJR092W</b>   |                                   | 10 | 602769 |
| <b>iYJR093C</b>   | YJR093C (FIP1)                    | 10 | 603894 |
| <b>iYJR094C-0</b> | YJR094C (IME1) YJR094W-A (RPL43B) | 10 | 605342 |
| <b>iYJR094W-A</b> | YJR095W (SFC1)                    | 10 | 608549 |
| <b>iYJR095W</b>   | YJR096W                           | 10 | 610432 |
| <b>iYJR096W</b>   | YJR097W                           | 10 | 611734 |
| <b>iYJR097W</b>   |                                   | 10 | 612622 |
| <b>iYJR098C</b>   | YJR098C YJR099W (YUH1)            | 10 | 614844 |
| <b>iYJR099W</b>   |                                   | 10 | 615974 |
| <b>iYJR100C</b>   | YJR100C tl(uag)j YJR101W (RSM26)  | 10 | 617022 |
| <b>iYJR101W</b>   |                                   | 10 | 618722 |
| <b>iYJR102C</b>   | YJR102C (VPS25) YJR103W (URA8)    | 10 | 619453 |
| <b>iYJR103W</b>   |                                   | 10 | 622136 |
| <b>iYJR104C</b>   | YJR104C (SOD1) YJR105W (ADO1)     | 10 | 622701 |
| <b>iYJR105W</b>   | YJR106W (ECM27)                   | 10 | 624290 |
| <b>iYJR106W</b>   | YJR107W                           | 10 | 626702 |
| <b>iYJR107W</b>   | YJR108W (ABM1)                    | 10 | 628014 |
| <b>iYJR108W</b>   |                                   | 10 | 628772 |
| <b>iYJR109C</b>   | YJR109C (CPA2) YJR110W            | 10 | 632630 |
| <b>iYJR110W</b>   |                                   | 10 | 635370 |
| <b>iYJR111C</b>   | YJR111C YJR112W (NNF1)            | 10 | 636395 |
| <b>iYJR112W</b>   |                                   | 10 | 637324 |
| <b>iYJR114W</b>   | YJR115W                           | 10 | 638740 |
| <b>iYJR115W</b>   | YJR116W                           | 10 | 640140 |
| <b>iYJR116W</b>   | YJR117W (STE24)                   | 10 | 641353 |
| <b>iYJR117W</b>   |                                   | 10 | 643057 |
| <b>iYJR118C</b>   | YJR118C (ILM1)                    | 10 | 643790 |
| <b>iYJR119C</b>   | YJR119C YJR120W                   | 10 | 646179 |
| <b>iYJR120W</b>   | YJR121W (ATP2)                    | 10 | 647165 |
| <b>iYJR121W</b>   | YJR122W (CAF17)                   | 10 | 648831 |
| <b>iYJR122W</b>   |                                   | 10 | 650958 |
| <b>iYJR123W</b>   |                                   | 10 | 652267 |
| <b>iYJR124C</b>   | YJR124C                           | 10 | 653927 |
| <b>iYJR125C</b>   | YJR125C (ENT3)                    | 10 | 655652 |
| <b>iYJR126C</b>   | YJR126C                           | 10 | 658378 |
| <b>iYJR128W</b>   |                                   | 10 | 662969 |
| <b>iYJR129C</b>   | YJR129C                           | 10 | 664708 |
| <b>iYJR130C</b>   | YJR130C (STR2) YJR131W (MNS1)     | 10 | 666826 |
| <b>iYJR131W</b>   | YJR132W (NMD5)                    | 10 | 668982 |
| <b>iYJR132W</b>   | YJR133W (XPT1)                    | 10 | 672357 |
| <b>iYJR133W</b>   |                                   | 10 | 673309 |
| <b>iYJR134C</b>   | YJR134C (SGM1)                    | 10 | 675541 |
| <b>iYJR135C</b>   | YJR135W-A (TIM8) YJR136C          | 10 | 676467 |
| <b>iYJR136C</b>   | YJR136C                           | 10 | 678395 |
| <b>iYJR137C</b>   | YJR137C (ECM17) YJR138W (IML1)    | 10 | 682974 |
| <b>iYJR138W</b>   |                                   | 10 | 689010 |
| <b>iYJR139C</b>   | YJR139C (HOM6)                    | 10 | 690213 |
| <b>iYJR140C</b>   | YJR140C (HIR3) YJR141W            | 10 | 695385 |

|                     |                                   |    |        |
|---------------------|-----------------------------------|----|--------|
| <b>iYJR141W</b>     | YJR142W                           | 10 | 696638 |
| <b>iYJR142W</b>     |                                   | 10 | 697858 |
| <b>iYJR143C</b>     | YJR143C (PMT4) YJR144W (MGM101)   | 10 | 700303 |
| <b>iYJR144W</b>     |                                   | 10 | 701380 |
| <b>iYJR145C</b>     | YJR145C (RPS4A) YJR146W           | 10 | 702757 |
| <b>iYJR147W</b>     | YJR148W (BAT2)                    | 10 | 704961 |
| <b>iYJR148W</b>     | YJR149W                           | 10 | 706563 |
| <b>iYJR149W</b>     |                                   | 10 | 708063 |
| <b>iYJR150C-0</b>   | YJR150C (DAN1)                    | 10 | 709396 |
| <b>iYJR150C-1</b>   | YJR150C (DAN1)                    | 10 | 710670 |
| <b>iYJR151C-0</b>   | YJR151C (DAN4) YJR152W (DAL5)     | 10 | 715429 |
| <b>iYJR151C-1</b>   | YJR151C (DAN4) YJR152W (DAL5)     | 10 | 716737 |
| <b>iYJR151C-2</b>   | YJR151C (DAN4) YJR152W (DAL5)     | 10 | 718045 |
| <b>iYJR152W</b>     | YJR153W (PGU1)                    | 10 | 720986 |
| <b>iYJR153W-0</b>   | YJR154W                           | 10 | 723589 |
| <b>iYJR153W-1</b>   | YJR154W                           | 10 | 724531 |
| <b>iYJR154W</b>     | YJR155W (AAD10)                   | 10 | 726513 |
| <b>iYJR155W</b>     |                                   | 10 | 727960 |
| <b>iYJR156C</b>     | YJR156C (THI11) YJR157W           | 10 | 729285 |
| <b>iYJR157W-0</b>   | YJR158W (HXT16)                   | 10 | 730566 |
| <b>iYJR157W-1</b>   | YJR158W (HXT16)                   | 10 | 731347 |
| <b>iYJR158W-0</b>   | YJR159W (SOR1)                    | 10 | 733832 |
| <b>iYJR158W-1</b>   | YJR159W (SOR1)                    | 10 | 734782 |
| <b>iYJR159W</b>     |                                   | 10 | 736806 |
| <b>iYJR160C-0</b>   | YJR160C                           | 10 | 739505 |
| <b>iYJR160C-1</b>   | YJR160C                           | 10 | 741021 |
| <b>iYJR161C</b>     | YJR161C (COS5)                    | 10 | 743688 |
| <b>iYJRWdelta14</b> | YJR043C (POL32)                   | 10 | 517787 |
| <b>iYJRWdelta17</b> | YJR055W (HIT1)                    | 10 | 538122 |
| <b>iYJRWdelta20</b> | YJR056C YJR057W (CDC8)            | 10 | 543458 |
| <b>iYKL001C</b>     | YKL001C (MET14)                   | 11 | 439026 |
| <b>iYKL002W</b>     |                                   | 11 | 438185 |
| <b>iYKL003C</b>     | YKL003C (MRP17) YKL002W (DID4)    | 11 | 437133 |
| <b>iYKL004W</b>     |                                   | 11 | 436426 |
| <b>iYKL005C</b>     | YKL005C YKL004W (AUR1)            | 11 | 434518 |
| <b>iYKL006C-A</b>   | YKL006C-A (SFT1) YKL006W (RPL14A) | 11 | 430273 |
| <b>iYKL006W</b>     |                                   | 11 | 432361 |
| <b>iYKL007W</b>     |                                   | 11 | 429749 |
| <b>iYKL008C</b>     | YKL008C (LAC1) YKL007W (CAP1)     | 11 | 428192 |
| <b>iYKL009W</b>     |                                   | 11 | 426593 |
| <b>iYKL010C</b>     | YKL010C (UFD4) YKL009W (MRT4)     | 11 | 425516 |
| <b>iYKL011C</b>     | YKL011C (CCE1)                    | 11 | 420857 |
| <b>iYKL012W</b>     |                                   | 11 | 419702 |
| <b>iYKL013C</b>     | YKL013C (ARC19) YKL012W (PRP40)   | 11 | 417664 |
| <b>iYKL014C</b>     | YKL014C                           | 11 | 416554 |
| <b>iYKL015W</b>     |                                   | 11 | 411124 |
| <b>iYKL016C</b>     | YKL016C (ATP7) YKL015W (PUT3)     | 11 | 407630 |
| <b>iYKL017C</b>     | YKL017C (HCS1)                    | 11 | 406882 |
| <b>iYKL018W</b>     |                                   | 11 | 404732 |
| <b>iYKL019W</b>     | YKL018W (SWD2)                    | 11 | 403159 |
| <b>iYKL020C</b>     | YKL020C (SPT23) YKL019W (RAM2)    | 11 | 401721 |



|                   |                               |    |        |
|-------------------|-------------------------------|----|--------|
| <b>iYKL021C</b>   | YKL021C (MAK11)               | 11 | 398391 |
| <b>iYKL022C</b>   | YKL022C (CDC16)               | 11 | 396889 |
| <b>iYKL023W</b>   |                               | 11 | 394195 |
| <b>iYKL024C</b>   | YKL024C (URA6) YKL023W        | 11 | 392781 |
| <b>iYKL025C</b>   | YKL025C (PAN3)                | 11 | 391920 |
| <b>iYKL026C</b>   | YKL026C (GPX1)                | 11 | 389524 |
| <b>iYKL027W</b>   |                               | 11 | 388546 |
| <b>iYKL028W</b>   | YKL027W                       | 11 | 386847 |
| <b>iYKL029C</b>   | YKL029C (MAE1) YKL028W (TFA1) | 11 | 384366 |
| <b>iYKL032C</b>   | YKL032C (IXR1) YKL031W        | 11 | 381499 |
| <b>iYKL033W</b>   |                               | 11 | 378213 |
| <b>iYKL033W-A</b> | YKL033W                       | 11 | 374329 |
| <b>iYKL034W</b>   | YKL033W-A                     | 11 | 373747 |
| <b>iYKL035W</b>   | YKL034W                       | 11 | 371032 |
| <b>iYKL038W</b>   | YKL037W                       | 11 | 368759 |
| <b>iYKL039W</b>   | YKL038W (RGT1)                | 11 | 363860 |
| <b>iYKL040C</b>   | YKL040C (NFU1) YKL039W (PTM1) | 11 | 361471 |
| <b>iYKL041W</b>   |                               | 11 | 360460 |
| <b>iYKL042W</b>   | YKL041W (VPS24)               | 11 | 359210 |
| <b>iYKL043W</b>   | YKL042W (SPC42)               | 11 | 357492 |
| <b>iYKL044W</b>   | YKL043W (PHD1)                | 11 | 356286 |
| <b>iYKL045W</b>   | YKL044W                       | 11 | 354723 |
| <b>iYKL046C</b>   | YKL046C YKL045W (PRI2)        | 11 | 352268 |
| <b>iYKL047W</b>   |                               | 11 | 350657 |
| <b>iYKL048C</b>   | YKL048C (ELM1) YKL047W        | 11 | 348780 |
| <b>iYKL049C</b>   | YKL049C (CSE4)                | 11 | 346133 |
| <b>iYKL050C</b>   | YKL050C                       | 11 | 345265 |
| <b>iYKL051W</b>   |                               | 11 | 342018 |
| <b>iYKL052C</b>   | YKL052C (ASK1) YKL051W        | 11 | 340191 |
| <b>iYKL053C-A</b> | YKL053C-A YKL053W             | 11 | 339087 |
| <b>iYKL054C</b>   |                               | 11 | 338398 |
| <b>iYKL055C</b>   | YKL055C (OAR1)                | 11 | 335802 |
| <b>iYKL056C</b>   | YKL056C                       | 11 | 334560 |
| <b>iYKL057C</b>   | YKL057C (NUP120)              | 11 | 333614 |
| <b>iYKL058W</b>   |                               | 11 | 330179 |
| <b>iYKL059C</b>   | YKL059C YKL058W (TOA2)        | 11 | 329088 |
| <b>iYKL060C</b>   | YKL060C (FBA1)                | 11 | 327132 |
| <b>iYKL061W</b>   |                               | 11 | 325757 |
| <b>iYKL062W</b>   | YKL061W                       | 11 | 324765 |
| <b>iYKL063C-0</b> | YKL063C YKL062W (MSN4)        | 11 | 321163 |
| <b>iYKL063C-1</b> | YKL063C YKL062W (MSN4)        | 11 | 322018 |
| <b>iYKL064W</b>   |                               | 11 | 320318 |
| <b>iYKL065C</b>   | YKL065C (YET1) YKL064W (MNR2) | 11 | 316702 |
| <b>iYKL066W</b>   |                               | 11 | 315369 |
| <b>iYKL068W</b>   | YKL067W (YNK1)                | 11 | 312723 |
| <b>iYKL069W</b>   | YKL068W (NUP100)              | 11 | 307472 |
| <b>iYKL070W</b>   | YKL069W                       | 11 | 306365 |
| <b>iYKL071W</b>   | YKL070W                       | 11 | 305529 |
| <b>iYKL072W</b>   | YKL071W                       | 11 | 301527 |
| <b>iYKL073W</b>   | YKL072W (STB6)                | 11 | 298720 |
| <b>iYKL074C</b>   | YKL074C (MUD2) YKL073W (LHS1) | 11 | 295838 |

|                     |                                |    |        |
|---------------------|--------------------------------|----|--------|
| <b>iYKL075C</b>     | YKL075C                        | 11 | 293953 |
| <b>iYKL077W</b>     |                                | 11 | 292276 |
| <b>iYKL078W</b>     | YKL077W                        | 11 | 290697 |
| <b>iYKL079W</b>     | YKL078W                        | 11 | 288218 |
| <b>iYKL081W</b>     | YKL080W (VMA5)                 | 11 | 284100 |
| <b>iYKL082C</b>     | YKL082C YKL081W (TEF4)         | 11 | 281974 |
| <b>iYKL084W</b>     | YKL083W                        | 11 | 280504 |
| <b>iYKL085W</b>     | YKL084W                        | 11 | 279772 |
| <b>iYKL086W</b>     | YKL085W (MDH1)                 | 11 | 278309 |
| <b>iYKL087C</b>     | YKL087C (CYT2) YKL086W         | 11 | 277508 |
| <b>iYKL088W</b>     |                                | 11 | 276643 |
| <b>iYKL089W</b>     | YKL088W                        | 11 | 274688 |
| <b>iYKL090W</b>     | YKL089W (MIF2)                 | 11 | 272854 |
| <b>iYKL091C</b>     | YKL091C YKL090W                | 11 | 270295 |
| <b>iYKL092C</b>     | YKL092C (BUD2)                 | 11 | 269104 |
| <b>iYKL093W</b>     |                                | 11 | 265453 |
| <b>iYKL094W</b>     | YKL093W (MBR1)                 | 11 | 263935 |
| <b>iYKL095W</b>     | YKL094W (YJU3)                 | 11 | 262758 |
| <b>iYKL096W</b>     | YKL095W (YJU2)                 | 11 | 261496 |
| <b>iYKL097C</b>     | YKL097C YKL096W-A (CWP2)       | 11 | 258558 |
| <b>iYKL097W-A-0</b> | YKL096W (CWP1)                 | 11 | 259176 |
| <b>iYKL097W-A-1</b> | YKL096W (CWP1)                 | 11 | 259976 |
| <b>iYKL098W</b>     |                                | 11 | 257488 |
| <b>iYKL099C</b>     | YKL099C YKL098W                | 11 | 256117 |
| <b>iYKL100C</b>     | YKL100C                        | 11 | 255106 |
| <b>iYKL101W</b>     |                                | 11 | 253122 |
| <b>iYKL102C</b>     | YKL102C YKL101W (HSL1)         | 11 | 248013 |
| <b>iYKL103C</b>     | YKL103C (LAP4)                 | 11 | 247328 |
| <b>iYKL104C</b>     | YKL104C (GFA1)                 | 11 | 245019 |
| <b>iYKL105C</b>     | YKL105C                        | 11 | 242229 |
| <b>iYKL106W</b>     |                                | 11 | 238537 |
| <b>iYKL107W</b>     | YKL106W (AAT1)                 | 11 | 236716 |
| <b>iYKL108W</b>     | YKL107W                        | 11 | 235433 |
| <b>iYKL109W</b>     | YKL108W (SLD2)                 | 11 | 233537 |
| <b>iYKL110C-0</b>   | YKL110C (KTI12) YKL109W (HAP4) | 11 | 229526 |
| <b>iYKL110C-1</b>   | YKL110C (KTI12) YKL109W (HAP4) | 11 | 230699 |
| <b>iYKL111C</b>     | YKL111C                        | 11 | 228445 |
| <b>iYKL113C</b>     | YKL113C (RAD27) YKL112W (ABF1) | 11 | 225521 |
| <b>iYKL114C</b>     | YKL114C (APN1)                 | 11 | 224101 |
| <b>iYKL115C</b>     | YKL115C                        | 11 | 222931 |
| <b>iYKL117W</b>     |                                | 11 | 220620 |
| <b>iYKL120W</b>     |                                | 11 | 217964 |
| <b>iYKL121W</b>     | YKL120W (OAC1)                 | 11 | 216346 |
| <b>iYKL125W</b>     | YKL124W (SSH4)                 | 11 | 209776 |
| <b>iYKL126W</b>     | YKL125W (RRN3)                 | 11 | 207395 |
| <b>iYKL127W</b>     | YKL126W (YPK1)                 | 11 | 204899 |
| <b>iYKL128C</b>     | YKL128C (PMU1) YKL127W (PGM1)  | 11 | 201417 |
| <b>iYKL130C</b>     | YKL130C (SHE2)                 | 11 | 196029 |
| <b>iYKL131W</b>     |                                | 11 | 195000 |
| <b>iYKL133C</b>     | YKL133C                        | 11 | 193071 |
| <b>iYKL134C</b>     | YKL134C (OCT1)                 | 11 | 191443 |

|                     |                                  |    |        |
|---------------------|----------------------------------|----|--------|
| <b>iYKL135C</b>     | YKL135C (APL2)                   | 11 | 188647 |
| <b>iYKL137W</b>     | YKL136W                          | 11 | 186299 |
| <b>iYKL138C</b>     | YKL138C (MRPL31) YKL137W         | 11 | 185686 |
| <b>iYKL139W</b>     |                                  | 11 | 184549 |
| <b>iYKL140W</b>     | YKL139W (CTK1)                   | 11 | 182430 |
| <b>iYKL141W</b>     | YKL140W (TGL1)                   | 11 | 180268 |
| <b>iYKL142W</b>     | YKL141W (SDH3)                   | 11 | 179179 |
| <b>iYKL143W</b>     | YKL142W (MRP8)                   | 11 | 178177 |
| <b>iYKL144C</b>     | YKL144C (RPC25) YKL143W (LTV1)   | 11 | 176486 |
| <b>iYKL145W</b>     |                                  | 11 | 175621 |
| <b>iYKL146W</b>     | YKL145W (RPT1)                   | 11 | 173866 |
| <b>iYKL148C</b>     | YKL148C (SDH1)                   | 11 | 171134 |
| <b>iYKL149C</b>     | YKL149C (DBR1)                   | 11 | 168834 |
| <b>iYKL150W</b>     |                                  | 11 | 167457 |
| <b>iYKL151C</b>     | YKL151C YKL150W (MCR1)           | 11 | 165935 |
| <b>iYKL152C</b>     | YKL152C (GPM1)                   | 11 | 164390 |
| <b>iYKL154W</b>     | YKL153W                          | 11 | 162340 |
| <b>iYKL155C</b>     | YKL155C (RSM22) YKL154W (SRP102) | 11 | 161347 |
| <b>iYKL156W</b>     |                                  | 11 | 159217 |
| <b>iYKL157W</b>     | YKL156W (RPS27A)                 | 11 | 158186 |
| <b>iYKL158W</b>     | YKL157W (APE2)                   | 11 | 155298 |
| <b>iYKL159C</b>     | YKL159C (RCN1)                   | 11 | 154456 |
| <b>iYKL160W</b>     |                                  | 11 | 153711 |
| <b>iYKL161C-0</b>   | YKL161C YKL160W                  | 11 | 150692 |
| <b>iYKL162C</b>     | YKL162C                          | 11 | 148843 |
| <b>iYKL162C-A-0</b> | YKL162C-A                        | 11 | 146079 |
| <b>iYKL162C-A-1</b> | YKL162C-A                        | 11 | 146857 |
| <b>iYKL163W</b>     |                                  | 11 | 145383 |
| <b>iYKL164C-0</b>   | YKL164C (PIR1) YKL163W (PIR3)    | 11 | 142824 |
| <b>iYKL164C-1</b>   | YKL164C (PIR1) YKL163W (PIR3)    | 11 | 143615 |
| <b>iYKL165C</b>     | YKL165C (MCD4)                   | 11 | 140696 |
| <b>iYKL166C-1</b>   | YKL166C (TPK3)                   | 11 | 136823 |
| <b>iYKL167C</b>     | YKL167C (MRP49)                  | 11 | 134139 |
| <b>iYKL168C</b>     | YKL168C (KKQ8)                   | 11 | 133497 |
| <b>iYKL169C</b>     | YKL169C                          | 11 | 131073 |
| <b>iYKL171W</b>     | YKL170W (MRPL38)                 | 11 | 130266 |
| <b>iYKL172W</b>     | YKL171W                          | 11 | 127047 |
| <b>iYKL173W</b>     | YKL172W (EBP2)                   | 11 | 125548 |
| <b>iYKL174C</b>     | YKL174C YKL173W (SNU114)         | 11 | 122241 |
| <b>iYKL175W</b>     |                                  | 11 | 120309 |
| <b>iYKL176C</b>     | YKL176C (LST4) YKL175W (ZRT3)    | 11 | 117991 |
| <b>iYKL177W</b>     |                                  | 11 | 114699 |
| <b>iYKL179C</b>     | YKL179C                          | 11 | 112508 |
| <b>iYKL180W</b>     |                                  | 11 | 110134 |
| <b>iYKL181W</b>     | YKL180W (RPL17A)                 | 11 | 108604 |
| <b>iYKL182W</b>     | YKL181W (PRS1)                   | 11 | 106831 |
| <b>iYKL183W</b>     | YKL182W (FAS1)                   | 11 | 99646  |
| <b>iYKL184W</b>     | YKL183W (LOT5)                   | 11 | 98162  |
| <b>iYKL185W</b>     | YKL184W (SPE1)                   | 11 | 96270  |
| <b>iYKL186C</b>     | YKL186C (MTR2) YKL185W (ASH1)    | 11 | 93303  |
| <b>iYKL187C</b>     | YKL187C                          | 11 | 91541  |

|                    |                               |    |        |
|--------------------|-------------------------------|----|--------|
| <b>iYKL188C</b>    | YKL188C (PXA2)                | 11 | 88791  |
| <b>iYKL189W</b>    |                               | 11 | 85908  |
| <b>iYKL190W</b>    | YKL189W (HYM1)                | 11 | 83555  |
| <b>iYKL191W</b>    | YKL190W (CNB1)                | 11 | 82644  |
| <b>iYKL192C</b>    | YKL192C (ACP1) YKL191W (DPH2) | 11 | 80542  |
| <b>iYKL193C</b>    | YKL193C (SDS22)               | 11 | 79887  |
| <b>iYKL194C</b>    | YKL194C (MST1)                | 11 | 78651  |
| <b>iYKL195W</b>    |                               | 11 | 77037  |
| <b>iYKL196C</b>    | YKL196C (YKT6) YKL195W        | 11 | 75539  |
| <b>iYKL197C</b>    | YKL197C (PEX1)                | 11 | 73870  |
| <b>iYKL198C</b>    | YKL198C (PTK1)                | 11 | 70223  |
| <b>iYKL200C</b>    |                               | 11 | 67109  |
| <b>iYKL201C</b>    |                               | 11 | 65546  |
| <b>iYKL203C</b>    | YKL203C (TOR2) YKL202W        | 11 | 63356  |
| <b>iYKL204W</b>    |                               | 11 | 55602  |
| <b>iYKL205W</b>    | YKL204W (EAP1)                | 11 | 53353  |
| <b>iYKL206C</b>    | YKL206C YKL205W (LOS1)        | 11 | 49809  |
| <b>iYKL207W</b>    |                               | 11 | 48890  |
| <b>iYKL208W</b>    | YKL207W                       | 11 | 47973  |
| <b>iYKL209C</b>    | YKL209C (STE6) YKL208W (CBT1) | 11 | 46296  |
| <b>iYKL210W</b>    |                               | 11 | 42238  |
| <b>iYKL211C</b>    | YKL211C (TRP3) YKL210W (UBA1) | 11 | 38154  |
| <b>iYKL212W</b>    |                               | 11 | 36415  |
| <b>iYKL213C</b>    | YKL213C (DOA1) YKL212W (SAC1) | 11 | 34108  |
| <b>iYKL214C</b>    | YKL214C                       | 11 | 31694  |
| <b>iYKL215C</b>    | YKL215C                       | 11 | 30688  |
| <b>iYKL216W</b>    |                               | 11 | 26160  |
| <b>iYKL217W</b>    | YKL216W (URA1)                | 11 | 24084  |
| <b>iYKL218C-0</b>  | YKL218C (SRY1) YKL217W (JEN1) | 11 | 18339  |
| <b>iYKL218C-1</b>  | YKL218C (SRY1) YKL217W (JEN1) | 11 | 19637  |
| <b>iYKL218C-2</b>  | YKL218C (SRY1) YKL217W (JEN1) | 11 | 20935  |
| <b>iYKL219W-1</b>  |                               | 11 | 16533  |
| <b>iYKL220C-0</b>  | YKL220C (FRE2) YKL219W (COS9) | 11 | 11227  |
| <b>iYKL220C-1</b>  | YKL220C (FRE2) YKL219W (COS9) | 11 | 12313  |
| <b>iYKL220C-2</b>  | YKL220C (FRE2) YKL219W (COS9) | 11 | 13399  |
| <b>iYKL221W-0</b>  |                               | 11 | 7529   |
| <b>iYKL221W-1</b>  |                               | 11 | 8310   |
| <b>iYKL222C</b>    | YKL222C YKL221W (MCH2)        | 11 | 5621   |
| <b>iYKL223W</b>    |                               | 11 | 2722   |
| <b>iYKL224C</b>    | YKL224C YKL223W               | 11 | 2182   |
| <b>iYKL225W</b>    |                               | 11 | 799    |
| <b>iYKLCdelta2</b> | YKL189W (HYM1)                | 11 | 84120  |
| <b>iYKLCdelta4</b> | YKL117W (SBA1)                | 11 | 219369 |
| <b>iYKLCdelta5</b> | YKL071W                       | 11 | 302270 |
| <b>iYKLCdelta6</b> | YKL067W (YNK1)                | 11 | 313564 |
| <b>iYKLWdelta1</b> | YKL197C (PEX1)                | 11 | 74523  |
| <b>iYKLWdelta3</b> | YKL153W                       | 11 | 163174 |
| <b>iYKLWdelta7</b> | YKL067W (YNK1)                | 11 | 314169 |
| <b>iYKR001C</b>    | YKR001C (VPS1) YKR002W (PAP1) | 11 | 442363 |
| <b>iYKR002W</b>    | YKR003W (OSH6)                | 11 | 444579 |
| <b>iYKR003W</b>    |                               | 11 | 446368 |

|            |                                |    |        |
|------------|--------------------------------|----|--------|
| iYKR004C   | YKR004C (ECM9)                 | 11 | 447318 |
| iYKR005C   | YKR005C                        | 11 | 449505 |
| iYKR006C   | YKR006C (MRPL13) YKR007W       | 11 | 450891 |
| iYKR007W   | YKR008W (RSC4)                 | 11 | 451629 |
| iYKR008W   |                                | 11 | 453719 |
| iYKR009C   | YKR009C (FOX2)                 | 11 | 456695 |
| iYKR010C   | YKR010C (TOF2)                 | 11 | 460880 |
| iYKR011C   | YKR011C (TOS5)                 | 11 | 462337 |
| iYKR013W   |                                | 11 | 464589 |
| iYKR014C   | YKR014C (YPT52)                | 11 | 465712 |
| iYKR015C   | YKR015C YKR016W                | 11 | 468308 |
| iYKR016W   |                                | 11 | 470980 |
| iYKR017C   | YKR017C                        | 11 | 472990 |
| iYKR018C   | YKR018C                        | 11 | 475541 |
| iYKR019C   | YKR019C (IRS4) YKR020W         | 11 | 477704 |
| iYKR020W   | YKR021W                        | 11 | 478473 |
| iYKR021W   |                                | 11 | 481622 |
| iYKR022C   | YKR022C YKR023W                | 11 | 482780 |
| iYKR023W   |                                | 11 | 484652 |
| iYKR024C   | YKR024C (DBP7) YKR025W (RPC37) | 11 | 487013 |
| iYKR025W   |                                | 11 | 488259 |
| iYKR026C   | YKR026C (GCN3) YKR027W         | 11 | 489296 |
| iYKR027W   | YKR028W (SAP190)               | 11 | 493302 |
| iYKR029C   | YKR029C (SET3) YKR030W         | 11 | 499473 |
| iYKR030W   |                                | 11 | 500743 |
| iYKR031C   | YKR031C (SPO14) YKR032W        | 11 | 506035 |
| iYKR034W   | YKR035W-A (DID2)               | 11 | 507347 |
| iYKR035W-A | YKR035C                        | 11 | 508193 |
| iYKR036C   | YKR036C (CAF4)                 | 11 | 510321 |
| iYKR037C   | YKR037C (SPC34)                | 11 | 511437 |
| iYKR038C   | YKR038C YKR039W (GAP1)         | 11 | 512904 |
| iYKR039W   |                                | 11 | 516511 |
| iYKR041W   | YKR042W (UTH1)                 | 11 | 518590 |
| iYKR042W   |                                | 11 | 520264 |
| iYKR043C   | YKR043C YKR044W (UIP5)         | 11 | 521352 |
| iYKR044W   |                                | 11 | 522986 |
| iYKR045C   | YKR045C                        | 11 | 523633 |
| iYKR046C   | YKR046C YKR047W                | 11 | 524714 |
| iYKR048C   | YKR048C (NAP1)                 | 11 | 526280 |
| iYKR049C   | YKR049C YKR050W (TRK2)         | 11 | 526871 |
| iYKR050W   | YKR051W                        | 11 | 530124 |
| iYKR051W   |                                | 11 | 531842 |
| iYKR052C   | YKR052C (MRS4)                 | 11 | 533104 |
| iYKR053C   | YKR053C (YSR3)                 | 11 | 534921 |
| iYKR054C   | YKR054C (DYN1) YKR055W (RHO4)  | 11 | 547565 |
| iYKR055W   | YKR056W (TRM2)                 | 11 | 548731 |
| iYKR056W   | YKR057W (RPS21A)               | 11 | 550941 |
| iYKR057W   | YKR058W (GLG1)                 | 11 | 551881 |
| iYKR058W   | YKR059W (TIF1)                 | 11 | 554259 |
| iYKR059W   | YKR060W                        | 11 | 555813 |
| iYKR060W   | YKR061W (KTR2)                 | 11 | 556981 |

|            |                                 |    |        |
|------------|---------------------------------|----|--------|
| iYKR061W   | YKR062W (TFA2)                  | 11 | 558593 |
| iYKR062W   |                                 | 11 | 560291 |
| iYKR063C   | YKR063C (LAS1) YKR064W          | 11 | 561936 |
| iYKR064W   |                                 | 11 | 564777 |
| iYKR065C   | YKR065C                         | 11 | 565531 |
| iYKR066C   | YKR066C (CCP1) YKR067W (GPT2)   | 11 | 566837 |
| iYKR067W   |                                 | 11 | 569788 |
| iYKR068C   | YKR068C (BET3) YKR069W (MET1)   | 11 | 570548 |
| iYKR069W   | YKR070W                         | 11 | 573032 |
| iYKR070W   |                                 | 11 | 574271 |
| iYKR071C   | YKR071C (DRE2)                  | 11 | 575619 |
| iYKR072C   | YKR072C (SIS2)                  | 11 | 577762 |
| iYKR073C   | YKR073C tk(uuu)k YKR074W        | 11 | 578146 |
| iYKR074W   |                                 | 11 | 579315 |
| iYKR075C-0 | YKR075C YKR076W (ECM4)          | 11 | 580389 |
| iYKR075C-1 | YKR075C YKR076W (ECM4)          | 11 | 581155 |
| iYKR076W   | YKR077W                         | 11 | 583034 |
| iYKR077W   | YKR078W                         | 11 | 584383 |
| iYKR078W   |                                 | 11 | 586348 |
| iYKR079C   | YKR079C YKR080W (MTD1)          | 11 | 588944 |
| iYKR080W   |                                 | 11 | 590996 |
| iYKR081C   | YKR081C (RPF2) YKR082W (NUP133) | 11 | 592179 |
| iYKR082W   |                                 | 11 | 595937 |
| iYKR083C   | YKR083C (DAD2)                  | 11 | 596461 |
| iYKR084C   | YKR084C (HBS1)                  | 11 | 598529 |
| iYKR085C   | YKR085C (MRPL20) YKR086W (PRP1) | 11 | 599320 |
| iYKR086W   |                                 | 11 | 602711 |
| iYKR087C   | YKR087C                         | 11 | 603778 |
| iYKR088C   | YKR088C                         | 11 | 605056 |
| iYKR089C   | YKR089C YKR090W (PXL1)          | 11 | 608003 |
| iYKR090W   | YKR091W (SRL3)                  | 11 | 610704 |
| iYKR092C-0 | YKR092C (SRP40) YKR093W (PTR2)  | 11 | 613522 |
| iYKR092C-1 | YKR092C (SRP40) YKR093W (PTR2)  | 11 | 614444 |
| iYKR093W   |                                 | 11 | 617172 |
| iYKR094C   | YKR094C (RPL40B) YKR095W (MLP1) | 11 | 618387 |
| iYKR095W   | YKR096W                         | 11 | 625069 |
| iYKR096W   | YKR097W (PCK1)                  | 11 | 630017 |
| iYKR097W   |                                 | 11 | 632434 |
| iYKR098C   | YKR098C (UBP11) YKR099W (BAS1)  | 11 | 634812 |
| iYKR099W   |                                 | 11 | 637919 |
| iYKR100C   | YKR100C YKR101W (SIR1)          | 11 | 639600 |
| iYKR101W-0 | YKR102W (FLO10)                 | 11 | 642136 |
| iYKR101W-1 | YKR102W (FLO10)                 | 11 | 643420 |
| iYKR101W-2 | YKR102W (FLO10)                 | 11 | 644704 |
| iYKR102W-0 | YKR103W                         | 11 | 649497 |
| iYKR102W-1 | YKR103W                         | 11 | 650568 |
| iYKR102W-2 | YKR103W                         | 11 | 651639 |
| iYKR103W   | YKR104W                         | 11 | 656368 |
| iYKR104W   |                                 | 11 | 657388 |
| iYKR105C   | YKR105C YKR106W                 | 11 | 660096 |
| iYKR106W-0 |                                 | 11 | 662921 |



|              |                                |    |        |
|--------------|--------------------------------|----|--------|
| iYKR106W-1   |                                | 11 | 663991 |
| iYKRCdelta11 | YKR038C YKR039W (GAP1)         | 11 | 513486 |
| iYKRCdelta12 |                                | 11 | 517424 |
| iYKRCdelta8  | YKR009C (FOX2)                 | 11 | 458112 |
| iYKRWdelta10 | YKR026C (GCN3) YKR027W         | 11 | 490428 |
| iYLL001W     |                                | 12 | 150162 |
| iYLL002W     | YLL001W (DNM1)                 | 12 | 147600 |
| iYLL003W     | YLL002W (REM50)                | 12 | 146040 |
| iYLL004W     | YLL003W (SFI1)                 | 12 | 142922 |
| iYLL005C     | YLL005C (SPO75) YLL004W (ORC3) | 12 | 140545 |
| iYLL006W     |                                | 12 | 137865 |
| iYLL007C     | YLL007C YLL006W (MMM1)         | 12 | 136298 |
| iYLL008W     |                                | 12 | 133986 |
| iYLL009C     | YLL009C (COX17) YLL008W (DRS1) | 12 | 131413 |
| iYLL010C     | YLL010C (PSR1)                 | 12 | 130612 |
| iYLL011W     |                                | 12 | 128991 |
| iYLL012W     | YLL011W (SOF1)                 | 12 | 127254 |
| iYLL014W     |                                | 12 | 121647 |
| iYLL015W     | YLL014W                        | 12 | 121110 |
| iYLL016W     | YLL015W (BPT1)                 | 12 | 115992 |
| iYLL017W     | YLL016W (SDC25)                | 12 | 112544 |
| iYLL018C     | YLL018C (DPS1) YLL017W (SDC25) | 12 | 111574 |
| iYLL018C-A   | YLL018C-A (COX19)              | 12 | 108971 |
| iYLL019C     | YLL019C (KNS1)                 | 12 | 107898 |
| iYLL022C     | YLL022C (HIF1) YLL021W (SPA2)  | 12 | 100200 |
| iYLL023C     | YLL023C                        | 12 | 98835  |
| iYLL024C     | YLL024C (SSA2)                 | 12 | 97484  |
| iYLL025W     |                                | 12 | 95120  |
| iYLL026W     | YLL025W                        | 12 | 91348  |
| iYLL027W     | YLL026W (HSP104)               | 12 | 88154  |
| iYLL028W     | YLL027W (ISA1)                 | 12 | 86563  |
| iYLL030C     | YLL030C YLL029W                | 12 | 80696  |
| iYLL031C     | YLL031C (GPI13)                | 12 | 80204  |
| iYLL032C     | YLL032C                        | 12 | 76746  |
| iYLL033W     |                                | 12 | 74100  |
| iYLL034C     | YLL034C YLL033W                | 12 | 73145  |
| iYLL035W     |                                | 12 | 70477  |
| iYLL036C     | YLL036C (PRP19) YLL035W (GRC3) | 12 | 68255  |
| iYLL039C     | YLL039C (UBI4)                 | 12 | 65206  |
| iYLL040C     | YLL040C (VPS13)                | 12 | 63644  |
| iYLL041C     | YLL041C (SDH2)                 | 12 | 53930  |
| iYLL042C     | YLL042C (APG10)                | 12 | 52589  |
| iYLL043W     |                                | 12 | 51946  |
| iYLL044W     | YLL043W (FPS1)                 | 12 | 48661  |
| iYLL046C     | YLL046C (RNP1)                 | 12 | 47462  |
| iYLL048C     | YLL048C (YBT1) YLL047W         | 12 | 46264  |
| iYLL049W     |                                | 12 | 41204  |
| iYLL050C     | YLL050C (COF1) YLL049W         | 12 | 40413  |
| iYLL051C     | YLL051C (FRE6)                 | 12 | 39470  |
| iYLL052C     | YLL052C (AQY2)                 | 12 | 36360  |
| iYLL054C     | YLL054C                        | 12 | 35203  |

|                     |                                    |    |        |
|---------------------|------------------------------------|----|--------|
| <b>iYLL055W</b>     |                                    | 12 | 31704  |
| <b>iYLL056C-0</b>   | YLL056C YLL055W                    | 12 | 28305  |
| <b>iYLL056C-1</b>   | YLL056C YLL055W                    | 12 | 29207  |
| <b>iYLL057C</b>     | YLL057C                            | 12 | 26994  |
| <b>iYLL058W</b>     |                                    | 12 | 25296  |
| <b>iYLL059C</b>     | YLL059C YLL058W                    | 12 | 22980  |
| <b>iYLL060C</b>     | YLL060C (GTT2)                     | 12 | 21839  |
| <b>iYLL061W</b>     |                                    | 12 | 19707  |
| <b>iYLL062C</b>     | YLL062C (MHT1) YLL061W (MMP1)      | 12 | 17613  |
| <b>iYLL063C</b>     | YLL063C (AYT1)                     | 12 | 16072  |
| <b>iYLL064C</b>     | YLL064C                            | 12 | 13445  |
| <b>iYLL065W</b>     |                                    | 12 | 12076  |
| <b>iYLL066C-0</b>   | YLL066C YLL065W (GIN11)            | 12 | 9836   |
| <b>iYLL066C-1</b>   | YLL066C YLL065W (GIN11)            | 12 | 10781  |
| <b>iYLL067C-0</b>   | YLL067C                            | 12 | 4301   |
| <b>iYLL067C-1</b>   | YLL067C                            | 12 | 5210   |
| <b>iYLLCdelta1</b>  | YLL025W                            | 12 | 92380  |
| <b>iYLR001C</b>     | YLR001C                            | 12 | 153976 |
| <b>iYLR003C</b>     | YLR003C                            | 12 | 157729 |
| <b>iYLR004C</b>     | YLR004C YLR005W (SSL1)             | 12 | 159504 |
| <b>iYLR005W</b>     |                                    | 12 | 161433 |
| <b>iYLR006C</b>     | YLR006C (SSK1) YLR007W             | 12 | 163892 |
| <b>iYLR007W</b>     |                                    | 12 | 165401 |
| <b>iYLR008C</b>     | YLR008C YLR009W (RLP24)            | 12 | 166082 |
| <b>iYLR009W</b>     |                                    | 12 | 167135 |
| <b>iYLR010C</b>     | YLR010C (TEN1) ts(AGA)I YLR011W (I | 12 | 167801 |
| <b>iYLR011W</b>     |                                    | 12 | 169677 |
| <b>iYLR014C</b>     | YLR014C (PPR1) YLR015W (BRE2)      | 12 | 174981 |
| <b>iYLR016C</b>     | YLR016C YLR017W (MEU1)             | 12 | 177415 |
| <b>iYLR017W</b>     |                                    | 12 | 178620 |
| <b>iYLR018C</b>     | YLR018C (POM34) YLR019W (PSR2)     | 12 | 179605 |
| <b>iYLR019W</b>     |                                    | 12 | 181480 |
| <b>iYLR020C</b>     | YLR020C YLR021W                    | 12 | 183404 |
| <b>iYLR022C</b>     | YLR022C                            | 12 | 184925 |
| <b>iYLR023C</b>     | YLR023C                            | 12 | 187128 |
| <b>iYLR025W</b>     |                                    | 12 | 195175 |
| <b>iYLR026C</b>     | YLR026C (SED5)                     | 12 | 196473 |
| <b>iYLR027C</b>     | YLR027C (AAT2) snr30               | 12 | 198128 |
| <b>iYLR028C</b>     | YLR028C (ADE16)                    | 12 | 201316 |
| <b>iYLR029C</b>     | YLR029C (RPL15A) YLR030W           | 12 | 202591 |
| <b>iYLR030W</b>     | YLR031W                            | 12 | 204082 |
| <b>iYLR031W</b>     | YLR032W (RAD5)                     | 12 | 204786 |
| <b>iYLR032W</b>     | YLR033W (RSC58)                    | 12 | 208501 |
| <b>iYLR033W</b>     |                                    | 12 | 210270 |
| <b>iYLR034C</b>     | YLR034C (SMF3)                     | 12 | 211934 |
| <b>iYLR035C</b>     | YLR035C (MLH2) ta(ugc)I            | 12 | 214457 |
| <b>iYLR035C-A-0</b> | YLR035C-A                          | 12 | 218908 |
| <b>iYLR035C-A-1</b> | YLR035C-A                          | 12 | 219788 |
| <b>iYLR036C</b>     | YLR036C                            | 12 | 222133 |
| <b>iYLR037C-0</b>   | YLR037C (DAN2)                     | 12 | 223060 |
| <b>iYLR037C-1</b>   | YLR037C (DAN2)                     | 12 | 223991 |

|                 |                                 |    |        |
|-----------------|---------------------------------|----|--------|
| <b>iYLR038C</b> | YLR038C (COX12)                 | 12 | 225173 |
| <b>iYLR039C</b> | YLR039C (RIC1)                  | 12 | 228597 |
| <b>iYLR041W</b> |                                 | 12 | 229698 |
| <b>iYLR043C</b> | YLR043C (TRX1)                  | 12 | 232014 |
| <b>iYLR044C</b> | YLR044C (PDC1)                  | 12 | 234082 |
| <b>iYLR045C</b> | YLR045C (STU2)                  | 12 | 237704 |
| <b>iYLR046C</b> | YLR046C                         | 12 | 238814 |
| <b>iYLR047C</b> | YLR047C YLR048W (RPS0B)         | 12 | 241408 |
| <b>iYLR048W</b> |                                 | 12 | 243350 |
| <b>iYLR049C</b> | YLR049C                         | 12 | 245173 |
| <b>iYLR050C</b> | YLR050C                         | 12 | 246073 |
| <b>iYLR051C</b> | YLR051C YLR052W (IES3)          | 12 | 246978 |
| <b>iYLR052W</b> |                                 | 12 | 247954 |
| <b>iYLR053C</b> | YLR053C                         | 12 | 248427 |
| <b>iYLR054C</b> | YLR054C                         | 12 | 250256 |
| <b>iYLR055C</b> | YLR055C (SPT8) YLR056W (ERG3)   | 12 | 253081 |
| <b>iYLR056W</b> | YLR057W                         | 12 | 254959 |
| <b>iYLR057W</b> |                                 | 12 | 257856 |
| <b>iYLR058C</b> | YLR058C (SHM2)                  | 12 | 259402 |
| <b>iYLR059C</b> | YLR059C (REX2) YLR060W (FRS1)   | 12 | 260548 |
| <b>iYLR060W</b> | YLR061W (RPL22A)                | 12 | 262767 |
| <b>iYLR062C</b> | YLR062C (BUD28) YLR063W         | 12 | 263955 |
| <b>iYLR064W</b> |                                 | 12 | 266278 |
| <b>iYLR065C</b> | YLR065C YLR066W (SPC3)          | 12 | 266919 |
| <b>iYLR066W</b> |                                 | 12 | 267724 |
| <b>iYLR067C</b> | YLR067C (PET309) YLR068W (FYV7) | 12 | 270711 |
| <b>iYLR068W</b> |                                 | 12 | 271464 |
| <b>iYLR069C</b> | YLR069C (MEF1)                  | 12 | 273916 |
| <b>iYLR070C</b> | YLR070C                         | 12 | 275212 |
| <b>iYLR071C</b> | YLR071C (RGR1) YLR072W          | 12 | 278627 |
| <b>iYLR072W</b> |                                 | 12 | 280944 |
| <b>iYLR073C</b> | YLR073C                         | 12 | 281622 |
| <b>iYLR074C</b> | YLR074C (BUD20) YLR075W (RPL10) | 12 | 282457 |
| <b>iYLR076C</b> | YLR076C YLR077W                 | 12 | 283608 |
| <b>iYLR077W</b> |                                 | 12 | 285624 |
| <b>iYLR078C</b> | YLR078C (BOS1) YLR079W (SIC1)   | 12 | 286560 |
| <b>iYLR079W</b> | YLR080W (EMP46)                 | 12 | 287675 |
| <b>iYLR080W</b> | YLR081W (GAL2)                  | 12 | 289251 |
| <b>iYLR081W</b> |                                 | 12 | 291937 |
| <b>iYLR082C</b> | YLR082C (SRL2)                  | 12 | 293573 |
| <b>iYLR083C</b> | YLR083C (EMP70)                 | 12 | 296095 |
| <b>iYLR084C</b> | YLR084C (RAX2)                  | 12 | 300252 |
| <b>iYLR085C</b> | YLR085C (ARP6) YLR086W (SMC4)   | 12 | 301990 |
| <b>iYLR086W</b> |                                 | 12 | 306500 |
| <b>iYLR087C</b> | YLR087C (CSF1) YLR088W (GAA1)   | 12 | 315732 |
| <b>iYLR088W</b> |                                 | 12 | 317952 |
| <b>iYLR089C</b> | YLR089C YLR090W (XDJ1)          | 12 | 320016 |
| <b>iYLR090W</b> | YLR091W                         | 12 | 322081 |
| <b>iYLR091W</b> | YLR092W (SUL2)                  | 12 | 323179 |
| <b>iYLR092W</b> |                                 | 12 | 326226 |
| <b>iYLR093C</b> | YLR093C (NYV1)                  | 12 | 327269 |

|                   |                                |    |        |
|-------------------|--------------------------------|----|--------|
| <b>iYLR094C</b>   | YLR094C (GIS3)                 | 12 | 329239 |
| <b>iYLR095C</b>   | YLR095C (IOC2) YLR096W (KIN2)  | 12 | 332116 |
| <b>iYLR096W</b>   |                                | 12 | 336034 |
| <b>iYLR097C</b>   | YLR097C                        | 12 | 337266 |
| <b>iYLR098C</b>   | YLR098C (CHA4)                 | 12 | 339474 |
| <b>iYLR099C</b>   | YLR099C (ICT1) YLR100W (ERG27) | 12 | 340929 |
| <b>iYLR102C</b>   | YLR102C (APC9)                 | 12 | 343768 |
| <b>iYLR103C</b>   | YLR103C (CDC45) YLR104W        | 12 | 345942 |
| <b>iYLR104W</b>   |                                | 12 | 346981 |
| <b>iYLR105C</b>   | YLR105C (SEN2) snr79           | 12 | 348181 |
| <b>iYLR106C</b>   | YLR106C YLR107W (REX3)         | 12 | 363739 |
| <b>iYLR107W</b>   |                                | 12 | 365331 |
| <b>iYLR108C</b>   | YLR108C YLR109W (AHP1)         | 12 | 368125 |
| <b>iYLR109W</b>   |                                | 12 | 369312 |
| <b>iYLR110C</b>   | YLR110C (CCW12) YLR111W        | 12 | 370099 |
| <b>iYLR111W</b>   | YLR112W                        | 12 | 370724 |
| <b>iYLR112W</b>   | YLR113W (HOG1)                 | 12 | 371211 |
| <b>iYLR113W</b>   |                                | 12 | 372928 |
| <b>iYLR114C</b>   | YLR114C YLR115W (CFT2)         | 12 | 377239 |
| <b>iYLR115W</b>   | YLR116W (MSL5)                 | 12 | 380565 |
| <b>iYLR116W</b>   |                                | 12 | 382253 |
| <b>iYLR117C</b>   | YLR117C (CLF1)                 | 12 | 384535 |
| <b>iYLR118C</b>   | YLR118C YLR119W (SRN2)         | 12 | 385409 |
| <b>iYLR119W</b>   |                                | 12 | 386176 |
| <b>iYLR120C</b>   | YLR120C (YPS1)                 | 12 | 388221 |
| <b>iYLR121C</b>   | YLR121C (YPS3)                 | 12 | 390271 |
| <b>iYLR123C</b>   | YLR123C YLR124W                | 12 | 391408 |
| <b>iYLR124W-0</b> | YLR125W                        | 12 | 391945 |
| <b>iYLR125W</b>   |                                | 12 | 393895 |
| <b>iYLR126C</b>   | YLR126C                        | 12 | 395521 |
| <b>iYLR127C</b>   | YLR127C (APC2) YLR128W         | 12 | 398320 |
| <b>iYLR128W</b>   | YLR129W (DIP2)                 | 12 | 399434 |
| <b>iYLR129W</b>   |                                | 12 | 402489 |
| <b>iYLR130C</b>   | YLR130C (ZRT2)                 | 12 | 404063 |
| <b>iYLR131C</b>   | YLR131C (ACE2)                 | 12 | 406823 |
| <b>iYLR132C</b>   | YLR132C YLR133W (CKI1)         | 12 | 408156 |
| <b>iYLR133W</b>   | YLR134W (PDC5)                 | 12 | 410194 |
| <b>iYLR134W</b>   | YLR135W (SLX4)                 | 12 | 412415 |
| <b>iYLR135W</b>   |                                | 12 | 415528 |
| <b>iYLR136C</b>   | YLR136C (TIS11) YLR137W        | 12 | 416659 |
| <b>iYLR137W</b>   | YLR138W (NHA1)                 | 12 | 418110 |
| <b>iYLR138W</b>   |                                | 12 | 421395 |
| <b>iYLR141W</b>   | YLR142W (PUT1)                 | 12 | 424775 |
| <b>iYLR142W</b>   | YLR143W                        | 12 | 426617 |
| <b>iYLR143W</b>   |                                | 12 | 429387 |
| <b>iYLR144C</b>   | YLR144C (ACF2) YLR145W         | 12 | 432017 |
| <b>iYLR146C</b>   | YLR146C (SPE4)                 | 12 | 433726 |
| <b>iYLR147C</b>   | YLR147C (SMD3) YLR148W (PEP3)  | 12 | 434464 |
| <b>iYLR148W</b>   |                                | 12 | 437398 |
| <b>iYLR149C</b>   | YLR149C YLR150W (STM1)         | 12 | 439824 |
| <b>iYLR150W</b>   |                                | 12 | 441289 |

|                   |                                |    |        |
|-------------------|--------------------------------|----|--------|
| <b>iYLR152C</b>   | YLR152C                        | 12 | 444689 |
| <b>iYLR153C</b>   | YLR153C (ACS2)                 | 12 | 447576 |
| <b>iYLR154C</b>   | YLR154C tq(uug)l               | 12 | 448315 |
| <b>iYLR155C-0</b> | YLR155C (ASP3-1) YLR156W       | 12 | 470406 |
| <b>iYLR155C-A</b> | YLR155C (ASP3-1) YLR156W       | 12 | 470406 |
| <b>iYLR157C-A</b> | YLR157C (ASP3-2)               | 12 | 474058 |
| <b>iYLR157C-B</b> | YLR157C (ASP3-2)               | 12 | 475018 |
| <b>iYLR158C-0</b> | YLR158C (ASP3-3) YLR159W       | 12 | 483638 |
| <b>iYLR159W</b>   |                                | 12 | 485690 |
| <b>iYLR160C-0</b> | YLR160C (ASP3-4) YLR161W       | 12 | 487290 |
| <b>iYLR161W</b>   | YLR162W                        | 12 | 489342 |
| <b>iYLR162W-0</b> |                                | 12 | 489930 |
| <b>iYLR162W-A</b> |                                | 12 | 489930 |
| <b>iYLR162W-B</b> |                                | 12 | 490900 |
| <b>iYLR163C</b>   | YLR163C (MAS1) YLR164W         | 12 | 493256 |
| <b>iYLR164W</b>   |                                | 12 | 494391 |
| <b>iYLR165C</b>   | YLR165C (PUS5)                 | 12 | 495260 |
| <b>iYLR167W</b>   |                                | 12 | 499407 |
| <b>iYLR168C</b>   | YLR168C YLR169W                | 12 | 500272 |
| <b>iYLR171W</b>   |                                | 12 | 501124 |
| <b>iYLR172C</b>   | YLR172C (DPH5) YLR173W         | 12 | 502164 |
| <b>iYLR173W</b>   | YLR174W (IDP2)                 | 12 | 504249 |
| <b>iYLR174W</b>   | YLR175W (CBF5)                 | 12 | 505831 |
| <b>iYLR175W</b>   |                                | 12 | 507587 |
| <b>iYLR176C</b>   | YLR176C (RFX1) YLR177W         | 12 | 510234 |
| <b>iYLR177W</b>   |                                | 12 | 512942 |
| <b>iYLR178C</b>   | YLR178C (TFS1)                 | 12 | 513823 |
| <b>iYLR179C</b>   | YLR179C YLR180W (SAM1)         | 12 | 514715 |
| <b>iYLR180W</b>   |                                | 12 | 516412 |
| <b>iYLR181C</b>   | YLR181C YLR182W (SWI6)         | 12 | 517672 |
| <b>iYLR182W</b>   |                                | 12 | 520353 |
| <b>iYLR183C</b>   | YLR183C (TOS4) YLR184W         | 12 | 522014 |
| <b>iYLR184W</b>   | YLR185W (RPL37A)               | 12 | 522455 |
| <b>iYLR186W</b>   | YLR187W                        | 12 | 524392 |
| <b>iYLR187W</b>   | YLR188W (MDL1)                 | 12 | 527947 |
| <b>iYLR188W</b>   |                                | 12 | 530389 |
| <b>iYLR191W</b>   |                                | 12 | 538434 |
| <b>iYLR194C</b>   | YLR194C                        | 12 | 541575 |
| <b>iYLR196W</b>   | YLR197W (SIK1)                 | 12 | 545700 |
| <b>iYLR199C</b>   | YLR199C YLR200W (YKE2)         | 12 | 548517 |
| <b>iYLR200W</b>   |                                | 12 | 549358 |
| <b>iYLR203C</b>   | YLR203C (MSS51) YLR204W (QRI5) | 12 | 551962 |
| <b>iYLR204W</b>   |                                | 12 | 552607 |
| <b>iYLR205C</b>   | YLR205C (HMX1) YLR206W (ENT2)  | 12 | 553547 |
| <b>iYLR207W</b>   | YLR208W (SEC13)                | 12 | 559289 |
| <b>iYLR208W</b>   |                                | 12 | 560444 |
| <b>iYLR209C</b>   | YLR209C (PNP1) YLR210W (CLB4)  | 12 | 561732 |
| <b>iYLR211C</b>   | YLR211C                        | 12 | 564214 |
| <b>iYLR212C</b>   | YLR212C (TUB4)                 | 12 | 566281 |
| <b>iYLR213C</b>   | YLR213C (CRR1) YLR214W (FRE1)  | 12 | 567922 |
| <b>iYLR214W</b>   |                                | 12 | 570627 |

|            |                                |    |        |
|------------|--------------------------------|----|--------|
| iYLR215C   | YLR215C (CDC123)               | 12 | 571858 |
| iYLR217W   |                                | 12 | 573232 |
| iYLR218C   | YLR218C YLR219W (MSC3)         | 12 | 573918 |
| iYLR219W   | YLR220W (CCC1)                 | 12 | 576337 |
| iYLR220W   |                                | 12 | 577793 |
| iYLR221C   | YLR221C (RSA3)                 | 12 | 579024 |
| iYLR224W   |                                | 12 | 587573 |
| iYLR225C   | YLR225C YLR226W (BUR2)         | 12 | 588918 |
| iYLR227C   | YLR227C (ADY4) YLR227W-A       | 12 | 592043 |
| iYLR228C-0 | YLR228C (ECM22)                | 12 | 602463 |
| iYLR228C-1 | YLR228C (ECM22)                | 12 | 603337 |
| iYLR230W   | YLR229C (CDC42)                | 12 | 604879 |
| iYLR232W   |                                | 12 | 607177 |
| iYLR233C   | YLR233C (EST1) YLR234W (TOP3)  | 12 | 609524 |
| iYLR236C   | YLR236C YLR237W (THI7)         | 12 | 612117 |
| iYLR237W   | YLR238W                        | 12 | 614163 |
| iYLR238W   |                                | 12 | 616191 |
| iYLR239C   | YLR239C (LIP2) YLR240W (VPS34) | 12 | 617318 |
| iYLR240W   | YLR241W                        | 12 | 620160 |
| iYLR241W   |                                | 12 | 622821 |
| iYLR243W   |                                | 12 | 625021 |
| iYLR244C   | YLR244C (MAP1)                 | 12 | 626331 |
| iYLR245C   | YLR245C (CDD1) YLR246W (ERF2)  | 12 | 626930 |
| iYLR246W   |                                | 12 | 628197 |
| iYLR247C   | YLR247C YLR248W (RCK2)         | 12 | 633354 |
| iYLR248W   | YLR249W (YEF3)                 | 12 | 636084 |
| iYLR249W   | YLR250W (SSP120)               | 12 | 639914 |
| iYLR250W   | YLR251W                        | 12 | 641021 |
| iYLR252W   | YLR253W                        | 12 | 642262 |
| iYLR253W   |                                | 12 | 644336 |
| iYLR254C   | YLR254C                        | 12 | 644973 |
| iYLR255C   | YLR255C YLR256W (HAP1)         | 12 | 645953 |
| iYLR257W   | YLR258W (GSY2)                 | 12 | 659791 |
| iYLR258W   |                                | 12 | 662833 |
| iYLR259C   | YLR259C (HSP60) YLR260W (LCB5) | 12 | 665002 |
| iYLR260W   |                                | 12 | 667907 |
| iYLR262C   | YLR262C (YPT6)                 | 12 | 668891 |
| iYLR262C-A | YLR262C-A YLR263W (RED1)       | 12 | 669662 |
| iYLR263W   | YLR264W (RPS28B)               | 12 | 672823 |
| iYLR265C   | YLR265C (NEJ1)                 | 12 | 675455 |
| iYLR266C   | YLR266C YLR267W (BOP2)         | 12 | 677724 |
| iYLR267W   | YLR268W (SEC22)                | 12 | 679924 |
| iYLR270W   | YLR271W                        | 12 | 682238 |
| iYLR271W   |                                | 12 | 683561 |
| iYLR273C   | YLR273C (PIG1) YLR274W (CDC46) | 12 | 691029 |
| iYLR274W   | YLR275W (SMD2)                 | 12 | 693882 |
| iYLR275W   |                                | 12 | 694800 |
| iYLR276C   | YLR276C (DBP9)                 | 12 | 696830 |
| iYLR277C   | YLR277C (YSH1)                 | 12 | 699495 |
| iYLR278C   | YLR278C YLR279W                | 12 | 704024 |
| iYLR281C   | YLR281C                        | 12 | 704960 |

|                   |                                |    |        |
|-------------------|--------------------------------|----|--------|
| <b>iYLR283W</b>   |                                | 12 | 706130 |
| <b>iYLR284C</b>   | YLR284C (ECI1) YLR285W         | 12 | 707040 |
| <b>iYLR285W</b>   |                                | 12 | 708145 |
| <b>iYLR286C</b>   | YLR286C (CTS1)                 | 12 | 710136 |
| <b>iYLR287C</b>   | YLR287C                        | 12 | 712058 |
| <b>iYLR287C-A</b> | YLR287C-A (RPS30A)             | 12 | 713158 |
| <b>iYLR288C</b>   | YLR288C (MEC3) YLR289W (GUF1)  | 12 | 714904 |
| <b>iYLR289W</b>   |                                | 12 | 717026 |
| <b>iYLR290C</b>   | YLR290C                        | 12 | 717978 |
| <b>iYLR291C</b>   | YLR291C (GCD7)                 | 12 | 719462 |
| <b>iYLR292C</b>   | YLR292C (SEC72)                | 12 | 720370 |
| <b>iYLR293C</b>   | YLR293C (GSP1)                 | 12 | 721430 |
| <b>iYLR295C</b>   | YLR295C (ATP14) YLR296W        | 12 | 722373 |
| <b>iYLR296W</b>   | YLR297W                        | 12 | 723304 |
| <b>iYLR297W</b>   |                                | 12 | 724433 |
| <b>iYLR298C</b>   | YLR298C (YHC1) YLR299W (ECM38) | 12 | 725416 |
| <b>iYLR299W</b>   | YLR300W (EXG1)                 | 12 | 728051 |
| <b>iYLR301W</b>   |                                | 12 | 731559 |
| <b>iYLR303W</b>   |                                | 12 | 733876 |
| <b>iYLR304C</b>   | YLR304C (ACO1)                 | 12 | 737548 |
| <b>iYLR305C</b>   | YLR305C (STT4) YLR306W (UBC12) | 12 | 743863 |
| <b>iYLR308W</b>   |                                | 12 | 748875 |
| <b>iYLR309C</b>   | YLR309C (IMH1)                 | 12 | 751769 |
| <b>iYLR310C</b>   | YLR310C (CDC25)                | 12 | 756993 |
| <b>iYLR312C</b>   | YLR312C YLR312W-A (MRPL15)     | 12 | 758833 |
| <b>iYLR312W-A</b> |                                | 12 | 760240 |
| <b>iYLR313C</b>   | YLR313C (SPH1)                 | 12 | 762341 |
| <b>iYLR314C</b>   | YLR314C (CDC3) YLR315W         | 12 | 764136 |
| <b>iYLR317W</b>   | YLR318W (EST2)                 | 12 | 766088 |
| <b>iYLR318W</b>   |                                | 12 | 769195 |
| <b>iYLR319C</b>   | YLR319C (BUD6) YLR320W (MMS22) | 12 | 771683 |
| <b>iYLR320W</b>   |                                | 12 | 776303 |
| <b>iYLR322W</b>   |                                | 12 | 777941 |
| <b>iYLR323C</b>   | YLR323C YLR324W                | 12 | 778951 |
| <b>iYLR324W</b>   |                                | 12 | 780785 |
| <b>iYLR325C</b>   | YLR325C (RPL38) YLR326W        | 12 | 781378 |
| <b>iYLR326W</b>   |                                | 12 | 782895 |
| <b>iYLR327C</b>   | YLR327C YLR328W                | 12 | 783386 |
| <b>iYLR328W</b>   | YLR329W (REC102)               | 12 | 786117 |
| <b>iYLR329W</b>   | YLR330W (CHS5)                 | 12 | 787332 |
| <b>iYLR330W</b>   |                                | 12 | 789678 |
| <b>iYLR332W-1</b> |                                | 12 | 792678 |
| <b>iYLR333C</b>   | YLR333C (RPS25B)               | 12 | 795898 |
| <b>iYLR335W</b>   |                                | 12 | 799591 |
| <b>iYLR336C</b>   | YLR336C (SGD1)                 | 12 | 802395 |
| <b>iYLR338W</b>   |                                | 12 | 805202 |
| <b>iYLR340W</b>   | YLR341W (SPO77)                | 12 | 806824 |
| <b>iYLR342W</b>   | YLR343W                        | 12 | 815626 |
| <b>iYLR343W</b>   | YLR344W (RPL26A)               | 12 | 817760 |
| <b>iYLR344W</b>   | YLR345W                        | 12 | 820141 |
| <b>iYLR347C</b>   | YLR347C (KAP95)                | 12 | 826411 |



|                   |                                 |    |        |
|-------------------|---------------------------------|----|--------|
| <b>iYLR349W</b>   | YLR350W                         | 12 | 828025 |
| <b>iYLR350W</b>   |                                 | 12 | 829378 |
| <b>iYLR351C</b>   | YLR351C (NIT3) YLR352W          | 12 | 830362 |
| <b>iYLR352W</b>   | YLR353W (BUD8)                  | 12 | 833537 |
| <b>iYLR353W</b>   |                                 | 12 | 836161 |
| <b>iYLR355C</b>   | YLR355C (ILV5) YLR356W          | 12 | 839251 |
| <b>iYLR356W</b>   | YLR357W (RSC2)                  | 12 | 840912 |
| <b>iYLR358C</b>   | YLR358C YLR359W (ADE13)         | 12 | 844048 |
| <b>iYLR361C</b>   | YLR361C YLR362W (STE11)         | 12 | 849122 |
| <b>iYLR362W</b>   |                                 | 12 | 852017 |
| <b>iYLR363C</b>   | YLR363C (NMD4) YLR364W          | 12 | 853149 |
| <b>iYLR366W</b>   | YLR367W (RPS22B)                | 12 | 855841 |
| <b>iYLR368W</b>   | YLR369W (SSQ1)                  | 12 | 859334 |
| <b>iYLR369W</b>   |                                 | 12 | 861523 |
| <b>iYLR370C</b>   | YLR370C (ARC18) YLR371W (ROM2)  | 12 | 862252 |
| <b>iYLR372W</b>   |                                 | 12 | 868389 |
| <b>iYLR373C</b>   | YLR373C (VID22)                 | 12 | 871365 |
| <b>iYLR375W</b>   |                                 | 12 | 872726 |
| <b>iYLR376C</b>   | YLR376C                         | 12 | 873552 |
| <b>iYLR377C</b>   | YLR377C (FBP1) tk(uuu)          | 12 | 874790 |
| <b>iYLR379W</b>   | YLR380W (CSR1)                  | 12 | 877294 |
| <b>iYLR380W</b>   | YLR381W                         | 12 | 879507 |
| <b>iYLR381W</b>   |                                 | 12 | 881923 |
| <b>iYLR382C</b>   | YLR382C (NAM2) YLR383W (RHC18)  | 12 | 884750 |
| <b>iYLR383W</b>   |                                 | 12 | 888631 |
| <b>iYLR384C</b>   | YLR384C (IKI3)                  | 12 | 892899 |
| <b>iYLR385C</b>   | YLR385C YLR386W                 | 12 | 893389 |
| <b>iYLR386W</b>   |                                 | 12 | 896269 |
| <b>iYLR387C</b>   | YLR387C YLR388W (RPS29A)        | 12 | 897671 |
| <b>iYLR388W</b>   |                                 | 12 | 898820 |
| <b>iYLR389C</b>   | YLR389C (STE23) YLR390W (ECM19) | 12 | 902658 |
| <b>iYLR390W</b>   | YLR390W-A (CCW14)               | 12 | 903402 |
| <b>iYLR391W-A</b> |                                 | 12 | 904438 |
| <b>iYLR392C</b>   | YLR392C YLR393W (ATP10)         | 12 | 906303 |
| <b>iYLR394W</b>   |                                 | 12 | 909396 |
| <b>iYLR395C</b>   | YLR395C (COX8)                  | 12 | 909963 |
| <b>iYLR396C</b>   | YLR396C (VPS33)                 | 12 | 912308 |
| <b>iYLR397C</b>   | YLR397C (AFG2)                  | 12 | 914890 |
| <b>iYLR398C</b>   | YLR398C (SKI2)                  | 12 | 919017 |
| <b>iYLR399C</b>   | YLR399C (BDF1) YLR400W          | 12 | 921594 |
| <b>iYLR400W</b>   |                                 | 12 | 922534 |
| <b>iYLR401C</b>   | YLR401C YLR402W                 | 12 | 924445 |
| <b>iYLR402W</b>   | YLR403W (SFP1)                  | 12 | 925076 |
| <b>iYLR404W</b>   | YLR405W                         | 12 | 929596 |
| <b>iYLR405W</b>   |                                 | 12 | 930888 |
| <b>iYLR406C</b>   | YLR406C (RPL31B) YLR407W        | 12 | 931751 |
| <b>iYLR407W</b>   |                                 | 12 | 933652 |
| <b>iYLR408C</b>   | YLR408C                         | 12 | 934248 |
| <b>iYLR409C</b>   | YLR409C YLR410W (VIP1)          | 12 | 937228 |
| <b>iYLR410W</b>   | YLR410W-A                       | 12 | 940976 |
| <b>iYLR412W-0</b> | YLR413W                         | 12 | 949187 |

|                    |                                 |    |         |
|--------------------|---------------------------------|----|---------|
| <b>iYLR413W</b>    |                                 | 12 | 953177  |
| <b>iYLR414C</b>    | YLR414C                         | 12 | 954138  |
| <b>iYLR416C</b>    | YLR416C YLR417W (VPS36)         | 12 | 954883  |
| <b>iYLR417W</b>    |                                 | 12 | 956704  |
| <b>iYLR418C</b>    | YLR418C (CDC73) YLR419W         | 12 | 958089  |
| <b>iYLR419W</b>    | YLR420W (URA4)                  | 12 | 962729  |
| <b>iYLR420W</b>    |                                 | 12 | 964873  |
| <b>iYLR421C</b>    | YLR421C (RPN13) YLR422W         | 12 | 965554  |
| <b>iYLR422W</b>    |                                 | 12 | 971689  |
| <b>iYLR423C</b>    | YLR423C (APG17) YLR424W         | 12 | 973164  |
| <b>iYLR424W</b>    | YLR425W (TUS1)                  | 12 | 975515  |
| <b>iYLR425W</b>    | YLR426W                         | 12 | 986811  |
| <b>iYLR426W</b>    | YLR427W                         | 12 | 988107  |
| <b>iYLR427W</b>    |                                 | 12 | 990434  |
| <b>iYLR431C</b>    | YLR431C YLR432W (IMD3)          | 12 | 1001697 |
| <b>iYLR432W</b>    |                                 | 12 | 1004122 |
| <b>iYLR435W</b>    |                                 | 12 | 1006989 |
| <b>iYLR436C</b>    | YLR436C (ECM30)                 | 12 | 1011239 |
| <b>iYLR437C</b>    | YLR437C YLR438W (CAR2)          | 12 | 1012017 |
| <b>iYLR438C-A</b>  | YLR438C-A (LSM3) YLR439W (MRPL4 | 12 | 1014172 |
| <b>iYLR438W</b>    |                                 | 12 | 1013769 |
| <b>iYLR439W</b>    |                                 | 12 | 1015444 |
| <b>iYLR440C</b>    | YLR440C                         | 12 | 1017691 |
| <b>iYLR441C</b>    | YLR441C (RPS1A)                 | 12 | 1018902 |
| <b>iYLR442C</b>    | YLR442C (SIR3) YLR443W (ECM7)   | 12 | 1022245 |
| <b>iYLR444C</b>    | YLR444C YLR445W                 | 12 | 1023982 |
| <b>iYLR445W</b>    | YLR446W                         | 12 | 1024587 |
| <b>iYLR446W</b>    |                                 | 12 | 1026509 |
| <b>iYLR447C</b>    | YLR447C (VMA6) YLR448W (RPL6B)  | 12 | 1027887 |
| <b>iYLR449W</b>    | YLR450W (HMG2)                  | 12 | 1032005 |
| <b>iYLR450W</b>    | YLR451W (LEU3)                  | 12 | 1035758 |
| <b>iYLR451W</b>    |                                 | 12 | 1038747 |
| <b>iYLR452C</b>    | YLR452C (SST2)                  | 12 | 1041361 |
| <b>iYLR453C</b>    | YLR453C (RIF2) YLR454W          | 12 | 1042981 |
| <b>iYLR454W</b>    | YLR455W                         | 12 | 1051879 |
| <b>iYLR455W</b>    | YLR456W                         | 12 | 1054538 |
| <b>iYLR456W</b>    |                                 | 12 | 1055679 |
| <b>iYLR458W</b>    | YLR459W (CDC91)                 | 12 | 1056830 |
| <b>iYLR460C-1</b>  | YLR460C YLR461W (PAU4)          | 12 | 1061898 |
| <b>iYLR461W-0</b>  | YLR462W                         | 12 | 1063276 |
| <b>iYLR461W-1</b>  | YLR462W                         | 12 | 1064613 |
| <b>iYLR466W</b>    | YLR467W (YRF1-5)                | 12 | 1071230 |
| <b>iYLRdelta18</b> |                                 | 12 | 732000  |
| <b>iYLRdelta19</b> |                                 | 12 | 734671  |
| <b>iYLRdelta21</b> | YLR344W (RPL26A)                | 12 | 818402  |
| <b>iYLRdelta24</b> | YLR420W (URA4)                  | 12 | 963539  |
| <b>iYLRdelta26</b> | YLR425W (TUS1)                  | 12 | 981694  |
| <b>iYLRdelta5</b>  |                                 | 12 | 366145  |
| <b>iYLRdelta8</b>  | YLR157C-A                       | 12 | 481898  |
| <b>iYLRdelta9</b>  | YLR227C (ADY4) YLR227W-A        | 12 | 593035  |
| <b>iYLRsigma1</b>  | YLR010C (TEN1) YLR011W (LOT6)   | 12 | 168379  |

|                      |                                 |    |        |
|----------------------|---------------------------------|----|--------|
| <b>iYLRctau1</b>     |                                 | 12 | 599844 |
| <b>iYLRWdelta11</b>  |                                 | 12 | 599062 |
| <b>iYLRWdelta14</b>  | YLR257W                         | 12 | 656743 |
| <b>iYLRWdelta15</b>  | YLR257W                         | 12 | 657767 |
| <b>iYLRWdelta17</b>  | YLR272C (YCS4)                  | 12 | 688664 |
| <b>iYLRWdelta20</b>  | YLR334C YLR335W (NUP2)          | 12 | 797087 |
| <b>iYLRWdelta23</b>  | YLR411W (CTR3)                  | 12 | 947145 |
| <b>iYLRWdelta4</b>   | YLR035C-A                       | 12 | 221267 |
| <b>iYLRWdelta6-0</b> | YLR154C                         | 12 | 449029 |
| <b>iYLRWdelta6-A</b> | YLR154C                         | 12 | 449029 |
| <b>iYML001W</b>      |                                 | 13 | 267800 |
| <b>iYML002W</b>      | YML001W (YPT7)                  | 13 | 266754 |
| <b>iYML003W</b>      | YML002W                         | 13 | 264355 |
| <b>iYML004C</b>      | YML004C (GLO1) YML003W          | 13 | 262685 |
| <b>iYML005W</b>      |                                 | 13 | 261609 |
| <b>iYML006C</b>      | YML006C ts(aga)m (GIS4) YML005W | 13 | 258416 |
| <b>iYML007W</b>      |                                 | 13 | 255800 |
| <b>iYML008C</b>      | YML008C (ERG6) YML007W (YAP1)   | 13 | 252990 |
| <b>iYML009C</b>      | YML009C (MRPL39)                | 13 | 251516 |
| <b>iYML010C-B</b>    | YML010C-B                       | 13 | 251001 |
| <b>iYML011C</b>      | YML011C YML010W (SPT5)          | 13 | 247428 |
| <b>iYML012W</b>      |                                 | 13 | 246751 |
| <b>iYML014W</b>      | YML013W                         | 13 | 244064 |
| <b>iYML015C</b>      | YML015C (TAF40) YML014W         | 13 | 243029 |
| <b>iYML016C</b>      | YML016C (PPZ1)                  | 13 | 241536 |
| <b>iYML018C</b>      | YML018C YML017W (PSP2)          | 13 | 235952 |
| <b>iYML019W</b>      |                                 | 13 | 234455 |
| <b>iYML020W</b>      | YML019W (OST6)                  | 13 | 233143 |
| <b>iYML021C</b>      | YML021C (UNG1) YML020W          | 13 | 230813 |
| <b>iYML022W</b>      |                                 | 13 | 229500 |
| <b>iYML023C</b>      | YML023C YML022W (APT1)          | 13 | 228664 |
| <b>iYML024W</b>      |                                 | 13 | 226697 |
| <b>iYML025C</b>      | YML025C YML024W (RPS17A)        | 13 | 225365 |
| <b>iYML026C</b>      |                                 | 13 | 223828 |
| <b>iYML027W</b>      |                                 | 13 | 222563 |
| <b>iYML028W</b>      | YML027W (YOX1)                  | 13 | 220728 |
| <b>iYML029W</b>      | YML028W (TSA1)                  | 13 | 219878 |
| <b>iYML030W</b>      | YML029W (USA1)                  | 13 | 216914 |
| <b>iYML031W</b>      | YML030W                         | 13 | 216156 |
| <b>iYML033W</b>      |                                 | 13 | 212155 |
| <b>iYML034W</b>      |                                 | 13 | 211495 |
| <b>iYML035C</b>      | YML035C (AMD1)                  | 13 | 208860 |
| <b>iYML036W</b>      |                                 | 13 | 206211 |
| <b>iYML037C</b>      | YML037C YML036W                 | 13 | 205408 |
| <b>iYML041C</b>      | YML041C YML040W                 | 13 | 195755 |
| <b>iYML042W</b>      |                                 | 13 | 194800 |
| <b>iYML043C</b>      | YML043C (RRN11) YML042W (CAT2)  | 13 | 191767 |
| <b>iYML046W</b>      | YML045W-A                       | 13 | 183363 |
| <b>iYML047C</b>      | YML047C (PRM6) YML046W (PRP39)  | 13 | 181075 |
| <b>iYML048W</b>      | YML048W-A                       | 13 | 179637 |
| <b>iYML049C</b>      | YML049C (RSE1) YML048W (GSF2)   | 13 | 178305 |

|                   |                                 |    |        |
|-------------------|---------------------------------|----|--------|
| <b>iYML050W</b>   |                                 | 13 | 174074 |
| <b>iYML051W</b>   | YML050W                         | 13 | 172901 |
| <b>iYML052W</b>   | YML051W (GAL80)                 | 13 | 171310 |
| <b>iYML053C</b>   | YML053C YML052W (SUR7)          | 13 | 169754 |
| <b>iYML054C</b>   | YML054C (CYB2)                  | 13 | 167308 |
| <b>iYML055W</b>   |                                 | 13 | 165326 |
| <b>iYML057W</b>   |                                 | 13 | 161994 |
| <b>iYML058W</b>   | YML057W (CMP2)                  | 13 | 159697 |
| <b>iYML060W</b>   |                                 | 13 | 153001 |
| <b>iYML061C</b>   | YML061C (PIF1) YML060W (OGG1)   | 13 | 151532 |
| <b>iYML062C</b>   | YML062C (MFT1)                  | 13 | 148683 |
| <b>iYML063W</b>   |                                 | 13 | 147249 |
| <b>iYML064C</b>   | YML064C (TEM1) YML063W (RPS1B)  | 13 | 145876 |
| <b>iYML065W</b>   |                                 | 13 | 144954 |
| <b>iYML066C</b>   | YML066C (SMA2) YML065W (ORC1)   | 13 | 141533 |
| <b>iYML067C</b>   | YML067C (ERV41)                 | 13 | 140214 |
| <b>iYML068W</b>   |                                 | 13 | 138944 |
| <b>iYML069W</b>   | YML068W                         | 13 | 137158 |
| <b>iYML070W</b>   | YML069W (POB3)                  | 13 | 135229 |
| <b>iYML071C</b>   | YML071C (DOR1) YML070W (DAK1)   | 13 | 131572 |
| <b>iYML072C</b>   | YML072C                         | 13 | 129367 |
| <b>iYML074C-0</b> | YML074C (FPR3)                  | 13 | 121324 |
| <b>iYML074C-1</b> | YML074C (FPR3)                  | 13 | 122275 |
| <b>iYML075C</b>   | YML075C (HMG1)                  | 13 | 118898 |
| <b>iYML076C</b>   | YML076C (WAR1)                  | 13 | 115347 |
| <b>iYML077W</b>   |                                 | 13 | 112344 |
| <b>iYML078W</b>   | YML077W (BET5)                  | 13 | 111550 |
| <b>iYML079W</b>   | YML078W (CPR3)                  | 13 | 110852 |
| <b>iYML080W</b>   | YML079W                         | 13 | 110077 |
| <b>iYML081C-A</b> | YML081C-A (ATP18) YML081W       | 13 | 104162 |
| <b>iYML081W</b>   | YML080W (DUS1)                  | 13 | 108532 |
| <b>iYML082W</b>   |                                 | 13 | 103811 |
| <b>iYML083C</b>   | YML083C YML082W                 | 13 | 101050 |
| <b>iYML085C</b>   | YML085C (TUB1) YML084W          | 13 | 99400  |
| <b>iYML086C</b>   | YML086C (ALO1)                  | 13 | 97371  |
| <b>iYML087C</b>   | YML087C                         | 13 | 95369  |
| <b>iYML088W</b>   |                                 | 13 | 94241  |
| <b>iYML089C</b>   | YML089C YML088W (UFO1)          | 13 | 91409  |
| <b>iYML093W</b>   |                                 | 13 | 85789  |
| <b>iYML094W</b>   | YML093W                         | 13 | 82849  |
| <b>iYML095C</b>   | YML095C (RAD10)                 | 13 | 82113  |
| <b>iYML097C</b>   | YML097C (VPS9) YML096W          | 13 | 79690  |
| <b>iYML098W</b>   |                                 | 13 | 77770  |
| <b>iYML099C</b>   | YML099C (ARG81) YML098W (TAF19) | 13 | 77040  |
| <b>iYML100W</b>   | YML100W-A                       | 13 | 73920  |
| <b>iYML101C</b>   | YML101C YML100W (TSL1)          | 13 | 70088  |
| <b>iYML103C</b>   | YML103C (NUP188) YML102W (CAC2) | 13 | 67549  |
| <b>iYML104C</b>   | YML104C (MDM1)                  | 13 | 62322  |
| <b>iYML105C</b>   | YML105C (SEC65)                 | 13 | 58687  |
| <b>iYML106W</b>   |                                 | 13 | 57453  |
| <b>iYML107C</b>   | YML107C YML106W (URA5)          | 13 | 56425  |

|                    |                                  |    |        |
|--------------------|----------------------------------|----|--------|
| <b>iYML108W</b>    |                                  | 13 | 55110  |
| <b>iYML110C</b>    | YML110C (COQ5) YML109W (ZDS2)    | 13 | 50954  |
| <b>iYML111W</b>    |                                  | 13 | 49704  |
| <b>iYML112W</b>    | YML111W (BUL2)                   | 13 | 45953  |
| <b>iYML114C</b>    | YML114C (TAF65) YML113W (DAT1)   | 13 | 43575  |
| <b>iYML115C</b>    | YML115C (VAN1)                   | 13 | 41794  |
| <b>iYML116W</b>    |                                  | 13 | 39824  |
| <b>iYML117W-A</b>  | YML116W (ATR1)                   | 13 | 37774  |
| <b>iYML118W</b>    | YML117W                          | 13 | 33851  |
| <b>iYML119W</b>    | YML118W (NGL3)                   | 13 | 31684  |
| <b>iYML120C</b>    | YML120C (NDI1) YML119W           | 13 | 29807  |
| <b>iYML121W</b>    |                                  | 13 | 27862  |
| <b>iYML122C</b>    | YML122C YML121W (GTR1)           | 13 | 26419  |
| <b>iYML123C</b>    | YML123C (PHO84)                  | 13 | 25801  |
| <b>iYML124C</b>    | YML124C (TUB3)                   | 13 | 23684  |
| <b>iYML125C</b>    | YML125C                          | 13 | 21700  |
| <b>iYML126C</b>    | YML126C (ERG13)                  | 13 | 20536  |
| <b>iYML128C</b>    | YML128C (MSC1) YML127W (RSC9)    | 13 | 16677  |
| <b>iYML129C</b>    | YML129C (COX14)                  | 13 | 14754  |
| <b>iYML131W</b>    |                                  | 13 | 11296  |
| <b>iYML132W-1</b>  | YML131W                          | 13 | 9291   |
| <b>iYML133C-0</b>  | YML133C YML132W (COS3)           | 13 | 4684   |
| <b>iYMLCdelta1</b> | YML071C (DOR1) YML070W (DAK1)    | 13 | 132321 |
| <b>iYMLCdelta2</b> | YML054C (CYB2)                   | 13 | 168681 |
| <b>iYMLWdelta4</b> |                                  | 13 | 190083 |
| <b>iYMLWdelta6</b> |                                  | 13 | 202234 |
| <b>iYMR001C</b>    | YMR001C (CDC5) YMR002W           | 13 | 271136 |
| <b>iYMR002W</b>    | YMR003W                          | 13 | 272663 |
| <b>iYMR003W</b>    | YMR004W (MVP1)                   | 13 | 273714 |
| <b>iYMR004W</b>    | YMR005W (MPT1)                   | 13 | 275552 |
| <b>iYMR005W</b>    |                                  | 13 | 277211 |
| <b>iYMR006C</b>    | YMR006C (PLB2) YMR007W           | 13 | 279681 |
| <b>iYMR007W</b>    |                                  | 13 | 280340 |
| <b>iYMR008C</b>    | YMR008C (PLB1) YMR009W           | 13 | 282584 |
| <b>iYMR009W</b>    | YMR010W                          | 13 | 284640 |
| <b>iYMR010W-0</b>  | YMR011W (HXT2)                   | 13 | 286316 |
| <b>iYMR010W-1</b>  | YMR011W (HXT2)                   | 13 | 287197 |
| <b>iYMR011W</b>    | YMR012W (CLU1)                   | 13 | 289703 |
| <b>iYMR012W</b>    |                                  | 13 | 294966 |
| <b>iYMR013C-0</b>  | YMR013C (SEC59) snr72-79 YMR014W | 13 | 296737 |
| <b>iYMR013C-1</b>  | YMR013C (SEC59) snr72-79YMR014W  | 13 | 297802 |
| <b>iYMR014W</b>    |                                  | 13 | 300426 |
| <b>iYMR015C</b>    | YMR015C (ERG5)                   | 13 | 302484 |
| <b>iYMR016C-0</b>  | YMR016C (SOK2) YMR017W (SPO20)   | 13 | 305592 |
| <b>iYMR017W</b>    | YMR018W                          | 13 | 308681 |
| <b>iYMR018W</b>    | YMR019W (STB4)                   | 13 | 311751 |
| <b>iYMR019W</b>    | YMR020W (FMS1)                   | 13 | 315004 |
| <b>iYMR020W</b>    |                                  | 13 | 316902 |
| <b>iYMR021C</b>    | YMR021C (MAC1) YMR022W (QRI8)    | 13 | 318417 |
| <b>iYMR022W</b>    |                                  | 13 | 319176 |
| <b>iYMR023C</b>    | YMR023C (MSS1) ta(agc)m1 YMR024W | 13 | 321016 |

|            |                                |    |        |
|------------|--------------------------------|----|--------|
| iYMR024W   | YMR025W                        | 13 | 323046 |
| iYMR026C   | YMR026C (PEX12) YMR027W (HRT2) | 13 | 325434 |
| iYMR027W   | YMR028W (TAP42)                | 13 | 327288 |
| iYMR028W   |                                | 13 | 328581 |
| iYMR029C   | YMR029C YMR030W                | 13 | 330230 |
| iYMR030W   |                                | 13 | 331922 |
| iYMR031W-A | YMR032W (HOF1)                 | 13 | 335034 |
| iYMR032W   | YMR033W (ARP9)                 | 13 | 337306 |
| iYMR033W   |                                | 13 | 339276 |
| iYMR034C   | YMR034C YMR035W (IMP2)         | 13 | 340721 |
| iYMR035W   |                                | 13 | 341674 |
| iYMR038C   | YMR038C (LYS7)                 | 13 | 348259 |
| iYMR039C   | YMR039C (SUB1) YMR040W         | 13 | 349521 |
| iYMR040W   |                                | 13 | 350862 |
| iYMR041C   | YMR041C tfgaa)m1YMR042W (ARG80 | 13 | 351972 |
| iYMR042W   | YMR043W (MCM1)                 | 13 | 353135 |
| iYMR043W   | YMR044W (IOC4)                 | 13 | 354730 |
| iYMR044W   |                                | 13 | 356810 |
| iYMR046W-A |                                | 13 | 362829 |
| iYMR047C   | YMR047C (NUP116) YMR048W (CSM3 | 13 | 366704 |
| iYMR048W   |                                | 13 | 367933 |
| iYMR049C-0 | YMR049C (ERB1)                 | 13 | 370516 |
| iYMR049C-1 | YMR049C (ERB1)                 | 13 | 371480 |
| iYMR053C   | YMR053C (STB2) YMR054W (STV1)  | 13 | 382897 |
| iYMR054W   |                                | 13 | 385974 |
| iYMR055C   | YMR055C (BUB2)                 | 13 | 387020 |
| iYMR056C   | YMR056C (AAC1)                 | 13 | 388243 |
| iYMR057C   | YMR057C YMR058W (FET3)         | 13 | 388729 |
| iYMR058W   | YMR059W (SEN15)                | 13 | 390731 |
| iYMR060C   | YMR060C (TOM37) YMR061W (RNA14 | 13 | 392514 |
| iYMR061W   |                                | 13 | 394787 |
| iYMR062C   | YMR062C (ECM40) YMR063W (RIM9) | 13 | 396378 |
| iYMR063W   | YMR064W (AEP1)                 | 13 | 397795 |
| iYMR064W   | YMR065W (KAR5)                 | 13 | 399458 |
| iYMR065W   | YMR066W (SOV1)                 | 13 | 401215 |
| iYMR066W   |                                | 13 | 404236 |
| iYMR067C   | YMR067C YMR068W                | 13 | 405572 |
| iYMR068W   | YMR069W                        | 13 | 407583 |
| iYMR069W   | YMR070W (MOT3)                 | 13 | 408565 |
| iYMR070W   |                                | 13 | 410625 |
| iYMR071C   | YMR071C YMR072W (ABF2)         | 13 | 411264 |
| iYMR072W   |                                | 13 | 412119 |
| iYMR073C   | YMR073C                        | 13 | 412872 |
| iYMR074C   | YMR074C YMR075W                | 13 | 413472 |
| iYMR075C-A | YMR075C-A                      | 13 | 416052 |
| iYMR076C   | YMR076C (PDS5) tv(aac)m2       | 13 | 420028 |
| iYMR077C   | YMR077C (VPS20)                | 13 | 422148 |
| iYMR078C   | YMR078C (CTF18) YMR079W (SEC14 | 13 | 424727 |
| iYMR079W   |                                | 13 | 426058 |
| iYMR080C   | YMR080C (NAM7)                 | 13 | 429626 |
| iYMR081C   | YMR081C (ISF1)                 | 13 | 431094 |

|                   |                                |    |        |
|-------------------|--------------------------------|----|--------|
| <b>iYMR082C-0</b> | YMR082C YMR083W (ADH3)         | 13 | 432124 |
| <b>iYMR082C-1</b> | YMR082C YMR083W (ADH3)         | 13 | 433455 |
| <b>iYMR083W</b>   | YMR084W                        | 13 | 435914 |
| <b>iYMR084W</b>   | YMR085W                        | 13 | 437415 |
| <b>iYMR085W</b>   | YMR086W                        | 13 | 438788 |
| <b>iYMR086C-A</b> | YMR086C-A YMR087W              | 13 | 442363 |
| <b>iYMR088C</b>   | YMR088C                        | 13 | 445101 |
| <b>iYMR089C</b>   | YMR089C (YTA12) YMR090W        | 13 | 448085 |
| <b>iYMR090W</b>   |                                | 13 | 449927 |
| <b>iYMR091C</b>   | YMR091C (NPL6)                 | 13 | 451364 |
| <b>iYMR092C</b>   | YMR092C (AIP1) YMR093W         | 13 | 453478 |
| <b>iYMR093W</b>   | YMR094W (CTF13)                | 13 | 455555 |
| <b>iYMR095C</b>   | YMR095C (SNO1) YMR096W (SNZ1)  | 13 | 457958 |
| <b>iYMR096W</b>   |                                | 13 | 459300 |
| <b>iYMR097C</b>   | YMR097C                        | 13 | 460526 |
| <b>iYMR098C</b>   | YMR098C td(guc)m               | 13 | 462608 |
| <b>iYMR099C</b>   | YMR099C YMR100W (MUB1)         | 13 | 464826 |
| <b>iYMR100W</b>   |                                | 13 | 468161 |
| <b>iYMR101C</b>   | YMR101C (SRT1)                 | 13 | 469475 |
| <b>iYMR102C</b>   | YMR102C                        | 13 | 472351 |
| <b>iYMR103C</b>   | YMR103C                        | 13 | 473263 |
| <b>iYMR104C</b>   | YMR104C (YPK2)                 | 13 | 475452 |
| <b>iYMR105C</b>   | YMR105C (PGM2)                 | 13 | 477605 |
| <b>iYMR106C</b>   | YMR106C (YKU80) YMR107W        | 13 | 480189 |
| <b>iYMR107W</b>   | YMR108W (ILV2)                 | 13 | 483360 |
| <b>iYMR108W</b>   | YMR109W (MYO5)                 | 13 | 486146 |
| <b>iYMR109W</b>   |                                | 13 | 490245 |
| <b>iYMR110C</b>   | YMR110C                        | 13 | 491991 |
| <b>iYMR111C</b>   | YMR111C                        | 13 | 493791 |
| <b>iYMR112C</b>   | YMR112C (MED11) YMR113W (FOL3) | 13 | 494494 |
| <b>iYMR113W</b>   |                                | 13 | 496281 |
| <b>iYMR114C</b>   | YMR114C YMR115W                | 13 | 497448 |
| <b>iYMR115W</b>   |                                | 13 | 499208 |
| <b>iYMR116C</b>   | YMR116C (ASC1)                 | 13 | 500687 |
| <b>iYMR117C</b>   | YMR117C (SPC24)                | 13 | 501890 |
| <b>iYMR118C</b>   | YMR118C YMR119W (ASI1)         | 13 | 502733 |
| <b>iYMR119W-A</b> |                                | 13 | 507369 |
| <b>iYMR120C</b>   | YMR120C (ADE17)                | 13 | 509279 |
| <b>iYMR122C-1</b> | YMR122C YMR123W (PKR1)         | 13 | 512333 |
| <b>iYMR123W</b>   | YMR124W                        | 13 | 513960 |
| <b>iYMR124W</b>   | YMR125W (STO1)                 | 13 | 517286 |
| <b>iYMR125W</b>   |                                | 13 | 520445 |
| <b>iYMR126C</b>   | YMR126C                        | 13 | 521788 |
| <b>iYMR127C</b>   | YMR127C (SAS2) YMR128W (ECM16) | 13 | 523344 |
| <b>iYMR128W</b>   | YMR129W (POM152)               | 13 | 527498 |
| <b>iYMR129W</b>   | YMR130W                        | 13 | 531816 |
| <b>iYMR130W</b>   |                                | 13 | 533026 |
| <b>iYMR131C</b>   | YMR131C (RRB1)                 | 13 | 534697 |
| <b>iYMR132C</b>   | YMR132C YMR133W (REC114)       | 13 | 535569 |
| <b>iYMR133W</b>   | YMR134W                        | 13 | 537608 |
| <b>iYMR134W</b>   |                                | 13 | 538550 |



|                   |                                 |    |        |
|-------------------|---------------------------------|----|--------|
| <b>iYMR135W-A</b> | YMR136W (GAT2)                  | 13 | 540443 |
| <b>iYMR136W</b>   |                                 | 13 | 542880 |
| <b>iYMR137C</b>   | YMR137C (PSO2) YMR138W (CIN4)   | 13 | 544962 |
| <b>iYMR138W</b>   | YMR139W (RIM11)                 | 13 | 545729 |
| <b>iYMR140W</b>   |                                 | 13 | 549182 |
| <b>iYMR141C</b>   | YMR141C                         | 13 | 550043 |
| <b>iYMR142C</b>   | YMR142C (RPL13B) YMR143W (RPS1) | 13 | 551206 |
| <b>iYMR143W</b>   | YMR144W                         | 13 | 552902 |
| <b>iYMR145C</b>   | YMR145C                         | 13 | 556474 |
| <b>iYMR146C</b>   | YMR146C (TIF34) YMR147W         | 13 | 558523 |
| <b>iYMR147W</b>   | YMR148W                         | 13 | 559869 |
| <b>iYMR148W</b>   | YMR149W (SWP1)                  | 13 | 560811 |
| <b>iYMR149W</b>   |                                 | 13 | 561855 |
| <b>iYMR151W</b>   | YMR152W (YIM1)                  | 13 | 562942 |
| <b>iYMR152W</b>   | YMR153W (NUP53)                 | 13 | 564192 |
| <b>iYMR153C-A</b> | YMR153C-A                       | 13 | 565908 |
| <b>iYMR154C</b>   | YMR154C (RIM13) YMR155W         | 13 | 568181 |
| <b>iYMR155W</b>   |                                 | 13 | 570193 |
| <b>iYMR156C</b>   | YMR156C (TPP1)                  | 13 | 571015 |
| <b>iYMR157C</b>   | YMR157C YMR158W                 | 13 | 572043 |
| <b>iYMR158C-B</b> | YMR158C-B YMR158W-A             | 13 | 573330 |
| <b>iYMR158W</b>   |                                 | 13 | 572714 |
| <b>iYMR159C</b>   | YMR159C (APG16) YMR160W         | 13 | 574927 |
| <b>iYMR160W</b>   | YMR161W (HLJ1)                  | 13 | 577515 |
| <b>iYMR161W</b>   |                                 | 13 | 578391 |
| <b>iYMR162C</b>   | YMR162C (DNF3)                  | 13 | 583920 |
| <b>iYMR163C</b>   | YMR163C                         | 13 | 586387 |
| <b>iYMR166C</b>   | YMR166C YMR167W (MLH1)          | 13 | 594472 |
| <b>iYMR167W</b>   |                                 | 13 | 597194 |
| <b>iYMR168C</b>   | YMR168C (CEP3)                  | 13 | 599157 |
| <b>iYMR169C</b>   | YMR169C (ALD3)                  | 13 | 600871 |
| <b>iYMR170C</b>   | YMR170C (ALD2)                  | 13 | 603081 |
| <b>iYMR171C</b>   | YMR171C YMR172W (HOT1)          | 13 | 605519 |
| <b>iYMR172C-A</b> | YMR172C-A YMR173W (DDR48)       | 13 | 608210 |
| <b>iYMR173W-A</b> |                                 | 13 | 610080 |
| <b>iYMR174C</b>   | YMR174C (PAI3) YMR175W (SIP18)  | 13 | 610364 |
| <b>iYMR175W</b>   | YMR176W (ECM5)                  | 13 | 611254 |
| <b>iYMR176W</b>   | YMR177W (MMT1)                  | 13 | 615974 |
| <b>iYMR177W</b>   | YMR178W                         | 13 | 618097 |
| <b>iYMR178W</b>   | YMR179W (SPT21)                 | 13 | 619302 |
| <b>iYMR179W</b>   |                                 | 13 | 622133 |
| <b>iYMR180C</b>   | YMR180C (CTL1)                  | 13 | 623212 |
| <b>iYMR181C</b>   | YMR181C                         | 13 | 624079 |
| <b>iYMR182C-0</b> | YMR182C (RGM1)                  | 13 | 625166 |
| <b>iYMR182C-1</b> | YMR182C (RGM1)                  | 13 | 626043 |
| <b>iYMR183C</b>   | YMR183C (SSO2) YMR184W          | 13 | 627807 |
| <b>iYMR185W</b>   | YMR186W (HSC82)                 | 13 | 631969 |
| <b>iYMR186W</b>   |                                 | 13 | 634471 |
| <b>iYMR187C</b>   | YMR187C                         | 13 | 635983 |
| <b>iYMR188C</b>   | YMR188C YMR189W (GCV2)          | 13 | 637003 |
| <b>iYMR189W</b>   |                                 | 13 | 640603 |

|            |                                 |    |        |
|------------|---------------------------------|----|--------|
| iYMR190C   | YMR190C (SGS1) YMR191W          | 13 | 645257 |
| iYMR191W   | YMR192W                         | 13 | 646776 |
| iYMR192W   | YMR193W (MRPL24)                | 13 | 649279 |
| iYMR193W   |                                 | 13 | 650811 |
| iYMR194C-A | YMR194C-A YMR195W (ICY1)        | 13 | 653135 |
| iYMR194W   |                                 | 13 | 651909 |
| iYMR195W   | YMR196W                         | 13 | 654416 |
| iYMR196W   |                                 | 13 | 658341 |
| iYMR197C   | YMR197C (VTI1) YMR198W (CIK1)   | 13 | 659197 |
| iYMR198W   | YMR199W (CLN1)                  | 13 | 661528 |
| iYMR199W   | YMR200W (ROT1)                  | 13 | 664283 |
| iYMR200W   |                                 | 13 | 665521 |
| iYMR201C   | YMR201C (RAD14) YMR202W (ERG2)  | 13 | 667043 |
| iYMR202W   | YMR203W (TOM40)                 | 13 | 668204 |
| iYMR203W   |                                 | 13 | 669654 |
| iYMR204C   | YMR204C                         | 13 | 671324 |
| iYMR205C   | YMR205C (PFK2) YMR206W          | 13 | 674765 |
| iYMR206W   |                                 | 13 | 676836 |
| iYMR207C   | YMR207C (HFA1) YMR208W (ERG12)  | 13 | 683563 |
| iYMR208W   |                                 | 13 | 685797 |
| iYMR209C   | YMR209C YMR210W                 | 13 | 687283 |
| iYMR210W   | YMR211W                         | 13 | 688864 |
| iYMR211W   |                                 | 13 | 690509 |
| iYMR212C   | YMR212C (EFR3) YMR213W (CEF1)   | 13 | 693042 |
| iYMR213W   | YMR214W (SCJ1)                  | 13 | 695152 |
| iYMR214W   | YMR215W                         | 13 | 696482 |
| iYMR215W   |                                 | 13 | 698369 |
| iYMR216C   | YMR216C (SKY1) YMR217W (GUA1)   | 13 | 701038 |
| iYMR217W   |                                 | 13 | 703366 |
| iYMR218C   | YMR218C (TRS130) YMR219W (ESC1) | 13 | 706886 |
| iYMR219W   | YMR220W (ERG8)                  | 13 | 712108 |
| iYMR220W   |                                 | 13 | 713670 |
| iYMR221C   | YMR221C                         | 13 | 715444 |
| iYMR222C   | YMR222C YMR223W (UBP8)          | 13 | 716308 |
| iYMR223W   |                                 | 13 | 718129 |
| iYMR224C   | YMR224C (MRE11)                 | 13 | 720652 |
| iYMR225C   | YMR225C (MRPL44)                | 13 | 721402 |
| iYMR226C   | YMR226C                         | 13 | 722395 |
| iYMR227C   | YMR227C (TAF67) YMR228W (MTF1)  | 13 | 724384 |
| iYMR228W   |                                 | 13 | 725650 |
| iYMR230W   | YMR231W (PEP5)                  | 13 | 733140 |
| iYMR231W   | YMR232W (FUS2)                  | 13 | 736633 |
| iYMR232W   | YMR233W (TRI1)                  | 13 | 738958 |
| iYMR233W   | YMR234W (RNH1)                  | 13 | 739864 |
| iYMR234W   |                                 | 13 | 741311 |
| iYMR235C   | YMR235C (RNA1) YMR236W (TAF17)  | 13 | 742734 |
| iYMR236W   | YMR237W                         | 13 | 743443 |
| iYMR237W   | YMR238W (DFG5)                  | 13 | 745922 |
| iYMR238W   |                                 | 13 | 747728 |
| iYMR239C   | YMR239C (RNT1)                  | 13 | 749676 |
| iYMR240C   | YMR240C (CUS1) YMR241W (YHM2)   | 13 | 751239 |

|            |                                 |    |        |
|------------|---------------------------------|----|--------|
| iYMR241W   |                                 | 13 | 752904 |
| iYMR242C   | YMR242C (RPL20A)                | 13 | 753766 |
| iYMR243C   | YMR243C (ZRC1) YMR244W          | 13 | 756165 |
| iYMR244W   |                                 | 13 | 758316 |
| iYMR245W   | YMR246W (FAA4)                  | 13 | 759182 |
| iYMR246W   |                                 | 13 | 761890 |
| iYMR247C   | YMR247C ta(agc)m2 YMR250W (GAD) | 13 | 768038 |
| iYMR250W   | YMR251W                         | 13 | 772557 |
| iYMR251W   | YMR251W-A (HOR7)                | 13 | 774014 |
| iYMR251W-A |                                 | 13 | 774930 |
| iYMR253C   | YMR253C                         | 13 | 777189 |
| iYMR254C   | YMR254C YMR255W (GFD1)          | 13 | 777922 |
| iYMR255W   |                                 | 13 | 778566 |
| iYMR256C   | YMR256C (COX7)                  | 13 | 779126 |
| iYMR257C   | YMR257C (PET111)                | 13 | 782030 |
| iYMR258C   | YMR258C                         | 13 | 784280 |
| iYMR259C   | YMR259C                         | 13 | 788882 |
| iYMR260C   | YMR260C (TIF11)                 | 13 | 789838 |
| iYMR261C   | YMR261C (TPS3) YMR262W          | 13 | 793368 |
| iYMR262W   | YMR263W (SAP30)                 | 13 | 794666 |
| iYMR263W   | YMR264W (CUE1)                  | 13 | 795523 |
| iYMR264W   |                                 | 13 | 796415 |
| iYMR265C   | YMR265C YMR266W (RSN1)          | 13 | 797924 |
| iYMR266W   | YMR267W (PPA2)                  | 13 | 801378 |
| iYMR267W   |                                 | 13 | 802703 |
| iYMR268C   | YMR268C (PRP24) YMR269W         | 13 | 804221 |
| iYMR269W   |                                 | 13 | 805091 |
| iYMR270C   | YMR270C (RRN9)                  | 13 | 806423 |
| iYMR271C   | YMR271C (URA10)                 | 13 | 807548 |
| iYMR272C   | YMR272C (SCS7)                  | 13 | 810777 |
| iYMR273C   | YMR273C (ZDS1)                  | 13 | 813980 |
| iYMR274C   | YMR274C (RCE1)                  | 13 | 815311 |
| iYMR275C   | YMR275C (BUL1) YMR276W (DSK2)   | 13 | 818581 |
| iYMR276W   | YMR277W (FCP1)                  | 13 | 819948 |
| iYMR277W   | YMR278W                         | 13 | 822454 |
| iYMR278W   |                                 | 13 | 824631 |
| iYMR279C   | YMR279C                         | 13 | 826351 |
| iYMR280C   | YMR280C (CAT8) YMR281W (GPI12)  | 13 | 831329 |
| iYMR282C   | YMR282C (AEP2)                  | 13 | 835098 |
| iYMR283C   | YMR283C (RIT1) YMR284W (YKU70)  | 13 | 836867 |
| iYMR284W   |                                 | 13 | 839995 |
| iYMR285C   | YMR285C (NGL2) YMR286W (MRPL35) | 13 | 841691 |
| iYMR286W   |                                 | 13 | 842202 |
| iYMR287C   | YMR287C (MSU1) YMR288W (HSH155) | 13 | 845345 |
| iYMR288W   | YMR289W                         | 13 | 848486 |
| iYMR289W   |                                 | 13 | 849809 |
| iYMR290W-A | YMR291W                         | 13 | 851769 |
| iYMR291W   | YMR292W (GOT1)                  | 13 | 854390 |
| iYMR292W   |                                 | 13 | 855293 |
| iYMR293C   | YMR293C YMR294W (JNM1)          | 13 | 856793 |
| iYMR294W   | YMR294W-A                       | 13 | 858087 |

|                |                                |    |        |
|----------------|--------------------------------|----|--------|
| iYMR296C       | YMR296C (LCB1) YMR297W (PRC1)  | 13 | 860891 |
| iYMR297W       | YMR298W                        | 13 | 863520 |
| iYMR298W       |                                | 13 | 864271 |
| iYMR299C       | YMR299C                        | 13 | 865350 |
| iYMR300C       | YMR300C (ADE4)                 | 13 | 867091 |
| iYMR301C       | YMR301C (ATM1)                 | 13 | 869627 |
| iYMR302C       | YMR302C (PRP12)                | 13 | 872625 |
| iYMR303C       | YMR303C (ADH2) YMR304W (UBP15) | 13 | 874337 |
| iYMR304W       |                                | 13 | 878679 |
| iYMR305C       | YMR305C (SCW10) YMR306W (FKS3) | 13 | 880232 |
| iYMR306C-A     | YMR306C-A YMR307W (GAS1)       | 13 | 886572 |
| iYMR307W       |                                | 13 | 888682 |
| iYMR308C       | YMR308C (PSE1)                 | 13 | 892221 |
| iYMR309C       | YMR309C (NIP1)                 | 13 | 895426 |
| iYMR310C       | YMR310C                        | 13 | 896669 |
| iYMR311C       | YMR311C (GLC8) YMR312W (ELP6)  | 13 | 897603 |
| iYMR312W       |                                | 13 | 899226 |
| iYMR313C       | YMR313C YMR314W (PRE5)         | 13 | 901307 |
| iYMR314W       | YMR315W                        | 13 | 902413 |
| iYMR315W       | YMR316W (DIA1)                 | 13 | 903849 |
| iYMR316C-A     | YMR316C-A                      | 13 | 905972 |
| iYMR317W       |                                | 13 | 910785 |
| iYMR318C       | YMR318C                        | 13 | 912142 |
| iYMR319C-0     | YMR319C (FET4) YMR320W         | 13 | 914537 |
| iYMR319C-1     | YMR319C (FET4) YMR320W         | 13 | 915641 |
| iYMR320W       |                                | 13 | 917050 |
| iYMR321C       | YMR321C                        | 13 | 917895 |
| iYMR322C       | YMR322C YMR323W                | 13 | 919078 |
| iYMR323W       |                                | 13 | 921400 |
| iYMR324C       | YMR324C YMR325W                | 13 | 922443 |
| iYMR325W       |                                | 13 | 923014 |
| iYMRCdelta10   | YMR051C YMR052W (FAR3)         | 13 | 378621 |
| iYMRCdelta13   | YMR098C                        | 13 | 463460 |
| iYMRCtau1      | YMR012W (CLU1)                 | 13 | 290223 |
| iYMRWdelta12   | YMR051C YMR052W (FAR3)         | 13 | 379197 |
| iYMRWdelta15   | YMR106C (YKU80) YMR107W        | 13 | 481807 |
| iYMRWdelta16   | YMR118C YMR119W (ASI1)         | 13 | 503388 |
| iYMRWdelta17   | YMR118C YMR119W (ASI1)         | 13 | 504676 |
| iYMRWdelta19-0 | YMR247C YMR250W (GAD1)         | 13 | 768878 |
| iYMRWdelta21   | YMR283C (RIT1) YMR284W (YKU70) | 13 | 837764 |
| iYMRWtau2      | YMR118C YMR119W (ASI1)         | 13 | 504140 |
| iYNL001W       |                                | 14 | 628615 |
| iYNL002C       | YNL002C (RLP7) YNL001W (DOM34) | 14 | 627141 |
| iYNL003C       | YNL003C (PET8)                 | 14 | 625828 |
| iYNL004W       |                                | 14 | 624620 |
| iYNL005C       | YNL005C (MRP7) YNL004W (HRB1)  | 14 | 622427 |
| iYNL006W       |                                | 14 | 620977 |
| iYNL007C       | YNL007C (SIS1) YNL006W (LST8)  | 14 | 619564 |
| iYNL008C       | YNL008C (ASI3)                 | 14 | 618218 |
| iYNL009W       |                                | 14 | 616081 |
| iYNL011C       | YNL011C YNL010W                | 14 | 613168 |

|          |                                 |    |        |
|----------|---------------------------------|----|--------|
| iYNL012W |                                 | 14 | 611663 |
| iYNL013C | YNL013C YNL012W (SPO1)          | 14 | 609508 |
| iYNL016W | YNL015W (PBI2)                  | 14 | 604266 |
| iYNL018C | YNL018C                         | 14 | 601772 |
| iYNL019C | YNL019C                         | 14 | 599228 |
| iYNL020C | YNL020C (ARK1)                  | 14 | 597537 |
| iYNL021W |                                 | 14 | 595345 |
| iYNL022C | YNL022C YNL021W (HDA1)          | 14 | 592897 |
| iYNL023C | YNL023C (FAP1)                  | 14 | 591158 |
| iYNL024C | YNL024C                         | 14 | 587845 |
| iYNL025C | YNL025C (SSN8)                  | 14 | 585289 |
| iYNL026W |                                 | 14 | 583372 |
| iYNL027W | YNL026W                         | 14 | 581614 |
| iYNL028W | YNL027W (CRZ1)                  | 14 | 578994 |
| iYNL030W |                                 | 14 | 577036 |
| iYNL031C | YNL031C (HHT2) YNL030W (HHF2)   | 14 | 576048 |
| iYNL032W |                                 | 14 | 575349 |
| iYNL033W | YNL032W (SIW14)                 | 14 | 573851 |
| iYNL034W | YNL033W                         | 14 | 572313 |
| iYNL035C | YNL035C ti(aau)n1YNL034W        | 14 | 569689 |
| iYNL036W |                                 | 14 | 560477 |
| iYNL037C | YNL037C (IDH1) YNL036W (NCE103) | 14 | 559000 |
| iYNL038W |                                 | 14 | 557656 |
| iYNL039W | YNL038W (GPI15)                 | 14 | 556830 |
| iYNL040W | YNL039W (BDP1)                  | 14 | 554748 |
| iYNL041C | YNL041C (COD2) YNL040W          | 14 | 551985 |
| iYNL042W |                                 | 14 | 549288 |
| iYNL043C | YNL043C YNL042W (BOP3)          | 14 | 545907 |
| iYNL045W | YNL044W (YIP3)                  | 14 | 544976 |
| iYNL046W | YNL045W                         | 14 | 542820 |
| iYNL047C | YNL047C YNL046W                 | 14 | 541879 |
| iYNL048W |                                 | 14 | 539817 |
| iYNL049C | YNL049C (SFB2) YNL048W (ALG11)  | 14 | 537909 |
| iYNL050C | YNL050C                         | 14 | 534980 |
| iYNL051W |                                 | 14 | 533868 |
| iYNL052W | YNL051W (COD4)                  | 14 | 532184 |
| iYNL053W | YNL052W (COX5A)                 | 14 | 531409 |
| iYNL054W | YNL053W (MSG5)                  | 14 | 529581 |
| iYNL055C | YNL055C (POR1) YNL054W-A        | 14 | 518843 |
| iYNL056W |                                 | 14 | 517840 |
| iYNL057W | YNL056W                         | 14 | 516733 |
| iYNL059C | YNL059C (ARP5)                  | 14 | 514933 |
| iYNL061W |                                 | 14 | 512394 |
| iYNL062C | YNL062C (GCD10) YNL061W (NOP2)  | 14 | 510210 |
| iYNL064C | YNL064C (YDJ1) YNL063W          | 14 | 507095 |
| iYNL065W |                                 | 14 | 505483 |
| iYNL066W | YNL065W (AQR1)                  | 14 | 502776 |
| iYNL067W | YNL066W (SUN4)                  | 14 | 500255 |
| iYNL068C | YNL068C (FKH2) YNL067W (RPL9B)  | 14 | 498288 |
| iYNL069C | YNL069C (RPL16B)                | 14 | 495000 |
| iYNL070W |                                 | 14 | 493547 |

|          |                               |    |        |
|----------|-------------------------------|----|--------|
| iYNL071W | YNL070W (TOM7)                | 14 | 492970 |
| iYNL072W | YNL071W (LAT1)                | 14 | 491239 |
| iYNL073W | YNL072W (RNH35)               | 14 | 490115 |
| iYNL074C | YNL074C (MLF3) YNL073W (MSK1) | 14 | 488123 |
| iYNL075W |                               | 14 | 486478 |
| iYNL076W | YNL075W (IMP4)                | 14 | 485309 |
| iYNL077W | YNL076W (MKS1)                | 14 | 482976 |
| iYNL078W | YNL077W                       | 14 | 480990 |
| iYNL079C | YNL079C (TPM1) YNL078W (JIP1) | 14 | 479164 |
| iYNL080C | YNL080C                       | 14 | 478031 |
| iYNL081C | YNL081C                       | 14 | 476618 |
| iYNL082W |                               | 14 | 476011 |
| iYNL083W | YNL082W (PMS1)                | 14 | 472860 |
| iYNL084C | YNL084C (END3) YNL083W        | 14 | 471101 |
| iYNL086W | YNL085W (MKT1)                | 14 | 466641 |
| iYNL089C | YNL089C YNL088W (TOP2)        | 14 | 457168 |
| iYNL091W | YNL090W (RHO2)                | 14 | 456129 |
| iYNL092W | YNL091W                       | 14 | 452072 |
| iYNL093W | YNL092W                       | 14 | 450529 |
| iYNL094W | YNL093W (YPT53)               | 14 | 449373 |
| iYNL095C | YNL095C YNL094W               | 14 | 446839 |
| iYNL096C | YNL096C (RPS7B)               | 14 | 444314 |
| iYNL097C | YNL097C tl(caa)n (PHO23)      | 14 | 442357 |
| iYNL098C | YNL098C (RAS2)                | 14 | 440569 |
| iYNL099C | YNL099C (OCA1)                | 14 | 439282 |
| iYNL100W |                               | 14 | 438316 |
| iYNL101W | YNL100W                       | 14 | 437139 |
| iYNL102W | YNL101W                       | 14 | 434492 |
| iYNL103W | YNL102W (POL1)                | 14 | 429752 |
| iYNL104C | YNL104C (LEU4) YNL103W (MET4) | 14 | 426753 |
| iYNL105W |                               | 14 | 424582 |
| iYNL107W |                               | 14 | 420777 |
| iYNL108C | YNL108C YNL107W (YAF9)        | 14 | 419825 |
| iYNL111C | YNL111C (CYB5)                | 14 | 417301 |
| iYNL112W |                               | 14 | 416280 |
| iYNL113W | YNL112W (DBP2)                | 14 | 413198 |
| iYNL115C | YNL115C                       | 14 | 412052 |
| iYNL116W |                               | 14 | 409908 |
| iYNL117W | YNL116W                       | 14 | 408021 |
| iYNL118C | YNL118C (DCP2) YNL117W (MLS1) | 14 | 405563 |
| iYNL119W |                               | 14 | 402520 |
| iYNL121C | YNL121C (TOM70)               | 14 | 400536 |
| iYNL122C | YNL122C                       | 14 | 398369 |
| iYNL123W |                               | 14 | 397677 |
| iYNL124W | YNL123W                       | 14 | 394369 |
| iYNL125C | YNL125C (ESBP6) YNL124W       | 14 | 392166 |
| iYNL126W |                               | 14 | 389766 |
| iYNL127W | YNL126W (SPC98)               | 14 | 386847 |
| iYNL128W | YNL127W                       | 14 | 383662 |
| iYNL129W | YNL128W (TEP1)                | 14 | 382201 |
| iYNL130C | YNL130C (CPT1) YNL129W        | 14 | 381158 |

|                   |                                    |    |        |
|-------------------|------------------------------------|----|--------|
| <b>iYNL131W</b>   |                                    | 14 | 379224 |
| <b>iYNL132W</b>   | YNL131W (TOM22)                    | 14 | 378490 |
| <b>iYNL133C</b>   | YNL133C (FYV6) tf(gaa)n YNL132W (K | 14 | 374691 |
| <b>iYNL134C</b>   | YNL134C                            | 14 | 373580 |
| <b>iYNL135C</b>   | YNL135C (FPR1)                     | 14 | 372225 |
| <b>iYNL136W</b>   |                                    | 14 | 371644 |
| <b>iYNL137C</b>   | YNL137C (NAM9) YNL136W             | 14 | 370054 |
| <b>iYNL138W</b>   |                                    | 14 | 368320 |
| <b>iYNL139C</b>   | YNL139C (RLR1) YNL138W (SRV2)      | 14 | 365716 |
| <b>iYNL141W</b>   |                                    | 14 | 360638 |
| <b>iYNL142W</b>   | YNL141W (AAH1)                     | 14 | 358951 |
| <b>iYNL143C</b>   | YNL143C YNL142W (MEP2)             | 14 | 357185 |
| <b>iYNL144C-0</b> | YNL144C                            | 14 | 355041 |
| <b>iYNL144C-1</b> | YNL144C                            | 14 | 355917 |
| <b>iYNL145W</b>   |                                    | 14 | 352529 |
| <b>iYNL146W</b>   | YNL145W (MFA2)                     | 14 | 352016 |
| <b>iYNL147W</b>   | YNL146W                            | 14 | 351382 |
| <b>iYNL148C</b>   | YNL148C (ALF1) YNL147W (LSM7)      | 14 | 350670 |
| <b>iYNL149C</b>   | YNL149C                            | 14 | 349755 |
| <b>iYNL151C</b>   | YNL151C (RPC31) YNL150W            | 14 | 348520 |
| <b>iYNL152W</b>   |                                    | 14 | 347541 |
| <b>iYNL153C</b>   | YNL153C (GIM3) YNL152W             | 14 | 346057 |
| <b>iYNL154C</b>   | YNL154C (YCK2)                     | 14 | 345275 |
| <b>iYNL155W</b>   |                                    | 14 | 343339 |
| <b>iYNL156C</b>   | YNL156C YNL155W                    | 14 | 341967 |
| <b>iYNL157W</b>   |                                    | 14 | 340857 |
| <b>iYNL158W</b>   | YNL157W                            | 14 | 340207 |
| <b>iYNL159C</b>   | YNL159C (ASI2) YNL158W             | 14 | 339346 |
| <b>iYNL160W</b>   |                                    | 14 | 337608 |
| <b>iYNL161W-0</b> | YNL160W (YGP1)                     | 14 | 334866 |
| <b>iYNL161W-1</b> | YNL160W (YGP1)                     | 14 | 335705 |
| <b>iYNL162W</b>   | YNL161W (CBK1)                     | 14 | 332153 |
| <b>iYNL164C</b>   | YNL164C                            | 14 | 326319 |
| <b>iYNL165W</b>   |                                    | 14 | 325051 |
| <b>iYNL166C</b>   | YNL166C (BNI5) YNL165W             | 14 | 323564 |
| <b>iYNL167C</b>   | YNL167C (SKO1)                     | 14 | 321358 |
| <b>iYNL168C</b>   | YNL168C                            | 14 | 318808 |
| <b>iYNL169C</b>   | YNL169C (PSD1)                     | 14 | 317670 |
| <b>iYNL173C</b>   | YNL173C (MDG1) YNL172W (APC1)      | 14 | 310056 |
| <b>iYNL174W</b>   |                                    | 14 | 308645 |
| <b>iYNL176C</b>   | YNL176C                            | 14 | 306979 |
| <b>iYNL177C</b>   | YNL177C                            | 14 | 304614 |
| <b>iYNL178W</b>   |                                    | 14 | 303401 |
| <b>iYNL179C-1</b> | YNL179C YNL178W (RPS3)             | 14 | 301890 |
| <b>iYNL181W</b>   |                                    | 14 | 299555 |
| <b>iYNL182C</b>   | YNL182C YNL181W                    | 14 | 297624 |
| <b>iYNL183C</b>   | YNL183C (NPR1)                     | 14 | 295506 |
| <b>iYNL184C</b>   | YNL184C                            | 14 | 292880 |
| <b>iYNL186W</b>   |                                    | 14 | 291873 |
| <b>iYNL187W</b>   | YNL186W (UBP10)                    | 14 | 289064 |
| <b>iYNL188W</b>   | YNL187W                            | 14 | 287605 |



|          |                                |    |        |
|----------|--------------------------------|----|--------|
| iYNL189W | YNL188W (KAR1)                 | 14 | 285884 |
| iYNL191W | YNL190W                        | 14 | 281501 |
| iYNL192W | YNL191W                        | 14 | 279893 |
| iYNL193W | YNL192W (CHS1)                 | 14 | 276040 |
| iYNL194C | YNL194C YNL193W                | 14 | 273611 |
| iYNL195C | YNL195C                        | 14 | 272304 |
| iYNL196C | YNL196C (SLZ1)                 | 14 | 271168 |
| iYNL197C | YNL197C (WHI3)                 | 14 | 269590 |
| iYNL198C | YNL198C                        | 14 | 266813 |
| iYNL200C | YNL200C                        | 14 | 264450 |
| iYNL201C | YNL201C                        | 14 | 263200 |
| iYNL202W |                                | 14 | 260453 |
| iYNL204C | YNL204C (SPS18)                | 14 | 259274 |
| iYNL207W |                                | 14 | 256627 |
| iYNL208W | YNL207W                        | 14 | 255031 |
| iYNL209W | YNL208W                        | 14 | 253899 |
| iYNL210W | YNL209W (SSB2)                 | 14 | 251742 |
| iYNL211C | YNL211C YNL210W (MER1)         | 14 | 250314 |
| iYNL212W |                                | 14 | 249808 |
| iYNL213C | YNL213C YNL212W (VID27)        | 14 | 247103 |
| iYNL214W |                                | 14 | 246215 |
| iYNL215W | YNL214W (PEX17)                | 14 | 245429 |
| iYNL216W | YNL215W (IES2)                 | 14 | 244171 |
| iYNL217W | YNL216W (RAP1)                 | 14 | 241310 |
| iYNL218W | YNL217W                        | 14 | 240000 |
| iYNL219C | YNL219C (ALG9) YNL218W (MGS1)  | 14 | 237662 |
| iYNL220W |                                | 14 | 235713 |
| iYNL221C | YNL221C (POP1) YNL220W (ADE12) | 14 | 233694 |
| iYNL222W |                                | 14 | 229713 |
| iYNL223W | YNL222W (SSU72)                | 14 | 228853 |
| iYNL224C | YNL224C YNL223W (AUT2)         | 14 | 227098 |
| iYNL225C | YNL225C (CNM67)                | 14 | 224468 |
| iYNL226W |                                | 14 | 222648 |
| iYNL229C | YNL229C (URE2) YNL228W         | 14 | 220200 |
| iYNL230C | YNL230C (ELA1)                 | 14 | 218661 |
| iYNL231C | YNL231C (PDR16)                | 14 | 217041 |
| iYNL232W |                                | 14 | 215800 |
| iYNL233W | YNL232W (CSL4)                 | 14 | 214599 |
| iYNL234W | YNL233W (BNI4)                 | 14 | 211512 |
| iYNL235C | YNL235C YNL234W                | 14 | 209978 |
| iYNL237W | YNL236W (SIN4)                 | 14 | 206566 |
| iYNL238W | YNL237W (YTP1)                 | 14 | 204871 |
| iYNL239W | YNL238W (KEX2)                 | 14 | 201932 |
| iYNL240C | YNL240C (NAR1) YNL239W (LAP3)  | 14 | 199976 |
| iYNL241C | YNL241C (ZWF1)                 | 14 | 197942 |
| iYNL242W |                                | 14 | 196101 |
| iYNL243W | YNL242W (APG2)                 | 14 | 190956 |
| iYNL244C | YNL244C (SUI1) YNL243W (SLA2)  | 14 | 187495 |
| iYNL245C | YNL245C                        | 14 | 186884 |
| iYNL247W | YNL246W                        | 14 | 185177 |
| iYNL248C | YNL248C (RPA49) YNL247W        | 14 | 182607 |

|                   |                                 |    |        |
|-------------------|---------------------------------|----|--------|
| <b>iYNL249C</b>   | YNL249C (MPA43)                 | 14 | 181021 |
| <b>iYNL251C</b>   | YNL251C (NRD1) YNL250W (RAD50)  | 14 | 174314 |
| <b>iYNL253W</b>   |                                 | 14 | 171285 |
| <b>iYNL254C</b>   | YNL254C YNL253W                 | 14 | 169247 |
| <b>iYNL255C</b>   | YNL255C (GIS2)                  | 14 | 167789 |
| <b>iYNL256W</b>   |                                 | 14 | 167096 |
| <b>iYNL257C</b>   | YNL257C (SIP3) YNL256W (FOL1)   | 14 | 164319 |
| <b>iYNL258C</b>   | YNL258C (DSL1)                  | 14 | 160372 |
| <b>iYNL259C</b>   | YNL259C (ATX1)                  | 14 | 157864 |
| <b>iYNL260C</b>   | YNL260C                         | 14 | 157454 |
| <b>iYNL261W</b>   |                                 | 14 | 156538 |
| <b>iYNL262W</b>   | YNL261W (ORC5)                  | 14 | 154879 |
| <b>iYNL263C</b>   | YNL263C (YIF1) YNL262W (POL2)   | 14 | 147839 |
| <b>iYNL264C</b>   | YNL264C (PDR17)                 | 14 | 146614 |
| <b>iYNL265C</b>   | YNL265C (IST1)                  | 14 | 145280 |
| <b>iYNL267W</b>   | YNL266W                         | 14 | 144077 |
| <b>iYNL268W</b>   | YNL267W (PIK1)                  | 14 | 140384 |
| <b>iYNL269W</b>   | YNL268W (LYP1)                  | 14 | 138093 |
| <b>iYNL271C</b>   | YNL271C (BNI1)                  | 14 | 135382 |
| <b>iYNL272C</b>   | YNL272C (SEC2)                  | 14 | 129082 |
| <b>iYNL273W</b>   |                                 | 14 | 126597 |
| <b>iYNL274C</b>   | YNL274C YNL273W (TOF1)          | 14 | 122168 |
| <b>iYNL275W</b>   |                                 | 14 | 120996 |
| <b>iYNL278W</b>   | YNL277W (MET2)                  | 14 | 116451 |
| <b>iYNL279W</b>   | YNL278W (CAF120)                | 14 | 112900 |
| <b>iYNL280C</b>   | YNL280C (ERG24) YNL279W (PRM1)  | 14 | 110409 |
| <b>iYNL281W</b>   |                                 | 14 | 108926 |
| <b>iYNL282W</b>   | YNL281W (HCH1)                  | 14 | 108272 |
| <b>iYNL283C</b>   | YNL283C (WSC2) YNL282W (POP3)   | 14 | 106693 |
| <b>iYNL284C</b>   | YNL284C (MRPL10)                | 14 | 104100 |
| <b>iYNL286W</b>   | YNL285W                         | 14 | 96078  |
| <b>iYNL287W</b>   | YNL286W (CUS2)                  | 14 | 94799  |
| <b>iYNL288W</b>   | YNL287W (SEC21)                 | 14 | 91422  |
| <b>iYNL289W-0</b> | YNL288W (CAF40)                 | 14 | 88734  |
| <b>iYNL289W-1</b> | YNL288W (CAF40)                 | 14 | 89517  |
| <b>iYNL290W</b>   | YNL289W (PCL1)                  | 14 | 87238  |
| <b>iYNL291C</b>   | YNL291C (MID1) YNL290W (RFC3)   | 14 | 85813  |
| <b>iYNL292W</b>   |                                 | 14 | 84015  |
| <b>iYNL293W</b>   | YNL292W (PUS4)                  | 14 | 82539  |
| <b>iYNL294C</b>   | YNL294C (RIM21) YNL293W (MSB3)  | 14 | 80258  |
| <b>iYNL295W</b>   |                                 | 14 | 78518  |
| <b>iYNL296W</b>   | YNL295W                         | 14 | 76585  |
| <b>iYNL298W</b>   |                                 | 14 | 71441  |
| <b>iYNL299W</b>   | YNL298W (CLA4)                  | 14 | 68393  |
| <b>iYNL300W</b>   | YNL299W (TRF5)                  | 14 | 66051  |
| <b>iYNL302C</b>   | YNL302C (RPS19B)                | 14 | 62942  |
| <b>iYNL303W</b>   |                                 | 14 | 61856  |
| <b>iYNL305C</b>   | YNL305C YNL304W (YPT11)         | 14 | 59791  |
| <b>iYNL306W</b>   |                                 | 14 | 58808  |
| <b>iYNL307C</b>   | YNL307C (MCK1) YNL306W (MRPS18) | 14 | 57573  |
| <b>iYNL308C</b>   | YNL308C (KRI1)                  | 14 | 55896  |

|                      |                                 |    |        |
|----------------------|---------------------------------|----|--------|
| <b>iYNL309W</b>      |                                 | 14 | 53923  |
| <b>iYNL311C</b>      | YNL311C                         | 14 | 51687  |
| <b>iYNL312W</b>      |                                 | 14 | 49215  |
| <b>iYNL313C</b>      | YNL313C YNL312W (RFA2)          | 14 | 48021  |
| <b>iYNL314W</b>      |                                 | 14 | 45213  |
| <b>iYNL315C</b>      | YNL315C (ATP11) YNL314W (DAL82) | 14 | 44279  |
| <b>iYNL316C</b>      | YNL316C (PHA2)                  | 14 | 43176  |
| <b>iYNL318C</b>      | YNL318C (HXT14) YNL317W (PFS2)  | 14 | 40328  |
| <b>iYNL320W</b>      | YNL319W                         | 14 | 38553  |
| <b>iYNL321W</b>      | YNL320W                         | 14 | 37421  |
| <b>iYNL322C</b>      | YNL322C (KRE1) YNL321W          | 14 | 34234  |
| <b>iYNL323W</b>      |                                 | 14 | 33187  |
| <b>iYNL324W</b>      | YNL323W (LEM3)                  | 14 | 31444  |
| <b>iYNL326C</b>      | YNL326C                         | 14 | 28346  |
| <b>iYNL327W</b>      |                                 | 14 | 27172  |
| <b>iYNL328C</b>      | YNL328C (MDJ2) YNL327W (EGT2)   | 14 | 23274  |
| <b>iYNL329C</b>      | YNL329C (PEX6)                  | 14 | 22633  |
| <b>iYNL330C</b>      | YNL330C (RPD3)                  | 14 | 19302  |
| <b>iYNL331C</b>      | YNL331C (AAD14)                 | 14 | 17248  |
| <b>iYNL332W</b>      |                                 | 14 | 15854  |
| <b>iYNL333W</b>      | YNL332W (THI12)                 | 14 | 14163  |
| <b>iYNL334C</b>      | YNL334C (SNO2) YNL333W (SNZ2)   | 14 | 12876  |
| <b>iYNL335W</b>      |                                 | 14 | 12129  |
| <b>iYNL336W-1</b>    | YNL335W                         | 14 | 10463  |
| <b>iYNL337W</b>      | YNL336W (COS1)                  | 14 | 7419   |
| <b>iYNL338W</b>      | YNL337W                         | 14 | 6719   |
| <b>iYNL339C</b>      | YNL339C (YRF1-6) YNL338W        | 14 | 6098   |
| <b>iYNLcdelta1-1</b> |                                 | 14 | 98251  |
| <b>iYNLcdelta1-3</b> |                                 | 14 | 100875 |
| <b>iYNLcdelta2</b>   | YNL284C-A                       | 14 | 102521 |
| <b>iYNLcdelta6</b>   |                                 | 14 | 567990 |
| <b>iYNLWdelta4</b>   | YNL054W (VAC7)                  | 14 | 525060 |
| <b>iYNR001C</b>      | YNR001C (CIT1) suf10 trna       | 14 | 631060 |
| <b>iYNR002C</b>      | YNR002C (FUN34)                 | 14 | 633855 |
| <b>iYNR003C</b>      | YNR003C (RPC34) YNR004W         | 14 | 635296 |
| <b>iYNR004W</b>      |                                 | 14 | 636382 |
| <b>iYNR006W</b>      |                                 | 14 | 638853 |
| <b>iYNR007C</b>      | YNR007C (AUT1) YNR008W (LRO1)   | 14 | 640113 |
| <b>iYNR008W</b>      | YNR009W                         | 14 | 642380 |
| <b>iYNR009W</b>      | YNR010W (CSE2)                  | 14 | 643438 |
| <b>iYNR010W</b>      |                                 | 14 | 644192 |
| <b>iYNR011C</b>      | YNR011C (PRP2) YNR012W (URK1)   | 14 | 646949 |
| <b>iYNR012W</b>      |                                 | 14 | 648936 |
| <b>iYNR013C</b>      | YNR013C (PHO91) YNR014W         | 14 | 651711 |
| <b>iYNR014W</b>      | YNR015W (SMM1)                  | 14 | 653102 |
| <b>iYNR015W</b>      |                                 | 14 | 654540 |
| <b>iYNR016C-0</b>    | YNR016C (ACC1) YNR017W (MAS6)   | 14 | 661373 |
| <b>iYNR016C-1</b>    | YNR016C (ACC1) YNR017W (MAS6)   | 14 | 662142 |
| <b>iYNR017W</b>      | YNR018W                         | 14 | 663580 |
| <b>iYNR019W</b>      |                                 | 14 | 667266 |
| <b>iYNR020C</b>      | YNR020C YNR021W                 | 14 | 668221 |

|            |                                 |    |        |
|------------|---------------------------------|----|--------|
| iYNR021W   |                                 | 14 | 669590 |
| iYNR022C   | YNR022C YNR023W (SNF12)         | 14 | 670192 |
| iYNR023W   | YNR024W                         | 14 | 672117 |
| iYNR025C   | YNR025C                         | 14 | 673060 |
| iYNR026C   | YNR026C (SEC12) YNR027W (BUD17) | 14 | 674688 |
| iYNR027W   | YNR028W (CPR8)                  | 14 | 675875 |
| iYNR028W   |                                 | 14 | 677102 |
| iYNR029C   | YNR029C YNR030W (ECM39)         | 14 | 678487 |
| iYNR030W   |                                 | 14 | 680453 |
| iYNR031C   | YNR031C (SSK2) YNR032W (PPG1)   | 14 | 685432 |
| iYNR032C-A | YNR032C-A (HUB1) YNR033W (ABZ1) | 14 | 687463 |
| iYNR032W   |                                 | 14 | 687115 |
| iYNR033W   | YNR034W (SOL1)                  | 14 | 689997 |
| iYNR034W-0 |                                 | 14 | 691285 |
| iYNR034W-1 |                                 | 14 | 692151 |
| iYNR036C   | YNR036C mitochond rib prot      | 14 | 694821 |
| iYNR037C   | YNR037C (RSM19) YNR038W (DBP6)  | 14 | 695326 |
| iYNR038W   |                                 | 14 | 697483 |
| iYNR039C   | YNR039C (ZRG17) YNR040W         | 14 | 699430 |
| iYNR040W   |                                 | 14 | 700459 |
| iYNR042W   | YNR043W (MVD1)                  | 14 | 701665 |
| iYNR043W   | YNR044W (AGA1)                  | 14 | 703084 |
| iYNR044W   | YNR045W (PET494)                | 14 | 705875 |
| iYNR045W   | YNR046W                         | 14 | 707607 |
| iYNR046W   | YNR047W                         | 14 | 708194 |
| iYNR047W   | YNR048W                         | 14 | 711203 |
| iYNR048W   |                                 | 14 | 712810 |
| iYNR049C   | YNR049C (MSO1)                  | 14 | 713654 |
| iYNR050C   | YNR050C (LYS9) snr49            | 14 | 715387 |
| iYNR051C   | YNR051C (BRE5)                  | 14 | 718326 |
| iYNR052C   | YNR052C (POP2)                  | 14 | 720646 |
| iYNR053C   | YNR053C (NOG2)                  | 14 | 723110 |
| iYNR054C-0 | YNR054C                         | 14 | 724304 |
| iYNR054C-1 | YNR054C                         | 14 | 725218 |
| iYNR055C   | YNR055C (HOL1)                  | 14 | 730184 |
| iYNR057C   | YNR057C (BIO4) YNR058W (BIO3)   | 14 | 734066 |
| iYNR058W   | YNR059W (MNT4)                  | 14 | 735730 |
| iYNR059W   | YNR060W (FRE4)                  | 14 | 738542 |
| iYNR060W   |                                 | 14 | 742107 |
| iYNR061C   | YNR061C                         | 14 | 743537 |
| iYNR062C-0 | YNR062C YNR063W                 | 14 | 745340 |
| iYNR062C-1 | YNR062C YNR063W                 | 14 | 746140 |
| iYNR063W   |                                 | 14 | 748763 |
| iYNR064C   | YNR064C                         | 14 | 750005 |
| iYNR066C   | YNR066C                         | 14 | 755032 |
| iYNR067C   | YNR067C (DSE4)                  | 14 | 759096 |
| iYNR068C   | YNR068C                         | 14 | 760882 |
| iYNR069C-0 | YNR069C YNR070W                 | 14 | 762589 |
| iYNR070W   |                                 | 14 | 769373 |
| iYNR071C   | YNR071C YNR072W (HXT17)         | 14 | 771465 |
| iYNR072W   |                                 | 14 | 774348 |

|             |                                 |    |        |
|-------------|---------------------------------|----|--------|
| iYNR073C    |                                 | 14 | 776297 |
| iYNR074C    | YNR074C YNR075W (COS10)         | 14 | 778735 |
| iYNR075W    | YNR076W (PAU6)                  | 14 | 781037 |
| iYNR076W    |                                 | 14 | 782277 |
| iYNRCdelta8 | YNR054C                         | 14 | 726943 |
| iYNRCdelta9 | YNR054C                         | 14 | 727659 |
| iYNRCtau3   | YNR001C (CIT1) tn(guu)n2        | 14 | 632488 |
| iYOL001W    | YOR001W (RRP6)                  | 15 | 326130 |
| iYOL002C    | YOL002C YOL001W (PHO80)         | 15 | 324394 |
| iYOL003C    | YOL003C                         | 15 | 322994 |
| iYOL004W    |                                 | 15 | 321548 |
| iYOL005C    | YOL005C (RPB11) YOL004W (SIN3)  | 15 | 316175 |
| iYOL006C    | YOL006C (TOP1)                  | 15 | 315387 |
| iYOL007C    | YOL007C                         | 15 | 312367 |
| iYOL008W    |                                 | 15 | 310935 |
| iYOL009C    | YOL009C (MDM12) YOL008W         | 15 | 310139 |
| iYOL010W    |                                 | 15 | 309041 |
| iYOL011W    | YOL010W (RCL1)                  | 15 | 307409 |
| iYOL012C    | YOL012C (HTZ1) YOL011W (PLB3)   | 15 | 303983 |
| iYOL013W-A  |                                 | 15 | 300980 |
| iYOL014W    | YOL013W-A                       | 15 | 300067 |
| iYOL015W    | YOL014W                         | 15 | 298838 |
| iYOL016C    | YOL016C (CMK2) YOL015W          | 15 | 296120 |
| iYOL017W    |                                 | 15 | 294673 |
| iYOL018C    | YOL018C (TLG2) YOL017W (ESC8)   | 15 | 292074 |
| iYOL019W    |                                 | 15 | 290553 |
| iYOL020W    | YOL019W (TOS7)                  | 15 | 287950 |
| iYOL021C    | YOL021C (DIS3) YOL020W (TAT2)   | 15 | 285426 |
| iYOL022C    | YOL022C                         | 15 | 281498 |
| iYOL023W    |                                 | 15 | 280086 |
| iYOL024W    | YOL023W (IFM1)                  | 15 | 277604 |
| iYOL025W    | YOL024W                         | 15 | 276939 |
| iYOL026C    | YOL026C ts(gcu)o YOL025W (LAG2) | 15 | 274353 |
| iYOL027C    | YOL027C                         | 15 | 273724 |
| iYOL028C    | YOL028C (YAP7)                  | 15 | 271370 |
| iYOL029C    | YOL029C                         | 15 | 270420 |
| iYOL030W    |                                 | 15 | 269641 |
| iYOL031C    | YOL031C YOL030W                 | 15 | 267529 |
| iYOL032W    |                                 | 15 | 266169 |
| iYOL033W    | YOL032W                         | 15 | 265085 |
| iYOL034W    | YOL033W (MSE1)                  | 15 | 263204 |
| iYOL035C    | YOL035C YOL034W                 | 15 | 259103 |
| iYOL038W    |                                 | 15 | 256099 |
| iYOL040C    | YOL040C (RPS15) YOL039W (RPP2A) | 15 | 253575 |
| iYOL041C    | YOL041C (NOP12)                 | 15 | 252644 |
| iYOL042W    |                                 | 15 | 250914 |
| iYOL043C    | YOL043C (NTG2) YOL042W (NGL1)   | 15 | 249532 |
| iYOL044W    |                                 | 15 | 248299 |
| iYOL045W    | YOL044W (PEX15)                 | 15 | 246800 |
| iYOL047C    | YOL047C                         | 15 | 242503 |
| iYOL049W    |                                 | 15 | 240092 |

|            |                                |    |        |
|------------|--------------------------------|----|--------|
| iYOL050C   | YOL050C YOL049W (GSH2)         | 15 | 238200 |
| iYOL052C   | YOL052C (SPE2) YOL051W (GAL11) | 15 | 233634 |
| iYOL053C-A | YOL052C-A (DDR2)               | 15 | 231753 |
| iYOL053W   |                                | 15 | 231270 |
| iYOL054W   | YOL053W                        | 15 | 229832 |
| iYOL055C   | YOL055C (THI20) YOL054W        | 15 | 226073 |
| iYOL056W   |                                | 15 | 224177 |
| iYOL057W   | YOL056W (GPM3)                 | 15 | 222900 |
| iYOL058W   | YOL057W                        | 15 | 220471 |
| iYOL059W   | YOL058W (ARG1)                 | 15 | 218447 |
| iYOL060C   | YOL060C (AMI3) YOL059W (GPD2)  | 15 | 216136 |
| iYOL061W   |                                | 15 | 213733 |
| iYOL062C   | YOL062C (APM4) YOL061W (PRS5)  | 15 | 211994 |
| iYOL063C   | YOL063C                        | 15 | 210264 |
| iYOL064C   | YOL064C (MET22)                | 15 | 207175 |
| iYOL065C   | YOL065C (INP54)                | 15 | 205884 |
| iYOL066C   | YOL066C (RIB2)                 | 15 | 204470 |
| iYOL067C   | YOL067C (RTG1)                 | 15 | 202517 |
| iYOL068C   | YOL068C (HST1)                 | 15 | 201878 |
| iYOL069W   |                                | 15 | 200296 |
| iYOL070C   | YOL070C YOL069W (NUF2)         | 15 | 198724 |
| iYOL071W   |                                | 15 | 196994 |
| iYOL072W   | YOL071W                        | 15 | 196336 |
| iYOL073C   | YOL073C YOL072W (THP1)         | 15 | 194799 |
| iYOL075C   | YOL075C                        | 15 | 193541 |
| iYOL076W   |                                | 15 | 189413 |
| iYOL077C   | YOL077C (BRX1) YOL076W (MDM20) | 15 | 186722 |
| iYOL078W   | YOL077C (BRX1)                 | 15 | 185211 |
| iYOL079W   | YOL078W                        | 15 | 181454 |
| iYOL081W   |                                | 15 | 180308 |
| iYOL082W   | YOL081W (IRA2)                 | 15 | 169973 |
| iYOL083W-0 | YOL082W (CVT19)                | 15 | 166951 |
| iYOL083W-1 | YOL082W (CVT19)                | 15 | 167838 |
| iYOL084W   | YOL083W                        | 15 | 165330 |
| iYOL085C   | YOL085C YOL084W (PHM7)         | 15 | 162013 |
| iYOL086C   | YOL086C (ADH1)                 | 15 | 160593 |
| iYOL087C   | YOL087C                        | 15 | 158636 |
| iYOL089C   | YOL089C (HAL9)                 | 15 | 153489 |
| iYOL090W   |                                | 15 | 150275 |
| iYOL091W   | YOL090W (MSH2)                 | 15 | 147162 |
| iYOL092W   | YOL091W (SPO21)                | 15 | 145129 |
| iYOL093W   | YOL092W                        | 15 | 143695 |
| iYOL094C   | YOL094C (RFC4) YOL093W         | 15 | 142554 |
| iYOL095C   | YOL095C (HMI1)                 | 15 | 141346 |
| iYOL096C   | YOL096C (COQ3)                 | 15 | 139056 |
| iYOL097C   | YOL097C (WRS1)                 | 15 | 137824 |
| iYOL098C   | YOL098C                        | 15 | 135837 |
| iYOL099C   | YOL099C                        | 15 | 132507 |
| iYOL101C   | YOL101C YOL100W (PKH2)         | 15 | 127919 |
| iYOL102C   | YOL102C (TPT1)                 | 15 | 126688 |
| iYOL103W   |                                | 15 | 125829 |

|                   |                                |    |        |
|-------------------|--------------------------------|----|--------|
| <b>iYOL104C</b>   | YOL104C (NDJ1) YOL103W (ITR2)  | 15 | 117453 |
| <b>iYOL105C</b>   | YOL105C (WSC3)                 | 15 | 115807 |
| <b>iYOL107W</b>   | YOL106W                        | 15 | 113129 |
| <b>iYOL108C</b>   | YOL108C (INO4) YOL107W         | 15 | 111885 |
| <b>iYOL110W</b>   | YOL109W                        | 15 | 109888 |
| <b>iYOL111C</b>   | YOL111C YOL110W (SHR5)         | 15 | 108895 |
| <b>iYOL112W</b>   |                                | 15 | 108187 |
| <b>iYOL113W</b>   | YOL112W (MSB4)                 | 15 | 106292 |
| <b>iYOL114C</b>   | YOL114C YOL113W (SKM1)         | 15 | 103924 |
| <b>iYOL115W</b>   |                                | 15 | 103228 |
| <b>iYOL116W</b>   | YOL115W (TRF4)                 | 15 | 100956 |
| <b>iYOL117W</b>   | YOL116W (MSN1)                 | 15 | 99487  |
| <b>iYOL118C</b>   | YOL118C YOL117W                | 15 | 96915  |
| <b>iYOL119C</b>   | YOL119C (MCH4)                 | 15 | 96360  |
| <b>iYOL120C</b>   | YOL120C (RPL18A)               | 15 | 94401  |
| <b>iYOL121C</b>   | YOL121C (RPS19A)               | 15 | 92849  |
| <b>iYOL122C</b>   | YOL122C (SMF1)                 | 15 | 91418  |
| <b>iYOL123W</b>   |                                | 15 | 89447  |
| <b>iYOL124C</b>   | YOL124C YOL123W (HRP1)         | 15 | 86756  |
| <b>iYOL125W</b>   |                                | 15 | 85263  |
| <b>iYOL126C</b>   | YOL126C (MDH2) YOL125W         | 15 | 83057  |
| <b>iYOL127W</b>   |                                | 15 | 81189  |
| <b>iYOL128C</b>   | YOL128C YOL127W (RPL25)        | 15 | 79478  |
| <b>iYOL129W</b>   |                                | 15 | 78113  |
| <b>iYOL130W</b>   | YOL129W                        | 15 | 76978  |
| <b>iYOL131W</b>   | YOL130W (ALR1)                 | 15 | 73356  |
| <b>iYOL132W</b>   | YOL131W                        | 15 | 72714  |
| <b>iYOL133W</b>   | YOL132W                        | 15 | 70689  |
| <b>iYOL135C</b>   | YOL135C (MED7)                 | 15 | 70043  |
| <b>iYOL136C</b>   | YOL136C (PFK27)                | 15 | 68753  |
| <b>iYOL137W</b>   |                                | 15 | 67113  |
| <b>iYOL138C</b>   | YOL138C YOL137W                | 15 | 65349  |
| <b>iYOL139C</b>   | YOL139C (CDC33)                | 15 | 61023  |
| <b>iYOL140W</b>   |                                | 15 | 60029  |
| <b>iYOL141W</b>   | YOL140W (ARG8)                 | 15 | 58537  |
| <b>iYOL142W</b>   | YOL141W (PPM2)                 | 15 | 56278  |
| <b>iYOL143C</b>   | YOL143C (RIB4) YOL142W (RRP40) | 15 | 55102  |
| <b>iYOL145C</b>   | YOL145C (CTR9) YOL144W (NOP8)  | 15 | 52786  |
| <b>iYOL146W</b>   |                                | 15 | 49446  |
| <b>iYOL147C</b>   | YOL147C (PEX11) YOL146W        | 15 | 48641  |
| <b>iYOL148C</b>   | YOL148C (SPT20)                | 15 | 47572  |
| <b>iYOL149W</b>   |                                | 15 | 45631  |
| <b>iYOL150C</b>   | YOL150C YOL149W (DCP1)         | 15 | 44782  |
| <b>iYOL152W</b>   | YOL151W (GRE2)                 | 15 | 42636  |
| <b>iYOL153C-0</b> |                                | 15 | 38566  |
| <b>iYOL153C-1</b> | YOL153C YOL152W (FRE7)         | 15 | 39656  |
| <b>iYOL154W</b>   |                                | 15 | 35406  |
| <b>iYOL155C-0</b> | YOL155C YOL154W                | 15 | 31605  |
| <b>iYOL155C-1</b> | YOL155C YOL154W                | 15 | 33131  |
| <b>iYOL156W-0</b> |                                | 15 | 26975  |
| <b>iYOL156W-1</b> |                                | 15 | 27838  |



|                       |                                 |    |        |
|-----------------------|---------------------------------|----|--------|
| <b>iYOL157C</b>       | YOL157C YOL156W (HXT11)         | 15 | 24293  |
| <b>iYOL158C</b>       | YOL158C (ENB1)                  | 15 | 21310  |
| <b>iYOL159C</b>       | YOL159C                         | 15 | 17795  |
| <b>iYOL160W-0</b>     |                                 | 15 | 14653  |
| <b>iYOL160W-1</b>     |                                 | 15 | 15966  |
| <b>iYOL161C-0</b>     | YOL161C YOL160W                 | 15 | 11910  |
| <b>iYOL161C-1</b>     |                                 | 15 | 13111  |
| <b>iYOL162W</b>       |                                 | 15 | 10765  |
| <b>iYOL164W</b>       | YOL163W                         | 15 | 8115   |
| <b>iYOL165C</b>       | YOL165C (AAD15) YOL164W         | 15 | 2078   |
| <b>iYOL166C</b>       | YOL166C                         | 15 | 1338   |
| <b>iYOLCdelta1</b>    | YOL165C (AAD15) YOL164W         | 15 | 3223   |
| <b>iYOLCdelta2</b>    | YOL159C                         | 15 | 18560  |
| <b>iYOLCdelta3</b>    |                                 | 15 | 113625 |
| <b>iYOLCdelta7</b>    | YOL055C (THI20) YOL054W         | 15 | 228176 |
| <b>iYOLCdelta9</b>    | YOR007C (SGT2)                  | 15 | 340898 |
| <b>iYOLWdelta10-1</b> | YOR012W                         | 15 | 355749 |
| <b>iYOLWdelta5</b>    | YOL104C (NDJ1) YOL103W (ITR2)   | 15 | 123627 |
| <b>iYOLWdelta6</b>    | YOL055C (THI20) YOL054W         | 15 | 227291 |
| <b>iYOLWsigma2</b>    | YOR012W                         | 15 | 354465 |
| <b>iYOLWtau1-0</b>    | YOL165C (AAD15) YOL164W         | 15 | 3986   |
| <b>iYOR001W</b>       | YOR002W (ALG6)                  | 15 | 329033 |
| <b>iYOR002W</b>       | YOR003W (YSP3)                  | 15 | 331051 |
| <b>iYOR003W</b>       | YOR004W                         | 15 | 332891 |
| <b>iYOR004W</b>       |                                 | 15 | 334356 |
| <b>iYOR005C</b>       | YOR005C (DNL4)                  | 15 | 337343 |
| <b>iYOR006C</b>       | YOR006C                         | 15 | 338621 |
| <b>iYOR007C</b>       | YOR007C (SGT2)                  | 15 | 339978 |
| <b>iYOR008C</b>       | YOR008C (SLG1)                  | 15 | 342414 |
| <b>iYOR008C-A</b>     | YOR008C-A YOR009W (TIR4)        | 15 | 343081 |
| <b>iYOR009W</b>       |                                 | 15 | 345797 |
| <b>iYOR010C-1</b>     | YOR010C (TIR2) YOR011W (AUS1)   | 15 | 348313 |
| <b>iYOR011W</b>       | YOR012W                         | 15 | 353862 |
| <b>iYOR013W</b>       | YOR014W (RTS1)                  | 15 | 357220 |
| <b>iYOR015W</b>       |                                 | 15 | 360351 |
| <b>iYOR016C</b>       | YOR016C (ERP4) YOR017W (PET127) | 15 | 361083 |
| <b>iYOR017W</b>       | YOR018W (ROD1)                  | 15 | 363813 |
| <b>iYOR018W</b>       | YOR019W                         | 15 | 366881 |
| <b>iYOR019W</b>       |                                 | 15 | 370318 |
| <b>iYOR020C-0</b>     | YOR020C (HSP10)                 | 15 | 370843 |
| <b>iYOR020C-1</b>     | YOR020C (HSP10)                 | 15 | 371820 |
| <b>iYOR021C</b>       | YOR021C                         | 15 | 373438 |
| <b>iYOR022C</b>       | YOR022C                         | 15 | 375856 |
| <b>iYOR023C</b>       | YOR023C (AHC1) YOR024W          | 15 | 377711 |
| <b>iYOR025W</b>       | YOR026W (BUB3)                  | 15 | 379561 |
| <b>iYOR026W</b>       | YOR027W (STI1)                  | 15 | 380805 |
| <b>iYOR027W</b>       |                                 | 15 | 382821 |
| <b>iYOR028C</b>       | YOR028C (CIN5) YOR029W          | 15 | 384419 |
| <b>iYOR029W-0</b>     | YOR030W (DFG16)                 | 15 | 384934 |
| <b>iYOR029W-1</b>     | YOR030W (DFG16)                 | 15 | 385879 |
| <b>iYOR030W</b>       | YOR031W (CRS5)                  | 15 | 388683 |

|            |                                |    |        |
|------------|--------------------------------|----|--------|
| iYOR031W   |                                | 15 | 389421 |
| iYOR032C   | YOR032C (HMS1)                 | 15 | 391074 |
| iYOR033C   | YOR033C (EXO1)                 | 15 | 394523 |
| iYOR034C   | YOR034C (AKR2)                 | 15 | 397085 |
| iYOR035C   | YOR035C (SHE4) YOR036W (PEP12) | 15 | 400103 |
| iYOR036W   | YOR037W (CYC2)                 | 15 | 401213 |
| iYOR037W   |                                | 15 | 402654 |
| iYOR038C   | YOR038C (HIR2) YOR039W (CKB2)  | 15 | 405387 |
| iYOR039W   | YOR040W (GLO4)                 | 15 | 406543 |
| iYOR040W   |                                | 15 | 407920 |
| iYOR042W   | YOR043W (WHI2)                 | 15 | 409659 |
| iYOR043W   | YOR044W                        | 15 | 412329 |
| iYOR044W   | YOR045W (TOM6)                 | 15 | 413479 |
| iYOR045W   |                                | 15 | 414036 |
| iYOR046C   | YOR046C (DBP5)                 | 15 | 415907 |
| iYOR047C   | YOR047C (STD1)                 | 15 | 417681 |
| iYOR048C   | YOR048C (RAT1)                 | 15 | 421650 |
| iYOR049C   | YOR049C                        | 15 | 423732 |
| iYOR050C   | YOR050C                        | 15 | 424618 |
| iYOR051C   | YOR051C                        | 15 | 426085 |
| iYOR052C   | YOR052C YOR053W                | 15 | 427225 |
| iYOR055W   |                                | 15 | 429913 |
| iYOR056C   | YOR056C YOR057W (SGT1)         | 15 | 431627 |
| iYOR057W   |                                | 15 | 433374 |
| iYOR058C-1 | YOR058C (ASE1)                 | 15 | 437261 |
| iYOR059C   | YOR059C                        | 15 | 440259 |
| iYOR060C   | YOR060C YOR061W (CKA2)         | 15 | 441164 |
| iYOR064C   | YOR064C (YNG1) YOR065W (CYT1)  | 15 | 446739 |
| iYOR066W   |                                | 15 | 451326 |
| iYOR068C   | YOR068C YOR069W (VPS5)         | 15 | 454213 |
| iYOR069W   |                                | 15 | 455795 |
| iYOR070C-0 | YOR070C (GYP1)                 | 15 | 457820 |
| iYOR070C-1 | YOR070C (GYP1)                 | 15 | 458650 |
| iYOR071C   | YOR071C YOR072W                | 15 | 461276 |
| iYOR072W-1 | YOR073W                        | 15 | 463133 |
| iYOR073W   |                                | 15 | 466543 |
| iYOR074C   | YOR074C (CDC21) YOR075W (UFE1) | 15 | 467589 |
| iYOR075W   |                                | 15 | 469252 |
| iYOR076C   | YOR076C (SKI7) YOR077W (RTS2)  | 15 | 471620 |
| iYOR077W   | YOR078W (BUD21)                | 15 | 472597 |
| iYOR078W   |                                | 15 | 473369 |
| iYOR079C   | YOR079C (ATX2) YOR080W (DIA2)  | 15 | 474416 |
| iYOR081C   | YOR081C                        | 15 | 479188 |
| iYOR084W   | YOR085W (OST3)                 | 15 | 481750 |
| iYOR085W   |                                | 15 | 483085 |
| iYOR086C   | YOR086C tn(guu)o2 YOR087W      | 15 | 486779 |
| iYOR088W   |                                | 15 | 489733 |
| iYOR089C   | YOR089C (VPS21)                | 15 | 490827 |
| iYOR090C   | YOR090C (PTC5) YOR091W         | 15 | 492840 |
| iYOR094W   |                                | 15 | 503344 |
| iYOR095C   | YOR095C (RKI1) YOR096W (RPS7A) | 15 | 504326 |

|            |                                 |    |        |
|------------|---------------------------------|----|--------|
| iYOR096W   |                                 | 15 | 506765 |
| iYOR097C   | YOR097C                         | 15 | 507503 |
| iYOR098C   | YOR098C (NUP1) YOR099W (KTR1)   | 15 | 511176 |
| iYOR100C   | YOR100C (CRC1) YOR101W (RAS1)   | 15 | 514276 |
| iYOR101W   | YOR102W                         | 15 | 516171 |
| iYOR103C   | YOR103C (OST2) YOR104W (PIN2)   | 15 | 516848 |
| iYOR108W   | YOR109W (INP53)                 | 15 | 524839 |
| iYOR110W   | YOR111W                         | 15 | 530246 |
| iYOR112W   | YOR113W (AZF1)                  | 15 | 533791 |
| iYOR114W   |                                 | 15 | 538452 |
| iYOR116C   | YOR116C (RPO31) YOR117W (RPT5)  | 15 | 544143 |
| iYOR117W   | YOR118W                         | 15 | 546331 |
| iYOR118W   |                                 | 15 | 548558 |
| iYOR119C   | YOR119C (RIO1) YOR120W (GCY1)   | 15 | 550244 |
| iYOR121C   | YOR121C                         | 15 | 552101 |
| iYOR123C   | YOR123C (LEO1)                  | 15 | 554568 |
| iYOR125C   | YOR125C (CAT5)                  | 15 | 559846 |
| iYOR126C   | YOR126C (IAH1) YOR127W (RGA1)   | 15 | 560675 |
| iYOR127W   |                                 | 15 | 564191 |
| iYOR128C   | YOR128C (ADE2)                  | 15 | 566189 |
| iYOR129C   | YOR129C                         | 15 | 569556 |
| iYOR130C   | YOR130C (ORT1)                  | 15 | 570805 |
| iYOR131C   | YOR131C YOR132W (VPS17)         | 15 | 572836 |
| iYOR132W   | YOR133W (EFT1)                  | 15 | 574828 |
| iYOR133W   |                                 | 15 | 577624 |
| iYOR134W   |                                 | 15 | 579791 |
| iYOR136W   |                                 | 15 | 581357 |
| iYOR137C   | YOR137C (SIA1)                  | 15 | 583679 |
| iYOR138C   | YOR138C                         | 15 | 586322 |
| iYOR140W   |                                 | 15 | 589279 |
| iYOR141C   | YOR141C (ARP8) YOR142W (LSC1)   | 15 | 592585 |
| iYOR142W   |                                 | 15 | 594044 |
| iYOR143C   | YOR143C (THI80)                 | 15 | 602340 |
| iYOR144C   | YOR144C (EFD1)                  | 15 | 605090 |
| iYOR146W   | YOR147W                         | 15 | 606176 |
| iYOR147W   |                                 | 15 | 608473 |
| iYOR148C   | YOR148C (SPP2)                  | 15 | 609195 |
| iYOR149C   | YOR149C (SMP3) YOR150W (MRPL23) | 15 | 611386 |
| iYOR150W   |                                 | 15 | 612488 |
| iYOR151C   | YOR151C (RPB2)                  | 15 | 616669 |
| iYOR152C-0 | YOR152C YOR153W (PDR5)          | 15 | 618286 |
| iYOR152C-1 | YOR152C YOR153W (PDR5)          | 15 | 619062 |
| iYOR153W   | YOR154W                         | 15 | 624373 |
| iYOR154W   |                                 | 15 | 626490 |
| iYOR155C   | YOR155C                         | 15 | 627978 |
| iYOR156C   | YOR156C (NFI1)                  | 15 | 630538 |
| iYOR157C   | YOR157C (PUP1) YOR158W (PET123) | 15 | 631749 |
| iYOR158W   |                                 | 15 | 633118 |
| iYOR159C   | YOR159C (SME1) YOR160W (MTR10)  | 15 | 633564 |
| iYOR160W   |                                 | 15 | 636755 |
| iYOR161C   | YOR161C                         | 15 | 638556 |

|            |                                 |    |        |
|------------|---------------------------------|----|--------|
| iYOR162C   | YOR162C (YRR1) YOR163W (DDP1)   | 15 | 641990 |
| iYOR163W   |                                 | 15 | 643305 |
| iYOR164C   | YOR164C YOR165W                 | 15 | 644330 |
| iYOR165W   |                                 | 15 | 646894 |
| iYOR166C   | YOR166C                         | 15 | 648500 |
| iYOR167C   | YOR167C (RPS28A) YOR168W (GLN4) | 15 | 649005 |
| iYOR171C   | YOR171C (LCB4) YOR172W          | 15 | 653882 |
| iYOR172W   | YOR173W                         | 15 | 656568 |
| iYOR173W   | YOR174W (MED4)                  | 15 | 658323 |
| iYOR174W   |                                 | 15 | 659599 |
| iYOR175C   | YOR175C YOR176W (HEM15)         | 15 | 661672 |
| iYOR176W   |                                 | 15 | 663580 |
| iYOR178C-0 | YOR178C (GAC1)                  | 15 | 670239 |
| iYOR178C-1 | YOR178C (GAC1)                  | 15 | 671041 |
| iYOR179C-0 | YOR179C                         | 15 | 672409 |
| iYOR180C   | YOR180C (DCI1) YOR181W (LAS17)  | 15 | 675165 |
| iYOR181W   |                                 | 15 | 677838 |
| iYOR182C   | YOR182C (RPS30B) YOR183W (FYV1) | 15 | 678791 |
| iYOR183W   | YOR184W (SER1)                  | 15 | 679259 |
| iYOR184W   |                                 | 15 | 680542 |
| iYOR185C   | YOR185C (GSP2) YOR186W          | 15 | 682104 |
| iYOR186W   | YOR187W (TUF1)                  | 15 | 683543 |
| iYOR187W   | YOR188W (MSB1)                  | 15 | 685341 |
| iYOR188W   | YOR189W (IES4)                  | 15 | 689178 |
| iYOR189W   | YOR190W (SPR1)                  | 15 | 689972 |
| iYOR190W   | YOR191W (RIS1)                  | 15 | 692030 |
| iYOR192C-0 | YOR192C YOR193W                 | 15 | 700565 |
| iYOR192C-1 | YOR192C YOR193W                 | 15 | 701996 |
| iYOR193W   |                                 | 15 | 711574 |
| iYOR194C   | YOR194C (TOA1) YOR195W (SLK19)  | 15 | 712541 |
| iYOR195W   |                                 | 15 | 715329 |
| iYOR196C   | YOR196C (LIP5) YOR197W (MCA1)   | 15 | 716835 |
| iYOR197W   |                                 | 15 | 718382 |
| iYOR198C   | YOR198C (BFR1) YOR199W          | 15 | 720063 |
| iYOR201C   | YOR201C (PET56) YOR202W (HIS3)  | 15 | 721706 |
| iYOR204W   |                                 | 15 | 724723 |
| iYOR205C   | YOR205C YOR206W (NOC2)          | 15 | 727232 |
| iYOR206W   |                                 | 15 | 729642 |
| iYOR207C   | YOR207C (RET1) YOR208W (PTP2)   | 15 | 733455 |
| iYOR208W   |                                 | 15 | 736175 |
| iYOR209C   | YOR209C (NPT1) YOR210W (RPB10)  | 15 | 737724 |
| iYOR210W   |                                 | 15 | 738530 |
| iYOR211C   | YOR211C (MGM1) YOR212W (STE4)   | 15 | 741630 |
| iYOR212W   |                                 | 15 | 744179 |
| iYOR213C   | YOR213C (SAS5)                  | 15 | 745279 |
| iYOR214C   | YOR214C                         | 15 | 746301 |
| iYOR215C   | YOR215C                         | 15 | 747280 |
| iYOR216C   | YOR216C (RUD3) YOR217W (RFC1)   | 15 | 748977 |
| iYOR218C   | YOR218C                         | 15 | 751893 |
| iYOR219C   | YOR219C (STE13) YOR220W         | 15 | 755007 |
| iYOR220W   |                                 | 15 | 756123 |

|          |                                  |    |        |
|----------|----------------------------------|----|--------|
| iYOR221C | YOR221C (MCT1) YOR222W (ODC2)    | 15 | 757829 |
| iYOR222W | YOR223W snr35                    | 15 | 759251 |
| iYOR223W |                                  | 15 | 760658 |
| iYOR224C | YOR224C (RPB8) YOR225W           | 15 | 761263 |
| iYOR226C | YOR226C (ISU2) YOR227W           | 15 | 762082 |
| iYOR227W |                                  | 15 | 766563 |
| iYOR228C | YOR228C YOR229W (WTM2)           | 15 | 767775 |
| iYOR229W | YOR230W (WTM1)                   | 15 | 769810 |
| iYOR230W | YOR231W (MKK1)                   | 15 | 772111 |
| iYOR231W | YOR232W (MGE1)                   | 15 | 774125 |
| iYOR232W | YOR233W (KIN4)                   | 15 | 775257 |
| iYOR233W |                                  | 15 | 778246 |
| iYOR234C | YOR234C (RPL33B) YOR235W         | 15 | 779403 |
| iYOR235W | YOR236W (DFR1) snr17a            | 15 | 780182 |
| iYOR236W | YOR237W (HES1)                   | 15 | 781539 |
| iYOR237W | YOR238W                          | 15 | 783296 |
| iYOR238W | YOR239W (ABP140)                 | 15 | 784586 |
| iYOR240W | YOR241W (MET7)                   | 15 | 786742 |
| iYOR241W |                                  | 15 | 788639 |
| iYOR242C | YOR242C (SSP2)                   | 15 | 789855 |
| iYOR243C | YOR243C YOR244W (ESA1)           | 15 | 792239 |
| iYOR244W |                                  | 15 | 793866 |
| iYOR245C | YOR245C (DGA1)                   | 15 | 795330 |
| iYOR246C | YOR246C YOR247W (SRL1)           | 15 | 796791 |
| iYOR248W |                                  | 15 | 798313 |
| iYOR249C | YOR249C (APC5)                   | 15 | 800729 |
| iYOR250C | YOR250C (CLP1)                   | 15 | 802305 |
| iYOR252W | YOR253W                          | 15 | 804200 |
| iYOR253W |                                  | 15 | 804904 |
| iYOR254C | YOR254C (SEC63) YOR255W          | 15 | 807020 |
| iYOR255W |                                  | 15 | 808104 |
| iYOR256C | YOR256C YOR257W (CDC31)          | 15 | 810679 |
| iYOR257W | YOR258W (HNT3)                   | 15 | 811489 |
| iYOR260W |                                  | 15 | 815716 |
| iYOR261C | YOR261C (RPN8) YOR262W           | 15 | 816927 |
| iYOR262W |                                  | 15 | 818330 |
| iYOR264W | YOR265W (RBL2)                   | 15 | 820153 |
| iYOR265W | YOR266W (PNT1)                   | 15 | 820769 |
| iYOR266W |                                  | 15 | 822289 |
| iYOR267C | YOR267C                          | 15 | 824862 |
| iYOR268C | YOR268C YOR269W (PAC1)           | 15 | 825927 |
| iYOR269W |                                  | 15 | 827864 |
| iYOR270C | YOR270C (VPH1)                   | 15 | 830569 |
| iYOR271C | YOR271C YOR272W (YTM1)           | 15 | 832037 |
| iYOR272W |                                  | 15 | 834190 |
| iYOR273C | YOR273C (TPO4) YOR274W (MOD5)    | 15 | 836426 |
| iYOR274W |                                  | 15 | 838955 |
| iYOR275C | YOR275C (RIM20) YOR276W (CAF20)  | 15 | 841064 |
| iYOR277C | YOR277C snr31 snr5 YOR278W (HEM- | 15 | 841818 |
| iYOR279C | YOR279C (RFM1)                   | 15 | 844625 |
| iYOR280C | YOR280C                          | 15 | 845787 |

|            |                                |    |        |
|------------|--------------------------------|----|--------|
| iYOR282W   | YOR283W                        | 15 | 847315 |
| iYOR283W   | YOR284W                        | 15 | 848140 |
| iYOR284W   | YOR285W                        | 15 | 849204 |
| iYOR286W   |                                | 15 | 850724 |
| iYOR287C   | YOR287C                        | 15 | 851834 |
| iYOR288C   | YOR288C (MPD1) YOR289W         | 15 | 853072 |
| iYOR289W   |                                | 15 | 854107 |
| iYOR290C   | YOR290C (SNF2) YOR291W         | 15 | 860253 |
| iYOR291W   |                                | 15 | 865588 |
| iYOR292C   | YOR292C YOR293W (RPS10A)       | 15 | 866577 |
| iYOR293W   | YOR294W (RRS1)                 | 15 | 867847 |
| iYOR294W   | YOR295W (UAF30)                | 15 | 868946 |
| iYOR295W   | YOR296W                        | 15 | 869889 |
| iYOR297C   | YOR297C (TIM18) YOR298W        | 15 | 875316 |
| iYOR298C-A | YOR298C-A (MBF1) YOR299W (BUD7 | 15 | 877401 |
| iYOR298W   |                                | 15 | 877033 |
| iYOR300W   | YOR301W (RAX1)                 | 15 | 880875 |
| iYOR301W   | YOR302W                        | 15 | 882264 |
| iYOR303W   | YOR304W (ISW2)                 | 15 | 884126 |
| iYOR304C-A | YOR304C-A YOR305W              | 15 | 888742 |
| iYOR304W   |                                | 15 | 887868 |
| iYOR305W   |                                | 15 | 889742 |
| iYOR306C   | YOR306C (MCH5)                 | 15 | 891424 |
| iYOR307C   | YOR307C (SLY41)                | 15 | 894083 |
| iYOR310C   | YOR310C (NOP58)                | 15 | 898351 |
| iYOR311C   | YOR311C (HSD1)                 | 15 | 899919 |
| iYOR312C   | YOR312C (RPL20B)               | 15 | 901172 |
| iYOR313C   | YOR313C (SPS4) YOR314W         | 15 | 902865 |
| iYOR314W   | YOR315W                        | 15 | 903363 |
| iYOR315W   |                                | 15 | 905791 |
| iYOR316C-0 | YOR316C (COT1) YOR317W (FAA1)  | 15 | 907546 |
| iYOR316C-1 | YOR316C (COT1) YOR317W (FAA1)  | 15 | 908440 |
| iYOR317W   |                                | 15 | 911436 |
| iYOR318C   | YOR318C YOR319W (HSH49)        | 15 | 912427 |
| iYOR320C   | YOR320C YOR321W (PMT3)         | 15 | 915085 |
| iYOR321W   |                                | 15 | 918282 |
| iYOR322C   | YOR322C                        | 15 | 921053 |
| iYOR323C   | YOR323C (PRO2)                 | 15 | 922896 |
| iYOR325W   | YOR326W (MYO2)                 | 15 | 925041 |
| iYOR326W   |                                | 15 | 930436 |
| iYOR327C   | YOR327C (SNC2) YOR328W (PDR10) | 15 | 931072 |
| iYOR328W   |                                | 15 | 936488 |
| iYOR329C   | YOR329C (SCD5)                 | 15 | 939340 |
| iYOR330C   | YOR330C (MIP1)                 | 15 | 943454 |
| iYOR332W   |                                | 15 | 944348 |
| iYOR334W   |                                | 15 | 945999 |
| iYOR335C   | YOR335C (ALA1) YOR336W (KRE5)  | 15 | 949100 |
| iYOR336W   | YOR337W (TEA1)                 | 15 | 953861 |
| iYOR337W   | YOR338W                        | 15 | 956614 |
| iYOR338W   |                                | 15 | 957980 |
| iYOR339C   | YOR339C (UBC11)                | 15 | 958823 |

|                     |                                 |    |         |
|---------------------|---------------------------------|----|---------|
| <b>iYOR340C</b>     | YOR340C (RPA43) YOR341W (RPA19) | 15 | 960173  |
| <b>iYOR341W</b>     |                                 | 15 | 965972  |
| <b>iYOR342C</b>     | YOR342C                         | 15 | 967616  |
| <b>iYOR343C</b>     | YOR343C                         | 15 | 968465  |
| <b>iYOR344C-1</b>   | YOR344C (TYE7)                  | 15 | 979155  |
| <b>iYOR346W</b>     |                                 | 15 | 984776  |
| <b>iYOR347C</b>     | YOR347C (PYK2)                  | 15 | 986453  |
| <b>iYOR348C</b>     | YOR348C (PUT4) YOR349W (CIN1)   | 15 | 988773  |
| <b>iYOR350C</b>     | YOR350C (MNE1)                  | 15 | 994846  |
| <b>iYOR351C</b>     | YOR351C (MEK1) YOR352W          | 15 | 996502  |
| <b>iYOR353C</b>     | YOR353C                         | 15 | 1000819 |
| <b>iYOR354C-0</b>   | YOR354C (MSC6) YOR355W (GDS1)   | 15 | 1003216 |
| <b>iYOR354C-1</b>   | YOR354C (MSC6) YOR355W (GDS1)   | 15 | 1004172 |
| <b>iYOR355W</b>     | YOR356W                         | 15 | 1006697 |
| <b>iYOR356W</b>     |                                 | 15 | 1009108 |
| <b>iYOR357C</b>     | YOR357C (GRD19) YOR358W (HAP5)  | 15 | 1009704 |
| <b>iYOR358W</b>     | YOR359W                         | 15 | 1010881 |
| <b>iYOR359W</b>     |                                 | 15 | 1012752 |
| <b>iYOR360C</b>     | YOR360C (PDE2)                  | 15 | 1014813 |
| <b>iYOR361C</b>     | YOR361C (PRT1)                  | 15 | 1017644 |
| <b>iYOR363C</b>     | YOR363C (PIP2) YOR364W          | 15 | 1023204 |
| <b>iYOR366W</b>     | YOR367W (SCP1)                  | 15 | 1025601 |
| <b>iYOR367W</b>     | YOR368W (RAD17)                 | 15 | 1026601 |
| <b>iYOR369C</b>     | YOR369C (RPS12)                 | 15 | 1028617 |
| <b>iYOR370C</b>     | YOR370C (MRS6)                  | 15 | 1030986 |
| <b>iYOR371C</b>     | YOR371C (KRH2)                  | 15 | 1034174 |
| <b>iYOR372C</b>     | YOR372C (NDD1) YOR373W (NUD1)   | 15 | 1036463 |
| <b>iYOR373W</b>     | YOR374W (ALD4)                  | 15 | 1039381 |
| <b>iYOR374W</b>     |                                 | 15 | 1041391 |
| <b>iYOR375C</b>     | YOR375C (GDH1) YOR376W          | 15 | 1043034 |
| <b>iYOR376W-0</b>   | YOR377W (ATF1)                  | 15 | 1043551 |
| <b>iYOR376W-1</b>   | YOR377W (ATF1)                  | 15 | 1044884 |
| <b>iYOR377W-0</b>   | YOR378W                         | 15 | 1047795 |
| <b>iYOR377W-1</b>   | YOR378W                         | 15 | 1048649 |
| <b>iYOR380W-0</b>   | YOR381W (FRE3)                  | 15 | 1052922 |
| <b>iYOR380W-1</b>   | YOR381W (FRE3)                  | 15 | 1054229 |
| <b>iYOR381W-0</b>   | YOR382W (FIT2)                  | 15 | 1057672 |
| <b>iYOR381W-1</b>   | YOR382W (FIT2)                  | 15 | 1058597 |
| <b>iYOR382W</b>     |                                 | 15 | 1059984 |
| <b>iYOR383C</b>     | YOR383C (FIT3) YOR384W (FRE5)   | 15 | 1061047 |
| <b>iYOR384W</b>     | YOR385W                         | 15 | 1063640 |
| <b>iYOR385W</b>     | YOR386W (PHR1)                  | 15 | 1065907 |
| <b>iYOR386W</b>     |                                 | 15 | 1068528 |
| <b>iYOR387C-0</b>   | YOR387C                         | 15 | 1070233 |
| <b>iYOR387C-1</b>   | YOR387C                         | 15 | 1071009 |
| <b>iYOR388C</b>     | YOR388C (FDH1) YOR389W          | 15 | 1072915 |
| <b>iYOR390W</b>     |                                 | 15 | 1077903 |
| <b>iYOR392W</b>     | YOR393W (ERR1)                  | 15 | 1079717 |
| <b>iYOR393W</b>     | YOR394W                         | 15 | 1081581 |
| <b>iYORCdelta11</b> | YOR058C (ASE1)                  | 15 | 438484  |
| <b>iYORCdelta25</b> | YOR344C (TYE7)                  | 15 | 980581  |



|                     |                                |    |        |
|---------------------|--------------------------------|----|--------|
| <b>iYORWdelta14</b> |                                | 15 | 600731 |
| <b>iYORWdelta16</b> |                                | 15 | 664467 |
| <b>iYORWdelta17</b> |                                | 15 | 665143 |
| <b>iYORWdelta22</b> | YOR343C                        | 15 | 969422 |
| <b>iYORWdelta24</b> | YOR343C                        | 15 | 976235 |
| <b>iYORWsigma3</b>  |                                | 15 | 854609 |
| <b>iYORWtau3</b>    | YOR192C YOR193W                | 15 | 710105 |
| <b>iYPL001W</b>     | YPR001W (CIT3)                 | 16 | 555724 |
| <b>iYPL002C</b>     | YPL002C (SNF8) YPL001W (HAT1)  | 16 | 554323 |
| <b>iYPL003W</b>     |                                | 16 | 553403 |
| <b>iYPL004C</b>     | YPL004C YPL003W (ULA1)         | 16 | 551652 |
| <b>iYPL005W</b>     |                                | 16 | 550301 |
| <b>iYPL006W</b>     | YPL005W                        | 16 | 548138 |
| <b>iYPL007C</b>     | YPL007C (TFC8) YPL006W (NCR1)  | 16 | 543843 |
| <b>iYPL008W</b>     |                                | 16 | 541965 |
| <b>iYPL009C</b>     | YPL009C YPL008W (CHL1)         | 16 | 538931 |
| <b>iYPL010W</b>     |                                | 16 | 535582 |
| <b>iYPL011C</b>     | YPL011C (TAF47) YPL010W (RET3) | 16 | 534698 |
| <b>iYPL012W</b>     |                                | 16 | 533404 |
| <b>iYPL013C</b>     | YPL013C YPL012W (RRP12)        | 16 | 529345 |
| <b>iYPL014W</b>     |                                | 16 | 528687 |
| <b>iYPL015C</b>     | YPL015C (HST2) YPL014W         | 16 | 526878 |
| <b>iYPL016W</b>     |                                | 16 | 524953 |
| <b>iYPL019C</b>     | YPL019C (VTC3) YPL018W (CTF19) | 16 | 517014 |
| <b>iYPL020C</b>     | YPL020C (ULP1)                 | 16 | 514174 |
| <b>iYPL021W</b>     |                                | 16 | 511660 |
| <b>iYPL023C</b>     | YPL023C (MET12) YPL022W (RAD1) | 16 | 506308 |
| <b>iYPL024W</b>     |                                | 16 | 504238 |
| <b>iYPL025C</b>     | YPL025C YPL024W (NCE4)         | 16 | 503026 |
| <b>iYPL026C</b>     | YPL026C (SKS1)                 | 16 | 502179 |
| <b>iYPL027W</b>     |                                | 16 | 500398 |
| <b>iYPL028W</b>     | YPL027W (SMA1)                 | 16 | 499288 |
| <b>iYPL029W</b>     | YPL028W (ERG10)                | 16 | 497715 |
| <b>iYPL030W</b>     | YPL029W (SUV3)                 | 16 | 495242 |
| <b>iYPL031C</b>     | YPL031C (PHO85) YPL030W        | 16 | 493033 |
| <b>iYPL038W</b>     |                                | 16 | 481063 |
| <b>iYPL039W</b>     | YPL038W (MET31)                | 16 | 480170 |
| <b>iYPL040C</b>     | YPL040C (ISM1) YPL039W         | 16 | 478996 |
| <b>iYPL041C</b>     | YPL041C                        | 16 | 475736 |
| <b>iYPL042C</b>     | YPL042C (SSN3)                 | 16 | 474702 |
| <b>iYPL045W</b>     |                                | 16 | 469651 |
| <b>iYPL046C</b>     | YPL046C (ELC1) YPL045W (VPS16) | 16 | 466938 |
| <b>iYPL047W</b>     |                                | 16 | 466256 |
| <b>iYPL048W</b>     | YPL047W                        | 16 | 465643 |
| <b>iYPL049C</b>     | YPL049C (DIG1) YPL048W (CAM1)  | 16 | 463834 |
| <b>iYPL050C</b>     | YPL050C (MNN9)                 | 16 | 461961 |
| <b>iYPL051W</b>     |                                | 16 | 460554 |
| <b>iYPL052W</b>     | YPL051W (ARL3)                 | 16 | 459673 |
| <b>iYPL053C</b>     | YPL053C (KTR6) YPL052W         | 16 | 458453 |
| <b>iYPL054W</b>     |                                | 16 | 456659 |
| <b>iYPL056C</b>     | YPL056C                        | 16 | 453730 |

|                   |                                |    |        |
|-------------------|--------------------------------|----|--------|
| <b>iYPL057C</b>   | YPL057C (SUR1)                 | 16 | 453052 |
| <b>iYPL058C-0</b> | YPL058C (PDR12)                | 16 | 450372 |
| <b>iYPL058C-1</b> | YPL058C (PDR12)                | 16 | 451138 |
| <b>iYPL060W</b>   |                                | 16 | 435759 |
| <b>iYPL061W</b>   | YPL060W (LPE10)                | 16 | 434085 |
| <b>iYPL062W</b>   | YPL061W (ALD6)                 | 16 | 432294 |
| <b>iYPL063W</b>   | YPL062W                        | 16 | 431364 |
| <b>iYPL064C</b>   | YPL064C YPL063W                | 16 | 429611 |
| <b>iYPL066W</b>   | YPL065W (VPS28)                | 16 | 427667 |
| <b>iYPL067C</b>   | YPL067C YPL066W                | 16 | 425842 |
| <b>iYPL068C</b>   | YPL068C                        | 16 | 425091 |
| <b>iYPL069C</b>   | YPL069C (BTS1)                 | 16 | 423887 |
| <b>iYPL070W</b>   |                                | 16 | 422781 |
| <b>iYPL071C</b>   | YPL071C YPL070W                | 16 | 420513 |
| <b>iYPL075W</b>   | YPL074W (YTA6)                 | 16 | 415357 |
| <b>iYPL076W-0</b> | YPL075W (GCR1)                 | 16 | 411280 |
| <b>iYPL076W-1</b> | YPL075W (GCR1)                 | 16 | 412051 |
| <b>iYPL077C</b>   | YPL077C YPL076W (GPI2)         | 16 | 410085 |
| <b>iYPL079W</b>   |                                | 16 | 407534 |
| <b>iYPL080C</b>   | YPL080C YPL079W (RPL21B)       | 16 | 406493 |
| <b>iYPL081W</b>   |                                | 16 | 406039 |
| <b>iYPL082C</b>   | YPL082C (MOT1) YPL081W (RPS9A) | 16 | 404078 |
| <b>iYPL083C</b>   | YPL083C (SEN54)                | 16 | 398100 |
| <b>iYPL084W</b>   |                                | 16 | 396567 |
| <b>iYPL085W</b>   | YPL084W (BRO1)                 | 16 | 393649 |
| <b>iYPL086C</b>   | YPL086C (ELP3) YPL085W (SEC16) | 16 | 386441 |
| <b>iYPL087W</b>   |                                | 16 | 384403 |
| <b>iYPL088W</b>   | YPL087W (YDC1)                 | 16 | 382988 |
| <b>iYPL091W</b>   |                                | 16 | 376948 |
| <b>iYPL092W</b>   | YPL091W (GLR1)                 | 16 | 375164 |
| <b>iYPL093W</b>   | YPL092W (SSU1)                 | 16 | 372916 |
| <b>iYPL094C</b>   | YPL094C (SEC62) YPL093W (NOG1) | 16 | 370685 |
| <b>iYPL095C</b>   | YPL095C                        | 16 | 369436 |
| <b>iYPL097W</b>   | YPL096W (PNG1)                 | 16 | 366425 |
| <b>iYPL098C</b>   | YPL098C YPL097W (MSY1)         | 16 | 364722 |
| <b>iYPL099C</b>   | YPL099C                        | 16 | 364063 |
| <b>iYPL101W</b>   | YPL100W                        | 16 | 361574 |
| <b>iYPL103C</b>   | YPL103C                        | 16 | 359401 |
| <b>iYPL104W</b>   |                                | 16 | 357671 |
| <b>iYPL105C</b>   | YPL105C YPL104W (MSD1)         | 16 | 355407 |
| <b>iYPL106C</b>   | YPL106C (SSE1)                 | 16 | 352270 |
| <b>iYPL107W</b>   |                                | 16 | 349860 |
| <b>iYPL109C</b>   | YPL109C YPL108W                | 16 | 347187 |
| <b>iYPL110C</b>   | YPL110C                        | 16 | 344738 |
| <b>iYPL111W</b>   |                                | 16 | 340944 |
| <b>iYPL112C</b>   | YPL112C YPL111W (CAR1)         | 16 | 338619 |
| <b>iYPL115C</b>   | YPL115C (BEM3) YPL114W         | 16 | 335485 |
| <b>iYPL116W</b>   |                                | 16 | 331698 |
| <b>iYPL118W</b>   |                                | 16 | 327661 |
| <b>iYPL119C</b>   | YPL119C (DBP1) YPL118W (MRP51) | 16 | 326263 |
| <b>iYPL120W</b>   |                                | 16 | 323743 |

|                 |                                   |    |        |
|-----------------|-----------------------------------|----|--------|
| <b>iYPL121C</b> | YPL121C (MEI5) YPL120W (VPS30)    | 16 | 321629 |
| <b>iYPL122C</b> | YPL122C (TFB2)                    | 16 | 320766 |
| <b>iYPL123C</b> | YPL123C (RNY1)                    | 16 | 318944 |
| <b>iYPL124W</b> |                                   | 16 | 317515 |
| <b>iYPL125W</b> | YPL124W (NIP29)                   | 16 | 316485 |
| <b>iYPL126W</b> | YPL125W (KAP120)                  | 16 | 312899 |
| <b>iYPL127C</b> | YPL127C (HHO1) YPL126W (NAN1)     | 16 | 309603 |
| <b>iYPL128C</b> | YPL128C (TBF1)                    | 16 | 308220 |
| <b>iYPL129W</b> |                                   | 16 | 306136 |
| <b>iYPL131W</b> | YPL130W (SPO19)                   | 16 | 304013 |
| <b>iYPL132W</b> | YPL131W (RPL5)                    | 16 | 302617 |
| <b>iYPL133C</b> | YPL133C YPL132W (COX11)           | 16 | 301227 |
| <b>iYPL134C</b> | YPL134C (ODC1)                    | 16 | 299502 |
| <b>iYPL135W</b> |                                   | 16 | 298049 |
| <b>iYPL136W</b> | YPL135W (ISU1)                    | 16 | 296653 |
| <b>iYPL138C</b> | YPL138C (SPP1)                    | 16 | 292426 |
| <b>iYPL139C</b> | YPL139C (UME1)                    | 16 | 291050 |
| <b>iYPL140C</b> | YPL140C (MKK2)                    | 16 | 289033 |
| <b>iYPL141C</b> | YPL141C                           | 16 | 286060 |
| <b>iYPL142C</b> | YPL142C                           | 16 | 283002 |
| <b>iYPL145C</b> | YPL145C (KES1) YPL144W            | 16 | 279698 |
| <b>iYPL146C</b> | YPL146C                           | 16 | 277528 |
| <b>iYPL147W</b> |                                   | 16 | 275866 |
| <b>iYPL148C</b> | YPL148C (PPT2) YPL147W (PXA1)     | 16 | 272826 |
| <b>iYPL149W</b> |                                   | 16 | 272193 |
| <b>iYPL150W</b> | YPL149W (APG5)                    | 16 | 270892 |
| <b>iYPL151C</b> | YPL151C (PRP46) YPL150W           | 16 | 267534 |
| <b>iYPL152W</b> |                                   | 16 | 266103 |
| <b>iYPL153C</b> | YPL153C (RAD53) YPL152W (RRD2)    | 16 | 264191 |
| <b>iYPL154C</b> | YPL154C (PEP4)                    | 16 | 260930 |
| <b>iYPL155C</b> | YPL155C (KIP2)                    | 16 | 259335 |
| <b>iYPL156C</b> | YPL156C (PRM4)                    | 16 | 256766 |
| <b>iYPL157W</b> |                                   | 16 | 255760 |
| <b>iYPL158C</b> | YPL158C YPL157W                   | 16 | 254309 |
| <b>iYPL159C</b> | YPL159C                           | 16 | 251667 |
| <b>iYPL160W</b> |                                   | 16 | 250261 |
| <b>iYPL161C</b> | YPL161C (BEM4) YPL160W (CDC60)    | 16 | 246219 |
| <b>iYPL162C</b> | YPL162C                           | 16 | 244026 |
| <b>iYPL163C</b> | YPL163C (SVS1)                    | 16 | 242699 |
| <b>iYPL164C</b> | YPL164C (MLH3)                    | 16 | 241496 |
| <b>iYPL165C</b> | YPL165C (SET6)                    | 16 | 239076 |
| <b>iYPL167C</b> | YPL167C (REV3) YPL166W            | 16 | 237106 |
| <b>iYPL168W</b> |                                   | 16 | 232508 |
| <b>iYPL169C</b> | YPL169C (MEX67) YPL168W           | 16 | 230837 |
| <b>iYPL170W</b> |                                   | 16 | 228771 |
| <b>iYPL171C</b> | YPL171C (OYE3) YPL170W            | 16 | 227370 |
| <b>iYPL172C</b> | YPL172C (COX10)                   | 16 | 225740 |
| <b>iYPL173W</b> |                                   | 16 | 224035 |
| <b>iYPL174C</b> | YPL174C (NIP100) YPL173W (MRPL4C) | 16 | 222772 |
| <b>iYPL175W</b> |                                   | 16 | 220087 |
| <b>iYPL176C</b> | YPL176C YPL175W (SPT14)           | 16 | 218362 |

|                   |                               |    |        |
|-------------------|-------------------------------|----|--------|
| <b>iYPL177C-0</b> | YPL177C (CUP9)                | 16 | 213961 |
| <b>iYPL178W</b>   |                               | 16 | 212783 |
| <b>iYPL179W</b>   | YPL178W (CBC2)                | 16 | 209805 |
| <b>iYPL180W</b>   | YPL179W (PPQ1)                | 16 | 207646 |
| <b>iYPL183C</b>   | YPL183C                       | 16 | 202535 |
| <b>iYPL183W-A</b> |                               | 16 | 199375 |
| <b>iYPL184C</b>   | YPL184C YPL183W-A             | 16 | 197787 |
| <b>iYPL185W</b>   |                               | 16 | 195647 |
| <b>iYPL187W</b>   |                               | 16 | 194144 |
| <b>iYPL188W</b>   | YPL187W (MF(ALPHA)1)          | 16 | 192649 |
| <b>iYPL190C</b>   | YPL190C (NAB3) YPL189W (GUP2) | 16 | 187724 |
| <b>iYPL191C</b>   | YPL191C                       | 16 | 184678 |
| <b>iYPL192C</b>   | YPL192C (PRM3)                | 16 | 183055 |
| <b>iYPL193W</b>   |                               | 16 | 182547 |
| <b>iYPL194W</b>   | YPL193W (RSA1)                | 16 | 181114 |
| <b>iYPL195W</b>   | YPL194W (DDC1)                | 16 | 179020 |
| <b>iYPL196W</b>   | YPL195W (APL5)                | 16 | 175863 |
| <b>iYPL197C</b>   | YPL197C YPL196W (OXR1)        | 16 | 174755 |
| <b>iYPL199C</b>   | YPL199C YPL198W (RPL7B)       | 16 | 172754 |
| <b>iYPL200W</b>   |                               | 16 | 171953 |
| <b>iYPL201C</b>   | YPL201C YPL200W (CSM4)        | 16 | 171154 |
| <b>iYPL202C</b>   | YPL202C (AFT2)                | 16 | 169337 |
| <b>iYPL203W</b>   |                               | 16 | 167397 |
| <b>iYPL204W</b>   | YPL203W (TPK2)                | 16 | 165759 |
| <b>iYPL206C</b>   | YPL206C                       | 16 | 163596 |
| <b>iYPL207W</b>   |                               | 16 | 162340 |
| <b>iYPL208W</b>   | YPL207W                       | 16 | 159592 |
| <b>iYPL209C</b>   | YPL209C (IPL1) YPL208W        | 16 | 157592 |
| <b>iYPL210C</b>   | YPL210C (SRP72)               | 16 | 156229 |
| <b>iYPL211W</b>   |                               | 16 | 154039 |
| <b>iYPL212C</b>   | YPL212C (PUS1) YPL211W (NIP7) | 16 | 153148 |
| <b>iYPL213W</b>   |                               | 16 | 151329 |
| <b>iYPL214C</b>   | YPL214C (THI6) YPL213W (LEA1) | 16 | 150190 |
| <b>iYPL215W</b>   |                               | 16 | 148422 |
| <b>iYPL216W</b>   | YPL215W (CBP3)                | 16 | 147128 |
| <b>iYPL217C</b>   | YPL217C (BMS1) YPL216W        | 16 | 143170 |
| <b>iYPL218W</b>   |                               | 16 | 139408 |
| <b>iYPL219W</b>   | YPL218W (SAR1)                | 16 | 138227 |
| <b>iYPL220W</b>   | YPL219W (PCL8)                | 16 | 136442 |
| <b>iYPL221W</b>   | YPL220W (RPL1A)               | 16 | 135423 |
| <b>iYPL222W</b>   | YPL221W (BOP1)                | 16 | 132227 |
| <b>iYPL224C</b>   | YPL224C (MMT2)                | 16 | 128087 |
| <b>iYPL225W</b>   |                               | 16 | 126446 |
| <b>iYPL226W</b>   | YPL225W                       | 16 | 125357 |
| <b>iYPL227C</b>   | YPL227C (ALG5) YPL226W (NEW1) | 16 | 121167 |
| <b>iYPL228W</b>   |                               | 16 | 120031 |
| <b>iYPL229W</b>   | YPL228W (CET1)                | 16 | 117687 |
| <b>iYPL230W</b>   | YPL229W                       | 16 | 116487 |
| <b>iYPL231W</b>   | YPL230W                       | 16 | 114315 |
| <b>iYPL232W</b>   | YPL231W (FAS2)                | 16 | 108147 |
| <b>iYPL233W</b>   | YPL232W (SSO1)                | 16 | 106822 |

|                    |                                  |    |        |
|--------------------|----------------------------------|----|--------|
| <b>iYPL234C</b>    | YPL234C (TFP3) YPL233W           | 16 | 105440 |
| <b>iYPL235W</b>    |                                  | 16 | 104647 |
| <b>iYPL236C</b>    | YPL236C YPL235W (RVB2)           | 16 | 102702 |
| <b>iYPL237W</b>    |                                  | 16 | 101353 |
| <b>iYPL239W</b>    |                                  | 16 | 100086 |
| <b>iYPL241C</b>    | YPL241C (CIN2)                   | 16 | 96258  |
| <b>iYPL242C</b>    | YPL242C (IQG1)                   | 16 | 95109  |
| <b>iYPL243W</b>    |                                  | 16 | 90316  |
| <b>iYPL244C</b>    | YPL244C (HUT1) YPL243W (SRP68)   | 16 | 88033  |
| <b>iYPL245W</b>    |                                  | 16 | 86950  |
| <b>iYPL246C</b>    | YPL246C YPL245W                  | 16 | 85297  |
| <b>iYPL247C</b>    | YPL247C                          | 16 | 84196  |
| <b>iYPL248C</b>    | YPL248C (GAL4)                   | 16 | 82356  |
| <b>iYPL249C</b>    | YPL249C (GYP5)                   | 16 | 79353  |
| <b>iYPL249C-A</b>  | YPL249C-A (RPL36B)               | 16 | 76239  |
| <b>iYPL251W</b>    |                                  | 16 | 73927  |
| <b>iYPL253C</b>    | YPL253C (VIK1)                   | 16 | 73006  |
| <b>iYPL254W</b>    |                                  | 16 | 70951  |
| <b>iYPL255W</b>    | YPL254W (HF11)                   | 16 | 68882  |
| <b>iYPL256C</b>    | YPL256C (CLN2) YPL255W (BBP1)    | 16 | 66614  |
| <b>iYPL257W</b>    |                                  | 16 | 63860  |
| <b>iYPL258C</b>    | YPL258C (THI21) tw(cca)p YPL257W | 16 | 55153  |
| <b>iYPL259C</b>    | YPL259C (APM1)                   | 16 | 52671  |
| <b>iYPL260W</b>    |                                  | 16 | 50958  |
| <b>iYPL262W</b>    |                                  | 16 | 48802  |
| <b>iYPL263C</b>    | YPL263C (KEL3) YPL262W (FUM1)    | 16 | 46506  |
| <b>iYPL264C</b>    | YPL264C                          | 16 | 44344  |
| <b>iYPL265W</b>    |                                  | 16 | 42869  |
| <b>iYPL266W</b>    | YPL265W (DIP5)                   | 16 | 40077  |
| <b>iYPL267W</b>    | YPL266W (DIM1)                   | 16 | 38798  |
| <b>iYPL268W</b>    | YPL267W                          | 16 | 37845  |
| <b>iYPL269W</b>    | YPL268W (PLC1)                   | 16 | 34947  |
| <b>iYPL270W</b>    | YPL269W (KAR9)                   | 16 | 32803  |
| <b>iYPL271W</b>    | YPL270W (MDL2)                   | 16 | 30267  |
| <b>iYPL273W</b>    |                                  | 16 | 26064  |
| <b>iYPL274W</b>    | YPL273W (SAM4)                   | 16 | 24701  |
| <b>iYPL275W-1</b>  | YPL274W (SAM3)                   | 16 | 20365  |
| <b>iYPL275W-2</b>  | YPL274W (SAM3)                   | 16 | 21651  |
| <b>iYPL277C</b>    | YPL277C YPL276W                  | 16 | 16868  |
| <b>iYPL279C</b>    | YPL279C                          | 16 | 14355  |
| <b>iYPL280W</b>    |                                  | 16 | 12600  |
| <b>iYPL281C</b>    | YPL281C (ERR2) YPL280W           | 16 | 10870  |
| <b>iYPL282C</b>    | YPL282C                          | 16 | 8427   |
| <b>iYPL283C-0</b>  | YPL283C (YRF1-7)                 | 16 | 6007   |
| <b>iYPL283C-1</b>  | YPL283C (YRF1-7)                 | 16 | 6970   |
| <b>iYPLCdelta1</b> | YPL258C (THI21) YPL257W          | 16 | 55858  |
| <b>iYPLCtau2</b>   | YPL060C-A YPL059W (GRX5)         | 16 | 443107 |
| <b>iYPLWdelta6</b> | YPL258C (THI21) YPL257W          | 16 | 63006  |
| <b>iYPLWdelta7</b> | YPL178W (CBC2)                   | 16 | 210770 |
| <b>iYPLWdelta8</b> | YPL178W (CBC2)                   | 16 | 211897 |
| <b>iYPR001W</b>    | YPR002W (PDH1)                   | 16 | 557832 |

|                   |                                 |    |        |
|-------------------|---------------------------------|----|--------|
| <b>iYPR002W</b>   |                                 | 16 | 559930 |
| <b>iYPR003C</b>   | YPR003C                         | 16 | 563763 |
| <b>iYPR004C</b>   | YPR004C                         | 16 | 565036 |
| <b>iYPR005C</b>   | YPR005C (HAL1)                  | 16 | 566666 |
| <b>iYPR006C</b>   | YPR006C (ICL2)                  | 16 | 568991 |
| <b>iYPR007C</b>   | YPR007C (SPO69) YPR008W (HAA1)  | 16 | 571373 |
| <b>iYPR009W</b>   |                                 | 16 | 577353 |
| <b>iYPR011C</b>   | YPR011C YPR012W                 | 16 | 584037 |
| <b>iYPR013C-0</b> | YPR013C                         | 16 | 585580 |
| <b>iYPR013C-1</b> | YPR013C                         | 16 | 586382 |
| <b>iYPR017C</b>   | YPR017C (DSS4) YPR018W (RLF2)   | 16 | 593912 |
| <b>iYPR018W</b>   | YPR019W (CDC54)                 | 16 | 596291 |
| <b>iYPR019W</b>   | YPR020W (ATP20)                 | 16 | 599546 |
| <b>iYPR021C</b>   | YPR021C                         | 16 | 603352 |
| <b>iYPR023C</b>   | YPR023C (EAF3) YPR024W (YME1)   | 16 | 610026 |
| <b>iYPR028W</b>   |                                 | 16 | 624197 |
| <b>iYPR029C</b>   | YPR029C (APL4) YPR030W (CSR2)   | 16 | 626962 |
| <b>iYPR030W</b>   | YPR031W                         | 16 | 631240 |
| <b>iYPR031W</b>   | YPR032W (SRO7)                  | 16 | 633756 |
| <b>iYPR032W</b>   |                                 | 16 | 637219 |
| <b>iYPR033C</b>   | YPR033C (HTS1) YPR034W (ARP7)   | 16 | 639014 |
| <b>iYPR040W</b>   | YPR041W (TIF5)                  | 16 | 648370 |
| <b>iYPR042C</b>   | YPR042C (PUF2) YPR043W (RPL43A) | 16 | 653657 |
| <b>iYPR045C</b>   | YPR045C YPR046W (MCM16)         | 16 | 656547 |
| <b>iYPR046W</b>   | YPR047W (MSF1)                  | 16 | 657339 |
| <b>iYPR047W</b>   | YPR048W (TAH18)                 | 16 | 658933 |
| <b>iYPR048W</b>   |                                 | 16 | 661048 |
| <b>iYPR049C</b>   | YPR049C (CVT9)                  | 16 | 664668 |
| <b>iYPR054W</b>   | YPR055W (SEC8)                  | 16 | 667441 |
| <b>iYPR055W</b>   | YPR056W (TFB4)                  | 16 | 670868 |
| <b>iYPR056W</b>   | YPR057W (BRR1)                  | 16 | 672137 |
| <b>iYPR057W</b>   | YPR058W (YMC1)                  | 16 | 673491 |
| <b>iYPR059C</b>   | YPR059C                         | 16 | 674695 |
| <b>iYPR061C</b>   | YPR061C YPR062W (FCY1)          | 16 | 676877 |
| <b>iYPR062W</b>   |                                 | 16 | 677636 |
| <b>iYPR063C</b>   | YPR063C YPR064W                 | 16 | 678315 |
| <b>iYPR064W</b>   | YPR065W (ROX1)                  | 16 | 679365 |
| <b>iYPR065W</b>   | YPR066W (UBA3)                  | 16 | 680794 |
| <b>iYPR066W</b>   | YPR067W (ISA2)                  | 16 | 682107 |
| <b>iYPR067W</b>   |                                 | 16 | 682772 |
| <b>iYPR068C</b>   | YPR068C (HOS1)                  | 16 | 684348 |
| <b>iYPR069C</b>   | YPR069C (SPE3) YPR070W (MED1)   | 16 | 685432 |
| <b>iYPR070W</b>   | YPR071W                         | 16 | 687593 |
| <b>iYPR072W</b>   |                                 | 16 | 691784 |
| <b>iYPR073C</b>   | YPR073C (LTP1)                  | 16 | 692413 |
| <b>iYPR074C</b>   | YPR074C (TKL1)                  | 16 | 694833 |
| <b>iYPR076W</b>   |                                 | 16 | 696845 |
| <b>iYPR079W</b>   | YPR080W (TEF1)                  | 16 | 700010 |
| <b>iYPR080W</b>   |                                 | 16 | 701966 |
| <b>iYPR081C</b>   | YPR081C                         | 16 | 703966 |
| <b>iYPR082C</b>   | YPR082C (DIB1) YPR083W          | 16 | 704652 |

|                   |                                   |    |        |
|-------------------|-----------------------------------|----|--------|
| <b>iYPR083W</b>   | YPR084W                           | 16 | 706589 |
| <b>iYPR084W</b>   |                                   | 16 | 708338 |
| <b>iYPR085C</b>   | YPR085C YPR086W (SUA7)            | 16 | 709839 |
| <b>iYPR086W</b>   | YPR087W                           | 16 | 711134 |
| <b>iYPR088C</b>   | YPR088C (SRP54) YPR089W           | 16 | 713024 |
| <b>iYPR090W</b>   |                                   | 16 | 715938 |
| <b>iYPR093C</b>   | YPR093C YPR094W                   | 16 | 720487 |
| <b>iYPR094W</b>   |                                   | 16 | 720957 |
| <b>iYPR095C</b>   | YPR095C (SYT1)                    | 16 | 724714 |
| <b>iYPR096C</b>   | YPR096C YPR097W                   | 16 | 725141 |
| <b>iYPR098C</b>   | YPR098C                           | 16 | 729270 |
| <b>iYPR100W</b>   | YPR101W (SNT309)                  | 16 | 730210 |
| <b>iYPR101W</b>   |                                   | 16 | 731016 |
| <b>iYPR103W</b>   |                                   | 16 | 733209 |
| <b>iYPR104C</b>   | YPR104C (FHL1)                    | 16 | 736430 |
| <b>iYPR105C</b>   | YPR105C (COD1) YPR106W (ISR1)     | 16 | 739566 |
| <b>iYPR107C</b>   | YPR107C (YTH1) YPR108W (RPN7)     | 16 | 742061 |
| <b>iYPR108W</b>   | YPR109W                           | 16 | 743740 |
| <b>iYPR109W</b>   |                                   | 16 | 745570 |
| <b>iYPR110C</b>   | YPR110C (RPC40) YPR111W (DBF20)   | 16 | 746832 |
| <b>iYPR111W</b>   |                                   | 16 | 748997 |
| <b>iYPR112C</b>   | YPR112C (MRD1) YPR113W (PIS1)     | 16 | 751916 |
| <b>iYPR113W</b>   | YPR114W                           | 16 | 752916 |
| <b>iYPR114W</b>   | YPR115W                           | 16 | 754245 |
| <b>iYPR115W</b>   | YPR116W                           | 16 | 758125 |
| <b>iYPR116W</b>   | YPR117W                           | 16 | 759478 |
| <b>iYPR117W</b>   | YPR118W                           | 16 | 767491 |
| <b>iYPR118W</b>   | YPR119W (CLB2)                    | 16 | 768984 |
| <b>iYPR120C</b>   | YPR120C (CLB5) tc(gca)p2YPR121W ( | 16 | 775179 |
| <b>iYPR122W</b>   |                                   | 16 | 785666 |
| <b>iYPR124W</b>   | YPR125W                           | 16 | 787423 |
| <b>iYPR126C</b>   | YPR126C YPR127W                   | 16 | 789380 |
| <b>iYPR127W</b>   |                                   | 16 | 791115 |
| <b>iYPR128C</b>   | YPR128C (ANT1) YPR129W (SCD6)     | 16 | 792199 |
| <b>iYPR130C</b>   | YPR130C                           | 16 | 793776 |
| <b>iYPR131C</b>   | YPR131C (NAT3) YPR132W (RPS23B)   | 16 | 794661 |
| <b>iYPR132W</b>   |                                   | 16 | 795762 |
| <b>iYPR133C</b>   | YPR133C (IWS1) YPR133W-A (TOM5)   | 16 | 797205 |
| <b>iYPR133W-A</b> | YPR134W (MSS18)                   | 16 | 797704 |
| <b>iYPR134W</b>   | YPR135W (CTF4)                    | 16 | 798852 |
| <b>iYPR135W</b>   |                                   | 16 | 802012 |
| <b>iYPR139C</b>   | YPR139C YPR140W                   | 16 | 814053 |
| <b>iYPR140W</b>   |                                   | 16 | 815531 |
| <b>iYPR141C</b>   | YPR141C (KAR3)                    | 16 | 817918 |
| <b>iYPR144C</b>   | YPR144C YPR145W (ASN1)            | 16 | 821418 |
| <b>iYPR147C</b>   | YPR147C                           | 16 | 826554 |
| <b>iYPR148C-0</b> | YPR148C YPR149W (NCE102)          | 16 | 828135 |
| <b>iYPR149W</b>   | YPR150W                           | 16 | 830434 |
| <b>iYPR151C</b>   | YPR151C                           | 16 | 831670 |
| <b>iYPR153W</b>   | YPR154W (PIN3)                    | 16 | 834240 |
| <b>iYPR154W</b>   |                                   | 16 | 835207 |



|                     |                                |    |        |
|---------------------|--------------------------------|----|--------|
| <b>iYPR155C</b>     | YPR155C (NCA2)                 | 16 | 837408 |
| <b>iYPR156C</b>     | YPR156C (TPO3) YPR157W         | 16 | 839772 |
| <b>iYPR157W</b>     | YPR158W                        | 16 | 842664 |
| <b>iYPR158W</b>     | YPR159W (KRE6)                 | 16 | 844015 |
| <b>iYPR159W</b>     | YPR160W (GPH1)                 | 16 | 859740 |
| <b>iYPR160W</b>     |                                | 16 | 864009 |
| <b>iYPR161C</b>     | YPR161C (SGV1)                 | 16 | 866417 |
| <b>iYPR162C</b>     | YPR162C (ORC4)                 | 16 | 868299 |
| <b>iYPR163C</b>     | YPR163C (TIF3) YPR164W (MMS1)  | 16 | 869950 |
| <b>iYPR164W</b>     | YPR165W (RHO1)                 | 16 | 874921 |
| <b>iYPR165W</b>     |                                | 16 | 875992 |
| <b>iYPR166C</b>     | YPR166C (MRP2)                 | 16 | 876624 |
| <b>iYPR167C</b>     | YPR167C (MET16) YPR168W (NUT2) | 16 | 877627 |
| <b>iYPR168W</b>     | YPR169W                        | 16 | 878544 |
| <b>iYPR169W</b>     |                                | 16 | 880163 |
| <b>iYPR170C</b>     | YPR170C YPR171W                | 16 | 883313 |
| <b>iYPR171W</b>     | YPR172W                        | 16 | 885553 |
| <b>iYPR172W</b>     |                                | 16 | 886393 |
| <b>iYPR173C</b>     | YPR173C (VPS4)                 | 16 | 887832 |
| <b>iYPR174C</b>     | YPR174C YPR175W (DPB2)         | 16 | 888703 |
| <b>iYPR176C</b>     | YPR176C (BET2)                 | 16 | 892073 |
| <b>iYPR178W</b>     |                                | 16 | 893724 |
| <b>iYPR179C</b>     | YPR179C (PLO1) YPR180W (AOS1)  | 16 | 895759 |
| <b>iYPR180W</b>     |                                | 16 | 896999 |
| <b>iYPR181C</b>     | YPR181C (SEC23) YPR182W (SMX3) | 16 | 899662 |
| <b>iYPR182W</b>     | YPR183W (DPM1)                 | 16 | 900449 |
| <b>iYPR183W</b>     | YPR184W (GDB1)                 | 16 | 901553 |
| <b>iYPR184W</b>     | YPR185W (APG13)                | 16 | 906649 |
| <b>iYPR185W</b>     |                                | 16 | 909429 |
| <b>iYPR186C</b>     | YPR186C (PZF1) YPR187W (RPO26) | 16 | 911017 |
| <b>iYPR187W</b>     |                                | 16 | 911795 |
| <b>iYPR188C</b>     | YPR188C (MLC2) YPR189W (SKI3)  | 16 | 912474 |
| <b>iYPR189W</b>     |                                | 16 | 916957 |
| <b>iYPR190C</b>     | YPR190C (RPC82) YPR191W (QCR2) | 16 | 919036 |
| <b>iYPR192W</b>     |                                | 16 | 922772 |
| <b>iYPR193C</b>     | YPR193C (HPA2)                 | 16 | 923374 |
| <b>iYPR195C-0</b>   | YPR195C YPR196W                | 16 | 928289 |
| <b>iYPR195C-1</b>   | YPR195C YPR196W                | 16 | 929316 |
| <b>iYPR196W</b>     |                                | 16 | 932783 |
| <b>iYPR198W-1</b>   |                                | 16 | 936901 |
| <b>iYPR199C</b>     | YPR199C (ARR1)                 | 16 | 939027 |
| <b>iYPR200C</b>     | YPR200C (ARR2) YPR201W (ARR3)  | 16 | 939666 |
| <b>iYPR201W-0</b>   | YPR202W                        | 16 | 941131 |
| <b>iYPR201W-1</b>   | YPR202W                        | 16 | 942079 |
| <b>iYPR203W</b>     | YPR204W                        | 16 | 944183 |
| <b>iYPRCdelta13</b> | YPR007C (SPO69) YPR008W (HAA1) | 16 | 572168 |
| <b>iYPRCdelta19</b> |                                | 16 | 810557 |
| <b>iYPRCdelta22</b> | YPR159W (KRE6)                 | 16 | 850507 |
| <b>iYPRCtau3</b>    |                                | 16 | 881825 |
| <b>iYPRWdelta14</b> | YPR120C (CLB5) YPR121W (THI22) | 16 | 776410 |
| <b>iYPRWdelta16</b> | YPR120C (CLB5) YPR121W (THI22) | 16 | 778151 |

|                    |         |    |        |
|--------------------|---------|----|--------|
| iYPRWsigma4        |         | 16 | 880721 |
| iYPRWtau4          |         | 16 | 933399 |
| KAR3prom22         |         | 16 | 818074 |
| KGD2prom           |         | 4  | 755423 |
| LSR1               | YBR230C | 2  | 680643 |
| MET16-r2           |         | 16 | 877424 |
| MUC1prom3          |         | 9  | 394471 |
| MUC1prom4          |         | 9  | 394470 |
| no primers control |         |    |        |
| PCK1prom           |         | 11 | 630765 |
| POLI35Supstr       |         | 12 | 459623 |
| POLI35Supstr2      |         | 12 | 458698 |
| POP5               |         | 1  | 83067  |
| PYK1prom           |         | 1  | 71839  |
| Q0005              |         |    | 1321   |
| Q0010              |         |    | 1872   |
| Q0015              |         |    | 2013   |
| Q0020              |         |    | 3260   |
| Q0025              |         |    | 3375   |
| Q0030              |         |    | 4230   |
| Q0035              |         |    | 4473   |
| Q0040              |         |    | 4630   |
| Q0050              |         |    | 6408   |
| RDN18-1            | YLR154C | 12 | 455934 |
| RDN18-1A           | YLR154C | 12 | 455934 |
| RDN18-1B           | YLR154C | 12 | 456833 |
| RDN25-1            | YLR154C | 12 | 453057 |
| RDN25-1A           | YLR154C | 12 | 451787 |
| RDN25-1B           | YLR154C | 12 | 452918 |
| RDN25-1C           | YLR154C | 12 | 454050 |
| RDN37-1            | YLR154C | 12 | 455573 |
| RDN37-1A           | YLR154C | 12 | 455183 |
| RDN37-1B           | YLR154C | 12 | 455573 |
| RDN37-1C           | YLR154C | 12 | 457734 |
| RDN5-1             | YLR154C | 12 | 459677 |
| RDN58-1            | YLR154C | 12 | 455415 |
| RPA190             |         | 15 | 961416 |
| RPL28              |         | 7  | 311804 |
| RPL28prom          |         | 7  | 310900 |
| RPL30prom          |         | 7  | 439244 |
| RPL38orf           |         | 12 | 781356 |
| RPL38prom          |         | 12 | 782072 |
| RPP1Aorf           |         | 4  | 310114 |
| RPP1Aprom          |         | 4  | 310581 |
| RPR1               |         | 5  | 118277 |
| RPR1orf            |         | 5  | 117861 |
| RPS5-1             |         | 10 | 651393 |
| RPS5-2             |         | 10 | 652015 |
| SCR1               |         | 5  | 441843 |
| SCR1-2             |         | 5  | 441883 |
| SCR1-3             |         | 5  | 442133 |

|                   |                                 |    |         |
|-------------------|---------------------------------|----|---------|
| <b>SEC23prom</b>  |                                 | 16 | 899960  |
| <b>SFT1prom</b>   |                                 | 11 | 430548  |
| <b>SIC1prom</b>   |                                 | 12 | 286769  |
| <b>SIC1prom2</b>  |                                 | 12 | 286771  |
| <b>snR128</b>     | YJL148W (RPA34)                 | 10 | 139263  |
| <b>SNR13</b>      | YDR472W (TRS31)                 | 4  | 1402953 |
| <b>snR14</b>      | YER007C-A                       | 5  | 167426  |
| <b>SNR189</b>     | YCR031C (RPS14A) YCR032W (BPH1) | 3  | 177338  |
| <b>SNR190</b>     | YJL148W (RPA34)                 | 10 | 139459  |
| <b>snR3</b>       |                                 | 10 | 663437  |
| <b>SNR33</b>      | YCR015C YCR016W                 | 3  | 141963  |
| <b>SNR34</b>      |                                 | 12 | 898986  |
| <b>snR37</b>      |                                 | 10 | 228122  |
| <b>SNR4</b>       |                                 | 5  | 424695  |
| <b>SNR42</b>      | YKR062W (TFA2)                  | 11 | 558655  |
| <b>SNR43</b>      | YCL007C (CWH36)                 | 3  | 107116  |
| <b>SNR44</b>      | YLR367W (RPS22B)                | 12 | 856708  |
| <b>SNR45</b>      | YPR144C YPR145W (ASN1)          | 16 | 821727  |
| <b>SNR46</b>      |                                 | 7  | 545363  |
| <b>SNR47</b>      | YDR042C                         | 4  | 541641  |
| <b>SNR48</b>      | YGR060W (ERG25)                 | 7  | 609578  |
| <b>SNR50</b>      | YOL035C YOL034W                 | 15 | 259489  |
| <b>SNR51</b>      |                                 | 16 | 718697  |
| <b>SNR52</b>      | YER132C (PMD1) YER133W (GLC7)   | 5  | 431126  |
| <b>SNR53</b>      | YEL050C (RML2) YEL049W (PAU2)   | 5  | 61699   |
| <b>SNR54</b>      |                                 | 13 | 163535  |
| <b>SNR55</b>      |                                 | 12 | 794696  |
| <b>SNR56</b>      |                                 | 2  | 88181   |
| <b>SNR57</b>      |                                 | 12 | 794936  |
| <b>SNR58</b>      | YOL098C                         | 15 | 136087  |
| <b>SNR59</b>      | YPL199C YPL198W (RPL7B)         | 16 | 173826  |
| <b>SNR6</b>       |                                 | 12 | 366236  |
| <b>SNR60</b>      | YJL048C                         | 10 | 348826  |
| <b>SNR61</b>      |                                 | 12 | 794485  |
| <b>SNR62</b>      | YOR043W (WHI2)                  | 15 | 409764  |
| <b>SNR6-2</b>     |                                 | 12 | 366414  |
| <b>SNR63</b>      |                                 | 4  | 323216  |
| <b>SNR6-3</b>     |                                 | 12 | 366436  |
| <b>SNR64</b>      | YKL211C (TRP3) YKL210W (UBA1)   | 11 | 38812   |
| <b>SNR65</b>      | YCR030C                         | 3  | 175907  |
| <b>SNR66</b>      | YNL025C (SSN8)                  | 14 | 586088  |
| <b>SNR68</b>      | YIL135C YIL134W (FLX1)          | 9  | 97111   |
| <b>SNR69</b>      | YKL038W (RGT1)                  | 11 | 364418  |
| <b>SNR6Bbox</b>   |                                 | 12 | 366690  |
| <b>SNR6Bdown</b>  |                                 | 12 | 366968  |
| <b>SNR70</b>      |                                 | 16 | 718884  |
| <b>SNR71</b>      |                                 | 8  | 411228  |
| <b>SNR7-L</b>     | YGR221C (TOS2) YGR222W (PET54)  | 7  | 939451  |
| <b>SNR7-S</b>     | YGR221C (TOS2) YGR222W (PET54)  | 7  | 939486  |
| <b>SNR8</b>       | YOR271C YOR272W (YTM1)          | 15 | 832327  |
| <b>SPO11prom3</b> |                                 | 8  | 64358   |

|                  |                                |    |         |
|------------------|--------------------------------|----|---------|
| <b>SPS2prom</b>  |                                | 4  | 1485633 |
| <b>SRB2prom</b>  |                                | 8  | 190159  |
| <b>SRM1</b>      |                                | 7  | 322464  |
| <b>SSB1</b>      |                                | 4  | 43800   |
| <b>SSY5</b>      |                                | 10 | 127335  |
| <b>tA(AGC)P</b>  | YPR159W (KRE6)                 | 16 | 856897  |
| <b>tA(UGC)O</b>  |                                | 15 | 854182  |
| <b>tC(GCA)P2</b> | YPR120C (CLB5) YPR121W (THI22) | 16 | 775762  |
| <b>tD(GUC)O</b>  | YOR130C (ORT1)                 | 15 | 571956  |
| <b>tD(guc)o1</b> |                                | 15 | 572060  |
| <b>tD(guc)o2</b> |                                | 15 | 572114  |
| <b>tE(UUC)C</b>  | YCL022C YCL020W                | 3  | 82424   |
| <b>tE(UUC)P</b>  | YPL178W (CBC2)                 | 16 | 210191  |
| <b>TEL15R-1</b>  |                                | 15 | 1083285 |
| <b>TEL15R-2</b>  |                                | 15 | 1084603 |
| <b>TEL15R-4</b>  |                                | 15 | 1087239 |
| <b>TEL15R-5</b>  |                                | 15 | 1088557 |
| <b>TEL15R-6</b>  |                                | 15 | 1089875 |
| <b>TEL1R</b>     |                                | 1  | 229310  |
| <b>TEL6R</b>     | YGL263W (COS12)                | 6  | 269505  |
| <b>TEL9L</b>     |                                | 9  | 80      |
| <b>tG(CCC)D</b>  | YDR390C (UBA2)                 | 4  | 1257042 |
| <b>tG(GCC)P2</b> | YPR160W (GPH1)                 | 16 | 860374  |
| <b>tG(UCC)O</b>  |                                | 15 | 110961  |
| <b>tH(GUG)M</b>  |                                | 13 | 363063  |
| <b>tl(AAU)P2</b> |                                | 16 | 880291  |
| <b>tl(auu)b</b>  |                                | 2  | 197592  |
| <b>tK(CUU)P</b>  | YPR010C (RPA135)               | 16 | 582057  |
| <b>tK(guu)G1</b> |                                | 7  | 122488  |
| <b>tL(GAG)G</b>  | YGR106C YGR107W                | 7  | 700669  |
| <b>tL(UAA)N</b>  | YNR054C                        | 14 | 726132  |
| <b>TLCprom</b>   |                                | 2  | 307366  |
| <b>tM(CAU)O2</b> | YOR343C                        | 15 | 976412  |
| <b>tM(CAU)P</b>  | YPL112C YPL111W (CAR1)         | 16 | 338847  |
| <b>tN(GUU)P</b>  |                                | 16 | 810671  |
| <b>tP(AGG)C</b>  | YCR006C                        | 3  | 123178  |
| <b>TPS3prom</b>  |                                | 13 | 793719  |
| <b>tQ(UUG)L</b>  | YLR154C                        | 12 | 448651  |
| <b>tR(acg)J</b>  |                                | 10 | 233828  |
| <b>tR(ACG)O</b>  | YOR007C (SGT2)                 | 15 | 340299  |
| <b>tR(CCG)L</b>  | YLR344W (RPL26A)               | 12 | 818608  |
| <b>tR(ucu)B</b>  |                                | 2  | 406026  |
| <b>tR(UCU)M2</b> | YML071C (DOR1) YML070W (DAK1)  | 13 | 131825  |
| <b>tS(AGA)M</b>  | YML006C (GIS4) YML005W         | 13 | 259158  |
| <b>tS(UGA)P</b>  | YPR072W (NOT5)                 | 16 | 689560  |
| <b>tT(AGU)O2</b> | YOR012W                        | 15 | 354040  |
| <b>tT(CGU)K</b>  | YKL209C (STE6) YKL208W (CBT1)  | 11 | 46736   |
| <b>tT(UGU)P</b>  | YPR109W                        | 16 | 744281  |
| <b>tV(AAC)M3</b> | YMR163C                        | 13 | 586635  |
| <b>tV(CAC)D</b>  | YDR306C YDR307W                | 4  | 1075508 |
| <b>tV(UAC)B</b>  | YBR044C (TCM62)                | 2  | 326749  |

|                |                                |   |         |
|----------------|--------------------------------|---|---------|
| YALCdelta2     | YAL007C (ERP2) YAL004W         | 1 | 138834  |
| YARCdelta3     |                                | 1 | 160106  |
| YARCdelta8     |                                | 1 | 209439  |
| YBLCdelta7     |                                | 2 | 196975  |
| YBLCdelta7up   |                                | 2 | 196999  |
| YBLCsigma1     |                                | 2 | 197893  |
| YBLCsigma1down |                                |   |         |
| YBLWdelta10    | YBL004W                        | 2 | 226580  |
| YBLWdelta6     |                                | 2 | 35592   |
| YBLWdelta8     | YBL005W-A                      | 2 | 220854  |
| YBLWtau1       |                                | 2 | 35839   |
| YBLWty2-1A     | YBL101C (ECM21) YBL101W-B      | 2 | 30282   |
| YBR028C        | YBR027C                        | 2 | 295607  |
| YBR084W        |                                | 2 | 412919  |
| YBRCdelta11    | YBR011C (IPP1)                 | 2 | 258624  |
| YBRCdelta18    | YBR210W                        | 2 | 643814  |
| YBRCdelta19    | YBR210W                        | 2 | 644317  |
| YBRWdelta16    | YBR044C (TCM62)                | 2 | 327347  |
| YBRWdelta17    |                                | 2 | 350415  |
| YCL001W-A      | YCR001W                        | 3 | 112684  |
| YCL026C-A      |                                | 3 | 74675   |
| YCLCdelta1     | YCL022C YCL020W                | 3 | 82675   |
| YCLWomega1     | YCL076W                        | 3 | 1172    |
| YCLWty5-1A     | YBR302C (COS2) YCL075W         | 3 | 1522    |
| YCLWty5-1B     | YCL074W                        | 3 | 2219    |
| YCLWty5-1C     |                                | 3 | 3266    |
| YCR020W-B      | YCR020C-A (MAK31)              | 3 | 155025  |
| YCR073W-A      | YCR073C (SSK22)                | 3 | 245688  |
| YCR097W-A      | YCR096C (HMRA2) YCR097W (HMRA) | 3 | 292557  |
| YCR102W-A      | YCR102C                        | 3 | 305455  |
| YCRCdelta14    |                                | 3 | 294680  |
| YCRCdelta6     | YCR006C                        | 3 | 123735  |
| YCRWdelta11    | YCR027C (RHB1)                 | 3 | 168259  |
| YCRWomega3     | YCR095C                        | 3 | 290644  |
| YDL130W-A      | YDL130W (RPP1B)                | 4 | 229171  |
| YDL133C-A      | YDL134C (PPH21) YDL133W        | 4 | 221724  |
| YDL233W        | YDL234C (GYP7) YDL232W (OST4)  | 4 | 36759   |
| YDL234C        |                                | 4 | 56375   |
| YDR034W-B      |                                | 4 | 521353  |
| YDR170W-A      | YDR170C (SEC7) YDR171W (HSP42) | 4 | 803233  |
| YDR525W-A      |                                | 4 | 1490644 |
| YDRCdelta9     | YDR098C-A YDR099W (BMH2)       | 4 | 651720  |
| YDRCTy1-2B     | YDR210W-D                      | 4 | 879819  |
| YDRCTy1-2D     | YDR211W (GCD6)                 | 4 | 882777  |
| YDRWdelta10    |                                | 4 | 668581  |
| YDRWdelta23    |                                | 4 | 1095804 |
| YDRWdelta30    |                                | 4 | 1353010 |
| YDRWdelta7     |                                | 4 | 520516  |
| YDRWsigma4     | YDR261C-C YDR262W              | 4 | 992776  |
| YE019C         |                                | 5 | 121087  |
| YELCdelta3     | YEL027W (CUP5)                 | 5 | 99490   |

|                    |                                 |   |        |
|--------------------|---------------------------------|---|--------|
| <b>YELCdelta4</b>  | YEL010W                         | 5 | 135612 |
| <b>YELCtau1</b>    |                                 | 5 | 118230 |
| <b>YER039C-A</b>   | YER039C (HVG1) YER040W (GLN3)   | 5 | 229262 |
| <b>YER048W-A</b>   | YER048C (CAJ1) YER049W          | 5 | 250717 |
| <b>YER091C-A</b>   | YER091C (MET6) YER092W (IES5)   | 5 | 342386 |
| <b>YER136W</b>     | YER135C                         | 5 | 440691 |
| <b>YER138W-A</b>   |                                 | 5 | 449471 |
| <b>YERCdelta10</b> | YER065C (ICL1) YER066W          | 5 | 287743 |
| <b>YERCdelta26</b> | YER181C YER182W                 | 5 | 552036 |
| <b>YERCdelta8</b>  | YER048C (CAJ1) YER048W-A        | 5 | 249108 |
| <b>YERComega1</b>  | YER186C YER187W                 | 5 | 563924 |
| <b>YERCtau3</b>    |                                 | 5 | 436276 |
| <b>YERWdelta12</b> | YER097W                         | 5 | 353395 |
| <b>YERWdelta13</b> | YER097W                         | 5 | 354132 |
| <b>YERWdelta17</b> | YER137C                         | 5 | 442731 |
| <b>YERWdelta21</b> |                                 | 5 | 444831 |
| <b>YERWdelta25</b> |                                 | 5 | 551438 |
| <b>YERWdelta9</b>  | YER048C (CAJ1) YER048W-A        | 5 | 249444 |
| <b>YERWomega2</b>  | YER189W                         | 5 | 568787 |
| <b>YFLCdelta6</b>  |                                 | 6 | 144518 |
| <b>YFLWdelta1</b>  | YFL020C (PAU5)                  | 6 | 100575 |
| <b>YFLWtau1</b>    |                                 | 6 | 144197 |
| <b>YFR032C-A</b>   | YFR032C                         | 6 | 223245 |
| <b>YFRCdelta9</b>  | YFR020W                         | 6 | 191672 |
| <b>YFRWdelta10</b> | YFR026C YFR027W (ECO1)          | 6 | 206909 |
| <b>YFRWdelta7</b>  | YFR007W                         | 6 | 158369 |
| <b>YGL197W</b>     | YGL196W                         | 7 | 125058 |
| <b>YGLCdelta5</b>  | YGL097W (SRM1)                  | 7 | 319007 |
| <b>YGLCtau3</b>    | YGL097W (SRM1)                  | 7 | 320353 |
| <b>YGLWdelta10</b> | YGL046W                         | 7 | 412452 |
| <b>YGLWdelta4</b>  | YGL097W (SRM1)                  | 7 | 318695 |
| <b>YGLWdelta6</b>  |                                 | 7 | 327902 |
| <b>YGLWtau2</b>    | YGL158W (RCK1)                  | 7 | 204986 |
| <b>YGRCdelta12</b> | YGR027C (RPS25A) YGR027W-A      | 7 | 535601 |
| <b>YGRCdelta20</b> | YGR109C (CLB6) YGR110W          | 7 | 713078 |
| <b>YGRCTy1-2A</b>  |                                 | 7 | 562187 |
| <b>YGRCTy1-2C</b>  |                                 | 7 | 564795 |
| <b>YGRCTy1-2D</b>  |                                 | 7 | 566274 |
| <b>YGRWdelta19</b> | YGR106C YGR107W                 | 7 | 701098 |
| <b>YGRWdelta26</b> | YGR150C                         | 7 | 793231 |
| <b>YHLComega1</b>  |                                 | 8 | 7993   |
| <b>YHLCsigma1</b>  | YHL009C (YAP3) YHL009W-A        | 8 | 85383  |
| <b>YHLWdelta2</b>  |                                 | 8 | 92235  |
| <b>YHRCdelta11</b> | YHR145C YHR146W (CRP1)          | 8 | 389613 |
| <b>YHRCdelta12</b> | YHR180W                         | 8 | 463915 |
| <b>YHRCdelta4</b>  | YHR005C-A (MRS11) YHR006W (STP2 | 8 | 116756 |
| <b>YHRCdelta5</b>  | YHR015W (MIP6)                  | 8 | 133192 |
| <b>YHRCdelta6</b>  | YHR015W (MIP6)                  | 8 | 133556 |
| <b>YHRCdelta8</b>  | YHR125W                         | 8 | 358674 |
| <b>YHRCtau4</b>    | YHR125W                         | 8 | 358852 |
| <b>YHRCTy1-1A</b>  |                                 | 8 | 543605 |

|                    |                                 |    |         |
|--------------------|---------------------------------|----|---------|
| <b>YHRCTy1-1B</b>  |                                 | 8  | 545105  |
| <b>YHRCTy1-1D</b>  | YHR215W (PHO12)                 | 8  | 548105  |
| <b>YHRWdelta9</b>  |                                 | 8  | 359081  |
| <b>YHRWtau3</b>    |                                 | 8  | 146835  |
| <b>YILCdelta2</b>  | YIL061C (SNP1) YIL060W          | 9  | 246217  |
| <b>YILCdelta3</b>  | YIL030C (SSM4)                  | 9  | 300407  |
| <b>YILCdelta5</b>  | YIL009C-A (EST3) YIL009W (FAA3) | 9  | 336705  |
| <b>YILWTy3-1A</b>  | YIL083C YIL082W-A               | 9  | 205567  |
| <b>YILWTy3-1B</b>  | YIL082W-A                       | 9  | 206573  |
| <b>YILWTy3-1C</b>  | YIL082W-A                       | 9  | 207929  |
| <b>YILWTy3-1D</b>  | YIL080W                         | 9  | 209285  |
| <b>YIR020W-B</b>   | YIR020C YIR021W (MRS1)          | 9  | 394914  |
| <b>YIRCdelta6</b>  | YIR038C (GTT1)                  | 9  | 426198  |
| <b>YJL163C</b>     | YJL164C (TPK1)                  | 10 | 112062  |
| <b>YJLCdelta6</b>  | YJL039C (NUP192)                | 10 | 374540  |
| <b>YJLCdelta7</b>  | YJL036W (SNX4)                  | 10 | 377294  |
| <b>YJLWdelta10</b> | YJL008C (CCT8)                  | 10 | 422289  |
| <b>YJLWdelta15</b> | YJR052W (RAD7)                  | 10 | 531204  |
| <b>YJLWdelta16</b> | YJR055W (HIT1)                  | 10 | 537429  |
| <b>YJLWdelta8</b>  | YJL011C                         | 10 | 416194  |
| <b>YJLWdelta9</b>  | YJL011C                         | 10 | 416587  |
| <b>YJLWtau4</b>    | YJL008C (CCT8)                  | 10 | 421634  |
| <b>YJRWdelta14</b> | YJR043C (POL32)                 | 10 | 517647  |
| <b>YJRWdelta20</b> | YJR056C YJR057W (CDC8)          | 10 | 543136  |
| <b>YJRWtau3</b>    | YJL011C                         | 10 | 415954  |
| <b>YKL033W-A</b>   | YKL033W                         | 11 | 374147  |
| <b>YKL053C-A</b>   | YKL054C (VID31) YKL053W         | 11 | 338827  |
| <b>YKL162C-A</b>   |                                 | 11 | 145927  |
| <b>YKLCdelta2</b>  | YKL189W (HYM1)                  | 11 | 83813   |
| <b>YKLCdelta4</b>  | YKL119C (VPH2) YKL117W (SBA1)   | 11 | 219041  |
| <b>YKLCdelta6</b>  |                                 | 11 | 313564  |
| <b>YKLWdelta1</b>  | YKL197C (PEX1)                  | 11 | 74241   |
| <b>YKRCdelta11</b> | YKR038C YKR039W (GAP1)          | 11 | 513172  |
| <b>YKRCdelta9</b>  | YKR026C (GCN3) YKR027W          | 11 | 489927  |
| <b>YKRWdelta10</b> | YKR026C (GCN3) YKR027W          | 11 | 490105  |
| <b>YLL018C-A</b>   | YLL019C (KNS1)                  | 12 | 108675  |
| <b>YLR107W</b>     |                                 | 12 | 364786  |
| <b>YLR262C-A</b>   | YLR262C (YPT6) YLR263W (RED1)   | 12 | 669468  |
| <b>YLR438C-A</b>   | YLR439W (MRPL4)                 | 12 | 1013903 |
| <b>YLRCdelta16</b> | YLR272C (YCS4)                  | 12 | 688119  |
| <b>YLRCdelta24</b> | YLR420W (URA4)                  | 12 | 963224  |
| <b>YLRCdelta27</b> | YLR455W                         | 12 | 1052298 |
| <b>YLRCtau1</b>    |                                 | 12 | 599570  |
| <b>YLRWdelta12</b> |                                 | 12 | 599268  |
| <b>YLRWdelta15</b> | YLR257W                         | 12 | 657449  |
| <b>YLRWdelta17</b> | YLR272C (YCS4)                  | 12 | 688369  |
| <b>YML081C-A</b>   | YML081W                         | 13 | 103983  |
| <b>YMLCdelta1</b>  | YML071C (DOR1) YML070W (DAK1)   | 13 | 131989  |
| <b>YMR046W-A</b>   | YMR046C                         | 13 | 362701  |
| <b>YMR158C-B</b>   | YMR158W-A                       | 13 | 573193  |
| <b>YMR194C-A</b>   | YMR195W (ICY1)                  | 13 | 652911  |



|             |                                 |    |        |
|-------------|---------------------------------|----|--------|
| YMRCDelta11 | YMR051C YMR052W (FAR3)          | 13 | 378726 |
| YMRCDelta14 | YMR106C (YKU80) YMR107W         | 13 | 481213 |
| YMRCTau1    | YMR012W (CLU1)                  | 13 | 290048 |
| YMRWdelta15 | YMR106C (YKU80) YMR107W         | 13 | 481570 |
| YMRWdelta16 | YMR118C YMR119W (ASI1)          | 13 | 503191 |
| YMRWdelta20 | YMR271C (URA10)                 | 13 | 809000 |
| YMRWdelta21 | YMR283C (RIT1) YMR284W (YKU70)  | 13 | 837450 |
| YNLWsigma2  | YNL043C YNL042W (BOP3)          | 14 | 546421 |
| YNR032C-A   | YNR033W (ABZ1)                  | 14 | 687242 |
| YNRCdelta9  | YNR054C                         | 14 | 727361 |
| YOL013W-A   |                                 | 15 | 300690 |
| YOLCdelta2  | YOL159C                         | 14 | 18301  |
| YOLCdelta8  |                                 | 15 | 300683 |
| YOLCdelta9  | YOR007C (SGT2)                  | 15 | 340598 |
| YOLWdelta6  | YOL055C (THI20) YOL054W         | 14 | 227094 |
| YOLWtau1    | YOL165C (AAD15) YOL164W         | 15 | 3809   |
| YOR129C     | YOR128C (ADE2)                  | 15 | 569202 |
| YOR235W     | YOR234C (RPL33B) YOR236W (DFR1) | 15 | 779868 |
| YOR298C-A   | YOR299W (BUD7)                  | 15 | 877225 |
| YORCdelta11 | YOR058C (ASE1)                  | 15 | 438176 |
| YORCdelta15 |                                 | 15 | 664001 |
| YORWdelta12 |                                 | 15 | 594510 |
| YORWdelta16 |                                 | 15 | 664323 |
| YORWdelta19 | YOR192C YOR193W                 | 14 | 703610 |
| YORWdelta22 | YOR343C                         | 15 | 969284 |
| YPL144W     | YPL145C (KES1) YPL143W (RPL33A) | 16 | 280479 |
| YPL183W-A   | YPL184C                         | 16 | 199094 |
| YPLCdelta1  | YPL258C (THI21) YPL257W         | 16 | 55657  |
| YPLCdelta10 |                                 | 16 | 436245 |
| YPLCTau1    |                                 | 16 | 436885 |
| YPLCTy4-1A  |                                 | 16 | 436535 |
| YPLCTy4-1B  |                                 | 16 | 438129 |
| YPLCTy4-1C  |                                 | 16 | 439373 |
| YPLCTy4-1D  |                                 | 16 | 440617 |
| YPLCTy4-1E  | YPL059W (GRX5)                  | 16 | 441861 |
| YPLWdelta11 |                                 | 16 | 436589 |
| YPLWdelta7  | YPL178W (CBC2)                  | 16 | 210450 |
| YPLWdelta9  |                                 | 16 | 436063 |
| YPR029C     | YPR030W (CSR2)                  | 16 | 626776 |
| YPR133W-A   | YPR133C (IWS1) YPR134W (MSS18)  | 16 | 797552 |
| YPRCdelta13 | YPR007C (SPO69) YPR008W (HAA1)  | 16 | 571840 |
| YPRCdelta15 | YPR120C (CLB5) YPR121W (THI22)  | 16 | 776664 |
| YPRCdelta22 | YPR159W (KRE6)                  | 16 | 850352 |
| YPRCTau3    |                                 | 16 | 881482 |
| YPRWdelta14 | YPR120C (CLB5) YPR121W (THI22)  | 16 | 776090 |
| YPRWdelta16 | YPR120C (CLB5) YPR121W (THI22)  | 16 | 777829 |
| YPRWtau4    |                                 | 16 | 933066 |
| YPT10cod    |                                 | 2  | 749232 |
| ZRT1        |                                 | 7  | 20994  |
| ZWF1prom    |                                 | 14 | 198218 |

| dist from left end | 2   | Non-ORF regi | # of promoter | HA-Htz1 CHIP (r | HA-Htz1 CHIP (p | Untagged contr |
|--------------------|-----|--------------|---------------|-----------------|-----------------|----------------|
| 456089             |     |              |               | 1.01            | 0.46            | 5.34           |
| 458448             |     |              |               | 0.66            | 0.31            | 1.43           |
| 737766             |     |              |               | 0.16            | 0.04            | 0.24           |
| 53886              |     |              |               | 0.22            | 0.06            | 1.56           |
| 54112              |     |              |               | 0.26            | 0.05            | 2.32           |
| 436112             | CEN | Sgl Promoter |               | #N/A            | #N/A            | #N/A           |
| 439891             | CEN | Sgl Promoter |               | #N/A            | #N/A            | #N/A           |
| 150946             | CEN | Non Promoter |               | #N/A            | #N/A            | #N/A           |
| 268141             | CEN | Non Promoter |               | #N/A            | #N/A            | #N/A           |
| 628866             | CEN | Non Promoter |               | #N/A            | #N/A            | #N/A           |
| 326702             | CEN | Sgl Promoter |               | #N/A            | #N/A            | #N/A           |
| 556069             | CEN | Sgl Promoter |               | #N/A            | #N/A            | #N/A           |
| 238281             | CEN | Sgl Promoter |               | #N/A            | #N/A            | #N/A           |
| 114094             | CEN | Sgl Promoter |               | #N/A            | #N/A            | #N/A           |
| 449863             | CEN | Non Promoter |               | #N/A            | #N/A            | 0.55           |
| 152113             | CEN | Dbl Promoter |               | #N/A            | #N/A            | #N/A           |
| 148621             | CEN | Sgl Promoter |               | #N/A            | #N/A            | #N/A           |
| 497032             | CEN | Sgl Promoter |               | #N/A            | #N/A            | #N/A           |
| 105696             | CEN | Sgl Promoter |               | #N/A            | #N/A            | #N/A           |
| 355743             | CEN | Non Promoter |               | #N/A            | #N/A            | #N/A           |
| 63552              |     |              |               | 0.66            | 0.30            | 0.39           |
| 64742              |     |              |               | #N/A            | #N/A            | #N/A           |
| 67085              |     |              |               | 0.65            | 0.31            | 0.32           |
| 66519              |     |              |               | 0.63            | 0.30            | #N/A           |
| 710576             |     |              |               | 0.76            | 0.34            | 0.71           |
| 710633             |     |              |               | 1.06            | 0.48            | 0.72           |
| 261119             |     |              |               | 0.69            | 0.31            | #N/A           |
| 260277             |     |              |               | #N/A            | #N/A            | #N/A           |
| 258918             |     |              |               | 0.41            | 0.14            | 0.85           |
| 900494             |     |              |               | 1.30            | 0.58            | 1.75           |
| 23811              |     |              |               | 0.58            | 0.25            | #N/A           |
| 48614              |     |              |               | 0.71            | 0.32            | 0.82           |
| 623026             |     |              |               | #N/A            | #N/A            | #N/A           |
| 874911             |     |              |               | 2.10            | 0.83            | 0.85           |
|                    |     |              |               | #N/A            | #N/A            | 0.55           |
| 81501              |     |              |               | 0.33            | 0.13            | 0.85           |
| 86600              |     |              |               | 1.21            | 0.54            | #N/A           |
| 71514              |     |              |               | #N/A            | #N/A            | #N/A           |
| 278309             |     |              |               | 1.24            | 0.56            | 2.20           |
| 276352             |     |              |               | 2.56            | 0.92            | #N/A           |
| 278434             |     |              |               | #N/A            | #N/A            | #N/A           |
| 278407             |     |              |               | 1.14            | 0.52            | #N/A           |
| 278732             |     |              |               | 2.27            | 0.87            | #N/A           |
| 464740             |     |              |               | 1.13            | 0.52            | 1.34           |
| 463020             |     |              |               | #N/A            | #N/A            | 0.73           |
| 275584             |     |              |               | 2.78            | 0.94            | 1.14           |
| 31942              |     |              |               | 0.68            | 0.30            | 0.69           |
| 32638              |     |              |               | 1.63            | 0.71            | #N/A           |
| 31222              |     |              |               | #N/A            | #N/A            | #N/A           |
| 569423             |     |              |               | 0.18            | 0.02            | 0.27           |

|         |            |              |      |      |      |
|---------|------------|--------------|------|------|------|
| 182087  |            |              | 1.66 | 0.73 | 0.95 |
| 255810  |            |              | 0.36 | 0.14 | 0.52 |
| 256091  |            |              | 0.21 | 0.04 | 0.95 |
| 576228  |            |              | #N/A | #N/A | #N/A |
| 49222   |            |              | 1.67 | 0.72 | 0.60 |
| 48546   |            |              | 0.73 | 0.33 | #N/A |
| 48545   |            |              | #N/A | #N/A | #N/A |
| 120136  |            |              | #N/A | #N/A | #N/A |
| 157221  |            |              | 1.58 | 0.69 | #N/A |
| 157507  |            |              | 1.81 | 0.75 | #N/A |
|         |            |              | 0.69 | 0.31 | 1.45 |
| 235923  |            |              | 0.31 | 0.09 | 0.42 |
| 155126  |            |              | 2.44 | 0.91 | #N/A |
| 152259  | INTERGENIC | Dbl Promoter | 1.14 | 0.51 | 5.07 |
| 436490  | INTERGENIC | Sgl Promoter | 1.55 | 0.67 | 7.39 |
| 440249  | INTERGENIC | Sgl Promoter | 1.07 | 0.49 | 5.21 |
| 151388  | INTERGENIC | Non Promoter | 0.99 | 0.47 | 2.92 |
| 269019  | INTERGENIC | Non Promoter | 0.73 | 0.33 | 3.90 |
| 326832  | INTERGENIC | Sgl Promoter | #N/A | #N/A | 1.76 |
| 556372  | INTERGENIC | Sgl Promoter | 2.70 | 0.93 | 2.67 |
| 238899  | INTERGENIC | Sgl Promoter | 2.00 | 0.82 | 2.65 |
| 115286  | INTERGENIC | Sgl Promoter | 1.19 | 0.53 | 2.32 |
| 450261  | INTERGENIC | Non Promoter | 1.79 | 0.75 | 7.64 |
| 153519  | INTERGENIC | Dbl Promoter | 0.79 | 0.36 | 1.48 |
| 149104  | INTERGENIC | Sgl Promoter | 1.09 | 0.50 | #N/A |
| 497128  | INTERGENIC | Sgl Promoter | #N/A | #N/A | #N/A |
| 106048  | INTERGENIC | Sgl Promoter | 1.24 | 0.57 | 3.41 |
| 356140  | INTERGENIC | Non Promoter | 0.74 | 0.34 | 2.80 |
| 259534  |            |              | 0.35 | 0.10 | #N/A |
| 579848  |            |              | #N/A | #N/A | 0.73 |
| 682134  | INTERGENIC | Sgl Promoter | 0.62 | 0.30 | 0.50 |
| 134499  |            |              | 0.69 | 0.33 | 1.72 |
| 135760  |            |              | 0.48 | 0.22 | 0.75 |
| 60685   | INTRON     | Sgl Promoter | 0.27 | 0.05 | 1.67 |
| 333343  | INTRON     | Sgl Promoter | #N/A | #N/A | 0.57 |
| 415213  | INTRON     | Non Promoter | #N/A | #N/A | #N/A |
| 293013  | INTRON     | Dbl Promoter | #N/A | #N/A | #N/A |
| 118158  | INTRON     | Sgl Promoter | 0.28 | 0.06 | 1.20 |
| 580058  | INTRON     | Sgl Promoter | 0.28 | 0.07 | 1.35 |
| 1237643 | INTRON     | Sgl Promoter | 0.21 | 0.04 | 1.56 |
| 433194  | INTRON     | Dbl Promoter | 0.54 | 0.23 | 1.01 |
| 311524  | INTRON     | Dbl Promoter | 0.27 | 0.06 | 1.76 |
| 168998  | INTRON     | Dbl Promoter | 0.48 | 0.19 | 0.96 |
| 127104  | INTRON     | Dbl Promoter | 0.22 | 0.04 | 1.03 |
| 148657  | INTRON     | Non Promoter | 0.27 | 0.08 | 1.03 |
| 580741  | INTRON     | Sgl Promoter | 0.67 | 0.30 | 1.79 |
| 415913  | INTRON     | Sgl Promoter | #N/A | #N/A | #N/A |
| 62922   | INTRON     | Non Promoter | 0.23 | 0.05 | 1.43 |
| 722309  | INTRON     | Sgl Promoter | 0.17 | 0.03 | 1.15 |
| 405453  | INTRON     | Dbl Promoter | 0.30 | 0.09 | 3.13 |
| 282665  | INTRON     | Sgl Promoter | 0.23 | 0.04 | 1.02 |

|         |            |              |      |      |      |
|---------|------------|--------------|------|------|------|
| 82275   |            |              | 1.92 | 0.79 | 0.81 |
| 516096  |            |              | #N/A | #N/A | 0.67 |
| 459677  | INTERGENIC | Sgl Promoter | 0.34 | 0.13 | 1.13 |
| 460917  | INTERGENIC | Sgl Promoter | 0.19 | 0.02 | 1.44 |
| 469318  | INTERGENIC | Sgl Promoter | #N/A | #N/A | 1.22 |
| 472970  | INTERGENIC | Non Promoter | #N/A | #N/A | 1.21 |
| 118230  | INTERGENIC | Non Promoter | #N/A | #N/A | 1.16 |
| 442731  | INTERGENIC | Sgl Promoter | 1.58 | 0.68 | 1.14 |
| 139459  | INTERGENIC | Sgl Promoter | 0.13 | 0.01 | 0.17 |
| 1403356 | INTERGENIC | Sgl Promoter | 1.01 | 0.46 | 1.60 |
| 167807  | INTERGENIC | Sgl Promoter | 1.39 | 0.61 | #N/A |
| 178249  | INTERGENIC | Dbl Promoter | 1.28 | 0.58 | 0.99 |
| 140135  | INTERGENIC | Sgl Promoter | 0.65 | 0.30 | 0.68 |
| 142304  | INTERGENIC | Dbl Promoter | #N/A | #N/A | #N/A |
| 899692  | INTERGENIC | Non Promoter | #N/A | #N/A | #N/A |
| 228722  | INTERGENIC | Non Promoter | 1.01 | 0.48 | #N/A |
| 425185  | INTERGENIC | Non Promoter | 0.46 | 0.17 | 0.97 |
| 559305  | INTERGENIC | Sgl Promoter | 1.88 | 0.79 | 0.48 |
| 857538  | INTERGENIC | Sgl Promoter | 0.73 | 0.33 | 1.74 |
| 545675  | INTERGENIC | Non Promoter | #N/A | #N/A | #N/A |
| 542714  | INTERGENIC | Sgl Promoter | 0.78 | 0.37 | 0.86 |
| 610558  | INTERGENIC | Sgl Promoter | 0.13 | 0.01 | 0.22 |
| 259923  | INTERGENIC | Dbl Promoter | 1.39 | 0.63 | #N/A |
| 718884  | INTERGENIC | Non Promoter | 0.24 | 0.04 | #N/A |
| 431487  | INTERGENIC | Dbl Promoter | 0.42 | 0.19 | 1.92 |
| 61890   | INTERGENIC | Dbl Promoter | #N/A | #N/A | #N/A |
| 164790  | INTERGENIC | Non Promoter | 0.69 | 0.31 | 1.53 |
| 794936  | INTERGENIC | Non Promoter | #N/A | #N/A | #N/A |
| 88514   | INTERGENIC | Non Promoter | #N/A | #N/A | #N/A |
| 795572  | INTERGENIC | Non Promoter | 0.37 | 0.12 | 0.95 |
| 136526  | INTERGENIC | Sgl Promoter | 0.92 | 0.42 | 1.18 |
| 174342  | INTERGENIC | Dbl Promoter | 0.42 | 0.16 | 1.35 |
| 366668  | INTERGENIC | Non Promoter | #N/A | #N/A | 1.78 |
| 349276  | INTERGENIC | Sgl Promoter | 0.97 | 0.44 | 1.42 |
| 794696  | INTERGENIC | Non Promoter | 0.52 | 0.23 | #N/A |
| 410869  | INTERGENIC | Sgl Promoter | 0.68 | 0.33 | 0.59 |
| 324046  | INTERGENIC | Non Promoter | 0.62 | 0.29 | 1.04 |
| 39164   | INTERGENIC | Dbl Promoter | 2.06 | 0.84 | 1.01 |
| 176224  | INTERGENIC | Sgl Promoter | 0.51 | 0.21 | #N/A |
| 587105  | INTERGENIC | Sgl Promoter | 1.97 | 0.81 | 1.07 |
| 61699   | INTERGENIC | Dbl Promoter | 0.51 | 0.20 | #N/A |
| 97395   | INTERGENIC | Dbl Promoter | #N/A | #N/A | 0.64 |
| 365247  | INTERGENIC | Sgl Promoter | 0.99 | 0.46 | 0.80 |
| 719555  | INTERGENIC | Non Promoter | 0.92 | 0.42 | 1.25 |
| 411384  | INTERGENIC | Non Promoter | 0.32 | 0.08 | #N/A |
| 939915  | INTERGENIC | Dbl Promoter | 1.75 | 0.75 | #N/A |
| 832808  | INTERGENIC | Dbl Promoter | 2.83 | 0.95 | 0.80 |
| 411802  | INTERGENIC | Sgl Promoter | 0.48 | 0.19 | #N/A |
| 205735  | INTERGENIC | Sgl Promoter | 1.53 | 0.68 | #N/A |
| 775187  | INTERGENIC | Sgl Promoter | 0.87 | 0.40 | 1.08 |
| 219970  | INTERGENIC | Sgl Promoter | 1.83 | 0.77 | 0.91 |

|         |            |              |      |      |      |
|---------|------------|--------------|------|------|------|
| 321874  | INTERGENIC | Dbl Promoter | 2.13 | 0.85 | 0.88 |
| 768547  | INTERGENIC | Dbl Promoter | #N/A | #N/A | #N/A |
| 857578  | INTERGENIC | Sgl Promoter | 0.46 | 0.18 | 0.66 |
| 166759  | INTERGENIC | Sgl Promoter | 0.48 | 0.19 | 1.23 |
| 312270  | INTERGENIC | Sgl Promoter | 0.78 | 0.37 | 1.10 |
| 794649  | INTERGENIC | Sgl Promoter | #N/A | #N/A | #N/A |
| 215081  | INTERGENIC | Sgl Promoter | 0.30 | 0.07 | 0.77 |
| 643443  | INTERGENIC | Sgl Promoter | 0.61 | 0.27 | 1.13 |
| 436063  | INTERGENIC | Non Promoter | 0.48 | 0.20 | 0.73 |
| 776090  | INTERGENIC | Dbl Promoter | 0.95 | 0.44 | 1.61 |
| 406582  | INTERGENIC | Sgl Promoter | 0.80 | 0.38 | 1.00 |
| 569274  | INTERGENIC | Sgl Promoter | 0.89 | 0.41 | 0.76 |
| 531877  | INTERGENIC | Non Promoter | #N/A | #N/A | #N/A |
| 545363  | INTERGENIC | Non Promoter | 0.47 | 0.18 | 0.98 |
| 336705  | INTERGENIC | Dbl Promoter | #N/A | #N/A | #N/A |
| 205002  | INTERGENIC | Sgl Promoter | 1.39 | 0.61 | 1.01 |
| 355720  | INTERGENIC | Sgl Promoter | 0.90 | 0.43 | 0.74 |
| 541480  | INTERGENIC | Non Promoter | #N/A | #N/A | 1.02 |
| 513172  | INTERGENIC | Dbl Promoter | 0.71 | 0.32 | #N/A |
| 427330  | INTERGENIC | Sgl Promoter | #N/A | #N/A | #N/A |
| 794485  | INTERGENIC | Non Promoter | 0.55 | 0.26 | 1.73 |
| 463933  | INTERGENIC | Sgl Promoter | 0.67 | 0.32 | 1.00 |
| 1018359 | INTERGENIC | Dbl Promoter | #N/A | #N/A | #N/A |
| 1019404 | INTERGENIC | Dbl Promoter | 1.52 | 0.66 | 0.83 |
| 197928  | INTERGENIC | Non Promoter | 1.01 | 0.46 | 0.72 |
| 645505  | INTERGENIC | Sgl Promoter | 2.12 | 0.84 | #N/A |
| 82675   | INTERGENIC | Dbl Promoter | #N/A | #N/A | #N/A |
| 177834  | INTERGENIC | Sgl Promoter | 1.59 | 0.71 | 0.91 |
| 355136  | INTERGENIC | Sgl Promoter | 0.38 | 0.16 | #N/A |
| 487830  | INTERGENIC | Non Promoter | 2.70 | 0.94 | 1.09 |
| 328872  | INTERGENIC | Non Promoter | 0.52 | 0.21 | #N/A |
| 542197  | INTERGENIC | Sgl Promoter | 2.64 | 0.93 | #N/A |
| 370701  | INTERGENIC | Dbl Promoter | 0.92 | 0.42 | #N/A |
| 117239  | INTERGENIC | Dbl Promoter | 1.71 | 0.73 | 0.95 |
| 141799  | INTERGENIC | Sgl Promoter | 0.86 | 0.39 | 1.09 |
| 797429  | INTERGENIC | Dbl Promoter | 0.81 | 0.39 | #N/A |
| 291133  | INTERGENIC | Sgl Promoter | 0.68 | 0.30 | 0.85 |
| 210450  | INTERGENIC | Sgl Promoter | #N/A | #N/A | #N/A |
| 36977   | INTERGENIC | Non Promoter | 0.45 | 0.18 | 0.67 |
| 1095804 | INTERGENIC | Sgl Promoter | #N/A | #N/A | 1.00 |
| 158369  | INTERGENIC | Sgl Promoter | 0.49 | 0.19 | #N/A |
| 441277  | INTERGENIC | Non Promoter | 0.27 | 0.09 | #N/A |
| 358674  | INTERGENIC | Sgl Promoter | #N/A | #N/A | #N/A |
| 352602  | INTERGENIC | Dbl Promoter | 0.92 | 0.43 | #N/A |
| 375320  | INTERGENIC | Dbl Promoter | 2.70 | 0.93 | 0.81 |
| 560476  | INTERGENIC | Non Promoter | 0.58 | 0.25 | 0.38 |
| 1257392 | INTERGENIC | Sgl Promoter | 0.42 | 0.15 | 1.20 |
| 84271   | INTERGENIC | Dbl Promoter | 1.98 | 0.80 | 0.65 |
| 993170  | INTERGENIC | Dbl Promoter | 1.37 | 0.62 | 0.79 |
| 62081   | INTERGENIC | Dbl Promoter | #N/A | #N/A | #N/A |
| 162481  | INTERGENIC | Sgl Promoter | 0.74 | 0.35 | #N/A |

|         |            |              |      |      |      |
|---------|------------|--------------|------|------|------|
| 182261  | INTERGENIC | Sgl Promoter | 0.73 | 0.33 | 1.11 |
| 845887  | INTERGENIC | Non Promoter | 1.40 | 0.62 | #N/A |
| 931163  | INTERGENIC | Sgl Promoter | #N/A | #N/A | #N/A |
| 397051  | INTERGENIC | Sgl Promoter | 0.99 | 0.45 | 0.76 |
| 531750  | INTERGENIC | Sgl Promoter | 0.76 | 0.36 | #N/A |
| 184170  | INTERGENIC | Sgl Promoter | #N/A | #N/A | #N/A |
| 282421  | INTERGENIC | Sgl Promoter | 0.48 | 0.22 | 0.81 |
| 861301  | INTERGENIC | Sgl Promoter | 1.45 | 0.65 | 0.98 |
| 780393  | INTERGENIC | Sgl Promoter | 1.51 | 0.66 | 1.05 |
| 96449   | INTERGENIC | Sgl Promoter | 0.99 | 0.45 | #N/A |
| 111430  | INTERGENIC | Non Promoter | 0.45 | 0.21 | 0.94 |
| 207643  | INTERGENIC | Non Promoter | 0.55 | 0.23 | #N/A |
| 110857  | INTERGENIC | Non Promoter | 0.57 | 0.26 | #N/A |
| 320353  | INTERGENIC | Sgl Promoter | 3.01 | 0.96 | 0.72 |
| 62958   | INTERGENIC | Sgl Promoter | #N/A | #N/A | #N/A |
| 313247  | INTERGENIC | Sgl Promoter | 1.42 | 0.63 | 1.48 |
| 363363  | INTERGENIC | Non Promoter | 0.42 | 0.15 | #N/A |
| 443367  | INTERGENIC | Sgl Promoter | 0.66 | 0.29 | #N/A |
| 551438  | INTERGENIC | Sgl Promoter | #N/A | #N/A | #N/A |
| 739938  | INTERGENIC | Dbl Promoter | 0.78 | 0.37 | 1.01 |
| 183934  | INTERGENIC | Dbl Promoter | 2.09 | 0.84 | #N/A |
| 210920  | INTERGENIC | Non Promoter | 0.30 | 0.07 | 0.42 |
| 735212  | INTERGENIC | Non Promoter | #N/A | #N/A | #N/A |
| 1052298 | INTERGENIC | Sgl Promoter | 0.42 | 0.15 | 0.91 |
| 570475  | INTERGENIC | Dbl Promoter | 0.38 | 0.12 | 0.78 |
| 602905  | INTERGENIC | Sgl Promoter | 0.59 | 0.26 | 0.86 |
| 819760  | INTERGENIC | Non Promoter | 0.10 | 0.01 | #N/A |
| 884764  | INTERGENIC | Sgl Promoter | 1.33 | 0.59 | #N/A |
| 605758  | INTERGENIC | Non Promoter | 1.34 | 0.60 | 1.22 |
| 151227  | INTERGENIC | Sgl Promoter | #N/A | #N/A | #N/A |
| 1202162 | INTERGENIC | Sgl Promoter | #N/A | #N/A | 0.98 |
| 1352678 | INTERGENIC | Dbl Promoter | 0.23 | 0.04 | #N/A |
| 135612  | INTERGENIC | Sgl Promoter | 0.63 | 0.30 | #N/A |
| 435943  | INTERGENIC | Non Promoter | 1.44 | 0.64 | 0.92 |
| 122697  | INTERGENIC | Sgl Promoter | 0.57 | 0.24 | 0.87 |
| 186063  | INTERGENIC | Dbl Promoter | #N/A | #N/A | #N/A |
| 876663  | INTERGENIC | Sgl Promoter | #N/A | #N/A | #N/A |
| 300407  | INTERGENIC | Sgl Promoter | #N/A | #N/A | #N/A |
| 415619  | INTERGENIC | Sgl Promoter | 2.43 | 0.90 | #N/A |
| 203187  | INTERGENIC | Dbl Promoter | 1.13 | 0.51 | 0.82 |
| 481213  | INTERGENIC | Dbl Promoter | 1.70 | 0.74 | 0.97 |
| 359824  |            |              | #N/A | #N/A | #N/A |
| 116061  | INTERGENIC | Dbl Promoter | 0.48 | 0.19 | 0.68 |
| 578848  | INTERGENIC | Dbl Promoter | 2.03 | 0.81 | #N/A |
| 875734  | INTERGENIC | Sgl Promoter | #N/A | #N/A | #N/A |
| 438907  | INTERGENIC | Sgl Promoter | 0.34 | 0.09 | 0.67 |
| 182517  | INTERGENIC | Dbl Promoter | 1.63 | 0.71 | 0.87 |
| 90939   | INTERGENIC | Sgl Promoter | 0.47 | 0.18 | 8.57 |
| 1462406 | INTERGENIC | Sgl Promoter | 0.45 | 0.17 | 1.19 |
| 423958  | INTERGENIC | Dbl Promoter | 1.14 | 0.52 | 0.87 |
| 858281  | INTERGENIC | Dbl Promoter | 1.75 | 0.75 | 0.85 |

|         |            |              |      |      |      |
|---------|------------|--------------|------|------|------|
| 458565  | INTERGENIC | Sgl Promoter | #N/A | #N/A | #N/A |
| 628684  | INTERGENIC | Non Promoter | #N/A | #N/A | #N/A |
| 505332  | INTERGENIC | Dbl Promoter | #N/A | #N/A | 1.01 |
| 700947  | INTERGENIC | Dbl Promoter | 0.29 | 0.10 | 1.46 |
| 9961    | INTERGENIC | Non Promoter | 0.60 | 0.26 | 1.13 |
| 347835  | INTERGENIC | Dbl Promoter | 0.34 | 0.13 | 0.45 |
| 520212  | INTERGENIC | Sgl Promoter | 1.82 | 0.76 | 1.08 |
| 424845  | INTERGENIC | Dbl Promoter | 1.36 | 0.62 | 0.81 |
| 84709   | INTERGENIC | Sgl Promoter | #N/A | #N/A | 1.37 |
| 963224  | INTERGENIC | Sgl Promoter | 0.27 | 0.09 | #N/A |
| 617922  | INTERGENIC | Dbl Promoter | 1.47 | 0.65 | 1.22 |
| 592706  | INTERGENIC | Dbl Promoter | #N/A | #N/A | #N/A |
| 309037  | INTERGENIC | Sgl Promoter | 0.41 | 0.15 | #N/A |
| 149926  | INTERGENIC | Sgl Promoter | 0.44 | 0.18 | 0.81 |
| 1176373 | INTERGENIC | Sgl Promoter | 0.46 | 0.18 | 1.09 |
| 100769  | INTERGENIC | Sgl Promoter | 0.54 | 0.24 | 1.21 |
| 391007  | INTERGENIC | Dbl Promoter | 1.17 | 0.54 | 1.03 |
| 422826  | INTERGENIC | Sgl Promoter | #N/A | #N/A | #N/A |
| 517647  | INTERGENIC | Sgl Promoter | #N/A | #N/A | #N/A |
| 573111  | INTERGENIC | Non Promoter | #N/A | #N/A | #N/A |
| 710444  | INTERGENIC | Dbl Promoter | 0.82 | 0.38 | #N/A |
| 977185  | INTERGENIC | Sgl Promoter | 0.31 | 0.09 | 0.92 |
| 339943  | INTERGENIC | Dbl Promoter | 0.22 | 0.06 | 0.55 |
| 128070  | INTERGENIC | Dbl Promoter | 0.42 | 0.15 | 1.12 |
| 137657  | INTERGENIC | Dbl Promoter | #N/A | #N/A | 0.08 |
| 731443  | INTERGENIC | Sgl Promoter | 1.34 | 0.60 | 0.93 |
| 74937   | INTERGENIC | Sgl Promoter | 0.65 | 0.31 | 1.15 |
| 976252  | INTERGENIC | Sgl Promoter | #N/A | #N/A | #N/A |
| 103132  | INTERGENIC | Sgl Promoter | 0.80 | 0.37 | #N/A |
| 633007  | INTERGENIC | Sgl Promoter | 1.53 | 0.67 | 0.51 |
| 228612  | INTERGENIC | Dbl Promoter | 0.95 | 0.45 | #N/A |
| 487707  | INTERGENIC | Dbl Promoter | #N/A | #N/A | 0.82 |
| 810979  | INTERGENIC | Non Promoter | 0.39 | 0.15 | 0.96 |
| 123735  | INTERGENIC | Sgl Promoter | 0.64 | 0.28 | 0.77 |
| 631997  | INTERGENIC | Sgl Promoter | 0.52 | 0.24 | 0.68 |
| 139506  | INTERGENIC | Dbl Promoter | 0.45 | 0.16 | #N/A |
| 101622  | INTERGENIC | Sgl Promoter | #N/A | #N/A | #N/A |
| 93697   | INTERGENIC | Sgl Promoter | 1.24 | 0.56 | 1.19 |
| 196332  | INTERGENIC | Dbl Promoter | 0.61 | 0.27 | #N/A |
| 548098  | INTERGENIC | Dbl Promoter | 1.09 | 0.50 | 1.05 |
| 568520  | INTERGENIC | Non Promoter | 1.11 | 0.50 | 2.33 |
| 301380  | INTERGENIC | Non Promoter | 0.35 | 0.13 | 1.03 |
| 464771  | INTERGENIC | Sgl Promoter | 2.72 | 0.94 | 1.24 |
| 808537  | INTERGENIC | Sgl Promoter | 0.76 | 0.34 | #N/A |
| 352149  | INTERGENIC | Non Promoter | 1.56 | 0.70 | 0.94 |
| 168259  | INTERGENIC | Sgl Promoter | #N/A | #N/A | #N/A |
| 521353  | INTERGENIC | Dbl Promoter | 1.39 | 0.63 | #N/A |
| 645540  | INTERGENIC | Sgl Promoter | 0.80 | 0.37 | 1.16 |
| 802943  | INTERGENIC | Dbl Promoter | 0.36 | 0.10 | #N/A |
| 250717  | INTERGENIC | Dbl Promoter | 1.08 | 0.49 | 0.68 |
| 131931  | INTERGENIC | Sgl Promoter | 1.89 | 0.78 | #N/A |



|         |            |              |      |      |      |
|---------|------------|--------------|------|------|------|
| 134545  | INTERGENIC | Sgl Promoter | 0.52 | 0.21 | #N/A |
| 448843  | INTERGENIC | Sgl Promoter | 0.75 | 0.35 | #N/A |
| 621114  | INTERGENIC | Dbl Promoter | 1.14 | 0.52 | 1.07 |
| 622150  | INTERGENIC | Dbl Promoter | 0.66 | 0.30 | 0.70 |
| 234017  | INTERGENIC | Non Promoter | 0.68 | 0.32 | 1.20 |
| 491005  | INTERGENIC | Dbl Promoter | 1.34 | 0.61 | 0.90 |
| 374945  | INTERGENIC | Non Promoter | 0.37 | 0.11 | 0.81 |
| 340598  | INTERGENIC | Sgl Promoter | 0.54 | 0.22 | #N/A |
| 819311  | INTERGENIC | Sgl Promoter | 0.39 | 0.13 | 0.71 |
| 538460  | INTERGENIC | Sgl Promoter | 1.66 | 0.71 | #N/A |
| 138918  | INTERGENIC | Non Promoter | 0.48 | 0.19 | #N/A |
| 405773  | INTERGENIC | Sgl Promoter | #N/A | #N/A | 0.46 |
| 829110  | INTERGENIC | Sgl Promoter | 1.14 | 0.52 | 0.92 |
| 374540  | INTERGENIC | Sgl Promoter | 0.73 | 0.35 | #N/A |
| 162836  | INTERGENIC | Sgl Promoter | 1.08 | 0.50 | 1.61 |
| 748261  | INTERGENIC | Non Promoter | #N/A | #N/A | #N/A |
| 131989  | INTERGENIC | Dbl Promoter | #N/A | #N/A | 0.76 |
| 227595  | INTERGENIC | Sgl Promoter | 2.61 | 0.93 | 1.05 |
| 438088  | INTERGENIC | Sgl Promoter | 1.23 | 0.57 | #N/A |
| 981207  | INTERGENIC | Dbl Promoter | #N/A | #N/A | #N/A |
| 1306301 | INTERGENIC | Sgl Promoter | 0.43 | 0.19 | #N/A |
| 86937   | INTERGENIC | Sgl Promoter | #N/A | #N/A | 0.85 |
| 561837  | INTERGENIC | Non Promoter | 0.43 | 0.18 | #N/A |
| 133192  | INTERGENIC | Sgl Promoter | #N/A | #N/A | #N/A |
| 524596  | INTERGENIC | Non Promoter | 1.11 | 0.50 | 1.43 |
| 260221  | INTERGENIC | Dbl Promoter | 1.18 | 0.54 | 1.05 |
| 191672  | INTERGENIC | Sgl Promoter | #N/A | #N/A | #N/A |
| 784912  | INTERGENIC | Dbl Promoter | 0.40 | 0.13 | 0.60 |
| 274957  | INTERGENIC | Dbl Promoter | 1.08 | 0.49 | #N/A |
| 289381  | INTERGENIC | Dbl Promoter | 1.39 | 0.62 | 0.92 |
| 290240  | INTERGENIC | Dbl Promoter | 0.57 | 0.24 | 1.04 |
| 249989  | INTERGENIC | Dbl Promoter | 0.29 | 0.06 | 0.36 |
| 690102  | INTERGENIC | Sgl Promoter | 1.02 | 0.46 | 1.37 |
| 266681  | INTERGENIC | Sgl Promoter | #N/A | #N/A | 0.97 |
| 294680  | INTERGENIC | Non Promoter | 1.20 | 0.54 | #N/A |
| 434464  | INTERGENIC | Sgl Promoter | #N/A | #N/A | #N/A |
| 116414  | INTERGENIC | Dbl Promoter | 0.69 | 0.33 | #N/A |
| 175304  | INTERGENIC | Sgl Promoter | #N/A | #N/A | #N/A |
| 326101  | INTERGENIC | Dbl Promoter | 1.40 | 0.62 | #N/A |
| 59504   | INTERGENIC | Sgl Promoter | 1.71 | 0.73 | 0.59 |
| 105182  | INTERGENIC | Sgl Promoter | 0.87 | 0.40 | 0.79 |
| 561605  | INTERGENIC | Non Promoter | 1.31 | 0.59 | 1.25 |
| 114137  | INTERGENIC | Non Promoter | #N/A | #N/A | #N/A |
| 47158   | INTERGENIC | Dbl Promoter | 1.18 | 0.54 | 0.96 |
| 662352  | INTERGENIC | Sgl Promoter | 0.64 | 0.30 | 0.36 |
| 1004620 | INTERGENIC | Dbl Promoter | 1.54 | 0.69 | 1.45 |
| 467223  | INTERGENIC | Sgl Promoter | 0.49 | 0.23 | #N/A |
| 744686  | INTERGENIC | Sgl Promoter | 1.06 | 0.48 | 0.88 |
| 439613  | INTERGENIC | Dbl Promoter | 0.69 | 0.31 | 0.74 |
| 469682  | INTERGENIC | Non Promoter | 0.32 | 0.08 | #N/A |
| 412452  | INTERGENIC | Sgl Promoter | #N/A | #N/A | #N/A |

|         |            |              |      |      |      |
|---------|------------|--------------|------|------|------|
| 824053  | INTERGENIC | Dbl Promoter | 0.29 | 0.08 | 0.71 |
| 75396   | INTERGENIC | Sgl Promoter | 1.25 | 0.58 | 1.03 |
| 378521  | INTERGENIC | Sgl Promoter | 1.59 | 0.69 | 1.63 |
| 308853  | INTERGENIC | Sgl Promoter | 0.57 | 0.27 | 0.88 |
| 379706  | INTERGENIC | Non Promoter | 0.36 | 0.14 | 1.16 |
| 688119  | INTERGENIC | Sgl Promoter | 0.72 | 0.33 | #N/A |
| 372696  | INTERGENIC | Sgl Promoter | #N/A | #N/A | #N/A |
| 421483  | INTERGENIC | Sgl Promoter | 0.92 | 0.42 | 0.86 |
| 587273  | INTERGENIC | Sgl Promoter | 0.29 | 0.07 | 0.99 |
| 664001  | INTERGENIC | Non Promoter | 0.65 | 0.29 | #N/A |
| 1075901 | INTERGENIC | Dbl Promoter | 1.12 | 0.51 | 1.60 |
| 327026  | INTERGENIC | Sgl Promoter | 1.33 | 0.61 | 1.28 |
| 489548  | INTERGENIC | Dbl Promoter | 0.59 | 0.25 | 1.37 |
| 288015  | INTERGENIC | Non Promoter | 0.74 | 0.35 | 0.85 |
| 880290  | INTERGENIC | Sgl Promoter | 1.02 | 0.46 | #N/A |
| 415954  | INTERGENIC | Sgl Promoter | 1.09 | 0.50 | #N/A |
| 303713  | INTERGENIC | Sgl Promoter | 1.27 | 0.57 | 1.00 |
| 304759  | INTERGENIC | Sgl Promoter | 0.51 | 0.21 | 1.13 |
| 379585  | INTERGENIC | Dbl Promoter | 1.82 | 0.76 | 1.07 |
| 946843  | INTERGENIC | Sgl Promoter | 0.83 | 0.38 | 1.10 |
| 167880  | INTERGENIC | Dbl Promoter | #N/A | #N/A | #N/A |
| 210924  | INTERGENIC | Dbl Promoter | 2.55 | 0.91 | 1.29 |
| 354234  | INTERGENIC | Sgl Promoter | #N/A | #N/A | #N/A |
| 543136  | INTERGENIC | Dbl Promoter | 0.59 | 0.25 | 1.74 |
| 169116  | INTERGENIC | Sgl Promoter | 0.33 | 0.08 | #N/A |
| 838187  | INTERGENIC | Dbl Promoter | 1.59 | 0.69 | 1.01 |
| 288898  | INTERGENIC | Sgl Promoter | 0.83 | 0.38 | 1.07 |
| 151458  | INTERGENIC | Dbl Promoter | 1.44 | 0.64 | 2.09 |
| 147596  | INTERGENIC | Non Promoter | #N/A | #N/A | #N/A |
| 144003  | INTERGENIC | Sgl Promoter | 1.40 | 0.62 | 1.35 |
| 142177  | INTERGENIC | Dbl Promoter | 0.56 | 0.23 | 0.63 |
| 138834  | INTERGENIC | Dbl Promoter | 2.61 | 0.92 | 0.95 |
| 137701  | INTERGENIC | Non Promoter | 0.55 | 0.23 | 0.97 |
| 136917  | INTERGENIC | Sgl Promoter | 1.89 | 0.79 | 1.19 |
| 135857  | INTERGENIC | Dbl Promoter | 2.75 | 0.94 | 0.95 |
| 134187  | INTERGENIC | Non Promoter | 1.15 | 0.52 | 1.11 |
| 130803  | INTERGENIC | Sgl Promoter | 0.56 | 0.23 | 0.91 |
| 129273  | INTERGENIC | Dbl Promoter | 2.26 | 0.86 | 0.83 |
| 128405  | INTERGENIC | Sgl Promoter | 0.45 | 0.21 | 1.01 |
| 126907  | INTERGENIC | Non Promoter | #N/A | #N/A | #N/A |
| 124883  | INTERGENIC | Sgl Promoter | 2.51 | 0.92 | 0.98 |
| 120229  | INTERGENIC | Dbl Promoter | 3.06 | 0.96 | 0.89 |
| 118568  | INTERGENIC | Non Promoter | 0.50 | 0.20 | #N/A |
| 114923  | INTERGENIC | Dbl Promoter | 3.45 | 0.98 | 0.55 |
| 113618  | INTERGENIC | Sgl Promoter | 2.09 | 0.84 | 0.73 |
| 110850  | INTERGENIC | Sgl Promoter | 0.64 | 0.30 | 1.04 |
| 108881  | INTERGENIC | Sgl Promoter | 2.07 | 0.84 | 1.04 |
| 101572  | INTERGENIC | Sgl Promoter | 1.81 | 0.76 | 0.90 |
| 100232  | INTERGENIC | Sgl Promoter | 1.74 | 0.74 | 0.43 |
| 95637   | INTERGENIC | Non Promoter | 0.12 | 0.01 | 0.16 |
| 94694   | INTERGENIC | Sgl Promoter | #N/A | #N/A | #N/A |

|        |            |              |      |      |      |
|--------|------------|--------------|------|------|------|
| 92907  | INTERGENIC | Dbl Promoter | 2.42 | 0.90 | 0.89 |
| 87862  | INTERGENIC | Non Promoter | 0.05 | 0.00 | 0.09 |
| 87293  | INTERGENIC | Dbl Promoter | 4.38 | 1.00 | #N/A |
| 84756  | INTERGENIC | Sgl Promoter | 2.82 | 0.95 | 0.65 |
| 83342  | INTERGENIC | Non Promoter | 0.08 | 0.01 | 0.09 |
| 82713  | INTERGENIC | Dbl Promoter | 1.87 | 0.77 | #N/A |
| 80717  | INTERGENIC | Non Promoter | #N/A | #N/A | 0.15 |
| 76434  | INTERGENIC | Dbl Promoter | 3.43 | 0.98 | 0.72 |
| 75050  | INTERGENIC | Non Promoter | 0.70 | 0.32 | #N/A |
| 74027  | INTERGENIC | Sgl Promoter | #N/A | #N/A | 1.04 |
| 70662  | INTERGENIC | Dbl Promoter | 0.72 | 0.34 | #N/A |
| 71793  | INTERGENIC | Dbl Promoter | 0.09 | 0.01 | 0.23 |
| 68723  | INTERGENIC | Sgl Promoter | 0.34 | 0.09 | 0.51 |
| 65785  | INTERGENIC | Non Promoter | 0.21 | 0.04 | 0.62 |
| 62847  | INTERGENIC | Sgl Promoter | 3.19 | 0.97 | 0.98 |
| 61238  | INTERGENIC | Sgl Promoter | #N/A | #N/A | 0.21 |
| 58702  | INTERGENIC | Sgl Promoter | 0.54 | 0.22 | 1.12 |
| 57957  | INTERGENIC | Sgl Promoter | #N/A | #N/A | #N/A |
| 57495  | INTERGENIC | Sgl Promoter | 0.32 | 0.08 | 0.28 |
| 57036  | INTERGENIC | Sgl Promoter | 0.25 | 0.04 | 0.22 |
| 54996  | INTERGENIC | Sgl Promoter | #N/A | #N/A | #N/A |
| 52808  | INTERGENIC | Sgl Promoter | 1.39 | 0.63 | 1.15 |
| 51862  | INTERGENIC | Non Promoter | 0.09 | 0.01 | 0.12 |
| 48569  | INTERGENIC | Sgl Promoter | 1.14 | 0.52 | 0.68 |
| 45904  | INTERGENIC | Dbl Promoter | 1.56 | 0.67 | 0.42 |
| 42886  | INTERGENIC | Non Promoter | 0.09 | 0.01 | #N/A |
| 42182  | INTERGENIC | Sgl Promoter | 1.36 | 0.61 | 0.94 |
| 39265  | INTERGENIC | Dbl Promoter | 1.03 | 0.47 | 0.32 |
| 37470  | INTERGENIC | Sgl Promoter | 2.14 | 0.85 | #N/A |
| 36515  | INTERGENIC | Sgl Promoter | 0.82 | 0.39 | #N/A |
| 35161  | INTERGENIC | Sgl Promoter | 0.81 | 0.37 | 0.55 |
| 33454  | INTERGENIC | Sgl Promoter | 1.41 | 0.62 | 0.58 |
| 29170  | INTERGENIC | Dbl Promoter | 0.85 | 0.40 | 0.78 |
| 30371  | INTERGENIC | Dbl Promoter | 1.45 | 0.65 | 1.19 |
| 15041  | INTERGENIC | Dbl Promoter | 0.73 | 0.33 | 0.77 |
| 16338  | INTERGENIC | Dbl Promoter | 0.61 | 0.26 | 1.18 |
| 17635  | INTERGENIC | Dbl Promoter | 0.93 | 0.43 | 1.00 |
| 18932  | INTERGENIC | Dbl Promoter | 1.57 | 0.69 | 0.88 |
| 20229  | INTERGENIC | Dbl Promoter | 1.15 | 0.53 | 0.85 |
| 21526  | INTERGENIC | Dbl Promoter | 1.00 | 0.46 | 0.63 |
| 22232  | INTERGENIC | Non Promoter | 1.06 | 0.48 | #N/A |
| 12047  | INTERGENIC | Dbl Promoter | 0.71 | 0.32 | 1.09 |
| 11566  | INTERGENIC | Non Promoter | 1.53 | 0.67 | 1.34 |
| 10092  | INTERGENIC | Dbl Promoter | 2.01 | 0.82 | 0.84 |
| 3435   | INTERGENIC | Sgl Promoter | 0.57 | 0.24 | 0.81 |
| 5967   | INTERGENIC | Sgl Promoter | #N/A | #N/A | #N/A |
| 1807   | INTERGENIC | Non Promoter | 0.32 | 0.09 | 0.84 |
| 139155 | INTERGENIC | Dbl Promoter | 0.84 | 0.39 | #N/A |
| 24001  | INTERGENIC | Non Promoter | 1.26 | 0.56 | #N/A |
| 155007 | INTERGENIC | Dbl Promoter | 3.01 | 0.96 | #N/A |
| 154067 | INTERGENIC | Non Promoter | 0.31 | 0.09 | 0.73 |

|        |            |              |      |      |      |
|--------|------------|--------------|------|------|------|
| 156756 | INTERGENIC | Non Promoter | 0.46 | 0.20 | 0.45 |
| 158967 | INTERGENIC | Dbl Promoter | 2.83 | 0.95 | 0.70 |
| 160106 | INTERGENIC | Non Promoter | 0.89 | 0.41 | 0.69 |
| 164545 | INTERGENIC | Sgl Promoter | 0.28 | 0.08 | 0.80 |
| 169371 | INTERGENIC | Dbl Promoter | 3.00 | 0.95 | 0.58 |
| 170392 | INTERGENIC | Non Promoter | 0.40 | 0.17 | 0.51 |
| 175994 | INTERGENIC | Sgl Promoter | 3.12 | 0.97 | 0.80 |
| 176855 | INTERGENIC | Sgl Promoter | 0.92 | 0.44 | 1.02 |
| 178151 | INTERGENIC | Sgl Promoter | 0.66 | 0.32 | #N/A |
| 179280 | INTERGENIC | Sgl Promoter | 0.45 | 0.17 | 1.06 |
| 181136 | INTERGENIC | Dbl Promoter | 1.36 | 0.62 | 0.86 |
| 184887 | INTERGENIC | Sgl Promoter | 2.02 | 0.83 | 0.78 |
| 186316 | INTERGENIC | Sgl Promoter | 1.23 | 0.55 | 0.64 |
| 188102 | INTERGENIC | Sgl Promoter | 2.02 | 0.81 | #N/A |
| 189421 | INTERGENIC | Sgl Promoter | 2.65 | 0.93 | 0.81 |
| 192614 | INTERGENIC | Sgl Promoter | 1.49 | 0.66 | 0.68 |
| 193600 | INTERGENIC | Sgl Promoter | 0.24 | 0.05 | 0.70 |
| 197499 | INTERGENIC | Non Promoter | 0.50 | 0.20 | 0.93 |
| 198819 | INTERGENIC | Non Promoter | 0.72 | 0.32 | 0.70 |
| 200139 | INTERGENIC | Non Promoter | #N/A | #N/A | 0.70 |
| 201460 | INTERGENIC | Non Promoter | 0.67 | 0.30 | 0.85 |
| 202587 | INTERGENIC | Dbl Promoter | #N/A | #N/A | 0.87 |
| 203394 | INTERGENIC | Dbl Promoter | 0.41 | 0.14 | #N/A |
| 208358 | INTERGENIC | Sgl Promoter | 1.40 | 0.62 | #N/A |
| 209439 | INTERGENIC | Non Promoter | 1.24 | 0.57 | 0.95 |
| 218132 | INTERGENIC | Dbl Promoter | 1.03 | 0.47 | 0.75 |
| 218541 | INTERGENIC | Sgl Promoter | 0.44 | 0.18 | 0.83 |
| 220190 | INTERGENIC | Sgl Promoter | 0.92 | 0.42 | 0.94 |
| 221041 | INTERGENIC | Sgl Promoter | 1.21 | 0.54 | 1.22 |
| 222398 | INTERGENIC | Sgl Promoter | 0.42 | 0.17 | 0.72 |
| 224003 | INTERGENIC | Non Promoter | 1.40 | 0.64 | 0.70 |
| 224555 | INTERGENIC | Sgl Promoter | 1.44 | 0.65 | 1.06 |
| 225452 | INTERGENIC | Dbl Promoter | 2.45 | 0.90 | 0.79 |
| 227734 | INTERGENIC | Sgl Promoter | 1.14 | 0.52 | 0.88 |
| 166268 | INTERGENIC | Sgl Promoter | 0.58 | 0.25 | #N/A |
| 211245 | INTERGENIC | Non Promoter | 1.06 | 0.49 | 0.79 |
| 212721 | INTERGENIC | Non Promoter | 1.11 | 0.51 | 0.78 |
| 214197 | INTERGENIC | Non Promoter | 1.15 | 0.53 | 0.87 |
| 215673 | INTERGENIC | Non Promoter | 1.45 | 0.64 | 0.93 |
| 217149 | INTERGENIC | Non Promoter | 0.63 | 0.29 | 1.77 |
| 183765 | INTERGENIC | Dbl Promoter | 1.55 | 0.68 | 1.03 |
| 190188 | INTERGENIC | Sgl Promoter | 0.64 | 0.31 | 0.45 |
| 183137 | INTERGENIC | Dbl Promoter | 0.11 | 0.01 | 0.28 |
| 238165 | INTERGENIC | Sgl Promoter | 0.93 | 0.43 | 2.38 |
| 237111 | INTERGENIC | Non Promoter | 0.52 | 0.21 | #N/A |
| 236451 | INTERGENIC | Dbl Promoter | 0.33 | 0.13 | 0.52 |
| 235353 | INTERGENIC | Non Promoter | #N/A | #N/A | #N/A |
| 220854 | INTERGENIC | Sgl Promoter | 0.40 | 0.18 | 1.03 |
| 217429 | INTERGENIC | Dbl Promoter | #N/A | #N/A | #N/A |
| 216651 | INTERGENIC | Sgl Promoter | 1.37 | 0.62 | 1.19 |
| 212590 | INTERGENIC | Non Promoter | 0.52 | 0.23 | 1.37 |

|        |            |              |      |      |      |
|--------|------------|--------------|------|------|------|
| 209611 | INTERGENIC | Sgl Promoter | 2.23 | 0.86 | 0.81 |
| 207152 | INTERGENIC | Dbl Promoter | 2.47 | 0.91 | #N/A |
| 206065 | INTERGENIC | Non Promoter | 0.58 | 0.25 | 1.05 |
| 203364 | INTERGENIC | Non Promoter | 0.98 | 0.47 | 0.30 |
| 202015 | INTERGENIC | Dbl Promoter | 4.15 | 0.99 | 0.94 |
| 196975 | INTERGENIC | Non Promoter | 1.53 | 0.68 | 0.86 |
| 194081 | INTERGENIC | Sgl Promoter | 1.70 | 0.74 | 1.13 |
| 192410 | INTERGENIC | Dbl Promoter | 1.27 | 0.58 | 0.66 |
| 186803 | INTERGENIC | Sgl Promoter | 1.71 | 0.74 | 1.02 |
| 185957 | INTERGENIC | Non Promoter | #N/A | #N/A | #N/A |
| 184312 | INTERGENIC | Sgl Promoter | 0.80 | 0.36 | #N/A |
| 181619 | INTERGENIC | Sgl Promoter | 1.53 | 0.67 | #N/A |
| 177833 | INTERGENIC | Sgl Promoter | 1.20 | 0.54 | #N/A |
| 174879 | INTERGENIC | Non Promoter | 0.32 | 0.12 | 1.59 |
| 172493 | INTERGENIC | Sgl Promoter | 1.10 | 0.50 | 1.44 |
| 171440 | INTERGENIC | Sgl Promoter | #N/A | #N/A | 1.28 |
| 170582 | INTERGENIC | Sgl Promoter | 1.32 | 0.59 | 0.94 |
| 168382 | INTERGENIC | Dbl Promoter | 0.11 | 0.01 | 0.34 |
| 167477 | INTERGENIC | Non Promoter | 0.65 | 0.29 | 0.70 |
| 165024 | INTERGENIC | Dbl Promoter | 0.83 | 0.40 | 0.73 |
| 166093 | INTERGENIC | Dbl Promoter | 0.30 | 0.08 | 0.32 |
| 163000 | INTERGENIC | Non Promoter | #N/A | #N/A | #N/A |
| 161658 | INTERGENIC | Sgl Promoter | 1.70 | 0.72 | 0.78 |
| 160143 | INTERGENIC | Dbl Promoter | 2.14 | 0.85 | 0.67 |
| 158615 | INTERGENIC | Sgl Promoter | 3.00 | 0.96 | 0.59 |
| 153807 | INTERGENIC | Sgl Promoter | #N/A | #N/A | #N/A |
| 151452 | INTERGENIC | Sgl Promoter | #N/A | #N/A | 1.05 |
| 150406 | INTERGENIC | Non Promoter | #N/A | #N/A | #N/A |
| 147168 | INTERGENIC | Sgl Promoter | 1.70 | 0.73 | 0.88 |
| 146146 | INTERGENIC | Dbl Promoter | 1.50 | 0.66 | 0.56 |
| 143948 | INTERGENIC | Sgl Promoter | 1.65 | 0.71 | 0.95 |
| 142071 | INTERGENIC | Non Promoter | 0.11 | 0.01 | 0.16 |
| 141206 | INTERGENIC | Dbl Promoter | 0.44 | 0.19 | 0.41 |
| 138300 | INTERGENIC | Non Promoter | 1.58 | 0.68 | 1.57 |
| 136647 | INTERGENIC | Sgl Promoter | 1.80 | 0.75 | 0.51 |
| 135957 | INTERGENIC | Dbl Promoter | 1.03 | 0.47 | 1.00 |
| 134102 | INTERGENIC | Non Promoter | 0.35 | 0.14 | 0.69 |
| 132383 | INTERGENIC | Dbl Promoter | 2.95 | 0.96 | 1.11 |
| 127854 | INTERGENIC | Non Promoter | 0.87 | 0.40 | 0.85 |
| 126787 | INTERGENIC | Sgl Promoter | 0.66 | 0.30 | 1.29 |
| 125084 | INTERGENIC | Dbl Promoter | 3.44 | 0.98 | 0.80 |
| 122712 | INTERGENIC | Sgl Promoter | 1.50 | 0.67 | 0.85 |
| 119294 | INTERGENIC | Sgl Promoter | 0.46 | 0.21 | 0.50 |
| 117548 | INTERGENIC | Dbl Promoter | 1.67 | 0.71 | 0.77 |
| 115532 | INTERGENIC | Non Promoter | 0.37 | 0.13 | 1.01 |
| 113721 | INTERGENIC | Dbl Promoter | 2.67 | 0.94 | 1.31 |
| 112759 | INTERGENIC | Non Promoter | #N/A | #N/A | #N/A |
| 111395 | INTERGENIC | Sgl Promoter | 1.81 | 0.75 | #N/A |
| 110552 | INTERGENIC | Sgl Promoter | 1.37 | 0.63 | 0.93 |
| 107890 | INTERGENIC | Dbl Promoter | 1.75 | 0.76 | 0.85 |
| 105266 | INTERGENIC | Sgl Promoter | 0.26 | 0.05 | 0.73 |

|        |            |              |      |      |      |
|--------|------------|--------------|------|------|------|
| 101844 | INTERGENIC | Dbl Promoter | 2.14 | 0.85 | 0.76 |
| 100329 | INTERGENIC | Non Promoter | 0.66 | 0.29 | #N/A |
| 96900  | INTERGENIC | Sgl Promoter | 0.75 | 0.34 | 1.05 |
| 93811  | INTERGENIC | Non Promoter | 0.46 | 0.17 | 1.12 |
| 92322  | INTERGENIC | Sgl Promoter | 1.71 | 0.74 | 0.85 |
| 90596  | INTERGENIC | Sgl Promoter | 0.91 | 0.41 | #N/A |
| 90214  | INTERGENIC | Sgl Promoter | 0.85 | 0.40 | 0.76 |
| 88181  | INTERGENIC | Non Promoter | #N/A | #N/A | 0.79 |
| 86713  | INTERGENIC | Sgl Promoter | 0.19 | 0.04 | 0.98 |
| 84490  | INTERGENIC | Sgl Promoter | #N/A | #N/A | #N/A |
| 80888  | INTERGENIC | Dbl Promoter | #N/A | #N/A | 0.28 |
| 80368  | INTERGENIC | Non Promoter | 0.67 | 0.30 | 0.86 |
| 75249  | INTERGENIC | Dbl Promoter | 2.37 | 0.89 | 0.76 |
| 73060  | INTERGENIC | Non Promoter | #N/A | #N/A | #N/A |
| 71856  | INTERGENIC | Dbl Promoter | 2.59 | 0.92 | 0.75 |
| 69703  | INTERGENIC | Sgl Promoter | #N/A | #N/A | 1.00 |
| 67159  | INTERGENIC | Non Promoter | #N/A | #N/A | #N/A |
| 63866  | INTERGENIC | Dbl Promoter | 0.90 | 0.41 | 0.67 |
| 61192  | INTERGENIC | Sgl Promoter | 0.28 | 0.09 | 0.44 |
| 59811  | INTERGENIC | Sgl Promoter | 0.93 | 0.43 | 0.73 |
| 48815  | INTERGENIC | Dbl Promoter | #N/A | #N/A | 0.84 |
| 47353  | INTERGENIC | Sgl Promoter | 1.27 | 0.57 | #N/A |
| 46555  | INTERGENIC | Non Promoter | #N/A | #N/A | #N/A |
| 45968  | INTERGENIC | Dbl Promoter | 0.49 | 0.19 | 0.68 |
| 44246  | INTERGENIC | Sgl Promoter | 0.36 | 0.11 | 1.70 |
| 43164  | INTERGENIC | Non Promoter | #N/A | #N/A | #N/A |
| 40899  | INTERGENIC | Sgl Promoter | 1.90 | 0.78 | #N/A |
| 39133  | INTERGENIC | Sgl Promoter | 0.86 | 0.41 | #N/A |
| 29632  | INTERGENIC | Non Promoter | 1.06 | 0.48 | #N/A |
| 24941  | INTERGENIC | Non Promoter | 0.43 | 0.15 | #N/A |
| 24093  | INTERGENIC | Dbl Promoter | 2.01 | 0.81 | 1.40 |
| 22070  | INTERGENIC | Sgl Promoter | 1.72 | 0.73 | 1.12 |
| 18317  | INTERGENIC | Sgl Promoter | 2.77 | 0.94 | 1.09 |
| 14241  | INTERGENIC | Sgl Promoter | 0.39 | 0.12 | 1.69 |
| 8848   | INTERGENIC | Sgl Promoter | 1.56 | 0.69 | 0.84 |
| 7151   | INTERGENIC | Sgl Promoter | 0.34 | 0.12 | 0.66 |
| 8177   | INTERGENIC | Sgl Promoter | 0.63 | 0.29 | 0.82 |
| 5790   | INTERGENIC | Dbl Promoter | 0.61 | 0.27 | 0.66 |
| 197453 | INTERGENIC | Non Promoter | #N/A | #N/A | #N/A |
| 199023 | INTERGENIC | Non Promoter | 1.00 | 0.47 | 0.86 |
| 227034 | INTERGENIC | Sgl Promoter | #N/A | #N/A | #N/A |
| 9583   | INTERGENIC | Non Promoter | #N/A | #N/A | #N/A |
| 36386  | INTERGENIC | Non Promoter | 1.08 | 0.49 | 1.18 |
| 241666 | INTERGENIC | Sgl Promoter | 0.81 | 0.37 | 1.57 |
| 242767 | INTERGENIC | Dbl Promoter | #N/A | #N/A | 0.74 |
| 244324 | INTERGENIC | Non Promoter | #N/A | #N/A | #N/A |
| 245864 | INTERGENIC | Dbl Promoter | 1.52 | 0.66 | #N/A |
| 246968 | INTERGENIC | Sgl Promoter | 1.52 | 0.66 | 1.06 |
| 248763 | INTERGENIC | Sgl Promoter | 0.80 | 0.37 | 0.91 |
| 251746 | INTERGENIC | Sgl Promoter | 0.68 | 0.32 | 0.41 |
| 252520 | INTERGENIC | Sgl Promoter | 0.99 | 0.47 | 1.24 |



|        |            |              |      |      |      |
|--------|------------|--------------|------|------|------|
| 255327 | INTERGENIC | Sgl Promoter | 0.84 | 0.39 | 1.95 |
| 256285 | INTERGENIC | Dbl Promoter | 0.32 | 0.13 | 0.70 |
| 257066 | INTERGENIC | Non Promoter | 0.88 | 0.40 | 1.19 |
| 258624 | INTERGENIC | Sgl Promoter | 1.42 | 0.63 | 0.82 |
| 266134 | INTERGENIC | Sgl Promoter | #N/A | #N/A | 0.46 |
| 267666 | INTERGENIC | Sgl Promoter | 0.50 | 0.20 | 0.56 |
| 270203 | INTERGENIC | Dbl Promoter | 1.67 | 0.71 | 0.92 |
| 270903 | INTERGENIC | Non Promoter | 0.69 | 0.31 | 1.28 |
| 274383 | INTERGENIC | Sgl Promoter | 1.39 | 0.62 | 0.51 |
| 276209 | INTERGENIC | Sgl Promoter | 2.04 | 0.82 | 1.03 |
| 278977 | INTERGENIC | Dbl Promoter | 2.37 | 0.89 | 2.49 |
| 281399 | INTERGENIC | Sgl Promoter | 1.16 | 0.53 | 0.76 |
| 283694 | INTERGENIC | Sgl Promoter | 1.77 | 0.75 | 1.01 |
| 284384 | INTERGENIC | Non Promoter | #N/A | #N/A | #N/A |
| 290637 | INTERGENIC | Non Promoter | 0.41 | 0.18 | 1.41 |
| 292833 | INTERGENIC | Sgl Promoter | 1.72 | 0.74 | 0.67 |
| 294381 | INTERGENIC | Sgl Promoter | #N/A | #N/A | #N/A |
| 296325 | INTERGENIC | Sgl Promoter | 1.05 | 0.49 | #N/A |
| 298248 | INTERGENIC | Dbl Promoter | 2.13 | 0.84 | 2.04 |
| 301475 | INTERGENIC | Sgl Promoter | #N/A | #N/A | #N/A |
| 301900 | INTERGENIC | Sgl Promoter | 1.31 | 0.59 | #N/A |
| 304886 | INTERGENIC | Non Promoter | 0.35 | 0.11 | 0.87 |
| 306225 | INTERGENIC | Sgl Promoter | 1.25 | 0.56 | #N/A |
| 307543 | INTERGENIC | Sgl Promoter | 1.38 | 0.63 | 0.95 |
| 310520 | INTERGENIC | Sgl Promoter | 2.39 | 0.89 | 0.94 |
| 311853 | INTERGENIC | Dbl Promoter | #N/A | #N/A | 0.84 |
| 315531 | INTERGENIC | Sgl Promoter | 1.21 | 0.55 | #N/A |
| 316924 | INTERGENIC | Sgl Promoter | 1.01 | 0.48 | #N/A |
| 318222 | INTERGENIC | Sgl Promoter | 1.86 | 0.78 | #N/A |
| 321834 | INTERGENIC | Sgl Promoter | 1.76 | 0.74 | 1.50 |
| 324295 | INTERGENIC | Sgl Promoter | #N/A | #N/A | 0.74 |
| 326749 | INTERGENIC | Sgl Promoter | 1.29 | 0.58 | 1.22 |
| 330463 | INTERGENIC | Sgl Promoter | 0.81 | 0.38 | #N/A |
| 331789 | INTERGENIC | Dbl Promoter | 1.26 | 0.56 | 0.79 |
| 332787 | INTERGENIC | Sgl Promoter | 0.25 | 0.05 | 0.33 |
| 334342 | INTERGENIC | Non Promoter | 0.30 | 0.07 | 0.91 |
| 337139 | INTERGENIC | Sgl Promoter | 1.66 | 0.72 | 0.80 |
| 338676 | INTERGENIC | Non Promoter | 2.40 | 0.89 | 0.91 |
| 339631 | INTERGENIC | Sgl Promoter | 2.02 | 0.82 | 0.78 |
| 341882 | INTERGENIC | Dbl Promoter | 0.97 | 0.44 | 0.54 |
| 343057 | INTERGENIC | Dbl Promoter | 1.11 | 0.50 | 0.84 |
| 344558 | INTERGENIC | Non Promoter | 3.77 | 0.99 | 0.80 |
| 350415 | INTERGENIC | Non Promoter | 1.65 | 0.72 | 1.01 |
| 353628 | INTERGENIC | Sgl Promoter | 1.03 | 0.48 | 1.17 |
| 356817 | INTERGENIC | Sgl Promoter | 2.69 | 0.93 | #N/A |
| 360608 | INTERGENIC | Sgl Promoter | 1.95 | 0.81 | 0.89 |
| 363606 | INTERGENIC | Sgl Promoter | 1.17 | 0.54 | 0.78 |
| 364743 | INTERGENIC | Sgl Promoter | 0.37 | 0.13 | 1.12 |
| 366927 | INTERGENIC | Sgl Promoter | 1.23 | 0.57 | 1.60 |
| 368541 | INTERGENIC | Non Promoter | #N/A | #N/A | 1.09 |
| 369994 | INTERGENIC | Sgl Promoter | 2.20 | 0.87 | 1.23 |



|        |            |              |      |      |      |
|--------|------------|--------------|------|------|------|
| 372059 | INTERGENIC | Sgl Promoter | 0.57 | 0.24 | 0.65 |
| 373817 | INTERGENIC | Sgl Promoter | 0.41 | 0.14 | 0.63 |
| 376530 | INTERGENIC | Sgl Promoter | 0.17 | 0.03 | 0.61 |
| 379176 | INTERGENIC | Sgl Promoter | 0.35 | 0.10 | 0.58 |
| 380366 | INTERGENIC | Dbl Promoter | #N/A | #N/A | 1.02 |
| 381985 | INTERGENIC | Sgl Promoter | 1.22 | 0.56 | 1.39 |
| 383065 | INTERGENIC | Sgl Promoter | 2.29 | 0.88 | 0.85 |
| 386239 | INTERGENIC | Sgl Promoter | 1.40 | 0.62 | 1.20 |
| 387789 | INTERGENIC | Sgl Promoter | 0.25 | 0.04 | 1.10 |
| 390329 | INTERGENIC | Sgl Promoter | 0.84 | 0.39 | 0.88 |
| 391759 | INTERGENIC | Non Promoter | 0.92 | 0.42 | 0.82 |
| 393078 | INTERGENIC | Dbl Promoter | 0.18 | 0.03 | 0.38 |
| 395337 | INTERGENIC | Non Promoter | 0.43 | 0.15 | #N/A |
| 398568 | INTERGENIC | Sgl Promoter | 1.50 | 0.66 | 0.89 |
| 401207 | INTERGENIC | Sgl Promoter | 2.05 | 0.83 | 0.44 |
| 405832 | INTERGENIC | Sgl Promoter | 0.77 | 0.36 | 0.93 |
| 408123 | INTERGENIC | Dbl Promoter | 0.75 | 0.35 | 1.15 |
| 409123 | INTERGENIC | Dbl Promoter | 0.21 | 0.03 | 0.44 |
| 411008 | INTERGENIC | Sgl Promoter | 0.70 | 0.32 | 0.74 |
| 415937 | INTERGENIC | Dbl Promoter | 0.64 | 0.28 | 0.62 |
| 414140 | INTERGENIC | Non Promoter | 0.43 | 0.15 | 0.65 |
| 417958 | INTERGENIC | Non Promoter | 1.50 | 0.66 | 0.86 |
| 419056 | INTERGENIC | Non Promoter | 0.94 | 0.45 | 0.82 |
| 420155 | INTERGENIC | Non Promoter | 0.90 | 0.41 | 0.59 |
| 423719 | INTERGENIC | Dbl Promoter | 1.05 | 0.48 | 0.88 |
| 424944 | INTERGENIC | Non Promoter | #N/A | #N/A | #N/A |
| 426144 | INTERGENIC | Non Promoter | 1.16 | 0.53 | 1.42 |
| 427109 | INTERGENIC | Sgl Promoter | #N/A | #N/A | 0.63 |
| 427652 | INTERGENIC | Sgl Promoter | #N/A | #N/A | 1.29 |
| 429502 | INTERGENIC | Sgl Promoter | 0.73 | 0.34 | 0.43 |
| 434360 | INTERGENIC | Non Promoter | #N/A | #N/A | #N/A |
| 435975 | INTERGENIC | Dbl Promoter | 1.71 | 0.74 | #N/A |
| 436905 | INTERGENIC | Sgl Promoter | #N/A | #N/A | #N/A |
| 441469 | INTERGENIC | Sgl Promoter | 1.01 | 0.46 | #N/A |
| 443776 | INTERGENIC | Non Promoter | 0.36 | 0.11 | 1.19 |
| 445017 | INTERGENIC | Sgl Promoter | #N/A | #N/A | 1.58 |
| 447664 | INTERGENIC | Dbl Promoter | #N/A | #N/A | 0.68 |
| 449622 | INTERGENIC | Sgl Promoter | 1.43 | 0.64 | 0.65 |
| 450836 | INTERGENIC | Non Promoter | 0.36 | 0.11 | 1.21 |
| 452613 | INTERGENIC | Dbl Promoter | 0.27 | 0.07 | 0.58 |
| 457873 | INTERGENIC | Non Promoter | 0.45 | 0.17 | #N/A |
| 458826 | INTERGENIC | Dbl Promoter | 1.46 | 0.66 | #N/A |
| 461132 | INTERGENIC | Non Promoter | 1.58 | 0.69 | 0.85 |
| 467202 | INTERGENIC | Sgl Promoter | 0.53 | 0.22 | 0.53 |
| 469702 | INTERGENIC | Non Promoter | #N/A | #N/A | #N/A |
| 474153 | INTERGENIC | Sgl Promoter | #N/A | #N/A | #N/A |
| 477625 | INTERGENIC | Dbl Promoter | 0.59 | 0.25 | 0.90 |
| 480389 | INTERGENIC | Non Promoter | #N/A | #N/A | #N/A |
| 481318 | INTERGENIC | Sgl Promoter | 1.21 | 0.56 | 0.52 |
| 483924 | INTERGENIC | Sgl Promoter | 1.14 | 0.53 | 0.87 |
| 484696 | INTERGENIC | Sgl Promoter | 1.87 | 0.78 | 1.06 |

|        |            |              |      |      |      |
|--------|------------|--------------|------|------|------|
| 487153 | INTERGENIC | Non Promoter | 0.49 | 0.19 | 0.80 |
| 491223 | INTERGENIC | Sgl Promoter | 1.35 | 0.62 | 0.89 |
| 493035 | INTERGENIC | Sgl Promoter | 1.94 | 0.79 | 0.67 |
| 494307 | INTERGENIC | Sgl Promoter | 2.34 | 0.88 | 1.02 |
| 495546 | INTERGENIC | Sgl Promoter | 2.73 | 0.93 | 1.13 |
| 497117 | INTERGENIC | Dbl Promoter | #N/A | #N/A | 0.71 |
| 501758 | INTERGENIC | Sgl Promoter | 0.41 | 0.15 | 0.86 |
| 504808 | INTERGENIC | Sgl Promoter | #N/A | #N/A | #N/A |
| 512998 | INTERGENIC | Sgl Promoter | 2.15 | 0.85 | 0.91 |
| 513716 | INTERGENIC | Non Promoter | 0.50 | 0.23 | 0.73 |
| 515618 | INTERGENIC | Dbl Promoter | 1.45 | 0.64 | 1.98 |
| 517304 | INTERGENIC | Non Promoter | #N/A | #N/A | #N/A |
| 526979 | INTERGENIC | Sgl Promoter | #N/A | #N/A | 1.04 |
| 528271 | INTERGENIC | Dbl Promoter | 1.63 | 0.70 | 0.59 |
| 530823 | INTERGENIC | Non Promoter | #N/A | #N/A | 1.41 |
| 533189 | INTERGENIC | Sgl Promoter | 1.26 | 0.57 | 1.05 |
| 533716 | INTERGENIC | Dbl Promoter | 1.19 | 0.55 | 0.89 |
| 535214 | INTERGENIC | Sgl Promoter | 2.22 | 0.87 | 0.88 |
| 536529 | INTERGENIC | Sgl Promoter | 1.54 | 0.69 | 1.06 |
| 537830 | INTERGENIC | Sgl Promoter | #N/A | #N/A | 1.08 |
| 539941 | INTERGENIC | Sgl Promoter | #N/A | #N/A | 0.85 |
| 541163 | INTERGENIC | Non Promoter | 0.76 | 0.36 | 0.66 |
| 544982 | INTERGENIC | Dbl Promoter | 1.46 | 0.65 | 0.84 |
| 546330 | INTERGENIC | Sgl Promoter | 1.00 | 0.46 | 0.71 |
| 547414 | INTERGENIC | Sgl Promoter | #N/A | #N/A | 0.75 |
| 548316 | INTERGENIC | Non Promoter | 0.56 | 0.23 | #N/A |
| 549725 | INTERGENIC | Dbl Promoter | #N/A | #N/A | #N/A |
| 551058 | INTERGENIC | Non Promoter | 0.37 | 0.12 | 1.37 |
| 553943 | INTERGENIC | Sgl Promoter | 0.82 | 0.37 | 0.96 |
| 555382 | INTERGENIC | Dbl Promoter | 0.41 | 0.14 | 0.74 |
| 556502 | INTERGENIC | Dbl Promoter | 0.22 | 0.04 | 0.57 |
| 558638 | INTERGENIC | Sgl Promoter | 2.07 | 0.83 | 1.06 |
| 560031 | INTERGENIC | Sgl Promoter | #N/A | #N/A | #N/A |
| 561588 | INTERGENIC | Sgl Promoter | 0.93 | 0.44 | 0.66 |
| 563157 | INTERGENIC | Non Promoter | #N/A | #N/A | #N/A |
| 565185 | INTERGENIC | Dbl Promoter | 0.41 | 0.17 | 0.59 |
| 565677 | INTERGENIC | Sgl Promoter | 2.55 | 0.92 | 0.97 |
| 567829 | INTERGENIC | Non Promoter | 0.39 | 0.13 | 1.63 |
| 568806 | INTERGENIC | Dbl Promoter | 1.57 | 0.68 | 0.74 |
| 569796 | INTERGENIC | Non Promoter | #N/A | #N/A | 0.08 |
| 571422 | INTERGENIC | Sgl Promoter | 2.13 | 0.84 | 1.37 |
| 572325 | INTERGENIC | Dbl Promoter | 1.22 | 0.54 | 0.69 |
| 573869 | INTERGENIC | Non Promoter | 0.57 | 0.24 | #N/A |
| 576298 | INTERGENIC | Sgl Promoter | 1.04 | 0.47 | 0.75 |
| 578318 | INTERGENIC | Dbl Promoter | #N/A | #N/A | #N/A |
| 579104 | INTERGENIC | Non Promoter | #N/A | #N/A | #N/A |
| 581680 | INTERGENIC | Sgl Promoter | 0.88 | 0.41 | #N/A |
| 582292 | INTERGENIC | Sgl Promoter | 1.95 | 0.81 | 0.82 |
| 583674 | INTERGENIC | Sgl Promoter | 1.49 | 0.65 | 1.47 |
| 584761 | INTERGENIC | Non Promoter | 0.35 | 0.14 | #N/A |
| 586501 | INTERGENIC | Non Promoter | #N/A | #N/A | #N/A |

|        |            |              |      |      |      |
|--------|------------|--------------|------|------|------|
| 589695 | INTERGENIC | Dbl Promoter | 2.12 | 0.85 | 0.75 |
| 591666 | INTERGENIC | Non Promoter | 0.19 | 0.05 | #N/A |
| 593460 | INTERGENIC | Sgl Promoter | 0.72 | 0.33 | 1.19 |
| 596069 | INTERGENIC | Dbl Promoter | 0.77 | 0.36 | 0.87 |
| 597317 | INTERGENIC | Sgl Promoter | 0.51 | 0.21 | #N/A |
| 599077 | INTERGENIC | Non Promoter | #N/A | #N/A | #N/A |
| 600507 | INTERGENIC | Dbl Promoter | 2.99 | 0.95 | 1.03 |
| 602588 | INTERGENIC | Sgl Promoter | 0.74 | 0.34 | 1.06 |
| 603639 | INTERGENIC | Non Promoter | 0.43 | 0.16 | 1.00 |
| 604462 | INTERGENIC | Dbl Promoter | 2.14 | 0.85 | 1.41 |
| 605920 | INTERGENIC | Sgl Promoter | 0.65 | 0.29 | 1.24 |
| 607606 | INTERGENIC | Sgl Promoter | 0.96 | 0.46 | 1.13 |
| 609036 | INTERGENIC | Non Promoter | 0.38 | 0.12 | 1.02 |
| 609992 | INTERGENIC | Dbl Promoter | 0.98 | 0.44 | 0.97 |
| 610568 | INTERGENIC | Non Promoter | 0.39 | 0.17 | 0.65 |
| 612190 | INTERGENIC | Sgl Promoter | 1.78 | 0.75 | #N/A |
| 615157 | INTERGENIC | Sgl Promoter | 0.20 | 0.04 | 0.52 |
| 616081 | INTERGENIC | Sgl Promoter | #N/A | #N/A | 0.57 |
| 618863 | INTERGENIC | Dbl Promoter | 2.40 | 0.89 | 0.67 |
| 620826 | INTERGENIC | Sgl Promoter | 1.05 | 0.48 | 0.80 |
| 623742 | INTERGENIC | Sgl Promoter | 1.77 | 0.74 | 1.12 |
| 629123 | INTERGENIC | Sgl Promoter | 0.60 | 0.27 | #N/A |
| 632209 | INTERGENIC | Non Promoter | 0.69 | 0.31 | #N/A |
| 633577 | INTERGENIC | Dbl Promoter | 2.93 | 0.96 | 0.98 |
| 635101 | INTERGENIC | Sgl Promoter | 0.74 | 0.35 | #N/A |
| 636658 | INTERGENIC | Non Promoter | 0.35 | 0.11 | 1.07 |
| 642538 | INTERGENIC | Dbl Promoter | 1.58 | 0.69 | 0.77 |
| 642962 | INTERGENIC | Sgl Promoter | 0.68 | 0.31 | 1.12 |
| 646113 | INTERGENIC | Non Promoter | #N/A | #N/A | #N/A |
| 647841 | INTERGENIC | Dbl Promoter | 1.65 | 0.71 | 0.57 |
| 650323 | INTERGENIC | Sgl Promoter | 0.97 | 0.46 | 0.83 |
| 651370 | INTERGENIC | Sgl Promoter | 2.60 | 0.92 | 0.61 |
| 653401 | INTERGENIC | Sgl Promoter | 3.25 | 0.98 | 1.03 |
| 655531 | INTERGENIC | Non Promoter | #N/A | #N/A | #N/A |
| 657787 | INTERGENIC | Dbl Promoter | 2.08 | 0.84 | 1.09 |
| 658662 | INTERGENIC | Non Promoter | #N/A | #N/A | 1.29 |
| 662454 | INTERGENIC | Sgl Promoter | #N/A | #N/A | #N/A |
| 665108 | INTERGENIC | Sgl Promoter | 1.85 | 0.78 | 1.11 |
| 666675 | INTERGENIC | Sgl Promoter | 1.42 | 0.63 | 0.76 |
| 668618 | INTERGENIC | Sgl Promoter | 1.11 | 0.51 | 0.62 |
| 675268 | INTERGENIC | Dbl Promoter | 1.05 | 0.48 | 0.55 |
| 676312 | INTERGENIC | Non Promoter | 0.04 | 0.00 | 0.18 |
| 679504 | INTERGENIC | Sgl Promoter | 3.25 | 0.98 | 0.58 |
| 680643 | INTERGENIC | Sgl Promoter | 0.91 | 0.44 | 0.74 |
| 683328 | INTERGENIC | Sgl Promoter | 1.39 | 0.62 | 0.88 |
| 685393 | INTERGENIC | Non Promoter | 2.56 | 0.92 | 1.55 |
| 686856 | INTERGENIC | Dbl Promoter | 2.44 | 0.90 | #N/A |
| 690338 | INTERGENIC | Non Promoter | 0.35 | 0.11 | 1.50 |
| 691924 | INTERGENIC | Dbl Promoter | #N/A | #N/A | 0.63 |
| 695062 | INTERGENIC | Non Promoter | 0.33 | 0.08 | 1.16 |
| 698309 | INTERGENIC | Sgl Promoter | 0.94 | 0.45 | 0.56 |

|        |            |              |      |      |      |
|--------|------------|--------------|------|------|------|
| 700445 | INTERGENIC | Sgl Promoter | 1.56 | 0.69 | 0.77 |
| 702544 | INTERGENIC | Sgl Promoter | 1.86 | 0.77 | 1.26 |
| 704625 | INTERGENIC | Dbl Promoter | 1.53 | 0.69 | 0.87 |
| 705402 | INTERGENIC | Non Promoter | #N/A | #N/A | #N/A |
| 707483 | INTERGENIC | Dbl Promoter | 1.69 | 0.73 | 1.06 |
| 708105 | INTERGENIC | Non Promoter | #N/A | #N/A | #N/A |
| 712959 | INTERGENIC | Non Promoter | #N/A | #N/A | #N/A |
| 714762 | INTERGENIC | Sgl Promoter | 1.68 | 0.72 | #N/A |
| 716837 | INTERGENIC | Sgl Promoter | 0.71 | 0.33 | 0.77 |
| 718988 | INTERGENIC | Dbl Promoter | 0.70 | 0.32 | 0.51 |
| 721345 | INTERGENIC | Sgl Promoter | 2.80 | 0.95 | #N/A |
| 722566 | INTERGENIC | Sgl Promoter | 1.36 | 0.62 | 0.79 |
| 723225 | INTERGENIC | Sgl Promoter | #N/A | #N/A | 1.18 |
| 723691 | INTERGENIC | Non Promoter | 0.85 | 0.39 | #N/A |
| 724411 | INTERGENIC | Dbl Promoter | 2.96 | 0.96 | 0.85 |
| 727341 | INTERGENIC | Non Promoter | 2.05 | 0.82 | 1.00 |
| 728840 | INTERGENIC | Dbl Promoter | 1.56 | 0.70 | 0.93 |
| 730342 | INTERGENIC | Dbl Promoter | 1.66 | 0.71 | #N/A |
| 732594 | INTERGENIC | Non Promoter | #N/A | #N/A | #N/A |
| 734787 | INTERGENIC | Sgl Promoter | 4.05 | 0.99 | 0.40 |
| 735675 | INTERGENIC | Sgl Promoter | 1.97 | 0.81 | 1.19 |
| 738537 | INTERGENIC | Dbl Promoter | 1.71 | 0.73 | #N/A |
| 739782 | INTERGENIC | Non Promoter | 1.27 | 0.57 | 1.11 |
| 741256 | INTERGENIC | Sgl Promoter | #N/A | #N/A | 1.04 |
| 742139 | INTERGENIC | Non Promoter | 0.98 | 0.45 | 0.87 |
| 742716 | INTERGENIC | Sgl Promoter | 0.72 | 0.33 | #N/A |
| 744807 | INTERGENIC | Dbl Promoter | 2.73 | 0.93 | 1.14 |
| 746316 | INTERGENIC | Non Promoter | 0.42 | 0.15 | 0.82 |
| 748016 | INTERGENIC | Sgl Promoter | #N/A | #N/A | #N/A |
| 749549 | INTERGENIC | Dbl Promoter | 3.43 | 0.98 | 0.95 |
| 751311 | INTERGENIC | Non Promoter | #N/A | #N/A | #N/A |
| 757576 | INTERGENIC | Sgl Promoter | 1.49 | 0.66 | #N/A |
| 760171 | INTERGENIC | Sgl Promoter | 1.59 | 0.71 | 1.17 |
| 761213 | INTERGENIC | Sgl Promoter | 1.98 | 0.80 | 0.81 |
| 762740 | INTERGENIC | Non Promoter | 0.41 | 0.17 | 0.58 |
| 764926 | INTERGENIC | Sgl Promoter | #N/A | #N/A | #N/A |
| 768196 | INTERGENIC | Dbl Promoter | #N/A | #N/A | 0.66 |
| 768899 | INTERGENIC | Non Promoter | 0.70 | 0.32 | #N/A |
| 771195 | INTERGENIC | Dbl Promoter | 2.11 | 0.83 | #N/A |
| 773878 | INTERGENIC | Sgl Promoter | 1.19 | 0.55 | 0.65 |
| 774578 | INTERGENIC | Sgl Promoter | 1.79 | 0.76 | #N/A |
| 776527 | INTERGENIC | Sgl Promoter | 1.35 | 0.62 | 0.83 |
| 777968 | INTERGENIC | Non Promoter | #N/A | #N/A | #N/A |
| 779623 | INTERGENIC | Dbl Promoter | 2.57 | 0.92 | #N/A |
| 782547 | INTERGENIC | Sgl Promoter | 1.15 | 0.52 | 0.90 |
| 783629 | INTERGENIC | Non Promoter | 0.36 | 0.11 | #N/A |
| 784658 | INTERGENIC | Sgl Promoter | 0.80 | 0.37 | 0.64 |
| 785995 | INTERGENIC | Dbl Promoter | 1.48 | 0.65 | 1.14 |
| 786961 | INTERGENIC | Dbl Promoter | 2.26 | 0.88 | 0.86 |
| 789190 | INTERGENIC | Sgl Promoter | 1.15 | 0.52 | 0.94 |
| 792803 | INTERGENIC | Sgl Promoter | 1.68 | 0.72 | 1.21 |

|        |            |              |      |      |      |
|--------|------------|--------------|------|------|------|
| 796752 | INTERGENIC | Non Promoter | 1.28 | 0.58 | #N/A |
| 799476 | INTERGENIC | Dbl Promoter | #N/A | #N/A | 0.74 |
| 800477 | INTERGENIC | Dbl Promoter | 1.68 | 0.73 | 1.22 |
| 802585 | INTERGENIC | Non Promoter | 1.20 | 0.54 | 1.11 |
| 805305 | INTERGENIC | Dbl Promoter | 2.38 | 0.89 | 0.78 |
| 808554 | INTERGENIC | Non Promoter | 1.23 | 0.56 | 1.29 |
| 810294 | INTERGENIC | Non Promoter | 1.87 | 0.79 | 1.14 |
| 259101 | INTERGENIC | Sgl Promoter | #N/A | #N/A | #N/A |
| 266334 | INTERGENIC | Sgl Promoter | #N/A | #N/A | #N/A |
| 644317 | INTERGENIC | Sgl Promoter | 1.67 | 0.73 | 1.18 |
| 645122 | INTERGENIC | Sgl Promoter | 1.84 | 0.77 | 1.09 |
| 328327 | INTERGENIC | Sgl Promoter | 1.18 | 0.55 | 0.88 |
| 350783 | INTERGENIC | Non Promoter | #N/A | #N/A | #N/A |
| 112684 | INTERGENIC | Sgl Promoter | 1.70 | 0.72 | 2.26 |
| 113982 | INTERGENIC | Sgl Promoter | 0.85 | 0.39 | 1.92 |
| 111520 | INTERGENIC | Dbl Promoter | 1.50 | 0.66 | 1.02 |
| 110526 | INTERGENIC | Non Promoter | 0.34 | 0.09 | 1.23 |
| 108713 | INTERGENIC | Sgl Promoter | 1.50 | 0.68 | #N/A |
| 107116 | INTERGENIC | Sgl Promoter | 0.32 | 0.08 | #N/A |
| 106585 | INTERGENIC | Sgl Promoter | 0.89 | 0.41 | 0.35 |
| 105307 | INTERGENIC | Sgl Promoter | 1.47 | 0.64 | 0.85 |
| 104230 | INTERGENIC | Sgl Promoter | 1.25 | 0.56 | 0.62 |
| 103182 | INTERGENIC | Sgl Promoter | 2.67 | 0.93 | 0.90 |
| 101686 | INTERGENIC | Non Promoter | 1.93 | 0.79 | 1.00 |
| 100113 | INTERGENIC | Sgl Promoter | 0.29 | 0.06 | #N/A |
| 95898  | INTERGENIC | Dbl Promoter | 3.34 | 0.97 | 1.17 |
| 94237  | INTERGENIC | Sgl Promoter | 3.25 | 0.98 | 0.87 |
| 92392  | INTERGENIC | Non Promoter | 0.50 | 0.20 | 4.14 |
| 82424  | INTERGENIC | Dbl Promoter | #N/A | #N/A | 0.66 |
| 78912  | INTERGENIC | Sgl Promoter | 0.26 | 0.07 | 0.52 |
| 75985  | INTERGENIC | Sgl Promoter | 1.99 | 0.81 | 0.86 |
| 71774  | INTERGENIC | Sgl Promoter | 1.30 | 0.60 | 0.78 |
| 70122  | INTERGENIC | Dbl Promoter | 2.08 | 0.83 | 1.08 |
| 68571  | INTERGENIC | Sgl Promoter | 0.31 | 0.09 | 0.40 |
| 65906  | INTERGENIC | Sgl Promoter | 1.64 | 0.70 | 0.65 |
| 64647  | INTERGENIC | Non Promoter | #N/A | #N/A | #N/A |
| 63413  | INTERGENIC | Dbl Promoter | #N/A | #N/A | 0.70 |
| 61897  | INTERGENIC | Dbl Promoter | 2.65 | 0.93 | 0.83 |
| 60814  | INTERGENIC | Non Promoter | 0.79 | 0.37 | 0.78 |
| 58999  | INTERGENIC | Dbl Promoter | 1.40 | 0.63 | #N/A |
| 57347  | INTERGENIC | Sgl Promoter | 0.84 | 0.38 | #N/A |
| 52619  | INTERGENIC | Sgl Promoter | 3.61 | 0.99 | 0.76 |
| 48630  | INTERGENIC | Sgl Promoter | 2.07 | 0.84 | 0.75 |
| 47088  | INTERGENIC | Non Promoter | #N/A | #N/A | 0.47 |
| 44600  | INTERGENIC | Sgl Promoter | 1.09 | 0.50 | #N/A |
| 43638  | INTERGENIC | Non Promoter | 0.44 | 0.16 | #N/A |
| 42142  | INTERGENIC | Dbl Promoter | 1.67 | 0.71 | 0.81 |
| 39763  | INTERGENIC | Sgl Promoter | 2.09 | 0.83 | #N/A |
| 37812  | INTERGENIC | Non Promoter | #N/A | #N/A | #N/A |
| 35844  | INTERGENIC | Dbl Promoter | 2.29 | 0.87 | 0.88 |
| 34126  | INTERGENIC | Non Promoter | 0.23 | 0.04 | #N/A |



|        |            |              |      |      |      |
|--------|------------|--------------|------|------|------|
| 30175  | INTERGENIC | Sgl Promoter | #N/A | #N/A | 0.75 |
| 31432  | INTERGENIC | Sgl Promoter | #N/A | #N/A | 0.86 |
| 27912  | INTERGENIC | Dbl Promoter | 1.25 | 0.56 | 0.70 |
| 24751  | INTERGENIC | Dbl Promoter | 1.37 | 0.61 | 1.03 |
| 23506  | INTERGENIC | Sgl Promoter | 2.76 | 0.93 | #N/A |
| 22412  | INTERGENIC | Sgl Promoter | 0.88 | 0.40 | 0.87 |
| 18799  | INTERGENIC | Non Promoter | #N/A | #N/A | 0.64 |
| 17273  | INTERGENIC | Dbl Promoter | 1.63 | 0.71 | 0.84 |
| 14947  | INTERGENIC | Non Promoter | 0.39 | 0.17 | 1.21 |
| 15787  | INTERGENIC | Non Promoter | 0.36 | 0.10 | 0.88 |
| 13271  | INTERGENIC | Dbl Promoter | #N/A | #N/A | #N/A |
| 12375  | INTERGENIC | Sgl Promoter | 0.64 | 0.29 | 0.96 |
| 11493  | INTERGENIC | Non Promoter | 0.99 | 0.45 | 0.73 |
| 9696   | INTERGENIC | Dbl Promoter | 0.48 | 0.18 | 0.92 |
| 4065   | INTERGENIC | Non Promoter | 0.17 | 0.02 | 0.78 |
| 2816   | INTERGENIC | Sgl Promoter | 0.20 | 0.02 | 0.62 |
| 83681  | INTERGENIC | Dbl Promoter | 0.77 | 0.35 | 0.80 |
| 90474  | INTERGENIC | Sgl Promoter | 0.38 | 0.16 | 1.86 |
| 5392   | INTERGENIC | Non Promoter | 0.28 | 0.06 | 0.68 |
| 6470   | INTERGENIC | Non Promoter | 0.27 | 0.05 | 0.85 |
| 116981 | INTERGENIC | Non Promoter | 1.29 | 0.58 | 1.23 |
| 118221 | INTERGENIC | Dbl Promoter | 3.13 | 0.97 | 1.36 |
| 119176 | INTERGENIC | Non Promoter | 0.66 | 0.30 | #N/A |
| 120547 | INTERGENIC | Sgl Promoter | 1.40 | 0.64 | 1.31 |
| 122131 | INTERGENIC | Sgl Promoter | 0.66 | 0.30 | 1.30 |
| 123178 | INTERGENIC | Sgl Promoter | 0.79 | 0.38 | 1.40 |
| 127317 | INTERGENIC | Dbl Promoter | 1.37 | 0.63 | 0.77 |
| 130345 | INTERGENIC | Non Promoter | 0.23 | 0.07 | 0.67 |
| 131873 | INTERGENIC | Sgl Promoter | 1.22 | 0.56 | 0.74 |
| 133323 | INTERGENIC | Sgl Promoter | 0.61 | 0.28 | 1.12 |
| 137345 | INTERGENIC | Dbl Promoter | 0.30 | 0.07 | 0.50 |
| 140816 | INTERGENIC | Sgl Promoter | 0.82 | 0.37 | 0.57 |
| 141963 | INTERGENIC | Dbl Promoter | 0.60 | 0.28 | #N/A |
| 144478 | INTERGENIC | Non Promoter | 0.43 | 0.15 | 0.89 |
| 147932 | INTERGENIC | Sgl Promoter | 2.10 | 0.84 | 0.86 |
| 152542 | INTERGENIC | Dbl Promoter | 1.32 | 0.61 | 1.06 |
| 153717 | INTERGENIC | Non Promoter | #N/A | #N/A | #N/A |
| 154535 | INTERGENIC | Sgl Promoter | 1.30 | 0.58 | 0.50 |
| 155025 | INTERGENIC | Dbl Promoter | 2.31 | 0.88 | #N/A |
| 155817 | INTERGENIC | Non Promoter | 0.89 | 0.41 | 1.85 |
| 157129 | INTERGENIC | Sgl Promoter | 1.90 | 0.78 | 0.81 |
| 158246 | INTERGENIC | Sgl Promoter | 1.13 | 0.52 | 1.24 |
| 160452 | INTERGENIC | Sgl Promoter | 1.37 | 0.61 | 0.68 |
| 162653 | INTERGENIC | Sgl Promoter | 0.28 | 0.06 | 1.08 |
| 163154 | INTERGENIC | Sgl Promoter | 0.33 | 0.09 | #N/A |
| 163819 | INTERGENIC | Sgl Promoter | 0.93 | 0.42 | 0.60 |
| 167084 | INTERGENIC | Sgl Promoter | 0.96 | 0.44 | 0.96 |
| 168015 | INTERGENIC | Sgl Promoter | 1.56 | 0.70 | 1.17 |
| 171640 | INTERGENIC | Sgl Promoter | 2.67 | 0.93 | 0.92 |
| 172551 | INTERGENIC | Sgl Promoter | 1.42 | 0.63 | 1.05 |
| 175907 | INTERGENIC | Sgl Promoter | 1.15 | 0.52 | 1.38 |

|        |            |              |      |      |      |
|--------|------------|--------------|------|------|------|
| 177338 | INTERGENIC | Dbl Promoter | 0.38 | 0.12 | 1.11 |
| 185218 | INTERGENIC | Sgl Promoter | 2.09 | 0.84 | #N/A |
| 189321 | INTERGENIC | Sgl Promoter | 1.12 | 0.50 | 0.68 |
| 190563 | INTERGENIC | Non Promoter | 0.24 | 0.05 | #N/A |
| 192026 | INTERGENIC | Dbl Promoter | 2.81 | 0.94 | 0.74 |
| 193143 | INTERGENIC | Non Promoter | #N/A | #N/A | #N/A |
| 196350 | INTERGENIC | Sgl Promoter | 1.09 | 0.49 | 0.43 |
| 198276 | INTERGENIC | Sgl Promoter | 0.66 | 0.30 | #N/A |
| 199172 | INTERGENIC | Dbl Promoter | 0.68 | 0.30 | #N/A |
| 204992 | INTERGENIC | Sgl Promoter | 1.48 | 0.67 | 0.75 |
| 205608 | INTERGENIC | Sgl Promoter | 2.10 | 0.84 | #N/A |
| 206866 | INTERGENIC | Sgl Promoter | 2.50 | 0.91 | 0.60 |
| 208645 | INTERGENIC | Sgl Promoter | 1.58 | 0.68 | 0.74 |
| 209449 | INTERGENIC | Sgl Promoter | 2.36 | 0.90 | #N/A |
| 210602 | INTERGENIC | Sgl Promoter | 2.94 | 0.96 | 0.75 |
| 212801 | INTERGENIC | Dbl Promoter | 3.25 | 0.97 | #N/A |
| 213724 | INTERGENIC | Sgl Promoter | 2.35 | 0.89 | 1.08 |
| 215427 | INTERGENIC | Sgl Promoter | 1.70 | 0.72 | 0.66 |
| 217106 | INTERGENIC | Non Promoter | #N/A | #N/A | #N/A |
| 219187 | INTERGENIC | Sgl Promoter | 0.85 | 0.39 | 1.25 |
| 222183 | INTERGENIC | Sgl Promoter | 2.92 | 0.96 | #N/A |
| 223128 | INTERGENIC | Dbl Promoter | 1.73 | 0.75 | #N/A |
| 224292 | INTERGENIC | Sgl Promoter | 0.46 | 0.21 | 0.84 |
| 226666 | INTERGENIC | Non Promoter | 0.58 | 0.26 | 1.17 |
| 228033 | INTERGENIC | Sgl Promoter | 0.31 | 0.07 | 0.32 |
| 230226 | INTERGENIC | Sgl Promoter | #N/A | #N/A | #N/A |
| 231851 | INTERGENIC | Non Promoter | 0.34 | 0.09 | #N/A |
| 235940 | INTERGENIC | Dbl Promoter | 1.43 | 0.63 | 0.70 |
| 237780 | INTERGENIC | Sgl Promoter | 3.21 | 0.97 | 1.64 |
| 238902 | INTERGENIC | Non Promoter | 1.04 | 0.47 | 0.41 |
| 239528 | INTERGENIC | Sgl Promoter | 3.92 | 0.99 | #N/A |
| 241364 | INTERGENIC | Sgl Promoter | 2.69 | 0.94 | 1.95 |
| 245688 | INTERGENIC | Dbl Promoter | 4.11 | 1.00 | 0.74 |
| 246756 | INTERGENIC | Non Promoter | #N/A | #N/A | #N/A |
| 248016 | INTERGENIC | Sgl Promoter | 3.07 | 0.96 | 1.03 |
| 248961 | INTERGENIC | Sgl Promoter | #N/A | #N/A | #N/A |
| 251571 | INTERGENIC | Dbl Promoter | 3.71 | 0.99 | 0.84 |
| 253094 | INTERGENIC | Sgl Promoter | 1.24 | 0.55 | #N/A |
| 257606 | INTERGENIC | Sgl Promoter | 2.11 | 0.84 | 1.02 |
| 258301 | INTERGENIC | Sgl Promoter | 1.83 | 0.76 | 1.26 |
| 259034 | INTERGENIC | Non Promoter | 0.41 | 0.16 | 0.95 |
| 261639 | INTERGENIC | Dbl Promoter | 2.03 | 0.82 | 0.84 |
| 262115 | INTERGENIC | Sgl Promoter | 1.37 | 0.61 | 0.67 |
| 263791 | INTERGENIC | Dbl Promoter | 2.57 | 0.92 | 0.83 |
| 266157 | INTERGENIC | Sgl Promoter | 1.15 | 0.52 | 0.86 |
| 273127 | INTERGENIC | Dbl Promoter | 1.69 | 0.73 | 0.65 |
| 275486 | INTERGENIC | Non Promoter | #N/A | #N/A | #N/A |
| 278839 | INTERGENIC | Dbl Promoter | 1.82 | 0.77 | 0.44 |
| 285484 | INTERGENIC | Sgl Promoter | 2.31 | 0.88 | #N/A |
| 286892 | INTERGENIC | Non Promoter | 0.38 | 0.12 | 0.90 |
| 289037 | INTERGENIC | Sgl Promoter | 1.54 | 0.67 | 1.00 |



|        |            |              |      |      |      |
|--------|------------|--------------|------|------|------|
| 290095 | INTERGENIC | Sgl Promoter | 0.63 | 0.27 | 1.09 |
| 292557 | INTERGENIC | Dbl Promoter | #N/A | #N/A | 1.11 |
| 293725 | INTERGENIC | Non Promoter | 0.61 | 0.29 | 0.97 |
| 298440 | INTERGENIC | Sgl Promoter | 2.50 | 0.91 | 1.14 |
| 301204 | INTERGENIC | Sgl Promoter | 0.64 | 0.28 | #N/A |
| 303083 | INTERGENIC | Sgl Promoter | 1.92 | 0.80 | #N/A |
| 305455 | INTERGENIC | Dbl Promoter | 1.72 | 0.73 | 1.22 |
| 305975 | INTERGENIC | Non Promoter | 0.77 | 0.35 | 0.86 |
| 306519 | INTERGENIC | Dbl Promoter | 0.65 | 0.29 | 0.94 |
| 307789 | INTERGENIC | Sgl Promoter | 0.48 | 0.18 | 0.99 |
| 309677 | INTERGENIC | Sgl Promoter | 2.26 | 0.88 | 1.28 |
| 312609 | INTERGENIC | Sgl Promoter | 0.40 | 0.13 | 0.99 |
| 295771 | INTERGENIC | Non Promoter | 0.71 | 0.33 | 0.96 |
| 124839 | INTERGENIC | Sgl Promoter | 0.78 | 0.36 | 0.87 |
| 124838 | INTERGENIC | Sgl Promoter | 0.78 | 0.36 | 0.95 |
| 125612 | INTERGENIC | Sgl Promoter | 0.83 | 0.38 | 0.71 |
| 143339 | INTERGENIC | Dbl Promoter | 3.38 | 0.97 | 0.57 |
| 150990 | INTERGENIC | Sgl Promoter | 0.92 | 0.44 | 1.32 |
| 169575 | INTERGENIC | Sgl Promoter | 1.08 | 0.49 | 0.90 |
| 290644 | INTERGENIC | Sgl Promoter | #N/A | #N/A | #N/A |
| 294206 | INTERGENIC | Non Promoter | 0.38 | 0.13 | #N/A |
| 149626 | INTERGENIC | Sgl Promoter | 0.28 | 0.08 | 0.92 |
| 150401 | INTERGENIC | Sgl Promoter | #N/A | #N/A | #N/A |
| 291901 | INTERGENIC | Sgl Promoter | 0.50 | 0.19 | 0.77 |
| 449752 | INTERGENIC | Non Promoter | #N/A | #N/A | #N/A |
| 448025 | INTERGENIC | Dbl Promoter | 0.99 | 0.45 | 1.28 |
| 447008 | INTERGENIC | Non Promoter | 0.53 | 0.22 | 1.41 |
| 444724 | INTERGENIC | Sgl Promoter | 1.20 | 0.56 | 0.96 |
| 443070 | INTERGENIC | Dbl Promoter | 1.81 | 0.76 | 0.97 |
| 441055 | INTERGENIC | Non Promoter | 0.34 | 0.09 | 0.95 |
| 439950 | INTERGENIC | Sgl Promoter | 0.81 | 0.37 | 0.86 |
| 434305 | INTERGENIC | Sgl Promoter | #N/A | #N/A | #N/A |
| 433538 | INTERGENIC | Dbl Promoter | 1.65 | 0.72 | 1.13 |
| 432349 | INTERGENIC | Sgl Promoter | 1.84 | 0.78 | 0.88 |
| 431149 | INTERGENIC | Non Promoter | 1.01 | 0.48 | 0.67 |
| 429108 | INTERGENIC | Sgl Promoter | 2.35 | 0.89 | 1.14 |
| 427405 | INTERGENIC | Dbl Promoter | 1.15 | 0.52 | 1.11 |
| 426043 | INTERGENIC | Sgl Promoter | 0.55 | 0.23 | #N/A |
| 424250 | INTERGENIC | Dbl Promoter | 2.34 | 0.89 | 1.07 |
| 417704 | INTERGENIC | Sgl Promoter | 1.36 | 0.62 | 0.77 |
| 415154 | INTERGENIC | Non Promoter | #N/A | #N/A | #N/A |
| 413994 | INTERGENIC | Sgl Promoter | 1.23 | 0.57 | 1.06 |
| 410420 | INTERGENIC | Sgl Promoter | 0.99 | 0.45 | 1.08 |
| 408492 | INTERGENIC | Sgl Promoter | 1.84 | 0.76 | 0.82 |
| 405385 | INTERGENIC | Non Promoter | 1.05 | 0.49 | #N/A |
| 403736 | INTERGENIC | Sgl Promoter | 2.88 | 0.95 | 0.63 |
| 401038 | INTERGENIC | Non Promoter | #N/A | #N/A | #N/A |
| 399381 | INTERGENIC | Sgl Promoter | 1.81 | 0.76 | 1.10 |
| 397578 | INTERGENIC | Sgl Promoter | 2.06 | 0.82 | 0.65 |
| 394258 | INTERGENIC | Sgl Promoter | 2.78 | 0.95 | 1.01 |
| 392700 | INTERGENIC | Non Promoter | 1.44 | 0.64 | 1.16 |

|        |            |              |      |      |      |
|--------|------------|--------------|------|------|------|
| 389213 | INTERGENIC | Sgl Promoter | 0.86 | 0.39 | 1.06 |
| 386591 | INTERGENIC | Sgl Promoter | 1.11 | 0.50 | 0.74 |
| 387554 | INTERGENIC | Sgl Promoter | 0.41 | 0.14 | #N/A |
| 382027 | INTERGENIC | Sgl Promoter | 2.17 | 0.86 | 0.82 |
| 378915 | INTERGENIC | Non Promoter | 1.15 | 0.53 | 0.60 |
| 376798 | INTERGENIC | Sgl Promoter | #N/A | #N/A | #N/A |
| 375721 | INTERGENIC | Sgl Promoter | 1.22 | 0.57 | 0.91 |
| 374008 | INTERGENIC | Sgl Promoter | 1.99 | 0.81 | #N/A |
| 372729 | INTERGENIC | Non Promoter | 0.49 | 0.23 | #N/A |
| 372289 | INTERGENIC | Sgl Promoter | 1.04 | 0.47 | #N/A |
| 369034 | INTERGENIC | Dbl Promoter | 0.63 | 0.30 | 0.64 |
| 369813 | INTERGENIC | Dbl Promoter | 0.47 | 0.22 | 0.62 |
| 365067 | INTERGENIC | Sgl Promoter | 0.81 | 0.37 | #N/A |
| 363951 | INTERGENIC | Dbl Promoter | #N/A | #N/A | 0.90 |
| 362671 | INTERGENIC | Sgl Promoter | 1.26 | 0.57 | #N/A |
| 361698 | INTERGENIC | Sgl Promoter | 1.31 | 0.59 | 0.49 |
| 358167 | INTERGENIC | Sgl Promoter | 0.77 | 0.37 | 0.50 |
| 359576 | INTERGENIC | Sgl Promoter | 1.22 | 0.55 | 0.86 |
| 355673 | INTERGENIC | Non Promoter | #N/A | #N/A | #N/A |
| 352876 | INTERGENIC | Sgl Promoter | 2.70 | 0.94 | 0.83 |
| 351433 | INTERGENIC | Sgl Promoter | 1.01 | 0.46 | 1.15 |
| 345664 | INTERGENIC | Dbl Promoter | 2.03 | 0.82 | 0.82 |
| 344236 | INTERGENIC | Non Promoter | #N/A | #N/A | #N/A |
| 341618 | INTERGENIC | Dbl Promoter | #N/A | #N/A | 1.14 |
| 340627 | INTERGENIC | Non Promoter | 0.69 | 0.31 | 1.25 |
| 338271 | INTERGENIC | Non Promoter | #N/A | #N/A | #N/A |
| 337486 | INTERGENIC | Dbl Promoter | 1.80 | 0.76 | 0.70 |
| 336248 | INTERGENIC | Non Promoter | #N/A | #N/A | #N/A |
| 334834 | INTERGENIC | Dbl Promoter | 1.69 | 0.73 | 1.24 |
| 334216 | INTERGENIC | Non Promoter | #N/A | #N/A | #N/A |
| 333120 | INTERGENIC | Non Promoter | #N/A | #N/A | #N/A |
| 330666 | INTERGENIC | Sgl Promoter | #N/A | #N/A | #N/A |
| 329835 | INTERGENIC | Non Promoter | #N/A | #N/A | #N/A |
| 326612 | INTERGENIC | Dbl Promoter | 2.47 | 0.91 | 0.87 |
| 323216 | INTERGENIC | Non Promoter | #N/A | #N/A | #N/A |
| 322225 | INTERGENIC | Dbl Promoter | 0.42 | 0.16 | 0.47 |
| 320667 | INTERGENIC | Sgl Promoter | 1.58 | 0.70 | 1.18 |
| 316970 | INTERGENIC | Sgl Promoter | 1.80 | 0.75 | 0.94 |
| 315356 | INTERGENIC | Sgl Promoter | 3.56 | 0.99 | 0.90 |
| 312950 | INTERGENIC | Sgl Promoter | 1.41 | 0.63 | 0.77 |
| 310641 | INTERGENIC | Sgl Promoter | 0.97 | 0.44 | 1.08 |
| 309801 | INTERGENIC | Non Promoter | #N/A | #N/A | 0.74 |
| 308423 | INTERGENIC | Dbl Promoter | 0.14 | 0.01 | 0.59 |
| 306925 | INTERGENIC | Non Promoter | 0.43 | 0.20 | 1.82 |
| 305236 | INTERGENIC | Sgl Promoter | 1.81 | 0.77 | 0.54 |
| 303210 | INTERGENIC | Sgl Promoter | 1.85 | 0.78 | 0.96 |
| 301412 | INTERGENIC | Dbl Promoter | 3.28 | 0.98 | 0.81 |
| 300213 | INTERGENIC | Sgl Promoter | #N/A | #N/A | #N/A |
| 298416 | INTERGENIC | Non Promoter | #N/A | #N/A | #N/A |
| 296819 | INTERGENIC | Dbl Promoter | 1.61 | 0.71 | 1.17 |
| 295033 | INTERGENIC | Sgl Promoter | #N/A | #N/A | 0.88 |

|        |            |              |      |      |      |
|--------|------------|--------------|------|------|------|
| 293391 | INTERGENIC | Non Promoter | 0.48 | 0.22 | 0.84 |
| 292780 | INTERGENIC | Sgl Promoter | 3.43 | 0.98 | #N/A |
| 289571 | INTERGENIC | Non Promoter | #N/A | #N/A | #N/A |
| 286997 | INTERGENIC | Sgl Promoter | 1.58 | 0.68 | 0.85 |
| 285390 | INTERGENIC | Sgl Promoter | 1.46 | 0.64 | 0.39 |
| 284580 | INTERGENIC | Non Promoter | 0.39 | 0.13 | #N/A |
| 283418 | INTERGENIC | DbI Promoter | #N/A | #N/A | #N/A |
| 282111 | INTERGENIC | Sgl Promoter | #N/A | #N/A | #N/A |
| 280306 | INTERGENIC | Non Promoter | 0.34 | 0.09 | #N/A |
| 276871 | INTERGENIC | DbI Promoter | 1.95 | 0.81 | 0.92 |
| 275147 | INTERGENIC | Sgl Promoter | 1.23 | 0.55 | #N/A |
| 272388 | INTERGENIC | DbI Promoter | 3.17 | 0.97 | 0.74 |
| 270221 | INTERGENIC | Non Promoter | #N/A | #N/A | #N/A |
| 268920 | INTERGENIC | Sgl Promoter | 0.91 | 0.43 | #N/A |
| 267697 | INTERGENIC | DbI Promoter | 1.07 | 0.48 | 1.20 |
| 265257 | INTERGENIC | Sgl Promoter | 1.22 | 0.55 | 1.05 |
| 264511 | INTERGENIC | Sgl Promoter | 1.98 | 0.81 | 0.85 |
| 263312 | INTERGENIC | Non Promoter | #N/A | #N/A | #N/A |
| 258914 | INTERGENIC | DbI Promoter | 2.38 | 0.89 | 1.00 |
| 256632 | INTERGENIC | Non Promoter | #N/A | #N/A | 0.71 |
| 255603 | INTERGENIC | DbI Promoter | 1.81 | 0.76 | 0.87 |
| 253994 | INTERGENIC | Non Promoter | 0.48 | 0.19 | #N/A |
| 251565 | INTERGENIC | Sgl Promoter | 2.62 | 0.92 | 0.74 |
| 248580 | INTERGENIC | Sgl Promoter | 1.26 | 0.57 | 0.76 |
| 246688 | INTERGENIC | Non Promoter | #N/A | #N/A | 0.80 |
| 245922 | INTERGENIC | DbI Promoter | 3.22 | 0.97 | 0.72 |
| 245132 | INTERGENIC | Non Promoter | #N/A | #N/A | #N/A |
| 242551 | INTERGENIC | Sgl Promoter | 1.12 | 0.51 | 0.89 |
| 241417 | INTERGENIC | Sgl Promoter | 2.45 | 0.90 | 1.06 |
| 240258 | INTERGENIC | DbI Promoter | 0.82 | 0.38 | 0.72 |
| 239018 | INTERGENIC | Sgl Promoter | 1.14 | 0.53 | 0.62 |
| 236156 | INTERGENIC | Non Promoter | #N/A | #N/A | 0.66 |
| 234927 | INTERGENIC | Sgl Promoter | 0.70 | 0.33 | 0.47 |
| 232652 | INTERGENIC | Sgl Promoter | 0.80 | 0.37 | 0.97 |
| 231024 | INTERGENIC | Sgl Promoter | 1.56 | 0.70 | 1.02 |
| 229906 | INTERGENIC | Sgl Promoter | 0.74 | 0.33 | 0.81 |
| 229171 | INTERGENIC | Sgl Promoter | 1.90 | 0.79 | 0.98 |
| 222427 | INTERGENIC | DbI Promoter | #N/A | #N/A | 0.70 |
| 224304 | INTERGENIC | Sgl Promoter | 2.07 | 0.83 | 0.93 |
| 221724 | INTERGENIC | Sgl Promoter | 1.15 | 0.54 | 0.92 |
| 219662 | INTERGENIC | Sgl Promoter | 1.11 | 0.52 | 1.16 |
| 218680 | INTERGENIC | Non Promoter | 0.41 | 0.14 | 1.17 |
| 217600 | INTERGENIC | Sgl Promoter | 0.31 | 0.07 | 1.44 |
| 216529 | INTERGENIC | Sgl Promoter | 0.95 | 0.45 | 0.92 |
| 213352 | INTERGENIC | DbI Promoter | 0.78 | 0.36 | 0.73 |
| 211376 | INTERGENIC | Sgl Promoter | 1.22 | 0.55 | 0.75 |
| 205361 | INTERGENIC | Non Promoter | 0.22 | 0.03 | 0.66 |
| 203040 | INTERGENIC | DbI Promoter | 1.90 | 0.80 | 0.84 |
| 201720 | INTERGENIC | Non Promoter | 0.05 | 0.01 | 0.14 |
| 199997 | INTERGENIC | DbI Promoter | 3.04 | 0.96 | 1.56 |
| 198663 | INTERGENIC | Sgl Promoter | 3.28 | 0.98 | 1.02 |

|        |            |              |      |      |      |
|--------|------------|--------------|------|------|------|
| 194572 | INTERGENIC | Non Promoter | 0.54 | 0.25 | 0.80 |
| 192751 | INTERGENIC | Sgl Promoter | 0.99 | 0.47 | 2.83 |
| 190925 | INTERGENIC | Dbl Promoter | 1.95 | 0.81 | 0.92 |
| 188155 | INTERGENIC | Non Promoter | 0.50 | 0.20 | 1.24 |
| 184926 | INTERGENIC | Sgl Promoter | 1.95 | 0.80 | 0.61 |
| 183319 | INTERGENIC | Non Promoter | 1.41 | 0.62 | 0.55 |
| 181187 | INTERGENIC | Non Promoter | #N/A | #N/A | #N/A |
| 178335 | INTERGENIC | Sgl Promoter | 0.29 | 0.07 | 0.82 |
| 176774 | INTERGENIC | Sgl Promoter | 1.16 | 0.52 | 1.04 |
| 172482 | INTERGENIC | Dbl Promoter | 0.61 | 0.28 | 0.87 |
| 167360 | INTERGENIC | Non Promoter | 1.66 | 0.72 | #N/A |
| 164988 | INTERGENIC | Non Promoter | 0.40 | 0.17 | #N/A |
| 164291 | INTERGENIC | Dbl Promoter | 1.14 | 0.52 | #N/A |
| 163450 | INTERGENIC | Sgl Promoter | 1.53 | 0.67 | #N/A |
| 160996 | INTERGENIC | Non Promoter | 0.09 | 0.01 | 0.23 |
| 159605 | INTERGENIC | Dbl Promoter | 1.65 | 0.73 | 1.16 |
| 158065 | INTERGENIC | Non Promoter | 0.47 | 0.18 | #N/A |
| 156319 | INTERGENIC | Dbl Promoter | 1.16 | 0.54 | 0.85 |
| 149204 | INTERGENIC | Sgl Promoter | #N/A | #N/A | #N/A |
| 145827 | INTERGENIC | Sgl Promoter | #N/A | #N/A | 0.99 |
| 144485 | INTERGENIC | Non Promoter | 0.38 | 0.12 | 0.95 |
| 142098 | INTERGENIC | Dbl Promoter | 2.35 | 0.88 | 1.21 |
| 141210 | INTERGENIC | Non Promoter | #N/A | #N/A | #N/A |
| 139523 | INTERGENIC | Sgl Promoter | 1.21 | 0.54 | 0.72 |
| 138292 | INTERGENIC | Sgl Promoter | 2.38 | 0.89 | 1.25 |
| 135897 | INTERGENIC | Sgl Promoter | #N/A | #N/A | #N/A |
| 135180 | INTERGENIC | Sgl Promoter | 1.05 | 0.48 | 0.73 |
| 132636 | INTERGENIC | Dbl Promoter | 1.27 | 0.57 | #N/A |
| 133438 | INTERGENIC | Dbl Promoter | 0.48 | 0.19 | 0.64 |
| 130872 | INTERGENIC | Sgl Promoter | 0.29 | 0.07 | 0.35 |
| 130408 | INTERGENIC | Non Promoter | 0.22 | 0.05 | 1.06 |
| 126788 | INTERGENIC | Sgl Promoter | 2.78 | 0.94 | 0.63 |
| 125510 | INTERGENIC | Sgl Promoter | 2.97 | 0.95 | 0.75 |
| 123866 | INTERGENIC | Non Promoter | #N/A | #N/A | #N/A |
| 121979 | INTERGENIC | Dbl Promoter | 2.78 | 0.94 | 0.96 |
| 118708 | INTERGENIC | Non Promoter | 0.46 | 0.17 | 0.97 |
| 117665 | INTERGENIC | Sgl Promoter | 0.35 | 0.10 | 1.30 |
| 116322 | INTERGENIC | Sgl Promoter | 1.12 | 0.51 | 0.95 |
| 114673 | INTERGENIC | Sgl Promoter | 1.55 | 0.69 | #N/A |
| 111581 | INTERGENIC | Sgl Promoter | 2.51 | 0.92 | 0.97 |
| 107209 | INTERGENIC | Sgl Promoter | 2.76 | 0.93 | 0.73 |
| 106742 | INTERGENIC | Dbl Promoter | #N/A | #N/A | 0.74 |
| 104918 | INTERGENIC | Sgl Promoter | 0.88 | 0.40 | 0.78 |
| 103650 | INTERGENIC | Sgl Promoter | 2.05 | 0.83 | #N/A |
| 101291 | INTERGENIC | Sgl Promoter | #N/A | #N/A | 0.30 |
| 99562  | INTERGENIC | Sgl Promoter | 2.15 | 0.85 | 0.80 |
| 98476  | INTERGENIC | Dbl Promoter | #N/A | #N/A | 0.82 |
| 96083  | INTERGENIC | Non Promoter | #N/A | #N/A | #N/A |
| 94606  | INTERGENIC | Dbl Promoter | 2.46 | 0.90 | 1.10 |
| 92763  | INTERGENIC | Non Promoter | #N/A | #N/A | #N/A |
| 90177  | INTERGENIC | Sgl Promoter | 1.60 | 0.71 | #N/A |

|        |            |              |      |      |      |
|--------|------------|--------------|------|------|------|
| 88249  | INTERGENIC | Sgl Promoter | 1.88 | 0.78 | #N/A |
| 87462  | INTERGENIC | Dbl Promoter | 1.85 | 0.78 | 0.92 |
| 86208  | INTERGENIC | Non Promoter | 0.63 | 0.30 | #N/A |
| 81458  | INTERGENIC | Dbl Promoter | 1.33 | 0.59 | 0.93 |
| 82503  | INTERGENIC | Dbl Promoter | 0.64 | 0.28 | 1.23 |
| 83549  | INTERGENIC | Dbl Promoter | 0.98 | 0.44 | 1.14 |
| 79295  | INTERGENIC | Non Promoter | #N/A | #N/A | #N/A |
| 78427  | INTERGENIC | Dbl Promoter | 2.19 | 0.85 | 1.49 |
| 77290  | INTERGENIC | Sgl Promoter | 0.50 | 0.20 | 1.11 |
| 74447  | INTERGENIC | Sgl Promoter | 3.11 | 0.97 | 0.80 |
| 70641  | INTERGENIC | Sgl Promoter | 0.68 | 0.31 | #N/A |
| 68998  | INTERGENIC | Sgl Promoter | 2.29 | 0.88 | 1.02 |
| 67984  | INTERGENIC | Non Promoter | 0.49 | 0.20 | 1.06 |
| 66494  | INTERGENIC | Sgl Promoter | 3.95 | 0.99 | 0.77 |
| 65243  | INTERGENIC | Dbl Promoter | 2.73 | 0.94 | 1.02 |
| 62012  | INTERGENIC | Dbl Promoter | 2.49 | 0.90 | 0.63 |
| 60873  | INTERGENIC | Sgl Promoter | 1.19 | 0.55 | 0.90 |
| 57266  | INTERGENIC | Sgl Promoter | 1.33 | 0.61 | 1.28 |
| 54398  | INTERGENIC | Non Promoter | 0.23 | 0.04 | #N/A |
| 52446  | INTERGENIC | Dbl Promoter | 5.38 | 1.00 | 1.49 |
| 49060  | INTERGENIC | Sgl Promoter | 0.70 | 0.32 | 0.98 |
| 50088  | INTERGENIC | Sgl Promoter | 1.56 | 0.70 | 0.66 |
| 51116  | INTERGENIC | Sgl Promoter | 0.70 | 0.32 | 1.24 |
| 46272  | INTERGENIC | Sgl Promoter | 0.64 | 0.28 | #N/A |
| 44066  | INTERGENIC | Sgl Promoter | 0.41 | 0.14 | 0.64 |
| 42701  | INTERGENIC | Dbl Promoter | 3.15 | 0.97 | 0.59 |
| 38868  | INTERGENIC | Non Promoter | 1.57 | 0.68 | #N/A |
| 38488  | INTERGENIC | Sgl Promoter | 2.17 | 0.85 | 0.79 |
| 36798  | INTERGENIC | Dbl Promoter | 3.41 | 0.98 | 1.23 |
| 34238  | INTERGENIC | Sgl Promoter | 1.95 | 0.81 | #N/A |
| 33415  | INTERGENIC | Non Promoter | 0.36 | 0.11 | #N/A |
| 32296  | INTERGENIC | Sgl Promoter | 2.46 | 0.91 | 0.95 |
| 30657  | INTERGENIC | Dbl Promoter | #N/A | #N/A | 0.86 |
| 28985  | INTERGENIC | Sgl Promoter | 0.38 | 0.12 | 1.20 |
| 26403  | INTERGENIC | Non Promoter | 0.43 | 0.16 | 1.20 |
| 21914  | INTERGENIC | Sgl Promoter | 1.71 | 0.74 | #N/A |
| 22823  | INTERGENIC | Sgl Promoter | 2.07 | 0.84 | 0.63 |
| 20635  | INTERGENIC | Sgl Promoter | 0.93 | 0.43 | 0.95 |
| 18959  | INTERGENIC | Dbl Promoter | 1.11 | 0.50 | 0.94 |
| 17577  | INTERGENIC | Non Promoter | 1.58 | 0.69 | 1.25 |
| 14782  | INTERGENIC | Dbl Promoter | 0.66 | 0.30 | 0.99 |
| 16204  | INTERGENIC | Dbl Promoter | 2.20 | 0.87 | 1.05 |
| 10706  | INTERGENIC | Sgl Promoter | 1.77 | 0.74 | 0.76 |
| 11657  | INTERGENIC | Sgl Promoter | 1.45 | 0.64 | #N/A |
| 8683   | INTERGENIC | Non Promoter | 2.24 | 0.86 | 0.96 |
| 4469   | INTERGENIC | Sgl Promoter | 0.38 | 0.13 | 0.88 |
| 5985   | INTERGENIC | Sgl Promoter | 1.23 | 0.57 | 0.92 |
| 435985 | INTERGENIC | Sgl Promoter | 1.40 | 0.62 | 1.09 |
| 437190 | INTERGENIC | Sgl Promoter | 0.89 | 0.41 | 0.79 |
| 437813 | INTERGENIC | Sgl Promoter | 0.32 | 0.08 | #N/A |
| 453086 | INTERGENIC | Dbl Promoter | 1.00 | 0.46 | 0.96 |



|        |            |              |      |      |      |
|--------|------------|--------------|------|------|------|
| 454163 | INTERGENIC | Sgl Promoter | #N/A | #N/A | 0.86 |
| 455242 | INTERGENIC | Sgl Promoter | 0.99 | 0.46 | 0.92 |
| 456877 | INTERGENIC | Non Promoter | 0.45 | 0.16 | #N/A |
| 458583 | INTERGENIC | Sgl Promoter | 1.53 | 0.69 | 1.05 |
| 461883 | INTERGENIC | Dbl Promoter | 1.44 | 0.64 | 3.68 |
| 463475 | INTERGENIC | Dbl Promoter | 1.48 | 0.65 | 1.39 |
| 465960 | INTERGENIC | Dbl Promoter | 0.37 | 0.14 | 0.89 |
| 471894 | INTERGENIC | Sgl Promoter | 0.85 | 0.41 | 1.17 |
| 473198 | INTERGENIC | Sgl Promoter | 0.38 | 0.12 | #N/A |
| 474087 | INTERGENIC | Sgl Promoter | 1.35 | 0.61 | 0.91 |
| 476940 | INTERGENIC | Non Promoter | 0.78 | 0.36 | 1.04 |
| 479155 | INTERGENIC | Sgl Promoter | 3.13 | 0.96 | 0.80 |
| 482710 | INTERGENIC | Sgl Promoter | 0.73 | 0.35 | 1.06 |
| 484203 | INTERGENIC | Sgl Promoter | 0.87 | 0.40 | 0.90 |
| 485786 | INTERGENIC | Sgl Promoter | 0.60 | 0.27 | 0.71 |
| 486844 | INTERGENIC | Dbl Promoter | 1.85 | 0.77 | 0.74 |
| 488112 | INTERGENIC | Non Promoter | 0.44 | 0.18 | #N/A |
| 488837 | INTERGENIC | Dbl Promoter | #N/A | #N/A | #N/A |
| 491057 | INTERGENIC | Sgl Promoter | #N/A | #N/A | #N/A |
| 492596 | INTERGENIC | Non Promoter | 0.47 | 0.18 | #N/A |
| 494689 | INTERGENIC | Sgl Promoter | 2.10 | 0.84 | 0.95 |
| 497875 | INTERGENIC | Sgl Promoter | 1.55 | 0.68 | 0.74 |
| 501140 | INTERGENIC | Dbl Promoter | #N/A | #N/A | #N/A |
| 501793 | INTERGENIC | Non Promoter | 1.57 | 0.68 | 0.84 |
| 503538 | INTERGENIC | Dbl Promoter | 2.54 | 0.92 | 0.83 |
| 504138 | INTERGENIC | Non Promoter | 0.87 | 0.41 | #N/A |
| 505884 | INTERGENIC | Dbl Promoter | 1.70 | 0.74 | 2.07 |
| 508186 | INTERGENIC | Dbl Promoter | 0.51 | 0.21 | 0.58 |
| 509776 | INTERGENIC | Non Promoter | 0.42 | 0.19 | 1.01 |
| 513025 | INTERGENIC | Sgl Promoter | 1.38 | 0.63 | 0.93 |
| 520845 | INTERGENIC | Dbl Promoter | 1.28 | 0.58 | 1.16 |
| 521855 | INTERGENIC | Sgl Promoter | 1.16 | 0.52 | 0.77 |
| 523250 | INTERGENIC | Non Promoter | 0.40 | 0.14 | #N/A |
| 525479 | INTERGENIC | Dbl Promoter | 1.86 | 0.77 | 0.63 |
| 527461 | INTERGENIC | Non Promoter | 0.44 | 0.16 | 0.82 |
| 531346 | INTERGENIC | Sgl Promoter | 1.73 | 0.74 | 0.89 |
| 539842 | INTERGENIC | Dbl Promoter | 1.27 | 0.57 | 0.64 |
| 540640 | INTERGENIC | Non Promoter | 0.26 | 0.06 | 0.54 |
| 541641 | INTERGENIC | Sgl Promoter | 0.36 | 0.14 | 1.27 |
| 544500 | INTERGENIC | Dbl Promoter | 0.61 | 0.28 | 0.92 |
| 546682 | INTERGENIC | Dbl Promoter | 2.12 | 0.85 | 0.60 |
| 548018 | INTERGENIC | Non Promoter | 0.72 | 0.32 | #N/A |
| 548802 | INTERGENIC | Sgl Promoter | 1.35 | 0.60 | 1.13 |
| 553124 | INTERGENIC | Non Promoter | 0.52 | 0.21 | 0.32 |
| 555766 | INTERGENIC | Non Promoter | 0.42 | 0.15 | #N/A |
| 557096 | INTERGENIC | Sgl Promoter | 0.44 | 0.17 | 0.48 |
| 558551 | INTERGENIC | Sgl Promoter | 0.99 | 0.45 | 1.23 |
| 561480 | INTERGENIC | Non Promoter | 1.10 | 0.50 | 1.10 |
| 563567 | INTERGENIC | Dbl Promoter | 1.20 | 0.54 | 0.93 |
| 565063 | INTERGENIC | Non Promoter | #N/A | #N/A | #N/A |
| 565967 | INTERGENIC | Dbl Promoter | 2.39 | 0.89 | 1.26 |

|        |            |              |      |      |      |
|--------|------------|--------------|------|------|------|
| 567763 | INTERGENIC | Non Promoter | #N/A | #N/A | #N/A |
| 568922 | INTERGENIC | Sgl Promoter | 0.83 | 0.38 | 0.82 |
| 574203 | INTERGENIC | Sgl Promoter | 0.46 | 0.19 | 0.71 |
| 576513 | INTERGENIC | Sgl Promoter | 1.39 | 0.63 | 1.21 |
| 578703 | INTERGENIC | Sgl Promoter | 0.95 | 0.43 | 1.46 |
| 579498 | INTERGENIC | Sgl Promoter | 0.47 | 0.22 | #N/A |
| 580727 | INTERGENIC | Sgl Promoter | 0.77 | 0.35 | #N/A |
| 581948 | INTERGENIC | Non Promoter | 0.44 | 0.16 | #N/A |
| 582831 | INTERGENIC | Sgl Promoter | 1.21 | 0.55 | 0.87 |
| 583753 | INTERGENIC | DbI Promoter | 2.40 | 0.90 | 1.16 |
| 584979 | INTERGENIC | Non Promoter | 0.48 | 0.19 | 1.22 |
| 588138 | INTERGENIC | Sgl Promoter | 3.48 | 0.98 | 0.72 |
| 588867 | INTERGENIC | Sgl Promoter | 1.17 | 0.54 | 1.57 |
| 589801 | INTERGENIC | Sgl Promoter | 1.06 | 0.49 | #N/A |
| 593932 | INTERGENIC | Sgl Promoter | 1.18 | 0.55 | 0.81 |
| 597195 | INTERGENIC | Sgl Promoter | 1.83 | 0.76 | 1.42 |
| 598507 | INTERGENIC | Sgl Promoter | 0.83 | 0.38 | #N/A |
| 600832 | INTERGENIC | Sgl Promoter | 0.22 | 0.03 | 0.38 |
| 602237 | INTERGENIC | Non Promoter | 0.34 | 0.11 | 1.38 |
| 603103 | INTERGENIC | DbI Promoter | 0.80 | 0.37 | 0.58 |
| 604047 | INTERGENIC | Sgl Promoter | 2.02 | 0.82 | 0.94 |
| 607343 | INTERGENIC | Non Promoter | 0.36 | 0.15 | 0.70 |
| 610480 | INTERGENIC | DbI Promoter | 2.84 | 0.95 | 1.00 |
| 612055 | INTERGENIC | Sgl Promoter | 0.88 | 0.42 | #N/A |
| 613443 | INTERGENIC | Non Promoter | #N/A | #N/A | #N/A |
| 614326 | INTERGENIC | Sgl Promoter | 1.83 | 0.77 | 0.87 |
| 616966 | INTERGENIC | Sgl Promoter | 1.12 | 0.50 | 0.79 |
| 617508 | INTERGENIC | Sgl Promoter | 0.75 | 0.34 | 0.60 |
| 618535 | INTERGENIC | Sgl Promoter | 1.30 | 0.58 | 0.40 |
| 620007 | INTERGENIC | DbI Promoter | 1.37 | 0.61 | 0.95 |
| 625104 | INTERGENIC | Non Promoter | 0.35 | 0.12 | 1.00 |
| 626746 | INTERGENIC | Sgl Promoter | 1.13 | 0.52 | 1.10 |
| 629914 | INTERGENIC | DbI Promoter | 1.56 | 0.69 | 0.75 |
| 631320 | INTERGENIC | Sgl Promoter | 0.67 | 0.30 | 0.54 |
| 637177 | INTERGENIC | DbI Promoter | 1.11 | 0.51 | 0.88 |
| 640147 | INTERGENIC | Non Promoter | #N/A | #N/A | #N/A |
| 644216 | INTERGENIC | Sgl Promoter | 1.78 | 0.74 | 1.72 |
| 645191 | INTERGENIC | Sgl Promoter | 0.70 | 0.32 | #N/A |
| 655051 | INTERGENIC | Sgl Promoter | 0.76 | 0.35 | 1.28 |
| 655724 | INTERGENIC | Non Promoter | 0.49 | 0.20 | #N/A |
| 657686 | INTERGENIC | Sgl Promoter | 0.94 | 0.43 | 3.46 |
| 658388 | INTERGENIC | DbI Promoter | 1.04 | 0.47 | 0.86 |
| 665387 | INTERGENIC | Sgl Promoter | 1.52 | 0.66 | 0.83 |
| 667042 | INTERGENIC | DbI Promoter | 3.23 | 0.98 | 0.60 |
| 668045 | INTERGENIC | Non Promoter | 0.86 | 0.40 | #N/A |
| 671307 | INTERGENIC | DbI Promoter | 2.44 | 0.91 | 1.12 |
| 676140 | INTERGENIC | DbI Promoter | 2.37 | 0.90 | 0.87 |
| 678279 | INTERGENIC | Non Promoter | 0.72 | 0.32 | 0.91 |
| 680534 | INTERGENIC | Non Promoter | 1.22 | 0.55 | 0.63 |
| 681962 | INTERGENIC | Sgl Promoter | #N/A | #N/A | #N/A |
| 682762 | INTERGENIC | Non Promoter | #N/A | #N/A | #N/A |



|        |            |              |      |      |      |
|--------|------------|--------------|------|------|------|
| 683984 | INTERGENIC | Sgl Promoter | 1.86 | 0.77 | 0.67 |
| 685920 | INTERGENIC | DbI Promoter | 2.37 | 0.90 | 0.59 |
| 688265 | INTERGENIC | Sgl Promoter | 1.04 | 0.47 | 0.85 |
| 691587 | INTERGENIC | Non Promoter | 1.00 | 0.45 | 0.76 |
| 693623 | INTERGENIC | DbI Promoter | 1.80 | 0.75 | 0.83 |
| 694738 | INTERGENIC | Sgl Promoter | 2.00 | 0.82 | 1.12 |
| 698592 | INTERGENIC | Non Promoter | 0.29 | 0.07 | 0.98 |
| 700353 | INTERGENIC | DbI Promoter | 1.00 | 0.46 | 0.79 |
| 701435 | INTERGENIC | Non Promoter | 0.28 | 0.10 | 0.42 |
| 703272 | INTERGENIC | DbI Promoter | 1.27 | 0.57 | 0.83 |
| 704522 | INTERGENIC | Sgl Promoter | 0.60 | 0.29 | #N/A |
| 709587 | INTERGENIC | Sgl Promoter | 0.60 | 0.26 | #N/A |
| 713378 | INTERGENIC | Non Promoter | 0.44 | 0.16 | 1.19 |
| 715785 | INTERGENIC | Sgl Promoter | 1.20 | 0.55 | 0.96 |
| 716828 | INTERGENIC | Sgl Promoter | 3.60 | 0.99 | 0.82 |
| 718854 | INTERGENIC | Sgl Promoter | #N/A | #N/A | 1.36 |
| 723042 | INTERGENIC | Sgl Promoter | 0.26 | 0.06 | 0.41 |
| 727749 | INTERGENIC | Sgl Promoter | 2.16 | 0.84 | 1.06 |
| 730616 | INTERGENIC | Sgl Promoter | 2.68 | 0.93 | 0.54 |
| 733656 | INTERGENIC | Non Promoter | 0.79 | 0.36 | 0.69 |
| 734176 | INTERGENIC | DbI Promoter | 1.68 | 0.72 | #N/A |
| 734939 | INTERGENIC | Non Promoter | 0.47 | 0.18 | #N/A |
| 740511 | INTERGENIC | Sgl Promoter | 1.91 | 0.80 | 0.68 |
| 742080 | INTERGENIC | Sgl Promoter | 1.02 | 0.48 | 0.87 |
| 744349 | INTERGENIC | Sgl Promoter | 1.59 | 0.71 | 0.86 |
| 746776 | INTERGENIC | DbI Promoter | 2.50 | 0.91 | 0.85 |
| 748651 | INTERGENIC | Non Promoter | #N/A | #N/A | #N/A |
| 751669 | INTERGENIC | DbI Promoter | 1.07 | 0.49 | 0.84 |
| 753713 | INTERGENIC | Non Promoter | 0.85 | 0.39 | 2.02 |
| 755593 | INTERGENIC | Sgl Promoter | 2.54 | 0.91 | 0.83 |
| 764216 | INTERGENIC | Non Promoter | 0.61 | 0.28 | 0.99 |
| 765744 | INTERGENIC | DbI Promoter | 1.14 | 0.53 | 0.78 |
| 766774 | INTERGENIC | Non Promoter | #N/A | #N/A | #N/A |
| 768441 | INTERGENIC | Sgl Promoter | 0.38 | 0.13 | 1.02 |
| 769563 | INTERGENIC | DbI Promoter | 0.33 | 0.11 | 0.45 |
| 771915 | INTERGENIC | Sgl Promoter | 2.78 | 0.95 | 0.94 |
| 776201 | INTERGENIC | Sgl Promoter | 2.21 | 0.86 | #N/A |
| 779081 | INTERGENIC | Sgl Promoter | 1.82 | 0.78 | 4.87 |
| 780428 | INTERGENIC | Non Promoter | #N/A | #N/A | #N/A |
| 781461 | INTERGENIC | DbI Promoter | 1.95 | 0.80 | 1.03 |
| 782079 | INTERGENIC | Non Promoter | 0.51 | 0.21 | 0.55 |
| 784909 | INTERGENIC | DbI Promoter | 2.75 | 0.94 | 1.22 |
| 786344 | INTERGENIC | Non Promoter | #N/A | #N/A | #N/A |
| 789487 | INTERGENIC | DbI Promoter | 2.31 | 0.89 | 0.70 |
| 790366 | INTERGENIC | Sgl Promoter | 1.93 | 0.80 | 1.04 |
| 795079 | INTERGENIC | Sgl Promoter | 1.91 | 0.80 | 1.36 |
| 796231 | INTERGENIC | Sgl Promoter | 2.25 | 0.88 | 0.84 |
| 802769 | INTERGENIC | DbI Promoter | 1.34 | 0.60 | 1.14 |
| 805607 | INTERGENIC | Sgl Promoter | 0.23 | 0.04 | 0.87 |
| 808362 | INTERGENIC | Sgl Promoter | 1.80 | 0.76 | 0.57 |
| 810603 | INTERGENIC | Non Promoter | #N/A | #N/A | #N/A |

|        |            |              |      |      |      |
|--------|------------|--------------|------|------|------|
| 812148 | INTERGENIC | Dbl Promoter | 0.89 | 0.41 | 0.41 |
| 813231 | INTERGENIC | Non Promoter | 0.29 | 0.06 | 2.17 |
| 814490 | INTERGENIC | Dbl Promoter | 1.52 | 0.67 | 0.71 |
| 816916 | INTERGENIC | Sgl Promoter | #N/A | #N/A | 0.60 |
| 817988 | INTERGENIC | Sgl Promoter | 2.23 | 0.87 | 0.72 |
| 818746 | INTERGENIC | Non Promoter | 0.61 | 0.26 | 1.09 |
| 820055 | INTERGENIC | Dbl Promoter | 1.24 | 0.57 | 0.46 |
| 821332 | INTERGENIC | Sgl Promoter | 2.87 | 0.95 | 0.72 |
| 825947 | INTERGENIC | Non Promoter | #N/A | #N/A | #N/A |
| 827619 | INTERGENIC | Dbl Promoter | 3.07 | 0.96 | 0.79 |
| 829622 | INTERGENIC | Sgl Promoter | 1.55 | 0.68 | 1.16 |
| 830666 | INTERGENIC | Non Promoter | 0.86 | 0.41 | 1.17 |
| 831971 | INTERGENIC | Sgl Promoter | 1.43 | 0.65 | 1.60 |
| 832896 | INTERGENIC | Sgl Promoter | 1.03 | 0.48 | #N/A |
| 836265 | INTERGENIC | Sgl Promoter | 0.57 | 0.26 | 0.43 |
| 838429 | INTERGENIC | Sgl Promoter | 1.57 | 0.70 | #N/A |
| 840641 | INTERGENIC | Non Promoter | #N/A | #N/A | #N/A |
| 842374 | INTERGENIC | Dbl Promoter | 1.80 | 0.76 | 0.69 |
| 843606 | INTERGENIC | Non Promoter | #N/A | #N/A | #N/A |
| 845989 | INTERGENIC | Non Promoter | 1.36 | 0.62 | 2.50 |
| 850311 | INTERGENIC | Non Promoter | #N/A | #N/A | #N/A |
| 851265 | INTERGENIC | Dbl Promoter | 2.02 | 0.81 | #N/A |
| 852570 | INTERGENIC | Non Promoter | 0.11 | 0.01 | 0.45 |
| 854212 | INTERGENIC | Dbl Promoter | 1.08 | 0.49 | #N/A |
| 856354 | INTERGENIC | Dbl Promoter | 2.31 | 0.88 | #N/A |
| 856935 | INTERGENIC | Non Promoter | #N/A | #N/A | #N/A |
| 858174 | INTERGENIC | Sgl Promoter | #N/A | #N/A | 0.98 |
| 859335 | INTERGENIC | Sgl Promoter | 2.54 | 0.92 | 0.80 |
| 862091 | INTERGENIC | Sgl Promoter | 2.06 | 0.84 | 1.22 |
| 865049 | INTERGENIC | Non Promoter | #N/A | #N/A | #N/A |
| 868261 | INTERGENIC | Dbl Promoter | 2.16 | 0.86 | 0.72 |
| 871858 | INTERGENIC | Non Promoter | 0.94 | 0.45 | 1.80 |
| 887269 | INTERGENIC | Sgl Promoter | 2.18 | 0.86 | 0.98 |
| 889788 | INTERGENIC | Sgl Promoter | 1.60 | 0.71 | #N/A |
| 892912 | INTERGENIC | Sgl Promoter | 1.03 | 0.47 | 0.75 |
| 894155 | INTERGENIC | Non Promoter | 0.35 | 0.14 | 0.72 |
| 895071 | INTERGENIC | Dbl Promoter | #N/A | #N/A | 0.80 |
| 899587 | INTERGENIC | Non Promoter | 0.61 | 0.29 | 1.10 |
| 903817 | INTERGENIC | Sgl Promoter | #N/A | #N/A | 0.75 |
| 905491 | INTERGENIC | Sgl Promoter | 0.67 | 0.32 | 1.07 |
| 907036 | INTERGENIC | Sgl Promoter | #N/A | #N/A | 0.69 |
| 910090 | INTERGENIC | Sgl Promoter | 0.57 | 0.24 | 0.65 |
| 912135 | INTERGENIC | Sgl Promoter | 1.65 | 0.71 | 1.08 |
| 914353 | INTERGENIC | Non Promoter | 1.35 | 0.60 | 0.98 |
| 915566 | INTERGENIC | Dbl Promoter | 0.60 | 0.26 | 1.23 |
| 916522 | INTERGENIC | Sgl Promoter | 0.64 | 0.29 | 0.95 |
| 917607 | INTERGENIC | Sgl Promoter | 1.26 | 0.58 | 1.22 |
| 921962 | INTERGENIC | Non Promoter | #N/A | #N/A | #N/A |
| 924821 | INTERGENIC | Dbl Promoter | 1.86 | 0.77 | 0.90 |
| 926259 | INTERGENIC | Sgl Promoter | 0.53 | 0.21 | #N/A |
| 927488 | INTERGENIC | Dbl Promoter | 1.14 | 0.52 | #N/A |

|         |            |              |      |      |      |
|---------|------------|--------------|------|------|------|
| 929506  | INTERGENIC | Non Promoter | 0.39 | 0.12 | 0.96 |
| 931165  | INTERGENIC | DbI Promoter | 0.41 | 0.14 | 0.59 |
| 933540  | INTERGENIC | SgI Promoter | 1.73 | 0.75 | 0.93 |
| 935272  | INTERGENIC | Non Promoter | #N/A | #N/A | 0.90 |
| 936651  | INTERGENIC | DbI Promoter | 2.69 | 0.93 | 0.81 |
| 937931  | INTERGENIC | Non Promoter | #N/A | #N/A | 0.98 |
| 941093  | INTERGENIC | SgI Promoter | 2.01 | 0.82 | 1.17 |
| 943710  | INTERGENIC | SgI Promoter | 2.35 | 0.89 | 1.00 |
| 948554  | INTERGENIC | Non Promoter | #N/A | #N/A | #N/A |
| 950599  | INTERGENIC | DbI Promoter | 1.45 | 0.64 | 0.51 |
| 952836  | INTERGENIC | SgI Promoter | 1.10 | 0.50 | #N/A |
| 954324  | INTERGENIC | SgI Promoter | 1.20 | 0.54 | 1.31 |
| 956049  | INTERGENIC | SgI Promoter | 1.03 | 0.48 | 0.85 |
| 957794  | INTERGENIC | Non Promoter | 0.27 | 0.05 | 0.72 |
| 958717  | INTERGENIC | SgI Promoter | 1.05 | 0.48 | 0.93 |
| 960122  | INTERGENIC | SgI Promoter | 1.57 | 0.69 | #N/A |
| 960650  | INTERGENIC | DbI Promoter | 1.04 | 0.47 | 1.00 |
| 964026  | INTERGENIC | Non Promoter | 0.72 | 0.33 | 0.83 |
| 965149  | INTERGENIC | DbI Promoter | 1.95 | 0.80 | 0.89 |
| 966593  | INTERGENIC | Non Promoter | 0.46 | 0.18 | #N/A |
| 968169  | INTERGENIC | SgI Promoter | #N/A | #N/A | 1.41 |
| 970026  | INTERGENIC | SgI Promoter | 0.31 | 0.08 | 1.12 |
| 971844  | INTERGENIC | SgI Promoter | 1.24 | 0.57 | 0.69 |
| 974667  | INTERGENIC | SgI Promoter | 1.15 | 0.54 | 1.92 |
| 976753  | INTERGENIC | SgI Promoter | 0.39 | 0.16 | 0.32 |
| 977557  | INTERGENIC | SgI Promoter | 2.54 | 0.91 | 0.80 |
| 980127  | INTERGENIC | DbI Promoter | 1.52 | 0.68 | #N/A |
| 981010  | INTERGENIC | DbI Promoter | 1.83 | 0.77 | 0.91 |
| 994278  | INTERGENIC | Non Promoter | 0.38 | 0.14 | 1.16 |
| 996065  | INTERGENIC | SgI Promoter | 0.56 | 0.26 | 1.20 |
| 998900  | INTERGENIC | DbI Promoter | 1.97 | 0.80 | 1.07 |
| 1000140 | INTERGENIC | Non Promoter | 0.39 | 0.13 | #N/A |
| 1004040 | INTERGENIC | DbI Promoter | 2.11 | 0.83 | 0.61 |
| 1005701 | INTERGENIC | Non Promoter | 1.16 | 0.53 | 0.82 |
| 1009046 | INTERGENIC | DbI Promoter | #N/A | #N/A | #N/A |
| 1010212 | INTERGENIC | SgI Promoter | 1.08 | 0.50 | 0.59 |
| 1011625 | INTERGENIC | Non Promoter | 1.14 | 0.53 | 0.71 |
| 1012288 | INTERGENIC | DbI Promoter | 0.55 | 0.23 | 0.81 |
| 1013512 | INTERGENIC | Non Promoter | 0.31 | 0.12 | 1.39 |
| 1014437 | INTERGENIC | SgI Promoter | 0.44 | 0.19 | 0.89 |
| 1017037 | INTERGENIC | SgI Promoter | 0.58 | 0.24 | 0.62 |
| 1020783 | INTERGENIC | SgI Promoter | 2.53 | 0.91 | 0.85 |
| 1022043 | INTERGENIC | Non Promoter | 0.49 | 0.20 | 1.54 |
| 1023173 | INTERGENIC | SgI Promoter | 1.49 | 0.65 | 0.67 |
| 1025106 | INTERGENIC | SgI Promoter | 1.94 | 0.80 | 1.18 |
| 1030586 | INTERGENIC | SgI Promoter | 2.54 | 0.92 | #N/A |
| 1032472 | INTERGENIC | DbI Promoter | 1.16 | 0.52 | 0.85 |
| 1035267 | INTERGENIC | Non Promoter | 0.63 | 0.28 | 0.56 |
| 1036031 | INTERGENIC | DbI Promoter | 2.65 | 0.93 | 0.86 |
| 1037231 | INTERGENIC | SgI Promoter | 1.96 | 0.81 | 0.92 |
| 1038316 | INTERGENIC | Non Promoter | 0.34 | 0.10 | 0.82 |

|         |            |              |      |      |      |
|---------|------------|--------------|------|------|------|
| 1043182 | INTERGENIC | Non Promoter | #N/A | #N/A | #N/A |
| 1045676 | INTERGENIC | Sgl Promoter | 0.74 | 0.34 | 0.77 |
| 1052659 | INTERGENIC | Sgl Promoter | 1.39 | 0.63 | 0.67 |
| 1055248 | INTERGENIC | DbI Promoter | 1.45 | 0.64 | 0.96 |
| 1056587 | INTERGENIC | Sgl Promoter | 0.74 | 0.34 | 0.46 |
| 1058212 | INTERGENIC | Non Promoter | 0.48 | 0.18 | 0.63 |
| 1059663 | INTERGENIC | DbI Promoter | 2.04 | 0.83 | 1.10 |
| 1061541 | INTERGENIC | Non Promoter | 0.42 | 0.19 | 0.77 |
| 1063388 | INTERGENIC | DbI Promoter | 3.32 | 0.97 | 0.83 |
| 1067767 | INTERGENIC | Sgl Promoter | 1.88 | 0.78 | 0.84 |
| 1068765 | INTERGENIC | Non Promoter | 0.67 | 0.32 | 6.99 |
| 1071916 | INTERGENIC | Sgl Promoter | 2.52 | 0.91 | 4.56 |
| 1072782 | INTERGENIC | Sgl Promoter | 1.26 | 0.57 | 0.67 |
| 1073771 | INTERGENIC | Sgl Promoter | #N/A | #N/A | #N/A |
| 1075508 | INTERGENIC | DbI Promoter | 1.81 | 0.76 | 0.79 |
| 1078063 | INTERGENIC | Non Promoter | #N/A | #N/A | #N/A |
| 1079084 | INTERGENIC | Sgl Promoter | #N/A | #N/A | 1.81 |
| 1081164 | INTERGENIC | Sgl Promoter | 0.34 | 0.10 | 0.50 |
| 1085102 | INTERGENIC | DbI Promoter | 1.59 | 0.69 | 0.89 |
| 1087618 | INTERGENIC | Sgl Promoter | 2.56 | 0.92 | 0.42 |
| 1090470 | INTERGENIC | Sgl Promoter | 1.59 | 0.69 | 0.62 |
| 1092778 | INTERGENIC | Sgl Promoter | 2.19 | 0.86 | #N/A |
| 1093800 | INTERGENIC | DbI Promoter | 1.76 | 0.76 | 0.93 |
| 1095407 | INTERGENIC | Sgl Promoter | 0.20 | 0.04 | 0.54 |
| 1104229 | INTERGENIC | Sgl Promoter | 1.33 | 0.61 | 0.74 |
| 1106132 | INTERGENIC | Sgl Promoter | 0.84 | 0.40 | #N/A |
| 1108739 | INTERGENIC | DbI Promoter | 2.02 | 0.81 | 1.06 |
| 1110626 | INTERGENIC | Sgl Promoter | 1.65 | 0.71 | 0.92 |
| 1112517 | INTERGENIC | Non Promoter | 1.83 | 0.77 | 0.93 |
| 1114470 | INTERGENIC | Sgl Promoter | 1.57 | 0.70 | 1.10 |
| 1117114 | INTERGENIC | DbI Promoter | #N/A | #N/A | 0.50 |
| 1120645 | INTERGENIC | Non Promoter | 0.70 | 0.32 | 0.88 |
| 1125338 | INTERGENIC | DbI Promoter | 3.75 | 0.99 | 1.04 |
| 1126306 | INTERGENIC | Sgl Promoter | 3.06 | 0.97 | 1.09 |
| 1127908 | INTERGENIC | DbI Promoter | 3.05 | 0.96 | 0.64 |
| 1129624 | INTERGENIC | Sgl Promoter | 2.23 | 0.86 | 0.71 |
| 1133296 | INTERGENIC | Non Promoter | #N/A | #N/A | 0.67 |
| 1135968 | INTERGENIC | DbI Promoter | 1.03 | 0.47 | 1.10 |
| 1145127 | INTERGENIC | Sgl Promoter | 1.18 | 0.54 | 0.81 |
| 1146354 | INTERGENIC | Sgl Promoter | 2.55 | 0.91 | 1.16 |
| 1147414 | INTERGENIC | Non Promoter | #N/A | #N/A | #N/A |
| 1149986 | INTERGENIC | Sgl Promoter | 2.22 | 0.86 | 1.29 |
| 1150877 | INTERGENIC | DbI Promoter | 0.84 | 0.38 | #N/A |
| 1154251 | INTERGENIC | Sgl Promoter | 1.35 | 0.61 | 1.18 |
| 1157189 | INTERGENIC | Sgl Promoter | #N/A | #N/A | 0.50 |
| 1158415 | INTERGENIC | Sgl Promoter | #N/A | #N/A | 0.75 |
| 1159643 | INTERGENIC | Sgl Promoter | #N/A | #N/A | 1.04 |
| 1162041 | INTERGENIC | Sgl Promoter | 1.16 | 0.53 | 0.71 |
| 1162992 | INTERGENIC | Sgl Promoter | 1.99 | 0.82 | 0.60 |
| 1165972 | INTERGENIC | Sgl Promoter | 0.37 | 0.11 | 0.52 |
| 1169213 | INTERGENIC | DbI Promoter | 1.96 | 0.81 | 0.93 |

|         |            |              |      |      |      |
|---------|------------|--------------|------|------|------|
| 1170361 | INTERGENIC | Non Promoter | 0.34 | 0.11 | 0.64 |
| 1172421 | INTERGENIC | Sgl Promoter | 1.06 | 0.48 | #N/A |
| 1175169 | INTERGENIC | Sgl Promoter | 1.99 | 0.82 | 0.93 |
| 1178700 | INTERGENIC | Dbl Promoter | 2.18 | 0.86 | 0.66 |
| 1181835 | INTERGENIC | Sgl Promoter | 1.00 | 0.46 | 0.74 |
| 1183333 | INTERGENIC | Sgl Promoter | #N/A | #N/A | 0.98 |
| 1184781 | INTERGENIC | Sgl Promoter | 0.79 | 0.38 | 1.72 |
| 1186101 | INTERGENIC | Non Promoter | 1.62 | 0.70 | 1.05 |
| 1189233 | INTERGENIC | Non Promoter | 0.52 | 0.21 | 1.13 |
| 1192040 | INTERGENIC | Non Promoter | 0.30 | 0.07 | 0.72 |
| 1195446 | INTERGENIC | Non Promoter | 1.00 | 0.46 | 1.39 |
| 1196713 | INTERGENIC | Sgl Promoter | 1.31 | 0.60 | #N/A |
| 1199217 | INTERGENIC | Dbl Promoter | 2.53 | 0.92 | 0.61 |
| 1201784 | INTERGENIC | Sgl Promoter | 0.27 | 0.07 | 0.89 |
| 1202877 | INTERGENIC | Non Promoter | 0.56 | 0.24 | 1.14 |
| 1204531 | INTERGENIC | Sgl Promoter | 1.47 | 0.66 | 0.77 |
| 1206738 | INTERGENIC | Dbl Promoter | #N/A | #N/A | 1.02 |
| 1213938 | INTERGENIC | Sgl Promoter | 1.89 | 0.79 | #N/A |
| 1215050 | INTERGENIC | Non Promoter | 0.43 | 0.18 | 1.00 |
| 1217816 | INTERGENIC | Sgl Promoter | 0.53 | 0.25 | #N/A |
| 1219447 | INTERGENIC | Dbl Promoter | 2.35 | 0.89 | 1.34 |
| 1221146 | INTERGENIC | Non Promoter | #N/A | #N/A | #N/A |
| 1222793 | INTERGENIC | Dbl Promoter | 2.08 | 0.84 | #N/A |
| 1223508 | INTERGENIC | Non Promoter | #N/A | #N/A | #N/A |
| 1225200 | INTERGENIC | Sgl Promoter | 2.79 | 0.95 | 1.24 |
| 1226856 | INTERGENIC | Dbl Promoter | #N/A | #N/A | 0.68 |
| 1228645 | INTERGENIC | Sgl Promoter | 1.00 | 0.45 | 1.49 |
| 1229383 | INTERGENIC | Non Promoter | 0.91 | 0.41 | #N/A |
| 1230201 | INTERGENIC | Dbl Promoter | 1.63 | 0.72 | 0.48 |
| 1234252 | INTERGENIC | Sgl Promoter | 0.96 | 0.46 | 0.81 |
| 1236592 | INTERGENIC | Sgl Promoter | 0.53 | 0.22 | 0.59 |
| 1239994 | INTERGENIC | Non Promoter | #N/A | #N/A | #N/A |
| 1241238 | INTERGENIC | Sgl Promoter | 0.70 | 0.32 | 1.00 |
| 1243264 | INTERGENIC | Dbl Promoter | 0.16 | 0.02 | 0.39 |
| 1246118 | INTERGENIC | Sgl Promoter | 0.68 | 0.33 | 0.99 |
| 1248188 | INTERGENIC | Non Promoter | 0.26 | 0.05 | 0.33 |
| 1250220 | INTERGENIC | Dbl Promoter | 2.13 | 0.85 | 0.74 |
| 1252571 | INTERGENIC | Sgl Promoter | 0.60 | 0.28 | #N/A |
| 1254971 | INTERGENIC | Non Promoter | 0.31 | 0.07 | 1.09 |
| 1257042 | INTERGENIC | Sgl Promoter | 1.96 | 0.81 | #N/A |
| 1258730 | INTERGENIC | Dbl Promoter | 2.29 | 0.88 | 0.78 |
| 1259935 | INTERGENIC | Sgl Promoter | #N/A | #N/A | 0.70 |
| 1261715 | INTERGENIC | Sgl Promoter | 1.84 | 0.77 | 0.79 |
| 1263358 | INTERGENIC | Sgl Promoter | #N/A | #N/A | #N/A |
| 1266329 | INTERGENIC | Sgl Promoter | #N/A | #N/A | #N/A |
| 1267505 | INTERGENIC | Dbl Promoter | 1.41 | 0.63 | 0.60 |
| 1270102 | INTERGENIC | Sgl Promoter | 0.48 | 0.21 | 0.40 |
| 1270983 | INTERGENIC | Sgl Promoter | #N/A | #N/A | 0.57 |
| 1272257 | INTERGENIC | Sgl Promoter | #N/A | #N/A | #N/A |
| 1274636 | INTERGENIC | Dbl Promoter | 1.22 | 0.55 | #N/A |
| 1276688 | INTERGENIC | Non Promoter | 0.81 | 0.37 | 0.97 |



|         |            |              |      |      |      |
|---------|------------|--------------|------|------|------|
| 1277680 | INTERGENIC | DbI Promoter | 3.05 | 0.96 | 0.94 |
| 1279244 | INTERGENIC | SgI Promoter | 1.11 | 0.51 | 0.99 |
| 1284103 | INTERGENIC | Non Promoter | #N/A | #N/A | #N/A |
| 1288249 | INTERGENIC | SgI Promoter | 2.35 | 0.89 | 0.91 |
| 1289440 | INTERGENIC | DbI Promoter | 1.39 | 0.61 | 0.90 |
| 1292406 | INTERGENIC | Non Promoter | #N/A | #N/A | 0.67 |
| 1293403 | INTERGENIC | SgI Promoter | 1.91 | 0.80 | 1.22 |
| 1294727 | INTERGENIC | DbI Promoter | 3.75 | 0.99 | 0.92 |
| 1295632 | INTERGENIC | SgI Promoter | 0.42 | 0.15 | 0.80 |
| 1297071 | INTERGENIC | SgI Promoter | 1.59 | 0.69 | 1.09 |
| 1298466 | INTERGENIC | DbI Promoter | 1.06 | 0.48 | 0.53 |
| 1301589 | INTERGENIC | Non Promoter | 0.40 | 0.15 | 0.81 |
| 1303208 | INTERGENIC | SgI Promoter | 0.75 | 0.35 | 0.91 |
| 1305664 | INTERGENIC | SgI Promoter | 0.33 | 0.11 | 1.28 |
| 1312074 | INTERGENIC | SgI Promoter | 1.47 | 0.66 | 1.25 |
| 1315360 | INTERGENIC | Non Promoter | 0.41 | 0.14 | 1.15 |
| 1318080 | INTERGENIC | SgI Promoter | 1.81 | 0.77 | #N/A |
| 1319421 | INTERGENIC | SgI Promoter | 0.82 | 0.39 | 0.58 |
| 1320098 | INTERGENIC | DbI Promoter | 1.93 | 0.79 | 1.04 |
| 1322239 | INTERGENIC | DbI Promoter | 2.59 | 0.92 | #N/A |
| 1323488 | INTERGENIC | Non Promoter | #N/A | #N/A | #N/A |
| 1325535 | INTERGENIC | SgI Promoter | #N/A | #N/A | 0.69 |
| 1328817 | INTERGENIC | SgI Promoter | #N/A | #N/A | #N/A |
| 1331271 | INTERGENIC | SgI Promoter | 0.60 | 0.27 | 1.00 |
| 1333017 | INTERGENIC | Non Promoter | #N/A | #N/A | #N/A |
| 1334855 | INTERGENIC | DbI Promoter | 2.15 | 0.85 | 0.82 |
| 1337386 | INTERGENIC | SgI Promoter | 1.27 | 0.58 | 0.85 |
| 1338308 | INTERGENIC | SgI Promoter | 1.03 | 0.47 | 0.79 |
| 1339710 | INTERGENIC | SgI Promoter | 1.30 | 0.58 | #N/A |
| 1342527 | INTERGENIC | SgI Promoter | 1.38 | 0.61 | 1.13 |
| 1344551 | INTERGENIC | Non Promoter | 0.37 | 0.15 | 0.78 |
| 1345681 | INTERGENIC | DbI Promoter | 0.44 | 0.16 | 0.22 |
| 1350324 | INTERGENIC | DbI Promoter | 1.63 | 0.71 | 0.47 |
| 1356099 | INTERGENIC | DbI Promoter | #N/A | #N/A | #N/A |
| 1357614 | INTERGENIC | Non Promoter | 0.38 | 0.16 | #N/A |
| 1359957 | INTERGENIC | DbI Promoter | 0.82 | 0.37 | 0.61 |
| 1361154 | INTERGENIC | Non Promoter | 0.72 | 0.33 | 0.95 |
| 1365106 | INTERGENIC | Non Promoter | 0.36 | 0.10 | #N/A |
| 1366298 | INTERGENIC | SgI Promoter | 2.29 | 0.88 | #N/A |
| 1367407 | INTERGENIC | SgI Promoter | 2.11 | 0.85 | 0.81 |
| 1369824 | INTERGENIC | SgI Promoter | 1.71 | 0.74 | 1.06 |
| 1382353 | INTERGENIC | SgI Promoter | 1.63 | 0.71 | #N/A |
| 1383845 | INTERGENIC | DbI Promoter | 1.93 | 0.80 | 1.19 |
| 1386676 | INTERGENIC | SgI Promoter | #N/A | #N/A | #N/A |
| 1393370 | INTERGENIC | Non Promoter | #N/A | #N/A | #N/A |
| 1395155 | INTERGENIC | DbI Promoter | 3.83 | 0.99 | 0.90 |
| 1398060 | INTERGENIC | SgI Promoter | 0.26 | 0.05 | 0.74 |
| 1399049 | INTERGENIC | DbI Promoter | 1.43 | 0.63 | 0.71 |
| 1399740 | INTERGENIC | Non Promoter | #N/A | #N/A | #N/A |
| 1401804 | INTERGENIC | DbI Promoter | 0.74 | 0.34 | 0.52 |
| 1402953 | INTERGENIC | SgI Promoter | #N/A | #N/A | 0.73 |

|         |            |              |      |      |      |
|---------|------------|--------------|------|------|------|
| 1404479 | INTERGENIC | Non Promoter | 0.95 | 0.44 | #N/A |
| 1406693 | INTERGENIC | Sgl Promoter | 1.23 | 0.57 | 0.70 |
| 1407498 | INTERGENIC | Sgl Promoter | 0.36 | 0.13 | 0.93 |
| 1409659 | INTERGENIC | Sgl Promoter | 0.52 | 0.21 | 0.99 |
| 1410485 | INTERGENIC | Sgl Promoter | 1.19 | 0.53 | 0.88 |
| 1412405 | INTERGENIC | DbI Promoter | 1.78 | 0.76 | 1.00 |
| 1414607 | INTERGENIC | Sgl Promoter | 1.71 | 0.74 | 0.63 |
| 1417431 | INTERGENIC | DbI Promoter | 1.91 | 0.78 | 1.17 |
| 1418582 | INTERGENIC | Non Promoter | 0.58 | 0.24 | #N/A |
| 1420463 | INTERGENIC | Sgl Promoter | 1.32 | 0.60 | 0.85 |
| 1421189 | INTERGENIC | DbI Promoter | 1.55 | 0.68 | 0.56 |
| 1422795 | INTERGENIC | Sgl Promoter | #N/A | #N/A | #N/A |
| 1424852 | INTERGENIC | Non Promoter | #N/A | #N/A | 0.88 |
| 1427463 | INTERGENIC | Sgl Promoter | 1.37 | 0.61 | 0.51 |
| 1428386 | INTERGENIC | Sgl Promoter | 0.93 | 0.43 | 0.57 |
| 1429220 | INTERGENIC | Sgl Promoter | #N/A | #N/A | 0.97 |
| 1431044 | INTERGENIC | DbI Promoter | #N/A | #N/A | 0.66 |
| 1432000 | INTERGENIC | Non Promoter | 0.61 | 0.27 | #N/A |
| 1434532 | INTERGENIC | Sgl Promoter | 1.86 | 0.78 | 0.58 |
| 1436249 | INTERGENIC | Sgl Promoter | 1.55 | 0.69 | 0.58 |
| 1436962 | INTERGENIC | Sgl Promoter | 2.48 | 0.90 | 0.55 |
| 1438163 | INTERGENIC | Non Promoter | 0.36 | 0.13 | #N/A |
| 1441481 | INTERGENIC | Sgl Promoter | 0.80 | 0.39 | 0.70 |
| 1443761 | INTERGENIC | Sgl Promoter | 1.40 | 0.62 | 0.81 |
| 1445891 | INTERGENIC | Sgl Promoter | 1.32 | 0.60 | #N/A |
| 1447878 | INTERGENIC | DbI Promoter | 1.71 | 0.74 | 0.67 |
| 1450246 | INTERGENIC | Non Promoter | #N/A | #N/A | #N/A |
| 1451401 | INTERGENIC | DbI Promoter | 0.38 | 0.15 | 0.77 |
| 1453358 | INTERGENIC | Non Promoter | 0.42 | 0.15 | 1.00 |
| 1456359 | INTERGENIC | Sgl Promoter | #N/A | #N/A | #N/A |
| 1459776 | INTERGENIC | Sgl Promoter | 0.94 | 0.45 | 0.96 |
| 1461763 | INTERGENIC | Sgl Promoter | 1.73 | 0.75 | #N/A |
| 1466501 | INTERGENIC | Sgl Promoter | 0.48 | 0.19 | 0.60 |
| 1469448 | INTERGENIC | Sgl Promoter | 0.47 | 0.18 | 0.49 |
| 1470065 | INTERGENIC | Sgl Promoter | 1.07 | 0.49 | 0.94 |
| 1470548 | INTERGENIC | Non Promoter | #N/A | #N/A | #N/A |
| 1471596 | INTERGENIC | Non Promoter | #N/A | #N/A | #N/A |
| 1473477 | INTERGENIC | DbI Promoter | 1.69 | 0.72 | 0.87 |
| 1475022 | INTERGENIC | Non Promoter | #N/A | #N/A | #N/A |
| 1477287 | INTERGENIC | DbI Promoter | 2.30 | 0.87 | 0.71 |
| 1478656 | INTERGENIC | Sgl Promoter | 1.77 | 0.75 | 1.21 |
| 1480473 | INTERGENIC | Sgl Promoter | 1.94 | 0.79 | #N/A |
| 1483843 | INTERGENIC | Non Promoter | 3.75 | 0.99 | 0.87 |
| 1485614 | INTERGENIC | Sgl Promoter | #N/A | #N/A | #N/A |
| 1487590 | INTERGENIC | Sgl Promoter | #N/A | #N/A | 0.69 |
| 1489953 | INTERGENIC | DbI Promoter | 0.44 | 0.19 | 1.58 |
| 1490644 | INTERGENIC | Sgl Promoter | 0.19 | 0.03 | #N/A |
| 1491123 | INTERGENIC | Non Promoter | 0.36 | 0.15 | 0.51 |
| 1493547 | INTERGENIC | Sgl Promoter | 1.36 | 0.62 | 0.81 |
| 1494634 | INTERGENIC | Sgl Promoter | 1.34 | 0.60 | 1.20 |
| 1496213 | INTERGENIC | Non Promoter | #N/A | #N/A | #N/A |



|         |            |              |      |      |      |
|---------|------------|--------------|------|------|------|
| 1496839 | INTERGENIC | Sgl Promoter | 1.41 | 0.62 | 0.69 |
| 1498280 | INTERGENIC | Dbl Promoter | #N/A | #N/A | #N/A |
| 1499444 | INTERGENIC | Non Promoter | #N/A | #N/A | #N/A |
| 1501495 | INTERGENIC | Sgl Promoter | 1.24 | 0.56 | 1.08 |
| 1503361 | INTERGENIC | Sgl Promoter | 0.90 | 0.41 | 1.09 |
| 1505800 | INTERGENIC | Sgl Promoter | 0.57 | 0.24 | 0.84 |
| 1506653 | INTERGENIC | Sgl Promoter | 0.53 | 0.21 | 1.27 |
| 1508052 | INTERGENIC | Dbl Promoter | 1.04 | 0.47 | 1.00 |
| 1510902 | INTERGENIC | Non Promoter | 1.43 | 0.63 | 1.30 |
| 1512140 | INTERGENIC | Sgl Promoter | 1.04 | 0.49 | 0.85 |
| 1514826 | INTERGENIC | Non Promoter | #N/A | #N/A | 0.69 |
| 1517176 | INTERGENIC | Non Promoter | 1.88 | 0.79 | 1.27 |
| 1518524 | INTERGENIC | Sgl Promoter | 1.80 | 0.76 | 1.00 |
| 1522014 | INTERGENIC | Dbl Promoter | 1.79 | 0.75 | 0.53 |
| 1523290 | INTERGENIC | Dbl Promoter | 0.87 | 0.41 | 0.73 |
| 1524675 | INTERGENIC | Non Promoter | 0.32 | 0.08 | 0.92 |
| 1525136 | INTERGENIC | Sgl Promoter | 0.35 | 0.12 | 0.52 |
| 1526362 | INTERGENIC | Dbl Promoter | 0.58 | 0.25 | 0.71 |
| 513731  | INTERGENIC | Sgl Promoter | #N/A | #N/A | #N/A |
| 519782  | INTERGENIC | Sgl Promoter | #N/A | #N/A | #N/A |
| 652831  | INTERGENIC | Dbl Promoter | 2.58 | 0.92 | 1.17 |
| 651720  | INTERGENIC | Dbl Promoter | 0.96 | 0.44 | 0.73 |
| 668581  | INTERGENIC | Non Promoter | 0.15 | 0.01 | #N/A |
| 884398  | INTERGENIC | Sgl Promoter | #N/A | #N/A | #N/A |
| 669054  | INTERGENIC | Non Promoter | #N/A | #N/A | #N/A |
| 945991  | INTERGENIC | Sgl Promoter | 1.26 | 0.56 | 1.49 |
| 878340  | INTERGENIC | Sgl Promoter | 1.05 | 0.48 | 1.26 |
| 1102221 | INTERGENIC | Sgl Promoter | 0.82 | 0.39 | #N/A |
| 1151838 | INTERGENIC | Non Promoter | 0.86 | 0.41 | 1.00 |
| 1175864 | INTERGENIC | Sgl Promoter | 0.88 | 0.40 | #N/A |
| 1353759 | INTERGENIC | Dbl Promoter | 2.75 | 0.94 | 0.84 |
| 1519704 | INTERGENIC | Sgl Promoter | 0.74 | 0.35 | 0.69 |
| 151960  | INTERGENIC | Dbl Promoter | 2.05 | 0.82 | 2.47 |
| 148721  | INTERGENIC | Non Promoter | #N/A | #N/A | #N/A |
| 148227  | INTERGENIC | Sgl Promoter | 1.90 | 0.79 | 1.17 |
| 146950  | INTERGENIC | Dbl Promoter | 1.52 | 0.68 | #N/A |
| 145906  | INTERGENIC | Non Promoter | 0.49 | 0.19 | 1.64 |
| 144326  | INTERGENIC | Sgl Promoter | 0.75 | 0.34 | 0.77 |
| 141891  | INTERGENIC | Sgl Promoter | 0.11 | 0.01 | 0.39 |
| 140512  | INTERGENIC | Dbl Promoter | 0.42 | 0.15 | 1.00 |
| 137324  | INTERGENIC | Non Promoter | 1.92 | 0.80 | 1.06 |
| 135425  | INTERGENIC | Sgl Promoter | 0.62 | 0.27 | #N/A |
| 133120  | INTERGENIC | Sgl Promoter | 1.83 | 0.78 | 0.85 |
| 131082  | INTERGENIC | Sgl Promoter | 0.54 | 0.22 | 1.61 |
| 128825  | INTERGENIC | Dbl Promoter | 2.00 | 0.81 | #N/A |
| 126629  | INTERGENIC | Dbl Promoter | #N/A | #N/A | 1.25 |
| 123657  | INTERGENIC | Dbl Promoter | 0.69 | 0.31 | 0.38 |
| 124737  | INTERGENIC | Non Promoter | 0.41 | 0.14 | 0.56 |
| 122798  | INTERGENIC | Non Promoter | #N/A | #N/A | #N/A |
| 121471  | INTERGENIC | Dbl Promoter | 1.80 | 0.75 | 0.51 |
| 120498  | INTERGENIC | Sgl Promoter | #N/A | #N/A | #N/A |

|        |            |              |      |      |      |
|--------|------------|--------------|------|------|------|
| 117667 | INTERGENIC | Sgl Promoter | 1.09 | 0.51 | 1.27 |
| 116167 | INTERGENIC | Sgl Promoter | 1.04 | 0.47 | 3.83 |
| 111421 | INTERGENIC | Dbl Promoter | 2.15 | 0.86 | 1.09 |
| 108504 | INTERGENIC | Non Promoter | 0.28 | 0.06 | 0.97 |
| 107260 | INTERGENIC | Dbl Promoter | 1.51 | 0.66 | 0.84 |
| 102581 | INTERGENIC | Non Promoter | 0.50 | 0.20 | 1.79 |
| 101943 | INTERGENIC | Sgl Promoter | 0.70 | 0.33 | 1.38 |
| 99490  | INTERGENIC | Sgl Promoter | 2.47 | 0.91 | 0.72 |
| 98668  | INTERGENIC | Dbl Promoter | 1.55 | 0.67 | 1.08 |
| 96858  | INTERGENIC | Non Promoter | 0.44 | 0.17 | #N/A |
| 94644  | INTERGENIC | Sgl Promoter | 1.29 | 0.58 | 1.49 |
| 90258  | INTERGENIC | Sgl Promoter | 2.27 | 0.88 | 0.81 |
| 85676  | INTERGENIC | Dbl Promoter | 0.27 | 0.07 | 1.05 |
| 83050  | INTERGENIC | Sgl Promoter | 0.99 | 0.45 | 0.87 |
| 81407  | INTERGENIC | Non Promoter | 0.49 | 0.23 | 0.56 |
| 80420  | INTERGENIC | Dbl Promoter | 2.64 | 0.93 | 0.70 |
| 79636  | INTERGENIC | Non Promoter | #N/A | #N/A | #N/A |
| 78053  | INTERGENIC | Sgl Promoter | 0.76 | 0.36 | 0.76 |
| 75944  | INTERGENIC | Sgl Promoter | 1.17 | 0.54 | 0.72 |
| 73771  | INTERGENIC | Sgl Promoter | #N/A | #N/A | 0.91 |
| 70478  | INTERGENIC | Sgl Promoter | 2.81 | 0.94 | #N/A |
| 69757  | INTERGENIC | Dbl Promoter | 0.17 | 0.02 | 0.38 |
| 67629  | INTERGENIC | Sgl Promoter | 0.66 | 0.30 | 0.81 |
| 65385  | INTERGENIC | Sgl Promoter | 1.03 | 0.48 | #N/A |
| 64709  | INTERGENIC | Non Promoter | 0.48 | 0.22 | 1.06 |
| 61352  | INTERGENIC | Dbl Promoter | 1.36 | 0.61 | 0.95 |
| 59670  | INTERGENIC | Non Promoter | 0.80 | 0.37 | 1.12 |
| 58378  | INTERGENIC | Sgl Promoter | 1.72 | 0.75 | 1.02 |
| 56571  | INTERGENIC | Dbl Promoter | #N/A | #N/A | 0.94 |
| 53901  | INTERGENIC | Sgl Promoter | 0.29 | 0.06 | 0.37 |
| 52721  | INTERGENIC | Sgl Promoter | #N/A | #N/A | 0.97 |
| 48471  | INTERGENIC | Non Promoter | #N/A | #N/A | #N/A |
| 47168  | INTERGENIC | Dbl Promoter | 1.55 | 0.69 | 1.11 |
| 45020  | INTERGENIC | Non Promoter | 1.43 | 0.63 | #N/A |
| 43252  | INTERGENIC | Sgl Promoter | #N/A | #N/A | 0.86 |
| 42400  | INTERGENIC | Sgl Promoter | 1.33 | 0.60 | 0.70 |
| 40046  | INTERGENIC | Sgl Promoter | 1.93 | 0.80 | 0.97 |
| 36535  | INTERGENIC | Non Promoter | 0.48 | 0.18 | 0.93 |
| 34380  | INTERGENIC | Dbl Promoter | 1.51 | 0.66 | 0.61 |
| 29797  | INTERGENIC | Non Promoter | 0.99 | 0.45 | 2.37 |
| 26189  | INTERGENIC | Sgl Promoter | 0.98 | 0.44 | 5.33 |
| 15385  | INTERGENIC | Sgl Promoter | 1.23 | 0.55 | 1.65 |
| 8786   | INTERGENIC | Dbl Promoter | 0.94 | 0.43 | 0.86 |
| 10019  | INTERGENIC | Dbl Promoter | 1.53 | 0.68 | 1.17 |
| 11252  | INTERGENIC | Dbl Promoter | 1.32 | 0.59 | #N/A |
| 12485  | INTERGENIC | Dbl Promoter | 1.24 | 0.56 | 0.98 |
| 13720  | INTERGENIC | Dbl Promoter | 1.78 | 0.75 | 0.72 |
| 7230   | INTERGENIC | Non Promoter | 0.66 | 0.29 | 1.10 |
| 6126   | INTERGENIC | Dbl Promoter | 1.00 | 0.46 | 0.90 |
| 4185   | INTERGENIC | Sgl Promoter | 0.79 | 0.36 | #N/A |
| 100133 | INTERGENIC | Sgl Promoter | 0.90 | 0.41 | 1.04 |

|        |            |              |      |      |      |
|--------|------------|--------------|------|------|------|
| 136279 | INTERGENIC | Sgl Promoter | 1.33 | 0.59 | 1.90 |
| 118617 | INTERGENIC | Non Promoter | 0.12 | 0.01 | #N/A |
| 63728  | INTERGENIC | Dbl Promoter | 1.16 | 0.53 | 0.80 |
| 138221 | INTERGENIC | Non Promoter | 0.82 | 0.38 | 1.30 |
| 138666 | INTERGENIC | Non Promoter | #N/A | #N/A | 0.59 |
| 157735 | INTERGENIC | Non Promoter | #N/A | #N/A | #N/A |
| 159579 | INTERGENIC | Dbl Promoter | 2.75 | 0.93 | 0.89 |
| 160549 | INTERGENIC | Sgl Promoter | 1.38 | 0.63 | 1.16 |
| 162722 | INTERGENIC | Sgl Promoter | 1.58 | 0.69 | 0.74 |
| 164526 | INTERGENIC | Sgl Promoter | 0.87 | 0.40 | #N/A |
| 167426 | INTERGENIC | Sgl Promoter | 0.99 | 0.45 | 1.60 |
| 166236 | INTERGENIC | Non Promoter | 0.53 | 0.25 | 1.04 |
| 172114 | INTERGENIC | Dbl Promoter | 2.78 | 0.95 | #N/A |
| 172633 | INTERGENIC | Non Promoter | 0.31 | 0.07 | #N/A |
| 174292 | INTERGENIC | Dbl Promoter | 1.43 | 0.65 | 1.04 |
| 175247 | INTERGENIC | Dbl Promoter | 1.38 | 0.62 | 0.48 |
| 176704 | INTERGENIC | Sgl Promoter | 1.04 | 0.47 | 1.43 |
| 178840 | INTERGENIC | Sgl Promoter | 3.03 | 0.96 | 1.49 |
| 182599 | INTERGENIC | Sgl Promoter | #N/A | #N/A | #N/A |
| 184540 | INTERGENIC | Sgl Promoter | 2.48 | 0.91 | #N/A |
| 188276 | INTERGENIC | Sgl Promoter | 1.30 | 0.58 | 0.86 |
| 189502 | INTERGENIC | Non Promoter | 0.38 | 0.13 | 0.71 |
| 191958 | INTERGENIC | Sgl Promoter | 1.93 | 0.79 | #N/A |
| 192796 | INTERGENIC | Dbl Promoter | 1.78 | 0.77 | 0.64 |
| 195167 | INTERGENIC | Dbl Promoter | 1.84 | 0.76 | 0.65 |
| 196947 | INTERGENIC | Sgl Promoter | 0.93 | 0.42 | 0.96 |
| 198811 | INTERGENIC | Sgl Promoter | 1.72 | 0.73 | #N/A |
| 201075 | INTERGENIC | Sgl Promoter | 2.00 | 0.81 | 0.84 |
| 202191 | INTERGENIC | Sgl Promoter | 1.58 | 0.71 | #N/A |
| 205250 | INTERGENIC | Sgl Promoter | 2.58 | 0.92 | 1.04 |
| 207356 | INTERGENIC | Non Promoter | #N/A | #N/A | #N/A |
| 208978 | INTERGENIC | Sgl Promoter | 1.36 | 0.60 | 1.07 |
| 210691 | INTERGENIC | Sgl Promoter | 2.37 | 0.89 | 1.03 |
| 212586 | INTERGENIC | Sgl Promoter | 0.53 | 0.22 | 0.43 |
| 213415 | INTERGENIC | Dbl Promoter | #N/A | #N/A | #N/A |
| 214075 | INTERGENIC | Non Promoter | 0.38 | 0.12 | 0.84 |
| 214915 | INTERGENIC | Dbl Promoter | 2.63 | 0.93 | 0.60 |
| 218056 | INTERGENIC | Non Promoter | 0.42 | 0.18 | 0.88 |
| 221845 | INTERGENIC | Dbl Promoter | 1.04 | 0.47 | 0.59 |
| 222638 | INTERGENIC | Sgl Promoter | #N/A | #N/A | 0.46 |
| 223366 | INTERGENIC | Non Promoter | 0.53 | 0.24 | 0.92 |
| 225888 | INTERGENIC | Dbl Promoter | 0.28 | 0.09 | 0.60 |
| 228455 | INTERGENIC | Sgl Promoter | #N/A | #N/A | #N/A |
| 229794 | INTERGENIC | Dbl Promoter | 3.14 | 0.97 | 0.96 |
| 232460 | INTERGENIC | Sgl Promoter | 0.85 | 0.39 | 0.88 |
| 234936 | INTERGENIC | Sgl Promoter | 1.23 | 0.57 | 0.73 |
| 235769 | INTERGENIC | Non Promoter | 0.46 | 0.18 | #N/A |
| 237569 | INTERGENIC | Sgl Promoter | #N/A | #N/A | 1.13 |
| 238459 | INTERGENIC | Sgl Promoter | 0.48 | 0.19 | 0.88 |
| 240031 | INTERGENIC | Sgl Promoter | #N/A | #N/A | 0.43 |
| 242339 | INTERGENIC | Dbl Promoter | 0.61 | 0.29 | 0.53 |

|        |            |              |      |      |      |
|--------|------------|--------------|------|------|------|
| 243179 | INTERGENIC | Dbl Promoter | 1.06 | 0.50 | 0.70 |
| 243809 | INTERGENIC | Non Promoter | 0.54 | 0.26 | #N/A |
| 246981 | INTERGENIC | Sgl Promoter | 1.75 | 0.76 | #N/A |
| 249108 | INTERGENIC | Dbl Promoter | 1.29 | 0.58 | 0.82 |
| 251727 | INTERGENIC | Sgl Promoter | 1.03 | 0.47 | 1.08 |
| 253970 | INTERGENIC | Non Promoter | #N/A | #N/A | #N/A |
| 254655 | INTERGENIC | Dbl Promoter | #N/A | #N/A | #N/A |
| 256374 | INTERGENIC | Non Promoter | 0.59 | 0.25 | 1.71 |
| 258736 | INTERGENIC | Sgl Promoter | 0.65 | 0.30 | 0.78 |
| 260844 | INTERGENIC | Sgl Promoter | 0.62 | 0.27 | 0.58 |
| 262051 | INTERGENIC | Sgl Promoter | 0.46 | 0.17 | 0.59 |
| 264891 | INTERGENIC | Sgl Promoter | 1.06 | 0.48 | 1.01 |
| 266511 | INTERGENIC | Sgl Promoter | 0.27 | 0.07 | 0.93 |
| 269421 | INTERGENIC | Sgl Promoter | 0.20 | 0.03 | 0.38 |
| 270735 | INTERGENIC | Sgl Promoter | 0.35 | 0.10 | 0.50 |
| 271766 | INTERGENIC | Dbl Promoter | 1.92 | 0.79 | 1.02 |
| 272622 | INTERGENIC | Sgl Promoter | 1.41 | 0.63 | 0.66 |
| 274565 | INTERGENIC | Sgl Promoter | 1.24 | 0.56 | 1.18 |
| 276570 | INTERGENIC | Sgl Promoter | 0.45 | 0.16 | #N/A |
| 278296 | INTERGENIC | Non Promoter | 0.68 | 0.30 | #N/A |
| 279928 | INTERGENIC | Sgl Promoter | 1.12 | 0.51 | #N/A |
| 281708 | INTERGENIC | Dbl Promoter | 0.96 | 0.44 | 0.86 |
| 282703 | INTERGENIC | Non Promoter | 0.34 | 0.11 | 0.87 |
| 291701 | INTERGENIC | Non Promoter | 2.20 | 0.86 | 0.42 |
| 293048 | INTERGENIC | Sgl Promoter | 1.96 | 0.81 | #N/A |
| 295408 | INTERGENIC | Sgl Promoter | 0.27 | 0.09 | 0.82 |
| 298948 | INTERGENIC | Sgl Promoter | 1.52 | 0.68 | 0.54 |
| 301945 | INTERGENIC | Non Promoter | 1.13 | 0.51 | 0.95 |
| 302804 | INTERGENIC | Dbl Promoter | 1.28 | 0.57 | 1.04 |
| 304027 | INTERGENIC | Sgl Promoter | 0.19 | 0.04 | #N/A |
| 306319 | INTERGENIC | Sgl Promoter | 0.20 | 0.03 | 1.04 |
| 308409 | INTERGENIC | Non Promoter | 1.31 | 0.59 | 1.17 |
| 312019 | INTERGENIC | Sgl Promoter | 0.52 | 0.25 | 0.82 |
| 314530 | INTERGENIC | Sgl Promoter | 1.48 | 0.66 | 1.08 |
| 316803 | INTERGENIC | Sgl Promoter | #N/A | #N/A | #N/A |
| 318916 | INTERGENIC | Dbl Promoter | 1.72 | 0.74 | 0.71 |
| 319959 | INTERGENIC | Sgl Promoter | 1.66 | 0.73 | 1.79 |
| 324268 | INTERGENIC | Non Promoter | #N/A | #N/A | #N/A |
| 326170 | INTERGENIC | Sgl Promoter | 1.33 | 0.59 | #N/A |
| 327615 | INTERGENIC | Non Promoter | 1.08 | 0.50 | 0.49 |
| 328473 | INTERGENIC | Dbl Promoter | #N/A | #N/A | #N/A |
| 330572 | INTERGENIC | Sgl Promoter | 1.27 | 0.59 | 1.44 |
| 333172 | INTERGENIC | Sgl Promoter | 2.43 | 0.90 | 0.77 |
| 332578 | INTERGENIC | Non Promoter | 1.14 | 0.52 | 1.02 |
| 335942 | INTERGENIC | Sgl Promoter | 0.52 | 0.21 | 0.56 |
| 337945 | INTERGENIC | Dbl Promoter | 1.13 | 0.51 | 0.55 |
| 339860 | INTERGENIC | Non Promoter | 0.49 | 0.19 | #N/A |
| 342386 | INTERGENIC | Sgl Promoter | #N/A | #N/A | #N/A |
| 342851 | INTERGENIC | Dbl Promoter | 0.61 | 0.27 | #N/A |
| 343316 | INTERGENIC | Non Promoter | 1.09 | 0.51 | 0.51 |
| 347908 | INTERGENIC | Sgl Promoter | 3.21 | 0.97 | 1.05 |

|        |            |              |      |      |      |
|--------|------------|--------------|------|------|------|
| 348725 | INTERGENIC | Sgl Promoter | #N/A | #N/A | 0.65 |
| 349976 | INTERGENIC | Dbl Promoter | 1.43 | 0.65 | 0.77 |
| 351694 | INTERGENIC | Sgl Promoter | 0.51 | 0.21 | 0.97 |
| 353395 | INTERGENIC | Sgl Promoter | #N/A | #N/A | 0.91 |
| 358101 | INTERGENIC | Non Promoter | 0.56 | 0.24 | #N/A |
| 359558 | INTERGENIC | Dbl Promoter | 3.11 | 0.96 | 0.71 |
| 360498 | INTERGENIC | Non Promoter | 0.36 | 0.11 | 0.48 |
| 363096 | INTERGENIC | Dbl Promoter | 1.07 | 0.49 | 0.90 |
| 364585 | INTERGENIC | Sgl Promoter | 1.33 | 0.60 | #N/A |
| 366798 | INTERGENIC | Sgl Promoter | 3.01 | 0.96 | 0.82 |
| 367834 | INTERGENIC | Non Promoter | #N/A | #N/A | 0.88 |
| 372322 | INTERGENIC | Dbl Promoter | 2.05 | 0.82 | #N/A |
| 373444 | INTERGENIC | Non Promoter | 0.76 | 0.35 | 0.89 |
| 375211 | INTERGENIC | Sgl Promoter | 1.55 | 0.68 | 0.94 |
| 377185 | INTERGENIC | Sgl Promoter | 0.37 | 0.11 | 0.63 |
| 387228 | INTERGENIC | Dbl Promoter | #N/A | #N/A | 0.85 |
| 387928 | INTERGENIC | Non Promoter | #N/A | #N/A | #N/A |
| 390586 | INTERGENIC | Sgl Promoter | 1.24 | 0.56 | 0.92 |
| 394288 | INTERGENIC | Sgl Promoter | 1.55 | 0.69 | 0.95 |
| 395344 | INTERGENIC | Sgl Promoter | 1.59 | 0.71 | #N/A |
| 396765 | INTERGENIC | Dbl Promoter | 1.09 | 0.49 | 0.47 |
| 397948 | INTERGENIC | Non Promoter | 0.49 | 0.19 | 1.81 |
| 399492 | INTERGENIC | Sgl Promoter | 1.91 | 0.80 | 0.52 |
| 402371 | INTERGENIC | Sgl Promoter | 1.76 | 0.76 | 1.17 |
| 402867 | INTERGENIC | Non Promoter | 0.52 | 0.24 | #N/A |
| 404809 | INTERGENIC | Dbl Promoter | 2.46 | 0.91 | 0.71 |
| 407339 | INTERGENIC | Non Promoter | 0.59 | 0.28 | 1.06 |
| 410186 | INTERGENIC | Dbl Promoter | 2.19 | 0.86 | 1.06 |
| 413391 | INTERGENIC | Non Promoter | #N/A | #N/A | 1.27 |
| 414478 | INTERGENIC | Dbl Promoter | 1.59 | 0.69 | 1.18 |
| 415856 | INTERGENIC | Sgl Promoter | 1.83 | 0.76 | #N/A |
| 417278 | INTERGENIC | Sgl Promoter | 1.97 | 0.80 | 0.59 |
| 421112 | INTERGENIC | Non Promoter | #N/A | #N/A | 1.37 |
| 423949 | INTERGENIC | Dbl Promoter | 0.58 | 0.26 | 0.76 |
| 424695 | INTERGENIC | Non Promoter | 0.45 | 0.17 | 1.00 |
| 431126 | INTERGENIC | Dbl Promoter | 0.80 | 0.36 | 1.07 |
| 437949 | INTERGENIC | Sgl Promoter | #N/A | #N/A | 0.66 |
| 438697 | INTERGENIC | Dbl Promoter | 0.88 | 0.40 | 0.98 |
| 441370 | INTERGENIC | Non Promoter | 0.55 | 0.25 | 0.92 |
| 450559 | INTERGENIC | Non Promoter | 0.59 | 0.25 | #N/A |
| 451561 | INTERGENIC | Dbl Promoter | 1.75 | 0.74 | #N/A |
| 453455 | INTERGENIC | Sgl Promoter | 1.25 | 0.56 | 0.48 |
| 456315 | INTERGENIC | Dbl Promoter | 1.81 | 0.76 | 1.16 |
| 457802 | INTERGENIC | Non Promoter | 0.36 | 0.15 | 0.51 |
| 460522 | INTERGENIC | Sgl Promoter | 1.68 | 0.72 | 1.13 |
| 462581 | INTERGENIC | Dbl Promoter | 0.82 | 0.37 | 0.67 |
| 462964 | INTERGENIC | Non Promoter | #N/A | #N/A | #N/A |
| 465299 | INTERGENIC | Dbl Promoter | #N/A | #N/A | 1.13 |
| 466204 | INTERGENIC | Non Promoter | #N/A | #N/A | #N/A |
| 468366 | INTERGENIC | Dbl Promoter | 1.70 | 0.72 | 0.99 |
| 469453 | INTERGENIC | Non Promoter | 1.33 | 0.60 | 0.97 |



|        |            |              |      |      |      |
|--------|------------|--------------|------|------|------|
| 472653 | INTERGENIC | Sgl Promoter | 2.15 | 0.86 | 0.81 |
| 475016 | INTERGENIC | Dbl Promoter | 2.22 | 0.85 | #N/A |
| 476341 | INTERGENIC | Non Promoter | 0.32 | 0.12 | #N/A |
| 483321 | INTERGENIC | Sgl Promoter | 0.76 | 0.34 | 0.54 |
| 484784 | INTERGENIC | Dbl Promoter | 2.63 | 0.93 | #N/A |
| 487327 | INTERGENIC | Non Promoter | #N/A | #N/A | #N/A |
| 491526 | INTERGENIC | Sgl Promoter | 0.89 | 0.42 | 0.61 |
| 492348 | INTERGENIC | Sgl Promoter | 0.30 | 0.09 | 0.74 |
| 500626 | INTERGENIC | Sgl Promoter | 2.36 | 0.88 | 1.16 |
| 503080 | INTERGENIC | Sgl Promoter | 1.95 | 0.80 | 0.44 |
| 504583 | INTERGENIC | Dbl Promoter | 0.91 | 0.43 | 0.89 |
| 505388 | INTERGENIC | Dbl Promoter | 0.65 | 0.29 | 1.22 |
| 510369 | INTERGENIC | Sgl Promoter | 0.66 | 0.30 | 0.69 |
| 512740 | INTERGENIC | Sgl Promoter | 1.37 | 0.61 | 0.59 |
| 518212 | INTERGENIC | Sgl Promoter | 0.75 | 0.34 | 0.80 |
| 521025 | INTERGENIC | Non Promoter | #N/A | #N/A | #N/A |
| 523365 | INTERGENIC | Dbl Promoter | 1.45 | 0.64 | 0.55 |
| 525970 | INTERGENIC | Sgl Promoter | 1.39 | 0.63 | #N/A |
| 527078 | INTERGENIC | Sgl Promoter | 1.93 | 0.80 | #N/A |
| 529526 | INTERGENIC | Non Promoter | #N/A | #N/A | 0.81 |
| 536296 | INTERGENIC | Dbl Promoter | 3.28 | 0.98 | #N/A |
| 538430 | INTERGENIC | Non Promoter | #N/A | #N/A | #N/A |
| 539460 | INTERGENIC | Sgl Promoter | 1.20 | 0.54 | 1.26 |
| 541686 | INTERGENIC | Dbl Promoter | 1.88 | 0.79 | 1.16 |
| 545607 | INTERGENIC | Sgl Promoter | 0.20 | 0.03 | 0.51 |
| 546744 | INTERGENIC | Sgl Promoter | #N/A | #N/A | 0.86 |
| 548417 | INTERGENIC | Sgl Promoter | 0.41 | 0.14 | #N/A |
| 549720 | INTERGENIC | Non Promoter | #N/A | #N/A | #N/A |
| 551281 | INTERGENIC | Sgl Promoter | 1.02 | 0.47 | 1.30 |
| 552036 | INTERGENIC | Dbl Promoter | 0.51 | 0.20 | #N/A |
| 553330 | INTERGENIC | Non Promoter | 0.10 | 0.01 | #N/A |
| 555128 | INTERGENIC | Sgl Promoter | 0.88 | 0.41 | 1.07 |
| 556292 | INTERGENIC | Sgl Promoter | 0.29 | 0.07 | 0.78 |
| 559450 | INTERGENIC | Dbl Promoter | 2.61 | 0.93 | 0.99 |
| 561701 | INTERGENIC | Non Promoter | 2.17 | 0.86 | 0.78 |
| 563924 | INTERGENIC | Dbl Promoter | 2.33 | 0.89 | 1.12 |
| 568036 | INTERGENIC | Sgl Promoter | 1.83 | 0.78 | 0.92 |
| 288441 | INTERGENIC | Dbl Promoter | 0.78 | 0.35 | 2.16 |
| 432492 | INTERGENIC | Dbl Promoter | 2.22 | 0.85 | #N/A |
| 449471 | INTERGENIC | Dbl Promoter | 1.02 | 0.46 | 1.19 |
| 499343 | INTERGENIC | Sgl Promoter | 0.56 | 0.26 | #N/A |
| 552521 | INTERGENIC | Dbl Promoter | 2.36 | 0.90 | #N/A |
| 249444 | INTERGENIC | Dbl Promoter | #N/A | #N/A | #N/A |
| 565123 | INTERGENIC | Dbl Promoter | 0.84 | 0.39 | 1.09 |
| 566226 | INTERGENIC | Dbl Promoter | 1.51 | 0.66 | 0.95 |
| 435125 | INTERGENIC | Non Promoter | #N/A | #N/A | 0.84 |
| 354847 | INTERGENIC | Sgl Promoter | 0.88 | 0.41 | #N/A |
| 437264 | INTERGENIC | Non Promoter | 0.50 | 0.20 | 0.96 |
| 312586 | INTERGENIC | Sgl Promoter | 0.51 | 0.20 | 0.94 |
| 354132 | INTERGENIC | Sgl Promoter | 1.65 | 0.71 | 1.17 |
| 443199 | INTERGENIC | Sgl Promoter | #N/A | #N/A | #N/A |

|        |            |              |      |      |      |
|--------|------------|--------------|------|------|------|
| 446417 | INTERGENIC | Sgl Promoter | 0.16 | 0.02 | 0.78 |
| 447698 | INTERGENIC | Sgl Promoter | 0.22 | 0.03 | 0.86 |
| 448981 | INTERGENIC | Sgl Promoter | 0.79 | 0.37 | 0.91 |
| 488853 | INTERGENIC | Non Promoter | 1.75 | 0.74 | 1.12 |
| 177098 | INTERGENIC | Sgl Promoter | 1.42 | 0.64 | 1.03 |
| 249929 | INTERGENIC | Dbf Promoter | 0.83 | 0.39 | #N/A |
| 570085 | INTERGENIC | Sgl Promoter | 0.51 | 0.21 | 0.58 |
| 147125 | INTERGENIC | Dbf Promoter | 2.05 | 0.83 | 1.26 |
| 137480 | INTERGENIC | Dbf Promoter | #N/A | #N/A | 1.68 |
| 134515 | INTERGENIC | Non Promoter | #N/A | #N/A | #N/A |
| 131804 | INTERGENIC | Sgl Promoter | 1.13 | 0.52 | 0.82 |
| 130328 | INTERGENIC | Sgl Promoter | 1.98 | 0.81 | 1.50 |
| 129140 | INTERGENIC | Sgl Promoter | #N/A | #N/A | #N/A |
| 123474 | INTERGENIC | Sgl Promoter | 2.10 | 0.84 | 0.83 |
| 119424 | INTERGENIC | Sgl Promoter | 2.88 | 0.95 | 0.60 |
| 116139 | INTERGENIC | Dbf Promoter | 2.22 | 0.86 | 0.90 |
| 114984 | INTERGENIC | Sgl Promoter | #N/A | #N/A | 1.10 |
| 110641 | INTERGENIC | Sgl Promoter | 2.91 | 0.95 | 1.12 |
| 107846 | INTERGENIC | Non Promoter | 0.54 | 0.25 | 0.77 |
| 107250 | INTERGENIC | Dbf Promoter | 1.09 | 0.49 | 0.73 |
| 106463 | INTERGENIC | Sgl Promoter | 0.50 | 0.24 | #N/A |
| 104695 | INTERGENIC | Sgl Promoter | 1.07 | 0.48 | #N/A |
| 103693 | INTERGENIC | Dbf Promoter | 1.17 | 0.53 | 0.98 |
| 100246 | INTERGENIC | Sgl Promoter | 1.87 | 0.78 | 0.88 |
| 98360  | INTERGENIC | Non Promoter | 1.85 | 0.78 | 0.92 |
| 99225  | INTERGENIC | Non Promoter | 1.32 | 0.60 | 0.81 |
| 93497  | INTERGENIC | Non Promoter | #N/A | #N/A | 0.66 |
| 90984  | INTERGENIC | Dbf Promoter | 0.58 | 0.24 | 0.53 |
| 87845  | INTERGENIC | Sgl Promoter | 0.90 | 0.42 | 1.22 |
| 84143  | INTERGENIC | Non Promoter | #N/A | #N/A | 1.72 |
| 82578  | INTERGENIC | Dbf Promoter | 3.06 | 0.96 | 1.75 |
| 80417  | INTERGENIC | Sgl Promoter | 1.60 | 0.69 | 1.20 |
| 79342  | INTERGENIC | Sgl Promoter | 2.48 | 0.90 | 0.75 |
| 78053  | INTERGENIC | Non Promoter | #N/A | #N/A | #N/A |
| 74871  | INTERGENIC | Dbf Promoter | 0.82 | 0.38 | 0.53 |
| 65476  | INTERGENIC | Dbf Promoter | 1.22 | 0.55 | 0.70 |
| 69114  | INTERGENIC | Non Promoter | #N/A | #N/A | #N/A |
| 64243  | INTERGENIC | Sgl Promoter | #N/A | #N/A | 0.69 |
| 63016  | INTERGENIC | Non Promoter | #N/A | #N/A | #N/A |
| 56336  | INTERGENIC | Dbf Promoter | 2.64 | 0.93 | 0.79 |
| 55366  | INTERGENIC | Sgl Promoter | 0.24 | 0.04 | #N/A |
| 53261  | INTERGENIC | Non Promoter | 0.67 | 0.32 | #N/A |
| 51351  | INTERGENIC | Sgl Promoter | 0.48 | 0.19 | #N/A |
| 49140  | INTERGENIC | Dbf Promoter | 1.48 | 0.66 | 0.91 |
| 45720  | INTERGENIC | Sgl Promoter | 1.02 | 0.46 | #N/A |
| 44655  | INTERGENIC | Sgl Promoter | 1.41 | 0.63 | 0.99 |
| 43628  | INTERGENIC | Non Promoter | 0.41 | 0.14 | 0.70 |
| 42815  | INTERGENIC | Sgl Promoter | 1.33 | 0.59 | 0.85 |
| 40421  | INTERGENIC | Dbf Promoter | 2.93 | 0.96 | #N/A |
| 38843  | INTERGENIC | Non Promoter | #N/A | #N/A | #N/A |
| 36803  | INTERGENIC | Dbf Promoter | 1.83 | 0.78 | 1.17 |



|        |            |              |      |      |      |
|--------|------------|--------------|------|------|------|
| 31906  | INTERGENIC | Sgl Promoter | 0.68 | 0.30 | 1.03 |
| 33272  | INTERGENIC | Sgl Promoter | 0.89 | 0.41 | 0.82 |
| 30058  | INTERGENIC | Non Promoter | 1.19 | 0.54 | 0.67 |
| 26715  | INTERGENIC | Sgl Promoter | 0.83 | 0.38 | 1.09 |
| 28232  | INTERGENIC | Sgl Promoter | 2.12 | 0.85 | 0.95 |
| 23423  | INTERGENIC | Dbl Promoter | 2.46 | 0.91 | 0.76 |
| 19763  | INTERGENIC | Non Promoter | 0.84 | 0.40 | 1.03 |
| 20847  | INTERGENIC | Non Promoter | 0.72 | 0.33 | #N/A |
| 16217  | INTERGENIC | Dbl Promoter | 0.52 | 0.21 | 0.94 |
| 17004  | INTERGENIC | Dbl Promoter | 1.75 | 0.75 | #N/A |
| 14305  | INTERGENIC | Non Promoter | 1.55 | 0.69 | 1.18 |
| 12929  | INTERGENIC | Sgl Promoter | 2.85 | 0.95 | 0.81 |
| 11363  | INTERGENIC | Dbl Promoter | 2.65 | 0.93 | 1.12 |
| 10301  | INTERGENIC | Non Promoter | 1.08 | 0.50 | #N/A |
| 8555   | INTERGENIC | Sgl Promoter | 1.45 | 0.65 | 1.08 |
| 9545   | INTERGENIC | Sgl Promoter | 1.75 | 0.74 | 0.98 |
| 6426   | INTERGENIC | Sgl Promoter | 0.79 | 0.36 | 1.00 |
| 3030   | INTERGENIC | Sgl Promoter | 1.27 | 0.57 | 1.01 |
| 1437   | INTERGENIC | Non Promoter | 0.22 | 0.04 | 0.70 |
| 836    | INTERGENIC | Sgl Promoter | 0.23 | 0.04 | 0.75 |
| 145108 | INTERGENIC | Non Promoter | 0.56 | 0.23 | 1.07 |
| 101370 | INTERGENIC | Sgl Promoter | 2.01 | 0.82 | 1.51 |
| 144197 | INTERGENIC | Non Promoter | #N/A | #N/A | #N/A |
| 150010 | INTERGENIC | Sgl Promoter | 1.75 | 0.75 | 0.84 |
| 152651 | INTERGENIC | Non Promoter | #N/A | #N/A | 0.18 |
| 153387 | INTERGENIC | Dbl Promoter | 2.03 | 0.83 | #N/A |
| 154521 | INTERGENIC | Non Promoter | #N/A | #N/A | #N/A |
| 156138 | INTERGENIC | Dbl Promoter | #N/A | #N/A | #N/A |
| 157909 | INTERGENIC | Sgl Promoter | #N/A | #N/A | #N/A |
| 160528 | INTERGENIC | Sgl Promoter | 1.65 | 0.71 | #N/A |
| 161797 | INTERGENIC | Sgl Promoter | 0.89 | 0.42 | #N/A |
| 165059 | INTERGENIC | Sgl Promoter | 0.83 | 0.39 | 0.84 |
| 166738 | INTERGENIC | Non Promoter | #N/A | #N/A | #N/A |
| 167429 | INTERGENIC | Dbl Promoter | 1.54 | 0.68 | #N/A |
| 169913 | INTERGENIC | Sgl Promoter | 1.91 | 0.78 | 0.61 |
| 172528 | INTERGENIC | Non Promoter | #N/A | #N/A | #N/A |
| 174256 | INTERGENIC | Sgl Promoter | 1.73 | 0.74 | 0.65 |
| 177033 | INTERGENIC | Sgl Promoter | 1.24 | 0.56 | 0.56 |
| 180965 | INTERGENIC | Sgl Promoter | #N/A | #N/A | #N/A |
| 183118 | INTERGENIC | Sgl Promoter | 1.88 | 0.79 | 0.86 |
| 184489 | INTERGENIC | Dbl Promoter | 2.06 | 0.82 | 0.57 |
| 191500 | INTERGENIC | Sgl Promoter | 0.55 | 0.23 | 1.32 |
| 194799 | INTERGENIC | Sgl Promoter | 1.92 | 0.80 | 1.17 |
| 196820 | INTERGENIC | Sgl Promoter | 1.88 | 0.79 | #N/A |
| 199861 | INTERGENIC | Sgl Promoter | #N/A | #N/A | 0.85 |
| 201947 | INTERGENIC | Non Promoter | #N/A | #N/A | #N/A |
| 203730 | INTERGENIC | Sgl Promoter | 1.72 | 0.74 | #N/A |
| 204911 | INTERGENIC | Sgl Promoter | #N/A | #N/A | #N/A |
| 206909 | INTERGENIC | Dbl Promoter | 1.00 | 0.45 | 1.62 |
| 208400 | INTERGENIC | Non Promoter | #N/A | #N/A | #N/A |
| 213299 | INTERGENIC | Sgl Promoter | 1.45 | 0.64 | 0.64 |

|        |            |              |      |      |      |
|--------|------------|--------------|------|------|------|
| 216581 | INTERGENIC | Non Promoter | #N/A | #N/A | #N/A |
| 220494 | INTERGENIC | Sgl Promoter | 1.29 | 0.58 | 0.88 |
| 222077 | INTERGENIC | Sgl Promoter | 0.33 | 0.09 | 0.38 |
| 223245 | INTERGENIC | Sgl Promoter | 0.68 | 0.32 | 0.67 |
| 224313 | INTERGENIC | Sgl Promoter | 0.26 | 0.06 | 1.14 |
| 225007 | INTERGENIC | Sgl Promoter | 0.31 | 0.07 | #N/A |
| 226108 | INTERGENIC | Sgl Promoter | #N/A | #N/A | 0.71 |
| 226675 | INTERGENIC | DbI Promoter | 0.53 | 0.22 | #N/A |
| 227499 | INTERGENIC | Non Promoter | 0.74 | 0.35 | 1.16 |
| 229366 | INTERGENIC | DbI Promoter | #N/A | #N/A | 1.00 |
| 231999 | INTERGENIC | Non Promoter | 0.33 | 0.09 | #N/A |
| 234521 | INTERGENIC | DbI Promoter | 2.10 | 0.83 | 0.96 |
| 237356 | INTERGENIC | Non Promoter | #N/A | #N/A | #N/A |
| 238446 | INTERGENIC | DbI Promoter | 2.45 | 0.90 | 1.10 |
| 239980 | INTERGENIC | Sgl Promoter | #N/A | #N/A | #N/A |
| 242450 | INTERGENIC | DbI Promoter | 2.09 | 0.84 | 0.85 |
| 243061 | INTERGENIC | Non Promoter | #N/A | #N/A | #N/A |
| 244266 | INTERGENIC | Sgl Promoter | #N/A | #N/A | #N/A |
| 246133 | INTERGENIC | DbI Promoter | 1.62 | 0.71 | 0.81 |
| 248510 | INTERGENIC | Sgl Promoter | 2.23 | 0.87 | 1.03 |
| 249053 | INTERGENIC | Non Promoter | 0.02 | 0.00 | #N/A |
| 250151 | INTERGENIC | Sgl Promoter | 2.06 | 0.83 | 1.11 |
| 252493 | INTERGENIC | DbI Promoter | 3.50 | 0.99 | 0.92 |
| 253580 | INTERGENIC | Non Promoter | #N/A | #N/A | #N/A |
| 256305 | INTERGENIC | Sgl Promoter | 1.69 | 0.72 | 0.84 |
| 257573 | INTERGENIC | Sgl Promoter | 1.53 | 0.67 | 1.10 |
| 258843 | INTERGENIC | Sgl Promoter | 0.80 | 0.39 | 0.92 |
| 260552 | INTERGENIC | Sgl Promoter | 1.40 | 0.64 | 1.11 |
| 262814 | INTERGENIC | Sgl Promoter | 1.51 | 0.68 | 1.10 |
| 263945 | INTERGENIC | Sgl Promoter | 1.09 | 0.50 | 1.23 |
| 266492 | INTERGENIC | Sgl Promoter | 0.69 | 0.31 | 1.03 |
| 267770 | INTERGENIC | Sgl Promoter | 0.62 | 0.27 | 0.76 |
| 162221 | INTERGENIC | Sgl Promoter | #N/A | #N/A | #N/A |
| 192725 | INTERGENIC | Sgl Promoter | 1.11 | 0.50 | 0.80 |
| 207439 | INTERGENIC | DbI Promoter | 2.31 | 0.88 | 0.76 |
| 159292 | INTERGENIC | Sgl Promoter | 1.21 | 0.56 | 0.86 |
| 496914 | INTERGENIC | Sgl Promoter | 0.88 | 0.40 | 7.44 |
| 495448 | INTERGENIC | Non Promoter | 0.82 | 0.37 | #N/A |
| 494512 | INTERGENIC | DbI Promoter | 2.00 | 0.81 | 0.84 |
| 492469 | INTERGENIC | Sgl Promoter | 1.23 | 0.55 | 1.11 |
| 490698 | INTERGENIC | Sgl Promoter | 1.15 | 0.52 | #N/A |
| 489703 | INTERGENIC | Non Promoter | #N/A | #N/A | #N/A |
| 484774 | INTERGENIC | Sgl Promoter | 0.35 | 0.13 | 0.56 |
| 485916 | INTERGENIC | Sgl Promoter | 1.35 | 0.60 | 1.09 |
| 483256 | INTERGENIC | DbI Promoter | 0.12 | 0.01 | 0.48 |
| 479906 | INTERGENIC | Sgl Promoter | 0.43 | 0.16 | 1.13 |
| 476309 | INTERGENIC | Non Promoter | 0.60 | 0.25 | #N/A |
| 475541 | INTERGENIC | DbI Promoter | 2.73 | 0.94 | 0.71 |
| 474485 | INTERGENIC | Non Promoter | 0.64 | 0.30 | 1.02 |
| 472851 | INTERGENIC | DbI Promoter | 1.84 | 0.77 | 0.63 |
| 469088 | INTERGENIC | Non Promoter | #N/A | #N/A | #N/A |

|        |            |              |      |      |      |
|--------|------------|--------------|------|------|------|
| 466137 | INTERGENIC | Dbl Promoter | 0.78 | 0.37 | 0.80 |
| 465039 | INTERGENIC | Non Promoter | 0.25 | 0.04 | #N/A |
| 461662 | INTERGENIC | Sgl Promoter | #N/A | #N/A | #N/A |
| 459850 | INTERGENIC | Dbl Promoter | #N/A | #N/A | 0.80 |
| 459106 | INTERGENIC | Non Promoter | #N/A | #N/A | 0.49 |
| 458152 | INTERGENIC | Dbl Promoter | 2.22 | 0.87 | 0.80 |
| 457159 | INTERGENIC | Non Promoter | #N/A | #N/A | #N/A |
| 454781 | INTERGENIC | Sgl Promoter | 0.44 | 0.20 | 1.20 |
| 452400 | INTERGENIC | Dbl Promoter | 4.19 | 0.99 | 0.40 |
| 450193 | INTERGENIC | Non Promoter | 0.37 | 0.11 | #N/A |
| 448760 | INTERGENIC | Sgl Promoter | 1.05 | 0.48 | 0.52 |
| 446408 | INTERGENIC | Sgl Promoter | 1.32 | 0.61 | #N/A |
| 443638 | INTERGENIC | Sgl Promoter | 1.71 | 0.73 | 0.75 |
| 440712 | INTERGENIC | Non Promoter | 0.58 | 0.24 | #N/A |
| 440059 | INTERGENIC | Sgl Promoter | 0.74 | 0.34 | #N/A |
| 439087 | INTERGENIC | Dbl Promoter | 0.20 | 0.05 | 1.06 |
| 437463 | INTERGENIC | Sgl Promoter | 0.94 | 0.43 | #N/A |
| 436566 | INTERGENIC | Non Promoter | #N/A | #N/A | #N/A |
| 434411 | INTERGENIC | Dbl Promoter | 2.17 | 0.86 | 0.79 |
| 435247 | INTERGENIC | Dbl Promoter | 1.08 | 0.50 | #N/A |
| 433210 | INTERGENIC | Sgl Promoter | 0.88 | 0.40 | 1.04 |
| 431544 | INTERGENIC | Non Promoter | #N/A | #N/A | #N/A |
| 428597 | INTERGENIC | Dbl Promoter | 1.10 | 0.50 | #N/A |
| 427294 | INTERGENIC | Sgl Promoter | 0.94 | 0.43 | 1.63 |
| 425359 | INTERGENIC | Non Promoter | 0.33 | 0.09 | 0.89 |
| 421820 | INTERGENIC | Dbl Promoter | 1.24 | 0.56 | 1.16 |
| 423089 | INTERGENIC | Dbl Promoter | 1.94 | 0.81 | 1.04 |
| 419524 | INTERGENIC | Sgl Promoter | #N/A | #N/A | #N/A |
| 418908 | INTERGENIC | Sgl Promoter | 1.17 | 0.53 | 0.51 |
| 417478 | INTERGENIC | Dbl Promoter | 2.28 | 0.87 | 1.18 |
| 416141 | INTERGENIC | Non Promoter | 0.39 | 0.15 | 0.84 |
| 415036 | INTERGENIC | Sgl Promoter | #N/A | #N/A | 1.44 |
| 412291 | INTERGENIC | Sgl Promoter | 0.67 | 0.30 | #N/A |
| 411549 | INTERGENIC | Dbl Promoter | #N/A | #N/A | #N/A |
| 410066 | INTERGENIC | Sgl Promoter | 1.28 | 0.59 | 0.85 |
| 406857 | INTERGENIC | Non Promoter | 0.46 | 0.19 | 0.82 |
| 405001 | INTERGENIC | Sgl Promoter | 2.69 | 0.93 | 0.78 |
| 403434 | INTERGENIC | Sgl Promoter | 1.01 | 0.46 | 0.74 |
| 401524 | INTERGENIC | Dbl Promoter | #N/A | #N/A | #N/A |
| 400868 | INTERGENIC | Non Promoter | 0.41 | 0.14 | #N/A |
| 398625 | INTERGENIC | Dbl Promoter | 0.50 | 0.20 | 0.54 |
| 396035 | INTERGENIC | Sgl Promoter | 0.15 | 0.02 | 0.54 |
| 394966 | INTERGENIC | Non Promoter | 0.55 | 0.23 | 1.21 |
| 393986 | INTERGENIC | Sgl Promoter | 2.06 | 0.83 | 0.86 |
| 392223 | INTERGENIC | Sgl Promoter | 1.71 | 0.74 | 0.77 |
| 390065 | INTERGENIC | Dbl Promoter | 2.17 | 0.86 | 1.05 |
| 388966 | INTERGENIC | Non Promoter | #N/A | #N/A | #N/A |
| 383652 | INTERGENIC | Dbl Promoter | 2.83 | 0.95 | 0.89 |
| 381521 | INTERGENIC | Sgl Promoter | 0.79 | 0.36 | 0.52 |
| 379758 | INTERGENIC | Non Promoter | 0.11 | 0.01 | 0.62 |
| 377607 | INTERGENIC | Sgl Promoter | 2.39 | 0.89 | 0.62 |

|        |            |              |      |      |      |
|--------|------------|--------------|------|------|------|
| 376099 | INTERGENIC | Sgl Promoter | 1.39 | 0.64 | 0.86 |
| 375048 | INTERGENIC | Sgl Promoter | 3.55 | 0.98 | 0.81 |
| 374457 | INTERGENIC | Non Promoter | 0.61 | 0.26 | 1.44 |
| 372010 | INTERGENIC | DbI Promoter | 0.63 | 0.27 | #N/A |
| 368594 | INTERGENIC | Sgl Promoter | 1.84 | 0.77 | 0.74 |
| 366923 | INTERGENIC | Sgl Promoter | 1.12 | 0.51 | 0.93 |
| 364333 | INTERGENIC | Sgl Promoter | 0.70 | 0.34 | 1.12 |
| 362223 | INTERGENIC | Sgl Promoter | 1.11 | 0.50 | 0.67 |
| 360286 | INTERGENIC | Non Promoter | #N/A | #N/A | #N/A |
| 359442 | INTERGENIC | Sgl Promoter | 1.58 | 0.69 | 2.19 |
| 358634 | INTERGENIC | Sgl Promoter | 1.87 | 0.77 | 0.88 |
| 357375 | INTERGENIC | Sgl Promoter | 1.13 | 0.52 | 0.53 |
| 355825 | INTERGENIC | Sgl Promoter | 1.75 | 0.74 | 0.86 |
| 353056 | INTERGENIC | DbI Promoter | 1.77 | 0.75 | 0.91 |
| 350614 | INTERGENIC | Non Promoter | #N/A | #N/A | #N/A |
| 347117 | INTERGENIC | DbI Promoter | 1.93 | 0.80 | 0.90 |
| 346404 | INTERGENIC | Non Promoter | 0.46 | 0.17 | 1.56 |
| 345834 | INTERGENIC | DbI Promoter | 0.73 | 0.33 | 0.87 |
| 344789 | INTERGENIC | Non Promoter | 0.59 | 0.25 | 0.90 |
| 342054 | INTERGENIC | Non Promoter | #N/A | #N/A | #N/A |
| 337904 | INTERGENIC | Sgl Promoter | #N/A | #N/A | #N/A |
| 334884 | INTERGENIC | DbI Promoter | 2.72 | 0.94 | 2.16 |
| 331116 | INTERGENIC | Sgl Promoter | 1.59 | 0.70 | 0.66 |
| 327030 | INTERGENIC | Non Promoter | 0.84 | 0.39 | 1.07 |
| 327902 | INTERGENIC | Non Promoter | 0.61 | 0.27 | #N/A |
| 324278 | INTERGENIC | Sgl Promoter | 0.40 | 0.17 | 0.54 |
| 325329 | INTERGENIC | Sgl Promoter | 0.57 | 0.24 | 0.54 |
| 318695 | INTERGENIC | Sgl Promoter | 0.38 | 0.12 | 0.77 |
| 317340 | INTERGENIC | Sgl Promoter | 0.81 | 0.38 | 1.14 |
| 314629 | INTERGENIC | Sgl Promoter | 2.35 | 0.89 | 1.73 |
| 313232 | INTERGENIC | Sgl Promoter | 1.49 | 0.65 | #N/A |
| 312191 | INTERGENIC | DbI Promoter | #N/A | #N/A | 1.38 |
| 310965 | INTERGENIC | DbI Promoter | 1.14 | 0.51 | 0.63 |
| 308711 | INTERGENIC | Non Promoter | #N/A | #N/A | 0.58 |
| 307435 | INTERGENIC | Sgl Promoter | 1.20 | 0.54 | #N/A |
| 306558 | INTERGENIC | DbI Promoter | 2.48 | 0.91 | #N/A |
| 304331 | INTERGENIC | Sgl Promoter | 1.14 | 0.52 | #N/A |
| 303511 | INTERGENIC | DbI Promoter | #N/A | #N/A | #N/A |
| 301535 | INTERGENIC | Non Promoter | #N/A | #N/A | #N/A |
| 299976 | INTERGENIC | DbI Promoter | 3.31 | 0.97 | 0.81 |
| 295930 | INTERGENIC | Sgl Promoter | 1.51 | 0.66 | 1.16 |
| 293458 | INTERGENIC | Sgl Promoter | 1.63 | 0.72 | 0.94 |
| 292031 | INTERGENIC | Sgl Promoter | #N/A | #N/A | 1.20 |
| 289807 | INTERGENIC | Sgl Promoter | 1.13 | 0.51 | 1.37 |
| 288513 | INTERGENIC | DbI Promoter | #N/A | #N/A | #N/A |
| 287351 | INTERGENIC | Non Promoter | 1.30 | 0.60 | 1.06 |
| 284443 | INTERGENIC | DbI Promoter | 1.88 | 0.79 | 0.75 |
| 281635 | INTERGENIC | Sgl Promoter | 1.23 | 0.56 | #N/A |
| 280778 | INTERGENIC | Sgl Promoter | 1.55 | 0.68 | 0.42 |
| 278947 | INTERGENIC | Non Promoter | 0.44 | 0.16 | 1.42 |
| 277618 | INTERGENIC | DbI Promoter | 0.68 | 0.31 | 0.53 |

|        |            |              |      |      |      |
|--------|------------|--------------|------|------|------|
| 274781 | INTERGENIC | Non Promoter | 0.26 | 0.06 | 1.12 |
| 272524 | INTERGENIC | Sgl Promoter | 0.28 | 0.06 | #N/A |
| 271001 | INTERGENIC | Dbf Promoter | 2.56 | 0.92 | 1.02 |
| 269297 | INTERGENIC | Sgl Promoter | #N/A | #N/A | #N/A |
| 267726 | INTERGENIC | Non Promoter | 0.32 | 0.09 | 1.11 |
| 266148 | INTERGENIC | Dbf Promoter | #N/A | #N/A | #N/A |
| 261583 | INTERGENIC | Sgl Promoter | #N/A | #N/A | #N/A |
| 257710 | INTERGENIC | Sgl Promoter | 1.07 | 0.50 | #N/A |
| 255666 | INTERGENIC | Sgl Promoter | 0.63 | 0.27 | 0.85 |
| 254644 | INTERGENIC | Dbf Promoter | 0.91 | 0.42 | 0.66 |
| 252900 | INTERGENIC | Non Promoter | #N/A | #N/A | #N/A |
| 249872 | INTERGENIC | Dbf Promoter | 2.20 | 0.86 | 1.14 |
| 248497 | INTERGENIC | Non Promoter | 0.39 | 0.16 | #N/A |
| 245719 |            |              | 1.83 | 0.77 | 1.25 |
| 241356 | INTERGENIC | Non Promoter | 0.01 | 0.00 | #N/A |
| 238356 | INTERGENIC | Dbf Promoter | 1.55 | 0.69 | #N/A |
| 236272 | INTERGENIC | Sgl Promoter | #N/A | #N/A | 1.38 |
| 234720 | INTERGENIC | Sgl Promoter | #N/A | #N/A | 1.13 |
| 232453 | INTERGENIC | Non Promoter | 0.22 | 0.03 | #N/A |
| 230246 | INTERGENIC | Dbf Promoter | 2.18 | 0.86 | #N/A |
| 228754 | INTERGENIC | Sgl Promoter | 0.21 | 0.05 | 0.67 |
| 227757 | INTERGENIC | Non Promoter | #N/A | #N/A | #N/A |
| 221107 | INTERGENIC | Non Promoter | #N/A | #N/A | #N/A |
| 217527 | INTERGENIC | Dbf Promoter | 1.86 | 0.79 | 0.85 |
| 214084 | INTERGENIC | Sgl Promoter | 1.91 | 0.78 | 1.04 |
| 210419 | INTERGENIC | Sgl Promoter | 1.07 | 0.50 | 1.35 |
| 209009 | INTERGENIC | Sgl Promoter | 1.66 | 0.73 | 0.47 |
| 204986 | INTERGENIC | Sgl Promoter | 0.86 | 0.41 | 1.05 |
| 202725 | INTERGENIC | Sgl Promoter | #N/A | #N/A | 1.13 |
| 200565 | INTERGENIC | Dbf Promoter | 3.32 | 0.98 | 0.87 |
| 199214 | INTERGENIC | Non Promoter | 0.02 | 0.00 | 0.11 |
| 197274 | INTERGENIC | Dbf Promoter | 1.53 | 0.67 | 0.86 |
| 198142 | INTERGENIC | Dbf Promoter | 0.34 | 0.11 | 0.57 |
| 193711 | INTERGENIC | Sgl Promoter | #N/A | #N/A | 0.57 |
| 191133 | INTERGENIC | Dbf Promoter | 1.68 | 0.72 | 0.87 |
| 187468 | INTERGENIC | Sgl Promoter | #N/A | #N/A | #N/A |
| 185718 | INTERGENIC | Dbf Promoter | 1.15 | 0.53 | 1.00 |
| 184157 | INTERGENIC | Non Promoter | #N/A | #N/A | #N/A |
| 182394 | INTERGENIC | Sgl Promoter | 2.19 | 0.86 | 0.70 |
| 175531 | INTERGENIC | Non Promoter | #N/A | #N/A | #N/A |
| 174549 | INTERGENIC | Dbf Promoter | 1.81 | 0.76 | 0.99 |
| 169079 | INTERGENIC | Sgl Promoter | 0.35 | 0.12 | #N/A |
| 170248 | INTERGENIC | Sgl Promoter | 0.27 | 0.06 | 0.81 |
| 163413 | INTERGENIC | Non Promoter | 0.56 | 0.26 | 0.94 |
| 160069 | INTERGENIC | Sgl Promoter | 1.59 | 0.71 | 0.81 |
| 157910 | INTERGENIC | Dbf Promoter | 2.23 | 0.87 | 0.85 |
| 154619 | INTERGENIC | Sgl Promoter | 1.87 | 0.79 | 0.48 |
| 153171 | INTERGENIC | Sgl Promoter | 2.50 | 0.91 | 0.64 |
| 151041 | INTERGENIC | Sgl Promoter | 0.43 | 0.16 | 1.17 |
| 149708 | INTERGENIC | Sgl Promoter | #N/A | #N/A | #N/A |
| 149347 | INTERGENIC | Sgl Promoter | 0.20 | 0.03 | 0.77 |



|        |            |              |      |      |      |
|--------|------------|--------------|------|------|------|
| 148233 | INTERGENIC | Sgl Promoter | 0.58 | 0.24 | 0.55 |
| 144812 | INTERGENIC | Sgl Promoter | 0.80 | 0.39 | 1.03 |
| 141920 | INTERGENIC | Sgl Promoter | #N/A | #N/A | #N/A |
| 140372 | INTERGENIC | Non Promoter | #N/A | #N/A | #N/A |
| 131529 | INTERGENIC | Sgl Promoter | 3.49 | 0.99 | 0.82 |
| 130553 | INTERGENIC | Sgl Promoter | 0.71 | 0.32 | 0.94 |
| 124701 | INTERGENIC | Sgl Promoter | 1.61 | 0.71 | 0.51 |
| 123575 | INTERGENIC | Sgl Promoter | 2.65 | 0.93 | #N/A |
| 122271 | INTERGENIC | Sgl Promoter | 1.35 | 0.60 | 0.95 |
| 117856 | INTERGENIC | Non Promoter | #N/A | #N/A | #N/A |
| 114941 | INTERGENIC | Dbl Promoter | 1.47 | 0.64 | 1.01 |
| 112477 | INTERGENIC | Sgl Promoter | #N/A | #N/A | 0.94 |
| 108160 | INTERGENIC | Dbl Promoter | 2.45 | 0.90 | 1.00 |
| 102545 | INTERGENIC | Non Promoter | 0.28 | 0.06 | 0.67 |
| 97340  | INTERGENIC | Sgl Promoter | 1.19 | 0.54 | 0.75 |
| 95860  | INTERGENIC | Sgl Promoter | 0.50 | 0.22 | 0.68 |
| 91435  | INTERGENIC | Dbl Promoter | #N/A | #N/A | #N/A |
| 87979  | INTERGENIC | Sgl Promoter | #N/A | #N/A | 1.15 |
| 84837  | INTERGENIC | Non Promoter | 2.21 | 0.87 | 0.40 |
| 82876  | INTERGENIC | Non Promoter | 0.88 | 0.42 | 0.88 |
| 82372  | INTERGENIC | Dbl Promoter | #N/A | #N/A | #N/A |
| 81424  | INTERGENIC | Sgl Promoter | 1.94 | 0.81 | 1.22 |
| 80657  | INTERGENIC | Sgl Promoter | 0.88 | 0.40 | #N/A |
| 79110  | INTERGENIC | Sgl Promoter | 1.33 | 0.59 | #N/A |
| 78013  | INTERGENIC | Non Promoter | #N/A | #N/A | #N/A |
| 73338  | INTERGENIC | Dbl Promoter | #N/A | #N/A | #N/A |
| 73827  | INTERGENIC | Sgl Promoter | #N/A | #N/A | #N/A |
| 72747  | INTERGENIC | Non Promoter | #N/A | #N/A | #N/A |
| 69670  | INTERGENIC | Sgl Promoter | 1.68 | 0.72 | 1.26 |
| 67597  | INTERGENIC | Dbl Promoter | 2.62 | 0.93 | 0.99 |
| 64502  | INTERGENIC | Sgl Promoter | #N/A | #N/A | #N/A |
| 63771  | INTERGENIC | Sgl Promoter | #N/A | #N/A | #N/A |
| 62074  | INTERGENIC | Sgl Promoter | #N/A | #N/A | #N/A |
| 59121  | INTERGENIC | Sgl Promoter | 1.77 | 0.75 | #N/A |
| 56481  | INTERGENIC | Sgl Promoter | 1.55 | 0.68 | 0.93 |
| 53756  | INTERGENIC | Sgl Promoter | #N/A | #N/A | 0.62 |
| 52731  | INTERGENIC | Non Promoter | #N/A | #N/A | #N/A |
| 49431  | INTERGENIC | Non Promoter | #N/A | #N/A | #N/A |
| 45445  | INTERGENIC | Dbl Promoter | #N/A | #N/A | #N/A |
| 44652  | INTERGENIC | Non Promoter | #N/A | #N/A | #N/A |
| 43307  | INTERGENIC | Sgl Promoter | #N/A | #N/A | #N/A |
| 41498  | INTERGENIC | Sgl Promoter | #N/A | #N/A | 0.87 |
| 38975  | INTERGENIC | Dbl Promoter | 1.34 | 0.60 | #N/A |
| 37617  | INTERGENIC | Non Promoter | 0.32 | 0.12 | #N/A |
| 36933  | INTERGENIC | Sgl Promoter | 2.09 | 0.84 | #N/A |
| 35653  | INTERGENIC | Sgl Promoter | 1.13 | 0.51 | 0.95 |
| 33098  | INTERGENIC | Sgl Promoter | 1.22 | 0.55 | 0.70 |
| 31898  | INTERGENIC | Dbl Promoter | 1.05 | 0.49 | 0.73 |
| 27921  | INTERGENIC | Sgl Promoter | 2.72 | 0.94 | 1.11 |
| 25718  | INTERGENIC | Non Promoter | #N/A | #N/A | #N/A |
| 23935  | INTERGENIC | Sgl Promoter | 0.55 | 0.23 | 0.63 |

|        |            |              |      |      |      |
|--------|------------|--------------|------|------|------|
| 22304  | INTERGENIC | Sgl Promoter | 1.55 | 0.67 | #N/A |
| 17474  | INTERGENIC | Sgl Promoter | 1.14 | 0.53 | 0.64 |
| 18641  | INTERGENIC | Sgl Promoter | 1.56 | 0.67 | #N/A |
| 19808  | INTERGENIC | Sgl Promoter | 1.26 | 0.58 | 0.78 |
| 20978  | INTERGENIC | Sgl Promoter | 1.15 | 0.52 | 0.61 |
| 14910  | INTERGENIC | Dbl Promoter | 1.41 | 0.63 | 0.75 |
| 12481  | INTERGENIC | Non Promoter | 1.08 | 0.49 | 1.15 |
| 10038  | INTERGENIC | Sgl Promoter | 1.05 | 0.48 | #N/A |
| 11110  | INTERGENIC | Sgl Promoter | 2.15 | 0.85 | 0.97 |
| 8470   | INTERGENIC | Sgl Promoter | 1.32 | 0.59 | 0.82 |
| 6860   | INTERGENIC | Dbl Promoter | 0.70 | 0.32 | 0.85 |
| 6290   | INTERGENIC | Non Promoter | #N/A | #N/A | 0.94 |
| 5312   | INTERGENIC | Sgl Promoter | #N/A | #N/A | 0.94 |
| 414100 | INTERGENIC | Sgl Promoter | 1.61 | 0.72 | 0.65 |
| 115490 | INTERGENIC | Dbl Promoter | 0.20 | 0.04 | 0.44 |
| 319007 | INTERGENIC | Sgl Promoter | #N/A | #N/A | #N/A |
| 328581 | INTERGENIC | Non Promoter | #N/A | #N/A | #N/A |
| 402586 | INTERGENIC | Dbl Promoter | #N/A | #N/A | 1.19 |
| 1934   | INTERGENIC | Sgl Promoter | #N/A | #N/A | #N/A |
| 205525 | INTERGENIC | Sgl Promoter | #N/A | #N/A | #N/A |
| 498471 | INTERGENIC | Sgl Promoter | 1.08 | 0.50 | 1.14 |
| 500127 | INTERGENIC | Dbl Promoter | 2.22 | 0.87 | #N/A |
| 502933 | INTERGENIC | Sgl Promoter | 1.17 | 0.53 | #N/A |
| 504652 | INTERGENIC | Non Promoter | 0.45 | 0.17 | 1.05 |
| 506065 | INTERGENIC | Dbl Promoter | 2.60 | 0.92 | 0.57 |
| 506963 | INTERGENIC | Sgl Promoter | 1.96 | 0.80 | 0.54 |
| 508104 | INTERGENIC | Non Promoter | 0.62 | 0.27 | #N/A |
| 509041 | INTERGENIC | Sgl Promoter | 1.13 | 0.52 | 0.74 |
| 511539 | INTERGENIC | Dbl Promoter | 2.08 | 0.83 | 0.93 |
| 513153 | INTERGENIC | Sgl Promoter | 2.61 | 0.93 | 0.74 |
| 514548 | INTERGENIC | Sgl Promoter | 1.42 | 0.64 | 0.61 |
| 516937 | INTERGENIC | Sgl Promoter | 0.30 | 0.08 | #N/A |
| 521084 | INTERGENIC | Non Promoter | 0.51 | 0.23 | 0.73 |
| 522255 | INTERGENIC | Dbl Promoter | #N/A | #N/A | 0.77 |
| 523781 | INTERGENIC | Sgl Promoter | 1.45 | 0.65 | 1.29 |
| 525223 | INTERGENIC | Dbl Promoter | #N/A | #N/A | 0.94 |
| 526967 | INTERGENIC | Non Promoter | #N/A | #N/A | 0.60 |
| 527626 | INTERGENIC | Dbl Promoter | #N/A | #N/A | 0.55 |
| 529251 | INTERGENIC | Non Promoter | 1.48 | 0.67 | 0.57 |
| 531604 | INTERGENIC | Non Promoter | 0.71 | 0.34 | 0.99 |
| 534126 | INTERGENIC | Non Promoter | 0.50 | 0.23 | 1.13 |
| 535205 | INTERGENIC | Dbl Promoter | 0.30 | 0.09 | 1.17 |
| 543846 | INTERGENIC | Sgl Promoter | 1.62 | 0.70 | 1.32 |
| 544571 | INTERGENIC | Non Promoter | 0.90 | 0.41 | 0.65 |
| 546435 | INTERGENIC | Dbl Promoter | 1.00 | 0.47 | #N/A |
| 548258 | INTERGENIC | Sgl Promoter | 0.84 | 0.39 | 0.78 |
| 554242 | INTERGENIC | Non Promoter | #N/A | #N/A | 0.92 |
| 555923 | INTERGENIC | Dbl Promoter | 0.31 | 0.07 | 0.62 |
| 557066 | INTERGENIC | Non Promoter | 0.45 | 0.17 | 1.39 |
| 558143 | INTERGENIC | Sgl Promoter | 0.30 | 0.08 | 0.42 |
| 559725 | INTERGENIC | Sgl Promoter | 1.39 | 0.62 | 1.00 |



|        |            |              |      |      |      |
|--------|------------|--------------|------|------|------|
| 560676 | INTERGENIC | Dbl Promoter | 1.20 | 0.55 | 0.71 |
| 561656 | INTERGENIC | Non Promoter | #N/A | #N/A | #N/A |
| 575392 | INTERGENIC | Sgl Promoter | #N/A | #N/A | #N/A |
| 577481 | INTERGENIC | Sgl Promoter | 0.33 | 0.10 | 0.63 |
| 579470 | INTERGENIC | Sgl Promoter | #N/A | #N/A | 0.70 |
| 582984 | INTERGENIC | Sgl Promoter | 0.64 | 0.31 | 0.73 |
| 584889 | INTERGENIC | Dbl Promoter | 1.48 | 0.66 | 0.57 |
| 586386 | INTERGENIC | Non Promoter | #N/A | #N/A | #N/A |
| 589820 | INTERGENIC | Dbl Promoter | #N/A | #N/A | #N/A |
| 591308 | INTERGENIC | Sgl Promoter | 0.74 | 0.34 | 0.89 |
| 592080 | INTERGENIC | Non Promoter | #N/A | #N/A | #N/A |
| 592900 | INTERGENIC | Sgl Promoter | 0.44 | 0.18 | 0.34 |
| 593590 | INTERGENIC | Dbl Promoter | 1.45 | 0.65 | 0.75 |
| 594980 | INTERGENIC | Non Promoter | #N/A | #N/A | #N/A |
| 596687 | INTERGENIC | Dbl Promoter | 2.29 | 0.88 | 0.71 |
| 599411 | INTERGENIC | Sgl Promoter | 0.22 | 0.03 | 0.37 |
| 601655 | INTERGENIC | Sgl Promoter | 0.92 | 0.42 | 1.04 |
| 604767 | INTERGENIC | Non Promoter | 0.30 | 0.10 | 0.80 |
| 606130 | INTERGENIC | Dbl Promoter | 1.83 | 0.76 | 0.80 |
| 607557 | INTERGENIC | Sgl Promoter | 1.36 | 0.61 | 0.73 |
| 609578 | INTERGENIC | Sgl Promoter | 0.32 | 0.12 | 0.99 |
| 611883 | INTERGENIC | Non Promoter | #N/A | #N/A | #N/A |
| 616322 | INTERGENIC | Sgl Promoter | 0.92 | 0.44 | 1.29 |
| 617510 | INTERGENIC | Sgl Promoter | 1.23 | 0.55 | #N/A |
| 618071 | INTERGENIC | Non Promoter | 0.08 | 0.01 | #N/A |
| 620915 | INTERGENIC | Sgl Promoter | 1.90 | 0.79 | #N/A |
| 622396 | INTERGENIC | Sgl Promoter | 1.86 | 0.78 | 1.87 |
| 625318 | INTERGENIC | Sgl Promoter | 0.55 | 0.23 | 1.20 |
| 627800 | INTERGENIC | Sgl Promoter | 0.98 | 0.45 | 1.43 |
| 631475 | INTERGENIC | Non Promoter | 0.16 | 0.03 | #N/A |
| 634298 | INTERGENIC | Dbl Promoter | #N/A | #N/A | #N/A |
| 635609 | INTERGENIC | Non Promoter | #N/A | #N/A | #N/A |
| 637098 | INTERGENIC | Sgl Promoter | 1.34 | 0.60 | #N/A |
| 637738 | INTERGENIC | Sgl Promoter | 0.94 | 0.43 | 0.27 |
| 639766 | INTERGENIC | Sgl Promoter | 1.72 | 0.74 | #N/A |
| 640714 | INTERGENIC | Dbl Promoter | 0.59 | 0.28 | 0.36 |
| 642004 | INTERGENIC | Sgl Promoter | 1.28 | 0.57 | #N/A |
| 643142 | INTERGENIC | Non Promoter | 0.49 | 0.20 | #N/A |
| 644038 | INTERGENIC | Dbl Promoter | 1.99 | 0.82 | 0.61 |
| 644854 | INTERGENIC | Non Promoter | #N/A | #N/A | #N/A |
| 647117 | INTERGENIC | Sgl Promoter | 1.58 | 0.68 | 0.97 |
| 649592 | INTERGENIC | Sgl Promoter | #N/A | #N/A | #N/A |
| 651284 | INTERGENIC | Sgl Promoter | 0.38 | 0.12 | 0.76 |
| 653785 | INTERGENIC | Dbl Promoter | 1.80 | 0.75 | 0.77 |
| 654595 | INTERGENIC | Dbl Promoter | 1.41 | 0.64 | 0.98 |
| 656954 | INTERGENIC | Sgl Promoter | 2.00 | 0.82 | 0.57 |
| 660753 | INTERGENIC | Sgl Promoter | 0.87 | 0.40 | 0.84 |
| 661743 | INTERGENIC | Sgl Promoter | 0.85 | 0.39 | 0.82 |
| 666335 | INTERGENIC | Sgl Promoter | #N/A | #N/A | #N/A |
| 668183 | INTERGENIC | Sgl Promoter | 0.51 | 0.20 | 0.53 |
| 670382 | INTERGENIC | Sgl Promoter | 1.53 | 0.66 | 1.03 |

|        |            |              |      |      |      |
|--------|------------|--------------|------|------|------|
| 675665 | INTERGENIC | Non Promoter | #N/A | #N/A | #N/A |
| 676615 | INTERGENIC | DbI Promoter | 1.81 | 0.76 | 0.58 |
| 678689 | INTERGENIC | SgI Promoter | 0.40 | 0.14 | 0.71 |
| 682560 | INTERGENIC | Non Promoter | 0.39 | 0.13 | 1.19 |
| 687893 | INTERGENIC | DbI Promoter | 2.81 | 0.94 | 0.91 |
| 690239 | INTERGENIC | SgI Promoter | 2.19 | 0.86 | 0.75 |
| 693357 | INTERGENIC | SgI Promoter | #N/A | #N/A | #N/A |
| 694578 | INTERGENIC | Non Promoter | 0.49 | 0.20 | 0.59 |
| 695411 | INTERGENIC | DbI Promoter | 2.05 | 0.83 | 0.51 |
| 697439 | INTERGENIC | Non Promoter | #N/A | #N/A | #N/A |
| 698593 | INTERGENIC | DbI Promoter | 2.10 | 0.83 | 1.25 |
| 698983 | INTERGENIC | Non Promoter | #N/A | #N/A | #N/A |
| 700669 | INTERGENIC | DbI Promoter | #N/A | #N/A | 1.29 |
| 703630 | INTERGENIC | SgI Promoter | 0.45 | 0.20 | 0.61 |
| 705353 | INTERGENIC | Non Promoter | 0.63 | 0.27 | 0.77 |
| 707102 | INTERGENIC | DbI Promoter | 1.72 | 0.73 | 0.90 |
| 715822 | INTERGENIC | SgI Promoter | 1.42 | 0.64 | 1.10 |
| 717352 | INTERGENIC | SgI Promoter | 1.75 | 0.74 | 1.05 |
| 718887 | INTERGENIC | SgI Promoter | 3.22 | 0.97 | 1.06 |
| 720258 | INTERGENIC | Non Promoter | 1.15 | 0.54 | 0.96 |
| 725042 | INTERGENIC | Non Promoter | #N/A | #N/A | #N/A |
| 726967 | INTERGENIC | DbI Promoter | 0.28 | 0.06 | 0.35 |
| 728040 | INTERGENIC | Non Promoter | #N/A | #N/A | 1.84 |
| 730027 | INTERGENIC | SgI Promoter | 2.19 | 0.86 | 1.39 |
| 731131 | INTERGENIC | SgI Promoter | 0.52 | 0.21 | #N/A |
| 733929 | INTERGENIC | DbI Promoter | 1.20 | 0.54 | 0.72 |
| 735976 | INTERGENIC | SgI Promoter | 1.09 | 0.50 | 0.75 |
| 735536 | INTERGENIC | Non Promoter | 0.32 | 0.08 | 0.78 |
| 739116 | INTERGENIC | DbI Promoter | 1.33 | 0.60 | 0.95 |
| 742319 | INTERGENIC | SgI Promoter | #N/A | #N/A | #N/A |
| 745829 | INTERGENIC | SgI Promoter | 1.55 | 0.67 | 1.01 |
| 746792 | INTERGENIC | SgI Promoter | 1.26 | 0.57 | #N/A |
| 747944 | INTERGENIC | Non Promoter | 0.16 | 0.03 | 0.28 |
| 750394 | INTERGENIC | DbI Promoter | 1.79 | 0.75 | #N/A |
| 751388 | INTERGENIC | Non Promoter | 0.54 | 0.22 | 1.09 |
| 754720 | INTERGENIC | DbI Promoter | 2.20 | 0.87 | #N/A |
| 755583 | INTERGENIC | Non Promoter | 0.56 | 0.23 | 1.05 |
| 756890 | INTERGENIC | DbI Promoter | 2.13 | 0.85 | 1.06 |
| 757764 | INTERGENIC | SgI Promoter | 2.60 | 0.92 | 1.01 |
| 761386 | INTERGENIC | SgI Promoter | 2.38 | 0.90 | 1.95 |
| 762422 | INTERGENIC | SgI Promoter | 0.65 | 0.29 | 0.87 |
| 763756 | INTERGENIC | Non Promoter | 0.61 | 0.26 | 1.21 |
| 765720 | INTERGENIC | DbI Promoter | 0.11 | 0.01 | 0.17 |
| 767423 | INTERGENIC | SgI Promoter | 0.98 | 0.44 | 0.92 |
| 770563 | INTERGENIC | SgI Promoter | 2.77 | 0.94 | 1.15 |
| 772448 | INTERGENIC | SgI Promoter | 1.06 | 0.48 | 0.80 |
| 774034 | INTERGENIC | SgI Promoter | 0.60 | 0.26 | 0.91 |
| 781761 | INTERGENIC | SgI Promoter | 3.92 | 0.99 | 0.52 |
| 784217 | INTERGENIC | Non Promoter | 0.82 | 0.38 | 1.25 |
| 786048 | INTERGENIC | SgI Promoter | 0.56 | 0.24 | 0.43 |
| 787306 | INTERGENIC | SgI Promoter | 3.28 | 0.98 | 1.32 |

|        |            |              |      |      |      |
|--------|------------|--------------|------|------|------|
| 790453 | INTERGENIC | Non Promoter | 0.34 | 0.11 | 0.71 |
| 793231 | INTERGENIC | Sgl Promoter | 1.65 | 0.71 | 0.61 |
| 796086 | INTERGENIC | Dbl Promoter | 2.14 | 0.85 | 0.76 |
| 798537 | INTERGENIC | Dbl Promoter | 0.49 | 0.20 | 1.17 |
| 800540 | INTERGENIC | Sgl Promoter | 2.24 | 0.87 | 0.85 |
| 802434 | INTERGENIC | Sgl Promoter | 0.35 | 0.11 | 0.86 |
| 805263 | INTERGENIC | Non Promoter | #N/A | #N/A | #N/A |
| 806406 | INTERGENIC | Sgl Promoter | 2.49 | 0.91 | #N/A |
| 808623 | INTERGENIC | Non Promoter | 1.23 | 0.55 | 0.52 |
| 810427 | INTERGENIC | Dbl Promoter | 0.39 | 0.16 | 0.81 |
| 811441 | INTERGENIC | Dbl Promoter | 1.07 | 0.49 | 0.87 |
| 827546 | INTERGENIC | Sgl Promoter | 1.40 | 0.62 | 0.74 |
| 830509 | INTERGENIC | Sgl Promoter | 2.06 | 0.83 | 1.16 |
| 832450 | INTERGENIC | Sgl Promoter | 2.82 | 0.95 | #N/A |
| 833346 | INTERGENIC | Non Promoter | 0.51 | 0.20 | #N/A |
| 834683 | INTERGENIC | Sgl Promoter | 1.42 | 0.64 | #N/A |
| 837136 | INTERGENIC | Dbl Promoter | 0.49 | 0.23 | 0.91 |
| 840818 | INTERGENIC | Non Promoter | 0.94 | 0.45 | 0.63 |
| 842839 | INTERGENIC | Sgl Promoter | 1.96 | 0.81 | 1.90 |
| 843848 | INTERGENIC | Dbl Promoter | 1.74 | 0.75 | #N/A |
| 845275 | INTERGENIC | Non Promoter | 0.70 | 0.32 | 1.32 |
| 846927 | INTERGENIC | Sgl Promoter | 1.35 | 0.60 | 1.47 |
| 848714 | INTERGENIC | Dbl Promoter | 0.39 | 0.17 | #N/A |
| 851041 | INTERGENIC | Sgl Promoter | 0.76 | 0.35 | 0.71 |
| 853669 | INTERGENIC | Sgl Promoter | 1.23 | 0.57 | #N/A |
| 855258 | INTERGENIC | Sgl Promoter | 2.68 | 0.94 | 1.10 |
| 857372 | INTERGENIC | Dbl Promoter | 0.55 | 0.23 | 0.45 |
| 859057 | INTERGENIC | Sgl Promoter | 0.58 | 0.26 | #N/A |
| 859895 | INTERGENIC | Sgl Promoter | 1.56 | 0.68 | 0.77 |
| 866330 | INTERGENIC | Sgl Promoter | 1.72 | 0.75 | 0.76 |
| 867768 | INTERGENIC | Dbl Promoter | 3.67 | 0.99 | 0.67 |
| 870226 | INTERGENIC | Non Promoter | 0.34 | 0.09 | #N/A |
| 872038 | INTERGENIC | Sgl Promoter | 2.45 | 0.91 | 0.81 |
| 875945 | INTERGENIC | Sgl Promoter | 2.43 | 0.90 | 1.59 |
| 878704 | INTERGENIC | Sgl Promoter | 0.67 | 0.32 | #N/A |
| 882806 | INTERGENIC | Non Promoter | #N/A | #N/A | 1.14 |
| 884503 | INTERGENIC | Sgl Promoter | 0.14 | 0.01 | 0.16 |
| 886067 | INTERGENIC | Sgl Promoter | 2.01 | 0.81 | 0.97 |
| 888876 | INTERGENIC | Dbl Promoter | 1.19 | 0.53 | 1.07 |
| 889727 | INTERGENIC | Non Promoter | 0.41 | 0.18 | #N/A |
| 892491 | INTERGENIC | Sgl Promoter | 3.50 | 0.98 | 0.95 |
| 894687 | INTERGENIC | Dbl Promoter | 1.56 | 0.69 | 0.96 |
| 897496 | INTERGENIC | Sgl Promoter | 1.25 | 0.56 | 1.22 |
| 899898 | INTERGENIC | Non Promoter | 0.36 | 0.10 | 0.89 |
| 902514 | INTERGENIC | Sgl Promoter | 1.63 | 0.71 | 0.85 |
| 903468 | INTERGENIC | Sgl Promoter | 0.54 | 0.22 | 0.93 |
| 905231 | INTERGENIC | Dbl Promoter | 0.55 | 0.25 | 0.56 |
| 909207 | INTERGENIC | Sgl Promoter | 1.38 | 0.62 | 0.47 |
| 910426 | INTERGENIC | Sgl Promoter | 1.52 | 0.66 | 1.28 |
| 910837 | INTERGENIC | Non Promoter | #N/A | #N/A | #N/A |
| 911877 | INTERGENIC | Dbl Promoter | 1.48 | 0.67 | #N/A |

|         |            |              |      |      |      |
|---------|------------|--------------|------|------|------|
| 912907  | INTERGENIC | Non Promoter | #N/A | #N/A | #N/A |
| 913497  | INTERGENIC | Sgl Promoter | 1.50 | 0.65 | 1.00 |
| 915235  | INTERGENIC | Dbl Promoter | #N/A | #N/A | 1.00 |
| 917034  | INTERGENIC | Sgl Promoter | 0.51 | 0.23 | 1.02 |
| 918506  | INTERGENIC | Non Promoter | 0.54 | 0.23 | #N/A |
| 920569  | INTERGENIC | Dbl Promoter | 0.58 | 0.25 | 0.71 |
| 922169  | INTERGENIC | Sgl Promoter | 4.28 | 1.00 | #N/A |
| 922627  | INTERGENIC | Non Promoter | 0.56 | 0.25 | #N/A |
| 924688  | INTERGENIC | Dbl Promoter | 2.27 | 0.88 | 0.97 |
| 930945  | INTERGENIC | Sgl Promoter | #N/A | #N/A | #N/A |
| 936027  | INTERGENIC | Sgl Promoter | #N/A | #N/A | #N/A |
| 937116  | INTERGENIC | Sgl Promoter | 2.65 | 0.93 | 0.53 |
| 939451  | INTERGENIC | Dbl Promoter | 0.93 | 0.43 | 1.47 |
| 940861  | INTERGENIC | Non Promoter | #N/A | #N/A | #N/A |
| 942798  | INTERGENIC | Dbl Promoter | 1.48 | 0.65 | #N/A |
| 945137  | INTERGENIC | Sgl Promoter | 2.84 | 0.95 | 0.50 |
| 947411  | INTERGENIC | Dbl Promoter | #N/A | #N/A | 0.67 |
| 949356  | INTERGENIC | Sgl Promoter | #N/A | #N/A | #N/A |
| 951885  | INTERGENIC | Dbl Promoter | 1.38 | 0.61 | 0.63 |
| 952525  | INTERGENIC | Non Promoter | 0.53 | 0.23 | #N/A |
| 953952  | INTERGENIC | Dbl Promoter | 3.17 | 0.97 | 0.86 |
| 959049  | INTERGENIC | Dbl Promoter | 0.89 | 0.43 | 0.61 |
| 961353  | INTERGENIC | Non Promoter | #N/A | #N/A | #N/A |
| 962422  | INTERGENIC | Sgl Promoter | 3.20 | 0.97 | 0.62 |
| 963293  | INTERGENIC | Sgl Promoter | 1.53 | 0.67 | 0.91 |
| 966034  | INTERGENIC | Sgl Promoter | 1.96 | 0.81 | 0.68 |
| 969182  | INTERGENIC | Sgl Promoter | 1.65 | 0.72 | 0.69 |
| 970766  | INTERGENIC | Sgl Promoter | 1.21 | 0.54 | 0.42 |
| 978031  | INTERGENIC | Non Promoter | #N/A | #N/A | #N/A |
| 979760  | INTERGENIC | Sgl Promoter | 1.15 | 0.53 | 0.97 |
| 982477  | INTERGENIC | Sgl Promoter | #N/A | #N/A | #N/A |
| 984961  | INTERGENIC | Dbl Promoter | 2.71 | 0.94 | #N/A |
| 985967  | INTERGENIC | Sgl Promoter | 1.73 | 0.74 | 0.91 |
| 988044  | INTERGENIC | Sgl Promoter | 0.97 | 0.44 | 0.44 |
| 990292  | INTERGENIC | Non Promoter | 1.56 | 0.68 | 0.75 |
| 991171  | INTERGENIC | Non Promoter | 2.05 | 0.83 | 0.82 |
| 994575  | INTERGENIC | Dbl Promoter | 1.20 | 0.54 | 0.75 |
| 995634  | INTERGENIC | Dbl Promoter | 1.62 | 0.70 | 0.85 |
| 996864  | INTERGENIC | Sgl Promoter | 2.13 | 0.85 | 0.92 |
| 998353  | INTERGENIC | Non Promoter | 0.30 | 0.07 | 0.95 |
| 1000028 | INTERGENIC | Dbl Promoter | 1.24 | 0.56 | 0.93 |
| 1004212 | INTERGENIC | Dbl Promoter | 1.13 | 0.52 | 0.94 |
| 1006201 | INTERGENIC | Non Promoter | 0.64 | 0.28 | #N/A |
| 1007667 | INTERGENIC | Sgl Promoter | 2.14 | 0.84 | 0.84 |
| 1011619 | INTERGENIC | Sgl Promoter | 0.97 | 0.44 | 1.02 |
| 1012477 | INTERGENIC | Sgl Promoter | 0.80 | 0.37 | 0.97 |
| 1014317 | INTERGENIC | Non Promoter | #N/A | #N/A | #N/A |
| 1016970 | INTERGENIC | Sgl Promoter | 2.28 | 0.87 | #N/A |
| 1017963 | INTERGENIC | Sgl Promoter | #N/A | #N/A | 1.18 |
| 1019594 | INTERGENIC | Sgl Promoter | 1.12 | 0.51 | 1.27 |
| 1022652 | INTERGENIC | Sgl Promoter | 2.26 | 0.88 | #N/A |

|         |            |              |      |      |      |
|---------|------------|--------------|------|------|------|
| 1025000 | INTERGENIC | Non Promoter | #N/A | #N/A | #N/A |
| 1026053 | INTERGENIC | Sgl Promoter | 1.42 | 0.65 | 1.06 |
| 1027366 | INTERGENIC | Sgl Promoter | 2.14 | 0.84 | 0.86 |
| 1031787 | INTERGENIC | Sgl Promoter | 1.95 | 0.80 | 1.30 |
| 1038038 | INTERGENIC | Non Promoter | 0.60 | 0.26 | 2.23 |
| 1038710 | INTERGENIC | Sgl Promoter | 1.09 | 0.50 | 0.53 |
| 1039891 | INTERGENIC | Sgl Promoter | 0.42 | 0.19 | 0.97 |
| 1043185 | INTERGENIC | Dbl Promoter | 1.52 | 0.68 | #N/A |
| 1043815 | INTERGENIC | Non Promoter | #N/A | #N/A | #N/A |
| 1045640 | INTERGENIC | Sgl Promoter | 1.83 | 0.77 | 0.92 |
| 1046727 | INTERGENIC | Dbl Promoter | 1.82 | 0.78 | #N/A |
| 1048794 | INTERGENIC | Non Promoter | #N/A | #N/A | #N/A |
| 1050906 | INTERGENIC | Sgl Promoter | 0.36 | 0.13 | 0.42 |
| 1052820 | INTERGENIC | Dbl Promoter | 1.33 | 0.60 | 0.69 |
| 1057779 | INTERGENIC | Non Promoter | #N/A | #N/A | 1.71 |
| 1059011 | INTERGENIC | Sgl Promoter | 0.47 | 0.18 | #N/A |
| 1060654 | INTERGENIC | Sgl Promoter | 1.25 | 0.56 | 0.92 |
| 1061848 | INTERGENIC | Sgl Promoter | 1.21 | 0.56 | 1.13 |
| 1063809 | INTERGENIC | Sgl Promoter | 1.35 | 0.61 | 1.28 |
| 1066077 | INTERGENIC | Sgl Promoter | 2.17 | 0.84 | 0.96 |
| 1067218 | INTERGENIC | Sgl Promoter | 1.53 | 0.66 | 0.99 |
| 1070289 | INTERGENIC | Dbl Promoter | 2.01 | 0.82 | 0.64 |
| 1072834 | INTERGENIC | Non Promoter | 1.10 | 0.50 | 0.97 |
| 1073959 | INTERGENIC | Non Promoter | 2.57 | 0.92 | #N/A |
| 1076279 | INTERGENIC | Non Promoter | 3.51 | 0.98 | 0.63 |
| 1076595 | INTERGENIC | Dbl Promoter | 1.13 | 0.53 | #N/A |
| 1079115 | INTERGENIC | Non Promoter | 1.65 | 0.72 | 1.41 |
| 1079881 | INTERGENIC | Non Promoter | 1.27 | 0.57 | 1.18 |
| 1081580 | INTERGENIC | Non Promoter | 2.13 | 0.85 | 1.02 |
| 568734  | INTERGENIC | Dbl Promoter | 1.34 | 0.60 | 1.35 |
| 574882  | INTERGENIC | Dbl Promoter | #N/A | #N/A | #N/A |
| 713703  | INTERGENIC | Dbl Promoter | 2.33 | 0.89 | 0.97 |
| 779610  | INTERGENIC | Sgl Promoter | 0.86 | 0.41 | 1.07 |
| 823476  | INTERGENIC | Dbl Promoter | 0.46 | 0.17 | 0.98 |
| 931680  | INTERGENIC | Sgl Promoter | 0.78 | 0.37 | #N/A |
| 541844  | INTERGENIC | Sgl Promoter | 0.08 | 0.01 | #N/A |
| 702661  | INTERGENIC | Dbl Promoter | 0.93 | 0.44 | 1.24 |
| 774343  | INTERGENIC | Sgl Promoter | 0.45 | 0.21 | 0.82 |
| 794411  | INTERGENIC | Sgl Promoter | 0.45 | 0.17 | 1.23 |
| 876388  | INTERGENIC | Sgl Promoter | #N/A | #N/A | #N/A |
| 932533  | INTERGENIC | Sgl Promoter | 1.47 | 0.65 | 0.63 |
| 713078  | INTERGENIC | Dbl Promoter | #N/A | #N/A | #N/A |
| 105579  | INTERGENIC | Sgl Promoter | 0.58 | 0.25 | 3.54 |
| 104270  | INTERGENIC | Sgl Promoter | 0.83 | 0.38 | 0.63 |
| 102605  | INTERGENIC | Dbl Promoter | 1.51 | 0.66 | 1.70 |
| 100642  | INTERGENIC | Non Promoter | #N/A | #N/A | #N/A |
| 98310   | INTERGENIC | Sgl Promoter | 0.91 | 0.43 | 0.88 |
| 95113   | INTERGENIC | Sgl Promoter | 0.75 | 0.34 | 1.49 |
| 85293   | INTERGENIC | Dbl Promoter | #N/A | #N/A | #N/A |
| 84063   | INTERGENIC | Sgl Promoter | #N/A | #N/A | 1.08 |
| 81959   | INTERGENIC | Sgl Promoter | 1.15 | 0.52 | 0.95 |



|        |            |              |      |      |      |
|--------|------------|--------------|------|------|------|
| 80649  | INTERGENIC | Non Promoter | #N/A | #N/A | #N/A |
| 78931  | INTERGENIC | Dbl Promoter | 1.34 | 0.60 | 0.70 |
| 77426  | INTERGENIC | Sgl Promoter | 1.66 | 0.73 | #N/A |
| 76093  | INTERGENIC | Non Promoter | 0.31 | 0.07 | #N/A |
| 75408  | INTERGENIC | Dbl Promoter | 1.22 | 0.54 | 0.49 |
| 72033  | INTERGENIC | Non Promoter | #N/A | #N/A | #N/A |
| 69704  | INTERGENIC | Dbl Promoter | 1.83 | 0.77 | 0.48 |
| 67727  | INTERGENIC | Sgl Promoter | #N/A | #N/A | #N/A |
| 66238  | INTERGENIC | Sgl Promoter | 0.72 | 0.32 | 0.99 |
| 64458  | INTERGENIC | Sgl Promoter | 1.41 | 0.62 | #N/A |
| 62752  | INTERGENIC | Sgl Promoter | 2.44 | 0.90 | #N/A |
| 59120  | INTERGENIC | Non Promoter | 0.74 | 0.35 | #N/A |
| 56646  | INTERGENIC | Sgl Promoter | 0.89 | 0.41 | 0.74 |
| 54848  | INTERGENIC | Dbl Promoter | 0.94 | 0.44 | 0.66 |
| 53217  | INTERGENIC | Non Promoter | 0.34 | 0.09 | 1.01 |
| 51109  | INTERGENIC | Sgl Promoter | 1.13 | 0.52 | 0.50 |
| 48761  | INTERGENIC | Dbl Promoter | 0.35 | 0.10 | 0.33 |
| 45927  | INTERGENIC | Non Promoter | #N/A | #N/A | #N/A |
| 40082  | INTERGENIC | Dbl Promoter | 1.54 | 0.67 | 0.99 |
| 38813  | INTERGENIC | Sgl Promoter | 2.63 | 0.93 | 0.64 |
| 36377  | INTERGENIC | Sgl Promoter | #N/A | #N/A | #N/A |
| 33191  | INTERGENIC | Sgl Promoter | 0.91 | 0.42 | 0.86 |
| 27976  | INTERGENIC | Non Promoter | #N/A | #N/A | #N/A |
| 26239  | INTERGENIC | Dbl Promoter | 1.53 | 0.67 | #N/A |
| 25698  | INTERGENIC | Sgl Promoter | 1.86 | 0.77 | #N/A |
| 23614  | INTERGENIC | Non Promoter | 0.44 | 0.16 | #N/A |
| 21780  | INTERGENIC | Dbl Promoter | 2.13 | 0.85 | 0.97 |
| 19085  | INTERGENIC | Non Promoter | 0.99 | 0.45 | 1.20 |
| 17390  | INTERGENIC | Sgl Promoter | 1.25 | 0.56 | 1.01 |
| 15665  | INTERGENIC | Sgl Promoter | #N/A | #N/A | #N/A |
| 14899  | INTERGENIC | Sgl Promoter | 0.77 | 0.36 | 0.93 |
| 13563  | INTERGENIC | Sgl Promoter | 1.77 | 0.75 | 1.27 |
| 12500  | INTERGENIC | Dbl Promoter | #N/A | #N/A | #N/A |
| 11066  | INTERGENIC | Sgl Promoter | #N/A | #N/A | 0.74 |
| 11921  | INTERGENIC | Sgl Promoter | #N/A | #N/A | 0.88 |
| 7993   | INTERGENIC | Non Promoter | #N/A | #N/A | 0.91 |
| 5470   | INTERGENIC | Dbl Promoter | 0.53 | 0.23 | 0.66 |
| 6400   | INTERGENIC | Dbl Promoter | 0.85 | 0.40 | 0.95 |
| 92235  | INTERGENIC | Non Promoter | 0.77 | 0.36 | #N/A |
| 8298   | INTERGENIC | Non Promoter | #N/A | #N/A | #N/A |
| 92622  | INTERGENIC | Non Promoter | #N/A | #N/A | #N/A |
| 107819 | INTERGENIC | Sgl Promoter | 1.38 | 0.63 | 0.94 |
| 110021 | INTERGENIC | Non Promoter | #N/A | #N/A | #N/A |
| 111747 | INTERGENIC | Sgl Promoter | 1.08 | 0.49 | #N/A |
| 113492 | INTERGENIC | Sgl Promoter | 0.90 | 0.41 | 1.11 |
| 115613 | INTERGENIC | Sgl Promoter | 0.44 | 0.16 | 0.56 |
| 116100 | INTERGENIC | Dbl Promoter | 0.53 | 0.22 | #N/A |
| 124102 | INTERGENIC | Sgl Promoter | 0.67 | 0.31 | 0.66 |
| 129473 | INTERGENIC | Sgl Promoter | 2.09 | 0.84 | 1.05 |
| 130722 | INTERGENIC | Non Promoter | 0.96 | 0.44 | 1.06 |
| 132038 | INTERGENIC | Dbl Promoter | 1.51 | 0.68 | 1.23 |

|        |            |              |      |      |      |
|--------|------------|--------------|------|------|------|
| 136872 | INTERGENIC | Non Promoter | 0.77 | 0.35 | 1.09 |
| 138685 | INTERGENIC | DbI Promoter | 2.00 | 0.82 | 0.66 |
| 140002 | INTERGENIC | Non Promoter | 0.36 | 0.11 | #N/A |
| 141885 | INTERGENIC | SgI Promoter | 0.56 | 0.25 | 1.06 |
| 143987 | INTERGENIC | DbI Promoter | 1.09 | 0.51 | 0.68 |
| 146233 | INTERGENIC | Non Promoter | 0.16 | 0.03 | #N/A |
| 149216 | INTERGENIC | DbI Promoter | 0.18 | 0.02 | 0.45 |
| 157735 | INTERGENIC | Non Promoter | #N/A | #N/A | #N/A |
| 159429 | INTERGENIC | DbI Promoter | 2.21 | 0.87 | #N/A |
| 160835 | INTERGENIC | SgI Promoter | 2.07 | 0.84 | 0.98 |
| 161721 | INTERGENIC | Non Promoter | #N/A | #N/A | #N/A |
| 164969 | INTERGENIC | SgI Promoter | 3.52 | 0.98 | #N/A |
| 167668 | INTERGENIC | SgI Promoter | 0.99 | 0.47 | #N/A |
| 168881 | INTERGENIC | SgI Promoter | 0.91 | 0.43 | #N/A |
| 175539 | INTERGENIC | SgI Promoter | 0.22 | 0.06 | 0.95 |
| 176956 | INTERGENIC | Non Promoter | #N/A | #N/A | #N/A |
| 178210 | INTERGENIC | DbI Promoter | 2.51 | 0.91 | 1.13 |
| 180336 | INTERGENIC | SgI Promoter | 3.40 | 0.97 | #N/A |
| 184866 | INTERGENIC | Non Promoter | #N/A | #N/A | #N/A |
| 187164 | INTERGENIC | SgI Promoter | #N/A | #N/A | #N/A |
| 187915 | INTERGENIC | DbI Promoter | 2.31 | 0.89 | 0.69 |
| 189122 | INTERGENIC | Non Promoter | #N/A | #N/A | #N/A |
| 190534 | INTERGENIC | DbI Promoter | 2.76 | 0.94 | 0.87 |
| 192796 | INTERGENIC | Non Promoter | #N/A | #N/A | 0.72 |
| 194059 | INTERGENIC | SgI Promoter | 1.87 | 0.79 | 0.73 |
| 197389 | INTERGENIC | Non Promoter | #N/A | #N/A | 1.03 |
| 198731 | INTERGENIC | SgI Promoter | 1.40 | 0.63 | 0.93 |
| 206453 | INTERGENIC | SgI Promoter | 1.09 | 0.50 | 0.92 |
| 207646 | INTERGENIC | DbI Promoter | 0.69 | 0.31 | 0.68 |
| 209697 | INTERGENIC | SgI Promoter | 1.17 | 0.53 | 0.75 |
| 213185 | INTERGENIC | SgI Promoter | 2.31 | 0.89 | 2.09 |
| 214533 | INTERGENIC | SgI Promoter | 1.07 | 0.48 | 1.06 |
| 215183 | INTERGENIC | SgI Promoter | 2.65 | 0.93 | 2.13 |
| 218227 | INTERGENIC | SgI Promoter | 2.33 | 0.88 | 6.27 |
| 220109 | INTERGENIC | DbI Promoter | 1.54 | 0.68 | 0.56 |
| 220726 | INTERGENIC | SgI Promoter | 1.82 | 0.77 | #N/A |
| 221535 | INTERGENIC | Non Promoter | 0.48 | 0.20 | #N/A |
| 222878 | INTERGENIC | SgI Promoter | 1.23 | 0.55 | 0.73 |
| 224031 | INTERGENIC | SgI Promoter | #N/A | #N/A | 1.21 |
| 225526 | INTERGENIC | SgI Promoter | 0.77 | 0.35 | 0.75 |
| 227533 | INTERGENIC | SgI Promoter | #N/A | #N/A | 0.86 |
| 229336 | INTERGENIC | DbI Promoter | 2.48 | 0.91 | 0.50 |
| 230971 | INTERGENIC | SgI Promoter | 0.79 | 0.37 | 0.89 |
| 232134 | INTERGENIC | SgI Promoter | 1.28 | 0.59 | 0.82 |
| 233580 | INTERGENIC | Non Promoter | 0.34 | 0.14 | #N/A |
| 234882 | INTERGENIC | DbI Promoter | 1.66 | 0.71 | #N/A |
| 237005 | INTERGENIC | SgI Promoter | 0.36 | 0.11 | 1.05 |
| 237849 | INTERGENIC | SgI Promoter | #N/A | #N/A | #N/A |
| 246194 | INTERGENIC | SgI Promoter | 1.93 | 0.80 | 1.11 |
| 248440 | INTERGENIC | Non Promoter | 0.16 | 0.02 | #N/A |
| 252375 | INTERGENIC | Non Promoter | 0.35 | 0.10 | 0.71 |



|        |            |              |      |      |      |
|--------|------------|--------------|------|------|------|
| 256361 | INTERGENIC | Dbl Promoter | 2.45 | 0.91 | 0.93 |
| 258245 | INTERGENIC | Non Promoter | #N/A | #N/A | #N/A |
| 262802 | INTERGENIC | Sgl Promoter | 0.92 | 0.42 | 0.79 |
| 267539 | INTERGENIC | Dbl Promoter | 1.77 | 0.76 | 0.80 |
| 268460 | INTERGENIC | Non Promoter | 0.28 | 0.09 | 1.09 |
| 274175 | INTERGENIC | Sgl Promoter | 1.87 | 0.79 | 0.91 |
| 278154 | INTERGENIC | Sgl Promoter | 2.83 | 0.94 | #N/A |
| 281496 | INTERGENIC | Sgl Promoter | 2.62 | 0.93 | 1.00 |
| 282682 | INTERGENIC | Non Promoter | #N/A | #N/A | #N/A |
| 283778 | INTERGENIC | Sgl Promoter | 1.34 | 0.60 | 0.92 |
| 284840 | INTERGENIC | Sgl Promoter | 2.48 | 0.90 | #N/A |
| 289144 | INTERGENIC | Dbl Promoter | 0.94 | 0.43 | #N/A |
| 292945 | INTERGENIC | Dbl Promoter | 0.64 | 0.28 | 0.85 |
| 299147 | INTERGENIC | Sgl Promoter | 0.85 | 0.39 | 1.21 |
| 314118 | INTERGENIC | Non Promoter | #N/A | #N/A | #N/A |
| 314876 | INTERGENIC | Sgl Promoter | 1.67 | 0.72 | 0.85 |
| 316574 | INTERGENIC | Dbl Promoter | 3.46 | 0.98 | #N/A |
| 320416 | INTERGENIC | Sgl Promoter | 0.95 | 0.45 | 0.88 |
| 323411 | INTERGENIC | Sgl Promoter | 1.13 | 0.52 | 1.00 |
| 324768 | INTERGENIC | Sgl Promoter | 2.15 | 0.84 | 0.88 |
| 325600 | INTERGENIC | Sgl Promoter | 1.59 | 0.69 | 0.90 |
| 326815 | INTERGENIC | Non Promoter | 0.34 | 0.12 | 0.77 |
| 328305 | INTERGENIC | Dbl Promoter | #N/A | #N/A | 0.74 |
| 330312 | INTERGENIC | Sgl Promoter | #N/A | #N/A | #N/A |
| 332284 | INTERGENIC | Sgl Promoter | 1.56 | 0.70 | #N/A |
| 333074 | INTERGENIC | Sgl Promoter | 2.12 | 0.84 | 1.05 |
| 334529 | INTERGENIC | Non Promoter | 0.31 | 0.09 | 0.68 |
| 336339 | INTERGENIC | Dbl Promoter | 2.12 | 0.85 | 0.83 |
| 338085 | INTERGENIC | Sgl Promoter | 1.46 | 0.66 | #N/A |
| 340111 | INTERGENIC | Non Promoter | 0.47 | 0.22 | #N/A |
| 341667 | INTERGENIC | Dbl Promoter | 3.88 | 0.99 | #N/A |
| 342351 | INTERGENIC | Sgl Promoter | 2.01 | 0.83 | #N/A |
| 346045 | INTERGENIC | Dbl Promoter | 3.55 | 0.98 | 0.86 |
| 349576 | INTERGENIC | Sgl Promoter | 1.42 | 0.63 | 0.53 |
| 352758 | INTERGENIC | Sgl Promoter | 1.79 | 0.76 | 0.89 |
| 353627 | INTERGENIC | Sgl Promoter | 1.85 | 0.77 | 0.99 |
| 354817 | INTERGENIC | Sgl Promoter | 1.31 | 0.59 | 0.73 |
| 356563 | INTERGENIC | Sgl Promoter | 0.28 | 0.06 | 0.74 |
| 363001 | INTERGENIC | Non Promoter | #N/A | #N/A | #N/A |
| 368503 | INTERGENIC | Sgl Promoter | 3.10 | 0.97 | 0.88 |
| 371749 | INTERGENIC | Dbl Promoter | 1.25 | 0.56 | #N/A |
| 372694 | INTERGENIC | Non Promoter | 0.41 | 0.14 | #N/A |
| 374654 | INTERGENIC | Sgl Promoter | 3.03 | 0.96 | #N/A |
| 375709 | INTERGENIC | Dbl Promoter | 1.12 | 0.51 | 0.33 |
| 377355 | INTERGENIC | Non Promoter | #N/A | #N/A | #N/A |
| 380108 | INTERGENIC | Sgl Promoter | 1.96 | 0.80 | 0.88 |
| 383538 | INTERGENIC | Dbl Promoter | #N/A | #N/A | #N/A |
| 385510 | INTERGENIC | Sgl Promoter | 1.50 | 0.67 | #N/A |
| 388893 | INTERGENIC | Sgl Promoter | 0.68 | 0.33 | #N/A |
| 393534 | INTERGENIC | Dbl Promoter | 2.26 | 0.88 | 0.67 |
| 394455 | INTERGENIC | Non Promoter | 0.61 | 0.26 | 1.75 |

|        |            |              |      |      |      |
|--------|------------|--------------|------|------|------|
| 397251 | INTERGENIC | Dbl Promoter | #N/A | #N/A | 0.25 |
| 399268 | INTERGENIC | Non Promoter | #N/A | #N/A | #N/A |
| 401434 | INTERGENIC | Dbl Promoter | 2.07 | 0.83 | 0.57 |
| 402086 | INTERGENIC | Non Promoter | 0.29 | 0.10 | #N/A |
| 402966 | INTERGENIC | Dbl Promoter | 1.73 | 0.75 | 1.65 |
| 411228 | INTERGENIC | Non Promoter | 0.74 | 0.35 | 0.75 |
| 412907 | INTERGENIC | Dbl Promoter | 1.41 | 0.63 | 0.84 |
| 413685 | INTERGENIC | Non Promoter | #N/A | #N/A | #N/A |
| 417549 | INTERGENIC | Dbl Promoter | 2.93 | 0.95 | 0.92 |
| 419221 | INTERGENIC | Non Promoter | 0.36 | 0.11 | 1.21 |
| 420373 | INTERGENIC | Sgl Promoter | 0.40 | 0.13 | 0.62 |
| 423630 | INTERGENIC | Sgl Promoter | 1.68 | 0.73 | 0.63 |
| 424609 | INTERGENIC | Non Promoter | 0.36 | 0.15 | 0.56 |
| 429706 | INTERGENIC | Sgl Promoter | 1.52 | 0.67 | 0.93 |
| 437169 | INTERGENIC | Sgl Promoter | 2.66 | 0.92 | 1.21 |
| 439341 | INTERGENIC | Dbl Promoter | 2.06 | 0.83 | 0.75 |
| 440376 | INTERGENIC | Sgl Promoter | 1.18 | 0.54 | 0.87 |
| 442179 | INTERGENIC | Sgl Promoter | #N/A | #N/A | #N/A |
| 443826 | INTERGENIC | Sgl Promoter | 1.72 | 0.73 | 0.91 |
| 445710 | INTERGENIC | Sgl Promoter | 1.64 | 0.71 | 2.14 |
| 448332 | INTERGENIC | Sgl Promoter | #N/A | #N/A | 0.76 |
| 451324 | INTERGENIC | Dbl Promoter | #N/A | #N/A | #N/A |
| 452869 | INTERGENIC | Sgl Promoter | 0.68 | 0.30 | #N/A |
| 459294 | INTERGENIC | Sgl Promoter | 0.62 | 0.29 | 0.96 |
| 462497 | INTERGENIC | Sgl Promoter | 0.92 | 0.42 | 1.04 |
| 463915 | INTERGENIC | Sgl Promoter | 0.86 | 0.41 | #N/A |
| 468214 | INTERGENIC | Sgl Promoter | 1.41 | 0.63 | 0.92 |
| 470955 | INTERGENIC | Sgl Promoter | 1.17 | 0.53 | 0.77 |
| 472739 | INTERGENIC | Sgl Promoter | 0.57 | 0.24 | 0.99 |
| 474622 | INTERGENIC | Non Promoter | #N/A | #N/A | #N/A |
| 475701 | INTERGENIC | Sgl Promoter | 0.35 | 0.10 | 0.63 |
| 480985 | INTERGENIC | Dbl Promoter | 2.61 | 0.92 | 0.66 |
| 482000 | INTERGENIC | Non Promoter | #N/A | #N/A | #N/A |
| 484023 | INTERGENIC | Dbl Promoter | 2.57 | 0.92 | 0.67 |
| 484840 | INTERGENIC | Sgl Promoter | 0.91 | 0.43 | 0.76 |
| 486821 | INTERGENIC | Dbl Promoter | 1.56 | 0.68 | 0.56 |
| 488652 | INTERGENIC | Dbl Promoter | 2.17 | 0.86 | 0.98 |
| 490742 | INTERGENIC | Sgl Promoter | 2.30 | 0.88 | 1.11 |
| 491926 | INTERGENIC | Sgl Promoter | 2.91 | 0.95 | 0.54 |
| 493891 | INTERGENIC | Sgl Promoter | #N/A | #N/A | #N/A |
| 496310 | INTERGENIC | Non Promoter | 0.32 | 0.08 | 0.78 |
| 497485 | INTERGENIC | Sgl Promoter | 1.66 | 0.72 | 0.97 |
| 499074 | INTERGENIC | Dbl Promoter | 1.27 | 0.57 | 0.98 |
| 499945 | INTERGENIC | Non Promoter | #N/A | #N/A | #N/A |
| 504471 | INTERGENIC | Non Promoter | 1.34 | 0.60 | 3.61 |
| 506314 | INTERGENIC | Dbl Promoter | 0.54 | 0.24 | 0.32 |
| 509358 | INTERGENIC | Sgl Promoter | 1.76 | 0.74 | 0.92 |
| 512727 | INTERGENIC | Sgl Promoter | 1.23 | 0.55 | 0.66 |
| 517527 | INTERGENIC | Dbl Promoter | 0.72 | 0.33 | 0.74 |
| 519432 | INTERGENIC | Sgl Promoter | 0.94 | 0.43 | 0.71 |
| 520707 | INTERGENIC | Non Promoter | 0.93 | 0.45 | 1.41 |

|        |            |              |      |      |      |
|--------|------------|--------------|------|------|------|
| 522950 | INTERGENIC | Dbl Promoter | 2.29 | 0.88 | 0.82 |
| 522951 | INTERGENIC | Dbl Promoter | 2.35 | 0.89 | 0.81 |
| 524171 | INTERGENIC | Dbl Promoter | 0.95 | 0.45 | 1.00 |
| 530044 | INTERGENIC | Non Promoter | 1.37 | 0.61 | 0.93 |
| 539146 | INTERGENIC | Dbl Promoter | 0.76 | 0.36 | 0.78 |
| 540694 | INTERGENIC | Sgl Promoter | 0.87 | 0.40 | 0.94 |
| 540693 | INTERGENIC | Sgl Promoter | 0.87 | 0.40 | 0.88 |
| 541646 | INTERGENIC | Sgl Promoter | 1.08 | 0.50 | 1.23 |
| 543003 | INTERGENIC | Sgl Promoter | 0.43 | 0.17 | 0.71 |
| 543605 | INTERGENIC | Non Promoter | 1.28 | 0.59 | 0.36 |
| 554391 | INTERGENIC | Sgl Promoter | 2.19 | 0.86 | 0.77 |
| 556576 | INTERGENIC | Non Promoter | 0.38 | 0.13 | 0.57 |
| 558009 | INTERGENIC | Dbl Promoter | 0.55 | 0.26 | 0.69 |
| 560168 | INTERGENIC | Sgl Promoter | 0.24 | 0.05 | 0.89 |
| 562418 | INTERGENIC | Sgl Promoter | 0.32 | 0.10 | 0.78 |
| 389613 | INTERGENIC | Dbl Promoter | #N/A | #N/A | #N/A |
| 390300 | INTERGENIC | Dbl Promoter | 3.93 | 0.99 | 0.79 |
| 465173 | INTERGENIC | Sgl Promoter | 1.86 | 0.78 | 1.34 |
| 531850 | INTERGENIC | Non Promoter | 1.09 | 0.50 | #N/A |
| 531873 | INTERGENIC | Non Promoter | 1.15 | 0.53 | 0.75 |
| 533373 | INTERGENIC | Non Promoter | 1.15 | 0.52 | 0.76 |
| 534873 | INTERGENIC | Non Promoter | 1.42 | 0.64 | 0.83 |
| 550863 | INTERGENIC | Dbl Promoter | 1.42 | 0.64 | 0.82 |
| 550863 | INTERGENIC | Dbl Promoter | 1.54 | 0.68 | #N/A |
| 552094 | INTERGENIC | Dbl Promoter | 2.14 | 0.85 | 0.95 |
| 117807 | INTERGENIC | Dbl Promoter | 1.35 | 0.60 | 0.98 |
| 133556 | INTERGENIC | Sgl Promoter | 0.42 | 0.15 | #N/A |
| 146835 | INTERGENIC | Non Promoter | 0.56 | 0.26 | #N/A |
| 134312 | INTERGENIC | Sgl Promoter | 0.97 | 0.44 | #N/A |
| 359704 | INTERGENIC | Non Promoter | 1.44 | 0.65 | 0.99 |
| 147862 | INTERGENIC | Non Promoter | 1.06 | 0.48 | 1.05 |
| 355626 | INTERGENIC | Non Promoter | 1.17 | 0.54 | 3.92 |
| 353937 | INTERGENIC | Dbl Promoter | 1.22 | 0.56 | 1.03 |
| 350588 | INTERGENIC | Non Promoter | 2.18 | 0.85 | 1.00 |
| 349119 | INTERGENIC | Dbl Promoter | 1.87 | 0.78 | 0.97 |
| 345689 | INTERGENIC | Sgl Promoter | 1.30 | 0.58 | #N/A |
| 344059 | INTERGENIC | Dbl Promoter | 2.36 | 0.90 | #N/A |
| 342991 | INTERGENIC | Non Promoter | 0.46 | 0.19 | #N/A |
| 336346 | INTERGENIC | Dbl Promoter | 1.29 | 0.58 | #N/A |
| 342533 | INTERGENIC | Sgl Promoter | 1.50 | 0.67 | 0.90 |
| 335663 | INTERGENIC | Non Promoter | 0.52 | 0.21 | 0.32 |
| 334879 | INTERGENIC | Sgl Promoter | 0.74 | 0.33 | #N/A |
| 333724 | INTERGENIC | Sgl Promoter | 0.97 | 0.44 | 0.72 |
| 333009 | INTERGENIC | Dbl Promoter | 0.46 | 0.19 | 0.60 |
| 328205 | INTERGENIC | Non Promoter | 0.27 | 0.09 | 1.00 |
| 325746 | INTERGENIC | Dbl Promoter | 1.49 | 0.66 | 1.29 |
| 324301 | INTERGENIC | Non Promoter | 0.69 | 0.33 | #N/A |
| 322340 | INTERGENIC | Sgl Promoter | 0.80 | 0.36 | 0.83 |
| 321452 | INTERGENIC | Dbl Promoter | 4.01 | 0.99 | 1.01 |
| 316766 | INTERGENIC | Sgl Promoter | 0.29 | 0.07 | 0.52 |
| 315091 | INTERGENIC | Dbl Promoter | 2.44 | 0.90 | #N/A |

|        |            |              |      |      |      |
|--------|------------|--------------|------|------|------|
| 314033 | INTERGENIC | Non Promoter | 0.07 | 0.00 | 0.21 |
| 312903 | INTERGENIC | Sgl Promoter | 0.91 | 0.42 | 1.72 |
| 311163 | INTERGENIC | Dbl Promoter | 1.91 | 0.80 | 0.98 |
| 309384 | INTERGENIC | Sgl Promoter | 0.80 | 0.38 | 0.91 |
| 308199 | INTERGENIC | Sgl Promoter | #N/A | #N/A | 1.05 |
| 304475 | INTERGENIC | Sgl Promoter | 1.87 | 0.78 | 0.96 |
| 303677 | INTERGENIC | Non Promoter | 0.60 | 0.26 | 0.91 |
| 300227 | INTERGENIC | Sgl Promoter | 3.18 | 0.97 | 0.88 |
| 296049 | INTERGENIC | Non Promoter | #N/A | #N/A | #N/A |
| 292632 | INTERGENIC | Dbl Promoter | 1.90 | 0.79 | 0.94 |
| 291960 | INTERGENIC | Sgl Promoter | 1.31 | 0.59 | 0.87 |
| 290418 | INTERGENIC | Sgl Promoter | 1.70 | 0.72 | 1.13 |
| 289225 | INTERGENIC | Sgl Promoter | 2.55 | 0.92 | 1.00 |
| 287789 | INTERGENIC | Non Promoter | 0.28 | 0.06 | 0.75 |
| 285665 | INTERGENIC | Dbl Promoter | 2.08 | 0.84 | #N/A |
| 283028 | INTERGENIC | Sgl Promoter | 3.77 | 0.99 | 1.54 |
| 280141 | INTERGENIC | Non Promoter | #N/A | #N/A | 1.97 |
| 277722 | INTERGENIC | Sgl Promoter | 0.51 | 0.21 | #N/A |
| 276524 | INTERGENIC | Dbl Promoter | 3.42 | 0.98 | 0.74 |
| 274071 | INTERGENIC | Sgl Promoter | 2.31 | 0.89 | 1.07 |
| 272949 | INTERGENIC | Non Promoter | #N/A | #N/A | #N/A |
| 271160 | INTERGENIC | Sgl Promoter | 1.51 | 0.67 | 1.17 |
| 268650 | INTERGENIC | Dbl Promoter | 1.43 | 0.65 | 0.58 |
| 265114 | INTERGENIC | Non Promoter | #N/A | #N/A | #N/A |
| 261436 | INTERGENIC | Sgl Promoter | 1.72 | 0.74 | 0.96 |
| 260157 | INTERGENIC | Sgl Promoter | 1.32 | 0.60 | 1.75 |
| 258912 | INTERGENIC | Dbl Promoter | #N/A | #N/A | 0.89 |
| 257842 | INTERGENIC | Sgl Promoter | 0.19 | 0.03 | 0.61 |
| 256224 | INTERGENIC | Non Promoter | #N/A | #N/A | #N/A |
| 255050 | INTERGENIC | Sgl Promoter | 0.20 | 0.05 | #N/A |
| 254541 | INTERGENIC | Dbl Promoter | 1.02 | 0.47 | 0.48 |
| 252040 | INTERGENIC | Non Promoter | 0.19 | 0.05 | 0.61 |
| 247899 | INTERGENIC | Non Promoter | #N/A | #N/A | 0.98 |
| 246217 | INTERGENIC | Dbl Promoter | 1.86 | 0.77 | 0.87 |
| 244654 | INTERGENIC | Sgl Promoter | 1.46 | 0.66 | #N/A |
| 243995 | INTERGENIC | Sgl Promoter | 1.03 | 0.47 | #N/A |
| 241940 | INTERGENIC | Dbl Promoter | 2.81 | 0.94 | 0.95 |
| 241305 | INTERGENIC | Sgl Promoter | 2.06 | 0.84 | 0.91 |
| 238096 | INTERGENIC | Sgl Promoter | 3.15 | 0.97 | 1.43 |
| 235721 | INTERGENIC | Sgl Promoter | 2.12 | 0.84 | 0.91 |
| 233054 | INTERGENIC | Sgl Promoter | #N/A | #N/A | #N/A |
| 231550 | INTERGENIC | Sgl Promoter | 0.94 | 0.43 | 0.73 |
| 230269 | INTERGENIC | Sgl Promoter | 1.59 | 0.69 | #N/A |
| 228657 | INTERGENIC | Non Promoter | 0.46 | 0.20 | 0.76 |
| 226599 | INTERGENIC | Dbl Promoter | 1.21 | 0.54 | 0.68 |
| 222934 | INTERGENIC | Sgl Promoter | 1.07 | 0.48 | 0.75 |
| 221078 | INTERGENIC | Sgl Promoter | 1.92 | 0.80 | 0.66 |
| 217860 | INTERGENIC | Non Promoter | 0.35 | 0.11 | 0.81 |
| 216466 | INTERGENIC | Dbl Promoter | 1.88 | 0.79 | 0.94 |
| 214988 | INTERGENIC | Non Promoter | #N/A | #N/A | #N/A |
| 212496 | INTERGENIC | Dbl Promoter | 2.38 | 0.89 | 1.47 |

|        |            |              |      |      |      |
|--------|------------|--------------|------|------|------|
| 205217 | INTERGENIC | Dbl Promoter | 2.13 | 0.84 | 1.28 |
| 203553 | INTERGENIC | Sgl Promoter | 1.94 | 0.80 | #N/A |
| 202273 | INTERGENIC | Sgl Promoter | 1.54 | 0.67 | #N/A |
| 199643 | INTERGENIC | Sgl Promoter | 2.46 | 0.91 | 0.96 |
| 196650 | INTERGENIC | Non Promoter | 1.74 | 0.75 | 1.02 |
| 195596 | INTERGENIC | Sgl Promoter | 0.66 | 0.31 | 1.16 |
| 193592 | INTERGENIC | Dbl Promoter | 3.76 | 0.99 | 0.81 |
| 191027 | INTERGENIC | Non Promoter | #N/A | #N/A | #N/A |
| 189063 | INTERGENIC | Dbl Promoter | 2.23 | 0.86 | 0.93 |
| 187987 | INTERGENIC | Sgl Promoter | 1.09 | 0.51 | 0.72 |
| 186514 | INTERGENIC | Non Promoter | 0.35 | 0.10 | #N/A |
| 183437 | INTERGENIC | Dbl Promoter | 1.99 | 0.82 | 1.07 |
| 182114 | INTERGENIC | Non Promoter | 0.33 | 0.13 | #N/A |
| 180424 | INTERGENIC | Dbl Promoter | 2.63 | 0.93 | 0.92 |
| 179769 | INTERGENIC | Non Promoter | #N/A | #N/A | #N/A |
| 178001 | INTERGENIC | Sgl Promoter | 0.80 | 0.37 | 0.81 |
| 177370 | INTERGENIC | Dbl Promoter | 1.85 | 0.77 | 0.55 |
| 175028 | INTERGENIC | Sgl Promoter | 0.40 | 0.13 | 0.96 |
| 173802 | INTERGENIC | Non Promoter | 1.48 | 0.65 | 0.56 |
| 174579 | INTERGENIC | Non Promoter | 1.34 | 0.61 | 0.60 |
| 171748 | INTERGENIC | Dbl Promoter | 2.20 | 0.87 | #N/A |
| 169979 | INTERGENIC | Sgl Promoter | 2.01 | 0.82 | 0.72 |
| 167578 | INTERGENIC | Non Promoter | 0.14 | 0.01 | 0.42 |
| 166731 | INTERGENIC | Dbl Promoter | 0.96 | 0.44 | 1.03 |
| 157382 | INTERGENIC | Non Promoter | #N/A | #N/A | #N/A |
| 156042 | INTERGENIC | Sgl Promoter | 2.22 | 0.85 | 1.30 |
| 155219 | INTERGENIC | Sgl Promoter | 1.09 | 0.50 | 1.03 |
| 151592 | INTERGENIC | Sgl Promoter | 1.83 | 0.77 | 1.02 |
| 150556 | INTERGENIC | Dbl Promoter | 1.71 | 0.73 | 0.82 |
| 149140 | INTERGENIC | Sgl Promoter | 4.21 | 1.00 | 0.88 |
| 144324 | INTERGENIC | Non Promoter | 0.41 | 0.14 | #N/A |
| 142925 | INTERGENIC | Dbl Promoter | 0.48 | 0.21 | 0.76 |
| 140610 | INTERGENIC | Non Promoter | 0.24 | 0.04 | #N/A |
| 138811 | INTERGENIC | Dbl Promoter | 0.34 | 0.09 | 0.61 |
| 136651 | INTERGENIC | Non Promoter | 0.45 | 0.17 | 1.01 |
| 134414 | INTERGENIC | Sgl Promoter | 0.56 | 0.24 | 0.68 |
| 132241 | INTERGENIC | Sgl Promoter | 1.06 | 0.48 | #N/A |
| 130607 | INTERGENIC | Sgl Promoter | 0.37 | 0.13 | 0.94 |
| 128151 | INTERGENIC | Sgl Promoter | 0.65 | 0.31 | 0.79 |
| 126204 | INTERGENIC | Sgl Promoter | 1.81 | 0.76 | 1.29 |
| 122689 | INTERGENIC | Sgl Promoter | 1.93 | 0.80 | 1.18 |
| 117992 | INTERGENIC | Dbl Promoter | 3.09 | 0.97 | 1.20 |
| 117024 | INTERGENIC | Non Promoter | 0.36 | 0.11 | #N/A |
| 113806 | INTERGENIC | Dbl Promoter | 3.03 | 0.96 | 1.00 |
| 102782 | INTERGENIC | Dbl Promoter | #N/A | #N/A | 0.68 |
| 100781 | INTERGENIC | Sgl Promoter | 1.06 | 0.48 | 1.05 |
| 99860  | INTERGENIC | Sgl Promoter | 0.21 | 0.03 | 0.51 |
| 98527  | INTERGENIC | Non Promoter | 0.36 | 0.11 | 0.83 |
| 97111  | INTERGENIC | Dbl Promoter | 0.88 | 0.41 | 0.79 |
| 95065  | INTERGENIC | Non Promoter | 0.29 | 0.08 | 0.79 |
| 93619  | INTERGENIC | Dbl Promoter | 2.10 | 0.84 | 1.09 |



|        |            |              |      |      |      |
|--------|------------|--------------|------|------|------|
| 89948  | INTERGENIC | Sgl Promoter | 1.46 | 0.66 | #N/A |
| 89230  | INTERGENIC | Sgl Promoter | 0.84 | 0.38 | 1.53 |
| 87979  | INTERGENIC | Non Promoter | #N/A | #N/A | #N/A |
| 85053  | INTERGENIC | Sgl Promoter | 0.56 | 0.23 | 0.81 |
| 83302  | INTERGENIC | DbI Promoter | 3.05 | 0.96 | 0.96 |
| 80510  | INTERGENIC | Non Promoter | 0.32 | 0.08 | #N/A |
| 78074  | INTERGENIC | DbI Promoter | 1.64 | 0.71 | 0.66 |
| 76354  | INTERGENIC | Sgl Promoter | 1.30 | 0.59 | 1.04 |
| 74184  | INTERGENIC | Sgl Promoter | 1.58 | 0.69 | 0.80 |
| 69791  | INTERGENIC | Non Promoter | #N/A | #N/A | #N/A |
| 68708  | INTERGENIC | DbI Promoter | 1.33 | 0.59 | 0.66 |
| 63028  | INTERGENIC | Sgl Promoter | 1.65 | 0.73 | 1.07 |
| 61013  | INTERGENIC | Sgl Promoter | 3.23 | 0.97 | 0.88 |
| 57338  | INTERGENIC | Non Promoter | #N/A | #N/A | 0.19 |
| 56545  | INTERGENIC | Sgl Promoter | 1.34 | 0.60 | #N/A |
| 55198  | INTERGENIC | DbI Promoter | 3.02 | 0.96 | 0.72 |
| 53981  | INTERGENIC | Sgl Promoter | #N/A | #N/A | 1.04 |
| 51759  | INTERGENIC | Non Promoter | 0.39 | 0.14 | 0.88 |
| 48091  | INTERGENIC | DbI Promoter | 2.47 | 0.91 | 0.79 |
| 46949  | INTERGENIC | Non Promoter | #N/A | #N/A | #N/A |
| 46201  | INTERGENIC | Sgl Promoter | 1.24 | 0.56 | 0.57 |
| 41825  | INTERGENIC | DbI Promoter | 1.60 | 0.69 | #N/A |
| 39433  | INTERGENIC | Sgl Promoter | 1.58 | 0.68 | 0.61 |
| 37385  | INTERGENIC | DbI Promoter | 0.57 | 0.24 | #N/A |
| 35792  | INTERGENIC | Sgl Promoter | 1.43 | 0.65 | 1.10 |
| 36899  | INTERGENIC | Sgl Promoter | 1.22 | 0.55 | 0.81 |
| 33718  | INTERGENIC | Sgl Promoter | 1.50 | 0.68 | 1.25 |
| 30938  | INTERGENIC | Non Promoter | #N/A | #N/A | 0.93 |
| 27569  | INTERGENIC | DbI Promoter | 0.40 | 0.14 | 1.32 |
| 29032  | INTERGENIC | DbI Promoter | 0.72 | 0.32 | 0.86 |
| 22169  | INTERGENIC | Non Promoter | 1.08 | 0.49 | 0.52 |
| 23119  | INTERGENIC | Non Promoter | 0.38 | 0.13 | 0.62 |
| 19515  | INTERGENIC | DbI Promoter | 1.86 | 0.79 | 0.74 |
| 16784  | INTERGENIC | Non Promoter | #N/A | #N/A | 1.16 |
| 10594  | INTERGENIC | Sgl Promoter | 0.82 | 0.37 | 0.83 |
| 11492  | INTERGENIC | Sgl Promoter | 1.95 | 0.81 | 0.93 |
| 8793   | INTERGENIC | Sgl Promoter | 0.36 | 0.12 | 0.71 |
| 197589 | INTERGENIC | Non Promoter | #N/A | #N/A | #N/A |
| 300827 | INTERGENIC | Sgl Promoter | 0.17 | 0.02 | 0.17 |
| 338117 | INTERGENIC | DbI Promoter | 1.69 | 0.74 | 1.27 |
| 339341 | INTERGENIC | DbI Promoter | 0.72 | 0.33 | 0.70 |
| 197137 | INTERGENIC | Non Promoter | 1.03 | 0.47 | #N/A |
| 357412 | INTERGENIC | Sgl Promoter | 1.28 | 0.58 | 0.76 |
| 360882 | INTERGENIC | DbI Promoter | 1.87 | 0.79 | 1.02 |
| 363218 | INTERGENIC | Sgl Promoter | #N/A | #N/A | #N/A |
| 364886 | INTERGENIC | Sgl Promoter | 1.54 | 0.68 | #N/A |
| 365463 | INTERGENIC | Non Promoter | 0.45 | 0.20 | #N/A |
| 370414 | INTERGENIC | DbI Promoter | 1.81 | 0.76 | 1.02 |
| 373074 | INTERGENIC | Non Promoter | #N/A | #N/A | #N/A |
| 374522 | INTERGENIC | DbI Promoter | 2.50 | 0.91 | 1.13 |
| 377284 | INTERGENIC | Non Promoter | #N/A | #N/A | #N/A |

|        |            |              |      |      |      |
|--------|------------|--------------|------|------|------|
| 378483 | INTERGENIC | Dbl Promoter | 2.96 | 0.96 | 1.08 |
| 380016 | INTERGENIC | Non Promoter | #N/A | #N/A | #N/A |
| 380981 | INTERGENIC | Dbl Promoter | 2.02 | 0.82 | 0.43 |
| 381945 | INTERGENIC | Sgl Promoter | 0.88 | 0.42 | 0.80 |
| 382625 | INTERGENIC | Sgl Promoter | 0.42 | 0.17 | 1.03 |
| 383553 | INTERGENIC | Non Promoter | 0.61 | 0.26 | 0.45 |
| 384606 | INTERGENIC | Dbl Promoter | 0.75 | 0.34 | 0.64 |
| 386751 | INTERGENIC | Non Promoter | 0.45 | 0.17 | 0.88 |
| 388159 | INTERGENIC | Non Promoter | 0.74 | 0.34 | 1.56 |
| 394914 | INTERGENIC | Dbl Promoter | 0.28 | 0.09 | 1.12 |
| 396223 | INTERGENIC | Sgl Promoter | 0.41 | 0.16 | 1.02 |
| 397291 | INTERGENIC | Sgl Promoter | 1.95 | 0.80 | 1.03 |
| 398730 | INTERGENIC | Sgl Promoter | 2.78 | 0.94 | 0.85 |
| 399774 | INTERGENIC | Sgl Promoter | 2.26 | 0.88 | 1.04 |
| 402838 | INTERGENIC | Non Promoter | #N/A | #N/A | 1.18 |
| 403656 | INTERGENIC | Dbl Promoter | 2.35 | 0.89 | 1.05 |
| 404870 | INTERGENIC | Non Promoter | 0.57 | 0.27 | 1.11 |
| 406257 | INTERGENIC | Sgl Promoter | #N/A | #N/A | 0.96 |
| 408465 | INTERGENIC | Dbl Promoter | 1.46 | 0.66 | 1.29 |
| 410804 | INTERGENIC | Sgl Promoter | 2.17 | 0.86 | 1.05 |
| 412033 | INTERGENIC | Non Promoter | 0.38 | 0.16 | 0.45 |
| 413012 | INTERGENIC | Sgl Promoter | 0.96 | 0.45 | #N/A |
| 415027 | INTERGENIC | Sgl Promoter | 2.20 | 0.86 | 1.41 |
| 416121 | INTERGENIC | Dbl Promoter | 3.76 | 0.99 | 0.36 |
| 419612 | INTERGENIC | Non Promoter | #N/A | #N/A | #N/A |
| 421023 | INTERGENIC | Sgl Promoter | 0.98 | 0.46 | 0.60 |
| 422071 | INTERGENIC | Sgl Promoter | 1.52 | 0.68 | 0.94 |
| 423125 | INTERGENIC | Dbl Promoter | 3.82 | 0.99 | 1.13 |
| 423806 | INTERGENIC | Non Promoter | #N/A | #N/A | 0.54 |
| 425354 | INTERGENIC | Sgl Promoter | 4.53 | 1.00 | 0.74 |
| 426198 | INTERGENIC | Sgl Promoter | 2.88 | 0.95 | 0.81 |
| 433385 | INTERGENIC | Sgl Promoter | 1.44 | 0.64 | 0.84 |
| 433925 | INTERGENIC | Dbl Promoter | 0.65 | 0.29 | 0.93 |
| 435270 | INTERGENIC | Non Promoter | 0.76 | 0.35 | 1.06 |
| 437040 | INTERGENIC | Sgl Promoter | 1.73 | 0.74 | 0.84 |
| 437991 | INTERGENIC | Sgl Promoter | 1.38 | 0.63 | 0.70 |
| 429136 | INTERGENIC | Sgl Promoter | 1.17 | 0.54 | 1.01 |
| 435996 | INTERGENIC | Sgl Promoter | 0.67 | 0.30 | 4.74 |
| 434851 | INTERGENIC | Dbl Promoter | 2.03 | 0.83 | 0.84 |
| 432909 | INTERGENIC | Non Promoter | #N/A | #N/A | #N/A |
| 432332 | INTERGENIC | Dbl Promoter | 2.28 | 0.87 | 0.98 |
| 431277 | INTERGENIC | Non Promoter | 0.48 | 0.18 | 0.96 |
| 424120 | INTERGENIC | Dbl Promoter | 0.87 | 0.41 | 0.83 |
| 421634 | INTERGENIC | Sgl Promoter | 1.97 | 0.80 | #N/A |
| 419543 | INTERGENIC | Dbl Promoter | #N/A | #N/A | #N/A |
| 414654 | INTERGENIC | Sgl Promoter | #N/A | #N/A | #N/A |
| 413973 | INTERGENIC | Sgl Promoter | 1.47 | 0.64 | 1.09 |
| 411141 | INTERGENIC | Sgl Promoter | 0.80 | 0.38 | 1.41 |
| 409182 | INTERGENIC | Non Promoter | 0.36 | 0.15 | 1.37 |
| 406448 | INTERGENIC | Sgl Promoter | 0.75 | 0.35 | #N/A |
| 405279 | INTERGENIC | Sgl Promoter | 1.78 | 0.76 | 0.75 |



|        |            |              |      |      |      |
|--------|------------|--------------|------|------|------|
| 402589 | INTERGENIC | Dbl Promoter | 2.82 | 0.95 | 1.20 |
| 398633 | INTERGENIC | Non Promoter | 1.79 | 0.76 | 1.08 |
| 396422 | INTERGENIC | Sgl Promoter | 0.80 | 0.38 | #N/A |
| 395627 | INTERGENIC | Non Promoter | #N/A | #N/A | 0.92 |
| 393663 | INTERGENIC | Sgl Promoter | #N/A | #N/A | #N/A |
| 392100 | INTERGENIC | Dbl Promoter | 1.75 | 0.74 | 0.86 |
| 391529 | INTERGENIC | Non Promoter | 0.44 | 0.16 | 0.48 |
| 390739 | INTERGENIC | Dbl Promoter | 2.10 | 0.83 | #N/A |
| 388081 | INTERGENIC | Non Promoter | 0.31 | 0.12 | #N/A |
| 387353 | INTERGENIC | Dbl Promoter | #N/A | #N/A | 0.94 |
| 386044 | INTERGENIC | Sgl Promoter | #N/A | #N/A | #N/A |
| 383533 | INTERGENIC | Sgl Promoter | 1.82 | 0.78 | 0.44 |
| 381023 | INTERGENIC | Dbl Promoter | 1.96 | 0.80 | 1.08 |
| 379945 | INTERGENIC | Non Promoter | 0.58 | 0.25 | #N/A |
| 377294 | INTERGENIC | Sgl Promoter | 1.58 | 0.70 | #N/A |
| 376358 | INTERGENIC | Dbl Promoter | 1.67 | 0.72 | 1.61 |
| 374120 | INTERGENIC | Sgl Promoter | 1.63 | 0.71 | 1.37 |
| 359826 | INTERGENIC | Dbl Promoter | 1.56 | 0.69 | 1.01 |
| 357996 | INTERGENIC | Non Promoter | 0.85 | 0.41 | 1.12 |
| 353940 | INTERGENIC | Sgl Promoter | 0.32 | 0.11 | 1.73 |
| 351956 | INTERGENIC | Dbl Promoter | 1.12 | 0.51 | 0.68 |
| 348826 | INTERGENIC | Sgl Promoter | 0.70 | 0.33 | 0.96 |
| 347143 | INTERGENIC | Non Promoter | #N/A | #N/A | #N/A |
| 345669 | INTERGENIC | Sgl Promoter | 1.33 | 0.60 | #N/A |
| 339483 | INTERGENIC | Sgl Promoter | 1.08 | 0.49 | 0.47 |
| 337967 | INTERGENIC | Sgl Promoter | 1.49 | 0.66 | 0.83 |
| 335594 | INTERGENIC | Sgl Promoter | #N/A | #N/A | #N/A |
| 333961 | INTERGENIC | Sgl Promoter | #N/A | #N/A | 1.27 |
| 333053 | INTERGENIC | Dbl Promoter | 2.52 | 0.92 | 0.63 |
| 330127 | INTERGENIC | Sgl Promoter | 1.40 | 0.64 | 1.13 |
| 327814 | INTERGENIC | Sgl Promoter | 1.42 | 0.64 | 1.37 |
| 324660 | INTERGENIC | Sgl Promoter | #N/A | #N/A | #N/A |
| 323082 | INTERGENIC | Sgl Promoter | 0.99 | 0.45 | 1.06 |
| 319712 | INTERGENIC | Sgl Promoter | 1.18 | 0.55 | #N/A |
| 316980 | INTERGENIC | Dbl Promoter | 3.41 | 0.98 | 1.31 |
| 315455 | INTERGENIC | Non Promoter | 2.17 | 0.86 | 0.97 |
| 314750 | INTERGENIC | Sgl Promoter | 1.65 | 0.71 | 0.75 |
| 313780 | INTERGENIC | Dbl Promoter | #N/A | #N/A | #N/A |
| 312712 | INTERGENIC | Sgl Promoter | 2.06 | 0.84 | #N/A |
| 310618 | INTERGENIC | Sgl Promoter | 1.49 | 0.66 | #N/A |
| 307667 | INTERGENIC | Non Promoter | #N/A | #N/A | #N/A |
| 305828 | INTERGENIC | Dbl Promoter | 2.26 | 0.86 | #N/A |
| 304917 | INTERGENIC | Non Promoter | 0.34 | 0.10 | 0.79 |
| 302877 | INTERGENIC | Dbl Promoter | 2.84 | 0.95 | 1.01 |
| 298853 | INTERGENIC | Sgl Promoter | #N/A | #N/A | #N/A |
| 294941 | INTERGENIC | Dbl Promoter | #N/A | #N/A | #N/A |
| 294362 | INTERGENIC | Sgl Promoter | 0.48 | 0.19 | 0.39 |
| 291032 | INTERGENIC | Sgl Promoter | 0.63 | 0.30 | 0.68 |
| 289571 | INTERGENIC | Sgl Promoter | 1.27 | 0.57 | 1.05 |
| 285254 | INTERGENIC | Sgl Promoter | 2.50 | 0.91 | 0.96 |
| 283498 | INTERGENIC | Non Promoter | 0.31 | 0.08 | 0.92 |

|        |            |              |      |      |      |
|--------|------------|--------------|------|------|------|
| 280881 | INTERGENIC | Sgl Promoter | 0.87 | 0.41 | #N/A |
| 278537 | INTERGENIC | Dbl Promoter | 1.75 | 0.75 | 0.61 |
| 274558 | INTERGENIC | Non Promoter | #N/A | #N/A | 0.92 |
| 269698 | INTERGENIC | Non Promoter | #N/A | #N/A | #N/A |
| 268189 | INTERGENIC | Sgl Promoter | 0.17 | 0.02 | 0.47 |
| 265622 | INTERGENIC | Dbl Promoter | 0.69 | 0.31 | 0.64 |
| 262453 | INTERGENIC | Sgl Promoter | 1.11 | 0.51 | 0.97 |
| 260776 | INTERGENIC | Non Promoter | #N/A | #N/A | 1.09 |
| 257119 | INTERGENIC | Dbl Promoter | 4.46 | 1.00 | 0.40 |
| 254433 | INTERGENIC | Sgl Promoter | 1.46 | 0.66 | 1.38 |
| 251517 | INTERGENIC | Non Promoter | 0.26 | 0.05 | 0.58 |
| 246951 | INTERGENIC | Sgl Promoter | 1.83 | 0.78 | 1.04 |
| 245288 | INTERGENIC | Sgl Promoter | 1.45 | 0.65 | #N/A |
| 241779 | INTERGENIC | Sgl Promoter | 1.11 | 0.51 | 0.80 |
| 239111 | INTERGENIC | Sgl Promoter | 1.33 | 0.59 | 0.98 |
| 236960 | INTERGENIC | Dbl Promoter | 1.04 | 0.49 | 0.48 |
| 233636 | INTERGENIC | Non Promoter | 0.32 | 0.12 | 0.82 |
| 230998 | INTERGENIC | Dbl Promoter | 2.43 | 0.90 | 0.69 |
| 228122 | INTERGENIC | Non Promoter | 0.55 | 0.26 | 1.26 |
| 223888 | INTERGENIC | Sgl Promoter | 2.42 | 0.90 | 0.87 |
| 224752 | INTERGENIC | Sgl Promoter | 0.65 | 0.29 | 0.72 |
| 221087 | INTERGENIC | Dbl Promoter | 1.25 | 0.56 | 0.52 |
| 217402 | INTERGENIC | Sgl Promoter | 1.26 | 0.58 | #N/A |
| 211697 | INTERGENIC | Sgl Promoter | 1.14 | 0.52 | 0.59 |
| 209619 | INTERGENIC | Non Promoter | #N/A | #N/A | 0.91 |
| 207574 | INTERGENIC | Sgl Promoter | 1.57 | 0.70 | 0.56 |
| 203099 | INTERGENIC | Sgl Promoter | #N/A | #N/A | #N/A |
| 197012 | INTERGENIC | Sgl Promoter | 0.76 | 0.35 | 0.88 |
| 195986 | INTERGENIC | Dbl Promoter | 0.98 | 0.45 | 0.69 |
| 193560 | INTERGENIC | Non Promoter | 1.31 | 0.60 | 1.10 |
| 192231 | INTERGENIC | Sgl Promoter | #N/A | #N/A | #N/A |
| 191272 | INTERGENIC | Non Promoter | 1.60 | 0.70 | 0.73 |
| 190074 | INTERGENIC | Non Promoter | 0.70 | 0.33 | 0.64 |
| 189416 | INTERGENIC | Dbl Promoter | 1.81 | 0.76 | 0.80 |
| 187704 | INTERGENIC | Sgl Promoter | 1.51 | 0.68 | 0.74 |
| 186826 | INTERGENIC | Sgl Promoter | 1.30 | 0.59 | 1.19 |
| 185227 | INTERGENIC | Non Promoter | #N/A | #N/A | #N/A |
| 184200 | INTERGENIC | Dbl Promoter | 1.91 | 0.78 | #N/A |
| 180899 | INTERGENIC | Sgl Promoter | 1.49 | 0.67 | 1.20 |
| 181997 | INTERGENIC | Sgl Promoter | 1.42 | 0.64 | #N/A |
| 177795 | INTERGENIC | Sgl Promoter | 1.23 | 0.56 | 0.96 |
| 173297 | INTERGENIC | Sgl Promoter | 0.60 | 0.25 | 0.86 |
| 165421 | INTERGENIC | Sgl Promoter | 2.28 | 0.87 | #N/A |
| 163976 | INTERGENIC | Non Promoter | 0.56 | 0.23 | 0.72 |
| 161612 | INTERGENIC | Sgl Promoter | 0.87 | 0.40 | #N/A |
| 160317 | INTERGENIC | Sgl Promoter | 0.32 | 0.08 | 0.35 |
| 157575 | INTERGENIC | Dbl Promoter | 0.33 | 0.10 | 0.35 |
| 156248 | INTERGENIC | Sgl Promoter | 1.29 | 0.59 | 1.06 |
| 154683 | INTERGENIC | Sgl Promoter | 1.03 | 0.47 | 0.85 |
| 153202 | INTERGENIC | Sgl Promoter | 0.71 | 0.32 | 1.03 |
| 151411 | INTERGENIC | Non Promoter | 0.15 | 0.01 | #N/A |

|        |            |              |      |      |      |
|--------|------------|--------------|------|------|------|
| 150659 | INTERGENIC | Dbl Promoter | 1.92 | 0.80 | 0.67 |
| 147517 | INTERGENIC | Non Promoter | 0.96 | 0.44 | 0.66 |
| 146799 | INTERGENIC | Sgl Promoter | 3.01 | 0.96 | 0.86 |
| 146057 | INTERGENIC | Sgl Promoter | 0.76 | 0.35 | 0.85 |
| 144858 | INTERGENIC | Sgl Promoter | 1.01 | 0.47 | 1.01 |
| 142990 | INTERGENIC | Dbl Promoter | 2.29 | 0.87 | 0.87 |
| 141117 | INTERGENIC | Non Promoter | 0.24 | 0.05 | 0.92 |
| 139263 | INTERGENIC | Sgl Promoter | #N/A | #N/A | #N/A |
| 136821 | INTERGENIC | Dbl Promoter | 0.60 | 0.26 | 0.77 |
| 135872 | INTERGENIC | Dbl Promoter | #N/A | #N/A | #N/A |
| 134030 | INTERGENIC | Sgl Promoter | 1.36 | 0.60 | #N/A |
| 130799 | INTERGENIC | Sgl Promoter | 1.14 | 0.53 | 1.23 |
| 128983 | INTERGENIC | Sgl Promoter | 1.89 | 0.78 | #N/A |
| 126587 | INTERGENIC | Sgl Promoter | 0.75 | 0.35 | 0.65 |
| 123533 | INTERGENIC | Sgl Promoter | 0.68 | 0.32 | 0.75 |
| 121962 | INTERGENIC | Non Promoter | #N/A | #N/A | #N/A |
| 119632 | INTERGENIC | Dbl Promoter | 1.83 | 0.77 | 0.65 |
| 120444 | INTERGENIC | Dbl Promoter | 0.96 | 0.44 | 0.59 |
| 118278 | INTERGENIC | Non Promoter | 2.10 | 0.84 | 0.86 |
| 114175 | INTERGENIC | Sgl Promoter | 1.49 | 0.66 | 0.98 |
| 111660 | INTERGENIC | Sgl Promoter | 1.86 | 0.77 | 0.90 |
| 109958 | INTERGENIC | Sgl Promoter | 2.41 | 0.89 | 1.04 |
| 106886 | INTERGENIC | Non Promoter | 0.52 | 0.21 | #N/A |
| 106426 | INTERGENIC | Sgl Promoter | 1.07 | 0.48 | 0.75 |
| 105006 | INTERGENIC | Dbl Promoter | 2.23 | 0.87 | 1.16 |
| 102091 | INTERGENIC | Dbl Promoter | 0.88 | 0.42 | 1.26 |
| 101143 | INTERGENIC | Sgl Promoter | #N/A | #N/A | #N/A |
| 99697  | INTERGENIC | Non Promoter | #N/A | #N/A | #N/A |
| 97730  | INTERGENIC | Dbl Promoter | 2.53 | 0.92 | 1.33 |
| 96158  | INTERGENIC | Non Promoter | #N/A | #N/A | #N/A |
| 95089  | INTERGENIC | Sgl Promoter | 3.39 | 0.98 | 0.60 |
| 92050  | INTERGENIC | Non Promoter | 0.46 | 0.17 | 1.19 |
| 90783  | INTERGENIC | Dbl Promoter | 0.53 | 0.22 | 0.57 |
| 89280  | INTERGENIC | Non Promoter | #N/A | #N/A | #N/A |
| 88785  | INTERGENIC | Dbl Promoter | #N/A | #N/A | #N/A |
| 87581  | INTERGENIC | Non Promoter | #N/A | #N/A | #N/A |
| 85433  | INTERGENIC | Non Promoter | #N/A | #N/A | #N/A |
| 84066  | INTERGENIC | Sgl Promoter | 2.88 | 0.95 | 0.85 |
| 83446  | INTERGENIC | Dbl Promoter | 1.87 | 0.79 | 0.55 |
| 82093  | INTERGENIC | Non Promoter | 0.65 | 0.31 | 0.65 |
| 80153  | INTERGENIC | Dbl Promoter | 0.90 | 0.41 | 1.32 |
| 76802  | INTERGENIC | Sgl Promoter | #N/A | #N/A | #N/A |
| 75932  | INTERGENIC | Dbl Promoter | 0.15 | 0.01 | 0.63 |
| 74909  | INTERGENIC | Non Promoter | #N/A | #N/A | #N/A |
| 73786  | INTERGENIC | Dbl Promoter | 0.68 | 0.30 | 0.68 |
| 72709  | INTERGENIC | Non Promoter | #N/A | #N/A | 0.40 |
| 71365  | INTERGENIC | Sgl Promoter | 2.98 | 0.96 | 0.92 |
| 69240  | INTERGENIC | Sgl Promoter | 0.53 | 0.25 | 0.64 |
| 67849  | INTERGENIC | Non Promoter | #N/A | #N/A | #N/A |
| 63804  | INTERGENIC | Sgl Promoter | 1.82 | 0.78 | 0.84 |
| 60843  | INTERGENIC | Dbl Promoter | 2.95 | 0.96 | 0.81 |

|        |            |              |      |      |      |
|--------|------------|--------------|------|------|------|
| 59100  | INTERGENIC | Sgl Promoter | #N/A | #N/A | #N/A |
| 56444  | INTERGENIC | Non Promoter | #N/A | #N/A | #N/A |
| 54379  | INTERGENIC | Dbl Promoter | 1.51 | 0.66 | #N/A |
| 53341  | INTERGENIC | Dbl Promoter | 1.60 | 0.69 | #N/A |
| 50139  | INTERGENIC | Sgl Promoter | 1.99 | 0.82 | 1.11 |
| 50629  | INTERGENIC | Sgl Promoter | 1.10 | 0.50 | 0.67 |
| 47659  | INTERGENIC | Sgl Promoter | 1.29 | 0.59 | #N/A |
| 41389  | INTERGENIC | Sgl Promoter | 1.50 | 0.66 | #N/A |
| 40194  | INTERGENIC | Non Promoter | #N/A | #N/A | #N/A |
| 38005  | INTERGENIC | Sgl Promoter | #N/A | #N/A | #N/A |
| 36757  | INTERGENIC | Sgl Promoter | 1.15 | 0.53 | 0.62 |
| 33850  | INTERGENIC | Non Promoter | 0.57 | 0.24 | 1.04 |
| 29785  | INTERGENIC | Sgl Promoter | 1.17 | 0.54 | 1.13 |
| 30974  | INTERGENIC | Sgl Promoter | 0.86 | 0.40 | 0.99 |
| 26887  | INTERGENIC | Dbl Promoter | 0.65 | 0.29 | #N/A |
| 26412  | INTERGENIC | Sgl Promoter | 1.12 | 0.51 | 1.44 |
| 24341  | INTERGENIC | Non Promoter | 0.84 | 0.38 | 1.08 |
| 23133  | INTERGENIC | Sgl Promoter | #N/A | #N/A | 0.62 |
| 21973  | INTERGENIC | Sgl Promoter | 1.45 | 0.64 | 0.89 |
| 19497  | INTERGENIC | Sgl Promoter | 1.79 | 0.75 | 0.78 |
| 16767  | INTERGENIC | Non Promoter | 1.20 | 0.54 | 1.47 |
| 10306  | INTERGENIC | Dbl Promoter | 0.75 | 0.34 | 0.84 |
| 8776   | INTERGENIC | Sgl Promoter | 0.37 | 0.11 | 0.75 |
| 204432 | INTERGENIC | Sgl Promoter | 0.83 | 0.38 | 1.23 |
| 355070 | INTERGENIC | Sgl Promoter | #N/A | #N/A | 1.26 |
| 374811 | INTERGENIC | Sgl Promoter | 0.77 | 0.36 | 0.08 |
| 378056 | INTERGENIC | Sgl Promoter | 1.49 | 0.66 | 1.60 |
| 59855  | INTERGENIC | Sgl Promoter | 2.23 | 0.87 | 0.75 |
| 531516 | INTERGENIC | Sgl Promoter | 0.38 | 0.12 | 0.60 |
| 541196 | INTERGENIC | Non Promoter | #N/A | #N/A | #N/A |
| 416587 | INTERGENIC | Sgl Promoter | 1.54 | 0.67 | 0.71 |
| 417250 | INTERGENIC | Sgl Promoter | 1.73 | 0.75 | 0.73 |
| 422289 | INTERGENIC | Sgl Promoter | #N/A | #N/A | #N/A |
| 438552 | INTERGENIC | Sgl Promoter | #N/A | #N/A | #N/A |
| 440681 | INTERGENIC | Non Promoter | #N/A | #N/A | 0.89 |
| 442596 | INTERGENIC | Sgl Promoter | #N/A | #N/A | 1.13 |
| 445610 | INTERGENIC | Dbl Promoter | 1.18 | 0.54 | 0.76 |
| 448889 | INTERGENIC | Sgl Promoter | 0.86 | 0.39 | 0.62 |
| 450707 | INTERGENIC | Sgl Promoter | 1.73 | 0.74 | 0.98 |
| 452117 | INTERGENIC | Sgl Promoter | 0.91 | 0.43 | 1.48 |
| 453370 | INTERGENIC | Non Promoter | #N/A | #N/A | #N/A |
| 455147 | INTERGENIC | Dbl Promoter | 0.61 | 0.26 | 0.40 |
| 458328 | INTERGENIC | Sgl Promoter | 2.09 | 0.84 | 1.27 |
| 457764 | INTERGENIC | Non Promoter | 1.14 | 0.51 | 0.99 |
| 459482 | INTERGENIC | Sgl Promoter | 1.88 | 0.78 | 0.69 |
| 460364 | INTERGENIC | Dbl Promoter | 1.40 | 0.62 | #N/A |
| 461517 | INTERGENIC | Sgl Promoter | #N/A | #N/A | #N/A |
| 462409 | INTERGENIC | Sgl Promoter | #N/A | #N/A | 0.78 |
| 464139 | INTERGENIC | Non Promoter | #N/A | #N/A | #N/A |
| 466209 | INTERGENIC | Sgl Promoter | 0.50 | 0.20 | 1.00 |
| 466920 | INTERGENIC | Non Promoter | 0.69 | 0.31 | #N/A |

|        |            |              |      |      |        |
|--------|------------|--------------|------|------|--------|
| 468243 | INTERGENIC | Non Promoter | 1.09 | 0.49 | 1.14   |
| 469415 | INTERGENIC | Dbl Promoter | 1.27 | 0.57 | 0.64   |
| 470826 | INTERGENIC | Sgl Promoter | 1.26 | 0.57 | 0.67   |
| 472151 | INTERGENIC | Dbl Promoter | 0.92 | 0.44 | 1.01   |
| 486274 | INTERGENIC | Sgl Promoter | 1.37 | 0.62 | 0.76   |
| 490769 | INTERGENIC | Dbl Promoter | 2.34 | 0.89 | 0.85   |
| 492066 | INTERGENIC | Non Promoter | #N/A | #N/A | #N/A   |
| 497043 | INTERGENIC | Sgl Promoter | #N/A | #N/A | #N/A   |
| 500401 | INTERGENIC | Non Promoter | 0.23 | 0.05 | #N/A   |
| 503398 | INTERGENIC | Non Promoter | 3.00 | 0.96 | 1.17   |
| 507434 | INTERGENIC | Sgl Promoter | 2.22 | 0.85 | 0.95   |
| 509927 | INTERGENIC | Non Promoter | #N/A | #N/A | #N/A   |
| 513743 | INTERGENIC | Dbl Promoter | 2.51 | 0.92 | #N/A   |
| 516149 | INTERGENIC | Non Promoter | #N/A | #N/A | #N/A   |
| 517501 | INTERGENIC | Sgl Promoter | 2.13 | 0.85 | 1.22   |
| 519326 | INTERGENIC | Sgl Promoter | #N/A | #N/A | #N/A   |
| 521736 | INTERGENIC | Dbl Promoter | 1.55 | 0.68 | 0.69   |
| 523700 | INTERGENIC | Non Promoter | #N/A | #N/A | #N/A   |
| 526023 | INTERGENIC | Dbl Promoter | 0.41 | 0.17 | 0.59   |
| 526572 | INTERGENIC | Non Promoter | 0.77 | 0.35 | #N/A   |
| 528385 | INTERGENIC | Dbl Promoter | 1.96 | 0.81 | 0.93   |
| 529549 | INTERGENIC | Sgl Promoter | 1.15 | 0.53 | 0.77   |
| 531204 | INTERGENIC | Sgl Promoter | 0.18 | 0.02 | #N/A   |
| 535744 | INTERGENIC | Sgl Promoter | 1.12 | 0.51 | 497.36 |
| 537429 | INTERGENIC | Sgl Promoter | #N/A | #N/A | 0.87   |
| 540454 | INTERGENIC | Non Promoter | 1.03 | 0.47 | 0.98   |
| 542644 | INTERGENIC | Dbl Promoter | 1.62 | 0.70 | 0.97   |
| 545475 | INTERGENIC | Dbl Promoter | 1.65 | 0.73 | 1.08   |
| 548447 | INTERGENIC | Sgl Promoter | 0.76 | 0.36 | 0.67   |
| 550199 | INTERGENIC | Sgl Promoter | #N/A | #N/A | #N/A   |
| 553164 | INTERGENIC | Non Promoter | #N/A | #N/A | #N/A   |
| 554883 | INTERGENIC | Dbl Promoter | 2.59 | 0.92 | 0.47   |
| 555602 | INTERGENIC | Sgl Promoter | 2.19 | 0.85 | 0.83   |
| 557497 | INTERGENIC | Non Promoter | 0.31 | 0.12 | 0.80   |
| 559104 | INTERGENIC | Dbl Promoter | 2.67 | 0.93 | 1.04   |
| 566707 | INTERGENIC | Non Promoter | #N/A | #N/A | #N/A   |
| 567331 | INTERGENIC | Dbl Promoter | 2.32 | 0.89 | 0.68   |
| 568494 | INTERGENIC | Non Promoter | #N/A | #N/A | #N/A   |
| 569309 | INTERGENIC | Sgl Promoter | 0.78 | 0.36 | 0.80   |
| 570655 | INTERGENIC | Non Promoter | 0.82 | 0.38 | 0.54   |
| 572003 | INTERGENIC | Sgl Promoter | 2.60 | 0.92 | #N/A   |
| 572783 | INTERGENIC | Dbl Promoter | #N/A | #N/A | 0.39   |
| 573669 | INTERGENIC | Sgl Promoter | 1.45 | 0.64 | 0.84   |
| 575042 | INTERGENIC | Non Promoter | #N/A | #N/A | #N/A   |
| 578548 | INTERGENIC | Dbl Promoter | 1.11 | 0.50 | 0.98   |
| 581602 | INTERGENIC | Sgl Promoter | 1.65 | 0.72 | 1.26   |
| 582296 | INTERGENIC | Sgl Promoter | 1.86 | 0.77 | #N/A   |
| 583421 | INTERGENIC | Dbl Promoter | #N/A | #N/A | 0.59   |
| 584808 | INTERGENIC | Non Promoter | 0.52 | 0.21 | #N/A   |
| 585756 | INTERGENIC | Dbl Promoter | #N/A | #N/A | #N/A   |
| 587406 | INTERGENIC | Dbl Promoter | 2.77 | 0.95 | 0.91   |



|        |            |              |      |      |      |
|--------|------------|--------------|------|------|------|
| 590560 | INTERGENIC | Non Promoter | 0.36 | 0.15 | 0.80 |
| 594749 | INTERGENIC | Sgl Promoter | 0.75 | 0.34 | 0.79 |
| 598807 | INTERGENIC | Dbl Promoter | 1.13 | 0.52 | 0.74 |
| 602911 | INTERGENIC | Non Promoter | 0.34 | 0.13 | 0.64 |
| 604260 | INTERGENIC | Sgl Promoter | 3.58 | 0.99 | 0.88 |
| 606669 | INTERGENIC | Dbl Promoter | 0.73 | 0.33 | 0.93 |
| 609464 | INTERGENIC | Sgl Promoter | 1.01 | 0.46 | 1.09 |
| 610886 | INTERGENIC | Sgl Promoter | 1.82 | 0.78 | #N/A |
| 612104 | INTERGENIC | Sgl Promoter | 2.76 | 0.94 | 0.50 |
| 612877 | INTERGENIC | Non Promoter | #N/A | #N/A | #N/A |
| 615264 | INTERGENIC | Dbl Promoter | 2.76 | 0.94 | 1.19 |
| 616039 | INTERGENIC | Non Promoter | #N/A | #N/A | #N/A |
| 617607 | INTERGENIC | Dbl Promoter | 1.39 | 0.62 | 1.00 |
| 618845 | INTERGENIC | Non Promoter | 0.55 | 0.23 | #N/A |
| 620442 | INTERGENIC | Dbl Promoter | 1.09 | 0.50 | 1.07 |
| 622237 | INTERGENIC | Non Promoter | 0.78 | 0.37 | #N/A |
| 623268 | INTERGENIC | Dbl Promoter | 0.70 | 0.32 | 0.79 |
| 624525 | INTERGENIC | Sgl Promoter | 1.68 | 0.73 | 1.78 |
| 627028 | INTERGENIC | Sgl Promoter | #N/A | #N/A | 1.27 |
| 628401 | INTERGENIC | Sgl Promoter | 1.34 | 0.60 | 0.91 |
| 629274 | INTERGENIC | Non Promoter | #N/A | #N/A | #N/A |
| 633304 | INTERGENIC | Dbl Promoter | 1.98 | 0.81 | 0.85 |
| 635544 | INTERGENIC | Non Promoter | 0.40 | 0.13 | #N/A |
| 636719 | INTERGENIC | Dbl Promoter | 1.46 | 0.66 | 0.55 |
| 637921 | INTERGENIC | Non Promoter | 1.87 | 0.78 | #N/A |
| 639631 | INTERGENIC | Sgl Promoter | 0.96 | 0.46 | 0.78 |
| 640514 | INTERGENIC | Sgl Promoter | 2.15 | 0.86 | 0.72 |
| 641696 | INTERGENIC | Sgl Promoter | 1.82 | 0.77 | 0.39 |
| 643179 | INTERGENIC | Non Promoter | 0.24 | 0.05 | 0.83 |
| 643993 | INTERGENIC | Sgl Promoter | #N/A | #N/A | #N/A |
| 646815 | INTERGENIC | Dbl Promoter | 1.73 | 0.75 | 0.95 |
| 647296 | INTERGENIC | Sgl Promoter | 0.49 | 0.23 | 1.07 |
| 649465 | INTERGENIC | Sgl Promoter | #N/A | #N/A | #N/A |
| 651590 | INTERGENIC | Sgl Promoter | 0.26 | 0.05 | 0.47 |
| 652581 | INTERGENIC | Non Promoter | 0.85 | 0.41 | #N/A |
| 654426 | INTERGENIC | Sgl Promoter | 0.92 | 0.44 | 1.05 |
| 655943 | INTERGENIC | Sgl Promoter | 2.43 | 0.90 | 1.11 |
| 658606 | INTERGENIC | Sgl Promoter | 1.41 | 0.62 | 1.07 |
| 663437 | INTERGENIC | Non Promoter | 0.44 | 0.20 | 0.35 |
| 664907 | INTERGENIC | Sgl Promoter | 0.96 | 0.44 | 0.89 |
| 667333 | INTERGENIC | Dbl Promoter | 2.03 | 0.83 | 0.90 |
| 669211 | INTERGENIC | Sgl Promoter | 1.33 | 0.59 | 1.02 |
| 672680 | INTERGENIC | Sgl Promoter | 1.93 | 0.80 | #N/A |
| 673418 | INTERGENIC | Non Promoter | #N/A | #N/A | #N/A |
| 675748 | INTERGENIC | Sgl Promoter | #N/A | #N/A | #N/A |
| 677130 | INTERGENIC | Dbl Promoter | 1.82 | 0.78 | 0.95 |
| 678646 | INTERGENIC | Sgl Promoter | #N/A | #N/A | #N/A |
| 684256 | INTERGENIC | Dbl Promoter | 0.96 | 0.44 | 0.79 |
| 689134 | INTERGENIC | Non Promoter | #N/A | #N/A | #N/A |
| 690439 | INTERGENIC | Sgl Promoter | #N/A | #N/A | 0.95 |
| 695595 | INTERGENIC | Dbl Promoter | 2.49 | 0.91 | #N/A |

|        |            |              |      |      |      |
|--------|------------|--------------|------|------|------|
| 696830 | INTERGENIC | Sgl Promoter | #N/A | #N/A | #N/A |
| 698015 | INTERGENIC | Non Promoter | 0.39 | 0.13 | #N/A |
| 700571 | INTERGENIC | Dbl Promoter | #N/A | #N/A | #N/A |
| 701716 | INTERGENIC | Non Promoter | 0.64 | 0.28 | 2.73 |
| 703574 | INTERGENIC | Dbl Promoter | 0.19 | 0.03 | 0.46 |
| 705433 | INTERGENIC | Sgl Promoter | #N/A | #N/A | #N/A |
| 706849 | INTERGENIC | Sgl Promoter | 0.34 | 0.10 | 1.30 |
| 708500 | INTERGENIC | Non Promoter | 0.58 | 0.27 | 0.79 |
| 710670 | INTERGENIC | Sgl Promoter | 1.45 | 0.63 | 0.72 |
| 711944 | INTERGENIC | Sgl Promoter | 1.79 | 0.77 | 1.29 |
| 716737 | INTERGENIC | Dbl Promoter | 1.18 | 0.55 | 0.74 |
| 718045 | INTERGENIC | Dbl Promoter | 3.03 | 0.96 | 0.69 |
| 719355 | INTERGENIC | Dbl Promoter | 1.13 | 0.51 | 0.96 |
| 722504 | INTERGENIC | Sgl Promoter | 1.21 | 0.56 | 0.89 |
| 724531 | INTERGENIC | Sgl Promoter | 1.52 | 0.68 | 0.61 |
| 725473 | INTERGENIC | Sgl Promoter | 1.66 | 0.72 | 0.94 |
| 727094 | INTERGENIC | Sgl Promoter | 0.54 | 0.22 | 1.13 |
| 728263 | INTERGENIC | Non Promoter | #N/A | #N/A | #N/A |
| 730204 | INTERGENIC | Dbl Promoter | 2.93 | 0.95 | 1.03 |
| 731347 | INTERGENIC | Sgl Promoter | 0.77 | 0.35 | 1.22 |
| 732129 | INTERGENIC | Sgl Promoter | 0.60 | 0.26 | 0.89 |
| 734782 | INTERGENIC | Sgl Promoter | 1.46 | 0.66 | 1.00 |
| 735733 | INTERGENIC | Sgl Promoter | 1.79 | 0.75 | 0.79 |
| 737697 | INTERGENIC | Non Promoter | 2.50 | 0.91 | 0.96 |
| 741021 | INTERGENIC | Sgl Promoter | 1.36 | 0.62 | 0.98 |
| 742537 | INTERGENIC | Sgl Promoter | 0.41 | 0.15 | 0.88 |
| 744600 | INTERGENIC | Sgl Promoter | 0.84 | 0.38 | 1.01 |
| 518451 | INTERGENIC | Sgl Promoter | 1.56 | 0.67 | 1.09 |
| 538243 | INTERGENIC | Sgl Promoter | 0.66 | 0.29 | #N/A |
| 543750 | INTERGENIC | Dbl Promoter | 1.26 | 0.58 | 0.80 |
| 439777 | INTERGENIC | Sgl Promoter | #N/A | #N/A | 2.94 |
| 438418 | INTERGENIC | Non Promoter | #N/A | #N/A | #N/A |
| 437730 | INTERGENIC | Dbl Promoter | 1.62 | 0.70 | 0.94 |
| 436738 | INTERGENIC | Non Promoter | 0.52 | 0.21 | 1.04 |
| 435221 | INTERGENIC | Dbl Promoter | 2.47 | 0.90 | 0.80 |
| 431547 | INTERGENIC | Dbl Promoter | 0.26 | 0.06 | 0.66 |
| 432734 | INTERGENIC | Non Promoter | 0.54 | 0.22 | #N/A |
| 429839 | INTERGENIC | Non Promoter | #N/A | #N/A | #N/A |
| 428943 | INTERGENIC | Dbl Promoter | 0.48 | 0.19 | 0.43 |
| 426936 | INTERGENIC | Non Promoter | 0.59 | 0.28 | 1.48 |
| 425883 | INTERGENIC | Dbl Promoter | #N/A | #N/A | #N/A |
| 421065 | INTERGENIC | Sgl Promoter | 0.65 | 0.31 | #N/A |
| 419796 | INTERGENIC | Non Promoter | #N/A | #N/A | #N/A |
| 417951 | INTERGENIC | Dbl Promoter | 2.53 | 0.92 | 1.15 |
| 417149 | INTERGENIC | Sgl Promoter | 1.58 | 0.69 | 0.65 |
| 411260 | INTERGENIC | Non Promoter | 0.41 | 0.18 | #N/A |
| 408185 | INTERGENIC | Dbl Promoter | #N/A | #N/A | #N/A |
| 407106 | INTERGENIC | Sgl Promoter | 0.79 | 0.36 | #N/A |
| 404831 | INTERGENIC | Non Promoter | 0.53 | 0.22 | #N/A |
| 403743 | INTERGENIC | Sgl Promoter | 3.47 | 0.98 | 0.80 |
| 402209 | INTERGENIC | Dbl Promoter | 2.50 | 0.91 | 0.68 |



|        |            |              |      |      |      |
|--------|------------|--------------|------|------|------|
| 398473 | INTERGENIC | Sgl Promoter | 0.28 | 0.06 | #N/A |
| 396985 | INTERGENIC | Sgl Promoter | 0.58 | 0.25 | #N/A |
| 394367 | INTERGENIC | Non Promoter | 0.34 | 0.09 | #N/A |
| 393362 | INTERGENIC | Dbl Promoter | 2.06 | 0.84 | 0.68 |
| 392167 | INTERGENIC | Sgl Promoter | #N/A | #N/A | #N/A |
| 389881 | INTERGENIC | Sgl Promoter | 1.01 | 0.47 | 1.18 |
| 389021 | INTERGENIC | Non Promoter | #N/A | #N/A | 0.81 |
| 387203 | INTERGENIC | Sgl Promoter | 1.06 | 0.48 | #N/A |
| 385399 | INTERGENIC | Dbl Promoter | 0.85 | 0.39 | 0.46 |
| 381713 | INTERGENIC | Dbl Promoter | 0.30 | 0.08 | 0.51 |
| 379321 | INTERGENIC | Non Promoter | 1.54 | 0.67 | 1.24 |
| 375097 | INTERGENIC | Sgl Promoter | 1.07 | 0.49 | 1.04 |
| 374147 | INTERGENIC | Sgl Promoter | #N/A | #N/A | 0.59 |
| 371471 | INTERGENIC | Sgl Promoter | 1.57 | 0.69 | 1.25 |
| 369007 | INTERGENIC | Sgl Promoter | 1.19 | 0.55 | 0.79 |
| 364418 | INTERGENIC | Sgl Promoter | 0.69 | 0.33 | 1.06 |
| 362265 | INTERGENIC | Dbl Promoter | 1.73 | 0.74 | 1.19 |
| 360701 | INTERGENIC | Non Promoter | #N/A | #N/A | #N/A |
| 359786 | INTERGENIC | Sgl Promoter | 1.62 | 0.72 | 0.72 |
| 358119 | INTERGENIC | Sgl Promoter | 0.93 | 0.43 | 1.03 |
| 356392 | INTERGENIC | Sgl Promoter | 0.43 | 0.16 | 0.38 |
| 355966 | INTERGENIC | Sgl Promoter | 0.20 | 0.04 | 0.24 |
| 353137 | INTERGENIC | Dbl Promoter | 2.47 | 0.91 | 0.79 |
| 350919 | INTERGENIC | Non Promoter | #N/A | #N/A | 1.46 |
| 349107 | INTERGENIC | Dbl Promoter | 3.09 | 0.97 | 0.86 |
| 346858 | INTERGENIC | Sgl Promoter | 1.60 | 0.70 | 0.72 |
| 345720 | INTERGENIC | Sgl Promoter | 0.61 | 0.29 | 1.09 |
| 342497 | INTERGENIC | Non Promoter | 0.57 | 0.25 | 0.78 |
| 340957 | INTERGENIC | Dbl Promoter | 0.37 | 0.13 | 0.43 |
| 339217 | INTERGENIC | Dbl Promoter | 0.59 | 0.28 | 0.50 |
| 338827 | INTERGENIC | Sgl Promoter | #N/A | #N/A | 0.47 |
| 336182 | INTERGENIC | Sgl Promoter | 0.84 | 0.38 | 0.55 |
| 334966 | INTERGENIC | Sgl Promoter | 0.84 | 0.40 | 1.12 |
| 334057 | INTERGENIC | Sgl Promoter | #N/A | #N/A | 1.46 |
| 330501 | INTERGENIC | Non Promoter | #N/A | #N/A | #N/A |
| 329811 | INTERGENIC | Dbl Promoter | 2.41 | 0.90 | 1.02 |
| 327763 | INTERGENIC | Sgl Promoter | 0.30 | 0.07 | 0.37 |
| 326053 | INTERGENIC | Non Promoter | 0.62 | 0.29 | #N/A |
| 325416 | INTERGENIC | Sgl Promoter | 1.00 | 0.46 | 0.93 |
| 322018 | INTERGENIC | Dbl Promoter | 1.07 | 0.49 | 0.60 |
| 322873 | INTERGENIC | Dbl Promoter | 0.58 | 0.25 | 0.33 |
| 320660 | INTERGENIC | Non Promoter | #N/A | #N/A | 0.70 |
| 317409 | INTERGENIC | Dbl Promoter | 1.84 | 0.78 | 0.76 |
| 316082 | INTERGENIC | Non Promoter | 1.12 | 0.51 | 0.78 |
| 313046 | INTERGENIC | Sgl Promoter | 0.42 | 0.15 | 1.78 |
| 307789 | INTERGENIC | Sgl Promoter | 1.23 | 0.56 | 0.84 |
| 306930 | INTERGENIC | Sgl Promoter | 1.34 | 0.60 | 1.21 |
| 305856 | INTERGENIC | Sgl Promoter | 0.31 | 0.12 | 0.65 |
| 301979 | INTERGENIC | Sgl Promoter | 0.43 | 0.18 | 1.15 |
| 299227 | INTERGENIC | Sgl Promoter | 2.38 | 0.90 | 1.19 |
| 296075 | INTERGENIC | Dbl Promoter | #N/A | #N/A | 0.98 |

|        |            |              |      |      |      |
|--------|------------|--------------|------|------|------|
| 294255 | INTERGENIC | Sgl Promoter | 2.62 | 0.92 | 1.10 |
| 292483 | INTERGENIC | Non Promoter | #N/A | #N/A | #N/A |
| 291098 | INTERGENIC | Sgl Promoter | 2.45 | 0.90 | 0.83 |
| 288490 | INTERGENIC | Sgl Promoter | 1.99 | 0.82 | 1.20 |
| 284675 | INTERGENIC | Sgl Promoter | 1.17 | 0.54 | 0.99 |
| 282536 | INTERGENIC | Dbl Promoter | 0.94 | 0.43 | 0.96 |
| 280566 | INTERGENIC | Sgl Promoter | #N/A | #N/A | #N/A |
| 280154 | INTERGENIC | Sgl Promoter | 0.57 | 0.24 | 0.74 |
| 278768 | INTERGENIC | Sgl Promoter | 1.47 | 0.65 | 0.63 |
| 277926 | INTERGENIC | Dbl Promoter | 2.15 | 0.84 | #N/A |
| 276834 | INTERGENIC | Non Promoter | 0.49 | 0.21 | 0.89 |
| 274928 | INTERGENIC | Sgl Promoter | 1.85 | 0.78 | 0.82 |
| 273039 | INTERGENIC | Sgl Promoter | 1.46 | 0.66 | 0.84 |
| 271523 | INTERGENIC | Dbl Promoter | 1.20 | 0.54 | 0.99 |
| 269363 | INTERGENIC | Sgl Promoter | 2.48 | 0.91 | 1.86 |
| 265790 | INTERGENIC | Non Promoter | 1.35 | 0.62 | 0.84 |
| 264434 | INTERGENIC | Sgl Promoter | 0.66 | 0.30 | 1.15 |
| 262994 | INTERGENIC | Sgl Promoter | 1.36 | 0.61 | #N/A |
| 261922 | INTERGENIC | Sgl Promoter | 1.61 | 0.70 | 1.06 |
| 258898 | INTERGENIC | Dbl Promoter | 0.23 | 0.04 | 0.54 |
| 259976 | INTERGENIC | Sgl Promoter | 0.40 | 0.16 | 0.66 |
| 260777 | INTERGENIC | Sgl Promoter | 0.19 | 0.03 | 0.30 |
| 258148 | INTERGENIC | Non Promoter | #N/A | #N/A | 0.51 |
| 256415 | INTERGENIC | Dbl Promoter | 3.15 | 0.97 | 0.65 |
| 255347 | INTERGENIC | Sgl Promoter | 1.09 | 0.50 | 0.78 |
| 253343 | INTERGENIC | Non Promoter | 0.25 | 0.04 | 0.96 |
| 248566 | INTERGENIC | Dbl Promoter | 2.18 | 0.86 | 0.73 |
| 247708 | INTERGENIC | Sgl Promoter | 0.93 | 0.43 | 0.60 |
| 245784 | INTERGENIC | Sgl Promoter | 0.78 | 0.38 | 0.67 |
| 242866 | INTERGENIC | Sgl Promoter | 1.50 | 0.66 | 1.25 |
| 238831 | INTERGENIC | Non Promoter | 0.40 | 0.14 | 1.06 |
| 237182 | INTERGENIC | Sgl Promoter | #N/A | #N/A | 0.61 |
| 235787 | INTERGENIC | Sgl Promoter | 0.64 | 0.28 | 0.96 |
| 234072 | INTERGENIC | Sgl Promoter | 1.34 | 0.60 | 1.13 |
| 230699 | INTERGENIC | Dbl Promoter | 0.61 | 0.27 | 0.73 |
| 231873 | INTERGENIC | Dbl Promoter | 0.23 | 0.06 | 0.67 |
| 228585 | INTERGENIC | Sgl Promoter | #N/A | #N/A | #N/A |
| 226216 | INTERGENIC | Dbl Promoter | 0.95 | 0.45 | 0.62 |
| 224373 | INTERGENIC | Sgl Promoter | 1.58 | 0.68 | 0.68 |
| 222998 | INTERGENIC | Sgl Promoter | 1.22 | 0.55 | #N/A |
| 220990 | INTERGENIC | Non Promoter | 0.39 | 0.13 | 0.99 |
| 218216 | INTERGENIC | Non Promoter | 0.53 | 0.22 | #N/A |
| 216990 | INTERGENIC | Sgl Promoter | 0.29 | 0.06 | 0.68 |
| 210239 | INTERGENIC | Sgl Promoter | 1.51 | 0.65 | 1.38 |
| 207893 | INTERGENIC | Sgl Promoter | 1.11 | 0.52 | 0.96 |
| 205353 | INTERGENIC | Sgl Promoter | 1.98 | 0.81 | 0.68 |
| 202290 | INTERGENIC | Dbl Promoter | 1.10 | 0.50 | #N/A |
| 196350 | INTERGENIC | Sgl Promoter | 1.65 | 0.70 | 1.05 |
| 195289 | INTERGENIC | Non Promoter | #N/A | #N/A | 1.15 |
| 193575 | INTERGENIC | Sgl Promoter | 1.73 | 0.74 | 1.67 |
| 191680 | INTERGENIC | Sgl Promoter | 0.98 | 0.45 | #N/A |

|        |            |              |      |      |      |
|--------|------------|--------------|------|------|------|
| 189131 | INTERGENIC | Sgl Promoter | 2.37 | 0.89 | 1.15 |
| 186423 | INTERGENIC | Sgl Promoter | #N/A | #N/A | #N/A |
| 185988 | INTERGENIC | Dbl Promoter | 1.21 | 0.55 | #N/A |
| 185291 | INTERGENIC | Non Promoter | 1.57 | 0.68 | 1.01 |
| 182963 | INTERGENIC | Sgl Promoter | 1.45 | 0.64 | #N/A |
| 180784 | INTERGENIC | Sgl Promoter | 1.58 | 0.70 | 0.90 |
| 179672 | INTERGENIC | Sgl Promoter | 1.14 | 0.52 | 1.09 |
| 178520 | INTERGENIC | Sgl Promoter | 0.61 | 0.28 | 0.82 |
| 176786 | INTERGENIC | Dbl Promoter | 2.53 | 0.91 | 0.42 |
| 175848 | INTERGENIC | Non Promoter | #N/A | #N/A | #N/A |
| 174218 | INTERGENIC | Sgl Promoter | 1.64 | 0.70 | 0.72 |
| 171556 | INTERGENIC | Sgl Promoter | 1.17 | 0.54 | 1.01 |
| 169212 | INTERGENIC | Sgl Promoter | #N/A | #N/A | #N/A |
| 167617 | INTERGENIC | Non Promoter | #N/A | #N/A | #N/A |
| 166549 | INTERGENIC | Dbl Promoter | 1.34 | 0.61 | #N/A |
| 164922 | INTERGENIC | Sgl Promoter | 0.25 | 0.05 | 0.35 |
| 162492 | INTERGENIC | Sgl Promoter | 0.42 | 0.15 | #N/A |
| 161606 | INTERGENIC | Dbl Promoter | 2.82 | 0.94 | 1.28 |
| 159461 | INTERGENIC | Non Promoter | #N/A | #N/A | #N/A |
| 158619 | INTERGENIC | Sgl Promoter | 0.61 | 0.28 | 1.17 |
| 155652 | INTERGENIC | Sgl Promoter | 1.35 | 0.62 | 0.87 |
| 154996 | INTERGENIC | Dbl Promoter | 3.22 | 0.97 | 1.16 |
| 153821 | INTERGENIC | Non Promoter | 0.75 | 0.36 | 1.10 |
| 151983 | INTERGENIC | Dbl Promoter | 0.83 | 0.38 | 1.02 |
| 149391 | INTERGENIC | Sgl Promoter | 1.64 | 0.71 | 0.67 |
| 146857 | INTERGENIC | Sgl Promoter | 1.79 | 0.77 | 0.94 |
| 147635 | INTERGENIC | Sgl Promoter | #N/A | #N/A | #N/A |
| 145927 | INTERGENIC | Non Promoter | 1.39 | 0.63 | 0.96 |
| 143615 | INTERGENIC | Dbl Promoter | 0.77 | 0.37 | 0.91 |
| 144406 | INTERGENIC | Dbl Promoter | 0.91 | 0.41 | 0.56 |
| 141023 | INTERGENIC | Sgl Promoter | 1.22 | 0.55 | #N/A |
| 137937 | INTERGENIC | Sgl Promoter | 1.02 | 0.47 | 1.38 |
| 134514 | INTERGENIC | Sgl Promoter | 1.98 | 0.81 | 0.81 |
| 133726 | INTERGENIC | Sgl Promoter | #N/A | #N/A | #N/A |
| 131293 | INTERGENIC | Sgl Promoter | 0.59 | 0.25 | #N/A |
| 130639 | INTERGENIC | Sgl Promoter | 2.32 | 0.89 | 0.87 |
| 127480 | INTERGENIC | Sgl Promoter | 2.05 | 0.82 | 0.73 |
| 125764 | INTERGENIC | Sgl Promoter | #N/A | #N/A | #N/A |
| 122522 | INTERGENIC | Dbl Promoter | 2.00 | 0.82 | 1.09 |
| 120385 | INTERGENIC | Non Promoter | #N/A | #N/A | #N/A |
| 118798 | INTERGENIC | Dbl Promoter | 2.07 | 0.82 | 0.73 |
| 115505 | INTERGENIC | Non Promoter | 0.94 | 0.44 | 0.51 |
| 113220 | INTERGENIC | Sgl Promoter | 2.09 | 0.84 | 0.79 |
| 110469 | INTERGENIC | Non Promoter | 0.62 | 0.27 | #N/A |
| 109274 | INTERGENIC | Sgl Promoter | #N/A | #N/A | 1.04 |
| 107321 | INTERGENIC | Sgl Promoter | 0.87 | 0.42 | 1.41 |
| 100676 | INTERGENIC | Sgl Promoter | 0.17 | 0.02 | 0.42 |
| 98726  | INTERGENIC | Sgl Promoter | 0.75 | 0.34 | 1.08 |
| 96762  | INTERGENIC | Sgl Promoter | 1.11 | 0.50 | 0.90 |
| 94504  | INTERGENIC | Dbl Promoter | 1.13 | 0.51 | 0.93 |
| 92749  | INTERGENIC | Sgl Promoter | 1.48 | 0.64 | 0.90 |

|        |            |              |      |      |      |
|--------|------------|--------------|------|------|------|
| 89289  | INTERGENIC | Sgl Promoter | 1.73 | 0.75 | #N/A |
| 86230  | INTERGENIC | Non Promoter | 0.45 | 0.17 | 1.27 |
| 83813  | INTERGENIC | Sgl Promoter | 0.43 | 0.18 | 0.77 |
| 82952  | INTERGENIC | Sgl Promoter | 1.56 | 0.67 | #N/A |
| 81040  | INTERGENIC | Dbl Promoter | 3.06 | 0.97 | #N/A |
| 80165  | INTERGENIC | Sgl Promoter | 1.50 | 0.67 | 1.09 |
| 78871  | INTERGENIC | Sgl Promoter | 5.72 | 1.00 | #N/A |
| 77263  | INTERGENIC | Non Promoter | 0.47 | 0.18 | #N/A |
| 75754  | INTERGENIC | Dbl Promoter | 2.90 | 0.96 | #N/A |
| 74241  | INTERGENIC | Sgl Promoter | 2.12 | 0.85 | 1.31 |
| 70739  | INTERGENIC | Sgl Promoter | 0.93 | 0.44 | 0.84 |
| 68275  | INTERGENIC | Non Promoter | 0.33 | 0.10 | 0.71 |
| 65913  | INTERGENIC | Non Promoter | 0.54 | 0.25 | 1.02 |
| 63818  | INTERGENIC | Dbl Promoter | 1.69 | 0.73 | 0.70 |
| 55935  | INTERGENIC | Non Promoter | 0.43 | 0.16 | 0.90 |
| 53704  | INTERGENIC | Sgl Promoter | 2.73 | 0.94 | 1.53 |
| 50051  | INTERGENIC | Dbl Promoter | 2.22 | 0.86 | 1.60 |
| 49006  | INTERGENIC | Non Promoter | 0.51 | 0.20 | 1.03 |
| 48108  | INTERGENIC | Sgl Promoter | 1.98 | 0.81 | 1.01 |
| 46736  | INTERGENIC | Dbl Promoter | 0.67 | 0.30 | 0.72 |
| 42424  | INTERGENIC | Non Promoter | #N/A | #N/A | #N/A |
| 38812  | INTERGENIC | Dbl Promoter | 0.88 | 0.40 | 0.58 |
| 36700  | INTERGENIC | Non Promoter | #N/A | #N/A | #N/A |
| 34544  | INTERGENIC | Dbl Promoter | 1.93 | 0.80 | 0.97 |
| 31961  | INTERGENIC | Sgl Promoter | #N/A | #N/A | 1.10 |
| 31083  | INTERGENIC | Sgl Promoter | 1.80 | 0.76 | 0.89 |
| 26828  | INTERGENIC | Non Promoter | 0.32 | 0.11 | 1.34 |
| 25216  | INTERGENIC | Sgl Promoter | 1.29 | 0.58 | 0.93 |
| 19637  | INTERGENIC | Dbl Promoter | 1.12 | 0.51 | #N/A |
| 20935  | INTERGENIC | Dbl Promoter | 0.63 | 0.28 | 0.68 |
| 22234  | INTERGENIC | Dbl Promoter | 0.72 | 0.33 | 0.81 |
| 17359  | INTERGENIC | Non Promoter | 0.55 | 0.25 | 0.79 |
| 12313  | INTERGENIC | Dbl Promoter | 1.11 | 0.51 | 0.76 |
| 13399  | INTERGENIC | Dbl Promoter | 1.20 | 0.56 | 1.14 |
| 14485  | INTERGENIC | Dbl Promoter | 1.26 | 0.57 | 2.91 |
| 8310   | INTERGENIC | Non Promoter | 3.01 | 0.96 | 0.52 |
| 9092   | INTERGENIC | Non Promoter | 1.05 | 0.48 | 2.03 |
| 6108   | INTERGENIC | Dbl Promoter | 1.82 | 0.76 | 1.02 |
| 3504   | INTERGENIC | Non Promoter | #N/A | #N/A | #N/A |
| 2390   | INTERGENIC | Dbl Promoter | 0.60 | 0.27 | 0.99 |
| 1811   | INTERGENIC | Non Promoter | 0.37 | 0.11 | 0.82 |
| 84213  | INTERGENIC | Sgl Promoter | #N/A | #N/A | #N/A |
| 219541 | INTERGENIC | Sgl Promoter | 0.41 | 0.16 | 1.15 |
| 302563 | INTERGENIC | Sgl Promoter | 0.99 | 0.45 | 1.58 |
| 313838 | INTERGENIC | Sgl Promoter | 1.28 | 0.57 | 1.00 |
| 74629  | INTERGENIC | Sgl Promoter | 0.48 | 0.18 | #N/A |
| 163605 | INTERGENIC | Sgl Promoter | 1.61 | 0.69 | 1.11 |
| 314457 | INTERGENIC | Sgl Promoter | 2.20 | 0.86 | 0.83 |
| 442873 | INTERGENIC | Dbl Promoter | 3.19 | 0.97 | 0.93 |
| 445022 | INTERGENIC | Sgl Promoter | 0.95 | 0.44 | 0.95 |
| 446440 | INTERGENIC | Non Promoter | #N/A | #N/A | #N/A |

|        |            |              |      |      |      |
|--------|------------|--------------|------|------|------|
| 448162 | INTERGENIC | Sgl Promoter | 1.21 | 0.56 | 1.11 |
| 450064 | INTERGENIC | Sgl Promoter | 0.84 | 0.38 | 0.79 |
| 451075 | INTERGENIC | Dbl Promoter | 2.78 | 0.95 | 0.63 |
| 451842 | INTERGENIC | Sgl Promoter | #N/A | #N/A | 0.75 |
| 453993 | INTERGENIC | Non Promoter | #N/A | #N/A | #N/A |
| 457781 | INTERGENIC | Sgl Promoter | 1.12 | 0.51 | 0.89 |
| 461276 | INTERGENIC | Sgl Promoter | 2.35 | 0.88 | 0.80 |
| 463380 | INTERGENIC | Sgl Promoter | 2.00 | 0.82 | #N/A |
| 465008 | INTERGENIC | Non Promoter | 0.97 | 0.44 | 1.00 |
| 466602 | INTERGENIC | Sgl Promoter | 1.68 | 0.73 | 0.79 |
| 469358 | INTERGENIC | Dbl Promoter | 0.82 | 0.38 | 0.73 |
| 471335 | INTERGENIC | Non Promoter | 0.36 | 0.14 | 0.66 |
| 473364 | INTERGENIC | Sgl Promoter | 1.81 | 0.76 | 1.38 |
| 475857 | INTERGENIC | Sgl Promoter | 2.11 | 0.84 | 0.84 |
| 477979 | INTERGENIC | Dbl Promoter | 2.22 | 0.87 | 0.93 |
| 478875 | INTERGENIC | Sgl Promoter | 1.65 | 0.71 | 0.88 |
| 481812 | INTERGENIC | Non Promoter | 0.24 | 0.05 | 0.55 |
| 483060 | INTERGENIC | Dbl Promoter | 3.75 | 0.99 | 1.48 |
| 484785 | INTERGENIC | Non Promoter | #N/A | #N/A | #N/A |
| 487411 | INTERGENIC | Dbl Promoter | 4.35 | 1.00 | 0.87 |
| 488379 | INTERGENIC | Non Promoter | 0.46 | 0.18 | #N/A |
| 489927 | INTERGENIC | Dbl Promoter | 2.57 | 0.92 | 1.36 |
| 493898 | INTERGENIC | Sgl Promoter | 1.71 | 0.74 | 0.84 |
| 499922 | INTERGENIC | Dbl Promoter | #N/A | #N/A | 0.94 |
| 500984 | INTERGENIC | Non Promoter | 0.43 | 0.19 | #N/A |
| 506157 | INTERGENIC | Dbl Promoter | 3.04 | 0.96 | 0.86 |
| 507560 | INTERGENIC | Sgl Promoter | 2.10 | 0.84 | 1.00 |
| 508342 | INTERGENIC | Sgl Promoter | 0.41 | 0.14 | #N/A |
| 510550 | INTERGENIC | Sgl Promoter | #N/A | #N/A | 0.77 |
| 511639 | INTERGENIC | Sgl Promoter | #N/A | #N/A | #N/A |
| 512972 | INTERGENIC | Dbl Promoter | #N/A | #N/A | #N/A |
| 517093 | INTERGENIC | Non Promoter | 0.69 | 0.31 | 0.57 |
| 518912 | INTERGENIC | Sgl Promoter | 0.11 | 0.01 | 0.40 |
| 520537 | INTERGENIC | Non Promoter | #N/A | #N/A | #N/A |
| 521655 | INTERGENIC | Dbl Promoter | 2.04 | 0.83 | 0.90 |
| 523058 | INTERGENIC | Non Promoter | 0.84 | 0.39 | 0.77 |
| 523863 | INTERGENIC | Sgl Promoter | 2.04 | 0.83 | #N/A |
| 524897 | INTERGENIC | Dbl Promoter | 1.31 | 0.59 | 0.89 |
| 526470 | INTERGENIC | Sgl Promoter | 2.62 | 0.93 | 0.64 |
| 527455 | INTERGENIC | Dbl Promoter | 2.34 | 0.88 | 1.08 |
| 530586 | INTERGENIC | Sgl Promoter | 1.89 | 0.78 | 0.78 |
| 532190 | INTERGENIC | Non Promoter | 0.38 | 0.12 | 1.32 |
| 533707 | INTERGENIC | Sgl Promoter | 1.44 | 0.63 | 0.96 |
| 535287 | INTERGENIC | Sgl Promoter | 0.78 | 0.36 | 0.70 |
| 547856 | INTERGENIC | Dbl Promoter | 3.57 | 0.99 | 0.60 |
| 549088 | INTERGENIC | Sgl Promoter | 1.11 | 0.50 | 0.76 |
| 551296 | INTERGENIC | Sgl Promoter | 0.65 | 0.29 | 0.66 |
| 552817 | INTERGENIC | Sgl Promoter | 1.39 | 0.64 | 0.76 |
| 554626 | INTERGENIC | Sgl Promoter | 1.02 | 0.46 | 0.70 |
| 556157 | INTERGENIC | Sgl Promoter | 1.24 | 0.56 | #N/A |
| 557316 | INTERGENIC | Sgl Promoter | 1.65 | 0.72 | 1.25 |



|        |            |              |      |      |      |
|--------|------------|--------------|------|------|------|
| 558655 | INTERGENIC | Sgl Promoter | #N/A | #N/A | #N/A |
| 560428 | INTERGENIC | Non Promoter | 0.47 | 0.18 | 1.88 |
| 562186 | INTERGENIC | Dbl Promoter | 2.39 | 0.90 | #N/A |
| 564938 | INTERGENIC | Non Promoter | 0.36 | 0.10 | 0.53 |
| 565752 | INTERGENIC | Sgl Promoter | 3.09 | 0.96 | #N/A |
| 567557 | INTERGENIC | Dbl Promoter | 3.00 | 0.96 | 0.94 |
| 569967 | INTERGENIC | Non Promoter | 0.34 | 0.12 | #N/A |
| 571251 | INTERGENIC | Dbl Promoter | 2.32 | 0.88 | 0.67 |
| 573213 | INTERGENIC | Sgl Promoter | 0.81 | 0.39 | 0.33 |
| 574573 | INTERGENIC | Non Promoter | 0.37 | 0.11 | 0.81 |
| 576074 | INTERGENIC | Sgl Promoter | 0.90 | 0.41 | 1.40 |
| 577826 | INTERGENIC | Sgl Promoter | #N/A | #N/A | #N/A |
| 578604 | INTERGENIC | Dbl Promoter | 0.97 | 0.45 | 1.13 |
| 579466 | INTERGENIC | Non Promoter | #N/A | #N/A | #N/A |
| 581155 | INTERGENIC | Dbl Promoter | 0.48 | 0.19 | 0.62 |
| 581922 | INTERGENIC | Dbl Promoter | 1.50 | 0.67 | 0.77 |
| 583292 | INTERGENIC | Sgl Promoter | #N/A | #N/A | 0.74 |
| 584591 | INTERGENIC | Sgl Promoter | #N/A | #N/A | 0.75 |
| 586428 | INTERGENIC | Non Promoter | #N/A | #N/A | #N/A |
| 590034 | INTERGENIC | Dbl Promoter | 1.31 | 0.60 | 1.01 |
| 591145 | INTERGENIC | Non Promoter | #N/A | #N/A | #N/A |
| 592464 | INTERGENIC | Dbl Promoter | 3.03 | 0.96 | 1.59 |
| 596060 | INTERGENIC | Non Promoter | 0.45 | 0.20 | #N/A |
| 596694 | INTERGENIC | Sgl Promoter | 1.01 | 0.46 | #N/A |
| 598733 | INTERGENIC | Sgl Promoter | 2.36 | 0.88 | 1.29 |
| 599496 | INTERGENIC | Dbl Promoter | 2.49 | 0.91 | 0.62 |
| 602834 | INTERGENIC | Non Promoter | 0.31 | 0.11 | #N/A |
| 604043 | INTERGENIC | Sgl Promoter | 2.28 | 0.87 | 0.98 |
| 605271 | INTERGENIC | Sgl Promoter | 1.13 | 0.52 | #N/A |
| 608584 | INTERGENIC | Dbl Promoter | #N/A | #N/A | 1.14 |
| 611444 | INTERGENIC | Sgl Promoter | 0.90 | 0.41 | 1.08 |
| 614444 | INTERGENIC | Dbl Promoter | 0.34 | 0.10 | 0.52 |
| 615367 | INTERGENIC | Dbl Promoter | 0.11 | 0.01 | 0.34 |
| 617633 | INTERGENIC | Non Promoter | 0.23 | 0.07 | 1.18 |
| 619442 | INTERGENIC | Dbl Promoter | 1.46 | 0.65 | 0.86 |
| 626430 | INTERGENIC | Sgl Promoter | 1.33 | 0.60 | 1.02 |
| 630785 | INTERGENIC | Sgl Promoter | 2.31 | 0.89 | 0.40 |
| 632659 | INTERGENIC | Non Promoter | 0.94 | 0.43 | #N/A |
| 635484 | INTERGENIC | Dbl Promoter | 2.71 | 0.94 | 0.55 |
| 638875 | INTERGENIC | Non Promoter | 0.34 | 0.12 | 0.83 |
| 640100 | INTERGENIC | Dbl Promoter | 2.78 | 0.94 | 0.97 |
| 643420 | INTERGENIC | Sgl Promoter | 1.75 | 0.74 | 1.00 |
| 644704 | INTERGENIC | Sgl Promoter | 0.51 | 0.21 | 1.17 |
| 645988 | INTERGENIC | Sgl Promoter | 0.79 | 0.37 | 0.80 |
| 650568 | INTERGENIC | Sgl Promoter | 2.11 | 0.83 | 1.27 |
| 651639 | INTERGENIC | Sgl Promoter | 0.37 | 0.11 | 1.21 |
| 652712 | INTERGENIC | Sgl Promoter | 0.32 | 0.08 | 1.09 |
| 656468 | INTERGENIC | Sgl Promoter | #N/A | #N/A | #N/A |
| 658348 | INTERGENIC | Non Promoter | 1.48 | 0.67 | 0.86 |
| 661074 | INTERGENIC | Dbl Promoter | 0.88 | 0.41 | 0.96 |
| 663991 | INTERGENIC | Non Promoter | 0.26 | 0.06 | 0.89 |

|        |            |              |      |      |      |
|--------|------------|--------------|------|------|------|
| 665062 | INTERGENIC | Non Promoter | 0.30 | 0.06 | 0.70 |
| 514703 | INTERGENIC | Dbl Promoter | 2.13 | 0.84 | 0.81 |
| 517628 | INTERGENIC | Non Promoter | 0.57 | 0.24 | #N/A |
| 458198 | INTERGENIC | Sgl Promoter | #N/A | #N/A | #N/A |
| 490609 | INTERGENIC | Dbl Promoter | 0.70 | 0.32 | #N/A |
| 150827 | INTERGENIC | Non Promoter | 1.66 | 0.73 | 3.66 |
| 147889 | INTERGENIC | Sgl Promoter | 1.93 | 0.80 | #N/A |
| 146290 | INTERGENIC | Sgl Promoter | #N/A | #N/A | #N/A |
| 143200 | INTERGENIC | Sgl Promoter | #N/A | #N/A | #N/A |
| 141072 | INTERGENIC | Dbl Promoter | 1.50 | 0.65 | 0.70 |
| 137939 | INTERGENIC | Non Promoter | #N/A | #N/A | 0.72 |
| 136585 | INTERGENIC | Dbl Promoter | 2.05 | 0.83 | #N/A |
| 134301 | INTERGENIC | Non Promoter | 0.45 | 0.17 | #N/A |
| 131728 | INTERGENIC | Dbl Promoter | #N/A | #N/A | 0.75 |
| 131204 | INTERGENIC | Sgl Promoter | 2.33 | 0.89 | #N/A |
| 129329 | INTERGENIC | Non Promoter | 0.22 | 0.04 | 0.93 |
| 127522 | INTERGENIC | Sgl Promoter | 2.86 | 0.95 | 1.12 |
| 122074 | INTERGENIC | Non Promoter | 0.65 | 0.29 | #N/A |
| 121321 | INTERGENIC | Sgl Promoter | 2.06 | 0.82 | 0.74 |
| 116431 | INTERGENIC | Sgl Promoter | 1.92 | 0.80 | 1.24 |
| 112846 | INTERGENIC | Sgl Promoter | 0.39 | 0.14 | 0.92 |
| 112233 | INTERGENIC | Dbl Promoter | 3.22 | 0.97 | 1.18 |
| 109901 | INTERGENIC | Sgl Promoter | 1.41 | 0.63 | 0.87 |
| 108675 | INTERGENIC | Sgl Promoter | 0.39 | 0.13 | 0.52 |
| 100946 | INTERGENIC | Dbl Promoter | #N/A | #N/A | #N/A |
| 99043  | INTERGENIC | Sgl Promoter | #N/A | #N/A | #N/A |
| 97996  | INTERGENIC | Sgl Promoter | #N/A | #N/A | #N/A |
| 95565  | INTERGENIC | Non Promoter | #N/A | #N/A | #N/A |
| 92049  | INTERGENIC | Sgl Promoter | 1.06 | 0.48 | 1.53 |
| 88622  | INTERGENIC | Sgl Promoter | 1.39 | 0.61 | 1.54 |
| 87402  | INTERGENIC | Sgl Promoter | 0.82 | 0.38 | 0.77 |
| 81460  | INTERGENIC | Dbl Promoter | 0.95 | 0.43 | 0.95 |
| 80355  | INTERGENIC | Sgl Promoter | 1.72 | 0.74 | #N/A |
| 77151  | INTERGENIC | Sgl Promoter | 1.73 | 0.75 | #N/A |
| 74269  | INTERGENIC | Non Promoter | 0.28 | 0.08 | #N/A |
| 73408  | INTERGENIC | Dbl Promoter | 3.86 | 0.99 | 0.72 |
| 70632  | INTERGENIC | Non Promoter | #N/A | #N/A | #N/A |
| 68579  | INTERGENIC | Dbl Promoter | 2.34 | 0.89 | 1.03 |
| 65774  | INTERGENIC | Sgl Promoter | 0.91 | 0.43 | #N/A |
| 64061  | INTERGENIC | Sgl Promoter | 2.54 | 0.92 | 0.84 |
| 54210  | INTERGENIC | Sgl Promoter | 1.42 | 0.63 | 0.79 |
| 53130  | INTERGENIC | Sgl Promoter | 0.87 | 0.42 | 0.99 |
| 52086  | INTERGENIC | Non Promoter | #N/A | #N/A | #N/A |
| 49937  | INTERGENIC | Sgl Promoter | 1.73 | 0.75 | 0.92 |
| 47858  | INTERGENIC | Sgl Promoter | 0.49 | 0.19 | #N/A |
| 46671  | INTERGENIC | Dbl Promoter | 2.36 | 0.88 | 0.57 |
| 41279  | INTERGENIC | Non Promoter | #N/A | #N/A | #N/A |
| 40665  | INTERGENIC | Dbl Promoter | 2.98 | 0.96 | 0.71 |
| 39803  | INTERGENIC | Sgl Promoter | 1.42 | 0.64 | 0.93 |
| 37332  | INTERGENIC | Sgl Promoter | 0.73 | 0.35 | #N/A |
| 35502  | INTERGENIC | Sgl Promoter | 2.05 | 0.83 | #N/A |



|        |            |              |      |      |      |
|--------|------------|--------------|------|------|------|
| 32894  | INTERGENIC | Non Promoter | 0.49 | 0.20 | 1.17 |
| 29207  | INTERGENIC | Dbl Promoter | 1.78 | 0.76 | 0.83 |
| 30109  | INTERGENIC | Dbl Promoter | 2.42 | 0.90 | 0.71 |
| 27409  | INTERGENIC | Sgl Promoter | 1.08 | 0.49 | 1.00 |
| 25756  | INTERGENIC | Non Promoter | #N/A | #N/A | 1.30 |
| 23569  | INTERGENIC | Dbl Promoter | 1.98 | 0.80 | 0.99 |
| 22474  | INTERGENIC | Sgl Promoter | 0.84 | 0.40 | 1.21 |
| 21138  | INTERGENIC | Non Promoter | 1.31 | 0.59 | 1.26 |
| 17956  | INTERGENIC | Dbl Promoter | 1.30 | 0.59 | 1.09 |
| 16639  | INTERGENIC | Sgl Promoter | 1.82 | 0.78 | 0.69 |
| 14648  | INTERGENIC | Sgl Promoter | 0.89 | 0.42 | 0.87 |
| 13083  | INTERGENIC | Non Promoter | 0.29 | 0.10 | 0.85 |
| 10781  | INTERGENIC | Dbl Promoter | 0.70 | 0.32 | 0.96 |
| 11726  | INTERGENIC | Dbl Promoter | 0.27 | 0.07 | 0.54 |
| 5210   | INTERGENIC | Sgl Promoter | 0.68 | 0.32 | 1.00 |
| 6120   | INTERGENIC | Sgl Promoter | 0.23 | 0.05 | 0.59 |
| 92547  | INTERGENIC | Sgl Promoter | 0.80 | 0.38 | 1.66 |
| 154342 | INTERGENIC | Sgl Promoter | 0.89 | 0.42 | 1.43 |
| 157933 | INTERGENIC | Sgl Promoter | 1.64 | 0.70 | #N/A |
| 160048 | INTERGENIC | Dbl Promoter | 2.27 | 0.88 | 1.05 |
| 161754 | INTERGENIC | Non Promoter | 0.44 | 0.20 | #N/A |
| 164391 | INTERGENIC | Dbl Promoter | 2.52 | 0.92 | 0.86 |
| 165576 | INTERGENIC | Non Promoter | 0.38 | 0.16 | 0.88 |
| 166536 | INTERGENIC | Dbl Promoter | 1.64 | 0.70 | 0.59 |
| 167319 | INTERGENIC | Non Promoter | 0.32 | 0.10 | #N/A |
| 167943 | INTERGENIC | Dbl Promoter | 1.43 | 0.63 | #N/A |
| 169981 | INTERGENIC | Non Promoter | 0.98 | 0.45 | 1.58 |
| 175226 | INTERGENIC | Dbl Promoter | 1.29 | 0.57 | #N/A |
| 177607 | INTERGENIC | Dbl Promoter | 2.43 | 0.91 | 1.38 |
| 178706 | INTERGENIC | Non Promoter | 0.36 | 0.11 | #N/A |
| 180287 | INTERGENIC | Dbl Promoter | 1.85 | 0.78 | 0.95 |
| 181788 | INTERGENIC | Non Promoter | 0.54 | 0.26 | 1.05 |
| 183622 | INTERGENIC | Dbl Promoter | #N/A | #N/A | 1.12 |
| 185497 | INTERGENIC | Sgl Promoter | 0.68 | 0.30 | 1.65 |
| 187664 | INTERGENIC | Sgl Promoter | 0.65 | 0.29 | 0.71 |
| 195451 | INTERGENIC | Non Promoter | #N/A | #N/A | #N/A |
| 196830 | INTERGENIC | Sgl Promoter | 1.69 | 0.72 | 0.69 |
| 199541 | INTERGENIC | Sgl Promoter | 0.57 | 0.24 | 1.28 |
| 201977 | INTERGENIC | Sgl Promoter | 0.77 | 0.35 | 0.94 |
| 203291 | INTERGENIC | Dbl Promoter | 2.17 | 0.86 | 0.95 |
| 204226 | INTERGENIC | Sgl Promoter | 0.48 | 0.18 | 0.64 |
| 204992 | INTERGENIC | Sgl Promoter | #N/A | #N/A | #N/A |
| 208762 | INTERGENIC | Sgl Promoter | #N/A | #N/A | #N/A |
| 210513 | INTERGENIC | Non Promoter | #N/A | #N/A | #N/A |
| 212370 | INTERGENIC | Sgl Promoter | 1.75 | 0.74 | 0.58 |
| 214884 | INTERGENIC | Sgl Promoter | 1.69 | 0.74 | 1.24 |
| 219788 | INTERGENIC | Sgl Promoter | 0.30 | 0.08 | 0.85 |
| 220669 | INTERGENIC | Sgl Promoter | 1.06 | 0.49 | 0.81 |
| 222686 | INTERGENIC | Sgl Promoter | 1.61 | 0.70 | 1.19 |
| 223991 | INTERGENIC | Sgl Promoter | 1.39 | 0.62 | 0.99 |
| 224922 | INTERGENIC | Sgl Promoter | 1.54 | 0.67 | 0.99 |

|        |            |              |      |      |      |
|--------|------------|--------------|------|------|------|
| 225427 | INTERGENIC | Sgl Promoter | 1.31 | 0.59 | 1.28 |
| 228909 | INTERGENIC | Sgl Promoter | 1.02 | 0.47 | 0.99 |
| 229967 | INTERGENIC | Non Promoter | #N/A | #N/A | #N/A |
| 232391 | INTERGENIC | Sgl Promoter | 1.09 | 0.49 | 0.95 |
| 235038 | INTERGENIC | Sgl Promoter | 0.29 | 0.06 | 0.49 |
| 238002 | INTERGENIC | Sgl Promoter | 1.75 | 0.74 | 0.94 |
| 239348 | INTERGENIC | Sgl Promoter | 0.80 | 0.38 | 0.63 |
| 242233 | INTERGENIC | Dbl Promoter | 0.41 | 0.14 | 0.71 |
| 243887 | INTERGENIC | Non Promoter | #N/A | #N/A | #N/A |
| 245588 | INTERGENIC | Sgl Promoter | 1.88 | 0.78 | 0.87 |
| 246325 | INTERGENIC | Sgl Promoter | 1.25 | 0.56 | 1.52 |
| 247202 | INTERGENIC | Dbl Promoter | #N/A | #N/A | 1.01 |
| 248101 | INTERGENIC | Non Promoter | #N/A | #N/A | #N/A |
| 248718 | INTERGENIC | Sgl Promoter | 2.01 | 0.82 | 1.36 |
| 251273 | INTERGENIC | Sgl Promoter | 0.71 | 0.32 | 0.97 |
| 253862 | INTERGENIC | Dbl Promoter | 0.75 | 0.34 | 0.57 |
| 255307 | INTERGENIC | Sgl Promoter | 2.51 | 0.92 | 1.00 |
| 257993 | INTERGENIC | Non Promoter | 0.31 | 0.09 | 1.06 |
| 259739 | INTERGENIC | Sgl Promoter | 0.52 | 0.21 | 0.71 |
| 260980 | INTERGENIC | Dbl Promoter | 1.68 | 0.73 | 0.70 |
| 263195 | INTERGENIC | Sgl Promoter | #N/A | #N/A | #N/A |
| 264158 | INTERGENIC | Dbl Promoter | 0.88 | 0.42 | #N/A |
| 266374 | INTERGENIC | Non Promoter | #N/A | #N/A | #N/A |
| 267170 | INTERGENIC | Dbl Promoter | 3.58 | 0.99 | #N/A |
| 267814 | INTERGENIC | Non Promoter | #N/A | #N/A | #N/A |
| 271009 | INTERGENIC | Dbl Promoter | 3.64 | 0.98 | 1.15 |
| 271631 | INTERGENIC | Non Promoter | #N/A | #N/A | 0.29 |
| 274142 | INTERGENIC | Sgl Promoter | 1.69 | 0.74 | #N/A |
| 275379 | INTERGENIC | Sgl Promoter | 0.67 | 0.30 | 0.80 |
| 278863 | INTERGENIC | Dbl Promoter | 4.49 | 1.00 | 0.72 |
| 281020 | INTERGENIC | Non Promoter | 0.24 | 0.05 | 0.59 |
| 281957 | INTERGENIC | Sgl Promoter | 1.10 | 0.50 | 1.06 |
| 282928 | INTERGENIC | Dbl Promoter | 0.56 | 0.27 | 0.57 |
| 283873 | INTERGENIC | Dbl Promoter | 0.58 | 0.27 | #N/A |
| 285737 | INTERGENIC | Non Promoter | #N/A | #N/A | #N/A |
| 286821 | INTERGENIC | Dbl Promoter | 1.72 | 0.74 | 1.13 |
| 287917 | INTERGENIC | Sgl Promoter | #N/A | #N/A | #N/A |
| 290213 | INTERGENIC | Sgl Promoter | 2.12 | 0.84 | 0.88 |
| 292395 | INTERGENIC | Non Promoter | 0.93 | 0.42 | 0.52 |
| 294092 | INTERGENIC | Sgl Promoter | 1.24 | 0.56 | 0.81 |
| 296590 | INTERGENIC | Sgl Promoter | 1.68 | 0.72 | 0.78 |
| 300674 | INTERGENIC | Sgl Promoter | 0.71 | 0.32 | 0.42 |
| 302244 | INTERGENIC | Dbl Promoter | 3.56 | 0.98 | 1.11 |
| 306856 | INTERGENIC | Non Promoter | 0.33 | 0.10 | #N/A |
| 316108 | INTERGENIC | Dbl Promoter | 3.19 | 0.97 | 1.13 |
| 318238 | INTERGENIC | Non Promoter | 0.31 | 0.09 | 0.86 |
| 320702 | INTERGENIC | Dbl Promoter | 1.23 | 0.56 | 0.92 |
| 322298 | INTERGENIC | Sgl Promoter | 1.22 | 0.55 | #N/A |
| 323545 | INTERGENIC | Sgl Promoter | 1.81 | 0.76 | 0.84 |
| 326514 | INTERGENIC | Non Promoter | 0.48 | 0.19 | #N/A |
| 327731 | INTERGENIC | Sgl Promoter | 1.14 | 0.53 | 1.20 |

|        |            |              |      |      |      |
|--------|------------|--------------|------|------|------|
| 329678 | INTERGENIC | Sgl Promoter | 1.17 | 0.53 | 0.85 |
| 332591 | INTERGENIC | Dbl Promoter | 5.01 | 1.00 | 0.95 |
| 336232 | INTERGENIC | Non Promoter | #N/A | #N/A | #N/A |
| 337528 | INTERGENIC | Sgl Promoter | 3.22 | 0.97 | 1.59 |
| 339745 | INTERGENIC | Sgl Promoter | 1.72 | 0.75 | 0.93 |
| 341811 | INTERGENIC | Dbl Promoter | 0.90 | 0.43 | 1.00 |
| 343990 | INTERGENIC | Sgl Promoter | 1.57 | 0.69 | #N/A |
| 346586 | INTERGENIC | Dbl Promoter | 2.45 | 0.91 | 1.19 |
| 347048 | INTERGENIC | Non Promoter | #N/A | #N/A | #N/A |
| 349007 | INTERGENIC | Sgl Promoter | 0.73 | 0.33 | 0.98 |
| 364117 | INTERGENIC | Dbl Promoter | 2.32 | 0.88 | 0.58 |
| 365811 | INTERGENIC | Non Promoter | 0.89 | 0.41 | 1.12 |
| 368782 | INTERGENIC | Dbl Promoter | 0.58 | 0.27 | 0.71 |
| 369698 | INTERGENIC | Non Promoter | 0.98 | 0.46 | #N/A |
| 370392 | INTERGENIC | Dbl Promoter | 0.12 | 0.02 | 0.39 |
| 370792 | INTERGENIC | Sgl Promoter | 0.16 | 0.02 | #N/A |
| 371621 | INTERGENIC | Sgl Promoter | 0.36 | 0.13 | 1.10 |
| 374000 | INTERGENIC | Non Promoter | 1.12 | 0.51 | 0.92 |
| 377986 | INTERGENIC | Dbl Promoter | 2.46 | 0.90 | 1.05 |
| 380823 | INTERGENIC | Sgl Promoter | #N/A | #N/A | 0.82 |
| 382472 | INTERGENIC | Non Promoter | 0.24 | 0.04 | #N/A |
| 384726 | INTERGENIC | Sgl Promoter | 2.47 | 0.90 | 0.94 |
| 385535 | INTERGENIC | Dbl Promoter | 1.65 | 0.70 | 0.94 |
| 386512 | INTERGENIC | Non Promoter | 0.35 | 0.13 | 1.19 |
| 388745 | INTERGENIC | Sgl Promoter | 1.36 | 0.61 | 0.53 |
| 390955 | INTERGENIC | Sgl Promoter | 1.24 | 0.57 | 1.03 |
| 391601 | INTERGENIC | Dbl Promoter | #N/A | #N/A | 1.48 |
| 392715 | INTERGENIC | Sgl Promoter | 0.85 | 0.39 | 1.09 |
| 394766 | INTERGENIC | Non Promoter | 0.61 | 0.27 | 0.83 |
| 395759 | INTERGENIC | Sgl Promoter | 1.09 | 0.49 | 0.36 |
| 398531 | INTERGENIC | Dbl Promoter | 1.85 | 0.77 | #N/A |
| 399658 | INTERGENIC | Sgl Promoter | #N/A | #N/A | #N/A |
| 402795 | INTERGENIC | Non Promoter | 0.22 | 0.04 | 0.86 |
| 404511 | INTERGENIC | Sgl Promoter | 0.93 | 0.44 | 0.83 |
| 407284 | INTERGENIC | Sgl Promoter | 1.23 | 0.55 | #N/A |
| 408446 | INTERGENIC | Dbl Promoter | 2.92 | 0.96 | 1.33 |
| 410724 | INTERGENIC | Sgl Promoter | #N/A | #N/A | 0.97 |
| 413282 | INTERGENIC | Sgl Promoter | 1.81 | 0.76 | 1.40 |
| 415802 | INTERGENIC | Non Promoter | 1.56 | 0.68 | 1.00 |
| 417007 | INTERGENIC | Dbl Promoter | 3.29 | 0.97 | 0.77 |
| 418438 | INTERGENIC | Sgl Promoter | #N/A | #N/A | 0.91 |
| 421543 | INTERGENIC | Non Promoter | 0.44 | 0.16 | #N/A |
| 425187 | INTERGENIC | Sgl Promoter | 0.97 | 0.45 | #N/A |
| 427133 | INTERGENIC | Sgl Promoter | 0.79 | 0.37 | #N/A |
| 429678 | INTERGENIC | Non Promoter | 0.33 | 0.09 | #N/A |
| 432169 | INTERGENIC | Dbl Promoter | 1.76 | 0.75 | #N/A |
| 434159 | INTERGENIC | Sgl Promoter | 2.69 | 0.93 | 1.93 |
| 434642 | INTERGENIC | Dbl Promoter | 1.60 | 0.70 | #N/A |
| 437632 | INTERGENIC | Non Promoter | #N/A | #N/A | #N/A |
| 440468 | INTERGENIC | Dbl Promoter | 1.08 | 0.49 | 0.61 |
| 441716 | INTERGENIC | Non Promoter | 0.84 | 0.39 | 1.36 |

|        |            |              |      |      |      |
|--------|------------|--------------|------|------|------|
| 445525 | INTERGENIC | Sgl Promoter | 1.11 | 0.51 | 0.97 |
| 447983 | INTERGENIC | Sgl Promoter | 0.26 | 0.08 | 0.71 |
| 448651 | INTERGENIC | Sgl Promoter | 0.69 | 0.31 | 0.93 |
| 471260 | INTERGENIC | Dbl Promoter | 0.85 | 0.39 | 1.22 |
| 471259 | INTERGENIC | Dbl Promoter | #N/A | #N/A | 1.15 |
| 475017 | INTERGENIC | Sgl Promoter | #N/A | #N/A | 1.12 |
| 475977 | INTERGENIC | Sgl Promoter | #N/A | #N/A | 1.09 |
| 484492 | INTERGENIC | Dbl Promoter | #N/A | #N/A | 1.12 |
| 486202 | INTERGENIC | Non Promoter | 0.22 | 0.03 | 1.26 |
| 488144 | INTERGENIC | Dbl Promoter | #N/A | #N/A | 1.15 |
| 489574 | INTERGENIC | Sgl Promoter | 0.23 | 0.05 | 1.23 |
| 490899 | INTERGENIC | Non Promoter | 0.59 | 0.28 | 4.66 |
| 490899 | INTERGENIC | Non Promoter | 0.63 | 0.28 | 5.33 |
| 491868 | INTERGENIC | Non Promoter | 0.92 | 0.43 | 1.09 |
| 493885 | INTERGENIC | Dbl Promoter | 2.30 | 0.89 | 0.84 |
| 494496 | INTERGENIC | Non Promoter | #N/A | #N/A | #N/A |
| 495431 | INTERGENIC | Sgl Promoter | 0.91 | 0.42 | 1.16 |
| 499580 | INTERGENIC | Non Promoter | #N/A | #N/A | #N/A |
| 500337 | INTERGENIC | Dbl Promoter | #N/A | #N/A | #N/A |
| 501262 | INTERGENIC | Non Promoter | 1.40 | 0.62 | 0.78 |
| 502423 | INTERGENIC | Dbl Promoter | 2.32 | 0.88 | 0.48 |
| 504593 | INTERGENIC | Sgl Promoter | 2.65 | 0.93 | 0.80 |
| 506136 | INTERGENIC | Sgl Promoter | #N/A | #N/A | #N/A |
| 507799 | INTERGENIC | Non Promoter | 0.78 | 0.36 | #N/A |
| 511056 | INTERGENIC | Dbl Promoter | 3.05 | 0.96 | 0.87 |
| 513164 | INTERGENIC | Non Promoter | #N/A | #N/A | #N/A |
| 514110 | INTERGENIC | Sgl Promoter | 1.16 | 0.54 | 0.96 |
| 515264 | INTERGENIC | Dbl Promoter | 0.48 | 0.18 | 0.45 |
| 516680 | INTERGENIC | Non Promoter | 0.31 | 0.10 | 0.96 |
| 517942 | INTERGENIC | Dbl Promoter | 2.89 | 0.96 | 1.14 |
| 520545 | INTERGENIC | Non Promoter | 0.41 | 0.14 | #N/A |
| 522108 | INTERGENIC | Dbl Promoter | 1.69 | 0.72 | #N/A |
| 522665 | INTERGENIC | Sgl Promoter | #N/A | #N/A | #N/A |
| 524867 | INTERGENIC | Sgl Promoter | 1.58 | 0.68 | 1.28 |
| 528302 | INTERGENIC | Sgl Promoter | 1.36 | 0.62 | 1.02 |
| 530799 | INTERGENIC | Non Promoter | 0.46 | 0.21 | 1.12 |
| 538794 | INTERGENIC | Non Promoter | 0.38 | 0.12 | 1.45 |
| 541939 | INTERGENIC | Sgl Promoter | 1.68 | 0.73 | 0.91 |
| 546099 | INTERGENIC | Sgl Promoter | 1.32 | 0.60 | #N/A |
| 549014 | INTERGENIC | Dbl Promoter | 1.97 | 0.81 | 1.10 |
| 549513 | INTERGENIC | Non Promoter | 0.50 | 0.20 | 1.01 |
| 552272 | INTERGENIC | Dbl Promoter | #N/A | #N/A | 0.80 |
| 552726 | INTERGENIC | Non Promoter | 0.76 | 0.35 | #N/A |
| 554578 | INTERGENIC | Dbl Promoter | 2.04 | 0.82 | 1.08 |
| 559551 | INTERGENIC | Sgl Promoter | 2.20 | 0.85 | 0.51 |
| 560797 | INTERGENIC | Non Promoter | 0.65 | 0.31 | 0.99 |
| 562008 | INTERGENIC | Dbl Promoter | 1.99 | 0.82 | 0.78 |
| 564860 | INTERGENIC | Sgl Promoter | #N/A | #N/A | #N/A |
| 566654 | INTERGENIC | Sgl Promoter | 1.66 | 0.71 | #N/A |
| 568567 | INTERGENIC | Dbl Promoter | 1.45 | 0.65 | 1.20 |
| 570776 | INTERGENIC | Non Promoter | 0.43 | 0.15 | #N/A |

|        |            |              |      |      |      |
|--------|------------|--------------|------|------|------|
| 572096 | INTERGENIC | Sgl Promoter | 1.42 | 0.64 | #N/A |
| 573466 | INTERGENIC | Non Promoter | 1.64 | 0.72 | 0.59 |
| 574151 | INTERGENIC | Dbl Promoter | #N/A | #N/A | 0.70 |
| 576825 | INTERGENIC | Sgl Promoter | 0.68 | 0.31 | 0.73 |
| 578362 | INTERGENIC | Non Promoter | 0.41 | 0.17 | 0.84 |
| 579318 | INTERGENIC | Sgl Promoter | 1.45 | 0.64 | #N/A |
| 587695 | INTERGENIC | Non Promoter | #N/A | #N/A | #N/A |
| 589354 | INTERGENIC | Dbl Promoter | 1.50 | 0.66 | #N/A |
| 592519 | INTERGENIC | Dbl Promoter | 1.21 | 0.54 | 1.28 |
| 603337 | INTERGENIC | Sgl Promoter | 0.95 | 0.44 | 0.97 |
| 604212 | INTERGENIC | Sgl Promoter | 1.20 | 0.54 | 0.93 |
| 605300 | INTERGENIC | Non Promoter | 1.56 | 0.70 | 1.32 |
| 607425 | INTERGENIC | Non Promoter | 0.98 | 0.46 | 0.84 |
| 609783 | INTERGENIC | Dbl Promoter | #N/A | #N/A | 0.58 |
| 612367 | INTERGENIC | Dbl Promoter | 0.86 | 0.39 | #N/A |
| 614755 | INTERGENIC | Sgl Promoter | 1.82 | 0.77 | 0.98 |
| 616332 | INTERGENIC | Non Promoter | 0.28 | 0.09 | 0.61 |
| 617533 | INTERGENIC | Dbl Promoter | 2.56 | 0.92 | 0.69 |
| 620473 | INTERGENIC | Sgl Promoter | 2.02 | 0.82 | 0.63 |
| 622918 | INTERGENIC | Non Promoter | #N/A | #N/A | #N/A |
| 625168 | INTERGENIC | Non Promoter | #N/A | #N/A | 1.07 |
| 626502 | INTERGENIC | Sgl Promoter | 0.28 | 0.06 | 0.29 |
| 627118 | INTERGENIC | Dbl Promoter | 1.45 | 0.64 | #N/A |
| 628383 | INTERGENIC | Non Promoter | 0.22 | 0.03 | 1.07 |
| 634252 | INTERGENIC | Dbl Promoter | 2.13 | 0.85 | 0.91 |
| 636780 | INTERGENIC | Sgl Promoter | 0.39 | 0.13 | 0.47 |
| 640317 | INTERGENIC | Sgl Promoter | 1.51 | 0.67 | 1.25 |
| 641464 | INTERGENIC | Sgl Promoter | 1.04 | 0.47 | 0.79 |
| 642627 | INTERGENIC | Sgl Promoter | 1.57 | 0.70 | 1.41 |
| 644404 | INTERGENIC | Non Promoter | #N/A | #N/A | #N/A |
| 645600 | INTERGENIC | Sgl Promoter | 2.26 | 0.88 | #N/A |
| 646415 | INTERGENIC | Dbl Promoter | 0.31 | 0.08 | 0.70 |
| 660716 | INTERGENIC | Sgl Promoter | 1.58 | 0.68 | 0.75 |
| 663284 | INTERGENIC | Non Promoter | 0.55 | 0.26 | 0.71 |
| 665844 | INTERGENIC | Dbl Promoter | 0.43 | 0.15 | #N/A |
| 668237 | INTERGENIC | Non Promoter | 0.47 | 0.18 | #N/A |
| 669468 | INTERGENIC | Sgl Promoter | 1.52 | 0.67 | 1.24 |
| 670340 | INTERGENIC | Dbl Promoter | 0.91 | 0.43 | 1.24 |
| 673131 | INTERGENIC | Sgl Promoter | 0.81 | 0.37 | #N/A |
| 675619 | INTERGENIC | Sgl Promoter | 1.40 | 0.62 | 0.90 |
| 678212 | INTERGENIC | Dbl Promoter | 2.37 | 0.89 | 0.90 |
| 680200 | INTERGENIC | Sgl Promoter | 2.28 | 0.87 | 0.80 |
| 682737 | INTERGENIC | Sgl Promoter | 1.12 | 0.51 | 1.13 |
| 683672 | INTERGENIC | Non Promoter | #N/A | #N/A | #N/A |
| 691555 | INTERGENIC | Dbl Promoter | 1.93 | 0.79 | 0.76 |
| 694378 | INTERGENIC | Sgl Promoter | 1.91 | 0.79 | 0.69 |
| 695046 | INTERGENIC | Non Promoter | #N/A | #N/A | #N/A |
| 697156 | INTERGENIC | Sgl Promoter | 2.74 | 0.94 | #N/A |
| 699999 | INTERGENIC | Sgl Promoter | 1.69 | 0.72 | #N/A |
| 704309 | INTERGENIC | Dbl Promoter | 0.48 | 0.19 | 0.72 |
| 705071 | INTERGENIC | Sgl Promoter | 1.85 | 0.78 | #N/A |



|        |            |              |      |      |      |
|--------|------------|--------------|------|------|------|
| 706198 | INTERGENIC | Non Promoter | 0.56 | 0.24 | #N/A |
| 707360 | INTERGENIC | Dbl Promoter | #N/A | #N/A | 0.68 |
| 708448 | INTERGENIC | Non Promoter | 0.63 | 0.28 | 0.87 |
| 710991 | INTERGENIC | Sgl Promoter | 0.70 | 0.34 | 1.41 |
| 712537 | INTERGENIC | Sgl Promoter | 0.41 | 0.18 | 1.52 |
| 713480 | INTERGENIC | Sgl Promoter | 0.92 | 0.42 | 0.59 |
| 715089 | INTERGENIC | Dbl Promoter | 2.50 | 0.91 | 1.50 |
| 717145 | INTERGENIC | Non Promoter | #N/A | #N/A | #N/A |
| 718317 | INTERGENIC | Sgl Promoter | #N/A | #N/A | #N/A |
| 719789 | INTERGENIC | Sgl Promoter | #N/A | #N/A | #N/A |
| 720771 | INTERGENIC | Sgl Promoter | 1.22 | 0.54 | 0.89 |
| 721701 | INTERGENIC | Sgl Promoter | #N/A | #N/A | 0.54 |
| 722978 | INTERGENIC | Dbl Promoter | 1.26 | 0.57 | 0.69 |
| 724044 | INTERGENIC | Sgl Promoter | 0.77 | 0.36 | 0.74 |
| 724721 | INTERGENIC | Non Promoter | 0.44 | 0.20 | #N/A |
| 726069 | INTERGENIC | Dbl Promoter | 0.33 | 0.09 | 0.56 |
| 728955 | INTERGENIC | Sgl Promoter | 0.34 | 0.10 | 0.52 |
| 731668 | INTERGENIC | Non Promoter | #N/A | #N/A | #N/A |
| 734501 | INTERGENIC | Non Promoter | 0.91 | 0.42 | 1.22 |
| 738161 | INTERGENIC | Sgl Promoter | 0.43 | 0.17 | 0.62 |
| 744151 | INTERGENIC | Dbl Promoter | 1.85 | 0.78 | #N/A |
| 749034 | INTERGENIC | Non Promoter | #N/A | #N/A | 0.55 |
| 752224 | INTERGENIC | Sgl Promoter | 2.04 | 0.83 | 0.70 |
| 757265 | INTERGENIC | Sgl Promoter | 2.28 | 0.87 | 0.97 |
| 759383 | INTERGENIC | Dbl Promoter | 2.13 | 0.84 | 1.19 |
| 760749 | INTERGENIC | Non Promoter | 0.40 | 0.17 | 0.74 |
| 762574 | INTERGENIC | Sgl Promoter | #N/A | #N/A | #N/A |
| 764807 | INTERGENIC | Dbl Promoter | 1.40 | 0.63 | #N/A |
| 766541 | INTERGENIC | Sgl Promoter | 1.92 | 0.79 | #N/A |
| 769317 | INTERGENIC | Non Promoter | #N/A | #N/A | #N/A |
| 771939 | INTERGENIC | Dbl Promoter | 2.50 | 0.92 | #N/A |
| 776583 | INTERGENIC | Non Promoter | #N/A | #N/A | #N/A |
| 778172 | INTERGENIC | Non Promoter | 2.59 | 0.93 | #N/A |
| 779214 | INTERGENIC | Dbl Promoter | 0.49 | 0.20 | 1.62 |
| 781142 | INTERGENIC | Non Promoter | 0.63 | 0.27 | 1.68 |
| 782173 | INTERGENIC | Dbl Promoter | 1.39 | 0.62 | 0.68 |
| 783126 | INTERGENIC | Non Promoter | 0.80 | 0.38 | 0.64 |
| 784353 | INTERGENIC | Dbl Promoter | 1.41 | 0.64 | 0.68 |
| 786730 | INTERGENIC | Sgl Promoter | 0.65 | 0.29 | 1.01 |
| 787663 | INTERGENIC | Sgl Promoter | 1.90 | 0.80 | 1.34 |
| 790668 | INTERGENIC | Non Promoter | 0.28 | 0.08 | 0.69 |
| 793551 | INTERGENIC | Non Promoter | 1.28 | 0.57 | 1.44 |
| 796697 | INTERGENIC | Sgl Promoter | 0.25 | 0.04 | 0.75 |
| 799696 | INTERGENIC | Non Promoter | #N/A | #N/A | #N/A |
| 802652 | INTERGENIC | Sgl Promoter | 1.62 | 0.70 | #N/A |
| 805783 | INTERGENIC | Non Promoter | #N/A | #N/A | 0.65 |
| 807384 | INTERGENIC | Sgl Promoter | #N/A | #N/A | 1.00 |
| 816093 | INTERGENIC | Sgl Promoter | 0.27 | 0.07 | 0.84 |
| 818072 | INTERGENIC | Sgl Promoter | #N/A | #N/A | #N/A |
| 820510 | INTERGENIC | Sgl Promoter | 1.08 | 0.49 | 1.95 |
| 826975 | INTERGENIC | Sgl Promoter | 0.87 | 0.40 | 0.42 |

|        |            |              |      |      |      |
|--------|------------|--------------|------|------|------|
| 828728 | INTERGENIC | Sgl Promoter | 0.85 | 0.40 | 0.84 |
| 829487 | INTERGENIC | Non Promoter | #N/A | #N/A | #N/A |
| 831114 | INTERGENIC | Dbl Promoter | 2.72 | 0.94 | 1.12 |
| 834350 | INTERGENIC | Sgl Promoter | 1.39 | 0.63 | 0.90 |
| 836348 | INTERGENIC | Non Promoter | 0.17 | 0.04 | #N/A |
| 840319 | INTERGENIC | Dbl Promoter | 0.60 | 0.25 | 0.68 |
| 841329 | INTERGENIC | Sgl Promoter | 2.13 | 0.85 | 1.04 |
| 844280 | INTERGENIC | Dbl Promoter | 1.47 | 0.66 | 0.99 |
| 849801 | INTERGENIC | Dbl Promoter | #N/A | #N/A | 0.91 |
| 852493 | INTERGENIC | Non Promoter | 0.39 | 0.14 | 0.74 |
| 854060 | INTERGENIC | Dbl Promoter | 1.56 | 0.68 | 0.55 |
| 856440 | INTERGENIC | Sgl Promoter | 0.41 | 0.14 | 1.25 |
| 859550 | INTERGENIC | Sgl Promoter | #N/A | #N/A | #N/A |
| 861716 | INTERGENIC | Non Promoter | 0.52 | 0.25 | 0.70 |
| 862712 | INTERGENIC | Dbl Promoter | 2.27 | 0.88 | 0.79 |
| 868660 | INTERGENIC | Non Promoter | #N/A | #N/A | 0.84 |
| 871451 | INTERGENIC | Sgl Promoter | 2.92 | 0.95 | 0.43 |
| 872824 | INTERGENIC | Non Promoter | #N/A | #N/A | #N/A |
| 873744 | INTERGENIC | Sgl Promoter | #N/A | #N/A | #N/A |
| 875374 | INTERGENIC | Sgl Promoter | 1.32 | 0.59 | 1.03 |
| 878281 | INTERGENIC | Sgl Promoter | 1.53 | 0.68 | 0.73 |
| 879722 | INTERGENIC | Sgl Promoter | 1.69 | 0.72 | 1.15 |
| 882066 | INTERGENIC | Non Promoter | 0.07 | 0.00 | #N/A |
| 885287 | INTERGENIC | Dbl Promoter | 2.15 | 0.85 | 1.27 |
| 888850 | INTERGENIC | Non Promoter | #N/A | #N/A | #N/A |
| 892991 | INTERGENIC | Sgl Promoter | 1.44 | 0.64 | #N/A |
| 893627 | INTERGENIC | Dbl Promoter | 3.83 | 0.99 | #N/A |
| 896373 | INTERGENIC | Non Promoter | #N/A | #N/A | #N/A |
| 898650 | INTERGENIC | Dbl Promoter | #N/A | #N/A | #N/A |
| 898986 | INTERGENIC | Non Promoter | 0.60 | 0.28 | 1.36 |
| 903064 | INTERGENIC | Dbl Promoter | 1.83 | 0.76 | 1.40 |
| 903722 | INTERGENIC | Sgl Promoter | 1.09 | 0.50 | 0.84 |
| 904747 | INTERGENIC | Non Promoter | #N/A | #N/A | #N/A |
| 907077 | INTERGENIC | Dbl Promoter | 2.09 | 0.84 | 1.35 |
| 909727 | INTERGENIC | Non Promoter | 0.76 | 0.35 | 0.84 |
| 910233 | INTERGENIC | Sgl Promoter | #N/A | #N/A | #N/A |
| 912548 | INTERGENIC | Sgl Promoter | 1.27 | 0.57 | #N/A |
| 915154 | INTERGENIC | Sgl Promoter | 1.14 | 0.52 | #N/A |
| 919534 | INTERGENIC | Sgl Promoter | 0.96 | 0.44 | #N/A |
| 922061 | INTERGENIC | Dbl Promoter | 0.34 | 0.10 | 0.78 |
| 922616 | INTERGENIC | Non Promoter | 0.42 | 0.19 | #N/A |
| 924561 | INTERGENIC | Dbl Promoter | 0.60 | 0.26 | #N/A |
| 925564 | INTERGENIC | Sgl Promoter | 0.90 | 0.43 | 1.37 |
| 929785 | INTERGENIC | Sgl Promoter | 0.77 | 0.35 | #N/A |
| 931061 | INTERGENIC | Non Promoter | #N/A | #N/A | #N/A |
| 932963 | INTERGENIC | Dbl Promoter | 0.56 | 0.23 | 0.66 |
| 933880 | INTERGENIC | Non Promoter | #N/A | #N/A | #N/A |
| 934409 | INTERGENIC | Sgl Promoter | 1.52 | 0.67 | 1.04 |
| 937536 | INTERGENIC | Dbl Promoter | 1.44 | 0.65 | #N/A |
| 941187 | INTERGENIC | Sgl Promoter | 1.12 | 0.51 | 0.61 |
| 950168 | INTERGENIC | Sgl Promoter | 0.60 | 0.26 | 0.98 |



|         |            |              |      |      |      |
|---------|------------|--------------|------|------|------|
| 953347  | INTERGENIC | Non Promoter | #N/A | #N/A | #N/A |
| 954253  | INTERGENIC | Sgl Promoter | 0.34 | 0.09 | #N/A |
| 955004  | INTERGENIC | Dbl Promoter | #N/A | #N/A | 0.40 |
| 956908  | INTERGENIC | Non Promoter | #N/A | #N/A | #N/A |
| 958422  | INTERGENIC | Dbl Promoter | 2.29 | 0.88 | #N/A |
| 962966  | INTERGENIC | Sgl Promoter | #N/A | #N/A | #N/A |
| 965084  | INTERGENIC | Non Promoter | #N/A | #N/A | #N/A |
| 965891  | INTERGENIC | Dbl Promoter | 2.69 | 0.93 | 1.01 |
| 971911  | INTERGENIC | Non Promoter | 0.47 | 0.18 | 1.03 |
| 973389  | INTERGENIC | Dbl Promoter | 2.82 | 0.95 | #N/A |
| 975977  | INTERGENIC | Sgl Promoter | #N/A | #N/A | #N/A |
| 987056  | INTERGENIC | Sgl Promoter | 1.80 | 0.76 | #N/A |
| 988422  | INTERGENIC | Sgl Promoter | #N/A | #N/A | 1.12 |
| 990611  | INTERGENIC | Non Promoter | 1.12 | 0.52 | 1.23 |
| 1002551 | INTERGENIC | Dbl Promoter | #N/A | #N/A | 0.71 |
| 1004341 | INTERGENIC | Non Promoter | #N/A | #N/A | #N/A |
| 1007415 | INTERGENIC | Non Promoter | 0.59 | 0.28 | #N/A |
| 1011616 | INTERGENIC | Sgl Promoter | 0.81 | 0.37 | 1.07 |
| 1012495 | INTERGENIC | Dbl Promoter | 0.38 | 0.12 | 0.67 |
| 1014485 | INTERGENIC | Dbl Promoter | 2.31 | 0.88 | 1.07 |
| 1013903 | INTERGENIC | Non Promoter | #N/A | #N/A | #N/A |
| 1015562 | INTERGENIC | Non Promoter | #N/A | #N/A | #N/A |
| 1018135 | INTERGENIC | Sgl Promoter | 0.98 | 0.44 | #N/A |
| 1019309 | INTERGENIC | Sgl Promoter | 0.36 | 0.11 | 0.86 |
| 1022619 | INTERGENIC | Dbl Promoter | #N/A | #N/A | 0.81 |
| 1024183 | INTERGENIC | Dbl Promoter | #N/A | #N/A | #N/A |
| 1025208 | INTERGENIC | Sgl Promoter | 1.29 | 0.59 | #N/A |
| 1026850 | INTERGENIC | Non Promoter | #N/A | #N/A | 0.82 |
| 1028847 | INTERGENIC | Dbl Promoter | 0.75 | 0.34 | 0.72 |
| 1032621 | INTERGENIC | Sgl Promoter | 2.78 | 0.94 | 0.75 |
| 1036087 | INTERGENIC | Sgl Promoter | #N/A | #N/A | 0.51 |
| 1039265 | INTERGENIC | Non Promoter | 0.31 | 0.10 | 0.72 |
| 1041794 | INTERGENIC | Sgl Promoter | #N/A | #N/A | #N/A |
| 1043993 | INTERGENIC | Dbl Promoter | #N/A | #N/A | 0.75 |
| 1052066 | INTERGENIC | Sgl Promoter | 0.58 | 0.25 | #N/A |
| 1055065 | INTERGENIC | Sgl Promoter | 1.01 | 0.46 | #N/A |
| 1055807 | INTERGENIC | Non Promoter | 0.39 | 0.13 | #N/A |
| 1057329 | INTERGENIC | Sgl Promoter | 1.78 | 0.74 | 1.16 |
| 1062914 | INTERGENIC | Dbl Promoter | 0.78 | 0.37 | 0.77 |
| 1064613 | INTERGENIC | Sgl Promoter | 0.37 | 0.11 | #N/A |
| 1065951 | INTERGENIC | Sgl Promoter | 0.63 | 0.28 | 0.69 |
| 1072503 | INTERGENIC | Sgl Promoter | 0.39 | 0.15 | 0.70 |
| 732090  | INTERGENIC | Non Promoter | #N/A | #N/A | #N/A |
| 734802  | INTERGENIC | Non Promoter | #N/A | #N/A | #N/A |
| 818608  | INTERGENIC | Sgl Promoter | #N/A | #N/A | #N/A |
| 963779  | INTERGENIC | Sgl Promoter | 0.99 | 0.45 | #N/A |
| 982888  | INTERGENIC | Sgl Promoter | #N/A | #N/A | 0.92 |
| 366236  | INTERGENIC | Non Promoter | 0.72 | 0.33 | #N/A |
| 482550  | INTERGENIC | Sgl Promoter | 0.22 | 0.04 | 1.27 |
| 593145  | INTERGENIC | Dbl Promoter | 1.00 | 0.45 | 0.75 |
| 169102  | INTERGENIC | Dbl Promoter | 2.63 | 0.92 | 1.26 |

|        |            |              |      |      |      |
|--------|------------|--------------|------|------|------|
| 600019 | INTERGENIC | Non Promoter | #N/A | #N/A | #N/A |
| 599268 | INTERGENIC | Non Promoter | #N/A | #N/A | #N/A |
| 656934 | INTERGENIC | Sgl Promoter | #N/A | #N/A | #N/A |
| 658826 | INTERGENIC | Sgl Promoter | 0.41 | 0.16 | 0.85 |
| 689083 | INTERGENIC | Sgl Promoter | 0.65 | 0.29 | #N/A |
| 797177 | INTERGENIC | Dbl Promoter | #N/A | #N/A | #N/A |
| 947248 | INTERGENIC | Sgl Promoter | #N/A | #N/A | 0.98 |
| 221522 | INTERGENIC | Sgl Promoter | 0.56 | 0.24 | 1.59 |
| 450404 | INTERGENIC | Sgl Promoter | 0.38 | 0.13 | 1.32 |
| 450404 | INTERGENIC | Sgl Promoter | 0.37 | 0.12 | 1.37 |
| 268031 | INTERGENIC | Non Promoter | #N/A | #N/A | 3.08 |
| 267174 | INTERGENIC | Sgl Promoter | 2.20 | 0.87 | 1.10 |
| 264541 | INTERGENIC | Sgl Promoter | 0.43 | 0.19 | 1.27 |
| 263483 | INTERGENIC | Dbl Promoter | 1.84 | 0.77 | 0.89 |
| 261705 | INTERGENIC | Non Promoter | #N/A | #N/A | #N/A |
| 259158 | INTERGENIC | Dbl Promoter | 0.70 | 0.32 | #N/A |
| 256092 | INTERGENIC | Non Promoter | 0.41 | 0.18 | #N/A |
| 253848 | INTERGENIC | Dbl Promoter | 0.49 | 0.22 | 0.70 |
| 251839 | INTERGENIC | Sgl Promoter | 2.13 | 0.85 | 0.74 |
| 251304 | INTERGENIC | Sgl Promoter | 1.81 | 0.77 | 0.72 |
| 247677 | INTERGENIC | Dbl Promoter | 2.82 | 0.95 | 0.95 |
| 246895 | INTERGENIC | Non Promoter | 0.18 | 0.03 | 0.16 |
| 244149 | INTERGENIC | Sgl Promoter | 1.95 | 0.81 | 0.71 |
| 243225 | INTERGENIC | Dbl Promoter | 3.09 | 0.97 | 0.79 |
| 241989 | INTERGENIC | Sgl Promoter | 1.15 | 0.54 | #N/A |
| 236995 | INTERGENIC | Dbl Promoter | 1.62 | 0.70 | 0.69 |
| 234771 | INTERGENIC | Non Promoter | #N/A | #N/A | 0.87 |
| 233457 | INTERGENIC | Sgl Promoter | 2.16 | 0.86 | 0.81 |
| 231149 | INTERGENIC | Dbl Promoter | 1.91 | 0.79 | 0.97 |
| 229734 | INTERGENIC | Non Promoter | 0.60 | 0.26 | 0.98 |
| 228937 | INTERGENIC | Dbl Promoter | 1.43 | 0.63 | 0.72 |
| 226994 | INTERGENIC | Non Promoter | 1.38 | 0.63 | #N/A |
| 225889 | INTERGENIC | Dbl Promoter | 0.79 | 0.36 | 0.41 |
| 224406 |            |              | 0.34 | 0.11 | 0.45 |
| 222987 | INTERGENIC | Non Promoter | 0.66 | 0.29 | 1.00 |
| 221406 | INTERGENIC | Sgl Promoter | 0.68 | 0.31 | 0.51 |
| 220138 | INTERGENIC | Sgl Promoter | 1.19 | 0.54 | 0.66 |
| 217362 | INTERGENIC | Sgl Promoter | 1.62 | 0.70 | 0.75 |
| 216435 | INTERGENIC | Sgl Promoter | 2.27 | 0.88 | 0.66 |
| 212515 | INTERGENIC | Non Promoter | 0.30 | 0.08 | 0.69 |
| 211715 | INTERGENIC | Sgl Promoter | 0.04 | 0.00 | #N/A |
| 209428 | INTERGENIC | Sgl Promoter | 0.83 | 0.38 | 0.73 |
| 206428 | INTERGENIC | Non Promoter | #N/A | #N/A | #N/A |
| 205642 | INTERGENIC | Dbl Promoter | 1.80 | 0.75 | 1.06 |
| 196068 | INTERGENIC | Dbl Promoter | 2.19 | 0.85 | 1.28 |
| 194913 | INTERGENIC | Non Promoter | 0.59 | 0.25 | #N/A |
| 192788 | INTERGENIC | Dbl Promoter | 1.55 | 0.67 | 1.22 |
| 183898 | INTERGENIC | Sgl Promoter | 0.90 | 0.42 | #N/A |
| 181474 | INTERGENIC | Dbl Promoter | 1.57 | 0.70 | 0.93 |
| 179893 | INTERGENIC | Sgl Promoter | 0.41 | 0.18 | 1.18 |
| 178426 | INTERGENIC | Dbl Promoter | #N/A | #N/A | 0.49 |

|        |            |              |      |      |      |
|--------|------------|--------------|------|------|------|
| 174220 | INTERGENIC | Non Promoter | #N/A | #N/A | #N/A |
| 173139 | INTERGENIC | Sgl Promoter | 1.52 | 0.66 | 1.23 |
| 171594 | INTERGENIC | Sgl Promoter | 1.47 | 0.64 | 0.89 |
| 170402 | INTERGENIC | Dbl Promoter | 0.66 | 0.30 | 0.38 |
| 168349 | INTERGENIC | Sgl Promoter | 0.91 | 0.42 | 0.98 |
| 165533 | INTERGENIC | Non Promoter | #N/A | #N/A | #N/A |
| 162194 | INTERGENIC | Non Promoter | #N/A | #N/A | #N/A |
| 160023 | INTERGENIC | Non Promoter | 0.60 | 0.26 | 1.32 |
| 153219 | INTERGENIC | Non Promoter | #N/A | #N/A | #N/A |
| 151871 | INTERGENIC | Dbl Promoter | 2.44 | 0.91 | #N/A |
| 148953 | INTERGENIC | Sgl Promoter | 1.97 | 0.81 | 0.89 |
| 147505 | INTERGENIC | Non Promoter | 0.49 | 0.20 | #N/A |
| 146482 | INTERGENIC | Dbl Promoter | 0.27 | 0.05 | 0.50 |
| 145139 | INTERGENIC | Non Promoter | #N/A | #N/A | #N/A |
| 142210 | INTERGENIC | Dbl Promoter | 2.51 | 0.91 | 1.05 |
| 140424 | INTERGENIC | Sgl Promoter | 1.92 | 0.80 | #N/A |
| 139063 | INTERGENIC | Non Promoter | #N/A | #N/A | #N/A |
| 137550 | INTERGENIC | Sgl Promoter | 1.05 | 0.48 | 0.84 |
| 135500 | INTERGENIC | Sgl Promoter | 2.28 | 0.88 | 1.68 |
| 131825 | INTERGENIC | Dbl Promoter | #N/A | #N/A | #N/A |
| 129749 | INTERGENIC | Sgl Promoter | 0.73 | 0.34 | 1.00 |
| 122275 | INTERGENIC | Sgl Promoter | 1.20 | 0.54 | 1.03 |
| 123227 | INTERGENIC | Sgl Promoter | #N/A | #N/A | 1.05 |
| 120089 | INTERGENIC | Sgl Promoter | 0.92 | 0.42 | 0.96 |
| 115734 | INTERGENIC | Sgl Promoter | #N/A | #N/A | 2.02 |
| 112513 | INTERGENIC | Non Promoter | 0.39 | 0.13 | 0.60 |
| 111865 | INTERGENIC | Sgl Promoter | #N/A | #N/A | 2.27 |
| 111002 | INTERGENIC | Sgl Promoter | 0.19 | 0.02 | 0.04 |
| 110247 | INTERGENIC | Sgl Promoter | 1.05 | 0.48 | #N/A |
| 104777 | INTERGENIC | Dbl Promoter | 2.79 | 0.94 | 0.71 |
| 108806 | INTERGENIC | Sgl Promoter | 3.43 | 0.98 | 1.11 |
| 103983 | INTERGENIC | Non Promoter | 0.98 | 0.44 | 0.78 |
| 101862 | INTERGENIC | Dbl Promoter | 1.96 | 0.81 | 0.95 |
| 99489  | INTERGENIC | Dbl Promoter | 2.14 | 0.85 | 0.73 |
| 97941  | INTERGENIC | Sgl Promoter | 1.52 | 0.66 | #N/A |
| 95791  | INTERGENIC | Sgl Promoter | 1.73 | 0.74 | 0.72 |
| 94431  | INTERGENIC | Non Promoter | #N/A | #N/A | #N/A |
| 92235  | INTERGENIC | Dbl Promoter | 0.74 | 0.33 | 0.82 |
| 85987  | INTERGENIC | Non Promoter | #N/A | #N/A | 0.61 |
| 83090  | INTERGENIC | Sgl Promoter | 2.07 | 0.83 | #N/A |
| 82219  | INTERGENIC | Sgl Promoter | 0.45 | 0.20 | 0.32 |
| 79909  | INTERGENIC | Dbl Promoter | #N/A | #N/A | #N/A |
| 78335  | INTERGENIC | Non Promoter | 0.68 | 0.30 | 1.10 |
| 77267  | INTERGENIC | Dbl Promoter | 1.07 | 0.49 | 0.66 |
| 74229  | INTERGENIC | Sgl Promoter | #N/A | #N/A | #N/A |
| 70624  | INTERGENIC | Dbl Promoter | 1.25 | 0.58 | #N/A |
| 68294  | INTERGENIC | Dbl Promoter | 1.10 | 0.50 | #N/A |
| 62582  | INTERGENIC | Sgl Promoter | 2.27 | 0.88 | 0.79 |
| 58939  | INTERGENIC | Sgl Promoter | 1.65 | 0.71 | #N/A |
| 57866  | INTERGENIC | Non Promoter | 0.41 | 0.14 | 0.87 |
| 56773  | INTERGENIC | Dbl Promoter | 0.83 | 0.40 | #N/A |

|        |            |              |      |      |      |
|--------|------------|--------------|------|------|------|
| 55265  | INTERGENIC | Non Promoter | 0.08 | 0.01 | #N/A |
| 51640  | INTERGENIC | Dbl Promoter | 1.76 | 0.76 | 0.88 |
| 50031  | INTERGENIC | Non Promoter | #N/A | #N/A | #N/A |
| 46942  | INTERGENIC | Sgl Promoter | 1.04 | 0.47 | 1.06 |
| 44045  | INTERGENIC | Dbl Promoter | 1.65 | 0.72 | #N/A |
| 42043  | INTERGENIC | Sgl Promoter | 2.40 | 0.89 | 1.12 |
| 40187  | INTERGENIC | Non Promoter | #N/A | #N/A | #N/A |
| 38196  | INTERGENIC | Sgl Promoter | 0.71 | 0.34 | 0.50 |
| 34243  | INTERGENIC | Sgl Promoter | 2.17 | 0.86 | 1.01 |
| 32334  | INTERGENIC | Sgl Promoter | #N/A | #N/A | 1.55 |
| 30611  | INTERGENIC | Dbl Promoter | 1.04 | 0.49 | #N/A |
| 28266  | INTERGENIC | Non Promoter | 0.39 | 0.15 | #N/A |
| 26930  | INTERGENIC | Dbl Promoter | 0.92 | 0.44 | 0.70 |
| 26039  | INTERGENIC | Sgl Promoter | 0.97 | 0.44 | 0.67 |
| 24038  | INTERGENIC | Sgl Promoter | 2.30 | 0.87 | 0.76 |
| 22049  | INTERGENIC | Sgl Promoter | 1.53 | 0.66 | 3.93 |
| 20762  | INTERGENIC | Sgl Promoter | 0.81 | 0.37 | #N/A |
| 17065  | INTERGENIC | Dbl Promoter | 2.46 | 0.91 | 0.96 |
| 15136  | INTERGENIC | Sgl Promoter | 3.68 | 0.99 | 0.46 |
| 11484  | INTERGENIC | Non Promoter | 0.20 | 0.04 | #N/A |
| 10199  | INTERGENIC | Sgl Promoter | 1.46 | 0.64 | 0.83 |
| 5964   | INTERGENIC | Dbl Promoter | 0.74 | 0.33 | 0.73 |
| 133475 | INTERGENIC | Dbl Promoter | 2.23 | 0.86 | 0.95 |
| 168795 | INTERGENIC | Sgl Promoter | #N/A | #N/A | #N/A |
| 190244 | INTERGENIC | Non Promoter | 0.23 | 0.06 | #N/A |
| 202775 | INTERGENIC | Non Promoter | 0.78 | 0.36 | 0.79 |
| 272193 | INTERGENIC | Dbl Promoter | 0.77 | 0.35 | 0.80 |
| 273118 | INTERGENIC | Sgl Promoter | 1.52 | 0.68 | #N/A |
| 274017 | INTERGENIC | Sgl Promoter | 2.49 | 0.91 | #N/A |
| 276045 | INTERGENIC | Sgl Promoter | 2.95 | 0.96 | 0.65 |
| 277561 | INTERGENIC | Non Promoter | 0.48 | 0.19 | 1.07 |
| 279960 | INTERGENIC | Dbl Promoter | #N/A | #N/A | 0.57 |
| 280590 | INTERGENIC | Non Promoter | 0.65 | 0.29 | #N/A |
| 284101 | INTERGENIC | Dbl Promoter | 1.19 | 0.53 | 1.01 |
| 285099 | INTERGENIC | Sgl Promoter | 1.51 | 0.66 | 0.94 |
| 287197 | INTERGENIC | Sgl Promoter | 0.52 | 0.24 | 1.24 |
| 288078 | INTERGENIC | Sgl Promoter | 0.63 | 0.28 | 0.52 |
| 290048 | INTERGENIC | Sgl Promoter | 1.52 | 0.66 | 0.66 |
| 295178 | INTERGENIC | Non Promoter | 0.13 | 0.01 | 0.14 |
| 297802 | INTERGENIC | Dbl Promoter | 0.57 | 0.25 | 1.26 |
| 298867 | INTERGENIC | Dbl Promoter | #N/A | #N/A | #N/A |
| 300868 | INTERGENIC | Non Promoter | 0.48 | 0.19 | 0.83 |
| 303235 | INTERGENIC | Sgl Promoter | 0.75 | 0.36 | 0.77 |
| 306540 | INTERGENIC | Dbl Promoter | 0.30 | 0.10 | 0.35 |
| 310207 | INTERGENIC | Sgl Promoter | 0.72 | 0.33 | 0.53 |
| 312155 | INTERGENIC | Sgl Promoter | 3.42 | 0.98 | 1.39 |
| 315376 | INTERGENIC | Sgl Promoter | 1.25 | 0.56 | 1.25 |
| 317164 | INTERGENIC | Non Promoter | 0.60 | 0.26 | #N/A |
| 318679 | INTERGENIC | Dbl Promoter | 3.18 | 0.97 | 1.44 |
| 319436 | INTERGENIC | Non Promoter | 0.70 | 0.34 | 1.74 |
| 321146 | INTERGENIC | Dbl Promoter | 1.07 | 0.49 | #N/A |

|        |            |              |      |      |      |
|--------|------------|--------------|------|------|------|
| 323299 | INTERGENIC | Sgl Promoter | 1.42 | 0.63 | #N/A |
| 325876 | INTERGENIC | Dbl Promoter | 1.64 | 0.70 | 1.70 |
| 327481 | INTERGENIC | Sgl Promoter | 0.85 | 0.40 | #N/A |
| 328659 | INTERGENIC | Non Promoter | #N/A | #N/A | #N/A |
| 330792 | INTERGENIC | Dbl Promoter | 2.68 | 0.94 | 0.92 |
| 332211 | INTERGENIC | Non Promoter | #N/A | #N/A | 0.94 |
| 335297 | INTERGENIC | Sgl Promoter | 0.77 | 0.37 | 0.78 |
| 337787 | INTERGENIC | Sgl Promoter | 2.45 | 0.90 | #N/A |
| 339417 | INTERGENIC | Non Promoter | 0.42 | 0.15 | #N/A |
| 341141 | INTERGENIC | Dbl Promoter | 2.36 | 0.89 | 0.85 |
| 341855 | INTERGENIC | Non Promoter | 0.53 | 0.23 | 0.71 |
| 348643 | INTERGENIC | Sgl Promoter | #N/A | #N/A | 0.94 |
| 350380 | INTERGENIC | Dbl Promoter | 2.51 | 0.91 | 0.80 |
| 350965 | INTERGENIC | Non Promoter | #N/A | #N/A | #N/A |
| 352279 | INTERGENIC | Dbl Promoter | 0.84 | 0.38 | 0.68 |
| 353870 | INTERGENIC | Sgl Promoter | 0.38 | 0.12 | 0.71 |
| 355383 | INTERGENIC | Sgl Promoter | 0.59 | 0.26 | 0.92 |
| 357004 | INTERGENIC | Non Promoter | 0.22 | 0.04 | 0.64 |
| 363063 | INTERGENIC | Non Promoter | #N/A | #N/A | 1.96 |
| 366980 | INTERGENIC | Dbl Promoter | 3.52 | 0.98 | 0.79 |
| 368093 | INTERGENIC | Non Promoter | 0.57 | 0.27 | 0.83 |
| 371480 | INTERGENIC | Sgl Promoter | 1.65 | 0.73 | 1.16 |
| 372444 | INTERGENIC | Sgl Promoter | 1.05 | 0.47 | 1.04 |
| 383302 | INTERGENIC | Dbl Promoter | 1.29 | 0.58 | 1.59 |
| 386100 | INTERGENIC | Non Promoter | #N/A | #N/A | #N/A |
| 387314 | INTERGENIC | Sgl Promoter | 1.55 | 0.69 | 0.87 |
| 388358 | INTERGENIC | Sgl Promoter | 0.42 | 0.15 | #N/A |
| 388821 | INTERGENIC | Dbl Promoter | 0.76 | 0.34 | #N/A |
| 391038 | INTERGENIC | Sgl Promoter | 1.60 | 0.71 | 1.63 |
| 392754 | INTERGENIC | Dbl Promoter | #N/A | #N/A | #N/A |
| 395053 | INTERGENIC | Non Promoter | 0.49 | 0.19 | 0.87 |
| 397076 | INTERGENIC | Dbl Promoter | 2.09 | 0.83 | 0.90 |
| 397902 | INTERGENIC | Sgl Promoter | 1.22 | 0.55 | #N/A |
| 399701 | INTERGENIC | Sgl Promoter | 1.34 | 0.60 | 2.36 |
| 401540 | INTERGENIC | Sgl Promoter | 2.50 | 0.91 | #N/A |
| 404322 | INTERGENIC | Non Promoter | #N/A | #N/A | #N/A |
| 406303 | INTERGENIC | Dbl Promoter | 1.64 | 0.72 | 0.99 |
| 407708 | INTERGENIC | Sgl Promoter | 0.51 | 0.24 | 0.48 |
| 409153 | INTERGENIC | Sgl Promoter | 0.22 | 0.03 | 0.56 |
| 410761 | INTERGENIC | Non Promoter | 0.42 | 0.18 | #N/A |
| 411568 | INTERGENIC | Dbl Promoter | 1.12 | 0.52 | 0.77 |
| 412267 | INTERGENIC | Non Promoter | #N/A | #N/A | 1.09 |
| 413035 | INTERGENIC | Sgl Promoter | 2.18 | 0.85 | #N/A |
| 413981 | INTERGENIC | Dbl Promoter | 1.13 | 0.51 | 0.61 |
| 416195 | INTERGENIC | Sgl Promoter | 0.65 | 0.29 | 0.72 |
| 420587 | INTERGENIC | Sgl Promoter | 1.51 | 0.66 | 0.85 |
| 422502 | INTERGENIC | Sgl Promoter | 2.21 | 0.87 | 0.89 |
| 424988 | INTERGENIC | Dbl Promoter | 2.73 | 0.94 | 1.16 |
| 426711 | INTERGENIC | Non Promoter | 0.70 | 0.34 | 1.17 |
| 430078 | INTERGENIC | Sgl Promoter | 2.17 | 0.86 | 0.74 |
| 431768 | INTERGENIC | Sgl Promoter | 0.89 | 0.42 | 0.80 |



|        |            |              |      |      |      |
|--------|------------|--------------|------|------|------|
| 433455 | INTERGENIC | Dbl Promoter | 1.03 | 0.47 | 0.99 |
| 434787 | INTERGENIC | Dbl Promoter | 0.76 | 0.34 | 0.70 |
| 436627 | INTERGENIC | Sgl Promoter | 2.02 | 0.83 | 1.16 |
| 437490 | INTERGENIC | Sgl Promoter | #N/A | #N/A | #N/A |
| 439207 | INTERGENIC | Sgl Promoter | 0.98 | 0.45 | 0.73 |
| 442526 | INTERGENIC | Dbl Promoter | 0.73 | 0.33 | 0.67 |
| 445608 | INTERGENIC | Sgl Promoter | 1.47 | 0.66 | 0.97 |
| 449244 | INTERGENIC | Dbl Promoter | 1.17 | 0.54 | 0.83 |
| 450057 | INTERGENIC | Non Promoter | #N/A | #N/A | #N/A |
| 451631 | INTERGENIC | Sgl Promoter | 1.61 | 0.70 | 0.97 |
| 454014 | INTERGENIC | Dbl Promoter | 1.90 | 0.78 | 0.86 |
| 455824 | INTERGENIC | Sgl Promoter | 1.68 | 0.73 | #N/A |
| 458407 | INTERGENIC | Dbl Promoter | 0.79 | 0.37 | 0.82 |
| 459423 | INTERGENIC | Non Promoter | 0.51 | 0.20 | 0.84 |
| 460770 | INTERGENIC | Sgl Promoter | 1.82 | 0.76 | 1.26 |
| 463127 | INTERGENIC | Sgl Promoter | #N/A | #N/A | 0.67 |
| 466299 | INTERGENIC | Dbl Promoter | 1.27 | 0.58 | 0.83 |
| 468444 | INTERGENIC | Non Promoter | #N/A | #N/A | 1.13 |
| 469847 | INTERGENIC | Sgl Promoter | 0.35 | 0.14 | 0.86 |
| 472901 | INTERGENIC | Sgl Promoter | 0.52 | 0.22 | 0.97 |
| 473419 | INTERGENIC | Sgl Promoter | #N/A | #N/A | #N/A |
| 475896 | INTERGENIC | Sgl Promoter | 1.81 | 0.76 | 1.08 |
| 478300 | INTERGENIC | Sgl Promoter | 1.78 | 0.76 | 0.88 |
| 480620 | INTERGENIC | Dbl Promoter | 1.66 | 0.73 | 1.38 |
| 484083 | INTERGENIC | Sgl Promoter | 0.30 | 0.08 | 0.91 |
| 486586 | INTERGENIC | Sgl Promoter | 1.56 | 0.68 | 1.05 |
| 490393 | INTERGENIC | Non Promoter | #N/A | #N/A | #N/A |
| 492403 | INTERGENIC | Sgl Promoter | 1.16 | 0.53 | 1.04 |
| 494099 | INTERGENIC | Sgl Promoter | 1.34 | 0.60 | 0.47 |
| 494998 | INTERGENIC | Dbl Promoter | #N/A | #N/A | #N/A |
| 496342 | INTERGENIC | Non Promoter | 0.81 | 0.37 | #N/A |
| 497703 | INTERGENIC | Dbl Promoter | 3.20 | 0.97 | 0.34 |
| 499455 | INTERGENIC | Non Promoter | #N/A | #N/A | #N/A |
| 501249 | INTERGENIC | Sgl Promoter | 0.54 | 0.23 | 0.76 |
| 502143 | INTERGENIC | Sgl Promoter | 2.83 | 0.95 | 0.41 |
| 503191 | INTERGENIC | Dbl Promoter | 0.58 | 0.25 | 1.21 |
| 507501 | INTERGENIC | Non Promoter | 0.31 | 0.12 | 0.77 |
| 509733 | INTERGENIC | Sgl Promoter | 1.04 | 0.49 | 0.93 |
| 513592 | INTERGENIC | Dbl Promoter | 1.69 | 0.74 | 0.86 |
| 514455 | INTERGENIC | Sgl Promoter | 1.08 | 0.49 | 1.00 |
| 517869 | INTERGENIC | Sgl Promoter | 2.23 | 0.86 | 0.87 |
| 520760 | INTERGENIC | Non Promoter | 0.78 | 0.36 | #N/A |
| 522328 | INTERGENIC | Sgl Promoter | 1.88 | 0.79 | 1.57 |
| 523695 | INTERGENIC | Dbl Promoter | #N/A | #N/A | 0.46 |
| 527803 | INTERGENIC | Sgl Promoter | 3.85 | 0.99 | 1.14 |
| 532118 | INTERGENIC | Sgl Promoter | 1.87 | 0.79 | 1.20 |
| 533162 | INTERGENIC | Non Promoter | #N/A | #N/A | 0.80 |
| 534943 | INTERGENIC | Sgl Promoter | 1.48 | 0.67 | 0.77 |
| 536206 | INTERGENIC | Dbl Promoter | #N/A | #N/A | #N/A |
| 537837 | INTERGENIC | Sgl Promoter | #N/A | #N/A | #N/A |
| 538688 | INTERGENIC | Non Promoter | #N/A | #N/A | 1.12 |

|        |            |              |      |      |      |
|--------|------------|--------------|------|------|------|
| 541198 | INTERGENIC | Sgl Promoter | 0.23 | 0.04 | 0.23 |
| 542977 | INTERGENIC | Non Promoter | 0.61 | 0.29 | #N/A |
| 545154 | INTERGENIC | Dbl Promoter | #N/A | #N/A | 1.11 |
| 546124 | INTERGENIC | Sgl Promoter | 3.52 | 0.98 | 0.96 |
| 549735 | INTERGENIC | Non Promoter | 0.38 | 0.12 | 1.01 |
| 550205 | INTERGENIC | Sgl Promoter | 0.25 | 0.08 | #N/A |
| 552282 | INTERGENIC | Dbl Promoter | 0.18 | 0.03 | 0.77 |
| 553361 | INTERGENIC | Sgl Promoter | 1.76 | 0.75 | 0.48 |
| 557480 | INTERGENIC | Sgl Promoter | 0.16 | 0.03 | #N/A |
| 559198 | INTERGENIC | Dbl Promoter | 0.76 | 0.35 | 0.78 |
| 560365 | INTERGENIC | Sgl Promoter | 1.08 | 0.49 | 0.83 |
| 560995 | INTERGENIC | Sgl Promoter | 1.25 | 0.56 | 0.82 |
| 561955 | INTERGENIC | Non Promoter | 0.86 | 0.40 | 1.05 |
| 563095 | INTERGENIC | Sgl Promoter | 0.99 | 0.45 | 1.34 |
| 564434 | INTERGENIC | Sgl Promoter | #N/A | #N/A | 0.84 |
| 565998 | INTERGENIC | Sgl Promoter | 0.34 | 0.13 | 0.68 |
| 568550 | INTERGENIC | Dbl Promoter | 1.89 | 0.78 | 0.90 |
| 570299 | INTERGENIC | Non Promoter | 0.21 | 0.04 | 0.60 |
| 571276 | INTERGENIC | Sgl Promoter | 1.88 | 0.78 | 0.81 |
| 572247 | INTERGENIC | Dbl Promoter | 2.98 | 0.95 | #N/A |
| 574470 | INTERGENIC | Dbl Promoter | 0.56 | 0.24 | 0.68 |
| 572882 | INTERGENIC | Non Promoter | #N/A | #N/A | #N/A |
| 575065 | INTERGENIC | Dbl Promoter | #N/A | #N/A | 0.74 |
| 577717 | INTERGENIC | Sgl Promoter | 1.99 | 0.82 | #N/A |
| 578950 | INTERGENIC | Non Promoter | 0.40 | 0.14 | 1.15 |
| 584270 | INTERGENIC | Sgl Promoter | 2.03 | 0.81 | #N/A |
| 586635 | INTERGENIC | Sgl Promoter | 1.94 | 0.79 | 1.11 |
| 594885 | INTERGENIC | Dbl Promoter | 1.51 | 0.65 | 1.09 |
| 597331 | INTERGENIC | Non Promoter | 0.26 | 0.07 | 1.17 |
| 599351 | INTERGENIC | Sgl Promoter | 1.61 | 0.70 | #N/A |
| 601561 | INTERGENIC | Sgl Promoter | 2.07 | 0.84 | 1.02 |
| 603867 | INTERGENIC | Sgl Promoter | 1.47 | 0.66 | 0.95 |
| 605980 | INTERGENIC | Dbl Promoter | 0.84 | 0.39 | 1.08 |
| 608688 | INTERGENIC | Dbl Promoter | 0.91 | 0.42 | 1.03 |
| 610158 | INTERGENIC | Non Promoter | #N/A | #N/A | #N/A |
| 611015 | INTERGENIC | Dbl Promoter | 1.50 | 0.65 | 1.93 |
| 611739 | INTERGENIC | Sgl Promoter | #N/A | #N/A | 0.86 |
| 616565 | INTERGENIC | Sgl Promoter | 1.77 | 0.74 | 1.22 |
| 618478 | INTERGENIC | Sgl Promoter | 2.09 | 0.84 | 0.97 |
| 619857 | INTERGENIC | Sgl Promoter | 1.81 | 0.77 | 1.17 |
| 622250 | INTERGENIC | Non Promoter | 0.58 | 0.25 | #N/A |
| 623615 | INTERGENIC | Sgl Promoter | 0.68 | 0.30 | 0.64 |
| 624531 | INTERGENIC | Sgl Promoter | 0.59 | 0.28 | 0.70 |
| 626043 | INTERGENIC | Sgl Promoter | 0.65 | 0.29 | 0.82 |
| 626920 | INTERGENIC | Sgl Promoter | 0.38 | 0.12 | 0.68 |
| 628188 | INTERGENIC | Dbl Promoter | 3.20 | 0.97 | 0.67 |
| 632354 | INTERGENIC | Sgl Promoter | 0.31 | 0.12 | 0.79 |
| 634688 | INTERGENIC | Non Promoter | #N/A | #N/A | #N/A |
| 636290 | INTERGENIC | Sgl Promoter | 0.95 | 0.43 | 0.62 |
| 637499 | INTERGENIC | Dbl Promoter | 1.28 | 0.59 | 0.88 |
| 640914 | INTERGENIC | Non Promoter | 0.35 | 0.10 | 0.62 |



|        |            |              |      |      |      |
|--------|------------|--------------|------|------|------|
| 645400 | INTERGENIC | Dbl Promoter | #N/A | #N/A | #N/A |
| 647117 | INTERGENIC | Sgl Promoter | #N/A | #N/A | 1.43 |
| 650035 | INTERGENIC | Sgl Promoter | 1.22 | 0.54 | 1.26 |
| 651071 | INTERGENIC | Non Promoter | 0.58 | 0.24 | 0.68 |
| 654033 | INTERGENIC | Dbl Promoter | 0.32 | 0.09 | 0.51 |
| 652911 | INTERGENIC | Non Promoter | 0.53 | 0.22 | 0.85 |
| 655075 | INTERGENIC | Sgl Promoter | 1.27 | 0.57 | #N/A |
| 658544 | INTERGENIC | Non Promoter | #N/A | #N/A | #N/A |
| 659744 | INTERGENIC | Dbl Promoter | 2.63 | 0.92 | 0.94 |
| 662643 | INTERGENIC | Sgl Promoter | 0.48 | 0.19 | 0.46 |
| 664751 | INTERGENIC | Sgl Promoter | 1.59 | 0.68 | 0.89 |
| 665844 | INTERGENIC | Non Promoter | 0.37 | 0.11 | 1.30 |
| 667536 | INTERGENIC | Dbl Promoter | 0.94 | 0.43 | 0.94 |
| 668491 | INTERGENIC | Sgl Promoter | 2.14 | 0.85 | 0.89 |
| 670062 | INTERGENIC | Non Promoter | 0.45 | 0.16 | 0.95 |
| 671886 | INTERGENIC | Sgl Promoter | 1.35 | 0.60 | 1.25 |
| 675895 | INTERGENIC | Dbl Promoter | 1.52 | 0.68 | 0.67 |
| 677192 | INTERGENIC | Non Promoter | 1.39 | 0.62 | 0.79 |
| 684466 | INTERGENIC | Dbl Promoter | 3.21 | 0.97 | 0.86 |
| 685910 | INTERGENIC | Non Promoter | 0.31 | 0.08 | #N/A |
| 687515 | INTERGENIC | Dbl Promoter | 2.10 | 0.84 | #N/A |
| 689082 | INTERGENIC | Sgl Promoter | 1.59 | 0.69 | #N/A |
| 690694 | INTERGENIC | Non Promoter | #N/A | #N/A | 1.41 |
| 693380 | INTERGENIC | Dbl Promoter | 2.71 | 0.93 | 0.97 |
| 695268 | INTERGENIC | Sgl Promoter | 2.28 | 0.88 | 0.88 |
| 696795 | INTERGENIC | Sgl Promoter | 2.34 | 0.89 | 0.74 |
| 698810 | INTERGENIC | Non Promoter | 0.40 | 0.18 | 0.81 |
| 701789 | INTERGENIC | Dbl Promoter | 0.97 | 0.46 | 0.95 |
| 703578 | INTERGENIC | Non Promoter | #N/A | #N/A | #N/A |
| 707132 | INTERGENIC | Dbl Promoter | 2.28 | 0.88 | 1.64 |
| 712315 | INTERGENIC | Sgl Promoter | 0.90 | 0.41 | 0.83 |
| 713930 | INTERGENIC | Non Promoter | 0.40 | 0.14 | #N/A |
| 715637 | INTERGENIC | Sgl Promoter | 2.22 | 0.85 | #N/A |
| 716714 | INTERGENIC | Dbl Promoter | 2.01 | 0.81 | 0.88 |
| 718574 | INTERGENIC | Non Promoter | 0.45 | 0.17 | 1.45 |
| 720959 | INTERGENIC | Sgl Promoter | 1.52 | 0.66 | 1.02 |
| 721592 | INTERGENIC | Sgl Promoter | 1.27 | 0.59 | 0.51 |
| 722612 | INTERGENIC | Sgl Promoter | 1.10 | 0.50 | #N/A |
| 724625 | INTERGENIC | Dbl Promoter | 2.04 | 0.82 | 0.80 |
| 725933 | INTERGENIC | Non Promoter | 0.47 | 0.18 | 1.15 |
| 733544 | INTERGENIC | Sgl Promoter | 0.81 | 0.37 | 0.99 |
| 736925 | INTERGENIC | Sgl Promoter | 0.61 | 0.26 | 0.89 |
| 739184 | INTERGENIC | Sgl Promoter | 0.71 | 0.32 | #N/A |
| 740265 | INTERGENIC | Sgl Promoter | 1.83 | 0.77 | 0.74 |
| 741511 | INTERGENIC | Non Promoter | #N/A | #N/A | #N/A |
| 742970 | INTERGENIC | Dbl Promoter | 3.26 | 0.97 | 0.71 |
| 743748 | INTERGENIC | Sgl Promoter | 2.17 | 0.86 | 0.83 |
| 746352 | INTERGENIC | Sgl Promoter | 2.16 | 0.86 | 1.21 |
| 747891 | INTERGENIC | Non Promoter | #N/A | #N/A | #N/A |
| 749929 | INTERGENIC | Sgl Promoter | 1.92 | 0.79 | 0.63 |
| 751960 | INTERGENIC | Dbl Promoter | 1.50 | 0.65 | 0.82 |

|        |            |              |      |      |      |
|--------|------------|--------------|------|------|------|
| 753224 | INTERGENIC | Non Promoter | 0.43 | 0.15 | #N/A |
| 754837 | INTERGENIC | Sgl Promoter | 0.25 | 0.07 | 0.67 |
| 757249 | INTERGENIC | Dbl Promoter | 0.83 | 0.38 | 0.78 |
| 758516 | INTERGENIC | Non Promoter | 0.73 | 0.35 | 0.99 |
| 759806 | INTERGENIC | Sgl Promoter | 0.67 | 0.30 | 0.60 |
| 763350 | INTERGENIC | Non Promoter | 0.50 | 0.20 | 1.22 |
| 768368 | INTERGENIC | Dbl Promoter | 1.13 | 0.53 | 0.41 |
| 772914 | INTERGENIC | Sgl Promoter | 1.15 | 0.53 | 0.76 |
| 774751 | INTERGENIC | Sgl Promoter | 0.62 | 0.27 | 0.67 |
| 775314 | INTERGENIC | Non Promoter | 0.77 | 0.35 | 0.97 |
| 777614 | INTERGENIC | Sgl Promoter | 1.20 | 0.55 | 0.47 |
| 778000 | INTERGENIC | Dbl Promoter | 0.65 | 0.29 | #N/A |
| 778944 | INTERGENIC | Non Promoter | 0.48 | 0.22 | 0.98 |
| 779628 | INTERGENIC | Sgl Promoter | 0.60 | 0.26 | 0.81 |
| 782619 | INTERGENIC | Sgl Promoter | #N/A | #N/A | 0.94 |
| 784620 | INTERGENIC | Sgl Promoter | 1.75 | 0.74 | #N/A |
| 789377 | INTERGENIC | Sgl Promoter | 1.71 | 0.73 | #N/A |
| 790204 | INTERGENIC | Sgl Promoter | #N/A | #N/A | 0.88 |
| 793725 | INTERGENIC | Dbl Promoter | 2.42 | 0.89 | 0.98 |
| 794918 | INTERGENIC | Sgl Promoter | 2.41 | 0.90 | 0.94 |
| 795804 | INTERGENIC | Sgl Promoter | 1.87 | 0.79 | 0.80 |
| 796539 | INTERGENIC | Non Promoter | 0.64 | 0.28 | #N/A |
| 798517 | INTERGENIC | Dbl Promoter | 1.06 | 0.48 | 0.45 |
| 801771 | INTERGENIC | Sgl Promoter | 1.48 | 0.64 | 0.93 |
| 802887 | INTERGENIC | Non Promoter | 0.35 | 0.11 | 0.95 |
| 804663 | INTERGENIC | Dbl Promoter | 1.65 | 0.72 | 1.02 |
| 805326 | INTERGENIC | Non Promoter | #N/A | #N/A | #N/A |
| 806865 | INTERGENIC | Sgl Promoter | 1.70 | 0.73 | #N/A |
| 808246 | INTERGENIC | Sgl Promoter | 1.27 | 0.58 | 1.03 |
| 811233 | INTERGENIC | Sgl Promoter | 0.75 | 0.34 | 0.46 |
| 814364 | INTERGENIC | Sgl Promoter | 1.31 | 0.58 | 0.86 |
| 815651 | INTERGENIC | Sgl Promoter | 0.98 | 0.44 | #N/A |
| 818827 | INTERGENIC | Dbl Promoter | 2.88 | 0.95 | 0.76 |
| 820256 | INTERGENIC | Sgl Promoter | 2.15 | 0.86 | 0.98 |
| 822763 | INTERGENIC | Sgl Promoter | 0.95 | 0.45 | 1.37 |
| 824729 | INTERGENIC | Non Promoter | 0.54 | 0.25 | #N/A |
| 827028 | INTERGENIC | Sgl Promoter | 0.42 | 0.18 | 1.12 |
| 832339 | INTERGENIC | Dbl Promoter | 1.14 | 0.51 | 1.14 |
| 835326 | INTERGENIC | Sgl Promoter | 3.16 | 0.97 | #N/A |
| 837450 | INTERGENIC | Dbl Promoter | 2.66 | 0.93 | 0.82 |
| 840144 | INTERGENIC | Non Promoter | 0.37 | 0.11 | #N/A |
| 841942 | INTERGENIC | Dbl Promoter | 3.43 | 0.98 | #N/A |
| 842436 | INTERGENIC | Non Promoter | 1.66 | 0.71 | #N/A |
| 845571 | INTERGENIC | Dbl Promoter | 2.31 | 0.89 | 0.98 |
| 848685 | INTERGENIC | Sgl Promoter | #N/A | #N/A | #N/A |
| 850074 | INTERGENIC | Non Promoter | 0.25 | 0.06 | 0.65 |
| 852630 | INTERGENIC | Sgl Promoter | 0.51 | 0.22 | 0.47 |
| 854795 | INTERGENIC | Sgl Promoter | 2.47 | 0.90 | 0.79 |
| 855399 | INTERGENIC | Non Promoter | 0.24 | 0.04 | #N/A |
| 856966 | INTERGENIC | Dbl Promoter | #N/A | #N/A | 1.44 |
| 858209 | INTERGENIC | Sgl Promoter | #N/A | #N/A | #N/A |

|        |            |              |      |      |      |
|--------|------------|--------------|------|------|------|
| 861922 | INTERGENIC | Dbl Promoter | 1.31 | 0.59 | 0.77 |
| 863819 | INTERGENIC | Sgl Promoter | 2.09 | 0.84 | #N/A |
| 864412 | INTERGENIC | Non Promoter | 0.63 | 0.27 | #N/A |
| 865559 | INTERGENIC | Sgl Promoter | #N/A | #N/A | #N/A |
| 867555 | INTERGENIC | Sgl Promoter | 1.41 | 0.62 | 0.64 |
| 870073 | INTERGENIC | Sgl Promoter | #N/A | #N/A | 0.86 |
| 873291 | INTERGENIC | Sgl Promoter | 3.50 | 0.98 | 0.89 |
| 874987 | INTERGENIC | Dbl Promoter | 2.23 | 0.86 | #N/A |
| 878780 | INTERGENIC | Non Promoter | #N/A | #N/A | #N/A |
| 881159 | INTERGENIC | Dbl Promoter | 0.79 | 0.36 | 0.81 |
| 887003 | INTERGENIC | Dbl Promoter | 0.55 | 0.26 | 0.79 |
| 888952 | INTERGENIC | Non Promoter | #N/A | #N/A | #N/A |
| 892988 | INTERGENIC | Sgl Promoter | 1.10 | 0.51 | 1.14 |
| 895716 | INTERGENIC | Sgl Promoter | #N/A | #N/A | 0.87 |
| 896914 | INTERGENIC | Sgl Promoter | 3.24 | 0.98 | 0.86 |
| 898405 | INTERGENIC | Dbl Promoter | 1.81 | 0.77 | 0.83 |
| 899379 | INTERGENIC | Non Promoter | #N/A | #N/A | #N/A |
| 901709 | INTERGENIC | Dbl Promoter | 2.50 | 0.91 | 0.74 |
| 902800 | INTERGENIC | Sgl Promoter | 1.13 | 0.51 | 0.85 |
| 904824 | INTERGENIC | Sgl Promoter | 1.92 | 0.79 | 0.94 |
| 907320 | INTERGENIC | Sgl Promoter | 0.99 | 0.45 | 0.75 |
| 911060 | INTERGENIC | Non Promoter | 1.30 | 0.58 | 0.81 |
| 912879 | INTERGENIC | Sgl Promoter | 0.93 | 0.43 | 0.67 |
| 915641 | INTERGENIC | Dbl Promoter | 0.94 | 0.43 | 0.71 |
| 916745 | INTERGENIC | Dbl Promoter | 0.43 | 0.19 | 1.05 |
| 917578 | INTERGENIC | Non Promoter | 1.39 | 0.61 | 0.49 |
| 918365 | INTERGENIC | Sgl Promoter | 1.24 | 0.56 | 1.13 |
| 920087 | INTERGENIC | Dbl Promoter | 2.40 | 0.89 | 0.97 |
| 922201 | INTERGENIC | Non Promoter | 0.85 | 0.39 | 0.88 |
| 922640 | INTERGENIC | Dbl Promoter | 0.57 | 0.24 | 0.90 |
| 923493 | INTERGENIC | Non Promoter | 0.60 | 0.26 | 0.92 |
| 378726 | INTERGENIC | Dbl Promoter | #N/A | #N/A | #N/A |
| 463553 | INTERGENIC | Sgl Promoter | 0.33 | 0.09 | #N/A |
| 290800 | INTERGENIC | Sgl Promoter | 1.46 | 0.65 | 0.82 |
| 379302 | INTERGENIC | Dbl Promoter | 1.07 | 0.50 | #N/A |
| 483013 | INTERGENIC | Dbl Promoter | 2.11 | 0.83 | 0.89 |
| 503770 | INTERGENIC | Dbl Promoter | 1.41 | 0.64 | 0.84 |
| 504894 | INTERGENIC | Dbl Promoter | 1.13 | 0.51 | 2.41 |
| 769839 | INTERGENIC | Dbl Promoter | 0.79 | 0.38 | 1.09 |
| 837928 | INTERGENIC | Dbl Promoter | 0.63 | 0.29 | 0.97 |
| 504345 | INTERGENIC | Dbl Promoter | #N/A | #N/A | #N/A |
| 628757 | INTERGENIC | Non Promoter | 0.60 | 0.29 | 4.35 |
| 627455 | INTERGENIC | Dbl Promoter | 1.25 | 0.58 | 1.20 |
| 626173 | INTERGENIC | Sgl Promoter | 0.89 | 0.42 | 0.58 |
| 624974 | INTERGENIC | Non Promoter | 0.63 | 0.27 | 1.51 |
| 623331 | INTERGENIC | Dbl Promoter | 1.24 | 0.56 | 0.83 |
| 621312 | INTERGENIC | Non Promoter | 0.43 | 0.17 | 0.63 |
| 620066 | INTERGENIC | Dbl Promoter | 1.71 | 0.74 | 0.84 |
| 618506 | INTERGENIC | Sgl Promoter | 1.77 | 0.75 | 1.63 |
| 616209 | INTERGENIC | Non Promoter | 0.65 | 0.29 | #N/A |
| 613633 | INTERGENIC | Dbl Promoter | 1.52 | 0.67 | 1.08 |

|        |            |              |      |      |      |
|--------|------------|--------------|------|------|------|
| 611834 | INTERGENIC | Non Promoter | 0.61 | 0.29 | #N/A |
| 610053 | INTERGENIC | DbI Promoter | 0.85 | 0.39 | 1.08 |
| 605382 | INTERGENIC | SgI Promoter | 1.09 | 0.49 | 0.53 |
| 602136 | INTERGENIC | SgI Promoter | 0.41 | 0.14 | 0.83 |
| 599934 | INTERGENIC | SgI Promoter | 0.53 | 0.24 | 0.89 |
| 598374 | INTERGENIC | SgI Promoter | 1.79 | 0.77 | 0.80 |
| 595621 | INTERGENIC | Non Promoter | 0.27 | 0.08 | 1.03 |
| 593225 | INTERGENIC | DbI Promoter | 1.76 | 0.76 | 0.71 |
| 591425 | INTERGENIC | SgI Promoter | 2.09 | 0.84 | 0.58 |
| 588261 | INTERGENIC | SgI Promoter | 1.07 | 0.48 | 0.69 |
| 586088 | INTERGENIC | SgI Promoter | 0.59 | 0.27 | 1.11 |
| 584318 | INTERGENIC | Non Promoter | 0.28 | 0.08 | 1.22 |
| 581918 | INTERGENIC | SgI Promoter | 2.30 | 0.88 | 0.87 |
| 579578 | INTERGENIC | SgI Promoter | 2.69 | 0.94 | 0.75 |
| 577203 | INTERGENIC | Non Promoter | #N/A | #N/A | #N/A |
| 576725 | INTERGENIC | DbI Promoter | #N/A | #N/A | 0.34 |
| 575638 | INTERGENIC | Non Promoter | #N/A | #N/A | 1.07 |
| 574504 | INTERGENIC | SgI Promoter | 1.58 | 0.71 | 0.86 |
| 572997 | INTERGENIC | SgI Promoter | 0.53 | 0.25 | 0.89 |
| 569865 | INTERGENIC | DbI Promoter | #N/A | #N/A | 0.81 |
| 560691 | INTERGENIC | Non Promoter | #N/A | #N/A | #N/A |
| 559812 | INTERGENIC | DbI Promoter | 0.65 | 0.29 | 0.60 |
| 557918 | INTERGENIC | Non Promoter | 0.50 | 0.20 | 0.96 |
| 557018 | INTERGENIC | SgI Promoter | 0.19 | 0.02 | 0.27 |
| 555046 | INTERGENIC | SgI Promoter | 2.51 | 0.91 | 0.62 |
| 553378 | INTERGENIC | DbI Promoter | 2.13 | 0.85 | 1.38 |
| 549466 | INTERGENIC | Non Promoter | 0.43 | 0.16 | 1.10 |
| 546421 | INTERGENIC | DbI Promoter | 1.15 | 0.53 | 1.42 |
| 545399 | INTERGENIC | SgI Promoter | 2.12 | 0.85 | 1.03 |
| 542961 | INTERGENIC | SgI Promoter | 1.36 | 0.62 | 0.65 |
| 542302 | INTERGENIC | DbI Promoter | 3.04 | 0.96 | 0.81 |
| 539909 | INTERGENIC | Non Promoter | #N/A | #N/A | #N/A |
| 538171 | INTERGENIC | DbI Promoter | 3.05 | 0.97 | 1.30 |
| 535279 | INTERGENIC | SgI Promoter | 1.47 | 0.66 | #N/A |
| 534077 | INTERGENIC | Non Promoter | #N/A | #N/A | #N/A |
| 532657 | INTERGENIC | SgI Promoter | 1.19 | 0.55 | 1.38 |
| 531723 | INTERGENIC | SgI Promoter | 1.54 | 0.69 | 0.85 |
| 529940 | INTERGENIC | SgI Promoter | 1.16 | 0.53 | 0.55 |
| 519097 | INTERGENIC | DbI Promoter | 0.77 | 0.37 | 1.17 |
| 517992 | INTERGENIC | Non Promoter | 0.45 | 0.17 | #N/A |
| 517247 | INTERGENIC | SgI Promoter | 1.65 | 0.71 | 0.71 |
| 515761 | INTERGENIC | SgI Promoter | 1.63 | 0.70 | 0.95 |
| 512666 | INTERGENIC | Non Promoter | 0.36 | 0.10 | #N/A |
| 510538 | INTERGENIC | DbI Promoter | 3.44 | 0.98 | 0.85 |
| 507756 | INTERGENIC | DbI Promoter | 1.55 | 0.68 | 0.75 |
| 505866 | INTERGENIC | Non Promoter | 0.29 | 0.06 | #N/A |
| 503723 | INTERGENIC | SgI Promoter | 0.22 | 0.03 | 0.55 |
| 501514 | INTERGENIC | SgI Promoter | 0.27 | 0.08 | 1.13 |
| 499680 | INTERGENIC | DbI Promoter | 0.43 | 0.16 | 0.91 |
| 495700 | INTERGENIC | SgI Promoter | 0.44 | 0.16 | 0.62 |
| 493955 | INTERGENIC | Non Promoter | 0.72 | 0.33 | #N/A |

|        |            |              |      |      |      |
|--------|------------|--------------|------|------|------|
| 493365 | INTERGENIC | Sgl Promoter | 1.31 | 0.59 | 0.66 |
| 491522 | INTERGENIC | Sgl Promoter | 1.60 | 0.70 | 0.69 |
| 490316 | INTERGENIC | Sgl Promoter | 1.17 | 0.53 | 0.73 |
| 488385 | INTERGENIC | Dbl Promoter | 1.60 | 0.69 | 1.03 |
| 486765 | INTERGENIC | Non Promoter | #N/A | #N/A | #N/A |
| 485606 | INTERGENIC | Sgl Promoter | #N/A | #N/A | 0.77 |
| 483555 | INTERGENIC | Sgl Promoter | 2.28 | 0.87 | 0.89 |
| 481390 | INTERGENIC | Sgl Promoter | 1.45 | 0.64 | 0.56 |
| 479767 | INTERGENIC | Dbl Promoter | 0.89 | 0.41 | 0.76 |
| 478565 | INTERGENIC | Sgl Promoter | 1.31 | 0.60 | 1.22 |
| 476931 | INTERGENIC | Sgl Promoter | 3.20 | 0.97 | 1.45 |
| 476187 | INTERGENIC | Non Promoter | 0.46 | 0.21 | 0.78 |
| 473297 | INTERGENIC | Sgl Promoter | 0.81 | 0.39 | 1.15 |
| 471376 | INTERGENIC | Dbl Promoter | 2.85 | 0.95 | 0.73 |
| 467130 | INTERGENIC | Sgl Promoter | 2.96 | 0.95 | 1.05 |
| 457703 | INTERGENIC | Dbl Promoter | 1.64 | 0.71 | #N/A |
| 456564 | INTERGENIC | Sgl Promoter | 2.45 | 0.91 | 0.59 |
| 452407 | INTERGENIC | Sgl Promoter | 2.47 | 0.91 | 0.74 |
| 450870 | INTERGENIC | Sgl Promoter | 3.60 | 0.99 | 0.70 |
| 449867 | INTERGENIC | Sgl Promoter | 0.81 | 0.39 | 1.09 |
| 447610 | INTERGENIC | Dbl Promoter | 2.46 | 0.91 | 0.84 |
| 444911 | INTERGENIC | Sgl Promoter | 0.30 | 0.06 | 0.41 |
| 443005 | INTERGENIC | Sgl Promoter | 1.22 | 0.56 | 0.88 |
| 441365 | INTERGENIC | Sgl Promoter | 0.58 | 0.24 | 0.35 |
| 439601 | INTERGENIC | Sgl Promoter | 1.64 | 0.72 | 1.39 |
| 438566 | INTERGENIC | Non Promoter | 0.42 | 0.18 | 1.43 |
| 437612 | INTERGENIC | Sgl Promoter | 1.59 | 0.68 | 0.99 |
| 434998 | INTERGENIC | Sgl Promoter | 1.90 | 0.79 | 0.78 |
| 430086 | INTERGENIC | Sgl Promoter | 1.57 | 0.69 | #N/A |
| 427734 | INTERGENIC | Dbl Promoter | 0.67 | 0.30 | 0.54 |
| 424894 | INTERGENIC | Non Promoter | 1.89 | 0.80 | 0.88 |
| 420943 | INTERGENIC | Non Promoter | #N/A | #N/A | 0.51 |
| 420097 | INTERGENIC | Dbl Promoter | 2.81 | 0.94 | 0.57 |
| 417825 | INTERGENIC | Sgl Promoter | 0.63 | 0.28 | 0.70 |
| 416939 | INTERGENIC | Non Promoter | 0.71 | 0.32 | 2.04 |
| 413638 | INTERGENIC | Sgl Promoter | 1.03 | 0.48 | #N/A |
| 412683 | INTERGENIC | Sgl Promoter | 1.88 | 0.79 | 0.94 |
| 410118 | INTERGENIC | Non Promoter | #N/A | #N/A | 1.01 |
| 408340 | INTERGENIC | Sgl Promoter | 5.05 | 1.00 | 0.64 |
| 406357 | INTERGENIC | Dbl Promoter | 2.43 | 0.90 | 0.68 |
| 402651 | INTERGENIC | Non Promoter | 0.15 | 0.01 | 0.31 |
| 401032 | INTERGENIC | Sgl Promoter | 2.06 | 0.82 | 1.07 |
| 398683 | INTERGENIC | Sgl Promoter | #N/A | #N/A | #N/A |
| 398022 | INTERGENIC | Non Promoter | 0.73 | 0.35 | 0.95 |
| 394684 | INTERGENIC | Sgl Promoter | 0.77 | 0.36 | 0.75 |
| 392891 | INTERGENIC | Dbl Promoter | 2.07 | 0.82 | 0.90 |
| 390145 | INTERGENIC | Non Promoter | 0.40 | 0.13 | 0.80 |
| 387226 | INTERGENIC | Sgl Promoter | 1.59 | 0.69 | 1.13 |
| 383986 | INTERGENIC | Sgl Promoter | #N/A | #N/A | 0.91 |
| 382358 | INTERGENIC | Sgl Promoter | 0.67 | 0.30 | 0.89 |
| 381479 | INTERGENIC | Dbl Promoter | 1.02 | 0.46 | 1.13 |



|        |            |              |      |      |      |
|--------|------------|--------------|------|------|------|
| 379557 | INTERGENIC | Non Promoter | 0.51 | 0.24 | 0.81 |
| 378766 | INTERGENIC | Sgl Promoter | 1.99 | 0.82 | 0.77 |
| 374868 | INTERGENIC | Dbl Promoter | #N/A | #N/A | 0.52 |
| 374170 | INTERGENIC | Sgl Promoter | 1.24 | 0.55 | 1.49 |
| 372450 | INTERGENIC | Sgl Promoter | 1.71 | 0.72 | 0.61 |
| 371881 | INTERGENIC | Non Promoter | 0.58 | 0.25 | 1.07 |
| 370367 | INTERGENIC | Dbl Promoter | 2.13 | 0.84 | 0.81 |
| 368594 | INTERGENIC | Non Promoter | 0.42 | 0.15 | 1.40 |
| 366740 | INTERGENIC | Dbl Promoter | 2.04 | 0.83 | 1.04 |
| 360916 | INTERGENIC | Non Promoter | 0.47 | 0.21 | 0.95 |
| 359595 | INTERGENIC | Sgl Promoter | 2.84 | 0.94 | 0.67 |
| 357452 | INTERGENIC | Dbl Promoter | 1.05 | 0.47 | 1.33 |
| 355917 | INTERGENIC | Sgl Promoter | 0.72 | 0.34 | 0.60 |
| 356793 | INTERGENIC | Sgl Promoter | 0.92 | 0.42 | 0.68 |
| 352819 | INTERGENIC | Non Promoter | 1.35 | 0.62 | 0.77 |
| 352413 | INTERGENIC | Sgl Promoter | 0.92 | 0.44 | 0.60 |
| 351714 | INTERGENIC | Sgl Promoter | 3.04 | 0.96 | 0.67 |
| 350939 | INTERGENIC | Dbl Promoter | #N/A | #N/A | 1.10 |
| 349906 | INTERGENIC | Sgl Promoter | 1.13 | 0.52 | 0.71 |
| 349250 | INTERGENIC | Dbl Promoter | 2.91 | 0.95 | 0.97 |
| 347765 | INTERGENIC | Non Promoter | #N/A | #N/A | 1.36 |
| 346312 | INTERGENIC | Dbl Promoter | 2.09 | 0.84 | 0.97 |
| 345668 | INTERGENIC | Sgl Promoter | #N/A | #N/A | 1.11 |
| 343635 | INTERGENIC | Non Promoter | 0.36 | 0.11 | 0.93 |
| 342515 | INTERGENIC | Dbl Promoter | 1.48 | 0.67 | 0.72 |
| 341068 | INTERGENIC | Non Promoter | #N/A | #N/A | #N/A |
| 340351 | INTERGENIC | Sgl Promoter | #N/A | #N/A | #N/A |
| 339611 | INTERGENIC | Dbl Promoter | 3.63 | 0.99 | 0.97 |
| 338477 | INTERGENIC | Non Promoter | 1.07 | 0.49 | 1.15 |
| 335705 | INTERGENIC | Sgl Promoter | 0.91 | 0.43 | 0.95 |
| 336544 | INTERGENIC | Sgl Promoter | 0.78 | 0.37 | 0.72 |
| 332596 | INTERGENIC | Sgl Promoter | 1.85 | 0.78 | 1.04 |
| 326740 | INTERGENIC | Sgl Promoter | 2.62 | 0.93 | 0.87 |
| 325264 | INTERGENIC | Non Promoter | 0.42 | 0.15 | 1.15 |
| 323831 | INTERGENIC | Dbl Promoter | 2.73 | 0.94 | 0.81 |
| 322218 | INTERGENIC | Sgl Promoter | 1.50 | 0.66 | 1.76 |
| 319415 | INTERGENIC | Sgl Promoter | 1.60 | 0.70 | 1.09 |
| 318029 | INTERGENIC | Sgl Promoter | 1.53 | 0.68 | 1.34 |
| 310635 | INTERGENIC | Dbl Promoter | 1.69 | 0.74 | 0.86 |
| 308956 | INTERGENIC | Non Promoter | 1.78 | 0.76 | 0.50 |
| 307400 | INTERGENIC | Sgl Promoter | 1.90 | 0.79 | 1.01 |
| 305069 | INTERGENIC | Sgl Promoter | 1.47 | 0.66 | 0.85 |
| 303685 | INTERGENIC | Non Promoter | 0.48 | 0.19 | #N/A |
| 302679 | INTERGENIC | Dbl Promoter | 0.80 | 0.38 | 1.07 |
| 299659 | INTERGENIC | Non Promoter | #N/A | #N/A | #N/A |
| 298332 | INTERGENIC | Dbl Promoter | 2.83 | 0.95 | 1.14 |
| 295957 | INTERGENIC | Sgl Promoter | 2.17 | 0.84 | 0.94 |
| 293134 | INTERGENIC | Sgl Promoter | 1.06 | 0.48 | #N/A |
| 292190 | INTERGENIC | Non Promoter | 0.68 | 0.30 | 1.11 |
| 289495 | INTERGENIC | Sgl Promoter | 0.46 | 0.17 | 0.49 |
| 287991 | INTERGENIC | Sgl Promoter | 1.84 | 0.78 | 0.92 |

|        |            |              |      |      |      |
|--------|------------|--------------|------|------|------|
| 286304 | INTERGENIC | Sgl Promoter | 1.33 | 0.60 | 1.14 |
| 282391 | INTERGENIC | Sgl Promoter | 0.39 | 0.15 | 0.46 |
| 280428 | INTERGENIC | Sgl Promoter | 1.16 | 0.52 | #N/A |
| 276498 | INTERGENIC | Sgl Promoter | 1.08 | 0.50 | 0.41 |
| 274364 | INTERGENIC | DbI Promoter | 2.18 | 0.86 | 1.41 |
| 272706 | INTERGENIC | Sgl Promoter | 1.25 | 0.58 | 0.74 |
| 271573 | INTERGENIC | Sgl Promoter | 0.79 | 0.36 | 0.73 |
| 270272 | INTERGENIC | Sgl Promoter | 1.62 | 0.72 | 0.71 |
| 267605 | INTERGENIC | Sgl Promoter | 0.48 | 0.22 | 0.81 |
| 264923 | INTERGENIC | Sgl Promoter | 1.46 | 0.65 | 0.82 |
| 263710 | INTERGENIC | Sgl Promoter | 1.32 | 0.59 | 0.73 |
| 260624 | INTERGENIC | Non Promoter | 0.49 | 0.19 | #N/A |
| 259436 | INTERGENIC | Sgl Promoter | 1.02 | 0.47 | #N/A |
| 256785 | INTERGENIC | Non Promoter | 0.26 | 0.09 | 0.43 |
| 255350 | INTERGENIC | Sgl Promoter | 2.64 | 0.92 | 1.03 |
| 254417 | INTERGENIC | Sgl Promoter | 0.97 | 0.44 | 0.60 |
| 252058 | INTERGENIC | Sgl Promoter | 1.26 | 0.58 | 0.52 |
| 250930 | INTERGENIC | DbI Promoter | 0.93 | 0.42 | 0.91 |
| 250054 | INTERGENIC | Non Promoter | 0.78 | 0.38 | 1.03 |
| 247460 | INTERGENIC | DbI Promoter | 3.20 | 0.97 | 0.90 |
| 246459 | INTERGENIC | Non Promoter | 0.67 | 0.30 | 0.85 |
| 245616 | INTERGENIC | Sgl Promoter | #N/A | #N/A | 0.67 |
| 244467 | INTERGENIC | Sgl Promoter | 2.05 | 0.83 | #N/A |
| 241688 | INTERGENIC | Sgl Promoter | 1.78 | 0.76 | 0.63 |
| 240330 | INTERGENIC | Sgl Promoter | 1.27 | 0.58 | 0.80 |
| 238237 | INTERGENIC | DbI Promoter | 2.25 | 0.87 | 1.25 |
| 235995 | INTERGENIC | Non Promoter | #N/A | #N/A | #N/A |
| 234412 | INTERGENIC | DbI Promoter | 0.79 | 0.36 | 0.63 |
| 231067 | INTERGENIC | Non Promoter | 0.90 | 0.41 | 1.27 |
| 229093 | INTERGENIC | Sgl Promoter | 3.09 | 0.96 | 1.23 |
| 227333 | INTERGENIC | DbI Promoter | 1.98 | 0.82 | 1.00 |
| 224795 | INTERGENIC | Sgl Promoter | 1.47 | 0.65 | #N/A |
| 222723 | INTERGENIC | Non Promoter | 0.69 | 0.31 | #N/A |
| 220644 | INTERGENIC | DbI Promoter | 1.58 | 0.69 | 0.65 |
| 219136 | INTERGENIC | Sgl Promoter | 1.06 | 0.48 | 1.01 |
| 217522 | INTERGENIC | Sgl Promoter | 0.38 | 0.13 | 0.49 |
| 215986 | INTERGENIC | Non Promoter | #N/A | #N/A | 1.03 |
| 214922 | INTERGENIC | Sgl Promoter | 1.82 | 0.77 | #N/A |
| 211921 | INTERGENIC | Sgl Promoter | 1.30 | 0.60 | #N/A |
| 210232 | INTERGENIC | DbI Promoter | 2.36 | 0.89 | #N/A |
| 206929 | INTERGENIC | Sgl Promoter | 1.39 | 0.62 | 1.04 |
| 205187 | INTERGENIC | Sgl Promoter | 0.60 | 0.26 | 0.91 |
| 202427 | INTERGENIC | Sgl Promoter | 1.50 | 0.66 | #N/A |
| 200481 | INTERGENIC | DbI Promoter | 2.72 | 0.93 | 0.75 |
| 198501 | INTERGENIC | Sgl Promoter | 0.57 | 0.26 | 0.80 |
| 196425 | INTERGENIC | Non Promoter | #N/A | #N/A | 1.42 |
| 191323 | INTERGENIC | Sgl Promoter | 2.42 | 0.89 | 0.97 |
| 188050 | INTERGENIC | DbI Promoter | 0.92 | 0.44 | 0.91 |
| 187169 | INTERGENIC | Sgl Promoter | 1.17 | 0.53 | 1.15 |
| 185459 | INTERGENIC | Sgl Promoter | 1.25 | 0.56 | 0.87 |
| 182874 | INTERGENIC | DbI Promoter | 2.51 | 0.91 | #N/A |



|        |            |              |      |      |      |
|--------|------------|--------------|------|------|------|
| 181360 | INTERGENIC | Sgl Promoter | 1.05 | 0.48 | 1.18 |
| 175409 | INTERGENIC | Dbl Promoter | 1.72 | 0.74 | 1.09 |
| 171440 | INTERGENIC | Non Promoter | 0.34 | 0.09 | 0.99 |
| 170017 | INTERGENIC | Dbl Promoter | 1.28 | 0.57 | 0.83 |
| 168042 | INTERGENIC | Sgl Promoter | 1.26 | 0.56 | 0.79 |
| 167328 | INTERGENIC | Non Promoter | #N/A | #N/A | #N/A |
| 164502 | INTERGENIC | Dbl Promoter | #N/A | #N/A | 0.76 |
| 160630 | INTERGENIC | Sgl Promoter | 2.88 | 0.95 | #N/A |
| 158108 | INTERGENIC | Sgl Promoter | 0.84 | 0.38 | 0.48 |
| 157643 | INTERGENIC | Sgl Promoter | 1.08 | 0.49 | #N/A |
| 156858 | INTERGENIC | Non Promoter | 0.68 | 0.30 | 3.36 |
| 155099 | INTERGENIC | Sgl Promoter | 1.60 | 0.70 | #N/A |
| 148211 | INTERGENIC | Dbl Promoter | 3.86 | 0.99 | 0.70 |
| 146895 | INTERGENIC | Sgl Promoter | 2.27 | 0.88 | #N/A |
| 145562 | INTERGENIC | Sgl Promoter | 1.94 | 0.81 | #N/A |
| 144244 | INTERGENIC | Sgl Promoter | #N/A | #N/A | 0.87 |
| 140877 | INTERGENIC | Sgl Promoter | 1.07 | 0.48 | 1.04 |
| 138549 | INTERGENIC | Sgl Promoter | 0.63 | 0.28 | 0.61 |
| 135939 | INTERGENIC | Sgl Promoter | 2.47 | 0.90 | 1.05 |
| 129521 | INTERGENIC | Sgl Promoter | 2.07 | 0.83 | 1.71 |
| 126803 | INTERGENIC | Non Promoter | #N/A | #N/A | #N/A |
| 122881 | INTERGENIC | Dbl Promoter | 2.78 | 0.95 | 0.98 |
| 121116 | INTERGENIC | Non Promoter | 0.11 | 0.01 | #N/A |
| 117347 | INTERGENIC | Sgl Promoter | 0.91 | 0.42 | 0.81 |
| 113269 | INTERGENIC | Sgl Promoter | 2.08 | 0.84 | 0.82 |
| 110915 | INTERGENIC | Dbl Promoter | 0.68 | 0.32 | 0.91 |
| 109093 | INTERGENIC | Non Promoter | 0.44 | 0.16 | 1.51 |
| 108465 | INTERGENIC | Sgl Promoter | 0.80 | 0.37 | #N/A |
| 107685 | INTERGENIC | Dbl Promoter | 0.85 | 0.39 | 0.51 |
| 104803 | INTERGENIC | Sgl Promoter | 2.08 | 0.84 | 1.35 |
| 96171  | INTERGENIC | Sgl Promoter | 0.66 | 0.31 | #N/A |
| 95221  | INTERGENIC | Sgl Promoter | #N/A | #N/A | 1.05 |
| 91992  | INTERGENIC | Sgl Promoter | 1.33 | 0.61 | 0.62 |
| 89517  | INTERGENIC | Sgl Promoter | 0.69 | 0.31 | 1.10 |
| 90301  | INTERGENIC | Sgl Promoter | 1.77 | 0.75 | 1.11 |
| 87895  | INTERGENIC | Sgl Promoter | 1.13 | 0.52 | 1.15 |
| 86216  | INTERGENIC | Dbl Promoter | 1.77 | 0.75 | 0.86 |
| 84167  | INTERGENIC | Non Promoter | 0.32 | 0.08 | 0.54 |
| 82804  | INTERGENIC | Sgl Promoter | 1.86 | 0.79 | 0.66 |
| 80638  | INTERGENIC | Dbl Promoter | 2.65 | 0.93 | 0.76 |
| 78657  | INTERGENIC | Non Promoter | 0.30 | 0.11 | 1.24 |
| 76944  | INTERGENIC | Sgl Promoter | 3.01 | 0.96 | 1.29 |
| 71671  | INTERGENIC | Non Promoter | #N/A | #N/A | #N/A |
| 68913  | INTERGENIC | Sgl Promoter | 0.90 | 0.41 | 0.86 |
| 66516  | INTERGENIC | Sgl Promoter | 2.52 | 0.92 | 0.81 |
| 63569  | INTERGENIC | Sgl Promoter | 0.21 | 0.03 | 0.53 |
| 61957  | INTERGENIC | Non Promoter | #N/A | #N/A | #N/A |
| 60482  | INTERGENIC | Dbl Promoter | 2.55 | 0.92 | 1.22 |
| 58898  | INTERGENIC | Non Promoter | 0.19 | 0.02 | #N/A |
| 58155  | INTERGENIC | Dbl Promoter | 3.01 | 0.96 | 0.79 |
| 56446  | INTERGENIC | Sgl Promoter | 1.45 | 0.64 | #N/A |

|        |            |              |      |      |      |
|--------|------------|--------------|------|------|------|
| 54121  | INTERGENIC | Non Promoter | 0.36 | 0.15 | 0.66 |
| 51906  | INTERGENIC | Sgl Promoter | 1.12 | 0.50 | 1.21 |
| 49396  | INTERGENIC | Non Promoter | #N/A | #N/A | 0.10 |
| 48286  | INTERGENIC | Dbl Promoter | 2.76 | 0.93 | #N/A |
| 45307  | INTERGENIC | Non Promoter | #N/A | #N/A | #N/A |
| 44446  | INTERGENIC | Dbl Promoter | 1.92 | 0.79 | #N/A |
| 43323  | INTERGENIC | Sgl Promoter | 0.78 | 0.36 | #N/A |
| 40618  | INTERGENIC | Dbl Promoter | 1.41 | 0.62 | 0.68 |
| 38641  | INTERGENIC | Sgl Promoter | #N/A | #N/A | #N/A |
| 37699  | INTERGENIC | Sgl Promoter | 2.45 | 0.91 | 1.20 |
| 34695  | INTERGENIC | Dbl Promoter | 2.48 | 0.90 | 0.72 |
| 33293  | INTERGENIC | Non Promoter | #N/A | #N/A | 0.05 |
| 31943  | INTERGENIC | Sgl Promoter | 3.45 | 0.98 | 0.85 |
| 28738  | INTERGENIC | Sgl Promoter | 1.42 | 0.63 | #N/A |
| 27336  | INTERGENIC | Non Promoter | 0.22 | 0.03 | #N/A |
| 24047  | INTERGENIC | Dbl Promoter | 1.00 | 0.47 | 0.76 |
| 22834  | INTERGENIC | Sgl Promoter | 1.25 | 0.56 | 0.61 |
| 19541  | INTERGENIC | Sgl Promoter | 3.92 | 0.99 | #N/A |
| 18001  | INTERGENIC | Sgl Promoter | 1.23 | 0.57 | 0.85 |
| 16118  | INTERGENIC | Non Promoter | 1.30 | 0.58 | 1.04 |
| 14832  | INTERGENIC | Sgl Promoter | 2.86 | 0.94 | 0.81 |
| 13267  | INTERGENIC | Dbl Promoter | 2.54 | 0.92 | #N/A |
| 12208  | INTERGENIC | Non Promoter | 1.02 | 0.48 | 0.70 |
| 11452  | INTERGENIC | Sgl Promoter | 1.76 | 0.74 | 1.01 |
| 8330   | INTERGENIC | Sgl Promoter | 0.94 | 0.43 | 0.99 |
| 7165   | INTERGENIC | Sgl Promoter | 0.31 | 0.07 | 0.58 |
| 6561   | INTERGENIC | Dbl Promoter | 0.47 | 0.18 | 0.58 |
| 99563  | INTERGENIC | Non Promoter | 0.17 | 0.02 | 0.79 |
| 102190 | INTERGENIC | Non Promoter | 0.83 | 0.38 | 0.83 |
| 102630 | INTERGENIC | Sgl Promoter | #N/A | #N/A | 1.11 |
| 568113 | INTERGENIC | Non Promoter | 1.00 | 0.47 | #N/A |
| 526084 | INTERGENIC | Sgl Promoter | 3.43 | 0.98 | #N/A |
| 631845 | INTERGENIC | Sgl Promoter | 1.17 | 0.53 | #N/A |
| 634343 | INTERGENIC | Sgl Promoter | 0.94 | 0.44 | 0.92 |
| 635942 | INTERGENIC | Dbl Promoter | 2.22 | 0.85 | 0.71 |
| 636930 | INTERGENIC | Non Promoter | 1.58 | 0.70 | 0.96 |
| 639181 | INTERGENIC | Non Promoter | 0.61 | 0.27 | #N/A |
| 640395 | INTERGENIC | Dbl Promoter | 2.29 | 0.88 | 1.11 |
| 642689 | INTERGENIC | Sgl Promoter | 0.76 | 0.35 | 0.79 |
| 643743 | INTERGENIC | Sgl Promoter | 1.43 | 0.64 | 0.96 |
| 644319 | INTERGENIC | Non Promoter | 0.52 | 0.21 | #N/A |
| 647431 | INTERGENIC | Dbl Promoter | #N/A | #N/A | 0.74 |
| 649027 | INTERGENIC | Non Promoter | #N/A | #N/A | #N/A |
| 652464 | INTERGENIC | Dbl Promoter | 0.38 | 0.12 | 0.34 |
| 653386 | INTERGENIC | Sgl Promoter | 2.64 | 0.93 | 0.66 |
| 654672 | INTERGENIC | Non Promoter | #N/A | #N/A | #N/A |
| 662142 | INTERGENIC | Dbl Promoter | 0.31 | 0.09 | 0.66 |
| 662912 | INTERGENIC | Dbl Promoter | 0.39 | 0.13 | #N/A |
| 664269 | INTERGENIC | Sgl Promoter | 0.30 | 0.07 | 0.56 |
| 667409 | INTERGENIC | Non Promoter | #N/A | #N/A | #N/A |
| 668376 | INTERGENIC | Dbl Promoter | 2.18 | 0.86 | #N/A |

|        |            |              |      |      |      |
|--------|------------|--------------|------|------|------|
| 669773 | INTERGENIC | Non Promoter | 0.59 | 0.26 | 0.93 |
| 670417 | INTERGENIC | DbI Promoter | 2.96 | 0.95 | #N/A |
| 672408 | INTERGENIC | SgI Promoter | 1.89 | 0.78 | 1.77 |
| 673273 | INTERGENIC | SgI Promoter | 0.38 | 0.16 | 1.31 |
| 674922 | INTERGENIC | DbI Promoter | #N/A | #N/A | #N/A |
| 676176 | INTERGENIC | SgI Promoter | 0.74 | 0.34 | 0.38 |
| 677198 | INTERGENIC | Non Promoter | 0.15 | 0.01 | #N/A |
| 678798 | INTERGENIC | DbI Promoter | 1.98 | 0.81 | 1.30 |
| 680693 | INTERGENIC | Non Promoter | #N/A | #N/A | #N/A |
| 686009 | INTERGENIC | DbI Promoter | 3.22 | 0.97 | 1.06 |
| 687634 | INTERGENIC | DbI Promoter | 1.91 | 0.80 | 1.46 |
| 687242 | INTERGENIC | Non Promoter | 0.08 | 0.01 | #N/A |
| 690320 | INTERGENIC | SgI Promoter | #N/A | #N/A | #N/A |
| 692151 | INTERGENIC | Non Promoter | 1.65 | 0.71 | 0.99 |
| 693018 | INTERGENIC | Non Promoter | 1.24 | 0.56 | 0.90 |
| 695051 | INTERGENIC | SgI Promoter | 2.95 | 0.95 | #N/A |
| 695594 | INTERGENIC | DbI Promoter | 3.92 | 0.99 | 1.56 |
| 697613 | INTERGENIC | Non Promoter | 0.24 | 0.07 | #N/A |
| 699689 | INTERGENIC | DbI Promoter | 3.62 | 0.98 | 0.53 |
| 700540 | INTERGENIC | Non Promoter | #N/A | #N/A | 0.19 |
| 701894 | INTERGENIC | SgI Promoter | 1.37 | 0.61 | 0.85 |
| 703698 | INTERGENIC | SgI Promoter | 0.93 | 0.44 | 0.95 |
| 706138 | INTERGENIC | SgI Promoter | #N/A | #N/A | #N/A |
| 707787 | INTERGENIC | SgI Promoter | #N/A | #N/A | #N/A |
| 708522 | INTERGENIC | SgI Promoter | 3.10 | 0.96 | 0.98 |
| 711629 | INTERGENIC | SgI Promoter | 1.78 | 0.75 | 1.08 |
| 713022 | INTERGENIC | Non Promoter | 0.68 | 0.31 | 1.32 |
| 714047 | INTERGENIC | SgI Promoter | 1.32 | 0.59 | 1.68 |
| 716779 | INTERGENIC | SgI Promoter | 0.65 | 0.29 | 1.09 |
| 719345 | INTERGENIC | SgI Promoter | 1.08 | 0.49 | 0.70 |
| 721119 | INTERGENIC | SgI Promoter | 1.09 | 0.50 | 1.26 |
| 723354 | INTERGENIC | SgI Promoter | 0.79 | 0.38 | 1.07 |
| 725218 | INTERGENIC | SgI Promoter | 1.15 | 0.54 | 1.01 |
| 726132 | INTERGENIC | SgI Promoter | 0.49 | 0.20 | 0.95 |
| 731615 | INTERGENIC | SgI Promoter | 1.30 | 0.58 | 1.55 |
| 734288 | INTERGENIC | DbI Promoter | 2.17 | 0.86 | #N/A |
| 736800 | INTERGENIC | SgI Promoter | 2.16 | 0.84 | 0.79 |
| 739948 | INTERGENIC | SgI Promoter | 1.19 | 0.55 | 0.80 |
| 742878 | INTERGENIC | Non Promoter | 1.22 | 0.55 | 1.08 |
| 744357 | INTERGENIC | SgI Promoter | #N/A | #N/A | 0.95 |
| 746140 | INTERGENIC | DbI Promoter | 0.30 | 0.08 | 0.91 |
| 746940 | INTERGENIC | DbI Promoter | 1.92 | 0.80 | 0.82 |
| 749133 | INTERGENIC | Non Promoter | 0.30 | 0.08 | 1.14 |
| 750347 | INTERGENIC | SgI Promoter | 0.58 | 0.25 | 0.50 |
| 755743 | INTERGENIC | SgI Promoter | 1.92 | 0.80 | 0.89 |
| 760064 | INTERGENIC | SgI Promoter | 1.97 | 0.81 | 1.05 |
| 761120 | INTERGENIC | SgI Promoter | #N/A | #N/A | #N/A |
| 763980 | INTERGENIC | DbI Promoter | 0.99 | 0.47 | 0.88 |
| 770437 | INTERGENIC | Non Promoter | 2.08 | 0.84 | 1.03 |
| 772654 | INTERGENIC | DbI Promoter | 0.49 | 0.19 | 1.46 |
| 774789 | INTERGENIC | Non Promoter | 3.20 | 0.97 | 0.72 |

|        |            |              |      |      |      |
|--------|------------|--------------|------|------|------|
| 777599 |            |              | 0.77 | 0.35 | 0.65 |
| 779913 | INTERGENIC | Dbl Promoter | 1.39 | 0.63 | 0.68 |
| 781915 | INTERGENIC | Sgl Promoter | 0.69 | 0.31 | 0.86 |
| 783284 | INTERGENIC | Non Promoter | 0.29 | 0.07 | 0.79 |
| 727361 | INTERGENIC | Sgl Promoter | 2.38 | 0.89 | 2.57 |
| 728424 | INTERGENIC | Sgl Promoter | 1.57 | 0.68 | #N/A |
| 632598 | INTERGENIC | Sgl Promoter | #N/A | #N/A | 0.86 |
| 326584 | INTERGENIC | Sgl Promoter | 2.17 | 0.86 | 3.42 |
| 325249 | INTERGENIC | Dbl Promoter | 1.22 | 0.55 | 1.04 |
| 323411 | INTERGENIC | Sgl Promoter | 2.06 | 0.84 | 1.24 |
| 321858 | INTERGENIC | Non Promoter | #N/A | #N/A | 1.31 |
| 316938 | INTERGENIC | Dbl Promoter | 2.13 | 0.85 | 1.04 |
| 315813 | INTERGENIC | Sgl Promoter | 0.69 | 0.31 | 0.90 |
| 313078 | INTERGENIC | Sgl Promoter | 1.08 | 0.50 | 0.55 |
| 311342 | INTERGENIC | Non Promoter | 0.67 | 0.30 | 1.00 |
| 310312 | INTERGENIC | Dbl Promoter | 1.46 | 0.66 | #N/A |
| 309324 | INTERGENIC | Non Promoter | #N/A | #N/A | #N/A |
| 307938 | INTERGENIC | Sgl Promoter | 2.49 | 0.90 | 0.83 |
| 305349 | INTERGENIC | Dbl Promoter | 1.00 | 0.45 | 0.69 |
| 301097 | INTERGENIC | Non Promoter | 0.44 | 0.16 | #N/A |
| 300683 | INTERGENIC | Sgl Promoter | 1.01 | 0.47 | 1.08 |
| 299693 | INTERGENIC | Sgl Promoter | 1.00 | 0.46 | 0.70 |
| 297078 | INTERGENIC | Dbl Promoter | 2.27 | 0.88 | 0.95 |
| 294777 | INTERGENIC | Non Promoter | 0.47 | 0.18 | 0.88 |
| 292529 | INTERGENIC | Dbl Promoter | 2.10 | 0.84 | 0.78 |
| 290881 | INTERGENIC | Non Promoter | 0.29 | 0.08 | 1.01 |
| 288192 | INTERGENIC | Sgl Promoter | #N/A | #N/A | #N/A |
| 286172 | INTERGENIC | Dbl Promoter | 0.43 | 0.19 | 0.51 |
| 282164 | INTERGENIC | Sgl Promoter | 1.49 | 0.67 | #N/A |
| 280272 | INTERGENIC | Non Promoter | 0.34 | 0.09 | 0.73 |
| 278056 | INTERGENIC | Sgl Promoter | 2.24 | 0.87 | 1.10 |
| 277086 | INTERGENIC | Sgl Promoter | 0.58 | 0.25 | 1.22 |
| 274673 | INTERGENIC | Dbl Promoter | 1.15 | 0.53 | 0.96 |
| 274012 | INTERGENIC | Sgl Promoter | 2.85 | 0.94 | 1.34 |
| 272003 | INTERGENIC | Sgl Promoter | 0.73 | 0.35 | 0.94 |
| 270633 | INTERGENIC | Sgl Promoter | #N/A | #N/A | #N/A |
| 269815 | INTERGENIC | Non Promoter | 0.44 | 0.16 | #N/A |
| 268187 | INTERGENIC | Dbl Promoter | 1.42 | 0.63 | 0.63 |
| 266264 | INTERGENIC | Non Promoter | 0.06 | 0.01 | 0.05 |
| 265429 | INTERGENIC | Sgl Promoter | 1.26 | 0.58 | 0.83 |
| 263475 | INTERGENIC | Sgl Promoter | #N/A | #N/A | #N/A |
| 259489 | INTERGENIC | Dbl Promoter | 0.85 | 0.39 | 1.33 |
| 256664 | INTERGENIC | Non Promoter | 1.06 | 0.48 | 0.79 |
| 254295 | INTERGENIC | Dbl Promoter | 0.12 | 0.01 | 0.22 |
| 253147 | INTERGENIC | Sgl Promoter | 1.16 | 0.52 | 0.86 |
| 251265 | INTERGENIC | Non Promoter | #N/A | #N/A | #N/A |
| 249823 | INTERGENIC | Dbl Promoter | 1.82 | 0.76 | 1.64 |
| 248390 | INTERGENIC | Non Promoter | 0.37 | 0.12 | #N/A |
| 247148 | INTERGENIC | Sgl Promoter | 2.76 | 0.94 | 0.50 |
| 243464 | INTERGENIC | Sgl Promoter | 1.30 | 0.58 | 0.63 |
| 240202 | INTERGENIC | Non Promoter | 0.17 | 0.03 | 0.41 |

|        |            |              |      |      |      |
|--------|------------|--------------|------|------|------|
| 238617 | INTERGENIC | Dbl Promoter | 2.40 | 0.90 | 0.89 |
| 234938 | INTERGENIC | Dbl Promoter | 1.46 | 0.65 | 0.72 |
| 232444 | INTERGENIC | Sgl Promoter | 0.96 | 0.46 | 0.48 |
| 231568 | INTERGENIC | Non Promoter | 0.81 | 0.37 | 0.86 |
| 230083 | INTERGENIC | Sgl Promoter | 0.76 | 0.35 | 0.47 |
| 226609 | INTERGENIC | Dbl Promoter | 1.96 | 0.81 | 1.82 |
| 224418 | INTERGENIC | Non Promoter | #N/A | #N/A | #N/A |
| 223266 | INTERGENIC | Sgl Promoter | 1.78 | 0.75 | 1.10 |
| 220765 | INTERGENIC | Sgl Promoter | #N/A | #N/A | 0.63 |
| 219209 | INTERGENIC | Sgl Promoter | 0.66 | 0.30 | 0.57 |
| 217125 | INTERGENIC | Dbl Promoter | 0.71 | 0.32 | #N/A |
| 214016 | INTERGENIC | Non Promoter | 0.25 | 0.08 | 0.83 |
| 212243 | INTERGENIC | Dbl Promoter | 4.01 | 0.99 | 0.83 |
| 210519 | INTERGENIC | Sgl Promoter | 2.84 | 0.95 | 1.17 |
| 207391 | INTERGENIC | Sgl Promoter | 1.58 | 0.68 | #N/A |
| 206102 | INTERGENIC | Sgl Promoter | 2.55 | 0.91 | 1.55 |
| 204730 | INTERGENIC | Sgl Promoter | 2.53 | 0.91 | #N/A |
| 202695 | INTERGENIC | Sgl Promoter | 0.86 | 0.41 | 0.38 |
| 201984 | INTERGENIC | Sgl Promoter | 1.06 | 0.48 | 1.00 |
| 200367 | INTERGENIC | Non Promoter | #N/A | #N/A | #N/A |
| 198941 | INTERGENIC | Dbl Promoter | 2.07 | 0.83 | #N/A |
| 197219 | INTERGENIC | Non Promoter | #N/A | #N/A | #N/A |
| 196506 | INTERGENIC | Sgl Promoter | #N/A | #N/A | 0.51 |
| 194969 | INTERGENIC | Dbl Promoter | 3.65 | 0.98 | 0.76 |
| 193831 | INTERGENIC | Sgl Promoter | #N/A | #N/A | 1.01 |
| 189657 | INTERGENIC | Non Promoter | #N/A | #N/A | #N/A |
| 187023 | INTERGENIC | Dbl Promoter | 3.12 | 0.97 | 0.75 |
| 185847 | INTERGENIC | Sgl Promoter | 2.34 | 0.89 | 0.92 |
| 181681 | INTERGENIC | Sgl Promoter | 3.54 | 0.98 | #N/A |
| 180557 | INTERGENIC | Non Promoter | 0.51 | 0.21 | 1.34 |
| 171069 | INTERGENIC | Sgl Promoter | 1.45 | 0.65 | 0.58 |
| 167838 | INTERGENIC | Sgl Promoter | 1.91 | 0.79 | 1.04 |
| 168726 | INTERGENIC | Sgl Promoter | 1.32 | 0.59 | 0.58 |
| 165713 | INTERGENIC | Sgl Promoter | 1.65 | 0.73 | 0.73 |
| 162355 | INTERGENIC | Dbl Promoter | 1.61 | 0.70 | #N/A |
| 161672 | INTERGENIC | Sgl Promoter | 0.56 | 0.24 | 0.53 |
| 159547 | INTERGENIC | Sgl Promoter | 2.07 | 0.84 | 1.06 |
| 153911 | INTERGENIC | Sgl Promoter | 1.52 | 0.67 | 0.76 |
| 150397 | INTERGENIC | Non Promoter | #N/A | #N/A | #N/A |
| 147381 | INTERGENIC | Sgl Promoter | 3.22 | 0.97 | #N/A |
| 145333 | INTERGENIC | Sgl Promoter | #N/A | #N/A | #N/A |
| 144203 | INTERGENIC | Sgl Promoter | 1.69 | 0.72 | 0.63 |
| 142814 | INTERGENIC | Dbl Promoter | 1.43 | 0.63 | 0.67 |
| 141583 | INTERGENIC | Sgl Promoter | 1.56 | 0.69 | #N/A |
| 139226 | INTERGENIC | Sgl Promoter | 1.92 | 0.80 | 0.55 |
| 138106 | INTERGENIC | Sgl Promoter | 1.76 | 0.76 | #N/A |
| 136087 | INTERGENIC | Sgl Promoter | 1.41 | 0.63 | 1.06 |
| 132724 | INTERGENIC | Sgl Promoter | 0.29 | 0.07 | #N/A |
| 129236 | INTERGENIC | Dbl Promoter | 1.43 | 0.63 | 0.77 |
| 126981 | INTERGENIC | Sgl Promoter | 1.78 | 0.74 | 1.21 |
| 125996 | INTERGENIC | Non Promoter | #N/A | #N/A | #N/A |



|        |            |              |      |      |      |
|--------|------------|--------------|------|------|------|
| 117702 | INTERGENIC | Dbl Promoter | 1.42 | 0.64 | 1.14 |
| 116395 | INTERGENIC | Sgl Promoter | 0.76 | 0.35 | 0.91 |
| 113225 | INTERGENIC | Sgl Promoter | 0.29 | 0.06 | 0.42 |
| 112101 | INTERGENIC | Dbl Promoter | 1.56 | 0.69 | #N/A |
| 110296 | INTERGENIC | Sgl Promoter | 0.09 | 0.01 | #N/A |
| 109175 | INTERGENIC | Dbl Promoter | 1.17 | 0.53 | 0.67 |
| 108257 | INTERGENIC | Non Promoter | 0.25 | 0.04 | #N/A |
| 106709 | INTERGENIC | Sgl Promoter | 1.92 | 0.79 | 0.68 |
| 104325 | INTERGENIC | Dbl Promoter | 1.57 | 0.68 | 0.74 |
| 103316 | INTERGENIC | Non Promoter | #N/A | #N/A | 0.63 |
| 101474 | INTERGENIC | Sgl Promoter | 1.73 | 0.74 | 0.79 |
| 99808  | INTERGENIC | Sgl Promoter | 2.66 | 0.93 | 0.95 |
| 97550  | INTERGENIC | Dbl Promoter | 1.03 | 0.47 | 1.08 |
| 96607  | INTERGENIC | Sgl Promoter | 0.70 | 0.33 | 0.93 |
| 94855  | INTERGENIC | Sgl Promoter | 0.25 | 0.08 | 0.59 |
| 93394  | INTERGENIC | Sgl Promoter | 0.16 | 0.04 | 0.87 |
| 92025  | INTERGENIC | Sgl Promoter | 1.30 | 0.58 | 1.16 |
| 89691  | INTERGENIC | Non Promoter | 0.65 | 0.29 | #N/A |
| 87843  | INTERGENIC | Dbl Promoter | 0.84 | 0.38 | 0.49 |
| 85455  | INTERGENIC | Non Promoter | #N/A | #N/A | #N/A |
| 83833  | INTERGENIC | Dbl Promoter | 1.39 | 0.62 | 0.58 |
| 81786  |            |              | 0.35 | 0.10 | 0.95 |
| 80347  | INTERGENIC | Dbl Promoter | 0.87 | 0.40 | 0.77 |
| 78351  | INTERGENIC | Non Promoter | 0.88 | 0.41 | 1.12 |
| 77559  | INTERGENIC | Sgl Promoter | 1.39 | 0.62 | 0.85 |
| 74399  | INTERGENIC | Sgl Promoter | 1.78 | 0.76 | 0.77 |
| 73030  | INTERGENIC | Sgl Promoter | 0.74 | 0.34 | 0.90 |
| 71299  | INTERGENIC | Sgl Promoter | 0.85 | 0.39 | 0.95 |
| 70155  | INTERGENIC | Sgl Promoter | 1.66 | 0.72 | 0.90 |
| 69375  | INTERGENIC | Sgl Promoter | 0.45 | 0.17 | 0.74 |
| 67560  | INTERGENIC | Non Promoter | 0.25 | 0.06 | #N/A |
| 65620  | INTERGENIC | Dbl Promoter | 3.14 | 0.97 | 0.84 |
| 61324  | INTERGENIC | Sgl Promoter | 1.36 | 0.61 | 1.19 |
| 60382  |            |              | 0.46 | 0.17 | #N/A |
| 58758  | INTERGENIC | Sgl Promoter | 0.42 | 0.15 | #N/A |
| 56450  | INTERGENIC | Sgl Promoter | 1.61 | 0.71 | #N/A |
| 55556  | INTERGENIC | Dbl Promoter | 3.38 | 0.98 | 0.92 |
| 53096  | INTERGENIC | Dbl Promoter | 3.37 | 0.98 | 1.04 |
| 49553  | INTERGENIC | Non Promoter | 0.21 | 0.03 | #N/A |
| 48736  | INTERGENIC | Dbl Promoter | 0.57 | 0.27 | 0.09 |
| 47931  | INTERGENIC | Sgl Promoter | #N/A | #N/A | 0.50 |
| 45758  | INTERGENIC | Non Promoter | #N/A | #N/A | #N/A |
| 44936  | INTERGENIC | Dbl Promoter | 3.14 | 0.96 | 0.89 |
| 43692  | INTERGENIC | Sgl Promoter | 1.20 | 0.55 | 1.28 |
| 39656  |            |              | 1.28 | 0.58 | 1.40 |
| 40747  | INTERGENIC | Dbl Promoter | 1.72 | 0.73 | 1.13 |
| 36821  | INTERGENIC | Non Promoter | 0.98 | 0.45 | 1.12 |
| 33131  | INTERGENIC | Dbl Promoter | 0.42 | 0.15 | 1.08 |
| 34657  | INTERGENIC | Dbl Promoter | 1.37 | 0.61 | 0.82 |
| 27838  | INTERGENIC | Non Promoter | 1.26 | 0.57 | 0.59 |
| 28702  | INTERGENIC | Non Promoter | 0.36 | 0.10 | 0.28 |

|        |            |              |      |      |      |
|--------|------------|--------------|------|------|------|
| 25272  | INTERGENIC | Dbl Promoter | 1.43 | 0.65 | 0.77 |
| 22524  | INTERGENIC | Sgl Promoter | 1.17 | 0.53 | 0.77 |
| 18301  | INTERGENIC | Sgl Promoter | 2.22 | 0.86 | 0.47 |
| 15966  | INTERGENIC | Non Promoter | 1.65 | 0.72 | 1.01 |
| 17280  | INTERGENIC | Non Promoter | 1.34 | 0.61 | 0.83 |
| 13111  | INTERGENIC | Dbl Promoter | 0.64 | 0.29 | #N/A |
| 14312  |            |              | 1.00 | 0.45 | 1.32 |
| 11548  | INTERGENIC | Non Promoter | 0.44 | 0.17 | 0.84 |
| 9596   | INTERGENIC | Sgl Promoter | 1.29 | 0.59 | 0.73 |
| 2894   | INTERGENIC | Dbl Promoter | 1.41 | 0.64 | #N/A |
| 1647   | INTERGENIC | Sgl Promoter | 0.58 | 0.25 | 0.81 |
| 3809   | INTERGENIC | Dbl Promoter | 1.88 | 0.78 | 0.70 |
| 19490  | INTERGENIC | Sgl Promoter | 0.90 | 0.43 | 0.98 |
| 113801 | INTERGENIC | Non Promoter | 0.63 | 0.27 | #N/A |
| 228329 | INTERGENIC | Dbl Promoter | 0.76 | 0.35 | #N/A |
| 341278 | INTERGENIC | Sgl Promoter | 0.37 | 0.12 | #N/A |
| 356542 | INTERGENIC | Sgl Promoter | 1.68 | 0.72 | 1.17 |
| 123991 | INTERGENIC | Dbl Promoter | 1.37 | 0.61 | 0.92 |
| 227849 | INTERGENIC | Dbl Promoter | 1.70 | 0.73 | 0.67 |
| 354680 | INTERGENIC | Sgl Promoter | 1.33 | 0.60 | #N/A |
| 5080   | INTERGENIC | Dbl Promoter | 1.69 | 0.73 | 1.22 |
| 329417 | INTERGENIC | Sgl Promoter | 1.34 | 0.61 | 1.15 |
| 331455 | INTERGENIC | Sgl Promoter | 1.00 | 0.45 | 1.11 |
| 333592 | INTERGENIC | Sgl Promoter | 2.04 | 0.82 | 0.80 |
| 334509 | INTERGENIC | Non Promoter | 0.31 | 0.07 | 0.89 |
| 337680 | INTERGENIC | Sgl Promoter | 1.03 | 0.47 | 0.83 |
| 338938 | INTERGENIC | Sgl Promoter | 1.44 | 0.63 | 1.17 |
| 340299 | INTERGENIC | Sgl Promoter | 0.81 | 0.37 | 0.95 |
| 342857 | INTERGENIC | Sgl Promoter | 1.01 | 0.47 | 0.76 |
| 344334 | INTERGENIC | Dbl Promoter | 0.71 | 0.33 | 0.76 |
| 346194 | INTERGENIC | Non Promoter | 0.93 | 0.43 | #N/A |
| 349678 | INTERGENIC | Dbl Promoter | 2.21 | 0.85 | #N/A |
| 354040 | INTERGENIC | Sgl Promoter | #N/A | #N/A | #N/A |
| 357673 | INTERGENIC | Sgl Promoter | 2.38 | 0.89 | 0.65 |
| 360460 | INTERGENIC | Non Promoter | 0.51 | 0.20 | 0.50 |
| 361411 | INTERGENIC | Dbl Promoter | 1.93 | 0.79 | 0.55 |
| 364368 | INTERGENIC | Sgl Promoter | 2.01 | 0.82 | 0.69 |
| 368126 | INTERGENIC | Sgl Promoter | 1.20 | 0.55 | 0.71 |
| 370523 | INTERGENIC | Non Promoter | 0.89 | 0.42 | #N/A |
| 371820 | INTERGENIC | Sgl Promoter | 1.54 | 0.69 | 0.87 |
| 372797 | INTERGENIC | Sgl Promoter | 0.82 | 0.38 | 0.93 |
| 373709 | INTERGENIC | Sgl Promoter | 1.98 | 0.80 | 0.46 |
| 376011 | INTERGENIC | Sgl Promoter | #N/A | #N/A | #N/A |
| 377846 | INTERGENIC | Dbl Promoter | 1.76 | 0.74 | 0.91 |
| 379780 | INTERGENIC | Sgl Promoter | 1.08 | 0.49 | #N/A |
| 381052 | INTERGENIC | Sgl Promoter | 0.83 | 0.38 | 0.76 |
| 383532 | INTERGENIC | Non Promoter | 0.36 | 0.11 | 0.63 |
| 384599 | INTERGENIC | Dbl Promoter | #N/A | #N/A | #N/A |
| 385879 | INTERGENIC | Sgl Promoter | 0.75 | 0.34 | 0.39 |
| 386824 | INTERGENIC | Sgl Promoter | 1.99 | 0.81 | 1.11 |
| 389212 | INTERGENIC | Sgl Promoter | 0.46 | 0.19 | 0.68 |



|        |            |              |      |      |      |
|--------|------------|--------------|------|------|------|
| 389770 | INTERGENIC | Non Promoter | 1.03 | 0.47 | 0.99 |
| 392415 | INTERGENIC | Sgl Promoter | 0.63 | 0.29 | 0.47 |
| 394836 | INTERGENIC | Sgl Promoter | 1.38 | 0.61 | 1.40 |
| 397734 | INTERGENIC | Sgl Promoter | 1.30 | 0.58 | 0.68 |
| 400347 | INTERGENIC | Dbl Promoter | 2.81 | 0.94 | 0.61 |
| 401440 | INTERGENIC | Sgl Promoter | 1.48 | 0.65 | 1.02 |
| 402760 | INTERGENIC | Non Promoter | #N/A | #N/A | #N/A |
| 405767 | INTERGENIC | Dbl Promoter | #N/A | #N/A | #N/A |
| 407063 | INTERGENIC | Sgl Promoter | 0.76 | 0.35 | 1.18 |
| 408357 | INTERGENIC | Non Promoter | 1.07 | 0.49 | 1.49 |
| 409764 | INTERGENIC | Sgl Promoter | 0.38 | 0.12 | 0.76 |
| 413006 | INTERGENIC | Sgl Promoter | 1.32 | 0.60 | 0.72 |
| 413851 | INTERGENIC | Sgl Promoter | 1.37 | 0.61 | 0.94 |
| 414459 | INTERGENIC | Non Promoter | 0.57 | 0.25 | 1.51 |
| 416347 | INTERGENIC | Sgl Promoter | 1.31 | 0.59 | 0.83 |
| 418630 | INTERGENIC | Sgl Promoter | 0.94 | 0.45 | 0.58 |
| 422668 | INTERGENIC | Sgl Promoter | 2.14 | 0.85 | 0.91 |
| 424271 | INTERGENIC | Sgl Promoter | 0.32 | 0.12 | 0.89 |
| 424847 | INTERGENIC | Sgl Promoter | 0.45 | 0.20 | #N/A |
| 426773 | INTERGENIC | Sgl Promoter | 0.45 | 0.17 | 0.55 |
| 427818 | INTERGENIC | Dbl Promoter | 1.47 | 0.66 | 0.84 |
| 430248 | INTERGENIC | Non Promoter | 1.26 | 0.57 | 0.80 |
| 432187 | INTERGENIC | Dbl Promoter | 1.92 | 0.79 | 0.82 |
| 433689 | INTERGENIC | Non Promoter | 0.40 | 0.14 | 1.17 |
| 438176 | INTERGENIC | Sgl Promoter | 1.80 | 0.77 | 0.83 |
| 440391 | INTERGENIC | Sgl Promoter | 0.24 | 0.04 | 0.47 |
| 441535 | INTERGENIC | Dbl Promoter | 1.16 | 0.54 | 1.04 |
| 447440 | INTERGENIC | Dbl Promoter | 0.77 | 0.35 | 0.43 |
| 451730 | INTERGENIC | Non Promoter | 0.43 | 0.16 | 1.18 |
| 454857 | INTERGENIC | Dbl Promoter | 0.36 | 0.10 | 0.74 |
| 455907 | INTERGENIC | Non Promoter | #N/A | #N/A | #N/A |
| 458650 | INTERGENIC | Sgl Promoter | 2.08 | 0.84 | 1.49 |
| 459480 | INTERGENIC | Sgl Promoter | 0.78 | 0.37 | 1.10 |
| 461502 | INTERGENIC | Dbl Promoter | 0.93 | 0.44 | #N/A |
| 464450 | INTERGENIC | Sgl Promoter | 1.26 | 0.57 | 0.95 |
| 466675 | INTERGENIC | Non Promoter | #N/A | #N/A | #N/A |
| 468212 | INTERGENIC | Dbl Promoter | 2.26 | 0.86 | 1.07 |
| 469377 | INTERGENIC | Non Promoter | #N/A | #N/A | #N/A |
| 471899 | INTERGENIC | Dbl Promoter | #N/A | #N/A | 0.60 |
| 472725 | INTERGENIC | Sgl Promoter | #N/A | #N/A | 0.69 |
| 473475 | INTERGENIC | Non Promoter | #N/A | #N/A | #N/A |
| 474552 | INTERGENIC | Dbl Promoter | 1.16 | 0.53 | #N/A |
| 479296 | INTERGENIC | Sgl Promoter | #N/A | #N/A | 0.35 |
| 482033 | INTERGENIC | Sgl Promoter | 3.37 | 0.98 | #N/A |
| 483219 | INTERGENIC | Non Promoter | #N/A | #N/A | #N/A |
| 487439 | INTERGENIC | Dbl Promoter | 2.25 | 0.87 | 0.92 |
| 490195 | INTERGENIC | Non Promoter | 0.45 | 0.16 | #N/A |
| 491122 | INTERGENIC | Sgl Promoter | 0.95 | 0.43 | 0.61 |
| 493263 | INTERGENIC | Dbl Promoter | 1.63 | 0.70 | 0.95 |
| 503550 | INTERGENIC | Non Promoter | 0.56 | 0.25 | #N/A |
| 505792 | INTERGENIC | Dbl Promoter | 0.66 | 0.30 | 0.54 |

|        |            |              |      |      |      |
|--------|------------|--------------|------|------|------|
| 506976 | INTERGENIC | Non Promoter | #N/A | #N/A | #N/A |
| 507946 | INTERGENIC | Sgl Promoter | 1.18 | 0.53 | 1.02 |
| 511823 | INTERGENIC | Dbl Promoter | 1.84 | 0.78 | 0.62 |
| 515242 | INTERGENIC | Dbl Promoter | 1.01 | 0.46 | 0.82 |
| 516421 | INTERGENIC | Sgl Promoter | #N/A | #N/A | #N/A |
| 517640 | INTERGENIC | Dbl Promoter | 1.25 | 0.58 | #N/A |
| 525276 | INTERGENIC | Sgl Promoter | 1.14 | 0.51 | 0.90 |
| 530427 | INTERGENIC | Sgl Promoter | #N/A | #N/A | #N/A |
| 534073 | INTERGENIC | Sgl Promoter | 1.81 | 0.76 | 1.02 |
| 538657 | INTERGENIC | Non Promoter | #N/A | #N/A | #N/A |
| 545027 | INTERGENIC | Dbl Promoter | 2.02 | 0.82 | 0.88 |
| 546855 | INTERGENIC | Sgl Promoter | 1.98 | 0.80 | 0.99 |
| 548790 | INTERGENIC | Non Promoter | #N/A | #N/A | 1.76 |
| 551112 | INTERGENIC | Dbl Promoter | 1.36 | 0.60 | 1.09 |
| 552296 | INTERGENIC | Sgl Promoter | 0.12 | 0.02 | 0.42 |
| 554822 | INTERGENIC | Sgl Promoter | 2.32 | 0.88 | 0.66 |
| 559959 | INTERGENIC | Sgl Promoter | 0.29 | 0.10 | #N/A |
| 561168 | INTERGENIC | Dbl Promoter | 1.25 | 0.58 | 0.90 |
| 564474 | INTERGENIC | Non Promoter | #N/A | #N/A | #N/A |
| 566875 | INTERGENIC | Sgl Promoter | 0.96 | 0.45 | 0.86 |
| 569927 | INTERGENIC | Sgl Promoter | 2.40 | 0.90 | 0.98 |
| 571956 | INTERGENIC | Sgl Promoter | 1.41 | 0.63 | 1.09 |
| 573173 | INTERGENIC | Dbl Promoter | 1.99 | 0.82 | 0.93 |
| 575096 | INTERGENIC | Sgl Promoter | 1.31 | 0.59 | 0.96 |
| 578562 | INTERGENIC | Sgl Promoter | 1.03 | 0.47 | 0.98 |
| 580157 | INTERGENIC | Non Promoter | 1.77 | 0.76 | 0.79 |
| 581811 | INTERGENIC | Non Promoter | 0.54 | 0.22 | #N/A |
| 584307 | INTERGENIC | Sgl Promoter | 0.88 | 0.41 | 1.11 |
| 586948 | INTERGENIC | Sgl Promoter | 1.89 | 0.78 | 1.17 |
| 589940 | INTERGENIC | Non Promoter | 0.44 | 0.16 | 1.12 |
| 593055 | INTERGENIC | Dbl Promoter | 2.77 | 0.95 | 0.92 |
| 594352 | INTERGENIC | Non Promoter | 0.57 | 0.24 | #N/A |
| 602715 | INTERGENIC | Sgl Promoter | 2.13 | 0.85 | 0.82 |
| 605345 | INTERGENIC | Sgl Promoter | 1.36 | 0.61 | #N/A |
| 606512 | INTERGENIC | Sgl Promoter | 0.86 | 0.39 | 0.56 |
| 608638 | INTERGENIC | Non Promoter | #N/A | #N/A | #N/A |
| 609836 | INTERGENIC | Sgl Promoter | 2.58 | 0.92 | 0.80 |
| 611997 | INTERGENIC | Dbl Promoter | 3.08 | 0.97 | #N/A |
| 612995 | INTERGENIC | Non Promoter | 0.27 | 0.09 | 1.22 |
| 617516 | INTERGENIC | Sgl Promoter | 1.84 | 0.78 | 1.51 |
| 619062 | INTERGENIC | Dbl Promoter | 0.94 | 0.45 | 0.71 |
| 619838 | INTERGENIC | Dbl Promoter | #N/A | #N/A | 0.40 |
| 624727 | INTERGENIC | Sgl Promoter | 0.93 | 0.42 | #N/A |
| 626626 | INTERGENIC | Non Promoter | 0.36 | 0.11 | 1.76 |
| 628358 | INTERGENIC | Sgl Promoter | 1.75 | 0.75 | 0.98 |
| 630964 | INTERGENIC | Sgl Promoter | 1.58 | 0.69 | 1.79 |
| 632162 | INTERGENIC | Dbl Promoter | 1.84 | 0.78 | 1.11 |
| 633280 | INTERGENIC | Non Promoter | 0.92 | 0.42 | 0.64 |
| 633837 | INTERGENIC | Dbl Promoter | 2.90 | 0.95 | 0.88 |
| 636937 | INTERGENIC | Non Promoter | #N/A | #N/A | #N/A |
| 639558 | INTERGENIC | Sgl Promoter | 0.55 | 0.25 | 0.55 |

|        |            |              |      |      |      |
|--------|------------|--------------|------|------|------|
| 642739 | INTERGENIC | Dbl Promoter | 2.26 | 0.88 | 1.39 |
| 643392 | INTERGENIC | Non Promoter | 0.73 | 0.35 | 0.65 |
| 644564 | INTERGENIC | Dbl Promoter | 2.33 | 0.88 | 1.71 |
| 647124 | INTERGENIC | Non Promoter | #N/A | #N/A | #N/A |
| 648802 | INTERGENIC | Sgl Promoter | 1.10 | 0.50 | 1.34 |
| 649301 | INTERGENIC | Dbl Promoter | 1.13 | 0.51 | 1.11 |
| 654208 | INTERGENIC | Dbl Promoter | 3.66 | 0.98 | 0.98 |
| 657130 | INTERGENIC | Sgl Promoter | 0.86 | 0.40 | 1.09 |
| 658745 | INTERGENIC | Sgl Promoter | 2.39 | 0.90 | 0.64 |
| 659813 | INTERGENIC | Non Promoter | #N/A | #N/A | #N/A |
| 662399 | INTERGENIC | Dbl Promoter | 2.75 | 0.94 | 0.97 |
| 663810 | INTERGENIC | Non Promoter | #N/A | #N/A | #N/A |
| 671041 | INTERGENIC | Sgl Promoter | 0.88 | 0.40 | 0.75 |
| 671843 | INTERGENIC | Sgl Promoter | 0.41 | 0.16 | 0.78 |
| 673379 | INTERGENIC | Sgl Promoter | 1.86 | 0.77 | 1.40 |
| 675937 | INTERGENIC | Dbl Promoter | #N/A | #N/A | #N/A |
| 678189 | INTERGENIC | Non Promoter | 0.52 | 0.21 | 1.34 |
| 678870 | INTERGENIC | Dbl Promoter | 0.13 | 0.02 | 0.42 |
| 679355 | INTERGENIC | Sgl Promoter | #N/A | #N/A | #N/A |
| 681442 | INTERGENIC | Non Promoter | 0.55 | 0.23 | 0.89 |
| 683109 | INTERGENIC | Dbl Promoter | 2.53 | 0.91 | 1.04 |
| 684028 | INTERGENIC | Sgl Promoter | 0.83 | 0.40 | 0.48 |
| 685765 | INTERGENIC | Sgl Promoter | 1.48 | 0.67 | 0.71 |
| 689622 | INTERGENIC | Sgl Promoter | 1.52 | 0.67 | #N/A |
| 690693 | INTERGENIC | Sgl Promoter | 1.71 | 0.73 | 0.80 |
| 692473 | INTERGENIC | Sgl Promoter | 2.07 | 0.83 | 0.65 |
| 701996 | INTERGENIC | Dbl Promoter | 2.01 | 0.82 | 1.11 |
| 703427 | INTERGENIC | Dbl Promoter | 1.05 | 0.48 | 1.05 |
| 711681 | INTERGENIC | Non Promoter | 0.21 | 0.03 | #N/A |
| 712864 | INTERGENIC | Dbl Promoter | 3.27 | 0.98 | 0.94 |
| 715591 | INTERGENIC | Non Promoter | 0.37 | 0.11 | #N/A |
| 717021 | INTERGENIC | Dbl Promoter | 2.71 | 0.94 | 0.72 |
| 718651 | INTERGENIC | Non Promoter | #N/A | #N/A | #N/A |
| 720179 | INTERGENIC | Dbl Promoter | 0.97 | 0.44 | 1.08 |
| 721944 | INTERGENIC | Dbl Promoter | 0.66 | 0.30 | 0.71 |
| 725562 | INTERGENIC | Non Promoter | 0.19 | 0.03 | 0.99 |
| 727510 | INTERGENIC | Dbl Promoter | #N/A | #N/A | 0.83 |
| 730006 | INTERGENIC | Non Promoter | 0.57 | 0.24 | #N/A |
| 733923 | INTERGENIC | Dbl Promoter | 3.35 | 0.97 | 0.97 |
| 736435 | INTERGENIC | Non Promoter | #N/A | #N/A | #N/A |
| 738318 | INTERGENIC | Dbl Promoter | 1.70 | 0.74 | 1.02 |
| 738922 | INTERGENIC | Non Promoter | 1.03 | 0.47 | 1.73 |
| 742908 | INTERGENIC | Dbl Promoter | 0.80 | 0.37 | 0.99 |
| 744533 | INTERGENIC | Non Promoter | 0.42 | 0.17 | 1.25 |
| 745591 | INTERGENIC | Sgl Promoter | 2.31 | 0.88 | 1.11 |
| 746723 | INTERGENIC | Sgl Promoter | 0.52 | 0.23 | 1.03 |
| 747523 | INTERGENIC | Sgl Promoter | 0.93 | 0.43 | 0.74 |
| 749299 | INTERGENIC | Dbl Promoter | 2.08 | 0.83 | #N/A |
| 752212 | INTERGENIC | Sgl Promoter | 0.23 | 0.03 | 0.65 |
| 755326 | INTERGENIC | Dbl Promoter | 1.78 | 0.76 | 0.95 |
| 756474 | INTERGENIC | Non Promoter | 0.34 | 0.10 | 1.17 |

|        |            |              |      |      |      |
|--------|------------|--------------|------|------|------|
| 758328 | INTERGENIC | Dbl Promoter | 0.65 | 0.29 | 1.18 |
| 759780 | INTERGENIC | Sgl Promoter | 1.34 | 0.60 | 0.89 |
| 760823 | INTERGENIC | Non Promoter | 0.65 | 0.29 | #N/A |
| 761390 | INTERGENIC | Dbl Promoter | #N/A | #N/A | 0.57 |
| 762823 | INTERGENIC | Dbl Promoter | 1.20 | 0.55 | 0.64 |
| 766867 | INTERGENIC | Non Promoter | #N/A | #N/A | #N/A |
| 768407 | INTERGENIC | Dbl Promoter | 2.26 | 0.88 | 1.05 |
| 770798 | INTERGENIC | Sgl Promoter | 0.42 | 0.16 | 0.44 |
| 772599 | INTERGENIC | Sgl Promoter | 2.62 | 0.93 | 1.11 |
| 774571 | INTERGENIC | Sgl Promoter | 2.86 | 0.95 | #N/A |
| 775844 | INTERGENIC | Sgl Promoter | 1.40 | 0.64 | 1.00 |
| 778553 | INTERGENIC | Non Promoter | 0.74 | 0.34 | #N/A |
| 779868 | INTERGENIC | Dbl Promoter | 0.13 | 0.01 | 0.45 |
| 780904 | INTERGENIC | Sgl Promoter | 0.64 | 0.28 | 1.49 |
| 781992 | INTERGENIC | Sgl Promoter | 3.34 | 0.98 | 1.02 |
| 783666 | INTERGENIC | Sgl Promoter | 0.80 | 0.37 | #N/A |
| 784855 | INTERGENIC | Sgl Promoter | 1.25 | 0.57 | 0.61 |
| 786993 | INTERGENIC | Sgl Promoter | 1.42 | 0.64 | #N/A |
| 788740 | INTERGENIC | Non Promoter | #N/A | #N/A | #N/A |
| 790209 | INTERGENIC | Sgl Promoter | 0.40 | 0.18 | 1.07 |
| 792529 | INTERGENIC | Dbl Promoter | 2.74 | 0.93 | 1.28 |
| 794074 | INTERGENIC | Non Promoter | 0.33 | 0.13 | #N/A |
| 795799 | INTERGENIC | Sgl Promoter | 1.70 | 0.72 | 0.90 |
| 797674 | INTERGENIC | Dbl Promoter | 1.15 | 0.53 | 1.02 |
| 798672 | INTERGENIC | Non Promoter | 0.31 | 0.07 | 1.09 |
| 800968 | INTERGENIC | Sgl Promoter | 1.79 | 0.75 | 0.67 |
| 802548 | INTERGENIC | Sgl Promoter | 2.10 | 0.84 | 1.48 |
| 804374 | INTERGENIC | Sgl Promoter | 2.24 | 0.86 | #N/A |
| 805029 | INTERGENIC | Non Promoter | #N/A | #N/A | #N/A |
| 807268 | INTERGENIC | Dbl Promoter | 2.44 | 0.91 | 0.55 |
| 808250 | INTERGENIC | Non Promoter | 0.53 | 0.22 | #N/A |
| 811004 | INTERGENIC | Dbl Promoter | 1.91 | 0.79 | 0.93 |
| 811667 | INTERGENIC | Sgl Promoter | 1.43 | 0.64 | #N/A |
| 815911 | INTERGENIC | Non Promoter | 0.26 | 0.05 | #N/A |
| 817287 | INTERGENIC | Dbl Promoter | 2.14 | 0.84 | 0.67 |
| 818752 | INTERGENIC | Non Promoter | 2.02 | 0.81 | 0.46 |
| 820449 | INTERGENIC | Sgl Promoter | 1.87 | 0.79 | 0.86 |
| 821018 | INTERGENIC | Sgl Promoter | 1.44 | 0.64 | 0.95 |
| 822583 | INTERGENIC | Non Promoter | #N/A | #N/A | #N/A |
| 825529 | INTERGENIC | Sgl Promoter | 0.99 | 0.45 | 0.84 |
| 826380 | INTERGENIC | Dbl Promoter | 1.73 | 0.73 | 1.09 |
| 828047 | INTERGENIC | Non Promoter | #N/A | #N/A | #N/A |
| 831054 | INTERGENIC | Sgl Promoter | 1.53 | 0.67 | 0.92 |
| 832327 | INTERGENIC | Dbl Promoter | 0.42 | 0.19 | 0.87 |
| 834447 | INTERGENIC | Non Promoter | 0.23 | 0.06 | 0.97 |
| 837669 | INTERGENIC | Dbl Promoter | 0.89 | 0.43 | 0.88 |
| 839079 | INTERGENIC | Non Promoter | 0.23 | 0.04 | 0.39 |
| 841328 | INTERGENIC | Dbl Promoter | 2.17 | 0.86 | 0.56 |
| 842812 | INTERGENIC | Dbl Promoter | 0.59 | 0.25 | 1.48 |
| 844987 | INTERGENIC | Sgl Promoter | 2.13 | 0.85 | 1.37 |
| 846264 | INTERGENIC | Sgl Promoter | 1.17 | 0.53 | 0.90 |

|        |            |              |      |      |      |
|--------|------------|--------------|------|------|------|
| 847448 | INTERGENIC | Sgl Promoter | 1.35 | 0.62 | 0.82 |
| 848473 | INTERGENIC | Sgl Promoter | 1.36 | 0.62 | #N/A |
| 849630 | INTERGENIC | Sgl Promoter | 2.68 | 0.94 | 1.12 |
| 850932 | INTERGENIC | Non Promoter | 0.69 | 0.31 | 0.84 |
| 852116 | INTERGENIC | Sgl Promoter | 1.70 | 0.72 | 0.53 |
| 853352 | INTERGENIC | Dbl Promoter | 2.50 | 0.91 | #N/A |
| 854182 | INTERGENIC | Non Promoter | #N/A | #N/A | #N/A |
| 861170 | INTERGENIC | Dbl Promoter | 2.08 | 0.84 | 0.96 |
| 865648 | INTERGENIC | Non Promoter | #N/A | #N/A | #N/A |
| 867093 | INTERGENIC | Dbl Promoter | 0.65 | 0.30 | 0.33 |
| 868335 | INTERGENIC | Sgl Promoter | 1.92 | 0.80 | 1.03 |
| 869203 | INTERGENIC | Sgl Promoter | 0.82 | 0.38 | 0.75 |
| 870197 | INTERGENIC | Sgl Promoter | 1.58 | 0.70 | 1.62 |
| 875594 | INTERGENIC | Dbl Promoter | 2.04 | 0.83 | 0.96 |
| 878427 | INTERGENIC | Dbl Promoter | 0.62 | 0.28 | 0.87 |
| 877225 | INTERGENIC | Non Promoter | #N/A | #N/A | 1.07 |
| 880957 | INTERGENIC | Sgl Promoter | 1.50 | 0.66 | 0.87 |
| 882757 | INTERGENIC | Sgl Promoter | 0.18 | 0.02 | 0.34 |
| 884506 | INTERGENIC | Sgl Promoter | #N/A | #N/A | 0.98 |
| 889014 | INTERGENIC | Dbl Promoter | #N/A | #N/A | 0.97 |
| 888512 | INTERGENIC | Non Promoter | 0.86 | 0.40 | 0.92 |
| 889859 | INTERGENIC | Non Promoter | #N/A | #N/A | #N/A |
| 892722 | INTERGENIC | Sgl Promoter | 0.53 | 0.23 | 0.96 |
| 894615 | INTERGENIC | Sgl Promoter | 1.32 | 0.59 | 0.57 |
| 899047 | INTERGENIC | Sgl Promoter | 1.35 | 0.60 | 1.55 |
| 900241 | INTERGENIC | Sgl Promoter | 1.87 | 0.77 | 1.90 |
| 901849 | INTERGENIC | Sgl Promoter | 0.31 | 0.08 | 0.94 |
| 903034 | INTERGENIC | Dbl Promoter | 0.17 | 0.04 | #N/A |
| 904751 | INTERGENIC | Sgl Promoter | 0.60 | 0.28 | 0.70 |
| 906227 | INTERGENIC | Non Promoter | 0.58 | 0.25 | 1.08 |
| 908440 | INTERGENIC | Dbl Promoter | 1.17 | 0.53 | 0.66 |
| 909334 | INTERGENIC | Dbl Promoter | 0.27 | 0.06 | 0.66 |
| 911775 | INTERGENIC | Non Promoter | 0.67 | 0.32 | 2.62 |
| 912813 | INTERGENIC | Dbl Promoter | 2.54 | 0.92 | 0.70 |
| 916021 | INTERGENIC | Dbl Promoter | 2.15 | 0.84 | 1.00 |
| 918597 | INTERGENIC | Non Promoter | 0.30 | 0.11 | 1.24 |
| 921526 | INTERGENIC | Sgl Promoter | 2.43 | 0.90 | 1.13 |
| 923223 | INTERGENIC | Sgl Promoter | 1.58 | 0.70 | 1.31 |
| 925712 | INTERGENIC | Sgl Promoter | 2.01 | 0.81 | #N/A |
| 930725 | INTERGENIC | Non Promoter | 1.37 | 0.62 | 1.05 |
| 931794 | INTERGENIC | Dbl Promoter | 1.02 | 0.48 | 1.00 |
| 936722 | INTERGENIC | Non Promoter | 0.49 | 0.19 | 1.70 |
| 939612 | INTERGENIC | Sgl Promoter | 2.73 | 0.93 | 1.61 |
| 943556 | INTERGENIC | Sgl Promoter | 3.34 | 0.98 | #N/A |
| 944532 | INTERGENIC | Non Promoter | #N/A | #N/A | #N/A |
| 946224 | INTERGENIC | Non Promoter | 0.50 | 0.20 | #N/A |
| 949764 | INTERGENIC | Dbl Promoter | 2.03 | 0.82 | 0.91 |
| 954335 | INTERGENIC | Sgl Promoter | 1.37 | 0.61 | 0.77 |
| 956889 | INTERGENIC | Sgl Promoter | 0.36 | 0.15 | 1.31 |
| 958353 | INTERGENIC | Non Promoter | 1.63 | 0.71 | 1.50 |
| 959193 | INTERGENIC | Sgl Promoter | 0.93 | 0.43 | 0.84 |



|         |            |              |      |      |      |
|---------|------------|--------------|------|------|------|
| 960978  | INTERGENIC | Dbl Promoter | 1.16 | 0.54 | 1.30 |
| 966657  | INTERGENIC | Non Promoter | 0.53 | 0.21 | 2.17 |
| 968139  | INTERGENIC | Sgl Promoter | 0.28 | 0.06 | 0.57 |
| 968982  | INTERGENIC | Sgl Promoter | 1.14 | 0.53 | 0.85 |
| 980250  | INTERGENIC | Sgl Promoter | 0.96 | 0.44 | 0.70 |
| 984933  | INTERGENIC | Non Promoter | #N/A | #N/A | #N/A |
| 986890  | INTERGENIC | Sgl Promoter | 1.96 | 0.80 | 1.03 |
| 989780  | INTERGENIC | Dbl Promoter | 0.45 | 0.17 | 0.60 |
| 995009  | INTERGENIC | Sgl Promoter | 2.14 | 0.85 | #N/A |
| 997204  | INTERGENIC | Dbl Promoter | 1.75 | 0.74 | 0.88 |
| 1001138 | INTERGENIC | Sgl Promoter | 2.03 | 0.83 | 0.55 |
| 1004172 | INTERGENIC | Dbl Promoter | #N/A | #N/A | #N/A |
| 1005129 | INTERGENIC | Dbl Promoter | 0.40 | 0.14 | 0.64 |
| 1007213 | INTERGENIC | Sgl Promoter | 0.62 | 0.27 | 1.12 |
| 1009216 | INTERGENIC | Non Promoter | 0.13 | 0.01 | #N/A |
| 1010153 | INTERGENIC | Dbl Promoter | 2.73 | 0.93 | 0.88 |
| 1011181 | INTERGENIC | Sgl Promoter | 1.54 | 0.69 | 1.06 |
| 1013233 | INTERGENIC | Non Promoter | #N/A | #N/A | #N/A |
| 1015353 | INTERGENIC | Sgl Promoter | 0.89 | 0.41 | 1.08 |
| 1017872 | INTERGENIC | Sgl Promoter | 0.70 | 0.32 | 0.80 |
| 1023363 | INTERGENIC | Dbl Promoter | #N/A | #N/A | 0.72 |
| 1025999 | INTERGENIC | Sgl Promoter | 0.86 | 0.41 | 0.74 |
| 1026835 | INTERGENIC | Sgl Promoter | #N/A | #N/A | 0.79 |
| 1029175 | INTERGENIC | Sgl Promoter | 0.30 | 0.10 | 1.02 |
| 1031481 | INTERGENIC | Sgl Promoter | 0.62 | 0.27 | 0.95 |
| 1034799 | INTERGENIC | Sgl Promoter | 2.25 | 0.87 | 1.06 |
| 1036826 | INTERGENIC | Dbl Promoter | 3.26 | 0.98 | 0.84 |
| 1039832 | INTERGENIC | Sgl Promoter | 1.84 | 0.77 | 0.81 |
| 1041670 | INTERGENIC | Non Promoter | #N/A | #N/A | #N/A |
| 1043183 | INTERGENIC | Dbl Promoter | 0.24 | 0.04 | #N/A |
| 1044884 | INTERGENIC | Sgl Promoter | 1.55 | 0.67 | 0.78 |
| 1046218 | INTERGENIC | Sgl Promoter | 0.90 | 0.42 | 1.07 |
| 1048649 | INTERGENIC | Sgl Promoter | 0.91 | 0.42 | 1.22 |
| 1049503 | INTERGENIC | Sgl Promoter | 1.26 | 0.57 | 0.80 |
| 1054229 | INTERGENIC | Sgl Promoter | 0.89 | 0.41 | 1.10 |
| 1055537 | INTERGENIC | Sgl Promoter | 1.43 | 0.65 | 2.68 |
| 1058597 | INTERGENIC | Sgl Promoter | 1.03 | 0.47 | 0.71 |
| 1059523 | INTERGENIC | Sgl Promoter | 2.50 | 0.91 | 1.16 |
| 1060433 | INTERGENIC | Non Promoter | 1.12 | 0.51 | 1.30 |
| 1061556 | INTERGENIC | Dbl Promoter | 0.37 | 0.12 | 0.85 |
| 1065035 | INTERGENIC | Sgl Promoter | 1.39 | 0.63 | 0.94 |
| 1066831 | INTERGENIC | Sgl Promoter | 1.15 | 0.52 | 0.76 |
| 1069613 | INTERGENIC | Non Promoter | 0.61 | 0.29 | 0.75 |
| 1071009 | INTERGENIC | Sgl Promoter | 1.93 | 0.80 | 0.98 |
| 1071785 | INTERGENIC | Sgl Promoter | 1.77 | 0.76 | 1.02 |
| 1074205 | INTERGENIC | Dbl Promoter | 1.09 | 0.50 | 0.84 |
| 1078537 | INTERGENIC | Non Promoter | 1.26 | 0.57 | 1.01 |
| 1080268 | INTERGENIC | Sgl Promoter | 1.79 | 0.77 | 0.86 |
| 1082710 | INTERGENIC | Sgl Promoter | 0.72 | 0.33 | 0.92 |
| 438644  | INTERGENIC | Sgl Promoter | #N/A | #N/A | #N/A |
| 980674  | INTERGENIC | Sgl Promoter | 0.68 | 0.31 | #N/A |

|        |            |              |      |      |      |
|--------|------------|--------------|------|------|------|
| 601381 | INTERGENIC | Non Promoter | 0.68 | 0.31 | 1.17 |
| 664811 | INTERGENIC | Non Promoter | 1.86 | 0.78 | 0.57 |
| 665783 | INTERGENIC | Non Promoter | 1.87 | 0.79 | 0.97 |
| 970277 | INTERGENIC | Sgl Promoter | 1.50 | 0.65 | 0.81 |
| 976412 | INTERGENIC | Sgl Promoter | #N/A | #N/A | #N/A |
| 855142 | INTERGENIC | Non Promoter | #N/A | #N/A | #N/A |
| 710199 | INTERGENIC | Dbl Promoter | 0.27 | 0.08 | #N/A |
| 555952 | INTERGENIC | Sgl Promoter | #N/A | #N/A | #N/A |
| 554600 | INTERGENIC | Dbl Promoter | 2.57 | 0.92 | 1.60 |
| 553622 | INTERGENIC | Non Promoter | 0.94 | 0.43 | 0.83 |
| 552015 | INTERGENIC | Dbl Promoter | 0.89 | 0.42 | 1.32 |
| 550627 | INTERGENIC | Non Promoter | 0.29 | 0.09 | 1.44 |
| 548481 | INTERGENIC | Sgl Promoter | 1.71 | 0.73 | 0.63 |
| 544626 | INTERGENIC | Dbl Promoter | 2.20 | 0.87 | 0.83 |
| 542077 | INTERGENIC | Non Promoter | 0.20 | 0.03 | 0.37 |
| 539380 | INTERGENIC | Dbl Promoter | 1.76 | 0.74 | 0.73 |
| 535815 | INTERGENIC | Non Promoter | 0.60 | 0.29 | 1.70 |
| 535013 | INTERGENIC | Dbl Promoter | 3.61 | 0.98 | 0.81 |
| 533637 | INTERGENIC | Non Promoter | #N/A | #N/A | #N/A |
| 529718 | INTERGENIC | Dbl Promoter | 1.59 | 0.70 | 0.94 |
| 528980 | INTERGENIC | Non Promoter | 0.45 | 0.18 | 0.86 |
| 527542 | INTERGENIC | Dbl Promoter | 0.88 | 0.40 | 0.48 |
| 525805 | INTERGENIC | Non Promoter | 0.53 | 0.22 | 0.92 |
| 517647 | INTERGENIC | Dbl Promoter | 2.05 | 0.82 | 0.78 |
| 514507 | INTERGENIC | Sgl Promoter | 2.40 | 0.90 | 1.00 |
| 512309 | INTERGENIC | Non Promoter | 1.39 | 0.62 | 0.80 |
| 506693 | INTERGENIC | Dbl Promoter | 2.30 | 0.87 | 0.68 |
| 504335 | INTERGENIC | Non Promoter | 0.53 | 0.25 | 0.61 |
| 503513 | INTERGENIC | Dbl Promoter | 1.17 | 0.54 | 0.95 |
| 502469 | INTERGENIC | Sgl Promoter | 0.30 | 0.07 | 0.46 |
| 500671 | INTERGENIC | Non Promoter | 0.55 | 0.23 | 0.85 |
| 499661 | INTERGENIC | Sgl Promoter | 1.02 | 0.48 | 1.13 |
| 498092 | INTERGENIC | Sgl Promoter | 1.98 | 0.82 | 0.98 |
| 495502 | INTERGENIC | Sgl Promoter | 2.25 | 0.87 | 0.55 |
| 493539 | INTERGENIC | Dbl Promoter | 2.91 | 0.96 | 0.61 |
| 481423 | INTERGENIC | Non Promoter | 1.57 | 0.68 | #N/A |
| 480530 | INTERGENIC | Sgl Promoter | 1.47 | 0.65 | 0.71 |
| 479220 | INTERGENIC | Dbl Promoter | 3.48 | 0.98 | 1.30 |
| 475988 | INTERGENIC | Sgl Promoter | 1.08 | 0.50 | 0.19 |
| 475113 | INTERGENIC | Sgl Promoter | 0.67 | 0.30 | 0.61 |
| 469921 | INTERGENIC | Non Promoter | 1.27 | 0.57 | 0.79 |
| 467255 | INTERGENIC | Dbl Promoter | 1.97 | 0.80 | 0.94 |
| 466639 | INTERGENIC | Non Promoter | 1.18 | 0.55 | 2.02 |
| 465957 | INTERGENIC | Sgl Promoter | 1.30 | 0.58 | 1.53 |
| 464396 | INTERGENIC | Dbl Promoter | 0.75 | 0.34 | 0.62 |
| 462476 | INTERGENIC | Sgl Promoter | 0.52 | 0.24 | 0.62 |
| 460774 | INTERGENIC | Non Promoter | #N/A | #N/A | #N/A |
| 459958 | INTERGENIC | Sgl Promoter | 2.13 | 0.85 | #N/A |
| 459068 | INTERGENIC | Dbl Promoter | 2.08 | 0.84 | 0.75 |
| 457113 | INTERGENIC | Non Promoter | 0.83 | 0.38 | 0.79 |
| 453987 | INTERGENIC | Sgl Promoter | 0.24 | 0.07 | 0.45 |



|        |            |              |      |      |      |
|--------|------------|--------------|------|------|------|
| 453425 | INTERGENIC | Sgl Promoter | 0.29 | 0.07 | 0.61 |
| 451138 | INTERGENIC | Sgl Promoter | 0.23 | 0.04 | 0.63 |
| 451904 | INTERGENIC | Sgl Promoter | 0.46 | 0.17 | 0.90 |
| 435888 | INTERGENIC | Non Promoter | 0.56 | 0.24 | #N/A |
| 434518 | INTERGENIC | Sgl Promoter | 1.29 | 0.58 | 0.81 |
| 432583 | INTERGENIC | Sgl Promoter | 0.28 | 0.10 | 0.29 |
| 431890 | INTERGENIC | Sgl Promoter | 0.65 | 0.29 | 0.46 |
| 429934 | INTERGENIC | Dbl Promoter | 1.47 | 0.64 | 0.60 |
| 427922 | INTERGENIC | Sgl Promoter | 1.93 | 0.80 | 0.72 |
| 426228 | INTERGENIC | Dbl Promoter | 0.86 | 0.39 | 1.06 |
| 425246 | INTERGENIC | Sgl Promoter | 1.03 | 0.47 | 0.62 |
| 424210 | INTERGENIC | Sgl Promoter | 1.68 | 0.72 | 0.67 |
| 422880 | INTERGENIC | Non Promoter | 0.46 | 0.17 | 0.65 |
| 420943 | INTERGENIC | Dbl Promoter | 1.44 | 0.64 | 0.66 |
| 415758 | INTERGENIC | Sgl Promoter | 1.15 | 0.53 | 0.96 |
| 412051 | INTERGENIC | Sgl Promoter | 1.31 | 0.60 | 0.96 |
| 412823 | INTERGENIC | Sgl Promoter | 0.41 | 0.15 | 0.96 |
| 410438 | INTERGENIC | Dbl Promoter | 2.11 | 0.85 | 0.97 |
| 408005 | INTERGENIC | Non Promoter | 0.35 | 0.14 | 1.22 |
| 406631 | INTERGENIC | Dbl Promoter | 0.27 | 0.08 | 0.51 |
| 406167 | INTERGENIC | Non Promoter | 0.36 | 0.14 | #N/A |
| 404945 | INTERGENIC | Dbl Promoter | 0.50 | 0.20 | #N/A |
| 398475 | INTERGENIC | Sgl Promoter | 1.09 | 0.50 | 1.38 |
| 396697 | INTERGENIC | Non Promoter | 0.01 | 0.00 | #N/A |
| 394033 | INTERGENIC | Sgl Promoter | 1.61 | 0.70 | 1.18 |
| 387062 | INTERGENIC | Dbl Promoter | 2.65 | 0.92 | 0.77 |
| 384768 | INTERGENIC | Non Promoter | 0.70 | 0.32 | 0.78 |
| 383450 | INTERGENIC | Sgl Promoter | #N/A | #N/A | #N/A |
| 377286 | INTERGENIC | Non Promoter | 0.70 | 0.32 | 1.03 |
| 375497 | INTERGENIC | Sgl Promoter | 1.74 | 0.74 | 0.51 |
| 373788 | INTERGENIC | Sgl Promoter | 1.11 | 0.51 | 1.04 |
| 370973 | INTERGENIC | Dbl Promoter | 1.94 | 0.79 | 0.50 |
| 369834 | INTERGENIC | Sgl Promoter | 0.92 | 0.42 | 1.37 |
| 366922 | INTERGENIC | Sgl Promoter | 2.24 | 0.86 | 0.91 |
| 364947 | INTERGENIC | Dbl Promoter | 1.91 | 0.80 | 0.83 |
| 364381 | INTERGENIC | Sgl Promoter | 1.13 | 0.51 | 1.12 |
| 361867 | INTERGENIC | Sgl Promoter | 3.24 | 0.97 | 1.58 |
| 359998 | INTERGENIC | Sgl Promoter | 2.55 | 0.91 | 1.23 |
| 357995 | INTERGENIC | Non Promoter | #N/A | #N/A | #N/A |
| 355695 | INTERGENIC | Dbl Promoter | #N/A | #N/A | 0.90 |
| 352858 | INTERGENIC | Sgl Promoter | 1.02 | 0.46 | 0.86 |
| 350189 | INTERGENIC | Non Promoter | 0.44 | 0.16 | 2.29 |
| 348441 | INTERGENIC | Dbl Promoter | 1.28 | 0.59 | 1.57 |
| 345556 | INTERGENIC | Sgl Promoter | #N/A | #N/A | #N/A |
| 341067 | INTERGENIC | Non Promoter | #N/A | #N/A | #N/A |
| 338847 | INTERGENIC | Dbl Promoter | 1.36 | 0.61 | 1.54 |
| 335947 | INTERGENIC | Dbl Promoter | 2.22 | 0.86 | 1.27 |
| 332099 | INTERGENIC | Non Promoter | 0.55 | 0.23 | 1.38 |
| 327863 | INTERGENIC | Non Promoter | 0.53 | 0.22 | #N/A |
| 326627 | INTERGENIC | Dbl Promoter | 3.55 | 0.98 | 1.06 |
| 324410 | INTERGENIC | Non Promoter | 0.89 | 0.41 | 1.08 |

|        |            |              |      |      |      |
|--------|------------|--------------|------|------|------|
| 322070 | INTERGENIC | Dbl Promoter | 1.60 | 0.71 | 0.96 |
| 320961 | INTERGENIC | Sgl Promoter | 1.36 | 0.60 | #N/A |
| 319225 | INTERGENIC | Sgl Promoter | 2.73 | 0.93 | 0.87 |
| 317640 | INTERGENIC | Non Promoter | #N/A | #N/A | #N/A |
| 316754 | INTERGENIC | Sgl Promoter | 1.56 | 0.67 | 0.96 |
| 313387 | INTERGENIC | Sgl Promoter | 1.92 | 0.80 | 0.84 |
| 310209 | INTERGENIC | Dbl Promoter | 0.70 | 0.32 | 0.52 |
| 308827 | INTERGENIC | Sgl Promoter | 1.38 | 0.63 | #N/A |
| 306532 | INTERGENIC | Non Promoter | 0.33 | 0.11 | 0.95 |
| 304386 | INTERGENIC | Sgl Promoter | 0.40 | 0.17 | 1.33 |
| 303120 | INTERGENIC | Sgl Promoter | 0.56 | 0.24 | 0.39 |
| 301715 | INTERGENIC | Dbl Promoter | 1.14 | 0.52 | 0.77 |
| 299887 | INTERGENIC | Sgl Promoter | 0.92 | 0.42 | #N/A |
| 298570 | INTERGENIC | Non Promoter | 0.29 | 0.09 | 1.18 |
| 297552 | INTERGENIC | Sgl Promoter | 0.49 | 0.20 | 0.77 |
| 292816 | INTERGENIC | Sgl Promoter | 2.41 | 0.90 | 0.78 |
| 291365 | INTERGENIC | Sgl Promoter | 2.03 | 0.83 | 1.64 |
| 289668 | INTERGENIC | Sgl Promoter | 2.43 | 0.90 | 0.43 |
| 287513 | INTERGENIC | Sgl Promoter | 1.02 | 0.46 | #N/A |
| 283463 | INTERGENIC | Sgl Promoter | #N/A | #N/A | #N/A |
| 280479 | INTERGENIC | Dbl Promoter | 0.90 | 0.41 | 0.68 |
| 278394 | INTERGENIC | Sgl Promoter | 0.89 | 0.42 | 1.07 |
| 276161 | INTERGENIC | Non Promoter | 0.68 | 0.31 | 1.10 |
| 273254 | INTERGENIC | Dbl Promoter | 1.53 | 0.68 | 0.54 |
| 272293 | INTERGENIC | Non Promoter | 0.60 | 0.28 | 1.31 |
| 271309 | INTERGENIC | Sgl Promoter | 1.86 | 0.77 | 1.11 |
| 268187 | INTERGENIC | Dbl Promoter | 3.32 | 0.98 | 0.75 |
| 266179 | INTERGENIC | Non Promoter | 0.43 | 0.15 | #N/A |
| 265027 | INTERGENIC | Dbl Promoter | 1.62 | 0.72 | 0.67 |
| 261726 | INTERGENIC | Sgl Promoter | 1.10 | 0.50 | 0.58 |
| 259713 | INTERGENIC | Sgl Promoter | 1.99 | 0.81 | 0.73 |
| 257215 | INTERGENIC | Sgl Promoter | 0.67 | 0.32 | 0.35 |
| 255912 | INTERGENIC | Non Promoter | 0.64 | 0.28 | #N/A |
| 254813 | INTERGENIC | Dbl Promoter | 1.99 | 0.80 | 0.73 |
| 252033 | INTERGENIC | Sgl Promoter | #N/A | #N/A | 0.68 |
| 250906 | INTERGENIC | Non Promoter | 0.39 | 0.13 | 0.89 |
| 246989 | INTERGENIC | Dbl Promoter | 2.12 | 0.84 | 1.03 |
| 244318 | INTERGENIC | Sgl Promoter | 1.72 | 0.74 | 1.05 |
| 243205 | INTERGENIC | Sgl Promoter | 0.63 | 0.28 | 1.15 |
| 241917 | INTERGENIC | Sgl Promoter | 1.93 | 0.80 | 1.02 |
| 239349 | INTERGENIC | Sgl Promoter | 1.43 | 0.63 | 0.65 |
| 237337 | INTERGENIC | Dbl Promoter | 2.39 | 0.90 | #N/A |
| 232592 | INTERGENIC | Non Promoter | 0.33 | 0.09 | #N/A |
| 231216 | INTERGENIC | Dbl Promoter | #N/A | #N/A | #N/A |
| 229038 | INTERGENIC | Non Promoter | 0.45 | 0.20 | 0.90 |
| 228313 | INTERGENIC | Dbl Promoter | 1.25 | 0.58 | 0.53 |
| 226168 | INTERGENIC | Sgl Promoter | 1.56 | 0.68 | 0.84 |
| 224352 | INTERGENIC | Non Promoter | #N/A | #N/A | 0.80 |
| 223142 | INTERGENIC | Dbl Promoter | 2.40 | 0.90 | 0.66 |
| 220166 | INTERGENIC | Non Promoter | #N/A | #N/A | #N/A |
| 218648 | INTERGENIC | Dbl Promoter | 3.47 | 0.98 | #N/A |

|        |            |              |      |      |      |
|--------|------------|--------------|------|------|------|
| 214986 | INTERGENIC | Sgl Promoter | 0.16 | 0.02 | 0.37 |
| 213041 | INTERGENIC | Non Promoter | 0.27 | 0.05 | #N/A |
| 210191 | INTERGENIC | Sgl Promoter | 0.38 | 0.12 | 1.28 |
| 208156 | INTERGENIC | Sgl Promoter | 1.37 | 0.62 | 1.02 |
| 203305 | INTERGENIC | Sgl Promoter | 1.17 | 0.54 | 0.62 |
| 199494 | INTERGENIC | Non Promoter | 1.20 | 0.56 | #N/A |
| 199094 | INTERGENIC | Dbl Promoter | 1.31 | 0.58 | 0.99 |
| 195949 | INTERGENIC | Non Promoter | 1.07 | 0.49 | 0.55 |
| 194511 | INTERGENIC | Non Promoter | 0.73 | 0.35 | 1.59 |
| 193647 | INTERGENIC | Sgl Promoter | 0.55 | 0.26 | 1.26 |
| 189153 | INTERGENIC | Dbl Promoter | 1.07 | 0.50 | 0.88 |
| 185316 | INTERGENIC | Sgl Promoter | 0.42 | 0.15 | 0.78 |
| 183596 | INTERGENIC | Sgl Promoter | 2.11 | 0.83 | 1.13 |
| 182654 | INTERGENIC | Non Promoter | #N/A | #N/A | 0.47 |
| 181402 | INTERGENIC | Sgl Promoter | 1.80 | 0.75 | #N/A |
| 179276 | INTERGENIC | Sgl Promoter | 2.30 | 0.88 | 0.75 |
| 176222 | INTERGENIC | Sgl Promoter | #N/A | #N/A | 0.78 |
| 175042 | INTERGENIC | Dbl Promoter | 1.23 | 0.56 | 0.95 |
| 173151 | INTERGENIC | Dbl Promoter | 1.15 | 0.53 | 0.67 |
| 172032 | INTERGENIC | Non Promoter | #N/A | #N/A | #N/A |
| 171483 | INTERGENIC | Dbl Promoter | 0.35 | 0.11 | 0.76 |
| 169769 | INTERGENIC | Sgl Promoter | 0.70 | 0.32 | 0.73 |
| 168087 | INTERGENIC | Non Promoter | 0.34 | 0.11 | 1.61 |
| 166255 | INTERGENIC | Sgl Promoter | 1.91 | 0.79 | 1.53 |
| 163921 | INTERGENIC | Sgl Promoter | 1.66 | 0.72 | #N/A |
| 162631 | INTERGENIC | Non Promoter | #N/A | #N/A | #N/A |
| 159908 | INTERGENIC | Sgl Promoter | 1.67 | 0.72 | 0.71 |
| 157841 | INTERGENIC | Dbl Promoter | 2.64 | 0.93 | 0.90 |
| 156489 | INTERGENIC | Sgl Promoter | 1.48 | 0.67 | 0.68 |
| 154289 | INTERGENIC | Non Promoter | 0.73 | 0.33 | 0.62 |
| 153494 | INTERGENIC | Dbl Promoter | 3.56 | 0.98 | #N/A |
| 151514 | INTERGENIC | Non Promoter | 0.55 | 0.23 | 0.58 |
| 150613 | INTERGENIC | Dbl Promoter | 2.69 | 0.94 | 0.66 |
| 148568 | INTERGENIC | Non Promoter | 0.35 | 0.14 | 1.03 |
| 147415 | INTERGENIC | Sgl Promoter | 2.81 | 0.94 | 0.63 |
| 143820 | INTERGENIC | Dbl Promoter | 1.84 | 0.78 | 1.21 |
| 139619 | INTERGENIC | Non Promoter | #N/A | #N/A | #N/A |
| 138697 | INTERGENIC | Sgl Promoter | 2.02 | 0.81 | 0.66 |
| 136749 | INTERGENIC | Sgl Promoter | 1.30 | 0.58 | 0.97 |
| 135789 | INTERGENIC | Sgl Promoter | #N/A | #N/A | 0.59 |
| 133042 | INTERGENIC | Sgl Promoter | 0.48 | 0.19 | 0.74 |
| 128631 | INTERGENIC | Sgl Promoter | 1.81 | 0.76 | 0.87 |
| 126738 | INTERGENIC | Non Promoter | 0.75 | 0.35 | 1.23 |
| 126006 | INTERGENIC | Sgl Promoter | 1.87 | 0.78 | 0.94 |
| 121767 | INTERGENIC | Dbl Promoter | 2.31 | 0.89 | 0.77 |
| 120163 | INTERGENIC | Non Promoter | 0.20 | 0.05 | #N/A |
| 118382 | INTERGENIC | Sgl Promoter | 1.78 | 0.76 | 0.88 |
| 117067 | INTERGENIC | Sgl Promoter | 1.79 | 0.77 | 0.84 |
| 115312 | INTERGENIC | Sgl Promoter | 1.30 | 0.58 | 0.95 |
| 108652 | INTERGENIC | Sgl Promoter | 0.52 | 0.21 | 0.68 |
| 107275 | INTERGENIC | Sgl Promoter | 0.51 | 0.22 | 0.60 |

|        |            |              |      |      |      |
|--------|------------|--------------|------|------|------|
| 106172 | INTERGENIC | Dbl Promoter | 1.44 | 0.64 | 1.58 |
| 104946 | INTERGENIC | Non Promoter | 1.80 | 0.77 | 1.67 |
| 103232 | INTERGENIC | Dbl Promoter | 2.28 | 0.87 | #N/A |
| 101608 | INTERGENIC | Non Promoter | 0.63 | 0.28 | 1.66 |
| 100474 | INTERGENIC | Non Promoter | 1.10 | 0.50 | 0.85 |
| 96496  | INTERGENIC | Sgl Promoter | 1.50 | 0.67 | 1.22 |
| 95372  | INTERGENIC | Sgl Promoter | 1.64 | 0.71 | #N/A |
| 90622  | INTERGENIC | Non Promoter | 0.60 | 0.26 | 1.39 |
| 88517  | INTERGENIC | Dbl Promoter | 2.44 | 0.90 | 0.98 |
| 87014  | INTERGENIC | Non Promoter | #N/A | #N/A | #N/A |
| 85586  | INTERGENIC | Dbl Promoter | 1.75 | 0.75 | 0.84 |
| 84509  | INTERGENIC | Sgl Promoter | 2.40 | 0.90 | 1.02 |
| 82625  | INTERGENIC | Sgl Promoter | 1.46 | 0.66 | 0.66 |
| 79711  | INTERGENIC | Sgl Promoter | 1.44 | 0.65 | 0.79 |
| 76669  | INTERGENIC | Sgl Promoter | 0.44 | 0.16 | 0.81 |
| 74309  | INTERGENIC | Non Promoter | 0.68 | 0.33 | 0.77 |
| 73363  | INTERGENIC | Sgl Promoter | 1.45 | 0.64 | 0.95 |
| 71063  | INTERGENIC | Non Promoter | #N/A | #N/A | #N/A |
| 69485  | INTERGENIC | Sgl Promoter | 2.65 | 0.93 | 0.95 |
| 67725  | INTERGENIC | Dbl Promoter | 1.14 | 0.52 | #N/A |
| 64977  | INTERGENIC | Non Promoter | 1.01 | 0.47 | 1.15 |
| 55657  | INTERGENIC | Dbl Promoter | 1.17 | 0.54 | 1.18 |
| 53498  | INTERGENIC | Sgl Promoter | 1.43 | 0.63 | 1.03 |
| 51244  | INTERGENIC | Non Promoter | 0.44 | 0.16 | 0.68 |
| 48996  | INTERGENIC | Non Promoter | 1.88 | 0.78 | #N/A |
| 47336  | INTERGENIC | Dbl Promoter | 1.51 | 0.66 | 0.87 |
| 44551  | INTERGENIC | Sgl Promoter | 1.12 | 0.51 | 0.58 |
| 43283  | INTERGENIC | Non Promoter | 0.78 | 0.35 | 0.52 |
| 41043  | INTERGENIC | Sgl Promoter | 0.31 | 0.07 | 0.79 |
| 39121  | INTERGENIC | Sgl Promoter | 2.65 | 0.93 | 1.49 |
| 38169  | INTERGENIC | Sgl Promoter | 1.36 | 0.62 | 1.02 |
| 35236  | INTERGENIC | Sgl Promoter | 2.07 | 0.82 | 0.80 |
| 33013  | INTERGENIC | Sgl Promoter | 3.56 | 0.99 | 0.78 |
| 30341  | INTERGENIC | Sgl Promoter | 1.02 | 0.46 | 0.77 |
| 26611  | INTERGENIC | Non Promoter | 1.89 | 0.79 | 0.91 |
| 25087  | INTERGENIC | Sgl Promoter | 0.68 | 0.31 | 0.71 |
| 21651  | INTERGENIC | Sgl Promoter | 0.65 | 0.29 | 1.01 |
| 22938  | INTERGENIC | Sgl Promoter | 0.90 | 0.43 | 0.95 |
| 17948  | INTERGENIC | Dbl Promoter | 1.28 | 0.58 | #N/A |
| 15053  | INTERGENIC | Sgl Promoter | 3.25 | 0.98 | 1.22 |
| 13228  | INTERGENIC | Non Promoter | 1.26 | 0.57 | 1.05 |
| 11887  | INTERGENIC | Dbl Promoter | 2.37 | 0.89 | 0.98 |
| 9557   | INTERGENIC | Sgl Promoter | 0.74 | 0.34 | 0.90 |
| 6970   | INTERGENIC | Sgl Promoter | 0.44 | 0.16 | 0.57 |
| 7933   | INTERGENIC | Sgl Promoter | 0.44 | 0.16 | 0.71 |
| 56169  | INTERGENIC | Dbl Promoter | 0.90 | 0.41 | 1.71 |
| 444574 | INTERGENIC | Dbl Promoter | 1.63 | 0.72 | 1.41 |
| 63279  | INTERGENIC | Dbl Promoter | 2.00 | 0.82 | 0.95 |
| 211576 | INTERGENIC | Sgl Promoter | #N/A | #N/A | 1.04 |
| 212157 | INTERGENIC | Sgl Promoter | 2.52 | 0.92 | #N/A |
| 558380 | INTERGENIC | Sgl Promoter | 1.50 | 0.66 | #N/A |

|        |            |              |      |      |      |
|--------|------------|--------------|------|------|------|
| 560193 | INTERGENIC | Non Promoter | 1.70 | 0.74 | #N/A |
| 564002 | INTERGENIC | Sgl Promoter | 1.01 | 0.46 | #N/A |
| 565782 | INTERGENIC | Sgl Promoter | 1.46 | 0.64 | 1.22 |
| 567264 | INTERGENIC | Sgl Promoter | 0.98 | 0.45 | 0.58 |
| 569331 | INTERGENIC | Sgl Promoter | 1.40 | 0.64 | 1.39 |
| 571840 | INTERGENIC | Dbl Promoter | 0.78 | 0.37 | 0.72 |
| 577580 | INTERGENIC | Non Promoter | #N/A | #N/A | #N/A |
| 584304 | INTERGENIC | Dbl Promoter | 1.56 | 0.67 | 0.89 |
| 586382 | INTERGENIC | Sgl Promoter | 0.66 | 0.30 | 0.64 |
| 587184 | INTERGENIC | Sgl Promoter | 0.70 | 0.32 | 0.66 |
| 594471 | INTERGENIC | Dbl Promoter | 2.27 | 0.87 | 0.75 |
| 596745 | INTERGENIC | Sgl Promoter | 1.74 | 0.74 | 0.99 |
| 599865 | INTERGENIC | Sgl Promoter | 1.04 | 0.49 | 0.63 |
| 603906 | INTERGENIC | Sgl Promoter | 1.29 | 0.59 | 1.08 |
| 610476 | INTERGENIC | Dbl Promoter | 2.99 | 0.96 | 0.81 |
| 624464 | INTERGENIC | Non Promoter | 0.37 | 0.14 | 1.17 |
| 627875 | INTERGENIC | Dbl Promoter | 2.30 | 0.88 | 1.10 |
| 631510 | INTERGENIC | Sgl Promoter | #N/A | #N/A | 1.42 |
| 634118 | INTERGENIC | Sgl Promoter | 0.91 | 0.44 | #N/A |
| 637374 | INTERGENIC | Non Promoter | #N/A | #N/A | #N/A |
| 639520 | INTERGENIC | Dbl Promoter | 1.60 | 0.69 | 0.70 |
| 648699 | INTERGENIC | Sgl Promoter | 1.51 | 0.66 | 0.91 |
| 654161 | INTERGENIC | Dbl Promoter | 1.59 | 0.69 | 0.97 |
| 656794 | INTERGENIC | Dbl Promoter | 1.99 | 0.81 | 1.20 |
| 657509 | INTERGENIC | Sgl Promoter | #N/A | #N/A | #N/A |
| 659177 | INTERGENIC | Sgl Promoter | 2.36 | 0.90 | 0.70 |
| 661132 | INTERGENIC | Non Promoter | 0.22 | 0.03 | #N/A |
| 664948 | INTERGENIC | Sgl Promoter | 1.60 | 0.71 | 1.00 |
| 667671 | INTERGENIC | Sgl Promoter | 2.62 | 0.92 | 1.09 |
| 671121 | INTERGENIC | Sgl Promoter | 1.57 | 0.70 | #N/A |
| 672466 | INTERGENIC | Sgl Promoter | 0.99 | 0.47 | 0.70 |
| 673746 | INTERGENIC | Sgl Promoter | #N/A | #N/A | 0.50 |
| 674856 | INTERGENIC | Sgl Promoter | 0.27 | 0.05 | 0.94 |
| 677160 | INTERGENIC | Dbl Promoter | 3.85 | 0.99 | 1.15 |
| 677807 | INTERGENIC | Non Promoter | 0.77 | 0.37 | 1.38 |
| 678946 | INTERGENIC | Dbl Promoter | 2.07 | 0.83 | 1.02 |
| 679688 | INTERGENIC | Sgl Promoter | #N/A | #N/A | 0.96 |
| 681208 | INTERGENIC | Sgl Promoter | 0.99 | 0.46 | #N/A |
| 682215 | INTERGENIC | Sgl Promoter | 3.14 | 0.96 | #N/A |
| 682936 | INTERGENIC | Non Promoter | 0.89 | 0.41 | #N/A |
| 684551 | INTERGENIC | Sgl Promoter | #N/A | #N/A | #N/A |
| 685893 | INTERGENIC | Dbl Promoter | 1.27 | 0.57 | #N/A |
| 688167 | INTERGENIC | Sgl Promoter | 0.73 | 0.34 | 0.96 |
| 691928 | INTERGENIC | Non Promoter | 0.45 | 0.17 | #N/A |
| 692791 | INTERGENIC | Sgl Promoter | 1.16 | 0.53 | #N/A |
| 695732 | INTERGENIC | Sgl Promoter | 0.41 | 0.16 | 0.65 |
| 697126 | INTERGENIC | Non Promoter | 2.33 | 0.89 | 0.53 |
| 700590 | INTERGENIC | Sgl Promoter | 0.40 | 0.15 | 0.60 |
| 702110 | INTERGENIC | Non Promoter | 0.14 | 0.02 | 0.37 |
| 704221 | INTERGENIC | Sgl Promoter | 1.22 | 0.55 | 1.08 |
| 704850 | INTERGENIC | Dbl Promoter | #N/A | #N/A | 0.90 |



|        |            |              |      |      |      |
|--------|------------|--------------|------|------|------|
| 706968 | INTERGENIC | Sgl Promoter | 2.26 | 0.87 | #N/A |
| 708493 | INTERGENIC | Non Promoter | #N/A | #N/A | #N/A |
| 710097 | INTERGENIC | Dbl Promoter | 3.63 | 0.98 | #N/A |
| 711350 | INTERGENIC | Sgl Promoter | #N/A | #N/A | #N/A |
| 713271 | INTERGENIC | Dbl Promoter | 3.99 | 0.99 | 0.79 |
| 716153 | INTERGENIC | Non Promoter | #N/A | #N/A | #N/A |
| 720634 | INTERGENIC | Dbl Promoter | 0.67 | 0.30 | 0.23 |
| 721034 | INTERGENIC | Non Promoter | #N/A | #N/A | #N/A |
| 724839 | INTERGENIC | Sgl Promoter | 1.25 | 0.56 | 0.79 |
| 725391 | INTERGENIC | Dbl Promoter | 1.86 | 0.78 | 0.65 |
| 729754 | INTERGENIC | Sgl Promoter | 2.03 | 0.82 | 1.68 |
| 730489 | INTERGENIC | Sgl Promoter | 1.50 | 0.67 | 1.07 |
| 731221 | INTERGENIC | Non Promoter | #N/A | #N/A | #N/A |
| 733620 | INTERGENIC | Non Promoter | 0.21 | 0.05 | 0.39 |
| 736981 | INTERGENIC | Sgl Promoter | 2.32 | 0.89 | 0.84 |
| 740058 | INTERGENIC | Dbl Promoter | 2.05 | 0.83 | 0.80 |
| 742451 | INTERGENIC | Dbl Promoter | 1.77 | 0.75 | 1.11 |
| 744281 | INTERGENIC | Sgl Promoter | 0.43 | 0.19 | 1.79 |
| 745825 | INTERGENIC | Non Promoter | #N/A | #N/A | #N/A |
| 747303 | INTERGENIC | Dbl Promoter | #N/A | #N/A | 1.05 |
| 749253 | INTERGENIC | Non Promoter | #N/A | #N/A | 0.73 |
| 752254 | INTERGENIC | Dbl Promoter | 1.35 | 0.60 | 0.91 |
| 753298 | INTERGENIC | Sgl Promoter | 1.20 | 0.54 | 0.98 |
| 754874 | INTERGENIC | Sgl Promoter | 0.97 | 0.46 | 0.78 |
| 758645 | INTERGENIC | Sgl Promoter | 1.17 | 0.54 | 0.88 |
| 760022 | INTERGENIC | Sgl Promoter | #N/A | #N/A | #N/A |
| 767749 | INTERGENIC | Sgl Promoter | 1.48 | 0.65 | 0.82 |
| 769204 | INTERGENIC | Sgl Promoter | #N/A | #N/A | #N/A |
| 775762 | INTERGENIC | Dbl Promoter | 0.48 | 0.23 | 0.83 |
| 786136 | INTERGENIC | Non Promoter | 0.75 | 0.36 | 1.03 |
| 787956 | INTERGENIC | Sgl Promoter | 1.34 | 0.61 | 1.20 |
| 790078 | INTERGENIC | Dbl Promoter | 1.16 | 0.52 | 0.99 |
| 791213 | INTERGENIC | Non Promoter | #N/A | #N/A | #N/A |
| 792682 | INTERGENIC | Dbl Promoter | 2.85 | 0.95 | 0.65 |
| 793906 | INTERGENIC | Sgl Promoter | 0.48 | 0.19 | 0.57 |
| 794960 | INTERGENIC | Dbl Promoter | 0.17 | 0.03 | 0.32 |
| 795973 | INTERGENIC | Non Promoter | 0.63 | 0.28 | #N/A |
| 797552 | INTERGENIC | Dbl Promoter | 2.04 | 0.83 | 1.19 |
| 798046 | INTERGENIC | Sgl Promoter | 1.50 | 0.65 | #N/A |
| 799229 | INTERGENIC | Sgl Promoter | 1.41 | 0.62 | 0.89 |
| 802320 | INTERGENIC | Non Promoter | 1.56 | 0.69 | #N/A |
| 814386 | INTERGENIC | Dbl Promoter | 1.60 | 0.70 | 1.04 |
| 815729 | INTERGENIC | Non Promoter | #N/A | #N/A | #N/A |
| 818125 | INTERGENIC | Sgl Promoter | 2.40 | 0.89 | 0.59 |
| 821727 | INTERGENIC | Dbl Promoter | 1.60 | 0.69 | 1.13 |
| 826828 | INTERGENIC | Sgl Promoter | 1.79 | 0.76 | 0.90 |
| 829024 | INTERGENIC | Dbl Promoter | 0.58 | 0.25 | 0.95 |
| 830994 | INTERGENIC | Sgl Promoter | 0.43 | 0.16 | 1.16 |
| 832056 | INTERGENIC | Sgl Promoter | 1.24 | 0.57 | 0.63 |
| 834560 | INTERGENIC | Sgl Promoter | 2.14 | 0.84 | 0.88 |
| 835558 | INTERGENIC | Non Promoter | 0.56 | 0.26 | 1.30 |

|        |            |              |      |      |      |
|--------|------------|--------------|------|------|------|
| 837904 | INTERGENIC | Sgl Promoter | 1.30 | 0.58 | 0.91 |
| 841261 | INTERGENIC | Dbl Promoter | 0.52 | 0.24 | 0.55 |
| 843257 | INTERGENIC | Sgl Promoter | 0.78 | 0.36 | 0.74 |
| 844407 | INTERGENIC | Sgl Promoter | 0.86 | 0.41 | 1.14 |
| 860374 | INTERGENIC | Sgl Promoter | 0.46 | 0.21 | 1.18 |
| 864444 | INTERGENIC | Non Promoter | 0.66 | 0.31 | 0.71 |
| 866710 | INTERGENIC | Sgl Promoter | 2.10 | 0.83 | 0.82 |
| 868640 | INTERGENIC | Sgl Promoter | #N/A | #N/A | #N/A |
| 870698 | INTERGENIC | Dbl Promoter | 3.19 | 0.97 | 0.60 |
| 875363 | INTERGENIC | Sgl Promoter | 1.85 | 0.78 | 1.18 |
| 876277 | INTERGENIC | Non Promoter | 0.40 | 0.14 | 1.94 |
| 876842 | INTERGENIC | Sgl Promoter | 1.77 | 0.75 | 0.61 |
| 878071 | INTERGENIC | Dbl Promoter | 1.90 | 0.79 | 1.07 |
| 878619 | INTERGENIC | Sgl Promoter | 0.17 | 0.02 | #N/A |
| 880291 | INTERGENIC | Non Promoter | #N/A | #N/A | #N/A |
| 883823 | INTERGENIC | Dbl Promoter | 1.70 | 0.72 | 1.06 |
| 885791 | INTERGENIC | Sgl Promoter | 1.52 | 0.66 | 1.10 |
| 886519 | INTERGENIC | Non Promoter | 0.39 | 0.13 | #N/A |
| 888038 | INTERGENIC | Sgl Promoter | #N/A | #N/A | 0.95 |
| 888960 | INTERGENIC | Dbl Promoter | 2.04 | 0.82 | 0.79 |
| 892308 | INTERGENIC | Sgl Promoter | 2.35 | 0.89 | 0.98 |
| 893792 | INTERGENIC | Non Promoter | #N/A | #N/A | #N/A |
| 895956 | INTERGENIC | Dbl Promoter | 1.37 | 0.62 | #N/A |
| 897356 | INTERGENIC | Non Promoter | 0.33 | 0.08 | 1.60 |
| 900189 | INTERGENIC | Dbl Promoter | 1.74 | 0.74 | 0.96 |
| 900750 | INTERGENIC | Sgl Promoter | 1.56 | 0.68 | 1.48 |
| 902039 | INTERGENIC | Sgl Promoter | 0.78 | 0.35 | 0.78 |
| 907213 | INTERGENIC | Sgl Promoter | 3.52 | 0.98 | 0.62 |
| 909728 | INTERGENIC | Non Promoter | #N/A | #N/A | #N/A |
| 911252 | INTERGENIC | Dbl Promoter | 3.30 | 0.97 | #N/A |
| 911983 | INTERGENIC | Non Promoter | 0.54 | 0.22 | #N/A |
| 912659 | INTERGENIC | Dbl Promoter | 1.44 | 0.63 | #N/A |
| 917072 | INTERGENIC | Non Promoter | #N/A | #N/A | 0.31 |
| 919376 | INTERGENIC | Dbl Promoter | 1.61 | 0.69 | #N/A |
| 922904 | INTERGENIC | Non Promoter | #N/A | #N/A | #N/A |
| 924299 | INTERGENIC | Sgl Promoter | 1.17 | 0.53 | 1.00 |
| 929316 | INTERGENIC | Dbl Promoter | 0.43 | 0.15 | 1.01 |
| 930343 | INTERGENIC | Dbl Promoter | 0.45 | 0.18 | 1.41 |
| 933066 | INTERGENIC | Non Promoter | #N/A | #N/A | #N/A |
| 938143 | INTERGENIC | Non Promoter | 1.19 | 0.55 | #N/A |
| 939274 | INTERGENIC | Sgl Promoter | 1.11 | 0.51 | #N/A |
| 939917 | INTERGENIC | Dbl Promoter | #N/A | #N/A | #N/A |
| 942079 | INTERGENIC | Sgl Promoter | 0.87 | 0.41 | 0.99 |
| 943027 | INTERGENIC | Sgl Promoter | 0.64 | 0.28 | 0.65 |
| 944598 | INTERGENIC | Sgl Promoter | 1.24 | 0.57 | 0.99 |
| 572264 | INTERGENIC | Dbl Promoter | 1.08 | 0.49 | 1.42 |
| 810671 | INTERGENIC | Non Promoter | 0.41 | 0.18 | #N/A |
| 850624 | INTERGENIC | Sgl Promoter | 1.07 | 0.49 | 1.40 |
| 882978 | INTERGENIC | Non Promoter | 1.71 | 0.73 | 1.02 |
| 776664 | INTERGENIC | Dbl Promoter | 1.30 | 0.58 | #N/A |
| 778578 | INTERGENIC | Dbl Promoter | 0.68 | 0.30 | 0.66 |



|        |            |              |   |      |      |       |
|--------|------------|--------------|---|------|------|-------|
| 881482 | INTERGENIC | Non Promoter |   | 1.45 | 0.64 | 1.08  |
| 933893 | INTERGENIC | Non Promoter |   | #N/A | #N/A | #N/A  |
| 818074 |            |              |   | 3.52 | 0.99 | #N/A  |
| 755161 |            |              |   | 1.85 | 0.77 | 0.96  |
| 681817 | SNRNA      | Sgl Promoter |   | 0.22 | 0.03 | 1.26  |
| 877261 |            |              |   | #N/A | #N/A | #N/A  |
| 394296 |            |              |   | 0.22 | 0.04 | 0.61  |
| 394296 |            |              |   | 0.25 | 0.05 | 0.74  |
|        |            |              |   | #N/A | #N/A | #N/A  |
| 630479 |            |              |   | 2.31 | 0.89 | 0.70  |
| 459438 |            |              |   | 0.25 | 0.05 | 1.18  |
| 458463 |            |              |   | 0.68 | 0.31 | 1.33  |
| 82824  |            |              |   | 1.59 | 0.69 | 0.72  |
| 71562  |            |              |   | 0.14 | 0.01 | 0.34  |
| 1393   | MIT        |              | 0 | #N/A | #N/A | 3.67  |
| 1944   | MIT        |              | 0 | #N/A | #N/A | #N/A  |
| 2084   | MIT        |              | 0 | 0.58 | 0.25 | 2.07  |
| 3341   | MIT        |              | 0 | 0.39 | 0.17 | #N/A  |
| 3446   | MIT        |              | 0 | 0.36 | 0.11 | 0.62  |
| 4301   | MIT        |              | 0 | #N/A | #N/A | #N/A  |
| 4545   | MIT        |              | 0 | #N/A | #N/A | #N/A  |
| 4701   | MIT        |              | 0 | #N/A | #N/A | #N/A  |
| 6490   | MIT        |              | 0 | #N/A | #N/A | #N/A  |
| 456833 | RRNA       | Sgl Promoter |   | 0.90 | 0.43 | 5.21  |
| 456832 | RRNA       | Sgl Promoter |   | 0.88 | 0.40 | 5.02  |
| 457733 | RRNA       | Sgl Promoter |   | 1.21 | 0.56 | 4.11  |
| 454326 | RRNA       | Sgl Promoter |   | 1.12 | 0.52 | 8.51  |
| 452917 | RRNA       | Sgl Promoter |   | 0.60 | 0.27 | 4.78  |
| 454049 | RRNA       | Sgl Promoter |   | 0.93 | 0.44 | 7.46  |
| 455182 | RRNA       | Sgl Promoter |   | 1.75 | 0.76 | 10.88 |
| 455933 | RRNA       | Sgl Promoter |   | 0.68 | 0.31 | 5.33  |
| 455414 | RRNA       | Sgl Promoter |   | 0.83 | 0.38 | 6.84  |
| 455933 | RRNA       | Sgl Promoter |   | 0.66 | 0.29 | 5.81  |
| 458433 | RRNA       | Sgl Promoter |   | 0.76 | 0.36 | 2.07  |
| 459797 | RRNA       | Sgl Promoter |   | 0.22 | 0.04 | 1.18  |
| 455572 | RRNA       | Sgl Promoter |   | 0.76 | 0.35 | 6.17  |
| 961208 |            |              |   | 0.50 | 0.20 | 2.01  |
| 311555 |            |              |   | 0.18 | 0.03 | 0.93  |
| 310608 |            |              |   | 0.62 | 0.27 | 0.37  |
| 439000 |            |              |   | 0.18 | 0.05 | 2.91  |
| 781109 |            |              |   | #N/A | #N/A | #N/A  |
| 781814 |            |              |   | #N/A | #N/A | #N/A  |
| 309866 |            |              |   | 0.41 | 0.16 | #N/A  |
| 310327 |            |              |   | 1.13 | 0.52 | #N/A  |
| 118013 |            |              |   | 1.71 | 0.73 | #N/A  |
| 117709 |            |              |   | #N/A | #N/A | #N/A  |
| 651138 |            |              |   | 0.11 | 0.01 | 0.33  |
| 651761 |            |              |   | #N/A | #N/A | #N/A  |
| 441608 |            |              |   | 1.53 | 0.67 | 1.20  |
| 441637 |            |              |   | 2.17 | 0.86 | 1.34  |
| 442133 |            |              |   | 0.39 | 0.17 | 1.83  |

|         |       |              |      |      |      |
|---------|-------|--------------|------|------|------|
| 899707  |       | 1.14         | 0.52 | 0.69 |      |
| 430300  |       | 0.89         | 0.41 | 0.80 |      |
| 286545  |       | 1.57         | 0.70 | 0.90 |      |
| 286545  |       | #N/A         | #N/A | #N/A |      |
| 139390  | SNRNA | Sgl Promoter | 0.25 | 0.05 | #N/A |
| 1403076 | SNRNA | Sgl Promoter | 0.38 | 0.12 | #N/A |
| 167585  | SNRNA | Sgl Promoter | 2.03 | 0.82 | 0.85 |
| 177526  | SNRNA | Dbl Promoter | 0.32 | 0.09 | 1.11 |
| 139648  | SNRNA | Sgl Promoter | 0.35 | 0.10 | 1.38 |
| 663630  | SNRNA | Non Promoter | 0.32 | 0.08 | 1.05 |
| 142145  | SNRNA | Dbl Promoter | #N/A | #N/A | #N/A |
| 899535  | SNRNA | Non Promoter | 0.75 | 0.34 | 0.92 |
| 228297  | SNRNA | Non Promoter | #N/A | #N/A | #N/A |
| 424880  | SNRNA | Non Promoter | 0.52 | 0.21 | 0.97 |
| 559005  | SNRNA | Sgl Promoter | 0.69 | 0.31 | 1.34 |
| 107324  | SNRNA | Sgl Promoter | 0.79 | 0.36 | 0.61 |
| 856918  | SNRNA | Sgl Promoter | 0.41 | 0.15 | 1.72 |
| 821898  | SNRNA | Dbl Promoter | 0.22 | 0.03 | 0.77 |
| 545559  | SNRNA | Non Promoter | 0.48 | 0.23 | 1.07 |
| 541701  | SNRNA | Sgl Promoter | #N/A | #N/A | #N/A |
| 609690  | SNRNA | Sgl Promoter | #N/A | #N/A | #N/A |
| 259578  | SNRNA | Dbl Promoter | 0.60 | 0.26 | 0.61 |
| 718803  | SNRNA | Non Promoter | 0.46 | 0.21 | #N/A |
| 431217  | SNRNA | Dbl Promoter | 0.41 | 0.18 | #N/A |
| 61789   | SNRNA | Dbl Promoter | #N/A | #N/A | #N/A |
| 163620  | SNRNA | Non Promoter | #N/A | #N/A | #N/A |
| 794793  | SNRNA | Non Promoter | 0.46 | 0.17 | #N/A |
| 88268   | SNRNA | Non Promoter | #N/A | #N/A | #N/A |
| 795023  | SNRNA | Non Promoter | #N/A | #N/A | #N/A |
| 136182  | SNRNA | Sgl Promoter | 0.68 | 0.30 | #N/A |
| 173903  | SNRNA | Dbl Promoter | #N/A | #N/A | #N/A |
| 366347  | SNRNA | Non Promoter | 0.97 | 0.44 | 1.45 |
| 348929  | SNRNA | Sgl Promoter | 0.50 | 0.20 | #N/A |
| 794574  | SNRNA | Non Promoter | #N/A | #N/A | #N/A |
| 409863  | SNRNA | Sgl Promoter | #N/A | #N/A | #N/A |
| 366189  |       |              | 0.88 | 0.40 | #N/A |
| 323470  | SNRNA | Non Promoter | 0.61 | 0.26 | #N/A |
| 366189  |       |              | 1.26 | 0.56 | 1.13 |
| 38912   | SNRNA | Dbl Promoter | #N/A | #N/A | 0.68 |
| 176006  | SNRNA | Sgl Promoter | #N/A | #N/A | 0.14 |
| 586173  | SNRNA | Sgl Promoter | #N/A | #N/A | #N/A |
| 97246   | SNRNA | Dbl Promoter | #N/A | #N/A | #N/A |
| 364518  | SNRNA | Sgl Promoter | 0.81 | 0.37 | 0.43 |
| 366414  |       |              | 0.71 | 0.32 | 1.44 |
| 366708  |       |              | 0.36 | 0.15 | #N/A |
| 719048  | SNRNA | Non Promoter | 0.35 | 0.10 | 1.79 |
| 411317  | SNRNA | Non Promoter | #N/A | #N/A | #N/A |
| 939665  | SNRNA | Dbl Promoter | #N/A | #N/A | #N/A |
| 939665  | SNRNA | Dbl Promoter | 0.46 | 0.20 | 0.91 |
| 832516  | SNRNA | Dbl Promoter | 0.44 | 0.17 | 0.88 |
| 64117   |       |              | #N/A | #N/A | #N/A |

|         |            |              |      |      |      |
|---------|------------|--------------|------|------|------|
| 1485353 |            |              | #N/A | #N/A | #N/A |
| 189870  |            |              | 3.05 | 0.96 | 0.78 |
| 322260  |            |              | 0.63 | 0.27 | #N/A |
| 36740   |            |              | 0.11 | 0.01 | #N/A |
| 127121  |            |              | 0.23 | 0.04 | 1.05 |
| 856969  | TRNA       | Sgl Promoter | 0.45 | 0.17 | #N/A |
| 854254  | TRNA       | Non Promoter | 0.45 | 0.19 | 1.58 |
| 775833  | TRNA       | DbI Promoter | #N/A | #N/A | #N/A |
| 572027  | TRNA       | Sgl Promoter | 0.56 | 0.24 | 1.23 |
| 571808  |            |              | 0.57 | 0.26 | 1.43 |
| 571867  |            |              | #N/A | #N/A | #N/A |
| 82495   | TRNA       | DbI Promoter | #N/A | #N/A | 1.25 |
| 210262  | TRNA       | Sgl Promoter | #N/A | #N/A | 1.25 |
| 1084602 | INTERGENIC | Non Promoter | 0.33 | 0.11 | 0.57 |
| 1085920 | INTERGENIC | Non Promoter | 0.54 | 0.25 | 0.74 |
| 1088556 | INTERGENIC | Non Promoter | 0.91 | 0.42 | 0.99 |
| 1089874 | INTERGENIC | Non Promoter | 0.23 | 0.04 | 0.77 |
| 1091193 | INTERGENIC | Non Promoter | 0.30 | 0.08 | 0.72 |
| 230108  | INTERGENIC | Non Promoter | 0.41 | 0.15 | 0.63 |
| 270095  | INTERGENIC | Sgl Promoter | 0.27 | 0.07 | 1.22 |
| 482     | INTERGENIC | Non Promoter | 0.22 | 0.04 | 0.61 |
| 1257113 | TRNA       | Sgl Promoter | #N/A | #N/A | #N/A |
| 860444  | TRNA       | Sgl Promoter | 0.51 | 0.24 | 1.13 |
| 111032  | TRNA       | Non Promoter | 0.59 | 0.27 | 1.52 |
| 363134  | TRNA       | Non Promoter | #N/A | #N/A | 1.54 |
| 880364  | TRNA       | Non Promoter | 0.49 | 0.21 | 1.22 |
| 197358  |            |              | #N/A | #N/A | 1.12 |
| 582129  | TRNA       | Sgl Promoter | #N/A | #N/A | 1.14 |
| 122232  |            |              | 0.47 | 0.19 | 0.97 |
| 700750  | TRNA       | DbI Promoter | #N/A | #N/A | #N/A |
| 726215  | TRNA       | Sgl Promoter | 0.56 | 0.25 | 1.22 |
| 307142  |            |              | 0.84 | 0.40 | 0.47 |
| 976484  | TRNA       | Sgl Promoter | #N/A | #N/A | 1.72 |
| 338918  | TRNA       | DbI Promoter | 0.41 | 0.14 | 1.49 |
| 810744  | TRNA       | Non Promoter | 0.57 | 0.24 | 1.31 |
| 123249  | TRNA       | Sgl Promoter | 0.35 | 0.14 | 0.96 |
| 793490  |            |              | 1.04 | 0.47 | 0.33 |
| 448722  | TRNA       | Sgl Promoter | #N/A | #N/A | 1.11 |
| 233585  |            |              | 0.37 | 0.15 | 1.07 |
| 340371  | TRNA       | Sgl Promoter | 0.57 | 0.24 | 1.09 |
| 818679  | TRNA       | Sgl Promoter | 0.29 | 0.06 | #N/A |
| 405776  |            |              | 0.49 | 0.22 | 1.39 |
| 131896  | TRNA       | DbI Promoter | 0.48 | 0.20 | #N/A |
| 259239  | TRNA       | DbI Promoter | 0.54 | 0.24 | 1.30 |
| 689641  | TRNA       | Sgl Promoter | #N/A | #N/A | 1.07 |
| 354112  | TRNA       | Sgl Promoter | 0.50 | 0.20 | 1.18 |
| 46807   | TRNA       | DbI Promoter | #N/A | #N/A | #N/A |
| 744352  | TRNA       | Sgl Promoter | 0.62 | 0.28 | 0.63 |
| 586708  | TRNA       | Sgl Promoter | 0.48 | 0.22 | 0.95 |
| 1075580 | TRNA       | DbI Promoter | 0.37 | 0.12 | #N/A |
| 326822  | TRNA       | Sgl Promoter | #N/A | #N/A | #N/A |

|         |      |      |      |
|---------|------|------|------|
| 138995  | 1.00 | 0.47 | #N/A |
| 160238  | 0.51 | 0.21 | 0.41 |
| 209769  | 1.02 | 0.48 | 0.95 |
| 197279  | 1.16 | 0.53 | 0.76 |
| 196755  | 0.80 | 0.36 | 0.96 |
| 197637  | 0.81 | 0.37 | #N/A |
|         | #N/A | #N/A | #N/A |
| 226911  | 0.94 | 0.43 | 1.33 |
| 35784   | #N/A | #N/A | 0.91 |
| 220995  | #N/A | #N/A | #N/A |
| 36209   | 1.40 | 0.62 | 1.29 |
| 31332   | 0.79 | 0.36 | 0.73 |
| 295407  | 0.45 | 0.19 | 0.93 |
| 412700  | 0.22 | 0.05 | 0.86 |
| 258930  | #N/A | #N/A | 1.34 |
| 643957  | #N/A | #N/A | #N/A |
| 644558  | 1.57 | 0.68 | 1.32 |
| 327661  | 1.38 | 0.61 | 1.01 |
| 350707  | 1.62 | 0.70 | #N/A |
| 113145  | 0.55 | 0.25 | 1.47 |
| 75253   | 2.05 | 0.82 | 0.91 |
| 82814   | #N/A | #N/A | #N/A |
| 1422    | #N/A | #N/A | 1.13 |
| 2219    | 0.20 | 0.03 | 0.62 |
| 3266    | 0.18 | 0.02 | 0.66 |
| 3964    | 0.19 | 0.02 | 0.63 |
| 155261  | 2.75 | 0.94 | 1.48 |
| 246635  | 2.50 | 0.91 | 1.13 |
| 293003  | 0.20 | 0.05 | 1.26 |
| 305652  | 0.45 | 0.17 | 0.63 |
| 294912  | #N/A | #N/A | #N/A |
| 124066  | 1.08 | 0.50 | 1.21 |
| 168579  | 1.66 | 0.71 | 0.99 |
| 290889  | 0.46 | 0.17 | 0.71 |
| 229431  | #N/A | #N/A | 1.03 |
| 221801  | #N/A | #N/A | #N/A |
| 36542   | 2.65 | 0.93 | #N/A |
| 44031   | #N/A | #N/A | #N/A |
| 521508  | #N/A | #N/A | 0.60 |
| 804555  | 0.80 | 0.38 | 0.88 |
| 1490883 | 0.35 | 0.12 | 0.44 |
| 652018  | 1.66 | 0.72 | 0.75 |
| 881298  | 0.17 | 0.02 | 0.84 |
| 883907  | 1.00 | 0.46 | 0.85 |
| 668822  | #N/A | #N/A | #N/A |
| 1096141 | 0.94 | 0.44 | 1.28 |
| 1353260 | 0.94 | 0.45 | 1.07 |
| 520844  | 0.94 | 0.45 | 1.56 |
| 992851  | #N/A | #N/A | #N/A |
| 121068  | 1.15 | 0.53 | 0.68 |
| 99664   | 1.35 | 0.60 | 0.59 |

|        |      |      |      |
|--------|------|------|------|
| 135939 | 0.96 | 0.44 | 1.37 |
| 118551 | 1.81 | 0.77 | 1.09 |
| 229480 | 2.30 | 0.88 | 0.93 |
| 251001 | 1.31 | 0.59 | 1.07 |
| 342607 | 0.22 | 0.06 | #N/A |
| 440457 | #N/A | #N/A | 1.41 |
| 449575 | 0.36 | 0.15 | #N/A |
| 288060 | 2.17 | 0.86 | 0.89 |
| 552263 | 0.78 | 0.35 | #N/A |
| 249330 | #N/A | #N/A | #N/A |
| 564020 | 0.35 | 0.14 | 0.26 |
| 436602 | 0.80 | 0.37 | 1.21 |
| 353731 | 1.79 | 0.75 | 0.99 |
| 354846 | 1.20 | 0.54 | 1.26 |
| 443069 | 0.96 | 0.46 | 1.25 |
| 445136 | 0.20 | 0.03 | 1.01 |
| 551769 | #N/A | #N/A | #N/A |
| 249751 | 0.83 | 0.38 | #N/A |
| 569020 | 1.41 | 0.62 | 0.80 |
| 144816 | #N/A | #N/A | 1.72 |
| 100895 | 1.79 | 0.75 | 1.24 |
| 144517 | 1.74 | 0.75 | 1.29 |
| 223424 | 0.23 | 0.06 | 0.59 |
| 191841 | 1.46 | 0.66 | #N/A |
| 207125 | 1.83 | 0.78 | 1.20 |
| 158679 | 0.98 | 0.44 | #N/A |
| 124828 | 0.90 | 0.41 | 1.35 |
| 319339 | 1.08 | 0.49 | 0.86 |
| 320705 | 1.28 | 0.59 | 1.43 |
| 412721 | 0.95 | 0.45 | 2.32 |
| 318858 | 0.59 | 0.25 | #N/A |
| 328222 | #N/A | #N/A | 0.97 |
| 205341 | 0.80 | 0.37 | #N/A |
| 535753 | #N/A | #N/A | #N/A |
| 713378 | 1.52 | 0.68 | 1.09 |
| 563316 | 0.23 | 0.04 | 1.00 |
| 566274 | 0.23 | 0.04 | 0.83 |
| 567404 | 0.97 | 0.44 | 0.85 |
| 701344 | #N/A | #N/A | #N/A |
| 793553 | 1.49 | 0.67 | 0.97 |
| 8224   | #N/A | #N/A | #N/A |
| 85533  | #N/A | #N/A | 1.11 |
| 92385  | #N/A | #N/A | #N/A |
| 389845 | 1.55 | 0.69 | #N/A |
| 464142 | #N/A | #N/A | #N/A |
| 117054 | 1.07 | 0.50 | 1.41 |
| 133433 | 0.61 | 0.29 | #N/A |
| 133675 | 1.09 | 0.50 | #N/A |
| 358852 | 0.68 | 0.31 | #N/A |
| 359069 | #N/A | #N/A | 0.71 |
| 545104 | 0.34 | 0.09 | 1.09 |

|         |      |      |      |
|---------|------|------|------|
| 546604  | 0.17 | 0.02 | 0.82 |
| 549632  | 1.03 | 0.48 | 0.90 |
| 359374  | 0.81 | 0.37 | #N/A |
| 147105  | 0.89 | 0.42 | 0.81 |
| 246549  | 1.00 | 0.46 | 1.35 |
| 300725  | 0.92 | 0.42 | 1.32 |
| 336894  | 0.24 | 0.04 | 0.37 |
| 206573  | 0.39 | 0.14 | 0.73 |
| 207929  | 1.84 | 0.78 | 0.63 |
| 209285  | 0.33 | 0.10 | 0.67 |
| 210294  | 0.26 | 0.06 | 0.66 |
| 395156  | 0.32 | 0.08 | 0.56 |
| 426422  | 1.26 | 0.57 | 1.31 |
| 111838  | 2.20 | 0.85 | #N/A |
| 374631  | #N/A | #N/A | #N/A |
| 377566  | 1.68 | 0.73 | 1.35 |
| 422575  | 0.85 | 0.39 | 1.35 |
| 531363  | 0.23 | 0.05 | 0.83 |
| 537729  | #N/A | #N/A | 1.26 |
| 416338  | 0.60 | 0.26 | #N/A |
| 416714  | #N/A | #N/A | #N/A |
| 421984  | 1.61 | 0.69 | #N/A |
| 517787  | #N/A | #N/A | #N/A |
| 543458  | 0.84 | 0.40 | 1.20 |
| 416129  | #N/A | #N/A | #N/A |
| 374329  | 1.94 | 0.79 | 1.11 |
| 339087  | 1.38 | 0.62 | 0.58 |
| 146079  | #N/A | #N/A | #N/A |
| 84120   | 0.88 | 0.40 | 1.70 |
| 219369  | 0.93 | 0.42 | 1.31 |
| 313838  | 1.54 | 0.69 | 1.26 |
| 74523   | 1.28 | 0.58 | 1.18 |
| 513486  | 1.01 | 0.46 | 1.19 |
| 490057  | 0.71 | 0.34 | #N/A |
| 490428  | 1.16 | 0.53 | 1.70 |
| 108971  | 0.61 | 0.27 | 1.13 |
| 364552  | 0.39 | 0.13 | 0.99 |
| 669662  | 1.14 | 0.51 | 0.95 |
| 1014172 | 2.83 | 0.94 | 0.78 |
| 688368  | 0.93 | 0.42 | #N/A |
| 963539  | 1.38 | 0.63 | 0.73 |
| 1052627 | #N/A | #N/A | #N/A |
| 599844  | 0.60 | 0.29 | #N/A |
| 599544  | 1.44 | 0.64 | 1.18 |
| 657767  | #N/A | #N/A | 1.75 |
| 688664  | 1.29 | 0.58 | 1.69 |
| 104162  | 3.16 | 0.97 | 0.75 |
| 132321  | #N/A | #N/A | #N/A |
| 362829  | 0.79 | 0.36 | 0.90 |
| 573330  | 0.85 | 0.39 | #N/A |
| 653135  | 0.37 | 0.14 | 0.68 |

|        |      |      |      |
|--------|------|------|------|
| 379060 | #N/A | #N/A | 1.06 |
| 481546 | 1.23 | 0.55 | 0.78 |
| 290223 | 1.38 | 0.62 | #N/A |
| 481807 | 1.45 | 0.64 | 0.66 |
| 503388 | 0.61 | 0.29 | 1.31 |
| 809233 | 2.48 | 0.91 | 1.04 |
| 837764 | #N/A | #N/A | 1.29 |
| 546712 | #N/A | #N/A | 1.30 |
| 687463 | 2.72 | 0.94 | 1.45 |
| 727659 | 1.48 | 0.66 | 1.18 |
| 300980 | 0.82 | 0.39 | #N/A |
| 18560  | 1.18 | 0.53 | #N/A |
| 301021 | 0.79 | 0.36 | 1.38 |
| 340898 | 0.72 | 0.32 | #N/A |
| 227291 | #N/A | #N/A | #N/A |
| 3986   | 1.34 | 0.60 | #N/A |
| 568977 | 0.88 | 0.41 | #N/A |
| 780182 | 0.17 | 0.02 | 0.51 |
| 877401 | 0.42 | 0.16 | 1.24 |
| 438484 | 0.83 | 0.38 | 0.50 |
| 664322 | #N/A | #N/A | 0.50 |
| 594817 | 1.12 | 0.51 | 0.89 |
| 664467 | 1.51 | 0.66 | #N/A |
| 703760 | #N/A | #N/A | #N/A |
| 969422 | 0.61 | 0.29 | #N/A |
| 280925 | 2.06 | 0.82 | 1.42 |
| 199375 | #N/A | #N/A | 0.75 |
| 55858  | #N/A | #N/A | 1.10 |
| 436582 | 1.28 | 0.57 | 0.57 |
| 437255 | 1.39 | 0.61 | 1.30 |
| 438129 | 0.72 | 0.34 | 1.33 |
| 439373 | 0.32 | 0.09 | 1.02 |
| 440617 | 0.37 | 0.14 | 1.02 |
| 441861 | 0.50 | 0.20 | 0.83 |
| 442757 | 1.09 | 0.51 | 0.95 |
| 436726 | #N/A | #N/A | #N/A |
| 210770 | 0.93 | 0.42 | 0.85 |
| 436244 | 0.77 | 0.35 | #N/A |
| 626560 | #N/A | #N/A | #N/A |
| 797704 | #N/A | #N/A | 0.52 |
| 572168 | 0.96 | 0.44 | 1.02 |
| 776793 | #N/A | #N/A | #N/A |
| 850507 | 0.89 | 0.41 | 0.58 |
| 881825 | #N/A | #N/A | 0.94 |
| 776410 | #N/A | #N/A | #N/A |
| 778151 | 0.85 | 0.39 | 0.56 |
| 933399 | 0.62 | 0.28 | 1.39 |
| 749014 | 1.46 | 0.65 | 0.78 |
| 20697  | 0.75 | 0.34 | 1.02 |
| 197988 | 0.57 | 0.24 | 0.76 |



| Untagged control | HA-Htz1, <i>swr1</i> Δ | HA-Htz1, <i>swr1</i> Δ | HA-Htz1, <i>yaf9</i> Δ | HA-Htz1, <i>yaf9</i> Δ | Swr1-Myc CHIP |
|------------------|------------------------|------------------------|------------------------|------------------------|---------------|
| 1.00             | 1.70                   | 0.97                   | 2.92                   | 0.99                   | 1.19          |
| 0.89             | 0.96                   | 0.44                   | 1.86                   | 0.94                   | 1.18          |
| 0.01             | 0.73                   | 0.13                   | #N/A                   | #N/A                   | 0.72          |
| 0.92             | 1.43                   | 0.91                   | 1.24                   | 0.78                   | 1.72          |
| 0.92             | 1.37                   | 0.87                   | 0.90                   | 0.52                   | 1.97          |
| #N/A             | #N/A                   | #N/A                   | #N/A                   | #N/A                   | #N/A          |
| #N/A             | #N/A                   | #N/A                   | #N/A                   | #N/A                   | #N/A          |
| #N/A             | #N/A                   | #N/A                   | #N/A                   | #N/A                   | #N/A          |
| #N/A             | #N/A                   | #N/A                   | #N/A                   | #N/A                   | #N/A          |
| #N/A             | #N/A                   | #N/A                   | #N/A                   | #N/A                   | #N/A          |
| #N/A             | #N/A                   | #N/A                   | #N/A                   | #N/A                   | #N/A          |
| #N/A             | #N/A                   | #N/A                   | #N/A                   | #N/A                   | #N/A          |
| #N/A             | #N/A                   | #N/A                   | #N/A                   | #N/A                   | #N/A          |
| 0.26             | #N/A                   | #N/A                   | 0.17                   | 0.01                   | #N/A          |
| #N/A             | #N/A                   | #N/A                   | #N/A                   | #N/A                   | #N/A          |
| #N/A             | #N/A                   | #N/A                   | #N/A                   | #N/A                   | #N/A          |
| #N/A             | #N/A                   | #N/A                   | #N/A                   | #N/A                   | #N/A          |
| #N/A             | #N/A                   | #N/A                   | #N/A                   | #N/A                   | #N/A          |
| #N/A             | #N/A                   | #N/A                   | #N/A                   | #N/A                   | #N/A          |
| 0.05             | 1.25                   | 0.53                   | #N/A                   | #N/A                   | #N/A          |
| #N/A             | #N/A                   | #N/A                   | #N/A                   | #N/A                   | #N/A          |
| 0.04             | 0.51                   | 0.03                   | 0.54                   | 0.13                   | 1.01          |
| #N/A             | 1.08                   | 0.60                   | 0.87                   | 0.48                   | 0.99          |
| 0.32             | 1.17                   | 0.51                   | 0.70                   | 0.28                   | 0.90          |
| 0.35             | 0.78                   | 0.22                   | 0.72                   | 0.31                   | 0.96          |
| #N/A             | #N/A                   | #N/A                   | #N/A                   | #N/A                   | 1.39          |
| #N/A             | 0.37                   | 0.01                   | #N/A                   | #N/A                   | 0.49          |
| 0.49             | 1.02                   | 0.55                   | 0.90                   | 0.52                   | 0.98          |
| 0.95             | 1.02                   | 0.52                   | 0.77                   | 0.35                   | #N/A          |
| #N/A             | 1.22                   | 0.53                   | 1.24                   | 0.77                   | 0.66          |
| 0.43             | 1.68                   | 0.97                   | #N/A                   | #N/A                   | #N/A          |
| #N/A             | 1.10                   | 0.66                   | #N/A                   | #N/A                   | 0.49          |
| 0.49             | 2.19                   | 0.99                   | 0.78                   | 0.37                   | 1.05          |
| 0.15             | 1.21                   | 0.78                   | #N/A                   | #N/A                   | 0.77          |
| 0.48             | 1.15                   | 0.69                   | 0.59                   | 0.18                   | #N/A          |
| #N/A             | #N/A                   | #N/A                   | #N/A                   | #N/A                   | 0.93          |
| #N/A             | 0.64                   | 0.11                   | 0.68                   | 0.26                   | #N/A          |
| 0.89             | 1.14                   | 0.70                   | 2.68                   | 0.98                   | #N/A          |
| #N/A             | 0.49                   | 0.03                   | 1.57                   | 0.90                   | 0.87          |
| #N/A             | #N/A                   | #N/A                   | 1.99                   | 0.95                   | #N/A          |
| #N/A             | #N/A                   | #N/A                   | #N/A                   | #N/A                   | #N/A          |
| #N/A             | #N/A                   | #N/A                   | #N/A                   | #N/A                   | #N/A          |
| 0.85             | 1.03                   | 0.56                   | 1.06                   | 0.64                   | 0.74          |
| 0.36             | #N/A                   | #N/A                   | 0.82                   | 0.41                   | 0.88          |
| 0.71             | 0.95                   | 0.41                   | 2.39                   | 0.97                   | 0.55          |
| 0.32             | 1.23                   | 0.78                   | #N/A                   | #N/A                   | 0.95          |
| #N/A             | 0.97                   | 0.44                   | 0.55                   | 0.15                   | 0.96          |
| #N/A             | #N/A                   | #N/A                   | #N/A                   | #N/A                   | 0.81          |
| 0.02             | #N/A                   | #N/A                   | 0.23                   | 0.02                   | #N/A          |

|      |      |      |      |      |      |
|------|------|------|------|------|------|
| 0.49 | 0.90 | 0.33 | 0.80 | 0.40 | 0.65 |
| 0.19 | 0.48 | 0.02 | 0.57 | 0.15 | 0.83 |
| 0.60 | 0.62 | 0.07 | 0.68 | 0.26 | 0.78 |
| #N/A | 0.48 | 0.03 | #N/A | #N/A | 0.63 |
| 0.28 | 1.03 | 0.54 | 2.12 | 0.96 | 0.80 |
| #N/A | #N/A | #N/A | 1.03 | 0.64 | #N/A |
| #N/A | #N/A | #N/A | #N/A | #N/A | #N/A |
| #N/A | #N/A | #N/A | #N/A | #N/A | #N/A |
| #N/A | #N/A | #N/A | #N/A | #N/A | 0.82 |
| #N/A | #N/A | #N/A | 0.74 | 0.32 | 0.74 |
| 0.80 | 0.90 | 0.35 | 0.42 | 0.07 | 0.81 |
| 0.08 | 0.44 | 0.02 | 0.34 | 0.04 | 0.59 |
| #N/A | #N/A | #N/A | 0.90 | 0.50 | #N/A |
| 1.00 | 1.95 | 0.98 | 4.00 | 0.99 | 1.43 |
| 1.00 | 1.90 | 0.98 | 3.13 | 0.99 | #N/A |
| 1.00 | #N/A | #N/A | 2.53 | 0.98 | #N/A |
| 0.99 | 1.46 | 0.88 | #N/A | #N/A | 1.10 |
| 0.99 | 1.27 | 0.83 | 2.00 | 0.95 | 1.12 |
| 0.95 | #N/A | #N/A | #N/A | #N/A | #N/A |
| 0.98 | 1.22 | 0.70 | 3.43 | 0.99 | 0.97 |
| 0.98 | 1.61 | 0.94 | 2.22 | 0.96 | 1.29 |
| 0.98 | 1.25 | 0.83 | 1.39 | 0.84 | 1.18 |
| 1.00 | 7.29 | 1.00 | 5.40 | 1.00 | 2.09 |
| 0.89 | 0.71 | 0.12 | 1.33 | 0.83 | 0.84 |
| #N/A | #N/A | #N/A | 4.21 | 1.00 | #N/A |
| #N/A | #N/A | #N/A | #N/A | #N/A | #N/A |
| 0.99 | 1.57 | 0.61 | 2.10 | 0.96 | 1.17 |
| 0.99 | 1.18 | 0.74 | 2.14 | 0.96 | 1.04 |
| #N/A | #N/A | #N/A | 0.65 | 0.23 | #N/A |
| 0.37 | 0.70 | 0.13 | 0.37 | 0.05 | 0.86 |
| 0.12 | 0.73 | 0.14 | 0.54 | 0.14 | 1.30 |
| 0.91 | #N/A | #N/A | #N/A | #N/A | 1.06 |
| 0.37 | #N/A | #N/A | 0.92 | 0.53 | 0.94 |
| 0.77 | 1.13 | 0.67 | 0.73 | 0.32 | 1.30 |
| 0.28 | 1.28 | 0.84 | 1.01 | 0.60 | 1.09 |
| #N/A | 1.17 | 0.74 | #N/A | #N/A | 1.23 |
| #N/A | #N/A | #N/A | #N/A | #N/A | #N/A |
| 0.65 | 1.53 | 0.89 | 1.30 | 0.80 | 1.61 |
| 0.85 | 1.47 | 0.93 | 0.79 | 0.38 | 1.86 |
| 0.92 | 1.21 | 0.75 | 1.23 | 0.78 | 1.72 |
| 0.60 | 0.92 | 0.37 | 0.80 | 0.39 | 0.91 |
| 0.95 | 1.00 | 0.51 | 0.73 | 0.31 | 2.05 |
| 0.62 | 1.43 | 0.92 | 0.73 | 0.33 | 1.04 |
| 0.68 | 1.03 | 0.56 | 0.93 | 0.54 | 1.16 |
| 0.64 | 1.14 | 0.71 | 0.93 | 0.54 | 1.23 |
| 0.93 | 1.11 | 0.67 | 1.36 | 0.83 | 0.93 |
| #N/A | 1.25 | 0.82 | #N/A | #N/A | 1.03 |
| 0.89 | 1.06 | 0.61 | #N/A | #N/A | 1.19 |
| 0.69 | 1.28 | 0.81 | #N/A | #N/A | 1.16 |
| 0.87 | 1.15 | 0.72 | 0.99 | 0.59 | 1.54 |
| 0.66 | #N/A | #N/A | 0.95 | 0.54 | 1.20 |

|      |      |      |      |      |      |
|------|------|------|------|------|------|
| 0.42 | 1.47 | 0.93 | #N/A | #N/A | 1.02 |
| 0.37 | 1.11 | 0.66 | #N/A | #N/A | 0.85 |
| 0.75 | 1.16 | 0.74 | 1.18 | 0.74 | #N/A |
| 0.89 | 0.99 | 0.49 | 1.02 | 0.61 | 1.03 |
| 0.81 | 1.23 | 0.78 | #N/A | #N/A | #N/A |
| 0.80 | 1.21 | 0.78 | #N/A | #N/A | #N/A |
| 0.75 | #N/A | #N/A | 0.86 | 0.45 | 1.74 |
| 0.72 | 1.40 | 0.88 | 1.39 | 0.84 | 2.02 |
| 0.01 | #N/A | #N/A | 0.11 | 0.01 | #N/A |
| 0.90 | 0.78 | 0.19 | 0.83 | 0.43 | 1.53 |
| #N/A | #N/A | #N/A | #N/A | #N/A | #N/A |
| 0.64 | 0.97 | 0.48 | 1.10 | 0.69 | 1.00 |
| 0.33 | 0.94 | 0.41 | #N/A | #N/A | 1.43 |
| #N/A | #N/A | #N/A | #N/A | #N/A | #N/A |
| #N/A | 1.04 | 0.56 | #N/A | #N/A | 1.28 |
| #N/A | 0.95 | 0.42 | #N/A | #N/A | 0.81 |
| 0.58 | 1.14 | 0.70 | 0.75 | 0.34 | #N/A |
| 0.11 | 0.95 | 0.43 | 0.73 | 0.32 | 0.96 |
| 0.91 | 1.19 | 0.76 | 1.41 | 0.84 | #N/A |
| #N/A | #N/A | #N/A | #N/A | #N/A | #N/A |
| 0.46 | 0.71 | 0.12 | 0.68 | 0.26 | 0.80 |
| 0.01 | 0.31 | 0.00 | 0.25 | 0.03 | 0.75 |
| #N/A | 0.82 | 0.23 | 0.74 | 0.34 | 1.02 |
| #N/A | #N/A | #N/A | #N/A | #N/A | #N/A |
| 0.96 | 0.81 | 0.25 | 0.70 | 0.27 | 1.42 |
| #N/A | #N/A | #N/A | #N/A | #N/A | #N/A |
| 0.90 | 1.28 | 0.81 | 0.90 | 0.51 | 1.21 |
| #N/A | #N/A | #N/A | #N/A | #N/A | #N/A |
| #N/A | #N/A | #N/A | #N/A | #N/A | #N/A |
| 0.56 | 0.93 | 0.44 | 1.61 | 0.90 | #N/A |
| 0.61 | 0.87 | 0.30 | 0.49 | 0.10 | 1.01 |
| 0.82 | 1.21 | 0.79 | 0.78 | 0.37 | 1.48 |
| 0.80 | #N/A | #N/A | 0.84 | 0.44 | 1.36 |
| 0.74 | 0.97 | 0.47 | 0.55 | 0.14 | 1.03 |
| #N/A | #N/A | #N/A | #N/A | #N/A | #N/A |
| 0.19 | 0.86 | 0.28 | 0.74 | 0.32 | 0.86 |
| 0.68 | 1.11 | 0.63 | 0.78 | 0.37 | 1.09 |
| 0.53 | 0.90 | 0.33 | 1.29 | 0.80 | 1.50 |
| #N/A | #N/A | #N/A | #N/A | #N/A | #N/A |
| 0.65 | 0.79 | 0.20 | 1.25 | 0.79 | 1.15 |
| #N/A | #N/A | #N/A | 0.47 | 0.09 | 1.09 |
| 0.24 | 1.18 | 0.68 | 0.62 | 0.20 | 1.03 |
| 0.41 | 1.17 | 0.75 | 0.67 | 0.25 | 1.22 |
| 0.82 | 1.01 | 0.50 | 0.61 | 0.21 | 1.33 |
| #N/A | #N/A | #N/A | #N/A | #N/A | #N/A |
| #N/A | #N/A | #N/A | 0.88 | 0.48 | 0.85 |
| 0.42 | #N/A | #N/A | 3.52 | 0.99 | 1.80 |
| #N/A | 0.60 | 0.06 | 0.82 | 0.41 | 0.95 |
| #N/A | 0.95 | 0.42 | 1.12 | 0.71 | 1.01 |
| 0.71 | 0.75 | 0.16 | 0.67 | 0.25 | 0.88 |
| 0.56 | 0.78 | 0.17 | 0.94 | 0.56 | #N/A |

|      |      |      |      |      |      |
|------|------|------|------|------|------|
| 0.51 | #N/A | #N/A | 1.47 | 0.86 | #N/A |
| #N/A | #N/A | #N/A | #N/A | #N/A | #N/A |
| 0.28 | 0.99 | 0.49 | 0.52 | 0.12 | 0.96 |
| 0.54 | 1.55 | 0.95 | 0.89 | 0.51 | 1.25 |
| 0.61 | #N/A | #N/A | 0.62 | 0.19 | #N/A |
| #N/A | #N/A | #N/A | #N/A | #N/A | #N/A |
| 0.38 | #N/A | #N/A | #N/A | #N/A | #N/A |
| 0.63 | 1.20 | 0.70 | 0.87 | 0.49 | 1.26 |
| 0.34 | #N/A | #N/A | 0.57 | 0.17 | 2.23 |
| 0.54 | 0.86 | 0.28 | 0.67 | 0.25 | 1.01 |
| 0.64 | 1.12 | 0.69 | 0.87 | 0.47 | 1.31 |
| 0.41 | 1.02 | 0.54 | 0.85 | 0.45 | 1.36 |
| #N/A | #N/A | #N/A | #N/A | #N/A | #N/A |
| 0.57 | 0.95 | 0.42 | #N/A | #N/A | 1.34 |
| #N/A | #N/A | #N/A | #N/A | #N/A | #N/A |
| 0.66 | 0.89 | 0.32 | 0.88 | 0.49 | 1.14 |
| 0.38 | 1.25 | 0.83 | 1.75 | 0.92 | #N/A |
| 0.58 | 1.20 | 0.77 | 0.64 | 0.22 | 1.18 |
| #N/A | #N/A | #N/A | #N/A | #N/A | #N/A |
| #N/A | #N/A | #N/A | 0.60 | 0.18 | #N/A |
| 0.87 | 1.39 | 0.88 | 0.93 | 0.53 | #N/A |
| 0.65 | 0.45 | 0.04 | 0.68 | 0.26 | 1.07 |
| #N/A | 1.38 | 0.70 | #N/A | #N/A | 0.94 |
| 0.47 | 1.04 | 0.57 | 0.68 | 0.26 | 0.96 |
| 0.34 | 1.12 | 0.66 | 0.74 | 0.32 | 1.03 |
| #N/A | 1.21 | 0.67 | 1.03 | 0.62 | 1.50 |
| #N/A | #N/A | #N/A | #N/A | #N/A | #N/A |
| 0.56 | 0.98 | 0.49 | 0.85 | 0.46 | 1.10 |
| #N/A | 0.58 | 0.12 | 0.80 | 0.38 | 1.58 |
| 0.62 | 1.18 | 0.73 | 1.51 | 0.88 | 1.18 |
| #N/A | 1.58 | 0.95 | #N/A | #N/A | 1.20 |
| #N/A | 3.09 | 0.80 | #N/A | #N/A | 1.08 |
| #N/A | #N/A | #N/A | #N/A | #N/A | #N/A |
| 0.58 | 1.03 | 0.54 | 0.94 | 0.54 | 1.14 |
| 0.61 | 1.24 | 0.67 | 1.02 | 0.63 | 1.03 |
| #N/A | 1.15 | 0.62 | #N/A | #N/A | #N/A |
| 0.47 | 0.93 | 0.47 | 0.92 | 0.53 | 0.92 |
| #N/A | #N/A | #N/A | #N/A | #N/A | #N/A |
| 0.28 | 0.86 | 0.29 | 0.54 | 0.13 | 0.98 |
| 0.62 | #N/A | #N/A | 0.90 | 0.51 | 1.45 |
| #N/A | 1.37 | 0.89 | 0.90 | 0.52 | #N/A |
| #N/A | #N/A | #N/A | 1.11 | 0.70 | 0.95 |
| #N/A | #N/A | #N/A | #N/A | #N/A | #N/A |
| #N/A | 0.81 | 0.34 | 0.78 | 0.37 | 1.07 |
| 0.42 | 0.96 | 0.43 | 2.48 | 0.98 | 1.53 |
| 0.07 | 0.51 | 0.14 | 0.51 | 0.12 | #N/A |
| 0.79 | 1.21 | 0.76 | 0.69 | 0.27 | 1.06 |
| 0.28 | 0.95 | 0.44 | 1.21 | 0.75 | 1.10 |
| 0.42 | 1.17 | 0.63 | 0.88 | 0.48 | #N/A |
| #N/A | #N/A | #N/A | #N/A | #N/A | #N/A |
| #N/A | 0.88 | 0.40 | #N/A | #N/A | #N/A |

|      |      |      |      |      |      |
|------|------|------|------|------|------|
| 0.70 | 1.04 | 0.56 | 1.16 | 0.73 | 0.94 |
| #N/A | 1.37 | 0.90 | 0.49 | 0.10 | 1.38 |
| #N/A | #N/A | #N/A | #N/A | #N/A | #N/A |
| 0.39 | 1.22 | 0.78 | 1.07 | 0.67 | 1.28 |
| #N/A | 1.58 | 0.95 | #N/A | #N/A | 1.11 |
| #N/A | 1.29 | 0.57 | #N/A | #N/A | 1.60 |
| 0.42 | #N/A | #N/A | #N/A | #N/A | 1.18 |
| 0.63 | 1.09 | 0.59 | 1.24 | 0.77 | 0.99 |
| 0.69 | 1.28 | 0.84 | 2.14 | 0.96 | 1.30 |
| #N/A | 1.31 | 0.74 | 0.80 | 0.39 | 1.65 |
| 0.59 | 1.01 | 0.52 | #N/A | #N/A | 1.22 |
| #N/A | #N/A | #N/A | #N/A | #N/A | #N/A |
| #N/A | #N/A | #N/A | #N/A | #N/A | #N/A |
| 0.38 | 1.03 | 0.55 | 1.20 | 0.76 | 1.55 |
| #N/A | #N/A | #N/A | #N/A | #N/A | #N/A |
| 0.90 | #N/A | #N/A | 0.87 | 0.47 | 1.59 |
| #N/A | 0.91 | 0.36 | #N/A | #N/A | 1.37 |
| #N/A | #N/A | #N/A | #N/A | #N/A | #N/A |
| #N/A | #N/A | #N/A | #N/A | #N/A | #N/A |
| 0.61 | 1.08 | 0.57 | 0.75 | 0.33 | 1.23 |
| #N/A | 1.17 | 0.61 | 0.68 | 0.26 | 1.11 |
| 0.07 | 1.76 | 0.92 | 0.29 | 0.03 | 1.01 |
| #N/A | #N/A | #N/A | #N/A | #N/A | #N/A |
| 0.54 | #N/A | #N/A | 0.87 | 0.46 | 0.83 |
| 0.39 | 1.05 | 0.59 | 0.84 | 0.43 | 1.21 |
| 0.50 | #N/A | #N/A | 0.98 | 0.59 | 0.80 |
| #N/A | #N/A | #N/A | #N/A | #N/A | #N/A |
| #N/A | #N/A | #N/A | 1.27 | 0.79 | 1.27 |
| 0.63 | 1.50 | 0.93 | 1.33 | 0.82 | #N/A |
| #N/A | #N/A | #N/A | #N/A | #N/A | #N/A |
| 0.60 | #N/A | #N/A | #N/A | #N/A | #N/A |
| #N/A | #N/A | #N/A | #N/A | #N/A | #N/A |
| #N/A | #N/A | #N/A | #N/A | #N/A | 1.44 |
| 0.57 | #N/A | #N/A | 0.95 | 0.57 | #N/A |
| 0.49 | 0.98 | 0.47 | 0.90 | 0.52 | 1.22 |
| #N/A | #N/A | #N/A | #N/A | #N/A | #N/A |
| #N/A | #N/A | #N/A | #N/A | #N/A | #N/A |
| #N/A | #N/A | #N/A | #N/A | #N/A | #N/A |
| #N/A | 1.10 | 0.65 | 1.68 | 0.91 | 1.27 |
| 0.45 | 1.18 | 0.74 | 0.80 | 0.39 | 1.05 |
| 0.59 | 1.14 | 0.65 | 0.79 | 0.37 | 1.26 |
| #N/A | #N/A | #N/A | #N/A | #N/A | #N/A |
| 0.28 | 0.90 | 0.34 | 0.51 | 0.12 | 1.24 |
| #N/A | #N/A | #N/A | 0.64 | 0.22 | 1.54 |
| #N/A | #N/A | #N/A | #N/A | #N/A | #N/A |
| 0.27 | #N/A | #N/A | 0.61 | 0.19 | #N/A |
| 0.51 | 1.09 | 0.65 | 0.91 | 0.51 | 1.19 |
| 1.00 | #N/A | #N/A | 3.42 | 0.99 | 0.88 |
| 0.58 | 2.00 | 0.99 | 0.70 | 0.28 | 0.94 |
| 0.49 | 1.06 | 0.60 | 0.76 | 0.35 | 0.94 |
| 0.45 | 1.08 | 0.61 | 1.23 | 0.76 | 1.08 |

|      |      |      |      |      |      |      |      |
|------|------|------|------|------|------|------|------|
| #N/A | #N/A | #N/A | #N/A | #N/A | #N/A | #N/A | #N/A |
| #N/A | #N/A | #N/A | #N/A | #N/A | #N/A | #N/A | #N/A |
| 0.66 | #N/A | #N/A | #N/A | #N/A | #N/A | #N/A | #N/A |
| 0.81 | #N/A | #N/A | #N/A | 0.79 | 0.37 | #N/A | #N/A |
| 0.65 | #N/A | #N/A | #N/A | 0.93 | 0.53 | 1.09 | #N/A |
| 0.10 | 0.70 | 0.16 | #N/A | 0.57 | 0.15 | #N/A | #N/A |
| 0.70 | 1.14 | 0.68 | #N/A | 0.91 | 0.51 | #N/A | #N/A |
| 0.43 | 0.97 | 0.46 | #N/A | 1.11 | 0.70 | 1.00 | #N/A |
| 0.86 | #N/A | #N/A | #N/A | #N/A | #N/A | 1.07 | #N/A |
| #N/A | #N/A | #N/A | #N/A | #N/A | #N/A | #N/A | #N/A |
| 0.64 | 0.80 | 0.30 | #N/A | 0.80 | 0.39 | 0.89 | #N/A |
| #N/A | #N/A | #N/A | #N/A | #N/A | #N/A | #N/A | #N/A |
| #N/A | #N/A | #N/A | #N/A | 0.45 | 0.09 | 0.61 | #N/A |
| 0.42 | 1.25 | 0.82 | #N/A | 0.64 | 0.23 | 1.13 | #N/A |
| 0.61 | 1.46 | 0.90 | #N/A | 1.46 | 0.86 | 0.97 | #N/A |
| 0.76 | 0.82 | 0.22 | #N/A | 0.72 | 0.29 | 0.96 | #N/A |
| 0.66 | 1.00 | 0.48 | #N/A | 1.40 | 0.85 | #N/A | #N/A |
| #N/A | #N/A | #N/A | #N/A | #N/A | #N/A | #N/A | #N/A |
| #N/A | #N/A | #N/A | #N/A | #N/A | #N/A | #N/A | #N/A |
| #N/A | #N/A | #N/A | #N/A | #N/A | #N/A | #N/A | #N/A |
| #N/A | #N/A | #N/A | #N/A | #N/A | #N/A | 0.79 | #N/A |
| 0.56 | 0.97 | 0.44 | #N/A | 0.97 | 0.59 | 0.97 | #N/A |
| 0.15 | 0.49 | 0.03 | #N/A | 0.35 | 0.04 | 0.71 | #N/A |
| 0.74 | 1.04 | 0.58 | #N/A | 0.81 | 0.41 | 0.98 | #N/A |
| 0.00 | #N/A | #N/A | #N/A | #N/A | #N/A | #N/A | #N/A |
| 0.54 | 1.56 | 0.93 | #N/A | 0.73 | 0.33 | #N/A | #N/A |
| 0.76 | 1.26 | 0.80 | #N/A | 1.00 | 0.61 | 1.26 | #N/A |
| #N/A | #N/A | #N/A | #N/A | #N/A | #N/A | #N/A | #N/A |
| #N/A | #N/A | #N/A | #N/A | 1.09 | 0.67 | #N/A | #N/A |
| 0.17 | #N/A | #N/A | #N/A | 0.89 | 0.49 | #N/A | #N/A |
| #N/A | 1.38 | 0.87 | #N/A | #N/A | #N/A | 1.11 | #N/A |
| 0.45 | #N/A | #N/A | #N/A | #N/A | #N/A | #N/A | #N/A |
| 0.58 | 0.97 | 0.45 | #N/A | 0.69 | 0.26 | 1.00 | #N/A |
| 0.39 | 0.78 | 0.23 | #N/A | 0.73 | 0.31 | 1.36 | #N/A |
| 0.34 | #N/A | #N/A | #N/A | #N/A | #N/A | #N/A | #N/A |
| #N/A | #N/A | #N/A | #N/A | #N/A | #N/A | #N/A | #N/A |
| #N/A | #N/A | #N/A | #N/A | #N/A | #N/A | #N/A | #N/A |
| 0.79 | 1.17 | 0.73 | #N/A | 1.19 | 0.74 | 1.05 | #N/A |
| #N/A | #N/A | #N/A | #N/A | 1.10 | 0.67 | #N/A | #N/A |
| 0.57 | 0.94 | 0.41 | #N/A | 1.18 | 0.74 | 1.10 | #N/A |
| 0.98 | 1.28 | 0.68 | #N/A | 1.02 | 0.61 | 1.09 | #N/A |
| 0.68 | #N/A | #N/A | #N/A | #N/A | #N/A | #N/A | #N/A |
| 0.69 | 0.71 | 0.11 | #N/A | 3.37 | 0.99 | #N/A | #N/A |
| #N/A | 1.01 | 0.49 | #N/A | #N/A | #N/A | #N/A | #N/A |
| 0.56 | 1.18 | 0.76 | #N/A | #N/A | #N/A | 1.05 | #N/A |
| #N/A | 1.52 | 0.75 | #N/A | #N/A | #N/A | #N/A | #N/A |
| #N/A | 0.73 | 0.14 | #N/A | 5.10 | 1.00 | #N/A | #N/A |
| 0.77 | 0.93 | 0.40 | #N/A | 0.92 | 0.53 | 0.96 | #N/A |
| #N/A | #N/A | #N/A | #N/A | #N/A | #N/A | #N/A | #N/A |
| 0.28 | 1.12 | 0.67 | #N/A | 1.13 | 0.71 | 1.11 | #N/A |
| #N/A | 0.88 | 0.32 | #N/A | #N/A | #N/A | 1.15 | #N/A |

|      |      |      |      |      |      |
|------|------|------|------|------|------|
| #N/A | 1.77 | 0.54 | 0.85 | 0.45 | 1.16 |
| #N/A | 1.04 | 0.48 | 0.94 | 0.55 | 1.04 |
| 0.71 | 1.20 | 0.79 | 0.92 | 0.51 | 0.97 |
| 0.31 | 0.75 | 0.16 | 0.50 | 0.11 | 0.83 |
| 0.80 | 1.07 | 0.59 | 1.05 | 0.65 | 0.95 |
| 0.51 | 1.28 | 0.65 | 1.30 | 0.81 | 0.94 |
| 0.43 | 1.27 | 0.82 | 0.74 | 0.34 | 0.96 |
| #N/A | #N/A | #N/A | #N/A | #N/A | #N/A |
| 0.32 | #N/A | #N/A | 0.74 | 0.33 | 1.14 |
| #N/A | #N/A | #N/A | 0.70 | 0.28 | #N/A |
| #N/A | #N/A | #N/A | #N/A | #N/A | #N/A |
| 0.11 | 1.01 | 0.51 | 0.57 | 0.17 | 1.43 |
| 0.56 | 1.12 | 0.68 | 0.82 | 0.41 | 1.30 |
| #N/A | 1.20 | 0.72 | 0.42 | 0.07 | #N/A |
| 0.92 | 1.22 | 0.80 | 0.90 | 0.52 | #N/A |
| #N/A | #N/A | #N/A | #N/A | #N/A | 1.30 |
| 0.38 | #N/A | #N/A | #N/A | #N/A | #N/A |
| 0.67 | 1.09 | 0.64 | 2.73 | 0.98 | 1.38 |
| #N/A | 1.25 | 0.55 | #N/A | #N/A | #N/A |
| #N/A | #N/A | #N/A | #N/A | #N/A | #N/A |
| #N/A | #N/A | #N/A | #N/A | #N/A | #N/A |
| 0.47 | #N/A | #N/A | 0.65 | 0.24 | 1.17 |
| #N/A | 0.94 | 0.44 | 0.78 | 0.37 | #N/A |
| #N/A | #N/A | #N/A | #N/A | #N/A | #N/A |
| 0.87 | 1.15 | 0.68 | 1.00 | 0.59 | 1.27 |
| 0.69 | 1.14 | 0.69 | 0.78 | 0.39 | 1.08 |
| #N/A | #N/A | #N/A | #N/A | #N/A | #N/A |
| 0.27 | 0.81 | 0.25 | 0.49 | 0.11 | 0.93 |
| #N/A | #N/A | #N/A | 0.81 | 0.39 | 1.27 |
| 0.57 | 0.98 | 0.49 | 0.74 | 0.32 | 1.09 |
| 0.65 | 1.30 | 0.86 | 0.77 | 0.36 | 0.89 |
| 0.05 | 0.41 | 0.02 | 0.43 | 0.08 | 0.78 |
| 0.78 | #N/A | #N/A | 1.07 | 0.67 | 0.98 |
| 0.54 | 1.49 | 0.91 | 0.83 | 0.43 | 1.27 |
| #N/A | 1.46 | 0.91 | 1.80 | 0.93 | 1.45 |
| #N/A | #N/A | #N/A | #N/A | #N/A | #N/A |
| #N/A | #N/A | #N/A | #N/A | #N/A | #N/A |
| #N/A | #N/A | #N/A | #N/A | #N/A | #N/A |
| #N/A | 1.16 | 0.74 | #N/A | #N/A | #N/A |
| 0.19 | 1.01 | 0.49 | 0.73 | 0.31 | 1.30 |
| 0.42 | 1.32 | 0.83 | 0.90 | 0.50 | 1.22 |
| 0.82 | 1.16 | 0.72 | 1.16 | 0.72 | 1.29 |
| #N/A | #N/A | #N/A | #N/A | #N/A | #N/A |
| 0.59 | #N/A | #N/A | 1.09 | 0.68 | #N/A |
| 0.05 | 1.00 | 0.48 | 0.71 | 0.29 | 1.22 |
| 0.56 | 1.09 | 0.56 | 1.28 | 0.79 | 1.66 |
| #N/A | #N/A | #N/A | #N/A | #N/A | 1.05 |
| 0.51 | 0.98 | 0.49 | 0.67 | 0.26 | 0.87 |
| 0.37 | 1.00 | 0.49 | 0.91 | 0.51 | 1.03 |
| #N/A | #N/A | #N/A | #N/A | #N/A | #N/A |
| #N/A | #N/A | #N/A | #N/A | #N/A | #N/A |



|      |      |      |      |      |      |
|------|------|------|------|------|------|
| 0.31 | 0.78 | 0.20 | 0.52 | 0.12 | #N/A |
| 0.68 | 1.16 | 0.74 | 0.96 | 0.58 | 1.08 |
| 0.89 | 0.95 | 0.43 | 0.88 | 0.47 | 1.18 |
| 0.49 | 0.72 | 0.14 | 0.50 | 0.11 | 0.65 |
| 0.71 | 1.01 | 0.53 | 0.84 | 0.44 | #N/A |
| #N/A | 1.95 | 0.87 | #N/A | #N/A | #N/A |
| #N/A | #N/A | #N/A | #N/A | #N/A | #N/A |
| 0.50 | 1.16 | 0.70 | 0.99 | 0.61 | 1.04 |
| 0.62 | 1.06 | 0.59 | 0.83 | 0.44 | 0.86 |
| #N/A | #N/A | #N/A | 0.93 | 0.54 | 1.23 |
| 0.90 | #N/A | #N/A | 0.81 | 0.40 | 1.60 |
| 0.51 | 1.31 | 0.67 | #N/A | #N/A | 2.29 |
| 0.88 | 1.13 | 0.62 | 1.21 | 0.75 | 1.08 |
| 0.49 | 1.15 | 0.73 | 1.23 | 0.78 | 1.11 |
| #N/A | 0.90 | 0.34 | 0.91 | 0.53 | 0.89 |
| #N/A | 0.84 | 0.29 | #N/A | #N/A | 1.28 |
| 0.62 | 1.35 | 0.78 | 0.97 | 0.58 | 0.89 |
| 0.75 | 1.20 | 0.79 | 0.89 | 0.50 | 0.84 |
| 0.68 | 0.88 | 0.40 | 0.70 | 0.28 | 1.34 |
| 0.72 | 1.16 | 0.74 | 0.97 | 0.59 | 1.24 |
| #N/A | #N/A | #N/A | #N/A | #N/A | 0.87 |
| 0.81 | #N/A | #N/A | 1.08 | 0.68 | 1.30 |
| #N/A | #N/A | #N/A | #N/A | #N/A | #N/A |
| 0.95 | 1.18 | 0.66 | 0.62 | 0.21 | 1.30 |
| #N/A | 1.16 | 0.70 | 0.82 | 0.41 | 1.46 |
| 0.66 | #N/A | #N/A | 0.81 | 0.40 | #N/A |
| 0.61 | 0.83 | 0.25 | 0.63 | 0.21 | 0.84 |
| 0.97 | 1.12 | 0.60 | 2.50 | 0.97 | 1.14 |
| #N/A | #N/A | #N/A | #N/A | #N/A | #N/A |
| 0.80 | 0.89 | 0.34 | 1.08 | 0.66 | 0.96 |
| 0.23 | 0.54 | 0.04 | 0.53 | 0.13 | 0.92 |
| 0.59 | 0.88 | 0.31 | 1.47 | 0.87 | 1.14 |
| 0.60 | #N/A | #N/A | #N/A | #N/A | #N/A |
| 0.69 | 1.24 | 0.79 | 1.17 | 0.74 | 0.77 |
| 0.52 | 1.18 | 0.72 | 1.09 | 0.69 | 0.72 |
| 0.62 | #N/A | #N/A | 1.13 | 0.70 | #N/A |
| 0.52 | 1.45 | 0.92 | 0.70 | 0.28 | 1.01 |
| 0.47 | 1.04 | 0.57 | 1.06 | 0.66 | 0.86 |
| 0.64 | 1.07 | 0.60 | 0.65 | 0.23 | 0.83 |
| #N/A | #N/A | #N/A | #N/A | #N/A | #N/A |
| 0.57 | 1.19 | 0.72 | 1.63 | 0.91 | 1.25 |
| 0.53 | 0.95 | 0.45 | 1.92 | 0.94 | 0.85 |
| #N/A | #N/A | #N/A | #N/A | #N/A | #N/A |
| 0.15 | 0.86 | 0.28 | 0.87 | 0.47 | 0.99 |
| 0.33 | 1.06 | 0.60 | 0.75 | 0.35 | 0.98 |
| 0.68 | 1.02 | 0.52 | 0.72 | 0.30 | #N/A |
| 0.61 | 1.08 | 0.63 | 0.94 | 0.56 | 1.19 |
| 0.54 | 0.98 | 0.46 | 1.71 | 0.92 | #N/A |
| 0.07 | 0.88 | 0.31 | 0.74 | 0.32 | 0.92 |
| 0.01 | #N/A | #N/A | 0.08 | 0.01 | #N/A |
| #N/A | #N/A | #N/A | #N/A | #N/A | #N/A |

|      |      |      |      |      |      |
|------|------|------|------|------|------|
| 0.53 | 0.95 | 0.44 | 1.34 | 0.83 | 0.99 |
| 0.00 | #N/A | #N/A | 0.03 | 0.00 | #N/A |
| #N/A | 0.74 | 0.16 | 2.04 | 0.95 | 1.11 |
| 0.29 | 1.03 | 0.48 | 1.59 | 0.90 | 0.91 |
| 0.00 | #N/A | #N/A | 0.10 | 0.01 | #N/A |
| #N/A | 1.43 | 0.91 | 0.76 | 0.36 | 1.06 |
| 0.01 | #N/A | #N/A | 0.09 | 0.00 | #N/A |
| 0.35 | 0.99 | 0.50 | 1.77 | 0.93 | 1.84 |
| #N/A | #N/A | #N/A | 0.90 | 0.50 | #N/A |
| 0.50 | 0.92 | 0.38 | 1.02 | 0.63 | 1.07 |
| #N/A | 0.81 | 0.21 | 0.98 | 0.58 | 0.88 |
| 0.01 | 0.21 | 0.00 | 0.26 | 0.02 | 0.55 |
| 0.13 | 0.73 | 0.15 | 0.46 | 0.08 | 0.72 |
| 0.22 | 1.37 | 0.85 | 0.94 | 0.55 | 1.12 |
| 0.51 | 1.15 | 0.72 | 0.84 | 0.44 | 1.40 |
| 0.01 | 1.01 | 0.51 | #N/A | #N/A | 1.22 |
| 0.59 | 0.98 | 0.46 | 0.53 | 0.13 | 0.88 |
| #N/A | 0.68 | 0.11 | #N/A | #N/A | #N/A |
| 0.02 | #N/A | #N/A | 0.20 | 0.02 | 0.80 |
| 0.01 | #N/A | #N/A | #N/A | #N/A | #N/A |
| #N/A | #N/A | #N/A | 0.20 | 0.02 | #N/A |
| 0.77 | 0.98 | 0.46 | 0.70 | 0.28 | 0.84 |
| 0.00 | #N/A | #N/A | 0.04 | 0.00 | #N/A |
| 0.29 | 0.79 | 0.20 | 0.59 | 0.18 | 0.78 |
| 0.07 | 0.48 | 0.02 | 2.89 | 0.99 | #N/A |
| #N/A | #N/A | #N/A | 0.11 | 0.01 | #N/A |
| 0.58 | 0.98 | 0.48 | 0.84 | 0.43 | 0.92 |
| 0.03 | 1.02 | 0.52 | #N/A | #N/A | 1.10 |
| #N/A | #N/A | #N/A | #N/A | #N/A | 0.95 |
| #N/A | 0.96 | 0.42 | #N/A | #N/A | 1.12 |
| 0.16 | 1.35 | 0.86 | 0.52 | 0.12 | 1.03 |
| 0.18 | 1.06 | 0.59 | 0.90 | 0.51 | 0.94 |
| 0.40 | 0.87 | 0.30 | 1.33 | 0.81 | 0.77 |
| 0.70 | 0.96 | 0.43 | 1.61 | 0.89 | 1.06 |
| 0.39 | 1.18 | 0.74 | 0.89 | 0.49 | 0.76 |
| 0.79 | 1.42 | 0.91 | 0.95 | 0.56 | 0.76 |
| 0.65 | 1.32 | 0.81 | 1.23 | 0.77 | 0.86 |
| 0.50 | 1.17 | 0.75 | 1.30 | 0.81 | 0.83 |
| 0.48 | 1.30 | 0.86 | 1.11 | 0.69 | 0.94 |
| 0.23 | 0.84 | 0.28 | 1.22 | 0.77 | 0.67 |
| #N/A | 1.11 | 0.67 | 0.93 | 0.55 | 0.73 |
| 0.72 | 1.09 | 0.62 | 0.60 | 0.19 | 0.76 |
| 0.86 | 1.01 | 0.52 | 1.06 | 0.64 | 0.81 |
| 0.44 | 1.13 | 0.70 | 1.42 | 0.85 | 0.85 |
| 0.42 | 1.47 | 0.93 | 1.64 | 0.90 | 0.98 |
| #N/A | 1.31 | 0.86 | 1.44 | 0.85 | 0.69 |
| 0.47 | 1.30 | 0.86 | 1.71 | 0.92 | 2.96 |
| #N/A | #N/A | #N/A | 0.68 | 0.26 | #N/A |
| #N/A | 1.11 | 0.67 | #N/A | #N/A | 0.78 |
| #N/A | 0.75 | 0.15 | 0.94 | 0.53 | 1.23 |
| 0.35 | 1.30 | 0.84 | 0.30 | 0.04 | 1.07 |

|      |      |      |      |      |      |
|------|------|------|------|------|------|
| 0.11 | 1.21 | 0.76 | 0.69 | 0.28 | 0.90 |
| 0.30 | 0.78 | 0.18 | 1.49 | 0.87 | 0.95 |
| 0.29 | 0.80 | 0.20 | #N/A | #N/A | 1.12 |
| 0.42 | 1.18 | 0.75 | 0.64 | 0.22 | 0.98 |
| 0.19 | 1.14 | 0.71 | 1.63 | 0.91 | 1.24 |
| 0.13 | 1.23 | 0.52 | 0.38 | 0.05 | #N/A |
| 0.42 | 1.10 | 0.65 | 0.87 | 0.48 | 0.93 |
| 0.67 | 1.26 | 0.82 | 1.00 | 0.59 | 0.84 |
| #N/A | 1.26 | 0.84 | #N/A | #N/A | 0.89 |
| 0.67 | 1.39 | 0.90 | 0.75 | 0.34 | 0.83 |
| 0.49 | 1.04 | 0.56 | 0.75 | 0.34 | 1.04 |
| 0.41 | 0.91 | 0.39 | 1.57 | 0.90 | 0.89 |
| 0.24 | 1.17 | 0.72 | 1.46 | 0.87 | 0.87 |
| #N/A | 0.94 | 0.43 | #N/A | #N/A | 0.87 |
| 0.45 | 0.99 | 0.48 | 1.48 | 0.87 | 1.01 |
| 0.28 | #N/A | #N/A | 1.49 | 0.87 | 0.80 |
| 0.34 | #N/A | #N/A | 0.49 | 0.10 | 0.93 |
| 0.51 | 1.32 | 0.87 | 0.97 | 0.58 | 0.81 |
| 0.33 | 0.95 | 0.42 | 0.79 | 0.39 | 0.74 |
| 0.33 | 1.21 | 0.79 | #N/A | #N/A | 1.01 |
| 0.47 | 1.06 | 0.58 | 0.79 | 0.39 | 0.88 |
| 0.51 | 1.06 | 0.60 | #N/A | #N/A | 0.74 |
| #N/A | 1.18 | 0.71 | 0.73 | 0.31 | 0.60 |
| #N/A | #N/A | #N/A | 0.81 | 0.41 | #N/A |
| 0.59 | 1.02 | 0.55 | 0.99 | 0.60 | 0.81 |
| 0.38 | 1.13 | 0.68 | 1.04 | 0.65 | 0.78 |
| 0.46 | #N/A | #N/A | 0.68 | 0.26 | 0.75 |
| 0.59 | 1.06 | 0.60 | 0.75 | 0.35 | 0.79 |
| 0.80 | 1.08 | 0.64 | 0.93 | 0.52 | 0.89 |
| 0.35 | 1.20 | 0.75 | 0.65 | 0.23 | 0.87 |
| 0.31 | 0.82 | 0.24 | 1.51 | 0.87 | 0.89 |
| 0.70 | 1.06 | 0.57 | #N/A | #N/A | 0.96 |
| 0.41 | 1.10 | 0.60 | 1.10 | 0.68 | 1.02 |
| 0.46 | 1.15 | 0.71 | #N/A | #N/A | 0.86 |
| #N/A | #N/A | #N/A | #N/A | #N/A | #N/A |
| 0.40 | 0.99 | 0.49 | 1.05 | 0.66 | 0.73 |
| 0.40 | 1.17 | 0.75 | 1.13 | 0.72 | 0.79 |
| 0.49 | 1.21 | 0.79 | 1.09 | 0.66 | 0.81 |
| 0.56 | 1.33 | 0.88 | 1.60 | 0.90 | 0.86 |
| 0.95 | 1.45 | 0.91 | 1.24 | 0.79 | 0.82 |
| 0.68 | 0.95 | 0.41 | 0.84 | 0.44 | 1.05 |
| 0.09 | 1.15 | 0.71 | 0.95 | 0.56 | 0.94 |
| 0.02 | #N/A | #N/A | 0.24 | 0.03 | #N/A |
| 0.98 | 1.19 | 0.76 | 1.58 | 0.90 | 1.26 |
| #N/A | #N/A | #N/A | #N/A | #N/A | #N/A |
| 0.13 | 0.44 | 0.02 | 0.30 | 0.04 | 0.64 |
| #N/A | #N/A | #N/A | #N/A | #N/A | #N/A |
| 0.67 | 1.36 | 0.88 | 0.72 | 0.30 | 0.91 |
| #N/A | 1.15 | 0.58 | 0.73 | 0.31 | 1.51 |
| 0.71 | 1.10 | 0.65 | 0.76 | 0.36 | 1.40 |
| 0.78 | 1.25 | 0.82 | 0.77 | 0.36 | 0.69 |

|      |      |      |      |      |      |
|------|------|------|------|------|------|
| 0.43 | 1.07 | 0.62 | 1.36 | 0.83 | 0.95 |
| #N/A | 0.81 | 0.25 | #N/A | #N/A | #N/A |
| 0.69 | #N/A | #N/A | 0.69 | 0.27 | 0.70 |
| 0.03 | #N/A | #N/A | 0.81 | 0.40 | 0.47 |
| 0.55 | 0.83 | 0.25 | 3.51 | 0.99 | #N/A |
| 0.47 | 1.00 | 0.51 | 1.66 | 0.90 | 0.75 |
| 0.55 | 1.07 | 0.58 | 0.97 | 0.57 | 0.86 |
| 0.27 | 0.78 | 0.18 | 0.65 | 0.23 | 0.82 |
| 0.65 | 1.04 | 0.57 | 1.48 | 0.87 | 0.94 |
| #N/A | #N/A | #N/A | #N/A | #N/A | #N/A |
| #N/A | #N/A | #N/A | #N/A | #N/A | #N/A |
| #N/A | 1.13 | 0.65 | #N/A | #N/A | 1.19 |
| #N/A | 1.16 | 0.74 | #N/A | #N/A | 0.70 |
| 0.87 | #N/A | #N/A | 1.00 | 0.61 | 0.84 |
| 0.89 | 1.10 | 0.64 | 0.95 | 0.57 | 1.07 |
| 0.82 | 0.88 | 0.34 | 0.93 | 0.55 | 0.95 |
| 0.60 | 0.99 | 0.47 | 1.09 | 0.69 | 1.05 |
| 0.04 | 0.30 | 0.00 | #N/A | #N/A | 1.12 |
| 0.30 | #N/A | #N/A | #N/A | #N/A | #N/A |
| 0.34 | 0.96 | 0.44 | #N/A | #N/A | 0.87 |
| 0.03 | 0.45 | 0.02 | 0.34 | 0.05 | 0.56 |
| #N/A | #N/A | #N/A | #N/A | #N/A | 0.94 |
| 0.42 | 1.04 | 0.57 | 1.10 | 0.69 | 0.96 |
| 0.32 | 0.74 | 0.20 | 1.41 | 0.84 | 1.20 |
| 0.23 | 0.89 | 0.37 | 1.82 | 0.93 | 0.97 |
| #N/A | 0.96 | 0.43 | #N/A | #N/A | 0.71 |
| 0.64 | 0.85 | 0.27 | #N/A | #N/A | 1.11 |
| #N/A | #N/A | #N/A | #N/A | #N/A | #N/A |
| 0.52 | 1.02 | 0.54 | 0.51 | 0.12 | 0.85 |
| 0.16 | 0.76 | 0.18 | 0.95 | 0.56 | 1.05 |
| 0.55 | 1.12 | 0.63 | 1.06 | 0.66 | 1.09 |
| 0.01 | #N/A | #N/A | 0.11 | 0.01 | #N/A |
| 0.11 | 0.45 | 0.02 | 0.52 | 0.12 | 0.73 |
| 0.91 | 1.27 | 0.83 | 1.18 | 0.75 | 0.98 |
| 0.16 | 1.00 | 0.51 | 1.64 | 0.90 | 0.72 |
| 0.59 | 0.65 | 0.08 | 0.65 | 0.23 | 0.71 |
| 0.29 | 1.39 | 0.78 | 0.92 | 0.53 | 0.62 |
| 0.72 | #N/A | #N/A | 1.28 | 0.80 | 0.95 |
| 0.48 | #N/A | #N/A | 0.71 | 0.31 | 1.03 |
| 0.82 | 0.93 | 0.38 | 0.71 | 0.29 | 0.91 |
| 0.44 | 1.04 | 0.57 | #N/A | #N/A | 1.44 |
| 0.48 | 1.07 | 0.62 | #N/A | #N/A | 0.91 |
| 0.12 | #N/A | #N/A | 0.57 | 0.15 | 0.94 |
| 0.39 | 0.70 | 0.11 | 0.96 | 0.55 | 0.76 |
| 0.56 | 1.29 | 0.83 | 0.37 | 0.06 | 0.99 |
| 0.66 | #N/A | #N/A | #N/A | #N/A | 1.21 |
| #N/A | #N/A | #N/A | #N/A | #N/A | #N/A |
| #N/A | #N/A | #N/A | #N/A | #N/A | #N/A |
| 0.56 | 0.93 | 0.40 | 0.77 | 0.36 | 1.08 |
| 0.48 | 1.06 | 0.56 | 0.96 | 0.57 | 0.86 |
| 0.42 | #N/A | #N/A | 0.41 | 0.07 | #N/A |

|      |      |      |      |      |      |
|------|------|------|------|------|------|
| 0.37 | 0.76 | 0.16 | 2.22 | 0.97 | 0.75 |
| #N/A | #N/A | #N/A | #N/A | #N/A | #N/A |
| 0.69 | 1.32 | 0.87 | 0.86 | 0.45 | 0.86 |
| 0.75 | 0.82 | 0.23 | 0.59 | 0.17 | 0.95 |
| 0.47 | 1.01 | 0.53 | 4.18 | 1.00 | 1.01 |
| #N/A | #N/A | #N/A | #N/A | #N/A | #N/A |
| 0.37 | 0.80 | 0.20 | 0.92 | 0.52 | 1.12 |
| 0.42 | 0.78 | 0.18 | 0.96 | 0.58 | 1.05 |
| 0.63 | 1.25 | 0.81 | 0.60 | 0.18 | 0.97 |
| #N/A | #N/A | #N/A | #N/A | #N/A | #N/A |
| 0.02 | #N/A | #N/A | #N/A | #N/A | #N/A |
| 0.50 | 1.48 | 0.88 | 1.34 | 0.83 | 0.75 |
| 0.37 | 0.94 | 0.40 | 0.85 | 0.45 | 0.96 |
| #N/A | #N/A | #N/A | #N/A | #N/A | #N/A |
| 0.41 | 1.12 | 0.68 | 1.21 | 0.77 | 1.01 |
| 0.51 | 1.21 | 0.77 | 2.32 | 0.97 | 1.19 |
| #N/A | #N/A | #N/A | #N/A | #N/A | #N/A |
| 0.29 | 0.88 | 0.31 | 0.97 | 0.57 | 0.89 |
| 0.09 | 0.51 | 0.04 | 0.55 | 0.15 | 0.85 |
| 0.34 | 1.08 | 0.63 | 0.69 | 0.27 | 0.91 |
| 0.44 | 0.71 | 0.12 | 0.71 | 0.30 | 0.82 |
| #N/A | 1.07 | 0.59 | 0.75 | 0.34 | 1.02 |
| #N/A | #N/A | #N/A | #N/A | #N/A | #N/A |
| 0.28 | 0.64 | 0.07 | 0.53 | 0.13 | 1.09 |
| 0.89 | 1.12 | 0.69 | 0.63 | 0.21 | 0.82 |
| #N/A | #N/A | #N/A | #N/A | #N/A | #N/A |
| #N/A | #N/A | #N/A | 1.41 | 0.84 | 0.73 |
| #N/A | 0.78 | 0.34 | 1.46 | 0.86 | #N/A |
| #N/A | 1.07 | 0.62 | 1.23 | 0.77 | 1.04 |
| #N/A | #N/A | #N/A | #N/A | #N/A | #N/A |
| 0.88 | 1.19 | 0.77 | 0.72 | 0.31 | 1.08 |
| 0.72 | 1.02 | 0.52 | 0.76 | 0.35 | 1.06 |
| 0.71 | 1.35 | 0.89 | 1.24 | 0.77 | 1.03 |
| 0.89 | 1.65 | 0.96 | #N/A | #N/A | 1.04 |
| 0.46 | 1.24 | 0.82 | 2.28 | 0.97 | 0.97 |
| 0.26 | 0.93 | 0.41 | 1.26 | 0.78 | #N/A |
| 0.45 | 1.37 | 0.90 | 1.68 | 0.92 | 1.19 |
| 0.27 | 0.76 | 0.18 | 0.69 | 0.27 | #N/A |
| #N/A | #N/A | #N/A | 0.90 | 0.52 | #N/A |
| 0.49 | 1.16 | 0.73 | 1.27 | 0.80 | 0.94 |
| #N/A | #N/A | #N/A | #N/A | #N/A | #N/A |
| #N/A | #N/A | #N/A | #N/A | #N/A | #N/A |
| 0.61 | 1.03 | 0.56 | 0.79 | 0.40 | 1.37 |
| 0.79 | 0.73 | 0.14 | 0.91 | 0.51 | #N/A |
| 0.35 | 0.52 | 0.04 | 1.36 | 0.82 | 1.14 |
| #N/A | #N/A | #N/A | #N/A | #N/A | #N/A |
| #N/A | 0.92 | 0.36 | #N/A | #N/A | 1.04 |
| 0.70 | #N/A | #N/A | 1.26 | 0.80 | 0.90 |
| 0.54 | 1.25 | 0.81 | 0.72 | 0.30 | 0.91 |
| 0.08 | 0.66 | 0.09 | 0.59 | 0.17 | 0.63 |
| 0.81 | 1.22 | 0.80 | 0.69 | 0.28 | 0.82 |

|      |      |      |      |      |      |
|------|------|------|------|------|------|
| 0.96 | 1.03 | 0.55 | 1.34 | 0.82 | 0.97 |
| 0.31 | 0.53 | 0.04 | 0.59 | 0.19 | 0.83 |
| 0.70 | 0.90 | 0.41 | 1.26 | 0.78 | 1.17 |
| 0.42 | 0.82 | 0.29 | 1.35 | 0.82 | 0.81 |
| 0.09 | 1.07 | 0.53 | #N/A | #N/A | #N/A |
| 0.20 | 1.13 | 0.70 | 0.72 | 0.30 | 0.87 |
| 0.56 | 1.02 | 0.54 | 0.61 | 0.21 | 0.97 |
| 0.84 | 1.07 | 0.62 | 0.85 | 0.45 | 1.10 |
| 0.12 | 1.10 | 0.66 | 2.12 | 0.96 | 0.73 |
| 0.68 | 1.23 | 0.78 | 2.21 | 0.97 | 0.68 |
| 0.93 | 1.32 | 0.84 | #N/A | #N/A | 0.88 |
| 0.37 | 0.82 | 0.25 | 0.45 | 0.08 | 0.63 |
| 0.56 | 1.30 | 0.78 | 0.97 | 0.58 | 0.99 |
| #N/A | #N/A | #N/A | #N/A | #N/A | #N/A |
| 0.82 | 1.05 | 0.57 | 0.75 | 0.35 | #N/A |
| 0.27 | 0.95 | 0.43 | 1.07 | 0.67 | 0.92 |
| #N/A | #N/A | #N/A | #N/A | #N/A | #N/A |
| #N/A | 1.32 | 0.88 | #N/A | #N/A | #N/A |
| 0.93 | 0.91 | 0.38 | 1.00 | 0.61 | 1.00 |
| #N/A | #N/A | #N/A | #N/A | #N/A | #N/A |
| #N/A | 1.24 | 0.58 | 0.71 | 0.31 | 0.79 |
| 0.49 | #N/A | #N/A | 0.73 | 0.33 | 1.26 |
| #N/A | 1.06 | 0.54 | 0.69 | 0.27 | #N/A |
| 0.59 | 1.08 | 0.64 | 0.67 | 0.25 | 1.17 |
| 0.58 | 1.06 | 0.57 | 0.81 | 0.41 | 1.19 |
| 0.47 | 0.90 | 0.33 | 0.88 | 0.47 | 0.93 |
| #N/A | 0.96 | 0.45 | 0.87 | 0.47 | 0.77 |
| #N/A | 0.85 | 0.28 | 1.09 | 0.69 | #N/A |
| #N/A | #N/A | #N/A | 2.80 | 0.98 | 0.95 |
| 0.60 | 1.56 | 0.79 | 0.71 | 0.29 | 0.78 |
| 0.35 | 1.12 | 0.54 | #N/A | #N/A | 0.77 |
| 0.76 | 1.18 | 0.60 | 0.66 | 0.25 | 1.10 |
| #N/A | 0.89 | 0.33 | 1.23 | 0.77 | 0.55 |
| 0.41 | 1.15 | 0.62 | 0.56 | 0.16 | #N/A |
| 0.03 | 0.36 | 0.01 | 0.29 | 0.03 | 0.96 |
| 0.51 | #N/A | #N/A | 0.66 | 0.25 | 0.99 |
| 0.42 | 0.70 | 0.11 | 0.57 | 0.15 | 0.88 |
| 0.55 | 1.09 | 0.61 | 0.94 | 0.53 | 1.08 |
| 0.43 | 1.03 | 0.52 | 0.78 | 0.38 | 0.85 |
| 0.16 | 0.85 | 0.29 | 0.71 | 0.29 | 0.91 |
| 0.47 | 0.91 | 0.36 | 0.95 | 0.54 | 0.81 |
| 0.44 | #N/A | #N/A | 1.53 | 0.88 | 0.89 |
| 0.65 | 1.10 | 0.66 | 0.89 | 0.49 | 1.18 |
| 0.77 | 1.01 | 0.53 | 1.10 | 0.68 | 1.46 |
| #N/A | 0.91 | 0.36 | 0.99 | 0.61 | 1.18 |
| 0.52 | 0.77 | 0.24 | 1.02 | 0.61 | 1.04 |
| 0.41 | 1.01 | 0.52 | 1.01 | 0.60 | 1.01 |
| 0.70 | 1.48 | 0.93 | 0.90 | 0.52 | 0.95 |
| 0.93 | 1.29 | 0.83 | 1.13 | 0.71 | 1.08 |
| 0.69 | 0.93 | 0.38 | 0.84 | 0.43 | 0.89 |
| 0.70 | #N/A | #N/A | 1.61 | 0.90 | 0.94 |

|      |      |      |      |      |      |
|------|------|------|------|------|------|
| 0.25 | 0.63 | 0.07 | 0.54 | 0.14 | 0.57 |
| 0.24 | 0.74 | 0.14 | 0.78 | 0.36 | 0.82 |
| 0.22 | 0.37 | 0.01 | 0.40 | 0.06 | 0.56 |
| 0.24 | 0.44 | 0.02 | 0.45 | 0.08 | 0.45 |
| 0.67 | 0.99 | 0.47 | 0.97 | 0.56 | 0.69 |
| 0.85 | 1.11 | 0.65 | 0.91 | 0.52 | 0.87 |
| 0.44 | 0.83 | 0.25 | 1.00 | 0.62 | 0.82 |
| 0.77 | 0.95 | 0.42 | 1.04 | 0.65 | #N/A |
| 0.73 | 1.36 | 0.84 | 0.64 | 0.23 | #N/A |
| 0.53 | 1.01 | 0.52 | 1.69 | 0.91 | 0.74 |
| 0.45 | 1.22 | 0.78 | 0.79 | 0.37 | 0.93 |
| 0.05 | 0.39 | 0.01 | 0.31 | 0.04 | 0.69 |
| #N/A | #N/A | #N/A | 0.77 | 0.37 | #N/A |
| 0.53 | 1.03 | 0.54 | 0.77 | 0.36 | 1.04 |
| 0.08 | 0.91 | 0.36 | #N/A | #N/A | 0.91 |
| 0.56 | 0.85 | 0.26 | 1.05 | 0.65 | 1.11 |
| 0.73 | 0.91 | 0.35 | 0.81 | 0.41 | 0.74 |
| 0.08 | 0.41 | 0.01 | 0.37 | 0.05 | 0.67 |
| 0.34 | 0.93 | 0.39 | 0.80 | 0.39 | 0.91 |
| 0.21 | 0.56 | 0.06 | #N/A | #N/A | 0.99 |
| 0.25 | 1.73 | 0.78 | 0.48 | 0.10 | 1.21 |
| 0.49 | 1.06 | 0.59 | 1.49 | 0.87 | 0.84 |
| 0.45 | 0.94 | 0.41 | 0.74 | 0.34 | 0.87 |
| 0.19 | 0.82 | 0.23 | 0.66 | 0.23 | 0.83 |
| 0.52 | 0.96 | 0.44 | 0.92 | 0.53 | 1.00 |
| #N/A | #N/A | #N/A | #N/A | #N/A | #N/A |
| 0.88 | 0.84 | 0.26 | 1.21 | 0.77 | 0.81 |
| 0.24 | #N/A | #N/A | #N/A | #N/A | #N/A |
| 0.84 | #N/A | #N/A | 2.03 | 0.95 | #N/A |
| 0.07 | 0.75 | 0.16 | #N/A | #N/A | 0.73 |
| #N/A | #N/A | #N/A | #N/A | #N/A | #N/A |
| #N/A | 0.74 | 0.14 | 1.01 | 0.62 | 1.05 |
| #N/A | #N/A | #N/A | #N/A | #N/A | #N/A |
| #N/A | #N/A | #N/A | #N/A | #N/A | #N/A |
| 0.54 | 1.28 | 0.85 | 0.78 | 0.38 | 0.78 |
| 0.70 | 1.07 | 0.59 | 0.78 | 0.38 | 0.93 |
| 0.28 | 0.89 | 0.31 | 0.89 | 0.49 | 0.97 |
| 0.26 | 1.02 | 0.53 | 0.84 | 0.45 | 0.85 |
| 0.80 | 1.37 | 0.90 | 0.55 | 0.14 | 0.90 |
| 0.19 | 0.58 | 0.05 | 0.28 | 0.03 | 0.63 |
| #N/A | 1.53 | 0.93 | 0.92 | 0.52 | 0.95 |
| #N/A | 0.95 | 0.42 | #N/A | #N/A | 1.00 |
| 0.48 | 1.36 | 0.89 | 0.80 | 0.39 | 0.89 |
| 0.14 | 0.69 | 0.10 | 0.88 | 0.47 | 0.70 |
| #N/A | #N/A | #N/A | #N/A | #N/A | #N/A |
| #N/A | 0.69 | 0.17 | #N/A | #N/A | 0.92 |
| 0.54 | 0.90 | 0.35 | #N/A | #N/A | 1.12 |
| #N/A | #N/A | #N/A | #N/A | #N/A | #N/A |
| 0.14 | 0.89 | 0.33 | 0.85 | 0.45 | 0.91 |
| 0.49 | 0.86 | 0.28 | 1.13 | 0.70 | 1.08 |
| 0.54 | 0.83 | 0.24 | 0.87 | 0.48 | 1.28 |



|      |      |      |      |      |      |
|------|------|------|------|------|------|
| 0.42 | 1.28 | 0.82 | 0.60 | 0.18 | 0.77 |
| 0.53 | 1.04 | 0.58 | #N/A | #N/A | 0.93 |
| 0.32 | 0.99 | 0.47 | 0.85 | 0.46 | 0.84 |
| 0.62 | #N/A | #N/A | #N/A | #N/A | #N/A |
| 0.64 | 1.01 | 0.51 | #N/A | #N/A | 1.04 |
| 0.33 | 0.95 | 0.41 | 0.79 | 0.40 | 0.68 |
| 0.49 | 1.47 | 0.93 | 0.75 | 0.33 | 0.89 |
| #N/A | 0.89 | 0.34 | #N/A | #N/A | 1.07 |
| 0.48 | 0.85 | 0.29 | 1.17 | 0.74 | 0.92 |
| 0.34 | #N/A | #N/A | 0.73 | 0.31 | #N/A |
| 0.85 | 1.21 | 0.79 | 0.95 | 0.57 | 0.64 |
| #N/A | #N/A | #N/A | #N/A | #N/A | #N/A |
| 0.67 | 1.25 | 0.82 | 1.36 | 0.83 | 1.07 |
| 0.20 | 1.00 | 0.50 | 0.79 | 0.37 | 0.91 |
| 0.89 | #N/A | #N/A | #N/A | #N/A | #N/A |
| 0.70 | 0.94 | 0.40 | 1.13 | 0.72 | 0.94 |
| 0.49 | 0.85 | 0.40 | 0.49 | 0.10 | 0.89 |
| 0.48 | 1.47 | 0.92 | 1.30 | 0.80 | 1.07 |
| 0.70 | 1.19 | 0.76 | 1.09 | 0.69 | 1.03 |
| 0.69 | 1.07 | 0.59 | 2.29 | 0.97 | 0.73 |
| 0.48 | 1.06 | 0.59 | 1.42 | 0.85 | 0.88 |
| 0.26 | #N/A | #N/A | 0.79 | 0.39 | #N/A |
| 0.47 | 0.74 | 0.14 | 0.84 | 0.44 | 1.04 |
| 0.32 | 1.05 | 0.59 | 0.96 | 0.58 | 0.77 |
| 0.37 | 1.05 | 0.56 | #N/A | #N/A | #N/A |
| #N/A | #N/A | #N/A | #N/A | #N/A | 1.27 |
| #N/A | 1.28 | 0.84 | #N/A | #N/A | 1.14 |
| 0.84 | 1.48 | 0.90 | 0.61 | 0.19 | 0.98 |
| 0.59 | 1.15 | 0.71 | 1.04 | 0.65 | 0.98 |
| 0.37 | 0.87 | 0.29 | 0.69 | 0.27 | 0.86 |
| 0.27 | 0.49 | 0.03 | 0.44 | 0.08 | 0.72 |
| 0.52 | 0.98 | 0.47 | 0.86 | 0.47 | 1.16 |
| #N/A | 0.92 | 0.37 | 0.74 | 0.33 | 0.70 |
| 0.27 | 0.68 | 0.10 | 0.77 | 0.36 | 0.74 |
| #N/A | 1.44 | 0.86 | #N/A | #N/A | 1.07 |
| 0.19 | 0.67 | 0.09 | 0.42 | 0.08 | #N/A |
| 0.49 | 0.84 | 0.24 | 1.44 | 0.86 | 1.04 |
| 0.94 | 1.42 | 0.72 | #N/A | #N/A | 0.61 |
| 0.36 | 0.99 | 0.49 | 1.08 | 0.68 | 0.96 |
| 0.00 | #N/A | #N/A | #N/A | #N/A | #N/A |
| 0.79 | 1.01 | 0.47 | 0.74 | 0.32 | #N/A |
| 0.33 | 1.10 | 0.66 | 0.57 | 0.16 | 1.13 |
| #N/A | #N/A | #N/A | 0.62 | 0.21 | 0.74 |
| 0.39 | 1.00 | 0.50 | 0.71 | 0.30 | 0.93 |
| #N/A | 0.81 | 0.25 | 0.83 | 0.42 | #N/A |
| #N/A | #N/A | #N/A | #N/A | #N/A | #N/A |
| #N/A | 0.87 | 0.30 | #N/A | #N/A | 1.29 |
| 0.44 | 0.95 | 0.42 | 0.88 | 0.50 | 1.24 |
| 0.85 | 0.99 | 0.50 | 0.86 | 0.47 | 1.11 |
| #N/A | #N/A | #N/A | #N/A | #N/A | #N/A |
| #N/A | #N/A | #N/A | #N/A | #N/A | #N/A |

|      |      |      |      |      |      |
|------|------|------|------|------|------|
| 0.39 | 0.84 | 0.24 | 2.88 | 0.99 | 0.77 |
| #N/A | #N/A | #N/A | #N/A | #N/A | #N/A |
| 0.71 | 0.78 | 0.18 | 1.14 | 0.72 | 1.23 |
| 0.51 | 0.82 | 0.26 | 0.66 | 0.23 | 0.80 |
| #N/A | 1.09 | 0.62 | #N/A | #N/A | 0.86 |
| #N/A | #N/A | #N/A | #N/A | #N/A | #N/A |
| 0.58 | 1.01 | 0.53 | 1.83 | 0.93 | 1.03 |
| 0.68 | 0.70 | 0.14 | 0.53 | 0.12 | 0.85 |
| 0.58 | #N/A | #N/A | 0.78 | 0.37 | 1.14 |
| 0.55 | 1.05 | 0.58 | 0.51 | 0.12 | 1.16 |
| 0.56 | 1.06 | 0.60 | 1.57 | 0.89 | 1.48 |
| 0.71 | #N/A | #N/A | 0.76 | 0.34 | 1.18 |
| 0.52 | #N/A | #N/A | #N/A | #N/A | #N/A |
| 0.62 | 1.00 | 0.50 | 0.84 | 0.43 | 0.92 |
| 0.25 | 1.06 | 0.61 | 0.39 | 0.06 | 0.92 |
| #N/A | 0.87 | 0.31 | 0.92 | 0.54 | 0.94 |
| 0.14 | 0.54 | 0.04 | 0.38 | 0.06 | 0.83 |
| 0.19 | 1.05 | 0.59 | 0.68 | 0.26 | 0.88 |
| 0.32 | #N/A | #N/A | 1.27 | 0.80 | 1.64 |
| 0.44 | 1.06 | 0.57 | 0.74 | 0.33 | 0.90 |
| 0.70 | 1.02 | 0.52 | 2.20 | 0.96 | 1.13 |
| #N/A | 0.86 | 0.34 | 0.92 | 0.53 | 0.84 |
| #N/A | 1.08 | 0.57 | #N/A | #N/A | 0.69 |
| 0.61 | 0.96 | 0.45 | 0.79 | 0.38 | 0.92 |
| #N/A | #N/A | #N/A | #N/A | #N/A | #N/A |
| 0.70 | #N/A | #N/A | 0.68 | 0.26 | 1.03 |
| 0.40 | 0.77 | 0.17 | 0.63 | 0.21 | 0.79 |
| 0.65 | 0.87 | 0.31 | 0.83 | 0.42 | 0.97 |
| #N/A | #N/A | #N/A | #N/A | #N/A | #N/A |
| 0.18 | 1.16 | 0.73 | 0.78 | 0.38 | 1.03 |
| 0.46 | 1.42 | 0.91 | 0.73 | 0.31 | 0.79 |
| 0.21 | 1.34 | 0.86 | 0.99 | 0.61 | 0.85 |
| 0.62 | 0.87 | 0.30 | 1.51 | 0.87 | 0.96 |
| #N/A | #N/A | #N/A | 0.78 | 0.37 | #N/A |
| 0.53 | 1.01 | 0.53 | 1.06 | 0.64 | #N/A |
| 0.60 | 1.21 | 0.69 | 0.59 | 0.18 | #N/A |
| #N/A | #N/A | #N/A | #N/A | #N/A | #N/A |
| 0.64 | 1.17 | 0.75 | 1.27 | 0.79 | 0.88 |
| 0.37 | 1.11 | 0.61 | #N/A | #N/A | 1.03 |
| 0.26 | 0.69 | 0.10 | 0.94 | 0.53 | 0.95 |
| 0.16 | 1.33 | 0.85 | #N/A | #N/A | 0.85 |
| 0.01 | #N/A | #N/A | 0.03 | 0.00 | #N/A |
| 0.18 | 0.84 | 0.26 | 1.85 | 0.93 | 1.02 |
| 0.35 | 0.80 | 0.28 | 0.67 | 0.26 | 0.99 |
| 0.52 | 0.90 | 0.33 | 0.62 | 0.21 | 0.98 |
| 0.82 | 1.33 | 0.86 | 1.03 | 0.64 | 1.05 |
| #N/A | 0.90 | 0.34 | #N/A | #N/A | 0.99 |
| 0.61 | 2.15 | 0.89 | #N/A | #N/A | #N/A |
| 0.26 | 0.91 | 0.35 | #N/A | #N/A | 1.02 |
| 0.68 | #N/A | #N/A | 0.71 | 0.29 | 0.88 |
| 0.18 | 0.63 | 0.08 | #N/A | #N/A | 0.75 |

|      |      |      |      |      |      |
|------|------|------|------|------|------|
| 0.39 | 1.00 | 0.47 | 1.16 | 0.72 | 1.05 |
| 0.68 | 0.79 | 0.19 | 1.11 | 0.70 | 0.88 |
| 0.48 | #N/A | #N/A | 0.79 | 0.38 | 0.86 |
| #N/A | #N/A | #N/A | #N/A | #N/A | #N/A |
| 0.57 | 1.00 | 0.50 | 0.79 | 0.39 | 0.87 |
| #N/A | #N/A | #N/A | #N/A | #N/A | #N/A |
| #N/A | 1.67 | 0.97 | 0.78 | 0.36 | #N/A |
| #N/A | 0.87 | 0.29 | 1.23 | 0.76 | 1.30 |
| 0.39 | #N/A | #N/A | 0.67 | 0.26 | 1.05 |
| 0.13 | 0.91 | 0.37 | 0.86 | 0.47 | 0.87 |
| #N/A | 1.00 | 0.51 | 1.48 | 0.87 | 1.21 |
| 0.42 | #N/A | #N/A | 1.45 | 0.86 | #N/A |
| 0.70 | #N/A | #N/A | 0.82 | 0.43 | 0.97 |
| #N/A | #N/A | #N/A | #N/A | #N/A | #N/A |
| 0.49 | 1.29 | 0.73 | 0.75 | 0.34 | #N/A |
| 0.65 | 1.17 | 0.75 | 0.82 | 0.42 | 1.25 |
| 0.57 | 1.07 | 0.60 | 0.83 | 0.43 | 0.94 |
| #N/A | #N/A | #N/A | #N/A | #N/A | #N/A |
| #N/A | #N/A | #N/A | #N/A | #N/A | #N/A |
| 0.07 | 1.26 | 0.63 | 1.04 | 0.65 | 0.95 |
| 0.79 | 1.20 | 0.77 | 0.85 | 0.45 | 1.17 |
| #N/A | 1.13 | 0.70 | 0.43 | 0.08 | 1.29 |
| 0.61 | 0.94 | 0.40 | 1.11 | 0.70 | 0.97 |
| 0.66 | 1.29 | 0.80 | 1.02 | 0.63 | 0.90 |
| 0.51 | 1.05 | 0.58 | 0.79 | 0.40 | 1.08 |
| #N/A | #N/A | #N/A | 0.30 | 0.03 | 0.85 |
| 0.63 | 1.02 | 0.54 | 1.03 | 0.64 | 0.98 |
| 0.45 | #N/A | #N/A | 0.67 | 0.25 | #N/A |
| #N/A | #N/A | #N/A | #N/A | #N/A | #N/A |
| 0.60 | 1.28 | 0.84 | 1.34 | 0.83 | #N/A |
| #N/A | #N/A | #N/A | #N/A | #N/A | #N/A |
| #N/A | #N/A | #N/A | 0.86 | 0.47 | 0.98 |
| 0.62 | #N/A | #N/A | 0.50 | 0.12 | 1.07 |
| 0.43 | #N/A | #N/A | 1.34 | 0.81 | #N/A |
| 0.23 | 1.02 | 0.55 | 0.56 | 0.14 | #N/A |
| #N/A | #N/A | #N/A | #N/A | #N/A | #N/A |
| 0.34 | 1.14 | 0.70 | 1.15 | 0.71 | 0.82 |
| #N/A | #N/A | #N/A | #N/A | #N/A | 1.05 |
| #N/A | 0.99 | 0.49 | #N/A | #N/A | 1.08 |
| 0.30 | 0.98 | 0.48 | 1.07 | 0.67 | 0.88 |
| #N/A | #N/A | #N/A | #N/A | #N/A | #N/A |
| 0.46 | 1.25 | 0.74 | 0.70 | 0.29 | 0.85 |
| #N/A | #N/A | #N/A | #N/A | #N/A | #N/A |
| #N/A | 0.97 | 0.44 | #N/A | #N/A | 1.22 |
| 0.52 | 1.00 | 0.51 | 0.76 | 0.35 | #N/A |
| #N/A | #N/A | #N/A | #N/A | #N/A | #N/A |
| 0.24 | #N/A | #N/A | 0.22 | 0.02 | 1.05 |
| 0.74 | 1.14 | 0.71 | 0.97 | 0.59 | 0.96 |
| 0.49 | 1.06 | 0.61 | 1.09 | 0.67 | 1.26 |
| 0.59 | 1.05 | 0.60 | 0.93 | 0.55 | 0.71 |
| 0.74 | #N/A | #N/A | 0.99 | 0.59 | 0.91 |



|      |      |      |      |      |      |
|------|------|------|------|------|------|
| 0.36 | 0.95 | 0.42 | 0.64 | 0.22 | 0.62 |
| 0.50 | 0.90 | 0.34 | 1.54 | 0.88 | 0.78 |
| 0.32 | 0.86 | 0.28 | #N/A | #N/A | 0.98 |
| 0.64 | #N/A | #N/A | 0.70 | 0.28 | #N/A |
| #N/A | 0.90 | 0.41 | 1.29 | 0.80 | 0.92 |
| 0.51 | 1.06 | 0.60 | 0.73 | 0.30 | 0.95 |
| 0.27 | 1.51 | 0.81 | #N/A | #N/A | #N/A |
| 0.46 | 0.98 | 0.45 | 1.42 | 0.85 | #N/A |
| 0.55 | 1.12 | 0.56 | #N/A | #N/A | 1.22 |
| 0.46 | 0.90 | 0.39 | 0.78 | 0.36 | 1.23 |
| #N/A | #N/A | #N/A | #N/A | #N/A | #N/A |
| 0.60 | 1.22 | 0.80 | 0.77 | 0.36 | 1.15 |
| 0.35 | 1.24 | 0.80 | 1.05 | 0.64 | 1.14 |
| 0.55 | 1.47 | 0.93 | 0.81 | 0.40 | 0.85 |
| 0.39 | 1.31 | 0.86 | 0.66 | 0.24 | 0.67 |
| 0.22 | 1.45 | 0.93 | 0.81 | 0.41 | 0.87 |
| 0.44 | 1.07 | 0.59 | 0.80 | 0.40 | 0.74 |
| 0.96 | #N/A | #N/A | 1.07 | 0.68 | #N/A |
| 0.29 | 1.71 | 0.97 | 0.90 | 0.49 | 1.11 |
| 0.48 | 1.55 | 0.95 | 0.87 | 0.48 | 0.86 |
| 0.80 | 1.09 | 0.62 | 1.05 | 0.65 | 1.05 |
| 0.64 | #N/A | #N/A | 1.81 | 0.93 | 1.16 |
| #N/A | #N/A | #N/A | #N/A | #N/A | #N/A |
| 0.79 | 1.09 | 0.57 | 0.94 | 0.55 | 1.00 |
| 0.81 | 1.15 | 0.70 | 1.44 | 0.86 | 0.85 |
| 0.84 | 0.86 | 0.31 | 0.59 | 0.17 | 1.18 |
| 0.39 | 0.90 | 0.33 | 0.96 | 0.58 | 1.08 |
| 0.29 | 1.21 | 0.75 | 0.46 | 0.09 | 0.98 |
| 0.37 | 0.80 | 0.20 | 0.80 | 0.40 | 0.88 |
| 0.66 | 0.98 | 0.48 | 0.93 | 0.55 | 0.87 |
| 0.15 | 0.35 | 0.01 | 0.30 | 0.03 | 0.58 |
| 0.22 | 1.20 | 0.75 | 0.78 | 0.36 | 0.71 |
| #N/A | #N/A | #N/A | #N/A | #N/A | #N/A |
| 0.53 | 1.09 | 0.65 | #N/A | #N/A | 1.03 |
| 0.48 | 0.83 | 0.28 | 1.04 | 0.63 | 0.92 |
| 0.68 | 1.15 | 0.72 | 0.68 | 0.26 | 1.13 |
| #N/A | #N/A | #N/A | #N/A | #N/A | #N/A |
| 0.13 | 1.44 | 0.82 | 0.80 | 0.39 | #N/A |
| #N/A | 1.07 | 0.60 | 0.82 | 0.41 | 1.09 |
| 0.87 | 1.18 | 0.75 | 1.01 | 0.62 | 0.97 |
| 0.45 | 0.96 | 0.43 | 0.82 | 0.42 | 0.86 |
| 0.77 | 1.00 | 0.47 | 0.99 | 0.58 | 0.90 |
| 0.32 | 0.93 | 0.43 | #N/A | #N/A | 0.86 |
| 0.72 | 0.99 | 0.49 | 0.87 | 0.47 | #N/A |
| #N/A | 0.63 | 0.07 | 0.64 | 0.23 | 0.96 |
| 0.21 | 0.70 | 0.11 | 0.89 | 0.51 | 0.98 |
| 0.61 | 0.98 | 0.47 | 0.89 | 0.49 | 0.70 |
| 0.71 | 1.07 | 0.61 | #N/A | #N/A | 1.25 |
| 0.57 | 1.05 | 0.57 | 1.32 | 0.81 | 0.99 |
| 0.68 | #N/A | #N/A | 0.75 | 0.34 | 0.83 |
| 0.86 | 1.06 | 0.61 | 1.01 | 0.62 | 0.91 |

|      |      |      |      |      |      |
|------|------|------|------|------|------|
| 0.71 | 0.79 | 0.23 | 0.55 | 0.14 | 1.07 |
| #N/A | 0.99 | 0.48 | #N/A | #N/A | 0.92 |
| 0.29 | #N/A | #N/A | 0.43 | 0.08 | 1.07 |
| #N/A | #N/A | #N/A | #N/A | #N/A | 0.91 |
| 0.36 | 0.74 | 0.13 | 1.25 | 0.78 | 1.42 |
| #N/A | #N/A | #N/A | #N/A | #N/A | #N/A |
| 0.07 | 0.70 | 0.19 | 1.00 | 0.61 | 0.75 |
| #N/A | 1.26 | 0.83 | #N/A | #N/A | 1.15 |
| #N/A | #N/A | #N/A | #N/A | #N/A | #N/A |
| 0.37 | 0.92 | 0.37 | 1.41 | 0.85 | 0.81 |
| #N/A | 0.89 | 0.40 | 0.89 | 0.50 | 1.31 |
| 0.20 | #N/A | #N/A | 1.06 | 0.66 | 1.13 |
| 0.35 | #N/A | #N/A | 1.11 | 0.70 | 0.95 |
| #N/A | 0.80 | 0.20 | 1.33 | 0.82 | #N/A |
| 0.37 | 0.89 | 0.31 | 1.19 | 0.74 | 1.04 |
| #N/A | 6.15 | 0.99 | 1.96 | 0.95 | 1.10 |
| 0.61 | 1.32 | 0.68 | #N/A | #N/A | #N/A |
| 0.28 | #N/A | #N/A | 0.76 | 0.34 | 1.14 |
| #N/A | #N/A | #N/A | #N/A | #N/A | #N/A |
| 0.81 | 0.97 | 0.44 | 1.10 | 0.70 | 0.70 |
| #N/A | 1.47 | 0.92 | 1.55 | 0.88 | 0.88 |
| #N/A | #N/A | #N/A | 0.59 | 0.18 | 1.24 |
| 0.48 | 0.72 | 0.12 | #N/A | #N/A | 0.94 |
| 0.78 | 1.24 | 0.82 | 0.97 | 0.57 | 1.23 |
| 0.03 | 0.51 | 0.03 | 0.33 | 0.04 | 1.10 |
| #N/A | 1.24 | 0.81 | 1.09 | 0.69 | 1.02 |
| #N/A | 1.15 | 0.72 | #N/A | #N/A | 0.61 |
| 0.30 | 0.79 | 0.19 | 0.72 | 0.31 | 1.00 |
| 0.87 | 1.05 | 0.57 | 1.14 | 0.72 | 1.06 |
| 0.06 | 1.31 | 0.60 | 0.45 | 0.09 | #N/A |
| #N/A | 0.87 | 0.30 | #N/A | #N/A | 1.26 |
| 0.67 | 1.17 | 0.70 | 3.90 | 0.99 | 1.09 |
| 0.35 | 0.84 | 0.25 | 2.27 | 0.97 | 1.16 |
| #N/A | #N/A | #N/A | #N/A | #N/A | #N/A |
| 0.66 | 0.95 | 0.41 | 0.95 | 0.56 | 0.95 |
| #N/A | #N/A | #N/A | #N/A | #N/A | #N/A |
| 0.47 | 1.10 | 0.63 | 0.90 | 0.52 | 1.21 |
| #N/A | #N/A | #N/A | 0.61 | 0.19 | 0.93 |
| 0.65 | #N/A | #N/A | #N/A | #N/A | #N/A |
| 0.62 | #N/A | #N/A | 0.63 | 0.21 | 0.88 |
| 0.57 | 1.35 | 0.79 | 0.84 | 0.43 | #N/A |
| 0.47 | 0.99 | 0.49 | 1.12 | 0.71 | 1.23 |
| 0.27 | 1.05 | 0.59 | 0.77 | 0.35 | #N/A |
| 0.46 | 1.01 | 0.52 | 0.95 | 0.57 | 1.19 |
| 0.49 | 0.94 | 0.41 | 0.75 | 0.34 | 0.77 |
| 0.26 | 1.17 | 0.75 | 1.30 | 0.81 | 0.86 |
| #N/A | #N/A | #N/A | #N/A | #N/A | #N/A |
| 0.08 | 1.12 | 0.64 | 0.74 | 0.33 | 1.32 |
| #N/A | #N/A | #N/A | 0.98 | 0.60 | 1.06 |
| 0.53 | #N/A | #N/A | 0.77 | 0.36 | 0.66 |
| 0.65 | 1.30 | 0.85 | 0.98 | 0.59 | 1.17 |

|      |      |      |      |      |      |
|------|------|------|------|------|------|
| 0.72 | 1.30 | 0.86 | 1.37 | 0.83 | 0.89 |
| 0.74 | 1.36 | 0.90 | #N/A | #N/A | 1.25 |
| 0.61 | 1.22 | 0.77 | 1.33 | 0.82 | 1.55 |
| 0.71 | 0.98 | 0.48 | 1.77 | 0.93 | 0.86 |
| #N/A | 1.05 | 0.54 | #N/A | #N/A | #N/A |
| #N/A | 1.19 | 0.76 | 1.54 | 0.88 | 0.91 |
| 0.80 | 1.35 | 0.85 | 1.56 | 0.89 | 0.82 |
| 0.49 | 1.20 | 0.76 | 2.39 | 0.97 | 0.80 |
| 0.58 | 1.43 | 0.92 | 1.61 | 0.90 | 1.02 |
| 0.64 | 1.20 | 0.77 | 0.96 | 0.57 | 1.19 |
| 0.83 | 1.15 | 0.71 | 1.30 | 0.80 | #N/A |
| 0.59 | 1.62 | 0.96 | 0.63 | 0.23 | 0.90 |
| 0.50 | 1.32 | 0.85 | 0.82 | 0.41 | 0.83 |
| 0.51 | 0.89 | 0.36 | 0.90 | 0.50 | 0.98 |
| 0.60 | 0.84 | 0.28 | 0.95 | 0.56 | 0.96 |
| 0.36 | 0.85 | 0.27 | 0.74 | 0.32 | 0.78 |
| 0.17 | 0.81 | 0.21 | 4.12 | 1.00 | 0.93 |
| 0.85 | 1.15 | 0.71 | 1.10 | 0.68 | 0.95 |
| 0.54 | 1.25 | 0.71 | 0.77 | 0.37 | 0.80 |
| #N/A | #N/A | #N/A | #N/A | #N/A | 0.80 |
| #N/A | 1.92 | 0.95 | 0.93 | 0.54 | 1.53 |
| 0.53 | 1.15 | 0.73 | 0.70 | 0.28 | 0.90 |
| #N/A | #N/A | #N/A | #N/A | #N/A | #N/A |
| 0.39 | 1.20 | 0.75 | 1.35 | 0.82 | 1.56 |
| #N/A | 3.20 | 0.99 | 4.41 | 1.00 | 1.30 |
| 0.76 | 0.84 | 0.27 | 0.84 | 0.45 | 0.73 |
| 0.83 | 1.14 | 0.67 | 1.08 | 0.66 | 1.10 |
| 0.62 | 1.06 | 0.61 | 1.74 | 0.92 | 0.99 |
| 0.59 | 0.95 | 0.43 | 1.28 | 0.79 | 1.05 |
| 0.59 | 1.08 | 0.61 | 0.65 | 0.23 | 0.90 |
| 0.49 | 0.98 | 0.46 | 0.86 | 0.45 | 0.85 |
| #N/A | #N/A | #N/A | #N/A | #N/A | 1.72 |
| 0.72 | 0.95 | 0.42 | 0.63 | 0.20 | 0.77 |
| 0.52 | 0.88 | 0.33 | 1.46 | 0.86 | 1.06 |
| 0.28 | #N/A | #N/A | 0.96 | 0.56 | 1.24 |
| 0.76 | 1.06 | 0.58 | 1.61 | 0.90 | 1.15 |
| 0.73 | 1.29 | 0.81 | 1.34 | 0.82 | 1.53 |
| #N/A | 1.52 | 0.88 | 0.76 | 0.34 | #N/A |
| 0.71 | 1.03 | 0.56 | 1.03 | 0.63 | 0.99 |
| 0.38 | 1.11 | 0.62 | #N/A | #N/A | 0.86 |
| #N/A | #N/A | #N/A | #N/A | #N/A | #N/A |
| 0.71 | 0.84 | 0.28 | 1.33 | 0.82 | 0.98 |
| 0.68 | 1.14 | 0.68 | 1.22 | 0.76 | 1.44 |
| 0.46 | 0.98 | 0.47 | 1.11 | 0.70 | 0.85 |
| #N/A | 1.27 | 0.70 | 1.54 | 0.88 | 0.91 |
| 0.23 | #N/A | #N/A | 1.88 | 0.94 | 1.39 |
| #N/A | 1.73 | 0.83 | #N/A | #N/A | 1.17 |
| 0.65 | 1.04 | 0.54 | 1.14 | 0.73 | 1.21 |
| 0.30 | 1.21 | 0.78 | 1.02 | 0.61 | 0.93 |
| 0.65 | #N/A | #N/A | 0.93 | 0.54 | 1.17 |
| 0.76 | 0.87 | 0.31 | 0.96 | 0.58 | 1.07 |



|      |      |      |      |      |      |
|------|------|------|------|------|------|
| 0.65 | #N/A | #N/A | 1.01 | 0.62 | 0.86 |
| 0.36 | 0.86 | 0.29 | 1.19 | 0.76 | 0.77 |
| #N/A | 0.58 | 0.05 | 0.52 | 0.12 | 0.63 |
| 0.45 | 1.04 | 0.58 | 1.08 | 0.68 | 0.93 |
| 0.21 | 0.88 | 0.31 | 0.83 | 0.42 | 0.75 |
| #N/A | #N/A | #N/A | #N/A | #N/A | #N/A |
| 0.55 | 1.24 | 0.77 | #N/A | #N/A | 0.99 |
| #N/A | 0.91 | 0.35 | 1.18 | 0.73 | 0.70 |
| #N/A | #N/A | #N/A | #N/A | #N/A | #N/A |
| #N/A | 1.17 | 0.75 | 0.82 | 0.42 | 1.06 |
| 0.24 | 0.75 | 0.19 | 0.89 | 0.48 | 0.82 |
| 0.23 | 0.66 | 0.09 | 0.61 | 0.20 | 0.62 |
| #N/A | #N/A | #N/A | #N/A | #N/A | #N/A |
| 0.54 | 0.82 | 0.22 | 0.86 | 0.46 | 1.13 |
| #N/A | 0.90 | 0.37 | 1.28 | 0.80 | 1.20 |
| 0.10 | #N/A | #N/A | 0.83 | 0.42 | 0.92 |
| 0.11 | 0.56 | 0.05 | 0.75 | 0.34 | 0.75 |
| 0.50 | 0.83 | 0.24 | 0.81 | 0.40 | 1.02 |
| #N/A | #N/A | #N/A | #N/A | #N/A | #N/A |
| 0.43 | 1.05 | 0.56 | 0.77 | 0.36 | 1.02 |
| 0.65 | 1.18 | 0.74 | 0.89 | 0.51 | 0.70 |
| 0.45 | 0.96 | 0.46 | 0.93 | 0.55 | 0.93 |
| #N/A | #N/A | #N/A | #N/A | #N/A | #N/A |
| 0.76 | 0.80 | 0.22 | 0.66 | 0.23 | 1.21 |
| 0.83 | 0.99 | 0.50 | 1.04 | 0.63 | 1.44 |
| #N/A | #N/A | #N/A | #N/A | #N/A | #N/A |
| 0.31 | 0.94 | 0.43 | 0.77 | 0.36 | #N/A |
| #N/A | #N/A | #N/A | #N/A | #N/A | #N/A |
| 0.80 | 0.87 | 0.29 | 0.79 | 0.38 | 0.99 |
| #N/A | #N/A | #N/A | 0.90 | 0.50 | 0.95 |
| #N/A | #N/A | #N/A | #N/A | #N/A | #N/A |
| #N/A | #N/A | #N/A | #N/A | #N/A | #N/A |
| #N/A | #N/A | #N/A | #N/A | #N/A | #N/A |
| 0.51 | 1.16 | 0.74 | 1.08 | 0.68 | 1.22 |
| #N/A | #N/A | #N/A | #N/A | #N/A | #N/A |
| 0.11 | 0.48 | 0.02 | 0.46 | 0.09 | 0.84 |
| 0.79 | 1.12 | 0.66 | 0.83 | 0.42 | 0.90 |
| 0.54 | 1.23 | 0.81 | 0.80 | 0.39 | 0.94 |
| 0.54 | 0.91 | 0.36 | 1.40 | 0.85 | 1.03 |
| 0.39 | 0.77 | 0.17 | 0.67 | 0.24 | 0.91 |
| 0.66 | #N/A | #N/A | 0.99 | 0.60 | 1.03 |
| 0.35 | 1.53 | 0.95 | 0.83 | 0.43 | 1.71 |
| 0.21 | 0.51 | 0.03 | 0.30 | 0.04 | 0.93 |
| 0.95 | 0.94 | 0.40 | 1.49 | 0.87 | 1.21 |
| 0.15 | 0.76 | 0.16 | 0.99 | 0.60 | 1.22 |
| 0.60 | 1.04 | 0.57 | 1.24 | 0.77 | 0.99 |
| 0.43 | 1.09 | 0.63 | 1.25 | 0.79 | 0.94 |
| #N/A | #N/A | #N/A | #N/A | #N/A | #N/A |
| #N/A | #N/A | #N/A | #N/A | #N/A | #N/A |
| 0.73 | 1.00 | 0.51 | 0.76 | 0.36 | 0.86 |
| 0.52 | 1.12 | 0.66 | 1.63 | 0.91 | 1.03 |

|      |      |      |      |      |      |
|------|------|------|------|------|------|
| 0.46 | 1.28 | 0.83 | 0.63 | 0.22 | 1.00 |
| #N/A | 0.98 | 0.47 | 1.52 | 0.88 | 1.12 |
| #N/A | #N/A | #N/A | #N/A | #N/A | #N/A |
| 0.44 | 0.78 | 0.18 | 0.81 | 0.41 | 1.21 |
| 0.06 | 1.13 | 0.70 | 0.52 | 0.12 | 0.74 |
| #N/A | 2.58 | 0.99 | #N/A | #N/A | 0.88 |
| #N/A | 1.07 | 0.53 | #N/A | #N/A | #N/A |
| #N/A | #N/A | #N/A | #N/A | #N/A | 0.65 |
| #N/A | 1.51 | 0.74 | #N/A | #N/A | #N/A |
| 0.52 | 0.92 | 0.39 | 0.70 | 0.28 | 0.86 |
| #N/A | #N/A | #N/A | #N/A | #N/A | #N/A |
| 0.36 | 0.88 | 0.30 | 1.13 | 0.72 | 1.20 |
| #N/A | #N/A | #N/A | #N/A | #N/A | #N/A |
| #N/A | 1.54 | 0.91 | 0.50 | 0.11 | 0.81 |
| 0.75 | 1.16 | 0.74 | 0.81 | 0.41 | #N/A |
| 0.57 | 1.13 | 0.56 | 0.90 | 0.52 | 0.81 |
| 0.48 | 1.01 | 0.51 | 0.88 | 0.50 | 1.18 |
| #N/A | #N/A | #N/A | #N/A | #N/A | #N/A |
| 0.65 | #N/A | #N/A | 0.96 | 0.58 | 0.80 |
| 0.40 | #N/A | #N/A | #N/A | #N/A | #N/A |
| 0.51 | 1.06 | 0.61 | 1.19 | 0.74 | 0.96 |
| #N/A | #N/A | #N/A | #N/A | #N/A | #N/A |
| 0.39 | 1.13 | 0.67 | #N/A | #N/A | #N/A |
| 0.38 | 0.97 | 0.46 | 0.46 | 0.09 | 0.96 |
| 0.42 | 1.26 | 0.53 | 0.62 | 0.20 | 1.14 |
| 0.33 | 0.98 | 0.48 | 1.87 | 0.94 | 0.99 |
| #N/A | #N/A | #N/A | #N/A | #N/A | #N/A |
| 0.53 | 1.13 | 0.68 | 0.73 | 0.33 | 1.04 |
| 0.58 | 0.80 | 0.22 | 1.22 | 0.76 | 1.23 |
| 0.35 | 0.67 | 0.10 | 0.51 | 0.12 | 0.61 |
| 0.23 | 1.07 | 0.61 | 0.87 | 0.47 | 1.12 |
| 0.26 | 0.87 | 0.31 | 0.85 | 0.46 | 1.02 |
| 0.10 | 0.76 | 0.19 | 0.52 | 0.12 | 0.83 |
| 0.61 | 0.95 | 0.43 | 0.77 | 0.36 | 0.91 |
| 0.66 | 1.09 | 0.58 | 0.88 | 0.50 | 1.11 |
| 0.43 | 0.62 | 0.07 | 0.83 | 0.42 | 1.00 |
| 0.57 | 0.73 | 0.13 | #N/A | #N/A | #N/A |
| 0.32 | 0.59 | 0.07 | 0.65 | 0.23 | 1.18 |
| 0.52 | #N/A | #N/A | 1.21 | 0.76 | #N/A |
| 0.56 | 1.09 | 0.65 | 1.28 | 0.79 | 1.13 |
| 0.53 | 0.92 | 0.38 | 1.01 | 0.62 | 1.01 |
| 0.78 | 0.93 | 0.38 | 1.25 | 0.79 | 1.26 |
| 0.89 | 0.90 | 0.36 | 0.60 | 0.18 | #N/A |
| 0.51 | 1.17 | 0.68 | 0.69 | 0.28 | 1.13 |
| 0.35 | 0.93 | 0.38 | 0.86 | 0.46 | 0.65 |
| 0.39 | 0.80 | 0.24 | #N/A | #N/A | 0.84 |
| 0.27 | 1.12 | 0.68 | 0.60 | 0.19 | 0.90 |
| 0.47 | 1.01 | 0.52 | 0.86 | 0.47 | 0.86 |
| 0.01 | 0.85 | 0.35 | #N/A | #N/A | 0.88 |
| 0.92 | 0.94 | 0.41 | 0.77 | 0.35 | 1.19 |
| 0.63 | 0.96 | 0.44 | 1.52 | 0.88 | #N/A |

|      |      |      |      |      |      |
|------|------|------|------|------|------|
| 0.42 | 1.47 | 0.87 | 0.72 | 0.30 | 0.83 |
| 0.98 | 1.11 | 0.60 | 0.64 | 0.22 | 0.78 |
| 0.57 | 0.98 | 0.46 | 1.32 | 0.81 | 1.34 |
| 0.66 | #N/A | #N/A | #N/A | #N/A | #N/A |
| 0.21 | 1.29 | 0.79 | 1.25 | 0.79 | 0.78 |
| 0.16 | #N/A | #N/A | #N/A | #N/A | 1.12 |
| #N/A | #N/A | #N/A | #N/A | #N/A | #N/A |
| 0.46 | 1.11 | 0.65 | 0.80 | 0.39 | 0.89 |
| 0.56 | 1.02 | 0.51 | 0.71 | 0.31 | 0.75 |
| 0.50 | 1.16 | 0.74 | 0.85 | 0.45 | 0.87 |
| #N/A | #N/A | #N/A | 0.70 | 0.27 | #N/A |
| #N/A | #N/A | #N/A | 1.00 | 0.60 | 1.00 |
| #N/A | 1.27 | 0.84 | #N/A | #N/A | 0.91 |
| #N/A | 1.18 | 0.64 | #N/A | #N/A | 0.95 |
| 0.01 | #N/A | #N/A | 0.13 | 0.01 | #N/A |
| 0.77 | 1.17 | 0.75 | 1.89 | 0.94 | 0.99 |
| #N/A | 1.27 | 0.84 | 1.21 | 0.76 | 1.04 |
| 0.49 | 0.76 | 0.16 | 1.23 | 0.77 | 1.05 |
| #N/A | #N/A | #N/A | #N/A | #N/A | #N/A |
| 0.62 | 0.95 | 0.45 | #N/A | #N/A | 1.20 |
| 0.56 | 1.10 | 0.55 | 1.06 | 0.66 | 0.89 |
| 0.73 | #N/A | #N/A | 0.73 | 0.33 | 0.94 |
| #N/A | #N/A | #N/A | #N/A | #N/A | #N/A |
| 0.34 | 1.09 | 0.63 | 0.53 | 0.13 | 0.98 |
| 0.72 | 0.88 | 0.31 | 1.51 | 0.87 | 0.85 |
| #N/A | 1.21 | 0.79 | 0.68 | 0.26 | 0.95 |
| 0.34 | 0.76 | 0.17 | 0.63 | 0.22 | 1.03 |
| #N/A | 0.81 | 0.22 | 1.03 | 0.62 | 1.01 |
| 0.27 | 0.52 | 0.03 | 0.49 | 0.10 | 0.90 |
| 0.04 | 0.58 | 0.05 | 0.36 | 0.05 | 1.21 |
| 0.61 | 1.83 | 0.97 | #N/A | #N/A | 1.19 |
| 0.24 | 0.97 | 0.46 | 4.09 | 1.00 | 1.85 |
| 0.36 | 1.18 | 0.75 | #N/A | #N/A | 1.05 |
| #N/A | #N/A | #N/A | #N/A | #N/A | #N/A |
| 0.60 | 0.84 | 0.26 | 1.40 | 0.84 | #N/A |
| 0.56 | #N/A | #N/A | 0.82 | 0.43 | 0.91 |
| 0.83 | 0.81 | 0.21 | 0.81 | 0.40 | 1.35 |
| 0.50 | 0.88 | 0.31 | 0.86 | 0.47 | 1.01 |
| #N/A | #N/A | #N/A | 1.91 | 0.94 | 0.83 |
| 0.57 | 1.01 | 0.53 | 1.69 | 0.92 | 0.87 |
| 0.36 | 0.87 | 0.29 | 2.08 | 0.96 | 1.77 |
| 0.37 | 0.94 | 0.43 | 0.76 | 0.34 | 1.16 |
| 0.39 | 0.93 | 0.39 | 0.77 | 0.36 | 0.93 |
| #N/A | #N/A | #N/A | 1.82 | 0.93 | 0.67 |
| 0.03 | 1.16 | 0.68 | 0.21 | 0.02 | #N/A |
| 0.41 | 0.99 | 0.49 | 1.27 | 0.80 | 1.17 |
| 0.46 | 1.03 | 0.55 | 1.16 | 0.74 | 1.34 |
| #N/A | #N/A | #N/A | #N/A | #N/A | #N/A |
| 0.72 | 1.07 | 0.62 | 1.07 | 0.67 | 1.00 |
| #N/A | #N/A | #N/A | #N/A | #N/A | #N/A |
| #N/A | 0.96 | 0.44 | 0.68 | 0.27 | 0.90 |

|      |      |      |      |      |      |
|------|------|------|------|------|------|
| #N/A | #N/A | #N/A | 1.40 | 0.84 | 0.98 |
| 0.57 | 0.89 | 0.33 | 0.55 | 0.14 | 0.93 |
| #N/A | 2.05 | 0.98 | #N/A | #N/A | 1.05 |
| 0.56 | 0.90 | 0.33 | #N/A | #N/A | 0.81 |
| 0.79 | 1.06 | 0.59 | 0.78 | 0.37 | 0.81 |
| 0.72 | 1.29 | 0.85 | 0.94 | 0.54 | 1.02 |
| #N/A | #N/A | #N/A | #N/A | #N/A | #N/A |
| 0.88 | 0.99 | 0.47 | 1.52 | 0.87 | 1.08 |
| 0.67 | 1.03 | 0.54 | 0.77 | 0.36 | 0.72 |
| 0.42 | 0.83 | 0.27 | 1.56 | 0.88 | 1.35 |
| #N/A | #N/A | #N/A | #N/A | #N/A | #N/A |
| 0.67 | 0.99 | 0.48 | 1.20 | 0.76 | 1.14 |
| 0.69 | 1.36 | 0.89 | 0.73 | 0.31 | 0.92 |
| 0.39 | 1.08 | 0.62 | 2.74 | 0.98 | 0.83 |
| 0.63 | 1.21 | 0.78 | #N/A | #N/A | 0.96 |
| 0.27 | #N/A | #N/A | 3.33 | 0.99 | #N/A |
| 0.55 | 1.09 | 0.65 | 1.07 | 0.65 | 0.98 |
| 0.76 | 1.26 | 0.83 | 1.09 | 0.69 | 1.12 |
| #N/A | 1.28 | 0.83 | 0.59 | 0.18 | 1.01 |
| 0.78 | 0.77 | 0.17 | 2.01 | 0.95 | 1.66 |
| 0.62 | 1.41 | 0.91 | 1.24 | 0.77 | 0.94 |
| 0.26 | 0.95 | 0.42 | 2.05 | 0.95 | 0.87 |
| 0.69 | 1.17 | 0.74 | 0.76 | 0.35 | 0.95 |
| #N/A | 0.78 | 0.37 | #N/A | #N/A | #N/A |
| 0.30 | #N/A | #N/A | 0.70 | 0.30 | #N/A |
| 0.21 | 0.85 | 0.27 | 1.59 | 0.89 | 1.15 |
| #N/A | #N/A | #N/A | #N/A | #N/A | 1.28 |
| 0.40 | 1.26 | 0.81 | 1.18 | 0.75 | 1.01 |
| 0.72 | 1.25 | 0.83 | 1.17 | 0.74 | 1.10 |
| #N/A | 0.76 | 0.22 | 1.50 | 0.88 | 1.18 |
| #N/A | #N/A | #N/A | #N/A | #N/A | #N/A |
| 0.55 | 0.88 | 0.30 | 1.29 | 0.81 | 0.96 |
| 0.50 | #N/A | #N/A | #N/A | #N/A | #N/A |
| 0.75 | 1.71 | 0.81 | 0.71 | 0.30 | #N/A |
| 0.74 | 1.49 | 0.94 | 0.67 | 0.25 | 0.96 |
| #N/A | 1.36 | 0.90 | 1.11 | 0.68 | 1.06 |
| 0.23 | 1.03 | 0.55 | 0.80 | 0.40 | 1.39 |
| 0.60 | 0.94 | 0.42 | #N/A | #N/A | 0.90 |
| 0.58 | 1.33 | 0.88 | 0.80 | 0.39 | 0.89 |
| 0.83 | 1.28 | 0.84 | 0.92 | 0.53 | 0.89 |
| 0.62 | 1.08 | 0.63 | 1.00 | 0.61 | 0.77 |
| 0.69 | 1.21 | 0.79 | 2.03 | 0.95 | 0.85 |
| 0.39 | 1.18 | 0.74 | 1.24 | 0.77 | 0.77 |
| #N/A | 1.32 | 0.83 | 1.33 | 0.82 | 0.86 |
| 0.56 | 1.40 | 0.91 | 1.22 | 0.76 | 1.01 |
| 0.52 | 1.27 | 0.84 | 0.86 | 0.47 | 0.85 |
| 0.56 | 1.16 | 0.73 | 1.21 | 0.76 | 0.79 |
| 0.71 | 0.87 | 0.30 | 2.69 | 0.98 | 0.83 |
| 0.41 | 1.05 | 0.58 | 2.21 | 0.96 | 0.77 |
| #N/A | #N/A | #N/A | #N/A | #N/A | #N/A |
| 0.61 | 1.11 | 0.62 | 0.66 | 0.24 | 0.72 |

|      |      |      |      |      |      |
|------|------|------|------|------|------|
| 0.49 | 0.90 | 0.35 | 1.02 | 0.63 | 0.92 |
| 0.57 | 1.17 | 0.73 | 1.01 | 0.61 | 1.09 |
| #N/A | #N/A | #N/A | #N/A | #N/A | #N/A |
| 0.68 | 0.89 | 0.33 | 1.02 | 0.63 | 0.80 |
| 0.99 | 1.08 | 0.64 | 2.63 | 0.98 | 0.99 |
| 0.80 | 1.15 | 0.72 | 1.09 | 0.69 | 0.98 |
| 0.49 | 0.75 | 0.16 | 0.55 | 0.14 | 1.01 |
| 0.78 | #N/A | #N/A | 0.64 | 0.22 | 1.01 |
| #N/A | #N/A | #N/A | #N/A | #N/A | #N/A |
| 0.53 | 0.76 | 0.16 | 1.55 | 0.89 | 0.78 |
| 0.64 | #N/A | #N/A | 0.89 | 0.49 | 0.82 |
| 0.42 | 0.79 | 0.21 | 1.81 | 0.93 | 1.34 |
| 0.67 | 0.87 | 0.30 | 0.42 | 0.07 | 0.71 |
| 0.54 | 0.85 | 0.29 | #N/A | #N/A | 0.63 |
| 0.32 | 0.96 | 0.44 | 0.77 | 0.36 | 0.82 |
| 0.35 | 1.20 | 0.75 | 1.17 | 0.74 | 1.08 |
| #N/A | #N/A | #N/A | #N/A | #N/A | #N/A |
| #N/A | 1.32 | 0.77 | 0.58 | 0.16 | #N/A |
| #N/A | #N/A | #N/A | #N/A | #N/A | #N/A |
| #N/A | #N/A | #N/A | #N/A | #N/A | 1.21 |
| 0.58 | 1.11 | 0.65 | 0.92 | 0.53 | 1.02 |
| 0.36 | 1.19 | 0.77 | 1.04 | 0.64 | 0.97 |
| #N/A | 1.20 | 0.63 | #N/A | #N/A | #N/A |
| 0.44 | 0.95 | 0.41 | 0.69 | 0.27 | 0.78 |
| 0.46 | 1.12 | 0.65 | 1.54 | 0.88 | 0.83 |
| #N/A | 1.34 | 0.76 | #N/A | #N/A | #N/A |
| 0.97 | 1.18 | 0.76 | 2.32 | 0.97 | 1.05 |
| 0.18 | 0.66 | 0.08 | 0.60 | 0.18 | 0.79 |
| 0.65 | 1.31 | 0.72 | 0.90 | 0.50 | #N/A |
| 0.57 | 0.80 | 0.19 | 1.01 | 0.62 | 0.98 |
| 0.72 | #N/A | #N/A | 1.02 | 0.63 | #N/A |
| 0.39 | 0.90 | 0.35 | 2.07 | 0.95 | 0.91 |
| #N/A | #N/A | #N/A | #N/A | #N/A | 0.73 |
| 0.23 | 0.77 | 0.17 | 1.09 | 0.67 | 1.00 |
| 0.44 | 1.16 | 0.73 | 0.80 | 0.39 | #N/A |
| 0.54 | 1.15 | 0.72 | 1.09 | 0.68 | 0.79 |
| 0.24 | 0.74 | 0.16 | 0.86 | 0.46 | 0.90 |
| 0.17 | 1.01 | 0.48 | 0.44 | 0.08 | #N/A |
| 0.75 | 1.39 | 0.91 | 0.87 | 0.49 | 1.23 |
| 0.57 | 0.88 | 0.31 | 0.78 | 0.36 | 0.78 |
| 0.20 | 0.80 | 0.19 | 0.70 | 0.28 | 0.72 |
| #N/A | 1.39 | 0.88 | #N/A | #N/A | 0.88 |
| 0.76 | 1.00 | 0.50 | 0.91 | 0.53 | 0.94 |
| 0.03 | #N/A | #N/A | 0.51 | 0.12 | #N/A |
| #N/A | 0.93 | 0.39 | 0.93 | 0.55 | #N/A |
| 0.10 | 0.65 | 0.08 | 0.57 | 0.16 | 0.62 |
| 0.81 | #N/A | #N/A | 1.02 | 0.61 | #N/A |
| 0.73 | 0.97 | 0.45 | 1.01 | 0.62 | 0.97 |
| 0.47 | 0.80 | 0.20 | 0.67 | 0.25 | 0.74 |
| #N/A | #N/A | #N/A | #N/A | #N/A | #N/A |
| 0.72 | 1.05 | 0.59 | 0.92 | 0.52 | 0.85 |



|      |      |      |      |      |      |
|------|------|------|------|------|------|
| 0.30 | 1.20 | 0.75 | 1.02 | 0.63 | 0.91 |
| 0.19 | #N/A | #N/A | 0.90 | 0.52 | #N/A |
| 0.48 | #N/A | #N/A | 0.74 | 0.33 | 0.88 |
| 0.38 | 0.84 | 0.26 | 0.93 | 0.52 | 0.81 |
| 0.45 | #N/A | #N/A | 1.19 | 0.74 | 0.88 |
| 0.70 | 0.85 | 0.27 | 1.21 | 0.77 | 1.18 |
| 0.61 | 1.42 | 0.90 | 0.68 | 0.26 | 0.89 |
| 0.41 | 0.87 | 0.29 | 0.63 | 0.21 | 0.90 |
| 0.07 | 1.00 | 0.50 | 0.85 | 0.44 | 0.71 |
| 0.47 | 0.97 | 0.47 | 0.69 | 0.27 | 1.03 |
| #N/A | #N/A | #N/A | #N/A | #N/A | #N/A |
| #N/A | #N/A | #N/A | #N/A | #N/A | #N/A |
| 0.79 | 1.42 | 0.92 | 0.59 | 0.18 | 0.87 |
| 0.61 | 0.95 | 0.42 | 0.83 | 0.43 | 0.93 |
| 0.42 | 1.62 | 0.96 | 1.62 | 0.90 | 1.27 |
| 0.86 | 1.93 | 0.97 | 1.47 | 0.87 | 0.83 |
| 0.08 | 0.45 | 0.02 | 0.39 | 0.06 | 0.64 |
| 0.60 | #N/A | #N/A | #N/A | #N/A | 1.03 |
| 0.16 | #N/A | #N/A | 1.70 | 0.91 | 0.96 |
| 0.30 | 1.26 | 0.80 | #N/A | #N/A | 1.11 |
| #N/A | 1.08 | 0.54 | 0.76 | 0.35 | 0.83 |
| #N/A | #N/A | #N/A | #N/A | #N/A | #N/A |
| 0.28 | 1.16 | 0.73 | 1.18 | 0.74 | 0.87 |
| 0.51 | 1.10 | 0.63 | 0.45 | 0.08 | 0.99 |
| 0.49 | 1.19 | 0.77 | 1.02 | 0.63 | 1.12 |
| 0.48 | #N/A | #N/A | 1.32 | 0.82 | 1.03 |
| #N/A | #N/A | #N/A | #N/A | #N/A | #N/A |
| 0.47 | #N/A | #N/A | 1.03 | 0.62 | #N/A |
| 0.94 | #N/A | #N/A | #N/A | #N/A | #N/A |
| 0.43 | 0.95 | 0.45 | 1.09 | 0.69 | 0.94 |
| 0.56 | #N/A | #N/A | 0.90 | 0.50 | 0.76 |
| 0.42 | 0.80 | 0.23 | 0.74 | 0.32 | 1.01 |
| #N/A | #N/A | #N/A | #N/A | #N/A | #N/A |
| 0.62 | #N/A | #N/A | 0.58 | 0.18 | 0.72 |
| 0.09 | 0.58 | 0.07 | 0.52 | 0.12 | 0.74 |
| 0.50 | 1.01 | 0.52 | 1.20 | 0.75 | 1.22 |
| #N/A | #N/A | #N/A | #N/A | #N/A | 0.81 |
| 1.00 | #N/A | #N/A | 2.84 | 0.98 | 1.14 |
| #N/A | 1.73 | 0.94 | 0.53 | 0.13 | 0.97 |
| 0.68 | 0.99 | 0.49 | 0.74 | 0.33 | 0.96 |
| 0.17 | #N/A | #N/A | 0.46 | 0.08 | #N/A |
| 0.75 | 1.00 | 0.49 | 1.06 | 0.66 | 1.13 |
| #N/A | #N/A | #N/A | #N/A | #N/A | #N/A |
| 0.30 | 1.19 | 0.76 | 1.01 | 0.62 | 0.97 |
| 0.67 | 1.15 | 0.62 | 0.78 | 0.38 | 1.08 |
| 0.78 | 1.16 | 0.74 | 1.08 | 0.68 | 1.38 |
| 0.47 | 1.15 | 0.72 | 1.18 | 0.75 | 0.91 |
| 0.76 | 1.34 | 0.71 | 0.95 | 0.54 | 1.16 |
| 0.51 | 1.16 | 0.74 | 0.65 | 0.22 | 1.01 |
| 0.17 | 0.97 | 0.44 | 1.32 | 0.81 | 1.01 |
| #N/A | #N/A | #N/A | #N/A | #N/A | #N/A |



|      |      |      |      |      |      |
|------|------|------|------|------|------|
| 0.09 | 0.62 | 0.07 | 0.45 | 0.08 | 0.63 |
| 0.93 | 1.20 | 0.77 | 0.82 | 0.43 | 0.93 |
| 0.32 | 0.81 | 0.21 | 0.85 | 0.45 | 0.88 |
| 0.20 | 0.89 | 0.32 | 1.02 | 0.61 | 1.08 |
| 0.34 | 1.00 | 0.51 | 0.88 | 0.47 | 1.01 |
| 0.57 | 0.96 | 0.45 | 0.96 | 0.55 | #N/A |
| 0.09 | 1.13 | 0.67 | 0.94 | 0.56 | 0.87 |
| 0.33 | 0.90 | 0.34 | 1.43 | 0.85 | 0.93 |
| #N/A | #N/A | #N/A | #N/A | #N/A | #N/A |
| 0.42 | 0.72 | 0.13 | 1.12 | 0.71 | #N/A |
| 0.59 | #N/A | #N/A | 0.90 | 0.52 | 1.03 |
| 0.60 | #N/A | #N/A | 0.95 | 0.54 | #N/A |
| 0.91 | #N/A | #N/A | 0.93 | 0.54 | 0.97 |
| #N/A | 1.05 | 0.54 | #N/A | #N/A | 0.89 |
| 0.07 | 0.64 | 0.09 | 0.50 | 0.11 | 1.05 |
| #N/A | #N/A | #N/A | 0.74 | 0.32 | 0.99 |
| #N/A | #N/A | #N/A | #N/A | #N/A | #N/A |
| 0.30 | 0.87 | 0.30 | 1.12 | 0.71 | 0.93 |
| #N/A | #N/A | #N/A | #N/A | #N/A | #N/A |
| 0.98 | 1.36 | 0.88 | 1.89 | 0.94 | 0.98 |
| #N/A | #N/A | #N/A | #N/A | #N/A | #N/A |
| #N/A | #N/A | #N/A | #N/A | #N/A | 1.10 |
| 0.09 | 1.67 | 0.86 | 0.21 | 0.02 | 0.72 |
| #N/A | #N/A | #N/A | #N/A | #N/A | #N/A |
| #N/A | 1.16 | 0.56 | 0.59 | 0.19 | 0.98 |
| #N/A | #N/A | #N/A | #N/A | #N/A | #N/A |
| 0.57 | 0.65 | 0.17 | #N/A | #N/A | #N/A |
| 0.44 | 0.88 | 0.31 | 0.66 | 0.24 | #N/A |
| 0.79 | 0.98 | 0.47 | 1.32 | 0.81 | 1.26 |
| #N/A | #N/A | #N/A | #N/A | #N/A | #N/A |
| 0.32 | 0.79 | 0.24 | 1.40 | 0.85 | 1.00 |
| 0.91 | 1.20 | 0.77 | 0.72 | 0.30 | 0.62 |
| 0.62 | 1.81 | 0.98 | 0.86 | 0.45 | 2.04 |
| #N/A | 0.80 | 0.20 | #N/A | #N/A | 0.78 |
| 0.40 | 0.76 | 0.16 | 0.96 | 0.56 | 0.97 |
| 0.33 | 1.56 | 0.86 | 0.68 | 0.25 | 1.05 |
| 0.44 | 1.12 | 0.68 | 1.04 | 0.63 | 0.73 |
| 0.64 | 1.69 | 0.95 | 0.89 | 0.49 | 0.77 |
| 0.36 | 1.05 | 0.59 | 1.65 | 0.90 | 0.73 |
| 0.70 | 1.35 | 0.87 | 1.58 | 0.89 | 0.84 |
| 0.29 | #N/A | #N/A | 0.67 | 0.24 | 1.08 |
| 0.29 | 0.63 | 0.09 | 0.59 | 0.18 | 0.65 |
| 0.71 | 1.13 | 0.70 | 0.75 | 0.35 | 0.88 |
| 0.60 | 0.85 | 0.26 | 1.02 | 0.63 | 0.82 |
| 0.73 | 1.13 | 0.63 | 0.69 | 0.28 | 1.00 |
| 0.60 | 0.74 | 0.14 | 0.69 | 0.28 | 0.85 |
| 0.75 | #N/A | #N/A | 0.98 | 0.57 | 0.88 |
| #N/A | #N/A | #N/A | #N/A | #N/A | #N/A |
| 0.54 | 1.10 | 0.66 | 0.77 | 0.37 | 1.10 |
| #N/A | #N/A | #N/A | #N/A | #N/A | #N/A |
| #N/A | 0.81 | 0.21 | #N/A | #N/A | 0.90 |

|      |      |      |      |      |      |
|------|------|------|------|------|------|
| 0.60 | 1.27 | 0.76 | 0.76 | 0.35 | 1.06 |
| 0.19 | 0.38 | 0.01 | 0.53 | 0.13 | 0.66 |
| 0.56 | 1.04 | 0.57 | 0.71 | 0.30 | 0.96 |
| 0.48 | #N/A | #N/A | #N/A | #N/A | #N/A |
| 0.43 | 1.16 | 0.66 | 0.90 | 0.52 | 1.15 |
| 0.53 | 1.47 | 0.93 | 0.51 | 0.12 | 0.97 |
| 0.65 | 0.85 | 0.34 | #N/A | #N/A | 0.88 |
| 0.56 | 1.24 | 0.72 | 0.99 | 0.60 | 1.04 |
| #N/A | #N/A | #N/A | #N/A | #N/A | #N/A |
| 0.12 | #N/A | #N/A | 0.88 | 0.49 | 0.69 |
| #N/A | 1.17 | 0.51 | 1.07 | 0.67 | #N/A |
| 0.76 | 0.71 | 0.13 | 0.73 | 0.31 | #N/A |
| 0.48 | 1.02 | 0.54 | 0.77 | 0.37 | 1.12 |
| 0.33 | 1.13 | 0.70 | 0.59 | 0.18 | 0.83 |
| 0.57 | #N/A | #N/A | 0.78 | 0.38 | 0.75 |
| #N/A | #N/A | #N/A | 0.80 | 0.39 | 0.76 |
| 0.66 | #N/A | #N/A | 1.04 | 0.62 | 0.92 |
| 0.47 | 1.56 | 0.95 | 0.78 | 0.37 | 0.98 |
| 0.49 | 1.00 | 0.49 | 0.96 | 0.56 | 0.89 |
| #N/A | #N/A | #N/A | #N/A | #N/A | #N/A |
| 0.88 | 1.06 | 0.58 | #N/A | #N/A | 0.83 |
| 0.51 | 1.25 | 0.79 | 0.67 | 0.25 | 0.68 |
| 0.29 | 1.64 | 0.95 | 1.60 | 0.89 | 0.80 |
| 0.96 | 0.83 | 0.24 | 0.85 | 0.45 | 0.84 |
| 0.03 | 0.41 | 0.01 | 0.38 | 0.06 | 0.63 |
| 0.42 | 0.97 | 0.44 | 1.52 | 0.88 | 1.09 |
| #N/A | 0.94 | 0.41 | #N/A | #N/A | 1.00 |
| 0.56 | 1.18 | 0.73 | 0.75 | 0.34 | 1.21 |
| 0.78 | 1.43 | 0.91 | 0.72 | 0.30 | 0.87 |
| 0.80 | #N/A | #N/A | 0.63 | 0.21 | 0.92 |
| 0.59 | 1.10 | 0.63 | 1.06 | 0.66 | 0.98 |
| #N/A | #N/A | #N/A | #N/A | #N/A | 0.82 |
| 0.21 | 1.08 | 0.62 | 0.79 | 0.40 | 1.00 |
| 0.46 | 1.00 | 0.51 | #N/A | #N/A | 0.93 |
| #N/A | #N/A | #N/A | #N/A | #N/A | #N/A |
| 0.20 | 1.05 | 0.55 | 1.03 | 0.62 | 0.72 |
| 0.32 | 0.60 | 0.06 | 0.66 | 0.23 | 0.72 |
| 0.42 | 0.67 | 0.09 | #N/A | #N/A | 0.68 |
| 0.87 | 1.26 | 0.80 | 0.93 | 0.54 | 1.09 |
| 0.52 | 0.52 | 0.03 | 0.34 | 0.05 | 0.71 |
| 0.25 | 0.86 | 0.28 | 0.71 | 0.30 | 0.73 |
| 0.49 | 1.09 | 0.61 | 2.39 | 0.97 | 1.15 |
| 0.90 | 1.01 | 0.51 | 0.92 | 0.53 | 0.87 |
| 0.28 | 0.99 | 0.48 | 2.05 | 0.95 | 0.80 |
| 0.63 | 0.96 | 0.45 | 0.76 | 0.36 | 0.83 |
| #N/A | 1.05 | 0.57 | 1.24 | 0.77 | 1.32 |
| 0.48 | 0.78 | 0.18 | 1.01 | 0.61 | 0.88 |
| 0.18 | #N/A | #N/A | 0.40 | 0.07 | 0.94 |
| 0.50 | 0.95 | 0.44 | 1.08 | 0.66 | 0.92 |
| 0.53 | 0.93 | 0.38 | #N/A | #N/A | 0.71 |
| 0.46 | 1.39 | 0.87 | 0.46 | 0.09 | 0.85 |

|      |      |      |      |      |      |
|------|------|------|------|------|------|
| #N/A | #N/A | #N/A | 0.14 | 0.01 | #N/A |
| 0.41 | 1.25 | 0.76 | 1.09 | 0.69 | 0.82 |
| 0.28 | #N/A | #N/A | 1.01 | 0.60 | 0.82 |
| 0.61 | 0.94 | 0.42 | 0.69 | 0.27 | 0.97 |
| 0.09 | 0.62 | 0.07 | 0.63 | 0.20 | 0.73 |
| 0.27 | 1.45 | 0.93 | 0.70 | 0.28 | #N/A |
| 0.66 | 0.88 | 0.33 | 1.27 | 0.79 | 1.12 |
| 0.39 | 0.95 | 0.41 | #N/A | #N/A | 0.92 |
| 0.46 | 1.20 | 0.78 | 1.66 | 0.91 | 1.27 |
| 0.48 | 0.95 | 0.44 | 1.16 | 0.73 | 1.05 |
| 1.00 | #N/A | #N/A | 3.85 | 0.99 | 0.75 |
| 0.99 | 1.22 | 0.72 | 3.49 | 0.99 | 1.44 |
| 0.29 | 1.06 | 0.54 | #N/A | #N/A | 1.07 |
| #N/A | #N/A | #N/A | #N/A | #N/A | 0.92 |
| 0.41 | 0.98 | 0.47 | 0.98 | 0.59 | 1.46 |
| #N/A | #N/A | #N/A | #N/A | #N/A | #N/A |
| 0.94 | 1.18 | 0.76 | 1.45 | 0.86 | 1.01 |
| 0.12 | 0.51 | 0.03 | 0.38 | 0.06 | 0.73 |
| 0.53 | 0.98 | 0.48 | 1.43 | 0.86 | 0.87 |
| 0.07 | 0.87 | 0.32 | 1.08 | 0.68 | 1.08 |
| 0.26 | 1.03 | 0.56 | 0.94 | 0.54 | 0.96 |
| #N/A | #N/A | #N/A | #N/A | #N/A | 1.01 |
| 0.53 | #N/A | #N/A | 0.73 | 0.32 | #N/A |
| 0.17 | 1.19 | 0.77 | 0.64 | 0.23 | 1.28 |
| 0.35 | 0.98 | 0.48 | 0.71 | 0.29 | #N/A |
| #N/A | #N/A | #N/A | #N/A | #N/A | #N/A |
| 0.67 | 0.99 | 0.50 | 1.21 | 0.75 | 1.12 |
| 0.56 | 1.35 | 0.53 | #N/A | #N/A | 0.74 |
| 0.56 | #N/A | #N/A | 0.88 | 0.49 | 1.05 |
| 0.73 | #N/A | #N/A | 1.62 | 0.90 | 0.89 |
| 0.17 | #N/A | #N/A | 1.00 | 0.61 | 1.03 |
| 0.49 | 1.17 | 0.73 | #N/A | #N/A | 0.65 |
| 0.66 | 1.03 | 0.49 | #N/A | #N/A | #N/A |
| 0.73 | 1.02 | 0.52 | 1.66 | 0.91 | 1.41 |
| 0.24 | #N/A | #N/A | #N/A | #N/A | 1.13 |
| 0.31 | 0.74 | 0.18 | 0.98 | 0.60 | 1.15 |
| 0.27 | 1.38 | 0.85 | 0.69 | 0.27 | 0.67 |
| 0.71 | 0.72 | 0.17 | #N/A | #N/A | 4.35 |
| 0.42 | 0.93 | 0.40 | 0.70 | 0.29 | 1.05 |
| 0.77 | #N/A | #N/A | 1.11 | 0.70 | #N/A |
| #N/A | #N/A | #N/A | #N/A | #N/A | #N/A |
| 0.84 | 0.85 | 0.28 | 0.91 | 0.53 | 0.92 |
| #N/A | 0.99 | 0.49 | 0.74 | 0.32 | #N/A |
| 0.75 | 0.90 | 0.41 | 1.23 | 0.76 | 0.96 |
| 0.12 | 0.76 | 0.16 | #N/A | #N/A | 0.99 |
| 0.36 | 1.13 | 0.68 | #N/A | #N/A | #N/A |
| 0.63 | 1.12 | 0.62 | #N/A | #N/A | #N/A |
| 0.32 | 0.83 | 0.31 | 1.20 | 0.76 | 0.73 |
| 0.20 | 1.07 | 0.62 | 0.84 | 0.44 | 1.00 |
| 0.13 | 0.56 | 0.05 | 0.58 | 0.17 | 0.64 |
| 0.58 | 0.87 | 0.29 | 0.66 | 0.25 | 0.95 |

|      |      |      |      |      |      |
|------|------|------|------|------|------|
| 0.25 | 1.34 | 0.86 | 0.61 | 0.19 | 0.93 |
| #N/A | 1.04 | 0.54 | #N/A | #N/A | 0.82 |
| 0.49 | 0.94 | 0.41 | 0.82 | 0.41 | 1.01 |
| 0.27 | 0.84 | 0.30 | 0.92 | 0.51 | 1.14 |
| 0.35 | #N/A | #N/A | 0.78 | 0.36 | 0.67 |
| 0.49 | 1.13 | 0.63 | #N/A | #N/A | 0.76 |
| 0.70 | 0.98 | 0.46 | 0.50 | 0.11 | 0.93 |
| 0.63 | #N/A | #N/A | 0.76 | 0.36 | 0.54 |
| 0.55 | 1.40 | 0.88 | 1.17 | 0.74 | 0.84 |
| 0.37 | 1.57 | 0.85 | 0.76 | 0.35 | #N/A |
| 0.69 | 0.82 | 0.23 | 0.89 | 0.51 | 0.91 |
| #N/A | 0.88 | 0.30 | 1.24 | 0.78 | 0.85 |
| 0.20 | #N/A | #N/A | 1.17 | 0.74 | #N/A |
| 0.53 | 1.38 | 0.89 | 0.80 | 0.38 | 0.90 |
| 0.70 | 1.22 | 0.80 | 0.98 | 0.59 | 1.06 |
| 0.40 | #N/A | #N/A | 0.93 | 0.55 | 0.85 |
| 0.60 | 0.83 | 0.31 | #N/A | #N/A | 1.32 |
| #N/A | 0.84 | 0.25 | 1.18 | 0.73 | 0.91 |
| 0.61 | #N/A | #N/A | 0.69 | 0.28 | 0.71 |
| #N/A | #N/A | #N/A | #N/A | #N/A | #N/A |
| 0.72 | 1.07 | 0.60 | 1.47 | 0.87 | 0.70 |
| #N/A | #N/A | #N/A | #N/A | #N/A | #N/A |
| #N/A | 0.95 | 0.42 | 1.35 | 0.83 | 1.26 |
| #N/A | #N/A | #N/A | #N/A | #N/A | #N/A |
| 0.76 | 1.06 | 0.51 | 1.39 | 0.84 | 1.17 |
| 0.29 | 1.03 | 0.55 | 0.59 | 0.17 | 0.96 |
| 0.87 | 1.02 | 0.49 | 0.52 | 0.12 | 0.92 |
| #N/A | #N/A | #N/A | #N/A | #N/A | #N/A |
| 0.15 | 0.83 | 0.24 | 1.03 | 0.62 | 1.10 |
| 0.44 | 0.94 | 0.40 | 0.83 | 0.43 | 1.07 |
| 0.21 | 0.67 | 0.09 | #N/A | #N/A | 0.72 |
| #N/A | #N/A | #N/A | #N/A | #N/A | #N/A |
| 0.55 | 0.95 | 0.41 | 0.97 | 0.58 | 0.95 |
| 0.06 | 0.34 | 0.01 | 0.28 | 0.03 | 0.52 |
| 0.57 | #N/A | #N/A | 0.95 | 0.57 | 1.12 |
| 0.03 | 1.43 | 0.87 | 1.00 | 0.61 | 0.95 |
| 0.35 | 0.93 | 0.39 | 0.85 | 0.46 | 0.79 |
| #N/A | 0.91 | 0.34 | 0.55 | 0.14 | 0.72 |
| 0.70 | #N/A | #N/A | 0.61 | 0.20 | 0.89 |
| #N/A | #N/A | #N/A | 0.57 | 0.15 | 1.18 |
| 0.40 | 1.07 | 0.61 | 0.89 | 0.50 | 0.95 |
| 0.30 | 0.98 | 0.49 | #N/A | #N/A | #N/A |
| 0.41 | 0.91 | 0.37 | 0.46 | 0.09 | 0.85 |
| #N/A | 0.89 | 0.33 | #N/A | #N/A | 0.99 |
| #N/A | #N/A | #N/A | #N/A | #N/A | #N/A |
| 0.21 | 0.80 | 0.20 | 0.72 | 0.30 | 0.83 |
| 0.06 | 0.50 | 0.03 | 0.70 | 0.28 | 0.66 |
| 0.20 | 1.19 | 0.77 | #N/A | #N/A | 0.98 |
| #N/A | #N/A | #N/A | #N/A | #N/A | 1.16 |
| #N/A | 1.08 | 0.59 | #N/A | #N/A | 0.79 |
| 0.62 | 1.14 | 0.71 | 0.99 | 0.60 | 1.04 |

|      |      |      |      |      |      |
|------|------|------|------|------|------|
| 0.56 | 0.86 | 0.28 | 1.41 | 0.85 | 1.53 |
| 0.61 | 0.91 | 0.35 | 1.27 | 0.79 | 0.98 |
| #N/A | #N/A | #N/A | #N/A | #N/A | #N/A |
| 0.56 | 0.88 | 0.39 | 1.05 | 0.63 | 1.26 |
| 0.55 | 0.86 | 0.28 | 0.78 | 0.39 | 1.14 |
| 0.28 | #N/A | #N/A | 0.62 | 0.19 | #N/A |
| 0.74 | 1.03 | 0.52 | 0.87 | 0.46 | #N/A |
| 0.55 | 0.95 | 0.41 | 1.55 | 0.88 | 1.22 |
| 0.42 | 0.88 | 0.38 | #N/A | #N/A | 0.98 |
| 0.61 | 1.08 | 0.54 | 1.21 | 0.77 | #N/A |
| 0.15 | #N/A | #N/A | 0.98 | 0.60 | 0.75 |
| 0.45 | #N/A | #N/A | 0.28 | 0.03 | 1.32 |
| 0.54 | 1.31 | 0.83 | 1.14 | 0.72 | 1.32 |
| 0.80 | 1.20 | 0.77 | 0.65 | 0.23 | 0.98 |
| 0.74 | 1.22 | 0.78 | #N/A | #N/A | 0.94 |
| 0.74 | 1.35 | 0.85 | 0.87 | 0.47 | 0.93 |
| #N/A | #N/A | #N/A | 1.02 | 0.61 | #N/A |
| 0.17 | #N/A | #N/A | 0.18 | 0.02 | 1.29 |
| 0.65 | 0.93 | 0.43 | #N/A | #N/A | 1.27 |
| #N/A | 0.62 | 0.11 | #N/A | #N/A | 1.45 |
| #N/A | #N/A | #N/A | #N/A | #N/A | #N/A |
| 0.32 | 0.79 | 0.19 | 0.79 | 0.39 | 1.02 |
| #N/A | #N/A | #N/A | #N/A | #N/A | #N/A |
| 0.63 | 1.20 | 0.75 | 0.65 | 0.24 | 1.09 |
| #N/A | #N/A | #N/A | #N/A | #N/A | #N/A |
| 0.43 | 0.97 | 0.45 | 0.83 | 0.42 | 0.94 |
| 0.45 | 1.14 | 0.71 | 1.01 | 0.62 | 0.86 |
| 0.41 | 1.07 | 0.61 | 0.80 | 0.39 | 1.02 |
| #N/A | #N/A | #N/A | #N/A | #N/A | #N/A |
| 0.73 | 1.03 | 0.56 | 0.87 | 0.46 | 0.77 |
| 0.40 | 0.89 | 0.32 | 0.50 | 0.12 | #N/A |
| 0.01 | #N/A | #N/A | 0.39 | 0.06 | 0.56 |
| 0.11 | 1.03 | 0.54 | 0.81 | 0.40 | 0.71 |
| #N/A | 0.90 | 0.33 | #N/A | #N/A | 1.00 |
| #N/A | 1.85 | 0.86 | 0.80 | 0.39 | #N/A |
| 0.23 | 0.68 | 0.10 | 0.82 | 0.42 | 1.11 |
| 0.55 | #N/A | #N/A | 0.67 | 0.26 | #N/A |
| #N/A | #N/A | #N/A | #N/A | #N/A | #N/A |
| #N/A | 0.92 | 0.37 | 1.34 | 0.82 | 0.95 |
| 0.44 | 0.66 | 0.09 | #N/A | #N/A | 0.94 |
| 0.70 | 0.99 | 0.49 | 1.10 | 0.67 | 1.06 |
| #N/A | #N/A | #N/A | #N/A | #N/A | #N/A |
| 0.80 | #N/A | #N/A | 1.13 | 0.70 | #N/A |
| #N/A | #N/A | #N/A | #N/A | #N/A | #N/A |
| #N/A | #N/A | #N/A | #N/A | #N/A | #N/A |
| 0.50 | 0.84 | 0.25 | 1.68 | 0.91 | 1.22 |
| 0.36 | 0.96 | 0.44 | 0.57 | 0.17 | #N/A |
| 0.35 | 0.74 | 0.19 | 0.74 | 0.34 | #N/A |
| #N/A | #N/A | #N/A | #N/A | #N/A | #N/A |
| 0.13 | 0.86 | 0.31 | 0.92 | 0.54 | 1.19 |
| 0.34 | #N/A | #N/A | 0.89 | 0.51 | 1.43 |

|      |      |      |      |      |      |      |
|------|------|------|------|------|------|------|
| #N/A | #N/A | #N/A | #N/A | #N/A | #N/A | #N/A |
| 0.31 | 1.00 | 0.50 | 0.70 | 0.29 | 0.85 | 0.85 |
| 0.56 | 1.22 | 0.67 | 0.58 | 0.16 | 0.83 | 0.83 |
| 0.59 | 1.21 | 0.79 | 0.95 | 0.55 | 0.93 | 0.93 |
| 0.52 | 1.20 | 0.62 | 0.63 | 0.21 | 0.79 | 0.79 |
| 0.58 | 1.09 | 0.63 | 0.85 | 0.45 | 1.09 | 1.09 |
| 0.23 | #N/A | #N/A | 0.74 | 0.32 | #N/A | #N/A |
| 0.57 | 1.16 | 0.74 | 0.64 | 0.22 | #N/A | #N/A |
| #N/A | #N/A | #N/A | #N/A | #N/A | 0.87 | 0.87 |
| 0.48 | 0.97 | 0.44 | 0.73 | 0.31 | 1.10 | 1.10 |
| 0.20 | 0.86 | 0.28 | 0.93 | 0.54 | 0.91 | 0.91 |
| #N/A | #N/A | #N/A | #N/A | #N/A | #N/A | #N/A |
| 0.48 | #N/A | #N/A | 0.59 | 0.18 | #N/A | #N/A |
| 0.13 | 1.11 | 0.67 | #N/A | #N/A | #N/A | #N/A |
| 0.23 | 1.26 | 0.51 | 0.51 | 0.12 | #N/A | #N/A |
| 0.61 | #N/A | #N/A | #N/A | #N/A | 1.00 | 1.00 |
| 0.28 | 0.90 | 0.34 | 2.48 | 0.97 | #N/A | #N/A |
| #N/A | #N/A | #N/A | #N/A | #N/A | #N/A | #N/A |
| 0.21 | 1.31 | 0.87 | 0.85 | 0.45 | 1.01 | 1.01 |
| 0.18 | 1.32 | 0.66 | 0.82 | 0.42 | #N/A | #N/A |
| 0.15 | 0.90 | 0.35 | 0.85 | 0.45 | 1.34 | 1.34 |
| #N/A | 1.39 | 0.90 | 1.02 | 0.62 | 1.19 | 1.19 |
| 0.34 | #N/A | #N/A | 1.11 | 0.70 | #N/A | #N/A |
| 0.42 | 1.19 | 0.70 | 1.00 | 0.61 | #N/A | #N/A |
| #N/A | 1.09 | 0.64 | #N/A | #N/A | 0.87 | 0.87 |
| 0.28 | 0.96 | 0.44 | 1.92 | 0.94 | 1.21 | 1.21 |
| #N/A | #N/A | #N/A | #N/A | #N/A | #N/A | #N/A |
| 0.41 | 0.74 | 0.16 | 0.63 | 0.20 | 1.12 | 1.12 |
| 0.65 | 1.36 | 0.89 | 0.64 | 0.22 | 0.86 | 0.86 |
| #N/A | 1.09 | 0.63 | #N/A | #N/A | 0.95 | 0.95 |
| 0.60 | 0.73 | 0.13 | 0.59 | 0.17 | 0.73 | 0.73 |
| #N/A | 1.37 | 0.51 | #N/A | #N/A | 0.76 | 0.76 |
| 0.22 | 0.91 | 0.35 | 0.62 | 0.22 | 0.73 | 0.73 |
| 0.12 | 0.37 | 0.01 | 0.22 | 0.02 | 0.67 | 0.67 |
| 0.52 | #N/A | #N/A | 0.87 | 0.48 | #N/A | #N/A |
| #N/A | #N/A | #N/A | #N/A | #N/A | #N/A | #N/A |
| #N/A | #N/A | #N/A | #N/A | #N/A | #N/A | #N/A |
| 0.50 | 0.93 | 0.41 | 0.86 | 0.45 | 1.08 | 1.08 |
| #N/A | #N/A | #N/A | #N/A | #N/A | #N/A | #N/A |
| 0.31 | 0.99 | 0.49 | 0.94 | 0.54 | 1.01 | 1.01 |
| 0.49 | #N/A | #N/A | 0.72 | 0.30 | #N/A | #N/A |
| #N/A | 1.14 | 0.69 | 1.05 | 0.63 | 1.00 | 1.00 |
| 0.48 | 1.20 | 0.57 | 3.11 | 0.99 | #N/A | #N/A |
| #N/A | #N/A | #N/A | 1.38 | 0.83 | #N/A | #N/A |
| 0.29 | #N/A | #N/A | 1.01 | 0.62 | #N/A | #N/A |
| 0.92 | 1.20 | 0.76 | 1.35 | 0.83 | 1.67 | 1.67 |
| #N/A | 0.45 | 0.03 | 0.37 | 0.06 | 0.97 | 0.97 |
| 0.16 | 0.64 | 0.08 | 0.71 | 0.29 | 0.90 | 0.90 |
| 0.44 | 0.97 | 0.45 | 1.46 | 0.86 | 1.34 | 1.34 |
| 0.80 | 0.86 | 0.28 | 0.93 | 0.55 | 0.82 | 0.82 |
| #N/A | #N/A | #N/A | #N/A | #N/A | 1.18 | 1.18 |

|      |      |      |      |      |      |
|------|------|------|------|------|------|
| 0.35 | 0.93 | 0.43 | 1.12 | 0.71 | 0.80 |
| #N/A | 0.88 | 0.30 | #N/A | #N/A | 0.91 |
| #N/A | #N/A | #N/A | #N/A | #N/A | #N/A |
| 0.68 | 0.97 | 0.45 | 0.85 | 0.45 | 0.82 |
| 0.72 | 1.43 | 0.91 | 0.93 | 0.54 | 0.95 |
| 0.44 | 1.17 | 0.65 | 1.52 | 0.88 | 0.69 |
| 0.83 | 1.22 | 0.71 | 0.59 | 0.18 | 0.81 |
| 0.63 | 1.11 | 0.59 | #N/A | #N/A | 0.93 |
| 0.58 | 0.99 | 0.49 | 0.94 | 0.54 | 0.92 |
| 0.45 | 1.38 | 0.88 | 0.85 | 0.44 | 0.67 |
| 0.29 | 0.95 | 0.41 | 0.61 | 0.20 | 0.69 |
| 0.80 | 1.19 | 0.70 | 1.02 | 0.63 | 0.82 |
| 0.63 | #N/A | #N/A | 0.89 | 0.48 | 0.98 |
| 0.16 | 1.41 | 0.91 | 0.99 | 0.58 | 0.74 |
| 0.34 | 1.54 | 0.90 | 1.50 | 0.87 | 1.05 |
| 0.56 | 1.34 | 0.88 | 1.78 | 0.93 | 2.52 |
| 0.13 | 0.97 | 0.46 | 1.07 | 0.65 | #N/A |
| 0.32 | 0.81 | 0.22 | 0.67 | 0.25 | #N/A |
| #N/A | #N/A | #N/A | #N/A | #N/A | #N/A |
| #N/A | #N/A | #N/A | #N/A | #N/A | #N/A |
| 0.73 | 0.85 | 0.27 | 2.85 | 0.98 | 0.79 |
| 0.35 | 0.91 | 0.35 | 0.74 | 0.34 | 0.91 |
| #N/A | #N/A | #N/A | #N/A | #N/A | #N/A |
| #N/A | #N/A | #N/A | #N/A | #N/A | #N/A |
| #N/A | #N/A | #N/A | #N/A | #N/A | #N/A |
| 0.91 | 1.15 | 0.66 | 1.39 | 0.84 | 1.21 |
| 0.83 | 1.17 | 0.74 | 1.08 | 0.66 | 1.09 |
| #N/A | 1.28 | 0.56 | 1.32 | 0.82 | 0.67 |
| 0.63 | 1.04 | 0.57 | 0.82 | 0.41 | #N/A |
| #N/A | #N/A | #N/A | 0.88 | 0.48 | #N/A |
| 0.48 | 0.97 | 0.47 | 1.14 | 0.73 | 1.05 |
| 0.32 | 1.11 | 0.66 | 0.84 | 0.43 | 0.59 |
| 0.98 | 1.10 | 0.62 | 2.07 | 0.95 | 1.22 |
| #N/A | #N/A | #N/A | #N/A | #N/A | #N/A |
| 0.78 | 0.91 | 0.39 | 1.31 | 0.81 | #N/A |
| #N/A | 1.03 | 0.56 | 1.30 | 0.80 | 1.27 |
| 0.73 | 1.24 | 0.76 | 0.96 | 0.58 | 0.78 |
| 0.38 | 1.07 | 0.62 | 0.63 | 0.21 | 0.93 |
| 0.06 | 0.31 | 0.01 | 0.26 | 0.03 | 0.76 |
| 0.65 | 0.79 | 0.20 | 0.67 | 0.25 | 0.97 |
| 0.67 | 0.90 | 0.34 | 1.39 | 0.84 | 0.78 |
| #N/A | #N/A | #N/A | #N/A | #N/A | #N/A |
| 0.48 | 1.08 | 0.63 | 0.79 | 0.37 | 0.83 |
| 0.93 | 1.78 | 0.79 | 0.99 | 0.61 | 1.04 |
| #N/A | #N/A | #N/A | #N/A | #N/A | #N/A |
| 0.79 | 1.08 | 0.62 | 1.16 | 0.72 | 1.01 |
| 0.05 | 0.52 | 0.03 | 0.56 | 0.15 | 0.81 |
| 0.18 | 1.00 | 0.51 | 0.59 | 0.17 | 0.84 |
| #N/A | 0.91 | 0.36 | #N/A | #N/A | 1.07 |
| 0.12 | 0.98 | 0.49 | 1.11 | 0.68 | 0.88 |
| #N/A | #N/A | #N/A | 0.94 | 0.53 | #N/A |



|      |      |      |      |      |      |
|------|------|------|------|------|------|
| 0.83 | 1.03 | 0.56 | 1.04 | 0.64 | 1.13 |
| 0.99 | 0.84 | 0.25 | 1.67 | 0.91 | 0.84 |
| 0.72 | 1.02 | 0.54 | 1.49 | 0.88 | 1.00 |
| 0.61 | 1.90 | 0.97 | 0.70 | 0.29 | 0.76 |
| 0.48 | 0.98 | 0.47 | 2.17 | 0.96 | 0.97 |
| 0.79 | #N/A | #N/A | 0.70 | 0.28 | 0.87 |
| 0.66 | 1.19 | 0.77 | 1.10 | 0.67 | #N/A |
| 0.35 | 0.98 | 0.45 | 0.96 | 0.57 | 1.29 |
| 0.69 | 1.14 | 0.69 | 0.81 | 0.40 | 0.90 |
| #N/A | 1.09 | 0.62 | #N/A | #N/A | 1.04 |
| 0.91 | 1.04 | 0.57 | 0.85 | 0.45 | 0.81 |
| 0.45 | 1.08 | 0.55 | #N/A | #N/A | 0.89 |
| 0.69 | 0.62 | 0.09 | 0.88 | 0.50 | 1.24 |
| 0.50 | 1.12 | 0.68 | 0.86 | 0.47 | 1.05 |
| 0.21 | 1.51 | 0.92 | 0.49 | 0.10 | 1.14 |
| 0.31 | 0.97 | 0.47 | 1.92 | 0.94 | 0.91 |
| #N/A | #N/A | #N/A | #N/A | #N/A | #N/A |
| 0.37 | 0.64 | 0.07 | 0.55 | 0.14 | 0.56 |
| 0.33 | 1.24 | 0.81 | 1.38 | 0.84 | 0.96 |
| 0.56 | #N/A | #N/A | 0.77 | 0.36 | 0.88 |
| #N/A | 1.01 | 0.47 | 1.08 | 0.68 | 1.15 |
| 0.05 | 0.27 | 0.00 | 0.25 | 0.03 | 0.47 |
| 0.44 | 1.16 | 0.72 | 1.14 | 0.71 | 1.30 |
| #N/A | #N/A | #N/A | #N/A | #N/A | #N/A |
| 0.66 | 1.29 | 0.85 | 0.93 | 0.52 | 0.88 |
| 0.59 | 1.34 | 0.88 | 0.68 | 0.26 | 1.20 |
| 0.61 | 0.95 | 0.43 | 0.71 | 0.29 | 0.93 |
| 0.49 | 0.74 | 0.14 | 0.94 | 0.54 | 1.10 |
| 0.58 | 1.25 | 0.75 | #N/A | #N/A | 0.85 |
| 0.10 | 0.51 | 0.07 | 0.20 | 0.02 | 1.02 |
| 0.61 | 1.24 | 0.80 | 1.10 | 0.69 | 1.36 |
| #N/A | #N/A | #N/A | #N/A | #N/A | #N/A |
| 0.73 | 0.98 | 0.48 | 1.28 | 0.80 | 0.88 |
| #N/A | #N/A | #N/A | #N/A | #N/A | #N/A |
| 0.50 | 0.53 | 0.04 | 0.71 | 0.30 | 0.63 |
| 0.31 | 0.71 | 0.16 | #N/A | #N/A | 0.88 |
| 0.62 | #N/A | #N/A | 1.55 | 0.88 | 0.88 |
| 0.51 | 1.50 | 0.85 | 0.88 | 0.48 | #N/A |
| 0.20 | 0.88 | 0.31 | 0.69 | 0.26 | 0.94 |
| 0.98 | #N/A | #N/A | 1.53 | 0.89 | 0.90 |
| 1.00 | 1.84 | 0.98 | 2.91 | 0.99 | 1.05 |
| 0.70 | 1.22 | 0.78 | 0.76 | 0.35 | 0.93 |
| 0.50 | 1.18 | 0.73 | 0.70 | 0.28 | 0.83 |
| 0.74 | 1.08 | 0.62 | #N/A | #N/A | 0.97 |
| #N/A | 1.16 | 0.72 | #N/A | #N/A | 0.88 |
| 0.63 | 1.20 | 0.77 | 1.15 | 0.73 | 0.85 |
| 0.33 | 1.05 | 0.58 | 1.50 | 0.88 | 0.98 |
| 0.74 | 1.21 | 0.79 | 1.04 | 0.63 | 1.88 |
| 0.55 | 0.92 | 0.39 | 0.88 | 0.50 | 1.62 |
| #N/A | 1.20 | 0.78 | #N/A | #N/A | 0.94 |
| 0.56 | 1.18 | 0.75 | 0.96 | 0.55 | 1.20 |

|      |      |      |      |      |      |
|------|------|------|------|------|------|
| 0.96 | #N/A | #N/A | 1.32 | 0.82 | 0.92 |
| #N/A | #N/A | #N/A | 0.08 | 0.01 | #N/A |
| 0.43 | 1.12 | 0.69 | 1.15 | 0.73 | 0.75 |
| 0.72 | 0.98 | 0.46 | 0.55 | 0.14 | #N/A |
| 0.19 | 1.27 | 0.57 | 1.49 | 0.87 | 1.37 |
| #N/A | #N/A | #N/A | #N/A | #N/A | #N/A |
| 0.51 | 1.04 | 0.57 | 1.11 | 0.69 | 1.09 |
| 0.77 | 1.17 | 0.75 | 0.90 | 0.51 | 0.95 |
| 0.35 | 1.09 | 0.63 | 1.24 | 0.77 | #N/A |
| #N/A | #N/A | #N/A | #N/A | #N/A | #N/A |
| 0.85 | 0.94 | 0.40 | 1.40 | 0.85 | 1.37 |
| 0.67 | #N/A | #N/A | 0.80 | 0.39 | 0.95 |
| #N/A | 0.61 | 0.08 | 0.73 | 0.31 | 0.94 |
| #N/A | #N/A | #N/A | #N/A | #N/A | #N/A |
| 0.69 | 0.85 | 0.26 | 1.16 | 0.73 | 0.87 |
| 0.10 | 0.66 | 0.09 | 0.88 | 0.48 | 0.55 |
| 0.89 | 0.95 | 0.43 | 0.89 | 0.48 | 0.92 |
| 0.86 | #N/A | #N/A | 1.26 | 0.80 | #N/A |
| #N/A | #N/A | #N/A | #N/A | #N/A | #N/A |
| #N/A | 0.99 | 0.48 | 1.63 | 0.90 | 0.79 |
| 0.50 | 1.12 | 0.68 | 0.65 | 0.22 | 0.99 |
| 0.31 | #N/A | #N/A | #N/A | #N/A | 0.87 |
| #N/A | #N/A | #N/A | #N/A | #N/A | 0.84 |
| 0.24 | #N/A | #N/A | 1.13 | 0.71 | 1.15 |
| 0.25 | 0.98 | 0.47 | 1.15 | 0.72 | 1.02 |
| 0.56 | 1.03 | 0.56 | 0.56 | 0.15 | 0.96 |
| #N/A | 1.25 | 0.59 | #N/A | #N/A | 1.09 |
| 0.48 | 1.79 | 0.98 | #N/A | #N/A | 1.34 |
| #N/A | #N/A | #N/A | #N/A | #N/A | #N/A |
| 0.67 | 1.03 | 0.56 | 1.39 | 0.84 | 1.39 |
| #N/A | 1.43 | 0.92 | #N/A | #N/A | 1.23 |
| 0.57 | 1.09 | 0.58 | 1.21 | 0.77 | 0.98 |
| 0.67 | 1.24 | 0.77 | 1.19 | 0.75 | 1.01 |
| 0.09 | 0.94 | 0.39 | 0.56 | 0.15 | 0.62 |
| #N/A | #N/A | #N/A | #N/A | #N/A | #N/A |
| 0.46 | 1.19 | 0.77 | 0.91 | 0.51 | 0.89 |
| 0.23 | #N/A | #N/A | 1.32 | 0.82 | 1.10 |
| 0.50 | 1.17 | 0.71 | 0.67 | 0.25 | 0.88 |
| 0.19 | 0.69 | 0.14 | 0.59 | 0.18 | 0.86 |
| 0.11 | 0.58 | 0.05 | 0.31 | 0.04 | 0.70 |
| 0.51 | 1.15 | 0.72 | 0.81 | 0.40 | #N/A |
| 0.20 | #N/A | #N/A | 0.30 | 0.04 | 0.98 |
| #N/A | #N/A | #N/A | #N/A | #N/A | #N/A |
| 0.57 | 0.97 | 0.45 | 1.26 | 0.79 | 1.03 |
| 0.52 | 1.50 | 0.94 | 1.00 | 0.61 | 0.98 |
| 0.38 | 0.93 | 0.41 | 1.11 | 0.70 | 0.72 |
| #N/A | #N/A | #N/A | 0.84 | 0.44 | #N/A |
| 0.49 | 0.78 | 0.19 | 0.57 | 0.16 | 0.85 |
| 0.50 | 0.70 | 0.11 | 0.59 | 0.17 | 0.67 |
| 0.12 | 1.75 | 0.88 | 1.13 | 0.70 | 0.92 |
| 0.14 | 0.50 | 0.03 | 0.43 | 0.07 | 0.69 |

|      |      |      |      |      |      |
|------|------|------|------|------|------|
| 0.31 | 0.88 | 0.32 | 0.47 | 0.10 | 0.83 |
| #N/A | #N/A | #N/A | #N/A | #N/A | #N/A |
| #N/A | 1.02 | 0.54 | #N/A | #N/A | 0.90 |
| 0.45 | 1.23 | 0.70 | 0.83 | 0.43 | 0.87 |
| 0.70 | 1.13 | 0.63 | 0.92 | 0.52 | #N/A |
| #N/A | 1.49 | 0.93 | 0.59 | 0.17 | 0.90 |
| #N/A | #N/A | #N/A | #N/A | #N/A | #N/A |
| 0.88 | #N/A | #N/A | #N/A | #N/A | #N/A |
| 0.41 | 0.95 | 0.42 | 0.78 | 0.37 | 0.92 |
| 0.20 | 0.71 | 0.11 | 0.64 | 0.22 | 0.75 |
| 0.20 | 0.59 | 0.05 | 0.58 | 0.18 | 0.61 |
| 0.65 | 0.96 | 0.45 | 1.02 | 0.62 | 0.78 |
| 0.58 | 0.71 | 0.14 | 0.63 | 0.21 | 0.77 |
| 0.05 | 0.38 | 0.01 | 0.53 | 0.14 | 0.62 |
| 0.12 | 0.93 | 0.41 | 0.41 | 0.07 | 1.04 |
| 0.67 | 1.11 | 0.66 | 0.92 | 0.53 | 0.99 |
| 0.27 | #N/A | #N/A | 0.97 | 0.59 | 1.00 |
| 0.79 | 1.17 | 0.74 | 1.10 | 0.68 | 0.59 |
| #N/A | 1.51 | 0.94 | 0.67 | 0.26 | 0.89 |
| #N/A | #N/A | #N/A | #N/A | #N/A | #N/A |
| #N/A | 1.18 | 0.67 | 1.10 | 0.67 | 0.93 |
| 0.48 | 0.62 | 0.07 | 0.64 | 0.22 | 0.72 |
| 0.49 | 1.32 | 0.87 | 0.99 | 0.60 | 0.96 |
| 0.10 | 1.06 | 0.60 | 1.64 | 0.90 | 0.70 |
| #N/A | 0.98 | 0.45 | 1.38 | 0.84 | 0.85 |
| 0.45 | #N/A | #N/A | 0.30 | 0.04 | 0.55 |
| 0.17 | 0.83 | 0.28 | 2.35 | 0.97 | #N/A |
| 0.54 | 0.77 | 0.19 | 1.07 | 0.65 | 0.85 |
| 0.57 | 0.94 | 0.42 | 0.78 | 0.39 | 0.96 |
| #N/A | 0.47 | 0.03 | 0.21 | 0.02 | 0.62 |
| 0.68 | 0.78 | 0.18 | 0.66 | 0.23 | 1.95 |
| 0.64 | 1.13 | 0.68 | #N/A | #N/A | 1.07 |
| 0.43 | 0.84 | 0.25 | 0.87 | 0.48 | 1.47 |
| 0.66 | 1.09 | 0.65 | 0.74 | 0.32 | 0.97 |
| #N/A | #N/A | #N/A | #N/A | #N/A | #N/A |
| 0.34 | 0.74 | 0.14 | #N/A | #N/A | 1.06 |
| 0.82 | 0.85 | 0.27 | 0.88 | 0.50 | 0.96 |
| #N/A | #N/A | #N/A | #N/A | #N/A | #N/A |
| #N/A | #N/A | #N/A | #N/A | #N/A | #N/A |
| 0.12 | 0.95 | 0.42 | #N/A | #N/A | 0.84 |
| #N/A | 1.03 | 0.53 | 6.78 | 1.00 | 1.10 |
| 0.89 | 1.07 | 0.62 | #N/A | #N/A | 0.71 |
| 0.39 | #N/A | #N/A | 1.11 | 0.70 | #N/A |
| 0.53 | 0.83 | 0.23 | 0.87 | 0.47 | 1.28 |
| 0.18 | 0.82 | 0.27 | #N/A | #N/A | 0.89 |
| 0.16 | 0.84 | 0.29 | 0.91 | 0.53 | 0.93 |
| #N/A | #N/A | #N/A | #N/A | #N/A | 0.77 |
| #N/A | #N/A | #N/A | #N/A | #N/A | #N/A |
| #N/A | 0.35 | 0.01 | #N/A | #N/A | #N/A |
| 0.16 | 0.81 | 0.22 | 0.56 | 0.16 | 1.08 |
| 0.59 | #N/A | #N/A | 1.13 | 0.71 | 1.05 |

|      |      |      |      |      |      |
|------|------|------|------|------|------|
| 0.25 | #N/A | #N/A | 0.88 | 0.47 | 0.92 |
| 0.39 | 0.81 | 0.22 | 1.37 | 0.83 | 1.23 |
| 0.61 | 1.30 | 0.85 | 1.19 | 0.75 | #N/A |
| 0.53 | 0.83 | 0.26 | 1.07 | 0.68 | 0.86 |
| #N/A | 1.42 | 0.90 | 0.73 | 0.32 | 0.57 |
| 0.32 | 0.98 | 0.49 | 1.29 | 0.81 | 0.95 |
| 0.10 | 1.32 | 0.87 | 0.53 | 0.14 | 0.99 |
| 0.54 | 0.91 | 0.35 | 0.92 | 0.53 | 1.22 |
| #N/A | 1.21 | 0.76 | #N/A | #N/A | 1.01 |
| 0.43 | 1.08 | 0.61 | 1.50 | 0.87 | 0.89 |
| 0.50 | 1.40 | 0.86 | #N/A | #N/A | 0.86 |
| #N/A | #N/A | #N/A | 3.28 | 0.99 | #N/A |
| 0.51 | 1.12 | 0.56 | 1.39 | 0.84 | 0.93 |
| 0.58 | 1.13 | 0.70 | 1.20 | 0.75 | 0.85 |
| 0.24 | 1.10 | 0.63 | 0.65 | 0.23 | 0.85 |
| 0.47 | 0.88 | 0.31 | 1.85 | 0.93 | 0.83 |
| #N/A | #N/A | #N/A | #N/A | #N/A | #N/A |
| 0.51 | 1.20 | 0.72 | 1.01 | 0.62 | 1.08 |
| 0.59 | 1.34 | 0.88 | 1.14 | 0.71 | 0.95 |
| #N/A | 1.33 | 0.88 | 0.92 | 0.54 | 1.15 |
| 0.10 | 0.61 | 0.06 | 0.58 | 0.18 | 1.13 |
| 0.95 | 1.27 | 0.56 | 1.01 | 0.62 | 1.05 |
| 0.16 | 0.98 | 0.49 | 0.82 | 0.42 | 0.89 |
| 0.61 | 1.06 | 0.61 | 0.93 | 0.54 | #N/A |
| #N/A | #N/A | #N/A | #N/A | #N/A | #N/A |
| 0.34 | 0.80 | 0.32 | 1.09 | 0.69 | 1.60 |
| 0.69 | 1.04 | 0.58 | 0.65 | 0.23 | 0.87 |
| 0.69 | 0.75 | 0.16 | 1.39 | 0.84 | 1.35 |
| 0.80 | 1.44 | 0.90 | 0.86 | 0.46 | 1.05 |
| 0.69 | 0.89 | 0.32 | 1.17 | 0.72 | 0.94 |
| #N/A | 1.22 | 0.77 | 1.41 | 0.85 | 1.04 |
| 0.20 | 1.21 | 0.79 | 0.79 | 0.39 | 1.16 |
| 0.87 | 1.10 | 0.67 | 0.92 | 0.51 | 1.00 |
| 0.38 | 0.70 | 0.15 | 0.81 | 0.40 | 1.10 |
| 0.63 | 0.78 | 0.18 | 0.77 | 0.35 | 1.11 |
| 0.71 | 0.82 | 0.24 | #N/A | #N/A | 0.84 |
| 0.26 | #N/A | #N/A | 0.76 | 0.35 | 0.78 |
| 0.59 | 1.11 | 0.67 | 1.22 | 0.77 | #N/A |
| 0.53 | 1.37 | 0.90 | 0.80 | 0.41 | 1.01 |
| #N/A | 1.16 | 0.68 | #N/A | #N/A | 0.96 |
| #N/A | 0.84 | 0.26 | 0.72 | 0.29 | 0.84 |
| 0.11 | 1.11 | 0.67 | 0.83 | 0.43 | 0.79 |
| 0.78 | 0.83 | 0.24 | 1.22 | 0.76 | 0.83 |
| 0.12 | #N/A | #N/A | 0.64 | 0.21 | 0.85 |
| 0.75 | 0.79 | 0.19 | #N/A | #N/A | 0.75 |
| 0.27 | 0.82 | 0.24 | 0.49 | 0.11 | 0.86 |
| #N/A | #N/A | #N/A | #N/A | #N/A | #N/A |
| 0.75 | 1.16 | 0.71 | 0.92 | 0.52 | 1.27 |
| #N/A | #N/A | #N/A | #N/A | #N/A | #N/A |
| 0.53 | 0.89 | 0.33 | 0.89 | 0.51 | 0.78 |
| 0.61 | 0.84 | 0.25 | 0.91 | 0.51 | 1.09 |

|      |      |      |      |      |      |
|------|------|------|------|------|------|
| 0.44 | 0.86 | 0.28 | #N/A | #N/A | 1.21 |
| #N/A | 1.12 | 0.66 | 0.81 | 0.41 | 1.11 |
| #N/A | #N/A | #N/A | 0.75 | 0.35 | 1.02 |
| 0.18 | 0.70 | 0.13 | 0.57 | 0.16 | 0.73 |
| #N/A | 1.00 | 0.50 | 1.23 | 0.77 | 1.06 |
| #N/A | #N/A | #N/A | #N/A | #N/A | #N/A |
| 0.20 | 0.67 | 0.09 | 0.54 | 0.15 | 0.80 |
| 0.35 | 0.87 | 0.30 | 0.56 | 0.15 | 1.14 |
| 0.75 | 0.88 | 0.31 | #N/A | #N/A | 1.04 |
| 0.09 | 1.21 | 0.56 | 0.47 | 0.10 | 0.98 |
| 0.53 | 1.01 | 0.52 | 0.85 | 0.44 | 1.03 |
| 0.81 | 1.13 | 0.69 | 0.82 | 0.43 | 1.10 |
| 0.31 | #N/A | #N/A | 0.45 | 0.08 | 0.65 |
| 0.19 | 1.40 | 0.86 | 0.97 | 0.57 | 0.74 |
| 0.42 | 0.86 | 0.32 | 0.90 | 0.52 | 0.70 |
| #N/A | #N/A | #N/A | #N/A | #N/A | #N/A |
| 0.16 | 0.60 | 0.07 | 0.90 | 0.52 | 0.81 |
| #N/A | #N/A | #N/A | #N/A | #N/A | #N/A |
| #N/A | 1.23 | 0.63 | 1.48 | 0.87 | #N/A |
| 0.42 | #N/A | #N/A | #N/A | #N/A | #N/A |
| #N/A | #N/A | #N/A | 0.93 | 0.55 | 0.86 |
| #N/A | #N/A | #N/A | #N/A | #N/A | #N/A |
| 0.83 | 1.10 | 0.64 | 0.61 | 0.19 | 0.88 |
| 0.68 | 1.18 | 0.76 | 0.93 | 0.55 | 0.93 |
| 0.14 | 0.48 | 0.03 | 0.32 | 0.04 | 0.72 |
| 0.47 | 0.93 | 0.38 | 0.70 | 0.28 | 1.18 |
| #N/A | 1.31 | 0.87 | 0.87 | 0.48 | 0.75 |
| #N/A | #N/A | #N/A | #N/A | #N/A | #N/A |
| 0.85 | 1.17 | 0.75 | 0.73 | 0.31 | 1.36 |
| #N/A | 0.78 | 0.18 | #N/A | #N/A | 1.18 |
| #N/A | #N/A | #N/A | 0.12 | 0.01 | #N/A |
| 0.66 | 1.43 | 0.92 | 0.74 | 0.33 | 0.86 |
| 0.40 | 1.20 | 0.78 | 0.77 | 0.37 | 0.82 |
| 0.64 | 0.97 | 0.47 | 0.77 | 0.35 | 0.83 |
| 0.41 | 1.11 | 0.67 | 1.25 | 0.79 | 1.03 |
| 0.75 | 1.00 | 0.50 | 1.73 | 0.92 | 0.92 |
| 0.56 | 0.96 | 0.44 | 1.03 | 0.64 | 0.97 |
| 0.97 | 1.43 | 0.88 | 0.96 | 0.56 | 1.30 |
| #N/A | 0.92 | 0.38 | 0.88 | 0.49 | 0.91 |
| 0.79 | #N/A | #N/A | 0.85 | 0.45 | 1.61 |
| #N/A | 1.07 | 0.62 | 0.83 | 0.42 | 0.89 |
| #N/A | #N/A | #N/A | #N/A | #N/A | 0.82 |
| #N/A | #N/A | #N/A | #N/A | #N/A | #N/A |
| 0.69 | 1.34 | 0.88 | 1.30 | 0.81 | 0.81 |
| 0.58 | 1.24 | 0.79 | 1.40 | 0.84 | 0.68 |
| 0.47 | 0.79 | 0.20 | 0.73 | 0.31 | 1.13 |
| #N/A | #N/A | #N/A | #N/A | #N/A | #N/A |
| 0.55 | 1.45 | 0.89 | 0.73 | 0.31 | 0.79 |
| 0.59 | 1.04 | 0.57 | 0.76 | 0.34 | 0.87 |
| 0.70 | #N/A | #N/A | 1.39 | 0.84 | 1.02 |
| #N/A | 0.66 | 0.20 | #N/A | #N/A | #N/A |

|      |      |      |      |      |      |
|------|------|------|------|------|------|
| 0.39 | 1.23 | 0.81 | 0.59 | 0.18 | 1.07 |
| 0.50 | 1.29 | 0.86 | 0.66 | 0.23 | #N/A |
| 0.56 | 0.94 | 0.41 | 0.68 | 0.26 | 1.14 |
| 0.75 | 1.09 | 0.64 | 1.31 | 0.81 | 1.00 |
| 0.65 | #N/A | #N/A | 1.40 | 0.85 | 1.38 |
| #N/A | #N/A | #N/A | #N/A | #N/A | #N/A |
| 0.19 | 0.93 | 0.40 | 1.12 | 0.69 | #N/A |
| 0.69 | 0.78 | 0.39 | 1.41 | 0.85 | 0.73 |
| 0.69 | 0.90 | 0.36 | #N/A | #N/A | 1.05 |
| #N/A | #N/A | #N/A | #N/A | #N/A | #N/A |
| 0.46 | 0.86 | 0.27 | 0.73 | 0.32 | 0.79 |
| 0.86 | 0.88 | 0.30 | 1.13 | 0.71 | 1.13 |
| #N/A | 1.66 | 0.96 | #N/A | #N/A | 0.93 |
| 0.46 | 1.08 | 0.63 | 1.13 | 0.72 | 0.83 |
| 0.20 | 0.90 | 0.37 | 2.68 | 0.98 | 0.95 |
| 0.55 | 0.93 | 0.38 | 1.03 | 0.63 | 0.88 |
| 0.71 | 1.01 | 0.50 | 1.54 | 0.89 | 0.80 |
| 0.54 | 0.83 | 0.27 | 1.86 | 0.94 | #N/A |
| 0.41 | #N/A | #N/A | 0.94 | 0.55 | 0.85 |
| 0.34 | 0.96 | 0.45 | 1.22 | 0.77 | 0.89 |
| #N/A | 0.46 | 0.02 | 0.45 | 0.08 | 0.59 |
| #N/A | #N/A | #N/A | #N/A | #N/A | #N/A |
| 0.64 | 0.80 | 0.20 | 0.88 | 0.50 | 0.81 |
| 0.52 | 1.16 | 0.66 | 1.20 | 0.76 | 0.86 |
| 0.57 | 1.13 | 0.70 | 1.47 | 0.87 | 0.95 |
| 0.44 | 1.02 | 0.54 | 1.12 | 0.69 | 0.83 |
| 0.28 | #N/A | #N/A | 0.39 | 0.06 | #N/A |
| 0.21 | 0.58 | 0.05 | 0.43 | 0.07 | 0.75 |
| 0.78 | 1.05 | 0.59 | #N/A | #N/A | 0.83 |
| 0.95 | #N/A | #N/A | #N/A | #N/A | 0.77 |
| 0.58 | 1.03 | 0.56 | 1.14 | 0.72 | 1.07 |
| 0.80 | 0.95 | 0.42 | 1.17 | 0.74 | 0.92 |
| 0.36 | 0.84 | 0.29 | #N/A | #N/A | #N/A |
| #N/A | #N/A | #N/A | #N/A | #N/A | #N/A |
| 0.16 | 0.57 | 0.05 | 0.52 | 0.12 | #N/A |
| 0.31 | 0.83 | 0.28 | #N/A | #N/A | 0.99 |
| #N/A | #N/A | #N/A | #N/A | #N/A | #N/A |
| 0.29 | #N/A | #N/A | 0.92 | 0.52 | 1.06 |
| #N/A | #N/A | #N/A | #N/A | #N/A | #N/A |
| 0.40 | 0.91 | 0.36 | 1.48 | 0.87 | 1.50 |
| #N/A | 0.49 | 0.03 | #N/A | #N/A | 0.85 |
| #N/A | #N/A | #N/A | #N/A | #N/A | #N/A |
| #N/A | #N/A | #N/A | #N/A | #N/A | #N/A |
| 0.53 | 1.23 | 0.81 | 0.71 | 0.31 | 1.01 |
| #N/A | #N/A | #N/A | 0.41 | 0.07 | 1.02 |
| 0.63 | 0.98 | 0.45 | 0.99 | 0.60 | 1.03 |
| 0.31 | 1.07 | 0.58 | 0.78 | 0.36 | 0.92 |
| 0.46 | #N/A | #N/A | 0.94 | 0.56 | #N/A |
| #N/A | #N/A | #N/A | #N/A | #N/A | 0.91 |
| #N/A | #N/A | #N/A | #N/A | #N/A | #N/A |
| 0.64 | 1.28 | 0.78 | 0.99 | 0.61 | 0.94 |

|      |      |      |      |      |      |
|------|------|------|------|------|------|
| 0.68 | 0.94 | 0.42 | 1.05 | 0.64 | 0.91 |
| 0.46 | 1.07 | 0.60 | 1.13 | 0.71 | 1.06 |
| 0.30 | 1.44 | 0.80 | 0.88 | 0.50 | 0.80 |
| 0.73 | 1.27 | 0.84 | 0.92 | 0.51 | 0.86 |
| 0.60 | 1.08 | 0.60 | 0.86 | 0.47 | 0.87 |
| 0.38 | 0.92 | 0.37 | 1.41 | 0.85 | 0.97 |
| 0.61 | 1.17 | 0.70 | 1.12 | 0.71 | 0.78 |
| #N/A | 0.91 | 0.36 | 1.04 | 0.63 | 0.85 |
| 0.57 | 1.39 | 0.90 | 0.79 | 0.38 | 1.00 |
| #N/A | 1.11 | 0.68 | 0.87 | 0.48 | 0.96 |
| 0.79 | 1.24 | 0.82 | 1.00 | 0.60 | 0.91 |
| 0.43 | 1.25 | 0.80 | 2.33 | 0.97 | 0.95 |
| 0.75 | 0.95 | 0.42 | 1.53 | 0.89 | 0.90 |
| #N/A | #N/A | #N/A | #N/A | #N/A | #N/A |
| 0.72 | 1.17 | 0.73 | 1.27 | 0.79 | 0.84 |
| 0.56 | 1.25 | 0.78 | 1.13 | 0.72 | 0.85 |
| 0.64 | 1.23 | 0.81 | 1.68 | 0.92 | 2.42 |
| 0.66 | 1.13 | 0.69 | 0.82 | 0.41 | 1.08 |
| 0.31 | #N/A | #N/A | 0.66 | 0.25 | #N/A |
| 0.36 | 1.26 | 0.81 | 0.67 | 0.26 | 1.12 |
| 0.63 | 1.27 | 0.70 | 0.65 | 0.23 | 1.02 |
| 0.61 | 1.22 | 0.78 | 1.06 | 0.67 | 1.23 |
| #N/A | #N/A | #N/A | #N/A | #N/A | #N/A |
| 0.48 | 0.80 | 0.23 | 0.95 | 0.57 | #N/A |
| 0.01 | #N/A | #N/A | #N/A | #N/A | #N/A |
| #N/A | #N/A | #N/A | #N/A | #N/A | 0.98 |
| #N/A | #N/A | #N/A | #N/A | #N/A | #N/A |
| #N/A | 0.58 | 0.05 | 0.52 | 0.13 | 0.57 |
| #N/A | #N/A | #N/A | #N/A | #N/A | #N/A |
| #N/A | #N/A | #N/A | 0.79 | 0.38 | #N/A |
| #N/A | 1.23 | 0.79 | 1.17 | 0.72 | 0.67 |
| 0.47 | 0.79 | 0.24 | 1.18 | 0.73 | #N/A |
| #N/A | #N/A | #N/A | #N/A | #N/A | #N/A |
| #N/A | #N/A | #N/A | #N/A | #N/A | #N/A |
| 0.21 | 0.79 | 0.19 | 2.37 | 0.97 | 0.74 |
| #N/A | 0.91 | 0.35 | #N/A | #N/A | #N/A |
| 0.25 | 0.77 | 0.18 | 0.80 | 0.39 | 0.76 |
| 0.23 | 0.70 | 0.11 | 0.76 | 0.35 | 0.64 |
| #N/A | #N/A | #N/A | #N/A | #N/A | #N/A |
| 0.50 | 0.91 | 0.36 | 1.05 | 0.66 | 0.97 |
| 0.17 | 0.75 | 0.15 | 1.24 | 0.78 | 0.93 |
| 0.74 | #N/A | #N/A | #N/A | #N/A | #N/A |
| 0.72 | 1.21 | 0.77 | 0.97 | 0.57 | 0.93 |
| #N/A | 1.02 | 0.54 | #N/A | #N/A | 0.83 |
| 0.48 | 1.04 | 0.57 | 1.16 | 0.73 | 0.81 |
| #N/A | #N/A | #N/A | #N/A | #N/A | #N/A |
| #N/A | #N/A | #N/A | 0.75 | 0.34 | 0.92 |
| #N/A | #N/A | #N/A | 0.28 | 0.03 | #N/A |
| 0.92 | 1.20 | 0.64 | 0.73 | 0.31 | 0.65 |
| #N/A | #N/A | #N/A | #N/A | #N/A | #N/A |
| 0.27 | 0.88 | 0.30 | 1.12 | 0.71 | 0.80 |





|      |      |      |      |      |      |
|------|------|------|------|------|------|
| 0.42 | #N/A | #N/A | 1.35 | 0.82 | #N/A |
| #N/A | #N/A | #N/A | #N/A | #N/A | #N/A |
| #N/A | #N/A | #N/A | 0.90 | 0.52 | #N/A |
| 0.42 | 1.10 | 0.66 | #N/A | #N/A | 1.00 |
| 0.11 | #N/A | #N/A | #N/A | #N/A | #N/A |
| 0.42 | 1.06 | 0.61 | 1.06 | 0.66 | 1.13 |
| #N/A | #N/A | #N/A | #N/A | #N/A | #N/A |
| 0.72 | 0.98 | 0.49 | #N/A | #N/A | #N/A |
| 0.06 | 0.93 | 0.41 | 2.12 | 0.96 | 1.75 |
| #N/A | #N/A | #N/A | #N/A | #N/A | #N/A |
| 0.16 | 0.95 | 0.42 | 0.65 | 0.24 | 0.86 |
| #N/A | 1.21 | 0.79 | 1.13 | 0.72 | 1.01 |
| 0.36 | 0.89 | 0.33 | 1.08 | 0.66 | 0.90 |
| #N/A | 1.12 | 0.56 | #N/A | #N/A | 1.25 |
| #N/A | 1.17 | 0.55 | 0.65 | 0.23 | 0.91 |
| 0.61 | 0.79 | 0.19 | 0.87 | 0.48 | 1.18 |
| #N/A | 1.17 | 0.72 | 1.25 | 0.78 | 1.13 |
| #N/A | #N/A | #N/A | #N/A | #N/A | #N/A |
| 0.40 | 0.84 | 0.28 | 1.64 | 0.90 | 0.84 |
| #N/A | 1.27 | 0.84 | 1.22 | 0.76 | 0.85 |
| 0.66 | 0.87 | 0.29 | 0.73 | 0.32 | 0.84 |
| #N/A | #N/A | #N/A | #N/A | #N/A | #N/A |
| #N/A | 0.34 | 0.01 | 0.32 | 0.04 | 0.58 |
| 0.94 | 0.78 | 0.19 | 0.63 | 0.21 | 0.62 |
| 0.51 | 1.49 | 0.92 | 1.11 | 0.70 | 0.84 |
| 0.71 | 0.83 | 0.24 | 1.09 | 0.68 | 0.86 |
| 0.69 | 0.96 | 0.45 | 1.63 | 0.90 | 0.81 |
| #N/A | 1.25 | 0.82 | #N/A | #N/A | 1.29 |
| 0.18 | 0.93 | 0.39 | 0.79 | 0.39 | #N/A |
| 0.79 | 0.93 | 0.43 | 1.06 | 0.64 | 0.99 |
| 0.47 | 1.36 | 0.89 | 0.71 | 0.29 | #N/A |
| 0.89 | 1.16 | 0.74 | 0.65 | 0.22 | 0.89 |
| #N/A | #N/A | #N/A | 0.47 | 0.10 | #N/A |
| #N/A | 1.06 | 0.61 | #N/A | #N/A | 0.94 |
| 0.49 | 1.20 | 0.77 | 0.82 | 0.42 | 0.86 |
| 0.45 | 1.42 | 0.86 | 0.69 | 0.27 | 0.88 |
| 0.42 | 0.97 | 0.46 | 1.37 | 0.83 | 1.05 |
| 0.35 | #N/A | #N/A | #N/A | #N/A | #N/A |
| #N/A | #N/A | #N/A | #N/A | #N/A | #N/A |
| #N/A | 1.03 | 0.55 | 0.79 | 0.40 | 0.99 |
| 0.16 | 0.54 | 0.04 | 0.42 | 0.08 | 0.66 |
| 0.16 | 1.14 | 0.68 | 0.14 | 0.01 | #N/A |
| 0.73 | 1.30 | 0.81 | #N/A | #N/A | 1.00 |
| 0.49 | 0.95 | 0.45 | 1.16 | 0.74 | 1.08 |
| 0.39 | #N/A | #N/A | 1.07 | 0.67 | #N/A |
| 0.70 | 0.76 | 0.17 | 1.12 | 0.69 | 0.84 |
| #N/A | #N/A | #N/A | #N/A | #N/A | #N/A |
| 0.48 | 0.79 | 0.19 | 2.03 | 0.95 | #N/A |
| 0.13 | 0.81 | 0.21 | 0.39 | 0.06 | #N/A |
| 0.26 | #N/A | #N/A | 0.59 | 0.18 | #N/A |
| 0.22 | 1.04 | 0.57 | 1.63 | 0.90 | 0.88 |

|      |      |      |      |      |      |
|------|------|------|------|------|------|
| 0.49 | 0.96 | 0.45 | 0.83 | 0.43 | 1.13 |
| 0.45 | 0.97 | 0.46 | 0.73 | 0.31 | 1.49 |
| 0.67 | 1.33 | 0.87 | 0.70 | 0.28 | 1.22 |
| #N/A | 0.95 | 0.46 | 0.51 | 0.11 | 1.04 |
| 0.36 | 0.79 | 0.19 | 0.64 | 0.21 | 0.90 |
| 0.57 | 1.02 | 0.54 | 0.77 | 0.36 | 1.33 |
| 0.74 | 1.17 | 0.68 | 0.99 | 0.59 | 1.12 |
| 0.28 | 0.95 | 0.42 | 1.13 | 0.70 | 0.89 |
| #N/A | #N/A | #N/A | #N/A | #N/A | #N/A |
| 0.81 | #N/A | #N/A | 0.87 | 0.47 | 0.87 |
| 0.48 | #N/A | #N/A | 1.03 | 0.63 | 0.94 |
| 0.15 | 1.07 | 0.60 | 1.21 | 0.77 | 0.76 |
| 0.48 | 1.13 | 0.67 | 0.73 | 0.33 | 1.09 |
| 0.51 | 0.87 | 0.29 | 0.84 | 0.44 | 1.05 |
| #N/A | #N/A | #N/A | #N/A | #N/A | #N/A |
| 0.48 | 0.89 | 0.32 | 1.00 | 0.61 | 1.09 |
| 0.92 | 1.33 | 0.88 | 1.25 | 0.78 | 1.79 |
| 0.51 | 0.72 | 0.13 | 0.62 | 0.20 | 0.98 |
| 0.54 | 1.28 | 0.69 | 0.86 | 0.47 | 1.21 |
| #N/A | #N/A | #N/A | #N/A | #N/A | #N/A |
| #N/A | #N/A | #N/A | 1.43 | 0.85 | 0.96 |
| 0.97 | 1.07 | 0.61 | 1.44 | 0.85 | 1.14 |
| 0.29 | 0.89 | 0.33 | 0.96 | 0.57 | 0.76 |
| 0.70 | 1.06 | 0.57 | 0.43 | 0.07 | 0.77 |
| #N/A | 1.19 | 0.74 | #N/A | #N/A | 0.90 |
| 0.15 | 0.65 | 0.09 | 0.54 | 0.14 | 0.57 |
| 0.15 | 0.90 | 0.33 | 0.50 | 0.10 | 0.76 |
| 0.42 | 1.32 | 0.82 | 0.54 | 0.14 | 0.82 |
| 0.73 | 1.06 | 0.58 | 1.11 | 0.68 | 1.17 |
| 0.82 | 1.21 | 0.55 | 1.30 | 0.80 | 0.92 |
| #N/A | #N/A | #N/A | 1.02 | 0.61 | #N/A |
| 0.80 | 1.09 | 0.62 | 0.72 | 0.31 | 1.35 |
| 0.22 | 0.66 | 0.10 | 0.97 | 0.58 | 1.20 |
| 0.18 | #N/A | #N/A | #N/A | #N/A | 0.77 |
| #N/A | 1.34 | 0.87 | 0.73 | 0.31 | 1.11 |
| #N/A | 0.66 | 0.10 | #N/A | #N/A | 1.43 |
| #N/A | #N/A | #N/A | #N/A | #N/A | 0.94 |
| #N/A | #N/A | #N/A | #N/A | #N/A | #N/A |
| #N/A | #N/A | #N/A | 0.55 | 0.14 | #N/A |
| 0.43 | #N/A | #N/A | 1.37 | 0.84 | 1.13 |
| 0.69 | 1.06 | 0.57 | 0.63 | 0.21 | 0.91 |
| 0.56 | 1.03 | 0.53 | 0.79 | 0.38 | 0.94 |
| 0.78 | 0.92 | 0.43 | #N/A | #N/A | 1.12 |
| 0.87 | 1.06 | 0.60 | 1.00 | 0.59 | 0.72 |
| #N/A | #N/A | #N/A | #N/A | #N/A | #N/A |
| 0.70 | 1.10 | 0.62 | 0.84 | 0.43 | 0.99 |
| 0.37 | 0.90 | 0.34 | 0.85 | 0.45 | 0.95 |
| #N/A | 0.92 | 0.40 | 0.77 | 0.36 | 0.93 |
| 0.07 | 0.98 | 0.49 | 0.86 | 0.47 | 1.01 |
| 0.63 | 1.37 | 0.82 | #N/A | #N/A | 1.41 |
| 0.13 | 0.62 | 0.07 | 0.58 | 0.18 | 1.01 |

|      |      |      |      |      |      |
|------|------|------|------|------|------|
| 0.73 | 1.77 | 0.97 | 0.63 | 0.20 | #N/A |
| #N/A | 0.52 | 0.04 | 0.41 | 0.07 | #N/A |
| 0.64 | 0.86 | 0.27 | #N/A | #N/A | 1.33 |
| #N/A | #N/A | #N/A | #N/A | #N/A | #N/A |
| 0.59 | #N/A | #N/A | 0.67 | 0.25 | #N/A |
| #N/A | #N/A | #N/A | #N/A | #N/A | #N/A |
| #N/A | #N/A | #N/A | #N/A | #N/A | #N/A |
| #N/A | #N/A | #N/A | #N/A | #N/A | 1.01 |
| 0.45 | 1.28 | 0.78 | 0.82 | 0.43 | #N/A |
| 0.26 | 0.95 | 0.42 | 0.57 | 0.17 | 0.88 |
| #N/A | #N/A | #N/A | #N/A | #N/A | #N/A |
| 0.54 | 0.56 | 0.04 | 3.04 | 0.99 | 0.88 |
| #N/A | #N/A | #N/A | 0.73 | 0.33 | 0.73 |
| 0.79 | 0.96 | 0.44 | 0.89 | 0.49 | 1.13 |
| #N/A | #N/A | #N/A | #N/A | #N/A | #N/A |
| #N/A | #N/A | #N/A | #N/A | #N/A | 1.06 |
| 0.88 | 1.10 | 0.66 | 0.98 | 0.57 | 0.77 |
| 0.74 | 1.00 | 0.50 | 0.80 | 0.39 | #N/A |
| #N/A | #N/A | #N/A | #N/A | #N/A | #N/A |
| #N/A | 0.96 | 0.43 | 2.36 | 0.97 | 1.04 |
| 0.34 | 0.72 | 0.14 | 0.61 | 0.20 | 0.90 |
| #N/A | #N/A | #N/A | #N/A | #N/A | #N/A |
| #N/A | #N/A | #N/A | #N/A | #N/A | #N/A |
| 0.45 | #N/A | #N/A | #N/A | #N/A | #N/A |
| 0.69 | 0.95 | 0.44 | 0.81 | 0.40 | 1.05 |
| 0.85 | 1.00 | 0.51 | 1.07 | 0.65 | 0.76 |
| 0.10 | 0.74 | 0.14 | #N/A | #N/A | 0.67 |
| 0.65 | 1.05 | 0.59 | #N/A | #N/A | 0.80 |
| 0.76 | #N/A | #N/A | 0.92 | 0.53 | 0.61 |
| 0.46 | 0.98 | 0.48 | 1.16 | 0.74 | 0.94 |
| 0.00 | #N/A | #N/A | #N/A | #N/A | #N/A |
| 0.49 | 1.06 | 0.61 | 1.18 | 0.75 | 0.94 |
| 0.18 | 0.64 | 0.07 | 0.52 | 0.12 | 0.62 |
| 0.17 | 0.96 | 0.44 | #N/A | #N/A | 0.88 |
| 0.50 | 1.11 | 0.67 | #N/A | #N/A | 1.02 |
| #N/A | #N/A | #N/A | #N/A | #N/A | #N/A |
| 0.64 | 1.29 | 0.86 | 1.35 | 0.82 | #N/A |
| #N/A | #N/A | #N/A | #N/A | #N/A | #N/A |
| 0.32 | 1.28 | 0.77 | 1.05 | 0.66 | 1.09 |
| #N/A | #N/A | #N/A | #N/A | #N/A | #N/A |
| 0.62 | 1.10 | 0.62 | 0.72 | 0.30 | 0.94 |
| #N/A | 1.39 | 0.90 | 0.70 | 0.30 | 0.95 |
| 0.43 | 1.30 | 0.85 | 0.62 | 0.19 | 0.84 |
| 0.56 | #N/A | #N/A | #N/A | #N/A | 0.74 |
| 0.43 | 0.82 | 0.24 | 1.35 | 0.83 | 0.82 |
| 0.49 | 0.82 | 0.23 | 1.32 | 0.82 | 0.91 |
| 0.10 | 0.92 | 0.39 | 0.64 | 0.22 | 0.98 |
| 0.23 | 0.81 | 0.30 | 1.08 | 0.68 | 1.23 |
| 0.69 | 1.06 | 0.59 | 0.73 | 0.31 | 0.90 |
| #N/A | #N/A | #N/A | #N/A | #N/A | #N/A |
| 0.39 | 0.71 | 0.15 | 0.48 | 0.11 | 1.37 |

|      |      |      |      |      |      |
|------|------|------|------|------|------|
| 0.19 | 1.10 | 0.63 | 0.84 | 0.44 | 0.97 |
| 0.66 | 0.80 | 0.20 | 0.70 | 0.28 | 1.02 |
| #N/A | 1.34 | 0.89 | #N/A | #N/A | #N/A |
| #N/A | 1.04 | 0.57 | 0.79 | 0.39 | 0.90 |
| 0.45 | 0.97 | 0.45 | 2.21 | 0.96 | 1.60 |
| 0.56 | 1.19 | 0.76 | 0.90 | 0.50 | 0.83 |
| 0.15 | 0.89 | 0.34 | 0.63 | 0.20 | 0.98 |
| #N/A | #N/A | #N/A | 1.06 | 0.66 | #N/A |
| 0.58 | 1.24 | 0.81 | 0.96 | 0.57 | 1.02 |
| #N/A | 2.18 | 0.76 | #N/A | #N/A | #N/A |
| 0.53 | 1.09 | 0.55 | 0.85 | 0.46 | #N/A |
| 0.59 | 0.85 | 0.29 | 0.93 | 0.55 | 1.01 |
| 0.56 | 0.91 | 0.39 | 4.04 | 1.00 | 0.77 |
| 0.27 | 1.16 | 0.70 | 0.71 | 0.29 | 0.91 |
| 0.36 | 1.01 | 0.51 | 0.64 | 0.22 | 0.95 |
| 0.31 | 0.67 | 0.10 | 0.50 | 0.12 | 0.62 |
| #N/A | #N/A | #N/A | #N/A | #N/A | #N/A |
| 0.75 | 1.45 | 0.93 | 0.72 | 0.31 | 0.96 |
| 0.06 | 0.71 | 0.12 | 1.12 | 0.71 | 0.96 |
| 0.50 | #N/A | #N/A | 0.65 | 0.24 | #N/A |
| #N/A | #N/A | #N/A | #N/A | #N/A | #N/A |
| 0.81 | 1.19 | 0.77 | #N/A | #N/A | #N/A |
| #N/A | #N/A | #N/A | #N/A | #N/A | #N/A |
| #N/A | #N/A | #N/A | #N/A | #N/A | 1.31 |
| #N/A | #N/A | #N/A | #N/A | #N/A | #N/A |
| #N/A | #N/A | #N/A | #N/A | #N/A | #N/A |
| #N/A | #N/A | #N/A | #N/A | #N/A | #N/A |
| #N/A | #N/A | #N/A | #N/A | #N/A | #N/A |
| 0.78 | #N/A | #N/A | 1.54 | 0.88 | 1.07 |
| 0.61 | 0.63 | 0.07 | 1.40 | 0.84 | 1.12 |
| #N/A | #N/A | #N/A | #N/A | #N/A | #N/A |
| #N/A | #N/A | #N/A | #N/A | #N/A | #N/A |
| #N/A | #N/A | #N/A | #N/A | #N/A | #N/A |
| #N/A | #N/A | #N/A | #N/A | #N/A | #N/A |
| 0.57 | 0.92 | 0.40 | 0.97 | 0.57 | 1.74 |
| 0.24 | 1.75 | 0.87 | #N/A | #N/A | 0.88 |
| #N/A | #N/A | #N/A | #N/A | #N/A | #N/A |
| #N/A | #N/A | #N/A | #N/A | #N/A | #N/A |
| #N/A | #N/A | #N/A | #N/A | #N/A | #N/A |
| #N/A | #N/A | #N/A | #N/A | #N/A | #N/A |
| #N/A | #N/A | #N/A | #N/A | #N/A | #N/A |
| 0.48 | 1.21 | 0.79 | 0.88 | 0.48 | 0.89 |
| #N/A | #N/A | #N/A | #N/A | #N/A | #N/A |
| #N/A | 0.65 | 0.09 | 0.61 | 0.21 | 0.42 |
| #N/A | #N/A | #N/A | #N/A | #N/A | #N/A |
| 0.57 | 0.95 | 0.43 | 1.08 | 0.68 | 0.83 |
| 0.32 | 1.22 | 0.74 | 0.97 | 0.58 | 0.88 |
| 0.35 | 1.34 | 0.83 | 1.91 | 0.94 | 0.78 |
| 0.69 | 0.97 | 0.44 | 1.26 | 0.80 | #N/A |
| #N/A | #N/A | #N/A | #N/A | #N/A | #N/A |
| 0.28 | 0.47 | 0.02 | 0.45 | 0.08 | 0.53 |

|      |      |      |      |      |      |
|------|------|------|------|------|------|
| #N/A | #N/A | #N/A | 0.47 | 0.09 | #N/A |
| 0.30 | 1.13 | 0.70 | 1.01 | 0.62 | 0.81 |
| #N/A | 1.12 | 0.67 | 1.74 | 0.92 | 0.79 |
| 0.40 | 1.18 | 0.76 | 0.93 | 0.55 | 1.01 |
| 0.21 | 1.07 | 0.60 | 1.11 | 0.70 | 0.76 |
| 0.36 | 1.14 | 0.72 | 0.81 | 0.41 | 1.02 |
| 0.77 | 1.04 | 0.57 | 1.06 | 0.66 | 0.78 |
| #N/A | 1.22 | 0.79 | 1.23 | 0.76 | 0.83 |
| 0.54 | 1.02 | 0.52 | 2.11 | 0.96 | 0.77 |
| 0.44 | 1.24 | 0.82 | 1.41 | 0.85 | 0.89 |
| 0.49 | 1.56 | 0.93 | #N/A | #N/A | 1.03 |
| 0.56 | 1.36 | 0.87 | #N/A | #N/A | #N/A |
| 0.58 | 1.21 | 0.79 | #N/A | #N/A | #N/A |
| 0.25 | 0.94 | 0.40 | 0.78 | 0.38 | 0.92 |
| 0.11 | #N/A | #N/A | 0.19 | 0.01 | 1.33 |
| #N/A | #N/A | #N/A | #N/A | #N/A | #N/A |
| #N/A | #N/A | #N/A | #N/A | #N/A | 1.00 |
| 0.80 | 0.97 | 0.45 | #N/A | #N/A | 1.00 |
| #N/A | 1.36 | 0.90 | #N/A | #N/A | #N/A |
| #N/A | #N/A | #N/A | #N/A | #N/A | #N/A |
| 0.76 | 1.06 | 0.61 | 0.87 | 0.47 | 1.04 |
| #N/A | 0.80 | 0.27 | #N/A | #N/A | 0.89 |
| #N/A | 0.95 | 0.42 | 0.96 | 0.56 | #N/A |
| 0.65 | 1.01 | 0.52 | 0.65 | 0.22 | 0.90 |
| 0.17 | 0.67 | 0.10 | #N/A | #N/A | 0.86 |
| 0.15 | 1.01 | 0.50 | 0.63 | 0.21 | 0.93 |
| #N/A | #N/A | #N/A | #N/A | #N/A | #N/A |
| 0.35 | 0.75 | 0.16 | 0.75 | 0.33 | 0.89 |
| 0.57 | 0.79 | 0.20 | 1.04 | 0.64 | 0.90 |
| 0.40 | 0.99 | 0.48 | 1.30 | 0.80 | 1.10 |
| 0.22 | #N/A | #N/A | 0.80 | 0.41 | 0.91 |
| #N/A | 0.77 | 0.17 | 0.52 | 0.13 | 0.70 |
| 0.35 | 1.31 | 0.80 | #N/A | #N/A | 0.81 |
| 0.38 | 0.96 | 0.44 | #N/A | #N/A | #N/A |
| 0.84 | 0.92 | 0.36 | 0.65 | 0.22 | 0.93 |
| 0.53 | 0.89 | 0.34 | 0.88 | 0.49 | 1.03 |
| 0.20 | #N/A | #N/A | #N/A | #N/A | #N/A |
| 0.15 | 0.89 | 0.32 | 0.70 | 0.28 | 0.77 |
| 0.17 | 0.94 | 0.40 | 1.37 | 0.84 | 0.93 |
| 0.61 | 1.30 | 0.86 | 0.80 | 0.40 | 1.17 |
| 0.72 | 1.25 | 0.82 | 0.72 | 0.30 | 1.45 |
| 0.75 | 0.84 | 0.25 | #N/A | #N/A | 1.22 |
| 0.85 | 1.05 | 0.57 | 0.83 | 0.43 | 1.02 |
| 0.25 | #N/A | #N/A | 1.52 | 0.88 | 1.60 |
| #N/A | 0.67 | 0.09 | #N/A | #N/A | 0.64 |
| 0.41 | 0.95 | 0.42 | #N/A | #N/A | 0.97 |
| 0.56 | 1.22 | 0.74 | #N/A | #N/A | 0.92 |
| 0.22 | 0.60 | 0.06 | 0.53 | 0.12 | 1.14 |
| 0.75 | #N/A | #N/A | 0.78 | 0.38 | 0.87 |
| 0.07 | 0.58 | 0.05 | 0.57 | 0.16 | 0.87 |
| 0.65 | 0.98 | 0.46 | 0.95 | 0.56 | 1.02 |

|      |      |      |      |      |      |
|------|------|------|------|------|------|
| 0.38 | 0.75 | 0.14 | 0.93 | 0.53 | 1.06 |
| #N/A | 1.40 | 0.68 | 0.61 | 0.19 | 1.59 |
| #N/A | #N/A | #N/A | #N/A | #N/A | #N/A |
| 0.23 | 0.81 | 0.23 | 0.49 | 0.10 | 0.78 |
| 0.31 | 1.06 | 0.60 | 1.54 | 0.88 | 0.96 |
| 0.34 | 1.09 | 0.62 | 1.09 | 0.68 | 0.95 |
| 0.17 | 0.93 | 0.39 | 1.04 | 0.63 | 0.77 |
| #N/A | #N/A | #N/A | #N/A | #N/A | #N/A |
| #N/A | 0.63 | 0.07 | 0.69 | 0.26 | 0.67 |
| 0.53 | 0.81 | 0.21 | #N/A | #N/A | 0.74 |
| #N/A | #N/A | #N/A | #N/A | #N/A | 0.96 |
| 0.04 | 0.33 | 0.01 | 0.59 | 0.17 | 0.59 |
| 0.36 | 1.10 | 0.52 | 0.75 | 0.34 | 0.81 |
| #N/A | #N/A | #N/A | #N/A | #N/A | #N/A |
| 0.32 | 1.01 | 0.51 | 2.65 | 0.98 | 0.93 |
| 0.05 | #N/A | #N/A | 0.40 | 0.07 | #N/A |
| 0.66 | 0.92 | 0.36 | 0.80 | 0.39 | 1.15 |
| 0.44 | 1.07 | 0.61 | #N/A | #N/A | 0.74 |
| 0.43 | 1.08 | 0.63 | 0.92 | 0.53 | 1.10 |
| 0.34 | 0.99 | 0.49 | 1.38 | 0.84 | 0.78 |
| 0.55 | 0.95 | 0.42 | 1.21 | 0.75 | 1.13 |
| #N/A | #N/A | #N/A | #N/A | #N/A | #N/A |
| 0.73 | 0.89 | 0.42 | 0.77 | 0.36 | 0.68 |
| #N/A | 0.79 | 0.22 | #N/A | #N/A | 1.36 |
| #N/A | #N/A | #N/A | #N/A | #N/A | #N/A |
| #N/A | 0.79 | 0.19 | 0.95 | 0.54 | 0.77 |
| 0.95 | 0.87 | 0.30 | 0.96 | 0.55 | 0.84 |
| 0.77 | 1.24 | 0.81 | 0.93 | 0.55 | 0.97 |
| 0.89 | #N/A | #N/A | 0.76 | 0.34 | 0.95 |
| #N/A | #N/A | #N/A | #N/A | #N/A | #N/A |
| #N/A | 0.71 | 0.15 | #N/A | #N/A | 0.88 |
| #N/A | #N/A | #N/A | #N/A | #N/A | #N/A |
| #N/A | 1.21 | 0.79 | #N/A | #N/A | 0.84 |
| 0.03 | #N/A | #N/A | #N/A | #N/A | #N/A |
| #N/A | 0.83 | 0.30 | 0.92 | 0.53 | 0.93 |
| 0.04 | 0.44 | 0.02 | 0.50 | 0.11 | 0.62 |
| #N/A | #N/A | #N/A | #N/A | #N/A | #N/A |
| #N/A | 1.19 | 0.77 | #N/A | #N/A | 0.86 |
| 0.21 | #N/A | #N/A | 0.78 | 0.38 | 0.92 |
| #N/A | #N/A | #N/A | #N/A | #N/A | #N/A |
| 0.61 | 0.99 | 0.50 | 1.04 | 0.64 | 0.83 |
| #N/A | 0.92 | 0.37 | 0.70 | 0.29 | 1.09 |
| 0.38 | 0.55 | 0.04 | 0.49 | 0.10 | 0.61 |
| 0.41 | 0.92 | 0.36 | 1.23 | 0.77 | 0.91 |
| 0.62 | 1.00 | 0.51 | 0.89 | 0.51 | 1.03 |
| 0.17 | 0.91 | 0.37 | 1.59 | 0.90 | 1.32 |
| 0.48 | 1.12 | 0.65 | 0.71 | 0.29 | 0.95 |
| 0.45 | 1.33 | 0.84 | 0.97 | 0.59 | 1.15 |
| #N/A | #N/A | #N/A | #N/A | #N/A | 0.76 |
| 0.18 | 0.78 | 0.19 | 0.69 | 0.27 | 0.78 |
| 0.68 | 0.85 | 0.27 | 1.35 | 0.83 | 0.84 |



|      |      |      |      |      |      |      |
|------|------|------|------|------|------|------|
| #N/A | #N/A | #N/A | #N/A | #N/A | #N/A | #N/A |
| 0.19 | #N/A | #N/A | #N/A | 0.88 | 0.48 | 0.74 |
| 0.31 | 0.62 | 0.07 | #N/A | 0.50 | 0.10 | 0.60 |
| 0.74 | 1.47 | 0.89 | #N/A | 0.66 | 0.24 | 0.78 |
| 0.54 | 1.14 | 0.72 | #N/A | 1.04 | 0.63 | 0.88 |
| 0.40 | 0.90 | 0.43 | #N/A | 1.24 | 0.77 | 0.82 |
| #N/A | #N/A | #N/A | #N/A | #N/A | #N/A | #N/A |
| 0.22 | #N/A | #N/A | #N/A | 0.70 | 0.29 | #N/A |
| 0.16 | 0.64 | 0.09 | #N/A | 1.15 | 0.73 | 0.85 |
| #N/A | #N/A | #N/A | #N/A | #N/A | #N/A | #N/A |
| 0.80 | 0.80 | 0.22 | #N/A | 0.90 | 0.52 | 1.55 |
| #N/A | #N/A | #N/A | #N/A | #N/A | #N/A | #N/A |
| 0.79 | 1.17 | 0.75 | #N/A | #N/A | #N/A | 1.68 |
| 0.24 | 0.88 | 0.33 | #N/A | 0.70 | 0.29 | 0.77 |
| 0.38 | #N/A | #N/A | #N/A | #N/A | #N/A | 0.64 |
| 0.48 | 0.82 | 0.25 | #N/A | 1.48 | 0.87 | 1.18 |
| 0.71 | 1.04 | 0.56 | #N/A | 0.73 | 0.31 | 0.92 |
| 0.69 | 1.10 | 0.66 | #N/A | #N/A | #N/A | 0.88 |
| 0.59 | 1.35 | 0.89 | #N/A | 1.21 | 0.77 | 1.01 |
| 0.61 | 0.94 | 0.43 | #N/A | 1.17 | 0.73 | 0.84 |
| #N/A | #N/A | #N/A | #N/A | #N/A | #N/A | #N/A |
| 0.04 | 0.33 | 0.01 | #N/A | 0.44 | 0.08 | 1.19 |
| 0.95 | #N/A | #N/A | #N/A | 0.93 | 0.55 | 1.26 |
| 0.87 | 1.02 | 0.50 | #N/A | 1.45 | 0.86 | 1.26 |
| #N/A | #N/A | #N/A | #N/A | #N/A | #N/A | 1.84 |
| 0.33 | 0.78 | 0.22 | #N/A | 0.97 | 0.58 | 0.91 |
| 0.36 | #N/A | #N/A | #N/A | 0.85 | 0.46 | 1.05 |
| 0.40 | #N/A | #N/A | #N/A | 0.75 | 0.34 | #N/A |
| 0.60 | 1.10 | 0.62 | #N/A | 1.26 | 0.79 | 1.16 |
| #N/A | 1.00 | 0.51 | #N/A | 1.23 | 0.78 | 1.01 |
| 0.52 | #N/A | #N/A | #N/A | 0.66 | 0.23 | 0.74 |
| #N/A | 1.23 | 0.81 | #N/A | #N/A | #N/A | 0.82 |
| 0.02 | 0.93 | 0.43 | #N/A | 0.48 | 0.10 | 0.90 |
| #N/A | 0.98 | 0.46 | #N/A | 1.06 | 0.66 | 0.90 |
| 0.72 | 1.05 | 0.59 | #N/A | 0.94 | 0.53 | 0.80 |
| #N/A | 0.81 | 0.21 | #N/A | 1.04 | 0.65 | 1.08 |
| 0.52 | 1.13 | 0.70 | #N/A | 0.66 | 0.25 | 0.96 |
| 0.64 | 0.97 | 0.46 | #N/A | 0.92 | 0.54 | 1.16 |
| 0.66 | 1.07 | 0.61 | #N/A | 1.15 | 0.73 | 1.01 |
| 0.97 | 1.34 | 0.86 | #N/A | 1.23 | 0.76 | 1.11 |
| 0.45 | 0.80 | 0.23 | #N/A | #N/A | #N/A | #N/A |
| 0.79 | 1.21 | 0.75 | #N/A | #N/A | #N/A | 0.83 |
| 0.01 | #N/A | #N/A | #N/A | 0.13 | 0.01 | #N/A |
| 0.49 | 0.85 | 0.29 | #N/A | 1.01 | 0.60 | 0.68 |
| 0.67 | #N/A | #N/A | #N/A | 1.75 | 0.93 | 1.00 |
| 0.43 | 0.71 | 0.14 | #N/A | 1.04 | 0.64 | 0.86 |
| 0.53 | #N/A | #N/A | #N/A | #N/A | #N/A | #N/A |
| 0.15 | 1.08 | 0.57 | #N/A | 5.72 | 1.00 | #N/A |
| 0.82 | 2.47 | 0.99 | #N/A | 0.97 | 0.59 | 1.19 |
| 0.07 | 0.73 | 0.17 | #N/A | 0.78 | 0.36 | 0.74 |
| 0.77 | 0.84 | 0.26 | #N/A | 2.49 | 0.98 | 1.24 |

|      |      |      |      |      |      |      |
|------|------|------|------|------|------|------|
| 0.34 | #N/A | #N/A | #N/A | #N/A | #N/A | #N/A |
| 0.21 | 1.35 | 0.78 | 0.31 | 0.04 | 0.88 |      |
| 0.37 | 0.84 | 0.26 | 1.18 | 0.75 | 0.80 |      |
| 0.69 | 1.02 | 0.54 | 0.50 | 0.12 | 0.95 |      |
| 0.44 | 0.97 | 0.45 | 1.71 | 0.92 | 1.31 |      |
| 0.49 | #N/A | #N/A | 0.67 | 0.24 | #N/A |      |
| #N/A | #N/A | #N/A | #N/A | #N/A | #N/A |      |
| #N/A | 1.27 | 0.70 | 2.38 | 0.97 | #N/A |      |
| 0.14 | 0.77 | 0.19 | 1.58 | 0.89 | 0.83 |      |
| 0.43 | 0.60 | 0.06 | 0.33 | 0.04 | 0.69 |      |
| 0.50 | 0.88 | 0.31 | 0.94 | 0.56 | 0.77 |      |
| 0.39 | 0.98 | 0.46 | 0.92 | 0.54 | 0.86 |      |
| 0.63 | 0.96 | 0.42 | 1.28 | 0.80 | #N/A |      |
| #N/A | 1.00 | 0.51 | 0.99 | 0.58 | 1.69 |      |
| #N/A | #N/A | #N/A | #N/A | #N/A | 1.09 |      |
| #N/A | #N/A | #N/A | #N/A | #N/A | #N/A |      |
| 0.56 | 0.95 | 0.43 | 0.82 | 0.43 | 1.01 |      |
| 0.23 | 1.20 | 0.73 | 0.74 | 0.32 | 0.89 |      |
| 0.96 | 1.28 | 0.85 | 0.70 | 0.29 | #N/A |      |
| #N/A | #N/A | #N/A | #N/A | #N/A | 1.60 |      |
| 0.85 | 1.03 | 0.55 | 0.66 | 0.25 | 0.89 |      |
| 0.79 | 1.18 | 0.76 | 1.32 | 0.82 | 0.97 |      |
| #N/A | 0.39 | 0.01 | #N/A | #N/A | 0.69 |      |
| 0.33 | 0.76 | 0.16 | 0.90 | 0.50 | 0.81 |      |
| #N/A | 0.81 | 0.21 | 0.75 | 0.35 | 0.83 |      |
| 0.58 | 0.86 | 0.29 | 1.01 | 0.60 | 1.13 |      |
| 0.08 | 0.49 | 0.03 | 0.61 | 0.20 | 0.69 |      |
| #N/A | #N/A | #N/A | 0.80 | 0.39 | 1.04 |      |
| 0.39 | 1.13 | 0.56 | 0.81 | 0.40 | 1.42 |      |
| 0.37 | 1.23 | 0.80 | 1.00 | 0.61 | 0.95 |      |
| 0.32 | 1.31 | 0.81 | 1.44 | 0.86 | 1.43 |      |
| #N/A | #N/A | #N/A | #N/A | #N/A | 0.89 |      |
| 0.44 | #N/A | #N/A | 1.07 | 0.67 | 0.81 |      |
| 0.84 | 0.92 | 0.36 | 0.89 | 0.51 | #N/A |      |
| #N/A | 0.53 | 0.04 | 0.48 | 0.10 | 0.66 |      |
| 0.70 | 1.24 | 0.82 | #N/A | #N/A | 1.27 |      |
| 0.01 | 0.24 | 0.00 | 0.19 | 0.02 | 0.52 |      |
| 0.63 | 0.82 | 0.25 | 1.03 | 0.64 | 0.94 |      |
| 0.68 | 1.25 | 0.83 | 1.52 | 0.88 | #N/A |      |
| #N/A | #N/A | #N/A | 0.44 | 0.08 | #N/A |      |
| 0.57 | #N/A | #N/A | 2.70 | 0.98 | 1.37 |      |
| 0.53 | 0.94 | 0.40 | 0.58 | 0.17 | 1.01 |      |
| 0.66 | #N/A | #N/A | #N/A | #N/A | #N/A |      |
| 0.50 | #N/A | #N/A | 0.42 | 0.07 | 0.95 |      |
| 0.49 | 0.94 | 0.39 | 0.46 | 0.09 | 0.77 |      |
| 0.54 | 1.30 | 0.86 | 0.75 | 0.35 | 0.84 |      |
| 0.16 | 0.70 | 0.12 | 0.61 | 0.19 | 0.70 |      |
| 0.11 | 1.00 | 0.51 | #N/A | #N/A | #N/A |      |
| 0.77 | #N/A | #N/A | #N/A | #N/A | #N/A |      |
| #N/A | #N/A | #N/A | #N/A | #N/A | #N/A |      |
| #N/A | #N/A | #N/A | #N/A | #N/A | 1.02 |      |

|      |      |      |      |      |      |      |
|------|------|------|------|------|------|------|
| #N/A | #N/A | #N/A | #N/A | #N/A | #N/A | #N/A |
| 0.61 | 1.20 | 0.78 | 0.97 | 0.57 | #N/A | #N/A |
| 0.65 | #N/A | #N/A | 1.10 | 0.68 | 1.12 | 1.12 |
| 0.58 | 1.42 | 0.92 | 0.78 | 0.38 | 0.96 | 0.96 |
| #N/A | #N/A | #N/A | #N/A | #N/A | #N/A | #N/A |
| 0.32 | 0.49 | 0.03 | 0.50 | 0.11 | 0.95 | 0.95 |
| #N/A | 0.74 | 0.14 | 1.79 | 0.93 | 1.23 | 1.23 |
| #N/A | #N/A | #N/A | #N/A | #N/A | #N/A | #N/A |
| 0.57 | 1.43 | 0.88 | 0.94 | 0.56 | 0.99 | 0.99 |
| #N/A | #N/A | #N/A | #N/A | #N/A | #N/A | #N/A |
| #N/A | #N/A | #N/A | #N/A | #N/A | #N/A | #N/A |
| 0.16 | 0.95 | 0.43 | 1.65 | 0.91 | 0.86 | 0.86 |
| 0.90 | 1.09 | 0.65 | 1.13 | 0.72 | 1.17 | 1.17 |
| #N/A | #N/A | #N/A | #N/A | #N/A | #N/A | #N/A |
| #N/A | 0.96 | 0.44 | 0.85 | 0.45 | 0.87 | 0.87 |
| 0.11 | 1.21 | 0.68 | 2.89 | 0.99 | 0.84 | 0.84 |
| 0.27 | 0.79 | 0.19 | #N/A | #N/A | 0.82 | 0.82 |
| #N/A | #N/A | #N/A | #N/A | #N/A | 2.49 | 2.49 |
| 0.22 | 0.74 | 0.22 | 1.12 | 0.69 | 0.66 | 0.66 |
| #N/A | #N/A | #N/A | #N/A | #N/A | #N/A | #N/A |
| 0.47 | 0.83 | 0.23 | 0.95 | 0.55 | 0.76 | 0.76 |
| 0.21 | 0.59 | 0.06 | 0.94 | 0.56 | 0.87 | 0.87 |
| #N/A | #N/A | #N/A | #N/A | #N/A | 1.19 | 1.19 |
| 0.32 | 0.82 | 0.23 | 1.37 | 0.83 | 0.88 | 0.88 |
| 0.51 | 1.09 | 0.65 | 0.90 | 0.49 | 0.92 | 0.92 |
| 0.33 | 1.03 | 0.56 | 1.44 | 0.86 | 0.99 | 0.99 |
| 0.33 | 1.05 | 0.58 | 0.99 | 0.60 | 1.19 | 1.19 |
| 0.07 | 0.82 | 0.25 | 1.09 | 0.68 | 1.12 | 1.12 |
| #N/A | #N/A | #N/A | #N/A | #N/A | #N/A | #N/A |
| 0.60 | 1.14 | 0.63 | 0.83 | 0.43 | 1.00 | 1.00 |
| #N/A | 1.14 | 0.71 | #N/A | #N/A | 1.10 | 1.10 |
| #N/A | 1.15 | 0.70 | 1.61 | 0.89 | 1.12 | 1.12 |
| 0.55 | #N/A | #N/A | 0.95 | 0.57 | 0.71 | 0.71 |
| 0.10 | 0.52 | 0.04 | 0.68 | 0.27 | 0.56 | 0.56 |
| 0.36 | 0.81 | 0.24 | 1.04 | 0.65 | 0.71 | 0.71 |
| 0.43 | 0.82 | 0.22 | 1.59 | 0.90 | 0.78 | 0.78 |
| 0.36 | 0.70 | 0.14 | 0.75 | 0.33 | 0.74 | 0.74 |
| 0.48 | 0.96 | 0.44 | 1.07 | 0.67 | 0.83 | 0.83 |
| 0.57 | 1.08 | 0.64 | 0.99 | 0.59 | 1.13 | 1.13 |
| 0.60 | #N/A | #N/A | 0.61 | 0.19 | 0.77 | 0.77 |
| 0.58 | 0.79 | 0.20 | 1.66 | 0.91 | 0.96 | 0.96 |
| 0.56 | #N/A | #N/A | #N/A | #N/A | #N/A | #N/A |
| #N/A | #N/A | #N/A | 0.72 | 0.32 | #N/A | #N/A |
| 0.46 | 0.82 | 0.23 | 0.96 | 0.58 | 1.09 | 1.09 |
| 0.56 | 0.96 | 0.44 | 1.57 | 0.89 | 0.96 | 0.96 |
| 0.62 | 0.90 | 0.34 | 1.65 | 0.91 | 0.91 | 0.91 |
| #N/A | #N/A | #N/A | #N/A | #N/A | #N/A | #N/A |
| #N/A | #N/A | #N/A | #N/A | #N/A | #N/A | #N/A |
| 0.56 | 0.85 | 0.31 | 1.61 | 0.89 | 0.83 | 0.83 |
| 0.84 | 1.31 | 0.87 | 1.20 | 0.76 | 0.97 | 0.97 |
| #N/A | 0.93 | 0.40 | #N/A | #N/A | 0.86 | 0.86 |

|      |      |      |      |      |      |      |
|------|------|------|------|------|------|------|
| #N/A | #N/A | #N/A | #N/A | #N/A | #N/A | #N/A |
| 0.70 | 0.97 | 0.47 | 0.72 | 0.30 | 1.09 | 0.72 |
| 0.47 | 0.73 | 0.16 | 1.23 | 0.77 | 1.47 | 0.77 |
| 0.84 | 1.30 | 0.63 | 0.88 | 0.48 | 0.92 | 0.48 |
| 0.98 | 1.38 | 0.72 | 0.77 | 0.37 | 0.85 | 0.37 |
| 0.16 | #N/A | #N/A | 0.52 | 0.13 | #N/A | 0.52 |
| 0.59 | 1.31 | 0.86 | 0.61 | 0.20 | 0.93 | 0.61 |
| #N/A | #N/A | #N/A | #N/A | #N/A | #N/A | #N/A |
| #N/A | #N/A | #N/A | #N/A | #N/A | #N/A | #N/A |
| 0.52 | 1.07 | 0.60 | 0.96 | 0.58 | 0.86 | 0.96 |
| #N/A | 1.26 | 0.68 | 0.64 | 0.23 | #N/A | 0.64 |
| #N/A | 1.44 | 0.92 | #N/A | #N/A | 1.15 | #N/A |
| 0.08 | 0.49 | 0.03 | 0.75 | 0.33 | 0.62 | 0.75 |
| 0.33 | 0.84 | 0.26 | 1.13 | 0.70 | 0.84 | 1.13 |
| 0.93 | 2.39 | 0.89 | 1.40 | 0.84 | 0.96 | 1.40 |
| #N/A | #N/A | #N/A | #N/A | #N/A | 0.89 | #N/A |
| 0.55 | 0.99 | 0.49 | 0.70 | 0.29 | 0.91 | 0.70 |
| 0.75 | 1.22 | 0.75 | #N/A | #N/A | #N/A | #N/A |
| 0.84 | #N/A | #N/A | 1.44 | 0.85 | 0.83 | 1.44 |
| 0.59 | 1.19 | 0.76 | 0.88 | 0.49 | 1.02 | 0.88 |
| 0.61 | 1.23 | 0.81 | 0.93 | 0.55 | 1.12 | 0.93 |
| 0.26 | 1.07 | 0.60 | 0.93 | 0.55 | 0.90 | 0.93 |
| 0.58 | 1.40 | 0.87 | 0.94 | 0.54 | 0.76 | 0.94 |
| #N/A | 1.02 | 0.52 | #N/A | #N/A | 0.71 | #N/A |
| 0.24 | 0.85 | 0.27 | 1.17 | 0.74 | 0.97 | 1.17 |
| #N/A | #N/A | #N/A | #N/A | #N/A | #N/A | #N/A |
| 0.71 | 1.26 | 0.83 | 0.97 | 0.57 | 1.24 | 0.97 |
| 0.72 | 1.13 | 0.69 | 0.79 | 0.39 | 0.83 | 0.79 |
| 0.66 | 0.87 | 0.29 | 2.09 | 0.96 | 0.88 | 2.09 |
| 0.71 | 0.92 | 0.37 | #N/A | #N/A | 0.94 | #N/A |
| #N/A | #N/A | #N/A | #N/A | #N/A | #N/A | #N/A |
| 0.62 | 0.90 | 0.33 | 1.47 | 0.87 | 0.87 | 1.47 |
| 0.70 | #N/A | #N/A | 1.07 | 0.67 | #N/A | 1.07 |
| 0.57 | #N/A | #N/A | 1.00 | 0.62 | #N/A | 1.00 |
| #N/A | 0.49 | 0.08 | 0.74 | 0.34 | 1.03 | 0.74 |
| #N/A | #N/A | #N/A | #N/A | #N/A | #N/A | #N/A |
| 0.78 | 0.89 | 0.33 | 1.00 | 0.62 | 0.83 | 1.00 |
| 0.45 | 1.11 | 0.66 | 0.88 | 0.49 | #N/A | 0.88 |
| 0.77 | 1.22 | 0.80 | 0.92 | 0.54 | 1.01 | 0.92 |
| #N/A | #N/A | #N/A | #N/A | #N/A | #N/A | #N/A |
| 0.24 | 0.88 | 0.31 | 1.15 | 0.71 | 1.01 | 1.15 |
| #N/A | 1.51 | 0.92 | 0.83 | 0.43 | 0.90 | 0.83 |
| 0.99 | 1.47 | 0.87 | 2.66 | 0.98 | #N/A | 2.66 |
| 0.24 | #N/A | #N/A | 0.69 | 0.27 | 1.24 | 0.69 |
| 0.79 | #N/A | #N/A | 1.13 | 0.70 | #N/A | 1.13 |
| #N/A | #N/A | #N/A | #N/A | #N/A | #N/A | #N/A |
| 0.52 | 0.81 | 0.21 | 0.57 | 0.15 | 1.09 | 0.57 |
| 0.90 | 0.96 | 0.44 | 0.69 | 0.26 | 0.91 | 0.69 |
| #N/A | #N/A | #N/A | #N/A | #N/A | #N/A | #N/A |
| 0.69 | 1.08 | 0.64 | 1.41 | 0.85 | 0.74 | 1.41 |
| 0.58 | 1.17 | 0.73 | 0.89 | 0.51 | 1.12 | 0.89 |

|      |      |      |      |      |      |      |
|------|------|------|------|------|------|------|
| #N/A | #N/A | #N/A | #N/A | #N/A | #N/A | #N/A |
| 0.30 | 1.13 | 0.57 | 1.22 | 0.76 | 0.80 |      |
| #N/A | #N/A | #N/A | #N/A | #N/A | #N/A |      |
| #N/A | #N/A | #N/A | #N/A | #N/A | 1.57 |      |
| 0.12 | 1.27 | 0.77 | 0.95 | 0.55 | 1.04 |      |
| #N/A | #N/A | #N/A | 0.34 | 0.05 | #N/A |      |
| 0.11 | 1.03 | 0.55 | 0.49 | 0.11 | 1.04 |      |
| #N/A | 1.26 | 0.68 | #N/A | #N/A | 1.09 |      |
| 0.63 | 1.02 | 0.54 | 0.80 | 0.38 | 0.86 |      |
| #N/A | #N/A | #N/A | #N/A | #N/A | #N/A |      |
| #N/A | 0.81 | 0.22 | #N/A | #N/A | 1.13 |      |
| #N/A | 1.05 | 0.58 | 0.56 | 0.15 | 0.81 |      |
| 0.36 | 0.64 | 0.08 | 1.05 | 0.63 | 0.78 |      |
| 0.25 | 0.89 | 0.32 | 0.85 | 0.45 | 0.83 |      |
| 0.61 | 0.96 | 0.48 | 0.61 | 0.19 | 0.84 |      |
| 0.12 | 0.73 | 0.14 | 0.80 | 0.39 | 0.80 |      |
| 0.03 | 0.34 | 0.01 | 0.38 | 0.06 | 0.62 |      |
| #N/A | #N/A | #N/A | #N/A | #N/A | #N/A |      |
| 0.56 | 0.90 | 0.35 | 1.20 | 0.76 | 0.84 |      |
| 0.24 | 1.24 | 0.79 | 1.78 | 0.92 | 1.06 |      |
| #N/A | #N/A | #N/A | #N/A | #N/A | 1.48 |      |
| 0.50 | 1.13 | 0.66 | 0.80 | 0.39 | 1.14 |      |
| #N/A | #N/A | #N/A | #N/A | #N/A | #N/A |      |
| #N/A | 0.84 | 0.27 | 1.13 | 0.71 | 0.84 |      |
| #N/A | 1.06 | 0.57 | #N/A | #N/A | 1.05 |      |
| #N/A | #N/A | #N/A | #N/A | #N/A | #N/A |      |
| 0.57 | 1.10 | 0.63 | 0.92 | 0.52 | 1.07 |      |
| 0.76 | 0.94 | 0.42 | 0.87 | 0.46 | 0.73 |      |
| 0.65 | 1.09 | 0.64 | 0.84 | 0.43 | 0.88 |      |
| #N/A | #N/A | #N/A | #N/A | #N/A | #N/A |      |
| 0.54 | 1.25 | 0.83 | 0.91 | 0.52 | 1.08 |      |
| 0.82 | 0.95 | 0.41 | 1.95 | 0.94 | 0.86 |      |
| #N/A | #N/A | #N/A | #N/A | #N/A | #N/A |      |
| 0.37 | 1.11 | 0.66 | #N/A | #N/A | 0.90 |      |
| 0.52 | 0.91 | 0.36 | #N/A | #N/A | 0.93 |      |
| 0.56 | 0.95 | 0.44 | #N/A | #N/A | 0.70 |      |
| 0.26 | 0.92 | 0.39 | 0.88 | 0.48 | #N/A |      |
| 0.60 | 1.13 | 0.70 | 1.75 | 0.93 | 2.53 |      |
| #N/A | 0.98 | 0.45 | 0.75 | 0.34 | 0.49 |      |
| #N/A | #N/A | #N/A | #N/A | #N/A | #N/A |      |
| #N/A | #N/A | #N/A | #N/A | #N/A | #N/A |      |
| 0.56 | 1.00 | 0.50 | 0.79 | 0.37 | 0.91 |      |
| #N/A | #N/A | #N/A | 0.42 | 0.07 | 1.11 |      |
| #N/A | 1.21 | 0.74 | 0.81 | 0.40 | 0.72 |      |
| 0.59 | 1.14 | 0.69 | 0.92 | 0.52 | 0.78 |      |
| 0.16 | 0.52 | 0.04 | 0.82 | 0.43 | 0.58 |      |
| #N/A | #N/A | #N/A | 0.96 | 0.58 | 1.39 |      |
| 0.34 | 0.91 | 0.35 | 0.66 | 0.24 | 0.65 |      |
| 0.58 | 1.13 | 0.64 | 1.05 | 0.66 | 0.90 |      |
| 0.67 | #N/A | #N/A | 1.15 | 0.73 | 0.91 |      |
| 0.80 | 0.99 | 0.48 | 2.05 | 0.95 | 0.87 |      |

|      |      |      |      |      |      |
|------|------|------|------|------|------|
| 0.73 | 0.93 | 0.42 | 0.90 | 0.50 | 0.74 |
| 0.29 | 0.85 | 0.29 | 0.88 | 0.48 | 0.86 |
| #N/A | #N/A | #N/A | 0.64 | 0.22 | #N/A |
| 0.70 | 1.04 | 0.57 | 0.87 | 0.47 | 0.92 |
| 0.28 | 0.89 | 0.32 | 0.73 | 0.31 | 0.96 |
| #N/A | 1.44 | 0.75 | 0.25 | 0.02 | 1.38 |
| 0.08 | #N/A | #N/A | #N/A | #N/A | 1.15 |
| #N/A | #N/A | #N/A | #N/A | #N/A | #N/A |
| #N/A | 1.01 | 0.52 | 0.61 | 0.19 | 0.94 |
| 0.61 | 1.11 | 0.67 | 1.62 | 0.90 | 1.37 |
| #N/A | #N/A | #N/A | #N/A | #N/A | #N/A |
| #N/A | #N/A | #N/A | #N/A | #N/A | 1.55 |
| #N/A | #N/A | #N/A | #N/A | #N/A | #N/A |
| #N/A | 1.10 | 0.62 | 0.78 | 0.37 | #N/A |
| 0.52 | 0.90 | 0.35 | 0.92 | 0.53 | 0.97 |
| #N/A | #N/A | #N/A | #N/A | #N/A | #N/A |
| 0.63 | #N/A | #N/A | 1.27 | 0.79 | 0.90 |
| #N/A | #N/A | #N/A | #N/A | #N/A | #N/A |
| #N/A | #N/A | #N/A | #N/A | #N/A | #N/A |
| #N/A | #N/A | #N/A | #N/A | #N/A | #N/A |
| 0.29 | 0.72 | 0.14 | 1.39 | 0.84 | 0.99 |
| #N/A | #N/A | #N/A | #N/A | #N/A | #N/A |
| 0.47 | 0.83 | 0.25 | 1.38 | 0.84 | 1.13 |
| 0.35 | 1.27 | 0.84 | 0.64 | 0.23 | 0.89 |
| 0.34 | 1.07 | 0.58 | 1.13 | 0.70 | 0.96 |
| 0.53 | 1.93 | 0.78 | 0.34 | 0.04 | #N/A |
| 0.57 | #N/A | #N/A | 1.11 | 0.70 | 0.98 |
| 0.50 | 0.66 | 0.15 | 0.63 | 0.21 | #N/A |
| 0.29 | 0.98 | 0.47 | 0.62 | 0.22 | #N/A |
| 0.37 | 0.81 | 0.24 | 0.88 | 0.47 | 1.04 |
| 0.97 | 0.85 | 0.28 | 2.63 | 0.98 | 0.87 |
| 0.70 | 0.84 | 0.33 | 1.10 | 0.69 | 0.82 |
| 0.97 | 0.99 | 0.50 | 2.76 | 0.98 | 0.89 |
| 1.00 | 1.13 | 0.68 | #N/A | #N/A | 1.14 |
| 0.22 | 0.60 | 0.06 | 0.45 | 0.08 | #N/A |
| #N/A | 1.00 | 0.50 | 0.69 | 0.27 | 0.73 |
| #N/A | #N/A | #N/A | 0.41 | 0.06 | 0.92 |
| 0.34 | 0.70 | 0.12 | 1.21 | 0.76 | #N/A |
| 0.66 | 1.06 | 0.60 | 1.54 | 0.88 | 0.73 |
| 0.37 | 1.20 | 0.77 | 0.84 | 0.44 | #N/A |
| 0.49 | 0.79 | 0.19 | 0.63 | 0.22 | 0.82 |
| 0.13 | 0.76 | 0.15 | 2.93 | 0.99 | 1.50 |
| 0.49 | #N/A | #N/A | 0.74 | 0.34 | 0.85 |
| 0.44 | 1.03 | 0.55 | 0.85 | 0.46 | #N/A |
| #N/A | #N/A | #N/A | #N/A | #N/A | #N/A |
| #N/A | #N/A | #N/A | #N/A | #N/A | 1.16 |
| 0.51 | 0.62 | 0.07 | 0.32 | 0.04 | 0.70 |
| #N/A | #N/A | #N/A | #N/A | #N/A | #N/A |
| 0.68 | 1.15 | 0.65 | 0.93 | 0.54 | 1.03 |
| #N/A | #N/A | #N/A | 0.15 | 0.01 | #N/A |
| 0.31 | 1.17 | 0.67 | #N/A | #N/A | 0.86 |

|      |      |      |      |      |      |
|------|------|------|------|------|------|
| 0.57 | 1.12 | 0.69 | 1.22 | 0.76 | 1.00 |
| #N/A | #N/A | #N/A | #N/A | #N/A | #N/A |
| 0.43 | 0.64 | 0.08 | 1.28 | 0.80 | 0.96 |
| 0.44 | 1.01 | 0.52 | 0.87 | 0.46 | 0.89 |
| 0.72 | 1.14 | 0.71 | 0.57 | 0.15 | 0.89 |
| 0.54 | 0.87 | 0.34 | 1.06 | 0.66 | 1.17 |
| #N/A | 1.09 | 0.64 | #N/A | #N/A | 1.11 |
| 0.51 | 0.83 | 0.23 | 1.69 | 0.92 | 1.14 |
| #N/A | #N/A | #N/A | #N/A | #N/A | #N/A |
| 0.53 | 1.03 | 0.55 | 0.91 | 0.51 | #N/A |
| #N/A | #N/A | #N/A | #N/A | #N/A | #N/A |
| #N/A | #N/A | #N/A | 1.23 | 0.76 | 0.84 |
| 0.44 | 0.85 | 0.37 | 0.91 | 0.50 | 0.65 |
| 0.80 | 0.97 | 0.47 | 0.87 | 0.47 | 0.89 |
| #N/A | #N/A | #N/A | #N/A | #N/A | #N/A |
| 0.49 | 0.83 | 0.28 | #N/A | #N/A | 1.11 |
| #N/A | 0.93 | 0.38 | 1.31 | 0.80 | 1.09 |
| 0.51 | 1.03 | 0.54 | 1.15 | 0.71 | #N/A |
| 0.62 | 1.04 | 0.56 | 0.75 | 0.33 | 0.82 |
| 0.53 | 0.83 | 0.24 | 1.03 | 0.62 | 0.93 |
| 0.53 | 0.91 | 0.37 | 0.80 | 0.39 | 0.91 |
| 0.41 | 1.26 | 0.83 | 0.73 | 0.31 | 0.99 |
| 0.34 | 1.25 | 0.82 | 1.03 | 0.62 | 1.28 |
| #N/A | #N/A | #N/A | #N/A | #N/A | #N/A |
| #N/A | #N/A | #N/A | #N/A | #N/A | #N/A |
| 0.64 | 0.96 | 0.43 | #N/A | #N/A | 0.90 |
| 0.29 | 1.06 | 0.59 | 0.53 | 0.14 | 0.76 |
| 0.47 | 1.30 | 0.84 | 1.00 | 0.61 | 1.16 |
| #N/A | #N/A | #N/A | #N/A | #N/A | #N/A |
| #N/A | 1.03 | 0.48 | #N/A | #N/A | 1.08 |
| #N/A | 0.91 | 0.38 | 1.08 | 0.66 | 1.25 |
| #N/A | 1.10 | 0.66 | 0.71 | 0.31 | 1.07 |
| 0.46 | 0.96 | 0.42 | 0.96 | 0.58 | 1.24 |
| 0.20 | 1.06 | 0.60 | 0.62 | 0.20 | 0.84 |
| 0.53 | 0.91 | 0.35 | #N/A | #N/A | 0.85 |
| 0.56 | 1.06 | 0.59 | 1.20 | 0.74 | #N/A |
| 0.35 | 0.94 | 0.43 | 0.59 | 0.17 | 1.12 |
| 0.36 | 1.09 | 0.65 | 1.15 | 0.73 | #N/A |
| #N/A | #N/A | #N/A | #N/A | #N/A | #N/A |
| 0.48 | 0.90 | 0.34 | 0.87 | 0.48 | 1.15 |
| #N/A | #N/A | #N/A | #N/A | #N/A | #N/A |
| #N/A | 1.06 | 0.54 | #N/A | #N/A | #N/A |
| #N/A | 0.86 | 0.28 | #N/A | #N/A | 1.30 |
| 0.04 | 0.56 | 0.05 | 0.85 | 0.45 | 0.84 |
| #N/A | #N/A | #N/A | #N/A | #N/A | #N/A |
| 0.50 | 0.96 | 0.44 | 1.86 | 0.93 | 0.80 |
| #N/A | #N/A | #N/A | #N/A | #N/A | #N/A |
| #N/A | #N/A | #N/A | 0.83 | 0.43 | #N/A |
| #N/A | #N/A | #N/A | 0.81 | 0.40 | #N/A |
| 0.32 | #N/A | #N/A | #N/A | #N/A | 1.22 |
| 0.75 | 1.51 | 0.89 | 1.26 | 0.78 | #N/A |



|      |      |      |      |      |      |
|------|------|------|------|------|------|
| 0.02 | 0.85 | 0.36 | 1.15 | 0.71 | 0.72 |
| #N/A | #N/A | #N/A | 0.83 | 0.43 | 0.74 |
| 0.20 | 0.88 | 0.31 | 0.90 | 0.52 | 0.97 |
| #N/A | 1.76 | 0.90 | 0.47 | 0.09 | 1.38 |
| 0.91 | 1.06 | 0.57 | 2.40 | 0.97 | 0.98 |
| 0.37 | 1.11 | 0.67 | 0.70 | 0.29 | #N/A |
| 0.48 | 0.91 | 0.35 | 0.89 | 0.49 | 0.83 |
| #N/A | #N/A | #N/A | #N/A | #N/A | #N/A |
| 0.55 | 1.18 | 0.74 | 1.02 | 0.63 | 1.02 |
| 0.80 | 1.41 | 0.85 | 0.78 | 0.37 | #N/A |
| 0.23 | #N/A | #N/A | 0.63 | 0.20 | 0.96 |
| 0.23 | 0.91 | 0.36 | 0.73 | 0.31 | 0.98 |
| 0.19 | 1.21 | 0.78 | 0.64 | 0.23 | 0.98 |
| 0.57 | #N/A | #N/A | #N/A | #N/A | 0.76 |
| 0.80 | 0.97 | 0.44 | 1.06 | 0.66 | 1.25 |
| 0.41 | #N/A | #N/A | 0.84 | 0.45 | 0.82 |
| 0.51 | 1.05 | 0.56 | 0.60 | 0.18 | 0.73 |
| #N/A | 0.69 | 0.11 | 0.84 | 0.44 | 0.64 |
| 0.55 | 0.81 | 0.22 | 1.44 | 0.86 | 0.88 |
| 0.73 | 1.20 | 0.65 | 1.33 | 0.82 | 0.67 |
| 0.38 | 0.83 | 0.23 | 1.71 | 0.92 | 0.85 |
| #N/A | #N/A | #N/A | #N/A | #N/A | #N/A |
| #N/A | 1.09 | 0.61 | 0.96 | 0.55 | 1.39 |
| 0.61 | 1.14 | 0.71 | 0.86 | 0.46 | 0.84 |
| 0.59 | 1.12 | 0.55 | 0.78 | 0.37 | 0.86 |
| #N/A | #N/A | #N/A | #N/A | #N/A | #N/A |
| 0.56 | 1.13 | 0.70 | 0.72 | 0.30 | 0.87 |
| 0.39 | 0.95 | 0.44 | 0.75 | 0.34 | 0.93 |
| 0.56 | 0.98 | 0.49 | 2.01 | 0.95 | 0.77 |
| #N/A | #N/A | #N/A | #N/A | #N/A | #N/A |
| 0.30 | 1.23 | 0.75 | #N/A | #N/A | 1.09 |
| 0.32 | #N/A | #N/A | 1.18 | 0.75 | 0.85 |
| #N/A | #N/A | #N/A | #N/A | #N/A | #N/A |
| 0.32 | 0.82 | 0.23 | 0.60 | 0.19 | 1.09 |
| 0.39 | 1.14 | 0.71 | 0.72 | 0.31 | 1.03 |
| 0.20 | #N/A | #N/A | 0.36 | 0.05 | #N/A |
| 0.63 | #N/A | #N/A | 1.83 | 0.93 | 1.52 |
| 0.70 | 1.15 | 0.72 | 1.58 | 0.90 | 0.99 |
| 0.15 | 1.84 | 0.93 | 2.15 | 0.96 | 1.59 |
| #N/A | #N/A | #N/A | #N/A | #N/A | #N/A |
| 0.40 | #N/A | #N/A | 0.57 | 0.16 | 0.87 |
| 0.61 | #N/A | #N/A | 1.16 | 0.73 | 0.44 |
| 0.63 | 0.72 | 0.12 | 0.88 | 0.50 | 1.11 |
| #N/A | #N/A | #N/A | 0.75 | 0.35 | #N/A |
| 0.99 | 1.75 | 0.91 | 1.40 | 0.85 | 1.29 |
| 0.04 | 0.62 | 0.07 | #N/A | #N/A | 1.25 |
| 0.56 | 0.90 | 0.35 | 1.56 | 0.89 | 1.09 |
| 0.27 | 0.87 | 0.30 | 0.96 | 0.56 | 0.90 |
| 0.35 | 1.01 | 0.52 | 0.71 | 0.29 | 0.82 |
| 0.32 | 1.05 | 0.54 | 0.70 | 0.29 | 0.97 |
| 0.56 | 1.62 | 0.88 | 0.55 | 0.14 | 0.79 |

|      |      |      |      |      |      |
|------|------|------|------|------|------|
| 0.45 | 1.02 | 0.53 | #N/A | #N/A | 1.16 |
| 0.43 | 0.95 | 0.43 | 1.01 | 0.62 | 1.09 |
| 0.63 | 1.09 | 0.63 | 0.86 | 0.47 | 0.91 |
| 0.57 | 1.12 | 0.68 | 0.91 | 0.52 | 0.76 |
| 0.40 | 1.23 | 0.81 | 0.93 | 0.53 | 0.80 |
| 0.58 | 1.13 | 0.70 | 0.81 | 0.40 | 0.84 |
| 0.52 | 1.29 | 0.84 | 0.74 | 0.32 | 0.85 |
| 0.80 | 1.05 | 0.58 | 0.92 | 0.51 | 0.92 |
| 0.33 | 1.31 | 0.85 | 0.65 | 0.24 | 0.98 |
| 0.04 | 0.87 | 0.32 | 0.79 | 0.39 | 0.75 |
| 0.39 | 1.13 | 0.69 | 1.52 | 0.88 | 0.98 |
| 0.17 | 0.91 | 0.37 | 1.05 | 0.66 | #N/A |
| 0.29 | 0.78 | 0.20 | 0.70 | 0.28 | #N/A |
| 0.53 | 1.17 | 0.75 | 0.80 | 0.39 | 0.88 |
| 0.40 | 1.09 | 0.64 | 0.74 | 0.32 | #N/A |
| #N/A | #N/A | #N/A | #N/A | #N/A | #N/A |
| 0.42 | #N/A | #N/A | 4.12 | 1.00 | #N/A |
| 0.86 | 1.15 | 0.72 | 1.35 | 0.83 | 1.12 |
| #N/A | 0.98 | 0.46 | 0.98 | 0.58 | 0.72 |
| 0.36 | 0.91 | 0.36 | 1.02 | 0.63 | 0.66 |
| 0.37 | 1.21 | 0.79 | 1.10 | 0.69 | 0.79 |
| 0.45 | 1.14 | 0.71 | 1.17 | 0.73 | 0.81 |
| 0.45 | 0.97 | 0.47 | 1.30 | 0.80 | 0.97 |
| #N/A | 1.05 | 0.59 | 1.48 | 0.87 | 1.00 |
| 0.59 | 1.22 | 0.74 | 1.14 | 0.73 | 1.03 |
| 0.61 | 0.97 | 0.46 | 1.09 | 0.69 | 1.01 |
| #N/A | #N/A | #N/A | #N/A | #N/A | #N/A |
| #N/A | #N/A | #N/A | #N/A | #N/A | 1.05 |
| #N/A | 0.81 | 0.21 | 0.81 | 0.40 | 1.44 |
| 0.57 | 1.44 | 0.87 | 1.53 | 0.88 | 0.91 |
| 0.65 | 1.26 | 0.79 | 0.93 | 0.54 | 1.19 |
| 0.99 | 1.19 | 0.53 | 2.31 | 0.97 | #N/A |
| 0.67 | 1.12 | 0.61 | 1.27 | 0.79 | 0.79 |
| 0.65 | 0.98 | 0.47 | 1.31 | 0.82 | 1.31 |
| 0.62 | 0.91 | 0.39 | 1.24 | 0.78 | 1.01 |
| #N/A | 0.99 | 0.48 | #N/A | #N/A | 0.87 |
| #N/A | 0.85 | 0.28 | 0.98 | 0.60 | 0.99 |
| #N/A | #N/A | #N/A | #N/A | #N/A | #N/A |
| #N/A | 0.96 | 0.45 | 0.99 | 0.60 | 1.38 |
| 0.53 | 0.98 | 0.47 | 1.23 | 0.78 | 0.99 |
| 0.03 | #N/A | #N/A | 0.64 | 0.22 | #N/A |
| #N/A | #N/A | #N/A | #N/A | #N/A | #N/A |
| 0.33 | 0.78 | 0.21 | 0.95 | 0.57 | 0.68 |
| 0.21 | 0.37 | 0.01 | 0.38 | 0.06 | 0.47 |
| 0.59 | #N/A | #N/A | 0.67 | 0.25 | #N/A |
| 0.74 | 1.23 | 0.62 | 0.70 | 0.30 | 1.36 |
| #N/A | #N/A | #N/A | #N/A | #N/A | 1.37 |
| 0.46 | 1.49 | 0.91 | 0.69 | 0.28 | 0.87 |
| 0.54 | 0.97 | 0.46 | 1.40 | 0.85 | 0.83 |
| 0.13 | 0.63 | 0.08 | 0.38 | 0.06 | 1.64 |
| #N/A | #N/A | #N/A | 1.10 | 0.69 | 0.78 |

|      |      |      |      |      |      |
|------|------|------|------|------|------|
| 0.02 | 1.43 | 0.73 | 0.08 | 0.00 | #N/A |
| 0.95 | 1.17 | 0.75 | 1.17 | 0.73 | 1.01 |
| 0.62 | 1.02 | 0.51 | 1.01 | 0.62 | 1.26 |
| 0.54 | 1.19 | 0.77 | 1.08 | 0.68 | 0.95 |
| 0.69 | 0.89 | 0.35 | 1.90 | 0.94 | 0.57 |
| 0.58 | 0.90 | 0.34 | 1.58 | 0.89 | #N/A |
| 0.56 | 1.19 | 0.65 | 0.75 | 0.33 | 0.78 |
| 0.52 | 1.05 | 0.58 | 2.44 | 0.97 | 1.78 |
| #N/A | #N/A | #N/A | #N/A | #N/A | #N/A |
| 0.49 | 1.05 | 0.58 | 1.25 | 0.77 | 1.17 |
| 0.50 | 0.91 | 0.37 | #N/A | #N/A | 0.91 |
| 0.62 | 0.98 | 0.48 | 0.91 | 0.52 | 1.24 |
| 0.63 | 0.74 | 0.16 | 1.11 | 0.68 | 1.60 |
| 0.37 | 1.15 | 0.65 | 0.95 | 0.55 | 0.84 |
| #N/A | 1.23 | 0.80 | 1.44 | 0.86 | 0.91 |
| 0.82 | #N/A | #N/A | 1.69 | 0.91 | 1.30 |
| 0.96 | #N/A | #N/A | #N/A | #N/A | #N/A |
| #N/A | #N/A | #N/A | #N/A | #N/A | 1.19 |
| 0.37 | 0.86 | 0.29 | 1.15 | 0.72 | 0.87 |
| 0.68 | 0.88 | 0.33 | 0.78 | 0.38 | 1.08 |
| #N/A | #N/A | #N/A | #N/A | #N/A | #N/A |
| 0.77 | 1.00 | 0.50 | 0.79 | 0.38 | 0.90 |
| 0.19 | 0.70 | 0.13 | 1.02 | 0.63 | 0.90 |
| #N/A | #N/A | #N/A | #N/A | #N/A | #N/A |
| 0.59 | 1.07 | 0.61 | 0.80 | 0.40 | 0.87 |
| 0.91 | 0.94 | 0.42 | #N/A | #N/A | 0.77 |
| 0.53 | 0.57 | 0.07 | 0.87 | 0.47 | 0.80 |
| 0.23 | 0.52 | 0.04 | 0.35 | 0.05 | 1.09 |
| #N/A | #N/A | #N/A | #N/A | #N/A | #N/A |
| #N/A | 0.48 | 0.03 | #N/A | #N/A | 0.45 |
| 0.10 | 0.69 | 0.10 | 0.86 | 0.47 | 0.64 |
| 0.23 | #N/A | #N/A | 0.42 | 0.07 | 0.82 |
| 0.63 | 0.90 | 0.35 | 1.16 | 0.72 | 1.10 |
| 0.51 | 1.23 | 0.74 | 0.86 | 0.47 | 1.07 |
| #N/A | 0.87 | 0.40 | #N/A | #N/A | #N/A |
| #N/A | #N/A | #N/A | #N/A | #N/A | #N/A |
| 0.59 | 0.94 | 0.40 | 1.38 | 0.83 | 1.05 |
| 0.55 | 1.28 | 0.76 | 1.28 | 0.80 | 0.93 |
| 0.55 | 1.16 | 0.72 | 2.47 | 0.97 | 0.73 |
| 0.55 | 0.88 | 0.32 | #N/A | #N/A | 0.90 |
| #N/A | 0.52 | 0.04 | #N/A | #N/A | 0.78 |
| 0.34 | 1.22 | 0.79 | 1.10 | 0.70 | 1.27 |
| #N/A | #N/A | #N/A | #N/A | #N/A | 0.85 |
| 0.39 | 1.30 | 0.83 | #N/A | #N/A | #N/A |
| 0.28 | 1.10 | 0.65 | 2.19 | 0.96 | 0.70 |
| 0.41 | #N/A | #N/A | 0.80 | 0.39 | 0.77 |
| 0.27 | 0.96 | 0.43 | 1.11 | 0.68 | 0.83 |
| 0.43 | 1.53 | 0.89 | 0.81 | 0.42 | 1.06 |
| 0.59 | 0.82 | 0.26 | 0.97 | 0.58 | 0.97 |
| #N/A | #N/A | #N/A | #N/A | #N/A | #N/A |
| 0.89 | 1.15 | 0.72 | 2.14 | 0.96 | 0.88 |

|      |      |      |      |      |      |
|------|------|------|------|------|------|
| 0.84 | 0.98 | 0.48 | 1.21 | 0.75 | 0.99 |
| #N/A | #N/A | #N/A | #N/A | #N/A | #N/A |
| #N/A | #N/A | #N/A | #N/A | #N/A | #N/A |
| 0.59 | 1.09 | 0.65 | 0.95 | 0.57 | 0.98 |
| 0.67 | #N/A | #N/A | 0.88 | 0.48 | 0.99 |
| 0.56 | 1.38 | 0.90 | 0.52 | 0.12 | 0.77 |
| 0.45 | 1.09 | 0.65 | 1.43 | 0.86 | 1.47 |
| #N/A | #N/A | #N/A | #N/A | #N/A | #N/A |
| 0.58 | 1.04 | 0.55 | 1.08 | 0.67 | 1.12 |
| 0.33 | 0.95 | 0.42 | 0.47 | 0.10 | 1.22 |
| #N/A | #N/A | #N/A | #N/A | #N/A | #N/A |
| 0.67 | 0.84 | 0.26 | 1.30 | 0.81 | 0.99 |
| #N/A | 1.19 | 0.73 | 0.44 | 0.08 | #N/A |
| 0.56 | 0.85 | 0.28 | 1.08 | 0.66 | 1.02 |
| #N/A | #N/A | #N/A | #N/A | #N/A | #N/A |
| 0.42 | 0.75 | 0.15 | 0.98 | 0.60 | 0.83 |
| 0.17 | 1.14 | 0.69 | 1.01 | 0.62 | 0.98 |
| 0.52 | 1.44 | 0.82 | 0.50 | 0.10 | #N/A |
| 0.16 | 1.00 | 0.50 | 0.89 | 0.50 | 0.90 |
| 0.20 | 1.04 | 0.52 | 0.69 | 0.27 | 0.85 |
| #N/A | #N/A | #N/A | 1.12 | 0.70 | #N/A |
| 0.33 | 0.99 | 0.49 | 0.94 | 0.55 | 0.92 |
| 0.13 | #N/A | #N/A | 0.25 | 0.02 | 0.70 |
| 0.66 | 1.14 | 0.72 | 0.72 | 0.29 | 1.05 |
| #N/A | #N/A | #N/A | #N/A | #N/A | #N/A |
| 0.85 | 0.83 | 0.24 | 0.88 | 0.48 | #N/A |
| 0.67 | 1.50 | 0.91 | 0.80 | 0.39 | 0.93 |
| 0.67 | 0.99 | 0.48 | 0.97 | 0.56 | 0.95 |
| 0.45 | 0.97 | 0.44 | 1.12 | 0.69 | 0.92 |
| 0.45 | 0.74 | 0.32 | #N/A | #N/A | 1.52 |
| #N/A | #N/A | #N/A | #N/A | #N/A | #N/A |
| 0.38 | 0.70 | 0.13 | 0.84 | 0.45 | 0.76 |
| #N/A | #N/A | #N/A | #N/A | #N/A | #N/A |
| 0.22 | 0.36 | 0.01 | 0.50 | 0.11 | 0.59 |
| 0.54 | #N/A | #N/A | 0.92 | 0.54 | 0.64 |
| 0.29 | 0.96 | 0.46 | 0.95 | 0.54 | 0.93 |
| #N/A | 0.90 | 0.38 | 2.32 | 0.97 | 0.76 |
| 0.56 | 0.74 | 0.15 | 0.57 | 0.16 | 0.76 |
| 0.41 | 0.75 | 0.17 | 0.78 | 0.38 | 0.90 |
| 0.81 | #N/A | #N/A | 1.02 | 0.63 | 0.86 |
| 0.77 | 1.04 | 0.56 | 1.11 | 0.70 | 0.92 |
| 0.75 | #N/A | #N/A | 1.50 | 0.87 | 1.09 |
| #N/A | #N/A | #N/A | 0.55 | 0.15 | #N/A |
| 0.65 | 0.89 | 0.33 | 1.02 | 0.63 | 1.19 |
| 0.28 | 0.75 | 0.15 | 2.24 | 0.96 | 0.90 |
| 0.66 | 0.94 | 0.40 | 0.86 | 0.46 | 0.77 |
| 0.21 | 0.60 | 0.10 | #N/A | #N/A | 0.86 |
| 0.45 | 1.27 | 0.66 | 0.78 | 0.37 | 1.21 |
| 0.41 | 0.82 | 0.27 | 0.82 | 0.43 | 1.19 |
| 0.41 | 1.06 | 0.61 | #N/A | #N/A | 0.83 |
| 0.73 | 1.36 | 0.89 | #N/A | #N/A | 0.77 |



|      |      |      |      |      |      |
|------|------|------|------|------|------|
| 0.70 | 0.98 | 0.46 | 2.21 | 0.96 | 1.26 |
| #N/A | #N/A | #N/A | #N/A | #N/A | #N/A |
| 0.07 | 1.19 | 0.76 | 2.00 | 0.95 | 1.07 |
| 0.43 | 0.62 | 0.08 | 0.64 | 0.21 | 0.89 |
| 0.67 | 0.96 | 0.44 | 0.54 | 0.14 | #N/A |
| 0.08 | 0.84 | 0.26 | 0.65 | 0.23 | 0.71 |
| 0.26 | #N/A | #N/A | 0.53 | 0.14 | #N/A |
| 0.52 | 0.77 | 0.23 | 0.69 | 0.27 | 0.80 |
| 0.92 | 1.12 | 0.69 | 1.24 | 0.77 | 0.89 |
| 0.73 | 1.04 | 0.56 | 0.87 | 0.46 | 0.71 |
| 0.67 | 1.31 | 0.87 | 0.85 | 0.46 | 0.91 |
| 0.63 | 1.23 | 0.80 | 1.18 | 0.73 | 0.85 |
| 0.48 | #N/A | #N/A | 1.02 | 0.61 | 1.07 |
| 0.58 | 0.97 | 0.46 | #N/A | #N/A | 1.03 |
| 0.76 | 1.26 | 0.84 | 0.56 | 0.16 | #N/A |
| 0.62 | 1.09 | 0.52 | #N/A | #N/A | 0.78 |
| 0.74 | #N/A | #N/A | 0.75 | 0.34 | 0.79 |
| 0.61 | 0.76 | 0.16 | 2.54 | 0.98 | #N/A |
| 0.84 | 1.02 | 0.54 | 2.34 | 0.97 | 0.83 |
| 0.69 | 1.07 | 0.59 | 1.40 | 0.84 | 0.92 |
| 0.08 | 0.63 | 0.08 | 0.23 | 0.02 | 0.80 |
| #N/A | 1.27 | 0.71 | 0.55 | 0.14 | #N/A |
| 0.52 | #N/A | #N/A | 0.93 | 0.54 | 0.72 |
| 0.05 | 0.61 | 0.08 | 1.70 | 0.92 | 0.81 |
| #N/A | #N/A | #N/A | #N/A | #N/A | #N/A |
| 0.20 | #N/A | #N/A | 0.77 | 0.36 | 1.02 |
| 0.58 | 0.87 | 0.29 | 0.93 | 0.53 | 0.78 |
| 0.75 | 0.89 | 0.35 | 1.26 | 0.78 | #N/A |
| 0.15 | #N/A | #N/A | 0.50 | 0.12 | 0.74 |
| 0.36 | 1.10 | 0.64 | 2.32 | 0.97 | 0.76 |
| 0.45 | 1.07 | 0.56 | 2.48 | 0.97 | 0.82 |
| 0.47 | 1.09 | 0.64 | 1.22 | 0.76 | 0.90 |
| 0.57 | 1.53 | 0.89 | 1.58 | 0.90 | #N/A |
| 0.70 | 1.20 | 0.78 | 0.96 | 0.58 | 0.82 |
| 0.48 | 1.11 | 0.66 | 1.19 | 0.74 | 0.89 |
| 0.32 | 1.11 | 0.68 | 1.89 | 0.94 | 1.01 |
| 0.64 | 1.07 | 0.62 | #N/A | #N/A | 0.79 |
| 1.00 | 1.80 | 0.98 | 4.03 | 1.00 | 0.93 |
| 0.46 | 0.68 | 0.11 | 1.40 | 0.84 | 0.99 |
| #N/A | #N/A | #N/A | #N/A | #N/A | #N/A |
| 0.53 | 0.87 | 0.30 | 0.85 | 0.44 | 1.28 |
| 0.57 | 1.63 | 0.75 | 0.52 | 0.13 | #N/A |
| 0.45 | 0.47 | 0.02 | 1.06 | 0.66 | 1.37 |
| #N/A | 2.45 | 0.97 | 0.95 | 0.57 | 1.10 |
| #N/A | #N/A | #N/A | #N/A | #N/A | #N/A |
| #N/A | #N/A | #N/A | 0.86 | 0.47 | 1.49 |
| 0.68 | 1.03 | 0.53 | 0.81 | 0.40 | 0.90 |
| 0.85 | 1.29 | 0.84 | 0.89 | 0.50 | 0.90 |
| 0.86 | 1.02 | 0.53 | 1.03 | 0.64 | #N/A |
| #N/A | #N/A | #N/A | 0.71 | 0.30 | #N/A |
| 0.37 | 1.15 | 0.72 | 0.92 | 0.51 | 0.97 |

|      |      |      |      |      |      |
|------|------|------|------|------|------|
| 0.80 | 0.91 | 0.35 | 1.75 | 0.92 | 0.97 |
| 0.64 | 1.19 | 0.76 | 1.06 | 0.66 | 0.90 |
| #N/A | #N/A | #N/A | #N/A | #N/A | #N/A |
| 0.57 | 0.97 | 0.44 | 0.94 | 0.55 | 0.87 |
| #N/A | #N/A | #N/A | #N/A | #N/A | #N/A |
| 0.49 | #N/A | #N/A | 0.88 | 0.48 | 1.00 |
| 0.13 | 0.56 | 0.05 | 0.90 | 0.49 | 0.80 |
| #N/A | 1.53 | 0.95 | 0.87 | 0.47 | 1.61 |
| #N/A | #N/A | #N/A | #N/A | #N/A | #N/A |
| 0.59 | 1.03 | 0.53 | 0.57 | 0.15 | 1.27 |
| #N/A | #N/A | #N/A | #N/A | #N/A | #N/A |
| 0.08 | 1.06 | 0.59 | 1.82 | 0.94 | 1.05 |
| 0.57 | 0.80 | 0.21 | #N/A | #N/A | 1.02 |
| #N/A | #N/A | #N/A | #N/A | #N/A | #N/A |
| #N/A | 1.14 | 0.59 | #N/A | #N/A | 0.77 |
| 0.91 | 1.06 | 0.61 | 2.14 | 0.96 | 0.74 |
| 0.87 | #N/A | #N/A | 1.08 | 0.68 | #N/A |
| 0.57 | 0.87 | 0.30 | 0.95 | 0.54 | 0.67 |
| 0.73 | 0.73 | 0.15 | 0.89 | 0.51 | 0.96 |
| 0.93 | 1.22 | 0.80 | 0.81 | 0.39 | 1.00 |
| 0.31 | #N/A | #N/A | 0.47 | 0.10 | #N/A |
| 0.59 | 0.79 | 0.21 | 0.61 | 0.19 | 1.18 |
| #N/A | #N/A | #N/A | #N/A | #N/A | #N/A |
| #N/A | 0.94 | 0.41 | 0.43 | 0.08 | 1.00 |
| 0.10 | #N/A | #N/A | 0.74 | 0.32 | #N/A |
| 0.46 | 0.79 | 0.19 | 0.81 | 0.41 | 1.10 |
| #N/A | 1.31 | 0.67 | 1.10 | 0.68 | #N/A |
| 0.67 | #N/A | #N/A | 0.96 | 0.58 | #N/A |
| 0.23 | 1.12 | 0.62 | 0.98 | 0.59 | 1.17 |
| 0.61 | 0.89 | 0.33 | #N/A | #N/A | 1.05 |
| 0.86 | 1.07 | 0.62 | 0.80 | 0.39 | 0.76 |
| #N/A | #N/A | #N/A | #N/A | #N/A | #N/A |
| 0.71 | 1.12 | 0.68 | 1.07 | 0.67 | 0.94 |
| #N/A | #N/A | #N/A | #N/A | #N/A | #N/A |
| 0.70 | 1.04 | 0.57 | 1.20 | 0.75 | 1.49 |
| 0.54 | #N/A | #N/A | 0.97 | 0.57 | 1.23 |
| 0.39 | 1.45 | 0.93 | 1.01 | 0.60 | 1.06 |
| #N/A | #N/A | #N/A | 0.99 | 0.58 | 1.24 |
| #N/A | #N/A | #N/A | 1.49 | 0.88 | #N/A |
| #N/A | #N/A | #N/A | #N/A | #N/A | #N/A |
| #N/A | #N/A | #N/A | #N/A | #N/A | #N/A |
| #N/A | 0.68 | 0.12 | 0.69 | 0.27 | 0.55 |
| 0.41 | #N/A | #N/A | 0.41 | 0.07 | 0.77 |
| 0.65 | 1.09 | 0.64 | 1.47 | 0.86 | 0.83 |
| #N/A | #N/A | #N/A | #N/A | #N/A | #N/A |
| #N/A | 0.91 | 0.37 | #N/A | #N/A | 1.22 |
| 0.08 | 0.37 | 0.01 | #N/A | #N/A | 0.66 |
| 0.28 | 0.77 | 0.17 | 0.63 | 0.21 | 0.79 |
| 0.69 | 1.00 | 0.51 | 1.08 | 0.68 | 1.00 |
| 0.60 | 0.98 | 0.47 | 0.68 | 0.25 | 1.00 |
| 0.56 | 1.25 | 0.80 | 0.61 | 0.21 | 0.90 |



|      |      |      |      |      |      |
|------|------|------|------|------|------|
| #N/A | 0.88 | 0.30 | 0.61 | 0.19 | 0.82 |
| 0.21 | 0.84 | 0.25 | 1.48 | 0.87 | 0.89 |
| 0.57 | #N/A | #N/A | 0.57 | 0.16 | 1.17 |
| #N/A | #N/A | #N/A | #N/A | #N/A | #N/A |
| 0.14 | 0.57 | 0.05 | 0.26 | 0.02 | #N/A |
| 0.28 | 0.71 | 0.12 | 2.15 | 0.96 | 0.72 |
| 0.58 | 0.80 | 0.20 | 1.01 | 0.60 | #N/A |
| 0.55 | 1.05 | 0.57 | 0.81 | 0.41 | 0.73 |
| 0.06 | 0.85 | 0.29 | 6.03 | 1.00 | 1.25 |
| 0.86 | 0.87 | 0.28 | 0.74 | 0.33 | 0.57 |
| 0.18 | #N/A | #N/A | 0.60 | 0.20 | #N/A |
| 0.55 | #N/A | #N/A | 1.09 | 0.67 | #N/A |
| #N/A | 1.54 | 0.65 | 1.61 | 0.90 | 1.05 |
| 0.42 | 1.03 | 0.52 | #N/A | #N/A | 0.71 |
| 0.62 | #N/A | #N/A | 0.85 | 0.46 | 0.92 |
| 0.10 | 0.61 | 0.08 | 0.57 | 0.16 | 0.77 |
| 0.45 | #N/A | #N/A | 0.89 | 0.50 | 1.19 |
| 0.30 | 1.01 | 0.52 | 1.37 | 0.83 | 0.86 |
| 0.72 | 1.14 | 0.71 | 1.21 | 0.76 | 1.65 |
| 0.49 | 0.76 | 0.17 | 1.59 | 0.89 | 0.71 |
| 0.34 | 0.87 | 0.31 | 0.95 | 0.56 | 0.74 |
| 0.13 | 0.86 | 0.29 | 0.95 | 0.57 | 0.66 |
| #N/A | 1.87 | 0.91 | #N/A | #N/A | 1.06 |
| 0.25 | 1.12 | 0.69 | 0.68 | 0.26 | 0.87 |
| 0.54 | 1.08 | 0.57 | 0.59 | 0.17 | 0.80 |
| 0.17 | 0.96 | 0.46 | 1.11 | 0.70 | 1.14 |
| #N/A | #N/A | #N/A | #N/A | #N/A | #N/A |
| 0.48 | 1.60 | 0.96 | 0.91 | 0.51 | 0.97 |
| 0.31 | 0.74 | 0.14 | 1.18 | 0.75 | 0.74 |
| 0.72 | 0.98 | 0.47 | 0.74 | 0.32 | 0.85 |
| #N/A | 1.19 | 0.61 | #N/A | #N/A | 0.95 |
| 0.34 | #N/A | #N/A | 1.61 | 0.89 | 0.99 |
| 0.25 | 1.25 | 0.80 | 1.04 | 0.63 | 1.20 |
| 0.41 | 0.91 | 0.35 | 1.45 | 0.86 | 1.00 |
| 0.34 | 1.01 | 0.52 | 1.01 | 0.62 | 1.02 |
| 0.71 | 0.95 | 0.42 | 0.83 | 0.43 | #N/A |
| #N/A | #N/A | #N/A | #N/A | #N/A | #N/A |
| #N/A | 1.02 | 0.54 | 0.99 | 0.61 | 0.96 |
| 0.76 | 0.97 | 0.46 | 0.90 | 0.51 | 1.23 |
| #N/A | 0.96 | 0.43 | 0.79 | 0.39 | 0.96 |
| 0.61 | 1.17 | 0.59 | 0.66 | 0.25 | 0.86 |
| 0.49 | 1.00 | 0.50 | 0.64 | 0.21 | 0.99 |
| #N/A | 0.86 | 0.29 | 0.62 | 0.20 | 1.07 |
| 0.35 | #N/A | #N/A | 0.40 | 0.06 | #N/A |
| #N/A | 0.98 | 0.48 | 0.98 | 0.60 | 0.97 |
| 0.06 | 0.51 | 0.03 | 0.57 | 0.16 | 0.67 |
| 0.04 | 0.65 | 0.11 | 0.82 | 0.43 | 1.69 |
| 0.65 | 0.88 | 0.31 | 1.01 | 0.60 | 0.93 |
| 0.48 | 0.92 | 0.38 | 0.72 | 0.31 | #N/A |
| 0.58 | 1.18 | 0.76 | 0.56 | 0.15 | #N/A |
| #N/A | #N/A | #N/A | #N/A | #N/A | #N/A |

|      |      |      |      |      |      |
|------|------|------|------|------|------|
| 0.29 | 0.81 | 0.26 | 1.21 | 0.77 | 0.96 |
| 0.27 | 1.46 | 0.87 | 1.25 | 0.79 | 1.35 |
| 0.49 | 0.91 | 0.37 | 1.74 | 0.92 | 1.76 |
| 0.49 | 0.96 | 0.44 | 0.92 | 0.53 | 0.88 |
| 0.64 | 0.84 | 0.27 | 0.85 | 0.46 | 0.86 |
| 0.50 | 0.75 | 0.18 | 0.69 | 0.27 | 0.88 |
| 0.57 | 0.95 | 0.41 | 0.54 | 0.14 | #N/A |
| #N/A | #N/A | #N/A | 0.30 | 0.04 | #N/A |
| 0.39 | 0.62 | 0.07 | 0.73 | 0.31 | 0.86 |
| #N/A | 1.25 | 0.74 | #N/A | #N/A | 0.95 |
| #N/A | 0.85 | 0.26 | 0.65 | 0.24 | 0.85 |
| 0.59 | #N/A | #N/A | 0.98 | 0.60 | 0.91 |
| #N/A | #N/A | #N/A | #N/A | #N/A | #N/A |
| 0.30 | 1.15 | 0.70 | 1.05 | 0.65 | 1.05 |
| 0.39 | 0.60 | 0.06 | 0.66 | 0.25 | 0.78 |
| #N/A | 1.03 | 0.56 | #N/A | #N/A | 1.29 |
| 0.28 | 1.00 | 0.49 | 0.70 | 0.27 | 1.01 |
| 0.19 | 0.73 | 0.17 | 0.74 | 0.32 | 0.60 |
| 0.49 | 1.01 | 0.49 | 1.06 | 0.66 | 1.37 |
| 0.63 | 0.95 | 0.42 | 1.26 | 0.78 | #N/A |
| 0.51 | 1.03 | 0.56 | 0.81 | 0.40 | 0.88 |
| 0.63 | 0.98 | 0.46 | #N/A | #N/A | 0.80 |
| #N/A | #N/A | #N/A | #N/A | #N/A | 1.02 |
| 0.36 | 0.86 | 0.29 | 0.71 | 0.29 | 0.85 |
| 0.74 | 1.10 | 0.64 | 1.28 | 0.80 | 1.20 |
| 0.52 | 1.24 | 0.82 | 1.01 | 0.60 | 0.70 |
| #N/A | #N/A | #N/A | #N/A | #N/A | #N/A |
| #N/A | #N/A | #N/A | #N/A | #N/A | #N/A |
| 0.76 | 1.02 | 0.49 | 0.96 | 0.58 | 0.97 |
| #N/A | #N/A | #N/A | #N/A | #N/A | 1.39 |
| 0.21 | 1.03 | 0.52 | 1.14 | 0.71 | 1.21 |
| 0.73 | 1.24 | 0.73 | #N/A | #N/A | 1.06 |
| 0.22 | 0.66 | 0.08 | 0.60 | 0.18 | 0.98 |
| #N/A | #N/A | #N/A | #N/A | #N/A | #N/A |
| #N/A | #N/A | #N/A | #N/A | #N/A | #N/A |
| #N/A | #N/A | #N/A | #N/A | #N/A | #N/A |
| #N/A | #N/A | #N/A | #N/A | #N/A | #N/A |
| 0.47 | 0.94 | 0.40 | #N/A | #N/A | 1.49 |
| 0.15 | 0.94 | 0.40 | 1.12 | 0.71 | 0.97 |
| 0.25 | #N/A | #N/A | 0.47 | 0.10 | 0.76 |
| 0.83 | 1.05 | 0.56 | 0.92 | 0.51 | 1.02 |
| #N/A | #N/A | #N/A | #N/A | #N/A | 1.28 |
| 0.28 | 0.52 | 0.04 | 0.19 | 0.02 | 1.22 |
| #N/A | #N/A | #N/A | #N/A | #N/A | #N/A |
| 0.36 | 0.83 | 0.23 | 0.57 | 0.16 | #N/A |
| 0.06 | #N/A | #N/A | 0.15 | 0.01 | #N/A |
| 0.57 | 0.88 | 0.32 | 1.53 | 0.88 | 1.03 |
| 0.30 | 0.61 | 0.07 | 0.36 | 0.05 | 0.65 |
| #N/A | #N/A | #N/A | #N/A | #N/A | #N/A |
| 0.44 | 1.16 | 0.74 | 2.05 | 0.95 | 1.03 |
| 0.44 | 0.93 | 0.39 | 2.83 | 0.98 | 0.93 |



|      |      |      |      |      |      |
|------|------|------|------|------|------|
| 0.74 | 1.30 | 0.83 | 0.77 | 0.35 | 1.08 |
| 0.23 | #N/A | #N/A | 0.41 | 0.07 | 0.67 |
| 0.29 | 0.94 | 0.39 | 0.84 | 0.44 | 0.83 |
| 0.66 | 1.04 | 0.57 | 1.08 | 0.67 | 0.85 |
| 0.37 | 0.83 | 0.27 | 1.87 | 0.94 | 0.62 |
| 0.49 | #N/A | #N/A | 1.33 | 0.82 | #N/A |
| #N/A | #N/A | #N/A | #N/A | #N/A | #N/A |
| #N/A | #N/A | #N/A | #N/A | #N/A | #N/A |
| #N/A | #N/A | #N/A | 0.42 | 0.07 | #N/A |
| 0.70 | 1.21 | 0.79 | 1.91 | 0.94 | 0.92 |
| 0.60 | 0.87 | 0.29 | 0.66 | 0.25 | 0.83 |
| #N/A | #N/A | #N/A | #N/A | #N/A | #N/A |
| #N/A | 1.04 | 0.53 | #N/A | #N/A | 1.28 |
| #N/A | #N/A | #N/A | #N/A | #N/A | #N/A |
| 0.75 | 1.06 | 0.61 | 1.42 | 0.85 | 1.21 |
| #N/A | 0.96 | 0.46 | 1.21 | 0.75 | 1.21 |
| 0.31 | 0.87 | 0.29 | 0.65 | 0.24 | 0.94 |
| #N/A | 1.18 | 0.76 | #N/A | #N/A | 1.48 |
| 0.26 | 0.48 | 0.02 | 0.72 | 0.29 | 0.57 |
| #N/A | 0.91 | 0.37 | 3.38 | 0.99 | 1.04 |
| 0.55 | #N/A | #N/A | 0.81 | 0.40 | #N/A |
| 0.40 | #N/A | #N/A | 0.89 | 0.49 | 0.86 |
| #N/A | #N/A | #N/A | 0.46 | 0.09 | 0.79 |
| 0.73 | #N/A | #N/A | #N/A | #N/A | 0.87 |
| 0.49 | #N/A | #N/A | 0.43 | 0.08 | #N/A |
| 0.63 | 1.08 | 0.63 | 0.93 | 0.55 | 0.91 |
| 0.61 | 1.03 | 0.55 | 0.98 | 0.59 | 1.16 |
| 0.68 | 1.02 | 0.53 | 0.70 | 0.28 | 1.13 |
| 0.27 | 0.96 | 0.43 | 0.74 | 0.33 | 0.84 |
| #N/A | 1.18 | 0.73 | 1.13 | 0.72 | 0.86 |
| #N/A | #N/A | #N/A | #N/A | #N/A | #N/A |
| 0.12 | 0.91 | 0.35 | 3.32 | 0.99 | 1.63 |
| 0.46 | 1.26 | 0.81 | 1.71 | 0.92 | 1.56 |
| 0.41 | #N/A | #N/A | 0.58 | 0.18 | 0.94 |
| 0.68 | #N/A | #N/A | 1.00 | 0.59 | #N/A |
| #N/A | #N/A | #N/A | #N/A | #N/A | #N/A |
| 0.28 | #N/A | #N/A | 0.78 | 0.36 | #N/A |
| #N/A | #N/A | #N/A | #N/A | #N/A | #N/A |
| 0.43 | #N/A | #N/A | 0.88 | 0.49 | 0.98 |
| 0.18 | 0.82 | 0.23 | 0.56 | 0.14 | 0.86 |
| #N/A | 1.14 | 0.50 | 0.77 | 0.37 | #N/A |
| 0.05 | #N/A | #N/A | 0.43 | 0.07 | #N/A |
| 0.47 | #N/A | #N/A | 0.61 | 0.21 | #N/A |
| #N/A | #N/A | #N/A | #N/A | #N/A | #N/A |
| 0.55 | 0.98 | 0.47 | 1.68 | 0.91 | 0.87 |
| 0.82 | #N/A | #N/A | 0.73 | 0.32 | 0.95 |
| #N/A | 1.11 | 0.61 | 1.12 | 0.69 | 1.10 |
| 0.22 | 0.82 | 0.23 | 0.71 | 0.29 | 1.06 |
| #N/A | #N/A | #N/A | #N/A | #N/A | #N/A |
| #N/A | #N/A | #N/A | #N/A | #N/A | #N/A |
| 0.53 | 1.01 | 0.51 | 1.20 | 0.76 | 1.00 |

|      |      |      |      |      |      |
|------|------|------|------|------|------|
| 0.44 | #N/A | #N/A | 1.05 | 0.65 | 0.77 |
| 0.42 | 1.27 | 0.84 | 0.77 | 0.37 | 1.04 |
| 0.38 | 1.13 | 0.70 | 1.03 | 0.64 | 1.04 |
| 0.25 | #N/A | #N/A | 0.51 | 0.12 | #N/A |
| 0.48 | 1.07 | 0.57 | 1.59 | 0.90 | 0.88 |
| 0.54 | 1.31 | 0.87 | 0.96 | 0.55 | 0.86 |
| 0.72 | 0.87 | 0.31 | 1.16 | 0.72 | 0.90 |
| #N/A | 0.85 | 0.26 | 0.83 | 0.43 | 0.96 |
| 0.14 | #N/A | #N/A | 1.58 | 0.90 | 1.29 |
| #N/A | #N/A | #N/A | #N/A | #N/A | #N/A |
| 0.76 | 0.98 | 0.47 | 0.92 | 0.54 | 0.92 |
| #N/A | #N/A | #N/A | #N/A | #N/A | #N/A |
| 0.65 | 0.64 | 0.08 | 1.26 | 0.78 | 1.17 |
| #N/A | #N/A | #N/A | #N/A | #N/A | 0.50 |
| 0.71 | 0.92 | 0.37 | 0.79 | 0.37 | 0.99 |
| #N/A | #N/A | #N/A | #N/A | #N/A | #N/A |
| 0.43 | 0.86 | 0.32 | 0.75 | 0.33 | 0.71 |
| 0.95 | 1.04 | 0.57 | 0.82 | 0.41 | 0.94 |
| 0.59 | 1.02 | 0.54 | #N/A | #N/A | #N/A |
| 0.55 | 1.11 | 0.68 | 0.88 | 0.49 | 1.12 |
| #N/A | #N/A | #N/A | #N/A | #N/A | #N/A |
| 0.46 | 0.81 | 0.22 | 1.55 | 0.88 | 1.01 |
| #N/A | 1.16 | 0.73 | 0.50 | 0.12 | 0.84 |
| 0.21 | 0.88 | 0.31 | 0.87 | 0.46 | 0.73 |
| #N/A | 1.08 | 0.62 | 0.77 | 0.36 | 1.11 |
| 0.40 | 0.69 | 0.12 | 1.13 | 0.72 | 0.95 |
| 0.32 | 0.84 | 0.27 | 1.19 | 0.75 | 1.19 |
| 0.05 | 0.73 | 0.14 | #N/A | #N/A | 1.00 |
| 0.45 | 1.67 | 0.96 | 0.49 | 0.11 | #N/A |
| #N/A | #N/A | #N/A | #N/A | #N/A | #N/A |
| 0.57 | 0.80 | 0.21 | 0.98 | 0.59 | 0.89 |
| 0.72 | #N/A | #N/A | #N/A | #N/A | 0.71 |
| #N/A | #N/A | #N/A | #N/A | #N/A | #N/A |
| 0.09 | 0.30 | 0.00 | 0.22 | 0.02 | 1.20 |
| #N/A | #N/A | #N/A | #N/A | #N/A | #N/A |
| 0.50 | 1.23 | 0.76 | 0.88 | 0.47 | 0.79 |
| 0.72 | 1.08 | 0.62 | 0.94 | 0.53 | 1.11 |
| 0.70 | #N/A | #N/A | 1.07 | 0.65 | #N/A |
| 0.06 | 0.55 | 0.05 | 0.66 | 0.24 | 0.85 |
| 0.48 | #N/A | #N/A | 0.80 | 0.40 | #N/A |
| 0.51 | 0.99 | 0.49 | 1.12 | 0.69 | 0.79 |
| 0.61 | 1.03 | 0.56 | 1.11 | 0.68 | 0.83 |
| #N/A | #N/A | #N/A | 1.01 | 0.62 | #N/A |
| #N/A | #N/A | #N/A | #N/A | #N/A | #N/A |
| #N/A | #N/A | #N/A | #N/A | #N/A | #N/A |
| 0.59 | 1.07 | 0.62 | 0.75 | 0.34 | #N/A |
| #N/A | #N/A | #N/A | #N/A | #N/A | #N/A |
| 0.41 | 0.98 | 0.46 | 1.11 | 0.69 | 0.97 |
| #N/A | #N/A | #N/A | #N/A | #N/A | #N/A |
| 0.60 | 0.94 | 0.40 | 0.52 | 0.12 | #N/A |
| #N/A | #N/A | #N/A | 0.77 | 0.36 | 0.97 |

|      |      |      |      |      |      |      |
|------|------|------|------|------|------|------|
| #N/A | #N/A | #N/A | #N/A | #N/A | #N/A | #N/A |
| #N/A | #N/A | #N/A | #N/A | 0.73 | 0.32 | 0.83 |
| #N/A | 1.41 | 0.85 | #N/A | #N/A | #N/A | 1.35 |
| 0.99 | 1.13 | 0.69 | #N/A | #N/A | #N/A | 1.73 |
| 0.09 | 0.38 | 0.01 | 0.41 | 0.07 | 0.77 | 0.77 |
| #N/A | #N/A | #N/A | #N/A | #N/A | #N/A | #N/A |
| 0.68 | 1.37 | 0.86 | 0.62 | 0.20 | 0.85 | 0.85 |
| 0.42 | 0.92 | 0.37 | 1.04 | 0.62 | 0.62 | 0.62 |
| 0.37 | 0.98 | 0.46 | 1.12 | 0.69 | 0.74 | 0.74 |
| 0.81 | 1.14 | 0.71 | 0.96 | 0.58 | 0.84 | 0.84 |
| 0.35 | 1.08 | 0.63 | 1.07 | 0.67 | 0.78 | 0.78 |
| 0.31 | 0.97 | 0.45 | 1.64 | 0.91 | 1.15 | 1.15 |
| 0.61 | 1.21 | 0.78 | 0.83 | 0.43 | 1.03 | 1.03 |
| 0.53 | 1.12 | 0.66 | 1.06 | 0.64 | 0.93 | 0.93 |
| 0.21 | 1.06 | 0.61 | 1.25 | 0.79 | 1.02 | 1.02 |
| 0.53 | 1.01 | 0.51 | #N/A | #N/A | 0.79 | 0.79 |
| 0.69 | 1.19 | 0.75 | 0.94 | 0.56 | 0.93 | 0.93 |
| #N/A | #N/A | #N/A | #N/A | #N/A | #N/A | #N/A |
| 0.68 | 1.10 | 0.65 | 2.02 | 0.95 | 0.93 | 0.93 |
| 0.76 | 1.14 | 0.70 | 1.17 | 0.74 | 0.79 | 0.79 |
| 0.53 | 1.02 | 0.54 | 0.90 | 0.50 | 0.74 | 0.74 |
| 0.65 | 1.37 | 0.86 | 1.30 | 0.81 | 0.89 | 0.89 |
| 0.41 | 1.05 | 0.57 | 1.27 | 0.79 | 0.78 | 0.78 |
| 0.57 | 1.30 | 0.86 | 1.23 | 0.77 | 1.05 | 1.05 |
| 0.62 | 1.18 | 0.76 | 1.30 | 0.81 | 0.77 | 0.77 |
| 0.52 | 1.18 | 0.75 | 0.88 | 0.48 | 0.81 | 0.81 |
| 0.66 | 1.10 | 0.66 | 1.74 | 0.92 | 2.59 | 2.59 |
| 0.73 | 1.06 | 0.59 | 0.78 | 0.36 | 0.87 | 0.87 |
| #N/A | #N/A | #N/A | #N/A | #N/A | #N/A | #N/A |
| 0.43 | 1.04 | 0.57 | 0.86 | 0.45 | 0.95 | 0.95 |
| 0.99 | 0.94 | 0.45 | 2.03 | 0.95 | 0.95 | 0.95 |
| #N/A | #N/A | #N/A | #N/A | #N/A | #N/A | #N/A |
| 0.58 | 1.09 | 0.65 | 0.78 | 0.38 | 1.21 | 1.21 |
| 0.68 | #N/A | #N/A | 0.85 | 0.45 | #N/A | #N/A |
| 0.41 | 0.82 | 0.25 | 1.30 | 0.80 | 1.24 | 1.24 |
| 0.26 | 0.71 | 0.13 | 0.47 | 0.10 | 1.16 | 1.16 |
| #N/A | 0.91 | 0.41 | 1.10 | 0.67 | 1.35 | 1.35 |
| #N/A | #N/A | #N/A | 0.22 | 0.02 | #N/A | #N/A |
| 0.10 | 0.40 | 0.01 | 0.32 | 0.04 | 0.57 | 0.57 |
| 0.82 | 1.13 | 0.70 | 0.77 | 0.37 | 0.93 | 0.93 |
| #N/A | 1.01 | 0.52 | #N/A | #N/A | 0.92 | 0.92 |
| #N/A | 0.42 | 0.04 | #N/A | #N/A | #N/A | #N/A |
| #N/A | #N/A | #N/A | #N/A | #N/A | #N/A | #N/A |
| 0.74 | 0.93 | 0.41 | 0.88 | 0.49 | 1.54 | 1.54 |
| 0.25 | 1.05 | 0.55 | #N/A | #N/A | 1.29 | 1.29 |
| #N/A | #N/A | #N/A | #N/A | #N/A | #N/A | #N/A |
| #N/A | 0.67 | 0.13 | 0.80 | 0.38 | 0.90 | 0.90 |
| #N/A | #N/A | #N/A | #N/A | #N/A | #N/A | #N/A |
| #N/A | #N/A | #N/A | #N/A | #N/A | #N/A | #N/A |
| 0.42 | 1.12 | 0.66 | 1.10 | 0.70 | 1.37 | 1.37 |
| 0.28 | 0.96 | 0.43 | 0.96 | 0.57 | 0.91 | 0.91 |

|      |      |      |      |      |      |
|------|------|------|------|------|------|
| #N/A | #N/A | #N/A | 0.13 | 0.01 | #N/A |
| #N/A | #N/A | #N/A | #N/A | #N/A | #N/A |
| #N/A | 1.15 | 0.55 | 0.55 | 0.15 | #N/A |
| 0.29 | 0.98 | 0.47 | 0.86 | 0.46 | 1.28 |
| #N/A | #N/A | #N/A | #N/A | #N/A | #N/A |
| 0.73 | 1.09 | 0.64 | 0.91 | 0.52 | #N/A |
| 0.41 | #N/A | #N/A | 1.26 | 0.80 | 0.84 |
| #N/A | #N/A | #N/A | #N/A | #N/A | #N/A |
| 0.09 | 0.44 | 0.02 | 0.62 | 0.21 | #N/A |
| 0.12 | 0.80 | 0.25 | #N/A | #N/A | 0.79 |
| 0.82 | 0.95 | 0.42 | 0.99 | 0.60 | 1.05 |
| 0.61 | 1.48 | 0.93 | 1.00 | 0.60 | 1.03 |
| 0.23 | 0.92 | 0.37 | 0.89 | 0.50 | 1.00 |
| 0.56 | 1.08 | 0.64 | 1.28 | 0.79 | 1.03 |
| 0.43 | 1.23 | 0.73 | 0.87 | 0.48 | 0.80 |
| 0.70 | 1.23 | 0.81 | 0.92 | 0.52 | 1.18 |
| 0.65 | 0.83 | 0.24 | 0.84 | 0.44 | 0.90 |
| #N/A | #N/A | #N/A | #N/A | #N/A | #N/A |
| 0.35 | 0.93 | 0.38 | 1.11 | 0.70 | 1.05 |
| 0.66 | 0.95 | 0.45 | 0.76 | 0.36 | 0.82 |
| 0.05 | #N/A | #N/A | 0.50 | 0.12 | 0.92 |
| 0.02 | 0.37 | 0.01 | 0.39 | 0.06 | 0.45 |
| 0.41 | 0.96 | 0.43 | 1.96 | 0.95 | 1.07 |
| 0.85 | 1.26 | 0.82 | 0.99 | 0.60 | 0.74 |
| 0.46 | 1.25 | 0.71 | 1.28 | 0.80 | 1.25 |
| 0.35 | 1.07 | 0.59 | #N/A | #N/A | 0.85 |
| 0.73 | 1.27 | 0.82 | 0.68 | 0.27 | 0.75 |
| 0.40 | 0.78 | 0.18 | 0.79 | 0.38 | 0.79 |
| 0.11 | 0.51 | 0.03 | 0.62 | 0.20 | 0.55 |
| 0.15 | 1.06 | 0.58 | 0.50 | 0.11 | #N/A |
| 0.12 | 0.69 | 0.10 | 0.50 | 0.11 | 0.86 |
| 0.22 | 1.30 | 0.86 | 1.00 | 0.61 | 0.87 |
| 0.66 | #N/A | #N/A | 0.86 | 0.46 | 0.90 |
| 0.74 | #N/A | #N/A | 1.74 | 0.92 | 1.34 |
| #N/A | #N/A | #N/A | #N/A | #N/A | 0.97 |
| 0.66 | 0.95 | 0.44 | 1.34 | 0.82 | 0.98 |
| 0.05 | 0.39 | 0.01 | 0.34 | 0.05 | 0.55 |
| #N/A | #N/A | #N/A | #N/A | #N/A | #N/A |
| 0.58 | #N/A | #N/A | 0.92 | 0.52 | 0.99 |
| 0.22 | 0.75 | 0.15 | #N/A | #N/A | 0.73 |
| 0.04 | 0.43 | 0.02 | 0.41 | 0.07 | 0.58 |
| 0.30 | 0.94 | 0.40 | #N/A | #N/A | 0.88 |
| 0.38 | 0.84 | 0.29 | 1.27 | 0.79 | 1.04 |
| 0.40 | #N/A | #N/A | 1.02 | 0.63 | 0.85 |
| 0.92 | 1.24 | 0.82 | 1.07 | 0.65 | 1.31 |
| 0.46 | 0.68 | 0.10 | 0.97 | 0.58 | #N/A |
| 0.80 | #N/A | #N/A | 1.03 | 0.64 | 1.08 |
| 0.35 | #N/A | #N/A | 0.77 | 0.35 | 0.93 |
| 0.77 | 2.66 | 0.68 | 1.03 | 0.64 | 0.80 |
| 0.65 | 0.67 | 0.09 | 3.58 | 0.99 | 0.97 |
| 0.57 | 0.90 | 0.34 | 1.30 | 0.80 | 0.65 |



|      |      |      |      |      |      |
|------|------|------|------|------|------|
| 0.59 | 1.21 | 0.79 | 1.98 | 0.95 | 0.92 |
| #N/A | #N/A | #N/A | #N/A | #N/A | #N/A |
| 0.43 | 1.48 | 0.91 | 1.19 | 0.75 | 1.02 |
| 0.59 | 0.97 | 0.44 | 2.84 | 0.99 | #N/A |
| 0.58 | 0.75 | 0.15 | 1.03 | 0.63 | 1.32 |
| 0.53 | 1.00 | 0.48 | #N/A | #N/A | 1.04 |
| #N/A | #N/A | #N/A | #N/A | #N/A | #N/A |
| 0.34 | 0.83 | 0.24 | 0.72 | 0.32 | 0.78 |
| 0.23 | 0.86 | 0.31 | 1.06 | 0.66 | 0.80 |
| #N/A | 0.89 | 0.33 | 1.86 | 0.94 | 1.06 |
| 0.54 | #N/A | #N/A | 0.46 | 0.09 | 1.01 |
| 0.45 | 1.03 | 0.48 | 0.88 | 0.49 | #N/A |
| 0.47 | #N/A | #N/A | 0.57 | 0.16 | #N/A |
| 0.58 | 1.08 | 0.61 | 0.85 | 0.46 | 0.95 |
| 0.95 | 1.13 | 0.61 | #N/A | #N/A | #N/A |
| 0.46 | #N/A | #N/A | 0.73 | 0.31 | 0.91 |
| 0.67 | 0.78 | 0.18 | 0.77 | 0.37 | 0.77 |
| #N/A | 0.89 | 0.32 | 0.72 | 0.30 | 0.96 |
| 0.66 | 1.07 | 0.62 | 0.93 | 0.55 | 0.83 |
| 0.15 | #N/A | #N/A | 0.54 | 0.14 | 0.87 |
| 0.27 | 0.98 | 0.48 | 0.62 | 0.20 | 1.01 |
| 0.03 | 0.43 | 0.02 | 0.36 | 0.05 | 0.47 |
| 0.22 | 1.19 | 0.63 | #N/A | #N/A | #N/A |
| 0.26 | #N/A | #N/A | 1.79 | 0.93 | 1.08 |
| 0.40 | 0.87 | 0.30 | 1.33 | 0.82 | #N/A |
| 0.56 | 1.41 | 0.77 | 0.44 | 0.08 | 0.70 |
| 0.34 | 0.92 | 0.36 | 1.76 | 0.93 | 0.97 |
| 0.20 | 0.78 | 0.18 | 1.03 | 0.63 | 0.81 |
| 0.27 | 0.71 | 0.12 | 0.73 | 0.31 | 0.56 |
| 0.82 | 1.20 | 0.78 | #N/A | #N/A | 0.91 |
| 0.68 | 1.23 | 0.72 | 0.73 | 0.33 | 0.84 |
| 0.32 | 1.05 | 0.58 | 0.77 | 0.36 | 0.98 |
| 0.60 | #N/A | #N/A | 0.80 | 0.38 | #N/A |
| 0.66 | 0.75 | 0.15 | 0.88 | 0.50 | #N/A |
| 0.35 | 0.77 | 0.17 | 0.57 | 0.17 | 0.72 |
| 0.28 | 0.47 | 0.03 | 0.26 | 0.03 | 0.57 |
| #N/A | #N/A | #N/A | #N/A | #N/A | #N/A |
| 0.23 | 0.81 | 0.21 | 0.95 | 0.57 | 0.74 |
| 0.28 | 1.06 | 0.60 | 0.89 | 0.49 | 1.12 |
| #N/A | #N/A | #N/A | #N/A | #N/A | #N/A |
| 0.56 | 1.20 | 0.68 | 0.87 | 0.47 | 0.99 |
| #N/A | #N/A | #N/A | 0.83 | 0.42 | 1.07 |
| 0.28 | 0.59 | 0.06 | 0.48 | 0.10 | 0.98 |
| 0.86 | 1.01 | 0.52 | #N/A | #N/A | 0.84 |
| 0.60 | 1.24 | 0.81 | 0.76 | 0.34 | 0.91 |
| 0.29 | 0.88 | 0.30 | 1.05 | 0.65 | 0.87 |
| #N/A | 0.88 | 0.30 | 0.58 | 0.16 | 0.88 |
| 0.70 | 1.02 | 0.54 | 1.12 | 0.71 | #N/A |
| 0.58 | 0.91 | 0.41 | #N/A | #N/A | 0.87 |
| 0.91 | 1.12 | 0.69 | 1.68 | 0.91 | 0.73 |
| #N/A | #N/A | #N/A | 0.34 | 0.05 | #N/A |

|      |      |      |      |      |      |
|------|------|------|------|------|------|
| 0.77 | 1.27 | 0.72 | 1.53 | 0.88 | 0.99 |
| #N/A | #N/A | #N/A | #N/A | #N/A | #N/A |
| #N/A | 1.44 | 0.90 | 0.89 | 0.48 | 1.06 |
| 0.65 | 0.94 | 0.41 | 0.68 | 0.25 | #N/A |
| #N/A | 1.42 | 0.91 | 1.09 | 0.68 | 0.71 |
| 0.51 | 0.87 | 0.30 | 0.90 | 0.50 | 0.89 |
| 0.61 | 0.71 | 0.16 | 0.67 | 0.25 | 0.97 |
| 0.45 | 0.99 | 0.50 | 0.96 | 0.58 | 0.81 |
| 0.14 | 1.57 | 0.76 | 1.30 | 0.80 | 0.77 |
| #N/A | #N/A | #N/A | #N/A | #N/A | #N/A |
| 0.35 | 0.89 | 0.33 | #N/A | #N/A | 1.15 |
| 0.61 | 1.05 | 0.56 | 0.73 | 0.32 | 0.89 |
| #N/A | #N/A | #N/A | #N/A | #N/A | 0.69 |
| #N/A | #N/A | #N/A | #N/A | #N/A | #N/A |
| #N/A | 1.09 | 0.64 | 0.98 | 0.59 | 0.95 |
| 0.06 | 0.48 | 0.03 | 0.52 | 0.12 | 0.81 |
| #N/A | #N/A | #N/A | #N/A | #N/A | 1.11 |
| 0.60 | 1.22 | 0.73 | 1.13 | 0.72 | #N/A |
| #N/A | #N/A | #N/A | #N/A | #N/A | #N/A |
| 0.54 | 1.03 | 0.51 | 0.66 | 0.24 | 0.93 |
| 0.51 | 1.07 | 0.61 | 0.98 | 0.57 | 0.80 |
| 0.70 | 1.27 | 0.80 | 1.01 | 0.63 | 0.95 |
| 0.67 | #N/A | #N/A | 1.13 | 0.70 | 1.58 |
| 0.60 | 0.79 | 0.21 | 0.69 | 0.27 | 0.76 |
| 0.28 | 1.11 | 0.64 | 1.17 | 0.74 | #N/A |
| 0.59 | 1.00 | 0.51 | 1.74 | 0.92 | 0.83 |
| #N/A | 0.81 | 0.21 | 1.67 | 0.91 | 0.58 |
| 0.59 | 1.16 | 0.73 | 0.96 | 0.55 | 0.97 |
| 0.56 | #N/A | #N/A | #N/A | #N/A | 0.67 |
| 0.16 | 1.29 | 0.86 | 1.00 | 0.61 | 0.72 |
| #N/A | #N/A | #N/A | #N/A | #N/A | 1.42 |
| 0.88 | 1.19 | 0.65 | 1.03 | 0.62 | 0.75 |
| 0.43 | 1.02 | 0.54 | 1.46 | 0.86 | 1.21 |
| #N/A | #N/A | #N/A | #N/A | #N/A | 1.08 |
| #N/A | #N/A | #N/A | #N/A | #N/A | #N/A |
| 0.51 | 0.88 | 0.39 | 1.19 | 0.75 | 1.08 |
| 0.34 | 0.93 | 0.38 | 0.84 | 0.43 | 1.14 |
| #N/A | #N/A | #N/A | #N/A | #N/A | #N/A |
| 0.69 | 1.01 | 0.51 | 0.85 | 0.45 | 0.82 |
| #N/A | #N/A | #N/A | #N/A | #N/A | #N/A |
| 0.34 | 0.95 | 0.42 | 1.35 | 0.82 | 1.33 |
| 0.13 | 0.83 | 0.24 | 0.85 | 0.44 | 0.77 |
| 0.41 | 0.82 | 0.22 | 2.16 | 0.96 | 0.91 |
| #N/A | 1.15 | 0.72 | 0.78 | 0.38 | 1.11 |
| 0.68 | #N/A | #N/A | 0.33 | 0.04 | 0.95 |
| 0.83 | 1.18 | 0.75 | 0.72 | 0.30 | 1.09 |
| 0.11 | 0.59 | 0.12 | 0.33 | 0.04 | 0.60 |
| 0.70 | 1.12 | 0.68 | 1.05 | 0.66 | 0.88 |
| 0.49 | 0.91 | 0.35 | 1.10 | 0.69 | 0.87 |
| 0.58 | 0.57 | 0.05 | 1.14 | 0.72 | 1.01 |
| 0.46 | 1.19 | 0.76 | 2.01 | 0.95 | 1.04 |

|      |      |      |      |      |      |
|------|------|------|------|------|------|
| #N/A | 0.89 | 0.32 | #N/A | #N/A | 0.71 |
| 0.77 | 1.07 | 0.61 | 0.70 | 0.28 | 0.89 |
| 0.40 | 0.99 | 0.48 | 0.75 | 0.33 | 1.05 |
| #N/A | 0.87 | 0.34 | 0.81 | 0.42 | 0.85 |
| #N/A | 0.76 | 0.16 | #N/A | #N/A | 1.22 |
| 0.71 | 1.04 | 0.57 | 1.13 | 0.71 | 1.21 |
| #N/A | #N/A | #N/A | 0.81 | 0.41 | 1.00 |
| #N/A | #N/A | #N/A | 0.94 | 0.53 | 1.05 |
| #N/A | 1.10 | 0.59 | #N/A | #N/A | 1.21 |
| 0.51 | 1.24 | 0.79 | 0.60 | 0.18 | 1.12 |
| 0.47 | 1.04 | 0.56 | 0.68 | 0.26 | 0.96 |
| 0.31 | 0.96 | 0.44 | 0.75 | 0.33 | 0.91 |
| 0.66 | 0.96 | 0.43 | 0.93 | 0.55 | 0.83 |
| 0.33 | 1.01 | 0.51 | 1.14 | 0.72 | 0.97 |
| 0.54 | 1.10 | 0.65 | 0.77 | 0.37 | 0.91 |
| 0.66 | 1.68 | 0.60 | 1.11 | 0.70 | 0.88 |
| 0.88 | 1.02 | 0.55 | 0.66 | 0.23 | 0.89 |
| 0.64 | 0.94 | 0.43 | 0.67 | 0.25 | 0.92 |
| 0.49 | 0.86 | 0.27 | 0.76 | 0.34 | 0.98 |
| 0.34 | 1.13 | 0.70 | 0.89 | 0.50 | 0.88 |
| #N/A | #N/A | #N/A | #N/A | #N/A | #N/A |
| 0.19 | 0.82 | 0.25 | 0.90 | 0.52 | 1.22 |
| #N/A | #N/A | #N/A | #N/A | #N/A | #N/A |
| 0.50 | 0.78 | 0.18 | 0.71 | 0.29 | 1.08 |
| 0.63 | #N/A | #N/A | #N/A | #N/A | 1.07 |
| 0.53 | 0.83 | 0.24 | 1.13 | 0.72 | 0.96 |
| 0.82 | 2.59 | 0.99 | 0.78 | 0.37 | #N/A |
| 0.55 | 1.15 | 0.71 | 0.62 | 0.20 | 1.03 |
| #N/A | 0.96 | 0.44 | 1.08 | 0.66 | 0.76 |
| 0.28 | 1.18 | 0.75 | 1.36 | 0.83 | 0.82 |
| 0.43 | 1.06 | 0.58 | 2.07 | 0.95 | 0.84 |
| 0.41 | 1.10 | 0.64 | 0.81 | 0.41 | 0.77 |
| 0.38 | 1.02 | 0.55 | 0.76 | 0.34 | 0.82 |
| 0.76 | 1.08 | 0.61 | 0.92 | 0.54 | 0.85 |
| 0.99 | 1.69 | 0.97 | 1.69 | 0.92 | 1.10 |
| 0.13 | 0.92 | 0.40 | 0.98 | 0.59 | 0.66 |
| 0.84 | #N/A | #N/A | 0.70 | 0.27 | 0.73 |
| 0.67 | 1.03 | 0.55 | #N/A | #N/A | 0.86 |
| #N/A | #N/A | #N/A | #N/A | #N/A | #N/A |
| 0.64 | #N/A | #N/A | #N/A | #N/A | 0.98 |
| 0.44 | 1.13 | 0.69 | 1.72 | 0.92 | 2.66 |
| #N/A | #N/A | #N/A | #N/A | #N/A | 1.66 |
| 0.71 | 1.18 | 0.73 | 0.54 | 0.14 | 1.67 |
| 0.93 | #N/A | #N/A | 1.27 | 0.79 | #N/A |
| 0.62 | #N/A | #N/A | 0.99 | 0.60 | 0.92 |
| #N/A | #N/A | #N/A | #N/A | #N/A | #N/A |
| 0.71 | 1.24 | 0.79 | 0.89 | 0.51 | 1.13 |
| 0.47 | 1.09 | 0.65 | 2.01 | 0.95 | #N/A |
| 0.54 | #N/A | #N/A | 1.88 | 0.94 | 1.00 |
| 0.57 | #N/A | #N/A | 0.64 | 0.21 | 0.85 |
| #N/A | #N/A | #N/A | #N/A | #N/A | #N/A |

|      |      |      |      |      |      |
|------|------|------|------|------|------|
| 0.73 | 0.82 | 0.22 | 0.79 | 0.37 | 0.91 |
| 0.42 | 1.29 | 0.85 | 1.01 | 0.60 | 1.15 |
| 0.23 | 1.08 | 0.64 | 1.13 | 0.71 | 1.33 |
| 0.40 | 0.96 | 0.44 | #N/A | #N/A | 1.46 |
| #N/A | #N/A | #N/A | #N/A | #N/A | #N/A |
| 0.53 | 0.92 | 0.36 | 1.44 | 0.86 | 0.97 |
| 0.42 | 1.09 | 0.65 | 1.22 | 0.76 | 1.00 |
| #N/A | 0.89 | 0.32 | 1.41 | 0.84 | 1.39 |
| 0.63 | 1.22 | 0.58 | 0.66 | 0.23 | 0.98 |
| 0.40 | 1.07 | 0.60 | 0.70 | 0.28 | 0.93 |
| 0.35 | 1.18 | 0.72 | 1.18 | 0.74 | 0.91 |
| 0.26 | 1.24 | 0.81 | 0.79 | 0.37 | 0.71 |
| 0.78 | 1.05 | 0.57 | 0.93 | 0.52 | #N/A |
| 0.47 | 1.10 | 0.65 | 0.70 | 0.28 | 0.85 |
| 0.57 | #N/A | #N/A | 0.83 | 0.43 | 0.73 |
| 0.50 | 0.89 | 0.32 | 0.50 | 0.12 | 0.95 |
| 0.18 | 0.89 | 0.41 | 0.50 | 0.11 | #N/A |
| 0.81 | 1.05 | 0.58 | 0.79 | 0.38 | 0.84 |
| #N/A | #N/A | #N/A | #N/A | #N/A | #N/A |
| 0.45 | 0.85 | 0.26 | #N/A | #N/A | 1.46 |
| #N/A | #N/A | #N/A | 0.67 | 0.25 | 0.86 |
| 0.84 | 1.08 | 0.56 | 1.71 | 0.92 | #N/A |
| 0.46 | 1.17 | 0.74 | 0.81 | 0.41 | 0.99 |
| 0.57 | 1.10 | 0.66 | 0.92 | 0.52 | 0.86 |
| #N/A | #N/A | #N/A | #N/A | #N/A | #N/A |
| 0.49 | 1.07 | 0.58 | 1.39 | 0.84 | 1.17 |
| 0.62 | 1.05 | 0.53 | 1.91 | 0.94 | #N/A |
| #N/A | 1.34 | 0.87 | 0.50 | 0.11 | 0.84 |
| 0.40 | 1.05 | 0.52 | 0.85 | 0.44 | 1.25 |
| #N/A | #N/A | #N/A | #N/A | #N/A | 0.70 |
| #N/A | #N/A | #N/A | #N/A | #N/A | #N/A |
| 0.18 | 0.81 | 0.22 | 0.56 | 0.15 | 0.84 |
| 0.09 | #N/A | #N/A | 0.34 | 0.04 | #N/A |
| #N/A | #N/A | #N/A | #N/A | #N/A | 1.60 |
| 0.54 | 0.95 | 0.44 | 1.40 | 0.84 | 0.89 |
| 0.39 | 1.00 | 0.51 | 0.62 | 0.20 | 1.09 |
| #N/A | #N/A | #N/A | 1.06 | 0.66 | 1.06 |
| 0.51 | #N/A | #N/A | 0.68 | 0.27 | 1.25 |
| 0.24 | #N/A | #N/A | #N/A | #N/A | #N/A |
| 0.65 | 1.05 | 0.57 | 1.07 | 0.67 | 0.97 |
| 0.41 | 0.98 | 0.49 | 0.82 | 0.42 | 0.85 |
| 0.78 | 1.10 | 0.62 | 0.92 | 0.54 | 0.90 |
| 0.60 | 0.91 | 0.36 | 0.74 | 0.34 | 0.78 |
| 0.30 | 1.02 | 0.51 | 0.86 | 0.46 | 0.72 |
| 0.25 | 0.89 | 0.35 | 2.19 | 0.96 | 0.94 |
| 0.37 | 1.11 | 0.66 | 1.75 | 0.92 | 0.97 |
| 0.31 | 0.92 | 0.38 | 1.14 | 0.72 | 0.88 |
| 0.39 | 0.95 | 0.42 | 0.75 | 0.34 | 1.13 |
| 0.32 | 0.83 | 0.23 | 0.68 | 0.27 | #N/A |
| #N/A | #N/A | #N/A | 1.19 | 0.74 | 0.82 |
| 0.67 | 1.33 | 0.52 | 0.79 | 0.38 | 0.93 |

|      |      |      |      |      |      |      |
|------|------|------|------|------|------|------|
| #N/A | #N/A | #N/A | #N/A | #N/A | #N/A | #N/A |
| 0.96 | #N/A | #N/A | #N/A | 0.80 | 0.39 | #N/A |
| #N/A | 1.21 | 0.61 | #N/A | 1.24 | 0.78 | 0.98 |
| 0.16 | 1.19 | 0.74 | #N/A | 0.35 | 0.05 | 0.91 |
| #N/A | #N/A | #N/A | #N/A | 1.16 | 0.74 | 1.15 |
| 0.57 | 1.12 | 0.64 | #N/A | 1.22 | 0.76 | 0.98 |
| #N/A | 0.89 | 0.32 | #N/A | 0.40 | 0.06 | #N/A |
| 0.28 | 0.75 | 0.17 | #N/A | 1.02 | 0.63 | 0.97 |
| 0.03 | 1.17 | 0.50 | #N/A | 0.31 | 0.04 | 0.90 |
| 0.44 | 1.50 | 0.92 | #N/A | 0.74 | 0.32 | 0.99 |
| 0.88 | 1.10 | 0.66 | #N/A | 0.62 | 0.21 | 0.98 |
| #N/A | #N/A | #N/A | #N/A | #N/A | #N/A | #N/A |
| 0.64 | 0.88 | 0.32 | #N/A | 0.82 | 0.41 | 1.38 |
| #N/A | #N/A | #N/A | #N/A | #N/A | #N/A | #N/A |
| 0.23 | 0.44 | 0.02 | #N/A | 0.51 | 0.12 | 0.54 |
| 0.38 | 1.00 | 0.50 | #N/A | 1.04 | 0.65 | 1.07 |
| 0.35 | 1.04 | 0.50 | #N/A | 1.08 | 0.66 | 0.80 |
| 0.39 | 1.10 | 0.57 | #N/A | #N/A | #N/A | #N/A |
| #N/A | #N/A | #N/A | #N/A | #N/A | #N/A | #N/A |
| 0.65 | 1.12 | 0.69 | #N/A | #N/A | #N/A | 1.31 |
| #N/A | #N/A | #N/A | #N/A | #N/A | #N/A | #N/A |
| 0.90 | 0.99 | 0.46 | #N/A | #N/A | #N/A | #N/A |
| #N/A | #N/A | #N/A | #N/A | #N/A | #N/A | #N/A |
| #N/A | #N/A | #N/A | #N/A | #N/A | #N/A | #N/A |
| 0.83 | 1.12 | 0.66 | #N/A | #N/A | #N/A | #N/A |
| 0.22 | #N/A | #N/A | #N/A | 1.15 | 0.73 | #N/A |
| #N/A | 1.04 | 0.56 | #N/A | #N/A | #N/A | 0.78 |
| 0.48 | 0.89 | 0.38 | #N/A | 1.42 | 0.85 | #N/A |
| #N/A | #N/A | #N/A | #N/A | #N/A | #N/A | #N/A |
| 0.50 | 1.12 | 0.60 | #N/A | 0.59 | 0.17 | 1.05 |
| 0.65 | 1.15 | 0.67 | #N/A | 0.59 | 0.18 | 0.91 |
| 0.14 | 0.79 | 0.22 | #N/A | 0.74 | 0.32 | 0.70 |
| 0.04 | 0.21 | 0.00 | #N/A | 0.24 | 0.02 | 0.31 |
| 0.76 | 1.39 | 0.89 | #N/A | 0.77 | 0.36 | 1.14 |
| 0.50 | 0.84 | 0.30 | #N/A | 1.22 | 0.76 | 1.05 |
| 0.62 | 1.13 | 0.68 | #N/A | 0.78 | 0.38 | 1.04 |
| 0.06 | 0.88 | 0.34 | #N/A | 2.28 | 0.96 | 0.76 |
| #N/A | #N/A | #N/A | #N/A | #N/A | #N/A | #N/A |
| 0.16 | 0.81 | 0.21 | #N/A | #N/A | #N/A | 0.84 |
| 0.46 | 1.15 | 0.72 | #N/A | 0.78 | 0.37 | 0.88 |
| 0.62 | 1.06 | 0.59 | #N/A | 1.17 | 0.74 | 0.98 |
| 0.62 | 1.15 | 0.69 | #N/A | 1.13 | 0.72 | 0.90 |
| 0.64 | 1.10 | 0.65 | #N/A | 0.92 | 0.53 | 0.88 |
| 0.42 | 1.11 | 0.66 | #N/A | 1.19 | 0.75 | 0.76 |
| 0.82 | 1.31 | 0.79 | #N/A | #N/A | #N/A | #N/A |
| 0.71 | 1.32 | 0.83 | #N/A | 0.67 | 0.25 | 0.74 |
| 0.69 | 1.22 | 0.74 | #N/A | 0.59 | 0.18 | 0.68 |
| #N/A | #N/A | #N/A | #N/A | #N/A | #N/A | #N/A |
| 0.50 | 1.25 | 0.81 | #N/A | 1.19 | 0.76 | 0.78 |
| 0.58 | 1.25 | 0.78 | #N/A | 1.05 | 0.65 | 0.74 |
| 0.53 | 1.43 | 0.92 | #N/A | 0.87 | 0.49 | 0.77 |

|      |      |      |      |      |      |
|------|------|------|------|------|------|
| 0.31 | 1.67 | 0.97 | 0.87 | 0.49 | 1.09 |
| 0.44 | 0.78 | 0.24 | 1.10 | 0.70 | 1.30 |
| #N/A | 1.06 | 0.59 | 1.24 | 0.77 | #N/A |
| #N/A | #N/A | #N/A | #N/A | #N/A | #N/A |
| #N/A | #N/A | #N/A | 0.42 | 0.07 | #N/A |
| 0.99 | 1.29 | 0.85 | 2.15 | 0.96 | 1.03 |
| #N/A | 0.89 | 0.37 | 0.63 | 0.20 | 0.88 |
| #N/A | #N/A | #N/A | #N/A | #N/A | #N/A |
| #N/A | 0.82 | 0.36 | 1.09 | 0.68 | 0.81 |
| 0.32 | 0.81 | 0.21 | 2.90 | 0.99 | 0.75 |
| 0.37 | #N/A | #N/A | #N/A | #N/A | #N/A |
| #N/A | 1.15 | 0.72 | 0.77 | 0.37 | 0.83 |
| #N/A | #N/A | #N/A | #N/A | #N/A | 1.12 |
| 0.35 | 0.80 | 0.20 | 2.03 | 0.95 | 1.26 |
| #N/A | 0.98 | 0.47 | 1.22 | 0.77 | 1.31 |
| 0.55 | 1.07 | 0.62 | 0.81 | 0.41 | 1.02 |
| 0.75 | #N/A | #N/A | 2.46 | 0.98 | #N/A |
| #N/A | #N/A | #N/A | 0.53 | 0.14 | 0.82 |
| 0.35 | #N/A | #N/A | 1.04 | 0.62 | 0.81 |
| 0.81 | 1.06 | 0.59 | 1.14 | 0.71 | 0.96 |
| 0.57 | 1.44 | 0.88 | 0.75 | 0.34 | #N/A |
| 0.55 | 1.14 | 0.67 | 1.72 | 0.92 | 0.82 |
| 0.51 | 1.13 | 0.67 | 1.16 | 0.74 | 0.86 |
| 0.13 | 0.82 | 0.24 | 0.68 | 0.26 | 0.83 |
| #N/A | #N/A | #N/A | #N/A | #N/A | #N/A |
| #N/A | #N/A | #N/A | #N/A | #N/A | #N/A |
| #N/A | 0.79 | 0.20 | 0.82 | 0.42 | #N/A |
| #N/A | #N/A | #N/A | #N/A | #N/A | #N/A |
| 0.78 | 1.13 | 0.70 | 1.24 | 0.79 | 0.86 |
| 0.78 | 1.05 | 0.58 | 1.14 | 0.70 | 1.22 |
| 0.40 | 0.95 | 0.44 | 0.91 | 0.53 | 1.15 |
| 0.57 | 1.02 | 0.52 | 3.95 | 1.00 | 0.85 |
| #N/A | #N/A | #N/A | 0.92 | 0.51 | 0.85 |
| #N/A | 1.28 | 0.82 | 0.86 | 0.46 | 0.87 |
| #N/A | #N/A | #N/A | 0.42 | 0.07 | 0.83 |
| 0.35 | 0.91 | 0.36 | 2.88 | 0.98 | 1.56 |
| #N/A | #N/A | #N/A | #N/A | #N/A | #N/A |
| 0.67 | 1.09 | 0.63 | 1.26 | 0.79 | #N/A |
| #N/A | 0.95 | 0.43 | 0.69 | 0.28 | 1.17 |
| 0.44 | 1.11 | 0.67 | 1.21 | 0.76 | 1.01 |
| 0.41 | 0.80 | 0.23 | 0.63 | 0.21 | #N/A |
| 0.61 | #N/A | #N/A | 1.25 | 0.79 | 0.85 |
| #N/A | #N/A | #N/A | #N/A | #N/A | #N/A |
| 0.54 | 0.91 | 0.35 | 1.17 | 0.73 | 1.00 |
| #N/A | 1.11 | 0.60 | 0.83 | 0.44 | 0.87 |
| 0.18 | #N/A | #N/A | 1.62 | 0.90 | 1.00 |
| #N/A | #N/A | #N/A | #N/A | #N/A | #N/A |
| 0.35 | 0.59 | 0.08 | 1.08 | 0.68 | 0.89 |
| 0.58 | 1.04 | 0.57 | 0.71 | 0.30 | 1.20 |
| #N/A | 1.10 | 0.63 | 0.67 | 0.25 | 0.78 |
| #N/A | 1.65 | 0.95 | 0.70 | 0.28 | 1.17 |

|      |      |      |      |      |      |
|------|------|------|------|------|------|
| 0.78 | 1.28 | 0.84 | 0.90 | 0.51 | 0.87 |
| 0.46 | 1.16 | 0.70 | 1.24 | 0.78 | 0.98 |
| 0.36 | 1.08 | 0.61 | 1.14 | 0.73 | 0.84 |
| 0.50 | 0.91 | 0.38 | 0.59 | 0.18 | 0.72 |
| 0.85 | 1.11 | 0.63 | 0.76 | 0.36 | 1.07 |
| 0.54 | 1.06 | 0.60 | 1.17 | 0.74 | 0.98 |
| 0.80 | 1.25 | 0.83 | 0.89 | 0.49 | 1.06 |
| 0.82 | 1.16 | 0.73 | 1.61 | 0.90 | 0.78 |
| 0.64 | 0.98 | 0.49 | 0.80 | 0.39 | 0.87 |
| 0.32 | 0.91 | 0.37 | 0.82 | 0.41 | 0.90 |
| 0.49 | 1.27 | 0.81 | 1.87 | 0.94 | 0.99 |
| 0.49 | 1.20 | 0.78 | 1.61 | 0.90 | 2.71 |
| 0.61 | 1.00 | 0.52 | 0.84 | 0.43 | 1.71 |
| 0.15 | 0.79 | 0.22 | 0.65 | 0.24 | #N/A |
| 0.65 | 0.97 | 0.46 | 0.80 | 0.41 | 1.79 |
| 0.20 | 0.71 | 0.14 | 0.46 | 0.09 | #N/A |
| 0.62 | #N/A | #N/A | #N/A | #N/A | 1.42 |
| 0.82 | 0.93 | 0.41 | 1.06 | 0.66 | 0.87 |
| #N/A | #N/A | #N/A | 0.96 | 0.59 | #N/A |
| 0.66 | 0.79 | 0.20 | 1.21 | 0.76 | 0.93 |
| #N/A | #N/A | #N/A | #N/A | #N/A | #N/A |
| 0.50 | 0.69 | 0.12 | 1.11 | 0.70 | 0.81 |
| 0.51 | #N/A | #N/A | 0.76 | 0.35 | #N/A |
| 0.19 | 0.99 | 0.48 | 0.62 | 0.21 | #N/A |
| #N/A | #N/A | #N/A | #N/A | #N/A | 0.83 |
| #N/A | #N/A | #N/A | #N/A | #N/A | #N/A |
| 0.92 | 1.11 | 0.63 | 0.96 | 0.58 | 0.75 |
| #N/A | #N/A | #N/A | #N/A | #N/A | #N/A |
| 0.69 | 0.74 | 0.14 | 1.17 | 0.74 | #N/A |
| #N/A | #N/A | #N/A | #N/A | #N/A | #N/A |
| 0.60 | 1.01 | 0.52 | 1.17 | 0.73 | 1.03 |
| 0.66 | 1.26 | 0.67 | 0.83 | 0.43 | 0.86 |
| 0.65 | 0.91 | 0.36 | #N/A | #N/A | 0.99 |
| 0.94 | 1.11 | 0.64 | 0.85 | 0.45 | 0.88 |
| 0.32 | 0.58 | 0.05 | 0.40 | 0.06 | 0.78 |
| #N/A | #N/A | #N/A | #N/A | #N/A | #N/A |
| 0.30 | 0.87 | 0.29 | 1.05 | 0.66 | 1.15 |
| 0.83 | 1.01 | 0.52 | 1.26 | 0.78 | 1.48 |
| 0.52 | 0.77 | 0.18 | 1.08 | 0.68 | 0.96 |
| 0.56 | 0.64 | 0.08 | 3.09 | 0.99 | 1.05 |
| 0.24 | 0.81 | 0.25 | 0.36 | 0.05 | 1.18 |
| #N/A | 0.91 | 0.37 | 0.53 | 0.13 | 0.61 |
| #N/A | 0.90 | 0.33 | #N/A | #N/A | #N/A |
| #N/A | #N/A | #N/A | #N/A | #N/A | #N/A |
| 0.18 | 0.92 | 0.36 | 1.12 | 0.71 | 0.70 |
| 0.81 | 1.01 | 0.51 | 1.13 | 0.72 | 1.01 |
| 0.49 | 1.16 | 0.73 | 0.66 | 0.23 | 1.03 |
| 0.44 | 0.97 | 0.46 | 0.72 | 0.30 | 1.03 |
| 0.71 | 1.21 | 0.76 | 1.40 | 0.84 | 0.90 |
| 0.58 | 1.20 | 0.75 | 1.03 | 0.63 | 0.81 |
| 0.61 | 1.17 | 0.74 | 0.92 | 0.52 | 0.85 |



|      |      |      |      |      |      |
|------|------|------|------|------|------|
| 0.84 | 0.90 | 0.35 | #N/A | #N/A | 1.00 |
| 0.61 | 1.15 | 0.72 | 1.59 | 0.89 | 0.95 |
| #N/A | #N/A | #N/A | #N/A | #N/A | #N/A |
| 0.60 | 0.83 | 0.25 | 1.25 | 0.77 | 1.51 |
| 0.11 | 0.35 | 0.01 | 0.37 | 0.05 | 0.55 |
| 0.59 | 0.94 | 0.40 | 1.98 | 0.95 | 1.06 |
| 0.28 | 0.90 | 0.34 | 0.83 | 0.42 | 0.73 |
| 0.32 | 0.77 | 0.22 | #N/A | #N/A | 1.24 |
| #N/A | #N/A | #N/A | #N/A | #N/A | #N/A |
| 0.46 | 0.72 | 0.14 | 1.17 | 0.74 | 0.72 |
| 0.55 | #N/A | #N/A | 1.02 | 0.63 | 0.83 |
| 0.58 | 0.85 | 0.26 | 0.61 | 0.19 | 1.16 |
| #N/A | #N/A | #N/A | 0.34 | 0.04 | #N/A |
| 0.86 | 1.36 | 0.89 | 1.61 | 0.90 | 0.89 |
| 0.59 | 1.01 | 0.52 | 1.89 | 0.94 | 0.75 |
| 0.17 | 0.54 | 0.04 | 0.59 | 0.18 | 0.85 |
| 0.65 | 1.13 | 0.59 | 0.69 | 0.27 | #N/A |
| 0.70 | #N/A | #N/A | #N/A | #N/A | #N/A |
| 0.32 | 0.77 | 0.17 | 0.55 | 0.15 | 0.77 |
| 0.35 | 1.09 | 0.65 | 0.93 | 0.55 | 1.44 |
| #N/A | #N/A | #N/A | #N/A | #N/A | #N/A |
| #N/A | #N/A | #N/A | #N/A | #N/A | #N/A |
| #N/A | #N/A | #N/A | #N/A | #N/A | #N/A |
| #N/A | #N/A | #N/A | 1.66 | 0.91 | #N/A |
| #N/A | #N/A | #N/A | 0.18 | 0.02 | #N/A |
| 0.67 | 1.03 | 0.55 | 1.72 | 0.92 | #N/A |
| 0.03 | #N/A | #N/A | #N/A | #N/A | #N/A |
| #N/A | #N/A | #N/A | #N/A | #N/A | #N/A |
| 0.42 | 1.08 | 0.60 | #N/A | #N/A | #N/A |
| 0.33 | #N/A | #N/A | #N/A | #N/A | #N/A |
| 0.28 | #N/A | #N/A | #N/A | #N/A | #N/A |
| 0.64 | 1.06 | 0.55 | 0.84 | 0.44 | 0.89 |
| 0.20 | #N/A | #N/A | 0.69 | 0.28 | 1.06 |
| #N/A | #N/A | #N/A | #N/A | #N/A | #N/A |
| #N/A | #N/A | #N/A | #N/A | #N/A | #N/A |
| 0.62 | 1.01 | 0.50 | 0.51 | 0.12 | 0.80 |
| #N/A | #N/A | #N/A | #N/A | #N/A | #N/A |
| 0.51 | 0.98 | 0.47 | 2.42 | 0.97 | 1.04 |
| 0.13 | 1.13 | 0.67 | 0.78 | 0.36 | #N/A |
| 0.44 | 1.19 | 0.77 | 1.12 | 0.71 | 0.83 |
| 0.39 | #N/A | #N/A | 1.76 | 0.93 | #N/A |
| 0.07 | 0.83 | 0.24 | 0.57 | 0.16 | 0.85 |
| 0.68 | 1.26 | 0.83 | 1.22 | 0.77 | 1.34 |
| #N/A | 1.25 | 0.79 | 0.82 | 0.41 | 0.80 |
| 0.76 | 1.14 | 0.69 | 0.93 | 0.55 | 0.93 |
| 0.48 | #N/A | #N/A | 0.63 | 0.21 | 0.75 |
| 0.56 | 0.91 | 0.36 | 0.85 | 0.45 | 1.11 |
| #N/A | 1.33 | 0.87 | #N/A | #N/A | 1.05 |
| 0.47 | 0.94 | 0.43 | 0.85 | 0.45 | 1.00 |
| #N/A | 1.39 | 0.83 | #N/A | #N/A | 0.93 |
| 0.69 | 0.94 | 0.40 | 0.83 | 0.43 | 0.87 |

|      |      |      |      |      |      |
|------|------|------|------|------|------|
| 0.49 | 0.79 | 0.21 | 1.14 | 0.72 | 0.97 |
| 0.55 | 0.86 | 0.29 | 2.85 | 0.98 | 1.73 |
| #N/A | #N/A | #N/A | #N/A | #N/A | #N/A |
| 0.91 | 1.27 | 0.77 | 1.51 | 0.87 | 1.04 |
| 0.52 | #N/A | #N/A | 1.04 | 0.64 | 0.81 |
| 0.65 | 1.10 | 0.66 | 0.73 | 0.31 | 1.11 |
| #N/A | #N/A | #N/A | 0.89 | 0.51 | 0.87 |
| 0.80 | 0.77 | 0.18 | 1.98 | 0.95 | 0.95 |
| #N/A | #N/A | #N/A | #N/A | #N/A | #N/A |
| 0.55 | 0.98 | 0.48 | 0.62 | 0.21 | 1.21 |
| 0.20 | #N/A | #N/A | 0.81 | 0.42 | 1.02 |
| 0.68 | #N/A | #N/A | 0.76 | 0.36 | 0.83 |
| 0.34 | 0.96 | 0.44 | 0.59 | 0.17 | 0.78 |
| #N/A | 1.15 | 0.60 | 1.07 | 0.65 | 1.14 |
| 0.06 | 0.41 | 0.01 | 0.25 | 0.02 | 0.88 |
| #N/A | #N/A | #N/A | #N/A | #N/A | #N/A |
| 0.55 | 0.79 | 0.19 | 0.55 | 0.15 | 1.07 |
| 0.56 | 1.02 | 0.54 | 0.95 | 0.57 | #N/A |
| 0.55 | 0.84 | 0.25 | 2.07 | 0.95 | 0.81 |
| 0.45 | 0.79 | 0.20 | 0.61 | 0.19 | 0.80 |
| #N/A | 1.46 | 0.93 | 0.81 | 0.40 | 0.91 |
| 0.54 | 0.64 | 0.08 | #N/A | #N/A | #N/A |
| 0.58 | 1.39 | 0.86 | 0.68 | 0.27 | #N/A |
| 0.75 | 1.26 | 0.82 | 0.88 | 0.47 | 0.77 |
| 0.14 | 0.83 | 0.24 | 0.67 | 0.25 | 0.90 |
| 0.63 | 0.75 | 0.15 | 1.33 | 0.82 | 0.76 |
| 0.90 | #N/A | #N/A | #N/A | #N/A | #N/A |
| 0.71 | 0.99 | 0.47 | 0.69 | 0.27 | 0.88 |
| 0.46 | 1.35 | 0.88 | 0.82 | 0.42 | 0.96 |
| 0.04 | #N/A | #N/A | 0.89 | 0.49 | 0.54 |
| #N/A | 0.98 | 0.45 | #N/A | #N/A | 0.73 |
| #N/A | 0.86 | 0.44 | 0.77 | 0.36 | 0.77 |
| 0.48 | 1.07 | 0.62 | 1.07 | 0.67 | 0.82 |
| 0.46 | #N/A | #N/A | 0.65 | 0.23 | 1.13 |
| #N/A | 0.88 | 0.33 | 0.93 | 0.55 | 0.58 |
| 0.85 | 1.35 | 0.77 | 1.28 | 0.79 | 0.85 |
| 0.61 | 1.06 | 0.60 | #N/A | #N/A | 0.74 |
| 0.88 | 1.20 | 0.76 | 1.39 | 0.84 | 1.02 |
| 0.65 | 0.90 | 0.38 | 0.99 | 0.59 | #N/A |
| 0.39 | 0.89 | 0.32 | 1.35 | 0.83 | 1.07 |
| 0.55 | 1.12 | 0.69 | 0.84 | 0.43 | 0.95 |
| #N/A | 1.23 | 0.81 | 0.68 | 0.27 | 0.79 |
| #N/A | 0.77 | 0.19 | 0.49 | 0.10 | 0.68 |
| #N/A | 1.00 | 0.49 | 0.93 | 0.52 | 1.61 |
| #N/A | 1.28 | 0.82 | 1.01 | 0.62 | 0.81 |
| #N/A | #N/A | #N/A | #N/A | #N/A | #N/A |
| 0.60 | 1.04 | 0.56 | 0.60 | 0.18 | 0.81 |
| #N/A | 0.85 | 0.27 | #N/A | #N/A | 0.97 |
| #N/A | #N/A | #N/A | #N/A | #N/A | #N/A |
| 0.23 | 0.50 | 0.03 | 0.92 | 0.52 | 0.60 |
| 0.82 | 0.93 | 0.42 | 0.75 | 0.34 | #N/A |

|      |      |      |      |      |      |
|------|------|------|------|------|------|
| 0.62 | 1.06 | 0.59 | 0.74 | 0.32 | 1.06 |
| 0.37 | 0.61 | 0.07 | 0.40 | 0.06 | 0.89 |
| 0.58 | 0.83 | 0.24 | 0.86 | 0.47 | 1.01 |
| 0.70 | 1.14 | 0.72 | #N/A | #N/A | #N/A |
| 0.65 | 1.12 | 0.69 | #N/A | #N/A | #N/A |
| 0.65 | 1.17 | 0.75 | #N/A | #N/A | #N/A |
| 0.71 | 1.34 | 0.88 | #N/A | #N/A | #N/A |
| 0.68 | 1.03 | 0.57 | #N/A | #N/A | #N/A |
| 0.82 | 1.14 | 0.71 | 0.90 | 0.51 | 1.01 |
| 0.69 | 1.02 | 0.55 | #N/A | #N/A | #N/A |
| 0.81 | 1.00 | 0.51 | 0.91 | 0.50 | 0.98 |
| 1.00 | 1.81 | 0.98 | 2.81 | 0.98 | 1.09 |
| 1.00 | 1.97 | 0.99 | 2.99 | 0.99 | 1.16 |
| 0.69 | 0.97 | 0.47 | 0.83 | 0.44 | 0.85 |
| 0.47 | 1.08 | 0.60 | 1.10 | 0.68 | 1.18 |
| #N/A | #N/A | #N/A | 0.37 | 0.06 | #N/A |
| 0.77 | #N/A | #N/A | 0.47 | 0.09 | 0.54 |
| #N/A | #N/A | #N/A | #N/A | #N/A | #N/A |
| #N/A | #N/A | #N/A | #N/A | #N/A | #N/A |
| 0.41 | #N/A | #N/A | #N/A | #N/A | #N/A |
| 0.10 | 1.04 | 0.56 | 0.52 | 0.12 | 0.99 |
| 0.44 | 0.96 | 0.45 | 1.94 | 0.95 | 0.83 |
| #N/A | #N/A | #N/A | #N/A | #N/A | #N/A |
| #N/A | #N/A | #N/A | #N/A | #N/A | #N/A |
| 0.50 | 1.06 | 0.60 | 1.24 | 0.78 | 0.88 |
| #N/A | #N/A | #N/A | #N/A | #N/A | #N/A |
| 0.50 | #N/A | #N/A | 1.15 | 0.72 | 0.91 |
| 0.09 | #N/A | #N/A | 0.54 | 0.15 | 0.72 |
| 0.50 | 1.00 | 0.49 | 0.86 | 0.46 | 0.85 |
| 0.59 | 1.14 | 0.62 | 1.12 | 0.69 | 1.41 |
| #N/A | #N/A | #N/A | 0.46 | 0.09 | #N/A |
| #N/A | #N/A | #N/A | 0.89 | 0.49 | #N/A |
| #N/A | #N/A | #N/A | #N/A | #N/A | #N/A |
| 0.77 | 1.08 | 0.62 | 0.60 | 0.18 | 1.00 |
| 0.60 | 1.20 | 0.78 | 1.09 | 0.66 | #N/A |
| 0.58 | 1.06 | 0.57 | 0.64 | 0.23 | 1.18 |
| 0.89 | 1.30 | 0.85 | 1.06 | 0.64 | 0.94 |
| 0.55 | 0.85 | 0.26 | 0.82 | 0.41 | #N/A |
| #N/A | 0.96 | 0.44 | #N/A | #N/A | #N/A |
| 0.59 | 0.99 | 0.49 | 1.15 | 0.73 | 0.96 |
| 0.61 | #N/A | #N/A | 0.53 | 0.13 | 1.20 |
| 0.42 | 0.82 | 0.28 | 1.17 | 0.74 | 1.53 |
| #N/A | #N/A | #N/A | #N/A | #N/A | #N/A |
| 0.68 | 0.81 | 0.22 | 1.30 | 0.81 | 1.16 |
| 0.13 | 0.82 | 0.31 | 1.12 | 0.69 | 1.39 |
| 0.59 | #N/A | #N/A | 1.31 | 0.82 | 0.76 |
| 0.40 | 1.26 | 0.69 | 0.88 | 0.49 | #N/A |
| #N/A | 0.98 | 0.49 | 1.16 | 0.74 | 0.77 |
| #N/A | 0.66 | 0.11 | 1.26 | 0.78 | 0.72 |
| 0.74 | 0.92 | 0.38 | 1.28 | 0.80 | 0.86 |
| #N/A | #N/A | #N/A | 0.77 | 0.35 | 0.76 |



|      |      |      |      |      |      |      |
|------|------|------|------|------|------|------|
| #N/A | #N/A | #N/A | #N/A | #N/A | #N/A | #N/A |
| 0.32 | #N/A | #N/A | #N/A | 1.05 | 0.63 | 0.87 |
| 0.48 | 1.18 | 0.73 | #N/A | 0.76 | 0.35 | 0.93 |
| 0.81 | 1.15 | 0.57 | #N/A | 1.11 | 0.70 | 1.08 |
| 0.65 | 1.07 | 0.55 | #N/A | 1.20 | 0.76 | #N/A |
| 0.25 | 0.83 | 0.37 | #N/A | 0.67 | 0.26 | 0.99 |
| 0.84 | 1.35 | 0.85 | #N/A | 1.05 | 0.63 | 1.07 |
| #N/A | #N/A | #N/A | #N/A | #N/A | #N/A | #N/A |
| #N/A | #N/A | #N/A | #N/A | #N/A | #N/A | #N/A |
| #N/A | 0.95 | 0.42 | #N/A | #N/A | #N/A | 0.87 |
| 0.47 | 1.06 | 0.59 | #N/A | 0.90 | 0.52 | 0.96 |
| 0.21 | 0.75 | 0.15 | #N/A | 0.60 | 0.18 | 0.87 |
| 0.36 | 0.79 | 0.18 | #N/A | 1.04 | 0.64 | 0.88 |
| 0.38 | 0.54 | 0.04 | #N/A | 0.65 | 0.24 | 0.65 |
| #N/A | #N/A | #N/A | #N/A | 0.79 | 0.38 | 0.72 |
| 0.20 | 0.38 | 0.01 | #N/A | #N/A | #N/A | 0.54 |
| 0.18 | #N/A | #N/A | #N/A | 0.43 | 0.07 | 0.53 |
| #N/A | #N/A | #N/A | #N/A | #N/A | #N/A | #N/A |
| 0.78 | 1.22 | 0.79 | #N/A | #N/A | #N/A | 1.01 |
| 0.23 | 0.83 | 0.24 | #N/A | 1.41 | 0.85 | 0.80 |
| #N/A | 1.04 | 0.57 | #N/A | 0.73 | 0.33 | #N/A |
| 0.17 | 0.79 | 0.19 | #N/A | 1.32 | 0.81 | #N/A |
| 0.31 | 0.80 | 0.22 | #N/A | 1.13 | 0.70 | 0.92 |
| 0.57 | #N/A | #N/A | #N/A | 1.16 | 0.73 | 1.10 |
| 0.52 | 0.63 | 0.08 | #N/A | 1.44 | 0.86 | 0.80 |
| 0.35 | 1.14 | 0.68 | #N/A | 0.76 | 0.36 | 0.80 |
| #N/A | #N/A | #N/A | #N/A | #N/A | #N/A | #N/A |
| #N/A | 0.85 | 0.27 | #N/A | 0.80 | 0.40 | 0.91 |
| #N/A | 1.28 | 0.79 | #N/A | 0.83 | 0.43 | 0.92 |
| #N/A | #N/A | #N/A | #N/A | #N/A | #N/A | #N/A |
| #N/A | 0.93 | 0.39 | #N/A | 0.67 | 0.26 | 0.70 |
| #N/A | #N/A | #N/A | #N/A | #N/A | #N/A | #N/A |
| #N/A | #N/A | #N/A | #N/A | 2.03 | 0.95 | #N/A |
| 0.89 | #N/A | #N/A | #N/A | #N/A | #N/A | 1.16 |
| 0.92 | 0.91 | 0.38 | #N/A | #N/A | #N/A | #N/A |
| 0.28 | 0.70 | 0.12 | #N/A | 0.91 | 0.52 | 1.08 |
| 0.23 | 0.76 | 0.20 | #N/A | 0.80 | 0.39 | 0.71 |
| 0.28 | 0.87 | 0.31 | #N/A | 0.89 | 0.50 | 0.88 |
| 0.62 | 1.03 | 0.56 | #N/A | 0.91 | 0.53 | 1.06 |
| 0.84 | 0.80 | 0.20 | #N/A | #N/A | #N/A | 1.05 |
| 0.30 | 0.68 | 0.10 | #N/A | 0.44 | 0.08 | #N/A |
| 0.89 | 0.82 | 0.24 | #N/A | 1.04 | 0.63 | 0.85 |
| 0.36 | 0.98 | 0.47 | #N/A | 0.76 | 0.35 | 1.13 |
| #N/A | #N/A | #N/A | #N/A | #N/A | #N/A | #N/A |
| #N/A | 0.63 | 0.08 | #N/A | #N/A | #N/A | 0.81 |
| 0.26 | #N/A | #N/A | #N/A | 0.91 | 0.50 | #N/A |
| 0.63 | 0.83 | 0.24 | #N/A | 0.60 | 0.19 | 0.77 |
| 0.47 | #N/A | #N/A | #N/A | 0.93 | 0.54 | 0.90 |
| #N/A | #N/A | #N/A | #N/A | #N/A | #N/A | #N/A |
| 0.84 | #N/A | #N/A | #N/A | 0.89 | 0.51 | 0.92 |
| 0.07 | 0.59 | 0.06 | #N/A | 0.75 | 0.35 | 0.70 |

|      |      |      |      |      |      |
|------|------|------|------|------|------|
| 0.47 | 0.80 | 0.21 | 0.65 | 0.22 | 0.78 |
| #N/A | #N/A | #N/A | #N/A | #N/A | #N/A |
| 0.67 | 1.04 | 0.56 | 1.04 | 0.65 | 1.06 |
| 0.51 | 0.93 | 0.38 | 1.24 | 0.77 | 0.95 |
| #N/A | #N/A | #N/A | #N/A | #N/A | #N/A |
| 0.28 | 0.75 | 0.15 | 0.69 | 0.27 | 0.76 |
| 0.65 | 1.10 | 0.66 | 0.91 | 0.52 | 1.12 |
| 0.64 | 0.97 | 0.45 | 1.13 | 0.71 | 1.21 |
| 0.56 | 1.01 | 0.52 | #N/A | #N/A | 1.09 |
| 0.35 | 1.24 | 0.76 | 0.41 | 0.06 | 0.77 |
| 0.15 | 1.09 | 0.64 | 1.03 | 0.64 | 1.10 |
| 0.82 | 1.13 | 0.66 | 0.92 | 0.53 | 1.74 |
| #N/A | #N/A | #N/A | #N/A | #N/A | #N/A |
| 0.31 | #N/A | #N/A | #N/A | #N/A | #N/A |
| 0.41 | 0.83 | 0.23 | 1.09 | 0.69 | 1.06 |
| 0.47 | 1.84 | 0.89 | #N/A | #N/A | 0.82 |
| 0.08 | #N/A | #N/A | 1.66 | 0.91 | #N/A |
| #N/A | #N/A | #N/A | #N/A | #N/A | #N/A |
| #N/A | #N/A | #N/A | #N/A | #N/A | #N/A |
| 0.68 | 1.15 | 0.71 | 1.06 | 0.66 | 1.15 |
| 0.35 | 0.82 | 0.23 | 0.66 | 0.25 | 0.93 |
| 0.71 | 1.13 | 0.69 | 1.20 | 0.76 | #N/A |
| #N/A | #N/A | #N/A | #N/A | #N/A | #N/A |
| 0.77 | 1.02 | 0.55 | 1.05 | 0.65 | 0.95 |
| #N/A | #N/A | #N/A | #N/A | #N/A | #N/A |
| #N/A | #N/A | #N/A | #N/A | #N/A | #N/A |
| #N/A | 1.12 | 0.68 | 0.96 | 0.58 | #N/A |
| #N/A | #N/A | #N/A | #N/A | #N/A | #N/A |
| #N/A | 1.03 | 0.55 | #N/A | #N/A | 1.30 |
| 0.86 | 0.90 | 0.36 | 0.82 | 0.42 | 1.76 |
| 0.73 | 0.94 | 0.39 | 0.79 | 0.38 | 1.04 |
| 0.47 | 0.83 | 0.24 | 0.72 | 0.30 | 1.09 |
| #N/A | #N/A | #N/A | #N/A | #N/A | #N/A |
| 0.87 | 1.15 | 0.61 | 0.98 | 0.57 | 0.88 |
| 0.46 | #N/A | #N/A | 0.74 | 0.32 | 0.95 |
| #N/A | #N/A | #N/A | #N/A | #N/A | #N/A |
| #N/A | #N/A | #N/A | #N/A | #N/A | #N/A |
| #N/A | 0.71 | 0.12 | #N/A | #N/A | #N/A |
| #N/A | #N/A | #N/A | #N/A | #N/A | #N/A |
| 0.40 | 0.61 | 0.07 | 0.55 | 0.14 | 0.91 |
| #N/A | 0.91 | 0.37 | 0.44 | 0.08 | 1.12 |
| #N/A | #N/A | #N/A | 0.52 | 0.12 | #N/A |
| 0.86 | 1.11 | 0.67 | 0.88 | 0.48 | 1.21 |
| #N/A | #N/A | #N/A | #N/A | #N/A | #N/A |
| #N/A | #N/A | #N/A | #N/A | #N/A | #N/A |
| 0.27 | 0.54 | 0.04 | 0.65 | 0.22 | 1.27 |
| #N/A | #N/A | #N/A | #N/A | #N/A | #N/A |
| 0.68 | 1.40 | 0.76 | 0.94 | 0.54 | 0.99 |
| #N/A | #N/A | #N/A | #N/A | #N/A | 0.74 |
| 0.21 | 1.23 | 0.78 | #N/A | #N/A | 0.87 |
| 0.56 | 1.02 | 0.52 | 1.17 | 0.74 | 0.97 |

|      |      |      |      |      |      |      |
|------|------|------|------|------|------|------|
| #N/A | #N/A | #N/A | #N/A | #N/A | #N/A | #N/A |
| #N/A | #N/A | #N/A | #N/A | #N/A | #N/A | #N/A |
| 0.06 | 0.93 | 0.40 | 0.65 | 0.23 | 0.76 | 0.76 |
| #N/A | #N/A | #N/A | #N/A | #N/A | #N/A | #N/A |
| #N/A | 0.83 | 0.27 | 0.69 | 0.28 | 0.75 | 0.75 |
| #N/A | #N/A | #N/A | #N/A | #N/A | #N/A | #N/A |
| #N/A | #N/A | #N/A | #N/A | #N/A | #N/A | 0.84 |
| 0.66 | #N/A | #N/A | 0.92 | 0.54 | 1.24 | 1.24 |
| 0.66 | 0.88 | 0.42 | 0.96 | 0.58 | #N/A | #N/A |
| #N/A | #N/A | #N/A | 0.74 | 0.34 | 1.29 | 1.29 |
| #N/A | 1.37 | 0.83 | 1.18 | 0.75 | 1.00 | 1.00 |
| #N/A | 1.11 | 0.65 | #N/A | #N/A | 0.94 | 0.94 |
| 0.63 | 1.02 | 0.53 | 1.19 | 0.74 | 0.93 | 0.93 |
| 0.79 | 1.02 | 0.54 | 1.04 | 0.64 | #N/A | #N/A |
| 0.35 | 0.82 | 0.23 | #N/A | #N/A | 0.86 | 0.86 |
| #N/A | #N/A | #N/A | #N/A | #N/A | #N/A | #N/A |
| #N/A | 1.96 | 0.96 | 0.81 | 0.41 | #N/A | #N/A |
| 0.70 | 1.08 | 0.50 | 0.76 | 0.34 | 1.04 | 1.04 |
| 0.28 | 0.85 | 0.27 | 0.67 | 0.25 | 1.29 | 1.29 |
| 0.55 | 0.85 | 0.27 | 1.78 | 0.93 | 1.40 | 1.40 |
| #N/A | #N/A | #N/A | #N/A | #N/A | #N/A | #N/A |
| #N/A | #N/A | #N/A | #N/A | #N/A | #N/A | #N/A |
| #N/A | #N/A | #N/A | #N/A | #N/A | 0.99 | 0.99 |
| 0.47 | 0.89 | 0.39 | 0.69 | 0.27 | 1.18 | 1.18 |
| 0.43 | 1.07 | 0.60 | #N/A | #N/A | 0.96 | 0.96 |
| #N/A | #N/A | #N/A | #N/A | #N/A | #N/A | #N/A |
| #N/A | 1.15 | 0.72 | 1.45 | 0.86 | #N/A | #N/A |
| 0.46 | 1.09 | 0.62 | 0.85 | 0.45 | #N/A | #N/A |
| 0.34 | 0.69 | 0.15 | 0.92 | 0.53 | 1.11 | 1.11 |
| 0.36 | 0.98 | 0.46 | 1.88 | 0.94 | 1.30 | 1.30 |
| 0.14 | 0.92 | 0.41 | 1.34 | 0.83 | 0.85 | 0.85 |
| 0.33 | 1.33 | 0.84 | 0.93 | 0.53 | 0.93 | 0.93 |
| #N/A | 0.73 | 0.13 | 0.68 | 0.27 | 0.82 | 0.82 |
| 0.35 | 1.13 | 0.69 | 0.87 | 0.47 | 0.97 | 0.97 |
| #N/A | #N/A | #N/A | #N/A | #N/A | #N/A | #N/A |
| #N/A | 1.15 | 0.73 | 0.87 | 0.48 | #N/A | #N/A |
| #N/A | #N/A | #N/A | 0.55 | 0.15 | 0.88 | 0.88 |
| 0.75 | 0.70 | 0.11 | 1.00 | 0.60 | 0.97 | 0.97 |
| 0.38 | 1.27 | 0.83 | 2.13 | 0.96 | 0.87 | 0.87 |
| #N/A | 1.00 | 0.50 | 1.47 | 0.87 | 3.01 | 3.01 |
| 0.30 | 0.80 | 0.23 | 0.82 | 0.41 | #N/A | #N/A |
| 0.31 | 0.63 | 0.08 | 0.61 | 0.18 | #N/A | #N/A |
| #N/A | #N/A | #N/A | #N/A | #N/A | #N/A | #N/A |
| #N/A | #N/A | #N/A | #N/A | #N/A | #N/A | #N/A |
| #N/A | #N/A | #N/A | #N/A | #N/A | #N/A | #N/A |
| #N/A | #N/A | #N/A | #N/A | #N/A | #N/A | 0.92 |
| 0.55 | 1.00 | 0.49 | 0.88 | 0.48 | 0.88 | 0.88 |
| #N/A | #N/A | #N/A | #N/A | #N/A | #N/A | #N/A |
| 0.83 | 1.19 | 0.77 | 0.92 | 0.54 | 0.98 | 0.98 |
| 0.37 | #N/A | #N/A | 0.67 | 0.26 | 0.92 | 0.92 |
| 0.75 | 1.10 | 0.62 | 1.61 | 0.89 | 0.98 | 0.98 |



|      |      |      |      |      |      |      |
|------|------|------|------|------|------|------|
| #N/A | #N/A | #N/A | #N/A | #N/A | #N/A | #N/A |
| #N/A | #N/A | #N/A | #N/A | #N/A | #N/A | #N/A |
| #N/A | #N/A | #N/A | #N/A | #N/A | #N/A | #N/A |
| 0.49 | 0.60 | 0.06 | 0.46 | 0.09 | 0.88 | 0.88 |
| #N/A | #N/A | #N/A | #N/A | #N/A | #N/A | 0.96 |
| #N/A | #N/A | #N/A | #N/A | #N/A | #N/A | #N/A |
| 0.57 | 1.35 | 0.77 | 0.94 | 0.56 | #N/A | #N/A |
| 0.93 | 1.62 | 0.67 | 1.15 | 0.73 | #N/A | #N/A |
| 0.85 | 0.93 | 0.38 | 0.76 | 0.36 | 0.99 | 0.99 |
| 0.85 | 1.10 | 0.64 | 0.71 | 0.30 | 1.04 | 1.04 |
| 0.99 | #N/A | #N/A | #N/A | #N/A | #N/A | #N/A |
| 0.69 | 1.03 | 0.51 | 1.49 | 0.88 | 1.18 | 1.18 |
| 0.84 | 1.11 | 0.65 | 0.59 | 0.18 | 0.81 | 0.81 |
| 0.52 | 0.99 | 0.50 | 1.19 | 0.74 | 1.06 | 1.06 |
| #N/A | #N/A | #N/A | #N/A | #N/A | #N/A | #N/A |
| #N/A | 0.79 | 0.18 | 0.70 | 0.29 | 0.99 | 0.99 |
| #N/A | 1.25 | 0.73 | 0.86 | 0.47 | 0.80 | 0.80 |
| 0.37 | 0.62 | 0.07 | 0.46 | 0.09 | 1.06 | 1.06 |
| 0.36 | 0.85 | 0.26 | 2.49 | 0.98 | 1.24 | 1.24 |
| 0.36 | 1.00 | 0.51 | 0.97 | 0.59 | 1.13 | 1.13 |
| 0.53 | 1.12 | 0.68 | 1.28 | 0.79 | 0.96 | 0.96 |
| 0.01 | 1.19 | 0.76 | #N/A | #N/A | 0.76 | 0.76 |
| 0.33 | #N/A | #N/A | 0.64 | 0.22 | 1.12 | 1.12 |
| 0.41 | 1.00 | 0.47 | 1.24 | 0.78 | 1.21 | 1.21 |
| #N/A | 0.91 | 0.38 | #N/A | #N/A | #N/A | #N/A |
| 0.30 | 1.04 | 0.57 | 1.25 | 0.79 | #N/A | #N/A |
| 0.48 | #N/A | #N/A | #N/A | #N/A | #N/A | #N/A |
| 0.42 | 0.92 | 0.40 | #N/A | #N/A | #N/A | #N/A |
| 0.62 | 0.93 | 0.42 | 0.97 | 0.59 | 0.89 | 0.89 |
| 0.62 | 1.24 | 0.80 | 0.62 | 0.20 | 0.94 | 0.94 |
| 0.37 | 0.98 | 0.47 | 0.78 | 0.37 | 0.93 | 0.93 |
| #N/A | #N/A | #N/A | #N/A | #N/A | #N/A | #N/A |
| 0.07 | 0.50 | 0.03 | 0.58 | 0.18 | 1.23 | 1.23 |
| 0.09 | 0.57 | 0.05 | 0.48 | 0.09 | 0.96 | 0.96 |
| 0.65 | 1.43 | 0.92 | 0.75 | 0.33 | 1.28 | 1.28 |
| 0.13 | 0.58 | 0.05 | 0.56 | 0.15 | 0.90 | 0.90 |
| 0.30 | 0.73 | 0.16 | 1.05 | 0.64 | 1.01 | 1.01 |
| 0.37 | #N/A | #N/A | 0.76 | 0.34 | 0.95 | 0.95 |
| 0.26 | 1.05 | 0.59 | 1.03 | 0.61 | 0.97 | 0.97 |
| 0.30 | #N/A | #N/A | 0.67 | 0.25 | 0.95 | 0.95 |
| #N/A | #N/A | #N/A | #N/A | #N/A | #N/A | #N/A |
| 0.34 | 0.68 | 0.10 | 0.63 | 0.21 | 0.77 | 0.77 |
| #N/A | #N/A | #N/A | #N/A | #N/A | 0.91 | 0.91 |
| 0.56 | 1.00 | 0.52 | 1.26 | 0.79 | #N/A | #N/A |
| 0.71 | 1.11 | 0.67 | 1.67 | 0.91 | 1.17 | 1.17 |
| #N/A | #N/A | #N/A | #N/A | #N/A | #N/A | #N/A |
| 0.79 | 0.88 | 0.31 | 4.90 | 1.00 | #N/A | #N/A |
| #N/A | 1.96 | 0.99 | 2.01 | 0.95 | #N/A | #N/A |
| 0.54 | 1.02 | 0.51 | #N/A | #N/A | 0.82 | 0.82 |
| 0.75 | 1.28 | 0.85 | 1.27 | 0.80 | 0.99 | 0.99 |
| 0.11 | 1.02 | 0.53 | #N/A | #N/A | 1.13 | 1.13 |

|      |      |      |      |      |      |      |
|------|------|------|------|------|------|------|
| #N/A | #N/A | #N/A | #N/A | #N/A | #N/A | #N/A |
| 0.75 | 1.01 | 0.51 | 1.49 | 0.87 | 0.79 |      |
| 0.54 | 1.03 | 0.56 | 1.22 | 0.77 | 1.01 |      |
| 0.06 | 0.43 | 0.02 | 0.34 | 0.05 | 0.50 |      |
| 0.59 | 0.98 | 0.49 | 0.67 | 0.25 | 1.06 |      |
| #N/A | #N/A | #N/A | #N/A | #N/A | #N/A |      |
| #N/A | #N/A | #N/A | #N/A | #N/A | #N/A |      |
| 0.85 | #N/A | #N/A | #N/A | #N/A | 0.99 |      |
| #N/A | #N/A | #N/A | #N/A | #N/A | #N/A |      |
| #N/A | 0.97 | 0.45 | 0.85 | 0.45 | #N/A |      |
| 0.54 | 1.03 | 0.54 | #N/A | #N/A | #N/A |      |
| #N/A | #N/A | #N/A | #N/A | #N/A | #N/A |      |
| 0.13 | 0.49 | 0.03 | 0.46 | 0.09 | 1.17 |      |
| #N/A | #N/A | #N/A | #N/A | #N/A | #N/A |      |
| 0.69 | #N/A | #N/A | 1.05 | 0.63 | 0.88 |      |
| #N/A | #N/A | #N/A | #N/A | #N/A | 0.69 |      |
| #N/A | #N/A | #N/A | #N/A | #N/A | #N/A |      |
| 0.47 | 0.99 | 0.48 | #N/A | #N/A | #N/A |      |
| 0.94 | 0.98 | 0.47 | 1.73 | 0.92 | 1.42 |      |
| #N/A | #N/A | #N/A | #N/A | #N/A | #N/A |      |
| 0.57 | 0.82 | 0.23 | #N/A | #N/A | 0.85 |      |
| 0.68 | 1.09 | 0.63 | 0.78 | 0.37 | 0.84 |      |
| 0.60 | #N/A | #N/A | 0.62 | 0.19 | 0.86 |      |
| 0.49 | 0.82 | 0.22 | #N/A | #N/A | 0.74 |      |
| 0.70 | 1.13 | 0.70 | #N/A | #N/A | 0.80 |      |
| 0.20 | 1.20 | 0.58 | 0.53 | 0.14 | #N/A |      |
| 0.98 | #N/A | #N/A | 0.96 | 0.58 | #N/A |      |
| 0.00 | #N/A | #N/A | 0.20 | 0.01 | #N/A |      |
| #N/A | 1.19 | 0.56 | #N/A | #N/A | 0.74 |      |
| 0.33 | 0.92 | 0.38 | 0.91 | 0.52 | 1.20 |      |
| 0.54 | 1.12 | 0.63 | 3.00 | 0.99 | 1.41 |      |
| 0.41 | #N/A | #N/A | 0.69 | 0.27 | 1.15 |      |
| 0.57 | 0.84 | 0.27 | 1.67 | 0.91 | 0.74 |      |
| 0.34 | 0.60 | 0.06 | 2.37 | 0.97 | 1.15 |      |
| #N/A | #N/A | #N/A | 0.87 | 0.46 | 0.91 |      |
| 0.35 | 0.81 | 0.22 | 0.87 | 0.48 | 0.97 |      |
| #N/A | #N/A | #N/A | #N/A | #N/A | #N/A |      |
| 0.45 | 0.73 | 0.14 | 1.50 | 0.87 | 0.88 |      |
| 0.28 | 1.21 | 0.74 | 0.37 | 0.05 | 0.92 |      |
| #N/A | 0.94 | 0.41 | 0.78 | 0.38 | 0.83 |      |
| 0.04 | 0.62 | 0.08 | #N/A | #N/A | 0.56 |      |
| #N/A | #N/A | #N/A | #N/A | #N/A | 0.91 |      |
| 0.73 | 1.27 | 0.84 | 0.99 | 0.60 | 0.79 |      |
| 0.27 | 0.91 | 0.35 | #N/A | #N/A | 0.80 |      |
| #N/A | #N/A | #N/A | #N/A | #N/A | #N/A |      |
| #N/A | 0.65 | 0.08 | 1.07 | 0.65 | 0.81 |      |
| #N/A | #N/A | #N/A | 0.72 | 0.30 | 1.10 |      |
| 0.45 | 1.11 | 0.66 | 1.31 | 0.81 | 0.96 |      |
| #N/A | #N/A | #N/A | #N/A | #N/A | 1.21 |      |
| 0.50 | #N/A | #N/A | 0.82 | 0.41 | #N/A |      |
| #N/A | #N/A | #N/A | #N/A | #N/A | #N/A |      |

|      |      |      |      |      |      |
|------|------|------|------|------|------|
| #N/A | 0.44 | 0.03 | 0.35 | 0.05 | #N/A |
| 0.50 | 0.77 | 0.18 | 1.68 | 0.91 | 0.86 |
| #N/A | #N/A | #N/A | #N/A | #N/A | #N/A |
| 0.64 | 0.75 | 0.17 | 0.72 | 0.30 | 0.71 |
| #N/A | 0.87 | 0.30 | 0.99 | 0.60 | 0.98 |
| 0.73 | 0.68 | 0.14 | 0.80 | 0.39 | #N/A |
| #N/A | #N/A | #N/A | #N/A | #N/A | #N/A |
| 0.14 | 0.77 | 0.18 | 1.08 | 0.68 | 1.02 |
| 0.56 | 1.02 | 0.54 | 1.43 | 0.85 | 0.94 |
| 0.87 | #N/A | #N/A | 0.95 | 0.57 | 0.85 |
| #N/A | 0.89 | 0.32 | 0.87 | 0.48 | 0.76 |
| #N/A | 1.16 | 0.68 | 0.60 | 0.19 | 0.98 |
| 0.30 | #N/A | #N/A | #N/A | #N/A | #N/A |
| 0.29 | 0.67 | 0.10 | 1.26 | 0.79 | 0.88 |
| 0.37 | 0.94 | 0.41 | 1.29 | 0.79 | 0.81 |
| 0.99 | 1.77 | 0.94 | 2.30 | 0.97 | #N/A |
| #N/A | 0.91 | 0.39 | 1.04 | 0.65 | 0.81 |
| 0.54 | 0.92 | 0.36 | 0.99 | 0.60 | 0.85 |
| 0.09 | 0.77 | 0.22 | 1.01 | 0.62 | #N/A |
| #N/A | #N/A | #N/A | #N/A | #N/A | #N/A |
| 0.46 | 0.91 | 0.41 | 1.32 | 0.82 | 0.74 |
| 0.34 | 0.83 | 0.28 | 0.86 | 0.46 | #N/A |
| 0.61 | 1.09 | 0.64 | 0.93 | 0.54 | 0.99 |
| #N/A | #N/A | #N/A | #N/A | #N/A | #N/A |
| #N/A | #N/A | #N/A | #N/A | #N/A | #N/A |
| 0.42 | 1.27 | 0.76 | 0.87 | 0.47 | 0.85 |
| 0.42 | 0.71 | 0.12 | 0.69 | 0.27 | 0.82 |
| #N/A | 0.66 | 0.08 | 1.03 | 0.61 | 1.00 |
| #N/A | #N/A | #N/A | #N/A | #N/A | #N/A |
| 0.25 | 0.91 | 0.37 | 2.11 | 0.96 | #N/A |
| 0.69 | #N/A | #N/A | 0.65 | 0.22 | 0.98 |
| 0.25 | #N/A | #N/A | 1.39 | 0.83 | 0.83 |
| #N/A | 0.91 | 0.41 | 0.98 | 0.60 | #N/A |
| 0.64 | 0.86 | 0.30 | 0.77 | 0.37 | 0.91 |
| 0.56 | 1.07 | 0.59 | 1.13 | 0.72 | 0.74 |
| 0.74 | 0.98 | 0.45 | 1.05 | 0.65 | 0.83 |
| 0.13 | 0.46 | 0.03 | 0.65 | 0.23 | 0.48 |
| 0.26 | #N/A | #N/A | 0.73 | 0.32 | #N/A |
| 0.01 | #N/A | #N/A | #N/A | #N/A | #N/A |
| 0.80 | 1.12 | 0.66 | 0.88 | 0.49 | 1.26 |
| #N/A | 1.10 | 0.66 | #N/A | #N/A | 1.68 |
| 0.47 | 1.13 | 0.57 | 0.86 | 0.47 | 0.82 |
| 0.38 | 0.61 | 0.06 | 0.98 | 0.58 | 0.84 |
| 0.04 | 0.40 | 0.01 | 0.31 | 0.04 | 0.58 |
| 0.13 | 1.07 | 0.61 | 1.18 | 0.74 | 0.73 |
| 0.88 | 1.05 | 0.54 | #N/A | #N/A | 1.09 |
| 0.73 | 1.10 | 0.64 | 0.79 | 0.40 | 0.88 |
| #N/A | 1.57 | 0.89 | 0.70 | 0.29 | 0.82 |
| 0.83 | 1.12 | 0.68 | #N/A | #N/A | #N/A |
| 0.93 | #N/A | #N/A | 1.25 | 0.79 | 0.80 |
| #N/A | #N/A | #N/A | #N/A | #N/A | #N/A |

|      |      |      |      |      |      |      |
|------|------|------|------|------|------|------|
| #N/A | #N/A | #N/A | #N/A | #N/A | #N/A | 0.66 |
| 0.92 | 1.01 | 0.53 | 0.78 | 0.38 | 1.09 |      |
| #N/A | #N/A | #N/A | #N/A | #N/A | #N/A | 0.96 |
| #N/A | #N/A | #N/A | #N/A | #N/A | #N/A | #N/A |
| 0.56 | 0.88 | 0.30 | 1.01 | 0.60 | 0.79 |      |
| 0.50 | #N/A | #N/A | #N/A | #N/A | #N/A | #N/A |
| 0.40 | 0.77 | 0.18 | 0.74 | 0.32 | 0.79 |      |
| #N/A | 1.41 | 0.89 | 1.10 | 0.69 | 1.25 |      |
| #N/A | #N/A | #N/A | 0.45 | 0.09 | 0.82 |      |
| 0.48 | 0.83 | 0.23 | 1.03 | 0.64 | 0.85 |      |
| 0.32 | #N/A | #N/A | #N/A | #N/A | 1.00 |      |
| 0.59 | 0.92 | 0.37 | 0.94 | 0.55 | 0.98 |      |
| 0.42 | 0.83 | 0.27 | 1.40 | 0.84 | 0.93 |      |
| #N/A | #N/A | #N/A | #N/A | #N/A | #N/A | #N/A |
| 0.32 | 1.01 | 0.53 | 0.75 | 0.35 | 1.10 |      |
| 0.34 | 0.57 | 0.05 | 0.68 | 0.27 | 0.74 |      |
| 0.56 | 1.06 | 0.59 | 0.77 | 0.35 | 0.93 |      |
| 0.27 | #N/A | #N/A | 0.79 | 0.38 | 0.75 |      |
| 0.80 | 1.07 | 0.56 | 0.67 | 0.25 | #N/A |      |
| 0.42 | 0.95 | 0.41 | 1.67 | 0.91 | 1.32 |      |
| 0.46 | 1.08 | 0.64 | #N/A | #N/A | 0.92 |      |
| 0.75 | #N/A | #N/A | #N/A | #N/A | 0.91 |      |
| 0.68 | 1.07 | 0.59 | 1.24 | 0.77 | 1.07 |      |
| 0.90 | 0.69 | 0.17 | #N/A | #N/A | 1.14 |      |
| #N/A | #N/A | #N/A | 0.42 | 0.08 | #N/A |      |
| 0.50 | #N/A | #N/A | 1.13 | 0.72 | #N/A |      |
| #N/A | 0.37 | 0.01 | 0.33 | 0.04 | 1.47 |      |
| #N/A | 1.40 | 0.64 | #N/A | #N/A | 1.81 |      |
| 0.94 | #N/A | #N/A | 1.43 | 0.86 | 0.94 |      |
| #N/A | 2.28 | 0.68 | 1.59 | 0.90 | 1.23 |      |
| 0.49 | #N/A | #N/A | 0.96 | 0.55 | #N/A |      |
| 0.47 | 0.91 | 0.35 | 0.86 | 0.46 | 0.88 |      |
| #N/A | #N/A | #N/A | 0.85 | 0.45 | 1.18 |      |
| 0.85 | 1.30 | 0.55 | 0.83 | 0.43 | 0.81 |      |
| #N/A | 0.94 | 0.40 | #N/A | #N/A | 0.95 |      |
| #N/A | #N/A | #N/A | #N/A | #N/A | #N/A | #N/A |
| 0.55 | 1.17 | 0.71 | 1.03 | 0.63 | 1.01 |      |
| 0.10 | 0.86 | 0.30 | 0.44 | 0.08 | 0.89 |      |
| 0.25 | #N/A | #N/A | 0.36 | 0.05 | 0.90 |      |
| #N/A | #N/A | #N/A | 0.53 | 0.13 | 1.29 |      |
| 0.39 | 0.81 | 0.22 | 0.83 | 0.42 | 0.81 |      |
| 0.67 | 1.12 | 0.69 | 1.35 | 0.82 | #N/A |      |
| #N/A | 1.11 | 0.68 | 0.84 | 0.44 | #N/A |      |
| 0.23 | 0.85 | 0.27 | 1.06 | 0.64 | 0.90 |      |
| 0.35 | #N/A | #N/A | 0.63 | 0.21 | #N/A |      |
| 0.44 | 0.99 | 0.47 | 3.66 | 0.99 | 1.09 |      |
| 0.53 | 1.04 | 0.57 | 1.19 | 0.74 | 0.97 |      |
| 0.77 | 0.97 | 0.46 | 1.13 | 0.72 | 0.91 |      |
| 0.78 | 1.44 | 0.87 | 0.73 | 0.33 | #N/A |      |
| 0.35 | #N/A | #N/A | 1.07 | 0.65 | 1.11 |      |
| 0.43 | 0.74 | 0.14 | #N/A | #N/A | 0.79 |      |

|      |      |      |      |      |      |
|------|------|------|------|------|------|
| 0.64 | 1.49 | 0.85 | 1.12 | 0.71 | 0.94 |
| 0.32 | 0.56 | 0.05 | 0.66 | 0.23 | 0.66 |
| 0.77 | 0.85 | 0.27 | 1.23 | 0.77 | 0.81 |
| #N/A | #N/A | #N/A | #N/A | #N/A | #N/A |
| 0.34 | 0.86 | 0.28 | 1.14 | 0.71 | 0.96 |
| 0.28 | 1.08 | 0.60 | 0.53 | 0.13 | 0.94 |
| 0.62 | 1.02 | 0.52 | 1.00 | 0.59 | #N/A |
| 0.46 | 0.98 | 0.49 | 0.79 | 0.37 | 0.97 |
| #N/A | #N/A | #N/A | 0.82 | 0.42 | #N/A |
| 0.59 | #N/A | #N/A | 1.12 | 0.71 | 1.09 |
| 0.50 | 0.95 | 0.42 | 1.00 | 0.61 | 0.94 |
| #N/A | 1.93 | 0.78 | 0.90 | 0.52 | 1.02 |
| 0.43 | 1.35 | 0.85 | 1.02 | 0.63 | 0.80 |
| 0.47 | 1.14 | 0.61 | 0.78 | 0.37 | #N/A |
| 0.80 | 1.08 | 0.60 | 0.75 | 0.34 | 0.62 |
| 0.27 | 0.98 | 0.48 | 0.65 | 0.24 | 0.92 |
| 0.45 | 0.95 | 0.41 | 1.03 | 0.62 | 0.82 |
| 0.76 | 1.18 | 0.75 | #N/A | #N/A | 0.86 |
| 0.49 | 1.01 | 0.53 | 0.92 | 0.52 | 0.64 |
| 0.62 | 0.92 | 0.39 | 0.50 | 0.11 | 0.98 |
| #N/A | 1.05 | 0.59 | #N/A | #N/A | 0.93 |
| 0.72 | 1.09 | 0.62 | 0.86 | 0.46 | 0.84 |
| 0.52 | 1.29 | 0.76 | 1.67 | 0.91 | 0.79 |
| 0.77 | 1.08 | 0.58 | 1.33 | 0.82 | 1.29 |
| 0.56 | 0.88 | 0.31 | #N/A | #N/A | 0.91 |
| 0.58 | 0.66 | 0.18 | 0.95 | 0.54 | #N/A |
| #N/A | #N/A | #N/A | #N/A | #N/A | #N/A |
| 0.65 | 0.92 | 0.38 | 0.94 | 0.55 | 0.89 |
| 0.10 | 1.17 | 0.70 | 0.89 | 0.51 | 1.08 |
| #N/A | 0.95 | 0.42 | 0.82 | 0.41 | 0.97 |
| #N/A | #N/A | #N/A | #N/A | #N/A | #N/A |
| 0.04 | 1.18 | 0.75 | 1.02 | 0.62 | 0.86 |
| #N/A | #N/A | #N/A | #N/A | #N/A | #N/A |
| 0.41 | 0.77 | 0.21 | 0.64 | 0.22 | 1.08 |
| 0.07 | 0.99 | 0.49 | 2.23 | 0.96 | 0.97 |
| 0.79 | 1.13 | 0.69 | #N/A | #N/A | 0.82 |
| 0.39 | 1.29 | 0.67 | 0.54 | 0.14 | 0.93 |
| 0.54 | 0.93 | 0.39 | 0.89 | 0.49 | 0.85 |
| 0.50 | 1.17 | 0.74 | 1.08 | 0.68 | 1.14 |
| 0.63 | 0.89 | 0.32 | 0.84 | 0.43 | 0.83 |
| 0.50 | 1.28 | 0.84 | 2.77 | 0.98 | #N/A |
| #N/A | #N/A | #N/A | #N/A | #N/A | #N/A |
| 0.88 | 0.96 | 0.45 | 1.22 | 0.77 | 1.04 |
| 0.09 | 0.78 | 0.22 | 1.54 | 0.88 | 0.97 |
| 0.76 | 1.82 | 0.89 | 2.44 | 0.97 | 1.74 |
| 0.66 | 0.85 | 0.28 | #N/A | #N/A | 0.90 |
| 0.42 | #N/A | #N/A | 0.78 | 0.37 | 0.66 |
| 0.42 | #N/A | #N/A | 1.46 | 0.86 | 0.87 |
| #N/A | #N/A | #N/A | #N/A | #N/A | #N/A |
| #N/A | #N/A | #N/A | #N/A | #N/A | #N/A |
| 0.75 | #N/A | #N/A | 0.89 | 0.49 | #N/A |

|      |      |      |      |      |      |
|------|------|------|------|------|------|
| 0.01 | 0.35 | 0.01 | 0.46 | 0.09 | 0.62 |
| #N/A | #N/A | #N/A | 0.58 | 0.17 | #N/A |
| 0.60 | #N/A | #N/A | 0.85 | 0.44 | 0.87 |
| 0.62 | 1.27 | 0.83 | 1.33 | 0.82 | 0.91 |
| 0.66 | 1.12 | 0.67 | 0.79 | 0.40 | 0.77 |
| #N/A | #N/A | #N/A | #N/A | #N/A | #N/A |
| 0.38 | 0.77 | 0.17 | 0.62 | 0.21 | 1.43 |
| 0.11 | 0.92 | 0.36 | 1.41 | 0.85 | 1.35 |
| #N/A | 0.50 | 0.03 | 0.39 | 0.06 | 0.66 |
| 0.40 | 0.80 | 0.21 | 0.83 | 0.44 | 0.87 |
| 0.44 | 1.07 | 0.62 | 1.36 | 0.83 | 0.78 |
| 0.46 | #N/A | #N/A | 0.87 | 0.46 | 0.95 |
| 0.68 | #N/A | #N/A | #N/A | #N/A | #N/A |
| 0.86 | 1.09 | 0.60 | 0.63 | 0.21 | 0.77 |
| 0.47 | #N/A | #N/A | 1.61 | 0.91 | 1.28 |
| 0.29 | 1.67 | 0.93 | 0.64 | 0.22 | 0.99 |
| 0.52 | 0.84 | 0.26 | #N/A | #N/A | 1.30 |
| 0.21 | #N/A | #N/A | 0.34 | 0.05 | 1.07 |
| 0.42 | 1.15 | 0.72 | 0.91 | 0.51 | 0.81 |
| #N/A | 0.75 | 0.20 | 1.02 | 0.63 | #N/A |
| 0.28 | 1.04 | 0.55 | 0.64 | 0.22 | 0.80 |
| #N/A | #N/A | #N/A | #N/A | #N/A | #N/A |
| 0.35 | 1.10 | 0.66 | 1.04 | 0.65 | 1.11 |
| #N/A | 1.28 | 0.69 | #N/A | #N/A | #N/A |
| 0.52 | 1.16 | 0.74 | 0.50 | 0.11 | 0.74 |
| #N/A | #N/A | #N/A | #N/A | #N/A | 0.71 |
| 0.74 | 0.99 | 0.50 | 1.25 | 0.78 | #N/A |
| 0.70 | 1.03 | 0.54 | 0.62 | 0.21 | 0.88 |
| 0.59 | 1.92 | 0.98 | 0.52 | 0.13 | #N/A |
| #N/A | 0.88 | 0.31 | 0.56 | 0.16 | 1.17 |
| 0.64 | 1.06 | 0.55 | 1.14 | 0.72 | 0.93 |
| 0.54 | 1.32 | 0.87 | 0.88 | 0.47 | 0.81 |
| 0.68 | 0.73 | 0.14 | #N/A | #N/A | 0.67 |
| 0.61 | 1.14 | 0.65 | 0.99 | 0.60 | 0.68 |
| #N/A | 0.83 | 0.26 | #N/A | #N/A | 0.91 |
| 0.92 | 0.95 | 0.43 | 1.02 | 0.61 | #N/A |
| 0.46 | 0.92 | 0.37 | 1.15 | 0.73 | 1.01 |
| 0.69 | 1.12 | 0.69 | 0.92 | 0.52 | 0.81 |
| 0.55 | 0.94 | 0.41 | 1.75 | 0.92 | 0.93 |
| 0.66 | 0.87 | 0.31 | 1.86 | 0.94 | 0.71 |
| #N/A | #N/A | #N/A | #N/A | #N/A | #N/A |
| 0.25 | 1.11 | 0.65 | #N/A | #N/A | 1.10 |
| 0.30 | 0.92 | 0.37 | 0.91 | 0.52 | 0.95 |
| 0.45 | 0.97 | 0.46 | 0.61 | 0.20 | 1.13 |
| 0.28 | 1.12 | 0.57 | #N/A | #N/A | 0.99 |
| 0.31 | 0.70 | 0.11 | 1.60 | 0.89 | 1.24 |
| 0.41 | 0.80 | 0.20 | 0.77 | 0.36 | #N/A |
| #N/A | #N/A | #N/A | #N/A | #N/A | #N/A |
| 0.24 | 1.62 | 0.95 | 0.81 | 0.42 | 0.71 |
| 0.52 | 0.75 | 0.21 | 0.88 | 0.50 | 1.15 |
| 0.25 | 1.31 | 0.82 | 0.69 | 0.26 | #N/A |

|      |      |      |      |      |      |
|------|------|------|------|------|------|
| #N/A | 0.84 | 0.26 | 1.06 | 0.66 | 0.89 |
| 0.85 | #N/A | #N/A | 0.83 | 0.43 | 0.76 |
| 0.81 | 0.87 | 0.29 | 1.14 | 0.73 | 1.02 |
| 0.28 | 1.14 | 0.61 | 0.62 | 0.20 | 1.13 |
| 0.14 | 0.36 | 0.01 | 0.36 | 0.05 | 0.69 |
| 0.49 | 1.05 | 0.57 | 1.10 | 0.69 | 1.33 |
| #N/A | 1.22 | 0.62 | #N/A | #N/A | 1.19 |
| #N/A | 1.38 | 0.79 | 0.80 | 0.40 | 1.07 |
| 0.58 | 0.88 | 0.31 | 1.05 | 0.63 | 1.10 |
| 0.09 | 0.38 | 0.01 | 0.46 | 0.09 | 0.89 |
| 0.48 | 1.10 | 0.65 | #N/A | #N/A | 0.89 |
| 0.82 | 1.23 | 0.81 | 0.97 | 0.58 | 0.84 |
| 0.56 | 0.82 | 0.23 | 0.82 | 0.41 | 1.12 |
| 0.51 | 1.07 | 0.54 | #N/A | #N/A | 1.53 |
| 0.59 | 1.15 | 0.72 | 0.98 | 0.58 | 0.94 |
| 0.79 | 2.14 | 0.84 | 0.93 | 0.55 | 0.89 |
| 0.27 | 0.62 | 0.07 | #N/A | #N/A | 0.71 |
| 0.40 | #N/A | #N/A | 0.92 | 0.51 | #N/A |
| 0.49 | 1.20 | 0.78 | 2.33 | 0.97 | 0.96 |
| #N/A | #N/A | #N/A | #N/A | #N/A | #N/A |
| #N/A | #N/A | #N/A | #N/A | #N/A | #N/A |
| #N/A | #N/A | #N/A | #N/A | #N/A | #N/A |
| 0.71 | 1.31 | 0.87 | 0.60 | 0.18 | 0.90 |
| 0.53 | 1.11 | 0.66 | 0.58 | 0.18 | 0.91 |
| 0.48 | 0.99 | 0.49 | 1.07 | 0.67 | 0.86 |
| 0.35 | 1.11 | 0.64 | 1.33 | 0.82 | 1.05 |
| 0.42 | 1.24 | 0.82 | 0.66 | 0.24 | 0.88 |
| 0.51 | 0.77 | 0.19 | 0.77 | 0.35 | 0.90 |
| #N/A | #N/A | #N/A | #N/A | #N/A | #N/A |
| 0.92 | 1.01 | 0.54 | 0.81 | 0.41 | 0.65 |
| 0.46 | 0.83 | 0.26 | 0.78 | 0.37 | 0.82 |
| #N/A | #N/A | #N/A | 0.78 | 0.38 | 1.03 |
| #N/A | 0.75 | 0.22 | 0.45 | 0.08 | #N/A |
| 0.50 | 1.29 | 0.73 | 0.78 | 0.39 | 0.92 |
| 0.90 | 1.51 | 0.94 | 0.77 | 0.36 | 0.72 |
| 0.65 | 1.10 | 0.65 | 0.90 | 0.49 | 0.95 |
| 0.12 | 1.15 | 0.55 | 0.47 | 0.10 | #N/A |
| #N/A | #N/A | #N/A | 0.91 | 0.50 | 0.85 |
| 0.44 | #N/A | #N/A | #N/A | #N/A | 0.71 |
| 0.65 | 1.46 | 0.92 | #N/A | #N/A | 1.63 |
| 0.63 | 1.01 | 0.48 | 0.93 | 0.52 | 1.02 |
| 0.50 | 1.09 | 0.52 | 1.32 | 0.82 | #N/A |
| #N/A | #N/A | #N/A | 0.74 | 0.32 | #N/A |
| 0.36 | #N/A | #N/A | 1.24 | 0.77 | 1.05 |
| #N/A | #N/A | #N/A | #N/A | #N/A | 0.94 |
| 0.32 | #N/A | #N/A | 1.17 | 0.73 | #N/A |
| 0.45 | 1.09 | 0.64 | 1.27 | 0.80 | 1.24 |
| 0.67 | 1.03 | 0.52 | #N/A | #N/A | 0.85 |
| #N/A | 1.08 | 0.63 | 0.93 | 0.52 | 0.91 |
| 0.23 | #N/A | #N/A | 1.21 | 0.77 | #N/A |
| 0.45 | 0.74 | 0.14 | 0.84 | 0.44 | 1.00 |



|      |      |      |      |      |      |
|------|------|------|------|------|------|
| #N/A | 1.08 | 0.52 | #N/A | #N/A | 1.09 |
| 0.28 | 0.70 | 0.11 | #N/A | #N/A | 1.14 |
| 0.40 | 1.43 | 0.63 | #N/A | #N/A | 0.82 |
| 0.61 | 0.94 | 0.40 | 1.17 | 0.73 | 0.62 |
| 0.22 | 0.63 | 0.08 | 0.92 | 0.53 | 0.74 |
| 0.81 | 1.06 | 0.59 | 0.82 | 0.41 | 1.13 |
| 0.07 | #N/A | #N/A | 0.79 | 0.38 | 0.76 |
| 0.37 | 1.02 | 0.53 | 2.30 | 0.97 | 0.93 |
| 0.32 | 0.54 | 0.04 | 0.60 | 0.19 | 0.86 |
| 0.58 | 1.30 | 0.84 | 0.67 | 0.25 | 0.92 |
| 0.10 | 0.68 | 0.11 | 0.79 | 0.38 | 0.76 |
| #N/A | #N/A | #N/A | #N/A | #N/A | #N/A |
| 0.63 | #N/A | #N/A | 0.67 | 0.24 | 0.89 |
| 0.43 | #N/A | #N/A | 0.64 | 0.23 | 0.74 |
| 0.55 | 1.06 | 0.57 | #N/A | #N/A | 1.12 |
| #N/A | #N/A | #N/A | 1.18 | 0.75 | 1.28 |
| #N/A | 1.17 | 0.74 | 1.41 | 0.84 | 1.02 |
| 0.51 | 0.91 | 0.37 | #N/A | #N/A | 1.02 |
| 0.63 | 1.20 | 0.66 | 0.64 | 0.22 | 1.09 |
| 0.59 | #N/A | #N/A | 0.55 | 0.14 | 0.85 |
| 0.42 | #N/A | #N/A | 0.93 | 0.53 | 0.99 |
| #N/A | 1.19 | 0.77 | 0.52 | 0.12 | 0.98 |
| 0.09 | #N/A | #N/A | 0.61 | 0.19 | 0.60 |
| 0.56 | 1.03 | 0.54 | 1.14 | 0.73 | 1.06 |
| 0.60 | #N/A | #N/A | 0.68 | 0.26 | 0.98 |
| 0.66 | 0.82 | 0.23 | 0.85 | 0.46 | 0.90 |
| #N/A | #N/A | #N/A | #N/A | #N/A | #N/A |
| #N/A | #N/A | #N/A | 0.70 | 0.28 | 0.97 |
| 0.67 | 1.35 | 0.85 | 1.20 | 0.76 | 1.08 |
| 0.09 | 0.91 | 0.35 | 0.85 | 0.45 | 0.75 |
| 0.50 | 0.96 | 0.45 | 0.62 | 0.20 | 0.91 |
| #N/A | #N/A | #N/A | #N/A | #N/A | #N/A |
| 0.38 | 0.96 | 0.45 | 1.06 | 0.64 | 1.09 |
| 0.63 | 0.97 | 0.46 | 0.90 | 0.51 | #N/A |
| 0.83 | 1.07 | 0.62 | 0.90 | 0.50 | 0.84 |
| #N/A | 1.21 | 0.67 | 0.58 | 0.18 | #N/A |
| 0.74 | 1.14 | 0.72 | 0.61 | 0.19 | 0.58 |
| 0.73 | 0.96 | 0.44 | 2.01 | 0.95 | 0.84 |
| #N/A | #N/A | #N/A | #N/A | #N/A | 0.81 |
| 0.45 | 1.05 | 0.56 | 1.06 | 0.64 | 0.97 |
| #N/A | #N/A | #N/A | 0.85 | 0.45 | 0.78 |
| #N/A | #N/A | #N/A | 0.85 | 0.45 | 0.98 |
| #N/A | #N/A | #N/A | #N/A | #N/A | #N/A |
| 0.53 | 0.96 | 0.43 | 0.87 | 0.48 | 0.93 |
| #N/A | #N/A | #N/A | 0.68 | 0.26 | 0.84 |
| 0.30 | 1.35 | 0.88 | 0.73 | 0.31 | 0.92 |
| 0.10 | 0.58 | 0.05 | 0.76 | 0.34 | 0.63 |
| 0.43 | 0.78 | 0.18 | 1.19 | 0.76 | 1.01 |
| #N/A | #N/A | #N/A | #N/A | #N/A | #N/A |
| 0.62 | #N/A | #N/A | 0.46 | 0.09 | 0.99 |
| #N/A | #N/A | #N/A | #N/A | #N/A | #N/A |

|      |      |      |      |      |      |
|------|------|------|------|------|------|
| 0.41 | 0.77 | 0.17 | 0.96 | 0.58 | 1.08 |
| #N/A | 1.44 | 0.78 | 1.52 | 0.88 | #N/A |
| #N/A | #N/A | #N/A | 0.85 | 0.46 | #N/A |
| #N/A | #N/A | #N/A | #N/A | #N/A | #N/A |
| 0.33 | 0.98 | 0.47 | 0.72 | 0.31 | 1.02 |
| 0.50 | 1.06 | 0.60 | 1.40 | 0.84 | 0.83 |
| 0.53 | 0.95 | 0.42 | 2.32 | 0.97 | 1.40 |
| #N/A | 0.93 | 0.42 | #N/A | #N/A | 1.07 |
| #N/A | #N/A | #N/A | #N/A | #N/A | #N/A |
| 0.43 | 0.95 | 0.42 | 1.38 | 0.83 | 0.77 |
| 0.43 | 0.70 | 0.12 | 0.54 | 0.15 | 0.78 |
| #N/A | #N/A | #N/A | #N/A | #N/A | #N/A |
| 0.69 | 1.08 | 0.62 | 0.92 | 0.52 | 1.24 |
| 0.47 | 1.06 | 0.58 | #N/A | #N/A | 1.21 |
| 0.47 | 1.05 | 0.58 | 1.56 | 0.89 | 1.43 |
| 0.46 | 0.85 | 0.29 | 0.93 | 0.54 | 0.98 |
| #N/A | #N/A | #N/A | #N/A | #N/A | #N/A |
| 0.40 | 0.80 | 0.23 | 1.29 | 0.81 | 1.10 |
| 0.49 | 1.40 | 0.77 | 0.84 | 0.43 | 0.91 |
| 0.58 | 0.94 | 0.40 | 0.87 | 0.47 | 0.74 |
| 0.36 | 0.96 | 0.43 | 1.16 | 0.74 | 0.69 |
| 0.42 | 1.06 | 0.57 | #N/A | #N/A | 0.71 |
| 0.28 | 0.99 | 0.49 | 0.61 | 0.20 | 0.94 |
| 0.35 | 0.79 | 0.21 | 0.82 | 0.41 | 0.80 |
| 0.65 | 1.28 | 0.85 | 0.81 | 0.40 | 0.89 |
| 0.20 | 1.43 | 0.92 | 0.86 | 0.46 | #N/A |
| 0.75 | #N/A | #N/A | 0.93 | 0.54 | 0.95 |
| 0.62 | 1.13 | 0.69 | 1.83 | 0.93 | 0.87 |
| 0.53 | 1.21 | 0.78 | 1.42 | 0.85 | 0.93 |
| 0.54 | 1.56 | 0.95 | 1.43 | 0.86 | 1.09 |
| 0.56 | 1.09 | 0.65 | 2.75 | 0.98 | 2.43 |
| #N/A | #N/A | #N/A | #N/A | #N/A | #N/A |
| #N/A | #N/A | #N/A | 0.21 | 0.02 | #N/A |
| 0.44 | 0.84 | 0.25 | #N/A | #N/A | 0.80 |
| #N/A | #N/A | #N/A | #N/A | #N/A | 1.32 |
| 0.50 | 0.97 | 0.45 | 1.54 | 0.89 | 1.08 |
| 0.47 | #N/A | #N/A | 1.08 | 0.66 | #N/A |
| 0.92 | #N/A | #N/A | 0.98 | 0.60 | #N/A |
| 0.72 | 1.19 | 0.77 | 0.65 | 0.22 | 0.80 |
| 0.62 | 1.33 | 0.87 | #N/A | #N/A | #N/A |
| #N/A | #N/A | #N/A | #N/A | #N/A | #N/A |
| 0.99 | #N/A | #N/A | 3.12 | 0.99 | 1.10 |
| 0.71 | 0.90 | 0.35 | #N/A | #N/A | 0.82 |
| 0.19 | 0.90 | 0.36 | 0.60 | 0.20 | #N/A |
| 0.87 | 1.16 | 0.73 | 0.65 | 0.24 | 0.95 |
| 0.46 | 1.26 | 0.78 | 0.92 | 0.52 | 1.11 |
| 0.24 | 1.10 | 0.52 | 0.80 | 0.41 | 0.75 |
| 0.46 | #N/A | #N/A | 0.81 | 0.40 | 0.89 |
| 0.78 | #N/A | #N/A | 0.77 | 0.35 | 0.90 |
| #N/A | 1.02 | 0.49 | 0.61 | 0.19 | 0.81 |
| 0.72 | 0.78 | 0.19 | #N/A | #N/A | 1.01 |

|      |      |      |      |      |      |      |
|------|------|------|------|------|------|------|
| #N/A | #N/A | #N/A | #N/A | #N/A | #N/A | #N/A |
| 0.71 | 0.92 | 0.38 | 1.37 | 0.83 | 0.79 |      |
| 0.14 | 0.72 | 0.12 | 1.08 | 0.66 | 0.85 |      |
| 0.45 | 1.01 | 0.52 | 0.74 | 0.33 | 1.00 |      |
| 0.54 | 1.19 | 0.77 | 0.93 | 0.55 | 0.78 |      |
| 0.43 | 1.23 | 0.81 | 0.79 | 0.38 | 0.97 |      |
| 0.51 | 1.55 | 0.95 | 0.86 | 0.45 | #N/A |      |
| 0.32 | 0.82 | 0.24 | 1.00 | 0.59 | 0.79 |      |
| 0.23 | #N/A | #N/A | #N/A | #N/A | #N/A |      |
| 0.29 | 0.93 | 0.41 | 0.79 | 0.38 | 1.03 |      |
| 0.59 | 1.38 | 0.86 | 0.91 | 0.51 | 1.57 |      |
| 0.80 | 1.14 | 0.71 | 0.88 | 0.48 | 0.71 |      |
| 0.51 | 1.06 | 0.60 | #N/A | #N/A | 0.86 |      |
| 0.37 | 0.83 | 0.25 | 1.10 | 0.69 | 0.97 |      |
| #N/A | #N/A | #N/A | #N/A | #N/A | #N/A |      |
| 0.04 | 0.50 | 0.03 | #N/A | #N/A | 0.69 |      |
| 0.62 | 1.46 | 0.92 | #N/A | #N/A | 1.10 |      |
| 0.49 | 1.07 | 0.62 | 0.92 | 0.54 | 0.86 |      |
| 0.53 | 1.32 | 0.87 | 0.95 | 0.56 | 0.77 |      |
| 0.44 | 1.04 | 0.56 | 0.65 | 0.23 | 1.08 |      |
| #N/A | #N/A | #N/A | #N/A | #N/A | #N/A |      |
| 0.22 | 0.49 | 0.03 | 0.61 | 0.19 | 0.79 |      |
| 0.60 | #N/A | #N/A | 1.04 | 0.62 | 0.78 |      |
| 0.02 | #N/A | #N/A | #N/A | #N/A | 0.78 |      |
| 0.22 | 1.27 | 0.58 | 1.47 | 0.86 | #N/A |      |
| 0.86 | 1.03 | 0.56 | 1.16 | 0.74 | 0.90 |      |
| 0.62 | 1.17 | 0.74 | #N/A | #N/A | #N/A |      |
| 0.89 | 0.81 | 0.22 | 0.74 | 0.32 | 0.92 |      |
| 0.66 | 0.99 | 0.47 | 1.07 | 0.67 | 1.10 |      |
| 0.25 | 0.96 | 0.44 | 0.75 | 0.35 | 1.03 |      |
| 0.42 | 0.92 | 0.36 | 1.06 | 0.64 | 1.01 |      |
| #N/A | #N/A | #N/A | 0.49 | 0.11 | #N/A |      |
| 0.80 | 0.90 | 0.33 | 0.79 | 0.38 | 1.23 |      |
| #N/A | #N/A | #N/A | #N/A | #N/A | #N/A |      |
| #N/A | #N/A | #N/A | #N/A | #N/A | #N/A |      |
| 0.88 | 1.22 | 0.76 | 1.10 | 0.70 | 0.96 |      |
| 0.48 | 1.08 | 0.60 | 1.04 | 0.64 | 0.88 |      |
| 0.17 | 0.79 | 0.19 | 0.65 | 0.22 | #N/A |      |
| 0.77 | 0.84 | 0.27 | #N/A | #N/A | 1.07 |      |
| #N/A | 1.02 | 0.52 | #N/A | #N/A | 0.73 |      |
| 0.35 | 0.99 | 0.49 | 1.48 | 0.87 | 0.87 |      |
| 0.57 | 1.15 | 0.73 | 0.94 | 0.56 | 1.13 |      |
| #N/A | 1.04 | 0.54 | 1.00 | 0.61 | 0.79 |      |
| 0.44 | 0.77 | 0.25 | 3.13 | 0.99 | 0.94 |      |
| 0.37 | 0.88 | 0.38 | 0.57 | 0.16 | #N/A |      |
| #N/A | 1.30 | 0.69 | 0.98 | 0.59 | #N/A |      |
| 0.17 | 0.51 | 0.03 | 0.41 | 0.07 | 0.48 |      |
| 0.71 | 0.79 | 0.19 | 0.87 | 0.48 | 1.19 |      |
| 0.56 | 0.83 | 0.26 | 0.78 | 0.37 | 0.91 |      |
| 0.22 | 0.65 | 0.08 | 0.55 | 0.14 | 1.09 |      |
| #N/A | #N/A | #N/A | #N/A | #N/A | 1.15 |      |

|      |      |      |      |      |      |
|------|------|------|------|------|------|
| 0.27 | 0.98 | 0.47 | 0.67 | 0.26 | 1.20 |
| 0.29 | 1.03 | 0.55 | #N/A | #N/A | 1.03 |
| 0.34 | #N/A | #N/A | #N/A | #N/A | 1.00 |
| 0.62 | 0.98 | 0.48 | #N/A | #N/A | 0.98 |
| #N/A | #N/A | #N/A | #N/A | #N/A | #N/A |
| 0.40 | 1.02 | 0.52 | #N/A | #N/A | 1.01 |
| 0.46 | 0.98 | 0.49 | 1.13 | 0.72 | 1.03 |
| 0.17 | 1.07 | 0.61 | 1.14 | 0.73 | 0.94 |
| 0.37 | 0.69 | 0.11 | 0.55 | 0.14 | 0.77 |
| 0.81 | 0.91 | 0.39 | 1.34 | 0.81 | 1.05 |
| 0.89 | 1.03 | 0.54 | 1.79 | 0.93 | 1.22 |
| 0.40 | #N/A | #N/A | 0.49 | 0.10 | 1.03 |
| 0.75 | 1.03 | 0.54 | 0.77 | 0.35 | 0.77 |
| 0.33 | 1.02 | 0.53 | 1.00 | 0.61 | 1.49 |
| 0.50 | 0.99 | 0.48 | 1.05 | 0.66 | #N/A |
| #N/A | 1.07 | 0.58 | 1.33 | 0.82 | 0.96 |
| 0.19 | 1.05 | 0.58 | 1.87 | 0.94 | 1.13 |
| 0.35 | 0.90 | 0.33 | 1.25 | 0.78 | 0.83 |
| 0.33 | 0.81 | 0.29 | 2.53 | 0.98 | 0.77 |
| 0.65 | 1.22 | 0.79 | 1.24 | 0.78 | 0.89 |
| 0.48 | 0.89 | 0.32 | 0.93 | 0.55 | 1.00 |
| 0.09 | 0.60 | 0.07 | 0.41 | 0.07 | 1.08 |
| 0.52 | 1.00 | 0.51 | 1.15 | 0.73 | 1.22 |
| 0.06 | 0.58 | 0.05 | 0.55 | 0.14 | 0.70 |
| 0.87 | 0.99 | 0.48 | 0.84 | 0.44 | 0.92 |
| 0.76 | 1.08 | 0.54 | 0.51 | 0.12 | 0.74 |
| 0.55 | 1.09 | 0.62 | 0.66 | 0.25 | 0.82 |
| 0.41 | 1.47 | 0.93 | 1.09 | 0.69 | 1.11 |
| #N/A | #N/A | #N/A | #N/A | #N/A | #N/A |
| 0.15 | 0.70 | 0.11 | 0.59 | 0.18 | 0.76 |
| 0.48 | 0.79 | 0.23 | 1.11 | 0.70 | 1.05 |
| 0.14 | 0.95 | 0.44 | 1.17 | 0.74 | 0.86 |
| 0.18 | 1.35 | 0.81 | 0.97 | 0.56 | 0.91 |
| 0.30 | 0.65 | 0.08 | 0.56 | 0.14 | 0.94 |
| 0.97 | 0.93 | 0.43 | 1.30 | 0.81 | 0.92 |
| #N/A | #N/A | #N/A | 1.15 | 0.72 | 1.26 |
| 0.59 | 0.83 | 0.24 | 1.03 | 0.62 | 0.98 |
| 0.62 | 1.09 | 0.64 | #N/A | #N/A | 0.61 |
| 0.28 | 0.82 | 0.29 | 2.35 | 0.97 | 1.91 |
| 0.35 | 0.76 | 0.16 | 1.50 | 0.87 | 0.90 |
| 0.06 | #N/A | #N/A | 0.10 | 0.00 | #N/A |
| 0.65 | 0.76 | 0.21 | 1.21 | 0.75 | 1.07 |
| #N/A | #N/A | #N/A | #N/A | #N/A | #N/A |
| 0.59 | 0.91 | 0.42 | 0.47 | 0.10 | 0.98 |
| 0.37 | 0.75 | 0.22 | 0.93 | 0.53 | 0.74 |
| 0.54 | 1.03 | 0.54 | 1.45 | 0.86 | 0.83 |
| 0.42 | 1.05 | 0.50 | 1.01 | 0.62 | 0.80 |
| 0.75 | 1.13 | 0.69 | 1.30 | 0.81 | 0.92 |
| 0.53 | #N/A | #N/A | 1.39 | 0.84 | 1.01 |
| 0.52 | #N/A | #N/A | 0.49 | 0.11 | 1.12 |
| 0.74 | 0.93 | 0.39 | 1.09 | 0.67 | 0.88 |

|      |      |      |      |      |      |      |
|------|------|------|------|------|------|------|
| 0.44 | #N/A | #N/A | #N/A | #N/A | #N/A | 0.91 |
| 0.40 | 1.07 | 0.59 | 1.08 | 0.68 | 0.97 |      |
| 0.16 | 0.97 | 0.46 | 0.80 | 0.39 | 1.26 |      |
| 0.78 | 1.06 | 0.59 | 0.92 | 0.53 | 1.00 |      |
| 0.23 | 1.09 | 0.65 | 0.80 | 0.40 | 0.74 |      |
| 0.69 | 1.06 | 0.56 | 0.87 | 0.49 | 1.20 |      |
| 0.43 | 1.02 | 0.53 | 0.93 | 0.55 | 0.93 |      |
| 0.88 | 1.02 | 0.54 | 0.78 | 0.37 | 0.97 |      |
| 0.68 | 0.76 | 0.16 | 0.88 | 0.48 | 1.14 |      |
| 0.47 | 1.04 | 0.57 | 0.76 | 0.35 | 0.61 |      |
| 0.28 | 0.57 | 0.05 | 1.90 | 0.94 | 1.24 |      |
| 0.81 | #N/A | #N/A | 1.01 | 0.60 | #N/A |      |
| 0.19 | 0.54 | 0.04 | 0.64 | 0.22 | 0.69 |      |
| 0.28 | 0.99 | 0.48 | 1.03 | 0.64 | 0.95 |      |
| 0.40 | #N/A | #N/A | 1.56 | 0.89 | 0.89 |      |
| 0.22 | 1.01 | 0.52 | 1.13 | 0.72 | 0.93 |      |
| 0.30 | 0.91 | 0.36 | 1.63 | 0.90 | 0.92 |      |
| 0.74 | 0.68 | 0.16 | 1.33 | 0.82 | 0.84 |      |
| 0.32 | 0.72 | 0.12 | 0.68 | 0.25 | 0.74 |      |
| 0.57 | 1.09 | 0.64 | 1.58 | 0.90 | 1.17 |      |
| 0.87 | 1.03 | 0.56 | 0.64 | 0.23 | #N/A |      |
| 0.60 | 1.14 | 0.68 | 0.74 | 0.32 | 1.19 |      |
| 0.57 | 0.96 | 0.46 | 0.88 | 0.48 | 1.20 |      |
| 0.54 | 1.52 | 0.94 | 0.75 | 0.33 | #N/A |      |
| 0.33 | 0.87 | 0.33 | 1.14 | 0.72 | 0.83 |      |
| #N/A | #N/A | #N/A | #N/A | #N/A | #N/A |      |
| #N/A | 0.86 | 0.28 | #N/A | #N/A | 0.95 |      |
| 0.59 | 1.03 | 0.54 | 0.95 | 0.55 | 1.29 |      |
| 0.77 | 1.24 | 0.79 | 0.92 | 0.54 | 1.03 |      |
| 0.60 | 0.77 | 0.17 | 0.81 | 0.40 | 1.11 |      |
| 0.33 | 0.92 | 0.40 | 0.60 | 0.19 | 0.94 |      |
| 0.52 | 0.86 | 0.28 | 0.95 | 0.57 | 1.13 |      |
| 0.50 | 1.10 | 0.66 | 2.87 | 0.99 | 1.00 |      |
| 0.75 | #N/A | #N/A | 0.80 | 0.38 | 0.98 |      |
| 0.43 | #N/A | #N/A | 0.63 | 0.22 | 0.79 |      |
| 0.95 | 0.96 | 0.44 | 1.43 | 0.86 | 0.81 |      |
| 0.70 | 0.83 | 0.24 | 0.93 | 0.54 | 0.88 |      |
| 0.86 | 0.96 | 0.43 | 0.74 | 0.32 | 0.94 |      |
| 0.45 | 1.03 | 0.56 | 0.54 | 0.14 | 0.68 |      |
| 0.13 | #N/A | #N/A | #N/A | #N/A | 0.71 |      |
| 0.65 | 0.87 | 0.30 | 0.99 | 0.58 | 0.77 |      |
| 0.47 | 1.03 | 0.54 | 1.12 | 0.71 | 1.03 |      |
| #N/A | 1.06 | 0.61 | 0.88 | 0.48 | 1.46 |      |
| 0.71 | 0.83 | 0.23 | 0.97 | 0.59 | 0.87 |      |
| #N/A | #N/A | #N/A | #N/A | #N/A | #N/A |      |
| 0.74 | 1.07 | 0.61 | 1.72 | 0.92 | 1.23 |      |
| 0.56 | 1.01 | 0.52 | 0.85 | 0.46 | 1.08 |      |
| #N/A | #N/A | #N/A | #N/A | #N/A | 1.12 |      |
| 0.65 | 1.17 | 0.72 | 0.71 | 0.30 | #N/A |      |
| 0.11 | 0.92 | 0.39 | 0.62 | 0.20 | 0.84 |      |
| 0.50 | 1.12 | 0.68 | 0.89 | 0.50 | 0.83 |      |

|      |      |      |      |      |      |
|------|------|------|------|------|------|
| 0.75 | 0.72 | 0.14 | 0.78 | 0.37 | 0.80 |
| 0.09 | 0.39 | 0.01 | 0.55 | 0.14 | 0.64 |
| #N/A | 0.82 | 0.23 | 1.24 | 0.77 | 0.87 |
| 0.06 | 0.86 | 0.28 | 0.71 | 0.29 | 0.72 |
| 0.88 | 1.06 | 0.59 | 1.89 | 0.94 | 0.77 |
| 0.36 | #N/A | #N/A | 0.81 | 0.40 | 0.83 |
| 0.33 | 0.88 | 0.30 | 0.99 | 0.60 | #N/A |
| 0.32 | 1.05 | 0.57 | 0.97 | 0.59 | 1.35 |
| 0.45 | #N/A | #N/A | 0.89 | 0.51 | 0.90 |
| 0.44 | 0.91 | 0.35 | 1.07 | 0.67 | 0.89 |
| 0.36 | 0.79 | 0.19 | 1.35 | 0.83 | 0.66 |
| #N/A | #N/A | #N/A | #N/A | #N/A | #N/A |
| #N/A | 1.29 | 0.70 | 1.76 | 0.93 | 0.87 |
| 0.15 | #N/A | #N/A | 0.35 | 0.05 | #N/A |
| 0.64 | 1.34 | 0.64 | 2.52 | 0.98 | 1.30 |
| 0.20 | 0.94 | 0.41 | 0.99 | 0.60 | 1.11 |
| 0.14 | 0.99 | 0.50 | 1.15 | 0.73 | 0.91 |
| 0.55 | 1.33 | 0.86 | 1.68 | 0.91 | #N/A |
| 0.65 | #N/A | #N/A | #N/A | #N/A | 0.82 |
| 0.51 | #N/A | #N/A | #N/A | #N/A | 1.11 |
| 0.49 | 0.93 | 0.39 | 0.77 | 0.35 | 1.10 |
| 0.27 | 1.02 | 0.51 | #N/A | #N/A | 0.94 |
| #N/A | #N/A | #N/A | 0.54 | 0.13 | 0.99 |
| 0.25 | 0.79 | 0.19 | 1.09 | 0.67 | 1.10 |
| 0.43 | 0.74 | 0.14 | 0.68 | 0.25 | #N/A |
| 0.82 | 1.02 | 0.53 | 0.82 | 0.42 | 0.85 |
| #N/A | #N/A | #N/A | 0.93 | 0.54 | #N/A |
| 0.23 | 0.50 | 0.03 | 0.74 | 0.32 | 0.75 |
| 0.78 | 1.12 | 0.67 | 1.10 | 0.69 | 1.34 |
| 0.81 | 1.01 | 0.50 | 1.46 | 0.87 | 1.13 |
| 0.61 | #N/A | #N/A | #N/A | #N/A | 0.94 |
| #N/A | 0.96 | 0.43 | 0.74 | 0.33 | 0.76 |
| #N/A | #N/A | #N/A | 0.49 | 0.11 | #N/A |
| 0.27 | 0.92 | 0.37 | 0.97 | 0.59 | 1.00 |
| 0.63 | 0.95 | 0.43 | 0.88 | 0.48 | #N/A |
| 0.11 | 0.46 | 0.02 | 0.54 | 0.15 | 0.73 |
| 0.68 | #N/A | #N/A | 1.05 | 0.66 | 1.21 |
| #N/A | 0.95 | 0.41 | 1.31 | 0.82 | 0.96 |
| #N/A | 1.08 | 0.59 | 1.22 | 0.77 | 0.79 |
| #N/A | 1.08 | 0.63 | 1.40 | 0.85 | 0.78 |
| 0.67 | #N/A | #N/A | 1.06 | 0.66 | 0.97 |
| 0.54 | 1.13 | 0.70 | 0.71 | 0.29 | 0.95 |
| #N/A | 1.23 | 0.81 | 0.67 | 0.26 | 0.88 |
| 0.41 | 1.09 | 0.62 | 1.36 | 0.83 | 0.96 |
| 0.42 | 0.88 | 0.32 | #N/A | #N/A | 0.99 |
| 0.72 | 1.25 | 0.82 | #N/A | #N/A | 0.87 |
| 0.54 | 0.92 | 0.37 | 1.12 | 0.69 | 0.89 |
| 0.54 | 0.99 | 0.49 | 0.78 | 0.36 | 1.13 |
| 0.68 | #N/A | #N/A | 0.74 | 0.34 | 1.53 |
| 0.48 | 0.84 | 0.27 | 0.80 | 0.39 | #N/A |
| #N/A | #N/A | #N/A | 1.19 | 0.75 | 0.98 |

|      |      |      |      |      |      |
|------|------|------|------|------|------|
| 0.74 | 0.96 | 0.43 | #N/A | #N/A | 0.64 |
| 0.70 | 0.98 | 0.49 | 0.99 | 0.61 | 1.23 |
| 0.58 | #N/A | #N/A | #N/A | #N/A | #N/A |
| 0.46 | 0.91 | 0.35 | 0.87 | 0.48 | 0.88 |
| 0.41 | #N/A | #N/A | 0.63 | 0.21 | 1.00 |
| #N/A | #N/A | #N/A | #N/A | #N/A | #N/A |
| 0.38 | #N/A | #N/A | 0.91 | 0.51 | 0.73 |
| #N/A | #N/A | #N/A | 1.60 | 0.89 | 0.90 |
| 0.10 | #N/A | #N/A | 0.84 | 0.44 | 0.82 |
| #N/A | #N/A | #N/A | #N/A | #N/A | #N/A |
| 0.85 | 1.10 | 0.55 | #N/A | #N/A | 0.79 |
| #N/A | #N/A | #N/A | #N/A | #N/A | #N/A |
| 0.33 | 0.96 | 0.43 | 1.84 | 0.93 | 1.31 |
| #N/A | #N/A | #N/A | 1.17 | 0.73 | 1.45 |
| #N/A | 1.36 | 0.74 | 0.93 | 0.52 | 0.98 |
| 0.49 | 1.02 | 0.53 | 0.92 | 0.54 | 0.98 |
| 0.61 | 1.06 | 0.60 | 1.08 | 0.68 | 1.07 |
| 0.23 | 0.54 | 0.04 | 0.56 | 0.16 | 0.76 |
| 0.70 | 1.15 | 0.70 | 2.13 | 0.96 | 1.07 |
| 0.92 | 0.94 | 0.41 | 1.39 | 0.84 | 0.86 |
| #N/A | #N/A | #N/A | #N/A | #N/A | #N/A |
| 0.63 | 0.83 | 0.23 | 1.29 | 0.81 | 0.90 |
| #N/A | #N/A | #N/A | 0.11 | 0.01 | #N/A |
| 0.43 | 1.06 | 0.61 | #N/A | #N/A | 0.80 |
| 0.45 | 0.97 | 0.44 | 0.72 | 0.30 | 0.76 |
| 0.55 | 0.86 | 0.30 | 0.94 | 0.56 | 0.84 |
| 0.89 | #N/A | #N/A | #N/A | #N/A | #N/A |
| #N/A | #N/A | #N/A | 0.64 | 0.22 | #N/A |
| 0.12 | 0.74 | 0.15 | 1.08 | 0.66 | 0.75 |
| 0.82 | 1.01 | 0.51 | 1.07 | 0.67 | 1.38 |
| #N/A | #N/A | #N/A | #N/A | #N/A | #N/A |
| 0.68 | 0.95 | 0.41 | #N/A | #N/A | 0.90 |
| 0.21 | 0.86 | 0.28 | 0.82 | 0.42 | 1.03 |
| 0.65 | 1.00 | 0.51 | 0.97 | 0.57 | 1.38 |
| 0.72 | 0.83 | 0.26 | 1.64 | 0.90 | 1.93 |
| 0.55 | 0.66 | 0.13 | 0.90 | 0.50 | 0.91 |
| 0.50 | 0.97 | 0.47 | 1.26 | 0.78 | 0.87 |
| 0.15 | #N/A | #N/A | 0.54 | 0.13 | 0.74 |
| 0.33 | #N/A | #N/A | 0.87 | 0.46 | 0.97 |
| 0.38 | 1.11 | 0.60 | 0.79 | 0.38 | 0.92 |
| 0.77 | #N/A | #N/A | 0.63 | 0.20 | 0.94 |
| 0.75 | 0.92 | 0.37 | 1.23 | 0.77 | 1.05 |
| #N/A | #N/A | #N/A | #N/A | #N/A | #N/A |
| 0.48 | 0.80 | 0.19 | 0.77 | 0.36 | 0.88 |
| 0.44 | 0.95 | 0.42 | 2.92 | 0.99 | 1.02 |
| 0.17 | 0.52 | 0.03 | 0.37 | 0.05 | 1.46 |
| #N/A | #N/A | #N/A | #N/A | #N/A | #N/A |
| 0.77 | 0.95 | 0.43 | 0.96 | 0.57 | 0.88 |
| #N/A | #N/A | #N/A | 0.07 | 0.00 | #N/A |
| 0.42 | 0.95 | 0.41 | 0.87 | 0.46 | 1.49 |
| #N/A | #N/A | #N/A | #N/A | #N/A | #N/A |



|      |      |      |      |      |      |
|------|------|------|------|------|------|
| 0.31 | 1.50 | 0.94 | 0.78 | 0.38 | 1.10 |
| 0.76 | 0.95 | 0.43 | 0.74 | 0.33 | 1.15 |
| 0.00 | #N/A | #N/A | 0.05 | 0.00 | #N/A |
| #N/A | #N/A | #N/A | #N/A | #N/A | #N/A |
| #N/A | #N/A | #N/A | #N/A | #N/A | #N/A |
| #N/A | 1.40 | 0.66 | 0.87 | 0.48 | #N/A |
| #N/A | #N/A | #N/A | #N/A | #N/A | #N/A |
| 0.30 | #N/A | #N/A | 1.94 | 0.94 | 0.86 |
| #N/A | #N/A | #N/A | #N/A | #N/A | #N/A |
| 0.72 | #N/A | #N/A | 1.11 | 0.68 | 1.08 |
| 0.33 | 0.92 | 0.37 | 1.32 | 0.81 | 1.23 |
| 0.00 | #N/A | #N/A | #N/A | #N/A | #N/A |
| 0.49 | 1.03 | 0.52 | 1.22 | 0.76 | 1.07 |
| #N/A | 0.77 | 0.17 | 0.63 | 0.22 | 1.05 |
| #N/A | #N/A | #N/A | #N/A | #N/A | #N/A |
| 0.37 | 0.62 | 0.07 | 0.91 | 0.51 | 0.72 |
| 0.24 | 1.24 | 0.80 | #N/A | #N/A | 0.93 |
| #N/A | #N/A | #N/A | 1.97 | 0.94 | 1.12 |
| 0.49 | 1.01 | 0.52 | 1.04 | 0.65 | 0.84 |
| 0.64 | 1.13 | 0.69 | #N/A | #N/A | 0.83 |
| 0.43 | 1.17 | 0.71 | 2.23 | 0.97 | 0.90 |
| #N/A | 0.93 | 0.38 | 1.70 | 0.91 | 0.88 |
| 0.34 | #N/A | #N/A | #N/A | #N/A | #N/A |
| 0.59 | 1.28 | 0.81 | 1.19 | 0.75 | 0.81 |
| 0.64 | 1.10 | 0.66 | 1.73 | 0.92 | #N/A |
| 0.19 | 0.95 | 0.44 | 0.86 | 0.46 | #N/A |
| 0.19 | 0.69 | 0.11 | 0.56 | 0.15 | #N/A |
| 0.41 | 1.41 | 0.91 | 0.65 | 0.24 | 1.04 |
| 0.47 | 1.00 | 0.51 | 0.69 | 0.27 | 1.14 |
| 0.72 | #N/A | #N/A | 0.82 | 0.42 | #N/A |
| #N/A | #N/A | #N/A | #N/A | #N/A | #N/A |
| #N/A | 0.95 | 0.41 | 1.77 | 0.93 | 1.22 |
| #N/A | 0.70 | 0.11 | 1.40 | 0.85 | 1.04 |
| 0.56 | 1.03 | 0.55 | 0.73 | 0.31 | 0.91 |
| 0.32 | #N/A | #N/A | 1.64 | 0.90 | 0.87 |
| 0.61 | 0.94 | 0.41 | 0.88 | 0.48 | 0.98 |
| #N/A | 1.33 | 0.57 | 0.76 | 0.34 | 0.98 |
| 0.63 | 0.85 | 0.35 | 1.16 | 0.74 | #N/A |
| 0.43 | 0.81 | 0.23 | 0.93 | 0.54 | 0.89 |
| 0.58 | 0.82 | 0.25 | #N/A | #N/A | 0.95 |
| #N/A | #N/A | #N/A | #N/A | #N/A | #N/A |
| 0.36 | 0.76 | 0.16 | 1.19 | 0.75 | 0.74 |
| #N/A | #N/A | #N/A | #N/A | #N/A | #N/A |
| 0.04 | 0.49 | 0.03 | 0.36 | 0.05 | 0.44 |
| 0.26 | 1.00 | 0.48 | 1.53 | 0.89 | 0.91 |
| #N/A | #N/A | #N/A | #N/A | #N/A | #N/A |
| 0.26 | 0.66 | 0.09 | 0.54 | 0.15 | 0.82 |
| #N/A | 0.67 | 0.10 | #N/A | #N/A | 0.80 |
| 0.18 | 0.53 | 0.04 | 0.62 | 0.21 | 0.89 |
| #N/A | #N/A | #N/A | #N/A | #N/A | #N/A |
| #N/A | 0.74 | 0.14 | 0.97 | 0.57 | 0.71 |

|      |      |      |      |      |      |
|------|------|------|------|------|------|
| 0.58 | 1.36 | 0.79 | 0.71 | 0.29 | 1.04 |
| #N/A | #N/A | #N/A | 0.86 | 0.46 | 1.15 |
| 0.95 | #N/A | #N/A | 1.23 | 0.77 | 1.00 |
| 0.83 | 1.35 | 0.80 | 0.88 | 0.48 | 0.84 |
| #N/A | 1.24 | 0.77 | 0.99 | 0.60 | 0.98 |
| 0.05 | 0.71 | 0.19 | 0.73 | 0.33 | 0.55 |
| #N/A | #N/A | #N/A | #N/A | #N/A | #N/A |
| 0.83 | 0.88 | 0.33 | #N/A | #N/A | 0.71 |
| #N/A | #N/A | #N/A | #N/A | #N/A | 0.92 |
| 0.70 | 1.17 | 0.75 | 1.25 | 0.79 | 1.31 |
| 0.66 | 1.04 | 0.56 | 0.87 | 0.49 | 1.11 |
| #N/A | #N/A | #N/A | #N/A | #N/A | #N/A |
| #N/A | 1.02 | 0.50 | 1.64 | 0.91 | 0.84 |
| 0.62 | 1.01 | 0.52 | 0.96 | 0.58 | 0.94 |
| 0.54 | 0.91 | 0.36 | 0.79 | 0.38 | 0.91 |
| #N/A | 1.21 | 0.79 | 0.90 | 0.52 | 1.64 |
| 0.80 | 0.93 | 0.39 | 1.51 | 0.88 | 1.09 |
| #N/A | #N/A | #N/A | 0.31 | 0.04 | #N/A |
| 0.14 | 0.80 | 0.24 | 1.46 | 0.86 | 0.76 |
| 0.02 | #N/A | #N/A | 0.20 | 0.02 | #N/A |
| 0.48 | 0.91 | 0.39 | 0.55 | 0.15 | 0.99 |
| 0.60 | 0.93 | 0.40 | 0.86 | 0.46 | 0.86 |
| #N/A | #N/A | #N/A | #N/A | #N/A | #N/A |
| #N/A | #N/A | #N/A | 0.70 | 0.28 | 1.59 |
| 0.59 | 1.05 | 0.58 | 1.68 | 0.91 | 1.52 |
| 0.67 | 1.00 | 0.50 | 0.87 | 0.47 | 0.99 |
| 0.70 | #N/A | #N/A | 0.73 | 0.31 | 1.07 |
| 0.94 | 1.11 | 0.55 | 0.89 | 0.50 | 1.03 |
| 0.73 | 1.00 | 0.50 | 0.76 | 0.34 | 1.14 |
| 0.31 | 1.13 | 0.69 | 0.80 | 0.40 | 0.95 |
| 0.77 | #N/A | #N/A | 0.77 | 0.35 | 0.80 |
| 0.56 | 0.83 | 0.34 | 0.75 | 0.33 | 0.87 |
| 0.65 | 1.17 | 0.75 | 0.84 | 0.44 | 1.04 |
| 0.59 | 1.35 | 0.89 | 0.84 | 0.44 | 1.07 |
| 0.78 | 1.50 | 0.93 | 1.16 | 0.73 | 0.88 |
| #N/A | 0.78 | 0.18 | 1.20 | 0.76 | 1.00 |
| 0.42 | 1.18 | 0.68 | 0.95 | 0.56 | 1.05 |
| 0.42 | 1.05 | 0.58 | 0.77 | 0.36 | 0.85 |
| 0.72 | 1.36 | 0.90 | 0.67 | 0.25 | 0.94 |
| 0.60 | 0.98 | 0.46 | #N/A | #N/A | 0.96 |
| 0.55 | 1.20 | 0.78 | 0.86 | 0.46 | 0.82 |
| 0.45 | 0.94 | 0.41 | 1.00 | 0.59 | 0.60 |
| 0.77 | 1.14 | 0.70 | 0.64 | 0.23 | 0.74 |
| 0.12 | 1.21 | 0.78 | 0.86 | 0.47 | 0.80 |
| 0.51 | 1.12 | 0.68 | 1.13 | 0.72 | 0.88 |
| 0.51 | #N/A | #N/A | 0.81 | 0.40 | #N/A |
| #N/A | #N/A | #N/A | #N/A | #N/A | #N/A |
| 0.52 | 1.04 | 0.57 | 0.82 | 0.43 | 0.81 |
| 0.68 | 1.14 | 0.70 | 0.98 | 0.59 | 0.91 |
| 0.90 | 0.99 | 0.50 | 1.00 | 0.62 | 0.76 |
| 0.32 | 0.87 | 0.30 | 2.34 | 0.97 | 0.89 |

|      |      |      |      |      |      |
|------|------|------|------|------|------|
| 0.26 | 1.07 | 0.62 | 0.91 | 0.52 | 0.81 |
| 0.30 | 0.91 | 0.36 | 0.85 | 0.45 | 1.00 |
| 0.49 | 1.43 | 0.92 | 2.10 | 0.96 | 1.03 |
| 0.40 | 1.27 | 0.83 | 1.69 | 0.92 | 2.82 |
| 0.98 | 1.03 | 0.54 | 1.07 | 0.67 | 1.04 |
| #N/A | 1.13 | 0.68 | #N/A | #N/A | 0.93 |
| 0.50 | 1.00 | 0.50 | 0.66 | 0.23 | 1.28 |
| 0.99 | #N/A | #N/A | 3.15 | 0.99 | #N/A |
| 0.69 | 1.08 | 0.63 | 0.88 | 0.49 | 1.01 |
| 0.75 | 0.98 | 0.45 | 1.39 | 0.83 | 0.84 |
| 0.77 | 1.29 | 0.75 | 0.82 | 0.41 | #N/A |
| 0.68 | 0.99 | 0.48 | 0.98 | 0.57 | 1.05 |
| 0.55 | 0.61 | 0.06 | 0.80 | 0.39 | 0.74 |
| 0.15 | 0.88 | 0.32 | 1.15 | 0.72 | 1.00 |
| 0.58 | 1.24 | 0.79 | 0.69 | 0.26 | 0.98 |
| #N/A | 1.02 | 0.53 | 0.53 | 0.13 | 0.94 |
| #N/A | #N/A | #N/A | #N/A | #N/A | #N/A |
| 0.46 | #N/A | #N/A | 1.98 | 0.95 | 1.26 |
| 0.32 | 0.74 | 0.15 | 0.85 | 0.44 | 0.90 |
| #N/A | #N/A | #N/A | #N/A | #N/A | #N/A |
| 0.70 | 1.05 | 0.59 | 0.82 | 0.41 | #N/A |
| 0.30 | 0.97 | 0.46 | 1.11 | 0.70 | 0.77 |
| 0.59 | 0.88 | 0.31 | 1.15 | 0.73 | 0.89 |
| 0.51 | #N/A | #N/A | 0.41 | 0.06 | 1.10 |
| 0.40 | 0.81 | 0.25 | 1.22 | 0.76 | 0.88 |
| 0.64 | 1.20 | 0.78 | 0.88 | 0.48 | #N/A |
| #N/A | #N/A | #N/A | #N/A | #N/A | #N/A |
| 0.13 | 0.67 | 0.10 | 0.50 | 0.12 | 0.73 |
| #N/A | 1.01 | 0.48 | 0.82 | 0.41 | 1.02 |
| 0.34 | 1.75 | 0.82 | 0.69 | 0.26 | 0.69 |
| 0.71 | 1.06 | 0.49 | 1.76 | 0.93 | 0.81 |
| 0.63 | 0.98 | 0.45 | 0.68 | 0.26 | 0.61 |
| 0.59 | 0.90 | 0.35 | 0.95 | 0.56 | 1.55 |
| 0.68 | 0.92 | 0.42 | 1.25 | 0.77 | 1.53 |
| 0.58 | 1.18 | 0.71 | 0.99 | 0.60 | 0.85 |
| #N/A | 0.91 | 0.36 | 0.59 | 0.17 | 0.86 |
| #N/A | #N/A | #N/A | #N/A | #N/A | 0.68 |
| 0.25 | 0.94 | 0.42 | 0.67 | 0.25 | 0.94 |
| 0.00 | #N/A | #N/A | #N/A | #N/A | #N/A |
| 0.44 | 0.70 | 0.15 | 0.68 | 0.26 | 0.82 |
| #N/A | #N/A | #N/A | #N/A | #N/A | #N/A |
| 0.70 | 0.95 | 0.41 | 0.89 | 0.49 | 1.01 |
| 0.41 | 0.99 | 0.48 | 0.79 | 0.39 | 1.01 |
| 0.01 | 0.27 | 0.00 | 0.32 | 0.04 | 0.83 |
| 0.50 | 1.02 | 0.53 | 1.03 | 0.64 | 1.10 |
| #N/A | #N/A | #N/A | #N/A | #N/A | 0.96 |
| 0.85 | 0.99 | 0.49 | 0.58 | 0.18 | 0.82 |
| #N/A | #N/A | #N/A | 0.47 | 0.10 | #N/A |
| 0.12 | 0.79 | 0.18 | 1.25 | 0.77 | 0.75 |
| 0.24 | 0.99 | 0.49 | 1.49 | 0.87 | 0.75 |
| 0.06 | #N/A | #N/A | 0.28 | 0.03 | #N/A |

|      |      |      |      |      |      |
|------|------|------|------|------|------|
| 0.51 | #N/A | #N/A | 0.84 | 0.45 | 1.32 |
| 0.36 | 0.83 | 0.24 | 0.81 | 0.42 | 1.18 |
| 0.11 | 0.77 | 0.17 | 0.62 | 0.20 | 0.80 |
| 0.49 | 0.97 | 0.46 | 0.77 | 0.35 | 0.83 |
| 0.11 | 1.12 | 0.69 | #N/A | #N/A | 0.79 |
| 0.93 | #N/A | #N/A | 0.88 | 0.48 | 1.15 |
| #N/A | #N/A | #N/A | #N/A | #N/A | #N/A |
| 0.74 | 1.06 | 0.55 | 1.10 | 0.67 | 0.89 |
| 0.25 | 0.88 | 0.32 | 1.10 | 0.69 | 0.85 |
| 0.19 | 0.69 | 0.12 | 0.68 | 0.27 | 0.74 |
| #N/A | 0.56 | 0.05 | 0.45 | 0.09 | 0.87 |
| 0.47 | 1.50 | 0.93 | 0.69 | 0.27 | 0.90 |
| 0.46 | 0.89 | 0.32 | 1.50 | 0.88 | 1.72 |
| 0.78 | 0.96 | 0.43 | 0.99 | 0.61 | 0.90 |
| #N/A | 1.27 | 0.83 | 0.84 | 0.44 | 0.78 |
| 0.91 | #N/A | #N/A | 0.78 | 0.36 | 1.03 |
| #N/A | #N/A | #N/A | 1.20 | 0.76 | 0.73 |
| 0.05 | 0.96 | 0.42 | #N/A | #N/A | 1.09 |
| 0.62 | 1.54 | 0.92 | 0.75 | 0.33 | #N/A |
| #N/A | #N/A | #N/A | #N/A | #N/A | #N/A |
| #N/A | #N/A | #N/A | #N/A | #N/A | #N/A |
| #N/A | #N/A | #N/A | #N/A | #N/A | #N/A |
| 0.15 | 1.03 | 0.56 | 0.41 | 0.07 | #N/A |
| 0.38 | #N/A | #N/A | 1.41 | 0.85 | 1.30 |
| 0.66 | 1.42 | 0.92 | 0.96 | 0.57 | 0.97 |
| #N/A | #N/A | #N/A | #N/A | #N/A | #N/A |
| 0.40 | 0.84 | 0.27 | #N/A | #N/A | 1.50 |
| 0.51 | 0.92 | 0.40 | 1.21 | 0.75 | 1.04 |
| #N/A | 1.06 | 0.53 | #N/A | #N/A | 1.00 |
| 0.66 | 1.40 | 0.85 | 0.85 | 0.45 | 0.90 |
| 0.19 | 0.80 | 0.20 | 0.73 | 0.31 | 0.82 |
| 0.68 | #N/A | #N/A | 1.95 | 0.94 | 0.82 |
| 0.18 | 0.76 | 0.17 | 0.68 | 0.26 | 0.99 |
| 0.35 | 0.77 | 0.19 | 1.57 | 0.89 | 0.76 |
| #N/A | 1.01 | 0.53 | 1.39 | 0.84 | 0.82 |
| 0.14 | 0.58 | 0.05 | 1.05 | 0.66 | 0.70 |
| 0.71 | 0.88 | 0.34 | 1.04 | 0.65 | 1.02 |
| 0.37 | #N/A | #N/A | 0.98 | 0.59 | 1.10 |
| #N/A | #N/A | #N/A | #N/A | #N/A | #N/A |
| #N/A | #N/A | #N/A | #N/A | #N/A | #N/A |
| #N/A | #N/A | #N/A | #N/A | #N/A | #N/A |
| 0.22 | 1.02 | 0.54 | 2.19 | 0.96 | 0.97 |
| 0.27 | #N/A | #N/A | 0.66 | 0.25 | 0.75 |
| #N/A | #N/A | #N/A | #N/A | #N/A | 1.11 |
| 0.18 | 0.95 | 0.42 | 1.06 | 0.66 | 1.14 |
| #N/A | 1.40 | 0.57 | 1.04 | 0.64 | 0.94 |
| 0.59 | 1.27 | 0.82 | #N/A | #N/A | 1.11 |
| #N/A | 1.27 | 0.74 | 0.40 | 0.06 | 0.78 |
| 0.40 | 0.95 | 0.42 | #N/A | #N/A | 0.85 |
| 0.60 | 1.01 | 0.52 | 2.52 | 0.98 | 0.80 |
| #N/A | #N/A | #N/A | #N/A | #N/A | #N/A |

|      |      |      |      |      |      |
|------|------|------|------|------|------|
| 0.60 | 0.98 | 0.47 | 1.40 | 0.85 | 0.88 |
| 0.52 | 0.99 | 0.46 | 1.00 | 0.59 | 0.75 |
| 0.07 | #N/A | #N/A | 0.60 | 0.19 | 0.68 |
| #N/A | 0.92 | 0.40 | #N/A | #N/A | 0.73 |
| #N/A | 0.22 | 0.00 | 0.28 | 0.03 | 0.47 |
| 0.28 | 0.66 | 0.09 | 0.77 | 0.38 | 0.67 |
| #N/A | #N/A | #N/A | 0.49 | 0.11 | #N/A |
| 0.29 | #N/A | #N/A | 0.53 | 0.13 | #N/A |
| 0.36 | 0.87 | 0.30 | 0.92 | 0.53 | 0.75 |
| 0.23 | #N/A | #N/A | #N/A | #N/A | #N/A |
| 0.41 | 0.92 | 0.38 | 0.83 | 0.42 | 0.95 |
| 0.48 | #N/A | #N/A | 1.50 | 0.87 | 1.12 |
| 0.69 | 1.11 | 0.63 | 0.69 | 0.28 | 1.13 |
| 0.57 | 1.16 | 0.67 | 0.55 | 0.15 | 0.94 |
| 0.21 | 0.81 | 0.23 | 0.88 | 0.47 | 1.20 |
| 0.46 | 0.79 | 0.21 | 0.63 | 0.20 | 1.63 |
| 0.77 | 0.77 | 0.18 | #N/A | #N/A | 0.97 |
| #N/A | #N/A | #N/A | #N/A | #N/A | #N/A |
| 0.16 | 0.96 | 0.43 | 1.46 | 0.86 | 0.77 |
| #N/A | #N/A | #N/A | #N/A | #N/A | #N/A |
| 0.22 | 0.55 | 0.04 | 0.86 | 0.45 | 0.74 |
| 0.61 | 1.03 | 0.53 | 0.83 | 0.42 | 1.16 |
| 0.39 | 0.72 | 0.20 | 0.81 | 0.41 | 1.22 |
| 0.74 | 0.88 | 0.31 | 0.79 | 0.38 | #N/A |
| 0.49 | 1.17 | 0.73 | 1.15 | 0.73 | 0.99 |
| 0.39 | 1.15 | 0.72 | 1.19 | 0.75 | 0.87 |
| 0.49 | 0.93 | 0.41 | 1.47 | 0.86 | 0.76 |
| 0.56 | 1.08 | 0.62 | 0.80 | 0.38 | #N/A |
| 0.54 | 1.04 | 0.54 | 0.85 | 0.44 | #N/A |
| 0.35 | 0.78 | 0.17 | 0.55 | 0.14 | 0.66 |
| #N/A | 1.23 | 0.81 | 0.59 | 0.17 | 0.90 |
| 0.48 | 1.09 | 0.65 | 1.35 | 0.82 | 1.05 |
| 0.75 | 1.08 | 0.63 | 1.04 | 0.65 | 1.19 |
| #N/A | 1.04 | 0.54 | 0.41 | 0.06 | 0.81 |
| #N/A | 0.52 | 0.04 | #N/A | #N/A | #N/A |
| #N/A | #N/A | #N/A | 0.98 | 0.59 | #N/A |
| 0.52 | 0.92 | 0.37 | 1.78 | 0.92 | 1.19 |
| 0.50 | 1.17 | 0.74 | 2.11 | 0.96 | #N/A |
| #N/A | #N/A | #N/A | #N/A | #N/A | #N/A |
| 0.00 | #N/A | #N/A | 0.07 | 0.00 | #N/A |
| 0.12 | 0.96 | 0.43 | 1.82 | 0.94 | 1.20 |
| #N/A | #N/A | #N/A | #N/A | #N/A | #N/A |
| 0.51 | #N/A | #N/A | 2.89 | 0.98 | #N/A |
| 0.83 | 1.04 | 0.57 | 1.41 | 0.84 | 1.06 |
| 0.88 | 1.00 | 0.48 | 0.76 | 0.34 | 0.89 |
| 0.75 | 1.02 | 0.54 | 0.92 | 0.51 | 0.88 |
| 0.74 | 1.05 | 0.59 | 1.06 | 0.66 | 0.80 |
| 0.71 | 1.30 | 0.86 | 0.91 | 0.50 | 0.95 |
| 0.44 | 0.98 | 0.48 | 1.19 | 0.74 | 0.91 |
| 0.19 | 0.56 | 0.04 | 0.89 | 0.48 | 0.70 |
| 0.02 | 0.42 | 0.01 | 0.39 | 0.05 | 0.60 |

|      |      |      |      |      |      |
|------|------|------|------|------|------|
| 0.38 | 0.96 | 0.45 | 1.39 | 0.83 | 0.80 |
| 0.40 | 0.79 | 0.19 | 0.77 | 0.35 | 0.88 |
| 0.14 | 0.93 | 0.42 | #N/A | #N/A | 0.65 |
| 0.66 | 0.95 | 0.42 | 0.97 | 0.59 | 0.99 |
| 0.46 | 1.15 | 0.73 | 0.78 | 0.38 | 0.97 |
| #N/A | 1.33 | 0.88 | 1.96 | 0.95 | 0.72 |
| 0.86 | 1.35 | 0.86 | 1.14 | 0.72 | 0.93 |
| 0.47 | 1.28 | 0.84 | 2.02 | 0.95 | 1.75 |
| 0.35 | 1.20 | 0.74 | 0.88 | 0.50 | 0.80 |
| #N/A | 1.45 | 0.84 | #N/A | #N/A | 0.98 |
| 0.44 | #N/A | #N/A | 2.03 | 0.95 | 1.09 |
| 0.31 | 1.47 | 0.83 | 1.15 | 0.73 | 0.88 |
| 0.60 | 1.13 | 0.65 | 1.15 | 0.73 | 0.79 |
| #N/A | #N/A | #N/A | 0.94 | 0.54 | 1.24 |
| #N/A | #N/A | #N/A | #N/A | #N/A | #N/A |
| #N/A | #N/A | #N/A | #N/A | #N/A | #N/A |
| 0.69 | 0.98 | 0.45 | 0.94 | 0.56 | 0.76 |
| 0.57 | 0.88 | 0.32 | 0.89 | 0.51 | 0.87 |
| 0.27 | 0.92 | 0.39 | 1.10 | 0.67 | #N/A |
| #N/A | 1.30 | 0.84 | 0.65 | 0.23 | 0.69 |
| 0.78 | 1.13 | 0.68 | 0.86 | 0.47 | 0.89 |
| 0.59 | 0.92 | 0.38 | 1.12 | 0.69 | #N/A |
| 0.72 | 1.12 | 0.50 | 0.55 | 0.15 | 0.89 |
| 0.43 | 0.92 | 0.38 | 1.04 | 0.65 | 0.98 |
| 0.54 | 1.36 | 0.80 | 0.66 | 0.24 | #N/A |
| 0.46 | 1.23 | 0.71 | 1.15 | 0.73 | #N/A |
| 0.72 | 1.02 | 0.55 | 1.12 | 0.70 | 0.92 |
| 0.56 | 0.92 | 0.38 | 0.90 | 0.52 | #N/A |
| 0.37 | 0.72 | 0.17 | 0.87 | 0.46 | 0.93 |
| 0.37 | 1.09 | 0.64 | 0.80 | 0.40 | 0.93 |
| #N/A | 1.99 | 0.99 | 0.77 | 0.37 | #N/A |
| #N/A | 0.95 | 0.42 | #N/A | #N/A | 0.93 |
| #N/A | #N/A | #N/A | 0.26 | 0.02 | #N/A |
| 0.26 | 0.95 | 0.43 | 1.40 | 0.85 | 0.98 |
| 0.12 | #N/A | #N/A | #N/A | #N/A | 0.93 |
| 0.16 | 0.81 | 0.22 | 0.76 | 0.34 | 0.84 |
| 0.30 | 0.86 | 0.28 | 0.81 | 0.41 | 1.02 |
| 0.33 | 1.21 | 0.79 | 1.94 | 0.94 | 0.98 |
| #N/A | 1.24 | 0.80 | 0.79 | 0.40 | 1.21 |
| 0.50 | 0.88 | 0.32 | 1.07 | 0.65 | 0.89 |
| 0.58 | #N/A | #N/A | 0.92 | 0.54 | 0.94 |
| 0.11 | #N/A | #N/A | 1.55 | 0.88 | 0.90 |
| #N/A | #N/A | #N/A | #N/A | #N/A | #N/A |
| 0.49 | 1.14 | 0.56 | 0.65 | 0.24 | 1.22 |
| #N/A | 1.00 | 0.50 | 0.94 | 0.56 | 1.14 |
| 0.40 | 1.19 | 0.69 | 0.77 | 0.35 | 0.80 |
| 0.26 | 0.95 | 0.41 | 0.43 | 0.07 | #N/A |
| #N/A | 0.74 | 0.34 | 0.71 | 0.29 | #N/A |
| 0.05 | 0.68 | 0.11 | 0.64 | 0.21 | 0.60 |
| 0.74 | 0.96 | 0.46 | 0.91 | 0.51 | 0.88 |
| 0.29 | 1.22 | 0.80 | 0.90 | 0.49 | 0.86 |

|      |      |      |      |      |      |
|------|------|------|------|------|------|
| 0.61 | 1.12 | 0.68 | 0.79 | 0.38 | 0.91 |
| 0.10 | 0.60 | 0.06 | 0.59 | 0.17 | 0.69 |
| 0.88 | 0.87 | 0.31 | #N/A | #N/A | 0.83 |
| 0.32 | 0.94 | 0.40 | 1.20 | 0.75 | 0.75 |
| 0.21 | 1.14 | 0.71 | #N/A | #N/A | 0.95 |
| 0.65 | 1.04 | 0.56 | 0.98 | 0.59 | 0.78 |
| #N/A | #N/A | #N/A | #N/A | #N/A | #N/A |
| #N/A | 1.12 | 0.66 | #N/A | #N/A | 0.93 |
| 0.70 | 1.22 | 0.79 | 0.85 | 0.45 | 1.03 |
| 0.91 | 0.90 | 0.37 | 0.68 | 0.26 | 1.13 |
| 0.40 | 1.21 | 0.78 | 0.68 | 0.25 | 1.55 |
| 0.32 | #N/A | #N/A | 1.10 | 0.68 | 0.93 |
| 0.54 | 0.97 | 0.44 | 1.09 | 0.69 | 1.03 |
| 0.91 | #N/A | #N/A | 0.60 | 0.18 | 0.84 |
| 0.46 | 0.57 | 0.05 | 0.72 | 0.30 | 0.80 |
| 0.19 | 0.85 | 0.27 | 0.51 | 0.13 | 0.67 |
| 0.53 | 1.09 | 0.64 | 1.39 | 0.84 | 1.13 |
| 0.52 | 0.88 | 0.32 | 0.77 | 0.35 | 0.73 |
| #N/A | 0.71 | 0.15 | 0.76 | 0.34 | 0.72 |
| 0.18 | #N/A | #N/A | 0.74 | 0.33 | #N/A |
| 0.47 | 0.80 | 0.20 | 0.55 | 0.16 | 0.80 |
| 0.42 | 0.90 | 0.44 | 0.98 | 0.59 | 0.81 |
| 0.43 | 0.97 | 0.46 | 0.88 | 0.48 | 0.93 |
| 0.62 | #N/A | #N/A | 0.61 | 0.19 | 0.74 |
| 0.47 | 1.04 | 0.57 | 0.91 | 0.53 | 0.81 |
| 0.11 | #N/A | #N/A | #N/A | #N/A | #N/A |
| 0.69 | 0.92 | 0.38 | 0.64 | 0.22 | 0.85 |
| 0.07 | 0.91 | 0.37 | 0.63 | 0.20 | 0.88 |
| 0.69 | 1.23 | 0.78 | 0.70 | 0.28 | #N/A |
| 0.35 | 1.37 | 0.90 | 0.71 | 0.30 | 0.90 |
| #N/A | #N/A | #N/A | #N/A | #N/A | #N/A |
| 0.91 | 0.93 | 0.39 | 1.00 | 0.59 | 0.94 |
| 0.72 | 1.15 | 0.72 | 0.73 | 0.31 | 0.80 |
| #N/A | #N/A | #N/A | #N/A | #N/A | #N/A |
| 0.60 | 0.87 | 0.29 | 1.63 | 0.90 | 0.88 |
| #N/A | #N/A | #N/A | #N/A | #N/A | #N/A |
| 0.70 | 1.01 | 0.52 | 1.48 | 0.87 | 1.03 |
| #N/A | #N/A | #N/A | #N/A | #N/A | #N/A |
| 0.22 | 0.79 | 0.18 | 1.18 | 0.74 | 0.83 |
| 0.31 | 0.65 | 0.09 | 0.51 | 0.12 | 0.86 |
| #N/A | #N/A | #N/A | #N/A | #N/A | #N/A |
| #N/A | #N/A | #N/A | #N/A | #N/A | #N/A |
| 0.05 | #N/A | #N/A | 0.25 | 0.02 | 0.59 |
| #N/A | 1.03 | 0.55 | 2.03 | 0.95 | 1.15 |
| #N/A | #N/A | #N/A | #N/A | #N/A | #N/A |
| 0.55 | 1.08 | 0.63 | 1.44 | 0.86 | 1.17 |
| #N/A | #N/A | #N/A | 1.15 | 0.71 | 0.82 |
| 0.21 | 1.03 | 0.56 | 0.92 | 0.53 | 1.13 |
| 0.60 | 0.93 | 0.42 | 0.81 | 0.40 | 0.98 |
| #N/A | #N/A | #N/A | 0.76 | 0.35 | #N/A |
| 0.16 | 0.63 | 0.07 | 0.83 | 0.43 | 0.96 |



|      |      |      |      |      |      |      |
|------|------|------|------|------|------|------|
| #N/A | #N/A | #N/A | #N/A | #N/A | #N/A | #N/A |
| 0.63 | 1.00 | 0.50 | 0.91 | 0.50 | #N/A | #N/A |
| 0.22 | 0.73 | 0.16 | 1.01 | 0.62 | 0.97 | 0.97 |
| 0.44 | 0.77 | 0.20 | 1.74 | 0.92 | 0.87 | 0.87 |
| #N/A | 0.61 | 0.18 | 0.95 | 0.54 | 0.78 | 0.78 |
| #N/A | 0.87 | 0.30 | 0.63 | 0.21 | 0.93 | 0.93 |
| 0.54 | 0.94 | 0.41 | 0.65 | 0.23 | 1.10 | 1.10 |
| #N/A | 1.15 | 0.71 | #N/A | #N/A | 0.94 | 0.94 |
| 0.66 | 1.06 | 0.61 | 1.12 | 0.70 | 0.98 | 0.98 |
| #N/A | #N/A | #N/A | #N/A | #N/A | #N/A | #N/A |
| 0.52 | 1.07 | 0.61 | 1.47 | 0.87 | 1.28 | 1.28 |
| 0.63 | #N/A | #N/A | 0.75 | 0.33 | 1.01 | 1.01 |
| 0.90 | #N/A | #N/A | #N/A | #N/A | 0.66 | 0.66 |
| 0.63 | 1.00 | 0.47 | 0.66 | 0.23 | 0.85 | 0.85 |
| 0.07 | #N/A | #N/A | 0.58 | 0.17 | 0.90 | 0.90 |
| 0.27 | 1.02 | 0.48 | 1.23 | 0.76 | 0.82 | 0.82 |
| #N/A | #N/A | #N/A | #N/A | #N/A | #N/A | #N/A |
| 0.54 | 1.15 | 0.66 | 0.89 | 0.50 | 0.77 | 0.77 |
| #N/A | #N/A | #N/A | #N/A | #N/A | #N/A | #N/A |
| 0.48 | 1.04 | 0.57 | 0.92 | 0.52 | 0.74 | 0.74 |
| 0.60 | 1.18 | 0.74 | 1.44 | 0.86 | 1.07 | 1.07 |
| 0.63 | 1.17 | 0.72 | 0.77 | 0.36 | 0.98 | 0.98 |
| 0.58 | 0.92 | 0.41 | 1.00 | 0.62 | 0.75 | 0.75 |
| 0.61 | 1.11 | 0.57 | 1.05 | 0.63 | 1.02 | 1.02 |
| 0.52 | #N/A | #N/A | 1.07 | 0.67 | 1.01 | 1.01 |
| 0.42 | 0.71 | 0.13 | 0.51 | 0.13 | 0.93 | 0.93 |
| #N/A | 1.07 | 0.59 | 1.02 | 0.61 | 0.70 | 0.70 |
| 0.73 | 1.22 | 0.80 | 0.68 | 0.25 | 0.92 | 0.92 |
| 0.78 | 0.97 | 0.44 | 0.91 | 0.52 | 1.05 | 1.05 |
| 0.71 | 1.00 | 0.52 | 0.60 | 0.18 | 0.81 | 0.81 |
| 0.52 | 0.92 | 0.43 | 0.99 | 0.60 | 1.12 | 1.12 |
| #N/A | #N/A | #N/A | #N/A | #N/A | #N/A | #N/A |
| 0.45 | 0.92 | 0.37 | 1.52 | 0.88 | 0.82 | 0.82 |
| #N/A | 1.12 | 0.59 | 0.79 | 0.38 | 1.23 | 1.23 |
| 0.17 | 0.52 | 0.03 | 0.36 | 0.05 | 0.86 | 0.86 |
| #N/A | #N/A | #N/A | #N/A | #N/A | #N/A | #N/A |
| 0.41 | 0.97 | 0.46 | 2.40 | 0.97 | 1.07 | 1.07 |
| #N/A | #N/A | #N/A | 1.14 | 0.71 | 1.32 | 1.32 |
| 0.80 | 2.37 | 0.98 | 0.69 | 0.28 | 1.11 | 1.11 |
| 0.76 | 0.99 | 0.49 | 1.33 | 0.82 | 1.29 | 1.29 |
| 0.33 | 0.65 | 0.08 | 0.74 | 0.33 | 0.79 | 0.79 |
| 0.07 | 0.38 | 0.01 | 0.33 | 0.04 | 0.98 | 0.98 |
| #N/A | #N/A | #N/A | #N/A | #N/A | #N/A | #N/A |
| 0.94 | #N/A | #N/A | #N/A | #N/A | #N/A | #N/A |
| 0.63 | 1.37 | 0.89 | 1.47 | 0.87 | 1.16 | 1.16 |
| 0.73 | #N/A | #N/A | 0.78 | 0.37 | 1.03 | 1.03 |
| 0.60 | 0.80 | 0.20 | 1.01 | 0.61 | 1.51 | 1.51 |
| 0.32 | 1.24 | 0.81 | 0.33 | 0.04 | #N/A | #N/A |
| 0.49 | 1.15 | 0.71 | 1.15 | 0.73 | 1.07 | 1.07 |
| #N/A | #N/A | #N/A | #N/A | #N/A | #N/A | #N/A |
| 0.19 | 0.68 | 0.10 | 0.53 | 0.13 | 0.76 | 0.76 |

|      |      |      |      |      |      |
|------|------|------|------|------|------|
| 0.87 | 0.98 | 0.46 | 0.87 | 0.49 | 0.97 |
| 0.31 | 1.35 | 0.53 | 0.50 | 0.12 | 0.66 |
| 0.70 | 0.67 | 0.09 | 1.31 | 0.81 | 0.98 |
| #N/A | #N/A | #N/A | #N/A | #N/A | #N/A |
| 0.86 | #N/A | #N/A | 1.00 | 0.61 | 1.36 |
| 0.61 | #N/A | #N/A | 0.86 | 0.47 | 0.89 |
| 0.62 | 0.91 | 0.37 | 1.07 | 0.67 | 1.00 |
| 0.63 | 1.18 | 0.75 | #N/A | #N/A | 0.84 |
| 0.28 | 1.22 | 0.56 | 0.95 | 0.57 | #N/A |
| #N/A | #N/A | #N/A | #N/A | #N/A | #N/A |
| 0.61 | 1.01 | 0.50 | 0.99 | 0.60 | 0.94 |
| #N/A | #N/A | #N/A | 1.02 | 0.62 | #N/A |
| 0.37 | 0.68 | 0.10 | 0.80 | 0.39 | 0.67 |
| 0.40 | 0.83 | 0.23 | 0.69 | 0.27 | 0.89 |
| 0.88 | 0.93 | 0.38 | #N/A | #N/A | 0.92 |
| #N/A | 0.90 | 0.33 | 1.04 | 0.63 | 0.98 |
| 0.85 | 1.14 | 0.71 | 0.95 | 0.56 | 0.92 |
| 0.08 | #N/A | #N/A | 0.19 | 0.02 | #N/A |
| #N/A | #N/A | #N/A | #N/A | #N/A | #N/A |
| 0.49 | 0.75 | 0.16 | 0.87 | 0.48 | 0.89 |
| 0.64 | 0.95 | 0.42 | 1.31 | 0.81 | 0.92 |
| 0.11 | 0.68 | 0.10 | 0.61 | 0.21 | 0.64 |
| 0.32 | 0.98 | 0.48 | #N/A | #N/A | 0.72 |
| #N/A | 0.78 | 0.18 | 1.04 | 0.64 | 0.82 |
| 0.41 | 1.16 | 0.73 | 1.04 | 0.64 | 0.84 |
| 0.27 | 1.07 | 0.52 | 1.03 | 0.64 | 0.91 |
| 0.72 | 1.01 | 0.51 | 1.04 | 0.65 | 0.80 |
| 0.68 | 0.97 | 0.44 | 0.76 | 0.35 | 0.98 |
| #N/A | #N/A | #N/A | #N/A | #N/A | #N/A |
| 0.56 | 1.01 | 0.50 | 2.11 | 0.96 | 2.45 |
| #N/A | 1.82 | 0.94 | 0.58 | 0.17 | 0.87 |
| 0.39 | 0.97 | 0.44 | 1.16 | 0.72 | 1.10 |
| #N/A | #N/A | #N/A | #N/A | #N/A | #N/A |
| 0.72 | 0.93 | 0.38 | 0.44 | 0.08 | 1.17 |
| 0.32 | 1.10 | 0.60 | 0.52 | 0.12 | 0.94 |
| 0.59 | 1.29 | 0.84 | 0.68 | 0.26 | 1.19 |
| 0.47 | #N/A | #N/A | 0.92 | 0.54 | 1.01 |
| #N/A | 1.26 | 0.75 | 0.66 | 0.23 | 1.04 |
| 0.62 | 1.02 | 0.54 | 1.35 | 0.83 | 1.24 |
| #N/A | #N/A | #N/A | 1.18 | 0.75 | 0.73 |
| 0.61 | 0.93 | 0.39 | 1.06 | 0.66 | 1.27 |
| 0.91 | 1.36 | 0.62 | #N/A | #N/A | #N/A |
| 0.64 | 0.66 | 0.09 | 0.64 | 0.23 | #N/A |
| 0.54 | 1.04 | 0.57 | 0.37 | 0.06 | 0.96 |
| 0.65 | 0.77 | 0.18 | 2.44 | 0.97 | 0.90 |
| 0.68 | 1.00 | 0.50 | 0.58 | 0.18 | 0.77 |
| 0.36 | 1.03 | 0.54 | 0.83 | 0.43 | 0.76 |
| #N/A | 0.86 | 0.27 | #N/A | #N/A | #N/A |
| 0.25 | 1.02 | 0.52 | 0.44 | 0.08 | 0.70 |
| 0.50 | #N/A | #N/A | 1.29 | 0.80 | 0.77 |
| 0.74 | 1.05 | 0.58 | 0.77 | 0.36 | 0.96 |

|      |      |      |      |      |      |
|------|------|------|------|------|------|
| 0.75 | 1.22 | 0.78 | 0.61 | 0.19 | 1.24 |
| 0.51 | 1.30 | 0.76 | 1.13 | 0.72 | 1.34 |
| #N/A | #N/A | #N/A | 0.34 | 0.05 | 1.57 |
| 0.18 | #N/A | #N/A | #N/A | #N/A | #N/A |
| 0.25 | 0.92 | 0.36 | 0.99 | 0.61 | 1.04 |
| #N/A | #N/A | #N/A | #N/A | #N/A | #N/A |
| 0.67 | 1.05 | 0.59 | 0.75 | 0.34 | 1.04 |
| 0.08 | 0.74 | 0.16 | 0.62 | 0.20 | 0.70 |
| 0.74 | 1.06 | 0.58 | 1.37 | 0.84 | 1.14 |
| #N/A | 0.98 | 0.49 | 1.04 | 0.62 | 1.00 |
| 0.63 | 0.99 | 0.47 | 0.66 | 0.24 | 1.01 |
| #N/A | #N/A | #N/A | #N/A | #N/A | #N/A |
| 0.11 | #N/A | #N/A | 0.45 | 0.08 | 1.46 |
| 0.91 | 1.01 | 0.50 | 1.21 | 0.77 | 1.60 |
| 0.57 | 1.06 | 0.60 | 2.37 | 0.97 | 1.07 |
| #N/A | 0.97 | 0.48 | 1.02 | 0.63 | #N/A |
| 0.26 | 0.75 | 0.15 | 0.81 | 0.42 | 1.04 |
| #N/A | #N/A | #N/A | 0.90 | 0.49 | 0.98 |
| #N/A | #N/A | #N/A | #N/A | #N/A | #N/A |
| 0.68 | 1.25 | 0.77 | 0.88 | 0.49 | 0.77 |
| 0.74 | 0.93 | 0.40 | 1.58 | 0.89 | 1.25 |
| #N/A | #N/A | #N/A | 0.85 | 0.44 | 0.98 |
| 0.54 | 1.01 | 0.53 | 0.66 | 0.25 | 0.85 |
| 0.60 | 0.71 | 0.11 | 0.98 | 0.59 | 1.34 |
| 0.57 | 1.18 | 0.66 | 1.05 | 0.64 | #N/A |
| 0.29 | 0.77 | 0.24 | 1.99 | 0.95 | 0.90 |
| 0.59 | 1.09 | 0.57 | 0.90 | 0.50 | 1.06 |
| #N/A | #N/A | #N/A | #N/A | #N/A | #N/A |
| #N/A | #N/A | #N/A | #N/A | #N/A | #N/A |
| 0.15 | 1.10 | 0.65 | 2.42 | 0.97 | 1.20 |
| #N/A | #N/A | #N/A | #N/A | #N/A | #N/A |
| 0.54 | 0.97 | 0.44 | 0.98 | 0.59 | 0.88 |
| #N/A | 1.42 | 0.71 | #N/A | #N/A | 1.04 |
| #N/A | #N/A | #N/A | 0.69 | 0.27 | #N/A |
| 0.27 | 1.22 | 0.80 | #N/A | #N/A | 1.13 |
| 0.09 | 0.88 | 0.32 | 1.24 | 0.77 | 0.75 |
| 0.48 | 0.83 | 0.27 | 1.23 | 0.77 | 1.04 |
| 0.59 | #N/A | #N/A | 0.94 | 0.56 | 0.95 |
| #N/A | #N/A | #N/A | #N/A | #N/A | #N/A |
| 0.46 | 0.82 | 0.23 | 0.97 | 0.58 | 0.93 |
| 0.59 | 0.87 | 0.35 | 0.83 | 0.42 | 0.72 |
| #N/A | #N/A | #N/A | #N/A | #N/A | #N/A |
| 0.54 | #N/A | #N/A | 1.30 | 0.80 | 1.02 |
| 0.45 | 0.83 | 0.27 | 0.63 | 0.22 | 1.09 |
| 0.61 | #N/A | #N/A | 0.59 | 0.19 | 0.78 |
| 0.52 | 0.72 | 0.13 | 0.79 | 0.39 | 0.78 |
| 0.07 | #N/A | #N/A | #N/A | #N/A | #N/A |
| 0.17 | 1.40 | 0.74 | 1.39 | 0.84 | 1.06 |
| 0.87 | 0.89 | 0.33 | 0.86 | 0.47 | 1.36 |
| 0.73 | 1.45 | 0.93 | 1.22 | 0.76 | 1.09 |
| 0.52 | 0.84 | 0.30 | 1.01 | 0.62 | 0.99 |

|      |      |      |      |      |      |
|------|------|------|------|------|------|
| 0.45 | 1.39 | 0.90 | #N/A | #N/A | 0.91 |
| #N/A | 1.35 | 0.79 | 1.07 | 0.67 | 1.02 |
| 0.75 | 0.96 | 0.44 | 1.29 | 0.79 | 0.94 |
| 0.44 | 0.83 | 0.24 | 0.48 | 0.11 | 0.90 |
| 0.15 | 0.87 | 0.29 | 1.10 | 0.67 | 0.67 |
| #N/A | 0.73 | 0.13 | 1.54 | 0.88 | 0.80 |
| #N/A | #N/A | #N/A | #N/A | #N/A | #N/A |
| 0.54 | 0.82 | 0.22 | 1.41 | 0.85 | 0.93 |
| #N/A | #N/A | #N/A | 0.40 | 0.06 | #N/A |
| 0.05 | 0.70 | 0.12 | 0.36 | 0.05 | 1.23 |
| 0.49 | 0.92 | 0.37 | 1.46 | 0.86 | 0.97 |
| 0.39 | 0.99 | 0.49 | 1.05 | 0.65 | 0.99 |
| 0.94 | #N/A | #N/A | 0.73 | 0.33 | 0.75 |
| 0.53 | 1.01 | 0.50 | 3.47 | 0.99 | #N/A |
| 0.50 | 0.80 | 0.22 | 0.70 | 0.28 | 1.02 |
| 0.70 | #N/A | #N/A | 0.55 | 0.14 | #N/A |
| 0.47 | 0.85 | 0.28 | 0.73 | 0.33 | 1.13 |
| 0.03 | 0.74 | 0.13 | #N/A | #N/A | 0.79 |
| 0.56 | 0.96 | 0.44 | #N/A | #N/A | 0.76 |
| 0.61 | #N/A | #N/A | 0.94 | 0.55 | 1.01 |
| 0.57 | 1.05 | 0.59 | 0.70 | 0.28 | 0.91 |
| #N/A | #N/A | #N/A | #N/A | #N/A | #N/A |
| 0.58 | 0.81 | 0.21 | 0.73 | 0.31 | 0.85 |
| 0.18 | 1.08 | 0.59 | 1.64 | 0.91 | 0.91 |
| 0.92 | 1.10 | 0.66 | 1.26 | 0.80 | 0.93 |
| 0.89 | 0.99 | 0.49 | 0.94 | 0.56 | 1.16 |
| 0.57 | 0.55 | 0.04 | 0.47 | 0.10 | 1.04 |
| #N/A | 0.75 | 0.15 | 0.54 | 0.14 | 0.93 |
| 0.35 | 0.46 | 0.02 | 0.90 | 0.50 | 0.68 |
| 0.64 | 1.69 | 0.88 | 0.66 | 0.25 | 0.80 |
| 0.26 | 0.83 | 0.26 | 0.94 | 0.56 | 0.77 |
| 0.27 | 0.61 | 0.06 | 0.45 | 0.08 | 0.56 |
| 0.99 | 1.29 | 0.56 | 1.35 | 0.83 | 0.77 |
| 0.30 | 0.93 | 0.38 | 2.32 | 0.97 | 0.89 |
| 0.65 | 0.91 | 0.36 | 1.48 | 0.87 | 0.93 |
| 0.78 | 1.01 | 0.53 | 0.77 | 0.37 | #N/A |
| 0.70 | 1.41 | 0.87 | 1.52 | 0.88 | 1.36 |
| 0.80 | 0.89 | 0.33 | 1.16 | 0.73 | 1.14 |
| #N/A | 0.90 | 0.37 | 1.22 | 0.77 | 1.08 |
| 0.62 | 1.07 | 0.59 | #N/A | #N/A | 1.16 |
| 0.65 | 0.83 | 0.26 | 1.02 | 0.63 | 0.80 |
| 0.95 | 1.19 | 0.56 | #N/A | #N/A | 0.70 |
| 0.63 | 1.50 | 0.94 | 1.69 | 0.91 | 1.03 |
| #N/A | #N/A | #N/A | #N/A | #N/A | 1.28 |
| #N/A | #N/A | #N/A | #N/A | #N/A | 0.98 |
| #N/A | #N/A | #N/A | #N/A | #N/A | #N/A |
| 0.50 | 0.84 | 0.28 | #N/A | #N/A | 0.96 |
| 0.39 | 0.76 | 0.16 | 0.95 | 0.56 | 0.75 |
| 0.84 | 1.20 | 0.78 | 0.89 | 0.51 | 0.86 |
| 0.91 | 1.17 | 0.75 | 1.24 | 0.78 | 0.86 |
| 0.44 | 1.31 | 0.87 | 0.84 | 0.45 | 0.82 |

|      |      |      |      |      |      |
|------|------|------|------|------|------|
| 0.78 | #N/A | #N/A | 1.53 | 0.88 | 0.92 |
| 0.98 | 1.39 | 0.90 | 1.38 | 0.83 | 0.86 |
| 0.19 | #N/A | #N/A | 0.48 | 0.10 | 0.64 |
| 0.48 | 1.07 | 0.60 | 0.92 | 0.53 | 0.95 |
| 0.31 | 0.56 | 0.06 | 1.14 | 0.73 | 0.75 |
| #N/A | #N/A | #N/A | #N/A | #N/A | #N/A |
| 0.57 | 0.95 | 0.42 | 1.43 | 0.86 | 0.66 |
| 0.21 | 0.51 | 0.03 | 0.64 | 0.23 | 0.78 |
| #N/A | 0.98 | 0.48 | 0.54 | 0.13 | 0.59 |
| 0.49 | 1.23 | 0.78 | 1.41 | 0.85 | 0.80 |
| 0.19 | 0.89 | 0.37 | 1.29 | 0.80 | #N/A |
| #N/A | 0.78 | 0.19 | 0.88 | 0.47 | 0.93 |
| 0.24 | 0.71 | 0.12 | 0.62 | 0.20 | 0.86 |
| 0.68 | 0.87 | 0.31 | 0.83 | 0.42 | 0.94 |
| #N/A | #N/A | #N/A | #N/A | #N/A | #N/A |
| 0.51 | 0.94 | 0.41 | #N/A | #N/A | 1.03 |
| 0.50 | 1.14 | 0.68 | 0.60 | 0.18 | #N/A |
| #N/A | #N/A | #N/A | #N/A | #N/A | #N/A |
| 0.72 | 0.85 | 0.26 | 0.66 | 0.24 | 0.85 |
| 0.43 | 0.96 | 0.43 | 0.88 | 0.48 | 0.89 |
| 0.37 | #N/A | #N/A | 0.48 | 0.10 | 0.84 |
| 0.39 | 1.04 | 0.57 | 1.31 | 0.81 | #N/A |
| 0.41 | 0.88 | 0.33 | 0.93 | 0.52 | #N/A |
| 0.50 | #N/A | #N/A | 0.79 | 0.37 | 1.08 |
| 0.57 | 0.93 | 0.39 | 0.78 | 0.37 | 1.02 |
| 0.71 | 1.17 | 0.68 | 1.17 | 0.73 | 0.94 |
| 0.44 | 0.99 | 0.49 | 2.83 | 0.98 | 1.04 |
| 0.44 | 0.97 | 0.45 | 1.02 | 0.63 | 0.99 |
| #N/A | #N/A | #N/A | #N/A | #N/A | #N/A |
| #N/A | #N/A | #N/A | #N/A | #N/A | 0.84 |
| 0.42 | 1.15 | 0.71 | 1.08 | 0.66 | 0.98 |
| 0.56 | 1.23 | 0.81 | 0.90 | 0.51 | 0.98 |
| 0.79 | 1.10 | 0.64 | 1.06 | 0.66 | 0.83 |
| 0.42 | 1.28 | 0.73 | 1.41 | 0.85 | 0.80 |
| 0.73 | 0.95 | 0.43 | 1.46 | 0.86 | 0.82 |
| 0.99 | 1.22 | 0.78 | 1.58 | 0.89 | 0.91 |
| 0.31 | 1.27 | 0.82 | 1.08 | 0.66 | 0.77 |
| 0.78 | 0.98 | 0.48 | 1.43 | 0.86 | 0.93 |
| 0.83 | #N/A | #N/A | 1.17 | 0.74 | #N/A |
| 0.46 | 1.23 | 0.81 | 0.59 | 0.17 | 0.68 |
| 0.59 | 1.02 | 0.52 | 1.02 | 0.61 | 0.80 |
| 0.37 | 1.19 | 0.77 | 1.11 | 0.70 | 0.85 |
| 0.36 | 1.23 | 0.74 | 0.87 | 0.49 | 0.87 |
| 0.49 | 1.04 | 0.56 | 1.88 | 0.94 | #N/A |
| 0.65 | 1.06 | 0.58 | 3.26 | 0.99 | 0.79 |
| 0.48 | 1.03 | 0.55 | 1.93 | 0.94 | 0.72 |
| 0.66 | 1.12 | 0.66 | 1.02 | 0.63 | 0.97 |
| 0.50 | 1.29 | 0.85 | 1.53 | 0.89 | 0.94 |
| 0.56 | 1.37 | 0.90 | 1.41 | 0.85 | 0.96 |
| #N/A | #N/A | #N/A | #N/A | #N/A | #N/A |
| #N/A | #N/A | #N/A | #N/A | #N/A | #N/A |

|      |      |      |      |      |      |
|------|------|------|------|------|------|
| 0.67 | 0.94 | 0.40 | 0.85 | 0.46 | #N/A |
| 0.18 | 0.95 | 0.47 | 1.44 | 0.85 | 0.79 |
| 0.60 | 1.01 | 0.53 | 1.43 | 0.86 | 0.72 |
| 0.42 | 1.09 | 0.64 | 0.87 | 0.48 | 0.85 |
| #N/A | #N/A | #N/A | #N/A | #N/A | 2.04 |
| #N/A | #N/A | #N/A | #N/A | #N/A | #N/A |
| #N/A | #N/A | #N/A | #N/A | #N/A | #N/A |
| #N/A | #N/A | #N/A | #N/A | #N/A | #N/A |
| 0.93 | #N/A | #N/A | 0.65 | 0.23 | 1.13 |
| 0.45 | 0.96 | 0.43 | 0.70 | 0.29 | 1.21 |
| 0.52 | 0.95 | 0.42 | 0.67 | 0.25 | 0.85 |
| 0.88 | 1.16 | 0.69 | 1.01 | 0.60 | 1.05 |
| 0.23 | #N/A | #N/A | #N/A | #N/A | 0.68 |
| 0.46 | 1.14 | 0.71 | #N/A | #N/A | 1.01 |
| 0.09 | #N/A | #N/A | 0.37 | 0.06 | #N/A |
| 0.34 | 1.09 | 0.64 | 0.83 | 0.43 | 0.92 |
| 0.89 | #N/A | #N/A | #N/A | #N/A | 0.88 |
| 0.44 | 1.01 | 0.52 | 1.23 | 0.78 | 1.14 |
| #N/A | #N/A | #N/A | #N/A | #N/A | #N/A |
| 0.56 | 1.05 | 0.59 | 0.93 | 0.53 | 0.98 |
| 0.50 | 1.11 | 0.68 | 0.66 | 0.24 | 0.88 |
| 0.11 | 0.69 | 0.12 | 0.59 | 0.19 | 0.68 |
| 0.56 | #N/A | #N/A | 0.85 | 0.44 | 0.95 |
| 0.42 | 0.84 | 0.25 | 0.71 | 0.30 | 0.97 |
| 0.63 | 1.11 | 0.50 | 1.39 | 0.83 | #N/A |
| 0.43 | 1.07 | 0.56 | 2.20 | 0.96 | 0.75 |
| 0.29 | 1.03 | 0.55 | 0.62 | 0.20 | 0.99 |
| 0.25 | #N/A | #N/A | 0.68 | 0.26 | 0.70 |
| 0.60 | #N/A | #N/A | 1.17 | 0.74 | 0.96 |
| 0.11 | 0.47 | 0.05 | 0.29 | 0.04 | 0.60 |
| 0.47 | #N/A | #N/A | 0.79 | 0.38 | 0.72 |
| 0.63 | 0.91 | 0.36 | 1.07 | 0.65 | 0.83 |
| 0.63 | 0.89 | 0.35 | 1.06 | 0.66 | 0.84 |
| 0.16 | 1.00 | 0.49 | 0.75 | 0.34 | 0.75 |
| 0.20 | 0.90 | 0.34 | 1.44 | 0.86 | 0.91 |
| #N/A | #N/A | #N/A | #N/A | #N/A | #N/A |
| 0.35 | 0.88 | 0.31 | 0.73 | 0.32 | 1.02 |
| 0.75 | 0.81 | 0.21 | 1.86 | 0.94 | 0.95 |
| 0.01 | 1.13 | 0.63 | 0.79 | 0.37 | 0.97 |
| 0.22 | 0.97 | 0.45 | 0.77 | 0.35 | 0.93 |
| 0.41 | 0.85 | 0.27 | 1.14 | 0.71 | 0.82 |
| 0.58 | 0.81 | 0.23 | 1.07 | 0.67 | 0.82 |
| 0.95 | 1.16 | 0.72 | 0.91 | 0.52 | 0.85 |
| 0.75 | 1.11 | 0.63 | 1.19 | 0.74 | 0.78 |
| 0.30 | 0.61 | 0.07 | 0.56 | 0.16 | 0.51 |
| 0.23 | 0.79 | 0.19 | 0.54 | 0.14 | 0.94 |
| #N/A | #N/A | #N/A | #N/A | #N/A | #N/A |
| #N/A | #N/A | #N/A | 0.94 | 0.55 | 0.94 |
| 0.36 | 1.00 | 0.50 | 1.21 | 0.76 | 0.85 |
| 0.41 | #N/A | #N/A | 0.90 | 0.50 | 0.83 |
| 0.11 | 0.55 | 0.05 | 0.50 | 0.11 | 0.80 |

|      |      |      |      |      |      |
|------|------|------|------|------|------|
| 0.21 | 0.53 | 0.04 | 0.54 | 0.14 | 0.83 |
| 0.22 | 0.52 | 0.04 | 0.25 | 0.02 | 0.51 |
| 0.53 | 0.99 | 0.49 | 0.72 | 0.30 | 0.74 |
| #N/A | #N/A | #N/A | #N/A | #N/A | #N/A |
| 0.44 | 1.00 | 0.50 | 0.97 | 0.57 | 0.95 |
| 0.03 | 0.55 | 0.05 | #N/A | #N/A | 0.76 |
| 0.09 | 0.44 | 0.02 | 0.61 | 0.20 | 0.64 |
| 0.22 | 1.06 | 0.60 | 1.02 | 0.61 | 0.74 |
| 0.33 | 0.82 | 0.28 | 1.06 | 0.66 | 0.83 |
| 0.67 | 0.60 | 0.06 | 1.07 | 0.65 | 0.93 |
| 0.27 | #N/A | #N/A | #N/A | #N/A | #N/A |
| 0.27 | 0.94 | 0.42 | 1.92 | 0.94 | #N/A |
| 0.27 | #N/A | #N/A | 0.66 | 0.25 | 0.89 |
| 0.28 | 0.94 | 0.42 | 0.82 | 0.42 | 0.83 |
| 0.58 | #N/A | #N/A | 0.79 | 0.38 | 0.72 |
| 0.59 | 0.91 | 0.36 | 0.87 | 0.47 | 0.75 |
| 0.60 | 0.95 | 0.42 | 0.73 | 0.31 | 0.75 |
| 0.60 | 1.07 | 0.57 | 1.15 | 0.73 | #N/A |
| 0.67 | 1.15 | 0.72 | 0.80 | 0.39 | 1.00 |
| 0.12 | 0.80 | 0.31 | 0.51 | 0.12 | 1.26 |
| #N/A | #N/A | #N/A | 0.69 | 0.26 | #N/A |
| #N/A | 0.89 | 0.36 | 1.09 | 0.67 | 0.90 |
| 0.65 | 1.30 | 0.86 | 0.90 | 0.52 | 0.80 |
| #N/A | #N/A | #N/A | 0.03 | 0.00 | #N/A |
| 0.77 | 1.03 | 0.55 | 0.70 | 0.28 | 0.86 |
| 0.39 | 0.95 | 0.42 | 1.89 | 0.94 | 0.95 |
| 0.40 | 1.08 | 0.53 | 0.70 | 0.29 | 0.88 |
| #N/A | 0.96 | 0.43 | 1.06 | 0.66 | 0.80 |
| 0.68 | 0.91 | 0.35 | 0.70 | 0.29 | #N/A |
| 0.13 | 0.79 | 0.20 | 1.18 | 0.74 | 0.79 |
| 0.68 | 0.72 | 0.12 | 0.84 | 0.44 | 0.85 |
| 0.16 | 0.88 | 0.35 | 0.56 | 0.15 | 0.88 |
| 0.85 | 1.21 | 0.74 | 1.21 | 0.75 | 0.79 |
| 0.54 | 1.06 | 0.58 | 1.04 | 0.64 | 1.09 |
| 0.46 | 0.90 | 0.37 | 0.88 | 0.47 | 1.08 |
| 0.59 | 1.01 | 0.48 | 0.88 | 0.48 | 0.96 |
| 0.93 | 0.68 | 0.14 | 1.25 | 0.79 | 0.85 |
| 0.81 | 0.92 | 0.37 | 2.26 | 0.97 | 1.02 |
| #N/A | #N/A | #N/A | #N/A | #N/A | #N/A |
| 0.50 | 0.57 | 0.05 | 0.44 | 0.07 | 1.23 |
| 0.46 | 1.12 | 0.68 | 1.07 | 0.67 | 0.88 |
| 0.96 | 1.01 | 0.49 | 0.98 | 0.59 | #N/A |
| 0.71 | 1.22 | 0.52 | 0.95 | 0.57 | 0.84 |
| #N/A | 1.04 | 0.57 | #N/A | #N/A | 0.80 |
| #N/A | #N/A | #N/A | #N/A | #N/A | #N/A |
| 0.86 | 1.35 | 0.84 | 0.81 | 0.41 | #N/A |
| 0.79 | 1.12 | 0.68 | 1.02 | 0.63 | 1.06 |
| 0.83 | #N/A | #N/A | 0.77 | 0.37 | 0.83 |
| #N/A | #N/A | #N/A | #N/A | #N/A | #N/A |
| 0.70 | 1.10 | 0.66 | 3.18 | 0.99 | 1.21 |
| 0.72 | 0.98 | 0.47 | 0.69 | 0.27 | 0.85 |



|      |      |      |      |      |      |
|------|------|------|------|------|------|
| 0.53 | 1.03 | 0.50 | 1.44 | 0.86 | 0.89 |
| #N/A | 0.89 | 0.37 | 1.06 | 0.67 | #N/A |
| 0.51 | 0.83 | 0.26 | 1.25 | 0.78 | 0.46 |
| #N/A | #N/A | #N/A | #N/A | #N/A | #N/A |
| 0.61 | 1.42 | 0.75 | 1.31 | 0.80 | 0.87 |
| 0.47 | 1.00 | 0.51 | 0.98 | 0.58 | 1.01 |
| 0.15 | 0.57 | 0.05 | 0.85 | 0.44 | 0.65 |
| #N/A | 0.90 | 0.34 | 1.10 | 0.70 | 0.88 |
| 0.57 | 1.41 | 0.91 | 0.58 | 0.18 | #N/A |
| 0.73 | 1.28 | 0.73 | 1.57 | 0.89 | 1.28 |
| 0.05 | 0.71 | 0.12 | 0.66 | 0.25 | 1.31 |
| 0.39 | 0.93 | 0.38 | 0.64 | 0.21 | 0.93 |
| #N/A | 1.07 | 0.62 | 0.95 | 0.57 | 0.98 |
| 0.77 | 1.33 | 0.88 | 1.08 | 0.66 | 1.12 |
| 0.39 | 0.69 | 0.10 | 0.67 | 0.25 | 0.87 |
| 0.40 | 0.93 | 0.43 | 1.10 | 0.70 | 1.15 |
| 0.74 | 1.23 | 0.78 | 1.19 | 0.75 | 0.97 |
| 0.08 | 1.06 | 0.59 | 2.28 | 0.97 | 1.16 |
| #N/A | 0.94 | 0.39 | #N/A | #N/A | 0.86 |
| #N/A | #N/A | #N/A | #N/A | #N/A | #N/A |
| 0.28 | 0.74 | 0.22 | 0.46 | 0.09 | 0.88 |
| 0.68 | #N/A | #N/A | 0.81 | 0.40 | 0.78 |
| 0.73 | 1.36 | 0.56 | 0.80 | 0.39 | 0.69 |
| 0.20 | 1.00 | 0.50 | 1.11 | 0.70 | 0.65 |
| 0.84 | #N/A | #N/A | #N/A | #N/A | 0.79 |
| 0.74 | 1.07 | 0.58 | #N/A | #N/A | 0.77 |
| 0.36 | 1.14 | 0.64 | 1.45 | 0.86 | 1.24 |
| #N/A | #N/A | #N/A | 0.88 | 0.48 | #N/A |
| 0.27 | 0.85 | 0.27 | 1.56 | 0.89 | 0.83 |
| 0.19 | 1.11 | 0.68 | 0.95 | 0.56 | 0.73 |
| 0.34 | 0.92 | 0.36 | 0.93 | 0.52 | 0.84 |
| 0.04 | 0.63 | 0.07 | 0.34 | 0.04 | 0.59 |
| #N/A | 0.98 | 0.46 | #N/A | #N/A | #N/A |
| 0.34 | 0.95 | 0.45 | 0.92 | 0.52 | 0.80 |
| 0.32 | #N/A | #N/A | 0.74 | 0.33 | 0.88 |
| 0.53 | 1.50 | 0.93 | #N/A | #N/A | 1.00 |
| 0.56 | 0.77 | 0.16 | 1.84 | 0.93 | 1.03 |
| 0.62 | 0.84 | 0.27 | 0.90 | 0.51 | 1.24 |
| 0.71 | 1.20 | 0.77 | 0.63 | 0.21 | 1.02 |
| 0.67 | 0.99 | 0.48 | 1.30 | 0.81 | 0.94 |
| 0.26 | #N/A | #N/A | #N/A | #N/A | 1.16 |
| #N/A | #N/A | #N/A | #N/A | #N/A | #N/A |
| #N/A | #N/A | #N/A | 0.12 | 0.01 | #N/A |
| #N/A | 0.86 | 0.30 | 0.31 | 0.04 | 1.06 |
| 0.54 | 0.98 | 0.46 | 0.83 | 0.43 | 0.89 |
| 0.14 | 0.60 | 0.06 | 1.17 | 0.74 | 0.76 |
| 0.45 | 0.63 | 0.07 | 0.61 | 0.19 | 0.77 |
| 0.43 | 1.27 | 0.82 | 0.84 | 0.45 | 1.01 |
| 0.33 | 1.14 | 0.68 | 1.05 | 0.63 | 0.99 |
| #N/A | #N/A | #N/A | #N/A | #N/A | #N/A |
| #N/A | 0.98 | 0.46 | 0.74 | 0.34 | 0.82 |

|      |      |      |      |      |      |
|------|------|------|------|------|------|
| 0.04 | 0.27 | 0.00 | 0.28 | 0.03 | 0.39 |
| #N/A | #N/A | #N/A | #N/A | #N/A | #N/A |
| 0.82 | #N/A | #N/A | 0.48 | 0.10 | 1.03 |
| 0.59 | 1.14 | 0.70 | #N/A | #N/A | 0.86 |
| 0.24 | 0.91 | 0.36 | 1.23 | 0.76 | 0.85 |
| #N/A | 0.83 | 0.27 | #N/A | #N/A | #N/A |
| 0.62 | 1.08 | 0.64 | 0.81 | 0.40 | 1.04 |
| 0.16 | 0.75 | 0.15 | 0.82 | 0.41 | 0.81 |
| 0.92 | 1.16 | 0.73 | 0.90 | 0.51 | 1.12 |
| 0.83 | 1.08 | 0.61 | 0.97 | 0.58 | 0.88 |
| 0.52 | 0.84 | 0.25 | 1.00 | 0.60 | 1.07 |
| 0.39 | 1.03 | 0.55 | 0.56 | 0.16 | 0.93 |
| 0.75 | #N/A | #N/A | 1.15 | 0.71 | #N/A |
| 0.10 | #N/A | #N/A | #N/A | #N/A | #N/A |
| #N/A | 1.04 | 0.49 | 0.90 | 0.52 | 0.67 |
| 0.36 | 0.84 | 0.24 | 1.75 | 0.92 | 0.93 |
| 0.41 | #N/A | #N/A | 0.95 | 0.57 | 0.90 |
| 0.59 | 0.81 | 0.22 | 0.56 | 0.15 | 0.97 |
| 0.33 | 0.73 | 0.15 | 1.40 | 0.84 | 0.96 |
| #N/A | #N/A | #N/A | #N/A | #N/A | #N/A |
| 0.38 | 1.02 | 0.54 | 0.93 | 0.55 | 0.78 |
| 0.36 | 0.71 | 0.12 | 0.63 | 0.21 | 0.68 |
| 0.93 | #N/A | #N/A | 0.79 | 0.38 | 0.80 |
| 0.92 | 0.95 | 0.42 | 1.13 | 0.72 | 0.96 |
| #N/A | 0.76 | 0.18 | 0.90 | 0.50 | 0.83 |
| #N/A | #N/A | #N/A | #N/A | #N/A | #N/A |
| 0.34 | 0.78 | 0.17 | 0.87 | 0.48 | 0.84 |
| 0.51 | 0.92 | 0.37 | 1.16 | 0.72 | 0.87 |
| 0.28 | 0.91 | 0.37 | 1.02 | 0.61 | 1.15 |
| 0.24 | 1.01 | 0.51 | 1.53 | 0.88 | 1.12 |
| #N/A | #N/A | #N/A | 1.49 | 0.87 | #N/A |
| 0.20 | 0.87 | 0.32 | 0.59 | 0.17 | 0.83 |
| 0.33 | 0.91 | 0.36 | 1.26 | 0.78 | 1.14 |
| 0.68 | 1.25 | 0.51 | 0.73 | 0.31 | 0.69 |
| 0.24 | 0.92 | 0.37 | 1.21 | 0.76 | 0.98 |
| 0.79 | #N/A | #N/A | 1.12 | 0.71 | 1.02 |
| #N/A | #N/A | #N/A | #N/A | #N/A | #N/A |
| 0.27 | 0.66 | 0.08 | 1.22 | 0.76 | 1.16 |
| 0.54 | 0.88 | 0.31 | 0.77 | 0.35 | 0.88 |
| 0.21 | #N/A | #N/A | 0.62 | 0.20 | 0.90 |
| 0.37 | 0.60 | 0.06 | 0.58 | 0.17 | 0.63 |
| 0.45 | 0.91 | 0.35 | 0.88 | 0.49 | 1.04 |
| 0.57 | 0.83 | 0.24 | 0.79 | 0.40 | 1.04 |
| 0.58 | 1.26 | 0.79 | 1.46 | 0.86 | 1.01 |
| 0.39 | 0.82 | 0.24 | 1.26 | 0.78 | 1.16 |
| #N/A | #N/A | #N/A | #N/A | #N/A | #N/A |
| 0.52 | 0.91 | 0.35 | 0.89 | 0.50 | 1.13 |
| 0.47 | 0.98 | 0.47 | #N/A | #N/A | 1.25 |
| 0.58 | 0.82 | 0.24 | 0.85 | 0.44 | 0.86 |
| 0.28 | 0.66 | 0.09 | 0.83 | 0.43 | 0.83 |
| 0.20 | 0.84 | 0.26 | 0.53 | 0.13 | 0.78 |

|      |      |      |      |      |      |
|------|------|------|------|------|------|
| 0.90 | 1.06 | 0.57 | 1.03 | 0.64 | 0.96 |
| 0.91 | 1.02 | 0.54 | 1.01 | 0.61 | 0.85 |
| #N/A | 1.17 | 0.76 | 0.97 | 0.58 | 0.92 |
| 0.79 | 0.86 | 0.29 | 0.89 | 0.50 | 1.02 |
| 0.49 | 1.02 | 0.54 | 0.76 | 0.36 | 0.98 |
| 0.67 | 0.84 | 0.25 | 1.36 | 0.83 | 0.69 |
| #N/A | #N/A | #N/A | #N/A | #N/A | 0.74 |
| 0.88 | 1.11 | 0.51 | 0.66 | 0.24 | #N/A |
| 0.59 | 1.00 | 0.51 | 1.22 | 0.75 | 1.10 |
| #N/A | #N/A | #N/A | 0.12 | 0.01 | #N/A |
| 0.46 | 0.89 | 0.34 | 0.72 | 0.30 | 1.04 |
| 0.67 | 1.28 | 0.84 | 0.72 | 0.30 | 0.93 |
| 0.26 | 1.12 | 0.67 | 1.31 | 0.81 | 0.70 |
| 0.42 | #N/A | #N/A | 0.73 | 0.31 | 1.00 |
| 0.43 | 0.73 | 0.13 | 0.60 | 0.20 | 1.48 |
| 0.40 | 0.96 | 0.43 | 0.99 | 0.60 | 1.15 |
| 0.60 | 0.89 | 0.36 | 0.94 | 0.56 | 1.15 |
| #N/A | #N/A | #N/A | #N/A | #N/A | #N/A |
| 0.59 | 0.97 | 0.47 | 1.61 | 0.90 | 1.34 |
| #N/A | 0.70 | 0.11 | 0.75 | 0.34 | 1.04 |
| 0.76 | 1.11 | 0.64 | 0.90 | 0.50 | 0.74 |
| 0.61 | 1.25 | 0.82 | 0.71 | 0.30 | 0.93 |
| 0.68 | 1.06 | 0.60 | 0.79 | 0.38 | 0.94 |
| 0.29 | 1.43 | 0.92 | 0.94 | 0.55 | #N/A |
| #N/A | 1.23 | 0.60 | 5.58 | 1.00 | 0.98 |
| 0.51 | 1.18 | 0.76 | 0.82 | 0.41 | 1.15 |
| 0.18 | 1.13 | 0.69 | 0.78 | 0.39 | 1.05 |
| 0.13 | 1.25 | 0.70 | 0.67 | 0.26 | 0.88 |
| 0.42 | 0.54 | 0.04 | 0.51 | 0.11 | 0.66 |
| 0.83 | 1.01 | 0.52 | 2.74 | 0.98 | #N/A |
| 0.67 | #N/A | #N/A | 1.00 | 0.61 | 0.68 |
| 0.43 | 0.88 | 0.32 | 1.22 | 0.77 | 0.84 |
| 0.40 | 1.34 | 0.59 | 2.41 | 0.97 | #N/A |
| 0.38 | 0.84 | 0.31 | #N/A | #N/A | 0.80 |
| 0.46 | 1.11 | 0.67 | 2.67 | 0.98 | #N/A |
| 0.42 | 1.07 | 0.53 | 0.89 | 0.51 | 0.75 |
| 0.66 | 1.07 | 0.62 | 0.87 | 0.47 | 0.82 |
| 0.53 | 0.98 | 0.48 | 0.71 | 0.29 | 0.72 |
| #N/A | 0.88 | 0.31 | #N/A | #N/A | 0.76 |
| 0.81 | 0.97 | 0.47 | 1.95 | 0.94 | 1.22 |
| 0.70 | 1.06 | 0.59 | 1.07 | 0.67 | 0.96 |
| 0.63 | 1.23 | 0.81 | 1.81 | 0.93 | 0.94 |
| 0.53 | 1.32 | 0.87 | 1.44 | 0.86 | 0.93 |
| 0.18 | 0.94 | 0.43 | 0.82 | 0.43 | #N/A |
| 0.32 | 1.08 | 0.63 | 2.12 | 0.96 | 3.30 |
| 0.90 | 1.07 | 0.62 | 0.78 | 0.37 | 1.24 |
| 0.89 | 1.08 | 0.64 | 1.04 | 0.64 | 0.95 |
| 0.53 | 0.80 | 0.19 | 1.19 | 0.75 | 1.03 |
| 0.65 | 0.93 | 0.39 | 0.91 | 0.52 | #N/A |
| #N/A | #N/A | #N/A | #N/A | #N/A | #N/A |
| #N/A | 0.75 | 0.16 | 0.79 | 0.37 | 0.79 |

|      |      |      |      |      |      |      |
|------|------|------|------|------|------|------|
| #N/A | #N/A | #N/A | #N/A | #N/A | #N/A | #N/A |
| #N/A | #N/A | #N/A | #N/A | #N/A | #N/A | #N/A |
| 0.80 | 0.98 | 0.46 | 0.93 | 0.55 | 0.88 | 0.88 |
| 0.20 | 0.64 | 0.08 | 0.51 | 0.11 | 0.67 | 0.67 |
| 0.88 | 0.91 | 0.36 | 1.91 | 0.94 | 0.77 | 0.77 |
| 0.33 | 1.13 | 0.69 | 1.00 | 0.59 | 0.82 | 0.82 |
| #N/A | #N/A | #N/A | #N/A | #N/A | #N/A | #N/A |
| 0.52 | 1.09 | 0.65 | 1.04 | 0.63 | 0.93 | 0.93 |
| 0.28 | 0.65 | 0.08 | 0.60 | 0.18 | 0.65 | 0.65 |
| 0.26 | 0.79 | 0.19 | 0.83 | 0.43 | 0.75 | 0.75 |
| 0.37 | 0.85 | 0.28 | 1.38 | 0.84 | 0.91 | 0.91 |
| 0.64 | 1.07 | 0.62 | 1.12 | 0.69 | 0.75 | 0.75 |
| 0.24 | #N/A | #N/A | 0.93 | 0.54 | #N/A | #N/A |
| 0.61 | #N/A | #N/A | 0.83 | 0.43 | 0.63 | 0.63 |
| 0.43 | 0.62 | 0.07 | #N/A | #N/A | 1.03 | 1.03 |
| 0.78 | 1.15 | 0.73 | 0.79 | 0.38 | 1.14 | 1.14 |
| 0.72 | 0.94 | 0.41 | #N/A | #N/A | 0.86 | 0.86 |
| 0.80 | #N/A | #N/A | 1.31 | 0.81 | #N/A | #N/A |
| #N/A | 1.11 | 0.59 | #N/A | #N/A | 1.07 | 1.07 |
| #N/A | #N/A | #N/A | #N/A | #N/A | #N/A | #N/A |
| 0.30 | #N/A | #N/A | #N/A | #N/A | 0.90 | 0.90 |
| 0.48 | 0.98 | 0.48 | 1.08 | 0.68 | 1.18 | 1.18 |
| 0.60 | 0.90 | 0.34 | 1.18 | 0.75 | 1.40 | 1.40 |
| 0.75 | 1.28 | 0.83 | #N/A | #N/A | 0.99 | 0.99 |
| #N/A | #N/A | #N/A | 0.04 | 0.00 | #N/A | #N/A |
| 0.33 | 1.02 | 0.53 | 1.11 | 0.70 | 0.81 | 0.81 |
| #N/A | #N/A | #N/A | 0.55 | 0.15 | #N/A | #N/A |
| 0.58 | 0.75 | 0.17 | 1.00 | 0.59 | 0.85 | 0.85 |
| 0.71 | 0.53 | 0.04 | 1.22 | 0.77 | 0.88 | 0.88 |
| #N/A | 0.91 | 0.36 | #N/A | #N/A | 0.60 | 0.60 |
| 0.32 | 1.15 | 0.69 | 0.89 | 0.49 | 0.91 | 0.91 |
| 0.12 | #N/A | #N/A | 0.85 | 0.46 | 0.96 | 0.96 |
| 0.50 | 1.54 | 0.85 | 0.98 | 0.59 | 0.85 | 0.85 |
| 0.62 | 0.83 | 0.25 | 2.92 | 0.99 | 0.99 | 0.99 |
| 0.88 | 1.14 | 0.67 | 1.29 | 0.81 | 1.09 | 1.09 |
| 0.60 | 0.85 | 0.27 | 2.09 | 0.95 | 1.09 | 1.09 |
| 0.61 | 0.82 | 0.23 | 0.47 | 0.09 | 0.83 | 0.83 |
| #N/A | 0.96 | 0.44 | 0.97 | 0.57 | 0.70 | 0.70 |
| #N/A | 0.96 | 0.43 | 1.41 | 0.85 | 1.24 | 1.24 |
| #N/A | #N/A | #N/A | 0.53 | 0.13 | 1.01 | 1.01 |
| #N/A | #N/A | #N/A | #N/A | #N/A | #N/A | #N/A |
| #N/A | 0.79 | 0.19 | 0.70 | 0.28 | #N/A | #N/A |
| 0.62 | 1.13 | 0.69 | 0.99 | 0.60 | 0.78 | 0.78 |
| #N/A | #N/A | #N/A | 0.60 | 0.20 | #N/A | #N/A |
| #N/A | 1.10 | 0.58 | 0.81 | 0.41 | 1.16 | 1.16 |
| 0.25 | 0.75 | 0.17 | 0.67 | 0.24 | 0.83 | 0.83 |
| 0.15 | #N/A | #N/A | 1.55 | 0.88 | 0.95 | 0.95 |
| 0.26 | 0.43 | 0.02 | 0.46 | 0.09 | 1.11 | 1.11 |
| 0.05 | #N/A | #N/A | 0.05 | 0.00 | #N/A | #N/A |
| 0.60 | 1.17 | 0.69 | #N/A | #N/A | 0.93 | 0.93 |
| 0.54 | #N/A | #N/A | 0.97 | 0.58 | 0.99 | 0.99 |

|      |      |      |      |      |      |
|------|------|------|------|------|------|
| #N/A | 1.01 | 0.52 | #N/A | #N/A | 0.98 |
| #N/A | #N/A | #N/A | #N/A | #N/A | #N/A |
| #N/A | 1.03 | 0.55 | 1.18 | 0.73 | 1.07 |
| #N/A | #N/A | #N/A | #N/A | #N/A | #N/A |
| 0.41 | 1.05 | 0.59 | 1.36 | 0.82 | 1.77 |
| #N/A | 0.92 | 0.37 | #N/A | #N/A | 1.29 |
| 0.01 | 0.84 | 0.26 | 0.33 | 0.04 | 1.02 |
| #N/A | #N/A | #N/A | #N/A | #N/A | #N/A |
| 0.43 | 1.18 | 0.77 | 0.49 | 0.10 | 0.78 |
| 0.25 | #N/A | #N/A | 0.82 | 0.41 | 1.05 |
| 0.50 | 0.99 | 0.49 | 0.80 | 0.39 | 1.00 |
| 0.64 | 0.97 | 0.45 | 0.65 | 0.23 | 1.10 |
| #N/A | 1.32 | 0.71 | 0.91 | 0.52 | 1.58 |
| 0.10 | 1.34 | 0.88 | 0.59 | 0.17 | 0.85 |
| 0.46 | 1.16 | 0.72 | 1.79 | 0.93 | 1.04 |
| 0.41 | 1.02 | 0.53 | 0.90 | 0.51 | 0.92 |
| 0.59 | 1.00 | 0.47 | 0.84 | 0.45 | 0.91 |
| 0.95 | 1.44 | 0.91 | 0.99 | 0.58 | 1.12 |
| #N/A | #N/A | #N/A | #N/A | #N/A | #N/A |
| 0.51 | 0.83 | 0.23 | #N/A | #N/A | 1.11 |
| 0.34 | #N/A | #N/A | #N/A | #N/A | 0.70 |
| 0.50 | 1.14 | 0.53 | 0.85 | 0.44 | 0.92 |
| 0.62 | 1.04 | 0.56 | 0.77 | 0.35 | 0.87 |
| 0.39 | 1.13 | 0.70 | 0.84 | 0.44 | 1.00 |
| 0.52 | 1.19 | 0.75 | 1.02 | 0.61 | 0.88 |
| #N/A | 1.02 | 0.51 | #N/A | #N/A | 0.72 |
| 0.45 | 1.00 | 0.49 | 0.86 | 0.47 | 0.94 |
| #N/A | #N/A | #N/A | #N/A | #N/A | #N/A |
| 0.47 | 0.96 | 0.42 | 0.58 | 0.17 | 0.76 |
| 0.68 | 1.06 | 0.57 | 0.96 | 0.58 | 0.79 |
| 0.64 | 1.15 | 0.72 | 0.88 | 0.48 | 0.82 |
| 0.64 | 1.03 | 0.55 | 1.03 | 0.62 | 1.01 |
| #N/A | #N/A | #N/A | #N/A | #N/A | #N/A |
| 0.29 | 0.89 | 0.35 | 1.20 | 0.75 | 1.24 |
| 0.19 | #N/A | #N/A | 0.81 | 0.39 | #N/A |
| 0.03 | #N/A | #N/A | 0.27 | 0.03 | 1.16 |
| #N/A | #N/A | #N/A | #N/A | #N/A | #N/A |
| 0.79 | 0.90 | 0.35 | 0.75 | 0.34 | 1.17 |
| #N/A | 1.48 | 0.87 | 1.08 | 0.68 | 1.15 |
| 0.51 | 1.22 | 0.73 | 0.87 | 0.47 | 0.94 |
| #N/A | 0.60 | 0.09 | 1.30 | 0.81 | 0.73 |
| 0.69 | 0.93 | 0.39 | 1.22 | 0.77 | #N/A |
| #N/A | #N/A | #N/A | #N/A | #N/A | 0.88 |
| 0.38 | #N/A | #N/A | 1.54 | 0.89 | 0.96 |
| 0.69 | #N/A | #N/A | 1.57 | 0.89 | 1.03 |
| 0.52 | #N/A | #N/A | 0.71 | 0.28 | #N/A |
| 0.61 | 0.69 | 0.11 | 0.72 | 0.31 | 0.65 |
| 0.73 | 0.70 | 0.19 | 0.68 | 0.27 | 1.12 |
| 0.23 | 1.28 | 0.80 | 0.74 | 0.32 | 1.13 |
| 0.49 | 0.80 | 0.21 | #N/A | #N/A | 1.04 |
| 0.74 | 1.26 | 0.81 | 0.78 | 0.38 | 0.91 |

|      |      |      |      |      |      |
|------|------|------|------|------|------|
| 0.56 | 1.15 | 0.59 | 1.04 | 0.64 | 0.83 |
| 0.16 | 0.61 | 0.06 | 0.62 | 0.19 | 0.61 |
| 0.36 | 0.88 | 0.30 | 0.92 | 0.53 | 0.98 |
| 0.76 | 1.25 | 0.79 | 0.94 | 0.53 | 1.02 |
| 0.78 | 1.39 | 0.83 | 1.00 | 0.59 | 1.19 |
| 0.32 | 1.21 | 0.79 | 0.77 | 0.36 | 0.92 |
| 0.45 | 0.79 | 0.23 | 1.16 | 0.72 | 0.88 |
| #N/A | #N/A | #N/A | #N/A | #N/A | #N/A |
| 0.20 | 0.74 | 0.14 | 4.72 | 1.00 | 0.96 |
| 0.79 | #N/A | #N/A | 1.09 | 0.66 | 1.09 |
| 0.96 | 1.17 | 0.67 | 0.88 | 0.47 | #N/A |
| 0.21 | 0.70 | 0.11 | 0.78 | 0.38 | 0.99 |
| 0.69 | 0.86 | 0.28 | 0.80 | 0.38 | 0.98 |
| #N/A | #N/A | #N/A | #N/A | #N/A | #N/A |
| #N/A | #N/A | #N/A | 0.13 | 0.01 | #N/A |
| 0.70 | 0.93 | 0.41 | 1.23 | 0.76 | #N/A |
| 0.66 | #N/A | #N/A | 0.72 | 0.30 | 0.88 |
| #N/A | #N/A | #N/A | #N/A | #N/A | #N/A |
| 0.59 | #N/A | #N/A | 1.08 | 0.68 | 1.03 |
| 0.41 | 0.93 | 0.43 | 1.43 | 0.85 | 0.97 |
| 0.62 | 1.15 | 0.72 | 0.70 | 0.28 | 1.04 |
| #N/A | #N/A | #N/A | #N/A | #N/A | #N/A |
| #N/A | #N/A | #N/A | 0.56 | 0.15 | #N/A |
| 0.57 | 1.39 | 0.89 | #N/A | #N/A | 0.93 |
| 0.56 | 1.12 | 0.67 | 1.06 | 0.67 | 1.46 |
| 0.91 | 1.20 | 0.77 | 0.78 | 0.37 | 1.52 |
| 0.39 | 1.11 | 0.67 | 0.63 | 0.21 | 1.27 |
| 0.23 | 1.01 | 0.52 | 0.99 | 0.59 | 1.02 |
| #N/A | #N/A | #N/A | #N/A | #N/A | #N/A |
| #N/A | #N/A | #N/A | 1.20 | 0.75 | 1.91 |
| #N/A | #N/A | #N/A | #N/A | #N/A | #N/A |
| #N/A | #N/A | #N/A | 0.71 | 0.29 | #N/A |
| 0.05 | #N/A | #N/A | #N/A | #N/A | #N/A |
| #N/A | 0.78 | 0.18 | 1.66 | 0.91 | 0.97 |
| #N/A | #N/A | #N/A | #N/A | #N/A | #N/A |
| 0.65 | 0.96 | 0.43 | 1.05 | 0.65 | 0.84 |
| 0.48 | 0.94 | 0.40 | 0.60 | 0.19 | #N/A |
| 0.88 | 1.23 | 0.76 | 0.95 | 0.57 | 0.84 |
| #N/A | #N/A | #N/A | #N/A | #N/A | #N/A |
| #N/A | 1.11 | 0.66 | 0.77 | 0.36 | 0.84 |
| #N/A | #N/A | #N/A | #N/A | #N/A | #N/A |
| #N/A | #N/A | #N/A | #N/A | #N/A | #N/A |
| 0.63 | 1.11 | 0.67 | 0.85 | 0.45 | 0.95 |
| 0.26 | 0.85 | 0.29 | 0.96 | 0.58 | #N/A |
| 0.64 | 1.16 | 0.73 | 0.89 | 0.51 | 1.16 |
| 0.87 | #N/A | #N/A | 0.69 | 0.26 | 1.32 |
| #N/A | #N/A | #N/A | #N/A | #N/A | 1.02 |
| 0.77 | #N/A | #N/A | 0.67 | 0.25 | 0.87 |
| 0.66 | 0.98 | 0.46 | 0.79 | 0.37 | 1.12 |
| #N/A | 0.70 | 0.11 | 1.44 | 0.86 | 0.93 |
| 0.26 | 1.07 | 0.61 | 0.91 | 0.50 | 0.90 |

|      |      |      |      |      |      |
|------|------|------|------|------|------|
| 0.60 | 1.12 | 0.66 | 1.24 | 0.77 | 0.91 |
| #N/A | #N/A | #N/A | #N/A | #N/A | 0.87 |
| #N/A | #N/A | #N/A | 3.99 | 0.99 | #N/A |
| 0.53 | #N/A | #N/A | 1.15 | 0.73 | 0.92 |
| 0.83 | 1.00 | 0.51 | 0.77 | 0.36 | 1.34 |
| #N/A | #N/A | #N/A | #N/A | #N/A | #N/A |
| 0.38 | 1.29 | 0.84 | 0.76 | 0.35 | 0.67 |
| 0.36 | 1.13 | 0.68 | 0.88 | 0.49 | 0.67 |
| #N/A | #N/A | #N/A | #N/A | #N/A | #N/A |
| 0.32 | 1.18 | 0.66 | 1.89 | 0.94 | 0.76 |
| 0.78 | 1.12 | 0.69 | 1.03 | 0.62 | 1.05 |
| 0.86 | 1.03 | 0.56 | 1.81 | 0.93 | 1.04 |
| 0.38 | 1.40 | 0.90 | 0.75 | 0.35 | 1.30 |
| 0.04 | 0.75 | 0.16 | 0.27 | 0.03 | #N/A |
| 0.99 | #N/A | #N/A | 2.27 | 0.96 | 1.07 |
| #N/A | #N/A | #N/A | #N/A | #N/A | #N/A |
| 0.97 | 1.39 | 0.91 | 1.49 | 0.87 | #N/A |
| #N/A | #N/A | #N/A | #N/A | #N/A | #N/A |
| 0.24 | #N/A | #N/A | 1.00 | 0.59 | 2.78 |
| #N/A | #N/A | #N/A | #N/A | #N/A | #N/A |
| #N/A | #N/A | #N/A | #N/A | #N/A | #N/A |
| #N/A | #N/A | #N/A | #N/A | #N/A | #N/A |
| #N/A | #N/A | #N/A | #N/A | #N/A | #N/A |
| 1.00 | 1.63 | 0.96 | 2.97 | 0.99 | #N/A |
| 1.00 | 1.53 | 0.89 | 2.56 | 0.98 | #N/A |
| 0.99 | 1.35 | 0.88 | 3.19 | 0.99 | 1.10 |
| 1.00 | 2.06 | 0.99 | 4.24 | 1.00 | #N/A |
| 0.99 | 1.88 | 0.98 | 2.92 | 0.99 | #N/A |
| 1.00 | 2.20 | 0.99 | 3.76 | 0.99 | #N/A |
| 1.00 | 2.44 | 1.00 | 4.74 | 1.00 | #N/A |
| 1.00 | 1.52 | 0.94 | 2.75 | 0.98 | 0.90 |
| 1.00 | 1.85 | 0.98 | 3.02 | 0.99 | 1.06 |
| 1.00 | 1.65 | 0.97 | 2.49 | 0.98 | 0.93 |
| 0.97 | 1.23 | 0.81 | 2.19 | 0.96 | #N/A |
| 0.76 | 1.13 | 0.70 | 0.89 | 0.49 | 1.00 |
| 1.00 | 1.66 | 0.96 | 2.83 | 0.98 | 0.96 |
| 0.88 | #N/A | #N/A | #N/A | #N/A | #N/A |
| 0.55 | 1.26 | 0.84 | 1.52 | 0.88 | 1.99 |
| 0.05 | 0.56 | 0.05 | 0.61 | 0.19 | 1.25 |
| 0.99 | #N/A | #N/A | 1.31 | 0.81 | 1.31 |
| #N/A | 0.76 | 0.16 | #N/A | #N/A | 1.28 |
| #N/A | 0.74 | 0.17 | 1.09 | 0.69 | 0.96 |
| #N/A | #N/A | #N/A | #N/A | #N/A | 1.27 |
| #N/A | 1.23 | 0.78 | 0.83 | 0.42 | 1.01 |
| #N/A | 1.07 | 0.59 | #N/A | #N/A | 1.81 |
| #N/A | #N/A | #N/A | #N/A | #N/A | #N/A |
| 0.03 | 0.31 | 0.01 | 0.10 | 0.00 | 1.15 |
| #N/A | 0.96 | 0.43 | #N/A | #N/A | 1.73 |
| 0.72 | 0.83 | 0.23 | 1.14 | 0.73 | 0.95 |
| 0.85 | 0.78 | 0.18 | 1.06 | 0.64 | #N/A |
| 0.93 | 1.45 | 0.67 | 1.48 | 0.86 | #N/A |



|      |      |      |      |      |      |
|------|------|------|------|------|------|
| 0.34 | 1.06 | 0.56 | 1.21 | 0.77 | 1.06 |
| 0.44 | #N/A | #N/A | 0.66 | 0.24 | #N/A |
| 0.52 | 0.92 | 0.38 | 0.50 | 0.11 | 0.91 |
| #N/A | 0.87 | 0.33 | #N/A | #N/A | 1.10 |
| #N/A | #N/A | #N/A | 0.80 | 0.40 | 1.62 |
| #N/A | 1.00 | 0.51 | 0.55 | 0.15 | 1.55 |
| 0.45 | #N/A | #N/A | 0.82 | 0.41 | #N/A |
| 0.60 | 0.79 | 0.19 | 0.56 | 0.14 | #N/A |
| 0.86 | 1.45 | 0.93 | 0.70 | 0.27 | 1.91 |
| 0.52 | #N/A | #N/A | 0.71 | 0.29 | 1.29 |
| #N/A | 0.83 | 0.29 | 0.44 | 0.08 | #N/A |
| 0.56 | 1.18 | 0.71 | 0.79 | 0.40 | 1.55 |
| #N/A | #N/A | #N/A | #N/A | #N/A | 0.92 |
| 0.61 | 1.01 | 0.52 | 0.65 | 0.23 | 1.26 |
| 0.86 | 1.27 | 0.68 | 0.87 | 0.48 | 1.14 |
| 0.21 | 1.14 | 0.56 | #N/A | #N/A | 1.24 |
| 0.77 | #N/A | #N/A | 1.03 | 0.62 | 1.73 |
| 0.38 | #N/A | #N/A | #N/A | #N/A | 1.15 |
| 0.50 | #N/A | #N/A | 0.67 | 0.26 | 1.24 |
| #N/A | #N/A | #N/A | #N/A | #N/A | #N/A |
| #N/A | #N/A | #N/A | #N/A | #N/A | #N/A |
| 0.22 | #N/A | #N/A | #N/A | #N/A | #N/A |
| #N/A | #N/A | #N/A | #N/A | #N/A | #N/A |
| #N/A | #N/A | #N/A | #N/A | #N/A | #N/A |
| #N/A | #N/A | #N/A | #N/A | #N/A | #N/A |
| #N/A | #N/A | #N/A | #N/A | #N/A | #N/A |
| #N/A | #N/A | #N/A | #N/A | #N/A | #N/A |
| #N/A | #N/A | #N/A | #N/A | #N/A | #N/A |
| #N/A | #N/A | #N/A | #N/A | #N/A | #N/A |
| #N/A | #N/A | #N/A | #N/A | #N/A | #N/A |
| #N/A | #N/A | #N/A | #N/A | #N/A | #N/A |
| 0.86 | 1.03 | 0.54 | 1.04 | 0.64 | 1.33 |
| #N/A | #N/A | #N/A | #N/A | #N/A | #N/A |
| #N/A | #N/A | #N/A | #N/A | #N/A | #N/A |
| #N/A | #N/A | #N/A | #N/A | #N/A | #N/A |
| #N/A | #N/A | #N/A | #N/A | #N/A | 1.33 |
| #N/A | 0.77 | 0.24 | 0.94 | 0.56 | 1.38 |
| 0.75 | #N/A | #N/A | 1.32 | 0.81 | 1.65 |
| 0.28 | 0.81 | 0.22 | 0.74 | 0.33 | 1.28 |
| 0.00 | #N/A | #N/A | #N/A | #N/A | #N/A |
| #N/A | #N/A | #N/A | 0.60 | 0.19 | 1.29 |
| #N/A | #N/A | #N/A | #N/A | #N/A | #N/A |
| 0.07 | #N/A | #N/A | #N/A | #N/A | 1.97 |
| 0.82 | 1.13 | 0.69 | 0.78 | 0.36 | 0.99 |
| #N/A | 1.23 | 0.81 | 0.58 | 0.16 | 0.85 |
| 0.91 | 1.41 | 0.73 | 0.75 | 0.33 | 1.82 |
| #N/A | #N/A | #N/A | #N/A | #N/A | #N/A |
| #N/A | 0.96 | 0.48 | #N/A | #N/A | 1.13 |
| 0.55 | #N/A | #N/A | 0.86 | 0.46 | 1.10 |
| 0.45 | #N/A | #N/A | 1.23 | 0.76 | 1.34 |
| #N/A | #N/A | #N/A | #N/A | #N/A | #N/A |



|      |      |      |      |      |      |      |
|------|------|------|------|------|------|------|
| #N/A | #N/A | #N/A | #N/A | #N/A | #N/A | #N/A |
| 0.06 | #N/A | #N/A | #N/A | #N/A | #N/A | #N/A |
| 0.60 | 1.24 | 0.68 | 0.87 | 0.48 | 0.56 | 0.56 |
| 0.38 | 1.08 | 0.57 | 1.13 | 0.70 | 0.71 | 0.71 |
| 0.53 | 0.99 | 0.49 | 0.98 | 0.60 | 0.68 | 0.68 |
| #N/A | 0.92 | 0.36 | 0.92 | 0.51 | 0.80 | 0.80 |
| #N/A | 0.93 | 0.39 | 1.02 | 0.64 | #N/A | #N/A |
| 0.86 | #N/A | #N/A | 1.15 | 0.72 | #N/A | #N/A |
| 0.56 | #N/A | #N/A | #N/A | #N/A | #N/A | #N/A |
| #N/A | #N/A | #N/A | #N/A | #N/A | #N/A | #N/A |
| 0.83 | 1.02 | 0.53 | 1.17 | 0.73 | 0.95 | 0.95 |
| 0.34 | 0.91 | 0.36 | 0.62 | 0.20 | 0.95 | 0.95 |
| 0.57 | 1.10 | 0.66 | 0.86 | 0.47 | 0.87 | 0.87 |
| 0.50 | 1.50 | 0.88 | 0.67 | 0.24 | 0.83 | 0.83 |
| 0.69 | 1.23 | 0.79 | #N/A | #N/A | #N/A | #N/A |
| #N/A | #N/A | #N/A | #N/A | #N/A | #N/A | #N/A |
| 0.80 | #N/A | #N/A | 1.14 | 0.72 | #N/A | #N/A |
| 0.62 | 2.24 | 0.98 | 1.06 | 0.66 | 0.75 | 0.75 |
| #N/A | 1.03 | 0.51 | 0.79 | 0.38 | 1.39 | 1.39 |
| 0.90 | 1.27 | 0.77 | 0.74 | 0.33 | 0.96 | 0.96 |
| 0.49 | 1.12 | 0.68 | 1.53 | 0.88 | 0.75 | 0.75 |
| #N/A | #N/A | #N/A | #N/A | #N/A | #N/A | #N/A |
| 0.68 | 1.09 | 0.62 | 1.09 | 0.69 | #N/A | #N/A |
| 0.22 | 1.82 | 0.97 | 0.78 | 0.36 | 1.70 | 1.70 |
| 0.27 | 1.54 | 0.94 | 0.68 | 0.27 | 0.94 | 0.94 |
| 0.23 | 1.52 | 0.94 | 0.73 | 0.32 | 1.13 | 1.13 |
| 0.91 | #N/A | #N/A | 1.00 | 0.61 | 1.31 | 1.31 |
| 0.76 | 1.12 | 0.69 | 1.13 | 0.71 | 1.30 | 1.30 |
| 0.82 | 1.57 | 0.94 | 1.31 | 0.81 | 1.29 | 1.29 |
| 0.23 | 1.84 | 0.98 | #N/A | #N/A | #N/A | #N/A |
| #N/A | #N/A | #N/A | #N/A | #N/A | #N/A | #N/A |
| 0.80 | 1.05 | 0.58 | 1.10 | 0.67 | 1.03 | 1.03 |
| 0.63 | 1.04 | 0.54 | 0.77 | 0.38 | #N/A | #N/A |
| 0.31 | 2.04 | 0.90 | 1.20 | 0.75 | 0.88 | 0.88 |
| 0.68 | 0.85 | 0.26 | 1.39 | 0.84 | 1.20 | 1.20 |
| #N/A | #N/A | #N/A | #N/A | #N/A | #N/A | #N/A |
| #N/A | 0.85 | 0.42 | #N/A | #N/A | 0.97 | 0.97 |
| #N/A | #N/A | #N/A | #N/A | #N/A | #N/A | #N/A |
| 0.22 | 0.96 | 0.43 | 4.86 | 1.00 | 0.88 | 0.88 |
| 0.52 | 0.94 | 0.40 | 0.70 | 0.28 | #N/A | #N/A |
| 0.08 | #N/A | #N/A | 0.59 | 0.17 | 0.87 | 0.87 |
| 0.36 | #N/A | #N/A | 1.71 | 0.92 | 1.26 | 1.26 |
| 0.47 | 1.31 | 0.87 | 0.64 | 0.23 | 1.06 | 1.06 |
| 0.49 | 0.96 | 0.45 | 0.72 | 0.31 | 1.15 | 1.15 |
| #N/A | #N/A | #N/A | #N/A | #N/A | #N/A | #N/A |
| 0.84 | 0.92 | 0.37 | 1.06 | 0.66 | 0.86 | 0.86 |
| 0.70 | 2.18 | 0.97 | 0.98 | 0.57 | 1.04 | 1.04 |
| 0.92 | 1.20 | 0.77 | 0.83 | 0.43 | 1.13 | 1.13 |
| #N/A | #N/A | #N/A | #N/A | #N/A | #N/A | #N/A |
| 0.28 | 0.98 | 0.47 | 0.86 | 0.46 | 0.84 | 0.84 |
| 0.20 | #N/A | #N/A | #N/A | #N/A | #N/A | #N/A |

|      |      |      |      |      |      |
|------|------|------|------|------|------|
| 0.87 | 1.07 | 0.59 | 1.23 | 0.77 | 0.93 |
| 0.71 | 1.88 | 0.56 | 1.24 | 0.77 | 1.29 |
| 0.56 | 1.15 | 0.72 | #N/A | #N/A | 1.04 |
| 0.63 | 1.34 | 0.84 | 1.27 | 0.80 | 0.93 |
| #N/A | 0.34 | 0.01 | 0.25 | 0.02 | 0.53 |
| 0.85 | #N/A | #N/A | 0.63 | 0.21 | #N/A |
| #N/A | 0.81 | 0.24 | #N/A | #N/A | 2.15 |
| 0.52 | 1.24 | 0.75 | 2.07 | 0.96 | 1.17 |
| #N/A | #N/A | #N/A | #N/A | #N/A | 0.83 |
| #N/A | #N/A | #N/A | #N/A | #N/A | #N/A |
| 0.02 | 0.90 | 0.35 | 0.38 | 0.06 | #N/A |
| 0.55 | #N/A | #N/A | 0.65 | 0.23 | #N/A |
| 0.63 | 0.99 | 0.49 | 0.99 | 0.60 | 0.93 |
| 0.81 | 1.01 | 0.53 | 1.09 | 0.67 | 0.96 |
| 0.77 | 1.51 | 0.86 | 0.75 | 0.33 | 1.34 |
| 0.66 | 1.10 | 0.66 | 0.70 | 0.29 | 0.78 |
| #N/A | 1.31 | 0.84 | 1.12 | 0.70 | 0.98 |
| #N/A | #N/A | #N/A | #N/A | #N/A | #N/A |
| 0.41 | 1.40 | 0.91 | 0.99 | 0.59 | #N/A |
| 0.95 | 1.45 | 0.81 | 1.05 | 0.63 | 0.84 |
| 0.81 | 1.23 | 0.61 | 0.96 | 0.58 | 0.90 |
| 0.84 | 1.39 | 0.62 | 0.77 | 0.38 | 1.01 |
| 0.21 | 1.15 | 0.73 | 0.44 | 0.08 | 1.25 |
| #N/A | #N/A | #N/A | 0.62 | 0.19 | 1.08 |
| 0.64 | 0.92 | 0.40 | 1.18 | 0.75 | 0.75 |
| #N/A | 1.81 | 0.95 | 1.35 | 0.82 | 0.94 |
| 0.56 | 1.46 | 0.89 | 0.50 | 0.11 | #N/A |
| 0.50 | 1.04 | 0.58 | 0.91 | 0.51 | 1.29 |
| 0.68 | 1.37 | 0.90 | 0.89 | 0.50 | 0.99 |
| 0.86 | #N/A | #N/A | 1.20 | 0.76 | 1.40 |
| #N/A | #N/A | #N/A | #N/A | #N/A | #N/A |
| 0.62 | #N/A | #N/A | 1.03 | 0.64 | 1.15 |
| #N/A | 0.95 | 0.45 | 0.93 | 0.54 | 1.00 |
| #N/A | #N/A | #N/A | #N/A | #N/A | #N/A |
| 0.68 | 0.90 | 0.34 | 2.07 | 0.96 | 1.01 |
| 0.65 | 1.17 | 0.74 | 0.71 | 0.29 | 0.78 |
| 0.46 | 1.23 | 0.81 | 0.68 | 0.25 | #N/A |
| 0.48 | 0.93 | 0.40 | 0.68 | 0.27 | #N/A |
| #N/A | #N/A | #N/A | #N/A | #N/A | #N/A |
| 0.62 | 1.08 | 0.59 | 0.88 | 0.49 | 0.88 |
| #N/A | #N/A | #N/A | #N/A | #N/A | 0.91 |
| 0.71 | #N/A | #N/A | 1.01 | 0.62 | #N/A |
| #N/A | #N/A | #N/A | #N/A | #N/A | #N/A |
| #N/A | #N/A | #N/A | 2.17 | 0.96 | #N/A |
| #N/A | #N/A | #N/A | #N/A | #N/A | #N/A |
| 0.55 | 1.00 | 0.51 | 1.26 | 0.79 | 0.79 |
| #N/A | #N/A | #N/A | #N/A | #N/A | #N/A |
| #N/A | #N/A | #N/A | #N/A | #N/A | #N/A |
| #N/A | #N/A | #N/A | #N/A | #N/A | 1.38 |
| 0.33 | 1.10 | 0.60 | 1.03 | 0.64 | 1.58 |
| 0.72 | 1.22 | 0.78 | 0.82 | 0.42 | 0.84 |

|      |      |      |      |      |      |
|------|------|------|------|------|------|
| 0.44 | 1.42 | 0.89 | 0.64 | 0.22 | #N/A |
| 0.54 | 1.02 | 0.54 | 0.74 | 0.32 | #N/A |
| #N/A | 1.05 | 0.58 | 1.06 | 0.66 | 1.02 |
| 0.44 | 1.01 | 0.52 | 0.77 | 0.36 | 1.00 |
| 0.86 | 1.36 | 0.88 | 1.13 | 0.72 | 1.05 |
| 0.85 | #N/A | #N/A | 1.06 | 0.64 | #N/A |
| 0.05 | #N/A | #N/A | 0.33 | 0.04 | 0.42 |
| 0.34 | 1.12 | 0.69 | 0.65 | 0.22 | 0.95 |
| 0.23 | 1.11 | 0.65 | 0.71 | 0.31 | 1.23 |
| 0.27 | 1.03 | 0.56 | 0.67 | 0.26 | 0.82 |
| 0.26 | 1.09 | 0.64 | 0.60 | 0.19 | 0.87 |
| 0.18 | 0.85 | 0.28 | 0.74 | 0.32 | 0.84 |
| 0.85 | 1.39 | 0.88 | 1.28 | 0.79 | #N/A |
| #N/A | 1.67 | 0.56 | #N/A | #N/A | 0.76 |
| #N/A | #N/A | #N/A | #N/A | #N/A | #N/A |
| 0.54 | 1.25 | 0.76 | 1.13 | 0.72 | 0.94 |
| 0.84 | 1.25 | 0.80 | 0.78 | 0.38 | 1.27 |
| 0.45 | #N/A | #N/A | 0.46 | 0.09 | 1.14 |
| 0.67 | 0.79 | 0.22 | #N/A | #N/A | #N/A |
| #N/A | #N/A | #N/A | 0.15 | 0.02 | #N/A |
| #N/A | #N/A | #N/A | #N/A | #N/A | #N/A |
| #N/A | 1.27 | 0.61 | #N/A | #N/A | 1.14 |
| #N/A | #N/A | #N/A | #N/A | #N/A | #N/A |
| 0.69 | 1.21 | 0.70 | 0.74 | 0.33 | 0.74 |
| #N/A | #N/A | #N/A | #N/A | #N/A | #N/A |
| 0.59 | 1.09 | 0.64 | 1.14 | 0.73 | 1.10 |
| 0.22 | 0.71 | 0.11 | 0.99 | 0.61 | 0.94 |
| #N/A | 0.98 | 0.45 | 1.73 | 0.92 | 0.71 |
| 0.94 | #N/A | #N/A | 0.99 | 0.60 | 1.12 |
| 0.82 | 1.23 | 0.77 | 1.03 | 0.63 | #N/A |
| 0.68 | 0.97 | 0.44 | 1.39 | 0.84 | 0.85 |
| 0.75 | #N/A | #N/A | 1.14 | 0.73 | 1.16 |
| 0.79 | #N/A | #N/A | 1.43 | 0.86 | 0.91 |
| #N/A | #N/A | #N/A | #N/A | #N/A | #N/A |
| 0.68 | #N/A | #N/A | 0.74 | 0.33 | 1.00 |
| 0.75 | 1.08 | 0.59 | 0.78 | 0.37 | 0.88 |
| 0.56 | #N/A | #N/A | 0.66 | 0.25 | 0.85 |
| 0.60 | 0.74 | 0.16 | 0.89 | 0.50 | 1.19 |
| 0.40 | 0.92 | 0.40 | #N/A | #N/A | 1.62 |
| #N/A | #N/A | #N/A | 1.60 | 0.89 | #N/A |
| 0.40 | #N/A | #N/A | 1.04 | 0.63 | #N/A |
| #N/A | #N/A | #N/A | #N/A | #N/A | #N/A |
| #N/A | #N/A | #N/A | 1.40 | 0.84 | 0.88 |
| 0.79 | #N/A | #N/A | 1.72 | 0.92 | 0.77 |
| 0.94 | 1.05 | 0.55 | 1.02 | 0.61 | 1.21 |
| 0.67 | #N/A | #N/A | #N/A | #N/A | #N/A |
| 0.37 | 1.10 | 0.66 | 1.26 | 0.80 | 1.27 |
| #N/A | 1.11 | 0.67 | 0.80 | 0.38 | 1.10 |
| 0.54 | #N/A | #N/A | #N/A | #N/A | #N/A |
| #N/A | #N/A | #N/A | 0.94 | 0.55 | #N/A |
| 0.29 | 0.55 | 0.04 | 0.62 | 0.21 | 0.90 |

|      |       |      |      |      |      |      |
|------|-------|------|------|------|------|------|
| 0.61 | #N/A  | #N/A | #N/A | #N/A | #N/A | 1.37 |
| 0.41 | 1.08  | 0.64 | 0.81 | 0.40 | 0.88 |      |
| #N/A | 0.92  | 0.37 | 0.91 | 0.51 | 0.60 |      |
| 0.27 | 1.22  | 0.65 | 0.85 | 0.45 | 0.94 |      |
| 0.78 | 1.41  | 0.91 | 0.50 | 0.12 | 0.93 |      |
| 0.53 | 1.20  | 0.57 | 1.52 | 0.88 | #N/A |      |
| 0.78 | 1.27  | 0.73 | 0.83 | 0.42 | 0.94 |      |
| 0.60 | 0.84  | 0.27 | 0.68 | 0.27 | 1.01 |      |
| 0.89 | 0.89  | 0.33 | #N/A | #N/A | 1.00 |      |
| 0.72 | 1.16  | 0.73 | 0.62 | 0.21 | 0.72 |      |
| #N/A | #N/A  | #N/A | #N/A | #N/A | #N/A |      |
| #N/A | 12.30 | 0.98 | 1.36 | 0.82 | 1.06 |      |
| 0.88 | #N/A  | #N/A | 0.86 | 0.47 | 1.15 |      |
| #N/A | #N/A  | #N/A | 1.23 | 0.78 | 0.99 |      |
| #N/A | #N/A  | #N/A | #N/A | #N/A | #N/A |      |
| #N/A | #N/A  | #N/A | 0.93 | 0.52 | 0.74 |      |
| #N/A | #N/A  | #N/A | #N/A | #N/A | 1.01 |      |
| 0.20 | 0.63  | 0.07 | #N/A | #N/A | #N/A |      |
| 0.76 | 0.94  | 0.40 | #N/A | #N/A | 0.78 |      |
| 0.14 | #N/A  | #N/A | 0.52 | 0.12 | #N/A |      |
| 0.12 | 0.99  | 0.49 | 1.07 | 0.67 | 0.98 |      |
| 0.53 | 1.23  | 0.81 | 1.12 | 0.69 | 1.17 |      |
| #N/A | #N/A  | #N/A | 0.82 | 0.41 | #N/A |      |
| #N/A | #N/A  | #N/A | #N/A | #N/A | #N/A |      |
| #N/A | #N/A  | #N/A | #N/A | #N/A | #N/A |      |
| 0.87 | 1.04  | 0.55 | 1.07 | 0.67 | 1.29 |      |
| 0.37 | 0.89  | 0.37 | 0.74 | 0.32 | 1.08 |      |
| 0.69 | #N/A  | #N/A | #N/A | #N/A | #N/A |      |
| 0.22 | 1.48  | 0.60 | 0.66 | 0.23 | 0.81 |      |
| 0.83 | 1.05  | 0.57 | 1.18 | 0.73 | 0.96 |      |
| 0.85 | 1.19  | 0.77 | 1.00 | 0.62 | 0.91 |      |
| 0.67 | 1.12  | 0.68 | 0.80 | 0.39 | 0.79 |      |
| 0.65 | 1.39  | 0.90 | 0.79 | 0.38 | 0.78 |      |
| 0.46 | 1.19  | 0.77 | 0.70 | 0.30 | 0.73 |      |
| 0.59 | 1.04  | 0.55 | 0.85 | 0.45 | 0.83 |      |
| #N/A | #N/A  | #N/A | #N/A | #N/A | #N/A |      |
| 0.48 | 1.04  | 0.50 | 1.10 | 0.69 | 0.98 |      |
| #N/A | #N/A  | #N/A | #N/A | #N/A | 0.84 |      |
| #N/A | #N/A  | #N/A | #N/A | #N/A | #N/A |      |
| 0.26 | 1.11  | 0.58 | 0.90 | 0.52 | 1.15 |      |
| 0.67 | 1.24  | 0.79 | #N/A | #N/A | 1.14 |      |
| #N/A | #N/A  | #N/A | #N/A | #N/A | #N/A |      |
| 0.19 | 1.73  | 0.96 | 0.81 | 0.42 | 1.04 |      |
| 0.59 | 1.09  | 0.65 | 1.10 | 0.68 | 0.96 |      |
| #N/A | #N/A  | #N/A | #N/A | #N/A | #N/A |      |
| 0.25 | #N/A  | #N/A | 0.53 | 0.13 | #N/A |      |
| 0.87 | 1.06  | 0.60 | 1.02 | 0.61 | 1.22 |      |
| 0.40 | #N/A  | #N/A | 0.83 | 0.42 | #N/A |      |
| 0.67 | 1.51  | 0.86 | 0.84 | 0.44 | #N/A |      |
| 0.40 | 0.91  | 0.38 | 0.73 | 0.31 | 1.06 |      |

**Swr1-Myc CHIP** Untagged control Untagged control for Myc-CHIP (percentile rank, MPR) - Intergenic

|      |      |      |
|------|------|------|
| 0.84 | #N/A | #N/A |
| 0.80 | 2.10 | 0.94 |
| 0.13 | 0.32 | 0.04 |
| 0.98 | 2.88 | 0.98 |
| 0.98 | 3.08 | 0.98 |
| #N/A | #N/A | #N/A |
| #N/A | #N/A | #N/A |
| #N/A | #N/A | #N/A |
| #N/A | #N/A | #N/A |
| #N/A | #N/A | #N/A |
| #N/A | #N/A | #N/A |
| #N/A | #N/A | #N/A |
| #N/A | #N/A | #N/A |
| #N/A | #N/A | #N/A |
| #N/A | #N/A | #N/A |
| #N/A | #N/A | #N/A |
| #N/A | #N/A | #N/A |
| #N/A | #N/A | #N/A |
| #N/A | #N/A | #N/A |
| #N/A | 0.74 | 0.37 |
| #N/A | #N/A | #N/A |
| 0.57 | 0.61 | 0.24 |
| 0.58 | #N/A | #N/A |
| 0.42 | 1.07 | 0.53 |
| 0.49 | 0.98 | 0.53 |
| 0.92 | 0.81 | 0.43 |
| 0.02 | #N/A | #N/A |
| 0.57 | 1.51 | 0.85 |
| #N/A | 1.02 | 0.51 |
| 0.08 | #N/A | #N/A |
| #N/A | #N/A | #N/A |
| 0.01 | #N/A | #N/A |
| 0.60 | #N/A | #N/A |
| 0.22 | 0.60 | 0.23 |
| #N/A | #N/A | #N/A |
| 0.44 | #N/A | #N/A |
| #N/A | 1.02 | 0.50 |
| #N/A | #N/A | #N/A |
| 0.36 | #N/A | #N/A |
| #N/A | #N/A | #N/A |
| #N/A | #N/A | #N/A |
| #N/A | #N/A | #N/A |
| 0.23 | 0.66 | 0.32 |
| 0.41 | 0.87 | 0.47 |
| 0.03 | 2.17 | 0.91 |
| 0.52 | #N/A | #N/A |
| 0.53 | 1.23 | 0.65 |
| 0.25 | #N/A | #N/A |
| #N/A | #N/A | #N/A |



|      |      |      |
|------|------|------|
| 0.08 | 1.08 | 0.61 |
| 0.30 | 0.50 | 0.18 |
| 0.21 | 1.30 | 0.78 |
| 0.05 | 0.24 | 0.01 |
| 0.24 | #N/A | #N/A |
| #N/A | 1.00 | 0.57 |
| #N/A | #N/A | #N/A |
| #N/A | #N/A | #N/A |
| 0.29 | #N/A | #N/A |
| 0.15 | #N/A | #N/A |
| 0.26 | #N/A | #N/A |
| 0.03 | #N/A | #N/A |
| #N/A | #N/A | #N/A |
| 0.91 | #N/A | #N/A |
| #N/A | #N/A | #N/A |
| #N/A | #N/A | #N/A |
| 0.76 | #N/A | #N/A |
| 0.78 | #N/A | #N/A |
| #N/A | #N/A | #N/A |
| 0.55 | #N/A | #N/A |
| 0.89 | #N/A | #N/A |
| 0.81 | #N/A | #N/A |
| 0.99 | #N/A | #N/A |
| 0.32 | #N/A | #N/A |
| #N/A | #N/A | #N/A |
| #N/A | #N/A | #N/A |
| 0.76 | #N/A | #N/A |
| 0.67 | #N/A | #N/A |
| #N/A | 1.25 | 0.70 |
| 0.36 | 0.30 | 0.02 |
| 0.90 | 1.00 | 0.58 |
| 0.70 | 0.96 | 0.57 |
| 0.47 | 0.62 | 0.30 |
| 0.90 | 1.99 | 0.89 |
| 0.71 | 1.49 | 0.82 |
| 0.81 | 1.77 | 0.91 |
| #N/A | #N/A | #N/A |
| 0.97 | #N/A | #N/A |
| 0.97 | 2.04 | 0.90 |
| 0.98 | 2.89 | 0.98 |
| 0.45 | 1.15 | 0.60 |
| 0.99 | 3.87 | 0.99 |
| 0.64 | 0.83 | 0.46 |
| 0.82 | 1.29 | 0.75 |
| 0.86 | 1.88 | 0.92 |
| 0.48 | 1.03 | 0.47 |
| 0.66 | 1.20 | 0.72 |
| 0.84 | #N/A | #N/A |
| 0.81 | #N/A | #N/A |
| 0.95 | #N/A | #N/A |
| 0.82 | #N/A | #N/A |

|      |      |      |
|------|------|------|
| 0.65 | 0.72 | 0.37 |
| 0.32 | #N/A | #N/A |
| #N/A | #N/A | #N/A |
| 0.62 | #N/A | #N/A |
| #N/A | 1.73 | 0.89 |
| #N/A | 1.85 | 0.92 |
| 0.98 | #N/A | #N/A |
| 0.99 | 2.57 | 0.96 |
| #N/A | 1.06 | 0.62 |
| 0.86 | 1.66 | 0.89 |
| #N/A | #N/A | #N/A |
| 0.61 | 0.81 | 0.42 |
| 0.94 | #N/A | #N/A |
| #N/A | #N/A | #N/A |
| 0.85 | 1.20 | 0.71 |
| 0.29 | #N/A | #N/A |
| #N/A | 1.11 | 0.68 |
| 0.55 | 0.35 | 0.04 |
| #N/A | #N/A | #N/A |
| #N/A | #N/A | #N/A |
| 0.23 | 0.81 | 0.43 |
| 0.17 | 0.51 | 0.14 |
| 0.62 | #N/A | #N/A |
| #N/A | 0.80 | 0.43 |
| 0.94 | #N/A | #N/A |
| #N/A | #N/A | #N/A |
| 0.80 | 1.40 | 0.82 |
| #N/A | #N/A | #N/A |
| #N/A | #N/A | #N/A |
| #N/A | 2.39 | 0.96 |
| 0.62 | 1.23 | 0.72 |
| 0.94 | 1.98 | 0.90 |
| 0.83 | #N/A | #N/A |
| 0.55 | 1.89 | 0.92 |
| #N/A | #N/A | #N/A |
| 0.36 | #N/A | #N/A |
| 0.74 | 1.34 | 0.69 |
| 0.96 | 1.43 | 0.68 |
| #N/A | 3.69 | 0.95 |
| 0.80 | 1.01 | 0.62 |
| 0.69 | #N/A | #N/A |
| 0.60 | 1.39 | 0.82 |
| 0.84 | 1.04 | 0.60 |
| 0.90 | 2.18 | 0.95 |
| #N/A | #N/A | #N/A |
| 0.32 | 0.94 | 0.55 |
| 0.98 | 2.36 | 0.87 |
| 0.53 | 0.66 | 0.29 |
| 0.62 | #N/A | #N/A |
| 0.39 | 1.14 | 0.69 |
| #N/A | #N/A | #N/A |

|      |      |      |
|------|------|------|
| #N/A | #N/A | #N/A |
| #N/A | 1.59 | 0.85 |
| 0.52 | 0.82 | 0.45 |
| 0.87 | #N/A | #N/A |
| #N/A | 1.54 | 0.84 |
| #N/A | #N/A | #N/A |
| #N/A | 0.91 | 0.54 |
| 0.87 | 1.18 | 0.72 |
| 0.99 | 1.42 | 0.83 |
| 0.63 | 1.18 | 0.66 |
| 0.90 | 1.30 | 0.77 |
| 0.90 | 1.60 | 0.87 |
| #N/A | #N/A | #N/A |
| 0.91 | 1.43 | 0.82 |
| #N/A | #N/A | #N/A |
| 0.77 | 0.88 | 0.48 |
| #N/A | 1.83 | 0.91 |
| 0.79 | #N/A | #N/A |
| #N/A | #N/A | #N/A |
| #N/A | #N/A | #N/A |
| #N/A | #N/A | #N/A |
| 0.71 | 2.12 | 0.95 |
| 0.51 | 2.24 | 0.95 |
| 0.54 | 0.54 | 0.19 |
| 0.65 | 1.29 | 0.72 |
| 0.95 | 0.63 | 0.26 |
| #N/A | #N/A | #N/A |
| 0.75 | 1.87 | 0.92 |
| 0.95 | #N/A | #N/A |
| 0.78 | #N/A | #N/A |
| 0.83 | 2.22 | 0.81 |
| 0.52 | #N/A | #N/A |
| #N/A | #N/A | #N/A |
| 0.79 | 0.98 | 0.60 |
| 0.66 | 1.37 | 0.72 |
| #N/A | 1.80 | 0.90 |
| 0.44 | 1.82 | 0.91 |
| #N/A | #N/A | #N/A |
| 0.58 | 0.90 | 0.54 |
| 0.93 | 1.79 | 0.90 |
| #N/A | 1.27 | 0.76 |
| 0.53 | 1.46 | 0.82 |
| #N/A | #N/A | #N/A |
| 0.71 | 1.24 | 0.72 |
| 0.96 | 1.10 | 0.68 |
| #N/A | #N/A | #N/A |
| 0.70 | 1.98 | 0.92 |
| 0.71 | 0.68 | 0.31 |
| #N/A | 1.64 | 0.85 |
| #N/A | #N/A | #N/A |
| #N/A | #N/A | #N/A |

|      |      |      |
|------|------|------|
| 0.51 | #N/A | #N/A |
| 0.93 | #N/A | #N/A |
| #N/A | #N/A | #N/A |
| 0.89 | 1.37 | 0.78 |
| 0.75 | #N/A | #N/A |
| 0.97 | #N/A | #N/A |
| 0.76 | #N/A | #N/A |
| 0.59 | 1.12 | 0.70 |
| 0.90 | 1.37 | 0.81 |
| 0.97 | 1.61 | 0.82 |
| 0.84 | 1.20 | 0.74 |
| #N/A | #N/A | #N/A |
| #N/A | #N/A | #N/A |
| 0.93 | 1.54 | 0.82 |
| #N/A | #N/A | #N/A |
| 0.95 | 1.43 | 0.83 |
| 0.92 | #N/A | #N/A |
| #N/A | #N/A | #N/A |
| #N/A | #N/A | #N/A |
| 0.77 | 0.51 | 0.17 |
| 0.76 | #N/A | #N/A |
| 0.58 | 1.43 | 0.82 |
| #N/A | 1.37 | 0.77 |
| 0.32 | #N/A | #N/A |
| 0.85 | 1.15 | 0.70 |
| 0.24 | #N/A | #N/A |
| #N/A | #N/A | #N/A |
| 0.75 | #N/A | #N/A |
| #N/A | 1.12 | 0.69 |
| #N/A | #N/A | #N/A |
| #N/A | 0.84 | 0.42 |
| #N/A | #N/A | #N/A |
| 0.94 | 1.73 | 0.87 |
| #N/A | 0.86 | 0.48 |
| 0.86 | 1.47 | 0.80 |
| #N/A | #N/A | #N/A |
| #N/A | 1.96 | 0.93 |
| #N/A | #N/A | #N/A |
| 0.86 | 1.34 | 0.70 |
| 0.69 | 1.44 | 0.79 |
| 0.87 | 0.58 | 0.26 |
| #N/A | #N/A | #N/A |
| 0.87 | 0.88 | 0.51 |
| 0.96 | 1.89 | 0.79 |
| #N/A | #N/A | #N/A |
| #N/A | 1.87 | 0.92 |
| 0.84 | 0.70 | 0.34 |
| 0.38 | #N/A | #N/A |
| 0.51 | 1.48 | 0.71 |
| 0.51 | 0.62 | 0.25 |
| 0.72 | #N/A | #N/A |

|      |      |      |
|------|------|------|
| #N/A | #N/A | #N/A |
| #N/A | #N/A | #N/A |
| #N/A | #N/A | #N/A |
| #N/A | 2.23 | 0.95 |
| 0.66 | #N/A | #N/A |
| #N/A | #N/A | #N/A |
| #N/A | 1.36 | 0.78 |
| 0.62 | #N/A | #N/A |
| 0.61 | #N/A | #N/A |
| #N/A | 1.00 | 0.55 |
| 0.40 | 0.68 | 0.32 |
| #N/A | #N/A | #N/A |
| 0.05 | 2.11 | 0.89 |
| 0.78 | 1.00 | 0.58 |
| 0.55 | 0.95 | 0.55 |
| 0.52 | #N/A | #N/A |
| #N/A | 0.86 | 0.43 |
| #N/A | #N/A | #N/A |
| #N/A | #N/A | #N/A |
| #N/A | #N/A | #N/A |
| 0.25 | #N/A | #N/A |
| 0.56 | #N/A | #N/A |
| 0.14 | 0.52 | 0.18 |
| 0.59 | 0.98 | 0.60 |
| #N/A | #N/A | #N/A |
| #N/A | 2.80 | 0.98 |
| 0.73 | 0.50 | 0.20 |
| #N/A | #N/A | #N/A |
| #N/A | 1.48 | 0.75 |
| #N/A | #N/A | #N/A |
| 0.76 | 1.30 | 0.79 |
| #N/A | #N/A | #N/A |
| 0.56 | 1.94 | 0.93 |
| 0.92 | 1.99 | 0.93 |
| #N/A | #N/A | #N/A |
| #N/A | #N/A | #N/A |
| #N/A | #N/A | #N/A |
| 0.68 | 1.47 | 0.83 |
| #N/A | #N/A | #N/A |
| 0.75 | 0.81 | 0.45 |
| 0.74 | 1.67 | 0.84 |
| #N/A | 2.09 | 0.95 |
| #N/A | 1.61 | 0.87 |
| #N/A | #N/A | #N/A |
| 0.68 | #N/A | #N/A |
| #N/A | #N/A | #N/A |
| #N/A | 1.21 | 0.72 |
| 0.54 | 1.30 | 0.79 |
| #N/A | #N/A | #N/A |
| 0.73 | #N/A | #N/A |
| 0.79 | #N/A | #N/A |

|      |      |      |
|------|------|------|
| 0.80 | #N/A | #N/A |
| 0.67 | 1.61 | 0.86 |
| 0.51 | 1.11 | 0.66 |
| 0.29 | 0.68 | 0.30 |
| 0.52 | 0.93 | 0.54 |
| 0.47 | 1.31 | 0.74 |
| 0.54 | 1.30 | 0.79 |
| #N/A | 0.86 | 0.49 |
| 0.78 | 1.97 | 0.92 |
| #N/A | #N/A | #N/A |
| #N/A | #N/A | #N/A |
| 0.94 | 1.34 | 0.67 |
| 0.88 | 1.03 | 0.61 |
| #N/A | 2.28 | 0.87 |
| #N/A | 1.65 | 0.86 |
| 0.89 | 4.01 | 0.99 |
| #N/A | 1.77 | 0.89 |
| 0.92 | 1.32 | 0.77 |
| #N/A | 1.45 | 0.83 |
| #N/A | #N/A | #N/A |
| #N/A | #N/A | #N/A |
| 0.79 | 1.03 | 0.62 |
| #N/A | #N/A | #N/A |
| #N/A | #N/A | #N/A |
| 0.88 | 1.84 | 0.89 |
| 0.72 | 1.06 | 0.66 |
| #N/A | #N/A | #N/A |
| 0.47 | 1.01 | 0.53 |
| 0.84 | 0.92 | 0.45 |
| 0.74 | 0.87 | 0.50 |
| 0.40 | 0.80 | 0.44 |
| 0.21 | 0.50 | 0.13 |
| 0.50 | 1.25 | 0.76 |
| 0.89 | #N/A | #N/A |
| 0.92 | 1.69 | 0.84 |
| #N/A | #N/A | #N/A |
| #N/A | #N/A | #N/A |
| #N/A | #N/A | #N/A |
| #N/A | #N/A | #N/A |
| 0.90 | 1.41 | 0.58 |
| 0.86 | 2.11 | 0.92 |
| 0.89 | 1.14 | 0.68 |
| #N/A | 0.21 | 0.00 |
| #N/A | 0.81 | 0.44 |
| 0.85 | 1.42 | 0.61 |
| 0.95 | 1.42 | 0.81 |
| 0.67 | #N/A | #N/A |
| 0.37 | 1.26 | 0.77 |
| 0.66 | 0.68 | 0.32 |
| #N/A | #N/A | #N/A |
| #N/A | #N/A | #N/A |

|      |      |      |
|------|------|------|
| #N/A | 1.22 | 0.71 |
| 0.65 | 0.86 | 0.49 |
| 0.78 | #N/A | #N/A |
| 0.07 | 1.01 | 0.62 |
| #N/A | 1.14 | 0.70 |
| #N/A | 1.53 | 0.86 |
| #N/A | #N/A | #N/A |
| 0.67 | 1.51 | 0.80 |
| 0.34 | 0.96 | 0.59 |
| 0.78 | 1.21 | 0.74 |
| 0.96 | 1.93 | 0.91 |
| 0.98 | #N/A | #N/A |
| 0.73 | 1.44 | 0.80 |
| 0.62 | #N/A | #N/A |
| 0.40 | #N/A | #N/A |
| 0.80 | 4.72 | 0.99 |
| 0.40 | #N/A | #N/A |
| 0.30 | 0.80 | 0.43 |
| 0.89 | #N/A | #N/A |
| 0.85 | 1.29 | 0.76 |
| 0.36 | #N/A | #N/A |
| 0.90 | 1.40 | 0.81 |
| #N/A | #N/A | #N/A |
| 0.89 | 1.40 | 0.80 |
| 0.75 | 1.80 | 0.85 |
| #N/A | #N/A | #N/A |
| 0.32 | 1.08 | 0.66 |
| 0.76 | 2.02 | 0.92 |
| #N/A | #N/A | #N/A |
| 0.53 | 1.28 | 0.78 |
| 0.47 | 0.89 | 0.52 |
| 0.78 | 0.66 | 0.29 |
| #N/A | #N/A | #N/A |
| 0.19 | 0.42 | 0.07 |
| 0.12 | #N/A | #N/A |
| #N/A | 1.26 | 0.74 |
| 0.61 | 0.52 | 0.16 |
| 0.34 | 0.65 | 0.29 |
| 0.28 | 0.79 | 0.42 |
| #N/A | #N/A | #N/A |
| 0.86 | 0.72 | 0.36 |
| 0.33 | 0.80 | 0.44 |
| #N/A | #N/A | #N/A |
| 0.59 | 0.52 | 0.15 |
| 0.57 | #N/A | #N/A |
| #N/A | 1.08 | 0.59 |
| 0.82 | 1.05 | 0.59 |
| #N/A | 0.77 | 0.40 |
| 0.46 | #N/A | #N/A |
| #N/A | #N/A | #N/A |
| #N/A | #N/A | #N/A |



|      |      |      |
|------|------|------|
| 0.59 | 1.15 | 0.69 |
| #N/A | #N/A | #N/A |
| 0.66 | 0.54 | 0.18 |
| 0.44 | #N/A | #N/A |
| #N/A | #N/A | #N/A |
| 0.70 | #N/A | #N/A |
| #N/A | #N/A | #N/A |
| 0.98 | 0.70 | 0.33 |
| #N/A | #N/A | #N/A |
| 0.72 | 0.94 | 0.56 |
| 0.39 | 0.93 | 0.55 |
| 0.02 | #N/A | #N/A |
| 0.12 | 0.57 | 0.20 |
| 0.76 | 0.79 | 0.43 |
| 0.88 | 1.44 | 0.83 |
| 0.86 | #N/A | #N/A |
| 0.37 | #N/A | #N/A |
| #N/A | #N/A | #N/A |
| 0.24 | #N/A | #N/A |
| #N/A | #N/A | #N/A |
| #N/A | #N/A | #N/A |
| 0.33 | 0.35 | 0.05 |
| #N/A | #N/A | #N/A |
| 0.23 | 0.82 | 0.46 |
| #N/A | 0.55 | 0.20 |
| #N/A | #N/A | #N/A |
| 0.46 | 0.73 | 0.35 |
| 0.75 | 0.31 | 0.03 |
| 0.52 | 1.88 | 0.76 |
| 0.77 | 0.97 | 0.50 |
| 0.66 | 1.15 | 0.68 |
| 0.51 | 1.22 | 0.58 |
| 0.18 | 0.75 | 0.39 |
| 0.70 | 0.51 | 0.15 |
| 0.18 | 0.97 | 0.57 |
| 0.17 | 0.76 | 0.39 |
| 0.34 | 1.01 | 0.62 |
| 0.29 | 0.80 | 0.44 |
| 0.50 | 0.73 | 0.36 |
| 0.08 | 0.91 | 0.53 |
| 0.13 | 0.67 | 0.31 |
| 0.18 | #N/A | #N/A |
| 0.25 | 0.76 | 0.40 |
| 0.34 | 0.48 | 0.14 |
| 0.58 | 1.60 | 0.87 |
| 0.10 | #N/A | #N/A |
| 1.00 | 6.95 | 1.00 |
| #N/A | 1.43 | 0.82 |
| 0.20 | 1.00 | 0.61 |
| 0.82 | 0.71 | 0.34 |
| 0.65 | 1.00 | 0.50 |

|      |      |      |
|------|------|------|
| 0.42 | 1.22 | 0.75 |
| 0.51 | 0.83 | 0.46 |
| 0.76 | 0.93 | 0.56 |
| 0.58 | 1.10 | 0.69 |
| 0.86 | 0.96 | 0.58 |
| #N/A | #N/A | #N/A |
| 0.49 | 1.36 | 0.75 |
| 0.30 | 1.11 | 0.68 |
| 0.40 | #N/A | #N/A |
| 0.29 | 1.18 | 0.70 |
| 0.64 | 0.92 | 0.55 |
| 0.40 | #N/A | #N/A |
| 0.36 | 0.83 | 0.46 |
| 0.37 | 1.13 | 0.65 |
| 0.62 | 1.20 | 0.71 |
| 0.23 | 0.49 | 0.12 |
| 0.49 | #N/A | #N/A |
| 0.25 | 0.89 | 0.52 |
| 0.18 | 0.77 | 0.38 |
| 0.62 | 0.90 | 0.52 |
| 0.38 | #N/A | #N/A |
| 0.19 | 0.79 | 0.42 |
| 0.05 | #N/A | #N/A |
| #N/A | #N/A | #N/A |
| 0.28 | 0.97 | 0.59 |
| 0.20 | 0.88 | 0.49 |
| 0.17 | 1.23 | 0.74 |
| 0.26 | 0.80 | 0.43 |
| 0.41 | 0.93 | 0.52 |
| 0.38 | 0.99 | 0.61 |
| 0.41 | 1.29 | 0.78 |
| 0.52 | 0.50 | 0.17 |
| 0.59 | 0.98 | 0.60 |
| 0.34 | #N/A | #N/A |
| #N/A | #N/A | #N/A |
| 0.14 | 0.80 | 0.43 |
| 0.22 | 0.77 | 0.40 |
| 0.25 | 0.76 | 0.40 |
| 0.35 | 1.02 | 0.64 |
| 0.28 | 1.16 | 0.71 |
| 0.67 | 0.87 | 0.48 |
| 0.50 | #N/A | #N/A |
| #N/A | 0.69 | 0.32 |
| 0.87 | 2.15 | 0.94 |
| #N/A | 1.52 | 0.84 |
| 0.05 | 0.88 | 0.46 |
| #N/A | #N/A | #N/A |
| 0.44 | 0.78 | 0.41 |
| 0.94 | 0.84 | 0.48 |
| 0.93 | 0.91 | 0.54 |
| 0.11 | 0.72 | 0.35 |

|      |      |      |
|------|------|------|
| 0.53 | 1.23 | 0.68 |
| #N/A | #N/A | #N/A |
| 0.10 | #N/A | #N/A |
| 0.01 | 0.41 | 0.06 |
| #N/A | 1.13 | 0.65 |
| 0.16 | 1.00 | 0.62 |
| 0.35 | 0.74 | 0.37 |
| 0.28 | 0.52 | 0.15 |
| 0.50 | 0.75 | 0.39 |
| #N/A | #N/A | #N/A |
| #N/A | #N/A | #N/A |
| 0.84 | #N/A | #N/A |
| 0.11 | #N/A | #N/A |
| 0.31 | 0.51 | 0.14 |
| 0.71 | 0.57 | 0.21 |
| 0.52 | 0.76 | 0.40 |
| 0.68 | 1.22 | 0.72 |
| 0.65 | 1.95 | 0.83 |
| #N/A | 1.92 | 0.93 |
| 0.36 | 0.90 | 0.52 |
| 0.02 | 0.64 | 0.29 |
| 0.47 | #N/A | #N/A |
| 0.55 | 0.61 | 0.24 |
| 0.83 | 0.80 | 0.42 |
| 0.53 | 0.82 | 0.41 |
| 0.12 | #N/A | #N/A |
| 0.75 | 0.66 | 0.30 |
| #N/A | #N/A | #N/A |
| 0.36 | #N/A | #N/A |
| 0.69 | #N/A | #N/A |
| 0.75 | 0.74 | 0.38 |
| #N/A | #N/A | #N/A |
| 0.15 | 0.34 | 0.04 |
| 0.56 | 1.95 | 0.89 |
| 0.13 | 0.41 | 0.08 |
| 0.16 | #N/A | #N/A |
| 0.05 | #N/A | #N/A |
| 0.48 | 0.93 | 0.54 |
| 0.60 | 0.98 | 0.59 |
| 0.45 | 1.40 | 0.69 |
| 0.94 | #N/A | #N/A |
| 0.44 | #N/A | #N/A |
| 0.51 | #N/A | #N/A |
| 0.19 | #N/A | #N/A |
| 0.58 | #N/A | #N/A |
| 0.78 | #N/A | #N/A |
| #N/A | #N/A | #N/A |
| #N/A | #N/A | #N/A |
| 0.72 | 0.66 | 0.32 |
| 0.35 | 0.96 | 0.54 |
| #N/A | #N/A | #N/A |

|      |      |      |
|------|------|------|
| 0.17 | #N/A | #N/A |
| #N/A | #N/A | #N/A |
| 0.37 | #N/A | #N/A |
| 0.52 | 0.66 | 0.29 |
| 0.60 | 0.73 | 0.36 |
| #N/A | #N/A | #N/A |
| 0.77 | 1.43 | 0.83 |
| 0.68 | 1.30 | 0.74 |
| 0.56 | #N/A | #N/A |
| #N/A | #N/A | #N/A |
| #N/A | #N/A | #N/A |
| 0.18 | 0.78 | 0.42 |
| 0.55 | 0.55 | 0.19 |
| #N/A | #N/A | #N/A |
| 0.62 | #N/A | #N/A |
| 0.79 | #N/A | #N/A |
| #N/A | #N/A | #N/A |
| 0.41 | 0.89 | 0.51 |
| 0.35 | 1.63 | 0.88 |
| 0.44 | #N/A | #N/A |
| 0.31 | 0.84 | 0.43 |
| 0.65 | 0.85 | 0.45 |
| #N/A | #N/A | #N/A |
| 0.72 | 1.18 | 0.73 |
| 0.28 | 1.24 | 0.55 |
| #N/A | #N/A | #N/A |
| 0.13 | 0.98 | 0.56 |
| #N/A | #N/A | #N/A |
| 0.66 | 0.87 | 0.49 |
| #N/A | #N/A | #N/A |
| 0.61 | 0.82 | 0.45 |
| 0.70 | 0.80 | 0.44 |
| 0.65 | #N/A | #N/A |
| 0.58 | #N/A | #N/A |
| 0.55 | 1.65 | 0.70 |
| #N/A | #N/A | #N/A |
| 0.83 | 2.56 | 0.97 |
| #N/A | #N/A | #N/A |
| #N/A | #N/A | #N/A |
| 0.50 | #N/A | #N/A |
| #N/A | #N/A | #N/A |
| #N/A | #N/A | #N/A |
| 0.92 | #N/A | #N/A |
| #N/A | 1.34 | 0.57 |
| 0.54 | 1.44 | 0.75 |
| #N/A | #N/A | #N/A |
| 0.62 | #N/A | #N/A |
| 0.42 | 0.57 | 0.20 |
| 0.45 | 0.89 | 0.50 |
| 0.06 | 0.36 | 0.04 |
| 0.28 | 0.48 | 0.11 |

|      |      |      |
|------|------|------|
| 0.55 | 1.26 | 0.77 |
| 0.30 | 0.82 | 0.44 |
| 0.82 | 1.73 | 0.89 |
| 0.25 | 0.73 | 0.35 |
| #N/A | 0.99 | 0.52 |
| 0.37 | 0.90 | 0.53 |
| 0.54 | 0.82 | 0.42 |
| 0.73 | 0.84 | 0.46 |
| 0.14 | 0.62 | 0.25 |
| 0.09 | 0.97 | 0.59 |
| 0.41 | #N/A | #N/A |
| 0.07 | 0.47 | 0.14 |
| 0.60 | 1.33 | 0.65 |
| #N/A | #N/A | #N/A |
| #N/A | #N/A | #N/A |
| 0.43 | #N/A | #N/A |
| #N/A | #N/A | #N/A |
| #N/A | #N/A | #N/A |
| 0.60 | 0.57 | 0.20 |
| #N/A | #N/A | #N/A |
| 0.22 | 0.57 | 0.20 |
| 0.88 | 0.56 | 0.22 |
| #N/A | #N/A | #N/A |
| 0.82 | 0.99 | 0.61 |
| 0.84 | 1.24 | 0.71 |
| 0.48 | #N/A | #N/A |
| 0.29 | 0.75 | 0.38 |
| #N/A | 1.35 | 0.75 |
| 0.49 | #N/A | #N/A |
| 0.19 | 0.40 | 0.12 |
| 0.20 | #N/A | #N/A |
| 0.74 | 1.49 | 0.74 |
| 0.02 | 0.92 | 0.47 |
| #N/A | 1.04 | 0.49 |
| 0.53 | #N/A | #N/A |
| 0.59 | 1.38 | 0.79 |
| 0.40 | 0.34 | 0.03 |
| 0.73 | 0.54 | 0.21 |
| 0.33 | 0.48 | 0.14 |
| 0.43 | 0.81 | 0.42 |
| 0.25 | 0.74 | 0.38 |
| 0.40 | #N/A | #N/A |
| 0.79 | #N/A | #N/A |
| 0.94 | 1.75 | 0.87 |
| 0.81 | 0.82 | 0.46 |
| 0.67 | 0.91 | 0.44 |
| 0.63 | 1.11 | 0.69 |
| 0.50 | 1.54 | 0.80 |
| 0.73 | 1.06 | 0.63 |
| 0.41 | 0.94 | 0.56 |
| 0.49 | 0.69 | 0.32 |

|      |      |      |
|------|------|------|
| 0.03 | 0.67 | 0.30 |
| 0.27 | 1.16 | 0.71 |
| 0.04 | #N/A | #N/A |
| 0.01 | 0.86 | 0.48 |
| 0.09 | 0.60 | 0.24 |
| 0.37 | 0.81 | 0.45 |
| 0.26 | 0.73 | 0.36 |
| #N/A | 0.61 | 0.27 |
| #N/A | #N/A | #N/A |
| 0.16 | #N/A | #N/A |
| 0.48 | #N/A | #N/A |
| 0.14 | 0.57 | 0.19 |
| #N/A | 2.05 | 0.88 |
| 0.51 | 1.65 | 0.89 |
| 0.45 | #N/A | #N/A |
| 0.76 | 1.22 | 0.75 |
| 0.15 | 1.04 | 0.51 |
| 0.08 | 0.63 | 0.26 |
| 0.44 | 0.77 | 0.40 |
| 0.59 | 1.38 | 0.81 |
| 0.74 | #N/A | #N/A |
| 0.32 | 1.03 | 0.64 |
| 0.37 | 0.80 | 0.42 |
| 0.36 | 0.63 | 0.25 |
| 0.60 | 0.56 | 0.20 |
| #N/A | #N/A | #N/A |
| 0.32 | #N/A | #N/A |
| #N/A | #N/A | #N/A |
| #N/A | 1.56 | 0.86 |
| 0.14 | 0.91 | 0.53 |
| #N/A | #N/A | #N/A |
| 0.60 | #N/A | #N/A |
| #N/A | #N/A | #N/A |
| #N/A | #N/A | #N/A |
| 0.26 | #N/A | #N/A |
| 0.47 | 1.12 | 0.70 |
| 0.56 | #N/A | #N/A |
| 0.35 | 1.09 | 0.52 |
| 0.41 | #N/A | #N/A |
| 0.05 | 0.84 | 0.48 |
| 0.53 | 1.13 | 0.67 |
| 0.62 | #N/A | #N/A |
| 0.40 | 0.50 | 0.18 |
| 0.10 | 0.54 | 0.17 |
| #N/A | #N/A | #N/A |
| 0.46 | #N/A | #N/A |
| 0.66 | 1.62 | 0.87 |
| #N/A | #N/A | #N/A |
| 0.45 | 0.76 | 0.39 |
| 0.73 | 0.92 | 0.55 |
| 0.88 | 0.67 | 0.30 |

|      |      |      |
|------|------|------|
| 0.20 | #N/A | #N/A |
| 0.49 | #N/A | #N/A |
| 0.31 | 0.62 | 0.25 |
| #N/A | #N/A | #N/A |
| 0.67 | #N/A | #N/A |
| 0.23 | #N/A | #N/A |
| 0.42 | 1.03 | 0.63 |
| 0.71 | #N/A | #N/A |
| 0.46 | #N/A | #N/A |
| #N/A | #N/A | #N/A |
| 0.10 | 0.52 | 0.15 |
| #N/A | #N/A | #N/A |
| 0.69 | 0.57 | 0.20 |
| 0.45 | 0.66 | 0.29 |
| #N/A | #N/A | #N/A |
| 0.48 | 0.81 | 0.43 |
| 0.40 | #N/A | #N/A |
| 0.70 | 0.49 | 0.12 |
| 0.66 | 1.13 | 0.62 |
| 0.15 | 0.63 | 0.26 |
| 0.39 | #N/A | #N/A |
| #N/A | #N/A | #N/A |
| 0.68 | 0.78 | 0.42 |
| 0.19 | 0.57 | 0.20 |
| #N/A | 0.69 | 0.33 |
| 0.79 | 1.44 | 0.78 |
| 0.80 | #N/A | #N/A |
| 0.57 | 1.22 | 0.75 |
| 0.57 | 0.92 | 0.53 |
| 0.34 | 0.70 | 0.34 |
| 0.16 | 0.84 | 0.48 |
| 0.81 | 0.97 | 0.59 |
| 0.16 | #N/A | #N/A |
| 0.15 | 0.64 | 0.28 |
| 0.71 | 2.18 | 0.94 |
| #N/A | 0.44 | 0.08 |
| 0.67 | 1.01 | 0.50 |
| 0.08 | #N/A | #N/A |
| 0.53 | 0.60 | 0.28 |
| #N/A | #N/A | #N/A |
| #N/A | #N/A | #N/A |
| 0.75 | 0.82 | 0.44 |
| 0.16 | #N/A | #N/A |
| 0.49 | 0.56 | 0.19 |
| #N/A | #N/A | #N/A |
| #N/A | #N/A | #N/A |
| 0.84 | #N/A | #N/A |
| 0.83 | 1.13 | 0.61 |
| 0.62 | 0.53 | 0.17 |
| #N/A | #N/A | #N/A |
| #N/A | #N/A | #N/A |



|      |      |      |
|------|------|------|
| 0.19 | 0.97 | 0.59 |
| #N/A | #N/A | #N/A |
| 0.86 | 1.52 | 0.85 |
| 0.23 | 0.82 | 0.44 |
| 0.35 | #N/A | #N/A |
| #N/A | #N/A | #N/A |
| 0.66 | 0.77 | 0.39 |
| 0.38 | 0.84 | 0.42 |
| 0.73 | 1.33 | 0.73 |
| 0.78 | #N/A | #N/A |
| 0.95 | #N/A | #N/A |
| 0.75 | 1.26 | 0.72 |
| #N/A | 0.63 | 0.26 |
| 0.45 | 0.89 | 0.49 |
| 0.45 | 0.70 | 0.34 |
| 0.48 | #N/A | #N/A |
| 0.30 | 0.66 | 0.30 |
| 0.39 | 1.15 | 0.71 |
| 0.97 | 1.07 | 0.55 |
| 0.43 | 0.76 | 0.38 |
| 0.78 | 1.07 | 0.66 |
| 0.30 | 1.02 | 0.58 |
| 0.15 | 0.70 | 0.34 |
| 0.47 | 1.13 | 0.69 |
| #N/A | #N/A | #N/A |
| 0.56 | #N/A | #N/A |
| 0.21 | #N/A | #N/A |
| 0.57 | 1.49 | 0.83 |
| #N/A | #N/A | #N/A |
| 0.67 | 0.64 | 0.27 |
| 0.21 | 1.05 | 0.59 |
| 0.38 | #N/A | #N/A |
| 0.52 | 1.25 | 0.70 |
| #N/A | #N/A | #N/A |
| #N/A | 0.76 | 0.38 |
| #N/A | 1.29 | 0.74 |
| #N/A | #N/A | #N/A |
| 0.39 | 0.91 | 0.47 |
| 0.65 | 0.63 | 0.26 |
| 0.47 | 1.14 | 0.50 |
| 0.33 | 0.47 | 0.18 |
| #N/A | #N/A | #N/A |
| 0.63 | 0.83 | 0.47 |
| 0.60 | 0.91 | 0.53 |
| 0.57 | #N/A | #N/A |
| 0.64 | 0.79 | 0.40 |
| 0.56 | #N/A | #N/A |
| #N/A | #N/A | #N/A |
| 0.53 | 0.76 | 0.38 |
| 0.39 | 0.85 | 0.45 |
| 0.20 | #N/A | #N/A |

|      |      |      |
|------|------|------|
| 0.66 | #N/A | #N/A |
| 0.41 | 0.42 | 0.07 |
| 0.36 | 0.67 | 0.30 |
| #N/A | #N/A | #N/A |
| 0.37 | 1.17 | 0.70 |
| #N/A | #N/A | #N/A |
| #N/A | 1.49 | 0.85 |
| 0.87 | 0.83 | 0.46 |
| 0.64 | 0.98 | 0.60 |
| 0.38 | 0.60 | 0.23 |
| 0.77 | #N/A | #N/A |
| #N/A | #N/A | #N/A |
| 0.56 | #N/A | #N/A |
| #N/A | #N/A | #N/A |
| #N/A | #N/A | #N/A |
| 0.88 | 1.03 | 0.60 |
| 0.48 | #N/A | #N/A |
| #N/A | #N/A | #N/A |
| #N/A | #N/A | #N/A |
| 0.53 | #N/A | #N/A |
| 0.80 | #N/A | #N/A |
| 0.89 | 0.97 | 0.59 |
| 0.54 | #N/A | #N/A |
| 0.42 | 0.58 | 0.21 |
| 0.73 | 0.80 | 0.41 |
| 0.33 | #N/A | #N/A |
| 0.56 | 0.71 | 0.35 |
| #N/A | #N/A | #N/A |
| #N/A | #N/A | #N/A |
| #N/A | 0.44 | 0.09 |
| #N/A | #N/A | #N/A |
| 0.57 | 1.30 | 0.74 |
| 0.61 | 0.77 | 0.39 |
| #N/A | 0.39 | 0.06 |
| #N/A | 0.79 | 0.42 |
| #N/A | #N/A | #N/A |
| 0.27 | 0.51 | 0.15 |
| 0.50 | #N/A | #N/A |
| 0.73 | 0.93 | 0.56 |
| 0.41 | 0.61 | 0.27 |
| #N/A | #N/A | #N/A |
| 0.39 | 0.83 | 0.45 |
| #N/A | #N/A | #N/A |
| 0.83 | #N/A | #N/A |
| #N/A | #N/A | #N/A |
| #N/A | #N/A | #N/A |
| 0.50 | #N/A | #N/A |
| 0.53 | 1.02 | 0.63 |
| 0.88 | 1.57 | 0.78 |
| 0.11 | 0.70 | 0.33 |
| 0.45 | 0.37 | 0.10 |

|      |      |      |
|------|------|------|
| #N/A | #N/A | #N/A |
| 0.13 | 1.66 | 0.70 |
| 0.23 | #N/A | #N/A |
| 0.51 | 0.98 | 0.60 |
| 0.23 | 1.62 | 0.87 |
| 0.63 | 1.08 | 0.66 |
| 0.39 | 0.87 | 0.50 |
| #N/A | #N/A | #N/A |
| #N/A | #N/A | #N/A |
| 0.49 | 1.25 | 0.76 |
| 0.53 | 1.01 | 0.59 |
| 0.24 | 1.27 | 0.64 |
| #N/A | #N/A | #N/A |
| 0.87 | 1.89 | 0.92 |
| 0.64 | 1.98 | 0.87 |
| 0.74 | 0.82 | 0.45 |
| 0.29 | 0.86 | 0.49 |
| 0.41 | 0.59 | 0.22 |
| 0.76 | 1.29 | 0.70 |
| 0.59 | 0.78 | 0.40 |
| 0.68 | 0.59 | 0.22 |
| 0.80 | 0.93 | 0.50 |
| 0.97 | #N/A | #N/A |
| 0.62 | 1.18 | 0.69 |
| #N/A | #N/A | #N/A |
| 0.74 | #N/A | #N/A |
| 0.73 | 0.63 | 0.27 |
| #N/A | #N/A | #N/A |
| #N/A | #N/A | #N/A |
| 0.17 | 0.69 | 0.32 |
| 0.18 | 1.08 | 0.57 |
| 0.33 | 0.97 | 0.49 |
| 0.48 | 0.79 | 0.42 |
| 0.20 | 0.50 | 0.13 |
| 0.97 | #N/A | #N/A |
| #N/A | #N/A | #N/A |
| 0.15 | #N/A | #N/A |
| 0.67 | 0.64 | 0.27 |
| 0.81 | 0.79 | 0.43 |
| 0.70 | 0.91 | 0.53 |
| 0.25 | 0.69 | 0.32 |
| 0.74 | 1.36 | 0.81 |
| 0.83 | 1.04 | 0.59 |
| 0.93 | 0.58 | 0.26 |
| 0.26 | #N/A | #N/A |
| #N/A | #N/A | #N/A |
| 0.30 | 0.85 | 0.43 |
| 0.36 | #N/A | #N/A |
| #N/A | #N/A | #N/A |
| 0.46 | 0.67 | 0.31 |
| #N/A | 0.56 | 0.20 |

|      |      |      |
|------|------|------|
| 0.05 | 0.92 | 0.55 |
| 0.23 | 1.15 | 0.58 |
| 0.56 | #N/A | #N/A |
| #N/A | #N/A | #N/A |
| 0.44 | 2.03 | 0.89 |
| 0.52 | 0.76 | 0.38 |
| #N/A | 1.27 | 0.70 |
| #N/A | 1.46 | 0.81 |
| 0.84 | #N/A | #N/A |
| 0.85 | 3.92 | 0.97 |
| #N/A | 3.50 | 0.99 |
| 0.80 | #N/A | #N/A |
| 0.70 | 3.18 | 0.98 |
| 0.33 | 1.59 | 0.85 |
| 0.43 | #N/A | #N/A |
| 0.38 | 2.33 | 0.96 |
| 0.21 | 0.65 | 0.28 |
| #N/A | #N/A | #N/A |
| 0.75 | 1.96 | 0.93 |
| 0.35 | 1.52 | 0.85 |
| 0.67 | 1.54 | 0.85 |
| 0.77 | 1.04 | 0.53 |
| #N/A | 0.88 | 0.51 |
| 0.54 | 0.96 | 0.58 |
| 0.42 | 1.37 | 0.75 |
| 0.83 | 1.17 | 0.71 |
| 0.74 | 1.32 | 0.66 |
| 0.55 | 1.50 | 0.85 |
| 0.39 | 0.48 | 0.11 |
| 0.40 | 0.72 | 0.34 |
| 0.03 | 0.58 | 0.27 |
| 0.11 | 1.33 | 0.79 |
| #N/A | #N/A | #N/A |
| 0.61 | 0.78 | 0.42 |
| 0.46 | 1.15 | 0.71 |
| 0.76 | 0.81 | 0.43 |
| #N/A | #N/A | #N/A |
| #N/A | #N/A | #N/A |
| 0.64 | 0.56 | 0.19 |
| 0.57 | 1.33 | 0.79 |
| 0.35 | 0.85 | 0.48 |
| 0.44 | 0.68 | 0.32 |
| 0.35 | 0.57 | 0.19 |
| #N/A | 1.68 | 0.86 |
| 0.54 | 1.41 | 0.82 |
| 0.56 | 0.55 | 0.17 |
| 0.11 | 0.71 | 0.35 |
| 0.77 | 1.42 | 0.79 |
| 0.58 | 0.69 | 0.36 |
| 0.29 | 0.89 | 0.48 |
| 0.42 | #N/A | #N/A |

|      |      |      |
|------|------|------|
| 0.71 | 1.77 | 0.89 |
| 0.46 | #N/A | #N/A |
| 0.72 | 0.51 | 0.13 |
| 0.45 | 1.54 | 0.84 |
| 0.92 | 1.47 | 0.82 |
| #N/A | #N/A | #N/A |
| 0.18 | 0.64 | 0.27 |
| 0.80 | #N/A | #N/A |
| #N/A | 5.49 | 1.00 |
| 0.25 | 0.80 | 0.44 |
| 0.83 | #N/A | #N/A |
| 0.74 | 0.78 | 0.40 |
| 0.51 | 1.25 | 0.70 |
| #N/A | #N/A | #N/A |
| 0.67 | 0.67 | 0.30 |
| 0.65 | #N/A | #N/A |
| #N/A | #N/A | #N/A |
| 0.80 | 0.51 | 0.14 |
| #N/A | #N/A | #N/A |
| 0.11 | 0.98 | 0.56 |
| 0.39 | #N/A | #N/A |
| 0.61 | #N/A | #N/A |
| 0.51 | 0.71 | 0.34 |
| 0.85 | 1.58 | 0.87 |
| 0.76 | 0.54 | 0.19 |
| 0.64 | #N/A | #N/A |
| 0.05 | #N/A | #N/A |
| 0.62 | 0.75 | 0.38 |
| 0.70 | 1.09 | 0.61 |
| #N/A | 0.58 | 0.21 |
| 0.83 | #N/A | #N/A |
| 0.72 | #N/A | #N/A |
| 0.82 | 0.88 | 0.49 |
| #N/A | #N/A | #N/A |
| 0.52 | 0.64 | 0.28 |
| #N/A | #N/A | #N/A |
| 0.85 | 1.13 | 0.68 |
| 0.47 | 1.26 | 0.74 |
| #N/A | #N/A | #N/A |
| 0.40 | 0.67 | 0.30 |
| #N/A | 1.11 | 0.68 |
| 0.86 | #N/A | #N/A |
| #N/A | 0.41 | 0.10 |
| 0.81 | 0.70 | 0.33 |
| 0.20 | #N/A | #N/A |
| 0.34 | 0.74 | 0.36 |
| #N/A | #N/A | #N/A |
| 0.89 | #N/A | #N/A |
| 0.71 | #N/A | #N/A |
| 0.08 | 1.05 | 0.54 |
| 0.80 | 0.66 | 0.29 |

|      |      |      |
|------|------|------|
| 0.42 | 1.51 | 0.68 |
| 0.86 | #N/A | #N/A |
| 0.96 | 3.39 | 0.99 |
| 0.35 | 1.11 | 0.68 |
| #N/A | 1.26 | 0.77 |
| 0.44 | #N/A | #N/A |
| 0.27 | 1.71 | 0.89 |
| 0.23 | #N/A | #N/A |
| 0.64 | 1.76 | 0.90 |
| 0.84 | 1.92 | 0.92 |
| #N/A | 0.83 | 0.44 |
| 0.42 | #N/A | #N/A |
| 0.30 | 0.53 | 0.16 |
| 0.53 | 0.92 | 0.49 |
| 0.51 | 0.96 | 0.52 |
| 0.21 | 1.11 | 0.69 |
| 0.45 | 1.19 | 0.49 |
| 0.50 | #N/A | #N/A |
| 0.23 | 1.03 | 0.63 |
| 0.24 | #N/A | #N/A |
| 0.88 | 2.61 | 0.97 |
| 0.42 | #N/A | #N/A |
| #N/A | #N/A | #N/A |
| 0.96 | 4.08 | 0.99 |
| 0.87 | 4.12 | 0.99 |
| 0.14 | #N/A | #N/A |
| 0.75 | 1.82 | 0.91 |
| 0.58 | 1.30 | 0.78 |
| 0.69 | 1.30 | 0.77 |
| 0.44 | 0.76 | 0.40 |
| 0.32 | 1.02 | 0.61 |
| 0.98 | #N/A | #N/A |
| 0.19 | 0.86 | 0.44 |
| 0.71 | 0.98 | 0.60 |
| 0.87 | 0.98 | 0.60 |
| 0.79 | 0.81 | 0.44 |
| 0.94 | 1.12 | 0.69 |
| #N/A | 1.19 | 0.61 |
| 0.59 | #N/A | #N/A |
| 0.35 | #N/A | #N/A |
| #N/A | #N/A | #N/A |
| 0.59 | 1.08 | 0.62 |
| 0.90 | #N/A | #N/A |
| 0.32 | 0.88 | 0.50 |
| 0.43 | 0.68 | 0.32 |
| 0.93 | 0.81 | 0.44 |
| 0.81 | 1.28 | 0.77 |
| 0.85 | 0.73 | 0.36 |
| 0.48 | 0.55 | 0.25 |
| 0.81 | 1.82 | 0.91 |
| 0.70 | #N/A | #N/A |

|      |      |      |
|------|------|------|
| 0.36 | 0.60 | 0.24 |
| 0.18 | #N/A | #N/A |
| 0.06 | #N/A | #N/A |
| 0.48 | 0.66 | 0.29 |
| 0.16 | 0.50 | 0.15 |
| #N/A | #N/A | #N/A |
| 0.60 | 0.78 | 0.41 |
| 0.10 | #N/A | #N/A |
| #N/A | #N/A | #N/A |
| 0.67 | #N/A | #N/A |
| 0.28 | 0.37 | 0.06 |
| 0.05 | 0.61 | 0.25 |
| #N/A | #N/A | #N/A |
| 0.78 | #N/A | #N/A |
| 0.84 | 0.77 | 0.41 |
| 0.47 | #N/A | #N/A |
| 0.17 | 0.55 | 0.18 |
| 0.64 | 0.87 | 0.50 |
| #N/A | #N/A | #N/A |
| 0.63 | #N/A | #N/A |
| 0.11 | 1.14 | 0.62 |
| 0.49 | 0.44 | 0.11 |
| #N/A | #N/A | #N/A |
| 0.85 | 1.74 | 0.90 |
| 0.93 | 0.99 | 0.56 |
| #N/A | #N/A | #N/A |
| #N/A | 1.04 | 0.48 |
| #N/A | #N/A | #N/A |
| 0.60 | 0.66 | 0.29 |
| 0.52 | #N/A | #N/A |
| #N/A | #N/A | #N/A |
| #N/A | #N/A | #N/A |
| #N/A | #N/A | #N/A |
| 0.82 | 0.51 | 0.14 |
| #N/A | #N/A | #N/A |
| 0.34 | 1.59 | 0.85 |
| 0.43 | #N/A | #N/A |
| 0.49 | 1.33 | 0.72 |
| 0.67 | 0.63 | 0.27 |
| 0.44 | 0.44 | 0.09 |
| 0.65 | 0.87 | 0.50 |
| 0.98 | 1.64 | 0.87 |
| 0.49 | #N/A | #N/A |
| 0.83 | 1.66 | 0.78 |
| 0.84 | 0.76 | 0.37 |
| 0.60 | 1.17 | 0.73 |
| 0.46 | 0.74 | 0.38 |
| #N/A | #N/A | #N/A |
| #N/A | #N/A | #N/A |
| 0.35 | 1.02 | 0.60 |
| 0.63 | 0.84 | 0.47 |



|      |      |      |
|------|------|------|
| 0.61 | 1.37 | 0.81 |
| 0.77 | #N/A | #N/A |
| #N/A | #N/A | #N/A |
| 0.85 | #N/A | #N/A |
| 0.14 | 0.91 | 0.50 |
| 0.40 | #N/A | #N/A |
| #N/A | #N/A | #N/A |
| 0.07 | #N/A | #N/A |
| #N/A | #N/A | #N/A |
| 0.34 | #N/A | #N/A |
| #N/A | #N/A | #N/A |
| 0.83 | 0.86 | 0.47 |
| #N/A | #N/A | #N/A |
| 0.27 | #N/A | #N/A |
| #N/A | 0.65 | 0.32 |
| 0.26 | 0.81 | 0.42 |
| 0.82 | 0.65 | 0.32 |
| #N/A | #N/A | #N/A |
| 0.27 | 1.02 | 0.55 |
| #N/A | #N/A | #N/A |
| 0.54 | 0.79 | 0.43 |
| #N/A | #N/A | #N/A |
| #N/A | 2.33 | 0.55 |
| 0.55 | 0.72 | 0.35 |
| 0.80 | 1.10 | 0.60 |
| 0.53 | #N/A | #N/A |
| #N/A | #N/A | #N/A |
| 0.64 | #N/A | #N/A |
| 0.86 | 0.56 | 0.19 |
| 0.05 | 0.36 | 0.04 |
| 0.75 | 1.23 | 0.69 |
| 0.62 | #N/A | #N/A |
| 0.28 | 0.74 | 0.37 |
| 0.44 | #N/A | #N/A |
| 0.73 | 2.18 | 0.95 |
| 0.61 | 1.64 | 0.88 |
| #N/A | 1.09 | 0.55 |
| 0.83 | #N/A | #N/A |
| #N/A | #N/A | #N/A |
| 0.68 | 1.27 | 0.72 |
| 0.59 | 0.90 | 0.50 |
| 0.61 | 2.02 | 0.93 |
| #N/A | 1.96 | 0.70 |
| 0.79 | 1.15 | 0.65 |
| 0.06 | #N/A | #N/A |
| 0.32 | 0.50 | 0.13 |
| 0.42 | 0.93 | 0.55 |
| 0.35 | 0.67 | 0.31 |
| 0.39 | #N/A | #N/A |
| 0.84 | 1.13 | 0.58 |
| #N/A | #N/A | #N/A |

|      |      |      |
|------|------|------|
| 0.29 | 1.21 | 0.72 |
| 0.20 | 0.53 | 0.21 |
| 0.90 | 1.12 | 0.57 |
| #N/A | #N/A | #N/A |
| 0.20 | 0.99 | 0.61 |
| 0.57 | #N/A | #N/A |
| #N/A | #N/A | #N/A |
| 0.41 | #N/A | #N/A |
| 0.15 | #N/A | #N/A |
| 0.37 | #N/A | #N/A |
| #N/A | #N/A | #N/A |
| 0.51 | 1.33 | 0.80 |
| 0.45 | 1.01 | 0.54 |
| 0.53 | 0.75 | 0.37 |
| #N/A | 0.69 | 0.32 |
| 0.59 | 0.80 | 0.41 |
| 0.59 | 0.89 | 0.47 |
| 0.69 | 0.76 | 0.39 |
| #N/A | #N/A | #N/A |
| 0.78 | 0.83 | 0.43 |
| 0.40 | 1.19 | 0.72 |
| 0.51 | 0.61 | 0.25 |
| #N/A | #N/A | #N/A |
| 0.54 | 0.90 | 0.50 |
| 0.35 | 0.54 | 0.17 |
| 0.50 | 0.79 | 0.43 |
| 0.66 | 0.56 | 0.19 |
| 0.58 | 0.80 | 0.43 |
| 0.43 | 0.47 | 0.11 |
| 0.85 | 1.54 | 0.86 |
| 0.82 | #N/A | #N/A |
| 0.98 | #N/A | #N/A |
| 0.64 | 1.39 | 0.76 |
| #N/A | #N/A | #N/A |
| #N/A | #N/A | #N/A |
| 0.45 | 1.71 | 0.86 |
| 0.85 | 2.04 | 0.92 |
| 0.59 | #N/A | #N/A |
| 0.32 | #N/A | #N/A |
| 0.38 | 0.65 | 0.28 |
| 0.98 | 0.78 | 0.40 |
| 0.75 | #N/A | #N/A |
| 0.48 | #N/A | #N/A |
| 0.08 | 0.67 | 0.30 |
| #N/A | #N/A | #N/A |
| 0.82 | 1.40 | 0.82 |
| 0.92 | #N/A | #N/A |
| #N/A | 0.96 | 0.48 |
| 0.60 | 1.66 | 0.68 |
| #N/A | #N/A | #N/A |
| 0.42 | 1.06 | 0.60 |

|      |      |      |
|------|------|------|
| 0.58 | #N/A | #N/A |
| 0.48 | 0.63 | 0.27 |
| 0.69 | 0.82 | 0.44 |
| 0.25 | 0.93 | 0.54 |
| 0.25 | 0.69 | 0.32 |
| 0.65 | 1.17 | 0.71 |
| #N/A | #N/A | #N/A |
| 0.71 | 0.63 | 0.26 |
| 0.14 | 0.44 | 0.11 |
| 0.92 | #N/A | #N/A |
| #N/A | #N/A | #N/A |
| 0.79 | 0.82 | 0.42 |
| 0.44 | #N/A | #N/A |
| 0.31 | 0.85 | 0.49 |
| 0.54 | #N/A | #N/A |
| #N/A | #N/A | #N/A |
| 0.58 | 0.77 | 0.41 |
| 0.77 | #N/A | #N/A |
| 0.63 | #N/A | #N/A |
| 0.97 | 0.86 | 0.45 |
| 0.50 | #N/A | #N/A |
| 0.38 | #N/A | #N/A |
| 0.53 | #N/A | #N/A |
| #N/A | 0.85 | 0.45 |
| #N/A | 0.64 | 0.28 |
| 0.80 | #N/A | #N/A |
| 0.89 | 0.79 | 0.41 |
| 0.62 | 0.75 | 0.38 |
| 0.74 | 1.08 | 0.64 |
| 0.83 | #N/A | #N/A |
| #N/A | #N/A | #N/A |
| 0.55 | #N/A | #N/A |
| #N/A | #N/A | #N/A |
| #N/A | 1.26 | 0.58 |
| 0.53 | 1.39 | 0.69 |
| 0.70 | 0.50 | 0.17 |
| 0.92 | 0.80 | 0.41 |
| 0.43 | #N/A | #N/A |
| 0.39 | 0.80 | 0.42 |
| 0.40 | 0.93 | 0.55 |
| 0.19 | 0.85 | 0.49 |
| 0.34 | 0.80 | 0.43 |
| 0.25 | 0.85 | 0.48 |
| 0.36 | 0.63 | 0.27 |
| 0.63 | 0.68 | 0.31 |
| 0.34 | 1.15 | 0.72 |
| 0.21 | 0.94 | 0.55 |
| 0.29 | 0.94 | 0.57 |
| 0.19 | 0.69 | 0.33 |
| #N/A | #N/A | #N/A |
| 0.19 | 1.17 | 0.69 |

|      |      |      |
|------|------|------|
| 0.46 | 0.74 | 0.38 |
| 0.72 | #N/A | #N/A |
| #N/A | #N/A | #N/A |
| 0.27 | 1.30 | 0.77 |
| 0.60 | 0.97 | 0.56 |
| 0.59 | 1.13 | 0.56 |
| 0.62 | #N/A | #N/A |
| 0.61 | 0.87 | 0.50 |
| #N/A | 1.45 | 0.82 |
| 0.32 | 0.87 | 0.46 |
| 0.28 | 0.64 | 0.27 |
| 0.90 | 0.91 | 0.54 |
| 0.11 | 0.73 | 0.37 |
| 0.06 | #N/A | #N/A |
| 0.31 | 0.84 | 0.47 |
| 0.57 | 0.83 | 0.44 |
| #N/A | #N/A | #N/A |
| #N/A | #N/A | #N/A |
| #N/A | #N/A | #N/A |
| 0.85 | #N/A | #N/A |
| 0.62 | 0.75 | 0.38 |
| 0.56 | 0.99 | 0.54 |
| #N/A | #N/A | #N/A |
| 0.25 | #N/A | #N/A |
| 0.29 | #N/A | #N/A |
| #N/A | #N/A | #N/A |
| 0.65 | 1.66 | 0.89 |
| 0.21 | 0.61 | 0.23 |
| #N/A | 2.28 | 0.96 |
| 0.58 | 0.88 | 0.51 |
| #N/A | 0.97 | 0.55 |
| 0.45 | 0.55 | 0.18 |
| 0.20 | 1.32 | 0.73 |
| 0.61 | 0.56 | 0.18 |
| #N/A | #N/A | #N/A |
| 0.22 | 0.84 | 0.48 |
| 0.41 | 0.73 | 0.37 |
| #N/A | 0.61 | 0.24 |
| 0.82 | 1.65 | 0.86 |
| 0.19 | 0.78 | 0.42 |
| 0.13 | 0.42 | 0.07 |
| 0.39 | 0.69 | 0.31 |
| 0.50 | 1.01 | 0.62 |
| #N/A | 0.86 | 0.48 |
| #N/A | 0.98 | 0.60 |
| 0.05 | #N/A | #N/A |
| #N/A | 1.09 | 0.65 |
| 0.54 | 0.76 | 0.39 |
| 0.14 | #N/A | #N/A |
| #N/A | #N/A | #N/A |
| 0.34 | 0.84 | 0.46 |

|      |      |      |
|------|------|------|
| #N/A | #N/A | #N/A |
| 0.98 | 1.68 | 0.89 |
| 0.12 | 0.58 | 0.21 |
| 0.43 | 0.78 | 0.41 |
| 0.55 | 1.31 | 0.58 |
| 0.70 | 1.70 | 0.86 |
| #N/A | #N/A | #N/A |
| #N/A | #N/A | #N/A |
| #N/A | 0.79 | 0.42 |
| 0.24 | 0.70 | 0.33 |
| 0.45 | 1.26 | 0.77 |
| 0.62 | 0.65 | 0.28 |
| 0.54 | 2.57 | 0.76 |
| 0.60 | #N/A | #N/A |
| 0.49 | 0.75 | 0.38 |
| 0.59 | 0.69 | 0.32 |
| #N/A | #N/A | #N/A |
| 0.04 | 0.33 | 0.03 |
| 0.86 | #N/A | #N/A |
| 0.60 | 0.26 | 0.02 |
| 0.43 | 1.80 | 0.91 |
| #N/A | 0.87 | 0.51 |
| 0.92 | #N/A | #N/A |
| #N/A | #N/A | #N/A |
| #N/A | #N/A | #N/A |
| 0.20 | 0.76 | 0.40 |
| 0.29 | #N/A | #N/A |
| 0.38 | 0.79 | 0.43 |
| 0.54 | #N/A | #N/A |
| 0.61 | 0.81 | 0.41 |
| 0.24 | #N/A | #N/A |
| 0.22 | 0.88 | 0.49 |
| 0.40 | 0.83 | 0.47 |
| 0.09 | 0.70 | 0.32 |
| 0.46 | #N/A | #N/A |
| #N/A | #N/A | #N/A |
| 0.49 | #N/A | #N/A |
| 0.77 | #N/A | #N/A |
| 0.42 | 0.96 | 0.51 |
| 0.50 | #N/A | #N/A |
| 0.70 | 2.95 | 0.98 |
| 0.47 | 1.39 | 0.81 |
| 0.61 | 0.48 | 0.14 |
| 0.84 | 0.53 | 0.16 |
| #N/A | #N/A | #N/A |
| 0.49 | #N/A | #N/A |
| 0.45 | #N/A | #N/A |
| #N/A | #N/A | #N/A |
| 0.43 | 0.68 | 0.31 |
| 0.28 | 0.79 | 0.42 |
| #N/A | #N/A | #N/A |

|      |      |      |
|------|------|------|
| 0.42 | 0.57 | 0.24 |
| #N/A | 0.81 | 0.43 |
| 0.38 | 0.70 | 0.33 |
| 0.25 | 0.86 | 0.49 |
| 0.39 | 0.50 | 0.13 |
| 0.82 | 0.66 | 0.29 |
| 0.39 | 0.73 | 0.37 |
| 0.43 | 0.71 | 0.34 |
| 0.11 | 0.56 | 0.18 |
| 0.66 | 0.88 | 0.46 |
| #N/A | #N/A | #N/A |
| #N/A | #N/A | #N/A |
| 0.37 | 1.04 | 0.64 |
| 0.49 | 0.59 | 0.29 |
| 0.84 | 0.77 | 0.39 |
| 0.30 | #N/A | #N/A |
| 0.06 | 0.73 | 0.36 |
| 0.63 | 1.49 | 0.56 |
| 0.47 | 1.19 | 0.65 |
| 0.75 | #N/A | #N/A |
| 0.33 | #N/A | #N/A |
| #N/A | #N/A | #N/A |
| 0.36 | 0.67 | 0.30 |
| 0.56 | 0.79 | 0.41 |
| 0.77 | 0.58 | 0.21 |
| 0.65 | 0.82 | 0.44 |
| #N/A | #N/A | #N/A |
| #N/A | 0.81 | 0.44 |
| #N/A | #N/A | #N/A |
| 0.50 | #N/A | #N/A |
| 0.16 | 1.39 | 0.82 |
| 0.61 | #N/A | #N/A |
| #N/A | #N/A | #N/A |
| 0.12 | #N/A | #N/A |
| 0.16 | 0.40 | 0.07 |
| 0.82 | #N/A | #N/A |
| 0.26 | #N/A | #N/A |
| 0.73 | 4.90 | 1.00 |
| 0.49 | 0.92 | 0.45 |
| 0.53 | 0.78 | 0.41 |
| #N/A | 0.71 | 0.33 |
| 0.76 | #N/A | #N/A |
| #N/A | #N/A | #N/A |
| 0.56 | 0.92 | 0.50 |
| 0.70 | #N/A | #N/A |
| 0.93 | 1.27 | 0.68 |
| 0.45 | 1.06 | 0.66 |
| 0.80 | 1.04 | 0.65 |
| 0.60 | 1.09 | 0.68 |
| 0.60 | 0.56 | 0.19 |
| #N/A | #N/A | #N/A |

|      |      |      |
|------|------|------|
| 0.06 | 0.39 | 0.06 |
| 0.49 | 1.37 | 0.69 |
| 0.40 | #N/A | #N/A |
| 0.68 | #N/A | #N/A |
| 0.62 | 0.66 | 0.29 |
| #N/A | 0.46 | 0.10 |
| 0.36 | #N/A | #N/A |
| 0.47 | #N/A | #N/A |
| #N/A | #N/A | #N/A |
| #N/A | 0.62 | 0.26 |
| 0.55 | 0.64 | 0.27 |
| #N/A | #N/A | #N/A |
| 0.56 | #N/A | #N/A |
| 0.41 | 1.71 | 0.90 |
| 0.69 | 0.82 | 0.46 |
| 0.59 | 0.59 | 0.22 |
| #N/A | #N/A | #N/A |
| 0.48 | #N/A | #N/A |
| #N/A | #N/A | #N/A |
| 0.58 | #N/A | #N/A |
| #N/A | #N/A | #N/A |
| 0.65 | #N/A | #N/A |
| 0.12 | 0.79 | 0.43 |
| #N/A | #N/A | #N/A |
| 0.57 | #N/A | #N/A |
| #N/A | #N/A | #N/A |
| #N/A | 0.47 | 0.11 |
| #N/A | 0.94 | 0.48 |
| 0.84 | #N/A | #N/A |
| #N/A | #N/A | #N/A |
| 0.61 | 0.58 | 0.21 |
| 0.39 | 0.55 | 0.18 |
| 0.95 | 1.18 | 0.63 |
| 0.23 | 0.83 | 0.47 |
| 0.52 | 0.75 | 0.39 |
| 0.68 | #N/A | #N/A |
| 0.14 | 0.88 | 0.50 |
| 0.24 | 0.64 | 0.27 |
| 0.13 | #N/A | #N/A |
| 0.30 | 0.61 | 0.25 |
| 0.56 | 0.63 | 0.27 |
| 0.08 | 0.62 | 0.25 |
| 0.40 | 0.67 | 0.30 |
| 0.28 | 0.71 | 0.34 |
| 0.57 | 0.99 | 0.61 |
| 0.33 | #N/A | #N/A |
| 0.38 | 1.42 | 0.80 |
| #N/A | #N/A | #N/A |
| 0.75 | 1.28 | 0.76 |
| #N/A | #N/A | #N/A |
| 0.43 | #N/A | #N/A |



|      |      |      |
|------|------|------|
| 0.65 | 1.67 | 0.89 |
| 0.07 | 0.60 | 0.23 |
| 0.49 | 0.57 | 0.20 |
| #N/A | #N/A | #N/A |
| 0.80 | 0.82 | 0.43 |
| 0.55 | #N/A | #N/A |
| 0.39 | #N/A | #N/A |
| 0.68 | 1.00 | 0.46 |
| #N/A | #N/A | #N/A |
| 0.09 | #N/A | #N/A |
| #N/A | 1.16 | 0.60 |
| #N/A | 0.95 | 0.45 |
| 0.76 | 0.79 | 0.43 |
| 0.30 | #N/A | #N/A |
| 0.17 | #N/A | #N/A |
| 0.18 | 0.89 | 0.46 |
| 0.47 | 1.08 | 0.57 |
| 0.58 | 0.92 | 0.52 |
| 0.41 | #N/A | #N/A |
| #N/A | #N/A | #N/A |
| 0.29 | #N/A | #N/A |
| 0.09 | 1.10 | 0.58 |
| 0.27 | 0.52 | 0.15 |
| 0.34 | 1.27 | 0.60 |
| 0.07 | 0.54 | 0.17 |
| 0.72 | 0.71 | 0.34 |
| 0.61 | #N/A | #N/A |
| 0.85 | 0.59 | 0.22 |
| 0.36 | #N/A | #N/A |
| 0.46 | 1.04 | 0.65 |
| 0.55 | 0.57 | 0.20 |
| 0.44 | #N/A | #N/A |
| 0.59 | 0.84 | 0.45 |
| 0.49 | #N/A | #N/A |
| #N/A | #N/A | #N/A |
| 0.14 | 0.85 | 0.46 |
| 0.16 | 0.73 | 0.37 |
| 0.14 | 1.39 | 0.80 |
| 0.74 | 1.64 | 0.88 |
| 0.11 | 0.95 | 0.53 |
| 0.14 | 0.64 | 0.27 |
| 0.79 | 1.19 | 0.64 |
| 0.37 | 0.74 | 0.38 |
| 0.25 | 0.59 | 0.22 |
| 0.29 | 0.97 | 0.56 |
| 0.89 | #N/A | #N/A |
| 0.38 | 0.52 | 0.16 |
| 0.50 | 0.43 | 0.08 |
| 0.46 | 0.54 | 0.18 |
| 0.12 | #N/A | #N/A |
| 0.37 | #N/A | #N/A |

|      |      |      |
|------|------|------|
| #N/A | #N/A | #N/A |
| 0.29 | 1.11 | 0.66 |
| 0.27 | 0.47 | 0.14 |
| 0.55 | #N/A | #N/A |
| 0.13 | 0.38 | 0.09 |
| #N/A | #N/A | #N/A |
| 0.78 | #N/A | #N/A |
| 0.47 | 0.77 | 0.40 |
| 0.88 | #N/A | #N/A |
| 0.68 | 1.01 | 0.61 |
| 0.18 | 0.53 | 0.19 |
| 0.94 | 0.86 | 0.46 |
| 0.71 | 1.02 | 0.63 |
| 0.45 | #N/A | #N/A |
| 0.90 | 1.80 | 0.90 |
| #N/A | #N/A | #N/A |
| 0.62 | 0.88 | 0.51 |
| 0.13 | 0.67 | 0.31 |
| 0.36 | 0.29 | 0.04 |
| 0.70 | 0.73 | 0.36 |
| 0.54 | 1.23 | 0.74 |
| 0.63 | #N/A | #N/A |
| #N/A | 0.38 | 0.07 |
| 0.89 | 1.17 | 0.71 |
| #N/A | #N/A | #N/A |
| #N/A | #N/A | #N/A |
| 0.78 | 0.93 | 0.53 |
| 0.22 | 0.78 | 0.39 |
| 0.69 | #N/A | #N/A |
| 0.40 | 0.58 | 0.29 |
| 0.62 | 1.64 | 0.83 |
| 0.09 | #N/A | #N/A |
| #N/A | 1.38 | 0.52 |
| 0.93 | 0.84 | 0.48 |
| 0.76 | #N/A | #N/A |
| 0.80 | #N/A | #N/A |
| 0.10 | 1.14 | 0.59 |
| 1.00 | 0.77 | 0.41 |
| 0.63 | #N/A | #N/A |
| #N/A | 0.49 | 0.12 |
| #N/A | #N/A | #N/A |
| 0.46 | #N/A | #N/A |
| #N/A | #N/A | #N/A |
| 0.51 | 0.75 | 0.39 |
| 0.52 | 0.69 | 0.31 |
| #N/A | 0.91 | 0.52 |
| #N/A | 0.74 | 0.37 |
| 0.14 | #N/A | #N/A |
| 0.56 | #N/A | #N/A |
| 0.07 | #N/A | #N/A |
| 0.51 | #N/A | #N/A |

|      |      |      |
|------|------|------|
| 0.48 | #N/A | #N/A |
| 0.29 | #N/A | #N/A |
| 0.63 | 0.74 | 0.37 |
| 0.77 | #N/A | #N/A |
| 0.08 | 0.94 | 0.57 |
| 0.22 | 0.44 | 0.10 |
| 0.47 | 0.44 | 0.11 |
| 0.02 | 0.66 | 0.29 |
| 0.32 | 0.71 | 0.33 |
| #N/A | #N/A | #N/A |
| 0.44 | #N/A | #N/A |
| 0.33 | 0.60 | 0.23 |
| #N/A | 0.94 | 0.46 |
| 0.43 | #N/A | #N/A |
| 0.65 | 1.74 | 0.76 |
| 0.34 | #N/A | #N/A |
| 0.85 | #N/A | #N/A |
| 0.44 | 2.27 | 0.95 |
| 0.16 | 0.34 | 0.04 |
| #N/A | #N/A | #N/A |
| 0.10 | 0.39 | 0.10 |
| #N/A | #N/A | #N/A |
| 0.85 | 0.65 | 0.28 |
| #N/A | #N/A | #N/A |
| 0.79 | 0.91 | 0.54 |
| 0.53 | #N/A | #N/A |
| 0.47 | 0.90 | 0.52 |
| #N/A | #N/A | #N/A |
| 0.64 | 0.71 | 0.34 |
| 0.71 | 0.65 | 0.28 |
| 0.11 | #N/A | #N/A |
| #N/A | #N/A | #N/A |
| 0.52 | 0.89 | 0.51 |
| 0.02 | 0.37 | 0.04 |
| 0.77 | #N/A | #N/A |
| 0.48 | 1.24 | 0.67 |
| 0.24 | 0.56 | 0.23 |
| 0.12 | #N/A | #N/A |
| 0.41 | 0.72 | 0.35 |
| 0.82 | 0.84 | 0.46 |
| 0.53 | 0.96 | 0.56 |
| #N/A | 1.16 | 0.69 |
| 0.34 | 1.38 | 0.76 |
| 0.59 | #N/A | #N/A |
| #N/A | #N/A | #N/A |
| 0.31 | 0.38 | 0.07 |
| 0.07 | 0.84 | 0.47 |
| 0.53 | #N/A | #N/A |
| 0.77 | #N/A | #N/A |
| 0.23 | #N/A | #N/A |
| 0.66 | 0.76 | 0.38 |

|      |      |      |
|------|------|------|
| 0.96 | #N/A | #N/A |
| 0.57 | 0.89 | 0.52 |
| #N/A | #N/A | #N/A |
| 0.87 | #N/A | #N/A |
| 0.78 | #N/A | #N/A |
| #N/A | 0.52 | 0.21 |
| #N/A | 1.25 | 0.71 |
| 0.86 | #N/A | #N/A |
| 0.53 | 0.72 | 0.35 |
| #N/A | #N/A | #N/A |
| 0.16 | #N/A | #N/A |
| 0.89 | 1.43 | 0.71 |
| 0.91 | 1.37 | 0.63 |
| 0.58 | #N/A | #N/A |
| 0.50 | 0.56 | 0.18 |
| 0.49 | 1.37 | 0.76 |
| #N/A | 0.69 | 0.32 |
| 0.51 | 1.15 | 0.68 |
| 0.89 | #N/A | #N/A |
| 0.79 | 0.80 | 0.43 |
| #N/A | #N/A | #N/A |
| 0.63 | 0.68 | 0.32 |
| #N/A | #N/A | #N/A |
| 0.75 | #N/A | #N/A |
| #N/A | #N/A | #N/A |
| 0.50 | 0.70 | 0.32 |
| 0.35 | #N/A | #N/A |
| 0.64 | 0.62 | 0.25 |
| #N/A | #N/A | #N/A |
| 0.19 | 0.71 | 0.35 |
| #N/A | #N/A | #N/A |
| 0.03 | 0.36 | 0.04 |
| 0.12 | 0.63 | 0.25 |
| 0.61 | #N/A | #N/A |
| #N/A | #N/A | #N/A |
| 0.76 | 1.00 | 0.62 |
| #N/A | 2.86 | 0.92 |
| #N/A | #N/A | #N/A |
| 0.48 | #N/A | #N/A |
| 0.51 | 0.84 | 0.43 |
| 0.70 | 0.44 | 0.14 |
| #N/A | 0.60 | 0.23 |
| #N/A | 1.04 | 0.63 |
| #N/A | #N/A | #N/A |
| #N/A | #N/A | #N/A |
| 0.86 | #N/A | #N/A |
| #N/A | #N/A | #N/A |
| #N/A | 0.46 | 0.11 |
| #N/A | #N/A | #N/A |
| 0.82 | 1.73 | 0.90 |
| 0.93 | 3.91 | 0.99 |

|      |      |      |
|------|------|------|
| #N/A | #N/A | #N/A |
| 0.33 | 0.99 | 0.60 |
| 0.30 | 0.89 | 0.52 |
| 0.47 | 1.49 | 0.85 |
| 0.22 | #N/A | #N/A |
| 0.75 | 0.80 | 0.43 |
| #N/A | 0.55 | 0.17 |
| #N/A | 1.26 | 0.70 |
| 0.36 | 0.64 | 0.28 |
| 0.72 | 0.77 | 0.39 |
| 0.43 | #N/A | #N/A |
| #N/A | #N/A | #N/A |
| #N/A | 0.66 | 0.30 |
| #N/A | 0.55 | 0.18 |
| #N/A | #N/A | #N/A |
| 0.60 | #N/A | #N/A |
| #N/A | #N/A | #N/A |
| #N/A | #N/A | #N/A |
| 0.57 | 0.63 | 0.26 |
| #N/A | 0.76 | 0.40 |
| 0.90 | 0.99 | 0.60 |
| 0.79 | 1.54 | 0.68 |
| #N/A | #N/A | #N/A |
| #N/A | #N/A | #N/A |
| 0.36 | 1.00 | 0.61 |
| 0.85 | 0.77 | 0.41 |
| #N/A | #N/A | #N/A |
| 0.75 | 1.81 | 0.91 |
| 0.34 | 0.78 | 0.42 |
| 0.51 | 0.54 | 0.17 |
| 0.14 | 0.75 | 0.38 |
| 0.36 | #N/A | #N/A |
| 0.13 | 0.62 | 0.25 |
| 0.07 | 0.48 | 0.12 |
| #N/A | 1.08 | 0.67 |
| #N/A | #N/A | #N/A |
| #N/A | #N/A | #N/A |
| 0.64 | 0.59 | 0.23 |
| #N/A | #N/A | #N/A |
| 0.64 | 0.75 | 0.39 |
| #N/A | #N/A | #N/A |
| 0.61 | #N/A | #N/A |
| #N/A | 0.86 | 0.50 |
| #N/A | #N/A | #N/A |
| #N/A | #N/A | #N/A |
| 0.97 | #N/A | #N/A |
| 0.54 | 1.33 | 0.79 |
| 0.43 | 0.73 | 0.37 |
| 0.91 | 1.11 | 0.66 |
| 0.28 | 0.82 | 0.46 |
| 0.54 | 1.82 | 0.91 |

|      |      |      |
|------|------|------|
| 0.24 | #N/A | #N/A |
| 0.43 | #N/A | #N/A |
| #N/A | #N/A | #N/A |
| 0.27 | 0.83 | 0.46 |
| 0.53 | 1.06 | 0.58 |
| 0.10 | 0.82 | 0.45 |
| 0.26 | 1.34 | 0.69 |
| 0.46 | 0.94 | 0.56 |
| 0.46 | 0.86 | 0.50 |
| 0.12 | 0.73 | 0.37 |
| 0.09 | #N/A | #N/A |
| 0.27 | 0.69 | 0.33 |
| 0.54 | #N/A | #N/A |
| 0.15 | #N/A | #N/A |
| 0.67 | 2.54 | 0.96 |
| 1.00 | 6.30 | 1.00 |
| #N/A | #N/A | #N/A |
| #N/A | 3.66 | 0.99 |
| #N/A | #N/A | #N/A |
| #N/A | #N/A | #N/A |
| 0.26 | 0.80 | 0.40 |
| 0.45 | #N/A | #N/A |
| #N/A | #N/A | #N/A |
| #N/A | #N/A | #N/A |
| #N/A | #N/A | #N/A |
| 0.71 | 0.91 | 0.54 |
| 0.73 | 1.42 | 0.82 |
| 0.07 | 0.82 | 0.40 |
| #N/A | 0.92 | 0.54 |
| #N/A | #N/A | #N/A |
| 0.68 | 0.59 | 0.22 |
| 0.04 | 0.62 | 0.25 |
| 0.80 | 1.93 | 0.93 |
| #N/A | #N/A | #N/A |
| #N/A | 0.73 | 0.36 |
| 0.67 | #N/A | #N/A |
| 0.22 | 2.93 | 0.89 |
| 0.48 | 0.87 | 0.49 |
| 0.17 | 1.42 | 0.82 |
| 0.57 | 1.98 | 0.93 |
| 0.20 | 0.77 | 0.39 |
| #N/A | #N/A | #N/A |
| 0.30 | 1.54 | 0.86 |
| 0.67 | 1.31 | 0.79 |
| #N/A | #N/A | #N/A |
| 0.62 | 0.65 | 0.28 |
| 0.25 | 0.68 | 0.32 |
| 0.39 | #N/A | #N/A |
| 0.71 | 1.29 | 0.78 |
| 0.39 | #N/A | #N/A |
| #N/A | #N/A | #N/A |

|      |      |      |
|------|------|------|
| 0.77 | #N/A | #N/A |
| 0.41 | #N/A | #N/A |
| 0.57 | 0.72 | 0.34 |
| 0.18 | 1.28 | 0.76 |
| 0.56 | 0.69 | 0.33 |
| 0.37 | #N/A | #N/A |
| #N/A | 0.63 | 0.27 |
| 0.75 | 0.82 | 0.41 |
| 0.43 | 1.09 | 0.52 |
| 0.66 | #N/A | #N/A |
| 0.26 | #N/A | #N/A |
| 0.41 | 1.14 | 0.49 |
| 0.86 | 1.83 | 0.89 |
| 0.69 | 0.60 | 0.23 |
| 0.79 | 0.64 | 0.27 |
| 0.45 | #N/A | #N/A |
| #N/A | #N/A | #N/A |
| 0.12 | #N/A | #N/A |
| 0.54 | #N/A | #N/A |
| 0.38 | #N/A | #N/A |
| 0.78 | #N/A | #N/A |
| 0.01 | 0.59 | 0.22 |
| 0.90 | 1.73 | 0.87 |
| #N/A | #N/A | #N/A |
| 0.40 | 0.83 | 0.46 |
| 0.74 | 1.02 | 0.63 |
| 0.48 | 1.57 | 0.83 |
| 0.72 | #N/A | #N/A |
| 0.34 | 0.38 | 0.06 |
| 0.64 | #N/A | #N/A |
| 0.88 | #N/A | #N/A |
| #N/A | 1.03 | 0.62 |
| 0.39 | 0.72 | 0.35 |
| #N/A | #N/A | #N/A |
| 0.05 | 0.40 | 0.07 |
| 0.39 | 0.54 | 0.16 |
| 0.38 | 0.58 | 0.25 |
| #N/A | 1.03 | 0.63 |
| 0.50 | 0.94 | 0.55 |
| 0.43 | 2.45 | 0.97 |
| 0.68 | #N/A | #N/A |
| 0.48 | 0.94 | 0.51 |
| 0.28 | #N/A | #N/A |
| 0.57 | #N/A | #N/A |
| 0.39 | 0.53 | 0.17 |
| 0.35 | 0.81 | 0.45 |
| 0.56 | 0.74 | 0.37 |
| 0.98 | 3.22 | 0.98 |
| 0.94 | 2.56 | 0.97 |
| 0.51 | 1.42 | 0.83 |
| 0.81 | 0.79 | 0.42 |



|      |      |      |
|------|------|------|
| 0.46 | 1.02 | 0.61 |
| #N/A | #N/A | #N/A |
| 0.19 | 0.89 | 0.53 |
| #N/A | #N/A | #N/A |
| 0.92 | #N/A | #N/A |
| #N/A | #N/A | #N/A |
| 0.64 | 0.75 | 0.38 |
| 0.52 | 1.09 | 0.68 |
| #N/A | 0.87 | 0.50 |
| #N/A | #N/A | #N/A |
| 0.92 | #N/A | #N/A |
| 0.51 | 0.98 | 0.60 |
| 0.49 | #N/A | #N/A |
| #N/A | #N/A | #N/A |
| 0.37 | #N/A | #N/A |
| 0.03 | 0.41 | 0.07 |
| 0.47 | 1.13 | 0.55 |
| #N/A | #N/A | #N/A |
| #N/A | #N/A | #N/A |
| 0.24 | 0.77 | 0.39 |
| 0.57 | 0.64 | 0.28 |
| 0.37 | 0.64 | 0.27 |
| 0.40 | #N/A | #N/A |
| 0.79 | 0.69 | 0.32 |
| 0.64 | #N/A | #N/A |
| 0.53 | 1.13 | 0.68 |
| 0.59 | #N/A | #N/A |
| 0.91 | #N/A | #N/A |
| #N/A | #N/A | #N/A |
| 0.92 | 0.85 | 0.45 |
| 0.86 | #N/A | #N/A |
| 0.58 | 0.88 | 0.52 |
| 0.61 | 0.41 | 0.09 |
| 0.06 | 0.67 | 0.30 |
| #N/A | #N/A | #N/A |
| 0.41 | 1.41 | 0.82 |
| 0.68 | #N/A | #N/A |
| 0.38 | 0.74 | 0.37 |
| 0.35 | 0.77 | 0.41 |
| 0.10 | 0.36 | 0.04 |
| #N/A | 1.36 | 0.81 |
| 0.55 | 0.98 | 0.50 |
| #N/A | #N/A | #N/A |
| 0.63 | #N/A | #N/A |
| 0.59 | 0.92 | 0.53 |
| 0.13 | 0.98 | 0.55 |
| #N/A | 2.34 | 0.93 |
| 0.32 | #N/A | #N/A |
| 0.11 | 0.74 | 0.37 |
| 0.46 | #N/A | #N/A |
| 0.09 | 0.40 | 0.08 |

|      |      |      |
|------|------|------|
| 0.29 | 0.54 | 0.20 |
| #N/A | #N/A | #N/A |
| 0.42 | #N/A | #N/A |
| 0.38 | 0.78 | 0.42 |
| #N/A | 2.64 | 0.78 |
| 0.41 | #N/A | #N/A |
| #N/A | #N/A | #N/A |
| #N/A | #N/A | #N/A |
| 0.45 | 0.47 | 0.11 |
| 0.20 | 0.55 | 0.19 |
| 0.04 | 0.65 | 0.28 |
| 0.21 | 1.11 | 0.67 |
| 0.19 | 1.36 | 0.79 |
| 0.07 | #N/A | #N/A |
| 0.61 | 1.07 | 0.59 |
| 0.59 | 0.79 | 0.43 |
| 0.59 | 0.74 | 0.38 |
| 0.25 | #N/A | #N/A |
| 0.40 | #N/A | #N/A |
| #N/A | #N/A | #N/A |
| 0.47 | 0.67 | 0.31 |
| 0.13 | #N/A | #N/A |
| 0.54 | 1.79 | 0.88 |
| 0.11 | 0.68 | 0.31 |
| 0.34 | 1.20 | 0.74 |
| 0.02 | 0.35 | 0.04 |
| #N/A | #N/A | #N/A |
| 0.33 | 1.46 | 0.83 |
| 0.54 | #N/A | #N/A |
| 0.06 | 0.83 | 0.46 |
| 0.99 | 2.60 | 0.95 |
| 0.70 | 1.22 | 0.75 |
| 0.95 | 0.88 | 0.51 |
| 0.55 | #N/A | #N/A |
| #N/A | #N/A | #N/A |
| 0.70 | #N/A | #N/A |
| 0.53 | 1.05 | 0.65 |
| #N/A | #N/A | #N/A |
| #N/A | 1.37 | 0.80 |
| 0.32 | #N/A | #N/A |
| 0.75 | #N/A | #N/A |
| 0.11 | 0.87 | 0.49 |
| #N/A | 1.01 | 0.56 |
| 0.89 | #N/A | #N/A |
| 0.42 | 0.45 | 0.09 |
| 0.48 | #N/A | #N/A |
| 0.30 | #N/A | #N/A |
| #N/A | #N/A | #N/A |
| #N/A | #N/A | #N/A |
| 0.69 | 0.43 | 0.08 |
| 0.69 | 0.60 | 0.24 |

|      |      |      |
|------|------|------|
| 0.46 | #N/A | #N/A |
| 0.86 | 1.21 | 0.75 |
| #N/A | #N/A | #N/A |
| 0.43 | #N/A | #N/A |
| 0.03 | 1.23 | 0.76 |
| 0.51 | 0.76 | 0.39 |
| 0.52 | 0.60 | 0.24 |
| 0.85 | 1.74 | 0.90 |
| 0.59 | 0.94 | 0.51 |
| 0.40 | 1.16 | 0.72 |
| 0.34 | 0.76 | 0.38 |
| #N/A | #N/A | #N/A |
| 0.47 | 1.02 | 0.56 |
| 0.33 | #N/A | #N/A |
| 0.33 | 0.41 | 0.07 |
| 0.29 | 0.64 | 0.27 |
| #N/A | #N/A | #N/A |
| 0.73 | #N/A | #N/A |
| 0.53 | 0.92 | 0.54 |
| 0.80 | #N/A | #N/A |
| 0.73 | 1.64 | 0.88 |
| 0.52 | #N/A | #N/A |
| 0.40 | 0.60 | 0.23 |
| #N/A | #N/A | #N/A |
| #N/A | #N/A | #N/A |
| 0.95 | #N/A | #N/A |
| 0.36 | #N/A | #N/A |
| 0.91 | 0.96 | 0.56 |
| 0.68 | 1.16 | 0.72 |
| 0.50 | 0.59 | 0.22 |
| 0.65 | #N/A | #N/A |
| 0.79 | #N/A | #N/A |
| 0.61 | #N/A | #N/A |
| 0.76 | 1.24 | 0.75 |
| 0.76 | 1.92 | 0.93 |
| 0.31 | 0.92 | 0.54 |
| 0.22 | 0.68 | 0.32 |
| #N/A | #N/A | #N/A |
| 0.62 | 1.31 | 0.79 |
| 0.51 | 1.53 | 0.86 |
| 0.29 | 0.56 | 0.22 |
| 0.24 | #N/A | #N/A |
| 0.30 | #N/A | #N/A |
| 0.33 | 0.74 | 0.37 |
| 0.20 | 0.86 | 0.49 |
| 0.34 | 0.89 | 0.52 |
| #N/A | #N/A | #N/A |
| 0.86 | 0.55 | 0.19 |
| #N/A | #N/A | #N/A |
| 0.35 | 1.03 | 0.64 |
| 0.72 | 1.51 | 0.67 |

|      |      |      |
|------|------|------|
| 0.85 | 0.78 | 0.39 |
| 0.76 | 1.41 | 0.78 |
| 0.64 | 1.14 | 0.60 |
| 0.13 | 1.06 | 0.54 |
| 0.69 | #N/A | #N/A |
| #N/A | #N/A | #N/A |
| 0.24 | 0.61 | 0.27 |
| 0.77 | #N/A | #N/A |
| 0.65 | 0.55 | 0.23 |
| 0.49 | #N/A | #N/A |
| 0.65 | 1.17 | 0.63 |
| 0.75 | #N/A | #N/A |
| 0.06 | #N/A | #N/A |
| 0.19 | 1.39 | 0.75 |
| 0.10 | 0.58 | 0.21 |
| #N/A | #N/A | #N/A |
| 0.25 | 0.49 | 0.13 |
| #N/A | #N/A | #N/A |
| #N/A | 0.95 | 0.49 |
| #N/A | #N/A | #N/A |
| 0.34 | 0.54 | 0.17 |
| #N/A | #N/A | #N/A |
| 0.38 | 0.55 | 0.19 |
| 0.49 | 1.42 | 0.83 |
| 0.12 | 0.54 | 0.17 |
| 0.66 | 0.92 | 0.49 |
| 0.24 | 2.70 | 0.85 |
| #N/A | #N/A | #N/A |
| 0.92 | 1.10 | 0.68 |
| 0.77 | #N/A | #N/A |
| #N/A | #N/A | #N/A |
| 0.35 | 0.84 | 0.47 |
| 0.26 | 1.00 | 0.60 |
| 0.30 | 0.83 | 0.47 |
| 0.65 | 0.78 | 0.41 |
| 0.47 | 1.21 | 0.74 |
| 0.55 | 1.33 | 0.78 |
| 0.84 | 1.54 | 0.86 |
| 0.45 | #N/A | #N/A |
| 0.96 | #N/A | #N/A |
| 0.41 | #N/A | #N/A |
| 0.29 | #N/A | #N/A |
| #N/A | #N/A | #N/A |
| 0.28 | #N/A | #N/A |
| 0.08 | 0.70 | 0.33 |
| 0.56 | #N/A | #N/A |
| #N/A | #N/A | #N/A |
| 0.21 | 0.94 | 0.54 |
| 0.37 | #N/A | #N/A |
| 0.64 | #N/A | #N/A |
| #N/A | #N/A | #N/A |

|      |      |      |
|------|------|------|
| 0.70 | 1.11 | 0.70 |
| #N/A | 1.22 | 0.75 |
| 0.79 | 1.00 | 0.62 |
| 0.58 | 0.86 | 0.45 |
| 0.91 | 2.77 | 0.97 |
| #N/A | #N/A | #N/A |
| #N/A | #N/A | #N/A |
| 0.14 | #N/A | #N/A |
| 0.67 | 0.94 | 0.57 |
| #N/A | #N/A | #N/A |
| 0.22 | 0.68 | 0.31 |
| 0.78 | 0.63 | 0.26 |
| 0.47 | #N/A | #N/A |
| 0.29 | 0.48 | 0.12 |
| 0.53 | 0.77 | 0.40 |
| 0.38 | 0.61 | 0.27 |
| 0.26 | #N/A | #N/A |
| #N/A | #N/A | #N/A |
| 0.32 | #N/A | #N/A |
| 0.41 | 0.77 | 0.40 |
| 0.05 | #N/A | #N/A |
| #N/A | #N/A | #N/A |
| 0.26 | #N/A | #N/A |
| 0.36 | 0.92 | 0.55 |
| 0.52 | 1.08 | 0.67 |
| 0.30 | #N/A | #N/A |
| #N/A | #N/A | #N/A |
| 0.18 | #N/A | #N/A |
| 0.28 | 1.01 | 0.62 |
| 0.21 | 0.89 | 0.52 |
| 0.65 | 0.81 | 0.40 |
| 0.46 | #N/A | #N/A |
| #N/A | 0.44 | 0.14 |
| #N/A | #N/A | #N/A |
| #N/A | 0.58 | 0.22 |
| 0.60 | #N/A | #N/A |
| #N/A | #N/A | #N/A |
| 0.70 | #N/A | #N/A |
| #N/A | #N/A | #N/A |
| 0.94 | 0.79 | 0.43 |
| 0.32 | 0.80 | 0.40 |
| #N/A | #N/A | #N/A |
| #N/A | #N/A | #N/A |
| 0.63 | 0.76 | 0.40 |
| 0.50 | #N/A | #N/A |
| 0.61 | #N/A | #N/A |
| 0.46 | #N/A | #N/A |
| #N/A | 0.53 | 0.18 |
| 0.45 | #N/A | #N/A |
| #N/A | #N/A | #N/A |
| 0.48 | 0.86 | 0.44 |

|      |      |      |
|------|------|------|
| 0.45 | 1.14 | 0.71 |
| 0.71 | 1.30 | 0.78 |
| 0.25 | #N/A | #N/A |
| 0.34 | #N/A | #N/A |
| 0.36 | 0.79 | 0.43 |
| 0.54 | 0.88 | 0.46 |
| 0.20 | 0.62 | 0.27 |
| 0.35 | 0.83 | 0.44 |
| 0.59 | #N/A | #N/A |
| 0.54 | 0.97 | 0.59 |
| 0.43 | 0.79 | 0.43 |
| 0.50 | 0.55 | 0.18 |
| 0.42 | 0.64 | 0.27 |
| #N/A | #N/A | #N/A |
| 0.31 | 1.32 | 0.78 |
| 0.32 | 0.98 | 0.58 |
| 0.99 | 4.79 | 0.99 |
| 0.71 | 1.38 | 0.81 |
| #N/A | 1.96 | 0.93 |
| 0.76 | 1.41 | 0.82 |
| 0.54 | 1.73 | 0.89 |
| 0.72 | 3.14 | 0.96 |
| #N/A | #N/A | #N/A |
| #N/A | 0.87 | 0.44 |
| #N/A | #N/A | #N/A |
| 0.55 | 1.47 | 0.77 |
| #N/A | #N/A | #N/A |
| 0.03 | 0.63 | 0.26 |
| #N/A | #N/A | #N/A |
| #N/A | #N/A | #N/A |
| 0.07 | #N/A | #N/A |
| #N/A | 0.90 | 0.53 |
| #N/A | #N/A | #N/A |
| #N/A | 1.24 | 0.76 |
| 0.15 | 0.65 | 0.28 |
| #N/A | 1.91 | 0.72 |
| 0.19 | 0.50 | 0.14 |
| 0.06 | 0.55 | 0.21 |
| #N/A | #N/A | #N/A |
| 0.54 | #N/A | #N/A |
| 0.48 | 0.58 | 0.21 |
| #N/A | 1.47 | 0.82 |
| 0.48 | #N/A | #N/A |
| 0.29 | 1.34 | 0.76 |
| 0.26 | 0.81 | 0.44 |
| #N/A | #N/A | #N/A |
| 0.46 | 0.62 | 0.25 |
| #N/A | #N/A | #N/A |
| 0.06 | #N/A | #N/A |
| #N/A | #N/A | #N/A |
| 0.26 | 0.69 | 0.31 |

|      |      |      |
|------|------|------|
| #N/A | #N/A | #N/A |
| 0.59 | #N/A | #N/A |
| 0.84 | 1.67 | 0.89 |
| 0.73 | #N/A | #N/A |
| 0.76 | 2.66 | 0.97 |
| 0.94 | #N/A | #N/A |
| #N/A | #N/A | #N/A |
| #N/A | #N/A | #N/A |
| #N/A | 1.13 | 0.69 |
| #N/A | 0.73 | 0.35 |
| 0.09 | #N/A | #N/A |
| 0.93 | 0.77 | 0.39 |
| #N/A | #N/A | #N/A |
| 0.71 | 0.85 | 0.47 |
| #N/A | #N/A | #N/A |
| 0.58 | 0.59 | 0.21 |
| #N/A | #N/A | #N/A |
| #N/A | #N/A | #N/A |
| 0.53 | 0.67 | 0.29 |
| 0.43 | 0.51 | 0.18 |
| #N/A | #N/A | #N/A |
| 0.67 | 1.10 | 0.47 |
| 0.83 | 0.81 | 0.42 |
| #N/A | #N/A | #N/A |
| 0.31 | 0.55 | 0.18 |
| 0.51 | 0.84 | 0.48 |
| 0.37 | 0.91 | 0.54 |
| #N/A | 1.01 | 0.49 |
| 0.54 | 0.80 | 0.41 |
| 0.81 | 0.86 | 0.49 |
| 0.50 | 1.25 | 0.74 |
| 0.40 | 1.41 | 0.82 |
| #N/A | #N/A | #N/A |
| 0.40 | 0.80 | 0.44 |
| 0.10 | 0.51 | 0.16 |
| 0.29 | 0.60 | 0.23 |
| 0.83 | #N/A | #N/A |
| #N/A | 1.97 | 0.74 |
| 0.91 | 0.87 | 0.48 |
| 0.57 | 1.19 | 0.73 |
| 0.48 | 0.50 | 0.13 |
| #N/A | #N/A | #N/A |
| 0.04 | 0.83 | 0.46 |
| 0.16 | 1.02 | 0.63 |
| 0.01 | 0.99 | 0.61 |
| 0.76 | #N/A | #N/A |
| 0.50 | #N/A | #N/A |
| #N/A | 0.58 | 0.21 |
| #N/A | #N/A | #N/A |
| #N/A | #N/A | #N/A |
| #N/A | #N/A | #N/A |



|      |      |      |
|------|------|------|
| #N/A | 0.57 | 0.20 |
| #N/A | #N/A | #N/A |
| #N/A | 0.86 | 0.48 |
| 0.56 | 0.46 | 0.11 |
| #N/A | #N/A | #N/A |
| 0.74 | #N/A | #N/A |
| #N/A | #N/A | #N/A |
| #N/A | 0.96 | 0.51 |
| 0.98 | 0.52 | 0.15 |
| #N/A | #N/A | #N/A |
| 0.35 | #N/A | #N/A |
| 0.60 | #N/A | #N/A |
| 0.43 | 0.87 | 0.50 |
| 0.85 | 1.66 | 0.87 |
| 0.44 | 1.69 | 0.82 |
| 0.83 | 1.95 | 0.93 |
| 0.76 | 0.69 | 0.32 |
| #N/A | #N/A | #N/A |
| 0.30 | 1.05 | 0.65 |
| 0.32 | #N/A | #N/A |
| 0.30 | 0.57 | 0.20 |
| #N/A | #N/A | #N/A |
| 0.03 | #N/A | #N/A |
| 0.06 | 0.55 | 0.19 |
| 0.31 | 0.85 | 0.48 |
| 0.35 | 0.82 | 0.46 |
| 0.27 | #N/A | #N/A |
| 0.50 | #N/A | #N/A |
| #N/A | 0.54 | 0.17 |
| 0.60 | 0.80 | 0.43 |
| #N/A | 0.88 | 0.52 |
| 0.40 | 0.69 | 0.31 |
| #N/A | #N/A | #N/A |
| 0.50 | #N/A | #N/A |
| 0.34 | 0.93 | 0.56 |
| 0.40 | 0.89 | 0.47 |
| 0.68 | 1.17 | 0.70 |
| #N/A | #N/A | #N/A |
| #N/A | #N/A | #N/A |
| 0.58 | 1.56 | 0.86 |
| 0.07 | 0.60 | 0.23 |
| #N/A | #N/A | #N/A |
| 0.61 | 0.99 | 0.61 |
| 0.73 | 0.82 | 0.42 |
| #N/A | 0.69 | 0.33 |
| 0.31 | 0.49 | 0.13 |
| #N/A | #N/A | #N/A |
| #N/A | #N/A | #N/A |
| #N/A | 0.64 | 0.27 |
| #N/A | 0.88 | 0.46 |
| 0.39 | #N/A | #N/A |

|      |      |      |
|------|------|------|
| 0.78 | #N/A | #N/A |
| 0.95 | #N/A | #N/A |
| 0.82 | 1.22 | 0.75 |
| 0.65 | 1.24 | 0.71 |
| 0.42 | 0.67 | 0.30 |
| 0.91 | 2.01 | 0.90 |
| 0.73 | 1.97 | 0.67 |
| 0.41 | 0.63 | 0.26 |
| #N/A | #N/A | #N/A |
| 0.38 | #N/A | #N/A |
| 0.51 | #N/A | #N/A |
| 0.21 | #N/A | #N/A |
| 0.73 | 1.01 | 0.62 |
| 0.68 | 0.85 | 0.46 |
| #N/A | #N/A | #N/A |
| 0.66 | #N/A | #N/A |
| 0.98 | 2.63 | 0.95 |
| 0.58 | 0.81 | 0.42 |
| 0.84 | 1.42 | 0.79 |
| #N/A | #N/A | #N/A |
| 0.52 | #N/A | #N/A |
| 0.77 | 0.58 | 0.24 |
| 0.17 | 0.58 | 0.21 |
| 0.19 | 0.90 | 0.53 |
| 0.41 | #N/A | #N/A |
| 0.03 | 0.46 | 0.15 |
| 0.19 | 0.90 | 0.53 |
| 0.28 | 1.23 | 0.72 |
| 0.82 | 1.56 | 0.83 |
| 0.47 | 0.49 | 0.19 |
| #N/A | #N/A | #N/A |
| 0.90 | 2.14 | 0.94 |
| 0.84 | 2.08 | 0.93 |
| 0.33 | #N/A | #N/A |
| 0.69 | 1.21 | 0.74 |
| 0.92 | #N/A | #N/A |
| 0.46 | #N/A | #N/A |
| #N/A | #N/A | #N/A |
| #N/A | #N/A | #N/A |
| 0.68 | 0.50 | 0.14 |
| 0.46 | 0.54 | 0.18 |
| 0.50 | 0.78 | 0.42 |
| 0.76 | #N/A | #N/A |
| 0.12 | #N/A | #N/A |
| #N/A | #N/A | #N/A |
| 0.59 | 1.30 | 0.79 |
| 0.52 | #N/A | #N/A |
| 0.48 | #N/A | #N/A |
| 0.60 | #N/A | #N/A |
| 0.92 | #N/A | #N/A |
| 0.63 | 1.12 | 0.68 |

|      |      |      |
|------|------|------|
| #N/A | 0.90 | 0.53 |
| #N/A | #N/A | #N/A |
| 0.91 | 1.10 | 0.66 |
| #N/A | #N/A | #N/A |
| #N/A | #N/A | #N/A |
| #N/A | #N/A | #N/A |
| #N/A | #N/A | #N/A |
| 0.62 | 1.08 | 0.54 |
| #N/A | #N/A | #N/A |
| 0.40 | 1.86 | 0.91 |
| #N/A | #N/A | #N/A |
| 0.41 | #N/A | #N/A |
| 0.20 | #N/A | #N/A |
| 0.79 | 0.79 | 0.43 |
| #N/A | #N/A | #N/A |
| 0.56 | #N/A | #N/A |
| 0.21 | 0.52 | 0.15 |
| #N/A | #N/A | #N/A |
| #N/A | #N/A | #N/A |
| 0.67 | 0.75 | 0.39 |
| 0.41 | 0.96 | 0.53 |
| #N/A | #N/A | #N/A |
| #N/A | #N/A | #N/A |
| #N/A | #N/A | #N/A |
| 0.69 | #N/A | #N/A |
| 0.22 | #N/A | #N/A |
| 0.10 | 0.73 | 0.35 |
| 0.24 | 0.64 | 0.30 |
| 0.04 | 0.60 | 0.23 |
| 0.48 | 0.86 | 0.49 |
| #N/A | #N/A | #N/A |
| 0.49 | 0.73 | 0.36 |
| 0.06 | 0.55 | 0.18 |
| 0.39 | #N/A | #N/A |
| 0.64 | #N/A | #N/A |
| #N/A | #N/A | #N/A |
| #N/A | 1.23 | 0.57 |
| #N/A | #N/A | #N/A |
| 0.53 | 0.35 | 0.04 |
| #N/A | #N/A | #N/A |
| 0.49 | #N/A | #N/A |
| 0.50 | 0.90 | 0.53 |
| 0.30 | 0.96 | 0.57 |
| 0.16 | 0.87 | 0.51 |
| 0.28 | 0.60 | 0.22 |
| 0.45 | 0.72 | 0.35 |
| 0.57 | 1.31 | 0.79 |
| 0.85 | 0.75 | 0.38 |
| 0.43 | 1.25 | 0.58 |
| #N/A | #N/A | #N/A |
| 0.91 | #N/A | #N/A |

|      |      |      |
|------|------|------|
| 0.55 | 1.06 | 0.66 |
| 0.55 | 0.69 | 0.33 |
| #N/A | #N/A | #N/A |
| 0.43 | #N/A | #N/A |
| 0.97 | #N/A | #N/A |
| 0.28 | 0.94 | 0.55 |
| 0.56 | 1.39 | 0.82 |
| #N/A | 0.83 | 0.45 |
| 0.65 | 0.97 | 0.59 |
| #N/A | 0.81 | 0.43 |
| #N/A | 0.51 | 0.15 |
| 0.60 | 0.75 | 0.38 |
| 0.18 | 1.32 | 0.79 |
| 0.44 | 1.07 | 0.67 |
| 0.49 | #N/A | #N/A |
| 0.05 | 0.93 | 0.55 |
| #N/A | #N/A | #N/A |
| 0.53 | 1.51 | 0.85 |
| 0.54 | 0.87 | 0.49 |
| #N/A | 0.68 | 0.31 |
| #N/A | #N/A | #N/A |
| #N/A | 0.40 | 0.06 |
| #N/A | 1.01 | 0.62 |
| 0.81 | #N/A | #N/A |
| #N/A | #N/A | #N/A |
| #N/A | #N/A | #N/A |
| #N/A | #N/A | #N/A |
| #N/A | #N/A | #N/A |
| 0.66 | #N/A | #N/A |
| 0.77 | 0.76 | 0.39 |
| #N/A | #N/A | #N/A |
| #N/A | #N/A | #N/A |
| #N/A | #N/A | #N/A |
| #N/A | #N/A | #N/A |
| 0.98 | 1.07 | 0.67 |
| 0.38 | #N/A | #N/A |
| #N/A | #N/A | #N/A |
| #N/A | #N/A | #N/A |
| #N/A | #N/A | #N/A |
| #N/A | #N/A | #N/A |
| 0.42 | #N/A | #N/A |
| #N/A | #N/A | #N/A |
| 0.01 | 0.88 | 0.50 |
| #N/A | #N/A | #N/A |
| 0.33 | 0.47 | 0.12 |
| 0.39 | 0.67 | 0.30 |
| 0.21 | 1.01 | 0.57 |
| #N/A | 0.53 | 0.16 |
| #N/A | #N/A | #N/A |
| 0.02 | 0.63 | 0.30 |

|      |      |      |
|------|------|------|
| #N/A | #N/A | #N/A |
| 0.24 | 0.65 | 0.28 |
| 0.21 | 1.08 | 0.64 |
| 0.63 | 0.81 | 0.43 |
| 0.17 | 1.00 | 0.56 |
| 0.64 | 1.03 | 0.51 |
| 0.19 | 0.56 | 0.21 |
| 0.28 | #N/A | #N/A |
| 0.19 | 0.94 | 0.57 |
| 0.42 | 1.08 | 0.67 |
| 0.66 | 1.89 | 0.92 |
| #N/A | #N/A | #N/A |
| #N/A | 1.03 | 0.64 |
| 0.47 | 0.62 | 0.25 |
| 0.71 | 0.71 | 0.36 |
| #N/A | #N/A | #N/A |
| 0.58 | 1.34 | 0.62 |
| 0.60 | #N/A | #N/A |
| #N/A | #N/A | #N/A |
| #N/A | #N/A | #N/A |
| 0.68 | 1.25 | 0.73 |
| 0.40 | #N/A | #N/A |
| #N/A | #N/A | #N/A |
| 0.42 | 0.66 | 0.30 |
| 0.36 | 0.72 | 0.36 |
| 0.48 | 0.70 | 0.34 |
| #N/A | #N/A | #N/A |
| 0.40 | 0.98 | 0.59 |
| 0.43 | 0.78 | 0.41 |
| 0.75 | 1.07 | 0.58 |
| 0.43 | 0.83 | 0.46 |
| 0.12 | #N/A | #N/A |
| 0.25 | 1.23 | 0.75 |
| #N/A | #N/A | #N/A |
| 0.45 | 0.53 | 0.16 |
| 0.64 | #N/A | #N/A |
| #N/A | 1.27 | 0.68 |
| 0.23 | #N/A | #N/A |
| 0.48 | 0.36 | 0.04 |
| 0.82 | #N/A | #N/A |
| 0.90 | 1.65 | 0.88 |
| 0.84 | 2.37 | 0.81 |
| 0.63 | 0.65 | 0.28 |
| 0.96 | #N/A | #N/A |
| 0.06 | #N/A | #N/A |
| 0.55 | #N/A | #N/A |
| 0.46 | 1.37 | 0.81 |
| 0.79 | 1.88 | 0.92 |
| 0.35 | 1.63 | 0.83 |
| 0.37 | 0.90 | 0.52 |
| 0.64 | #N/A | #N/A |

|      |      |      |
|------|------|------|
| 0.67 | #N/A | #N/A |
| 0.91 | 2.28 | 0.84 |
| #N/A | #N/A | #N/A |
| 0.22 | 0.76 | 0.38 |
| 0.48 | 1.47 | 0.83 |
| 0.52 | 0.76 | 0.39 |
| 0.22 | 0.68 | 0.30 |
| #N/A | #N/A | #N/A |
| 0.08 | 0.22 | 0.01 |
| 0.15 | #N/A | #N/A |
| 0.52 | #N/A | #N/A |
| 0.05 | 0.25 | 0.01 |
| 0.35 | 0.77 | 0.39 |
| #N/A | #N/A | #N/A |
| 0.48 | #N/A | #N/A |
| #N/A | 1.34 | 0.73 |
| 0.68 | 0.41 | 0.10 |
| 0.16 | 1.18 | 0.71 |
| 0.72 | 1.03 | 0.64 |
| 0.23 | 0.63 | 0.25 |
| 0.76 | 1.23 | 0.75 |
| #N/A | #N/A | #N/A |
| 0.08 | #N/A | #N/A |
| 0.92 | 1.25 | 0.73 |
| #N/A | #N/A | #N/A |
| 0.19 | #N/A | #N/A |
| 0.34 | 0.80 | 0.41 |
| 0.56 | 0.83 | 0.45 |
| 0.47 | 0.54 | 0.24 |
| #N/A | #N/A | #N/A |
| 0.39 | 0.71 | 0.33 |
| #N/A | #N/A | #N/A |
| 0.31 | #N/A | #N/A |
| #N/A | #N/A | #N/A |
| 0.48 | 0.95 | 0.57 |
| 0.08 | #N/A | #N/A |
| #N/A | #N/A | #N/A |
| 0.35 | 1.58 | 0.81 |
| 0.46 | #N/A | #N/A |
| #N/A | #N/A | #N/A |
| 0.28 | 0.86 | 0.49 |
| 0.74 | #N/A | #N/A |
| 0.05 | 0.67 | 0.31 |
| 0.44 | 0.59 | 0.23 |
| 0.65 | 0.56 | 0.19 |
| 0.91 | 0.98 | 0.55 |
| 0.52 | #N/A | #N/A |
| 0.76 | #N/A | #N/A |
| 0.36 | #N/A | #N/A |
| 0.22 | 0.66 | 0.29 |
| 0.39 | #N/A | #N/A |

|      |      |      |
|------|------|------|
| #N/A | #N/A | #N/A |
| 0.15 | 0.72 | 0.35 |
| 0.04 | 0.54 | 0.17 |
| 0.21 | 1.33 | 0.77 |
| 0.39 | #N/A | #N/A |
| 0.28 | 0.39 | 0.07 |
| #N/A | #N/A | #N/A |
| #N/A | 0.60 | 0.24 |
| 0.32 | #N/A | #N/A |
| #N/A | #N/A | #N/A |
| 0.77 | 0.81 | 0.42 |
| #N/A | #N/A | #N/A |
| 0.97 | #N/A | #N/A |
| 0.20 | 0.89 | 0.51 |
| 0.16 | 2.26 | 0.93 |
| 0.81 | 1.43 | 0.65 |
| 0.43 | 0.60 | 0.27 |
| 0.40 | 0.72 | 0.35 |
| 0.56 | 0.83 | 0.45 |
| 0.32 | 1.21 | 0.67 |
| #N/A | #N/A | #N/A |
| 0.83 | 2.62 | 0.96 |
| 0.88 | #N/A | #N/A |
| 0.87 | 1.24 | 0.73 |
| 0.98 | #N/A | #N/A |
| 0.44 | 0.95 | 0.55 |
| 0.68 | #N/A | #N/A |
| #N/A | #N/A | #N/A |
| 0.81 | 0.99 | 0.61 |
| 0.57 | 1.19 | 0.66 |
| 0.17 | 1.28 | 0.72 |
| 0.26 | #N/A | #N/A |
| 0.42 | 0.58 | 0.25 |
| 0.42 | #N/A | #N/A |
| 0.23 | 0.67 | 0.30 |
| 0.65 | 0.44 | 0.08 |
| 0.54 | 0.80 | 0.42 |
| 0.80 | 0.63 | 0.26 |
| 0.63 | 0.80 | 0.42 |
| 0.75 | #N/A | #N/A |
| #N/A | 0.82 | 0.44 |
| 0.28 | 1.35 | 0.79 |
| #N/A | #N/A | #N/A |
| 0.11 | 0.51 | 0.14 |
| 0.59 | 0.47 | 0.11 |
| 0.34 | 0.45 | 0.10 |
| #N/A | 0.79 | 0.40 |
| #N/A | 0.92 | 0.54 |
| 0.81 | #N/A | #N/A |
| 0.14 | 0.74 | 0.37 |
| 0.85 | 1.08 | 0.65 |



|      |      |      |
|------|------|------|
| #N/A | 0.79 | 0.39 |
| 0.38 | #N/A | #N/A |
| 0.24 | 0.47 | 0.13 |
| 0.52 | 0.64 | 0.28 |
| 0.85 | #N/A | #N/A |
| #N/A | 0.54 | 0.18 |
| #N/A | #N/A | #N/A |
| #N/A | #N/A | #N/A |
| 0.34 | 1.06 | 0.66 |
| 0.09 | 0.48 | 0.12 |
| 0.19 | 0.63 | 0.26 |
| 0.36 | 1.18 | 0.63 |
| #N/A | #N/A | #N/A |
| 0.98 | 0.64 | 0.27 |
| 0.52 | #N/A | #N/A |
| #N/A | #N/A | #N/A |
| 0.62 | 0.93 | 0.56 |
| 0.40 | #N/A | #N/A |
| #N/A | #N/A | #N/A |
| 0.68 | #N/A | #N/A |
| 0.42 | 1.31 | 0.79 |
| 0.55 | 1.26 | 0.77 |
| 0.11 | #N/A | #N/A |
| 0.26 | 1.07 | 0.67 |
| 0.28 | #N/A | #N/A |
| 0.75 | 1.54 | 0.70 |
| 0.10 | 1.04 | 0.49 |
| 0.66 | #N/A | #N/A |
| 0.90 | 1.11 | 0.59 |
| 0.52 | 1.18 | 0.73 |
| 0.93 | 0.46 | 0.10 |
| 0.40 | 0.40 | 0.10 |
| 0.26 | #N/A | #N/A |
| #N/A | #N/A | #N/A |
| 0.10 | 1.09 | 0.59 |
| 0.88 | 2.75 | 0.97 |
| 0.02 | #N/A | #N/A |
| 0.49 | 0.78 | 0.42 |
| #N/A | 0.81 | 0.45 |
| #N/A | 0.69 | 0.33 |
| 0.84 | #N/A | #N/A |
| 0.55 | 0.85 | 0.48 |
| #N/A | #N/A | #N/A |
| 0.52 | #N/A | #N/A |
| 0.19 | #N/A | #N/A |
| 0.31 | 0.88 | 0.47 |
| 0.11 | 0.57 | 0.29 |
| #N/A | #N/A | #N/A |
| #N/A | #N/A | #N/A |
| #N/A | #N/A | #N/A |
| 0.64 | #N/A | #N/A |

|      |      |      |
|------|------|------|
| #N/A | #N/A | #N/A |
| #N/A | 1.07 | 0.64 |
| 0.74 | #N/A | #N/A |
| 0.52 | 0.87 | 0.49 |
| #N/A | #N/A | #N/A |
| 0.53 | 0.82 | 0.44 |
| 0.80 | 0.79 | 0.39 |
| #N/A | #N/A | #N/A |
| 0.59 | #N/A | #N/A |
| #N/A | #N/A | #N/A |
| #N/A | #N/A | #N/A |
| 0.34 | #N/A | #N/A |
| 0.77 | 0.71 | 0.35 |
| #N/A | #N/A | #N/A |
| 0.36 | 0.76 | 0.39 |
| 0.33 | 0.43 | 0.12 |
| 0.27 | #N/A | #N/A |
| 0.90 | 1.28 | 0.72 |
| 0.07 | 0.73 | 0.37 |
| #N/A | #N/A | #N/A |
| 0.18 | #N/A | #N/A |
| 0.37 | 0.66 | 0.29 |
| 0.83 | #N/A | #N/A |
| 0.41 | 0.43 | 0.10 |
| 0.46 | 0.71 | 0.34 |
| 0.59 | #N/A | #N/A |
| 0.75 | #N/A | #N/A |
| 0.59 | #N/A | #N/A |
| #N/A | #N/A | #N/A |
| 0.62 | #N/A | #N/A |
| 0.75 | #N/A | #N/A |
| 0.75 | 0.71 | 0.34 |
| 0.13 | #N/A | #N/A |
| 0.02 | 0.61 | 0.24 |
| 0.11 | #N/A | #N/A |
| 0.26 | 0.67 | 0.30 |
| 0.14 | 0.68 | 0.30 |
| 0.28 | 0.64 | 0.27 |
| 0.78 | 1.00 | 0.54 |
| 0.31 | 1.18 | 0.59 |
| 0.52 | 0.67 | 0.31 |
| #N/A | 1.08 | 0.55 |
| #N/A | 0.77 | 0.39 |
| 0.72 | #N/A | #N/A |
| 0.54 | #N/A | #N/A |
| 0.44 | 0.72 | 0.35 |
| #N/A | #N/A | #N/A |
| #N/A | #N/A | #N/A |
| 0.32 | #N/A | #N/A |
| 0.51 | 1.29 | 0.63 |
| 0.34 | #N/A | #N/A |

|      |      |      |
|------|------|------|
| #N/A | #N/A | #N/A |
| 0.73 | 0.56 | 0.19 |
| 0.94 | 0.89 | 0.50 |
| 0.46 | #N/A | #N/A |
| 0.34 | 0.97 | 0.48 |
| #N/A | 0.49 | 0.18 |
| 0.45 | 1.20 | 0.68 |
| #N/A | #N/A | #N/A |
| #N/A | #N/A | #N/A |
| 0.35 | 0.78 | 0.39 |
| #N/A | 1.08 | 0.58 |
| 0.79 | #N/A | #N/A |
| 0.05 | 0.53 | 0.16 |
| 0.30 | 0.79 | 0.43 |
| 0.52 | 1.27 | 0.69 |
| 0.45 | #N/A | #N/A |
| 0.44 | 0.86 | 0.49 |
| #N/A | #N/A | #N/A |
| 0.36 | 0.85 | 0.45 |
| 0.64 | 0.96 | 0.52 |
| 0.73 | 0.76 | 0.40 |
| 0.42 | 0.59 | 0.22 |
| 0.17 | 0.52 | 0.15 |
| 0.12 | #N/A | #N/A |
| 0.53 | 0.96 | 0.59 |
| #N/A | #N/A | #N/A |
| 0.82 | 0.85 | 0.46 |
| 0.28 | #N/A | #N/A |
| 0.39 | 0.95 | 0.57 |
| 0.49 | #N/A | #N/A |
| #N/A | #N/A | #N/A |
| 0.37 | 0.83 | 0.46 |
| #N/A | #N/A | #N/A |
| #N/A | 1.38 | 0.81 |
| 0.50 | #N/A | #N/A |
| #N/A | #N/A | #N/A |
| 0.31 | 0.67 | 0.30 |
| #N/A | 1.95 | 0.93 |
| 0.62 | #N/A | #N/A |
| #N/A | 2.38 | 0.96 |
| 0.61 | 0.81 | 0.44 |
| 0.43 | #N/A | #N/A |
| #N/A | #N/A | #N/A |
| 0.87 | 2.63 | 0.97 |
| #N/A | 0.94 | 0.56 |
| #N/A | 1.66 | 0.89 |
| 0.74 | 0.78 | 0.39 |
| 0.45 | #N/A | #N/A |
| #N/A | #N/A | #N/A |
| 0.18 | #N/A | #N/A |
| 0.77 | 1.37 | 0.79 |

|      |      |      |
|------|------|------|
| #N/A | #N/A | #N/A |
| 0.23 | 1.42 | 0.67 |
| #N/A | #N/A | #N/A |
| 0.92 | 1.94 | 0.91 |
| 0.68 | 0.90 | 0.52 |
| #N/A | #N/A | #N/A |
| 0.65 | 0.68 | 0.31 |
| 0.74 | #N/A | #N/A |
| 0.34 | 0.96 | 0.58 |
| #N/A | #N/A | #N/A |
| 0.70 | #N/A | #N/A |
| 0.26 | 0.39 | 0.08 |
| 0.20 | 0.54 | 0.17 |
| 0.29 | 0.74 | 0.37 |
| 0.31 | 0.72 | 0.35 |
| 0.25 | #N/A | #N/A |
| 0.08 | 0.77 | 0.40 |
| #N/A | #N/A | #N/A |
| 0.31 | #N/A | #N/A |
| 0.70 | 0.78 | 0.41 |
| 0.91 | #N/A | #N/A |
| 0.70 | 1.15 | 0.68 |
| #N/A | #N/A | #N/A |
| 0.34 | #N/A | #N/A |
| 0.62 | #N/A | #N/A |
| #N/A | #N/A | #N/A |
| 0.71 | 0.98 | 0.60 |
| 0.14 | 0.75 | 0.38 |
| 0.39 | 0.53 | 0.17 |
| #N/A | #N/A | #N/A |
| 0.72 | #N/A | #N/A |
| 0.36 | 0.62 | 0.25 |
| #N/A | #N/A | #N/A |
| 0.43 | 0.57 | 0.24 |
| 0.49 | 0.74 | 0.38 |
| 0.21 | #N/A | #N/A |
| #N/A | #N/A | #N/A |
| 0.99 | 5.98 | 1.00 |
| 0.01 | #N/A | #N/A |
| #N/A | #N/A | #N/A |
| #N/A | #N/A | #N/A |
| 0.42 | #N/A | #N/A |
| 0.76 | 1.07 | 0.64 |
| 0.21 | #N/A | #N/A |
| 0.19 | 0.69 | 0.34 |
| 0.03 | 0.38 | 0.08 |
| 0.93 | #N/A | #N/A |
| 0.07 | 0.71 | 0.34 |
| 0.44 | 0.93 | 0.55 |
| 0.44 | #N/A | #N/A |
| 0.37 | #N/A | #N/A |

|      |      |      |
|------|------|------|
| 0.14 | 0.98 | 0.59 |
| 0.35 | 0.44 | 0.13 |
| #N/A | 1.36 | 0.71 |
| 0.46 | 0.90 | 0.51 |
| 0.52 | 0.67 | 0.31 |
| 0.86 | 1.58 | 0.87 |
| 0.77 | 2.24 | 0.95 |
| #N/A | #N/A | #N/A |
| 0.50 | #N/A | #N/A |
| 0.90 | 1.01 | 0.56 |
| #N/A | #N/A | #N/A |
| 0.83 | #N/A | #N/A |
| #N/A | #N/A | #N/A |
| #N/A | 1.99 | 0.84 |
| 0.55 | #N/A | #N/A |
| #N/A | #N/A | #N/A |
| 0.41 | #N/A | #N/A |
| #N/A | #N/A | #N/A |
| #N/A | #N/A | #N/A |
| #N/A | #N/A | #N/A |
| 0.60 | #N/A | #N/A |
| #N/A | 0.59 | 0.23 |
| 0.75 | 0.49 | 0.14 |
| 0.41 | 1.25 | 0.58 |
| 0.50 | 0.58 | 0.21 |
| #N/A | 0.72 | 0.35 |
| 0.55 | 0.58 | 0.26 |
| #N/A | 0.90 | 0.50 |
| #N/A | 0.71 | 0.33 |
| 0.57 | 0.76 | 0.40 |
| 0.37 | 0.64 | 0.27 |
| 0.28 | 0.87 | 0.51 |
| 0.42 | 0.71 | 0.34 |
| 0.79 | 0.64 | 0.27 |
| #N/A | 0.77 | 0.39 |
| 0.19 | 0.41 | 0.07 |
| 0.47 | 0.77 | 0.39 |
| #N/A | 0.61 | 0.24 |
| 0.13 | 0.63 | 0.31 |
| #N/A | 0.77 | 0.41 |
| 0.28 | #N/A | #N/A |
| 0.90 | #N/A | #N/A |
| 0.36 | 0.71 | 0.34 |
| #N/A | #N/A | #N/A |
| #N/A | #N/A | #N/A |
| 0.75 | #N/A | #N/A |
| 0.12 | 0.69 | 0.32 |
| #N/A | #N/A | #N/A |
| 0.64 | #N/A | #N/A |
| #N/A | #N/A | #N/A |
| 0.41 | #N/A | #N/A |

|      |      |      |
|------|------|------|
| 0.61 | 0.84 | 0.47 |
| #N/A | #N/A | #N/A |
| 0.50 | 1.29 | 0.77 |
| 0.40 | 0.53 | 0.18 |
| 0.40 | #N/A | #N/A |
| 0.82 | #N/A | #N/A |
| 0.69 | #N/A | #N/A |
| 0.77 | 1.28 | 0.59 |
| #N/A | #N/A | #N/A |
| #N/A | 0.79 | 0.40 |
| #N/A | #N/A | #N/A |
| 0.40 | 0.43 | 0.08 |
| 0.14 | 0.76 | 0.39 |
| 0.40 | 0.82 | 0.44 |
| #N/A | #N/A | #N/A |
| 0.60 | 0.53 | 0.17 |
| 0.73 | 0.69 | 0.33 |
| #N/A | 0.62 | 0.25 |
| 0.27 | 0.75 | 0.38 |
| 0.47 | 1.03 | 0.64 |
| 0.44 | 0.65 | 0.28 |
| 0.58 | 0.75 | 0.37 |
| 0.85 | 0.81 | 0.43 |
| #N/A | #N/A | #N/A |
| #N/A | #N/A | #N/A |
| 0.42 | 0.36 | 0.07 |
| 0.17 | 0.56 | 0.19 |
| 0.81 | 0.60 | 0.23 |
| #N/A | #N/A | #N/A |
| 0.57 | #N/A | #N/A |
| 0.88 | #N/A | #N/A |
| 0.72 | #N/A | #N/A |
| 0.85 | 0.62 | 0.25 |
| 0.32 | #N/A | #N/A |
| 0.33 | #N/A | #N/A |
| #N/A | #N/A | #N/A |
| 0.75 | 0.84 | 0.48 |
| #N/A | 0.94 | 0.50 |
| #N/A | #N/A | #N/A |
| 0.77 | 0.64 | 0.27 |
| #N/A | #N/A | #N/A |
| #N/A | #N/A | #N/A |
| 0.89 | #N/A | #N/A |
| 0.36 | 0.89 | 0.52 |
| #N/A | #N/A | #N/A |
| 0.23 | 0.73 | 0.36 |
| #N/A | 2.76 | 0.97 |
| #N/A | 0.48 | 0.16 |
| #N/A | 0.88 | 0.51 |
| 0.86 | 1.51 | 0.67 |
| #N/A | 1.27 | 0.76 |

|      |      |      |
|------|------|------|
| 0.15 | #N/A | #N/A |
| 0.37 | #N/A | #N/A |
| 0.56 | 0.73 | 0.37 |
| 0.82 | 0.59 | 0.21 |
| 0.58 | 0.89 | 0.45 |
| #N/A | #N/A | #N/A |
| 0.29 | 0.68 | 0.32 |
| #N/A | #N/A | #N/A |
| 0.62 | 0.86 | 0.49 |
| #N/A | #N/A | #N/A |
| 0.53 | #N/A | #N/A |
| 0.57 | 0.80 | 0.42 |
| 0.58 | 0.81 | 0.43 |
| 0.17 | 0.75 | 0.38 |
| 0.88 | 1.25 | 0.52 |
| 0.27 | #N/A | #N/A |
| 0.16 | 0.61 | 0.27 |
| 0.06 | #N/A | #N/A |
| 0.38 | 0.83 | 0.47 |
| 0.16 | 0.55 | 0.19 |
| 0.33 | 0.79 | 0.41 |
| #N/A | #N/A | #N/A |
| 0.93 | 1.98 | 0.89 |
| 0.31 | 0.94 | 0.56 |
| 0.35 | 0.60 | 0.23 |
| #N/A | #N/A | #N/A |
| 0.37 | 0.48 | 0.18 |
| 0.49 | 0.76 | 0.39 |
| 0.23 | #N/A | #N/A |
| #N/A | #N/A | #N/A |
| 0.74 | #N/A | #N/A |
| 0.33 | 0.70 | 0.32 |
| #N/A | #N/A | #N/A |
| 0.62 | #N/A | #N/A |
| 0.65 | #N/A | #N/A |
| #N/A | 0.53 | 0.17 |
| 0.94 | 1.09 | 0.67 |
| 0.59 | 0.66 | 0.29 |
| 0.97 | 0.62 | 0.26 |
| #N/A | #N/A | #N/A |
| 0.37 | 0.99 | 0.54 |
| 0.17 | #N/A | #N/A |
| 0.75 | 0.61 | 0.24 |
| #N/A | #N/A | #N/A |
| 0.66 | #N/A | #N/A |
| 0.87 | 1.34 | 0.78 |
| 0.74 | 1.12 | 0.70 |
| 0.42 | 0.56 | 0.19 |
| 0.26 | 0.62 | 0.28 |
| 0.55 | #N/A | #N/A |
| 0.28 | 1.23 | 0.75 |



|      |      |      |
|------|------|------|
| 0.73 | #N/A | #N/A |
| 0.71 | 0.57 | 0.20 |
| 0.45 | 0.90 | 0.53 |
| 0.17 | 1.06 | 0.66 |
| 0.23 | 1.07 | 0.63 |
| 0.33 | 0.78 | 0.42 |
| 0.34 | 0.92 | 0.55 |
| 0.46 | 0.98 | 0.60 |
| 0.57 | 0.92 | 0.55 |
| 0.16 | 0.91 | 0.54 |
| 0.58 | 1.04 | 0.65 |
| #N/A | #N/A | #N/A |
| #N/A | #N/A | #N/A |
| 0.39 | 1.47 | 0.84 |
| #N/A | #N/A | #N/A |
| #N/A | #N/A | #N/A |
| #N/A | 0.33 | 0.05 |
| 0.78 | #N/A | #N/A |
| 0.12 | 0.80 | 0.43 |
| 0.07 | 0.70 | 0.32 |
| 0.21 | 0.73 | 0.36 |
| 0.26 | 0.76 | 0.39 |
| 0.55 | 1.27 | 0.77 |
| 0.62 | 1.26 | 0.77 |
| 0.64 | 0.73 | 0.36 |
| 0.62 | 0.96 | 0.56 |
| #N/A | #N/A | #N/A |
| 0.61 | #N/A | #N/A |
| 0.93 | #N/A | #N/A |
| 0.46 | 1.29 | 0.52 |
| 0.84 | #N/A | #N/A |
| #N/A | 2.69 | 0.85 |
| 0.22 | 0.74 | 0.38 |
| 0.90 | 1.33 | 0.80 |
| 0.62 | 1.16 | 0.71 |
| 0.36 | 0.83 | 0.47 |
| 0.58 | 0.43 | 0.09 |
| #N/A | 0.74 | 0.36 |
| 0.91 | 1.41 | 0.74 |
| 0.60 | 1.18 | 0.68 |
| #N/A | #N/A | #N/A |
| #N/A | #N/A | #N/A |
| 0.08 | 0.71 | 0.35 |
| 0.01 | 0.36 | 0.05 |
| #N/A | #N/A | #N/A |
| 0.91 | #N/A | #N/A |
| 0.92 | 1.35 | 0.79 |
| 0.36 | 1.15 | 0.66 |
| 0.30 | 0.74 | 0.38 |
| 0.97 | 2.93 | 0.98 |
| 0.21 | 0.56 | 0.20 |

|      |      |      |
|------|------|------|
| #N/A | #N/A | #N/A |
| 0.63 | 1.40 | 0.82 |
| 0.79 | #N/A | #N/A |
| 0.52 | 0.74 | 0.37 |
| 0.03 | 0.49 | 0.14 |
| #N/A | #N/A | #N/A |
| 0.20 | 0.91 | 0.54 |
| 0.98 | #N/A | #N/A |
| #N/A | #N/A | #N/A |
| 0.76 | 0.76 | 0.39 |
| 0.44 | #N/A | #N/A |
| 0.84 | 0.71 | 0.35 |
| 0.97 | 0.78 | 0.40 |
| 0.36 | 1.02 | 0.56 |
| 0.42 | 0.53 | 0.17 |
| 0.90 | 1.79 | 0.89 |
| #N/A | #N/A | #N/A |
| 0.71 | #N/A | #N/A |
| 0.38 | 0.68 | 0.32 |
| 0.53 | 0.54 | 0.17 |
| #N/A | #N/A | #N/A |
| 0.42 | 0.72 | 0.35 |
| 0.43 | 0.53 | 0.16 |
| #N/A | #N/A | #N/A |
| 0.37 | #N/A | #N/A |
| 0.20 | #N/A | #N/A |
| 0.23 | #N/A | #N/A |
| 0.74 | 2.89 | 0.97 |
| #N/A | #N/A | #N/A |
| 0.01 | #N/A | #N/A |
| 0.08 | 0.45 | 0.09 |
| 0.37 | 0.72 | 0.35 |
| 0.72 | 0.71 | 0.34 |
| 0.70 | #N/A | #N/A |
| #N/A | 0.83 | 0.44 |
| #N/A | #N/A | #N/A |
| 0.69 | #N/A | #N/A |
| 0.48 | 1.04 | 0.63 |
| 0.18 | 0.69 | 0.33 |
| 0.41 | 0.67 | 0.31 |
| 0.20 | 1.16 | 0.69 |
| 0.89 | #N/A | #N/A |
| 0.43 | #N/A | #N/A |
| #N/A | 0.79 | 0.43 |
| 0.10 | #N/A | #N/A |
| 0.24 | 0.54 | 0.18 |
| 0.30 | 1.06 | 0.65 |
| 0.61 | 0.40 | 0.06 |
| 0.56 | #N/A | #N/A |
| #N/A | #N/A | #N/A |
| 0.38 | 1.29 | 0.71 |

|      |      |      |
|------|------|------|
| 0.54 | 1.04 | 0.60 |
| #N/A | #N/A | #N/A |
| #N/A | #N/A | #N/A |
| 0.57 | #N/A | #N/A |
| 0.52 | #N/A | #N/A |
| 0.19 | #N/A | #N/A |
| 0.95 | 0.48 | 0.12 |
| #N/A | #N/A | #N/A |
| 0.77 | 0.61 | 0.24 |
| 0.84 | #N/A | #N/A |
| #N/A | #N/A | #N/A |
| 0.59 | 0.97 | 0.56 |
| #N/A | #N/A | #N/A |
| 0.63 | 0.46 | 0.11 |
| #N/A | #N/A | #N/A |
| 0.29 | 0.52 | 0.16 |
| 0.57 | #N/A | #N/A |
| #N/A | 2.62 | 0.97 |
| 0.42 | 0.78 | 0.40 |
| 0.32 | 1.28 | 0.75 |
| #N/A | #N/A | #N/A |
| 0.46 | #N/A | #N/A |
| 0.21 | 0.64 | 0.28 |
| 0.69 | 0.76 | 0.38 |
| #N/A | #N/A | #N/A |
| #N/A | 1.40 | 0.81 |
| 0.49 | 0.84 | 0.46 |
| 0.48 | #N/A | #N/A |
| 0.46 | 0.67 | 0.33 |
| 0.88 | 0.82 | 0.42 |
| #N/A | #N/A | #N/A |
| 0.18 | 0.95 | 0.52 |
| #N/A | #N/A | #N/A |
| 0.04 | 0.92 | 0.52 |
| 0.16 | 0.92 | 0.48 |
| 0.47 | 1.03 | 0.62 |
| 0.19 | 0.63 | 0.26 |
| 0.18 | 0.72 | 0.34 |
| 0.44 | 0.93 | 0.52 |
| 0.34 | 1.20 | 0.64 |
| 0.46 | #N/A | #N/A |
| 0.72 | 0.59 | 0.22 |
| #N/A | 1.23 | 0.74 |
| 0.80 | 0.58 | 0.22 |
| 0.41 | #N/A | #N/A |
| 0.26 | #N/A | #N/A |
| 0.34 | 1.49 | 0.83 |
| 0.79 | 1.38 | 0.78 |
| 0.82 | 1.22 | 0.75 |
| 0.33 | 0.64 | 0.27 |
| 0.19 | #N/A | #N/A |

|      |      |      |
|------|------|------|
| #N/A | 2.59 | 0.97 |
| #N/A | #N/A | #N/A |
| #N/A | #N/A | #N/A |
| #N/A | 1.26 | 0.74 |
| 0.72 | 0.63 | 0.26 |
| 0.35 | #N/A | #N/A |
| 0.44 | 1.05 | 0.66 |
| 0.57 | 1.34 | 0.73 |
| 0.25 | 0.72 | 0.36 |
| #N/A | #N/A | #N/A |
| 0.71 | 1.23 | 0.72 |
| 0.22 | 0.50 | 0.19 |
| 0.78 | 1.01 | 0.62 |
| #N/A | #N/A | #N/A |
| 0.51 | 0.69 | 0.32 |
| 0.54 | 0.49 | 0.16 |
| 0.71 | #N/A | #N/A |
| 0.76 | 0.99 | 0.61 |
| 0.88 | #N/A | #N/A |
| 0.58 | 0.64 | 0.28 |
| #N/A | 0.46 | 0.12 |
| 0.58 | 0.77 | 0.38 |
| 0.17 | #N/A | #N/A |
| #N/A | #N/A | #N/A |
| 0.45 | 0.74 | 0.37 |
| 0.30 | 0.52 | 0.15 |
| #N/A | 0.70 | 0.33 |
| 0.60 | #N/A | #N/A |
| 0.62 | 1.27 | 0.77 |
| 0.30 | 2.06 | 0.92 |
| 0.07 | #N/A | #N/A |
| 0.10 | 1.01 | 0.62 |
| 0.49 | 1.01 | 0.61 |
| #N/A | 1.07 | 0.65 |
| 0.31 | 1.03 | 0.64 |
| 0.27 | 0.92 | 0.54 |
| 1.00 | #N/A | #N/A |
| #N/A | #N/A | #N/A |
| #N/A | #N/A | #N/A |
| 0.67 | 0.77 | 0.41 |
| 0.09 | 0.70 | 0.33 |
| #N/A | 0.75 | 0.39 |
| 0.57 | 1.74 | 0.89 |
| 0.33 | 1.26 | 0.70 |
| #N/A | #N/A | #N/A |
| 0.35 | 0.88 | 0.45 |
| #N/A | #N/A | #N/A |
| 0.76 | 0.71 | 0.34 |
| #N/A | #N/A | #N/A |
| 0.77 | 1.05 | 0.66 |
| #N/A | #N/A | #N/A |

|      |      |      |
|------|------|------|
| 0.87 | #N/A | #N/A |
| #N/A | #N/A | #N/A |
| 0.70 | 1.31 | 0.77 |
| 0.40 | #N/A | #N/A |
| #N/A | 0.79 | 0.42 |
| 0.14 | #N/A | #N/A |
| #N/A | 0.64 | 0.27 |
| 0.24 | 0.93 | 0.56 |
| 0.42 | 1.03 | 0.63 |
| 0.11 | 0.75 | 0.39 |
| 0.44 | 0.98 | 0.60 |
| 0.33 | 1.37 | 0.74 |
| 0.69 | #N/A | #N/A |
| 0.63 | #N/A | #N/A |
| #N/A | #N/A | #N/A |
| 0.20 | #N/A | #N/A |
| 0.22 | 0.59 | 0.24 |
| #N/A | 0.68 | 0.34 |
| 0.28 | 0.80 | 0.43 |
| 0.47 | 0.59 | 0.22 |
| 0.23 | 0.60 | 0.26 |
| #N/A | 0.58 | 0.23 |
| 0.13 | 0.48 | 0.14 |
| 0.29 | 0.78 | 0.40 |
| #N/A | #N/A | #N/A |
| 0.65 | 0.60 | 0.28 |
| 0.20 | 0.30 | 0.03 |
| #N/A | 0.86 | 0.47 |
| 0.15 | 0.35 | 0.06 |
| 0.17 | #N/A | #N/A |
| 0.28 | 0.81 | 0.45 |
| 0.43 | 0.97 | 0.59 |
| #N/A | 1.80 | 0.90 |
| 0.27 | 1.05 | 0.66 |
| 0.41 | #N/A | #N/A |
| 0.64 | #N/A | #N/A |
| 0.21 | #N/A | #N/A |
| 0.46 | 3.03 | 0.97 |
| 0.57 | #N/A | #N/A |
| #N/A | #N/A | #N/A |
| 0.86 | 0.91 | 0.54 |
| #N/A | 1.02 | 0.62 |
| 0.82 | #N/A | #N/A |
| 0.63 | 1.43 | 0.70 |
| #N/A | #N/A | #N/A |
| 0.95 | #N/A | #N/A |
| 0.43 | 0.92 | 0.55 |
| 0.42 | #N/A | #N/A |
| #N/A | #N/A | #N/A |
| #N/A | #N/A | #N/A |
| 0.56 | 0.85 | 0.46 |

|      |      |      |
|------|------|------|
| 0.57 | #N/A | #N/A |
| 0.43 | 1.00 | 0.62 |
| #N/A | #N/A | #N/A |
| 0.36 | 0.58 | 0.21 |
| #N/A | #N/A | #N/A |
| 0.61 | #N/A | #N/A |
| 0.25 | 0.61 | 0.28 |
| 0.82 | #N/A | #N/A |
| #N/A | #N/A | #N/A |
| 0.88 | 0.83 | 0.42 |
| #N/A | #N/A | #N/A |
| 0.69 | 1.78 | 0.90 |
| 0.61 | 0.63 | 0.25 |
| #N/A | #N/A | #N/A |
| 0.37 | #N/A | #N/A |
| 0.15 | #N/A | #N/A |
| #N/A | #N/A | #N/A |
| 0.07 | 1.02 | 0.62 |
| 0.53 | 0.54 | 0.20 |
| 0.57 | 0.57 | 0.19 |
| #N/A | #N/A | #N/A |
| 0.77 | 1.49 | 0.81 |
| #N/A | #N/A | #N/A |
| 0.57 | 0.79 | 0.43 |
| #N/A | #N/A | #N/A |
| 0.75 | 0.50 | 0.17 |
| #N/A | #N/A | #N/A |
| #N/A | 0.91 | 0.49 |
| 0.78 | 0.56 | 0.19 |
| 0.66 | #N/A | #N/A |
| 0.23 | 0.92 | 0.49 |
| #N/A | #N/A | #N/A |
| 0.49 | 0.89 | 0.51 |
| #N/A | #N/A | #N/A |
| 0.95 | #N/A | #N/A |
| 0.86 | 0.49 | 0.12 |
| 0.70 | 0.78 | 0.41 |
| 0.87 | 0.76 | 0.37 |
| #N/A | 0.49 | 0.15 |
| #N/A | #N/A | #N/A |
| #N/A | #N/A | #N/A |
| 0.02 | 1.13 | 0.57 |
| 0.39 | 0.58 | 0.21 |
| 0.35 | 1.04 | 0.62 |
| #N/A | #N/A | #N/A |
| 0.85 | #N/A | #N/A |
| 0.09 | 0.38 | 0.06 |
| 0.27 | 0.68 | 0.31 |
| 0.62 | #N/A | #N/A |
| 0.58 | #N/A | #N/A |
| 0.42 | #N/A | #N/A |

|      |      |      |
|------|------|------|
| 0.28 | #N/A | #N/A |
| 0.40 | 0.50 | 0.15 |
| 0.51 | #N/A | #N/A |
| #N/A | #N/A | #N/A |
| #N/A | 0.39 | 0.06 |
| 0.12 | 0.54 | 0.19 |
| #N/A | 0.89 | 0.44 |
| 0.14 | #N/A | #N/A |
| 0.87 | 0.96 | 0.58 |
| 0.03 | 0.45 | 0.14 |
| #N/A | #N/A | #N/A |
| #N/A | 0.55 | 0.19 |
| 0.65 | #N/A | #N/A |
| 0.11 | #N/A | #N/A |
| 0.46 | 0.70 | 0.33 |
| 0.19 | 0.45 | 0.11 |
| 0.84 | 1.37 | 0.80 |
| 0.35 | #N/A | #N/A |
| 0.97 | 1.79 | 0.91 |
| 0.11 | 0.69 | 0.32 |
| 0.19 | 1.15 | 0.67 |
| 0.07 | 0.91 | 0.53 |
| 0.68 | #N/A | #N/A |
| 0.37 | #N/A | #N/A |
| 0.24 | #N/A | #N/A |
| 0.67 | 0.91 | 0.47 |
| #N/A | #N/A | #N/A |
| 0.54 | 0.87 | 0.51 |
| 0.14 | 0.89 | 0.52 |
| 0.33 | 1.13 | 0.70 |
| 0.48 | #N/A | #N/A |
| 0.60 | 0.69 | 0.33 |
| 0.82 | #N/A | #N/A |
| 0.60 | 0.58 | 0.20 |
| 0.65 | 0.75 | 0.39 |
| #N/A | 0.96 | 0.59 |
| #N/A | #N/A | #N/A |
| 0.54 | 0.59 | 0.26 |
| 0.84 | 0.63 | 0.25 |
| 0.55 | #N/A | #N/A |
| 0.35 | 0.66 | 0.29 |
| 0.59 | 0.83 | 0.45 |
| 0.64 | #N/A | #N/A |
| #N/A | #N/A | #N/A |
| 0.57 | #N/A | #N/A |
| 0.08 | 0.51 | 0.15 |
| 0.98 | 1.79 | 0.91 |
| 0.48 | #N/A | #N/A |
| #N/A | 0.50 | 0.13 |
| #N/A | 1.06 | 0.66 |
| #N/A | #N/A | #N/A |

|      |      |      |
|------|------|------|
| 0.54 | 0.74 | 0.37 |
| 0.92 | #N/A | #N/A |
| 0.98 | 0.66 | 0.29 |
| 0.38 | 0.68 | 0.32 |
| 0.35 | 0.81 | 0.44 |
| 0.40 | #N/A | #N/A |
| #N/A | 0.87 | 0.49 |
| #N/A | #N/A | #N/A |
| 0.34 | 1.24 | 0.70 |
| 0.48 | #N/A | #N/A |
| 0.32 | 0.87 | 0.51 |
| 0.43 | #N/A | #N/A |
| #N/A | #N/A | #N/A |
| 0.70 | 0.90 | 0.53 |
| 0.20 | 0.79 | 0.43 |
| 0.87 | 1.73 | 0.85 |
| 0.64 | #N/A | #N/A |
| 0.04 | 0.51 | 0.14 |
| 0.92 | #N/A | #N/A |
| #N/A | 1.03 | 0.64 |
| 0.39 | 0.82 | 0.45 |
| 0.25 | #N/A | #N/A |
| 0.62 | #N/A | #N/A |
| 0.36 | 1.03 | 0.58 |
| 0.84 | 0.61 | 0.25 |
| 0.13 | 0.74 | 0.37 |
| #N/A | #N/A | #N/A |
| #N/A | #N/A | #N/A |
| 0.56 | 0.94 | 0.54 |
| 0.87 | #N/A | #N/A |
| 0.83 | 0.80 | 0.42 |
| 0.67 | 1.78 | 0.78 |
| 0.59 | 1.02 | 0.63 |
| #N/A | #N/A | #N/A |
| #N/A | #N/A | #N/A |
| #N/A | #N/A | #N/A |
| #N/A | #N/A | #N/A |
| 0.95 | #N/A | #N/A |
| 0.55 | 0.76 | 0.39 |
| 0.22 | #N/A | #N/A |
| 0.64 | 1.37 | 0.76 |
| 0.60 | #N/A | #N/A |
| 0.79 | 2.01 | 0.92 |
| #N/A | #N/A | #N/A |
| #N/A | 2.48 | 0.97 |
| #N/A | #N/A | #N/A |
| 0.62 | 0.85 | 0.45 |
| 0.08 | 0.60 | 0.23 |
| #N/A | #N/A | #N/A |
| 0.66 | 0.58 | 0.21 |
| 0.48 | 0.46 | 0.15 |



|      |      |      |
|------|------|------|
| 0.52 | #N/A | #N/A |
| 0.07 | #N/A | #N/A |
| 0.47 | #N/A | #N/A |
| 0.26 | 0.59 | 0.22 |
| 0.73 | 0.75 | 0.36 |
| 0.69 | 0.48 | 0.12 |
| 0.20 | 0.60 | 0.27 |
| #N/A | #N/A | #N/A |
| #N/A | #N/A | #N/A |
| #N/A | #N/A | #N/A |
| 0.11 | 0.48 | 0.13 |
| 0.25 | 0.63 | 0.30 |
| 0.38 | #N/A | #N/A |
| 0.35 | 0.96 | 0.59 |
| #N/A | #N/A | #N/A |
| 0.52 | #N/A | #N/A |
| 0.17 | 1.25 | 0.76 |
| 0.21 | #N/A | #N/A |
| #N/A | #N/A | #N/A |
| 0.37 | 1.08 | 0.62 |
| 0.32 | 1.22 | 0.75 |
| 0.48 | 1.35 | 0.81 |
| #N/A | 7.60 | 1.00 |
| 0.90 | 1.41 | 0.83 |
| 0.94 | 1.79 | 0.90 |
| #N/A | #N/A | #N/A |
| 0.58 | 0.94 | 0.45 |
| #N/A | 0.57 | 0.22 |
| 0.63 | #N/A | #N/A |
| #N/A | #N/A | #N/A |
| 0.77 | 0.84 | 0.45 |
| 0.25 | 1.04 | 0.58 |
| #N/A | #N/A | #N/A |
| #N/A | #N/A | #N/A |
| 0.49 | 0.96 | 0.55 |
| 0.53 | 1.01 | 0.58 |
| 0.26 | 0.88 | 0.51 |
| 0.32 | 1.14 | 0.70 |
| 0.66 | 1.15 | 0.70 |
| 0.66 | 0.77 | 0.39 |
| #N/A | #N/A | #N/A |
| 0.01 | 0.54 | 0.20 |
| 0.44 | 1.05 | 0.55 |
| 0.82 | 0.72 | 0.34 |
| 0.24 | 0.90 | 0.43 |
| 0.32 | #N/A | #N/A |
| #N/A | #N/A | #N/A |
| 0.38 | 0.57 | 0.20 |
| #N/A | #N/A | #N/A |
| 0.47 | 0.79 | 0.41 |
| #N/A | #N/A | #N/A |

|      |      |      |
|------|------|------|
| 0.72 | 1.38 | 0.80 |
| 0.11 | 0.32 | 0.03 |
| 0.33 | 1.15 | 0.71 |
| 0.33 | 0.99 | 0.61 |
| 0.05 | 0.49 | 0.13 |
| #N/A | #N/A | #N/A |
| #N/A | #N/A | #N/A |
| #N/A | #N/A | #N/A |
| #N/A | #N/A | #N/A |
| 0.47 | 0.53 | 0.18 |
| 0.31 | 0.49 | 0.14 |
| #N/A | #N/A | #N/A |
| 0.77 | #N/A | #N/A |
| #N/A | #N/A | #N/A |
| 0.83 | #N/A | #N/A |
| 0.84 | 1.65 | 0.89 |
| 0.50 | 0.54 | 0.18 |
| 0.94 | 1.18 | 0.73 |
| 0.03 | #N/A | #N/A |
| 0.59 | 0.94 | 0.50 |
| #N/A | 0.66 | 0.29 |
| 0.34 | 0.61 | 0.25 |
| 0.41 | 0.97 | 0.58 |
| 0.37 | #N/A | #N/A |
| #N/A | 1.37 | 0.76 |
| 0.44 | 0.97 | 0.56 |
| 0.81 | 0.88 | 0.50 |
| 0.78 | 0.97 | 0.58 |
| 0.30 | 0.80 | 0.44 |
| 0.35 | 1.28 | 0.74 |
| #N/A | #N/A | #N/A |
| 0.97 | #N/A | #N/A |
| 0.96 | 1.12 | 0.69 |
| 0.47 | 0.73 | 0.35 |
| #N/A | #N/A | #N/A |
| #N/A | #N/A | #N/A |
| #N/A | 0.72 | 0.35 |
| #N/A | #N/A | #N/A |
| 0.56 | 0.99 | 0.61 |
| 0.33 | 0.76 | 0.39 |
| #N/A | #N/A | #N/A |
| #N/A | 0.54 | 0.19 |
| #N/A | #N/A | #N/A |
| #N/A | #N/A | #N/A |
| 0.37 | 0.54 | 0.23 |
| 0.53 | 0.84 | 0.48 |
| 0.74 | #N/A | #N/A |
| 0.70 | #N/A | #N/A |
| #N/A | #N/A | #N/A |
| #N/A | #N/A | #N/A |
| 0.61 | 0.75 | 0.39 |

|      |      |      |
|------|------|------|
| 0.18 | 1.06 | 0.59 |
| 0.67 | #N/A | #N/A |
| 0.64 | 1.21 | 0.74 |
| #N/A | 0.72 | 0.35 |
| 0.38 | 0.63 | 0.26 |
| 0.35 | 1.01 | 0.62 |
| 0.43 | 1.31 | 0.71 |
| 0.53 | #N/A | #N/A |
| 0.89 | 1.41 | 0.76 |
| #N/A | #N/A | #N/A |
| 0.47 | 0.66 | 0.29 |
| #N/A | #N/A | #N/A |
| 0.80 | #N/A | #N/A |
| 0.01 | #N/A | #N/A |
| 0.58 | 0.87 | 0.48 |
| #N/A | #N/A | #N/A |
| 0.16 | #N/A | #N/A |
| 0.51 | #N/A | #N/A |
| #N/A | #N/A | #N/A |
| 0.71 | 1.15 | 0.72 |
| #N/A | #N/A | #N/A |
| 0.61 | #N/A | #N/A |
| 0.35 | #N/A | #N/A |
| 0.13 | 0.78 | 0.42 |
| 0.75 | 0.87 | 0.49 |
| 0.52 | 1.00 | 0.62 |
| 0.83 | #N/A | #N/A |
| 0.59 | 0.70 | 0.33 |
| #N/A | 0.36 | 0.05 |
| #N/A | #N/A | #N/A |
| 0.40 | #N/A | #N/A |
| 0.13 | 1.35 | 0.80 |
| #N/A | #N/A | #N/A |
| 0.83 | 1.63 | 0.87 |
| #N/A | #N/A | #N/A |
| 0.22 | 1.25 | 0.62 |
| 0.76 | 0.59 | 0.23 |
| #N/A | 0.35 | 0.04 |
| 0.37 | 0.53 | 0.17 |
| #N/A | 0.33 | 0.03 |
| 0.22 | 0.47 | 0.11 |
| 0.30 | 0.70 | 0.34 |
| #N/A | #N/A | #N/A |
| #N/A | #N/A | #N/A |
| #N/A | #N/A | #N/A |
| #N/A | #N/A | #N/A |
| #N/A | #N/A | #N/A |
| 0.54 | #N/A | #N/A |
| #N/A | #N/A | #N/A |
| #N/A | 0.98 | 0.60 |
| 0.49 | 1.84 | 0.91 |

|      |      |      |
|------|------|------|
| #N/A | #N/A | #N/A |
| 0.34 | #N/A | #N/A |
| 0.84 | #N/A | #N/A |
| 0.98 | 2.73 | 0.97 |
| 0.19 | 1.09 | 0.68 |
| #N/A | #N/A | #N/A |
| 0.31 | 1.52 | 0.63 |
| 0.04 | 0.67 | 0.31 |
| 0.16 | 0.71 | 0.34 |
| 0.35 | #N/A | #N/A |
| 0.20 | 0.56 | 0.19 |
| 0.74 | 1.08 | 0.65 |
| 0.63 | 0.78 | 0.39 |
| 0.48 | 0.84 | 0.46 |
| 0.64 | #N/A | #N/A |
| 0.21 | #N/A | #N/A |
| 0.48 | #N/A | #N/A |
| #N/A | #N/A | #N/A |
| 0.45 | #N/A | #N/A |
| 0.22 | 0.93 | 0.55 |
| 0.14 | #N/A | #N/A |
| 0.41 | #N/A | #N/A |
| 0.23 | 0.79 | 0.43 |
| 0.68 | #N/A | #N/A |
| 0.19 | 0.88 | 0.51 |
| 0.26 | 1.21 | 0.74 |
| 0.99 | 5.44 | 1.00 |
| 0.36 | 1.02 | 0.62 |
| #N/A | #N/A | #N/A |
| 0.52 | 0.77 | 0.40 |
| 0.51 | 1.76 | 0.91 |
| #N/A | #N/A | #N/A |
| 0.85 | 0.81 | 0.44 |
| #N/A | 1.51 | 0.84 |
| 0.86 | 1.07 | 0.67 |
| 0.81 | #N/A | #N/A |
| 0.80 | 1.70 | 0.89 |
| #N/A | #N/A | #N/A |
| 0.05 | 0.63 | 0.27 |
| 0.49 | 1.36 | 0.79 |
| 0.46 | #N/A | #N/A |
| #N/A | #N/A | #N/A |
| #N/A | #N/A | #N/A |
| 0.96 | 0.69 | 0.31 |
| 0.89 | 0.93 | 0.45 |
| #N/A | #N/A | #N/A |
| 0.44 | 0.60 | 0.28 |
| #N/A | #N/A | #N/A |
| #N/A | #N/A | #N/A |
| 0.92 | 0.79 | 0.42 |
| 0.43 | 0.55 | 0.18 |

|      |      |      |
|------|------|------|
| #N/A | #N/A | #N/A |
| #N/A | #N/A | #N/A |
| #N/A | #N/A | #N/A |
| 0.89 | 0.94 | 0.52 |
| #N/A | #N/A | #N/A |
| #N/A | #N/A | #N/A |
| 0.36 | #N/A | #N/A |
| #N/A | 1.00 | 0.55 |
| #N/A | 0.44 | 0.12 |
| 0.23 | #N/A | #N/A |
| 0.65 | 1.04 | 0.63 |
| 0.66 | 0.64 | 0.27 |
| 0.62 | #N/A | #N/A |
| 0.65 | 1.04 | 0.60 |
| 0.24 | #N/A | #N/A |
| 0.83 | #N/A | #N/A |
| 0.42 | 0.57 | 0.20 |
| #N/A | #N/A | #N/A |
| 0.69 | 0.75 | 0.37 |
| 0.27 | 0.75 | 0.38 |
| 0.46 | 0.47 | 0.12 |
| 0.01 | 0.40 | 0.07 |
| 0.68 | #N/A | #N/A |
| 0.14 | #N/A | #N/A |
| 0.85 | #N/A | #N/A |
| 0.34 | #N/A | #N/A |
| 0.16 | 0.98 | 0.53 |
| 0.26 | #N/A | #N/A |
| 0.02 | 0.62 | 0.25 |
| #N/A | 0.85 | 0.49 |
| 0.35 | 0.96 | 0.45 |
| 0.36 | 0.75 | 0.38 |
| 0.42 | #N/A | #N/A |
| 0.89 | 0.62 | 0.27 |
| 0.48 | 1.60 | 0.63 |
| 0.58 | #N/A | #N/A |
| 0.02 | #N/A | #N/A |
| #N/A | #N/A | #N/A |
| 0.60 | 1.12 | 0.69 |
| 0.14 | 0.54 | 0.22 |
| 0.04 | 0.27 | 0.02 |
| 0.38 | #N/A | #N/A |
| 0.68 | 0.66 | 0.29 |
| 0.33 | 0.86 | 0.46 |
| 0.90 | #N/A | #N/A |
| #N/A | 0.90 | 0.53 |
| 0.70 | 0.79 | 0.43 |
| 0.48 | #N/A | #N/A |
| 0.23 | #N/A | #N/A |
| 0.51 | 1.02 | 0.56 |
| 0.11 | #N/A | #N/A |

|      |      |      |
|------|------|------|
| 0.45 | 0.65 | 0.34 |
| #N/A | #N/A | #N/A |
| 0.63 | #N/A | #N/A |
| #N/A | #N/A | #N/A |
| 0.90 | 0.81 | 0.44 |
| 0.67 | #N/A | #N/A |
| #N/A | #N/A | #N/A |
| 0.21 | #N/A | #N/A |
| 0.24 | 0.59 | 0.22 |
| 0.67 | #N/A | #N/A |
| 0.58 | 1.10 | 0.62 |
| #N/A | #N/A | #N/A |
| #N/A | #N/A | #N/A |
| 0.51 | 0.56 | 0.19 |
| #N/A | 1.41 | 0.79 |
| 0.45 | 0.66 | 0.29 |
| 0.20 | #N/A | #N/A |
| 0.52 | #N/A | #N/A |
| 0.29 | #N/A | #N/A |
| 0.39 | #N/A | #N/A |
| 0.63 | #N/A | #N/A |
| 0.01 | 0.70 | 0.33 |
| #N/A | 0.91 | 0.54 |
| 0.69 | #N/A | #N/A |
| #N/A | #N/A | #N/A |
| 0.29 | 1.29 | 0.78 |
| 0.56 | 0.75 | 0.37 |
| 0.27 | 0.81 | 0.44 |
| 0.02 | 0.88 | 0.46 |
| 0.44 | 0.98 | 0.59 |
| 0.32 | #N/A | #N/A |
| 0.55 | 0.76 | 0.39 |
| #N/A | 1.15 | 0.68 |
| #N/A | #N/A | #N/A |
| 0.12 | 0.49 | 0.12 |
| 0.04 | 0.41 | 0.10 |
| #N/A | #N/A | #N/A |
| 0.14 | 0.67 | 0.33 |
| 0.77 | 0.71 | 0.35 |
| #N/A | #N/A | #N/A |
| 0.57 | #N/A | #N/A |
| 0.66 | 1.75 | 0.68 |
| 0.57 | 0.69 | 0.32 |
| 0.32 | #N/A | #N/A |
| 0.44 | 0.48 | 0.11 |
| 0.37 | 0.41 | 0.07 |
| 0.38 | 1.10 | 0.57 |
| #N/A | 0.56 | 0.20 |
| 0.36 | #N/A | #N/A |
| 0.13 | 0.90 | 0.53 |
| #N/A | #N/A | #N/A |

|      |      |      |
|------|------|------|
| 0.58 | 0.79 | 0.42 |
| #N/A | #N/A | #N/A |
| 0.52 | #N/A | #N/A |
| #N/A | 0.92 | 0.55 |
| 0.15 | 1.52 | 0.85 |
| 0.40 | 0.48 | 0.12 |
| 0.55 | #N/A | #N/A |
| 0.26 | 1.14 | 0.68 |
| 0.19 | #N/A | #N/A |
| #N/A | #N/A | #N/A |
| 0.75 | 0.66 | 0.30 |
| 0.40 | 0.64 | 0.32 |
| 0.10 | #N/A | #N/A |
| #N/A | #N/A | #N/A |
| 0.52 | #N/A | #N/A |
| 0.29 | 0.76 | 0.38 |
| 0.69 | #N/A | #N/A |
| #N/A | 0.92 | 0.53 |
| #N/A | #N/A | #N/A |
| 0.48 | 1.36 | 0.74 |
| 0.24 | 1.36 | 0.80 |
| 0.51 | 1.04 | 0.57 |
| 0.96 | 1.14 | 0.71 |
| 0.21 | 0.86 | 0.49 |
| #N/A | 0.78 | 0.42 |
| 0.30 | 1.05 | 0.54 |
| 0.03 | #N/A | #N/A |
| 0.54 | 0.70 | 0.33 |
| 0.08 | 1.06 | 0.62 |
| 0.18 | 1.31 | 0.79 |
| 0.89 | #N/A | #N/A |
| 0.16 | 0.42 | 0.07 |
| 0.85 | 0.76 | 0.38 |
| 0.70 | #N/A | #N/A |
| #N/A | #N/A | #N/A |
| 0.67 | #N/A | #N/A |
| 0.77 | 0.72 | 0.35 |
| #N/A | #N/A | #N/A |
| 0.26 | 0.42 | 0.07 |
| #N/A | #N/A | #N/A |
| 0.90 | 0.90 | 0.52 |
| 0.20 | 0.74 | 0.38 |
| 0.44 | 1.39 | 0.82 |
| 0.75 | 1.15 | 0.68 |
| 0.46 | 1.93 | 0.93 |
| 0.71 | 1.12 | 0.70 |
| 0.08 | 0.30 | 0.03 |
| 0.39 | #N/A | #N/A |
| 0.38 | 0.59 | 0.22 |
| 0.62 | 0.54 | 0.18 |
| 0.66 | 0.87 | 0.49 |

|      |      |      |
|------|------|------|
| 0.16 | #N/A | #N/A |
| 0.42 | 0.73 | 0.37 |
| 0.69 | 1.19 | 0.63 |
| 0.36 | 0.89 | 0.51 |
| 0.81 | 0.74 | 0.37 |
| 0.82 | 0.81 | 0.44 |
| 0.59 | #N/A | #N/A |
| 0.69 | #N/A | #N/A |
| 0.83 | #N/A | #N/A |
| 0.77 | #N/A | #N/A |
| 0.49 | 0.60 | 0.23 |
| 0.44 | 0.88 | 0.51 |
| 0.28 | #N/A | #N/A |
| 0.57 | 0.87 | 0.50 |
| 0.44 | 0.90 | 0.53 |
| 0.38 | #N/A | #N/A |
| 0.41 | #N/A | #N/A |
| 0.46 | 0.58 | 0.21 |
| 0.56 | 0.75 | 0.38 |
| 0.40 | 0.54 | 0.23 |
| #N/A | #N/A | #N/A |
| 0.83 | 1.31 | 0.76 |
| #N/A | #N/A | #N/A |
| 0.73 | #N/A | #N/A |
| 0.72 | #N/A | #N/A |
| 0.53 | 0.50 | 0.13 |
| #N/A | 1.01 | 0.60 |
| 0.66 | 0.88 | 0.51 |
| 0.20 | 0.79 | 0.42 |
| 0.27 | 1.00 | 0.58 |
| 0.30 | 0.63 | 0.26 |
| 0.20 | 0.97 | 0.60 |
| 0.28 | 1.25 | 0.72 |
| 0.33 | #N/A | #N/A |
| 0.75 | 2.19 | 0.95 |
| 0.08 | 0.62 | 0.29 |
| 0.14 | 0.59 | 0.22 |
| 0.34 | #N/A | #N/A |
| #N/A | #N/A | #N/A |
| 0.57 | #N/A | #N/A |
| 0.99 | 6.05 | 1.00 |
| 0.88 | #N/A | #N/A |
| 0.97 | 1.64 | 0.85 |
| #N/A | 1.32 | 0.69 |
| 0.47 | #N/A | #N/A |
| #N/A | #N/A | #N/A |
| 0.78 | 1.93 | 0.92 |
| #N/A | #N/A | #N/A |
| 0.61 | 1.28 | 0.73 |
| 0.33 | 0.56 | 0.22 |
| #N/A | #N/A | #N/A |



|      |      |      |
|------|------|------|
| 0.44 | 1.43 | 0.81 |
| 0.80 | 0.87 | 0.47 |
| 0.90 | #N/A | #N/A |
| 0.95 | #N/A | #N/A |
| #N/A | #N/A | #N/A |
| 0.55 | 0.63 | 0.26 |
| 0.60 | 0.80 | 0.43 |
| 0.80 | 0.91 | 0.53 |
| 0.53 | #N/A | #N/A |
| 0.46 | 0.67 | 0.30 |
| 0.45 | 0.86 | 0.48 |
| 0.12 | 0.85 | 0.46 |
| #N/A | 0.54 | 0.18 |
| 0.32 | 0.67 | 0.32 |
| 0.16 | 0.79 | 0.43 |
| 0.51 | 0.70 | 0.32 |
| #N/A | 0.28 | 0.02 |
| 0.35 | 0.78 | 0.41 |
| #N/A | #N/A | #N/A |
| 0.95 | 0.63 | 0.27 |
| 0.34 | #N/A | #N/A |
| #N/A | 1.56 | 0.59 |
| 0.50 | 1.30 | 0.76 |
| 0.36 | #N/A | #N/A |
| #N/A | #N/A | #N/A |
| 0.82 | #N/A | #N/A |
| #N/A | 0.69 | 0.32 |
| 0.32 | 0.64 | 0.29 |
| 0.86 | 0.59 | 0.24 |
| 0.10 | #N/A | #N/A |
| #N/A | #N/A | #N/A |
| 0.31 | #N/A | #N/A |
| #N/A | 0.98 | 0.53 |
| 0.97 | #N/A | #N/A |
| 0.39 | 0.66 | 0.29 |
| 0.65 | 1.18 | 0.69 |
| 0.70 | 1.03 | 0.62 |
| 0.84 | 0.69 | 0.32 |
| #N/A | #N/A | #N/A |
| 0.55 | 0.54 | 0.16 |
| 0.33 | 0.65 | 0.28 |
| 0.43 | #N/A | #N/A |
| 0.21 | 0.58 | 0.26 |
| 0.11 | 1.43 | 0.82 |
| 0.48 | #N/A | #N/A |
| 0.56 | 0.85 | 0.46 |
| 0.39 | 0.87 | 0.45 |
| 0.67 | 1.29 | 0.74 |
| #N/A | #N/A | #N/A |
| 0.28 | 1.18 | 0.65 |
| 0.45 | 0.60 | 0.24 |

|      |      |      |
|------|------|------|
| #N/A | #N/A | #N/A |
| #N/A | #N/A | #N/A |
| 0.58 | 0.92 | 0.44 |
| 0.43 | #N/A | #N/A |
| 0.79 | #N/A | #N/A |
| 0.58 | #N/A | #N/A |
| #N/A | 0.49 | 0.13 |
| 0.54 | 0.57 | 0.19 |
| 0.41 | 0.75 | 0.38 |
| 0.55 | #N/A | #N/A |
| 0.59 | #N/A | #N/A |
| #N/A | #N/A | #N/A |
| 0.93 | 1.02 | 0.62 |
| #N/A | #N/A | #N/A |
| 0.02 | 0.35 | 0.06 |
| 0.68 | #N/A | #N/A |
| 0.31 | #N/A | #N/A |
| #N/A | #N/A | #N/A |
| #N/A | #N/A | #N/A |
| 0.88 | 1.50 | 0.85 |
| #N/A | #N/A | #N/A |
| #N/A | 1.05 | 0.65 |
| #N/A | #N/A | #N/A |
| #N/A | #N/A | #N/A |
| #N/A | 0.62 | 0.26 |
| #N/A | 0.58 | 0.20 |
| 0.26 | 0.90 | 0.51 |
| #N/A | 0.57 | 0.21 |
| #N/A | #N/A | #N/A |
| 0.61 | #N/A | #N/A |
| 0.44 | 1.25 | 0.76 |
| 0.10 | 0.77 | 0.40 |
| 0.00 | 0.35 | 0.07 |
| 0.80 | 1.42 | 0.80 |
| 0.67 | #N/A | #N/A |
| 0.68 | 1.04 | 0.65 |
| 0.19 | 0.66 | 0.35 |
| #N/A | #N/A | #N/A |
| 0.31 | #N/A | #N/A |
| 0.40 | 1.07 | 0.62 |
| 0.58 | 0.89 | 0.51 |
| 0.42 | 1.88 | 0.89 |
| 0.39 | 1.18 | 0.73 |
| 0.17 | 0.82 | 0.45 |
| #N/A | #N/A | #N/A |
| 0.18 | 1.25 | 0.74 |
| 0.09 | 1.29 | 0.78 |
| #N/A | #N/A | #N/A |
| 0.21 | #N/A | #N/A |
| 0.14 | #N/A | #N/A |
| 0.19 | #N/A | #N/A |

|      |      |      |
|------|------|------|
| 0.73 | 2.14 | 0.95 |
| 0.88 | 0.83 | 0.45 |
| #N/A | 1.95 | 0.93 |
| #N/A | #N/A | #N/A |
| #N/A | #N/A | #N/A |
| 0.59 | 4.94 | 0.97 |
| 0.38 | 0.53 | 0.22 |
| #N/A | #N/A | #N/A |
| 0.26 | #N/A | #N/A |
| 0.29 | 0.85 | 0.43 |
| #N/A | #N/A | #N/A |
| 0.31 | #N/A | #N/A |
| 0.65 | #N/A | #N/A |
| 0.86 | #N/A | #N/A |
| 0.90 | #N/A | #N/A |
| 0.63 | 0.88 | 0.45 |
| #N/A | #N/A | #N/A |
| 0.27 | #N/A | #N/A |
| 0.26 | 0.47 | 0.12 |
| 0.53 | 0.64 | 0.29 |
| #N/A | 0.93 | 0.56 |
| 0.27 | 0.70 | 0.35 |
| 0.33 | 0.83 | 0.45 |
| 0.29 | 0.71 | 0.34 |
| #N/A | #N/A | #N/A |
| #N/A | #N/A | #N/A |
| #N/A | #N/A | #N/A |
| #N/A | 1.65 | 0.85 |
| 0.35 | #N/A | #N/A |
| 0.63 | 1.10 | 0.68 |
| 0.78 | 1.46 | 0.81 |
| 0.32 | 0.92 | 0.54 |
| 0.34 | 0.64 | 0.28 |
| 0.43 | 0.55 | 0.19 |
| 0.32 | 0.57 | 0.20 |
| 0.95 | 1.24 | 0.56 |
| #N/A | #N/A | #N/A |
| #N/A | 0.99 | 0.61 |
| 0.79 | #N/A | #N/A |
| 0.62 | #N/A | #N/A |
| #N/A | #N/A | #N/A |
| 0.36 | 0.87 | 0.50 |
| #N/A | #N/A | #N/A |
| 0.61 | 1.55 | 0.86 |
| 0.37 | 0.98 | 0.54 |
| 0.58 | 0.74 | 0.37 |
| #N/A | #N/A | #N/A |
| 0.41 | #N/A | #N/A |
| 0.67 | 0.68 | 0.31 |
| 0.20 | #N/A | #N/A |
| 0.54 | #N/A | #N/A |

|      |      |      |
|------|------|------|
| 0.36 | 0.72 | 0.36 |
| 0.58 | 0.93 | 0.55 |
| 0.29 | 1.28 | 0.64 |
| 0.15 | 0.99 | 0.57 |
| 0.72 | 0.63 | 0.26 |
| 0.57 | #N/A | #N/A |
| 0.69 | 0.77 | 0.41 |
| 0.21 | #N/A | #N/A |
| 0.36 | 0.54 | 0.21 |
| 0.42 | #N/A | #N/A |
| 0.59 | 1.57 | 0.87 |
| 1.00 | 5.88 | 1.00 |
| 0.93 | 2.06 | 0.94 |
| #N/A | #N/A | #N/A |
| 0.92 | 1.73 | 0.90 |
| #N/A | #N/A | #N/A |
| 0.93 | 1.28 | 0.78 |
| 0.37 | 0.87 | 0.43 |
| #N/A | #N/A | #N/A |
| 0.48 | 0.90 | 0.49 |
| #N/A | #N/A | #N/A |
| 0.25 | 0.73 | 0.35 |
| #N/A | 1.55 | 0.75 |
| #N/A | #N/A | #N/A |
| 0.30 | #N/A | #N/A |
| #N/A | #N/A | #N/A |
| 0.23 | 1.33 | 0.79 |
| #N/A | #N/A | #N/A |
| #N/A | 0.42 | 0.11 |
| #N/A | #N/A | #N/A |
| 0.55 | 0.92 | 0.53 |
| 0.35 | 1.23 | 0.63 |
| 0.58 | #N/A | #N/A |
| 0.38 | 0.85 | 0.47 |
| 0.21 | 0.65 | 0.28 |
| #N/A | #N/A | #N/A |
| 0.79 | 1.51 | 0.61 |
| 0.95 | 1.96 | 0.93 |
| 0.53 | 1.31 | 0.71 |
| 0.69 | #N/A | #N/A |
| 0.83 | 0.73 | 0.36 |
| 0.04 | #N/A | #N/A |
| #N/A | #N/A | #N/A |
| #N/A | #N/A | #N/A |
| 0.10 | 0.43 | 0.08 |
| 0.62 | #N/A | #N/A |
| 0.64 | 1.02 | 0.63 |
| 0.66 | 0.89 | 0.53 |
| 0.43 | 0.92 | 0.49 |
| 0.26 | 0.75 | 0.39 |
| 0.34 | 0.91 | 0.53 |

|      |      |      |
|------|------|------|
| 0.58 | #N/A | #N/A |
| 0.52 | 1.56 | 0.86 |
| #N/A | #N/A | #N/A |
| 0.93 | 2.61 | 0.97 |
| 0.02 | 0.73 | 0.37 |
| 0.67 | 1.29 | 0.76 |
| 0.16 | 0.78 | 0.42 |
| 0.87 | 2.12 | 0.95 |
| #N/A | #N/A | #N/A |
| 0.17 | 0.56 | 0.22 |
| 0.29 | 0.93 | 0.56 |
| 0.79 | #N/A | #N/A |
| #N/A | #N/A | #N/A |
| 0.40 | 0.62 | 0.25 |
| 0.21 | 0.74 | 0.38 |
| 0.33 | 0.58 | 0.21 |
| #N/A | 1.09 | 0.52 |
| #N/A | #N/A | #N/A |
| 0.19 | 0.38 | 0.08 |
| 0.94 | #N/A | #N/A |
| #N/A | 2.06 | 0.92 |
| #N/A | #N/A | #N/A |
| #N/A | #N/A | #N/A |
| #N/A | #N/A | #N/A |
| #N/A | #N/A | #N/A |
| #N/A | 0.65 | 0.28 |
| #N/A | #N/A | #N/A |
| #N/A | #N/A | #N/A |
| #N/A | 0.92 | 0.55 |
| #N/A | 0.98 | 0.48 |
| #N/A | #N/A | #N/A |
| 0.41 | #N/A | #N/A |
| 0.67 | #N/A | #N/A |
| #N/A | #N/A | #N/A |
| #N/A | 0.83 | 0.47 |
| 0.26 | #N/A | #N/A |
| #N/A | #N/A | #N/A |
| 0.64 | 1.04 | 0.64 |
| #N/A | #N/A | #N/A |
| 0.30 | #N/A | #N/A |
| #N/A | 0.77 | 0.40 |
| 0.33 | #N/A | #N/A |
| 0.91 | #N/A | #N/A |
| 0.24 | 0.54 | 0.17 |
| 0.48 | #N/A | #N/A |
| 0.16 | #N/A | #N/A |
| 0.76 | 0.67 | 0.31 |
| 0.65 | #N/A | #N/A |
| 0.60 | #N/A | #N/A |
| 0.48 | 1.42 | 0.76 |
| 0.36 | 1.29 | 0.77 |

|      |      |      |
|------|------|------|
| 0.56 | 0.69 | 0.32 |
| 0.98 | 0.98 | 0.56 |
| #N/A | #N/A | #N/A |
| 0.67 | #N/A | #N/A |
| 0.26 | #N/A | #N/A |
| 0.77 | 0.68 | 0.31 |
| 0.41 | 0.67 | 0.31 |
| 0.51 | 0.50 | 0.16 |
| #N/A | #N/A | #N/A |
| 0.85 | 1.16 | 0.70 |
| 0.65 | 0.56 | 0.20 |
| 0.35 | 0.69 | 0.32 |
| 0.20 | 1.29 | 0.77 |
| 0.73 | #N/A | #N/A |
| 0.39 | 1.83 | 0.89 |
| #N/A | #N/A | #N/A |
| 0.71 | 1.15 | 0.56 |
| #N/A | 0.99 | 0.61 |
| 0.24 | #N/A | #N/A |
| 0.24 | 0.95 | 0.45 |
| 0.44 | #N/A | #N/A |
| #N/A | 1.10 | 0.61 |
| #N/A | 0.54 | 0.17 |
| 0.19 | 1.07 | 0.67 |
| 0.43 | 0.79 | 0.43 |
| 0.25 | 0.85 | 0.42 |
| #N/A | #N/A | #N/A |
| 0.38 | 0.76 | 0.40 |
| 0.53 | #N/A | #N/A |
| 0.33 | 0.86 | 0.43 |
| 0.13 | #N/A | #N/A |
| 0.21 | #N/A | #N/A |
| 0.27 | 1.75 | 0.90 |
| 0.62 | 1.78 | 0.90 |
| 0.03 | 0.72 | 0.35 |
| 0.33 | #N/A | #N/A |
| 0.16 | #N/A | #N/A |
| 0.64 | 1.25 | 0.77 |
| #N/A | 0.86 | 0.46 |
| 0.66 | 0.80 | 0.42 |
| 0.51 | #N/A | #N/A |
| 0.21 | 1.00 | 0.57 |
| 0.09 | 0.65 | 0.29 |
| 0.97 | #N/A | #N/A |
| 0.26 | #N/A | #N/A |
| #N/A | #N/A | #N/A |
| 0.27 | 0.78 | 0.40 |
| 0.55 | #N/A | #N/A |
| #N/A | #N/A | #N/A |
| 0.04 | 0.69 | 0.34 |
| #N/A | 1.73 | 0.88 |

|      |      |      |
|------|------|------|
| 0.70 | #N/A | #N/A |
| 0.40 | #N/A | #N/A |
| 0.59 | 1.25 | 0.76 |
| #N/A | 1.26 | 0.77 |
| #N/A | 1.11 | 0.69 |
| #N/A | 1.20 | 0.74 |
| #N/A | 1.28 | 0.78 |
| #N/A | 1.11 | 0.69 |
| 0.62 | 1.82 | 0.91 |
| #N/A | 1.07 | 0.66 |
| 0.57 | 1.68 | 0.89 |
| 0.74 | 4.60 | 0.99 |
| 0.80 | #N/A | #N/A |
| 0.33 | #N/A | #N/A |
| 0.77 | 0.93 | 0.49 |
| #N/A | #N/A | #N/A |
| 0.03 | #N/A | #N/A |
| #N/A | #N/A | #N/A |
| #N/A | #N/A | #N/A |
| #N/A | 0.98 | 0.60 |
| 0.52 | #N/A | #N/A |
| 0.32 | 1.27 | 0.77 |
| #N/A | #N/A | #N/A |
| #N/A | #N/A | #N/A |
| 0.38 | 0.53 | 0.16 |
| #N/A | #N/A | #N/A |
| 0.44 | 0.67 | 0.30 |
| 0.13 | #N/A | #N/A |
| 0.32 | 1.04 | 0.61 |
| 0.93 | 0.84 | 0.43 |
| #N/A | #N/A | #N/A |
| #N/A | #N/A | #N/A |
| #N/A | #N/A | #N/A |
| 0.58 | 0.76 | 0.39 |
| #N/A | 2.22 | 0.89 |
| 0.72 | 0.54 | 0.19 |
| 0.48 | 2.27 | 0.71 |
| #N/A | 0.62 | 0.26 |
| #N/A | 0.70 | 0.34 |
| 0.54 | #N/A | #N/A |
| 0.84 | 0.67 | 0.30 |
| 0.95 | 0.89 | 0.45 |
| #N/A | #N/A | #N/A |
| 0.81 | 0.74 | 0.37 |
| 0.92 | 1.00 | 0.56 |
| 0.17 | #N/A | #N/A |
| #N/A | #N/A | #N/A |
| 0.22 | #N/A | #N/A |
| 0.28 | #N/A | #N/A |
| 0.33 | #N/A | #N/A |
| 0.19 | 0.75 | 0.37 |

|      |      |      |
|------|------|------|
| 0.88 | 0.74 | 0.37 |
| 0.66 | 0.81 | 0.44 |
| 0.49 | 0.92 | 0.55 |
| 0.49 | #N/A | #N/A |
| 0.42 | 1.24 | 0.75 |
| 0.64 | 1.51 | 0.73 |
| #N/A | #N/A | #N/A |
| #N/A | #N/A | #N/A |
| 0.58 | #N/A | #N/A |
| 0.18 | 0.97 | 0.59 |
| 0.43 | 1.31 | 0.68 |
| 0.94 | 1.33 | 0.78 |
| 0.29 | #N/A | #N/A |
| 0.44 | 0.65 | 0.29 |
| #N/A | 0.94 | 0.56 |
| 0.32 | #N/A | #N/A |
| 0.51 | 0.63 | 0.26 |
| 0.38 | 0.81 | 0.45 |
| 0.42 | 0.50 | 0.13 |
| #N/A | #N/A | #N/A |
| #N/A | 0.85 | 0.46 |
| #N/A | #N/A | #N/A |
| 0.84 | #N/A | #N/A |
| #N/A | 1.42 | 0.83 |
| 0.45 | 0.72 | 0.34 |
| 0.06 | 0.29 | 0.02 |
| 0.75 | 1.42 | 0.83 |
| 0.54 | 0.87 | 0.47 |
| #N/A | 0.59 | 0.23 |
| #N/A | #N/A | #N/A |
| 0.69 | 0.50 | 0.13 |
| 0.17 | 0.67 | 0.30 |
| 0.73 | 1.21 | 0.65 |
| 0.42 | #N/A | #N/A |
| 0.77 | 0.82 | 0.45 |
| 0.44 | 0.88 | 0.51 |
| 0.83 | 0.32 | 0.04 |
| 0.68 | 0.85 | 0.44 |
| 0.19 | #N/A | #N/A |
| #N/A | 1.40 | 0.71 |
| 0.41 | #N/A | #N/A |
| 0.88 | #N/A | #N/A |
| 0.36 | #N/A | #N/A |
| #N/A | #N/A | #N/A |
| 0.26 | 0.75 | 0.38 |
| 0.58 | 0.65 | 0.29 |
| #N/A | #N/A | #N/A |
| 0.47 | #N/A | #N/A |
| #N/A | 1.49 | 0.78 |
| 0.18 | 0.46 | 0.10 |
| #N/A | #N/A | #N/A |



|      |      |      |
|------|------|------|
| #N/A | #N/A | #N/A |
| 0.37 | #N/A | #N/A |
| 0.48 | #N/A | #N/A |
| 0.62 | #N/A | #N/A |
| #N/A | 1.30 | 0.63 |
| 0.59 | 1.98 | 0.89 |
| 0.71 | #N/A | #N/A |
| #N/A | #N/A | #N/A |
| #N/A | #N/A | #N/A |
| 0.36 | #N/A | #N/A |
| 0.55 | 0.86 | 0.49 |
| 0.37 | #N/A | #N/A |
| 0.38 | 0.78 | 0.41 |
| 0.06 | 0.65 | 0.28 |
| 0.12 | 0.77 | 0.41 |
| 0.02 | #N/A | #N/A |
| 0.02 | #N/A | #N/A |
| #N/A | #N/A | #N/A |
| 0.63 | #N/A | #N/A |
| 0.24 | #N/A | #N/A |
| #N/A | #N/A | #N/A |
| #N/A | 0.52 | 0.16 |
| 0.44 | 0.74 | 0.37 |
| 0.75 | 0.97 | 0.59 |
| 0.23 | #N/A | #N/A |
| 0.23 | #N/A | #N/A |
| #N/A | #N/A | #N/A |
| 0.44 | #N/A | #N/A |
| 0.46 | #N/A | #N/A |
| #N/A | #N/A | #N/A |
| 0.10 | #N/A | #N/A |
| #N/A | #N/A | #N/A |
| #N/A | #N/A | #N/A |
| 0.72 | #N/A | #N/A |
| #N/A | #N/A | #N/A |
| 0.69 | 0.94 | 0.54 |
| 0.14 | 0.75 | 0.39 |
| 0.39 | 0.97 | 0.59 |
| 0.70 | #N/A | #N/A |
| 0.68 | #N/A | #N/A |
| #N/A | 0.73 | 0.37 |
| 0.32 | 0.82 | 0.42 |
| 0.76 | #N/A | #N/A |
| #N/A | #N/A | #N/A |
| 0.26 | 0.60 | 0.23 |
| #N/A | 1.43 | 0.82 |
| 0.19 | #N/A | #N/A |
| 0.44 | #N/A | #N/A |
| #N/A | #N/A | #N/A |
| 0.47 | 1.46 | 0.82 |
| 0.10 | 1.10 | 0.60 |

|      |      |      |
|------|------|------|
| 0.23 | 0.51 | 0.15 |
| #N/A | #N/A | #N/A |
| 0.68 | 0.58 | 0.21 |
| 0.52 | #N/A | #N/A |
| #N/A | #N/A | #N/A |
| 0.17 | 1.02 | 0.63 |
| 0.75 | 0.89 | 0.48 |
| 0.85 | 2.46 | 0.96 |
| 0.70 | #N/A | #N/A |
| 0.19 | 0.86 | 0.47 |
| 0.68 | 0.65 | 0.28 |
| 0.98 | 2.04 | 0.94 |
| #N/A | #N/A | #N/A |
| #N/A | #N/A | #N/A |
| 0.70 | 0.61 | 0.24 |
| 0.28 | 0.96 | 0.56 |
| #N/A | 0.80 | 0.41 |
| #N/A | #N/A | #N/A |
| #N/A | #N/A | #N/A |
| 0.80 | 0.91 | 0.53 |
| 0.49 | 0.74 | 0.38 |
| #N/A | #N/A | #N/A |
| #N/A | #N/A | #N/A |
| 0.51 | 0.54 | 0.17 |
| #N/A | #N/A | #N/A |
| #N/A | #N/A | #N/A |
| #N/A | #N/A | #N/A |
| #N/A | #N/A | #N/A |
| 0.89 | #N/A | #N/A |
| 0.98 | 1.07 | 0.62 |
| 0.63 | 0.72 | 0.36 |
| 0.74 | 0.97 | 0.48 |
| #N/A | #N/A | #N/A |
| 0.39 | 1.65 | 0.89 |
| 0.53 | 0.74 | 0.37 |
| #N/A | #N/A | #N/A |
| #N/A | #N/A | #N/A |
| #N/A | #N/A | #N/A |
| #N/A | #N/A | #N/A |
| 0.44 | 1.19 | 0.70 |
| 0.77 | 1.87 | 0.92 |
| #N/A | #N/A | #N/A |
| 0.78 | 1.13 | 0.67 |
| #N/A | #N/A | #N/A |
| #N/A | 1.81 | 0.83 |
| 0.88 | 2.24 | 0.95 |
| #N/A | #N/A | #N/A |
| 0.56 | #N/A | #N/A |
| 0.14 | #N/A | #N/A |
| 0.36 | 1.54 | 0.82 |
| 0.57 | #N/A | #N/A |

|      |      |      |
|------|------|------|
| #N/A | #N/A | #N/A |
| #N/A | #N/A | #N/A |
| 0.20 | #N/A | #N/A |
| #N/A | #N/A | #N/A |
| 0.21 | #N/A | #N/A |
| #N/A | #N/A | #N/A |
| 0.31 | #N/A | #N/A |
| 0.87 | 0.90 | 0.49 |
| #N/A | 1.07 | 0.63 |
| 0.85 | #N/A | #N/A |
| 0.49 | #N/A | #N/A |
| 0.47 | #N/A | #N/A |
| 0.45 | 0.79 | 0.42 |
| #N/A | 0.60 | 0.23 |
| 0.34 | #N/A | #N/A |
| #N/A | #N/A | #N/A |
| #N/A | 1.01 | 0.60 |
| 0.68 | 1.14 | 0.71 |
| 0.88 | #N/A | #N/A |
| 0.93 | 1.05 | 0.63 |
| #N/A | #N/A | #N/A |
| #N/A | #N/A | #N/A |
| 0.59 | #N/A | #N/A |
| 0.80 | 2.22 | 0.96 |
| 0.53 | 0.72 | 0.36 |
| #N/A | #N/A | #N/A |
| #N/A | 1.07 | 0.61 |
| #N/A | #N/A | #N/A |
| 0.75 | 1.26 | 0.77 |
| 0.90 | 1.08 | 0.60 |
| 0.42 | 0.60 | 0.23 |
| 0.48 | 1.34 | 0.74 |
| 0.30 | #N/A | #N/A |
| 0.54 | 0.99 | 0.57 |
| #N/A | #N/A | #N/A |
| #N/A | 0.85 | 0.46 |
| 0.39 | #N/A | #N/A |
| 0.55 | 0.63 | 0.28 |
| 0.36 | 1.59 | 0.87 |
| 1.00 | 5.91 | 1.00 |
| #N/A | 4.15 | 0.99 |
| #N/A | 3.92 | 0.99 |
| #N/A | #N/A | #N/A |
| #N/A | #N/A | #N/A |
| #N/A | #N/A | #N/A |
| 0.45 | #N/A | #N/A |
| 0.39 | #N/A | #N/A |
| #N/A | #N/A | #N/A |
| 0.58 | 1.84 | 0.92 |
| 0.45 | 1.19 | 0.57 |
| 0.57 | 0.91 | 0.54 |

|      |      |      |
|------|------|------|
| #N/A | #N/A | #N/A |
| #N/A | #N/A | #N/A |
| #N/A | #N/A | #N/A |
| 0.39 | 1.03 | 0.63 |
| 0.49 | 1.10 | 0.67 |
| #N/A | #N/A | #N/A |
| #N/A | 0.82 | 0.46 |
| #N/A | #N/A | #N/A |
| 0.61 | 0.89 | 0.51 |
| 0.68 | 1.01 | 0.59 |
| #N/A | 3.44 | 0.99 |
| 0.82 | 1.27 | 0.69 |
| 0.28 | #N/A | #N/A |
| 0.68 | 1.31 | 0.76 |
| #N/A | #N/A | #N/A |
| 0.60 | #N/A | #N/A |
| 0.24 | 1.20 | 0.73 |
| 0.70 | 0.96 | 0.59 |
| 0.87 | 0.85 | 0.49 |
| 0.69 | #N/A | #N/A |
| 0.54 | #N/A | #N/A |
| 0.18 | 0.56 | 0.20 |
| 0.77 | 0.60 | 0.23 |
| 0.79 | 0.47 | 0.11 |
| #N/A | #N/A | #N/A |
| #N/A | 0.70 | 0.33 |
| #N/A | 2.12 | 0.80 |
| #N/A | #N/A | #N/A |
| 0.42 | 0.61 | 0.24 |
| 0.50 | 1.02 | 0.63 |
| 0.45 | 1.07 | 0.66 |
| #N/A | #N/A | #N/A |
| 0.86 | 1.73 | 0.89 |
| 0.54 | 0.91 | 0.54 |
| 0.87 | 1.37 | 0.81 |
| 0.42 | 0.93 | 0.51 |
| 0.61 | 1.27 | 0.74 |
| 0.49 | #N/A | #N/A |
| 0.56 | 0.90 | 0.50 |
| 0.51 | #N/A | #N/A |
| #N/A | 1.01 | 0.62 |
| 0.21 | #N/A | #N/A |
| 0.42 | #N/A | #N/A |
| #N/A | 0.83 | 0.43 |
| 0.81 | 1.28 | 0.66 |
| #N/A | #N/A | #N/A |
| #N/A | 0.79 | 0.39 |
| #N/A | 2.95 | 0.98 |
| 0.32 | 0.72 | 0.35 |
| 0.51 | 1.05 | 0.56 |
| 0.78 | 0.41 | 0.07 |

|      |      |      |
|------|------|------|
| #N/A | #N/A | #N/A |
| 0.23 | 1.48 | 0.84 |
| 0.59 | 1.01 | 0.62 |
| 0.01 | 0.37 | 0.06 |
| 0.69 | 0.75 | 0.38 |
| #N/A | #N/A | #N/A |
| #N/A | #N/A | #N/A |
| 0.60 | #N/A | #N/A |
| #N/A | #N/A | #N/A |
| #N/A | 0.81 | 0.40 |
| #N/A | #N/A | #N/A |
| #N/A | #N/A | #N/A |
| 0.80 | 1.88 | 0.92 |
| #N/A | #N/A | #N/A |
| 0.38 | 0.72 | 0.36 |
| 0.23 | #N/A | #N/A |
| #N/A | #N/A | #N/A |
| #N/A | 0.71 | 0.35 |
| 0.87 | #N/A | #N/A |
| #N/A | #N/A | #N/A |
| 0.33 | #N/A | #N/A |
| 0.32 | #N/A | #N/A |
| 0.33 | #N/A | #N/A |
| 0.16 | 0.93 | 0.51 |
| 0.28 | 1.05 | 0.63 |
| #N/A | 0.68 | 0.32 |
| #N/A | #N/A | #N/A |
| #N/A | #N/A | #N/A |
| 0.18 | #N/A | #N/A |
| 0.84 | 0.80 | 0.43 |
| 0.88 | #N/A | #N/A |
| 0.70 | #N/A | #N/A |
| 0.22 | #N/A | #N/A |
| 0.81 | #N/A | #N/A |
| 0.43 | 0.76 | 0.39 |
| 0.50 | 0.46 | 0.10 |
| #N/A | #N/A | #N/A |
| 0.39 | 1.40 | 0.81 |
| 0.46 | #N/A | #N/A |
| 0.30 | #N/A | #N/A |
| 0.03 | #N/A | #N/A |
| 0.42 | 0.59 | 0.26 |
| 0.23 | 0.72 | 0.35 |
| 0.29 | 0.74 | 0.38 |
| #N/A | #N/A | #N/A |
| 0.25 | 0.47 | 0.11 |
| 0.74 | #N/A | #N/A |
| 0.54 | #N/A | #N/A |
| 0.82 | #N/A | #N/A |
| #N/A | #N/A | #N/A |
| #N/A | #N/A | #N/A |

|      |      |      |
|------|------|------|
| #N/A | 0.46 | 0.13 |
| 0.36 | 0.48 | 0.14 |
| #N/A | #N/A | #N/A |
| 0.12 | 0.84 | 0.44 |
| 0.58 | 0.65 | 0.28 |
| #N/A | 0.51 | 0.16 |
| #N/A | #N/A | #N/A |
| 0.64 | 1.11 | 0.68 |
| 0.48 | 0.89 | 0.52 |
| 0.32 | #N/A | #N/A |
| 0.18 | #N/A | #N/A |
| 0.53 | 1.56 | 0.86 |
| #N/A | 0.58 | 0.21 |
| 0.39 | 1.10 | 0.59 |
| 0.24 | 1.29 | 0.78 |
| #N/A | #N/A | #N/A |
| 0.29 | 0.63 | 0.26 |
| 0.33 | #N/A | #N/A |
| #N/A | 0.58 | 0.32 |
| #N/A | #N/A | #N/A |
| 0.15 | 0.46 | 0.13 |
| #N/A | 3.79 | 0.99 |
| 0.59 | 0.77 | 0.40 |
| #N/A | #N/A | #N/A |
| #N/A | #N/A | #N/A |
| 0.33 | 0.46 | 0.10 |
| 0.28 | 1.12 | 0.70 |
| 0.48 | 1.57 | 0.82 |
| #N/A | #N/A | #N/A |
| #N/A | #N/A | #N/A |
| 0.58 | #N/A | #N/A |
| 0.29 | #N/A | #N/A |
| #N/A | 1.43 | 0.72 |
| 0.45 | 0.89 | 0.52 |
| 0.15 | 0.94 | 0.46 |
| 0.30 | #N/A | #N/A |
| 0.01 | 0.41 | 0.08 |
| #N/A | 0.60 | 0.26 |
| #N/A | #N/A | #N/A |
| 0.83 | 1.94 | 0.93 |
| 0.98 | #N/A | #N/A |
| 0.31 | 1.17 | 0.69 |
| 0.30 | 1.16 | 0.72 |
| 0.03 | 0.45 | 0.09 |
| 0.14 | 0.60 | 0.23 |
| 0.71 | 0.97 | 0.57 |
| 0.39 | 1.13 | 0.51 |
| 0.29 | 1.09 | 0.68 |
| #N/A | 0.50 | 0.16 |
| 0.23 | #N/A | #N/A |
| #N/A | #N/A | #N/A |

|      |      |      |
|------|------|------|
| 0.07 | #N/A | #N/A |
| 0.74 | 0.75 | 0.39 |
| 0.54 | 0.97 | 0.57 |
| #N/A | #N/A | #N/A |
| 0.22 | 0.87 | 0.49 |
| #N/A | 0.78 | 0.39 |
| 0.21 | 0.95 | 0.58 |
| 0.82 | #N/A | #N/A |
| 0.30 | 0.86 | 0.46 |
| 0.37 | 0.50 | 0.13 |
| 0.56 | #N/A | #N/A |
| 0.58 | 0.90 | 0.52 |
| 0.48 | 0.89 | 0.52 |
| #N/A | #N/A | #N/A |
| 0.76 | #N/A | #N/A |
| 0.16 | #N/A | #N/A |
| 0.48 | 0.94 | 0.57 |
| 0.16 | #N/A | #N/A |
| #N/A | 3.19 | 0.98 |
| 0.90 | #N/A | #N/A |
| 0.47 | 0.98 | 0.60 |
| 0.44 | #N/A | #N/A |
| 0.71 | 0.99 | 0.58 |
| 0.79 | 1.55 | 0.84 |
| #N/A | #N/A | #N/A |
| #N/A | 1.18 | 0.69 |
| 0.50 | #N/A | #N/A |
| 0.98 | 2.01 | 0.93 |
| 0.50 | 1.74 | 0.83 |
| 0.86 | #N/A | #N/A |
| #N/A | #N/A | #N/A |
| 0.38 | 0.77 | 0.39 |
| 0.81 | 0.73 | 0.37 |
| 0.41 | 1.36 | 0.48 |
| 0.50 | #N/A | #N/A |
| #N/A | #N/A | #N/A |
| 0.61 | 0.90 | 0.53 |
| 0.41 | 0.59 | 0.25 |
| 0.42 | 0.56 | 0.22 |
| 0.86 | 1.51 | 0.84 |
| 0.27 | #N/A | #N/A |
| #N/A | 1.10 | 0.68 |
| #N/A | 0.87 | 0.50 |
| 0.44 | 0.73 | 0.37 |
| #N/A | 0.79 | 0.41 |
| 0.73 | #N/A | #N/A |
| 0.57 | #N/A | #N/A |
| 0.43 | 1.13 | 0.71 |
| #N/A | 1.69 | 0.87 |
| 0.75 | 0.57 | 0.20 |
| 0.23 | 0.83 | 0.46 |

|      |      |      |
|------|------|------|
| 0.51 | 1.22 | 0.74 |
| 0.10 | 0.43 | 0.11 |
| 0.27 | 1.83 | 0.60 |
| #N/A | #N/A | #N/A |
| 0.51 | #N/A | #N/A |
| 0.49 | #N/A | #N/A |
| #N/A | #N/A | #N/A |
| 0.55 | 0.64 | 0.27 |
| #N/A | 0.72 | 0.34 |
| 0.74 | #N/A | #N/A |
| 0.48 | 0.41 | 0.07 |
| 0.56 | 2.34 | 0.59 |
| 0.23 | #N/A | #N/A |
| #N/A | 0.56 | 0.21 |
| 0.05 | 0.69 | 0.35 |
| 0.47 | #N/A | #N/A |
| 0.27 | #N/A | #N/A |
| 0.37 | 0.95 | 0.52 |
| 0.06 | 1.46 | 0.51 |
| 0.57 | 1.47 | 0.77 |
| 0.46 | #N/A | #N/A |
| 0.31 | #N/A | #N/A |
| 0.24 | 0.77 | 0.40 |
| 0.85 | #N/A | #N/A |
| 0.44 | 0.51 | 0.18 |
| #N/A | 1.36 | 0.77 |
| #N/A | #N/A | #N/A |
| 0.41 | 0.88 | 0.51 |
| 0.73 | 0.70 | 0.33 |
| 0.53 | 0.49 | 0.16 |
| #N/A | #N/A | #N/A |
| 0.34 | 0.89 | 0.44 |
| #N/A | #N/A | #N/A |
| 0.70 | #N/A | #N/A |
| 0.55 | 0.63 | 0.28 |
| 0.27 | #N/A | #N/A |
| 0.48 | 0.61 | 0.24 |
| 0.39 | 0.62 | 0.25 |
| 0.79 | 0.67 | 0.31 |
| 0.30 | 0.88 | 0.48 |
| #N/A | 0.74 | 0.38 |
| #N/A | #N/A | #N/A |
| 0.67 | 0.64 | 0.27 |
| 0.52 | 1.21 | 0.70 |
| 0.98 | #N/A | #N/A |
| 0.42 | #N/A | #N/A |
| 0.07 | 0.97 | 0.59 |
| 0.37 | 1.48 | 0.81 |
| #N/A | #N/A | #N/A |
| #N/A | #N/A | #N/A |
| #N/A | #N/A | #N/A |



|      |      |      |
|------|------|------|
| 0.05 | 0.60 | 0.24 |
| #N/A | #N/A | #N/A |
| 0.37 | 0.57 | 0.20 |
| 0.45 | 0.75 | 0.37 |
| 0.18 | 1.01 | 0.63 |
| #N/A | #N/A | #N/A |
| 0.93 | 2.49 | 0.97 |
| 0.85 | 1.86 | 0.91 |
| 0.07 | 0.70 | 0.33 |
| 0.35 | 0.77 | 0.39 |
| 0.20 | 0.99 | 0.59 |
| 0.50 | 0.50 | 0.18 |
| #N/A | #N/A | #N/A |
| 0.18 | #N/A | #N/A |
| 0.81 | 1.56 | 0.83 |
| 0.53 | #N/A | #N/A |
| 0.89 | 0.62 | 0.25 |
| 0.62 | 0.54 | 0.16 |
| 0.24 | 0.68 | 0.32 |
| #N/A | #N/A | #N/A |
| 0.27 | #N/A | #N/A |
| #N/A | 2.10 | 0.67 |
| 0.76 | 0.91 | 0.43 |
| #N/A | #N/A | #N/A |
| 0.15 | 1.06 | 0.65 |
| 0.16 | #N/A | #N/A |
| #N/A | 1.18 | 0.69 |
| 0.39 | 0.68 | 0.31 |
| #N/A | 1.06 | 0.66 |
| 0.80 | #N/A | #N/A |
| 0.49 | 0.70 | 0.33 |
| 0.29 | 0.95 | 0.53 |
| 0.07 | 0.56 | 0.19 |
| 0.09 | 0.63 | 0.27 |
| 0.44 | #N/A | #N/A |
| #N/A | 0.70 | 0.33 |
| 0.62 | 0.68 | 0.31 |
| 0.26 | 0.59 | 0.26 |
| 0.48 | #N/A | #N/A |
| 0.11 | 0.89 | 0.50 |
| #N/A | #N/A | #N/A |
| 0.67 | #N/A | #N/A |
| 0.52 | 0.75 | 0.37 |
| 0.76 | 1.33 | 0.77 |
| 0.56 | #N/A | #N/A |
| 0.79 | #N/A | #N/A |
| #N/A | 1.70 | 0.77 |
| #N/A | #N/A | #N/A |
| 0.12 | 0.80 | 0.44 |
| 0.80 | 0.76 | 0.39 |
| #N/A | #N/A | #N/A |

|      |      |      |
|------|------|------|
| 0.41 | #N/A | #N/A |
| 0.18 | 0.86 | 0.46 |
| 0.62 | 0.90 | 0.52 |
| 0.74 | 0.87 | 0.50 |
| 0.09 | 0.45 | 0.14 |
| 0.91 | 1.70 | 0.89 |
| 0.76 | #N/A | #N/A |
| 0.71 | 0.57 | 0.22 |
| 0.75 | 0.63 | 0.27 |
| 0.41 | 0.48 | 0.12 |
| 0.41 | 0.60 | 0.24 |
| 0.33 | 0.93 | 0.53 |
| 0.77 | 0.60 | 0.23 |
| 0.95 | 0.55 | 0.19 |
| 0.50 | 1.34 | 0.80 |
| 0.41 | 1.79 | 0.88 |
| 0.12 | 0.78 | 0.40 |
| #N/A | 0.65 | 0.28 |
| 0.54 | #N/A | #N/A |
| #N/A | #N/A | #N/A |
| #N/A | #N/A | #N/A |
| #N/A | 0.69 | 0.31 |
| 0.43 | 0.51 | 0.14 |
| 0.44 | 0.80 | 0.41 |
| 0.35 | #N/A | #N/A |
| 0.67 | 0.55 | 0.19 |
| 0.39 | 1.14 | 0.69 |
| 0.42 | #N/A | #N/A |
| #N/A | #N/A | #N/A |
| 0.13 | 0.50 | 0.15 |
| 0.29 | 0.64 | 0.27 |
| 0.66 | #N/A | #N/A |
| #N/A | #N/A | #N/A |
| 0.47 | 0.74 | 0.38 |
| 0.12 | 0.90 | 0.50 |
| 0.52 | 0.86 | 0.48 |
| #N/A | #N/A | #N/A |
| 0.33 | #N/A | #N/A |
| 0.11 | #N/A | #N/A |
| 0.76 | 1.09 | 0.60 |
| 0.62 | 0.97 | 0.57 |
| #N/A | 0.82 | 0.45 |
| #N/A | #N/A | #N/A |
| 0.62 | #N/A | #N/A |
| 0.49 | #N/A | #N/A |
| #N/A | 0.89 | 0.45 |
| 0.85 | #N/A | #N/A |
| 0.34 | #N/A | #N/A |
| 0.44 | #N/A | #N/A |
| #N/A | 1.41 | 0.81 |
| 0.58 | 0.89 | 0.52 |

|      |      |      |
|------|------|------|
| 0.61 | #N/A | #N/A |
| 0.79 | 1.89 | 0.92 |
| 0.27 | #N/A | #N/A |
| 0.08 | 0.95 | 0.53 |
| 0.16 | 0.42 | 0.09 |
| 0.78 | 1.55 | 0.86 |
| 0.20 | #N/A | #N/A |
| 0.48 | 1.68 | 0.89 |
| 0.37 | 0.93 | 0.54 |
| 0.44 | 1.24 | 0.75 |
| 0.17 | 0.55 | 0.17 |
| #N/A | #N/A | #N/A |
| 0.40 | 1.48 | 0.80 |
| 0.15 | 0.80 | 0.43 |
| 0.76 | 0.78 | 0.39 |
| 0.62 | 1.15 | 0.66 |
| 0.63 | #N/A | #N/A |
| 0.65 | 0.60 | 0.23 |
| 0.71 | 0.98 | 0.46 |
| 0.35 | #N/A | #N/A |
| 0.59 | 0.66 | 0.29 |
| 0.48 | 0.57 | 0.27 |
| 0.04 | 0.50 | 0.17 |
| 0.69 | 1.22 | 0.74 |
| 0.58 | 1.19 | 0.73 |
| 0.43 | 0.61 | 0.24 |
| #N/A | #N/A | #N/A |
| 0.56 | 0.76 | 0.39 |
| 0.70 | #N/A | #N/A |
| 0.17 | #N/A | #N/A |
| 0.44 | 0.57 | 0.20 |
| #N/A | 1.23 | 0.58 |
| 0.73 | 0.70 | 0.33 |
| #N/A | 0.75 | 0.37 |
| 0.32 | 0.99 | 0.56 |
| #N/A | 1.30 | 0.77 |
| 0.04 | #N/A | #N/A |
| 0.32 | #N/A | #N/A |
| 0.27 | #N/A | #N/A |
| 0.53 | 0.54 | 0.22 |
| 0.20 | #N/A | #N/A |
| 0.58 | 1.11 | 0.67 |
| #N/A | #N/A | #N/A |
| 0.48 | 0.64 | 0.27 |
| 0.30 | 0.49 | 0.13 |
| 0.47 | #N/A | #N/A |
| 0.08 | 0.53 | 0.15 |
| 0.61 | #N/A | #N/A |
| #N/A | #N/A | #N/A |
| 0.57 | #N/A | #N/A |
| #N/A | #N/A | #N/A |

|      |      |      |
|------|------|------|
| 0.72 | 0.82 | 0.46 |
| #N/A | 0.99 | 0.53 |
| #N/A | 1.54 | 0.74 |
| #N/A | #N/A | #N/A |
| 0.64 | 0.75 | 0.39 |
| 0.30 | #N/A | #N/A |
| 0.92 | 0.96 | 0.57 |
| 0.72 | #N/A | #N/A |
| #N/A | #N/A | #N/A |
| 0.19 | 0.66 | 0.29 |
| 0.31 | 0.53 | 0.16 |
| #N/A | #N/A | #N/A |
| 0.83 | 1.18 | 0.71 |
| 0.79 | #N/A | #N/A |
| 0.94 | 1.09 | 0.68 |
| 0.59 | 0.95 | 0.58 |
| #N/A | #N/A | #N/A |
| 0.75 | 0.86 | 0.50 |
| 0.44 | 1.38 | 0.56 |
| 0.15 | 1.08 | 0.64 |
| 0.09 | 0.74 | 0.36 |
| 0.12 | 1.02 | 0.57 |
| 0.49 | 0.69 | 0.33 |
| 0.23 | 1.13 | 0.67 |
| 0.39 | 0.96 | 0.58 |
| #N/A | 0.87 | 0.50 |
| 0.51 | #N/A | #N/A |
| 0.38 | 1.04 | 0.64 |
| 0.49 | 2.09 | 0.94 |
| 0.73 | 1.86 | 0.92 |
| 0.99 | 5.81 | 1.00 |
| #N/A | #N/A | #N/A |
| #N/A | #N/A | #N/A |
| 0.25 | 1.52 | 0.69 |
| 0.71 | #N/A | #N/A |
| 0.71 | 0.85 | 0.47 |
| #N/A | 1.30 | 0.66 |
| #N/A | #N/A | #N/A |
| 0.27 | 0.72 | 0.35 |
| #N/A | 0.96 | 0.57 |
| #N/A | #N/A | #N/A |
| 0.51 | 3.71 | 0.99 |
| 0.27 | #N/A | #N/A |
| #N/A | 1.08 | 0.68 |
| 0.51 | 1.30 | 0.51 |
| 0.76 | #N/A | #N/A |
| 0.18 | #N/A | #N/A |
| 0.40 | 0.88 | 0.51 |
| 0.43 | 0.64 | 0.29 |
| 0.26 | 1.25 | 0.62 |
| 0.57 | 0.84 | 0.46 |

|      |      |      |
|------|------|------|
| #N/A | 1.03 | 0.58 |
| 0.23 | 1.02 | 0.62 |
| 0.33 | 0.66 | 0.34 |
| 0.61 | 1.16 | 0.71 |
| 0.20 | 0.95 | 0.55 |
| 0.57 | 0.71 | 0.34 |
| #N/A | 1.07 | 0.67 |
| 0.23 | 0.48 | 0.14 |
| #N/A | #N/A | #N/A |
| 0.59 | 0.82 | 0.46 |
| 0.95 | 2.28 | 0.96 |
| 0.11 | 1.32 | 0.76 |
| 0.36 | 0.51 | 0.14 |
| 0.56 | 0.52 | 0.16 |
| #N/A | #N/A | #N/A |
| 0.11 | #N/A | #N/A |
| 0.61 | #N/A | #N/A |
| 0.34 | 0.74 | 0.38 |
| 0.20 | 1.02 | 0.60 |
| 0.72 | 1.03 | 0.58 |
| #N/A | #N/A | #N/A |
| 0.21 | 0.52 | 0.19 |
| 0.21 | 1.20 | 0.51 |
| 0.24 | #N/A | #N/A |
| #N/A | #N/A | #N/A |
| 0.44 | 0.82 | 0.45 |
| #N/A | 1.01 | 0.63 |
| 0.46 | 1.23 | 0.74 |
| 0.70 | #N/A | #N/A |
| 0.65 | 0.85 | 0.48 |
| 0.60 | 0.66 | 0.29 |
| #N/A | 0.60 | 0.23 |
| 0.86 | 0.85 | 0.47 |
| #N/A | #N/A | #N/A |
| #N/A | #N/A | #N/A |
| 0.50 | #N/A | #N/A |
| 0.40 | 0.84 | 0.48 |
| #N/A | 1.01 | 0.62 |
| 0.69 | 1.05 | 0.54 |
| 0.17 | 1.59 | 0.87 |
| 0.37 | 0.69 | 0.32 |
| 0.78 | 0.95 | 0.57 |
| 0.24 | #N/A | #N/A |
| 0.48 | #N/A | #N/A |
| #N/A | 0.89 | 0.49 |
| #N/A | #N/A | #N/A |
| 0.01 | #N/A | #N/A |
| 0.84 | 2.15 | 0.91 |
| 0.45 | 1.12 | 0.70 |
| 0.70 | 1.93 | 0.93 |
| 0.67 | #N/A | #N/A |

|      |      |      |
|------|------|------|
| 0.84 | 1.36 | 0.64 |
| 0.59 | #N/A | #N/A |
| 0.53 | #N/A | #N/A |
| 0.58 | #N/A | #N/A |
| #N/A | #N/A | #N/A |
| 0.61 | #N/A | #N/A |
| 0.64 | 0.93 | 0.55 |
| 0.50 | 1.06 | 0.66 |
| 0.19 | 0.88 | 0.47 |
| 0.66 | 0.91 | 0.53 |
| 0.71 | #N/A | #N/A |
| 0.63 | 1.98 | 0.87 |
| 0.25 | 0.43 | 0.10 |
| 0.88 | 0.80 | 0.43 |
| #N/A | 0.50 | 0.17 |
| 0.53 | 0.57 | 0.21 |
| 0.74 | 0.92 | 0.55 |
| 0.29 | 0.90 | 0.51 |
| 0.18 | 0.49 | 0.12 |
| 0.42 | #N/A | #N/A |
| 0.58 | 0.81 | 0.44 |
| 0.72 | 1.04 | 0.64 |
| 0.86 | 1.17 | 0.71 |
| 0.11 | 0.32 | 0.03 |
| 0.47 | 0.68 | 0.31 |
| 0.21 | 0.55 | 0.24 |
| 0.29 | #N/A | #N/A |
| 0.75 | 2.36 | 0.52 |
| #N/A | #N/A | #N/A |
| 0.18 | 0.56 | 0.18 |
| 0.69 | 1.23 | 0.72 |
| 0.34 | #N/A | #N/A |
| 0.45 | 0.45 | 0.14 |
| 0.48 | 0.49 | 0.12 |
| 0.47 | 1.14 | 0.61 |
| 0.88 | 0.89 | 0.51 |
| 0.58 | #N/A | #N/A |
| 0.05 | 0.92 | 0.52 |
| 0.99 | 0.68 | 0.33 |
| 0.43 | 0.69 | 0.32 |
| #N/A | #N/A | #N/A |
| 0.69 | 0.83 | 0.44 |
| #N/A | #N/A | #N/A |
| 0.58 | 0.98 | 0.59 |
| 0.24 | 0.71 | 0.34 |
| 0.29 | 1.10 | 0.69 |
| 0.24 | 1.08 | 0.55 |
| 0.46 | 1.09 | 0.57 |
| 0.62 | 0.50 | 0.13 |
| 0.78 | #N/A | #N/A |
| 0.37 | 0.58 | 0.21 |

|      |      |      |
|------|------|------|
| 0.44 | 2.35 | 0.92 |
| 0.55 | 0.64 | 0.28 |
| 0.85 | #N/A | #N/A |
| 0.62 | 0.87 | 0.48 |
| 0.14 | #N/A | #N/A |
| 0.84 | 1.04 | 0.65 |
| 0.48 | 0.70 | 0.33 |
| 0.56 | #N/A | #N/A |
| 0.78 | 1.02 | 0.63 |
| 0.05 | 0.62 | 0.25 |
| 0.77 | #N/A | #N/A |
| #N/A | 0.48 | 0.14 |
| 0.10 | 0.51 | 0.15 |
| 0.52 | 1.13 | 0.68 |
| 0.40 | 0.64 | 0.29 |
| 0.47 | 0.54 | 0.16 |
| 0.45 | #N/A | #N/A |
| 0.32 | 0.90 | 0.50 |
| 0.16 | #N/A | #N/A |
| 0.82 | 0.55 | 0.20 |
| #N/A | #N/A | #N/A |
| 0.78 | 0.57 | 0.19 |
| 0.85 | 1.02 | 0.63 |
| #N/A | 1.33 | 0.70 |
| 0.30 | 1.02 | 0.60 |
| #N/A | #N/A | #N/A |
| 0.51 | #N/A | #N/A |
| 0.89 | 1.26 | 0.68 |
| 0.66 | 1.53 | 0.85 |
| 0.76 | 1.24 | 0.76 |
| 0.50 | 1.25 | 0.74 |
| 0.78 | #N/A | #N/A |
| 0.57 | 0.68 | 0.32 |
| 0.52 | 0.63 | 0.27 |
| 0.29 | #N/A | #N/A |
| 0.27 | 1.09 | 0.67 |
| 0.38 | #N/A | #N/A |
| 0.50 | #N/A | #N/A |
| 0.09 | 0.69 | 0.33 |
| 0.10 | 0.45 | 0.09 |
| 0.18 | #N/A | #N/A |
| 0.66 | 0.85 | 0.47 |
| 0.95 | #N/A | #N/A |
| 0.38 | 0.66 | 0.29 |
| #N/A | #N/A | #N/A |
| 0.83 | 0.58 | 0.20 |
| 0.63 | 0.64 | 0.28 |
| 0.64 | #N/A | #N/A |
| #N/A | 0.78 | 0.41 |
| 0.32 | #N/A | #N/A |
| 0.29 | 0.83 | 0.46 |

|      |      |      |
|------|------|------|
| 0.24 | #N/A | #N/A |
| 0.07 | 0.56 | 0.19 |
| 0.36 | 0.85 | 0.46 |
| 0.12 | 0.75 | 0.38 |
| 0.19 | 0.82 | 0.42 |
| 0.30 | 0.61 | 0.24 |
| #N/A | 1.24 | 0.68 |
| 0.92 | 0.97 | 0.59 |
| 0.42 | #N/A | #N/A |
| 0.40 | 0.48 | 0.12 |
| 0.07 | 1.00 | 0.61 |
| #N/A | 0.57 | 0.22 |
| 0.37 | 0.71 | 0.34 |
| #N/A | #N/A | #N/A |
| 0.89 | 1.31 | 0.68 |
| 0.76 | #N/A | #N/A |
| 0.45 | 0.72 | 0.35 |
| #N/A | 0.57 | 0.20 |
| 0.27 | #N/A | #N/A |
| 0.76 | #N/A | #N/A |
| 0.74 | #N/A | #N/A |
| 0.50 | #N/A | #N/A |
| 0.59 | 0.58 | 0.21 |
| 0.75 | 1.57 | 0.79 |
| #N/A | 0.78 | 0.41 |
| 0.33 | 0.81 | 0.41 |
| #N/A | #N/A | #N/A |
| 0.16 | 0.41 | 0.07 |
| 0.91 | 1.71 | 0.89 |
| 0.78 | 0.96 | 0.52 |
| 0.50 | 0.43 | 0.09 |
| 0.26 | #N/A | #N/A |
| #N/A | #N/A | #N/A |
| 0.60 | #N/A | #N/A |
| #N/A | 0.64 | 0.27 |
| 0.13 | 0.85 | 0.47 |
| 0.69 | 1.45 | 0.82 |
| 0.53 | 0.72 | 0.35 |
| 0.26 | 0.90 | 0.52 |
| 0.22 | 0.41 | 0.07 |
| 0.54 | 1.25 | 0.75 |
| 0.48 | 1.13 | 0.69 |
| 0.39 | 0.79 | 0.42 |
| 0.53 | #N/A | #N/A |
| 0.57 | #N/A | #N/A |
| 0.36 | #N/A | #N/A |
| 0.40 | #N/A | #N/A |
| 0.78 | 1.08 | 0.53 |
| 0.96 | 1.07 | 0.67 |
| #N/A | 0.69 | 0.33 |
| 0.54 | #N/A | #N/A |



|      |      |      |
|------|------|------|
| 0.09 | 1.09 | 0.68 |
| 0.83 | 0.97 | 0.59 |
| #N/A | 1.30 | 0.73 |
| 0.39 | #N/A | #N/A |
| 0.59 | #N/A | #N/A |
| #N/A | 1.20 | 0.71 |
| 0.13 | #N/A | #N/A |
| 0.43 | #N/A | #N/A |
| 0.34 | 0.84 | 0.46 |
| #N/A | #N/A | #N/A |
| 0.26 | #N/A | #N/A |
| #N/A | #N/A | #N/A |
| 0.86 | 0.57 | 0.19 |
| 0.66 | 0.83 | 0.44 |
| 0.57 | 1.07 | 0.67 |
| 0.53 | 0.64 | 0.29 |
| 0.70 | 1.22 | 0.66 |
| 0.17 | 0.40 | 0.06 |
| 0.71 | 0.64 | 0.27 |
| 0.36 | 0.48 | 0.12 |
| #N/A | #N/A | #N/A |
| 0.42 | 0.80 | 0.40 |
| #N/A | #N/A | #N/A |
| 0.25 | 0.93 | 0.52 |
| 0.19 | 0.79 | 0.41 |
| 0.31 | #N/A | #N/A |
| #N/A | 0.82 | 0.46 |
| #N/A | 0.90 | 0.46 |
| 0.16 | 0.95 | 0.58 |
| 0.92 | 1.51 | 0.84 |
| #N/A | #N/A | #N/A |
| 0.42 | #N/A | #N/A |
| 0.64 | 0.69 | 0.31 |
| 0.92 | 1.79 | 0.91 |
| 0.99 | 1.69 | 0.86 |
| 0.45 | 0.96 | 0.53 |
| 0.35 | 0.75 | 0.36 |
| 0.14 | 0.87 | 0.49 |
| 0.57 | #N/A | #N/A |
| 0.46 | 0.35 | 0.04 |
| 0.49 | 0.94 | 0.57 |
| 0.68 | #N/A | #N/A |
| #N/A | #N/A | #N/A |
| 0.39 | 0.63 | 0.26 |
| 0.64 | 1.10 | 0.66 |
| 0.93 | 2.26 | 0.96 |
| #N/A | #N/A | #N/A |
| 0.39 | 0.69 | 0.32 |
| #N/A | #N/A | #N/A |
| 0.95 | 0.88 | 0.50 |
| #N/A | #N/A | #N/A |

|      |      |      |
|------|------|------|
| 0.75 | 0.80 | 0.44 |
| 0.79 | #N/A | #N/A |
| #N/A | 0.66 | 0.31 |
| #N/A | #N/A | #N/A |
| #N/A | #N/A | #N/A |
| #N/A | 0.80 | 0.40 |
| #N/A | #N/A | #N/A |
| 0.34 | 0.71 | 0.33 |
| #N/A | #N/A | #N/A |
| 0.73 | 0.55 | 0.18 |
| 0.77 | 0.66 | 0.30 |
| #N/A | #N/A | #N/A |
| 0.69 | 1.29 | 0.70 |
| 0.51 | #N/A | #N/A |
| #N/A | #N/A | #N/A |
| 0.12 | 0.96 | 0.56 |
| 0.45 | #N/A | #N/A |
| 0.76 | #N/A | #N/A |
| 0.29 | 0.94 | 0.56 |
| 0.30 | 0.75 | 0.39 |
| 0.42 | 0.52 | 0.15 |
| 0.39 | 0.68 | 0.31 |
| #N/A | 0.64 | 0.28 |
| 0.26 | 1.09 | 0.62 |
| #N/A | 5.14 | 1.00 |
| #N/A | #N/A | #N/A |
| #N/A | 4.38 | 0.99 |
| 0.66 | 1.18 | 0.73 |
| 0.76 | 0.93 | 0.56 |
| #N/A | 1.15 | 0.69 |
| #N/A | #N/A | #N/A |
| 0.86 | 0.83 | 0.47 |
| 0.58 | 0.80 | 0.43 |
| 0.45 | 1.11 | 0.69 |
| 0.38 | 1.64 | 0.85 |
| 0.55 | #N/A | #N/A |
| 0.50 | #N/A | #N/A |
| #N/A | #N/A | #N/A |
| 0.41 | 0.96 | 0.52 |
| 0.52 | #N/A | #N/A |
| #N/A | 0.99 | 0.53 |
| 0.17 | #N/A | #N/A |
| #N/A | #N/A | #N/A |
| 0.01 | 0.38 | 0.05 |
| 0.43 | 0.48 | 0.12 |
| #N/A | #N/A | #N/A |
| 0.29 | 0.54 | 0.18 |
| 0.23 | 0.67 | 0.30 |
| 0.41 | 0.62 | 0.25 |
| #N/A | #N/A | #N/A |
| 0.11 | 1.09 | 0.64 |

|      |      |      |
|------|------|------|
| 0.63 | 1.13 | 0.62 |
| 0.75 | #N/A | #N/A |
| 0.56 | #N/A | #N/A |
| 0.31 | 0.69 | 0.33 |
| 0.58 | #N/A | #N/A |
| 0.02 | 0.43 | 0.10 |
| #N/A | #N/A | #N/A |
| 0.11 | #N/A | #N/A |
| 0.46 | #N/A | #N/A |
| 0.90 | 0.75 | 0.38 |
| 0.74 | 0.80 | 0.43 |
| #N/A | #N/A | #N/A |
| 0.33 | 1.49 | 0.68 |
| 0.51 | 0.85 | 0.48 |
| 0.45 | 0.73 | 0.36 |
| 0.93 | #N/A | #N/A |
| 0.73 | 0.75 | 0.39 |
| #N/A | #N/A | #N/A |
| 0.18 | 0.44 | 0.12 |
| #N/A | #N/A | #N/A |
| 0.59 | 0.73 | 0.37 |
| 0.35 | #N/A | #N/A |
| #N/A | #N/A | #N/A |
| 0.97 | 0.43 | 0.12 |
| 0.95 | 0.94 | 0.57 |
| 0.58 | 1.53 | 0.77 |
| 0.63 | 1.01 | 0.60 |
| 0.66 | #N/A | #N/A |
| 0.75 | 1.24 | 0.76 |
| 0.51 | 1.17 | 0.62 |
| 0.24 | #N/A | #N/A |
| 0.37 | 0.96 | 0.58 |
| 0.68 | 0.76 | 0.40 |
| 0.71 | 1.07 | 0.67 |
| 0.39 | 0.80 | 0.41 |
| 0.62 | 0.41 | 0.08 |
| 0.69 | 0.63 | 0.26 |
| 0.34 | 0.98 | 0.60 |
| 0.49 | 0.52 | 0.19 |
| 0.54 | 0.51 | 0.14 |
| 0.33 | 1.09 | 0.68 |
| 0.04 | 0.98 | 0.57 |
| 0.18 | 0.57 | 0.20 |
| 0.28 | 0.56 | 0.22 |
| 0.39 | 1.21 | 0.73 |
| #N/A | 0.92 | 0.55 |
| #N/A | #N/A | #N/A |
| 0.27 | 1.01 | 0.56 |
| 0.44 | 0.62 | 0.25 |
| 0.16 | 0.70 | 0.33 |
| 0.41 | 0.55 | 0.18 |

|      |      |      |
|------|------|------|
| 0.26 | 1.01 | 0.61 |
| 0.62 | 0.86 | 0.44 |
| 0.65 | 1.73 | 0.90 |
| 1.00 | 6.08 | 1.00 |
| 0.65 | #N/A | #N/A |
| 0.49 | #N/A | #N/A |
| 0.89 | 2.07 | 0.94 |
| #N/A | #N/A | #N/A |
| 0.64 | 0.99 | 0.59 |
| 0.34 | 0.76 | 0.40 |
| #N/A | 1.20 | 0.63 |
| 0.69 | 1.09 | 0.67 |
| 0.15 | 1.29 | 0.78 |
| 0.60 | 1.08 | 0.63 |
| 0.58 | 0.92 | 0.54 |
| 0.50 | 0.48 | 0.15 |
| #N/A | #N/A | #N/A |
| 0.88 | 1.03 | 0.61 |
| 0.42 | 0.81 | 0.45 |
| #N/A | 2.27 | 0.90 |
| #N/A | 1.81 | 0.84 |
| 0.19 | 0.61 | 0.25 |
| 0.40 | 0.46 | 0.10 |
| 0.67 | 1.05 | 0.63 |
| 0.38 | 0.66 | 0.30 |
| #N/A | 0.80 | 0.44 |
| #N/A | #N/A | #N/A |
| 0.15 | 0.49 | 0.12 |
| 0.64 | 1.08 | 0.66 |
| 0.09 | 0.60 | 0.23 |
| 0.25 | #N/A | #N/A |
| 0.05 | 0.91 | 0.49 |
| 0.96 | 1.30 | 0.77 |
| 0.95 | 0.52 | 0.16 |
| 0.33 | 0.71 | 0.34 |
| 0.34 | #N/A | #N/A |
| 0.13 | 1.41 | 0.82 |
| 0.48 | 0.50 | 0.13 |
| #N/A | #N/A | #N/A |
| 0.26 | 0.50 | 0.15 |
| #N/A | #N/A | #N/A |
| 0.64 | 1.18 | 0.64 |
| 0.62 | 0.63 | 0.26 |
| 0.33 | 1.19 | 0.74 |
| 0.75 | 1.16 | 0.72 |
| 0.47 | #N/A | #N/A |
| 0.26 | 0.44 | 0.08 |
| #N/A | #N/A | #N/A |
| 0.17 | 0.57 | 0.25 |
| 0.17 | 0.73 | 0.37 |
| #N/A | 0.69 | 0.32 |

|      |      |      |
|------|------|------|
| 0.84 | #N/A | #N/A |
| 0.83 | 0.60 | 0.24 |
| 0.28 | 0.78 | 0.40 |
| 0.33 | 0.67 | 0.31 |
| 0.23 | #N/A | #N/A |
| 0.80 | 0.66 | 0.29 |
| #N/A | #N/A | #N/A |
| 0.41 | #N/A | #N/A |
| 0.34 | 0.89 | 0.51 |
| 0.15 | 0.73 | 0.37 |
| 0.36 | 0.53 | 0.16 |
| 0.42 | 1.25 | 0.76 |
| 0.98 | 0.67 | 0.32 |
| 0.44 | 1.06 | 0.52 |
| 0.28 | #N/A | #N/A |
| 0.67 | 0.71 | 0.35 |
| 0.18 | 0.79 | 0.42 |
| 0.73 | 0.49 | 0.13 |
| #N/A | 0.52 | 0.15 |
| #N/A | #N/A | #N/A |
| #N/A | #N/A | #N/A |
| #N/A | #N/A | #N/A |
| #N/A | 0.48 | 0.12 |
| 0.89 | 0.54 | 0.19 |
| 0.56 | 1.16 | 0.56 |
| #N/A | #N/A | #N/A |
| 0.96 | #N/A | #N/A |
| 0.63 | #N/A | #N/A |
| 0.48 | #N/A | #N/A |
| 0.44 | 0.90 | 0.49 |
| 0.29 | 0.50 | 0.13 |
| 0.27 | 0.81 | 0.40 |
| 0.59 | #N/A | #N/A |
| 0.18 | 0.71 | 0.35 |
| 0.28 | #N/A | #N/A |
| 0.10 | 0.92 | 0.54 |
| 0.63 | 1.16 | 0.72 |
| 0.73 | 1.27 | 0.55 |
| #N/A | #N/A | #N/A |
| #N/A | #N/A | #N/A |
| #N/A | #N/A | #N/A |
| 0.55 | 0.63 | 0.27 |
| 0.16 | #N/A | #N/A |
| 0.58 | #N/A | #N/A |
| 0.78 | 0.50 | 0.15 |
| 0.47 | #N/A | #N/A |
| 0.73 | 0.62 | 0.30 |
| 0.21 | #N/A | #N/A |
| 0.33 | 0.54 | 0.18 |
| 0.26 | #N/A | #N/A |
| #N/A | #N/A | #N/A |

|      |      |      |
|------|------|------|
| 0.38 | #N/A | #N/A |
| 0.16 | #N/A | #N/A |
| 0.12 | 0.95 | 0.47 |
| 0.23 | #N/A | #N/A |
| 0.01 | 0.61 | 0.25 |
| 0.08 | 0.88 | 0.49 |
| #N/A | #N/A | #N/A |
| #N/A | #N/A | #N/A |
| 0.18 | 0.78 | 0.41 |
| #N/A | #N/A | #N/A |
| 0.53 | #N/A | #N/A |
| 0.77 | #N/A | #N/A |
| 0.78 | 1.51 | 0.84 |
| 0.50 | 1.15 | 0.70 |
| 0.79 | 2.38 | 0.96 |
| 0.96 | 2.27 | 0.95 |
| 0.52 | #N/A | #N/A |
| #N/A | #N/A | #N/A |
| 0.19 | 1.15 | 0.68 |
| #N/A | #N/A | #N/A |
| 0.15 | 1.11 | 0.59 |
| 0.81 | 1.54 | 0.86 |
| 0.83 | 1.85 | 0.91 |
| #N/A | 1.67 | 0.73 |
| 0.59 | 0.68 | 0.32 |
| 0.36 | 0.81 | 0.42 |
| 0.17 | 0.65 | 0.28 |
| #N/A | 0.83 | 0.45 |
| #N/A | #N/A | #N/A |
| 0.07 | 0.51 | 0.14 |
| 0.43 | #N/A | #N/A |
| 0.60 | 1.23 | 0.75 |
| 0.78 | 0.72 | 0.36 |
| 0.31 | 1.28 | 0.54 |
| #N/A | #N/A | #N/A |
| #N/A | 0.97 | 0.59 |
| 0.82 | 0.51 | 0.20 |
| #N/A | 1.66 | 0.82 |
| #N/A | #N/A | #N/A |
| #N/A | #N/A | #N/A |
| 0.80 | #N/A | #N/A |
| #N/A | #N/A | #N/A |
| #N/A | #N/A | #N/A |
| 0.70 | 0.72 | 0.36 |
| 0.41 | 1.13 | 0.70 |
| 0.38 | 0.63 | 0.29 |
| 0.23 | 1.29 | 0.63 |
| 0.52 | 1.89 | 0.92 |
| 0.44 | 1.23 | 0.76 |
| 0.10 | 0.60 | 0.22 |
| 0.04 | 0.50 | 0.14 |

|      |      |      |
|------|------|------|
| 0.23 | 1.03 | 0.60 |
| 0.39 | 1.15 | 0.68 |
| 0.06 | 1.33 | 0.79 |
| 0.59 | 0.69 | 0.33 |
| 0.55 | 1.01 | 0.59 |
| 0.13 | 0.96 | 0.56 |
| 0.46 | 0.95 | 0.56 |
| 0.97 | 4.08 | 0.99 |
| 0.24 | 0.81 | 0.44 |
| 0.55 | #N/A | #N/A |
| 0.75 | 2.94 | 0.98 |
| 0.39 | 1.42 | 0.78 |
| 0.22 | 1.05 | 0.64 |
| 0.87 | 1.42 | 0.82 |
| #N/A | #N/A | #N/A |
| #N/A | 0.85 | 0.47 |
| 0.18 | 0.79 | 0.42 |
| 0.36 | 0.92 | 0.54 |
| #N/A | 1.12 | 0.65 |
| 0.09 | 1.10 | 0.68 |
| 0.41 | 0.77 | 0.39 |
| #N/A | 1.12 | 0.67 |
| 0.40 | 1.79 | 0.90 |
| 0.53 | 0.99 | 0.61 |
| #N/A | 0.91 | 0.54 |
| #N/A | 0.74 | 0.37 |
| 0.47 | #N/A | #N/A |
| #N/A | 1.39 | 0.82 |
| 0.46 | 0.45 | 0.10 |
| 0.48 | 0.67 | 0.30 |
| #N/A | 1.72 | 0.85 |
| 0.48 | 0.97 | 0.55 |
| #N/A | #N/A | #N/A |
| 0.55 | 0.75 | 0.38 |
| 0.46 | 0.92 | 0.49 |
| 0.31 | 0.45 | 0.09 |
| 0.60 | 0.95 | 0.50 |
| 0.56 | 0.73 | 0.36 |
| 0.82 | 1.49 | 0.81 |
| 0.40 | 0.79 | 0.41 |
| 0.50 | 0.92 | 0.55 |
| 0.44 | 0.62 | 0.29 |
| #N/A | #N/A | #N/A |
| 0.85 | #N/A | #N/A |
| 0.79 | 0.84 | 0.46 |
| 0.23 | #N/A | #N/A |
| #N/A | #N/A | #N/A |
| #N/A | 0.70 | 0.33 |
| 0.07 | 0.51 | 0.14 |
| 0.39 | 0.99 | 0.58 |
| 0.35 | 0.77 | 0.40 |

|      |      |      |
|------|------|------|
| 0.46 | 0.53 | 0.19 |
| 0.10 | 0.52 | 0.15 |
| 0.30 | 1.78 | 0.57 |
| 0.16 | 0.97 | 0.49 |
| 0.51 | 0.66 | 0.29 |
| 0.21 | 0.46 | 0.11 |
| #N/A | #N/A | #N/A |
| 0.48 | #N/A | #N/A |
| 0.66 | #N/A | #N/A |
| 0.78 | 1.28 | 0.78 |
| 0.96 | 1.21 | 0.75 |
| 0.47 | 0.84 | 0.47 |
| 0.65 | 0.37 | 0.06 |
| 0.39 | 1.14 | 0.69 |
| 0.24 | 0.39 | 0.07 |
| 0.08 | 0.76 | 0.39 |
| 0.79 | #N/A | #N/A |
| 0.13 | 0.58 | 0.21 |
| 0.16 | 0.61 | 0.29 |
| #N/A | 1.39 | 0.81 |
| 0.24 | 0.63 | 0.26 |
| 0.26 | 1.04 | 0.65 |
| 0.46 | 0.57 | 0.25 |
| 0.15 | #N/A | #N/A |
| 0.28 | 0.86 | 0.48 |
| #N/A | #N/A | #N/A |
| 0.34 | 0.63 | 0.25 |
| 0.39 | 0.78 | 0.41 |
| #N/A | 0.58 | 0.20 |
| 0.42 | 0.97 | 0.52 |
| #N/A | #N/A | #N/A |
| 0.48 | 0.65 | 0.28 |
| 0.24 | 0.93 | 0.56 |
| #N/A | #N/A | #N/A |
| 0.38 | 0.79 | 0.42 |
| #N/A | #N/A | #N/A |
| 0.66 | 0.84 | 0.47 |
| #N/A | #N/A | #N/A |
| 0.30 | #N/A | #N/A |
| 0.34 | 0.87 | 0.47 |
| #N/A | #N/A | #N/A |
| #N/A | #N/A | #N/A |
| 0.18 | 0.58 | 0.23 |
| 0.70 | 0.85 | 0.49 |
| #N/A | #N/A | #N/A |
| 0.81 | 0.84 | 0.45 |
| 0.31 | #N/A | #N/A |
| 0.78 | 0.56 | 0.19 |
| 0.59 | 0.43 | 0.09 |
| #N/A | 0.91 | 0.51 |
| 0.52 | 1.32 | 0.78 |



|      |      |      |
|------|------|------|
| #N/A | #N/A | #N/A |
| #N/A | #N/A | #N/A |
| 0.56 | 0.53 | 0.16 |
| 0.38 | 0.71 | 0.35 |
| 0.20 | 1.23 | 0.74 |
| 0.48 | 0.74 | 0.38 |
| 0.72 | 1.08 | 0.65 |
| 0.51 | 0.86 | 0.45 |
| 0.57 | 0.55 | 0.18 |
| #N/A | #N/A | #N/A |
| 0.89 | 0.75 | 0.37 |
| 0.59 | #N/A | #N/A |
| 0.08 | #N/A | #N/A |
| 0.34 | #N/A | #N/A |
| 0.42 | 0.97 | 0.59 |
| 0.30 | 0.79 | 0.41 |
| #N/A | #N/A | #N/A |
| 0.19 | 0.93 | 0.49 |
| #N/A | #N/A | #N/A |
| 0.16 | #N/A | #N/A |
| 0.66 | 0.81 | 0.41 |
| 0.57 | 0.67 | 0.31 |
| 0.17 | 0.58 | 0.21 |
| 0.64 | 1.09 | 0.65 |
| 0.63 | #N/A | #N/A |
| 0.48 | 0.19 | 0.01 |
| 0.11 | 1.22 | 0.75 |
| 0.47 | 0.71 | 0.36 |
| 0.67 | 0.76 | 0.39 |
| 0.25 | #N/A | #N/A |
| 0.78 | 0.73 | 0.35 |
| #N/A | 1.08 | 0.67 |
| 0.28 | 0.80 | 0.40 |
| 0.75 | 0.67 | 0.30 |
| 0.40 | 0.36 | 0.07 |
| #N/A | #N/A | #N/A |
| 0.72 | 0.80 | 0.44 |
| 0.91 | #N/A | #N/A |
| 0.70 | 1.70 | 0.84 |
| 0.89 | 0.90 | 0.52 |
| 0.28 | 0.54 | 0.16 |
| 0.54 | #N/A | #N/A |
| #N/A | 1.53 | 0.78 |
| #N/A | #N/A | #N/A |
| 0.79 | 0.85 | 0.48 |
| 0.64 | 0.99 | 0.49 |
| 0.95 | 0.62 | 0.25 |
| #N/A | #N/A | #N/A |
| 0.71 | 1.69 | 0.88 |
| #N/A | #N/A | #N/A |
| 0.16 | 0.78 | 0.42 |

|      |      |      |
|------|------|------|
| 0.56 | 0.82 | 0.44 |
| 0.07 | 1.20 | 0.58 |
| 0.59 | #N/A | #N/A |
| #N/A | #N/A | #N/A |
| 0.92 | 0.81 | 0.44 |
| 0.41 | 0.98 | 0.60 |
| 0.61 | 0.82 | 0.45 |
| 0.31 | 0.95 | 0.57 |
| #N/A | 1.07 | 0.67 |
| #N/A | 1.43 | 0.83 |
| 0.47 | 0.78 | 0.42 |
| #N/A | 1.22 | 0.74 |
| 0.09 | 0.90 | 0.49 |
| 0.40 | 0.86 | 0.50 |
| 0.44 | #N/A | #N/A |
| 0.57 | #N/A | #N/A |
| 0.47 | 1.13 | 0.68 |
| #N/A | #N/A | #N/A |
| #N/A | #N/A | #N/A |
| 0.40 | 0.84 | 0.47 |
| 0.47 | #N/A | #N/A |
| 0.06 | #N/A | #N/A |
| 0.17 | 0.68 | 0.35 |
| 0.29 | 0.42 | 0.11 |
| 0.30 | 1.17 | 0.70 |
| 0.42 | #N/A | #N/A |
| 0.24 | 0.63 | 0.26 |
| 0.55 | 0.85 | 0.48 |
| #N/A | #N/A | #N/A |
| 1.00 | 1.27 | 0.77 |
| 0.38 | 0.76 | 0.38 |
| 0.75 | 1.48 | 0.55 |
| #N/A | #N/A | #N/A |
| 0.77 | 0.77 | 0.40 |
| 0.50 | 0.81 | 0.40 |
| 0.84 | 1.98 | 0.93 |
| 0.59 | 0.72 | 0.35 |
| 0.67 | 1.73 | 0.66 |
| 0.86 | 0.58 | 0.22 |
| 0.13 | 1.85 | 0.90 |
| 0.87 | 0.53 | 0.16 |
| #N/A | 1.84 | 0.88 |
| #N/A | 0.43 | 0.08 |
| 0.55 | 0.70 | 0.34 |
| 0.42 | #N/A | #N/A |
| 0.25 | 0.46 | 0.10 |
| 0.20 | 1.03 | 0.64 |
| #N/A | #N/A | #N/A |
| 0.14 | #N/A | #N/A |
| 0.21 | #N/A | #N/A |
| 0.53 | 1.15 | 0.65 |

|      |      |      |
|------|------|------|
| 0.86 | 1.34 | 0.80 |
| 0.91 | 1.50 | 0.71 |
| 0.85 | #N/A | #N/A |
| #N/A | #N/A | #N/A |
| 0.68 | 0.87 | 0.49 |
| #N/A | #N/A | #N/A |
| 0.55 | 0.74 | 0.37 |
| 0.10 | 0.81 | 0.42 |
| 0.79 | 1.08 | 0.67 |
| 0.60 | 1.50 | 0.75 |
| 0.63 | 1.05 | 0.57 |
| #N/A | #N/A | #N/A |
| 0.94 | 2.28 | 0.96 |
| 0.97 | 2.98 | 0.98 |
| 0.72 | #N/A | #N/A |
| #N/A | #N/A | #N/A |
| 0.67 | 0.92 | 0.55 |
| 0.49 | 2.06 | 0.90 |
| #N/A | #N/A | #N/A |
| 0.24 | 0.64 | 0.27 |
| 0.82 | #N/A | #N/A |
| 0.56 | 0.97 | 0.60 |
| 0.34 | 0.79 | 0.43 |
| 0.91 | 0.91 | 0.54 |
| #N/A | 1.07 | 0.66 |
| 0.41 | 0.94 | 0.50 |
| 0.69 | 0.54 | 0.17 |
| #N/A | #N/A | #N/A |
| #N/A | #N/A | #N/A |
| 0.84 | 0.91 | 0.54 |
| #N/A | #N/A | #N/A |
| 0.41 | #N/A | #N/A |
| 0.61 | #N/A | #N/A |
| #N/A | #N/A | #N/A |
| 0.75 | 0.81 | 0.40 |
| 0.16 | 0.37 | 0.05 |
| 0.66 | #N/A | #N/A |
| 0.53 | #N/A | #N/A |
| #N/A | #N/A | #N/A |
| 0.49 | 0.81 | 0.43 |
| 0.12 | 0.31 | 0.03 |
| #N/A | #N/A | #N/A |
| 0.63 | #N/A | #N/A |
| 0.74 | 0.57 | 0.22 |
| 0.21 | 1.32 | 0.78 |
| 0.22 | #N/A | #N/A |
| #N/A | 0.58 | 0.21 |
| 0.68 | #N/A | #N/A |
| 0.92 | 1.86 | 0.89 |
| 0.74 | 0.88 | 0.50 |
| 0.53 | 0.84 | 0.46 |

|      |      |      |
|------|------|------|
| 0.42 | 1.04 | 0.65 |
| 0.61 | #N/A | #N/A |
| 0.50 | 1.22 | 0.75 |
| 0.42 | #N/A | #N/A |
| 0.08 | #N/A | #N/A |
| 0.27 | 0.51 | 0.16 |
| #N/A | #N/A | #N/A |
| 0.49 | 0.73 | 0.36 |
| #N/A | #N/A | #N/A |
| 0.80 | 2.04 | 0.93 |
| 0.57 | 0.72 | 0.35 |
| 0.56 | 0.75 | 0.39 |
| 0.17 | 1.33 | 0.75 |
| #N/A | #N/A | #N/A |
| 0.64 | 1.08 | 0.59 |
| #N/A | #N/A | #N/A |
| 0.78 | 0.59 | 0.23 |
| 0.21 | 0.76 | 0.39 |
| 0.18 | 0.46 | 0.10 |
| 0.63 | 0.74 | 0.37 |
| 0.44 | 0.74 | 0.38 |
| #N/A | #N/A | #N/A |
| 0.32 | 0.73 | 0.35 |
| 0.45 | #N/A | #N/A |
| 0.48 | 1.46 | 0.82 |
| 0.76 | 1.64 | 0.88 |
| 0.61 | 1.13 | 0.68 |
| 0.48 | #N/A | #N/A |
| 0.08 | 1.15 | 0.72 |
| 0.26 | 1.85 | 0.88 |
| 0.19 | 0.62 | 0.26 |
| 0.03 | 0.39 | 0.06 |
| 0.19 | 2.25 | 0.95 |
| 0.41 | 0.38 | 0.10 |
| 0.48 | 0.76 | 0.39 |
| #N/A | #N/A | #N/A |
| 0.92 | 1.27 | 0.75 |
| 0.79 | 1.76 | 0.91 |
| 0.71 | #N/A | #N/A |
| 0.81 | 0.72 | 0.35 |
| 0.26 | 0.63 | 0.28 |
| 0.17 | 0.64 | 0.27 |
| 0.61 | 1.09 | 0.67 |
| 0.87 | 0.64 | 0.28 |
| 0.56 | #N/A | #N/A |
| #N/A | 1.62 | 0.84 |
| 0.52 | 0.55 | 0.20 |
| 0.19 | 0.94 | 0.56 |
| 0.41 | 0.64 | 0.29 |
| 0.37 | 0.65 | 0.28 |
| 0.27 | 0.90 | 0.47 |

|      |      |      |
|------|------|------|
| 0.46 | 1.14 | 0.68 |
| 0.34 | 2.10 | 0.95 |
| 0.08 | 0.73 | 0.36 |
| 0.47 | 1.02 | 0.60 |
| 0.16 | #N/A | #N/A |
| #N/A | #N/A | #N/A |
| 0.07 | #N/A | #N/A |
| 0.21 | 0.60 | 0.23 |
| 0.07 | #N/A | #N/A |
| 0.24 | 0.65 | 0.28 |
| #N/A | 0.78 | 0.41 |
| 0.48 | 0.83 | 0.44 |
| 0.34 | 1.38 | 0.81 |
| 0.49 | 0.88 | 0.51 |
| #N/A | #N/A | #N/A |
| 0.64 | 0.77 | 0.41 |
| #N/A | #N/A | #N/A |
| #N/A | #N/A | #N/A |
| 0.34 | 1.15 | 0.56 |
| 0.43 | #N/A | #N/A |
| 0.31 | 0.65 | 0.29 |
| #N/A | #N/A | #N/A |
| #N/A | 0.92 | 0.52 |
| 0.69 | #N/A | #N/A |
| 0.62 | 0.90 | 0.46 |
| 0.51 | 1.07 | 0.62 |
| 0.67 | 1.04 | 0.63 |
| 0.58 | 0.86 | 0.47 |
| #N/A | #N/A | #N/A |
| 0.31 | 0.58 | 0.25 |
| 0.54 | 0.65 | 0.28 |
| 0.58 | 0.74 | 0.38 |
| 0.28 | 0.75 | 0.38 |
| 0.23 | #N/A | #N/A |
| 0.26 | 0.96 | 0.55 |
| 0.45 | 1.61 | 0.87 |
| 0.18 | #N/A | #N/A |
| 0.49 | 0.59 | 0.22 |
| #N/A | 0.90 | 0.53 |
| 0.11 | 0.71 | 0.34 |
| 0.24 | 0.86 | 0.48 |
| 0.32 | 0.60 | 0.23 |
| 0.37 | 0.80 | 0.44 |
| #N/A | 0.93 | 0.56 |
| 0.22 | 0.94 | 0.54 |
| 0.13 | 0.84 | 0.48 |
| 0.56 | 1.15 | 0.71 |
| 0.51 | 1.13 | 0.70 |
| 0.55 | 1.99 | 0.93 |
| #N/A | #N/A | #N/A |
| #N/A | #N/A | #N/A |

|      |      |      |
|------|------|------|
| #N/A | 1.07 | 0.61 |
| 0.21 | 0.53 | 0.17 |
| 0.12 | #N/A | #N/A |
| 0.33 | 0.50 | 0.15 |
| 0.99 | 1.49 | 0.85 |
| #N/A | #N/A | #N/A |
| #N/A | #N/A | #N/A |
| #N/A | #N/A | #N/A |
| 0.78 | 1.45 | 0.78 |
| 0.81 | 0.99 | 0.59 |
| 0.32 | 1.18 | 0.73 |
| 0.63 | 1.35 | 0.80 |
| 0.14 | 0.53 | 0.16 |
| 0.63 | #N/A | #N/A |
| #N/A | #N/A | #N/A |
| 0.47 | 0.68 | 0.31 |
| 0.38 | 0.97 | 0.58 |
| 0.80 | 0.47 | 0.13 |
| #N/A | #N/A | #N/A |
| 0.59 | 0.72 | 0.35 |
| 0.40 | 0.94 | 0.56 |
| 0.11 | 0.56 | 0.24 |
| 0.52 | 0.65 | 0.31 |
| 0.52 | 0.76 | 0.39 |
| #N/A | 0.73 | 0.37 |
| 0.24 | 0.92 | 0.45 |
| 0.57 | #N/A | #N/A |
| 0.11 | 0.61 | 0.23 |
| 0.54 | 0.59 | 0.22 |
| 0.04 | 0.45 | 0.15 |
| 0.12 | #N/A | #N/A |
| 0.36 | #N/A | #N/A |
| 0.38 | 0.65 | 0.28 |
| 0.15 | 1.09 | 0.65 |
| 0.44 | 0.62 | 0.27 |
| #N/A | #N/A | #N/A |
| 0.64 | #N/A | #N/A |
| 0.53 | 0.55 | 0.18 |
| 0.56 | #N/A | #N/A |
| 0.49 | 0.75 | 0.39 |
| 0.28 | 0.48 | 0.11 |
| 0.27 | 0.46 | 0.10 |
| 0.35 | 2.32 | 0.92 |
| 0.22 | #N/A | #N/A |
| 0.02 | #N/A | #N/A |
| 0.51 | 0.76 | 0.39 |
| #N/A | #N/A | #N/A |
| 0.50 | #N/A | #N/A |
| 0.34 | 0.69 | 0.33 |
| 0.29 | 0.78 | 0.41 |
| 0.25 | #N/A | #N/A |

|      |      |      |
|------|------|------|
| 0.28 | 0.47 | 0.12 |
| 0.02 | 0.33 | 0.04 |
| 0.14 | 0.84 | 0.48 |
| #N/A | #N/A | #N/A |
| 0.53 | 1.71 | 0.86 |
| 0.23 | #N/A | #N/A |
| 0.05 | 0.67 | 0.30 |
| 0.17 | 0.67 | 0.33 |
| 0.34 | 0.67 | 0.31 |
| 0.49 | 0.50 | 0.13 |
| #N/A | #N/A | #N/A |
| #N/A | 0.91 | 0.44 |
| 0.41 | 1.03 | 0.63 |
| 0.28 | 0.53 | 0.22 |
| 0.13 | 0.99 | 0.57 |
| 0.16 | 0.81 | 0.44 |
| 0.15 | 1.23 | 0.70 |
| #N/A | 0.48 | 0.12 |
| 0.57 | 1.11 | 0.59 |
| 0.87 | 2.95 | 0.98 |
| #N/A | 2.22 | 0.92 |
| 0.42 | 0.84 | 0.46 |
| 0.24 | 0.73 | 0.36 |
| #N/A | #N/A | #N/A |
| 0.34 | 0.96 | 0.57 |
| 0.49 | 0.89 | 0.52 |
| 0.38 | 1.20 | 0.65 |
| 0.27 | #N/A | #N/A |
| #N/A | 1.78 | 0.91 |
| 0.26 | 0.93 | 0.56 |
| 0.36 | 1.03 | 0.64 |
| 0.39 | 0.59 | 0.21 |
| 0.24 | 1.18 | 0.67 |
| 0.61 | #N/A | #N/A |
| 0.69 | 0.61 | 0.24 |
| 0.55 | #N/A | #N/A |
| 0.32 | 0.98 | 0.60 |
| 0.63 | #N/A | #N/A |
| #N/A | #N/A | #N/A |
| 0.79 | 1.34 | 0.67 |
| 0.38 | 0.88 | 0.49 |
| #N/A | 0.82 | 0.44 |
| 0.34 | 0.83 | 0.47 |
| 0.23 | #N/A | #N/A |
| #N/A | #N/A | #N/A |
| #N/A | #N/A | #N/A |
| 0.69 | 0.57 | 0.20 |
| 0.29 | #N/A | #N/A |
| #N/A | #N/A | #N/A |
| 0.79 | 1.25 | 0.75 |
| 0.33 | 0.68 | 0.31 |

|      |      |      |
|------|------|------|
| 0.42 | 1.07 | 0.55 |
| #N/A | 0.53 | 0.15 |
| 0.19 | #N/A | #N/A |
| #N/A | #N/A | #N/A |
| 0.37 | 0.99 | 0.61 |
| 0.58 | 0.60 | 0.23 |
| 0.07 | 0.67 | 0.30 |
| 0.38 | 0.90 | 0.53 |
| #N/A | 0.98 | 0.49 |
| 0.88 | 2.13 | 0.93 |
| 0.90 | 1.57 | 0.83 |
| 0.49 | 1.75 | 0.88 |
| 0.57 | #N/A | #N/A |
| 0.76 | 1.14 | 0.71 |
| 0.36 | 0.69 | 0.32 |
| 0.80 | 0.70 | 0.33 |
| 0.52 | 0.66 | 0.29 |
| 0.81 | 1.01 | 0.62 |
| 0.36 | #N/A | #N/A |
| #N/A | #N/A | #N/A |
| 0.40 | 0.80 | 0.43 |
| 0.20 | 0.99 | 0.53 |
| 0.14 | #N/A | #N/A |
| 0.06 | 0.83 | 0.45 |
| 0.24 | 1.03 | 0.62 |
| 0.27 | #N/A | #N/A |
| 0.87 | 0.78 | 0.41 |
| #N/A | 0.72 | 0.34 |
| 0.28 | 0.61 | 0.24 |
| 0.13 | 0.58 | 0.24 |
| 0.32 | 0.52 | 0.15 |
| 0.03 | 0.31 | 0.04 |
| #N/A | 1.16 | 0.72 |
| 0.23 | 0.77 | 0.40 |
| 0.40 | 0.68 | 0.31 |
| 0.57 | #N/A | #N/A |
| 0.66 | 0.81 | 0.45 |
| 0.86 | 0.89 | 0.52 |
| 0.64 | 0.89 | 0.50 |
| 0.50 | 0.66 | 0.30 |
| 0.64 | #N/A | #N/A |
| #N/A | #N/A | #N/A |
| #N/A | #N/A | #N/A |
| 0.69 | 0.64 | 0.29 |
| 0.40 | 1.31 | 0.74 |
| 0.18 | 0.37 | 0.05 |
| 0.20 | #N/A | #N/A |
| 0.60 | 0.76 | 0.39 |
| 0.58 | 0.45 | 0.09 |
| #N/A | #N/A | #N/A |
| 0.33 | #N/A | #N/A |



|      |      |      |
|------|------|------|
| 0.00 | 0.29 | 0.02 |
| #N/A | #N/A | #N/A |
| 0.66 | 1.71 | 0.89 |
| 0.34 | #N/A | #N/A |
| 0.34 | #N/A | #N/A |
| #N/A | #N/A | #N/A |
| 0.67 | 0.88 | 0.51 |
| 0.27 | 0.75 | 0.38 |
| 0.75 | 1.69 | 0.87 |
| 0.39 | #N/A | #N/A |
| 0.72 | 1.16 | 0.72 |
| 0.49 | 0.91 | 0.52 |
| #N/A | #N/A | #N/A |
| #N/A | #N/A | #N/A |
| 0.22 | #N/A | #N/A |
| 0.48 | #N/A | #N/A |
| 0.42 | #N/A | #N/A |
| 0.55 | 1.35 | 0.75 |
| 0.51 | #N/A | #N/A |
| #N/A | #N/A | #N/A |
| 0.20 | #N/A | #N/A |
| 0.09 | 0.65 | 0.27 |
| 0.26 | 0.96 | 0.49 |
| 0.54 | 0.87 | 0.50 |
| 0.28 | #N/A | #N/A |
| #N/A | #N/A | #N/A |
| 0.33 | 0.57 | 0.21 |
| 0.36 | 0.95 | 0.58 |
| 0.65 | 0.85 | 0.48 |
| 0.77 | 1.45 | 0.83 |
| #N/A | 0.95 | 0.48 |
| 0.33 | 0.95 | 0.57 |
| 0.80 | 0.57 | 0.21 |
| 0.10 | #N/A | #N/A |
| 0.56 | 0.65 | 0.28 |
| 0.61 | #N/A | #N/A |
| #N/A | #N/A | #N/A |
| 0.81 | 0.90 | 0.54 |
| 0.38 | 0.81 | 0.44 |
| 0.43 | 0.77 | 0.41 |
| 0.05 | 0.67 | 0.30 |
| 0.67 | 0.79 | 0.43 |
| 0.52 | 0.68 | 0.31 |
| 0.63 | 0.91 | 0.54 |
| 0.71 | 0.49 | 0.14 |
| #N/A | 0.87 | 0.50 |
| 0.77 | 0.64 | 0.27 |
| 0.87 | #N/A | #N/A |
| 0.35 | 0.76 | 0.38 |
| 0.29 | 0.68 | 0.32 |
| 0.20 | 0.71 | 0.34 |

|      |      |      |
|------|------|------|
| 0.48 | 0.64 | 0.28 |
| 0.33 | 0.91 | 0.53 |
| 0.46 | #N/A | #N/A |
| 0.64 | #N/A | #N/A |
| 0.58 | 0.60 | 0.26 |
| 0.11 | 0.87 | 0.50 |
| 0.28 | #N/A | #N/A |
| #N/A | 1.01 | 0.55 |
| 0.74 | 0.44 | 0.09 |
| #N/A | #N/A | #N/A |
| 0.68 | 0.73 | 0.36 |
| 0.48 | 0.56 | 0.19 |
| 0.10 | #N/A | #N/A |
| 0.62 | 0.81 | 0.43 |
| 0.95 | 1.72 | 0.90 |
| 0.77 | #N/A | #N/A |
| 0.79 | 0.83 | 0.46 |
| #N/A | #N/A | #N/A |
| 0.92 | 1.23 | 0.72 |
| 0.64 | #N/A | #N/A |
| 0.14 | 0.83 | 0.46 |
| 0.49 | 0.67 | 0.31 |
| 0.51 | 0.73 | 0.37 |
| #N/A | #N/A | #N/A |
| 0.54 | 0.70 | 0.34 |
| 0.79 | 0.52 | 0.16 |
| 0.67 | 0.61 | 0.24 |
| 0.38 | 1.51 | 0.85 |
| 0.09 | 0.51 | 0.14 |
| #N/A | 0.61 | 0.31 |
| 0.16 | 0.69 | 0.32 |
| 0.31 | #N/A | #N/A |
| #N/A | 0.61 | 0.25 |
| 0.24 | 0.65 | 0.31 |
| #N/A | 0.85 | 0.45 |
| 0.25 | #N/A | #N/A |
| 0.26 | 1.29 | 0.75 |
| 0.14 | 0.89 | 0.48 |
| 0.17 | #N/A | #N/A |
| 0.85 | 0.93 | 0.54 |
| 0.54 | 1.13 | 0.70 |
| 0.50 | 1.19 | 0.73 |
| 0.48 | 1.96 | 0.93 |
| #N/A | #N/A | #N/A |
| 1.00 | 7.33 | 1.00 |
| 0.85 | 2.05 | 0.93 |
| 0.52 | 0.89 | 0.52 |
| 0.65 | #N/A | #N/A |
| #N/A | 1.02 | 0.63 |
| #N/A | #N/A | #N/A |
| 0.23 | 0.93 | 0.55 |

|      |      |      |
|------|------|------|
| #N/A | #N/A | #N/A |
| #N/A | #N/A | #N/A |
| 0.39 | #N/A | #N/A |
| 0.08 | 0.63 | 0.26 |
| 0.18 | 0.88 | 0.48 |
| 0.27 | 0.94 | 0.56 |
| #N/A | 1.26 | 0.77 |
| 0.49 | #N/A | #N/A |
| 0.06 | 0.52 | 0.15 |
| 0.15 | 0.74 | 0.37 |
| 0.44 | 0.43 | 0.09 |
| 0.16 | 0.59 | 0.21 |
| #N/A | 1.56 | 0.68 |
| 0.05 | 1.06 | 0.53 |
| 0.66 | 0.75 | 0.38 |
| 0.79 | 1.35 | 0.80 |
| 0.35 | 1.28 | 0.75 |
| #N/A | 0.56 | 0.19 |
| 0.69 | #N/A | #N/A |
| #N/A | #N/A | #N/A |
| 0.42 | 0.75 | 0.37 |
| 0.82 | 0.84 | 0.42 |
| 0.91 | 1.64 | 0.88 |
| 0.58 | #N/A | #N/A |
| #N/A | #N/A | #N/A |
| 0.25 | 1.38 | 0.55 |
| #N/A | #N/A | #N/A |
| 0.33 | 0.53 | 0.16 |
| 0.37 | 0.80 | 0.41 |
| 0.06 | #N/A | #N/A |
| 0.45 | 0.86 | 0.48 |
| 0.48 | #N/A | #N/A |
| 0.32 | 1.08 | 0.67 |
| 0.55 | 1.06 | 0.50 |
| 0.72 | 1.38 | 0.80 |
| 0.74 | 0.53 | 0.16 |
| 0.28 | #N/A | #N/A |
| 0.10 | 0.60 | 0.23 |
| 0.87 | 0.82 | 0.44 |
| 0.56 | 0.92 | 0.53 |
| #N/A | #N/A | #N/A |
| #N/A | 1.12 | 0.64 |
| 0.20 | 1.61 | 0.83 |
| #N/A | #N/A | #N/A |
| 0.69 | 0.87 | 0.51 |
| 0.28 | 0.63 | 0.28 |
| 0.52 | 0.59 | 0.23 |
| 0.73 | 2.29 | 0.93 |
| #N/A | #N/A | #N/A |
| 0.46 | 1.45 | 0.83 |
| 0.53 | 0.56 | 0.21 |

|      |      |      |
|------|------|------|
| 0.58 | #N/A | #N/A |
| #N/A | #N/A | #N/A |
| 0.72 | 0.72 | 0.36 |
| #N/A | #N/A | #N/A |
| 0.98 | 0.63 | 0.28 |
| 0.88 | #N/A | #N/A |
| 0.58 | #N/A | #N/A |
| #N/A | #N/A | #N/A |
| 0.21 | 1.30 | 0.69 |
| 0.66 | 0.44 | 0.09 |
| 0.54 | 0.76 | 0.40 |
| 0.73 | 0.49 | 0.14 |
| 0.96 | #N/A | #N/A |
| 0.40 | 0.83 | 0.43 |
| 0.68 | 0.84 | 0.46 |
| 0.46 | 0.77 | 0.40 |
| 0.43 | 0.98 | 0.51 |
| 0.74 | 1.29 | 0.73 |
| #N/A | #N/A | #N/A |
| 0.73 | #N/A | #N/A |
| 0.26 | 1.10 | 0.68 |
| 0.47 | 0.76 | 0.39 |
| 0.39 | 0.78 | 0.40 |
| 0.60 | 0.79 | 0.43 |
| 0.38 | 0.80 | 0.42 |
| 0.13 | 0.78 | 0.40 |
| 0.50 | 0.60 | 0.28 |
| #N/A | #N/A | #N/A |
| 0.27 | 1.26 | 0.76 |
| 0.21 | 0.91 | 0.52 |
| 0.31 | 0.51 | 0.14 |
| 0.54 | 1.19 | 0.74 |
| #N/A | #N/A | #N/A |
| 0.87 | 0.62 | 0.25 |
| #N/A | #N/A | #N/A |
| 0.80 | 1.38 | 0.81 |
| #N/A | #N/A | #N/A |
| 0.80 | 0.66 | 0.29 |
| 0.80 | 1.22 | 0.53 |
| 0.49 | #N/A | #N/A |
| 0.15 | 0.95 | 0.46 |
| #N/A | 0.77 | 0.38 |
| 0.38 | 1.01 | 0.49 |
| 0.53 | #N/A | #N/A |
| 0.62 | 1.43 | 0.82 |
| #N/A | 0.43 | 0.12 |
| 0.07 | 0.61 | 0.27 |
| 0.77 | 1.07 | 0.63 |
| 0.79 | 1.07 | 0.63 |
| 0.65 | #N/A | #N/A |
| 0.45 | 1.22 | 0.69 |

|      |      |      |
|------|------|------|
| 0.29 | 0.68 | 0.31 |
| 0.04 | 1.09 | 0.60 |
| 0.57 | 0.75 | 0.37 |
| 0.65 | 1.06 | 0.64 |
| 0.83 | 1.47 | 0.80 |
| 0.47 | 0.77 | 0.41 |
| 0.38 | 1.18 | 0.69 |
| #N/A | #N/A | #N/A |
| 0.52 | 1.02 | 0.59 |
| 0.68 | #N/A | #N/A |
| #N/A | #N/A | #N/A |
| 0.58 | 0.58 | 0.22 |
| 0.57 | 1.06 | 0.63 |
| #N/A | #N/A | #N/A |
| #N/A | #N/A | #N/A |
| #N/A | #N/A | #N/A |
| 0.39 | 0.66 | 0.30 |
| #N/A | #N/A | #N/A |
| 0.66 | 0.95 | 0.58 |
| 0.55 | 0.73 | 0.36 |
| 0.64 | 0.87 | 0.49 |
| #N/A | #N/A | #N/A |
| #N/A | #N/A | #N/A |
| 0.50 | 0.77 | 0.41 |
| 0.95 | 0.82 | 0.43 |
| 0.95 | 0.97 | 0.48 |
| 0.88 | 0.87 | 0.51 |
| 0.62 | #N/A | #N/A |
| #N/A | #N/A | #N/A |
| 0.94 | #N/A | #N/A |
| #N/A | #N/A | #N/A |
| #N/A | 1.10 | 0.64 |
| #N/A | #N/A | #N/A |
| 0.54 | 0.59 | 0.26 |
| #N/A | #N/A | #N/A |
| 0.31 | 0.64 | 0.27 |
| #N/A | 0.56 | 0.25 |
| 0.31 | 0.74 | 0.37 |
| #N/A | #N/A | #N/A |
| 0.31 | 0.78 | 0.41 |
| #N/A | #N/A | #N/A |
| #N/A | #N/A | #N/A |
| 0.49 | 1.26 | 0.74 |
| #N/A | #N/A | #N/A |
| 0.79 | 1.37 | 0.81 |
| 0.91 | 3.13 | 0.98 |
| 0.64 | 1.23 | 0.69 |
| 0.42 | #N/A | #N/A |
| 0.71 | 0.73 | 0.36 |
| 0.49 | 1.14 | 0.66 |
| 0.42 | #N/A | #N/A |

|      |      |      |
|------|------|------|
| 0.45 | 0.57 | 0.20 |
| 0.39 | 1.79 | 0.91 |
| #N/A | #N/A | #N/A |
| 0.47 | #N/A | #N/A |
| 0.91 | 2.33 | 0.96 |
| #N/A | #N/A | #N/A |
| 0.12 | 0.81 | 0.44 |
| 0.13 | #N/A | #N/A |
| #N/A | #N/A | #N/A |
| 0.18 | 0.60 | 0.30 |
| 0.69 | 1.71 | 0.90 |
| 0.67 | 1.94 | 0.93 |
| 0.90 | 0.99 | 0.54 |
| #N/A | #N/A | #N/A |
| 0.72 | #N/A | #N/A |
| #N/A | #N/A | #N/A |
| #N/A | #N/A | #N/A |
| #N/A | #N/A | #N/A |
| 1.00 | #N/A | #N/A |
| #N/A | #N/A | #N/A |
| #N/A | #N/A | #N/A |
| #N/A | #N/A | #N/A |
| #N/A | #N/A | #N/A |
| #N/A | #N/A | #N/A |
| #N/A | #N/A | #N/A |
| 0.74 | #N/A | #N/A |
| #N/A | #N/A | #N/A |
| #N/A | #N/A | #N/A |
| #N/A | #N/A | #N/A |
| #N/A | #N/A | #N/A |
| 0.42 | #N/A | #N/A |
| 0.69 | #N/A | #N/A |
| 0.48 | #N/A | #N/A |
| #N/A | #N/A | #N/A |
| 0.60 | #N/A | #N/A |
| 0.54 | #N/A | #N/A |
| #N/A | #N/A | #N/A |
| 0.98 | #N/A | #N/A |
| 0.87 | 2.80 | 0.98 |
| 0.89 | 2.39 | 0.89 |
| 0.86 | #N/A | #N/A |
| 0.52 | 0.63 | 0.27 |
| 0.88 | 2.04 | 0.93 |
| 0.62 | 0.83 | 0.46 |
| 0.98 | 3.13 | 0.98 |
| #N/A | #N/A | #N/A |
| 0.80 | 1.47 | 0.80 |
| 0.98 | #N/A | #N/A |
| 0.52 | 0.94 | 0.57 |
| #N/A | 0.98 | 0.60 |
| #N/A | #N/A | #N/A |

|      |      |      |
|------|------|------|
| 0.70 | #N/A | #N/A |
| #N/A | 1.78 | 0.88 |
| 0.43 | 0.53 | 0.17 |
| 0.60 | #N/A | #N/A |
| 0.97 | 2.51 | 0.96 |
| 0.83 | 1.31 | 0.79 |
| #N/A | #N/A | #N/A |
| #N/A | 3.65 | 0.99 |
| 0.99 | 2.85 | 0.97 |
| 0.87 | 1.91 | 0.92 |
| #N/A | 1.98 | 0.93 |
| 0.96 | 0.99 | 0.61 |
| 0.46 | #N/A | #N/A |
| 0.87 | 1.49 | 0.85 |
| 0.80 | 2.42 | 0.95 |
| 0.85 | 1.97 | 0.91 |
| 0.91 | #N/A | #N/A |
| 0.80 | 1.56 | 0.85 |
| 0.82 | 1.25 | 0.76 |
| #N/A | #N/A | #N/A |
| #N/A | #N/A | #N/A |
| #N/A | #N/A | #N/A |
| #N/A | #N/A | #N/A |
| #N/A | #N/A | #N/A |
| #N/A | #N/A | #N/A |
| #N/A | #N/A | #N/A |
| #N/A | #N/A | #N/A |
| #N/A | #N/A | #N/A |
| #N/A | #N/A | #N/A |
| #N/A | #N/A | #N/A |
| #N/A | #N/A | #N/A |
| 0.85 | 0.95 | 0.57 |
| #N/A | 1.67 | 0.84 |
| #N/A | #N/A | #N/A |
| #N/A | #N/A | #N/A |
| 0.90 | #N/A | #N/A |
| 0.77 | 2.71 | 0.85 |
| 0.97 | 1.43 | 0.58 |
| 0.85 | #N/A | #N/A |
| #N/A | #N/A | #N/A |
| 0.79 | 0.76 | 0.40 |
| #N/A | 1.53 | 0.83 |
| 0.99 | 0.73 | 0.36 |
| 0.57 | #N/A | #N/A |
| 0.34 | 1.19 | 0.73 |
| 0.99 | 3.46 | 0.99 |
| #N/A | 1.34 | 0.77 |
| 0.77 | 3.07 | 0.98 |
| 0.66 | 2.58 | 0.96 |
| 0.90 | 0.79 | 0.43 |
| #N/A | #N/A | #N/A |

|      |      |      |
|------|------|------|
| #N/A | #N/A | #N/A |
| 0.83 | 0.52 | 0.16 |
| 0.52 | 0.48 | 0.19 |
| #N/A | #N/A | #N/A |
| 0.44 | 0.94 | 0.57 |
| 0.93 | #N/A | #N/A |
| 0.95 | #N/A | #N/A |
| 0.85 | #N/A | #N/A |
| 0.95 | #N/A | #N/A |
| 0.96 | #N/A | #N/A |
| #N/A | #N/A | #N/A |
| 0.94 | 1.76 | 0.90 |
| 0.92 | 2.11 | 0.94 |
| #N/A | #N/A | #N/A |
| #N/A | #N/A | #N/A |
| 0.42 | #N/A | #N/A |
| #N/A | #N/A | #N/A |
| #N/A | #N/A | #N/A |
| #N/A | #N/A | #N/A |
| 1.00 | #N/A | #N/A |
| #N/A | #N/A | #N/A |
| 0.95 | 1.02 | 0.63 |
| #N/A | 2.18 | 0.95 |
| 0.98 | 2.34 | 0.96 |
| #N/A | 1.69 | 0.88 |
| #N/A | 1.44 | 0.82 |
| 0.94 | 1.54 | 0.86 |
| #N/A | 1.94 | 0.93 |
| 0.93 | 1.88 | 0.90 |
| 0.99 | #N/A | #N/A |
| 0.91 | #N/A | #N/A |
| 0.61 | 1.31 | 0.77 |
| 0.95 | #N/A | #N/A |
| 0.92 | #N/A | #N/A |
| 0.92 | 1.96 | 0.93 |
| 0.94 | #N/A | #N/A |
| #N/A | 0.34 | 0.06 |
| 0.88 | 1.54 | 0.86 |
| 0.70 | 1.76 | 0.89 |
| 0.76 | #N/A | #N/A |
| #N/A | 1.62 | 0.84 |
| 0.96 | 1.83 | 0.91 |
| 0.95 | 1.88 | 0.92 |
| 0.92 | 2.07 | 0.93 |
| 0.88 | 1.65 | 0.88 |
| 0.94 | #N/A | #N/A |
| #N/A | #N/A | #N/A |
| 0.84 | #N/A | #N/A |
| 0.88 | 1.38 | 0.81 |
| #N/A | 1.61 | 0.87 |
| #N/A | #N/A | #N/A |



|      |      |      |
|------|------|------|
| #N/A | #N/A | #N/A |
| #N/A | #N/A | #N/A |
| 0.03 | 0.57 | 0.20 |
| 0.11 | 1.36 | 0.76 |
| 0.08 | #N/A | #N/A |
| 0.37 | 1.38 | 0.82 |
| #N/A | #N/A | #N/A |
| #N/A | #N/A | #N/A |
| #N/A | #N/A | #N/A |
| #N/A | #N/A | #N/A |
| 0.51 | 1.01 | 0.62 |
| 0.52 | 0.80 | 0.44 |
| 0.38 | #N/A | #N/A |
| 0.31 | 1.22 | 0.75 |
| #N/A | 3.59 | 0.65 |
| #N/A | #N/A | #N/A |
| #N/A | 1.17 | 0.71 |
| 0.17 | 0.81 | 0.45 |
| 0.80 | 1.85 | 0.91 |
| 0.47 | 1.53 | 0.83 |
| 0.17 | 1.19 | 0.63 |
| #N/A | #N/A | #N/A |
| #N/A | #N/A | #N/A |
| 0.97 | #N/A | #N/A |
| 0.50 | #N/A | #N/A |
| 0.78 | #N/A | #N/A |
| 0.55 | 1.30 | 0.79 |
| 0.88 | 1.15 | 0.68 |
| 0.90 | 3.34 | 0.98 |
| #N/A | 0.96 | 0.58 |
| #N/A | 0.65 | 0.28 |
| 0.66 | 1.40 | 0.81 |
| #N/A | 0.67 | 0.30 |
| 0.39 | 1.59 | 0.83 |
| 0.85 | #N/A | #N/A |
| #N/A | #N/A | #N/A |
| 0.56 | #N/A | #N/A |
| #N/A | #N/A | #N/A |
| 0.41 | 0.60 | 0.23 |
| #N/A | #N/A | #N/A |
| 0.36 | 0.63 | 0.26 |
| 0.88 | #N/A | #N/A |
| 0.67 | 1.18 | 0.73 |
| 0.79 | #N/A | #N/A |
| #N/A | #N/A | #N/A |
| 0.35 | 1.22 | 0.75 |
| 0.63 | #N/A | #N/A |
| 0.76 | #N/A | #N/A |
| #N/A | #N/A | #N/A |
| 0.36 | 0.84 | 0.47 |
| #N/A | #N/A | #N/A |

|      |      |      |
|------|------|------|
| 0.48 | 1.46 | 0.84 |
| 0.87 | 1.79 | 0.89 |
| 0.61 | #N/A | #N/A |
| 0.48 | 0.89 | 0.50 |
| 0.02 | 0.27 | 0.01 |
| #N/A | #N/A | #N/A |
| 0.99 | #N/A | #N/A |
| 0.80 | 1.52 | 0.85 |
| 0.32 | 0.40 | 0.07 |
| #N/A | #N/A | #N/A |
| #N/A | #N/A | #N/A |
| #N/A | 0.68 | 0.34 |
| 0.45 | 1.00 | 0.53 |
| 0.53 | 0.97 | 0.59 |
| 0.92 | 1.45 | 0.84 |
| 0.20 | 1.24 | 0.76 |
| 0.58 | 1.01 | 0.51 |
| #N/A | #N/A | #N/A |
| #N/A | 1.29 | 0.78 |
| 0.31 | 1.75 | 0.86 |
| 0.43 | #N/A | #N/A |
| 0.57 | #N/A | #N/A |
| 0.86 | 1.32 | 0.76 |
| 0.69 | 2.00 | 0.59 |
| 0.16 | 0.63 | 0.26 |
| 0.51 | #N/A | #N/A |
| #N/A | 1.39 | 0.81 |
| 0.87 | 0.88 | 0.50 |
| 0.60 | 0.43 | 0.11 |
| 0.93 | 1.55 | 0.86 |
| #N/A | #N/A | #N/A |
| 0.62 | 1.66 | 0.82 |
| 0.48 | 2.78 | 0.97 |
| #N/A | #N/A | #N/A |
| 0.53 | 0.84 | 0.43 |
| 0.20 | 1.23 | 0.76 |
| #N/A | #N/A | #N/A |
| #N/A | #N/A | #N/A |
| #N/A | #N/A | #N/A |
| #N/A | #N/A | #N/A |
| 0.38 | 0.69 | 0.32 |
| 0.47 | 1.27 | 0.71 |
| #N/A | #N/A | #N/A |
| #N/A | #N/A | #N/A |
| #N/A | #N/A | #N/A |
| #N/A | #N/A | #N/A |
| 0.22 | #N/A | #N/A |
| #N/A | #N/A | #N/A |
| #N/A | #N/A | #N/A |
| 0.88 | #N/A | #N/A |
| 0.76 | #N/A | #N/A |
| 0.31 | 1.20 | 0.74 |

|      |      |      |
|------|------|------|
| #N/A | #N/A | #N/A |
| #N/A | #N/A | #N/A |
| 0.59 | 0.85 | 0.49 |
| 0.60 | 0.46 | 0.10 |
| 0.69 | 1.35 | 0.80 |
| #N/A | #N/A | #N/A |
| 0.01 | #N/A | #N/A |
| 0.52 | 1.09 | 0.68 |
| 0.81 | #N/A | #N/A |
| 0.27 | 0.66 | 0.29 |
| 0.38 | 0.74 | 0.38 |
| 0.31 | 0.82 | 0.43 |
| #N/A | 0.90 | 0.49 |
| 0.20 | #N/A | #N/A |
| #N/A | #N/A | #N/A |
| 0.48 | 1.55 | 0.83 |
| 0.83 | 2.05 | 0.94 |
| 0.79 | 2.04 | 0.89 |
| #N/A | 1.11 | 0.47 |
| #N/A | #N/A | #N/A |
| #N/A | #N/A | #N/A |
| 0.78 | #N/A | #N/A |
| #N/A | #N/A | #N/A |
| 0.15 | 1.62 | 0.65 |
| #N/A | #N/A | #N/A |
| 0.73 | #N/A | #N/A |
| 0.50 | 0.87 | 0.49 |
| 0.11 | #N/A | #N/A |
| 0.73 | 1.54 | 0.77 |
| #N/A | #N/A | #N/A |
| 0.33 | 1.23 | 0.76 |
| 0.79 | #N/A | #N/A |
| 0.45 | #N/A | #N/A |
| #N/A | #N/A | #N/A |
| 0.57 | 0.68 | 0.32 |
| 0.38 | 1.03 | 0.63 |
| 0.32 | 0.87 | 0.48 |
| 0.83 | 0.98 | 0.57 |
| 0.97 | #N/A | #N/A |
| #N/A | 1.54 | 0.86 |
| #N/A | 1.34 | 0.64 |
| #N/A | #N/A | #N/A |
| 0.41 | 1.04 | 0.64 |
| 0.23 | 0.47 | 0.15 |
| 0.84 | 1.29 | 0.75 |
| #N/A | 1.22 | 0.75 |
| 0.88 | #N/A | #N/A |
| 0.73 | #N/A | #N/A |
| #N/A | #N/A | #N/A |
| #N/A | #N/A | #N/A |
| 0.43 | #N/A | #N/A |

|      |      |      |
|------|------|------|
| 0.92 | 0.88 | 0.51 |
| 0.38 | 0.57 | 0.26 |
| 0.06 | 0.64 | 0.31 |
| 0.46 | 1.00 | 0.46 |
| 0.48 | #N/A | #N/A |
| #N/A | #N/A | #N/A |
| 0.51 | 0.75 | 0.39 |
| 0.55 | 1.58 | 0.84 |
| 0.57 | #N/A | #N/A |
| 0.17 | 0.80 | 0.42 |
| #N/A | 1.34 | 0.72 |
| 0.63 | 1.60 | 0.86 |
| 0.80 | 1.47 | 0.66 |
| 0.59 | 1.73 | 0.77 |
| #N/A | #N/A | #N/A |
| 0.17 | 1.20 | 0.69 |
| 0.58 | #N/A | #N/A |
| #N/A | #N/A | #N/A |
| 0.36 | #N/A | #N/A |
| #N/A | 0.82 | 0.46 |
| 0.57 | #N/A | #N/A |
| 0.76 | 1.40 | 0.75 |
| #N/A | #N/A | #N/A |
| #N/A | #N/A | #N/A |
| #N/A | #N/A | #N/A |
| 0.89 | #N/A | #N/A |
| 0.72 | 0.43 | 0.16 |
| #N/A | #N/A | #N/A |
| 0.29 | #N/A | #N/A |
| 0.55 | 1.03 | 0.64 |
| 0.44 | 1.06 | 0.65 |
| 0.23 | 0.83 | 0.46 |
| 0.20 | 1.00 | 0.59 |
| 0.14 | 1.07 | 0.66 |
| 0.29 | 0.81 | 0.43 |
| #N/A | #N/A | #N/A |
| 0.58 | 0.80 | 0.42 |
| 0.33 | #N/A | #N/A |
| #N/A | #N/A | #N/A |
| 0.80 | 0.88 | 0.44 |
| 0.76 | 1.47 | 0.81 |
| #N/A | #N/A | #N/A |
| 0.64 | 0.95 | 0.57 |
| 0.54 | #N/A | #N/A |
| #N/A | #N/A | #N/A |
| #N/A | 0.51 | 0.15 |
| 0.66 | #N/A | #N/A |
| #N/A | 0.51 | 0.17 |
| #N/A | 0.74 | 0.38 |
| 0.63 | 0.98 | 0.60 |

| UniGeneID | Name  | Other Names     | Promoter     | - chromosome | length | dist from left end | 1 |
|-----------|-------|-----------------|--------------|--------------|--------|--------------------|---|
| YAL001C   | TFC3  | FUN24 TSV115    | iYAL001C     | 1            | 3573   | 151167             |   |
| YAL002W   | VPS8  | FUN15 VPT8      | iYAL003W     | 1            | 3531   | 144002             |   |
| YAL003W   | EFB1  | EF-1 beta TEF5  | iYAL004W     | 1            | 987    | 142176             |   |
| YAL004W   | 0     | #N/A            | itP(UGG)A    | 1            | 648    | 140762             |   |
| YAL005C   | SSA1  | YG100           | iYAL004W     | 1            | 1929   | 141433             |   |
| YAL007C   | ERP2  |                 | 0 iYAL007C   | 1            | 648    | 138347             |   |
| YAL008W   | FUN14 |                 | 0 iYAL009W   | 1            | 597    | 136916             |   |
| YAL009W   | SPO7  |                 | 0 iYAL010C   | 1            | 780    | 135856             |   |
| YAL010C   | MDM10 | FUN37           | iYAL010C     | 1            | 1482   | 135667             |   |
| YAL011W   | 0     | SWC1            | iYAL012W     | 1            | 1917   | 132163             |   |
| YAL012W   | CYS3  | CY11 FUN35 STR1 | iYAL013W     | 1            | 1185   | 130802             |   |
| YAL013W   | DEP1  | FUN54           | iYAL014C     | 1            | 1089   | 129272             |   |
| YAL014C   | UIP2  | SLT2 UIP2       | iYAL014C     | 1            | 618    | 129021             |   |
| YAL015C   | NTG1  | FUN33 SCR1      | iYAL015C     | 1            | 1200   | 128104             |   |
| YAL016W   | TPD3  | FUN32           | iYAL017W     | 1            | 1908   | 124881             |   |
| YAL018C   | 0     | #N/A            | iYAL018C     | 1            | 978    | 119543             |   |
| YAL019W   | FUN30 |                 | 0 iYAL020C   | 1            | 3396   | 114921             |   |
| YAL020C   | ATS1  | FUN28 KTI13     | iYAL020C     | 1            | 1002   | 114617             |   |
| YAL023C   | PMT2  | FUN25           | iYAL023C     | 1            | 2277   | 108553             |   |
| YAL025C   | MAK16 |                 | 0 iYAL025C   | 1            | 921    | 101147             |   |
| YAL027W   | 0     | #N/A            | iYAL028W     | 1            | 786    | 94689              |   |
| YAL030W   | SNC1  |                 | 0 iYAL031C   | 1            | 467    | 87288              |   |
| YAL031C   | FUN21 |                 | 0 iYAL031C   | 1            | 2283   | 87033              |   |
| YAL032C   | PRP45 | FUN20           | iYAL032C     | 1            | 1140   | 84476              |   |
| YAL033W   | POP5  | FUN53           | iYAL034C     | 1            | 522    | 82708              |   |
| YAL034C   | FUN19 |                 | 0 iYAL034C   | 1            | 1392   | 82103              |   |
| YAL034W-A | MTW1  | DSN3 NSL2       | iYAL036C     | 1            | 870    | 79720              |   |
| YAL035C-A | #N/A  | #N/A            | iYAL034W-)   | #N/A         | #N/A   | #N/A               |   |
| YAL037W   | 0     | #N/A            | iYAL038W     | 1            | 804    | 74022              |   |
| YAL039C   | CYC3  |                 | 0 iYAL039C-0 | 1            | 810    | 69527              |   |
| YAL040C   | CLN3  | DAF1 FUN10 WHI1 | iYAL040C     | 1            | 1743   | 67522              |   |
| YAL041W   | CDC24 | CLS4            | iYAL042W     | 1            | 2565   | 62842              |   |
| YAL042W   | ERV46 | FUN9            | iYAL043C     | 1            | 1248   | 61318              |   |
| YAL043C   | PTA1  | FUN39           | iYAL043C     | 1            | 2358   | 61054              |   |
| YAL043C-A | #N/A  | #N/A            | iYAL042W     | #N/A         | #N/A   | #N/A               |   |
| YAL044C   | GCV3  |                 | 0 iYAL044C   | 1            | 534    | 58485              |   |
| YAL045C   | 0     | #N/A            | iYAL045C     | 1            | 309    | 57798              |   |
| YAL046C   | 0     | #N/A            | iYAL046C     | 1            | 357    | 57387              |   |
| YAL047C   | SPC72 | LDB4            | iYAL047C     | 1            | 1869   | 56859              |   |
| YAL048C   | 0     |                 | 0 iYAL048C   | 1            | 1989   | 54791              |   |
| YAL049C   | 0     | #N/A            | iYAL049C     | 1            | 741    | 52597              |   |
| YAL051W   | OAF1  | YAF1            | iYAL053W     | 1            | 3189   | 48564              |   |
| YAL054C   | ACS1  | FUN44           | iYAL054C     | 1            | 2142   | 45022              |   |
| YAL055W   | PEX22 | YAF5            | iYAL056W     | 1            | 543    | 42177              |   |
| YAL058C-A | #N/A  | #N/A            | iYAL058C-A   | #N/A         | #N/A   | #N/A               |   |
| YAL058W   | CNE1  | FUN48           | iYAL059W     | 1            | 1509   | 37465              |   |
| YAL059W   | ECM1  |                 | 0 iYAL060W   | 1            | 639    | 36510              |   |
| YAL060W   | BDH1  |                 | 0 iYAL061W   | 1            | 1149   | 35156              |   |
| YAL061W   | 0     | #N/A            | iYAL062W     | 1            | 1254   | 33449              |   |
| YAL062W   | GDH3  | FUN51           | iYAL063C-2   | 1            | 1374   | 31568              |   |

|           |       |                |   |            |      |      |        |
|-----------|-------|----------------|---|------------|------|------|--------|
| YAL063C   | FLO9  |                | 0 | iYAL063C-0 | 1    | 3969 | 27969  |
| YAL064W   | 0     | #N/A           |   | iYAL064C-A | 1    | 327  | 21526  |
| YAL065C   | 0     | #N/A           |   | iYAL064C-A | 1    | 387  | 11952  |
| YAL065C-A | #N/A  | #N/A           |   | #N/A       | #N/A | #N/A | #N/A   |
| YAL066W   | 0     | #N/A           |   | #N/A       | 1    | 309  | 10092  |
| YAL067C   | SEO1  |                | 0 | iYAL064C-A | 1    | 1782 | 9017   |
| YAL068C   | 0     | #N/A           |   | iYAL064C-A | 1    | 363  | 2169   |
| YAL069W   | 0     | #N/A           |   | #N/A       | 1    | 315  | 335    |
| YAR002AC  | #N/A  | #N/A           |   | #N/A       | #N/A | #N/A | #N/A   |
| YAR002W   | NUP60 |                | 0 | iCEN1      | 1    | 1620 | 152258 |
| YAR003W   | SWD1  | CPS50 SAF49    |   | iYAR002C-A | 1    | 1281 | 155006 |
| YAR007C   | RFA1  | BUF2 FUN3 RPA1 |   | iYAR007C   | 1    | 1866 | 158620 |
| YAR008W   | SEN34 | FUN4           |   | iYAR007C   | 1    | 828  | 158966 |
| YAR010C   | #N/A  | #N/A           |   | iYARCdelta | 1    | #N/A | 165866 |
| YAR015W   | ADE1  |                | 0 | iYAR014C   | 1    | 921  | 169370 |
| YAR020C   | PAU7  |                | 0 | iYAR020C-C | 1    | 168  | 177021 |
| YAR023C   | 0     | #N/A           |   | iYAR023C   | 1    | 540  | 179818 |
| YAR027W   | UIP3  |                | 0 | iYARWdelta | 1    | 708  | 183764 |
| YAR028W   | 0     | #N/A           |   | iYAR027W   | 1    | 705  | 184886 |
| YAR029W   | 0     | #N/A           |   | iYAR028W   | 1    | 225  | 186315 |
| YAR030C   | 0     | #N/A           |   | iYAR031W   | 1    | 342  | 186847 |
| YAR031W   | PRM9  |                | 0 | iYAR028W   | 1    | 897  | 186830 |
| YAR033W   | 0     |                | 0 | iYAR031W   | 1    | 705  | 188101 |
| YAR035W   | YAT1  |                | 0 | iYARWdelta | 1    | 2064 | 190187 |
| YAR037W   | #N/A  | #N/A           |   | #N/A       | #N/A | #N/A | #N/A   |
| YAR040C   | #N/A  | #N/A           |   | #N/A       | #N/A | #N/A | #N/A   |
| YAR042W   | SWH1  | OSH1           |   | iYAR035W   | 1    | 771  | 192613 |
| YAR043C   | #N/A  | #N/A           |   | #N/A       | #N/A | #N/A | #N/A   |
| YAR044W   | OSH1  |                | 0 | iYAR042W   | 1    | 2580 | 193599 |
| YAR047C   | 0     | #N/A           |   | iYAR047C-C | 1    | 321  | 201779 |
| YAR052C   | #N/A  | #N/A           |   | #N/A       | #N/A | #N/A | #N/A   |
| YAR053W   | 0     | #N/A           |   | iYAR050W   | 1    | 297  | 208357 |
| YAR060C   | 0     | #N/A           |   | iYAR060C   | 1    | 336  | 217482 |
| YAR061W   | 0     | #N/A           |   | iYAR060C   | 1    | 204  | 218130 |
| YAR062W   | 0     | #N/A           |   | iYAR061W   | 1    | 597  | 218539 |
| YAR064W   | 0     | #N/A           |   | iYAR062W   | 1    | 300  | 220188 |
| YAR066W   | 0     | #N/A           |   | iYAR064W   | 1    | 612  | 221039 |
| YAR068W   | 0     | #N/A           |   | iYAR066W   | 1    | 486  | 222396 |
| YAR069C   | 0     | #N/A           |   | iYAR069C   | 1    | 294  | 224294 |
| YAR070C   | 0     | #N/A           |   | iYAR070C   | 1    | 300  | 224852 |
| YAR071W   | PHO11 |                | 0 | iYAR070C   | 1    | 1404 | 225450 |
| YAR073W   | IMD1  |                | 0 | iYAR071W   | 1    | 1212 | 227732 |
| YAR074C   | #N/A  | #N/A           |   | #N/A       | #N/A | #N/A | #N/A   |
| YAR075W   | 0     | #N/A           |   | iYAR071W   | 1    | 474  | 228834 |
| YBL001C   | ECM15 |                | 0 | iYBL001C   | 2    | 315  | 237428 |
| YBL002W   | HTB2  |                | 0 | iYBL003C   | 2    | 396  | 236454 |
| YBL003C   | HTA2  | H2A2           |   | iYBL003C   | 2    | 399  | 235754 |
| YBL004W   | UTP20 |                | 0 | itS(AGA)B  | 2    | 7482 | 227598 |
| YBL005W-A | #N/A  | #N/A           |   | iYBL005W   | 2    | #N/A | 221292 |
| YBL006C   | 0     |                | 0 | iYBL006C   | 2    | 438  | 217091 |
| YBL007C   | SLA1  |                | 0 | iYBL007C   | 2    | 3735 | 216327 |

|         |        |                |      |            |   |      |        |
|---------|--------|----------------|------|------------|---|------|--------|
| YBL010C |        | 0              | #N/A | iYBL010C   | 2 | 843  | 206910 |
| YBL011W | SCT1   | GAT2           |      | iYBL013W   | 2 | 2280 | 203499 |
| YBL013W | FMT1   |                |      | 0 iYBL014C | 2 | 1182 | 202018 |
| YBL014C | RRN6   |                |      | 0 iYBL014C | 2 | 2685 | 201710 |
| YBL015W | ACH1   |                |      | 0 iYBL016W | 2 | 1581 | 194084 |
| YBL016W | FUS3   | DAC2           |      | iYBL017C   | 2 | 1062 | 192413 |
| YBL017C | PEP1   | VPS10 VPT1     |      | iYBL017C   | 2 | 4740 | 191545 |
| YBL018C | POP8   |                |      | 0 iYBL018C | 2 | 477  | 186436 |
| YBL019W | APN2   | ETH1           |      | iYBL020W   | 2 | 1563 | 184315 |
| YBL020W | RFT1   |                |      | 0 iYBL021C | 2 | 1725 | 182363 |
| YBL021C | HAP3   |                |      | 0 iYBL021C | 2 | 435  | 182056 |
| YBL022C | PIM1   | LON1 Lon       |      | iYBL022C   | 2 | 3402 | 181237 |
| YBL023C | MCM2   |                |      | 0 iYBL023C | 2 | 2607 | 177488 |
| YBL024W | NCL1   | TRM4           |      | iYBL025W   | 2 | 2055 | 172496 |
| YBL025W | RRN10  |                |      | 0 iYBL026W | 2 | 438  | 171443 |
| YBL028C |        | 0              | #N/A | iYBL028C   | 2 | 321  | 167800 |
| YBL029W |        | 0              | #N/A | iYBL030C-1 | 2 | 1131 | 166096 |
| YBL030C | PET9   | AAC2 ANC2 OP1  |      | iYBL030C-0 | 2 | 957  | 163959 |
| YBL031W | SHE1   |                |      | 0 iYBL032W | 2 | 1017 | 161661 |
| YBL032W | HEK2   | KHD1           |      | iYBL033C   | 2 | 1146 | 160146 |
| YBL033C | RIB1   |                |      | 0 iYBL033C | 2 | 1038 | 159655 |
| YBL036C |        | 0              | #N/A | iYBL036C   | 2 | 774  | 151182 |
| YBL038W | MRPL16 |                |      | 0 iYBL039C | 2 | 699  | 146149 |
| YBL039C | URA7   |                |      | 0 iYBL039C | 2 | 1740 | 145690 |
| YBL040C | ERD2   |                |      | 0 iYBL040C | 2 | 757  | 142830 |
| YBL041W | PRE7   | PRS3           |      | iYBL042C   | 2 | 726  | 141209 |
| YBL042C | FUI1   |                |      | 0 iYBL042C | 2 | 1920 | 140222 |
| YBL043W | ECM13  |                |      | 0 iYBL044W | 2 | 774  | 136650 |
| YBL044W |        | 0              | #N/A | iYBL045C   | 2 | 369  | 135960 |
| YBL046W |        | 0              | #N/A | iYBL047C   | 2 | 1326 | 132386 |
| YBL048W |        | 0              | #N/A | iYBL050W   | 2 | 312  | 127261 |
| YBL049W |        | 0              |      | 0 iYBL050W | 2 | 417  | 126790 |
| YBL050W | SEC17  |                |      | 0 iYBL051C | 2 | 995  | 125087 |
| YBL051C | PIN4   | MDT1           |      | iYBL051C   | 2 | 2007 | 124721 |
| YBL053W |        | 0              | #N/A | iYBL054W   | 2 | 375  | 119297 |
| YBL054W |        | 0              | #N/A | iYBL055C   | 2 | 1578 | 117551 |
| YBL055C |        | 0              | #N/A | iYBL055C   | 2 | 1257 | 116791 |
| YBL056W | PTC3   |                |      | 0 iYBL057C | 2 | 1407 | 113724 |
| YBL057C |        | 0              |      | 0 iYBL057C | 2 | 645  | 113406 |
| YBL058W | SHP1   |                |      | 0 iYBL059W | 2 | 1272 | 111398 |
| YBL059W |        | 0              | #N/A | iYBL060W   | 2 | 651  | 110555 |
| YBL060W |        | 0              | #N/A | iYBL061C   | 2 | 2064 | 107893 |
| YBL061C | SKT5   | CAL2 CHS4 CSD4 |      | iYBL061C   | 2 | 2091 | 107367 |
| YBL062W |        | 0              | #N/A | iYBL063W   | 2 | 381  | 105269 |
| YBL063W | KIP1   | CIN9           |      | iYBL064C   | 2 | 3336 | 101847 |
| YBL064C |        | 0 mTPx         |      | iYBL064C   | 2 | 786  | 101117 |
| YBL065W |        | 0              | #N/A | iYBL067C   | 2 | 345  | 99924  |
| YBL067C | UBP13  |                |      | 0 iYBL067C | 2 | 2067 | 95880  |
| YBL068W | PRS4   |                |      | 0 iYBL069W | 2 | 1068 | 92325  |
| YBL069W | AST1   |                |      | 0 iYBL071C | 2 | 1290 | 90736  |
| YBL070C |        | 0              | #N/A | iYBL069W   | 2 | 321  | 90920  |

|           |        |                |             |      |      |        |
|-----------|--------|----------------|-------------|------|------|--------|
| YBL071C   | 0      | #N/A           | iYBL071C    | 2    | 309  | 90526  |
| YBL072C   | RPS8A  |                | 0 iYBL072C  | 2    | 603  | 89120  |
| YBL073W   | 0      | #N/A           | iYBL075C    | 2    | 312  | 87641  |
| YBL074C   | AAR2   |                | 0 iYBL073W  | 2    | 1068 | 87784  |
| YBL075C   | SSA3   | HSP70          | iYBL075C    | 2    | 1950 | 86443  |
| YBL077W   | 0      | #N/A           | iYBL078C    | 2    | 432  | 80892  |
| YBL078C   | AUT7   | APG8 AUT7 CVT5 | iYBL078C    | 2    | 354  | 80725  |
| YBL080C   | PET112 |                | 0 iYBL080C  | 2    | 1626 | 74689  |
| YBL081W   | 0      | #N/A           | iYBL082C    | 2    | 1107 | 71860  |
| YBL082C   | RHK1   | ALG3           | iYBL082C    | 2    | 1377 | 71121  |
| YBL083C   | 0      | #N/A           | iYBL082C    | 2    | 426  | 70132  |
| YBL086C   | 0      | #N/A           | iYBL086C    | 2    | 1401 | 62596  |
| YBL087C   | RPL23A |                | 0 iYBL087C  | 2    | 918  | 60732  |
| YBL088C   | TEL1   |                | 0 iYBL088C  | 2    | 8364 | 59376  |
| YBL089W   | 0      |                | 0 iYBL090W  | 2    | 1530 | 49418  |
| YBL090W   | MRP21  | MRP50          | iYBL091C    | 2    | 534  | 48819  |
| YBL091C   | MAP2   |                | 0 iYBL091C  | 2    | 1266 | 48622  |
| YBL092W   | RPL32  |                | 0 iYBL093C  | 2    | 393  | 45972  |
| YBL093C   | ROX3   | NUT3 SSN7      | iYBL093C    | 2    | 663  | 44912  |
| YBL094C   | 0      | #N/A           | iYBL094C    | 2    | 333  | 44091  |
| YBL095W   | 0      | #N/A           | iYBL097W    | 2    | 813  | 43271  |
| YBL096C   | 0      | #N/A           | iYBL094C    | 2    | 309  | 43476  |
| YBL097W   | BRN1   |                | 0 iYBL098W  | 2    | 2187 | 40903  |
| YBL098W   | BNA4   |                | 0 iYBL099W  | 2    | 1383 | 39137  |
| YBL099W   | ATP1   |                | 0 itF(GAA)B | 2    | 1638 | 37045  |
| YBL100C   | 0      | #N/A           | iYBL099W    | 2    | 315  | 37295  |
| YBL101C   | ECM21  |                | 0 iYBL101C  | 2    | 3354 | 28294  |
| YBL101W-A | #N/A   | #N/A           | iYBL101C    | 2    | #N/A | 29927  |
| YBL102W   | SFT2   |                | 0 iYBL103C  | 2    | 648  | 24093  |
| YBL103C   | RTG3   |                | 0 iYBL103C  | 2    | 1461 | 23530  |
| YBL107C   | 0      | #N/A           | iYBL107C    | 2    | 591  | 10551  |
| YBL109W   | 0      | #N/A           | iYBL111C    | 2    | 336  | 5790   |
| YBL111C   | 0      | #N/A           | iYBL111C    | 2    | 2103 | 5009   |
| YBL112C   | 0      | #N/A           | iYBL111C    | 2    | 318  | 2899   |
| YBL113C   | 0      | #N/A           | iYBL111C    | 2    | 2379 | 2658   |
| YBLOO5W   | #N/A   | #N/A           | #N/A        | #N/A | #N/A | #N/A   |
| YBR001C   | NTH2   |                | 0 iYBR001C  | 2    | 2343 | 241244 |
| YBR002C   | RER2   |                | 0 iYBR002C  | 2    | 861  | 242529 |
| YBR003W   | COQ1   |                | 0 iYBR002C  | 2    | 1422 | 242770 |
| YBR004C   | 0      |                | 0 iYBR004C  | 2    | 1302 | 245628 |
| YBR005W   | 0      |                | 0 iYBR004C  | 2    | 642  | 245867 |
| YBR006W   | UGA2   | UGA5           | iYBR005W    | 2    | 1494 | 246971 |
| YBR009C   | HHF1   |                | 0 iYBR009C  | 2    | 312  | 255641 |
| YBR010W   | HHT1   | BUR5 SIN2      | iYBR009C    | 2    | 411  | 256288 |
| YBR011C   | IPP1   | PPA1           | iYBR011C    | 2    | 864  | 257932 |
| YBR012C   | 0      | #N/A           | iYBR013C    | 2    | 420  | 259523 |
| YBR012W-A | #N/A   | #N/A           | iYBR013C    | 2    | #N/A | 259826 |
| YBR013C   | 0      | #N/A           | iYBR013C    | 2    | 390  | 265838 |
| YBR014C   | 0      | #N/A           | iYBR014C    | 2    | 612  | 267295 |
| YBR016W   | 0      | #N/A           | iYBR015C    | 2    | 387  | 270206 |
| YBR018C   | GAL7   |                | 0 iYBR018C  | 2    | 1101 | 275486 |



|           |        |                |   |            |   |      |        |
|-----------|--------|----------------|---|------------|---|------|--------|
| YBR019C   | GAL10  |                | 0 | iYBR019C   | 2 | 2100 | 278311 |
| YBR020W   | GAL1   |                | 0 | iYBR019C   | 2 | 1587 | 278980 |
| YBR022W   | 0      | #N/A           |   | iYBR021W   | 2 | 534  | 283697 |
| YBR024W   | SCO2   |                | 0 | iYBR023C   | 2 | 906  | 289404 |
| YBR025C   | 0      | #N/A           |   | iYBR025C   | 2 | 1185 | 291824 |
| YBR026C   | MRF1'  | MRF1 MRF1'     |   | iYBR027C   | 2 | 1143 | 293978 |
| YBR028C   | 0      | #N/A           |   | iYBR028C   | 2 | 1578 | 295961 |
| YBR029C   | CDS1   | CDG1           |   | iYBR029C   | 2 | 1374 | 297701 |
| YBR030W   | 0      | #N/A           |   | iYBR029C   | 2 | 1659 | 298251 |
| YBR031W   | RPL4A  |                | 0 | iYBR030W   | 2 | 1089 | 300125 |
| YBR032W   | 0      | #N/A           |   | iYBR031W   | 2 | 303  | 301478 |
| YBR033W   | EDS1   |                | 0 | iYBR032W   | 2 | 2760 | 301903 |
| YBR034C   | HMT1   | HCP1 ODP1 RMT1 |   | iYBR034C   | 2 | 1047 | 305935 |
| YBR035C   | PDX3   |                | 0 | iYBR035C   | 2 | 687  | 306914 |
| YBR036C   | CSG2   | CLS2           |   | iYBR036C   | 2 | 1233 | 310272 |
| YBR037C   | SCO1   | PET161         |   | iYBR037C   | 2 | 888  | 311410 |
| YBR039W   | ATP3   |                | 0 | iYBR038W   | 2 | 936  | 315534 |
| YBR040W   | FIG1   |                | 0 | iYBR039W   | 2 | 897  | 316927 |
| YBR044C   | TCM62  |                | 0 | iYBR044C   | 2 | 1722 | 326019 |
| YBR045C   | GIP1   |                | 0 | iYBR045C   | 2 | 1722 | 330051 |
| YBR047W   | 0      |                | 0 | iYBR046C   | 2 | 528  | 331792 |
| YBR050C   | REG2   |                | 0 | iYBR051W   | 2 | 1017 | 338158 |
| YBR051W   | 0      | #N/A           |   | iYBR049C   | 2 | 351  | 337947 |
| YBR053C   | 0      | #N/A           |   | iYBR053C-C | 2 | 1077 | 340710 |
| YBR054W   | YRO2   |                | 0 | iYBR053C-1 | 2 | 1035 | 343060 |
| YBR057C   | MUM2   | SPOT8          |   | iYBR057C   | 2 | 1101 | 353252 |
| YBR060C   | ORC2   | RRR1 SIR5      |   | iYBR060C-C | 2 | 1863 | 362473 |
| YBR061C   | TRM7   |                | 0 | iYBR061C   | 2 | 933  | 365678 |
| YBR062C   | 0      | #N/A           |   | iYBR062C   | 2 | 348  | 366282 |
| YBR063C   | 0      | #N/A           |   | iYBR064W   | 2 | 1215 | 368144 |
| YBR064W   | 0      | #N/A           |   | iYBR062C   | 2 | 429  | 367723 |
| YBR065C   | ECM2   | SLT11          |   | iYBR065C   | 2 | 1095 | 369638 |
| YBR066C   | NRG2   |                | 0 | iYBR066C   | 2 | 663  | 370659 |
| YBR067C   | TIP1   |                | 0 | iYBR067C   | 2 | 633  | 372694 |
| YBR068C   | BAP2   |                | 0 | iYBR068C   | 2 | 1830 | 375649 |
| YBR069C   | TAT1   | VAP1           |   | iYBR069C   | 2 | 1860 | 378392 |
| YBR070C   | 0      | #N/A           |   | iYBR070C   | 2 | 714  | 379893 |
| YBR071W   | 0      | #N/A           |   | iYBR070C   | 2 | 636  | 380370 |
| YBR072W   | HSP26  |                | 0 | iYBR071W   | 2 | 645  | 381989 |
| YBR074W   | 0      | #N/A           |   | iYBR073W   | 2 | 1242 | 386243 |
| YBR075W   | 0      | #N/A           |   | iYBR074W   | 2 | 1383 | 387793 |
| YBR076W   | ECM8   |                | 0 | iYBR075W   | 2 | 1020 | 390333 |
| YBR077C   | 0      | #N/A           |   | iYBR077C   | 2 | 489  | 392251 |
| YBR082C   | UBC4   |                | 0 | iYBR082C-C | 2 | 542  | 407127 |
| YBR083W   | TEC1   | ROC1           |   | iYBR082C-1 | 2 | 1461 | 409127 |
| YBR084C-A | RPL19A |                | 0 | iYBR084C-A | 2 | 1076 | 415219 |
| YBR085W   | AAC3   | ANC3           |   | iYBR084C-A | 2 | 924  | 415941 |
| YBR087W   | RFC5   |                | 0 | iYBR086C   | 2 | 1065 | 423723 |
| YBR088C   | POL30  | PCNA           |   | iYBR089W   | 2 | 777  | 425724 |
| YBR089W   | 0      | #N/A           |   | iYBR087W   | 2 | 600  | 425141 |
| YBR090C   | 0      | #N/A           |   | iYBR090C   | 2 | 726  | 427016 |

| YBR090C-A | #N/A   | #N/A              | #N/A | #N/A       | #N/A | #N/A |        |
|-----------|--------|-------------------|------|------------|------|------|--------|
| YBR091C   | MRS5   | TIM12             |      | iYBR091C   | 2    | 330  | 427442 |
| YBR092C   | PHO3   |                   |      | 0 iYBR092C | 2    | 1404 | 429059 |
| YBR093C   | PHO5   |                   |      | 0 iYBR093C | 2    | 1404 | 430909 |
| YBR095C   | 0      |                   |      | 0 iYBR095C | 2    | 1362 | 435725 |
| YBR096W   | 0      | #N/A              |      | iYBR095C   | 2    | 693  | 435979 |
| YBR098W   | MMS4   | SLX2              |      | iYBR097W   | 2    | 1416 | 441473 |
| YBR099C   | 0      | #N/A              |      | iYBR100W   | 2    | 384  | 443265 |
| YBR100W   | 0      | #N/A              |      | iYBR097W   | #N/A | 339  | #N/A   |
| YBR101C   | 0      |                   |      | 0 iYBR101C | 2    | 873  | 444651 |
| YBR103W   | SIF2   | EMB1              |      | iYBR102C   | 2    | 1608 | 447667 |
| YBR104W   | YMC2   |                   |      | 0 iYBR103W | 2    | 990  | 449625 |
| YBR105C   | VID24  | GID4              |      | iYBR105C   | 2    | 1089 | 451927 |
| YBR106W   | PHO88  |                   |      | 0 iYBR105C | 2    | 567  | 452616 |
| YBR107C   | IML3   | MCM19             |      | iYBR107C   | 2    | 738  | 454488 |
| YBR108W   | 0      | #N/A              |      | iYBR107C   | 2    | 2547 | 454780 |
| YBR109C   | CMD1   |                   |      | 0 iYBR109C | 2    | 444  | 458319 |
| YBR110W   | ALG1   |                   |      | 0 iYBR109C | 2    | 1350 | 458829 |
| YBR111C   | YSA1   | RMA2              |      | iYBR111C   | 2    | 696  | 461830 |
| YBR112C   | CYC8   | CRT8 SSN6         |      | iYBR113W   | 2    | 2901 | 465727 |
| YBR113W   | 0      | #N/A              |      | iYBR111C   | 2    | 483  | 465523 |
| YBR116C   | 0      | #N/A              |      | iYBR117C   | 2    | 528  | 474683 |
| YBR117C   | TKL2   |                   |      | 0 iYBR117C | 2    | 2046 | 476394 |
| YBR118W   | TEF2   | EF-1 alpha        |      | iYBR117C   | 2    | 1377 | 477628 |
| YBR119W   | MUD1   |                   |      | 0 iYBR118W | 2    | 986  | 479295 |
| YBR120C   | CBP6   |                   |      | 0 iYBR120C | 2    | 489  | 480880 |
| YBR122C   | MRPL36 |                   |      | 0 iYBR122C | 2    | 591  | 484517 |
| YBR123C   | TFC1   |                   |      | 0 iYBR124W | 2    | 1950 | 486648 |
| YBR124W   | 0      | #N/A              |      | iYBR122C   | 2    | 360  | 486464 |
| YBR125C   | PTC4   | GCT1              |      | iYBR125C   | 2    | 1182 | 488337 |
| YBR126C   | TPS1   | BYP1 CIF1 FDP1 GG |      | iYBR126C   | 2    | 1488 | 490349 |
| YBR127C   | VMA2   | ATPSV VAT2        |      | iYBR127C   | 2    | 1554 | 492779 |
| YBR128C   | APG14  | APG14 CVT12       |      | iYBR128C   | 2    | 1035 | 494072 |
| YBR129C   | OPY1   |                   |      | 0 iYBR129C | 2    | 987  | 495296 |
| YBR130C   | SHE3   |                   |      | 0 iYBR130C | 2    | 1278 | 496826 |
| YBR131W   | CCZ1   | CVT16             |      | iYBR130C   | 2    | 2115 | 497120 |
| YBR132C   | AGP2   |                   |      | 0 iYBR132C | 2    | 1791 | 501399 |
| YBR133C   | HSL7   |                   |      | 0 iYBR134W | 2    | 2484 | 504244 |
| YBR135W   | CKS1   |                   |      | 0 iYBR134W | 2    | 453  | 504811 |
| YBR136W   | MEC1   | ESR1 SAD3         |      | iYBR135W   | 2    | 7107 | 505625 |
| YBR137W   | 0      | #N/A              |      | iYBR136W   | 2    | 540  | 513001 |
| YBR139W   | 0      | #N/A              |      | iYBR138C   | 2    | 1527 | 515621 |
| YBR141C   | 0      | #N/A              |      | iYBR141C   | 2    | 1014 | 527995 |
| YBR144C   | 0      | #N/A              |      | iYBR144C   | 2    | 315  | 533506 |
| YBR145W   | ADH5   |                   |      | 0 iYBR144C | 2    | 1056 | 533719 |
| YBR146W   | MRPS9  |                   |      | 0 iYBR145W | 2    | 837  | 535217 |
| YBR148W   | YSW1   |                   |      | 0 iYBR147W | 2    | 1830 | 537833 |
| YBR149W   | ARA1   |                   |      | 0 iYBR148W | 2    | 1035 | 539944 |
| YBR150C   | TBS1   |                   |      | 0 iYBR150C | 2    | 3285 | 544450 |
| YBR151W   | APD1   |                   |      | 0 iYBR150C | 2    | 951  | 544985 |
| YBR152W   | SPP381 |                   |      | 0 iYBR151W | 2    | 876  | 546333 |

|           |        |                  |   |            |   |      |        |
|-----------|--------|------------------|---|------------|---|------|--------|
| YBR153W   | RIB7   |                  | 0 | iYBR152W   | 2 | 735  | 547417 |
| YBR154C   | RPB5   |                  | 0 | iYBR154C   | 2 | 648  | 548966 |
| YBR155W   | CNS1   |                  | 0 | iYBR154C   | 2 | 1158 | 549728 |
| YBR157C   | ICS2   |                  | 0 | iYBR157C-C | 2 | 321  | 554266 |
| YBR158W   | CST13  | CST13 ICS4       |   | iYBR157C-1 | 2 | 1650 | 556505 |
| YBR159W   | 0      | #N/A             |   | iYBR158W   | 2 | 1044 | 558641 |
| YBR160W   | CDC28  | CDK1 HSL5 SRM5   |   | iYBR159W   | 2 | 897  | 560034 |
| YBR161W   | 0      |                  | 0 | iYBR160W   | 2 | 1131 | 561591 |
| YBR162C   | TOS1   |                  | 0 | iYBR162C   | 2 | 1368 | 564527 |
| YBR162W-A | YSY6   |                  | 0 | iYBR162C   | 2 | 198  | 565188 |
| YBR164C   | ARL1   | DLP2             |   | iYBR164C   | 2 | 552  | 568383 |
| YBR165W   | UBS1   |                  | 0 | iYBR164C   | 2 | 834  | 568809 |
| YBR166C   | TYR1   |                  | 0 | iYBR166C   | 2 | 1359 | 571157 |
| YBR167C   | POP7   | RPP2             |   | iYBR167C   | 2 | 423  | 571847 |
| YBR168W   | 0      |                  | 0 | iYBR167C   | 2 | 1242 | 572328 |
| YBR169C   | SSE2   |                  | 0 | iYBR169C   | 2 | 2082 | 575953 |
| YBR170C   | NPL4   | HRD4             |   | iYBR170C   | 2 | 1743 | 578043 |
| YBR171W   | SEC66  | HSS1 SEC71       |   | iYBR170C   | 2 | 621  | 578321 |
| YBR172C   | SMY2   |                  | 0 | iYBR172C   | 2 | 2373 | 581479 |
| YBR173C   | UMP1   |                  | 0 | iYBR173C   | 2 | 447  | 582129 |
| YBR174C   | 0      | #N/A             |   | iYBR175W   | 2 | 315  | 582609 |
| YBR175W   | SWD3   | CPS30 SAF35      |   | iYBR173C   | 2 | 948  | 582365 |
| YBR176W   | ECM31  |                  | 0 | iYBR175W   | 2 | 939  | 583677 |
| YBR177C   | EHT1   |                  | 0 | iYBR178W   | 2 | 1356 | 586119 |
| YBR178W   | 0      | #N/A             |   | iYBR176W   | 2 | 375  | 586028 |
| YBR180W   | DTR1   |                  | 0 | iYBR179C   | 2 | 1719 | 589698 |
| YBR181C   | RPS6B  | LPG18 RPS101 RPS |   | iYBR181C   | 2 | 1063 | 592731 |
| YBR182C   | SMP1   |                  | 0 | iYBR182C   | 2 | 1359 | 594821 |
| YBR183W   | YPC1   |                  | 0 | iYBR182C   | 2 | 951  | 596072 |
| YBR184W   | 0      | #N/A             |   | iYBR183W   | 2 | 1572 | 597320 |
| YBR185C   | MBA1   |                  | 0 | iYBR185C   | 2 | 837  | 599916 |
| YBR187W   | 0      | #N/A             |   | iYBR186W   | 2 | 843  | 602591 |
| YBR188C   | NTC20  |                  | 0 | iYBR188C   | 2 | 423  | 604064 |
| YBR189W   | RPS9B  | RPS13A SUP46     |   | iYBR188C   | 2 | 1001 | 604465 |
| YBR190W   | 0      | #N/A             |   | iYBR189W   | 2 | 312  | 605923 |
| YBR191W   | RPL21A | URP1             |   | iYBR189W   | 2 | 871  | 606227 |
| YBR192W   | RIM2   |                  | 0 | iYBR191W   | 2 | 1134 | 607609 |
| YBR193C   | MED8   |                  | 0 | iYBR193C   | 2 | 672  | 609710 |
| YBR194W   | 0      |                  | 0 | iYBR193C   | 2 | 372  | 609995 |
| YBR195C   | MSI1   | CAC3             |   | iYBR195C   | 2 | 1269 | 611839 |
| YBR196C   | PGI1   | CDC30            |   | iYBR196C   | 2 | 1665 | 613857 |
| YBR197C   | 0      | #N/A             |   | iYBR197C   | 2 | 654  | 615813 |
| YBR199W   | KTR4   |                  | 0 | iYBR198C   | 2 | 1395 | 618866 |
| YBR200W   | BEM1   | SRO1             |   | iYBR199W   | 2 | 1656 | 620829 |
| YBR201W   | DER1   |                  | 0 | iYBR200W   | 2 | 636  | 623534 |
| YBR202W   | CDC47  | MCM7             |   | iYBR201W-  | 2 | 2538 | 625729 |
| YBR204C   | 0      | #N/A             |   | iYBR204C   | 2 | 1128 | 633338 |
| YBR205W   | KTR3   |                  | 0 | iYBR204C   | 2 | 1215 | 633579 |
| YBR206W   | 0      | #N/A             |   | iYBR204C   | 2 | 324  | 634558 |
| YBR209W   | 0      | #N/A             |   | iYBR208C   | 2 | 318  | 642540 |
| YBR210W   | 0      |                  | 0 | itE(UUC)B  | 2 | 429  | 645507 |

|         |        |            |            |   |      |        |
|---------|--------|------------|------------|---|------|--------|
| YBR211C | AME1   | ARP100     | iYBR211C   | 2 | 975  | 647089 |
| YBR213W | MET8   |            | 0 iYBR212W | 2 | 825  | 650325 |
| YBR214W | SDS24  |            | 0 iYBR213W | 2 | 1584 | 651372 |
| YBR215W | HPC2   |            | 0 iYBR214W | 2 | 1872 | 653403 |
| YBR216C | 0      |            | 0 iYBR216C | 2 | 2025 | 657557 |
| YBR217W | APG12  | APG12      | iYBR216C   | 2 | 561  | 657789 |
| YBR219C | 0      | #N/A       | iYBR220C   | 2 | 805  | 663260 |
| YBR220C | 0      | #N/A       | iYBR220C   | 2 | 1683 | 664634 |
| YBR221C | PDB1   |            | 0 iYBR221C | 2 | 1101 | 666210 |
| YBR222C | FAT2   | FAT2       | iYBR222C   | 2 | 1632 | 668308 |
| YBR223C | TDP1   |            | 0 iYBR227C | 2 | 1635 | 670254 |
| YBR225W | 0      | #N/A       | iYBR222C   | 2 | 2703 | 670584 |
| YBR226C | 0      | #N/A       | iYBR227C   | 2 | 411  | 673522 |
| YBR228W | SLX1   |            | 0 iYBR227C | 2 | 915  | 675270 |
| YBR229C | ROT2   | GLS2       | iYBR229C   | 2 | 2865 | 679178 |
| YBR230C | 0      | #N/A       | iYBR230C   | 2 | 502  | 680007 |
| YBR231C | AOR1   | AOR1       | iYBR231C   | 2 | 912  | 683047 |
| YBR232C | 0      | #N/A       | iYBR233W   | 2 | 360  | 683689 |
| YBR233W | PBP2   | HEK1       | iYBR231C   | 2 | 1242 | 683385 |
| YBR234C | ARC40  |            | 0 iYBR234C | 2 | 1155 | 686549 |
| YBR236C | ABD1   |            | 0 iYBR236C | 2 | 1311 | 691650 |
| YBR238C | 0      | #N/A       | iYBR238C   | 2 | 2196 | 697259 |
| YBR240C | THI2   | PHO6       | iYBR240C   | 2 | 1353 | 701799 |
| YBR241C | 0      | #N/A       | iYBR241C   | 2 | 1467 | 704012 |
| YBR242W | 0      | #N/A       | iYBR241C   | 2 | 717  | 704627 |
| YBR243C | ALG7   | TUR1       | iYBR243C   | 2 | 1347 | 706750 |
| YBR244W | GPX2   | AMI1       | iYBR243C   | 2 | 489  | 707485 |
| YBR246W | 0      | #N/A       | iYBR244W   | 2 | 1164 | 711548 |
| YBR247C | ENP1   | MEG1       | iYBR247C   | 2 | 1452 | 714412 |
| YBR248C | HIS7   |            | 0 iYBR248C | 2 | 1659 | 716422 |
| YBR249C | ARO4   |            | 0 iYBR249C | 2 | 1113 | 717951 |
| YBR250W | 0      | #N/A       | iYBR249C   | 2 | 1572 | 718990 |
| YBR251W | MRPS5  |            | 0 iYBR250W | 2 | 924  | 721347 |
| YBR252W | DUT1   |            | 0 iYBR251W | 2 | 444  | 722568 |
| YBR253W | SRB6   |            | 0 iYBR252W | 2 | 366  | 723227 |
| YBR254C | TRS20  |            | 0 iYBR254C | 2 | 528  | 724220 |
| YBR255W | 0      | #N/A       | iYBR254C   | 2 | 2085 | 724413 |
| YBR256C | RIB5   |            | 0 iYBR256C | 2 | 717  | 728059 |
| YBR257W | POP4   |            | 0 iYBR256C | 2 | 840  | 728842 |
| YBR258C | SHG1   | CPS15      | iYBR258C   | 2 | 429  | 730119 |
| YBR259W | 0      | #N/A       | iYBR258C   | 2 | 2067 | 730344 |
| YBR260C | RGD1   |            | 0 iYBR260C | 2 | 2001 | 734596 |
| YBR261C | 0      | #N/A       | iYBR261C   | 2 | 699  | 735487 |
| YBR262C | 0      |            | 0 iYBR264C | 2 | 321  | 735997 |
| YBR263W | SHM1   | SHMT1 TMP3 | iYBR261C   | 2 | 1698 | 735996 |
| YBR264C | YPT10  |            | 0 iYBR264C | 2 | 657  | 738383 |
| YBR265W | TSC10  |            | 0 iYBR264C | 2 | 963  | 738539 |
| YBR266C | 0      | #N/A       | iYBR267W   | 2 | 453  | 740345 |
| YBR267W | 0      |            | 0 iYBR265W | 2 | 1182 | 739798 |
| YBR268W | MRPL37 |            | 0 iYBR267W | 2 | 318  | 741256 |
| YBR269C | 0      |            | 0 iYBR269C | 2 | 393  | 742531 |

|         |                      |      |              |      |      |        |
|---------|----------------------|------|--------------|------|------|--------|
| YBR270C | 0                    | #N/A | iYBR270C     | 2    | 1638 | 744353 |
| YBR271W | 0                    | #N/A | iYBR270C     | 2    | 1260 | 744807 |
| YBR272C | HSM3                 |      | 0 iYBR272C   | 2    | 1443 | 747758 |
| YBR273C | 0                    |      | 0 iYBR273C   | 2    | 1311 | 749326 |
| YBR274W | CHK1                 |      | 0 iYBR273C   | 2    | 1584 | 749549 |
| YBR275C | RIF1                 |      | 0 iYBR275C   | 2    | 5751 | 757061 |
| YBR276C | PPS1                 |      | 0 iYBR276C   | 2    | 2424 | 759999 |
| YBR277C | 0                    | #N/A | iYBR278W     | 2    | 402  | 760572 |
| YBR278W | DPB3                 |      | 0 iYBR276C   | 2    | 606  | 760250 |
| YBR279W | PAF1                 |      | 0 iYBR278W   | 2    | 1338 | 761213 |
| YBR280C | 0                    | #N/A | iYBR280C     | 2    | 1929 | 764668 |
| YBR281C | 0                    | #N/A | iYBR281C     | 2    | 2637 | 767562 |
| YBR282W | MRPL27               |      | 0 iYBR281C   | 2    | 441  | 768196 |
| YBR283C | SSH1                 |      | 0 iYBR283C   | 2    | 1473 | 770371 |
| YBR284W | 0                    | #N/A | iYBR283C     | 2    | 2394 | 771195 |
| YBR285W | 0                    | #N/A | iYBR284W     | 2    | 435  | 773878 |
| YBR286W | APE3 APY1            |      | iYBR285W     | 2    | 1692 | 774578 |
| YBR287W | 0                    |      | 0 iYBR286W   | 2    | 1284 | 776527 |
| YBR288C | APM3 YKS6            |      | iYBR288C     | 2    | 1452 | 779419 |
| YBR289W | SNF5 HAF4 SWI10 TYE4 |      | iYBR288C     | 2    | 2718 | 779623 |
| YBR290W | BSD2                 |      | 0 iYBR289W   | 2    | 966  | 782547 |
| YBR291C | CTP1                 |      | 0 iYBR291C   | 2    | 900  | 784528 |
| YBR292C | 0                    | #N/A | iYBR292C-    | 2    | 372  | 785029 |
| YBR293W | 0                    | #N/A | iYBR292C-1   | 2    | 1425 | 786961 |
| YBR294W | SUL1 SFP2            |      | iYBR293W     | 2    | 2580 | 789190 |
| YBR295W | PCA1 CAD2 PAY2       |      | iYBR294W     | 2    | 3651 | 792803 |
| YBR296C | PHO89 ITN1           |      | iYBR296C-    | 2    | 1725 | 798476 |
| YBR297W | MAL33 MAL3R          |      | iYBR296C-1   | 2    | 1407 | 800477 |
| YBR298C | MAL31 MAL3T          |      | iYBR298C     | 2    | 1845 | 804429 |
| YBR299W | MAL32 MAL3S          |      | iYBR298C     | 2    | 1755 | 805305 |
| YBR300C | 0                    | #N/A | iYBR301W     | 2    | 498  | 809051 |
| YBR301W | DAN3                 |      | 0 iYBR299W   | 2    | 363  | 809011 |
| YBR302C | COS2                 |      | 0 #N/A       | 2    | 1140 | 811433 |
| YCL001W | RER1                 |      | 0 iYCL011C   | 3    | 567  | 111910 |
| YCL002C | 0                    | #N/A | iYCRCdelta   | 3    | 459  | 111297 |
| YCL003W | #N/A                 | #N/A | #N/A         | #N/A | #N/A | #N/A   |
| YCL004W | PGS1 PEL1            |      | iYCL011C     | 3    | 1566 | 109101 |
| YCL005W | 0                    | #N/A | iYCL011C     | 3    | 771  | 108017 |
| YCL006C | #N/A                 | #N/A | iYCRCdelta   | #N/A | #N/A | #N/A   |
| YCL007C | CWH36                | #N/A | iYCRCdelta   | 3    | 393  | 107362 |
| YCL008C | STP22 VPS23          |      | iYCRCdelta   | 3    | 891  | 106849 |
| YCL009C | ILV6                 |      | 0 iYCRCdelta | 3    | 930  | 105543 |
| YCL010C | SGF29                |      | 0 iYCRCdelta | 3    | 780  | 104345 |
| YCL011C | GBP2 RLF6            |      | iYCL011C     | 3    | 1284 | 103353 |
| YCL012W | #N/A                 | #N/A | iYCLWdelta   | #N/A | #N/A | #N/A   |
| YCL013W | #N/A                 | #N/A | #N/A         | #N/A | #N/A | #N/A   |
| YCL014W | BUD3                 |      | 0 iYCLWdelta | 3    | 4911 | 96280  |
| YCL016C | DCC1                 |      | 0 iYCL011C   | 3    | 1143 | 95762  |
| YCL017C | NFS1 SPL1            |      | iYCL011C     | 3    | 1494 | 94269  |
| YCL018W | LEU2                 |      | 0 iYCLWdelta | 3    | 1095 | 91323  |
| YCL019W | #N/A                 | #N/A | iYCL022C     | 3    | #N/A | 85101  |

|         |               |            |            |      |      |       |
|---------|---------------|------------|------------|------|------|-------|
| YCL020W | #N/A          | #N/A       | iYCL022C   | 3    | #N/A | 85101 |
| YCL021W | #N/A          | #N/A       | #N/A       | #N/A | #N/A | #N/A  |
| YCL022C | 0             | #N/A       | iYCL022C   | 3    | 516  | 82084 |
| YCL023C | 0             | #N/A       | iYCL022C   | 3    | 348  | 79295 |
| YCL024W | KCC4          |            | 0 iYCL025C | 3    | 3114 | 79161 |
| YCL025C | AGP1          | YCC5       | iYCL025C   | 3    | 1788 | 77918 |
| YCL026C | #N/A          | #N/A       | #N/A       | #N/A | #N/A | #N/A  |
| YCL027W | FUS1          |            | 0 iYCL028W | 3    | 1539 | 71803 |
| YCL028W | RNQ1          | [PIN(+)]   | iYCL029C   | 3    | 1218 | 70150 |
| YCL029C | BIK1          | ARM5 PAC14 | iYCL029C   | 3    | 1323 | 69921 |
| YCL030C | HIS4          |            | 0 iYCL030C | 3    | 2400 | 68333 |
| YCL031C | RRP7          |            | 0 iYCL031C | 3    | 894  | 65568 |
| YCL032W | STE50         |            | 0 iYCL033C | 3    | 1041 | 63441 |
| YCL033C | 0             | #N/A       | iYCL033C   | 3    | 507  | 63282 |
| YCL034W | LSB5          |            | 0 iYCL035C | 3    | 1065 | 61658 |
| YCL035C | GRX1          |            | 0 iYCL035C | 3    | 333  | 61173 |
| YCL036W | GFD2          |            | 0 iYCL037C | 3    | 1701 | 59026 |
| YCL037C | SRO9          |            | 0 iYCL037C | 3    | 1401 | 58774 |
| YCL038C | AUT4          | AUT4       | iYCL038C   | 3    | 1587 | 56527 |
| YCL039W | 0             | MOH2       | iYCL040W   | 3    | 2238 | 52645 |
| YCL040W | GLK1          | HOR3       | iYCL044C   | 3    | 1503 | 50838 |
| YCL041C | 0             | #N/A       | iYCL040W   | 3    | 495  | 50627 |
| YCL042W | 0             | #N/A       | iYCL044C   | 3    | 360  | 50584 |
| YCL043C | PDI1          | MFP1 TRG1  | iYCL040W   | 3    | 1569 | 50221 |
| YCL044C | 0             | #N/A       | iYCL044C   | 3    | 1254 | 48364 |
| YCL045C | 0             | #N/A       | iYCL046W   | 3    | 2283 | 46905 |
| YCL046W | 0             | #N/A       | iYCL047C   | 3    | 324  | 46640 |
| YCL047C | 0             | #N/A       | iYCL047C   | 3    | 777  | 44437 |
| YCL048W | 0             | #N/A       | iYCL049C   | 3    | 1392 | 42165 |
| YCL049C | 0             | #N/A       | iYCL049C   | 3    | 939  | 40724 |
| YCL050C | APA1          | DTP1       | iYCL050C   | 3    | 966  | 38801 |
| YCL051W | LRE1          |            | 0 iYCL052C | 3    | 1752 | 35865 |
| YCL052C | PBN1          |            | 0 iYCL052C | 3    | 1251 | 35393 |
| YCL053C | #N/A          | #N/A       | #N/A       | #N/A | #N/A | #N/A  |
| YCL054W | SPB1          |            | 0 iYCL055W | 3    | 2526 | 31449 |
| YCL055W | KAR4          |            | 0 iYCL056C | 3    | 1008 | 27929 |
| YCL056C | 0             | #N/A       | iYCL056C   | 3    | 435  | 27359 |
| YCL057W | PRD1          |            | 0 iYCL058C | 3    | 2139 | 24768 |
| YCL058C | FYV5          |            | 0 iYCL058C | 3    | 459  | 23981 |
| YCL059C | KRR1          |            | 0 iYCL059C | 3    | 951  | 23379 |
| YCL060C | #N/A          | #N/A       | #N/A       | #N/A | #N/A | #N/A  |
| YCL061C | MRC1          |            | 0 iYCL061C | 3    | 3291 | 22106 |
| YCL062W | #N/A          | #N/A       | #N/A       | #N/A | #N/A | #N/A  |
| YCL063W | 0             |            | 0 iYCL064C | 3    | 1272 | 17290 |
| YCL064C | CHA1          |            | 0 iYCL064C | 3    | 1083 | 16880 |
| YCL065W | 0             | #N/A       | iYCL067C   | 3    | 369  | 13751 |
| YCL066W | HMLALPIALPHA1 | MATALPHA   | iYCL067C   | 3    | 528  | 13282 |
| YCL067C | HMLALPIALPHA2 | MATALPHA   | iYCL067C   | 3    | 633  | 13018 |
| YCL068C | 0             | #N/A       | iYCL068C   | 3    | 783  | 12285 |
| YCL069W | 0             | #N/A       | iYCL073C   | 3    | 1377 | 9706  |
| YCL073C | 0             | #N/A       | iYCL073C   | 3    | 1848 | 8326  |

|           |        |                  |              |      |      |        |
|-----------|--------|------------------|--------------|------|------|--------|
| YCL074W   | #N/A   | #N/A             | iYCL075W     | 3    | #N/A | 2824   |
| YCL075W   | #N/A   | #N/A             | #N/A         | 3    | #N/A | 2126   |
| YCL076W   | 0      | #N/A             | #N/A         | 3    | 744  | 1392   |
| YCLX01W   | #N/A   | #N/A             | #N/A         | #N/A | #N/A | #N/A   |
| YCLX02C   | #N/A   | #N/A             | #N/A         | #N/A | #N/A | #N/A   |
| YCLX03C   | #N/A   | #N/A             | #N/A         | #N/A | #N/A | #N/A   |
| YCLX04W   | #N/A   | #N/A             | #N/A         | #N/A | #N/A | #N/A   |
| YCLX05C   | #N/A   | #N/A             | #N/A         | #N/A | #N/A | #N/A   |
| YCLX06C   | #N/A   | #N/A             | #N/A         | #N/A | #N/A | #N/A   |
| YCLX07W   | #N/A   | #N/A             | #N/A         | #N/A | #N/A | #N/A   |
| YCLX08C   | #N/A   | #N/A             | #N/A         | #N/A | #N/A | #N/A   |
| YCLX09W   | #N/A   | #N/A             | #N/A         | #N/A | #N/A | #N/A   |
| YCLX10C   | #N/A   | #N/A             | #N/A         | #N/A | #N/A | #N/A   |
| YCLX11W   | #N/A   | #N/A             | #N/A         | #N/A | #N/A | #N/A   |
| YCLX12W   | #N/A   | #N/A             | #N/A         | #N/A | #N/A | #N/A   |
| YCR001W   | 0      | #N/A             | iYCL011C     | 3    | 315  | 115679 |
| YCR002C   | CDC10  |                  | 0 iYCRCdelta | 3    | 969  | 118342 |
| YCR003W   | MRPL32 |                  | 0 iYCL011C   | 3    | 552  | 118614 |
| YCR004C   | YCP4   |                  | 0 iYCRCdelta | 3    | 744  | 120312 |
| YCR005C   | CIT2   |                  | 0 iYCRCdelta | 3    | 1383 | 122322 |
| YCR006C   | 0      | #N/A             | iYCRCdelta   | 3    | 474  | 122997 |
| YCR007C   | 0      | #N/A             | itG(GCC)C    | 3    | 720  | 126724 |
| YCR008W   | SAT4   | HAL4             | iYCRCdelta   | 3    | 1812 | 128464 |
| YCR009C   | RVS161 | END6 FUS7 SPE161 | itG(GCC)C    | 3    | 798  | 131536 |
| YCR010C   | ADY2   | ATO1             | itG(GCC)C    | 3    | 852  | 133118 |
| YCR011C   | ADP1   |                  | 0 itG(GCC)C  | 3    | 3150 | 136867 |
| YCR012W   | PGK1   |                  | 0 iYCRCdelta | 3    | 1251 | 137740 |
| YCR013C   | 0      | #N/A             | itG(GCC)C    | 3    | 648  | 139043 |
| YCR014C   | POL4   | POLX             | itG(GCC)C    | 3    | 1749 | 140927 |
| YCR015C   | 0      | #N/A             | itG(GCC)C    | 3    | 954  | 142164 |
| YCR016W   | 0      | #N/A             | itG(GCC)C    | 3    | 873  | 143628 |
| YCR017C   | CWH43  |                  | 0 iYCR017C   | 3    | 2862 | 147628 |
| YCR018C   | SRD1   |                  | 0 iYCR018C   | 3    | 666  | 148897 |
| YCR019W   | MAK32  |                  | 0 iYCR018C-/ | 3    | 1092 | 152831 |
| YCR020C   | PET18  | HIT2             | iYCR020C     | 3    | 648  | 154653 |
| YCR020C-A | MAK31  | LSM9 SMX1        | iYCR020C-/   | 3    | 267  | 155090 |
| YCR021C   | HSP30  | YRO1             | iYCR021C     | 3    | 999  | 157099 |
| YCR022C   | 0      | #N/A             | iYCR022C     | 3    | 345  | 157757 |
| YCR023C   | 0      | #N/A             | iYCR023C     | 3    | 1836 | 160365 |
| YCR024C   | 0      | #N/A             | iYCR024C     | 3    | 1479 | 162214 |
| YCR024C-A | PMP1   |                  | 0 iYCR024C-/ | 3    | 123  | 163059 |
| YCR025C   | 0      | #N/A             | iYCR025C     | 3    | 411  | 163848 |
| YCR026C   | 0      | #N/A             | iYCR026C     | 3    | 2229 | 166331 |
| YCR027C   | RHB1   |                  | 0 iYCR027C   | 3    | 630  | 167991 |
| YCR028C   | FEN2   |                  | 0 iYCR028C   | 3    | 1539 | 172416 |
| YCR029C   | #N/A   | #N/A             | #N/A         | #N/A | #N/A | #N/A   |
| YCR029C-A | #N/A   | #N/A             | #N/A         | #N/A | #N/A | #N/A   |
| YCR030C   | SYP1   |                  | 0 iYCR030C   | 3    | 2613 | 176430 |
| YCR031C   | RPS14A | CRY1 RPL59       | iYCR031C     | 3    | 721  | 178212 |
| YCR032W   | BPH1   |                  | 0 iSNR189    | 3    | 6504 | 179512 |
| YCR033W   | SNT1   |                  | 0 iYCR032W   | 3    | 3681 | 186481 |

|         |                        |                    |            |      |      |      |        |
|---------|------------------------|--------------------|------------|------|------|------|--------|
| YCR034W | FEN1                   | ELO2 GNS1 VBM2     | iYCR033W   |      | 3    | 1044 | 190584 |
| YCR035C | RRP43                  |                    | 0 iYCR035C |      | 3    | 1185 | 193010 |
| YCR036W | RBK1                   |                    | 0 iYCR035C |      | 3    | 1002 | 193289 |
| YCR037C | PHO87                  |                    | 0 iYCR037C |      | 3    | 2772 | 197177 |
| YCR038C | BUD5                   |                    | 0 iYCR038C |      | 3    | 1929 | 199541 |
| YCR039C | MATALP ALPHA2 HMLALPHA |                    | iYCR039C   |      | 3    | 633  | 200170 |
| YCR040W | MATALP ALPHA1 HMLALPHA |                    | iYCR039C   |      | 3    | 528  | 200434 |
| YCR041W | 0                      | #N/A               | iYCR039C   |      | 3    | 333  | 200903 |
| YCR042C | TAF2                   | TAF150 TSM1 TafII1 | iYCR042C   |      | 3    | 4224 | 205389 |
| YCR043C | 0                      | #N/A               | iYCR043C   |      | 3    | 384  | 206636 |
| YCR044C | PER1                   | COS16              | iYCR044C   |      | 3    | 1074 | 207942 |
| YCR045C | 0                      | #N/A               | iYCR045C   |      | 3    | 1476 | 209602 |
| YCR046C | IMG1                   |                    | 0 iYCR046C |      | 3    | 510  | 210415 |
| YCR047C | BUD23                  |                    | 0 iYCR047C |      | 3    | 828  | 211537 |
| YCR048W | ARE1                   | SAT2               | iYCR047C   |      | 3    | 1833 | 211921 |
| YCR049C | 0                      | #N/A               | iYCR050C   |      | 3    | 447  | 212309 |
| YCR050C | 0                      | #N/A               | iYCR050C   |      | 3    | 309  | 213764 |
| YCR051W | 0                      | #N/A               | iYCR050C   |      | 3    | 669  | 214063 |
| YCR052W | RSC6                   |                    | 0 iYCR051W |      | 3    | 1452 | 214986 |
| YCR053W | THR4                   |                    | 0 iYCR052W |      | 3    | 1545 | 216689 |
| YCR054C | CTR86                  |                    | 0 iYCR054C |      | 3    | 1692 | 220059 |
| YCR055C | #N/A                   | #N/A               | #N/A       | #N/A | #N/A | #N/A | #N/A   |
| YCR056W | #N/A                   | #N/A               | #N/A       | #N/A | #N/A | #N/A | #N/A   |
| YCR057C | PWP2                   | UTP1               | iYCR057C   |      | 3    | 2772 | 223220 |
| YCR058C | #N/A                   | #N/A               | #N/A       | #N/A | #N/A | #N/A | #N/A   |
| YCR059C | YIH1                   |                    | 0 iYCR059C |      | 3    | 777  | 224222 |
| YCR060W | 0                      |                    | 0 iYCR059C |      | 3    | 336  | 224391 |
| YCR061W | 0                      | #N/A               | iYCR060W   |      | 3    | 1896 | 225555 |
| YCR062W | #N/A                   | #N/A               | iYCR060W   | #N/A | #N/A | #N/A | #N/A   |
| YCR063W | BUD31                  | CWC14              | iYCR062W   |      | 3    | 474  | 228310 |
| YCR064C | 0                      | #N/A               | iYCR063W   |      | 3    | 411  | 228497 |
| YCR065W | HCM1                   |                    | 0 iYCR063W |      | 3    | 1695 | 229302 |
| YCR066W | RAD18                  |                    | 0 iYCR065W |      | 3    | 1464 | 231492 |
| YCR067C | SED4                   |                    | 0 iYCR067C |      | 3    | 3198 | 236314 |
| YCR068W | CVT17                  | AUT5 CVT17         | iYCR067C   |      | 3    | 1563 | 237206 |
| YCR069W | CPR4                   | CYP4 SCC3          | iYCR068W   |      | 3    | 957  | 239047 |
| YCR070W | #N/A                   | #N/A               | #N/A       | #N/A | #N/A | #N/A | #N/A   |
| YCR071C | IMG2                   |                    | 0 iYCR071C |      | 3    | 441  | 240535 |
| YCR072C | 0                      | #N/A               | iYCR072C   |      | 3    | 1548 | 242344 |
| YCR073C | SSK22                  |                    | 0 iYCR073C |      | 3    | 3996 | 246576 |
| YCR074C | #N/A                   | #N/A               | #N/A       | #N/A | #N/A | #N/A | #N/A   |
| YCR075C | ERS1                   |                    | 0 iYCR075C |      | 3    | 783  | 248808 |
| YCR076C | 0                      | #N/A               | iYCR076C   |      | 3    | 753  | 250038 |
| YCR077C | PAT1                   | MRT1               | iYCR077C   |      | 3    | 2391 | 252621 |
| YCR079W | 0                      | #N/A               | iYCR077C   |      | 3    | 1329 | 252838 |
| YCR080W | #N/A                   | #N/A               | #N/A       | #N/A | #N/A | #N/A | #N/A   |
| YCR081W | SRB8                   | GIG1 NUT6 SSN5     | iYCR079W   |      | 3    | 4284 | 254364 |
| YCR082W | 0                      |                    | 0 iYCR081W |      | 3    | 387  | 258876 |
| YCR083W | TRX3                   |                    | 0 iYCR082W |      | 3    | 384  | 259571 |
| YCR084C | TUP1                   | AAR1 AER2 AMM1 C   | iYCR084C   |      | 3    | 2142 | 262445 |
| YCR085W | 0                      | #N/A               | iYCR084C   |      | 3    | 354  | 262909 |



|          |       |                 |   |            |      |      |        |
|----------|-------|-----------------|---|------------|------|------|--------|
| YCR086W  | CSM1  |                 | 0 | iYCR085W   | 3    | 573  | 263385 |
| YCR087W  | 0     | #N/A            |   | iYCR085W   | 3    | 516  | 263969 |
| YCR088W  | ABP1  |                 | 0 | iYCR087C-' | 3    | 1779 | 265061 |
| YCR089W  | FIG2  |                 | 0 | iYCR088W   | 3    | 4830 | 267427 |
| YCR090C  | 0     | #N/A            |   | iYCR090C-( | 3    | 549  | 272856 |
| YCR091W  | KIN82 |                 | 0 | iYCR090C-' | 3    | 2163 | 274397 |
| YCR092C  | MSH3  |                 | 0 | iYCR092C   | 3    | 3144 | 279900 |
| YCR093W  | CDC39 | NOT1 ROS1 SMD6  |   | iYCR092C   | 3    | 6327 | 280110 |
| YCR094W  | CDC50 |                 | 0 | iYCR093W   | 3    | 1176 | 286755 |
| YCR095C  | 0     | #N/A            |   | iYCR095C-( | 3    | 1089 | 289251 |
| YCR096C  | HMRA2 | A2 MATA2        |   | iYCR096C   | 3    | 360  | 293531 |
| YCR097WA | #N/A  | #N/A            |   | #N/A       | #N/A | #N/A | #N/A   |
| YCR097WB | #N/A  | #N/A            |   | #N/A       | #N/A | #N/A | #N/A   |
| YCR098C  | GIT1  |                 | 0 | iYCR098C-( | 3    | 1557 | 298598 |
| YCR099C  | 0     | #N/A            |   | iYCR100C   | 3    | 468  | 301292 |
| YCR100C  | 0     | #N/A            |   | iYCR100C   | 3    | 951  | 302214 |
| YCR101C  | 0     | #N/A            |   | iYCR101C   | 3    | 549  | 303023 |
| YCR102C  | 0     | #N/A            |   | iYCR102C   | 3    | 1107 | 305460 |
| YCR103C  | #N/A  | #N/A            |   | iYCR103C   | #N/A | #N/A | #N/A   |
| YCR104W  | PAU3  |                 | 0 | iYCR103C   | 3    | 375  | 307794 |
| YCR105W  | 0     | ADHVII          |   | iYCR104W   | 3    | 1086 | 309063 |
| YCR106W  | RDS1  |                 | 0 | iYCR105W   | 3    | 2499 | 310951 |
| YCR107W  | AAD3  |                 | 0 | iYCR106W   | 3    | 1092 | 313883 |
| YCRX01W  | #N/A  | #N/A            |   | #N/A       | #N/A | #N/A | #N/A   |
| YCRX02C  | #N/A  | #N/A            |   | #N/A       | #N/A | #N/A | #N/A   |
| YCRX03C  | #N/A  | #N/A            |   | #N/A       | #N/A | #N/A | #N/A   |
| YCRX04W  | #N/A  | #N/A            |   | #N/A       | #N/A | #N/A | #N/A   |
| YCRX05W  | #N/A  | #N/A            |   | #N/A       | #N/A | #N/A | #N/A   |
| YCRX06W  | #N/A  | #N/A            |   | #N/A       | #N/A | #N/A | #N/A   |
| YCRX07W  | #N/A  | #N/A            |   | #N/A       | #N/A | #N/A | #N/A   |
| YCRX08W  | #N/A  | #N/A            |   | #N/A       | #N/A | #N/A | #N/A   |
| YCRX09C  | #N/A  | #N/A            |   | #N/A       | #N/A | #N/A | #N/A   |
| YCRX10W  | #N/A  | #N/A            |   | #N/A       | #N/A | #N/A | #N/A   |
| YCRX11W  | #N/A  | #N/A            |   | #N/A       | #N/A | #N/A | #N/A   |
| YCRX12W  | #N/A  | #N/A            |   | #N/A       | #N/A | #N/A | #N/A   |
| YCRX13W  | #N/A  | #N/A            |   | #N/A       | #N/A | #N/A | #N/A   |
| YCRX14W  | #N/A  | #N/A            |   | #N/A       | #N/A | #N/A | #N/A   |
| YCRX15W  | #N/A  | #N/A            |   | #N/A       | #N/A | #N/A | #N/A   |
| YCRX16C  | #N/A  | #N/A            |   | #N/A       | #N/A | #N/A | #N/A   |
| YCRX17W  | #N/A  | #N/A            |   | #N/A       | #N/A | #N/A | #N/A   |
| YCRX18C  | #N/A  | #N/A            |   | #N/A       | #N/A | #N/A | #N/A   |
| YCRX19W  | #N/A  | #N/A            |   | #N/A       | #N/A | #N/A | #N/A   |
| YCRX20C  | #N/A  | #N/A            |   | #N/A       | #N/A | #N/A | #N/A   |
| YCRX21C  | #N/A  | #N/A            |   | #N/A       | #N/A | #N/A | #N/A   |
| YDL001W  | 0     |                 | 0 | iYDL002C   | 4    | 1293 | 447980 |
| YDL002C  | NHP10 | HMO2            |   | iYDL002C   | 4    | 612  | 447574 |
| YDL003W  | MCD1  | PDS3 RHC21 SCC1 |   | iYDL004W   | 4    | 1701 | 444679 |
| YDL004W  | ATP16 |                 | 0 | iYDL005C   | 4    | 483  | 443025 |
| YDL005C  | MED2  |                 | 0 | iYDL005C   | 4    | 1296 | 442305 |
| YDL006W  | PTC1  | CWH47 KCS2 TPD1 |   | iYDL007W   | 4    | 846  | 439905 |
| YDL007W  | RPT2  | YHS4 YTA5       |   | itS(AGA)D1 | 4    | 1314 | 438043 |

|         |       |                           |       |            |            |      |        |        |
|---------|-------|---------------------------|-------|------------|------------|------|--------|--------|
| YDL008W | APC11 |                           | 0     | iYDL009C   | 4          | 498  | 433493 |        |
| YDL009C |       | 0                         | #N/A  | iYDL009C   | 4          | 324  | 433244 |        |
| YDL010W |       | 0                         | #N/A  | iYDL012C   | 4          | 696  | 432326 |        |
| YDL011C |       | 0                         | #N/A  | iYDL009C   | 4          | 324  | 432627 |        |
| YDL012C |       | 0                         | #N/A  | iYDL012C   | 4          | 410  | 431513 |        |
| YDL013W | HEX3  | SLX5                      |       | iYDL014W   | 4          | 1860 | 429063 |        |
| YDL014W | NOP1  | LOT3                      |       | iYDL015C   | 4          | 984  | 427360 |        |
| YDL015C | TSC13 |                           | 0     | iYDL015C   | 4          | 933  | 426930 |        |
| YDL016C |       | 0                         | #N/A  | iYDL016C   | 4          | 303  | 425868 |        |
| YDL017W | CDC7  | LSD6 SAS1                 |       | iYDL018C   | 4          | 1524 | 424205 |        |
| YDL018C | ERP3  |                           | 0     | iYDL018C   | 4          | 678  | 423506 |        |
| YDL019C | OSH2  |                           | 0     | iYDL019C   | 4          | 3852 | 421510 |        |
| YDL020C | RPN4  | SON1 UFD5                 |       | iYDL020C   | 4          | 1596 | 416704 |        |
| YDL021W | GPM2  |                           | 0     | iYDL022W   | 4          | 936  | 413949 |        |
| YDL022W | GPD1  | DAR1 HOR1 OSG1 CitA(AGC)D |       |            | 4          | 1176 | 411821 |        |
| YDL023C |       | 0                         | 0     | iYDL022W   | 4          | 321  | 412077 |        |
| YDL024C | DIA3  |                           | 0     | iYDL024C   | 4          | 1407 | 409853 |        |
| YDL025C |       | 0                         | #N/A  | iYDL025C   | 4          | 1863 | 407202 |        |
| YDL026W |       | 0                         | #N/A  | iYDL028C   | 4          | 312  | 404745 |        |
| YDL027C |       | 0                         | #N/A  | iYDL026W   | 4          | 1263 | 404953 |        |
| YDL028C | MPS1  | RPK1                      |       | iYDL028C   | 4          | 2295 | 403287 |        |
| YDL029W | ARP2  | ACT2                      |       | iYDL030W   | 4          | 1299 | 399336 |        |
| YDL030W | PRP9  |                           | 0     | iYDL031W   | 4          | 1593 | 397533 |        |
| YDL031W | DBP10 |                           | 0     | iYDL032W   | 4          | 2988 | 394213 |        |
| YDL032W |       | 0                         | #N/A  | iYDL034W   | 4          | 312  | 393686 |        |
| YDL033C |       | 0                         |       | 0          | iYDL032W   | 4    | 1254   | 393908 |
| YDL034W |       | 0                         | #N/A  | iYDL036C   | 4          | 345  | 391779 |        |
| YDL035C | GPR1  |                           | 0     | iYDL034W   | 4          | 2886 | 392053 |        |
| YDL036C |       | 0                         | #N/A  | iYDL036C   | 4          | 1389 | 388897 |        |
| YDL037C |       | 0                         |       | 0          | iYDL037C-0 | 4    | 987    | 385583 |
| YDL038C |       | 0                         | #N/A  | iYDL038C   | 4          | 1752 | 384077 |        |
| YDL039C | PRM7  |                           | 0     | iYDL038C   | 4          | 348  | 382329 |        |
| YDL040C | NAT1  | AAA1                      |       | iYDL040C   | 4          | 2565 | 381434 |        |
| YDL041W | KRE26 |                           | #N/A  | iYDL043C   | 4          | 354  | 378098 |        |
| YDL042C | SIR2  |                           | 38047 | iYDL041W   | 4          | 1689 | 378441 |        |
| YDL043C | PRP11 | RNA11                     |       | iYDL043C   | 4          | 801  | 376476 |        |
| YDL044C | MTF2  | NAM1                      |       | iYDL044C   | 4          | 1323 | 375285 |        |
| YDL045C | FAD1  |                           | 0     | iYDL045C   | 4          | 921  | 373604 |        |
| YDL046W |       | 0                         |       | 0          | iYDL047W   | 4    | 522    | 371236 |
| YDL047W | SIT4  | LGN4                      |       | iYDL048C-1 | 4          | 936  | 369768 |        |
| YDL048C | STP4  |                           | 0     | iYDL048C-0 | 4          | 1473 | 368210 |        |
| YDL049C | KNH1  |                           | 0     | iYDL049C   | 4          | 807  | 365873 |        |
| YDL050C |       | 0                         | #N/A  | iYDL050C   | 4          | 372  | 364816 |        |
| YDL051W | LHP1  | LAH1 YLA1                 |       | iYDL052C   | 4          | 828  | 363951 |        |
| YDL052C | SLC1  |                           | 0     | iYDL052C   | 4          | 912  | 363582 |        |
| YDL053C |       | 0                         |       | 0          | iYDL053C   | 4    | 558    | 362255 |
| YDL054C | MCH1  |                           | 0     | iYDL054C   | 4          | 1461 | 361284 |        |
| YDL055C | PSA1  | MPG1 SRB1 VIG9            |       | iYDL055C-0 | 4          | 1086 | 356758 |        |
| YDL056W | MBP1  |                           | 0     | iYDL057W   | 4          | 2502 | 352876 |        |
| YDL057W |       | 0                         | #N/A  | iYDL058W   | 4          | 987  | 351433 |        |
| YDL058W | USO1  | INT1                      |       | iYDL059C   | 4          | 5373 | 345664 |        |

|         |        |                  |   |          |   |      |        |
|---------|--------|------------------|---|----------|---|------|--------|
| YDL059C | RAD59  |                  | 0 | iYDL059C | 4 | 717  | 344952 |
| YDL060W | TSR1   |                  | 0 | iYDL061C | 4 | 2367 | 341618 |
| YDL061C | RPS29B | YS29B            |   | iYDL061C | 4 | 171  | 340797 |
| YDL062W | 0      | #N/A             |   | iYDL064W | 4 | 426  | 339856 |
| YDL063C | 0      | #N/A             |   | iYDL062W | 4 | 1863 | 340133 |
| YDL064W | UBC9   |                  | 0 | iYDL065C | 4 | 584  | 337486 |
| YDL065C | PEX19  | PAS12            |   | iYDL065C | 4 | 1053 | 337300 |
| YDL066W | IDP1   |                  | 0 | iYDL067C | 4 | 1287 | 334834 |
| YDL067C | COX9   |                  | 0 | iYDL067C | 4 | 180  | 334395 |
| YDL068W | 0      | #N/A             |   | iYDL070W | 4 | 330  | 333499 |
| YDL069C | CBS1   |                  | 0 | iYDL068W | 4 | 702  | 333821 |
| YDL070W | BDF2   |                  | 0 | iYDL072C | 4 | 1917 | 331024 |
| YDL071C | 0      | #N/A             |   | iYDL070W | 4 | 375  | 331040 |
| YDL072C | 0      |                  | 0 | iYDL072C | 4 | 612  | 330446 |
| YDL073W | 0      | #N/A             |   | iYDL074C | 4 | 2955 | 326612 |
| YDL074C | BRE1   |                  | 0 | iYDL074C | 4 | 2103 | 326148 |
| YDL075W | RPL31A | RPL34            |   | iYDL076C | 4 | 763  | 322225 |
| YDL076C | 0      |                  | 0 | iYDL076C | 4 | 885  | 321551 |
| YDL077C | VAM6   | CVT4 VPL18 VPL22 |   | iYDL077C | 4 | 3150 | 320119 |
| YDL078C | MDH3   |                  | 0 | iYDL078C | 4 | 1032 | 316387 |
| YDL079C | MRK1   |                  | 0 | iYDL079C | 4 | 1798 | 314747 |
| YDL080C | THI3   | KID1             |   | iYDL080C | 4 | 1830 | 312470 |
| YDL081C | RPP1A  | RPLA1            |   | iYDL081C | 4 | 321  | 310121 |
| YDL082W | RPL13A |                  | 0 | iYDL083C | 4 | 965  | 308423 |
| YDL083C | RPS16B |                  | 0 | iYDL083C | 4 | 864  | 307788 |
| YDL084W | SUB2   |                  | 0 | iYDL085W | 4 | 1341 | 305236 |
| YDL085W | NDE2   | NDH2             |   | iYDL086W | 4 | 1638 | 303210 |
| YDL086W | 0      | #N/A             |   | iYDL087C | 4 | 822  | 301412 |
| YDL087C | LUC7   | EPE1 EXM2        |   | iYDL087C | 4 | 786  | 300998 |
| YDL088C | ASM4   | NUP59            |   | iYDL088C | 4 | 1587 | 300002 |
| YDL089W | 0      | #N/A             |   | iYDL090C | 4 | 1455 | 296819 |
| YDL090C | RAM1   | DPR1 FUS8 SCG2 S |   | iYDL090C | 4 | 1296 | 296328 |
| YDL091C | 0      |                  | 0 | iYDL091C | 4 | 1368 | 294758 |
| YDL092W | SRP14  |                  | 0 | iYDL093W | 4 | 441  | 292780 |
| YDL093W | PMT5   |                  | 0 | iYDL095W | 4 | 2232 | 289908 |
| YDL094C | 0      | #N/A             |   | iYDL093W | 4 | 510  | 290080 |
| YDL095W | PMT1   |                  | 0 | iYDL097C | 4 | 2454 | 287058 |
| YDL096C | 0      | #N/A             |   | iYDL095W | 4 | 327  | 287323 |
| YDL097C | RPN6   | NAS4             |   | iYDL097C | 4 | 1305 | 286694 |
| YDL098C | SNU23  |                  | 0 | iYDL098C | 4 | 585  | 285164 |
| YDL099W | 0      | #N/A             |   | iYDL100C | 4 | 1026 | 283418 |
| YDL100C | ARR4   |                  | 0 | iYDL100C | 4 | 1065 | 283175 |
| YDL101C | DUN1   |                  | 0 | iYDL101C | 4 | 1542 | 281847 |
| YDL102W | CDC2   | HPR6 POL3 TEX1   |   | iYDL103C | 4 | 3294 | 276871 |
| YDL103C | QRI1   | UAP1             |   | iYDL103C | 4 | 1434 | 276580 |
| YDL104C | QRI7   |                  | 0 | iYDL104C | 4 | 1224 | 274875 |
| YDL105W | QRI2   |                  | 0 | iYDL106C | 4 | 1209 | 272388 |
| YDL106C | PHO2   | BAS2 GRF10       |   | iYDL106C | 4 | 1680 | 271900 |
| YDL107W | MSS2   |                  | 0 | iYDL108W | 4 | 1056 | 268920 |
| YDL108W | KIN28  |                  | 0 | iYDL109C | 4 | 1002 | 267697 |
| YDL109C | 0      | #N/A             |   | iYDL109C | 4 | 1944 | 267200 |

|           |        |                  |            |      |      |        |
|-----------|--------|------------------|------------|------|------|--------|
| YDL110C   | 0      | #N/A             | iYDL110C   | 4    | 453  | 264963 |
| YDL111C   | RRP42  |                  | 0 iYDL111C | 4    | 798  | 264109 |
| YDL112W   | TRM3   |                  | 0 iYDL113C | 4    | 4311 | 258914 |
| YDL113C   | CVT20  | CVT20 SNX42      | iYDL113C   | 4    | 1923 | 258554 |
| YDL114W   | 0      | #N/A             | iYDL115C   | 4    | 927  | 255603 |
| YDL115C   | IWR1   |                  | 0 iYDL115C | 4    | 723  | 254716 |
| YDL116W   | NUP84  |                  | 0 iYDL117W | 4    | 2181 | 251565 |
| YDL117W   | CYK3   |                  | 0 iYDL118W | 4    | 2658 | 248580 |
| YDL118W   | 0      | #N/A             | iYDL120W   | 4    | 381  | 247301 |
| YDL119C   | 0      | #N/A             | iYDL118W   | 4    | 924  | 247611 |
| YDL120W   | YFH1   |                  | 0 iYDL121C | 4    | 525  | 245922 |
| YDL121C   | 0      | #N/A             | iYDL121C   | 4    | 450  | 245581 |
| YDL122W   | UBP1   |                  | 0 iYDL123W | 4    | 2430 | 242551 |
| YDL123W   | SNA4   |                  | 0 iYDL124W | 4    | 423  | 241417 |
| YDL124W   | 0      | #N/A             | iYDL125C   | 4    | 939  | 240258 |
| YDL125C   | HNT1   |                  | 0 iYDL125C | 4    | 588  | 239605 |
| YDL126C   | CDC48  |                  | 0 iYDL126C | 4    | 2508 | 238663 |
| YDL127W   | PCL2   | CLN4             | iYDL128W   | 4    | 840  | 234927 |
| YDL128W   | VCX1   | HUM1 MNR1        | iYDL129W   | 4    | 1236 | 232652 |
| YDL129W   | 0      | #N/A             | iYDL130W   | 4    | 876  | 231024 |
| YDL130W   | RPP1B  | RPL44 RPLA3      | iYDL130W-  | 4    | 622  | 229906 |
| YDL131W   | LYS21  |                  | 0 iYDL132W | 4    | 1323 | 227393 |
| YDL132W   | CDC53  |                  | 0 iYDL133W | 4    | 2448 | 224304 |
| YDL133W   | 0      | #N/A             | iYDL133C-A | 4    | 1314 | 222427 |
| YDL134C   | PPH21  | PPH1             | iYDL134C   | 4    | 1110 | 220771 |
| YDL134C-A | #N/A   | #N/A             | #N/A       | #N/A | #N/A | #N/A   |
| YDL135C   | RDI1   |                  | 0 iYDL135C | 4    | 609  | 219288 |
| YDL136W   | RPL35B | SOS2             | iYDL137W   | 4    | 768  | 217600 |
| YDL137W   | ARF2   |                  | 0 iYDL138W | 4    | 546  | 216529 |
| YDL138W   | RGT2   |                  | 0 iYDL139C | 4    | 2292 | 213352 |
| YDL139C   | SCM3   |                  | 0 iYDL139C | 4    | 744  | 212119 |
| YDL140C   | RPO21  | RPB1 RPB220 SUA8 | iYDL140C   | 4    | 5202 | 210562 |
| YDL141W   | BPL1   | ACC2             | iYDL142C   | 4    | 2073 | 203040 |
| YDL142C   | CRD1   | CLS1             | iYDL142C   | 4    | 852  | 202571 |
| YDL143W   | CCT4   | TCP4             | iYDL144C   | 4    | 1587 | 199997 |
| YDL144C   | 0      | #N/A             | iYDL144C   | 4    | 1080 | 199742 |
| YDL145C   | COP1   | RET1 SEC33       | iYDL145C   | 4    | 3606 | 198177 |
| YDL146W   | 0      | #N/A             | iYDL147W   | 4    | 1476 | 192751 |
| YDL147W   | RPN5   | NAS5             | iYDL148C   | 4    | 1338 | 190925 |
| YDL148C   | NOP14  | UTP2             | iYDL148C   | 4    | 2433 | 190587 |
| YDL149W   | APG9   | APG9 AUT9 CVT7   | iYDL150W   | 4    | 2994 | 184926 |
| YDL150W   | RPC53  | RPC4             | iYDL152W   | 4    | 1269 | 183344 |
| YDL151C   | FYV3   |                  | 0 iYDL150W | 4    | 582  | 183900 |
| YDL152W   | 0      | #N/A             | iYDL154W   | 4    | 366  | 182823 |
| YDL153C   | SAS10  | UTP3             | iYDL152W   | 4    | 1833 | 183019 |
| YDL154W   | MSH5   |                  | 0 iYDL155W | 4    | 2706 | 178335 |
| YDL155W   | CLB3   |                  | 0 iYDL156W | 4    | 1284 | 176774 |
| YDL156W   | 0      | #N/A             | iYDL157C   | 4    | 1569 | 174919 |
| YDL157C   | 0      | #N/A             | iYDL157C   | 4    | 357  | 174589 |
| YDL158C   | 0      | #N/A             | iYDL157C   | 4    | 309  | 174175 |
| YDL159W   | STE7   |                  | 0 iYDL160C | 4    | 1548 | 172482 |

|         |        |            |      |            |            |      |        |
|---------|--------|------------|------|------------|------------|------|--------|
| YDL160C | DHH1   |            | 0    | iYDL160C   | 4          | 1521 | 171931 |
| YDL161W | ENT1   |            |      | 0          | iYDL163W   | 4    | 1365   |
| YDL162C |        | 0          | #N/A | iYDL161W   | 4          | 357  | 167716 |
| YDL163W |        | 0          | #N/A | iYDL165W   | 4          | 303  | 166957 |
| YDL164C | CDC9   | MMS8       |      | iYDL163W   | 4          | 2268 | 167255 |
| YDL165W | CDC36  | DNA19 NOT2 |      | iYDL166C   | 4          | 576  | 164291 |
| YDL166C | FAP7   |            |      | 0          | iYDL166C   | 4    | 594    |
| YDL167C | NRP1   |            |      | 0          | iYDL167C   | 4    | 2160   |
| YDL168W | SFA1   | ADH5       |      | iYDL169C   | 4          | 1161 | 159605 |
| YDL169C | UGX2   |            |      | 0          | iYDL169C   | 4    | 672    |
| YDL170W | UGA3   |            |      | 0          | iYDL171C   | 4    | 1587   |
| YDL171C | GLT1   |            |      | 0          | iYDL171C   | 4    | 6438   |
| YDL172C |        | 0          | #N/A | iYDL172C   | 4          | 480  | 149087 |
| YDL173W |        | 0          | #N/A | iYDL174C   | 4          | 888  | 148192 |
| YDL174C | DLD1   |            |      | 0          | iYDL174C   | 4    | 1764   |
| YDL175C | AIR2   |            |      | 0          | iYDL175C   | 4    | 1035   |
| YDL176W |        | 0          | #N/A | iYDL177C   | 4          | 2127 | 142098 |
| YDL177C |        | 0          | #N/A | iYDL177C   | 4          | 513  | 141722 |
| YDL178W | DLD2   | AIP2       |      | iYDL179W   | 4          | 1593 | 139523 |
| YDL179W | PCL9   |            |      | 0          | iYDL180W   | 4    | 915    |
| YDL180W |        | 0          | #N/A | iYDL181W   | 4          | 1644 | 135897 |
| YDL181W | INH1   |            |      | 0          | iYDL182W   | 4    | 258    |
| YDL182W | LYS20  |            |      | 0          | iYDL183C-1 | 4    | 1287   |
| YDL183C |        | 0          | #N/A | iYDL183C-0 | 4          | 963  | 131834 |
| YDL184C | RPL41A | RPL47A     |      | iYDL184C   | 4          | 78   | 130485 |
| YDL185W | TFP1   | CLS8 VMA1  |      | iYDL186W   | 4          | 3216 | 126788 |
| YDL186W |        | 0          | #N/A | iYDL188C   | 4          | 834  | 125617 |
| YDL187C |        | 0          | #N/A | iYDL186W   | 4          | 330  | 125839 |
| YDL188C | PPH22  | PPH2       |      | iYDL188C   | 4          | 1134 | 124999 |
| YDL189W |        | 0          |      | 0          | iYDL190C   | 4    | 1374   |
| YDL190C | UFD2   |            |      | 0          | iYDL190C   | 4    | 2886   |
| YDL191W | RPL35A | SOS1       |      | iYDL192W   | 4          | 854  | 117665 |
| YDL192W | ARF1   |            |      | 0          | iYDL193W   | 4    | 546    |
| YDL193W |        | 0          | #N/A | iYDL194W   | 4          | 1128 | 114673 |
| YDL194W | SNF3   |            |      | 0          | iYDL195W   | 4    | 2655   |
| YDL195W | SEC31  | WEB1       |      | iYDL196W   | 4          | 3822 | 107209 |
| YDL196W |        | 0          | #N/A | iYDL197C   | 4          | 330  | 106742 |
| YDL197C | ASF2   |            |      | 0          | iYDL197C   | 4    | 1578   |
| YDL198C | YHM1   | YHM1       |      | iYDL198C   | 4          | 903  | 104552 |
| YDL199C |        | 0          | #N/A | iYDL199C   | 4          | 2064 | 103354 |
| YDL200C | MGT1   | MGMT       |      | iYDL200C   | 4          | 621  | 101122 |
| YDL201W | TRM8   |            |      | 0          | iYDL202W   | 4    | 861    |
| YDL202W | MRPL11 |            |      | 0          | iYDL203C   | 4    | 750    |
| YDL203C |        | 0          | #N/A | iYDL203C   | 4          | 1872 | 97954  |
| YDL204W |        | 0          |      | 0          | iYDL205C   | 4    | 1182   |
| YDL205C | HEM3   |            |      | 0          | iYDL205C   | 4    | 984    |
| YDL206W |        | 0          | #N/A | iYDL207W   | 4          | 2289 | 90177  |
| YDL207W | GLE1   | BRR3 RSS1  |      | iYDL208W   | 4          | 1617 | 88249  |
| YDL208W | NHP2   |            |      | 0          | iYDL209C   | 4    | 522    |
| YDL209C | CWC2   | NTC40      |      | iYDL209C   | 4          | 1020 | 87227  |
| YDL210W | UGA4   |            |      | 0          | itG(GCC)D1 | 4    | 1716   |

|         |       |                 |        |              |   |      |        |
|---------|-------|-----------------|--------|--------------|---|------|--------|
| YDL211C |       | 0               | #N/A   | iYDL211C-0   | 4 | 1119 | 80413  |
| YDL212W | SHR3  | APF1            |        | iYDL213C     | 4 | 633  | 78427  |
| YDL213C | FYV14 |                 |        | 0 iYDL213C   | 4 | 678  | 77967  |
| YDL214C | PRR2  |                 |        | 0 iYDL214C   | 4 | 2100 | 76546  |
| YDL215C | GDH2  | GDH-B GDHB      |        | iYDL215C     | 4 | 3279 | 73919  |
| YDL216C | RRI1  | CSN5 JAB1       |        | iYDL216C     | 4 | 1368 | 70365  |
| YDL217C | TIM22 |                 |        | 0 iYDL217C   | 4 | 624  | 68607  |
| YDL218W |       | 0               | #N/A   | iYDL219W     | 4 | 954  | 66494  |
| YDL219W | DTD1  |                 |        | 0 iYDL220C   | 4 | 524  | 65243  |
| YDL220C | CDC13 | EST4            |        | iYDL220C     | 4 | 2775 | 65019  |
| YDL221W |       | 0               | #N/A   | iYDL222C     | 4 | 552  | 62012  |
| YDL222C |       | 0               |        | 0 iYDL222C   | 4 | 930  | 61802  |
| YDL223C | HBT1  |                 |        | 0 iYDL223C   | 4 | 3141 | 60406  |
| YDL224C | WHI4  |                 |        | 0 iYDL224C   | 4 | 1950 | 56347  |
| YDL225W | SHS1  |                 | 38237  | iYDL226C     | 4 | 1656 | 52446  |
| YDL226C | GCS1  |                 |        | 0 iYDL226C   | 4 | 1059 | 52174  |
| YDL227C | HO    |                 |        | 0 iYDL227C-0 | 4 | 1761 | 48032  |
| YDL228C |       | 0               | #N/A   | iYDL228C     | 4 | 642  | 45919  |
| YDL229W | SSB1  | YG101           |        | iYDL230W     | 4 | 1842 | 44066  |
| YDL230W | PTP1  |                 |        | 0 iYDL231C   | 4 | 1008 | 42701  |
| YDL231C | BRE4  |                 |        | 0 iYDL231C   | 4 | 3378 | 42245  |
| YDL232W | OST4  |                 |        | 0 iYDL233W   | 4 | 111  | 38488  |
| YDL233W |       | 0               | #N/A   | iYDL234C     | 4 | 1377 | 36798  |
| YDL234C | GYP7  |                 |        | 0 iYDL234C   | 4 | 2241 | 36478  |
| YDL235C | YPD1  |                 |        | 0 iYDL235C   | 4 | 504  | 33918  |
| YDL236W | PHO13 |                 |        | 0 iYDL237W   | 4 | 939  | 32296  |
| YDL237W |       | 0               | #N/A   | iYDL238C     | 4 | 1173 | 30657  |
| YDL238C |       | 0               |        | 0 iYDL238C   | 4 | 1470 | 30454  |
| YDL239C | ADY3  |                 |        | 0 iYDL239C   | 4 | 2373 | 28775  |
| YDL240W | LRG1  |                 |        | 0 iYDL241W-  | 4 | 3054 | 22823  |
| YDL241W |       | 0               | #N/A   | iYDL242W     | 4 | 372  | 20635  |
| YDL242W |       | 0               | #N/A   | iYDL243C     | 4 | 354  | 18959  |
| YDL243C | AAD4  |                 |        | 0 iYDL243C   | 4 | 990  | 18566  |
| YDL244W | THI13 |                 |        | 0 iYDL245C-1 | 4 | 1023 | 16204  |
| YDL245C | HXT15 |                 |        | 0 iYDL245C-0 | 4 | 1704 | 13360  |
| YDL246C |       | 0               |        | 0 iYDL246C-0 | 4 | 1074 | 9756   |
| YDL247W |       | 0               |        | 0 iYDL248W-  | 4 | 1830 | 5985   |
| YDL248W | COS7  |                 |        | 0 #N/A       | 4 | 1152 | 1802   |
| YDR001C | NTH1  |                 |        | 0 iYDR001C   | 4 | 2256 | 452471 |
| YDR002W | YRB1  | CST20 HTN1 SFO1 |        | iYDR001C     | 4 | 606  | 453041 |
| YDR003W |       | 0               |        | 0 iYDR002W   | 4 | 633  | 454118 |
| YDR004W | RAD57 |                 |        | 0 iYDR003W   | 4 | 1383 | 455197 |
| YDR005C | MAF1  |                 |        | 0 iYDR005C   | 4 | 1268 | 458099 |
| YDR006C | SOK1  |                 |        | 0 iYDR006C   | 4 | 2706 | 461243 |
| YDR007W | TRP1  |                 |        | 0 iYDR006C   | 4 | 675  | 461838 |
| YDR008C |       | 0               | #N/A   | iYDR008C     | 4 | 351  | 462598 |
| YDR009W | GAL3  |                 |        | 0 iYDR008C   | 4 | 1563 | 463430 |
| YDR010C |       | 0               | #N/A   | iYDR010C     | 4 | 333  | 465379 |
| YDR011W | SNQ2  |                 |        | 0 iYDR010C   | 4 | 4506 | 465915 |
| YDR012W | RPL4B |                 |        | 0 iYDR011W   | 4 | 1089 | 471849 |
| YDR013W |       | 0               | CDC101 | iYDR012W     | 4 | 627  | 473153 |

|         |        |                  |   |            |   |      |        |
|---------|--------|------------------|---|------------|---|------|--------|
| YDR014W | RAD61  |                  | 0 | iYDR013W   | 4 | 1944 | 474042 |
| YDR015C | 0      | #N/A             |   | iYDR015C   | 4 | 390  | 478194 |
| YDR016C | DAD1   |                  | 0 | iYDR016C   | 4 | 285  | 478753 |
| YDR017C | KCS1   |                  | 0 | iYDR017C   | 4 | 3153 | 482262 |
| YDR018C | 0      | #N/A             |   | iYDR018C   | 4 | 1191 | 483855 |
| YDR019C | GCV1   | GSD1             |   | iYDR019C   | 4 | 1203 | 485360 |
| YDR020C | 0      | #N/A             |   | iYDR020C   | 4 | 699  | 486439 |
| YDR021W | FAL1   |                  | 0 | iYDR020C   | 4 | 1200 | 486799 |
| YDR022C | CIS1   |                  | 0 | iYDR022C   | 4 | 591  | 488657 |
| YDR023W | SES1   | SerRS            |   | itV(UAC)D  | 4 | 1389 | 489503 |
| YDR024W | FYV1   |                  | 0 | iYDR023W   | 4 | 486  | 491012 |
| YDR025W | RPS11A |                  | 0 | iYDR023W   | 4 | 810  | 491510 |
| YDR026C | 0      | #N/A             |   | iYDR026C   | 4 | 1713 | 494263 |
| YDR027C | LUV1   | CGP1 LUV1 TCS3   |   | iYDR027C   | 4 | 2670 | 497313 |
| YDR028C | REG1   | HEX2 PZF240 SPP4 |   | iYDR028C   | 4 | 3045 | 500874 |
| YDR029W | 0      | #N/A             |   | iYDR028C   | 4 | 315  | 501095 |
| YDR030C | RAD28  |                  | 0 | iYDR030C   | 4 | 1521 | 503268 |
| YDR031W | 0      | #N/A             |   | iYDR030C   | 4 | 354  | 503493 |
| YDR032C | PST2   |                  | 0 | iYDR032C-( | 4 | 597  | 504689 |
| YDR033W | MRH1   |                  | 0 | iYDR032C-2 | 4 | 963  | 508141 |
| YDR034C | LYS14  |                  | 0 | iYDR034C   | 4 | 2373 | 512103 |
| YDR035W | ARO3   |                  | 0 | iYDR034W-  | 4 | 1113 | 521810 |
| YDR036C | 0      | MRP5             |   | iYDR036C   | 4 | 1503 | 524707 |
| YDR037W | KRS1   | GCD5             |   | iYDR036C   | 4 | 1776 | 525434 |
| YDR038C | ENA5   |                  | 0 | iYDR038C   | 4 | 3276 | 530691 |
| YDR039C | ENA2   |                  | 0 | iYDR039C   | 4 | 3276 | 534576 |
| YDR040C | ENA1   | HOR6 PMR2        |   | iYDR040C   | 4 | 3276 | 538461 |
| YDR041W | RSM10  |                  | 0 | iYDR040C   | 4 | 612  | 539797 |
| YDR042C | 0      | #N/A             |   | iYDR042C   | 4 | 603  | 541197 |
| YDR043C | NRG1   |                  | 0 | iYDR043C-( | 4 | 696  | 543364 |
| YDR044W | HEM13  |                  | 0 | iYDR043C-2 | 4 | 987  | 546637 |
| YDR045C | RPC11  |                  | 0 | iYDR045C   | 4 | 333  | 548305 |
| YDR046C | BAP3   | PAP1             |   | iYDR046C   | 4 | 1815 | 550571 |
| YDR047W | HEM12  | HEM6             |   | iYDR046C   | 4 | 1089 | 551855 |
| YDR048C | 0      | #N/A             |   | iYDR049W   | 4 | 315  | 553393 |
| YDR049W | 0      | #N/A             |   | iYDR047W   | 4 | 1899 | 553249 |
| YDR050C | TPI1   |                  | 0 | iYDR050C   | 4 | 747  | 556467 |
| YDR051C | 0      | #N/A             |   | iYDR051C   | 4 | 1005 | 558055 |
| YDR052C | DBF4   | LSD7             |   | iYDR053W   | 4 | 2115 | 560620 |
| YDR053W | 0      | #N/A             |   | iYDR051C   | 4 | 396  | 560244 |
| YDR054C | CDC34  | DNA6 UBC3        |   | iYDR054C   | 4 | 888  | 562322 |
| YDR055W | PST1   |                  | 0 | iYDR054C   | 4 | 1335 | 563522 |
| YDR056C | 0      | #N/A             |   | iYDR056C   | 4 | 618  | 565635 |
| YDR057W | 0      |                  | 0 | iYDR056C   | 4 | 1629 | 565922 |
| YDR058C | TGL2   |                  | 0 | iYDR058C   | 4 | 981  | 568698 |
| YDR059C | UBC5   |                  | 0 | iYDR059C   | 4 | 537  | 569765 |
| YDR060W | MAK21  | NOC1             |   | iYDR059C   | 4 | 3078 | 570643 |
| YDR061W | 0      | #N/A             |   | iYDR060W   | 4 | 1620 | 574158 |
| YDR062W | LCB2   | SCS1 TSC1        |   | iYDR061W   | 4 | 1686 | 576468 |
| YDR063W | 0      | #N/A             |   | iYDR062W   | 4 | 450  | 578658 |
| YDR064W | RPS13  | RPS13B RPS13C    |   | iYDR063W   | 4 | 995  | 579453 |

|         |        |                   |            |   |      |        |
|---------|--------|-------------------|------------|---|------|--------|
| YDR065W | 0      | #N/A              | iYDR064W   | 4 | 1098 | 580682 |
| YDR066C | 0      | #N/A              | iYDR066C   | 4 | 591  | 582493 |
| YDR067C | 0      | #N/A              | iYDR067C   | 4 | 675  | 583460 |
| YDR068W | DOS2   |                   | 0 iYDR067C | 4 | 933  | 583708 |
| YDR069C | DOA4   | DOS1 MUT4 NPI2 SS | iYDR069C   | 4 | 2781 | 587714 |
| YDR070C | 0      |                   | 0 iYDR070C | 4 | 282  | 588374 |
| YDR071C | 0      |                   | 0 iYDR071C | 4 | 576  | 589397 |
| YDR072C | IPT1   | SYR4              | iYDR072C   | 4 | 1584 | 591339 |
| YDR073W | SNF11  |                   | 0 iYDR072C | 4 | 510  | 592433 |
| YDR074W | TPS2   | HOG2 PFK3         | iYDR073W   | 4 | 2691 | 593887 |
| YDR075W | PPH3   |                   | 0 iYDR074W | 4 | 927  | 597150 |
| YDR076W | RAD55  |                   | 0 iYDR075W | 4 | 1221 | 598462 |
| YDR077W | SED1   |                   | 0 iYDR076W | 4 | 1017 | 600787 |
| YDR078C | SHU2   |                   | 0 iYDR078C | 4 | 672  | 602863 |
| YDR079W | PET100 |                   | 0 iYDR078C | 4 | 336  | 603058 |
| YDR080W | VPS41  | CVT8 FET2 SVL2 VA | iYDR079W   | 4 | 2979 | 604002 |
| YDR081C | PDC2   |                   | 0 iYDR081C | 4 | 2778 | 610075 |
| YDR082W | STN1   |                   | 0 iYDR081C | 4 | 1485 | 610435 |
| YDR083W | RRP8   |                   | 0 iYDR082W | 4 | 1209 | 612010 |
| YDR084C | 0      |                   | 0 iYDR084C | 4 | 600  | 613997 |
| YDR085C | AFR1   |                   | 0 iYDR085C | 4 | 1863 | 616143 |
| YDR086C | SSS1   |                   | 0 iYDR086C | 4 | 243  | 617163 |
| YDR087C | RRP1   |                   | 0 iYDR087C | 4 | 837  | 618299 |
| YDR088C | SLU7   | SLT17             | iYDR088C   | 4 | 1149 | 619638 |
| YDR089W | 0      | #N/A              | itR(ACG)D- | 4 | 2610 | 622105 |
| YDR090C | 0      | #N/A              | iYDR090C   | 4 | 933  | 625991 |
| YDR091C | RLI1   |                   | 0 iYDR091C | 4 | 1827 | 628527 |
| YDR092W | UBC13  |                   | 0 iYDR091C | 4 | 730  | 629869 |
| YDR093W | DNF2   |                   | 0 iYDR092W | 4 | 4839 | 631275 |
| YDR094W | 0      | #N/A              | iYDR092W   | 4 | 336  | 635833 |
| YDR095C | 0      | #N/A              | iYDR095C   | 4 | 411  | 636520 |
| YDR096W | GIS1   |                   | 0 iYDR095C | 4 | 2685 | 637132 |
| YDR097C | MSH6   | PMS3              | iYDR097C   | 4 | 3729 | 643830 |
| YDR098C | GRX3   |                   | 0 iYDR098C | 4 | 858  | 645028 |
| YDR099W | BMH2   | SCD3              | iYDRcdelta | 4 | 822  | 653600 |
| YDR100W | 0      |                   | 0 iYDR099W | 4 | 432  | 655006 |
| YDR101C | ARX1   |                   | 0 iYDR101C | 4 | 1782 | 657460 |
| YDR102C | 0      | #N/A              | iYDR102C   | 4 | 333  | 657973 |
| YDR103W | STE5   | HMD3 NUL3         | iYDR102C   | 4 | 2754 | 658343 |
| YDR104C | SPO71  |                   | 0 iYDR104C | 4 | 3738 | 664903 |
| YDR105C | 0      |                   | 0 iYDR105C | 4 | 1422 | 666763 |
| YDR106W | ARP10  |                   | 0 iYDR105C | 4 | 855  | 666997 |
| YDR107C | 0      | #N/A              | iYDR107C   | 4 | 2019 | 671027 |
| YDR108W | GSG1   | TRS85             | iYDR107C   | 4 | 2097 | 671262 |
| YDR109C | 0      | #N/A              | iYDR109C   | 4 | 2148 | 675660 |
| YDR110W | FOB1   | HRM1              | iYDR109C   | 4 | 1701 | 676095 |
| YDR111C | 0      |                   | 0 iYDR112W | 4 | 1524 | 679757 |
| YDR112W | 0      | #N/A              | iYDR110W   | 4 | 309  | 679537 |
| YDR113C | PDS1   |                   | 0 iYDR113C | 4 | 1122 | 681610 |
| YDR114C | 0      | #N/A              | iYDR115W   | 4 | 303  | 682219 |
| YDR115W | 0      | #N/A              | iYDR113C   | 4 | 318  | 682168 |



|         |       |                     |            |   |      |        |
|---------|-------|---------------------|------------|---|------|--------|
| YDR116C | 0     |                     | 0 iYDR116C | 4 | 858  | 683574 |
| YDR117C | 0     | #N/A                | iYDR117C   | 4 | 1698 | 685636 |
| YDR118W | APC4  |                     | 0 iYDR117C | 4 | 1959 | 685875 |
| YDR119W | 0     | #N/A                | iYDR118W   | 4 | 2307 | 688220 |
| YDR120C | TRM1  |                     | 0 iYDR120C | 4 | 1713 | 693254 |
| YDR121W | DPB4  |                     | 0 iYDR120C | 4 | 591  | 693578 |
| YDR122W | KIN1  |                     | 0 iYDR121W | 4 | 3195 | 694693 |
| YDR123C | INO2  | DIE1 SCS1           | iYDR123C   | 4 | 915  | 699461 |
| YDR124W | 0     | #N/A                | iYDR123C   | 4 | 975  | 700308 |
| YDR125C | ECM18 |                     | 0 iYDR125C | 4 | 1362 | 702751 |
| YDR126W | PSL10 | PSL10               | iYDR125C   | 4 | 1011 | 703227 |
| YDR127W | ARO1  |                     | 0 iYDR126W | 4 | 4767 | 704477 |
| YDR128W | 0     | #N/A                | iYDR127W   | 4 | 3447 | 709542 |
| YDR129C | SAC6  | ABP67               | iYDR129C   | 4 | 2040 | 715372 |
| YDR130C | FIN1  |                     | 0 iYDR130C | 4 | 876  | 716615 |
| YDR131C | 0     | #N/A                | iYDR131C   | 4 | 1671 | 718453 |
| YDR132C | 0     | #N/A                | iYDR132C   | 4 | 1488 | 720296 |
| YDR133C | 0     | #N/A                | iYDR134C   | 4 | 336  | 721290 |
| YDR134C | 0     | #N/A                | iYDR134C   | 4 | 411  | 721474 |
| YDR135C | YCF1  |                     | 0 iYDR135C | 4 | 4548 | 727544 |
| YDR136C | VPS61 |                     | 0 iYDR137W | 4 | 573  | 728276 |
| YDR137W | RGP1  |                     | 0 iYDR135C | 4 | 1992 | 728252 |
| YDR138W | HPR1  |                     | 0 iYDR137W | 4 | 2259 | 730571 |
| YDR139C | RUB1  |                     | 0 iYDR139C | 4 | 307  | 733917 |
| YDR140W | FYV9  | #N/A                | iYDR139C   | 4 | 666  | 734131 |
| YDR141C | DOP1  |                     | 0 iYDR141C | 4 | 5097 | 739990 |
| YDR142C | PEX7  | PAS7 PEB1           | iYDR142C   | 4 | 1128 | 741593 |
| YDR143C | SAN1  |                     | 0 iYDR143C | 4 | 1833 | 743867 |
| YDR144C | MKC7  | YPS2                | iYDR144C   | 4 | 1791 | 746094 |
| YDR145W | TAF12 | TAF61 TAF68 TafII61 | iYDR144C   | 4 | 1620 | 746731 |
| YDR146C | SWI5  |                     | 0 iYDR146C | 4 | 2130 | 750735 |
| YDR147W | EKI1  |                     | 0 iYDR146C | 4 | 1605 | 751624 |
| YDR148C | KGD2  |                     | 0 iYDR148C | 4 | 1392 | 755059 |
| YDR149C | 0     | #N/A                | iYDR150W   | 4 | 708  | 756255 |
| YDR150W | NUM1  | PAC12               | iYDR148C   | 4 | 8247 | 755621 |
| YDR151C | CTH1  |                     | 0 iYDR151C | 4 | 978  | 765148 |
| YDR152W | 0     |                     | 0 iYDR151C | 4 | 798  | 765699 |
| YDR153C | 0     |                     | 0 iYDR153C | 4 | 1236 | 767964 |
| YDR154C | 0     | #N/A                | iYDR155C   | 4 | 351  | 768746 |
| YDR155C | CPR1  | CPH1 CYP1           | iYDR155C   | 4 | 489  | 768993 |
| YDR156W | RPA14 |                     | 0 iYDR155C | 4 | 414  | 769518 |
| YDR157W | 0     | #N/A                | iYDR155C   | 4 | 402  | 769924 |
| YDR158W | HOM2  |                     | 0 iYDR155C | 4 | 1098 | 770350 |
| YDR159W | SAC3  | LEP1                | iYDR158W   | 4 | 3906 | 771870 |
| YDR160W | SSY1  | SHR10               | iYDR159W   | 4 | 2559 | 776156 |
| YDR161W | TCI1  | #N/A                | iYDR160W   | 4 | 1164 | 779036 |
| YDR162C | NBP2  |                     | 0 iYDR162C | 4 | 711  | 781093 |
| YDR163W | CWC15 |                     | 0 iYDR162C | 4 | 528  | 781416 |
| YDR164C | SEC1  |                     | 0 iYDR164C | 4 | 2175 | 784208 |
| YDR165W | TRM82 |                     | 0 iYDR164C | 4 | 1335 | 784864 |
| YDR166C | SEC5  |                     | 0 iYDR166C | 4 | 2916 | 789214 |

|           |        |                      |             |   |      |        |
|-----------|--------|----------------------|-------------|---|------|--------|
| YDR167W   | TAF10  | TAF23 TAF25 TafII25i | YDR166C     | 4 | 621  | 789442 |
| YDR168W   | CDC37  | SMO1                 | iYDR167W    | 4 | 1521 | 790321 |
| YDR169C   | STB3   |                      | 0 iYDR169C- | 4 | 1542 | 793882 |
| YDR170C   | SEC7   |                      | 0 iYDR170C  | 4 | 6030 | 802215 |
| YDR171W   | HSP42  |                      | 0 iYDR170W- | 4 | 1128 | 806614 |
| YDR172W   | SUP35  | GST1 PNM2 SAL3 Sl    | YDR171W     | 4 | 2058 | 808317 |
| YDR173C   | ARG82  | ARGR3 IPK2           | iYDR173C    | 4 | 1068 | 811625 |
| YDR174W   | HMO1   | HSM2                 | iYDR173C    | 4 | 741  | 812103 |
| YDR175C   | RSM24  |                      | 0 iYDR175C  | 4 | 960  | 814145 |
| YDR176W   | NGG1   | ADA3 SWI7            | iYDR175C    | 4 | 2109 | 814445 |
| YDR177W   | UBC1   |                      | 0 iYDR176W  | 4 | 648  | 816871 |
| YDR178W   | SDH4   | ACN18                | iYDR177W    | 4 | 546  | 817943 |
| YDR179C   | 0      |                      | 0 iYDR179C  | 4 | 489  | 819189 |
| YDR179W-A | 0      | #N/A                 | iYDR179C    | 4 | 807  | 820010 |
| YDR180W   | SCC2   |                      | 0 iYDR179W- | 4 | 4482 | 821287 |
| YDR181C   | SAS4   |                      | 0 iYDR181C  | 4 | 1446 | 827347 |
| YDR182W   | CDC1   | DSC1 DSR1 ESP2       | iYDR181C    | 4 | 1476 | 827574 |
| YDR183W   | PLP1   |                      | 0 iYDR182W  | 4 | 693  | 829577 |
| YDR184C   | ATC1   | LIC4                 | iYDR184C    | 4 | 885  | 831505 |
| YDR185C   | 0      | #N/A                 | iYDR185C    | 4 | 540  | 832465 |
| YDR186C   | 0      | #N/A                 | iYDR186C    | 4 | 2634 | 835484 |
| YDR187C   | 0      | #N/A                 | iYDR188W    | 4 | 519  | 836738 |
| YDR188W   | CCT6   | HTR3 TCP20 TCP6      | iYDR186C    | 4 | 1641 | 836413 |
| YDR189W   | SLY1   |                      | 0 iYDR188W  | 4 | 2001 | 838384 |
| YDR190C   | RVB1   | TIH1 TIP49A          | iYDR190C    | 4 | 1392 | 841987 |
| YDR191W   | HST4   |                      | 0 iYDR190C  | 4 | 1113 | 842329 |
| YDR192C   | NUP42  | RIP1 UIP1            | iYDR193W    | 4 | 1293 | 844853 |
| YDR193W   | 0      | #N/A                 | iYDR191W    | 4 | 399  | 844546 |
| YDR194C   | MSS116 |                      | 0 iYDR194C  | 4 | 1995 | 847938 |
| YDR195W   | REF2   |                      | 0 iYDR194C  | 4 | 1602 | 848591 |
| YDR196C   | 0      | #N/A                 | iYDR196C    | 4 | 726  | 850991 |
| YDR197W   | CBS2   | CBP7                 | iYDR196C    | 4 | 1170 | 851220 |
| YDR198C   | 0      | #N/A                 | iYDR198C    | 4 | 1440 | 853964 |
| YDR199W   | 0      | #N/A                 | iYDR198C    | 4 | 366  | 854167 |
| YDR200C   | VPS64  | FAR9                 | iYDR200C    | 4 | 1815 | 856085 |
| YDR201W   | SPC19  |                      | 0 iYDR200C  | 4 | 498  | 856309 |
| YDR202C   | RAV2   |                      | 0 iYDR203W  | 4 | 1056 | 857945 |
| YDR203W   | 0      | #N/A                 | iYDR201W    | 4 | 318  | 857674 |
| YDR204W   | COQ4   |                      | 0 iYDR203W  | 4 | 1008 | 858129 |
| YDR205W   | MSC2   |                      | 0 iYDR204W  | 4 | 2223 | 859290 |
| YDR206W   | EBS1   |                      | 0 iYDR205W  | 4 | 2655 | 862046 |
| YDR207C   | UME6   | CAR80 NIM2 RIM16     | iYDR207C    | 4 | 2511 | 867514 |
| YDR208W   | MSS4   |                      | 0 iYDR207C  | 4 | 2340 | 868216 |
| YDR209C   | 0      | #N/A                 | iYDR210W    | 4 | 414  | 871441 |
| YDR210W   | 0      | #N/A                 | iYDR208W    | 4 | 228  | 871066 |
| YDR211W   | GCD6   |                      | 0 itl(UAU)D | 4 | 2139 | 884719 |
| YDR212W   | TCP1   | CCT1                 | iYDR211W    | 4 | 1680 | 887224 |
| YDR213W   | UPC2   | MOX4                 | iYDR212W    | 4 | 2742 | 889743 |
| YDR214W   | AHA1   |                      | 0 iYDR213W  | 4 | 1053 | 892867 |
| YDR215C   | 0      | #N/A                 | iYDR215C    | 4 | 384  | 894493 |
| YDR216W   | ADR1   |                      | 0 iYDR215C  | 4 | 3972 | 895026 |

|         |       |                 |              |   |      |         |
|---------|-------|-----------------|--------------|---|------|---------|
| YDR217C | RAD9  |                 | 0 iYDR217C   | 4 | 3930 | 903471  |
| YDR218C | SPR28 |                 | 0 iYDR218C   | 4 | 1272 | 905043  |
| YDR219C | 0     | #N/A            | iYDR219C     | 4 | 1398 | 906843  |
| YDR220C | 0     | #N/A            | iYDR221W     | 4 | 294  | 907284  |
| YDR221W | 0     | #N/A            | iYDR219C     | 4 | 2109 | 907321  |
| YDR222W | 0     | #N/A            | iYDR221W     | 4 | 1248 | 910045  |
| YDR223W | 0     | #N/A            | iYDR222W     | 4 | 1404 | 912090  |
| YDR224C | HTB1  | SPT12           | iYDR224C     | 4 | 396  | 914703  |
| YDR225W | HTA1  | H2A1 SPT11      | iYDR224C     | 4 | 399  | 915521  |
| YDR226W | ADK1  | AKY1 AKY2       | iYDR225W     | 4 | 669  | 916477  |
| YDR227W | SIR4  | ASD1 STE9 UTH2  | iYDR226W     | 4 | 4077 | 917562  |
| YDR228C | PCF11 |                 | 0 iYDR228C   | 4 | 1881 | 923797  |
| YDR229W | 0     |                 | 0 iYDR228C   | 4 | 1362 | 924776  |
| YDR230W | 0     | #N/A            | iYDR229W     | 4 | 348  | 926214  |
| YDR231C | COX20 |                 | 0 iYDR231C   | 4 | 618  | 926901  |
| YDR232W | HEM1  | CYD1            | iYDR231C     | 4 | 1647 | 927443  |
| YDR233C | 0     |                 | 0 iYDR233C   | 4 | 888  | 930348  |
| YDR234W | LYS4  | LYS3            | iYDR233C     | 4 | 2082 | 931120  |
| YDR235W | PRP42 | MUD16 SNU65     | iYDR234W     | 4 | 1635 | 933495  |
| YDR236C | FMN1  |                 | 0 iYDR236C   | 4 | 657  | 935883  |
| YDR237W | MRPL7 | YmL5/7          | iYDR236C     | 4 | 879  | 936606  |
| YDR238C | SEC26 |                 | 0 iYDR238C   | 4 | 2922 | 940807  |
| YDR239C | 0     | #N/A            | iYDR239C     | 4 | 2364 | 943411  |
| YDR240C | SNU56 | MUD10           | YDRWdelta    | 4 | 1479 | 945143  |
| YDR241W | BUD26 |                 | 0 iYDR239C   | 4 | 288  | 945142  |
| YDR242W | AMD2  |                 | 0 itY(GUA)D  | 4 | 1650 | 946798  |
| YDR243C | PRP28 |                 | 0 iYDR243C   | 4 | 1767 | 950275  |
| YDR244W | PEX5  | PAS10           | iYDR243C     | 4 | 1839 | 950554  |
| YDR245W | MNN10 | BED1 REC41 SLC2 | iYDR244W     | 4 | 1182 | 952791  |
| YDR246W | TRS23 |                 | 0 iYDR245W   | 4 | 660  | 954279  |
| YDR247W | 0     |                 | 0 iYDR246W   | 4 | 1386 | 956004  |
| YDR248C | 0     | #N/A            | iYDR248C     | 4 | 582  | 958330  |
| YDR249C | 0     | #N/A            | iYDR249C     | 4 | 1122 | 959793  |
| YDR250C | 0     | #N/A            | iYDR250C     | 4 | 276  | 960352  |
| YDR251W | PAM1  |                 | 0 iYDR250C   | 4 | 2493 | 960605  |
| YDR252W | BTT1  |                 | 0 iYDR251W   | 4 | 450  | 963403  |
| YDR253C | MET32 |                 | 0 iYDR253C   | 4 | 576  | 964556  |
| YDR254W | CHL4  | CTF17 MCM17     | iYDR253C     | 4 | 1377 | 965104  |
| YDR255C | 0     | GID2            | iYDR255C     | 4 | 1266 | 967813  |
| YDR256C | CTA1  |                 | 0 iYDR256C   | 4 | 1548 | 969671  |
| YDR257C | RMS1  | RMS1            | iYDR257C     | 4 | 1485 | 971465  |
| YDR258C | HSP78 |                 | 0 iYDR258C   | 4 | 2436 | 974234  |
| YDR259C | YAP6  | HAL7            | iYDR259C     | 4 | 1152 | 975773  |
| YDR260C | SWM1  |                 | 0 iYDR260C   | 4 | 513  | 977220  |
| YDR261C | EXG2  |                 | 0 iYDR261C-( | 4 | 1689 | 979200  |
| YDR262W | 0     | #N/A            | itG(GCC)D2   | 4 | 819  | 993125  |
| YDR263C | DIN7  | DIN3            | iYDR263C     | 4 | 1293 | 995525  |
| YDR264C | AKR1  |                 | 0 iYDR264C   | 4 | 2295 | 998314  |
| YDR265W | PEX10 | PAS4            | iYDR264C     | 4 | 1014 | 998855  |
| YDR266C | 0     | #N/A            | iYDR266C     | 4 | 1920 | 1002014 |
| YDR267C | 0     | #N/A            | iYDR267C     | 4 | 993  | 1003493 |

|         |        |                   |   |            |   |      |         |
|---------|--------|-------------------|---|------------|---|------|---------|
| YDR268W | MSW1   |                   | 0 | iYDR267C   | 4 | 1140 | 1003995 |
| YDR269C | 0      | #N/A              |   | iYDR271C   | 4 | 324  | 1005979 |
| YDR270W | CCC2   |                   | 0 | iYDR268W   | 4 | 3015 | 1005666 |
| YDR271C | 0      | #N/A              |   | iYDR271C   | 4 | 372  | 1008757 |
| YDR272W | GLO2   |                   | 0 | iYDR271C   | 4 | 825  | 1009001 |
| YDR273W | DON1   |                   | 0 | iYDR272W   | 4 | 1098 | 1010167 |
| YDR274C | 0      | #N/A              |   | iYDR274C   | 4 | 372  | 1011951 |
| YDR275W | 0      |                   | 0 | iYDR274C   | 4 | 708  | 1012243 |
| YDR276C | PMP3   | SNA1              |   | iYDR276C   | 4 | 168  | 1013634 |
| YDR277C | MTH1   | BPC1 DGT1 HTR1    |   | iYDR277C   | 4 | 1302 | 1015693 |
| YDR278C | 0      | #N/A              |   | itE(CUC)D- | 4 | 318  | 1017309 |
| YDR279W | 0      | Rnh2B             |   | itE(CUC)D- | 4 | 1053 | 1019359 |
| YDR280W | RRP45  |                   | 0 | iYDR279W   | 4 | 918  | 1020738 |
| YDR281C | PHM6   |                   | 0 | iYDR281C   | 4 | 315  | 1022312 |
| YDR282C | 0      | #N/A              |   | iYDR282C   | 4 | 1245 | 1024746 |
| YDR283C | GCN2   | AAS1              |   | iYDR283C   | 4 | 4980 | 1030040 |
| YDR284C | DPP1   | ZRG1              |   | iYDR284C   | 4 | 870  | 1031410 |
| YDR285W | ZIP1   |                   | 0 | iYDR284C   | 4 | 2628 | 1032427 |
| YDR286C | 0      | #N/A              |   | iYDR286C   | 4 | 345  | 1035566 |
| YDR287W | 0      | #N/A              |   | iYDR286C   | 4 | 879  | 1035986 |
| YDR288W | 0      |                   | 0 | iYDR287W   | 4 | 912  | 1037186 |
| YDR289C | RTT103 |                   | 0 | iYDR291W   | 4 | 1230 | 1039500 |
| YDR290W | 0      | #N/A              |   | iYDR288W   | 4 | 330  | 1039361 |
| YDR291W | 0      | #N/A              |   | iYDR288W   | 4 | 3234 | 1039719 |
| YDR292C | SRP101 |                   | 0 | iYDR292C   | 4 | 1866 | 1045002 |
| YDR293C | SSD1   | CLA1 MCS1 RLT1 SF |   | iYDR293C   | 4 | 3753 | 1049383 |
| YDR294C | DPL1   | BST1              |   | iYDR294C   | 4 | 1770 | 1052219 |
| YDR295C | PLO2   | PLO2              |   | iYDR295C   | 4 | 2025 | 1054638 |
| YDR296W | MHR1   | XTC1              |   | iYDR295C   | 4 | 681  | 1055203 |
| YDR297W | SUR2   | SYR2              |   | iYDR296W   | 4 | 1050 | 1056542 |
| YDR298C | ATP5   | OSC1              |   | iYDR298C   | 4 | 639  | 1058805 |
| YDR299W | BFR2   |                   | 0 | iYDR298C   | 4 | 1605 | 1059618 |
| YDR300C | PRO1   |                   | 0 | iYDR300C   | 4 | 1287 | 1062782 |
| YDR301W | CFT1   | YHH1              |   | iYDR300C   | 4 | 4074 | 1063343 |
| YDR302W | GPI11  |                   | 0 | iYDR301W   | 4 | 660  | 1067722 |
| YDR303C | RSC3   |                   | 0 | iYDR303C   | 4 | 2658 | 1071377 |
| YDR304C | CPR5   | CYP5              |   | iYDR304C   | 4 | 678  | 1072548 |
| YDR305C | HNT2   | APH1              |   | iYDR305C   | 4 | 743  | 1073479 |
| YDR306C | 0      | #N/A              |   | iYDR306C   | 4 | 1437 | 1075162 |
| YDR307W | 0      | #N/A              |   | itV(CAC)D  | 4 | 1989 | 1075856 |
| YDR308C | SRB7   |                   | 0 | iYDR308C   | 4 | 423  | 1078440 |
| YDR309C | GIC2   |                   | 0 | iYDR309C   | 4 | 1152 | 1080190 |
| YDR310C | SUM1   |                   | 0 | iYDR310C   | 4 | 3189 | 1084307 |
| YDR311W | TFB1   |                   | 0 | iYDR310C   | 4 | 1929 | 1085057 |
| YDR312W | SSF2   |                   | 0 | iYDR311W   | 4 | 1362 | 1087573 |
| YDR313C | PIB1   |                   | 0 | iYDR313C   | 4 | 861  | 1090071 |
| YDR314C | 0      | #N/A              |   | iYDR314C   | 4 | 2079 | 1092503 |
| YDR315C | IPK1   | GSL1              |   | iYDR315C   | 4 | 846  | 1093578 |
| YDR316W | 0      |                   | 0 | iYDR315C   | 4 | 1416 | 1093755 |
| YDR317W | 0      | #N/A              |   | iYDRWdelta | 4 | 1245 | 1102176 |
| YDR318W | MCM21  | CTF5              |   | iYDR317W   | 4 | 756  | 1104184 |

|         |        |                  |              |   |      |         |
|---------|--------|------------------|--------------|---|------|---------|
| YDR319C | 0      | #N/A             | iYDR319C     | 4 | 825  | 1105819 |
| YDR320C | SWA2   | AUX1 BUD24       | iYDR320C     | 4 | 2007 | 1108093 |
| YDR321W | ASP1   |                  | 0 iYDR320C   | 4 | 1146 | 1108694 |
| YDR322W | MRPL35 | YmL35            | iYDR321W     | 4 | 1104 | 1110581 |
| YDR323C | PEP7   | VAC1 VPL21 VPS19 | iYDR323C     | 4 | 1548 | 1114019 |
| YDR324C | UTP4   |                  | 0 iYDR324C   | 4 | 2331 | 1116755 |
| YDR325W | YCG1   | TIE1 YCS5        | iYDR324C     | 4 | 3156 | 1117116 |
| YDR326C | 0      | #N/A             | iYDR326C     | 4 | 4317 | 1124915 |
| YDR327W | 0      | #N/A             | iYDR326C     | 4 | 327  | 1125292 |
| YDR328C | SKP1   | CBF3D MGO1       | iYDR328C     | 4 | 585  | 1126008 |
| YDR329C | PEX3   | PAS3             | iYDR329C     | 4 | 1326 | 1127585 |
| YDR330W | 0      |                  | 0 iYDR329C   | 4 | 1503 | 1127862 |
| YDR331W | GPI8   |                  | 0 iYDR330W   | 4 | 1236 | 1129578 |
| YDR332W | 0      | #N/A             | iYDR331W     | 4 | 2070 | 1130991 |
| YDR333C | 0      | #N/A             | iYDR333C     | 4 | 2172 | 1135421 |
| YDR334W | SWR1   |                  | 0 iYDR333C   | 4 | 4545 | 1135922 |
| YDR335W | MSN5   | KAP142 STE21     | iYDR334W     | 4 | 3675 | 1141157 |
| YDR336W | 0      | #N/A             | iYDR335W     | 4 | 945  | 1145081 |
| YDR337W | MRPS28 |                  | 0 iYDR336W   | 4 | 861  | 1146308 |
| YDR338C | 0      | #N/A             | iYDR338C     | 4 | 2088 | 1149455 |
| YDR339C | 0      | #N/A             | iYDR339C     | 4 | 570  | 1150509 |
| YDR340W | 0      | #N/A             | iYDR339C     | 4 | 303  | 1150870 |
| YDR341C | 0      | #N/A             | iYDR341C     | 4 | 1824 | 1153615 |
| YDR342C | HXT7   |                  | 0 iYDR342C-( | 4 | 1713 | 1155917 |
| YDR343C | HXT6   |                  | 0 iYDR343C   | 4 | 1713 | 1161309 |
| YDR344C | 0      | #N/A             | iYDR344C     | 4 | 444  | 1162438 |
| YDR345C | HXT3   |                  | 0 iYDR345C-( | 4 | 1704 | 1164649 |
| YDR346C | SGI1   |                  | 0 iYDR346C   | 4 | 1446 | 1168648 |
| YDR347W | MRP1   |                  | 0 iYDR346C   | 4 | 966  | 1169167 |
| YDR348C | 0      | #N/A             | iYDR348C     | 4 | 1500 | 1171814 |
| YDR349C | YPS7   |                  | 0 iYDR349C   | 4 | 1791 | 1174165 |
| YDR350C | TCM10  | ATP22            | iYDR350C     | 4 | 1836 | 1178162 |
| YDR351W | SBE2   |                  | 0 iYDR350C   | 4 | 2595 | 1178654 |
| YDR352W | 0      | #N/A             | iYDR351W     | 4 | 954  | 1181789 |
| YDR353W | TRR1   |                  | 0 iYDR352W   | 4 | 960  | 1183287 |
| YDR354W | TRP4   |                  | 0 iYDR353W   | 4 | 1143 | 1184735 |
| YDR355C | 0      | #N/A             | iYDR356W     | 4 | 303  | 1186357 |
| YDR356W | SPC110 | NUF1 XCM1        | iYDR354W     | 4 | 2835 | 1186095 |
| YDR357C | 0      | #N/A             | iYDR357C     | 4 | 369  | 1189555 |
| YDR358W | GGA1   |                  | 0 iYDR357C   | 4 | 1674 | 1190047 |
| YDR359C | VID21  | EAF1             | iYDR360W     | 4 | 2880 | 1194873 |
| YDR360W | 0      | #N/A             | iYDR358W     | 4 | 387  | 1194587 |
| YDR361C | BCP1   |                  | 0 iYDR361C   | 4 | 852  | 1196251 |
| YDR362C | TFC6   |                  | 0 iYDR362C   | 4 | 2019 | 1198685 |
| YDR363W | ESC2   |                  | 0 iYDR362C   | 4 | 1371 | 1199171 |
| YDR364C | CDC40  | PRP17 SLT15 SLU4 | iYDR364C     | 4 | 1368 | 1204198 |
| YDR365C | 0      |                  | 0 iYDR365C   | 4 | 1887 | 1206371 |
| YDR366C | 0      | #N/A             | iYDR367W     | 4 | 399  | 1212824 |
| YDR367W | 0      | #N/A             | iYDR365C     | 4 | 767  | 1212836 |
| YDR368W | YPR1   |                  | 0 iYDR367W   | 4 | 939  | 1213892 |
| YDR369C | XRS2   |                  | 0 iYDR369C   | 4 | 2565 | 1217568 |

|         |        |            |              |   |      |         |
|---------|--------|------------|--------------|---|------|---------|
| YDR370C | 0      | #N/A       | iYDR370C     | 4 | 1329 | 1219098 |
| YDR371W | CTS2   |            | 0 iYDR370C   | 4 | 1536 | 1219401 |
| YDR372C | VPS74  | API1       | iYDR372C     | 4 | 1038 | 1222137 |
| YDR373W | FRQ1   |            | 0 iYDR372C   | 4 | 573  | 1222747 |
| YDR374C | 0      | #N/A       | iYDR374C     | 4 | 921  | 1224382 |
| YDR375C | BCS1   |            | 0 iYDR375C   | 4 | 1371 | 1226524 |
| YDR376W | ARH1   |            | 0 iYDR375C   | 4 | 1482 | 1226810 |
| YDR377W | ATP17  |            | 0 iYDR376W   | 4 | 306  | 1228599 |
| YDR378C | LSM6   |            | 0 iYDR378C   | 4 | 372  | 1229708 |
| YDR379W | RGA2   |            | 0 iYDR378C   | 4 | 3030 | 1230155 |
| YDR380W | ARO10  |            | 0 iYDR379W   | 4 | 1908 | 1234206 |
| YDR381W | YRA1   | SHE11      | iYDR380W     | 4 | 1447 | 1236546 |
| YDR382W | RPP2B  | RPL45 YPA1 | iYDR381W     | 4 | 333  | 1239480 |
| YDR383C | NKP1   |            | 0 iYDR383C   | 4 | 759  | 1240706 |
| YDR384C | 0      |            | 0 iYDR384C   | 4 | 828  | 1242019 |
| YDR385W | EFT2   |            | 0 iYDR384C   | 4 | 2529 | 1243218 |
| YDR386W | MUS81  | SLX3       | iYDR385W     | 4 | 1899 | 1246072 |
| YDR387C | 0      | #N/A       | iYDR387C     | 4 | 1668 | 1249809 |
| YDR388W | RVS167 |            | 0 iYDR387C   | 4 | 1449 | 1250174 |
| YDR389W | SAC7   |            | 0 iYDR388W   | 4 | 1965 | 1252525 |
| YDR390C | UBA2   | UAL1       | iYDR390C     | 4 | 1911 | 1256835 |
| YDR391C | 0      | #N/A       | iYDR391C     | 4 | 699  | 1258044 |
| YDR392W | SPT3   |            | 0 iYDR391C   | 4 | 1014 | 1258684 |
| YDR393W | SHE9   | MDM33      | iYDR392W     | 4 | 1371 | 1259889 |
| YDR394W | RPT3   | YNT1 YTA2  | iYDR393W     | 4 | 1287 | 1261669 |
| YDR395W | SXM1   | KAP108     | iYDR394W     | 4 | 2835 | 1263312 |
| YDR396W | 0      | #N/A       | iYDR395W     | 4 | 501  | 1266283 |
| YDR397C | NCB2   | YDR1       | iYDR397C     | 4 | 533  | 1266886 |
| YDR398W | UTP5   |            | 0 iYDR397C   | 4 | 1932 | 1267459 |
| YDR399W | HPT1   | BRA6       | iYDR398W     | 4 | 666  | 1270056 |
| YDR400W | URH1   |            | 0 iYDR399W   | 4 | 1137 | 1270937 |
| YDR401W | 0      | #N/A       | iYDR400W     | 4 | 564  | 1272211 |
| YDR402C | DIT2   | CYP56      | iYDR402C     | 4 | 1470 | 1273691 |
| YDR403W | DIT1   |            | 0 iYDR402C   | 4 | 1611 | 1274590 |
| YDR404C | RPB7   |            | 0 iYDR404C   | 4 | 516  | 1277157 |
| YDR405W | MRP20  | MRPL41     | iYDR404C     | 4 | 792  | 1277634 |
| YDR406W | PDR15  |            | 0 iYDR405W   | 4 | 4590 | 1279198 |
| YDR407C | TRS120 |            | 0 iYDR407C   | 4 | 3870 | 1287926 |
| YDR408C | ADE8   |            | 0 iYDR408C   | 4 | 645  | 1288847 |
| YDR409W | SIZ1   | ULL1       | iYDR408C     | 4 | 2715 | 1289394 |
| YDR410C | STE14  |            | 0 iYDR410C   | 4 | 720  | 1293079 |
| YDR411C | 0      |            | 0 iYDR411C   | 4 | 1026 | 1294382 |
| YDR412W | 0      | #N/A       | iYDR411C     | 4 | 708  | 1294681 |
| YDR413C | 0      | #N/A       | iYDR413C     | 4 | 576  | 1295399 |
| YDR414C | ERD1   | LDB2       | iYDR414C     | 4 | 1089 | 1296674 |
| YDR415C | 0      | #N/A       | iYDR415C     | 4 | 1125 | 1298149 |
| YDR416W | SYF1   | NTC90      | iYDR415C     | 4 | 2580 | 1298420 |
| YDR417C | 0      | #N/A       | iYDR418W     | 4 | 372  | 1301914 |
| YDR418W | RPL12B |            | 0 iYDR416W   | 4 | 498  | 1301604 |
| YDR419W | RAD30  | DBH1       | iYDR418W     | 4 | 1899 | 1303162 |
| YDR420W | HKR1   |            | 0 itS(AGA)D3 | 4 | 5409 | 1306255 |

|         |        |                   |      |          |            |      |         |         |
|---------|--------|-------------------|------|----------|------------|------|---------|---------|
| YDR421W | ARO80  |                   | 0    | iYDR420W | 4          | 2853 | 1312028 |         |
| YDR422C | SIP1   |                   | 0    | iYDR422C | 4          | 2592 | 1317905 |         |
| YDR423C | CAD1   | YAP2              |      | iYDR423C | 4          | 1230 | 1319263 |         |
| YDR424C | DYN2   | SLC1              |      | iYDR424C | 4          | 455  | 1319829 |         |
| YDR425W |        | 0                 |      | 0        | iYDR424C   | 4    | 1878    | 1320052 |
| YDR426C |        | 0                 | #N/A |          | iYDR426C   | 4    | 378     | 1321994 |
| YDR427W | RPN9   |                   |      | 0        | iYDR426C   | 4    | 1182    | 1322193 |
| YDR428C |        | 0                 | #N/A |          | iYDR428C   | 4    | 786     | 1324227 |
| YDR429C | TIF35  |                   |      | 0        | iYDR429C   | 4    | 825     | 1325289 |
| YDR430C | CYM1   |                   |      | 0        | iYDR431W   | 4    | 2970    | 1328458 |
| YDR431W |        | 0                 | #N/A |          | iYDR429C   | 4    | 312     | 1328378 |
| YDR432W | NPL3   | MTR13 MTS1 NAB1   |      |          | iYDR431W   | 4    | 1245    | 1328771 |
| YDR433W | KRE22  |                   | #N/A |          | iYDR431W   | 4    | 441     | 1329588 |
| YDR434W | GPI17  |                   |      | 0        | iYDR433W   | 4    | 1605    | 1331225 |
| YDR435C | PPM1   |                   |      | 0        | iYDR435C   | 4    | 987     | 1333957 |
| YDR436W | PPZ2   |                   |      | 0        | iYDR435C   | 4    | 2133    | 1334809 |
| YDR437W |        | 0                 | #N/A |          | iYDR436W   | 4    | 423     | 1337340 |
| YDR438W |        | 0                 | #N/A |          | iYDR437W   | 4    | 1113    | 1338262 |
| YDR439W | LRS4   |                   |      | 0        | iYDR438W   | 4    | 1044    | 1339664 |
| YDR440W | DOT1   | PCH1              |      |          | iYDR439W-  | 4    | 1749    | 1342481 |
| YDR441C | APT2   |                   |      | 0        | iYDR441C   | 4    | 546     | 1345050 |
| YDR442W |        | 0                 | #N/A |          | iYDR441C   | 4    | 393     | 1345635 |
| YDR443C | SSN2   | NUT8 RYE3 SCA1 Sf |      |          | iYDR443C   | 4    | 4263    | 1349926 |
| YDR444W |        | 0                 | #N/A |          | iYDR443C   | 4    | 2064    | 1350278 |
| YDR445C |        | 0                 | #N/A |          | itK(CUU)D2 | 4    | 408     | 1352577 |
| YDR446W | ECM11  |                   |      | 0        | iYDRWdelta | 4    | 909     | 1353713 |
| YDR447C | RPS17B | RP51B RPL51B      |      |          | iYDR447C   | 4    | 725     | 1355541 |
| YDR448W | ADA2   | SWI8              |      |          | iYDR447C   | 4    | 1305    | 1356053 |
| YDR449C | UTP6   |                   |      | 0        | iYDR449C   | 4    | 1323    | 1358890 |
| YDR450W | RPS18A |                   |      | 0        | iYDR449C   | 4    | 876     | 1359911 |
| YDR451C | YHP1   |                   |      | 0        | iYDR451C   | 4    | 1062    | 1362169 |
| YDR452W | PPN1   | PHM5              |      |          | iYDR451C   | 4    | 2025    | 1362866 |
| YDR453C | TSA2   | cTPxII            |      |          | iYDR453C   | 4    | 591     | 1365650 |
| YDR454C | GUK1   | PUR5              |      |          | iYDR454C   | 4    | 564     | 1366815 |
| YDR455C |        | 0                 | #N/A |          | iYDR456W   | 4    | 309     | 1367669 |
| YDR456W | NHX1   | NHA2 VPS44        |      |          | iYDR454C   | 4    | 1902    | 1367473 |
| YDR457W | TOM1   |                   |      | 0        | iYDR456W   | 4    | 9807    | 1369778 |
| YDR458C |        | 0                 | #N/A |          | iYDR458C   | 4    | 1992    | 1382034 |
| YDR459C |        | 0                 | #N/A |          | iYDR459C   | 4    | 1125    | 1383431 |
| YDR460W | TFB3   | RIG2              |      |          | iYDR459C   | 4    | 966     | 1383799 |
| YDR461W | MFA1   |                   |      | 0        | iYDR460W   | 4    | 111     | 1385164 |
| YDR462W | MRPL28 |                   |      | 0        | iYDR461W   | 4    | 444     | 1386061 |
| YDR463W | STP1   | BAP1 SSY2         |      |          | iYDR462W   | 4    | 1734    | 1386630 |
| YDR464W | SPP41  |                   |      | 0        | iYDR463W   | 4    | 4308    | 1388860 |
| YDR465C | RMT2   |                   |      | 0        | iYDR465C   | 4    | 1239    | 1394562 |
| YDR466W |        | 0                 |      | 0        | iYDR465C   | 4    | 2697    | 1395109 |
| YDR467C |        | 0                 | #N/A |          | iYDR467C   | 4    | 327     | 1397897 |
| YDR468C | TLG1   |                   |      | 0        | iYDR468C   | 4    | 675     | 1398688 |
| YDR469W | SDC1   | CPS25 SAF19       |      |          | iYDR468C   | 4    | 528     | 1399003 |
| YDR470C | UGO1   |                   |      | 0        | iYDR470C   | 4    | 1509    | 1401202 |
| YDR471W | RPL27B |                   |      | 0        | iYDR470C   | 4    | 795     | 1401758 |

|         |        |                  |            |   |      |         |
|---------|--------|------------------|------------|---|------|---------|
| YDR472W | TRS31  |                  | 0 iSNR13   | 4 | 852  | 1403310 |
| YDR473C | PRP3   | RNA3             | iYDR473C-( | 4 | 1410 | 1405842 |
| YDR474C | 0      | #N/A             | iYDR474C   | 4 | 1668 | 1409119 |
| YDR475C | JIP4   |                  | 0 iYDR475C | 4 | 468  | 1410080 |
| YDR476C | 0      | #N/A             | iYDR476C   | 4 | 675  | 1411113 |
| YDR477W | SNF1   | CAT1 CCR1 GLC2 H | iYDR476C   | 4 | 1902 | 1412359 |
| YDR478W | SNM1   |                  | 0 iYDR477W | 4 | 597  | 1414561 |
| YDR479C | 0      |                  | 0 iYDR479C | 4 | 1665 | 1416860 |
| YDR480W | DIG2   | RST2             | iYDR479C   | 4 | 972  | 1417385 |
| YDR481C | PHO8   |                  | 0 iYDR481C | 4 | 1701 | 1420236 |
| YDR482C | CWC21  |                  | 0 iYDR482C | 4 | 408  | 1420824 |
| YDR483W | KRE2   | MNT1             | iYDR482C   | 4 | 1329 | 1421143 |
| YDR484W | SAC2   | SAC2             | iYDR483W   | 4 | 1926 | 1422749 |
| YDR485C | VPS72  | SWC2             | iYDR485C   | 4 | 2433 | 1427238 |
| YDR486C | VPS60  | CHM5 MOS10       | iYDR486C   | 4 | 789  | 1428205 |
| YDR487C | RIB3   |                  | 0 iYDR487C | 4 | 627  | 1428966 |
| YDR488C | PAC11  |                  | 0 iYDR488C | 4 | 1602 | 1430775 |
| YDR489W | 0      | CDC105           | iYDR488C   | 4 | 885  | 1430998 |
| YDR490C | PKH1   |                  | 0 iYDR490C | 4 | 2301 | 1434254 |
| YDR491C | 0      | #N/A             | iYDR492W   | 4 | 492  | 1434977 |
| YDR492W | 0      |                  | 0 iYDR490C | 4 | 951  | 1434910 |
| YDR493W | 0      |                  | 0 iYDR492W | 4 | 372  | 1436203 |
| YDR494W | RSM28  |                  | 0 iYDR493W | 4 | 867  | 1436916 |
| YDR495C | VPS3   | PEP6 VPL3 VPT17  | iYDR495C   | 4 | 3036 | 1441136 |
| YDR496C | PUF6   |                  | 0 iYDR496C | 4 | 1971 | 1443389 |
| YDR497C | ITR1   |                  | 0 iYDR497C | 4 | 1755 | 1445453 |
| YDR498C | SEC20  |                  | 0 iYDR498C | 4 | 1152 | 1446980 |
| YDR499W | LCD1   | DDC2 PIE1        | iYDR498C   | 4 | 2244 | 1447816 |
| YDR500C | RPL37B |                  | 0 iYDR500C | 4 | 656  | 1450839 |
| YDR501W | PLM2   |                  | 0 iYDR500C | 4 | 1566 | 1451339 |
| YDR502C | SAM2   | ETH2             | iYDR502C   | 4 | 1155 | 1454450 |
| YDR503C | LPP1   |                  | 0 iYDR503C | 4 | 825  | 1455852 |
| YDR504C | 0      |                  | 0 iYDR505C | 4 | 384  | 1456680 |
| YDR505C | PSP1   | GIN5             | iYDR505C   | 4 | 2526 | 1459206 |
| YDR506C | 0      | #N/A             | iYDR506C   | 4 | 1827 | 1461540 |
| YDR507C | GIN4   | ERC47            | iYDR507C   | 4 | 3429 | 1465772 |
| YDR508C | GNP1   |                  | 0 iYDR509W | 4 | 1992 | 1468430 |
| YDR509W | 0      | #N/A             | iYDR507C   | 4 | 348  | 1468212 |
| YDR510W | SMT3   |                  | 0 iYDR509W | 4 | 306  | 1469386 |
| YDR511W | ACN9   |                  | 0 iYDR510W | 4 | 402  | 1470003 |
| YDR512C | 0      |                  | 0 iYDR513W | 4 | 564  | 1471049 |
| YDR513W | TTR1   | GRX2             | iYDR511W   | 4 | 432  | 1471003 |
| YDR514C | 0      | #N/A             | iYDR514C   | 4 | 1452 | 1472985 |
| YDR515W | SLF1   | SRO99            | iYDR514C   | 4 | 1344 | 1473415 |
| YDR516C | 0      |                  | 0 iYDR516C | 4 | 1503 | 1476462 |
| YDR517W | GRH1   |                  | 0 iYDR516C | 4 | 1119 | 1477225 |
| YDR518W | EUG1   |                  | 0 iYDR517W | 4 | 1554 | 1478594 |
| YDR519W | FPR2   | FKB2             | iYDR518W   | 4 | 408  | 1480411 |
| YDR520C | 0      | #N/A             | iYDR521W   | 4 | 2319 | 1483389 |
| YDR521W | 0      | #N/A             | iYDR519W   | 4 | 336  | 1483127 |
| YDR522C | SPS2   |                  | 0 iYDR522C | 4 | 1509 | 1485289 |



|           |        |                |      |              |   |      |         |
|-----------|--------|----------------|------|--------------|---|------|---------|
| YDR523C   | SPS1   |                | 0    | iYDR523C     | 4 | 1473 | 1487024 |
| YDR524C   | AGE1   | SAT1           |      | iYDR524C     | 4 | 1449 | 1488976 |
| YDR525W   | API2   |                | 0    | iYDR524C     | 4 | 330  | 1489891 |
| YDR526C   |        | 0              | #N/A | iYDR527W-    | 4 | 471  | 1491531 |
| YDR527W   |        | 0              |      | 0 iYDR525W-  | 4 | 1320 | 1491080 |
| YDR528W   | HLR1   |                |      | 0 iYDR527W-  | 4 | 1272 | 1494572 |
| YDR529C   | QCR7   | COR4 CRO1 UCR7 |      | iYDR529C     | 4 | 384  | 1496534 |
| YDR530C   | APA2   |                | 0    | iYDR530C     | 4 | 978  | 1497754 |
| YDR531W   |        | 0              | #N/A | iYDR530C     | 4 | 1104 | 1498218 |
| YDR532C   | KRE28  |                | #N/A | iYDR532C     | 4 | 1158 | 1500539 |
| YDR533C   |        | 0              |      | 0 iYDR533C   | 4 | 714  | 1502146 |
| YDR534C   | FIT1   |                |      | 0 iYDR534C-( | 4 | 1587 | 1504885 |
| YDR535C   |        | 0              | #N/A | iYDR535C     | 4 | 757  | 1507347 |
| YDR536W   | STL1   |                |      | 0 iYDR535C   | 4 | 1710 | 1507990 |
| YDR537C   |        | 0              | #N/A | iYDR538W     | 4 | 606  | 1511445 |
| YDR538W   | PAD1   | POF1           |      | iYDR536W     | 4 | 729  | 1510886 |
| YDR539W   |        | 0              | #N/A | iYDR538W     | 4 | 1512 | 1512078 |
| YDR540C   |        | 0              | #N/A | iYDR540C     | 4 | 540  | 1517653 |
| YDR541C   |        | 0              | #N/A | iYDR541C-(   | 4 | 1035 | 1520676 |
| YDR542W   |        | 0              | #N/A | iYDR541C-'   | 4 | 363  | 1523228 |
| YDR543C   |        | 0              | #N/A | iYDR543C     | 4 | 300  | 1524912 |
| YDR544C   |        | 0              | #N/A | iYDR544C     | 4 | 429  | 1525502 |
| YDR545W   | YRF1-1 | YRF1           |      | iYDR544C     | 4 | 5391 | 1526300 |
| YEL001C   |        | 0              | #N/A | iYEL001C     | 5 | 678  | 150977  |
| YEL002C   | WBP1   |                |      | 0 iYEL002C   | 5 | 1293 | 150013  |
| YEL003W   | GIM4   | PFD2           |      | iYEL004W     | 5 | 372  | 148227  |
| YEL004W   | YEA4   |                |      | 0 iYEL005C   | 5 | 1029 | 146950  |
| YEL005C   | VAB2   | VAB31          |      | iYEL005C     | 5 | 849  | 146754  |
| YEL006W   |        | 0              | #N/A | iYEL007W     | 5 | 1008 | 144326  |
| YEL007W   | TOS9   |                | #N/A | iYEL008W     | 5 | 2001 | 141891  |
| YEL008W   |        | 0              | #N/A | iYEL009C     | 5 | 381  | 140512  |
| YEL009C   | GCN4   | AAS3 ARG9      |      | iYEL009C     | 5 | 846  | 139763  |
| YEL010W   |        | 0              | #N/A | iYELCdelta4  | 5 | 351  | 136279  |
| YEL011W   | GLC3   | GHA1           |      | iYEL012W     | 5 | 2115 | 133120  |
| YEL012W   | UBC8   | GID3           |      | itQ(UUG)E2   | 5 | 780  | 131772  |
| YEL013W   | VAC8   | YEB3           |      | iYEL014C     | 5 | 1737 | 128825  |
| YEL014C   |        | 0              | #N/A | iYEL014C     | 5 | 306  | 128608  |
| YEL015W   |        | 0              | DCP3 | iYEL016C     | 5 | 1656 | 126629  |
| YEL016C   |        | 0              | #N/A | iYEL016C     | 5 | 1482 | 126218  |
| YEL017C-A | PMP2   |                |      | 0 iYEL017C-A | 5 | 132  | 122929  |
| YEL017W   |        | 0              |      | 0 iYEL017C-A | 5 | 1014 | 123657  |
| YEL018W   | EAF5   |                |      | 0 iYEL019C   | 5 | 840  | 121471  |
| YEL019C   | MMS21  |                |      | 0 iYEL019C   | 5 | 804  | 121301  |
| YEL020C   |        | 0              | #N/A | iYEL020C     | 5 | 1683 | 120299  |
| YEL021W   | URA3   |                |      | 0 iYEL022W   | 5 | 804  | 116167  |
| YEL022W   | GEA2   |                |      | 0 iYEL023C   | 5 | 4380 | 111421  |
| YEL023C   |        | 0              | #N/A | iYEL023C     | 5 | 2049 | 110552  |
| YEL024W   | RIP1   |                |      | 0 iYEL025C   | 5 | 648  | 107260  |
| YEL025C   | SRI1   |                | #N/A | iYEL025C     | 5 | 3567 | 106147  |
| YEL026W   | SNU13  |                |      | 0 iYEL027W   | 5 | 381  | 101943  |
| YEL027W   | CUP5   | CLS7 GEF2 VMA3 |      | itM(CAU)E    | 5 | 483  | 100769  |

|           |        |                |              |   |      |       |
|-----------|--------|----------------|--------------|---|------|-------|
| YEL028W   | 0      | #N/A           | iYEL029C     | 5 | 462  | 98668 |
| YEL029C   | BUD16  |                | 0 iYEL029C   | 5 | 939  | 97796 |
| YEL030W   | ECM10  | SSC3           | iYEL031W     | 5 | 1935 | 94644 |
| YEL031W   | SPF1   | COD1 PER9 PIO1 | iYEL032W     | 5 | 3648 | 90258 |
| YEL032W   | MCM3   |                | 0 itS(AGA)E  | 5 | 2916 | 86937 |
| YEL033W   | 0      | #N/A           | iYEL035C     | 5 | 420  | 86179 |
| YEL034W   | HYP2   | TIF51A         | iYEL035C     | 5 | 474  | 85676 |
| YEL035C   | UTR5   |                | 0 iYEL035C   | 5 | 501  | 85545 |
| YEL036C   | ANP1   | GEM3 MNN8      | iYEL036C     | 5 | 1503 | 84552 |
| YEL037C   | RAD23  |                | 0 iYEL037C   | 5 | 1197 | 82603 |
| YEL038W   | UTR4   |                | 0 iYEL039C   | 5 | 726  | 80420 |
| YEL039C   | CYC7   |                | 0 iYEL039C   | 5 | 342  | 79977 |
| YEL040W   | UTR2   | CRH2           | iYEL041W     | 5 | 1404 | 78053 |
| YEL041W   | 0      | #N/A           | iYEL042W     | 5 | 1488 | 75944 |
| YEL042W   | GDA1   | GDPase         | iYEL043W     | 5 | 1557 | 73771 |
| YEL043W   | 0      | #N/A           | iYEL044W     | 5 | 2871 | 70478 |
| YEL044W   | IES6   |                | 0 iYEL045C   | 5 | 501  | 69757 |
| YEL045C   | 0      | #N/A           | iYEL045C     | 5 | 426  | 69265 |
| YEL046C   | GLY1   |                | 0 iYEL045C   | 5 | 1164 | 68792 |
| YEL047C   | 0      | #N/A           | iYEL047C     | 5 | 1413 | 66797 |
| YEL048C   | 0      | #N/A           | iYEL048C     | 5 | 459  | 65167 |
| YEL049W   | PAU2   |                | 0 iYELWdelta | 5 | 363  | 63728 |
| YEL050C   | RML2   |                | 0 iYEL050C   | 5 | 1182 | 60851 |
| YEL051W   | VMA8   |                | 0 iYEL052W   | 5 | 771  | 58378 |
| YEL052W   | AFG1   |                | 0 iYEL053C   | 5 | 1530 | 56571 |
| YEL053C   | MAK10  |                | 0 iYEL053C   | 5 | 2202 | 56102 |
| YEL054C   | RPL12A |                | 0 iYEL054C   | 5 | 498  | 53218 |
| YEL055C   | POL5   |                | 0 iYEL055C   | 5 | 3069 | 51539 |
| YEL056W   | HAT2   |                | 0 iYEL057C   | 5 | 1206 | 47168 |
| YEL057C   | 0      | #N/A           | iYEL057C     | 5 | 702  | 45721 |
| YEL058W   | PCM1   | AGM1           | iYEL059W     | 5 | 1674 | 43252 |
| YEL059C-A | SOM1   |                | 0 iYEL059W   | 5 | 225  | 42624 |
| YEL059W   | 0      | #N/A           | iYEL060C     | 5 | 309  | 42652 |
| YEL060C   | PRB1   | CVT1 yscB      | iYEL060C     | 5 | 1908 | 41953 |
| YEL061C   | CIN8   | KSL2 SDS15     | iYEL061C     | 5 | 3117 | 39651 |
| YEL062W   | NPR2   |                | 0 iYEL063C   | 5 | 1875 | 34380 |
| YEL063C   | CAN1   |                | 0 iYEL063C   | 5 | 1773 | 33466 |
| YEL064C   | 0      |                | 0 iYEL064C   | 5 | 1443 | 31239 |
| YEL065W   | SIT1   | ARN3           | iYEL066W     | 5 | 1887 | 27657 |
| YEL066W   | HPA3   |                | 0 iYEL068C   | 5 | 540  | 26667 |
| YEL067C   | 0      | #N/A           | iYEL066W     | 5 | 588  | 26776 |
| YEL068C   | 0      | #N/A           | iYEL068C     | 5 | 333  | 25978 |
| YEL069C   | HXT13  |                | 0 iYEL069C-0 | 5 | 1695 | 23231 |
| YEL070W   | 0      | #N/A           | iYEL071W-    | 5 | 1509 | 19589 |
| YEL071W   | DLD3   |                | 0 iYEL072W-  | 5 | 1491 | 16355 |
| YEL072W   | 0      |                | 0 iYEL073C-4 | 5 | 696  | 13720 |
| YEL073C   | 0      | #N/A           | iYEL073C-0   | 5 | 324  | 7553  |
| YEL074W   | 0      | #N/A           | iYEL075C     | 5 | 339  | 6126  |
| YEL075C   | 0      | #N/A           | iYEL075C     | 5 | 369  | 5713  |
| YEL076C   | 0      | #N/A           | iYEL075C     | 5 | 651  | 5114  |
| YEL076C-A | 0      | #N/A           | iYEL075C     | 5 | 930  | 5114  |

|           |       |          |                          |      |      |        |
|-----------|-------|----------|--------------------------|------|------|--------|
| YEL076W-C | #N/A  | #N/A     | iYEL077C                 | #N/A | #N/A | #N/A   |
| YEL077C   | 0     | #N/A     | iYEL077C                 | 5    | 3834 | 4097   |
| YER001W   | MNN1  |          | 0 iCEN5                  | 5    | 2289 | 153519 |
| YER002W   | NOP16 |          | 0 iYER001W               | 5    | 696  | 156802 |
| YER003C   | PMI40 | PMI      | iYER003C                 | 5    | 1383 | 159117 |
| YER004W   | 0     |          | 0 iYER003C               | 5    | 696  | 159579 |
| YER005W   | YND1  | YEJ5     | iYER004W                 | 5    | 1893 | 160549 |
| YER006W   | NUG1  |          | 0 iYER005W               | 5    | 1563 | 162722 |
| YER007C-A | 0     | #N/A     | iYER007C- <del>A</del>   | 5    | 649  | 166884 |
| YER007W   | PAC2  |          | 0 iYER006W               | 5    | 1557 | 164526 |
| YER008C   | SEC3  | PSL1     | iYER008C                 | 5    | 4011 | 171817 |
| YER009W   | NTF2  |          | 0 iYER008C               | 5    | 378  | 172114 |
| YER010C   | 0     | #N/A     | iYER010C- <del>C</del>   | 5    | 705  | 173337 |
| YER011W   | TIR1  | SRP1     | iYER010C-1               | 5    | 765  | 175247 |
| YER012W   | PRE1  |          | 0 itE(UUC)E1             | 5    | 597  | 177834 |
| YER013W   | PRP22 |          | 0 iYER012W               | 5    | 3438 | 178840 |
| YER014W   | HEM14 |          | 0 iYER013W               | 5    | 1620 | 182599 |
| YER015W   | FAA2  | FAM1     | iYER014W                 | 5    | 2235 | 184540 |
| YER016W   | BIM1  | EB1 YEB1 | iYER015W                 | 5    | 1035 | 188276 |
| YER017C   | AFG3  | YTA10    | iYER017C                 | 5    | 2286 | 191787 |
| YER018C   | SPC25 |          | 0 iYER018C               | 5    | 666  | 192623 |
| YER019C-A | SBH2  | SEB2     | iYER019C- <del>A</del>   | 5    | 267  | 194538 |
| YER019W   | ISC1  |          | 0 iYER018C               | 5    | 1434 | 192796 |
| YER020W   | GPA2  | SSP101   | iYER019C- <del>A</del>   | 5    | 1350 | 195167 |
| YER021W   | RPN3  | SUN2     | iYER020W                 | 5    | 1572 | 196947 |
| YER022W   | SRB4  |          | 0 iYER021W               | 5    | 2064 | 198811 |
| YER023W   | PRO3  | ORE2     | iYER022W                 | 5    | 861  | 201075 |
| YER024W   | YAT2  |          | 0 iYER023W               | 5    | 2772 | 202191 |
| YER025W   | GCD11 | SUI4     | iYER024W                 | 5    | 1584 | 205250 |
| YER026C   | CHO1  | PSS1     | iYER026C                 | 5    | 831  | 208473 |
| YER027C   | GAL83 | SPM1     | iYER027C                 | 5    | 1254 | 210231 |
| YER028C   | 0     |          | 0 iYER028C               | 5    | 1185 | 211875 |
| YER029C   | SMB1  | Sm B     | iYER029C                 | 5    | 591  | 213176 |
| YER030W   | 0     | #N/A     | iYER029C                 | 5    | 483  | 213415 |
| YER031C   | YPT31 | YPT8     | iYER031C                 | 5    | 672  | 214746 |
| YER032W   | FIR1  | PIP1     | iYER031C                 | 5    | 2778 | 214915 |
| YER033C   | ZRG8  |          | 0 iYER033C               | 5    | 3231 | 221286 |
| YER034W   | 0     | #N/A     | iYER033C                 | 5    | 558  | 221845 |
| YER035W   | EDC2  |          | 0 iYER034W               | 5    | 438  | 222638 |
| YER036C   | KRE30 | #N/A     | iYER036C                 | 5    | 1833 | 225198 |
| YER037W   | PHM8  |          | 0 iYER036C               | 5    | 966  | 225888 |
| YER038C   | KRE29 |          | 0 iYER038C               | 5    | 1395 | 228251 |
| YER039C   | HVG1  | YEM9     | iYER039C- <del>A</del>   | 5    | 750  | 229204 |
| YER040W   | GLN3  |          | 0 iYER039C- <del>A</del> | 5    | 2193 | 229794 |
| YER041W   | YEN1  |          | 0 iYER040W               | 5    | 2280 | 232460 |
| YER042W   | MXR1  | MSRA     | iYER041W                 | 5    | 555  | 234936 |
| YER043C   | SAH1  |          | 0 iYER043C               | 5    | 1350 | 237118 |
| YER044C   | ERG28 | BUD18    | iYER044C                 | 5    | 447  | 238015 |
| YER044C-A | MEI4  |          | 0 iYER044C- <del>A</del> | 5    | 1315 | 239773 |
| YER045C   | ACA1  |          | 0 iYER045C- <del>C</del> | 5    | 1470 | 241500 |
| YER046W   | SPO73 |          | 0 iYER045C-1             | 5    | 432  | 243179 |

|           |        |                 |      |              |      |      |        |
|-----------|--------|-----------------|------|--------------|------|------|--------|
| YER047C   | SAP1   |                 | 0    | iYER047C     | 5    | 2694 | 246502 |
| YER048C   | CAJ1   |                 |      | 0 iYER048C   | 5    | 1176 | 248156 |
| YER049W   |        | 0               | #N/A | iYER048W-    | 5    | 1935 | 251727 |
| YER050C   | RSM18  |                 |      | 0 iYER050C   | 5    | 609  | 254578 |
| YER051W   |        | 0               | #N/A | iYER050C     | 5    | 1479 | 254655 |
| YER052C   | HOM3   | BOR1 SIL4       |      | iYER052C     | 5    | 1584 | 257957 |
| YER053C   |        | 0               |      | 0 iYER053C-C | 5    | 903  | 259638 |
| YER054C   | GIP2   |                 |      | 0 iYER054C   | 5    | 1647 | 263697 |
| YER055C   | HIS1   |                 |      | 0 iYER055C   | 5    | 894  | 265784 |
| YER056C   | FCY2   | BRA7            |      | iYER056C     | 5    | 1602 | 268112 |
| YER056C-A | RPL34A |                 |      | 0 iYER056C-A | 5    | 763  | 270183 |
| YER057C   | HMF1   | HIG1            |      | iYER057C     | 5    | 390  | 271124 |
| YER058W   | PET117 |                 |      | 0 iYER057C   | 5    | 324  | 271766 |
| YER059W   | PCL6   |                 |      | 0 iYER058W   | 5    | 1263 | 272622 |
| YER060W   | FCY21  |                 |      | 0 iYER059W   | 5    | 1587 | 274565 |
| YER060W-A | FCY22  |                 |      | 0 iYER060W   | 5    | 1593 | 276570 |
| YER061C   | CEM1   |                 |      | 0 iYER061C   | 5    | 1329 | 279624 |
| YER062C   | HOR2   | GPP2            |      | iYER062C     | 5    | 753  | 280680 |
| YER063W   | THO1   |                 |      | 0 iYER062C   | 5    | 657  | 281708 |
| YER064C   |        | 0               | #N/A | iYER064C     | 5    | 1518 | 284220 |
| YER065C   | ICL1   |                 |      | 0 iYER065C   | 5    | 1674 | 286912 |
| YER066C-A |        | 0               | #N/A | iYER067W     | 5    | 501  | 292201 |
| YER066W   |        | 0               | #N/A | itS(UGA)E-   | 5    | 558  | 290240 |
| YER067W   |        | 0               | #N/A | iYER066W     | 5    | 486  | 292064 |
| YER068W   | MOT2   | NOT4 SIG1       |      | iYER067W     | 5    | 1764 | 293048 |
| YER069W   | ARG5,6 |                 |      | 0 iYER068W   | 5    | 2592 | 295408 |
| YER070W   | RNR1   | CRT7 RIR1 SDS12 |      | iYER069W     | 5    | 2667 | 298948 |
| YER071C   |        | 0               | #N/A | iYER071C     | 5    | 381  | 302325 |
| YER072W   | VTC1   | NRF1 PHM4       |      | iYER071C     | 5    | 390  | 302804 |
| YER073W   | ALD5   |                 |      | 0 iYER072W   | 5    | 1563 | 304027 |
| YER074W   | RPS24A | RPS24EA         |      | iYER073W     | 5    | 874  | 306319 |
| YER075C   | PTP3   |                 |      | 0 iYER075C   | 5    | 2787 | 311195 |
| YER076C   |        | 0               | #N/A | iYER076C     | 5    | 909  | 313494 |
| YER077C   |        | 0               | #N/A | iYER077C     | 5    | 2067 | 316596 |
| YER078C   |        | 0               | #N/A | iYER078C     | 5    | 1536 | 318338 |
| YER079W   |        | 0               | #N/A | iYER078C     | 5    | 633  | 318916 |
| YER080W   |        | 0               |      | 0 iYER079W   | 5    | 1884 | 319959 |
| YER081W   | SER3   |                 |      | 0 iYER080W   | 5    | 1410 | 322682 |
| YER082C   | UTP7   | KRE31           |      | iYER082C     | 5    | 1665 | 325932 |
| YER083C   |        | 0               |      | 0 iYER084W   | 5    | 924  | 327093 |
| YER084W   |        | 0               | #N/A | iYER082C     | 5    | 387  | 327061 |
| YER085C   |        | 0               | #N/A | iYER085C     | 5    | 522  | 328136 |
| YER086W   | ILV1   | ISO1            |      | iYER085C     | 5    | 1731 | 328473 |
| YER087C-A | #N/A   | #N/A            | #N/A | iYER087C-A   | #N/A | #N/A | #N/A   |
| YER087W   |        | 0               | #N/A | iYER086W     | 5    | 1731 | 330572 |
| YER088C   | DOT6   |                 |      | 0 iYER088C   | 5    | 2013 | 335184 |
| YER089C   | PTC2   |                 |      | 0 iYER089C   | 5    | 1395 | 337336 |
| YER090W   | TRP2   |                 |      | 0 iYER089C   | 5    | 1524 | 337945 |
| YER091C   | MET6   |                 |      | 0 iYER091C   | 5    | 2304 | 342163 |
| YER092W   | IES5   |                 |      | 0 iYER091C-A | 5    | 378  | 342851 |
| YER093C   |        | 0               | AVO3 | iYER093C     | 5    | 4293 | 347608 |

|           |        |                     |                    |      |      |        |
|-----------|--------|---------------------|--------------------|------|------|--------|
| YER093C-A | 0      | #N/A                | iYER093C- <i>f</i> | 5    | 489  | 348396 |
| YER094C   | PUP3   | SCS32               | iYER094C           | 5    | 618  | 349342 |
| YER095W   | RAD51  | MUT5                | iYER094C           | 5    | 1203 | 349976 |
| YER096W   | SHC1   |                     | 0 iYER095W         | 5    | 1539 | 351694 |
| YER097W   | 0      | #N/A                | itE(UUC)E2         | 5    | 330  | 355136 |
| YER098W   | UBP9   |                     | 0 itE(UUC)E2       | 5    | 2265 | 355462 |
| YER099C   | PRS2   |                     | 0 iYER099C         | 5    | 957  | 359057 |
| YER100W   | UBC6   | DOA2                | iYER099C           | 5    | 753  | 359558 |
| YER101C   | AST2   |                     | 0 iYER101C         | 5    | 1293 | 361790 |
| YER102W   | RPS8B  |                     | 0 iYER101C         | 5    | 603  | 363096 |
| YER103W   | SSA4   |                     | 0 iYER102W         | 5    | 1929 | 364585 |
| YER104W   | RTT105 |                     | 0 iYER103W         | 5    | 627  | 366798 |
| YER105C   | NUP157 |                     | 0 iYER105C         | 5    | 4176 | 372009 |
| YER106W   | MAM1   |                     | 0 iYER105C         | 5    | 909  | 372322 |
| YER107C   | GLE2   | RAE1                | iYER107C           | 5    | 1098 | 374541 |
| YER108C   | #N/A   | #N/A                | #N/A               | #N/A | #N/A | #N/A   |
| YER109C   | FLO8   | PHD5                | iYER108C           | 5    | 2400 | 377610 |
| YER110C   | KAP123 | YRB4                | iYER110C           | 5    | 3342 | 382099 |
| YER111C   | SWI4   | ART1                | iYER111C           | 5    | 3282 | 385872 |
| YER112W   | LSM4   | SDB23 USS1          | iYER111C           | 5    | 564  | 387228 |
| YER113C   | 0      | #N/A                | iYER113C           | 5    | 2121 | 390048 |
| YER114C   | BOI2   | BEB1                | iYER114C           | 5    | 3123 | 393708 |
| YER115C   | SPR6   |                     | 0 iYER115C         | 5    | 576  | 394863 |
| YER116C   | SLX8   |                     | 0 iYER116C         | 5    | 825  | 396168 |
| YER117W   | RPL23B |                     | 0 iYER116C         | 5    | 885  | 396765 |
| YER118C   | SHO1   | SSU81               | iYER118C           | 5    | 1104 | 399051 |
| YER119C   | 0      |                     | 0 iYER120W         | 5    | 1347 | 400838 |
| YER119C-A | 0      | #N/A                | iYER120W           | 5    | 372  | 401234 |
| YER120W   | SCS2   |                     | 0 iYER118C         | 5    | 735  | 401131 |
| YER121W   | 0      | #N/A                | iYER120W           | 5    | 345  | 402371 |
| YER122C   | GLO3   |                     | 0 iYER122C         | 5    | 1482 | 404348 |
| YER123W   | YCK3   | CKI3                | iYER122C           | 5    | 1575 | 404809 |
| YER124C   | DSE1   |                     | 0 iYER124C         | 5    | 1722 | 409059 |
| YER125W   | RSP5   | MDP1 MUT2 NPI1 SN   | iYER124C           | 5    | 2430 | 410185 |
| YER126C   | NSA2   |                     | 0 iYER126C         | 5    | 786  | 414175 |
| YER127W   | LCP5   |                     | 0 iYER126C         | 5    | 1074 | 414477 |
| YER128W   | 0      | #N/A                | iYER127W           | 5    | 612  | 415855 |
| YER129W   | PAK1   |                     | 0 iYER128W         | 5    | 3429 | 417277 |
| YER130C   | 0      | #N/A                | iYER130C           | 5    | 1332 | 422442 |
| YER131W   | RPS26B |                     | 0 iYER130C         | 5    | 360  | 423948 |
| YER132C   | PMD1   |                     | 0 iYER132C         | 5    | 5262 | 430445 |
| YER133W   | GLC7   | CID1 DIS2 DIS2S1 PI | iYERcdelta         | 5    | 1464 | 432491 |
| YER134C   | 0      | #N/A                | iYER134C           | 5    | 537  | 437799 |
| YER135C   | 0      | #N/A                | iYER135C           | 5    | 393  | 438340 |
| YER136W   | GDI1   | SEC19               | itV(AAC)E1         | 5    | 1356 | 439612 |
| YER137C   | 0      | #N/A                | iSCR1              | 5    | 447  | 441815 |
| YER138C   | #N/A   | #N/A                | YERWdelta          | 5    | #N/A | 449020 |
| YER139C   | 0      | #N/A                | iYER139C           | 5    | 681  | 451238 |
| YER140W   | 0      | #N/A                | iYER139C           | 5    | 1671 | 451560 |
| YER141W   | COX15  |                     | 0 iYER140W         | 5    | 1461 | 453454 |
| YER142C   | MAG1   | MMS5                | iYER142C           | 5    | 891  | 456031 |

|         |        |                  |                |   |      |        |
|---------|--------|------------------|----------------|---|------|--------|
| YER143W | DDI1   | VSM1             | iYER142C       | 5 | 1287 | 456314 |
| YER144C | UBP5   |                  | 0 iYER144C     | 5 | 2418 | 460218 |
| YER145C | FTR1   |                  | 0 iYER145C     | 5 | 1215 | 461735 |
| YER146W | LSM5   |                  | 0 iYER145C     | 5 | 282  | 462580 |
| YER147C | SCC4   |                  | 0 iYER147C     | 5 | 1875 | 464837 |
| YER148W | SPT15  | BTF1 TBP TBP1    | iYER147C       | 5 | 723  | 465298 |
| YER149C | PEA2   | DFG9 PPF2        | iYER149C       | 5 | 1263 | 467465 |
| YER150W | SPI1   |                  | 0 iYER149C     | 5 | 447  | 468365 |
| YER151C | UBP3   |                  | 0 iYER151C     | 5 | 2739 | 472419 |
| YER152C | 0      | #N/A             | iYER153C       | 5 | 1332 | 473983 |
| YER153C | PET122 |                  | 0 iYER153C     | 5 | 765  | 474800 |
| YER154W | OXA1   | PET1402          | iYER153C       | 5 | 1209 | 475015 |
| YER155C | BEM2   | IPL2 SUP9 TSL1   | iYER155C       | 5 | 6504 | 482843 |
| YER156C | 0      | #N/A             | iYER156C       | 5 | 1017 | 484336 |
| YER157W | SEC34  | GRD20 SEC34      | iYER156C       | 5 | 2406 | 484783 |
| YER158C | 0      | #N/A             | iYER158C       | 5 | 1722 | 490573 |
| YER159C | BUR6   | NCB1             | iYER159C       | 5 | 429  | 491953 |
| YER160C | #N/A   | #N/A             | iYERCdelta     | 5 | #N/A | 498119 |
| YER161C | SPT2   | EXA1 SIN1        | iYER161C       | 5 | 1002 | 500343 |
| YER162C | RAD4   |                  | 0 iYER162C     | 5 | 2265 | 502889 |
| YER163C | 0      | #N/A             | iYER163C-C     | 5 | 699  | 503777 |
| YER164W | CHD1   |                  | 0 iYER163C-1   | 5 | 4407 | 505387 |
| YER165W | PAB1   |                  | 0 iYER164W     | 5 | 1734 | 510368 |
| YER166W | DNF1   |                  | 0 iYER165W     | 5 | 4716 | 512739 |
| YER167W | BCK2   | CTR7             | iYER166W       | 5 | 2556 | 518211 |
| YER168C | CCA1   | TNT1             | iYER168C       | 5 | 1641 | 522664 |
| YER169W | RPH1   |                  | 0 iYER168C     | 5 | 2391 | 523364 |
| YER170W | ADK2   | AKY3 PAK3        | iYER169W       | 5 | 678  | 525969 |
| YER171W | RAD3   | REM1             | iYER170W       | 5 | 2337 | 527077 |
| YER172C | BRR2   | PRP44 RSS1 SLT22 | iYER172C       | 5 | 6492 | 536016 |
| YER173W | RAD24  | RS1              | iYER172C       | 5 | 1980 | 536295 |
| YER174C | GRX4   |                  | 0 iYER174C     | 5 | 735  | 539163 |
| YER175C | TMT1   | TAM1             | iYER175C       | 5 | 900  | 540358 |
| YER176W | ECM32  | HEL1 MTT1        | iYER175C       | 5 | 3366 | 541685 |
| YER177W | BMH1   |                  | 38083 iYER176W | 5 | 804  | 545606 |
| YER178W | PDA1   |                  | 0 iYER177W     | 5 | 1332 | 546743 |
| YER179W | DMC1   | ISC2             | iYER178W       | 5 | 1097 | 548416 |
| YER180C | ISC10  |                  | 0 iYER180C     | 5 | 804  | 550522 |
| YER181C | 0      | #N/A             | iYER181C       | 5 | 324  | 551791 |
| YER182W | 0      |                  | 0 iYERCdelta   | 5 | 735  | 552520 |
| YER183C | FAU1   |                  | 0 iYER183C-C   | 5 | 636  | 553964 |
| YER184C | 0      | #N/A             | iYER184C       | 5 | 2385 | 558675 |
| YER185W | 0      | #N/A             | iYER184C       | 5 | 912  | 559449 |
| YER186C | 0      | #N/A             | iYER186C       | 5 | 921  | 562620 |
| YER187W | 0      | #N/A             | iYERComeç      | 5 | 426  | 566225 |
| YER188W | 0      | #N/A             | iYER187W       | 5 | 720  | 568035 |
| YER189W | 0      | #N/A             | iYERWome       | 5 | 369  | 571150 |
| YER190W | YRF1-2 | YRF1             | iYERWome       | 5 | 5046 | 571475 |
| YFL001W | DEG1   | PUS3             | iYFL002C       | 6 | 1329 | 147125 |
| YFL002C | SPB4   |                  | 0 iYFL002C     | 6 | 1821 | 146928 |
| YFL003C | MSH4   |                  | 0 iYFL003C     | 6 | 2637 | 137151 |

|           |       |                 |      |              |      |      |      |        |
|-----------|-------|-----------------|------|--------------|------|------|------|--------|
| YFL004W   | VTC2  | PHM1            |      | iYFL005W     | 6    | 2487 |      | 131804 |
| YFL005W   | SEC4  | SRO6            |      | iYFL006W     | 6    | 648  |      | 130328 |
| YFL006W   |       | 0               | #N/A | iYFL007W     | 6    | 765  |      | 129140 |
| YFL007W   | BLM3  |                 |      | 0 iYFL008W   | 6    | 5415 |      | 123474 |
| YFL008W   | SMC1  | CHL10           |      | iYFL009W     | 6    | 3678 |      | 119424 |
| YFL009W   | CDC4  |                 |      | 0 iYFL010C   | 6    | 2340 |      | 116139 |
| YFL010C   | WWM1  |                 |      | 0 iYFL010C   | 6    | 636  |      | 115737 |
| YFL011W   | HXT10 |                 |      | 0 iYFL012W   | 6    | 1641 |      | 112339 |
| YFL011W-A | #N/A  |                 | #N/A | #N/A         | #N/A | #N/A | #N/A | #N/A   |
| YFL012W   |       | 0               | #N/A | iYFL013W-1   | 6    | 447  |      | 110641 |
| YFL013C   | IES1  |                 |      | 0 iYFL013W-1 | 6    | 2079 |      | 109924 |
| YFL013W-A | #N/A  |                 | #N/A | iYFL014W     | #N/A | #N/A | #N/A | #N/A   |
| YFL014W   | HSP12 | GLP1 HOR5       |      | iYFL015C     | 6    | 330  |      | 107250 |
| YFL015C   |       | 0               | #N/A | iYFL015C     | 6    | 495  |      | 106957 |
| YFL016C   | MDJ1  |                 |      | 0 iYFL016C   | 6    | 1536 |      | 106230 |
| YFL017C   | GNA1  | PAT1            |      | iYFL017C     | 6    | 480  |      | 104456 |
| YFL018C   | LPD1  | HPD1            |      | iYFL018C     | 6    | 1500 |      | 103121 |
| YFL018W-A | #N/A  |                 | #N/A | #N/A         | #N/A | #N/A | #N/A | #N/A   |
| YFL019C   |       | 0               | #N/A | YFLWdelta1   | 6    | 354  |      | 100599 |
| YFL020C   | PAU5  |                 |      | 0 iYFL020C   | 6    | 369  |      | 99593  |
| YFL021W   | GAT1  | MEP80 NIL1      |      | iYFL022C     | 6    | 1533 |      | 95964  |
| YFL022C   | FRS2  |                 |      | 0 iYFL022C   | 6    | 1512 |      | 95008  |
| YFL023W   | FYV11 |                 |      | 0 iYFL024C   | 6    | 2391 |      | 90984  |
| YFL024C   | EPL1  |                 |      | 0 iYFL024C   | 6    | 2499 |      | 90343  |
| YFL025C   | BST1  |                 |      | 0 iYFL025C   | 6    | 3090 |      | 87232  |
| YFL026W   | STE2  |                 |      | 0 iYFL027C   | 6    | 1296 |      | 82578  |
| YFL027C   | GYP8  |                 |      | 0 iYFL027C   | 6    | 1494 |      | 81910  |
| YFL028C   | CAF16 |                 |      | 0 iYFL028C   | 6    | 870  |      | 80211  |
| YFL029C   | CAK1  | CIV1            |      | iYFL029C     | 6    | 1107 |      | 79159  |
| YFL030W   |       | 0               |      | 0 iYFL031W   | 6    | 1158 |      | 76829  |
| YFL031W   | HAC1  | ERN4 IRE15      |      | iYFL033C     | 6    | 969  |      | 75177  |
| YFL032W   |       | 0               | #N/A | iYFL033C     | 6    | 321  |      | 74870  |
| YFL033C   | RIM15 | TAK1            |      | iYFL033C     | 6    | 5313 |      | 74425  |
| YFL034W   |       | 0               | #N/A | iYFL034C-A   | 6    | 3222 |      | 65475  |
| YFL035C   | #N/A  |                 | #N/A | #N/A         | #N/A | #N/A | #N/A | #N/A   |
| YFL035C-A | #N/A  |                 | #N/A | #N/A         | #N/A | #N/A | #N/A | #N/A   |
| YFL035C-B | #N/A  |                 | #N/A | #N/A         | #N/A | #N/A | #N/A | #N/A   |
| YFL036W   | RPO41 |                 |      | 0 iYFL037W   | 6    | 4056 |      | 58781  |
| YFL037W   | TUB2  | ARM10 SHE8      |      | iYFL038C     | 6    | 1374 |      | 56335  |
| YFL038C   | YPT1  | YP2             |      | iYFL038C     | 6    | 621  |      | 55985  |
| YFL039C   | ACT1  | ABY1 END7 actin |      | iYFL039C     | 6    | 1436 |      | 54695  |
| YFL040W   |       | 0               | #N/A | iYFL041W     | 6    | 1623 |      | 51350  |
| YFL041W   | FET5  |                 |      | 0 iYFL042C   | 6    | 1869 |      | 49139  |
| YFL042C   |       | 0               | #N/A | iYFL042C     | 6    | 2025 |      | 47744  |
| YFL043C   | #N/A  |                 | #N/A | iYFL042C     | #N/A | #N/A | #N/A | #N/A   |
| YFL044C   |       | 0               |      | 0 iYFL044C   | 6    | 906  |      | 45560  |
| YFL045C   | SEC53 | ALG4            |      | iYFL045C     | 6    | 765  |      | 44392  |
| YFL046W   |       | 0               |      | 0 iYFL047W   | 6    | 624  |      | 42815  |
| YFL047W   | RGD2  |                 |      | 0 iYFL048C   | 6    | 2145 |      | 40421  |
| YFL048C   | EMP47 |                 |      | 0 iYFL048C   | 6    | 1338 |      | 40180  |
| YFL049W   |       | 0               | #N/A | iYFL050C     | 6    | 1872 |      | 36803  |

|           |       |                  |      |              |      |      |        |
|-----------|-------|------------------|------|--------------|------|------|--------|
| YFL050C   | ALR2  |                  | 0    | iYFL050C     | 6    | 2577 | 35848  |
| YFL051C   |       | 0                | #N/A | iYFL051C-0   | 6    | 483  | 30540  |
| YFL052W   |       | 0                | #N/A | iYFL053W-    | 6    | 1398 | 28232  |
| YFL053W   | DAK2  |                  | 0    | iYFL054C     | 6    | 1776 | 23423  |
| YFL054C   |       | 0                | #N/A | iYFL054C     | 6    | 1941 | 22787  |
| YFL055W   | AGP3  |                  | 0    | iYFL056C-1   | 6    | 1677 | 17004  |
| YFL056C   | AAD6  |                  | 0    | iYFL056C-0   | 6    | 639  | 15431  |
| YFL057C   |       | 0                |      | 0 iYFL056C-0 | 6    | 459  | 14763  |
| YFL058W   | THI5  |                  | 0    | iYFL059W     | 6    | 1023 | 12929  |
| YFL059W   | SNZ3  |                  | 0    | iYFL060C     | 6    | 897  | 11363  |
| YFL060C   | SNO3  |                  | 0    | iYFL060C     | 6    | 669  | 10969  |
| YFL061W   |       | 0                | #N/A | iYFL062W-    | 6    | 678  | 9545   |
| YFL062W   | COS4  |                  | 0    | iYFL063W     | 6    | 1140 | 6426   |
| YFL063W   |       | 0                | #N/A | iYFL064C     | 6    | 456  | 5066   |
| YFL064C   |       | 0                | #N/A | iYFL064C     | 6    | 525  | 3846   |
| YFL065C   |       | 0                | #N/A | iYFL064C     | 6    | 309  | 3338   |
| YFL066C   |       | 0                | #N/A | iYFL066C     | 6    | 1179 | 2615   |
| YFL067W   |       | 0                | #N/A | iYFL068W     | 6    | 528  | 836    |
| YFL068W   |       | 0                | #N/A | #N/A         | 6    | 483  | 53     |
| YFL-TYA   | #N/A  | #N/A             | #N/A | #N/A         | #N/A | #N/A | #N/A   |
| YFL-TYB   | #N/A  | #N/A             | #N/A | #N/A         | #N/A | #N/A | #N/A   |
| YFR001W   | LOC1  |                  | 0    | iCEN6        | 6    | 615  | 149104 |
| YFR002W   | NIC96 |                  | 0    | iYFR001W     | 6    | 2520 | 150010 |
| YFR003C   |       | 0                |      | 0 iYFR003C   | 6    | 468  | 153118 |
| YFR004W   | RPN11 | MPR1             |      | iYFR003C     | 6    | 921  | 153387 |
| YFR005C   | SAD1  |                  | 0    | iYFR005C     | 6    | 1347 | 155867 |
| YFR006W   |       | 0                | #N/A | iYFR005C     | 6    | 1608 | 156138 |
| YFR007W   |       | 0                | #N/A | iYFRWdelta   | 6    | 1062 | 159292 |
| YFR008W   |       | 0                |      | 0 iYFR007W   | 6    | 666  | 160528 |
| YFR009W   | GCN20 |                  | 0    | itG(GCC)F1   | 6    | 2259 | 162481 |
| YFR010W   | UBP6  |                  | 0    | iYFR009W     | 6    | 1500 | 165059 |
| YFR011C   |       | 0                | #N/A | iYFR011C     | 6    | 513  | 167250 |
| YFR012W   |       | 0                | #N/A | itY(GUA)F1   | 6    | 609  | 167880 |
| YFR013W   | IOC3  |                  | 0    | iYFR012W     | 6    | 2364 | 169913 |
| YFR014C   | CMK1  |                  | 0    | iYFR014C     | 6    | 1341 | 173868 |
| YFR015C   | GSY1  |                  | 0    | iYFR015C     | 6    | 2127 | 176382 |
| YFR016C   |       | 0                | #N/A | iYFR016C     | 6    | 3702 | 180734 |
| YFR017C   |       | 0                | #N/A | iYFR017C     | 6    | 588  | 182848 |
| YFR018C   |       | 0                | #N/A | iYFR018C     | 6    | 1092 | 184209 |
| YFR019W   | FAB1  | SVL7             |      | iYFR018C     | 6    | 6837 | 184489 |
| YFR020W   |       | 0                | #N/A | iYFRCdelta   | 6    | 699  | 192725 |
| YFR021W   | AUT10 | AUT10 CVT18 NMR1 |      | iYFR020W     | 6    | 1503 | 194799 |
| YFR022W   |       | 0                | #N/A | iYFR021W     | 6    | 2202 | 196820 |
| YFR023W   | PES4  |                  | 0    | iYFR022W     | 6    | 1836 | 199861 |
| YFR024C   |       | 0                | #N/A | iYFR024C-/   | 6    | 1122 | 203068 |
| YFR024C-A | LSB3  | YFR024C          |      | iYFR024C-/   | 6    | 1474 | 203420 |
| YFR025C   | HIS2  |                  | 0    | iYFR025C     | 6    | 1008 | 204737 |
| YFR026C   |       | 0                | #N/A | iYFR026C     | 6    | 510  | 206244 |
| YFR027W   | ECO1  | CTF7             |      | iYFRWdelta   | 6    | 846  | 207439 |
| YFR028C   | CDC14 | OAF3             |      | iYFR028C     | 6    | 1656 | 210055 |
| YFR029W   | PTR3  | SSY3             |      | itY(GUA)F2   | 6    | 2037 | 210924 |



|           |        |                  |   |            |   |      |        |
|-----------|--------|------------------|---|------------|---|------|--------|
| YFR030W   | MET10  |                  | 0 | iYFR029W   | 6 | 3108 | 213299 |
| YFR031C   | SMC2   |                  | 0 | iYFR031C   | 6 | 3513 | 220093 |
| YFR031C-A | RPL2A  | RPL5B            |   | iYFR031C-A | 6 | 912  | 221405 |
| YFR032C   | 0      | #N/A             |   | iYFR032C   | 6 | 870  | 222946 |
| YFR033C   | QCR6   | COR3 UCR6        |   | iYFR033C   | 6 | 444  | 224756 |
| YFR034C   | PHO4   |                  | 0 | iYFR034C   | 6 | 939  | 225945 |
| YFR035C   | 0      | #N/A             |   | iYFR035C   | 6 | 345  | 226452 |
| YFR036W   | CDC26  | HIT3 SCD26       |   | iYFR036W   | 6 | 375  | 226949 |
| YFR037C   | RSC8   | SWH3             |   | iYFR037C   | 6 | 1674 | 229172 |
| YFR038W   | 0      | #N/A             |   | iYFR037C   | 6 | 2337 | 229366 |
| YFR039C   | 0      | #N/A             |   | iYFR039C   | 6 | 1533 | 233531 |
| YFR040W   | SAP155 |                  | 0 | iYFR039C   | 6 | 2718 | 234521 |
| YFR041C   | 0      |                  | 0 | iYFR041C   | 6 | 888  | 238243 |
| YFR042W   | 0      | #N/A             |   | iYFR041C   | 6 | 603  | 238446 |
| YFR043C   | 0      | #N/A             |   | iYFR043C   | 6 | 714  | 239815 |
| YFR044C   | 0      | #N/A             |   | iYFR044C   | 6 | 1446 | 241425 |
| YFR045W   | 0      | #N/A             |   | iYFR044C   | 6 | 537  | 242450 |
| YFR046C   | 0      |                  | 0 | iYFR046C   | 6 | 1086 | 244146 |
| YFR047C   | BNA6   | QPT1             |   | iYFR047C   | 6 | 888  | 245153 |
| YFR048W   | 0      |                  | 0 | iYFR047C   | 6 | 1989 | 246133 |
| YFR049W   | YMR31  |                  | 0 | iYFR048W   | 6 | 372  | 248510 |
| YFR050C   | PRE4   |                  | 0 | iYFR050C   | 6 | 801  | 249853 |
| YFR051C   | RET2   |                  | 0 | iYFR051C   | 6 | 1641 | 251791 |
| YFR052W   | RPN12  | NIN1             |   | iYFR051C   | 6 | 825  | 252493 |
| YFR053C   | HXK1   |                  | 0 | iYFR053C-C | 6 | 1458 | 255037 |
| YFR054C   | 0      | #N/A             |   | iYFR054C-C | 6 | 579  | 259421 |
| YFR055W   | 0      | #N/A             |   | iYFR054C-C | 6 | 1023 | 264192 |
| YFR056C   | 0      | #N/A             |   | iYFR055W-H | 6 | 369  | 264313 |
| YFR057W   | 0      | #N/A             |   | iYFR055W-H | 6 | 456  | 269049 |
| YGL001C   | ERG26  |                  | 0 | iYGL001C   | 7 | 1050 | 496498 |
| YGL002W   | ERP6   |                  | 0 | iYGL003C   | 7 | 651  | 494513 |
| YGL003C   | CDH1   | HCT1             |   | iYGL003C   | 7 | 1701 | 494170 |
| YGL004C   | 0      |                  | 0 | iYGL004C   | 7 | 1254 | 491952 |
| YGL005C   | COD5   | COD5             |   | iYGL005C   | 7 | 840  | 490543 |
| YGL006W   | PMC1   |                  | 0 | iYGL007W-  | 7 | 3522 | 485917 |
| YGL007W   | 0      | #N/A             |   | iYGL008C   | 7 | 378  | 483257 |
| YGL008C   | PMA1   |                  | 0 | iYGL008C   | 7 | 2757 | 482663 |
| YGL009C   | LEU1   |                  | 0 | iYGL009C   | 7 | 2340 | 478649 |
| YGL010W   | 0      | #N/A             |   | iYGL011C   | 7 | 525  | 475542 |
| YGL011C   | SCL1   | PRC2             |   | iYGL011C   | 7 | 759  | 475244 |
| YGL012W   | ERG4   |                  | 0 | iYGL013C   | 7 | 1422 | 472852 |
| YGL013C   | PDR1   | AMY1 ANT1 BOR2 C |   | iYGL013C   | 7 | 3207 | 472295 |
| YGL014W   | PUF4   | YGL023           |   | iYGL015C   | 7 | 2667 | 466138 |
| YGL015C   | 0      | #N/A             |   | iYGL015C   | 7 | 393  | 465432 |
| YGL016W   | KAP122 | PDR6             |   | iYGL017W   | 7 | 3246 | 461663 |
| YGL017W   | ATE1   |                  | 0 | iYGL018C   | 7 | 1512 | 459851 |
| YGL018C   | JAC1   |                  | 0 | iYGL018C   | 7 | 555  | 459661 |
| YGL019W   | CKB1   |                  | 0 | iYGL020C   | 7 | 837  | 458153 |
| YGL020C   | 0      |                  | 0 | iYGL020C   | 7 | 708  | 457867 |
| YGL021W   | ALK1   |                  | 0 | iYGL022W   | 7 | 2283 | 454782 |
| YGL022W   | STT3   |                  | 0 | iYGL023C   | 7 | 2157 | 452401 |

|         |         |                       |   |          |            |      |        |        |
|---------|---------|-----------------------|---|----------|------------|------|--------|--------|
| YGL023C | PIB2    |                       | 0 | iYGL023C | 7          | 1908 | 452101 |        |
| YGL024W | 0       |                       |   | 0        | iYGL026C   | 7    | 336    | 449785 |
| YGL025C | PGD1    | HRS1 MED3             |   |          | iYGL024W   | 7    | 1296   | 450056 |
| YGL026C | TRP5    |                       |   | 0        | iYGL026C   | 7    | 2124   | 448532 |
| YGL027C | CWH41   | GLS1                  |   |          | iYGL027C   | 7    | 2502   | 446140 |
| YGL028C | SCW11   |                       |   | 0        | iYGL028C   | 7    | 1629   | 442906 |
| YGL029W | CGR1    |                       |   | 0        | iYGL030W   | 7    | 363    | 440060 |
| YGL030W | RPL30   |                       |   | 0        | iYGL031C   | 7    | 548    | 439088 |
| YGL031C | RPL24A  | RPL30A                |   |          | iYGL031C   | 7    | 468    | 437931 |
| YGL032C | AGA2    |                       |   | 0        | iYGL032C   | 7    | 264    | 436830 |
| YGL033W | HOP2    |                       |   | 0        | iYGL034C-1 | 7    | 727    | 435622 |
| YGL034C | 0       | #N/A                  |   |          | iYGL034C-C | 7    | 366    | 433576 |
| YGL035C | MIG1    | CAT4 SSN1 TDS22       |   |          | iYGL035C   | 7    | 1515   | 433059 |
| YGL036W | 0       | #N/A                  |   |          | iYGL037C   | 7    | 2730   | 428598 |
| YGL037C | PNC1    |                       |   | 0        | iYGL037C   | 7    | 651    | 427945 |
| YGL038C | OCH1    | LDB12 NGD29           |   |          | iYGL038C   | 7    | 1443   | 426802 |
| YGL039W | 0       | #N/A                  |   |          | itL(CAA)G2 | 7    | 1047   | 423959 |
| YGL040C | HEM2    | SLU1                  |   |          | iYGL040C-C | 7    | 1029   | 420553 |
| YGL041C | 0       | #N/A                  |   |          | iYGL041C   | 7    | 315    | 419223 |
| YGL042C | 0       | #N/A                  |   |          | iYGL042C   | 7    | 306    | 418589 |
| YGL043W | DST1    | P37 PPR2 S-III SII TF |   |          | iYGL044C   | 7    | 930    | 417479 |
| YGL044C | RNA15   |                       |   | 0        | iYGL044C   | 7    | 891    | 417032 |
| YGL045W | 0       | PAL3                  |   |          | iYGL046W   | 7    | 690    | 415037 |
| YGL046W | 0       | #N/A                  |   |          | iYGLWdelta | 7    | 789    | 414101 |
| YGL047W | 0       | #N/A                  |   |          | iYGL048C   | 7    | 609    | 411550 |
| YGL048C | RPT6    | CIM3 CRL3 SCB68 S     |   |          | iYGL048C   | 7    | 1218   | 411284 |
| YGL049C | TIF4632 |                       |   | 0        | iYGL049C   | 7    | 2745   | 409602 |
| YGL050W | 0       | #N/A                  |   |          | itR(UCU)G1 | 7    | 822    | 405774 |
| YGL051W | 0       |                       |   | 0        | iYGL053W   | 7    | 705    | 403685 |
| YGL052W | 0       | #N/A                  |   |          | iYGL053W   | 7    | 306    | 403435 |
| YGL053W | PRM8    |                       |   | 0        | iYGLWdelta | 7    | 714    | 402587 |
| YGL054C | ERV14   |                       |   | 0        | iYGL054C   | 7    | 417    | 401285 |
| YGL055W | OLE1    | MDM2                  |   |          | iYGL056C   | 7    | 1533   | 398626 |
| YGL056C | SDS23   |                       |   | 0        | iYGL056C   | 7    | 1584   | 397619 |
| YGL057C | 0       | #N/A                  |   |          | iYGL057C   | 7    | 864    | 395830 |
| YGL058W | RAD6    | UBC2                  |   |          | iYGL059W   | 7    | 519    | 393987 |
| YGL059W | 0       | #N/A                  |   |          | iYGL060W   | 7    | 1338   | 392223 |
| YGL060W | 0       |                       |   | 0        | iYGL061C   | 7    | 1926   | 390065 |
| YGL061C | DUO1    |                       |   | 0        | iYGL061C   | 7    | 744    | 389709 |
| YGL061L | #N/A    | #N/A                  |   | #N/A     | #N/A       | #N/A | #N/A   |        |
| YGL062W | PYC1    |                       |   | 0        | iYGL063W   | 7    | 3537   | 385194 |
| YGL063W | PUS2    |                       |   | 0        | iYGL064C   | 7    | 1113   | 383652 |
| YGL064C | MRH4    |                       |   | 0        | iYGL064C   | 7    | 1686   | 383206 |
| YGL065C | ALG2    |                       |   | 0        | iYGL065C   | 7    | 1512   | 381269 |
| YGL066W | SGF73   |                       |   | 0        | iYGL067W   | 7    | 1974   | 377607 |
| YGL067W | NPY1    |                       |   | 0        | iYGL068W   | 7    | 1155   | 376099 |
| YGL068W | 0       |                       |   | 0        | iYGL070C   | 7    | 585    | 375085 |
| YGL069C | 0       |                       |   | 0        | iYGL068W   | 7    | 465    | 375512 |
| YGL070C | RPB9    | SHI1 SSU73            |   |          | iYGL070C   | 7    | 369    | 374825 |
| YGL071W | RCS1    | AFT1                  |   |          | iYGL072C   | 7    | 2073   | 372010 |
| YGL072C | 0       | #N/A                  |   |          | iYGL072C   | 7    | 360    | 371360 |

|         |         |                  |             |   |      |        |
|---------|---------|------------------|-------------|---|------|--------|
| YGL073W | HSF1    | EXA3 MAS3        | iYGL075C    | 7 | 2502 | 368751 |
| YGL074C | 0       | #N/A             | iYGL072C    | 7 | 327  | 368920 |
| YGL075C | MPS2    | MMC1             | iYGL075C    | 7 | 1164 | 368086 |
| YGL076C | RPL7A   |                  | 0 iYGL076C  | 7 | 1662 | 365994 |
| YGL077C | HNM1    |                  | 0 iYGL077C  | 7 | 1692 | 363914 |
| YGL078C | DBP3    |                  | 0 iYGL078C  | 7 | 1572 | 361857 |
| YGL079W | 0       | #N/A             | iYGL080W    | 7 | 657  | 359442 |
| YGL080W | 0       |                  | 0 iYGL081W  | 7 | 393  | 358634 |
| YGL081W | 0       | #N/A             | iYGL082W    | 7 | 963  | 357375 |
| YGL082W | 0       | #N/A             | iYGL083W    | 7 | 1146 | 355825 |
| YGL083W | SCY1    |                  | 0 iYGL084C  | 7 | 2415 | 353056 |
| YGL084C | GUP1    |                  | 0 iYGL084C  | 7 | 1683 | 352296 |
| YGL085W | 0       | #N/A             | iYGL086W    | 7 | 825  | 349614 |
| YGL086W | MAD1    |                  | 0 iYGL087C  | 7 | 2250 | 347117 |
| YGL087C | MMS2    |                  | 0 iYGL087C  | 7 | 499  | 346902 |
| YGL088W | 0       | #N/A             | iYGL089C    | 7 | 366  | 345834 |
| YGL089C | MF(ALP) |                  | 0 iYGL089C  | 7 | 363  | 345151 |
| YGL090W | LIF1    |                  | 0 iYGL091C  | 7 | 1266 | 343317 |
| YGL091C | NBP35   |                  | 0 iYGL091C  | 7 | 987  | 343040 |
| YGL092W | NUP145  | RAT10            | iYGL093W    | 7 | 3954 | 337904 |
| YGL093W | SPC105  |                  | 0 iYGL094C  | 7 | 2754 | 334884 |
| YGL094C | PAN2    |                  | 0 iYGL094C  | 7 | 3348 | 334463 |
| YGL095C | VPS45   | STT10 VPL28      | iYGL095C    | 7 | 1734 | 330605 |
| YGL096W | TOS8    |                  | 0 iYGL097W- | 7 | 831  | 325329 |
| YGL097W | SRM1    | MTR1 PRP20       | iYGLCtau3   | 7 | 1449 | 321780 |
| YGL098W | 0       | SLT1             | iYGL099W    | 7 | 738  | 317340 |
| YGL099W | LSG1    | KRE35            | iYGL100W    | 7 | 1923 | 314629 |
| YGL100W | SEH1    |                  | 0 iYGL101W  | 7 | 1050 | 313232 |
| YGL101W | 0       | #N/A             | iYGL102C    | 7 | 648  | 312191 |
| YGL102C | 0       | #N/A             | iYGL102C    | 7 | 429  | 311931 |
| YGL103W | RPL28   | CYH2             | iYGL104C    | 7 | 961  | 310965 |
| YGL104C | VPS73   |                  | 0 iYGL104C  | 7 | 1461 | 310171 |
| YGL105W | ARC1    |                  | 0 iYGL106W  | 7 | 1131 | 307435 |
| YGL106W | MLC1    |                  | 0 iYGL107C  | 7 | 450  | 306558 |
| YGL107C | 0       |                  | 0 iYGL107C  | 7 | 1941 | 306271 |
| YGL108C | 0       | #N/A             | iYGL108C    | 7 | 423  | 304069 |
| YGL109W | 0       | #N/A             | iYGL110C    | 7 | 324  | 303511 |
| YGL110C | 0       |                  | 0 iYGL110C  | 7 | 1875 | 303409 |
| YGL111W | NSA1    |                  | 0 iYGL112C  | 7 | 1392 | 299976 |
| YGL112C | TAF6    | TAF60 TafII60    | iYGL112C    | 7 | 1551 | 299726 |
| YGL113W | SLD3    |                  | 0 iYGL114W  | 7 | 2007 | 295930 |
| YGL114W | 0       | #N/A             | iYGL115W    | 7 | 2178 | 293458 |
| YGL115W | SNF4    | CAT3 SCI1        | iYGL116W    | 7 | 969  | 292031 |
| YGL116W | CDC20   | PAC5             | iYGL117W    | 7 | 1833 | 289807 |
| YGL117W | 0       | #N/A             | iYGL118C    | 7 | 798  | 288513 |
| YGL118C | 0       | #N/A             | iYGL118C    | 7 | 438  | 288452 |
| YGL119W | ABC1    | COQ8             | iYGL120C    | 7 | 1506 | 284443 |
| YGL120C | PRP43   | JA1              | iYGL120C    | 7 | 2304 | 283938 |
| YGL121C | 0       |                  | 0 iYGL121C  | 7 | 381  | 281158 |
| YGL122C | NAB2    |                  | 0 iYGL122C  | 7 | 1578 | 280524 |
| YGL123W | RPS2    | RPS4 SUP138 SUP3 | iYGL124C    | 7 | 765  | 277618 |

|         |       |                  |   |            |   |      |        |
|---------|-------|------------------|---|------------|---|------|--------|
| YGL124C | MON1  |                  | 0 | iYGL124C   | 7 | 1935 | 276715 |
| YGL125W | MET13 | MET11 MRPL45     |   | iYGL126W   | 7 | 1800 | 272524 |
| YGL126W | SCS3  |                  | 0 | iYGL127C   | 7 | 1143 | 271001 |
| YGL127C | SOH1  |                  | 0 | iYGL127C   | 7 | 384  | 270779 |
| YGL128C | CWC23 |                  | 0 | iYGL127C   | 7 | 1044 | 270340 |
| YGL129C | RSM23 |                  | 0 | iYGL129C   | 7 | 1467 | 269192 |
| YGL130W | CEG1  |                  | 0 | iYGL131C   | 7 | 1380 | 266148 |
| YGL131C | SNT2  |                  | 0 | iYGL131C   | 7 | 4212 | 265862 |
| YGL132W | 0     | #N/A             |   | iYGL133W   | 7 | 336  | 261583 |
| YGL133W | ITC1  |                  | 0 | iYGL134W   | 7 | 3795 | 257710 |
| YGL134W | PCL10 |                  | 0 | iYGL135W   | 7 | 1302 | 255666 |
| YGL135W | RPL1B | SSM2             |   | iYGL136C   | 7 | 654  | 254644 |
| YGL136C | MRM2  |                  | 0 | iYGL136C   | 7 | 963  | 253862 |
| YGL137W | SEC27 |                  | 0 | iYGL138C   | 7 | 2870 | 249872 |
| YGL138C | 0     | #N/A             |   | iYGL138C   | 7 | 1038 | 249534 |
| YGL139W | 0     | #N/A             |   | iYGL140C   | 7 | 2409 | 245719 |
| YGL140C | 0     | #N/A             |   | iYGL140C   | 7 | 3660 | 245015 |
| YGL141W | HUL5  |                  | 0 | iYGL142C   | 7 | 2733 | 238356 |
| YGL142C | GPI10 |                  | 0 | iYGL142C   | 7 | 1851 | 238122 |
| YGL143C | MRF1  |                  | 0 | iYGL143C   | 7 | 1242 | 235961 |
| YGL144C | 0     |                  | 0 | iYGL144C   | 7 | 2058 | 234510 |
| YGL145W | TIP20 | TIP1             |   | iYGL146C   | 7 | 2106 | 230246 |
| YGL146C | 0     | #N/A             |   | iYGL146C   | 7 | 936  | 229689 |
| YGL147C | RPL9A |                  | 0 | iYGL147C   | 7 | 576  | 228332 |
| YGL148W | ARO2  |                  | 0 | iYGL149W   | 7 | 1131 | 226402 |
| YGL149W | 0     | #N/A             |   | iYGL151W   | 7 | 306  | 225575 |
| YGL150C | INO80 |                  | 0 | iYGL149W   | 7 | 4470 | 225576 |
| YGL151W | NUT1  |                  | 0 | iYGL152C   | 7 | 3399 | 217527 |
| YGL152C | 0     | #N/A             |   | iYGL152C   | 7 | 678  | 217372 |
| YGL153W | PEX14 |                  | 0 | iYGL154C   | 7 | 1026 | 216276 |
| YGL154C | LYS5  |                  | 0 | iYGL154C   | 7 | 819  | 216099 |
| YGL155W | CDC43 | CAL1             |   | iYGL156W   | 7 | 1131 | 214084 |
| YGL156W | AMS1  |                  | 0 | iYGL157W   | 7 | 3252 | 210419 |
| YGL157W | 0     | #N/A             |   | iYGL158W   | 7 | 1044 | 209009 |
| YGL158W | RCK1  |                  | 0 | iL(CAA)G1  | 7 | 1539 | 207036 |
| YGL159W | 0     | #N/A             |   | iYGL160W   | 7 | 1113 | 202725 |
| YGL160W | 0     | #N/A             |   | iYGL161C   | 7 | 1713 | 200565 |
| YGL161C | 0     |                  | 0 | iYGL161C   | 7 | 933  | 200146 |
| YGL162W | SUT1  |                  | 0 | iYGL163C-1 | 7 | 900  | 198142 |
| YGL163C | RAD54 | XRS1             |   | iYGL163C-C | 7 | 2697 | 196407 |
| YGL164C | 0     |                  | 0 | iYGL164C   | 7 | 1323 | 193304 |
| YGL165C | 0     | #N/A             |   | iYGL164C   | 7 | 579  | 191980 |
| YGL166W | CUP2  | ACE1             |   | iYGL167C   | 7 | 678  | 191133 |
| YGL167C | PMR1  | BSD1 LDB1        |   | iYGL167C   | 7 | 2853 | 190472 |
| YGL168W | 0     |                  | 0 | iYGL169W   | 7 | 333  | 187468 |
| YGL169W | SUA5  |                  | 0 | iK(CUU)G2  | 7 | 1281 | 186063 |
| YGL170C | SPO74 |                  | 0 | iYGL170C   | 7 | 1242 | 185398 |
| YGL171W | ROK1  |                  | 0 | iYGL172W   | 7 | 1695 | 182394 |
| YGL172W | NUP49 | NSP49            |   | iYGL173C   | 7 | 1419 | 180704 |
| YGL173C | KEM1  | DST2 RAR5 SEP1 S |   | iYGL173C   | 7 | 4587 | 180117 |
| YGL174W | BUD13 | CWC26            |   | iYGL175C   | 7 | 801  | 174549 |

|         |        |                 |              |   |      |        |
|---------|--------|-----------------|--------------|---|------|--------|
| YGL175C | SAE2   | COM1            | iYGL175C     | 7 | 1038 | 174326 |
| YGL176C | 0      | #N/A            | iYGL176C     | 7 | 1665 | 173083 |
| YGL177W | 0      | #N/A            | iYGL179C-1   | 7 | 348  | 167563 |
| YGL178W | MPT5   | HTR1 PUF5 UTH4  | iYGL177W-    | 7 | 3220 | 167356 |
| YGL179C | TOS3   |                 | 0 iYGL179C-C | 7 | 1683 | 165095 |
| YGL180W | APG1   | APG1 AUT3 CVT10 | iYGL181W     | 7 | 2694 | 160069 |
| YGL181W | GTS1   | FHT1            | iYGL182C     | 7 | 1191 | 157910 |
| YGL182C | 0      | #N/A            | iYGL182C     | 7 | 324  | 157600 |
| YGL183C | MND1   |                 | 0 iYGL183C   | 7 | 525  | 157071 |
| YGL184C | STR3   |                 | 0 iYGL184C   | 7 | 1398 | 156016 |
| YGL185C | 0      | #N/A            | iYGL185C     | 7 | 1140 | 154310 |
| YGL186C | 0      |                 | 0 iYGL186C   | 7 | 1740 | 152780 |
| YGL187C | COX4   |                 | 0 iYGL187C   | 7 | 468  | 150175 |
| YGL188C | 0      | #N/A            | iYGL188C     | 7 | 174  | 149520 |
| YGL189C | RPS26A | RPS26           | iYGL189C     | 7 | 360  | 148592 |
| YGL190C | CDC55  |                 | 0 iYGL190C   | 7 | 1581 | 147393 |
| YGL191W | COX13  |                 | 0 iYGL192W   | 7 | 390  | 144812 |
| YGL192W | IME4   | SPO8            | iYGL194C     | 7 | 1803 | 142250 |
| YGL193C | 0      | #N/A            | iYGL192W     | 7 | 312  | 142231 |
| YGL194C | HOS2   | RTL1            | iYGL194C     | 7 | 1359 | 141730 |
| YGL195W | GCN1   |                 | 0 iYGL196W   | 7 | 8019 | 131529 |
| YGL196W | 0      | #N/A            | iYGL197W     | 7 | 498  | 130553 |
| YGL197W | MDS3   |                 | 0 iYGL198W   | 7 | 4464 | 124701 |
| YGL198W | 0      |                 | 0 iYGL200C   | 7 | 786  | 123594 |
| YGL199C | 0      | #N/A            | iYGL198W     | 7 | 471  | 124045 |
| YGL200C | EMP24  | BST2            | iYGL200C     | 7 | 612  | 123308 |
| YGL201C | MCM6   |                 | 0 iYGL201C   | 7 | 3054 | 120909 |
| YGL202W | ARO8   |                 | 0 itK(UUU)G1 | 7 | 1503 | 116061 |
| YGL203C | KEX1   |                 | 0 iYGL203C   | 7 | 2190 | 114666 |
| YGL204C | 0      | #N/A            | iYGL204C     | 7 | 306  | 112007 |
| YGL205W | POX1   | FOX1            | iYGL206C     | 7 | 2247 | 108160 |
| YGL206C | CHC1   | SWA5            | iYGL206C     | 7 | 4962 | 107506 |
| YGL207W | SPT16  | CDC68 SSF1      | iYGL208W     | 7 | 3108 | 98971  |
| YGL208W | SIP2   | SPM2            | iYGL209W     | 7 | 1248 | 97340  |
| YGL209W | MIG2   | MLZ1            | iYGL210W     | 7 | 1149 | 95860  |
| YGL210W | YPT32  |                 | 0 iYGL211W   | 7 | 669  | 93795  |
| YGL211W | 0      |                 | 0 iYGL212W   | 7 | 582  | 92515  |
| YGL212W | VAM7   | VPS43           | iYGL213C     | 7 | 951  | 91435  |
| YGL213C | SKI8   | REC103          | iYGL213C     | 7 | 1194 | 91250  |
| YGL214W | 0      | #N/A            | iYGL215W     | 7 | 489  | 90010  |
| YGL215W | CLG1   |                 | 0 iYGL216W   | 7 | 1359 | 87979  |
| YGL216W | KIP3   |                 | 0 iYGL218W   | 7 | 2418 | 84883  |
| YGL217C | 0      | #N/A            | iYGL216W     | 7 | 342  | 85178  |
| YGL218W | 0      |                 | 0 iYGL220W   | 7 | 651  | 83648  |
| YGL219C | MMM2   | MMM2            | iYGL218W     | 7 | 1380 | 84255  |
| YGL220W | 0      | #N/A            | iYGL221C     | 7 | 363  | 82372  |
| YGL221C | NIF3   |                 | 0 iYGL221C   | 7 | 867  | 82290  |
| YGL222C | EDC1   |                 | 0 iYGL222C   | 7 | 528  | 81184  |
| YGL223C | COD3   | COD3 LDB11      | iYGL223C     | 7 | 1254 | 80363  |
| YGL224C | SDT1   | SSM1            | iYGL224C     | 7 | 843  | 78855  |
| YGL225W | VRG4   | GOG5 LDB3 VAN2  | itV(AAC)G3   | 7 | 1014 | 76892  |

|         |        |                  |             |   |      |        |
|---------|--------|------------------|-------------|---|------|--------|
| YGL226W | 0      | #N/A             | iYGL226C-   | 7 | 372  | 73338  |
| YGL227W | VID30  | GID1             | iYGL228W    | 7 | 2877 | 69670  |
| YGL228W | SHE10  |                  | 0 iYGL229C  | 7 | 1734 | 67597  |
| YGL229C | SAP4   |                  | 0 iYGL229C  | 7 | 2457 | 66958  |
| YGL230C | 0      | #N/A             | iYGL230C    | 7 | 444  | 64214  |
| YGL231C | 0      | #N/A             | iYGL231C    | 7 | 573  | 63619  |
| YGL232W | 0      |                  | 0 iYGL233W  | 7 | 928  | 62074  |
| YGL233W | SEC15  |                  | 0 iYGL234W  | 7 | 2733 | 59121  |
| YGL234W | ADE5,7 |                  | 0 iYGL235W  | 7 | 2409 | 56481  |
| YGL235W | 0      | #N/A             | iYGL237C    | 7 | 537  | 55278  |
| YGL236C | MTO1   | IPS1             | iYGL235W    | 7 | 2040 | 55795  |
| YGL237C | HAP2   |                  | 0 iYGL237C  | 7 | 798  | 53528  |
| YGL238W | CSE1   | KAP109           | iYGL240W    | 7 | 2883 | 49552  |
| YGL239C | 0      | #N/A             | iYGL238W    | 7 | 315  | 49745  |
| YGL240W | DOC1   | APC10            | iYGL242C    | 7 | 852  | 48514  |
| YGL241W | KAP114 |                  | 0 iYGL242C  | 7 | 3015 | 45445  |
| YGL242C | 0      | #N/A             | iYGL242C    | 7 | 546  | 45197  |
| YGL243W | TAD1   |                  | 0 iYGL244W  | 7 | 1203 | 43307  |
| YGL244W | RTF1   | CSL3             | iYGL245W    | 7 | 1677 | 41498  |
| YGL245W | 0      |                  | 0 iYGL246C  | 7 | 2175 | 38975  |
| YGL246C | RAI1   |                  | 0 iYGL246C  | 7 | 1164 | 38780  |
| YGL247W | BRR6   |                  | 0 iYGL248W  | 7 | 594  | 36933  |
| YGL248W | PDE1   |                  | 0 iYGL249W  | 7 | 1110 | 35653  |
| YGL249W | ZIP2   |                  | 0 iYGL250W  | 7 | 2115 | 33098  |
| YGL250W | 0      | #N/A             | iYGL251C    | 7 | 738  | 31898  |
| YGL251C | HFM1   | MER3             | iYGL251C    | 7 | 3716 | 31636  |
| YGL252C | RTG2   |                  | 0 iYGL252C  | 7 | 1767 | 27484  |
| YGL253W | HXK2   | HEX1 HKB SCI2    | iYGL254W    | 7 | 1461 | 23935  |
| YGL254W | FZF1   | NRC299 RSU1 SUL1 | iYGL255W    | 7 | 900  | 22304  |
| YGL255W | ZRT1   |                  | 0 iYGL256W- | 7 | 1131 | 20978  |
| YGL256W | ADH4   | NRC465 ZRG5      | iYGL257C    | 7 | 1398 | 14910  |
| YGL257C | MNT2   |                  | 0 iYGL257C  | 7 | 1677 | 14157  |
| YGL258W | 0      | #N/A             | iYGL259W-   | 7 | 621  | 11110  |
| YGL259W | YPS5   |                  | 0 iYGL260W  | 7 | 498  | 8470   |
| YGL260W | 0      | #N/A             | iYGL261C    | 7 | 231  | 6860   |
| YGL261C | 0      | #N/A             | iYGL261C    | 7 | 363  | 6652   |
| YGL262W | 0      | #N/A             | iYGL263W    | 7 | 528  | 5312   |
| YGL263W | COS12  |                  | 0 iYGLWome  | 7 | 1143 | 2790   |
| YGR001C | 0      | #N/A             | iYGR001C    | 7 | 902  | 498030 |
| YGR002C | 0      | EAF2 GOD1        | iYGR002C    | 7 | 1431 | 499902 |
| YGR003W | 0      | CULB CULLIN B    | iYGR002C    | 7 | 2235 | 500128 |
| YGR004W | 0      |                  | 0 iYGR003W  | 7 | 1389 | 502934 |
| YGR005C | TFG2   |                  | 0 iYGR005C  | 7 | 1203 | 505855 |
| YGR006W | PRP18  |                  | 0 iYGR005C  | 7 | 660  | 506066 |
| YGR007W | MUQ1   | ECT1             | iYGR006W    | 7 | 972  | 506964 |
| YGR008C | STF2   |                  | 0 iYGR008C  | 7 | 255  | 508359 |
| YGR009C | SEC9   | HSS7             | iYGR009C    | 7 | 1956 | 510997 |
| YGR010W | NMA2   |                  | 0 iYGR009C  | 7 | 1188 | 511540 |
| YGR011W | 0      | #N/A             | iYGR009C    | 7 | 327  | 512492 |
| YGR012W | 0      | #N/A             | iYGR011W    | 7 | 1182 | 513154 |
| YGR013W | SNU71  |                  | 0 iYGR012W  | 7 | 1863 | 514549 |

|         |        |        |      |            |   |      |        |
|---------|--------|--------|------|------------|---|------|--------|
| YGR014W | MSB2   |        | 0    | iYGR013W   | 7 | 3921 | 516938 |
| YGR015C |        | 0      | #N/A | iYGR015C   | 7 | 987  | 522071 |
| YGR016W |        | 0      | #N/A | iYGR015C   | 7 | 573  | 522256 |
| YGR017W |        | 0      | #N/A | iYGR016W   | 7 | 894  | 523782 |
| YGR018C |        | 0      | #N/A | iYGR018C   | 7 | 330  | 524689 |
| YGR019W | UGA1   |        | 0    | iYGR018C   | 7 | 1416 | 525224 |
| YGR020C | VMA7   |        | 0    | iYGR020C   | 7 | 357  | 527324 |
| YGR021W |        | 0      | #N/A | iYGR020C   | 7 | 873  | 527627 |
| YGR022C |        | 0      | #N/A | iYGR023W   | 7 | 330  | 529581 |
| YGR023W | MTL1   |        | 0    | iYGR021W   | 7 | 1656 | 529259 |
| YGR024C |        | 0      |      | iYGR026W   | 7 | 714  | 532591 |
| YGR025W |        | 0      | #N/A | itD(GUC)G1 | 7 | 303  | 532634 |
| YGR026W |        | 0      | #N/A | itD(GUC)G1 | 7 | 837  | 532980 |
| YGR027C | RPS25A | RPS31A |      | iYGR027C   | 7 | 327  | 534453 |
| YGR028W | MSP1   | YTA4   |      | itE(UUC)G3 | 7 | 1089 | 542198 |
| YGR029W | ERV1   |        |      | 0 iYGR028W | 7 | 653  | 543548 |
| YGR030C | POP6   |        |      | 0 iYGR030C | 7 | 477  | 546152 |
| YGR031W |        | 0      | #N/A | iYGR030C   | 7 | 1029 | 546436 |
| YGR032W | GSC2   | FKS2   |      | iYGR031W   | 7 | 5688 | 548259 |
| YGR033C |        | 0      |      | 0 iYGR033C | 7 | 720  | 554962 |
| YGR034W | RPL26B |        |      | 0 iYGR033C | 7 | 744  | 555924 |
| YGR035C |        | 0      | #N/A | iYGR035C   | 7 | 351  | 557417 |
| YGR036C | CAX4   | CWH8   |      | iYGR036C   | 7 | 720  | 558863 |
| YGR037C | ACB1   |        |      | 0 iYGR037C | 7 | 264  | 559989 |
| YGR038W | ORM1   |        |      | 0 iYGR037C | 7 | 669  | 560677 |
| YGR039W |        | 0      | #N/A | iYGR039W   | 7 | 312  | 574883 |
| YGR040W | KSS1   |        |      | 0 iYGR039W | 7 | 1107 | 575393 |
| YGR041W | BUD9   |        |      | 0 iYGR040W | 7 | 1644 | 577482 |
| YGR042W |        | 0      | #N/A | iYGR041W   | 7 | 816  | 579471 |
| YGR043C |        | 0      | #N/A | iYGR043C-( | 7 | 1002 | 581431 |
| YGR044C | RME1   | CSP1   |      | iYGR045C   | 7 | 903  | 583887 |
| YGR045C |        | 0      | #N/A | iYGR045C   | 7 | 363  | 584291 |
| YGR046W |        | 0      | #N/A | iYGR045C   | 7 | 1158 | 584890 |
| YGR047C | TFC4   | PCF1   |      | iYGR047C   | 7 | 3078 | 589464 |
| YGR048W | UFD1   |        |      | 0 iYGR047C | 7 | 1086 | 589821 |
| YGR049W | SCM4   |        |      | 0 iYGR048W | 7 | 564  | 591309 |
| YGR050C |        | 0      | #N/A | iYGR050C   | 7 | 357  | 592437 |
| YGR051C |        | 0      | #N/A | iYGR051C   | 7 | 324  | 593224 |
| YGR052W |        | 0      |      | 0 iYGR051C | 7 | 1110 | 593591 |
| YGR053C |        | 0      | #N/A | iYGR053C   | 7 | 852  | 595832 |
| YGR054W |        | 0      | #N/A | iYGR053C   | 7 | 1929 | 596688 |
| YGR055W | MUP1   |        |      | 0 iYGR054W | 7 | 1725 | 599412 |
| YGR056W | RSC1   |        |      | 0 iYGR055W | 7 | 2787 | 601656 |
| YGR057C | LST7   |        |      | 0 iYGR057C | 7 | 738  | 605505 |
| YGR058W |        | 0      | #N/A | iYGR057C   | 7 | 1008 | 606131 |
| YGR059W | SPR3   |        |      | 0 iYGR058W | 7 | 1539 | 607558 |
| YGR060W | ERG25  |        |      | 0 iSNR48   | 7 | 930  | 610559 |
| YGR061C | ADE6   |        |      | 0 iYGR061C | 7 | 4077 | 615960 |
| YGR062C | COX18  | OXA2   |      | iYGR062C   | 7 | 951  | 617273 |
| YGR063C | SPT4   |        |      | 0 iYGR064W | 7 | 309  | 617819 |
| YGR064W |        | 0      | #N/A | iYGR062C   | 7 | 369  | 617616 |

|         |        |                |   |            |   |      |        |
|---------|--------|----------------|---|------------|---|------|--------|
| YGR065C | VHT1   |                | 0 | iYGR065C   | 7 | 1782 | 619853 |
| YGR066C | 0      | #N/A           |   | iYGR066C   | 7 | 879  | 621794 |
| YGR067C | 0      | #N/A           |   | iYGR067C   | 7 | 2385 | 624781 |
| YGR068C | 0      | #N/A           |   | iYGR069W   | 7 | 1761 | 627079 |
| YGR069W | 0      | #N/A           |   | iYGR067C   | 7 | 336  | 627078 |
| YGR070W | ROM1   | SKC1           |   | iYGR069W   | 7 | 3468 | 627801 |
| YGR071C | 0      | #N/A           |   | iYGR071C   | 7 | 2583 | 634058 |
| YGR072W | UPF3   | SUA6           |   | iYGR071C   | 7 | 1164 | 634299 |
| YGR073C | 0      | #N/A           |   | iYGR075C   | 7 | 372  | 635981 |
| YGR074W | SMD1   | SPP92 Sm D1    |   | iYGR072W   | 7 | 441  | 635707 |
| YGR075C | PRP38  |                | 0 | iYGR075C   | 7 | 729  | 636870 |
| YGR076C | MRPL25 | YMR26          |   | iYGR076C   | 7 | 474  | 637572 |
| YGR077C | PEX8   | PAS6           |   | iYGR077C   | 7 | 1770 | 639508 |
| YGR078C | PAC10  | GIM2 PFD3 RKS2 |   | iYGR078C   | 7 | 600  | 640366 |
| YGR079W | 0      | #N/A           |   | iYGR078C   | 7 | 1113 | 640715 |
| YGR080W | TWF1   |                | 0 | iYGR079W   | 7 | 999  | 642005 |
| YGR081C | 0      |                | 0 | iYGR081C   | 7 | 633  | 643775 |
| YGR082W | TOM20  | MAS20 MOM19    |   | iYGR081C   | 7 | 552  | 644039 |
| YGR083C | GCD2   | GCD12          |   | iYGR083C   | 7 | 1956 | 646810 |
| YGR084C | MRP13  |                | 0 | iYGR084C   | 7 | 1020 | 648137 |
| YGR085C | RPL11B |                | 0 | iYGR085C   | 7 | 525  | 648902 |
| YGR086C | 0      |                | 0 | iYGR086C   | 7 | 1020 | 650612 |
| YGR087C | PDC6   |                | 0 | iYGR087C-  | 7 | 1692 | 652976 |
| YGR088W | CTT1   |                | 0 | iYGR087C-  | 7 | 1722 | 654596 |
| YGR089W | 0      |                | 0 | iYGR088W   | 7 | 2811 | 656955 |
| YGR090W | 0      |                | 0 | itT(UGU)G1 | 7 | 3714 | 662353 |
| YGR091W | PRP31  |                | 0 | iYGR090W   | 7 | 1485 | 666336 |
| YGR092W | DBF2   |                | 0 | iYGR091W   | 7 | 1719 | 668184 |
| YGR093W | 0      | #N/A           |   | iYGR092W   | 7 | 1524 | 670383 |
| YGR094W | VAS1   |                | 0 | iYGR093W   | 7 | 3315 | 672181 |
| YGR095C | RRP46  |                | 0 | iYGR095C   | 7 | 771  | 676436 |
| YGR096W | 0      |                | 0 | iYGR095C   | 7 | 945  | 676616 |
| YGR097W | ASK10  |                | 0 | iYGR096W   | 7 | 3441 | 678690 |
| YGR098C | ESP1   |                | 0 | iYGR098C   | 7 | 4893 | 687453 |
| YGR099W | TEL2   |                | 0 | iYGR098C   | 7 | 2067 | 687894 |
| YGR100W | MDR1   | GYP2 MIC1      |   | iYGR099W   | 7 | 2853 | 690240 |
| YGR101W | PCP1   | MDM37 RBD1     |   | iYGR100W   | 7 | 1041 | 693358 |
| YGR102C | 0      | #N/A           |   | iYGR102C   | 7 | 552  | 695130 |
| YGR103W | NOP7   | YPH1           |   | iYGR102C   | 7 | 1818 | 695412 |
| YGR104C | SRB5   |                | 0 | iYGR104C   | 7 | 924  | 698363 |
| YGR105W | VMA21  |                | 0 | iYGR104C   | 7 | 234  | 698594 |
| YGR106C | 0      | #N/A           |   | iYGR106C   | 7 | 798  | 699781 |
| YGR107W | 0      | #N/A           |   | iYGRWdelta | 7 | 450  | 702662 |
| YGR108W | CLB1   | SCB1           |   | iYGR107W   | 7 | 1416 | 703631 |
| YGR109C | CLB6   |                | 0 | iYGR109C   | 7 | 1143 | 706496 |
| YGR110W | 0      | #N/A           |   | iYGRcdelta | 7 | 1338 | 713704 |
| YGR111W | 0      | #N/A           |   | iYGR110W   | 7 | 1203 | 715823 |
| YGR112W | SHY1   |                | 0 | iYGR111W   | 7 | 1170 | 717353 |
| YGR113W | DAM1   |                | 0 | iYGR112W   | 7 | 1032 | 718888 |
| YGR114C | 0      | #N/A           |   | iYGR116W   | 7 | 390  | 720649 |
| YGR115C | 0      | #N/A           |   | iYGR116W   | 7 | 780  | 721146 |



|         |         |                   |              |   |      |        |
|---------|---------|-------------------|--------------|---|------|--------|
| YGR116W | SPT6    | CRE2 SSN20        | iYGR113W     | 7 | 4356 | 720404 |
| YGR117C | 0       | #N/A              | iYGR117C     | 7 | 1431 | 726474 |
| YGR118W | RPS23A  |                   | 0 iYGR117C   | 7 | 758  | 726969 |
| YGR119C | NUP57   |                   | 0 iYGR119C   | 7 | 1626 | 729667 |
| YGR120C | SEC35   | SEC35             | iYGR120C     | 7 | 828  | 730856 |
| YGR121C | MEP1    | AMT1              | iYGR121C     | 7 | 1479 | 732923 |
| YGR122W | 0       | #N/A              | iYGR121C     | 7 | 1209 | 733931 |
| YGR123C | PPT1    |                   | 0 iYGR123C   | 7 | 1542 | 738199 |
| YGR124W | ASN2    |                   | 0 itI(AAU)G  | 7 | 1719 | 739940 |
| YGR125W | 0       | #N/A              | iYGR124W     | 7 | 3111 | 742321 |
| YGR126W | 0       | #N/A              | iYGR125W     | 7 | 693  | 745831 |
| YGR127W | 0       | #N/A              | iYGR126W     | 7 | 939  | 746794 |
| YGR128C | UTP8    |                   | 0 iYGR128C   | 7 | 2142 | 750087 |
| YGR129W | SYF2    | NTC31             | iYGR128C     | 7 | 648  | 750396 |
| YGR130C | 0       | #N/A              | iYGR130C     | 7 | 2451 | 753840 |
| YGR131W | 0       | #N/A              | iYGR130C     | 7 | 525  | 754722 |
| YGR132C | PHB1    |                   | 0 iYGR132C   | 7 | 864  | 756448 |
| YGR133W | PEX4    | PAS2 UBC10        | iYGR132C     | 7 | 552  | 756892 |
| YGR134W | CAF130  |                   | 0 iYGR133W   | 7 | 3369 | 757766 |
| YGR135W | PRE9    |                   | 0 iYGR134W   | 7 | 777  | 761388 |
| YGR136W | LSB1    |                   | 0 iYGR135W   | 7 | 726  | 762424 |
| YGR137W | 0       | #N/A              | iYGR135W     | 7 | 375  | 762884 |
| YGR138C | TPO2    |                   | 0 iYGR138C   | 7 | 1845 | 765602 |
| YGR139W | 0       | #N/A              | iYGR138C     | 7 | 339  | 765722 |
| YGR140W | CBF2    | CBF3A CEP2 CSL5 C | iYGR139W     | 7 | 2871 | 767425 |
| YGR141W | VPS62   |                   | 0 iYGR140W   | 7 | 1404 | 770565 |
| YGR142W | BTN2    |                   | 0 iYGR141W   | 7 | 1233 | 772450 |
| YGR143W | SKN1    |                   | 0 itA(AGC)G  | 7 | 2316 | 775189 |
| YGR144W | THI4    | ESP35 MOL1        | itG(UCC)G    | 7 | 981  | 780395 |
| YGR145W | 0       |                   | 0 iYGR144W   | 7 | 2124 | 781763 |
| YGR146C | 0       | #N/A              | iYGR146C     | 7 | 636  | 784854 |
| YGR147C | NAT2    |                   | 0 iYGR147C   | 7 | 867  | 786916 |
| YGR148C | RPL24B  | RPL30B            | iYGR148C     | 7 | 468  | 787775 |
| YGR149W | 0       | #N/A              | iYGR148C     | 7 | 1299 | 789027 |
| YGR150C | 0       | #N/A              | iYGR150C     | 7 | 2595 | 793049 |
| YGR151C | 0       | #N/A              | iYGR152C     | 7 | 336  | 794986 |
| YGR152C | RSR1    | BUD1              | iYGR152C     | 7 | 819  | 795488 |
| YGR153W | TOS10   | #N/A              | iYGR152C     | 7 | 654  | 796088 |
| YGR154C | 0       | #N/A              | iYGR154C     | 7 | 1071 | 797864 |
| YGR155W | CYS4    | NHS5 STR4 VMA41   | iYGR154C     | 7 | 1524 | 798539 |
| YGR156W | PTI1    |                   | 0 iYGR155W   | 7 | 1278 | 800542 |
| YGR157W | CHO2    | PEM1              | iYGR156W     | 7 | 2610 | 802436 |
| YGR158C | MTR3    |                   | 0 iYGR158C   | 7 | 753  | 806017 |
| YGR159C | NSR1    | SHE5              | iYGR160W     | 7 | 1245 | 807652 |
| YGR160W | FYV13   | #N/A              | iYGR158C     | 7 | 612  | 807069 |
| YGR161C | 0       |                   | 0 iYGR161C-( | 7 | 792  | 809416 |
| YGR162W | TIF4631 |                   | 0 itV(AAC)G2 | 7 | 2859 | 824055 |
| YGR163W | GTR2    |                   | 0 iYGR162W   | 7 | 1026 | 827548 |
| YGR164W | 0       | #N/A              | iYGR162W     | 7 | 336  | 828621 |
| YGR165W | 0       |                   | 0 itR(UCU)G2 | 7 | 1038 | 829112 |
| YGR166W | KRE11   | TRS65             | iYGR165W     | 7 | 1683 | 830511 |

|         |       |                  |              |   |      |        |
|---------|-------|------------------|--------------|---|------|--------|
| YGR167W | CLC1  | SCD4             | iYGR166W     | 7 | 702  | 832452 |
| YGR168C | 0     | #N/A             | iYGR168C     | 7 | 1131 | 834478 |
| YGR169C | PUS6  |                  | 0 iYGR169C   | 7 | 1215 | 835899 |
| YGR170W | PSD2  |                  | 0 iYGR169C   | 7 | 3417 | 837138 |
| YGR171C | MSM1  |                  | 0 iYGR171C   | 7 | 1728 | 842547 |
| YGR172C | YIP1  |                  | 0 iYGR172C   | 7 | 747  | 843587 |
| YGR173W | 0     | GIR1             | iYGR172C     | 7 | 1107 | 843850 |
| YGR174C | CBP4  |                  | 0 iYGR174C   | 7 | 513  | 846401 |
| YGR175C | ERG1  |                  | 0 iYGR175C   | 7 | 1491 | 848419 |
| YGR176W | 0     | #N/A             | iYGR175C     | 7 | 348  | 848716 |
| YGR177C | ATF2  |                  | 0 iYGR177C   | 7 | 1608 | 850432 |
| YGR178C | PBP1  | MRS16            | iYGR178C     | 7 | 2169 | 853211 |
| YGR179C | OKP1  |                  | 0 iYGR179C   | 7 | 1221 | 854891 |
| YGR180C | RNR4  | CRT3             | iYGR180C     | 7 | 1038 | 856297 |
| YGR181W | TIM13 |                  | 0 itL(CAA)G3 | 7 | 318  | 858283 |
| YGR182C | 0     | #N/A             | iYGR182C     | 7 | 354  | 858900 |
| YGR183C | QCR9  | UCR9             | iYGR183C     | 7 | 414  | 859472 |
| YGR184C | UBR1  | PTR1             | iYGR184C     | 7 | 5853 | 865749 |
| YGR185C | TYS1  | TTS1 TYRRS       | iYGR185C     | 7 | 1185 | 867516 |
| YGR186W | TFG1  | RAP74 SSU71      | iYGR185C     | 7 | 2208 | 867770 |
| YGR187C | HGH1  |                  | 0 iYGR187C   | 7 | 1185 | 871412 |
| YGR188C | BUB1  |                  | 0 iYGR188C   | 7 | 3066 | 875105 |
| YGR189C | CRH1  |                  | 0 iYGR189C   | 7 | 1524 | 878188 |
| YGR190C | 0     | #N/A             | iYGR191W     | 7 | 366  | 880657 |
| YGR191W | HIP1  |                  | 0 itW(CCA)G2 | 7 | 1812 | 880416 |
| YGR192C | TDH3  | GLD1 HSP35 HSP36 | iYGR192C     | 7 | 999  | 883806 |
| YGR193C | PDX1  |                  | 0 iYGR193C   | 7 | 1233 | 885737 |
| YGR194C | XKS1  |                  | 0 iYGR194C   | 7 | 1803 | 887871 |
| YGR195W | SKI6  | ECM20 RRP41      | iYGR194C     | 7 | 741  | 888878 |
| YGR196C | FYV8  |                  | 0 iYGR196C   | 7 | 2454 | 892182 |
| YGR197C | SNG1  |                  | 0 iYGR197C   | 7 | 1644 | 894136 |
| YGR198W | 0     | #N/A             | iYGR197C     | 7 | 2454 | 894689 |
| YGR199W | PMT6  |                  | 0 iYGR198W   | 7 | 2280 | 897498 |
| YGR200C | ELP2  | TOT2             | iYGR200C     | 7 | 2367 | 902266 |
| YGR201C | 0     | #N/A             | iYGR201C     | 7 | 825  | 903340 |
| YGR202C | PCT1  | BSR2 CCT1        | iYGR202C     | 7 | 1275 | 904744 |
| YGR203W | 0     | #N/A             | iYGR202C     | 7 | 447  | 905233 |
| YGR204W | ADE3  |                  | 0 iYGR203W   | 7 | 2841 | 905930 |
| YGR205W | 0     | #N/A             | iYGR204W     | 7 | 873  | 909209 |
| YGR206W | 0     | #N/A             | iYGR205W     | 7 | 306  | 910428 |
| YGR207C | 0     | #N/A             | iYGR207C     | 7 | 786  | 911624 |
| YGR208W | SER2  |                  | 0 iYGR207C   | 7 | 930  | 911879 |
| YGR209C | TRX2  | LMA1             | iYGR209C     | 7 | 315  | 913223 |
| YGR210C | 0     | #N/A             | iYGR210C     | 7 | 1236 | 914734 |
| YGR211W | ZPR1  |                  | 0 iYGR210C   | 7 | 1461 | 915237 |
| YGR212W | 0     | #N/A             | iYGR211W     | 7 | 1407 | 917036 |
| YGR213C | RTA1  |                  | 0 iYGR213C   | 7 | 954  | 919461 |
| YGR214W | RPS0A | NAB1 NAB1A YST1  | iYGR213C     | 7 | 1214 | 920571 |
| YGR215W | RSM27 |                  | 0 iYGR214W   | 7 | 333  | 922171 |
| YGR216C | GPI1  |                  | 0 iYGR216C   | 7 | 1830 | 924458 |
| YGR217W | CCH1  |                  | 0 iYGR216C   | 7 | 6120 | 924690 |

|         |         |             |              |   |      |         |
|---------|---------|-------------|--------------|---|------|---------|
| YGR218W | CRM1    | KAP124 XPO1 | iYGRWdelta   | 7 | 3255 | 932535  |
| YGR219W | 0       | #N/A        | iYGR218W     | 7 | 342  | 936029  |
| YGR220C | MRPL9   |             | 0 iYGR220C   | 7 | 810  | 936877  |
| YGR221C | TOS2    |             | 0 iYGR221C   | 7 | 1869 | 938986  |
| YGR222W | PET54   |             | 0 iSNR7-S    | 7 | 882  | 939917  |
| YGR223C | 0       |             | 0 iYGR223C   | 7 | 1347 | 942209  |
| YGR224W | AZR1    |             | 0 iYGR223C   | 7 | 1842 | 942800  |
| YGR225W | AMA1    | SPO70       | iYGR224W     | 7 | 1782 | 945139  |
| YGR226C | 0       | #N/A        | iYGR226C     | 7 | 600  | 946994  |
| YGR227W | DIE2    | ALG10       | iYGR226C     | 7 | 1578 | 947413  |
| YGR228W | 0       | #N/A        | iYGR227W     | 7 | 345  | 949358  |
| YGR229C | SMI1    | KNR4        | iYGR229C     | 7 | 1518 | 950892  |
| YGR230W | BNS1    |             | 0 iYGR229C   | 7 | 414  | 951887  |
| YGR231C | PHB2    |             | 0 iYGR231C   | 7 | 948  | 953474  |
| YGR232W | NAS6    |             | 0 iYGR231C   | 7 | 687  | 953954  |
| YGR233C | PHO81   |             | 0 iYGR233C-  | 7 | 3537 | 958204  |
| YGR234W | YHB1    | YHB4        | iYGR233C-    | 7 | 1200 | 959899  |
| YGR235C | 0       | #N/A        | iYGR235C     | 7 | 702  | 962056  |
| YGR236C | SPG1    |             | 0 iYGR236C   | 7 | 390  | 962813  |
| YGR237C | 0       | #N/A        | iYGR237C     | 7 | 2358 | 965652  |
| YGR238C | KEL2    |             | 0 iYGR238C   | 7 | 2649 | 968684  |
| YGR239C | PEX21   |             | 0 iYGR239C   | 7 | 867  | 970050  |
| YGR240C | PFK1    |             | 0 iYGR240C   | 7 | 2964 | 973731  |
| YGR241C | YAP1802 |             | 0 iYGR242W   | 7 | 1707 | 976578  |
| YGR242W | 0       | #N/A        | iYGR240C     | 7 | 309  | 976412  |
| YGR243W | 0       |             | 0 iYGR242W   | 7 | 441  | 977333  |
| YGR244C | LSC2    |             | 0 iYGR244C   | 7 | 1284 | 979316  |
| YGR245C | SDA1    |             | 0 iYGR245C   | 7 | 2304 | 982065  |
| YGR246C | BRF1    | PCF4 TDS4   | iYGR246C     | 7 | 1791 | 984269  |
| YGR247W | CPD1    |             | 0 iYGR246C   | 7 | 720  | 984963  |
| YGR248W | SOL4    |             | 0 iYGR247W   | 7 | 768  | 985969  |
| YGR249W | MGA1    |             | 0 iYGR248W   | 7 | 1371 | 988046  |
| YGR250C | 0       | #N/A        | iYGR250C-    | 7 | 2346 | 993518  |
| YGR251W | 0       | #N/A        | iYGR250C-    | 7 | 591  | 995636  |
| YGR252W | GCN5    | ADA4 SWI9   | iYGR251W     | 7 | 1320 | 996866  |
| YGR253C | PUP2    | DOA5        | iYGR253C-    | 7 | 783  | 999137  |
| YGR254W | ENO1    | HSP48       | iYGR253C-    | 7 | 1314 | 1000924 |
| YGR255C | COQ6    |             | 0 iYGR255C   | 7 | 1440 | 1003959 |
| YGR256W | GND2    |             | 0 itT(UGU)G2 | 7 | 1479 | 1004622 |
| YGR257C | 0       |             | 0 iYGR257C   | 7 | 1101 | 1007303 |
| YGR258C | RAD2    |             | 0 iYGR258C-  | 7 | 3096 | 1010764 |
| YGR259C | 0       | #N/A        | iYGR260W     | 7 | 441  | 1012919 |
| YGR260W | TNA1    |             | 0 iYGR258C-  | 7 | 1605 | 1012483 |
| YGR261C | APL6    | YKS5        | iYGR261C     | 7 | 2430 | 1016748 |
| YGR262C | BUD32   | LDB14       | iYGR262C     | 7 | 786  | 1017757 |
| YGR263C | 0       | #N/A        | iYGR263C     | 7 | 1275 | 1019239 |
| YGR264C | MES1    | MESI MetRS  | iYGR265W     | 7 | 2256 | 1021851 |
| YGR265W | 0       | #N/A        | iYGR263C     | 7 | 411  | 1021646 |
| YGR266W | 0       | #N/A        | iYGR265W     | 7 | 2106 | 1022654 |
| YGR267C | FOL2    |             | 0 iYGR267C   | 7 | 732  | 1025733 |
| YGR268C | 0       |             | 0 iYGR269W   | 7 | 597  | 1026651 |

|         |        |                    |             |   |      |         |
|---------|--------|--------------------|-------------|---|------|---------|
| YGR269W | 0      | #N/A               | iYGR267C    | 7 | 327  | 1026634 |
| YGR270W | YTA7   |                    | 0 iYGR269W  | 7 | 4140 | 1027368 |
| YGR271W | SLH1   |                    | 0 iYGR270W  | 7 | 5904 | 1031789 |
| YGR272C | 0      | #N/A               | iYGR272C    | 7 | 459  | 1038498 |
| YGR273C | 0      | #N/A               | iYGR273C    | 7 | 525  | 1039236 |
| YGR274C | TAF1   | TAF130 TAF145 TafI | iYGR274C    | 7 | 3201 | 1043093 |
| YGR275W | RTT102 |                    | 0 iYGR274C  | 7 | 561  | 1043187 |
| YGR276C | RNH70  | REX1               | iYGR276C    | 7 | 1662 | 1045478 |
| YGR277C | 0      | #N/A               | iYGR277C    | 7 | 918  | 1046559 |
| YGR278W | CWC22  |                    | 0 iYGR277C  | 7 | 1734 | 1046729 |
| YGR279C | SCW4   |                    | 0 iYGR279C  | 7 | 1161 | 1049956 |
| YGR280C | PXR1   | GNO1               | iYGR280C    | 7 | 816  | 1051723 |
| YGR281W | YOR1   | YRS1               | iYGR280C    | 7 | 4434 | 1052822 |
| YGR282C | BGL2   |                    | 0 iYGR282C  | 7 | 942  | 1058722 |
| YGR283C | 0      | #N/A               | iYGR283C    | 7 | 1026 | 1060038 |
| YGR284C | ERV29  |                    | 0 iYGR284C  | 7 | 933  | 1061588 |
| YGR285C | ZUO1   |                    | 0 iYGR285C  | 7 | 1302 | 1063151 |
| YGR286C | BIO2   |                    | 0 iYGR286C- | 7 | 1128 | 1064938 |
| YGR287C | 0      | #N/A               | iYGR287C    | 7 | 1770 | 1068989 |
| YGR288W | MAL13  |                    | 0 iYGR287C  | 7 | 1422 | 1070291 |
| YGR289C | MAL11  | AGT1               | iYGR290W    | 7 | 1851 | 1075811 |
| YGR290W | 0      | #N/A               | iYGR288W-   | 7 | 444  | 1075480 |
| YGR291C | 0      | #N/A               | iYGR291C    | 7 | 222  | 1076502 |
| YGR292W | MAL12  |                    | 0 iYGR291C  | 7 | 1755 | 1076597 |
| YGR293C | 0      | #N/A               | iYGR294W    | 7 | 462  | 1080344 |
| YGR294W | 0      | #N/A               | iYGR292W-   | 7 | 363  | 1080304 |
| YGR295C | COS6   |                    | 0 iYGR295C- | 7 | 1146 | 1082727 |
| YGR296W | YRF1-3 | YRF1               | iYGR295C-   | 7 | 5728 | 1084862 |
| YHL001W | RPL14B |                    | 0 iYHL002W  | 8 | 815  | 104270  |
| YHL002W | HSE1   |                    | 0 iYHL003C  | 8 | 1359 | 102605  |
| YHL003C | LAG1   |                    | 0 iYHL003C  | 8 | 1236 | 101877  |
| YHL004W | MRP4   |                    | 0 iYHL007C  | 8 | 1185 | 99213   |
| YHL005C | 0      | #N/A               | iYHL004W    | 8 | 393  | 99214   |
| YHL006C | SHU1   |                    | 0 iYHL004W  | 8 | 480  | 98789   |
| YHL007C | STE20  |                    | 0 iYHL007C  | 8 | 2820 | 97932   |
| YHL008C | 0      | #N/A               | iYHL008C    | 8 | 1884 | 94505   |
| YHL009C | YAP3   |                    | 0 iYHL009C  | 8 | 993  | 85055   |
| YHL010C | 0      | #N/A               | iYHL010C    | 8 | 1758 | 83716   |
| YHL011C | PRS3   |                    | 0 iYHL011C  | 8 | 963  | 81611   |
| YHL012W | 0      | #N/A               | iYHL013C    | 8 | 1482 | 78931   |
| YHL013C | 0      | #N/A               | iYHL013C    | 8 | 924  | 78349   |
| YHL014C | YLF2   | YLF1               | iYHL014C    | 8 | 1218 | 77310   |
| YHL015W | RPS20  | URP2               | iYHL016C    | 8 | 366  | 75408   |
| YHL016C | DUR3   |                    | 0 iYHL016C  | 8 | 2208 | 74240   |
| YHL017W | 0      | #N/A               | iYHL018W    | 8 | 1599 | 70272   |
| YHL018W | 0      | #N/A               | iYHL019C    | 8 | 363  | 69704   |
| YHL019C | APM2   |                    | 0 iYHL019C  | 8 | 1818 | 69544   |
| YHL020C | OPI1   |                    | 0 iYHL020C  | 8 | 1215 | 67452   |
| YHL021C | 0      |                    | 0 iYHL021C  | 8 | 1398 | 65855   |
| YHL022C | SPO11  |                    | 0 iYHL022C  | 8 | 1197 | 64154   |
| YHL023C | 0      |                    | 0 iYHL023C  | 8 | 3441 | 62560   |

|           |        |                 |      |              |   |      |        |
|-----------|--------|-----------------|------|--------------|---|------|--------|
| YHL024W   | RIM4   |                 | 0    | iYHL025W     | 8 | 2142 | 56646  |
| YHL025W   | SNF6   |                 |      | 0 iYHL026C   | 8 | 999  | 54848  |
| YHL026C   |        | 0               | #N/A | iYHL026C     | 8 | 807  | 54023  |
| YHL027W   | RIM101 | RIM1            |      | iYHL028W     | 8 | 1878 | 51109  |
| YHL028W   | WSC4   | YHC8            |      | iYHL029C     | 8 | 1818 | 48761  |
| YHL029C   |        | 0               | #N/A | iYHL029C     | 8 | 2040 | 47966  |
| YHL030W   | ECM29  |                 |      | 0 iYHL031C   | 8 | 5607 | 40082  |
| YHL031C   | GOS1   |                 |      | 0 iYHL031C   | 8 | 672  | 39484  |
| YHL032C   | GUT1   |                 |      | 0 iYHL032C   | 8 | 2130 | 38506  |
| YHL033C   | RPL8A  | MAK7            |      | iYHL033C     | 8 | 771  | 36023  |
| YHL034C   | SBP1   | SSB1 SSBR1      |      | iYHL034C     | 8 | 885  | 34075  |
| YHL035C   |        | 0               |      | 0 iYHL035C   | 8 | 4779 | 32754  |
| YHL036W   | MUP3   |                 |      | 0 iYHL037C   | 8 | 1641 | 26239  |
| YHL037C   |        | 0               | #N/A | iYHL037C     | 8 | 480  | 26177  |
| YHL038C   | CBP2   |                 |      | 0 iYHL038C   | 8 | 1893 | 25506  |
| YHL039W   |        | 0               | #N/A | iYHL040C     | 8 | 1758 | 21780  |
| YHL040C   | ARN1   |                 |      | 0 iYHL040C   | 8 | 1884 | 20968  |
| YHL041W   |        | 0               | #N/A | iYHL042W     | 8 | 450  | 17390  |
| YHL042W   |        | 0               | #N/A | iYHL043W     | 8 | 453  | 15665  |
| YHL043W   | ECM34  |                 |      | 0 iYHL044W   | 8 | 513  | 14899  |
| YHL044W   |        | 0               | #N/A | iYHL045W     | 8 | 708  | 13563  |
| YHL045W   |        | 0               | #N/A | iYHL046C     | 8 | 348  | 12500  |
| YHL046C   |        | 0               | #N/A | iYHL046C     | 8 | 363  | 12283  |
| YHL047C   | ARN2   | TAF1            |      | iYHL047C-0   | 8 | 1914 | 10211  |
| YHL048W   | COS8   |                 |      | 0 iYHL049C-1 | 8 | 1146 | 6400   |
| YHL049C   |        | 0               | #N/A | iYHL049C-0   | 8 | 816  | 4540   |
| YHL050C   |        | 0               | #N/A | iYHL050C     | 8 | 2866 | 3310   |
| YHR001W   | OSH7   |                 |      | 0 iCEN8      | 8 | 1314 | 106048 |
| YHR001W-A | QCR10  |                 |      | 0 iYHR001W   | 8 | 297  | 107819 |
| YHR002W   | LEU5   |                 |      | 0 iYHR001W-  | 8 | 1074 | 108805 |
| YHR003C   |        | 0               | #N/A | iYHR003C     | 8 | 1290 | 111310 |
| YHR004C   | NEM1   |                 |      | 0 iYHR004C   | 8 | 1341 | 113087 |
| YHR005C   | GPA1   | CDC70 DAC1 SCG1 |      | iYHR005C     | 8 | 1419 | 114910 |
| YHR006W   | STP2   |                 |      | 0 iYHRCdelta | 8 | 1626 | 117807 |
| YHR007C   | ERG11  | CYP51           |      | iYHR007C     | 8 | 1593 | 121676 |
| YHR008C   | SOD2   |                 |      | 0 iYHR008C   | 8 | 702  | 123583 |
| YHR009C   |        | 0               | #N/A | iYHR009C     | 8 | 1572 | 125673 |
| YHR010W   | RPL27A | RPL27           |      | iYHR009C     | 8 | 972  | 126513 |
| YHR011W   | DIA4   |                 |      | 0 iYHR010W   | 8 | 1341 | 127772 |
| YHR012W   | VPS29  | PEP11           |      | iYHR011W     | 8 | 968  | 129473 |
| YHR013C   | ARD1   |                 |      | 0 iYHR013C   | 8 | 717  | 131438 |
| YHR014W   | SPO13  |                 |      | 0 iYHR013C   | 8 | 876  | 132038 |
| YHR015W   | MIP6   |                 |      | 0 itQ(UUG)H  | 8 | 1980 | 134545 |
| YHR016C   | YSC84  | LSB4            |      | iYHR016C     | 8 | 1575 | 138446 |
| YHR017W   | YSC83  |                 |      | 0 iYHR016C   | 8 | 1158 | 138685 |
| YHR018C   | ARG4   |                 |      | 0 iYHR018C   | 8 | 1392 | 141393 |
| YHR019C   | DED81  |                 |      | 0 iYHR019C   | 8 | 1665 | 143549 |
| YHR020W   |        | 0               | #N/A | iYHR019C     | 8 | 2067 | 143987 |
| YHR021C   | RPS27B |                 |      | 0 iYHR021C   | 8 | 799  | 148660 |
| YHR022C   |        | 0               | #N/A | iYHR022C     | 8 | 771  | 150336 |
| YHR023W   | MYO1   |                 |      | 0 iYHR022C   | 8 | 5787 | 151657 |

|           |        |                |              |      |      |        |
|-----------|--------|----------------|--------------|------|------|--------|
| YHR024C   | MAS2   | MIF2           | iYHR024C     | 8    | 1449 | 159183 |
| YHR025W   | THR1   |                | 0 iYHR024C   | 8    | 1074 | 159429 |
| YHR026W   | PPA1   | VMA16          | iYHR025W     | 8    | 642  | 160835 |
| YHR027C   | RPN1   | HRD2 NAS1      | iYHR027C     | 8    | 2982 | 164702 |
| YHR028C   | DAP2   | DPP2           | iYHR028C     | 8    | 2457 | 167425 |
| YHR029C   | 0      | #N/A           | iYHR029C     | 8    | 885  | 168552 |
| YHR030C   | SLT2   | BYC2 MPK1 SLK2 | iYHR030C     | 8    | 1455 | 170335 |
| YHR031C   | RRM3   | RTT104         | iYHR031C     | 8    | 2172 | 172961 |
| YHR032W   | 0      | #N/A           | iYHR031C     | 8    | 1746 | 173335 |
| YHR033W   | 0      | #N/A           | iYHR032W     | 8    | 1272 | 175539 |
| YHR034C   | 0      |                | 0 iYHR034C   | 8    | 1035 | 177990 |
| YHR035W   | 0      | #N/A           | iYHR034C     | 8    | 1893 | 178210 |
| YHR036W   | 0      | #N/A           | iYHR035W     | 8    | 1416 | 180336 |
| YHR037W   | PUT2   |                | 0 iYHR036W   | 8    | 1728 | 181968 |
| YHR038W   | FIL1   | FIL1 KIM4      | iYHR037W     | 8    | 693  | 184057 |
| YHR039BC  | #N/A   | #N/A           | #N/A         | #N/A | #N/A | #N/A   |
| YHR039C   | MSC7   |                | 0 iYHR039C   | 8    | 1935 | 186800 |
| YHR040W   | 0      |                | 0 iYHR039C-E | 8    | 1101 | 187915 |
| YHR041C   | SRB2   | HRS2           | iYHR041C     | 8    | 734  | 189855 |
| YHR042W   | NCP1   | CPR1           | iYHR041C     | 8    | 2076 | 190534 |
| YHR043C   | DOG2   |                | 0 iYHR043C   | 8    | 741  | 193536 |
| YHR044C   | DOG1   |                | 0 iYHR044C   | 8    | 741  | 194799 |
| YHR045W   | 0      | #N/A           | iYHR044C     | 8    | 1683 | 195542 |
| YHR046C   | INM1   |                | 0 iYHR046C   | 8    | 888  | 198276 |
| YHR047C   | AAP1'  | AAP1           | iYHR047C-C   | 8    | 2571 | 201301 |
| YHR048W   | 0      | #N/A           | iYHR047C-2   | 8    | 1545 | 204598 |
| YHR049C-A | 0      | #N/A           | iYHR049C-A   | 8    | 312  | 207522 |
| YHR049W   | FSH1   |                | 0 iYHR048W   | 8    | 732  | 206453 |
| YHR050W   | SMF2   |                | 0 iYHR049C-A | 8    | 1650 | 207646 |
| YHR051W   | COX6   |                | 0 iYHR050W   | 8    | 447  | 209697 |
| YHR052W   | CIC1   | NSA3           | iYHR051W     | 8    | 1131 | 210840 |
| YHR053C   | CUP1-1 | CUP1           | iYHR053C     | 8    | 186  | 212720 |
| YHR054C   | 0      | #N/A           | iYHR054C     | 8    | 1065 | 214249 |
| YHR055C   | CUP1-2 | CUP1           | iYHR055C     | 8    | 186  | 214718 |
| YHR056C   | RSC30  |                | 0 iYHR056C   | 8    | 2499 | 217681 |
| YHR057C   | CPR2   | CYP2           | iYHR057C     | 8    | 618  | 218844 |
| YHR058C   | MED6   |                | 0 iYHR058C   | 8    | 888  | 219885 |
| YHR059W   | FYV4   |                | 0 iYHR058C   | 8    | 393  | 220109 |
| YHR060W   | VMA22  | CEV1 VPH6      | iYHR059W     | 8    | 546  | 220726 |
| YHR061C   | GIC1   |                | 0 iYHR061C   | 8    | 945  | 222479 |
| YHR062C   | RPP1   |                | 0 iYHR062C   | 8    | 882  | 223759 |
| YHR063C   | PAN5   |                | 0 iYHR063C   | 8    | 1140 | 225170 |
| YHR064C   | SSZ1   | PDR13          | iYHR064C     | 8    | 1719 | 227244 |
| YHR065C   | RRP3   |                | 0 iYHR065C   | 8    | 1632 | 229164 |
| YHR066W   | SSF1   |                | 0 iYHR065C   | 8    | 1362 | 229336 |
| YHR067W   | 0      | HTD2           | iYHR066W     | 8    | 843  | 230971 |
| YHR068W   | DYS1   |                | 0 iYHR067W   | 8    | 1164 | 232134 |
| YHR069C   | RRP4   |                | 0 iYHR069C   | 8    | 1080 | 234659 |
| YHR070W   | TRM5   |                | 0 iYHR069C   | 8    | 1500 | 234882 |
| YHR071W   | PCL5   |                | 0 iYHR070W   | 8    | 690  | 237005 |
| YHR072W   | ERG7   |                | 0 itF(GAA)H1 | 8    | 2196 | 239099 |

|          |       |                |       |          |      |       |        |
|----------|-------|----------------|-------|----------|------|-------|--------|
| YHR073W  | OSH3  |                | 0     | iYHR072W | 8    | 2991  | 242583 |
| YHR074W  | QNS1  |                | 0     | iYHR073W | 8    | 2145  | 246194 |
| YHR075C  | PPE1  | MRPS2          |       | iYHR075C | 8    | 1203  | 249642 |
| YHR076W  |       | 0              | 0     | iYHR075C | 8    | 1125  | 251102 |
| YHR077C  | NMD2  | IFS1 SUA1 UPF2 |       | iYHR077C | 8    | 3383  | 255757 |
| YHR078W  |       | 0              | #N/A  | iYHR077C | 8    | 1659  | 256361 |
| YHR079BC | #N/A  | #N/A           |       | #N/A     | #N/A | #N/A  |        |
| YHR079C  | IRE1  | ERN1           |       | iYHR079C | 8    | 3348  | 261592 |
| YHR080C  |       | 0              | #N/A  | iYHR080C | 8    | 4038  | 266839 |
| YHR081W  |       | 0              | YC1D  | iYHR080C | 8    | 555   | 267539 |
| YHR082C  | KSP1  |                | 0     | iYHR082C | 8    | 3090  | 271549 |
| YHR083W  |       | 0              | FMP20 | iYHR082C | 8    | 990   | 272628 |
| YHR084W  | STE12 |                | 0     | iYHR083W | 8    | 2067  | 274175 |
| YHR085W  |       | 0              |       | iYHR084W | 8    | 1005  | 276765 |
| YHR086W  | NAM8  | MRE2 MUD15     |       | iYHR085W | 8    | 1572  | 278154 |
| YHR087W  |       | 0              | #N/A  | iYHR086W | 8    | 336   | 280821 |
| YHR088W  | RPF1  |                |       | iYHR087W | 8    | 888   | 281496 |
| YHR089C  | GAR1  |                |       | iYHR089C | 8    | 618   | 283299 |
| YHR090C  | YNG2  | EAF4 NBN1      |       | iYHR090C | 8    | 849   | 284626 |
| YHR091C  | MSR1  |                |       | iYHR091C | 8    | 1932  | 286771 |
| YHR092C  | HXT4  | LGT1 RAG1      |       | iYHR092C | 8    | 1683  | 288813 |
| YHR093W  | AHT1  |                |       | iYHR092C | 8    | 549   | 289144 |
| YHR094C  | HXT1  | HOR4           |       | iYHR094C | 8    | 1713  | 292627 |
| YHR095W  |       | 0              | #N/A  | iYHR094C | 8    | 435   | 292945 |
| YHR096C  | HXT5  |                |       | iYHR096C | 8    | 1779  | 296449 |
| YHR097C  |       | 0              | #N/A  | iYHR097C | 8    | 1225  | 298611 |
| YHR098C  | SFB3  | LST1           |       | iYHR098C | 8    | 2790  | 301936 |
| YHR099W  | TRA1  |                |       | iYHR098C | 8    | 11235 | 302763 |
| YHR100C  |       | 0              | #N/A  | iYHR100C | 8    | 558   | 314675 |
| YHR101C  | BIG1  |                |       | iYHR101C | 8    | 1095  | 315970 |
| YHR102W  | KIC1  | NRK1           |       | iYHR101C | 8    | 3243  | 316574 |
| YHR103W  | SBE22 |                |       | iYHR102W | 8    | 2559  | 320416 |
| YHR104W  | GRE3  |                |       | iYHR103W | 8    | 984   | 323411 |
| YHR105W  |       | 0              |       | iYHR104W | 8    | 645   | 324768 |
| YHR106W  | TRR2  |                |       | iYHR105W | 8    | 1029  | 325600 |
| YHR107C  | CDC12 | CLA10 PSL7     |       | iYHR107C | 8    | 1224  | 328038 |
| YHR108W  | GGA2  |                |       | iYHR107C | 8    | 1758  | 328305 |
| YHR109W  | CTM1  |                |       | iYHR108W | 8    | 1758  | 330312 |
| YHR110W  | ERP5  |                |       | iYHR109W | 8    | 639   | 332284 |
| YHR111W  |       | 0              | YHR1  | iYHR110W | 8    | 1323  | 333074 |
| YHR112C  |       | 0              | #N/A  | iYHR112C | 8    | 1137  | 335665 |
| YHR113W  |       | 0              | #N/A  | iYHR112C | 8    | 1473  | 336339 |
| YHR114W  | BZZ1  | LSB7           |       | iYHR113W | 8    | 1902  | 338085 |
| YHR115C  |       | 0              |       | iYHR115C | 8    | 1251  | 341361 |
| YHR116W  |       | 0              |       | iYHR115C | 8    | 456   | 341667 |
| YHR117W  | TOM71 | TOM72          |       | iYHR116W | 8    | 1920  | 342351 |
| YHR118C  | ORC6  |                |       | iYHR118C | 8    | 1308  | 345630 |
| YHR119W  | SET1  | YTX1           |       | iYHR118C | 8    | 3243  | 346045 |
| YHR120W  | MSH1  |                |       | iYHR119W | 8    | 2880  | 349576 |
| YHR121W  |       | 0              |       | iYHR120W | 8    | 564   | 352758 |
| YHR122W  |       | 0              | #N/A  | iYHR121W | 8    | 696   | 353627 |

|           |         |                 |      |              |   |      |        |
|-----------|---------|-----------------|------|--------------|---|------|--------|
| YHR123W   | EPT1    |                 | 0    | iYHR122W     | 8 | 1267 | 354817 |
| YHR124W   | NDT80   |                 |      | 0 iYHR123W   | 8 | 1884 | 356563 |
| YHR125W   |         | 0               | #N/A | itF(GAA)H2   | 8 | 306  | 358860 |
| YHR126C   |         | 0               | #N/A | iYHR126C     | 8 | 480  | 360183 |
| YHR127W   |         | 0               | #N/A | iYHR126C     | 8 | 732  | 360915 |
| YHR128W   | FUR1    |                 |      | 0 iYHR127W   | 8 | 756  | 362012 |
| YHR129C   | ARP1    | ACT5            |      | iYHR129C     | 8 | 1155 | 364155 |
| YHR130C   |         | 0               | #N/A | iYHR131C     | 8 | 336  | 365302 |
| YHR131C   |         | 0               | #N/A | iYHR131C     | 8 | 2523 | 367864 |
| YHR132C   | ECM14   |                 |      | 0 iYHR132C   | 8 | 1293 | 369795 |
| YHR133C   |         | 0               |      | 0 iYHR133C   | 8 | 876  | 371598 |
| YHR134W   | WSS1    |                 |      | 0 iYHR133C   | 8 | 810  | 371750 |
| YHR135C   | YCK1    | CKI2            |      | iYHR135C     | 8 | 1617 | 374311 |
| YHR136C   | SPL2    |                 |      | 0 iYHR136C   | 8 | 447  | 375101 |
| YHR137W   | ARO9    |                 |      | 0 iYHR136C   | 8 | 1542 | 375710 |
| YHR138C   |         | 0               | #N/A | iYHR138C     | 8 | 345  | 377700 |
| YHR139C   | SPS100  |                 |      | 0 iYHR139C   | 8 | 981  | 379200 |
| YHR139C-A |         | 0               | #N/A | iYHR139C-1   | 8 | 312  | 380420 |
| YHR140W   |         | 0               | #N/A | iYHR139C-1   | 8 | 720  | 380573 |
| YHR141C   | RPL42B  | MAK18           |      | iYHR141C     | 8 | 762  | 382752 |
| YHR142W   | CHS7    |                 |      | 0 iYHR141C   | 8 | 951  | 383539 |
| YHR143W   | DSE2    |                 |      | 0 iYHR142W   | 8 | 978  | 385511 |
| YHR143W-A | RPC10   | RPB12           |      | iYHR143W     | 8 | 213  | 387234 |
| YHR144C   | DCD1    |                 |      | 0 iYHR144C   | 8 | 939  | 388727 |
| YHR145C   |         | 0               | #N/A | iYHRCdelta   | 8 | 357  | 389338 |
| YHR146W   | CRP1    |                 |      | 0 iYHRCdelta | 8 | 1398 | 390301 |
| YHR147C   | MRPL6   |                 |      | 0 iYHR147C   | 8 | 645  | 393284 |
| YHR148W   | IMP3    |                 |      | 0 iYHR147C   | 8 | 552  | 393535 |
| YHR149C   |         | 0               |      | 0 iYHR149C   | 8 | 2205 | 396660 |
| YHR150W   |         | 0               |      | 0 iYHR149C   | 8 | 1740 | 397252 |
| YHR151C   |         | 0               | #N/A | iYHR151C     | 8 | 1581 | 400849 |
| YHR152W   | SPO12   |                 |      | 0 iYHR151C   | 8 | 522  | 401435 |
| YHR153C   | SPO16   |                 |      | 0 iYHR153C   | 8 | 597  | 402683 |
| YHR154W   | RTT107  | ESC4            |      | iYHR153C     | 8 | 3213 | 402967 |
| YHR155W   |         | 0               | #N/A | iYHR154W     | 8 | 3687 | 407104 |
| YHR156C   | LIN1    |                 |      | 0 iYHR156C   | 8 | 1023 | 412407 |
| YHR157W   | REC104  |                 |      | 0 iYHR156C   | 8 | 549  | 412908 |
| YHR158C   | KEL1    |                 |      | 0 iYHR158C   | 8 | 3495 | 417180 |
| YHR159W   |         | 0               | #N/A | iYHR158C     | 8 | 1515 | 417550 |
| YHR160C   | PEX18   |                 |      | 0 iYHR160C   | 8 | 852  | 420073 |
| YHR161C   | YAP1801 |                 |      | 0 iYHR161C   | 8 | 1914 | 422287 |
| YHR162W   |         | 0               | #N/A | iYHR161C     | 8 | 390  | 423073 |
| YHR163W   | SOL3    |                 |      | 0 iYHR162W   | 8 | 843  | 423631 |
| YHR164C   | DNA2    | WEB2            |      | iYHR164C     | 8 | 4569 | 429178 |
| YHR165C   | PRP8    | DBF3 DNA39 RNA8 |      | iYHR165C     | 8 | 7242 | 436948 |
| YHR166C   | CDC23   |                 |      | 0 iYHR166C   | 8 | 1881 | 439050 |
| YHR167W   | THP2    |                 |      | 0 iYHR166C   | 8 | 786  | 439342 |
| YHR168W   |         | 0               |      | 0 iYHR167W   | 8 | 1500 | 440377 |
| YHR169W   | DBP8    |                 |      | 0 iYHR168W   | 8 | 1296 | 442180 |
| YHR170W   | NMD3    | SRC5            |      | iYHR169W     | 8 | 1557 | 443827 |
| YHR171W   | APG7    | APG7 CVT2       |      | iYHR170W     | 8 | 1893 | 445711 |



|           |       |                   |   |            |   |      |        |
|-----------|-------|-------------------|---|------------|---|------|--------|
| YHR172W   | SPC97 |                   | 0 | iYHR171W   | 8 | 2472 | 448333 |
| YHR173C   | 0     | #N/A              |   | iYHR173C   | 8 | 339  | 451151 |
| YHR174W   | ENO2  |                   | 0 | iYHR173C   | 8 | 1314 | 451325 |
| YHR175W   | CTR2  |                   | 0 | iYHR174W   | 8 | 570  | 452870 |
| YHR176W   | 0     | FMO               |   | iYHR175W   | 8 | 1122 | 454227 |
| YHR177W   | 0     | #N/A              |   | iYHR176W   | 8 | 1362 | 456587 |
| YHR178W   | STB5  |                   | 0 | iYHR177W   | 8 | 2232 | 459295 |
| YHR179W   | OYE2  | Old Yellow Enzyme |   | iYHR178W   | 8 | 1203 | 462498 |
| YHR180W   | 0     | #N/A              |   | iYHRCdelta | 8 | 492  | 465174 |
| YHR181W   | 0     |                   | 0 | itT(UGU)H  | 8 | 687  | 467224 |
| YHR182W   | 0     | #N/A              |   | iYHR181W   | 8 | 2358 | 468215 |
| YHR183W   | GND1  |                   | 0 | iYHR182W   | 8 | 1470 | 470956 |
| YHR184W   | SSP1  | SPO3              |   | iYHR183W   | 8 | 1716 | 472740 |
| YHR185C   | PFS1  | ADY1              |   | iYHR185C   | 8 | 714  | 475336 |
| YHR186C   | COG1  |                   | 0 | iYHR186C   | 8 | 4674 | 480668 |
| YHR187W   | IKI1  | ELP5 HAP2 TOT5    |   | iYHR186C   | 8 | 930  | 480986 |
| YHR188C   | GPI16 |                   | 0 | iYHR188C   | 8 | 1833 | 483833 |
| YHR189W   | 0     | PTH               |   | iYHR188C   | 8 | 573  | 484024 |
| YHR190W   | ERG9  |                   | 0 | iYHR189W   | 8 | 1335 | 484841 |
| YHR191C   | CTF8  |                   | 0 | iYHR191C   | 8 | 402  | 486627 |
| YHR192W   | 0     | #N/A              |   | iYHR191C   | 8 | 837  | 486822 |
| YHR193C   | EGD2  |                   | 0 | iYHR193C   | 8 | 525  | 488232 |
| YHR194W   | 0     |                   | 0 | iYHR193C   | 8 | 1740 | 488653 |
| YHR195W   | NVJ1  | VAB36             |   | iYHR194W   | 8 | 966  | 490743 |
| YHR196W   | UTP9  |                   | 0 | iYHR195W   | 8 | 1728 | 491927 |
| YHR197W   | 0     |                   | 0 | iYHR196W   | 8 | 2292 | 493892 |
| YHR198C   | 0     |                   | 0 | iYHR198C   | 8 | 966  | 497276 |
| YHR199C   | 0     |                   | 0 | iYHR199C   | 8 | 933  | 498418 |
| YHR200W   | RPN10 | MCB1 SUN1         |   | iYHR199C   | 8 | 807  | 499075 |
| YHR201C   | PPX1  |                   | 0 | iYHR201C   | 8 | 1194 | 501139 |
| YHR202W   | 0     | #N/A              |   | iYHR201C   | 8 | 1809 | 502384 |
| YHR203C   | RPS4B |                   | 0 | iYHR203C   | 8 | 1055 | 505526 |
| YHR204W   | MNL1  | HTM1              |   | iYHR203C   | 8 | 2391 | 506315 |
| YHR205W   | SCH9  | KOM1              |   | iYHR204W   | 8 | 2475 | 509359 |
| YHR206W   | SKN7  | BRY1 POS9         |   | iYHR205W   | 8 | 1869 | 512728 |
| YHR207C   | SET5  |                   | 0 | iYHR207C   | 8 | 1581 | 516481 |
| YHR208W   | BAT1  | ECA39 TWT1        |   | iYHR207C   | 8 | 1182 | 517528 |
| YHR209W   | 0     | #N/A              |   | iYHR208W   | 8 | 876  | 519433 |
| YHR210C   | 0     | #N/A              |   | iYHR210C-( | 8 | 1026 | 521733 |
| YHR211W   | FLO5  |                   | 0 | iYHR210C-( | 8 | 3228 | 525388 |
| YHR212C   | 0     | #N/A              |   | iYHR213W-  | 8 | 336  | 538090 |
| YHR213W   | 0     | #N/A              |   | iYHRCdelta | 8 | 597  | 539147 |
| YHR214C-B | #N/A  | #N/A              |   | iYHRCdelta | 8 | #N/A | 549342 |
| YHR214W   | 0     | #N/A              |   | iYHR213W-  | 8 | 612  | 541647 |
| YHR214W-A | 0     | #N/A              |   | iYHR213W-  | 8 | 486  | 543004 |
| YHR215W   | PHO12 | PHO10             |   | iYHRCdelta | 8 | 1404 | 552095 |
| YHR216W   | IMD2  | PUR5              |   | iYHRCdelta | 8 | 1572 | 554392 |
| YHR217C   | 0     | #N/A              |   | #N/A       | 8 | 462  | 557038 |
| YHR218W   | 0     | #N/A              |   | iYHRCdelta | 8 | 1911 | 558010 |
| YHR219W   | 0     | #N/A              |   | iYHRCdelta | 8 | 1875 | 560169 |
| YIL001W   | 0     | #N/A              |   | iYIL002C   | 9 | 1542 | 353937 |

|           |       |                  |               |      |      |        |
|-----------|-------|------------------|---------------|------|------|--------|
| YIL002C   | INP51 | SJL1             | iYIL002C      | 9    | 2841 | 353428 |
| YIL003W   | DRE3  | DRE3             | iYIL004C      | 9    | 882  | 349119 |
| YIL004C   | BET1  | SLY12            | iYIL004C      | 9    | 560  | 348502 |
| YIL005W   | EPS1  |                  | 0 iYIL006W    | 9    | 2106 | 345689 |
| YIL006W   | 0     | #N/A             | iYIL007C      | 9    | 1122 | 344059 |
| YIL007C   | 0     |                  | 0 iYIL007C    | 9    | 663  | 343653 |
| YIL008W   | URM1  |                  | 0 iYIL009W    | 9    | 300  | 342533 |
| YIL009W   | FAA3  |                  | 0 iYILCdelta5 | 9    | 2085 | 339341 |
| YIL010W   | DOT5  | nTPx             | iYIL011W      | 9    | 648  | 334879 |
| YIL011W   | TIR3  | YIB1             | iYIL012W      | 9    | 810  | 333724 |
| YIL012W   | 0     | #N/A             | iYIL013C      | 9    | 393  | 333009 |
| YIL013C   | PDR11 |                  | 0 iYIL013C    | 9    | 4236 | 332440 |
| YIL014W   | MNT3  |                  | 0 itT(AGU)I2  | 9    | 1893 | 326101 |
| YIL015C-A | #N/A  | #N/A             | iYIL015C-A    | #N/A | #N/A | #N/A   |
| YIL015W   | BAR1  | SST1             | iYIL016W      | 9    | 1764 | 322340 |
| YIL016W   | SNL1  |                  | 0 iYIL017C    | 9    | 480  | 321452 |
| YIL017W   | #N/A  | #N/A             | #N/A          | #N/A | #N/A | #N/A   |
| YIL018W   | RPL2B | LOT2 RPL5A       | iYIL019W      | 9    | 1165 | 316766 |
| YIL019W   | 0     |                  | 0 iYIL020C    | 9    | 1041 | 315091 |
| YIL020C   | HIS6  |                  | 0 iYIL020C    | 9    | 786  | 314818 |
| YIL021W   | RPB3  |                  | 0 iYIL022W    | 9    | 957  | 312903 |
| YIL022W   | TIM44 | ISP45 MIM44 MPI1 | iYIL023C      | 9    | 1296 | 311163 |
| YIL023C   | 0     | #N/A             | iYIL023C      | 9    | 1041 | 310424 |
| YIL024C   | 0     | #N/A             | iYIL024C      | 9    | 570  | 309169 |
| YIL025C   | 0     | #N/A             | iYIL024C      | 9    | 375  | 308573 |
| YIL026C   | IRR1  | SCC3             | iYIL026C      | 9    | 3453 | 307927 |
| YIL027C   | KRE27 |                  | 0 iYIL027C    | 9    | 426  | 304102 |
| YIL028W   | 0     | #N/A             | iYIL029C      | 9    | 399  | 302098 |
| YIL029C   | 0     | #N/A             | iYIL029C      | 9    | 429  | 301255 |
| YIL030C   | SSM4  | DOA10            | iYIL030C      | 9    | 3960 | 300008 |
| YIL031W   | ULP2  | SMT4             | iYIL032C      | 9    | 3105 | 292632 |
| YIL032C   | 0     | #N/A             | iYIL032C      | 9    | 357  | 292316 |
| YIL033C   | BCY1  | SRA1             | iYIL033C      | 9    | 1251 | 291668 |
| YIL034C   | CAP2  |                  | 0 iYIL034C    | 9    | 864  | 290088 |
| YIL035C   | CKA1  |                  | 0 iYIL035C    | 9    | 1119 | 288907 |
| YIL036W   | CST6  | ACA2 SHF1        | iYIL037C      | 9    | 1764 | 285665 |
| YIL037C   | PRM2  |                  | 0 iYIL037C    | 9    | 1971 | 284998 |
| YIL038C   | NOT3  |                  | 0 iYIL038C    | 9    | 2511 | 282651 |
| YIL039W   | 0     | #N/A             | iYIL040W      | 9    | 1422 | 278425 |
| YIL040W   | 0     |                  | 0 iYIL041W    | 9    | 417  | 277722 |
| YIL041W   | 0     |                  | 0 iYIL042C    | 9    | 981  | 276524 |
| YIL042C   | 0     | #N/A             | iYIL042C      | 9    | 1185 | 276291 |
| YIL043C   | CBR1  | CBR5             | iYIL043C      | 9    | 969  | 275039 |
| YIL044C   | AGE2  | SAT2             | iYIL044C      | 9    | 897  | 273845 |
| YIL045W   | PIG2  |                  | 0 iYIL046W    | 9    | 1617 | 271160 |
| YIL046W   | MET30 | ZRG11            | iYIL047C      | 9    | 1923 | 268650 |
| YIL047C   | SYG1  |                  | 0 iYIL047C    | 9    | 2709 | 267822 |
| YIL048W   | NEO1  |                  | 0 iYIL049W    | 9    | 3456 | 261436 |
| YIL049W   | DFG10 |                  | 0 iYIL050W    | 9    | 762  | 260157 |
| YIL050W   | PCL7  |                  | 0 iYIL051C    | 9    | 858  | 258912 |
| YIL051C   | MMF1  | IBM1             | iYIL051C      | 9    | 438  | 258279 |

|           |        |             |      |            |      |      |        |
|-----------|--------|-------------|------|------------|------|------|--------|
| YIL052C   | RPL34B |             | 0    | iYIL052C   | 9    | 838  | 257061 |
| YIL053W   | RHR2   | GPP1        |      | iYIL054W   | 9    | 816  | 255050 |
| YIL054W   | FYV2   |             | #N/A | iYIL055C   | 9    | 318  | 254541 |
| YIL055C   |        |             | 0    | iYIL055C   | 9    | 1884 | 253923 |
| YIL056W   |        |             | 0    | itS(UGA)I  | 9    | 1923 | 249989 |
| YIL057C   |        |             | 0    | iYIL057C   | 9    | 495  | 248393 |
| YIL058W   |        |             | 0    | iYIL061C   | 9    | 285  | 246911 |
| YIL059C   |        |             | 0    | iYIL058W   | 9    | 366  | 246912 |
| YIL060W   |        |             | 0    | iYIL061C   | 9    | 435  | 246389 |
| YIL061C   | SNP1   |             |      | 0 iYIL061C | 9    | 903  | 245556 |
| YIL062C   | ARC15  |             |      | 0 iYIL062C | 9    | 465  | 244459 |
| YIL063C   | YRB2   |             |      | 0 iYIL063C | 9    | 984  | 243741 |
| YIL064W   |        |             | 0    | #N/A       | 9    | 774  | 241940 |
| YIL065C   | FIS1   | MDV2        |      | iYIL065C   | 9    | 468  | 241772 |
| YIL066C   | RNR3   | DIN1 RIR3   |      | iYIL066C   | 9    | 2610 | 240705 |
| YIL067C   |        |             | 0    | #N/A       | 9    | 2037 | 237757 |
| YIL068C   | SEC6   |             |      | 0 iYIL068C | 9    | 2418 | 235471 |
| YIL069C   | RPS24B | RPS24EB     |      | iYIL069C   | 9    | 817  | 232366 |
| YIL070C   | MAM33  |             |      | 0 iYIL070C | 9    | 801  | 231069 |
| YIL071W   | #N/A   | #N/A        |      | #N/A       | #N/A | #N/A | #N/A   |
| YIL072W   | HOP1   |             |      | 0 iYIL073C | 9    | 1818 | 226599 |
| YIL073C   | SPO22  |             |      | 0 iYIL073C | 9    | 2661 | 225594 |
| YIL074C   | SER33  |             |      | 0 iYIL074C | 9    | 1410 | 222487 |
| YIL075C   | RPN2   | SEN3        |      | iYIL075C   | 9    | 2838 | 220697 |
| YIL076W   | SEC28  | ANU2        |      | iYIL077C   | 9    | 1080 | 216466 |
| YIL077C   |        |             | 0    | #N/A       | 9    | 963  | 215950 |
| YIL078W   | THS1   |             |      | 0 iYIL079C | 9    | 2205 | 212496 |
| YIL079C   | AIR1   |             |      | 0 iYIL079C | 9    | 1083 | 212002 |
| YIL080W   | #N/A   | #N/A        |      | YILWTy3-1C | 9    | #N/A | 205632 |
| YIL082W   |        |             | 0    | #N/A       | 9    | 873  | 205632 |
| YIL082W-A |        |             | 0    | #N/A       | 9    | 4498 | 205632 |
| YIL083C   |        |             | 0    | #N/A       | 9    | 1098 | 204650 |
| YIL084C   | SDS3   |             |      | 0 iYIL084C | 9    | 984  | 203256 |
| YIL085C   | KTR7   |             |      | 0 iYIL085C | 9    | 1554 | 202040 |
| YIL086C   |        |             | 0    | #N/A       | 9    | 309  | 200458 |
| YIL087C   |        |             | 0    | #N/A       | 9    | 474  | 200116 |
| YIL088C   |        |             | 0    | iYIL088C   | 9    | 1473 | 199400 |
| YIL089W   |        |             | 0    | #N/A       | 9    | 618  | 195596 |
| YIL090W   |        |             | 0    | #N/A       | 9    | 1476 | 193592 |
| YIL091C   |        |             | 0    | #N/A       | 9    | 2166 | 193192 |
| YIL092W   |        |             | 0    | #N/A       | 9    | 1902 | 189063 |
| YIL093C   | RSM25  |             |      | 0 iYIL093C | 9    | 795  | 188781 |
| YIL094C   | LYS12  | LYS10 LYS11 |      | iYIL094C   | 9    | 1116 | 187629 |
| YIL095W   | PRK1   | PAK1        |      | itI(AAU)I1 | 9    | 2433 | 183934 |
| YIL096C   |        |             | 0    | #N/A       | 9    | 1011 | 183124 |
| YIL097W   | FYV10  | GID9        |      | iYIL098C   | 9    | 1551 | 180424 |
| YIL098C   | FMC1   |             |      | 0 iYIL098C | 9    | 468  | 180236 |
| YIL099W   | SGA1   |             |      | 0 iYIL100W | 9    | 1650 | 178001 |
| YIL100W   |        |             | 0    | #N/A       | 9    | 354  | 177370 |
| YIL101C   | XBP1   |             |      | 0 iYIL101C | 9    | 1944 | 177247 |
| YIL102C   |        |             | 0    | #N/A       | 9    | 306  | 174884 |

|         |        |                  |              |   |      |        |
|---------|--------|------------------|--------------|---|------|--------|
| YIL103W | 0      | #N/A             | iYIL104C     | 9 | 1278 | 171748 |
| YIL104C | SHQ1   |                  | 0 iYIL104C   | 9 | 1524 | 171502 |
| YIL105C | 0 LIT2 |                  | iYIL105C     | 9 | 2061 | 169638 |
| YIL106W | MOB1   |                  | 0 iYIL107C   | 9 | 1030 | 166412 |
| YIL107C | PFK26  | PFK-2            | iYIL107C     | 9 | 2484 | 165758 |
| YIL108W | 0      | #N/A             | iYIL109C     | 9 | 2091 | 160884 |
| YIL109C | SEC24  | ANU1             | iYIL109C     | 9 | 2781 | 160162 |
| YIL110W | 0      | #N/A             | iYIL111W     | 9 | 1134 | 156042 |
| YIL111W | COX5B  |                  | 0 iYIL112W   | 9 | 544  | 155219 |
| YIL112W | 0      |                  | 0 iYIL113W   | 9 | 3252 | 151592 |
| YIL113W | 0      |                  | 0 iYIL114C   | 9 | 630  | 150556 |
| YIL114C | POR2   | YVDAC2           | iYIL114C     | 9 | 846  | 149985 |
| YIL115C | NUP159 | NUP158 RAT7      | iYIL115C     | 9 | 4383 | 148706 |
| YIL116W | HIS5   |                  | 0 iYIL117C   | 9 | 1158 | 142925 |
| YIL117C | PRM5   |                  | 0 iYIL117C   | 9 | 957  | 141566 |
| YIL118W | RHO3   |                  | 0 iYIL119C-1 | 9 | 696  | 139749 |
| YIL119C | RPI1   |                  | 0 iYIL119C-0 | 9 | 1224 | 137874 |
| YIL120W | QDR1   |                  | 0 iYIL121W   | 9 | 1692 | 134414 |
| YIL121W | 0      |                  | 0 iYIL122W   | 9 | 1629 | 132241 |
| YIL122W | POG1   |                  | 0 iYIL123W   | 9 | 1056 | 130607 |
| YIL123W | SIM1   |                  | 0 iYIL124W   | 9 | 1428 | 128151 |
| YIL124W | AYR1   |                  | 0 iYIL125W   | 9 | 894  | 126204 |
| YIL125W | KGD1   | OGD1             | iYIL126W     | 9 | 3045 | 122689 |
| YIL126W | STH1   | NPS1             | iYIL127C     | 9 | 4080 | 117992 |
| YIL127C | 0      | #N/A             | iYIL127C     | 9 | 621  | 117644 |
| YIL128W | MET18  | MMS19            | iYIL129C     | 9 | 3099 | 113806 |
| YIL129C | TAO3   | PAG1             | iYIL129C     | 9 | 7131 | 113237 |
| YIL130W | GIN1   | #N/A             | iYIL131C     | 9 | 2895 | 102782 |
| YIL131C | FKH1   |                  | 0 iYIL131C   | 9 | 1455 | 102235 |
| YIL132C | CSM2   |                  | 0 iYIL132C   | 9 | 642  | 100501 |
| YIL133C | RPL16A | RPL13            | iYIL133C     | 9 | 890  | 99416  |
| YIL134W | FLX1   |                  | 0 iSNR68     | 9 | 936  | 97395  |
| YIL135C | 0      |                  | 0 iYIL135C   | 9 | 1311 | 96375  |
| YIL136W | OM45   |                  | 0 iYIL137C   | 9 | 1182 | 93619  |
| YIL137C | 0      | #N/A             | iYIL137C     | 9 | 2841 | 92788  |
| YIL138C | TPM2   | tropomyosin      | iYIL138C     | 9 | 486  | 89715  |
| YIL139C | REV7   |                  | 0 iYIL139C   | 9 | 738  | 88716  |
| YIL140W | AXL2   | BUD10 SRO4       | iYIL142W     | 9 | 2472 | 85366  |
| YIL141W | 0      | #N/A             | iYIL142W     | 9 | 390  | 85053  |
| YIL142W | CCT2   | BIN3 TCP2        | iYIL143C     | 9 | 1584 | 83302  |
| YIL143C | SSL2   | LOM3 RAD25       | iYIL143C     | 9 | 2532 | 83041  |
| YIL144W | TID3   | HEC1 NDC80       | iYIL145C     | 9 | 2076 | 78074  |
| YIL145C | PAN6   |                  | 0 iYIL145C   | 9 | 1038 | 77391  |
| YIL146C | ECM37  |                  | 0 iYIL146C   | 9 | 1590 | 75773  |
| YIL147C | SLN1   | YPD2             | iYIL147C     | 9 | 3663 | 73453  |
| YIL148W | RPL40A | CEP52A UB11 UBI1 | iYIL149C     | 9 | 821  | 68708  |
| YIL149C | MLP2   |                  | 0 iYIL149C   | 9 | 5040 | 68067  |
| YIL150C | DNA43  | DNA43            | iYIL150C     | 9 | 1716 | 62728  |
| YIL151C | 0      | #N/A             | iYIL151C     | 9 | 3357 | 60694  |
| YIL152W | 0      | #N/A             | iYIL153W     | 9 | 708  | 56545  |
| YIL153W | RRD1   | YPA1             | iYIL154C     | 9 | 1182 | 55198  |

|         |       |                |              |   |      |        |
|---------|-------|----------------|--------------|---|------|--------|
| YIL154C | IMP2' | IMP2           | iYIL154C     | 9 | 1041 | 55021  |
| YIL155C | GUT2  |                | 0 iYIL155C   | 9 | 1950 | 53708  |
| YIL156W | UBP7  |                | 0 iYIL157C   | 9 | 3216 | 48091  |
| YIL157C | 0     |                | 0 iYIL157C   | 9 | 594  | 47542  |
| YIL158W | 0     | #N/A           | iYIL159W     | 9 | 615  | 46201  |
| YIL159W | BNR1  |                | 0 iYIL160C   | 9 | 4128 | 41825  |
| YIL160C | POT1  | FOX3 POX3      | iYIL160C     | 9 | 1254 | 41444  |
| YIL161W | 0     | #N/A           | iYIL162W     | 9 | 708  | 39433  |
| YIL162W | SUC2  |                | 0 iYIL163C   | 9 | 1599 | 37385  |
| YIL163C | 0     | #N/A           | iYIL163C     | 9 | 354  | 37252  |
| YIL164C | NIT1  |                | 0 iYIL164C-0 | 9 | 600  | 34686  |
| YIL165C | 0     | #N/A           | iYIL164C-0   | 9 | 360  | 34077  |
| YIL166C | 0     | #N/A           | iYIL166C     | 9 | 1629 | 32566  |
| YIL167W | 0     |                | 0 iYIL169C-1 | 9 | 633  | 29416  |
| YIL168W | SDL1  | #N/A           | iYIL169C-1   | 9 | 384  | 29032  |
| YIL169C | 0     | #N/A           | iYIL169C-0   | 9 | 2988 | 26106  |
| YIL170W | HXT12 |                | 0 iYIL172C   | 9 | 1374 | 19847  |
| YIL171W | HXT12 | #N/A           | iYIL172C     | 9 | 330  | 19515  |
| YIL172C | 0     | #N/A           | iYIL172C     | 9 | 1770 | 18553  |
| YIL173W | VTH1  |                | 0 iYIL174W-1 | 9 | 4650 | 11492  |
| YIL174W | 0     | #N/A           | iYIL177C-1   | 9 | 228  | 9469   |
| YIL175W | 0     | #N/A           | iYIL177C-1   | 9 | 318  | 9183   |
| YIL176C | 0     | #N/A           | iYIL174W-0   | 9 | 363  | 9155   |
| YIL177C | 0     | #N/A           | iYIL177C-0   | 9 | 5665 | 6147   |
| YIR001C | SGN1  | RBP1 RBP29     | iYIR001C     | 9 | 753  | 356892 |
| YIR002C | MPH1  |                | 0 iYIR002C   | 9 | 2982 | 360393 |
| YIR003W | 0     | #N/A           | iYIR002C     | 9 | 2040 | 360882 |
| YIR004W | DJP1  | ICS1 PAS22     | iYIR003W     | 9 | 1299 | 363218 |
| YIR005W | IST3  | SNU17          | iYIR004W     | 9 | 447  | 364886 |
| YIR006C | PAN1  | DIM2 MDP3 MIP3 | iYIR006C     | 9 | 4443 | 369905 |
| YIR007W | 0     | #N/A           | itE(UUC)I    | 9 | 2295 | 370701 |
| YIR008C | PRI1  |                | 0 iYIR008C   | 9 | 1230 | 374303 |
| YIR009W | MSL1  | YIB9w          | iYIR008C     | 9 | 336  | 374522 |
| YIR010W | DSN1  |                | 0 iYIR009W   | 9 | 1731 | 375428 |
| YIR011C | STS1  | DBF8 SSM5      | iYIR011C     | 9 | 960  | 378243 |
| YIR012W | SQT1  |                | 0 iYIR011C   | 9 | 1296 | 378483 |
| YIR013C | GAT4  |                | 0 iYIR013C   | 9 | 366  | 380381 |
| YIR014W | 0     | #N/A           | iYIR013C     | 9 | 831  | 380981 |
| YIR015W | RPR2  |                | 0 iYIR014W   | 9 | 435  | 381945 |
| YIR016W | 0     | #N/A           | iYIR015W     | 9 | 798  | 382625 |
| YIR017C | MET28 |                | 0 iYIR017C   | 9 | 564  | 384116 |
| YIR018W | YAP5  |                | 0 iYIR017C   | 9 | 738  | 384606 |
| YIR019C | MUC1  | FLO11 STA4     | iYIR019C     | 9 | 4104 | 393672 |
| YIR020C | 0     | #N/A           | iYIR020C     | 9 | 303  | 394554 |
| YIR021W | MRS1  | PET157         | iYIR020W-E   | 9 | 1092 | 397291 |
| YIR022W | SEC11 |                | 0 iYIR021W   | 9 | 504  | 398730 |
| YIR023W | DAL81 | UGA35          | iYIR022W     | 9 | 2913 | 399774 |
| YIR024C | GIF1  | #N/A           | iYIR024C     | 9 | 651  | 403488 |
| YIR025W | MND2  |                | 0 iYIR024C   | 9 | 1107 | 403656 |
| YIR026C | YVH1  |                | 0 iYIR026C   | 9 | 1095 | 405964 |
| YIR027C | DAL1  |                | 0 iYIR027C   | 9 | 1383 | 407639 |

|         |        |                            |       |            |      |      |        |
|---------|--------|----------------------------|-------|------------|------|------|--------|
| YIR028W | DAL4   |                            | 0     | iYIR027C   | 9    | 1908 | 408465 |
| YIR029W | DAL2   | ALC1                       |       | iYIR028W   | 9    | 1032 | 410804 |
| YIR030C | DCG1   |                            | 0     | iYIR030C   | 9    | 735  | 412767 |
| YIR031C | DAL7   | MLS2 MSL2                  |       | iYIR031C   | 9    | 1665 | 414676 |
| YIR032C | DAL3   |                            | 0     | iYIR032C   | 9    | 588  | 415614 |
| YIR033W | MGA2   |                            | 0     | iYIR032C   | 9    | 3342 | 416121 |
| YIR034C | LYS1   |                            | 0     | iYIR034C   | 9    | 1122 | 420733 |
| YIR035C |        | 0                          | #N/A  | iYIR035C   | 9    | 765  | 421787 |
| YIR036C |        | 0                          | #N/A  | iYIR036C   | 9    | 792  | 422862 |
| YIR037W | HYR1   | GPX3 ORP1                  |       | iYIR036C   | 9    | 492  | 423125 |
| YIR038C | GTT1   |                            | 0     | iYIR038C-0 | 9    | 705  | 424510 |
| YIR039C | YPS6   |                            | 0     | iYIR039C   | 9    | 1614 | 432107 |
| YIR040C |        | 0                          | #N/A  | iYIR040C   | 9    | 333  | 433717 |
| YIR041W |        | 0                          | #N/A  | iYIR040C   | 9    | 375  | 433925 |
| YIR042C |        | 0                          | #N/A  | iYIR042C   | 9    | 711  | 435980 |
| YIR043C |        | 0                          | #N/A  | iYIR043C   | 9    | 693  | 437732 |
| YIR044C |        | 0                          | #N/A  | #N/A       | 9    | 186  | 438176 |
| YJL001W | PRE3   | CRL21                      |       | iYJL002C   | 10   | 764  | 434856 |
| YJL002C | OST1   | NLT1                       |       | iYJL002C   | 10   | 1431 | 434344 |
| YJL003W |        | 0                          |       | 0          | 10   | 357  | 432337 |
| YJL004C | SYS1   |                            |       | 0          | 10   | 612  | 431893 |
| YJL005W | CYR1   | CDC35 FIL1 HSR1 SitL(UAA)J |       | 0          | 10   | 6081 | 424850 |
| YJL006C | CTK2   |                            |       | 0          | 10   | 972  | 423802 |
| YJL007C |        | 0                          | #N/A  | itM(CAU)J2 | 10   | 315  | 422705 |
| YJL008C | CCT8   |                            |       | 0          | 10   | 1707 | 421356 |
| YJL009W |        | 0                          | #N/A  | iYJL010C   | 10   | 327  | 419548 |
| YJL010C |        | 0                          | #N/A  | iYJL010C   | 10   | 2001 | 419255 |
| YJL011C |        | 0                          |       | 0          | 10   | 486  | 414463 |
| YJL012C | VTC4   | PHM3                       |       | iYJL012C   | 10   | 1947 | 413092 |
| YJL013C | MAD3   |                            |       | 0          | 10   | 1548 | 410734 |
| YJL014W | CCT3   | BIN2 TCP3                  |       | iYJL017W   | 10   | 1605 | 407252 |
| YJL015C |        | 0                          | #N/A  | iYJL014W   | 10   | 375  | 407211 |
| YJL016W |        | 0                          | #N/A  | iYJL017W   | 10   | 516  | 406453 |
| YJL017W |        | 0                          | #N/A  | iYJL018W   | 10   | 978  | 405284 |
| YJL018W |        | 0                          | #N/A  | iYJL020C   | #N/A | 315  | #N/A   |
| YJL019W |        | 0                          | NEP98 | iYJL020C   | 10   | 1863 | 402593 |
| YJL020C | BBC1   | MT11                       |       | iYJL020C   | 10   | 3474 | 402106 |
| YJL021C | #N/A   | #N/A                       | #N/A  | iYJL020C   | #N/A | #N/A | #N/A   |
| YJL022W |        | 0                          | #N/A  | itG(GCC)J1 | 10   | 309  | 397805 |
| YJL023C | PET130 |                            |       | 0          | 10   | 1044 | 398094 |
| YJL024C | APS3   | YKS7                       |       | iYJL024C   | 10   | 662  | 396288 |
| YJL025W | RRN7   |                            |       | 0          | 10   | 1545 | 393663 |
| YJL026W | RNR2   | CRT6                       |       | iYJL027C   | 10   | 1200 | 392100 |
| YJL027C |        | 0                          | #N/A  | iYJL027C   | 10   | 417  | 391945 |
| YJL028W |        | 0                          | #N/A  | itM(CAU)J1 | 10   | 336  | 391007 |
| YJL029C | VPS53  |                            |       | 0          | 10   | 2469 | 390549 |
| YJL030W | MAD2   |                            |       | 0          | 10   | 591  | 387353 |
| YJL031C | BET4   |                            |       | 0          | 10   | 873  | 386936 |
| YJL032W |        | 0                          | #N/A  | iYJL033W   | 10   | 315  | 386044 |
| YJL033W | HCA4   | DBP4 ECM24                 |       | iYJL034W   | 10   | 2313 | 383533 |
| YJL034W | KAR2   | BIP GRP78                  |       | iYJL035C   | 10   | 2049 | 381023 |

|         |        |                  |        |            |          |      |        |        |
|---------|--------|------------------|--------|------------|----------|------|--------|--------|
| YJL035C | TAD2   |                  | 0      | iYJL035C   | 10       | 753  | 380697 |        |
| YJL036W | SNX4   | ATG24 CVT13      |        | itV(AAC)J  | 10       | 1272 | 378521 |        |
| YJL037W |        | 0                | #N/A   | iYJL038C   | 10       | 675  | 376358 |        |
| YJL038C |        | 0                | #N/A   | iYJL038C   | 10       | 660  | 375470 |        |
| YJL039C | NUP192 |                  |        | 0          | iYJL039C | 10   | 5052   | 373495 |
| YJL041W | NSP1   |                  |        | 0          | iYJL042W | 10   | 2590   | 365480 |
| YJL042W | MHP1   |                  |        | 0          | iYJL043W | 10   | 4197   | 360945 |
| YJL043W |        | 0                | #N/A   | iYJL044C   | 10       | 774  | 359826 |        |
| YJL044C | GYP6   |                  |        | 0          | iYJL044C | 10   | 1377   | 359372 |
| YJL045W |        | 0                | #N/A   | itD(GUC)J2 | 10       | 1905 | 355720 |        |
| YJL046W |        | 0                | #N/A   | iYJL047C   | 10       | 1356 | 351956 |        |
| YJL047C | RTT101 | CUL8 CULC CULLIN |        | iYJL047C   | 10       | 2529 | 351804 |        |
| YJL048C |        | 0                |        | 0          | iYJL048C | 10   | 1191   | 348333 |
| YJL049W |        | 0                | #N/A   | iYJL050W   | 10       | 1353 | 345669 |        |
| YJL050W | MTR4   | DOB1             |        | iYJL051W   | 10       | 3222 | 342218 |        |
| YJL051W |        | 0                | #N/A   | iYJL052W   | 10       | 2469 | 339483 |        |
| YJL052W | TDH1   | GLD3             |        | iYJL053W   | 10       | 999  | 337967 |        |
| YJL053W | PEP8   | GRD6 VPS26 VPT4  |        | iYJL054W   | 10       | 1140 | 335594 |        |
| YJL054W | TIM54  |                  |        | 0          | iYJL055W | 10   | 1437   | 333961 |
| YJL055W |        | 0                | #N/A   | iYJL056C   | 10       | 738  | 333053 |        |
| YJL056C | ZAP1   | ZRG10            |        | iYJL056C   | 10       | 2643 | 332769 |        |
| YJL057C | IKS1   |                  | #N/A   | iYJL057C   | 10       | 2004 | 329817 |        |
| YJL058C |        | 0                |        | 0          | iYJL058C | 10   | 1632   | 327569 |
| YJL059W | YHC3   | BTN1             |        | iYJL060W   | 10       | 1227 | 324660 |        |
| YJL060W | BNA3   |                  |        | 0          | iYJL061W | 10   | 1335   | 323082 |
| YJL061W | NUP82  | HRB187           |        | iYJL062W   | 10       | 2142 | 319712 |        |
| YJL062W | LAS21  | GPI7             |        | iYJL063C   | 10       | 2493 | 316980 |        |
| YJL063C | MRPL8  | HRD238           |        | iYJL063C   | 10       | 717  | 316171 |        |
| YJL064W |        | 0                | #N/A   | iYJL066C   | 10       | 396  | 314871 |        |
| YJL065C |        | 0                |        | 0          | iYJL064W | 10   | 504    | 315253 |
| YJL066C | MPM1   |                  |        | 0          | iYJL066C | 10   | 759    | 314568 |
| YJL067W |        | 0                | #N/A   | iYJL068C   | 10       | 351  | 313780 |        |
| YJL068C |        | 0                | #N/A   | iYJL068C   | 10       | 900  | 313611 |        |
| YJL069C | UTP18  |                  |        | 0          | iYJL069C | 10   | 1785   | 312402 |
| YJL070C |        | 0                | #N/A   | iYJL070C   | 10       | 2667 | 310333 |        |
| YJL071W | ARG2   | HRB574           |        | iYJL072C   | 10       | 1725 | 305828 |        |
| YJL072C |        | 0                | CDC102 | iYJL072C   | 10       | 642  | 305558 |        |
| YJL073W | JEM1   | KAR8             |        | iYJL074C   | 10       | 1938 | 302877 |        |
| YJL074C | SMC3   |                  |        | 0          | iYJL074C | 10   | 3693   | 302545 |
| YJL075C |        | 0                |        | 0          | iYJL075C | 10   | 417    | 298572 |
| YJL076W | NET1   | CFI1 ESC5        |        | iYJL077C   | 10       | 3570 | 294941 |        |
| YJL077C | ICS3   |                  |        | 0          | iYJL077C | 10   | 396    | 294757 |
| YJL078C | PRY3   |                  |        | 0          | iYJL078C | 10   | 2646   | 293677 |
| YJL079C | PRY1   |                  |        | 0          | iYJL079C | 10   | 900    | 290470 |
| YJL080C | SCP160 |                  |        | 0          | iYJL080C | 10   | 3669   | 288922 |
| YJL081C | ARP4   | ACT3             |        | iYJL081C   | 10       | 1470 | 284967 |        |
| YJL082W | IML2   |                  |        | 0          | iYJL083W | 10   | 2196   | 280881 |
| YJL083W |        | 0                | #N/A   | iYJL084C   | 10       | 1815 | 278537 |        |
| YJL084C |        | 0                | #N/A   | iYJL084C   | 10       | 3141 | 277698 |        |
| YJL085W | EXO70  |                  |        | 0          | iYJL088W | 10   | 1872   | 272523 |
| YJL086C |        | 0                | #N/A   | iYJL085W   | 10       | 369  | 272542 |        |

|         |        |                   |              |    |      |        |
|---------|--------|-------------------|--------------|----|------|--------|
| YJL087C | TRL1   | LIG1 RLG1         | iYJL085W     | 10 | 2484 | 272181 |
| YJL088W | ARG3   |                   | 0 iYJL089W   | 10 | 1017 | 268495 |
| YJL089W | SIP4   |                   | 0 iYJL090C   | 10 | 2490 | 265622 |
| YJL090C | DPB11  |                   | 0 iYJL090C   | 10 | 2295 | 264747 |
| YJL091C | 0      |                   | 0 iYJL091C   | 10 | 1497 | 262272 |
| YJL092W | HPR5   | RADH RADH1 SRS2   | iYJL093C     | 10 | 3525 | 257119 |
| YJL093C | TOK1   | DUK1 YKC1 YORK Y  | iYJL093C     | 10 | 2076 | 256508 |
| YJL094C | KHA1   |                   | 0 iYJL094C   | 10 | 2622 | 254138 |
| YJL095W | BCK1   | LAS3 SAP3 SLK1 SS | iYJL096W     | 10 | 4437 | 246951 |
| YJL096W | MRPL49 |                   | 0 iYJL098W   | 10 | 675  | 245998 |
| YJL097W | 0      | #N/A              | iYJL098W     | 10 | 654  | 245288 |
| YJL098W | SAP185 |                   | 0 iYJL099W   | 10 | 3177 | 241779 |
| YJL099W | CHS6   | CSD3              | iYJL100W     | 10 | 2241 | 239111 |
| YJL100W | LSB6   |                   | 0 iYJL101C   | 10 | 1824 | 236960 |
| YJL101C | GSH1   |                   | 0 iYJL101C   | 10 | 2037 | 236053 |
| YJL102W | MEF2   |                   | 0 iYJL103C   | 10 | 2460 | 230998 |
| YJL103C | 0      | #N/A              | iYJL103C     | 10 | 1857 | 230578 |
| YJL104W | MIA1   | MIA1 TIM16        | iYJL105W     | 10 | 450  | 227024 |
| YJL105W | SET4   |                   | 0 iYJL106W-1 | 10 | 1683 | 224752 |
| YJL106W | IME2   | SME1              | iYJL107C     | 10 | 1938 | 221087 |
| YJL107C | 0      | #N/A              | iYJL107C     | 10 | 1164 | 219713 |
| YJL108C | PRM10  |                   | 0 iYJL107C   | 10 | 1152 | 218553 |
| YJL109C | UTP10  |                   | 0 iYJL109C   | 10 | 5310 | 217006 |
| YJL110C | GZF3   | DEH1 NIL2         | iYJL110C     | 10 | 1656 | 211274 |
| YJL111W | CCT7   | TCP7              | iYJL112W     | 10 | 1653 | 207574 |
| YJL112W | MDV1   | FIS2 GAG3         | itD(GUC)J1   | 10 | 2145 | 205002 |
| YJL113W | #N/A   | #N/A              | iYJL115W     | 10 | #N/A | 197614 |
| YJL114W | #N/A   | #N/A              | iYJL115W     | 10 | #N/A | 197614 |
| YJL115W | ASF1   |                   | 0 iYJL116C   | 10 | 840  | 195986 |
| YJL116C | NCA3   |                   | 0 iYJL116C   | 10 | 1014 | 194573 |
| YJL117W | PHO86  |                   | 0 iYJL118W   | 10 | 936  | 192231 |
| YJL118W | 0      | #N/A              | iYJL120W     | 10 | 660  | 191339 |
| YJL119C | 0      | #N/A              | iYJL118W     | 10 | 324  | 191595 |
| YJL120W | 0      | #N/A              | iYJL122W     | 10 | 324  | 190722 |
| YJL121C | RPE1   | EPI1 POS18        | iYJL120W     | 10 | 717  | 190790 |
| YJL122W | 0      | #N/A              | iYJL123C     | 10 | 528  | 189416 |
| YJL123C | 0      | #N/A              | iYJL123C     | 10 | 1437 | 189140 |
| YJL124C | LSM1   | SPB8              | iYJL124C     | 10 | 519  | 187344 |
| YJL125C | GCD14  |                   | 0 iYJL125C   | 10 | 1152 | 186378 |
| YJL126W | NIT2   |                   | 0 iYJL127C   | 10 | 924  | 184200 |
| YJL127C | SPT10  | CRE1 SUD1         | iYJL127C     | 10 | 1923 | 183919 |
| YJL128C | PBS2   | HOG4 SFS4 SSK4    | iYJL128C-0   | 10 | 2007 | 179801 |
| YJL129C | TRK1   |                   | 0 iYJL129C   | 10 | 3708 | 177004 |
| YJL130C | URA2   |                   | 0 iYJL130C   | 10 | 6645 | 172065 |
| YJL131C | 0      | #N/A              | iYJL131C     | 10 | 1071 | 165046 |
| YJL132W | 0      | #N/A              | iYJL133W     | 10 | 2253 | 161612 |
| YJL133W | MRS3   |                   | 0 iYJL134W   | 10 | 945  | 160317 |
| YJL134W | LCB3   | LBP1 YSR2         | iYJL136C     | 10 | 1230 | 157886 |
| YJL135W | 0      | #N/A              | iYJL136C     | 10 | 318  | 157575 |
| YJL136C | RPS21B |                   | 0 iYJL136C   | 10 | 724  | 156971 |
| YJL137C | GLG2   |                   | 0 iYJL137C   | 10 | 1143 | 155825 |



|         |        |                 |       |            |    |      |        |
|---------|--------|-----------------|-------|------------|----|------|--------|
| YJL138C | TIF2   |                 | 0     | iYJL138C   | 10 | 1188 | 154389 |
| YJL139C | YUR1   |                 | 0     | iYJL139C   | 10 | 1287 | 152697 |
| YJL140W | RPB4   | CTF15           |       | iYJL141C   | 10 | 666  | 150659 |
| YJL141C | YAK1   |                 | 0     | iYJL141C   | 10 | 2424 | 150088 |
| YJL142C |        | 0 #N/A          |       | iYJL141C   | 10 | 393  | 147909 |
| YJL143W | TIM17  | MIM17 MPI2 SMS1 |       | iYJL144W   | 10 | 477  | 146799 |
| YJL144W |        | 0 #N/A          |       | iYJL145W   | 10 | 315  | 146057 |
| YJL145W | SFH5   |                 | 0     | iYJL146W   | 10 | 885  | 144858 |
| YJL146W | IDS2   |                 | 0     | iYJL147C   | 10 | 1410 | 142990 |
| YJL147C |        | 0 #N/A          |       | iYJL147C   | 10 | 1149 | 142265 |
| YJL148W | RPA34  |                 | 0     | iSNR190    | 10 | 702  | 140135 |
| YJL149W |        | 0 #N/A          |       | iYJL151C   | 10 | 1992 | 137077 |
| YJL150W |        | 0 #N/A          |       | iYJL151C   | 10 | 303  | 136821 |
| YJL151C | SNA3   |                 | 0     | iYJL151C   | 10 | 402  | 136471 |
| YJL152W |        | 0 #N/A          |       | iYJL153C   | 10 | 360  | 135872 |
| YJL153C | INO1   |                 | 38078 | iYJL153C   | 10 | 1668 | 135697 |
| YJL154C | VPS35  | GRD9 VPT7       |       | iYJL154C   | 10 | 2835 | 133633 |
| YJL155C | FBP26  | FBPase-2        |       | iYJL155C   | 10 | 1359 | 130341 |
| YJL156C | SSY5   |                 | 0     | iYJL156C   | 10 | 2064 | 128650 |
| YJL157C | FAR1   |                 | 0     | iYJL157C   | 10 | 2493 | 126025 |
| YJL158C | CIS3   | CCW11 CCW5 PIR4 |       | iYJL158C   | 10 | 684  | 122645 |
| YJL159W | HSP150 | CCW7 ORE1 PIR2  |       | iYJL160C-1 | 10 | 933  | 120444 |
| YJL160C |        | 0 #N/A          |       | iYJL160C-0 | 10 | 543  | 118820 |
| YJL161W |        | 0               |       | iE(UUC)J   | 10 | 543  | 117239 |
| YJL162C |        | 0               |       | iYJL162C   | 10 | 1449 | 115623 |
| YJL163C |        | 0 #N/A          |       | iYJL163C   | 10 | 1668 | 113327 |
| YJL164C | TPK1   | PKA1 SRA3       |       | iYJL164C   | 10 | 1194 | 111151 |
| YJL165C | HAL5   |                 | 0     | iYJL165C   | 10 | 2568 | 109453 |
| YJL166W | QCR8   | COR5            |       | iYJL167W   | 10 | 285  | 106426 |
| YJL167W | ERG20  | BOT3 FDS1 FPP1  |       | iYJL168C   | 10 | 1059 | 105006 |
| YJL168C | SET2   | EZL1            |       | iYJL168C   | 10 | 2202 | 104420 |
| YJL169W |        | 0 #N/A          |       | iYJL170C   | 10 | 369  | 102091 |
| YJL170C | ASG7   |                 | 0     | iYJL170C   | 10 | 552  | 101694 |
| YJL171C |        | 0 #N/A          |       | iYJL171C   | 10 | 1191 | 100887 |
| YJL172W | CPS1   |                 | 0     | iYJL173C   | 10 | 1731 | 97730  |
| YJL173C | RFA3   |                 | 0     | iYJL173C   | 10 | 369  | 96526  |
| YJL174W | KRE9   |                 | 0     | iYJL175W   | 10 | 831  | 95089  |
| YJL175W |        | 0 #N/A          |       | iYJL177W   | 10 | 513  | 94046  |
| YJL176C | SWI3   | TYE2            |       | iYJL175W   | 10 | 2478 | 94527  |
| YJL177W | RPL17B |                 | 0     | iYJL178C   | 10 | 872  | 90783  |
| YJL178C |        | 0 ETF1          |       | iYJL178C   | 10 | 591  | 89870  |
| YJL179W | PFD1   | GIM6            |       | iYJL180C   | 10 | 330  | 88785  |
| YJL180C | ATP12  |                 | 0     | iYJL180C   | 10 | 978  | 88558  |
| YJL181W |        | 0 #N/A          |       | iYJL183W   | 10 | 1836 | 85658  |
| YJL182C |        | 0 #N/A          |       | iYJL181W   | 10 | 318  | 85750  |
| YJL183W | MNN11  |                 | 0     | iYJL184W   | 10 | 1269 | 84066  |
| YJL184W |        | 0 LDB6          |       | iYJL185C   | 10 | 372  | 83446  |
| YJL185C |        | 0 #N/A          |       | iYJL185C   | 10 | 882  | 82974  |
| YJL186W | MNN5   |                 | 0     | iYJL187C   | 10 | 1761 | 80153  |
| YJL187C | SWE1   | WEE1            |       | iYJL187C   | 10 | 2460 | 79261  |
| YJL188C | BUD19  |                 | 0     | iYJL188C   | 10 | 309  | 76509  |

|           |        |                 |              |      |      |        |
|-----------|--------|-----------------|--------------|------|------|--------|
| YJL189W   | RPL39  | PUB2 RPL46 SPB2 | iYJL190C     | 10   | 542  | 75932  |
| YJL190C   | RPS22A | RPS24           | iYJL190C     | 10   | 393  | 75301  |
| YJL191W   | RPS14B | CRY2            | iYJL192C     | 10   | 825  | 73786  |
| YJL192C   | 0      |                 | 0 iYJL192C   | 10   | 705  | 73413  |
| YJL193W   | 0      | #N/A            | iYJL194W     | 10   | 1209 | 71365  |
| YJL194W   | CDC6   |                 | 0 iYJL196C   | 10   | 1542 | 69337  |
| YJL195C   | 0      | #N/A            | iYJL194W     | 10   | 702  | 69941  |
| YJL196C   | ELO1   |                 | 0 iYJL196C   | 10   | 933  | 68781  |
| YJL197W   | UBP12  |                 | 0 iYJL198W   | 10   | 3765 | 63804  |
| YJL198W   | PHO90  |                 | 0 iYJL199C   | 10   | 2646 | 60843  |
| YJL199C   | 0      |                 | 0 iYJL199C   | 10   | 327  | 60181  |
| YJL200C   | 0      | #N/A            | iYJL200C     | 10   | 2370 | 58813  |
| YJL201W   | ECM25  |                 | 0 iYJL202C   | 10   | 1800 | 54379  |
| YJL202C   | 0      | #N/A            | iYJL202C     | 10   | 348  | 54290  |
| YJL203W   | PRP21  | SPP91           | iYJL204C     | 10   | 843  | 53341  |
| YJL204C   | RCY1   |                 | 0 iYJL204C   | 10   | 2523 | 53151  |
| YJL206C   | 0      | #N/A            | iYJL206C     | 10   | 2277 | 49935  |
| YJL206C-A | #N/A   | #N/A            | #N/A         | #N/A | #N/A | #N/A   |
| YJL207C   | 0      | #N/A            | iYJL207C     | 10   | 6045 | 47433  |
| YJL208C   | NUC1   |                 | 0 iYJL208C   | 10   | 990  | 41183  |
| YJL209W   | CBP1   |                 | 0 iYJL210W   | 10   | 1965 | 38005  |
| YJL210W   | PEX2   | CRT1 PAS5       | iYJL212C     | 10   | 816  | 36919  |
| YJL211C   | 0      | #N/A            | iYJL210W     | 10   | 444  | 37200  |
| YJL212C   | OPT1   | GSH11 HGT1      | iYJL212C     | 10   | 2400 | 36249  |
| YJL213W   | 0      | #N/A            | iYJL214W-2   | 10   | 996  | 32163  |
| YJL214W   | HXT8   |                 | 0 iYJL215C   | 10   | 1710 | 26887  |
| YJL215C   | 0      | #N/A            | iYJL215C     | 10   | 360  | 26771  |
| YJL216C   | 0      | #N/A            | iYJL216C     | 10   | 1746 | 26086  |
| YJL217W   | 0      | #N/A            | iYJL218W     | 10   | 597  | 23133  |
| YJL218W   | 0      | #N/A            | iYJL219W     | 10   | 591  | 21973  |
| YJL219W   | HXT9   |                 | 0 iYJL220W   | 10   | 1704 | 19497  |
| YJL220W   | 0      | #N/A            | iYJL222W     | 10   | 453  | 18243  |
| YJL221C   | FSP2   |                 | 0 iYJL220W   | 10   | 1770 | 18536  |
| YJL222W   | VTH2   |                 | 0 iYJL223C-1 | 10   | 4650 | 11475  |
| YJL223C   | PAU1   |                 | 0 iYJL223C-0 | 10   | 363  | 9138   |
| YJL225C   | 0      | #N/A            | iYJL225C-0   | 10   | 5665 | 6130   |
| YJR001W   | 0      |                 | 0 iCEN10     | 10   | 1809 | 436495 |
| YJR002W   | MPP10  |                 | 0 iYJR001W   | 10   | 1782 | 438557 |
| YJR003C   | 0      | #N/A            | iYJR003C     | 10   | 1620 | 442305 |
| YJR004C   | SAG1   | AG(ALPHA)1      | iYJR004C     | 10   | 1953 | 444553 |
| YJR005W   | APL1   | YAP80           | iYJR004C     | 10   | 2103 | 445615 |
| YJR006W   | HYS2   | HUS2 POL31 SDP5 | iYJR005W     | 10   | 1464 | 448894 |
| YJR007W   | SUI2   |                 | 0 iYJR006W   | 10   | 915  | 450712 |
| YJR008W   | 0      | #N/A            | iYJR007W     | 10   | 1017 | 452122 |
| YJR009C   | TDH2   | GLD2            | iYJR009C-0   | 10   | 999  | 454373 |
| YJR010C-A | SPC1   |                 | 0 iYJR010C-A | 10   | 285  | 458053 |
| YJR010W   | MET3   |                 | 0 iYJR009C-1 | 10   | 1536 | 455931 |
| YJR011C   | 0      | #N/A            | iYJR011C     | 10   | 786  | 459118 |
| YJR012C   | 0      | #N/A            | iYJR012C     | 10   | 624  | 460110 |
| YJR013W   | 0      |                 | 0 iYJR012C   | 10   | 918  | 460369 |
| YJR014W   | 0      | #N/A            | iYJR013W     | 10   | 597  | 461522 |

|         |        |              |              |    |      |        |
|---------|--------|--------------|--------------|----|------|--------|
| YJR015W | 0      | #N/A         | iYJR014W     | 10 | 1533 | 462414 |
| YJR016C | ILV3   |              | 0 iYJR016C   | 10 | 1758 | 465901 |
| YJR017C | ESS1   | PIN1 PTF1    | iYJR018W     | 10 | 573  | 466786 |
| YJR018W | 0      | #N/A         | iYJR016C     | 10 | 363  | 466479 |
| YJR019C | TES1   | PTE1         | iYJR020W     | 10 | 1050 | 467974 |
| YJR020W | 0      | #N/A         | iYJR018W     | 10 | 333  | 467694 |
| YJR021C | REC107 | MER2         | iYJR021C     | 10 | 1025 | 469272 |
| YJR022W | LSM8   |              | 0 iYJR021C   | 10 | 387  | 469420 |
| YJR023C | 0      | #N/A         | iYJR024C     | 10 | 402  | 469898 |
| YJR024C | 0      | #N/A         | iYJR024C     | 10 | 735  | 470657 |
| YJR025C | BNA1   | HAD1         | iYJR025C     | 10 | 534  | 471364 |
| YJR026W | #N/A   | #N/A         | iYJR025C     | 10 | #N/A | 472453 |
| YJR027W | #N/A   | #N/A         | iYJR025C     | 10 | #N/A | 472453 |
| YJR028W | #N/A   | #N/A         | iYJR025C     | 10 | #N/A | 478037 |
| YJR029W | #N/A   | #N/A         | iYJR025C     | 10 | #N/A | 478037 |
| YJR030C | 0      | #N/A         | iYJR030C     | 10 | 2238 | 485889 |
| YJR031C | GEA1   |              | 0 iYJR031C   | 10 | 4227 | 490505 |
| YJR032W | CPR7   |              | 0 iYJR031C   | 10 | 1182 | 490774 |
| YJR033C | RAV1   |              | 0 iYJR033C   | 10 | 4074 | 496144 |
| YJR034W | PET191 |              | 0 iYJR033C   | 10 | 327  | 496376 |
| YJR035W | RAD26  |              | 0 iYJR034W   | 10 | 3258 | 497048 |
| YJR036C | HUL4   |              | 0 iYJR037W   | 10 | 2679 | 503084 |
| YJR037W | 0      | #N/A         | iYJR035W     | 10 | 384  | 502795 |
| YJR038C | 0      | #N/A         | iYJR039W     | 10 | 363  | 503765 |
| YJR039W | 0      | #N/A         | iYJR037W     | 10 | 3366 | 503629 |
| YJR040W | GEF1   | CLC          | iYJR039W     | 10 | 2340 | 507439 |
| YJR041C | 0      |              | 0 iYJR041C   | 10 | 3525 | 513456 |
| YJR042W | NUP85  | RAT9         | iYJR041C     | 10 | 2235 | 513748 |
| YJR043C | POL32  |              | 0 iYJR043C   | 10 | 1053 | 517206 |
| YJR044C | VPS55  |              | 0 iYJR044C   | 10 | 423  | 518878 |
| YJR045C | SSC1   | ENS1 mtHSP70 | iYJR045C     | 10 | 1965 | 521295 |
| YJR046W | TAH11  | CDT1 SID2    | iYJR045C     | 10 | 1815 | 521741 |
| YJR047C | ANB1   | HYP1 TIF51B  | iYJR047C     | 10 | 474  | 525074 |
| YJR048W | CYC1   |              | 0 iYJR047C   | 10 | 330  | 526028 |
| YJR049C | UTR1   |              | 0 iYJR049C   | 10 | 1593 | 528169 |
| YJR050W | ISY1   | NTC30 UTR3   | iYJR049C     | 10 | 708  | 528390 |
| YJR051W | OSM1   |              | 0 iYJR050W   | 10 | 1506 | 529554 |
| YJR052W | RAD7   |              | 0 itG(GCC)J2 | 10 | 1698 | 531755 |
| YJR053W | BFA1   | IBD1         | iYJR052W     | 10 | 1725 | 533720 |
| YJR054W | 0      | #N/A         | iYJR053W     | 10 | 1494 | 535749 |
| YJR055W | HIT1   |              | 0 itR(CCU)J  | 10 | 495  | 538465 |
| YJR056C | 0      | #N/A         | iYJR056C     | 10 | 711  | 542195 |
| YJR057W | CDC8   |              | 0 iYJRWdelta | 10 | 651  | 543755 |
| YJR058C | APS2   | YAP17        | iYJR058C     | 10 | 444  | 544868 |
| YJR059W | PTK2   | STK2         | iYJR058C     | 10 | 2457 | 545480 |
| YJR060W | CBF1   | CEP1 CPF1    | iYJR059W     | 10 | 1056 | 548452 |
| YJR061W | 0      | #N/A         | iYJR060W     | 10 | 2808 | 550204 |
| YJR062C | NTA1   | DEA1         | iYJR062C     | 10 | 1374 | 554542 |
| YJR063W | RPA12  | RRN4         | iYJR062C     | 10 | 378  | 554888 |
| YJR064W | CCT5   | TCP5         | iYJR063W     | 10 | 1689 | 555607 |
| YJR065C | ARP3   | ACT4         | iYJR065C     | 10 | 1350 | 558851 |

|           |        |                 |              |    |      |        |
|-----------|--------|-----------------|--------------|----|------|--------|
| YJR066W   | TOR1   | DRR1            | iYJR065C     | 10 | 7413 | 559109 |
| YJR067C   | YAE1   |                 | 0 iYJR067C   | 10 | 426  | 567137 |
| YJR068W   | RFC2   |                 | 0 iYJR067C   | 10 | 1062 | 567336 |
| YJR069C   | HAM1   |                 | 0 iYJR069C   | 10 | 594  | 569092 |
| YJR070C   | 0      |                 | 0 iYJR071W   | 10 | 978  | 570291 |
| YJR071W   | 0      | #N/A            | iYJR069C     | 10 | 369  | 570098 |
| YJR072C   | 0      | #N/A            | iYJR072C     | 10 | 1158 | 571817 |
| YJR073C   | OPI3   | PEM2            | iYJR073C     | 10 | 621  | 572628 |
| YJR074W   | MOG1   |                 | 0 iYJR073C   | 10 | 657  | 572788 |
| YJR075W   | HOC1   |                 | 0 iYJR074W   | 10 | 1191 | 573674 |
| YJR076C   | CDC11  | PSL9            | iYJR076C     | 10 | 1248 | 576294 |
| YJR077C   | MIR1   |                 | 0 iYJR077C   | 10 | 936  | 577883 |
| YJR078W   | BNA2   |                 | 0 iYJR077C   | 10 | 1362 | 578553 |
| YJR079W   | 0      | #N/A            | iYJR077C     | 10 | 1035 | 579898 |
| YJR080C   | 0      |                 | 0 iYJR080C   | 10 | 1185 | 581309 |
| YJR082C   | EAF6   |                 | 0 iYJR082C   | 10 | 342  | 581948 |
| YJR083C   | 0      |                 | 0 iYJR083C   | 10 | 930  | 583230 |
| YJR084W   | 0      |                 | 0 iYJR083C   | 10 | 1272 | 583426 |
| YJR085C   | 0      | #N/A            | iYJR085C     | 10 | 318  | 585130 |
| YJR086W   | STE18  |                 | 0 iYJR085C   | 10 | 333  | 585761 |
| YJR087W   | 0      | #N/A            | iYJR085C     | 10 | 351  | 586093 |
| YJR088C   | 0      | #N/A            | iYJR088C     | 10 | 879  | 587066 |
| YJR089W   | BIR1   |                 | 0 iYJR088C   | 10 | 2865 | 587411 |
| YJR090C   | GRR1   | CAT80 COT2 SSU2 | iYJR090C     | 10 | 3456 | 594020 |
| YJR091C   | JSN1   | PUF1            | iYJR091C     | 10 | 3276 | 598029 |
| YJR092W   | BUD4   |                 | 0 iYJR091C   | 10 | 3963 | 598812 |
| YJR093C   | FIP1   |                 | 0 iYJR093C   | 10 | 984  | 603899 |
| YJR094C   | IME1   |                 | 0 iYJR094C-0 | 10 | 1083 | 605347 |
| YJR094W-A | RPL43B |                 | 0 iYJR094C-1 | 10 | 554  | 608001 |
| YJR095W   | SFC1   | ACR1            | iYJR094W-1   | 10 | 969  | 609469 |
| YJR096W   | 0      | #N/A            | iYJR095W     | 10 | 849  | 610891 |
| YJR097W   | 0      |                 | 0 iYJR096W   | 10 | 519  | 612109 |
| YJR098C   | 0      | #N/A            | iYJR098C     | 10 | 1968 | 614849 |
| YJR099W   | YUH1   |                 | 0 iYJR098C   | 10 | 711  | 615269 |
| YJR100C   | 0      | #N/A            | iYJR100C     | 10 | 984  | 617027 |
| YJR101W   | RSM26  |                 | 0 itL(UAG)J  | 10 | 801  | 617927 |
| YJR102C   | VPS25  | VPT25           | iYJR102C     | 10 | 609  | 619458 |
| YJR103W   | URA8   |                 | 0 iYJR102C   | 10 | 1695 | 620447 |
| YJR104C   | SOD1   | CRS4            | iYJR104C     | 10 | 465  | 622706 |
| YJR105W   | ADO1   |                 | 0 iYJR104C   | 10 | 1023 | 623273 |
| YJR106W   | ECM27  |                 | 0 iYJR105W   | 10 | 2178 | 624530 |
| YJR107W   | 0      | #N/A            | iYJR106W     | 10 | 987  | 627033 |
| YJR108W   | ABM1   |                 | 0 iYJR107W   | 10 | 372  | 628406 |
| YJR109C   | CPA2   |                 | 0 iYJR109C   | 10 | 3357 | 632635 |
| YJR110W   | 0      |                 | 0 iYJR109C   | 10 | 2067 | 633309 |
| YJR111C   | 0      | #N/A            | iYJR111C     | 10 | 852  | 636400 |
| YJR112W   | NNF1   |                 | 0 iYJR111C   | 10 | 606  | 636724 |
| YJR113C   | RSM7   |                 | 0 iYJR114W   | 10 | 744  | 638669 |
| YJR114W   | 0      |                 | 0 iYJR112W   | 10 | 393  | 638353 |
| YJR115W   | 0      | #N/A            | iYJR114W     | 10 | 510  | 639636 |
| YJR116W   | 0      | #N/A            | iYJR115W     | 10 | 840  | 640519 |

|         |        |                |              |    |      |        |
|---------|--------|----------------|--------------|----|------|--------|
| YJR117W | STE24  | AFC1 PIO2      | iYJR116W     | 10 | 1362 | 641701 |
| YJR118C | ILM1   |                | 0 iYJR118C   | 10 | 612  | 643795 |
| YJR119C | 0      | #N/A           | iYJR119C     | 10 | 2187 | 646184 |
| YJR120W | 0      | #N/A           | iYJR119C     | 10 | 351  | 646820 |
| YJR121W | ATP2   |                | 0 iYJR120W   | 10 | 1536 | 647301 |
| YJR122W | CAF17  |                | 0 iYJR121W   | 10 | 1494 | 649470 |
| YJR123W | RPS5   |                | 0 iYJR122W   | 10 | 678  | 651595 |
| YJR124C | 0      | #N/A           | iYJR124C     | 10 | 1347 | 653932 |
| YJR125C | ENT3   |                | 0 iYJR125C   | 10 | 1227 | 655657 |
| YJR126C | VPS70  |                | 0 iYJR126C   | 10 | 2436 | 658383 |
| YJR127C | ZMS1   |                | 0 iYJR128W   | 10 | 4143 | 662753 |
| YJR128W | 0      | #N/A           | iYJR126C     | 10 | 360  | 662615 |
| YJR129C | 0      | #N/A           | iYJR129C     | 10 | 1020 | 664713 |
| YJR130C | STR2   |                | 0 iYJR130C   | 10 | 1920 | 666831 |
| YJR131W | MNS1   |                | 0 iYJR130C   | 10 | 1650 | 667338 |
| YJR132W | NMD5   | KAP119         | iYJR131W     | 10 | 3147 | 669216 |
| YJR133W | XPT1   |                | 0 iYJR132W   | 10 | 630  | 672685 |
| YJR134C | SGM1   |                | 0 iYJR134C   | 10 | 2124 | 675546 |
| YJR135C | MCM22  |                | 0 iYJR135C   | 10 | 720  | 676472 |
| YJR136C | 0      | #N/A           | iYJR136C     | 10 | 1266 | 678400 |
| YJR137C | ECM17  | MET5           | iYJR137C     | 10 | 4329 | 682979 |
| YJR138W | IML1   |                | 0 iYJR137C   | 10 | 4755 | 684261 |
| YJR139C | HOM6   |                | 0 iYJR139C   | 10 | 1080 | 690218 |
| YJR140C | HIR3   | HPC1           | iYJR140C     | 10 | 4947 | 695390 |
| YJR141W | 0      | #N/A           | iYJR140C     | 10 | 1044 | 695600 |
| YJR142W | 0      | #N/A           | iYJR141W     | 10 | 1029 | 696835 |
| YJR143C | PMT4   |                | 0 iYJR143C   | 10 | 2289 | 700308 |
| YJR144W | MGM101 | MGM9           | iYJR143C     | 10 | 810  | 700576 |
| YJR145C | RPS4A  |                | 0 iYJR145C   | 10 | 1042 | 702762 |
| YJR146W | 0      | #N/A           | iYJR145C     | 10 | 354  | 703579 |
| YJR147W | HMS2   |                | 0 iYJR145C   | 10 | 1077 | 703890 |
| YJR148W | BAT2   | ECA40 TWT2     | iYJR147W     | 10 | 1131 | 705438 |
| YJR149W | 0      | #N/A           | iYJR148W     | 10 | 1215 | 706854 |
| YJR150C | DAN1   | CCW13          | iYJR150C-0   | 10 | 897  | 709401 |
| YJR151C | DAN4   |                | 0 iYJR151C-0 | 10 | 3486 | 715434 |
| YJR152W | DAL5   | UREP1          | iYJR151C-2   | 10 | 1632 | 719360 |
| YJR153W | PGU1   | PGL1 PSM1      | iYJR152W     | 10 | 1086 | 722509 |
| YJR154W | 0      | #N/A           | iYJR153W-    | 10 | 1041 | 725478 |
| YJR155W | AAD10  |                | 0 iYJR154W   | 10 | 867  | 727099 |
| YJR156C | THI11  |                | 0 iYJR156C   | 10 | 1023 | 729290 |
| YJR157W | 0      | #N/A           | iYJR156C     | 10 | 363  | 730209 |
| YJR158W | HXT16  |                | 0 iYJR157W-  | 10 | 1704 | 732134 |
| YJR159W | SOR1   | SDH1           | iYJR158W-    | 10 | 1074 | 735738 |
| YJR160C | 0      |                | 0 iYJR160C-0 | 10 | 1809 | 739510 |
| YJR161C | COS5   |                | 0 iYJR161C   | 10 | 1152 | 743693 |
| YJR162C | 0      | #N/A           | #N/A         | 10 | 351  | 744955 |
| YKL001C | MET14  |                | 0 iYKL001C   | 11 | 609  | 439023 |
| YKL002W | DID4   | CHM2 GRD7 REN1 | iYKL003C     | 11 | 767  | 437416 |
| YKL003C | MRP17  |                | 0 iYKL003C   | 11 | 396  | 437130 |
| YKL004W | AUR1   |                | 0 iYKL005C   | 11 | 1206 | 435218 |
| YKL005C | 0      |                | 0 iYKL005C   | 11 | 1785 | 434515 |

|           |        |             |   |            |    |      |        |
|-----------|--------|-------------|---|------------|----|------|--------|
| YKL006C-A | SFT1   |             | 0 | iYKL006C-A | 11 | 435  | 430270 |
| YKL006W   | RPL14A |             | 0 | iYKL006C-A | 11 | 815  | 431544 |
| YKL007W   | CAP1   |             | 0 | iYKL008C   | 11 | 807  | 428940 |
| YKL008C   | LAC1   | DGT1        |   | iYKL008C   | 11 | 1257 | 428189 |
| YKL009W   | MRT4   |             | 0 | iYKL010C   | 11 | 711  | 425880 |
| YKL010C   | UFD4   |             | 0 | iYKL010C   | 11 | 4452 | 425513 |
| YKL011C   | CCE1   | MGT1        |   | iYKL011C   | 11 | 1062 | 420854 |
| YKL012W   | PRP40  |             | 0 | iYKL013C   | 11 | 1752 | 417948 |
| YKL013C   | ARC19  |             | 0 | iYKL013C   | 11 | 516  | 417661 |
| YKL014C   |        |             | 0 | iYKL014C   | 11 | 5295 | 416551 |
| YKL015W   | PUT3   |             | 0 | iYKL016C   | 11 | 2940 | 408182 |
| YKL016C   | ATP7   |             | 0 | iYKL016C   | 11 | 525  | 407627 |
| YKL017C   | HCS1   | DIP1        |   | iYKL017C   | 11 | 2052 | 406879 |
| YKL018W   | SWD2   | CPS35 SAF37 |   | iYKL019W   | 11 | 990  | 403740 |
| YKL019W   | RAM2   |             | 0 | iYKL020C   | 11 | 951  | 402206 |
| YKL020C   | SPT23  |             | 0 | iYKL020C   | 11 | 3249 | 401718 |
| YKL021C   | MAK11  |             | 0 | iYKL021C   | 11 | 1407 | 398388 |
| YKL022C   | CDC16  |             | 0 | iYKL022C   | 11 | 2523 | 396886 |
| YKL023W   |        |             | 0 | #N/A       | 11 | 834  | 393359 |
| YKL024C   | URA6   | SOC8        |   | iYKL024C   | 11 | 615  | 392778 |
| YKL025C   | PAN3   | ECM35       |   | iYKL025C   | 11 | 2040 | 391917 |
| YKL026C   | GPX1   |             | 0 | iYKL026C   | 11 | 504  | 389521 |
| YKL027W   |        |             | 0 | #N/A       | 11 | 1344 | 387200 |
| YKL028W   | TFA1   |             | 0 | iYKL029C   | 11 | 1449 | 385396 |
| YKL029C   | MAE1   |             | 0 | iYKL029C   | 11 | 2010 | 384363 |
| YKL030W   |        |             | 0 | #N/A       | 11 | 606  | 382136 |
| YKL031W   |        |             | 0 | #N/A       | 11 | 414  | 381710 |
| YKL032C   | IXR1   | ORD1        |   | iYKL032C   | 11 | 1794 | 381496 |
| YKL033W   |        |             | 0 | iYKL033W-) | 11 | 3117 | 375094 |
| YKL034W   | TUL1   |             | 0 | iYKL035W   | 11 | 2277 | 371468 |
| YKL035W   | UGP1   |             | 0 | iYKL038W   | 11 | 1500 | 369530 |
| YKL036C   |        |             | 0 | #N/A       | 11 | 393  | 369559 |
| YKL037W   |        |             | 0 | #N/A       | 11 | 357  | 369004 |
| YKL038W   | RGT1   |             | 0 | iSNR69     | 11 | 3513 | 365244 |
| YKL039W   | PTM1   |             | 0 | iYKL040C   | 11 | 1596 | 362262 |
| YKL040C   | NFU1   | NUB1        |   | iYKL040C   | 11 | 771  | 361468 |
| YKL041W   | VPS24  | DID3        |   | iYKL042W   | 11 | 675  | 359783 |
| YKL042W   | SPC42  |             | 0 | iYKL043W   | 11 | 1092 | 358116 |
| YKL043W   | PHD1   |             | 0 | iYKL044W   | 11 | 1101 | 356389 |
| YKL044W   |        |             | 0 | #N/A       | 11 | 321  | 355963 |
| YKL045W   | PRI2   |             | 0 | iYKL046C   | 11 | 1587 | 353134 |
| YKL046C   |        |             | 0 | iYKL046C   | 11 | 1350 | 352265 |
| YKL047W   |        |             | 0 | #N/A       | 11 | 1551 | 349104 |
| YKL048C   | ELM1   | LDB9        |   | iYKL048C   | 11 | 1923 | 348777 |
| YKL049C   | CSE4   | CSL2        |   | iYKL049C   | 11 | 414  | 346130 |
| YKL050C   |        |             | 0 | #N/A       | 11 | 2769 | 345262 |
| YKL051W   |        |             | 0 | iYKL052C   | 11 | 1062 | 340954 |
| YKL052C   | ASK1   |             | 0 | iYKL052C   | 11 | 879  | 340188 |
| YKL053W   |        |             | 0 | #N/A       | 11 | 375  | 339214 |
| YKL054C   | VID31  | VID31       |   | iYKL054C   | 11 | 2217 | 338395 |
| YKL055C   | OAR1   |             | 0 | iYKL055C   | 11 | 837  | 335799 |

|           |        |               |              |      |      |        |
|-----------|--------|---------------|--------------|------|------|--------|
| YKL056C   | 0      | #N/A          | iYKL056C     | 11   | 504  | 334557 |
| YKL057C   | NUP120 | RAT2          | iYKL057C     | 11   | 3114 | 333611 |
| YKL058W   | TOA2   |               | 0 iYKL059C   | 11   | 369  | 329808 |
| YKL059C   | MPE1   |               | 0 iYKL059C   | 11   | 1326 | 329085 |
| YKL060C   | FBA1   | LOT1          | iYKL060C     | 11   | 1080 | 327129 |
| YKL061W   | 0      | #N/A          | iYKL062W     | 11   | 342  | 325413 |
| YKL062W   | MSN4   |               | 0 iYKL063C-1 | 11   | 1893 | 322870 |
| YKL063C   | 0      | #N/A          | iYKL063C-0   | 11   | 504  | 321160 |
| YKL064W   | MNR2   |               | 0 iYKL065C   | 11   | 2910 | 317406 |
| YKL065C   | YET1   |               | 0 iYKL065C   | 11   | 621  | 316699 |
| YKL066W   | 0      | #N/A          | iYKLWdelta   | 11   | 444  | 314923 |
| YKL067W   | YNK1   | NDK1          | iYKLWdelta   | 11   | 462  | 314454 |
| YKL068W   | NUP100 | NSP100        | itV(AAC)K1-  | 11   | 2880 | 309841 |
| YKL069W   | 0      | #N/A          | iYKL070W     | 11   | 543  | 306927 |
| YKL070W   | 0      | #N/A          | iYKL071W     | 11   | 510  | 305853 |
| YKL071W   | 0      | #N/A          | itW(CCA)K-   | 11   | 771  | 304756 |
| YKL072W   | STB6   |               | 0 iYKL073W   | 11   | 2301 | 299224 |
| YKL073W   | LHS1   | CER1 SSI1     | iYKL074C     | 11   | 2646 | 296072 |
| YKL074C   | MUD2   |               | 0 iYKL074C   | 11   | 1584 | 295835 |
| YKL075C   | 0      | #N/A          | iYKL075C     | 11   | 1353 | 293950 |
| YKL076C   | 0      |               | 0 iYKL075C   | 11   | 384  | 292863 |
| YKL077W   | 0      | #N/A          | iYKL078W     | 11   | 1179 | 291095 |
| YKL078W   | DHR2   |               | 0 iYKL079W   | 11   | 2208 | 288487 |
| YKL079W   | SMY1   |               | 0 iYKL080W   | 11   | 1971 | 286245 |
| YKL080W   | VMA5   | CSL5 VAT3     | iYKL081W     | 11   | 1179 | 284672 |
| YKL081W   | TEF4   | EFC1          | iYKL082C     | 11   | 1565 | 282533 |
| YKL082C   | 0      |               | 0 iYKL082C   | 11   | 1305 | 281971 |
| YKL083W   | 0      | #N/A          | iYKL084W     | 11   | 615  | 280563 |
| YKL084W   | 0      | #N/A          | iYKL085W     | 11   | 351  | 280151 |
| YKL085W   | MDH1   |               | 0 iYKL086W   | 11   | 1005 | 278765 |
| YKL086W   | 0      |               | 0 iYKL087C   | 11   | 384  | 277923 |
| YKL087C   | CYT2   |               | 0 iYKL087C   | 11   | 675  | 277505 |
| YKL088W   | 0      | #N/A          | iYKL089W     | 11   | 1716 | 274925 |
| YKL089W   | MIF2   |               | 0 iYKL090W   | 11   | 1650 | 273036 |
| YKL090W   | 0      |               | 0 iYKL091C   | 11   | 1332 | 271520 |
| YKL091C   | 0      | #N/A          | iYKL091C     | 11   | 933  | 270292 |
| YKL092C   | BUD2   | CLA2 ERC25    | iYKL092C     | 11   | 3315 | 269101 |
| YKL093W   | MBR1   |               | 0 iYKL094W   | 11   | 1020 | 264431 |
| YKL094W   | YJU3   |               | 0 iYKL095W   | 11   | 942  | 262991 |
| YKL095W   | YJU2   | CWC16         | iYKL096W     | 11   | 837  | 261919 |
| YKL096W   | CWP1   | YJU1          | iYKL097W-)   | 11   | 720  | 260774 |
| YKL097C   | 0      | #N/A          | iYKL097C     | 11   | 411  | 258555 |
| YKL097W-A | #N/A   | #N/A          | #N/A         | #N/A | #N/A | #N/A   |
| YKL098W   | 0      | #N/A          | iYKL099C     | 11   | 1074 | 256412 |
| YKL099C   | UTP11  |               | 0 iYKL099C   | 11   | 771  | 256114 |
| YKL100C   | 0      | #N/A          | iYKL100C     | 11   | 1764 | 255103 |
| YKL101W   | HSL1   | NIK1          | iYKL102C     | 11   | 4557 | 248563 |
| YKL102C   | 0      | #N/A          | iYKL102C     | 11   | 306  | 248010 |
| YKL103C   | LAP4   | APE1 API YSC1 | iYKL103C     | 11   | 1545 | 247325 |
| YKL104C   | GFA1   |               | 0 iYKL104C   | 11   | 2154 | 245016 |
| YKL105C   | 0      | #N/A          | iYKL105C     | 11   | 3399 | 242226 |

|         |        |                   |            |            |    |      |        |
|---------|--------|-------------------|------------|------------|----|------|--------|
| YKL106W | AAT1   |                   | 0          | iYKL107W   | 11 | 1356 | 237179 |
| YKL107W | 0      | #N/A              |            | iYKL108W   | 11 | 930  | 235784 |
| YKL108W | SLD2   | DRC1              |            | iYKL109W   | 11 | 1362 | 234069 |
| YKL109W | HAP4   |                   | 0          | iYKL110C-1 | 11 | 1665 | 231870 |
| YKL110C | KTI12  | TOT4              |            | iYKL110C-0 | 11 | 942  | 229523 |
| YKL111C | 0      | #N/A              |            | iYKL111C   | 11 | 336  | 228442 |
| YKL112W | ABF1   | BAF1 OBF1 REB2 SE | iYKL113C   |            | 11 | 2196 | 226213 |
| YKL113C | RAD27  | ERC11 RTH1        | iYKL113C   |            | 11 | 1149 | 225518 |
| YKL114C | APN1   |                   | 0          | iYKL114C   | 11 | 1104 | 224098 |
| YKL115C | 0      | #N/A              |            | iYKL115C   | 11 | 393  | 222928 |
| YKL116C | PRR1   |                   | 0          | iYKL115C   | 11 | 1557 | 222543 |
| YKL117W | SBA1   |                   | 0          | itA(AGC)K1 | 11 | 651  | 219967 |
| YKL118W | 0      | #N/A              |            | iYKL120W   | 11 | 312  | 218769 |
| YKL119C | VPH2   | CLS10 VMA12       | iYKLCdelta |            | 11 | 648  | 218860 |
| YKL120W | OAC1   |                   | 0          | iYKL121W   | 11 | 975  | 216987 |
| YKL121W | 0      | #N/A              |            | iYKL122C   | 11 | 2559 | 213785 |
| YKL122C | SRP21  |                   | 0          | iYKL122C   | 11 | 504  | 212641 |
| YKL123W | 0      | #N/A              |            | iYKL125W   | 11 | 381  | 211686 |
| YKL124W | SSH4   | MLF4              |            | iYKL125W   | 11 | 1740 | 210236 |
| YKL125W | RRN3   |                   | 0          | iYKL126W   | 11 | 1884 | 207890 |
| YKL126W | YPK1   | SLI2              |            | iYKL127W   | 11 | 2043 | 205350 |
| YKL127W | PGM1   |                   | 0          | itK(CUU)K  | 11 | 1713 | 203184 |
| YKL128C | PMU1   |                   | 0          | iYKL128C   | 11 | 888  | 201414 |
| YKL129C | MYO3   |                   | 0          | iYKL129C   | 11 | 3816 | 200162 |
| YKL130C | SHE2   |                   | 0          | iYKL130C   | 11 | 741  | 196026 |
| YKL131W | 0      | #N/A              |            | iYKL133C   | 11 | 522  | 194476 |
| YKL132C | RMA1   |                   | 0          | iYKL131W   | 11 | 1293 | 194864 |
| YKL133C | 0      | #N/A              |            | iYKL133C   | 11 | 1392 | 193068 |
| YKL134C | 37530  |                   | 0          | iYKL134C   | 11 | 2313 | 191440 |
| YKL135C | APL2   |                   | 0          | iYKL135C   | 11 | 2181 | 188644 |
| YKL136W | 0      | #N/A              |            | iYKL137W   | 11 | 399  | 186420 |
| YKL137W | 0      | #N/A              |            | iYKL138C   | 11 | 312  | 185985 |
| YKL138C | MRPL31 |                   | 0          | iYKL138C   | 11 | 396  | 185683 |
| YKL139W | CTK1   |                   | 0          | iYKL140W   | 11 | 1587 | 182960 |
| YKL140W | TGL1   | YKL5              |            | iYKL141W   | 11 | 1647 | 180781 |
| YKL141W | SDH3   | CYB3 YKL4         |            | iYKL142W   | 11 | 597  | 179669 |
| YKL142W | MRP8   | YKL3              |            | iYKL143W   | 11 | 660  | 178517 |
| YKL143W | LTV1   | YKL2              |            | iYKL144C   | 11 | 1392 | 176783 |
| YKL144C | RPC25  | YKL1              |            | iYKL144C   | 11 | 639  | 176483 |
| YKL145W | RPT1   | CIM5 YTA3         |            | iYKL146W   | 11 | 1404 | 174215 |
| YKL146W | 0      |                   | 0          | iYKL148C   | 11 | 2079 | 171785 |
| YKL147C | 0      | #N/A              |            | iYKL146W   | 11 | 618  | 172170 |
| YKL148C | SDH1   |                   | 0          | iYKL148C   | 11 | 1923 | 171131 |
| YKL149C | DBR1   | PRP26             |            | iYKL149C   | 11 | 1218 | 168831 |
| YKL150W | MCR1   |                   | 0          | iYKL151C   | 11 | 909  | 166546 |
| YKL151C | 0      | #N/A              |            | iYKL151C   | 11 | 1014 | 165932 |
| YKL152C | GPM1   |                   | 0          | iYKL152C   | 11 | 744  | 164387 |
| YKL153W | 0      | #N/A              |            | iYKLWdelta | 11 | 510  | 163602 |
| YKL154W | SRP102 |                   | 0          | iYKL155C   | 11 | 735  | 161603 |
| YKL155C | RSM22  |                   | 0          | iYKL155C   | 11 | 1887 | 161344 |
| YKL156W | RPS27A |                   | 0          | iYKL157W   | 11 | 599  | 158616 |



|         |        |                   |              |      |      |        |
|---------|--------|-------------------|--------------|------|------|--------|
| YKL157W | APE2   | LAP1              | iYKL158W     | 11   | 3191 | 154993 |
| YKL158W | #N/A   | #N/A              | #N/A         | #N/A | #N/A | #N/A   |
| YKL159C | RCN1   |                   | 0 iYKL159C   | 11   | 636  | 154453 |
| YKL160W | 0      |                   | 0 iYKL161C-1 | 11   | 438  | 153271 |
| YKL161C | 0      | #N/A              | iYKL161C-0   | 11   | 1302 | 150689 |
| YKL162C | 0      | #N/A              | iYKL162C     | 11   | 1209 | 148840 |
| YKL163W | PIR3   | CCW8              | iYKL164C-1   | 11   | 978  | 144403 |
| YKL164C | PIR1   | CCW6              | iYKL164C-0   | 11   | 1026 | 142821 |
| YKL165C | MCD4   | FSR2 SSU21 ZRG16  | iYKL165C     | 11   | 2760 | 140693 |
| YKL166C | TPK3   |                   | 0 iYKL166C-0 | 11   | 1197 | 135707 |
| YKL167C | MRP49  |                   | 0 iYKL167C   | 11   | 414  | 134136 |
| YKL168C | KKQ8   |                   | 0 iYKL168C   | 11   | 2205 | 133494 |
| YKL169C | 0      | #N/A              | iYKL169C     | 11   | 384  | 131070 |
| YKL170W | MRPL38 | MRPL34            | iYKL171W     | 11   | 417  | 130636 |
| YKL171W | 0      | #N/A              | iYKL172W     | 11   | 2787 | 127477 |
| YKL172W | EBP2   |                   | 0 iYKL173W   | 11   | 1284 | 125761 |
| YKL173W | SNU114 | GIN10             | iYKL174C     | 11   | 3027 | 122519 |
| YKL174C | 0      | #N/A              | iYKL174C     | 11   | 1857 | 122238 |
| YKL175W | ZRT3   |                   | 0 iYKL176C   | 11   | 1512 | 118795 |
| YKL176C | LST4   |                   | 0 iYKL176C   | 11   | 2487 | 117988 |
| YKL177W | 0      | #N/A              | iYKL179C     | 11   | 339  | 114358 |
| YKL178C | STE3   | DAF2              | iYKL177W     | 11   | 1413 | 114629 |
| YKL179C | COY1   |                   | 0 iYKL179C   | 11   | 2040 | 112505 |
| YKL180W | RPL17A | RPL17             | iYKL181W     | 11   | 861  | 109271 |
| YKL181W | PRS1   | PRP1              | iYKL182W     | 11   | 1284 | 107318 |
| YKL182W | FAS1   |                   | 0 iYKL183W   | 11   | 6156 | 100673 |
| YKL183W | LOT5   |                   | 0 iYKL184W   | 11   | 921  | 98723  |
| YKL184W | SPE1   | ORD1 SPE10        | iYKL185W     | 11   | 1401 | 96759  |
| YKL185W | ASH1   |                   | 0 iYKL186C   | 11   | 1767 | 94501  |
| YKL186C | MTR2   |                   | 0 iYKL186C   | 11   | 555  | 93300  |
| YKL187C | 0      | #N/A              | iYKL187C     | 11   | 2253 | 91538  |
| YKL188C | PXA2   | PAT1              | iYKL188C     | 11   | 2562 | 88788  |
| YKL189W | HYM1   |                   | 0 itL(UAA)K  | 11   | 1200 | 84706  |
| YKL190W | CNB1   | CRV1 YCN2         | iYKL191W     | 11   | 604  | 82949  |
| YKL191W | DPH2   |                   | 0 iYKL192C   | 11   | 1605 | 81037  |
| YKL192C | ACP1   |                   | 0 iYKL192C   | 11   | 378  | 80539  |
| YKL193C | SDS22  | EGP1              | iYKL193C     | 11   | 1017 | 79884  |
| YKL194C | MST1   |                   | 0 iYKL194C   | 11   | 1389 | 78648  |
| YKL195W | 0      |                   | 0 iYKL196C   | 11   | 1284 | 75751  |
| YKL196C | YKT6   |                   | 0 iYKL196C   | 11   | 603  | 75536  |
| YKL197C | PEX1   | PAS1              | iYKL197C     | 11   | 3132 | 73867  |
| YKL198C | PTK1   | KKT8 POT1 STK1 YK | iYKL198C     | 11   | 1200 | 70220  |
| YKL199C | YKT9   |                   | 0 iYKL198C   | 11   | 840  | 69109  |
| YKL200C | #N/A   | #N/A              | #N/A         | #N/A | #N/A | #N/A   |
| YKL201C | MNN4   |                   | 0 iYKL201C   | 11   | 3537 | 67463  |
| YKL202W | 0      | #N/A              | iYKL203C     | 11   | 582  | 63818  |
| YKL203C | TOR2   | DRR2              | iYKL203C     | 11   | 7422 | 63356  |
| YKL204W | EAP1   |                   | 0 iYKL205W   | 11   | 1899 | 53704  |
| YKL205W | LOS1   |                   | 0 iYKL206C   | 11   | 3303 | 50051  |
| YKL206C | 0      | #N/A              | iYKL206C     | 11   | 804  | 49809  |
| YKL207W | 0      | #N/A              | iYKL208W     | 11   | 783  | 48108  |

|         |        |                 |              |    |      |        |
|---------|--------|-----------------|--------------|----|------|--------|
| YKL208W | CBT1   |                 | 0 itT(CGU)K  | 11 | 816  | 47158  |
| YKL209C | STE6   |                 | 0 iYKL209C   | 11 | 3873 | 46296  |
| YKL210W | UBA1   |                 | 0 iSNR64     | 11 | 3075 | 39164  |
| YKL211C | TRP3   |                 | 0 iYKL211C   | 11 | 1455 | 38154  |
| YKL212W | SAC1   | RSD1            | iYKL213C     | 11 | 1872 | 34544  |
| YKL213C | DOA1   | UFD3 ZZZ4       | iYKL213C     | 11 | 2148 | 34108  |
| YKL214C | YRA2   |                 | 0 iYKL214C   | 11 | 612  | 31694  |
| YKL215C |        | 0 #N/A          | iYKL215C     | 11 | 3861 | 30688  |
| YKL216W | URA1   |                 | 0 iYKL217W   | 11 | 945  | 25216  |
| YKL217W | JEN1   |                 | 0 iYKL218C-2 | 11 | 1851 | 22234  |
| YKL218C | SRY1   |                 | 0 iYKL218C-0 | 11 | 981  | 18339  |
| YKL219W | COS9   |                 | 0 iYKL220C-2 | 11 | 1224 | 14485  |
| YKL220C | FRE2   |                 | 0 iYKL220C-0 | 11 | 2136 | 11227  |
| YKL221W | MCH2   |                 | 0 iYKL222C   | 11 | 1422 | 6108   |
| YKL222C |        | 0 #N/A          | iYKL222C     | 11 | 2118 | 5621   |
| YKL223W |        | 0 #N/A          | iYKL224C     | 11 | 333  | 2390   |
| YKL224C |        | 0 #N/A          | iYKL224C     | 11 | 372  | 2182   |
| YKL225W |        | 0 #N/A          | #N/A         | 11 | 348  | 452    |
| YKR001C | VPS1   | GRD1 LAM1 SPO15 | iYKR001C     | 11 | 2115 | 442360 |
| YKR002W | PAP1   |                 | 0 iYKR001C   | 11 | 1707 | 442870 |
| YKR003W | OSH6   |                 | 0 iYKR002W   | 11 | 1347 | 445019 |
| YKR004C | ECM9   |                 | 0 iYKR004C   | 11 | 879  | 447315 |
| YKR005C |        | 0 #N/A          | iYKR005C     | 11 | 1344 | 449502 |
| YKR006C | MRPL13 | YK105           | iYKR006C     | 11 | 828  | 450888 |
| YKR007W |        | 0               | 0 iYKR006C   | 11 | 555  | 451072 |
| YKR008W | RSC4   |                 | 0 iYKR007W   | 11 | 1878 | 451839 |
| YKR009C | FOX2   | POX2            | iYKR009C     | 11 | 2703 | 456692 |
| YKR010C | TOF2   |                 | 0 iYKR010C   | 11 | 2316 | 460877 |
| YKR011C | TOS5   | #N/A            | iYKR011C     | 11 | 1062 | 462334 |
| YKR012C |        | 0 #N/A          | iYKR013W     | 11 | 378  | 463754 |
| YKR013W | PRY2   |                 | 0 iYKR011C   | 11 | 990  | 463597 |
| YKR014C | YPT52  |                 | 0 iYKR014C   | 11 | 705  | 465709 |
| YKR015C |        | 0 #N/A          | iYKR015C     | 11 | 1707 | 468305 |
| YKR016W |        | 0               | 0 iYKR015C   | 11 | 1623 | 469355 |
| YKR017C |        | 0 #N/A          | iYKR017C     | 11 | 1656 | 472987 |
| YKR018C |        | 0 #N/A          | iYKR018C     | 11 | 2178 | 475538 |
| YKR019C | IRS4   |                 | 0 iYKR019C   | 11 | 1848 | 477701 |
| YKR020W | VPS67  | API3 VPS67 WHI6 | iYKR019C     | 11 | 495  | 477976 |
| YKR021W |        | 0 #N/A          | iYKR020W     | 11 | 2748 | 478872 |
| YKR022C |        | 0 #N/A          | iYKR022C     | 11 | 969  | 482777 |
| YKR023W |        | 0 #N/A          | iYKR022C     | 11 | 1593 | 483057 |
| YKR024C | DBP7   |                 | 0 iYKR024C   | 11 | 2229 | 487010 |
| YKR025W | RPC37  |                 | 0 iYKR024C   | 11 | 849  | 487408 |
| YKR026C | GCN3   | AAS2            | iYKR026C     | 11 | 918  | 489293 |
| YKR027W |        | 0               | 0 itR(ACG)K  | 11 | 2298 | 491002 |
| YKR028W | SAP190 |                 | 0 iYKR027W   | 11 | 3297 | 493895 |
| YKR029C | SET3   |                 | 0 iYKR029C   | 11 | 2256 | 499470 |
| YKR030W |        | 0 MSG1          | iYKR029C     | 11 | 822  | 499919 |
| YKR031C | SPO14  | PLD1            | iYKR031C     | 11 | 5052 | 506032 |
| YKR032W |        | 0 #N/A          | iYKR031C     | 11 | 315  | 506154 |
| YKR033C |        | 0 #N/A          | iYKR034W     | 11 | 426  | 506941 |

|         |        |                |              |    |       |        |
|---------|--------|----------------|--------------|----|-------|--------|
| YKR034W | DAL80  | UGA43          | iYKR031C     | 11 | 810   | 506535 |
| YKR035C | 0      | #N/A           | iYKR035W-    | 11 | 642   | 508198 |
| YKR036C | CAF4   |                | 0 iYKR036C   | 11 | 1980  | 510318 |
| YKR037C | SPC34  |                | 0 iYKR037C   | 11 | 888   | 511434 |
| YKR038C | 0      |                | 0 iYKR038C   | 11 | 1266  | 512901 |
| YKR039W | GAP1   |                | 0 iYKRCdelta | 11 | 1809  | 514700 |
| YKR040C | 0      | #N/A           | iYKR041W     | 11 | 504   | 518203 |
| YKR041W | 0      | #N/A           | iYKRCdelta   | 11 | 753   | 517835 |
| YKR042W | UTH1   |                | 0 iYKR041W   | 11 | 1353  | 518909 |
| YKR043C | 0      | #N/A           | iYKR043C     | 11 | 816   | 521349 |
| YKR044W | UIP5   |                | 0 iYKR043C   | 11 | 1332  | 521652 |
| YKR045C | 0      | #N/A           | iYKR045C     | 11 | 576   | 523630 |
| YKR046C | 0      |                | 0 iYKR046C   | 11 | 852   | 524711 |
| YKR047W | 0      | #N/A           | iYKR046C     | 11 | 306   | 524894 |
| YKR048C | NAP1   |                | 0 iYKR048C   | 11 | 1254  | 526277 |
| YKR049C | 0      |                | 0 iYKR049C   | 11 | 402   | 526868 |
| YKR050W | TRK2   | RPD2           | iYKR049C     | 11 | 2670  | 527452 |
| YKR051W | 0      | #N/A           | iYKR050W     | 11 | 1257  | 530583 |
| YKR052C | MRS4   |                | 0 iYKR052C   | 11 | 915   | 533101 |
| YKR053C | YSR3   | LBP2           | iYKR053C     | 11 | 1215  | 534918 |
| YKR054C | DYN1   | DHC1 PAC6      | iYKR054C     | 11 | 12279 | 547562 |
| YKR055W | RHO4   |                | 0 iYKR054C   | 11 | 876   | 547853 |
| YKR056W | TRM2   | NUC2 NUD1 RNC1 | iYKR055W     | 11 | 1854  | 549085 |
| YKR057W | RPS21A | RPS25          | iYKR056W     | 11 | 586   | 551293 |
| YKR058W | GLG1   |                | 0 iYKR057W   | 11 | 1443  | 552814 |
| YKR059W | TIF1   |                | 0 iYKR058W   | 11 | 1188  | 554623 |
| YKR060W | 0      |                | 0 iYKR059W   | 11 | 825   | 556154 |
| YKR061W | KTR2   |                | 0 iYKR060W   | 11 | 1278  | 557313 |
| YKR062W | TFA2   |                | 0 iSNR42     | 11 | 987   | 559302 |
| YKR063C | LAS1   |                | 0 iYKR063C   | 11 | 1509  | 561933 |
| YKR064W | 0      | #N/A           | iYKR063C     | 11 | 2592  | 562183 |
| YKR065C | 0      |                | 0 iYKR065C   | 11 | 594   | 565528 |
| YKR066C | CCP1   |                | 0 iYKR066C   | 11 | 1086  | 566834 |
| YKR067W | GPT2   | GAT1           | iYKR066C     | 11 | 2232  | 567554 |
| YKR068C | BET3   |                | 0 iYKR068C   | 11 | 582   | 570545 |
| YKR069W | MET1   | MET20          | iYKR068C     | 11 | 1782  | 571248 |
| YKR070W | 0      | #N/A           | iYKR069W     | 11 | 1059  | 573210 |
| YKR071C | DRE2   |                | 0 iYKR071C   | 11 | 1047  | 575616 |
| YKR072C | SIS2   | HAL3           | iYKR072C     | 11 | 1689  | 577759 |
| YKR073C | 0      | #N/A           | iYKR073C     | 11 | 321   | 578143 |
| YKR074W | 0      | #N/A           | itK(UUU)K    | 11 | 468   | 578845 |
| YKR075C | 0      | #N/A           | iYKR075C-C   | 11 | 924   | 580386 |
| YKR076W | ECM4   |                | 0 iYKR075C-1 | 11 | 1113  | 581919 |
| YKR077W | 0      | #N/A           | iYKR076W     | 11 | 1092  | 583289 |
| YKR078W | 0      | #N/A           | iYKR077W     | 11 | 1758  | 584588 |
| YKR079C | 0      |                | 0 iYKR079C   | 11 | 2517  | 588941 |
| YKR080W | MTD1   |                | 0 iYKR079C   | 11 | 963   | 590031 |
| YKR081C | RPF2   |                | 0 iYKR081C   | 11 | 1035  | 592176 |
| YKR082W | NUP133 | RAT3           | iYKR081C     | 11 | 3474  | 592461 |
| YKR083C | DAD2   | HSK1           | iYKR083C     | 11 | 402   | 596458 |
| YKR084C | HBS1   |                | 0 iYKR084C   | 11 | 1836  | 598526 |

|         |        |                  |      |          |            |     |        |        |
|---------|--------|------------------|------|----------|------------|-----|--------|--------|
| YKR085C | MRPL20 |                  | 0    | iYKR085C | 11         | 588 | 599317 |        |
| YKR086W | PRP16  |                  |      | 0        | iYKR085C   | 11  | 3216   | 599493 |
| YKR087C |        | 0                |      | 0        | iYKR087C   | 11  | 945    | 603775 |
| YKR088C |        | 0                |      | 0        | iYKR088C   | 11  | 1014   | 605053 |
| YKR089C |        | 0                |      | 0        | iYKR089C   | 11  | 2733   | 608000 |
| YKR090W | PXL1   |                  |      | 0        | iYKR089C   | 11  | 2121   | 608581 |
| YKR091W | SRL3   |                  |      | 0        | iYKR090W   | 11  | 459    | 611441 |
| YKR092C | SRP40  |                  |      | 0        | iYKR092C-C | 11  | 1221   | 613519 |
| YKR093W | PTR2   |                  |      | 0        | iYKR092C-1 | 11  | 1806   | 615364 |
| YKR094C | RPL40B | CEP52B UB12 UBI2 |      |          | iYKR094C   | 11  | 755    | 618384 |
| YKR095W | MLP1   | MPL1             |      |          | iYKR094C   | 11  | 5628   | 619439 |
| YKR096W |        | 0                | #N/A |          | iYKR095W   | 11  | 3588   | 626427 |
| YKR097W | PCK1   | JPM2 PPC1        |      |          | iYKR096W   | 11  | 1650   | 630782 |
| YKR098C | UBP11  |                  |      | 0        | iYKR098C   | 11  | 2154   | 634809 |
| YKR099W | BAS1   |                  |      | 0        | iYKR098C   | 11  | 2436   | 635481 |
| YKR100C |        | 0                |      | 0        | iYKR100C   | 11  | 726    | 639597 |
| YKR101W | SIR1   |                  |      | 0        | iYKR100C   | 11  | 2037   | 640097 |
| YKR102W | FLO10  |                  |      | 0        | iYKR101W-  | 11  | 3510   | 645985 |
| YKR103W |        | 0                |      | 0        | iYKR102W-  | 11  | 3657   | 652709 |
| YKR104W |        | 0                | #N/A |          | iYKR103W   | 11  | 921    | 656465 |
| YKR105C |        | 0                | #N/A |          | iYKR105C   | 11  | 1749   | 660093 |
| YKR106W |        | 0                | #N/A |          | iYKR105C   | 11  | 1848   | 661071 |
| YLL001W | DNM1   |                  |      | 0        | iYLL002W   | 12  | 2274   | 147889 |
| YLL002W | RTT109 | KIM2 REM50       |      |          | iYLL003W   | 12  | 1311   | 146290 |
| YLL003W | SFI1   |                  |      | 0        | iYLL004W   | 12  | 2841   | 143200 |
| YLL004W | ORC3   |                  |      | 0        | iYLL005C   | 12  | 1851   | 141072 |
| YLL005C | SPO75  |                  |      | 0        | iYLL005C   | 12  | 2607   | 140545 |
| YLL006W | MMM1   | YME6             |      |          | iYLL007C   | 12  | 1281   | 136585 |
| YLL007C |        | 0                | #N/A |          | iYLL007C   | 12  | 1998   | 136298 |
| YLL008W | DRS1   |                  |      | 0        | iYLL009C   | 12  | 2259   | 131728 |
| YLL009C | COX17  |                  |      | 0        | iYLL009C   | 12  | 210    | 131413 |
| YLL010C | PSR1   |                  |      | 0        | iYLL010C   | 12  | 1284   | 130612 |
| YLL011W | SOF1   |                  |      | 0        | iYLL012W   | 12  | 1470   | 127522 |
| YLL012W |        | 0                | #N/A |          | iYLL013C   | 12  | 1722   | 125533 |
| YLL013C | PUF3   |                  |      | 0        | iYLL013C   | 12  | 2640   | 124713 |
| YLL014W |        | 0                | #N/A |          | iYLL015W   | 12  | 327    | 121321 |
| YLL015W | BPT1   |                  |      | 0        | iYLL016W   | 12  | 4680   | 116431 |
| YLL016W | SDC25  |                  |      | 0        | iYLL017W   | 12  | 3147   | 112846 |
| YLL017W | SDC25  |                  | #N/A |          | iYLL018C   | 12  | 312    | 112233 |
| YLL018C | DPS1   | AspRS            |      |          | iYLL018C   | 12  | 1674   | 111574 |
| YLL019C | KNS1   | L124             |      |          | iYLL019C   | 12  | 2214   | 107898 |
| YLL020C |        | 0                | #N/A |          | iYLL019C   | 12  | 306    | 105860 |
| YLL021W | SPA2   | FUS6 PEA1        |      |          | iYLL022C   | 12  | 4401   | 100946 |
| YLL022C | HIF1   |                  |      | 0        | iYLL022C   | 12  | 1158   | 100200 |
| YLL023C |        | 0                | #N/A |          | iYLL023C   | 12  | 840    | 98835  |
| YLL024C | SSA2   |                  |      | 0        | iYLL024C   | 12  | 1920   | 97484  |
| YLL025W |        | 0                | #N/A |          | itP(UGG)L- | 12  | 375    | 94746  |
| YLL026W | HSP104 |                  |      | 0        | iYLL027W   | 12  | 2727   | 88622  |
| YLL027W | ISA1   |                  |      | 0        | iYLL028W   | 12  | 753    | 87402  |
| YLL028W | TPO1   |                  |      | 0        | iYLL029W   | 12  | 1761   | 84803  |
| YLL029W |        | 0                | #N/A |          | iYLL030C   | 12  | 2250   | 81460  |

|         |       |            |              |    |      |        |
|---------|-------|------------|--------------|----|------|--------|
| YLL030C | 0     | #N/A       | iYLL030C     | 12 | 342  | 80696  |
| YLL031C | GPI13 | MPC1       | iYLL031C     | 12 | 3054 | 80204  |
| YLL032C | 0     | #N/A       | iYLL032C     | 12 | 2478 | 76746  |
| YLL033W | 0     | #N/A       | iYLL034C     | 12 | 693  | 73408  |
| YLL034C | 0     |            | 0 iYLL034C   | 12 | 2514 | 73145  |
| YLL035W | GRC3  |            | 0 iYLL036C   | 12 | 1899 | 68579  |
| YLL036C | PRP19 | PSO4       | iYLL036C     | 12 | 1512 | 68255  |
| YLL037W | 0     | #N/A       | iYLL039C     | 12 | 381  | 66561  |
| YLL038C | ENT4  |            | 0 iYLL036C   | 12 | 744  | 66517  |
| YLL039C | UBI4  | SCD2 UB14  | iYLL039C     | 12 | 1146 | 65206  |
| YLL040C | VPS13 | SOI1 VPT2  | iYLL040C     | 12 | 9435 | 63644  |
| YLL041C | SDH2  | ACN17      | iYLL041C     | 12 | 801  | 53930  |
| YLL042C | APG10 | APG10      | iYLL042C     | 12 | 504  | 52589  |
| YLL043W | FPS1  |            | 0 iYLL044W   | 12 | 2010 | 49937  |
| YLL044W | 0     | #N/A       | iYLL046C     | 12 | 447  | 48215  |
| YLL045C | RPL8B | KRB1 SCL41 | iYLL044W     | 12 | 771  | 48628  |
| YLL046C | RNP1  |            | 0 iYLL046C   | 12 | 750  | 47462  |
| YLL047W | 0     | #N/A       | iYLL048C     | 12 | 384  | 46671  |
| YLL048C | YBT1  | BAT1       | iYLL048C     | 12 | 4986 | 46264  |
| YLL049W | 0     | #N/A       | iYLL050C     | 12 | 540  | 40665  |
| YLL050C | COF1  |            | 0 iYLL050C   | 12 | 611  | 40413  |
| YLL051C | FRE6  |            | 0 iYLL051C   | 12 | 2139 | 39470  |
| YLL052C | AQY2  |            | 0 iYLL052C   | 12 | 450  | 36360  |
| YLL053C | 0     | #N/A       | iYLL052C     | 12 | 459  | 35960  |
| YLL054C | 0     | #N/A       | iYLL054C     | 12 | 2310 | 35203  |
| YLL055W | 0     | #N/A       | iYLL056C-1   | 12 | 1596 | 30109  |
| YLL056C | 0     | #N/A       | iYLL056C-0   | 12 | 897  | 28305  |
| YLL057C | 0     |            | 0 iYLL057C   | 12 | 1239 | 26994  |
| YLL058W | 0     | #N/A       | iYLL059C     | 12 | 1728 | 23569  |
| YLL059C | 0     | #N/A       | iYLL059C     | 12 | 507  | 22980  |
| YLL060C | GTT2  |            | 0 iYLL060C   | 12 | 702  | 21839  |
| YLL061W | MMP1  |            | 0 iYLL062C   | 12 | 1752 | 17956  |
| YLL062C | MHT1  |            | 0 iYLL062C   | 12 | 975  | 17613  |
| YLL063C | AYT1  |            | 0 iYLL063C   | 12 | 1425 | 16072  |
| YLL064C | 0     | #N/A       | iYLL064C     | 12 | 363  | 13445  |
| YLL065W | 0     | #N/A       | iYLL066C-1   | 12 | 351  | 11726  |
| YLL066C | 0     | #N/A       | iYLL066C-0   | 12 | 3717 | 9836   |
| YLL067C | 0     | #N/A       | iYLL067C-0   | 12 | 3717 | 4301   |
| YLR001C | 0     | #N/A       | iYLR001C     | 12 | 2589 | 153976 |
| YLR002C | NOC3  |            | 0 iYLR002C   | 12 | 1992 | 156333 |
| YLR003C | 0     | #N/A       | iYLR003C     | 12 | 876  | 157729 |
| YLR004C | 0     | #N/A       | iYLR004C     | 12 | 1572 | 159504 |
| YLR005W | SSL1  |            | 0 iYLR004C   | 12 | 1386 | 160048 |
| YLR006C | SSK1  |            | 0 iYLR006C   | 12 | 2139 | 163892 |
| YLR007W | NSE1  |            | 0 iYLR006C   | 12 | 1011 | 164391 |
| YLR008C | 0     | TIM14      | iYLR008C     | 12 | 507  | 166082 |
| YLR009W | RLP24 |            | 0 iYLR008C   | 12 | 600  | 166536 |
| YLR010C | TEN1  |            | 0 iYLR010C   | 12 | 483  | 167801 |
| YLR011W | LOT6  |            | 0 iYLR0sigma | 12 | 576  | 169102 |
| YLR012C | 0     | #N/A       | iYLR012C     | 12 | 369  | 170349 |
| YLR013W | GAT3  |            | 0 iYLR012C   | 12 | 426  | 171338 |

|         |        |            |      |              |    |      |        |
|---------|--------|------------|------|--------------|----|------|--------|
| YLR014C | PPR1   |            | 0    | iYLR014C     | 12 | 2715 | 174981 |
| YLR015W | BRE2   | CPS60      |      | iYLR014C     | 12 | 1518 | 175226 |
| YLR016C |        | 0          | #N/A | iYLR016C     | 12 | 615  | 177415 |
| YLR017W | MEU1   |            |      | 0 iYLR016C   | 12 | 1014 | 177607 |
| YLR018C | POM34  |            |      | 0 iYLR018C   | 12 | 900  | 179605 |
| YLR019W | PSR2   |            |      | 0 iYLR018C   | 12 | 1194 | 180287 |
| YLR020C |        | 0          | #N/A | iYLR020C     | 12 | 1617 | 183404 |
| YLR021W |        | 0          | #N/A | iYLR020C     | 12 | 540  | 183622 |
| YLR022C |        | 0          | #N/A | iYLR022C     | 12 | 753  | 184925 |
| YLR023C |        | 0          |      | 0 iYLR023C   | 12 | 1632 | 187128 |
| YLR024C | UBR2   |            |      | 0 iYLR024C   | 12 | 5619 | 193282 |
| YLR025W | SNF7   | DID1 VPS32 |      | iYLR024C     | 12 | 723  | 194453 |
| YLR026C | SED5   |            |      | 0 iYLR026C   | 12 | 1023 | 196473 |
| YLR027C | AAT2   | ASP5       |      | iYLR027C     | 12 | 1299 | 198128 |
| YLR028C | ADE16  |            |      | 0 iYLR028C   | 12 | 1776 | 201316 |
| YLR029C | RPL15A | RPL10A     |      | iYLR029C     | 12 | 615  | 202591 |
| YLR030W |        | 0          | #N/A | iYLR029C     | 12 | 792  | 203291 |
| YLR031W |        | 0          | #N/A | iYLR030W     | 12 | 561  | 204226 |
| YLR032W | RAD5   | REV2 SNM2  |      | iYLR031W     | 12 | 3510 | 204992 |
| YLR033W | RSC58  |            |      | 0 iYLR032W   | 12 | 1509 | 208762 |
| YLR034C | SMF3   |            |      | 0 iYLR034C   | 12 | 1422 | 211934 |
| YLR035C | MLH2   |            |      | 0 iYLR035C   | 12 | 2088 | 214457 |
| YLR036C |        | 0          | #N/A | iYLR036C     | 12 | 612  | 222133 |
| YLR037C | DAN2   |            |      | 0 iYLR037C-0 | 12 | 375  | 223060 |
| YLR038C | COX12  |            |      | 0 iYLR038C   | 12 | 252  | 225173 |
| YLR039C | RIC1   |            |      | 0 iYLR039C   | 12 | 3171 | 228597 |
| YLR040C |        | 0          | #N/A | iYLR041W     | 12 | 675  | 229583 |
| YLR041W |        | 0          | #N/A | iYLR039C     | 12 | 321  | 229378 |
| YLR042C |        | 0          | #N/A | iYLR042C     | 12 | 486  | 230452 |
| YLR043C | TRX1   | LMA1       |      | iYLR043C     | 12 | 312  | 232014 |
| YLR044C | PDC1   |            |      | 0 iYLR044C   | 12 | 1692 | 234082 |
| YLR045C | STU2   |            |      | 0 iYLR045C   | 12 | 2667 | 237704 |
| YLR046C |        | 0          | #N/A | iYLR046C     | 12 | 813  | 238814 |
| YLR047C |        | 0          | #N/A | iYLR047C     | 12 | 2061 | 241408 |
| YLR048W | RPS0B  | NAB1B YST2 |      | iYLR047C     | 12 | 1118 | 242233 |
| YLR049C |        | 0          | #N/A | iYLR049C     | 12 | 1287 | 245173 |
| YLR050C |        | 0          | #N/A | iYLR050C     | 12 | 486  | 246073 |
| YLR051C |        | 0          | #N/A | iYLR051C     | 12 | 654  | 246978 |
| YLR052W | IES3   |            |      | 0 iYLR051C   | 12 | 753  | 247202 |
| YLR053C |        | 0          | #N/A | iYLR053C     | 12 | 327  | 248427 |
| YLR054C |        | 0          |      | 0 iYLR054C   | 12 | 1539 | 250256 |
| YLR055C | SPT8   |            |      | 0 iYLR055C   | 12 | 1809 | 253081 |
| YLR056W | ERG3   | PSO6 SYR1  |      | iYLR055C     | 12 | 1098 | 253862 |
| YLR057W |        | 0          | #N/A | iYLR056W     | 12 | 2550 | 255307 |
| YLR058C | SHM2   | SHMT2      |      | iYLR058C     | 12 | 1410 | 259402 |
| YLR059C | REX2   | YNT20      |      | iYLR059C     | 12 | 810  | 260548 |
| YLR060W | FRS1   |            |      | 0 iYLR059C   | 12 | 1788 | 260980 |
| YLR061W | RPL22A |            |      | 0 iYLR060W   | 12 | 755  | 263195 |
| YLR062C | BUD28  |            |      | 0 iYLR062C   | 12 | 378  | 263955 |
| YLR063W |        | 0          | #N/A | iYLR062C     | 12 | 1098 | 264158 |
| YLR064W |        | 0          | #N/A | iYLR063W     | 12 | 822  | 265457 |

|         |        |           |            |    |       |        |
|---------|--------|-----------|------------|----|-------|--------|
| YLR065C | 0      | #N/A      | iYLR065C   | 12 | 546   | 266919 |
| YLR066W | SPC3   |           | 0 iYLR065C | 12 | 555   | 267170 |
| YLR067C | PET309 |           | 0 iYLR067C | 12 | 2898  | 270711 |
| YLR068W | FYV7   |           | 0 iYLR067C | 12 | 456   | 271009 |
| YLR069C | MEF1   |           | 0 iYLR069C | 12 | 2286  | 273916 |
| YLR070C | XYL2   |           | 0 iYLR070C | 12 | 1071  | 275212 |
| YLR071C | RGR1   |           | 0 iYLR071C | 12 | 3249  | 278627 |
| YLR072W | 0      | #N/A      | iYLR071C   | 12 | 2082  | 278863 |
| YLR073C | 0      | #N/A      | iYLR073C   | 12 | 603   | 281622 |
| YLR074C | BUD20  |           | 0 iYLR074C | 12 | 501   | 282457 |
| YLR075W | RPL10  | GRC5 QSR1 | iYLR074C   | 12 | 666   | 282928 |
| YLR076C | 0      | #N/A      | iYLR076C   | 12 | 423   | 283608 |
| YLR077W | 0      |           | 0 iYLR076C | 12 | 1752  | 283873 |
| YLR078C | BOS1   | SEC32     | iYLR078C   | 12 | 824   | 286560 |
| YLR079W | SIC1   | SDB25     | iYLR078C   | 12 | 855   | 286821 |
| YLR080W | EMP46  |           | 0 iYLR079W | 12 | 1335  | 287917 |
| YLR081W | GAL2   |           | 0 iYLR080W | 12 | 1725  | 290213 |
| YLR082C | SRL2   |           | 0 iYLR082C | 12 | 1179  | 293573 |
| YLR083C | EMP70  |           | 0 iYLR083C | 12 | 2004  | 296095 |
| YLR084C | RAX2   |           | 0 iYLR084C | 12 | 3663  | 300252 |
| YLR085C | ARP6   |           | 0 iYLR085C | 12 | 1317  | 301990 |
| YLR086W | SMC4   |           | 0 iYLR085C | 12 | 4257  | 302244 |
| YLR087C | CSF1   |           | 0 iYLR087C | 12 | 8877  | 315732 |
| YLR088W | GAA1   | END2      | iYLR087C   | 12 | 1845  | 316108 |
| YLR089C | 0      |           | 0 iYLR089C | 12 | 1779  | 320016 |
| YLR090W | XDJ1   |           | 0 iYLR089C | 12 | 1380  | 320702 |
| YLR091W | 0      | #N/A      | iYLR090W   | 12 | 882   | 322298 |
| YLR092W | SUL2   |           | 0 iYLR091W | 12 | 2682  | 323545 |
| YLR093C | NYV1   | MAM2      | iYLR093C   | 12 | 903   | 327416 |
| YLR094C | GIS3   |           | 0 iYLR094C | 12 | 1509  | 329239 |
| YLR095C | IOC2   |           | 0 iYLR095C | 12 | 2439  | 332116 |
| YLR096W | KIN2   |           | 0 iYLR095C | 12 | 3444  | 332591 |
| YLR097C | 0      |           | 0 iYLR097C | 12 | 1035  | 337266 |
| YLR098C | CHA4   | SIL2 SIL3 | iYLR098C   | 12 | 1947  | 339474 |
| YLR099C | ICT1   |           | 0 iYLR099C | 12 | 1185  | 340929 |
| YLR100W | ERG27  |           | 0 iYLR099C | 12 | 1044  | 341811 |
| YLR101C | 0      | #N/A      | iYLR102C   | 12 | 396   | 342962 |
| YLR102C | APC9   |           | 0 iYLR102C | 12 | 798   | 343768 |
| YLR103C | CDC45  | SLD4      | iYLR103C   | 12 | 1953  | 345942 |
| YLR104W | 0      | #N/A      | iYLR103C   | 12 | 396   | 346586 |
| YLR105C | SEN2   |           | 0 iYLR105C | 12 | 1134  | 348181 |
| YLR106C | MDN1   | REA1      | iYLR106C   | 12 | 14733 | 363739 |
| YLR107W | REX3   |           | 0 iYLR106C | 12 | 1215  | 364117 |
| YLR108C | 0      | #N/A      | iYLR108C   | 12 | 1458  | 368125 |
| YLR109W | AHP1   | cTPxIII   | iYLR108C   | 12 | 531   | 368782 |
| YLR110C | CCW12  |           | 0 iYLR110C | 12 | 402   | 370099 |
| YLR111W | 0      | #N/A      | iYLR110C   | 12 | 333   | 370392 |
| YLR112W | 0      | #N/A      | iYLR111W   | 12 | 420   | 370792 |
| YLR113W | HOG1   | SSK3      | iYLR112W   | 12 | 1308  | 371621 |
| YLR114C | 0      | #N/A      | iYLR114C   | 12 | 2295  | 377239 |
| YLR115W | CFT2   | YDH1      | iYLR114C   | 12 | 2580  | 377986 |

|         |        |                  |            |    |      |        |
|---------|--------|------------------|------------|----|------|--------|
| YLR116W | MSL5   | BBP              | iYLR115W   | 12 | 1431 | 380823 |
| YLR117C | CLF1   | NTC77 SYF3       | iYLR117C   | 12 | 2064 | 384535 |
| YLR118C | 0      | #N/A             | iYLR118C   | 12 | 684  | 385409 |
| YLR119W | SRN2   | SRN10 VPS37      | iYLR118C   | 12 | 642  | 385535 |
| YLR120C | YPS1   | YAP3             | iYLR120C   | 12 | 1710 | 388221 |
| YLR121C | YPS3   | YPS4             | iYLR121C   | 12 | 1527 | 390271 |
| YLR122C | 0      | #N/A             | iYLR123C   | 12 | 378  | 391332 |
| YLR123C | 0      | #N/A             | iYLR123C   | 12 | 330  | 391408 |
| YLR124W | 0      | #N/A             | iYLR123C   | 12 | 345  | 391601 |
| YLR125W | 0      | #N/A             | iYLR124W   | 12 | 411  | 393485 |
| YLR126C | 0      | #N/A             | iYLR126C   | 12 | 756  | 395521 |
| YLR127C | APC2   | RSI1             | iYLR127C   | 12 | 2562 | 398320 |
| YLR128W | 0      |                  | 0 iYLR127C | 12 | 904  | 398531 |
| YLR129W | DIP2   | UTP12            | iYLR128W   | 12 | 2832 | 399658 |
| YLR130C | ZRT2   |                  | 0 iYLR130C | 12 | 1269 | 404063 |
| YLR131C | ACE2   |                  | 0 iYLR131C | 12 | 2313 | 406823 |
| YLR132C | 0      | #N/A             | iYLR132C   | 12 | 873  | 408156 |
| YLR133W | CKI1   |                  | 0 iYLR132C | 12 | 1749 | 408446 |
| YLR134W | PDC5   |                  | 0 iYLR133W | 12 | 1692 | 410724 |
| YLR135W | SLX4   |                  | 0 iYLR134W | 12 | 2247 | 413282 |
| YLR136C | TIS11  | CTH2             | iYLR136C   | 12 | 858  | 416659 |
| YLR137W | 0      | #N/A             | iYLR136C   | 12 | 1104 | 417007 |
| YLR138W | NHA1   |                  | 0 iYLR137W | 12 | 2958 | 418438 |
| YLR139C | SLS1   |                  | 0 iYLR141W | 12 | 1932 | 423474 |
| YLR140W | 0      | #N/A             | iYLR138W   | 12 | 327  | 423475 |
| YLR141W | RRN5   |                  | 0 iYLR138W | 12 | 1092 | 423684 |
| YLR142W | PUT1   |                  | 0 iYLR141W | 12 | 1431 | 425187 |
| YLR143W | 0      | #N/A             | itD(GUC)L1 | 12 | 2058 | 427330 |
| YLR144C | ACF2   | ENG2             | iYLR144C   | 12 | 2340 | 432017 |
| YLR145W | 0      | #N/A             | iYLR144C   | 12 | 606  | 432169 |
| YLR146C | SPE4   |                  | 0 iYLR146C | 12 | 903  | 433726 |
| YLR147C | SMD3   | SLT16 Sm D3      | iYLR147C   | 12 | 306  | 434464 |
| YLR148W | PEP3   | VAM8 VPS18 VPT18 | iYLR147C   | 12 | 2757 | 434642 |
| YLR149C | 0      | #N/A             | iYLR149C   | 12 | 2193 | 439824 |
| YLR150W | STM1   | MPT4             | iYLR149C   | 12 | 822  | 440468 |
| YLR151C | PCD1   |                  | 0 iYLR151C | 12 | 1023 | 442738 |
| YLR152C | 0      | #N/A             | iYLR152C   | 12 | 1731 | 444689 |
| YLR153C | ACS2   |                  | 0 iYLR153C | 12 | 2052 | 447576 |
| YLR154C | 0      | Rnh2C            | iYLRWdelta | 12 | 333  | 448315 |
| YLR155C | ASP3-1 | ASP3             | iYLR155C-0 | 12 | 1089 | 470406 |
| YLR156W | 0      | #N/A             | iYLR155C-0 | 12 | 345  | 472114 |
| YLR157C | ASP3-2 | ASP3             | iYLR157C-0 | 12 | 1089 | 474058 |
| YLR158C | ASP3-3 | ASP3             | iYLR158C-0 | 12 | 1089 | 483638 |
| YLR159W | 0      | #N/A             | iYLR158C-1 | 12 | 345  | 485346 |
| YLR160C | ASP3-4 | ASP3             | iYLR160C-0 | 12 | 1089 | 487290 |
| YLR161W | 0      | #N/A             | iYLR160C-1 | 12 | 345  | 488998 |
| YLR162W | 0      | #N/A             | iYLR160C-1 | 12 | 357  | 489574 |
| YLR163C | MAS1   | MIF1             | iYLR163C   | 12 | 1389 | 493256 |
| YLR164W | 0      | #N/A             | iYLR163C   | 12 | 507  | 493885 |
| YLR165C | PUS5   |                  | 0 iYLR165C | 12 | 765  | 495260 |
| YLR166C | SEC10  |                  | 0 iYLR166C | 12 | 2616 | 498046 |



|         |        |            |            |    |      |        |
|---------|--------|------------|------------|----|------|--------|
| YLR167W | RPS31  | RPS37 UBI3 | iYLR166C   | 12 | 459  | 498949 |
| YLR168C | 0      | #N/A       | iYLR168C   | 12 | 693  | 500272 |
| YLR169W | 0      | #N/A       | iYLR168C   | 12 | 354  | 500337 |
| YLR170C | APS1   | YAP19      | iYLR171W   | 12 | 471  | 501051 |
| YLR171W | 0      | #N/A       | iYLR168C   | 12 | 390  | 500735 |
| YLR172C | DPH5   |            | 0 iYLR172C | 12 | 903  | 502164 |
| YLR173W | 0      | #N/A       | iYLR172C   | 12 | 1827 | 502423 |
| YLR174W | IDP2   |            | 0 iYLR173W | 12 | 1239 | 504593 |
| YLR175W | CBF5   |            | 0 iYLR174W | 12 | 1452 | 506136 |
| YLR176C | RFX1   | CRT1       | iYLR176C   | 12 | 2436 | 510234 |
| YLR177W | 0      | #N/A       | iYLR176C   | 12 | 1887 | 511056 |
| YLR178C | TFS1   | DKA1       | iYLR178C   | 12 | 660  | 513823 |
| YLR179C | 0      | #N/A       | iYLR179C   | 12 | 606  | 514715 |
| YLR180W | SAM1   | ETH10      | iYLR179C   | 12 | 1149 | 515264 |
| YLR181C | VTA1   |            | 0 iYLR181C | 12 | 993  | 517672 |
| YLR182W | SWI6   | PSL8 SDS11 | iYLR181C   | 12 | 2412 | 517942 |
| YLR183C | TOS4   |            | 0 iYLR183C | 12 | 1470 | 522014 |
| YLR184W | 0      | #N/A       | iYLR183C   | 12 | 348  | 522108 |
| YLR185W | RPL37A |            | 0 iYLR184W | 12 | 626  | 522665 |
| YLR186W | EMG1   | NEP1       | iYLR185W   | 12 | 759  | 523634 |
| YLR187W | 0      |            | 0 iYLR186W | 12 | 3081 | 524867 |
| YLR188W | MDL1   |            | 0 iYLR187W | 12 | 2088 | 528302 |
| YLR189C | UGT51  | UGT51      | iYLR189C   | 12 | 3597 | 534395 |
| YLR190W | 0      |            | 0 iYLR189C | 12 | 1476 | 535216 |
| YLR191W | PEX13  | PAS20      | iYLR190W   | 12 | 1161 | 537274 |
| YLR192C | HCR1   |            | 0 iYLR192C | 12 | 798  | 539591 |
| YLR193C | 0      | #N/A       | iYLR193C   | 12 | 528  | 540538 |
| YLR194C | 0      | #N/A       | iYLR194C   | 12 | 765  | 541575 |
| YLR195C | NMT1   | CDC72      | iYLR195C   | 12 | 1368 | 543306 |
| YLR196W | PWP1   |            | 0 iYLR195C | 12 | 1731 | 543970 |
| YLR197W | SIK1   | NOP56      | iYLR196W   | 12 | 1515 | 546099 |
| YLR198C | 0      | #N/A       | iYLR198C   | 12 | 360  | 547647 |
| YLR199C | 0      | #N/A       | iYLR199C   | 12 | 663  | 548517 |
| YLR200W | YKE2   | GIM1 PFD6  | iYLR199C   | 12 | 345  | 549014 |
| YLR201C | 0      |            | 0 iYLR203C | 12 | 783  | 550295 |
| YLR202C | 0      | #N/A       | iYLR203C   | 12 | 443  | 550638 |
| YLR203C | MSS51  |            | 0 iYLR203C | 12 | 1311 | 551962 |
| YLR204W | QRI5   |            | 0 iYLR203C | 12 | 336  | 552272 |
| YLR205C | HMX1   |            | 0 iYLR205C | 12 | 822  | 553547 |
| YLR206W | ENT2   |            | 0 iYLR205C | 12 | 1842 | 554578 |
| YLR207W | HRD3   |            | 0 iYLR206W | 12 | 2502 | 556788 |
| YLR208W | SEC13  | ANU3       | iYLR207W   | 12 | 894  | 559551 |
| YLR209C | PNP1   |            | 0 iYLR209C | 12 | 936  | 561732 |
| YLR210W | CLB4   |            | 0 iYLR209C | 12 | 1383 | 562008 |
| YLR211C | 0      | #N/A       | iYLR211C   | 12 | 740  | 564531 |
| YLR212C | TUB4   |            | 0 iYLR212C | 12 | 1422 | 566281 |
| YLR213C | CRR1   |            | 0 iYLR213C | 12 | 1269 | 567922 |
| YLR214W | FRE1   |            | 0 iYLR213C | 12 | 2061 | 568567 |
| YLR215C | CDC123 |            | 0 iYLR215C | 12 | 1083 | 571858 |
| YLR216C | CPR6   |            | 0 iYLR217W | 12 | 1116 | 573211 |
| YLR217W | 0      | #N/A       | iYLR215C   | 12 | 324  | 572909 |

|         |        |                  |                          |    |      |        |
|---------|--------|------------------|--------------------------|----|------|--------|
| YLR218C | 0      | #N/A             | iYLR218C                 | 12 | 453  | 573918 |
| YLR219W | MSC3   |                  | 0 iYLR218C               | 12 | 2187 | 574151 |
| YLR220W | CCC1   |                  | 0 iYLR219W               | 12 | 969  | 576825 |
| YLR221C | RSA3   |                  | 0 iYLR221C               | 12 | 663  | 579024 |
| YLR222C | UTP13  |                  | 0 iYLR222C               | 12 | 2454 | 581771 |
| YLR223C | IFH1   |                  | 0 iYLR223C               | 12 | 3258 | 585490 |
| YLR224W | 0      | #N/A             | iYLR223C                 | 12 | 1110 | 586464 |
| YLR225C | 0      | #N/A             | iYLR225C                 | 12 | 1224 | 588918 |
| YLR226W | BUR2   | CST4             | iYLR225C                 | 12 | 1188 | 589354 |
| YLR227C | ADY4   |                  | 0 iYLR227C               | 12 | 1482 | 592043 |
| YLR228C | ECM22  |                  | 0 iYLR228C-0             | 12 | 2445 | 602463 |
| YLR229C | CDC42  |                  | 0 iYLR230W               | 12 | 576  | 604787 |
| YLR230W | 0      | #N/A             | iYLR228C-1               | 12 | 306  | 604574 |
| YLR231C | BNA5   |                  | 0 iYLR232W               | 12 | 1362 | 607119 |
| YLR232W | 0      | #N/A             | iti(UAU)L                | 12 | 348  | 606830 |
| YLR233C | EST1   |                  | 0 iYLR233C               | 12 | 2100 | 609524 |
| YLR234W | TOP3   | EDR1             | iYLR233C                 | 12 | 1971 | 609783 |
| YLR235C | 0      | #N/A             | iYLR236C                 | 12 | 399  | 611930 |
| YLR236C | 0      | #N/A             | iYLR236C                 | 12 | 324  | 612117 |
| YLR237W | THI7   | THI10            | iYLR236C                 | 12 | 1797 | 612367 |
| YLR238W | 0      |                  | 0 iYLR237W               | 12 | 1437 | 614755 |
| YLR239C | LIP2   |                  | 0 iYLR239C               | 12 | 987  | 617318 |
| YLR240W | VPS34  | END12 PEP15 VPL7 | iYLR239C                 | 12 | 2628 | 617533 |
| YLR241W | 0      | #N/A             | iYLR240W                 | 12 | 2349 | 620473 |
| YLR242C | ARV1   |                  | 0 iYLR242C               | 12 | 966  | 623883 |
| YLR243W | 0      | #N/A             | iYLR242C                 | 12 | 819  | 624203 |
| YLR244C | MAP1   |                  | 0 iYLR244C               | 12 | 1164 | 626331 |
| YLR245C | CDD1   |                  | 0 iYLR245C               | 12 | 429  | 626930 |
| YLR246W | ERF2   |                  | 0 iYLR245C               | 12 | 1080 | 627118 |
| YLR247C | 0      | #N/A             | iYLR247C                 | 12 | 4671 | 633354 |
| YLR248W | RCK2   | CLK1 CMK3        | iYLR247C                 | 12 | 1833 | 634252 |
| YLR249W | YEF3   | EF-3 TEF3        | iYLR248W                 | 12 | 3135 | 636780 |
| YLR250W | SSP120 |                  | 0 iYLR249W               | 12 | 705  | 640317 |
| YLR251W | SYM1   |                  | 0 iYLR250W               | 12 | 594  | 641464 |
| YLR252W | 0      | #N/A             | iYLR250W                 | 12 | 306  | 641957 |
| YLR253W | 0      | #N/A             | iYLR252W                 | 12 | 1710 | 642627 |
| YLR254C | 0      | #N/A             | iYLR254C                 | 12 | 570  | 644973 |
| YLR255C | 0      | #N/A             | iYLR255C                 | 12 | 354  | 645953 |
| YLR256W | HAP1   | CYP1             | iYLR255C                 | 12 | 4509 | 646415 |
| YLR257W | 0      | #N/A             | iYLRWdelta               | 12 | 966  | 658826 |
| YLR258W | GSY2   |                  | 0 iYLR257W               | 12 | 2118 | 660716 |
| YLR259C | HSP60  | CPN60 MIF4       | iYLR259C                 | 12 | 1719 | 665002 |
| YLR260W | LCB5   |                  | 0 iYLR259C               | 12 | 2064 | 665844 |
| YLR261C | VPS63  |                  | 0 iYLR262C               | 12 | 327  | 668563 |
| YLR262C | YPT6   |                  | 0 iYLR262C               | 12 | 648  | 668891 |
| YLR263W | RED1   |                  | 0 iYLR262C- <sup>A</sup> | 12 | 2484 | 670340 |
| YLR264W | RPS28B | RPS33B           | iYLR263W                 | 12 | 204  | 673131 |
| YLR265C | NEJ1   | LIF2             | iYLR265C                 | 12 | 1029 | 675455 |
| YLR266C | 0      |                  | 0 iYLR266C               | 12 | 2106 | 677724 |
| YLR267W | BOP2   |                  | 0 iYLR266C               | 12 | 1713 | 678212 |
| YLR268W | SEC22  | SLY2 TSL26       | iYLR267W                 | 12 | 645  | 680200 |

|           |        |             |              |    |      |        |
|-----------|--------|-------------|--------------|----|------|--------|
| YLR269C   | 0      | #N/A        | iYLR270W     | 12 | 351  | 681216 |
| YLR270W   | 0      | DcpS        | iYLR267W     | 12 | 1053 | 681186 |
| YLR271W   | 0      | #N/A        | iYLR270W     | 12 | 825  | 682737 |
| YLR272C   | YCS4   | LOC7        | iYLR272C     | 12 | 3531 | 687202 |
| YLR273C   | PIG1   |             | 0 iYLR273C   | 12 | 1947 | 691029 |
| YLR274W   | CDC46  | BOB1 MCM5   | iYLR273C     | 12 | 2328 | 691555 |
| YLR275W   | SMD2   | Sm D2       | iYLR274W     | 12 | 423  | 694378 |
| YLR276C   | DBP9   |             | 0 iYLR276C   | 12 | 1785 | 696830 |
| YLR277C   | YSH1   | BRR5        | iYLR277C     | 12 | 2340 | 699495 |
| YLR278C   | 0      | #N/A        | iYLR278C     | 12 | 4026 | 704024 |
| YLR279W   | 0      | #N/A        | iYLR278C     | 12 | 390  | 704309 |
| YLR280C   | 0      | #N/A        | iYLR281C     | 12 | 351  | 704833 |
| YLR281C   | 0      | #N/A        | iYLR281C     | 12 | 468  | 704960 |
| YLR282C   | 0      | #N/A        | iYLR283W     | 12 | 342  | 705412 |
| YLR283W   | 0      | #N/A        | iYLR281C     | 12 | 945  | 705186 |
| YLR284C   | ECI1   |             | 0 iYLR284C   | 12 | 843  | 707040 |
| YLR285W   | 0      |             | 0 iYLR284C   | 12 | 786  | 707360 |
| YLR286C   | CTS1   |             | 0 iYLR286C   | 12 | 1689 | 710136 |
| YLR287C   | 0      | #N/A        | iYLR287C     | 12 | 1068 | 712058 |
| YLR287C-A | RPS30A |             | 0 iYLR287C-A | 12 | 622  | 713158 |
| YLR288C   | MEC3   | PIP3        | iYLR288C     | 12 | 1425 | 714904 |
| YLR289W   | GUF1   |             | 0 iYLR288C   | 12 | 1938 | 715089 |
| YLR290C   | 0      | #N/A        | iYLR290C     | 12 | 834  | 717978 |
| YLR291C   | GCD7   |             | 0 iYLR291C   | 12 | 1146 | 719462 |
| YLR292C   | SEC72  | SEC67 SIM2  | iYLR292C     | 12 | 582  | 720370 |
| YLR293C   | GSP1   | CNR1 CST17  | iYLR293C     | 12 | 660  | 721430 |
| YLR294C   | 0      | #N/A        | iYLR295C     | 12 | 330  | 722030 |
| YLR295C   | ATP14  |             | 0 iYLR295C   | 12 | 375  | 722373 |
| YLR296W   | 0      | #N/A        | iYLR295C     | 12 | 327  | 722978 |
| YLR297W   | 0      | #N/A        | iYLR296W     | 12 | 390  | 724044 |
| YLR298C   | YHC1   |             | 0 iYLR298C   | 12 | 696  | 725416 |
| YLR299W   | ECM38  | CIS2        | iYLR298C     | 12 | 1983 | 726069 |
| YLR300W   | EXG1   | BGL1        | iYLR299W     | 12 | 1347 | 728955 |
| YLR301W   | 0      | #N/A        | iYLR300W     | 12 | 735  | 730825 |
| YLR302C   | 0      | #N/A        | iYLR303W     | 12 | 363  | 732553 |
| YLR303W   | MET17  | MET15 MET25 | iYLRcdelta'  | 12 | 1335 | 732542 |
| YLR304C   | ACO1   | GLU1        | iYLR304C     | 12 | 2337 | 737548 |
| YLR305C   | STT4   | BLM1        | iYLR305C     | 12 | 5703 | 743863 |
| YLR306W   | UBC12  |             | 0 iYLR305C   | 12 | 701  | 744151 |
| YLR307W   | CDA1   |             | 0 iYLR306W   | 12 | 906  | 745620 |
| YLR308W   | CDA2   |             | 0 iYLR307W   | 12 | 939  | 747937 |
| YLR309C   | IMH1   | SYS3        | iYLR309C     | 12 | 2736 | 751769 |
| YLR310C   | CDC25  | CDC25 CTN1  | iYLR310C     | 12 | 4770 | 756993 |
| YLR311C   | 0      | #N/A        | iYLR312C     | 12 | 348  | 757612 |
| YLR312C   | 0      | #N/A        | iYLR312C     | 12 | 1197 | 758833 |
| YLR313C   | SPH1   |             | 0 iYLR313C   | 12 | 1593 | 762342 |
| YLR314C   | CDC3   |             | 0 iYLR314C   | 12 | 1563 | 764137 |
| YLR315W   | NKP2   |             | 0 iYLR314C   | 12 | 462  | 764808 |
| YLR316C   | TAD3   |             | 0 iYLR317W   | 12 | 1093 | 766358 |
| YLR317W   | KRE34  | #N/A        | iYLR314C     | 12 | 435  | 765655 |
| YLR318W   | EST2   | TERT        | iYLR317W     | 12 | 2655 | 766542 |

|         |        |                 |              |      |      |        |
|---------|--------|-----------------|--------------|------|------|--------|
| YLR319C | BUD6   | AIP3            | iYLR319C     | 12   | 2367 | 771684 |
| YLR320W | MMS22  | SLM2            | iYLR319C     | 12   | 4365 | 771940 |
| YLR321C | SFH1   |                 | 0 iYLR322W   | 12   | 1281 | 777864 |
| YLR322W | VPS65  |                 | 0 iYLR320W   | 12   | 315  | 777628 |
| YLR323C | CWC24  |                 | 0 iYLR323C   | 12   | 780  | 778952 |
| YLR324W | 0      |                 | 0 iYLR323C   | 12   | 1572 | 779215 |
| YLR325C | RPL38  |                 | 0 iYLR325C   | 12   | 237  | 781379 |
| YLR326W | 0      | #N/A            | iYLR325C     | 12   | 723  | 782174 |
| YLR327C | 0      | #N/A            | iYLR327C     | 12   | 261  | 783387 |
| YLR328W | NMA1   |                 | 0 itS(GCU)L  | 12   | 1206 | 784913 |
| YLR329W | REC102 |                 | 0 iYLR328W   | 12   | 603  | 786731 |
| YLR330W | CHS5   | CAL3            | iYLR329W     | 12   | 2016 | 787664 |
| YLR331C | JIP3   |                 | 0 iYLR332W-l | 12   | 378  | 791046 |
| YLR332W | MID2   | KAI1            | iYLR330W     | 12   | 1131 | 790676 |
| YLR333C | RPS25B |                 | 0 iYLR333C   | 12   | 327  | 795899 |
| YLR334C | 0      | #N/A            | iYLRWdelta   | 12   | 381  | 797078 |
| YLR335W | NUP2   |                 | 0 itE(UUC)L  | 12   | 2163 | 797430 |
| YLR336C | SGD1   |                 | 0 iYLR336C   | 12   | 2700 | 802396 |
| YLR337W | #N/A   | #N/A            | #N/A         | #N/A | #N/A | #N/A   |
| YLR338W | KRE21  | #N/A            | iYLR336C     | 12   | 858  | 804346 |
| YLR339C | 0      | #N/A            | iYLR340W     | 12   | 552  | 806335 |
| YLR340W | RPP0   | RPL10E          | iYLR338W     | 12   | 939  | 805887 |
| YLR341W | SPO77  |                 | 0 iYLR340W   | 12   | 1434 | 807385 |
| YLR342W | FKS1   | CND1 CWH53 ETG1 | iYLR341W     | 12   | 5631 | 809997 |
| YLR343W | 0      |                 | 0 iYLR342W   | 12   | 1668 | 816094 |
| YLR344W | RPL26A |                 | 0 itR(CCG)L  | 12   | 831  | 819312 |
| YLR345W | 0      | #N/A            | iYLR344W     | 12   | 1530 | 820511 |
| YLR346C | 0      | #N/A            | iYLR346C     | 12   | 306  | 822592 |
| YLR347C | KAP95  | RSL1            | iYLR347C     | 12   | 2586 | 826412 |
| YLR348C | DIC1   |                 | 0 iYLR349W   | 12   | 897  | 827872 |
| YLR349W | 0      | #N/A            | iYLR347C     | 12   | 507  | 827520 |
| YLR350W | ORM2   |                 | 0 iYLR349W   | 12   | 651  | 828729 |
| YLR351C | NIT3   |                 | 0 iYLR351C   | 12   | 876  | 830363 |
| YLR352W | 0      | #N/A            | iYLR351C     | 12   | 2424 | 831115 |
| YLR353W | BUD8   |                 | 0 iYLR352W   | 12   | 1812 | 834351 |
| YLR354C | TAL1   |                 | 0 iYLR354C   | 12   | 1008 | 837356 |
| YLR355C | ILV5   |                 | 0 iYLR355C   | 12   | 1188 | 839252 |
| YLR356W | 0      | #N/A            | iYLR355C     | 12   | 594  | 840320 |
| YLR357W | RSC2   |                 | 0 iYLR356W   | 12   | 2670 | 841330 |
| YLR358C | 0      | #N/A            | iYLR358C     | 12   | 564  | 844049 |
| YLR359W | ADE13  | BRA1 BRA8       | iYLR358C     | 12   | 1449 | 844281 |
| YLR360W | VPS38  | VPL17           | iYLR359W     | 12   | 1320 | 846102 |
| YLR361C | 0      |                 | 0 iYLR361C   | 12   | 1737 | 849123 |
| YLR362W | STE11  |                 | 0 iYLR361C   | 12   | 2154 | 849865 |
| YLR363C | NMD4   |                 | 0 iYLR363C   | 12   | 657  | 853150 |
| YLR364W | 0      | #N/A            | iYLR363C     | 12   | 330  | 854061 |
| YLR365W | 0      | #N/A            | iYLR364W     | 12   | 333  | 855198 |
| YLR366W | 0      | #N/A            | iYLR364W     | 12   | 306  | 855537 |
| YLR367W | RPS22B |                 | 0 iYLR366W   | 12   | 876  | 856441 |
| YLR368W | FLM1   |                 | 0 iSNR44     | 12   | 1797 | 857539 |
| YLR369W | SSQ1   | SSC2            | iYLR368W     | 12   | 1974 | 859551 |

|         |        |                    |      |            |      |      |        |
|---------|--------|--------------------|------|------------|------|------|--------|
| YLR370C | ARC18  |                    | 0    | iYLR370C   | 12   | 537  | 862253 |
| YLR371W | ROM2   |                    | 0    | iYLR370C   | 12   | 4071 | 862713 |
| YLR372W | SUR4   | APA1 ELO3 SRE1 VEI |      | iYLR371W   | 12   | 1038 | 867353 |
| YLR373C | VID22  |                    | 0    | iYLR373C   | 12   | 2706 | 871366 |
| YLR374C | 0      | #N/A               |      | iYLR375W   | 12   | 390  | 871841 |
| YLR375W | STP3   |                    | 0    | iYLR373C   | 12   | 1032 | 871696 |
| YLR376C | 0      |                    | 0    | iYLR376C   | 12   | 729  | 873553 |
| YLR377C | FBP1   | ACN8 FBPase        |      | iYLR377C   | 12   | 1047 | 874791 |
| YLR378C | SEC61  |                    | 0    | iYLR379W   | 12   | 1443 | 877177 |
| YLR379W | 0      | #N/A               |      | itK(UUU)L  | 12   | 375  | 876921 |
| YLR380W | CSR1   | SFH2               |      | iYLR379W   | 12   | 1227 | 878282 |
| YLR381W | CTF3   | CHL3               |      | iYLR380W   | 12   | 2202 | 879723 |
| YLR382C | NAM2   | MSL1               |      | iYLR382C   | 12   | 2685 | 884751 |
| YLR383W | RHC18  | SMC6               |      | iYLR382C   | 12   | 3345 | 885288 |
| YLR384C | IKI3   | ELP1 TOT1          |      | iYLR384C   | 12   | 4050 | 892900 |
| YLR385C | 0      | AWS1               |      | iYLR385C   | 12   | 399  | 893390 |
| YLR386W | VAC14  |                    | 0    | iYLR385C   | 12   | 2643 | 893628 |
| YLR387C | 0      |                    | 0    | iYLR387C   | 12   | 1299 | 897672 |
| YLR388W | RPS29A |                    | 0    | iYLR387C   | 12   | 171  | 898651 |
| YLR389C | STE23  |                    | 0    | iYLR389C   | 12   | 2967 | 902659 |
| YLR390W | ECM19  |                    | 0    | iYLR389C   | 12   | 339  | 903065 |
| YLR391W | #N/A   | #N/A               | #N/A | #N/A       | #N/A | #N/A | #N/A   |
| YLR392C | 0      | #N/A               |      | iYLR392C   | 12   | 1557 | 906304 |
| YLR393W | ATP10  |                    | 0    | iYLR392C   | 12   | 840  | 907078 |
| YLR394W | CST9   | ZIP3               |      | iYLR392C   | 12   | 1449 | 907949 |
| YLR395C | COX8   |                    | 0    | iYLR395C   | 12   | 237  | 909964 |
| YLR396C | VPS33  | CLS14 MET27 PEP1   |      | iYLR396C   | 12   | 2076 | 912309 |
| YLR397C | AFG2   | DRG1               |      | iYLR397C   | 12   | 2343 | 914891 |
| YLR398C | SKI2   |                    | 0    | iYLR398C   | 12   | 3864 | 919018 |
| YLR399C | BDF1   |                    | 0    | iYLR399C   | 12   | 2061 | 921595 |
| YLR400W | 0      | #N/A               |      | iYLR399C   | 12   | 474  | 922062 |
| YLR401C | 0      |                    | 0    | iYLR401C   | 12   | 1830 | 924446 |
| YLR402W | 0      | #N/A               |      | iYLR401C   | 12   | 516  | 924562 |
| YLR403W | SFP1   |                    | 0    | iYLR402W   | 12   | 2052 | 925565 |
| YLR404W | 0      | #N/A               |      | iYLR403W   | 12   | 858  | 928740 |
| YLR405W | 0      |                    | 0    | iYLR404W   | 12   | 1104 | 929786 |
| YLR406C | RPL31B |                    | 0    | iYLR406C   | 12   | 691  | 931752 |
| YLR407W | 0      | #N/A               |      | iYLR406C   | 12   | 690  | 932964 |
| YLR408C | 0      | #N/A               |      | iYLR408C   | 12   | 369  | 934249 |
| YLR409C | UTP21  |                    | 0    | iYLR409C   | 12   | 2820 | 937229 |
| YLR410W | VIP1   |                    | 0    | iYLR409C   | 12   | 3441 | 937537 |
| YLR411W | CTR3   |                    | 0    | iYLRWdelta | 12   | 726  | 947249 |
| YLR412W | 0      | #N/A               |      | iYLR411W   | 12   | 825  | 948364 |
| YLR413W | 0      | #N/A               |      | iYLR412W   | 12   | 2028 | 951151 |
| YLR414C | 0      | #N/A               |      | iYLR414C   | 12   | 792  | 954139 |
| YLR415C | 0      | #N/A               |      | iYLR416C   | 12   | 339  | 954592 |
| YLR416C | 0      | #N/A               |      | iYLR416C   | 12   | 399  | 954884 |
| YLR417W | VPS36  | GRD12 VAC3 VPL11   |      | iYLR416C   | 12   | 1701 | 955005 |
| YLR418C | CDC73  |                    | 0    | iYLR418C   | 12   | 1182 | 958090 |
| YLR419W | 0      | #N/A               |      | iYLR418C   | 12   | 4308 | 958423 |
| YLR420W | URA4   |                    | 0    | iYLRdelta  | 12   | 1095 | 963780 |

|         |        |                |   |              |    |      |         |
|---------|--------|----------------|---|--------------|----|------|---------|
| YLR421C | RPN13  |                | 0 | iYLR421C     | 12 | 471  | 965555  |
| YLR422W | 0      | #N/A           |   | iYLR421C     | 12 | 5799 | 965892  |
| YLR423C | APG17  | APG17          |   | iYLR423C     | 12 | 1254 | 973165  |
| YLR424W | 0      |                | 0 | iYLR423C     | 12 | 2127 | 973390  |
| YLR425W | TUS1   | SOP10          |   | iYLRdelta2   | 12 | 3924 | 982889  |
| YLR426W | 0      | #N/A           |   | iYLR425W     | 12 | 1052 | 987057  |
| YLR427W | 0      |                | 0 | iYLR426W     | 12 | 2013 | 988423  |
| YLR428C | 0      | #N/A           |   | iYLR429W     | 12 | 345  | 990956  |
| YLR429W | CRN1   |                |   | 0 iYLR427W   | 12 | 1956 | 990772  |
| YLR430W | SEN1   | CIK3 NRD2      |   | iYLR429W     | 12 | 6696 | 993429  |
| YLR431C | 0      | CVT23          |   | iYLR431C     | 12 | 1362 | 1001698 |
| YLR432W | IMD3   |                |   | 0 iYLR431C   | 12 | 1572 | 1002552 |
| YLR433C | CNA1   | CMP1           |   | iYLR435W     | 12 | 1662 | 1006003 |
| YLR434C | 0      | #N/A           |   | iYLR435W     | 12 | 384  | 1006403 |
| YLR435W | 0      |                | 0 | iYLR432W     | 12 | 750  | 1006241 |
| YLR436C | ECM30  |                |   | 0 iYLR436C   | 12 | 3825 | 1011240 |
| YLR437C | 0      | #N/A           |   | iYLR437C     | 12 | 402  | 1012018 |
| YLR438W | CAR2   |                |   | 0 iYLR437C   | 12 | 1275 | 1012496 |
| YLR439W | MRPL4  |                |   | 0 iYLR438C-A | 12 | 960  | 1014486 |
| YLR440C | 0      |                |   | 0 iYLR440C   | 12 | 2130 | 1017692 |
| YLR441C | RPS1A  | RP10A          |   | iYLR441C     | 12 | 768  | 1018903 |
| YLR442C | SIR3   | CMT1 MAR2 STE8 |   | iYLR442C     | 12 | 2937 | 1022246 |
| YLR443W | ECM7   | ZRG15          |   | iYLR442C     | 12 | 1347 | 1022620 |
| YLR444C | 0      | #N/A           |   | iYLR444C     | 12 | 303  | 1023983 |
| YLR445W | 0      | #N/A           |   | iYLR444C     | 12 | 405  | 1024184 |
| YLR446W | 0      | #N/A           |   | iYLR445W     | 12 | 1302 | 1025209 |
| YLR447C | VMA6   |                |   | 0 iYLR447C   | 12 | 1038 | 1027888 |
| YLR448W | RPL6B  |                |   | 0 iYLR447C   | 12 | 915  | 1028848 |
| YLR449W | FPR4   |                |   | 0 iYLR448W   | 12 | 1179 | 1030828 |
| YLR450W | HMG2   |                |   | 0 iYLR449W   | 12 | 3138 | 1032622 |
| YLR451W | LEU3   |                |   | 0 iYLR450W   | 12 | 2661 | 1036088 |
| YLR452C | SST2   |                |   | 0 iYLR452C   | 12 | 2097 | 1041362 |
| YLR453C | RIF2   |                |   | 0 iYLR453C   | 12 | 1188 | 1042982 |
| YLR454W | 0      |                |   | 0 iYLR453C   | 12 | 7887 | 1043994 |
| YLR455W | 0      | #N/A           |   | iYLRdelta2   | 12 | 915  | 1053625 |
| YLR456W | 0      | #N/A           |   | iYLR455W     | 12 | 615  | 1055066 |
| YLR457C | NBP1   |                |   | 0 iYLR458W   | 12 | 960  | 1056767 |
| YLR458W | 0      | #N/A           |   | iYLR456W     | 12 | 381  | 1056451 |
| YLR459W | CDC91  |                |   | 0 iYLR458W   | 12 | 1185 | 1057330 |
| YLR460C | 0      | #N/A           |   | iYLR460C-0   | 12 | 1131 | 1060883 |
| YLR461W | PAU4   |                |   | 0 iYLR460C-1 | 12 | 363  | 1062915 |
| YLR462W | 0      | #N/A           |   | iYLR461W-    | 12 | 609  | 1065952 |
| YLR463C | 0      | #N/A           |   | iYLR466W     | 12 | 552  | 1066812 |
| YLR464W | 0      | #N/A           |   | iYLR461W-    | 12 | 930  | 1066568 |
| YLR465C | 0      |                |   | 0 iYLR466W   | 12 | 309  | 1067349 |
| YLR466W | YRF1-4 | YRF1           |   | iYLR461W-    | 12 | 4149 | 1067083 |
| YLR467W | YRF1-5 | YRF1           |   | iYLR466W     | 12 | 5391 | 1072504 |
| YML001W | YPT7   | AST4 VAM4      |   | iYML002W     | 13 | 627  | 267174  |
| YML002W | 0      | #N/A           |   | iYML003W     | 13 | 2214 | 264541  |
| YML003W | 0      | #N/A           |   | iYML004C     | 13 | 873  | 263483  |
| YML004C | GLO1   |                |   | 0 iYML004C   | 13 | 981  | 262685  |

|           |        |                  |      |             |      |      |        |
|-----------|--------|------------------|------|-------------|------|------|--------|
| YML005W   |        | 0                | 0    | itS(AGA)M   | 13   | 1389 | 260221 |
| YML006C   | GIS4   |                  | 0    | iYML006C    | 13   | 2325 | 258416 |
| YML007W   | YAP1   | PAR1 SNQ3        |      | iYML008C    | 13   | 1953 | 253848 |
| YML008C   | ERG6   | ISE1 LIS1 SED6   |      | iYML008C    | 13   | 1152 | 252990 |
| YML009C   | MRPL39 |                  | 0    | iYML009C    | 13   | 213  | 251516 |
| YML010W   | SPT5   |                  | 0    | iYML011C    | 13   | 3192 | 247677 |
| YML010W-A | #N/A   | #N/A             |      | iYML011C    | #N/A | #N/A | #N/A   |
| YML010W-B | #N/A   | #N/A             |      | #N/A        | #N/A | #N/A | #N/A   |
| YML011C   |        | 0                | #N/A | iYML011C    | 13   | 534  | 247428 |
| YML012W   | ERV25  |                  | 0    | iYML013C-/- | 13   | 636  | 246116 |
| YML013C-A | #N/A   | #N/A             |      | iYML013C-/- | #N/A | #N/A | #N/A   |
| YML013W   | SEL1   |                  |      | iYML014W    | 13   | 1755 | 244149 |
| YML014W   |        | 0                |      | iYML015C    | 13   | 840  | 243225 |
| YML015C   | TAF11  | TAF40 TafII40    |      | iYML015C    | 13   | 1041 | 243029 |
| YML016C   | PPZ1   |                  | 0    | iYML016C    | 13   | 2079 | 241536 |
| YML017W   | PSP2   | MRS15            |      | iYML018C    | 13   | 1737 | 236995 |
| YML018C   |        | 0                | #N/A | iYML018C    | 13   | 1182 | 235952 |
| YML019W   | OST6   |                  | 0    | iYML020W    | 13   | 999  | 233457 |
| YML020W   |        | 0                | #N/A | iYML021C    | 13   | 1995 | 231149 |
| YML021C   | UNG1   |                  | 0    | iYML021C    | 13   | 1080 | 230813 |
| YML022W   | APT1   |                  | 0    | iYML023C    | 13   | 564  | 228937 |
| YML023C   |        | 0                | #N/A | iYML023C    | 13   | 1671 | 228664 |
| YML024W   | RPS17A | RP51A RPL51A     |      | iYML025C    | 13   | 809  | 225889 |
| YML025C   |        | 0                |      | iYML025C    | 13   | 960  | 225365 |
| YML026C   | RPS18B |                  | 0    | iYML026C    | 13   | 842  | 223828 |
| YML027W   | YOX1   |                  | 0    | iYML028W    | 13   | 1158 | 221406 |
| YML028W   | TSA1   | TPX1 ZRG14 cTPxi |      | iYML029W    | 13   | 591  | 220138 |
| YML029W   | USA1   |                  | 0    | iYML030W    | 13   | 2517 | 217362 |
| YML030W   |        | 0                | #N/A | iYML031W    | 13   | 480  | 216435 |
| YML031W   | NDC1   |                  | 0    | iYML033W    | 13   | 1968 | 214189 |
| YML032C   | RAD52  |                  | 0    | iYML031W    | 13   | 1515 | 214029 |
| YML032C-A | #N/A   | #N/A             |      | #N/A        | #N/A | #N/A | #N/A   |
| YML033W   | #N/A   | #N/A             |      | #N/A        | #N/A | #N/A | #N/A   |
| YML034W   | SRC1   |                  | 0    | iYML034W    | 13   | 2631 | 209525 |
| YML035C   | AMD1   | AMD3             |      | iYML035C    | 13   | 2433 | 208860 |
| YML035C-A | #N/A   | #N/A             |      | iYML034W    | #N/A | #N/A | #N/A   |
| YML036W   |        | 0                | #N/A | iYML037C    | 13   | 570  | 205642 |
| YML037C   |        | 0                | #N/A | iYML037C    | 13   | 1023 | 205408 |
| YML038C   | YMD8   |                  | 0    | iYML038C    | 13   | 1329 | 204103 |
| YML039W   | #N/A   | #N/A             |      | itP(UGG)M   | 13   | #N/A | 196628 |
| YML040W   | #N/A   | #N/A             |      | itP(UGG)M   | 13   | #N/A | 196628 |
| YML041C   | VPS71  | SWC6             |      | iYML041C    | 13   | 843  | 195755 |
| YML042W   | CAT2   | YCAT             |      | iYML043C    | 13   | 2013 | 192788 |
| YML043C   | RRN11  |                  | 0    | iYML043C    | 13   | 1524 | 191767 |
| YML045W   | #N/A   | #N/A             |      | itG(GCC)M   | 13   | #N/A | 184461 |
| YML046W   | PRP39  |                  | 0    | iYML047C    | 13   | 1890 | 181474 |
| YML047C   | PRM6   |                  | 0    | iYML047C    | 13   | 1059 | 181075 |
| YML048W   | GSF2   | ECM6             |      | iYML049C    | 13   | 1212 | 178426 |
| YML048W-A | #N/A   | #N/A             |      | iYML048W    | #N/A | #N/A | #N/A   |
| YML049C   | RSE1   |                  | 0    | iYML049C    | 13   | 4086 | 178305 |
| YML050W   |        | 0                | #N/A | iYML051W    | 13   | 936  | 173139 |

|           |       |                     |      |   |                        |            |      |      |        |
|-----------|-------|---------------------|------|---|------------------------|------------|------|------|--------|
| YML051W   | GAL80 |                     |      | 0 | iYML052W               | 13         | 1308 |      | 171594 |
| YML052W   | SUR7  |                     |      |   | 0                      | iYML053C   | 13   | 909  | 170402 |
| YML053C   |       | 0                   | #N/A |   | iYML053C               | 13         | 639  |      | 169754 |
| YML054C   | CYB2  |                     |      |   | 0                      | iYML054C   | 13   | 1776 | 167308 |
| YML055W   | SPC2  | SPY1                |      |   | iSNR54                 | 13         | 537  |      | 164790 |
| YML056C   | IMD4  |                     |      |   | 0                      | iSNR54     | 13   | 1983 | 164176 |
| YML057W   | CMP2  | CNA2                |      |   | iYML058W               | 13         | 1815 |      | 160180 |
| YML058C-A | #N/A  |                     | #N/A |   | iYML057W               | #N/A       | #N/A |      | #N/A   |
| YML058W   | SML1  |                     |      |   | 0                      | iYML059C   | 13   | 315  | 159383 |
| YML059C   |       | 0                   | #N/A |   | iYML059C               | 13         | 5040 |      | 158258 |
| YML060W   | OGG1  |                     |      |   | 0                      | iYML061C   | 13   | 1131 | 151871 |
| YML061C   | PIF1  | TST1                |      |   | iYML061C               | 13         | 2580 |      | 151532 |
| YML062C   | MFT1  | MFT52               |      |   | iYML062C               | 13         | 1179 |      | 148683 |
| YML063W   | RPS1B | PLC2 RP10B          |      |   | iYML064C               | 13         | 768  |      | 146482 |
| YML064C   | TEM1  |                     |      |   | 0                      | iYML064C   | 13   | 738  | 145876 |
| YML065W   | ORC1  |                     |      |   | 0                      | iYML066C   | 13   | 2745 | 142210 |
| YML066C   | SMA2  |                     |      |   | 0                      | iYML066C   | 13   | 1110 | 141533 |
| YML067C   | ERV41 |                     |      |   | 0                      | iYML067C   | 13   | 1152 | 140214 |
| YML068W   |       | 0                   |      |   | 0                      | iYML069W   | 13   | 1395 | 137550 |
| YML069W   | POB3  |                     |      |   | 0                      | iYML070W   | 13   | 1659 | 135500 |
| YML070W   | DAK1  |                     |      |   | 0                      | iYMLCdelta | 13   | 1755 | 133475 |
| YML071C   | DOR1  | DOR1                |      |   | iYML071C               | 13         | 1824 |      | 131572 |
| YML072C   |       | 0                   |      |   | 0                      | iYML072C   | 13   | 4638 | 129367 |
| YML073C   | RPL6A | YL16A               |      |   | iYML073C               | 13         | 946  |      | 124172 |
| YML074C   | FPR3  | NPI46               |      |   | iYML074C-C             | 13         | 1236 |      | 121324 |
| YML075C   | HMG1  |                     |      |   | 0                      | iYML075C   | 13   | 3165 | 118898 |
| YML076C   | WAR1  |                     |      |   | 0                      | iYML076C   | 13   | 2835 | 115347 |
| YML077W   | BET5  |                     |      |   | 0                      | iYML078W   | 13   | 480  | 111865 |
| YML078W   | CPR3  | CYP3                |      |   | iYML079W               | 13         | 549  |      | 111002 |
| YML079W   |       | 0                   | #N/A |   | iYML080W               | 13         | 606  |      | 110247 |
| YML080W   | DUS1  |                     |      |   | 0                      | iYML081W   | 13   | 1272 | 108806 |
| YML081W   |       | 0                   | #N/A |   | iYML081C- <del>1</del> | 13         | 3756 |      | 104777 |
| YML082W   |       | 0                   | #N/A |   | iYML083C               | 13         | 1950 |      | 101862 |
| YML083C   |       | 0                   | #N/A |   | iYML083C               | 13         | 1257 |      | 101050 |
| YML084W   |       | 0                   | #N/A |   | iYML085C               | 13         | 309  |      | 99489  |
| YML085C   | TUB1  |                     |      |   | 0                      | iYML085C   | 13   | 1460 | 99400  |
| YML086C   | ALO1  |                     |      |   | 0                      | iYML086C   | 13   | 1581 | 97371  |
| YML087C   |       | 0                   | #N/A |   | iYML087C               | 13         | 939  |      | 95369  |
| YML088W   | UFO1  |                     |      |   | 0                      | iYML089C   | 13   | 2007 | 92235  |
| YML089C   |       | 0                   | #N/A |   | iYML089C               | 13         | 369  |      | 91409  |
| YML090W   |       | 0                   | #N/A |   | iYML092C               | 13         | 387  |      | 90744  |
| YML091C   | RPM2  |                     |      |   | 0                      | iYML089C   | 13   | 3609 | 90731  |
| YML092C   | PRE8  |                     |      |   | 0                      | iYML092C   | 13   | 753  | 86739  |
| YML093W   | UTP14 |                     |      |   | 0                      | iYML094W   | 13   | 2700 | 83090  |
| YML094W   | GIM5  | PFD5                |      |   | iYML095C               | 13         | 575  |      | 82275  |
| YML095C   | RAD10 |                     |      |   | 0                      | iYML095C   | 13   | 633  | 82113  |
| YML095C-A | #N/A  |                     | #N/A |   | iYML094W               | #N/A       | #N/A |      | #N/A   |
| YML096W   |       | 0                   | #N/A |   | iYML097C               | 13         | 1578 |      | 79909  |
| YML097C   | VPS9  | VPL31 VPT9          |      |   | iYML097C               | 13         | 1356 |      | 79690  |
| YML098W   | TAF13 | FUN81 TAF19 TafII15 |      |   | iYML099C               | 13         | 504  |      | 77267  |
| YML099C   | ARG81 | ARGR2               |      |   | iYML099C               | 13         | 2643 |      | 77040  |



|           |        |                       |   |            |      |      |        |
|-----------|--------|-----------------------|---|------------|------|------|--------|
| YML100W   | TSL1   |                       | 0 | iYML101C   | 13   | 3297 | 70624  |
| YML100W-A | #N/A   | #N/A                  |   | iYML100W   | #N/A | #N/A | #N/A   |
| YML101C   | 0      |                       | 0 | iYML101C   | 13   | 354  | 70088  |
| YML102C-A | #N/A   | #N/A                  |   | iYML101C   | #N/A | #N/A | #N/A   |
| YML102W   | CAC2   |                       | 0 | iYML103C   | 13   | 1407 | 68294  |
| YML103C   | NUP188 |                       | 0 | iYML103C   | 13   | 4968 | 67549  |
| YML104C   | MDM1   |                       | 0 | iYML104C   | 13   | 3384 | 62322  |
| YML105C   | SEC65  |                       | 0 | iYML105C   | 13   | 822  | 58687  |
| YML106W   | URA5   | PYR5                  |   | iYML107C   | 13   | 681  | 56773  |
| YML107C   | 0      | #N/A                  |   | iYML107C   | 13   | 1161 | 56425  |
| YML108W   | 0      | #N/A                  |   | iYML109W   | 13   | 318  | 54793  |
| YML109W   | ZDS2   | CES4                  |   | iYML110C   | 13   | 2829 | 51640  |
| YML110C   | COQ5   | DBI56                 |   | iYML110C   | 13   | 924  | 50954  |
| YML111W   | BUL2   |                       | 0 | iYML112W   | 13   | 2763 | 46942  |
| YML112W   | CTK3   |                       | 0 | iYML113W   | 13   | 891  | 45063  |
| YML113W   | DAT1   |                       | 0 | iYML114C   | 13   | 747  | 44045  |
| YML114C   | TAF8   | TAF65 TafII65         |   | iYML114C   | 13   | 1533 | 43575  |
| YML115C   | VAN1   | LDB13 VRG7 VRG8       |   | iYML115C   | 13   | 1608 | 41794  |
| YML116W   | ATR1   | SNQ1                  |   | iYML117W-  | 13   | 1629 | 38196  |
| YML117W   | 0      |                       | 0 | iYML118W   | 13   | 3405 | 34243  |
| YML117W-A | #N/A   | #N/A                  |   | iYML118W   | #N/A | #N/A | #N/A   |
| YML118W   | NGL3   |                       | 0 | iYML119W   | 13   | 1518 | 32334  |
| YML119W   | 0      | #N/A                  |   | iYML120C   | 13   | 1074 | 30611  |
| YML120C   | NDI1   |                       | 0 | iYML120C   | 13   | 1542 | 29807  |
| YML121W   | GTR1   |                       | 0 | iYML122C   | 13   | 933  | 26930  |
| YML122C   | 0      | #N/A                  |   | iYML122C   | 13   | 381  | 26419  |
| YML123C   | PHO84  |                       | 0 | iYML123C   | 13   | 1764 | 25801  |
| YML124C   | TUB3   |                       | 0 | iYML124C   | 13   | 1636 | 23684  |
| YML125C   | 0      | #N/A                  |   | iYML125C   | 13   | 939  | 21700  |
| YML126C   | ERG13  | HMGS                  |   | iYML126C   | 13   | 1476 | 20536  |
| YML127W   | RSC9   |                       | 0 | iYML128C   | 13   | 1746 | 17065  |
| YML128C   | MSC1   |                       | 0 | iYML128C   | 13   | 1542 | 16677  |
| YML129C   | COX14  |                       | 0 | iYML129C   | 13   | 213  | 14754  |
| YML130C   | ERO1   |                       | 0 | iYML130C   | 13   | 1692 | 13175  |
| YML131W   | 0      | #N/A                  |   | iYML132W-  | 13   | 1098 | 10199  |
| YML132W   | COS3   |                       | 0 | iYML133C-1 | 13   | 1140 | 7244   |
| YML133C   | 0      | #N/A                  |   | iYML133C-0 | 13   | 4224 | 4684   |
| YMR001C   | CDC5   | MSD2 PKX2             |   | iYMR001C   | 13   | 2118 | 271136 |
| YMR002W   | 0      | #N/A                  |   | iYMR001C   | 13   | 471  | 272193 |
| YMR003W   | 0      | #N/A                  |   | iYMR002W   | 13   | 597  | 273118 |
| YMR004W   | MVP1   |                       | 0 | iYMR003W   | 13   | 1536 | 274017 |
| YMR005W   | TAF4   | MPT1 TAF48 TSG2 TIF31 |   | iYMR004W   | 13   | 1167 | 276045 |
| YMR006C   | PLB2   |                       | 0 | iYMR006C   | 13   | 2121 | 279681 |
| YMR007W   | 0      | #N/A                  |   | iYMR006C   | 13   | 381  | 279960 |
| YMR008C   | PLB1   |                       | 0 | iYMR008C   | 13   | 1995 | 282584 |
| YMR009W   | 0      | #N/A                  |   | iYMR008C   | 13   | 540  | 284101 |
| YMR010W   | 0      | #N/A                  |   | iYMR009W   | 13   | 1218 | 285099 |
| YMR011W   | HXT2   |                       | 0 | iYMR010W-  | 13   | 1626 | 288078 |
| YMR012W   | CLU1   | TIF31                 |   | iE(UUC)M   | 13   | 3834 | 291133 |
| YMR013C   | SEC59  |                       | 0 | iYMR013C-  | 13   | 1560 | 296737 |
| YMR014W   | BUD22  |                       | 0 | iYMR013C-  | 13   | 1560 | 298867 |

|           |        |               |   |            |    |      |        |
|-----------|--------|---------------|---|------------|----|------|--------|
| YMR015C   | ERG5   |               | 0 | iYMR015C   | 13 | 1617 | 302484 |
| YMR016C   | SOK2   |               | 0 | iYMR016C-  | 13 | 2358 | 305592 |
| YMR017W   | SPO20  | DBI9          |   | iYMR016C-  | 13 | 1194 | 307488 |
| YMR018W   | 0      | #N/A          |   | iYMR017W   | 13 | 1545 | 310207 |
| YMR019W   | STB4   |               | 0 | iYMR018W   | 13 | 2850 | 312155 |
| YMR020W   | FMS1   |               | 0 | iYMR019W   | 13 | 1527 | 315376 |
| YMR021C   | MAC1   | CUA1          |   | iYMR021C   | 13 | 1254 | 318417 |
| YMR022W   | QRI8   | UBC7          |   | iYMR021C   | 13 | 498  | 318679 |
| YMR023C   | MSS1   | PET53         |   | iYMR023C   | 13 | 1581 | 321016 |
| YMR024W   | MRPL3  |               | 0 | itA(AGC)M1 | 13 | 1173 | 321874 |
| YMR025W   | 0      |               | 0 | iYMR024W   | 13 | 888  | 323299 |
| YMR026C   | PEX12  | PAS11         |   | iYMR026C   | 13 | 1200 | 325434 |
| YMR027W   | HRT2   | #N/A          |   | iYMR026C   | 13 | 1413 | 325876 |
| YMR028W   | TAP42  |               | 0 | iYMR027W   | 13 | 1101 | 327481 |
| YMR029C   | 0      |               | 0 | iYMR029C   | 13 | 1572 | 330230 |
| YMR030W   | 0      |               | 0 | iYMR029C   | 13 | 1131 | 330792 |
| YMR031C   | 0      | #N/A          |   | iYMR031W-  | 13 | 2532 | 334742 |
| YMR031W-A | 0      | #N/A          |   | iYMR030W   | 13 | 327  | 334708 |
| YMR032W   | HOF1   | CYK2          |   | iYMR031W-  | 13 | 2010 | 335297 |
| YMR033W   | ARP9   | SWP59         |   | iYMR032W   | 13 | 1490 | 337787 |
| YMR034C   | 0      | #N/A          |   | iYMR034C   | 13 | 1305 | 340721 |
| YMR035W   | IMP2   |               | 0 | iYMR034C   | 13 | 534  | 341141 |
| YMR036C   | MIH1   |               | 0 | iYMR036C   | 13 | 1665 | 343519 |
| YMR037C   | MSN2   |               | 0 | iYMR037C   | 13 | 2115 | 346516 |
| YMR038C   | LYS7   | CCS           |   | iYMR038C   | 13 | 750  | 348259 |
| YMR039C   | SUB1   | TSP1          |   | iYMR039C   | 13 | 879  | 349521 |
| YMR040W   | 0      |               | 0 | iYMR039C   | 13 | 483  | 350380 |
| YMR041C   | 0      | #N/A          |   | iYMR041C   | 13 | 1008 | 351972 |
| YMR042W   | ARG80  | ARGR1         |   | itF(GAA)M  | 13 | 534  | 352602 |
| YMR043W   | MCM1   | FUN80         |   | iYMR042W   | 13 | 861  | 353870 |
| YMR044W   | IOC4   |               | 0 | iYMR043W   | 13 | 1428 | 355383 |
| YMR045C   | #N/A   | #N/A          |   | iYMR046W-  | 13 | #N/A | 362626 |
| YMR046C   | #N/A   | #N/A          |   | iYMR046W-  | 13 | #N/A | 362626 |
| YMR047C   | NUP116 | NSP116        |   | iYMR047C   | 13 | 3342 | 366704 |
| YMR048W   | CSM3   |               | 0 | iYMR047C   | 13 | 954  | 366980 |
| YMR049C   | ERB1   |               | 0 | iYMR049C-  | 13 | 2424 | 370516 |
| YMR050C   | #N/A   | #N/A          |   | iYMRCdelta | 13 | #N/A | 378324 |
| YMR051C   | #N/A   | #N/A          |   | iYMRCdelta | 13 | #N/A | 378324 |
| YMR052C-A | 0      | #N/A          |   | iYMR053C   | 13 | 366  | 380433 |
| YMR052W   | FAR3   |               | 0 | itW(CCA)M  | 13 | 615  | 379585 |
| YMR053C   | STB2   |               | 0 | iYMR053C   | 13 | 2553 | 382897 |
| YMR054W   | STV1   |               | 0 | iYMR053C   | 13 | 2673 | 383302 |
| YMR055C   | BUB2   | PAC7          |   | iYMR055C   | 13 | 921  | 387020 |
| YMR056C   | AAC1   |               | 0 | iYMR056C   | 13 | 930  | 388243 |
| YMR057C   | 0      | #N/A          |   | iYMR057C   | 13 | 372  | 388729 |
| YMR058W   | FET3   |               | 0 | iYMR057C   | 13 | 1911 | 388821 |
| YMR059W   | SEN15  |               | 0 | iYMR058W   | 13 | 447  | 391038 |
| YMR060C   | TOM37  | MAS37 PET3027 |   | iYMR060C   | 13 | 984  | 392514 |
| YMR061W   | RNA14  |               | 0 | iYMR060C   | 13 | 2034 | 392754 |
| YMR062C   | ECM40  | ARG7          |   | iYMR062C   | 13 | 1326 | 396378 |
| YMR063W   | RIM9   |               | 0 | iYMR062C   | 13 | 720  | 397076 |

|           |       |                |  |              |    |      |        |
|-----------|-------|----------------|--|--------------|----|------|--------|
| YMR064W   | AEP1  | NCA1           |  | iYMR063W     | 13 | 1557 | 397902 |
| YMR065W   | KAR5  | FIG3           |  | iYMR064W     | 13 | 1515 | 399701 |
| YMR066W   | SOV1  |                |  | 0 iYMR065W   | 13 | 2697 | 401540 |
| YMR067C   | 0     |                |  | 0 iYMR067C   | 13 | 1251 | 405572 |
| YMR068W   | AVO2  |                |  | 0 iYMR067C   | 13 | 1281 | 406303 |
| YMR069W   | 0     |                |  | 0 iYMR068W   | 13 | 858  | 407708 |
| YMR070W   | MOT3  | ROX7           |  | iYMR069W     | 13 | 1473 | 409153 |
| YMR071C   | 0     |                |  | 0 iYMR071C   | 13 | 504  | 411264 |
| YMR072W   | ABF2  |                |  | 0 iYMR071C   | 13 | 552  | 411568 |
| YMR073C   | 0     | #N/A           |  | iYMR073C     | 13 | 606  | 412872 |
| YMR074C   | 0     | #N/A           |  | iYMR074C     | 13 | 438  | 413472 |
| YMR075C-A | 0     | #N/A           |  | iYMR075C-    | 13 | 366  | 416052 |
| YMR075W   | 0     |                |  | 0 iYMR074C   | 13 | 2055 | 413981 |
| YMR076C   | PDS5  |                |  | 0 iYMR076C   | 13 | 3834 | 420028 |
| YMR077C   | VPS20 | CHM6           |  | iYMR077C     | 13 | 666  | 422148 |
| YMR078C   | CTF18 | CHL12          |  | iYMR078C     | 13 | 2226 | 424727 |
| YMR079W   | SEC14 | PIT1           |  | iYMR078C     | 13 | 1071 | 424988 |
| YMR080C   | NAM7  | IFS2 MOF4 UPF1 |  | iYMR080C     | 13 | 2916 | 429626 |
| YMR081C   | ISF1  | MBR3           |  | iYMR081C     | 13 | 1017 | 431094 |
| YMR082C   | 0     | #N/A           |  | iYMR082C-    | 13 | 357  | 432124 |
| YMR083W   | ADH3  |                |  | 0 iYMR082C-  | 13 | 1128 | 434787 |
| YMR084W   | 0     | #N/A           |  | iYMR083W     | 13 | 789  | 436627 |
| YMR085W   | 0     | #N/A           |  | iYMR084W     | 13 | 1299 | 437490 |
| YMR086C-A | 0     | #N/A           |  | iYMR086C-    | 13 | 339  | 442363 |
| YMR086W   | 0     | #N/A           |  | iYMR085W     | 13 | 2883 | 439207 |
| YMR087W   | 0     | #N/A           |  | iYMR086C-    | 13 | 855  | 442526 |
| YMR088C   | 0     | #N/A           |  | iYMR088C     | 13 | 1689 | 445101 |
| YMR089C   | YTA12 | RCA1           |  | iYMR089C     | 13 | 2478 | 448085 |
| YMR090W   | 0     | #N/A           |  | iYMR089C     | 13 | 684  | 449244 |
| YMR091C   | NPL6  |                |  | 0 iYMR091C   | 13 | 1308 | 451364 |
| YMR092C   | AIP1  |                |  | 0 iYMR092C   | 13 | 1848 | 453478 |
| YMR093W   | UTP15 |                |  | 0 iYMR092C   | 13 | 1542 | 454014 |
| YMR094W   | CTF13 | CBF3C          |  | iYMR093W     | 13 | 1437 | 455824 |
| YMR095C   | SNO1  |                |  | 0 iYMR095C   | 13 | 675  | 457958 |
| YMR096W   | SNZ1  |                |  | 0 iYMR095C   | 13 | 894  | 458407 |
| YMR097C   | 0     |                |  | 0 iYMR097C   | 13 | 1104 | 460526 |
| YMR098C   | 0     | #N/A           |  | iYMR098C     | 13 | 1839 | 462608 |
| YMR099C   | 0     | #N/A           |  | iYMR099C     | 13 | 894  | 464826 |
| YMR100W   | MUB1  |                |  | 0 iYMR099C   | 13 | 1863 | 466299 |
| YMR101C   | SRT1  |                |  | 0 iYMR101C   | 13 | 1032 | 469475 |
| YMR102C   | 0     | #N/A           |  | iYMR102C     | 13 | 2505 | 472351 |
| YMR103C   | 0     | #N/A           |  | iYMR103C     | 13 | 363  | 473263 |
| YMR104C   | YPK2  | YKR2           |  | iYMR104C     | 13 | 2034 | 475452 |
| YMR105C   | PGM2  | GAL5           |  | iYMR105C     | 13 | 1710 | 477605 |
| YMR106C   | YKU80 | HDF2           |  | iYMR106C     | 13 | 1890 | 480189 |
| YMR107W   | 0     |                |  | 0 iYMRWdelta | 13 | 348  | 483013 |
| YMR108W   | ILV2  | SMR1 THI1      |  | iYMR107W     | 13 | 2064 | 484083 |
| YMR109W   | MYO5  |                |  | 0 iYMR108W   | 13 | 3660 | 486586 |
| YMR110C   | 0     | #N/A           |  | iYMR110C     | 13 | 1599 | 491991 |
| YMR111C   | 0     | #N/A           |  | iYMR111C     | 13 | 1389 | 493791 |
| YMR112C   | MED11 |                |  | 0 iYMR112C   | 13 | 396  | 494494 |

|           |        |                  |   |            |    |      |        |
|-----------|--------|------------------|---|------------|----|------|--------|
| YMR113W   | FOL3   |                  | 0 | iYMR112C   | 13 | 1284 | 494998 |
| YMR114C   | 0      | #N/A             |   | iYMR114C   | 13 | 1107 | 497448 |
| YMR115W   | 0      |                  |   | 0 iYMR114C | 13 | 1506 | 497703 |
| YMR116C   | ASC1   | CPC2             |   | iYMR116C   | 13 | 1233 | 500687 |
| YMR117C   | SPC24  |                  | 0 | iYMR117C   | 13 | 642  | 501890 |
| YMR118C   | 0      | #N/A             |   | iYMR118C   | 13 | 591  | 502733 |
| YMR119W   | ASI1   |                  | 0 | itL(CAA)M  | 13 | 1875 | 505332 |
| YMR119W-A | 0      | #N/A             |   | itL(CAA)M  | 13 | 375  | 506995 |
| YMR120C   | ADE17  |                  | 0 | iYMR120C   | 13 | 1779 | 509279 |
| YMR121C   | RPL15B |                  | 0 | iYMR121C   | 13 | 615  | 510347 |
| YMR122C   | 0      | #N/A             |   | iYMR122C-  | 13 | 375  | 511074 |
| YMR123W   | PKR1   |                  | 0 | iYMR122C-  | 13 | 369  | 513592 |
| YMR124W   | 0      | #N/A             |   | iYMR123W   | 13 | 2832 | 514455 |
| YMR125W   | STO1   | CBC1 CBP80 GCR3  |   | iYMR124W   | 13 | 2908 | 517538 |
| YMR126C   | 0      |                  | 0 | iYMR126C   | 13 | 1029 | 521788 |
| YMR127C   | SAS2   |                  | 0 | iYMR127C   | 13 | 1017 | 523344 |
| YMR128W   | ECM16  | DHR1             |   | iYMR127C   | 13 | 3804 | 523695 |
| YMR129W   | POM152 |                  | 0 | iYMR128W   | 13 | 4014 | 527803 |
| YMR130W   | 0      | #N/A             |   | iYMR129W   | 13 | 909  | 532118 |
| YMR131C   | RRB1   |                  | 0 | iYMR131C   | 13 | 1536 | 534697 |
| YMR132C   | 0      |                  | 0 | iYMR132C   | 13 | 627  | 535569 |
| YMR133W   | REC114 |                  | 0 | iYMR132C   | 13 | 1403 | 536206 |
| YMR134W   | 0      | #N/A             |   | iYMR133W   | 13 | 714  | 537837 |
| YMR135C   | 0      | DCR1             |   | iYMR135W-  | 13 | 1368 | 540055 |
| YMR135W-A | 0      | #N/A             |   | iYMR134W   | 13 | 534  | 539910 |
| YMR136W   | GAT2   |                  | 0 | iYMR135W-  | 13 | 1683 | 541198 |
| YMR137C   | PSO2   | SNM1             |   | iYMR137C   | 13 | 1986 | 544962 |
| YMR138W   | CIN4   | GTP1 UGX1        |   | iYMR137C   | 13 | 576  | 545154 |
| YMR139W   | RIM11  | GSK3 MDS1        |   | iYMR138W   | 13 | 1113 | 546124 |
| YMR140W   | 0      |                  | 0 | iYMR139W   | 13 | 1470 | 547713 |
| YMR141C   | 0      | #N/A             |   | iYMR141C   | 13 | 309  | 550043 |
| YMR142C   | RPL13B |                  | 0 | iYMR142C   | 13 | 1002 | 551206 |
| YMR143W   | RPS16A |                  | 0 | iYMR142C   | 13 | 976  | 551927 |
| YMR144W   | 0      | #N/A             |   | iYMR143W   | 13 | 1029 | 553361 |
| YMR145C   | NDE1   | NDH1             |   | iYMR145C   | 13 | 1683 | 556474 |
| YMR146C   | TIF34  |                  | 0 | iYMR146C   | 13 | 1044 | 558523 |
| YMR147W   | 0      | #N/A             |   | iYMR146C   | 13 | 672  | 559198 |
| YMR148W   | 0      | #N/A             |   | iYMR147W   | 13 | 447  | 560365 |
| YMR149W   | SWP1   |                  | 0 | iYMR148W   | 13 | 861  | 560995 |
| YMR150C   | IMP1   | PET-TS2858       |   | iYMR151W   | 13 | 573  | 562527 |
| YMR151W   | YIM2   |                  | 0 | iYMR149W   | 13 | 438  | 562505 |
| YMR152W   | YIM1   |                  | 0 | iYMR151W   | 13 | 1098 | 563095 |
| YMR153C-A | 0      | #N/A             |   | iYMR153C-  | 13 | 336  | 565908 |
| YMR153W   | NUP53  |                  | 0 | iYMR152W   | 13 | 1428 | 564434 |
| YMR154C   | RIM13  | CPL1             |   | iYMR154C   | 13 | 2184 | 568181 |
| YMR155W   | 0      | #N/A             |   | iYMR154C   | 13 | 1644 | 568550 |
| YMR156C   | TPP1   |                  | 0 | iYMR156C   | 13 | 717  | 571015 |
| YMR157C   | 0      |                  | 0 | iYMR157C   | 13 | 768  | 572043 |
| YMR158W   | 0      |                  | 0 | iYMR157C   | 13 | 468  | 572247 |
| YMR158W-A | 0      | #N/A             |   | iYMR158C-  | 13 | 321  | 574470 |
| YMR159C   | APG16  | APG16 CVT11 SAP1 |   | iYMR159C   | 13 | 453  | 574927 |

|           |        |                 |      |             |    |      |        |
|-----------|--------|-----------------|------|-------------|----|------|--------|
| YMR160W   |        | 0               | #N/A | iYMR159C    | 13 | 2451 | 575065 |
| YMR161W   | HLJ1   |                 |      | 0 iYMR160W  | 13 | 675  | 577717 |
| YMR162C   | DNF3   |                 |      | 0 iYMR162C  | 13 | 4971 | 583920 |
| YMR163C   |        | 0               | #N/A | iYMR163C    | 13 | 2118 | 586387 |
| YMR164C   | MSS11  |                 |      | 0 iYMR164C  | 13 | 2277 | 589549 |
| YMR165C   | SMP2   |                 |      | 0 iYMR165C  | 13 | 2589 | 592627 |
| YMR166C   |        | 0               | #N/A | iYMR166C    | 13 | 1107 | 594472 |
| YMR167W   | MLH1   | PMS2            |      | iYMR166C    | 13 | 2310 | 594885 |
| YMR168C   | CEP3   | CBF3 CBF3B CSL1 |      | iYMR168C    | 13 | 1827 | 599157 |
| YMR169C   | ALD3   |                 |      | 0 iYMR169C  | 13 | 1521 | 600871 |
| YMR170C   | ALD2   |                 |      | 0 iYMR170C  | 13 | 1521 | 603081 |
| YMR171C   |        | 0               | #N/A | iYMR171C    | 13 | 1653 | 605519 |
| YMR172C-A |        | 0               | #N/A | iYMR172C-   | 13 | 384  | 608210 |
| YMR172W   | HOT1   |                 |      | 0 iYMR171C  | 13 | 2160 | 605980 |
| YMR173W   | DDR48  | FSP             |      | iYMR172C-   | 13 | 1293 | 608688 |
| YMR173W-A |        | 0               | #N/A | iYMR172C-   | 13 | 1185 | 608896 |
| YMR174C   | PAI3   |                 |      | 0 iYMR174C  | 13 | 207  | 610364 |
| YMR175W   | SIP18  |                 |      | 0 iYMR174C  | 13 | 240  | 611015 |
| YMR176W   | ECM5   |                 |      | 0 iYMR175W  | 13 | 4236 | 611739 |
| YMR177W   | MMT1   |                 |      | 0 iYMR176W  | 13 | 1533 | 616565 |
| YMR178W   |        | 0               | #N/A | iYMR177W    | 13 | 825  | 618478 |
| YMR179W   | SPT21  |                 |      | 0 iYMR178W  | 13 | 2277 | 619857 |
| YMR180C   | CTL1   | CTH1            |      | iYMR180C    | 13 | 963  | 623212 |
| YMR181C   |        | 0               | #N/A | iYMR181C    | 13 | 465  | 624079 |
| YMR182C   | RGM1   |                 |      | 0 iYMR182C- | 13 | 636  | 625166 |
| YMR183C   | SSO2   |                 |      | 0 iYMR183C  | 13 | 888  | 627807 |
| YMR184W   |        | 0               | #N/A | iYMR183C    | 13 | 597  | 628188 |
| YMR185W   |        | 0               | #N/A | iYMR184W    | 13 | 2946 | 629024 |
| YMR186W   | HSC82  |                 |      | 0 iYMR185W  | 13 | 2118 | 632354 |
| YMR187C   |        | 0               | #N/A | iYMR187C    | 13 | 1296 | 635983 |
| YMR188C   |        | 0               |      | 0 iYMR188C  | 13 | 714  | 637003 |
| YMR189W   | GCV2   | GSD2            |      | iYMR188C    | 13 | 3105 | 637499 |
| YMR190C   | SGS1   |                 |      | 0 iYMR190C  | 13 | 4344 | 645257 |
| YMR191W   |        | 0               |      | 0 iYMR190C  | 13 | 1377 | 645400 |
| YMR192W   |        | 0               |      | 0 iYMR191W  | 13 | 2163 | 647117 |
| YMR193C-A |        | 0               | #N/A | iYMR194W    | 13 | 387  | 651457 |
| YMR193W   | MRPL24 | MRPL14          |      | iYMR192W    | 13 | 777  | 650035 |
| YMR194W   | RPL36A | RPL39B          |      | iYMR193W    | 13 | 766  | 651144 |
| YMR195W   | ICY1   |                 |      | 0 iYMR194C- | 13 | 384  | 654033 |
| YMR196W   |        | 0               | #N/A | iYMR195W    | 13 | 3267 | 655075 |
| YMR197C   | VTI1   |                 |      | 0 iYMR197C  | 13 | 654  | 659197 |
| YMR198W   | CIK1   |                 |      | 0 iYMR197C  | 13 | 1785 | 659744 |
| YMR199W   | CLN1   |                 |      | 0 iYMR198W  | 13 | 1641 | 662643 |
| YMR200W   | ROT1   |                 |      | 0 iYMR199W  | 13 | 771  | 664751 |
| YMR201C   | RAD14  |                 |      | 0 iYMR201C  | 13 | 1200 | 667043 |
| YMR202W   | ERG2   | END11           |      | iYMR201C    | 13 | 669  | 667536 |
| YMR203W   | TOM40  | ISP42 MOM38     |      | iYMR202W    | 13 | 1164 | 668491 |
| YMR204C   |        | 0               | #N/A | iYMR204C    | 13 | 1263 | 671324 |
| YMR205C   | PFK2   |                 |      | 0 iYMR205C  | 13 | 2880 | 674765 |
| YMR206W   |        | 0               | #N/A | iYMR205C    | 13 | 942  | 675895 |
| YMR207C   | HFA1   |                 |      | 0 iYMR207C  | 13 | 6372 | 683563 |

|           |        |                   |              |    |      |        |
|-----------|--------|-------------------|--------------|----|------|--------|
| YMR208W   | ERG12  | RAR1              | iYMR207C     | 13 | 1332 | 684466 |
| YMR209C   | 0      | #N/A              | iYMR209C     | 13 | 1374 | 687283 |
| YMR210W   | 0      | #N/A              | iYMR209C     | 13 | 1350 | 687515 |
| YMR211W   | DML1   |                   | 0 iYMR210W   | 13 | 1428 | 689082 |
| YMR212C   | EFR3   |                   | 0 iYMR212C   | 13 | 2349 | 693042 |
| YMR213W   | CEF1   |                   | 0 iYMR212C   | 13 | 1773 | 693380 |
| YMR214W   | SCJ1   |                   | 0 iYMR213W   | 13 | 1215 | 695268 |
| YMR215W   | GAS3   |                   | 0 iYMR214W   | 13 | 1575 | 696795 |
| YMR216C   | SKY1   |                   | 0 iYMR216C   | 13 | 2229 | 701038 |
| YMR217W   | GUA1   |                   | 0 iYMR216C   | 13 | 1578 | 701789 |
| YMR218C   | TRS130 |                   | 0 iYMR218C   | 13 | 3309 | 706886 |
| YMR219W   | ESC1   |                   | 0 iYMR218C   | 13 | 4977 | 707132 |
| YMR220W   | ERG8   |                   | 0 iYMR219W   | 13 | 1356 | 712315 |
| YMR221C   | 0      |                   | 0 iYMR221C   | 13 | 1515 | 715444 |
| YMR222C   | FSH2   |                   | 0 iYMR222C   | 13 | 672  | 716308 |
| YMR223W   | UBP8   |                   | 0 iYMR222C   | 13 | 1416 | 716714 |
| YMR224C   | MRE11  | NGS1 RAD58 XRS4   | iYMR224C     | 13 | 2079 | 720652 |
| YMR225C   | MRPL44 | YMR44             | iYMR225C     | 13 | 444  | 721402 |
| YMR226C   | 0      | #N/A              | iYMR226C     | 13 | 804  | 722395 |
| YMR227C   | TAF7   | TAF67 TafII67     | iYMR227C     | 13 | 1773 | 724384 |
| YMR228W   | MTF1   |                   | 0 iYMR227C   | 13 | 1026 | 724625 |
| YMR229C   | RRP5   |                   | 0 iYMR229C   | 13 | 5190 | 731122 |
| YMR230W   | RPS10B |                   | 0 iYMR229C   | 13 | 728  | 732413 |
| YMR231W   | PEP5   | END1 VAM1 VPL9 Vf | iYMR230W     | 13 | 3090 | 733544 |
| YMR232W   | FUS2   |                   | 0 iYMR231W   | 13 | 2034 | 736925 |
| YMR233W   | TRI1   | #N/A              | iYMR232W     | 13 | 681  | 739184 |
| YMR234W   | RNH1   |                   | 0 iYMR233W   | 13 | 1047 | 740265 |
| YMR235C   | RNA1   |                   | 0 iYMR235C   | 13 | 1224 | 742734 |
| YMR236W   | TAF9   | TAF17 TafII17     | iYMR235C     | 13 | 474  | 742970 |
| YMR237W   | 0      |                   | 0 iYMR236W   | 13 | 2175 | 743748 |
| YMR238W   | DFG5   |                   | 0 iYMR237W   | 13 | 1377 | 746352 |
| YMR239C   | RNT1   |                   | 0 iYMR239C   | 13 | 1416 | 749676 |
| YMR240C   | CUS1   |                   | 0 iYMR240C   | 13 | 1311 | 751239 |
| YMR241W   | YHM2   |                   | 0 iYMR240C   | 13 | 945  | 751960 |
| YMR242C   | RPL20A | RPL18A2           | iYMR242C     | 13 | 543  | 753766 |
| YMR243C   | ZRC1   | OSR1              | iYMR243C     | 13 | 1329 | 756165 |
| YMR244C-A | 0      | #N/A              | iYMR245W     | 13 | 315  | 758830 |
| YMR244W   | 0      | #N/A              | iYMR243C     | 13 | 1068 | 757249 |
| YMR245W   | 0      | #N/A              | iYMR244W     | 13 | 621  | 758562 |
| YMR246W   | FAA4   |                   | 0 iYMR245W   | 13 | 2085 | 759806 |
| YMR247C   | 0      | #N/A              | iYMR247C     | 13 | 4689 | 768038 |
| YMR250W   | GAD1   |                   | 0 iYMRWdelta | 13 | 1758 | 770800 |
| YMR251W   | 0      | #N/A              | iYMR250W     | 13 | 1101 | 772914 |
| YMR251W-A | HOR7   |                   | 0 iYMR251W   | 13 | 180  | 774751 |
| YMR252C   | 0      | #N/A              | iYMR252C     | 13 | 405  | 775718 |
| YMR253C   | 0      | #N/A              | iYMR253C     | 13 | 1245 | 777189 |
| YMR254C   | 0      | #N/A              | iYMR254C     | 13 | 309  | 777922 |
| YMR255W   | GFD1   |                   | 0 iYMR254C   | 13 | 567  | 778000 |
| YMR256C   | COX7   |                   | 0 iYMR256C   | 13 | 183  | 779126 |
| YMR257C   | PET111 |                   | 0 iYMR257C   | 13 | 2403 | 782030 |
| YMR258C   | 0      | #N/A              | iYMR258C     | 13 | 1662 | 784280 |

|           |        |                  |             |    |      |        |
|-----------|--------|------------------|-------------|----|------|--------|
| YMR259C   | 0      | #N/A             | iYMR259C    | 13 | 4263 | 788882 |
| YMR260C   | TIF11  |                  | 0 iYMR260C  | 13 | 462  | 789838 |
| YMR261C   | TPS3   |                  | 0 iYMR261C  | 13 | 3165 | 793368 |
| YMR262W   | 0      | #N/A             | iYMR261C    | 13 | 942  | 793725 |
| YMR263W   | SAP30  |                  | 0 iYMR262W  | 13 | 606  | 794918 |
| YMR264W   | CUE1   |                  | 0 iYMR263W  | 13 | 612  | 795804 |
| YMR265C   | 0      | #N/A             | iYMR265C    | 13 | 1386 | 797924 |
| YMR266W   | RSN1   |                  | 0 iYMR265C  | 13 | 2862 | 798517 |
| YMR267W   | PPA2   | IPP2             | iYMR266W    | 13 | 933  | 801771 |
| YMR268C   | PRP24  |                  | 0 iYMR268C  | 13 | 1335 | 804221 |
| YMR269W   | 0      | #N/A             | iYMR268C    | 13 | 429  | 804663 |
| YMR270C   | RRN9   |                  | 0 iYMR270C  | 13 | 1098 | 806423 |
| YMR271C   | URA10  |                  | 0 iYMR271C  | 13 | 684  | 807548 |
| YMR272C   | SCS7   | FAH1             | iYMR272C    | 13 | 1155 | 810777 |
| YMR273C   | ZDS1   | CES1 CKM1 NRC1 O | iYMR273C    | 13 | 2748 | 813980 |
| YMR274C   | RCE1   |                  | 0 iYMR274C  | 13 | 948  | 815311 |
| YMR275C   | BUL1   | DAG1 RDS1 SMM2   | iYMR275C    | 13 | 2931 | 818581 |
| YMR276W   | DSK2   |                  | 0 iYMR275C  | 13 | 1122 | 818827 |
| YMR277W   | FCP1   |                  | 0 iYMR276W  | 13 | 2199 | 820256 |
| YMR278W   | 0      | #N/A             | iYMR277W    | 13 | 1869 | 822763 |
| YMR279C   | 0      | #N/A             | iYMR279C    | 13 | 1623 | 826351 |
| YMR280C   | CAT8   | DIL1 MSP8        | iYMR280C    | 13 | 4302 | 831329 |
| YMR281W   | GPI12  |                  | 0 iYMR280C  | 13 | 915  | 832339 |
| YMR282C   | AEP2   | ATP13            | iYMR282C    | 13 | 1743 | 835098 |
| YMR283C   | RIT1   |                  | 0 iYMR283C  | 13 | 1542 | 836867 |
| YMR284W   | YKU70  | HDF1 NES24       | itY(GUA)M2  | 13 | 1809 | 838187 |
| YMR285C   | NGL2   |                  | 0 iYMR285C  | 13 | 1548 | 841691 |
| YMR286W   | MRPL33 |                  | 0 iYMR285C  | 13 | 261  | 841942 |
| YMR287C   | MSU1   | DSS1             | iYMR287C    | 13 | 2910 | 845345 |
| YMR288W   | HSH155 |                  | 0 iYMR287C  | 13 | 2916 | 845571 |
| YMR289W   | 0      |                  | 0 iYMR288W  | 13 | 1125 | 848685 |
| YMR290C   | HAS1   |                  | 0 iYMR290W- | 13 | 1518 | 851591 |
| YMR290W-A | 0      | #N/A             | iYMR289W    | 13 | 348  | 851422 |
| YMR291W   | 0      | #N/A             | iYMR290W-   | 13 | 1761 | 852630 |
| YMR292W   | GOT1   |                  | 0 iYMR291W  | 13 | 499  | 854795 |
| YMR293C   | 0      | #N/A             | iYMR293C    | 13 | 1395 | 856793 |
| YMR294W   | JNM1   | INS1 PAC3        | iYMR293C    | 13 | 1122 | 856966 |
| YMR294W-A | 0      | #N/A             | iYMR294W    | 13 | 360  | 858209 |
| YMR295C   | 0      | #N/A             | iYMR295C    | 13 | 594  | 858890 |
| YMR296C   | LCB1   | END8 TSC2        | iYMR296C    | 13 | 1677 | 860891 |
| YMR297W   | PRC1   | LBC1             | iYMR296C    | 13 | 1599 | 861922 |
| YMR298W   | 0      | #N/A             | iYMR297W    | 13 | 453  | 863819 |
| YMR299C   | 0      |                  | 0 iYMR299C  | 13 | 939  | 865350 |
| YMR300C   | ADE4   |                  | 0 iYMR300C  | 13 | 1533 | 867091 |
| YMR301C   | ATM1   |                  | 0 iYMR301C  | 13 | 2073 | 869627 |
| YMR302C   | PRP12  | RNA12 YME2       | iYMR302C    | 13 | 2553 | 872625 |
| YMR303C   | ADH2   | ADR2             | iYMR303C    | 13 | 1047 | 874337 |
| YMR304C-A | 0      | #N/A             | iYMR305C    | 13 | 351  | 879130 |
| YMR304W   | UBP15  |                  | 0 iYMR303C  | 13 | 3693 | 874987 |
| YMR305C   | SCW10  |                  | 0 iYMR305C  | 13 | 1170 | 880232 |
| YMR306C-A | 0      | #N/A             | iYMR306C-   | 13 | 390  | 886572 |

|           |       |                   |             |             |    |      |        |
|-----------|-------|-------------------|-------------|-------------|----|------|--------|
| YMR306W   | FKS3  |                   | 0           | iYMR305C    | 13 | 5358 | 881159 |
| YMR308C   | PSE1  | KAP121            |             | iYMR308C    | 13 | 3270 | 892221 |
| YMR309C   | NIP1  |                   | 0           | iYMR309C    | 13 | 2439 | 895426 |
| YMR310C   |       | 0                 | #N/A        | iYMR310C    | 13 | 954  | 896669 |
| YMR311C   | GLC8  |                   | 0           | iYMR311C    | 13 | 690  | 897603 |
| YMR312W   | ELP6  | HAP3 TOT6         |             | iYMR311C    | 13 | 822  | 898405 |
| YMR313C   |       | 0                 |             | 0 iYMR313C  | 13 | 1929 | 901307 |
| YMR314W   | PRE5  |                   |             | 0 iYMR313C  | 13 | 705  | 901709 |
| YMR315W   |       | 0                 | #N/A        | iYMR314W    | 13 | 1050 | 902800 |
| YMR316C-A |       | 0                 | #N/A        | iYMR316C-   | 13 | 312  | 905972 |
| YMR316C-B |       | 0                 | #N/A        | iYMR317W    | 13 | 309  | 907628 |
| YMR316W   | DIA1  |                   |             | 0 iYMR315W  | 13 | 1011 | 904824 |
| YMR317W   |       | 0                 | #N/A        | iYMR316C-   | 13 | 3423 | 907363 |
| YMR318C   | ADH6  | ADHVI             |             | iYMR318C    | 13 | 1083 | 912142 |
| YMR319C   | FET4  |                   |             | 0 iYMR319C- | 13 | 1659 | 914537 |
| YMR320W   |       | 0                 | #N/A        | iYMR319C-   | 13 | 306  | 916745 |
| YMR321C   |       | 0                 | #N/A        | iYMR321C    | 13 | 318  | 917895 |
| YMR322C   |       | 0                 | HSP34       | iYMR322C    | 13 | 714  | 919078 |
| YMR323W   |       | 0                 | #N/A        | iYMR322C    | 13 | 1314 | 920087 |
| YMR324C   |       | 0                 | #N/A        | iYMR324C    | 13 | 243  | 922443 |
| YMR325W   |       | 0                 | #N/A        | iYMR324C    | 13 | 375  | 922640 |
| YMR326C   |       | 0                 | #N/A        | #N/A        | 13 | 309  | 923801 |
| YNL001W   | DOM34 |                   |             | 0 iYNL002C  | 14 | 1161 | 627453 |
| YNL002C   | RLP7  | RPL7              |             | iYNL002C    | 14 | 969  | 627139 |
| YNL003C   | PET8  | SAM5              |             | iYNL003C    | 14 | 855  | 625826 |
| YNL004W   | HRB1  | TOM34             |             | iYNL005C    | 14 | 1290 | 623329 |
| YNL005C   | MRP7  | MRPL2             |             | iYNL005C    | 14 | 1116 | 622425 |
| YNL006W   | LST8  |                   |             | 0 iYNL007C  | 14 | 912  | 620064 |
| YNL007C   | SIS1  |                   |             | 0 iYNL007C  | 14 | 1059 | 619562 |
| YNL008C   | ASI3  |                   |             | 0 iYNL008C  | 14 | 2010 | 618216 |
| YNL009W   | IDP3  |                   |             | 0 iYNL010W  | 14 | 1263 | 614817 |
| YNL010W   |       | 0                 | #N/A        | iYNL011C    | 14 | 726  | 613631 |
| YNL011C   |       | 0                 | #N/A        | iYNL011C    | 14 | 1335 | 613166 |
| YNL012W   | SPO1  |                   |             | 0 iYNL013C  | 14 | 1980 | 609682 |
| YNL013C   |       | 0                 | #N/A        | iYNL013C    | 14 | 378  | 609506 |
| YNL014W   | HEF3  | EF-3 ZRG7         |             | iYNL015W    | 14 | 3135 | 606315 |
| YNL015W   | PBI2  | I2B IB2 LMA1      |             | iYNL016W    | 14 | 228  | 605380 |
| YNL016W   | PUB1  | RNP1              |             | iti(AAU)N2  | 14 | 1362 | 602903 |
| YNL017C   |       | 0                 | #N/A        | iti(AAU)N2  | 14 | 339  | 602472 |
| YNL018C   |       | 0                 | #N/A        | iYNL018C    | 14 | 1839 | 601770 |
| YNL019C   |       | 0                 | #N/A        | iYNL019C    | 14 | 855  | 599226 |
| YNL020C   | ARK1  |                   |             | 0 iYNL020C  | 14 | 1917 | 597535 |
| YNL021W   | HDA1  |                   |             | 0 iYNL022C  | 14 | 2121 | 593223 |
| YNL022C   |       | 0                 | #N/A        | iYNL022C    | 14 | 1473 | 592895 |
| YNL023C   | FAP1  |                   |             | 0 iYNL023C  | 14 | 2898 | 591156 |
| YNL024C   |       | 0                 | #N/A        | iYNL024C    | 14 | 741  | 587843 |
| YNL025C   | SSN8  | GIG3 NUT9 RYE2 SF |             | iYNL025C    | 14 | 972  | 585287 |
| YNL026W   |       | 0                 | OMP85 TOB55 | iYNL027W    | 14 | 1455 | 581916 |
| YNL027W   | CRZ1  | HAL8 TCN1         |             | iYNL028W    | 14 | 2037 | 579576 |
| YNL028W   |       | 0                 | #N/A        | iYNL030W    | 14 | 318  | 578675 |
| YNL029C   | KTR5  |                   |             | 0 iYNL028W  | 14 | 1569 | 578769 |



|         |        |             |   |            |    |      |        |
|---------|--------|-------------|---|------------|----|------|--------|
| YNL030W | HHF2   |             | 0 | iYNL031C   | 14 | 312  | 576723 |
| YNL031C | HHT2   |             | 0 | iYNL031C   | 14 | 411  | 576046 |
| YNL032W | SIW14  |             | 0 | iYNL033W   | 14 | 846  | 574502 |
| YNL033W | 0      | #N/A        |   | iYNL034W   | 14 | 855  | 572995 |
| YNL034W | 0      | #N/A        |   | itI(AAU)N1 | 14 | 1839 | 570473 |
| YNL035C | 0      | #N/A        |   | iYNL035C   | 14 | 1170 | 569687 |
| YNL036W | NCE103 | NCE3        |   | iYNL037C   | 14 | 666  | 559810 |
| YNL037C | IDH1   |             | 0 | iYNL037C   | 14 | 1083 | 558998 |
| YNL038W | GPI15  |             | 0 | iYNL039W   | 14 | 639  | 557016 |
| YNL039W | BDP1   | TFC5        |   | iYNL040W   | 14 | 1785 | 555044 |
| YNL040W | 0      | #N/A        |   | iYNL041C   | 14 | 1371 | 553376 |
| YNL041C | COD2   | COD2        |   | iYNL041C   | 14 | 2520 | 551983 |
| YNL042W | BOP3   |             | 0 | itP(UGG)N1 | 14 | 1191 | 548096 |
| YNL043C | 0      | #N/A        |   | iYNL043C   | 14 | 321  | 545905 |
| YNL044W | YIP3   |             | 0 | iYNL045W   | 14 | 610  | 545264 |
| YNL045W | 0      | #N/A        |   | iYNL046W   | 14 | 2016 | 542959 |
| YNL046W | 0      | #N/A        |   | iYNL047C   | 14 | 519  | 542300 |
| YNL047C | 0      | LIT1        |   | iYNL047C   | 14 | 1971 | 541877 |
| YNL048W | ALG11  |             | 0 | iYNL049C   | 14 | 1647 | 538169 |
| YNL049C | SFB2   |             | 0 | iYNL049C   | 14 | 2631 | 537907 |
| YNL050C | 0      | #N/A        |   | iYNL050C   | 14 | 904  | 534978 |
| YNL051W | COD4   | API4 COD4   |   | iYNL052W   | 14 | 1212 | 532655 |
| YNL052W | COX5A  |             | 0 | iYNL053W   | 14 | 462  | 531721 |
| YNL053W | MSG5   |             | 0 | iYNL054W   | 14 | 1470 | 529938 |
| YNL054W | VAC7   |             | 0 | iYNLWdelta | 14 | 3498 | 526082 |
| YNL055C | POR1   | OMP2 YVDAC1 |   | iYNL055C   | 14 | 852  | 518841 |
| YNL056W | 0      | #N/A        |   | iYNL057W   | 14 | 594  | 517245 |
| YNL057W | 0      | #N/A        |   | iYNL059C   | 14 | 333  | 516399 |
| YNL058C | 0      | #N/A        |   | iYNL057W   | 14 | 951  | 516709 |
| YNL059C | ARP5   |             | 0 | iYNL059C   | 14 | 2268 | 514931 |
| YNL061W | NOP2   | YNA1        |   | iYNL062C   | 14 | 1857 | 510536 |
| YNL062C | GCD10  |             | 0 | iYNL062C   | 14 | 1437 | 510208 |
| YNL063W | 0      | #N/A        |   | iYNL064C   | 14 | 945  | 507754 |
| YNL064C | YDJ1   | HSP40 MAS5  |   | iYNL064C   | 14 | 1230 | 507093 |
| YNL065W | AQR1   |             | 0 | iYNL066W   | 14 | 1761 | 503721 |
| YNL066W | SUN4   | SCW3        |   | iYNL067W   | 14 | 1263 | 501512 |
| YNL067W | RPL9B  |             | 0 | iYNL068C   | 14 | 576  | 499678 |
| YNL068C | FKH2   |             | 0 | iYNL068C   | 14 | 2589 | 498286 |
| YNL069C | RPL16B | RP23        |   | iYNL069C   | 14 | 1046 | 494998 |
| YNL070W | TOM7   | MOM7 YOK22  |   | iYNL071W   | 14 | 183  | 493363 |
| YNL071W | LAT1   | ODP2 PDA2   |   | iYNL072W   | 14 | 1449 | 491520 |
| YNL072W | RNH35  | RNH35 Rnh2A |   | iYNL073W   | 14 | 924  | 490314 |
| YNL073W | MSK1   |             | 0 | iYNL074C   | 14 | 1731 | 488383 |
| YNL074C | MLF3   | YMK1        |   | iYNL074C   | 14 | 1359 | 488121 |
| YNL075W | IMP4   |             | 0 | iYNL076W   | 14 | 873  | 485604 |
| YNL076W | MKS1   | LYS80       |   | iYNL077W   | 14 | 1755 | 483553 |
| YNL077W | 0      |             | 0 | iYNL078W   | 14 | 1587 | 481388 |
| YNL078W | NIS1   | JIP1        |   | iYNL079C   | 14 | 1224 | 479765 |
| YNL079C | TPM1   | tropomyosin |   | iYNL079C   | 14 | 600  | 479162 |
| YNL080C | 0      | #N/A        |   | iYNL080C   | 14 | 1101 | 478029 |
| YNL081C | 0      |             | 0 | iYNL081C   | 14 | 432  | 476616 |

|         |       |                  |      |             |    |      |        |
|---------|-------|------------------|------|-------------|----|------|--------|
| YNL082W | PMS1  |                  | 0    | iYNL083W    | 14 | 2715 | 473295 |
| YNL083W |       | 0                | #N/A | iYNL084C    | 14 | 1485 | 471374 |
| YNL084C | END3  |                  |      | 0 iYNL084C  | 14 | 1050 | 471099 |
| YNL085W | MKT1  |                  |      | 0 iYNL086W  | 14 | 2493 | 467128 |
| YNL086W |       | 0                | #N/A | iYNL087W    | 14 | 309  | 466331 |
| YNL087W |       | 0                |      | 0 iYNL088W  | 14 | 3537 | 462408 |
| YNL088W | TOP2  | TOR3 TRF3        |      | iYNL089C    | 14 | 4287 | 457701 |
| YNL089C |       | 0                | #N/A | iYNL089C    | 14 | 477  | 457166 |
| YNL090W | RHO2  |                  |      | 0 iYNL091W  | 14 | 579  | 456562 |
| YNL091W | NST1  |                  |      | 0 iYNL092W  | 14 | 3723 | 452405 |
| YNL092W |       | 0                | #N/A | iYNL093W    | 14 | 1203 | 450868 |
| YNL093W | YPT53 |                  |      | 0 iYNL094W  | 14 | 663  | 449865 |
| YNL094W | APP1  |                  |      | 0 iYNL095C  | 14 | 1764 | 447608 |
| YNL095C |       | 0                | #N/A | iYNL095C    | 14 | 1929 | 446837 |
| YNL096C | RPS7B |                  |      | 0 iYNL096C  | 14 | 918  | 444312 |
| YNL097C | PHO23 |                  |      | 0 iYNL097C  | 14 | 993  | 442355 |
| YNL098C | RAS2  | CTN5 CYR3 GLC5 T |      | iYNL098C    | 14 | 969  | 440567 |
| YNL099C | OCA1  |                  |      | 0 iYNL099C  | 14 | 717  | 439280 |
| YNL100W |       | 0                | #N/A | iYNL101W    | 14 | 705  | 437610 |
| YNL101W |       | 0                |      | 0 iYNL102W  | 14 | 2142 | 434996 |
| YNL102W | POL1  | CDC17 CRT5 HPR3  |      | iYNL103W    | 14 | 4407 | 430084 |
| YNL103W | MET4  |                  |      | 0 iYNL104C  | 14 | 2019 | 427732 |
| YNL104C | LEU4  |                  |      | 0 iYNL104C  | 14 | 1860 | 426751 |
| YNL105W |       | 0                | #N/A | iYNL107W    | 14 | 429  | 424152 |
| YNL106C | INP52 | SJL2             |      | iYNL105W    | 14 | 3552 | 424492 |
| YNL107W | YAF9  |                  |      | 0 iYNL108C  | 14 | 681  | 420095 |
| YNL108C |       | 0                | #N/A | iYNL108C    | 14 | 813  | 419823 |
| YNL109W |       | 0                | #N/A | iYNL110C    | 14 | 546  | 418961 |
| YNL110C | NOP15 |                  |      | 0 iYNL110C  | 14 | 663  | 418485 |
| YNL111C | CYB5  |                  |      | 0 iYNL111C  | 14 | 363  | 417299 |
| YNL112W | DBP2  |                  |      | 0 iYNL113W  | 14 | 2643 | 413636 |
| YNL113W | RPC19 |                  |      | 0 iYNL115C  | 14 | 429  | 412768 |
| YNL114C |       | 0                | #N/A | iYNL113W    | 14 | 372  | 413052 |
| YNL115C |       | 0                | #N/A | iYNL115C    | 14 | 1935 | 412050 |
| YNL116W |       | 0                |      | 0 iYNL117W  | 14 | 1569 | 408338 |
| YNL117W | MLS1  |                  |      | 0 iYNL118C  | 14 | 1665 | 406355 |
| YNL118C | DCP2  | PSU1             |      | iYNL118C    | 14 | 2913 | 405561 |
| YNL119W |       | 0                |      | 0 iYNL121C  | 14 | 1482 | 401037 |
| YNL120C |       | 0                | #N/A | iYNL119W    | 14 | 486  | 401515 |
| YNL121C | TOM70 | MAS70 MOM72 OMP  |      | iYNL121C    | 14 | 1854 | 400534 |
| YNL122C |       | 0                | #N/A | iYNL122C    | 14 | 348  | 398367 |
| YNL123W |       | 0                | #N/A | iYNL124W    | 14 | 2994 | 394682 |
| YNL124W | NAF1  |                  |      | 0 iYNL125C  | 14 | 1479 | 392889 |
| YNL125C | ESBP6 | MCH3             |      | iYNL125C    | 14 | 2022 | 392164 |
| YNL126W | SPC98 |                  |      | 0 iYNL127W  | 14 | 2541 | 387224 |
| YNL127W |       | 0                |      | 0 iYNL128W  | 14 | 2862 | 383984 |
| YNL128W | TEP1  |                  |      | 0 iYNL129W  | 14 | 1305 | 382356 |
| YNL129W |       | 0                |      | 0 iYNL130C  | 14 | 723  | 381477 |
| YNL130C | CPT1  |                  |      | 0 iYNL130C  | 14 | 1602 | 381156 |
| YNL131W | TOM22 | MAS17 MAS22 MOM  |      | iYNL132W    | 14 | 459  | 378764 |
| YNL132W | KRE33 |                  |      | 0 itF(GAA)N | 14 | 3171 | 375318 |

|         |        |                 |   |            |    |      |        |
|---------|--------|-----------------|---|------------|----|------|--------|
| YNL133C | FYV6   |                 | 0 | iYNL133C   | 14 | 522  | 374689 |
| YNL134C | 0      | #N/A            |   | iYNL134C   | 14 | 1131 | 373578 |
| YNL135C | FPR1   | FKB1 RBP1       |   | iYNL135C   | 14 | 345  | 372223 |
| YNL136W | 0      |                 | 0 | iYNL137C   | 14 | 1278 | 370365 |
| YNL137C | NAM9   | MNA6            |   | iYNL137C   | 14 | 1461 | 370052 |
| YNL138W | SRV2   | CAP             |   | iYNL139C   | 14 | 1581 | 366738 |
| YNL139C | RLR1   | LDB5 THO2 ZRG13 |   | iYNL139C   | 14 | 4794 | 365714 |
| YNL140C | 0      | #N/A            |   | iYNL139C   | 14 | 570  | 361483 |
| YNL141W | AAH1   |                 | 0 | iYNL142W   | 14 | 1044 | 359593 |
| YNL142W | MEP2   |                 | 0 | iYNL143C   | 14 | 1500 | 357450 |
| YNL143C | 0      | #N/A            |   | iYNL143C   | 14 | 393  | 357183 |
| YNL144C | 0      | #N/A            |   | iYNL144C-0 | 14 | 2223 | 355039 |
| YNL145W | MFA2   |                 | 0 | iYNL146W   | 14 | 117  | 352411 |
| YNL146W | 0      | #N/A            |   | iYNL147W   | 14 | 303  | 351712 |
| YNL147W | LSM7   |                 | 0 | iYNL148C   | 14 | 444  | 350937 |
| YNL148C | ALF1   |                 | 0 | iYNL148C   | 14 | 765  | 350668 |
| YNL149C | 0      | #N/A            |   | iYNL149C   | 14 | 390  | 349753 |
| YNL150W | 0      | #N/A            |   | iYNL151C   | 14 | 408  | 349248 |
| YNL151C | RPC31  | ACP2 RPC8       |   | iYNL151C   | 14 | 756  | 348518 |
| YNL152W | 0      | #N/A            |   | iYNL153C   | 14 | 1230 | 346310 |
| YNL153C | GIM3   | PFD4            |   | iYNL153C   | 14 | 390  | 346055 |
| YNL154C | YCK2   |                 | 0 | iYNL154C   | 14 | 1641 | 345273 |
| YNL155W | 0      | #N/A            |   | iYNL156C   | 14 | 825  | 342513 |
| YNL156C | 0      |                 | 0 | iYNL156C   | 14 | 900  | 341965 |
| YNL157W | 0      | #N/A            |   | iYNL158W   | 14 | 507  | 340349 |
| YNL158W | 0      | #N/A            |   | iYNL159C   | 14 | 597  | 339609 |
| YNL159C | ASI2   |                 | 0 | iYNL159C   | 14 | 870  | 339344 |
| YNL160W | YGP1   |                 | 0 | iYNL161W-  | 14 | 1065 | 336542 |
| YNL161W | CBK1   |                 | 0 | iYNL162W   | 14 | 2271 | 332594 |
| YNL162W | RPL42A |                 | 0 | iYNL163C   | 14 | 833  | 331319 |
| YNL163C | RIA1   | EFL1            |   | iYNL163C   | 14 | 3333 | 330070 |
| YNL164C | IBD2   |                 | 0 | iYNL164C   | 14 | 1056 | 326317 |
| YNL165W | 0      | #N/A            |   | iYNL166C   | 14 | 1221 | 323829 |
| YNL166C | BNI5   |                 | 0 | iYNL166C   | 14 | 1347 | 323562 |
| YNL167C | SKO1   | ACR1            |   | iYNL167C   | 14 | 1944 | 321356 |
| YNL168C | 0      |                 | 0 | iYNL168C   | 14 | 780  | 318806 |
| YNL169C | PSD1   |                 | 0 | iYNL169C   | 14 | 1503 | 317668 |
| YNL170W | 0      | #N/A            |   | iYNL173C   | 14 | 396  | 315975 |
| YNL171C | 0      | #N/A            |   | iYNL169C   | 14 | 369  | 315994 |
| YNL172W | APC1   |                 | 0 | iYNL173C   | 14 | 5247 | 310633 |
| YNL173C | MDG1   |                 | 0 | iYNL173C   | 14 | 1101 | 310054 |
| YNL174W | 0      | #N/A            |   | iYNL176C   | 14 | 573  | 308071 |
| YNL175C | NOP13  |                 | 0 | iYNL174W   | 14 | 1212 | 308609 |
| YNL176C | 0      | #N/A            |   | iYNL176C   | 14 | 1911 | 306977 |
| YNL177C | 0      |                 | 0 | iYNL177C   | 14 | 930  | 304612 |
| YNL178W | RPS3   | SUF14           |   | iYNL179C-1 | 14 | 723  | 302677 |
| YNL179C | 0      |                 | 0 | iYNL179C-0 | 14 | 438  | 301100 |
| YNL180C | RHO5   |                 | 0 | iYNL179C-0 | 14 | 996  | 300646 |
| YNL181W | 0      | #N/A            |   | iYNL182C   | 14 | 1224 | 298332 |
| YNL182C | 0      |                 | 0 | iYNL182C   | 14 | 1668 | 297624 |
| YNL183C | NPR1   |                 | 0 | iYNL183C   | 14 | 2373 | 295506 |

|         |        |                |            |    |      |        |
|---------|--------|----------------|------------|----|------|--------|
| YNL184C | 0      | #N/A           | iYNL184C   | 14 | 327  | 292880 |
| YNL185C | MRPL19 |                | 0 iYNL184C | 14 | 477  | 292666 |
| YNL186W | UBP10  | DOT4           | iYNL187W   | 14 | 2379 | 289495 |
| YNL187W | 0      | #N/A           | iYNL188W   | 14 | 1074 | 287991 |
| YNL188W | KAR1   |                | 0 iYNL189W | 14 | 1302 | 286304 |
| YNL189W | SRP1   | KAP60 SCM1     | iYNL190W   | 14 | 1629 | 284256 |
| YNL190W | 0      | #N/A           | iYNL191W   | 14 | 615  | 282391 |
| YNL191W | 0      | #N/A           | iYNL192W   | 14 | 1074 | 280428 |
| YNL192W | CHS1   | USA4           | iYNL193W   | 14 | 3396 | 276498 |
| YNL193W | 0      | #N/A           | iYNL194C   | 14 | 1677 | 274364 |
| YNL194C | 0      | #N/A           | iYNL194C   | 14 | 906  | 273611 |
| YNL195C | 0      | #N/A           | iYNL195C   | 14 | 732  | 272304 |
| YNL196C | SLZ1   | #N/A           | iYNL196C   | 14 | 897  | 271168 |
| YNL197C | WHI3   |                | 0 iYNL197C | 14 | 1986 | 269590 |
| YNL198C | 0      | #N/A           | iYNL198C   | 14 | 303  | 266813 |
| YNL199C | GCR2   |                | 0 iYNL198C | 14 | 1605 | 266527 |
| YNL200C | 0      | #N/A           | iYNL200C   | 14 | 741  | 264450 |
| YNL201C | 0      |                | 0 iYNL201C | 14 | 2577 | 263200 |
| YNL202W | SPS19  | SPX19          | iYNL204C   | 14 | 888  | 259566 |
| YNL203C | 0      | #N/A           | iYNL202W   | 14 | 612  | 260047 |
| YNL204C | SPS18  | SPX18          | iYNL204C   | 14 | 903  | 259274 |
| YNL205C | 0      | #N/A           | iYNL204C   | 14 | 423  | 258574 |
| YNL206C | RTT106 |                | 0 iYNL204C | 14 | 1368 | 258152 |
| YNL207W | RIO2   |                | 0 iYNL208W | 14 | 1278 | 255350 |
| YNL208W | 0      | #N/A           | iYNL209W   | 14 | 615  | 254417 |
| YNL209W | SSB2   |                | 0 iYNL210W | 14 | 1842 | 252058 |
| YNL210W | MER1   |                | 0 iYNL211C | 14 | 813  | 250930 |
| YNL211C | 0      | #N/A           | iYNL211C   | 14 | 261  | 250314 |
| YNL212W | VID27  |                | 0 iYNL213C | 14 | 2349 | 247460 |
| YNL213C | 0      | #N/A           | iYNL213C   | 14 | 645  | 247103 |
| YNL214W | PEX17  | PAS9           | iYNL215W   | 14 | 600  | 245616 |
| YNL215W | IES2   |                | 0 iYNL216W | 14 | 963  | 244467 |
| YNL216W | RAP1   | GRF1 TBA1 TUF1 | iYNL217W   | 14 | 2484 | 241688 |
| YNL217W | 0      | #N/A           | iYNL218W   | 14 | 981  | 240330 |
| YNL218W | MGS1   |                | 0 iYNL219C | 14 | 1764 | 238237 |
| YNL219C | ALG9   |                | 0 iYNL219C | 14 | 1668 | 237662 |
| YNL220W | ADE12  | BRA9           | iYNL221C   | 14 | 1302 | 234412 |
| YNL221C | POP1   |                | 0 iYNL221C | 14 | 2628 | 233694 |
| YNL222W | SSU72  |                | 0 iYNL223W | 14 | 621  | 229093 |
| YNL223W | AUT2   | APG4 AUT2      | iYNL224C   | 14 | 1521 | 227333 |
| YNL224C | 0      | #N/A           | iYNL224C   | 14 | 2304 | 227098 |
| YNL225C | CNM67  |                | 0 iYNL225C | 14 | 1746 | 224468 |
| YNL226W | 0      | #N/A           | iYNL229C   | 14 | 411  | 222238 |
| YNL227C | 0      |                | 0 iYNL226W | 14 | 1773 | 222430 |
| YNL228W | 0      | #N/A           | iYNL229C   | 14 | 777  | 220644 |
| YNL229C | URE2   | [URE3]         | iYNL229C   | 14 | 1065 | 220200 |
| YNL230C | ELA1   |                | 0 iYNL230C | 14 | 1140 | 218661 |
| YNL231C | PDR16  | SFH3           | iYNL231C   | 14 | 1056 | 217041 |
| YNL232W | CSL4   | SKI4           | iYNL233W   | 14 | 879  | 214922 |
| YNL233W | BNI4   |                | 0 iYNL234W | 14 | 2679 | 211921 |
| YNL234W | 0      | #N/A           | iYNL235C   | 14 | 1281 | 210232 |

|         |        |                    |            |    |      |        |
|---------|--------|--------------------|------------|----|------|--------|
| YNL235C | 0      | #N/A               | iYNL235C   | 14 | 432  | 209978 |
| YNL236W | SIN4   | BEL2 GAL22 RYE1 Si | iYNL237W   | 14 | 2925 | 206929 |
| YNL237W | YTP1   |                    | 0 iYNL238W | 14 | 1380 | 205187 |
| YNL238W | KEX2   | QDS1 SRB1 VMA45    | iYNL239W   | 14 | 2445 | 202427 |
| YNL239W | LAP3   | BLH1 GAL6 YCP1     | iYNL240C   | 14 | 1452 | 200481 |
| YNL240C | NAR1   |                    | 0 iYNL240C | 14 | 1476 | 199976 |
| YNL241C | ZWF1   | MET19 POS10        | iYNL241C   | 14 | 1518 | 197942 |
| YNL242W | APG2   | APG2 AUT8 SPO72    | iYNL243W   | 14 | 4779 | 191323 |
| YNL243W | SLA2   | END4 MOP2          | iYNL244C   | 14 | 2907 | 188050 |
| YNL244C | SUI1   | MOF2 RFR1          | iYNL244C   | 14 | 327  | 187495 |
| YNL245C | CWC25  |                    | 0 iYNL245C | 14 | 540  | 186884 |
| YNL246W | VPS75  |                    | 0 iYNL247W | 14 | 890  | 185459 |
| YNL247W | 0      | #N/A               | iYNL248C   | 14 | 2304 | 182874 |
| YNL248C | RPA49  |                    | 0 iYNL248C | 14 | 1248 | 182607 |
| YNL249C | MPA43  |                    | 0 iYNL249C | 14 | 1629 | 181021 |
| YNL250W | RAD50  |                    | 0 iYNL251C | 14 | 3939 | 175409 |
| YNL251C | NRD1   |                    | 0 iYNL251C | 14 | 1728 | 174314 |
| YNL252C | MRPL17 | MRPL30             | iYNL252C   | 14 | 846  | 172285 |
| YNL253W | 0      |                    | 0 iYNL254C | 14 | 1269 | 170017 |
| YNL254C | 0      | #N/A               | iYNL254C   | 14 | 1206 | 169247 |
| YNL255C | GIS2   |                    | 0 iYNL255C | 14 | 462  | 167789 |
| YNL256W | FOL1   |                    | 0 iYNL257C | 14 | 2595 | 164502 |
| YNL257C | SIP3   |                    | 0 iYNL257C | 14 | 3690 | 164319 |
| YNL258C | DSL1   |                    | 0 iYNL258C | 14 | 2265 | 160372 |
| YNL259C | ATX1   |                    | 0 iYNL259C | 14 | 222  | 157864 |
| YNL260C | 0      | #N/A               | iYNL260C   | 14 | 597  | 157454 |
| YNL261W | ORC5   |                    | 0 iYNL262W | 14 | 1440 | 155099 |
| YNL262W | POL2   | DUN2               | iYNL263C   | 14 | 6669 | 148211 |
| YNL263C | YIF1   |                    | 0 iYNL263C | 14 | 945  | 147839 |
| YNL264C | PDR17  | ISS1 SFH4          | iYNL264C   | 14 | 1053 | 146614 |
| YNL265C | IST1   |                    | 0 iYNL265C | 14 | 1002 | 145280 |
| YNL266W | 0      | #N/A               | iYNL267W   | 14 | 420  | 144244 |
| YNL267W | PIK1   | PIK120 PIK41       | iYNL268W   | 14 | 3201 | 140877 |
| YNL268W | LYP1   |                    | 0 iYNL269W | 14 | 1836 | 138549 |
| YNL269W | 0      |                    | 0 iYNL271C | 14 | 396  | 137698 |
| YNL270C | ALP1   | APL1               | iYNL269W   | 14 | 1722 | 137660 |
| YNL271C | BNI1   | PPF3 SHE5          | iYNL271C   | 14 | 5862 | 135382 |
| YNL272C | SEC2   |                    | 0 iYNL272C | 14 | 2280 | 129082 |
| YNL273W | TOF1   |                    | 0 iYNL274C | 14 | 3717 | 122881 |
| YNL274C | 0      | #N/A               | iYNL274C   | 14 | 1053 | 122168 |
| YNL275W | 0      | #N/A               | iYNL276C   | 14 | 1731 | 119266 |
| YNL276C | 0      | #N/A               | iYNL276C   | 14 | 396  | 118824 |
| YNL277W | MET2   |                    | 0 iYNL278W | 14 | 1461 | 117347 |
| YNL278W | CAF120 |                    | 0 iYNL279W | 14 | 3183 | 113269 |
| YNL279W | PRM1   |                    | 0 iYNL280C | 14 | 1986 | 110915 |
| YNL280C | ERG24  |                    | 0 iYNL280C | 14 | 1317 | 110409 |
| YNL281W | HCH1   |                    | 0 iYNL282W | 14 | 462  | 108465 |
| YNL282W | POP3   |                    | 0 iYNL283C | 14 | 588  | 107685 |
| YNL283C | WSC2   | STA3               | iYNL283C   | 14 | 1512 | 106693 |
| YNL284C | MRPL10 | MRPL18             | iYNL284C   | 14 | 969  | 104100 |
| YNL285W | 0      | #N/A               | itG(UCC)N  | 14 | 372  | 96171  |

|         |        |                   |      |           |      |      |       |
|---------|--------|-------------------|------|-----------|------|------|-------|
| YNL286W | CUS2   |                   | 0    | iYNL287W  | 14   | 858  | 95221 |
| YNL287W | SEC21  |                   | 0    | iYNL288W  | 14   | 2808 | 91992 |
| YNL288W | CAF40  |                   | 0    | iYNL289W- | 14   | 1122 | 90301 |
| YNL289W | PCL1   | HCS26             |      | iYNL290W  | 14   | 840  | 87895 |
| YNL290W | RFC3   |                   | 0    | iYNL291C  | 14   | 1023 | 86216 |
| YNL291C | MID1   |                   | 0    | iYNL291C  | 14   | 1647 | 85813 |
| YNL292W | PUS4   |                   | 0    | iYNL293W  | 14   | 1212 | 82804 |
| YNL293W | MSB3   | GYP3              |      | iYNL294C  | 14   | 1902 | 80638 |
| YNL294C | RIM21  | PAL2              |      | iYNL294C  | 14   | 1602 | 80258 |
| YNL295W | 0      | #N/A              |      | iYNL296W  | 14   | 1575 | 76944 |
| YNL296W | KRE25  | #N/A              |      | iYNL298W  | 14   | 315  | 76271 |
| YNL297C | MON2   | YSL2              |      | iYNL296W  | 14   | 4911 | 76581 |
| YNL298W | CLA4   | ERC10             |      | iYNL299W  | 14   | 2529 | 68913 |
| YNL299W | TRF5   |                   | 0    | iYNL300W  | 14   | 1878 | 66516 |
| YNL300W | TOS6   | #N/A              |      | iYNL301C  | 14   | 309  | 65743 |
| YNL301C | RPL18B | RP28B             |      | iYNL301C  | 14   | 993  | 64561 |
| YNL302C | RPS19B | RP55B             |      | iYNL302C  | 14   | 986  | 62942 |
| YNL303W | 0      | #N/A              |      | iYNL305C  | 14   | 348  | 61509 |
| YNL304W | YPT11  |                   | 0    | iYNL305C  | 14   | 1068 | 60482 |
| YNL305C | 0      | #N/A              |      | iYNL305C  | 14   | 894  | 59791 |
| YNL306W | MRPS18 |                   | 0    | iYNL307C  | 14   | 654  | 58155 |
| YNL307C | MCK1   | YPK1              |      | iYNL307C  | 14   | 1128 | 57573 |
| YNL308C | KRI1   |                   | 0    | iYNL308C  | 14   | 1776 | 55896 |
| YNL309W | STB1   |                   | 0    | iYNL311C  | 14   | 1380 | 52544 |
| YNL310C | 0      |                   | 0    | iYNL309W  | 14   | 618  | 52523 |
| YNL311C | 0      | #N/A              |      | iYNL311C  | 14   | 2292 | 51687 |
| YNL312W | RFA2   | BUF1 RPA2         |      | iYNL313C  | 14   | 930  | 48286 |
| YNL313C | 0      | #N/A              |      | iYNL313C  | 14   | 2715 | 48021 |
| YNL314W | DAL82  |                   | 0    | iYNL315C  | 14   | 768  | 44446 |
| YNL315C | ATP11  |                   | 0    | iYNL315C  | 14   | 957  | 44279 |
| YNL316C | PHA2   |                   | 0    | iYNL316C  | 14   | 1107 | 43176 |
| YNL317W | PFS2   |                   | 0    | iYNL318C  | 14   | 1398 | 40618 |
| YNL318C | HXT14  |                   | 0    | iYNL318C  | 14   | 1623 | 40328 |
| YNL318L | #N/A   | #N/A              | #N/A | #N/A      | #N/A | #N/A | #N/A  |
| YNL319W | 0      | #N/A              |      | iYNL320W  | 14   | 441  | 38641 |
| YNL320W | 0      | #N/A              |      | iYNL321W  | 14   | 855  | 37699 |
| YNL321W | 0      | #N/A              |      | iYNL322C  | 14   | 2727 | 34695 |
| YNL322C | KRE1   |                   | 0    | iYNL322C  | 14   | 942  | 34234 |
| YNL323W | LEM3   | BRE3 ROS3         |      | iYNL324W  | 14   | 1245 | 31943 |
| YNL324W | 0      | #N/A              |      | iYNL326C  | 14   | 396  | 31049 |
| YNL325C | FIG4   |                   | 0    | iYNL324W  | 14   | 2640 | 31377 |
| YNL326C | 0      | #N/A              |      | iYNL326C  | 14   | 1011 | 28346 |
| YNL327W | EGT2   |                   | 0    | iYNL328C  | 14   | 3126 | 24047 |
| YNL328C | MDJ2   |                   | 0    | iYNL328C  | 14   | 441  | 23274 |
| YNL329C | PEX6   | PAS8              |      | iYNL329C  | 14   | 3093 | 22633 |
| YNL330C | RPD3   | MOF6 REC3 SDI2 SE |      | iYNL330C  | 14   | 1302 | 19302 |
| YNL331C | AAD14  |                   | 0    | iYNL331C  | 14   | 1131 | 17248 |
| YNL332W | THI12  |                   | 0    | iYNL333W  | 14   | 1023 | 14832 |
| YNL333W | SNZ2   |                   | 0    | iYNL334C  | 14   | 897  | 13267 |
| YNL334C | SNO2   |                   | 0    | iYNL334C  | 14   | 669  | 12876 |
| YNL335W | 0      | #N/A              |      | iYNL336W- | 14   | 678  | 11452 |

|         |        |                  |   |           |    |      |        |
|---------|--------|------------------|---|-----------|----|------|--------|
| YNL336W | COS1   |                  | 0 | iYNL337W  | 14 | 1146 | 8330   |
| YNL337W | 0      | #N/A             |   | iYNL338W  | 14 | 255  | 7165   |
| YNL338W | 0      | #N/A             |   | iYNL339C  | 14 | 159  | 6561   |
| YNL339C | YRF1-6 | YRF1             |   | iYNL339C  | 14 | 5728 | 6098   |
| YNR001C | CIT1   | CS1 LYS6         |   | iYNR001C  | 14 | 1440 | 631058 |
| YNR002C | FUN34  | ATO2             |   | iYNR002C  | 14 | 849  | 633853 |
| YNR003C | RPC34  |                  | 0 | iYNR003C  | 14 | 954  | 635294 |
| YNR004W | 0      | #N/A             |   | iYNR003C  | 14 | 441  | 635940 |
| YNR005C | 0      | #N/A             |   | iYNR006W  | 14 | 405  | 637332 |
| YNR006W | VPS27  | DID7 GRD11 SSV17 |   | iYNR004W  | 14 | 1869 | 636983 |
| YNR007C | AUT1   | APG3 AUT1        |   | iYNR007C  | 14 | 933  | 640111 |
| YNR008W | LRO1   |                  | 0 | iYNR007C  | 14 | 1986 | 640393 |
| YNR009W | 0      | #N/A             |   | iYNR008W  | 14 | 750  | 642687 |
| YNR010W | CSE2   | MED9             |   | iYNR009W  | 14 | 450  | 643741 |
| YNR011C | PRP2   | RNA2             |   | iYNR011C  | 14 | 2631 | 646947 |
| YNR012W | URK1   |                  | 0 | iYNR011C  | 14 | 1506 | 647429 |
| YNR013C | PHO91  |                  | 0 | iYNR013C  | 14 | 2685 | 651709 |
| YNR014W | 0      | #N/A             |   | iYNR013C  | 14 | 639  | 652462 |
| YNR015W | SMM1   | DUS2             |   | iYNR014W  | 14 | 1155 | 653384 |
| YNR016C | ACC1   | ABP2 FAS3 MTR7   |   | iYNR016C- | 14 | 6702 | 661371 |
| YNR017W | MAS6   | MIM23 MPI3 TIM23 |   | iYNR016C- | 14 | 669  | 662910 |
| YNR018W | 0      | #N/A             |   | iYNR017W  | 14 | 675  | 664267 |
| YNR019W | ARE2   | SAT1             |   | iYNR018W  | 14 | 1929 | 665336 |
| YNR020C | 0      | #N/A             |   | iYNR020C  | 14 | 813  | 668219 |
| YNR021W | 0      | #N/A             |   | iYNR020C  | 14 | 1215 | 668374 |
| YNR022C | 0      |                  | 0 | iYNR022C  | 14 | 420  | 670190 |
| YNR023W | SNF12  | SWP73            |   | iYNR022C  | 14 | 1701 | 670415 |
| YNR024W | 0      | #N/A             |   | iYNR023W  | 14 | 561  | 672406 |
| YNR025C | 0      | #N/A             |   | iYNR025C  | 14 | 360  | 673058 |
| YNR026C | SEC12  | SED2             |   | iYNR026C  | 14 | 1416 | 674686 |
| YNR027W | BUD17  |                  | 0 | iYNR026C  | 14 | 954  | 674920 |
| YNR028W | CPR8   |                  | 0 | iYNR027W  | 14 | 927  | 676174 |
| YNR029C | 0      | #N/A             |   | iYNR029C  | 14 | 1290 | 678485 |
| YNR030W | ECM39  | ALG12            |   | iYNR029C  | 14 | 1656 | 678796 |
| YNR031C | SSK2   |                  | 0 | iYNR031C  | 14 | 4740 | 685430 |
| YNR032W | PPG1   |                  | 0 | iYNR031C  | 14 | 1107 | 686007 |
| YNR033W | ABZ1   |                  | 0 | iYNR032C- | 14 | 2364 | 687632 |
| YNR034W | SOL1   |                  | 0 | iYNR033W  | 14 | 966  | 690318 |
| YNR035C | ARC35  | END9             |   | iYNR035C  | 14 | 1029 | 694044 |
| YNR036C | 0      | #N/A             |   | iYNR036C  | 14 | 462  | 694819 |
| YNR037C | RSM19  |                  | 0 | iYNR037C  | 14 | 276  | 695324 |
| YNR038W | DBP6   |                  | 0 | iYNR037C  | 14 | 1890 | 695592 |
| YNR039C | ZRG17  |                  | 0 | iYNR039C  | 14 | 1818 | 699428 |
| YNR040W | 0      | #N/A             |   | iYNR039C  | 14 | 771  | 699687 |
| YNR041C | COQ2   |                  | 0 | iYNR042W  | 14 | 1119 | 701656 |
| YNR042W | 0      | #N/A             |   | iYNR040W  | 14 | 429  | 701235 |
| YNR043W | MVD1   | ERG19            |   | iYNR042W  | 14 | 1191 | 701892 |
| YNR044W | AGA1   |                  | 0 | iYNR043W  | 14 | 2178 | 703696 |
| YNR045W | PET494 |                  | 0 | iYNR044W  | 14 | 1470 | 706136 |
| YNR046W | 0      | #N/A             |   | iYNR045W  | 14 | 408  | 707785 |
| YNR047W | 0      | #N/A             |   | iYNR046W  | 14 | 2682 | 708520 |

|         |       |                   |              |    |      |        |
|---------|-------|-------------------|--------------|----|------|--------|
| YNR048W | 0     | #N/A              | iYNR047W     | 14 | 1182 | 711627 |
| YNR049C | MSO1  |                   | 0 iYNR049C   | 14 | 633  | 713652 |
| YNR050C | LYS9  | LYS13             | iYNR050C     | 14 | 1341 | 715385 |
| YNR051C | BRE5  |                   | 0 iYNR051C   | 14 | 1548 | 718324 |
| YNR052C | POP2  | CAF1              | iYNR052C     | 14 | 1302 | 720644 |
| YNR053C | NOG2  |                   | 0 iYNR053C   | 14 | 1992 | 723108 |
| YNR054C | 0     | #N/A              | iYNR054C-(   | 14 | 951  | 724302 |
| YNR055C | HOL1  |                   | 0 iYNR055C   | 14 | 1761 | 730182 |
| YNR056C | BIO5  |                   | 0 iYNR057C   | 14 | 1686 | 733298 |
| YNR057C | BIO4  |                   | 0 iYNR057C   | 14 | 714  | 734064 |
| YNR058W | BIO3  |                   | 0 iYNR057C   | 14 | 1443 | 734286 |
| YNR059W | MNT4  |                   | 0 iYNR058W   | 14 | 1743 | 736798 |
| YNR060W | FRE4  |                   | 0 iYNR059W   | 14 | 2160 | 739946 |
| YNR061C | 0     | #N/A              | iYNR061C     | 14 | 660  | 743535 |
| YNR062C | 0     | #N/A              | iYNR062C-(   | 14 | 984  | 745338 |
| YNR063W | 0     | #N/A              | iYNR062C-'   | 14 | 1824 | 746938 |
| YNR064C | 0     | #N/A              | iYNR064C     | 14 | 873  | 750003 |
| YNR065C | YSN1  |                   | 0 iYNR066C   | 14 | 3351 | 753695 |
| YNR066C | 0     | #N/A              | iYNR066C     | 14 | 1311 | 755030 |
| YNR067C | DSE4  | ENG1              | iYNR067C     | 14 | 3354 | 759094 |
| YNR068C | 0     | #N/A              | iYNR068C     | 14 | 819  | 760880 |
| YNR069C | 0     |                   | 0 iYNR069C-( | 14 | 1470 | 762587 |
| YNR070W | PDR18 | #N/A              | iYNR069C-'   | 14 | 4002 | 765370 |
| YNR071C | 0     | #N/A              | iYNR071C     | 14 | 1029 | 771463 |
| YNR072W | HXT17 |                   | 0 iYNR071C   | 14 | 1695 | 772652 |
| YNR073C | 0     | #N/A              | iYNR073C     | 14 | 1509 | 776295 |
| YNR074C | 0     | #N/A              | iYNR074C     | 14 | 1137 | 778733 |
| YNR075W | COS10 |                   | 0 iYNR074C   | 14 | 1125 | 779911 |
| YNR076W | PAU6  |                   | 0 iYNR075W   | 14 | 363  | 781913 |
| YNR077C | 0     | #N/A              | #N/A         | 14 | 255  | 783536 |
| YOL001W | PHO80 | AGS3 TUP7 VAC5    | iYOL002C     | 15 | 882  | 325249 |
| YOL002C | 0     |                   | 0 iYOL002C   | 15 | 984  | 324394 |
| YOL003C | 0     | #N/A              | iYOL003C     | 15 | 1137 | 322994 |
| YOL004W | SIN3  | CPE1 GAM2 RPD1 S  | iYOL005C     | 15 | 4611 | 316938 |
| YOL005C | RPB11 |                   | 0 iYOL005C   | 15 | 363  | 316175 |
| YOL006C | TOP1  | MAK1 MAK17        | iYOL006C     | 15 | 2310 | 315387 |
| YOL007C | 0     | #N/A              | iYOL007C     | 15 | 1026 | 312367 |
| YOL008W | 0     | #N/A              | iYOL009C     | 15 | 624  | 310312 |
| YOL009C | MDM12 |                   | 0 iYOL009C   | 15 | 816  | 310139 |
| YOL010W | RCL1  |                   | 0 iYOL011W   | 15 | 1104 | 307938 |
| YOL011W | PLB3  |                   | 0 iYOL012C   | 15 | 2061 | 305349 |
| YOL012C | HTZ1  | H2A.F/Z H2AZ HTA3 | iYOL012C     | 15 | 405  | 303983 |
| YOL013C | HRD1  | DER3              | iYOL013C     | 15 | 1656 | 303035 |
| YOL014W | 0     | #N/A              | iYOL015W     | 15 | 375  | 299693 |
| YOL015W | 0     | #N/A              | iYOL016C     | 15 | 1761 | 297078 |
| YOL016C | CMK2  |                   | 0 iYOL016C   | 15 | 1344 | 296120 |
| YOL017W | ESC8  |                   | 0 iYOL018C   | 15 | 2145 | 292529 |
| YOL018C | TLG2  |                   | 0 iYOL018C   | 15 | 1194 | 292074 |
| YOL019W | TOS7  | #N/A              | itY(GUA)O    | 15 | 1656 | 288898 |
| YOL020W | TAT2  | LTG3 SAB2 SCM2 T/ | iYOL021C     | 15 | 1779 | 286172 |
| YOL021C | DIS3  | RRP44             | iYOL021C     | 15 | 3006 | 285426 |



|           |       |                   |              |      |      |        |
|-----------|-------|-------------------|--------------|------|------|--------|
| YOL022C   | 0     | #N/A              | iYOL022C     | 15   | 1227 | 281498 |
| YOL023W   | IFM1  |                   | 0 iYOL024W   | 15   | 2031 | 278056 |
| YOL024W   | 0     | #N/A              | iYOL025W     | 15   | 519  | 277086 |
| YOL025W   | LAG2  | ECM36             | itS(GCU)O    | 15   | 1983 | 274957 |
| YOL026C   | 0     |                   | 0 iYOL026C   | 15   | 342  | 274353 |
| YOL027C   | 0     |                   | 0 iYOL027C   | 15   | 1722 | 273724 |
| YOL028C   | YAP7  |                   | 0 iYOL028C   | 15   | 738  | 271370 |
| YOL029C   | 0     | #N/A              | iYOL029C     | 15   | 606  | 270420 |
| YOL030W   | GAS5  |                   | 0 iYOL031C   | 15   | 1455 | 268187 |
| YOL031C   | 0     | SLS1              | iYOL031C     | 15   | 1266 | 267529 |
| YOL032W   | 0     | #N/A              | iYOL033W     | 15   | 741  | 265429 |
| YOL033W   | MSE1  |                   | 0 iYOL034W   | 15   | 1611 | 263475 |
| YOL034W   | SMC5  |                   | 0 iSNR50     | 15   | 3282 | 259923 |
| YOL035C   | 0     | #N/A              | iYOL035C     | 15   | 303  | 259103 |
| YOL036W   | 0     | #N/A              | iYOL038W     | 15   | 2286 | 256743 |
| YOL037C   | 0     | #N/A              | iYOL035C     | 15   | 354  | 257017 |
| YOL038W   | PRE6  |                   | 0 iYOL039W   | 15   | 765  | 255335 |
| YOL039W   | RPP2A | RPL44 RPLA2       | iYOL040C     | 15   | 321  | 254295 |
| YOL040C   | RPS15 | RPS21             | iYOL040C     | 15   | 429  | 253575 |
| YOL041C   | NOP12 |                   | 0 iYOL041C   | 15   | 1380 | 252644 |
| YOL042W   | NGL1  |                   | 0 iYOL043C   | 15   | 1092 | 249823 |
| YOL043C   | NTG2  | SCR2              | iYOL043C     | 15   | 1143 | 249532 |
| YOL044W   | PEX15 | PAS21             | iYOL045W     | 15   | 1152 | 247148 |
| YOL045W   | 0     |                   | 0 iYOL047C   | 15   | 3306 | 243495 |
| YOL046C   | 0     | #N/A              | iYOL045W     | 15   | 675  | 244138 |
| YOL047C   | 0     | #N/A              | iYOL047C     | 15   | 1134 | 242745 |
| YOL048C   | 0     | #N/A              | iYOL048C     | 15   | 321  | 240522 |
| YOL049W   | GSH2  |                   | 0 iYOL050C   | 15   | 1476 | 238617 |
| YOL050C   | 0     | #N/A              | iYOL050C     | 15   | 321  | 238200 |
| YOL051W   | GAL11 | ABE1 RAR3 SDS4 Sf | iYOL052C     | 15   | 3246 | 234938 |
| YOL052C   | SPE2  |                   | 0 iYOL052C   | 15   | 1191 | 233634 |
| YOL053C-A | #N/A  | #N/A              | #N/A         | #N/A | #N/A | #N/A   |
| YOL053W   | 0     | #N/A              | iYOL054W     | 15   | 1188 | 230083 |
| YOL054W   | 0     |                   | 0 itN(GUU)O1 | 15   | 1221 | 228612 |
| YOL055C   | THI20 |                   | 0 iYOL055C   | 15   | 1656 | 226073 |
| YOL056W   | GPM3  |                   | 0 iYOL057W   | 15   | 912  | 223266 |
| YOL057W   | 0     | #N/A              | iYOL058W     | 15   | 2136 | 220765 |
| YOL058W   | ARG1  | ARG10             | iYOL059W     | 15   | 1263 | 219209 |
| YOL059W   | GPD2  | GPD3              | iYOL060C     | 15   | 1323 | 217125 |
| YOL060C   | MAM3  |                   | 0 iYOL060C   | 15   | 2121 | 216136 |
| YOL061W   | PRS5  |                   | 0 iYOL062C   | 15   | 1491 | 212243 |
| YOL062C   | APM4  | AMP1              | iYOL062C     | 15   | 1476 | 211994 |
| YOL063C   | 0     |                   | 0 iYOL063C   | 15   | 2874 | 210264 |
| YOL064C   | MET22 | HAL2              | iYOL064C     | 15   | 1074 | 207175 |
| YOL065C   | INP54 |                   | 0 iYOL065C   | 15   | 1155 | 205884 |
| YOL066C   | RIB2  |                   | 0 iYOL066C   | 15   | 1776 | 204470 |
| YOL067C   | RTG1  |                   | 0 iYOL067C   | 15   | 534  | 202517 |
| YOL068C   | HST1  |                   | 0 iYOL068C   | 15   | 1512 | 201878 |
| YOL069W   | NUF2  |                   | 0 iYOL070C   | 15   | 1356 | 198941 |
| YOL070C   | 0     | #N/A              | iYOL070C     | 15   | 1506 | 198724 |
| YOL071W   | 0     |                   | 0 iYOL072W   | 15   | 489  | 196506 |

|         |        |                  |       |            |    |      |        |
|---------|--------|------------------|-------|------------|----|------|--------|
| YOL072W | THP1   | BUD29            |       | iYOL073C   | 15 | 1368 | 194969 |
| YOL073C |        | 0                | #N/A  | iYOL073C   | 15 | 969  | 194799 |
| YOL075C |        | 0                | #N/A  | iYOL075C   | 15 | 3885 | 193541 |
| YOL076W | MDM20  |                  | 38322 | iYOL077C   | 15 | 2391 | 187023 |
| YOL077C | BRX1   |                  | 0     | iYOL077C   | 15 | 876  | 186722 |
| YOL078W | AVO1   |                  | 0     | iYOL079W   | 15 | 3531 | 181681 |
| YOL079W |        | 0                | #N/A  | iYOL081W   | 15 | 399  | 181056 |
| YOL080C | REX4   |                  | 0     | iYOL079W   | 15 | 870  | 181426 |
| YOL081W | IRA2   | CCS1 GLC4        |       | iYOL082W   | 15 | 9240 | 171069 |
| YOL082W | CVT19  | CVT19            |       | iYOL083W-  | 15 | 1248 | 168726 |
| YOL083W |        | 0                | #N/A  | iYOL084W   | 15 | 1239 | 165713 |
| YOL084W | PHM7   |                  | 0     | iYOL085C   | 15 | 2976 | 162355 |
| YOL085C |        | 0                | #N/A  | iYOL085C   | 15 | 342  | 162013 |
| YOL086C | ADH1   | ADC1             |       | iYOL086C   | 15 | 1047 | 160593 |
| YOL087C |        | 0                | #N/A  | iYOL087C   | 15 | 3351 | 158636 |
| YOL088C | MPD2   |                  | 0     | iYOL088C   | 15 | 834  | 154744 |
| YOL089C | HAL9   |                  | 0     | iYOL089C   | 15 | 3093 | 153489 |
| YOL090W | MSH2   | PMS5             |       | iYOL091W   | 15 | 2895 | 147381 |
| YOL091W | SPO21  | MPC70            |       | iYOL092W   | 15 | 1830 | 145333 |
| YOL092W |        | 0                | #N/A  | iYOL093W   | 15 | 927  | 144203 |
| YOL093W |        | 0                |       | 0 iYOL094C | 15 | 882  | 142814 |
| YOL094C | RFC4   |                  | 0     | iYOL094C   | 15 | 972  | 142554 |
| YOL095C | HMI1   |                  | 0     | iYOL095C   | 15 | 2121 | 141346 |
| YOL096C | COQ3   |                  | 0     | iYOL096C   | 15 | 951  | 139056 |
| YOL097C | WRS1   | HRE342           |       | iYOL097C   | 15 | 1299 | 137824 |
| YOL098C |        | 0                | #N/A  | iYOL098C   | 15 | 3114 | 135837 |
| YOL099C |        | 0                | #N/A  | iYOL099C   | 15 | 492  | 132507 |
| YOL100W | PKH2   |                  | 0     | iYOL101C   | 15 | 3246 | 129236 |
| YOL101C |        | 0                |       | 0 iYOL101C | 15 | 939  | 127919 |
| YOL102C | TPT1   |                  | 0     | iYOL102C   | 15 | 693  | 126688 |
| YOL103W | ITR2   | HRB612           |       | iYOLWdelta | 15 | 1839 | 123991 |
| YOL104C | NDJ1   | TAM1             |       | iYOL104C   | 15 | 1059 | 117453 |
| YOL105C | WSC3   |                  | 0     | iYOL105C   | 15 | 1671 | 115807 |
| YOL106W |        | 0                | #N/A  | iYOL107W   | 15 | 354  | 113225 |
| YOL107W |        | 0                | #N/A  | iYOL108C   | 15 | 1029 | 112101 |
| YOL108C | INO4   |                  | 0     | iYOL108C   | 15 | 456  | 111885 |
| YOL109W |        | 0                |       | 0 iYOL110W | 15 | 342  | 110296 |
| YOL110W | SHR5   | ERF4             |       | iYOL111C   | 15 | 714  | 109175 |
| YOL111C |        | 0                | #N/A  | iYOL111C   | 15 | 639  | 108895 |
| YOL112W | MSB4   |                  | 0     | iYOL113W   | 15 | 1479 | 106709 |
| YOL113W | SKM1   |                  | 0     | iYOL114C   | 15 | 1968 | 104325 |
| YOL114C |        | 0                | #N/A  | iYOL114C   | 15 | 609  | 103924 |
| YOL115W | TRF4   |                  | 0     | iYOL116W   | 15 | 1755 | 101474 |
| YOL116W | MSN1   | FUP1 HRB382 MSS1 |       | iYOL117W   | 15 | 1149 | 99808  |
| YOL117W |        | 0 CSN10          |       | iYOL118C   | 15 | 1938 | 97550  |
| YOL118C |        | 0                | #N/A  | iYOL118C   | 15 | 309  | 96915  |
| YOL119C | MCH4   |                  | 0     | iYOL119C   | 15 | 1506 | 96360  |
| YOL120C | RPL18A | RP28A            |       | iYOL120C   | 15 | 1008 | 94401  |
| YOL121C | RPS19A |                  | 0     | iYOL121C   | 15 | 825  | 92849  |
| YOL122C | SMF1   | SBS1             |       | iYOL122C   | 15 | 1728 | 91418  |
| YOL123W | HRP1   | NAB4 NAB5        |       | iYOL124C   | 15 | 1605 | 87843  |

|         |       |                |              |    |      |        |
|---------|-------|----------------|--------------|----|------|--------|
| YOL124C | 0     | #N/A           | iYOL124C     | 15 | 1302 | 86756  |
| YOL125W | 0     | #N/A           | iYOL126C     | 15 | 1431 | 83833  |
| YOL126C | MDH2  |                | 0 iYOL126C   | 15 | 1272 | 83057  |
| YOL127W | RPL25 |                | 0 iYOL128C   | 15 | 843  | 80347  |
| YOL128C | 0     |                | 0 iYOL128C   | 15 | 1128 | 79478  |
| YOL129W | VPS68 |                | 0 iYOL130W   | 15 | 555  | 77559  |
| YOL130W | ALR1  | SWC3           | iYOL131W     | 15 | 2580 | 74399  |
| YOL131W | 0     | #N/A           | iYOL132W     | 15 | 327  | 73030  |
| YOL132W | GAS4  |                | 0 iYOL133W   | 15 | 1416 | 71299  |
| YOL133W | HRT1  | HRT2 RBX1 ROC1 | iYOL135C     | 15 | 366  | 70324  |
| YOL134C | 0     | #N/A           | iYOL133W     | 15 | 390  | 70544  |
| YOL135C | MED7  |                | 0 iYOL135C   | 15 | 669  | 70043  |
| YOL136C | PFK27 | PFK-2          | iYOL136C     | 15 | 1194 | 68753  |
| YOL137W | 0     |                | 0 iYOL138C   | 15 | 1494 | 65620  |
| YOL138C | 0     | #N/A           | iYOL138C     | 15 | 4026 | 65349  |
| YOL139C | CDC33 | TIF45 eIF-4E   | iYOL139C     | 15 | 642  | 61023  |
| YOL140W | ARG8  |                | 0 iYOL141W   | 15 | 1272 | 58758  |
| YOL141W | PPM2  |                | 0 iYOL142W   | 15 | 2088 | 56450  |
| YOL142W | RRP40 |                | 0 iYOL143C   | 15 | 723  | 55556  |
| YOL143C | RIB4  |                | 0 iYOL143C   | 15 | 510  | 55102  |
| YOL144W | NOP8  |                | 0 iYOL145C   | 15 | 1455 | 53096  |
| YOL145C | CTR9  | CDP1           | iYOL145C     | 15 | 3234 | 52786  |
| YOL146W | 0     |                | 0 iYOL147C   | 15 | 711  | 48736  |
| YOL147C | PEX11 | PMP24 PMP27    | iYOL147C     | 15 | 711  | 48641  |
| YOL148C | SPT20 | ADA5           | iYOL148C     | 15 | 1815 | 47572  |
| YOL149W | DCP1  |                | 0 iYOL150C   | 15 | 696  | 44936  |
| YOL150C | 0     | #N/A           | iYOL150C     | 15 | 312  | 44782  |
| YOL151W | GRE2  |                | 0 iYOL152W   | 15 | 1029 | 43692  |
| YOL152W | FRE7  |                | 0 iYOL153C-1 | 15 | 1890 | 40747  |
| YOL153C | 0     | #N/A           | iYOL153C-C   | 15 | 1746 | 38566  |
| YOL154W | 0     |                | 0 iYOL155C-1 | 15 | 750  | 34657  |
| YOL155C | 0     | #N/A           | iYOL155C-C   | 15 | 2904 | 31605  |
| YOL156W | HXT11 | LGT3           | iYOL157C     | 15 | 1704 | 25272  |
| YOL157C | 0     | #N/A           | iYOL157C     | 15 | 1770 | 24293  |
| YOL158C | ENB1  | ARN4           | iYOL158C     | 15 | 1821 | 21310  |
| YOL159C | 0     | #N/A           | iYOL159C     | 15 | 516  | 17795  |
| YOL160W | 0     | #N/A           | iYOL161C-1   | 15 | 342  | 14312  |
| YOL161C | 0     | #N/A           | iYOL161C-C   | 15 | 363  | 11910  |
| YOL162W | 0     | #N/A           | iYOL164W     | 15 | 648  | 10118  |
| YOL163W | 0     | #N/A           | iYOL164W     | 15 | 510  | 9596   |
| YOL164W | 0     | #N/A           | iYOLWtau1-   | 15 | 1941 | 6175   |
| YOL165C | AAD15 |                | 0 iYOL165C   | 15 | 432  | 2078   |
| YOL166C | 0     | #N/A           | iYOL166C     | 15 | 339  | 1338   |
| YOR001W | RRP6  |                | 0 iCEN15     | 15 | 2202 | 326832 |
| YOR002W | ALG6  |                | 0 iYOR001W   | 15 | 1635 | 329417 |
| YOR003W | YSP3  |                | 0 iYOR002W   | 15 | 1437 | 331455 |
| YOR004W | 0     | #N/A           | iYOR003W     | 15 | 765  | 333592 |
| YOR005C | DNL4  | LIG4           | iYOR005C     | 15 | 2835 | 337343 |
| YOR006C | 0     | #N/A           | iYOR006C     | 15 | 942  | 338621 |
| YOR007C | SGT2  |                | 0 iYOR007C   | 15 | 1041 | 339978 |
| YOR008C | SLG1  | HCS77 WSC1     | iYOR008C     | 15 | 1137 | 342414 |

|         |        |                 |      |            |    |      |        |
|---------|--------|-----------------|------|------------|----|------|--------|
| YOR009W | TIR4   |                 | 0    | iYOR008C-  | 15 | 1464 | 344334 |
| YOR010C | TIR2   | SRP2            |      | iYOR010C-  | 15 | 756  | 346949 |
| YOR011W | AUS1   |                 | 0    | iYOR010C-  | 15 | 4185 | 349678 |
| YOR012W |        | 0               | #N/A | iYOLWdelta | 15 | 414  | 356542 |
| YOR013W |        | 0               | #N/A | iYOLWdelta | 15 | 471  | 356750 |
| YOR014W | RTS1   | SCS1            |      | iYOR013W   | 15 | 2274 | 357673 |
| YOR015W |        | 0               | #N/A | iYOR013W   | 15 | 360  | 359992 |
| YOR016C | ERP4   |                 | 0    | iYOR016C   | 15 | 624  | 361083 |
| YOR017W | PET127 |                 | 0    | iYOR016C   | 15 | 2403 | 361411 |
| YOR018W | ROD1   |                 | 0    | iYOR017W   | 15 | 2514 | 364368 |
| YOR019W |        | 0               | #N/A | iYOR018W   | 15 | 2193 | 368126 |
| YOR020C | HSP10  | CPN10           |      | iYOR020C-  | 15 | 321  | 370843 |
| YOR021C |        | 0               | #N/A | iYOR021C   | 15 | 642  | 373438 |
| YOR022C |        | 0               | #N/A | iYOR022C   | 15 | 2148 | 375856 |
| YOR023C | AHC1   |                 | 0    | iYOR023C   | 15 | 1701 | 377711 |
| YOR024W |        | 0               | #N/A | iYOR023C   | 15 | 324  | 377846 |
| YOR025W | HST3   |                 | 0    | iYOR023C   | 15 | 1344 | 378218 |
| YOR026W | BUB3   |                 | 0    | iYOR025W   | 15 | 1026 | 379780 |
| YOR027W | STI1   |                 | 0    | iYOR026W   | 15 | 1770 | 381052 |
| YOR028C | CIN5   | HAL6 YAP4       |      | iYOR028C   | 15 | 888  | 384419 |
| YOR029W |        | 0               | #N/A | iYOR028C   | 15 | 336  | 384599 |
| YOR030W | DFG16  | ECM41 ZRG11     |      | iYOR029W-  | 15 | 1860 | 386824 |
| YOR031W | CRS5   |                 | 0    | iYOR030W   | 15 | 210  | 389212 |
| YOR032C | HMS1   |                 | 0    | iYOR032C   | 15 | 1305 | 391074 |
| YOR033C | EXO1   | DHS1            |      | iYOR033C   | 15 | 2109 | 394523 |
| YOR034C | AKR2   |                 | 0    | iYOR034C   | 15 | 2250 | 397085 |
| YOR035C | SHE4   | DIM1            |      | iYOR035C   | 15 | 2370 | 400103 |
| YOR036W | PEP12  | VPL6 VPS6 VPT13 |      | iYOR035C   | 15 | 867  | 400347 |
| YOR037W | CYC2   |                 | 0    | iYOR036W   | 15 | 1215 | 401440 |
| YOR038C | HIR2   | SPT1            |      | iYOR038C   | 15 | 2628 | 405387 |
| YOR039W | CKB2   |                 | 0    | iYOR038C   | 15 | 777  | 405767 |
| YOR040W | GLO4   |                 | 0    | iYOR039W   | 15 | 858  | 407063 |
| YOR041C |        | 0               |      | 0 iYOR042W | 15 | 432  | 408788 |
| YOR042W |        | 0               |      | 0 iYOR040W | 15 | 1236 | 408424 |
| YOR043W | WHI2   |                 | 0    | iSNR62     | 15 | 1461 | 410869 |
| YOR044W |        | 0               | #N/A | iYOR043W   | 15 | 474  | 413006 |
| YOR045W | TOM6   | ISP6 MOM8B      |      | iYOR044W   | 15 | 186  | 413851 |
| YOR046C | DBP5   | RAT8            |      | iYOR046C   | 15 | 1449 | 415907 |
| YOR047C | STD1   | MSN3 SFS3       |      | iYOR047C   | 15 | 1335 | 417681 |
| YOR048C | RAT1   | HKE1 TAP1 XRN2  |      | iYOR048C   | 15 | 3021 | 421650 |
| YOR049C |        | 0               |      | 0 iYOR049C | 15 | 1065 | 423732 |
| YOR050C |        | 0               | #N/A | iYOR050C   | 15 | 348  | 424618 |
| YOR051C |        | 0               | #N/A | iYOR051C   | 15 | 1239 | 426085 |
| YOR052C |        | 0               | #N/A | iYOR052C   | 15 | 453  | 427225 |
| YOR053W |        | 0               | #N/A | iYOR052C   | 15 | 342  | 427818 |
| YOR054C |        | 0               |      | 0 iYOR055W | 15 | 2025 | 429858 |
| YOR055W |        | 0               | #N/A | iYOR052C   | 15 | 435  | 429479 |
| YOR056C | NOB1   | YOR29-07        |      | iYOR056C   | 15 | 1380 | 431627 |
| YOR057W | SGT1   | YOR29-08        |      | iYOR056C   | 15 | 1188 | 432187 |
| YOR058C | ASE1   | YOR29-09        |      | iYOR058C-  | 15 | 2658 | 436346 |
| YOR059C |        | 0               | #N/A | iYOR059C   | 15 | 1353 | 440259 |

|         |       |                   |          |              |    |      |        |
|---------|-------|-------------------|----------|--------------|----|------|--------|
| YOR060C |       | 0                 | #N/A     | iYOR060C     | 15 | 774  | 441164 |
| YOR061W | CKA2  | YOR29-12          |          | iYOR060C     | 15 | 1020 | 441535 |
| YOR062C |       | 0                 | #N/A     | iYOR062C     | 15 | 807  | 443532 |
| YOR063W | RPL3  | MAK8 TCM1 YOR29-  |          | iYOR062C     | 15 | 1164 | 444687 |
| YOR064C | YNG1  | YOR29-15          |          | iYOR064C     | 15 | 660  | 446739 |
| YOR065W | CYT1  | CTC1 YOR29-16     |          | iYOR064C     | 15 | 930  | 447440 |
| YOR066W |       | 0                 | #N/A     | iYOR065W     | 15 | 1890 | 449437 |
| YOR067C | ALG8  | YOR29-18          |          | iYOR067C     | 15 | 1734 | 453463 |
| YOR068C |       | 0                 | YOR29-19 | iYOR068C     | 15 | 345  | 454214 |
| YOR069W | VPS5  | GRD2 PEP10 VPT5   |          | iYOR068C     | 15 | 939  | 454858 |
| YOR070C | GYP1  | YOR29-21          |          | iYOR070C-    | 15 | 1914 | 457821 |
| YOR071C |       | 0                 | #N/A     | iYOR071C     | 15 | 1797 | 461277 |
| YOR072W |       | 0                 | #N/A     | iYOR071C     | 15 | 315  | 461503 |
| YOR073W |       | 0                 |          | 0 itP(UGG)O2 | 15 | 1773 | 464772 |
| YOR074C | CDC21 | CRT9 TMP1 YOR29-  |          | iYOR074C     | 15 | 915  | 467590 |
| YOR075W | UFE1  | YOR29-26          |          | iYOR074C     | 15 | 1041 | 468213 |
| YOR076C | SKI7  | YOR29-27          |          | iYOR076C     | 15 | 2244 | 471621 |
| YOR077W | RTS2  | YOR29-28          |          | iYOR076C     | 15 | 699  | 471900 |
| YOR078W | BUD21 | UTP16 YOR29-29    |          | iYOR077W     | 15 | 645  | 472726 |
| YOR079C | ATX2  | YOR29-30          |          | iYOR079C     | 15 | 942  | 474417 |
| YOR080W | DIA2  | YOR29-31          |          | iYOR079C     | 15 | 2241 | 474553 |
| YOR081C |       | 0                 |          | 0 iYOR081C   | 15 | 2250 | 479189 |
| YOR082C |       | 0                 | #N/A     | iYOR083W     | 15 | 342  | 479638 |
| YOR083W | WHI5  |                   |          | 0 iYOR081C   | 15 | 888  | 479534 |
| YOR084W |       | 0                 | #N/A     | iYOR083W     | 15 | 1164 | 480588 |
| YOR085W | OST3  |                   |          | 0 iYOR084W   | 15 | 1053 | 482034 |
| YOR086C |       | 0                 |          | 0 iYOR086C   | 15 | 3561 | 486780 |
| YOR087W | YVC1  |                   |          | 0 itN(GUU)O2 | 15 | 744  | 487708 |
| YOR088W |       | 0                 | #N/A     | itN(GUU)O2   | 15 | 1449 | 488286 |
| YOR089C | VPS21 | VPS12 VPT12 YPT21 |          | iYOR089C     | 15 | 633  | 490828 |
| YOR090C | PTC5  |                   |          | 0 iYOR090C   | 15 | 1719 | 492841 |
| YOR091W |       | 0                 | #N/A     | iYOR090C     | 15 | 1206 | 493264 |
| YOR092W | ECM3  | YOR3165W          |          | iYOR091W     | 15 | 1842 | 495126 |
| YOR093C |       | 0                 | #N/A     | iYOR093C     | 15 | 4947 | 502451 |
| YOR094W | ARF3  | ARL2              |          | iYOR093C     | 15 | 552  | 502794 |
| YOR095C | RKI1  |                   |          | 0 iYOR095C   | 15 | 777  | 504327 |
| YOR096W | RPS7A | RPS30             |          | iYOR095C     | 15 | 974  | 505793 |
| YOR097C |       | 0                 | #N/A     | iYOR097C     | 15 | 528  | 507504 |
| YOR098C | NUP1  |                   |          | 0 iYOR098C   | 15 | 3231 | 511177 |
| YOR099W | KTR1  |                   |          | 0 iYOR098C   | 15 | 1182 | 511824 |
| YOR100C | CRC1  |                   |          | 0 iYOR100C   | 15 | 984  | 514277 |
| YOR101W | RAS1  |                   |          | 0 iYOR100C   | 15 | 930  | 515243 |
| YOR102W |       | 0                 | #N/A     | iYOR101W     | 15 | 351  | 516422 |
| YOR103C | OST2  |                   |          | 0 iYOR103C   | 15 | 402  | 516849 |
| YOR104W | PIN2  |                   |          | 0 iYOR103C   | 15 | 849  | 517641 |
| YOR105W |       | 0                 | #N/A     | iYOR103C     | 15 | 327  | 518194 |
| YOR106W | VAM3  | PTH1              |          | iYOR105W     | 15 | 852  | 519120 |
| YOR107W | RGS2  |                   |          | 0 iYOR106W   | 15 | 930  | 521352 |
| YOR108W |       | 0                 |          | 0 iYOR107W   | 15 | 1815 | 523026 |
| YOR109W | INP53 | SJL3 SOP2         |          | iYOR108W     | 15 | 3324 | 525277 |
| YOR110W | TFC7  |                   |          | 0 iYOR109W   | 15 | 1308 | 528940 |

|         |        |                   |            |    |      |        |
|---------|--------|-------------------|------------|----|------|--------|
| YOR111W | 0      | #N/A              | iYOR110W   | 15 | 699  | 530428 |
| YOR112W | 0      | #N/A              | iYOR111W   | 15 | 2286 | 531507 |
| YOR113W | AZF1   |                   | 0 iYOR112W | 15 | 2745 | 534074 |
| YOR114W | 0      | #N/A              | iYOR113W   | 15 | 885  | 537569 |
| YOR115C | TRS33  |                   | 0 iYOR115C | 15 | 807  | 539464 |
| YOR116C | RPO31  | RPC1 RPC160       | iYOR116C   | 15 | 4383 | 544144 |
| YOR117W | RPT5   | YTA1              | iYOR116C   | 15 | 1305 | 545028 |
| YOR118W | 0      | #N/A              | iYOR117W   | 15 | 1704 | 546856 |
| YOR119C | RIO1   | RRP10             | iYOR119C   | 15 | 1455 | 550245 |
| YOR120W | GCY1   | GCY               | iYOR119C   | 15 | 939  | 551113 |
| YOR121C | 0      | #N/A              | iYOR121C   | 15 | 306  | 552102 |
| YOR122C | PFY1   | PRF1              | iYOR122C   | 15 | 590  | 552886 |
| YOR123C | LEO1   |                   | 0 iYOR123C | 15 | 1395 | 554569 |
| YOR124C | UBP2   |                   | 0 iYOR124C | 15 | 3819 | 558641 |
| YOR125C | CAT5   | COQ7              | iYOR125C   | 15 | 819  | 559847 |
| YOR126C | IAH1   |                   | 0 iYOR126C | 15 | 717  | 560676 |
| YOR127W | RGA1   | DBM1 THE1         | iYOR126C   | 15 | 3024 | 561169 |
| YOR128C | ADE2   |                   | 0 iYOR128C | 15 | 1716 | 566190 |
| YOR129C | 0      | #N/A              | iYOR129C   | 15 | 2682 | 569557 |
| YOR130C | ORT1   | ARG11             | iYOR130C   | 15 | 879  | 570806 |
| YOR131C | 0      | #N/A              | iYOR131C   | 15 | 657  | 572837 |
| YOR132W | VPS17  | PEP21             | iYOR131C   | 15 | 1656 | 573174 |
| YOR133W | EFT1   |                   | 0 iYOR132W | 15 | 2529 | 575097 |
| YOR134W | BAG7   |                   | 0 iYOR133W | 15 | 1230 | 578563 |
| YOR135C | 0      | #N/A              | iYOR136W   | 15 | 342  | 580499 |
| YOR136W | IDH2   |                   | 0 iYOR134W | 15 | 1110 | 580249 |
| YOR137C | SIA1   |                   | 0 iYOR137C | 15 | 1869 | 583680 |
| YOR138C | 0      |                   | 0 iYOR138C | 15 | 2016 | 586323 |
| YOR139C | 0      | #N/A              | iYOR140W   | 15 | 393  | 587341 |
| YOR140W | SFL1   |                   | 0 iYOR138C | 15 | 2301 | 586980 |
| YOR141C | ARP8   |                   | 0 iYOR141C | 15 | 2646 | 592586 |
| YOR142W | LSC1   |                   | 0 iYOR141C | 15 | 990  | 593056 |
| YOR143C | THI80  |                   | 0 iYOR143C | 15 | 960  | 602341 |
| YOR144C | ELG1   | RTT110            | iYOR144C   | 15 | 2376 | 605091 |
| YOR145C | 0      | RRP20             | iYOR146W   | 15 | 825  | 606170 |
| YOR146W | 0      | #N/A              | iYOR144C   | 15 | 306  | 605872 |
| YOR147W | 0      |                   | 0 iYOR146W | 15 | 1962 | 606513 |
| YOR148C | SPP2   |                   | 0 iYOR148C | 15 | 558  | 609196 |
| YOR149C | SMP3   | LAS2 SAP2         | iYOR149C   | 15 | 1551 | 611387 |
| YOR150W | MRPL23 |                   | 0 iYOR149C | 15 | 492  | 611998 |
| YOR151C | RPB2   | RPB150 RPO22 SIT2 | iYOR151C   | 15 | 3675 | 616670 |
| YOR152C | 0      | #N/A              | iYOR152C-  | 15 | 771  | 618287 |
| YOR153W | PDR5   | LEM1 STS1 YDR1    | iYOR152C-  | 15 | 4536 | 619839 |
| YOR154W | 0      | #N/A              | iYOR153W   | 15 | 1764 | 624728 |
| YOR155C | 0      |                   | 0 iYOR155C | 15 | 1353 | 627979 |
| YOR156C | NFI1   | SIZ2              | iYOR156C   | 15 | 2181 | 630539 |
| YOR157C | PUP1   |                   | 0 iYOR157C | 15 | 786  | 631750 |
| YOR158W | PET123 |                   | 0 iYOR157C | 15 | 957  | 632163 |
| YOR159C | SME1   | Sm E              | iYOR159C   | 15 | 285  | 633565 |
| YOR160W | MTR10  | KAP111            | iYOR159C   | 15 | 2919 | 633838 |
| YOR161C | 0      |                   | 0 iYOR161C | 15 | 1620 | 638557 |

|         |        |                  |      |           |            |      |        |        |
|---------|--------|------------------|------|-----------|------------|------|--------|--------|
| YOR162C | YRR1   |                  | 0    | iYOR162C  | 15         | 2433 | 641991 |        |
| YOR163W | DDP1   |                  |      | 0         | iYOR162C   | 15   | 567    | 642740 |
| YOR164C |        | 0                | #N/A | iYOR164C  | 15         | 939  | 644331 |        |
| YOR165W |        | 0                |      | 0         | iYOR164C   | 15   | 2331   | 644565 |
| YOR166C |        | 0                | #N/A | iYOR166C  | 15         | 1377 | 648501 |        |
| YOR167C | RPS28A | RPS33A           |      | iYOR167C  | 15         | 204  | 649006 |        |
| YOR168W | GLN4   |                  |      | 0         | iYOR167C   | 15   | 2430   | 649302 |
| YOR169C |        | 0                | #N/A | iYOR171C  | 15         | 465  | 651839 |        |
| YOR170W |        | 0                | #N/A | iYOR167C  | 15         | 306  | 651857 |        |
| YOR171C | LCB4   |                  |      | 0         | iYOR171C   | 15   | 1875   | 653883 |
| YOR172W |        | 0                |      | 0         | iYOR171C   | 15   | 2361   | 654209 |
| YOR173W |        | 0                |      | 0         | iYOR172W   | 15   | 1194   | 657131 |
| YOR174W | MED4   |                  |      | 0         | iYOR173W   | 15   | 855    | 658746 |
| YOR175C |        | 0                | #N/A | iYOR175C  | 15         | 1860 | 661673 |        |
| YOR176W | HEM15  |                  |      | 0         | iYOR175C   | 15   | 1182   | 662400 |
| YOR177C | MPC54  |                  |      | 0         | iYOR177C   | 15   | 1395   | 667178 |
| YOR178C | GAC1   |                  |      | 0         | iYOR178C-  | 15   | 2382   | 670240 |
| YOR179C |        | 0                |      | 0         | iYOR179C-  | 15   | 567    | 672410 |
| YOR180C | DCI1   | ECI2             |      | iYOR180C  | 15         | 816  | 675166 |        |
| YOR181W | LAS17  | BEE1             |      | iYOR180C  | 15         | 1902 | 675938 |        |
| YOR182C | RPS30B |                  |      | 0         | iYOR182C   | 15   | 603    | 678792 |
| YOR183W | FYV12  |                  |      | 0         | iYOR182C   | 15   | 390    | 678871 |
| YOR184W | SER1   | ADE9             |      | iYOR183W  | 15         | 1188 | 679356 |        |
| YOR185C | GSP2   | CNR2             |      | iYOR185C  | 15         | 663  | 682105 |        |
| YOR186W |        | 0                | #N/A | iYOR185C  | 15         | 435  | 683110 |        |
| YOR187W | TUF1   |                  |      | 0         | iYOR186W   | 15   | 1314   | 684029 |
| YOR188W | MSB1   |                  |      | 0         | iYOR187W   | 15   | 3414   | 685766 |
| YOR189W | IES4   |                  |      | 0         | iYOR188W   | 15   | 351    | 689623 |
| YOR190W | SPR1   | SSG1             |      | iYOR189W  | 15         | 1338 | 690694 |        |
| YOR191W | RIS1   | DIS1             |      | iYOR190W  | 15         | 4860 | 692474 |        |
| YOR192C |        | 0                | #N/A | iYOR192C- | 15         | 1800 | 700566 |        |
| YOR193W |        | 0                |      | 0         | itM(CAU)O1 | 15   | 1131   | 710445 |
| YOR194C | TOA1   |                  |      | 0         | iYOR194C   | 15   | 861    | 712542 |
| YOR195W | SLK19  |                  |      | 0         | iYOR194C   | 15   | 2466   | 712865 |
| YOR196C | LIP5   |                  |      | 0         | iYOR196C   | 15   | 1245   | 716836 |
| YOR197W | MCA1   | YCA1             |      | iYOR196C  | 15         | 1362 | 717022 |        |
| YOR198C | BFR1   |                  |      | 0         | iYOR198C   | 15   | 1413   | 720064 |
| YOR199W |        | 0                | #N/A | iYOR198C  | 15         | 330  | 720180 |        |
| YOR200W |        | 0                | #N/A | iYOR198C  | 15         | 399  | 720416 |        |
| YOR201C | PET56  |                  |      | 0         | iYOR201C   | 15   | 1239   | 721707 |
| YOR202W | HIS3   | HIS10            |      | iYOR201C  | 15         | 663  | 721945 |        |
| YOR203W |        | 0                | #N/A | iYOR201C  | 15         | 354  | 722564 |        |
| YOR204W | DED1   | SPP81            |      | iYOR201C  | 15         | 1815 | 722910 |        |
| YOR205C |        | 0                |      | 0         | iYOR205C   | 15   | 1671   | 727233 |
| YOR206W | NOC2   |                  |      | 0         | iYOR205C   | 15   | 2133   | 727511 |
| YOR207C | RET1   | PDS2 RPC128 RPC2 |      | iYOR207C  | 15         | 3450 | 733456 |        |
| YOR208W | PTP2   |                  |      | 0         | iYOR207C   | 15   | 2253   | 733924 |
| YOR209C | NPT1   |                  |      | 0         | iYOR209C   | 15   | 1290   | 737725 |
| YOR210W | RPB10  |                  |      | 0         | iYOR209C   | 15   | 213    | 738319 |
| YOR211C | MGM1   | MNA1             |      | iYOR211C  | 15         | 2709 | 741631 |        |
| YOR212W | STE4   | HMD2             |      | iYOR211C  | 15         | 1272 | 742909 |        |

|         |        |                 |      |          |      |      |        |
|---------|--------|-----------------|------|----------|------|------|--------|
| YOR213C | SAS5   |                 | 0    | iYOR213C | 15   | 747  | 745280 |
| YOR214C |        | 0               | #N/A | iYOR214C | 15   | 711  | 746302 |
| YOR215C |        | 0               | #N/A | iYOR215C | 15   | 558  | 747281 |
| YOR216C | RUD3   | GRP1            |      | iYOR216C | 15   | 1455 | 748978 |
| YOR217W | RFC1   | CDC44           |      | iYOR216C | 15   | 2586 | 749300 |
| YOR218C |        | 0               | #N/A | iYOR218C | 15   | 420  | 751894 |
| YOR219C | STE13  | YCI1            |      | iYOR219C | 15   | 2796 | 755008 |
| YOR220W |        | 0               | #N/A | iYOR219C | 15   | 798  | 755327 |
| YOR221C | MCT1   |                 | 0    | iYOR221C | 15   | 1356 | 757830 |
| YOR222W | ODC2   |                 | 0    | iYOR221C | 15   | 924  | 758329 |
| YOR223W |        | 0               | #N/A | iYOR222W | 15   | 879  | 759781 |
| YOR224C | RPB8   |                 | 0    | iYOR224C | 15   | 441  | 761264 |
| YOR225W |        | 0               | #N/A | iYOR224C | 15   | 330  | 761391 |
| YOR226C | ISU2   | NUA2            |      | iYOR226C | 15   | 471  | 762083 |
| YOR227W |        | 0               | #N/A | iYOR226C | 15   | 3741 | 762824 |
| YOR228C |        | 0               | #N/A | iYOR228C | 15   | 909  | 767776 |
| YOR229W | WTM2   |                 | 0    | iYOR228C | 15   | 1404 | 768408 |
| YOR230W | WTM1   |                 | 0    | iYOR229W | 15   | 1314 | 770799 |
| YOR231W | MKK1   | SSP32           |      | iYOR230W | 15   | 1527 | 772600 |
| YOR232W | MGE1   | YGE1            |      | iYOR231W | 15   | 687  | 774572 |
| YOR233W | KIN4   | KIN3 KIN31      |      | iYOR232W | 15   | 2403 | 775845 |
| YOR234C | RPL33B | RPL37B          |      | iYOR234C | 15   | 851  | 779404 |
| YOR235W |        | 0               | #N/A | iYOR234C | 15   | 315  | 779869 |
| YOR236W | DFR1   |                 | 0    | iYOR235W | 15   | 636  | 780905 |
| YOR237W | HES1   | OSH5            |      | iYOR236W | 15   | 1305 | 781993 |
| YOR238W |        | 0               | #N/A | iYOR237W | 15   | 921  | 783667 |
| YOR239W | ABP140 |                 | 0    | iYOR238W | 15   | 1888 | 784856 |
| YOR240W | #N/A   | #N/A            | #N/A | iYOR238W | #N/A | #N/A | #N/A   |
| YOR241W | MET7   | MET23           |      | iYOR240W | 15   | 1647 | 786994 |
| YOR242C | SSP2   |                 | 0    | iYOR242C | 15   | 1116 | 789856 |
| YOR243C |        | 0               |      | iYOR243C | 15   | 2031 | 792240 |
| YOR244W | ESA1   | TAS1            |      | iYOR243C | 15   | 1338 | 792530 |
| YOR245C | DGA1   |                 | 0    | iYOR245C | 15   | 1257 | 795331 |
| YOR246C |        | 0               | #N/A | iYOR246C | 15   | 993  | 796792 |
| YOR247W | SRL1   |                 | 0    | iYOR246C | 15   | 633  | 797675 |
| YOR248W | TOS11  |                 | #N/A | iYOR246C | 15   | 303  | 798012 |
| YOR249C | APC5   | RMC1            |      | iYOR249C | 15   | 2058 | 800730 |
| YOR250C | CLP1   |                 | 0    | iYOR250C | 15   | 1338 | 802306 |
| YOR251C |        | 0               | #N/A | iYOR251C | 15   | 915  | 803463 |
| YOR252W |        | 0               | #N/A | iYOR251C | 15   | 426  | 803776 |
| YOR253W | ARD2   | ARD2 ROG2       |      | iYOR252W | 15   | 531  | 804375 |
| YOR254C | SEC63  | PTL1            |      | iYOR254C | 15   | 1992 | 807021 |
| YOR255W |        | 0               |      | iYOR254C | 15   | 837  | 807269 |
| YOR256C |        | 0               | #N/A | iYOR256C | 15   | 2430 | 810680 |
| YOR257W | CDC31  | DSK1            |      | iYOR256C | 15   | 486  | 811005 |
| YOR258W | HNT3   |                 | 0    | iYOR257W | 15   | 654  | 811668 |
| YOR259C | RPT4   | CRL13 PCS1 SUG2 |      | iYOR259C | 15   | 1314 | 813705 |
| YOR260W | GCD1   | TRA3            |      | iYOR259C | 15   | 1737 | 813981 |
| YOR261C | RPN8   |                 | 0    | iYOR261C | 15   | 1017 | 816928 |
| YOR262W |        | 0               | #N/A | iYOR261C | 15   | 1044 | 817288 |
| YOR263C |        | 0               | #N/A | iYOR264W | 15   | 408  | 819160 |



|           |        |                  |   |            |            |      |        |        |
|-----------|--------|------------------|---|------------|------------|------|--------|--------|
| YOR264W   | DSE3   |                  | 0 | iYOR262W   | 15         | 1293 | 818862 |        |
| YOR265W   | RBL2   |                  | 0 | iYOR264W   | 15         | 321  | 820450 |        |
| YOR266W   | PNT1   |                  | 0 | iYOR265W   | 15         | 1272 | 821019 |        |
| YOR267C   |        |                  | 0 | iYOR267C   | 15         | 2280 | 824863 |        |
| YOR268C   |        |                  | 0 | #N/A       | iYOR268C   | 15   | 399    | 825928 |
| YOR269W   | PAC1   |                  | 0 | iYOR268C   | 15         | 1485 | 826381 |        |
| YOR270C   | VPH1   |                  | 0 | iYOR270C   | 15         | 2523 | 830570 |        |
| YOR271C   |        |                  | 0 | #N/A       | iYOR271C   | 15   | 984    | 832038 |
| YOR272W   | YTM1   |                  | 0 | iSNR8      | 15         | 1383 | 832809 |        |
| YOR273C   | TPO4   |                  | 0 | iYOR273C   | 15         | 1980 | 836427 |        |
| YOR274W   | MOD5   |                  | 0 | iYOR273C   | 15         | 1287 | 837670 |        |
| YOR275C   | RIM20  |                  | 0 | iYOR275C   | 15         | 1986 | 841065 |        |
| YOR276W   | CAF20  | CAF2 CAP20       |   | iYOR275C   | 15         | 486  | 841329 |        |
| YOR277C   |        |                  | 0 | #N/A       | iYOR277C   | 15   | 309    | 841819 |
| YOR278W   | HEM4   | SLU2             |   | iYOR277C   | 15         | 828  | 842813 |        |
| YOR279C   | RFM1   |                  | 0 | iYOR279C   | 15         | 933  | 844626 |        |
| YOR280C   | FSH3   |                  | 0 | iYOR280C   | 15         | 801  | 845788 |        |
| YOR281C   | PLP2   |                  | 0 | iYOR282W   | 15         | 861  | 847125 |        |
| YOR282W   |        |                  | 0 | #N/A       | iYOR280C   | 15   | 321    | 846996 |
| YOR283W   |        |                  | 0 | #N/A       | iYOR282W   | 15   | 693    | 847449 |
| YOR284W   |        |                  | 0 | iYOR283W   | 15         | 732  | 848474 |        |
| YOR285W   |        |                  | 0 | #N/A       | iYOR284W   | 15   | 420    | 849631 |
| YOR286W   |        |                  | 0 | iYOR285W   | 15         | 450  | 850276 |        |
| YOR287C   |        |                  | 0 | #N/A       | iYOR287C   | 15   | 903    | 851835 |
| YOR288C   | MPD1   |                  | 0 | iYOR288C   | 15         | 957  | 853073 |        |
| YOR289W   |        |                  | 0 | #N/A       | iYOR288C   | 15   | 756    | 853353 |
| YOR290C   | SNF2   | GAM1 HAF1 SWI2 T |   | iYOR290C   | 15         | 5112 | 860254 |        |
| YOR291W   |        |                  | 0 | #N/A       | iYOR290C   | 15   | 4419   | 861171 |
| YOR292C   |        |                  | 0 | #N/A       | iYOR292C   | 15   | 930    | 866578 |
| YOR293W   | RPS10A |                  | 0 | iYOR292C   | 15         | 755  | 867094 |        |
| YOR294W   | RRS1   |                  | 0 | iYOR293W   | 15         | 612  | 868336 |        |
| YOR295W   | UAF30  |                  | 0 | iYOR294W   | 15         | 687  | 869204 |        |
| YOR296W   |        |                  | 0 | #N/A       | iYOR295W   | 15   | 3870   | 870198 |
| YOR297C   | TIM18  |                  | 0 | iYOR297C   | 15         | 579  | 875317 |        |
| YOR298W   |        |                  | 0 | #N/A       | iYOR297C   | 15   | 1440   | 875595 |
| YOR299W   | BUD7   |                  | 0 | iYOR298C-) | 15         | 2241 | 878428 |        |
| YOR300W   |        |                  | 0 | #N/A       | iYOR298C-) | 15   | 309    | 880568 |
| YOR301W   | RAX1   |                  | 0 | iYOR300W   | 15         | 1308 | 880958 |        |
| YOR302W   |        |                  | 0 | #N/A       | iYOR301W   | 15   | 78     | 882758 |
| YOR303W   | CPA1   |                  | 0 | iYOR301W   | 15         | 1236 | 882892 |        |
| YOR304C-A |        |                  | 0 | #N/A       | iYOR304C-) | 15   | 231    | 888743 |
| YOR304W   | ISW2   |                  | 0 | iYOR303W   | 15         | 3363 | 884507 |        |
| YOR305W   |        |                  | 0 | #N/A       | iYOR304C-) | 15   | 729    | 889015 |
| YOR306C   | MCH5   |                  | 0 | iYOR306C   | 15         | 1566 | 891425 |        |
| YOR307C   | SLY41  |                  | 0 | iYOR307C   | 15         | 1362 | 894084 |        |
| YOR308C   | SNU66  |                  | 0 | iYOR308C   | 15         | 1764 | 896379 |        |
| YOR309C   |        |                  | 0 | #N/A       | iYOR310C   | 15   | 381    | 897070 |
| YOR310C   | NOP58  | NOP5             |   | iYOR310C   | 15         | 1536 | 898352 |        |
| YOR311C   | HSD1   |                  | 0 | iYOR311C   | 15         | 873  | 899920 |        |
| YOR312C   | RPL20B | RPL18A1          |   | iYOR312C   | 15         | 932  | 901173 |        |
| YOR313C   | SPS4   |                  | 0 | iYOR313C   | 15         | 1017 | 902866 |        |

|         |        |             |              |    |      |         |
|---------|--------|-------------|--------------|----|------|---------|
| YOR314W | 0      | #N/A        | iYOR313C     | 15 | 330  | 903035  |
| YOR315W | 0      | #N/A        | iYOR314W     | 15 | 1041 | 904752  |
| YOR316C | COT1   |             | 0 iYOR316C-  | 15 | 1320 | 907547  |
| YOR317W | FAA1   |             | 0 iYOR316C-  | 15 | 2103 | 909335  |
| YOR318C | 0      | #N/A        | iYOR318C     | 15 | 653  | 912428  |
| YOR319W | HSH49  |             | 0 iYOR318C   | 15 | 642  | 912814  |
| YOR320C | 0      |             | 0 iYOR320C   | 15 | 1476 | 915086  |
| YOR321W | PMT3   |             | 0 iYOR320C   | 15 | 2262 | 916022  |
| YOR322C | 0      | #N/A        | iYOR322C     | 15 | 2457 | 921054  |
| YOR323C | PRO2   |             | 0 iYOR323C   | 15 | 1371 | 922897  |
| YOR324C | 0      |             | 0 iYOR325W   | 15 | 1809 | 925032  |
| YOR325W | 0      | #N/A        | iYOR323C     | 15 | 474  | 924569  |
| YOR326W | MYO2   | CDC66       | iYOR325W     | 15 | 4725 | 925713  |
| YOR327C | SNC2   |             | 0 iYOR327C   | 15 | 348  | 931073  |
| YOR328W | PDR10  |             | 0 iYOR327C   | 15 | 4695 | 931795  |
| YOR329C | SCD5   | FTB1        | iYOR329C     | 15 | 2619 | 939341  |
| YOR330C | MIP1   |             | 0 iYOR330C   | 15 | 3843 | 943455  |
| YOR331C | 0      | #N/A        | iYOR332W     | 15 | 558  | 944114  |
| YOR332W | VMA4   |             | 0 iYOR330C   | 15 | 702  | 943648  |
| YOR333C | 0      | #N/A        | iYOR334W     | 15 | 417  | 944949  |
| YOR334W | MRS2   |             | 0 iYOR332W   | 15 | 1413 | 944588  |
| YOR335C | ALA1   | CDC64       | iYOR335C     | 15 | 2877 | 949101  |
| YOR336W | KRE5   |             | 0 iYOR335C   | 15 | 4098 | 949765  |
| YOR337W | TEA1   |             | 0 iYOR336W   | 15 | 2280 | 954336  |
| YOR338W | 0      | #N/A        | iYOR337W     | 15 | 1092 | 956890  |
| YOR339C | UBC11  |             | 0 iYOR339C   | 15 | 471  | 958824  |
| YOR340C | RPA43  |             | 0 iYOR340C   | 15 | 981  | 960174  |
| YOR341W | RPA190 | RRN1        | iYOR340C     | 15 | 4995 | 960979  |
| YOR342C | 0      | #N/A        | iYOR342C     | 15 | 960  | 967617  |
| YOR343C | 0      | #N/A        | iYOR343C     | 15 | 327  | 968466  |
| YOR344C | TYE7   | SGC1        | iYOR344C-    | 15 | 876  | 978061  |
| YOR345C | 0      | #N/A        | iYOR346W     | 15 | 351  | 982154  |
| YOR346W | REV1   |             | 0 itP(UGG)O3 | 15 | 2958 | 981820  |
| YOR347C | PYK2   |             | 0 iYOR347C   | 15 | 1521 | 986454  |
| YOR348C | PUT4   |             | 0 iYOR348C   | 15 | 1884 | 988774  |
| YOR349W | CIN1   |             | 0 iYOR348C   | 15 | 3045 | 989781  |
| YOR350C | MNE1   |             | 0 iYOR350C   | 15 | 1992 | 994847  |
| YOR351C | MEK1   | MRE4        | iYOR351C     | 15 | 1494 | 996503  |
| YOR352W | 0      | #N/A        | iYOR351C     | 15 | 1032 | 997205  |
| YOR353C | 0      |             | 0 iYOR353C   | 15 | 2376 | 1000820 |
| YOR354C | MSC6   |             | 0 iYOR354C-  | 15 | 2079 | 1003217 |
| YOR355W | GDS1   |             | 0 iYOR354C-  | 15 | 1569 | 1005130 |
| YOR356W | 0      | #N/A        | iYOR355W     | 15 | 1896 | 1007214 |
| YOR357C | GRD19  | SNX3        | iYOR357C     | 15 | 489  | 1009705 |
| YOR358W | HAP5   |             | 0 iYOR357C   | 15 | 729  | 1010154 |
| YOR359W | VTS1   |             | 0 iYOR358W   | 15 | 1572 | 1011182 |
| YOR360C | PDE2   | SRA5        | iYOR360C     | 15 | 1581 | 1014814 |
| YOR361C | PRT1   | CDC63 DNA26 | iYOR361C     | 15 | 2292 | 1017645 |
| YOR362C | PRE10  |             | 0 iYOR362C   | 15 | 867  | 1018739 |
| YOR363C | PIP2   | OAF2        | iYOR363C     | 15 | 2991 | 1023205 |
| YOR364W | 0      | #N/A        | iYOR363C     | 15 | 369  | 1023364 |

|         |       |                  |             |    |      |         |
|---------|-------|------------------|-------------|----|------|---------|
| YOR365C | 0     | #N/A             | iYOR366W    | 15 | 2112 | 1025565 |
| YOR366W | 0     | #N/A             | iYOR363C    | 15 | 354  | 1025249 |
| YOR367W | SCP1  |                  | 0 iYOR366W  | 15 | 603  | 1026000 |
| YOR368W | RAD17 |                  | 0 iYOR367W  | 15 | 1206 | 1026836 |
| YOR369C | RPS12 |                  | 0 iYOR369C  | 15 | 432  | 1028618 |
| YOR370C | MRS6  | MSI4             | iYOR370C    | 15 | 1812 | 1030987 |
| YOR371C | KRH2  | KRH2             | iYOR371C    | 15 | 2694 | 1034175 |
| YOR372C | NDD1  |                  | 0 iYOR372C  | 15 | 1665 | 1036464 |
| YOR373W | NUD1  |                  | 0 iYOR372C  | 15 | 2556 | 1036827 |
| YOR374W | ALD4  | ALD7             | iYOR373W    | 15 | 1560 | 1039833 |
| YOR375C | GDH1  | GDH-A GDH-A URE1 | iYOR375C    | 15 | 1365 | 1043035 |
| YOR376W | 0     | #N/A             | iYOR375C    | 15 | 369  | 1043184 |
| YOR377W | ATF1  |                  | 0 iYOR376W- | 15 | 1578 | 1046219 |
| YOR378W | 0     | #N/A             | iYOR377W-   | 15 | 1548 | 1049504 |
| YOR379C | 0     | #N/A             | iYOR379C    | 15 | 339  | 1051057 |
| YOR380W | RDR1  |                  | 0 iYOR379C  | 15 | 1641 | 1051283 |
| YOR381W | FRE3  |                  | 0 iYOR380W- | 15 | 2136 | 1055538 |
| YOR382W | FIT2  |                  | 0 iYOR381W- | 15 | 462  | 1059524 |
| YOR383C | FIT3  |                  | 0 iYOR383C  | 15 | 615  | 1061048 |
| YOR384W | FRE5  |                  | 0 iYOR383C  | 15 | 2085 | 1061557 |
| YOR385W | 0     | #N/A             | iYOR384W    | 15 | 873  | 1065036 |
| YOR386W | PHR1  |                  | 0 iYOR385W  | 15 | 1698 | 1066832 |
| YOR387C | 0     | #N/A             | iYOR387C-   | 15 | 621  | 1070234 |
| YOR388C | FDH1  |                  | 0 iYOR388C  | 15 | 1131 | 1072916 |
| YOR389W | 0     | #N/A             | iYOR388C    | 15 | 1875 | 1074206 |
| YOR390W | 0     | #N/A             | iYOR389W    | 15 | 1128 | 1076777 |
| YOR391C | 0     |                  | 0 iYOR392W  | 15 | 714  | 1079251 |
| YOR392W | 0     | #N/A             | iYOR390W    | 15 | 444  | 1079275 |
| YOR393W | ERR1  |                  | 0 iYOR392W  | 15 | 1314 | 1080269 |
| YOR394W | 0     | #N/A             | iYOR393W    | 15 | 495  | 1082711 |
| YPL001W | HAT1  |                  | 0 iYPL002C  | 16 | 1125 | 554600  |
| YPL002C | SNF8  | VPS22            | iYPL002C    | 16 | 702  | 554323  |
| YPL003W | ULA1  | ENR2             | iYPL004C    | 16 | 1389 | 552015  |
| YPL004C | 0     |                  | 0 iYPL004C  | 16 | 1026 | 551652  |
| YPL005W | 0     |                  | 0 iYPL006W  | 16 | 1821 | 548481  |
| YPL006W | NCR1  |                  | 0 iYPL007C  | 16 | 3513 | 544626  |
| YPL007C | TFC8  |                  | 0 iYPL007C  | 16 | 1767 | 543843  |
| YPL008W | CHL1  | CTF1 LPA9        | iYPL009C    | 16 | 2586 | 539380  |
| YPL009C | 0     | #N/A             | iYPL009C    | 16 | 3117 | 538931  |
| YPL010W | RET3  |                  | 0 iYPL011C  | 16 | 570  | 535013  |
| YPL011C | TAF3  | TAF47 TafII47    | iYPL011C    | 16 | 1062 | 534698  |
| YPL012W | RRP12 |                  | 0 iYPL013C  | 16 | 3687 | 529718  |
| YPL013C | 0     |                  | 0 iYPL013C  | 16 | 366  | 529345  |
| YPL014W | 0     | #N/A             | iYPL015C    | 16 | 1146 | 527542  |
| YPL015C | HST2  |                  | 0 iYPL015C  | 16 | 1074 | 526878  |
| YPL016W | SWI1  | ADR6 GAM3 LPA1   | iYPL017C    | 16 | 3945 | 521009  |
| YPL017C | 0     | #N/A             | iYPL017C    | 16 | 1500 | 520229  |
| YPL018W | CTF19 | MCM18            | iYPL019C    | 16 | 1110 | 517647  |
| YPL019C | VTC3  | PHM2             | iYPL019C    | 16 | 2508 | 517014  |
| YPL020C | ULP1  |                  | 0 iYPL020C  | 16 | 1866 | 514174  |
| YPL021W | ECM23 | SRD2             | iYPL022W    | 16 | 564  | 511097  |

|         |       |                   |              |    |      |        |
|---------|-------|-------------------|--------------|----|------|--------|
| YPL022W | RAD1  | LPB9              | iYPL023C     | 16 | 3303 | 506693 |
| YPL023C | MET12 |                   | 0 iYPL023C   | 16 | 1974 | 506308 |
| YPL024W | NCE4  |                   | 0 iYPL025C   | 16 | 726  | 503513 |
| YPL025C | 0     | #N/A              | iYPL025C     | 16 | 558  | 503026 |
| YPL026C | SKS1  | SHA3              | iYPL026C     | 16 | 1509 | 502179 |
| YPL027W | SMA1  |                   | 0 iYPL028W   | 16 | 738  | 499661 |
| YPL028W | ERG10 | LPB3 TSM0115      | iYPL029W     | 16 | 1197 | 498092 |
| YPL029W | SUV3  | LPB2              | iYPL030W     | 16 | 2214 | 495502 |
| YPL030W | 0     | #N/A              | iYPL031C     | 16 | 1704 | 493539 |
| YPL031C | PHO85 | LDB15             | iYPL031C     | 16 | 1020 | 493033 |
| YPL032C | SVL3  |                   | 0 iYPL032C   | 16 | 2478 | 491360 |
| YPL033C | 0     | #N/A              | iYPL033C     | 16 | 846  | 488203 |
| YPL034W | 0     | #N/A              | iYPL036W     | 16 | 498  | 486708 |
| YPL035C | 0     | #N/A              | iYPL033C     | 16 | 348  | 486907 |
| YPL036W | PMA2  |                   | 0 iYPL037C   | 16 | 2844 | 482839 |
| YPL037C | EGD1  |                   | 0 iYPL037C   | 16 | 474  | 481896 |
| YPL038W | MET31 |                   | 0 iYPL039W   | 16 | 534  | 480530 |
| YPL039W | 0     | #N/A              | iYPL040C     | 16 | 951  | 479220 |
| YPL040C | ISM1  |                   | 0 iYPL040C   | 16 | 3009 | 478996 |
| YPL041C | 0     | #N/A              | iYPL041C     | 16 | 624  | 475736 |
| YPL042C | SSN3  | GIG2 NUT7 RYE5 SF | iYPL042C     | 16 | 1668 | 474702 |
| YPL043W | NOP4  | NOP77             | iYPL045W     | 16 | 2058 | 469934 |
| YPL044C | 0     | #N/A              | iYPL043W     | 16 | 549  | 470469 |
| YPL045W | VPS16 | SVL6 VAM9 VPT16   | iYPL046C     | 16 | 2397 | 467255 |
| YPL046C | ELC1  |                   | 0 iYPL046C   | 16 | 300  | 466938 |
| YPL047W | 0     |                   | 0 iYPL048W   | 16 | 300  | 465957 |
| YPL048W | CAM1  | EF-1 gamma TEF3   | iYPL049C     | 16 | 1248 | 464396 |
| YPL049C | DIG1  | RST1              | iYPL049C     | 16 | 1359 | 463834 |
| YPL050C | MNN9  |                   | 0 iYPL050C   | 16 | 1188 | 461961 |
| YPL051W | ARL3  |                   | 0 iYPL052W   | 16 | 597  | 459958 |
| YPL052W | 0     | #N/A              | iYPL053C     | 16 | 606  | 459068 |
| YPL053C | KTR6  | MNN6              | iYPL053C     | 16 | 1341 | 458453 |
| YPL054W | LEE1  |                   | 0 iYPL055C   | 16 | 906  | 455754 |
| YPL055C | LGE1  |                   | 0 iYPL055C   | 16 | 999  | 454985 |
| YPL056C | 0     | #N/A              | iYPL056C     | 16 | 306  | 453730 |
| YPL057C | SUR1  | BCL21 CSG1 LPE15  | iYPL057C     | 16 | 1149 | 453052 |
| YPL058C | PDR12 |                   | 0 iYPL058C-0 | 16 | 4536 | 450372 |
| YPL059W | GRX5  |                   | 0 iYPLCtau2  | 16 | 453  | 444574 |
| YPL060W | LPE10 |                   | 0 iYPL061W   | 16 | 1242 | 434518 |
| YPL061W | ALD6  |                   | 0 iYPL062W   | 16 | 1503 | 432583 |
| YPL062W | 0     | #N/A              | iYPL063W     | 16 | 405  | 431890 |
| YPL063W | 0     |                   | 0 iYPL064C   | 16 | 1431 | 429934 |
| YPL064C | CWC27 |                   | 0 iYPL064C   | 16 | 906  | 429611 |
| YPL065W | VPS28 | VPT28             | iYPL066W     | 16 | 729  | 427922 |
| YPL066W | 0     | #N/A              | iYPL067C     | 16 | 1440 | 426228 |
| YPL067C | 0     | #N/A              | iYPL067C     | 16 | 597  | 425842 |
| YPL068C | 0     | #N/A              | iYPL068C     | 16 | 882  | 425091 |
| YPL069C | BTS1  |                   | 0 iYPL069C   | 16 | 1008 | 423887 |
| YPL070W | 0     |                   | 0 iYPL071C   | 16 | 1839 | 420943 |
| YPL071C | 0     | #N/A              | iYPL071C     | 16 | 471  | 420513 |
| YPL072W | UBP16 |                   | 0 iYPL074W   | 16 | 1500 | 418507 |

|         |        |                    |            |      |      |        |
|---------|--------|--------------------|------------|------|------|--------|
| YPL073C | 0      | #N/A               | iYPL071C   | 16   | 486  | 418979 |
| YPL074W | YTA6   |                    | 0 iYPL075W | 16   | 2265 | 415758 |
| YPL075W | GCR1   | LPF10              | iYPL076W-  | 16   | 3109 | 412249 |
| YPL076W | GPI2   | GCR4               | iYPL077C   | 16   | 843  | 410438 |
| YPL077C | 0      | #N/A               | iYPL077C   | 16   | 723  | 410085 |
| YPL078C | ATP4   | LPF7               | iYPL078C   | 16   | 735  | 408739 |
| YPL079W | RPL21B |                    | 0 iYPL080C | 16   | 904  | 406631 |
| YPL080C | 0      | #N/A               | iYPL080C   | 16   | 327  | 406493 |
| YPL081W | RPS9A  |                    | 0 iYPL082C | 16   | 1095 | 404945 |
| YPL082C | MOT1   | BTAF1 BUR3 LPF4    | iYPL082C   | 16   | 5604 | 404078 |
| YPL083C | SEN54  |                    | 0 iYPL083C | 16   | 1404 | 398100 |
| YPL084W | BRO1   | ASI6 LPF2 NPI3 VPS | iYPL085W   | 16   | 2535 | 394033 |
| YPL085W | SEC16  | LPF1               | iYPL086C   | 16   | 6588 | 387062 |
| YPL086C | ELP3   | HPA1 TOT3          | iYPL086C   | 16   | 1674 | 386441 |
| YPL087W | YDC1   |                    | 0 iYPL088W | 16   | 954  | 383450 |
| YPL088W | 0      | #N/A               | iYPL089C   | 16   | 1029 | 381960 |
| YPL089C | RLM1   |                    | 0 iYPL089C | 16   | 2031 | 381145 |
| YPL090C | RPS6A  |                    | 0 iYPL090C | 16   | 1105 | 378390 |
| YPL091W | GLR1   | LPG17              | iYPL092W   | 16   | 1452 | 375497 |
| YPL092W | SSU1   | LPG16              | iYPL093W   | 16   | 1377 | 373788 |
| YPL093W | NOG1   |                    | 0 iYPL094C | 16   | 1944 | 370973 |
| YPL094C | SEC62  | LPG14              | iYPL094C   | 16   | 852  | 370685 |
| YPL095C | 0      | #N/A               | iYPL095C   | 16   | 1371 | 369436 |
| YPL096W | PNG1   |                    | 0 iYPL097W | 16   | 1092 | 366922 |
| YPL097W | MSY1   |                    | 0 iYPL098C | 16   | 1479 | 364947 |
| YPL098C | 0      | #N/A               | iYPL098C   | 16   | 342  | 364722 |
| YPL099C | 0      |                    | 0 iYPL099C | 16   | 549  | 364063 |
| YPL100W | MAI1   | HSV1 MAI1          | iYPL101W   | 16   | 1491 | 361867 |
| YPL101W | ELP4   | HAP1 TOT7          | iYPL103C   | 16   | 1371 | 360204 |
| YPL102C | KRE24  | #N/A               | iYPL101W   | 16   | 303  | 360300 |
| YPL103C | 0      |                    | 0 iYPL103C | 16   | 1407 | 359401 |
| YPL104W | MSD1   | LPG5               | iYPL105C   | 16   | 1977 | 355695 |
| YPL105C | 0      | #N/A               | iYPL105C   | 16   | 2550 | 355407 |
| YPL106C | SSE1   | LPG3 MSI3          | iYPL106C   | 16   | 2082 | 352270 |
| YPL106W | #N/A   | #N/A               | #N/A       | #N/A | #N/A | #N/A   |
| YPL107W | 0      | #N/A               | iYPL109C   | 16   | 747  | 349114 |
| YPL108W | 0      | #N/A               | iYPL109C   | 16   | 507  | 348441 |
| YPL109C | 0      | #N/A               | iYPL109C   | 16   | 1632 | 347187 |
| YPL110C | 0      | #N/A               | iYPL110C   | 16   | 3672 | 344738 |
| YPL111W | CAR1   | LPH15              | itM(CAU)P  | 16   | 1002 | 339943 |
| YPL112C | 0      |                    | 0 iYPL112C | 16   | 1185 | 338619 |
| YPL113C | 0      | #N/A               | iYPL113C   | 16   | 1191 | 337142 |
| YPL114W | 0      | #N/A               | iYPL115C   | 16   | 420  | 335947 |
| YPL115C | BEM3   |                    | 0 iYPL115C | 16   | 3387 | 335485 |
| YPL116W | HOS3   |                    | 0 iYPL117C | 16   | 2094 | 329605 |
| YPL117C | IDI1   | BOT2 LPH10         | iYPL117C   | 16   | 867  | 328729 |
| YPL118W | MRP51  |                    | 0 iYPL119C | 16   | 1035 | 326627 |
| YPL119C | DBP1   | LPH8               | iYPL119C   | 16   | 1854 | 326263 |
| YPL120W | VPS30  | APG6 ATG6 VPT30    | iYPL121C   | 16   | 1674 | 322070 |
| YPL121C | MEI5   | LPH6               | iYPL121C   | 16   | 669  | 321629 |
| YPL122C | TFB2   |                    | 0 iYPL122C | 16   | 1542 | 320766 |

|         |        |                      |   |          |    |      |        |
|---------|--------|----------------------|---|----------|----|------|--------|
| YPL123C | ARNY1  |                      | 0 | iYPL123C | 16 | 1305 | 318944 |
| YPL124W | SPC29  | LPH3 NIP29           |   | iYPL125W | 16 | 762  | 316754 |
| YPL125W | KAP120 |                      | 0 | iYPL126W | 16 | 3099 | 313387 |
| YPL126W | NAN1   | UTP17                |   | iYPL127C | 16 | 2691 | 310209 |
| YPL127C | HHO1   |                      | 0 | iYPL127C | 16 | 777  | 309603 |
| YPL128C | TBF1   | LPI16                |   | iYPL128C | 16 | 1689 | 308220 |
| YPL129W | TAF14  | ANC1 SWP29 TAF30     |   | iYPL130W | 16 | 840  | 305297 |
| YPL130W | SPO19  |                      | 0 | iYPL131W | 16 | 672  | 304386 |
| YPL131W | RPL5   | LPI14 RPL1           |   | iYPL132W | 16 | 894  | 303120 |
| YPL132W | COX11  | LPI13 PSO7           |   | iYPL133C | 16 | 903  | 301715 |
| YPL133C | RDS2   |                      | 0 | iYPL133C | 16 | 1341 | 301227 |
| YPL134C | ODC1   |                      | 0 | iYPL134C | 16 | 933  | 299502 |
| YPL135W | ISU1   | NUA1                 |   | iYPL136W | 16 | 498  | 297552 |
| YPL136W |        | 0 #N/A               |   | iYPL138C | 16 | 369  | 296285 |
| YPL137C |        | 0 #N/A               |   | iYPL136W | 16 | 3831 | 296646 |
| YPL138C | SPP1   | CPS40 SAF41          |   | iYPL138C | 16 | 1062 | 292426 |
| YPL139C | UME1   | WTM3                 |   | iYPL139C | 16 | 1383 | 291050 |
| YPL140C | MKK2   | LPI6 SSP33           |   | iYPL140C | 16 | 1521 | 289033 |
| YPL141C |        | 0 #N/A               |   | iYPL141C | 16 | 2598 | 286060 |
| YPL142C |        | 0 #N/A               |   | iYPL142C | 16 | 318  | 283002 |
| YPL143W | RPL33A | RPL37A               |   | iYPL144W | 16 | 849  | 282121 |
| YPL144W |        | 0 #N/A               |   | iYPL145C | 16 | 447  | 280479 |
| YPL145C | KES1   | LPI3 OSH4            |   | iYPL145C | 16 | 1305 | 279698 |
| YPL146C |        | 0 #N/A               |   | iYPL146C | 16 | 1368 | 277528 |
| YPL147W | PXA1   | LPI1 PAL1 PAT2 SSP   |   | iYPL148C | 16 | 2613 | 273254 |
| YPL148C | PPT2   |                      | 0 | iYPL148C | 16 | 534  | 272826 |
| YPL149W | APG5   | APG5                 |   | iYPL150W | 16 | 885  | 271309 |
| YPL150W |        | 0 #N/A               |   | iYPL151C | 16 | 2706 | 268187 |
| YPL151C | PRP46  | NTC50                |   | iYPL151C | 16 | 1356 | 267534 |
| YPL152W | RRD2   | YPA2                 |   | iYPL153C | 16 | 1077 | 265027 |
| YPL153C | RAD53  | LSD1 MEC2 SPK1       |   | iYPL153C | 16 | 2466 | 264191 |
| YPL154C | PEP4   | PHO9 PRA1 yjcA       |   | iYPL154C | 16 | 1218 | 260930 |
| YPL155C | KIP2   |                      | 0 | iYPL155C | 16 | 2121 | 259335 |
| YPL156C | PRM4   |                      | 0 | iYPL156C | 16 | 855  | 256766 |
| YPL157W |        | 0                    |   | iYPL158C | 16 | 948  | 254813 |
| YPL158C |        | 0 #N/A               |   | iYPL158C | 16 | 2277 | 254309 |
| YPL159C |        | 0                    |   | iYPL159C | 16 | 762  | 251667 |
| YPL160W | CDC60  | LeuRS                |   | iYPL161C | 16 | 3273 | 246989 |
| YPL161C | BEM4   | ROM7                 |   | iYPL161C | 16 | 1902 | 246219 |
| YPL162C |        | 0 #N/A               |   | iYPL162C | 16 | 822  | 244026 |
| YPL163C | SVS1   |                      | 0 | iYPL163C | 16 | 783  | 242699 |
| YPL164C | MLH3   |                      | 0 | iYPL164C | 16 | 2148 | 241496 |
| YPL165C | SET6   |                      | 0 | iYPL165C | 16 | 1122 | 239076 |
| YPL166W |        | 0 #N/A               |   | iYPL167C | 16 | 642  | 237337 |
| YPL167C | REV3   | PSO1                 |   | iYPL167C | 16 | 4515 | 237106 |
| YPL168W |        | 0 #N/A               |   | iYPL169C | 16 | 1293 | 231216 |
| YPL169C | MEX67  |                      | 0 | iYPL169C | 16 | 1800 | 230837 |
| YPL170W |        | 0                    |   | iYPL171C | 16 | 459  | 228313 |
| YPL171C | OYE3   | Old Yellow Enzyme Zi |   | iYPL171C | 16 | 1203 | 227370 |
| YPL172C | COX10  |                      | 0 | iYPL172C | 16 | 1389 | 225740 |
| YPL173W | MRPL40 |                      | 0 | iYPL174C | 16 | 894  | 223142 |

|         |         |                  |              |    |      |        |
|---------|---------|------------------|--------------|----|------|--------|
| YPL174C | NIP100  | PAC13            | iYPL174C     | 16 | 2607 | 222772 |
| YPL175W | SPT14   | CWH6 GPI3        | iYPL176C     | 16 | 1459 | 218629 |
| YPL176C | 0       | #N/A             | iYPL176C     | 16 | 2352 | 218362 |
| YPL177C | CUP9    |                  | 0 iYPL177C-0 | 16 | 921  | 213961 |
| YPL178W | CBC2    | CBP20 MUD13 SAE1 | iYPLWdelta   | 16 | 627  | 212157 |
| YPL179W | PPQ1    | SAL6             | iYPL180W     | 16 | 1650 | 208156 |
| YPL180W | 0       |                  | 0 iYPL181W   | 16 | 2400 | 205247 |
| YPL181W | 0       | RXT1             | iYPL183C     | 16 | 1521 | 203420 |
| YPL182C | 0       | #N/A             | iYPL181W     | 16 | 384  | 203688 |
| YPL183C | 0       | #N/A             | iYPL183C     | 16 | 3042 | 202535 |
| YPL184C | 0       | #N/A             | iYPL184C     | 16 | 1839 | 197787 |
| YPL185W | 0       | #N/A             | iYPL187W     | 16 | 396  | 195252 |
| YPL186C | UIP4    |                  | 0 iYPL185W   | 16 | 915  | 195425 |
| YPL187W | MF(ALP- |                  | 0 iYPL188W   | 16 | 498  | 193647 |
| YPL188W | POS5    |                  | 0 iYPL189W   | 16 | 1245 | 191405 |
| YPL189W | GUP2    |                  | 0 iYPL190C   | 16 | 1830 | 189153 |
| YPL190C | NAB3    | HMD1             | iYPL190C     | 16 | 2409 | 187724 |
| YPL191C | 0       | #N/A             | iYPL191C     | 16 | 1083 | 184678 |
| YPL192C | PRM3    |                  | 0 iYPL192C   | 16 | 402  | 183055 |
| YPL193W | RSA1    |                  | 0 iYPL194W   | 16 | 1146 | 181402 |
| YPL194W | DDC1    |                  | 0 iYPL195W   | 16 | 1839 | 179276 |
| YPL195W | APL5    | YKS4             | iYPL196W     | 16 | 2799 | 176222 |
| YPL196W | OXR1    |                  | 0 iYPL197C   | 16 | 822  | 175042 |
| YPL197C | 0       | #N/A             | iYPL197C     | 16 | 414  | 174755 |
| YPL198W | RPL7B   |                  | 0 iSNR59     | 16 | 1551 | 173151 |
| YPL199C | 0       | #N/A             | iYPL199C     | 16 | 723  | 172754 |
| YPL200W | CSM4    |                  | 0 iYPL201C   | 16 | 471  | 171483 |
| YPL201C | 0       | #N/A             | iYPL201C     | 16 | 1386 | 171154 |
| YPL202C | AFT2    |                  | 0 iYPL202C   | 16 | 1251 | 169337 |
| YPL203W | TPK2    | PKA2 PKA3 YKR1   | iYPL204W     | 16 | 1143 | 166255 |
| YPL204W | HRR25   |                  | 0 iYPL206C   | 16 | 1485 | 164275 |
| YPL205C | 0       | #N/A             | iYPL204W     | 16 | 345  | 164265 |
| YPL206C | 0       | #N/A             | iYPL206C     | 16 | 966  | 163596 |
| YPL207W | 0       | #N/A             | iYPL208W     | 16 | 2433 | 159908 |
| YPL208W | 0       | #N/A             | iYPL209C     | 16 | 1752 | 157841 |
| YPL209C | IPL1    | PAC15            | iYPL209C     | 16 | 1104 | 157592 |
| YPL210C | SRP72   |                  | 0 iYPL210C   | 16 | 1941 | 156229 |
| YPL211W | NIP7    |                  | 0 iYPL212C   | 16 | 546  | 153494 |
| YPL212C | PUS1    |                  | 0 iYPL212C   | 16 | 1635 | 153148 |
| YPL213W | LEA1    |                  | 0 iYPL214C   | 16 | 717  | 150613 |
| YPL214C | THI6    |                  | 0 iYPL214C   | 16 | 1623 | 150190 |
| YPL215W | CBP3    |                  | 0 iYPL216W   | 16 | 1008 | 147415 |
| YPL216W | 0       | #N/A             | iYPL217C     | 16 | 3309 | 143820 |
| YPL217C | BMS1    |                  | 0 iYPL217C   | 16 | 3552 | 143170 |
| YPL218W | SAR1    |                  | 0 iYPL219W   | 16 | 712  | 138697 |
| YPL219W | PCL8    |                  | 0 iYPL220W   | 16 | 1479 | 136749 |
| YPL220W | RPL1A   | SSM1             | iYPL221W     | 16 | 654  | 135789 |
| YPL221W | BOP1    |                  | 0 iYPL222W   | 16 | 2382 | 133042 |
| YPL222W | 0       |                  | 0 iYPL223C   | 16 | 2067 | 130161 |
| YPL223C | GRE1    |                  | 0 iYPL223C   | 16 | 507  | 129137 |
| YPL224C | MMT2    | MFT2             | iYPL224C     | 16 | 1350 | 128087 |

|         |       |             |              |    |      |        |
|---------|-------|-------------|--------------|----|------|--------|
| YPL225W | 0     | #N/A        | iYPL226W     | 16 | 441  | 126006 |
| YPL226W | NEW1  |             | 0 iYPL227C   | 16 | 3591 | 121767 |
| YPL227C | ALG5  |             | 0 iYPL227C   | 16 | 1005 | 121167 |
| YPL228W | CET1  | CES5        | iYPL229W     | 16 | 1650 | 118382 |
| YPL229W | 0     | #N/A        | iYPL230W     | 16 | 621  | 117067 |
| YPL230W | 0     | #N/A        | iYPL231W     | 16 | 1176 | 115312 |
| YPL231W | FAS2  |             | 0 iYPL232W   | 16 | 5664 | 108652 |
| YPL232W | SSO1  |             | 0 iYPL233W   | 16 | 873  | 107275 |
| YPL233W | NSL1  |             | 0 iYPL234C   | 16 | 651  | 106172 |
| YPL234C | TFP3  | CLS9 VMA11  | iYPL234C     | 16 | 495  | 105440 |
| YPL235W | RVB2  | TIH2 TIP49B | iYPL236C     | 16 | 1416 | 103232 |
| YPL236C | 0     | #N/A        | iYPL236C     | 16 | 1095 | 102702 |
| YPL237W | SUI3  |             | 0 iYPL239W   | 16 | 858  | 100496 |
| YPL238C | 0     | #N/A        | iYPL237W     | 16 | 390  | 100863 |
| YPL239W | YAR1  |             | 0 iYPL240C   | 16 | 603  | 99484  |
| YPL240C | HSP82 | HSP83 HSP90 | iYPL240C     | 16 | 2130 | 98625  |
| YPL241C | CIN2  |             | 0 iYPL241C   | 16 | 887  | 96258  |
| YPL242C | IQG1  | CYK1        | iYPL242C     | 16 | 4488 | 95109  |
| YPL243W | SRP68 |             | 0 iYPL244C   | 16 | 1800 | 88517  |
| YPL244C | HUT1  |             | 0 iYPL244C   | 16 | 1020 | 88033  |
| YPL245W | 0     | #N/A        | iYPL246C     | 16 | 1365 | 85586  |
| YPL246C | 0     |             | 0 iYPL246C   | 16 | 789  | 85297  |
| YPL247C | 0     | #N/A        | iYPL247C     | 16 | 1572 | 84196  |
| YPL248C | GAL4  | GAL81       | iYPL248C     | 16 | 2646 | 82356  |
| YPL249C | GYP5  |             | 0 iYPL249C   | 16 | 2685 | 79353  |
| YPL250C | ICY2  |             | 0 iYPL250C   | 16 | 411  | 74719  |
| YPL251W | 0     | #N/A        | iYPL253C     | 16 | 303  | 73625  |
| YPL252C | YAH1  |             | 0 iYPL251W   | 16 | 519  | 73881  |
| YPL253C | VIK1  |             | 0 iYPL253C   | 16 | 1944 | 73006  |
| YPL254W | HF11  | ADA1 SUP110 | iYPL255W     | 16 | 1467 | 69485  |
| YPL255W | BBP1  |             | 0 iYPL256C   | 16 | 1158 | 67725  |
| YPL256C | CLN2  |             | 0 iYPL256C   | 16 | 1638 | 66614  |
| YPL257W | 0     | #N/A        | iYPLWdelta   | 16 | 582  | 63279  |
| YPL258C | THI21 |             | 0 iYPL258C   | 16 | 1656 | 55153  |
| YPL259C | APM1  | YAP54       | iYPL259C     | 16 | 1428 | 52671  |
| YPL260W | 0     | #N/A        | iYPL262W     | 16 | 1656 | 49303  |
| YPL261C | 0     | #N/A        | iYPL260W     | 16 | 309  | 49304  |
| YPL262W | FUM1  |             | 0 iYPL263C   | 16 | 1467 | 47336  |
| YPL263C | KEL3  |             | 0 iYPL263C   | 16 | 1956 | 46506  |
| YPL264C | 0     | #N/A        | iYPL264C     | 16 | 1062 | 44344  |
| YPL265W | DIP5  |             | 0 iYPL266W   | 16 | 1827 | 41043  |
| YPL266W | DIM1  | CDH1        | iYPL267W     | 16 | 957  | 39121  |
| YPL267W | 0     | #N/A        | iYPL268W     | 16 | 630  | 38169  |
| YPL268W | PLC1  |             | 0 iYPL269W   | 16 | 2610 | 35236  |
| YPL269W | KAR9  |             | 0 iYPL270W   | 16 | 1935 | 33013  |
| YPL270W | MDL2  |             | 0 iYPL271W   | 16 | 2463 | 30341  |
| YPL271W | ATP15 | ATPEPSILON  | iYPL272C-1   | 16 | 189  | 30079  |
| YPL272C | 0     | #N/A        | iYPL272C-0   | 16 | 1554 | 28164  |
| YPL273W | SAM4  |             | 0 iYPL274W   | 16 | 978  | 25087  |
| YPL274W | SAM3  |             | 0 iYPL275W-; | 16 | 1764 | 22938  |
| YPL275W | FDH2  |             | 0 iYPL277C   | 16 | 711  | 18369  |



|         |        |                |              |    |      |        |
|---------|--------|----------------|--------------|----|------|--------|
| YPL276W | FDH2   | #N/A           | iYPL277C     | 16 | 438  | 17948  |
| YPL277C | 0      | #N/A           | iYPL277C     | 16 | 1464 | 16868  |
| YPL278C | 0      | #N/A           | iYPL277C     | 16 | 303  | 15355  |
| YPL279C | 0      | #N/A           | iYPL279C     | 16 | 1128 | 14355  |
| YPL280W | 0      |                | 0 iYPL281C   | 16 | 714  | 11887  |
| YPL281C | ERR2   |                | 0 iYPL281C   | 16 | 1314 | 10870  |
| YPL282C | 0      | #N/A           | iYPL282C     | 16 | 495  | 8427   |
| YPL283C | YRF1-7 | YRF1           | iYPL283C-0   | 16 | 5728 | 6007   |
| YPR001W | CIT3   |                | 0 iCEN16     | 16 | 1461 | 556372 |
| YPR002W | PDH1   |                | 0 iYPR001W   | 16 | 1551 | 558380 |
| YPR003C | 0      | #N/A           | iYPR003C     | 16 | 2265 | 563763 |
| YPR004C | 0      | #N/A           | iYPR004C     | 16 | 1035 | 565036 |
| YPR005C | HAL1   |                | 0 iYPR005C   | 16 | 885  | 566666 |
| YPR006C | ICL2   |                | 0 iYPR006C   | 16 | 1728 | 568991 |
| YPR007C | SPO69  | SPO69          | iYPR007C     | 16 | 2043 | 571373 |
| YPR008W | HAA1   |                | 0 itG(GCC)P1 | 16 | 2085 | 573013 |
| YPR009W | SUT2   |                | 0 iYPR008W   | 16 | 807  | 576547 |
| YPR010C | RPA135 | RPA2 RRN2 SRP3 | iYPR010C     | 16 | 3612 | 581191 |
| YPR011C | 0      | #N/A           | iYPR011C     | 16 | 981  | 584037 |
| YPR012W | 0      | #N/A           | iYPR011C     | 16 | 255  | 584304 |
| YPR013C | 0      | #N/A           | iYPR013C-C   | 16 | 954  | 585580 |
| YPR014C | 0      | #N/A           | iYPR014C-C   | 16 | 330  | 587513 |
| YPR015C | 0      | #N/A           | iYPR015C     | 16 | 744  | 591021 |
| YPR016C | TIF6   | CDC95          | iYPR016C     | 16 | 738  | 593064 |
| YPR017C | DSS4   |                | 0 iYPR017C   | 16 | 432  | 593912 |
| YPR018W | RLF2   | CAC1           | iYPR017C     | 16 | 1821 | 594471 |
| YPR019W | CDC54  | HCD21 MCM4     | iYPR018W     | 16 | 2802 | 596745 |
| YPR020W | ATP20  |                | 0 iYPR019W   | 16 | 348  | 599865 |
| YPR021C | 0      |                | 0 iYPR021C   | 16 | 2709 | 603352 |
| YPR022C | 0      | #N/A           | iYPR022C     | 16 | 3402 | 607307 |
| YPR023C | EAF3   |                | 0 iYPR023C   | 16 | 1206 | 610026 |
| YPR024W | YME1   | OSD1 YTA11     | iYPR023C     | 16 | 2244 | 610476 |
| YPR025C | CCL1   |                | 0 iYPR025C   | 16 | 1182 | 614553 |
| YPR026W | ATH1   |                | 0 iYPR025C   | 16 | 3636 | 615374 |
| YPR027C | 0      | #N/A           | iYPR027C     | 16 | 834  | 621253 |
| YPR028W | YOP1   | YIP2           | itF(GAA)P2   | 16 | 676  | 623522 |
| YPR029C | APL4   |                | 0 iYPR029C   | 16 | 2499 | 626962 |
| YPR030W | CSR2   | MRG19          | iYPR029C     | 16 | 3366 | 627875 |
| YPR031W | 0      |                | 0 iYPR030W   | 16 | 2247 | 631510 |
| YPR032W | SRO7   | SNI1 SOP1      | iYPR031W     | 16 | 3102 | 634118 |
| YPR033C | HTS1   | TSM4572        | iYPR033C     | 16 | 1641 | 639014 |
| YPR034W | ARP7   | SWP61          | iYPR033C     | 16 | 1434 | 639520 |
| YPR035W | GLN1   |                | 0 iYPR034W   | 16 | 1113 | 642203 |
| YPR036W | VMA13  | CLS11          | iYPR035W     | 16 | 1437 | 643831 |
| YPR037C | ERV2   |                | 0 iYPR040W   | 16 | 591  | 647033 |
| YPR038W | 0      | #N/A           | iYPR036W     | 16 | 360  | 646831 |
| YPR039W | 0      | #N/A           | iYPR036W     | 16 | 336  | 647007 |
| YPR040W | SDF1   |                | 0 iYPR036W   | 16 | 1071 | 647300 |
| YPR041W | TIF5   |                | 0 iYPR040W   | 16 | 1218 | 648699 |
| YPR042C | PUF2   |                | 0 iYPR042C   | 16 | 3228 | 653657 |
| YPR043W | RPL43A |                | 0 iYPR042C   | 16 | 682  | 654161 |

|         |       |                |             |    |      |        |
|---------|-------|----------------|-------------|----|------|--------|
| YPR044C | 0     | #N/A           | iYPR044C    | 16 | 354  | 654872 |
| YPR045C | 0     | #N/A           | iYPR045C    | 16 | 1413 | 656547 |
| YPR046W | MCM16 |                | 0 iYPR045C  | 16 | 546  | 656794 |
| YPR047W | MSF1  |                | 0 iYPR046W  | 16 | 1425 | 657509 |
| YPR048W | TAH18 |                | 0 iYPR047W  | 16 | 1872 | 659177 |
| YPR049C | CVT9  | CVT9           | iYPR049C    | 16 | 3537 | 664668 |
| YPR050C | 0     | #N/A           | iYPR051W    | 16 | 414  | 665361 |
| YPR051W | MAK3  |                | 0 iYPR049C  | 16 | 531  | 664955 |
| YPR052C | NHP6A |                | 0 iYPR054W  | 16 | 282  | 665969 |
| YPR053C | 0     | #N/A           | iYPR054W    | 16 | 456  | 666238 |
| YPR054W | SMK1  |                | 0 iYPR051W  | 16 | 1167 | 666275 |
| YPR055W | SEC8  |                | 0 iYPR054W  | 16 | 3198 | 667671 |
| YPR056W | TFB4  |                | 0 iYPR055W  | 16 | 1017 | 671121 |
| YPR057W | BRR1  |                | 0 iYPR056W  | 16 | 1026 | 672466 |
| YPR058W | YMC1  |                | 0 iYPR057W  | 16 | 924  | 673746 |
| YPR059C | 0     | #N/A           | iYPR059C    | 16 | 387  | 674695 |
| YPR060C | ARO7  | HGS1 OSM2 TYR7 | iYPR060C    | 16 | 771  | 675626 |
| YPR061C | 0     |                | 0 iYPR061C  | 16 | 906  | 676877 |
| YPR062W | FCY1  |                | 0 iYPR061C  | 16 | 477  | 677160 |
| YPR063C | 0     | #N/A           | iYPR063C    | 16 | 509  | 678315 |
| YPR064W | 0     | #N/A           | iYPR063C    | 16 | 420  | 678946 |
| YPR065W | ROX1  | REO1           | iYPR064W    | 16 | 1107 | 679688 |
| YPR066W | UBA3  |                | 0 iYPR065W  | 16 | 900  | 681208 |
| YPR067W | ISA2  |                | 0 iYPR066W  | 16 | 558  | 682215 |
| YPR068C | HOS1  |                | 0 iYPR068C  | 16 | 1413 | 684348 |
| YPR069C | SPE3  |                | 0 iYPR069C  | 16 | 882  | 685432 |
| YPR070W | MED1  |                | 0 iYPR069C  | 16 | 1701 | 685893 |
| YPR071W | 0     | #N/A           | iYPR070W    | 16 | 636  | 688167 |
| YPR072W | NOT5  |                | 0 itS(UGA)P | 16 | 1683 | 690102 |
| YPR073C | LTP1  |                | 0 iYPR073C  | 16 | 486  | 692413 |
| YPR074C | TKL1  |                | 0 iYPR074C  | 16 | 2043 | 694833 |
| YPR075C | OPY2  |                | 0 iYPR076W  | 16 | 1083 | 696814 |
| YPR076W | 0     | #N/A           | iYPR074C    | 16 | 375  | 696471 |
| YPR077C | 0     | #N/A           | iYPR078C    | 16 | 372  | 697497 |
| YPR078C | 0     | #N/A           | iYPR078C    | 16 | 1119 | 698260 |
| YPR079W | MRL1  |                | 0 iYPR078C  | 16 | 1146 | 698865 |
| YPR080W | TEF1  | EF-1 alpha     | iYPR079W    | 16 | 1377 | 700590 |
| YPR081C | 0     |                | 0 iYPR081C  | 16 | 1857 | 703966 |
| YPR082C | DIB1  | SNU16          | iYPR082C    | 16 | 432  | 704652 |
| YPR083W | 0     |                | 0 iYPR082C  | 16 | 1740 | 704850 |
| YPR084W | 0     | #N/A           | iYPR083W    | 16 | 1371 | 706968 |
| YPR085C | 0     | #N/A           | iYPR085C    | 16 | 1347 | 709839 |
| YPR086W | SUA7  | SOH4           | iYPR085C    | 16 | 1038 | 710097 |
| YPR087W | VPS69 |                | 0 iYPR086W  | 16 | 321  | 711350 |
| YPR088C | SRP54 | SRH1           | iYPR088C    | 16 | 1626 | 713024 |
| YPR089W | 0     | #N/A           | iYPR088C    | 16 | 468  | 713271 |
| YPR090W | 0     | #N/A           | iYPR088C    | 16 | 2211 | 713728 |
| YPR091C | 0     | #N/A           | iSNR51      | 16 | 2313 | 718465 |
| YPR092W | 0     | #N/A           | iYPR090W    | 16 | 306  | 718376 |
| YPR093C | 0     | #N/A           | iYPR093C    | 16 | 933  | 720487 |
| YPR094W | RDS3  |                | 0 iYPR093C  | 16 | 324  | 720634 |

|         |        |                |      |              |    |      |        |
|---------|--------|----------------|------|--------------|----|------|--------|
| YPR095C | SYT1   |                | 0    | iYPR095C     | 16 | 3681 | 724714 |
| YPR096C |        | 0              | #N/A | iYPR096C     | 16 | 303  | 725141 |
| YPR097W |        | 0              | #N/A | iYPR096C     | 16 | 3222 | 725391 |
| YPR098C |        | 0              | #N/A | iYPR098C     | 16 | 327  | 729270 |
| YPR099C |        | 0              | #N/A | iYPR100W     | 16 | 357  | 730110 |
| YPR100W |        | 0              |      | 0 iYPR098C   | 16 | 423  | 729788 |
| YPR101W | SNT309 |                |      | 0 iYPR100W   | 16 | 528  | 730489 |
| YPR102C | RPL11A |                |      | 0 iYPR102C   | 16 | 525  | 731745 |
| YPR103W | PRE2   | DOA3 PRG1 SRR2 |      | iYPR102C     | 16 | 864  | 732346 |
| YPR104C | FHL1   |                |      | 0 iYPR104C   | 16 | 2811 | 736430 |
| YPR105C | COD1   | COD1 SEC38     |      | iYPR105C     | 16 | 2586 | 739566 |
| YPR106W | ISR1   |                |      | 0 iYPR105C   | 16 | 1332 | 740058 |
| YPR107C | YTH1   |                |      | 0 iYPR107C   | 16 | 627  | 742061 |
| YPR108W | RPN7   |                |      | 0 iYPR107C   | 16 | 1290 | 742451 |
| YPR109W |        | 0              | #N/A | itT(UGU)P    | 16 | 885  | 744686 |
| YPR110C | RPC40  | RPC5           |      | iYPR110C     | 16 | 1008 | 746832 |
| YPR111W | DBF20  |                |      | 0 iYPR110C   | 16 | 1695 | 747303 |
| YPR112C | MRD1   |                |      | 0 iYPR112C   | 16 | 2664 | 751916 |
| YPR113W | PIS1   |                |      | 0 iYPR112C   | 16 | 663  | 752254 |
| YPR114W |        | 0              | #N/A | iYPR113W     | 16 | 948  | 753298 |
| YPR115W |        | 0              | #N/A | iYPR114W     | 16 | 3252 | 754874 |
| YPR116W |        | 0              | #N/A | iYPR115W     | 16 | 834  | 758645 |
| YPR117W |        | 0              | #N/A | iYPR116W     | 16 | 7470 | 760022 |
| YPR118W |        | 0              | #N/A | iYPR117W     | 16 | 1236 | 767749 |
| YPR119W | CLB2   |                |      | 0 iYPRWsigm  | 16 | 1476 | 771650 |
| YPR120C | CLB5   |                |      | 0 iYPR120C   | 16 | 1308 | 775179 |
| YPR121W | THI22  |                |      | 0 iYPRWdelta | 16 | 1719 | 778578 |
| YPR122W | AXL1   | FUS5 STE22     |      | iYPR121W-    | 16 | 3627 | 782040 |
| YPR123C |        | 0              | #N/A | iYPR124W     | 16 | 435  | 786570 |
| YPR124W | CTR1   |                |      | 0 iYPR122W   | 16 | 1221 | 786203 |
| YPR125W |        | 0              | #N/A | iYPR124W     | 16 | 1365 | 787956 |
| YPR126C |        | 0              | #N/A | iYPR126C     | 16 | 309  | 789380 |
| YPR127W |        | 0              | #N/A | iYPR126C     | 16 | 1038 | 790078 |
| YPR128C | ANT1   |                |      | 0 iYPR128C   | 16 | 987  | 792199 |
| YPR129W | SCD6   |                |      | 0 iYPR128C   | 16 | 1050 | 792682 |
| YPR130C |        | 0              | #N/A | iYPR130C     | 16 | 408  | 793776 |
| YPR131C | NAT3   |                |      | 0 iYPR131C   | 16 | 756  | 794661 |
| YPR132W | RPS23B |                |      | 0 iYPR131C   | 16 | 803  | 794960 |
| YPR133C | IWS1   | SPN1           |      | iYPR133C     | 16 | 1233 | 797205 |
| YPR134W | MSS18  |                |      | 0 iYPR133W-  | 16 | 807  | 798046 |
| YPR135W | CTF4   | CHL15 POB1     |      | iYPR134W     | 16 | 2784 | 799229 |
| YPR136C | FYV15  |                | #N/A | iYPR137W     | 16 | 513  | 802832 |
| YPR137W | RRP9   |                |      | 0 iYPR135W   | 16 | 1722 | 802354 |
| YPR138C | MEP3   |                |      | 0 iYPR138C   | 16 | 1470 | 812448 |
| YPR139C | VPS66  |                |      | 0 iYPR139C   | 16 | 903  | 814053 |
| YPR140W |        | 0              |      | 0 iYPR139C   | 16 | 1146 | 814386 |
| YPR141C | KAR3   | OSR11          |      | iYPR141C     | 16 | 2190 | 817918 |
| YPR142C |        | 0              | #N/A | iYPR143W     | 16 | 564  | 818688 |
| YPR143W |        | 0              | #N/A | iYPR141C     | 16 | 753  | 818318 |
| YPR144C | UTP19  | UTP19          |      | iYPR144C     | 16 | 1659 | 821418 |
| YPR145W | ASN1   |                |      | 0 iSNR45     | 16 | 1719 | 822615 |

|         |        |                   |              |    |      |        |
|---------|--------|-------------------|--------------|----|------|--------|
| YPR146C | 0      | #N/A              | iYPR147C     | 16 | 330  | 825671 |
| YPR147C | 0      | #N/A              | iYPR147C     | 16 | 915  | 826554 |
| YPR148C | 0      | #N/A              | iYPR148C-C   | 16 | 1308 | 828135 |
| YPR149W | NCE102 | NCE2              | iYPR148C-1   | 16 | 522  | 829913 |
| YPR150W | 0      | #N/A              | iYPR149W     | 16 | 522  | 830994 |
| YPR151C | 0      |                   | 0 iYPR151C   | 16 | 621  | 831670 |
| YPR152C | 0      | #N/A              | iYPR152C     | 16 | 1398 | 833453 |
| YPR153W | 0      | #N/A              | iYPR152C     | 16 | 435  | 833806 |
| YPR154W | PIN3   | LSB2              | iYPR153W     | 16 | 648  | 834560 |
| YPR155C | NCA2   |                   | 0 iYPR155C   | 16 | 1851 | 837408 |
| YPR156C | TPO3   |                   | 0 iYPR156C   | 16 | 1869 | 839772 |
| YPR157W | 0      | #N/A              | iYPR156C     | 16 | 1404 | 841261 |
| YPR158W | 0      | #N/A              | iYPR157W     | 16 | 759  | 843257 |
| YPR159W | KRE6   | CWH48             | itA(AGC)P    | 16 | 2163 | 857578 |
| YPR160W | GPH1   |                   | 0 itG(GCC)P2 | 16 | 2709 | 861301 |
| YPR161C | SGV1   | BUR1              | iYPR161C     | 16 | 1974 | 866417 |
| YPR162C | ORC4   |                   | 0 iYPR162C   | 16 | 1590 | 868299 |
| YPR163C | TIF3   | RBL3 STM1         | iYPR163C     | 16 | 1311 | 869950 |
| YPR164W | MMS1   | RTT108 SLM6       | iYPR163C     | 16 | 4224 | 870698 |
| YPR165W | RHO1   |                   | 0 iYPR164W   | 16 | 630  | 875363 |
| YPR166C | MRP2   |                   | 0 iYPR166C   | 16 | 348  | 876624 |
| YPR167C | MET16  |                   | 0 iYPR167C   | 16 | 786  | 877627 |
| YPR168W | NUT2   | MED10             | iYPR167C     | 16 | 474  | 878071 |
| YPR169W | JIP5   |                   | 0 iYPR168W   | 16 | 1545 | 878619 |
| YPR170C | 0      | #N/A              | iYPR170C     | 16 | 336  | 883313 |
| YPR171W | 0      |                   | 0 iYPR170C   | 16 | 1731 | 883823 |
| YPR172W | 0      | #N/A              | iYPR171W     | 16 | 603  | 885791 |
| YPR173C | VPS4   | CSC1 DID6 END13 G | iYPR173C     | 16 | 1314 | 887832 |
| YPR174C | 0      | #N/A              | iYPR174C     | 16 | 666  | 888703 |
| YPR175W | DPB2   |                   | 0 iYPR174C   | 16 | 2079 | 888960 |
| YPR176C | BET2   |                   | 0 iYPR176C   | 16 | 978  | 892073 |
| YPR177C | 0      | #N/A              | iYPR178W     | 16 | 372  | 892679 |
| YPR178W | PRP4   | RNA4              | iYPR176C     | 16 | 1398 | 892327 |
| YPR179C | PLO1   | PLO1              | iYPR179C     | 16 | 1968 | 895759 |
| YPR180W | AOS1   |                   | 0 iYPR179C   | 16 | 1044 | 895956 |
| YPR181C | SEC23  |                   | 0 iYPR181C   | 16 | 2307 | 899662 |
| YPR182W | SMX3   | Sm F              | iYPR181C     | 16 | 261  | 900189 |
| YPR183W | DPM1   | SED3              | iYPR182W     | 16 | 804  | 900750 |
| YPR184W | GDB1   |                   | 0 iYPR183W   | 16 | 4611 | 902039 |
| YPR185W | APG13  | APG13             | iYPR184W     | 16 | 2217 | 907213 |
| YPR186C | PZF1   | TFC2              | iYPR186C     | 16 | 1290 | 911017 |
| YPR187W | RPO26  | RPB6              | iYPR186C     | 16 | 544  | 911252 |
| YPR188C | MLC2   |                   | 0 iYPR188C   | 16 | 492  | 912474 |
| YPR189W | SKI3   | SKI5              | iYPR188C     | 16 | 4299 | 912659 |
| YPR190C | RPC82  | RPC3              | iYPR190C     | 16 | 1965 | 919036 |
| YPR191W | QCR2   | COR2 UCR2         | iYPR190C     | 16 | 1107 | 919376 |
| YPR192W | AQY1   |                   | 0 iYPR191W   | 16 | 918  | 921855 |
| YPR193C | HPA2   |                   | 0 iYPR193C   | 16 | 471  | 923374 |
| YPR194C | OPT2   |                   | 0 iYPR194C   | 16 | 2634 | 926932 |
| YPR195C | 0      | #N/A              | iYPR195C-C   | 16 | 330  | 928289 |
| YPR196W | 0      | #N/A              | iYPR195C-2   | 16 | 1413 | 931371 |

|                |      |           |           |    |      |        |
|----------------|------|-----------|-----------|----|------|--------|
| <b>YPR197C</b> | 0    | #N/A      | iYPR198W- | 16 | 564  | 934456 |
| <b>YPR198W</b> | SGE1 | NOR1      | iYPRWtau4 | 16 | 1632 | 934029 |
| <b>YPR199C</b> | ARR1 | ACR1 YAP8 | iYPR199C  | 16 | 885  | 939027 |
| <b>YPR200C</b> | ARR2 | ACR2      | iYPR200C  | 16 | 393  | 939666 |
| <b>YPR201W</b> | ARR3 | ACR3      | iYPR200C  | 16 | 1215 | 939917 |
| <b>YPR202W</b> | 0    | #N/A      | iYPR201W- | 16 | 865  | 943027 |
| <b>YPR203W</b> | 0    | #N/A      | iYPR201W- | 16 | 309  | 943875 |
| <b>YPR204W</b> | 0    | #N/A      | iYPR203W  | 16 | 3099 | 944598 |

| dist from left end 2 | HA-Htz1 CHI | HA-Htz1 CHI | Untagged cc | Untagged cc | HA-Htz1 CHI | HA-Htz1 CHI |
|----------------------|-------------|-------------|-------------|-------------|-------------|-------------|
| 147595               | 1.44        | 0.64        | 2.09        | 0.97        | 0.32        | 0.02        |
| 147532               | 1.40        | 0.62        | 1.35        | 0.80        | 0.82        | 0.37        |
| 143162               | 0.56        | 0.23        | 0.63        | 0.23        | #N/A        | #N/A        |
| 141409               | 0.45        | 0.16        | #N/A        | #N/A        | #N/A        | #N/A        |
| 139505               | 0.56        | 0.23        | 0.63        | 0.23        | 0.59        | 0.20        |
| 137700               | 2.61        | 0.92        | 0.95        | 0.59        | 1.80        | 0.82        |
| 137512               | 1.89        | 0.79        | 1.19        | 0.69        | 2.26        | 0.91        |
| 136635               | 2.75        | 0.94        | 0.95        | 0.52        | 2.35        | 0.92        |
| 134186               | 2.75        | 0.94        | 0.95        | 0.52        | 0.99        | 0.50        |
| 134079               | #N/A        | #N/A        | #N/A        | #N/A        | 1.39        | 0.70        |
| 131986               | 0.56        | 0.23        | 0.91        | 0.52        | 0.76        | 0.32        |
| 130360               | 2.26        | 0.86        | 0.83        | 0.47        | 0.99        | 0.50        |
| 128254               | 2.26        | 0.86        | 0.83        | 0.47        | 1.40        | 0.71        |
| 126905               | 0.45        | 0.21        | 1.01        | 0.64        | 1.68        | 0.81        |
| 126788               | 2.51        | 0.92        | 0.98        | 0.57        | 0.88        | 0.42        |
| 118566               | 3.06        | 0.96        | 0.89        | 0.53        | 1.12        | 0.58        |
| 118316               | 3.45        | 0.98        | 0.55        | 0.15        | #N/A        | #N/A        |
| 113616               | 3.45        | 0.98        | 0.55        | 0.15        | 3.99        | 0.99        |
| 106274               | 2.07        | 0.84        | 1.04        | 0.61        | 0.37        | 0.05        |
| 100227               | 1.81        | 0.76        | 0.90        | 0.54        | 0.88        | 0.41        |
| 95474                | #N/A        | #N/A        | #N/A        | #N/A        | 1.61        | 0.77        |
| 87754                | 4.38        | 1.00        | #N/A        | #N/A        | 3.03        | 0.97        |
| 84751                | 4.38        | 1.00        | #N/A        | #N/A        | 0.48        | 0.13        |
| 83337                | 2.82        | 0.95        | 0.65        | 0.29        | 2.06        | 0.88        |
| 83229                | 1.87        | 0.77        | #N/A        | #N/A        | #N/A        | #N/A        |
| 80712                | 1.87        | 0.77        | #N/A        | #N/A        | 0.51        | 0.14        |
| 80589                | 3.43        | 0.98        | 0.72        | 0.35        | 1.34        | 0.66        |
| #N/A                 | #N/A        | #N/A        | 0.15        | 0.01        | 3.90        | 0.99        |
| 74825                | #N/A        | #N/A        | 1.04        | 0.50        | 1.39        | 0.71        |
| 68718                | 0.72        | 0.34        | #N/A        | #N/A        | 1.57        | 0.76        |
| 65780                | 0.34        | 0.09        | 0.51        | 0.13        | 0.41        | 0.07        |
| 65406                | 3.19        | 0.97        | 0.98        | 0.51        | 0.90        | 0.42        |
| 62565                | #N/A        | #N/A        | 0.21        | 0.01        | 2.00        | 0.87        |
| 58697                | #N/A        | #N/A        | 0.21        | 0.01        | 0.83        | 0.37        |
| #N/A                 | 3.19        | 0.97        | 0.98        | 0.51        | 4.32        | 1.00        |
| 57952                | 0.54        | 0.22        | 1.12        | 0.59        | 1.04        | 0.53        |
| 57490                | #N/A        | #N/A        | #N/A        | #N/A        | 2.90        | 0.96        |
| 57031                | 0.32        | 0.08        | 0.28        | 0.02        | 3.93        | 0.99        |
| 54991                | 0.25        | 0.04        | 0.22        | 0.01        | 1.45        | 0.73        |
| 52803                | #N/A        | #N/A        | #N/A        | #N/A        | 1.26        | 0.64        |
| 51857                | 1.39        | 0.63        | 1.15        | 0.77        | 1.72        | 0.82        |
| 51752                | 1.14        | 0.52        | 0.68        | 0.29        | #N/A        | #N/A        |
| 42881                | 1.56        | 0.67        | 0.42        | 0.07        | 1.55        | 0.76        |
| 42719                | 1.36        | 0.61        | 0.94        | 0.58        | 1.68        | 0.80        |
| #N/A                 | 1.03        | 0.47        | 0.32        | 0.03        | 1.56        | 0.77        |
| 38973                | 2.14        | 0.85        | #N/A        | #N/A        | 1.43        | 0.70        |
| 37148                | 0.82        | 0.39        | #N/A        | #N/A        | 2.01        | 0.87        |
| 36304                | 0.81        | 0.37        | 0.55        | 0.16        | 1.22        | 0.61        |
| 34702                | 1.41        | 0.62        | 0.58        | 0.18        | 1.03        | 0.52        |
| 32941                | #N/A        | #N/A        | #N/A        | #N/A        | 1.50        | 0.73        |

|      |        |      |      |      |      |      |      |
|------|--------|------|------|------|------|------|------|
|      | 24001  | 0.85 | 0.40 | 0.78 | 0.40 | #N/A | #N/A |
|      | 21852  | 1.00 | 0.46 | 0.63 | 0.23 | 1.59 | 0.78 |
|      | 11566  | 1.15 | 0.53 | 0.85 | 0.48 | 1.58 | 0.77 |
| #N/A |        | #N/A | #N/A | #N/A | #N/A | 0.46 | 0.10 |
|      | 10400  | #N/A | #N/A | #N/A | #N/A | #N/A | #N/A |
|      | 7236   | 1.15 | 0.53 | 0.85 | 0.48 | #N/A | #N/A |
|      | 1807   | 1.15 | 0.53 | 0.85 | 0.48 | 0.99 | 0.50 |
|      | 649    | #N/A | #N/A | #N/A | #N/A | 0.54 | 0.16 |
| #N/A |        | #N/A | #N/A | #N/A | #N/A | 2.22 | 0.90 |
|      | 153877 | 1.14 | 0.51 | 5.07 | 1.00 | 0.60 | 0.20 |
|      | 156286 | 3.01 | 0.96 | #N/A | #N/A | 1.18 | 0.59 |
|      | 156755 | 2.83 | 0.95 | 0.70 | 0.30 | 1.02 | 0.51 |
|      | 159793 | 2.83 | 0.95 | 0.70 | 0.30 | 1.54 | 0.75 |
|      | 164544 | 0.58 | 0.25 | #N/A | #N/A | 1.06 | 0.54 |
|      | 170290 | 3.00 | 0.95 | 0.58 | 0.19 | 0.77 | 0.34 |
|      | 176854 | 0.66 | 0.32 | #N/A | #N/A | 1.09 | 0.54 |
|      | 179279 | 1.36 | 0.62 | 0.86 | 0.49 | 1.24 | 0.64 |
|      | 184471 | 1.55 | 0.68 | 1.03 | 0.68 | 1.80 | 0.82 |
|      | 185590 | 2.02 | 0.83 | 0.78 | 0.41 | 2.00 | 0.87 |
|      | 186539 | 1.23 | 0.55 | 0.64 | 0.24 | 0.91 | 0.44 |
|      | 186506 | 2.02 | 0.81 | #N/A | #N/A | #N/A | #N/A |
|      | 187726 | 1.23 | 0.55 | 0.64 | 0.24 | 2.00 | 0.87 |
|      | 188805 | 2.02 | 0.81 | #N/A | #N/A | 2.47 | 0.93 |
|      | 192250 | 0.64 | 0.31 | 0.45 | 0.09 | 2.41 | 0.92 |
| #N/A |        | #N/A | #N/A | #N/A | #N/A | 1.88 | 0.84 |
| #N/A |        | #N/A | #N/A | #N/A | #N/A | 3.37 | 0.98 |
|      | 193383 | 1.49 | 0.66 | 0.68 | 0.28 | 1.18 | 0.60 |
| #N/A |        | #N/A | #N/A | #N/A | #N/A | 0.90 | 0.44 |
|      | 196178 | 0.24 | 0.05 | 0.70 | 0.34 | 0.46 | 0.10 |
|      | 201459 | #N/A | #N/A | 0.87 | 0.51 | 0.08 | 0.00 |
| #N/A |        | #N/A | #N/A | #N/A | #N/A | 0.98 | 0.48 |
|      | 208653 | 1.40 | 0.62 | #N/A | #N/A | 1.12 | 0.56 |
|      | 217147 | 1.03 | 0.47 | 0.75 | 0.38 | 1.24 | 0.64 |
|      | 218333 | 1.03 | 0.47 | 0.75 | 0.38 | 0.71 | 0.29 |
|      | 219135 | 0.44 | 0.18 | 0.83 | 0.46 | 0.69 | 0.29 |
|      | 220487 | 0.92 | 0.42 | 0.94 | 0.59 | 0.88 | 0.42 |
|      | 221650 | 1.21 | 0.54 | 1.22 | 0.80 | 1.01 | 0.51 |
|      | 222881 | 0.42 | 0.17 | 0.72 | 0.35 | 1.12 | 0.58 |
|      | 224001 | 1.44 | 0.65 | 1.06 | 0.70 | 2.03 | 0.88 |
|      | 224553 | 2.45 | 0.90 | 0.79 | 0.41 | 2.42 | 0.92 |
|      | 226853 | 2.45 | 0.90 | 0.79 | 0.41 | 1.13 | 0.57 |
|      | 228943 | 1.14 | 0.52 | 0.88 | 0.46 | 0.68 | 0.27 |
| #N/A |        | #N/A | #N/A | #N/A | #N/A | 0.70 | 0.28 |
|      | 229307 | 1.14 | 0.52 | 0.88 | 0.46 | 0.43 | 0.09 |
|      | 237114 | 0.93 | 0.43 | 2.38 | 0.98 | 1.13 | 0.58 |
|      | 236849 | 0.33 | 0.13 | 0.52 | 0.13 | 0.86 | 0.41 |
|      | 235356 | 0.33 | 0.13 | 0.52 | 0.13 | 0.94 | 0.45 |
|      | 235079 | 2.61 | 0.93 | 1.05 | 0.67 | #N/A | #N/A |
|      | 222614 | 0.40 | 0.18 | 1.03 | 0.67 | 1.19 | 0.61 |
|      | 216654 | #N/A | #N/A | #N/A | #N/A | 2.23 | 0.91 |
|      | 212593 | 1.37 | 0.62 | 1.19 | 0.71 | 0.67 | 0.26 |

|        |      |      |      |      |      |      |
|--------|------|------|------|------|------|------|
| 206068 | 2.47 | 0.91 | #N/A | #N/A | 1.72 | 0.80 |
| 205778 | 0.98 | 0.47 | 0.30 | 0.03 | 0.69 | 0.29 |
| 203199 | 4.15 | 0.99 | 0.94 | 0.55 | 2.06 | 0.88 |
| 199026 | 4.15 | 0.99 | 0.94 | 0.55 | 0.94 | 0.45 |
| 195664 | 1.70 | 0.74 | 1.13 | 0.55 | 1.21 | 0.60 |
| 193474 | 1.27 | 0.58 | 0.66 | 0.27 | 0.57 | 0.19 |
| 186806 | 1.27 | 0.58 | 0.66 | 0.27 | #N/A | #N/A |
| 185960 | 1.71 | 0.74 | 1.02 | 0.65 | #N/A | #N/A |
| 185877 | 0.80 | 0.36 | #N/A | #N/A | 1.38 | 0.68 |
| 184087 | #N/A | #N/A | #N/A | #N/A | 0.73 | 0.31 |
| 181622 | #N/A | #N/A | #N/A | #N/A | 1.98 | 0.86 |
| 177836 | 1.53 | 0.67 | #N/A | #N/A | 0.66 | 0.26 |
| 174882 | 1.20 | 0.54 | #N/A | #N/A | 0.72 | 0.29 |
| 174550 | 1.10 | 0.50 | 1.44 | 0.89 | 0.61 | 0.21 |
| 171880 | #N/A | #N/A | 1.28 | 0.82 | 1.47 | 0.74 |
| 167480 | 0.11 | 0.01 | 0.34 | 0.04 | 0.69 | 0.29 |
| 167226 | 0.30 | 0.08 | 0.32 | 0.03 | 1.15 | 0.58 |
| 163003 | 0.83 | 0.40 | 0.73 | 0.34 | 0.39 | 0.05 |
| 162677 | 1.70 | 0.72 | 0.78 | 0.42 | 0.85 | 0.41 |
| 161291 | 2.14 | 0.85 | 0.67 | 0.32 | 1.67 | 0.80 |
| 158618 | 2.14 | 0.85 | 0.67 | 0.32 | 1.28 | 0.64 |
| 150409 | #N/A | #N/A | 1.05 | 0.64 | 1.31 | 0.66 |
| 146847 | 1.50 | 0.66 | 0.56 | 0.16 | 1.18 | 0.60 |
| 143951 | 1.50 | 0.66 | 0.56 | 0.16 | 0.75 | 0.32 |
| 142074 | 1.65 | 0.71 | 0.95 | 0.55 | 2.20 | 0.90 |
| 141934 | 0.44 | 0.19 | 0.41 | 0.11 | 1.11 | 0.55 |
| 138303 | 0.44 | 0.19 | 0.41 | 0.11 | #N/A | #N/A |
| 137423 | 1.80 | 0.75 | 0.51 | 0.16 | 2.42 | 0.93 |
| 136328 | 1.03 | 0.47 | 1.00 | 0.59 | 1.92 | 0.85 |
| 133711 | 2.95 | 0.96 | 1.11 | 0.72 | 0.82 | 0.38 |
| 127572 | 0.66 | 0.30 | 1.29 | 0.82 | 0.77 | 0.35 |
| 127206 | 0.66 | 0.30 | 1.29 | 0.82 | #N/A | #N/A |
| 126081 | 3.44 | 0.98 | 0.80 | 0.44 | 1.39 | 0.69 |
| 122715 | 3.44 | 0.98 | 0.80 | 0.44 | 0.56 | 0.19 |
| 119671 | 0.46 | 0.21 | 0.50 | 0.12 | 0.26 | 0.01 |
| 119128 | 1.67 | 0.71 | 0.77 | 0.39 | #N/A | #N/A |
| 115535 | 1.67 | 0.71 | 0.77 | 0.39 | 1.01 | 0.51 |
| 115130 | 2.67 | 0.94 | 1.31 | 0.66 | 1.12 | 0.57 |
| 112762 | 2.67 | 0.94 | 1.31 | 0.66 | #N/A | #N/A |
| 112669 | 1.81 | 0.75 | #N/A | #N/A | 1.26 | 0.64 |
| 111205 | 1.37 | 0.63 | 0.93 | 0.56 | 1.88 | 0.84 |
| 109956 | 1.75 | 0.76 | 0.85 | 0.48 | 0.94 | 0.47 |
| 105277 | 1.75 | 0.76 | 0.85 | 0.48 | 0.44 | 0.09 |
| 105649 | 0.26 | 0.05 | 0.73 | 0.42 | 0.32 | 0.02 |
| 105182 | 2.14 | 0.85 | 0.76 | 0.37 | 1.36 | 0.69 |
| 100332 | 2.14 | 0.85 | 0.76 | 0.37 | 3.41 | 0.98 |
| 100268 | 0.75 | 0.34 | 1.05 | 0.69 | #N/A | #N/A |
| 93814  | 0.75 | 0.34 | 1.05 | 0.69 | #N/A | #N/A |
| 93392  | 1.71 | 0.74 | 0.85 | 0.47 | 1.22 | 0.62 |
| 92025  | 0.91 | 0.41 | #N/A | #N/A | 1.21 | 0.61 |
| 90600  | 1.71 | 0.74 | 0.85 | 0.47 | 2.39 | 0.92 |



|        |      |      |      |      |      |      |
|--------|------|------|------|------|------|------|
| 90218  | 0.91 | 0.41 | #N/A | #N/A | #N/A | #N/A |
| 88518  | 0.85 | 0.40 | 0.76 | 0.37 | #N/A | #N/A |
| 87952  | 0.19 | 0.04 | 0.98 | 0.63 | 0.38 | 0.05 |
| 86717  | #N/A | #N/A | 0.79 | 0.42 | #N/A | #N/A |
| 84494  | 0.19 | 0.04 | 0.98 | 0.63 | 1.00 | 0.51 |
| 81323  | #N/A | #N/A | 0.28 | 0.02 | #N/A | #N/A |
| 80372  | #N/A | #N/A | 0.28 | 0.02 | 4.08 | 0.99 |
| 73064  | 2.37 | 0.89 | 0.76 | 0.37 | 1.53 | 0.75 |
| 72966  | 2.59 | 0.92 | 0.75 | 0.41 | 0.40 | 0.06 |
| 69745  | 2.59 | 0.92 | 0.75 | 0.41 | 1.64 | 0.79 |
| 69707  | 2.59 | 0.92 | 0.75 | 0.41 | 1.40 | 0.70 |
| 61196  | 0.90 | 0.41 | 0.67 | 0.29 | 0.68 | 0.28 |
| 59815  | 0.28 | 0.09 | 0.44 | 0.09 | 0.36 | 0.04 |
| 51013  | 0.93 | 0.43 | 0.73 | 0.34 | 0.58 | 0.20 |
| 50947  | #N/A | #N/A | #N/A | #N/A | 1.02 | 0.52 |
| 49352  | #N/A | #N/A | 0.84 | 0.44 | 2.56 | 0.94 |
| 47357  | #N/A | #N/A | 0.84 | 0.44 | 0.91 | 0.44 |
| 46364  | 0.49 | 0.19 | 0.68 | 0.28 | 0.31 | 0.02 |
| 44250  | 0.49 | 0.19 | 0.68 | 0.28 | 1.18 | 0.59 |
| 43759  | 0.36 | 0.11 | 1.70 | 0.89 | 0.26 | 0.01 |
| 44083  | #N/A | #N/A | #N/A | #N/A | 0.84 | 0.40 |
| 43168  | 0.36 | 0.11 | 1.70 | 0.89 | 1.30 | 0.66 |
| 43089  | 1.90 | 0.78 | #N/A | #N/A | 0.72 | 0.30 |
| 40519  | 0.86 | 0.41 | #N/A | #N/A | 2.06 | 0.88 |
| 38682  | 0.45 | 0.18 | 0.67 | 0.28 | 0.43 | 0.09 |
| 36981  | 0.86 | 0.41 | #N/A | #N/A | 0.36 | 0.04 |
| 24941  | 1.06 | 0.48 | #N/A | #N/A | 0.58 | 0.20 |
| 31243  | 1.06 | 0.48 | #N/A | #N/A | 1.45 | 0.73 |
| 24740  | 2.01 | 0.81 | 1.40 | 0.88 | 1.42 | 0.71 |
| 22070  | 2.01 | 0.81 | 1.40 | 0.88 | 0.46 | 0.10 |
| 9961   | #N/A | #N/A | #N/A | #N/A | 1.43 | 0.71 |
| 6125   | 0.61 | 0.27 | 0.66 | 0.27 | 2.48 | 0.93 |
| 2907   | 0.61 | 0.27 | 0.66 | 0.27 | 1.05 | 0.54 |
| 2582   | 0.61 | 0.27 | 0.66 | 0.27 | 0.38 | 0.05 |
| 280    | 0.61 | 0.27 | 0.66 | 0.27 | 0.43 | 0.08 |
| #N/A   | #N/A | #N/A | #N/A | #N/A | #N/A | #N/A |
| 238902 | 0.81 | 0.37 | 1.57 | 0.79 | 0.96 | 0.46 |
| 241669 | #N/A | #N/A | 0.74 | 0.35 | 1.57 | 0.76 |
| 244191 | #N/A | #N/A | 0.74 | 0.35 | 1.19 | 0.59 |
| 244327 | 1.52 | 0.66 | #N/A | #N/A | 0.97 | 0.47 |
| 246508 | 1.52 | 0.66 | #N/A | #N/A | 1.35 | 0.67 |
| 248464 | 1.52 | 0.66 | 1.06 | 0.70 | #N/A | #N/A |
| 255330 | 0.32 | 0.13 | 0.70 | 0.31 | #N/A | #N/A |
| 256698 | 0.32 | 0.13 | 0.70 | 0.31 | 0.40 | 0.06 |
| 257069 | 1.42 | 0.63 | 0.82 | 0.42 | 0.70 | 0.28 |
| 259104 | #N/A | #N/A | 0.46 | 0.09 | #N/A | #N/A |
| 261148 | #N/A | #N/A | #N/A | #N/A | 1.41 | 0.70 |
| 265449 | #N/A | #N/A | 0.46 | 0.09 | #N/A | #N/A |
| 266684 | 0.50 | 0.20 | 0.56 | 0.20 | 0.98 | 0.49 |
| 270592 | 1.67 | 0.71 | 0.92 | 0.56 | 1.59 | 0.78 |
| 274386 | 2.04 | 0.82 | 1.03 | 0.68 | 1.19 | 0.61 |

|        |      |      |      |      |      |      |
|--------|------|------|------|------|------|------|
| 276212 | 2.37 | 0.89 | 2.49 | 0.93 | 1.55 | 0.76 |
| 280566 | 2.37 | 0.89 | 2.49 | 0.93 | 1.45 | 0.71 |
| 284230 | 1.77 | 0.75 | 1.01 | 0.56 | 1.92 | 0.85 |
| 290309 | #N/A | #N/A | #N/A | #N/A | 2.10 | 0.89 |
| 290640 | 1.72 | 0.74 | 0.67 | 0.27 | 0.57 | 0.19 |
| 292836 | #N/A | #N/A | #N/A | #N/A | 1.25 | 0.64 |
| 294384 | 1.05 | 0.49 | #N/A | #N/A | 0.54 | 0.17 |
| 296328 | 2.13 | 0.84 | 2.04 | 0.93 | 0.99 | 0.50 |
| 299909 | 2.13 | 0.84 | 2.04 | 0.93 | 1.33 | 0.67 |
| 301213 | #N/A | #N/A | #N/A | #N/A | 0.95 | 0.47 |
| 301780 | #N/A | #N/A | #N/A | #N/A | #N/A | #N/A |
| 304662 | 1.31 | 0.59 | #N/A | #N/A | 0.87 | 0.42 |
| 304889 | 1.25 | 0.56 | #N/A | #N/A | 1.07 | 0.55 |
| 306228 | 1.38 | 0.63 | 0.95 | 0.59 | 1.96 | 0.86 |
| 309040 | 2.39 | 0.89 | 0.94 | 0.58 | 1.13 | 0.58 |
| 310523 | #N/A | #N/A | 0.84 | 0.47 | 2.65 | 0.95 |
| 316469 | 1.21 | 0.55 | #N/A | #N/A | 0.78 | 0.34 |
| 317823 | 1.01 | 0.48 | #N/A | #N/A | 1.13 | 0.58 |
| 324298 | 1.29 | 0.58 | 1.22 | 0.76 | 0.87 | 0.41 |
| 328330 | 0.81 | 0.38 | #N/A | #N/A | 1.05 | 0.52 |
| 332319 | 1.26 | 0.56 | 0.79 | 0.41 | #N/A | #N/A |
| 337142 | 2.40 | 0.89 | 0.91 | 0.55 | 2.60 | 0.94 |
| 338297 | 1.66 | 0.72 | 0.80 | 0.42 | 2.30 | 0.91 |
| 339634 | 0.97 | 0.44 | 0.54 | 0.16 | 1.48 | 0.74 |
| 344094 | 1.11 | 0.50 | 0.84 | 0.47 | 2.46 | 0.93 |
| 352152 | 1.03 | 0.48 | 1.17 | 0.77 | 0.82 | 0.38 |
| 360611 | 1.17 | 0.54 | 0.78 | 0.41 | 0.55 | 0.18 |
| 364746 | #N/A | #N/A | #N/A | #N/A | 1.28 | 0.66 |
| 365935 | 1.23 | 0.57 | 1.60 | 0.93 | #N/A | #N/A |
| 366930 | #N/A | #N/A | 1.09 | 0.69 | 0.45 | 0.10 |
| 368151 | 1.23 | 0.57 | 1.60 | 0.93 | #N/A | #N/A |
| 368544 | 2.20 | 0.87 | 1.23 | 0.70 | 1.28 | 0.65 |
| 369997 | 0.57 | 0.24 | 0.65 | 0.25 | 1.39 | 0.70 |
| 372062 | 0.41 | 0.14 | 0.63 | 0.24 | #N/A | #N/A |
| 373820 | 0.17 | 0.03 | 0.61 | 0.22 | 0.31 | 0.02 |
| 376533 | 0.35 | 0.10 | 0.58 | 0.24 | 0.44 | 0.09 |
| 379180 | #N/A | #N/A | 1.02 | 0.67 | 0.88 | 0.41 |
| 381005 | #N/A | #N/A | 1.02 | 0.67 | 0.79 | 0.36 |
| 382633 | 1.22 | 0.56 | 1.39 | 0.85 | 2.58 | 0.94 |
| 387484 | 1.40 | 0.62 | 1.20 | 0.77 | 0.72 | 0.30 |
| 389175 | 0.25 | 0.04 | 1.10 | 0.73 | 0.35 | 0.03 |
| 391352 | 0.84 | 0.39 | 0.88 | 0.53 | 1.04 | 0.52 |
| 391763 | 0.18 | 0.03 | 0.38 | 0.05 | 1.54 | 0.75 |
| 406586 | 0.75 | 0.35 | 1.15 | 0.73 | 0.60 | 0.21 |
| 410587 | 0.21 | 0.03 | 0.44 | 0.08 | 0.47 | 0.11 |
| 414144 | 0.64 | 0.28 | 0.62 | 0.21 | 0.44 | 0.09 |
| 416864 | 0.64 | 0.28 | 0.62 | 0.21 | 1.32 | 0.68 |
| 424787 | 1.05 | 0.48 | 0.88 | 0.52 | 0.85 | 0.39 |
| 424948 | 1.16 | 0.53 | 1.42 | 0.88 | 1.23 | 0.62 |
| 425740 | #N/A | #N/A | #N/A | #N/A | 1.29 | 0.65 |
| 426291 | #N/A | #N/A | 0.63 | 0.24 | 1.44 | 0.71 |

|        |      |      |      |      |      |      |
|--------|------|------|------|------|------|------|
| #N/A   | #N/A | #N/A | #N/A | #N/A | 1.27 | 0.65 |
| 427113 | #N/A | #N/A | 1.29 | 0.84 | 3.96 | 0.99 |
| 427656 | 0.73 | 0.34 | 0.43 | 0.07 | 1.22 | 0.63 |
| 429506 | #N/A | #N/A | #N/A | #N/A | 1.12 | 0.56 |
| 434364 | 1.71 | 0.74 | #N/A | #N/A | 1.04 | 0.52 |
| 436671 | 1.71 | 0.74 | #N/A | #N/A | 1.36 | 0.68 |
| 443548 | 1.01 | 0.46 | #N/A | #N/A | 1.03 | 0.52 |
| 442882 | 0.36 | 0.11 | 1.19 | 0.54 | #N/A | #N/A |
| #N/A   | 1.01 | 0.46 | #N/A | #N/A | 0.34 | 0.03 |
| 443779 | #N/A | #N/A | 1.58 | 0.70 | 1.13 | 0.57 |
| 449274 | #N/A | #N/A | 0.68 | 0.28 | 1.28 | 0.65 |
| 450614 | 1.43 | 0.64 | 0.65 | 0.26 | 0.70 | 0.28 |
| 450839 | 0.27 | 0.07 | 0.58 | 0.19 | 0.45 | 0.11 |
| 453182 | 0.27 | 0.07 | 0.58 | 0.19 | 0.98 | 0.49 |
| 453751 | #N/A | #N/A | #N/A | #N/A | 1.66 | 0.79 |
| 457326 | #N/A | #N/A | #N/A | #N/A | 0.77 | 0.34 |
| 457876 | 1.46 | 0.66 | #N/A | #N/A | 1.62 | 0.77 |
| 460178 | 1.46 | 0.66 | #N/A | #N/A | 0.86 | 0.39 |
| 461135 | #N/A | #N/A | #N/A | #N/A | 1.37 | 0.70 |
| 462827 | 0.53 | 0.22 | 0.53 | 0.14 | 0.38 | 0.05 |
| 466005 | #N/A | #N/A | #N/A | #N/A | 0.44 | 0.09 |
| 474156 | 0.59 | 0.25 | 0.90 | 0.54 | #N/A | #N/A |
| 474349 | 0.59 | 0.25 | 0.90 | 0.54 | #N/A | #N/A |
| 479004 | 0.59 | 0.25 | 0.90 | 0.54 | 0.41 | 0.07 |
| 480280 | #N/A | #N/A | #N/A | #N/A | #N/A | #N/A |
| 480392 | 1.21 | 0.56 | 0.52 | 0.14 | #N/A | #N/A |
| 483927 | 1.87 | 0.78 | 1.06 | 0.54 | 2.26 | 0.91 |
| 484699 | 0.49 | 0.19 | 0.80 | 0.42 | 0.96 | 0.48 |
| 486823 | 1.87 | 0.78 | 1.06 | 0.54 | 2.02 | 0.87 |
| 487156 | #N/A | #N/A | #N/A | #N/A | 0.71 | 0.30 |
| 488862 | 1.35 | 0.62 | 0.89 | 0.53 | 0.99 | 0.48 |
| 491226 | 1.94 | 0.79 | 0.67 | 0.32 | 0.64 | 0.24 |
| 493038 | 2.34 | 0.88 | 1.02 | 0.62 | 2.44 | 0.93 |
| 494310 | 2.73 | 0.93 | 1.13 | 0.64 | 2.46 | 0.93 |
| 495549 | #N/A | #N/A | 0.71 | 0.33 | 1.21 | 0.62 |
| 499234 | #N/A | #N/A | 0.71 | 0.33 | 0.63 | 0.22 |
| 499609 | 0.41 | 0.15 | 0.86 | 0.49 | 0.56 | 0.18 |
| 501761 | #N/A | #N/A | #N/A | #N/A | #N/A | #N/A |
| 505263 | #N/A | #N/A | #N/A | #N/A | 3.04 | 0.97 |
| 512731 | #N/A | #N/A | #N/A | #N/A | #N/A | #N/A |
| 513540 | 2.15 | 0.85 | 0.91 | 0.48 | 1.45 | 0.71 |
| 517147 | 1.45 | 0.64 | 1.98 | 0.85 | 0.78 | 0.34 |
| 526982 | 1.63 | 0.70 | 0.59 | 0.20 | 2.31 | 0.91 |
| 533192 | 1.19 | 0.55 | 0.89 | 0.49 | 2.12 | 0.89 |
| 534774 | 1.19 | 0.55 | 0.89 | 0.49 | 1.07 | 0.54 |
| 536053 | 2.22 | 0.87 | 0.88 | 0.48 | 1.69 | 0.81 |
| 539662 | #N/A | #N/A | 1.08 | 0.69 | 1.14 | 0.59 |
| 540978 | #N/A | #N/A | 0.85 | 0.48 | 0.99 | 0.50 |
| 541166 | 1.46 | 0.65 | 0.84 | 0.47 | #N/A | #N/A |
| 545935 | 1.46 | 0.65 | 0.84 | 0.47 | 0.87 | 0.42 |
| 547208 | 1.00 | 0.46 | 0.71 | 0.32 | 0.98 | 0.49 |

|        |      |      |      |      |      |      |
|--------|------|------|------|------|------|------|
| 548151 | #N/A | #N/A | 0.75 | 0.37 | 0.92 | 0.44 |
| 548319 | #N/A | #N/A | #N/A | #N/A | 0.84 | 0.38 |
| 550885 | #N/A | #N/A | #N/A | #N/A | 0.87 | 0.41 |
| 553946 | 0.41 | 0.14 | 0.74 | 0.37 | 0.63 | 0.23 |
| 558154 | 0.22 | 0.04 | 0.57 | 0.27 | 0.52 | 0.16 |
| 559684 | 2.07 | 0.83 | 1.06 | 0.52 | 1.56 | 0.77 |
| 560930 | #N/A | #N/A | #N/A | #N/A | 1.05 | 0.53 |
| 562721 | 0.93 | 0.44 | 0.66 | 0.27 | 0.67 | 0.26 |
| 563160 | 0.41 | 0.17 | 0.59 | 0.19 | 0.46 | 0.11 |
| 565385 | 0.41 | 0.17 | 0.59 | 0.19 | 1.58 | 0.77 |
| 567832 | 1.57 | 0.68 | 0.74 | 0.36 | 0.90 | 0.44 |
| 569642 | 1.57 | 0.68 | 0.74 | 0.36 | 0.95 | 0.47 |
| 569799 | 2.13 | 0.84 | 1.37 | 0.79 | 0.92 | 0.44 |
| 571425 | 1.22 | 0.54 | 0.69 | 0.33 | 1.35 | 0.69 |
| 573569 | 1.22 | 0.54 | 0.69 | 0.33 | 0.69 | 0.27 |
| 573872 | 1.04 | 0.47 | 0.75 | 0.39 | 0.63 | 0.23 |
| 576301 | #N/A | #N/A | #N/A | #N/A | 1.08 | 0.55 |
| 578941 | #N/A | #N/A | #N/A | #N/A | 2.20 | 0.90 |
| 579107 | 0.88 | 0.41 | #N/A | #N/A | 0.83 | 0.39 |
| 581683 | 1.95 | 0.81 | 0.82 | 0.44 | 1.72 | 0.81 |
| 582295 | 1.49 | 0.65 | 1.47 | 0.85 | 3.68 | 0.99 |
| 583312 | 1.95 | 0.81 | 0.82 | 0.44 | 1.71 | 0.80 |
| 584615 | 1.49 | 0.65 | 1.47 | 0.85 | 1.36 | 0.70 |
| 584764 | #N/A | #N/A | #N/A | #N/A | 0.48 | 0.13 |
| 586402 | 0.35 | 0.14 | #N/A | #N/A | 0.72 | 0.29 |
| 591416 | 2.12 | 0.85 | 0.75 | 0.39 | 1.03 | 0.51 |
| 591669 | 0.72 | 0.33 | 1.19 | 0.71 | 0.42 | 0.07 |
| 593463 | 0.77 | 0.36 | 0.87 | 0.51 | 1.17 | 0.60 |
| 597022 | 0.77 | 0.36 | 0.87 | 0.51 | 0.85 | 0.39 |
| 598891 | 0.51 | 0.21 | #N/A | #N/A | 0.88 | 0.41 |
| 599080 | 2.99 | 0.95 | 1.03 | 0.58 | 1.44 | 0.73 |
| 603433 | 0.74 | 0.34 | 1.06 | 0.68 | 0.59 | 0.20 |
| 603642 | 2.14 | 0.85 | 1.41 | 0.55 | 1.32 | 0.66 |
| 605465 | 2.14 | 0.85 | 1.41 | 0.55 | 0.34 | 0.03 |
| 606234 | 0.65 | 0.29 | 1.24 | 0.56 | #N/A | #N/A |
| 607097 | 0.65 | 0.29 | 1.24 | 0.56 | 0.39 | 0.06 |
| 608742 | 0.96 | 0.46 | 1.13 | 0.71 | 0.60 | 0.21 |
| 609039 | 0.98 | 0.44 | 0.97 | 0.62 | 1.45 | 0.73 |
| 610366 | 0.98 | 0.44 | 0.97 | 0.62 | 1.23 | 0.62 |
| 610571 | 1.78 | 0.75 | #N/A | #N/A | 0.96 | 0.48 |
| 612193 | 0.20 | 0.04 | 0.52 | 0.14 | 0.42 | 0.08 |
| 615160 | #N/A | #N/A | 0.57 | 0.19 | 1.04 | 0.53 |
| 620260 | 2.40 | 0.89 | 0.67 | 0.32 | 1.01 | 0.51 |
| 622484 | 1.05 | 0.48 | 0.80 | 0.44 | #N/A | #N/A |
| 624169 | 1.77 | 0.74 | 1.12 | 0.70 | 1.21 | 0.62 |
| 628266 | #N/A | #N/A | #N/A | #N/A | 0.73 | 0.32 |
| 632211 | 2.93 | 0.96 | 0.98 | 0.61 | 1.45 | 0.72 |
| 634793 | 2.93 | 0.96 | 0.98 | 0.61 | 1.04 | 0.52 |
| 634881 | 2.93 | 0.96 | 0.98 | 0.61 | 1.52 | 0.75 |
| 642857 | 1.58 | 0.69 | 0.77 | 0.40 | 1.39 | 0.69 |
| 645935 | 2.12 | 0.84 | #N/A | #N/A | 2.15 | 0.90 |

|        |      |      |      |      |      |      |
|--------|------|------|------|------|------|------|
| 646115 | 1.65 | 0.71 | 0.57 | 0.18 | 1.11 | 0.57 |
| 651149 | 0.97 | 0.46 | 0.83 | 0.46 | 1.98 | 0.86 |
| 652955 | 2.60 | 0.92 | 0.61 | 0.21 | 1.68 | 0.80 |
| 655274 | 3.25 | 0.98 | 1.03 | 0.62 | 0.50 | 0.13 |
| 655533 | 2.08 | 0.84 | 1.09 | 0.53 | 0.77 | 0.33 |
| 658349 | 2.08 | 0.84 | 1.09 | 0.53 | 1.84 | 0.84 |
| 662456 | 1.85 | 0.78 | 1.11 | 0.64 | 0.99 | 0.49 |
| 662952 | 1.85 | 0.78 | 1.11 | 0.64 | 1.09 | 0.56 |
| 665110 | 1.42 | 0.63 | 0.76 | 0.37 | 0.80 | 0.37 |
| 666677 | 1.11 | 0.51 | 0.62 | 0.26 | 0.96 | 0.48 |
| 668620 | 1.05 | 0.48 | 0.55 | 0.16 | 1.36 | 0.68 |
| 673286 | 1.11 | 0.51 | 0.62 | 0.26 | 0.54 | 0.17 |
| 673112 | 1.05 | 0.48 | 0.55 | 0.16 | 0.33 | 0.02 |
| 676184 | 1.05 | 0.48 | 0.55 | 0.16 | 1.83 | 0.84 |
| 676314 | 3.25 | 0.98 | 0.58 | 0.18 | 1.06 | 0.53 |
| 679506 | 0.91 | 0.44 | 0.74 | 0.35 | 1.18 | 0.61 |
| 682136 | 1.39 | 0.62 | 0.88 | 0.52 | 1.70 | 0.80 |
| 683330 | 2.56 | 0.92 | 1.55 | 0.82 | 1.24 | 0.63 |
| 684626 | 1.39 | 0.62 | 0.88 | 0.52 | 1.03 | 0.51 |
| 685395 | 2.44 | 0.90 | #N/A | #N/A | 1.29 | 0.64 |
| 690340 | #N/A | #N/A | 0.63 | 0.26 | 1.07 | 0.53 |
| 695064 | 0.94 | 0.45 | 0.56 | 0.18 | 0.78 | 0.33 |
| 700447 | 1.86 | 0.77 | 1.26 | 0.68 | 3.24 | 0.97 |
| 702546 | 1.53 | 0.69 | 0.87 | 0.48 | 1.46 | 0.73 |
| 705343 | 1.53 | 0.69 | 0.87 | 0.48 | 0.78 | 0.33 |
| 705404 | 1.69 | 0.73 | 1.06 | 0.57 | 1.25 | 0.64 |
| 707973 | 1.69 | 0.73 | 1.06 | 0.57 | 0.99 | 0.50 |
| 712711 | #N/A | #N/A | #N/A | #N/A | 0.92 | 0.45 |
| 712961 | 1.68 | 0.72 | #N/A | #N/A | 0.65 | 0.24 |
| 714764 | 0.71 | 0.33 | 0.77 | 0.39 | 0.85 | 0.39 |
| 716839 | 0.70 | 0.32 | 0.51 | 0.13 | 0.81 | 0.38 |
| 720561 | 0.70 | 0.32 | 0.51 | 0.13 | 1.21 | 0.61 |
| 722270 | 2.80 | 0.95 | #N/A | #N/A | #N/A | #N/A |
| 723011 | 1.36 | 0.62 | 0.79 | 0.42 | #N/A | #N/A |
| 723592 | #N/A | #N/A | 1.18 | 0.70 | 1.92 | 0.86 |
| 723693 | 2.96 | 0.96 | 0.85 | 0.49 | #N/A | #N/A |
| 726497 | 2.96 | 0.96 | 0.85 | 0.49 | 0.70 | 0.29 |
| 727343 | 1.56 | 0.70 | 0.93 | 0.57 | 1.01 | 0.52 |
| 729681 | 1.56 | 0.70 | 0.93 | 0.57 | #N/A | #N/A |
| 729691 | 1.66 | 0.71 | #N/A | #N/A | 1.07 | 0.54 |
| 732410 | 1.66 | 0.71 | #N/A | #N/A | #N/A | #N/A |
| 732596 | 4.05 | 0.99 | 0.40 | 0.07 | #N/A | #N/A |
| 734789 | 1.97 | 0.81 | 1.19 | 0.79 | 3.11 | 0.97 |
| 735677 | 1.71 | 0.73 | #N/A | #N/A | #N/A | #N/A |
| 737693 | 1.97 | 0.81 | 1.19 | 0.79 | 1.09 | 0.56 |
| 737727 | 1.71 | 0.73 | #N/A | #N/A | 2.51 | 0.93 |
| 739501 | 1.71 | 0.73 | #N/A | #N/A | 1.41 | 0.72 |
| 739893 | #N/A | #N/A | 1.04 | 0.66 | #N/A | #N/A |
| 740979 | 1.27 | 0.57 | 1.11 | 0.61 | 0.91 | 0.45 |
| 741573 | #N/A | #N/A | 1.04 | 0.66 | #N/A | #N/A |
| 742139 | 0.72 | 0.33 | #N/A | #N/A | 1.96 | 0.86 |

|        |      |      |      |      |      |      |
|--------|------|------|------|------|------|------|
| 742716 | 2.73 | 0.93 | 1.14 | 0.63 | 1.26 | 0.65 |
| 746066 | 2.73 | 0.93 | 1.14 | 0.63 | 1.12 | 0.57 |
| 746316 | #N/A | #N/A | #N/A | #N/A | 0.78 | 0.33 |
| 748016 | 3.43 | 0.98 | 0.95 | 0.60 | 1.30 | 0.65 |
| 751132 | 3.43 | 0.98 | 0.95 | 0.60 | 1.19 | 0.61 |
| 751311 | 1.49 | 0.66 | #N/A | #N/A | #N/A | #N/A |
| 757576 | 1.59 | 0.71 | 1.17 | 0.62 | #N/A | #N/A |
| 760171 | 1.98 | 0.80 | 0.81 | 0.43 | 1.19 | 0.59 |
| 760855 | 1.59 | 0.71 | 1.17 | 0.62 | 1.70 | 0.80 |
| 762550 | 1.98 | 0.80 | 0.81 | 0.43 | 1.00 | 0.49 |
| 762740 | #N/A | #N/A | #N/A | #N/A | 1.24 | 0.62 |
| 764926 | #N/A | #N/A | 0.66 | 0.34 | 0.72 | 0.30 |
| 768636 | #N/A | #N/A | 0.66 | 0.34 | #N/A | #N/A |
| 768899 | 2.11 | 0.83 | #N/A | #N/A | 0.49 | 0.13 |
| 773588 | 2.11 | 0.83 | #N/A | #N/A | 1.86 | 0.85 |
| 774312 | 1.19 | 0.55 | 0.65 | 0.30 | #N/A | #N/A |
| 776269 | 1.79 | 0.76 | #N/A | #N/A | 0.78 | 0.34 |
| 777810 | 1.35 | 0.62 | 0.83 | 0.46 | 0.66 | 0.24 |
| 777968 | 2.57 | 0.92 | #N/A | #N/A | #N/A | #N/A |
| 782340 | 2.57 | 0.92 | #N/A | #N/A | 0.76 | 0.32 |
| 783512 | 1.15 | 0.52 | 0.90 | 0.52 | 1.42 | 0.70 |
| 783629 | 0.80 | 0.37 | 0.64 | 0.24 | 1.20 | 0.60 |
| 784658 | 1.48 | 0.65 | 1.14 | 0.74 | #N/A | #N/A |
| 788385 | 2.26 | 0.88 | 0.86 | 0.49 | #N/A | #N/A |
| 791769 | 1.15 | 0.52 | 0.94 | 0.59 | 0.55 | 0.17 |
| 796453 | 1.68 | 0.72 | 1.21 | 0.74 | 0.85 | 0.39 |
| 796752 | #N/A | #N/A | 0.74 | 0.37 | #N/A | #N/A |
| 801883 | 1.68 | 0.73 | 1.22 | 0.71 | #N/A | #N/A |
| 802585 | 2.38 | 0.89 | 0.78 | 0.39 | 0.45 | 0.10 |
| 807059 | 2.38 | 0.89 | 0.78 | 0.39 | 1.89 | 0.85 |
| 808554 | 1.87 | 0.79 | 1.14 | 0.76 | 1.46 | 0.73 |
| 809373 | 1.23 | 0.56 | 1.29 | 0.83 | #N/A | #N/A |
| 810294 | #N/A | #N/A | #N/A | #N/A | #N/A | #N/A |
| 112476 | 2.67 | 0.93 | 0.90 | 0.50 | 0.57 | 0.20 |
| 110839 | 0.78 | 0.36 | 0.87 | 0.51 | #N/A | #N/A |
| #N/A   | #N/A | #N/A | #N/A | #N/A | #N/A | #N/A |
| 110666 | 2.67 | 0.93 | 0.90 | 0.50 | 0.86 | 0.41 |
| 108787 | 2.67 | 0.93 | 0.90 | 0.50 | 1.69 | 0.81 |
| #N/A   | 0.78 | 0.36 | 0.87 | 0.51 | 1.36 | 0.69 |
| 106970 | 0.78 | 0.36 | 0.87 | 0.51 | #N/A | #N/A |
| 105959 | 0.78 | 0.36 | 0.87 | 0.51 | #N/A | #N/A |
| 104614 | 0.78 | 0.36 | 0.87 | 0.51 | #N/A | #N/A |
| 103566 | 0.78 | 0.36 | 0.87 | 0.51 | 1.55 | 0.76 |
| 102070 | 2.67 | 0.93 | 0.90 | 0.50 | 1.47 | 0.72 |
| #N/A   | 0.38 | 0.16 | 1.86 | 0.96 | 0.48 | 0.13 |
| #N/A   | #N/A | #N/A | #N/A | #N/A | 0.29 | 0.01 |
| 101190 | 0.38 | 0.16 | 1.86 | 0.96 | 0.64 | 0.24 |
| 94620  | 2.67 | 0.93 | 0.90 | 0.50 | 1.02 | 0.50 |
| 92776  | 2.67 | 0.93 | 0.90 | 0.50 | 0.89 | 0.43 |
| 92417  | 0.38 | 0.16 | 1.86 | 0.96 | 0.66 | 0.26 |
| 90414  | #N/A | #N/A | 0.66 | 0.28 | 0.17 | 0.00 |

|      |       |      |      |      |      |      |      |
|------|-------|------|------|------|------|------|------|
|      | 86417 | #N/A | #N/A | 0.66 | 0.28 | 1.55 | 0.76 |
| #N/A |       | #N/A | #N/A | #N/A | #N/A | 0.36 | 0.04 |
|      | 81569 | #N/A | #N/A | 0.66 | 0.28 | 0.90 | 0.44 |
|      | 78948 | #N/A | #N/A | 0.66 | 0.28 | #N/A | #N/A |
|      | 82274 | 0.26 | 0.07 | 0.52 | 0.16 | 1.02 | 0.51 |
|      | 76131 | 0.26 | 0.07 | 0.52 | 0.16 | #N/A | #N/A |
| #N/A |       | #N/A | #N/A | #N/A | #N/A | 2.12 | 0.89 |
|      | 73341 | 1.30 | 0.60 | 0.78 | 0.41 | #N/A | #N/A |
|      | 71367 | 2.08 | 0.83 | 1.08 | 0.69 | 0.94 | 0.47 |
|      | 68599 | 2.08 | 0.83 | 1.08 | 0.69 | 0.92 | 0.44 |
|      | 65934 | 0.31 | 0.09 | 0.40 | 0.06 | 0.43 | 0.08 |
|      | 64675 | 1.64 | 0.70 | 0.65 | 0.25 | 1.62 | 0.77 |
|      | 64481 | #N/A | #N/A | 0.70 | 0.31 | 1.35 | 0.67 |
|      | 62776 | #N/A | #N/A | 0.70 | 0.31 | 3.39 | 0.98 |
|      | 62722 | 2.65 | 0.93 | 0.83 | 0.44 | 0.85 | 0.38 |
|      | 60841 | 2.65 | 0.93 | 0.83 | 0.44 | #N/A | #N/A |
|      | 60726 | 1.40 | 0.63 | #N/A | #N/A | 0.98 | 0.47 |
|      | 57374 | 1.40 | 0.63 | #N/A | #N/A | 0.44 | 0.09 |
|      | 54941 | 0.84 | 0.38 | #N/A | #N/A | 1.31 | 0.65 |
|      | 54882 | 3.61 | 0.99 | 0.76 | 0.37 | 0.90 | 0.42 |
|      | 52340 | 2.07 | 0.84 | 0.75 | 0.36 | 1.31 | 0.65 |
|      | 50133 | 3.61 | 0.99 | 0.76 | 0.37 | #N/A | #N/A |
|      | 50943 | 2.07 | 0.84 | 0.75 | 0.36 | #N/A | #N/A |
|      | 48653 | 3.61 | 0.99 | 0.76 | 0.37 | #N/A | #N/A |
|      | 47111 | 2.07 | 0.84 | 0.75 | 0.36 | 1.59 | 0.76 |
|      | 44623 | #N/A | #N/A | 0.47 | 0.13 | 0.91 | 0.43 |
|      | 46963 | 1.09 | 0.50 | #N/A | #N/A | #N/A | #N/A |
|      | 43661 | 1.09 | 0.50 | #N/A | #N/A | #N/A | #N/A |
|      | 43556 | 1.67 | 0.71 | 0.81 | 0.44 | 1.83 | 0.83 |
|      | 39786 | 1.67 | 0.71 | 0.81 | 0.44 | 1.27 | 0.64 |
|      | 37836 | 2.09 | 0.83 | #N/A | #N/A | 0.76 | 0.34 |
|      | 37616 | 2.29 | 0.87 | 0.88 | 0.49 | 0.49 | 0.13 |
|      | 34143 | 2.29 | 0.87 | 0.88 | 0.49 | 1.65 | 0.80 |
| #N/A |       | #N/A | #N/A | #N/A | #N/A | 0.37 | 0.04 |
|      | 33974 | #N/A | #N/A | 0.86 | 0.50 | 0.73 | 0.30 |
|      | 28936 | 1.25 | 0.56 | 0.70 | 0.32 | 0.84 | 0.40 |
|      | 26925 | 1.25 | 0.56 | 0.70 | 0.32 | 1.40 | 0.69 |
|      | 26906 | 1.37 | 0.61 | 1.03 | 0.64 | 1.44 | 0.72 |
|      | 23523 | 1.37 | 0.61 | 1.03 | 0.64 | 1.63 | 0.79 |
|      | 22429 | 2.76 | 0.93 | #N/A | #N/A | 2.00 | 0.87 |
| #N/A |       | #N/A | #N/A | #N/A | #N/A | 0.48 | 0.13 |
| #N/A | 18816 | 0.88 | 0.40 | 0.87 | 0.51 | 0.39 | 0.05 |
| #N/A |       | #N/A | #N/A | #N/A | #N/A | 0.45 | 0.10 |
|      | 18561 | 1.63 | 0.71 | 0.84 | 0.46 | 2.35 | 0.92 |
|      | 15798 | 1.63 | 0.71 | 0.84 | 0.46 | 0.44 | 0.09 |
|      | 14119 | #N/A | #N/A | #N/A | #N/A | 0.76 | 0.34 |
|      | 13809 | #N/A | #N/A | #N/A | #N/A | 0.66 | 0.25 |
|      | 12386 | #N/A | #N/A | #N/A | #N/A | 0.47 | 0.12 |
|      | 11503 | 0.64 | 0.29 | 0.96 | 0.60 | 0.69 | 0.27 |
|      | 11082 | 0.48 | 0.18 | 0.92 | 0.55 | 0.58 | 0.19 |
|      | 6479  | 0.48 | 0.18 | 0.92 | 0.55 | 1.16 | 0.60 |

|      |        |      |      |      |      |      |      |
|------|--------|------|------|------|------|------|------|
|      | 3750   | 0.20 | 0.02 | 0.62 | 0.22 | 0.23 | 0.01 |
|      | 2566   | #N/A | #N/A | #N/A | #N/A | 0.23 | 0.01 |
|      | 2135   | #N/A | #N/A | #N/A | #N/A | 0.58 | 0.20 |
| #N/A |        | #N/A | #N/A | #N/A | #N/A | 1.52 | 0.75 |
| #N/A |        | #N/A | #N/A | #N/A | #N/A | 0.32 | 0.02 |
| #N/A |        | #N/A | #N/A | #N/A | #N/A | 1.96 | 0.86 |
| #N/A |        | #N/A | #N/A | #N/A | #N/A | 0.98 | 0.48 |
| #N/A |        | #N/A | #N/A | #N/A | #N/A | 0.82 | 0.36 |
| #N/A |        | #N/A | #N/A | #N/A | #N/A | 0.76 | 0.34 |
| #N/A |        | #N/A | #N/A | #N/A | #N/A | 1.83 | 0.83 |
| #N/A |        | #N/A | #N/A | #N/A | #N/A | 1.97 | 0.86 |
| #N/A |        | #N/A | #N/A | #N/A | #N/A | 0.53 | 0.16 |
| #N/A |        | #N/A | #N/A | #N/A | #N/A | 0.55 | 0.18 |
| #N/A |        | #N/A | #N/A | #N/A | #N/A | 0.91 | 0.45 |
| #N/A |        | #N/A | #N/A | #N/A | #N/A | 2.44 | 0.92 |
|      | 115993 | 2.67 | 0.93 | 0.90 | 0.50 | 0.95 | 0.47 |
|      | 117374 | 0.78 | 0.36 | 0.87 | 0.51 | #N/A | #N/A |
|      | 119165 | 2.67 | 0.93 | 0.90 | 0.50 | 1.71 | 0.80 |
|      | 119569 | 0.78 | 0.36 | 0.87 | 0.51 | 1.22 | 0.63 |
|      | 120940 | 0.78 | 0.36 | 0.87 | 0.51 | 0.40 | 0.06 |
|      | 122524 | 0.78 | 0.36 | 0.87 | 0.51 | #N/A | #N/A |
|      | 126005 | #N/A | #N/A | #N/A | #N/A | 0.71 | 0.29 |
|      | 130275 | 0.78 | 0.36 | 0.87 | 0.51 | 0.26 | 0.01 |
|      | 130739 | #N/A | #N/A | #N/A | #N/A | 1.01 | 0.51 |
|      | 132267 | #N/A | #N/A | #N/A | #N/A | 1.14 | 0.59 |
|      | 133718 | #N/A | #N/A | #N/A | #N/A | 0.40 | 0.06 |
|      | 138990 | 0.78 | 0.36 | 0.87 | 0.51 | 0.50 | 0.13 |
|      | 138396 | #N/A | #N/A | #N/A | #N/A | 0.39 | 0.06 |
|      | 139179 | #N/A | #N/A | #N/A | #N/A | 0.65 | 0.25 |
|      | 141211 | #N/A | #N/A | #N/A | #N/A | 1.13 | 0.57 |
|      | 144500 | #N/A | #N/A | #N/A | #N/A | 1.30 | 0.67 |
|      | 144767 | 2.10 | 0.84 | 0.86 | 0.48 | #N/A | #N/A |
|      | 148232 | #N/A | #N/A | #N/A | #N/A | #N/A | #N/A |
|      | 153922 | 1.32 | 0.61 | 1.06 | 0.68 | 1.31 | 0.66 |
|      | 154006 | 1.30 | 0.58 | 0.50 | 0.13 | 1.67 | 0.80 |
|      | 154824 | 2.31 | 0.88 | #N/A | #N/A | 2.13 | 0.89 |
|      | 156101 | 1.90 | 0.78 | 0.81 | 0.45 | 1.99 | 0.87 |
|      | 157413 | 1.13 | 0.52 | 1.24 | 0.77 | 1.24 | 0.64 |
|      | 158530 | 1.37 | 0.61 | 0.68 | 0.32 | 0.70 | 0.30 |
|      | 160736 | 0.28 | 0.06 | 1.08 | 0.72 | 0.82 | 0.38 |
|      | 162937 | 0.33 | 0.09 | #N/A | #N/A | 0.16 | 0.00 |
|      | 163438 | 0.93 | 0.42 | 0.60 | 0.21 | 0.57 | 0.19 |
|      | 164103 | 0.96 | 0.44 | 0.96 | 0.61 | 0.72 | 0.30 |
|      | 167362 | 1.56 | 0.70 | 1.17 | 0.71 | 0.78 | 0.35 |
|      | 170878 | 2.67 | 0.93 | 0.92 | 0.57 | 0.92 | 0.44 |
| #N/A |        | #N/A | #N/A | #N/A | #N/A | 1.14 | 0.58 |
| #N/A |        | #N/A | #N/A | #N/A | #N/A | 0.49 | 0.13 |
|      | 173818 | 1.15 | 0.52 | 1.38 | 0.86 | 0.46 | 0.11 |
|      | 177492 | 0.38 | 0.12 | 1.11 | 0.71 | 0.95 | 0.47 |
|      | 186015 | 1.28 | 0.58 | 0.99 | 0.64 | 0.60 | 0.21 |
|      | 190161 | 2.09 | 0.84 | #N/A | #N/A | 0.38 | 0.05 |



|        |      |      |      |      |      |      |
|--------|------|------|------|------|------|------|
| 191627 | 1.12 | 0.50 | 0.68 | 0.29 | 0.97 | 0.49 |
| 191826 | 2.81 | 0.94 | 0.74 | 0.36 | 0.68 | 0.27 |
| 194290 | 2.81 | 0.94 | 0.74 | 0.36 | 0.85 | 0.41 |
| 194406 | 1.09 | 0.49 | 0.43 | 0.07 | 0.64 | 0.24 |
| 197613 | 0.66 | 0.30 | #N/A | #N/A | 0.75 | 0.33 |
| 199538 | 0.68 | 0.30 | #N/A | #N/A | #N/A | #N/A |
| 200961 | 0.68 | 0.30 | #N/A | #N/A | 0.84 | 0.40 |
| 201235 | 0.68 | 0.30 | #N/A | #N/A | 1.09 | 0.56 |
| 201166 | 1.48 | 0.67 | 0.75 | 0.37 | 0.86 | 0.41 |
| 206253 | 2.10 | 0.84 | #N/A | #N/A | #N/A | #N/A |
| 206869 | 2.50 | 0.91 | 0.60 | 0.20 | 1.65 | 0.78 |
| 208127 | 1.58 | 0.68 | 0.74 | 0.35 | 1.63 | 0.77 |
| 209906 | 2.36 | 0.90 | #N/A | #N/A | 2.83 | 0.96 |
| 210710 | 2.94 | 0.96 | 0.75 | 0.37 | #N/A | #N/A |
| 213753 | 2.94 | 0.96 | 0.75 | 0.37 | 1.59 | 0.78 |
| 211863 | 3.25 | 0.97 | #N/A | #N/A | 3.63 | 0.99 |
| 213456 | 3.25 | 0.97 | #N/A | #N/A | 1.20 | 0.62 |
| 214731 | 3.25 | 0.97 | #N/A | #N/A | 3.89 | 0.99 |
| 216437 | 2.35 | 0.89 | 1.08 | 0.61 | 1.59 | 0.76 |
| 218233 | 1.70 | 0.72 | 0.66 | 0.28 | 1.26 | 0.65 |
| 218368 | 0.85 | 0.39 | 1.25 | 0.81 | 0.73 | 0.31 |
| #N/A   | #N/A | #N/A | #N/A | #N/A | #N/A | #N/A |
| #N/A   | #N/A | #N/A | #N/A | #N/A | 0.78 | 0.34 |
| 220449 | 2.92 | 0.96 | #N/A | #N/A | #N/A | #N/A |
| #N/A   | #N/A | #N/A | #N/A | #N/A | 2.59 | 0.94 |
| 223446 | 1.73 | 0.75 | #N/A | #N/A | 2.38 | 0.92 |
| 224726 | 1.73 | 0.75 | #N/A | #N/A | 2.56 | 0.94 |
| 227450 | 0.46 | 0.21 | 0.84 | 0.48 | 0.73 | 0.30 |
| #N/A   | 0.46 | 0.21 | 0.84 | 0.48 | 0.63 | 0.24 |
| 228783 | 0.58 | 0.26 | 1.17 | 0.78 | 1.65 | 0.79 |
| 228087 | 0.31 | 0.07 | 0.32 | 0.03 | 1.32 | 0.68 |
| 230996 | 0.31 | 0.07 | 0.32 | 0.03 | 0.40 | 0.06 |
| 232955 | #N/A | #N/A | #N/A | #N/A | 1.01 | 0.51 |
| 233117 | 1.43 | 0.63 | 0.70 | 0.30 | 0.60 | 0.20 |
| 238768 | 1.43 | 0.63 | 0.70 | 0.30 | 1.11 | 0.55 |
| 240003 | 3.21 | 0.97 | 1.64 | 0.87 | 1.31 | 0.67 |
| #N/A   | #N/A | #N/A | #N/A | #N/A | 0.87 | 0.41 |
| 240095 | 3.92 | 0.99 | #N/A | #N/A | 4.20 | 1.00 |
| 240797 | 2.69 | 0.94 | 1.95 | 0.67 | 1.27 | 0.66 |
| 242581 | 4.11 | 1.00 | 0.74 | 0.35 | #N/A | #N/A |
| #N/A   | #N/A | #N/A | #N/A | #N/A | 2.89 | 0.96 |
| 248026 | 3.07 | 0.96 | 1.03 | 0.66 | 2.82 | 0.96 |
| 249286 | #N/A | #N/A | #N/A | #N/A | 1.86 | 0.84 |
| 250231 | 3.71 | 0.99 | 0.84 | 0.47 | 1.06 | 0.54 |
| 254166 | 3.71 | 0.99 | 0.84 | 0.47 | 1.75 | 0.82 |
| #N/A   | #N/A | #N/A | #N/A | #N/A | 1.96 | 0.86 |
| 258647 | 1.24 | 0.55 | #N/A | #N/A | 0.77 | 0.33 |
| 259262 | 2.11 | 0.84 | 1.02 | 0.65 | 2.97 | 0.96 |
| 259954 | 1.83 | 0.76 | 1.26 | 0.62 | 1.78 | 0.83 |
| 260304 | 2.03 | 0.82 | 0.84 | 0.47 | 0.40 | 0.06 |
| 263262 | 2.03 | 0.82 | 0.84 | 0.47 | 2.47 | 0.93 |

|        |      |      |      |      |      |      |
|--------|------|------|------|------|------|------|
| 263957 | 1.37 | 0.61 | 0.67 | 0.27 | 1.33 | 0.68 |
| 264484 | 1.37 | 0.61 | 0.67 | 0.27 | 1.94 | 0.86 |
| 266839 | 2.57 | 0.92 | 0.83 | 0.46 | 1.01 | 0.50 |
| 272256 | 1.15 | 0.52 | 0.86 | 0.49 | 0.36 | 0.04 |
| 272308 | #N/A | #N/A | #N/A | #N/A | 1.28 | 0.65 |
| 276559 | 1.69 | 0.73 | 0.65 | 0.26 | 0.89 | 0.43 |
| 276757 | 1.82 | 0.77 | 0.44 | 0.08 | 0.91 | 0.44 |
| 286436 | 1.82 | 0.77 | 0.44 | 0.08 | 0.47 | 0.11 |
| 287930 | 2.31 | 0.88 | #N/A | #N/A | 0.51 | 0.14 |
| 288163 | 1.54 | 0.67 | 1.00 | 0.65 | 1.74 | 0.81 |
| 293172 | #N/A | #N/A | 1.11 | 0.74 | 0.49 | 0.14 |
| #N/A   | #N/A | #N/A | #N/A | #N/A | #N/A | #N/A |
| #N/A   | #N/A | #N/A | #N/A | #N/A | #N/A | #N/A |
| 297042 | 2.50 | 0.91 | 1.14 | 0.71 | 1.75 | 0.81 |
| 300825 | 0.64 | 0.28 | #N/A | #N/A | 0.41 | 0.08 |
| 301264 | 0.64 | 0.28 | #N/A | #N/A | 0.41 | 0.07 |
| 302475 | 1.92 | 0.80 | #N/A | #N/A | 1.28 | 0.64 |
| 304354 | 1.72 | 0.73 | 1.22 | 0.80 | 1.85 | 0.84 |
| #N/A   | 0.65 | 0.29 | 0.94 | 0.58 | 0.99 | 0.48 |
| 308168 | 0.65 | 0.29 | 0.94 | 0.58 | 0.83 | 0.39 |
| 310148 | 0.48 | 0.18 | 0.99 | 0.64 | 1.20 | 0.62 |
| 313449 | 2.26 | 0.88 | 1.28 | 0.83 | 0.62 | 0.22 |
| 314974 | 0.40 | 0.13 | 0.99 | 0.59 | 0.91 | 0.45 |
| #N/A   | #N/A | #N/A | #N/A | #N/A | #N/A | #N/A |
| #N/A   | #N/A | #N/A | #N/A | #N/A | 0.44 | 0.09 |
| #N/A   | #N/A | #N/A | #N/A | #N/A | 0.33 | 0.03 |
| #N/A   | #N/A | #N/A | #N/A | #N/A | 0.63 | 0.23 |
| #N/A   | #N/A | #N/A | #N/A | #N/A | 0.38 | 0.05 |
| #N/A   | #N/A | #N/A | #N/A | #N/A | 0.79 | 0.36 |
| #N/A   | #N/A | #N/A | #N/A | #N/A | 0.54 | 0.16 |
| #N/A   | #N/A | #N/A | #N/A | #N/A | 0.90 | 0.43 |
| #N/A   | #N/A | #N/A | #N/A | #N/A | 1.27 | 0.65 |
| #N/A   | #N/A | #N/A | #N/A | #N/A | #N/A | #N/A |
| #N/A   | #N/A | #N/A | #N/A | #N/A | 0.57 | 0.19 |
| #N/A   | #N/A | #N/A | #N/A | #N/A | #N/A | #N/A |
| #N/A   | #N/A | #N/A | #N/A | #N/A | 2.65 | 0.95 |
| #N/A   | #N/A | #N/A | #N/A | #N/A | 0.42 | 0.08 |
| #N/A   | #N/A | #N/A | #N/A | #N/A | 4.14 | 1.00 |
| #N/A   | #N/A | #N/A | #N/A | #N/A | 1.73 | 0.81 |
| #N/A   | #N/A | #N/A | #N/A | #N/A | 0.74 | 0.32 |
| #N/A   | #N/A | #N/A | #N/A | #N/A | 0.29 | 0.01 |
| #N/A   | #N/A | #N/A | #N/A | #N/A | 0.74 | 0.32 |
| #N/A   | #N/A | #N/A | #N/A | #N/A | #N/A | #N/A |
| #N/A   | #N/A | #N/A | #N/A | #N/A | 0.93 | 0.45 |
| 449272 | 0.99 | 0.45 | 1.28 | 0.76 | 0.57 | 0.19 |
| 446963 | 0.99 | 0.45 | 1.28 | 0.76 | 0.82 | 0.38 |
| 446379 | 1.20 | 0.56 | 0.96 | 0.62 | 0.71 | 0.28 |
| 443507 | 1.81 | 0.76 | 0.97 | 0.59 | 1.88 | 0.85 |
| 441010 | 1.81 | 0.76 | 0.97 | 0.59 | 0.63 | 0.24 |
| 440750 | 0.81 | 0.37 | 0.86 | 0.49 | 0.56 | 0.18 |
| 439356 | 1.23 | 0.57 | #N/A | #N/A | 0.63 | 0.23 |

|        |      |      |      |      |      |      |
|--------|------|------|------|------|------|------|
| 433990 | 1.65 | 0.72 | 1.13 | 0.72 | 1.52 | 0.74 |
| 432921 | 1.65 | 0.72 | 1.13 | 0.72 | #N/A | #N/A |
| 433021 | 1.84 | 0.78 | 0.88 | 0.52 | 1.01 | 0.50 |
| 432304 | 1.65 | 0.72 | 1.13 | 0.72 | #N/A | #N/A |
| 431104 | 1.84 | 0.78 | 0.88 | 0.52 | 3.03 | 0.97 |
| 430922 | 2.35 | 0.89 | 1.14 | 0.76 | 0.72 | 0.29 |
| 428343 | 1.15 | 0.52 | 1.11 | 0.73 | 0.92 | 0.45 |
| 425998 | 1.15 | 0.52 | 1.11 | 0.73 | 0.67 | 0.26 |
| 425566 | 0.55 | 0.23 | #N/A | #N/A | #N/A | #N/A |
| 425728 | 2.34 | 0.89 | 1.07 | 0.71 | 0.71 | 0.30 |
| 422829 | 2.34 | 0.89 | 1.07 | 0.71 | 1.44 | 0.71 |
| 417659 | #N/A | #N/A | #N/A | #N/A | 0.65 | 0.24 |
| 415109 | 1.36 | 0.62 | 0.77 | 0.38 | 0.41 | 0.08 |
| 414884 | 1.23 | 0.57 | 1.06 | 0.71 | 2.32 | 0.92 |
| 412996 | 0.48 | 0.19 | #N/A | #N/A | 0.68 | 0.26 |
| 411757 | 1.23 | 0.57 | 1.06 | 0.71 | 0.86 | 0.40 |
| 408447 | 0.99 | 0.45 | 1.08 | 0.68 | 2.10 | 0.88 |
| 405340 | 1.84 | 0.76 | 0.82 | 0.46 | 0.61 | 0.21 |
| 405056 | 2.88 | 0.95 | 0.63 | 0.23 | 4.21 | 0.99 |
| 403691 | 1.05 | 0.49 | #N/A | #N/A | 1.54 | 0.74 |
| 400993 | 2.88 | 0.95 | 0.63 | 0.23 | 0.61 | 0.21 |
| 400634 | 1.81 | 0.76 | 1.10 | 0.65 | 1.28 | 0.65 |
| 399125 | 2.06 | 0.82 | 0.65 | 0.30 | 1.31 | 0.65 |
| 397200 | 2.78 | 0.95 | 1.01 | 0.65 | 0.81 | 0.37 |
| 393997 | 1.44 | 0.64 | 1.16 | 0.76 | 3.17 | 0.97 |
| 392655 | 2.78 | 0.95 | 1.01 | 0.65 | 1.61 | 0.78 |
| 392123 | 0.86 | 0.39 | 1.06 | 0.65 | 1.17 | 0.58 |
| 389168 | 1.44 | 0.64 | 1.16 | 0.76 | 0.47 | 0.11 |
| 387509 | 0.86 | 0.39 | 1.06 | 0.65 | 0.67 | 0.27 |
| 384597 | 1.11 | 0.50 | 0.74 | 0.36 | 0.90 | 0.44 |
| 382326 | #N/A | #N/A | #N/A | #N/A | #N/A | #N/A |
| 381982 | #N/A | #N/A | #N/A | #N/A | 1.24 | 0.63 |
| 378870 | 2.17 | 0.86 | 0.82 | 0.45 | 0.81 | 0.37 |
| 378451 | #N/A | #N/A | #N/A | #N/A | 1.76 | 0.81 |
| 376753 | 1.15 | 0.53 | 0.60 | 0.21 | 0.99 | 0.48 |
| 375676 | #N/A | #N/A | #N/A | #N/A | 1.91 | 0.85 |
| 373963 | 1.22 | 0.57 | 0.91 | 0.55 | 1.03 | 0.53 |
| 372684 | 1.99 | 0.81 | #N/A | #N/A | 1.03 | 0.51 |
| 371757 | #N/A | #N/A | #N/A | #N/A | 1.87 | 0.84 |
| 370703 | 0.47 | 0.22 | 0.62 | 0.23 | 0.55 | 0.18 |
| 366738 | 0.63 | 0.30 | 0.64 | 0.24 | 1.57 | 0.77 |
| 365067 | #N/A | #N/A | #N/A | #N/A | 2.10 | 0.89 |
| 364445 | 0.81 | 0.37 | #N/A | #N/A | 0.79 | 0.36 |
| 364778 | #N/A | #N/A | 0.90 | 0.54 | 0.89 | 0.43 |
| 362671 | #N/A | #N/A | 0.90 | 0.54 | 1.72 | 0.81 |
| 361698 | 1.26 | 0.57 | #N/A | #N/A | 1.17 | 0.60 |
| 359824 | 1.31 | 0.59 | 0.49 | 0.10 | 1.29 | 0.66 |
| 355673 | 0.77 | 0.37 | 0.50 | 0.11 | 0.56 | 0.18 |
| 355377 | 2.70 | 0.94 | 0.83 | 0.43 | 0.64 | 0.24 |
| 352419 | 1.01 | 0.46 | 1.15 | 0.65 | 1.88 | 0.84 |
| 351036 | 2.03 | 0.82 | 0.82 | 0.45 | 0.60 | 0.21 |

|        |      |      |      |      |      |      |
|--------|------|------|------|------|------|------|
| 344236 | 2.03 | 0.82 | 0.82 | 0.45 | 2.16 | 0.89 |
| 343984 | #N/A | #N/A | 1.14 | 0.76 | 0.49 | 0.13 |
| 340627 | #N/A | #N/A | 1.14 | 0.76 | 0.46 | 0.10 |
| 340281 | #N/A | #N/A | #N/A | #N/A | 2.55 | 0.94 |
| 338271 | 0.69 | 0.31 | 1.25 | 0.83 | 0.89 | 0.42 |
| 338069 | 1.80 | 0.76 | 0.70 | 0.31 | 1.26 | 0.64 |
| 336248 | 1.80 | 0.76 | 0.70 | 0.31 | 0.84 | 0.39 |
| 336120 | 1.69 | 0.73 | 1.24 | 0.80 | 1.08 | 0.56 |
| 334216 | 1.69 | 0.73 | 1.24 | 0.80 | 1.43 | 0.72 |
| 333828 | #N/A | #N/A | #N/A | #N/A | 1.13 | 0.58 |
| 333120 | #N/A | #N/A | #N/A | #N/A | 1.23 | 0.62 |
| 332940 | #N/A | #N/A | #N/A | #N/A | 0.35 | 0.03 |
| 330666 | #N/A | #N/A | #N/A | #N/A | 0.64 | 0.23 |
| 329835 | #N/A | #N/A | #N/A | #N/A | 2.06 | 0.88 |
| 329566 | 2.47 | 0.91 | 0.87 | 0.51 | 0.43 | 0.09 |
| 324046 | 2.47 | 0.91 | 0.87 | 0.51 | 0.77 | 0.35 |
| 322987 | 0.42 | 0.16 | 0.47 | 0.11 | 0.30 | 0.01 |
| 320667 | 0.42 | 0.16 | 0.47 | 0.11 | 0.78 | 0.34 |
| 316970 | 1.58 | 0.70 | 1.18 | 0.79 | 0.56 | 0.19 |
| 315356 | 1.80 | 0.75 | 0.94 | 0.54 | 1.27 | 0.66 |
| 312950 | 3.56 | 0.99 | 0.90 | 0.54 | 1.24 | 0.62 |
| 310641 | 1.41 | 0.63 | 0.77 | 0.39 | 1.06 | 0.54 |
| 309801 | 0.97 | 0.44 | 1.08 | 0.66 | 0.58 | 0.19 |
| 309387 | 0.14 | 0.01 | 0.59 | 0.21 | 0.35 | 0.03 |
| 306925 | 0.14 | 0.01 | 0.59 | 0.21 | 0.38 | 0.05 |
| 306576 | 1.81 | 0.77 | 0.54 | 0.15 | 0.87 | 0.42 |
| 304847 | 1.85 | 0.78 | 0.96 | 0.60 | 1.57 | 0.77 |
| 302233 | 3.28 | 0.98 | 0.81 | 0.43 | 1.64 | 0.79 |
| 300213 | 3.28 | 0.98 | 0.81 | 0.43 | 2.52 | 0.93 |
| 298416 | #N/A | #N/A | #N/A | #N/A | 1.00 | 0.49 |
| 298273 | 1.61 | 0.71 | 1.17 | 0.73 | 0.70 | 0.29 |
| 295033 | 1.61 | 0.71 | 1.17 | 0.73 | 1.16 | 0.58 |
| 293391 | #N/A | #N/A | 0.88 | 0.52 | 0.79 | 0.35 |
| 293220 | 3.43 | 0.98 | #N/A | #N/A | 2.12 | 0.89 |
| 292139 | #N/A | #N/A | #N/A | #N/A | 1.22 | 0.62 |
| 289571 | 3.43 | 0.98 | #N/A | #N/A | 2.73 | 0.95 |
| 289511 | 1.58 | 0.68 | 0.85 | 0.44 | 0.80 | 0.37 |
| 286997 | #N/A | #N/A | #N/A | #N/A | 2.55 | 0.93 |
| 285390 | 1.58 | 0.68 | 0.85 | 0.44 | 0.86 | 0.41 |
| 284580 | 1.46 | 0.64 | 0.39 | 0.06 | 2.12 | 0.89 |
| 284443 | #N/A | #N/A | #N/A | #N/A | 0.70 | 0.28 |
| 282111 | #N/A | #N/A | #N/A | #N/A | 1.39 | 0.69 |
| 280306 | #N/A | #N/A | #N/A | #N/A | 1.20 | 0.61 |
| 280164 | 1.95 | 0.81 | 0.92 | 0.52 | 0.71 | 0.29 |
| 275147 | 1.95 | 0.81 | 0.92 | 0.52 | 1.78 | 0.82 |
| 273652 | 1.23 | 0.55 | #N/A | #N/A | 1.01 | 0.51 |
| 273596 | 3.17 | 0.97 | 0.74 | 0.36 | 1.77 | 0.82 |
| 270221 | 3.17 | 0.97 | 0.74 | 0.36 | 1.19 | 0.59 |
| 269975 | 0.91 | 0.43 | #N/A | #N/A | 1.07 | 0.55 |
| 268698 | 1.07 | 0.48 | 1.20 | 0.75 | 1.53 | 0.74 |
| 265257 | 1.07 | 0.48 | 1.20 | 0.75 | 0.91 | 0.43 |

|        |      |      |      |      |      |      |
|--------|------|------|------|------|------|------|
| 264511 | 1.22 | 0.55 | 1.05 | 0.57 | 1.48 | 0.72 |
| 263312 | 1.98 | 0.81 | 0.85 | 0.48 | 1.88 | 0.85 |
| 263224 | 2.38 | 0.89 | 1.00 | 0.65 | 0.65 | 0.25 |
| 256632 | 2.38 | 0.89 | 1.00 | 0.65 | 0.16 | 0.00 |
| 256529 | 1.81 | 0.76 | 0.87 | 0.51 | 1.32 | 0.66 |
| 253994 | 1.81 | 0.76 | 0.87 | 0.51 | #N/A | #N/A |
| 253745 | 2.62 | 0.92 | 0.74 | 0.39 | 0.77 | 0.33 |
| 251237 | 1.26 | 0.57 | 0.76 | 0.38 | 0.49 | 0.14 |
| 247681 | #N/A | #N/A | 0.80 | 0.42 | 1.95 | 0.86 |
| 246688 | 1.26 | 0.57 | 0.76 | 0.38 | 1.59 | 0.78 |
| 246446 | 3.22 | 0.97 | 0.72 | 0.33 | 1.89 | 0.85 |
| 245132 | 3.22 | 0.97 | 0.72 | 0.33 | 3.17 | 0.97 |
| 244980 | 1.12 | 0.51 | 0.89 | 0.53 | 0.35 | 0.03 |
| 241839 | 2.45 | 0.90 | 1.06 | 0.58 | 2.04 | 0.88 |
| 241196 | 0.82 | 0.38 | 0.72 | 0.35 | #N/A | #N/A |
| 239018 | 0.82 | 0.38 | 0.72 | 0.35 | 1.38 | 0.68 |
| 236156 | 1.14 | 0.53 | 0.62 | 0.23 | 0.46 | 0.12 |
| 235766 | 0.70 | 0.33 | 0.47 | 0.10 | 0.77 | 0.35 |
| 233887 | 0.80 | 0.37 | 0.97 | 0.61 | 0.69 | 0.29 |
| 231899 | 1.56 | 0.70 | 1.02 | 0.66 | 1.06 | 0.53 |
| 230527 | 0.74 | 0.33 | 0.81 | 0.43 | 0.43 | 0.09 |
| 228715 | #N/A | #N/A | #N/A | #N/A | 0.74 | 0.32 |
| 226751 | 2.07 | 0.83 | 0.93 | 0.52 | 0.48 | 0.12 |
| 223740 | #N/A | #N/A | 0.70 | 0.32 | 0.60 | 0.21 |
| 219662 | 1.15 | 0.54 | 0.92 | 0.56 | 0.74 | 0.32 |
| #N/A   | #N/A | #N/A | #N/A | #N/A | 0.66 | 0.26 |
| 218680 | 1.11 | 0.52 | 1.16 | 0.53 | 0.99 | 0.50 |
| 218367 | 0.31 | 0.07 | 1.44 | 0.89 | 0.42 | 0.08 |
| 217074 | 0.95 | 0.45 | 0.92 | 0.51 | 0.58 | 0.19 |
| 215643 | 0.78 | 0.36 | 0.73 | 0.35 | 0.65 | 0.26 |
| 211376 | 0.78 | 0.36 | 0.73 | 0.35 | 1.62 | 0.78 |
| 205361 | 1.22 | 0.55 | 0.75 | 0.39 | 0.27 | 0.01 |
| 205112 | 1.90 | 0.80 | 0.84 | 0.47 | 0.65 | 0.25 |
| 201720 | 1.90 | 0.80 | 0.84 | 0.47 | 1.09 | 0.55 |
| 201583 | 3.04 | 0.96 | 1.56 | 0.92 | 1.19 | 0.61 |
| 198663 | 3.04 | 0.96 | 1.56 | 0.92 | 2.45 | 0.93 |
| 194572 | 3.28 | 0.98 | 1.02 | 0.63 | 0.43 | 0.09 |
| 194226 | 0.99 | 0.47 | 2.83 | 0.98 | 0.72 | 0.31 |
| 192262 | 1.95 | 0.81 | 0.92 | 0.57 | 0.69 | 0.27 |
| 188155 | 1.95 | 0.81 | 0.92 | 0.57 | 0.86 | 0.40 |
| 187919 | 1.95 | 0.80 | 0.61 | 0.21 | 1.27 | 0.65 |
| 184612 | 1.41 | 0.62 | 0.55 | 0.16 | 0.72 | 0.29 |
| 183319 | 1.95 | 0.80 | 0.61 | 0.21 | 0.99 | 0.50 |
| 183188 | #N/A | #N/A | #N/A | #N/A | 2.48 | 0.93 |
| 181187 | 1.41 | 0.62 | 0.55 | 0.16 | 0.66 | 0.26 |
| 181040 | 0.29 | 0.07 | 0.82 | 0.46 | 0.50 | 0.13 |
| 178057 | 1.16 | 0.52 | 1.04 | 0.56 | 0.69 | 0.28 |
| 176487 | #N/A | #N/A | #N/A | #N/A | 0.87 | 0.41 |
| 174233 | #N/A | #N/A | #N/A | #N/A | 3.00 | 0.97 |
| 173867 | #N/A | #N/A | #N/A | #N/A | #N/A | #N/A |
| 174029 | 0.61 | 0.28 | 0.87 | 0.50 | 1.18 | 0.61 |

|        |      |      |      |      |      |      |
|--------|------|------|------|------|------|------|
| 170411 | 0.61 | 0.28 | 0.87 | 0.50 | 0.40 | 0.06 |
| 169079 | 1.66 | 0.72 | #N/A | #N/A | 0.92 | 0.45 |
| 167360 | #N/A | #N/A | #N/A | #N/A | 3.85 | 0.99 |
| 167259 | 0.40 | 0.17 | #N/A | #N/A | #N/A | #N/A |
| 164988 | 1.66 | 0.72 | #N/A | #N/A | 0.79 | 0.36 |
| 164866 | 1.14 | 0.52 | #N/A | #N/A | 1.52 | 0.76 |
| 163450 | 1.14 | 0.52 | #N/A | #N/A | 1.55 | 0.76 |
| 160996 | 1.53 | 0.67 | #N/A | #N/A | 0.64 | 0.23 |
| 160765 | 1.65 | 0.73 | 1.16 | 0.77 | 1.32 | 0.67 |
| 158065 | 1.65 | 0.73 | 1.16 | 0.77 | 1.45 | 0.73 |
| 157905 | 1.16 | 0.54 | 0.85 | 0.49 | 0.80 | 0.37 |
| 149204 | 1.16 | 0.54 | 0.85 | 0.49 | 0.49 | 0.13 |
| 148608 | #N/A | #N/A | #N/A | #N/A | 0.87 | 0.41 |
| 149079 | #N/A | #N/A | #N/A | #N/A | 1.75 | 0.81 |
| 145827 | #N/A | #N/A | #N/A | #N/A | 0.87 | 0.42 |
| 144485 | #N/A | #N/A | 0.99 | 0.62 | 1.59 | 0.76 |
| 144224 | 2.35 | 0.88 | 1.21 | 0.73 | 0.54 | 0.18 |
| 141210 | 2.35 | 0.88 | 1.21 | 0.73 | 1.59 | 0.77 |
| 141115 | 1.21 | 0.54 | 0.72 | 0.34 | 0.75 | 0.32 |
| 139206 | 2.38 | 0.89 | 1.25 | 0.72 | 1.24 | 0.62 |
| 137540 | #N/A | #N/A | #N/A | #N/A | 0.50 | 0.14 |
| 135437 | 1.05 | 0.48 | 0.73 | 0.34 | 0.95 | 0.47 |
| 134724 | 0.48 | 0.19 | 0.64 | 0.27 | 1.02 | 0.51 |
| 130872 | 1.27 | 0.57 | #N/A | #N/A | 1.05 | 0.52 |
| 130408 | 0.29 | 0.07 | 0.35 | 0.04 | #N/A | #N/A |
| 130003 | 2.78 | 0.94 | 0.63 | 0.24 | 0.43 | 0.09 |
| 126450 | 2.97 | 0.95 | 0.75 | 0.36 | 3.15 | 0.97 |
| 125510 | 2.78 | 0.94 | 0.63 | 0.24 | 1.45 | 0.72 |
| 123866 | 2.97 | 0.95 | 0.75 | 0.36 | 0.91 | 0.44 |
| 123590 | 2.78 | 0.94 | 0.96 | 0.60 | 0.82 | 0.38 |
| 118708 | 2.78 | 0.94 | 0.96 | 0.60 | 0.80 | 0.36 |
| 118518 | 0.35 | 0.10 | 1.30 | 0.83 | 0.44 | 0.09 |
| 116867 | 1.12 | 0.51 | 0.95 | 0.50 | 0.74 | 0.32 |
| 115800 | 1.55 | 0.69 | #N/A | #N/A | 1.77 | 0.82 |
| 114235 | 2.51 | 0.92 | 0.97 | 0.57 | 0.70 | 0.28 |
| 111030 | 2.76 | 0.93 | 0.73 | 0.36 | 0.45 | 0.10 |
| 107071 | #N/A | #N/A | 0.74 | 0.37 | 3.25 | 0.98 |
| 104918 | #N/A | #N/A | 0.74 | 0.37 | 0.87 | 0.40 |
| 103650 | 0.88 | 0.40 | 0.78 | 0.39 | 0.72 | 0.31 |
| 101291 | 2.05 | 0.83 | #N/A | #N/A | 1.29 | 0.66 |
| 100502 | #N/A | #N/A | 0.30 | 0.03 | 1.49 | 0.73 |
| 100422 | 2.15 | 0.85 | 0.80 | 0.41 | 1.40 | 0.71 |
| 99225  | #N/A | #N/A | 0.82 | 0.46 | 2.95 | 0.96 |
| 96083  | #N/A | #N/A | 0.82 | 0.46 | 1.00 | 0.51 |
| 95787  | 2.46 | 0.90 | 1.10 | 0.72 | 0.75 | 0.33 |
| 92763  | 2.46 | 0.90 | 1.10 | 0.72 | 1.10 | 0.57 |
| 92465  | 1.60 | 0.71 | #N/A | #N/A | #N/A | #N/A |
| 89865  | 1.88 | 0.78 | #N/A | #N/A | 1.18 | 0.59 |
| 87983  | 1.85 | 0.78 | 0.92 | 0.57 | 2.32 | 0.91 |
| 86208  | 1.85 | 0.78 | 0.92 | 0.57 | 1.36 | 0.69 |
| 85986  | 1.98 | 0.80 | 0.65 | 0.28 | 2.32 | 0.91 |

|        |      |      |      |      |      |      |
|--------|------|------|------|------|------|------|
| 79295  | 1.33 | 0.59 | 0.93 | 0.56 | 1.24 | 0.62 |
| 79059  | 2.19 | 0.85 | 1.49 | 0.88 | 1.66 | 0.80 |
| 77290  | 2.19 | 0.85 | 1.49 | 0.88 | 1.74 | 0.81 |
| 74447  | 0.50 | 0.20 | 1.11 | 0.67 | 1.21 | 0.61 |
| 70641  | 3.11 | 0.97 | 0.80 | 0.42 | 0.74 | 0.32 |
| 68998  | 0.68 | 0.31 | #N/A | #N/A | 1.65 | 0.78 |
| 67984  | 2.29 | 0.88 | 1.02 | 0.67 | 1.64 | 0.79 |
| 67447  | 3.95 | 0.99 | 0.77 | 0.39 | 1.27 | 0.65 |
| 65766  | 2.73 | 0.94 | 1.02 | 0.63 | 2.30 | 0.91 |
| 62245  | 2.73 | 0.94 | 1.02 | 0.63 | 1.28 | 0.65 |
| 62563  | 2.49 | 0.90 | 0.63 | 0.27 | 2.71 | 0.95 |
| 60873  | 2.49 | 0.90 | 0.63 | 0.27 | 2.37 | 0.92 |
| 57266  | 1.19 | 0.55 | 0.90 | 0.55 | 1.68 | 0.81 |
| 54398  | 1.33 | 0.61 | 1.28 | 0.76 | 0.33 | 0.02 |
| 54101  | 5.38 | 1.00 | 1.49 | 0.78 | 0.95 | 0.46 |
| 51116  | 5.38 | 1.00 | 1.49 | 0.78 | 2.25 | 0.90 |
| 46272  | 0.70 | 0.32 | 0.98 | 0.62 | 1.41 | 0.72 |
| 45278  | 0.64 | 0.28 | #N/A | #N/A | 0.39 | 0.06 |
| 45907  | 0.41 | 0.14 | 0.64 | 0.30 | 0.36 | 0.04 |
| 43708  | 3.15 | 0.97 | 0.59 | 0.21 | 2.21 | 0.90 |
| 38868  | 3.15 | 0.97 | 0.59 | 0.21 | 0.74 | 0.33 |
| 38598  | 2.17 | 0.85 | 0.79 | 0.40 | 2.23 | 0.90 |
| 38174  | 3.41 | 0.98 | 1.23 | 0.72 | 1.83 | 0.83 |
| 34238  | 3.41 | 0.98 | 1.23 | 0.72 | #N/A | #N/A |
| 33415  | 1.95 | 0.81 | #N/A | #N/A | 1.20 | 0.60 |
| 33234  | 2.46 | 0.91 | 0.95 | 0.55 | 1.29 | 0.66 |
| 31829  | #N/A | #N/A | 0.86 | 0.50 | 1.35 | 0.67 |
| 28985  | #N/A | #N/A | 0.86 | 0.50 | 0.80 | 0.37 |
| 26403  | 0.38 | 0.12 | 1.20 | 0.75 | 0.41 | 0.07 |
| 25876  | 2.07 | 0.84 | 0.63 | 0.23 | 0.38 | 0.05 |
| 21006  | 0.93 | 0.43 | 0.95 | 0.60 | 1.83 | 0.84 |
| 19312  | 1.11 | 0.50 | 0.94 | 0.58 | #N/A | #N/A |
| 17577  | 1.11 | 0.50 | 0.94 | 0.58 | 1.03 | 0.52 |
| 17226  | 2.20 | 0.87 | 1.05 | 0.69 | 3.05 | 0.97 |
| 11657  | 0.66 | 0.30 | 0.99 | 0.62 | 1.37 | 0.70 |
| 8683   | 1.77 | 0.74 | 0.76 | 0.39 | 3.24 | 0.98 |
| 7814   | 1.23 | 0.57 | 0.92 | 0.56 | 1.34 | 0.68 |
| 2953   | #N/A | #N/A | #N/A | #N/A | 1.26 | 0.64 |
| 450216 | 1.00 | 0.46 | 0.96 | 0.61 | 0.58 | 0.20 |
| 453646 | 1.00 | 0.46 | 0.96 | 0.61 | 1.40 | 0.69 |
| 454750 | #N/A | #N/A | 0.86 | 0.49 | 1.02 | 0.52 |
| 456579 | 0.99 | 0.46 | 0.92 | 0.57 | 0.87 | 0.42 |
| 456832 | 1.53 | 0.69 | 1.05 | 0.68 | 0.84 | 0.39 |
| 458538 | 1.44 | 0.64 | 3.68 | 0.99 | 0.54 | 0.17 |
| 462512 | 1.44 | 0.64 | 3.68 | 0.99 | 1.82 | 0.83 |
| 462248 | 1.48 | 0.65 | 1.39 | 0.80 | 1.80 | 0.84 |
| 464992 | 1.48 | 0.65 | 1.39 | 0.80 | 1.77 | 0.82 |
| 465047 | 0.37 | 0.14 | 0.89 | 0.49 | 0.61 | 0.21 |
| 470420 | 0.37 | 0.14 | 0.89 | 0.49 | 0.48 | 0.13 |
| 472937 | 0.85 | 0.41 | 1.17 | 0.78 | 0.94 | 0.46 |
| 473779 | 0.38 | 0.12 | #N/A | #N/A | 2.15 | 0.89 |

|        |      |      |      |      |      |      |
|--------|------|------|------|------|------|------|
| 475985 | 1.35 | 0.61 | 0.91 | 0.53 | 1.08 | 0.54 |
| 477805 | #N/A | #N/A | #N/A | #N/A | 1.69 | 0.80 |
| 478469 | 3.13 | 0.96 | 0.80 | 0.42 | 2.96 | 0.96 |
| 479110 | 0.73 | 0.35 | 1.06 | 0.67 | 0.41 | 0.07 |
| 482665 | 0.87 | 0.40 | 0.90 | 0.54 | 1.48 | 0.74 |
| 484158 | 0.60 | 0.27 | 0.71 | 0.32 | 0.68 | 0.27 |
| 485741 | 1.85 | 0.77 | 0.74 | 0.35 | 1.03 | 0.53 |
| 487998 | 1.85 | 0.77 | 0.74 | 0.35 | 1.25 | 0.64 |
| 488067 | #N/A | #N/A | #N/A | #N/A | 1.00 | 0.51 |
| 490891 | 0.59 | 0.25 | 1.37 | 0.88 | 0.52 | 0.15 |
| 491497 | #N/A | #N/A | #N/A | #N/A | 0.26 | 0.01 |
| 492319 | #N/A | #N/A | #N/A | #N/A | 0.34 | 0.03 |
| 492551 | 2.10 | 0.84 | 0.95 | 0.58 | 0.55 | 0.18 |
| 494644 | 1.55 | 0.68 | 0.74 | 0.36 | 0.66 | 0.26 |
| 497830 | #N/A | #N/A | #N/A | #N/A | 0.37 | 0.04 |
| 501409 | #N/A | #N/A | #N/A | #N/A | 1.75 | 0.82 |
| 501748 | 2.54 | 0.92 | 0.83 | 0.46 | 1.49 | 0.73 |
| 503846 | 2.54 | 0.92 | 0.83 | 0.46 | 3.50 | 0.98 |
| 504093 | 1.70 | 0.74 | 2.07 | 0.97 | 1.59 | 0.78 |
| 509103 | 0.51 | 0.21 | 0.58 | 0.18 | 0.46 | 0.12 |
| 509731 | 1.38 | 0.63 | 0.93 | 0.57 | 0.51 | 0.15 |
| 522922 | 1.16 | 0.52 | 0.77 | 0.39 | #N/A | #N/A |
| 523205 | 1.86 | 0.77 | 0.63 | 0.23 | 1.35 | 0.67 |
| 527209 | 1.86 | 0.77 | 0.63 | 0.23 | 0.45 | 0.10 |
| 527416 | 1.73 | 0.74 | 0.89 | 0.54 | 0.68 | 0.26 |
| 531301 | #N/A | #N/A | #N/A | #N/A | 0.70 | 0.29 |
| 535186 | 1.27 | 0.57 | 0.64 | 0.24 | 0.71 | 0.29 |
| 540408 | 1.27 | 0.57 | 0.64 | 0.24 | 2.12 | 0.89 |
| 540595 | 0.36 | 0.14 | 1.27 | 0.75 | 0.91 | 0.45 |
| 542669 | 0.61 | 0.28 | 0.92 | 0.57 | #N/A | #N/A |
| 547623 | 2.12 | 0.85 | 0.60 | 0.20 | 1.62 | 0.79 |
| 547973 | 1.35 | 0.60 | 1.13 | 0.76 | 1.91 | 0.85 |
| 548757 | #N/A | #N/A | #N/A | #N/A | 0.35 | 0.03 |
| 552943 | #N/A | #N/A | #N/A | #N/A | 0.58 | 0.20 |
| 553079 | 0.42 | 0.15 | #N/A | #N/A | 1.55 | 0.76 |
| 555147 | 0.52 | 0.21 | 0.32 | 0.03 | 0.53 | 0.17 |
| 555721 | 0.44 | 0.17 | 0.48 | 0.10 | 0.45 | 0.10 |
| 557051 | 0.99 | 0.45 | 1.23 | 0.81 | 1.12 | 0.57 |
| 558506 | 1.10 | 0.50 | 1.10 | 0.73 | 0.44 | 0.09 |
| 560639 | 0.99 | 0.45 | 1.23 | 0.81 | 1.20 | 0.62 |
| 561435 | 1.20 | 0.54 | 0.93 | 0.47 | 0.47 | 0.12 |
| 564856 | 1.20 | 0.54 | 0.93 | 0.47 | 1.43 | 0.71 |
| 565018 | 2.39 | 0.89 | 1.26 | 0.72 | 1.30 | 0.66 |
| 567550 | 2.39 | 0.89 | 1.26 | 0.72 | 1.20 | 0.60 |
| 567718 | 0.83 | 0.38 | 0.82 | 0.44 | 1.38 | 0.70 |
| 569229 | #N/A | #N/A | #N/A | #N/A | #N/A | #N/A |
| 573720 | #N/A | #N/A | #N/A | #N/A | 0.60 | 0.20 |
| 575777 | 0.46 | 0.19 | 0.71 | 0.32 | 0.75 | 0.33 |
| 578153 | 1.39 | 0.63 | 1.21 | 0.72 | 0.43 | 0.08 |
| 579107 | 0.95 | 0.43 | 1.46 | 0.64 | 1.47 | 0.72 |
| 580447 | 0.47 | 0.22 | #N/A | #N/A | 0.42 | 0.09 |



|        |      |      |      |      |      |      |
|--------|------|------|------|------|------|------|
| 581779 | 0.77 | 0.35 | #N/A | #N/A | 0.59 | 0.21 |
| 581903 | 1.21 | 0.55 | 0.87 | 0.51 | 1.09 | 0.56 |
| 582786 | 2.40 | 0.90 | 1.16 | 0.58 | 1.23 | 0.61 |
| 584640 | 2.40 | 0.90 | 1.16 | 0.58 | 0.70 | 0.28 |
| 584934 | 3.48 | 0.98 | 0.72 | 0.37 | 0.46 | 0.11 |
| 588093 | 1.17 | 0.54 | 1.57 | 0.93 | 2.66 | 0.94 |
| 588822 | 1.06 | 0.49 | #N/A | #N/A | #N/A | #N/A |
| 589756 | #N/A | #N/A | #N/A | #N/A | 0.56 | 0.18 |
| 592942 | #N/A | #N/A | #N/A | #N/A | 0.84 | 0.40 |
| 596577 | 1.18 | 0.55 | 0.81 | 0.44 | 0.59 | 0.21 |
| 598076 | 1.83 | 0.76 | 1.42 | 0.89 | 0.85 | 0.40 |
| 599682 | 0.83 | 0.38 | #N/A | #N/A | 0.83 | 0.37 |
| 601803 | 0.22 | 0.03 | 0.38 | 0.06 | 0.41 | 0.07 |
| 602192 | 0.80 | 0.37 | 0.58 | 0.20 | 1.91 | 0.85 |
| 603393 | 0.80 | 0.37 | 0.58 | 0.20 | 1.54 | 0.75 |
| 606980 | 2.02 | 0.82 | 0.94 | 0.59 | 0.88 | 0.42 |
| 607298 | 2.84 | 0.95 | 1.00 | 0.65 | 0.66 | 0.24 |
| 611919 | 2.84 | 0.95 | 1.00 | 0.65 | 1.75 | 0.82 |
| 613218 | 0.88 | 0.42 | #N/A | #N/A | 0.61 | 0.21 |
| 613398 | 1.83 | 0.77 | 0.87 | 0.51 | 1.70 | 0.80 |
| 614281 | 1.12 | 0.50 | 0.79 | 0.40 | 1.14 | 0.59 |
| 616921 | 0.75 | 0.34 | 0.60 | 0.22 | #N/A | #N/A |
| 617463 | 1.30 | 0.58 | 0.40 | 0.06 | 1.70 | 0.80 |
| 618490 | 1.37 | 0.61 | 0.95 | 0.60 | 0.86 | 0.41 |
| 624714 | 0.66 | 0.30 | 0.70 | 0.31 | 0.35 | 0.03 |
| 625059 | 1.13 | 0.52 | 1.10 | 0.60 | 0.96 | 0.46 |
| 626701 | 1.56 | 0.69 | 0.75 | 0.36 | 1.00 | 0.49 |
| 630598 | 1.56 | 0.69 | 0.75 | 0.36 | 1.43 | 0.71 |
| 636113 | 0.67 | 0.30 | 0.54 | 0.16 | 0.34 | 0.03 |
| 636168 | 0.67 | 0.30 | 0.54 | 0.16 | 0.77 | 0.35 |
| 636110 | 1.11 | 0.51 | 0.88 | 0.50 | 1.44 | 0.71 |
| 639816 | 1.11 | 0.51 | 0.88 | 0.50 | 0.38 | 0.05 |
| 640102 | 1.78 | 0.74 | 1.72 | 0.50 | 0.75 | 0.32 |
| 644171 | 0.70 | 0.32 | #N/A | #N/A | 1.64 | 0.79 |
| 654421 | #N/A | #N/A | #N/A | #N/A | 0.38 | 0.05 |
| 655437 | 0.76 | 0.35 | 1.28 | 0.80 | 1.54 | 0.74 |
| 655679 | 0.94 | 0.43 | 3.46 | 0.99 | 1.06 | 0.54 |
| 657641 | 1.04 | 0.47 | 0.86 | 0.47 | #N/A | #N/A |
| 661096 | 1.04 | 0.47 | 0.86 | 0.47 | 0.55 | 0.17 |
| 661166 | 1.52 | 0.66 | 0.83 | 0.44 | 0.68 | 0.28 |
| 665342 | 3.23 | 0.98 | 0.60 | 0.20 | 1.66 | 0.79 |
| 667851 | 3.23 | 0.98 | 0.60 | 0.20 | 1.89 | 0.85 |
| 669009 | 2.44 | 0.91 | 1.12 | 0.70 | 0.74 | 0.32 |
| 673358 | 2.44 | 0.91 | 1.12 | 0.70 | 0.62 | 0.22 |
| 673513 | 2.37 | 0.90 | 0.87 | 0.49 | 0.78 | 0.34 |
| 677795 | 2.37 | 0.90 | 0.87 | 0.49 | 0.80 | 0.35 |
| 678234 | 1.22 | 0.55 | 0.63 | 0.23 | 0.74 | 0.31 |
| 679845 | 0.72 | 0.32 | 0.91 | 0.49 | 1.15 | 0.58 |
| 680489 | #N/A | #N/A | #N/A | #N/A | 1.13 | 0.58 |
| 681917 | #N/A | #N/A | #N/A | #N/A | 3.57 | 0.99 |
| 682485 | #N/A | #N/A | #N/A | #N/A | 4.46 | 1.00 |

|        |      |      |      |      |      |      |
|--------|------|------|------|------|------|------|
| 682717 | 1.86 | 0.77 | 0.67 | 0.30 | 1.93 | 0.85 |
| 683939 | 2.37 | 0.90 | 0.59 | 0.19 | 1.01 | 0.51 |
| 687833 | 2.37 | 0.90 | 0.59 | 0.19 | 1.02 | 0.52 |
| 690526 | 1.04 | 0.47 | 0.85 | 0.48 | 0.48 | 0.13 |
| 691542 | 1.80 | 0.75 | 0.83 | 0.45 | 0.91 | 0.45 |
| 694168 | 1.80 | 0.75 | 0.83 | 0.45 | 1.63 | 0.78 |
| 697887 | 2.00 | 0.82 | 1.12 | 0.70 | 0.41 | 0.07 |
| 698547 | 1.00 | 0.46 | 0.79 | 0.41 | 0.57 | 0.19 |
| 701282 | 1.00 | 0.46 | 0.79 | 0.41 | 0.78 | 0.35 |
| 701390 | 1.27 | 0.57 | 0.83 | 0.47 | 1.29 | 0.64 |
| 704237 | 1.27 | 0.57 | 0.83 | 0.47 | 1.03 | 0.52 |
| 709243 | 0.60 | 0.29 | #N/A | #N/A | 0.39 | 0.06 |
| 712988 | 0.60 | 0.26 | #N/A | #N/A | 0.68 | 0.27 |
| 713333 | 1.20 | 0.55 | 0.96 | 0.61 | 0.48 | 0.12 |
| 715740 | 3.60 | 0.99 | 0.82 | 0.42 | 1.32 | 0.67 |
| 716783 | #N/A | #N/A | 1.36 | 0.86 | 1.13 | 0.57 |
| 718809 | #N/A | #N/A | #N/A | #N/A | 0.89 | 0.43 |
| 720955 | 0.26 | 0.06 | 0.41 | 0.08 | 0.55 | 0.18 |
| 721064 | 0.26 | 0.06 | 0.41 | 0.08 | 0.48 | 0.13 |
| 722997 | 2.16 | 0.84 | 1.06 | 0.60 | 0.47 | 0.11 |
| 727704 | 2.68 | 0.93 | 0.54 | 0.16 | 2.61 | 0.94 |
| 730243 | 2.16 | 0.84 | 1.06 | 0.60 | 0.78 | 0.35 |
| 732829 | 2.68 | 0.93 | 0.54 | 0.16 | 0.50 | 0.14 |
| 733611 | 1.68 | 0.72 | #N/A | #N/A | 2.36 | 0.92 |
| 734796 | 1.68 | 0.72 | #N/A | #N/A | 1.39 | 0.70 |
| 734894 | 1.91 | 0.80 | 0.68 | 0.28 | 0.57 | 0.19 |
| 740466 | 1.02 | 0.48 | 0.87 | 0.51 | 0.79 | 0.36 |
| 742035 | 1.59 | 0.71 | 0.86 | 0.49 | 0.67 | 0.26 |
| 744304 | 2.50 | 0.91 | 0.85 | 0.48 | 0.68 | 0.27 |
| 748350 | 2.50 | 0.91 | 0.85 | 0.48 | 0.80 | 0.37 |
| 748606 | 1.07 | 0.49 | 0.84 | 0.47 | 0.43 | 0.09 |
| 753228 | 1.07 | 0.49 | 0.84 | 0.47 | 1.31 | 0.66 |
| 753668 | 2.54 | 0.91 | 0.83 | 0.43 | 1.00 | 0.51 |
| 755548 | 0.61 | 0.28 | 0.99 | 0.56 | 2.70 | 0.95 |
| 763867 | 2.54 | 0.91 | 0.83 | 0.43 | 0.38 | 0.06 |
| 764171 | 1.14 | 0.53 | 0.78 | 0.42 | 0.94 | 0.47 |
| 766496 | 1.14 | 0.53 | 0.78 | 0.42 | 1.20 | 0.60 |
| 766729 | 0.38 | 0.13 | 1.02 | 0.62 | 0.44 | 0.09 |
| 768396 | 0.33 | 0.11 | 0.45 | 0.09 | #N/A | #N/A |
| 768505 | 0.33 | 0.11 | 0.45 | 0.09 | #N/A | #N/A |
| 769931 | 0.33 | 0.11 | 0.45 | 0.09 | 1.13 | 0.56 |
| 770325 | 0.33 | 0.11 | 0.45 | 0.09 | 0.65 | 0.25 |
| 771447 | 0.33 | 0.11 | 0.45 | 0.09 | 0.68 | 0.26 |
| 775775 | 2.78 | 0.95 | 0.94 | 0.50 | 0.49 | 0.13 |
| 778714 | 2.21 | 0.86 | #N/A | #N/A | 0.58 | 0.19 |
| 780199 | 1.82 | 0.78 | 4.87 | 1.00 | 1.66 | 0.80 |
| 780383 | 1.95 | 0.80 | 1.03 | 0.68 | 0.92 | 0.45 |
| 781943 | 1.95 | 0.80 | 1.03 | 0.68 | 1.81 | 0.83 |
| 782034 | 2.75 | 0.94 | 1.22 | 0.75 | 0.67 | 0.25 |
| 786198 | 2.75 | 0.94 | 1.22 | 0.75 | 0.90 | 0.43 |
| 786299 | 2.31 | 0.89 | 0.70 | 0.30 | 0.57 | 0.19 |

|        |      |      |      |      |      |      |
|--------|------|------|------|------|------|------|
| 790062 | 2.31 | 0.89 | 0.70 | 0.30 | 2.96 | 0.96 |
| 791841 | 1.93 | 0.80 | 1.04 | 0.67 | 0.67 | 0.26 |
| 792341 | 1.91 | 0.80 | 1.36 | 0.78 | 0.32 | 0.02 |
| 796186 | 1.34 | 0.60 | 1.14 | 0.76 | 0.36 | 0.04 |
| 807741 | #N/A | #N/A | #N/A | #N/A | 1.01 | 0.51 |
| 810374 | 1.80 | 0.76 | 0.57 | 0.17 | 0.64 | 0.24 |
| 810558 | 0.89 | 0.41 | 0.41 | 0.09 | 1.28 | 0.64 |
| 812843 | 0.89 | 0.41 | 0.41 | 0.09 | 0.49 | 0.14 |
| 813186 | 1.52 | 0.67 | 0.71 | 0.32 | 1.16 | 0.58 |
| 816553 | 1.52 | 0.67 | 0.71 | 0.32 | 0.87 | 0.40 |
| 817518 | #N/A | #N/A | 0.60 | 0.20 | 1.74 | 0.81 |
| 818488 | 2.23 | 0.87 | 0.72 | 0.34 | 1.74 | 0.82 |
| 818701 | 1.24 | 0.57 | 0.46 | 0.09 | 1.82 | 0.83 |
| 820816 | 1.24 | 0.57 | 0.46 | 0.09 | 1.33 | 0.66 |
| 825768 | 2.87 | 0.95 | 0.72 | 0.33 | 0.64 | 0.25 |
| 825902 | 3.07 | 0.96 | 0.79 | 0.42 | 0.80 | 0.37 |
| 829049 | 3.07 | 0.96 | 0.79 | 0.42 | 1.26 | 0.64 |
| 830269 | 1.55 | 0.68 | 1.16 | 0.59 | 1.31 | 0.67 |
| 830621 | 1.43 | 0.65 | 1.60 | 0.91 | 0.95 | 0.46 |
| 831926 | 1.03 | 0.48 | #N/A | #N/A | 1.78 | 0.83 |
| 832851 | 0.57 | 0.26 | 0.43 | 0.07 | 0.40 | 0.06 |
| 836220 | 1.57 | 0.70 | #N/A | #N/A | 1.34 | 0.68 |
| 838053 | 0.57 | 0.26 | 0.43 | 0.07 | 0.76 | 0.34 |
| 840384 | 1.57 | 0.70 | #N/A | #N/A | 0.63 | 0.23 |
| 840596 | 1.80 | 0.76 | 0.69 | 0.30 | 1.01 | 0.51 |
| 843441 | 1.80 | 0.76 | 0.69 | 0.30 | 1.47 | 0.73 |
| 843561 | 1.36 | 0.62 | 2.50 | 0.98 | 1.84 | 0.83 |
| 844944 | #N/A | #N/A | #N/A | #N/A | 3.00 | 0.96 |
| 845944 | #N/A | #N/A | #N/A | #N/A | 0.70 | 0.28 |
| 850192 | #N/A | #N/A | #N/A | #N/A | 0.74 | 0.32 |
| 850266 | 2.02 | 0.81 | #N/A | #N/A | 1.99 | 0.87 |
| 852389 | 2.02 | 0.81 | #N/A | #N/A | 0.86 | 0.41 |
| 852525 | 1.08 | 0.49 | #N/A | #N/A | 0.78 | 0.33 |
| 854532 | 1.08 | 0.49 | #N/A | #N/A | #N/A | #N/A |
| 854271 | 2.31 | 0.88 | #N/A | #N/A | 1.79 | 0.82 |
| 856806 | 2.31 | 0.88 | #N/A | #N/A | 2.58 | 0.94 |
| 856890 | #N/A | #N/A | 0.98 | 0.57 | 1.15 | 0.58 |
| 857991 | #N/A | #N/A | #N/A | #N/A | 2.85 | 0.96 |
| 859136 | #N/A | #N/A | 0.98 | 0.57 | 2.25 | 0.90 |
| 861512 | 2.54 | 0.92 | 0.80 | 0.44 | 1.44 | 0.73 |
| 864700 | 2.06 | 0.84 | 1.22 | 0.79 | 0.42 | 0.07 |
| 865004 | 2.16 | 0.86 | 0.72 | 0.32 | 1.27 | 0.65 |
| 870555 | 2.16 | 0.86 | 0.72 | 0.32 | 0.51 | 0.14 |
| 871028 | 0.94 | 0.45 | 1.80 | 0.91 | 2.07 | 0.88 |
| 871293 | #N/A | #N/A | #N/A | #N/A | 1.56 | 0.76 |
| 886857 | 1.33 | 0.59 | #N/A | #N/A | 0.66 | 0.26 |
| 888903 | 2.18 | 0.86 | 0.98 | 0.62 | 0.68 | 0.26 |
| 892484 | 1.60 | 0.71 | #N/A | #N/A | 0.67 | 0.26 |
| 893919 | 1.03 | 0.47 | 0.75 | 0.40 | 0.81 | 0.36 |
| 894110 | #N/A | #N/A | 0.80 | 0.44 | 2.12 | 0.89 |
| 898997 | #N/A | #N/A | 0.80 | 0.44 | 0.61 | 0.21 |

|         |      |      |      |      |      |      |
|---------|------|------|------|------|------|------|
| 899542  | #N/A | #N/A | 0.75 | 0.36 | 0.69 | 0.28 |
| 903772  | 0.67 | 0.32 | 1.07 | 0.70 | 1.97 | 0.86 |
| 905446  | #N/A | #N/A | 0.69 | 0.29 | 0.50 | 0.13 |
| 906991  | 0.57 | 0.24 | 0.65 | 0.29 | 2.55 | 0.94 |
| 909429  | #N/A | #N/A | 0.69 | 0.29 | 1.45 | 0.73 |
| 911292  | 0.57 | 0.24 | 0.65 | 0.29 | 0.55 | 0.17 |
| 913493  | 1.65 | 0.71 | 1.08 | 0.71 | 0.95 | 0.47 |
| 914308  | 0.60 | 0.26 | 1.23 | 0.73 | 0.84 | 0.39 |
| 915919  | 0.60 | 0.26 | 1.23 | 0.73 | 1.10 | 0.54 |
| 917145  | 0.64 | 0.29 | 0.95 | 0.60 | 0.82 | 0.37 |
| 921638  | 1.26 | 0.58 | 1.22 | 0.75 | 0.46 | 0.11 |
| 921917  | 1.86 | 0.77 | 0.90 | 0.54 | 0.51 | 0.15 |
| 926137  | 1.86 | 0.77 | 0.90 | 0.54 | 0.65 | 0.25 |
| 926561  | 0.53 | 0.21 | #N/A | #N/A | #N/A | #N/A |
| 926284  | 1.14 | 0.52 | #N/A | #N/A | 1.69 | 0.80 |
| 929089  | 1.14 | 0.52 | #N/A | #N/A | 0.48 | 0.13 |
| 929461  | 0.41 | 0.14 | 0.59 | 0.19 | 0.46 | 0.11 |
| 933201  | 0.41 | 0.14 | 0.59 | 0.19 | 0.20 | 0.01 |
| 935129  | 1.73 | 0.75 | 0.93 | 0.56 | 0.71 | 0.30 |
| 935227  | 2.69 | 0.93 | 0.81 | 0.43 | 1.80 | 0.83 |
| 937484  | 2.69 | 0.93 | 0.81 | 0.43 | 1.09 | 0.54 |
| 937886  | 2.01 | 0.82 | 1.17 | 0.65 | 0.47 | 0.12 |
| 941048  | 2.35 | 0.89 | 1.00 | 0.56 | 0.89 | 0.43 |
| 943665  | #N/A | #N/A | #N/A | #N/A | 1.13 | 0.58 |
| 945429  | 2.35 | 0.89 | 1.00 | 0.56 | #N/A | #N/A |
| 948447  | 0.83 | 0.38 | 1.10 | 0.72 | 0.63 | 0.23 |
| 948509  | 1.45 | 0.64 | 0.51 | 0.12 | 0.52 | 0.15 |
| 952392  | 1.45 | 0.64 | 0.51 | 0.12 | 0.63 | 0.23 |
| 953972  | 1.10 | 0.50 | #N/A | #N/A | 0.54 | 0.16 |
| 954938  | 1.20 | 0.54 | 1.31 | 0.76 | 1.68 | 0.80 |
| 957389  | 1.03 | 0.48 | 0.85 | 0.48 | 0.47 | 0.12 |
| 957749  | 1.05 | 0.48 | 0.93 | 0.57 | 1.09 | 0.56 |
| 958672  | 1.57 | 0.69 | #N/A | #N/A | 0.98 | 0.49 |
| 960077  | 1.04 | 0.47 | 1.00 | 0.66 | 1.94 | 0.86 |
| 963097  | 1.04 | 0.47 | 1.00 | 0.66 | 0.53 | 0.16 |
| 963852  | #N/A | #N/A | #N/A | #N/A | 2.16 | 0.89 |
| 963981  | 1.95 | 0.80 | 0.89 | 0.49 | 0.75 | 0.33 |
| 966480  | 1.95 | 0.80 | 0.89 | 0.49 | 0.97 | 0.49 |
| 966548  | #N/A | #N/A | 1.41 | 0.88 | 0.73 | 0.32 |
| 968124  | 0.31 | 0.08 | 1.12 | 0.51 | 0.91 | 0.43 |
| 969981  | 1.24 | 0.57 | 0.69 | 0.29 | 0.76 | 0.33 |
| 971799  | 1.15 | 0.54 | 1.92 | 0.96 | 0.79 | 0.34 |
| 974622  | 0.39 | 0.16 | 0.32 | 0.03 | 0.99 | 0.50 |
| 976708  | 2.54 | 0.91 | 0.80 | 0.42 | 1.96 | 0.86 |
| 977512  | 1.52 | 0.68 | #N/A | #N/A | 1.01 | 0.51 |
| 993943  | 1.37 | 0.62 | 0.79 | 0.42 | 1.02 | 0.51 |
| 994233  | 0.56 | 0.26 | 1.20 | 0.80 | 0.56 | 0.18 |
| 996020  | 1.97 | 0.80 | 1.07 | 0.59 | #N/A | #N/A |
| 999868  | 1.97 | 0.80 | 1.07 | 0.59 | 1.06 | 0.54 |
| 1000095 | #N/A | #N/A | #N/A | #N/A | 0.58 | 0.19 |
| 1002501 | 2.11 | 0.83 | 0.61 | 0.21 | 0.82 | 0.36 |

|         |      |      |      |      |      |      |
|---------|------|------|------|------|------|------|
| 1005134 | 2.11 | 0.83 | 0.61 | 0.21 | 1.33 | 0.68 |
| 1005656 | #N/A | #N/A | #N/A | #N/A | 0.78 | 0.35 |
| 1008680 | 1.16 | 0.53 | 0.82 | 0.46 | 0.54 | 0.17 |
| 1008386 | #N/A | #N/A | #N/A | #N/A | 1.10 | 0.56 |
| 1009825 | #N/A | #N/A | #N/A | #N/A | 1.29 | 0.65 |
| 1011264 | 1.08 | 0.50 | 0.59 | 0.20 | 1.40 | 0.70 |
| 1011580 | 0.55 | 0.23 | 0.81 | 0.42 | 0.50 | 0.15 |
| 1012950 | 0.55 | 0.23 | 0.81 | 0.42 | 0.82 | 0.38 |
| 1013467 | 0.44 | 0.19 | 0.89 | 0.52 | 0.87 | 0.41 |
| 1014392 | 0.58 | 0.24 | 0.62 | 0.25 | 0.83 | 0.39 |
| 1016992 | #N/A | #N/A | #N/A | #N/A | 0.70 | 0.29 |
| 1020411 | 1.52 | 0.66 | 0.83 | 0.47 | 1.23 | 0.62 |
| 1021655 | 2.53 | 0.91 | 0.85 | 0.49 | 1.21 | 0.62 |
| 1021998 | 1.49 | 0.65 | 0.67 | 0.28 | 1.17 | 0.60 |
| 1023502 | 1.94 | 0.80 | 1.18 | 0.63 | 1.27 | 0.64 |
| 1025061 | 2.54 | 0.92 | #N/A | #N/A | 0.43 | 0.09 |
| 1030541 | 1.16 | 0.52 | 0.85 | 0.48 | 1.50 | 0.75 |
| 1035054 | 1.16 | 0.52 | 0.85 | 0.48 | 0.99 | 0.51 |
| 1035222 | 2.65 | 0.93 | 0.86 | 0.50 | 2.45 | 0.92 |
| 1036864 | 2.65 | 0.93 | 0.86 | 0.50 | 1.35 | 0.68 |
| 1038097 | 1.96 | 0.81 | 0.92 | 0.53 | 1.17 | 0.60 |
| 1038271 | #N/A | #N/A | #N/A | #N/A | 0.62 | 0.23 |
| 1039690 | 0.34 | 0.10 | 0.82 | 0.46 | 1.26 | 0.65 |
| 1042952 | 0.34 | 0.10 | 0.82 | 0.46 | 0.46 | 0.11 |
| 1043137 | 0.74 | 0.34 | 0.77 | 0.41 | 0.38 | 0.06 |
| 1045631 | #N/A | #N/A | #N/A | #N/A | 0.33 | 0.02 |
| 1050450 | 1.39 | 0.63 | 0.67 | 0.28 | 0.87 | 0.41 |
| 1052614 | 1.45 | 0.64 | 0.96 | 0.61 | 0.63 | 0.23 |
| 1055883 | 1.45 | 0.64 | 0.96 | 0.61 | 1.46 | 0.74 |
| 1057591 | 0.74 | 0.34 | 0.46 | 0.09 | 1.02 | 0.51 |
| 1058167 | 2.04 | 0.83 | 1.10 | 0.66 | 1.13 | 0.58 |
| 1061222 | 2.04 | 0.83 | 1.10 | 0.66 | 0.78 | 0.35 |
| 1061496 | 3.32 | 0.97 | 0.83 | 0.46 | 0.94 | 0.47 |
| 1067416 | 3.32 | 0.97 | 0.83 | 0.46 | 0.78 | 0.34 |
| 1068381 | 1.88 | 0.78 | 0.84 | 0.48 | 1.44 | 0.71 |
| 1068720 | 2.52 | 0.91 | 4.56 | 0.99 | 0.92 | 0.45 |
| 1071871 | 1.26 | 0.57 | 0.67 | 0.29 | 1.28 | 0.66 |
| 1072737 | #N/A | #N/A | #N/A | #N/A | 2.46 | 0.93 |
| 1073726 | 1.81 | 0.76 | 0.79 | 0.41 | 1.21 | 0.60 |
| 1077844 | 1.12 | 0.51 | 1.60 | 0.90 | 0.75 | 0.33 |
| 1078018 | #N/A | #N/A | 1.81 | 0.94 | 2.22 | 0.90 |
| 1079039 | 0.34 | 0.10 | 0.50 | 0.12 | 0.43 | 0.08 |
| 1081119 | 1.59 | 0.69 | 0.89 | 0.53 | 0.31 | 0.02 |
| 1086985 | 1.59 | 0.69 | 0.89 | 0.53 | 1.10 | 0.56 |
| 1088934 | 2.56 | 0.92 | 0.42 | 0.07 | 1.38 | 0.69 |
| 1089211 | 1.59 | 0.69 | 0.62 | 0.26 | 0.97 | 0.47 |
| 1090425 | 2.19 | 0.86 | #N/A | #N/A | 0.80 | 0.37 |
| 1092733 | 1.76 | 0.76 | 0.93 | 0.53 | 2.29 | 0.91 |
| 1095170 | 1.76 | 0.76 | 0.93 | 0.53 | 0.65 | 0.25 |
| 1103420 | 0.82 | 0.39 | #N/A | #N/A | 1.03 | 0.51 |
| 1104939 | 1.33 | 0.61 | 0.74 | 0.35 | 0.59 | 0.20 |

|         |      |      |      |      |      |      |
|---------|------|------|------|------|------|------|
| 1104995 | 0.84 | 0.40 | #N/A | #N/A | 0.82 | 0.38 |
| 1106087 | 2.02 | 0.81 | 1.06 | 0.67 | 0.97 | 0.48 |
| 1109839 | 2.02 | 0.81 | 1.06 | 0.67 | 1.47 | 0.74 |
| 1111684 | 1.65 | 0.71 | 0.92 | 0.56 | 0.90 | 0.43 |
| 1112472 | 1.57 | 0.70 | 1.10 | 0.73 | 1.85 | 0.84 |
| 1114425 | #N/A | #N/A | 0.50 | 0.17 | 0.99 | 0.50 |
| 1120223 | #N/A | #N/A | 0.50 | 0.17 | 0.50 | 0.14 |
| 1120599 | 3.75 | 0.99 | 1.04 | 0.66 | 0.49 | 0.14 |
| 1125618 | 3.75 | 0.99 | 1.04 | 0.66 | 2.49 | 0.93 |
| 1125424 | 3.06 | 0.97 | 1.09 | 0.73 | 3.69 | 0.99 |
| 1126260 | 3.05 | 0.96 | 0.64 | 0.24 | 1.46 | 0.72 |
| 1129364 | 3.05 | 0.96 | 0.64 | 0.24 | 1.51 | 0.75 |
| 1130813 | 2.23 | 0.86 | 0.71 | 0.31 | 1.75 | 0.81 |
| 1133060 | #N/A | #N/A | #N/A | #N/A | 0.98 | 0.48 |
| 1133250 | 1.03 | 0.47 | 1.10 | 0.71 | 0.89 | 0.43 |
| 1140466 | 1.03 | 0.47 | 1.10 | 0.71 | 0.43 | 0.08 |
| 1144831 | #N/A | #N/A | #N/A | #N/A | 0.46 | 0.10 |
| 1146025 | 1.18 | 0.54 | 0.81 | 0.42 | 1.53 | 0.76 |
| 1147168 | 2.55 | 0.91 | 1.16 | 0.77 | 1.84 | 0.83 |
| 1147368 | 2.22 | 0.86 | 1.29 | 0.84 | 0.64 | 0.25 |
| 1149940 | 0.84 | 0.38 | #N/A | #N/A | 1.63 | 0.78 |
| 1151172 | 0.84 | 0.38 | #N/A | #N/A | 0.93 | 0.46 |
| 1151792 | 1.35 | 0.61 | 1.18 | 0.75 | 0.46 | 0.11 |
| 1154205 | #N/A | #N/A | 0.50 | 0.12 | 0.92 | 0.45 |
| 1159597 | 1.16 | 0.53 | 0.71 | 0.32 | 0.87 | 0.42 |
| 1161995 | 1.99 | 0.82 | 0.60 | 0.20 | 2.16 | 0.89 |
| 1162946 | 0.37 | 0.11 | 0.52 | 0.13 | 0.77 | 0.34 |
| 1167203 | 1.96 | 0.81 | 0.93 | 0.58 | 0.67 | 0.25 |
| 1170132 | 1.96 | 0.81 | 0.93 | 0.58 | 0.98 | 0.48 |
| 1170315 | 1.06 | 0.48 | #N/A | #N/A | 0.66 | 0.25 |
| 1172375 | 1.99 | 0.82 | 0.93 | 0.49 | 1.04 | 0.51 |
| 1176327 | 2.18 | 0.86 | 0.66 | 0.27 | 0.92 | 0.45 |
| 1181248 | 2.18 | 0.86 | 0.66 | 0.27 | 0.46 | 0.10 |
| 1182742 | 1.00 | 0.46 | 0.74 | 0.35 | 0.66 | 0.25 |
| 1184246 | #N/A | #N/A | 0.98 | 0.49 | 0.60 | 0.21 |
| 1185877 | 0.79 | 0.38 | 1.72 | 0.70 | 0.74 | 0.32 |
| 1186055 | 0.52 | 0.21 | 1.13 | 0.55 | 4.08 | 0.99 |
| 1188929 | 1.62 | 0.70 | 1.05 | 0.63 | 0.94 | 0.45 |
| 1189187 | #N/A | #N/A | #N/A | #N/A | 1.22 | 0.63 |
| 1191720 | #N/A | #N/A | #N/A | #N/A | 1.35 | 0.69 |
| 1191994 | 1.00 | 0.46 | 1.39 | 0.69 | 0.36 | 0.04 |
| 1194973 | 0.30 | 0.07 | 0.72 | 0.37 | 0.41 | 0.07 |
| 1195400 | 1.31 | 0.60 | #N/A | #N/A | 1.46 | 0.73 |
| 1196667 | 2.53 | 0.92 | 0.61 | 0.20 | 0.90 | 0.44 |
| 1200541 | 2.53 | 0.92 | 0.61 | 0.20 | 0.77 | 0.33 |
| 1202831 | 1.47 | 0.66 | 0.77 | 0.40 | 0.91 | 0.44 |
| 1204485 | #N/A | #N/A | 1.02 | 0.60 | 0.88 | 0.41 |
| 1212426 | 1.89 | 0.79 | #N/A | #N/A | 1.22 | 0.63 |
| 1213602 | #N/A | #N/A | 1.02 | 0.60 | 1.40 | 0.71 |
| 1214830 | 1.89 | 0.79 | #N/A | #N/A | 1.64 | 0.78 |
| 1215004 | 0.53 | 0.25 | #N/A | #N/A | 0.88 | 0.41 |

|         |      |      |      |      |      |      |
|---------|------|------|------|------|------|------|
| 1217770 | 2.35 | 0.89 | 1.34 | 0.72 | 1.06 | 0.54 |
| 1220936 | 2.35 | 0.89 | 1.34 | 0.72 | 0.72 | 0.31 |
| 1221100 | 2.08 | 0.84 | #N/A | #N/A | 0.58 | 0.20 |
| 1223319 | 2.08 | 0.84 | #N/A | #N/A | 1.45 | 0.71 |
| 1223462 | 2.79 | 0.95 | 1.24 | 0.76 | 0.84 | 0.38 |
| 1225154 | #N/A | #N/A | 0.68 | 0.29 | 1.20 | 0.61 |
| 1228291 | #N/A | #N/A | 0.68 | 0.29 | 1.05 | 0.53 |
| 1228904 | 1.00 | 0.45 | 1.49 | 0.87 | 0.82 | 0.38 |
| 1229337 | 1.63 | 0.72 | 0.48 | 0.15 | 2.48 | 0.93 |
| 1233184 | 1.63 | 0.72 | 0.48 | 0.15 | 0.46 | 0.11 |
| 1236113 | 0.96 | 0.46 | 0.81 | 0.44 | 0.68 | 0.28 |
| 1237992 | 0.53 | 0.22 | 0.59 | 0.21 | 0.43 | 0.09 |
| 1239812 | #N/A | #N/A | #N/A | #N/A | 0.80 | 0.36 |
| 1239948 | 0.70 | 0.32 | 1.00 | 0.55 | 1.25 | 0.63 |
| 1241192 | 0.16 | 0.02 | 0.39 | 0.06 | 0.44 | 0.09 |
| 1245746 | 0.16 | 0.02 | 0.39 | 0.06 | 0.43 | 0.09 |
| 1247970 | 0.68 | 0.33 | 0.99 | 0.57 | 0.90 | 0.44 |
| 1248142 | 2.13 | 0.85 | 0.74 | 0.35 | 0.73 | 0.31 |
| 1251622 | 2.13 | 0.85 | 0.74 | 0.35 | 1.39 | 0.71 |
| 1254489 | 0.60 | 0.28 | #N/A | #N/A | 0.28 | 0.01 |
| 1254925 | 1.96 | 0.81 | #N/A | #N/A | 0.88 | 0.41 |
| 1257346 | 2.29 | 0.88 | 0.78 | 0.40 | 1.03 | 0.51 |
| 1259697 | 2.29 | 0.88 | 0.78 | 0.40 | 1.48 | 0.74 |
| 1261259 | #N/A | #N/A | 0.70 | 0.30 | 0.68 | 0.26 |
| 1262955 | 1.84 | 0.77 | 0.79 | 0.41 | 0.68 | 0.27 |
| 1266146 | #N/A | #N/A | #N/A | #N/A | 0.49 | 0.13 |
| 1266783 | #N/A | #N/A | #N/A | #N/A | 0.52 | 0.16 |
| 1266354 | 1.41 | 0.63 | 0.60 | 0.21 | 0.82 | 0.38 |
| 1269390 | 1.41 | 0.63 | 0.60 | 0.21 | 0.74 | 0.31 |
| 1270721 | 0.48 | 0.21 | 0.40 | 0.06 | 0.75 | 0.33 |
| 1272073 | #N/A | #N/A | 0.57 | 0.20 | 1.28 | 0.66 |
| 1272774 | #N/A | #N/A | #N/A | #N/A | 2.06 | 0.88 |
| 1272222 | 1.22 | 0.55 | #N/A | #N/A | 1.53 | 0.76 |
| 1276200 | 1.22 | 0.55 | #N/A | #N/A | 1.85 | 0.84 |
| 1276642 | 3.05 | 0.96 | 0.94 | 0.56 | 1.46 | 0.74 |
| 1278425 | 3.05 | 0.96 | 0.94 | 0.56 | 1.41 | 0.71 |
| 1283787 | 1.11 | 0.51 | 0.99 | 0.61 | 1.38 | 0.70 |
| 1284057 | 2.35 | 0.89 | 0.91 | 0.56 | 0.72 | 0.29 |
| 1288203 | 1.39 | 0.61 | 0.90 | 0.55 | 3.07 | 0.97 |
| 1292108 | 1.39 | 0.61 | 0.90 | 0.55 | 0.64 | 0.23 |
| 1292360 | 1.91 | 0.80 | 1.22 | 0.74 | 1.80 | 0.84 |
| 1293357 | 3.75 | 0.99 | 0.92 | 0.55 | 2.41 | 0.93 |
| 1295388 | 3.75 | 0.99 | 0.92 | 0.55 | 1.84 | 0.83 |
| 1294824 | 0.42 | 0.15 | 0.80 | 0.42 | 1.16 | 0.59 |
| 1295586 | 1.59 | 0.69 | 1.09 | 0.61 | 0.95 | 0.46 |
| 1297025 | 1.06 | 0.48 | 0.53 | 0.15 | 1.24 | 0.63 |
| 1300999 | 1.06 | 0.48 | 0.53 | 0.15 | 0.67 | 0.25 |
| 1301543 | 0.75 | 0.35 | 0.91 | 0.54 | 0.42 | 0.07 |
| 1302101 | 0.40 | 0.15 | 0.81 | 0.45 | 0.38 | 0.05 |
| 1305060 | 0.75 | 0.35 | 0.91 | 0.54 | 0.93 | 0.46 |
| 1311663 | 0.43 | 0.19 | #N/A | #N/A | 0.27 | 0.01 |

|         |      |      |      |      |      |      |
|---------|------|------|------|------|------|------|
| 1314880 | 1.47 | 0.66 | 1.25 | 0.74 | 0.92 | 0.45 |
| 1315314 | 1.81 | 0.77 | #N/A | #N/A | 1.04 | 0.52 |
| 1318034 | 0.82 | 0.39 | 0.58 | 0.17 | 1.13 | 0.58 |
| 1319375 | 1.93 | 0.79 | 1.04 | 0.65 | 3.00 | 0.96 |
| 1321929 | 1.93 | 0.79 | 1.04 | 0.65 | 1.47 | 0.74 |
| 1321617 | 2.59 | 0.92 | #N/A | #N/A | 1.70 | 0.81 |
| 1323374 | 2.59 | 0.92 | #N/A | #N/A | 0.99 | 0.49 |
| 1323442 | #N/A | #N/A | #N/A | #N/A | 1.22 | 0.62 |
| 1324465 | #N/A | #N/A | 0.69 | 0.32 | 1.58 | 0.76 |
| 1325489 | #N/A | #N/A | #N/A | #N/A | 0.58 | 0.20 |
| 1328689 | #N/A | #N/A | 0.69 | 0.32 | 2.43 | 0.92 |
| 1330015 | #N/A | #N/A | #N/A | #N/A | 0.44 | 0.09 |
| 1330028 | #N/A | #N/A | #N/A | #N/A | 0.38 | 0.05 |
| 1332829 | 0.60 | 0.27 | 1.00 | 0.63 | #N/A | #N/A |
| 1332971 | 2.15 | 0.85 | 0.82 | 0.43 | 2.59 | 0.94 |
| 1336941 | 2.15 | 0.85 | 0.82 | 0.43 | 0.89 | 0.43 |
| 1337762 | 1.27 | 0.58 | 0.85 | 0.45 | 1.95 | 0.86 |
| 1339374 | 1.03 | 0.47 | 0.79 | 0.41 | 1.42 | 0.70 |
| 1340707 | 1.30 | 0.58 | #N/A | #N/A | 0.87 | 0.40 |
| 1344229 | 1.38 | 0.61 | 1.13 | 0.73 | 0.67 | 0.26 |
| 1344505 | 0.44 | 0.16 | 0.22 | 0.01 | 1.00 | 0.50 |
| 1346027 | 0.44 | 0.16 | 0.22 | 0.01 | 0.38 | 0.05 |
| 1345664 | 1.63 | 0.71 | 0.47 | 0.11 | 0.46 | 0.10 |
| 1352341 | 1.63 | 0.71 | 0.47 | 0.11 | 0.51 | 0.14 |
| 1352170 | 0.23 | 0.04 | #N/A | #N/A | 0.75 | 0.33 |
| 1354621 | 2.75 | 0.94 | 0.84 | 0.48 | 0.95 | 0.46 |
| 1354817 | #N/A | #N/A | #N/A | #N/A | 0.44 | 0.09 |
| 1357357 | #N/A | #N/A | #N/A | #N/A | 0.83 | 0.39 |
| 1357568 | 0.82 | 0.37 | 0.61 | 0.23 | 0.70 | 0.28 |
| 1360786 | 0.82 | 0.37 | 0.61 | 0.23 | #N/A | #N/A |
| 1361108 | #N/A | #N/A | #N/A | #N/A | 0.72 | 0.30 |
| 1364890 | #N/A | #N/A | #N/A | #N/A | 0.64 | 0.24 |
| 1365060 | 2.29 | 0.88 | #N/A | #N/A | 3.31 | 0.98 |
| 1366252 | 2.11 | 0.85 | 0.81 | 0.44 | #N/A | #N/A |
| 1367361 | 1.71 | 0.74 | 1.06 | 0.70 | 4.70 | 1.00 |
| 1369374 | 2.11 | 0.85 | 0.81 | 0.44 | 1.07 | 0.53 |
| 1379584 | 1.71 | 0.74 | 1.06 | 0.70 | 0.38 | 0.05 |
| 1380043 | 1.63 | 0.71 | #N/A | #N/A | 0.83 | 0.37 |
| 1382307 | 1.93 | 0.80 | 1.19 | 0.80 | 1.39 | 0.71 |
| 1384764 | 1.93 | 0.80 | 1.19 | 0.80 | 0.88 | 0.42 |
| 1385274 | #N/A | #N/A | #N/A | #N/A | 1.51 | 0.75 |
| 1386504 | #N/A | #N/A | #N/A | #N/A | 4.27 | 1.00 |
| 1388363 | #N/A | #N/A | #N/A | #N/A | 1.29 | 0.66 |
| 1393167 | #N/A | #N/A | #N/A | #N/A | 0.38 | 0.05 |
| 1393324 | 3.83 | 0.99 | 0.90 | 0.50 | 1.33 | 0.68 |
| 1397805 | 3.83 | 0.99 | 0.90 | 0.50 | 0.47 | 0.12 |
| 1397571 | 0.26 | 0.05 | 0.74 | 0.36 | #N/A | #N/A |
| 1398014 | 1.43 | 0.63 | 0.71 | 0.35 | 0.77 | 0.35 |
| 1399530 | 1.43 | 0.63 | 0.71 | 0.35 | 1.52 | 0.74 |
| 1399694 | 0.74 | 0.34 | 0.52 | 0.13 | 1.08 | 0.54 |
| 1402552 | 0.74 | 0.34 | 0.52 | 0.13 | 0.35 | 0.03 |



|         |      |      |      |      |      |      |
|---------|------|------|------|------|------|------|
| 1404161 | 1.01 | 0.46 | 1.60 | 0.90 | 0.93 | 0.45 |
| 1404433 | 1.23 | 0.57 | 0.70 | 0.31 | 0.77 | 0.33 |
| 1407452 | 0.52 | 0.21 | 0.99 | 0.59 | 0.47 | 0.12 |
| 1409613 | 1.19 | 0.53 | 0.88 | 0.52 | 1.21 | 0.61 |
| 1410439 | 1.78 | 0.76 | 1.00 | 0.58 | 1.77 | 0.82 |
| 1414260 | 1.78 | 0.76 | 1.00 | 0.58 | 0.57 | 0.19 |
| 1415157 | 1.71 | 0.74 | 0.63 | 0.23 | 1.94 | 0.86 |
| 1415196 | 1.91 | 0.78 | 1.17 | 0.57 | 0.94 | 0.45 |
| 1418356 | 1.91 | 0.78 | 1.17 | 0.57 | 1.15 | 0.59 |
| 1418536 | 1.32 | 0.60 | 0.85 | 0.48 | 0.95 | 0.46 |
| 1420417 | 1.55 | 0.68 | 0.56 | 0.20 | 1.93 | 0.86 |
| 1422471 | 1.55 | 0.68 | 0.56 | 0.20 | 0.88 | 0.42 |
| 1424674 | #N/A | #N/A | #N/A | #N/A | 0.78 | 0.34 |
| 1424806 | 1.37 | 0.61 | 0.51 | 0.13 | 0.47 | 0.12 |
| 1427417 | 0.93 | 0.43 | 0.57 | 0.23 | 2.06 | 0.88 |
| 1428340 | #N/A | #N/A | 0.97 | 0.61 | 1.62 | 0.78 |
| 1429174 | #N/A | #N/A | 0.66 | 0.28 | 1.68 | 0.80 |
| 1431882 | #N/A | #N/A | 0.66 | 0.28 | 1.66 | 0.78 |
| 1431954 | 1.86 | 0.78 | 0.58 | 0.21 | 1.36 | 0.68 |
| 1434486 | 1.55 | 0.69 | 0.58 | 0.18 | 1.65 | 0.78 |
| 1435860 | 1.86 | 0.78 | 0.58 | 0.21 | 0.66 | 0.26 |
| 1436574 | 1.55 | 0.69 | 0.58 | 0.18 | 2.93 | 0.96 |
| 1438001 | 2.48 | 0.90 | 0.55 | 0.15 | 1.63 | 0.78 |
| 1438101 | 0.80 | 0.39 | 0.70 | 0.34 | 0.55 | 0.17 |
| 1441419 | 1.40 | 0.62 | 0.81 | 0.42 | 0.60 | 0.20 |
| 1443699 | 1.32 | 0.60 | #N/A | #N/A | 0.49 | 0.13 |
| 1445829 | 1.71 | 0.74 | 0.67 | 0.28 | 1.36 | 0.69 |
| 1450059 | 1.71 | 0.74 | 0.67 | 0.28 | 0.72 | 0.31 |
| 1450184 | 0.38 | 0.15 | 0.77 | 0.41 | 0.26 | 0.01 |
| 1452904 | 0.38 | 0.15 | 0.77 | 0.41 | 0.95 | 0.46 |
| 1453296 | #N/A | #N/A | #N/A | #N/A | 0.59 | 0.21 |
| 1455028 | #N/A | #N/A | #N/A | #N/A | 1.47 | 0.73 |
| 1456297 | 0.94 | 0.45 | 0.96 | 0.60 | 0.44 | 0.09 |
| 1456681 | 0.94 | 0.45 | 0.96 | 0.60 | 0.30 | 0.01 |
| 1459714 | 1.73 | 0.75 | #N/A | #N/A | 1.69 | 0.81 |
| 1462344 | 0.48 | 0.19 | 0.60 | 0.22 | 0.40 | 0.06 |
| 1466439 | 0.47 | 0.18 | 0.49 | 0.12 | 0.28 | 0.01 |
| 1468559 | 0.48 | 0.19 | 0.60 | 0.22 | 0.31 | 0.02 |
| 1469691 | 0.47 | 0.18 | 0.49 | 0.12 | 1.64 | 0.80 |
| 1470404 | 1.07 | 0.49 | 0.94 | 0.52 | 1.81 | 0.83 |
| 1470486 | #N/A | #N/A | #N/A | #N/A | 1.66 | 0.79 |
| 1471434 | #N/A | #N/A | #N/A | #N/A | #N/A | #N/A |
| 1471534 | 1.69 | 0.72 | 0.87 | 0.50 | 0.74 | 0.33 |
| 1474758 | 1.69 | 0.72 | 0.87 | 0.50 | 0.46 | 0.12 |
| 1474960 | 2.30 | 0.87 | 0.71 | 0.31 | 1.90 | 0.85 |
| 1478343 | 2.30 | 0.87 | 0.71 | 0.31 | 1.07 | 0.55 |
| 1480147 | 1.77 | 0.75 | 1.21 | 0.49 | 1.39 | 0.69 |
| 1480818 | 1.94 | 0.79 | #N/A | #N/A | 2.45 | 0.93 |
| 1481071 | 3.75 | 0.99 | 0.87 | 0.48 | 1.21 | 0.60 |
| 1483462 | #N/A | #N/A | #N/A | #N/A | 3.22 | 0.97 |
| 1483781 | #N/A | #N/A | #N/A | #N/A | 1.21 | 0.62 |

|         |      |      |      |      |      |      |
|---------|------|------|------|------|------|------|
| 1485552 | #N/A | #N/A | 0.69 | 0.29 | 1.07 | 0.55 |
| 1487528 | 0.44 | 0.19 | 1.58 | 0.92 | 0.71 | 0.29 |
| 1490220 | 0.44 | 0.19 | 1.58 | 0.92 | 0.15 | 0.00 |
| 1491061 | 1.36 | 0.62 | 0.81 | 0.44 | 0.73 | 0.31 |
| 1492399 | 0.36 | 0.15 | 0.51 | 0.16 | 0.55 | 0.17 |
| 1495843 | 1.34 | 0.60 | 1.20 | 0.80 | 0.52 | 0.16 |
| 1496151 | 1.41 | 0.62 | 0.69 | 0.35 | #N/A | #N/A |
| 1496777 | #N/A | #N/A | #N/A | #N/A | 1.53 | 0.74 |
| 1499321 | #N/A | #N/A | #N/A | #N/A | 0.57 | 0.19 |
| 1499382 | 1.24 | 0.56 | 1.08 | 0.68 | #N/A | #N/A |
| 1501433 | 0.90 | 0.41 | 1.09 | 0.72 | 1.10 | 0.57 |
| 1503299 | 0.57 | 0.24 | 0.84 | 0.44 | 0.76 | 0.32 |
| 1506591 | 1.04 | 0.47 | 1.00 | 0.63 | 2.65 | 0.95 |
| 1509699 | 1.04 | 0.47 | 1.00 | 0.63 | 1.00 | 0.50 |
| 1510840 | 1.04 | 0.49 | 0.85 | 0.45 | 1.12 | 0.56 |
| 1511614 | 1.43 | 0.63 | 1.30 | 0.58 | 1.04 | 0.51 |
| 1513589 | 1.04 | 0.49 | 0.85 | 0.45 | 0.89 | 0.42 |
| 1517114 | 1.80 | 0.76 | 1.00 | 0.63 | 1.07 | 0.54 |
| 1519642 | 1.79 | 0.75 | 0.53 | 0.16 | 0.85 | 0.38 |
| 1523590 | 0.87 | 0.41 | 0.73 | 0.34 | 1.04 | 0.52 |
| 1524613 | 0.35 | 0.12 | 0.52 | 0.13 | 0.59 | 0.20 |
| 1525074 | 0.58 | 0.25 | 0.71 | 0.32 | 0.42 | 0.08 |
| 1531690 | 0.58 | 0.25 | 0.71 | 0.32 | 0.50 | 0.13 |
| 150300  | 2.05 | 0.82 | 2.47 | 0.98 | 1.98 | 0.86 |
| 148721  | #N/A | #N/A | #N/A | #N/A | 0.79 | 0.35 |
| 148598  | 1.90 | 0.79 | 1.17 | 0.78 | 1.54 | 0.75 |
| 147978  | 1.52 | 0.68 | #N/A | #N/A | 1.69 | 0.80 |
| 145906  | 1.52 | 0.68 | #N/A | #N/A | 1.02 | 0.52 |
| 145333  | 0.75 | 0.34 | 0.77 | 0.38 | 1.27 | 0.65 |
| 143891  | 0.11 | 0.01 | 0.39 | 0.06 | 0.31 | 0.02 |
| 140892  | 0.42 | 0.15 | 1.00 | 0.65 | 0.14 | 0.00 |
| 138918  | 0.42 | 0.15 | 1.00 | 0.65 | 0.38 | 0.05 |
| 136629  | 1.33 | 0.59 | 1.90 | 0.96 | 2.16 | 0.90 |
| 135234  | 1.83 | 0.78 | 0.85 | 0.48 | 1.23 | 0.63 |
| 132551  | 1.89 | 0.78 | #N/A | #N/A | 1.29 | 0.66 |
| 130561  | 2.00 | 0.81 | #N/A | #N/A | 0.64 | 0.23 |
| 128303  | 2.00 | 0.81 | #N/A | #N/A | 1.79 | 0.82 |
| 128284  | #N/A | #N/A | 1.25 | 0.79 | 0.84 | 0.38 |
| 124737  | #N/A | #N/A | 1.25 | 0.79 | 0.62 | 0.22 |
| 122798  | 0.69 | 0.31 | 0.38 | 0.05 | 0.20 | 0.01 |
| 124670  | 0.69 | 0.31 | 0.38 | 0.05 | 1.62 | 0.78 |
| 122310  | 1.80 | 0.75 | 0.51 | 0.12 | 1.23 | 0.61 |
| 120498  | 1.80 | 0.75 | 0.51 | 0.12 | 1.86 | 0.85 |
| 118617  | #N/A | #N/A | #N/A | #N/A | 0.78 | 0.35 |
| 116970  | 1.04 | 0.47 | 3.83 | 0.99 | 1.62 | 0.78 |
| 115800  | 2.15 | 0.86 | 1.09 | 0.72 | 0.71 | 0.29 |
| 108504  | 2.15 | 0.86 | 1.09 | 0.72 | 0.55 | 0.17 |
| 107907  | 1.51 | 0.66 | 0.84 | 0.48 | 0.67 | 0.26 |
| 102581  | 1.51 | 0.66 | 0.84 | 0.48 | 0.50 | 0.13 |
| 102323  | 0.70 | 0.33 | 1.38 | 0.66 | 0.82 | 0.38 |
| 101251  | 0.54 | 0.24 | 1.21 | 0.76 | 0.78 | 0.34 |

|       |      |      |      |      |      |      |
|-------|------|------|------|------|------|------|
| 99129 | 1.55 | 0.67 | 1.08 | 0.69 | 1.50 | 0.74 |
| 96858 | 1.55 | 0.67 | 1.08 | 0.69 | 1.24 | 0.62 |
| 96578 | 1.29 | 0.58 | 1.49 | 0.91 | 1.48 | 0.73 |
| 93905 | 2.27 | 0.88 | 0.81 | 0.45 | 0.53 | 0.16 |
| 89852 | #N/A | #N/A | 0.85 | 0.47 | 0.82 | 0.38 |
| 86598 | 0.27 | 0.07 | 1.05 | 0.69 | 0.50 | 0.14 |
| 86149 | 0.27 | 0.07 | 1.05 | 0.69 | 0.81 | 0.36 |
| 85045 | 0.27 | 0.07 | 1.05 | 0.69 | 0.14 | 0.00 |
| 83050 | #N/A | #N/A | #N/A | #N/A | 0.82 | 0.38 |
| 81407 | 0.99 | 0.45 | 0.87 | 0.50 | 0.59 | 0.20 |
| 81145 | 2.64 | 0.93 | 0.70 | 0.31 | 5.01 | 1.00 |
| 79636 | 2.64 | 0.93 | 0.70 | 0.31 | 1.31 | 0.65 |
| 79456 | 0.76 | 0.36 | 0.76 | 0.37 | 0.48 | 0.12 |
| 77431 | 1.17 | 0.54 | 0.72 | 0.33 | 1.58 | 0.76 |
| 75327 | #N/A | #N/A | 0.91 | 0.56 | 0.62 | 0.22 |
| 73348 | 2.81 | 0.94 | #N/A | #N/A | 0.64 | 0.24 |
| 70257 | 0.17 | 0.02 | 0.38 | 0.05 | 1.02 | 0.52 |
| 68840 | 0.17 | 0.02 | 0.38 | 0.05 | 0.19 | 0.01 |
| 67629 | 0.17 | 0.02 | 0.38 | 0.05 | 0.41 | 0.07 |
| 65385 | 0.66 | 0.30 | 0.81 | 0.44 | 2.10 | 0.89 |
| 64709 | 1.03 | 0.48 | #N/A | #N/A | #N/A | #N/A |
| 64090 | 1.16 | 0.53 | 0.80 | 0.43 | 1.00 | 0.50 |
| 59670 | 1.36 | 0.61 | 0.95 | 0.59 | 0.93 | 0.46 |
| 59148 | 1.72 | 0.75 | 1.02 | 0.49 | 2.38 | 0.93 |
| 58100 | #N/A | #N/A | 0.94 | 0.58 | 1.29 | 0.66 |
| 53901 | #N/A | #N/A | 0.94 | 0.58 | 0.86 | 0.39 |
| 52721 | 0.29 | 0.06 | 0.37 | 0.10 | 0.33 | 0.02 |
| 48471 | #N/A | #N/A | 0.97 | 0.61 | 0.50 | 0.15 |
| 48373 | 1.55 | 0.69 | 1.11 | 0.73 | 0.70 | 0.28 |
| 45020 | 1.55 | 0.69 | 1.11 | 0.73 | 2.27 | 0.91 |
| 44925 | #N/A | #N/A | 0.86 | 0.50 | 2.07 | 0.88 |
| 42400 | #N/A | #N/A | 0.86 | 0.50 | 3.67 | 0.99 |
| 42960 | 1.33 | 0.60 | 0.70 | 0.31 | 2.83 | 0.96 |
| 40046 | 1.33 | 0.60 | 0.70 | 0.31 | 0.84 | 0.40 |
| 36535 | 1.93 | 0.80 | 0.97 | 0.62 | 0.89 | 0.43 |
| 36254 | 1.51 | 0.66 | 0.61 | 0.20 | 0.78 | 0.36 |
| 31694 | 1.51 | 0.66 | 0.61 | 0.20 | 0.44 | 0.09 |
| 29797 | #N/A | #N/A | #N/A | #N/A | 1.18 | 0.61 |
| 29543 | #N/A | #N/A | #N/A | #N/A | 0.88 | 0.43 |
| 27206 | 0.98 | 0.44 | 5.33 | 1.00 | 3.55 | 0.98 |
| 26189 | #N/A | #N/A | #N/A | #N/A | 3.69 | 0.99 |
| 25646 | 0.98 | 0.44 | 5.33 | 1.00 | 3.65 | 0.99 |
| 21537 | #N/A | #N/A | #N/A | #N/A | 0.81 | 0.36 |
| 21097 | #N/A | #N/A | #N/A | #N/A | 3.11 | 0.97 |
| 17845 | #N/A | #N/A | #N/A | #N/A | 0.64 | 0.23 |
| 14415 | 1.78 | 0.75 | 0.72 | 0.33 | 0.97 | 0.47 |
| 7230  | 0.94 | 0.43 | 0.86 | 0.50 | 1.25 | 0.64 |
| 6464  | 1.00 | 0.46 | 0.90 | 0.55 | 0.74 | 0.31 |
| 5345  | 1.00 | 0.46 | 0.90 | 0.55 | 0.90 | 0.42 |
| 4464  | 1.00 | 0.46 | 0.90 | 0.55 | 0.80 | 0.36 |
| 4185  | 1.00 | 0.46 | 0.90 | 0.55 | 1.02 | 0.51 |

|        |      |      |      |      |      |      |
|--------|------|------|------|------|------|------|
| #N/A   | 0.79 | 0.36 | #N/A | #N/A | 0.89 | 0.42 |
| 264    | 0.79 | 0.36 | #N/A | #N/A | 0.64 | 0.24 |
| 155807 | 0.79 | 0.36 | 1.48 | 0.89 | 0.73 | 0.30 |
| 157497 | #N/A | #N/A | #N/A | #N/A | 1.14 | 0.57 |
| 157735 | 2.75 | 0.93 | 0.89 | 0.51 | 0.94 | 0.45 |
| 160274 | 2.75 | 0.93 | 0.89 | 0.51 | 2.48 | 0.93 |
| 162441 | 1.38 | 0.63 | 1.16 | 0.77 | 1.11 | 0.57 |
| 164284 | 1.58 | 0.69 | 0.74 | 0.35 | 0.94 | 0.47 |
| 166236 | 0.99 | 0.45 | 1.60 | 0.85 | 1.42 | 0.70 |
| 166082 | 0.87 | 0.40 | #N/A | #N/A | 1.24 | 0.64 |
| 167807 | 2.78 | 0.95 | #N/A | #N/A | 0.52 | 0.15 |
| 172491 | 2.78 | 0.95 | #N/A | #N/A | 2.56 | 0.94 |
| 172633 | 1.43 | 0.65 | 1.04 | 0.69 | #N/A | #N/A |
| 176011 | 1.38 | 0.62 | 0.48 | 0.10 | 3.01 | 0.97 |
| 178430 | 1.59 | 0.71 | 0.91 | 0.56 | 1.29 | 0.66 |
| 182277 | 3.03 | 0.96 | 1.49 | 0.86 | 0.51 | 0.14 |
| 184218 | #N/A | #N/A | #N/A | #N/A | 1.43 | 0.72 |
| 186774 | 2.48 | 0.91 | #N/A | #N/A | 1.87 | 0.85 |
| 189310 | 1.30 | 0.58 | 0.86 | 0.50 | 1.02 | 0.52 |
| 189502 | 1.93 | 0.79 | #N/A | #N/A | 0.71 | 0.29 |
| 191958 | 1.78 | 0.77 | 0.64 | 0.24 | 2.56 | 0.94 |
| 194272 | 1.84 | 0.76 | 0.65 | 0.25 | #N/A | #N/A |
| 194229 | 1.78 | 0.77 | 0.64 | 0.24 | 1.37 | 0.70 |
| 196516 | 1.84 | 0.76 | 0.65 | 0.25 | 0.80 | 0.35 |
| 198518 | 0.93 | 0.42 | 0.96 | 0.56 | 0.59 | 0.21 |
| 200874 | 1.72 | 0.73 | #N/A | #N/A | 0.72 | 0.30 |
| 201935 | 2.00 | 0.81 | 0.84 | 0.48 | 2.12 | 0.89 |
| 204962 | 1.58 | 0.71 | #N/A | #N/A | 1.97 | 0.86 |
| 206833 | 2.58 | 0.92 | 1.04 | 0.67 | 0.74 | 0.31 |
| 207643 | 1.36 | 0.60 | 1.07 | 0.57 | 0.85 | 0.41 |
| 208978 | 2.37 | 0.89 | 1.03 | 0.67 | 1.05 | 0.52 |
| 210691 | 0.53 | 0.22 | 0.43 | 0.09 | 1.51 | 0.73 |
| 212586 | #N/A | #N/A | #N/A | #N/A | 1.54 | 0.75 |
| 213897 | #N/A | #N/A | #N/A | #N/A | 1.39 | 0.69 |
| 214075 | 2.63 | 0.93 | 0.60 | 0.23 | 1.82 | 0.83 |
| 217692 | 2.63 | 0.93 | 0.60 | 0.23 | 1.13 | 0.56 |
| 218056 | 1.04 | 0.47 | 0.59 | 0.19 | 0.53 | 0.15 |
| 222402 | 1.04 | 0.47 | 0.59 | 0.19 | 1.05 | 0.54 |
| 223075 | #N/A | #N/A | 0.46 | 0.11 | 0.96 | 0.48 |
| 223366 | 0.28 | 0.09 | 0.60 | 0.20 | 0.41 | 0.08 |
| 226853 | 0.28 | 0.09 | 0.60 | 0.20 | 0.95 | 0.46 |
| 226857 | #N/A | #N/A | #N/A | #N/A | 1.70 | 0.80 |
| 228455 | 3.14 | 0.97 | 0.96 | 0.57 | 2.14 | 0.89 |
| 231986 | 3.14 | 0.97 | 0.96 | 0.57 | 0.87 | 0.42 |
| 234739 | 0.85 | 0.39 | 0.88 | 0.52 | 1.07 | 0.53 |
| 235490 | 1.23 | 0.57 | 0.73 | 0.38 | 1.60 | 0.78 |
| 235769 | #N/A | #N/A | 1.13 | 0.49 | 0.52 | 0.15 |
| 237569 | 0.48 | 0.19 | 0.88 | 0.50 | 1.09 | 0.56 |
| 238459 | #N/A | #N/A | 0.43 | 0.12 | 1.41 | 0.70 |
| 240031 | 0.61 | 0.29 | 0.53 | 0.14 | 0.96 | 0.47 |
| 243610 | 1.06 | 0.50 | 0.70 | 0.31 | 1.24 | 0.62 |

|        |      |      |      |      |      |      |
|--------|------|------|------|------|------|------|
| 243809 | 1.75 | 0.76 | #N/A | #N/A | 0.45 | 0.10 |
| 246981 | 1.29 | 0.58 | 0.82 | 0.45 | 0.84 | 0.40 |
| 253661 | 1.03 | 0.47 | 1.08 | 0.70 | 0.52 | 0.15 |
| 253970 | #N/A | #N/A | #N/A | #N/A | 2.12 | 0.89 |
| 256133 | #N/A | #N/A | #N/A | #N/A | 1.36 | 0.67 |
| 256374 | 0.65 | 0.30 | 0.78 | 0.41 | 0.42 | 0.08 |
| 258736 | 0.62 | 0.27 | 0.58 | 0.20 | 0.87 | 0.42 |
| 262051 | 1.06 | 0.48 | 1.01 | 0.65 | 1.26 | 0.65 |
| 264891 | 0.27 | 0.07 | 0.93 | 0.58 | 0.40 | 0.07 |
| 266511 | 0.20 | 0.03 | 0.38 | 0.05 | 0.39 | 0.06 |
| 269421 | 0.35 | 0.10 | 0.50 | 0.12 | 0.37 | 0.05 |
| 270735 | 1.92 | 0.79 | 1.02 | 0.67 | 1.18 | 0.61 |
| 272089 | 1.92 | 0.79 | 1.02 | 0.67 | 2.51 | 0.94 |
| 273884 | 1.41 | 0.63 | 0.66 | 0.27 | 0.65 | 0.25 |
| 276151 | 1.24 | 0.56 | 1.18 | 0.79 | 0.52 | 0.15 |
| 278162 | 0.45 | 0.16 | #N/A | #N/A | 0.59 | 0.21 |
| 278296 | 1.12 | 0.51 | #N/A | #N/A | 0.88 | 0.43 |
| 279928 | 0.96 | 0.44 | 0.86 | 0.48 | 1.07 | 0.55 |
| 282364 | 0.96 | 0.44 | 0.86 | 0.48 | 1.12 | 0.57 |
| 282703 | #N/A | #N/A | #N/A | #N/A | 0.01 | 0.00 |
| 285239 | #N/A | #N/A | #N/A | #N/A | 0.50 | 0.15 |
| 291701 | 1.96 | 0.81 | #N/A | #N/A | 2.82 | 0.96 |
| 290797 | 0.57 | 0.24 | 1.04 | 0.65 | 0.63 | 0.23 |
| 292549 | 2.20 | 0.86 | 0.42 | 0.10 | 1.70 | 0.80 |
| 294811 | 1.96 | 0.81 | #N/A | #N/A | 0.43 | 0.09 |
| 297999 | 0.27 | 0.09 | 0.82 | 0.45 | #N/A | #N/A |
| 301614 | 1.52 | 0.68 | 0.54 | 0.17 | 1.03 | 0.52 |
| 301945 | 1.28 | 0.57 | 1.04 | 0.57 | #N/A | #N/A |
| 303193 | 1.28 | 0.57 | 1.04 | 0.57 | 0.95 | 0.47 |
| 305589 | 0.19 | 0.04 | #N/A | #N/A | 0.36 | 0.04 |
| 307192 | 0.20 | 0.03 | 1.04 | 0.68 | 0.42 | 0.07 |
| 308409 | 0.52 | 0.25 | 0.82 | 0.43 | 0.50 | 0.15 |
| 312586 | 1.48 | 0.66 | 1.08 | 0.66 | 1.03 | 0.52 |
| 314530 | #N/A | #N/A | #N/A | #N/A | 0.88 | 0.43 |
| 316803 | 1.72 | 0.74 | 0.71 | 0.34 | 0.84 | 0.40 |
| 319548 | 1.72 | 0.74 | 0.71 | 0.34 | 0.49 | 0.13 |
| 321842 | 1.66 | 0.73 | 1.79 | 0.82 | 1.05 | 0.52 |
| 324091 | #N/A | #N/A | #N/A | #N/A | 0.50 | 0.15 |
| 324268 | 1.33 | 0.59 | #N/A | #N/A | 0.67 | 0.25 |
| 326170 | 1.08 | 0.50 | 0.49 | 0.12 | 2.79 | 0.95 |
| 327447 | 1.33 | 0.59 | #N/A | #N/A | 2.88 | 0.96 |
| 327615 | #N/A | #N/A | #N/A | #N/A | 4.21 | 1.00 |
| 330203 | #N/A | #N/A | #N/A | #N/A | 0.77 | 0.34 |
| #N/A   | 2.43 | 0.90 | 0.77 | 0.39 | 3.38 | 0.98 |
| 332302 | 1.27 | 0.59 | 1.44 | 0.89 | 1.29 | 0.66 |
| 333172 | 0.52 | 0.21 | 0.56 | 0.18 | 0.77 | 0.32 |
| 335942 | 1.13 | 0.51 | 0.55 | 0.16 | 0.84 | 0.38 |
| 339468 | 1.13 | 0.51 | 0.55 | 0.16 | 0.75 | 0.33 |
| 339860 | #N/A | #N/A | #N/A | #N/A | 0.55 | 0.17 |
| 343228 | 0.61 | 0.27 | #N/A | #N/A | 2.68 | 0.95 |
| 343316 | 3.21 | 0.97 | 1.05 | 0.59 | 1.08 | 0.54 |

|        |      |      |      |      |      |      |
|--------|------|------|------|------|------|------|
| 347908 | #N/A | #N/A | 0.65 | 0.25 | 3.11 | 0.97 |
| 348725 | 1.43 | 0.65 | 0.77 | 0.39 | 1.52 | 0.75 |
| 351178 | 1.43 | 0.65 | 0.77 | 0.39 | 0.80 | 0.36 |
| 353232 | 0.51 | 0.21 | 0.97 | 0.61 | 1.54 | 0.76 |
| 355465 | 0.38 | 0.16 | #N/A | #N/A | 1.21 | 0.61 |
| 357726 | 0.38 | 0.16 | #N/A | #N/A | 0.96 | 0.48 |
| 358101 | 3.11 | 0.96 | 0.71 | 0.32 | 1.84 | 0.84 |
| 360310 | 3.11 | 0.96 | 0.71 | 0.32 | 1.07 | 0.53 |
| 360498 | 1.07 | 0.49 | 0.90 | 0.54 | 1.45 | 0.73 |
| 363698 | 1.07 | 0.49 | 0.90 | 0.54 | 0.44 | 0.09 |
| 366513 | 1.33 | 0.60 | #N/A | #N/A | 0.99 | 0.50 |
| 367424 | 3.01 | 0.96 | 0.82 | 0.43 | 3.25 | 0.98 |
| 367834 | 2.05 | 0.82 | #N/A | #N/A | 0.69 | 0.28 |
| 373230 | 2.05 | 0.82 | #N/A | #N/A | 1.18 | 0.60 |
| 373444 | 1.55 | 0.68 | 0.94 | 0.58 | 1.06 | 0.54 |
| #N/A   | #N/A | #N/A | #N/A | #N/A | 0.38 | 0.05 |
| 375211 | 0.37 | 0.11 | 0.63 | 0.24 | 1.16 | 0.59 |
| 378758 | #N/A | #N/A | #N/A | #N/A | 0.54 | 0.17 |
| 382591 | #N/A | #N/A | 0.85 | 0.47 | 0.42 | 0.08 |
| 387791 | #N/A | #N/A | 0.85 | 0.47 | 0.85 | 0.40 |
| 387928 | 1.24 | 0.56 | 0.92 | 0.51 | 0.72 | 0.29 |
| 390586 | 1.55 | 0.69 | 0.95 | 0.59 | 0.48 | 0.12 |
| 394288 | 1.59 | 0.71 | #N/A | #N/A | 1.08 | 0.56 |
| 395344 | 1.09 | 0.49 | 0.47 | 0.10 | 1.58 | 0.77 |
| 397649 | 1.09 | 0.49 | 0.47 | 0.10 | 0.37 | 0.04 |
| 397948 | 1.91 | 0.80 | 0.52 | 0.16 | 0.80 | 0.36 |
| 399492 | 1.76 | 0.76 | 1.17 | 0.61 | 1.98 | 0.87 |
| 400863 | 1.76 | 0.76 | 1.17 | 0.61 | 3.41 | 0.98 |
| 401865 | 1.91 | 0.80 | 0.52 | 0.16 | 1.57 | 0.77 |
| 402715 | 1.76 | 0.76 | 1.17 | 0.61 | 1.85 | 0.84 |
| 402867 | 2.46 | 0.91 | 0.71 | 0.34 | 0.66 | 0.25 |
| 406383 | 2.46 | 0.91 | 0.71 | 0.34 | 0.61 | 0.23 |
| 407338 | 2.19 | 0.86 | 1.06 | 0.69 | 0.91 | 0.43 |
| 412614 | 2.19 | 0.86 | 1.06 | 0.69 | 0.38 | 0.05 |
| 413390 | 1.59 | 0.69 | 1.18 | 0.69 | 0.85 | 0.41 |
| 415550 | 1.59 | 0.69 | 1.18 | 0.69 | 1.04 | 0.52 |
| 416466 | 1.83 | 0.76 | #N/A | #N/A | 2.98 | 0.96 |
| 420705 | 1.97 | 0.80 | 0.59 | 0.20 | 0.39 | 0.05 |
| 421111 | 0.58 | 0.26 | 0.76 | 0.38 | 1.48 | 0.74 |
| 424307 | 0.58 | 0.26 | 0.76 | 0.38 | 0.47 | 0.12 |
| 425184 | 0.80 | 0.36 | 1.07 | 0.71 | 0.43 | 0.08 |
| 433954 | 2.22 | 0.85 | #N/A | #N/A | 0.62 | 0.23 |
| 437263 | #N/A | #N/A | 0.66 | 0.26 | 1.50 | 0.73 |
| 437948 | 0.88 | 0.40 | 0.98 | 0.59 | 1.26 | 0.63 |
| 440967 | 0.69 | 0.31 | 0.74 | 0.37 | 0.46 | 0.12 |
| 441369 | 1.58 | 0.68 | 1.14 | 0.72 | 2.17 | 0.89 |
| 443752 | 0.20 | 0.03 | 1.01 | 0.66 | 0.52 | 0.16 |
| 450558 | 1.75 | 0.74 | #N/A | #N/A | 1.26 | 0.65 |
| 453230 | 1.75 | 0.74 | #N/A | #N/A | 1.06 | 0.55 |
| 454914 | 1.25 | 0.56 | 0.48 | 0.11 | 0.65 | 0.24 |
| 455141 | 1.81 | 0.76 | 1.16 | 0.78 | #N/A | #N/A |

|        |      |      |      |      |      |      |
|--------|------|------|------|------|------|------|
| 457600 | 1.81 | 0.76 | 1.16 | 0.78 | 0.87 | 0.42 |
| 457801 | 1.68 | 0.72 | 1.13 | 0.75 | 0.59 | 0.20 |
| 460521 | 0.82 | 0.37 | 0.67 | 0.27 | 0.98 | 0.49 |
| 462861 | 0.82 | 0.37 | 0.67 | 0.27 | 2.82 | 0.96 |
| 462963 | #N/A | #N/A | 1.13 | 0.75 | 1.29 | 0.65 |
| 466020 | #N/A | #N/A | 1.13 | 0.75 | 0.66 | 0.25 |
| 466203 | 1.70 | 0.72 | 0.99 | 0.53 | 1.18 | 0.59 |
| 468811 | 1.70 | 0.72 | 0.99 | 0.53 | 0.99 | 0.49 |
| 469681 | 2.15 | 0.86 | 0.81 | 0.44 | 0.70 | 0.28 |
| 472652 | 2.22 | 0.85 | #N/A | #N/A | 1.15 | 0.59 |
| 474036 | 2.22 | 0.85 | #N/A | #N/A | 2.89 | 0.96 |
| 476223 | 2.22 | 0.85 | #N/A | #N/A | 1.45 | 0.73 |
| 476340 | 0.76 | 0.34 | 0.54 | 0.18 | #N/A | #N/A |
| 483320 | 2.63 | 0.93 | #N/A | #N/A | 1.35 | 0.68 |
| 487188 | 2.63 | 0.93 | #N/A | #N/A | 0.82 | 0.36 |
| 488852 | 0.89 | 0.42 | 0.61 | 0.20 | 1.19 | 0.61 |
| 491525 | 0.30 | 0.09 | 0.74 | 0.35 | #N/A | #N/A |
| 492851 | 0.56 | 0.26 | #N/A | #N/A | 0.59 | 0.20 |
| 499342 | 2.36 | 0.88 | 1.16 | 0.75 | 0.73 | 0.31 |
| 500625 | 1.95 | 0.80 | 0.44 | 0.09 | 1.17 | 0.58 |
| 503079 | 0.91 | 0.43 | 0.89 | 0.53 | 2.03 | 0.87 |
| 509793 | 0.65 | 0.29 | 1.22 | 0.81 | 0.49 | 0.12 |
| 512101 | 0.66 | 0.30 | 0.69 | 0.31 | 0.41 | 0.08 |
| 517454 | 1.37 | 0.61 | 0.59 | 0.19 | 0.39 | 0.06 |
| 520766 | 0.75 | 0.34 | 0.80 | 0.42 | 0.35 | 0.03 |
| 521024 | 1.45 | 0.64 | 0.55 | 0.16 | 2.08 | 0.89 |
| 525754 | 1.45 | 0.64 | 0.55 | 0.16 | 0.71 | 0.29 |
| 526646 | 1.39 | 0.63 | #N/A | #N/A | 2.29 | 0.91 |
| 529413 | 1.93 | 0.80 | #N/A | #N/A | 0.65 | 0.26 |
| 529525 | 3.28 | 0.98 | #N/A | #N/A | 0.41 | 0.07 |
| 538274 | 3.28 | 0.98 | #N/A | #N/A | 1.17 | 0.58 |
| 538429 | 1.20 | 0.54 | 1.26 | 0.83 | 1.12 | 0.56 |
| 539459 | 1.88 | 0.79 | 1.16 | 0.68 | #N/A | #N/A |
| 545050 | 1.88 | 0.79 | 1.16 | 0.68 | 0.62 | 0.23 |
| 546409 | 0.20 | 0.03 | 0.51 | 0.14 | 0.45 | 0.10 |
| 548074 | #N/A | #N/A | 0.86 | 0.47 | 0.74 | 0.32 |
| 549512 | 0.41 | 0.14 | #N/A | #N/A | 1.56 | 0.77 |
| 549719 | 1.02 | 0.47 | 1.30 | 0.85 | #N/A | #N/A |
| 551468 | 0.51 | 0.20 | #N/A | #N/A | 0.83 | 0.39 |
| 553254 | 2.36 | 0.90 | #N/A | #N/A | 2.10 | 0.88 |
| 553329 | 0.88 | 0.41 | 1.07 | 0.66 | 2.13 | 0.89 |
| 556291 | 2.61 | 0.93 | 0.99 | 0.64 | 0.45 | 0.10 |
| 560360 | 2.61 | 0.93 | 0.99 | 0.64 | 1.93 | 0.85 |
| 561700 | 2.33 | 0.89 | 1.12 | 0.75 | 1.26 | 0.63 |
| 566650 | 1.51 | 0.66 | 0.95 | 0.58 | 2.00 | 0.87 |
| 568754 | 1.83 | 0.78 | 0.92 | 0.56 | 1.75 | 0.82 |
| 571518 | #N/A | #N/A | #N/A | #N/A | 0.89 | 0.42 |
| 576520 | #N/A | #N/A | #N/A | #N/A | 0.66 | 0.25 |
| 148453 | 2.05 | 0.83 | 1.26 | 0.69 | #N/A | #N/A |
| 145108 | 2.05 | 0.83 | 1.26 | 0.69 | 1.14 | 0.57 |
| 134515 | #N/A | #N/A | 1.68 | 0.69 | 1.54 | 0.76 |

|      |        |      |      |      |      |      |      |
|------|--------|------|------|------|------|------|------|
|      | 134290 | 1.13 | 0.52 | 0.82 | 0.46 | 0.68 | 0.27 |
|      | 130975 | 1.98 | 0.81 | 1.50 | 0.86 | 1.03 | 0.52 |
|      | 129904 | #N/A | #N/A | #N/A | #N/A | 1.66 | 0.79 |
|      | 128888 | 2.10 | 0.84 | 0.83 | 0.46 | 0.54 | 0.16 |
|      | 123101 | 2.88 | 0.95 | 0.60 | 0.20 | 0.93 | 0.46 |
|      | 118478 | 2.22 | 0.86 | 0.90 | 0.55 | 0.70 | 0.27 |
|      | 115102 | 2.22 | 0.86 | 0.90 | 0.55 | 1.43 | 0.72 |
|      | 113979 | #N/A | #N/A | #N/A | #N/A | 1.35 | 0.69 |
| #N/A | #N/A   | #N/A | #N/A | #N/A | #N/A | 0.98 | 0.48 |
|      | 111087 | 2.91 | 0.95 | 1.12 | 0.54 | 1.67 | 0.80 |
|      | 107846 | 2.91 | 0.95 | 1.12 | 0.54 | 0.92 | 0.44 |
| #N/A | #N/A   | 0.54 | 0.25 | 0.77 | 0.41 | 3.84 | 0.99 |
|      | 107579 | 1.09 | 0.49 | 0.73 | 0.34 | 0.94 | 0.47 |
|      | 106463 | 1.09 | 0.49 | 0.73 | 0.34 | 1.17 | 0.60 |
|      | 104695 | 0.50 | 0.24 | #N/A | #N/A | 0.67 | 0.27 |
|      | 103977 | 1.07 | 0.48 | #N/A | #N/A | 2.00 | 0.87 |
|      | 101622 | 1.17 | 0.53 | 0.98 | 0.64 | 0.78 | 0.36 |
| #N/A | #N/A   | #N/A | #N/A | #N/A | #N/A | 2.94 | 0.96 |
|      | 100246 | 1.79 | 0.75 | 1.24 | 0.81 | #N/A | #N/A |
|      | 99225  | 1.87 | 0.78 | 0.88 | 0.52 | 1.11 | 0.56 |
|      | 97496  | #N/A | #N/A | #N/A | #N/A | 0.70 | 0.29 |
|      | 93497  | #N/A | #N/A | #N/A | #N/A | 0.52 | 0.15 |
|      | 93374  | 0.58 | 0.24 | 0.53 | 0.21 | 0.47 | 0.11 |
|      | 87845  | 0.58 | 0.24 | 0.53 | 0.21 | 0.56 | 0.18 |
|      | 84143  | 0.90 | 0.42 | 1.22 | 0.78 | 0.65 | 0.24 |
|      | 83873  | 3.06 | 0.96 | 1.75 | 0.58 | 1.12 | 0.57 |
|      | 80417  | 3.06 | 0.96 | 1.75 | 0.58 | 1.98 | 0.86 |
|      | 79342  | 1.60 | 0.69 | 1.20 | 0.80 | 1.49 | 0.73 |
|      | 78053  | 2.48 | 0.90 | 0.75 | 0.36 | 1.82 | 0.83 |
|      | 77986  | #N/A | #N/A | #N/A | #N/A | 2.86 | 0.96 |
|      | 76145  | 0.82 | 0.38 | 0.53 | 0.16 | 0.53 | 0.16 |
|      | 75190  | 0.82 | 0.38 | 0.53 | 0.16 | 0.65 | 0.25 |
|      | 69113  | 0.82 | 0.38 | 0.53 | 0.16 | 0.44 | 0.10 |
|      | 68696  | 1.22 | 0.55 | 0.70 | 0.31 | 0.41 | 0.07 |
| #N/A | #N/A   | #N/A | #N/A | #N/A | #N/A | 0.72 | 0.31 |
| #N/A | #N/A   | #N/A | #N/A | #N/A | #N/A | 0.97 | 0.49 |
| #N/A | #N/A   | #N/A | #N/A | #N/A | #N/A | 0.30 | 0.02 |
|      | 62836  | #N/A | #N/A | #N/A | #N/A | 0.37 | 0.04 |
|      | 57708  | 2.64 | 0.93 | 0.79 | 0.40 | 1.38 | 0.69 |
|      | 55365  | 2.64 | 0.93 | 0.79 | 0.40 | 1.92 | 0.85 |
|      | 53260  | 0.24 | 0.04 | #N/A | #N/A | 0.44 | 0.09 |
|      | 52972  | 0.48 | 0.19 | #N/A | #N/A | 1.29 | 0.66 |
|      | 51007  | 1.48 | 0.66 | 0.91 | 0.53 | 0.88 | 0.42 |
|      | 45720  | 1.48 | 0.66 | 0.91 | 0.53 | 1.02 | 0.50 |
| #N/A | #N/A   | 1.48 | 0.66 | 0.91 | 0.53 | 1.12 | 0.58 |
|      | 44655  | 1.02 | 0.46 | #N/A | #N/A | 2.01 | 0.87 |
|      | 43628  | 1.41 | 0.63 | 0.99 | 0.63 | 0.55 | 0.18 |
|      | 43438  | 1.33 | 0.59 | 0.85 | 0.46 | 1.36 | 0.70 |
|      | 42565  | 2.93 | 0.96 | #N/A | #N/A | 1.22 | 0.62 |
|      | 38843  | 2.93 | 0.96 | #N/A | #N/A | 1.31 | 0.67 |
|      | 38674  | 1.83 | 0.78 | 1.17 | 0.64 | 0.89 | 0.43 |



|        |      |      |      |      |      |      |
|--------|------|------|------|------|------|------|
| 33272  | 1.83 | 0.78 | 1.17 | 0.64 | 0.44 | 0.10 |
| 30058  | 0.68 | 0.30 | 1.03 | 0.68 | 1.44 | 0.73 |
| 29629  | 2.12 | 0.85 | 0.95 | 0.60 | 2.32 | 0.91 |
| 25198  | 2.46 | 0.91 | 0.76 | 0.38 | 1.78 | 0.83 |
| 20847  | 2.46 | 0.91 | 0.76 | 0.38 | 0.92 | 0.45 |
| 18680  | 1.75 | 0.75 | #N/A | #N/A | 1.57 | 0.76 |
| 14793  | 0.52 | 0.21 | 0.94 | 0.57 | 0.59 | 0.20 |
| 14305  | 0.52 | 0.21 | 0.94 | 0.57 | 1.42 | 0.72 |
| 13951  | 2.85 | 0.95 | 0.81 | 0.43 | 3.23 | 0.97 |
| 12259  | 2.65 | 0.93 | 1.12 | 0.75 | 2.54 | 0.94 |
| 10301  | 2.65 | 0.93 | 1.12 | 0.75 | 2.93 | 0.96 |
| 10222  | 1.75 | 0.74 | 0.98 | 0.56 | 1.88 | 0.84 |
| 7565   | 0.79 | 0.36 | 1.00 | 0.64 | 1.17 | 0.60 |
| 5521   | #N/A | #N/A | #N/A | #N/A | 0.58 | 0.20 |
| 3322   | #N/A | #N/A | #N/A | #N/A | 0.83 | 0.39 |
| 3030   | #N/A | #N/A | #N/A | #N/A | 1.03 | 0.52 |
| 1437   | 1.27 | 0.57 | 1.01 | 0.66 | 0.78 | 0.34 |
| 1363   | 0.23 | 0.04 | 0.75 | 0.36 | 0.38 | 0.05 |
| 535    | #N/A | #N/A | #N/A | #N/A | 0.45 | 0.10 |
| #N/A   | #N/A | #N/A | #N/A | #N/A | 1.65 | 0.78 |
| #N/A   | #N/A | #N/A | #N/A | #N/A | 0.40 | 0.06 |
| 149718 | 1.09 | 0.50 | #N/A | #N/A | 2.13 | 0.89 |
| 152529 | 1.75 | 0.75 | 0.84 | 0.48 | 0.56 | 0.18 |
| 152651 | 2.03 | 0.83 | #N/A | #N/A | 1.50 | 0.74 |
| 154307 | 2.03 | 0.83 | #N/A | #N/A | 1.67 | 0.80 |
| 154521 | #N/A | #N/A | #N/A | #N/A | 0.63 | 0.22 |
| 157745 | #N/A | #N/A | #N/A | #N/A | 0.61 | 0.22 |
| 160353 | 1.21 | 0.56 | 0.86 | 0.48 | #N/A | #N/A |
| 161193 | 1.65 | 0.71 | #N/A | #N/A | 1.49 | 0.73 |
| 164739 | 0.74 | 0.35 | #N/A | #N/A | 0.63 | 0.23 |
| 166558 | 0.83 | 0.39 | 0.84 | 0.47 | 0.72 | 0.29 |
| 166738 | 1.54 | 0.68 | #N/A | #N/A | 2.03 | 0.87 |
| 168488 | #N/A | #N/A | #N/A | #N/A | 2.38 | 0.92 |
| 172276 | 1.91 | 0.78 | 0.61 | 0.21 | 0.97 | 0.47 |
| 172528 | 1.73 | 0.74 | 0.65 | 0.25 | 2.05 | 0.87 |
| 174256 | 1.24 | 0.56 | 0.56 | 0.23 | 1.73 | 0.80 |
| 177033 | #N/A | #N/A | #N/A | #N/A | 0.59 | 0.19 |
| 182261 | 1.88 | 0.79 | 0.86 | 0.50 | 1.41 | 0.70 |
| 183118 | 2.06 | 0.82 | 0.57 | 0.17 | 1.32 | 0.66 |
| 191325 | 2.06 | 0.82 | 0.57 | 0.17 | 0.61 | 0.22 |
| 193423 | 1.11 | 0.50 | 0.80 | 0.43 | 0.77 | 0.34 |
| 196301 | 1.92 | 0.80 | 1.17 | 0.72 | 1.27 | 0.65 |
| 199021 | 1.88 | 0.79 | #N/A | #N/A | 0.83 | 0.39 |
| 201696 | #N/A | #N/A | 0.85 | 0.48 | 1.49 | 0.73 |
| 201947 | 1.72 | 0.74 | #N/A | #N/A | 0.65 | 0.25 |
| 201947 | 1.72 | 0.74 | #N/A | #N/A | 0.83 | 0.38 |
| 203730 | #N/A | #N/A | #N/A | #N/A | 1.59 | 0.78 |
| 205735 | 1.00 | 0.45 | 1.62 | 0.92 | 1.73 | 0.80 |
| 208284 | 2.31 | 0.88 | 0.76 | 0.37 | 2.34 | 0.91 |
| 208400 | #N/A | #N/A | #N/A | #N/A | 1.06 | 0.54 |
| 212960 | 2.55 | 0.91 | 1.29 | 0.81 | 0.79 | 0.36 |

|        |      |      |      |      |      |      |
|--------|------|------|------|------|------|------|
| 216406 | 1.45 | 0.64 | 0.64 | 0.27 | 0.76 | 0.33 |
| 216581 | 1.29 | 0.58 | 0.88 | 0.51 | 0.58 | 0.19 |
| 220494 | 0.33 | 0.09 | 0.38 | 0.06 | 0.45 | 0.11 |
| 222077 | 0.68 | 0.32 | 0.67 | 0.27 | 1.89 | 0.85 |
| 224313 | 0.31 | 0.07 | #N/A | #N/A | 0.38 | 0.05 |
| 225007 | #N/A | #N/A | 0.71 | 0.38 | 0.67 | 0.27 |
| 226108 | 0.53 | 0.22 | #N/A | #N/A | 1.27 | 0.63 |
| 227323 | #N/A | #N/A | #N/A | #N/A | 1.97 | 0.86 |
| 227499 | #N/A | #N/A | 1.00 | 0.60 | 1.21 | 0.61 |
| 231702 | #N/A | #N/A | 1.00 | 0.60 | 1.22 | 0.61 |
| 231999 | 2.10 | 0.83 | 0.96 | 0.59 | 0.85 | 0.40 |
| 237238 | 2.10 | 0.83 | 0.96 | 0.59 | 0.33 | 0.03 |
| 237356 | 2.45 | 0.90 | 1.10 | 0.73 | 1.37 | 0.68 |
| 239048 | 2.45 | 0.90 | 1.10 | 0.73 | 2.52 | 0.93 |
| 239102 | #N/A | #N/A | #N/A | #N/A | 1.85 | 0.84 |
| 239980 | 2.09 | 0.84 | 0.85 | 0.49 | 1.31 | 0.66 |
| 242986 | 2.09 | 0.84 | 0.85 | 0.49 | 1.11 | 0.57 |
| 243061 | #N/A | #N/A | #N/A | #N/A | 1.35 | 0.69 |
| 244266 | 1.62 | 0.71 | 0.81 | 0.43 | 2.03 | 0.88 |
| 248121 | 1.62 | 0.71 | 0.81 | 0.43 | 0.85 | 0.41 |
| 248881 | 2.23 | 0.87 | 1.03 | 0.68 | 2.10 | 0.89 |
| 249053 | 2.06 | 0.83 | 1.11 | 0.74 | 1.86 | 0.84 |
| 250151 | 3.50 | 0.99 | 0.92 | 0.54 | 0.98 | 0.49 |
| 253317 | 3.50 | 0.99 | 0.92 | 0.54 | 2.26 | 0.91 |
| 253580 | 1.69 | 0.72 | 0.84 | 0.48 | 1.37 | 0.69 |
| 258843 | 1.40 | 0.64 | 1.11 | 0.72 | 2.00 | 0.87 |
| 265214 | 1.09 | 0.50 | 1.23 | 0.81 | 0.55 | 0.17 |
| 263945 | 0.69 | 0.31 | 1.03 | 0.63 | 0.66 | 0.25 |
| 269504 | #N/A | #N/A | #N/A | #N/A | 0.92 | 0.44 |
| 495449 | 0.88 | 0.40 | 7.44 | 1.00 | 0.70 | 0.28 |
| 495163 | 2.00 | 0.81 | 0.84 | 0.44 | 1.13 | 0.57 |
| 492470 | 2.00 | 0.81 | 0.84 | 0.44 | 1.04 | 0.53 |
| 490699 | 1.23 | 0.55 | 1.11 | 0.74 | 1.52 | 0.75 |
| 489704 | 1.15 | 0.52 | #N/A | #N/A | 1.26 | 0.63 |
| 489438 | 1.35 | 0.60 | 1.09 | 0.65 | 0.68 | 0.28 |
| 483634 | 0.12 | 0.01 | 0.48 | 0.14 | 0.10 | 0.00 |
| 479907 | 0.12 | 0.01 | 0.48 | 0.14 | 0.38 | 0.05 |
| 476310 | 0.43 | 0.16 | 1.13 | 0.71 | 0.46 | 0.11 |
| 476066 | 2.73 | 0.94 | 0.71 | 0.34 | 1.90 | 0.85 |
| 474486 | 2.73 | 0.94 | 0.71 | 0.34 | 1.84 | 0.83 |
| 474273 | 1.84 | 0.77 | 0.63 | 0.25 | 0.88 | 0.42 |
| 469089 | 1.84 | 0.77 | 0.63 | 0.25 | 0.72 | 0.31 |
| 468804 | 0.78 | 0.37 | 0.80 | 0.42 | 0.33 | 0.02 |
| 465040 | 0.78 | 0.37 | 0.80 | 0.42 | 0.80 | 0.37 |
| 464908 | #N/A | #N/A | #N/A | #N/A | 0.65 | 0.24 |
| 461362 | #N/A | #N/A | 0.80 | 0.42 | 1.42 | 0.72 |
| 459107 | #N/A | #N/A | 0.80 | 0.42 | 2.76 | 0.95 |
| 458989 | 2.22 | 0.87 | 0.80 | 0.42 | 1.07 | 0.55 |
| 457160 | 2.22 | 0.87 | 0.80 | 0.42 | 1.40 | 0.70 |
| 457064 | 0.44 | 0.20 | 1.20 | 0.72 | 0.72 | 0.31 |
| 454557 | 4.19 | 0.99 | 0.40 | 0.06 | 1.06 | 0.54 |

|        |      |      |      |      |      |      |
|--------|------|------|------|------|------|------|
| 450194 | 4.19 | 0.99 | 0.40 | 0.06 | 1.72 | 0.81 |
| 450120 | 1.05 | 0.48 | 0.52 | 0.16 | 3.79 | 0.99 |
| 448761 | 0.37 | 0.11 | #N/A | #N/A | 1.35 | 0.67 |
| 446409 | 1.05 | 0.48 | 0.52 | 0.16 | 0.78 | 0.35 |
| 443639 | 1.32 | 0.61 | #N/A | #N/A | 1.11 | 0.58 |
| 441278 | 1.71 | 0.73 | 0.75 | 0.36 | 0.40 | 0.06 |
| 440422 | 0.74 | 0.34 | #N/A | #N/A | 1.19 | 0.61 |
| 439635 | 0.20 | 0.05 | 1.06 | 0.61 | 0.36 | 0.04 |
| 437464 | 0.20 | 0.05 | 1.06 | 0.61 | 0.51 | 0.14 |
| 436567 | 0.94 | 0.43 | #N/A | #N/A | 1.34 | 0.68 |
| 436348 | 1.08 | 0.50 | #N/A | #N/A | 1.82 | 0.83 |
| 433211 | 2.17 | 0.86 | 0.79 | 0.40 | 1.60 | 0.78 |
| 431545 | 0.88 | 0.40 | 1.04 | 0.66 | 0.65 | 0.25 |
| 431327 | 1.10 | 0.50 | #N/A | #N/A | 0.99 | 0.49 |
| 427295 | 1.10 | 0.50 | #N/A | #N/A | 1.02 | 0.51 |
| 425360 | 0.94 | 0.43 | 1.63 | 0.94 | 0.49 | 0.13 |
| 425005 | 1.14 | 0.52 | 0.87 | 0.49 | 0.76 | 0.34 |
| 419525 | 1.24 | 0.56 | 1.16 | 0.71 | 0.66 | 0.25 |
| 418909 | #N/A | #N/A | #N/A | #N/A | 1.71 | 0.81 |
| 418284 | 1.17 | 0.53 | 0.51 | 0.18 | 0.70 | 0.29 |
| 418408 | 2.28 | 0.87 | 1.18 | 0.79 | 1.06 | 0.54 |
| 416142 | 2.28 | 0.87 | 1.18 | 0.79 | 0.93 | 0.45 |
| 415726 | #N/A | #N/A | 1.44 | 0.89 | 0.67 | 0.27 |
| 414889 | 1.61 | 0.72 | 0.65 | 0.25 | 1.70 | 0.81 |
| 412158 | #N/A | #N/A | #N/A | #N/A | 1.88 | 0.85 |
| 410067 | #N/A | #N/A | #N/A | #N/A | 0.93 | 0.46 |
| 406858 | 1.28 | 0.59 | 0.85 | 0.49 | 0.52 | 0.15 |
| 406595 | #N/A | #N/A | 0.46 | 0.11 | 1.11 | 0.58 |
| 404389 | 1.01 | 0.46 | 0.74 | 0.35 | 2.52 | 0.93 |
| 403740 | 1.01 | 0.46 | 0.74 | 0.35 | 2.40 | 0.93 |
| 403300 | #N/A | #N/A | 1.19 | 0.80 | 2.04 | 0.87 |
| 400869 | #N/A | #N/A | #N/A | #N/A | #N/A | #N/A |
| 400158 | 0.50 | 0.20 | 0.54 | 0.16 | 0.83 | 0.38 |
| 396036 | 0.50 | 0.20 | 0.54 | 0.16 | 0.53 | 0.17 |
| 394967 | 0.15 | 0.02 | 0.54 | 0.16 | 1.43 | 0.72 |
| 394505 | 2.06 | 0.83 | 0.86 | 0.49 | 2.19 | 0.90 |
| 393698 | 1.71 | 0.74 | 0.77 | 0.39 | 1.38 | 0.69 |
| 391990 | 2.17 | 0.86 | 1.05 | 0.70 | 1.04 | 0.53 |
| 388966 | 2.17 | 0.86 | 1.05 | 0.70 | 2.00 | 0.87 |
| #N/A   | #N/A | #N/A | #N/A | #N/A | 1.75 | 0.81 |
| 388730 | #N/A | #N/A | #N/A | #N/A | 0.56 | 0.18 |
| 384764 | 2.83 | 0.95 | 0.89 | 0.48 | 1.60 | 0.77 |
| 381521 | 2.83 | 0.95 | 0.89 | 0.48 | 1.61 | 0.79 |
| 379758 | 0.79 | 0.36 | 0.52 | 0.13 | 0.85 | 0.41 |
| 379580 | 2.39 | 0.89 | 0.62 | 0.22 | 0.49 | 0.13 |
| 377253 | 1.39 | 0.64 | 0.86 | 0.49 | #N/A | #N/A |
| 375669 | 3.55 | 0.98 | 0.81 | 0.45 | #N/A | #N/A |
| 375048 | 1.39 | 0.64 | 0.86 | 0.49 | 3.66 | 0.99 |
| 374457 | 3.55 | 0.98 | 0.81 | 0.45 | 2.93 | 0.96 |
| 374082 | 0.63 | 0.27 | #N/A | #N/A | 0.32 | 0.02 |
| 371001 | 0.63 | 0.27 | #N/A | #N/A | 0.54 | 0.16 |

|        |      |      |      |      |      |      |
|--------|------|------|------|------|------|------|
| 371252 | 1.84 | 0.77 | 0.74 | 0.36 | 0.56 | 0.18 |
| 368594 | 0.63 | 0.27 | #N/A | #N/A | 1.71 | 0.81 |
| 366923 | 1.84 | 0.77 | 0.74 | 0.36 | 1.06 | 0.54 |
| 364333 | 1.12 | 0.51 | 0.93 | 0.57 | 0.22 | 0.01 |
| 362223 | 0.70 | 0.34 | 1.12 | 0.74 | 0.47 | 0.11 |
| 360286 | 1.11 | 0.50 | 0.67 | 0.28 | 0.44 | 0.09 |
| 360098 | 1.58 | 0.69 | 2.19 | 0.81 | 2.06 | 0.88 |
| 359026 | 1.87 | 0.77 | 0.88 | 0.48 | 1.69 | 0.80 |
| 358337 | 1.13 | 0.52 | 0.53 | 0.15 | 1.68 | 0.79 |
| 356970 | 1.75 | 0.74 | 0.86 | 0.48 | 0.95 | 0.46 |
| 355470 | 1.77 | 0.75 | 0.91 | 0.51 | 0.95 | 0.47 |
| 350614 | 1.77 | 0.75 | 0.91 | 0.51 | 0.96 | 0.47 |
| 350438 | #N/A | #N/A | #N/A | #N/A | 1.51 | 0.75 |
| 349366 | 1.93 | 0.80 | 0.90 | 0.48 | 1.26 | 0.63 |
| 346404 | 1.93 | 0.80 | 0.90 | 0.48 | 1.32 | 0.67 |
| 346199 | 0.73 | 0.33 | 0.87 | 0.51 | #N/A | #N/A |
| 344789 | 0.73 | 0.33 | 0.87 | 0.51 | 1.14 | 0.58 |
| 344582 | #N/A | #N/A | #N/A | #N/A | 0.98 | 0.49 |
| 342054 | #N/A | #N/A | #N/A | #N/A | 1.23 | 0.63 |
| 341857 | #N/A | #N/A | #N/A | #N/A | 0.47 | 0.12 |
| 337637 | 2.72 | 0.94 | 2.16 | 0.97 | 0.73 | 0.31 |
| 331116 | 2.72 | 0.94 | 2.16 | 0.97 | 0.49 | 0.14 |
| 328872 | 1.59 | 0.70 | 0.66 | 0.29 | 0.72 | 0.31 |
| 326159 | 0.57 | 0.24 | 0.54 | 0.15 | 1.48 | 0.74 |
| 323228 | #N/A | #N/A | #N/A | #N/A | 1.58 | 0.77 |
| 318077 | 0.81 | 0.38 | 1.14 | 0.73 | 0.75 | 0.33 |
| 316551 | 2.35 | 0.89 | 1.73 | 0.82 | 0.87 | 0.42 |
| 314281 | 1.49 | 0.65 | #N/A | #N/A | 1.94 | 0.86 |
| 312838 | #N/A | #N/A | 1.38 | 0.80 | 0.70 | 0.30 |
| 311503 | #N/A | #N/A | 1.38 | 0.80 | #N/A | #N/A |
| 311925 | 1.14 | 0.51 | 0.63 | 0.22 | 0.35 | 0.03 |
| 308711 | 1.14 | 0.51 | 0.63 | 0.22 | 1.61 | 0.78 |
| 308565 | 1.20 | 0.54 | #N/A | #N/A | 0.72 | 0.30 |
| 307007 | 2.48 | 0.91 | #N/A | #N/A | 2.94 | 0.96 |
| 304331 | 2.48 | 0.91 | #N/A | #N/A | 1.20 | 0.62 |
| 303647 | 1.14 | 0.52 | #N/A | #N/A | 1.49 | 0.74 |
| 303834 | #N/A | #N/A | #N/A | #N/A | 1.44 | 0.73 |
| 301535 | #N/A | #N/A | #N/A | #N/A | 0.55 | 0.18 |
| 301367 | 3.31 | 0.97 | 0.81 | 0.43 | 1.23 | 0.62 |
| 298176 | 3.31 | 0.97 | 0.81 | 0.43 | 1.40 | 0.70 |
| 297936 | 1.51 | 0.66 | 1.16 | 0.69 | 0.57 | 0.19 |
| 295635 | 1.63 | 0.72 | 0.94 | 0.56 | 0.67 | 0.27 |
| 292999 | #N/A | #N/A | 1.20 | 0.78 | 1.11 | 0.57 |
| 291639 | 1.13 | 0.51 | 1.37 | 0.87 | 0.59 | 0.21 |
| 289310 | #N/A | #N/A | #N/A | #N/A | 0.69 | 0.27 |
| 288015 | #N/A | #N/A | #N/A | #N/A | 1.29 | 0.64 |
| 285948 | 1.88 | 0.79 | 0.75 | 0.37 | 0.77 | 0.33 |
| 281635 | 1.88 | 0.79 | 0.75 | 0.37 | 0.65 | 0.25 |
| 280778 | 1.23 | 0.56 | #N/A | #N/A | 2.73 | 0.95 |
| 278947 | 1.55 | 0.68 | 0.42 | 0.07 | 0.40 | 0.06 |
| 278382 | 0.68 | 0.31 | 0.53 | 0.13 | 0.36 | 0.04 |

|        |      |      |      |      |      |      |
|--------|------|------|------|------|------|------|
| 274781 | 0.68 | 0.31 | 0.53 | 0.13 | 1.02 | 0.50 |
| 274323 | 0.28 | 0.06 | #N/A | #N/A | 0.70 | 0.29 |
| 272143 | 2.56 | 0.92 | 1.02 | 0.64 | 1.51 | 0.75 |
| 270396 | 2.56 | 0.92 | 1.02 | 0.64 | 3.95 | 0.99 |
| 269297 | 2.56 | 0.92 | 1.02 | 0.64 | 1.92 | 0.86 |
| 267726 | #N/A | #N/A | #N/A | #N/A | 1.24 | 0.62 |
| 267527 | #N/A | #N/A | #N/A | #N/A | 0.92 | 0.44 |
| 261651 | #N/A | #N/A | #N/A | #N/A | 0.45 | 0.10 |
| 261918 | #N/A | #N/A | #N/A | #N/A | #N/A | #N/A |
| 261504 | 1.07 | 0.50 | #N/A | #N/A | 0.41 | 0.07 |
| 256967 | 0.63 | 0.27 | 0.85 | 0.45 | 0.70 | 0.29 |
| 255297 | 0.91 | 0.42 | 0.66 | 0.26 | 0.70 | 0.29 |
| 252900 | 0.91 | 0.42 | 0.66 | 0.26 | 1.15 | 0.58 |
| 252741 | 2.20 | 0.86 | 1.14 | 0.54 | 0.54 | 0.17 |
| 248497 | 2.20 | 0.86 | 1.14 | 0.54 | #N/A | #N/A |
| 248127 | 1.83 | 0.77 | 1.25 | 0.79 | 0.45 | 0.10 |
| 241356 | 1.83 | 0.77 | 1.25 | 0.79 | 0.47 | 0.12 |
| 241088 | 1.55 | 0.69 | #N/A | #N/A | 0.74 | 0.32 |
| 236272 | 1.55 | 0.69 | #N/A | #N/A | 1.11 | 0.55 |
| 234720 | #N/A | #N/A | 1.38 | 0.88 | 1.88 | 0.84 |
| 232453 | #N/A | #N/A | 1.13 | 0.74 | 0.96 | 0.48 |
| 232351 | 2.18 | 0.86 | #N/A | #N/A | 1.35 | 0.67 |
| 228754 | 2.18 | 0.86 | #N/A | #N/A | 1.57 | 0.77 |
| 227757 | 0.21 | 0.05 | 0.67 | 0.34 | 0.38 | 0.05 |
| 227532 | #N/A | #N/A | #N/A | #N/A | 0.83 | 0.37 |
| 225880 | #N/A | #N/A | #N/A | #N/A | 1.04 | 0.53 |
| 221107 | #N/A | #N/A | #N/A | #N/A | 0.38 | 0.05 |
| 220925 | 1.86 | 0.79 | 0.85 | 0.45 | 0.82 | 0.37 |
| 216695 | 1.86 | 0.79 | 0.85 | 0.45 | 1.60 | 0.78 |
| 217301 | #N/A | #N/A | #N/A | #N/A | 1.69 | 0.80 |
| 215281 | #N/A | #N/A | #N/A | #N/A | 2.46 | 0.93 |
| 215214 | 1.91 | 0.78 | 1.04 | 0.69 | 1.07 | 0.53 |
| 213670 | 1.07 | 0.50 | 1.35 | 0.85 | 0.95 | 0.45 |
| 210052 | 1.66 | 0.73 | 0.47 | 0.10 | 0.99 | 0.50 |
| 208574 | #N/A | #N/A | #N/A | #N/A | 1.83 | 0.83 |
| 203837 | #N/A | #N/A | 1.13 | 0.76 | 1.12 | 0.56 |
| 202277 | 3.32 | 0.98 | 0.87 | 0.46 | 0.75 | 0.32 |
| 199214 | 3.32 | 0.98 | 0.87 | 0.46 | 1.67 | 0.79 |
| 199041 | 0.34 | 0.11 | 0.57 | 0.18 | 0.65 | 0.24 |
| 193711 | 1.53 | 0.67 | 0.86 | 0.49 | 0.76 | 0.34 |
| 191982 | #N/A | #N/A | 0.57 | 0.17 | 0.88 | 0.42 |
| 191402 | #N/A | #N/A | 0.57 | 0.17 | 2.57 | 0.94 |
| 191810 | 1.68 | 0.72 | 0.87 | 0.50 | 3.72 | 0.99 |
| 187620 | 1.68 | 0.72 | 0.87 | 0.50 | 0.49 | 0.13 |
| 187800 | #N/A | #N/A | #N/A | #N/A | 0.46 | 0.12 |
| 187343 | #N/A | #N/A | #N/A | #N/A | 1.10 | 0.55 |
| 184157 | 1.15 | 0.53 | 1.00 | 0.64 | #N/A | #N/A |
| 184088 | 2.19 | 0.86 | 0.70 | 0.32 | 0.89 | 0.43 |
| 182122 | #N/A | #N/A | #N/A | #N/A | 2.14 | 0.90 |
| 175531 | #N/A | #N/A | #N/A | #N/A | 0.41 | 0.07 |
| 175349 | 1.81 | 0.76 | 0.99 | 0.62 | 1.22 | 0.63 |

|        |      |      |      |      |      |      |
|--------|------|------|------|------|------|------|
| 173289 | 1.81 | 0.76 | 0.99 | 0.62 | 2.04 | 0.87 |
| 171419 | #N/A | #N/A | #N/A | #N/A | 0.75 | 0.33 |
| 167910 | #N/A | #N/A | #N/A | #N/A | 0.88 | 0.42 |
| 170575 | 0.27 | 0.06 | 0.81 | 0.43 | 0.56 | 0.18 |
| 163413 | #N/A | #N/A | #N/A | #N/A | 1.00 | 0.49 |
| 162762 | 1.59 | 0.71 | 0.81 | 0.43 | 0.55 | 0.17 |
| 159100 | 2.23 | 0.87 | 0.85 | 0.49 | 1.39 | 0.71 |
| 157277 | 2.23 | 0.87 | 0.85 | 0.49 | 2.61 | 0.94 |
| 156547 | #N/A | #N/A | #N/A | #N/A | 0.93 | 0.46 |
| 154619 | #N/A | #N/A | #N/A | #N/A | 1.28 | 0.66 |
| 153171 | 1.87 | 0.79 | 0.48 | 0.10 | 1.33 | 0.67 |
| 151041 | 2.50 | 0.91 | 0.64 | 0.23 | 0.42 | 0.08 |
| 149708 | 0.43 | 0.16 | 1.17 | 0.69 | 0.49 | 0.14 |
| 149347 | #N/A | #N/A | #N/A | #N/A | #N/A | #N/A |
| 148233 | 0.20 | 0.03 | 0.77 | 0.39 | 0.40 | 0.07 |
| 145813 | 0.58 | 0.24 | 0.55 | 0.19 | 0.32 | 0.02 |
| 145201 | 0.80 | 0.39 | 1.03 | 0.66 | 1.01 | 0.51 |
| 144052 | #N/A | #N/A | #N/A | #N/A | 0.57 | 0.18 |
| 141920 | 0.80 | 0.39 | 1.03 | 0.66 | 1.21 | 0.61 |
| 140372 | #N/A | #N/A | #N/A | #N/A | 1.31 | 0.68 |
| 139547 | 3.49 | 0.99 | 0.82 | 0.45 | 0.47 | 0.11 |
| 131050 | 0.71 | 0.32 | 0.94 | 0.56 | 1.91 | 0.85 |
| 129164 | 1.61 | 0.71 | 0.51 | 0.15 | 0.38 | 0.05 |
| 124379 | 2.65 | 0.93 | #N/A | #N/A | 3.31 | 0.98 |
| 123575 | 1.61 | 0.71 | 0.51 | 0.15 | 4.08 | 0.99 |
| 122697 | 2.65 | 0.93 | #N/A | #N/A | 2.18 | 0.90 |
| 117856 | 1.35 | 0.60 | 0.95 | 0.58 | 0.54 | 0.17 |
| 117563 | 0.48 | 0.19 | 0.68 | 0.28 | 0.54 | 0.16 |
| 112477 | 1.47 | 0.64 | 1.01 | 0.53 | 0.48 | 0.12 |
| 111702 | #N/A | #N/A | 0.94 | 0.59 | 2.50 | 0.93 |
| 110406 | 2.45 | 0.90 | 1.00 | 0.56 | 1.06 | 0.54 |
| 102545 | 2.45 | 0.90 | 1.00 | 0.56 | 0.31 | 0.02 |
| 102078 | #N/A | #N/A | #N/A | #N/A | 0.46 | 0.10 |
| 98587  | 1.19 | 0.54 | 0.75 | 0.36 | 1.58 | 0.77 |
| 97008  | 0.50 | 0.22 | 0.68 | 0.31 | 0.59 | 0.21 |
| 94463  | #N/A | #N/A | #N/A | #N/A | 1.87 | 0.85 |
| 93096  | #N/A | #N/A | #N/A | #N/A | 3.62 | 0.99 |
| 92385  | #N/A | #N/A | #N/A | #N/A | 2.53 | 0.94 |
| 90057  | #N/A | #N/A | #N/A | #N/A | 1.08 | 0.53 |
| 90498  | #N/A | #N/A | #N/A | #N/A | 0.53 | 0.16 |
| 89337  | #N/A | #N/A | 1.15 | 0.75 | 0.33 | 0.02 |
| 87300  | 2.21 | 0.87 | 0.40 | 0.06 | 0.83 | 0.38 |
| 84837  | #N/A | #N/A | 1.15 | 0.75 | #N/A | #N/A |
| 84298  | 0.88 | 0.42 | 0.88 | 0.50 | 1.72 | 0.81 |
| 82876  | 2.21 | 0.87 | 0.40 | 0.06 | 0.90 | 0.44 |
| 82734  | #N/A | #N/A | #N/A | #N/A | 3.50 | 0.98 |
| 81424  | #N/A | #N/A | #N/A | #N/A | 1.65 | 0.78 |
| 80657  | 1.94 | 0.81 | 1.22 | 0.81 | 1.46 | 0.73 |
| 79110  | 0.88 | 0.40 | #N/A | #N/A | 0.90 | 0.43 |
| 78013  | 1.33 | 0.59 | #N/A | #N/A | 1.05 | 0.54 |
| 77905  | #N/A | #N/A | #N/A | #N/A | 0.99 | 0.50 |

|        |      |      |      |      |      |      |
|--------|------|------|------|------|------|------|
| 73709  | #N/A | #N/A | #N/A | #N/A | 3.74 | 0.99 |
| 72546  | 1.68 | 0.72 | 1.26 | 0.78 | 0.73 | 0.32 |
| 69330  | 2.62 | 0.93 | 0.99 | 0.61 | 1.12 | 0.56 |
| 64502  | 2.62 | 0.93 | 0.99 | 0.61 | 1.14 | 0.59 |
| 63771  | #N/A | #N/A | #N/A | #N/A | 1.36 | 0.69 |
| 63047  | #N/A | #N/A | #N/A | #N/A | 1.74 | 0.82 |
| 63001  | #N/A | #N/A | #N/A | #N/A | 1.10 | 0.55 |
| 61853  | 1.77 | 0.75 | #N/A | #N/A | 0.83 | 0.37 |
| 58889  | 1.55 | 0.68 | 0.93 | 0.57 | 0.75 | 0.33 |
| 55814  | #N/A | #N/A | 0.62 | 0.24 | 2.22 | 0.91 |
| 53756  | 1.55 | 0.68 | 0.93 | 0.57 | 1.39 | 0.71 |
| 52731  | #N/A | #N/A | 0.62 | 0.24 | 1.73 | 0.80 |
| 52434  | #N/A | #N/A | #N/A | #N/A | 0.87 | 0.40 |
| 49431  | #N/A | #N/A | #N/A | #N/A | 3.82 | 0.99 |
| 49365  | #N/A | #N/A | #N/A | #N/A | 2.59 | 0.94 |
| 48459  | #N/A | #N/A | #N/A | #N/A | 1.07 | 0.55 |
| 44652  | #N/A | #N/A | #N/A | #N/A | 1.43 | 0.70 |
| 44509  | #N/A | #N/A | #N/A | #N/A | 2.15 | 0.89 |
| 43174  | #N/A | #N/A | 0.87 | 0.48 | 0.93 | 0.45 |
| 41149  | 1.34 | 0.60 | #N/A | #N/A | 0.96 | 0.48 |
| 37617  | 1.34 | 0.60 | #N/A | #N/A | 1.06 | 0.54 |
| 37526  | 2.09 | 0.84 | #N/A | #N/A | 2.41 | 0.93 |
| 36762  | 1.13 | 0.51 | 0.95 | 0.57 | 1.31 | 0.65 |
| 35212  | 1.22 | 0.55 | 0.70 | 0.32 | 0.85 | 0.40 |
| 32635  | 1.05 | 0.49 | 0.73 | 0.35 | 3.46 | 0.98 |
| 27921  | 1.05 | 0.49 | 0.73 | 0.35 | 1.07 | 0.55 |
| 25718  | 2.72 | 0.94 | 1.11 | 0.69 | 0.73 | 0.30 |
| 25395  | 0.55 | 0.23 | 0.63 | 0.28 | 0.46 | 0.11 |
| 23203  | 1.55 | 0.67 | #N/A | #N/A | 1.52 | 0.76 |
| 22108  | 1.15 | 0.52 | 0.61 | 0.21 | 1.03 | 0.52 |
| 16307  | 1.41 | 0.63 | 0.75 | 0.36 | 0.53 | 0.16 |
| 12481  | 1.41 | 0.63 | 0.75 | 0.36 | 0.77 | 0.34 |
| 11730  | 2.15 | 0.85 | 0.97 | 0.54 | 1.42 | 0.72 |
| 8967   | 1.32 | 0.59 | 0.82 | 0.44 | 2.14 | 0.89 |
| 7090   | 0.70 | 0.32 | 0.85 | 0.49 | 0.99 | 0.50 |
| 6290   | 0.70 | 0.32 | 0.85 | 0.49 | 0.96 | 0.48 |
| 5839   | #N/A | #N/A | 0.94 | 0.58 | #N/A | #N/A |
| 3932   | #N/A | #N/A | #N/A | #N/A | 0.59 | 0.21 |
| 497129 | 1.08 | 0.50 | 1.14 | 0.76 | 0.81 | 0.38 |
| 498472 | 2.22 | 0.87 | #N/A | #N/A | 1.09 | 0.56 |
| 502362 | 2.22 | 0.87 | #N/A | #N/A | 0.83 | 0.37 |
| 504322 | 1.17 | 0.53 | #N/A | #N/A | 1.14 | 0.58 |
| 504653 | 2.60 | 0.92 | 0.57 | 0.17 | 0.86 | 0.41 |
| 506725 | 2.60 | 0.92 | 0.57 | 0.17 | 2.31 | 0.91 |
| 507935 | 1.96 | 0.80 | 0.54 | 0.15 | 1.46 | 0.73 |
| 508105 | 1.13 | 0.52 | 0.74 | 0.35 | 1.54 | 0.75 |
| 509042 | 2.08 | 0.83 | 0.93 | 0.57 | 0.87 | 0.40 |
| 512727 | 2.08 | 0.83 | 0.93 | 0.57 | 1.35 | 0.68 |
| 512818 | 2.08 | 0.83 | 0.93 | 0.57 | #N/A | #N/A |
| 514335 | 2.61 | 0.93 | 0.74 | 0.40 | 2.12 | 0.89 |
| 516411 | 1.42 | 0.64 | 0.61 | 0.22 | 1.08 | 0.54 |

|        |      |      |      |      |      |      |
|--------|------|------|------|------|------|------|
| 520858 | 0.30 | 0.08 | #N/A | #N/A | 0.35 | 0.03 |
| 521085 | #N/A | #N/A | 0.77 | 0.38 | 1.27 | 0.64 |
| 522828 | #N/A | #N/A | 0.77 | 0.38 | 1.41 | 0.70 |
| 524675 | 1.45 | 0.65 | 1.29 | 0.84 | 0.67 | 0.26 |
| 524360 | #N/A | #N/A | 0.94 | 0.53 | 0.73 | 0.30 |
| 526639 | #N/A | #N/A | 0.94 | 0.53 | 1.73 | 0.82 |
| 526968 | #N/A | #N/A | 0.55 | 0.15 | 1.49 | 0.74 |
| 528499 | #N/A | #N/A | 0.55 | 0.15 | 1.37 | 0.69 |
| 529252 | 0.71 | 0.34 | 0.99 | 0.61 | 0.99 | 0.49 |
| 530914 | 1.48 | 0.67 | 0.57 | 0.17 | 0.63 | 0.23 |
| 531878 | 0.50 | 0.23 | 1.13 | 0.72 | 2.20 | 0.91 |
| 532936 | #N/A | #N/A | #N/A | #N/A | 2.79 | 0.95 |
| 533816 | #N/A | #N/A | #N/A | #N/A | 0.74 | 0.32 |
| 534127 | 0.30 | 0.09 | 1.17 | 0.75 | #N/A | #N/A |
| 543286 | 2.64 | 0.93 | #N/A | #N/A | 1.79 | 0.82 |
| 544200 | 1.62 | 0.70 | 1.32 | 0.85 | 1.20 | 0.60 |
| 545676 | 1.00 | 0.47 | #N/A | #N/A | 1.19 | 0.59 |
| 547464 | 1.00 | 0.47 | #N/A | #N/A | 1.43 | 0.72 |
| 553946 | 0.84 | 0.39 | 0.78 | 0.41 | 0.67 | 0.26 |
| 554243 | 0.31 | 0.07 | 0.62 | 0.22 | 0.69 | 0.28 |
| 556667 | 0.31 | 0.07 | 0.62 | 0.22 | 0.31 | 0.02 |
| 557067 | 0.30 | 0.08 | 0.42 | 0.07 | 0.53 | 0.16 |
| 558144 | 1.39 | 0.62 | 1.00 | 0.65 | 0.80 | 0.35 |
| 559726 | 1.20 | 0.55 | 0.71 | 0.38 | 1.12 | 0.56 |
| 561345 | 1.20 | 0.55 | 0.71 | 0.38 | #N/A | #N/A |
| 575194 | #N/A | #N/A | #N/A | #N/A | 1.63 | 0.79 |
| 576499 | #N/A | #N/A | #N/A | #N/A | 0.60 | 0.21 |
| 579125 | 0.33 | 0.10 | 0.63 | 0.23 | 0.66 | 0.25 |
| 580286 | #N/A | #N/A | 0.70 | 0.31 | 1.18 | 0.60 |
| 580430 | #N/A | #N/A | #N/A | #N/A | 2.65 | 0.95 |
| 582985 | 1.48 | 0.66 | 0.57 | 0.17 | 1.18 | 0.61 |
| 583929 | 1.48 | 0.66 | 0.57 | 0.17 | 1.32 | 0.67 |
| 586047 | 1.48 | 0.66 | 0.57 | 0.17 | 0.88 | 0.41 |
| 586387 | #N/A | #N/A | #N/A | #N/A | 0.55 | 0.17 |
| 590906 | #N/A | #N/A | #N/A | #N/A | 0.79 | 0.36 |
| 591872 | 0.74 | 0.34 | 0.89 | 0.53 | 1.15 | 0.58 |
| 592081 | 0.44 | 0.18 | 0.34 | 0.04 | #N/A | #N/A |
| 592901 | 1.45 | 0.65 | 0.75 | 0.36 | 1.54 | 0.76 |
| 594700 | 1.45 | 0.65 | 0.75 | 0.36 | 2.47 | 0.93 |
| 594981 | 2.29 | 0.88 | 0.71 | 0.32 | 3.17 | 0.97 |
| 598616 | 2.29 | 0.88 | 0.71 | 0.32 | #N/A | #N/A |
| 601136 | 0.22 | 0.03 | 0.37 | 0.05 | 0.46 | 0.11 |
| 604442 | 0.92 | 0.42 | 1.04 | 0.66 | 0.40 | 0.06 |
| 604768 | 1.83 | 0.76 | 0.80 | 0.43 | 1.69 | 0.79 |
| 607138 | 1.83 | 0.76 | 0.80 | 0.43 | 1.64 | 0.78 |
| 609096 | 1.36 | 0.61 | 0.73 | 0.34 | 1.11 | 0.57 |
| 611488 | 0.13 | 0.01 | 0.22 | 0.01 | 0.37 | 0.04 |
| 611884 | 0.92 | 0.44 | 1.29 | 0.73 | #N/A | #N/A |
| 616323 | 1.23 | 0.55 | #N/A | #N/A | 1.27 | 0.63 |
| 617511 | 0.08 | 0.01 | #N/A | #N/A | 4.56 | 1.00 |
| 617984 | 1.23 | 0.55 | #N/A | #N/A | 4.73 | 1.00 |



|        |      |      |      |      |      |      |
|--------|------|------|------|------|------|------|
| 618072 | 1.90 | 0.79 | #N/A | #N/A | 1.14 | 0.58 |
| 620916 | 1.86 | 0.78 | 1.87 | 0.95 | 1.51 | 0.75 |
| 622397 | 0.55 | 0.23 | 1.20 | 0.77 | #N/A | #N/A |
| 625319 | 0.98 | 0.45 | 1.43 | 0.89 | 1.00 | 0.50 |
| 627413 | 0.55 | 0.23 | 1.20 | 0.77 | 3.43 | 0.98 |
| 631268 | 0.98 | 0.45 | 1.43 | 0.89 | #N/A | #N/A |
| 631476 | #N/A | #N/A | #N/A | #N/A | 0.56 | 0.18 |
| 635462 | #N/A | #N/A | #N/A | #N/A | 1.24 | 0.62 |
| 635610 | 1.34 | 0.60 | #N/A | #N/A | 3.27 | 0.98 |
| 636147 | #N/A | #N/A | #N/A | #N/A | 2.58 | 0.94 |
| 636142 | 1.34 | 0.60 | #N/A | #N/A | 1.24 | 0.64 |
| 637099 | 0.94 | 0.43 | 0.27 | 0.03 | 2.86 | 0.96 |
| 637739 | 1.72 | 0.74 | #N/A | #N/A | 1.64 | 0.78 |
| 639767 | 0.59 | 0.28 | 0.36 | 0.04 | 1.35 | 0.69 |
| 641827 | 0.59 | 0.28 | 0.36 | 0.04 | 0.86 | 0.39 |
| 643003 | 1.28 | 0.57 | #N/A | #N/A | 2.32 | 0.91 |
| 643143 | 1.99 | 0.82 | 0.61 | 0.21 | 1.73 | 0.80 |
| 644590 | 1.99 | 0.82 | 0.61 | 0.21 | 1.59 | 0.78 |
| 644855 | 1.58 | 0.68 | 0.97 | 0.61 | 0.75 | 0.33 |
| 647118 | #N/A | #N/A | #N/A | #N/A | 2.52 | 0.93 |
| 648378 | #N/A | #N/A | #N/A | #N/A | #N/A | #N/A |
| 649593 | 0.38 | 0.12 | 0.76 | 0.38 | #N/A | #N/A |
| 651285 | 1.80 | 0.75 | 0.77 | 0.41 | #N/A | #N/A |
| 656317 | 1.41 | 0.64 | 0.98 | 0.62 | 1.87 | 0.84 |
| 659765 | 2.00 | 0.82 | 0.57 | 0.17 | #N/A | #N/A |
| 666066 | 0.64 | 0.30 | 0.36 | 0.05 | #N/A | #N/A |
| 667820 | #N/A | #N/A | #N/A | #N/A | #N/A | #N/A |
| 669902 | 0.51 | 0.20 | 0.53 | 0.18 | 0.60 | 0.20 |
| 671906 | 1.53 | 0.66 | 1.03 | 0.68 | #N/A | #N/A |
| 675495 | #N/A | #N/A | #N/A | #N/A | #N/A | #N/A |
| 675666 | 1.81 | 0.76 | 0.58 | 0.19 | #N/A | #N/A |
| 677560 | 1.81 | 0.76 | 0.58 | 0.19 | #N/A | #N/A |
| 682130 | 0.40 | 0.14 | 0.71 | 0.31 | #N/A | #N/A |
| 682561 | 2.81 | 0.94 | 0.91 | 0.54 | #N/A | #N/A |
| 689960 | 2.81 | 0.94 | 0.91 | 0.54 | #N/A | #N/A |
| 693092 | 2.19 | 0.86 | 0.75 | 0.40 | 0.72 | 0.30 |
| 694398 | #N/A | #N/A | #N/A | #N/A | 0.86 | 0.41 |
| 694579 | 2.05 | 0.83 | 0.51 | 0.16 | 1.99 | 0.87 |
| 697229 | 2.05 | 0.83 | 0.51 | 0.16 | 0.55 | 0.17 |
| 697440 | 2.10 | 0.83 | 1.25 | 0.80 | 1.09 | 0.54 |
| 698827 | 2.10 | 0.83 | 1.25 | 0.80 | 3.08 | 0.97 |
| 698984 | #N/A | #N/A | 1.29 | 0.79 | 2.00 | 0.87 |
| 703111 | 0.93 | 0.44 | 1.24 | 0.78 | 0.49 | 0.12 |
| 705046 | 0.45 | 0.20 | 0.61 | 0.24 | 0.42 | 0.08 |
| 705354 | 1.72 | 0.73 | 0.90 | 0.48 | 0.70 | 0.29 |
| 715041 | 2.33 | 0.89 | 0.97 | 0.62 | 1.25 | 0.64 |
| 717025 | 1.42 | 0.64 | 1.10 | 0.71 | 1.13 | 0.58 |
| 718522 | 1.75 | 0.74 | 1.05 | 0.69 | 1.60 | 0.78 |
| 719919 | 3.22 | 0.97 | 1.06 | 0.59 | 1.35 | 0.67 |
| 720260 | #N/A | #N/A | #N/A | #N/A | 2.29 | 0.91 |
| 720367 | #N/A | #N/A | #N/A | #N/A | 1.03 | 0.53 |

|        |      |      |      |      |      |      |
|--------|------|------|------|------|------|------|
| 724759 | 1.15 | 0.54 | 0.96 | 0.61 | 0.50 | 0.14 |
| 725044 | 0.28 | 0.06 | 0.35 | 0.04 | 0.93 | 0.46 |
| 727726 | 0.28 | 0.06 | 0.35 | 0.04 | 0.35 | 0.04 |
| 728042 | 2.19 | 0.86 | 1.39 | 0.87 | 0.87 | 0.40 |
| 730029 | 0.52 | 0.21 | #N/A | #N/A | 1.61 | 0.78 |
| 731445 | 1.20 | 0.54 | 0.72 | 0.33 | 0.97 | 0.47 |
| 735139 | 1.20 | 0.54 | 0.72 | 0.33 | 0.74 | 0.32 |
| 736658 | 1.33 | 0.60 | 0.95 | 0.60 | 1.01 | 0.50 |
| 741658 | 0.78 | 0.37 | 1.01 | 0.61 | 0.47 | 0.12 |
| 745431 | #N/A | #N/A | #N/A | #N/A | 0.57 | 0.20 |
| 746523 | 1.55 | 0.67 | 1.01 | 0.52 | 1.69 | 0.81 |
| 747732 | 1.26 | 0.57 | #N/A | #N/A | 0.89 | 0.44 |
| 747946 | 1.79 | 0.75 | #N/A | #N/A | 0.79 | 0.36 |
| 751043 | 1.79 | 0.75 | #N/A | #N/A | 1.42 | 0.71 |
| 751390 | 2.20 | 0.87 | #N/A | #N/A | 0.67 | 0.26 |
| 755246 | 2.20 | 0.87 | #N/A | #N/A | 1.70 | 0.80 |
| 755585 | 2.13 | 0.85 | 1.06 | 0.64 | 1.57 | 0.77 |
| 757443 | 2.13 | 0.85 | 1.06 | 0.64 | 2.55 | 0.94 |
| 761134 | 2.60 | 0.92 | 1.01 | 0.66 | 0.78 | 0.35 |
| 762164 | 2.38 | 0.90 | 1.95 | 0.97 | 1.42 | 0.70 |
| 763149 | 0.65 | 0.29 | 0.87 | 0.45 | 0.63 | 0.23 |
| 763258 | 0.65 | 0.29 | 0.87 | 0.45 | 0.56 | 0.18 |
| 763758 | 0.11 | 0.01 | 0.17 | 0.01 | 0.68 | 0.26 |
| 766060 | 0.11 | 0.01 | 0.17 | 0.01 | 1.29 | 0.64 |
| 770295 | 0.98 | 0.44 | 0.92 | 0.49 | 1.21 | 0.62 |
| 771968 | 2.77 | 0.94 | 1.15 | 0.67 | 1.11 | 0.57 |
| 773682 | 1.06 | 0.48 | 0.80 | 0.43 | 0.35 | 0.04 |
| 777504 | 0.87 | 0.40 | 1.08 | 0.71 | 0.46 | 0.10 |
| 781375 | 1.51 | 0.66 | 1.05 | 0.69 | 4.29 | 1.00 |
| 783886 | 3.92 | 0.99 | 0.52 | 0.15 | 1.05 | 0.52 |
| 784219 | 0.56 | 0.24 | 0.43 | 0.07 | 0.84 | 0.39 |
| 786050 | 3.28 | 0.98 | 1.32 | 0.77 | 1.67 | 0.80 |
| 787308 | #N/A | #N/A | #N/A | #N/A | 0.53 | 0.15 |
| 790325 | #N/A | #N/A | #N/A | #N/A | 0.67 | 0.25 |
| 790455 | 1.65 | 0.71 | 0.61 | 0.21 | 0.57 | 0.18 |
| 794651 | 2.14 | 0.85 | 0.76 | 0.37 | 0.93 | 0.44 |
| 794670 | 2.14 | 0.85 | 0.76 | 0.37 | 1.05 | 0.52 |
| 796741 | 2.14 | 0.85 | 0.76 | 0.37 | 1.00 | 0.51 |
| 796794 | 0.49 | 0.20 | 1.17 | 0.69 | 0.53 | 0.15 |
| 800062 | 0.49 | 0.20 | 1.17 | 0.69 | 0.54 | 0.17 |
| 801819 | 2.24 | 0.87 | 0.85 | 0.44 | 0.73 | 0.31 |
| 805045 | 0.35 | 0.11 | 0.86 | 0.49 | 0.29 | 0.02 |
| 805265 | 2.49 | 0.91 | #N/A | #N/A | 2.00 | 0.87 |
| 806408 | 1.23 | 0.55 | 0.52 | 0.14 | 1.03 | 0.52 |
| 807680 | 2.49 | 0.91 | #N/A | #N/A | 0.88 | 0.41 |
| 808625 | 0.39 | 0.16 | 0.81 | 0.43 | 0.66 | 0.26 |
| 826913 | 0.29 | 0.08 | 0.71 | 0.31 | 0.36 | 0.04 |
| 828573 | 1.40 | 0.62 | 0.74 | 0.39 | 1.20 | 0.62 |
| 828956 | 1.40 | 0.62 | 0.74 | 0.39 | 0.65 | 0.25 |
| 830149 | 1.14 | 0.52 | 0.92 | 0.56 | 1.27 | 0.64 |
| 832193 | 2.06 | 0.83 | 1.16 | 0.63 | 0.87 | 0.42 |

|        |      |      |      |      |      |      |
|--------|------|------|------|------|------|------|
| 833153 | 2.82 | 0.95 | #N/A | #N/A | 1.78 | 0.82 |
| 833348 | 1.42 | 0.64 | #N/A | #N/A | 1.08 | 0.54 |
| 834685 | 0.49 | 0.23 | 0.91 | 0.56 | 1.65 | 0.78 |
| 840554 | 0.49 | 0.23 | 0.91 | 0.56 | 0.79 | 0.36 |
| 840820 | 1.96 | 0.81 | 1.90 | 0.96 | 1.40 | 0.71 |
| 842841 | 1.74 | 0.75 | #N/A | #N/A | 1.85 | 0.83 |
| 844956 | 1.74 | 0.75 | #N/A | #N/A | 2.12 | 0.89 |
| 845889 | 1.35 | 0.60 | 1.47 | 0.79 | 2.31 | 0.91 |
| 846929 | 0.39 | 0.17 | #N/A | #N/A | 0.42 | 0.08 |
| 849063 | 0.39 | 0.17 | #N/A | #N/A | 0.88 | 0.43 |
| 848825 | 0.76 | 0.35 | 0.71 | 0.33 | 0.78 | 0.33 |
| 851043 | 1.23 | 0.57 | #N/A | #N/A | 0.57 | 0.18 |
| 853671 | 2.68 | 0.94 | 1.10 | 0.58 | 1.10 | 0.57 |
| 855260 | 0.55 | 0.23 | 0.45 | 0.08 | 1.06 | 0.55 |
| 858600 | 1.75 | 0.75 | 0.85 | 0.45 | 3.28 | 0.98 |
| 858547 | 0.58 | 0.26 | #N/A | #N/A | #N/A | #N/A |
| 859059 | 1.56 | 0.68 | 0.77 | 0.39 | 1.04 | 0.52 |
| 859897 | 1.72 | 0.75 | 0.76 | 0.37 | 0.57 | 0.19 |
| 866332 | 3.67 | 0.99 | 0.67 | 0.32 | 1.31 | 0.66 |
| 869977 | 3.67 | 0.99 | 0.67 | 0.32 | 0.75 | 0.32 |
| 870228 | 2.45 | 0.91 | 0.81 | 0.44 | 0.66 | 0.25 |
| 872040 | 2.43 | 0.90 | 1.59 | 0.84 | 0.63 | 0.23 |
| 876665 | 0.67 | 0.32 | #N/A | #N/A | 0.76 | 0.33 |
| 880292 | #N/A | #N/A | 1.14 | 0.70 | 0.58 | 0.20 |
| 882227 | 1.02 | 0.46 | #N/A | #N/A | 0.42 | 0.08 |
| 882808 | 0.14 | 0.01 | 0.16 | 0.01 | 1.04 | 0.52 |
| 884505 | 2.01 | 0.81 | 0.97 | 0.63 | 1.13 | 0.56 |
| 886069 | 1.19 | 0.53 | 1.07 | 0.68 | 1.29 | 0.66 |
| 889618 | 1.19 | 0.53 | 1.07 | 0.68 | 1.33 | 0.66 |
| 889729 | 3.50 | 0.98 | 0.95 | 0.57 | 0.67 | 0.27 |
| 892493 | 1.56 | 0.69 | 0.96 | 0.53 | 1.64 | 0.78 |
| 897142 | 1.56 | 0.69 | 0.96 | 0.53 | 0.53 | 0.17 |
| 899777 | 1.25 | 0.56 | 1.22 | 0.66 | 0.67 | 0.26 |
| 899900 | 1.63 | 0.71 | 0.85 | 0.49 | 0.57 | 0.19 |
| 902516 | 0.54 | 0.22 | 0.93 | 0.54 | 0.94 | 0.46 |
| 903470 | 0.55 | 0.25 | 0.56 | 0.16 | 0.90 | 0.44 |
| 905679 | 0.55 | 0.25 | 0.56 | 0.16 | 0.34 | 0.03 |
| 908770 | #N/A | #N/A | #N/A | #N/A | 0.44 | 0.10 |
| 910081 | 1.38 | 0.62 | 0.47 | 0.11 | 1.03 | 0.51 |
| 910733 | 1.52 | 0.66 | 1.28 | 0.77 | 2.05 | 0.88 |
| 910839 | 1.48 | 0.67 | #N/A | #N/A | 0.88 | 0.41 |
| 912808 | 1.48 | 0.67 | #N/A | #N/A | 0.79 | 0.35 |
| 912909 | 1.50 | 0.65 | 1.00 | 0.61 | 1.38 | 0.68 |
| 913499 | #N/A | #N/A | 1.00 | 0.65 | 0.99 | 0.50 |
| 916697 | #N/A | #N/A | 1.00 | 0.65 | 0.62 | 0.22 |
| 918442 | 0.51 | 0.23 | 1.02 | 0.58 | 1.22 | 0.63 |
| 918508 | 0.58 | 0.25 | 0.71 | 0.32 | 1.04 | 0.53 |
| 921784 | 0.58 | 0.25 | 0.71 | 0.32 | 0.42 | 0.08 |
| 922503 | 4.28 | 1.00 | #N/A | #N/A | 3.03 | 0.97 |
| 922629 | 2.27 | 0.88 | 0.97 | 0.57 | 0.99 | 0.48 |
| 930809 | 2.27 | 0.88 | 0.97 | 0.57 | #N/A | #N/A |

|         |      |      |      |      |      |      |
|---------|------|------|------|------|------|------|
| 935789  | 1.47 | 0.65 | 0.63 | 0.24 | 0.37 | 0.04 |
| 936370  | #N/A | #N/A | #N/A | #N/A | #N/A | #N/A |
| 936068  | 2.65 | 0.93 | 0.53 | 0.16 | 1.90 | 0.85 |
| 937118  | 0.93 | 0.43 | 1.47 | 0.90 | 1.38 | 0.69 |
| 940798  | 1.75 | 0.75 | #N/A | #N/A | 1.51 | 0.74 |
| 940863  | 1.48 | 0.65 | #N/A | #N/A | 1.21 | 0.62 |
| 944641  | 1.48 | 0.65 | #N/A | #N/A | 0.73 | 0.32 |
| 946920  | 2.84 | 0.95 | 0.50 | 0.11 | 1.30 | 0.67 |
| 946395  | #N/A | #N/A | 0.67 | 0.27 | 1.30 | 0.67 |
| 948990  | #N/A | #N/A | 0.67 | 0.27 | 0.74 | 0.31 |
| 949702  | #N/A | #N/A | #N/A | #N/A | 0.33 | 0.03 |
| 949375  | 1.38 | 0.61 | 0.63 | 0.22 | 0.31 | 0.02 |
| 952300  | 1.38 | 0.61 | 0.63 | 0.22 | 1.60 | 0.77 |
| 952527  | 3.17 | 0.97 | 0.86 | 0.47 | 1.61 | 0.77 |
| 954640  | 3.17 | 0.97 | 0.86 | 0.47 | 2.43 | 0.93 |
| 954668  | 0.89 | 0.43 | 0.61 | 0.21 | 0.46 | 0.11 |
| 961098  | #N/A | #N/A | #N/A | #N/A | 0.79 | 0.35 |
| 961355  | 3.20 | 0.97 | 0.62 | 0.32 | 1.62 | 0.78 |
| 962424  | 1.53 | 0.67 | 0.91 | 0.51 | 3.42 | 0.98 |
| 963295  | 1.96 | 0.81 | 0.68 | 0.33 | 0.82 | 0.38 |
| 966036  | 1.65 | 0.72 | 0.69 | 0.33 | 1.37 | 0.70 |
| 969184  | 1.21 | 0.54 | 0.42 | 0.07 | 1.46 | 0.72 |
| 970768  | #N/A | #N/A | #N/A | #N/A | 0.33 | 0.03 |
| 974872  | #N/A | #N/A | #N/A | #N/A | 0.48 | 0.13 |
| 976720  | #N/A | #N/A | #N/A | #N/A | 0.92 | 0.44 |
| 977773  | #N/A | #N/A | #N/A | #N/A | 1.03 | 0.52 |
| 978033  | 1.15 | 0.53 | 0.97 | 0.60 | 1.30 | 0.66 |
| 979762  | #N/A | #N/A | #N/A | #N/A | 0.69 | 0.27 |
| 982479  | 2.71 | 0.94 | #N/A | #N/A | 1.26 | 0.63 |
| 985682  | 2.71 | 0.94 | #N/A | #N/A | 1.44 | 0.73 |
| 986736  | 1.73 | 0.74 | 0.91 | 0.55 | 2.08 | 0.89 |
| 989416  | 0.97 | 0.44 | 0.44 | 0.10 | 1.06 | 0.53 |
| 991173  | 1.20 | 0.54 | 0.75 | 0.36 | 0.55 | 0.17 |
| 996226  | 1.62 | 0.70 | 0.85 | 0.48 | 1.97 | 0.87 |
| 998185  | 2.13 | 0.85 | 0.92 | 0.57 | 1.15 | 0.59 |
| 998355  | 1.24 | 0.56 | 0.93 | 0.58 | 1.65 | 0.79 |
| 1002237 | #N/A | #N/A | #N/A | #N/A | 1.01 | 0.51 |
| 1002520 | 1.13 | 0.52 | 0.94 | 0.56 | 0.80 | 0.37 |
| 1006100 | 1.54 | 0.69 | 1.45 | 0.56 | 1.95 | 0.86 |
| 1006203 | 2.14 | 0.84 | 0.84 | 0.46 | 1.28 | 0.64 |
| 1007669 | 0.97 | 0.44 | 1.02 | 0.56 | 1.19 | 0.60 |
| 1012479 | #N/A | #N/A | #N/A | #N/A | 1.62 | 0.78 |
| 1014087 | 0.80 | 0.37 | 0.97 | 0.62 | 0.85 | 0.40 |
| 1014319 | 2.28 | 0.87 | #N/A | #N/A | 0.74 | 0.31 |
| 1016972 | #N/A | #N/A | 1.18 | 0.56 | 2.23 | 0.91 |
| 1017965 | 1.12 | 0.51 | 1.27 | 0.84 | 2.70 | 0.95 |
| 1019596 | 2.26 | 0.88 | #N/A | #N/A | 0.46 | 0.12 |
| 1022056 | 1.12 | 0.51 | 1.27 | 0.84 | 1.55 | 0.75 |
| 1024759 | 2.26 | 0.88 | #N/A | #N/A | 0.67 | 0.27 |
| 1025002 | 1.42 | 0.65 | 1.06 | 0.70 | 0.96 | 0.48 |
| 1026055 | 2.14 | 0.84 | 0.86 | 0.47 | 2.77 | 0.95 |

|         |      |      |      |      |      |      |
|---------|------|------|------|------|------|------|
| 1026960 | 1.42 | 0.65 | 1.06 | 0.70 | 2.83 | 0.96 |
| 1031507 | 2.14 | 0.84 | 0.86 | 0.47 | 0.49 | 0.14 |
| 1037692 | 1.95 | 0.80 | 1.30 | 0.84 | 0.38 | 0.05 |
| 1038040 | 1.09 | 0.50 | 0.53 | 0.16 | 1.17 | 0.60 |
| 1038712 | 0.42 | 0.19 | 0.97 | 0.59 | #N/A | #N/A |
| 1039893 | 1.52 | 0.68 | #N/A | #N/A | 1.13 | 0.58 |
| 1043747 | 1.52 | 0.68 | #N/A | #N/A | 3.54 | 0.98 |
| 1043817 | 1.83 | 0.77 | 0.92 | 0.52 | 1.08 | 0.55 |
| 1045642 | 1.82 | 0.78 | #N/A | #N/A | 1.60 | 0.77 |
| 1048462 | 1.82 | 0.78 | #N/A | #N/A | 0.74 | 0.32 |
| 1048796 | 0.36 | 0.13 | 0.42 | 0.08 | 0.46 | 0.10 |
| 1050908 | 1.33 | 0.60 | 0.69 | 0.33 | 1.95 | 0.86 |
| 1057255 | 1.33 | 0.60 | 0.69 | 0.33 | 0.36 | 0.04 |
| 1057781 | 0.47 | 0.18 | #N/A | #N/A | 0.44 | 0.10 |
| 1059013 | 1.25 | 0.56 | 0.92 | 0.55 | 1.09 | 0.54 |
| 1060656 | 1.21 | 0.56 | 1.13 | 0.75 | 1.34 | 0.68 |
| 1061850 | 1.35 | 0.61 | 1.28 | 0.84 | 1.18 | 0.60 |
| 1063811 | 2.17 | 0.84 | 0.96 | 0.59 | 1.20 | 0.62 |
| 1067220 | 2.01 | 0.82 | 0.64 | 0.26 | 1.93 | 0.86 |
| 1071712 | 2.01 | 0.82 | 0.64 | 0.26 | 1.38 | 0.69 |
| 1073961 | 3.51 | 0.98 | 0.63 | 0.24 | 0.66 | 0.25 |
| 1075923 | 2.57 | 0.92 | #N/A | #N/A | 0.91 | 0.44 |
| 1076281 | 1.13 | 0.53 | #N/A | #N/A | 3.51 | 0.98 |
| 1078351 | 1.13 | 0.53 | #N/A | #N/A | 2.01 | 0.87 |
| 1079883 | 2.13 | 0.85 | 1.02 | 0.66 | 2.35 | 0.92 |
| 1080666 | 1.27 | 0.57 | 1.18 | 0.72 | 1.09 | 0.55 |
| 1081582 | #N/A | #N/A | #N/A | #N/A | 1.21 | 0.62 |
| 1090589 | #N/A | #N/A | #N/A | #N/A | 0.65 | 0.24 |
| 105084  | 0.83 | 0.38 | 0.63 | 0.24 | 0.44 | 0.09 |
| 103963  | 1.51 | 0.66 | 1.70 | 0.79 | 1.68 | 0.80 |
| 100642  | 1.51 | 0.66 | 1.70 | 0.79 | 0.69 | 0.27 |
| 100397  | 0.91 | 0.43 | 0.88 | 0.52 | 0.70 | 0.28 |
| 98822   | #N/A | #N/A | #N/A | #N/A | 1.91 | 0.85 |
| 98310   | #N/A | #N/A | #N/A | #N/A | 1.69 | 0.80 |
| 95113   | 0.91 | 0.43 | 0.88 | 0.52 | 0.40 | 0.06 |
| 92622   | 0.75 | 0.34 | 1.49 | 0.90 | 0.62 | 0.22 |
| 84063   | #N/A | #N/A | #N/A | #N/A | 0.98 | 0.48 |
| 81959   | #N/A | #N/A | 1.08 | 0.69 | 0.73 | 0.31 |
| 80649   | 1.15 | 0.52 | 0.95 | 0.58 | 0.72 | 0.29 |
| 80412   | 1.34 | 0.60 | 0.70 | 0.30 | 0.54 | 0.17 |
| 77426   | 1.34 | 0.60 | 0.70 | 0.30 | 1.15 | 0.59 |
| 76093   | 1.66 | 0.73 | #N/A | #N/A | 1.32 | 0.68 |
| 75773   | 1.22 | 0.54 | 0.49 | 0.12 | 0.32 | 0.02 |
| 72033   | 1.22 | 0.54 | 0.49 | 0.12 | 0.48 | 0.13 |
| 71870   | #N/A | #N/A | #N/A | #N/A | 1.10 | 0.55 |
| 70066   | 1.83 | 0.77 | 0.48 | 0.11 | 3.11 | 0.97 |
| 67727   | 1.83 | 0.77 | 0.48 | 0.11 | 1.27 | 0.66 |
| 66238   | #N/A | #N/A | #N/A | #N/A | 0.88 | 0.42 |
| 64458   | 0.72 | 0.32 | 0.99 | 0.63 | 1.26 | 0.63 |
| 62958   | 1.41 | 0.62 | #N/A | #N/A | 1.43 | 0.72 |
| 59120   | 2.44 | 0.90 | #N/A | #N/A | 0.69 | 0.28 |

|        |      |      |      |      |      |      |
|--------|------|------|------|------|------|------|
| 58787  | 0.89 | 0.41 | 0.74 | 0.36 | 1.33 | 0.67 |
| 55846  | 0.94 | 0.44 | 0.66 | 0.25 | 1.53 | 0.75 |
| 53217  | 0.94 | 0.44 | 0.66 | 0.25 | 0.87 | 0.42 |
| 52986  | 1.13 | 0.52 | 0.50 | 0.12 | 0.81 | 0.38 |
| 50578  | 0.35 | 0.10 | 0.33 | 0.03 | 0.74 | 0.32 |
| 45927  | 0.35 | 0.10 | 0.33 | 0.03 | 0.41 | 0.07 |
| 45688  | 1.54 | 0.67 | 0.99 | 0.56 | 0.64 | 0.23 |
| 38813  | 1.54 | 0.67 | 0.99 | 0.56 | 2.87 | 0.96 |
| 36377  | 2.63 | 0.93 | 0.64 | 0.24 | 1.30 | 0.65 |
| 35253  | #N/A | #N/A | #N/A | #N/A | 0.43 | 0.08 |
| 33191  | #N/A | #N/A | #N/A | #N/A | 0.67 | 0.26 |
| 27976  | 0.91 | 0.42 | 0.86 | 0.50 | 0.47 | 0.11 |
| 27879  | 1.53 | 0.67 | #N/A | #N/A | 1.18 | 0.60 |
| 25698  | 1.53 | 0.67 | #N/A | #N/A | 1.81 | 0.84 |
| 23614  | 1.86 | 0.77 | #N/A | #N/A | 1.03 | 0.51 |
| 23537  | 2.13 | 0.85 | 0.97 | 0.57 | 0.80 | 0.35 |
| 19085  | 2.13 | 0.85 | 0.97 | 0.57 | 0.59 | 0.20 |
| 17839  | 1.25 | 0.56 | 1.01 | 0.65 | 1.25 | 0.63 |
| 16117  | #N/A | #N/A | #N/A | #N/A | 1.92 | 0.85 |
| 15411  | 0.77 | 0.36 | 0.93 | 0.54 | 0.89 | 0.43 |
| 14270  | 1.77 | 0.75 | 1.27 | 0.82 | 1.81 | 0.83 |
| 12847  | #N/A | #N/A | #N/A | #N/A | 0.94 | 0.47 |
| 11921  | #N/A | #N/A | #N/A | #N/A | 0.94 | 0.46 |
| 8298   | #N/A | #N/A | 0.74 | 0.37 | 0.81 | 0.37 |
| 7545   | 0.85 | 0.40 | 0.95 | 0.60 | 1.40 | 0.71 |
| 3725   | 0.53 | 0.23 | 0.66 | 0.26 | 0.93 | 0.46 |
| 445    | #N/A | #N/A | #N/A | #N/A | 0.48 | 0.13 |
| 107361 | 1.24 | 0.57 | 3.41 | 0.99 | 0.71 | 0.30 |
| 108115 | 1.38 | 0.63 | 0.94 | 0.56 | 0.83 | 0.39 |
| 109878 | #N/A | #N/A | #N/A | #N/A | 0.65 | 0.26 |
| 110021 | 1.08 | 0.49 | #N/A | #N/A | 0.73 | 0.31 |
| 111747 | 0.90 | 0.41 | 1.11 | 0.59 | 0.81 | 0.37 |
| 113492 | 0.44 | 0.16 | 0.56 | 0.16 | 0.83 | 0.39 |
| 119432 | 1.35 | 0.60 | 0.98 | 0.61 | 0.71 | 0.29 |
| 120084 | #N/A | #N/A | #N/A | #N/A | 0.49 | 0.13 |
| 122882 | 0.67 | 0.31 | 0.66 | 0.34 | 0.79 | 0.36 |
| 124102 | #N/A | #N/A | #N/A | #N/A | 0.51 | 0.16 |
| 127484 | #N/A | #N/A | #N/A | #N/A | 0.32 | 0.02 |
| 129112 | #N/A | #N/A | #N/A | #N/A | 0.85 | 0.40 |
| 130440 | 2.09 | 0.84 | 1.05 | 0.58 | 0.97 | 0.48 |
| 130722 | 1.51 | 0.68 | 1.23 | 0.80 | 0.85 | 0.39 |
| 132913 | 1.51 | 0.68 | 1.23 | 0.80 | 1.05 | 0.53 |
| 136524 | 0.52 | 0.21 | #N/A | #N/A | 0.92 | 0.44 |
| 136872 | 2.00 | 0.82 | 0.66 | 0.29 | 1.02 | 0.52 |
| 139842 | 2.00 | 0.82 | 0.66 | 0.29 | 1.70 | 0.80 |
| 140002 | 0.56 | 0.25 | 1.06 | 0.70 | 0.80 | 0.36 |
| 141885 | 1.09 | 0.51 | 0.68 | 0.28 | 0.71 | 0.29 |
| 146053 | 1.09 | 0.51 | 0.68 | 0.28 | 0.55 | 0.17 |
| 147862 | 0.18 | 0.02 | 0.45 | 0.08 | 0.47 | 0.11 |
| 149566 | #N/A | #N/A | #N/A | #N/A | 0.83 | 0.37 |
| 157443 | #N/A | #N/A | #N/A | #N/A | 0.42 | 0.07 |

|        |      |      |      |      |      |      |
|--------|------|------|------|------|------|------|
| 157735 | 2.21 | 0.87 | #N/A | #N/A | 0.74 | 0.32 |
| 160502 | 2.21 | 0.87 | #N/A | #N/A | 1.22 | 0.62 |
| 161476 | 2.07 | 0.84 | 0.98 | 0.61 | 1.76 | 0.83 |
| 161721 | 3.52 | 0.98 | #N/A | #N/A | 0.41 | 0.08 |
| 164969 | 0.99 | 0.47 | #N/A | #N/A | 0.67 | 0.26 |
| 167668 | 0.91 | 0.43 | #N/A | #N/A | 1.44 | 0.71 |
| 168881 | #N/A | #N/A | #N/A | #N/A | 0.79 | 0.35 |
| 170790 | #N/A | #N/A | #N/A | #N/A | 0.96 | 0.47 |
| 175080 | #N/A | #N/A | #N/A | #N/A | 0.54 | 0.17 |
| 176810 | 0.22 | 0.06 | 0.95 | 0.52 | 0.51 | 0.14 |
| 176956 | 2.51 | 0.91 | 1.13 | 0.63 | 2.20 | 0.90 |
| 180102 | 2.51 | 0.91 | 1.13 | 0.63 | 1.72 | 0.81 |
| 181751 | 3.40 | 0.97 | #N/A | #N/A | 1.04 | 0.53 |
| 183695 | #N/A | #N/A | #N/A | #N/A | 0.48 | 0.13 |
| 184749 | #N/A | #N/A | #N/A | #N/A | 0.79 | 0.36 |
| #N/A   | #N/A | #N/A | #N/A | #N/A | 1.52 | 0.74 |
| 184866 | #N/A | #N/A | #N/A | #N/A | 0.44 | 0.09 |
| 189015 | 2.31 | 0.89 | 0.69 | 0.29 | 2.00 | 0.87 |
| 189122 | 2.76 | 0.94 | 0.87 | 0.47 | 3.01 | 0.97 |
| 192609 | 2.76 | 0.94 | 0.87 | 0.47 | 0.63 | 0.22 |
| 192796 | 1.87 | 0.79 | 0.73 | 0.34 | 1.58 | 0.77 |
| 194059 | #N/A | #N/A | #N/A | #N/A | 1.50 | 0.73 |
| 197224 | #N/A | #N/A | #N/A | #N/A | 0.57 | 0.19 |
| 197389 | 1.40 | 0.63 | 0.93 | 0.57 | 0.71 | 0.29 |
| 198731 | #N/A | #N/A | #N/A | #N/A | 0.49 | 0.13 |
| 206142 | #N/A | #N/A | #N/A | #N/A | 1.76 | 0.82 |
| 207211 | 0.69 | 0.31 | 0.68 | 0.29 | 1.23 | 0.62 |
| 207184 | 1.09 | 0.50 | 0.92 | 0.50 | 1.21 | 0.61 |
| 209295 | 0.69 | 0.31 | 0.68 | 0.29 | 0.90 | 0.44 |
| 210143 | 1.17 | 0.53 | 0.75 | 0.37 | 0.91 | 0.45 |
| 211970 | #N/A | #N/A | #N/A | #N/A | #N/A | #N/A |
| 212535 | 2.31 | 0.89 | 2.09 | 0.97 | 2.52 | 0.93 |
| 213185 | 1.07 | 0.48 | 1.06 | 0.70 | 1.68 | 0.80 |
| 214533 | 2.65 | 0.93 | 2.13 | 0.97 | 2.56 | 0.94 |
| 215183 | 2.33 | 0.88 | 6.27 | 1.00 | 1.43 | 0.73 |
| 218227 | #N/A | #N/A | #N/A | #N/A | 2.00 | 0.87 |
| 218998 | 1.54 | 0.68 | 0.56 | 0.22 | 2.24 | 0.90 |
| 220501 | 1.54 | 0.68 | 0.56 | 0.22 | 1.82 | 0.83 |
| 221271 | 1.82 | 0.77 | #N/A | #N/A | #N/A | #N/A |
| 221535 | 1.23 | 0.55 | 0.73 | 0.34 | 0.71 | 0.28 |
| 222878 | #N/A | #N/A | 1.21 | 0.66 | 1.71 | 0.81 |
| 224031 | 0.77 | 0.35 | 0.75 | 0.37 | 1.19 | 0.61 |
| 225526 | #N/A | #N/A | 0.86 | 0.49 | 1.11 | 0.55 |
| 227533 | 2.48 | 0.91 | 0.50 | 0.13 | 0.79 | 0.36 |
| 230697 | 2.48 | 0.91 | 0.50 | 0.13 | 1.20 | 0.62 |
| 231813 | 0.79 | 0.37 | 0.89 | 0.49 | 1.45 | 0.72 |
| 233297 | 1.28 | 0.59 | 0.82 | 0.44 | 0.81 | 0.37 |
| 233580 | 1.66 | 0.71 | #N/A | #N/A | 1.60 | 0.78 |
| 236381 | 1.66 | 0.71 | #N/A | #N/A | 1.92 | 0.85 |
| 237694 | 0.36 | 0.11 | 1.05 | 0.51 | 0.51 | 0.15 |
| 241294 | #N/A | #N/A | #N/A | #N/A | 0.69 | 0.27 |

|        |      |      |      |      |      |      |
|--------|------|------|------|------|------|------|
| 245573 | #N/A | #N/A | #N/A | #N/A | 0.48 | 0.12 |
| 248338 | 1.93 | 0.80 | 1.11 | 0.68 | 0.98 | 0.49 |
| 248440 | #N/A | #N/A | #N/A | #N/A | 1.89 | 0.85 |
| 252226 | #N/A | #N/A | #N/A | #N/A | 1.51 | 0.75 |
| 252375 | 2.45 | 0.91 | 0.93 | 0.57 | 0.31 | 0.02 |
| 258019 | 2.45 | 0.91 | 0.93 | 0.57 | 0.34 | 0.03 |
| #N/A   | #N/A | #N/A | #N/A | #N/A | 1.22 | 0.62 |
| 258245 | #N/A | #N/A | #N/A | #N/A | 0.43 | 0.08 |
| 262802 | 1.77 | 0.76 | 0.80 | 0.44 | 0.58 | 0.19 |
| 268093 | 1.77 | 0.76 | 0.80 | 0.44 | 1.36 | 0.67 |
| 268460 | #N/A | #N/A | #N/A | #N/A | 0.28 | 0.01 |
| 273617 | #N/A | #N/A | #N/A | #N/A | 2.25 | 0.91 |
| 276241 | 1.87 | 0.79 | 0.91 | 0.54 | 0.34 | 0.03 |
| 277769 | #N/A | #N/A | #N/A | #N/A | 1.09 | 0.56 |
| 279725 | 2.83 | 0.94 | #N/A | #N/A | 0.69 | 0.28 |
| 281156 | #N/A | #N/A | #N/A | #N/A | 2.90 | 0.96 |
| 282383 | 2.62 | 0.93 | 1.00 | 0.51 | 1.63 | 0.78 |
| 282682 | 1.34 | 0.60 | 0.92 | 0.53 | 0.92 | 0.45 |
| 283778 | 2.48 | 0.90 | #N/A | #N/A | 1.52 | 0.75 |
| 284840 | #N/A | #N/A | #N/A | #N/A | 1.62 | 0.78 |
| 287131 | 0.94 | 0.43 | #N/A | #N/A | 1.17 | 0.58 |
| 289692 | 0.94 | 0.43 | #N/A | #N/A | #N/A | #N/A |
| 290915 | 0.64 | 0.28 | 0.85 | 0.44 | 0.58 | 0.20 |
| 293379 | 0.64 | 0.28 | 0.85 | 0.44 | 0.33 | 0.03 |
| 294671 | #N/A | #N/A | #N/A | #N/A | 0.98 | 0.49 |
| 297387 | 0.85 | 0.39 | 1.21 | 0.80 | 1.14 | 0.57 |
| 299147 | #N/A | #N/A | #N/A | #N/A | 0.63 | 0.23 |
| 313997 | #N/A | #N/A | #N/A | #N/A | 1.02 | 0.50 |
| 314118 | 1.67 | 0.72 | 0.85 | 0.49 | 2.70 | 0.95 |
| 314876 | 3.46 | 0.98 | #N/A | #N/A | 2.27 | 0.91 |
| 319816 | 3.46 | 0.98 | #N/A | #N/A | 0.57 | 0.19 |
| 322974 | 0.95 | 0.45 | 0.88 | 0.51 | 0.45 | 0.11 |
| 324394 | 1.13 | 0.52 | 1.00 | 0.62 | 1.17 | 0.60 |
| 325412 | 2.15 | 0.84 | 0.88 | 0.53 | 3.00 | 0.96 |
| 326628 | 1.59 | 0.69 | 0.90 | 0.53 | 0.99 | 0.49 |
| 326815 | #N/A | #N/A | 0.74 | 0.34 | 1.24 | 0.63 |
| 330062 | #N/A | #N/A | 0.74 | 0.34 | 0.86 | 0.41 |
| 332069 | #N/A | #N/A | #N/A | #N/A | 1.50 | 0.73 |
| 332922 | 1.56 | 0.70 | #N/A | #N/A | 2.54 | 0.93 |
| 334396 | 2.12 | 0.84 | 1.05 | 0.64 | 1.32 | 0.66 |
| 334529 | 2.12 | 0.85 | 0.83 | 0.47 | 1.25 | 0.64 |
| 337811 | 2.12 | 0.85 | 0.83 | 0.47 | 1.46 | 0.72 |
| 339986 | 1.46 | 0.66 | #N/A | #N/A | 0.60 | 0.20 |
| 340111 | 3.88 | 0.99 | #N/A | #N/A | 1.34 | 0.67 |
| 342122 | 3.88 | 0.99 | #N/A | #N/A | 4.64 | 1.00 |
| 344270 | 2.01 | 0.83 | #N/A | #N/A | 0.92 | 0.45 |
| 344323 | 3.55 | 0.98 | 0.86 | 0.46 | 1.30 | 0.66 |
| 349287 | 3.55 | 0.98 | 0.86 | 0.46 | 0.54 | 0.17 |
| 352455 | 1.42 | 0.63 | 0.53 | 0.20 | 0.85 | 0.39 |
| 353321 | 1.79 | 0.76 | 0.89 | 0.53 | 1.76 | 0.82 |
| 354322 | 1.85 | 0.77 | 0.99 | 0.56 | 1.25 | 0.64 |



|        |      |      |      |      |      |      |
|--------|------|------|------|------|------|------|
| 356083 | 1.31 | 0.59 | 0.73 | 0.35 | 0.97 | 0.49 |
| 358446 | 0.28 | 0.06 | 0.74 | 0.36 | 1.05 | 0.53 |
| 359165 | #N/A | #N/A | #N/A | #N/A | 1.42 | 0.72 |
| 359704 | #N/A | #N/A | #N/A | #N/A | 2.66 | 0.95 |
| 361646 | #N/A | #N/A | #N/A | #N/A | 1.79 | 0.83 |
| 362767 | #N/A | #N/A | #N/A | #N/A | 0.70 | 0.27 |
| 363001 | #N/A | #N/A | #N/A | #N/A | 1.11 | 0.58 |
| 364967 | 3.10 | 0.97 | 0.88 | 0.48 | 0.59 | 0.20 |
| 365342 | 3.10 | 0.97 | 0.88 | 0.48 | 0.53 | 0.16 |
| 368503 | #N/A | #N/A | #N/A | #N/A | 0.81 | 0.36 |
| 370723 | 1.25 | 0.56 | #N/A | #N/A | #N/A | #N/A |
| 372559 | 1.25 | 0.56 | #N/A | #N/A | 1.34 | 0.68 |
| 372695 | 3.03 | 0.96 | #N/A | #N/A | 0.75 | 0.33 |
| 374655 | 1.12 | 0.51 | 0.33 | 0.04 | 2.68 | 0.94 |
| 377251 | 1.12 | 0.51 | 0.33 | 0.04 | 0.69 | 0.29 |
| 377356 | #N/A | #N/A | #N/A | #N/A | 3.37 | 0.98 |
| 378220 | 1.96 | 0.80 | 0.88 | 0.50 | 1.49 | 0.74 |
| 380109 | #N/A | #N/A | #N/A | #N/A | 1.76 | 0.83 |
| 381292 | #N/A | #N/A | #N/A | #N/A | 2.26 | 0.91 |
| 381991 | #N/A | #N/A | #N/A | #N/A | 0.49 | 0.13 |
| 384489 | #N/A | #N/A | #N/A | #N/A | 0.76 | 0.34 |
| 386488 | 1.50 | 0.67 | #N/A | #N/A | 0.96 | 0.46 |
| 387446 | #N/A | #N/A | #N/A | #N/A | 3.19 | 0.98 |
| 387789 | 0.68 | 0.33 | #N/A | #N/A | 0.79 | 0.36 |
| 388982 | #N/A | #N/A | #N/A | #N/A | 0.93 | 0.46 |
| 391698 | 3.93 | 0.99 | 0.79 | 0.42 | 0.78 | 0.35 |
| 392640 | 2.26 | 0.88 | 0.67 | 0.32 | 1.39 | 0.71 |
| 394086 | 2.26 | 0.88 | 0.67 | 0.32 | 3.50 | 0.98 |
| 394456 | #N/A | #N/A | 0.25 | 0.02 | 0.48 | 0.12 |
| 398991 | #N/A | #N/A | 0.25 | 0.02 | 1.32 | 0.67 |
| 399269 | 2.07 | 0.83 | 0.57 | 0.20 | 0.91 | 0.43 |
| 401956 | 2.07 | 0.83 | 0.57 | 0.20 | 0.67 | 0.27 |
| 402087 | 1.73 | 0.75 | 1.65 | 0.91 | 1.33 | 0.68 |
| 406179 | 1.73 | 0.75 | 1.65 | 0.91 | 0.79 | 0.37 |
| 410790 | #N/A | #N/A | #N/A | #N/A | 0.68 | 0.26 |
| 411385 | 1.41 | 0.63 | 0.84 | 0.48 | 0.95 | 0.46 |
| 413456 | 1.41 | 0.63 | 0.84 | 0.48 | 1.75 | 0.82 |
| 413686 | 2.93 | 0.95 | 0.92 | 0.55 | 0.52 | 0.15 |
| 419064 | 2.93 | 0.95 | 0.92 | 0.55 | 1.30 | 0.65 |
| 419222 | 0.40 | 0.13 | 0.62 | 0.23 | 0.60 | 0.21 |
| 420374 | #N/A | #N/A | #N/A | #N/A | 0.50 | 0.14 |
| 423462 | #N/A | #N/A | #N/A | #N/A | 0.57 | 0.19 |
| 424473 | 1.68 | 0.73 | 0.63 | 0.23 | 1.07 | 0.55 |
| 424610 | 1.52 | 0.67 | 0.93 | 0.57 | 0.43 | 0.09 |
| 429707 | 2.66 | 0.92 | 1.21 | 0.80 | 0.79 | 0.34 |
| 437170 | 2.06 | 0.83 | 0.75 | 0.41 | 1.80 | 0.83 |
| 440127 | 2.06 | 0.83 | 0.75 | 0.41 | 1.55 | 0.77 |
| 441876 | 1.18 | 0.54 | 0.87 | 0.51 | 1.71 | 0.81 |
| 443475 | #N/A | #N/A | #N/A | #N/A | 1.22 | 0.63 |
| 445383 | 1.72 | 0.73 | 0.91 | 0.55 | 0.86 | 0.41 |
| 447603 | 1.64 | 0.71 | 2.14 | 0.73 | 0.81 | 0.38 |

|        |      |      |      |      |      |      |
|--------|------|------|------|------|------|------|
| 450804 | #N/A | #N/A | 0.76 | 0.38 | 0.83 | 0.37 |
| 450813 | #N/A | #N/A | #N/A | #N/A | 0.21 | 0.01 |
| 452638 | #N/A | #N/A | #N/A | #N/A | 0.86 | 0.40 |
| 453439 | 0.68 | 0.30 | #N/A | #N/A | 1.74 | 0.81 |
| 455348 | #N/A | #N/A | #N/A | #N/A | 2.57 | 0.94 |
| 457948 | #N/A | #N/A | #N/A | #N/A | 0.78 | 0.35 |
| 461526 | 0.62 | 0.29 | 0.96 | 0.61 | 1.05 | 0.52 |
| 463700 | 0.92 | 0.42 | 1.04 | 0.59 | 0.61 | 0.21 |
| 465665 | 1.86 | 0.78 | 1.34 | 0.86 | 3.00 | 0.96 |
| 467910 | 0.49 | 0.23 | #N/A | #N/A | 0.93 | 0.45 |
| 470572 | 1.41 | 0.63 | 0.92 | 0.56 | 1.16 | 0.58 |
| 472425 | 1.17 | 0.53 | 0.77 | 0.39 | 0.57 | 0.19 |
| 474455 | 0.57 | 0.24 | 0.99 | 0.56 | 1.27 | 0.64 |
| 474623 | 0.35 | 0.10 | 0.63 | 0.30 | 1.02 | 0.52 |
| 475995 | 2.61 | 0.92 | 0.66 | 0.32 | 0.51 | 0.14 |
| 481915 | 2.61 | 0.92 | 0.66 | 0.32 | 1.58 | 0.77 |
| 482001 | 2.57 | 0.92 | 0.67 | 0.32 | 1.11 | 0.56 |
| 484596 | 2.57 | 0.92 | 0.67 | 0.32 | 2.97 | 0.96 |
| 486175 | 0.91 | 0.43 | 0.76 | 0.39 | 0.68 | 0.26 |
| 486226 | 1.56 | 0.68 | 0.56 | 0.20 | 2.78 | 0.95 |
| 487658 | 1.56 | 0.68 | 0.56 | 0.20 | 2.26 | 0.91 |
| 487708 | 2.17 | 0.86 | 0.98 | 0.63 | 1.27 | 0.64 |
| 490392 | 2.17 | 0.86 | 0.98 | 0.63 | 1.94 | 0.86 |
| 491708 | 2.30 | 0.88 | 1.11 | 0.70 | 1.39 | 0.71 |
| 493654 | 2.91 | 0.95 | 0.54 | 0.15 | 1.57 | 0.77 |
| 496183 | #N/A | #N/A | #N/A | #N/A | 0.90 | 0.44 |
| 496311 | 1.66 | 0.72 | 0.97 | 0.61 | 1.71 | 0.80 |
| 497486 | 1.27 | 0.57 | 0.98 | 0.63 | 1.21 | 0.62 |
| 499881 | 1.27 | 0.57 | 0.98 | 0.63 | 1.53 | 0.76 |
| 499946 | #N/A | #N/A | #N/A | #N/A | 0.69 | 0.27 |
| 504192 | #N/A | #N/A | #N/A | #N/A | 1.78 | 0.83 |
| 504472 | 0.54 | 0.24 | 0.32 | 0.04 | 0.39 | 0.05 |
| 508705 | 0.54 | 0.24 | 0.32 | 0.04 | 0.68 | 0.27 |
| 511833 | 1.76 | 0.74 | 0.92 | 0.56 | 0.34 | 0.03 |
| 514596 | 1.23 | 0.55 | 0.66 | 0.27 | 0.40 | 0.06 |
| 514901 | 0.72 | 0.33 | 0.74 | 0.35 | 0.86 | 0.39 |
| 518709 | 0.72 | 0.33 | 0.74 | 0.35 | 0.58 | 0.20 |
| 520308 | 0.94 | 0.43 | 0.71 | 0.32 | 1.46 | 0.73 |
| 520708 | 2.29 | 0.88 | 0.82 | 0.45 | 1.27 | 0.65 |
| 528615 | 2.29 | 0.88 | 0.82 | 0.45 | 0.69 | 0.27 |
| 537755 | 0.87 | 0.40 | 0.94 | 0.58 | #N/A | #N/A |
| 539743 | 1.09 | 0.50 | #N/A | #N/A | 0.56 | 0.18 |
| 543960 | 1.42 | 0.64 | 0.82 | 0.45 | 0.65 | 0.26 |
| 542258 | 0.87 | 0.40 | 0.94 | 0.58 | 0.70 | 0.29 |
| 543489 | 0.87 | 0.40 | 0.94 | 0.58 | 1.21 | 0.61 |
| 553498 | 1.42 | 0.64 | 0.82 | 0.45 | 1.10 | 0.55 |
| 555963 | 1.42 | 0.64 | 0.82 | 0.45 | 0.59 | 0.20 |
| 556577 | #N/A | #N/A | #N/A | #N/A | 0.69 | 0.28 |
| 559920 | 1.42 | 0.64 | 0.82 | 0.45 | 1.16 | 0.59 |
| 562043 | 1.42 | 0.64 | 0.82 | 0.45 | 0.40 | 0.07 |
| 355478 | 1.22 | 0.56 | 1.03 | 0.67 | 0.71 | 0.30 |

|        |      |      |      |      |      |      |
|--------|------|------|------|------|------|------|
| 350588 | 1.22 | 0.56 | 1.03 | 0.67 | 0.62 | 0.22 |
| 350000 | 1.87 | 0.78 | 0.97 | 0.62 | 2.33 | 0.92 |
| 347943 | 1.87 | 0.78 | 0.97 | 0.62 | 1.94 | 0.86 |
| 347794 | 1.30 | 0.58 | #N/A | #N/A | 1.00 | 0.50 |
| 345180 | 2.36 | 0.90 | #N/A | #N/A | 2.66 | 0.95 |
| 342991 | 2.36 | 0.90 | #N/A | #N/A | 1.86 | 0.85 |
| 342832 | 1.50 | 0.67 | 0.90 | 0.53 | 3.10 | 0.97 |
| 341425 | 0.72 | 0.33 | 0.70 | 0.33 | 0.50 | 0.14 |
| 335526 | 0.74 | 0.33 | #N/A | #N/A | 1.97 | 0.86 |
| 334533 | 0.97 | 0.44 | 0.72 | 0.33 | 1.64 | 0.79 |
| 333401 | 0.46 | 0.19 | 0.60 | 0.21 | 0.84 | 0.38 |
| 328205 | 0.46 | 0.19 | 0.60 | 0.21 | 1.11 | 0.57 |
| 327993 | 1.40 | 0.62 | #N/A | #N/A | 0.59 | 0.20 |
| #N/A   | 1.49 | 0.66 | 1.29 | 0.74 | 2.61 | 0.94 |
| 324103 | 0.80 | 0.36 | 0.83 | 0.46 | 2.85 | 0.96 |
| 321931 | 4.01 | 0.99 | 1.01 | 0.54 | 3.63 | 0.99 |
| #N/A   | #N/A | #N/A | #N/A | #N/A | 0.83 | 0.37 |
| 317930 | 0.29 | 0.07 | 0.52 | 0.13 | 0.46 | 0.11 |
| 316131 | 2.44 | 0.90 | #N/A | #N/A | 1.01 | 0.50 |
| 314033 | 2.44 | 0.90 | #N/A | #N/A | 1.08 | 0.56 |
| 313859 | 0.91 | 0.42 | 1.72 | 0.95 | 1.09 | 0.54 |
| 312458 | 1.91 | 0.80 | 0.98 | 0.62 | 0.93 | 0.46 |
| 309384 | 1.91 | 0.80 | 0.98 | 0.62 | 1.78 | 0.82 |
| 308600 | 0.80 | 0.38 | 0.91 | 0.54 | 0.64 | 0.24 |
| 308199 | 0.80 | 0.38 | 0.91 | 0.54 | #N/A | #N/A |
| 304475 | #N/A | #N/A | 1.05 | 0.69 | 0.99 | 0.50 |
| 303677 | 1.87 | 0.78 | 0.96 | 0.58 | 2.92 | 0.96 |
| 302496 | #N/A | #N/A | #N/A | #N/A | 1.20 | 0.61 |
| 300827 | #N/A | #N/A | #N/A | #N/A | 1.82 | 0.84 |
| 296049 | 3.18 | 0.97 | 0.88 | 0.52 | 0.56 | 0.17 |
| 295736 | 1.90 | 0.79 | 0.94 | 0.49 | 0.55 | 0.18 |
| 291960 | 1.90 | 0.79 | 0.94 | 0.49 | 1.26 | 0.65 |
| 290418 | 1.31 | 0.59 | 0.87 | 0.50 | 1.08 | 0.54 |
| 289225 | 1.70 | 0.72 | 1.13 | 0.62 | 2.00 | 0.87 |
| 287789 | 2.55 | 0.92 | 1.00 | 0.63 | #N/A | #N/A |
| 287428 | 2.08 | 0.84 | #N/A | #N/A | 0.46 | 0.12 |
| 283028 | 2.08 | 0.84 | #N/A | #N/A | 1.11 | 0.57 |
| 280141 | 3.77 | 0.99 | 1.54 | 0.82 | 0.39 | 0.06 |
| 279846 | #N/A | #N/A | #N/A | #N/A | 1.24 | 0.63 |
| 278138 | 0.51 | 0.21 | #N/A | #N/A | 2.26 | 0.90 |
| 277504 | 3.42 | 0.98 | 0.74 | 0.37 | 2.00 | 0.87 |
| 275107 | 3.42 | 0.98 | 0.74 | 0.37 | 2.06 | 0.88 |
| 274071 | #N/A | #N/A | #N/A | #N/A | 1.83 | 0.84 |
| 272949 | 2.31 | 0.89 | 1.07 | 0.68 | 1.68 | 0.80 |
| 272776 | 1.51 | 0.67 | 1.17 | 0.77 | 1.43 | 0.72 |
| 270572 | 1.43 | 0.65 | 0.58 | 0.19 | 0.99 | 0.50 |
| 265114 | 1.43 | 0.65 | 0.58 | 0.19 | 0.43 | 0.09 |
| 264891 | 1.72 | 0.74 | 0.96 | 0.59 | 0.39 | 0.06 |
| 260918 | 1.32 | 0.60 | 1.75 | 0.91 | 2.03 | 0.88 |
| 259769 | #N/A | #N/A | 0.89 | 0.53 | 0.67 | 0.26 |
| 257842 | #N/A | #N/A | 0.89 | 0.53 | 0.59 | 0.21 |

|        |      |      |      |      |      |      |
|--------|------|------|------|------|------|------|
| 256224 | 0.19 | 0.03 | 0.61 | 0.23 | 0.32 | 0.02 |
| 255865 | 0.20 | 0.05 | #N/A | #N/A | 0.46 | 0.11 |
| 254858 | 1.02 | 0.47 | 0.48 | 0.10 | 0.23 | 0.01 |
| 252040 | 1.02 | 0.47 | 0.48 | 0.10 | 0.90 | 0.44 |
| 251911 | 0.29 | 0.06 | 0.36 | 0.05 | 0.66 | 0.26 |
| 247899 | #N/A | #N/A | #N/A | #N/A | 1.96 | 0.86 |
| 247195 | 1.86 | 0.77 | 0.87 | 0.51 | 1.82 | 0.84 |
| 246547 | #N/A | #N/A | 0.98 | 0.63 | 1.20 | 0.62 |
| 246823 | 1.86 | 0.77 | 0.87 | 0.51 | 1.13 | 0.58 |
| 244654 | 1.86 | 0.77 | 0.87 | 0.51 | 2.05 | 0.88 |
| 243995 | 1.46 | 0.66 | #N/A | #N/A | 3.59 | 0.99 |
| 242758 | 1.03 | 0.47 | #N/A | #N/A | 1.07 | 0.54 |
| 242713 | 2.81 | 0.94 | 0.95 | 0.59 | 3.41 | 0.98 |
| 241305 | 2.81 | 0.94 | 0.95 | 0.59 | 2.81 | 0.95 |
| 238096 | 2.06 | 0.84 | 0.91 | 0.55 | 2.67 | 0.95 |
| 235721 | 3.15 | 0.97 | 1.43 | 0.55 | 1.65 | 0.78 |
| 233054 | 2.12 | 0.84 | 0.91 | 0.55 | 0.69 | 0.29 |
| 231550 | #N/A | #N/A | #N/A | #N/A | 0.41 | 0.07 |
| 230269 | 0.94 | 0.43 | 0.73 | 0.34 | 1.83 | 0.83 |
| #N/A   | #N/A | #N/A | #N/A | #N/A | 1.59 | 0.78 |
| 228416 | 1.21 | 0.54 | 0.68 | 0.28 | 1.74 | 0.82 |
| 222934 | 1.21 | 0.54 | 0.68 | 0.28 | #N/A | #N/A |
| 221078 | 1.07 | 0.48 | 0.75 | 0.41 | 0.75 | 0.34 |
| 217860 | 1.92 | 0.80 | 0.66 | 0.27 | 0.43 | 0.08 |
| 217545 | 1.88 | 0.79 | 0.94 | 0.59 | 1.34 | 0.68 |
| 214988 | 1.88 | 0.79 | 0.94 | 0.59 | 0.92 | 0.45 |
| 214700 | 2.38 | 0.89 | 1.47 | 0.89 | 0.49 | 0.12 |
| 210920 | 2.38 | 0.89 | 1.47 | 0.89 | 2.16 | 0.89 |
| 210354 | 0.33 | 0.10 | 0.67 | 0.27 | #N/A | #N/A |
| 206504 | 2.13 | 0.84 | 1.28 | 0.84 | 0.57 | 0.19 |
| 210129 | 0.33 | 0.10 | 0.67 | 0.27 | 0.87 | 0.42 |
| 203553 | 2.13 | 0.84 | 1.28 | 0.84 | 1.42 | 0.72 |
| 202273 | 1.94 | 0.80 | #N/A | #N/A | 1.46 | 0.74 |
| 200487 | 1.54 | 0.67 | #N/A | #N/A | 0.83 | 0.39 |
| 200150 | 1.54 | 0.67 | #N/A | #N/A | 1.65 | 0.80 |
| 199643 | 1.54 | 0.67 | #N/A | #N/A | 2.31 | 0.91 |
| 197928 | 2.46 | 0.91 | 0.96 | 0.59 | 1.29 | 0.66 |
| 196213 | 0.66 | 0.31 | 1.16 | 0.56 | 2.08 | 0.89 |
| 195067 | 3.76 | 0.99 | 0.81 | 0.45 | 1.25 | 0.65 |
| 191027 | 3.76 | 0.99 | 0.81 | 0.45 | 0.87 | 0.42 |
| 190964 | 2.23 | 0.86 | 0.93 | 0.58 | 0.79 | 0.34 |
| 187987 | 2.23 | 0.86 | 0.93 | 0.58 | 1.76 | 0.82 |
| 186514 | 1.09 | 0.51 | 0.72 | 0.33 | 0.64 | 0.24 |
| 186366 | 2.09 | 0.84 | #N/A | #N/A | 0.88 | 0.42 |
| 182114 | 1.99 | 0.82 | 1.07 | 0.67 | 1.45 | 0.73 |
| 181974 | 2.63 | 0.93 | 0.92 | 0.56 | 0.82 | 0.39 |
| 179769 | 2.63 | 0.93 | 0.92 | 0.56 | 2.73 | 0.95 |
| 179650 | 0.80 | 0.37 | 0.81 | 0.42 | 1.95 | 0.86 |
| 177723 | 1.85 | 0.77 | 0.55 | 0.17 | 1.90 | 0.85 |
| 175304 | 1.85 | 0.77 | 0.55 | 0.17 | 1.29 | 0.67 |
| 174579 | 0.40 | 0.13 | 0.96 | 0.52 | 0.67 | 0.26 |

|        |      |      |      |      |      |      |
|--------|------|------|------|------|------|------|
| 173025 | 2.20 | 0.87 | #N/A | #N/A | 0.89 | 0.43 |
| 169979 | 2.20 | 0.87 | #N/A | #N/A | 0.93 | 0.46 |
| 167578 | 2.01 | 0.82 | 0.72 | 0.33 | 0.69 | 0.29 |
| 167441 | 0.96 | 0.44 | 1.03 | 0.66 | 0.66 | 0.26 |
| 163275 | 0.96 | 0.44 | 1.03 | 0.66 | 1.30 | 0.66 |
| 162974 | #N/A | #N/A | #N/A | #N/A | 0.90 | 0.44 |
| 157382 | #N/A | #N/A | #N/A | #N/A | 0.67 | 0.27 |
| 157175 | 2.22 | 0.85 | 1.30 | 0.85 | 1.34 | 0.67 |
| 155762 | 1.09 | 0.50 | 1.03 | 0.67 | 0.90 | 0.44 |
| 154843 | 1.83 | 0.77 | 1.02 | 0.67 | 0.75 | 0.33 |
| 151185 | 1.71 | 0.73 | 0.82 | 0.45 | 2.12 | 0.89 |
| 149140 | 1.71 | 0.73 | 0.82 | 0.45 | 2.03 | 0.87 |
| 144324 | 4.21 | 1.00 | 0.88 | 0.45 | 0.42 | 0.07 |
| 144082 | 0.48 | 0.21 | 0.76 | 0.38 | 1.81 | 0.82 |
| 140610 | 0.48 | 0.21 | 0.76 | 0.38 | 0.90 | 0.44 |
| 140444 | #N/A | #N/A | #N/A | #N/A | 0.84 | 0.39 |
| 136651 | 0.34 | 0.09 | 0.61 | 0.22 | 0.50 | 0.15 |
| 136105 | 0.56 | 0.24 | 0.68 | 0.29 | 1.95 | 0.86 |
| 133869 | 1.06 | 0.48 | #N/A | #N/A | 0.55 | 0.17 |
| 131662 | 0.37 | 0.13 | 0.94 | 0.56 | 0.86 | 0.41 |
| 129578 | 0.65 | 0.31 | 0.79 | 0.41 | 0.43 | 0.08 |
| 127097 | 1.81 | 0.76 | 1.29 | 0.81 | 1.72 | 0.80 |
| 125733 | 1.93 | 0.80 | 1.18 | 0.77 | 0.49 | 0.13 |
| 122071 | 3.09 | 0.97 | 1.20 | 0.75 | 0.76 | 0.34 |
| 117024 | 3.09 | 0.97 | 1.20 | 0.75 | 1.79 | 0.83 |
| 116904 | 3.03 | 0.96 | 1.00 | 0.65 | 0.80 | 0.35 |
| 106107 | 3.03 | 0.96 | 1.00 | 0.65 | 1.70 | 0.80 |
| 105676 | #N/A | #N/A | 0.68 | 0.28 | 0.47 | 0.11 |
| 100781 | #N/A | #N/A | 0.68 | 0.28 | 1.70 | 0.80 |
| 99860  | 1.06 | 0.48 | 1.05 | 0.66 | 1.51 | 0.75 |
| 98527  | 0.21 | 0.03 | 0.51 | 0.21 | 0.36 | 0.04 |
| 98330  | #N/A | #N/A | 0.64 | 0.24 | 1.57 | 0.77 |
| 95065  | 0.88 | 0.41 | 0.79 | 0.41 | 0.77 | 0.34 |
| 94800  | 2.10 | 0.84 | 1.09 | 0.73 | 1.72 | 0.80 |
| 89948  | 2.10 | 0.84 | 1.09 | 0.73 | 0.84 | 0.39 |
| 89230  | 1.46 | 0.66 | #N/A | #N/A | 1.14 | 0.57 |
| 87979  | 0.84 | 0.38 | 1.53 | 0.62 | 1.38 | 0.70 |
| 87837  | 0.56 | 0.23 | 0.81 | 0.42 | 0.92 | 0.44 |
| 85442  | 0.56 | 0.23 | 0.81 | 0.42 | 1.48 | 0.72 |
| 84885  | 3.05 | 0.96 | 0.96 | 0.61 | 1.72 | 0.80 |
| 80510  | 3.05 | 0.96 | 0.96 | 0.61 | 0.77 | 0.35 |
| 80149  | 1.64 | 0.71 | 0.66 | 0.27 | 0.84 | 0.39 |
| 76354  | 1.64 | 0.71 | 0.66 | 0.27 | 2.00 | 0.87 |
| 74184  | 1.30 | 0.59 | 1.04 | 0.68 | 0.74 | 0.31 |
| 69791  | 1.58 | 0.69 | 0.80 | 0.43 | 0.51 | 0.16 |
| 69528  | 1.33 | 0.59 | 0.66 | 0.26 | 0.37 | 0.04 |
| 63028  | 1.33 | 0.59 | 0.66 | 0.26 | 0.37 | 0.04 |
| 61013  | 1.65 | 0.73 | 1.07 | 0.71 | 0.91 | 0.45 |
| 57338  | 3.23 | 0.97 | 0.88 | 0.48 | 0.75 | 0.33 |
| 57252  | 1.34 | 0.60 | #N/A | #N/A | 2.50 | 0.94 |
| 56379  | 3.02 | 0.96 | 0.72 | 0.34 | 3.15 | 0.97 |

|        |      |      |      |      |      |      |
|--------|------|------|------|------|------|------|
| 53981  | 3.02 | 0.96 | 0.72 | 0.34 | 3.06 | 0.97 |
| 51759  | #N/A | #N/A | 1.04 | 0.66 | 1.17 | 0.60 |
| 51306  | 2.47 | 0.91 | 0.79 | 0.41 | 0.90 | 0.42 |
| 46949  | 2.47 | 0.91 | 0.79 | 0.41 | 1.73 | 0.82 |
| 46815  | 1.24 | 0.56 | 0.57 | 0.18 | 1.30 | 0.65 |
| 45952  | 1.60 | 0.69 | #N/A | #N/A | 1.00 | 0.49 |
| 40191  | 1.60 | 0.69 | #N/A | #N/A | 0.60 | 0.22 |
| 40140  | 1.58 | 0.68 | 0.61 | 0.23 | 1.28 | 0.64 |
| 38983  | 0.57 | 0.24 | #N/A | #N/A | 2.12 | 0.89 |
| 36899  | 0.57 | 0.24 | #N/A | #N/A | 1.68 | 0.81 |
| 34087  | 1.43 | 0.65 | 1.10 | 0.64 | 0.73 | 0.32 |
| 33718  | 1.43 | 0.65 | 1.10 | 0.64 | 0.52 | 0.15 |
| 30938  | 1.50 | 0.68 | 1.25 | 0.80 | 1.87 | 0.85 |
| 30048  | 0.72 | 0.32 | 0.86 | 0.48 | 1.29 | 0.64 |
| 29415  | 0.72 | 0.32 | 0.86 | 0.48 | 1.54 | 0.76 |
| 23119  | 0.40 | 0.14 | 1.32 | 0.86 | 0.46 | 0.10 |
| 21220  | 1.86 | 0.79 | 0.74 | 0.35 | 2.87 | 0.96 |
| 19844  | 1.86 | 0.79 | 0.74 | 0.35 | 1.67 | 0.80 |
| 16784  | 1.86 | 0.79 | 0.74 | 0.35 | 2.41 | 0.93 |
| 16141  | 1.95 | 0.81 | 0.93 | 0.58 | 0.66 | 0.24 |
| 9696   | 0.36 | 0.12 | 0.71 | 0.31 | 1.13 | 0.57 |
| 9500   | 0.36 | 0.12 | 0.71 | 0.31 | 0.86 | 0.41 |
| 8793   | 0.82 | 0.37 | 0.83 | 0.46 | 1.01 | 0.50 |
| 483    | #N/A | #N/A | #N/A | #N/A | 0.57 | 0.19 |
| 356140 | 1.28 | 0.58 | 0.76 | 0.37 | 1.38 | 0.70 |
| 357412 | 1.87 | 0.79 | 1.02 | 0.65 | 0.72 | 0.30 |
| 362921 | 1.87 | 0.79 | 1.02 | 0.65 | 1.07 | 0.55 |
| 364516 | #N/A | #N/A | #N/A | #N/A | 1.08 | 0.54 |
| 365332 | 1.54 | 0.68 | #N/A | #N/A | #N/A | #N/A |
| 365463 | 1.81 | 0.76 | 1.02 | 0.64 | 0.70 | 0.28 |
| 372995 | 0.92 | 0.42 | #N/A | #N/A | 0.84 | 0.40 |
| 373074 | 2.50 | 0.91 | 1.13 | 0.65 | 1.28 | 0.65 |
| 374857 | 2.50 | 0.91 | 1.13 | 0.65 | 2.76 | 0.95 |
| 377158 | #N/A | #N/A | #N/A | #N/A | 1.30 | 0.65 |
| 377284 | 2.96 | 0.96 | 1.08 | 0.70 | 1.49 | 0.74 |
| 379778 | 2.96 | 0.96 | 1.08 | 0.70 | 2.10 | 0.89 |
| 380016 | 2.02 | 0.82 | 0.43 | 0.07 | #N/A | #N/A |
| 381811 | 2.02 | 0.82 | 0.43 | 0.07 | 2.54 | 0.93 |
| 382379 | 0.88 | 0.42 | 0.80 | 0.43 | 1.41 | 0.70 |
| 383422 | 0.42 | 0.17 | 1.03 | 0.67 | 0.59 | 0.20 |
| 383553 | 0.75 | 0.34 | 0.64 | 0.26 | 1.64 | 0.79 |
| 385343 | 0.75 | 0.34 | 0.64 | 0.26 | 1.08 | 0.56 |
| 389569 | #N/A | #N/A | #N/A | #N/A | 0.37 | 0.05 |
| 394252 | 0.28 | 0.09 | 1.12 | 0.73 | 0.39 | 0.05 |
| 398382 | 1.95 | 0.80 | 1.03 | 0.63 | 2.14 | 0.89 |
| 399233 | 2.78 | 0.94 | 0.85 | 0.48 | 2.47 | 0.93 |
| 402686 | 2.26 | 0.88 | 1.04 | 0.58 | 0.68 | 0.28 |
| 402838 | 2.35 | 0.89 | 1.05 | 0.62 | 1.25 | 0.63 |
| 404762 | 2.35 | 0.89 | 1.05 | 0.62 | 0.85 | 0.39 |
| 404870 | #N/A | #N/A | 0.96 | 0.61 | 1.98 | 0.86 |
| 406257 | 1.46 | 0.66 | 1.29 | 0.84 | 2.70 | 0.95 |

|        |      |      |      |      |      |      |
|--------|------|------|------|------|------|------|
| 410372 | 1.46 | 0.66 | 1.29 | 0.84 | 1.92 | 0.85 |
| 411835 | 2.17 | 0.86 | 1.05 | 0.69 | 2.04 | 0.88 |
| 412033 | 0.96 | 0.45 | #N/A | #N/A | 1.50 | 0.74 |
| 413012 | 2.20 | 0.86 | 1.41 | 0.52 | 0.84 | 0.38 |
| 415027 | 3.76 | 0.99 | 0.36 | 0.05 | 3.55 | 0.98 |
| 419462 | 3.76 | 0.99 | 0.36 | 0.05 | 0.77 | 0.33 |
| 419612 | 0.98 | 0.46 | 0.60 | 0.20 | 1.02 | 0.51 |
| 421023 | 1.52 | 0.68 | 0.94 | 0.58 | 2.03 | 0.88 |
| 422071 | 3.82 | 0.99 | 1.13 | 0.75 | 3.68 | 0.99 |
| 423616 | 3.82 | 0.99 | 1.13 | 0.75 | 3.88 | 0.99 |
| 423806 | 4.53 | 1.00 | 0.74 | 0.36 | 2.19 | 0.90 |
| 430494 | 1.44 | 0.64 | 0.84 | 0.47 | 2.06 | 0.88 |
| 433385 | 0.65 | 0.29 | 0.93 | 0.57 | 1.13 | 0.57 |
| 434299 | 0.65 | 0.29 | 0.93 | 0.57 | 1.09 | 0.56 |
| 435270 | 1.73 | 0.74 | 0.84 | 0.48 | 2.27 | 0.91 |
| 437040 | 1.38 | 0.63 | 0.70 | 0.32 | 0.96 | 0.47 |
| 437991 | #N/A | #N/A | #N/A | #N/A | 2.61 | 0.94 |
| 435619 | 2.03 | 0.83 | 0.84 | 0.46 | 0.86 | 0.41 |
| 432914 | 2.03 | 0.83 | 0.84 | 0.46 | 1.01 | 0.51 |
| 432693 | 2.28 | 0.87 | 0.98 | 0.53 | 1.68 | 0.81 |
| 431282 | 2.28 | 0.87 | 0.98 | 0.53 | 2.81 | 0.95 |
| 430930 | 1.36 | 0.62 | 0.81 | 0.43 | 0.48 | 0.12 |
| 422831 | 0.87 | 0.41 | 0.83 | 0.45 | 1.56 | 0.77 |
| 422391 | #N/A | #N/A | #N/A | #N/A | 0.63 | 0.23 |
| 419650 | 1.97 | 0.80 | #N/A | #N/A | 0.92 | 0.44 |
| 419874 | #N/A | #N/A | #N/A | #N/A | 1.27 | 0.65 |
| 417255 | #N/A | #N/A | #N/A | #N/A | 0.67 | 0.26 |
| 413978 | #N/A | #N/A | #N/A | #N/A | 1.51 | 0.75 |
| 411146 | 1.47 | 0.64 | 1.09 | 0.68 | 0.49 | 0.13 |
| 409187 | 0.80 | 0.38 | 1.41 | 0.85 | 1.08 | 0.55 |
| 408856 | 0.75 | 0.35 | #N/A | #N/A | 1.03 | 0.51 |
| 406837 | 0.36 | 0.15 | 1.37 | 0.86 | #N/A | #N/A |
| 406968 | 0.75 | 0.35 | #N/A | #N/A | 1.78 | 0.82 |
| 406261 | 1.78 | 0.76 | 0.75 | 0.37 | 1.14 | 0.58 |
| #N/A   | 2.82 | 0.95 | 1.20 | 0.80 | 1.38 | 0.69 |
| 404641 | 2.82 | 0.95 | 1.20 | 0.80 | 1.21 | 0.62 |
| 398633 | 2.82 | 0.95 | 1.20 | 0.80 | 0.55 | 0.18 |
| #N/A   | 2.82 | 0.95 | 1.20 | 0.80 | 0.41 | 0.07 |
| 398113 | 0.99 | 0.45 | 0.76 | 0.39 | 2.25 | 0.91 |
| 397051 | 1.79 | 0.76 | 1.08 | 0.64 | 1.44 | 0.73 |
| 395627 | 0.80 | 0.38 | #N/A | #N/A | 0.95 | 0.47 |
| 395207 | #N/A | #N/A | #N/A | #N/A | 0.79 | 0.36 |
| 393299 | 1.75 | 0.74 | 0.86 | 0.49 | 1.07 | 0.53 |
| 391529 | 1.75 | 0.74 | 0.86 | 0.49 | 1.42 | 0.71 |
| 391342 | 1.17 | 0.54 | 1.03 | 0.66 | 1.61 | 0.79 |
| 388081 | 2.10 | 0.83 | #N/A | #N/A | 0.59 | 0.20 |
| 387943 | #N/A | #N/A | 0.94 | 0.59 | 2.17 | 0.90 |
| 386064 | #N/A | #N/A | 0.94 | 0.59 | 0.74 | 0.32 |
| 386358 | #N/A | #N/A | #N/A | #N/A | #N/A | #N/A |
| 385845 | 1.82 | 0.78 | 0.44 | 0.08 | 1.01 | 0.50 |
| 383071 | 1.96 | 0.80 | 1.08 | 0.57 | 0.44 | 0.10 |

|        |      |      |      |      |      |      |
|--------|------|------|------|------|------|------|
| 379945 | 1.96 | 0.80 | 1.08 | 0.57 | 2.53 | 0.94 |
| 379792 | 1.59 | 0.69 | 1.63 | 0.89 | 0.96 | 0.46 |
| 377032 | 1.67 | 0.72 | 1.61 | 0.91 | 2.68 | 0.95 |
| 374811 | 1.67 | 0.72 | 1.61 | 0.91 | 1.83 | 0.84 |
| 368444 | 1.63 | 0.71 | 1.37 | 0.87 | 0.39 | 0.06 |
| 368069 | #N/A | #N/A | #N/A | #N/A | 0.75 | 0.32 |
| 365141 | #N/A | #N/A | #N/A | #N/A | 0.86 | 0.39 |
| 360599 | 1.56 | 0.69 | 1.01 | 0.57 | 2.14 | 0.90 |
| 357996 | 1.56 | 0.69 | 1.01 | 0.57 | 1.76 | 0.82 |
| 357624 | 0.90 | 0.43 | 0.74 | 0.38 | 2.34 | 0.92 |
| 353311 | 1.12 | 0.51 | 0.68 | 0.31 | 1.15 | 0.59 |
| 349276 | 1.12 | 0.51 | 0.68 | 0.31 | 0.98 | 0.48 |
| 347143 | 0.70 | 0.33 | 0.96 | 0.59 | 0.99 | 0.50 |
| 347021 | 1.33 | 0.60 | #N/A | #N/A | 1.00 | 0.50 |
| 345439 | #N/A | #N/A | #N/A | #N/A | 0.67 | 0.27 |
| 341951 | 1.08 | 0.49 | 0.47 | 0.10 | 0.87 | 0.42 |
| 338965 | 1.49 | 0.66 | 0.83 | 0.46 | 1.51 | 0.74 |
| 336733 | #N/A | #N/A | #N/A | #N/A | 1.00 | 0.51 |
| 335397 | #N/A | #N/A | 1.27 | 0.67 | 1.35 | 0.69 |
| 333790 | 2.52 | 0.92 | 0.63 | 0.23 | 2.58 | 0.94 |
| 330127 | 2.52 | 0.92 | 0.63 | 0.23 | 0.94 | 0.46 |
| 327814 | 1.40 | 0.64 | 1.13 | 0.61 | 1.46 | 0.74 |
| 325938 | 1.42 | 0.64 | 1.37 | 0.86 | 1.36 | 0.70 |
| 325886 | #N/A | #N/A | #N/A | #N/A | 1.66 | 0.80 |
| 324416 | 0.99 | 0.45 | 1.06 | 0.71 | 1.40 | 0.70 |
| 321853 | 1.18 | 0.55 | #N/A | #N/A | 0.79 | 0.34 |
| 319472 | 3.41 | 0.98 | 1.31 | 0.70 | 1.52 | 0.74 |
| 315455 | 3.41 | 0.98 | 1.31 | 0.70 | 3.82 | 0.99 |
| 315266 | 1.65 | 0.71 | 0.75 | 0.39 | 3.60 | 0.99 |
| 314750 | 2.17 | 0.86 | 0.97 | 0.54 | 3.38 | 0.98 |
| 313810 | 1.65 | 0.71 | 0.75 | 0.39 | 3.43 | 0.98 |
| 314130 | #N/A | #N/A | #N/A | #N/A | #N/A | #N/A |
| 312712 | #N/A | #N/A | #N/A | #N/A | 2.65 | 0.95 |
| 310618 | 2.06 | 0.84 | #N/A | #N/A | 1.23 | 0.63 |
| 307667 | 1.49 | 0.66 | #N/A | #N/A | 0.64 | 0.23 |
| 307552 | 2.26 | 0.86 | #N/A | #N/A | 0.97 | 0.48 |
| 304917 | 2.26 | 0.86 | #N/A | #N/A | 1.48 | 0.72 |
| 304814 | 2.84 | 0.95 | 1.01 | 0.65 | 0.88 | 0.41 |
| 298853 | 2.84 | 0.95 | 1.01 | 0.65 | 0.98 | 0.48 |
| 298156 | #N/A | #N/A | #N/A | #N/A | 0.39 | 0.06 |
| 298510 | #N/A | #N/A | #N/A | #N/A | 0.50 | 0.14 |
| 294362 | #N/A | #N/A | #N/A | #N/A | 0.95 | 0.47 |
| 291032 | 0.48 | 0.19 | 0.39 | 0.08 | 1.19 | 0.59 |
| 289571 | 0.63 | 0.30 | 0.68 | 0.28 | 1.16 | 0.60 |
| 285254 | 1.27 | 0.57 | 1.05 | 0.69 | 0.51 | 0.14 |
| 283498 | 2.50 | 0.91 | 0.96 | 0.60 | 1.06 | 0.55 |
| 283076 | 0.87 | 0.41 | #N/A | #N/A | 0.52 | 0.15 |
| 280351 | 1.75 | 0.75 | 0.61 | 0.21 | 1.02 | 0.52 |
| 274558 | 1.75 | 0.75 | 0.61 | 0.21 | 0.37 | 0.05 |
| 274394 | #N/A | #N/A | #N/A | #N/A | 0.48 | 0.12 |
| 272174 | #N/A | #N/A | 0.92 | 0.57 | 2.35 | 0.92 |



|        |      |      |      |      |      |      |
|--------|------|------|------|------|------|------|
| 269698 | #N/A | #N/A | 0.92 | 0.57 | 0.52 | 0.15 |
| 269511 | 0.17 | 0.02 | 0.47 | 0.14 | 0.86 | 0.40 |
| 268111 | 0.69 | 0.31 | 0.64 | 0.28 | 0.93 | 0.46 |
| 262453 | 0.69 | 0.31 | 0.64 | 0.28 | 0.57 | 0.19 |
| 260776 | 1.11 | 0.51 | 0.97 | 0.58 | 1.44 | 0.71 |
| 260643 | 4.46 | 1.00 | 0.40 | 0.06 | 0.89 | 0.42 |
| 254433 | 4.46 | 1.00 | 0.40 | 0.06 | 1.29 | 0.64 |
| 251517 | 1.46 | 0.66 | 1.38 | 0.86 | 0.62 | 0.22 |
| 251387 | 1.83 | 0.78 | 1.04 | 0.55 | 0.66 | 0.25 |
| 246672 | 1.45 | 0.65 | #N/A | #N/A | 2.39 | 0.93 |
| 245941 | 1.45 | 0.65 | #N/A | #N/A | #N/A | #N/A |
| 244955 | 1.11 | 0.51 | 0.80 | 0.42 | 0.41 | 0.08 |
| 241351 | 1.33 | 0.59 | 0.98 | 0.62 | 0.86 | 0.40 |
| 238783 | 1.04 | 0.49 | 0.48 | 0.10 | 0.97 | 0.49 |
| 234017 | 1.04 | 0.49 | 0.48 | 0.10 | 0.53 | 0.17 |
| 233457 | 2.43 | 0.90 | 0.69 | 0.30 | 1.22 | 0.62 |
| 228722 | 2.43 | 0.90 | 0.69 | 0.30 | 0.78 | 0.33 |
| 227473 | #N/A | #N/A | #N/A | #N/A | 2.19 | 0.90 |
| 226434 | 0.65 | 0.29 | 0.72 | 0.34 | 0.45 | 0.10 |
| 223024 | 1.25 | 0.56 | 0.52 | 0.13 | 0.85 | 0.39 |
| 218550 | 1.25 | 0.56 | 0.52 | 0.13 | 0.65 | 0.25 |
| 217402 | 1.25 | 0.56 | 0.52 | 0.13 | 0.44 | 0.09 |
| 211697 | 1.26 | 0.58 | #N/A | #N/A | 0.39 | 0.06 |
| 209619 | 1.14 | 0.52 | 0.59 | 0.25 | 0.50 | 0.13 |
| 209226 | 1.57 | 0.70 | 0.56 | 0.17 | 0.88 | 0.43 |
| 207146 | 1.39 | 0.61 | 1.01 | 0.66 | 0.57 | 0.19 |
| 203026 | 0.76 | 0.35 | 0.88 | 0.48 | 0.67 | 0.26 |
| 198858 | 0.76 | 0.35 | 0.88 | 0.48 | 1.29 | 0.66 |
| 196825 | 0.98 | 0.45 | 0.69 | 0.31 | 0.94 | 0.45 |
| 193560 | 0.98 | 0.45 | 0.69 | 0.31 | 1.59 | 0.78 |
| 193166 | #N/A | #N/A | #N/A | #N/A | 0.98 | 0.48 |
| 191998 | 1.60 | 0.70 | 0.73 | 0.34 | 2.16 | 0.89 |
| 191272 | #N/A | #N/A | #N/A | #N/A | 2.39 | 0.92 |
| 191045 | 0.70 | 0.33 | 0.64 | 0.25 | 2.90 | 0.96 |
| 190074 | 1.60 | 0.70 | 0.73 | 0.34 | 1.54 | 0.75 |
| 189943 | 1.81 | 0.76 | 0.80 | 0.41 | 2.23 | 0.91 |
| 187704 | 1.81 | 0.76 | 0.80 | 0.41 | 0.88 | 0.42 |
| 186826 | 1.51 | 0.68 | 0.74 | 0.34 | 1.70 | 0.80 |
| 185227 | 1.30 | 0.59 | 1.19 | 0.71 | 0.84 | 0.38 |
| 185123 | 1.91 | 0.78 | #N/A | #N/A | 1.10 | 0.56 |
| 181997 | 1.91 | 0.78 | #N/A | #N/A | 0.85 | 0.40 |
| 177795 | 1.49 | 0.67 | 1.20 | 0.76 | 0.42 | 0.07 |
| 173297 | 1.23 | 0.56 | 0.96 | 0.61 | 0.33 | 0.02 |
| 165421 | 0.60 | 0.25 | 0.86 | 0.49 | 0.42 | 0.09 |
| 163976 | 2.28 | 0.87 | #N/A | #N/A | 1.42 | 0.72 |
| 163864 | 0.87 | 0.40 | #N/A | #N/A | 1.52 | 0.75 |
| 161261 | 0.32 | 0.08 | 0.35 | 0.06 | 0.59 | 0.21 |
| 159115 | 0.33 | 0.10 | 0.35 | 0.04 | 0.54 | 0.16 |
| 157892 | 0.33 | 0.10 | 0.35 | 0.04 | 1.88 | 0.84 |
| 156248 | 0.33 | 0.10 | 0.35 | 0.04 | #N/A | #N/A |
| 154683 | 1.29 | 0.59 | 1.06 | 0.65 | 1.30 | 0.65 |

|        |      |      |      |      |      |      |
|--------|------|------|------|------|------|------|
| 153202 | 1.03 | 0.47 | 0.85 | 0.48 | 0.61 | 0.21 |
| 151411 | 0.71 | 0.32 | 1.03 | 0.58 | 1.26 | 0.63 |
| 151324 | 1.92 | 0.80 | 0.67 | 0.29 | 0.86 | 0.41 |
| 147665 | 1.92 | 0.80 | 0.67 | 0.29 | 0.49 | 0.13 |
| 147517 | 1.92 | 0.80 | 0.67 | 0.29 | 0.90 | 0.43 |
| 147275 | 3.01 | 0.96 | 0.86 | 0.49 | 3.16 | 0.97 |
| 146371 | 0.76 | 0.35 | 0.85 | 0.49 | 1.67 | 0.79 |
| 145742 | 1.01 | 0.47 | 1.01 | 0.64 | 0.81 | 0.38 |
| 144399 | 2.29 | 0.87 | 0.87 | 0.50 | 0.93 | 0.46 |
| 141117 | 2.29 | 0.87 | 0.87 | 0.50 | 1.11 | 0.55 |
| 140836 | 0.65 | 0.30 | 0.68 | 0.33 | 0.69 | 0.28 |
| 139068 | 0.60 | 0.26 | 0.77 | 0.39 | 0.89 | 0.43 |
| 137123 | 0.60 | 0.26 | 0.77 | 0.39 | 1.92 | 0.85 |
| 136070 | 0.60 | 0.26 | 0.77 | 0.39 | 0.77 | 0.35 |
| 136231 | #N/A | #N/A | #N/A | #N/A | 0.71 | 0.30 |
| 134030 | #N/A | #N/A | #N/A | #N/A | 1.24 | 0.62 |
| 130799 | 1.36 | 0.60 | #N/A | #N/A | 0.56 | 0.18 |
| 128983 | 1.14 | 0.53 | 1.23 | 0.59 | 1.39 | 0.69 |
| 126587 | 1.89 | 0.78 | #N/A | #N/A | 0.71 | 0.30 |
| 123533 | 0.75 | 0.35 | 0.65 | 0.30 | 0.42 | 0.08 |
| 121962 | 0.68 | 0.32 | 0.75 | 0.39 | 1.05 | 0.54 |
| 121376 | 0.96 | 0.44 | 0.59 | 0.19 | 0.76 | 0.34 |
| 118278 | 1.83 | 0.77 | 0.65 | 0.28 | 1.89 | 0.85 |
| 117781 | 1.71 | 0.73 | 0.95 | 0.58 | 2.63 | 0.94 |
| 114175 | #N/A | #N/A | #N/A | #N/A | 0.61 | 0.22 |
| 111660 | 1.49 | 0.66 | 0.98 | 0.63 | 2.08 | 0.88 |
| 109958 | 1.86 | 0.77 | 0.90 | 0.51 | 1.16 | 0.58 |
| 106886 | 2.41 | 0.89 | 1.04 | 0.63 | 0.57 | 0.18 |
| 106710 | 1.07 | 0.48 | 0.75 | 0.36 | #N/A | #N/A |
| 106064 | 2.23 | 0.87 | 1.16 | 0.74 | 1.09 | 0.54 |
| 102219 | 2.23 | 0.87 | 1.16 | 0.74 | 0.56 | 0.19 |
| 102459 | 0.88 | 0.42 | 1.26 | 0.52 | 0.39 | 0.05 |
| 101143 | 0.88 | 0.42 | 1.26 | 0.52 | 3.78 | 0.99 |
| 99697  | #N/A | #N/A | #N/A | #N/A | 1.48 | 0.73 |
| 99460  | 2.53 | 0.92 | 1.33 | 0.76 | 1.23 | 0.63 |
| 96158  | 2.53 | 0.92 | 1.33 | 0.76 | 3.17 | 0.98 |
| 95919  | 3.39 | 0.98 | 0.60 | 0.21 | 0.85 | 0.41 |
| 94558  | 0.46 | 0.17 | 1.19 | 0.73 | 3.10 | 0.97 |
| 92050  | 3.39 | 0.98 | 0.60 | 0.21 | 1.13 | 0.57 |
| 91654  | 0.53 | 0.22 | 0.57 | 0.22 | 0.45 | 0.11 |
| 89280  | 0.53 | 0.22 | 0.57 | 0.22 | 0.88 | 0.41 |
| 89114  | #N/A | #N/A | #N/A | #N/A | 2.39 | 0.92 |
| 87581  | #N/A | #N/A | #N/A | #N/A | 1.39 | 0.71 |
| 87493  | #N/A | #N/A | #N/A | #N/A | 0.88 | 0.41 |
| 85433  | #N/A | #N/A | #N/A | #N/A | 2.84 | 0.96 |
| 85334  | 2.88 | 0.95 | 0.85 | 0.47 | 1.66 | 0.79 |
| 83817  | 1.87 | 0.79 | 0.55 | 0.15 | 4.16 | 0.99 |
| 82093  | 1.87 | 0.79 | 0.55 | 0.15 | 2.20 | 0.90 |
| 81913  | 0.90 | 0.41 | 1.32 | 0.83 | 0.55 | 0.17 |
| 76802  | 0.90 | 0.41 | 1.32 | 0.83 | 0.49 | 0.13 |
| 76201  | #N/A | #N/A | #N/A | #N/A | 0.61 | 0.22 |

|        |      |      |      |      |      |      |
|--------|------|------|------|------|------|------|
| 76473  | 0.15 | 0.01 | 0.63 | 0.28 | 0.34 | 0.03 |
| 74909  | 0.15 | 0.01 | 0.63 | 0.28 | 0.52 | 0.15 |
| 74610  | 0.68 | 0.30 | 0.68 | 0.36 | 0.48 | 0.12 |
| 72709  | 0.68 | 0.30 | 0.68 | 0.36 | 1.23 | 0.63 |
| 72573  | 2.98 | 0.96 | 0.92 | 0.57 | 1.38 | 0.69 |
| 70878  | 0.53 | 0.25 | 0.64 | 0.30 | 0.61 | 0.22 |
| 69240  | 2.98 | 0.96 | 0.92 | 0.57 | 0.56 | 0.19 |
| 67849  | 0.53 | 0.25 | 0.64 | 0.30 | 1.20 | 0.62 |
| 67568  | 1.82 | 0.78 | 0.84 | 0.44 | 0.50 | 0.14 |
| 63488  | 2.95 | 0.96 | 0.81 | 0.44 | 0.76 | 0.32 |
| 59855  | 2.95 | 0.96 | 0.81 | 0.44 | 4.91 | 1.00 |
| 56444  | #N/A | #N/A | #N/A | #N/A | 0.66 | 0.25 |
| 56178  | 1.51 | 0.66 | #N/A | #N/A | 0.79 | 0.35 |
| 53943  | 1.51 | 0.66 | #N/A | #N/A | 1.19 | 0.59 |
| 54183  | 1.60 | 0.69 | #N/A | #N/A | 1.48 | 0.74 |
| 50629  | 1.60 | 0.69 | #N/A | #N/A | 0.67 | 0.25 |
| 47659  | 1.99 | 0.82 | 1.11 | 0.74 | 1.26 | 0.64 |
| #N/A   | #N/A | #N/A | #N/A | #N/A | 2.29 | 0.91 |
| 41389  | 1.29 | 0.59 | #N/A | #N/A | 0.51 | 0.15 |
| 40194  | 1.50 | 0.66 | #N/A | #N/A | 1.56 | 0.75 |
| 39969  | #N/A | #N/A | #N/A | #N/A | 0.93 | 0.46 |
| 37734  | 1.15 | 0.53 | 0.62 | 0.22 | 1.54 | 0.76 |
| 36757  | #N/A | #N/A | #N/A | #N/A | 1.54 | 0.75 |
| 33850  | 1.15 | 0.53 | 0.62 | 0.22 | 0.58 | 0.20 |
| 33158  | #N/A | #N/A | #N/A | #N/A | 0.79 | 0.36 |
| 28596  | 0.65 | 0.29 | #N/A | #N/A | 1.19 | 0.60 |
| 26412  | 0.65 | 0.29 | #N/A | #N/A | 1.38 | 0.69 |
| 24341  | 1.12 | 0.51 | 1.44 | 0.83 | 0.70 | 0.29 |
| 23729  | #N/A | #N/A | 0.62 | 0.23 | 1.36 | 0.68 |
| 22563  | 1.45 | 0.64 | 0.89 | 0.52 | 1.91 | 0.85 |
| 21200  | 1.79 | 0.75 | 0.78 | 0.39 | 2.61 | 0.94 |
| 18695  | 1.20 | 0.54 | 1.47 | 0.89 | 2.03 | 0.88 |
| 16767  | 1.79 | 0.75 | 0.78 | 0.39 | 2.41 | 0.92 |
| 16124  | #N/A | #N/A | #N/A | #N/A | 0.62 | 0.22 |
| 8776   | 0.75 | 0.34 | 0.84 | 0.47 | 1.02 | 0.51 |
| 466    | #N/A | #N/A | #N/A | #N/A | 0.61 | 0.22 |
| 438303 | 1.55 | 0.67 | 7.39 | 1.00 | 0.98 | 0.49 |
| 440338 | #N/A | #N/A | #N/A | #N/A | 0.78 | 0.35 |
| 440686 | #N/A | #N/A | 1.13 | 0.54 | 1.36 | 0.68 |
| 442601 | 1.18 | 0.54 | 0.76 | 0.38 | 0.66 | 0.24 |
| 447717 | 1.18 | 0.54 | 0.76 | 0.38 | 0.62 | 0.22 |
| 450357 | 0.86 | 0.39 | 0.62 | 0.24 | 2.40 | 0.93 |
| 451626 | 1.73 | 0.74 | 0.98 | 0.51 | 0.85 | 0.40 |
| 453138 | 0.91 | 0.43 | 1.48 | 0.91 | 1.05 | 0.53 |
| 453375 | 0.61 | 0.26 | 0.40 | 0.06 | 0.99 | 0.50 |
| 457769 | 2.09 | 0.84 | 1.27 | 0.83 | 2.11 | 0.89 |
| 457466 | #N/A | #N/A | #N/A | #N/A | 1.23 | 0.63 |
| 458333 | 1.88 | 0.78 | 0.69 | 0.30 | 1.96 | 0.86 |
| 459487 | 1.40 | 0.62 | #N/A | #N/A | 2.30 | 0.92 |
| 461286 | 1.40 | 0.62 | #N/A | #N/A | 1.42 | 0.70 |
| 462118 | #N/A | #N/A | #N/A | #N/A | 0.90 | 0.43 |

|        |      |      |        |      |      |      |
|--------|------|------|--------|------|------|------|
| 463946 | #N/A | #N/A | 0.78   | 0.39 | 0.81 | 0.38 |
| 464144 | 0.50 | 0.20 | 1.00   | 0.65 | 0.36 | 0.04 |
| 466214 | 0.69 | 0.31 | #N/A   | #N/A | 2.11 | 0.89 |
| 466841 | 0.50 | 0.20 | 1.00   | 0.65 | 2.35 | 0.92 |
| 466925 | 1.09 | 0.49 | 1.14   | 0.74 | 2.58 | 0.94 |
| 468026 | 0.69 | 0.31 | #N/A   | #N/A | 2.23 | 0.91 |
| 468248 | 1.27 | 0.57 | 0.64   | 0.23 | 1.30 | 0.67 |
| 469806 | 1.27 | 0.57 | 0.64   | 0.23 | #N/A | #N/A |
| 469497 | 1.26 | 0.57 | 0.67   | 0.29 | 2.32 | 0.92 |
| 469923 | 1.26 | 0.57 | 0.67   | 0.29 | 1.51 | 0.75 |
| 470831 | 0.92 | 0.44 | 1.01   | 0.66 | 1.46 | 0.74 |
| 473775 | 0.92 | 0.44 | 1.01   | 0.66 | 1.21 | 0.62 |
| 477721 | 0.92 | 0.44 | 1.01   | 0.66 | 0.50 | 0.14 |
| 479359 | 0.92 | 0.44 | 1.01   | 0.66 | 1.34 | 0.69 |
| 483305 | 0.92 | 0.44 | 1.01   | 0.66 | 0.51 | 0.14 |
| 483652 | 1.37 | 0.62 | 0.76   | 0.37 | 0.68 | 0.28 |
| 486279 | 2.34 | 0.89 | 0.85   | 0.49 | 0.81 | 0.36 |
| 491955 | 2.34 | 0.89 | 0.85   | 0.49 | 1.19 | 0.61 |
| 492071 | #N/A | #N/A | #N/A   | #N/A | 0.65 | 0.25 |
| 496702 | #N/A | #N/A | #N/A   | #N/A | 3.23 | 0.97 |
| 500305 | #N/A | #N/A | #N/A   | #N/A | 0.70 | 0.29 |
| 500406 | 3.00 | 0.96 | 1.17   | 0.70 | 0.86 | 0.41 |
| 503178 | 0.23 | 0.05 | #N/A   | #N/A | 2.52 | 0.93 |
| 503403 | 2.22 | 0.85 | 0.95   | 0.60 | 4.40 | 1.00 |
| 506994 | 3.00 | 0.96 | 1.17   | 0.70 | 1.16 | 0.58 |
| 509778 | 2.22 | 0.85 | 0.95   | 0.60 | 0.80 | 0.37 |
| 509932 | 2.51 | 0.92 | #N/A   | #N/A | 0.62 | 0.22 |
| 515982 | 2.51 | 0.92 | #N/A   | #N/A | 0.40 | 0.06 |
| 516154 | 2.13 | 0.85 | 1.22   | 0.75 | 1.19 | 0.59 |
| 518456 | #N/A | #N/A | #N/A   | #N/A | 2.33 | 0.91 |
| 519331 | 1.55 | 0.68 | 0.69   | 0.31 | 0.37 | 0.05 |
| 523555 | 1.55 | 0.68 | 0.69   | 0.31 | 1.03 | 0.53 |
| 524601 | 0.41 | 0.17 | 0.59   | 0.26 | 1.99 | 0.87 |
| 526357 | 0.41 | 0.17 | 0.59   | 0.26 | 0.75 | 0.31 |
| 526577 | 1.96 | 0.81 | 0.93   | 0.55 | 1.09 | 0.54 |
| 529097 | 1.96 | 0.81 | 0.93   | 0.55 | 1.57 | 0.77 |
| 531059 | 1.15 | 0.53 | 0.77   | 0.40 | 0.91 | 0.45 |
| 533452 | 0.76 | 0.36 | #N/A   | #N/A | 1.04 | 0.53 |
| 535444 | #N/A | #N/A | #N/A   | #N/A | 0.97 | 0.49 |
| 537242 | 1.12 | 0.51 | 497.36 | 0.73 | 0.46 | 0.11 |
| 538959 | 1.66 | 0.71 | #N/A   | #N/A | 2.00 | 0.87 |
| 541485 | 1.62 | 0.70 | 0.97   | 0.61 | 1.08 | 0.56 |
| 544405 | 1.26 | 0.58 | 0.80   | 0.43 | 1.31 | 0.66 |
| 544425 | 1.65 | 0.73 | 1.08   | 0.68 | 1.87 | 0.85 |
| 547936 | 1.65 | 0.73 | 1.08   | 0.68 | 0.66 | 0.25 |
| 549507 | 0.76 | 0.36 | 0.67   | 0.27 | 0.78 | 0.36 |
| 553011 | #N/A | #N/A | #N/A   | #N/A | 1.13 | 0.57 |
| 553169 | 2.59 | 0.92 | 0.47   | 0.12 | 0.88 | 0.42 |
| 555265 | 2.59 | 0.92 | 0.47   | 0.12 | 3.39 | 0.98 |
| 557295 | 2.19 | 0.85 | 0.83   | 0.46 | 1.15 | 0.59 |
| 557502 | 2.67 | 0.93 | 1.04   | 0.68 | 1.58 | 0.77 |

|        |      |      |      |      |      |      |
|--------|------|------|------|------|------|------|
| 566521 | 2.67 | 0.93 | 1.04 | 0.68 | 0.79 | 0.35 |
| 566712 | 2.32 | 0.89 | 0.68 | 0.28 | 3.23 | 0.97 |
| 568397 | 2.32 | 0.89 | 0.68 | 0.28 | 1.62 | 0.77 |
| 568499 | 0.78 | 0.36 | 0.80 | 0.43 | 1.73 | 0.81 |
| 569314 | 0.82 | 0.38 | 0.54 | 0.18 | 0.71 | 0.29 |
| 570466 | 0.78 | 0.36 | 0.80 | 0.43 | 0.75 | 0.33 |
| 570660 | 2.60 | 0.92 | #N/A | #N/A | 1.51 | 0.75 |
| 572008 | #N/A | #N/A | 0.39 | 0.05 | 2.46 | 0.93 |
| 573444 | #N/A | #N/A | 0.39 | 0.05 | 3.00 | 0.97 |
| 574864 | 1.45 | 0.64 | 0.84 | 0.47 | 0.72 | 0.29 |
| 575047 | #N/A | #N/A | #N/A | #N/A | 1.12 | 0.58 |
| 576948 | 1.11 | 0.50 | 0.98 | 0.55 | 0.98 | 0.48 |
| 579914 | 1.11 | 0.50 | 0.98 | 0.55 | 1.89 | 0.85 |
| 580932 | 1.11 | 0.50 | 0.98 | 0.55 | 0.91 | 0.45 |
| 580125 | 1.65 | 0.72 | 1.26 | 0.82 | 1.48 | 0.73 |
| 581607 | 1.86 | 0.77 | #N/A | #N/A | 2.16 | 0.89 |
| 582301 | #N/A | #N/A | 0.59 | 0.22 | 2.23 | 0.91 |
| 584697 | #N/A | #N/A | 0.59 | 0.22 | 1.26 | 0.64 |
| 584813 | #N/A | #N/A | #N/A | #N/A | 3.33 | 0.98 |
| 586093 | #N/A | #N/A | #N/A | #N/A | 2.54 | 0.93 |
| 586443 | #N/A | #N/A | #N/A | #N/A | 0.82 | 0.38 |
| 586188 | 2.77 | 0.95 | 0.91 | 0.53 | 1.30 | 0.67 |
| 590275 | 2.77 | 0.95 | 0.91 | 0.53 | 0.57 | 0.19 |
| 590565 | 0.75 | 0.34 | 0.79 | 0.42 | 0.43 | 0.09 |
| 594754 | 1.13 | 0.52 | 0.74 | 0.38 | 0.60 | 0.21 |
| 602774 | 1.13 | 0.52 | 0.74 | 0.38 | 0.40 | 0.07 |
| 602916 | 3.58 | 0.99 | 0.88 | 0.48 | 1.14 | 0.59 |
| 604265 | 0.73 | 0.33 | 0.93 | 0.54 | 1.49 | 0.74 |
| 608554 | #N/A | #N/A | #N/A | #N/A | 0.90 | 0.44 |
| 610437 | 1.01 | 0.46 | 1.09 | 0.72 | 2.68 | 0.95 |
| 611739 | 1.82 | 0.78 | #N/A | #N/A | 2.76 | 0.95 |
| 612627 | 2.76 | 0.94 | 0.50 | 0.14 | 1.75 | 0.82 |
| 612882 | 2.76 | 0.94 | 1.19 | 0.76 | 1.31 | 0.67 |
| 615979 | 2.76 | 0.94 | 1.19 | 0.76 | 1.11 | 0.58 |
| 616044 | 1.39 | 0.62 | 1.00 | 0.65 | 1.22 | 0.62 |
| 618727 | 1.47 | 0.65 | 1.22 | 0.64 | 0.97 | 0.48 |
| 618850 | 1.09 | 0.50 | 1.07 | 0.71 | 1.75 | 0.82 |
| 622141 | 1.09 | 0.50 | 1.07 | 0.71 | 0.94 | 0.47 |
| 622242 | 0.70 | 0.32 | 0.79 | 0.43 | 0.62 | 0.22 |
| 624295 | 0.70 | 0.32 | 0.79 | 0.43 | 1.20 | 0.60 |
| 626707 | 1.68 | 0.73 | 1.78 | 0.95 | 1.36 | 0.69 |
| 628019 | #N/A | #N/A | 1.27 | 0.59 | 0.51 | 0.14 |
| 628777 | 1.34 | 0.60 | 0.91 | 0.55 | 2.08 | 0.89 |
| 629279 | 1.98 | 0.81 | 0.85 | 0.46 | 0.46 | 0.11 |
| 635375 | 1.98 | 0.81 | 0.85 | 0.46 | 0.73 | 0.31 |
| 635549 | 1.46 | 0.66 | 0.55 | 0.21 | 0.62 | 0.22 |
| 637329 | 1.46 | 0.66 | 0.55 | 0.21 | 1.88 | 0.84 |
| 637926 | 0.96 | 0.46 | 0.78 | 0.40 | 1.77 | 0.82 |
| 638745 | 1.87 | 0.78 | #N/A | #N/A | 2.30 | 0.91 |
| 640145 | 0.96 | 0.46 | 0.78 | 0.40 | 3.87 | 0.99 |
| 641358 | 2.15 | 0.86 | 0.72 | 0.32 | 2.24 | 0.90 |

|        |      |      |      |      |      |      |
|--------|------|------|------|------|------|------|
| 643062 | 1.82 | 0.77 | 0.39 | 0.05 | 0.84 | 0.40 |
| 643184 | #N/A | #N/A | #N/A | #N/A | 2.06 | 0.88 |
| 643998 | 1.73 | 0.75 | 0.95 | 0.57 | 1.57 | 0.77 |
| 647170 | 1.73 | 0.75 | 0.95 | 0.57 | 0.85 | 0.38 |
| 648836 | 0.49 | 0.23 | 1.07 | 0.72 | 0.42 | 0.08 |
| 650963 | #N/A | #N/A | #N/A | #N/A | 1.62 | 0.78 |
| 652272 | 0.26 | 0.05 | 0.47 | 0.09 | #N/A | #N/A |
| 652586 | 0.92 | 0.44 | 1.05 | 0.50 | 0.84 | 0.39 |
| 654431 | 2.43 | 0.90 | 1.11 | 0.72 | 1.09 | 0.54 |
| 655948 | 1.41 | 0.62 | 1.07 | 0.70 | 0.76 | 0.33 |
| 658611 | 0.44 | 0.20 | 0.35 | 0.06 | 0.35 | 0.03 |
| 662974 | 1.41 | 0.62 | 1.07 | 0.70 | 0.18 | 0.01 |
| 663694 | 0.96 | 0.44 | 0.89 | 0.48 | 1.23 | 0.63 |
| 664912 | 2.03 | 0.83 | 0.90 | 0.51 | 0.80 | 0.36 |
| 668987 | 2.03 | 0.83 | 0.90 | 0.51 | 1.27 | 0.65 |
| 672362 | 1.33 | 0.59 | 1.02 | 0.61 | 0.57 | 0.19 |
| 673314 | 1.93 | 0.80 | #N/A | #N/A | 1.67 | 0.79 |
| 673423 | #N/A | #N/A | #N/A | #N/A | 0.97 | 0.49 |
| 675753 | 1.82 | 0.78 | 0.95 | 0.59 | 1.99 | 0.87 |
| 677135 | #N/A | #N/A | #N/A | #N/A | 1.66 | 0.78 |
| 678651 | 0.96 | 0.44 | 0.79 | 0.41 | 0.60 | 0.21 |
| 689015 | 0.96 | 0.44 | 0.79 | 0.41 | 0.52 | 0.16 |
| 689139 | #N/A | #N/A | 0.95 | 0.60 | 0.79 | 0.36 |
| 690444 | 2.49 | 0.91 | #N/A | #N/A | 0.67 | 0.26 |
| 696643 | 2.49 | 0.91 | #N/A | #N/A | 1.53 | 0.74 |
| 697863 | #N/A | #N/A | #N/A | #N/A | 1.64 | 0.78 |
| 698020 | #N/A | #N/A | #N/A | #N/A | 0.66 | 0.25 |
| 701385 | #N/A | #N/A | #N/A | #N/A | 1.40 | 0.70 |
| 701721 | 0.19 | 0.03 | 0.46 | 0.09 | 0.42 | 0.08 |
| 703932 | 0.19 | 0.03 | 0.46 | 0.09 | 0.88 | 0.43 |
| 704966 | 0.19 | 0.03 | 0.46 | 0.09 | 0.55 | 0.18 |
| 706568 | #N/A | #N/A | #N/A | #N/A | 0.49 | 0.13 |
| 708068 | 0.34 | 0.10 | 1.30 | 0.68 | 0.60 | 0.21 |
| 708505 | 1.45 | 0.63 | 0.72 | 0.37 | 2.20 | 0.90 |
| 711949 | 1.18 | 0.55 | 0.74 | 0.35 | 0.54 | 0.16 |
| 720991 | 1.13 | 0.51 | 0.96 | 0.61 | 0.54 | 0.16 |
| 723594 | 1.21 | 0.56 | 0.89 | 0.53 | 0.98 | 0.48 |
| 726518 | 1.66 | 0.72 | 0.94 | 0.53 | 0.98 | 0.48 |
| 727965 | 0.54 | 0.22 | 1.13 | 0.69 | 0.69 | 0.27 |
| 728268 | 2.93 | 0.95 | 1.03 | 0.68 | 3.41 | 0.98 |
| 730571 | 2.93 | 0.95 | 1.03 | 0.68 | 1.19 | 0.59 |
| 733837 | 0.60 | 0.26 | 0.89 | 0.53 | 1.22 | 0.62 |
| 736811 | 1.79 | 0.75 | 0.79 | 0.41 | 4.11 | 0.99 |
| 737702 | 1.36 | 0.62 | 0.98 | 0.62 | 1.38 | 0.68 |
| 742542 | 0.84 | 0.38 | 1.01 | 0.66 | 1.36 | 0.67 |
| 744605 | #N/A | #N/A | #N/A | #N/A | 0.62 | 0.23 |
| 438415 | #N/A | #N/A | 2.94 | 0.99 | 1.38 | 0.69 |
| 438182 | 1.62 | 0.70 | 0.94 | 0.58 | 1.14 | 0.59 |
| 436735 | 1.62 | 0.70 | 0.94 | 0.58 | 2.32 | 0.91 |
| 436423 | 2.47 | 0.90 | 0.80 | 0.41 | 0.72 | 0.30 |
| 432731 | 2.47 | 0.90 | 0.80 | 0.41 | 0.98 | 0.49 |

|        |      |      |      |      |      |      |
|--------|------|------|------|------|------|------|
| 429836 | 0.26 | 0.06 | 0.66 | 0.26 | 0.43 | 0.08 |
| 432358 | 0.26 | 0.06 | 0.66 | 0.26 | 0.43 | 0.08 |
| 429746 | 0.48 | 0.19 | 0.43 | 0.10 | 1.17 | 0.60 |
| 426933 | 0.48 | 0.19 | 0.43 | 0.10 | 0.57 | 0.18 |
| 426590 | #N/A | #N/A | #N/A | #N/A | 1.42 | 0.72 |
| 421062 | #N/A | #N/A | #N/A | #N/A | 0.55 | 0.17 |
| 419793 | 0.65 | 0.31 | #N/A | #N/A | 1.57 | 0.77 |
| 419699 | 2.53 | 0.92 | 1.15 | 0.74 | 0.85 | 0.39 |
| 417146 | 2.53 | 0.92 | 1.15 | 0.74 | 3.39 | 0.98 |
| 411257 | 1.58 | 0.69 | 0.65 | 0.25 | 0.62 | 0.23 |
| 411121 | #N/A | #N/A | #N/A | #N/A | 0.68 | 0.26 |
| 407103 | #N/A | #N/A | #N/A | #N/A | 1.09 | 0.56 |
| 404828 | 0.79 | 0.36 | #N/A | #N/A | 0.79 | 0.36 |
| 404729 | 3.47 | 0.98 | 0.80 | 0.42 | 2.32 | 0.91 |
| 403156 | 2.50 | 0.91 | 0.68 | 0.28 | 1.50 | 0.74 |
| 398470 | 2.50 | 0.91 | 0.68 | 0.28 | 0.67 | 0.27 |
| 396982 | 0.28 | 0.06 | #N/A | #N/A | 1.27 | 0.65 |
| 394364 | 0.58 | 0.25 | #N/A | #N/A | 1.22 | 0.63 |
| 394192 | 2.06 | 0.84 | 0.68 | 0.29 | 1.63 | 0.79 |
| 392164 | 2.06 | 0.84 | 0.68 | 0.29 | 1.61 | 0.78 |
| 389878 | #N/A | #N/A | #N/A | #N/A | 1.52 | 0.75 |
| 389018 | 1.01 | 0.47 | 1.18 | 0.73 | 2.20 | 0.90 |
| 388543 | 1.06 | 0.48 | #N/A | #N/A | 0.59 | 0.21 |
| 386844 | 0.85 | 0.39 | 0.46 | 0.09 | 1.24 | 0.62 |
| 382354 | 0.85 | 0.39 | 0.46 | 0.09 | 0.60 | 0.21 |
| 382741 | 0.30 | 0.08 | 0.51 | 0.12 | 0.71 | 0.29 |
| 382123 | 0.30 | 0.08 | 0.51 | 0.12 | 0.17 | 0.01 |
| 379703 | 0.30 | 0.08 | 0.51 | 0.12 | 0.46 | 0.11 |
| 378210 | 1.07 | 0.49 | 1.04 | 0.61 | 0.66 | 0.25 |
| 373744 | 1.57 | 0.69 | 1.25 | 0.56 | 0.93 | 0.45 |
| 371029 | 1.19 | 0.55 | 0.79 | 0.43 | 0.53 | 0.17 |
| 369167 | 1.57 | 0.69 | 1.25 | 0.56 | 2.26 | 0.91 |
| 369360 | 1.19 | 0.55 | 0.79 | 0.43 | 2.89 | 0.96 |
| 368756 | 0.99 | 0.46 | 0.80 | 0.41 | 0.42 | 0.08 |
| 363857 | 1.73 | 0.74 | 1.19 | 0.65 | 0.46 | 0.11 |
| 360698 | 1.73 | 0.74 | 1.19 | 0.65 | 0.90 | 0.42 |
| 360457 | 1.62 | 0.72 | 0.72 | 0.35 | 1.30 | 0.67 |
| 359207 | 0.93 | 0.43 | 1.03 | 0.66 | 0.70 | 0.29 |
| 357489 | 0.43 | 0.16 | 0.38 | 0.05 | 0.58 | 0.19 |
| 356283 | 0.20 | 0.04 | 0.24 | 0.02 | 0.75 | 0.33 |
| 354720 | 2.47 | 0.91 | 0.79 | 0.41 | 0.86 | 0.40 |
| 350916 | 2.47 | 0.91 | 0.79 | 0.41 | 0.94 | 0.46 |
| 350654 | 3.09 | 0.97 | 0.86 | 0.46 | 0.86 | 0.40 |
| 346855 | 3.09 | 0.97 | 0.86 | 0.46 | 0.94 | 0.46 |
| 345717 | 1.60 | 0.70 | 0.72 | 0.35 | 0.77 | 0.34 |
| 342494 | 0.61 | 0.29 | 1.09 | 0.73 | 0.89 | 0.43 |
| 342015 | 0.37 | 0.13 | 0.43 | 0.11 | 0.65 | 0.24 |
| 339310 | 0.37 | 0.13 | 0.43 | 0.11 | 0.83 | 0.37 |
| 339588 | 0.59 | 0.28 | 0.50 | 0.15 | 0.86 | 0.39 |
| 336179 | #N/A | #N/A | 0.47 | 0.12 | 0.24 | 0.01 |
| 334963 | 0.84 | 0.38 | 0.55 | 0.22 | 1.82 | 0.83 |

|        |      |      |      |      |      |      |
|--------|------|------|------|------|------|------|
| 334054 | 0.84 | 0.40 | 1.12 | 0.66 | 0.48 | 0.13 |
| 330498 | #N/A | #N/A | 1.46 | 0.74 | 0.71 | 0.28 |
| 330176 | 2.41 | 0.90 | 1.02 | 0.66 | 2.83 | 0.96 |
| 327760 | 2.41 | 0.90 | 1.02 | 0.66 | 0.88 | 0.42 |
| 326050 | 0.30 | 0.07 | 0.37 | 0.05 | 0.51 | 0.15 |
| 325754 | 1.00 | 0.46 | 0.93 | 0.58 | 0.81 | 0.36 |
| 324762 | 0.58 | 0.25 | 0.33 | 0.04 | 0.81 | 0.37 |
| 320657 | 1.07 | 0.49 | 0.60 | 0.22 | 0.80 | 0.37 |
| 320315 | 1.84 | 0.78 | 0.76 | 0.38 | 0.78 | 0.34 |
| 316079 | 1.84 | 0.78 | 0.76 | 0.38 | 1.18 | 0.59 |
| 315366 | 2.20 | 0.86 | 0.83 | 0.47 | 2.02 | 0.87 |
| 314915 | 2.20 | 0.86 | 0.83 | 0.47 | 0.93 | 0.44 |
| 312720 | #N/A | #N/A | #N/A | #N/A | 0.41 | 0.07 |
| 307469 | 1.34 | 0.60 | 1.21 | 0.80 | 2.91 | 0.96 |
| 306362 | 0.31 | 0.12 | 0.65 | 0.35 | 0.67 | 0.26 |
| 305526 | 0.51 | 0.21 | 1.13 | 0.75 | 0.43 | 0.09 |
| 301524 | 2.38 | 0.90 | 1.19 | 0.65 | 0.48 | 0.13 |
| 298717 | #N/A | #N/A | 0.98 | 0.57 | 1.00 | 0.50 |
| 294252 | #N/A | #N/A | 0.98 | 0.57 | 1.56 | 0.75 |
| 292598 | 2.62 | 0.92 | 1.10 | 0.59 | 0.69 | 0.28 |
| 292480 | 2.62 | 0.92 | 1.10 | 0.59 | 0.59 | 0.21 |
| 292273 | 2.45 | 0.90 | 0.83 | 0.43 | 0.78 | 0.34 |
| 290694 | 1.99 | 0.82 | 1.20 | 0.59 | 1.13 | 0.58 |
| 288215 | #N/A | #N/A | #N/A | #N/A | 0.95 | 0.46 |
| 285850 | 1.17 | 0.54 | 0.99 | 0.58 | 0.85 | 0.40 |
| 284097 | 0.94 | 0.43 | 0.96 | 0.53 | 0.46 | 0.11 |
| 280667 | 0.94 | 0.43 | 0.96 | 0.53 | 0.48 | 0.13 |
| 281177 | #N/A | #N/A | #N/A | #N/A | 0.29 | 0.01 |
| 280501 | 0.57 | 0.24 | 0.74 | 0.34 | 1.56 | 0.77 |
| 279769 | 1.47 | 0.65 | 0.63 | 0.23 | 1.02 | 0.52 |
| 278306 | 2.15 | 0.84 | #N/A | #N/A | #N/A | #N/A |
| 276831 | 2.15 | 0.84 | #N/A | #N/A | 1.58 | 0.77 |
| 276640 | 1.85 | 0.78 | 0.82 | 0.45 | 0.59 | 0.21 |
| 274685 | 1.46 | 0.66 | 0.84 | 0.47 | 1.00 | 0.50 |
| 272851 | 1.20 | 0.54 | 0.99 | 0.58 | 1.45 | 0.73 |
| 269360 | 1.20 | 0.54 | 0.99 | 0.58 | 1.42 | 0.72 |
| 265787 | 2.48 | 0.91 | 1.86 | 0.95 | 0.73 | 0.30 |
| 265450 | 0.66 | 0.30 | 1.15 | 0.67 | 1.15 | 0.59 |
| 263932 | 1.36 | 0.61 | #N/A | #N/A | 1.68 | 0.79 |
| 262755 | 1.61 | 0.70 | 1.06 | 0.66 | 1.00 | 0.49 |
| 261493 | 0.19 | 0.03 | 0.30 | 0.03 | 1.38 | 0.70 |
| 258145 | 0.23 | 0.04 | 0.54 | 0.15 | 0.41 | 0.07 |
| #N/A   | #N/A | #N/A | #N/A | #N/A | #N/A | #N/A |
| 257485 | 3.15 | 0.97 | 0.65 | 0.26 | 1.16 | 0.60 |
| 255344 | 3.15 | 0.97 | 0.65 | 0.26 | 2.10 | 0.89 |
| 253340 | 1.09 | 0.50 | 0.78 | 0.40 | 0.69 | 0.29 |
| 253119 | 2.18 | 0.86 | 0.73 | 0.34 | 0.41 | 0.08 |
| 247705 | 2.18 | 0.86 | 0.73 | 0.34 | 2.81 | 0.96 |
| 245781 | 0.93 | 0.43 | 0.60 | 0.20 | 1.47 | 0.74 |
| 242863 | 0.78 | 0.38 | 0.67 | 0.27 | 0.41 | 0.07 |
| 238828 | 1.50 | 0.66 | 1.25 | 0.82 | 0.61 | 0.23 |



|        |      |      |      |      |      |      |
|--------|------|------|------|------|------|------|
| 238534 | #N/A | #N/A | 0.61 | 0.32 | 0.66 | 0.25 |
| 236713 | 0.64 | 0.28 | 0.96 | 0.60 | 1.70 | 0.80 |
| 235430 | 1.34 | 0.60 | 1.13 | 0.66 | 0.89 | 0.43 |
| 233534 | 0.23 | 0.06 | 0.67 | 0.28 | 0.47 | 0.12 |
| 228582 | 0.61 | 0.27 | 0.73 | 0.35 | 0.76 | 0.33 |
| 228107 | #N/A | #N/A | #N/A | #N/A | 0.38 | 0.06 |
| 228408 | 0.95 | 0.45 | 0.62 | 0.23 | 0.37 | 0.04 |
| 224370 | 0.95 | 0.45 | 0.62 | 0.23 | 1.30 | 0.66 |
| 222995 | 1.58 | 0.68 | 0.68 | 0.28 | 1.25 | 0.65 |
| 222536 | 1.22 | 0.55 | #N/A | #N/A | 2.67 | 0.95 |
| 220987 | 1.22 | 0.55 | #N/A | #N/A | 0.81 | 0.38 |
| 220617 | 1.83 | 0.77 | 0.91 | 0.56 | 1.10 | 0.56 |
| 219080 | 0.53 | 0.22 | #N/A | #N/A | 1.97 | 0.86 |
| 218213 | 0.41 | 0.16 | 1.15 | 0.71 | 1.96 | 0.86 |
| 217961 | 0.29 | 0.06 | 0.68 | 0.28 | 0.37 | 0.04 |
| 216343 | #N/A | #N/A | #N/A | #N/A | 0.61 | 0.22 |
| 212138 | #N/A | #N/A | #N/A | #N/A | 2.10 | 0.89 |
| 212066 | 1.51 | 0.65 | 1.38 | 0.86 | 0.62 | 0.22 |
| 211975 | 1.51 | 0.65 | 1.38 | 0.86 | 0.78 | 0.35 |
| 209773 | 1.11 | 0.52 | 0.96 | 0.60 | 0.56 | 0.18 |
| 207392 | 1.98 | 0.81 | 0.68 | 0.29 | 0.49 | 0.14 |
| 204896 | 1.13 | 0.51 | 0.82 | 0.45 | 1.01 | 0.50 |
| 200527 | 1.10 | 0.50 | #N/A | #N/A | 1.41 | 0.71 |
| 196347 | #N/A | #N/A | #N/A | #N/A | 0.79 | 0.36 |
| 195286 | 1.65 | 0.70 | 1.05 | 0.70 | 1.32 | 0.67 |
| 194997 | 1.73 | 0.74 | 1.67 | 0.91 | 2.96 | 0.96 |
| 193572 | #N/A | #N/A | 1.15 | 0.58 | 1.68 | 0.80 |
| 191677 | 1.73 | 0.74 | 1.67 | 0.91 | 2.38 | 0.92 |
| 189128 | 0.98 | 0.45 | #N/A | #N/A | 0.91 | 0.45 |
| 186464 | 2.37 | 0.89 | 1.15 | 0.77 | 0.71 | 0.30 |
| 186818 | #N/A | #N/A | #N/A | #N/A | #N/A | #N/A |
| 186296 | 1.21 | 0.55 | #N/A | #N/A | 1.36 | 0.70 |
| 185288 | 1.21 | 0.55 | #N/A | #N/A | 1.65 | 0.79 |
| 184546 | 1.45 | 0.64 | #N/A | #N/A | 0.54 | 0.16 |
| 182427 | 1.58 | 0.70 | 0.90 | 0.51 | 0.76 | 0.32 |
| 180265 | 1.14 | 0.52 | 1.09 | 0.61 | 1.27 | 0.64 |
| 179176 | 0.61 | 0.28 | 0.82 | 0.45 | 1.11 | 0.56 |
| 178174 | 2.53 | 0.91 | 0.42 | 0.14 | 1.50 | 0.73 |
| 175845 | 2.53 | 0.91 | 0.42 | 0.14 | 2.46 | 0.93 |
| 175618 | 1.64 | 0.70 | 0.72 | 0.35 | 0.75 | 0.31 |
| 173863 | 1.17 | 0.54 | 1.01 | 0.61 | 0.95 | 0.46 |
| 171553 | 1.64 | 0.70 | 0.72 | 0.35 | 2.59 | 0.94 |
| 169209 | 1.17 | 0.54 | 1.01 | 0.61 | 0.78 | 0.35 |
| 167614 | #N/A | #N/A | #N/A | #N/A | 0.91 | 0.44 |
| 167454 | 1.34 | 0.61 | #N/A | #N/A | 0.91 | 0.43 |
| 164919 | 1.34 | 0.61 | #N/A | #N/A | 0.85 | 0.38 |
| 163644 | 0.25 | 0.05 | 0.35 | 0.06 | 0.57 | 0.19 |
| 164111 | 1.61 | 0.69 | 1.11 | 0.71 | #N/A | #N/A |
| 162337 | 2.82 | 0.94 | 1.28 | 0.60 | 1.65 | 0.78 |
| 159458 | 2.82 | 0.94 | 1.28 | 0.60 | 0.63 | 0.23 |
| 159214 | 0.61 | 0.28 | 1.17 | 0.54 | 0.40 | 0.06 |

|        |      |      |      |      |      |      |
|--------|------|------|------|------|------|------|
| 158183 | 1.35 | 0.62 | 0.87 | 0.51 | 0.61 | 0.22 |
| #N/A   | #N/A | #N/A | #N/A | #N/A | 2.59 | 0.94 |
| 153818 | 3.22 | 0.97 | 1.16 | 0.70 | 1.34 | 0.68 |
| 153708 | #N/A | #N/A | #N/A | #N/A | 1.95 | 0.86 |
| 149388 | 0.83 | 0.38 | 1.02 | 0.60 | 0.80 | 0.35 |
| 147632 | 1.64 | 0.71 | 0.67 | 0.28 | 1.05 | 0.52 |
| 145380 | 0.91 | 0.41 | 0.56 | 0.16 | 1.05 | 0.52 |
| 141796 | 0.77 | 0.37 | 0.91 | 0.56 | 0.80 | 0.35 |
| 137934 | 1.22 | 0.55 | #N/A | #N/A | 0.68 | 0.28 |
| 134511 | #N/A | #N/A | #N/A | #N/A | 0.98 | 0.48 |
| 133723 | 1.98 | 0.81 | 0.81 | 0.43 | 2.97 | 0.96 |
| 131290 | #N/A | #N/A | #N/A | #N/A | 1.00 | 0.51 |
| 130687 | 0.59 | 0.25 | #N/A | #N/A | 2.20 | 0.90 |
| 131052 | 2.32 | 0.89 | 0.87 | 0.51 | 2.38 | 0.92 |
| 130263 | 2.05 | 0.82 | 0.73 | 0.34 | 0.75 | 0.33 |
| 127044 | #N/A | #N/A | #N/A | #N/A | 0.59 | 0.20 |
| 125545 | 2.00 | 0.82 | 1.09 | 0.69 | 1.08 | 0.54 |
| 120382 | 2.00 | 0.82 | 1.09 | 0.69 | 0.92 | 0.45 |
| 120306 | 2.07 | 0.82 | 0.73 | 0.34 | 1.28 | 0.66 |
| 115502 | 2.07 | 0.82 | 0.73 | 0.34 | 0.45 | 0.10 |
| 114696 | 2.09 | 0.84 | 0.79 | 0.41 | 1.18 | 0.61 |
| 113217 | 0.94 | 0.44 | 0.51 | 0.13 | 1.06 | 0.54 |
| 110466 | 2.09 | 0.84 | 0.79 | 0.41 | 0.49 | 0.13 |
| 110131 | #N/A | #N/A | 1.04 | 0.68 | 0.36 | 0.04 |
| 108601 | 0.87 | 0.42 | 1.41 | 0.83 | 0.45 | 0.10 |
| 106828 | 0.17 | 0.02 | 0.42 | 0.11 | 0.16 | 0.00 |
| 99643  | 0.75 | 0.34 | 1.08 | 0.70 | 1.03 | 0.51 |
| 98159  | 1.11 | 0.50 | 0.90 | 0.49 | 0.41 | 0.07 |
| 96267  | 1.13 | 0.51 | 0.93 | 0.58 | 0.94 | 0.47 |
| 92746  | 1.13 | 0.51 | 0.93 | 0.58 | 3.15 | 0.97 |
| 89286  | 1.48 | 0.64 | 0.90 | 0.46 | 1.53 | 0.76 |
| 86227  | 1.73 | 0.75 | #N/A | #N/A | 1.35 | 0.67 |
| 85905  | #N/A | #N/A | 1.37 | 0.86 | 1.36 | 0.68 |
| 83552  | 1.56 | 0.67 | #N/A | #N/A | 1.73 | 0.82 |
| 82641  | 3.06 | 0.97 | #N/A | #N/A | 1.87 | 0.84 |
| 80162  | 3.06 | 0.97 | #N/A | #N/A | 2.68 | 0.95 |
| 78868  | 1.50 | 0.67 | 1.09 | 0.71 | 1.60 | 0.77 |
| 77260  | 5.72 | 1.00 | #N/A | #N/A | 1.67 | 0.80 |
| 77034  | 2.90 | 0.96 | #N/A | #N/A | 1.31 | 0.65 |
| 74934  | 2.90 | 0.96 | #N/A | #N/A | 2.02 | 0.87 |
| 70736  | 2.12 | 0.85 | 1.31 | 0.51 | 0.93 | 0.46 |
| 69021  | 0.93 | 0.44 | 0.84 | 0.47 | 1.27 | 0.65 |
| 68270  | 0.93 | 0.44 | 0.84 | 0.47 | 0.34 | 0.03 |
| #N/A   | #N/A | #N/A | #N/A | #N/A | 1.66 | 0.79 |
| 63927  | 0.54 | 0.25 | 1.02 | 0.66 | 0.43 | 0.09 |
| 64399  | 1.69 | 0.73 | 0.70 | 0.33 | 0.52 | 0.15 |
| 55935  | 1.69 | 0.73 | 0.70 | 0.33 | 0.49 | 0.13 |
| 55602  | 2.73 | 0.94 | 1.53 | 0.66 | 0.73 | 0.31 |
| 53353  | 2.22 | 0.86 | 1.60 | 0.88 | 0.67 | 0.26 |
| 49006  | 2.22 | 0.86 | 1.60 | 0.88 | 1.83 | 0.83 |
| 48890  | 1.98 | 0.81 | 1.01 | 0.49 | 1.80 | 0.82 |

|        |      |      |      |      |      |      |
|--------|------|------|------|------|------|------|
| 47973  | 1.18 | 0.54 | 0.96 | 0.59 | 2.11 | 0.89 |
| 42424  | 0.67 | 0.30 | 0.72 | 0.34 | 1.26 | 0.65 |
| 42238  | 2.06 | 0.84 | 1.01 | 0.53 | 0.72 | 0.30 |
| 36700  | 0.88 | 0.40 | 0.58 | 0.19 | 1.19 | 0.61 |
| 36415  | 1.93 | 0.80 | 0.97 | 0.50 | 0.59 | 0.21 |
| 31961  | 1.93 | 0.80 | 0.97 | 0.50 | 1.25 | 0.64 |
| 31083  | #N/A | #N/A | 1.10 | 0.63 | 2.55 | 0.94 |
| 26828  | 1.80 | 0.76 | 0.89 | 0.53 | 0.55 | 0.17 |
| 26160  | 1.29 | 0.58 | 0.93 | 0.55 | 0.52 | 0.15 |
| 24084  | 0.72 | 0.33 | 0.81 | 0.43 | 1.65 | 0.79 |
| 17359  | 1.12 | 0.51 | #N/A | #N/A | 1.44 | 0.72 |
| 15708  | 1.26 | 0.57 | 2.91 | 0.99 | 1.16 | 0.59 |
| 9092   | 1.11 | 0.51 | 0.76 | 0.38 | 0.62 | 0.22 |
| 7529   | 1.82 | 0.76 | 1.02 | 0.67 | 1.37 | 0.70 |
| 3504   | 1.82 | 0.76 | 1.02 | 0.67 | 0.86 | 0.41 |
| 2722   | 0.60 | 0.27 | 0.99 | 0.64 | 1.16 | 0.58 |
| 1811   | 0.60 | 0.27 | 0.99 | 0.64 | 1.07 | 0.55 |
| 799    | #N/A | #N/A | #N/A | #N/A | 0.63 | 0.22 |
| 440246 | 3.19 | 0.97 | 0.93 | 0.54 | 0.95 | 0.48 |
| 444576 | 3.19 | 0.97 | 0.93 | 0.54 | 0.82 | 0.37 |
| 446365 | 0.95 | 0.44 | 0.95 | 0.57 | 1.02 | 0.52 |
| 446437 | 1.21 | 0.56 | 1.11 | 0.73 | 0.84 | 0.40 |
| 448159 | 0.84 | 0.38 | 0.79 | 0.42 | 1.70 | 0.80 |
| 450061 | 2.78 | 0.95 | 0.63 | 0.23 | 2.28 | 0.91 |
| 451626 | 2.78 | 0.95 | 0.63 | 0.23 | 3.41 | 0.98 |
| 453716 | #N/A | #N/A | 0.75 | 0.40 | 1.15 | 0.57 |
| 453990 | 1.12 | 0.51 | 0.89 | 0.53 | 1.88 | 0.84 |
| 458562 | 2.35 | 0.88 | 0.80 | 0.42 | 0.55 | 0.17 |
| 461273 | 2.00 | 0.82 | #N/A | #N/A | 1.68 | 0.81 |
| 463377 | 0.97 | 0.44 | 1.00 | 0.63 | 2.31 | 0.91 |
| 464586 | 2.00 | 0.82 | #N/A | #N/A | 1.48 | 0.72 |
| 465005 | 1.68 | 0.73 | 0.79 | 0.40 | 0.97 | 0.48 |
| 466599 | 0.82 | 0.38 | 0.73 | 0.35 | 0.40 | 0.06 |
| 470977 | 0.82 | 0.38 | 0.73 | 0.35 | 0.73 | 0.31 |
| 471332 | 1.81 | 0.76 | 1.38 | 0.78 | 0.90 | 0.43 |
| 473361 | 2.11 | 0.84 | 0.84 | 0.47 | 0.89 | 0.42 |
| 475854 | 2.22 | 0.87 | 0.93 | 0.57 | 1.35 | 0.67 |
| 478470 | 2.22 | 0.87 | 0.93 | 0.57 | 1.98 | 0.86 |
| 481619 | 1.65 | 0.71 | 0.88 | 0.50 | 0.57 | 0.19 |
| 481809 | 3.75 | 0.99 | 1.48 | 0.81 | 0.92 | 0.45 |
| 484649 | 3.75 | 0.99 | 1.48 | 0.81 | 0.72 | 0.29 |
| 484782 | 4.35 | 1.00 | 0.87 | 0.45 | 0.75 | 0.33 |
| 488256 | 4.35 | 1.00 | 0.87 | 0.45 | 2.98 | 0.97 |
| 488376 | 2.57 | 0.92 | 1.36 | 0.84 | 0.92 | 0.45 |
| 493299 | 1.34 | 0.61 | 0.90 | 0.51 | 0.89 | 0.43 |
| 497191 | 1.71 | 0.74 | 0.84 | 0.46 | 0.34 | 0.03 |
| 497215 | #N/A | #N/A | 0.94 | 0.57 | 0.97 | 0.47 |
| 500740 | #N/A | #N/A | 0.94 | 0.57 | 1.73 | 0.81 |
| 500981 | 3.04 | 0.96 | 0.86 | 0.49 | 0.66 | 0.26 |
| 506468 | 3.04 | 0.96 | 0.86 | 0.49 | 4.22 | 1.00 |
| 506516 | 2.10 | 0.84 | 1.00 | 0.62 | 1.82 | 0.83 |

|        |      |      |      |      |      |      |
|--------|------|------|------|------|------|------|
| 507344 | 3.04 | 0.96 | 0.86 | 0.49 | 1.61 | 0.78 |
| 507557 | 0.41 | 0.14 | #N/A | #N/A | 2.31 | 0.91 |
| 508339 | #N/A | #N/A | 0.77 | 0.40 | 0.67 | 0.25 |
| 510547 | #N/A | #N/A | #N/A | #N/A | 2.27 | 0.91 |
| 511636 | #N/A | #N/A | #N/A | #N/A | 1.60 | 0.78 |
| 516508 | 2.13 | 0.84 | 0.81 | 0.44 | 0.88 | 0.41 |
| 517700 | 0.11 | 0.01 | 0.40 | 0.09 | 0.51 | 0.14 |
| 518587 | 0.57 | 0.24 | #N/A | #N/A | 0.36 | 0.04 |
| 520261 | 0.11 | 0.01 | 0.40 | 0.09 | 0.38 | 0.05 |
| 520534 | 2.04 | 0.83 | 0.90 | 0.54 | 1.20 | 0.60 |
| 522983 | 2.04 | 0.83 | 0.90 | 0.54 | 0.77 | 0.35 |
| 523055 | 2.04 | 0.83 | #N/A | #N/A | 1.82 | 0.83 |
| 523860 | 1.31 | 0.59 | 0.89 | 0.51 | 1.72 | 0.81 |
| 525199 | 1.31 | 0.59 | 0.89 | 0.51 | 1.20 | 0.62 |
| 525024 | 2.62 | 0.93 | 0.64 | 0.24 | 1.91 | 0.85 |
| 526467 | 2.34 | 0.88 | 1.08 | 0.65 | 3.79 | 0.99 |
| 530121 | 2.34 | 0.88 | 1.08 | 0.65 | 0.84 | 0.39 |
| 531839 | 1.89 | 0.78 | 0.78 | 0.41 | 0.86 | 0.40 |
| 532187 | 1.44 | 0.63 | 0.96 | 0.60 | 0.82 | 0.38 |
| 533704 | 0.78 | 0.36 | 0.70 | 0.30 | 1.16 | 0.59 |
| 535284 | 3.57 | 0.99 | 0.60 | 0.25 | 0.64 | 0.24 |
| 548728 | 3.57 | 0.99 | 0.60 | 0.25 | 2.85 | 0.96 |
| 550938 | 1.11 | 0.50 | 0.76 | 0.37 | 1.59 | 0.76 |
| 551878 | 0.65 | 0.29 | 0.66 | 0.31 | 0.71 | 0.29 |
| 554256 | 1.39 | 0.64 | 0.76 | 0.39 | 0.82 | 0.38 |
| 555810 | 1.02 | 0.46 | 0.70 | 0.32 | 0.61 | 0.21 |
| 556978 | 1.24 | 0.56 | #N/A | #N/A | 1.52 | 0.74 |
| 558590 | 1.65 | 0.72 | 1.25 | 0.67 | 1.01 | 0.50 |
| 560288 | 1.88 | 0.79 | 0.48 | 0.11 | 1.35 | 0.69 |
| 560425 | 2.39 | 0.90 | #N/A | #N/A | 1.55 | 0.75 |
| 564774 | 2.39 | 0.90 | #N/A | #N/A | 0.90 | 0.43 |
| 564935 | 3.09 | 0.96 | #N/A | #N/A | 3.56 | 0.98 |
| 565749 | 3.00 | 0.96 | 0.94 | 0.57 | 1.80 | 0.84 |
| 569785 | 3.00 | 0.96 | 0.94 | 0.57 | 1.00 | 0.50 |
| 569964 | 2.32 | 0.88 | 0.67 | 0.28 | 1.67 | 0.80 |
| 573029 | 2.32 | 0.88 | 0.67 | 0.28 | 0.76 | 0.32 |
| 574268 | 0.81 | 0.39 | 0.33 | 0.03 | 1.50 | 0.73 |
| 574570 | 0.90 | 0.41 | 1.40 | 0.88 | 0.52 | 0.14 |
| 576071 | #N/A | #N/A | #N/A | #N/A | 0.59 | 0.20 |
| 577823 | 0.97 | 0.45 | 1.13 | 0.64 | 3.07 | 0.97 |
| 579312 | 2.03 | 0.81 | #N/A | #N/A | 1.72 | 0.81 |
| 579463 | 0.48 | 0.19 | 0.62 | 0.23 | 2.65 | 0.95 |
| 583031 | 1.50 | 0.67 | 0.77 | 0.38 | 2.09 | 0.88 |
| 584380 | #N/A | #N/A | 0.74 | 0.35 | 1.07 | 0.54 |
| 586345 | #N/A | #N/A | 0.75 | 0.39 | 0.96 | 0.46 |
| 586425 | 1.31 | 0.60 | 1.01 | 0.65 | 0.53 | 0.16 |
| 590993 | 1.31 | 0.60 | 1.01 | 0.65 | 1.08 | 0.55 |
| 591142 | 3.03 | 0.96 | 1.59 | 0.90 | 1.55 | 0.76 |
| 595934 | 3.03 | 0.96 | 1.59 | 0.90 | 0.73 | 0.30 |
| 596057 | 1.01 | 0.46 | #N/A | #N/A | 1.75 | 0.81 |
| 596691 | 2.36 | 0.88 | 1.29 | 0.83 | 1.37 | 0.68 |

|        |      |      |      |      |      |      |
|--------|------|------|------|------|------|------|
| 598730 | 2.49 | 0.91 | 0.62 | 0.22 | 3.60 | 0.98 |
| 602708 | 2.49 | 0.91 | 0.62 | 0.22 | 0.73 | 0.31 |
| 602831 | 2.28 | 0.87 | 0.98 | 0.48 | 0.86 | 0.41 |
| 604040 | 1.13 | 0.52 | #N/A | #N/A | 1.67 | 0.80 |
| 605268 | #N/A | #N/A | 1.14 | 0.50 | 0.53 | 0.16 |
| 610701 | #N/A | #N/A | 1.14 | 0.50 | 0.76 | 0.33 |
| 611899 | 0.90 | 0.41 | 1.08 | 0.65 | 1.06 | 0.53 |
| 612299 | 0.34 | 0.10 | 0.52 | 0.14 | 0.71 | 0.29 |
| 617169 | 0.11 | 0.01 | 0.34 | 0.04 | 0.37 | 0.04 |
| 617630 | 1.46 | 0.65 | 0.86 | 0.50 | 0.33 | 0.02 |
| 625066 | 1.46 | 0.65 | 0.86 | 0.50 | 0.35 | 0.03 |
| 630014 | 1.33 | 0.60 | 1.02 | 0.62 | 0.41 | 0.07 |
| 632431 | 2.31 | 0.89 | 0.40 | 0.06 | 2.97 | 0.96 |
| 632656 | 2.71 | 0.94 | 0.55 | 0.16 | 1.31 | 0.66 |
| 637916 | 2.71 | 0.94 | 0.55 | 0.16 | 0.41 | 0.07 |
| 638872 | 2.78 | 0.94 | 0.97 | 0.62 | 0.60 | 0.20 |
| 642133 | 2.78 | 0.94 | 0.97 | 0.62 | 0.79 | 0.36 |
| 649494 | 0.79 | 0.37 | 0.80 | 0.42 | 0.90 | 0.43 |
| 656365 | 0.32 | 0.08 | 1.09 | 0.69 | 0.48 | 0.12 |
| 657385 | #N/A | #N/A | #N/A | #N/A | 0.49 | 0.13 |
| 658345 | 0.88 | 0.41 | 0.96 | 0.58 | 0.51 | 0.14 |
| 662918 | 0.88 | 0.41 | 0.96 | 0.58 | 1.12 | 0.57 |
| 150162 | 1.93 | 0.80 | #N/A | #N/A | 0.80 | 0.37 |
| 147600 | #N/A | #N/A | #N/A | #N/A | 1.49 | 0.74 |
| 146040 | #N/A | #N/A | #N/A | #N/A | 0.90 | 0.44 |
| 142922 | 1.50 | 0.65 | 0.70 | 0.32 | 1.38 | 0.69 |
| 137939 | 1.50 | 0.65 | 0.70 | 0.32 | #N/A | #N/A |
| 137865 | 2.05 | 0.83 | #N/A | #N/A | 0.89 | 0.43 |
| 134301 | 2.05 | 0.83 | #N/A | #N/A | 0.84 | 0.38 |
| 133986 | #N/A | #N/A | 0.75 | 0.35 | 0.68 | 0.28 |
| 131204 | #N/A | #N/A | 0.75 | 0.35 | #N/A | #N/A |
| 129329 | 2.33 | 0.89 | #N/A | #N/A | 0.70 | 0.29 |
| 128991 | 2.86 | 0.95 | 1.12 | 0.75 | 1.27 | 0.65 |
| 127254 | #N/A | #N/A | #N/A | #N/A | 0.82 | 0.37 |
| 122074 | #N/A | #N/A | #N/A | #N/A | 0.31 | 0.02 |
| 121647 | 2.06 | 0.82 | 0.74 | 0.35 | 3.36 | 0.98 |
| 121110 | 1.92 | 0.80 | 1.24 | 0.81 | 0.51 | 0.14 |
| 115992 | 0.39 | 0.14 | 0.92 | 0.57 | 1.25 | 0.63 |
| 112544 | 3.22 | 0.97 | 1.18 | 0.55 | 1.01 | 0.51 |
| 109901 | 3.22 | 0.97 | 1.18 | 0.55 | 1.08 | 0.56 |
| 105685 | 0.39 | 0.13 | 0.52 | 0.13 | 0.44 | 0.10 |
| 105555 | 0.39 | 0.13 | 0.52 | 0.13 | #N/A | #N/A |
| 105346 | #N/A | #N/A | #N/A | #N/A | 0.43 | 0.09 |
| 99043  | #N/A | #N/A | #N/A | #N/A | 1.59 | 0.78 |
| 97996  | #N/A | #N/A | #N/A | #N/A | 1.86 | 0.85 |
| 95565  | #N/A | #N/A | #N/A | #N/A | 0.50 | 0.15 |
| 95120  | #N/A | #N/A | #N/A | #N/A | 1.55 | 0.76 |
| 91348  | 1.39 | 0.61 | 1.54 | 0.78 | 0.50 | 0.13 |
| 88154  | 0.82 | 0.38 | 0.77 | 0.40 | 0.83 | 0.37 |
| 86563  | #N/A | #N/A | #N/A | #N/A | 0.63 | 0.24 |
| 83709  | 0.95 | 0.43 | 0.95 | 0.57 | 0.57 | 0.20 |

|        |      |      |      |      |      |      |
|--------|------|------|------|------|------|------|
| 80355  | 0.95 | 0.43 | 0.95 | 0.57 | 1.42 | 0.71 |
| 77151  | 1.72 | 0.74 | #N/A | #N/A | 0.52 | 0.16 |
| 74269  | 1.73 | 0.75 | #N/A | #N/A | 0.57 | 0.19 |
| 74100  | 3.86 | 0.99 | 0.72 | 0.35 | 2.16 | 0.90 |
| 70632  | 3.86 | 0.99 | 0.72 | 0.35 | 0.68 | 0.26 |
| 70477  | 2.34 | 0.89 | 1.03 | 0.67 | 0.87 | 0.42 |
| 66744  | 2.34 | 0.89 | 1.03 | 0.67 | 1.63 | 0.78 |
| 66941  | 0.91 | 0.43 | #N/A | #N/A | 3.03 | 0.97 |
| 65774  | 2.34 | 0.89 | 1.03 | 0.67 | 2.53 | 0.94 |
| 64061  | 0.91 | 0.43 | #N/A | #N/A | 0.75 | 0.33 |
| 54210  | 2.54 | 0.92 | 0.84 | 0.44 | 0.45 | 0.10 |
| 53130  | 1.42 | 0.63 | 0.79 | 0.41 | 1.36 | 0.69 |
| 52086  | 0.87 | 0.42 | 0.99 | 0.61 | 2.42 | 0.93 |
| 51946  | 1.73 | 0.75 | 0.92 | 0.54 | 0.50 | 0.13 |
| 48661  | 0.49 | 0.19 | #N/A | #N/A | 0.41 | 0.07 |
| 47858  | 1.73 | 0.75 | 0.92 | 0.54 | 0.43 | 0.08 |
| 46713  | 0.49 | 0.19 | #N/A | #N/A | 1.45 | 0.73 |
| 47054  | 2.36 | 0.88 | 0.57 | 0.18 | 2.28 | 0.91 |
| 41279  | 2.36 | 0.88 | 0.57 | 0.18 | 0.35 | 0.03 |
| 41204  | 2.98 | 0.96 | 0.71 | 0.35 | 4.34 | 1.00 |
| 39803  | 2.98 | 0.96 | 0.71 | 0.35 | 2.72 | 0.95 |
| 37332  | 1.42 | 0.64 | 0.93 | 0.58 | 0.63 | 0.24 |
| 35911  | 0.73 | 0.35 | #N/A | #N/A | 1.04 | 0.53 |
| 35502  | 0.73 | 0.35 | #N/A | #N/A | 1.07 | 0.55 |
| 32894  | 2.05 | 0.83 | #N/A | #N/A | 1.02 | 0.52 |
| 31704  | 2.42 | 0.90 | 0.71 | 0.36 | 0.74 | 0.32 |
| 27409  | 1.78 | 0.76 | 0.83 | 0.46 | 1.21 | 0.62 |
| 25756  | 1.08 | 0.49 | 1.00 | 0.50 | 2.50 | 0.94 |
| 25296  | 1.98 | 0.80 | 0.99 | 0.54 | 1.37 | 0.69 |
| 22474  | 1.98 | 0.80 | 0.99 | 0.54 | 2.41 | 0.93 |
| 21138  | 0.84 | 0.40 | 1.21 | 0.80 | 0.87 | 0.42 |
| 19707  | 1.30 | 0.59 | 1.09 | 0.64 | 0.67 | 0.25 |
| 16639  | 1.30 | 0.59 | 1.09 | 0.64 | 1.32 | 0.68 |
| 14648  | 1.82 | 0.78 | 0.69 | 0.32 | 1.26 | 0.64 |
| 13083  | 0.89 | 0.42 | 0.87 | 0.49 | 1.05 | 0.52 |
| 12076  | 0.27 | 0.07 | 0.54 | 0.15 | 0.55 | 0.18 |
| 6120   | 0.70 | 0.32 | 0.96 | 0.61 | 0.69 | 0.28 |
| 585    | 0.68 | 0.32 | 1.00 | 0.65 | 0.74 | 0.32 |
| 151388 | 0.89 | 0.42 | 1.43 | 0.82 | 0.88 | 0.42 |
| 154342 | #N/A | #N/A | #N/A | #N/A | 0.82 | 0.38 |
| 156854 | 1.64 | 0.70 | #N/A | #N/A | 1.83 | 0.83 |
| 157933 | 2.27 | 0.88 | 1.05 | 0.66 | 1.91 | 0.86 |
| 161433 | 2.27 | 0.88 | 1.05 | 0.66 | 1.42 | 0.70 |
| 161754 | 2.52 | 0.92 | 0.86 | 0.50 | 0.77 | 0.33 |
| 165401 | 2.52 | 0.92 | 0.86 | 0.50 | 2.10 | 0.89 |
| 165576 | 1.64 | 0.70 | 0.59 | 0.19 | 1.99 | 0.87 |
| 167135 | 1.64 | 0.70 | 0.59 | 0.19 | 0.62 | 0.22 |
| 167319 | 1.43 | 0.63 | #N/A | #N/A | #N/A | #N/A |
| 169677 | 2.63 | 0.92 | 1.26 | 0.75 | 2.84 | 0.96 |
| 169981 | #N/A | #N/A | #N/A | #N/A | 1.22 | 0.61 |
| 171763 | #N/A | #N/A | #N/A | #N/A | 1.89 | 0.85 |

|        |      |      |      |      |      |      |
|--------|------|------|------|------|------|------|
| 172267 | 1.29 | 0.57 | #N/A | #N/A | 0.81 | 0.37 |
| 176743 | 1.29 | 0.57 | #N/A | #N/A | 1.54 | 0.74 |
| 176801 | 2.43 | 0.91 | 1.38 | 0.69 | 2.32 | 0.92 |
| 178620 | 2.43 | 0.91 | 1.38 | 0.69 | 1.70 | 0.80 |
| 178706 | 1.85 | 0.78 | 0.95 | 0.60 | 1.61 | 0.78 |
| 181480 | 1.85 | 0.78 | 0.95 | 0.60 | 0.59 | 0.20 |
| 181788 | #N/A | #N/A | 1.12 | 0.65 | 0.82 | 0.38 |
| 184161 | #N/A | #N/A | 1.12 | 0.65 | 1.86 | 0.84 |
| 184173 | 0.68 | 0.30 | 1.65 | 0.94 | 0.91 | 0.45 |
| 185497 | 0.65 | 0.29 | 0.71 | 0.32 | 0.44 | 0.09 |
| 187664 | #N/A | #N/A | #N/A | #N/A | 0.67 | 0.26 |
| 195175 | #N/A | #N/A | #N/A | #N/A | 1.45 | 0.73 |
| 195451 | 1.69 | 0.72 | 0.69 | 0.30 | 0.84 | 0.40 |
| 196830 | 0.57 | 0.24 | 1.28 | 0.83 | 1.03 | 0.51 |
| 199541 | 0.77 | 0.35 | 0.94 | 0.52 | 0.55 | 0.18 |
| 201977 | 2.17 | 0.86 | 0.95 | 0.56 | 1.36 | 0.67 |
| 204082 | 2.17 | 0.86 | 0.95 | 0.56 | 1.02 | 0.52 |
| 204786 | 0.48 | 0.18 | 0.64 | 0.24 | 1.47 | 0.74 |
| 208501 | #N/A | #N/A | #N/A | #N/A | 0.85 | 0.38 |
| 210270 | #N/A | #N/A | #N/A | #N/A | 0.64 | 0.24 |
| 210513 | 1.75 | 0.74 | 0.58 | 0.18 | 0.61 | 0.22 |
| 212370 | 1.69 | 0.74 | 1.24 | 0.81 | 1.90 | 0.85 |
| 221522 | 1.61 | 0.70 | 1.19 | 0.71 | #N/A | #N/A |
| 222686 | 1.39 | 0.62 | 0.99 | 0.58 | 1.57 | 0.77 |
| 224922 | 1.31 | 0.59 | 1.28 | 0.84 | #N/A | #N/A |
| 225427 | 1.02 | 0.47 | 0.99 | 0.61 | 1.22 | 0.61 |
| 228909 | #N/A | #N/A | #N/A | #N/A | 0.83 | 0.39 |
| 229698 | 1.02 | 0.47 | 0.99 | 0.61 | 0.81 | 0.37 |
| 229967 | #N/A | #N/A | #N/A | #N/A | 0.74 | 0.31 |
| 231703 | 1.09 | 0.49 | 0.95 | 0.60 | 2.40 | 0.92 |
| 232391 | 0.29 | 0.06 | 0.49 | 0.11 | 0.87 | 0.41 |
| 235038 | 1.75 | 0.74 | 0.94 | 0.59 | 0.50 | 0.14 |
| 238002 | 0.80 | 0.38 | 0.63 | 0.28 | 0.93 | 0.44 |
| 239348 | 0.41 | 0.14 | 0.71 | 0.32 | 0.77 | 0.33 |
| 243350 | 0.41 | 0.14 | 0.71 | 0.32 | 0.38 | 0.05 |
| 243887 | 1.88 | 0.78 | 0.87 | 0.46 | 1.07 | 0.54 |
| 245588 | 1.25 | 0.56 | 1.52 | 0.55 | 1.96 | 0.86 |
| 246325 | #N/A | #N/A | 1.01 | 0.58 | 1.99 | 0.87 |
| 247954 | #N/A | #N/A | 1.01 | 0.58 | 1.16 | 0.58 |
| 248101 | 2.01 | 0.82 | 1.36 | 0.86 | 1.17 | 0.58 |
| 248718 | 0.71 | 0.32 | 0.97 | 0.59 | 2.81 | 0.96 |
| 251273 | 0.75 | 0.34 | 0.57 | 0.17 | 1.23 | 0.62 |
| 254959 | 0.75 | 0.34 | 0.57 | 0.17 | 0.65 | 0.25 |
| 257856 | 2.51 | 0.92 | 1.00 | 0.65 | 0.61 | 0.21 |
| 257993 | 0.52 | 0.21 | 0.71 | 0.32 | 0.37 | 0.05 |
| 259739 | 1.68 | 0.73 | 0.70 | 0.35 | 1.11 | 0.57 |
| 262767 | 1.68 | 0.73 | 0.70 | 0.35 | 0.62 | 0.22 |
| 263949 | #N/A | #N/A | #N/A | #N/A | #N/A | #N/A |
| 263578 | 0.88 | 0.42 | #N/A | #N/A | 0.51 | 0.14 |
| 265255 | 0.88 | 0.42 | #N/A | #N/A | 1.29 | 0.66 |
| 266278 | #N/A | #N/A | #N/A | #N/A | 0.66 | 0.25 |

|        |      |      |      |      |      |      |
|--------|------|------|------|------|------|------|
| 266374 | 3.58 | 0.99 | #N/A | #N/A | 2.76 | 0.95 |
| 267724 | 3.58 | 0.99 | #N/A | #N/A | 1.71 | 0.80 |
| 267814 | 3.64 | 0.98 | 1.15 | 0.67 | 0.69 | 0.27 |
| 271464 | 3.64 | 0.98 | 1.15 | 0.67 | 2.16 | 0.89 |
| 271631 | 1.69 | 0.74 | #N/A | #N/A | 0.70 | 0.28 |
| 274142 | 0.67 | 0.30 | 0.80 | 0.42 | 3.08 | 0.97 |
| 275379 | 4.49 | 1.00 | 0.72 | 0.33 | 1.29 | 0.66 |
| 280944 | 4.49 | 1.00 | 0.72 | 0.33 | 1.51 | 0.75 |
| 281020 | 1.10 | 0.50 | 1.06 | 0.64 | 0.76 | 0.32 |
| 281957 | 0.56 | 0.27 | 0.57 | 0.20 | 2.16 | 0.89 |
| 283593 | 0.56 | 0.27 | 0.57 | 0.20 | 0.48 | 0.12 |
| 283186 | 0.58 | 0.27 | #N/A | #N/A | 0.59 | 0.21 |
| 285624 | 0.58 | 0.27 | #N/A | #N/A | 0.84 | 0.38 |
| 285737 | 1.72 | 0.74 | 1.13 | 0.62 | 1.16 | 0.58 |
| 287675 | 1.72 | 0.74 | 1.13 | 0.62 | 1.53 | 0.75 |
| 289251 | #N/A | #N/A | #N/A | #N/A | 2.06 | 0.88 |
| 291937 | 2.12 | 0.84 | 0.88 | 0.51 | 1.78 | 0.83 |
| 292395 | 1.24 | 0.56 | 0.81 | 0.44 | 0.96 | 0.48 |
| 294092 | 1.68 | 0.72 | 0.78 | 0.39 | 0.53 | 0.16 |
| 296590 | 0.71 | 0.32 | 0.42 | 0.07 | 0.43 | 0.08 |
| 300674 | 3.56 | 0.98 | 1.11 | 0.68 | 1.65 | 0.79 |
| 306500 | 3.56 | 0.98 | 1.11 | 0.68 | 0.69 | 0.27 |
| 306856 | 3.19 | 0.97 | 1.13 | 0.76 | 0.50 | 0.13 |
| 317952 | 3.19 | 0.97 | 1.13 | 0.76 | 0.81 | 0.38 |
| 318238 | 1.23 | 0.56 | 0.92 | 0.56 | 0.50 | 0.15 |
| 322081 | 1.23 | 0.56 | 0.92 | 0.56 | 0.80 | 0.37 |
| 323179 | 1.22 | 0.55 | #N/A | #N/A | 1.50 | 0.75 |
| 326226 | 1.81 | 0.76 | 0.84 | 0.47 | 1.40 | 0.69 |
| 326514 | 1.14 | 0.53 | 1.20 | 0.69 | 0.73 | 0.31 |
| 327731 | 1.17 | 0.53 | 0.85 | 0.49 | 0.57 | 0.19 |
| 329678 | 5.01 | 1.00 | 0.95 | 0.55 | 1.17 | 0.60 |
| 336034 | 5.01 | 1.00 | 0.95 | 0.55 | 0.64 | 0.23 |
| 336232 | 3.22 | 0.97 | 1.59 | 0.91 | 1.77 | 0.82 |
| 337528 | 1.72 | 0.75 | 0.93 | 0.52 | 0.98 | 0.47 |
| 339745 | 0.90 | 0.43 | 1.00 | 0.65 | 1.13 | 0.59 |
| 342854 | 0.90 | 0.43 | 1.00 | 0.65 | 0.78 | 0.35 |
| 342567 | 1.57 | 0.69 | #N/A | #N/A | 0.62 | 0.23 |
| 342971 | 1.57 | 0.69 | #N/A | #N/A | 2.02 | 0.88 |
| 343990 | 2.45 | 0.91 | 1.19 | 0.80 | 1.12 | 0.56 |
| 346981 | 2.45 | 0.91 | 1.19 | 0.80 | 2.81 | 0.95 |
| 347048 | 0.73 | 0.33 | 0.98 | 0.55 | 1.27 | 0.64 |
| 349007 | 2.32 | 0.88 | 0.58 | 0.20 | 0.38 | 0.05 |
| 365331 | 2.32 | 0.88 | 0.58 | 0.20 | 1.30 | 0.67 |
| 366668 | 0.58 | 0.27 | 0.71 | 0.34 | 0.58 | 0.19 |
| 369312 | 0.58 | 0.27 | 0.71 | 0.34 | 0.71 | 0.30 |
| 369698 | 0.12 | 0.02 | 0.39 | 0.06 | 0.38 | 0.05 |
| 370724 | 0.12 | 0.02 | 0.39 | 0.06 | 0.10 | 0.00 |
| 371211 | 0.16 | 0.02 | #N/A | #N/A | 0.17 | 0.01 |
| 372928 | 0.36 | 0.13 | 1.10 | 0.55 | 0.56 | 0.18 |
| 374945 | 2.46 | 0.90 | 1.05 | 0.55 | 0.42 | 0.08 |
| 380565 | 2.46 | 0.90 | 1.05 | 0.55 | 0.71 | 0.29 |



|        |      |      |      |      |      |      |
|--------|------|------|------|------|------|------|
| 382253 | #N/A | #N/A | 0.82 | 0.45 | 0.58 | 0.20 |
| 382472 | 2.47 | 0.90 | 0.94 | 0.54 | 1.25 | 0.64 |
| 384726 | 1.65 | 0.70 | 0.94 | 0.58 | 3.16 | 0.98 |
| 386176 | 1.65 | 0.70 | 0.94 | 0.58 | 1.71 | 0.80 |
| 386512 | 1.36 | 0.61 | 0.53 | 0.14 | 0.88 | 0.42 |
| 388745 | 1.24 | 0.57 | 1.03 | 0.63 | 2.51 | 0.93 |
| 390955 | #N/A | #N/A | 1.48 | 0.90 | 2.57 | 0.94 |
| 391079 | #N/A | #N/A | 1.48 | 0.90 | 2.22 | 0.90 |
| 391945 | #N/A | #N/A | 1.48 | 0.90 | 2.36 | 0.92 |
| 393895 | #N/A | #N/A | #N/A | #N/A | 1.62 | 0.79 |
| 394766 | 1.09 | 0.49 | 0.36 | 0.04 | 1.37 | 0.69 |
| 395759 | 1.85 | 0.77 | #N/A | #N/A | 1.44 | 0.72 |
| 399434 | 1.85 | 0.77 | #N/A | #N/A | 2.74 | 0.95 |
| 402489 | #N/A | #N/A | #N/A | #N/A | 0.74 | 0.33 |
| 402795 | 0.93 | 0.44 | 0.83 | 0.46 | 0.61 | 0.21 |
| 404511 | 1.23 | 0.55 | #N/A | #N/A | 0.64 | 0.23 |
| 407284 | 2.92 | 0.96 | 1.33 | 0.85 | 1.85 | 0.84 |
| 410194 | 2.92 | 0.96 | 1.33 | 0.85 | 1.10 | 0.56 |
| 412415 | #N/A | #N/A | 0.97 | 0.61 | 1.49 | 0.73 |
| 415528 | 1.81 | 0.76 | 1.40 | 0.88 | 1.00 | 0.49 |
| 415802 | 3.29 | 0.97 | 0.77 | 0.39 | 1.84 | 0.84 |
| 418110 | 3.29 | 0.97 | 0.77 | 0.39 | 2.65 | 0.94 |
| 421395 | #N/A | #N/A | 0.91 | 0.55 | 0.44 | 0.09 |
| 421543 | 0.97 | 0.45 | #N/A | #N/A | 0.63 | 0.23 |
| 423801 | 0.44 | 0.16 | #N/A | #N/A | 3.66 | 0.99 |
| 424775 | 0.44 | 0.16 | #N/A | #N/A | 1.73 | 0.81 |
| 426617 | 0.97 | 0.45 | #N/A | #N/A | 1.20 | 0.60 |
| 429387 | #N/A | #N/A | #N/A | #N/A | 0.72 | 0.29 |
| 429678 | 1.76 | 0.75 | #N/A | #N/A | 0.98 | 0.48 |
| 432774 | 1.76 | 0.75 | #N/A | #N/A | 1.92 | 0.86 |
| 432824 | 2.69 | 0.93 | 1.93 | 0.60 | 2.48 | 0.93 |
| 434159 | 1.60 | 0.70 | #N/A | #N/A | 2.86 | 0.96 |
| 437398 | 1.60 | 0.70 | #N/A | #N/A | 1.19 | 0.61 |
| 437632 | 1.08 | 0.49 | 0.61 | 0.23 | 1.26 | 0.64 |
| 441289 | 1.08 | 0.49 | 0.61 | 0.23 | 0.51 | 0.16 |
| 441716 | #N/A | #N/A | #N/A | #N/A | 1.15 | 0.59 |
| 442959 | 1.11 | 0.51 | 0.97 | 0.62 | 0.83 | 0.38 |
| 445525 | 0.26 | 0.08 | 0.71 | 0.37 | 0.37 | 0.04 |
| 447983 | 0.38 | 0.13 | 1.32 | 0.85 | 1.00 | 0.51 |
| 469318 | 0.85 | 0.39 | 1.22 | 0.70 | 0.08 | 0.00 |
| 472458 | 0.85 | 0.39 | 1.22 | 0.70 | 0.41 | 0.07 |
| 472970 | #N/A | #N/A | #N/A | #N/A | 0.03 | 0.00 |
| 482550 | #N/A | #N/A | 1.12 | 0.68 | 0.05 | 0.00 |
| 485690 | #N/A | #N/A | #N/A | #N/A | #N/A | #N/A |
| 486202 | #N/A | #N/A | 1.15 | 0.69 | #N/A | #N/A |
| 489342 | #N/A | #N/A | #N/A | #N/A | 0.20 | 0.01 |
| 489930 | #N/A | #N/A | #N/A | #N/A | 0.96 | 0.48 |
| 491868 | 2.30 | 0.89 | 0.84 | 0.47 | 1.28 | 0.64 |
| 494391 | 2.30 | 0.89 | 0.84 | 0.47 | 1.69 | 0.80 |
| 494496 | 0.91 | 0.42 | 1.16 | 0.77 | 2.52 | 0.93 |
| 495431 | #N/A | #N/A | #N/A | #N/A | 0.79 | 0.35 |

|        |      |      |      |      |      |      |
|--------|------|------|------|------|------|------|
| 499407 | #N/A | #N/A | #N/A | #N/A | 0.43 | 0.09 |
| 499580 | #N/A | #N/A | #N/A | #N/A | 0.77 | 0.33 |
| 500690 | #N/A | #N/A | #N/A | #N/A | 0.66 | 0.26 |
| 500581 | 1.40 | 0.62 | 0.78 | 0.41 | 1.79 | 0.83 |
| 501124 | #N/A | #N/A | #N/A | #N/A | 2.09 | 0.89 |
| 501262 | 2.32 | 0.88 | 0.48 | 0.10 | 2.21 | 0.90 |
| 504249 | 2.32 | 0.88 | 0.48 | 0.10 | 2.96 | 0.96 |
| 505831 | 2.65 | 0.93 | 0.80 | 0.44 | 2.80 | 0.95 |
| 507587 | #N/A | #N/A | #N/A | #N/A | 0.60 | 0.20 |
| 507799 | 3.05 | 0.96 | 0.87 | 0.50 | 1.25 | 0.64 |
| 512942 | 3.05 | 0.96 | 0.87 | 0.50 | 1.18 | 0.59 |
| 513164 | 1.16 | 0.54 | 0.96 | 0.50 | 1.94 | 0.86 |
| 514110 | 0.48 | 0.18 | 0.45 | 0.09 | 1.81 | 0.83 |
| 516412 | 0.48 | 0.18 | 0.45 | 0.09 | 0.49 | 0.13 |
| 516680 | 2.89 | 0.96 | 1.14 | 0.59 | 1.40 | 0.69 |
| 520353 | 2.89 | 0.96 | 1.14 | 0.59 | 0.74 | 0.30 |
| 520545 | 1.69 | 0.72 | #N/A | #N/A | 1.28 | 0.65 |
| 522455 | 1.69 | 0.72 | #N/A | #N/A | #N/A | #N/A |
| 523290 | #N/A | #N/A | #N/A | #N/A | #N/A | #N/A |
| 524392 | #N/A | #N/A | #N/A | #N/A | 1.82 | 0.83 |
| 527947 | 1.58 | 0.68 | 1.28 | 0.77 | 0.58 | 0.20 |
| 530389 | 1.36 | 0.62 | 1.02 | 0.60 | 0.71 | 0.29 |
| 530799 | #N/A | #N/A | #N/A | #N/A | 0.70 | 0.28 |
| 536691 | #N/A | #N/A | #N/A | #N/A | 0.62 | 0.22 |
| 538434 | #N/A | #N/A | #N/A | #N/A | 1.40 | 0.71 |
| 538794 | #N/A | #N/A | #N/A | #N/A | 0.76 | 0.33 |
| 540011 | #N/A | #N/A | #N/A | #N/A | 1.40 | 0.69 |
| 540811 | 1.68 | 0.73 | 0.91 | 0.55 | 1.63 | 0.79 |
| 541939 | #N/A | #N/A | #N/A | #N/A | 1.33 | 0.68 |
| 545700 | #N/A | #N/A | #N/A | #N/A | 0.89 | 0.42 |
| 547613 | 1.32 | 0.60 | #N/A | #N/A | 0.58 | 0.20 |
| 547288 | #N/A | #N/A | #N/A | #N/A | #N/A | #N/A |
| 547855 | 1.97 | 0.81 | 1.10 | 0.59 | 0.77 | 0.35 |
| 549358 | 1.97 | 0.81 | 1.10 | 0.59 | #N/A | #N/A |
| 549513 | #N/A | #N/A | 0.80 | 0.42 | 1.77 | 0.82 |
| 550196 | #N/A | #N/A | 0.80 | 0.42 | #N/A | #N/A |
| 550652 | #N/A | #N/A | 0.80 | 0.42 | 1.82 | 0.83 |
| 552607 | #N/A | #N/A | 0.80 | 0.42 | 5.45 | 1.00 |
| 552726 | 2.04 | 0.82 | 1.08 | 0.68 | 1.55 | 0.76 |
| 556419 | 2.04 | 0.82 | 1.08 | 0.68 | 0.44 | 0.09 |
| 559289 | #N/A | #N/A | #N/A | #N/A | 0.97 | 0.49 |
| 560444 | 2.20 | 0.85 | 0.51 | 0.13 | 2.09 | 0.88 |
| 560797 | 1.99 | 0.82 | 0.78 | 0.40 | 1.82 | 0.83 |
| 563390 | 1.99 | 0.82 | 0.78 | 0.40 | 0.87 | 0.42 |
| 563792 | #N/A | #N/A | #N/A | #N/A | 0.89 | 0.43 |
| 564860 | 1.66 | 0.71 | #N/A | #N/A | 1.73 | 0.81 |
| 566654 | 1.45 | 0.65 | 1.20 | 0.74 | 1.09 | 0.57 |
| 570627 | 1.45 | 0.65 | 1.20 | 0.74 | 0.53 | 0.16 |
| 570776 | 1.42 | 0.64 | #N/A | #N/A | 1.21 | 0.60 |
| 572096 | 1.64 | 0.72 | 0.59 | 0.20 | 1.00 | 0.50 |
| 573232 | 1.42 | 0.64 | #N/A | #N/A | 1.60 | 0.77 |

|        |      |      |      |      |      |      |
|--------|------|------|------|------|------|------|
| 573466 | #N/A | #N/A | 0.70 | 0.30 | 2.72 | 0.95 |
| 576337 | #N/A | #N/A | 0.70 | 0.30 | 0.71 | 0.28 |
| 577793 | 0.68 | 0.31 | 0.73 | 0.33 | 0.73 | 0.31 |
| 578362 | 1.45 | 0.64 | #N/A | #N/A | 1.36 | 0.67 |
| 579318 | #N/A | #N/A | #N/A | #N/A | 0.66 | 0.25 |
| 582233 | #N/A | #N/A | #N/A | #N/A | 0.35 | 0.03 |
| 587573 | #N/A | #N/A | #N/A | #N/A | 0.79 | 0.36 |
| 587695 | 1.50 | 0.66 | #N/A | #N/A | 0.91 | 0.43 |
| 590541 | 1.50 | 0.66 | #N/A | #N/A | 0.96 | 0.48 |
| 590562 | 1.21 | 0.54 | 1.28 | 0.66 | 0.81 | 0.37 |
| 600019 | 0.95 | 0.44 | 0.97 | 0.62 | 0.79 | 0.35 |
| 604212 | 1.56 | 0.70 | 1.32 | 0.81 | 1.27 | 0.65 |
| 604879 | 1.20 | 0.54 | 0.93 | 0.58 | #N/A | #N/A |
| 605758 | 0.98 | 0.46 | 0.84 | 0.47 | 1.14 | 0.57 |
| 607177 | 1.34 | 0.60 | 1.22 | 0.63 | 1.95 | 0.86 |
| 607425 | #N/A | #N/A | 0.58 | 0.18 | 1.18 | 0.61 |
| 611753 | #N/A | #N/A | 0.58 | 0.18 | 2.07 | 0.88 |
| 611532 | 0.86 | 0.39 | #N/A | #N/A | 1.65 | 0.80 |
| 611794 | 0.86 | 0.39 | #N/A | #N/A | 1.09 | 0.54 |
| 614163 | 0.86 | 0.39 | #N/A | #N/A | 0.90 | 0.44 |
| 616191 | 1.82 | 0.77 | 0.98 | 0.63 | 0.83 | 0.39 |
| 616332 | 2.56 | 0.92 | 0.69 | 0.32 | 1.13 | 0.58 |
| 620160 | 2.56 | 0.92 | 0.69 | 0.32 | 0.73 | 0.31 |
| 622821 | 2.02 | 0.82 | 0.63 | 0.24 | 0.87 | 0.40 |
| 622918 | #N/A | #N/A | #N/A | #N/A | 1.66 | 0.80 |
| 625021 | #N/A | #N/A | #N/A | #N/A | 1.32 | 0.66 |
| 625168 | 0.28 | 0.06 | 0.29 | 0.03 | 0.68 | 0.28 |
| 626502 | 1.45 | 0.64 | #N/A | #N/A | 2.08 | 0.88 |
| 628197 | 1.45 | 0.64 | #N/A | #N/A | 1.40 | 0.71 |
| 628684 | 2.13 | 0.85 | 0.91 | 0.54 | 0.43 | 0.09 |
| 636084 | 2.13 | 0.85 | 0.91 | 0.54 | 0.63 | 0.23 |
| 639914 | 0.39 | 0.13 | 0.47 | 0.10 | 0.35 | 0.03 |
| 641021 | 1.51 | 0.67 | 1.25 | 0.81 | 1.58 | 0.76 |
| 642057 | 1.04 | 0.47 | 0.79 | 0.43 | 0.95 | 0.47 |
| 642262 | 1.04 | 0.47 | 0.79 | 0.43 | 1.27 | 0.65 |
| 644336 | 1.57 | 0.70 | 1.41 | 0.89 | 0.60 | 0.21 |
| 644404 | 2.26 | 0.88 | #N/A | #N/A | 1.50 | 0.74 |
| 645600 | 0.31 | 0.08 | 0.70 | 0.30 | 1.15 | 0.59 |
| 650923 | 0.31 | 0.08 | 0.70 | 0.30 | 0.45 | 0.11 |
| 659791 | 0.41 | 0.16 | 0.85 | 0.49 | 0.45 | 0.11 |
| 662833 | 1.58 | 0.68 | 0.75 | 0.38 | 0.99 | 0.50 |
| 663284 | 0.43 | 0.15 | #N/A | #N/A | 0.42 | 0.09 |
| 667907 | 0.43 | 0.15 | #N/A | #N/A | 0.66 | 0.27 |
| 668237 | 1.52 | 0.67 | 1.24 | 0.66 | 0.50 | 0.14 |
| 668244 | 1.52 | 0.67 | 1.24 | 0.66 | 0.92 | 0.45 |
| 672823 | 0.91 | 0.43 | 1.24 | 0.74 | 0.41 | 0.08 |
| 673334 | 0.81 | 0.37 | #N/A | #N/A | #N/A | #N/A |
| 674427 | 1.40 | 0.62 | 0.90 | 0.50 | 1.05 | 0.52 |
| 675619 | 2.37 | 0.89 | 0.90 | 0.54 | 1.58 | 0.76 |
| 679924 | 2.37 | 0.89 | 0.90 | 0.54 | 1.55 | 0.75 |
| 680844 | 2.28 | 0.87 | 0.80 | 0.41 | 2.61 | 0.94 |

|        |      |      |      |      |      |      |
|--------|------|------|------|------|------|------|
| 680866 | 1.12 | 0.51 | 1.13 | 0.71 | 2.82 | 0.96 |
| 682238 | 2.28 | 0.87 | 0.80 | 0.41 | 1.60 | 0.78 |
| 683561 | 1.12 | 0.51 | 1.13 | 0.71 | 1.34 | 0.67 |
| 683672 | #N/A | #N/A | #N/A | #N/A | 0.73 | 0.32 |
| 689083 | 1.93 | 0.79 | 0.76 | 0.41 | 0.93 | 0.46 |
| 693882 | 1.93 | 0.79 | 0.76 | 0.41 | 0.55 | 0.17 |
| 694800 | 1.91 | 0.79 | 0.69 | 0.31 | 1.82 | 0.83 |
| 695046 | 2.74 | 0.94 | #N/A | #N/A | 0.67 | 0.26 |
| 697156 | 1.69 | 0.72 | #N/A | #N/A | 0.55 | 0.17 |
| 699999 | 0.48 | 0.19 | 0.72 | 0.32 | 0.41 | 0.07 |
| 704698 | 0.48 | 0.19 | 0.72 | 0.32 | 0.47 | 0.12 |
| 704483 | 1.85 | 0.78 | #N/A | #N/A | 1.51 | 0.74 |
| 704493 | 1.85 | 0.78 | #N/A | #N/A | 2.22 | 0.90 |
| 705071 | 0.56 | 0.24 | #N/A | #N/A | 2.32 | 0.92 |
| 706130 | 1.85 | 0.78 | #N/A | #N/A | 1.48 | 0.74 |
| 706198 | #N/A | #N/A | 0.68 | 0.32 | 1.19 | 0.61 |
| 708145 | #N/A | #N/A | 0.68 | 0.32 | 3.30 | 0.98 |
| 708448 | 0.70 | 0.34 | 1.41 | 0.81 | 0.84 | 0.39 |
| 710991 | 0.41 | 0.18 | 1.52 | 0.65 | 0.73 | 0.30 |
| 712537 | 0.92 | 0.42 | 0.59 | 0.25 | 2.62 | 0.94 |
| 713480 | 2.50 | 0.91 | 1.50 | 0.84 | 1.45 | 0.72 |
| 717026 | 2.50 | 0.91 | 1.50 | 0.84 | 0.99 | 0.50 |
| 717145 | #N/A | #N/A | #N/A | #N/A | 1.58 | 0.78 |
| 718317 | #N/A | #N/A | #N/A | #N/A | 1.03 | 0.52 |
| 719789 | 1.22 | 0.54 | 0.89 | 0.47 | 1.85 | 0.84 |
| 720771 | #N/A | #N/A | 0.54 | 0.21 | 0.71 | 0.30 |
| 721701 | 1.26 | 0.57 | 0.69 | 0.36 | 0.80 | 0.36 |
| 721999 | 1.26 | 0.57 | 0.69 | 0.36 | 1.81 | 0.84 |
| 723304 | 1.26 | 0.57 | 0.69 | 0.36 | 1.10 | 0.57 |
| 724433 | 0.77 | 0.36 | 0.74 | 0.38 | 1.17 | 0.60 |
| 724721 | 0.33 | 0.09 | 0.56 | 0.20 | 1.66 | 0.78 |
| 728051 | 0.33 | 0.09 | 0.56 | 0.20 | 0.68 | 0.27 |
| 730301 | 0.34 | 0.10 | 0.52 | 0.18 | 0.51 | 0.14 |
| 731559 | #N/A | #N/A | #N/A | #N/A | 1.31 | 0.67 |
| 732191 | 0.91 | 0.42 | 1.22 | 0.78 | 1.37 | 0.68 |
| 733876 | #N/A | #N/A | #N/A | #N/A | 1.11 | 0.55 |
| 735212 | 0.43 | 0.17 | 0.62 | 0.23 | 0.51 | 0.15 |
| 738161 | 1.85 | 0.78 | #N/A | #N/A | 0.52 | 0.16 |
| 744851 | 1.85 | 0.78 | #N/A | #N/A | 1.57 | 0.76 |
| 746525 | #N/A | #N/A | #N/A | #N/A | 2.31 | 0.92 |
| 748875 | #N/A | #N/A | #N/A | #N/A | 0.89 | 0.42 |
| 749034 | 2.04 | 0.83 | 0.70 | 0.31 | 0.62 | 0.22 |
| 752224 | 2.28 | 0.87 | 0.97 | 0.57 | 0.64 | 0.24 |
| 757265 | 2.13 | 0.84 | 1.19 | 0.52 | 3.22 | 0.97 |
| 757637 | 2.13 | 0.84 | 1.19 | 0.52 | 1.86 | 0.85 |
| 760750 | #N/A | #N/A | #N/A | #N/A | 0.93 | 0.45 |
| 762575 | 1.40 | 0.63 | #N/A | #N/A | 1.10 | 0.55 |
| 765269 | 1.40 | 0.63 | #N/A | #N/A | 3.20 | 0.97 |
| 765266 | 1.92 | 0.79 | #N/A | #N/A | 1.02 | 0.51 |
| 766089 | 1.40 | 0.63 | #N/A | #N/A | 0.97 | 0.49 |
| 769196 | 1.92 | 0.79 | #N/A | #N/A | 0.90 | 0.44 |

|        |      |      |      |      |      |      |
|--------|------|------|------|------|------|------|
| 769318 | 2.50 | 0.92 | #N/A | #N/A | 0.72 | 0.31 |
| 776304 | 2.50 | 0.92 | #N/A | #N/A | 0.59 | 0.20 |
| 776584 | 2.59 | 0.93 | #N/A | #N/A | 1.39 | 0.69 |
| 777942 | #N/A | #N/A | #N/A | #N/A | 4.08 | 0.99 |
| 778173 | 0.49 | 0.20 | 1.62 | 0.89 | 1.68 | 0.80 |
| 780786 | 0.49 | 0.20 | 1.62 | 0.89 | 1.43 | 0.72 |
| 781143 | 1.39 | 0.62 | 0.68 | 0.28 | 0.57 | 0.19 |
| 782896 | 1.39 | 0.62 | 0.68 | 0.28 | 1.38 | 0.70 |
| 783127 | 1.41 | 0.64 | 0.68 | 0.28 | 1.36 | 0.68 |
| 786118 | 0.40 | 0.13 | 0.60 | 0.27 | 0.37 | 0.04 |
| 787333 | 0.65 | 0.29 | 1.01 | 0.62 | 1.16 | 0.58 |
| 789679 | 1.90 | 0.80 | 1.34 | 0.84 | 0.39 | 0.06 |
| 790669 | #N/A | #N/A | #N/A | #N/A | 0.31 | 0.02 |
| 791806 | 0.28 | 0.08 | 0.69 | 0.30 | 0.31 | 0.02 |
| 795573 | 0.25 | 0.04 | 0.75 | 0.36 | 0.41 | 0.07 |
| 796698 | #N/A | #N/A | #N/A | #N/A | 0.64 | 0.24 |
| 799592 | 0.81 | 0.39 | #N/A | #N/A | 0.45 | 0.11 |
| 799697 | 1.62 | 0.70 | #N/A | #N/A | 0.53 | 0.15 |
| #N/A   | #N/A | #N/A | #N/A | #N/A | 0.49 | 0.12 |
| 805203 | 1.62 | 0.70 | #N/A | #N/A | 0.78 | 0.35 |
| 805784 | #N/A | #N/A | 1.00 | 0.63 | 0.43 | 0.09 |
| 806825 | #N/A | #N/A | 0.65 | 0.26 | 0.41 | 0.08 |
| 808818 | #N/A | #N/A | 1.00 | 0.63 | 1.15 | 0.57 |
| 815627 | #N/A | #N/A | #N/A | #N/A | 0.31 | 0.02 |
| 817761 | 0.27 | 0.07 | 0.84 | 0.47 | 1.03 | 0.52 |
| 820142 | 0.39 | 0.13 | 0.71 | 0.32 | 0.41 | 0.06 |
| 822040 | 1.08 | 0.49 | 1.95 | 0.84 | 0.86 | 0.41 |
| 822287 | #N/A | #N/A | #N/A | #N/A | 1.13 | 0.56 |
| 823827 | 0.87 | 0.40 | 0.42 | 0.07 | 0.43 | 0.09 |
| 826976 | 0.85 | 0.40 | 0.84 | 0.47 | 1.38 | 0.70 |
| 828026 | 0.87 | 0.40 | 0.42 | 0.07 | 1.39 | 0.69 |
| 829379 | 0.85 | 0.40 | 0.84 | 0.47 | 0.99 | 0.50 |
| 829488 | 2.72 | 0.94 | 1.12 | 0.67 | 1.68 | 0.81 |
| 833538 | 2.72 | 0.94 | 1.12 | 0.67 | 1.06 | 0.53 |
| 836162 | 1.39 | 0.63 | 0.90 | 0.51 | 0.35 | 0.03 |
| 836349 | #N/A | #N/A | #N/A | #N/A | 0.90 | 0.43 |
| 838065 | 0.60 | 0.25 | 0.68 | 0.28 | 0.39 | 0.05 |
| 840913 | 0.60 | 0.25 | 0.68 | 0.28 | 1.48 | 0.74 |
| 843999 | 2.13 | 0.85 | 1.04 | 0.65 | 0.64 | 0.24 |
| 843486 | 1.47 | 0.66 | 0.99 | 0.64 | 0.65 | 0.24 |
| 845729 | 1.47 | 0.66 | 0.99 | 0.64 | 0.68 | 0.26 |
| 847421 | #N/A | #N/A | #N/A | #N/A | 0.67 | 0.27 |
| 847387 | #N/A | #N/A | 0.91 | 0.56 | 0.97 | 0.47 |
| 852018 | #N/A | #N/A | 0.91 | 0.56 | 0.67 | 0.26 |
| 852494 | 1.56 | 0.68 | 0.55 | 0.15 | #N/A | #N/A |
| 854390 | 1.56 | 0.68 | 0.55 | 0.15 | 1.99 | 0.87 |
| 855530 | #N/A | #N/A | #N/A | #N/A | 1.40 | 0.71 |
| 855842 | #N/A | #N/A | #N/A | #N/A | 1.23 | 0.62 |
| 857316 | 0.41 | 0.14 | 1.25 | 0.82 | 0.50 | 0.15 |
| 859335 | 0.73 | 0.33 | 1.74 | 0.91 | 0.87 | 0.40 |
| 861524 | #N/A | #N/A | #N/A | #N/A | 0.64 | 0.23 |

|        |      |      |      |      |      |      |
|--------|------|------|------|------|------|------|
| 861717 | 2.27 | 0.88 | 0.79 | 0.41 | 2.88 | 0.96 |
| 866783 | 2.27 | 0.88 | 0.79 | 0.41 | 0.44 | 0.09 |
| 868390 | #N/A | #N/A | #N/A | #N/A | 0.43 | 0.09 |
| 868661 | 2.92 | 0.95 | 0.43 | 0.08 | 1.61 | 0.78 |
| 871452 | #N/A | #N/A | #N/A | #N/A | 3.06 | 0.97 |
| 872727 | 2.92 | 0.95 | 0.43 | 0.08 | 1.14 | 0.59 |
| 872825 | #N/A | #N/A | #N/A | #N/A | 1.17 | 0.58 |
| 873745 | 1.32 | 0.59 | 1.03 | 0.68 | 2.06 | 0.88 |
| 875735 | 1.53 | 0.68 | 0.73 | 0.35 | 0.45 | 0.10 |
| 877295 | #N/A | #N/A | #N/A | #N/A | 0.74 | 0.31 |
| 879508 | 1.53 | 0.68 | 0.73 | 0.35 | 1.22 | 0.61 |
| 881924 | 1.69 | 0.72 | 1.15 | 0.71 | 0.88 | 0.43 |
| 882067 | 2.15 | 0.85 | 1.27 | 0.77 | 0.74 | 0.32 |
| 888632 | 2.15 | 0.85 | 1.27 | 0.77 | 0.67 | 0.27 |
| 888851 | 1.44 | 0.64 | #N/A | #N/A | 0.57 | 0.19 |
| 892992 | 3.83 | 0.99 | #N/A | #N/A | 3.83 | 0.99 |
| 896270 | 3.83 | 0.99 | #N/A | #N/A | 0.93 | 0.44 |
| 896374 | #N/A | #N/A | #N/A | #N/A | 0.59 | 0.20 |
| 898821 | #N/A | #N/A | #N/A | #N/A | 0.58 | 0.20 |
| 899693 | 1.83 | 0.76 | 1.40 | 0.73 | 0.58 | 0.20 |
| 903403 | 1.83 | 0.76 | 1.40 | 0.73 | 1.62 | 0.78 |
| #N/A   | #N/A | #N/A | #N/A | #N/A | 0.49 | 0.13 |
| 904748 | 2.09 | 0.84 | 1.35 | 0.87 | 0.61 | 0.22 |
| 907917 | 2.09 | 0.84 | 1.35 | 0.87 | 1.30 | 0.65 |
| 909397 | 2.09 | 0.84 | 1.35 | 0.87 | 0.47 | 0.12 |
| 909728 | #N/A | #N/A | #N/A | #N/A | 1.54 | 0.76 |
| 910234 | 1.27 | 0.57 | #N/A | #N/A | 0.97 | 0.48 |
| 912549 | 1.14 | 0.52 | #N/A | #N/A | 0.58 | 0.20 |
| 915155 | 0.96 | 0.44 | #N/A | #N/A | 0.58 | 0.19 |
| 919535 | 0.34 | 0.10 | 0.78 | 0.40 | 0.40 | 0.06 |
| 922535 | 0.34 | 0.10 | 0.78 | 0.40 | 0.61 | 0.21 |
| 922617 | 0.60 | 0.26 | #N/A | #N/A | 0.52 | 0.15 |
| 925077 | 0.60 | 0.26 | #N/A | #N/A | 1.77 | 0.82 |
| 927616 | 0.90 | 0.43 | 1.37 | 0.86 | 0.33 | 0.02 |
| 929597 | #N/A | #N/A | #N/A | #N/A | 1.42 | 0.70 |
| 930889 | 0.77 | 0.35 | #N/A | #N/A | 0.96 | 0.48 |
| 931062 | 0.56 | 0.23 | 0.66 | 0.27 | 0.39 | 0.05 |
| 933653 | 0.56 | 0.23 | 0.66 | 0.27 | 0.85 | 0.41 |
| 933881 | 1.52 | 0.67 | 1.04 | 0.68 | 2.52 | 0.93 |
| 934410 | 1.44 | 0.65 | #N/A | #N/A | 0.68 | 0.27 |
| 940977 | 1.44 | 0.65 | #N/A | #N/A | 0.70 | 0.29 |
| 947974 | #N/A | #N/A | 0.98 | 0.57 | 1.93 | 0.85 |
| 949188 | #N/A | #N/A | #N/A | #N/A | 0.75 | 0.31 |
| 953178 | #N/A | #N/A | #N/A | #N/A | 0.35 | 0.03 |
| 953348 | 0.34 | 0.09 | #N/A | #N/A | 0.69 | 0.29 |
| 954254 | #N/A | #N/A | 0.40 | 0.06 | 0.89 | 0.44 |
| 954486 | #N/A | #N/A | 0.40 | 0.06 | 1.20 | 0.62 |
| 956705 | #N/A | #N/A | 0.40 | 0.06 | 1.01 | 0.52 |
| 956909 | 2.29 | 0.88 | #N/A | #N/A | 0.82 | 0.38 |
| 962730 | 2.29 | 0.88 | #N/A | #N/A | 0.43 | 0.08 |
| 964874 | 0.99 | 0.45 | #N/A | #N/A | 0.80 | 0.37 |

|         |      |      |      |      |      |      |
|---------|------|------|------|------|------|------|
| 965085  | 2.69 | 0.93 | 1.01 | 0.66 | 1.82 | 0.83 |
| 971690  | 2.69 | 0.93 | 1.01 | 0.66 | 0.52 | 0.16 |
| 971912  | 2.82 | 0.95 | #N/A | #N/A | 1.05 | 0.54 |
| 975516  | 2.82 | 0.95 | #N/A | #N/A | 1.01 | 0.50 |
| 986812  | #N/A | #N/A | 0.92 | 0.55 | 0.62 | 0.23 |
| 988108  | 1.80 | 0.76 | #N/A | #N/A | 4.02 | 0.99 |
| 990435  | #N/A | #N/A | 1.12 | 0.63 | 0.67 | 0.26 |
| 990612  | #N/A | #N/A | #N/A | #N/A | 3.90 | 0.99 |
| 992727  | 1.12 | 0.52 | 1.23 | 0.79 | 0.98 | 0.48 |
| 1000124 | #N/A | #N/A | #N/A | #N/A | 0.58 | 0.20 |
| 1000337 | #N/A | #N/A | 0.71 | 0.35 | 1.23 | 0.63 |
| 1004123 | #N/A | #N/A | 0.71 | 0.35 | 0.59 | 0.21 |
| 1004342 | 0.59 | 0.28 | #N/A | #N/A | 0.52 | 0.16 |
| 1006020 | 0.59 | 0.28 | #N/A | #N/A | 1.75 | 0.81 |
| 1006990 | #N/A | #N/A | #N/A | #N/A | 1.57 | 0.77 |
| 1007416 | 0.81 | 0.37 | 1.07 | 0.70 | 0.60 | 0.22 |
| 1011617 | 0.38 | 0.12 | 0.67 | 0.28 | 0.83 | 0.37 |
| 1013770 | 0.38 | 0.12 | 0.67 | 0.28 | 0.69 | 0.28 |
| 1015445 | 2.31 | 0.88 | 1.07 | 0.55 | 1.27 | 0.65 |
| 1015563 | 0.98 | 0.44 | #N/A | #N/A | 0.55 | 0.17 |
| 1018136 | 0.36 | 0.11 | 0.86 | 0.47 | 0.39 | 0.06 |
| 1019310 | #N/A | #N/A | 0.81 | 0.43 | 0.52 | 0.15 |
| 1023966 | #N/A | #N/A | 0.81 | 0.43 | 0.79 | 0.35 |
| 1023681 | #N/A | #N/A | #N/A | #N/A | 0.67 | 0.27 |
| 1024588 | #N/A | #N/A | #N/A | #N/A | 1.13 | 0.57 |
| 1026510 | 1.29 | 0.59 | #N/A | #N/A | 0.93 | 0.46 |
| 1026851 | 0.75 | 0.34 | 0.72 | 0.34 | 1.04 | 0.52 |
| 1029762 | 0.75 | 0.34 | 0.72 | 0.34 | 0.34 | 0.03 |
| 1032006 | #N/A | #N/A | #N/A | #N/A | 0.64 | 0.24 |
| 1035759 | 2.78 | 0.94 | 0.75 | 0.36 | 1.10 | 0.57 |
| 1038748 | #N/A | #N/A | 0.51 | 0.14 | 0.45 | 0.10 |
| 1039266 | #N/A | #N/A | #N/A | #N/A | 0.36 | 0.04 |
| 1041795 | #N/A | #N/A | 0.75 | 0.35 | 1.44 | 0.73 |
| 1051880 | #N/A | #N/A | 0.75 | 0.35 | 0.46 | 0.11 |
| 1054539 | #N/A | #N/A | #N/A | #N/A | 0.32 | 0.02 |
| 1055680 | 1.01 | 0.46 | #N/A | #N/A | 1.77 | 0.83 |
| 1055808 | 1.78 | 0.74 | 1.16 | 0.75 | 1.04 | 0.52 |
| 1056831 | 0.39 | 0.13 | #N/A | #N/A | 1.70 | 0.80 |
| 1058514 | 1.78 | 0.74 | 1.16 | 0.75 | 1.32 | 0.67 |
| 1059753 | #N/A | #N/A | #N/A | #N/A | 2.11 | 0.89 |
| 1063277 | 0.78 | 0.37 | 0.77 | 0.38 | 1.08 | 0.56 |
| 1066560 | 0.63 | 0.28 | 0.69 | 0.30 | 0.88 | 0.42 |
| 1066261 | 0.39 | 0.15 | 0.70 | 0.31 | 0.94 | 0.45 |
| 1067497 | 0.63 | 0.28 | 0.69 | 0.30 | 1.00 | 0.50 |
| 1067041 | 0.39 | 0.15 | 0.70 | 0.31 | 0.87 | 0.40 |
| 1071231 | 0.63 | 0.28 | 0.69 | 0.30 | 0.69 | 0.27 |
| 1077894 | 0.39 | 0.15 | 0.70 | 0.31 | #N/A | #N/A |
| 267800  | 2.20 | 0.87 | 1.10 | 0.69 | 1.68 | 0.79 |
| 266754  | 0.43 | 0.19 | 1.27 | 0.84 | 0.85 | 0.41 |
| 264355  | 1.84 | 0.77 | 0.89 | 0.52 | #N/A | #N/A |
| 261705  | 1.84 | 0.77 | 0.89 | 0.52 | 1.05 | 0.53 |

|        |      |      |      |      |      |      |
|--------|------|------|------|------|------|------|
| 261609 | 1.18 | 0.54 | 1.05 | 0.69 | 0.94 | 0.46 |
| 256092 | 0.70 | 0.32 | #N/A | #N/A | 0.45 | 0.10 |
| 255800 | 0.49 | 0.22 | 0.70 | 0.37 | 0.49 | 0.14 |
| 251839 | 0.49 | 0.22 | 0.70 | 0.37 | 0.72 | 0.30 |
| 251304 | 2.13 | 0.85 | 0.74 | 0.36 | 3.45 | 0.98 |
| 250868 | 2.82 | 0.95 | 0.95 | 0.53 | 0.75 | 0.33 |
| #N/A   | 2.82 | 0.95 | 0.95 | 0.53 | 0.67 | 0.27 |
| #N/A   | #N/A | #N/A | #N/A | #N/A | 0.77 | 0.34 |
| 246895 | 2.82 | 0.95 | 0.95 | 0.53 | 1.31 | 0.67 |
| 246751 | #N/A | #N/A | #N/A | #N/A | 1.55 | 0.76 |
| #N/A   | #N/A | #N/A | #N/A | #N/A | 1.63 | 0.78 |
| 245903 | 1.95 | 0.81 | 0.71 | 0.33 | 1.72 | 0.81 |
| 244064 | 3.09 | 0.97 | 0.79 | 0.41 | 3.15 | 0.97 |
| 241989 | 3.09 | 0.97 | 0.79 | 0.41 | 1.94 | 0.86 |
| 239458 | 1.15 | 0.54 | #N/A | #N/A | 0.40 | 0.06 |
| 238731 | 1.62 | 0.70 | 0.69 | 0.30 | 0.34 | 0.03 |
| 234771 | 1.62 | 0.70 | 0.69 | 0.30 | 0.48 | 0.12 |
| 234455 | 2.16 | 0.86 | 0.81 | 0.42 | 1.50 | 0.75 |
| 233143 | 1.91 | 0.79 | 0.97 | 0.62 | 0.88 | 0.42 |
| 229734 | 1.91 | 0.79 | 0.97 | 0.62 | 1.13 | 0.57 |
| 229500 | 1.43 | 0.63 | 0.72 | 0.37 | 1.13 | 0.57 |
| 226994 | 1.43 | 0.63 | 0.72 | 0.37 | 0.75 | 0.32 |
| 226697 | 0.79 | 0.36 | 0.41 | 0.07 | 0.38 | 0.06 |
| 224406 | 0.79 | 0.36 | 0.41 | 0.07 | 2.34 | 0.92 |
| 222987 | 0.34 | 0.11 | 0.45 | 0.09 | 0.38 | 0.05 |
| 222563 | 0.68 | 0.31 | 0.51 | 0.13 | 1.06 | 0.54 |
| 220728 | 1.19 | 0.54 | 0.66 | 0.30 | 0.84 | 0.38 |
| 219878 | 1.62 | 0.70 | 0.75 | 0.37 | 0.81 | 0.38 |
| 216914 | 2.27 | 0.88 | 0.66 | 0.26 | 3.21 | 0.98 |
| 216156 | 0.30 | 0.08 | 0.69 | 0.30 | 1.42 | 0.72 |
| 212515 | 2.27 | 0.88 | 0.66 | 0.26 | 0.71 | 0.29 |
| #N/A   | #N/A | #N/A | #N/A | #N/A | 5.20 | 1.00 |
| #N/A   | #N/A | #N/A | #N/A | #N/A | 0.28 | 0.01 |
| 212155 | 0.04 | 0.00 | #N/A | #N/A | 0.56 | 0.19 |
| 206428 | 0.83 | 0.38 | 0.73 | 0.34 | 0.52 | 0.15 |
| #N/A   | 0.04 | 0.00 | #N/A | #N/A | 1.47 | 0.73 |
| 206211 | 1.80 | 0.75 | 1.06 | 0.56 | 2.51 | 0.93 |
| 204386 | 1.80 | 0.75 | 1.06 | 0.56 | 2.30 | 0.92 |
| 202775 | #N/A | #N/A | #N/A | #N/A | 1.06 | 0.54 |
| 201896 | 0.61 | 0.27 | #N/A | #N/A | 0.53 | 0.15 |
| 197950 | 0.61 | 0.27 | #N/A | #N/A | 1.42 | 0.72 |
| 194913 | 2.19 | 0.85 | 1.28 | 0.71 | 2.54 | 0.94 |
| 194800 | 1.55 | 0.67 | 1.22 | 0.79 | 2.63 | 0.94 |
| 190244 | 1.55 | 0.67 | 1.22 | 0.79 | 0.79 | 0.35 |
| 189729 | #N/A | #N/A | #N/A | #N/A | 1.36 | 0.68 |
| 183363 | 1.57 | 0.70 | 0.93 | 0.54 | 1.23 | 0.63 |
| 180017 | 1.57 | 0.70 | 0.93 | 0.54 | #N/A | #N/A |
| 179637 | #N/A | #N/A | 0.49 | 0.11 | 1.33 | 0.67 |
| #N/A   | 0.41 | 0.18 | 1.18 | 0.75 | #N/A | #N/A |
| 174220 | #N/A | #N/A | 0.49 | 0.11 | 0.98 | 0.49 |
| 174074 | 1.52 | 0.66 | 1.23 | 0.75 | 2.53 | 0.93 |



|        |      |      |      |      |      |      |
|--------|------|------|------|------|------|------|
| 172901 | 1.47 | 0.64 | 0.89 | 0.54 | 1.52 | 0.75 |
| 171310 | 0.66 | 0.30 | 0.38 | 0.06 | 0.77 | 0.35 |
| 169116 | 0.66 | 0.30 | 0.38 | 0.06 | 0.92 | 0.45 |
| 165533 | 0.91 | 0.42 | 0.98 | 0.59 | 1.08 | 0.55 |
| 165326 | 0.69 | 0.31 | 1.53 | 0.90 | 2.26 | 0.91 |
| 162194 | 0.69 | 0.31 | 1.53 | 0.90 | 0.38 | 0.05 |
| 161994 | 0.60 | 0.26 | 1.32 | 0.85 | 0.66 | 0.26 |
| #N/A   | #N/A | #N/A | #N/A | #N/A | 1.29 | 0.66 |
| 159697 | #N/A | #N/A | #N/A | #N/A | 0.40 | 0.06 |
| 153219 | #N/A | #N/A | #N/A | #N/A | 0.46 | 0.12 |
| 153001 | 2.44 | 0.91 | #N/A | #N/A | 1.82 | 0.83 |
| 148953 | 2.44 | 0.91 | #N/A | #N/A | 0.82 | 0.37 |
| 147505 | 1.97 | 0.81 | 0.89 | 0.54 | 0.66 | 0.25 |
| 147249 | 0.27 | 0.05 | 0.50 | 0.13 | 0.39 | 0.05 |
| 145139 | 0.27 | 0.05 | 0.50 | 0.13 | 1.31 | 0.67 |
| 144954 | 2.51 | 0.91 | 1.05 | 0.69 | 0.67 | 0.26 |
| 140424 | 2.51 | 0.91 | 1.05 | 0.69 | 2.14 | 0.89 |
| 139063 | 1.92 | 0.80 | #N/A | #N/A | 1.02 | 0.52 |
| 138944 | 1.05 | 0.48 | 0.84 | 0.47 | 0.61 | 0.22 |
| 137158 | 2.28 | 0.88 | 1.68 | 0.94 | 0.97 | 0.47 |
| 135229 | 2.23 | 0.86 | 0.95 | 0.61 | 1.36 | 0.69 |
| 129749 | #N/A | #N/A | #N/A | #N/A | 0.79 | 0.34 |
| 124730 | 0.73 | 0.34 | 1.00 | 0.57 | 0.41 | 0.07 |
| 123227 | #N/A | #N/A | #N/A | #N/A | 0.43 | 0.09 |
| 120089 | 1.20 | 0.54 | 1.03 | 0.68 | 0.77 | 0.33 |
| 115734 | 0.92 | 0.42 | 0.96 | 0.49 | 0.33 | 0.02 |
| 112513 | #N/A | #N/A | 2.02 | 0.70 | 0.57 | 0.18 |
| 112344 | #N/A | #N/A | 2.27 | 0.98 | 1.82 | 0.83 |
| 111550 | 0.19 | 0.02 | 0.04 | 0.00 | 1.53 | 0.74 |
| 110852 | 1.05 | 0.48 | #N/A | #N/A | 2.12 | 0.89 |
| 110077 | 3.43 | 0.98 | 1.11 | 0.54 | 1.75 | 0.82 |
| 108532 | 2.79 | 0.94 | 0.71 | 0.33 | 0.70 | 0.29 |
| 103811 | 1.96 | 0.81 | 0.95 | 0.57 | 1.03 | 0.52 |
| 99794  | 1.96 | 0.81 | 0.95 | 0.57 | 1.37 | 0.70 |
| 99797  | 2.14 | 0.85 | 0.73 | 0.34 | 4.08 | 0.99 |
| 97941  | 2.14 | 0.85 | 0.73 | 0.34 | 1.21 | 0.62 |
| 95791  | 1.52 | 0.66 | #N/A | #N/A | 0.74 | 0.32 |
| 94431  | 1.73 | 0.74 | 0.72 | 0.35 | 1.98 | 0.86 |
| 94241  | 0.74 | 0.33 | 0.82 | 0.45 | 0.85 | 0.40 |
| 91041  | 0.74 | 0.33 | 0.82 | 0.45 | 1.02 | 0.51 |
| 91130  | #N/A | #N/A | #N/A | #N/A | 0.76 | 0.34 |
| 87123  | 0.74 | 0.33 | 0.82 | 0.45 | 0.34 | 0.03 |
| 85987  | #N/A | #N/A | #N/A | #N/A | 1.39 | 0.71 |
| 85789  | 2.07 | 0.83 | #N/A | #N/A | 0.45 | 0.11 |
| 82849  | 0.45 | 0.20 | 0.32 | 0.04 | 3.25 | 0.98 |
| 81481  | 0.45 | 0.20 | 0.32 | 0.04 | 2.24 | 0.90 |
| #N/A   | 2.07 | 0.83 | #N/A | #N/A | 3.22 | 0.98 |
| 81486  | #N/A | #N/A | #N/A | #N/A | 0.72 | 0.29 |
| 78335  | #N/A | #N/A | #N/A | #N/A | 0.95 | 0.47 |
| 77770  | 1.07 | 0.49 | 0.66 | 0.27 | 1.12 | 0.57 |
| 74398  | 1.07 | 0.49 | 0.66 | 0.27 | 0.58 | 0.19 |

|      |        |      |      |      |      |      |      |
|------|--------|------|------|------|------|------|------|
|      | 73920  | 1.25 | 0.58 | #N/A | #N/A | 0.77 | 0.35 |
| #N/A |        | #N/A | #N/A | #N/A | #N/A | 0.40 | 0.07 |
|      | 69735  | 1.25 | 0.58 | #N/A | #N/A | 2.20 | 0.90 |
| #N/A |        | 1.25 | 0.58 | #N/A | #N/A | 3.07 | 0.97 |
|      | 69700  | 1.10 | 0.50 | #N/A | #N/A | 1.68 | 0.79 |
|      | 62582  | 1.10 | 0.50 | #N/A | #N/A | 0.59 | 0.20 |
|      | 58939  | 2.27 | 0.88 | 0.79 | 0.45 | 1.16 | 0.58 |
|      | 57866  | 1.65 | 0.71 | #N/A | #N/A | 1.74 | 0.81 |
|      | 57453  | 0.83 | 0.40 | #N/A | #N/A | 0.51 | 0.15 |
|      | 55265  | 0.83 | 0.40 | #N/A | #N/A | 1.65 | 0.78 |
|      | 55110  | #N/A | #N/A | #N/A | #N/A | 1.92 | 0.86 |
|      | 54468  | 1.76 | 0.76 | 0.88 | 0.50 | 0.92 | 0.45 |
|      | 50031  | 1.76 | 0.76 | 0.88 | 0.50 | 1.62 | 0.79 |
|      | 49704  | 1.04 | 0.47 | 1.06 | 0.64 | 0.36 | 0.04 |
|      | 45953  | #N/A | #N/A | #N/A | #N/A | 1.76 | 0.82 |
|      | 44791  | 1.65 | 0.72 | #N/A | #N/A | 1.31 | 0.66 |
|      | 42043  | 1.65 | 0.72 | #N/A | #N/A | 1.46 | 0.72 |
|      | 40187  | 2.40 | 0.89 | 1.12 | 0.73 | 0.83 | 0.37 |
|      | 39824  | 0.71 | 0.34 | 0.50 | 0.14 | 0.54 | 0.17 |
|      | 37647  | 2.17 | 0.86 | 1.01 | 0.56 | 0.44 | 0.10 |
| #N/A |        | 2.17 | 0.86 | 1.01 | 0.56 | 0.69 | 0.27 |
|      | 33851  | #N/A | #N/A | 1.55 | 0.87 | 2.09 | 0.89 |
|      | 31684  | 1.04 | 0.49 | #N/A | #N/A | 1.02 | 0.50 |
|      | 28266  | 1.04 | 0.49 | #N/A | #N/A | 1.18 | 0.61 |
|      | 27862  | 0.92 | 0.44 | 0.70 | 0.30 | 2.15 | 0.90 |
|      | 26039  | 0.92 | 0.44 | 0.70 | 0.30 | 1.02 | 0.52 |
|      | 24038  | 0.97 | 0.44 | 0.67 | 0.29 | 0.87 | 0.41 |
|      | 22049  | 2.30 | 0.87 | 0.76 | 0.37 | 1.24 | 0.64 |
|      | 20762  | 1.53 | 0.66 | 3.93 | 0.99 | 1.46 | 0.72 |
|      | 19061  | 0.81 | 0.37 | #N/A | #N/A | 0.46 | 0.11 |
|      | 18810  | 2.46 | 0.91 | 0.96 | 0.54 | 1.35 | 0.67 |
|      | 15136  | 2.46 | 0.91 | 0.96 | 0.54 | 1.97 | 0.86 |
|      | 14542  | 3.68 | 0.99 | 0.46 | 0.09 | 5.31 | 1.00 |
|      | 11484  | #N/A | #N/A | #N/A | #N/A | 0.76 | 0.34 |
|      | 11296  | 1.46 | 0.64 | 0.83 | 0.46 | 1.86 | 0.84 |
|      | 8383   | #N/A | #N/A | #N/A | #N/A | 1.47 | 0.74 |
|      | 461    | 0.74 | 0.33 | 0.73 | 0.34 | 0.65 | 0.25 |
|      | 269019 | 0.77 | 0.35 | 0.80 | 0.42 | 0.41 | 0.07 |
|      | 272663 | 0.77 | 0.35 | 0.80 | 0.42 | 0.67 | 0.25 |
|      | 273714 | 1.52 | 0.68 | #N/A | #N/A | 1.93 | 0.85 |
|      | 275552 | 2.49 | 0.91 | #N/A | #N/A | 1.44 | 0.72 |
|      | 277211 | 2.95 | 0.96 | 0.65 | 0.25 | 1.25 | 0.64 |
|      | 277561 | #N/A | #N/A | 0.57 | 0.25 | 0.82 | 0.37 |
|      | 280340 | #N/A | #N/A | 0.57 | 0.25 | 1.18 | 0.59 |
|      | 280590 | 1.19 | 0.53 | 1.01 | 0.64 | 1.23 | 0.62 |
|      | 284640 | 1.19 | 0.53 | 1.01 | 0.64 | 2.03 | 0.87 |
|      | 286316 | 1.51 | 0.66 | 0.94 | 0.56 | 0.58 | 0.20 |
|      | 289703 | 0.63 | 0.28 | 0.52 | 0.13 | 1.04 | 0.53 |
|      | 294966 | 0.68 | 0.30 | 0.85 | 0.47 | 0.32 | 0.02 |
|      | 295178 | 0.57 | 0.25 | 1.26 | 0.80 | 0.85 | 0.38 |
|      | 300426 | #N/A | #N/A | #N/A | #N/A | 0.44 | 0.09 |

|        |      |      |      |      |      |      |
|--------|------|------|------|------|------|------|
| 300868 | 0.75 | 0.36 | 0.77 | 0.38 | 0.39 | 0.05 |
| 303235 | 0.30 | 0.10 | 0.35 | 0.04 | 0.51 | 0.15 |
| 308681 | #N/A | #N/A | #N/A | #N/A | 1.90 | 0.85 |
| 311751 | 0.72 | 0.33 | 0.53 | 0.13 | 0.69 | 0.29 |
| 315004 | 3.42 | 0.98 | 1.39 | 0.88 | 0.14 | 0.00 |
| 316902 | 1.25 | 0.56 | 1.25 | 0.73 | 1.59 | 0.78 |
| 317164 | 3.18 | 0.97 | 1.44 | 0.83 | 1.57 | 0.77 |
| 319176 | 3.18 | 0.97 | 1.44 | 0.83 | 3.29 | 0.98 |
| 319436 | 1.07 | 0.49 | #N/A | #N/A | 1.18 | 0.61 |
| 323046 | 2.13 | 0.85 | 0.88 | 0.51 | 1.85 | 0.84 |
| 324186 | 1.42 | 0.63 | #N/A | #N/A | 1.64 | 0.79 |
| 324235 | 1.64 | 0.70 | 1.70 | 0.92 | 0.73 | 0.31 |
| 327288 | 1.64 | 0.70 | 1.70 | 0.92 | 0.92 | 0.45 |
| 328581 | 0.85 | 0.40 | #N/A | #N/A | #N/A | #N/A |
| 328659 | 2.68 | 0.94 | 0.92 | 0.56 | 1.03 | 0.53 |
| 331922 | 2.68 | 0.94 | 0.92 | 0.56 | 1.10 | 0.56 |
| 332211 | 0.77 | 0.37 | 0.78 | 0.40 | 0.41 | 0.07 |
| 335034 | #N/A | #N/A | 0.94 | 0.50 | 1.27 | 0.64 |
| 337306 | 0.77 | 0.37 | 0.78 | 0.40 | 0.53 | 0.16 |
| 339276 | 2.45 | 0.90 | #N/A | #N/A | 0.86 | 0.41 |
| 339417 | 2.36 | 0.89 | 0.85 | 0.48 | 1.52 | 0.75 |
| 341674 | 2.36 | 0.89 | 0.85 | 0.48 | 2.17 | 0.89 |
| 341855 | #N/A | #N/A | #N/A | #N/A | 0.69 | 0.27 |
| 344402 | #N/A | #N/A | #N/A | #N/A | 0.35 | 0.03 |
| 347510 | #N/A | #N/A | 0.94 | 0.59 | 0.87 | 0.41 |
| 348643 | 2.51 | 0.91 | 0.80 | 0.42 | 0.58 | 0.19 |
| 350862 | 2.51 | 0.91 | 0.80 | 0.42 | 2.87 | 0.96 |
| 350965 | 0.84 | 0.38 | 0.68 | 0.32 | 1.01 | 0.49 |
| 353135 | 0.92 | 0.43 | #N/A | #N/A | 0.78 | 0.34 |
| 354730 | 0.38 | 0.12 | 0.71 | 0.34 | 0.42 | 0.07 |
| 356810 | 0.59 | 0.26 | 0.92 | 0.56 | 0.75 | 0.33 |
| 357358 | #N/A | #N/A | 1.96 | 0.80 | 0.50 | 0.15 |
| 361304 | #N/A | #N/A | 1.96 | 0.80 | 1.42 | 0.71 |
| 363363 | 3.52 | 0.98 | 0.79 | 0.42 | 0.74 | 0.31 |
| 367933 | 3.52 | 0.98 | 0.79 | 0.42 | 1.47 | 0.73 |
| 368093 | 1.65 | 0.73 | 1.16 | 0.75 | 0.93 | 0.44 |
| 373056 | #N/A | #N/A | #N/A | #N/A | 0.53 | 0.16 |
| 377002 | #N/A | #N/A | #N/A | #N/A | 1.27 | 0.64 |
| 380068 | 1.29 | 0.58 | 1.59 | 0.90 | 0.99 | 0.50 |
| 380199 | 1.82 | 0.76 | 1.07 | 0.68 | 1.88 | 0.84 |
| 380345 | 1.29 | 0.58 | 1.59 | 0.90 | 0.93 | 0.46 |
| 385974 | 1.29 | 0.58 | 1.59 | 0.90 | 0.49 | 0.13 |
| 386100 | 1.55 | 0.69 | 0.87 | 0.50 | 2.14 | 0.89 |
| 387314 | 0.42 | 0.15 | #N/A | #N/A | 1.22 | 0.63 |
| 388358 | 0.76 | 0.34 | #N/A | #N/A | 0.62 | 0.23 |
| 390731 | 0.76 | 0.34 | #N/A | #N/A | 0.69 | 0.28 |
| 391484 | 1.60 | 0.71 | 1.63 | 0.94 | 3.03 | 0.97 |
| 391531 | #N/A | #N/A | #N/A | #N/A | 2.19 | 0.90 |
| 394787 | #N/A | #N/A | #N/A | #N/A | 1.20 | 0.61 |
| 395053 | 2.09 | 0.83 | 0.90 | 0.47 | 0.70 | 0.28 |
| 397795 | 2.09 | 0.83 | 0.90 | 0.47 | 2.15 | 0.89 |

|        |      |      |      |      |      |      |
|--------|------|------|------|------|------|------|
| 399458 | 1.22 | 0.55 | #N/A | #N/A | 1.28 | 0.66 |
| 401215 | 1.34 | 0.60 | 2.36 | 0.85 | 1.12 | 0.57 |
| 404236 | 2.50 | 0.91 | #N/A | #N/A | 0.66 | 0.25 |
| 404322 | 1.64 | 0.72 | 0.99 | 0.55 | 0.90 | 0.44 |
| 407583 | 1.64 | 0.72 | 0.99 | 0.55 | 1.97 | 0.87 |
| 408565 | 0.51 | 0.24 | 0.48 | 0.10 | 1.52 | 0.75 |
| 410625 | 0.22 | 0.03 | 0.56 | 0.25 | 0.28 | 0.01 |
| 410761 | 1.12 | 0.52 | 0.77 | 0.39 | 1.71 | 0.80 |
| 412119 | 1.12 | 0.52 | 0.77 | 0.39 | 1.40 | 0.71 |
| 412267 | 2.18 | 0.85 | #N/A | #N/A | 2.58 | 0.94 |
| 413035 | 1.13 | 0.51 | 0.61 | 0.23 | 2.35 | 0.92 |
| 415687 | 0.65 | 0.29 | 0.72 | 0.35 | 0.62 | 0.22 |
| 416035 | 1.13 | 0.51 | 0.61 | 0.23 | 0.70 | 0.30 |
| 416195 | 1.51 | 0.66 | 0.85 | 0.44 | 0.76 | 0.32 |
| 421483 | 2.21 | 0.87 | 0.89 | 0.53 | 1.28 | 0.64 |
| 422502 | 2.73 | 0.94 | 1.16 | 0.77 | 1.23 | 0.63 |
| 426058 | 2.73 | 0.94 | 1.16 | 0.77 | 0.63 | 0.24 |
| 426711 | 2.17 | 0.86 | 0.74 | 0.35 | 0.64 | 0.23 |
| 430078 | 0.89 | 0.42 | 0.80 | 0.43 | 1.40 | 0.70 |
| 431768 | 1.03 | 0.47 | 0.99 | 0.64 | 1.15 | 0.59 |
| 435914 | 0.76 | 0.34 | 0.70 | 0.32 | 0.56 | 0.19 |
| 437415 | 2.02 | 0.83 | 1.16 | 0.77 | 1.32 | 0.67 |
| 438788 | #N/A | #N/A | #N/A | #N/A | 0.88 | 0.41 |
| 442025 | 0.73 | 0.33 | 0.67 | 0.28 | 0.92 | 0.44 |
| 442089 | 0.98 | 0.45 | 0.73 | 0.34 | 0.47 | 0.11 |
| 443380 | 0.73 | 0.33 | 0.67 | 0.28 | #N/A | #N/A |
| 443413 | 1.47 | 0.66 | 0.97 | 0.62 | 0.82 | 0.38 |
| 445608 | 1.17 | 0.54 | 0.83 | 0.46 | 0.48 | 0.13 |
| 449927 | 1.17 | 0.54 | 0.83 | 0.46 | 0.47 | 0.11 |
| 450057 | 1.61 | 0.70 | 0.97 | 0.59 | 1.16 | 0.60 |
| 451631 | 1.90 | 0.78 | 0.86 | 0.50 | 0.78 | 0.34 |
| 455555 | 1.90 | 0.78 | 0.86 | 0.50 | 1.26 | 0.64 |
| 457260 | 1.68 | 0.73 | #N/A | #N/A | 0.93 | 0.46 |
| 457284 | 0.79 | 0.37 | 0.82 | 0.43 | 2.03 | 0.87 |
| 459300 | 0.79 | 0.37 | 0.82 | 0.43 | 0.52 | 0.15 |
| 459423 | 1.82 | 0.76 | 1.26 | 0.80 | 0.99 | 0.48 |
| 460770 | #N/A | #N/A | 0.67 | 0.27 | 1.11 | 0.57 |
| 463933 | 1.27 | 0.58 | 0.83 | 0.45 | 1.27 | 0.64 |
| 468161 | 1.27 | 0.58 | 0.83 | 0.45 | 0.56 | 0.18 |
| 468444 | 0.35 | 0.14 | 0.86 | 0.49 | 0.97 | 0.49 |
| 469847 | 0.52 | 0.22 | 0.97 | 0.62 | 0.34 | 0.03 |
| 472901 | #N/A | #N/A | #N/A | #N/A | 0.78 | 0.35 |
| 473419 | 1.81 | 0.76 | 1.08 | 0.72 | 0.85 | 0.41 |
| 475896 | 1.78 | 0.76 | 0.88 | 0.52 | 0.64 | 0.25 |
| 478300 | 1.66 | 0.73 | 1.38 | 0.77 | 2.20 | 0.90 |
| 483360 | 2.11 | 0.83 | 0.89 | 0.50 | 1.92 | 0.85 |
| 486146 | 0.30 | 0.08 | 0.91 | 0.56 | 0.40 | 0.06 |
| 490245 | 1.56 | 0.68 | 1.05 | 0.58 | 0.40 | 0.06 |
| 490393 | 1.16 | 0.53 | 1.04 | 0.65 | 0.79 | 0.35 |
| 492403 | 1.34 | 0.60 | 0.47 | 0.10 | 1.20 | 0.61 |
| 494099 | #N/A | #N/A | #N/A | #N/A | 2.65 | 0.95 |

|        |      |      |      |      |      |      |
|--------|------|------|------|------|------|------|
| 496281 | #N/A | #N/A | #N/A | #N/A | 1.10 | 0.55 |
| 496342 | 3.20 | 0.97 | 0.34 | 0.04 | 3.18 | 0.97 |
| 499208 | 3.20 | 0.97 | 0.34 | 0.04 | 1.09 | 0.56 |
| 499455 | 0.54 | 0.23 | 0.76 | 0.41 | 0.57 | 0.19 |
| 501249 | 2.83 | 0.95 | 0.41 | 0.07 | 2.00 | 0.87 |
| 502143 | 0.58 | 0.25 | 1.21 | 0.79 | 3.16 | 0.97 |
| 507206 | #N/A | #N/A | 1.01 | 0.66 | 0.44 | 0.10 |
| 507369 | #N/A | #N/A | 1.01 | 0.66 | 0.42 | 0.07 |
| 507501 | 1.04 | 0.49 | 0.93 | 0.54 | 0.90 | 0.44 |
| 509733 | #N/A | #N/A | #N/A | #N/A | 1.61 | 0.78 |
| 510700 | #N/A | #N/A | #N/A | #N/A | 0.72 | 0.30 |
| 513960 | 1.69 | 0.74 | 0.86 | 0.50 | 1.74 | 0.82 |
| 517286 | 1.08 | 0.49 | 1.00 | 0.63 | 0.40 | 0.06 |
| 520445 | 2.23 | 0.86 | 0.87 | 0.50 | 0.59 | 0.20 |
| 520760 | 1.88 | 0.79 | 1.57 | 0.88 | 0.71 | 0.30 |
| 522328 | #N/A | #N/A | 0.46 | 0.09 | 1.13 | 0.57 |
| 527498 | #N/A | #N/A | 0.46 | 0.09 | 0.55 | 0.17 |
| 531816 | 3.85 | 0.99 | 1.14 | 0.76 | 0.85 | 0.40 |
| 533026 | 1.87 | 0.79 | 1.20 | 0.66 | 1.40 | 0.69 |
| 533162 | 1.48 | 0.67 | 0.77 | 0.42 | 0.62 | 0.22 |
| 534943 | #N/A | #N/A | #N/A | #N/A | 1.40 | 0.70 |
| 537608 | #N/A | #N/A | #N/A | #N/A | 1.35 | 0.68 |
| 538550 | #N/A | #N/A | #N/A | #N/A | 0.70 | 0.28 |
| 538688 | 0.23 | 0.04 | 0.23 | 0.01 | 1.66 | 0.79 |
| 540443 | #N/A | #N/A | 1.12 | 0.75 | 1.49 | 0.73 |
| 542880 | 0.23 | 0.04 | 0.23 | 0.01 | 1.37 | 0.68 |
| 542977 | #N/A | #N/A | 1.11 | 0.60 | 1.04 | 0.52 |
| 545729 | #N/A | #N/A | 1.11 | 0.60 | 3.18 | 0.97 |
| 547236 | 3.52 | 0.98 | 0.96 | 0.62 | 1.21 | 0.61 |
| 549182 | #N/A | #N/A | #N/A | #N/A | 0.74 | 0.31 |
| 549735 | 0.25 | 0.08 | #N/A | #N/A | 0.52 | 0.16 |
| 550205 | 0.18 | 0.03 | 0.77 | 0.38 | 0.40 | 0.06 |
| 552902 | 0.18 | 0.03 | 0.77 | 0.38 | 0.33 | 0.02 |
| 554389 | 1.76 | 0.75 | 0.48 | 0.11 | 0.87 | 0.40 |
| 554792 | 0.16 | 0.03 | #N/A | #N/A | 0.33 | 0.02 |
| 557480 | 0.76 | 0.35 | 0.78 | 0.40 | 0.70 | 0.29 |
| 559869 | 0.76 | 0.35 | 0.78 | 0.40 | 1.33 | 0.67 |
| 560811 | 1.08 | 0.49 | 0.83 | 0.44 | 1.97 | 0.86 |
| 561855 | 1.25 | 0.56 | 0.82 | 0.46 | 0.97 | 0.49 |
| 561955 | 0.99 | 0.45 | 1.34 | 0.86 | 1.23 | 0.63 |
| 562942 | 0.86 | 0.40 | 1.05 | 0.68 | 1.46 | 0.73 |
| 564192 | 0.99 | 0.45 | 1.34 | 0.86 | 1.49 | 0.73 |
| 565573 | 0.34 | 0.13 | 0.68 | 0.29 | 0.35 | 0.03 |
| 565861 | #N/A | #N/A | 0.84 | 0.47 | 1.58 | 0.78 |
| 565998 | 1.89 | 0.78 | 0.90 | 0.52 | 1.02 | 0.51 |
| 570193 | 1.89 | 0.78 | 0.90 | 0.52 | 0.96 | 0.47 |
| 570299 | 1.88 | 0.78 | 0.81 | 0.42 | 1.89 | 0.85 |
| 571276 | 2.98 | 0.95 | #N/A | #N/A | 1.83 | 0.83 |
| 572714 | 2.98 | 0.95 | #N/A | #N/A | 2.48 | 0.93 |
| 574790 | 0.56 | 0.24 | 0.68 | 0.28 | 2.12 | 0.89 |
| 574475 | #N/A | #N/A | 0.74 | 0.35 | 3.08 | 0.97 |

|        |      |      |      |      |      |      |
|--------|------|------|------|------|------|------|
| 577515 | #N/A | #N/A | 0.74 | 0.35 | 1.80 | 0.82 |
| 578391 | 1.99 | 0.82 | #N/A | #N/A | 1.61 | 0.78 |
| 578950 | 2.03 | 0.81 | #N/A | #N/A | 0.42 | 0.08 |
| 584270 | 1.94 | 0.79 | 1.11 | 0.74 | 1.72 | 0.81 |
| 587273 | #N/A | #N/A | #N/A | #N/A | #N/A | #N/A |
| 590039 | #N/A | #N/A | #N/A | #N/A | 0.73 | 0.32 |
| 593366 | 1.51 | 0.65 | 1.09 | 0.70 | 1.00 | 0.51 |
| 597194 | 1.51 | 0.65 | 1.09 | 0.70 | 0.45 | 0.11 |
| 597331 | 1.61 | 0.70 | #N/A | #N/A | 0.75 | 0.33 |
| 599351 | 2.07 | 0.84 | 1.02 | 0.64 | 1.65 | 0.79 |
| 601561 | 1.47 | 0.66 | 0.95 | 0.54 | 1.44 | 0.73 |
| 603867 | 0.84 | 0.39 | 1.08 | 0.68 | #N/A | #N/A |
| 607827 | 0.91 | 0.42 | 1.03 | 0.61 | 0.93 | 0.46 |
| 608139 | 0.84 | 0.39 | 1.08 | 0.68 | 1.09 | 0.54 |
| 609980 | 0.91 | 0.42 | 1.03 | 0.61 | 1.03 | 0.51 |
| 610080 | 0.91 | 0.42 | 1.03 | 0.61 | 1.00 | 0.49 |
| 610158 | 1.50 | 0.65 | 1.93 | 0.92 | 2.32 | 0.91 |
| 611254 | 1.50 | 0.65 | 1.93 | 0.92 | 2.25 | 0.91 |
| 615974 | #N/A | #N/A | 0.86 | 0.46 | #N/A | #N/A |
| 618097 | 1.77 | 0.74 | 1.22 | 0.69 | 0.85 | 0.39 |
| 619302 | 2.09 | 0.84 | 0.97 | 0.55 | 2.90 | 0.96 |
| 622133 | 1.81 | 0.77 | 1.17 | 0.66 | 0.71 | 0.29 |
| 622250 | 0.68 | 0.30 | 0.64 | 0.25 | 1.38 | 0.70 |
| 623615 | 0.59 | 0.28 | 0.70 | 0.30 | 0.68 | 0.26 |
| 624531 | 0.65 | 0.29 | 0.82 | 0.45 | 0.66 | 0.24 |
| 626920 | 3.20 | 0.97 | 0.67 | 0.31 | 1.40 | 0.71 |
| 628784 | 3.20 | 0.97 | 0.67 | 0.31 | 2.90 | 0.96 |
| 631969 | #N/A | #N/A | #N/A | #N/A | 1.47 | 0.72 |
| 634471 | 0.31 | 0.12 | 0.79 | 0.41 | 0.48 | 0.13 |
| 634688 | 0.95 | 0.43 | 0.62 | 0.24 | 1.11 | 0.57 |
| 636290 | 1.28 | 0.59 | 0.88 | 0.52 | #N/A | #N/A |
| 640603 | 1.28 | 0.59 | 0.88 | 0.52 | 0.42 | 0.08 |
| 640914 | #N/A | #N/A | #N/A | #N/A | 0.64 | 0.24 |
| 646776 | #N/A | #N/A | #N/A | #N/A | 2.62 | 0.94 |
| 649279 | #N/A | #N/A | 1.43 | 0.85 | 0.79 | 0.37 |
| 651071 | 0.53 | 0.22 | 0.85 | 0.49 | 0.46 | 0.11 |
| 650811 | 1.22 | 0.54 | 1.26 | 0.81 | 1.20 | 0.62 |
| 651909 | 0.58 | 0.24 | 0.68 | 0.28 | 0.39 | 0.06 |
| 654416 | 0.32 | 0.09 | 0.51 | 0.14 | #N/A | #N/A |
| 658341 | 1.27 | 0.57 | #N/A | #N/A | 2.01 | 0.87 |
| 658544 | 2.63 | 0.92 | 0.94 | 0.58 | 2.22 | 0.90 |
| 661528 | 2.63 | 0.92 | 0.94 | 0.58 | 0.49 | 0.13 |
| 664283 | 0.48 | 0.19 | 0.46 | 0.09 | 0.67 | 0.26 |
| 665521 | 1.59 | 0.68 | 0.89 | 0.48 | 0.85 | 0.40 |
| 665844 | 0.94 | 0.43 | 0.94 | 0.56 | 0.81 | 0.38 |
| 668204 | 0.94 | 0.43 | 0.94 | 0.56 | 1.37 | 0.69 |
| 669654 | 2.14 | 0.85 | 0.89 | 0.51 | 1.24 | 0.63 |
| 670062 | 1.35 | 0.60 | 1.25 | 0.79 | 0.56 | 0.18 |
| 671886 | 1.52 | 0.68 | 0.67 | 0.27 | 0.36 | 0.04 |
| 676836 | 1.52 | 0.68 | 0.67 | 0.27 | 3.29 | 0.98 |
| 677192 | 3.21 | 0.97 | 0.86 | 0.49 | 0.44 | 0.09 |

|        |      |      |      |      |      |      |
|--------|------|------|------|------|------|------|
| 685797 | 3.21 | 0.97 | 0.86 | 0.49 | 0.85 | 0.41 |
| 685910 | 2.10 | 0.84 | #N/A | #N/A | 0.92 | 0.45 |
| 688864 | 2.10 | 0.84 | #N/A | #N/A | 1.03 | 0.53 |
| 690509 | 1.59 | 0.69 | #N/A | #N/A | 0.62 | 0.23 |
| 690694 | 2.71 | 0.93 | 0.97 | 0.53 | 0.60 | 0.21 |
| 695152 | 2.71 | 0.93 | 0.97 | 0.53 | 1.01 | 0.51 |
| 696482 | 2.28 | 0.88 | 0.88 | 0.48 | 1.66 | 0.80 |
| 698369 | 2.34 | 0.89 | 0.74 | 0.35 | 1.41 | 0.72 |
| 698810 | 0.97 | 0.46 | 0.95 | 0.51 | 0.43 | 0.09 |
| 703366 | 0.97 | 0.46 | 0.95 | 0.51 | 0.49 | 0.13 |
| 703578 | 2.28 | 0.88 | 1.64 | 0.92 | 0.63 | 0.22 |
| 712108 | 2.28 | 0.88 | 1.64 | 0.92 | 0.52 | 0.16 |
| 713670 | 0.90 | 0.41 | 0.83 | 0.46 | 0.67 | 0.27 |
| 713930 | 2.22 | 0.85 | #N/A | #N/A | 1.17 | 0.58 |
| 715637 | 2.01 | 0.81 | 0.88 | 0.50 | 3.25 | 0.98 |
| 718129 | 2.01 | 0.81 | 0.88 | 0.50 | 0.60 | 0.21 |
| 718574 | 1.52 | 0.66 | 1.02 | 0.65 | 0.91 | 0.45 |
| 720959 | 1.27 | 0.59 | 0.51 | 0.12 | 1.97 | 0.86 |
| 721592 | 1.10 | 0.50 | #N/A | #N/A | 1.55 | 0.76 |
| 722612 | 2.04 | 0.82 | 0.80 | 0.44 | 0.76 | 0.34 |
| 725650 | 2.04 | 0.82 | 0.80 | 0.44 | 0.79 | 0.34 |
| 725933 | #N/A | #N/A | #N/A | #N/A | 0.54 | 0.16 |
| 733140 | #N/A | #N/A | #N/A | #N/A | 0.38 | 0.06 |
| 736633 | 0.81 | 0.37 | 0.99 | 0.63 | 0.52 | 0.15 |
| 738958 | 0.61 | 0.26 | 0.89 | 0.50 | 0.85 | 0.41 |
| 739864 | 0.71 | 0.32 | #N/A | #N/A | 1.58 | 0.76 |
| 741311 | 1.83 | 0.77 | 0.74 | 0.36 | 1.45 | 0.71 |
| 741511 | 3.26 | 0.97 | 0.71 | 0.32 | 1.38 | 0.70 |
| 743443 | 3.26 | 0.97 | 0.71 | 0.32 | 2.65 | 0.95 |
| 745922 | 2.17 | 0.86 | 0.83 | 0.45 | 1.35 | 0.68 |
| 747728 | 2.16 | 0.86 | 1.21 | 0.67 | 1.06 | 0.53 |
| 748261 | 1.92 | 0.79 | 0.63 | 0.23 | 0.60 | 0.20 |
| 749929 | 1.50 | 0.65 | 0.82 | 0.45 | 1.09 | 0.56 |
| 752904 | 1.50 | 0.65 | 0.82 | 0.45 | 0.99 | 0.49 |
| 753224 | 0.25 | 0.07 | 0.67 | 0.28 | 0.40 | 0.06 |
| 754837 | 0.83 | 0.38 | 0.78 | 0.40 | 0.40 | 0.07 |
| 758516 | 0.67 | 0.30 | 0.60 | 0.22 | 1.32 | 0.67 |
| 758316 | 0.83 | 0.38 | 0.78 | 0.40 | 3.74 | 0.99 |
| 759182 | 0.73 | 0.35 | 0.99 | 0.61 | 1.09 | 0.54 |
| 761890 | 0.67 | 0.30 | 0.60 | 0.22 | 0.74 | 0.32 |
| 763350 | 1.13 | 0.53 | 0.41 | 0.07 | 0.45 | 0.10 |
| 772557 | #N/A | #N/A | #N/A | #N/A | 1.46 | 0.72 |
| 774014 | 1.15 | 0.53 | 0.76 | 0.37 | 2.55 | 0.94 |
| 774930 | 0.62 | 0.27 | 0.67 | 0.32 | 0.67 | 0.27 |
| 775314 | #N/A | #N/A | #N/A | #N/A | 2.35 | 0.92 |
| 775945 | 1.20 | 0.55 | 0.47 | 0.10 | 1.25 | 0.63 |
| 777614 | 0.65 | 0.29 | #N/A | #N/A | 2.02 | 0.88 |
| 778566 | 0.65 | 0.29 | #N/A | #N/A | 1.03 | 0.51 |
| 778944 | 0.60 | 0.26 | 0.81 | 0.43 | 1.98 | 0.87 |
| 779628 | #N/A | #N/A | 0.94 | 0.55 | 0.39 | 0.06 |
| 782619 | 1.75 | 0.74 | #N/A | #N/A | 0.83 | 0.38 |

|        |      |      |      |      |      |      |
|--------|------|------|------|------|------|------|
| 784620 | 1.71 | 0.73 | #N/A | #N/A | 0.49 | 0.12 |
| 789377 | #N/A | #N/A | 0.88 | 0.51 | 1.63 | 0.78 |
| 790204 | 2.42 | 0.89 | 0.98 | 0.63 | 0.64 | 0.23 |
| 794666 | 2.42 | 0.89 | 0.98 | 0.63 | 2.00 | 0.87 |
| 795523 | 2.41 | 0.90 | 0.94 | 0.59 | 1.84 | 0.83 |
| 796415 | 1.87 | 0.79 | 0.80 | 0.42 | 2.42 | 0.92 |
| 796539 | 1.06 | 0.48 | 0.45 | 0.09 | 1.77 | 0.83 |
| 801378 | 1.06 | 0.48 | 0.45 | 0.09 | 0.46 | 0.11 |
| 802703 | 1.48 | 0.64 | 0.93 | 0.56 | 0.96 | 0.48 |
| 802887 | 1.65 | 0.72 | 1.02 | 0.66 | 1.25 | 0.64 |
| 805091 | 1.65 | 0.72 | 1.02 | 0.66 | 1.23 | 0.63 |
| 805326 | 1.70 | 0.73 | #N/A | #N/A | 0.83 | 0.39 |
| 806865 | 1.27 | 0.58 | 1.03 | 0.67 | 1.20 | 0.61 |
| 809623 | 0.75 | 0.34 | 0.46 | 0.09 | 0.95 | 0.46 |
| 811233 | 1.31 | 0.58 | 0.86 | 0.50 | 0.56 | 0.18 |
| 814364 | 0.98 | 0.44 | #N/A | #N/A | 2.38 | 0.92 |
| 815651 | 2.88 | 0.95 | 0.76 | 0.38 | 1.28 | 0.65 |
| 819948 | 2.88 | 0.95 | 0.76 | 0.38 | 1.78 | 0.82 |
| 822454 | 2.15 | 0.86 | 0.98 | 0.63 | 0.88 | 0.43 |
| 824631 | 0.95 | 0.45 | 1.37 | 0.83 | 0.60 | 0.21 |
| 824729 | 0.42 | 0.18 | 1.12 | 0.74 | 0.42 | 0.08 |
| 827028 | 1.14 | 0.51 | 1.14 | 0.73 | 0.95 | 0.47 |
| 833253 | 1.14 | 0.51 | 1.14 | 0.73 | 1.62 | 0.79 |
| 833356 | 3.16 | 0.97 | #N/A | #N/A | 1.10 | 0.55 |
| 835326 | 2.66 | 0.93 | 0.82 | 0.45 | 1.39 | 0.71 |
| 839995 | 1.59 | 0.69 | 1.01 | 0.66 | 1.29 | 0.66 |
| 840144 | 3.43 | 0.98 | #N/A | #N/A | 1.18 | 0.60 |
| 842202 | 3.43 | 0.98 | #N/A | #N/A | 4.61 | 1.00 |
| 842436 | 2.31 | 0.89 | 0.98 | 0.53 | 0.62 | 0.21 |
| 848486 | 2.31 | 0.89 | 0.98 | 0.53 | 0.78 | 0.36 |
| 849809 | #N/A | #N/A | #N/A | #N/A | 1.44 | 0.73 |
| 850074 | 0.51 | 0.22 | 0.47 | 0.10 | 0.81 | 0.37 |
| 851769 | 0.25 | 0.06 | 0.65 | 0.30 | #N/A | #N/A |
| 854390 | 0.51 | 0.22 | 0.47 | 0.10 | 0.47 | 0.12 |
| 855293 | 2.47 | 0.90 | 0.79 | 0.43 | 3.16 | 0.97 |
| 855399 | #N/A | #N/A | 1.44 | 0.62 | 1.23 | 0.62 |
| 858087 | #N/A | #N/A | 1.44 | 0.62 | 1.21 | 0.60 |
| 858568 | #N/A | #N/A | #N/A | #N/A | 0.74 | 0.33 |
| 858297 | #N/A | #N/A | #N/A | #N/A | 1.19 | 0.61 |
| 859215 | 1.31 | 0.59 | 0.77 | 0.41 | 0.58 | 0.20 |
| 863520 | 1.31 | 0.59 | 0.77 | 0.41 | 1.00 | 0.50 |
| 864271 | 2.09 | 0.84 | #N/A | #N/A | 2.46 | 0.93 |
| 864412 | #N/A | #N/A | #N/A | #N/A | 1.69 | 0.80 |
| 865559 | 1.41 | 0.62 | 0.64 | 0.33 | 0.85 | 0.40 |
| 867555 | #N/A | #N/A | 0.86 | 0.50 | 1.02 | 0.50 |
| 870073 | 3.50 | 0.98 | 0.89 | 0.53 | 0.76 | 0.32 |
| 873291 | 2.23 | 0.86 | #N/A | #N/A | 1.08 | 0.56 |
| 878780 | 0.79 | 0.36 | 0.81 | 0.43 | #N/A | #N/A |
| 878679 | 2.23 | 0.86 | #N/A | #N/A | 0.67 | 0.26 |
| 879063 | 0.79 | 0.36 | 0.81 | 0.43 | 0.74 | 0.32 |
| 886183 | 0.55 | 0.26 | 0.79 | 0.43 | 1.05 | 0.54 |



|        |      |      |      |      |      |      |
|--------|------|------|------|------|------|------|
| 886516 | 0.79 | 0.36 | 0.81 | 0.43 | 0.41 | 0.08 |
| 888952 | 1.10 | 0.51 | 1.14 | 0.69 | 0.37 | 0.04 |
| 892988 | #N/A | #N/A | 0.87 | 0.47 | #N/A | #N/A |
| 895716 | 3.24 | 0.98 | 0.86 | 0.47 | 1.80 | 0.83 |
| 896914 | 1.81 | 0.77 | 0.83 | 0.46 | 2.09 | 0.89 |
| 899226 | 1.81 | 0.77 | 0.83 | 0.46 | 2.55 | 0.93 |
| 899379 | 2.50 | 0.91 | 0.74 | 0.40 | 0.89 | 0.43 |
| 902413 | 2.50 | 0.91 | 0.74 | 0.40 | 2.07 | 0.88 |
| 903849 | 1.13 | 0.51 | 0.85 | 0.49 | 1.03 | 0.52 |
| 905661 | 0.99 | 0.45 | 0.75 | 0.36 | 1.03 | 0.52 |
| 907320 | 1.30 | 0.58 | 0.81 | 0.42 | 1.05 | 0.52 |
| 905834 | 1.92 | 0.79 | 0.94 | 0.58 | 1.35 | 0.67 |
| 910785 | 0.99 | 0.45 | 0.75 | 0.36 | 0.78 | 0.34 |
| 911060 | 0.93 | 0.43 | 0.67 | 0.28 | 0.89 | 0.43 |
| 912879 | 0.94 | 0.43 | 0.71 | 0.35 | 0.59 | 0.20 |
| 917050 | 0.43 | 0.19 | 1.05 | 0.65 | 0.84 | 0.40 |
| 917578 | 1.24 | 0.56 | 1.13 | 0.75 | 1.86 | 0.84 |
| 918365 | 2.40 | 0.89 | 0.97 | 0.62 | 2.32 | 0.92 |
| 921400 | 2.40 | 0.89 | 0.97 | 0.62 | 2.69 | 0.95 |
| 922201 | 0.57 | 0.24 | 0.90 | 0.54 | 0.91 | 0.43 |
| 923014 | 0.57 | 0.24 | 0.90 | 0.54 | 1.08 | 0.54 |
| 923493 | #N/A | #N/A | #N/A | #N/A | 0.56 | 0.18 |
| 628613 | 1.25 | 0.58 | 1.20 | 0.71 | 0.63 | 0.24 |
| 626171 | 1.25 | 0.58 | 1.20 | 0.71 | 0.69 | 0.27 |
| 624972 | 0.89 | 0.42 | 0.58 | 0.19 | 1.12 | 0.58 |
| 624618 | 1.24 | 0.56 | 0.83 | 0.46 | 0.53 | 0.16 |
| 621310 | 1.24 | 0.56 | 0.83 | 0.46 | 0.86 | 0.41 |
| 620975 | 1.71 | 0.74 | 0.84 | 0.46 | 1.59 | 0.78 |
| 618504 | 1.71 | 0.74 | 0.84 | 0.46 | 0.53 | 0.16 |
| 616207 | 1.77 | 0.75 | 1.63 | 0.78 | 0.67 | 0.25 |
| 616079 | #N/A | #N/A | #N/A | #N/A | 2.18 | 0.90 |
| 614356 | 1.52 | 0.67 | 1.08 | 0.72 | 1.09 | 0.56 |
| 611832 | 1.52 | 0.67 | 1.08 | 0.72 | 1.45 | 0.73 |
| 611661 | 0.85 | 0.39 | 1.08 | 0.71 | 1.15 | 0.59 |
| 609129 | 0.85 | 0.39 | 1.08 | 0.71 | #N/A | #N/A |
| 609449 | #N/A | #N/A | #N/A | #N/A | 1.67 | 0.79 |
| 605607 | 1.09 | 0.49 | 0.53 | 0.14 | 0.99 | 0.50 |
| 604264 | 0.59 | 0.26 | 0.86 | 0.50 | 0.46 | 0.11 |
| 602134 | 0.59 | 0.26 | 0.86 | 0.50 | 0.60 | 0.20 |
| 599932 | 0.41 | 0.14 | 0.83 | 0.45 | 0.85 | 0.41 |
| 598372 | 0.53 | 0.24 | 0.89 | 0.54 | 1.65 | 0.79 |
| 595619 | 1.79 | 0.77 | 0.80 | 0.43 | 0.59 | 0.20 |
| 595343 | 1.76 | 0.76 | 0.71 | 0.32 | 0.46 | 0.11 |
| 591423 | 1.76 | 0.76 | 0.71 | 0.32 | 1.47 | 0.72 |
| 588259 | 2.09 | 0.84 | 0.58 | 0.23 | 0.71 | 0.30 |
| 587103 | 1.07 | 0.48 | 0.69 | 0.29 | 2.17 | 0.89 |
| 584316 | 0.59 | 0.27 | 1.11 | 0.59 | 0.88 | 0.41 |
| 583370 | 2.30 | 0.88 | 0.87 | 0.51 | 1.09 | 0.56 |
| 581612 | 2.69 | 0.94 | 0.75 | 0.37 | 0.80 | 0.37 |
| 578992 | #N/A | #N/A | #N/A | #N/A | 4.07 | 0.99 |
| 577201 | 2.69 | 0.94 | 0.75 | 0.37 | #N/A | #N/A |

|        |      |      |      |      |      |      |
|--------|------|------|------|------|------|------|
| 577034 | #N/A | #N/A | 0.34 | 0.04 | 1.24 | 0.64 |
| 575636 | #N/A | #N/A | 0.34 | 0.04 | 0.48 | 0.13 |
| 575347 | 1.58 | 0.71 | 0.86 | 0.49 | 1.00 | 0.49 |
| 573849 | 0.53 | 0.25 | 0.89 | 0.53 | 1.56 | 0.76 |
| 572311 | 0.38 | 0.12 | 0.78 | 0.39 | 0.89 | 0.44 |
| 568518 | #N/A | #N/A | 0.81 | 0.44 | 1.37 | 0.68 |
| 560475 | 0.65 | 0.29 | 0.60 | 0.22 | 1.18 | 0.61 |
| 557916 | 0.65 | 0.29 | 0.60 | 0.22 | 0.92 | 0.45 |
| 557654 | 0.19 | 0.02 | 0.27 | 0.02 | 1.24 | 0.64 |
| 556828 | 2.51 | 0.91 | 0.62 | 0.22 | 0.91 | 0.45 |
| 554746 | 2.13 | 0.85 | 1.38 | 0.86 | 1.83 | 0.84 |
| 549464 | 2.13 | 0.85 | 1.38 | 0.86 | 0.82 | 0.38 |
| 549286 | 1.09 | 0.50 | 1.05 | 0.57 | 0.84 | 0.40 |
| 545585 | 1.15 | 0.53 | 1.42 | 0.89 | 0.97 | 0.49 |
| 545873 | 2.12 | 0.85 | 1.03 | 0.66 | 1.12 | 0.56 |
| 544974 | 1.36 | 0.62 | 0.65 | 0.25 | 1.34 | 0.67 |
| 542818 | 3.04 | 0.96 | 0.81 | 0.42 | 2.08 | 0.88 |
| 539907 | 3.04 | 0.96 | 0.81 | 0.42 | 1.37 | 0.69 |
| 539815 | 3.05 | 0.97 | 1.30 | 0.80 | 1.41 | 0.71 |
| 535277 | 3.05 | 0.97 | 1.30 | 0.80 | 1.05 | 0.54 |
| 534075 | 1.47 | 0.66 | #N/A | #N/A | 0.63 | 0.23 |
| 533866 | 1.19 | 0.55 | 1.38 | 0.88 | 1.27 | 0.65 |
| 532182 | 1.54 | 0.69 | 0.85 | 0.48 | 1.79 | 0.83 |
| 531407 | 1.16 | 0.53 | 0.55 | 0.17 | 0.85 | 0.40 |
| 529579 | 3.43 | 0.98 | #N/A | #N/A | 0.80 | 0.35 |
| 517990 | 0.77 | 0.37 | 1.17 | 0.77 | 0.73 | 0.32 |
| 517838 | 1.65 | 0.71 | 0.71 | 0.35 | 1.18 | 0.61 |
| 516731 | 1.63 | 0.70 | 0.95 | 0.57 | 1.35 | 0.67 |
| 515759 | 1.65 | 0.71 | 0.71 | 0.35 | 0.97 | 0.48 |
| 512664 | 1.63 | 0.70 | 0.95 | 0.57 | 0.95 | 0.47 |
| 512392 | 3.44 | 0.98 | 0.85 | 0.44 | 0.85 | 0.40 |
| 508772 | 3.44 | 0.98 | 0.85 | 0.44 | 1.26 | 0.63 |
| 508698 | 1.55 | 0.68 | 0.75 | 0.37 | 1.71 | 0.81 |
| 505864 | 1.55 | 0.68 | 0.75 | 0.37 | 0.36 | 0.04 |
| 505481 | 0.22 | 0.03 | 0.55 | 0.17 | 0.35 | 0.03 |
| 502774 | 0.27 | 0.08 | 1.13 | 0.71 | 0.41 | 0.07 |
| 500253 | 0.43 | 0.16 | 0.91 | 0.56 | 0.32 | 0.02 |
| 495698 | 0.43 | 0.16 | 0.91 | 0.56 | 0.31 | 0.01 |
| 493953 | 0.44 | 0.16 | 0.62 | 0.22 | 0.39 | 0.06 |
| 493545 | 1.31 | 0.59 | 0.66 | 0.27 | 1.65 | 0.79 |
| 492968 | 1.60 | 0.70 | 0.69 | 0.29 | 1.14 | 0.58 |
| 491237 | 1.17 | 0.53 | 0.73 | 0.34 | 1.54 | 0.75 |
| 490113 | 1.60 | 0.69 | 1.03 | 0.62 | 1.42 | 0.70 |
| 486763 | 1.60 | 0.69 | 1.03 | 0.62 | 0.53 | 0.16 |
| 486476 | #N/A | #N/A | 0.77 | 0.40 | 1.51 | 0.75 |
| 485307 | 2.28 | 0.87 | 0.89 | 0.46 | 0.70 | 0.28 |
| 482974 | 1.45 | 0.64 | 0.56 | 0.17 | 0.66 | 0.25 |
| 480988 | 0.89 | 0.41 | 0.76 | 0.37 | 1.11 | 0.57 |
| 478563 | 0.89 | 0.41 | 0.76 | 0.37 | 1.06 | 0.54 |
| 476929 | 1.31 | 0.60 | 1.22 | 0.81 | 0.97 | 0.48 |
| 476185 | 3.20 | 0.97 | 1.45 | 0.89 | 3.04 | 0.97 |

|        |      |      |      |      |      |      |
|--------|------|------|------|------|------|------|
| 476009 | 0.81 | 0.39 | 1.15 | 0.75 | 0.77 | 0.35 |
| 472858 | 2.85 | 0.95 | 0.73 | 0.33 | 1.22 | 0.63 |
| 470050 | 2.85 | 0.95 | 0.73 | 0.33 | 1.06 | 0.54 |
| 469620 | 2.96 | 0.95 | 1.05 | 0.50 | 0.43 | 0.10 |
| 466639 | #N/A | #N/A | #N/A | #N/A | 4.90 | 1.00 |
| 465944 | #N/A | #N/A | #N/A | #N/A | 0.72 | 0.29 |
| 461987 | 1.64 | 0.71 | #N/A | #N/A | 1.02 | 0.50 |
| 456690 | 1.64 | 0.71 | #N/A | #N/A | 1.25 | 0.63 |
| 457140 | 2.45 | 0.91 | 0.59 | 0.19 | 1.75 | 0.81 |
| 456127 | 2.47 | 0.91 | 0.74 | 0.35 | 0.45 | 0.11 |
| 452070 | 3.60 | 0.99 | 0.70 | 0.33 | 3.13 | 0.97 |
| 450527 | 0.81 | 0.39 | 1.09 | 0.65 | 2.58 | 0.94 |
| 449371 | 2.46 | 0.91 | 0.84 | 0.48 | 0.64 | 0.25 |
| 444909 | 2.46 | 0.91 | 0.84 | 0.48 | 0.69 | 0.27 |
| 443395 | 0.30 | 0.06 | 0.41 | 0.09 | 0.37 | 0.05 |
| 441363 | 1.22 | 0.56 | 0.88 | 0.52 | 1.03 | 0.52 |
| 439599 | 0.58 | 0.24 | 0.35 | 0.06 | 0.88 | 0.41 |
| 438564 | 1.64 | 0.72 | 1.39 | 0.87 | 1.34 | 0.69 |
| 438314 | 1.59 | 0.68 | 0.99 | 0.55 | 1.14 | 0.57 |
| 437137 | 1.90 | 0.79 | 0.78 | 0.41 | 0.60 | 0.21 |
| 434490 | 1.57 | 0.69 | #N/A | #N/A | 0.76 | 0.32 |
| 429750 | 0.67 | 0.30 | 0.54 | 0.15 | 0.37 | 0.04 |
| 424892 | 0.67 | 0.30 | 0.54 | 0.15 | 0.39 | 0.06 |
| 424580 | #N/A | #N/A | 0.51 | 0.14 | 3.01 | 0.97 |
| 420941 | 1.89 | 0.80 | 0.88 | 0.48 | 0.67 | 0.27 |
| 420775 | 2.81 | 0.94 | 0.57 | 0.18 | 1.71 | 0.80 |
| 419011 | 2.81 | 0.94 | 0.57 | 0.18 | 1.60 | 0.78 |
| 419506 | #N/A | #N/A | #N/A | #N/A | 0.95 | 0.47 |
| 417823 | #N/A | #N/A | #N/A | #N/A | 1.33 | 0.68 |
| 416937 | 0.63 | 0.28 | 0.70 | 0.30 | 0.74 | 0.31 |
| 416278 | 1.03 | 0.48 | #N/A | #N/A | 0.60 | 0.20 |
| 413196 | 1.88 | 0.79 | 0.94 | 0.59 | 3.04 | 0.97 |
| 412681 | 1.03 | 0.48 | #N/A | #N/A | 3.54 | 0.98 |
| 410116 | 1.88 | 0.79 | 0.94 | 0.59 | 1.07 | 0.53 |
| 409906 | 5.05 | 1.00 | 0.64 | 0.28 | 1.76 | 0.83 |
| 408019 | 2.43 | 0.90 | 0.68 | 0.35 | 1.80 | 0.82 |
| 402649 | 2.43 | 0.90 | 0.68 | 0.35 | 0.37 | 0.04 |
| 402518 | 2.06 | 0.82 | 1.07 | 0.65 | 1.33 | 0.68 |
| 401030 | 0.15 | 0.01 | 0.31 | 0.06 | 2.91 | 0.96 |
| 398681 | 2.06 | 0.82 | 1.07 | 0.65 | 0.87 | 0.41 |
| 398020 | #N/A | #N/A | #N/A | #N/A | 2.90 | 0.96 |
| 397675 | 0.77 | 0.36 | 0.75 | 0.37 | 0.48 | 0.12 |
| 394367 | 2.07 | 0.82 | 0.90 | 0.54 | 1.40 | 0.71 |
| 390143 | 2.07 | 0.82 | 0.90 | 0.54 | 0.52 | 0.15 |
| 389764 | 1.59 | 0.69 | 1.13 | 0.75 | 1.08 | 0.56 |
| 386845 | #N/A | #N/A | 0.91 | 0.53 | 0.67 | 0.25 |
| 383660 | 0.67 | 0.30 | 0.89 | 0.52 | 2.34 | 0.92 |
| 382199 | 1.02 | 0.46 | 1.13 | 0.74 | 1.07 | 0.55 |
| 379555 | 1.02 | 0.46 | 1.13 | 0.74 | 0.78 | 0.33 |
| 379222 | 1.99 | 0.82 | 0.77 | 0.40 | 1.91 | 0.85 |
| 378488 | 2.70 | 0.93 | 0.81 | 0.42 | 1.02 | 0.50 |

|        |      |      |      |      |      |      |
|--------|------|------|------|------|------|------|
| 374168 | #N/A | #N/A | 0.52 | 0.16 | 1.79 | 0.83 |
| 372448 | 1.24 | 0.55 | 1.49 | 0.78 | 2.02 | 0.87 |
| 371879 | 1.71 | 0.72 | 0.61 | 0.23 | 1.94 | 0.85 |
| 371642 | 2.13 | 0.84 | 0.81 | 0.43 | 0.74 | 0.32 |
| 368592 | 2.13 | 0.84 | 0.81 | 0.43 | 0.78 | 0.34 |
| 368318 | 2.04 | 0.83 | 1.04 | 0.68 | 1.11 | 0.55 |
| 360921 | 2.04 | 0.83 | 1.04 | 0.68 | 0.59 | 0.20 |
| 360914 | 2.04 | 0.83 | 1.04 | 0.68 | 0.63 | 0.22 |
| 360636 | 2.84 | 0.94 | 0.67 | 0.28 | 0.53 | 0.16 |
| 358949 | 1.05 | 0.47 | 1.33 | 0.81 | 0.86 | 0.41 |
| 356791 | 1.05 | 0.47 | 1.33 | 0.81 | #N/A | #N/A |
| 352817 | 0.72 | 0.34 | 0.60 | 0.19 | 1.59 | 0.77 |
| 352527 | 0.92 | 0.44 | 0.60 | 0.22 | #N/A | #N/A |
| 352014 | 3.04 | 0.96 | 0.67 | 0.30 | 2.20 | 0.90 |
| 351380 | #N/A | #N/A | 1.10 | 0.74 | #N/A | #N/A |
| 349904 | #N/A | #N/A | 1.10 | 0.74 | 2.14 | 0.89 |
| 349364 | 1.13 | 0.52 | 0.71 | 0.32 | 1.37 | 0.69 |
| 349655 | 2.91 | 0.95 | 0.97 | 0.57 | 1.35 | 0.69 |
| 347763 | 2.91 | 0.95 | 0.97 | 0.57 | 1.81 | 0.83 |
| 347539 | 2.09 | 0.84 | 0.97 | 0.60 | 0.77 | 0.34 |
| 345666 | 2.09 | 0.84 | 0.97 | 0.60 | 2.01 | 0.87 |
| 343633 | #N/A | #N/A | 1.11 | 0.57 | 0.36 | 0.04 |
| 343337 | 1.48 | 0.67 | 0.72 | 0.33 | 1.08 | 0.55 |
| 341066 | 1.48 | 0.67 | 0.72 | 0.33 | 0.63 | 0.23 |
| 340855 | #N/A | #N/A | #N/A | #N/A | 1.14 | 0.59 |
| 340205 | 3.63 | 0.99 | 0.97 | 0.59 | 1.93 | 0.85 |
| 338475 | 3.63 | 0.99 | 0.97 | 0.59 | 1.68 | 0.80 |
| 337606 | 0.78 | 0.37 | 0.72 | 0.33 | 1.22 | 0.63 |
| 334864 | 1.85 | 0.78 | 1.04 | 0.52 | 0.50 | 0.14 |
| 332151 | #N/A | #N/A | #N/A | #N/A | 0.39 | 0.05 |
| 326738 | #N/A | #N/A | #N/A | #N/A | 0.73 | 0.31 |
| 325262 | 2.62 | 0.93 | 0.87 | 0.50 | 1.02 | 0.51 |
| 325049 | 2.73 | 0.94 | 0.81 | 0.43 | 1.70 | 0.80 |
| 322216 | 2.73 | 0.94 | 0.81 | 0.43 | 1.07 | 0.55 |
| 319413 | 1.50 | 0.66 | 1.76 | 0.95 | 0.50 | 0.15 |
| 318027 | 1.60 | 0.70 | 1.09 | 0.70 | 1.70 | 0.81 |
| 316166 | 1.53 | 0.68 | 1.34 | 0.86 | 0.74 | 0.32 |
| 316370 | 1.69 | 0.74 | 0.86 | 0.45 | #N/A | #N/A |
| 315626 | 1.53 | 0.68 | 1.34 | 0.86 | 0.37 | 0.04 |
| 315879 | 1.69 | 0.74 | 0.86 | 0.45 | 0.44 | 0.10 |
| 308954 | 1.69 | 0.74 | 0.86 | 0.45 | 1.35 | 0.69 |
| 308643 | 1.90 | 0.79 | 1.01 | 0.65 | 1.59 | 0.76 |
| 307398 | 1.78 | 0.76 | 0.50 | 0.13 | 1.48 | 0.74 |
| 305067 | 1.90 | 0.79 | 1.01 | 0.65 | 0.38 | 0.05 |
| 303683 | 1.47 | 0.66 | 0.85 | 0.47 | 1.39 | 0.70 |
| 303399 | 0.80 | 0.38 | 1.07 | 0.71 | 0.38 | 0.06 |
| 300663 | #N/A | #N/A | #N/A | #N/A | 0.80 | 0.35 |
| 299651 | #N/A | #N/A | #N/A | #N/A | 0.40 | 0.06 |
| 299555 | 2.83 | 0.95 | 1.14 | 0.74 | 1.28 | 0.65 |
| 295957 | 2.83 | 0.95 | 1.14 | 0.74 | 1.06 | 0.53 |
| 293134 | 2.17 | 0.84 | 0.94 | 0.56 | 0.42 | 0.08 |

|        |      |      |      |      |      |      |
|--------|------|------|------|------|------|------|
| 292554 | 1.06 | 0.48 | #N/A | #N/A | #N/A | #N/A |
| 292190 | 1.06 | 0.48 | #N/A | #N/A | 2.98 | 0.96 |
| 291873 | 0.46 | 0.17 | 0.49 | 0.11 | 0.35 | 0.03 |
| 289064 | 1.84 | 0.78 | 0.92 | 0.50 | 0.66 | 0.25 |
| 287605 | 1.33 | 0.60 | 1.14 | 0.75 | 0.60 | 0.21 |
| 285884 | #N/A | #N/A | #N/A | #N/A | 0.54 | 0.17 |
| 283005 | 0.39 | 0.15 | 0.46 | 0.09 | 0.34 | 0.03 |
| 281501 | 1.16 | 0.52 | #N/A | #N/A | 1.73 | 0.82 |
| 279893 | 1.08 | 0.50 | 0.41 | 0.06 | 0.48 | 0.12 |
| 276040 | 2.18 | 0.86 | 1.41 | 0.88 | 1.54 | 0.76 |
| 272706 | 2.18 | 0.86 | 1.41 | 0.88 | 1.71 | 0.81 |
| 271573 | 1.25 | 0.58 | 0.74 | 0.36 | 2.52 | 0.93 |
| 270272 | 0.79 | 0.36 | 0.73 | 0.33 | 1.97 | 0.86 |
| 267605 | 1.62 | 0.72 | 0.71 | 0.32 | 0.27 | 0.01 |
| 266511 | 0.48 | 0.22 | 0.81 | 0.45 | 1.07 | 0.53 |
| 264923 | 0.48 | 0.22 | 0.81 | 0.45 | 0.46 | 0.10 |
| 263710 | 1.46 | 0.65 | 0.82 | 0.44 | 2.31 | 0.91 |
| 260624 | 1.32 | 0.59 | 0.73 | 0.36 | 0.57 | 0.18 |
| 260453 | 1.02 | 0.47 | #N/A | #N/A | 1.74 | 0.82 |
| 259436 | 0.49 | 0.19 | #N/A | #N/A | 1.39 | 0.70 |
| 258372 | 1.02 | 0.47 | #N/A | #N/A | 1.36 | 0.68 |
| 258152 | 1.02 | 0.47 | #N/A | #N/A | 3.67 | 0.99 |
| 256785 | 1.02 | 0.47 | #N/A | #N/A | 1.12 | 0.57 |
| 256627 | 2.64 | 0.92 | 1.03 | 0.64 | 1.06 | 0.53 |
| 255031 | 0.97 | 0.44 | 0.60 | 0.20 | 2.84 | 0.96 |
| 253899 | 1.26 | 0.58 | 0.52 | 0.14 | 0.43 | 0.09 |
| 251742 | 0.93 | 0.42 | 0.91 | 0.55 | 1.41 | 0.72 |
| 250054 | 0.93 | 0.42 | 0.91 | 0.55 | 1.86 | 0.84 |
| 249808 | 3.20 | 0.97 | 0.90 | 0.51 | 1.02 | 0.51 |
| 246459 | 3.20 | 0.97 | 0.90 | 0.51 | 1.31 | 0.67 |
| 246215 | #N/A | #N/A | 0.67 | 0.27 | 1.77 | 0.83 |
| 245429 | 2.05 | 0.83 | #N/A | #N/A | 1.41 | 0.71 |
| 244171 | 1.78 | 0.76 | 0.63 | 0.25 | 0.80 | 0.37 |
| 241310 | 1.27 | 0.58 | 0.80 | 0.43 | 1.32 | 0.66 |
| 240000 | 2.25 | 0.87 | 1.25 | 0.82 | 1.33 | 0.66 |
| 235995 | 2.25 | 0.87 | 1.25 | 0.82 | 0.51 | 0.14 |
| 235713 | 0.79 | 0.36 | 0.63 | 0.23 | 0.61 | 0.22 |
| 231067 | 0.79 | 0.36 | 0.63 | 0.23 | 0.67 | 0.26 |
| 229713 | 3.09 | 0.96 | 1.23 | 0.81 | 2.68 | 0.95 |
| 228853 | 1.98 | 0.82 | 1.00 | 0.61 | 1.99 | 0.87 |
| 224795 | 1.98 | 0.82 | 1.00 | 0.61 | 0.89 | 0.42 |
| 222723 | 1.47 | 0.65 | #N/A | #N/A | 0.65 | 0.24 |
| 222648 | 1.58 | 0.69 | 0.65 | 0.27 | 3.10 | 0.97 |
| 220658 | 0.69 | 0.31 | #N/A | #N/A | 1.61 | 0.78 |
| 221420 | 1.58 | 0.69 | 0.65 | 0.27 | 1.59 | 0.76 |
| 219136 | 1.58 | 0.69 | 0.65 | 0.27 | 0.48 | 0.13 |
| 217522 | 1.06 | 0.48 | 1.01 | 0.63 | 1.49 | 0.74 |
| 215986 | 0.38 | 0.13 | 0.49 | 0.11 | 0.52 | 0.16 |
| 215800 | 1.82 | 0.77 | #N/A | #N/A | 1.04 | 0.53 |
| 214599 | 1.30 | 0.60 | #N/A | #N/A | 0.65 | 0.26 |
| 211512 | 2.36 | 0.89 | #N/A | #N/A | 1.41 | 0.72 |

|        |      |      |      |      |      |      |
|--------|------|------|------|------|------|------|
| 209547 | 2.36 | 0.89 | #N/A | #N/A | 0.75 | 0.31 |
| 209853 | 1.39 | 0.62 | 1.04 | 0.67 | 0.75 | 0.33 |
| 206566 | 0.60 | 0.26 | 0.91 | 0.54 | 0.68 | 0.27 |
| 204871 | 1.50 | 0.66 | #N/A | #N/A | 0.39 | 0.06 |
| 201932 | 2.72 | 0.93 | 0.75 | 0.41 | 1.05 | 0.54 |
| 198501 | 2.72 | 0.93 | 0.75 | 0.41 | 1.48 | 0.74 |
| 196425 | 0.57 | 0.26 | 0.80 | 0.42 | 0.45 | 0.10 |
| 196101 | 2.42 | 0.89 | 0.97 | 0.54 | 0.77 | 0.35 |
| 190956 | 0.92 | 0.44 | 0.91 | 0.54 | 0.71 | 0.29 |
| 187169 | 0.92 | 0.44 | 0.91 | 0.54 | 1.01 | 0.50 |
| 186345 | 1.17 | 0.53 | 1.15 | 0.68 | 1.13 | 0.56 |
| 186348 | 1.25 | 0.56 | 0.87 | 0.48 | 1.11 | 0.57 |
| 185177 | 2.51 | 0.91 | #N/A | #N/A | 0.94 | 0.45 |
| 181360 | 2.51 | 0.91 | #N/A | #N/A | 0.96 | 0.47 |
| 179393 | 1.05 | 0.48 | 1.18 | 0.74 | 1.18 | 0.59 |
| 179347 | 1.72 | 0.74 | 1.09 | 0.70 | 0.72 | 0.30 |
| 172587 | 1.72 | 0.74 | 1.09 | 0.70 | 0.54 | 0.16 |
| 171440 | #N/A | #N/A | #N/A | #N/A | 0.94 | 0.46 |
| 171285 | 1.28 | 0.57 | 0.83 | 0.46 | 1.04 | 0.51 |
| 168042 | 1.28 | 0.57 | 0.83 | 0.46 | 2.25 | 0.91 |
| 167328 | 1.26 | 0.56 | 0.79 | 0.41 | 1.36 | 0.69 |
| 167096 | #N/A | #N/A | 0.76 | 0.38 | 0.74 | 0.32 |
| 160630 | #N/A | #N/A | 0.76 | 0.38 | 0.84 | 0.40 |
| 158108 | 2.88 | 0.95 | #N/A | #N/A | 0.54 | 0.17 |
| 157643 | 0.84 | 0.38 | 0.48 | 0.10 | 1.40 | 0.71 |
| 156858 | 1.08 | 0.49 | #N/A | #N/A | 1.24 | 0.63 |
| 156538 | 1.60 | 0.70 | #N/A | #N/A | 0.73 | 0.31 |
| 154879 | 3.86 | 0.99 | 0.70 | 0.33 | 0.94 | 0.47 |
| 146895 | 3.86 | 0.99 | 0.70 | 0.33 | 2.16 | 0.89 |
| 145562 | 2.27 | 0.88 | #N/A | #N/A | 3.98 | 0.99 |
| 144279 | 1.94 | 0.81 | #N/A | #N/A | 0.92 | 0.45 |
| 144663 | #N/A | #N/A | 0.87 | 0.49 | 0.51 | 0.14 |
| 144077 | 1.07 | 0.48 | 1.04 | 0.61 | 0.41 | 0.08 |
| 140384 | 0.63 | 0.28 | 0.61 | 0.23 | 0.40 | 0.06 |
| 138093 | 2.47 | 0.90 | 1.05 | 0.70 | 1.83 | 0.84 |
| 135939 | 0.63 | 0.28 | 0.61 | 0.23 | 1.17 | 0.60 |
| 129521 | 2.47 | 0.90 | 1.05 | 0.70 | 0.42 | 0.08 |
| 126803 | 2.07 | 0.83 | 1.71 | 0.92 | 0.63 | 0.24 |
| 126597 | 2.78 | 0.95 | 0.98 | 0.63 | 0.93 | 0.46 |
| 121116 | 2.78 | 0.95 | 0.98 | 0.63 | 1.95 | 0.86 |
| 120996 | #N/A | #N/A | #N/A | #N/A | 1.50 | 0.75 |
| 118429 | #N/A | #N/A | #N/A | #N/A | 1.84 | 0.83 |
| 118807 | 0.91 | 0.42 | 0.81 | 0.43 | 1.01 | 0.50 |
| 116451 | 2.08 | 0.84 | 0.82 | 0.45 | 0.66 | 0.25 |
| 112900 | 0.68 | 0.32 | 0.91 | 0.55 | 1.45 | 0.72 |
| 109093 | 0.68 | 0.32 | 0.91 | 0.55 | 0.57 | 0.19 |
| 108926 | 0.80 | 0.37 | #N/A | #N/A | 1.19 | 0.61 |
| 108272 | 0.85 | 0.39 | 0.51 | 0.12 | 2.55 | 0.93 |
| 105182 | 0.85 | 0.39 | 0.51 | 0.12 | 0.50 | 0.13 |
| 103132 | 2.08 | 0.84 | 1.35 | 0.82 | 1.80 | 0.83 |
| 96542  | 0.99 | 0.45 | #N/A | #N/A | 1.17 | 0.58 |

|       |      |      |      |      |      |      |
|-------|------|------|------|------|------|------|
| 96078 | #N/A | #N/A | 1.05 | 0.68 | #N/A | #N/A |
| 94799 | 1.33 | 0.61 | 0.62 | 0.21 | 0.47 | 0.11 |
| 91422 | 1.77 | 0.75 | 1.11 | 0.72 | 1.01 | 0.52 |
| 88734 | 1.13 | 0.52 | 1.15 | 0.55 | 1.97 | 0.87 |
| 87238 | 1.77 | 0.75 | 0.86 | 0.50 | 1.17 | 0.60 |
| 84167 | 1.77 | 0.75 | 0.86 | 0.50 | 0.61 | 0.21 |
| 84015 | 1.86 | 0.79 | 0.66 | 0.33 | 1.75 | 0.81 |
| 82539 | 2.65 | 0.93 | 0.76 | 0.38 | 1.12 | 0.57 |
| 78657 | 2.65 | 0.93 | 0.76 | 0.38 | 0.80 | 0.35 |
| 78518 | 3.01 | 0.96 | 1.29 | 0.75 | 0.94 | 0.45 |
| 76585 | #N/A | #N/A | #N/A | #N/A | 3.45 | 0.98 |
| 71671 | 3.01 | 0.96 | 1.29 | 0.75 | 0.61 | 0.22 |
| 71441 | 0.90 | 0.41 | 0.86 | 0.48 | 0.30 | 0.02 |
| 68393 | 2.52 | 0.92 | 0.81 | 0.44 | 0.82 | 0.38 |
| 66051 | #N/A | #N/A | #N/A | #N/A | 1.61 | 0.77 |
| 63569 | #N/A | #N/A | #N/A | #N/A | 0.49 | 0.13 |
| 61957 | 0.21 | 0.03 | 0.53 | 0.17 | 0.37 | 0.05 |
| 61856 | 2.55 | 0.92 | 1.22 | 0.77 | 1.10 | 0.55 |
| 61549 | 2.55 | 0.92 | 1.22 | 0.77 | 1.35 | 0.68 |
| 58898 | 2.55 | 0.92 | 1.22 | 0.77 | 1.92 | 0.85 |
| 58808 | 3.01 | 0.96 | 0.79 | 0.42 | 2.41 | 0.93 |
| 56446 | 3.01 | 0.96 | 0.79 | 0.42 | 1.34 | 0.68 |
| 54121 | 1.45 | 0.64 | #N/A | #N/A | 0.96 | 0.47 |
| 53923 | 1.12 | 0.50 | 1.21 | 0.76 | 1.44 | 0.73 |
| 51906 | 0.36 | 0.15 | 0.66 | 0.31 | 3.36 | 0.98 |
| 49396 | 1.12 | 0.50 | 1.21 | 0.76 | 0.53 | 0.17 |
| 49215 | 2.76 | 0.93 | #N/A | #N/A | 1.92 | 0.86 |
| 45307 | 2.76 | 0.93 | #N/A | #N/A | 0.74 | 0.33 |
| 45213 | 1.92 | 0.79 | #N/A | #N/A | 2.35 | 0.92 |
| 43323 | 1.92 | 0.79 | #N/A | #N/A | 1.40 | 0.71 |
| 42070 | 0.78 | 0.36 | #N/A | #N/A | 1.25 | 0.63 |
| 42015 | 1.41 | 0.62 | 0.68 | 0.30 | 1.25 | 0.64 |
| 38706 | 1.41 | 0.62 | 0.68 | 0.30 | 0.69 | 0.27 |
| #N/A  | #N/A | #N/A | #N/A | #N/A | 0.77 | 0.35 |
| 39081 | #N/A | #N/A | #N/A | #N/A | 0.63 | 0.23 |
| 38553 | 2.45 | 0.91 | 1.20 | 0.72 | 1.90 | 0.85 |
| 37421 | 2.48 | 0.90 | 0.72 | 0.33 | 1.20 | 0.60 |
| 33293 | 2.48 | 0.90 | 0.72 | 0.33 | 1.41 | 0.70 |
| 33187 | 3.45 | 0.98 | 0.85 | 0.49 | 1.40 | 0.70 |
| 31444 | 1.42 | 0.63 | #N/A | #N/A | 2.22 | 0.90 |
| 28738 | 3.45 | 0.98 | 0.85 | 0.49 | 0.83 | 0.39 |
| 27336 | 1.42 | 0.63 | #N/A | #N/A | 1.46 | 0.73 |
| 27172 | 1.00 | 0.47 | 0.76 | 0.37 | 0.52 | 0.15 |
| 22834 | 1.00 | 0.47 | 0.76 | 0.37 | 1.66 | 0.80 |
| 19541 | 1.25 | 0.56 | 0.61 | 0.24 | 0.81 | 0.37 |
| 18001 | 3.92 | 0.99 | #N/A | #N/A | 1.55 | 0.76 |
| 16118 | 1.23 | 0.57 | 0.85 | 0.49 | 1.28 | 0.65 |
| 15854 | 2.86 | 0.94 | 0.81 | 0.43 | 3.70 | 0.99 |
| 14163 | 2.54 | 0.92 | #N/A | #N/A | 2.61 | 0.94 |
| 12208 | 2.54 | 0.92 | #N/A | #N/A | 2.88 | 0.96 |
| 12129 | 1.76 | 0.74 | 1.01 | 0.59 | 1.92 | 0.86 |

|        |      |      |      |      |      |      |
|--------|------|------|------|------|------|------|
| 9475   | 0.94 | 0.43 | 0.99 | 0.64 | 1.34 | 0.68 |
| 7419   | 0.31 | 0.07 | 0.58 | 0.19 | 0.55 | 0.18 |
| 6719   | 0.47 | 0.18 | 0.58 | 0.19 | 0.31 | 0.02 |
| 371    | 0.47 | 0.18 | 0.58 | 0.19 | 0.69 | 0.27 |
| 629619 | 1.17 | 0.53 | #N/A | #N/A | 0.42 | 0.07 |
| 633005 | 0.94 | 0.44 | 0.92 | 0.56 | 1.18 | 0.59 |
| 634341 | 2.22 | 0.85 | 0.71 | 0.32 | 1.78 | 0.82 |
| 636380 | 2.22 | 0.85 | 0.71 | 0.32 | 1.38 | 0.71 |
| 636928 | 0.61 | 0.27 | #N/A | #N/A | 2.06 | 0.88 |
| 638851 | 1.58 | 0.70 | 0.96 | 0.61 | 0.48 | 0.12 |
| 639179 | 2.29 | 0.88 | 1.11 | 0.63 | 1.06 | 0.55 |
| 642378 | 2.29 | 0.88 | 1.11 | 0.63 | 1.19 | 0.61 |
| 643436 | 0.76 | 0.35 | 0.79 | 0.43 | 1.00 | 0.50 |
| 644190 | 1.43 | 0.64 | 0.96 | 0.58 | 3.00 | 0.97 |
| 644317 | #N/A | #N/A | 0.74 | 0.36 | 0.88 | 0.42 |
| 648934 | #N/A | #N/A | 0.74 | 0.36 | 0.99 | 0.50 |
| 649025 | 0.38 | 0.12 | 0.34 | 0.04 | 0.39 | 0.06 |
| 653100 | 0.38 | 0.12 | 0.34 | 0.04 | 2.64 | 0.94 |
| 654538 | 2.64 | 0.93 | 0.66 | 0.26 | 2.18 | 0.89 |
| 654670 | 0.31 | 0.09 | 0.66 | 0.26 | 0.44 | 0.09 |
| 663578 | 0.39 | 0.13 | #N/A | #N/A | 0.70 | 0.29 |
| 664941 | 0.30 | 0.07 | 0.56 | 0.18 | 0.71 | 0.30 |
| 667264 | #N/A | #N/A | #N/A | #N/A | 0.47 | 0.12 |
| 667407 | 2.18 | 0.86 | #N/A | #N/A | 2.71 | 0.95 |
| 669588 | 2.18 | 0.86 | #N/A | #N/A | 1.64 | 0.79 |
| 669771 | 2.96 | 0.95 | #N/A | #N/A | 3.18 | 0.98 |
| 672115 | 2.96 | 0.95 | #N/A | #N/A | 1.07 | 0.55 |
| 672966 | 1.89 | 0.78 | 1.77 | 0.95 | 2.51 | 0.93 |
| 672699 | 0.38 | 0.16 | 1.31 | 0.83 | 1.19 | 0.61 |
| 673271 | #N/A | #N/A | #N/A | #N/A | 1.58 | 0.77 |
| 675873 | #N/A | #N/A | #N/A | #N/A | 1.91 | 0.85 |
| 677100 | 0.74 | 0.34 | 0.38 | 0.05 | 0.62 | 0.22 |
| 677196 | 1.98 | 0.81 | 1.30 | 0.83 | 0.77 | 0.33 |
| 680451 | 1.98 | 0.81 | 1.30 | 0.83 | 0.88 | 0.43 |
| 680691 | 3.22 | 0.97 | 1.06 | 0.70 | 0.45 | 0.10 |
| 687113 | 3.22 | 0.97 | 1.06 | 0.70 | 1.37 | 0.69 |
| 689995 | 1.91 | 0.80 | 1.46 | 0.66 | 1.45 | 0.73 |
| 691283 | #N/A | #N/A | #N/A | #N/A | 0.96 | 0.47 |
| 693016 | #N/A | #N/A | #N/A | #N/A | 1.97 | 0.87 |
| 694358 | 2.95 | 0.95 | #N/A | #N/A | 4.21 | 1.00 |
| 695049 | 3.92 | 0.99 | 1.56 | 0.80 | 4.26 | 0.99 |
| 697481 | 3.92 | 0.99 | 1.56 | 0.80 | 1.47 | 0.72 |
| 697611 | 3.62 | 0.98 | 0.53 | 0.14 | 0.76 | 0.34 |
| 700457 | 3.62 | 0.98 | 0.53 | 0.14 | 3.73 | 0.99 |
| 700538 | 1.37 | 0.61 | 0.85 | 0.48 | 1.48 | 0.72 |
| 701663 | #N/A | #N/A | 0.19 | 0.02 | 2.13 | 0.90 |
| 703082 | 1.37 | 0.61 | 0.85 | 0.48 | 1.06 | 0.54 |
| 705873 | 0.93 | 0.44 | 0.95 | 0.60 | 0.60 | 0.21 |
| 707605 | #N/A | #N/A | #N/A | #N/A | 1.90 | 0.85 |
| 708192 | #N/A | #N/A | #N/A | #N/A | 3.24 | 0.98 |
| 711201 | 3.10 | 0.96 | 0.98 | 0.59 | 0.95 | 0.47 |



|        |      |      |      |      |      |      |
|--------|------|------|------|------|------|------|
| 712808 | 1.78 | 0.75 | 1.08 | 0.67 | 0.96 | 0.46 |
| 713020 | 1.32 | 0.59 | 1.68 | 0.94 | 2.10 | 0.88 |
| 714045 | 0.65 | 0.29 | 1.09 | 0.73 | 0.68 | 0.26 |
| 716777 | 1.08 | 0.49 | 0.70 | 0.31 | 0.26 | 0.01 |
| 719343 | 1.09 | 0.50 | 1.26 | 0.77 | 0.79 | 0.35 |
| 721117 | 0.79 | 0.38 | 1.07 | 0.56 | 0.56 | 0.18 |
| 723352 | 1.15 | 0.54 | 1.01 | 0.65 | 0.90 | 0.44 |
| 728422 | 1.30 | 0.58 | 1.55 | 0.78 | 0.39 | 0.06 |
| 731613 | 2.17 | 0.86 | #N/A | #N/A | 1.16 | 0.59 |
| 733351 | 2.17 | 0.86 | #N/A | #N/A | 4.72 | 1.00 |
| 735728 | 2.17 | 0.86 | #N/A | #N/A | 1.22 | 0.61 |
| 738540 | 2.16 | 0.84 | 0.79 | 0.42 | 0.98 | 0.50 |
| 742105 | 1.19 | 0.55 | 0.80 | 0.42 | 1.35 | 0.69 |
| 742876 | #N/A | #N/A | 0.95 | 0.60 | 0.96 | 0.46 |
| 744355 | 0.30 | 0.08 | 0.91 | 0.55 | 0.48 | 0.12 |
| 748761 | 1.92 | 0.80 | 0.82 | 0.45 | 0.71 | 0.30 |
| 749131 | 0.58 | 0.25 | 0.50 | 0.12 | 0.88 | 0.41 |
| 750345 | 1.92 | 0.80 | 0.89 | 0.51 | 0.44 | 0.09 |
| 753720 | 1.92 | 0.80 | 0.89 | 0.51 | 1.56 | 0.76 |
| 755741 | 1.97 | 0.81 | 1.05 | 0.51 | 0.62 | 0.22 |
| 760062 | #N/A | #N/A | #N/A | #N/A | 0.50 | 0.15 |
| 761118 | 0.99 | 0.47 | 0.88 | 0.52 | 0.59 | 0.20 |
| 769371 | #N/A | #N/A | #N/A | #N/A | 0.82 | 0.38 |
| 770435 | 0.49 | 0.19 | 1.46 | 0.90 | 1.50 | 0.75 |
| 774346 | 0.49 | 0.19 | 1.46 | 0.90 | 0.98 | 0.48 |
| 774787 | 0.77 | 0.35 | 0.65 | 0.26 | 3.69 | 0.99 |
| 777597 | 1.39 | 0.63 | 0.68 | 0.30 | 0.99 | 0.50 |
| 781035 | 1.39 | 0.63 | 0.68 | 0.30 | 1.52 | 0.76 |
| 782275 | 0.69 | 0.31 | 0.86 | 0.49 | 1.14 | 0.57 |
| 783282 | #N/A | #N/A | #N/A | #N/A | 0.57 | 0.18 |
| 326130 | 1.22 | 0.55 | 1.04 | 0.69 | 0.73 | 0.31 |
| 323411 | 1.22 | 0.55 | 1.04 | 0.69 | 0.87 | 0.40 |
| 321858 | 2.06 | 0.84 | 1.24 | 0.75 | 1.37 | 0.69 |
| 321548 | 2.13 | 0.85 | 1.04 | 0.68 | 0.41 | 0.07 |
| 315813 | 2.13 | 0.85 | 1.04 | 0.68 | 2.76 | 0.95 |
| 313078 | 0.69 | 0.31 | 0.90 | 0.55 | 0.49 | 0.14 |
| 311342 | 1.08 | 0.50 | 0.55 | 0.15 | 0.92 | 0.45 |
| 310935 | 1.46 | 0.66 | #N/A | #N/A | 2.33 | 0.92 |
| 309324 | 1.46 | 0.66 | #N/A | #N/A | 1.13 | 0.56 |
| 309041 | 2.49 | 0.90 | 0.83 | 0.46 | 1.57 | 0.77 |
| 307409 | 1.00 | 0.45 | 0.69 | 0.32 | 0.55 | 0.17 |
| 303579 | 1.00 | 0.45 | 0.69 | 0.32 | 2.35 | 0.92 |
| 301380 | #N/A | #N/A | #N/A | #N/A | 0.72 | 0.30 |
| 300067 | 1.00 | 0.46 | 0.70 | 0.30 | #N/A | #N/A |
| 298838 | 2.27 | 0.88 | 0.95 | 0.59 | 0.81 | 0.38 |
| 294777 | 2.27 | 0.88 | 0.95 | 0.59 | 1.25 | 0.64 |
| 294673 | 2.10 | 0.84 | 0.78 | 0.40 | 0.92 | 0.44 |
| 290881 | 2.10 | 0.84 | 0.78 | 0.40 | 1.16 | 0.58 |
| 290553 | 0.83 | 0.38 | 1.07 | 0.61 | 0.54 | 0.16 |
| 287950 | 0.43 | 0.19 | 0.51 | 0.13 | 0.35 | 0.03 |
| 282421 | 0.43 | 0.19 | 0.51 | 0.13 | 0.73 | 0.30 |

|        |      |      |      |      |      |      |
|--------|------|------|------|------|------|------|
| 280272 | 1.49 | 0.67 | #N/A | #N/A | 1.13 | 0.57 |
| 280086 | 2.24 | 0.87 | 1.10 | 0.71 | 0.62 | 0.22 |
| 277604 | 0.58 | 0.25 | 1.22 | 0.63 | 1.40 | 0.71 |
| 276939 | 1.08 | 0.49 | #N/A | #N/A | 1.01 | 0.50 |
| 274012 | 1.15 | 0.53 | 0.96 | 0.59 | 3.98 | 0.99 |
| 272003 | 2.85 | 0.94 | 1.34 | 0.68 | 0.91 | 0.43 |
| 270633 | 0.73 | 0.35 | 0.94 | 0.58 | 0.52 | 0.15 |
| 269815 | #N/A | #N/A | #N/A | #N/A | 0.35 | 0.03 |
| 269641 | 1.42 | 0.63 | 0.63 | 0.25 | 0.73 | 0.31 |
| 266264 | 1.42 | 0.63 | 0.63 | 0.25 | 1.18 | 0.60 |
| 266169 | 1.26 | 0.58 | 0.83 | 0.44 | 1.24 | 0.63 |
| 265085 | #N/A | #N/A | #N/A | #N/A | 1.56 | 0.77 |
| 263204 | 1.39 | 0.63 | #N/A | #N/A | 0.73 | 0.31 |
| 258801 | 0.85 | 0.39 | 1.33 | 0.70 | 0.56 | 0.18 |
| 259028 | 1.06 | 0.48 | 0.79 | 0.41 | 0.37 | 0.04 |
| 256664 | 0.85 | 0.39 | 1.33 | 0.70 | 0.51 | 0.14 |
| 256099 | #N/A | #N/A | #N/A | #N/A | 1.21 | 0.61 |
| 254615 | 0.12 | 0.01 | 0.22 | 0.01 | 0.59 | 0.20 |
| 253147 | 0.12 | 0.01 | 0.22 | 0.01 | 0.36 | 0.04 |
| 251265 | 1.16 | 0.52 | 0.86 | 0.50 | 0.71 | 0.29 |
| 250914 | 1.82 | 0.76 | 1.64 | 0.85 | 1.48 | 0.72 |
| 248390 | 1.82 | 0.76 | 1.64 | 0.85 | 0.87 | 0.42 |
| 248299 | 2.76 | 0.94 | 0.50 | 0.12 | 1.75 | 0.82 |
| 246800 | 1.30 | 0.58 | 0.63 | 0.24 | 0.38 | 0.06 |
| 243464 | 2.76 | 0.94 | 0.50 | 0.12 | 0.49 | 0.14 |
| 241612 | 1.30 | 0.58 | 0.63 | 0.24 | 1.49 | 0.73 |
| 240202 | #N/A | #N/A | #N/A | #N/A | 0.54 | 0.17 |
| 240092 | 2.40 | 0.90 | 0.89 | 0.51 | 1.00 | 0.49 |
| 237880 | 2.40 | 0.90 | 0.89 | 0.51 | #N/A | #N/A |
| 238183 | 1.46 | 0.65 | 0.72 | 0.36 | 0.33 | 0.03 |
| 232444 | 1.46 | 0.65 | 0.72 | 0.36 | 0.96 | 0.48 |
| #N/A   | #N/A | #N/A | #N/A | #N/A | 1.45 | 0.72 |
| 231270 | 0.76 | 0.35 | 0.47 | 0.11 | 1.71 | 0.80 |
| 229832 | 0.95 | 0.45 | #N/A | #N/A | 0.76 | 0.34 |
| 224418 | 1.96 | 0.81 | 1.82 | 0.93 | 1.55 | 0.75 |
| 224177 | 1.78 | 0.75 | 1.10 | 0.74 | 1.36 | 0.68 |
| 222900 | #N/A | #N/A | 0.63 | 0.25 | 0.86 | 0.40 |
| 220471 | 0.66 | 0.30 | 0.57 | 0.19 | 1.33 | 0.66 |
| 218447 | 0.71 | 0.32 | #N/A | #N/A | 0.69 | 0.28 |
| 214016 | 0.71 | 0.32 | #N/A | #N/A | 0.85 | 0.41 |
| 213733 | 4.01 | 0.99 | 0.83 | 0.46 | 1.61 | 0.78 |
| 210519 | 4.01 | 0.99 | 0.83 | 0.46 | 1.50 | 0.73 |
| 207391 | 2.84 | 0.95 | 1.17 | 0.78 | 0.96 | 0.48 |
| 206102 | 1.58 | 0.68 | #N/A | #N/A | 1.30 | 0.65 |
| 204730 | 2.55 | 0.91 | 1.55 | 0.91 | 2.07 | 0.88 |
| 202695 | 2.53 | 0.91 | #N/A | #N/A | 1.08 | 0.56 |
| 201984 | 0.86 | 0.41 | 0.38 | 0.05 | 1.76 | 0.82 |
| 200367 | 1.06 | 0.48 | 1.00 | 0.62 | 1.01 | 0.50 |
| 200296 | 2.07 | 0.83 | #N/A | #N/A | 0.98 | 0.49 |
| 197219 | 2.07 | 0.83 | #N/A | #N/A | 0.79 | 0.36 |
| 196994 | #N/A | #N/A | 0.51 | 0.15 | 3.11 | 0.97 |

|        |      |      |      |      |      |      |
|--------|------|------|------|------|------|------|
| 196336 | 3.65 | 0.98 | 0.76 | 0.38 | #N/A | #N/A |
| 193831 | 3.65 | 0.98 | 0.76 | 0.38 | 3.06 | 0.97 |
| 189657 | #N/A | #N/A | 1.01 | 0.66 | 0.61 | 0.21 |
| 189413 | 3.12 | 0.97 | 0.75 | 0.40 | 1.23 | 0.63 |
| 185847 | 3.12 | 0.97 | 0.75 | 0.40 | 1.13 | 0.59 |
| 185211 | 3.54 | 0.98 | #N/A | #N/A | 0.73 | 0.31 |
| 181454 | 0.51 | 0.21 | 1.34 | 0.66 | 2.69 | 0.95 |
| 180557 | 3.54 | 0.98 | #N/A | #N/A | 1.51 | 0.75 |
| 180308 | 1.45 | 0.65 | 0.58 | 0.19 | 0.41 | 0.06 |
| 169973 | 1.32 | 0.59 | 0.58 | 0.18 | 1.15 | 0.59 |
| 166951 | 1.65 | 0.73 | 0.73 | 0.35 | 2.22 | 0.90 |
| 165330 | 1.61 | 0.70 | #N/A | #N/A | 3.16 | 0.97 |
| 161672 | 1.61 | 0.70 | #N/A | #N/A | 1.58 | 0.77 |
| 159547 | 0.56 | 0.24 | 0.53 | 0.14 | 0.85 | 0.38 |
| 155286 | 2.07 | 0.84 | 1.06 | 0.71 | 0.54 | 0.17 |
| 153911 | #N/A | #N/A | #N/A | #N/A | 1.50 | 0.74 |
| 150397 | 1.52 | 0.67 | 0.76 | 0.37 | 0.98 | 0.47 |
| 150275 | 3.22 | 0.97 | #N/A | #N/A | 0.71 | 0.29 |
| 147162 | #N/A | #N/A | #N/A | #N/A | 1.47 | 0.73 |
| 145129 | 1.69 | 0.72 | 0.63 | 0.22 | 2.21 | 0.90 |
| 143695 | 1.43 | 0.63 | 0.67 | 0.27 | 1.06 | 0.52 |
| 141583 | 1.43 | 0.63 | 0.67 | 0.27 | 1.63 | 0.79 |
| 139226 | 1.56 | 0.69 | #N/A | #N/A | 1.32 | 0.66 |
| 138106 | 1.92 | 0.80 | 0.55 | 0.18 | 2.25 | 0.91 |
| 136526 | 1.76 | 0.76 | #N/A | #N/A | 1.22 | 0.61 |
| 132724 | 1.41 | 0.63 | 1.06 | 0.59 | 0.55 | 0.17 |
| 132016 | 0.29 | 0.07 | #N/A | #N/A | 0.37 | 0.04 |
| 132481 | 1.43 | 0.63 | 0.77 | 0.40 | 0.37 | 0.05 |
| 126981 | 1.43 | 0.63 | 0.77 | 0.40 | 1.29 | 0.65 |
| 125996 | 1.78 | 0.74 | 1.21 | 0.60 | 2.63 | 0.94 |
| 125829 | 1.37 | 0.61 | 0.92 | 0.57 | 0.79 | 0.34 |
| 116395 | 1.42 | 0.64 | 1.14 | 0.60 | 0.97 | 0.49 |
| 114137 | 0.76 | 0.35 | 0.91 | 0.52 | 0.46 | 0.11 |
| 113578 | 0.29 | 0.06 | 0.42 | 0.07 | 0.75 | 0.32 |
| 113129 | 1.56 | 0.69 | #N/A | #N/A | 0.95 | 0.48 |
| 111430 | 1.56 | 0.69 | #N/A | #N/A | 1.31 | 0.65 |
| 110637 | 0.09 | 0.01 | #N/A | #N/A | 0.34 | 0.03 |
| 109888 | 1.17 | 0.53 | 0.67 | 0.28 | 0.31 | 0.02 |
| 108257 | 1.17 | 0.53 | 0.67 | 0.28 | 0.90 | 0.44 |
| 108187 | 1.92 | 0.79 | 0.68 | 0.29 | 0.46 | 0.12 |
| 106292 | 1.57 | 0.68 | 0.74 | 0.36 | 0.71 | 0.29 |
| 103316 | 1.57 | 0.68 | 0.74 | 0.36 | 1.22 | 0.62 |
| 103228 | 1.73 | 0.74 | 0.79 | 0.41 | 0.60 | 0.21 |
| 100956 | 2.66 | 0.93 | 0.95 | 0.48 | 0.94 | 0.46 |
| 99487  | 1.03 | 0.47 | 1.08 | 0.69 | 1.99 | 0.87 |
| 96607  | 1.03 | 0.47 | 1.08 | 0.69 | #N/A | #N/A |
| 94855  | 0.70 | 0.33 | 0.93 | 0.57 | 0.48 | 0.13 |
| 93394  | 0.25 | 0.08 | 0.59 | 0.21 | 0.46 | 0.11 |
| 92025  | 0.16 | 0.04 | 0.87 | 0.46 | 0.52 | 0.15 |
| 89691  | 1.30 | 0.58 | 1.16 | 0.77 | 1.27 | 0.64 |
| 89447  | 0.84 | 0.38 | 0.49 | 0.16 | 0.37 | 0.04 |

|        |      |      |      |      |      |      |
|--------|------|------|------|------|------|------|
| 85455  | 0.84 | 0.38 | 0.49 | 0.16 | 1.79 | 0.82 |
| 85263  | 1.39 | 0.62 | 0.58 | 0.22 | 1.02 | 0.50 |
| 81786  | 1.39 | 0.62 | 0.58 | 0.22 | 0.57 | 0.20 |
| 81189  | 0.87 | 0.40 | 0.77 | 0.39 | 0.42 | 0.08 |
| 78351  | 0.87 | 0.40 | 0.77 | 0.39 | 0.30 | 0.02 |
| 78113  | 1.39 | 0.62 | 0.85 | 0.49 | 2.54 | 0.93 |
| 76978  | 1.78 | 0.76 | 0.77 | 0.39 | 0.38 | 0.05 |
| 73356  | 0.74 | 0.34 | 0.90 | 0.49 | 1.00 | 0.51 |
| 72714  | 0.85 | 0.39 | 0.95 | 0.56 | 1.81 | 0.83 |
| 70689  | 1.66 | 0.72 | 0.90 | 0.54 | 3.68 | 0.99 |
| 70155  | 0.85 | 0.39 | 0.95 | 0.56 | 3.77 | 0.99 |
| 69375  | 1.66 | 0.72 | 0.90 | 0.54 | 2.29 | 0.92 |
| 67560  | 0.45 | 0.17 | 0.74 | 0.35 | 0.35 | 0.03 |
| 67113  | 3.14 | 0.97 | 0.84 | 0.48 | 0.87 | 0.41 |
| 61324  | 3.14 | 0.97 | 0.84 | 0.48 | 0.61 | 0.22 |
| 60382  | 1.36 | 0.61 | 1.19 | 0.75 | 1.19 | 0.59 |
| 60029  | 0.42 | 0.15 | #N/A | #N/A | 0.62 | 0.23 |
| 58537  | 1.61 | 0.71 | #N/A | #N/A | 1.03 | 0.51 |
| 56278  | 3.38 | 0.98 | 0.92 | 0.52 | 3.32 | 0.98 |
| 54593  | 3.38 | 0.98 | 0.92 | 0.52 | 1.97 | 0.86 |
| 54550  | 3.37 | 0.98 | 1.04 | 0.50 | 0.66 | 0.26 |
| 49553  | 3.37 | 0.98 | 1.04 | 0.50 | 0.73 | 0.32 |
| 49446  | 0.57 | 0.27 | 0.09 | 0.00 | 2.24 | 0.91 |
| 47931  | 0.57 | 0.27 | 0.09 | 0.00 | 1.94 | 0.86 |
| 45758  | #N/A | #N/A | 0.50 | 0.12 | 1.48 | 0.74 |
| 45631  | 3.14 | 0.96 | 0.89 | 0.51 | 3.91 | 0.99 |
| 44471  | 3.14 | 0.96 | 0.89 | 0.51 | #N/A | #N/A |
| 44720  | 1.20 | 0.55 | 1.28 | 0.83 | 1.93 | 0.85 |
| 42636  | 1.72 | 0.73 | 1.13 | 0.75 | 0.91 | 0.43 |
| 36821  | 1.28 | 0.58 | 1.40 | 0.88 | 0.82 | 0.37 |
| 35406  | 1.37 | 0.61 | 0.82 | 0.44 | 1.38 | 0.70 |
| 28702  | 0.42 | 0.15 | 1.08 | 0.71 | 0.50 | 0.13 |
| 26975  | 1.43 | 0.65 | 0.77 | 0.38 | 2.60 | 0.94 |
| 22524  | 1.43 | 0.65 | 0.77 | 0.38 | 2.51 | 0.94 |
| 19490  | 1.17 | 0.53 | 0.77 | 0.40 | 0.56 | 0.19 |
| 17280  | 2.22 | 0.86 | 0.47 | 0.14 | #N/A | #N/A |
| 14653  | 1.00 | 0.45 | 1.32 | 0.86 | 1.41 | 0.71 |
| 11548  | 0.64 | 0.29 | #N/A | #N/A | 1.08 | 0.55 |
| 10765  | 1.29 | 0.59 | 0.73 | 0.35 | 0.87 | 0.40 |
| 10105  | 1.29 | 0.59 | 0.73 | 0.35 | 2.39 | 0.92 |
| 8115   | #N/A | #N/A | #N/A | #N/A | 1.82 | 0.83 |
| 1647   | 1.41 | 0.64 | #N/A | #N/A | 1.65 | 0.80 |
| 1000   | 0.58 | 0.25 | 0.81 | 0.44 | 0.70 | 0.28 |
| 329033 | #N/A | #N/A | 1.76 | 0.95 | 0.89 | 0.43 |
| 331051 | 1.34 | 0.61 | 1.15 | 0.59 | 0.88 | 0.42 |
| 332891 | 1.00 | 0.45 | 1.11 | 0.72 | 1.99 | 0.87 |
| 334356 | 2.04 | 0.82 | 0.80 | 0.43 | 1.53 | 0.76 |
| 334509 | 1.03 | 0.47 | 0.83 | 0.46 | 1.28 | 0.64 |
| 337680 | 1.44 | 0.63 | 1.17 | 0.72 | 0.83 | 0.37 |
| 338938 | 0.81 | 0.37 | 0.95 | 0.56 | 1.23 | 0.62 |
| 341278 | 1.01 | 0.47 | 0.76 | 0.37 | 0.47 | 0.11 |

|        |      |      |      |      |      |      |
|--------|------|------|------|------|------|------|
| 345797 | 0.71 | 0.33 | 0.76 | 0.37 | 0.46 | 0.11 |
| 346194 | #N/A | #N/A | #N/A | #N/A | 1.94 | 0.86 |
| 353862 | 2.21 | 0.85 | #N/A | #N/A | 1.34 | 0.67 |
| 356955 | 1.68 | 0.72 | 1.17 | 0.69 | 1.96 | 0.86 |
| 357220 | 1.68 | 0.72 | 1.17 | 0.69 | 2.77 | 0.95 |
| 359946 | 2.38 | 0.89 | 0.65 | 0.26 | 0.42 | 0.08 |
| 360351 | 2.38 | 0.89 | 0.65 | 0.26 | 0.44 | 0.09 |
| 360460 | 1.93 | 0.79 | 0.55 | 0.16 | 1.41 | 0.71 |
| 363813 | 1.93 | 0.79 | 0.55 | 0.16 | 0.91 | 0.44 |
| 366881 | 2.01 | 0.82 | 0.69 | 0.30 | 0.82 | 0.38 |
| 370318 | 1.20 | 0.55 | 0.71 | 0.33 | 1.53 | 0.74 |
| 370523 | 1.54 | 0.69 | 0.87 | 0.50 | 1.39 | 0.71 |
| 372797 | 1.98 | 0.80 | 0.46 | 0.11 | 2.79 | 0.95 |
| 373709 | #N/A | #N/A | #N/A | #N/A | 1.55 | 0.76 |
| 376011 | 1.76 | 0.74 | 0.91 | 0.49 | 0.56 | 0.18 |
| 378169 | 1.76 | 0.74 | 0.91 | 0.49 | 2.37 | 0.92 |
| 379561 | 1.76 | 0.74 | 0.91 | 0.49 | 0.97 | 0.48 |
| 380805 | 1.08 | 0.49 | #N/A | #N/A | 1.59 | 0.77 |
| 382821 | 0.83 | 0.38 | 0.76 | 0.40 | 0.37 | 0.05 |
| 383532 | #N/A | #N/A | #N/A | #N/A | 0.54 | 0.16 |
| 384934 | #N/A | #N/A | #N/A | #N/A | 0.79 | 0.36 |
| 388683 | 1.99 | 0.81 | 1.11 | 0.74 | 0.71 | 0.30 |
| 389421 | 0.46 | 0.19 | 0.68 | 0.29 | 0.92 | 0.45 |
| 389770 | 0.63 | 0.29 | 0.47 | 0.10 | 1.15 | 0.57 |
| 392415 | 1.38 | 0.61 | 1.40 | 0.88 | 0.62 | 0.23 |
| 394836 | 1.30 | 0.58 | 0.68 | 0.32 | 0.78 | 0.34 |
| 397734 | 2.81 | 0.94 | 0.61 | 0.21 | 1.22 | 0.61 |
| 401213 | 2.81 | 0.94 | 0.61 | 0.21 | 1.59 | 0.78 |
| 402654 | 1.48 | 0.65 | 1.02 | 0.65 | #N/A | #N/A |
| 402760 | #N/A | #N/A | #N/A | #N/A | 0.60 | 0.20 |
| 406543 | #N/A | #N/A | #N/A | #N/A | 1.49 | 0.73 |
| 407920 | 0.76 | 0.35 | 1.18 | 0.70 | 1.41 | 0.71 |
| 408357 | 0.38 | 0.12 | 0.76 | 0.40 | 2.53 | 0.93 |
| 409659 | 1.07 | 0.49 | 1.49 | 0.91 | 0.73 | 0.32 |
| 412329 | 0.68 | 0.33 | 0.59 | 0.19 | 0.38 | 0.06 |
| 413479 | 1.32 | 0.60 | 0.72 | 0.32 | 1.22 | 0.61 |
| 414036 | 1.37 | 0.61 | 0.94 | 0.54 | 2.89 | 0.96 |
| 414459 | 1.31 | 0.59 | 0.83 | 0.46 | 1.01 | 0.52 |
| 416347 | 0.94 | 0.45 | 0.58 | 0.19 | 0.31 | 0.02 |
| 418630 | 2.14 | 0.85 | 0.91 | 0.53 | 0.77 | 0.35 |
| 422668 | 0.32 | 0.12 | 0.89 | 0.52 | 0.64 | 0.24 |
| 424271 | 0.45 | 0.20 | #N/A | #N/A | 0.24 | 0.01 |
| 424847 | 0.45 | 0.17 | 0.55 | 0.18 | 0.58 | 0.20 |
| 426773 | 1.47 | 0.66 | 0.84 | 0.47 | 0.57 | 0.19 |
| 428159 | 1.47 | 0.66 | 0.84 | 0.47 | 0.78 | 0.36 |
| 427834 | 1.26 | 0.57 | 0.80 | 0.42 | 0.74 | 0.32 |
| 429913 | 1.47 | 0.66 | 0.84 | 0.47 | 1.30 | 0.66 |
| 430248 | 1.92 | 0.79 | 0.82 | 0.43 | 0.97 | 0.47 |
| 433374 | 1.92 | 0.79 | 0.82 | 0.43 | 1.01 | 0.50 |
| 433689 | #N/A | #N/A | #N/A | #N/A | 0.45 | 0.10 |
| 438907 | 0.24 | 0.04 | 0.47 | 0.11 | 0.63 | 0.23 |

|        |      |      |      |      |      |      |
|--------|------|------|------|------|------|------|
| 440391 | 1.16 | 0.54 | 1.04 | 0.69 | 1.05 | 0.52 |
| 442554 | 1.16 | 0.54 | 1.04 | 0.69 | 0.62 | 0.23 |
| 442726 | #N/A | #N/A | #N/A | #N/A | 1.48 | 0.74 |
| 445850 | #N/A | #N/A | #N/A | #N/A | 0.43 | 0.09 |
| 446080 | 0.77 | 0.35 | 0.43 | 0.07 | 1.24 | 0.62 |
| 448369 | 0.77 | 0.35 | 0.43 | 0.07 | 0.49 | 0.13 |
| 451326 | #N/A | #N/A | #N/A | #N/A | 0.61 | 0.22 |
| 451730 | #N/A | #N/A | #N/A | #N/A | 1.00 | 0.50 |
| 453870 | 0.36 | 0.10 | 0.74 | 0.35 | 1.38 | 0.68 |
| 455796 | 0.36 | 0.10 | 0.74 | 0.35 | 0.32 | 0.02 |
| 455908 | 2.08 | 0.84 | 1.49 | 0.91 | 0.61 | 0.21 |
| 459481 | 0.93 | 0.44 | #N/A | #N/A | 1.09 | 0.56 |
| 461817 | 0.93 | 0.44 | #N/A | #N/A | 2.12 | 0.89 |
| 466544 | 2.72 | 0.94 | 1.24 | 0.69 | 1.10 | 0.55 |
| 466676 | 2.26 | 0.86 | 1.07 | 0.70 | 1.83 | 0.84 |
| 469253 | 2.26 | 0.86 | 1.07 | 0.70 | 1.08 | 0.54 |
| 469378 | #N/A | #N/A | 0.60 | 0.22 | 0.78 | 0.34 |
| 472598 | #N/A | #N/A | 0.60 | 0.22 | 1.75 | 0.81 |
| 473370 | #N/A | #N/A | 0.69 | 0.31 | 1.02 | 0.51 |
| 473476 | 1.16 | 0.53 | #N/A | #N/A | 1.25 | 0.64 |
| 476793 | 1.16 | 0.53 | #N/A | #N/A | 0.65 | 0.26 |
| 476940 | #N/A | #N/A | 0.35 | 0.05 | 0.63 | 0.23 |
| 479297 | #N/A | #N/A | #N/A | #N/A | 1.43 | 0.72 |
| 480421 | #N/A | #N/A | 0.35 | 0.05 | 2.30 | 0.91 |
| 481751 | #N/A | #N/A | #N/A | #N/A | 1.82 | 0.83 |
| 483086 | 3.37 | 0.98 | #N/A | #N/A | 1.59 | 0.78 |
| 483220 | 2.25 | 0.87 | 0.92 | 0.55 | 0.65 | 0.24 |
| 488451 | #N/A | #N/A | 0.82 | 0.45 | 1.06 | 0.53 |
| 489734 | #N/A | #N/A | 0.82 | 0.45 | 0.53 | 0.15 |
| 490196 | 0.95 | 0.43 | 0.61 | 0.21 | 1.00 | 0.51 |
| 491123 | 1.63 | 0.70 | 0.95 | 0.60 | 0.90 | 0.43 |
| 494469 | 1.63 | 0.70 | 0.95 | 0.60 | 0.97 | 0.48 |
| 496967 | #N/A | #N/A | #N/A | #N/A | 0.77 | 0.35 |
| 497505 | #N/A | #N/A | #N/A | #N/A | 0.57 | 0.19 |
| 503345 | #N/A | #N/A | #N/A | #N/A | 1.05 | 0.54 |
| 503551 | 0.66 | 0.30 | 0.54 | 0.16 | 0.63 | 0.22 |
| 506766 | 0.66 | 0.30 | 0.54 | 0.16 | 0.34 | 0.03 |
| 506977 | 1.18 | 0.53 | 1.02 | 0.63 | 1.55 | 0.76 |
| 507947 | 1.84 | 0.78 | 0.62 | 0.22 | 0.57 | 0.19 |
| 513005 | 1.84 | 0.78 | 0.62 | 0.22 | 0.81 | 0.37 |
| 513294 | 1.01 | 0.46 | 0.82 | 0.44 | 2.44 | 0.92 |
| 516172 | 1.01 | 0.46 | 0.82 | 0.44 | 0.76 | 0.32 |
| 516772 | #N/A | #N/A | #N/A | #N/A | 1.29 | 0.65 |
| 516448 | 1.25 | 0.58 | #N/A | #N/A | 1.69 | 0.80 |
| 518489 | 1.25 | 0.58 | #N/A | #N/A | 1.11 | 0.55 |
| 518520 | 1.25 | 0.58 | #N/A | #N/A | 0.58 | 0.20 |
| 519971 | #N/A | #N/A | #N/A | #N/A | 0.83 | 0.39 |
| 522281 | #N/A | #N/A | #N/A | #N/A | 0.48 | 0.12 |
| 524840 | #N/A | #N/A | #N/A | #N/A | 0.42 | 0.08 |
| 528600 | 1.14 | 0.51 | 0.90 | 0.54 | 0.48 | 0.12 |
| 530247 | #N/A | #N/A | #N/A | #N/A | 0.87 | 0.42 |

|        |      |      |      |      |      |      |
|--------|------|------|------|------|------|------|
| 531126 | #N/A | #N/A | #N/A | #N/A | 1.67 | 0.80 |
| 533792 | #N/A | #N/A | #N/A | #N/A | 0.68 | 0.28 |
| 536818 | 1.81 | 0.76 | 1.02 | 0.66 | 0.79 | 0.34 |
| 538453 | #N/A | #N/A | #N/A | #N/A | #N/A | #N/A |
| 538658 | #N/A | #N/A | #N/A | #N/A | 1.38 | 0.69 |
| 539762 | 2.02 | 0.82 | 0.88 | 0.52 | 0.44 | 0.09 |
| 546332 | 2.02 | 0.82 | 0.88 | 0.52 | 0.77 | 0.34 |
| 548559 | 1.98 | 0.80 | 0.99 | 0.63 | 0.46 | 0.11 |
| 548791 | 1.36 | 0.60 | 1.09 | 0.63 | 1.02 | 0.52 |
| 552051 | 1.36 | 0.60 | 1.09 | 0.63 | 0.70 | 0.28 |
| 551797 | 0.12 | 0.02 | 0.42 | 0.07 | 0.80 | 0.37 |
| 552297 | #N/A | #N/A | #N/A | #N/A | 1.40 | 0.69 |
| 553175 | 2.32 | 0.88 | 0.66 | 0.27 | 1.87 | 0.84 |
| 554823 | #N/A | #N/A | #N/A | #N/A | #N/A | #N/A |
| 559029 | 0.29 | 0.10 | #N/A | #N/A | 2.03 | 0.88 |
| 559960 | 1.25 | 0.58 | 0.90 | 0.54 | 1.75 | 0.82 |
| 564192 | 1.25 | 0.58 | 0.90 | 0.54 | 0.39 | 0.05 |
| 564475 | 0.96 | 0.45 | 0.86 | 0.48 | 0.68 | 0.27 |
| 566876 | 2.40 | 0.90 | 0.98 | 0.60 | 0.73 | 0.31 |
| 569928 | 1.41 | 0.63 | 1.09 | 0.63 | 1.04 | 0.53 |
| 572181 | 1.99 | 0.82 | 0.93 | 0.58 | 2.23 | 0.90 |
| 574829 | 1.99 | 0.82 | 0.93 | 0.58 | 1.17 | 0.60 |
| 577625 | 1.31 | 0.59 | 0.96 | 0.61 | 0.44 | 0.10 |
| 579792 | 1.03 | 0.47 | 0.98 | 0.52 | 2.23 | 0.91 |
| 580158 | 0.54 | 0.22 | #N/A | #N/A | 0.64 | 0.24 |
| 581358 | 1.77 | 0.76 | 0.79 | 0.42 | #N/A | #N/A |
| 581812 | 0.88 | 0.41 | 1.11 | 0.73 | 0.40 | 0.06 |
| 584308 | 1.89 | 0.78 | 1.17 | 0.78 | 1.36 | 0.70 |
| 586949 | 0.44 | 0.16 | 1.12 | 0.71 | #N/A | #N/A |
| 589280 | 1.89 | 0.78 | 1.17 | 0.78 | 0.48 | 0.12 |
| 589941 | 2.77 | 0.95 | 0.92 | 0.52 | 0.87 | 0.41 |
| 594045 | 2.77 | 0.95 | 0.92 | 0.52 | 0.78 | 0.35 |
| 601382 | 2.13 | 0.85 | 0.82 | 0.45 | 1.17 | 0.60 |
| 602716 | 1.36 | 0.61 | #N/A | #N/A | 1.00 | 0.50 |
| 605346 | 0.86 | 0.39 | 0.56 | 0.17 | 1.61 | 0.78 |
| 606177 | 1.36 | 0.61 | #N/A | #N/A | 1.70 | 0.80 |
| 608474 | 0.86 | 0.39 | 0.56 | 0.17 | 1.00 | 0.49 |
| 608639 | 2.58 | 0.92 | 0.80 | 0.41 | 2.10 | 0.88 |
| 609837 | 3.08 | 0.97 | #N/A | #N/A | 1.32 | 0.66 |
| 612489 | 3.08 | 0.97 | #N/A | #N/A | 4.62 | 1.00 |
| 612996 | 1.84 | 0.78 | 1.51 | 0.76 | 0.33 | 0.02 |
| 617517 | 0.94 | 0.45 | 0.71 | 0.33 | 1.46 | 0.73 |
| 624374 | #N/A | #N/A | 0.40 | 0.07 | 0.35 | 0.03 |
| 626491 | 0.93 | 0.42 | #N/A | #N/A | 0.89 | 0.42 |
| 626627 | 1.75 | 0.75 | 0.98 | 0.63 | 1.09 | 0.56 |
| 628359 | 1.58 | 0.69 | 1.79 | 0.73 | 0.57 | 0.19 |
| 630965 | 1.84 | 0.78 | 1.11 | 0.60 | 1.32 | 0.67 |
| 633119 | 1.84 | 0.78 | 1.11 | 0.60 | 1.11 | 0.56 |
| 633281 | 2.90 | 0.95 | 0.88 | 0.49 | 2.32 | 0.91 |
| 636756 | 2.90 | 0.95 | 0.88 | 0.49 | 0.41 | 0.07 |
| 636938 | 0.55 | 0.25 | 0.55 | 0.19 | 0.67 | 0.26 |

|        |      |      |      |      |      |      |
|--------|------|------|------|------|------|------|
| 639559 | 2.26 | 0.88 | 1.39 | 0.87 | 0.93 | 0.46 |
| 643306 | 2.26 | 0.88 | 1.39 | 0.87 | 3.11 | 0.97 |
| 643393 | 2.33 | 0.88 | 1.71 | 0.70 | 1.86 | 0.84 |
| 646895 | 2.33 | 0.88 | 1.71 | 0.70 | 0.72 | 0.30 |
| 647125 | 1.10 | 0.50 | 1.34 | 0.86 | 1.12 | 0.56 |
| 648803 | 1.13 | 0.51 | 1.11 | 0.61 | 0.84 | 0.38 |
| 651731 | 1.13 | 0.51 | 1.11 | 0.61 | 0.51 | 0.14 |
| 651375 | 3.66 | 0.98 | 0.98 | 0.62 | #N/A | #N/A |
| 652162 | 1.13 | 0.51 | 1.11 | 0.61 | 0.12 | 0.00 |
| 652009 | 3.66 | 0.98 | 0.98 | 0.62 | 1.28 | 0.66 |
| 656569 | 3.66 | 0.98 | 0.98 | 0.62 | 1.13 | 0.56 |
| 658324 | 0.86 | 0.40 | 1.09 | 0.63 | 1.50 | 0.73 |
| 659600 | 2.39 | 0.90 | 0.64 | 0.28 | 1.13 | 0.58 |
| 659814 | 2.75 | 0.94 | 0.97 | 0.61 | 0.96 | 0.47 |
| 663581 | 2.75 | 0.94 | 0.97 | 0.61 | 0.81 | 0.37 |
| 665784 | #N/A | #N/A | #N/A | #N/A | 2.02 | 0.88 |
| 667859 | 0.88 | 0.40 | 0.75 | 0.37 | 0.76 | 0.32 |
| 671844 | 1.86 | 0.77 | 1.40 | 0.88 | 1.87 | 0.85 |
| 674351 | #N/A | #N/A | #N/A | #N/A | #N/A | #N/A |
| 677839 | #N/A | #N/A | #N/A | #N/A | 0.40 | 0.06 |
| 678190 | 0.13 | 0.02 | 0.42 | 0.08 | 0.40 | 0.06 |
| 679260 | 0.13 | 0.02 | 0.42 | 0.08 | 0.37 | 0.04 |
| 680543 | #N/A | #N/A | #N/A | #N/A | 0.76 | 0.34 |
| 681443 | 2.53 | 0.91 | 1.04 | 0.64 | 1.97 | 0.86 |
| 683544 | 2.53 | 0.91 | 1.04 | 0.64 | 1.95 | 0.86 |
| 685342 | 0.83 | 0.40 | 0.48 | 0.11 | 0.62 | 0.22 |
| 689179 | 1.48 | 0.67 | 0.71 | 0.32 | 0.48 | 0.13 |
| 689973 | 1.52 | 0.67 | #N/A | #N/A | 2.22 | 0.90 |
| 692031 | 1.71 | 0.73 | 0.80 | 0.41 | 1.04 | 0.53 |
| 697333 | 2.07 | 0.83 | 0.65 | 0.27 | 0.41 | 0.07 |
| 698767 | 2.01 | 0.82 | 1.11 | 0.72 | 0.79 | 0.34 |
| 711575 | 0.82 | 0.38 | #N/A | #N/A | 0.76 | 0.34 |
| 711682 | 3.27 | 0.98 | 0.94 | 0.56 | 1.17 | 0.60 |
| 715330 | 3.27 | 0.98 | 0.94 | 0.56 | 0.87 | 0.42 |
| 715592 | 2.71 | 0.94 | 0.72 | 0.39 | 1.21 | 0.62 |
| 718383 | 2.71 | 0.94 | 0.72 | 0.39 | 2.33 | 0.92 |
| 718652 | 0.97 | 0.44 | 1.08 | 0.72 | 0.54 | 0.17 |
| 720509 | 0.97 | 0.44 | 1.08 | 0.72 | #N/A | #N/A |
| 720814 | 0.97 | 0.44 | 1.08 | 0.72 | 1.08 | 0.54 |
| 720469 | 0.66 | 0.30 | 0.71 | 0.32 | 0.85 | 0.40 |
| 722607 | 0.66 | 0.30 | 0.71 | 0.32 | 1.09 | 0.54 |
| 722917 | 0.66 | 0.30 | 0.71 | 0.32 | 0.83 | 0.38 |
| 724724 | 0.66 | 0.30 | 0.71 | 0.32 | 0.44 | 0.10 |
| 725563 | #N/A | #N/A | 0.83 | 0.47 | 0.85 | 0.41 |
| 729643 | #N/A | #N/A | 0.83 | 0.47 | 0.68 | 0.27 |
| 730007 | 3.35 | 0.97 | 0.97 | 0.62 | 0.55 | 0.17 |
| 736176 | 3.35 | 0.97 | 0.97 | 0.62 | 0.74 | 0.30 |
| 736436 | 1.70 | 0.74 | 1.02 | 0.61 | 0.60 | 0.22 |
| 738531 | 1.70 | 0.74 | 1.02 | 0.61 | 3.76 | 0.99 |
| 738923 | 0.80 | 0.37 | 0.99 | 0.64 | 0.62 | 0.22 |
| 744180 | 0.80 | 0.37 | 0.99 | 0.64 | 0.41 | 0.07 |



|        |      |      |      |      |      |      |
|--------|------|------|------|------|------|------|
| 744534 | 2.31 | 0.88 | 1.11 | 0.65 | 2.18 | 0.89 |
| 745592 | 0.52 | 0.23 | 1.03 | 0.68 | 1.04 | 0.53 |
| 746724 | 0.93 | 0.43 | 0.74 | 0.36 | 1.82 | 0.83 |
| 747524 | 2.08 | 0.83 | #N/A | #N/A | 0.69 | 0.28 |
| 751885 | 2.08 | 0.83 | #N/A | #N/A | 0.55 | 0.18 |
| 751475 | 0.23 | 0.03 | 0.65 | 0.25 | 0.31 | 0.02 |
| 752213 | 1.78 | 0.76 | 0.95 | 0.50 | 0.49 | 0.13 |
| 756124 | 1.78 | 0.76 | 0.95 | 0.50 | 1.12 | 0.58 |
| 756475 | 0.65 | 0.29 | 1.18 | 0.75 | 1.07 | 0.55 |
| 759252 | 0.65 | 0.29 | 1.18 | 0.75 | 0.53 | 0.16 |
| 760659 | 1.34 | 0.60 | 0.89 | 0.51 | 1.47 | 0.72 |
| 760824 | #N/A | #N/A | 0.57 | 0.18 | 3.35 | 0.98 |
| 761720 | #N/A | #N/A | 0.57 | 0.18 | 1.38 | 0.70 |
| 761613 | 1.20 | 0.55 | 0.64 | 0.25 | #N/A | #N/A |
| 766564 | 1.20 | 0.55 | 0.64 | 0.25 | 0.52 | 0.15 |
| 766868 | 2.26 | 0.88 | 1.05 | 0.67 | 1.16 | 0.58 |
| 769811 | 2.26 | 0.88 | 1.05 | 0.67 | 1.30 | 0.67 |
| 772112 | 0.42 | 0.16 | 0.44 | 0.08 | 0.75 | 0.31 |
| 774126 | 2.62 | 0.93 | 1.11 | 0.74 | 1.25 | 0.64 |
| 775258 | 2.86 | 0.95 | #N/A | #N/A | 1.42 | 0.70 |
| 778247 | 1.40 | 0.64 | 1.00 | 0.63 | 0.44 | 0.10 |
| 778554 | 0.13 | 0.01 | 0.45 | 0.11 | 0.36 | 0.04 |
| 780183 | 0.13 | 0.01 | 0.45 | 0.11 | #N/A | #N/A |
| 781540 | 0.64 | 0.28 | 1.49 | 0.91 | 2.56 | 0.94 |
| 783297 | 3.34 | 0.98 | 1.02 | 0.57 | 1.55 | 0.75 |
| 784587 | 0.80 | 0.37 | #N/A | #N/A | 2.03 | 0.87 |
| 786743 | 1.25 | 0.57 | 0.61 | 0.26 | 0.65 | 0.25 |
| #N/A   | 1.25 | 0.57 | 0.61 | 0.26 | 0.41 | 0.07 |
| 788640 | 1.42 | 0.64 | #N/A | #N/A | 1.06 | 0.54 |
| 788741 | 0.40 | 0.18 | 1.07 | 0.68 | 0.77 | 0.33 |
| 790210 | 2.74 | 0.93 | 1.28 | 0.74 | 0.74 | 0.32 |
| 793867 | 2.74 | 0.93 | 1.28 | 0.74 | 0.82 | 0.37 |
| 794075 | 1.70 | 0.72 | 0.90 | 0.54 | 1.28 | 0.65 |
| 795800 | 1.15 | 0.53 | 1.02 | 0.60 | 1.53 | 0.76 |
| 798307 | 1.15 | 0.53 | 1.02 | 0.60 | 0.43 | 0.09 |
| 798314 | 1.15 | 0.53 | 1.02 | 0.60 | 0.43 | 0.10 |
| 798673 | 1.79 | 0.75 | 0.67 | 0.29 | 0.96 | 0.47 |
| 800969 | 2.10 | 0.84 | 1.48 | 0.59 | 1.50 | 0.74 |
| 802549 | #N/A | #N/A | #N/A | #N/A | 1.76 | 0.81 |
| 804201 | #N/A | #N/A | #N/A | #N/A | 2.18 | 0.90 |
| 804905 | 2.24 | 0.86 | #N/A | #N/A | 2.30 | 0.91 |
| 805030 | 2.44 | 0.91 | 0.55 | 0.15 | 0.97 | 0.47 |
| 808105 | 2.44 | 0.91 | 0.55 | 0.15 | 0.89 | 0.42 |
| 808251 | 1.91 | 0.79 | 0.93 | 0.54 | 0.48 | 0.13 |
| 811490 | 1.91 | 0.79 | 0.93 | 0.54 | 1.80 | 0.82 |
| 812321 | 1.43 | 0.64 | #N/A | #N/A | 1.99 | 0.87 |
| 812392 | #N/A | #N/A | #N/A | #N/A | 0.85 | 0.41 |
| 815717 | #N/A | #N/A | #N/A | #N/A | 1.12 | 0.58 |
| 815912 | 2.14 | 0.84 | 0.67 | 0.27 | 0.66 | 0.25 |
| 818331 | 2.14 | 0.84 | 0.67 | 0.27 | 1.72 | 0.81 |
| 818753 | 1.87 | 0.79 | 0.86 | 0.48 | 1.50 | 0.73 |

|        |      |      |      |      |      |      |
|--------|------|------|------|------|------|------|
| 820154 | 2.02 | 0.81 | 0.46 | 0.09 | 1.09 | 0.54 |
| 820770 | 1.87 | 0.79 | 0.86 | 0.48 | 3.72 | 0.99 |
| 822290 | 1.44 | 0.64 | 0.95 | 0.59 | 1.25 | 0.63 |
| 822584 | 0.99 | 0.45 | 0.84 | 0.46 | 0.35 | 0.03 |
| 825530 | 1.73 | 0.73 | 1.09 | 0.59 | 1.62 | 0.78 |
| 827865 | 1.73 | 0.73 | 1.09 | 0.59 | 0.75 | 0.33 |
| 828048 | 1.53 | 0.67 | 0.92 | 0.54 | 0.40 | 0.06 |
| 831055 | 0.42 | 0.19 | 0.87 | 0.45 | 0.79 | 0.35 |
| 834191 | 2.83 | 0.95 | 0.80 | 0.42 | 1.36 | 0.68 |
| 834448 | 0.89 | 0.43 | 0.88 | 0.52 | 0.45 | 0.11 |
| 838956 | 0.89 | 0.43 | 0.88 | 0.52 | 1.13 | 0.59 |
| 839080 | 2.17 | 0.86 | 0.56 | 0.17 | 0.71 | 0.30 |
| 841814 | 2.17 | 0.86 | 0.56 | 0.17 | 1.43 | 0.72 |
| 841511 | 0.59 | 0.25 | 1.48 | 0.87 | 1.01 | 0.52 |
| 843640 | 0.59 | 0.25 | 1.48 | 0.87 | 0.87 | 0.41 |
| 843694 | 2.13 | 0.85 | 1.37 | 0.73 | 0.62 | 0.23 |
| 844988 | 1.17 | 0.53 | 0.90 | 0.52 | 2.69 | 0.95 |
| 846265 | 1.35 | 0.62 | 0.82 | 0.45 | 1.02 | 0.52 |
| 847316 | 1.17 | 0.53 | 0.90 | 0.52 | 2.30 | 0.91 |
| 848141 | 1.35 | 0.62 | 0.82 | 0.45 | 1.23 | 0.61 |
| 849205 | 1.36 | 0.62 | #N/A | #N/A | 1.99 | 0.87 |
| 850050 | 2.68 | 0.94 | 1.12 | 0.75 | 2.49 | 0.93 |
| 850725 | #N/A | #N/A | #N/A | #N/A | 2.72 | 0.95 |
| 850933 | 1.70 | 0.72 | 0.53 | 0.15 | 1.25 | 0.64 |
| 852117 | 2.50 | 0.91 | #N/A | #N/A | 2.21 | 0.91 |
| 854108 | 2.50 | 0.91 | #N/A | #N/A | 2.17 | 0.90 |
| 855143 | 2.08 | 0.84 | 0.96 | 0.54 | 0.39 | 0.05 |
| 865589 | 2.08 | 0.84 | 0.96 | 0.54 | 0.63 | 0.22 |
| 865649 | 0.65 | 0.30 | 0.33 | 0.05 | 1.49 | 0.74 |
| 867848 | 0.65 | 0.30 | 0.33 | 0.05 | 0.36 | 0.04 |
| 868947 | 1.92 | 0.80 | 1.03 | 0.49 | 1.91 | 0.85 |
| 869890 | 0.82 | 0.38 | 0.75 | 0.39 | 1.40 | 0.71 |
| 874067 | 1.58 | 0.70 | 1.62 | 0.94 | 0.72 | 0.29 |
| 874739 | 2.04 | 0.83 | 0.96 | 0.53 | 1.18 | 0.61 |
| 877034 | 2.04 | 0.83 | 0.96 | 0.53 | 1.18 | 0.61 |
| 880668 | 0.62 | 0.28 | 0.87 | 0.50 | 0.64 | 0.24 |
| 880876 | 0.62 | 0.28 | 0.87 | 0.50 | 1.47 | 0.74 |
| 882265 | 1.50 | 0.66 | 0.87 | 0.47 | 1.05 | 0.53 |
| 882835 | 0.18 | 0.02 | 0.34 | 0.03 | 0.31 | 0.02 |
| 884127 | 0.18 | 0.02 | 0.34 | 0.03 | 0.43 | 0.08 |
| 888513 | #N/A | #N/A | 0.97 | 0.61 | 2.41 | 0.93 |
| 887869 | #N/A | #N/A | 0.98 | 0.56 | 0.40 | 0.07 |
| 889743 | #N/A | #N/A | 0.97 | 0.61 | 1.95 | 0.86 |
| 889860 | 0.53 | 0.23 | 0.96 | 0.58 | 0.38 | 0.06 |
| 892723 | 1.32 | 0.59 | 0.57 | 0.18 | 0.55 | 0.17 |
| 894616 | #N/A | #N/A | #N/A | #N/A | 0.53 | 0.15 |
| 896690 | 1.35 | 0.60 | 1.55 | 0.92 | 0.30 | 0.01 |
| 896817 | 1.35 | 0.60 | 1.55 | 0.92 | 0.53 | 0.17 |
| 899048 | 1.87 | 0.77 | 1.90 | 0.89 | 1.49 | 0.73 |
| 900242 | 0.31 | 0.08 | 0.94 | 0.57 | 0.43 | 0.09 |
| 901850 | 0.17 | 0.04 | #N/A | #N/A | 0.55 | 0.17 |

|         |      |      |      |      |      |      |
|---------|------|------|------|------|------|------|
| 903364  | 0.17 | 0.04 | #N/A | #N/A | 2.07 | 0.88 |
| 905792  | 0.60 | 0.28 | 0.70 | 0.35 | 0.75 | 0.33 |
| 906228  | 1.17 | 0.53 | 0.66 | 0.26 | 0.96 | 0.47 |
| 911437  | 0.27 | 0.06 | 0.66 | 0.27 | 0.49 | 0.14 |
| 911776  | 2.54 | 0.92 | 0.70 | 0.30 | 1.51 | 0.74 |
| 913455  | 2.54 | 0.92 | 0.70 | 0.30 | 3.36 | 0.98 |
| 913611  | 2.15 | 0.84 | 1.00 | 0.65 | 0.92 | 0.44 |
| 918283  | 2.15 | 0.84 | 1.00 | 0.65 | 1.15 | 0.59 |
| 918598  | 2.43 | 0.90 | 1.13 | 0.70 | 0.48 | 0.12 |
| 921527  | 1.58 | 0.70 | 1.31 | 0.80 | 1.19 | 0.61 |
| 923224  | 2.01 | 0.81 | #N/A | #N/A | 1.06 | 0.54 |
| 925042  | 1.58 | 0.70 | 1.31 | 0.80 | 1.72 | 0.81 |
| 930437  | 2.01 | 0.81 | #N/A | #N/A | 0.45 | 0.10 |
| 930726  | 1.02 | 0.48 | 1.00 | 0.65 | 1.34 | 0.68 |
| 936489  | 1.02 | 0.48 | 1.00 | 0.65 | 1.36 | 0.69 |
| 936723  | 2.73 | 0.93 | 1.61 | 0.63 | 0.47 | 0.12 |
| 939613  | 3.34 | 0.98 | #N/A | #N/A | 1.08 | 0.56 |
| 943557  | #N/A | #N/A | #N/A | #N/A | 2.81 | 0.96 |
| 944349  | 3.34 | 0.98 | #N/A | #N/A | 2.23 | 0.90 |
| 944533  | 0.50 | 0.20 | #N/A | #N/A | 2.50 | 0.93 |
| 946000  | #N/A | #N/A | #N/A | #N/A | 1.07 | 0.55 |
| 946225  | 2.03 | 0.82 | 0.91 | 0.50 | 0.36 | 0.04 |
| 953862  | 2.03 | 0.82 | 0.91 | 0.50 | 1.00 | 0.50 |
| 956615  | 1.37 | 0.61 | 0.77 | 0.39 | 0.47 | 0.12 |
| 957981  | 0.36 | 0.15 | 1.31 | 0.84 | 1.55 | 0.76 |
| 958354  | 0.93 | 0.43 | 0.84 | 0.44 | 1.71 | 0.81 |
| 959194  | 1.16 | 0.54 | 1.30 | 0.78 | 0.70 | 0.29 |
| 965973  | 1.16 | 0.54 | 1.30 | 0.78 | 0.38 | 0.05 |
| 966658  | 0.28 | 0.06 | 0.57 | 0.19 | 0.42 | 0.08 |
| 968140  | 1.14 | 0.53 | 0.85 | 0.48 | 0.77 | 0.34 |
| 977186  | #N/A | #N/A | #N/A | #N/A | 0.61 | 0.21 |
| 981804  | #N/A | #N/A | #N/A | #N/A | 1.37 | 0.68 |
| 984777  | #N/A | #N/A | #N/A | #N/A | 0.45 | 0.10 |
| 984934  | 1.96 | 0.80 | 1.03 | 0.57 | 0.94 | 0.45 |
| 986891  | 0.45 | 0.17 | 0.60 | 0.21 | 0.97 | 0.49 |
| 992825  | 0.45 | 0.17 | 0.60 | 0.21 | 0.63 | 0.24 |
| 992856  | 2.14 | 0.85 | #N/A | #N/A | 1.07 | 0.53 |
| 995010  | 1.75 | 0.74 | 0.88 | 0.49 | 0.97 | 0.49 |
| 998236  | 1.75 | 0.74 | 0.88 | 0.49 | 1.33 | 0.66 |
| 998445  | 2.03 | 0.83 | 0.55 | 0.19 | 0.51 | 0.15 |
| 1001139 | #N/A | #N/A | #N/A | #N/A | 1.16 | 0.60 |
| 1006698 | 0.40 | 0.14 | 0.64 | 0.24 | 0.31 | 0.02 |
| 1009109 | 0.62 | 0.27 | 1.12 | 0.68 | 0.74 | 0.32 |
| 1009217 | 2.73 | 0.93 | 0.88 | 0.51 | 3.09 | 0.97 |
| 1010882 | 2.73 | 0.93 | 0.88 | 0.51 | 1.83 | 0.84 |
| 1012753 | 1.54 | 0.69 | 1.06 | 0.50 | 0.51 | 0.14 |
| 1013234 | 0.89 | 0.41 | 1.08 | 0.72 | 0.42 | 0.08 |
| 1015354 | 0.70 | 0.32 | 0.80 | 0.43 | 0.83 | 0.38 |
| 1017873 | #N/A | #N/A | #N/A | #N/A | 1.40 | 0.70 |
| 1020215 | #N/A | #N/A | 0.72 | 0.37 | 0.53 | 0.16 |
| 1023732 | #N/A | #N/A | 0.72 | 0.37 | 1.79 | 0.82 |

|         |      |      |      |      |      |      |
|---------|------|------|------|------|------|------|
| 1023454 | 0.86 | 0.41 | 0.74 | 0.39 | 1.04 | 0.52 |
| 1025602 | #N/A | #N/A | 0.72 | 0.37 | 0.73 | 0.31 |
| 1026602 | 0.86 | 0.41 | 0.74 | 0.39 | 1.63 | 0.79 |
| 1028041 | #N/A | #N/A | 0.79 | 0.41 | 1.30 | 0.65 |
| 1028187 | 0.30 | 0.10 | 1.02 | 0.50 | 0.34 | 0.03 |
| 1029176 | 0.62 | 0.27 | 0.95 | 0.57 | 0.39 | 0.05 |
| 1031482 | 2.25 | 0.87 | 1.06 | 0.71 | 0.76 | 0.34 |
| 1034800 | 3.26 | 0.98 | 0.84 | 0.44 | 1.17 | 0.59 |
| 1039382 | 3.26 | 0.98 | 0.84 | 0.44 | 0.95 | 0.47 |
| 1041392 | 1.84 | 0.77 | 0.81 | 0.44 | 1.59 | 0.76 |
| 1041671 | 0.24 | 0.04 | #N/A | #N/A | 0.54 | 0.16 |
| 1043552 | 0.24 | 0.04 | #N/A | #N/A | 1.11 | 0.55 |
| 1047796 | 0.90 | 0.42 | 1.07 | 0.56 | 0.55 | 0.17 |
| 1051051 | 1.26 | 0.57 | 0.80 | 0.42 | 2.52 | 0.93 |
| 1050719 | #N/A | #N/A | #N/A | #N/A | 5.30 | 1.00 |
| 1052923 | #N/A | #N/A | #N/A | #N/A | 2.01 | 0.88 |
| 1057673 | 1.43 | 0.65 | 2.68 | 0.99 | 0.90 | 0.44 |
| 1059985 | 2.50 | 0.91 | 1.16 | 0.78 | 3.46 | 0.98 |
| 1060434 | 0.37 | 0.12 | 0.85 | 0.46 | 0.54 | 0.17 |
| 1063641 | 0.37 | 0.12 | 0.85 | 0.46 | 0.39 | 0.05 |
| 1065908 | 1.39 | 0.63 | 0.94 | 0.59 | 1.06 | 0.54 |
| 1068529 | 1.15 | 0.52 | 0.76 | 0.37 | 1.36 | 0.68 |
| 1069614 | 1.93 | 0.80 | 0.98 | 0.49 | 1.39 | 0.69 |
| 1071786 | 1.09 | 0.50 | 0.84 | 0.48 | 1.27 | 0.64 |
| 1076080 | 1.09 | 0.50 | 0.84 | 0.48 | 2.71 | 0.95 |
| 1077904 | #N/A | #N/A | #N/A | #N/A | 2.32 | 0.91 |
| 1078538 | 1.79 | 0.77 | 0.86 | 0.50 | 2.02 | 0.88 |
| 1079718 | 1.26 | 0.57 | 1.01 | 0.66 | 3.41 | 0.98 |
| 1081582 | 1.79 | 0.77 | 0.86 | 0.50 | 2.52 | 0.93 |
| 1083205 | 0.72 | 0.33 | 0.92 | 0.56 | 0.97 | 0.47 |
| 555724  | 2.57 | 0.92 | 1.60 | 0.93 | 1.31 | 0.66 |
| 553622  | 2.57 | 0.92 | 1.60 | 0.93 | 1.54 | 0.76 |
| 553403  | 0.89 | 0.42 | 1.32 | 0.52 | 0.94 | 0.46 |
| 550627  | 0.89 | 0.42 | 1.32 | 0.52 | 0.52 | 0.15 |
| 550301  | 1.71 | 0.73 | 0.63 | 0.23 | 0.96 | 0.48 |
| 548138  | 2.20 | 0.87 | 0.83 | 0.46 | 0.92 | 0.45 |
| 542077  | 2.20 | 0.87 | 0.83 | 0.46 | 0.81 | 0.38 |
| 541965  | 1.76 | 0.74 | 0.73 | 0.34 | 0.54 | 0.16 |
| 535815  | 1.76 | 0.74 | 0.73 | 0.34 | 0.62 | 0.22 |
| 535582  | 3.61 | 0.98 | 0.81 | 0.44 | 2.01 | 0.87 |
| 533637  | 3.61 | 0.98 | 0.81 | 0.44 | 1.66 | 0.79 |
| 533404  | 1.59 | 0.70 | 0.94 | 0.56 | 0.42 | 0.08 |
| 528980  | 1.59 | 0.70 | 0.94 | 0.56 | 1.61 | 0.77 |
| 528687  | 0.88 | 0.40 | 0.48 | 0.11 | 1.10 | 0.56 |
| 525805  | 0.88 | 0.40 | 0.48 | 0.11 | 0.90 | 0.43 |
| 524953  | #N/A | #N/A | #N/A | #N/A | 0.10 | 0.00 |
| 518730  | #N/A | #N/A | #N/A | #N/A | 0.62 | 0.23 |
| 518756  | 2.05 | 0.82 | 0.78 | 0.42 | 1.56 | 0.75 |
| 514507  | 2.05 | 0.82 | 0.78 | 0.42 | 0.70 | 0.28 |
| 512309  | 2.40 | 0.90 | 1.00 | 0.63 | 0.92 | 0.46 |
| 511660  | #N/A | #N/A | #N/A | #N/A | 1.93 | 0.85 |

|        |      |      |      |      |      |      |
|--------|------|------|------|------|------|------|
| 509995 | 2.30 | 0.87 | 0.68 | 0.29 | 0.48 | 0.13 |
| 504335 | 2.30 | 0.87 | 0.68 | 0.29 | 0.65 | 0.24 |
| 504238 | 1.17 | 0.54 | 0.95 | 0.60 | 1.57 | 0.77 |
| 502469 | 1.17 | 0.54 | 0.95 | 0.60 | 0.21 | 0.01 |
| 500671 | 0.30 | 0.07 | 0.46 | 0.11 | 0.43 | 0.09 |
| 500398 | 1.02 | 0.48 | 1.13 | 0.63 | 1.64 | 0.79 |
| 499288 | 1.98 | 0.82 | 0.98 | 0.63 | 0.88 | 0.42 |
| 497715 | 2.25 | 0.87 | 0.55 | 0.16 | 0.78 | 0.36 |
| 495242 | 2.91 | 0.96 | 0.61 | 0.20 | 0.86 | 0.39 |
| 492014 | 2.91 | 0.96 | 0.61 | 0.20 | 1.53 | 0.76 |
| 488883 | #N/A | #N/A | #N/A | #N/A | 0.26 | 0.01 |
| 487358 | #N/A | #N/A | #N/A | #N/A | 1.16 | 0.60 |
| 487205 | #N/A | #N/A | #N/A | #N/A | 0.83 | 0.37 |
| 486560 | #N/A | #N/A | #N/A | #N/A | 1.08 | 0.55 |
| 485682 | #N/A | #N/A | #N/A | #N/A | 0.73 | 0.32 |
| 481423 | #N/A | #N/A | #N/A | #N/A | 1.25 | 0.64 |
| 481063 | 1.47 | 0.65 | 0.71 | 0.35 | 1.69 | 0.79 |
| 480170 | 3.48 | 0.98 | 1.30 | 0.75 | 2.33 | 0.91 |
| 475988 | 3.48 | 0.98 | 1.30 | 0.75 | 0.72 | 0.31 |
| 475113 | 1.08 | 0.50 | 0.19 | 0.01 | 2.39 | 0.93 |
| 473035 | 0.67 | 0.30 | 0.61 | 0.22 | 0.42 | 0.07 |
| 471991 | 1.27 | 0.57 | 0.79 | 0.41 | 0.67 | 0.25 |
| 469921 | #N/A | #N/A | #N/A | #N/A | 1.42 | 0.70 |
| 469651 | 1.97 | 0.80 | 0.94 | 0.58 | 0.76 | 0.32 |
| 466639 | 1.97 | 0.80 | 0.94 | 0.58 | 0.62 | 0.22 |
| 466256 | 1.30 | 0.58 | 1.53 | 0.75 | 2.54 | 0.93 |
| 465643 | 0.75 | 0.34 | 0.62 | 0.30 | 0.71 | 0.30 |
| 462476 | 0.75 | 0.34 | 0.62 | 0.30 | 0.67 | 0.25 |
| 460774 | 0.52 | 0.24 | 0.62 | 0.23 | 0.49 | 0.13 |
| 460554 | 2.13 | 0.85 | #N/A | #N/A | 2.30 | 0.92 |
| 459673 | 2.08 | 0.84 | 0.75 | 0.36 | 0.88 | 0.43 |
| 457113 | 2.08 | 0.84 | 0.75 | 0.36 | 1.04 | 0.53 |
| 456659 | #N/A | #N/A | #N/A | #N/A | 2.80 | 0.96 |
| 453987 | #N/A | #N/A | #N/A | #N/A | 1.38 | 0.69 |
| 453425 | 0.24 | 0.07 | 0.45 | 0.11 | 0.29 | 0.01 |
| 451904 | 0.29 | 0.07 | 0.61 | 0.21 | 0.44 | 0.10 |
| 445837 | 0.23 | 0.04 | 0.63 | 0.22 | 0.41 | 0.07 |
| 445026 | 1.63 | 0.72 | 1.41 | 0.89 | 2.23 | 0.90 |
| 435759 | 1.29 | 0.58 | 0.81 | 0.44 | 1.33 | 0.67 |
| 434085 | 0.28 | 0.10 | 0.29 | 0.03 | 0.55 | 0.18 |
| 432294 | 0.65 | 0.29 | 0.46 | 0.09 | 0.19 | 0.01 |
| 431364 | 1.47 | 0.64 | 0.60 | 0.22 | 0.71 | 0.29 |
| 428706 | 1.47 | 0.64 | 0.60 | 0.22 | 0.77 | 0.35 |
| 428650 | 1.93 | 0.80 | 0.72 | 0.33 | 1.49 | 0.73 |
| 427667 | 0.86 | 0.39 | 1.06 | 0.67 | 0.67 | 0.27 |
| 425246 | 0.86 | 0.39 | 1.06 | 0.67 | 2.09 | 0.88 |
| 424210 | 1.03 | 0.47 | 0.62 | 0.27 | 1.31 | 0.67 |
| 422880 | 1.68 | 0.72 | 0.67 | 0.27 | 1.41 | 0.70 |
| 422781 | 1.44 | 0.64 | 0.66 | 0.28 | 0.82 | 0.36 |
| 420043 | 1.44 | 0.64 | 0.66 | 0.28 | 1.28 | 0.65 |
| 420006 | #N/A | #N/A | #N/A | #N/A | 0.94 | 0.47 |

|        |      |      |      |      |      |      |
|--------|------|------|------|------|------|------|
| 418494 | 1.44 | 0.64 | 0.66 | 0.28 | 1.56 | 0.77 |
| 418022 | 1.15 | 0.53 | 0.96 | 0.58 | 0.55 | 0.18 |
| 415357 | 0.41 | 0.15 | 0.96 | 0.60 | 0.26 | 0.01 |
| 411280 | 2.11 | 0.85 | 0.97 | 0.60 | 0.96 | 0.47 |
| 409363 | 2.11 | 0.85 | 0.97 | 0.60 | 1.58 | 0.77 |
| 408005 | #N/A | #N/A | #N/A | #N/A | 1.37 | 0.68 |
| 407534 | 0.27 | 0.08 | 0.51 | 0.12 | 0.37 | 0.04 |
| 406167 | 0.27 | 0.08 | 0.51 | 0.12 | 0.45 | 0.11 |
| 406039 | 0.50 | 0.20 | #N/A | #N/A | 0.40 | 0.06 |
| 398475 | 0.50 | 0.20 | #N/A | #N/A | 0.36 | 0.04 |
| 396697 | 1.09 | 0.50 | 1.38 | 0.65 | 1.27 | 0.64 |
| 396567 | 1.61 | 0.70 | 1.18 | 0.77 | 0.62 | 0.22 |
| 393649 | 2.65 | 0.92 | 0.77 | 0.39 | 0.43 | 0.08 |
| 384768 | 2.65 | 0.92 | 0.77 | 0.39 | 0.65 | 0.25 |
| 384403 | #N/A | #N/A | #N/A | #N/A | 1.17 | 0.59 |
| 382988 | #N/A | #N/A | #N/A | #N/A | 1.85 | 0.84 |
| 379115 | #N/A | #N/A | #N/A | #N/A | 0.38 | 0.05 |
| 377286 | #N/A | #N/A | #N/A | #N/A | 0.42 | 0.08 |
| 376948 | 1.74 | 0.74 | 0.51 | 0.13 | 0.82 | 0.38 |
| 375164 | 1.11 | 0.51 | 1.04 | 0.68 | 1.29 | 0.66 |
| 372916 | 1.94 | 0.79 | 0.50 | 0.16 | 0.52 | 0.16 |
| 369834 | 1.94 | 0.79 | 0.50 | 0.16 | 1.80 | 0.82 |
| 368066 | 0.92 | 0.42 | 1.37 | 0.85 | 1.54 | 0.75 |
| 368013 | 2.24 | 0.86 | 0.91 | 0.54 | 0.86 | 0.41 |
| 366425 | 1.91 | 0.80 | 0.83 | 0.46 | 0.94 | 0.47 |
| 364381 | 1.91 | 0.80 | 0.83 | 0.46 | 2.64 | 0.95 |
| 363515 | 1.13 | 0.51 | 1.12 | 0.59 | 1.70 | 0.81 |
| 363357 | 3.24 | 0.97 | 1.58 | 0.93 | 0.79 | 0.37 |
| 361574 | 2.55 | 0.91 | 1.23 | 0.81 | 2.39 | 0.93 |
| 359998 | 3.24 | 0.97 | 1.58 | 0.93 | 6.65 | 1.00 |
| 357995 | 2.55 | 0.91 | 1.23 | 0.81 | 0.81 | 0.37 |
| 357671 | #N/A | #N/A | 0.90 | 0.50 | 0.63 | 0.23 |
| 352858 | #N/A | #N/A | 0.90 | 0.50 | 0.74 | 0.31 |
| 350189 | 1.02 | 0.46 | 0.86 | 0.46 | 0.49 | 0.13 |
| #N/A   | #N/A | #N/A | #N/A | #N/A | 0.38 | 0.05 |
| 349860 | 1.28 | 0.59 | 1.57 | 0.71 | 1.01 | 0.51 |
| 348947 | 1.28 | 0.59 | 1.57 | 0.71 | 2.56 | 0.94 |
| 345556 | 1.28 | 0.59 | 1.57 | 0.71 | 0.60 | 0.22 |
| 341067 | #N/A | #N/A | #N/A | #N/A | 0.85 | 0.40 |
| 340944 | 0.22 | 0.06 | 0.55 | 0.15 | 0.49 | 0.13 |
| 337435 | 1.36 | 0.61 | 1.54 | 0.86 | 0.99 | 0.49 |
| 335952 | #N/A | #N/A | #N/A | #N/A | 1.61 | 0.78 |
| 336366 | 2.22 | 0.86 | 1.27 | 0.79 | 2.02 | 0.87 |
| 332099 | 2.22 | 0.86 | 1.27 | 0.79 | 0.35 | 0.03 |
| 331698 | #N/A | #N/A | #N/A | #N/A | 0.34 | 0.03 |
| 327863 | #N/A | #N/A | #N/A | #N/A | 1.88 | 0.84 |
| 327661 | 3.55 | 0.98 | 1.06 | 0.70 | 1.41 | 0.70 |
| 324410 | 3.55 | 0.98 | 1.06 | 0.70 | 2.43 | 0.93 |
| 323743 | 1.60 | 0.71 | 0.96 | 0.53 | 1.44 | 0.73 |
| 320961 | 1.60 | 0.71 | 0.96 | 0.53 | 1.34 | 0.68 |
| 319225 | 1.36 | 0.60 | #N/A | #N/A | 1.27 | 0.64 |

|        |      |      |      |      |      |      |
|--------|------|------|------|------|------|------|
| 317640 | 2.73 | 0.93 | 0.87 | 0.51 | 1.30 | 0.65 |
| 317515 | 1.56 | 0.67 | 0.96 | 0.61 | 1.75 | 0.81 |
| 316485 | 1.92 | 0.80 | 0.84 | 0.47 | 0.60 | 0.21 |
| 312899 | 0.70 | 0.32 | 0.52 | 0.15 | 0.52 | 0.15 |
| 308827 | 0.70 | 0.32 | 0.52 | 0.15 | 1.34 | 0.68 |
| 306532 | 1.38 | 0.63 | #N/A | #N/A | 0.70 | 0.29 |
| 306136 | #N/A | #N/A | #N/A | #N/A | 0.92 | 0.44 |
| 305057 | 0.40 | 0.17 | 1.33 | 0.73 | 1.28 | 0.65 |
| 304013 | 0.56 | 0.24 | 0.39 | 0.05 | 0.37 | 0.05 |
| 302617 | 1.14 | 0.52 | 0.77 | 0.39 | 0.87 | 0.42 |
| 299887 | 1.14 | 0.52 | 0.77 | 0.39 | 0.64 | 0.24 |
| 298570 | 0.92 | 0.42 | #N/A | #N/A | 0.86 | 0.41 |
| 298049 | 0.49 | 0.20 | 0.77 | 0.39 | 0.63 | 0.23 |
| 296653 | 2.41 | 0.90 | 0.78 | 0.40 | 0.65 | 0.26 |
| 292816 | 0.49 | 0.20 | 0.77 | 0.39 | 0.37 | 0.05 |
| 291365 | 2.41 | 0.90 | 0.78 | 0.40 | 1.91 | 0.85 |
| 289668 | 2.03 | 0.83 | 1.64 | 0.74 | 0.94 | 0.47 |
| 287513 | 2.43 | 0.90 | 0.43 | 0.08 | 0.78 | 0.35 |
| 283463 | 1.02 | 0.46 | #N/A | #N/A | 0.38 | 0.05 |
| 282685 | #N/A | #N/A | #N/A | #N/A | 0.31 | 0.02 |
| 282969 | #N/A | #N/A | #N/A | #N/A | #N/A | #N/A |
| 280925 | 0.90 | 0.41 | 0.68 | 0.28 | 2.81 | 0.95 |
| 278394 | 0.90 | 0.41 | 0.68 | 0.28 | 0.37 | 0.04 |
| 276161 | 0.89 | 0.42 | 1.07 | 0.68 | 0.53 | 0.16 |
| 275866 | 1.53 | 0.68 | 0.54 | 0.20 | 1.62 | 0.79 |
| 272293 | 1.53 | 0.68 | 0.54 | 0.20 | 1.26 | 0.65 |
| 272193 | 1.86 | 0.77 | 1.11 | 0.74 | 1.13 | 0.56 |
| 270892 | 3.32 | 0.98 | 0.75 | 0.36 | 0.65 | 0.26 |
| 266179 | 3.32 | 0.98 | 0.75 | 0.36 | 0.89 | 0.41 |
| 266103 | 1.62 | 0.72 | 0.67 | 0.27 | 1.39 | 0.69 |
| 261726 | 1.62 | 0.72 | 0.67 | 0.27 | 0.85 | 0.40 |
| 259713 | 1.10 | 0.50 | 0.58 | 0.19 | 0.64 | 0.24 |
| 257215 | 1.99 | 0.81 | 0.73 | 0.34 | 1.19 | 0.61 |
| 255912 | 0.67 | 0.32 | 0.35 | 0.04 | 0.55 | 0.18 |
| 255760 | 1.99 | 0.80 | 0.73 | 0.34 | 1.10 | 0.55 |
| 252033 | 1.99 | 0.80 | 0.73 | 0.34 | 1.20 | 0.60 |
| 250906 | #N/A | #N/A | 0.68 | 0.32 | 0.95 | 0.47 |
| 250261 | 2.12 | 0.84 | 1.03 | 0.56 | 0.39 | 0.05 |
| 244318 | 2.12 | 0.84 | 1.03 | 0.56 | 0.80 | 0.37 |
| 243205 | 1.72 | 0.74 | 1.05 | 0.62 | 1.34 | 0.67 |
| 241917 | 0.63 | 0.28 | 1.15 | 0.71 | 0.65 | 0.25 |
| 239349 | 1.93 | 0.80 | 1.02 | 0.67 | 1.11 | 0.57 |
| 237955 | 1.43 | 0.63 | 0.65 | 0.26 | 0.75 | 0.32 |
| 237978 | 2.39 | 0.90 | #N/A | #N/A | #N/A | #N/A |
| 232592 | 2.39 | 0.90 | #N/A | #N/A | 0.54 | 0.16 |
| 232508 | #N/A | #N/A | #N/A | #N/A | 0.74 | 0.32 |
| 229038 | #N/A | #N/A | #N/A | #N/A | 0.79 | 0.36 |
| 228771 | 1.25 | 0.58 | 0.53 | 0.14 | 1.29 | 0.66 |
| 226168 | 1.25 | 0.58 | 0.53 | 0.14 | 2.49 | 0.93 |
| 224352 | 1.56 | 0.68 | 0.84 | 0.45 | 0.87 | 0.42 |
| 224035 | 2.40 | 0.90 | 0.66 | 0.33 | 0.78 | 0.35 |

|        |      |      |      |      |      |      |
|--------|------|------|------|------|------|------|
| 220166 | 2.40 | 0.90 | 0.66 | 0.33 | 0.72 | 0.30 |
| 220087 | 3.47 | 0.98 | #N/A | #N/A | 1.03 | 0.53 |
| 216011 | 3.47 | 0.98 | #N/A | #N/A | 0.72 | 0.31 |
| 213041 | 0.16 | 0.02 | 0.37 | 0.04 | 0.46 | 0.12 |
| 212783 | 2.52 | 0.92 | #N/A | #N/A | 1.32 | 0.67 |
| 209805 | 1.37 | 0.62 | 1.02 | 0.59 | 0.38 | 0.05 |
| 207646 | #N/A | #N/A | #N/A | #N/A | 0.92 | 0.45 |
| 204940 | 1.17 | 0.54 | 0.62 | 0.24 | 0.70 | 0.29 |
| 203305 | #N/A | #N/A | #N/A | #N/A | 0.87 | 0.40 |
| 199494 | 1.17 | 0.54 | 0.62 | 0.24 | 0.56 | 0.18 |
| 195949 | 1.31 | 0.58 | 0.99 | 0.62 | 0.40 | 0.06 |
| 195647 | 0.73 | 0.35 | 1.59 | 0.92 | 2.20 | 0.90 |
| 194511 | 1.07 | 0.49 | 0.55 | 0.16 | 2.00 | 0.87 |
| 194144 | 0.55 | 0.26 | 1.26 | 0.83 | 1.02 | 0.50 |
| 192649 | #N/A | #N/A | #N/A | #N/A | 0.91 | 0.43 |
| 190982 | 1.07 | 0.50 | 0.88 | 0.52 | 1.83 | 0.83 |
| 185316 | 1.07 | 0.50 | 0.88 | 0.52 | 0.40 | 0.06 |
| 183596 | 0.42 | 0.15 | 0.78 | 0.39 | 1.78 | 0.82 |
| 182654 | 2.11 | 0.83 | 1.13 | 0.75 | 0.95 | 0.46 |
| 182547 | 1.80 | 0.75 | #N/A | #N/A | 0.72 | 0.31 |
| 181114 | 2.30 | 0.88 | 0.75 | 0.36 | 2.06 | 0.88 |
| 179020 | #N/A | #N/A | 0.78 | 0.41 | 0.72 | 0.30 |
| 175863 | 1.23 | 0.56 | 0.95 | 0.59 | 1.54 | 0.76 |
| 174342 | 1.23 | 0.56 | 0.95 | 0.59 | 0.56 | 0.18 |
| 174701 | 0.42 | 0.16 | 1.35 | 0.82 | 0.46 | 0.11 |
| 172032 | 1.15 | 0.53 | 0.67 | 0.33 | 1.50 | 0.73 |
| 171953 | 0.35 | 0.11 | 0.76 | 0.38 | 0.40 | 0.06 |
| 169769 | 0.35 | 0.11 | 0.76 | 0.38 | 0.93 | 0.45 |
| 168087 | 0.70 | 0.32 | 0.73 | 0.36 | 0.59 | 0.20 |
| 167397 | 1.91 | 0.79 | 1.53 | 0.92 | 1.06 | 0.53 |
| 165759 | 1.66 | 0.72 | #N/A | #N/A | 0.49 | 0.12 |
| 163921 | 1.91 | 0.79 | 1.53 | 0.92 | 1.61 | 0.77 |
| 162631 | 1.66 | 0.72 | #N/A | #N/A | 1.41 | 0.72 |
| 162340 | 1.67 | 0.72 | 0.71 | 0.34 | 0.51 | 0.16 |
| 159592 | 2.64 | 0.93 | 0.90 | 0.51 | 1.04 | 0.52 |
| 156489 | 2.64 | 0.93 | 0.90 | 0.51 | 1.43 | 0.71 |
| 154289 | 1.48 | 0.67 | 0.68 | 0.28 | 0.61 | 0.21 |
| 154039 | 3.56 | 0.98 | #N/A | #N/A | 2.32 | 0.92 |
| 151514 | 3.56 | 0.98 | #N/A | #N/A | 0.68 | 0.28 |
| 151329 | 2.69 | 0.94 | 0.66 | 0.33 | 1.65 | 0.79 |
| 148568 | 2.69 | 0.94 | 0.66 | 0.33 | 1.00 | 0.51 |
| 148422 | 2.81 | 0.94 | 0.63 | 0.24 | #N/A | #N/A |
| 147128 | 1.84 | 0.78 | 1.21 | 0.79 | 0.98 | 0.49 |
| 139619 | 1.84 | 0.78 | 1.21 | 0.79 | 0.68 | 0.28 |
| 139408 | 2.02 | 0.81 | 0.66 | 0.27 | 0.95 | 0.46 |
| 138227 | 1.30 | 0.58 | 0.97 | 0.54 | 0.94 | 0.47 |
| 136442 | #N/A | #N/A | 0.59 | 0.21 | 0.75 | 0.31 |
| 135423 | 0.48 | 0.19 | 0.74 | 0.37 | 0.54 | 0.17 |
| 132227 | #N/A | #N/A | #N/A | #N/A | 1.57 | 0.77 |
| 128631 | #N/A | #N/A | #N/A | #N/A | 2.84 | 0.96 |
| 126738 | 1.81 | 0.76 | 0.87 | 0.45 | 1.18 | 0.59 |



|        |      |      |      |      |      |      |
|--------|------|------|------|------|------|------|
| 126446 | 1.87 | 0.78 | 0.94 | 0.58 | 1.50 | 0.75 |
| 125357 | 2.31 | 0.89 | 0.77 | 0.39 | 0.44 | 0.09 |
| 120163 | 2.31 | 0.89 | 0.77 | 0.39 | 1.10 | 0.56 |
| 120031 | 1.78 | 0.76 | 0.88 | 0.52 | 0.61 | 0.22 |
| 117687 | 1.79 | 0.77 | 0.84 | 0.47 | 1.97 | 0.86 |
| 116487 | 1.30 | 0.58 | 0.95 | 0.58 | 1.98 | 0.86 |
| 114315 | 0.52 | 0.21 | 0.68 | 0.28 | 0.51 | 0.14 |
| 108147 | 0.51 | 0.22 | 0.60 | 0.20 | 0.56 | 0.18 |
| 106822 | 1.44 | 0.64 | 1.58 | 0.90 | 1.08 | 0.55 |
| 104946 | 1.44 | 0.64 | 1.58 | 0.90 | 1.82 | 0.83 |
| 104647 | 2.28 | 0.87 | #N/A | #N/A | 0.76 | 0.33 |
| 101608 | 2.28 | 0.87 | #N/A | #N/A | 0.93 | 0.45 |
| 101353 | 1.10 | 0.50 | 0.85 | 0.49 | 1.29 | 0.65 |
| 100474 | 0.63 | 0.28 | 1.66 | 0.79 | 1.78 | 0.82 |
| 100086 | #N/A | #N/A | #N/A | #N/A | 2.17 | 0.89 |
| 96496  | #N/A | #N/A | #N/A | #N/A | 0.60 | 0.21 |
| 95372  | 1.50 | 0.67 | 1.22 | 0.67 | 1.37 | 0.68 |
| 90622  | 1.64 | 0.71 | #N/A | #N/A | 0.44 | 0.09 |
| 90316  | 2.44 | 0.90 | 0.98 | 0.59 | 0.54 | 0.17 |
| 87014  | 2.44 | 0.90 | 0.98 | 0.59 | 1.21 | 0.62 |
| 86950  | 1.75 | 0.75 | 0.84 | 0.46 | 1.12 | 0.58 |
| 84509  | 1.75 | 0.75 | 0.84 | 0.46 | 1.80 | 0.83 |
| 82625  | 2.40 | 0.90 | 1.02 | 0.67 | 1.42 | 0.70 |
| 79711  | 1.46 | 0.66 | 0.66 | 0.26 | 1.03 | 0.53 |
| 76669  | 1.44 | 0.65 | 0.79 | 0.42 | 0.76 | 0.34 |
| 74309  | #N/A | #N/A | #N/A | #N/A | 0.75 | 0.33 |
| 73927  | 1.45 | 0.64 | 0.95 | 0.60 | 1.30 | 0.67 |
| 73363  | 0.68 | 0.33 | 0.77 | 0.40 | 1.13 | 0.58 |
| 71063  | 1.45 | 0.64 | 0.95 | 0.60 | 1.00 | 0.49 |
| 70951  | 2.65 | 0.93 | 0.95 | 0.59 | 0.89 | 0.43 |
| 68882  | 1.14 | 0.52 | #N/A | #N/A | 1.53 | 0.74 |
| 64977  | 1.14 | 0.52 | #N/A | #N/A | 0.79 | 0.35 |
| 63860  | 2.00 | 0.82 | 0.95 | 0.53 | 1.88 | 0.84 |
| 53498  | 1.17 | 0.54 | 1.18 | 0.61 | 1.05 | 0.52 |
| 51244  | 1.43 | 0.63 | 1.03 | 0.68 | 0.84 | 0.40 |
| 50958  | 1.88 | 0.78 | #N/A | #N/A | 0.79 | 0.36 |
| 48996  | 0.44 | 0.16 | 0.68 | 0.29 | 2.20 | 0.90 |
| 48802  | 1.51 | 0.66 | 0.87 | 0.51 | 1.16 | 0.59 |
| 44551  | 1.51 | 0.66 | 0.87 | 0.51 | 0.64 | 0.23 |
| 43283  | 1.12 | 0.51 | 0.58 | 0.18 | 1.48 | 0.72 |
| 42869  | 0.31 | 0.07 | 0.79 | 0.42 | 0.49 | 0.13 |
| 40077  | 2.65 | 0.93 | 1.49 | 0.83 | 1.92 | 0.85 |
| 38798  | 1.36 | 0.62 | 1.02 | 0.67 | 1.75 | 0.82 |
| 37845  | 2.07 | 0.82 | 0.80 | 0.43 | 0.97 | 0.48 |
| 34947  | 3.56 | 0.99 | 0.78 | 0.40 | 1.76 | 0.81 |
| 32803  | 1.02 | 0.46 | 0.77 | 0.38 | 1.26 | 0.63 |
| 30267  | #N/A | #N/A | #N/A | #N/A | 2.01 | 0.87 |
| 26611  | #N/A | #N/A | #N/A | #N/A | 0.48 | 0.12 |
| 26064  | 0.68 | 0.31 | 0.71 | 0.42 | 1.38 | 0.70 |
| 24701  | 0.90 | 0.43 | 0.95 | 0.53 | 0.40 | 0.07 |
| 19079  | 1.28 | 0.58 | #N/A | #N/A | 1.21 | 0.62 |

|        |      |      |      |      |      |      |
|--------|------|------|------|------|------|------|
| 18385  | 1.28 | 0.58 | #N/A | #N/A | 1.16 | 0.58 |
| 15405  | 1.28 | 0.58 | #N/A | #N/A | 2.68 | 0.95 |
| 15053  | 1.28 | 0.58 | #N/A | #N/A | 1.91 | 0.85 |
| 13228  | 3.25 | 0.98 | 1.22 | 0.81 | 2.23 | 0.91 |
| 12600  | 2.37 | 0.89 | 0.98 | 0.63 | 2.17 | 0.90 |
| 9557   | 2.37 | 0.89 | 0.98 | 0.63 | 2.66 | 0.95 |
| 7933   | 0.74 | 0.34 | 0.90 | 0.53 | 0.99 | 0.48 |
| 280    | 0.44 | 0.16 | 0.57 | 0.18 | 0.69 | 0.27 |
| 557832 | 2.70 | 0.93 | 2.67 | 0.98 | 2.20 | 0.90 |
| 559930 | 1.50 | 0.66 | #N/A | #N/A | 1.72 | 0.81 |
| 561499 | 1.01 | 0.46 | #N/A | #N/A | 1.42 | 0.72 |
| 564002 | 1.46 | 0.64 | 1.22 | 0.80 | 1.01 | 0.52 |
| 565782 | 0.98 | 0.45 | 0.58 | 0.20 | 1.13 | 0.56 |
| 567264 | 1.40 | 0.64 | 1.39 | 0.88 | 2.25 | 0.91 |
| 569331 | 0.78 | 0.37 | 0.72 | 0.33 | 1.48 | 0.73 |
| 575097 | #N/A | #N/A | #N/A | #N/A | 0.41 | 0.07 |
| 577353 | #N/A | #N/A | #N/A | #N/A | 0.85 | 0.39 |
| 577580 | #N/A | #N/A | #N/A | #N/A | 0.37 | 0.05 |
| 583057 | 1.56 | 0.67 | 0.89 | 0.52 | 1.74 | 0.81 |
| 584558 | 1.56 | 0.67 | 0.89 | 0.52 | 1.86 | 0.85 |
| 584627 | 0.66 | 0.30 | 0.64 | 0.28 | 0.72 | 0.30 |
| 587184 | #N/A | #N/A | #N/A | #N/A | 0.39 | 0.05 |
| 590278 | #N/A | #N/A | #N/A | #N/A | 2.04 | 0.88 |
| 592327 | #N/A | #N/A | #N/A | #N/A | 0.69 | 0.28 |
| 593481 | 2.27 | 0.87 | 0.75 | 0.37 | 3.49 | 0.98 |
| 596291 | 2.27 | 0.87 | 0.75 | 0.37 | 0.64 | 0.25 |
| 599546 | 1.74 | 0.74 | 0.99 | 0.64 | 0.68 | 0.28 |
| 600212 | 1.04 | 0.49 | 0.63 | 0.24 | 1.90 | 0.85 |
| 600644 | 1.29 | 0.59 | 1.08 | 0.61 | 0.54 | 0.17 |
| 603906 | #N/A | #N/A | #N/A | #N/A | 0.44 | 0.09 |
| 608821 | 2.99 | 0.96 | 0.81 | 0.43 | 1.96 | 0.87 |
| 612719 | 2.99 | 0.96 | 0.81 | 0.43 | 0.49 | 0.13 |
| 613372 | #N/A | #N/A | #N/A | #N/A | 1.09 | 0.54 |
| 619009 | #N/A | #N/A | #N/A | #N/A | 0.88 | 0.43 |
| 620420 | #N/A | #N/A | #N/A | #N/A | 0.64 | 0.23 |
| 624197 | #N/A | #N/A | #N/A | #N/A | 0.85 | 0.38 |
| 624464 | 2.30 | 0.88 | 1.10 | 0.72 | 0.91 | 0.43 |
| 631240 | 2.30 | 0.88 | 1.10 | 0.72 | 1.85 | 0.84 |
| 633756 | #N/A | #N/A | 1.42 | 0.80 | 0.74 | 0.32 |
| 637219 | 0.91 | 0.44 | #N/A | #N/A | 0.64 | 0.24 |
| 637374 | 1.60 | 0.69 | 0.70 | 0.30 | 0.77 | 0.34 |
| 640953 | 1.60 | 0.69 | 0.70 | 0.30 | 0.76 | 0.33 |
| 643315 | #N/A | #N/A | #N/A | #N/A | 0.50 | 0.15 |
| 645267 | #N/A | #N/A | #N/A | #N/A | 1.14 | 0.59 |
| 646443 | 1.51 | 0.66 | 0.91 | 0.48 | 1.94 | 0.86 |
| 647190 | #N/A | #N/A | #N/A | #N/A | 2.47 | 0.93 |
| 647342 | #N/A | #N/A | #N/A | #N/A | 2.66 | 0.95 |
| 648370 | #N/A | #N/A | #N/A | #N/A | 1.71 | 0.81 |
| 649916 | 1.51 | 0.66 | 0.91 | 0.48 | 0.86 | 0.41 |
| 650430 | 1.59 | 0.69 | 0.97 | 0.60 | 0.11 | 0.00 |
| 654842 | 1.59 | 0.69 | 0.97 | 0.60 | 0.39 | 0.06 |

|        |      |      |      |      |      |      |
|--------|------|------|------|------|------|------|
| 654519 | #N/A | #N/A | #N/A | #N/A | 0.43 | 0.08 |
| 655135 | 1.99 | 0.81 | 1.20 | 0.75 | 1.24 | 0.63 |
| 657339 | 1.99 | 0.81 | 1.20 | 0.75 | 2.21 | 0.90 |
| 658933 | #N/A | #N/A | #N/A | #N/A | 1.09 | 0.56 |
| 661048 | 2.36 | 0.90 | 0.70 | 0.33 | 0.96 | 0.48 |
| 661132 | 1.60 | 0.71 | 1.00 | 0.58 | 0.67 | 0.26 |
| 664948 | #N/A | #N/A | #N/A | #N/A | 2.06 | 0.88 |
| 665485 | 1.60 | 0.71 | 1.00 | 0.58 | 1.91 | 0.85 |
| 665688 | 2.62 | 0.92 | 1.09 | 0.71 | #N/A | #N/A |
| 665783 | 2.62 | 0.92 | 1.09 | 0.71 | 1.01 | 0.51 |
| 667441 | #N/A | #N/A | #N/A | #N/A | 1.40 | 0.69 |
| 670868 | 2.62 | 0.92 | 1.09 | 0.71 | 0.87 | 0.42 |
| 672137 | 1.57 | 0.70 | #N/A | #N/A | 1.55 | 0.76 |
| 673491 | 0.99 | 0.47 | 0.70 | 0.32 | 1.61 | 0.78 |
| 674669 | #N/A | #N/A | 0.50 | 0.12 | 1.26 | 0.63 |
| 674309 | 0.27 | 0.05 | 0.94 | 0.50 | 0.67 | 0.26 |
| 674856 | #N/A | #N/A | #N/A | #N/A | #N/A | #N/A |
| 675972 | 3.85 | 0.99 | 1.15 | 0.62 | 1.94 | 0.86 |
| 677636 | 3.85 | 0.99 | 1.15 | 0.62 | 5.08 | 1.00 |
| 677807 | 2.07 | 0.83 | 1.02 | 0.60 | 2.24 | 0.90 |
| 679365 | 2.07 | 0.83 | 1.02 | 0.60 | 0.26 | 0.01 |
| 680794 | #N/A | #N/A | 0.96 | 0.61 | 0.37 | 0.04 |
| 682107 | 0.99 | 0.46 | #N/A | #N/A | 3.51 | 0.98 |
| 682772 | 3.14 | 0.96 | #N/A | #N/A | 2.67 | 0.94 |
| 682936 | #N/A | #N/A | #N/A | #N/A | 1.44 | 0.71 |
| 684551 | 1.27 | 0.57 | #N/A | #N/A | 0.94 | 0.47 |
| 687593 | 1.27 | 0.57 | #N/A | #N/A | 0.59 | 0.20 |
| 688802 | 0.73 | 0.34 | 0.96 | 0.62 | 1.63 | 0.78 |
| 691784 | 1.02 | 0.46 | 1.37 | 0.78 | #N/A | #N/A |
| 691928 | 1.16 | 0.53 | #N/A | #N/A | 1.28 | 0.66 |
| 692791 | 0.41 | 0.16 | 0.65 | 0.25 | #N/A | #N/A |
| 695732 | 2.33 | 0.89 | 0.53 | 0.15 | 1.73 | 0.81 |
| 696845 | 0.41 | 0.16 | 0.65 | 0.25 | 2.95 | 0.96 |
| 697126 | #N/A | #N/A | #N/A | #N/A | 2.43 | 0.93 |
| 697142 | #N/A | #N/A | #N/A | #N/A | 1.03 | 0.52 |
| 700010 | #N/A | #N/A | #N/A | #N/A | 1.51 | 0.73 |
| 701966 | 0.40 | 0.15 | 0.60 | 0.26 | 0.40 | 0.06 |
| 702110 | 1.22 | 0.55 | 1.08 | 0.60 | 0.97 | 0.48 |
| 704221 | #N/A | #N/A | 0.90 | 0.54 | 3.11 | 0.97 |
| 706589 | #N/A | #N/A | 0.90 | 0.54 | 1.52 | 0.75 |
| 708338 | 2.26 | 0.87 | #N/A | #N/A | 1.05 | 0.53 |
| 708493 | 3.63 | 0.98 | #N/A | #N/A | 1.82 | 0.83 |
| 711134 | 3.63 | 0.98 | #N/A | #N/A | 1.53 | 0.76 |
| 711670 | #N/A | #N/A | #N/A | #N/A | #N/A | #N/A |
| 711399 | 3.99 | 0.99 | 0.79 | 0.41 | 1.42 | 0.72 |
| 713738 | 3.99 | 0.99 | 0.79 | 0.41 | 3.88 | 0.99 |
| 715938 | 3.99 | 0.99 | 0.79 | 0.41 | 0.41 | 0.07 |
| 716153 | 0.24 | 0.04 | #N/A | #N/A | 0.77 | 0.34 |
| 718681 | #N/A | #N/A | #N/A | #N/A | 2.04 | 0.87 |
| 719555 | 0.67 | 0.30 | 0.23 | 0.01 | 1.76 | 0.82 |
| 720957 | 0.67 | 0.30 | 0.23 | 0.01 | 2.15 | 0.90 |

|        |      |      |      |      |      |      |
|--------|------|------|------|------|------|------|
| 721034 | 1.25 | 0.56 | 0.79 | 0.43 | 0.55 | 0.17 |
| 724839 | 1.86 | 0.78 | 0.65 | 0.25 | 2.89 | 0.96 |
| 728612 | 1.86 | 0.78 | 0.65 | 0.25 | 0.48 | 0.13 |
| 728944 | 2.03 | 0.82 | 1.68 | 0.50 | 1.43 | 0.71 |
| 729754 | 1.50 | 0.67 | 1.07 | 0.64 | 2.56 | 0.94 |
| 730210 | 2.03 | 0.82 | 1.68 | 0.50 | 2.08 | 0.88 |
| 731016 | 1.50 | 0.67 | 1.07 | 0.64 | 1.14 | 0.59 |
| 731221 | #N/A | #N/A | #N/A | #N/A | 0.50 | 0.14 |
| 733209 | #N/A | #N/A | #N/A | #N/A | 0.76 | 0.33 |
| 733620 | 2.32 | 0.89 | 0.84 | 0.46 | 0.36 | 0.04 |
| 736981 | 2.05 | 0.83 | 0.80 | 0.41 | 0.78 | 0.34 |
| 741389 | 2.05 | 0.83 | 0.80 | 0.41 | 1.66 | 0.80 |
| 741435 | 1.77 | 0.75 | 1.11 | 0.59 | 1.20 | 0.60 |
| 743740 | 1.77 | 0.75 | 1.11 | 0.59 | 0.63 | 0.24 |
| 745570 | 1.06 | 0.48 | 0.88 | 0.51 | 0.94 | 0.45 |
| 745825 | #N/A | #N/A | 1.05 | 0.51 | 1.57 | 0.77 |
| 748997 | #N/A | #N/A | 1.05 | 0.51 | 0.87 | 0.41 |
| 749253 | 1.35 | 0.60 | 0.91 | 0.50 | 0.55 | 0.17 |
| 752916 | 1.35 | 0.60 | 0.91 | 0.50 | 0.98 | 0.49 |
| 754245 | 1.20 | 0.54 | 0.98 | 0.62 | 0.66 | 0.25 |
| 758125 | 0.97 | 0.46 | 0.78 | 0.39 | 0.61 | 0.21 |
| 759478 | 1.17 | 0.54 | 0.88 | 0.52 | 2.29 | 0.91 |
| 767491 | #N/A | #N/A | #N/A | #N/A | 0.48 | 0.12 |
| 768984 | 1.48 | 0.65 | 0.82 | 0.45 | 1.45 | 0.73 |
| 773125 | #N/A | #N/A | #N/A | #N/A | 0.54 | 0.17 |
| 773872 | 0.48 | 0.23 | 0.83 | 0.47 | 1.00 | 0.49 |
| 780296 | 0.68 | 0.30 | 0.66 | 0.26 | 0.67 | 0.27 |
| 785666 | #N/A | #N/A | #N/A | #N/A | 0.18 | 0.01 |
| 786136 | 1.34 | 0.61 | 1.20 | 0.64 | 1.19 | 0.61 |
| 787423 | 0.75 | 0.36 | 1.03 | 0.68 | 1.19 | 0.60 |
| 789320 | 1.34 | 0.61 | 1.20 | 0.64 | 0.77 | 0.33 |
| 789072 | 1.16 | 0.52 | 0.99 | 0.64 | 0.91 | 0.44 |
| 791115 | 1.16 | 0.52 | 0.99 | 0.64 | 1.70 | 0.80 |
| 791213 | 2.85 | 0.95 | 0.65 | 0.29 | 1.54 | 0.76 |
| 793731 | 2.85 | 0.95 | 0.65 | 0.29 | 1.14 | 0.58 |
| 793369 | 0.48 | 0.19 | 0.57 | 0.19 | 0.55 | 0.17 |
| 793906 | 0.17 | 0.03 | 0.32 | 0.03 | 1.11 | 0.57 |
| 795762 | 0.17 | 0.03 | 0.32 | 0.03 | 0.37 | 0.04 |
| 795973 | 2.04 | 0.83 | 1.19 | 0.79 | 0.93 | 0.46 |
| 798852 | 1.50 | 0.65 | #N/A | #N/A | 1.62 | 0.78 |
| 802012 | 1.41 | 0.62 | 0.89 | 0.51 | 1.12 | 0.58 |
| 802320 | #N/A | #N/A | #N/A | #N/A | 1.01 | 0.51 |
| 804075 | 1.56 | 0.69 | #N/A | #N/A | 0.48 | 0.13 |
| 810979 | #N/A | #N/A | #N/A | #N/A | 0.39 | 0.06 |
| 813151 | 1.60 | 0.70 | 1.04 | 0.69 | 1.30 | 0.65 |
| 815531 | 1.60 | 0.70 | 1.04 | 0.69 | 0.60 | 0.21 |
| 815729 | 2.40 | 0.89 | 0.59 | 0.38 | 0.67 | 0.27 |
| 818125 | #N/A | #N/A | #N/A | #N/A | 3.25 | 0.98 |
| 819070 | 2.40 | 0.89 | 0.59 | 0.38 | 2.09 | 0.88 |
| 819760 | 1.60 | 0.69 | 1.13 | 0.69 | 0.66 | 0.25 |
| 824333 | #N/A | #N/A | #N/A | #N/A | 0.35 | 0.04 |

|        |      |      |      |      |      |      |
|--------|------|------|------|------|------|------|
| 825342 | 1.79 | 0.76 | 0.90 | 0.52 | 1.32 | 0.66 |
| 825640 | 1.79 | 0.76 | 0.90 | 0.52 | 1.88 | 0.84 |
| 826828 | 0.58 | 0.25 | 0.95 | 0.61 | 0.80 | 0.37 |
| 830434 | #N/A | #N/A | #N/A | #N/A | 0.54 | 0.17 |
| 831515 | 0.43 | 0.16 | 1.16 | 0.73 | 1.46 | 0.72 |
| 831050 | 1.24 | 0.57 | 0.63 | 0.23 | 1.42 | 0.71 |
| 832056 | #N/A | #N/A | #N/A | #N/A | 1.22 | 0.63 |
| 834240 | #N/A | #N/A | #N/A | #N/A | 2.79 | 0.96 |
| 835207 | 2.14 | 0.84 | 0.88 | 0.49 | 1.10 | 0.57 |
| 835558 | 1.30 | 0.58 | 0.91 | 0.56 | 0.70 | 0.29 |
| 837904 | 0.52 | 0.24 | 0.55 | 0.16 | 0.64 | 0.24 |
| 842664 | 0.52 | 0.24 | 0.55 | 0.16 | 0.85 | 0.39 |
| 844015 | 0.78 | 0.36 | 0.74 | 0.36 | 0.85 | 0.39 |
| 859740 | 0.46 | 0.18 | 0.66 | 0.28 | 0.39 | 0.05 |
| 864009 | 1.45 | 0.65 | 0.98 | 0.63 | 0.94 | 0.47 |
| 864444 | 2.10 | 0.83 | 0.82 | 0.45 | 0.95 | 0.47 |
| 866710 | #N/A | #N/A | #N/A | #N/A | 1.02 | 0.51 |
| 868640 | 3.19 | 0.97 | 0.60 | 0.20 | 0.82 | 0.38 |
| 874921 | 3.19 | 0.97 | 0.60 | 0.20 | 1.10 | 0.55 |
| 875992 | 1.85 | 0.78 | 1.18 | 0.79 | 0.63 | 0.23 |
| 876277 | 1.77 | 0.75 | 0.61 | 0.21 | #N/A | #N/A |
| 876842 | 1.90 | 0.79 | 1.07 | 0.69 | 2.40 | 0.92 |
| 878544 | 1.90 | 0.79 | 1.07 | 0.69 | 2.26 | 0.91 |
| 880163 | 0.17 | 0.02 | #N/A | #N/A | 0.77 | 0.35 |
| 882978 | 1.70 | 0.72 | 1.06 | 0.70 | 4.16 | 0.99 |
| 885553 | 1.70 | 0.72 | 1.06 | 0.70 | 0.99 | 0.49 |
| 886393 | 1.52 | 0.66 | 1.10 | 0.66 | 2.00 | 0.87 |
| 886519 | #N/A | #N/A | 0.95 | 0.59 | 1.13 | 0.59 |
| 888038 | 2.04 | 0.82 | 0.79 | 0.41 | 2.70 | 0.95 |
| 891038 | 2.04 | 0.82 | 0.79 | 0.41 | 0.98 | 0.49 |
| 891096 | 2.35 | 0.89 | 0.98 | 0.62 | 1.54 | 0.74 |
| 892308 | #N/A | #N/A | #N/A | #N/A | 2.01 | 0.87 |
| 893724 | 2.35 | 0.89 | 0.98 | 0.62 | 0.75 | 0.33 |
| 893792 | 1.37 | 0.62 | #N/A | #N/A | 0.78 | 0.35 |
| 896999 | 1.37 | 0.62 | #N/A | #N/A | 1.15 | 0.59 |
| 897356 | 1.74 | 0.74 | 0.96 | 0.56 | 0.65 | 0.25 |
| 900449 | 1.74 | 0.74 | 0.96 | 0.56 | 3.16 | 0.97 |
| 901553 | 1.56 | 0.68 | 1.48 | 0.91 | 1.28 | 0.66 |
| 906649 | 0.78 | 0.35 | 0.78 | 0.39 | 0.99 | 0.50 |
| 909429 | 3.52 | 0.98 | 0.62 | 0.23 | 0.48 | 0.12 |
| 909728 | 3.30 | 0.97 | #N/A | #N/A | 1.77 | 0.82 |
| 911795 | 3.30 | 0.97 | #N/A | #N/A | 2.42 | 0.92 |
| 911983 | 1.44 | 0.63 | #N/A | #N/A | 2.75 | 0.95 |
| 916957 | 1.44 | 0.63 | #N/A | #N/A | 0.47 | 0.11 |
| 917072 | 1.61 | 0.69 | #N/A | #N/A | 1.39 | 0.69 |
| 920482 | 1.61 | 0.69 | #N/A | #N/A | 0.58 | 0.20 |
| 922772 | #N/A | #N/A | #N/A | #N/A | 0.92 | 0.45 |
| 922904 | 1.17 | 0.53 | 1.00 | 0.65 | 1.97 | 0.87 |
| 924299 | #N/A | #N/A | #N/A | #N/A | 0.36 | 0.04 |
| 927960 | 0.43 | 0.15 | 1.01 | 0.48 | 0.20 | 0.01 |
| 932783 | #N/A | #N/A | #N/A | #N/A | 0.87 | 0.40 |

|        |      |      |      |      |      |      |
|--------|------|------|------|------|------|------|
| 933893 | #N/A | #N/A | #N/A | #N/A | 1.41 | 0.71 |
| 935660 | #N/A | #N/A | #N/A | #N/A | 0.82 | 0.38 |
| 938143 | 1.11 | 0.51 | #N/A | #N/A | 1.17 | 0.59 |
| 939274 | #N/A | #N/A | #N/A | #N/A | 1.00 | 0.51 |
| 941131 | #N/A | #N/A | #N/A | #N/A | 1.44 | 0.73 |
| 943891 | 0.64 | 0.28 | 0.65 | 0.26 | 1.06 | 0.54 |
| 944183 | 0.64 | 0.28 | 0.65 | 0.26 | 1.06 | 0.53 |
| 947696 | 1.24 | 0.57 | 0.99 | 0.64 | 0.51 | 0.14 |

**Untagged cc Untagged control for HA-CHIP (percentile rank, MPR) - ORF**

|      |      |
|------|------|
| 0.71 | 0.13 |
| 0.83 | 0.25 |
| 1.68 | 0.93 |
| #N/A | #N/A |
| 1.42 | 0.87 |
| 0.87 | 0.35 |
| 1.11 | 0.66 |
| 0.96 | 0.46 |
| 0.83 | 0.28 |
| 0.70 | 0.11 |
| 0.82 | 0.23 |
| 0.80 | 0.21 |
| 0.89 | 0.34 |
| 0.97 | 0.45 |
| 0.95 | 0.43 |
| 0.95 | 0.45 |
| #N/A | #N/A |
| 0.91 | 0.36 |
| 0.81 | 0.28 |
| 0.91 | 0.40 |
| #N/A | #N/A |
| 0.55 | 0.06 |
| 1.10 | 0.60 |
| 1.04 | 0.55 |
| #N/A | #N/A |
| 1.17 | 0.72 |
| 1.02 | 0.54 |
| 1.31 | 0.68 |
| 0.64 | 0.16 |
| 1.25 | 0.79 |
| 1.08 | 0.57 |
| 1.36 | 0.83 |
| 1.18 | 0.75 |
| #N/A | #N/A |
| 1.07 | 0.61 |
| 0.96 | 0.45 |
| 1.00 | 0.46 |
| 1.50 | 0.93 |
| 0.90 | 0.36 |
| 0.95 | 0.42 |
| 0.67 | 0.12 |
| #N/A | #N/A |
| 1.12 | 0.67 |
| 0.82 | 0.31 |
| 0.97 | 0.45 |
| 1.15 | 0.54 |
| 0.81 | 0.23 |
| 1.11 | 0.65 |
| 1.14 | 0.58 |
| 0.81 | 0.27 |

|      |      |
|------|------|
| #N/A | #N/A |
| 0.85 | 0.27 |
| 1.26 | 0.82 |
| #N/A | #N/A |
| #N/A | #N/A |
| 0.81 | 0.23 |
| 0.89 | 0.33 |
| 0.67 | 0.11 |
| 0.90 | 0.35 |
| 0.99 | 0.49 |
| 0.80 | 0.20 |
| 0.88 | 0.32 |
| 0.76 | 0.20 |
| 0.96 | 0.44 |
| 0.85 | 0.35 |
| 1.28 | 0.74 |
| 1.36 | 0.54 |
| 1.44 | 0.91 |
| 0.95 | 0.45 |
| #N/A | #N/A |
| 1.37 | 0.87 |
| 0.98 | 0.46 |
| 1.30 | 0.69 |
| 1.08 | 0.54 |
| 0.70 | 0.22 |
| #N/A | #N/A |
| 0.87 | 0.31 |
| 0.88 | 0.33 |
| 1.07 | 0.54 |
| #N/A | #N/A |
| 1.09 | 0.60 |
| 0.95 | 0.43 |
| 0.65 | 0.10 |
| 0.88 | 0.33 |
| 0.71 | 0.12 |
| #N/A | #N/A |
| 0.84 | 0.25 |
| 0.63 | 0.09 |
| 1.30 | 0.84 |
| 0.80 | 0.22 |
| 0.91 | 0.37 |
| 0.80 | 0.23 |
| 1.03 | 0.56 |
| #N/A | #N/A |
| #N/A | #N/A |
| 1.34 | 0.77 |
| #N/A | #N/A |
| #N/A | #N/A |
| 0.93 | 0.39 |
| 1.02 | 0.51 |
| 1.02 | 0.48 |



|      |      |
|------|------|
| 0.92 | 0.38 |
| 1.04 | 0.50 |
| 0.90 | 0.45 |
| 1.05 | 0.55 |
| 0.97 | 0.46 |
| 1.03 | 0.55 |
| 0.84 | 0.44 |
| #N/A | #N/A |
| #N/A | #N/A |
| 1.24 | 0.77 |
| 1.89 | 0.97 |
| 1.19 | 0.71 |
| 1.02 | 0.53 |
| 1.08 | 0.60 |
| 1.16 | 0.71 |
| 0.96 | 0.44 |
| #N/A | #N/A |
| 0.99 | 0.49 |
| 0.88 | 0.34 |
| 1.22 | 0.73 |
| 1.04 | 0.57 |
| 0.86 | 0.29 |
| 0.96 | 0.45 |
| 1.15 | 0.71 |
| 0.80 | 0.27 |
| #N/A | #N/A |
| #N/A | #N/A |
| 0.92 | 0.37 |
| 0.22 | 0.00 |
| 0.80 | 0.24 |
| 0.68 | 0.10 |
| #N/A | #N/A |
| 1.44 | 0.91 |
| 0.78 | 0.19 |
| 0.63 | 0.06 |
| #N/A | #N/A |
| 1.32 | 0.85 |
| 1.03 | 0.51 |
| #N/A | #N/A |
| 1.22 | 0.77 |
| #N/A | #N/A |
| 1.07 | 0.60 |
| #N/A | #N/A |
| 0.82 | 0.44 |
| 1.00 | 0.47 |
| 0.91 | 0.38 |
| #N/A | #N/A |
| 0.80 | 0.25 |
| 1.30 | 0.76 |
| 1.28 | 0.82 |
| 1.21 | 0.53 |

|      |      |
|------|------|
| 1.24 | 0.76 |
| #N/A | #N/A |
| #N/A | #N/A |
| 1.21 | 0.73 |
| 0.91 | 0.38 |
| 0.87 | 0.34 |
| #N/A | #N/A |
| 1.09 | 0.64 |
| 0.73 | 0.15 |
| 0.75 | 0.21 |
| 1.01 | 0.51 |
| 0.84 | 0.32 |
| 1.27 | 0.69 |
| 1.02 | 0.48 |
| #N/A | #N/A |
| 0.66 | 0.11 |
| 0.63 | 0.08 |
| #N/A | #N/A |
| 1.14 | 0.71 |
| 0.97 | 0.45 |
| 1.20 | 0.75 |
| 1.47 | 0.92 |
| 0.90 | 0.35 |
| 0.75 | 0.16 |
| 0.91 | 0.38 |
| 0.59 | 0.24 |
| 1.13 | 0.64 |
| 0.84 | 0.26 |
| 0.88 | 0.32 |
| 1.10 | 0.58 |
| #N/A | #N/A |
| #N/A | #N/A |
| 1.26 | 0.69 |
| 1.00 | 0.48 |
| 0.87 | 0.32 |
| 1.04 | 0.57 |
| 1.33 | 0.76 |
| 1.25 | 0.72 |
| #N/A | #N/A |
| 1.00 | 0.51 |
| 1.31 | 0.83 |
| #N/A | #N/A |
| 1.04 | 0.52 |
| 1.96 | 0.97 |
| 1.14 | 0.59 |
| 0.95 | 0.47 |
| 1.02 | 0.53 |
| 0.79 | 0.20 |
| 1.25 | 0.81 |
| 1.09 | 0.62 |
| 0.52 | 0.02 |

|      |      |
|------|------|
| 0.77 | 0.20 |
| 0.71 | 0.17 |
| 0.93 | 0.40 |
| #N/A | #N/A |
| 0.90 | 0.38 |
| 0.87 | 0.30 |
| #N/A | #N/A |
| 1.11 | 0.61 |
| #N/A | #N/A |
| 1.36 | 0.75 |
| 0.76 | 0.17 |
| 1.11 | 0.63 |
| 1.02 | 0.55 |
| 1.04 | 0.56 |
| 1.28 | 0.83 |
| 1.39 | 0.87 |
| 0.96 | 0.45 |
| #N/A | #N/A |
| 0.94 | 0.41 |
| 1.48 | 0.92 |
| 0.88 | 0.36 |
| 1.00 | 0.52 |
| #N/A | #N/A |
| #N/A | #N/A |
| 1.16 | 0.68 |
| 1.17 | 0.72 |
| 0.82 | 0.24 |
| 1.03 | 0.51 |
| 1.39 | 0.70 |
| 0.87 | 0.35 |
| #N/A | #N/A |
| 1.05 | 0.58 |
| #N/A | #N/A |
| #N/A | #N/A |
| #N/A | #N/A |
| 1.03 | 0.56 |
| 0.85 | 0.28 |
| 0.82 | 0.24 |
| #N/A | #N/A |
| 1.08 | 0.58 |
| #N/A | #N/A |
| 1.29 | 0.82 |
| #N/A | #N/A |
| 1.18 | 0.65 |
| 1.01 | 0.52 |
| 1.38 | 0.87 |
| 1.29 | 0.83 |
| 1.31 | 0.73 |
| #N/A | #N/A |
| 1.45 | 0.70 |
| #N/A | #N/A |

|      |      |
|------|------|
| 1.03 | 0.56 |
| #N/A | #N/A |
| 1.10 | 0.59 |
| #N/A | #N/A |
| 0.93 | 0.41 |
| 1.26 | 0.67 |
| 1.07 | 0.60 |
| 0.75 | 0.23 |
| 1.20 | 0.51 |
| #N/A | #N/A |
| 1.00 | 0.49 |
| 1.37 | 0.69 |
| 0.93 | 0.41 |
| 1.28 | 0.64 |
| 0.64 | 0.15 |
| 0.79 | 0.19 |
| #N/A | #N/A |
| #N/A | #N/A |
| 1.06 | 0.58 |
| 0.85 | 0.28 |
| 0.52 | 0.02 |
| 0.75 | 0.15 |
| 1.04 | 0.58 |
| 1.74 | 0.96 |
| 1.02 | 0.54 |
| #N/A | #N/A |
| 1.00 | 0.52 |
| 0.93 | 0.40 |
| 1.02 | 0.47 |
| 0.90 | 0.36 |
| 1.08 | 0.61 |
| 1.03 | 0.49 |
| 0.84 | 0.29 |
| #N/A | #N/A |
| 1.14 | 0.69 |
| 1.28 | 0.61 |
| 0.98 | 0.47 |
| #N/A | #N/A |
| #N/A | #N/A |
| #N/A | #N/A |
| #N/A | #N/A |
| 1.18 | 0.51 |
| #N/A | #N/A |
| 0.56 | 0.09 |
| 1.17 | 0.73 |
| #N/A | #N/A |
| 1.18 | 0.66 |
| 1.36 | 0.86 |
| #N/A | #N/A |
| 0.92 | 0.38 |
| 0.91 | 0.36 |

|      |      |
|------|------|
| #N/A | #N/A |
| 1.16 | 0.53 |
| 0.74 | 0.15 |
| 1.28 | 0.54 |
| 0.80 | 0.22 |
| 0.98 | 0.48 |
| #N/A | #N/A |
| 1.07 | 0.60 |
| 1.20 | 0.70 |
| 1.29 | 0.70 |
| 0.46 | 0.03 |
| #N/A | #N/A |
| 1.15 | 0.71 |
| 0.92 | 0.37 |
| 1.11 | 0.65 |
| 0.82 | 0.27 |
| 1.01 | 0.52 |
| 1.12 | 0.67 |
| 1.05 | 0.58 |
| 1.36 | 0.87 |
| 1.14 | 0.51 |
| 1.10 | 0.61 |
| 1.23 | 0.78 |
| 0.87 | 0.31 |
| 0.46 | 0.05 |
| 1.12 | 0.66 |
| 1.61 | 0.95 |
| 1.65 | 0.96 |
| 1.25 | 0.75 |
| 0.83 | 0.26 |
| 1.25 | 0.51 |
| 1.22 | 0.78 |
| #N/A | #N/A |
| 1.61 | 0.95 |
| #N/A | #N/A |
| 1.74 | 0.94 |
| 1.02 | 0.49 |
| 0.88 | 0.34 |
| #N/A | #N/A |
| 1.19 | 0.75 |
| 0.99 | 0.46 |
| 1.10 | 0.56 |
| 1.30 | 0.83 |
| #N/A | #N/A |
| 0.95 | 0.43 |
| 1.06 | 0.61 |
| 0.96 | 0.44 |
| 0.85 | 0.30 |
| 0.95 | 0.43 |
| #N/A | #N/A |
| 1.09 | 0.50 |

|      |      |
|------|------|
| #N/A | #N/A |
| 1.01 | 0.52 |
| 0.72 | 0.12 |
| 0.78 | 0.18 |
| 1.04 | 0.55 |
| 0.97 | 0.46 |
| 1.08 | 0.57 |
| 1.18 | 0.71 |
| 1.17 | 0.62 |
| 1.17 | 0.64 |
| 0.83 | 0.25 |
| 1.01 | 0.54 |
| 1.09 | 0.53 |
| 0.84 | 0.28 |
| 1.70 | 0.95 |
| 0.61 | 0.09 |
| 0.90 | 0.36 |
| 1.00 | 0.51 |
| 1.14 | 0.67 |
| 1.35 | 0.80 |
| 0.97 | 0.44 |
| #N/A | #N/A |
| 0.90 | 0.37 |
| 1.13 | 0.60 |
| 0.91 | 0.37 |
| 1.13 | 0.67 |
| 0.69 | 0.28 |
| #N/A | #N/A |
| 1.20 | 0.76 |
| 0.94 | 0.41 |
| #N/A | #N/A |
| 0.83 | 0.25 |
| #N/A | #N/A |
| #N/A | #N/A |
| 1.25 | 0.78 |
| 1.18 | 0.71 |
| #N/A | #N/A |
| 0.73 | 0.15 |
| #N/A | #N/A |
| 0.98 | 0.48 |
| 0.62 | 0.05 |
| 0.73 | 0.14 |
| #N/A | #N/A |
| 0.89 | 0.36 |
| 1.30 | 0.84 |
| 1.21 | 0.72 |
| 0.80 | 0.33 |
| 1.33 | 0.78 |
| 1.50 | 0.88 |
| #N/A | #N/A |
| 1.67 | 0.86 |

|       |      |
|-------|------|
| 0.93  | 0.41 |
| 0.97  | 0.46 |
| 0.92  | 0.39 |
| 1.04  | 0.52 |
| #N/A  | #N/A |
| #N/A  | #N/A |
| #N/A  | #N/A |
| 1.29  | 0.77 |
| 1.74  | 0.92 |
| 1.16  | 0.71 |
| 1.01  | 0.49 |
| 1.00  | 0.51 |
| 0.82  | 0.23 |
| 1.15  | 0.71 |
| 0.93  | 0.39 |
| 1.21  | 0.71 |
| #N/A  | #N/A |
| 1.64  | 0.96 |
| #N/A  | #N/A |
| 0.86  | 0.29 |
| #N/A  | #N/A |
| 0.92  | 0.38 |
| 0.88  | 0.39 |
| #N/A  | #N/A |
| #N/A  | #N/A |
| #N/A  | #N/A |
| #N/A  | #N/A |
| #N/A  | #N/A |
| 1.10  | 0.56 |
| #N/A  | #N/A |
| 0.84  | 0.26 |
| #N/A  | #N/A |
| 1.72  | 0.94 |
| #N/A  | #N/A |
| 0.81  | 0.24 |
| 0.75  | 0.19 |
| #N/A  | #N/A |
| #N/A  | #N/A |
| #N/A  | #N/A |
| 0.81  | 0.24 |
| #N/A  | #N/A |
| 0.61  | 0.05 |
| 1.11  | 0.66 |
| 0.88  | 0.34 |
| 0.58  | 0.04 |
| #N/A  | #N/A |
| 1.07  | 0.62 |
| 0.99  | 0.49 |
| 10.98 | 1.00 |
| #N/A  | #N/A |

|      |      |
|------|------|
| 1.04 | 0.54 |
| 0.63 | 0.15 |
| 0.87 | 0.38 |
| #N/A | #N/A |
| 0.96 | 0.46 |
| #N/A | #N/A |
| 0.95 | 0.48 |
| #N/A | #N/A |
| 0.81 | 0.22 |
| 1.02 | 0.52 |
| 1.42 | 0.80 |
| 1.10 | 0.64 |
| 1.22 | 0.62 |
| #N/A | #N/A |
| 0.86 | 0.30 |
| #N/A | #N/A |
| #N/A | #N/A |
| 1.12 | 0.55 |
| 0.98 | 0.45 |
| #N/A | #N/A |
| 1.31 | 0.85 |
| 0.77 | 0.17 |
| 1.33 | 0.65 |
| 1.63 | 0.95 |
| 0.65 | 0.07 |
| 0.90 | 0.36 |
| #N/A | #N/A |
| #N/A | #N/A |
| 1.06 | 0.58 |
| 1.05 | 0.57 |
| 0.79 | 0.25 |
| 0.96 | 0.44 |
| 0.68 | 0.11 |
| 0.80 | 0.32 |
| 0.86 | 0.29 |
| #N/A | #N/A |
| 0.50 | 0.02 |
| 1.20 | 0.76 |
| 0.81 | 0.25 |
| 1.30 | 0.82 |
| #N/A | #N/A |
| 0.83 | 0.25 |
| 0.73 | 0.15 |
| #N/A | #N/A |
| 1.27 | 0.79 |
| 1.03 | 0.56 |
| 1.01 | 0.52 |
| 0.94 | 0.41 |
| 0.94 | 0.41 |
| 1.02 | 0.55 |
| 0.86 | 0.32 |



|       |      |
|-------|------|
| 0.61  | 0.07 |
| #N/A  | #N/A |
| 0.85  | 0.31 |
| 0.84  | 0.31 |
| 0.68  | 0.10 |
| 0.87  | 0.33 |
| #N/A  | #N/A |
| 0.90  | 0.37 |
| 0.94  | 0.41 |
| 1.00  | 0.49 |
| 1.07  | 0.49 |
| 1.75  | 0.97 |
| 12.76 | 1.00 |
| 1.26  | 0.80 |
| #N/A  | #N/A |
| 0.81  | 0.22 |
| #N/A  | #N/A |
| 0.93  | 0.39 |
| #N/A  | #N/A |
| 1.11  | 0.65 |
| 0.76  | 0.35 |
| 0.95  | 0.44 |
| 0.97  | 0.45 |
| 0.67  | 0.08 |
| 0.57  | 0.03 |
| 1.14  | 0.60 |
| 1.30  | 0.79 |
| 1.88  | 0.98 |
| 0.72  | 0.14 |
| 0.85  | 0.32 |
| 0.95  | 0.44 |
| #N/A  | #N/A |
| #N/A  | #N/A |
| 0.91  | 0.36 |
| 0.63  | 0.06 |
| #N/A  | #N/A |
| 0.98  | 0.49 |
| 0.85  | 0.31 |
| 1.14  | 0.70 |
| 0.97  | 0.44 |
| 0.66  | 0.11 |
| 0.51  | 0.09 |
| 0.78  | 0.21 |
| 0.87  | 0.32 |
| 1.12  | 0.65 |
| 1.01  | 0.53 |
| 0.88  | 0.32 |
| 0.90  | 0.35 |
| 1.27  | 0.82 |
| #N/A  | #N/A |
| 0.83  | 0.25 |

|      |      |
|------|------|
| 1.30 | 0.74 |
| 0.82 | 0.25 |
| 0.92 | 0.41 |
| 1.25 | 0.80 |
| 1.00 | 0.52 |
| #N/A | #N/A |
| 1.18 | 0.74 |
| #N/A | #N/A |
| 1.06 | 0.60 |
| #N/A | #N/A |
| 1.12 | 0.68 |
| 1.23 | 0.78 |
| 1.19 | 0.75 |
| 1.56 | 0.52 |
| 0.79 | 0.20 |
| #N/A | #N/A |
| 1.40 | 0.74 |
| #N/A | #N/A |
| 0.99 | 0.50 |
| 0.95 | 0.44 |
| 1.39 | 0.54 |
| #N/A | #N/A |
| 1.33 | 0.63 |
| #N/A | #N/A |
| 1.07 | 0.50 |
| 0.59 | 0.04 |
| 0.86 | 0.28 |
| 0.70 | 0.13 |
| 0.99 | 0.49 |
| 0.80 | 0.23 |
| 1.04 | 0.54 |
| 0.98 | 0.45 |
| 0.62 | 0.06 |
| 0.87 | 0.31 |
| 0.94 | 0.43 |
| 0.99 | 0.50 |
| 1.04 | 0.54 |
| #N/A | #N/A |
| 0.88 | 0.32 |
| 1.06 | 0.53 |
| 1.35 | 0.85 |
| #N/A | #N/A |
| 1.21 | 0.68 |
| 0.80 | 0.21 |
| 0.88 | 0.33 |
| 1.18 | 0.66 |
| 1.15 | 0.66 |
| 2.16 | 0.94 |
| 0.85 | 0.28 |
| 0.78 | 0.19 |
| 0.61 | 0.05 |

|      |      |
|------|------|
| 0.95 | 0.43 |
| 1.30 | 0.83 |
| 1.04 | 0.54 |
| 0.92 | 0.38 |
| #N/A | #N/A |
| 0.76 | 0.21 |
| 0.99 | 0.50 |
| 1.26 | 0.80 |
| 0.58 | 0.03 |
| 0.69 | 0.17 |
| #N/A | #N/A |
| #N/A | #N/A |
| #N/A | #N/A |
| 0.99 | 0.50 |
| #N/A | #N/A |
| 1.16 | 0.71 |
| 0.53 | 0.06 |
| 0.79 | 0.23 |
| #N/A | #N/A |
| 0.94 | 0.44 |
| 0.76 | 0.16 |
| 0.67 | 0.08 |
| 0.76 | 0.20 |
| 1.03 | 0.49 |
| 0.73 | 0.13 |
| 0.82 | 0.29 |
| 0.74 | 0.15 |
| 0.64 | 0.06 |
| #N/A | #N/A |
| 0.85 | 0.28 |
| #N/A | #N/A |
| 0.67 | 0.10 |
| #N/A | #N/A |
| 1.03 | 0.48 |
| 2.32 | 0.93 |
| 1.12 | 0.68 |
| 1.02 | 0.54 |
| 1.19 | 0.71 |
| 1.09 | 0.64 |
| 0.79 | 0.22 |
| 0.66 | 0.07 |
| 0.89 | 0.36 |
| #N/A | #N/A |
| 1.04 | 0.57 |
| 1.08 | 0.61 |
| 0.95 | 0.43 |
| 0.88 | 0.32 |
| 0.90 | 0.34 |
| 0.98 | 0.48 |
| 1.04 | 0.51 |
| 0.95 | 0.43 |

|      |      |
|------|------|
| 1.00 | 0.48 |
| #N/A | #N/A |
| 0.98 | 0.47 |
| #N/A | #N/A |
| 0.99 | 0.45 |
| 1.00 | 0.47 |
| 1.14 | 0.68 |
| #N/A | #N/A |
| #N/A | #N/A |
| 0.98 | 0.48 |
| #N/A | #N/A |
| 1.06 | 0.58 |
| 1.08 | 0.63 |
| 0.87 | 0.34 |
| 1.21 | 0.77 |
| 1.08 | 0.63 |
| #N/A | #N/A |
| 0.89 | 0.37 |
| 0.66 | 0.13 |
| 0.85 | 0.31 |
| 0.99 | 0.50 |
| 0.89 | 0.34 |
| 1.05 | 0.56 |
| 0.98 | 0.48 |
| 1.15 | 0.71 |
| 0.94 | 0.42 |
| 1.02 | 0.48 |
| 0.81 | 0.26 |
| 0.78 | 0.19 |
| 0.91 | 0.36 |
| 0.70 | 0.10 |
| 0.72 | 0.12 |
| 1.17 | 0.61 |
| 0.59 | 0.08 |
| 0.83 | 0.25 |
| 0.96 | 0.45 |
| 1.21 | 0.77 |
| 1.10 | 0.65 |
| 0.94 | 0.41 |
| 1.20 | 0.76 |
| 0.96 | 0.46 |
| 0.85 | 0.38 |
| 1.21 | 0.65 |
| #N/A | #N/A |
| 0.94 | 0.41 |
| #N/A | #N/A |
| 0.96 | 0.46 |
| #N/A | #N/A |
| 0.86 | 0.32 |
| 0.92 | 0.42 |
| 1.06 | 0.60 |

|      |      |
|------|------|
| 1.25 | 0.61 |
| 1.13 | 0.67 |
| #N/A | #N/A |
| 1.65 | 0.89 |
| #N/A | #N/A |
| 1.02 | 0.50 |
| 0.72 | 0.13 |
| 1.57 | 0.94 |
| 1.29 | 0.80 |
| 0.78 | 0.19 |
| 0.82 | 0.23 |
| 1.07 | 0.61 |
| 1.01 | 0.48 |
| 1.17 | 0.70 |
| 0.76 | 0.17 |
| 0.91 | 0.36 |
| 1.01 | 0.52 |
| 0.84 | 0.32 |
| 0.95 | 0.44 |
| 0.84 | 0.26 |
| 0.82 | 0.23 |
| 1.18 | 0.71 |
| 1.20 | 0.75 |
| 1.38 | 0.88 |
| 1.04 | 0.56 |
| 0.86 | 0.29 |
| 1.28 | 0.83 |
| 0.77 | 0.19 |
| 0.79 | 0.20 |
| 0.88 | 0.32 |
| 1.31 | 0.85 |
| 1.05 | 0.58 |
| 0.85 | 0.28 |
| 0.95 | 0.43 |
| 1.01 | 0.53 |
| 0.98 | 0.48 |
| 0.87 | 0.33 |
| 0.63 | 0.06 |
| 0.96 | 0.45 |
| 1.07 | 0.59 |
| 0.75 | 0.15 |
| 1.47 | 0.92 |
| #N/A | #N/A |
| 0.98 | 0.48 |
| 1.49 | 0.89 |
| 1.07 | 0.60 |
| #N/A | #N/A |
| 0.76 | 0.20 |
| 0.71 | 0.11 |
| 1.33 | 0.78 |
| 0.96 | 0.43 |

|      |      |
|------|------|
| 1.18 | 0.74 |
| #N/A | #N/A |
| 1.18 | 0.59 |
| #N/A | #N/A |
| 1.30 | 0.69 |
| 0.95 | 0.42 |
| 0.88 | 0.33 |
| 0.92 | 0.41 |
| 1.00 | 0.51 |
| 1.06 | 0.60 |
| 0.80 | 0.42 |
| 0.78 | 0.19 |
| 0.94 | 0.43 |
| 1.16 | 0.59 |
| 1.06 | 0.52 |
| #N/A | #N/A |
| 1.17 | 0.73 |
| #N/A | #N/A |
| 1.23 | 0.79 |
| 0.69 | 0.10 |
| 1.39 | 0.82 |
| 1.02 | 0.54 |
| 0.91 | 0.37 |
| 0.81 | 0.25 |
| 1.08 | 0.62 |
| 0.86 | 0.33 |
| 0.97 | 0.46 |
| #N/A | #N/A |
| 1.85 | 0.97 |
| 0.94 | 0.42 |
| 1.27 | 0.82 |
| 0.90 | 0.36 |
| 1.27 | 0.75 |
| #N/A | #N/A |
| 1.18 | 0.68 |
| 1.46 | 0.86 |
| 0.94 | 0.42 |
| #N/A | #N/A |
| 0.76 | 0.20 |
| 0.89 | 0.34 |
| 0.91 | 0.36 |
| 1.05 | 0.57 |
| 1.08 | 0.62 |
| 1.14 | 0.64 |
| 1.03 | 0.53 |
| #N/A | #N/A |
| 0.85 | 0.29 |
| 1.01 | 0.48 |
| 0.60 | 0.04 |
| 0.65 | 0.08 |
| 1.27 | 0.82 |

|      |      |
|------|------|
| 0.86 | 0.35 |
| 0.92 | 0.37 |
| #N/A | #N/A |
| 0.76 | 0.37 |
| 0.84 | 0.28 |
| 0.89 | 0.36 |
| 1.36 | 0.67 |
| 1.13 | 0.65 |
| 0.76 | 0.17 |
| 0.75 | 0.23 |
| 1.02 | 0.55 |
| 0.92 | 0.39 |
| 1.01 | 0.47 |
| 1.22 | 0.57 |
| 1.22 | 0.78 |
| 1.03 | 0.50 |
| 0.76 | 0.16 |
| 0.82 | 0.26 |
| 0.74 | 0.17 |
| 0.85 | 0.30 |
| 1.04 | 0.56 |
| 1.01 | 0.50 |
| 1.19 | 0.73 |
| 1.35 | 0.87 |
| 0.77 | 0.19 |
| 1.01 | 0.52 |
| 0.73 | 0.13 |
| 1.39 | 0.50 |
| 1.17 | 0.72 |
| 1.07 | 0.61 |
| #N/A | #N/A |
| 1.32 | 0.85 |
| #N/A | #N/A |
| 1.03 | 0.51 |
| 0.86 | 0.28 |
| 1.01 | 0.51 |
| #N/A | #N/A |
| 0.94 | 0.42 |
| 0.78 | 0.19 |
| 0.75 | 0.16 |
| 0.95 | 0.43 |
| 0.96 | 0.45 |
| #N/A | #N/A |
| 1.19 | 0.74 |
| 0.91 | 0.37 |
| #N/A | #N/A |
| #N/A | #N/A |
| 0.91 | 0.36 |
| 1.38 | 0.76 |
| 1.33 | 0.85 |
| 1.06 | 0.56 |

|      |      |
|------|------|
| 0.94 | 0.41 |
| 1.18 | 0.73 |
| 0.99 | 0.48 |
| 0.88 | 0.32 |
| 0.87 | 0.31 |
| 1.06 | 0.56 |
| 1.56 | 0.93 |
| 0.84 | 0.26 |
| #N/A | #N/A |
| 0.86 | 0.29 |
| 0.90 | 0.35 |
| 0.88 | 0.33 |
| 0.97 | 0.46 |
| 1.33 | 0.78 |
| 0.84 | 0.30 |
| 1.04 | 0.58 |
| 1.32 | 0.82 |
| 2.13 | 0.99 |
| 1.72 | 0.96 |
| 1.06 | 0.60 |
| 0.84 | 0.28 |
| 1.70 | 0.94 |
| 0.99 | 0.47 |
| #N/A | #N/A |
| 0.85 | 0.39 |
| 0.89 | 0.36 |
| 1.27 | 0.75 |
| 0.87 | 0.35 |
| 1.00 | 0.49 |
| 0.84 | 0.26 |
| 1.11 | 0.53 |
| #N/A | #N/A |
| 1.19 | 0.75 |
| 1.04 | 0.55 |
| 0.86 | 0.29 |
| 0.98 | 0.48 |
| 0.85 | 0.27 |
| 0.90 | 0.38 |
| #N/A | #N/A |
| 1.34 | 0.75 |
| 2.05 | 0.96 |
| #N/A | #N/A |
| 1.75 | 0.94 |
| 0.93 | 0.40 |
| 6.85 | 1.00 |
| 7.60 | 1.00 |
| 1.60 | 0.95 |
| #N/A | #N/A |
| 1.01 | 0.48 |
| 1.17 | 0.72 |
| 1.68 | 0.78 |



|      |      |
|------|------|
| 0.95 | 0.44 |
| 1.00 | 0.51 |
| 0.84 | 0.26 |
| 0.96 | 0.44 |
| 1.20 | 0.76 |
| 1.66 | 0.81 |
| 0.64 | 0.06 |
| 1.52 | 0.92 |
| 1.24 | 0.67 |
| 1.35 | 0.87 |
| 0.90 | 0.39 |
| #N/A | #N/A |
| 1.07 | 0.54 |
| 0.95 | 0.43 |
| 1.10 | 0.54 |
| 1.26 | 0.77 |
| 0.82 | 0.27 |
| 2.26 | 0.99 |
| 0.97 | 0.44 |
| 1.05 | 0.58 |
| 1.13 | 0.66 |
| #N/A | #N/A |
| 0.95 | 0.45 |
| 1.07 | 0.60 |
| 0.99 | 0.49 |
| 0.91 | 0.36 |
| 0.97 | 0.46 |
| 0.98 | 0.49 |
| 1.03 | 0.52 |
| #N/A | #N/A |
| 1.36 | 0.75 |
| 1.44 | 0.84 |
| 1.26 | 0.81 |
| 1.06 | 0.59 |
| 0.48 | 0.02 |
| 0.83 | 0.25 |
| #N/A | #N/A |
| 1.07 | 0.62 |
| #N/A | #N/A |
| 1.12 | 0.66 |
| 0.91 | 0.36 |
| 1.16 | 0.67 |
| #N/A | #N/A |
| 1.17 | 0.68 |
| #N/A | #N/A |
| #N/A | #N/A |
| 0.79 | 0.23 |
| 0.75 | 0.18 |
| 1.14 | 0.60 |
| 1.04 | 0.55 |
| 1.34 | 0.87 |

|      |      |
|------|------|
| #N/A | #N/A |
| 1.01 | 0.50 |
| #N/A | #N/A |
| 0.75 | 0.19 |
| 1.01 | 0.50 |
| 0.68 | 0.11 |
| #N/A | #N/A |
| #N/A | #N/A |
| 1.00 | 0.51 |
| 1.05 | 0.57 |
| 1.20 | 0.71 |
| #N/A | #N/A |
| 0.98 | 0.47 |
| #N/A | #N/A |
| 1.03 | 0.47 |
| #N/A | #N/A |
| 0.94 | 0.42 |
| #N/A | #N/A |
| 0.89 | 0.37 |
| #N/A | #N/A |
| 1.08 | 0.63 |
| 0.55 | 0.03 |
| 0.79 | 0.20 |
| 0.79 | 0.23 |
| 1.04 | 0.57 |
| #N/A | #N/A |
| 1.24 | 0.79 |
| #N/A | #N/A |
| 1.15 | 0.72 |
| 0.95 | 0.43 |
| 0.71 | 0.36 |
| #N/A | #N/A |
| 0.80 | 0.29 |
| #N/A | #N/A |
| #N/A | #N/A |
| #N/A | #N/A |
| 1.24 | 0.73 |
| 0.81 | 0.23 |
| 0.95 | 0.42 |
| 1.04 | 0.56 |
| 0.79 | 0.25 |
| #N/A | #N/A |
| 0.88 | 0.34 |
| 0.99 | 0.49 |
| 0.92 | 0.38 |
| 1.16 | 0.65 |
| #N/A | #N/A |
| #N/A | #N/A |
| 0.71 | 0.12 |
| 0.53 | 0.11 |
| 0.53 | 0.07 |

|      |      |
|------|------|
| 0.98 | 0.47 |
| 1.01 | 0.48 |
| #N/A | #N/A |
| 1.18 | 0.73 |
| 1.03 | 0.56 |
| #N/A | #N/A |
| 0.90 | 0.39 |
| 1.17 | 0.73 |
| 0.65 | 0.11 |
| 1.08 | 0.52 |
| #N/A | #N/A |
| 1.13 | 0.65 |
| 1.11 | 0.64 |
| 1.19 | 0.72 |
| #N/A | #N/A |
| 1.33 | 0.78 |
| 1.08 | 0.63 |
| 1.40 | 0.74 |
| 1.53 | 0.87 |
| 0.94 | 0.41 |
| #N/A | #N/A |
| 0.93 | 0.42 |
| #N/A | #N/A |
| 0.96 | 0.45 |
| 1.23 | 0.75 |
| 0.92 | 0.39 |
| #N/A | #N/A |
| 0.98 | 0.45 |
| 1.00 | 0.51 |
| 1.06 | 0.57 |
| 1.15 | 0.71 |
| 1.27 | 0.65 |
| 1.32 | 0.84 |
| 1.05 | 0.51 |
| 0.98 | 0.47 |
| 1.30 | 0.83 |
| 1.32 | 0.83 |
| 1.21 | 0.77 |
| #N/A | #N/A |
| 1.21 | 0.54 |
| 1.02 | 0.54 |
| 0.94 | 0.41 |
| 1.26 | 0.81 |
| #N/A | #N/A |
| 1.12 | 0.64 |
| 1.23 | 0.78 |
| 1.14 | 0.63 |
| #N/A | #N/A |
| 0.74 | 0.18 |
| 0.52 | 0.03 |
| 1.08 | 0.58 |

|      |      |
|------|------|
| 1.04 | 0.52 |
| 1.06 | 0.56 |
| 0.79 | 0.29 |
| 0.94 | 0.42 |
| 1.00 | 0.50 |
| 0.97 | 0.47 |
| 0.97 | 0.45 |
| 1.52 | 0.93 |
| 0.99 | 0.48 |
| 0.89 | 0.34 |
| 1.30 | 0.63 |
| 0.82 | 0.23 |
| 0.81 | 0.22 |
| 0.72 | 0.12 |
| 0.91 | 0.36 |
| 0.72 | 0.15 |
| 0.95 | 0.42 |
| 1.22 | 0.78 |
| 1.05 | 0.58 |
| 1.00 | 0.47 |
| 0.98 | 0.48 |
| #N/A | #N/A |
| 1.07 | 0.58 |
| 0.64 | 0.07 |
| 1.20 | 0.64 |
| 0.98 | 0.45 |
| 1.38 | 0.88 |
| #N/A | #N/A |
| 1.23 | 0.75 |
| #N/A | #N/A |
| 0.97 | 0.45 |
| 0.99 | 0.50 |
| 0.99 | 0.50 |
| #N/A | #N/A |
| 1.08 | 0.63 |
| #N/A | #N/A |
| 0.70 | 0.11 |
| 0.76 | 0.19 |
| 1.68 | 0.85 |
| 0.77 | 0.19 |
| 0.97 | 0.45 |
| 0.79 | 0.20 |
| 1.01 | 0.50 |
| 1.44 | 0.91 |
| 1.24 | 0.80 |
| 0.81 | 0.23 |
| 0.71 | 0.24 |
| 0.74 | 0.14 |
| 0.95 | 0.45 |
| 1.30 | 0.84 |
| 0.84 | 0.27 |

|      |      |
|------|------|
| 0.77 | 0.18 |
| 0.94 | 0.42 |
| 0.86 | 0.30 |
| 0.91 | 0.38 |
| 1.07 | 0.61 |
| 0.81 | 0.36 |
| 1.00 | 0.51 |
| 1.00 | 0.49 |
| 0.90 | 0.35 |
| 1.31 | 0.75 |
| 0.89 | 0.35 |
| 0.91 | 0.36 |
| 0.84 | 0.30 |
| #N/A | #N/A |
| 1.09 | 0.62 |
| #N/A | #N/A |
| 1.53 | 0.92 |
| 0.59 | 0.04 |
| 1.32 | 0.80 |
| #N/A | #N/A |
| 1.00 | 0.50 |
| 1.08 | 0.61 |
| 1.14 | 0.70 |
| 0.95 | 0.42 |
| 0.46 | 0.03 |
| 1.39 | 0.88 |
| #N/A | #N/A |
| 1.29 | 0.75 |
| 1.09 | 0.56 |
| 0.82 | 0.24 |
| 0.97 | 0.44 |
| 1.07 | 0.60 |
| #N/A | #N/A |
| #N/A | #N/A |
| 0.96 | 0.46 |
| 0.41 | 0.02 |
| 0.71 | 0.12 |
| 0.93 | 0.41 |
| 1.02 | 0.50 |
| 1.00 | 0.50 |
| 0.92 | 0.38 |
| 1.24 | 0.78 |
| 0.84 | 0.26 |
| 1.00 | 0.52 |
| 1.04 | 0.55 |
| #N/A | #N/A |
| 0.50 | 0.03 |
| 1.15 | 0.58 |
| #N/A | #N/A |
| 1.01 | 0.52 |
| 1.29 | 0.78 |

|      |      |
|------|------|
| 1.23 | 0.79 |
| #N/A | #N/A |
| 0.99 | 0.50 |
| 0.90 | 0.35 |
| 1.02 | 0.53 |
| 0.85 | 0.28 |
| 0.57 | 0.03 |
| 1.09 | 0.62 |
| 1.12 | 0.68 |
| 0.88 | 0.32 |
| 0.81 | 0.23 |
| 0.98 | 0.48 |
| 0.85 | 0.29 |
| 1.18 | 0.70 |
| 1.01 | 0.51 |
| 1.01 | 0.51 |
| 1.09 | 0.62 |
| 0.83 | 0.25 |
| 0.77 | 0.24 |
| 1.07 | 0.53 |
| 1.22 | 0.77 |
| 1.00 | 0.49 |
| #N/A | #N/A |
| 1.17 | 0.71 |
| 1.15 | 0.71 |
| 0.87 | 0.34 |
| 1.13 | 0.67 |
| 1.14 | 0.68 |
| 1.07 | 0.57 |
| 0.97 | 0.47 |
| 1.03 | 0.53 |
| 0.68 | 0.09 |
| 1.07 | 0.61 |
| 0.85 | 0.28 |
| 1.20 | 0.64 |
| 4.05 | 1.00 |
| #N/A | #N/A |
| 1.43 | 0.89 |
| 1.01 | 0.52 |
| 1.06 | 0.55 |
| 1.50 | 0.89 |
| 0.79 | 0.20 |
| 0.77 | 0.17 |
| 1.01 | 0.50 |
| 0.87 | 0.32 |
| 1.10 | 0.65 |
| 0.99 | 0.49 |
| #N/A | #N/A |
| 0.93 | 0.40 |
| 1.03 | 0.54 |
| 1.08 | 0.55 |

|      |      |
|------|------|
| #N/A | #N/A |
| 0.98 | 0.48 |
| 1.67 | 0.96 |
| 1.38 | 0.84 |
| #N/A | #N/A |
| 0.95 | 0.42 |
| 0.90 | 0.35 |
| 1.02 | 0.54 |
| 0.65 | 0.07 |
| 0.82 | 0.27 |
| 1.02 | 0.55 |
| 0.99 | 0.50 |
| #N/A | #N/A |
| 1.07 | 0.54 |
| 1.18 | 0.72 |
| 1.15 | 0.68 |
| 1.18 | 0.71 |
| 1.09 | 0.54 |
| #N/A | #N/A |
| 1.08 | 0.61 |
| 1.15 | 0.70 |
| #N/A | #N/A |
| 0.87 | 0.32 |
| 0.97 | 0.46 |
| 0.91 | 0.35 |
| 0.63 | 0.10 |
| 0.96 | 0.46 |
| 0.84 | 0.27 |
| 0.88 | 0.34 |
| 0.98 | 0.49 |
| 1.17 | 0.69 |
| 1.20 | 0.65 |
| 0.85 | 0.27 |
| 0.89 | 0.35 |
| 0.97 | 0.47 |
| 0.97 | 0.46 |
| 0.78 | 0.34 |
| 0.86 | 0.31 |
| 0.94 | 0.42 |
| #N/A | #N/A |
| 0.83 | 0.26 |
| 0.92 | 0.39 |
| 1.08 | 0.53 |
| 0.95 | 0.43 |
| 0.83 | 0.25 |
| 1.28 | 0.73 |
| 0.92 | 0.37 |
| 1.13 | 0.69 |
| 1.05 | 0.59 |
| 1.39 | 0.67 |
| 0.88 | 0.31 |

|      |      |
|------|------|
| 1.03 | 0.55 |
| 1.12 | 0.68 |
| 1.22 | 0.79 |
| 1.17 | 0.50 |
| 0.82 | 0.23 |
| 1.55 | 0.83 |
| 1.31 | 0.85 |
| #N/A | #N/A |
| 0.85 | 0.27 |
| 1.03 | 0.56 |
| 1.43 | 0.87 |
| #N/A | #N/A |
| 1.06 | 0.58 |
| #N/A | #N/A |
| 1.09 | 0.60 |
| 1.34 | 0.86 |
| 0.94 | 0.41 |
| 1.15 | 0.71 |
| 1.44 | 0.81 |
| 1.08 | 0.63 |
| 1.16 | 0.71 |
| #N/A | #N/A |
| 1.21 | 0.76 |
| 1.32 | 0.80 |
| 0.70 | 0.10 |
| 1.07 | 0.61 |
| 0.83 | 0.28 |
| 0.78 | 0.20 |
| 0.88 | 0.32 |
| 1.08 | 0.62 |
| 1.14 | 0.69 |
| 1.00 | 0.51 |
| 0.86 | 0.32 |
| 0.89 | 0.34 |
| 0.83 | 0.27 |
| 0.69 | 0.09 |
| 1.04 | 0.56 |
| 1.18 | 0.70 |
| 1.40 | 0.75 |
| 0.79 | 0.21 |
| 1.35 | 0.56 |
| 1.24 | 0.72 |
| 1.02 | 0.52 |
| 0.99 | 0.49 |
| 1.33 | 0.81 |
| 1.11 | 0.59 |
| 1.08 | 0.62 |
| 2.05 | 0.98 |
| 2.10 | 0.99 |
| 1.13 | 0.69 |
| 0.78 | 0.18 |



|      |      |
|------|------|
| 1.05 | 0.58 |
| 0.85 | 0.28 |
| 0.76 | 0.17 |
| 1.48 | 0.84 |
| 0.86 | 0.30 |
| #N/A | #N/A |
| 1.09 | 0.63 |
| #N/A | #N/A |
| 1.39 | 0.83 |
| #N/A | #N/A |
| #N/A | #N/A |
| 1.18 | 0.60 |
| 1.14 | 0.59 |
| 1.21 | 0.74 |
| 0.98 | 0.45 |
| 0.92 | 0.37 |
| #N/A | #N/A |
| 1.32 | 0.81 |
| #N/A | #N/A |
| 0.81 | 0.29 |
| 1.01 | 0.53 |
| 0.69 | 0.12 |
| 0.83 | 0.26 |
| 0.86 | 0.31 |
| 1.07 | 0.61 |
| #N/A | #N/A |
| 1.22 | 0.65 |
| 1.02 | 0.51 |
| 0.92 | 0.44 |
| 1.09 | 0.65 |
| 0.81 | 0.26 |
| 1.03 | 0.53 |
| 0.81 | 0.22 |
| 1.21 | 0.78 |
| #N/A | #N/A |
| 0.88 | 0.37 |
| #N/A | #N/A |
| 0.92 | 0.41 |
| 0.93 | 0.41 |
| 1.15 | 0.66 |
| 0.84 | 0.41 |
| 1.27 | 0.58 |
| 0.95 | 0.42 |
| 0.85 | 0.28 |
| 0.89 | 0.34 |
| 0.84 | 0.28 |
| #N/A | #N/A |
| 1.19 | 0.66 |
| 0.80 | 0.27 |
| 0.91 | 0.36 |
| #N/A | #N/A |

|      |      |
|------|------|
| 1.46 | 0.87 |
| 0.95 | 0.42 |
| 1.07 | 0.56 |
| 1.08 | 0.62 |
| 0.86 | 0.34 |
| 1.13 | 0.69 |
| 1.39 | 0.87 |
| 1.41 | 0.90 |
| 1.24 | 0.76 |
| 1.20 | 0.70 |
| 0.91 | 0.38 |
| #N/A | #N/A |
| 1.01 | 0.53 |
| 0.99 | 0.49 |
| 0.87 | 0.33 |
| 1.30 | 0.61 |
| 1.06 | 0.57 |
| #N/A | #N/A |
| 0.95 | 0.45 |
| 0.67 | 0.18 |
| 0.90 | 0.35 |
| 0.53 | 0.02 |
| 0.94 | 0.44 |
| 0.80 | 0.26 |
| 0.84 | 0.26 |
| 0.90 | 0.35 |
| 0.85 | 0.27 |
| 1.24 | 0.80 |
| 0.96 | 0.43 |
| 0.77 | 0.18 |
| #N/A | #N/A |
| 0.74 | 0.18 |
| #N/A | #N/A |
| 0.86 | 0.29 |
| 1.55 | 0.84 |
| #N/A | #N/A |
| 0.90 | 0.35 |
| 1.04 | 0.58 |
| 1.59 | 0.95 |
| 0.47 | 0.04 |
| 0.91 | 0.40 |
| 0.71 | 0.15 |
| 1.20 | 0.74 |
| 1.11 | 0.65 |
| 1.12 | 0.65 |
| 1.35 | 0.81 |
| 1.22 | 0.78 |
| 0.92 | 0.39 |
| 1.02 | 0.53 |
| #N/A | #N/A |
| 1.19 | 0.73 |

|       |      |
|-------|------|
| #N/A  | #N/A |
| 0.97  | 0.44 |
| #N/A  | #N/A |
| 1.12  | 0.67 |
| #N/A  | #N/A |
| 1.15  | 0.70 |
| 0.99  | 0.50 |
| 1.37  | 0.81 |
| #N/A  | #N/A |
| 1.17  | 0.65 |
| #N/A  | #N/A |
| 0.97  | 0.45 |
| #N/A  | #N/A |
| #N/A  | #N/A |
| #N/A  | #N/A |
| 1.10  | 0.61 |
| 1.09  | 0.64 |
| 1.20  | 0.68 |
| 0.78  | 0.19 |
| 0.80  | 0.21 |
| 0.57  | 0.03 |
| 0.70  | 0.11 |
| 0.88  | 0.32 |
| 1.22  | 0.74 |
| 1.11  | 0.66 |
| 0.66  | 0.09 |
| 1.27  | 0.77 |
| 0.91  | 0.36 |
| 0.94  | 0.42 |
| 0.95  | 0.42 |
| 0.32  | 0.01 |
| 1.57  | 0.69 |
| 0.78  | 0.20 |
| 0.92  | 0.39 |
| 0.94  | 0.41 |
| 1.41  | 0.90 |
| #N/A  | #N/A |
| 1.05  | 0.59 |
| 1.07  | 0.59 |
| 0.78  | 0.22 |
| 0.90  | 0.34 |
| 0.92  | 0.39 |
| 0.82  | 0.24 |
| 0.83  | 0.32 |
| 12.08 | 1.00 |
| 1.00  | 0.51 |
| #N/A  | #N/A |
| 1.06  | 0.60 |
| #N/A  | #N/A |
| 1.29  | 0.82 |
| 1.26  | 0.74 |

|      |      |
|------|------|
| 1.14 | 0.64 |
| 1.08 | 0.63 |
| 1.19 | 0.76 |
| 1.16 | 0.72 |
| 1.37 | 0.66 |
| 1.78 | 0.81 |
| 1.07 | 0.61 |
| #N/A | #N/A |
| 0.94 | 0.41 |
| 0.74 | 0.15 |
| 0.66 | 0.17 |
| #N/A | #N/A |
| 0.96 | 0.46 |
| 0.79 | 0.20 |
| 1.06 | 0.60 |
| 0.80 | 0.22 |
| #N/A | #N/A |
| 0.54 | 0.03 |
| 1.25 | 0.60 |
| 0.99 | 0.50 |
| #N/A | #N/A |
| 0.84 | 0.26 |
| 1.12 | 0.67 |
| 0.84 | 0.31 |
| 0.79 | 0.20 |
| 1.17 | 0.71 |
| 1.46 | 0.79 |
| 0.94 | 0.42 |
| 1.19 | 0.67 |
| 0.75 | 0.25 |
| 0.82 | 0.23 |
| 1.16 | 0.58 |
| 1.14 | 0.70 |
| 1.03 | 0.54 |
| 0.85 | 0.29 |
| 0.61 | 0.05 |
| 1.05 | 0.59 |
| 0.73 | 0.13 |
| 1.15 | 0.67 |
| 0.88 | 0.34 |
| 1.03 | 0.52 |
| 1.00 | 0.51 |
| 0.83 | 0.24 |
| 0.87 | 0.31 |
| 1.11 | 0.57 |
| #N/A | #N/A |
| 0.99 | 0.48 |
| 0.77 | 0.18 |
| 1.16 | 0.70 |
| 1.04 | 0.52 |
| 1.06 | 0.57 |

|      |      |
|------|------|
| 1.03 | 0.52 |
| 1.04 | 0.52 |
| 1.21 | 0.75 |
| 1.05 | 0.57 |
| 1.18 | 0.70 |
| 1.28 | 0.64 |
| 1.19 | 0.55 |
| 1.28 | 0.77 |
| #N/A | #N/A |
| 0.74 | 0.14 |
| 0.87 | 0.36 |
| 1.29 | 0.83 |
| #N/A | #N/A |
| 1.27 | 0.58 |
| 1.84 | 0.96 |
| 0.89 | 0.35 |
| 0.84 | 0.28 |
| 1.06 | 0.59 |
| 0.91 | 0.38 |
| 1.18 | 0.69 |
| 0.73 | 0.16 |
| 0.98 | 0.48 |
| 1.14 | 0.70 |
| 0.80 | 0.28 |
| 1.03 | 0.56 |
| 0.80 | 0.21 |
| 0.93 | 0.42 |
| 0.94 | 0.42 |
| 1.44 | 0.90 |
| 1.53 | 0.93 |
| 0.90 | 0.40 |
| 0.91 | 0.38 |
| 1.30 | 0.79 |
| 0.92 | 0.38 |
| #N/A | #N/A |
| 0.90 | 0.35 |
| 0.78 | 0.19 |
| 0.64 | 0.08 |
| 1.05 | 0.57 |
| 1.29 | 0.79 |
| 1.26 | 0.76 |
| 1.09 | 0.60 |
| 1.26 | 0.81 |
| 0.91 | 0.37 |
| 1.00 | 0.51 |
| #N/A | #N/A |
| 1.55 | 0.87 |
| 1.49 | 0.68 |
| #N/A | #N/A |
| 0.91 | 0.37 |
| #N/A | #N/A |

|      |      |
|------|------|
| 0.89 | 0.33 |
| 1.13 | 0.60 |
| 1.01 | 0.49 |
| #N/A | #N/A |
| 1.17 | 0.72 |
| 1.02 | 0.53 |
| 0.79 | 0.27 |
| 1.00 | 0.51 |
| 1.26 | 0.64 |
| 0.77 | 0.17 |
| 1.40 | 0.89 |
| #N/A | #N/A |
| 0.91 | 0.38 |
| 1.04 | 0.54 |
| 0.74 | 0.14 |
| 0.88 | 0.32 |
| 0.72 | 0.13 |
| 0.72 | 0.19 |
| #N/A | #N/A |
| #N/A | #N/A |
| 1.11 | 0.67 |
| 0.82 | 0.24 |
| 1.01 | 0.51 |
| 1.03 | 0.55 |
| 0.91 | 0.37 |
| #N/A | #N/A |
| 0.86 | 0.30 |
| 0.74 | 0.19 |
| 0.87 | 0.33 |
| 1.24 | 0.67 |
| 1.99 | 0.98 |
| 1.12 | 0.62 |
| 1.10 | 0.63 |
| 1.21 | 0.78 |
| 1.11 | 0.66 |
| #N/A | #N/A |
| 1.12 | 0.64 |
| 1.04 | 0.57 |
| 0.99 | 0.46 |
| 1.04 | 0.56 |
| 0.82 | 0.23 |
| #N/A | #N/A |
| 1.26 | 0.82 |
| #N/A | #N/A |
| 1.14 | 0.53 |
| 0.99 | 0.49 |
| 1.31 | 0.76 |
| 1.09 | 0.64 |
| 1.36 | 0.86 |
| #N/A | #N/A |
| 0.90 | 0.35 |

|      |      |
|------|------|
| #N/A | #N/A |
| 1.07 | 0.60 |
| 0.86 | 0.29 |
| #N/A | #N/A |
| 0.62 | 0.05 |
| 1.09 | 0.64 |
| 0.87 | 0.30 |
| #N/A | #N/A |
| 1.06 | 0.53 |
| #N/A | #N/A |
| 1.00 | 0.49 |
| 0.81 | 0.27 |
| 0.92 | 0.39 |
| 0.77 | 0.18 |
| 0.89 | 0.35 |
| 0.68 | 0.09 |
| 0.80 | 0.24 |
| 1.61 | 0.84 |
| 0.84 | 0.27 |
| 0.95 | 0.43 |
| 1.04 | 0.55 |
| 0.94 | 0.42 |
| 1.23 | 0.75 |
| 0.71 | 0.15 |
| 1.13 | 0.60 |
| 0.93 | 0.41 |
| 1.16 | 0.69 |
| 0.77 | 0.19 |
| 1.50 | 0.92 |
| #N/A | #N/A |
| 1.20 | 0.77 |
| 0.93 | 0.40 |
| 0.95 | 0.45 |
| 0.97 | 0.47 |
| 0.92 | 0.38 |
| 0.81 | 0.22 |
| #N/A | #N/A |
| 0.91 | 0.36 |
| #N/A | #N/A |
| 1.34 | 0.86 |
| 0.94 | 0.41 |
| 1.07 | 0.60 |
| #N/A | #N/A |
| #N/A | #N/A |
| 1.28 | 0.81 |
| 0.97 | 0.45 |
| 1.06 | 0.58 |
| 1.16 | 0.68 |
| 1.00 | 0.51 |
| 1.09 | 0.63 |
| 1.27 | 0.74 |

|      |      |
|------|------|
| 1.12 | 0.57 |
| #N/A | #N/A |
| 1.14 | 0.62 |
| 0.88 | 0.32 |
| 1.18 | 0.52 |
| 0.67 | 0.16 |
| 0.81 | 0.22 |
| 0.72 | 0.20 |
| 1.20 | 0.69 |
| 1.00 | 0.52 |
| 1.04 | 0.57 |
| 0.90 | 0.35 |
| 0.92 | 0.39 |
| 0.98 | 0.45 |
| 1.08 | 0.60 |
| 0.85 | 0.27 |
| 0.80 | 0.22 |
| 1.19 | 0.73 |
| 0.78 | 0.19 |
| 0.81 | 0.28 |
| 1.30 | 0.79 |
| 0.82 | 0.25 |
| 1.03 | 0.55 |
| 0.99 | 0.50 |
| 0.95 | 0.43 |
| 1.06 | 0.53 |
| 1.11 | 0.66 |
| 1.73 | 0.96 |
| 1.06 | 0.55 |
| 1.19 | 0.75 |
| 1.01 | 0.50 |
| #N/A | #N/A |
| 1.42 | 0.87 |
| 0.85 | 0.27 |
| #N/A | #N/A |
| 1.31 | 0.84 |
| 0.80 | 0.24 |
| 1.18 | 0.72 |
| #N/A | #N/A |
| 1.11 | 0.66 |
| 1.90 | 0.89 |
| 0.65 | 0.07 |
| 1.06 | 0.52 |
| 1.31 | 0.60 |
| 1.06 | 0.60 |
| 1.20 | 0.60 |
| 1.17 | 0.72 |
| #N/A | #N/A |
| #N/A | #N/A |
| #N/A | #N/A |
| #N/A | #N/A |



|      |      |
|------|------|
| 1.18 | 0.63 |
| #N/A | #N/A |
| 1.19 | 0.72 |
| 1.77 | 0.97 |
| 0.97 | 0.44 |
| 1.02 | 0.54 |
| 1.22 | 0.70 |
| 0.70 | 0.11 |
| 1.04 | 0.49 |
| #N/A | #N/A |
| 0.91 | 0.37 |
| #N/A | #N/A |
| 0.92 | 0.38 |
| #N/A | #N/A |
| 1.22 | 0.70 |
| #N/A | #N/A |
| 1.27 | 0.80 |
| 0.82 | 0.23 |
| 1.09 | 0.52 |
| 0.98 | 0.48 |
| 0.95 | 0.45 |
| 1.12 | 0.64 |
| 0.82 | 0.25 |
| 0.97 | 0.47 |
| 1.15 | 0.71 |
| 0.98 | 0.48 |
| 1.14 | 0.68 |
| #N/A | #N/A |
| 1.45 | 0.90 |
| 0.69 | 0.10 |
| #N/A | #N/A |
| 0.87 | 0.35 |
| 0.81 | 0.23 |
| 0.84 | 0.26 |
| #N/A | #N/A |
| 0.91 | 0.41 |
| #N/A | #N/A |
| 0.78 | 0.21 |
| 0.85 | 0.28 |
| 0.89 | 0.35 |
| 1.34 | 0.78 |
| #N/A | #N/A |
| 0.91 | 0.38 |
| 0.85 | 0.29 |
| #N/A | #N/A |
| #N/A | #N/A |
| 1.55 | 0.89 |
| #N/A | #N/A |
| 1.31 | 0.76 |
| #N/A | #N/A |
| 1.02 | 0.50 |

|      |      |
|------|------|
| 0.82 | 0.28 |
| 0.93 | 0.42 |
| 0.99 | 0.48 |
| 0.88 | 0.35 |
| 0.99 | 0.49 |
| 0.80 | 0.21 |
| 1.22 | 0.70 |
| 1.09 | 0.63 |
| 1.06 | 0.58 |
| 0.97 | 0.46 |
| 0.74 | 0.21 |
| 1.14 | 0.62 |
| 0.91 | 0.36 |
| 0.66 | 0.09 |
| 1.15 | 0.66 |
| 0.91 | 0.38 |
| 1.08 | 0.62 |
| 0.81 | 0.23 |
| 1.02 | 0.51 |
| 0.90 | 0.35 |
| 0.88 | 0.32 |
| 1.30 | 0.84 |
| 1.25 | 0.81 |
| 0.87 | 0.33 |
| 0.99 | 0.47 |
| 0.94 | 0.42 |
| #N/A | #N/A |
| 1.52 | 0.83 |
| 0.80 | 0.22 |
| 1.14 | 0.70 |
| 0.98 | 0.48 |
| #N/A | #N/A |
| 0.70 | 0.12 |
| 0.81 | 0.29 |
| 0.85 | 0.31 |
| 0.96 | 0.46 |
| 0.86 | 0.28 |
| 0.71 | 0.11 |
| 0.47 | 0.02 |
| 1.01 | 0.52 |
| 1.01 | 0.51 |
| 1.03 | 0.53 |
| 0.88 | 0.31 |
| 0.80 | 0.30 |
| 0.92 | 0.37 |
| 0.92 | 0.38 |
| 1.16 | 0.73 |
| 1.00 | 0.50 |
| #N/A | #N/A |
| 0.98 | 0.49 |
| 0.70 | 0.12 |

|      |      |
|------|------|
| 0.94 | 0.44 |
| 0.91 | 0.36 |
| 1.52 | 0.73 |
| 0.60 | 0.04 |
| 1.04 | 0.57 |
| 0.86 | 0.29 |
| 0.60 | 0.14 |
| 0.77 | 0.19 |
| 1.04 | 0.56 |
| 0.84 | 0.28 |
| 1.11 | 0.67 |
| 0.93 | 0.40 |
| 0.93 | 0.43 |
| 0.86 | 0.28 |
| 0.95 | 0.44 |
| 1.06 | 0.57 |
| 1.05 | 0.58 |
| 0.96 | 0.45 |
| 0.88 | 0.31 |
| 1.10 | 0.63 |
| 0.74 | 0.14 |
| 1.43 | 0.64 |
| 0.94 | 0.40 |
| 1.55 | 0.91 |
| 1.14 | 0.61 |
| 1.22 | 0.68 |
| 1.00 | 0.51 |
| 1.36 | 0.65 |
| 1.42 | 0.79 |
| 1.58 | 0.94 |
| 0.83 | 0.34 |
| 1.16 | 0.73 |
| 0.98 | 0.45 |
| 1.53 | 0.91 |
| 1.23 | 0.79 |
| 0.21 | 0.00 |
| 1.70 | 0.96 |
| 1.34 | 0.86 |
| 0.86 | 0.37 |
| #N/A | #N/A |
| 1.13 | 0.69 |
| 0.76 | 0.16 |
| 0.89 | 0.34 |
| 0.76 | 0.17 |
| 0.86 | 0.30 |
| 0.92 | 0.40 |
| 0.94 | 0.41 |
| 0.63 | 0.07 |
| 0.86 | 0.29 |
| 0.77 | 0.17 |
| 0.83 | 0.25 |

|      |      |
|------|------|
| 0.70 | 0.11 |
| 0.66 | 0.08 |
| 0.74 | 0.14 |
| 0.95 | 0.42 |
| 1.03 | 0.52 |
| 0.83 | 0.27 |
| 0.94 | 0.41 |
| 1.73 | 0.73 |
| 1.91 | 0.98 |
| 0.89 | 0.34 |
| 0.83 | 0.24 |
| 0.87 | 0.29 |
| 1.01 | 0.50 |
| 1.12 | 0.68 |
| 1.67 | 0.85 |
| 0.86 | 0.30 |
| 1.02 | 0.50 |
| 1.09 | 0.63 |
| 0.73 | 0.13 |
| 0.94 | 0.42 |
| 1.12 | 0.67 |
| 1.08 | 0.57 |
| 1.17 | 0.67 |
| 0.94 | 0.42 |
| 0.99 | 0.50 |
| 1.01 | 0.51 |
| 0.85 | 0.29 |
| #N/A | #N/A |
| 1.42 | 0.67 |
| #N/A | #N/A |
| 1.41 | 0.86 |
| #N/A | #N/A |
| 0.94 | 0.41 |
| 1.12 | 0.59 |
| 1.16 | 0.71 |
| #N/A | #N/A |
| 1.01 | 0.54 |
| 1.05 | 0.57 |
| 1.08 | 0.62 |
| 1.12 | 0.67 |
| 1.26 | 0.72 |
| 1.20 | 0.71 |
| 0.95 | 0.43 |
| #N/A | #N/A |
| 0.77 | 0.18 |
| 1.15 | 0.70 |
| #N/A | #N/A |
| 1.04 | 0.53 |
| 1.25 | 0.69 |
| 0.84 | 0.34 |
| #N/A | #N/A |

|      |      |
|------|------|
| 0.88 | 0.34 |
| 0.86 | 0.30 |
| 1.30 | 0.81 |
| #N/A | #N/A |
| 1.09 | 0.64 |
| 1.02 | 0.54 |
| 0.97 | 0.46 |
| 0.84 | 0.30 |
| 0.75 | 0.15 |
| #N/A | #N/A |
| 1.18 | 0.74 |
| 0.90 | 0.34 |
| #N/A | #N/A |
| 0.99 | 0.50 |
| 1.13 | 0.63 |
| 1.25 | 0.63 |
| 1.78 | 0.82 |
| 1.05 | 0.50 |
| 1.22 | 0.76 |
| #N/A | #N/A |
| 1.10 | 0.64 |
| 0.87 | 0.34 |
| 0.87 | 0.31 |
| 1.16 | 0.68 |
| 1.08 | 0.56 |
| 0.82 | 0.24 |
| 1.12 | 0.68 |
| #N/A | #N/A |
| 1.80 | 0.96 |
| #N/A | #N/A |
| 1.23 | 0.66 |
| 0.90 | 0.36 |
| 1.20 | 0.75 |
| 1.14 | 0.51 |
| 1.24 | 0.69 |
| 0.84 | 0.27 |
| 0.98 | 0.48 |
| 0.86 | 0.34 |
| 0.93 | 0.41 |
| 0.88 | 0.32 |
| 0.84 | 0.29 |
| 1.02 | 0.54 |
| 1.18 | 0.73 |
| 0.88 | 0.34 |
| #N/A | #N/A |
| 0.71 | 0.13 |
| #N/A | #N/A |
| 0.81 | 0.22 |
| 1.40 | 0.74 |
| 0.92 | 0.38 |
| 1.81 | 0.67 |

|      |      |
|------|------|
| 0.73 | 0.16 |
| 1.26 | 0.79 |
| 0.82 | 0.23 |
| 0.82 | 0.23 |
| 0.99 | 0.50 |
| 1.05 | 0.56 |
| 0.90 | 0.35 |
| 1.05 | 0.59 |
| 0.90 | 0.39 |
| 1.09 | 0.61 |
| 1.15 | 0.67 |
| 1.19 | 0.75 |
| #N/A | #N/A |
| 1.13 | 0.69 |
| #N/A | #N/A |
| 1.08 | 0.56 |
| 1.04 | 0.58 |
| 1.06 | 0.58 |
| 1.16 | 0.72 |
| 0.83 | 0.24 |
| 1.37 | 0.85 |
| 1.10 | 0.61 |
| 1.07 | 0.61 |
| 1.37 | 0.88 |
| 1.23 | 0.78 |
| 0.83 | 0.25 |
| 1.12 | 0.67 |
| 1.15 | 0.66 |
| 1.13 | 0.69 |
| 1.10 | 0.66 |
| #N/A | #N/A |
| 1.29 | 0.63 |
| 0.77 | 0.19 |
| #N/A | #N/A |
| 0.91 | 0.39 |
| #N/A | #N/A |
| 0.94 | 0.42 |
| 1.16 | 0.62 |
| 1.16 | 0.51 |
| 0.84 | 0.31 |
| 0.85 | 0.28 |
| 1.16 | 0.69 |
| 1.38 | 0.88 |
| 0.95 | 0.43 |
| 0.99 | 0.46 |
| 0.98 | 0.49 |
| 1.25 | 0.61 |
| 0.79 | 0.23 |
| 1.00 | 0.46 |
| 1.03 | 0.56 |
| 0.92 | 0.38 |

|      |      |
|------|------|
| 0.93 | 0.43 |
| 1.36 | 0.80 |
| 1.05 | 0.49 |
| 1.04 | 0.54 |
| 1.10 | 0.65 |
| 1.09 | 0.60 |
| 0.98 | 0.48 |
| 0.88 | 0.33 |
| 1.03 | 0.56 |
| 0.68 | 0.17 |
| 1.00 | 0.48 |
| 1.21 | 0.71 |
| 0.93 | 0.42 |
| #N/A | #N/A |
| 1.42 | 0.80 |
| 0.96 | 0.43 |
| 1.42 | 0.79 |
| 1.07 | 0.62 |
| 1.44 | 0.64 |
| 1.28 | 0.81 |
| 1.30 | 0.80 |
| #N/A | #N/A |
| 0.97 | 0.47 |
| 0.87 | 0.32 |
| 0.87 | 0.31 |
| 1.08 | 0.64 |
| 0.95 | 0.42 |
| 1.64 | 0.95 |
| 0.73 | 0.14 |
| 1.22 | 0.59 |
| 0.86 | 0.31 |
| 0.70 | 0.10 |
| 1.03 | 0.51 |
| 0.89 | 0.35 |
| 0.90 | 0.38 |
| 0.90 | 0.39 |
| 1.27 | 0.73 |
| 0.71 | 0.12 |
| 0.91 | 0.40 |
| 0.94 | 0.44 |
| 0.81 | 0.23 |
| 0.95 | 0.43 |
| #N/A | #N/A |
| 0.99 | 0.47 |
| 0.98 | 0.47 |
| 0.98 | 0.45 |
| 1.18 | 0.71 |
| 0.76 | 0.17 |
| 0.67 | 0.10 |
| 0.95 | 0.44 |
| 1.01 | 0.52 |

|      |      |
|------|------|
| 1.05 | 0.58 |
| 0.93 | 0.41 |
| 1.23 | 0.78 |
| 1.19 | 0.74 |
| 1.16 | 0.50 |
| 1.29 | 0.75 |
| 0.99 | 0.49 |
| 1.13 | 0.65 |
| 1.09 | 0.61 |
| 0.96 | 0.46 |
| 0.97 | 0.46 |
| 0.57 | 0.09 |
| #N/A | #N/A |
| 1.82 | 0.98 |
| 0.88 | 0.31 |
| 0.91 | 0.37 |
| 0.92 | 0.38 |
| 0.81 | 0.22 |
| 0.78 | 0.22 |
| 1.02 | 0.55 |
| 0.87 | 0.33 |
| 1.53 | 0.89 |
| 1.06 | 0.58 |
| 0.92 | 0.37 |
| #N/A | #N/A |
| 0.83 | 0.25 |
| 1.01 | 0.52 |
| 1.30 | 0.78 |
| 0.67 | 0.09 |
| 1.01 | 0.54 |
| 0.87 | 0.36 |
| 0.80 | 0.20 |
| #N/A | #N/A |
| 1.08 | 0.56 |
| 0.70 | 0.19 |
| 0.82 | 0.23 |
| #N/A | #N/A |
| 0.65 | 0.07 |
| #N/A | #N/A |
| 0.71 | 0.12 |
| 0.85 | 0.28 |
| 1.31 | 0.84 |
| 0.95 | 0.42 |
| 1.24 | 0.67 |
| 0.89 | 0.39 |
| 1.83 | 0.91 |
| 0.97 | 0.47 |
| 0.80 | 0.23 |
| 0.80 | 0.23 |
| 1.02 | 0.51 |
| 0.80 | 0.21 |



|      |      |
|------|------|
| 0.92 | 0.38 |
| 1.33 | 0.65 |
| 1.06 | 0.56 |
| 0.79 | 0.20 |
| 0.71 | 0.14 |
| 0.92 | 0.37 |
| 0.98 | 0.45 |
| 0.97 | 0.44 |
| 1.56 | 0.94 |
| 1.27 | 0.82 |
| 0.97 | 0.47 |
| 1.11 | 0.67 |
| 1.13 | 0.69 |
| #N/A | #N/A |
| 1.12 | 0.67 |
| 1.53 | 0.91 |
| 0.89 | 0.33 |
| 1.26 | 0.61 |
| 0.74 | 0.14 |
| 1.06 | 0.59 |
| 1.02 | 0.52 |
| #N/A | #N/A |
| 0.75 | 0.15 |
| 0.98 | 0.48 |
| 1.65 | 0.87 |
| #N/A | #N/A |
| 1.16 | 0.71 |
| 0.93 | 0.40 |
| #N/A | #N/A |
| 0.92 | 0.37 |
| 1.05 | 0.57 |
| 0.88 | 0.40 |
| 0.85 | 0.29 |
| 0.87 | 0.35 |
| #N/A | #N/A |
| #N/A | #N/A |
| #N/A | #N/A |
| 0.39 | 0.01 |
| 0.74 | 0.14 |
| 1.01 | 0.50 |
| #N/A | #N/A |
| 1.40 | 0.87 |
| 0.89 | 0.34 |
| #N/A | #N/A |
| 1.12 | 0.67 |
| 1.05 | 0.59 |
| 1.14 | 0.67 |
| #N/A | #N/A |
| 1.15 | 0.61 |
| 1.35 | 0.74 |
| 1.36 | 0.83 |

|      |      |
|------|------|
| 0.93 | 0.44 |
| 0.75 | 0.20 |
| #N/A | #N/A |
| 1.09 | 0.63 |
| 0.99 | 0.48 |
| #N/A | #N/A |
| 1.05 | 0.59 |
| 1.04 | 0.55 |
| 0.78 | 0.19 |
| 0.83 | 0.27 |
| #N/A | #N/A |
| 1.48 | 0.58 |
| 0.97 | 0.46 |
| 1.37 | 0.86 |
| 0.82 | 0.26 |
| 1.24 | 0.79 |
| 1.10 | 0.52 |
| 1.19 | 0.64 |
| 1.10 | 0.59 |
| #N/A | #N/A |
| #N/A | #N/A |
| 1.22 | 0.77 |
| #N/A | #N/A |
| 0.93 | 0.39 |
| #N/A | #N/A |
| #N/A | #N/A |
| #N/A | #N/A |
| 1.12 | 0.61 |
| #N/A | #N/A |
| #N/A | #N/A |
| #N/A | #N/A |
| #N/A | #N/A |
| #N/A | #N/A |
| #N/A | #N/A |
| #N/A | #N/A |
| 0.99 | 0.49 |
| 0.91 | 0.37 |
| 0.79 | 0.30 |
| 0.84 | 0.26 |
| 0.81 | 0.22 |
| 0.79 | 0.21 |
| 0.86 | 0.29 |
| 0.24 | 0.00 |
| 1.04 | 0.57 |
| 0.71 | 0.14 |
| 1.10 | 0.64 |
| 0.87 | 0.31 |
| 0.89 | 0.33 |
| 0.90 | 0.40 |
| 0.92 | 0.43 |
| #N/A | #N/A |

|      |      |
|------|------|
| 0.97 | 0.47 |
| #N/A | #N/A |
| 1.07 | 0.61 |
| 1.12 | 0.68 |
| 1.12 | 0.67 |
| 1.01 | 0.53 |
| 1.04 | 0.54 |
| #N/A | #N/A |
| 1.14 | 0.69 |
| 0.90 | 0.35 |
| 1.30 | 0.79 |
| 0.74 | 0.15 |
| 1.00 | 0.52 |
| 1.07 | 0.58 |
| 1.04 | 0.54 |
| #N/A | #N/A |
| 1.06 | 0.53 |
| 1.16 | 0.59 |
| 0.85 | 0.31 |
| 1.00 | 0.51 |
| 0.88 | 0.37 |
| 0.90 | 0.37 |
| 0.84 | 0.32 |
| #N/A | #N/A |
| #N/A | #N/A |
| 0.95 | 0.43 |
| 0.91 | 0.43 |
| 0.84 | 0.30 |
| #N/A | #N/A |
| 0.78 | 0.26 |
| 0.84 | 0.26 |
| 0.79 | 0.21 |
| 1.45 | 0.86 |
| 0.88 | 0.34 |
| 0.80 | 0.23 |
| 0.80 | 0.22 |
| 0.99 | 0.50 |
| 0.75 | 0.19 |
| 1.02 | 0.54 |
| 1.54 | 0.84 |
| 1.26 | 0.76 |
| 0.88 | 0.34 |
| 1.22 | 0.68 |
| 1.01 | 0.50 |
| 0.95 | 0.43 |
| 0.89 | 0.34 |
| 1.02 | 0.52 |
| 1.00 | 0.51 |
| 1.35 | 0.87 |
| #N/A | #N/A |
| 0.81 | 0.27 |

|      |      |
|------|------|
| 0.93 | 0.41 |
| 0.89 | 0.33 |
| 0.69 | 0.10 |
| 1.02 | 0.50 |
| 1.35 | 0.83 |
| 1.43 | 0.87 |
| #N/A | #N/A |
| 1.14 | 0.62 |
| 1.15 | 0.72 |
| 1.23 | 0.77 |
| 0.95 | 0.44 |
| 1.42 | 0.90 |
| #N/A | #N/A |
| 1.10 | 0.52 |
| 1.03 | 0.52 |
| 1.14 | 0.66 |
| 1.88 | 0.98 |
| 0.93 | 0.40 |
| 0.96 | 0.45 |
| 0.83 | 0.28 |
| #N/A | #N/A |
| 0.81 | 0.22 |
| 0.83 | 0.25 |
| 0.99 | 0.50 |
| 0.94 | 0.44 |
| 1.43 | 0.90 |
| 0.85 | 0.27 |
| 1.14 | 0.69 |
| 1.16 | 0.59 |
| 0.81 | 0.22 |
| 1.03 | 0.54 |
| 0.98 | 0.48 |
| 0.95 | 0.43 |
| 1.29 | 0.80 |
| 1.23 | 0.69 |
| 1.26 | 0.70 |
| 0.27 | 0.00 |
| 1.13 | 0.66 |
| 0.86 | 0.37 |
| 1.38 | 0.85 |
| 0.78 | 0.29 |
| 1.33 | 0.56 |
| 1.10 | 0.65 |
| 1.47 | 0.90 |
| 1.20 | 0.77 |
| 1.16 | 0.64 |
| #N/A | #N/A |
| 1.19 | 0.53 |
| #N/A | #N/A |
| 0.97 | 0.45 |
| #N/A | #N/A |

|      |      |
|------|------|
| 1.10 | 0.60 |
| #N/A | #N/A |
| 1.01 | 0.49 |
| 0.95 | 0.43 |
| 0.79 | 0.20 |
| 0.97 | 0.46 |
| 0.86 | 0.32 |
| 0.84 | 0.26 |
| 1.13 | 0.57 |
| 0.95 | 0.44 |
| 0.91 | 0.37 |
| 0.97 | 0.46 |
| 0.91 | 0.38 |
| 0.95 | 0.44 |
| #N/A | #N/A |
| 0.93 | 0.42 |
| 1.31 | 0.84 |
| 1.17 | 0.72 |
| 0.81 | 0.31 |
| 0.76 | 0.16 |
| 0.93 | 0.40 |
| 0.61 | 0.07 |
| 1.14 | 0.69 |
| 0.81 | 0.22 |
| 0.86 | 0.33 |
| 1.75 | 0.91 |
| 0.87 | 0.31 |
| 0.72 | 0.20 |
| 0.84 | 0.26 |
| 0.79 | 0.19 |
| 0.91 | 0.37 |
| 0.61 | 0.05 |
| 0.97 | 0.46 |
| #N/A | #N/A |
| 0.96 | 0.43 |
| 1.13 | 0.64 |
| 1.51 | 0.90 |
| 1.22 | 0.73 |
| 0.93 | 0.39 |
| 1.27 | 0.79 |
| 0.78 | 0.19 |
| 0.80 | 0.31 |
| 1.17 | 0.70 |
| 1.14 | 0.71 |
| 0.90 | 0.35 |
| #N/A | #N/A |
| 0.99 | 0.49 |
| #N/A | #N/A |
| 1.25 | 0.81 |
| 0.77 | 0.19 |
| 1.04 | 0.55 |

|      |      |
|------|------|
| #N/A | #N/A |
| 1.04 | 0.55 |
| 1.01 | 0.53 |
| 0.97 | 0.46 |
| #N/A | #N/A |
| 1.04 | 0.57 |
| #N/A | #N/A |
| 0.95 | 0.45 |
| 1.16 | 0.66 |
| 0.91 | 0.40 |
| 1.42 | 0.88 |
| 0.71 | 0.11 |
| 0.78 | 0.22 |
| 0.93 | 0.42 |
| 0.81 | 0.25 |
| 1.02 | 0.49 |
| 1.29 | 0.84 |
| 0.96 | 0.45 |
| 0.77 | 0.17 |
| 0.81 | 0.22 |
| 0.72 | 0.12 |
| 0.79 | 0.28 |
| 0.47 | 0.01 |
| 1.07 | 0.55 |
| 1.01 | 0.52 |
| 0.87 | 0.29 |
| 0.88 | 0.32 |
| 0.88 | 0.32 |
| 2.14 | 0.99 |
| 1.16 | 0.72 |
| 0.90 | 0.35 |
| 0.98 | 0.45 |
| 0.57 | 0.17 |
| 0.88 | 0.39 |
| 1.14 | 0.70 |
| 0.88 | 0.33 |
| 1.37 | 0.84 |
| 0.81 | 0.26 |
| 1.28 | 0.82 |
| 1.24 | 0.63 |
| 0.87 | 0.32 |
| 1.14 | 0.70 |
| 1.23 | 0.51 |
| 0.90 | 0.34 |
| 0.93 | 0.40 |
| 1.16 | 0.52 |
| 1.20 | 0.77 |
| 1.25 | 0.72 |
| 0.92 | 0.38 |
| 1.08 | 0.63 |
| 0.89 | 0.34 |

|      |      |
|------|------|
| 1.12 | 0.60 |
| 0.85 | 0.37 |
| 1.49 | 0.91 |
| 1.20 | 0.73 |
| 0.79 | 0.24 |
| 1.06 | 0.59 |
| 1.04 | 0.57 |
| 0.80 | 0.21 |
| 0.80 | 0.21 |
| 1.16 | 0.72 |
| 0.90 | 0.36 |
| 0.92 | 0.38 |
| 0.92 | 0.38 |
| 0.68 | 0.10 |
| 0.74 | 0.21 |
| 1.21 | 0.78 |
| 0.80 | 0.21 |
| 0.69 | 0.29 |
| 0.56 | 0.09 |
| 0.74 | 0.23 |
| 1.23 | 0.59 |
| 1.01 | 0.53 |
| 0.90 | 0.36 |
| 0.85 | 0.27 |
| 0.84 | 0.26 |
| 0.98 | 0.48 |
| 0.91 | 0.36 |
| 1.14 | 0.61 |
| 1.06 | 0.59 |
| 1.26 | 0.80 |
| 1.20 | 0.75 |
| 0.93 | 0.39 |
| 1.12 | 0.68 |
| 0.99 | 0.49 |
| 1.07 | 0.61 |
| 1.02 | 0.54 |
| 0.97 | 0.45 |
| 1.29 | 0.84 |
| 0.93 | 0.39 |
| 1.30 | 0.84 |
| 0.99 | 0.50 |
| 1.05 | 0.58 |
| 1.03 | 0.57 |
| 1.04 | 0.58 |
| 1.37 | 0.88 |
| 1.16 | 0.70 |
| 1.11 | 0.57 |
| 1.05 | 0.56 |
| 1.35 | 0.76 |
| #N/A | #N/A |
| 1.01 | 0.49 |

|      |      |
|------|------|
| 1.23 | 0.75 |
| 1.28 | 0.83 |
| 0.65 | 0.20 |
| 0.88 | 0.35 |
| #N/A | #N/A |
| 0.89 | 0.33 |
| 0.80 | 0.27 |
| 1.04 | 0.56 |
| 0.80 | 0.24 |
| 0.64 | 0.07 |
| 1.01 | 0.50 |
| 0.99 | 0.49 |
| 0.88 | 0.32 |
| 0.75 | 0.19 |
| #N/A | #N/A |
| 1.50 | 0.93 |
| 0.96 | 0.45 |
| 0.89 | 0.35 |
| 1.27 | 0.82 |
| 0.84 | 0.26 |
| 0.95 | 0.44 |
| 1.04 | 0.58 |
| 1.22 | 0.78 |
| 0.87 | 0.31 |
| 0.75 | 0.21 |
| 1.19 | 0.72 |
| 0.53 | 0.02 |
| 0.90 | 0.37 |
| 0.90 | 0.39 |
| 1.09 | 0.60 |
| #N/A | #N/A |
| 1.17 | 0.70 |
| 2.51 | 1.00 |
| 1.21 | 0.73 |
| 6.48 | 1.00 |
| 1.32 | 0.76 |
| 1.26 | 0.81 |
| 1.05 | 0.50 |
| #N/A | #N/A |
| 1.13 | 0.69 |
| 1.71 | 0.93 |
| 1.46 | 0.84 |
| #N/A | #N/A |
| 1.21 | 0.75 |
| 0.82 | 0.23 |
| 0.90 | 0.34 |
| 1.00 | 0.51 |
| 1.56 | 0.94 |
| 0.94 | 0.41 |
| 1.13 | 0.68 |
| 0.76 | 0.16 |



|      |      |
|------|------|
| 0.86 | 0.30 |
| 1.08 | 0.60 |
| #N/A | #N/A |
| 1.20 | 0.72 |
| 0.72 | 0.15 |
| #N/A | #N/A |
| #N/A | #N/A |
| 0.89 | 0.33 |
| 0.98 | 0.49 |
| 0.98 | 0.47 |
| 0.86 | 0.32 |
| 0.75 | 0.18 |
| 1.03 | 0.50 |
| 1.03 | 0.55 |
| 0.87 | 0.32 |
| #N/A | #N/A |
| 0.87 | 0.33 |
| 1.48 | 0.74 |
| 1.05 | 0.59 |
| 1.06 | 0.59 |
| 0.90 | 0.34 |
| #N/A | #N/A |
| 0.99 | 0.47 |
| 0.44 | 0.02 |
| 1.03 | 0.52 |
| 1.37 | 0.87 |
| 0.96 | 0.45 |
| 1.05 | 0.59 |
| 0.81 | 0.22 |
| 1.49 | 0.88 |
| 1.01 | 0.50 |
| #N/A | #N/A |
| 1.34 | 0.87 |
| #N/A | #N/A |
| 1.07 | 0.57 |
| 1.46 | 0.90 |
| 1.16 | 0.69 |
| #N/A | #N/A |
| 1.06 | 0.60 |
| #N/A | #N/A |
| 1.14 | 0.67 |
| 0.96 | 0.46 |
| 0.98 | 0.45 |
| 0.93 | 0.39 |
| 0.66 | 0.10 |
| 1.20 | 0.77 |
| 0.79 | 0.20 |
| 1.01 | 0.52 |
| 0.94 | 0.42 |
| 1.04 | 0.55 |
| 1.42 | 0.85 |

|      |      |
|------|------|
| 1.24 | 0.54 |
| #N/A | #N/A |
| 1.07 | 0.51 |
| 0.75 | 0.20 |
| 0.70 | 0.15 |
| 1.10 | 0.64 |
| 1.04 | 0.55 |
| #N/A | #N/A |
| 1.02 | 0.50 |
| 0.80 | 0.21 |
| #N/A | #N/A |
| 1.20 | 0.62 |
| 0.92 | 0.39 |
| 0.70 | 0.13 |
| 1.34 | 0.80 |
| 0.63 | 0.13 |
| 0.72 | 0.14 |
| 1.09 | 0.50 |
| 0.98 | 0.47 |
| 1.54 | 0.91 |
| 1.08 | 0.64 |
| 1.38 | 0.85 |
| 1.01 | 0.50 |
| 1.34 | 0.54 |
| 1.27 | 0.83 |
| 1.05 | 0.57 |
| 0.97 | 0.44 |
| 1.22 | 0.70 |
| 0.94 | 0.41 |
| 0.82 | 0.25 |
| 0.92 | 0.38 |
| 0.94 | 0.40 |
| #N/A | #N/A |
| 1.08 | 0.60 |
| 1.16 | 0.71 |
| 1.22 | 0.78 |
| 0.98 | 0.47 |
| 0.93 | 0.40 |
| 0.88 | 0.33 |
| 1.02 | 0.54 |
| 1.01 | 0.52 |
| 0.62 | 0.05 |
| 1.27 | 0.80 |
| 0.86 | 0.28 |
| 0.85 | 0.31 |
| 0.95 | 0.44 |
| 0.94 | 0.43 |
| 1.06 | 0.60 |
| 1.05 | 0.52 |
| 0.92 | 0.40 |
| 0.90 | 0.36 |

|      |      |
|------|------|
| 0.90 | 0.36 |
| 0.30 | 0.00 |
| 1.22 | 0.77 |
| 1.16 | 0.68 |
| #N/A | #N/A |
| 0.84 | 0.31 |
| 0.67 | 0.08 |
| 1.08 | 0.64 |
| 1.44 | 0.74 |
| 1.15 | 0.69 |
| 0.81 | 0.26 |
| 1.25 | 0.62 |
| 1.13 | 0.67 |
| 1.19 | 0.66 |
| 1.00 | 0.51 |
| 1.16 | 0.66 |
| 0.85 | 0.27 |
| 0.49 | 0.07 |
| 0.91 | 0.37 |
| 1.01 | 0.52 |
| 1.29 | 0.58 |
| 1.53 | 0.84 |
| 1.03 | 0.56 |
| 0.99 | 0.47 |
| 1.18 | 0.74 |
| #N/A | #N/A |
| 0.74 | 0.16 |
| 0.93 | 0.40 |
| 1.19 | 0.76 |
| 1.11 | 0.67 |
| 0.81 | 0.22 |
| 1.35 | 0.86 |
| 1.35 | 0.81 |
| 1.10 | 0.65 |
| 0.97 | 0.47 |
| 1.01 | 0.52 |
| 1.32 | 0.56 |
| #N/A | #N/A |
| 1.27 | 0.74 |
| 0.89 | 0.34 |
| 0.86 | 0.34 |
| 0.68 | 0.09 |
| 1.04 | 0.58 |
| 0.98 | 0.48 |
| 0.83 | 0.25 |
| 0.92 | 0.40 |
| 0.84 | 0.31 |
| 0.82 | 0.35 |
| 1.05 | 0.55 |
| 0.81 | 0.22 |
| #N/A | #N/A |

|      |      |
|------|------|
| 0.98 | 0.48 |
| 1.03 | 0.52 |
| 1.08 | 0.51 |
| #N/A | #N/A |
| 1.56 | 0.89 |
| 1.51 | 0.93 |
| #N/A | #N/A |
| 0.97 | 0.45 |
| 0.79 | 0.24 |
| 0.73 | 0.22 |
| #N/A | #N/A |
| 0.98 | 0.47 |
| 1.05 | 0.55 |
| 1.54 | 0.93 |
| 0.75 | 0.15 |
| 1.00 | 0.50 |
| 1.01 | 0.52 |
| 1.62 | 0.65 |
| 0.84 | 0.29 |
| 0.96 | 0.45 |
| #N/A | #N/A |
| 1.06 | 0.61 |
| 0.91 | 0.38 |
| 0.72 | 0.14 |
| #N/A | #N/A |
| 0.90 | 0.36 |
| #N/A | #N/A |
| 1.10 | 0.58 |
| #N/A | #N/A |
| 1.02 | 0.49 |
| 0.94 | 0.42 |
| 1.00 | 0.50 |
| 1.41 | 0.84 |
| 1.04 | 0.56 |
| #N/A | #N/A |
| 0.87 | 0.31 |
| 0.89 | 0.36 |
| 0.89 | 0.35 |
| 0.98 | 0.48 |
| 1.21 | 0.56 |
| 0.73 | 0.14 |
| 0.90 | 0.34 |
| #N/A | #N/A |
| #N/A | #N/A |
| 0.88 | 0.40 |
| 1.06 | 0.60 |
| 1.00 | 0.51 |
| 0.96 | 0.43 |
| 1.00 | 0.49 |
| 1.10 | 0.55 |
| #N/A | #N/A |

|      |      |
|------|------|
| 1.19 | 0.58 |
| #N/A | #N/A |
| 0.38 | 0.01 |
| 1.09 | 0.59 |
| 1.10 | 0.65 |
| 1.07 | 0.51 |
| 1.31 | 0.80 |
| 0.75 | 0.15 |
| 0.90 | 0.34 |
| 0.84 | 0.30 |
| 1.22 | 0.78 |
| 1.10 | 0.61 |
| 1.63 | 0.88 |
| #N/A | #N/A |
| 0.80 | 0.23 |
| 1.01 | 0.53 |
| 0.95 | 0.44 |
| #N/A | #N/A |
| 0.92 | 0.38 |
| #N/A | #N/A |
| 0.91 | 0.37 |
| #N/A | #N/A |
| 1.20 | 0.61 |
| 1.10 | 0.64 |
| 1.03 | 0.54 |
| 1.18 | 0.67 |
| 1.53 | 0.93 |
| 1.31 | 0.76 |
| #N/A | #N/A |
| 0.81 | 0.23 |
| 0.70 | 0.16 |
| #N/A | #N/A |
| 1.41 | 0.85 |
| #N/A | #N/A |
| 1.08 | 0.62 |
| 0.74 | 0.18 |
| 0.87 | 0.32 |
| 1.03 | 0.53 |
| 0.92 | 0.43 |
| 0.94 | 0.43 |
| 0.94 | 0.43 |
| 1.34 | 0.73 |
| #N/A | #N/A |
| 0.88 | 0.31 |
| 0.91 | 0.36 |
| 0.90 | 0.36 |
| 1.06 | 0.57 |
| 1.04 | 0.55 |
| #N/A | #N/A |
| 0.89 | 0.36 |
| 1.05 | 0.59 |

|      |      |
|------|------|
| 0.98 | 0.48 |
| 1.11 | 0.67 |
| 0.90 | 0.40 |
| 0.99 | 0.47 |
| 0.94 | 0.41 |
| 1.17 | 0.65 |
| 0.96 | 0.44 |
| 1.20 | 0.77 |
| 1.03 | 0.56 |
| 1.04 | 0.56 |
| 0.77 | 0.28 |
| 0.83 | 0.30 |
| 1.12 | 0.66 |
| 1.05 | 0.55 |
| 1.16 | 0.59 |
| 0.90 | 0.35 |
| 1.01 | 0.49 |
| 0.81 | 0.28 |
| 1.20 | 0.59 |
| 1.09 | 0.63 |
| 1.15 | 0.71 |
| 1.52 | 0.75 |
| 1.16 | 0.72 |
| 1.10 | 0.64 |
| 1.28 | 0.83 |
| 1.15 | 0.62 |
| 1.18 | 0.67 |
| 1.30 | 0.81 |
| 1.16 | 0.62 |
| 1.06 | 0.58 |
| #N/A | #N/A |
| #N/A | #N/A |
| 0.94 | 0.42 |
| 0.75 | 0.16 |
| 1.13 | 0.69 |
| 0.81 | 0.23 |
| 0.97 | 0.46 |
| 0.91 | 0.37 |
| 0.96 | 0.45 |
| 0.94 | 0.42 |
| 1.10 | 0.63 |
| 0.96 | 0.46 |
| 1.10 | 0.57 |
| #N/A | #N/A |
| 0.75 | 0.16 |
| #N/A | #N/A |
| 0.85 | 0.27 |
| 0.91 | 0.36 |
| 1.02 | 0.54 |
| 0.88 | 0.37 |
| 1.02 | 0.54 |

|      |      |
|------|------|
| 1.02 | 0.52 |
| 0.92 | 0.39 |
| 1.15 | 0.69 |
| 0.99 | 0.49 |
| 0.89 | 0.38 |
| 1.00 | 0.52 |
| 1.34 | 0.76 |
| 0.91 | 0.38 |
| 1.02 | 0.55 |
| #N/A | #N/A |
| 0.81 | 0.22 |
| 1.12 | 0.68 |
| 0.85 | 0.28 |
| #N/A | #N/A |
| 1.01 | 0.51 |
| 1.10 | 0.64 |
| 1.00 | 0.52 |
| #N/A | #N/A |
| 0.97 | 0.46 |
| 1.02 | 0.54 |
| 1.00 | 0.50 |
| 0.89 | 0.32 |
| 0.97 | 0.45 |
| 1.06 | 0.51 |
| 1.18 | 0.70 |
| 1.12 | 0.67 |
| 1.03 | 0.53 |
| 0.66 | 0.07 |
| 0.84 | 0.28 |
| 0.99 | 0.50 |
| 0.81 | 0.28 |
| 0.74 | 0.14 |
| 1.36 | 0.60 |
| 0.66 | 0.11 |
| #N/A | #N/A |
| 1.02 | 0.53 |
| 1.38 | 0.53 |
| 1.19 | 0.75 |
| 0.71 | 0.14 |
| 1.51 | 0.93 |
| 0.81 | 0.34 |
| #N/A | #N/A |
| 0.55 | 0.07 |
| 0.84 | 0.42 |
| 1.37 | 0.88 |
| #N/A | #N/A |
| 0.85 | 0.29 |
| 0.81 | 0.22 |
| 0.88 | 0.32 |
| 1.06 | 0.58 |
| 1.10 | 0.59 |

|      |      |
|------|------|
| 0.78 | 0.19 |
| 0.95 | 0.44 |
| 0.82 | 0.23 |
| 1.12 | 0.67 |
| 1.21 | 0.58 |
| 1.06 | 0.59 |
| 0.77 | 0.27 |
| 1.03 | 0.55 |
| 1.09 | 0.54 |
| 1.21 | 0.67 |
| 1.06 | 0.61 |
| 1.11 | 0.65 |
| 0.85 | 0.27 |
| 1.19 | 0.76 |
| 1.05 | 0.55 |
| 1.02 | 0.54 |
| #N/A | #N/A |
| 1.75 | 0.97 |
| 1.10 | 0.55 |
| 1.85 | 0.94 |
| #N/A | #N/A |
| 1.05 | 0.60 |
| 1.23 | 0.59 |
| 2.13 | 0.99 |
| 1.38 | 0.87 |
| #N/A | #N/A |
| 0.77 | 0.19 |
| 0.70 | 0.13 |
| 0.98 | 0.48 |
| 0.81 | 0.32 |
| 1.05 | 0.57 |
| #N/A | #N/A |
| 1.10 | 0.66 |
| 1.00 | 0.51 |
| 0.91 | 0.38 |
| 0.91 | 0.38 |
| 0.78 | 0.18 |
| 0.80 | 0.21 |
| 0.72 | 0.17 |
| 0.98 | 0.46 |
| 1.08 | 0.61 |
| 0.97 | 0.46 |
| 1.16 | 0.62 |
| 0.59 | 0.04 |
| 1.06 | 0.49 |
| 0.94 | 0.40 |
| 1.01 | 0.51 |
| 0.98 | 0.45 |
| 0.56 | 0.04 |
| 1.00 | 0.51 |
| 0.91 | 0.36 |



|      |      |
|------|------|
| 1.31 | 0.84 |
| 1.03 | 0.55 |
| 0.99 | 0.50 |
| #N/A | #N/A |
| 1.19 | 0.72 |
| #N/A | #N/A |
| 1.06 | 0.59 |
| 0.83 | 0.26 |
| 1.14 | 0.66 |
| 0.92 | 0.38 |
| 1.13 | 0.69 |
| 0.97 | 0.45 |
| 1.09 | 0.57 |
| #N/A | #N/A |
| 1.02 | 0.54 |
| 1.03 | 0.56 |
| 1.44 | 0.91 |
| 1.11 | 0.62 |
| 1.18 | 0.75 |
| 0.87 | 0.30 |
| 1.05 | 0.55 |
| 1.03 | 0.54 |
| 0.92 | 0.40 |
| 1.02 | 0.52 |
| 0.93 | 0.39 |
| 1.00 | 0.49 |
| 1.10 | 0.57 |
| 0.56 | 0.04 |
| 1.52 | 0.61 |
| #N/A | #N/A |
| 1.42 | 0.83 |
| #N/A | #N/A |
| 0.91 | 0.38 |
| 1.13 | 0.63 |
| 1.18 | 0.73 |
| 0.81 | 0.26 |
| 1.22 | 0.76 |
| 1.46 | 0.77 |
| #N/A | #N/A |
| 0.77 | 0.18 |
| 0.83 | 0.25 |
| 0.57 | 0.08 |
| 0.86 | 0.31 |
| 0.85 | 0.30 |
| 1.03 | 0.56 |
| 0.88 | 0.33 |
| 1.12 | 0.67 |
| 1.27 | 0.82 |
| 1.06 | 0.60 |
| 1.07 | 0.59 |
| 0.63 | 0.24 |

|      |      |
|------|------|
| 0.95 | 0.42 |
| 0.58 | 0.04 |
| 1.29 | 0.80 |
| 1.09 | 0.61 |
| 1.05 | 0.58 |
| 0.88 | 0.35 |
| 0.94 | 0.41 |
| 1.04 | 0.58 |
| 1.14 | 0.71 |
| #N/A | #N/A |
| #N/A | #N/A |
| 1.18 | 0.73 |
| 0.82 | 0.30 |
| 1.05 | 0.55 |
| 0.91 | 0.37 |
| 1.08 | 0.63 |
| 0.80 | 0.27 |
| 1.13 | 0.69 |
| 0.96 | 0.45 |
| 1.02 | 0.51 |
| 0.74 | 0.14 |
| 1.25 | 0.56 |
| 0.94 | 0.43 |
| 0.82 | 0.23 |
| 0.76 | 0.19 |
| 0.98 | 0.48 |
| 0.96 | 0.46 |
| 0.92 | 0.38 |
| 0.90 | 0.38 |
| 0.66 | 0.11 |
| 1.07 | 0.53 |
| 0.92 | 0.42 |
| 1.13 | 0.68 |
| 0.88 | 0.36 |
| 0.65 | 0.11 |
| 1.25 | 0.76 |
| 0.78 | 0.18 |
| 0.74 | 0.20 |
| 1.29 | 0.83 |
| 1.05 | 0.58 |
| 0.82 | 0.23 |
| 1.11 | 0.62 |
| 1.00 | 0.51 |
| 1.21 | 0.77 |
| 1.04 | 0.54 |
| 1.20 | 0.72 |
| 1.61 | 0.92 |
| 0.69 | 0.13 |
| 1.22 | 0.78 |
| #N/A | #N/A |
| 1.39 | 0.88 |

|      |      |
|------|------|
| 0.79 | 0.19 |
| 1.00 | 0.50 |
| 1.18 | 0.67 |
| 1.05 | 0.58 |
| 1.15 | 0.58 |
| 0.71 | 0.17 |
| 0.69 | 0.12 |
| #N/A | #N/A |
| 1.40 | 0.89 |
| 1.30 | 0.57 |
| 1.12 | 0.67 |
| 0.96 | 0.46 |
| 1.16 | 0.71 |
| #N/A | #N/A |
| 0.98 | 0.48 |
| #N/A | #N/A |
| #N/A | #N/A |
| 0.68 | 0.10 |
| 0.89 | 0.34 |
| 0.97 | 0.47 |
| 1.33 | 0.85 |
| 1.07 | 0.53 |
| 0.80 | 0.23 |
| 0.88 | 0.34 |
| 0.86 | 0.33 |
| 0.90 | 0.34 |
| 1.11 | 0.53 |
| 1.04 | 0.58 |
| #N/A | #N/A |
| 0.96 | 0.45 |
| 0.88 | 0.33 |
| 0.95 | 0.45 |
| 1.34 | 0.86 |
| 0.95 | 0.42 |
| 0.96 | 0.45 |
| 0.96 | 0.45 |
| 1.12 | 0.68 |
| 1.29 | 0.72 |
| 1.18 | 0.71 |
| #N/A | #N/A |
| 1.45 | 0.82 |
| #N/A | #N/A |
| 1.22 | 0.78 |
| 1.29 | 0.79 |
| 1.03 | 0.47 |
| #N/A | #N/A |
| 1.12 | 0.51 |
| #N/A | #N/A |
| 1.15 | 0.71 |
| 1.04 | 0.55 |
| 1.10 | 0.61 |

|      |      |
|------|------|
| #N/A | #N/A |
| 1.81 | 0.90 |
| 1.59 | 0.94 |
| 0.89 | 0.35 |
| #N/A | #N/A |
| 1.03 | 0.52 |
| 0.91 | 0.36 |
| 1.17 | 0.69 |
| 0.96 | 0.45 |
| 1.01 | 0.51 |
| 1.06 | 0.58 |
| 1.10 | 0.62 |
| #N/A | #N/A |
| #N/A | #N/A |
| 0.65 | 0.07 |
| #N/A | #N/A |
| 0.98 | 0.45 |
| 0.88 | 0.31 |
| 0.72 | 0.15 |
| 0.95 | 0.44 |
| 0.81 | 0.25 |
| 0.82 | 0.37 |
| 0.69 | 0.18 |
| 1.23 | 0.68 |
| 0.94 | 0.41 |
| 0.78 | 0.18 |
| 1.38 | 0.86 |
| 0.89 | 0.35 |
| #N/A | #N/A |
| 1.00 | 0.48 |
| 1.01 | 0.53 |
| 0.87 | 0.32 |
| 0.98 | 0.49 |
| 0.95 | 0.43 |
| 0.87 | 0.30 |
| 0.89 | 0.32 |
| 1.35 | 0.84 |
| 1.13 | 0.68 |
| #N/A | #N/A |
| 0.97 | 0.46 |
| 1.21 | 0.77 |
| 1.14 | 0.69 |
| 1.56 | 0.90 |
| 1.03 | 0.53 |
| 1.48 | 0.91 |
| 1.74 | 0.90 |
| 1.15 | 0.69 |
| 0.67 | 0.09 |
| #N/A | #N/A |
| 0.92 | 0.39 |
| 0.95 | 0.44 |

|      |      |
|------|------|
| 1.10 | 0.65 |
| 1.20 | 0.73 |
| 1.57 | 0.95 |
| #N/A | #N/A |
| 1.07 | 0.60 |
| 0.62 | 0.10 |
| 1.10 | 0.61 |
| 0.95 | 0.42 |
| #N/A | #N/A |
| 1.02 | 0.47 |
| 0.94 | 0.42 |
| 0.91 | 0.37 |
| 0.85 | 0.29 |
| 0.84 | 0.27 |
| 0.87 | 0.32 |
| 0.81 | 0.26 |
| #N/A | #N/A |
| 1.22 | 0.78 |
| 0.80 | 0.21 |
| 0.62 | 0.05 |
| 0.85 | 0.34 |
| #N/A | #N/A |
| #N/A | #N/A |
| 1.29 | 0.80 |
| 1.09 | 0.58 |
| 1.15 | 0.66 |
| 0.93 | 0.41 |
| 1.71 | 0.54 |
| 0.93 | 0.41 |
| 0.84 | 0.33 |
| 1.67 | 0.93 |
| 1.16 | 0.58 |
| 0.95 | 0.44 |
| 0.91 | 0.36 |
| 1.27 | 0.82 |
| 0.85 | 0.27 |
| 0.81 | 0.22 |
| 0.87 | 0.31 |
| 0.98 | 0.47 |
| 1.06 | 0.60 |
| 1.39 | 0.86 |
| #N/A | #N/A |
| 1.13 | 0.61 |
| #N/A | #N/A |
| 1.11 | 0.66 |
| 1.25 | 0.80 |
| 1.05 | 0.58 |
| #N/A | #N/A |
| 0.95 | 0.43 |
| 1.16 | 0.72 |
| 1.10 | 0.65 |

|      |      |
|------|------|
| 0.98 | 0.47 |
| 1.10 | 0.51 |
| 1.21 | 0.78 |
| 1.10 | 0.64 |
| 1.27 | 0.76 |
| 0.90 | 0.34 |
| 1.05 | 0.52 |
| 1.22 | 0.78 |
| 0.44 | 0.01 |
| 0.96 | 0.45 |
| 1.25 | 0.60 |
| 1.38 | 0.80 |
| 0.71 | 0.17 |
| #N/A | #N/A |
| 1.29 | 0.70 |
| 0.40 | 0.06 |
| 1.12 | 0.67 |
| 0.92 | 0.37 |
| 0.56 | 0.11 |
| 0.95 | 0.45 |
| 1.15 | 0.55 |
| 1.42 | 0.90 |
| 0.75 | 0.16 |
| 0.92 | 0.42 |
| 0.96 | 0.46 |
| 1.01 | 0.52 |
| 1.27 | 0.80 |
| 1.04 | 0.58 |
| 0.78 | 0.18 |
| 0.72 | 0.14 |
| 1.53 | 0.93 |
| 0.70 | 0.11 |
| 0.83 | 0.25 |
| 0.99 | 0.46 |
| 1.01 | 0.53 |
| 0.96 | 0.45 |
| 1.33 | 0.83 |
| 1.04 | 0.54 |
| 1.43 | 0.88 |
| 1.53 | 0.91 |
| 1.22 | 0.78 |
| 0.78 | 0.19 |
| 0.92 | 0.43 |
| 1.11 | 0.63 |
| 1.04 | 0.58 |
| 0.80 | 0.21 |
| 0.97 | 0.44 |
| 1.73 | 0.95 |
| 1.32 | 0.74 |
| 1.69 | 0.96 |
| 0.88 | 0.31 |

|      |      |
|------|------|
| 1.08 | 0.63 |
| #N/A | #N/A |
| 0.82 | 0.25 |
| #N/A | #N/A |
| 1.13 | 0.69 |
| 1.43 | 0.90 |
| #N/A | #N/A |
| 1.33 | 0.86 |
| 0.78 | 0.18 |
| 0.90 | 0.35 |
| 0.85 | 0.32 |
| 0.14 | 0.00 |
| 1.13 | 0.66 |
| 1.05 | 0.55 |
| 1.07 | 0.57 |
| 0.78 | 0.19 |
| 0.85 | 0.29 |
| 1.07 | 0.61 |
| 0.90 | 0.37 |
| 0.85 | 0.27 |
| 0.97 | 0.47 |
| 0.89 | 0.34 |
| 1.12 | 0.64 |
| 0.92 | 0.38 |
| 0.81 | 0.26 |
| 1.24 | 0.78 |
| 0.99 | 0.47 |
| 1.88 | 0.97 |
| 1.36 | 0.86 |
| 0.87 | 0.36 |
| 0.77 | 0.18 |
| 1.16 | 0.65 |
| 1.15 | 0.66 |
| #N/A | #N/A |
| 0.72 | 0.12 |
| 0.97 | 0.45 |
| 1.09 | 0.55 |
| 1.04 | 0.54 |
| 0.77 | 0.21 |
| 1.02 | 0.52 |
| 1.04 | 0.52 |
| 0.86 | 0.29 |
| 0.99 | 0.51 |
| 0.91 | 0.37 |
| 0.82 | 0.26 |
| 0.68 | 0.10 |
| 1.10 | 0.64 |
| 1.63 | 0.95 |
| 1.13 | 0.53 |
| 0.88 | 0.32 |
| 1.41 | 0.79 |

|      |      |
|------|------|
| 1.81 | 0.97 |
| 1.69 | 0.95 |
| 0.92 | 0.40 |
| 1.17 | 0.58 |
| 0.82 | 0.24 |
| 0.96 | 0.46 |
| 0.86 | 0.29 |
| 1.26 | 0.68 |
| 0.96 | 0.45 |
| 0.75 | 0.15 |
| 0.79 | 0.20 |
| 1.24 | 0.68 |
| 0.72 | 0.12 |
| 0.89 | 0.37 |
| 1.21 | 0.65 |
| 0.82 | 0.24 |
| 0.89 | 0.33 |
| 1.07 | 0.62 |
| 0.94 | 0.41 |
| 1.02 | 0.54 |
| 0.88 | 0.37 |
| 1.33 | 0.82 |
| 1.07 | 0.60 |
| 1.05 | 0.55 |
| 1.03 | 0.56 |
| 1.05 | 0.57 |
| #N/A | #N/A |
| 0.77 | 0.17 |
| 1.04 | 0.57 |
| 0.86 | 0.30 |
| 1.07 | 0.60 |
| 0.88 | 0.31 |
| 1.01 | 0.48 |
| 0.93 | 0.40 |
| 1.15 | 0.71 |
| 1.26 | 0.80 |
| 1.23 | 0.79 |
| 1.00 | 0.51 |
| 0.66 | 0.18 |
| 1.04 | 0.57 |
| 1.17 | 0.62 |
| 1.23 | 0.71 |
| #N/A | #N/A |
| 0.97 | 0.45 |
| 0.85 | 0.29 |
| 0.99 | 0.50 |
| #N/A | #N/A |
| 0.97 | 0.47 |
| #N/A | #N/A |
| 0.66 | 0.08 |
| 1.70 | 0.96 |



|      |      |
|------|------|
| 2.85 | 0.94 |
| 0.79 | 0.19 |
| 1.02 | 0.49 |
| 0.79 | 0.20 |
| 2.11 | 0.98 |
| #N/A | #N/A |
| 0.74 | 0.14 |
| 0.80 | 0.21 |
| 0.82 | 0.23 |
| 1.02 | 0.50 |
| 1.73 | 0.54 |
| 1.65 | 0.78 |
| 0.79 | 0.27 |
| 0.89 | 0.40 |
| 0.99 | 0.47 |
| 0.80 | 0.24 |
| 0.78 | 0.26 |
| 1.14 | 0.70 |
| 1.16 | 0.72 |
| 1.14 | 0.60 |
| 1.58 | 0.94 |
| 0.91 | 0.40 |
| 0.87 | 0.34 |
| 1.07 | 0.58 |
| 1.18 | 0.62 |
| 1.30 | 0.84 |
| 0.85 | 0.29 |
| 0.82 | 0.29 |
| 1.18 | 0.73 |
| 1.18 | 0.74 |
| #N/A | #N/A |
| 1.08 | 0.63 |
| 1.06 | 0.57 |
| 0.94 | 0.43 |
| 0.90 | 0.43 |
| 1.26 | 0.79 |
| 1.06 | 0.60 |
| 0.82 | 0.23 |
| 1.54 | 0.94 |
| 0.89 | 0.38 |
| 1.35 | 0.85 |
| #N/A | #N/A |
| #N/A | #N/A |
| 1.06 | 0.60 |
| 1.33 | 0.77 |
| 0.99 | 0.47 |
| 1.08 | 0.63 |
| 0.72 | 0.14 |
| 0.98 | 0.47 |
| 0.91 | 0.40 |
| 0.76 | 0.19 |

|      |      |
|------|------|
| 1.34 | 0.85 |
| 0.78 | 0.31 |
| 0.83 | 0.33 |
| 1.25 | 0.72 |
| 0.96 | 0.43 |
| 1.13 | 0.57 |
| 0.83 | 0.25 |
| 0.65 | 0.10 |
| 1.04 | 0.55 |
| 1.26 | 0.56 |
| 0.76 | 0.16 |
| 1.28 | 0.70 |
| 0.42 | 0.01 |
| 1.11 | 0.62 |
| 0.76 | 0.22 |
| 1.12 | 0.67 |
| 0.92 | 0.38 |
| 0.95 | 0.43 |
| 1.01 | 0.50 |
| 1.11 | 0.66 |
| 0.89 | 0.34 |
| 1.16 | 0.66 |
| 1.37 | 0.84 |
| 0.82 | 0.25 |
| 1.25 | 0.70 |
| 0.81 | 0.22 |
| 0.84 | 0.29 |
| 1.25 | 0.72 |
| 1.13 | 0.69 |
| 0.94 | 0.42 |
| 0.79 | 0.21 |
| 0.78 | 0.24 |
| 1.47 | 0.92 |
| 1.17 | 0.73 |
| 1.07 | 0.57 |
| 1.35 | 0.82 |
| 1.64 | 0.53 |
| 1.07 | 0.58 |
| 1.18 | 0.66 |
| 1.10 | 0.50 |
| 0.95 | 0.42 |
| 0.70 | 0.12 |
| 0.97 | 0.47 |
| #N/A | #N/A |
| 1.27 | 0.63 |
| 0.93 | 0.40 |
| 1.38 | 0.87 |
| #N/A | #N/A |
| 0.85 | 0.30 |
| #N/A | #N/A |
| 1.24 | 0.75 |

|      |      |
|------|------|
| 0.94 | 0.42 |
| 0.92 | 0.39 |
| 1.00 | 0.52 |
| 0.80 | 0.28 |
| #N/A | #N/A |
| #N/A | #N/A |
| 0.83 | 0.26 |
| 0.97 | 0.48 |
| 1.13 | 0.67 |
| 1.31 | 0.82 |
| 1.65 | 0.93 |
| 1.15 | 0.71 |
| 1.08 | 0.60 |
| 1.02 | 0.53 |
| 0.83 | 0.25 |
| 0.77 | 0.20 |
| 1.00 | 0.51 |
| 0.82 | 0.24 |
| 1.14 | 0.60 |
| 1.20 | 0.76 |
| 1.10 | 0.51 |
| #N/A | #N/A |
| 1.01 | 0.53 |
| #N/A | #N/A |
| 1.00 | 0.47 |
| #N/A | #N/A |
| 1.13 | 0.63 |
| 0.99 | 0.49 |
| 1.25 | 0.80 |
| #N/A | #N/A |
| 0.82 | 0.24 |
| 1.00 | 0.51 |
| 1.17 | 0.56 |
| 1.24 | 0.78 |
| 1.04 | 0.58 |
| #N/A | #N/A |
| #N/A | #N/A |
| #N/A | #N/A |
| 1.05 | 0.56 |
| #N/A | #N/A |
| 0.89 | 0.35 |
| 0.95 | 0.42 |
| 0.44 | 0.01 |
| 1.01 | 0.50 |
| 1.08 | 0.53 |
| 1.03 | 0.51 |
| 0.80 | 0.27 |
| 0.87 | 0.32 |
| 1.08 | 0.59 |
| 0.81 | 0.22 |
| 1.18 | 0.74 |

|      |      |
|------|------|
| 0.70 | 0.12 |
| 0.88 | 0.34 |
| 1.08 | 0.61 |
| 0.88 | 0.34 |
| 1.04 | 0.58 |
| 0.99 | 0.49 |
| 1.36 | 0.86 |
| 1.03 | 0.54 |
| 0.75 | 0.19 |
| 0.94 | 0.41 |
| 1.10 | 0.66 |
| 0.77 | 0.19 |
| 1.33 | 0.74 |
| 0.74 | 0.16 |
| #N/A | #N/A |
| 0.75 | 0.18 |
| 0.96 | 0.44 |
| 0.64 | 0.07 |
| 0.97 | 0.47 |
| 1.04 | 0.58 |
| #N/A | #N/A |
| 1.62 | 0.94 |
| 1.22 | 0.78 |
| 1.78 | 0.95 |
| 0.80 | 0.21 |
| 1.03 | 0.54 |
| 0.90 | 0.36 |
| 1.00 | 0.51 |
| #N/A | #N/A |
| 0.93 | 0.40 |
| 0.94 | 0.41 |
| 1.45 | 0.91 |
| 0.87 | 0.31 |
| 0.93 | 0.39 |
| 1.13 | 0.61 |
| 1.15 | 0.69 |
| 0.91 | 0.37 |
| #N/A | #N/A |
| 0.70 | 0.11 |
| 0.73 | 0.13 |
| 0.79 | 0.22 |
| 0.93 | 0.40 |
| 0.80 | 0.27 |
| 0.91 | 0.38 |
| 1.08 | 0.63 |
| 0.92 | 0.39 |
| 1.11 | 0.56 |
| 0.89 | 0.43 |
| 0.83 | 0.25 |
| #N/A | #N/A |
| 0.73 | 0.13 |

|      |      |
|------|------|
| 0.65 | 0.07 |
| 1.10 | 0.65 |
| 0.85 | 0.29 |
| 1.07 | 0.51 |
| 1.03 | 0.53 |
| 0.98 | 0.47 |
| 0.63 | 0.06 |
| 0.57 | 0.03 |
| 1.28 | 0.83 |
| 0.75 | 0.15 |
| 0.98 | 0.48 |
| 1.25 | 0.80 |
| 1.43 | 0.81 |
| 1.46 | 0.88 |
| 1.14 | 0.70 |
| 0.96 | 0.47 |
| 1.02 | 0.55 |
| 0.91 | 0.36 |
| 1.11 | 0.63 |
| 1.24 | 0.80 |
| 1.15 | 0.68 |
| 0.87 | 0.37 |
| 1.06 | 0.58 |
| #N/A | #N/A |
| 0.89 | 0.36 |
| #N/A | #N/A |
| 1.23 | 0.60 |
| #N/A | #N/A |
| 1.11 | 0.65 |
| 0.79 | 0.22 |
| 0.91 | 0.36 |
| 1.12 | 0.51 |
| 1.16 | 0.71 |
| 1.05 | 0.53 |
| 0.90 | 0.39 |
| 1.03 | 0.56 |
| 0.86 | 0.31 |
| 0.87 | 0.30 |
| 0.99 | 0.50 |
| 0.53 | 0.03 |
| 0.73 | 0.16 |
| 0.97 | 0.46 |
| 0.88 | 0.32 |
| 0.75 | 0.17 |
| #N/A | #N/A |
| 0.97 | 0.47 |
| 1.34 | 0.86 |
| 1.14 | 0.59 |
| 0.97 | 0.46 |
| 0.81 | 0.23 |
| 1.22 | 0.78 |

|      |      |
|------|------|
| 1.04 | 0.52 |
| 1.07 | 0.60 |
| 1.24 | 0.70 |
| 1.34 | 0.86 |
| 0.79 | 0.22 |
| 0.89 | 0.33 |
| 1.22 | 0.68 |
| 0.99 | 0.49 |
| 1.21 | 0.77 |
| 1.18 | 0.59 |
| 0.88 | 0.33 |
| 0.83 | 0.25 |
| 0.93 | 0.42 |
| 1.04 | 0.57 |
| 1.04 | 0.56 |
| 1.48 | 0.92 |
| 1.11 | 0.66 |
| 1.07 | 0.61 |
| 0.83 | 0.25 |
| 0.78 | 0.18 |
| 0.99 | 0.49 |
| 0.79 | 0.23 |
| 1.35 | 0.87 |
| 1.15 | 0.68 |
| 1.06 | 0.58 |
| #N/A | #N/A |
| 0.98 | 0.47 |
| 1.03 | 0.56 |
| 0.98 | 0.47 |
| 0.86 | 0.29 |
| 1.20 | 0.74 |
| 1.03 | 0.55 |
| 0.97 | 0.46 |
| 0.94 | 0.42 |
| 0.73 | 0.13 |
| 1.41 | 0.52 |
| 0.89 | 0.33 |
| #N/A | #N/A |
| 0.68 | 0.09 |
| 1.28 | 0.82 |
| 0.92 | 0.37 |
| #N/A | #N/A |
| 0.81 | 0.22 |
| 0.95 | 0.45 |
| 1.15 | 0.58 |
| 1.44 | 0.90 |
| 0.98 | 0.48 |
| 0.91 | 0.36 |
| 0.77 | 0.22 |
| 0.89 | 0.34 |
| 1.00 | 0.48 |

|      |      |
|------|------|
| 0.66 | 0.07 |
| 0.94 | 0.42 |
| 0.89 | 0.33 |
| 1.28 | 0.55 |
| 1.09 | 0.64 |
| 1.07 | 0.53 |
| 0.95 | 0.42 |
| #N/A | #N/A |
| 1.09 | 0.50 |
| #N/A | #N/A |
| 0.89 | 0.35 |
| 1.20 | 0.77 |
| 0.67 | 0.31 |
| 0.93 | 0.39 |
| 1.33 | 0.77 |
| 1.30 | 0.73 |
| 0.91 | 0.38 |
| 0.53 | 0.03 |
| 1.17 | 0.73 |
| #N/A | #N/A |
| 1.79 | 0.96 |
| 0.82 | 0.24 |
| 0.93 | 0.39 |
| 0.90 | 0.36 |
| #N/A | #N/A |
| 1.10 | 0.57 |
| 1.09 | 0.64 |
| 0.95 | 0.43 |
| 0.94 | 0.41 |
| 0.73 | 0.13 |
| 0.89 | 0.36 |
| 0.85 | 0.28 |
| #N/A | #N/A |
| 0.77 | 0.17 |
| 0.78 | 0.21 |
| 0.65 | 0.08 |
| 0.96 | 0.44 |
| 1.04 | 0.53 |
| 1.14 | 0.69 |
| 1.06 | 0.59 |
| 1.14 | 0.69 |
| 1.01 | 0.52 |
| 0.99 | 0.50 |
| 1.08 | 0.61 |
| 1.10 | 0.53 |
| 1.18 | 0.69 |
| 1.42 | 0.88 |
| #N/A | #N/A |
| 1.40 | 0.77 |
| #N/A | #N/A |
| 1.11 | 0.54 |

|      |      |
|------|------|
| 0.88 | 0.31 |
| 0.88 | 0.32 |
| 1.13 | 0.68 |
| 0.98 | 0.46 |
| 0.95 | 0.42 |
| 1.19 | 0.75 |
| 1.13 | 0.70 |
| 0.95 | 0.42 |
| 1.04 | 0.49 |
| 1.05 | 0.59 |
| 1.13 | 0.69 |
| 1.24 | 0.71 |
| 1.22 | 0.78 |
| 1.80 | 0.98 |
| 1.30 | 0.71 |
| 2.05 | 0.97 |
| #N/A | #N/A |
| 0.64 | 0.07 |
| 0.91 | 0.38 |
| 1.27 | 0.78 |
| 1.29 | 0.62 |
| 1.11 | 0.63 |
| #N/A | #N/A |
| 1.13 | 0.69 |
| #N/A | #N/A |
| #N/A | #N/A |
| 0.94 | 0.43 |
| #N/A | #N/A |
| 0.74 | 0.14 |
| 1.03 | 0.52 |
| 1.31 | 0.83 |
| 0.81 | 0.23 |
| 0.73 | 0.24 |
| 0.86 | 0.30 |
| 1.08 | 0.62 |
| 0.79 | 0.27 |
| 0.98 | 0.49 |
| 0.86 | 0.29 |
| 0.95 | 0.42 |
| 1.56 | 0.94 |
| 0.97 | 0.47 |
| 0.85 | 0.28 |
| 1.30 | 0.84 |
| 1.01 | 0.50 |
| 1.00 | 0.50 |
| 1.08 | 0.53 |
| 0.97 | 0.47 |
| 1.11 | 0.67 |
| 1.03 | 0.49 |
| 0.86 | 0.33 |
| 1.06 | 0.59 |



|      |      |
|------|------|
| 0.74 | 0.14 |
| 1.31 | 0.60 |
| 1.09 | 0.63 |
| 0.87 | 0.30 |
| 0.81 | 0.22 |
| 1.23 | 0.78 |
| 1.05 | 0.57 |
| 1.16 | 0.66 |
| 1.08 | 0.59 |
| #N/A | #N/A |
| 1.72 | 0.93 |
| #N/A | #N/A |
| 0.95 | 0.43 |
| #N/A | #N/A |
| 1.41 | 0.88 |
| #N/A | #N/A |
| 1.19 | 0.72 |
| 0.68 | 0.15 |
| 1.05 | 0.55 |
| 1.17 | 0.73 |
| 1.19 | 0.65 |
| 1.08 | 0.62 |
| #N/A | #N/A |
| 0.77 | 0.23 |
| 1.27 | 0.71 |
| 0.94 | 0.44 |
| 0.85 | 0.41 |
| 0.84 | 0.33 |
| 0.98 | 0.47 |
| 1.53 | 0.82 |
| 0.87 | 0.31 |
| 0.80 | 0.21 |
| 1.08 | 0.52 |
| 1.08 | 0.60 |
| 1.21 | 0.76 |
| 0.92 | 0.41 |
| 1.04 | 0.49 |
| 0.81 | 0.26 |
| 0.78 | 0.28 |
| 1.06 | 0.61 |
| 0.77 | 0.17 |
| 0.68 | 0.11 |
| 1.01 | 0.49 |
| 0.96 | 0.46 |
| 1.26 | 0.51 |
| 1.86 | 0.97 |
| 0.50 | 0.02 |
| 0.47 | 0.08 |
| 1.15 | 0.67 |
| 0.78 | 0.18 |
| 1.04 | 0.57 |

|      |      |
|------|------|
| 1.06 | 0.58 |
| 0.95 | 0.42 |
| 1.16 | 0.73 |
| 0.74 | 0.16 |
| 1.18 | 0.65 |
| 1.07 | 0.58 |
| #N/A | #N/A |
| 2.07 | 0.99 |
| #N/A | #N/A |
| 1.25 | 0.80 |
| 1.05 | 0.58 |
| 1.09 | 0.64 |
| #N/A | #N/A |
| 0.98 | 0.46 |
| 1.22 | 0.78 |
| 0.97 | 0.47 |
| 1.42 | 0.90 |
| 1.26 | 0.79 |
| 1.39 | 0.74 |
| 0.96 | 0.45 |
| 0.81 | 0.22 |
| 0.85 | 0.28 |
| 0.83 | 0.30 |
| 0.78 | 0.21 |
| 0.84 | 0.34 |
| #N/A | #N/A |
| 1.16 | 0.69 |
| 0.94 | 0.41 |
| 0.93 | 0.40 |
| 0.98 | 0.48 |
| #N/A | #N/A |
| 0.56 | 0.04 |
| 0.92 | 0.38 |
| 1.06 | 0.59 |
| 1.44 | 0.89 |
| 1.10 | 0.62 |
| 0.85 | 0.27 |
| 1.39 | 0.88 |
| 1.40 | 0.57 |
| 1.35 | 0.87 |
| 1.25 | 0.80 |
| 1.37 | 0.88 |
| 1.33 | 0.86 |
| 1.45 | 0.87 |
| 1.31 | 0.85 |
| 1.28 | 0.80 |
| 3.63 | 1.00 |
| 1.18 | 0.75 |
| #N/A | #N/A |
| 1.10 | 0.59 |
| #N/A | #N/A |

|      |      |
|------|------|
| 0.92 | 0.38 |
| #N/A | #N/A |
| 1.21 | 0.77 |
| #N/A | #N/A |
| 1.12 | 0.56 |
| #N/A | #N/A |
| 1.01 | 0.49 |
| 1.02 | 0.53 |
| 1.25 | 0.81 |
| 0.81 | 0.22 |
| 1.13 | 0.69 |
| 1.14 | 0.64 |
| 0.86 | 0.33 |
| 1.10 | 0.63 |
| 1.04 | 0.57 |
| 0.93 | 0.40 |
| 0.71 | 0.11 |
| 0.26 | 0.00 |
| #N/A | #N/A |
| 1.11 | 0.59 |
| 0.77 | 0.22 |
| 1.02 | 0.53 |
| 0.85 | 0.30 |
| 0.90 | 0.36 |
| 0.96 | 0.43 |
| 1.17 | 0.73 |
| 1.24 | 0.73 |
| 1.28 | 0.79 |
| #N/A | #N/A |
| 0.88 | 0.33 |
| 1.15 | 0.69 |
| 0.71 | 0.15 |
| 1.12 | 0.67 |
| #N/A | #N/A |
| 0.91 | 0.36 |
| 0.75 | 0.17 |
| 1.15 | 0.71 |
| #N/A | #N/A |
| 1.30 | 0.77 |
| 0.82 | 0.24 |
| 1.04 | 0.57 |
| 1.12 | 0.60 |
| 0.99 | 0.47 |
| #N/A | #N/A |
| 0.92 | 0.40 |
| 0.94 | 0.41 |
| 0.90 | 0.34 |
| 1.16 | 0.65 |
| 1.23 | 0.67 |
| #N/A | #N/A |
| 0.94 | 0.41 |

|      |      |
|------|------|
| #N/A | #N/A |
| 1.10 | 0.64 |
| 1.13 | 0.64 |
| 0.84 | 0.26 |
| 1.28 | 0.80 |
| 0.94 | 0.42 |
| 1.22 | 0.73 |
| 1.00 | 0.52 |
| #N/A | #N/A |
| 0.99 | 0.49 |
| 0.90 | 0.35 |
| 1.47 | 0.89 |
| 1.42 | 0.90 |
| 0.67 | 0.08 |
| 1.00 | 0.50 |
| 0.85 | 0.34 |
| 0.73 | 0.13 |
| 0.78 | 0.22 |
| 0.82 | 0.23 |
| 1.03 | 0.53 |
| 0.82 | 0.32 |
| 0.56 | 0.03 |
| 1.00 | 0.52 |
| 0.97 | 0.47 |
| 1.17 | 0.62 |
| 0.73 | 0.14 |
| 1.00 | 0.51 |
| #N/A | #N/A |
| 1.57 | 0.85 |
| 1.03 | 0.54 |
| 0.83 | 0.26 |
| 1.55 | 0.92 |
| 1.58 | 0.70 |
| 0.69 | 0.14 |
| 0.98 | 0.48 |
| 0.98 | 0.47 |
| 1.00 | 0.51 |
| 0.53 | 0.03 |
| 1.15 | 0.71 |
| 1.16 | 0.72 |
| 1.11 | 0.65 |
| 1.20 | 0.76 |
| 0.84 | 0.26 |
| 1.00 | 0.46 |
| 0.89 | 0.36 |
| 0.79 | 0.21 |
| 1.31 | 0.82 |
| 1.44 | 0.77 |
| 1.30 | 0.84 |
| 0.91 | 0.37 |
| #N/A | #N/A |

|       |      |
|-------|------|
| 0.87  | 0.31 |
| 1.46  | 0.85 |
| 1.02  | 0.52 |
| 1.13  | 0.69 |
| 1.00  | 0.48 |
| 0.93  | 0.40 |
| 1.47  | 0.81 |
| 1.15  | 0.71 |
| 1.42  | 0.90 |
| 1.09  | 0.60 |
| 0.36  | 0.01 |
| 0.79  | 0.41 |
| 1.11  | 0.50 |
| 0.83  | 0.26 |
| 0.81  | 0.31 |
| 1.19  | 0.75 |
| 1.21  | 0.66 |
| 0.71  | 0.13 |
| 1.16  | 0.67 |
| 0.78  | 0.19 |
| 1.20  | 0.75 |
| 0.82  | 0.24 |
| #N/A  | #N/A |
| 0.86  | 0.37 |
| 0.94  | 0.41 |
| 1.06  | 0.51 |
| 1.04  | 0.50 |
| 0.89  | 0.34 |
| 0.71  | 0.30 |
| 1.02  | 0.53 |
| #N/A  | #N/A |
| 0.94  | 0.42 |
| 1.62  | 0.94 |
| 1.23  | 0.78 |
| 11.40 | 1.00 |
| 1.18  | 0.74 |
| 1.26  | 0.79 |
| 1.13  | 0.66 |
| 1.37  | 0.82 |
| 0.91  | 0.37 |
| 0.92  | 0.41 |
| 0.87  | 0.31 |
| 1.05  | 0.59 |
| 1.37  | 0.83 |
| 0.98  | 0.47 |
| 0.99  | 0.48 |
| 1.10  | 0.65 |
| 0.98  | 0.48 |
| 1.62  | 0.65 |
| 1.19  | 0.72 |
| 0.96  | 0.46 |

|      |      |
|------|------|
| 0.91 | 0.37 |
| 1.02 | 0.54 |
| 1.28 | 0.81 |
| 1.10 | 0.66 |
| 0.95 | 0.43 |
| 1.04 | 0.53 |
| #N/A | #N/A |
| #N/A | #N/A |
| 0.69 | 0.10 |
| 1.06 | 0.56 |
| 0.81 | 0.22 |
| 1.00 | 0.49 |
| 0.77 | 0.19 |
| 0.90 | 0.35 |
| 1.23 | 0.65 |
| 0.75 | 0.16 |
| 0.93 | 0.42 |
| 0.90 | 0.37 |
| 0.71 | 0.12 |
| 0.81 | 0.29 |
| #N/A | #N/A |
| 1.68 | 0.96 |
| 0.78 | 0.19 |
| 1.20 | 0.76 |
| 0.86 | 0.30 |
| 1.19 | 0.53 |
| 1.03 | 0.51 |
| 0.92 | 0.39 |
| 1.29 | 0.74 |
| 1.28 | 0.81 |
| 1.13 | 0.67 |
| 0.98 | 0.46 |
| #N/A | #N/A |
| 1.00 | 0.48 |
| 0.87 | 0.32 |
| 1.59 | 0.95 |
| 2.67 | 0.99 |
| 1.03 | 0.51 |
| 2.13 | 0.99 |
| 2.07 | 0.96 |
| 1.59 | 0.95 |
| 1.08 | 0.62 |
| 1.07 | 0.60 |
| 1.00 | 0.51 |
| 1.34 | 0.58 |
| 0.97 | 0.44 |
| #N/A | #N/A |
| 0.78 | 0.46 |
| 1.76 | 0.97 |
| 0.98 | 0.46 |
| 1.25 | 0.78 |

|      |      |
|------|------|
| 1.26 | 0.76 |
| 0.98 | 0.47 |
| 1.29 | 0.63 |
| 1.02 | 0.53 |
| 0.44 | 0.01 |
| 0.65 | 0.11 |
| 0.86 | 0.29 |
| 1.04 | 0.57 |
| 0.85 | 0.31 |
| 1.00 | 0.48 |
| 1.05 | 0.52 |
| 0.90 | 0.36 |
| 1.02 | 0.50 |
| 0.66 | 0.07 |
| 1.19 | 0.74 |
| 0.96 | 0.44 |
| 1.09 | 0.63 |
| 1.07 | 0.62 |
| 1.39 | 0.67 |
| 0.93 | 0.40 |
| 0.57 | 0.05 |
| 1.15 | 0.55 |
| 1.00 | 0.48 |
| 0.84 | 0.28 |
| 0.70 | 0.11 |
| 1.16 | 0.54 |
| 0.97 | 0.47 |
| 1.05 | 0.59 |
| 1.02 | 0.51 |
| 1.20 | 0.76 |
| 0.77 | 0.20 |
| 1.01 | 0.54 |
| 0.49 | 0.02 |
| 1.15 | 0.70 |
| 1.02 | 0.54 |
| 1.42 | 0.86 |
| 1.45 | 0.91 |
| 1.42 | 0.82 |
| 2.11 | 0.53 |
| 0.87 | 0.33 |
| 1.17 | 0.68 |
| 1.35 | 0.69 |
| 1.12 | 0.63 |
| 1.43 | 0.90 |
| 0.99 | 0.46 |
| 0.90 | 0.37 |
| 1.28 | 0.78 |
| 0.91 | 0.39 |
| 1.53 | 0.91 |
| 1.02 | 0.52 |
| 1.18 | 0.70 |

|      |      |
|------|------|
| #N/A | #N/A |
| 1.00 | 0.50 |
| 0.80 | 0.26 |
| 0.81 | 0.24 |
| 0.84 | 0.35 |
| 0.94 | 0.41 |
| 0.95 | 0.45 |
| 0.81 | 0.24 |
| 0.73 | 0.15 |
| 0.94 | 0.41 |
| 0.94 | 0.43 |
| 0.93 | 0.42 |
| 1.16 | 0.72 |
| 0.73 | 0.28 |
| 0.81 | 0.24 |
| 0.97 | 0.46 |
| 0.81 | 0.28 |
| 1.02 | 0.55 |
| 0.90 | 0.35 |
| 1.17 | 0.73 |
| 0.96 | 0.44 |
| 1.06 | 0.59 |
| 1.01 | 0.53 |
| 1.02 | 0.50 |
| 0.63 | 0.06 |
| 1.26 | 0.82 |
| 1.48 | 0.92 |
| 1.44 | 0.89 |
| 0.97 | 0.47 |
| 0.88 | 0.31 |
| 1.12 | 0.67 |
| 1.05 | 0.56 |
| 1.00 | 0.46 |
| 1.37 | 0.88 |
| 0.88 | 0.31 |
| 1.18 | 0.54 |
| 0.75 | 0.17 |
| 0.92 | 0.38 |
| #N/A | #N/A |
| 0.85 | 0.29 |
| 0.93 | 0.40 |
| 1.23 | 0.72 |
| 1.12 | 0.61 |
| 1.10 | 0.61 |
| 1.16 | 0.66 |
| 1.02 | 0.51 |
| #N/A | #N/A |
| 1.86 | 0.98 |
| 1.17 | 0.73 |
| #N/A | #N/A |
| 0.96 | 0.45 |



|      |      |
|------|------|
| 0.96 | 0.45 |
| 0.95 | 0.43 |
| 1.00 | 0.49 |
| 1.20 | 0.68 |
| #N/A | #N/A |
| 1.04 | 0.55 |
| 1.29 | 0.84 |
| 1.12 | 0.68 |
| #N/A | #N/A |
| 1.05 | 0.57 |
| 1.76 | 0.73 |
| 0.93 | 0.43 |
| 1.13 | 0.64 |
| 1.01 | 0.50 |
| 0.85 | 0.29 |
| 1.23 | 0.78 |
| 0.71 | 0.12 |
| 0.90 | 0.35 |
| 0.94 | 0.42 |
| 1.17 | 0.66 |
| 0.98 | 0.46 |
| 0.79 | 0.24 |
| 1.28 | 0.83 |
| 1.43 | 0.88 |
| 1.28 | 0.83 |
| 0.80 | 0.20 |
| 1.07 | 0.57 |
| 0.95 | 0.44 |
| 1.22 | 0.73 |
| 0.92 | 0.38 |
| 0.95 | 0.42 |
| #N/A | #N/A |
| 0.81 | 0.40 |
| 0.86 | 0.29 |
| 0.78 | 0.18 |
| 0.82 | 0.27 |
| 1.86 | 0.97 |
| 1.30 | 0.83 |
| 1.17 | 0.67 |
| 1.03 | 0.54 |
| 1.00 | 0.50 |
| 0.97 | 0.46 |
| 0.94 | 0.41 |
| 1.10 | 0.66 |
| 1.06 | 0.57 |
| 1.04 | 0.55 |
| 0.75 | 0.15 |
| 1.24 | 0.73 |
| #N/A | #N/A |
| 0.92 | 0.38 |
| 0.76 | 0.16 |

|      |      |
|------|------|
| 0.77 | 0.17 |
| 1.50 | 0.93 |
| 1.21 | 0.76 |
| 0.99 | 0.48 |
| 0.85 | 0.28 |
| 1.35 | 0.84 |
| 1.16 | 0.61 |
| 0.95 | 0.44 |
| 0.99 | 0.48 |
| 0.92 | 0.40 |
| 0.86 | 0.33 |
| 1.05 | 0.59 |
| 1.08 | 0.62 |
| 1.11 | 0.59 |
| 1.09 | 0.65 |
| 1.07 | 0.63 |
| 1.01 | 0.53 |
| 1.72 | 0.96 |
| #N/A | #N/A |
| 1.14 | 0.69 |
| 0.83 | 0.28 |
| 1.00 | 0.52 |
| 1.33 | 0.86 |
| 1.59 | 0.92 |
| 1.09 | 0.60 |
| 1.00 | 0.50 |
| 1.01 | 0.51 |
| 0.78 | 0.27 |
| 1.43 | 0.77 |
| 1.33 | 0.82 |
| 1.18 | 0.66 |
| 1.02 | 0.54 |
| 1.16 | 0.72 |
| 0.73 | 0.13 |
| #N/A | #N/A |
| 1.01 | 0.53 |
| #N/A | #N/A |
| 1.14 | 0.52 |
| 1.13 | 0.69 |
| 0.69 | 0.11 |
| #N/A | #N/A |
| 1.03 | 0.56 |
| #N/A | #N/A |
| 0.70 | 0.10 |
| 0.97 | 0.47 |
| 1.09 | 0.55 |
| 0.97 | 0.46 |
| 1.01 | 0.50 |
| 1.40 | 0.77 |
| 0.99 | 0.50 |
| 0.92 | 0.38 |

|      |      |
|------|------|
| 0.71 | 0.13 |
| 1.25 | 0.81 |
| 0.27 | 0.00 |
| 0.68 | 0.09 |
| 0.90 | 0.35 |
| 0.93 | 0.41 |
| 0.80 | 0.22 |
| 0.92 | 0.41 |
| 1.24 | 0.72 |
| 1.11 | 0.66 |
| 0.61 | 0.06 |
| 1.14 | 0.70 |
| 0.96 | 0.45 |
| 0.75 | 0.16 |
| 1.29 | 0.82 |
| 0.93 | 0.39 |
| 1.05 | 0.58 |
| 1.43 | 0.87 |
| 0.88 | 0.32 |
| 1.03 | 0.55 |
| 0.72 | 0.17 |
| 0.85 | 0.27 |
| 1.15 | 0.64 |
| 1.07 | 0.52 |
| 1.67 | 0.84 |
| 0.42 | 0.02 |
| 1.43 | 0.89 |
| 1.27 | 0.72 |
| 1.47 | 0.91 |
| 1.25 | 0.67 |
| 1.05 | 0.56 |
| 0.98 | 0.45 |
| 0.65 | 0.17 |
| 1.05 | 0.56 |
| 1.05 | 0.58 |
| 0.94 | 0.40 |
| 1.06 | 0.56 |
| 1.06 | 0.59 |
| 1.11 | 0.68 |
| 1.09 | 0.55 |
| 1.30 | 0.77 |
| 1.04 | 0.58 |
| 1.08 | 0.58 |
| 0.69 | 0.11 |
| 0.88 | 0.32 |
| 1.14 | 0.64 |
| #N/A | #N/A |
| 0.94 | 0.41 |
| 0.77 | 0.20 |
| 1.00 | 0.48 |
| 0.70 | 0.10 |

|      |      |
|------|------|
| 1.11 | 0.65 |
| 0.76 | 0.18 |
| 0.74 | 0.14 |
| 0.76 | 0.17 |
| #N/A | #N/A |
| 1.16 | 0.72 |
| 1.28 | 0.82 |
| 1.29 | 0.74 |
| 1.09 | 0.65 |
| 1.04 | 0.57 |
| 1.14 | 0.60 |
| 0.95 | 0.43 |
| 0.89 | 0.35 |
| #N/A | #N/A |
| 1.32 | 0.56 |
| 0.77 | 0.21 |
| 0.89 | 0.33 |
| 1.01 | 0.48 |
| 0.90 | 0.37 |
| 1.58 | 0.81 |
| 0.81 | 0.22 |
| 1.30 | 0.83 |
| #N/A | #N/A |
| 0.95 | 0.45 |
| 0.96 | 0.43 |
| 1.11 | 0.57 |
| 1.07 | 0.56 |
| 1.13 | 0.55 |
| 0.73 | 0.29 |
| 0.87 | 0.32 |
| 0.98 | 0.48 |
| 1.05 | 0.57 |
| 1.04 | 0.54 |
| 0.90 | 0.37 |
| 1.01 | 0.48 |
| 1.09 | 0.63 |
| 1.08 | 0.61 |
| 0.87 | 0.31 |
| 1.11 | 0.52 |
| 1.10 | 0.60 |
| 0.76 | 0.18 |
| 0.94 | 0.41 |
| 0.93 | 0.41 |
| 0.93 | 0.40 |
| 0.37 | 0.01 |
| 1.07 | 0.60 |
| 1.56 | 0.90 |
| 0.94 | 0.41 |
| 1.04 | 0.58 |
| 0.93 | 0.41 |
| 0.82 | 0.23 |

|      |      |
|------|------|
| 1.14 | 0.64 |
| 1.03 | 0.53 |
| 0.84 | 0.27 |
| 1.22 | 0.74 |
| 1.07 | 0.49 |
| 0.87 | 0.33 |
| 0.73 | 0.15 |
| 0.76 | 0.21 |
| #N/A | #N/A |
| 0.90 | 0.39 |
| 1.63 | 0.95 |
| 1.19 | 0.76 |
| 0.95 | 0.42 |
| 1.02 | 0.55 |
| 1.13 | 0.67 |
| 0.97 | 0.46 |
| 1.04 | 0.58 |
| 0.96 | 0.44 |
| 0.72 | 0.13 |
| #N/A | #N/A |
| 1.90 | 0.98 |
| 1.23 | 0.58 |
| 1.19 | 0.76 |
| 1.15 | 0.61 |
| 0.84 | 0.27 |
| 1.33 | 0.74 |
| 1.40 | 0.84 |
| 1.11 | 0.63 |
| 1.18 | 0.74 |
| 1.20 | 0.76 |
| 1.02 | 0.49 |
| 1.07 | 0.56 |
| 1.29 | 0.77 |
| 1.18 | 0.68 |
| 0.69 | 0.14 |
| 0.79 | 0.20 |
| 0.89 | 0.35 |
| 1.16 | 0.72 |
| #N/A | #N/A |
| 0.76 | 0.16 |
| 1.01 | 0.53 |
| 0.63 | 0.08 |
| 0.83 | 0.27 |
| 0.90 | 0.37 |
| 0.80 | 0.23 |
| 0.78 | 0.19 |
| 0.93 | 0.41 |
| 1.03 | 0.56 |
| 0.93 | 0.40 |
| 0.91 | 0.37 |
| 0.77 | 0.18 |

|      |      |
|------|------|
| 1.04 | 0.57 |
| 0.99 | 0.50 |
| 0.88 | 0.31 |
| 2.05 | 0.93 |
| 0.95 | 0.42 |
| 0.83 | 0.24 |
| 1.11 | 0.65 |
| 1.07 | 0.61 |
| 1.25 | 0.75 |
| 1.78 | 0.96 |
| #N/A | #N/A |
| 0.83 | 0.28 |
| 0.88 | 0.32 |
| 1.12 | 0.67 |
| #N/A | #N/A |
| 0.88 | 0.35 |
| 1.11 | 0.64 |
| 1.02 | 0.54 |
| 1.05 | 0.55 |
| 0.92 | 0.38 |
| 1.24 | 0.79 |
| 0.76 | 0.16 |
| #N/A | #N/A |
| 0.82 | 0.23 |
| 0.61 | 0.05 |
| 0.91 | 0.36 |
| 0.91 | 0.36 |
| 1.39 | 0.89 |
| 0.75 | 0.15 |
| 0.90 | 0.36 |
| 1.14 | 0.50 |
| #N/A | #N/A |
| 1.21 | 0.77 |
| 0.89 | 0.39 |
| 0.99 | 0.50 |
| 1.26 | 0.75 |
| 0.81 | 0.27 |
| #N/A | #N/A |
| 1.11 | 0.66 |
| #N/A | #N/A |
| #N/A | #N/A |
| #N/A | #N/A |
| #N/A | #N/A |
| 0.97 | 0.46 |
| 1.10 | 0.61 |
| 0.93 | 0.42 |
| 1.11 | 0.63 |
| 0.89 | 0.34 |
| 0.90 | 0.43 |
| 1.00 | 0.48 |
| 1.04 | 0.50 |

|      |      |
|------|------|
| 1.19 | 0.56 |
| 0.91 | 0.40 |
| 0.93 | 0.40 |
| #N/A | #N/A |
| #N/A | #N/A |
| 1.31 | 0.71 |
| 1.04 | 0.55 |
| 1.05 | 0.58 |
| 1.44 | 0.75 |
| 1.19 | 0.75 |
| 1.23 | 0.78 |
| #N/A | #N/A |
| 0.78 | 0.18 |
| 0.82 | 0.23 |
| 1.06 | 0.60 |
| 1.04 | 0.57 |
| 0.99 | 0.46 |
| 1.34 | 0.60 |
| #N/A | #N/A |
| 0.90 | 0.36 |
| #N/A | #N/A |
| 0.92 | 0.38 |
| 0.89 | 0.35 |
| #N/A | #N/A |
| 1.05 | 0.58 |
| 1.31 | 0.59 |
| 1.25 | 0.74 |
| #N/A | #N/A |
| 1.25 | 0.80 |
| 1.18 | 0.74 |
| #N/A | #N/A |
| 0.90 | 0.35 |
| 0.92 | 0.38 |
| 1.14 | 0.66 |
| 1.04 | 0.58 |
| 0.98 | 0.46 |
| 1.39 | 0.89 |
| 1.62 | 0.95 |
| 1.36 | 0.51 |
| #N/A | #N/A |
| 0.60 | 0.06 |
| 1.24 | 0.68 |
| 0.86 | 0.33 |
| 1.01 | 0.52 |
| 0.88 | 0.32 |
| 1.08 | 0.59 |
| 1.05 | 0.57 |
| 0.86 | 0.33 |
| 1.40 | 0.89 |
| 1.06 | 0.52 |
| 0.96 | 0.45 |

|      |      |
|------|------|
| 0.93 | 0.42 |
| 1.36 | 0.87 |
| 0.91 | 0.37 |
| 1.08 | 0.63 |
| 0.73 | 0.14 |
| 0.77 | 0.17 |
| 1.19 | 0.75 |
| 0.95 | 0.43 |
| 1.14 | 0.65 |
| 1.27 | 0.82 |
| #N/A | #N/A |
| 1.20 | 0.77 |
| 0.94 | 0.44 |
| 1.30 | 0.81 |
| #N/A | #N/A |
| 1.32 | 0.84 |
| 1.06 | 0.60 |
| 1.39 | 0.76 |
| 0.98 | 0.48 |
| 1.05 | 0.56 |
| 1.68 | 0.96 |
| 1.28 | 0.83 |
| #N/A | #N/A |
| 1.12 | 0.64 |
| 1.02 | 0.55 |
| 0.69 | 0.13 |
| 0.85 | 0.27 |
| 1.18 | 0.74 |
| 1.08 | 0.62 |
| 1.29 | 0.79 |
| 0.93 | 0.42 |
| 0.81 | 0.22 |
| 1.05 | 0.57 |
| #N/A | #N/A |
| 1.25 | 0.79 |
| 1.38 | 0.88 |
| 1.05 | 0.56 |
| 0.63 | 0.06 |
| 0.72 | 0.15 |
| 1.09 | 0.62 |
| 0.98 | 0.48 |
| 0.79 | 0.20 |
| 1.12 | 0.62 |
| #N/A | #N/A |
| 0.90 | 0.36 |
| 1.05 | 0.54 |
| 0.54 | 0.06 |
| 0.93 | 0.40 |
| #N/A | #N/A |
| 1.17 | 0.74 |
| 1.57 | 0.93 |



|      |      |
|------|------|
| 1.02 | 0.50 |
| 1.65 | 0.91 |
| 0.95 | 0.43 |
| 1.04 | 0.57 |
| 0.99 | 0.50 |
| 1.09 | 0.65 |
| 1.14 | 0.60 |
| 1.11 | 0.57 |
| 1.06 | 0.60 |
| 1.14 | 0.70 |
| 0.78 | 0.23 |
| 1.12 | 0.67 |
| 1.10 | 0.61 |
| 0.86 | 0.30 |
| 1.06 | 0.60 |
| 0.78 | 0.19 |
| 1.19 | 0.74 |
| 1.22 | 0.59 |
| 1.25 | 0.80 |
| 1.11 | 0.66 |
| 0.87 | 0.31 |
| #N/A | #N/A |
| 1.31 | 0.74 |
| 0.96 | 0.44 |
| 1.13 | 0.59 |
| 0.91 | 0.38 |
| 0.99 | 0.50 |
| 0.65 | 0.25 |
| 1.09 | 0.59 |
| 0.99 | 0.49 |
| #N/A | #N/A |
| 0.93 | 0.41 |
| 0.83 | 0.40 |
| 0.83 | 0.25 |
| 0.77 | 0.22 |
| 1.22 | 0.74 |
| 0.79 | 0.28 |
| 1.04 | 0.49 |
| 1.08 | 0.49 |
| 1.22 | 0.76 |
| 1.26 | 0.81 |
| 1.48 | 0.90 |
| 1.19 | 0.70 |
| 0.89 | 0.33 |
| 1.00 | 0.51 |
| #N/A | #N/A |
| 1.16 | 0.71 |
| 0.96 | 0.45 |
| 1.01 | 0.53 |
| #N/A | #N/A |
| 0.73 | 0.38 |

|      |      |
|------|------|
| #N/A | #N/A |
| 1.10 | 0.64 |
| #N/A | #N/A |
| 0.91 | 0.37 |
| 1.17 | 0.69 |
| 0.78 | 0.22 |
| 1.38 | 0.84 |
| 1.39 | 0.68 |
| 1.42 | 0.58 |
| 0.84 | 0.32 |
| #N/A | #N/A |
| 1.48 | 0.90 |
| #N/A | #N/A |
| 1.72 | 0.90 |
| #N/A | #N/A |
| 0.97 | 0.47 |
| #N/A | #N/A |
| 1.10 | 0.57 |
| 0.87 | 0.33 |
| 1.04 | 0.53 |
| 1.08 | 0.63 |
| 0.67 | 0.09 |
| 2.12 | 0.98 |
| #N/A | #N/A |
| 1.28 | 0.73 |
| 0.89 | 0.33 |
| 1.22 | 0.77 |
| 1.10 | 0.61 |
| 1.53 | 0.93 |
| 1.03 | 0.55 |
| 1.14 | 0.69 |
| 1.17 | 0.57 |
| 1.51 | 0.87 |
| 1.11 | 0.64 |
| 0.95 | 0.43 |
| 0.88 | 0.32 |
| 0.53 | 0.05 |
| 1.01 | 0.53 |
| 1.09 | 0.64 |
| 0.76 | 0.16 |
| 0.86 | 0.34 |
| 0.96 | 0.45 |
| 0.95 | 0.42 |
| 0.79 | 0.20 |
| 0.87 | 0.33 |
| 0.76 | 0.17 |
| 0.89 | 0.34 |
| 0.95 | 0.42 |
| 0.89 | 0.34 |
| 0.76 | 0.16 |
| #N/A | #N/A |

|      |      |
|------|------|
| 1.09 | 0.55 |
| #N/A | #N/A |
| 1.71 | 0.93 |
| 1.00 | 0.46 |
| 0.83 | 0.26 |
| #N/A | #N/A |
| 1.42 | 0.85 |
| 1.50 | 0.93 |
| 1.19 | 0.73 |
| 1.00 | 0.50 |
| 1.15 | 0.71 |
| #N/A | #N/A |
| 1.19 | 0.73 |
| #N/A | #N/A |
| #N/A | #N/A |
| 1.45 | 0.90 |
| #N/A | #N/A |
| 0.84 | 0.34 |
| 0.85 | 0.29 |
| 0.84 | 0.29 |
| 0.85 | 0.31 |
| 0.93 | 0.41 |
| 0.98 | 0.48 |
| 0.73 | 0.13 |
| 0.83 | 0.28 |
| 0.91 | 0.38 |
| 1.29 | 0.83 |
| 1.01 | 0.50 |
| 0.99 | 0.48 |
| 0.80 | 0.28 |
| 0.93 | 0.43 |
| 1.07 | 0.57 |
| 1.50 | 0.93 |
| 0.99 | 0.49 |
| 0.92 | 0.40 |
| 1.35 | 0.82 |
| 1.31 | 0.85 |
| 0.85 | 0.28 |
| 1.51 | 0.91 |
| 0.88 | 0.35 |
| 1.18 | 0.71 |
| 1.12 | 0.67 |
| 1.10 | 0.59 |
| 0.89 | 0.36 |
| #N/A | #N/A |
| 1.13 | 0.67 |
| 1.11 | 0.65 |
| 1.04 | 0.55 |
| 1.11 | 0.64 |
| 1.06 | 0.59 |
| 1.56 | 0.94 |

|      |      |
|------|------|
| #N/A | #N/A |
| 1.31 | 0.78 |
| 1.09 | 0.61 |
| 1.18 | 0.75 |
| #N/A | #N/A |
| 1.19 | 0.75 |
| 0.94 | 0.41 |
| 1.16 | 0.64 |
| 1.14 | 0.63 |
| 0.93 | 0.39 |
| 1.14 | 0.59 |
| 1.07 | 0.55 |
| 1.16 | 0.68 |
| 0.86 | 0.30 |
| 1.12 | 0.67 |
| 0.97 | 0.46 |
| 0.89 | 0.38 |
| 1.15 | 0.71 |
| 1.09 | 0.65 |
| #N/A | #N/A |
| 0.92 | 0.37 |
| 0.60 | 0.05 |
| 0.87 | 0.31 |
| 1.68 | 0.96 |
| 0.99 | 0.48 |
| #N/A | #N/A |
| 1.17 | 0.73 |
| 1.28 | 0.79 |
| 1.01 | 0.52 |
| #N/A | #N/A |
| 1.12 | 0.69 |
| 1.21 | 0.72 |
| 1.08 | 0.63 |
| 1.20 | 0.72 |
| 0.97 | 0.45 |
| 1.18 | 0.74 |
| 0.83 | 0.25 |
| 1.22 | 0.78 |
| 1.16 | 0.52 |
| 1.34 | 0.85 |
| 1.85 | 0.94 |
| 1.11 | 0.67 |
| 0.93 | 0.39 |
| 1.26 | 0.81 |
| 1.20 | 0.76 |
| 0.99 | 0.50 |
| 0.75 | 0.17 |
| 0.63 | 0.08 |
| #N/A | #N/A |
| 0.84 | 0.29 |
| 1.13 | 0.66 |

|      |      |
|------|------|
| 0.85 | 0.27 |
| 0.94 | 0.41 |
| 1.03 | 0.51 |
| 0.97 | 0.46 |
| 0.88 | 0.32 |
| 1.21 | 0.71 |
| 1.25 | 0.73 |
| 1.31 | 0.77 |
| 1.08 | 0.57 |
| 1.03 | 0.55 |
| 0.57 | 0.09 |
| 0.86 | 0.32 |
| #N/A | #N/A |
| 1.10 | 0.64 |
| #N/A | #N/A |
| 0.47 | 0.02 |
| #N/A | #N/A |
| 1.05 | 0.50 |
| 1.00 | 0.49 |
| 0.93 | 0.42 |
| 0.90 | 0.38 |
| 0.72 | 0.12 |
| 0.95 | 0.44 |
| 0.98 | 0.47 |
| 0.81 | 0.22 |
| 1.34 | 0.82 |
| 1.30 | 0.84 |
| 0.76 | 0.16 |
| 0.86 | 0.29 |
| 1.51 | 0.90 |
| 0.99 | 0.49 |
| 1.39 | 0.86 |
| 0.97 | 0.44 |
| 1.12 | 0.67 |
| 1.05 | 0.57 |
| #N/A | #N/A |
| 1.17 | 0.73 |
| #N/A | #N/A |
| 1.15 | 0.70 |
| 1.05 | 0.51 |
| 1.05 | 0.59 |
| #N/A | #N/A |
| 1.05 | 0.49 |
| 0.84 | 0.26 |
| 1.36 | 0.85 |
| 2.51 | 0.95 |
| 0.70 | 0.11 |
| 1.04 | 0.54 |
| 1.25 | 0.69 |
| 0.94 | 0.42 |
| 1.09 | 0.64 |

|      |      |
|------|------|
| 1.25 | 0.79 |
| 1.23 | 0.66 |
| 1.12 | 0.68 |
| 1.06 | 0.59 |
| 0.95 | 0.43 |
| 1.55 | 0.94 |
| 1.24 | 0.80 |
| 1.32 | 0.79 |
| 0.86 | 0.32 |
| #N/A | #N/A |
| 1.06 | 0.60 |
| #N/A | #N/A |
| 0.92 | 0.38 |
| 0.69 | 0.09 |
| 0.65 | 0.25 |
| 0.77 | 0.21 |
| #N/A | #N/A |
| 1.19 | 0.76 |
| 1.40 | 0.82 |
| 1.30 | 0.57 |
| 0.77 | 0.24 |
| 0.53 | 0.04 |
| 1.01 | 0.48 |
| 1.02 | 0.54 |
| 1.50 | 0.54 |
| 2.15 | 0.98 |
| 0.94 | 0.43 |
| 0.54 | 0.08 |
| 0.94 | 0.41 |
| 1.73 | 0.87 |
| 0.96 | 0.44 |
| 1.02 | 0.54 |
| 0.88 | 0.32 |
| 1.27 | 0.82 |
| 1.15 | 0.72 |
| 1.07 | 0.60 |
| #N/A | #N/A |
| 0.97 | 0.47 |
| 1.00 | 0.51 |
| 1.16 | 0.71 |
| 1.07 | 0.55 |
| 1.13 | 0.69 |
| 1.22 | 0.51 |
| 0.91 | 0.36 |
| 0.75 | 0.18 |
| 0.83 | 0.25 |
| 0.98 | 0.47 |
| 1.55 | 0.82 |
| 0.92 | 0.38 |
| 1.02 | 0.55 |
| #N/A | #N/A |

|      |      |
|------|------|
| #N/A | #N/A |
| 0.97 | 0.44 |
| 1.01 | 0.50 |
| 0.98 | 0.48 |
| 1.15 | 0.71 |
| 1.08 | 0.61 |
| 1.08 | 0.60 |
| 0.86 | 0.30 |
| 0.99 | 0.50 |
| 1.41 | 0.89 |
| 1.00 | 0.49 |
| 0.97 | 0.46 |
| 1.14 | 0.70 |
| 0.93 | 0.39 |
| 1.11 | 0.60 |
| 0.91 | 0.37 |
| 0.91 | 0.40 |
| 0.69 | 0.10 |
| 1.03 | 0.52 |
| 1.02 | 0.48 |
| 1.45 | 0.86 |
| 1.38 | 0.88 |
| 1.04 | 0.58 |
| 0.84 | 0.29 |
| 0.70 | 0.11 |
| 0.87 | 0.37 |
| 1.44 | 0.71 |
| 1.16 | 0.72 |
| 1.25 | 0.78 |
| 0.97 | 0.44 |
| 1.13 | 0.69 |
| 1.12 | 0.68 |
| 1.03 | 0.55 |
| 0.99 | 0.49 |
| 0.56 | 0.09 |
| 1.00 | 0.52 |
| 1.03 | 0.53 |
| 0.81 | 0.25 |
| 1.02 | 0.53 |
| 1.21 | 0.57 |
| 1.33 | 0.83 |
| 0.58 | 0.09 |
| 0.97 | 0.46 |
| 0.79 | 0.20 |
| 1.38 | 0.86 |
| #N/A | #N/A |
| 1.24 | 0.70 |
| 1.74 | 0.93 |
| 1.01 | 0.49 |
| #N/A | #N/A |
| 1.89 | 0.98 |

|      |      |
|------|------|
| #N/A | #N/A |
| 0.96 | 0.45 |
| 0.75 | 0.24 |
| 1.29 | 0.67 |
| 0.92 | 0.38 |
| 0.91 | 0.38 |
| 1.16 | 0.72 |
| 1.00 | 0.48 |
| 1.05 | 0.60 |
| 1.04 | 0.56 |
| 2.04 | 0.99 |
| #N/A | #N/A |
| 0.79 | 0.20 |
| 0.84 | 0.26 |
| 1.09 | 0.63 |
| 1.80 | 0.96 |
| 1.09 | 0.61 |
| 0.63 | 0.08 |
| 0.98 | 0.47 |
| 0.97 | 0.44 |
| 0.84 | 0.27 |
| 0.67 | 0.09 |
| 1.13 | 0.68 |
| 0.82 | 0.23 |
| 0.94 | 0.42 |
| 0.89 | 0.38 |
| 1.24 | 0.72 |
| 1.02 | 0.53 |
| 0.88 | 0.34 |
| 0.79 | 0.24 |
| 0.95 | 0.43 |
| 0.83 | 0.27 |
| 0.83 | 0.26 |
| 0.92 | 0.37 |
| 1.09 | 0.61 |
| 1.40 | 0.83 |
| 0.96 | 0.44 |
| 1.68 | 0.95 |
| 1.22 | 0.68 |
| #N/A | #N/A |
| 1.16 | 0.72 |
| 1.04 | 0.58 |
| 0.92 | 0.38 |
| 1.57 | 0.93 |
| 0.99 | 0.50 |
| 1.12 | 0.64 |
| 1.00 | 0.52 |
| 1.03 | 0.53 |
| 0.99 | 0.48 |
| #N/A | #N/A |
| #N/A | #N/A |



|      |      |
|------|------|
| 0.82 | 0.24 |
| #N/A | #N/A |
| #N/A | #N/A |
| 0.83 | 0.25 |
| 1.01 | 0.48 |
| 0.93 | 0.45 |
| 1.25 | 0.71 |
| 0.87 | 0.32 |
| 0.84 | 0.42 |
| 0.82 | 0.23 |
| 0.84 | 0.32 |
| 0.74 | 0.18 |
| 0.73 | 0.18 |
| #N/A | #N/A |
| 0.93 | 0.39 |
| 1.10 | 0.64 |
| 0.90 | 0.35 |
| 0.90 | 0.37 |
| 0.99 | 0.50 |
| 1.05 | 0.59 |
| 1.51 | 0.69 |
| 0.91 | 0.38 |
| 0.93 | 0.40 |
| 0.98 | 0.47 |
| 1.25 | 0.81 |
| 1.07 | 0.57 |
| 0.99 | 0.51 |
| 1.23 | 0.67 |
| #N/A | #N/A |
| 1.10 | 0.64 |
| 0.73 | 0.18 |
| 0.97 | 0.46 |
| 1.18 | 0.73 |
| 1.16 | 0.72 |
| 1.01 | 0.54 |
| 0.90 | 0.37 |
| 1.11 | 0.66 |
| 1.34 | 0.72 |
| 1.06 | 0.61 |
| 1.14 | 0.53 |
| #N/A | #N/A |
| 1.36 | 0.75 |
| 1.21 | 0.77 |
| 1.28 | 0.52 |
| 1.02 | 0.48 |
| 1.23 | 0.65 |
| 0.97 | 0.44 |
| 0.79 | 0.20 |
| 0.92 | 0.42 |
| #N/A | #N/A |
| 0.99 | 0.50 |

|      |      |
|------|------|
| #N/A | #N/A |
| 1.27 | 0.82 |
| 0.91 | 0.38 |
| 0.78 | 0.18 |
| 0.86 | 0.31 |
| 0.98 | 0.48 |
| 0.77 | 0.18 |
| 0.93 | 0.39 |
| 0.78 | 0.18 |
| 0.74 | 0.14 |
| 0.92 | 0.42 |
| 0.96 | 0.44 |
| 1.20 | 0.74 |
| 0.97 | 0.47 |
| 1.12 | 0.61 |
| 1.03 | 0.56 |
| 0.89 | 0.36 |
| 1.00 | 0.51 |
| 0.97 | 0.46 |
| 0.91 | 0.36 |
| 0.83 | 0.25 |
| #N/A | #N/A |
| 0.96 | 0.44 |
| #N/A | #N/A |
| 0.87 | 0.30 |
| 0.87 | 0.29 |
| 1.03 | 0.55 |
| #N/A | #N/A |
| 0.91 | 0.36 |
| 0.73 | 0.15 |
| 1.72 | 0.93 |
| 1.03 | 0.47 |
| 1.16 | 0.73 |
| 1.09 | 0.64 |
| 1.04 | 0.51 |
| 0.90 | 0.35 |
| 1.00 | 0.50 |
| #N/A | #N/A |
| #N/A | #N/A |
| 1.08 | 0.59 |
| 1.37 | 0.86 |
| #N/A | #N/A |
| 1.28 | 0.75 |
| #N/A | #N/A |
| #N/A | #N/A |
| 1.07 | 0.60 |
| 0.93 | 0.44 |
| 0.88 | 0.33 |
| 0.82 | 0.23 |
| 0.91 | 0.37 |
| 1.19 | 0.75 |

|      |      |
|------|------|
| 1.16 | 0.72 |
| 0.91 | 0.37 |
| 0.55 | 0.03 |
| 0.96 | 0.46 |
| 1.02 | 0.48 |
| 1.01 | 0.52 |
| 0.90 | 0.38 |
| #N/A | #N/A |
| 1.61 | 0.60 |
| 0.93 | 0.42 |
| 1.12 | 0.62 |
| 0.99 | 0.48 |
| 1.02 | 0.54 |
| 1.10 | 0.66 |
| 1.12 | 0.67 |
| 0.91 | 0.37 |
| 1.11 | 0.52 |
| 0.91 | 0.36 |
| 1.59 | 0.93 |
| 1.00 | 0.51 |
| 1.17 | 0.72 |
| 1.38 | 0.88 |
| 0.68 | 0.11 |
| 1.10 | 0.62 |
| 1.42 | 0.89 |
| 0.95 | 0.42 |
| 1.13 | 0.68 |
| 0.91 | 0.37 |
| 1.04 | 0.57 |
| 0.87 | 0.30 |
| 1.04 | 0.50 |
| 0.69 | 0.12 |
| 1.10 | 0.63 |
| 0.75 | 0.15 |
| 1.10 | 0.66 |
| 1.03 | 0.55 |
| 0.92 | 0.39 |
| 1.31 | 0.80 |
| 1.31 | 0.82 |
| 0.97 | 0.45 |
| 0.91 | 0.38 |
| 0.96 | 0.46 |
| 1.08 | 0.60 |
| 1.02 | 0.55 |
| 0.79 | 0.23 |
| 1.04 | 0.58 |
| 1.32 | 0.85 |
| 1.43 | 0.81 |
| 0.97 | 0.46 |
| 1.01 | 0.53 |
| 1.00 | 0.48 |

|      |      |
|------|------|
| 0.82 | 0.23 |
| 1.06 | 0.55 |
| 0.90 | 0.36 |
| 0.78 | 0.19 |
| 1.37 | 0.85 |
| 0.93 | 0.39 |
| 1.04 | 0.55 |
| 1.04 | 0.53 |
| 0.75 | 0.18 |
| 0.95 | 0.42 |
| 0.89 | 0.37 |
| 0.93 | 0.39 |
| 0.55 | 0.04 |
| 1.16 | 0.72 |
| 0.98 | 0.48 |
| 1.43 | 0.90 |
| 1.12 | 0.67 |
| 0.92 | 0.37 |
| 1.03 | 0.53 |
| 1.29 | 0.61 |
| 1.09 | 0.57 |
| 1.05 | 0.58 |
| 1.30 | 0.74 |
| 0.86 | 0.30 |
| 0.84 | 0.26 |
| 1.03 | 0.51 |
| 0.82 | 0.28 |
| 1.04 | 0.53 |
| 0.77 | 0.18 |
| #N/A | #N/A |
| 1.31 | 0.85 |
| 1.04 | 0.57 |
| 1.18 | 0.71 |
| #N/A | #N/A |
| 1.15 | 0.55 |
| 1.02 | 0.51 |
| 1.80 | 0.81 |
| #N/A | #N/A |
| 1.35 | 0.77 |
| 0.94 | 0.41 |
| 1.01 | 0.53 |
| 1.14 | 0.57 |
| 0.83 | 0.25 |
| 1.16 | 0.72 |
| 0.97 | 0.47 |
| 1.12 | 0.53 |
| 0.93 | 0.41 |
| 1.71 | 0.96 |
| 1.10 | 0.65 |
| 0.85 | 0.29 |
| 1.09 | 0.61 |

|      |      |
|------|------|
| 0.92 | 0.39 |
| 1.29 | 0.78 |
| 1.16 | 0.71 |
| 1.64 | 0.82 |
| #N/A | #N/A |
| 1.41 | 0.89 |
| 1.07 | 0.62 |
| 1.06 | 0.55 |
| 0.78 | 0.20 |
| 0.94 | 0.41 |
| 1.01 | 0.49 |
| 1.35 | 0.81 |
| #N/A | #N/A |
| 0.74 | 0.18 |
| 1.05 | 0.56 |
| 1.62 | 0.94 |
| 1.33 | 0.78 |
| 0.97 | 0.44 |
| #N/A | #N/A |
| 1.25 | 0.72 |
| 0.86 | 0.28 |
| 1.17 | 0.71 |
| #N/A | #N/A |
| 0.71 | 0.15 |
| 1.05 | 0.55 |
| 1.08 | 0.54 |
| #N/A | #N/A |
| 1.02 | 0.49 |
| 1.24 | 0.80 |
| 0.86 | 0.30 |
| 1.40 | 0.74 |
| 1.17 | 0.72 |
| 1.06 | 0.58 |
| 0.99 | 0.50 |
| 0.82 | 0.29 |
| 0.76 | 0.17 |
| 0.65 | 0.07 |
| 0.81 | 0.22 |
| 0.87 | 0.32 |
| 0.79 | 0.21 |
| 1.13 | 0.52 |
| #N/A | #N/A |
| 1.01 | 0.49 |
| 1.49 | 0.92 |
| 1.14 | 0.70 |
| 0.77 | 0.20 |
| 1.04 | 0.56 |
| 1.01 | 0.52 |
| 0.96 | 0.45 |
| 0.99 | 0.50 |
| 0.95 | 0.42 |

|      |      |
|------|------|
| 0.85 | 0.29 |
| 0.67 | 0.15 |
| 1.04 | 0.51 |
| 0.92 | 0.38 |
| 1.11 | 0.63 |
| 0.94 | 0.42 |
| 0.86 | 0.30 |
| #N/A | #N/A |
| 1.23 | 0.71 |
| 1.14 | 0.68 |
| 1.01 | 0.50 |
| 1.20 | 0.68 |
| 1.33 | 0.86 |
| 0.84 | 0.26 |
| 0.88 | 0.34 |
| #N/A | #N/A |
| 1.05 | 0.51 |
| 0.77 | 0.18 |
| 1.09 | 0.57 |
| 1.02 | 0.53 |
| 0.46 | 0.02 |
| 0.92 | 0.39 |
| 1.15 | 0.70 |
| 0.92 | 0.39 |
| 0.95 | 0.43 |
| 1.29 | 0.66 |
| 1.24 | 0.74 |
| 1.00 | 0.51 |
| #N/A | #N/A |
| 1.07 | 0.61 |
| #N/A | #N/A |
| 1.31 | 0.74 |
| 0.76 | 0.16 |
| 0.75 | 0.21 |
| 0.89 | 0.35 |
| 1.04 | 0.56 |
| 0.89 | 0.38 |
| 1.09 | 0.59 |
| 0.86 | 0.41 |
| 1.06 | 0.57 |
| 1.03 | 0.56 |
| 0.22 | 0.00 |
| 1.03 | 0.56 |
| 0.87 | 0.33 |
| 1.05 | 0.56 |
| 0.99 | 0.49 |
| #N/A | #N/A |
| 0.84 | 0.28 |
| 1.00 | 0.50 |
| 0.91 | 0.37 |
| 1.04 | 0.49 |

|      |      |
|------|------|
| 0.88 | 0.31 |
| 0.92 | 0.41 |
| #N/A | #N/A |
| 1.40 | 0.87 |
| 0.99 | 0.50 |
| 0.80 | 0.21 |
| 0.93 | 0.41 |
| 0.85 | 0.28 |
| 0.99 | 0.46 |
| 0.86 | 0.34 |
| 1.00 | 0.50 |
| 0.97 | 0.46 |
| 1.16 | 0.70 |
| 0.86 | 0.29 |
| 1.00 | 0.49 |
| 0.90 | 0.38 |
| 0.94 | 0.42 |
| 1.02 | 0.54 |
| 1.29 | 0.83 |
| 1.11 | 0.63 |
| 1.29 | 0.63 |
| 0.97 | 0.45 |
| #N/A | #N/A |
| 1.02 | 0.52 |
| 0.96 | 0.45 |
| 1.04 | 0.58 |
| 1.04 | 0.56 |
| 1.42 | 0.89 |
| 1.24 | 0.72 |
| 1.07 | 0.60 |
| 0.80 | 0.21 |
| 0.98 | 0.47 |
| 1.05 | 0.56 |
| 0.97 | 0.46 |
| 0.69 | 0.09 |
| 1.04 | 0.54 |
| 1.55 | 0.92 |
| 1.24 | 0.73 |
| 0.89 | 0.39 |
| 1.05 | 0.57 |
| 1.14 | 0.66 |
| 1.05 | 0.59 |
| 0.99 | 0.47 |
| #N/A | #N/A |
| 0.85 | 0.30 |
| 0.79 | 0.21 |
| 0.92 | 0.39 |
| 1.14 | 0.61 |
| 1.17 | 0.73 |
| 1.03 | 0.55 |
| 1.07 | 0.57 |

|      |      |
|------|------|
| #N/A | #N/A |
| 1.10 | 0.66 |
| 0.93 | 0.41 |
| 1.17 | 0.68 |
| 0.66 | 0.08 |
| 1.06 | 0.60 |
| 1.25 | 0.80 |
| 0.77 | 0.17 |
| 0.77 | 0.18 |
| 0.80 | 0.21 |
| 0.89 | 0.33 |
| 1.21 | 0.65 |
| 0.87 | 0.34 |
| #N/A | #N/A |
| 1.06 | 0.54 |
| #N/A | #N/A |
| 1.04 | 0.57 |
| 1.30 | 0.80 |
| 1.00 | 0.50 |
| 0.86 | 0.31 |
| 1.35 | 0.70 |
| 1.02 | 0.52 |
| 1.39 | 0.88 |
| 0.79 | 0.24 |
| 1.08 | 0.49 |
| #N/A | #N/A |
| 0.87 | 0.33 |
| 0.92 | 0.42 |
| 3.02 | 1.00 |
| 0.90 | 0.38 |
| 0.83 | 0.25 |
| 1.24 | 0.80 |
| 0.87 | 0.31 |
| 0.93 | 0.40 |
| 1.05 | 0.58 |
| 0.91 | 0.37 |
| 0.84 | 0.26 |
| 0.67 | 0.08 |
| 1.25 | 0.63 |
| 0.82 | 0.23 |
| 1.15 | 0.60 |
| #N/A | #N/A |
| 1.44 | 0.90 |
| #N/A | #N/A |
| 0.92 | 0.42 |
| 0.79 | 0.20 |
| 1.65 | 0.91 |
| 1.04 | 0.53 |
| 0.69 | 0.11 |
| 0.80 | 0.21 |
| 1.07 | 0.58 |



|      |      |
|------|------|
| 1.04 | 0.57 |
| 1.74 | 0.65 |
| 1.17 | 0.68 |
| 1.08 | 0.56 |
| #N/A | #N/A |
| 1.51 | 0.91 |
| 1.43 | 0.82 |
| 1.95 | 0.52 |
| 0.51 | 0.03 |
| 1.06 | 0.60 |
| 1.16 | 0.65 |
| 1.00 | 0.50 |
| 1.43 | 0.90 |
| 1.13 | 0.68 |
| 1.16 | 0.70 |
| 0.97 | 0.46 |
| 1.02 | 0.52 |
| 1.16 | 0.70 |
| 1.01 | 0.53 |
| 0.73 | 0.14 |
| #N/A | #N/A |
| #N/A | #N/A |
| #N/A | #N/A |
| 1.55 | 0.53 |
| 0.63 | 0.06 |
| 1.05 | 0.58 |
| 0.84 | 0.27 |
| #N/A | #N/A |
| 1.08 | 0.60 |
| 0.98 | 0.49 |
| 0.90 | 0.39 |
| 0.96 | 0.44 |
| 0.93 | 0.39 |
| 1.05 | 0.57 |
| 0.53 | 0.03 |
| 1.05 | 0.58 |
| 1.01 | 0.50 |
| 0.55 | 0.03 |
| #N/A | #N/A |
| 1.09 | 0.50 |
| 0.88 | 0.42 |
| 1.38 | 0.78 |
| 1.52 | 0.92 |
| 0.87 | 0.36 |
| 1.06 | 0.57 |
| 1.11 | 0.66 |
| 1.07 | 0.62 |
| 1.61 | 0.89 |
| #N/A | #N/A |
| 0.97 | 0.46 |
| 1.09 | 0.61 |

|      |      |
|------|------|
| 1.14 | 0.64 |
| 1.53 | 0.57 |
| 1.03 | 0.53 |
| 0.75 | 0.16 |
| 0.84 | 0.27 |
| 1.09 | 0.49 |
| 1.12 | 0.68 |
| 1.14 | 0.63 |
| 1.23 | 0.60 |
| 1.06 | 0.51 |
| 0.90 | 0.36 |
| #N/A | #N/A |
| 1.00 | 0.47 |
| #N/A | #N/A |
| 1.33 | 0.86 |
| 0.89 | 0.35 |
| 1.00 | 0.47 |
| 1.26 | 0.75 |
| 0.87 | 0.33 |
| 1.27 | 0.55 |
| 0.99 | 0.45 |
| 1.55 | 0.94 |
| 0.78 | 0.40 |
| 1.66 | 0.96 |
| 0.89 | 0.35 |
| 1.05 | 0.53 |
| 0.87 | 0.31 |
| 1.34 | 0.82 |
| 1.26 | 0.82 |
| 0.83 | 0.28 |
| 1.06 | 0.58 |
| 0.87 | 0.33 |
| 0.92 | 0.39 |
| 1.21 | 0.62 |
| 0.85 | 0.29 |
| 0.92 | 0.42 |
| 1.14 | 0.67 |
| 1.15 | 0.71 |
| 0.98 | 0.48 |
| 0.99 | 0.46 |
| 1.21 | 0.69 |
| 0.85 | 0.29 |
| 0.84 | 0.34 |
| 1.02 | 0.54 |
| 0.92 | 0.39 |
| 0.82 | 0.23 |
| 1.00 | 0.50 |
| 1.10 | 0.53 |
| 1.04 | 0.55 |
| 1.02 | 0.54 |
| 1.10 | 0.64 |

|      |      |
|------|------|
| 1.02 | 0.50 |
| 1.10 | 0.62 |
| 0.82 | 0.25 |
| 1.07 | 0.59 |
| 0.60 | 0.16 |
| 0.94 | 0.41 |
| 0.89 | 0.34 |
| 0.68 | 0.26 |
| #N/A | #N/A |
| 1.03 | 0.53 |
| 1.25 | 0.77 |
| 0.92 | 0.38 |
| 0.95 | 0.43 |
| 0.96 | 0.43 |
| #N/A | #N/A |
| 0.80 | 0.29 |
| 0.87 | 0.34 |
| 1.04 | 0.54 |
| 0.98 | 0.45 |
| 0.94 | 0.43 |
| 0.94 | 0.43 |
| 0.83 | 0.39 |
| 0.72 | 0.18 |
| 0.95 | 0.44 |
| 0.62 | 0.05 |
| #N/A | #N/A |
| 1.03 | 0.56 |
| 1.00 | 0.51 |
| 0.82 | 0.25 |
| 1.53 | 0.87 |
| 0.95 | 0.42 |
| 1.02 | 0.51 |
| 1.07 | 0.62 |
| 1.18 | 0.64 |
| 1.19 | 0.72 |
| 1.31 | 0.84 |
| #N/A | #N/A |
| 0.96 | 0.46 |
| #N/A | #N/A |
| 1.36 | 0.87 |
| 0.75 | 0.27 |
| 1.01 | 0.53 |
| 1.11 | 0.67 |
| 1.10 | 0.65 |
| 1.08 | 0.55 |
| 0.73 | 0.19 |
| 1.18 | 0.74 |
| 1.11 | 0.59 |
| 1.14 | 0.69 |
| 1.18 | 0.70 |
| 0.66 | 0.10 |

|      |      |
|------|------|
| 1.27 | 0.52 |
| 0.92 | 0.39 |
| 1.29 | 0.61 |
| 0.90 | 0.34 |
| 0.77 | 0.33 |
| 1.40 | 0.88 |
| 0.92 | 0.42 |
| 0.82 | 0.23 |
| 0.87 | 0.31 |
| 0.70 | 0.11 |
| 0.74 | 0.17 |
| 0.75 | 0.17 |
| 1.15 | 0.67 |
| #N/A | #N/A |
| 1.01 | 0.49 |
| 0.88 | 0.34 |
| 1.02 | 0.54 |
| 0.77 | 0.18 |
| #N/A | #N/A |
| 0.64 | 0.08 |
| 0.74 | 0.14 |
| 0.96 | 0.46 |
| 1.14 | 0.67 |
| 0.95 | 0.43 |
| 1.36 | 0.88 |
| 0.87 | 0.36 |
| 0.93 | 0.43 |
| 1.04 | 0.57 |
| 1.16 | 0.70 |
| 0.57 | 0.03 |
| 1.18 | 0.74 |
| 0.88 | 0.31 |
| 1.01 | 0.53 |
| 0.67 | 0.08 |
| 0.53 | 0.03 |
| 1.12 | 0.62 |
| 1.02 | 0.49 |
| 1.23 | 0.78 |
| 1.51 | 0.92 |
| 0.91 | 0.36 |
| 1.14 | 0.70 |
| #N/A | #N/A |
| 1.02 | 0.55 |
| 0.87 | 0.31 |
| 1.02 | 0.47 |
| 0.79 | 0.20 |
| 1.54 | 0.80 |
| 1.24 | 0.79 |
| 1.00 | 0.51 |
| 1.05 | 0.52 |
| 0.91 | 0.37 |

|      |      |
|------|------|
| #N/A | #N/A |
| 1.28 | 0.78 |
| #N/A | #N/A |
| 1.46 | 0.86 |
| #N/A | #N/A |
| 1.29 | 0.84 |
| 1.18 | 0.56 |
| 1.02 | 0.53 |
| 1.07 | 0.61 |
| 1.40 | 0.89 |
| 1.26 | 0.82 |
| #N/A | #N/A |
| 0.88 | 0.38 |
| 1.10 | 0.63 |
| 1.04 | 0.55 |
| 1.10 | 0.65 |
| 0.81 | 0.22 |
| #N/A | #N/A |
| 1.18 | 0.75 |
| 0.67 | 0.09 |
| #N/A | #N/A |
| 0.85 | 0.27 |
| 0.86 | 0.30 |
| 0.70 | 0.12 |
| 0.81 | 0.23 |
| 0.94 | 0.41 |
| 0.89 | 0.35 |
| 1.29 | 0.83 |
| 0.65 | 0.08 |
| 1.19 | 0.75 |
| 1.31 | 0.70 |
| 0.97 | 0.46 |
| 1.31 | 0.85 |
| 1.22 | 0.67 |
| 0.86 | 0.31 |
| 1.14 | 0.69 |
| #N/A | #N/A |
| 0.99 | 0.49 |
| 0.95 | 0.42 |
| 1.11 | 0.66 |
| 1.12 | 0.52 |
| 0.94 | 0.40 |
| #N/A | #N/A |
| 0.73 | 0.16 |
| 1.17 | 0.68 |
| #N/A | #N/A |
| 0.88 | 0.34 |
| 0.94 | 0.41 |
| 1.16 | 0.72 |
| 1.13 | 0.51 |
| #N/A | #N/A |

|      |      |
|------|------|
| 1.02 | 0.48 |
| 1.05 | 0.52 |
| 1.01 | 0.47 |
| #N/A | #N/A |
| 0.91 | 0.37 |
| 0.85 | 0.27 |
| 1.28 | 0.79 |
| 0.99 | 0.48 |
| 0.63 | 0.06 |
| 1.41 | 0.89 |
| 0.72 | 0.13 |
| 1.70 | 0.89 |
| 1.31 | 0.65 |
| 0.98 | 0.45 |
| 0.90 | 0.37 |
| 1.80 | 0.69 |
| 0.91 | 0.37 |
| 1.60 | 0.58 |
| 1.03 | 0.55 |
| 1.18 | 0.74 |
| 0.76 | 0.16 |
| 0.63 | 0.06 |
| 0.77 | 0.29 |
| 1.07 | 0.61 |
| 0.98 | 0.49 |
| 0.85 | 0.27 |
| 1.37 | 0.87 |
| 1.04 | 0.57 |
| 1.04 | 0.48 |
| 0.94 | 0.41 |
| 0.87 | 0.39 |
| 1.14 | 0.61 |
| 0.71 | 0.12 |
| 1.10 | 0.63 |
| #N/A | #N/A |
| 1.15 | 0.70 |
| 1.10 | 0.65 |
| 1.55 | 0.84 |
| 0.88 | 0.32 |
| 1.22 | 0.73 |
| 0.33 | 0.01 |
| 1.35 | 0.58 |
| 0.86 | 0.40 |
| 0.98 | 0.47 |
| 1.30 | 0.84 |
| 1.59 | 0.90 |
| 1.00 | 0.51 |
| #N/A | #N/A |
| 1.09 | 0.64 |
| 1.01 | 0.52 |
| 1.08 | 0.63 |

|      |      |
|------|------|
| #N/A | #N/A |
| 1.13 | 0.66 |
| 1.16 | 0.64 |
| 1.35 | 0.84 |
| 1.30 | 0.73 |
| 1.48 | 0.52 |
| 1.80 | 0.97 |
| #N/A | #N/A |
| 1.50 | 0.93 |
| 1.06 | 0.60 |
| 0.99 | 0.50 |
| 1.07 | 0.61 |
| 0.86 | 0.29 |
| 1.09 | 0.61 |
| 0.98 | 0.48 |
| 1.04 | 0.52 |
| 0.70 | 0.11 |
| 1.84 | 0.98 |
| 1.06 | 0.57 |
| 0.87 | 0.30 |
| 1.16 | 0.63 |
| 1.02 | 0.53 |
| 1.14 | 0.63 |
| 1.31 | 0.81 |
| 0.90 | 0.40 |
| #N/A | #N/A |
| 1.40 | 0.77 |
| 0.88 | 0.35 |
| 1.08 | 0.62 |
| 1.37 | 0.80 |
| 1.03 | 0.53 |
| 0.88 | 0.32 |
| 1.00 | 0.51 |
| 1.10 | 0.66 |
| 0.92 | 0.38 |
| 0.91 | 0.36 |
| 0.85 | 0.27 |
| 1.04 | 0.58 |
| 1.03 | 0.54 |
| 0.85 | 0.31 |
| 1.18 | 0.74 |
| 1.06 | 0.58 |
| 1.03 | 0.56 |
| 1.07 | 0.59 |
| 1.28 | 0.82 |
| 1.07 | 0.61 |
| 1.14 | 0.61 |
| 1.22 | 0.76 |
| 1.19 | 0.73 |
| 0.82 | 0.24 |
| 1.07 | 0.61 |

|      |      |
|------|------|
| #N/A | #N/A |
| 0.90 | 0.35 |
| 1.19 | 0.65 |
| #N/A | #N/A |
| 1.35 | 0.78 |
| 0.83 | 0.25 |
| 1.13 | 0.66 |
| 0.67 | 0.19 |
| 1.30 | 0.84 |
| 0.95 | 0.42 |
| 1.12 | 0.63 |
| 1.58 | 0.91 |
| 1.56 | 0.94 |
| #N/A | #N/A |
| 1.07 | 0.62 |
| 0.81 | 0.24 |
| 0.74 | 0.15 |
| 0.96 | 0.45 |
| 0.79 | 0.24 |
| 1.47 | 0.92 |
| #N/A | #N/A |
| 0.95 | 0.43 |
| 1.12 | 0.64 |
| 0.86 | 0.31 |
| 1.22 | 0.78 |
| 0.91 | 0.37 |
| #N/A | #N/A |
| 1.12 | 0.68 |
| 0.88 | 0.32 |
| 0.98 | 0.48 |
| 1.16 | 0.70 |
| 1.60 | 0.93 |
| 1.03 | 0.56 |
| #N/A | #N/A |
| 1.10 | 0.50 |
| 1.02 | 0.52 |
| 1.04 | 0.58 |
| 1.02 | 0.50 |
| #N/A | #N/A |
| 1.21 | 0.78 |
| 0.84 | 0.29 |
| 1.16 | 0.61 |
| #N/A | #N/A |
| 0.86 | 0.35 |
| #N/A | #N/A |
| 1.00 | 0.48 |
| 0.88 | 0.32 |
| 0.96 | 0.44 |
| 1.33 | 0.60 |
| 1.13 | 0.66 |
| 1.12 | 0.60 |



|      |      |
|------|------|
| 1.00 | 0.51 |
| 0.96 | 0.45 |
| 1.11 | 0.64 |
| 0.91 | 0.36 |
| #N/A | #N/A |
| 0.79 | 0.24 |
| 1.18 | 0.74 |
| 0.80 | 0.22 |
| 1.07 | 0.51 |
| 1.07 | 0.61 |
| 0.99 | 0.49 |
| 1.07 | 0.62 |
| 1.38 | 0.87 |
| 1.23 | 0.78 |
| 1.18 | 0.73 |
| 0.79 | 0.21 |
| 0.89 | 0.34 |
| 0.67 | 0.11 |
| 0.74 | 0.15 |
| #N/A | #N/A |
| 1.00 | 0.51 |
| #N/A | #N/A |
| 0.99 | 0.48 |
| 1.22 | 0.72 |
| 1.44 | 0.83 |
| 1.75 | 0.95 |
| 0.67 | 0.08 |
| 1.16 | 0.72 |
| 0.90 | 0.39 |
| 1.22 | 0.73 |
| 1.03 | 0.56 |
| #N/A | #N/A |
| 1.17 | 0.71 |
| 0.97 | 0.47 |
| 1.26 | 0.78 |
| 1.09 | 0.56 |
| 1.17 | 0.70 |
| #N/A | #N/A |
| 1.04 | 0.55 |
| #N/A | #N/A |
| #N/A | #N/A |
| #N/A | #N/A |
| 1.03 | 0.55 |
| 0.96 | 0.44 |
| 1.26 | 0.82 |
| 1.08 | 0.56 |
| 1.18 | 0.74 |
| 1.20 | 0.76 |
| 0.72 | 0.16 |
| 1.34 | 0.86 |
| 0.96 | 0.46 |

|      |      |
|------|------|
| 0.91 | 0.37 |
| 1.03 | 0.57 |
| 0.67 | 0.10 |
| 0.93 | 0.40 |
| 0.60 | 0.05 |
| 0.82 | 0.25 |
| #N/A | #N/A |
| 1.20 | 0.74 |
| 1.04 | 0.55 |
| 0.97 | 0.46 |
| 0.91 | 0.40 |
| 1.16 | 0.71 |
| 1.32 | 0.75 |
| 1.39 | 0.76 |
| 0.92 | 0.38 |
| 1.47 | 0.89 |
| 1.12 | 0.52 |
| 1.12 | 0.68 |
| 1.10 | 0.59 |
| 1.06 | 0.58 |
| 1.09 | 0.62 |
| 0.98 | 0.45 |
| 0.88 | 0.33 |
| 1.06 | 0.60 |
| 1.16 | 0.69 |
| 1.00 | 0.49 |
| 1.03 | 0.56 |
| 1.08 | 0.57 |
| 0.77 | 0.18 |
| 1.12 | 0.55 |
| 1.11 | 0.66 |
| 1.25 | 0.60 |
| #N/A | #N/A |
| 1.17 | 0.68 |
| 0.90 | 0.35 |
| 1.19 | 0.75 |
| 0.55 | 0.03 |
| 0.94 | 0.41 |
| 1.04 | 0.57 |
| 0.92 | 0.43 |
| 1.41 | 0.87 |
| 1.55 | 0.91 |
| 1.26 | 0.76 |
| 0.93 | 0.40 |
| #N/A | #N/A |
| 0.98 | 0.47 |
| 0.88 | 0.35 |
| 0.81 | 0.21 |
| 1.37 | 0.68 |
| 1.08 | 0.61 |
| 0.73 | 0.15 |

|      |      |
|------|------|
| 0.67 | 0.08 |
| 0.85 | 0.28 |
| 0.88 | 0.40 |
| 0.88 | 0.32 |
| 0.90 | 0.36 |
| 0.75 | 0.16 |
| 1.10 | 0.65 |
| 0.96 | 0.44 |
| 1.00 | 0.50 |
| 1.01 | 0.51 |
| 1.27 | 0.82 |
| 0.80 | 0.20 |
| 1.02 | 0.53 |
| 0.92 | 0.39 |
| 1.06 | 0.54 |
| 0.94 | 0.41 |
| #N/A | #N/A |
| 1.10 | 0.63 |
| 1.06 | 0.60 |
| 0.77 | 0.17 |
| 0.96 | 0.46 |
| 0.36 | 0.01 |
| 1.24 | 0.80 |
| 1.36 | 0.87 |
| 0.88 | 0.31 |
| 0.82 | 0.24 |
| 0.94 | 0.42 |
| #N/A | #N/A |
| 1.22 | 0.72 |
| 0.93 | 0.41 |
| 1.02 | 0.50 |
| 1.16 | 0.72 |
| 1.16 | 0.68 |
| 0.78 | 0.19 |
| 1.26 | 0.65 |
| 1.04 | 0.55 |
| 1.43 | 0.90 |
| 1.04 | 0.55 |
| 0.90 | 0.38 |
| 0.97 | 0.46 |
| 1.16 | 0.69 |
| 1.10 | 0.64 |
| 1.23 | 0.65 |
| 0.96 | 0.45 |
| #N/A | #N/A |
| 0.88 | 0.40 |
| #N/A | #N/A |
| 0.91 | 0.39 |
| 1.08 | 0.60 |
| #N/A | #N/A |
| 1.40 | 0.86 |

|      |      |
|------|------|
| 1.13 | 0.62 |
| 1.18 | 0.74 |
| 0.86 | 0.28 |
| 1.15 | 0.66 |
| 0.92 | 0.38 |
| 1.09 | 0.61 |
| #N/A | #N/A |
| 1.18 | 0.75 |
| 0.64 | 0.08 |
| 0.68 | 0.14 |
| 0.90 | 0.35 |
| 1.11 | 0.63 |
| 1.06 | 0.54 |
| 0.98 | 0.48 |
| #N/A | #N/A |
| 1.02 | 0.52 |
| #N/A | #N/A |
| 1.29 | 0.79 |
| #N/A | #N/A |
| 0.98 | 0.45 |
| 0.46 | 0.04 |
| 0.92 | 0.38 |
| #N/A | #N/A |
| 0.98 | 0.48 |
| 0.99 | 0.49 |
| 1.08 | 0.50 |
| #N/A | #N/A |
| 1.23 | 0.73 |
| 1.03 | 0.52 |
| 0.78 | 0.19 |
| #N/A | #N/A |
| 1.03 | 0.50 |
| #N/A | #N/A |
| 0.91 | 0.41 |
| 0.67 | 0.10 |
| 1.45 | 0.89 |
| 1.76 | 0.97 |
| 1.18 | 0.74 |
| #N/A | #N/A |
| 1.02 | 0.54 |
| 0.95 | 0.43 |
| #N/A | #N/A |
| 0.89 | 0.39 |
| 0.95 | 0.45 |
| 0.84 | 0.33 |
| 1.09 | 0.62 |
| 0.98 | 0.48 |
| #N/A | #N/A |
| 1.11 | 0.49 |
| 0.87 | 0.30 |
| 0.73 | 0.13 |

|      |      |
|------|------|
| 1.10 | 0.66 |
| 0.69 | 0.10 |
| 0.81 | 0.22 |
| #N/A | #N/A |
| 1.00 | 0.49 |
| 1.10 | 0.60 |
| 1.12 | 0.57 |
| 1.43 | 0.87 |
| 1.32 | 0.82 |
| 0.97 | 0.47 |
| 0.90 | 0.35 |
| 1.37 | 0.85 |
| 1.37 | 0.85 |
| 1.27 | 0.74 |
| 1.01 | 0.50 |
| 1.37 | 0.87 |
| 1.06 | 0.56 |
| 0.86 | 0.29 |
| 1.22 | 0.78 |
| 1.32 | 0.85 |
| 1.05 | 0.58 |
| #N/A | #N/A |
| 0.96 | 0.43 |
| 1.19 | 0.58 |
| 0.92 | 0.39 |
| 0.90 | 0.35 |
| 0.94 | 0.41 |
| #N/A | #N/A |
| #N/A | #N/A |
| 1.13 | 0.69 |
| 1.13 | 0.59 |
| 1.26 | 0.79 |
| #N/A | #N/A |
| #N/A | #N/A |
| 1.11 | 0.66 |
| #N/A | #N/A |
| 1.38 | 0.85 |
| 1.04 | 0.56 |
| 0.83 | 0.25 |
| 1.21 | 0.78 |
| 0.97 | 0.45 |
| 1.40 | 0.76 |
| 1.20 | 0.74 |
| 1.11 | 0.62 |
| 0.84 | 0.33 |
| 0.95 | 0.43 |
| 0.66 | 0.08 |
| 0.73 | 0.16 |
| 0.67 | 0.12 |
| 1.04 | 0.58 |
| 1.53 | 0.92 |

|      |      |
|------|------|
| 1.00 | 0.47 |
| #N/A | #N/A |
| 0.85 | 0.28 |
| #N/A | #N/A |
| 0.94 | 0.41 |
| 0.97 | 0.44 |
| 0.92 | 0.38 |
| 1.09 | 0.53 |
| 1.18 | 0.75 |
| 0.94 | 0.41 |
| 0.90 | 0.34 |
| 0.91 | 0.36 |
| 1.34 | 0.85 |
| #N/A | #N/A |
| 0.75 | 0.18 |
| 1.07 | 0.61 |
| 1.11 | 0.65 |
| 1.31 | 0.80 |
| 0.94 | 0.41 |
| 1.49 | 0.92 |
| #N/A | #N/A |
| 0.96 | 0.43 |
| 1.11 | 0.50 |
| 1.08 | 0.64 |
| 1.64 | 0.87 |
| 0.96 | 0.44 |
| #N/A | #N/A |
| 1.21 | 0.77 |
| 0.86 | 0.30 |
| 0.99 | 0.46 |
| 0.83 | 0.25 |
| 1.00 | 0.47 |
| 1.11 | 0.65 |
| 0.93 | 0.42 |
| 0.86 | 0.35 |
| 0.87 | 0.30 |
| 0.93 | 0.40 |
| 0.91 | 0.37 |
| 0.81 | 0.23 |
| 0.90 | 0.36 |
| 0.78 | 0.18 |
| 0.94 | 0.42 |
| 0.78 | 0.41 |
| 1.02 | 0.55 |
| 1.03 | 0.54 |
| 0.68 | 0.10 |
| 1.24 | 0.73 |
| 1.11 | 0.49 |
| 0.94 | 0.43 |
| 0.63 | 0.12 |
| 0.84 | 0.28 |

|      |      |
|------|------|
| 0.82 | 0.24 |
| 1.18 | 0.71 |
| 0.99 | 0.47 |
| #N/A | #N/A |
| 1.67 | 0.86 |
| 1.34 | 0.71 |
| 1.09 | 0.61 |
| 0.90 | 0.36 |

| UniGeneID    | H2A-TAP | H2A-TAP | H3-TAP | CH3-TAP | C Untagged | Untagged control for TAP-CHIF |
|--------------|---------|---------|--------|---------|------------|-------------------------------|
| 18S          | 0.78    | 0.14    | 0.77   | 0.23    | 1.28       | 0.74                          |
| 5S           | 0.58    | 0.06    | 0.53   | 0.07    | 0.98       | 0.48                          |
| ACO1prom     | 0.86    | 0.19    | 0.71   | 0.13    | 0.99       | 0.62                          |
| ACT1         | 1.05    | 0.34    | 0.92   | 0.29    | 0.92       | 0.33                          |
| ACT1-2       | 1.04    | 0.38    | 1.08   | 0.48    | 1.20       | 0.67                          |
| CEN10        | #N/A    | #N/A    | #N/A   | #N/A    | #N/A       | #N/A                          |
| CEN11        | #N/A    | #N/A    | #N/A   | #N/A    | #N/A       | #N/A                          |
| CEN12        | #N/A    | #N/A    | #N/A   | #N/A    | #N/A       | #N/A                          |
| CEN13        | #N/A    | #N/A    | #N/A   | #N/A    | #N/A       | #N/A                          |
| CEN14        | #N/A    | #N/A    | #N/A   | #N/A    | #N/A       | #N/A                          |
| CEN15        | #N/A    | #N/A    | #N/A   | #N/A    | #N/A       | #N/A                          |
| CEN16        | #N/A    | #N/A    | #N/A   | #N/A    | #N/A       | #N/A                          |
| CEN2         | #N/A    | #N/A    | #N/A   | #N/A    | #N/A       | #N/A                          |
| CEN3         | #N/A    | #N/A    | #N/A   | #N/A    | #N/A       | #N/A                          |
| CEN4         | #N/A    | #N/A    | #N/A   | #N/A    | #N/A       | #N/A                          |
| CEN5         | #N/A    | #N/A    | #N/A   | #N/A    | #N/A       | #N/A                          |
| CEN6         | #N/A    | #N/A    | #N/A   | #N/A    | #N/A       | #N/A                          |
| CEN7         | #N/A    | #N/A    | #N/A   | #N/A    | #N/A       | #N/A                          |
| CEN8         | #N/A    | #N/A    | #N/A   | #N/A    | #N/A       | #N/A                          |
| CEN9         | #N/A    | #N/A    | #N/A   | #N/A    | #N/A       | #N/A                          |
| CLN2down     | 0.78    | 0.14    | 0.99   | 0.37    | #N/A       | #N/A                          |
| CLN2ds       | #N/A    | #N/A    | #N/A   | #N/A    | #N/A       | #N/A                          |
| CLN2prom     | 0.67    | 0.10    | 0.56   | 0.07    | 0.57       | 0.04                          |
| CLN2promlb   | 1.37    | 0.78    | 1.16   | 0.58    | 1.66       | 0.97                          |
| CTS1prom2    | #N/A    | #N/A    | 0.53   | 0.06    | 1.06       | 0.73                          |
| CTS1promcc'2 | #N/A    | #N/A    | 0.51   | 0.05    | 1.17       | 0.74                          |
| CWP1         | 1.22    | 0.61    | 1.07   | 0.46    | 0.91       | 0.36                          |
| CWP1prom     | 0.33    | 0.02    | 0.29   | 0.02    | #N/A       | #N/A                          |
| CWP2         | 1.01    | 0.34    | 0.91   | 0.27    | 1.16       | 0.84                          |
| DPM1prom     | 0.86    | 0.21    | 1.90   | 0.98    | 1.40       | 0.84                          |
| EGT2prom     | #N/A    | #N/A    | #N/A   | #N/A    | #N/A       | #N/A                          |
| f650HO2      | 1.13    | 0.49    | 1.19   | 0.56    | 1.27       | 0.76                          |
| f658SOD1     | 1.00    | 0.34    | 1.04   | 0.44    | #N/A       | #N/A                          |
| FBP1         | 0.86    | 0.21    | 1.21   | 0.56    | 0.96       | 0.44                          |
| FLO9         | 1.25    | 0.61    | 1.15   | 0.55    | 0.89       | 0.33                          |
| FUN19        | 1.73    | 0.95    | 1.61   | 0.92    | 1.03       | 0.55                          |
| FUN21        | #N/A    | #N/A    | 1.21   | 0.59    | #N/A       | #N/A                          |
| FUS1prom     | #N/A    | #N/A    | 0.95   | 0.32    | 1.42       | 0.83                          |
| GAL10        | 0.83    | 0.17    | #N/A   | #N/A    | #N/A       | #N/A                          |
| GAL10ds      | 1.07    | 0.42    | 0.65   | 0.10    | #N/A       | #N/A                          |
| GAL10prom1   | #N/A    | #N/A    | #N/A   | #N/A    | #N/A       | #N/A                          |
| GAL10prom2   | #N/A    | #N/A    | 0.58   | 0.09    | #N/A       | #N/A                          |
| GAL1prom     | #N/A    | #N/A    | #N/A   | #N/A    | #N/A       | #N/A                          |
| GAL3dse      | #N/A    | #N/A    | 1.16   | 0.57    | 0.94       | 0.41                          |
| GAL3prom     | 1.03    | 0.33    | 1.12   | 0.51    | 0.94       | 0.40                          |
| GAL7prom     | 1.25    | 0.62    | 0.96   | 0.39    | #N/A       | #N/A                          |
| GDH3orf-1    | 1.28    | 0.69    | 1.23   | 0.62    | #N/A       | #N/A                          |
| GDH3orf-2    | 1.17    | 0.52    | 1.60   | 0.91    | 0.71       | 0.13                          |
| GDH3prom     | #N/A    | #N/A    | #N/A   | #N/A    | #N/A       | #N/A                          |
| HAM1         | #N/A    | #N/A    | 1.42   | 0.80    | #N/A       | #N/A                          |



|               |      |      |      |      |      |      |
|---------------|------|------|------|------|------|------|
| HAP3prom      | 1.12 | 0.44 | 0.93 | 0.32 | 0.61 | 0.05 |
| HHT1prom2     | 0.51 | 0.04 | 0.41 | 0.03 | 0.64 | 0.10 |
| HHT1tata      | 0.88 | 0.20 | 0.73 | 0.15 | 0.74 | 0.15 |
| HHT2prom      | 0.55 | 0.05 | 0.47 | 0.04 | 0.51 | 0.03 |
| HOurs1        | #N/A | #N/A | 0.88 | 0.25 | 0.91 | 0.36 |
| HOurs2        | #N/A | #N/A | #N/A | #N/A | #N/A | #N/A |
| HOurs2-2      | #N/A | #N/A | #N/A | #N/A | #N/A | #N/A |
| HSP150prom    | #N/A | #N/A | #N/A | #N/A | #N/A | #N/A |
| HSP30prom1    | #N/A | #N/A | #N/A | #N/A | #N/A | #N/A |
| HSP30prom2    | #N/A | #N/A | 1.08 | 0.49 | 0.56 | 0.05 |
| HTB1prom      | 0.66 | 0.09 | 0.74 | 0.23 | 0.67 | 0.09 |
| HTB2prom      | 0.55 | 0.06 | 0.43 | 0.03 | 0.44 | 0.02 |
| HTL1prom      | #N/A | #N/A | #N/A | #N/A | #N/A | #N/A |
| iCEN1         | 1.08 | 0.41 | 0.81 | 0.22 | #N/A | #N/A |
| iCEN10        | #N/A | #N/A | #N/A | #N/A | #N/A | #N/A |
| iCEN11        | 0.80 | 0.15 | 1.03 | 0.42 | #N/A | #N/A |
| iCEN12        | 1.00 | 0.34 | 0.89 | 0.26 | #N/A | #N/A |
| iCEN13        | 1.12 | 0.47 | 1.56 | 0.85 | 1.23 | 0.81 |
| iCEN15        | #N/A | #N/A | #N/A | #N/A | #N/A | #N/A |
| iCEN16        | #N/A | #N/A | 0.69 | 0.17 | 0.98 | 0.60 |
| iCEN2         | 0.98 | 0.32 | 1.03 | 0.43 | 0.88 | 0.29 |
| iCEN3         | 1.17 | 0.53 | 1.52 | 0.83 | 1.09 | 0.77 |
| iCEN4         | 0.62 | 0.07 | #N/A | #N/A | #N/A | #N/A |
| iCEN5         | 0.59 | 0.06 | 0.76 | 0.19 | 1.03 | 0.48 |
| iCEN6         | #N/A | #N/A | 0.79 | 0.19 | 1.00 | 0.43 |
| iCEN7         | #N/A | #N/A | #N/A | #N/A | #N/A | #N/A |
| iCEN8         | 0.83 | 0.17 | 0.88 | 0.26 | #N/A | #N/A |
| iCEN9         | 1.04 | 0.39 | 1.21 | 0.57 | 1.48 | 0.94 |
| iCWP2         | #N/A | #N/A | 0.67 | 0.11 | 0.86 | 0.27 |
| IDH2prom      | 0.70 | 0.10 | 0.60 | 0.08 | 0.83 | 0.35 |
| iLSR1         | 0.65 | 0.09 | 0.66 | 0.11 | 0.76 | 0.23 |
| INO1orf       | 1.26 | 0.67 | #N/A | #N/A | 0.81 | 0.20 |
| INO1prom      | 0.98 | 0.29 | 0.89 | 0.28 | 0.85 | 0.38 |
| IntYBL087C    | 1.16 | 0.47 | 1.12 | 0.52 | 1.73 | 0.96 |
| IntYBR048W    | 1.01 | 0.32 | 1.07 | 0.47 | 1.22 | 0.79 |
| IntYBR084C-A  | 0.91 | 0.23 | 1.03 | 0.41 | 0.97 | 0.45 |
| IntYCR097W-A2 | #N/A | #N/A | #N/A | #N/A | #N/A | #N/A |
| IntYDL191W    | 0.92 | 0.25 | 0.93 | 0.31 | #N/A | #N/A |
| IntYDR064W    | 1.02 | 0.31 | 0.66 | 0.11 | 1.58 | 0.91 |
| IntYDR381W    | 1.10 | 0.41 | 1.04 | 0.42 | 1.57 | 0.92 |
| IntYER133W    | 0.85 | 0.20 | 0.95 | 0.33 | 0.96 | 0.38 |
| IntYGL103W    | 0.71 | 0.11 | 0.57 | 0.07 | 1.41 | 0.96 |
| IntYGL178W    | 1.48 | 0.88 | 1.48 | 0.83 | 1.16 | 0.79 |
| IntYHR010W    | 1.17 | 0.55 | 1.00 | 0.38 | 1.40 | 0.91 |
| IntYHR021C    | 1.02 | 0.34 | 1.00 | 0.38 | 1.59 | 0.90 |
| IntYJR079W    | 1.47 | 0.82 | 1.44 | 0.82 | 1.05 | 0.58 |
| IntYNL112W    | 1.32 | 0.68 | 1.15 | 0.53 | 1.06 | 0.73 |
| IntYNL302C    | #N/A | #N/A | #N/A | #N/A | 1.42 | 0.83 |
| IntYNR053C    | 1.24 | 0.57 | 1.28 | 0.71 | #N/A | #N/A |
| IntYPL081W    | #N/A | #N/A | #N/A | #N/A | #N/A | #N/A |
| IntYPL143W    | #N/A | #N/A | 0.72 | 0.14 | #N/A | #N/A |

|             |      |      |      |      |      |      |
|-------------|------|------|------|------|------|------|
| iPOP5/FUN19 | 1.47 | 0.87 | 1.29 | 0.69 | 1.18 | 0.73 |
| IRA1        | 1.26 | 0.65 | 1.27 | 0.69 | 1.00 | 0.50 |
| iRDN37-1    | 0.71 | 0.11 | 0.68 | 0.12 | 1.12 | 0.69 |
| iRDN5-1     | 0.60 | 0.07 | 0.62 | 0.11 | 1.10 | 0.65 |
| iRDN5-2     | 0.84 | 0.19 | 0.84 | 0.22 | 1.09 | 0.65 |
| iRDN5-3     | 0.92 | 0.25 | 0.79 | 0.18 | 1.07 | 0.61 |
| irpr1       | #N/A | #N/A | 0.53 | 0.05 | 0.73 | 0.19 |
| iSCR1       | 0.66 | 0.09 | 0.66 | 0.10 | 1.25 | 0.83 |
| isnR128     | #N/A | #N/A | #N/A | #N/A | #N/A | #N/A |
| iSNR13      | 1.27 | 0.68 | 1.49 | 0.83 | 1.51 | 0.94 |
| isnR14      | #N/A | #N/A | #N/A | #N/A | #N/A | #N/A |
| iSNR189     | 1.06 | 0.41 | 1.00 | 0.37 | 1.14 | 0.72 |
| iSNR190     | 0.71 | 0.11 | 0.56 | 0.07 | 0.82 | 0.26 |
| iSNR33      | #N/A | #N/A | #N/A | #N/A | #N/A | #N/A |
| iSNR34      | 0.96 | 0.28 | 1.15 | 0.55 | 1.45 | 0.95 |
| isnR37      | 0.92 | 0.24 | 1.58 | 0.74 | #N/A | #N/A |
| iSNR4       | 0.86 | 0.19 | #N/A | #N/A | 1.30 | 0.86 |
| iSNR42      | 0.93 | 0.27 | 1.03 | 0.41 | 0.61 | 0.07 |
| iSNR44      | 1.19 | 0.58 | 0.96 | 0.35 | 1.68 | 0.98 |
| iSNR46      | #N/A | #N/A | #N/A | #N/A | #N/A | #N/A |
| iSNR47      | 0.79 | 0.15 | 0.72 | 0.14 | 0.90 | 0.34 |
| iSNR48      | 0.28 | 0.01 | 0.30 | 0.01 | 0.51 | 0.02 |
| iSNR50      | #N/A | #N/A | 0.97 | 0.34 | 1.16 | 0.62 |
| iSNR51      | #N/A | #N/A | #N/A | #N/A | #N/A | #N/A |
| iSNR52      | 0.77 | 0.14 | 0.53 | 0.07 | 0.96 | 0.39 |
| iSNR53      | #N/A | #N/A | #N/A | #N/A | #N/A | #N/A |
| iSNR54      | 1.27 | 0.65 | 1.21 | 0.62 | 1.30 | 0.94 |
| iSNR55      | #N/A | #N/A | #N/A | #N/A | #N/A | #N/A |
| iSNR56      | #N/A | #N/A | #N/A | #N/A | #N/A | #N/A |
| iSNR57      | 0.90 | 0.24 | #N/A | #N/A | 1.22 | 0.80 |
| iSNR58      | #N/A | #N/A | 0.91 | 0.30 | 1.32 | 0.92 |
| iSNR59      | 1.23 | 0.56 | 1.07 | 0.46 | 1.16 | 0.84 |
| iSNR6       | 0.78 | 0.14 | 1.04 | 0.43 | 0.95 | 0.55 |
| iSNR60      | #N/A | #N/A | 0.74 | 0.16 | 0.93 | 0.51 |
| iSNR61      | #N/A | #N/A | #N/A | #N/A | #N/A | #N/A |
| iSNR62      | 1.08 | 0.41 | 0.93 | 0.32 | 1.12 | 0.78 |
| iSNR63      | 1.22 | 0.59 | 1.10 | 0.50 | 0.97 | 0.58 |
| iSNR64      | 0.79 | 0.14 | 0.61 | 0.13 | 1.01 | 0.45 |
| iSNR65      | #N/A | #N/A | #N/A | #N/A | #N/A | #N/A |
| iSNR66      | 1.10 | 0.40 | 0.89 | 0.25 | 0.76 | 0.16 |
| iSNR67      | #N/A | #N/A | #N/A | #N/A | #N/A | #N/A |
| iSNR68      | 0.99 | 0.32 | #N/A | #N/A | 1.42 | 0.92 |
| iSNR69      | 1.18 | 0.51 | 1.24 | 0.65 | 1.32 | 0.82 |
| iSNR70      | 0.93 | 0.24 | 0.76 | 0.20 | 1.24 | 0.82 |
| iSNR71      | #N/A | #N/A | #N/A | #N/A | #N/A | #N/A |
| iSNR7-S     | #N/A | #N/A | 0.85 | 0.24 | #N/A | #N/A |
| iSNR8       | #N/A | #N/A | 0.83 | 0.23 | 0.91 | 0.35 |
| itA(AGC)D   | 0.50 | 0.04 | 0.51 | 0.05 | 0.69 | 0.14 |
| itA(AGC)F   | 0.99 | 0.31 | 1.24 | 0.58 | 0.82 | 0.33 |
| itA(AGC)G   | 0.79 | 0.15 | 0.97 | 0.35 | 0.81 | 0.31 |
| itA(AGC)K1  | 0.87 | 0.19 | 1.01 | 0.43 | 0.68 | 0.13 |

|             |      |      |      |      |      |      |
|-------------|------|------|------|------|------|------|
| itA(AGC)M1  | #N/A | #N/A | 1.01 | 0.38 | 0.76 | 0.23 |
| itA(AGC)M2  | #N/A | #N/A | #N/A | #N/A | #N/A | #N/A |
| itA(AGC)P   | 0.84 | 0.18 | 0.78 | 0.18 | 0.99 | 0.49 |
| itA(UGC)A   | 1.28 | 0.63 | 1.07 | 0.46 | 1.17 | 0.75 |
| itA(UGC)E   | #N/A | #N/A | 0.71 | 0.13 | 0.91 | 0.47 |
| itA(UGC)G   | #N/A | #N/A | #N/A | #N/A | #N/A | #N/A |
| itA(UGC)L   | #N/A | #N/A | #N/A | #N/A | 1.18 | 0.75 |
| itC(GCA)B   | 0.82 | 0.18 | 0.92 | 0.30 | 1.55 | 0.96 |
| itC(GCA)P1  | #N/A | #N/A | #N/A | #N/A | #N/A | #N/A |
| itC(GCA)P2  | #N/A | #N/A | #N/A | #N/A | 0.90 | 0.42 |
| itD(GUC)B   | 1.09 | 0.44 | 1.22 | 0.60 | 1.29 | 0.85 |
| itD(GUC)D   | #N/A | #N/A | 1.09 | 0.50 | 1.45 | 0.93 |
| itD(GUC)G1  | #N/A | #N/A | #N/A | #N/A | #N/A | #N/A |
| itD(GUC)G2  | 0.74 | 0.12 | 0.64 | 0.10 | 1.23 | 0.81 |
| itD(GUC)I2  | #N/A | #N/A | #N/A | #N/A | #N/A | #N/A |
| itD(GUC)J1  | 0.93 | 0.25 | 0.89 | 0.29 | 1.02 | 0.55 |
| itD(GUC)J2  | #N/A | #N/A | 0.80 | 0.20 | 1.20 | 0.67 |
| itD(GUC)J4  | 0.95 | 0.28 | 1.25 | 0.67 | 1.16 | 0.73 |
| itD(GUC)K   | #N/A | #N/A | #N/A | #N/A | #N/A | #N/A |
| itD(GUC)L1  | #N/A | #N/A | #N/A | #N/A | #N/A | #N/A |
| itD(GUC)L2  | 0.81 | 0.16 | 0.97 | 0.35 | 1.56 | 0.89 |
| itD(GUC)M   | 0.62 | 0.07 | 1.06 | 0.44 | #N/A | #N/A |
| itE(CUC)D-0 | 1.10 | 0.43 | 1.28 | 0.67 | 1.14 | 0.60 |
| itE(CUC)D-1 | 1.61 | 0.93 | 1.29 | 0.71 | 1.25 | 0.80 |
| itE(CUC)I   | 0.81 | 0.16 | 0.64 | 0.10 | 0.87 | 0.28 |
| itE(UUC)B   | 1.33 | 0.73 | 0.74 | 0.16 | 1.42 | 0.87 |
| itE(UUC)C   | #N/A | #N/A | #N/A | #N/A | #N/A | #N/A |
| itE(UUC)E1  | 1.02 | 0.34 | 0.78 | 0.18 | 1.27 | 0.73 |
| itE(UUC)E2  | 0.89 | 0.23 | 0.67 | 0.11 | 0.60 | 0.07 |
| itE(UUC)E3  | 0.93 | 0.27 | 0.97 | 0.35 | 1.11 | 0.67 |
| itE(UUC)G1  | #N/A | #N/A | 0.72 | 0.16 | #N/A | #N/A |
| itE(UUC)G3  | #N/A | #N/A | #N/A | #N/A | #N/A | #N/A |
| itE(UUC)I   | #N/A | #N/A | #N/A | #N/A | #N/A | #N/A |
| itE(UUC)J   | 1.01 | 0.30 | 1.04 | 0.42 | 1.13 | 0.59 |
| itE(UUC)K   | #N/A | #N/A | 1.00 | 0.38 | 0.86 | 0.39 |
| itE(UUC)L   | #N/A | #N/A | #N/A | #N/A | #N/A | #N/A |
| itE(UUC)M   | #N/A | #N/A | 0.71 | 0.13 | 0.84 | 0.35 |
| itE(UUC)P   | #N/A | #N/A | #N/A | #N/A | #N/A | #N/A |
| itF(GAA)B   | 0.85 | 0.19 | 0.84 | 0.22 | 1.20 | 0.78 |
| itF(GAA)D   | 0.66 | 0.09 | 0.64 | 0.10 | #N/A | #N/A |
| itF(GAA)F   | 0.97 | 0.29 | 0.75 | 0.15 | 1.07 | 0.74 |
| itF(GAA)G   | 1.08 | 0.44 | #N/A | #N/A | 1.20 | 0.88 |
| itF(GAA)H2  | #N/A | #N/A | #N/A | #N/A | #N/A | #N/A |
| itF(GAA)M   | 0.73 | 0.12 | 0.65 | 0.11 | 1.09 | 0.64 |
| itF(GAA)N   | 0.69 | 0.10 | 0.75 | 0.19 | 1.20 | 0.82 |
| itF(GAA)P1  | 1.01 | 0.30 | #N/A | #N/A | #N/A | #N/A |
| itG(CCC)D   | 0.95 | 0.25 | 1.01 | 0.41 | 1.07 | 0.61 |
| itG(GCC)D1  | 1.07 | 0.42 | 1.19 | 0.60 | 1.01 | 0.53 |
| itG(GCC)D2  | 0.58 | 0.06 | 0.46 | 0.06 | 1.07 | 0.53 |
| itG(GCC)E   | #N/A | #N/A | #N/A | #N/A | #N/A | #N/A |
| itG(GCC)F1  | #N/A | #N/A | #N/A | #N/A | #N/A | #N/A |

|            |      |      |      |      |      |      |
|------------|------|------|------|------|------|------|
| itG(GCC)F2 | 1.10 | 0.40 | 1.26 | 0.69 | 0.93 | 0.52 |
| itG(GCC)G1 | 0.95 | 0.29 | 1.10 | 0.49 | 1.13 | 0.82 |
| itG(GCC)G2 | #N/A | #N/A | 0.60 | 0.13 | #N/A | #N/A |
| itG(GCC)J1 | 1.13 | 0.48 | 1.19 | 0.59 | 0.88 | 0.32 |
| itG(GCC)J2 | #N/A | #N/A | #N/A | #N/A | #N/A | #N/A |
| itG(GCC)M  | 0.60 | 0.07 | 0.38 | 0.02 | #N/A | #N/A |
| itG(GCC)O2 | #N/A | #N/A | 0.90 | 0.27 | 1.16 | 0.85 |
| itG(GCC)P2 | 1.01 | 0.34 | 0.94 | 0.31 | 0.93 | 0.37 |
| itG(UCC)G  | 0.82 | 0.17 | 0.77 | 0.17 | 1.29 | 0.77 |
| itG(UCC)N  | 0.77 | 0.14 | #N/A | #N/A | 1.10 | 0.55 |
| itG(UCC)O  | 0.94 | 0.26 | 1.34 | 0.76 | 1.10 | 0.66 |
| itH(GUG)E1 | #N/A | #N/A | #N/A | #N/A | #N/A | #N/A |
| itH(GUG)G1 | #N/A | #N/A | #N/A | #N/A | #N/A | #N/A |
| itH(GUG)G2 | 0.75 | 0.13 | 0.95 | 0.32 | 1.31 | 0.81 |
| itH(GUG)H  | #N/A | #N/A | #N/A | #N/A | #N/A | #N/A |
| itH(GUG)K  | 0.55 | 0.06 | 0.65 | 0.11 | #N/A | #N/A |
| itH(GUG)M  | #N/A | #N/A | #N/A | #N/A | #N/A | #N/A |
| itI(AAU)E1 | #N/A | #N/A | #N/A | #N/A | #N/A | #N/A |
| itI(AAU)E2 | #N/A | #N/A | #N/A | #N/A | #N/A | #N/A |
| itI(AAU)G  | 0.90 | 0.21 | 0.82 | 0.20 | 0.89 | 0.38 |
| itI(AAU)I1 | 0.99 | 0.32 | 0.93 | 0.34 | 1.02 | 0.68 |
| itI(AAU)I2 | #N/A | #N/A | 0.77 | 0.20 | #N/A | #N/A |
| itI(AAU)L1 | #N/A | #N/A | #N/A | #N/A | #N/A | #N/A |
| itI(AAU)L2 | #N/A | #N/A | 0.78 | 0.17 | #N/A | #N/A |
| itI(AAU)N1 | 0.89 | 0.21 | 0.94 | 0.32 | 1.11 | 0.69 |
| itI(AAU)N2 | 0.60 | 0.07 | 0.61 | 0.09 | 0.80 | 0.29 |
| itI(AAU)P1 | #N/A | #N/A | #N/A | #N/A | #N/A | #N/A |
| itI(UAU)D  | 0.77 | 0.13 | 0.45 | 0.03 | #N/A | #N/A |
| itI(UAU)L  | #N/A | #N/A | 0.84 | 0.25 | 1.04 | 0.70 |
| itK(CUU)C  | #N/A | #N/A | #N/A | #N/A | #N/A | #N/A |
| itK(CUU)D1 | 0.66 | 0.09 | 0.82 | 0.21 | #N/A | #N/A |
| itK(CUU)D2 | #N/A | #N/A | #N/A | #N/A | #N/A | #N/A |
| itK(CUU)E1 | #N/A | #N/A | #N/A | #N/A | #N/A | #N/A |
| itK(CUU)E2 | #N/A | #N/A | 1.33 | 0.71 | #N/A | #N/A |
| itK(CUU)G1 | 1.04 | 0.37 | 1.03 | 0.40 | 1.12 | 0.69 |
| itK(CUU)G2 | #N/A | #N/A | #N/A | #N/A | #N/A | #N/A |
| itK(CUU)G3 | #N/A | #N/A | #N/A | #N/A | #N/A | #N/A |
| itK(CUU)I  | #N/A | #N/A | #N/A | #N/A | #N/A | #N/A |
| itK(CUU)J  | 1.11 | 0.42 | 0.93 | 0.34 | 1.10 | 0.79 |
| itK(CUU)K  | 0.98 | 0.28 | 0.80 | 0.19 | 0.81 | 0.25 |
| itK(CUU)M  | 1.08 | 0.43 | 1.23 | 0.64 | 0.92 | 0.37 |
| itK(UUU)D  | #N/A | #N/A | #N/A | #N/A | #N/A | #N/A |
| itK(UUU)G1 | 0.83 | 0.18 | #N/A | #N/A | 1.02 | 0.52 |
| itK(UUU)K  | #N/A | #N/A | 0.67 | 0.11 | #N/A | #N/A |
| itK(UUU)L  | #N/A | #N/A | #N/A | #N/A | #N/A | #N/A |
| itK(UUU)O  | #N/A | #N/A | #N/A | #N/A | #N/A | #N/A |
| itL(CAA)A  | 1.37 | 0.79 | 1.51 | 0.88 | 1.01 | 0.60 |
| itL(CAA)C  | #N/A | #N/A | #N/A | #N/A | #N/A | #N/A |
| itL(CAA)D  | 0.74 | 0.13 | 0.91 | 0.28 | 1.15 | 0.72 |
| itL(CAA)G2 | 1.07 | 0.40 | 1.16 | 0.57 | 0.82 | 0.32 |
| itL(CAA)G3 | 1.05 | 0.34 | 1.08 | 0.47 | 1.03 | 0.55 |

|             |      |      |      |      |      |      |
|-------------|------|------|------|------|------|------|
| itL(CAA)K   | #N/A | #N/A | #N/A | #N/A | #N/A | #N/A |
| itL(CAA)L   | #N/A | #N/A | #N/A | #N/A | #N/A | #N/A |
| itL(CAA)M   | #N/A | #N/A | 0.86 | 0.23 | 1.01 | 0.45 |
| itL(GAG)G   | 0.28 | 0.01 | #N/A | #N/A | 1.36 | 0.86 |
| itL(UAA)B1  | 1.34 | 0.75 | 1.33 | 0.76 | #N/A | #N/A |
| itL(UAA)B2  | 0.48 | 0.04 | 0.81 | 0.20 | #N/A | #N/A |
| itL(UAA)D   | #N/A | #N/A | 0.76 | 0.16 | #N/A | #N/A |
| itL(UAA)J   | 1.08 | 0.43 | 1.09 | 0.49 | 1.38 | 0.81 |
| itL(UAA)K   | 1.09 | 0.44 | 1.03 | 0.40 | 0.98 | 0.56 |
| itL(UAA)L   | #N/A | #N/A | #N/A | #N/A | #N/A | #N/A |
| itL(UAG)J   | 0.89 | 0.23 | 0.95 | 0.34 | 1.10 | 0.65 |
| itL(UAG)L1  | #N/A | #N/A | #N/A | #N/A | #N/A | #N/A |
| iTLC1       | #N/A | #N/A | #N/A | #N/A | #N/A | #N/A |
| itM(CAU)C   | 1.06 | 0.40 | 1.52 | 0.88 | 1.27 | 0.75 |
| itM(CAU)D   | 1.19 | 0.52 | 0.99 | 0.37 | 1.19 | 0.78 |
| itM(CAU)E   | #N/A | #N/A | 0.56 | 0.07 | 0.86 | 0.28 |
| itM(CAU)J1  | 0.74 | 0.13 | 0.72 | 0.14 | 1.09 | 0.64 |
| itM(CAU)J2  | #N/A | #N/A | #N/A | #N/A | #N/A | #N/A |
| itM(CAU)J3  | #N/A | #N/A | #N/A | #N/A | #N/A | #N/A |
| itM(CAU)M   | #N/A | #N/A | #N/A | #N/A | #N/A | #N/A |
| itM(CAU)O1  | #N/A | #N/A | #N/A | #N/A | #N/A | #N/A |
| itM(CAU)O2  | 0.93 | 0.25 | 1.10 | 0.49 | 1.16 | 0.73 |
| itM(CAU)P   | 0.50 | 0.03 | 0.44 | 0.03 | 0.81 | 0.21 |
| itN(GUU)C   | #N/A | #N/A | 1.27 | 0.70 | 1.24 | 0.91 |
| itN(GUU)F   | #N/A | #N/A | 0.10 | 0.00 | #N/A | #N/A |
| itN(GUU)G   | 1.07 | 0.41 | #N/A | #N/A | 1.07 | 0.73 |
| itN(GUU)K   | #N/A | #N/A | 1.22 | 0.61 | #N/A | #N/A |
| itN(GUU)L   | #N/A | #N/A | #N/A | #N/A | #N/A | #N/A |
| itN(GUU)N1  | #N/A | #N/A | #N/A | #N/A | #N/A | #N/A |
| itN(GUU)N2  | 1.09 | 0.42 | 0.67 | 0.11 | #N/A | #N/A |
| itN(GUU)O1  | 1.09 | 0.38 | 0.79 | 0.19 | #N/A | #N/A |
| itN(GUU)O2  | #N/A | #N/A | #N/A | #N/A | #N/A | #N/A |
| itN(GUU)P   | 1.04 | 0.39 | 0.83 | 0.30 | 1.08 | 0.63 |
| itP(AGG)C   | 0.41 | 0.02 | 0.38 | 0.02 | 0.88 | 0.30 |
| itP(AGG)N   | #N/A | #N/A | #N/A | #N/A | #N/A | #N/A |
| itP(UGG)A   | #N/A | #N/A | #N/A | #N/A | #N/A | #N/A |
| itP(UGG)F   | #N/A | #N/A | #N/A | #N/A | #N/A | #N/A |
| itP(UGG)L-0 | 1.20 | 0.53 | 1.40 | 0.78 | 0.98 | 0.48 |
| itP(UGG)M   | #N/A | #N/A | #N/A | #N/A | #N/A | #N/A |
| itP(UGG)N1  | 1.03 | 0.36 | 1.15 | 0.55 | 0.77 | 0.24 |
| itP(UGG)N2  | 1.15 | 0.51 | 1.24 | 0.63 | 1.31 | 0.76 |
| itP(UGG)O1  | #N/A | #N/A | #N/A | #N/A | #N/A | #N/A |
| itP(UGG)O2  | 0.82 | 0.16 | 0.74 | 0.17 | 0.94 | 0.54 |
| itQ(CUG)M   | #N/A | #N/A | 0.61 | 0.08 | #N/A | #N/A |
| itQ(UUG)B   | 1.16 | 0.53 | 1.12 | 0.52 | 1.43 | 0.89 |
| itQ(UUG)C   | #N/A | #N/A | #N/A | #N/A | #N/A | #N/A |
| itQ(UUG)D1  | #N/A | #N/A | 0.93 | 0.38 | #N/A | #N/A |
| itQ(UUG)D2  | #N/A | #N/A | 1.10 | 0.49 | #N/A | #N/A |
| itQ(UUG)D3  | #N/A | #N/A | #N/A | #N/A | #N/A | #N/A |
| itQ(UUG)E1  | 0.66 | 0.09 | 0.79 | 0.19 | 0.98 | 0.41 |
| itQ(UUG)E2  | 1.12 | 0.48 | 1.05 | 0.44 | 1.06 | 0.51 |

|             |      |      |      |      |      |      |
|-------------|------|------|------|------|------|------|
| itQ(UUG)H   | #N/A | #N/A | 1.03 | 0.45 | #N/A | #N/A |
| itQ(UUG)L   | #N/A | #N/A | #N/A | #N/A | #N/A | #N/A |
| itR(ACG)D-0 | 1.39 | 0.81 | 1.35 | 0.77 | 1.18 | 0.75 |
| itR(ACG)D-1 | 0.85 | 0.19 | 0.90 | 0.27 | 0.81 | 0.31 |
| itR(ACG)J   | 1.29 | 0.64 | 1.03 | 0.43 | 1.11 | 0.66 |
| itR(ACG)K   | 1.31 | 0.66 | 0.78 | 0.18 | 1.55 | 0.89 |
| itR(ACG)L   | 1.46 | 0.82 | 1.24 | 0.64 | 1.20 | 0.77 |
| itR(ACG)O   | #N/A | #N/A | #N/A | #N/A | #N/A | #N/A |
| itR(CCG)L   | 0.42 | 0.03 | 0.37 | 0.02 | 0.63 | 0.07 |
| itR(CCU)J   | #N/A | #N/A | #N/A | #N/A | #N/A | #N/A |
| itR(UCU)E   | #N/A | #N/A | #N/A | #N/A | #N/A | #N/A |
| itR(UCU)G1  | 0.84 | 0.19 | 0.80 | 0.19 | 1.43 | 0.93 |
| itR(UCU)G2  | #N/A | #N/A | 0.63 | 0.09 | 1.21 | 0.67 |
| itR(UCU)J2  | 0.83 | 0.18 | 1.16 | 0.57 | 1.20 | 0.78 |
| itR(UCU)K   | #N/A | #N/A | 0.79 | 0.19 | #N/A | #N/A |
| itR(UCU)M1  | #N/A | #N/A | #N/A | #N/A | #N/A | #N/A |
| itR(UCU)M2  | #N/A | #N/A | #N/A | #N/A | #N/A | #N/A |
| itS(AGA)B   | 0.86 | 0.19 | 0.83 | 0.21 | 1.40 | 0.91 |
| itS(AGA)D1  | 0.69 | 0.10 | 0.63 | 0.09 | 1.11 | 0.68 |
| itS(AGA)D2  | #N/A | #N/A | #N/A | #N/A | #N/A | #N/A |
| itS(AGA)D3  | #N/A | #N/A | #N/A | #N/A | 0.84 | 0.26 |
| itS(AGA)E   | #N/A | #N/A | 0.70 | 0.13 | 1.23 | 0.71 |
| itS(AGA)G   | #N/A | #N/A | #N/A | #N/A | #N/A | #N/A |
| itS(AGA)H   | #N/A | #N/A | #N/A | #N/A | #N/A | #N/A |
| itS(AGA)J   | 1.00 | 0.29 | 0.97 | 0.35 | 1.04 | 0.58 |
| itS(AGA)M   | 1.30 | 0.65 | 1.37 | 0.77 | 1.45 | 0.93 |
| itS(GCU)F   | #N/A | #N/A | #N/A | #N/A | #N/A | #N/A |
| itS(GCU)L   | 0.75 | 0.13 | 0.57 | 0.07 | 0.73 | 0.19 |
| itS(GCU)O   | #N/A | #N/A | 0.67 | 0.11 | 1.00 | 0.46 |
| itS(UGA)E-0 | 1.07 | 0.41 | 1.00 | 0.37 | 1.24 | 0.76 |
| itS(UGA)E-1 | 1.52 | 0.89 | 1.51 | 0.82 | 0.97 | 0.58 |
| itS(UGA)I   | 0.45 | 0.03 | 0.37 | 0.02 | 0.62 | 0.08 |
| itS(UGA)P   | 0.56 | 0.06 | 0.71 | 0.13 | 0.91 | 0.33 |
| itT(AGU)B   | #N/A | #N/A | 1.31 | 0.74 | 1.43 | 0.92 |
| itT(AGU)C   | 1.05 | 0.40 | 1.53 | 0.88 | 1.17 | 0.68 |
| itT(AGU)D   | #N/A | #N/A | #N/A | #N/A | #N/A | #N/A |
| itT(AGU)H   | #N/A | #N/A | #N/A | #N/A | #N/A | #N/A |
| itT(AGU)I1  | #N/A | #N/A | #N/A | #N/A | #N/A | #N/A |
| itT(AGU)I2  | #N/A | #N/A | #N/A | #N/A | #N/A | #N/A |
| itT(AGU)J   | 1.03 | 0.37 | 1.05 | 0.44 | 1.06 | 0.50 |
| itT(AGU)N1  | 0.85 | 0.19 | 0.72 | 0.14 | 1.02 | 0.50 |
| itT(AGU)N2  | 1.11 | 0.45 | 1.01 | 0.39 | 0.93 | 0.35 |
| itT(AGU)O1  | #N/A | #N/A | #N/A | #N/A | #N/A | #N/A |
| itT(CGU)K   | #N/A | #N/A | 1.10 | 0.49 | 1.11 | 0.57 |
| itT(UGU)G1  | 0.71 | 0.11 | 0.92 | 0.29 | 0.87 | 0.41 |
| itT(UGU)G2  | 1.01 | 0.30 | 0.85 | 0.28 | 1.70 | 0.98 |
| itT(UGU)H   | #N/A | #N/A | #N/A | #N/A | #N/A | #N/A |
| itT(UGU)P   | 0.78 | 0.14 | 0.98 | 0.35 | 1.41 | 0.92 |
| itV(AAC)E1  | 1.02 | 0.34 | 0.91 | 0.28 | 1.15 | 0.73 |
| itV(AAC)E2  | 1.02 | 0.35 | #N/A | #N/A | #N/A | #N/A |
| itV(AAC)G1  | #N/A | #N/A | #N/A | #N/A | #N/A | #N/A |

|              |      |      |      |      |      |      |
|--------------|------|------|------|------|------|------|
| itV(AAC)G2   | 0.52 | 0.04 | 0.49 | 0.04 | 0.90 | 0.34 |
| itV(AAC)G3-0 | 1.36 | 0.73 | 1.29 | 0.72 | 0.88 | 0.43 |
| itV(AAC)J    | 1.15 | 0.52 | 1.31 | 0.73 | 1.03 | 0.48 |
| itV(AAC)K1-0 | 0.74 | 0.13 | 0.66 | 0.11 | 0.77 | 0.17 |
| itV(AAC)K2   | #N/A | #N/A | 0.95 | 0.32 | 1.22 | 0.71 |
| itV(AAC)L    | #N/A | #N/A | 1.55 | 0.66 | #N/A | #N/A |
| itV(AAC)M1   | #N/A | #N/A | #N/A | #N/A | #N/A | #N/A |
| itV(AAC)M2   | 1.20 | 0.59 | #N/A | #N/A | 1.25 | 0.82 |
| itV(AAC)M3   | 1.16 | 0.54 | 1.17 | 0.58 | 1.33 | 0.81 |
| itV(AAC)O    | #N/A | #N/A | #N/A | #N/A | #N/A | #N/A |
| itV(CAC)D    | 0.97 | 0.30 | 0.86 | 0.26 | 0.92 | 0.46 |
| itV(UAC)B    | #N/A | #N/A | #N/A | #N/A | #N/A | #N/A |
| itV(UAC)D    | 1.04 | 0.39 | 0.97 | 0.36 | 0.87 | 0.41 |
| itW(CCA)G1   | 1.14 | 0.51 | 0.96 | 0.33 | 1.22 | 0.69 |
| itW(CCA)G2   | 1.08 | 0.42 | 1.29 | 0.67 | 0.91 | 0.36 |
| itW(CCA)J    | 0.65 | 0.08 | 0.69 | 0.13 | #N/A | #N/A |
| itW(CCA)K-0  | 1.27 | 0.68 | 1.42 | 0.83 | 0.89 | 0.44 |
| itW(CCA)K-1  | 1.25 | 0.67 | 1.41 | 0.81 | 0.85 | 0.25 |
| itW(CCA)M    | 0.85 | 0.18 | #N/A | #N/A | 1.12 | 0.58 |
| itY(GUA)D    | 0.99 | 0.31 | 0.78 | 0.18 | 0.95 | 0.43 |
| itY(GUA)F1   | #N/A | #N/A | #N/A | #N/A | #N/A | #N/A |
| itY(GUA)F2   | 1.04 | 0.38 | #N/A | #N/A | 1.01 | 0.52 |
| itY(GUA)J1   | #N/A | #N/A | #N/A | #N/A | #N/A | #N/A |
| itY(GUA)J2   | 1.18 | 0.49 | 1.21 | 0.57 | 1.01 | 0.54 |
| itY(GUA)M1   | #N/A | #N/A | #N/A | #N/A | #N/A | #N/A |
| itY(GUA)M2   | #N/A | #N/A | 0.66 | 0.14 | #N/A | #N/A |
| itY(GUA)O    | 0.72 | 0.12 | 0.68 | 0.12 | 0.85 | 0.25 |
| iYAL001C     | 0.90 | 0.21 | 0.79 | 0.18 | 1.49 | 0.94 |
| iYAL002W     | #N/A | #N/A | #N/A | #N/A | #N/A | #N/A |
| iYAL003W     | #N/A | #N/A | 1.44 | 0.78 | 1.08 | 0.76 |
| iYAL004W     | 0.46 | 0.04 | 0.52 | 0.05 | 0.78 | 0.17 |
| iYAL007C     | 1.12 | 0.47 | 1.22 | 0.65 | 1.47 | 0.86 |
| iYAL008W     | 1.32 | 0.67 | 1.42 | 0.70 | #N/A | #N/A |
| iYAL009W     | 1.26 | 0.65 | 1.60 | 0.92 | 1.16 | 0.74 |
| iYAL010C     | 1.76 | 0.97 | 1.44 | 0.81 | 1.01 | 0.66 |
| iYAL011W     | #N/A | #N/A | 0.55 | 0.08 | 1.12 | 0.71 |
| iYAL013W     | 1.49 | 0.87 | 1.47 | 0.80 | 1.07 | 0.54 |
| iYAL014C     | 1.41 | 0.77 | 1.27 | 0.67 | 0.86 | 0.30 |
| iYAL015C     | #N/A | #N/A | 1.32 | 0.71 | 1.07 | 0.62 |
| iYAL016W     | #N/A | #N/A | #N/A | #N/A | #N/A | #N/A |
| iYAL017W     | 0.85 | 0.18 | 0.94 | 0.31 | 1.02 | 0.54 |
| iYAL018C     | 1.15 | 0.52 | 0.98 | 0.37 | 0.96 | 0.38 |
| iYAL019W     | #N/A | #N/A | #N/A | #N/A | #N/A | #N/A |
| iYAL020C     | 1.28 | 0.63 | 1.14 | 0.55 | 0.77 | 0.22 |
| iYAL021C     | #N/A | #N/A | 1.18 | 0.59 | 0.99 | 0.48 |
| iYAL022C     | 1.16 | 0.54 | 1.15 | 0.55 | 0.92 | 0.39 |
| iYAL023C     | 0.97 | 0.26 | 0.89 | 0.26 | 0.79 | 0.19 |
| iYAL025C     | #N/A | #N/A | #N/A | #N/A | 1.10 | 0.65 |
| iYAL026C     | 1.23 | 0.60 | 1.03 | 0.40 | #N/A | #N/A |
| iYAL027W     | #N/A | #N/A | #N/A | #N/A | #N/A | #N/A |
| iYAL028W     | #N/A | #N/A | #N/A | #N/A | #N/A | #N/A |

|              |      |      |      |      |      |      |
|--------------|------|------|------|------|------|------|
| iYAL029C     | #N/A | #N/A | 0.94 | 0.31 | 1.07 | 0.67 |
| iYAL030W     | #N/A | #N/A | #N/A | #N/A | #N/A | #N/A |
| iYAL031C     | #N/A | #N/A | 0.88 | 0.25 | 1.14 | 0.83 |
| iYAL032C     | 1.23 | 0.63 | 1.50 | 0.86 | 1.12 | 0.58 |
| iYAL033W     | #N/A | #N/A | #N/A | #N/A | 0.30 | 0.01 |
| iYAL034C     | 1.52 | 0.88 | 1.46 | 0.85 | 1.31 | 0.87 |
| iYAL034W-A   | #N/A | #N/A | #N/A | #N/A | #N/A | #N/A |
| iYAL036C     | 1.11 | 0.41 | 0.96 | 0.37 | 0.81 | 0.21 |
| iYAL037W     | 0.27 | 0.01 | 0.67 | 0.12 | #N/A | #N/A |
| iYAL038W     | 1.35 | 0.71 | 1.34 | 0.72 | 0.81 | 0.32 |
| iYAL039C-0   | 1.06 | 0.35 | 0.91 | 0.28 | 0.81 | 0.21 |
| iYAL039C-1   | 0.21 | 0.00 | 0.19 | 0.00 | #N/A | #N/A |
| iYAL040C     | 0.64 | 0.09 | 0.71 | 0.13 | 0.90 | 0.32 |
| iYAL041W     | 1.08 | 0.41 | 1.36 | 0.78 | #N/A | #N/A |
| iYAL042W     | 1.17 | 0.53 | 1.21 | 0.63 | 1.25 | 0.90 |
| iYAL043C     | #N/A | #N/A | 0.80 | 0.20 | 0.62 | 0.06 |
| iYAL044C     | #N/A | #N/A | #N/A | #N/A | 0.56 | 0.05 |
| iYAL045C     | #N/A | #N/A | #N/A | #N/A | #N/A | #N/A |
| iYAL046C     | #N/A | #N/A | #N/A | #N/A | #N/A | #N/A |
| iYAL047C     | 0.87 | 0.20 | #N/A | #N/A | #N/A | #N/A |
| iYAL048C     | #N/A | #N/A | #N/A | #N/A | #N/A | #N/A |
| iYAL049C     | #N/A | #N/A | 1.11 | 0.52 | 0.63 | 0.08 |
| iYAL051W     | #N/A | #N/A | #N/A | #N/A | #N/A | #N/A |
| iYAL053W     | #N/A | #N/A | 1.02 | 0.41 | #N/A | #N/A |
| iYAL054C     | 0.52 | 0.05 | 0.62 | 0.09 | 0.61 | 0.07 |
| iYAL055W     | #N/A | #N/A | #N/A | #N/A | #N/A | #N/A |
| iYAL056W     | 1.16 | 0.47 | 1.26 | 0.62 | 0.96 | 0.45 |
| iYAL058C-A   | 1.22 | 0.60 | 1.23 | 0.63 | #N/A | #N/A |
| iYAL059W     | 1.10 | 0.46 | 1.14 | 0.51 | #N/A | #N/A |
| iYAL060W     | 1.48 | 0.83 | 1.45 | 0.82 | #N/A | #N/A |
| iYAL061W     | 1.10 | 0.46 | 1.11 | 0.50 | 1.03 | 0.51 |
| iYAL062W     | 1.04 | 0.37 | 1.04 | 0.42 | 0.78 | 0.19 |
| iYAL063C-0   | 0.88 | 0.21 | 1.24 | 0.66 | 0.91 | 0.33 |
| iYAL063C-1   | 1.16 | 0.47 | 1.37 | 0.67 | 1.07 | 0.52 |
| iYAL064C-A-0 | 1.41 | 0.78 | 1.61 | 0.90 | 0.96 | 0.56 |
| iYAL064C-A-1 | 1.34 | 0.76 | 1.70 | 0.92 | 0.92 | 0.41 |
| iYAL064C-A-2 | 1.59 | 0.91 | 1.62 | 0.89 | 1.04 | 0.54 |
| iYAL064C-A-3 | 1.50 | 0.88 | 1.43 | 0.83 | 1.03 | 0.56 |
| iYAL064C-A-4 | 1.40 | 0.76 | 1.55 | 0.89 | 1.09 | 0.77 |
| iYAL064C-A-5 | 0.92 | 0.23 | 0.89 | 0.26 | 0.88 | 0.38 |
| iYAL064W     | 1.15 | 0.50 | 1.24 | 0.63 | 0.86 | 0.32 |
| iYAL065C     | 1.37 | 0.78 | 1.08 | 0.47 | 0.95 | 0.43 |
| iYAL066W     | 1.50 | 0.89 | 1.58 | 0.85 | 1.40 | 0.82 |
| iYAL067C     | 1.81 | 0.97 | 2.22 | 0.95 | 1.06 | 0.54 |
| iYAL068C-0   | 1.33 | 0.69 | 1.41 | 0.82 | 1.10 | 0.56 |
| iYAL068C-2   | 1.83 | 0.97 | 1.84 | 0.97 | 1.00 | 0.63 |
| iYAL069W     | 1.12 | 0.47 | 1.25 | 0.67 | 1.10 | 0.65 |
| iYALCdelta2  | #N/A | #N/A | #N/A | #N/A | #N/A | #N/A |
| iYALWdelta1  | 1.42 | 0.83 | 1.48 | 0.85 | 1.01 | 0.50 |
| iYAR002C-A   | 1.63 | 0.94 | #N/A | #N/A | 0.88 | 0.43 |
| iYAR002W     | #N/A | #N/A | #N/A | #N/A | 0.83 | 0.24 |



|               |      |      |      |      |      |      |
|---------------|------|------|------|------|------|------|
| iYAR003W      | #N/A | #N/A | #N/A | #N/A | 0.79 | 0.19 |
| iYAR007C      | 1.07 | 0.40 | 1.21 | 0.62 | 0.74 | 0.19 |
| iYAR008W      | 1.07 | 0.41 | 1.03 | 0.42 | 1.36 | 0.87 |
| iYAR009C      | 1.20 | 0.57 | 1.01 | 0.41 | 1.14 | 0.71 |
| iYAR014C      | 1.17 | 0.52 | 1.31 | 0.71 | 0.71 | 0.12 |
| iYAR015W      | #N/A | #N/A | #N/A | #N/A | #N/A | #N/A |
| iYAR019C-0    | 1.48 | 0.86 | 1.25 | 0.68 | 0.97 | 0.45 |
| iYAR019C-1    | #N/A | #N/A | 1.43 | 0.82 | 0.99 | 0.63 |
| iYAR020C-0    | 1.54 | 0.90 | 1.65 | 0.90 | 1.02 | 0.62 |
| iYAR020C-1    | 1.72 | 0.96 | 1.75 | 0.96 | 1.17 | 0.69 |
| iYAR023C      | 1.17 | 0.53 | 1.30 | 0.70 | 1.15 | 0.73 |
| iYAR027W      | 1.48 | 0.83 | 1.28 | 0.66 | 0.91 | 0.39 |
| iYAR028W      | 1.27 | 0.67 | 1.43 | 0.83 | 0.90 | 0.46 |
| iYAR031W      | 1.29 | 0.64 | 1.20 | 0.61 | 1.11 | 0.57 |
| iYAR033W      | 1.18 | 0.54 | 1.14 | 0.55 | 1.06 | 0.59 |
| iYAR035W      | 1.18 | 0.54 | 1.10 | 0.49 | 0.88 | 0.31 |
| iYAR042W      | #N/A | #N/A | 1.18 | 0.59 | 0.76 | 0.17 |
| iYAR044W-0    | 1.57 | 0.89 | 1.57 | 0.91 | 0.84 | 0.35 |
| iYAR044W-1    | 1.04 | 0.38 | 0.99 | 0.36 | 0.80 | 0.20 |
| iYAR044W-2    | 1.55 | 0.90 | 1.30 | 0.72 | 1.10 | 0.57 |
| iYAR044W-3    | 1.57 | 0.92 | 1.25 | 0.67 | 1.18 | 0.76 |
| iYAR047C-0    | 1.38 | 0.80 | 1.38 | 0.80 | 1.02 | 0.56 |
| iYAR047C-1    | 1.21 | 0.54 | 1.25 | 0.62 | 0.71 | 0.12 |
| iYAR050W      | #N/A | #N/A | #N/A | #N/A | 0.62 | 0.06 |
| iYAR053W      | 1.40 | 0.76 | 1.51 | 0.88 | 0.98 | 0.52 |
| iYAR060C      | 1.39 | 0.80 | 1.61 | 0.88 | 0.86 | 0.39 |
| iYAR061W      | 1.31 | 0.73 | 1.07 | 0.46 | 0.77 | 0.24 |
| iYAR062W      | 1.32 | 0.71 | 1.31 | 0.73 | 1.02 | 0.55 |
| iYAR064W      | 1.18 | 0.56 | 1.37 | 0.73 | 0.76 | 0.17 |
| iYAR066W      | 1.21 | 0.58 | 1.29 | 0.70 | 0.96 | 0.50 |
| iYAR068W      | 1.17 | 0.55 | 1.49 | 0.77 | 0.88 | 0.44 |
| iYAR069C      | 1.14 | 0.50 | 1.71 | 0.91 | 0.77 | 0.17 |
| iYAR070C      | 1.37 | 0.73 | 1.39 | 0.76 | 0.87 | 0.30 |
| iYAR071W      | 1.29 | 0.71 | 1.54 | 0.89 | 0.80 | 0.20 |
| iYARCdelta5   | #N/A | #N/A | #N/A | #N/A | #N/A | #N/A |
| iYARCdelta8-0 | 1.06 | 0.36 | 1.05 | 0.44 | 0.93 | 0.37 |
| iYARCdelta8-1 | 1.23 | 0.60 | 1.33 | 0.76 | 0.99 | 0.62 |
| iYARCdelta8-2 | 1.51 | 0.89 | 1.55 | 0.86 | 1.04 | 0.61 |
| iYARCdelta8-3 | 1.42 | 0.83 | 1.50 | 0.85 | 1.05 | 0.59 |
| iYARCdelta8-4 | 1.26 | 0.65 | 1.47 | 0.83 | 0.93 | 0.48 |
| iYARWdelta6   | 1.17 | 0.55 | 1.14 | 0.54 | 1.05 | 0.72 |
| iYARWdelta7   | 0.66 | 0.09 | 0.71 | 0.13 | 0.81 | 0.22 |
| iYARWsigma1   | #N/A | #N/A | #N/A | #N/A | #N/A | #N/A |
| iYBL001C      | 1.07 | 0.37 | 1.40 | 0.74 | 1.29 | 0.85 |
| iYBL002W      | #N/A | #N/A | #N/A | #N/A | #N/A | #N/A |
| iYBL003C      | 0.55 | 0.05 | 0.46 | 0.04 | 0.56 | 0.05 |
| iYBL004W      | #N/A | #N/A | #N/A | #N/A | #N/A | #N/A |
| iYBL005W      | 1.21 | 0.60 | 1.42 | 0.83 | 1.38 | 0.86 |
| iYBL006C      | 0.83 | 0.17 | 0.97 | 0.35 | 0.65 | 0.07 |
| iYBL007C      | 1.08 | 0.40 | 1.00 | 0.39 | 1.38 | 0.87 |
| iYBL008W      | 1.57 | 0.92 | 1.53 | 0.83 | 1.13 | 0.70 |

|            |      |      |      |      |      |      |
|------------|------|------|------|------|------|------|
| iYBL009W   | 1.48 | 0.84 | 1.37 | 0.79 | 1.15 | 0.73 |
| iYBL010C   | #N/A | #N/A | 1.09 | 0.50 | #N/A | #N/A |
| iYBL011W   | #N/A | #N/A | 1.28 | 0.70 | #N/A | #N/A |
| iYBL013W   | 0.87 | 0.19 | 0.64 | 0.09 | 0.72 | 0.17 |
| iYBL014C   | 0.96 | 0.28 | 1.05 | 0.43 | 0.88 | 0.31 |
| iYBL015W   | 1.15 | 0.50 | 1.37 | 0.73 | 0.86 | 0.28 |
| iYBL016W   | 1.05 | 0.40 | 1.05 | 0.44 | 0.76 | 0.16 |
| iYBL017C   | 1.17 | 0.55 | 0.87 | 0.24 | 0.80 | 0.28 |
| iYBL018C   | 1.02 | 0.34 | 0.92 | 0.30 | 0.96 | 0.44 |
| iYBL019W   | #N/A | #N/A | #N/A | #N/A | #N/A | #N/A |
| iYBL020W   | #N/A | #N/A | #N/A | #N/A | #N/A | #N/A |
| iYBL022C   | 1.23 | 0.60 | 1.09 | 0.50 | 0.98 | 0.60 |
| iYBL023C   | 1.55 | 0.91 | 1.80 | 0.92 | 1.02 | 0.55 |
| iYBL024W   | #N/A | #N/A | 1.49 | 0.73 | 1.10 | 0.66 |
| iYBL025W   | 1.37 | 0.76 | 1.35 | 0.77 | 1.30 | 0.78 |
| iYBL026W   | 1.20 | 0.57 | 1.43 | 0.82 | 1.22 | 0.68 |
| iYBL027W   | #N/A | #N/A | 1.21 | 0.62 | 1.04 | 0.64 |
| iYBL028C   | 0.25 | 0.01 | 0.20 | 0.01 | 0.35 | 0.01 |
| iYBL029W   | #N/A | #N/A | 1.06 | 0.45 | 1.04 | 0.70 |
| iYBL030C-0 | 0.95 | 0.27 | 0.93 | 0.30 | 0.97 | 0.59 |
| iYBL030C-1 | 0.39 | 0.02 | 0.36 | 0.02 | 0.61 | 0.08 |
| iYBL031W   | 0.91 | 0.25 | 0.95 | 0.34 | #N/A | #N/A |
| iYBL032W   | 1.20 | 0.52 | 1.04 | 0.42 | 0.84 | 0.24 |
| iYBL033C   | 0.67 | 0.09 | 0.71 | 0.13 | 0.56 | 0.03 |
| iYBL034C   | #N/A | #N/A | 1.13 | 0.53 | 1.00 | 0.64 |
| iYBL035C   | #N/A | #N/A | #N/A | #N/A | #N/A | #N/A |
| iYBL036C   | 1.39 | 0.75 | 0.98 | 0.41 | 1.17 | 0.74 |
| iYBL037W   | #N/A | #N/A | #N/A | #N/A | #N/A | #N/A |
| iYBL038W   | #N/A | #N/A | 1.05 | 0.43 | 1.31 | 0.86 |
| iYBL039C   | 0.92 | 0.25 | 0.87 | 0.24 | 0.83 | 0.35 |
| iYBL040C   | 1.48 | 0.86 | 1.30 | 0.72 | 0.81 | 0.31 |
| iYBL041W   | #N/A | #N/A | #N/A | #N/A | #N/A | #N/A |
| iYBL042C   | 0.52 | 0.05 | 0.41 | 0.03 | 0.70 | 0.12 |
| iYBL043W   | 1.08 | 0.42 | 1.20 | 0.59 | 1.05 | 0.54 |
| iYBL044W   | 1.13 | 0.43 | 1.05 | 0.44 | 0.37 | 0.01 |
| iYBL045C   | 0.91 | 0.22 | 0.82 | 0.22 | 0.79 | 0.19 |
| iYBL046W   | 1.45 | 0.86 | 2.06 | 0.94 | #N/A | #N/A |
| iYBL047C   | 1.12 | 0.43 | 1.17 | 0.59 | 1.03 | 0.56 |
| iYBL048W   | #N/A | #N/A | 1.36 | 0.77 | 1.01 | 0.45 |
| iYBL050W   | 1.28 | 0.68 | 1.33 | 0.71 | 1.21 | 0.81 |
| iYBL051C   | 0.97 | 0.28 | 1.06 | 0.44 | 1.09 | 0.76 |
| iYBL052C   | 1.23 | 0.61 | 1.07 | 0.46 | 1.08 | 0.64 |
| iYBL054W   | #N/A | #N/A | #N/A | #N/A | #N/A | #N/A |
| iYBL055C   | 0.88 | 0.21 | 0.79 | 0.19 | 0.92 | 0.49 |
| iYBL056W   | 1.41 | 0.78 | 1.46 | 0.85 | 0.93 | 0.52 |
| iYBL057C   | 1.03 | 0.35 | 0.93 | 0.30 | 0.86 | 0.39 |
| iYBL058W   | #N/A | #N/A | #N/A | #N/A | #N/A | #N/A |
| iYBL059W   | #N/A | #N/A | #N/A | #N/A | #N/A | #N/A |
| iYBL060W   | 1.33 | 0.75 | 1.19 | 0.56 | 1.28 | 0.83 |
| iYBL061C   | 1.35 | 0.77 | 1.08 | 0.48 | 0.91 | 0.47 |
| iYBL063W   | #N/A | #N/A | #N/A | #N/A | #N/A | #N/A |

|              |      |      |      |      |      |      |
|--------------|------|------|------|------|------|------|
| iYBL064C     | 0.97 | 0.29 | 1.15 | 0.55 | 0.82 | 0.22 |
| iYBL065W     | #N/A | #N/A | #N/A | #N/A | #N/A | #N/A |
| iYBL067C     | 1.29 | 0.71 | 1.38 | 0.80 | 0.97 | 0.40 |
| iYBL068W     | 1.33 | 0.75 | 1.26 | 0.64 | 0.94 | 0.41 |
| iYBL069W     | 1.41 | 0.82 | 1.27 | 0.69 | 0.99 | 0.63 |
| iYBL071C     | #N/A | #N/A | #N/A | #N/A | #N/A | #N/A |
| iYBL072C     | 0.84 | 0.17 | 0.82 | 0.20 | 0.95 | 0.44 |
| iYBL073W     | 0.61 | 0.07 | 0.65 | 0.10 | 0.82 | 0.33 |
| iYBL075C     | 1.34 | 0.74 | 1.40 | 0.72 | 1.02 | 0.58 |
| iYBL076C     | #N/A | #N/A | #N/A | #N/A | #N/A | #N/A |
| iYBL078C     | #N/A | #N/A | #N/A | #N/A | #N/A | #N/A |
| iYBL079W     | #N/A | #N/A | 1.49 | 0.87 | 0.76 | 0.23 |
| iYBL080C     | 1.31 | 0.67 | 0.99 | 0.38 | 1.11 | 0.72 |
| iYBL081W     | #N/A | #N/A | #N/A | #N/A | #N/A | #N/A |
| iYBL082C     | 1.27 | 0.68 | 1.14 | 0.55 | 1.04 | 0.66 |
| iYBL084C     | #N/A | #N/A | 0.96 | 0.35 | 0.80 | 0.20 |
| iYBL085W     | #N/A | #N/A | #N/A | #N/A | #N/A | #N/A |
| iYBL086C     | 1.05 | 0.35 | 1.29 | 0.68 | 1.00 | 0.51 |
| iYBL087C     | #N/A | #N/A | 0.64 | 0.10 | 0.62 | 0.08 |
| iYBL088C     | #N/A | #N/A | #N/A | #N/A | 1.25 | 0.71 |
| iYBL091C     | 1.60 | 0.93 | 1.18 | 0.54 | #N/A | #N/A |
| iYBL091C-A   | 1.25 | 0.65 | 1.23 | 0.65 | 0.87 | 0.33 |
| iYBL092W     | #N/A | #N/A | #N/A | #N/A | #N/A | #N/A |
| iYBL093C     | 0.55 | 0.06 | 0.52 | 0.05 | 0.71 | 0.16 |
| iYBL094C     | 1.49 | 0.88 | 1.22 | 0.62 | 0.89 | 0.40 |
| iYBL097W     | #N/A | #N/A | #N/A | #N/A | #N/A | #N/A |
| iYBL098W     | #N/A | #N/A | #N/A | #N/A | #N/A | #N/A |
| iYBL099W     | 1.16 | 0.54 | 0.90 | 0.28 | #N/A | #N/A |
| iYBL101C     | 1.31 | 0.73 | 1.29 | 0.71 | 0.95 | 0.44 |
| iYBL102W     | #N/A | #N/A | #N/A | #N/A | #N/A | #N/A |
| iYBL103C     | #N/A | #N/A | 1.23 | 0.65 | 0.97 | 0.58 |
| iYBL104C     | 1.52 | 0.90 | 1.48 | 0.85 | #N/A | #N/A |
| iYBL105C     | 1.37 | 0.78 | 1.40 | 0.81 | 1.06 | 0.73 |
| iYBL106C     | 1.27 | 0.69 | 1.69 | 0.79 | 0.98 | 0.60 |
| iYBL108W     | 1.33 | 0.74 | 1.69 | 0.92 | 0.75 | 0.21 |
| iYBL109W-0   | 0.58 | 0.06 | 0.70 | 0.13 | 0.99 | 0.50 |
| iYBL109W-1   | 1.18 | 0.57 | 1.44 | 0.81 | 0.91 | 0.36 |
| iYBL111C     | 0.73 | 0.12 | 0.77 | 0.18 | 0.86 | 0.28 |
| iYBLCdelta7  | #N/A | #N/A | #N/A | #N/A | #N/A | #N/A |
| iYBLCsigma1  | 1.35 | 0.77 | 1.34 | 0.76 | 1.18 | 0.75 |
| iYBLWdelta10 | #N/A | #N/A | #N/A | #N/A | #N/A | #N/A |
| iYBLWdelta3  | #N/A | #N/A | #N/A | #N/A | #N/A | #N/A |
| iYBLWtau1    | 0.63 | 0.08 | 0.61 | 0.08 | #N/A | #N/A |
| iYBR001C     | 1.46 | 0.82 | 1.49 | 0.87 | 0.80 | 0.29 |
| iYBR002C     | 1.15 | 0.51 | 1.11 | 0.50 | #N/A | #N/A |
| iYBR003W     | #N/A | #N/A | #N/A | #N/A | #N/A | #N/A |
| iYBR004C     | 1.18 | 0.53 | 1.66 | 0.69 | #N/A | #N/A |
| iYBR005W     | #N/A | #N/A | 1.62 | 0.88 | 1.03 | 0.56 |
| iYBR006W     | 1.25 | 0.66 | 1.36 | 0.77 | 0.96 | 0.56 |
| iYBR007C-0   | 0.61 | 0.08 | 0.65 | 0.10 | 0.73 | 0.13 |
| iYBR007C-1   | 1.39 | 0.75 | 1.48 | 0.86 | 1.28 | 0.74 |

|            |      |      |      |      |      |      |
|------------|------|------|------|------|------|------|
| iYBR008C   | #N/A | #N/A | 1.36 | 0.78 | 1.09 | 0.62 |
| iYBR009C   | 0.61 | 0.07 | 0.55 | 0.06 | 0.78 | 0.26 |
| iYBR010W   | 1.38 | 0.80 | #N/A | #N/A | 1.13 | 0.82 |
| iYBR011C   | 1.16 | 0.54 | 1.23 | 0.64 | 0.98 | 0.47 |
| iYBR013C   | 1.22 | 0.55 | 1.00 | 0.38 | 0.92 | 0.50 |
| iYBR014C   | 1.25 | 0.59 | 1.27 | 0.68 | 1.00 | 0.51 |
| iYBR015C   | 0.99 | 0.33 | 1.24 | 0.66 | 0.97 | 0.51 |
| iYBR016W   | 1.60 | 0.91 | #N/A | #N/A | 1.11 | 0.68 |
| iYBR017C   | 1.01 | 0.35 | 0.72 | 0.14 | 0.91 | 0.32 |
| iYBR018C   | #N/A | #N/A | 1.21 | 0.63 | 1.17 | 0.69 |
| iYBR019C   | 1.43 | 0.79 | 1.04 | 0.44 | 0.93 | 0.35 |
| iYBR020W   | 0.93 | 0.25 | 0.80 | 0.18 | 0.80 | 0.29 |
| iYBR021W   | 1.28 | 0.68 | 1.20 | 0.62 | 1.47 | 0.91 |
| iYBR022W   | #N/A | #N/A | #N/A | #N/A | #N/A | #N/A |
| iYBR024W   | 1.22 | 0.60 | 1.07 | 0.46 | 1.07 | 0.60 |
| iYBR025C   | 1.04 | 0.37 | 0.94 | 0.32 | 0.83 | 0.33 |
| iYBR027C   | #N/A | #N/A | #N/A | #N/A | #N/A | #N/A |
| iYBR028C   | 1.22 | 0.62 | 0.89 | 0.31 | #N/A | #N/A |
| iYBR029C   | 1.26 | 0.60 | 1.11 | 0.52 | 1.04 | 0.57 |
| iYBR031W   | #N/A | #N/A | #N/A | #N/A | #N/A | #N/A |
| iYBR032W   | 1.16 | 0.54 | 1.32 | 0.68 | 0.75 | 0.15 |
| iYBR033W   | #N/A | #N/A | 1.13 | 0.53 | #N/A | #N/A |
| iYBR034C   | #N/A | #N/A | 1.18 | 0.53 | 1.00 | 0.64 |
| iYBR035C   | 1.23 | 0.63 | 1.22 | 0.65 | 1.16 | 0.73 |
| iYBR036C   | 1.18 | 0.57 | 1.06 | 0.44 | 1.03 | 0.48 |
| iYBR037C   | 1.11 | 0.41 | 1.04 | 0.42 | 1.11 | 0.57 |
| iYBR038W   | 1.16 | 0.53 | 1.09 | 0.48 | 0.89 | 0.45 |
| iYBR039W   | 1.25 | 0.63 | 1.32 | 0.74 | 1.31 | 0.87 |
| iYBR040W   | #N/A | #N/A | 0.96 | 0.38 | 0.81 | 0.21 |
| iYBR042C   | #N/A | #N/A | 1.34 | 0.74 | 1.09 | 0.71 |
| iYBR043C   | 1.55 | 0.88 | 1.21 | 0.60 | 0.93 | 0.52 |
| iYBR044C   | 1.24 | 0.64 | 1.09 | 0.49 | 1.04 | 0.59 |
| iYBR045C   | 0.91 | 0.24 | 0.97 | 0.43 | #N/A | #N/A |
| iYBR046C   | 1.04 | 0.33 | 0.89 | 0.28 | #N/A | #N/A |
| iYBR047W   | 0.33 | 0.01 | 0.35 | 0.02 | 0.49 | 0.03 |
| iYBR048W   | #N/A | #N/A | #N/A | #N/A | 1.00 | 0.62 |
| iYBR049C   | 0.80 | 0.17 | 0.69 | 0.12 | 1.00 | 0.50 |
| iYBR051W   | 1.19 | 0.57 | 1.01 | 0.39 | 1.09 | 0.78 |
| iYBR052C   | 1.16 | 0.50 | 1.24 | 0.64 | 0.87 | 0.30 |
| iYBR053C-0 | 1.09 | 0.44 | 0.93 | 0.31 | 0.88 | 0.29 |
| iYBR053C-1 | 0.88 | 0.21 | 0.95 | 0.34 | 0.88 | 0.41 |
| iYBR054W   | 1.47 | 0.87 | #N/A | #N/A | 0.84 | 0.27 |
| iYBR056W   | 1.17 | 0.51 | 1.39 | 0.80 | 1.13 | 0.71 |
| iYBR057C   | 0.83 | 0.19 | 0.67 | 0.11 | 0.90 | 0.35 |
| iYBR058C   | 1.22 | 0.59 | 1.11 | 0.51 | 1.14 | 0.72 |
| iYBR059C   | 0.83 | 0.18 | 0.78 | 0.18 | 0.82 | 0.22 |
| iYBR060C-0 | 1.55 | 0.88 | 1.35 | 0.76 | 1.23 | 0.78 |
| iYBR060C-1 | 1.62 | 0.93 | 1.54 | 0.89 | 1.00 | 0.65 |
| iYBR062C   | 1.38 | 0.78 | 1.48 | 0.86 | 1.22 | 0.70 |
| iYBR064W   | 1.27 | 0.67 | 1.21 | 0.62 | 1.20 | 0.78 |
| iYBR065C   | 0.98 | 0.30 | 1.05 | 0.43 | 0.65 | 0.08 |

|            |      |      |      |      |      |      |
|------------|------|------|------|------|------|------|
| iYBR066C   | 0.65 | 0.08 | 0.71 | 0.13 | 0.75 | 0.15 |
| iYBR067C   | 0.86 | 0.18 | 0.94 | 0.34 | 0.84 | 0.30 |
| iYBR068C   | 0.41 | 0.02 | 0.40 | 0.03 | 0.47 | 0.02 |
| iYBR069C   | #N/A | #N/A | 0.52 | 0.06 | 0.37 | 0.01 |
| iYBR070C   | 0.96 | 0.28 | 0.96 | 0.33 | 1.05 | 0.66 |
| iYBR071W   | 1.18 | 0.56 | 1.24 | 0.64 | 0.97 | 0.46 |
| iYBR072W   | 1.39 | 0.80 | 1.21 | 0.61 | 0.76 | 0.20 |
| iYBR073W   | 1.37 | 0.74 | 1.38 | 0.80 | 0.72 | 0.12 |
| iYBR074W   | 1.56 | 0.89 | #N/A | #N/A | 0.73 | 0.18 |
| iYBR075W   | 1.30 | 0.72 | 1.45 | 0.85 | 0.86 | 0.28 |
| iYBR076W   | 1.18 | 0.54 | 1.09 | 0.49 | 0.79 | 0.28 |
| iYBR077C   | 0.36 | 0.02 | 0.28 | 0.01 | 0.65 | 0.11 |
| iYBR078W   | 1.24 | 0.57 | 1.34 | 0.77 | 1.51 | 0.98 |
| iYBR079C   | 0.83 | 0.17 | 1.15 | 0.56 | 1.16 | 0.62 |
| iYBR080C   | #N/A | #N/A | 1.56 | 0.84 | 0.86 | 0.39 |
| iYBR081C   | 0.82 | 0.17 | 0.96 | 0.33 | 1.15 | 0.83 |
| iYBR082C-0 | 0.74 | 0.12 | 0.85 | 0.24 | 0.99 | 0.42 |
| iYBR082C-1 | 0.52 | 0.04 | 0.56 | 0.07 | 0.70 | 0.16 |
| iYBR083W   | 1.07 | 0.36 | 0.98 | 0.36 | 0.79 | 0.18 |
| iYBR084C-A | 0.49 | 0.03 | 0.52 | 0.05 | 0.61 | 0.07 |
| iYBR084W   | 0.98 | 0.30 | 0.93 | 0.32 | 0.93 | 0.40 |
| iYBR085W-0 | 1.32 | 0.73 | 1.35 | 0.76 | 1.00 | 0.43 |
| iYBR085W-1 | 1.25 | 0.66 | 1.38 | 0.79 | 1.16 | 0.84 |
| iYBR085W-2 | 0.82 | 0.16 | 1.04 | 0.42 | 0.87 | 0.42 |
| iYBR086C   | 1.10 | 0.40 | 0.99 | 0.37 | 0.58 | 0.06 |
| iYBR087W   | #N/A | #N/A | #N/A | #N/A | #N/A | #N/A |
| iYBR089W   | 1.23 | 0.63 | #N/A | #N/A | 1.00 | 0.44 |
| iYBR090C   | #N/A | #N/A | #N/A | #N/A | #N/A | #N/A |
| iYBR091C   | #N/A | #N/A | #N/A | #N/A | #N/A | #N/A |
| iYBR092C   | 1.08 | 0.38 | 0.89 | 0.34 | 0.88 | 0.38 |
| iYBR094W   | #N/A | #N/A | #N/A | #N/A | #N/A | #N/A |
| iYBR095C   | #N/A | #N/A | 1.21 | 0.63 | #N/A | #N/A |
| iYBR096W   | #N/A | #N/A | #N/A | #N/A | #N/A | #N/A |
| iYBR097W   | #N/A | #N/A | #N/A | #N/A | #N/A | #N/A |
| iYBR100W   | #N/A | #N/A | 0.93 | 0.39 | #N/A | #N/A |
| iYBR101C   | 0.89 | 0.21 | 0.67 | 0.18 | 0.81 | 0.31 |
| iYBR102C   | 1.15 | 0.47 | 1.13 | 0.52 | 1.19 | 0.66 |
| iYBR103W   | 1.40 | 0.76 | 1.16 | 0.56 | 0.88 | 0.29 |
| iYBR104W   | 1.22 | 0.61 | 1.17 | 0.57 | 1.37 | 0.90 |
| iYBR105C   | #N/A | #N/A | 0.63 | 0.09 | 0.66 | 0.09 |
| iYBR108W   | 1.60 | 0.93 | 1.56 | 0.90 | 1.23 | 0.89 |
| iYBR109C   | 1.04 | 0.35 | 1.02 | 0.40 | 0.95 | 0.42 |
| iYBR110W   | 1.53 | 0.90 | 1.56 | 0.90 | 1.01 | 0.52 |
| iYBR113W   | 0.58 | 0.06 | 0.68 | 0.12 | 0.73 | 0.17 |
| iYBR114W   | #N/A | #N/A | #N/A | #N/A | #N/A | #N/A |
| iYBR115C   | #N/A | #N/A | #N/A | #N/A | #N/A | #N/A |
| iYBR117C   | #N/A | #N/A | 0.74 | 0.15 | 0.79 | 0.19 |
| iYBR119W   | #N/A | #N/A | #N/A | #N/A | #N/A | #N/A |
| iYBR120C   | 1.04 | 0.37 | 0.94 | 0.34 | 1.05 | 0.59 |
| iYBR121C   | 1.24 | 0.65 | 1.26 | 0.69 | 0.81 | 0.26 |
| iYBR122C   | 1.00 | 0.33 | #N/A | #N/A | 1.01 | 0.45 |

|            |      |      |      |      |      |      |
|------------|------|------|------|------|------|------|
| iYBR124W   | 1.52 | 0.89 | 1.32 | 0.68 | #N/A | #N/A |
| iYBR126C   | #N/A | #N/A | 0.91 | 0.28 | 0.85 | 0.37 |
| iYBR127C   | 1.07 | 0.38 | 0.97 | 0.35 | 1.07 | 0.69 |
| iYBR128C   | #N/A | #N/A | #N/A | #N/A | #N/A | #N/A |
| iYBR129C   | 1.23 | 0.57 | 1.15 | 0.55 | 0.80 | 0.22 |
| iYBR130C   | 1.11 | 0.47 | 1.11 | 0.50 | #N/A | #N/A |
| iYBR132C   | 1.60 | 0.91 | 1.56 | 0.84 | 1.19 | 0.70 |
| iYBR134W   | 1.16 | 0.52 | 0.74 | 0.16 | #N/A | #N/A |
| iYBR136W   | 0.94 | 0.24 | 1.13 | 0.54 | 0.75 | 0.15 |
| iYBR137W   | #N/A | #N/A | #N/A | #N/A | #N/A | #N/A |
| iYBR138C   | 0.99 | 0.32 | 1.33 | 0.75 | 0.46 | 0.01 |
| iYBR139W   | #N/A | #N/A | #N/A | #N/A | #N/A | #N/A |
| iYBR140C   | 1.15 | 0.53 | 1.28 | 0.70 | 0.85 | 0.27 |
| iYBR141C   | 1.28 | 0.69 | 1.24 | 0.66 | 0.89 | 0.33 |
| iYBR142W   | #N/A | #N/A | #N/A | #N/A | #N/A | #N/A |
| iYBR143C   | #N/A | #N/A | 1.27 | 0.68 | 0.88 | 0.42 |
| iYBR144C   | #N/A | #N/A | 1.29 | 0.72 | #N/A | #N/A |
| iYBR145W   | 1.16 | 0.47 | 1.30 | 0.72 | 1.86 | 0.96 |
| iYBR146W   | #N/A | #N/A | 1.31 | 0.73 | 0.75 | 0.16 |
| iYBR147W   | 1.18 | 0.50 | 1.26 | 0.68 | 1.07 | 0.75 |
| iYBR148W   | #N/A | #N/A | 1.24 | 0.66 | 0.75 | 0.21 |
| iYBR149W   | #N/A | #N/A | #N/A | #N/A | #N/A | #N/A |
| iYBR150C   | 0.89 | 0.22 | 0.87 | 0.24 | 0.91 | 0.46 |
| iYBR151W   | 1.22 | 0.56 | 1.36 | 0.78 | 1.09 | 0.69 |
| iYBR152W   | 1.25 | 0.64 | 0.99 | 0.38 | #N/A | #N/A |
| iYBR153W   | #N/A | #N/A | 0.99 | 0.37 | #N/A | #N/A |
| iYBR154C   | 1.15 | 0.53 | 1.07 | 0.46 | 1.04 | 0.64 |
| iYBR155W   | 1.31 | 0.66 | 1.21 | 0.63 | 0.98 | 0.51 |
| iYBR156C   | 1.28 | 0.70 | 1.63 | 0.92 | 1.40 | 0.90 |
| iYBR157C-0 | 0.73 | 0.12 | 0.77 | 0.19 | 0.92 | 0.37 |
| iYBR157C-1 | 0.44 | 0.03 | 0.47 | 0.05 | 0.80 | 0.21 |
| iYBR158W   | 0.98 | 0.31 | 1.18 | 0.59 | 0.84 | 0.35 |
| iYBR159W   | 0.98 | 0.31 | #N/A | #N/A | #N/A | #N/A |
| iYBR160W   | 0.83 | 0.17 | 0.94 | 0.33 | 0.96 | 0.56 |
| iYBR161W   | 1.37 | 0.78 | 1.70 | 0.77 | 1.25 | 0.91 |
| iYBR162C   | 0.66 | 0.09 | 0.72 | 0.14 | 0.86 | 0.36 |
| iYBR162W-A | 0.86 | 0.20 | 0.76 | 0.16 | 1.01 | 0.53 |
| iYBR163W   | 1.53 | 0.87 | 1.40 | 0.80 | #N/A | #N/A |
| iYBR164C   | 1.31 | 0.66 | 1.15 | 0.56 | 0.92 | 0.37 |
| iYBR165W   | #N/A | #N/A | #N/A | #N/A | #N/A | #N/A |
| iYBR166C   | #N/A | #N/A | #N/A | #N/A | #N/A | #N/A |
| iYBR167C   | 1.24 | 0.63 | 1.21 | 0.64 | 1.25 | 0.83 |
| iYBR168W   | 1.44 | 0.84 | 1.45 | 0.72 | #N/A | #N/A |
| iYBR169C   | #N/A | #N/A | 0.99 | 0.39 | 1.01 | 0.45 |
| iYBR170C   | 1.18 | 0.54 | 0.92 | 0.30 | #N/A | #N/A |
| iYBR171W   | #N/A | #N/A | #N/A | #N/A | #N/A | #N/A |
| iYBR172C   | 0.86 | 0.19 | #N/A | #N/A | #N/A | #N/A |
| iYBR173C   | 0.94 | 0.25 | 1.13 | 0.53 | 1.15 | 0.72 |
| iYBR175W   | 1.20 | 0.57 | 1.41 | 0.82 | 0.90 | 0.46 |
| iYBR176W   | #N/A | #N/A | #N/A | #N/A | #N/A | #N/A |
| iYBR178W   | #N/A | #N/A | #N/A | #N/A | #N/A | #N/A |

|          |      |      |      |      |      |      |
|----------|------|------|------|------|------|------|
| iYBR179C | 1.09 | 0.42 | 0.95 | 0.41 | 1.09 | 0.64 |
| iYBR180W | #N/A | #N/A | #N/A | #N/A | #N/A | #N/A |
| iYBR181C | 0.82 | 0.16 | 0.93 | 0.31 | 1.25 | 0.71 |
| iYBR182C | 0.90 | 0.23 | 0.85 | 0.25 | 0.97 | 0.47 |
| iYBR183W | 1.42 | 0.83 | 1.43 | 0.80 | 1.29 | 0.74 |
| iYBR184W | #N/A | #N/A | #N/A | #N/A | #N/A | #N/A |
| iYBR185C | 1.19 | 0.58 | 1.25 | 0.63 | 0.86 | 0.40 |
| iYBR186W | 1.07 | 0.37 | 1.10 | 0.49 | 0.76 | 0.16 |
| iYBR187W | 1.48 | 0.87 | 1.24 | 0.63 | 1.17 | 0.75 |
| iYBR188C | 0.94 | 0.24 | 0.74 | 0.15 | 0.71 | 0.12 |
| iYBR189W | #N/A | #N/A | 0.80 | 0.18 | 0.89 | 0.32 |
| iYBR191W | 1.17 | 0.55 | 1.30 | 0.73 | 1.04 | 0.70 |
| iYBR192W | 1.62 | 0.94 | 1.67 | 0.81 | 1.22 | 0.80 |
| iYBR193C | 1.22 | 0.62 | 1.07 | 0.45 | 1.13 | 0.79 |
| iYBR194W | 1.23 | 0.64 | 1.29 | 0.69 | 1.02 | 0.45 |
| iYBR195C | #N/A | #N/A | 1.20 | 0.55 | #N/A | #N/A |
| iYBR196C | 0.56 | 0.05 | 0.58 | 0.07 | 0.49 | 0.03 |
| iYBR197C | 1.18 | 0.50 | 0.89 | 0.28 | 0.91 | 0.32 |
| iYBR198C | #N/A | #N/A | 1.05 | 0.44 | 0.68 | 0.10 |
| iYBR199W | 1.30 | 0.65 | 1.34 | 0.76 | 1.00 | 0.50 |
| iYBR200W | 1.23 | 0.61 | 1.41 | 0.81 | 1.34 | 0.93 |
| iYBR202W | 0.89 | 0.22 | 0.98 | 0.35 | 0.80 | 0.29 |
| iYBR203W | 1.51 | 0.89 | 2.09 | 0.93 | 0.88 | 0.43 |
| iYBR204C | 1.29 | 0.69 | 1.30 | 0.73 | 0.92 | 0.49 |
| iYBR206W | #N/A | #N/A | #N/A | #N/A | #N/A | #N/A |
| iYBR207W | #N/A | #N/A | 1.31 | 0.58 | #N/A | #N/A |
| iYBR208C | 1.02 | 0.34 | 1.05 | 0.44 | 0.94 | 0.36 |
| iYBR209W | 0.60 | 0.07 | 0.59 | 0.09 | 0.95 | 0.50 |
| iYBR210W | #N/A | #N/A | #N/A | #N/A | #N/A | #N/A |
| iYBR211C | 1.08 | 0.43 | 1.21 | 0.63 | 0.92 | 0.49 |
| iYBR212W | #N/A | #N/A | 1.22 | 0.64 | 0.96 | 0.47 |
| iYBR213W | 1.11 | 0.46 | 1.07 | 0.46 | 0.99 | 0.48 |
| iYBR214W | 1.47 | 0.84 | 1.36 | 0.74 | 1.03 | 0.47 |
| iYBR215W | #N/A | #N/A | #N/A | #N/A | #N/A | #N/A |
| iYBR216C | 1.26 | 0.67 | 1.14 | 0.53 | 0.93 | 0.41 |
| iYBR217W | 1.29 | 0.69 | 1.26 | 0.68 | 1.28 | 0.92 |
| iYBR218C | #N/A | #N/A | #N/A | #N/A | #N/A | #N/A |
| iYBR220C | 1.21 | 0.60 | 1.24 | 0.65 | 1.20 | 0.80 |
| iYBR221C | 1.28 | 0.69 | 1.18 | 0.58 | 0.91 | 0.48 |
| iYBR222C | 1.18 | 0.50 | 1.01 | 0.40 | 0.57 | 0.04 |
| iYBR227C | 1.27 | 0.62 | 1.26 | 0.68 | 0.96 | 0.44 |
| iYBR228W | #N/A | #N/A | #N/A | #N/A | #N/A | #N/A |
| iYBR229C | #N/A | #N/A | 1.25 | 0.59 | 0.87 | 0.30 |
| iYBR230C | 0.69 | 0.10 | 0.79 | 0.21 | 0.96 | 0.53 |
| iYBR231C | 1.12 | 0.42 | 1.03 | 0.41 | 0.83 | 0.24 |
| iYBR233W | 1.26 | 0.67 | 1.62 | 0.93 | 1.14 | 0.82 |
| iYBR234C | 1.01 | 0.30 | 1.19 | 0.59 | 0.99 | 0.52 |
| iYBR235W | 1.00 | 0.29 | 1.32 | 0.74 | 1.05 | 0.59 |
| iYBR236C | 1.16 | 0.54 | #N/A | #N/A | 0.65 | 0.11 |
| iYBR237W | #N/A | #N/A | 1.63 | 0.92 | 0.96 | 0.56 |
| iYBR238C | 0.74 | 0.13 | 0.74 | 0.16 | 0.76 | 0.19 |



|            |      |      |      |      |      |      |
|------------|------|------|------|------|------|------|
| iYBR239C   | 1.31 | 0.70 | 1.50 | 0.88 | 1.12 | 0.69 |
| iYBR240C   | 1.10 | 0.45 | 0.98 | 0.41 | 0.88 | 0.30 |
| iYBR241C   | #N/A | #N/A | 1.11 | 0.50 | 0.71 | 0.16 |
| iYBR242W   | #N/A | #N/A | #N/A | #N/A | #N/A | #N/A |
| iYBR243C   | 1.19 | 0.55 | 1.07 | 0.46 | 0.78 | 0.27 |
| iYBR244W   | #N/A | #N/A | #N/A | #N/A | #N/A | #N/A |
| iYBR246W   | 1.49 | 0.84 | #N/A | #N/A | #N/A | #N/A |
| iYBR247C   | 1.29 | 0.71 | 1.16 | 0.57 | 1.11 | 0.67 |
| iYBR248C   | #N/A | #N/A | #N/A | #N/A | 0.93 | 0.49 |
| iYBR249C   | 1.08 | 0.43 | 1.13 | 0.53 | 0.78 | 0.26 |
| iYBR250W   | 1.39 | 0.76 | 1.45 | 0.83 | 1.05 | 0.66 |
| iYBR251W   | #N/A | #N/A | 0.95 | 0.42 | #N/A | #N/A |
| iYBR252W   | 1.28 | 0.62 | 1.27 | 0.65 | #N/A | #N/A |
| iYBR253W   | #N/A | #N/A | #N/A | #N/A | #N/A | #N/A |
| iYBR254C   | 0.81 | 0.17 | 1.31 | 0.72 | #N/A | #N/A |
| iYBR255W   | 1.41 | 0.82 | 1.54 | 0.81 | 1.05 | 0.59 |
| iYBR256C   | 1.30 | 0.70 | 1.41 | 0.81 | 1.16 | 0.74 |
| iYBR258C   | #N/A | #N/A | #N/A | #N/A | #N/A | #N/A |
| iYBR259W   | #N/A | #N/A | #N/A | #N/A | #N/A | #N/A |
| iYBR260C   | #N/A | #N/A | 1.45 | 0.79 | 1.32 | 0.78 |
| iYBR261C   | 1.50 | 0.85 | 1.34 | 0.73 | 1.02 | 0.53 |
| iYBR264C   | 1.31 | 0.73 | 0.89 | 0.28 | 1.14 | 0.71 |
| iYBR265W   | 1.40 | 0.81 | 1.11 | 0.51 | #N/A | #N/A |
| iYBR267W   | 1.02 | 0.31 | 1.37 | 0.79 | 0.81 | 0.20 |
| iYBR268W   | 1.28 | 0.63 | 1.67 | 0.92 | 0.84 | 0.36 |
| iYBR269C   | 1.29 | 0.69 | 0.97 | 0.39 | #N/A | #N/A |
| iYBR270C   | 1.39 | 0.75 | 1.40 | 0.76 | 1.27 | 0.73 |
| iYBR271W   | #N/A | #N/A | 1.56 | 0.89 | 0.94 | 0.53 |
| iYBR272C   | #N/A | #N/A | #N/A | #N/A | #N/A | #N/A |
| iYBR273C   | 1.45 | 0.84 | 1.79 | 0.88 | #N/A | #N/A |
| iYBR274W   | #N/A | #N/A | #N/A | #N/A | #N/A | #N/A |
| iYBR275C   | 1.27 | 0.62 | #N/A | #N/A | 1.08 | 0.63 |
| iYBR276C   | 1.13 | 0.49 | 1.28 | 0.61 | 1.15 | 0.77 |
| iYBR278W   | 0.70 | 0.11 | 0.98 | 0.34 | 0.82 | 0.23 |
| iYBR279W   | 1.57 | 0.89 | 1.50 | 0.82 | #N/A | #N/A |
| iYBR280C   | #N/A | #N/A | #N/A | #N/A | #N/A | #N/A |
| iYBR281C   | 1.15 | 0.50 | 1.33 | 0.69 | 0.90 | 0.46 |
| iYBR282W   | #N/A | #N/A | #N/A | #N/A | #N/A | #N/A |
| iYBR283C   | 1.13 | 0.49 | 1.28 | 0.68 | 1.20 | 0.88 |
| iYBR284W   | 1.23 | 0.57 | 1.37 | 0.77 | 0.81 | 0.30 |
| iYBR285W   | #N/A | #N/A | #N/A | #N/A | #N/A | #N/A |
| iYBR286W   | #N/A | #N/A | 0.84 | 0.22 | 1.62 | 0.99 |
| iYBR287W   | #N/A | #N/A | #N/A | #N/A | #N/A | #N/A |
| iYBR288C   | #N/A | #N/A | 1.20 | 0.58 | #N/A | #N/A |
| iYBR289W   | 1.17 | 0.48 | 1.14 | 0.55 | #N/A | #N/A |
| iYBR290W   | #N/A | #N/A | #N/A | #N/A | #N/A | #N/A |
| iYBR291C   | #N/A | #N/A | #N/A | #N/A | #N/A | #N/A |
| iYBR292C-0 | 1.36 | 0.77 | 1.35 | 0.77 | 1.12 | 0.66 |
| iYBR292C-1 | 1.41 | 0.77 | 1.72 | 0.95 | 1.00 | 0.50 |
| iYBR293W   | 1.21 | 0.60 | 1.34 | 0.66 | 1.01 | 0.45 |
| iYBR294W   | 1.17 | 0.53 | 1.24 | 0.64 | 0.85 | 0.26 |



|              |      |      |      |      |      |      |
|--------------|------|------|------|------|------|------|
| iYBR295W     | 1.32 | 0.73 | #N/A | #N/A | #N/A | #N/A |
| iYBR296C-0   | 1.09 | 0.42 | 1.15 | 0.54 | 0.97 | 0.39 |
| iYBR296C-1   | 1.24 | 0.58 | 1.22 | 0.61 | 0.94 | 0.41 |
| iYBR297W     | #N/A | #N/A | 1.37 | 0.69 | 0.92 | 0.50 |
| iYBR298C     | 1.32 | 0.74 | 1.37 | 0.78 | 1.02 | 0.47 |
| iYBR299W     | 1.40 | 0.81 | 1.64 | 0.93 | 0.92 | 0.34 |
| iYBR301W     | 1.30 | 0.68 | 1.49 | 0.79 | 1.00 | 0.44 |
| iYBRCdelta11 | #N/A | #N/A | #N/A | #N/A | #N/A | #N/A |
| iYBRCdelta14 | #N/A | #N/A | #N/A | #N/A | #N/A | #N/A |
| iYBRCdelta18 | 1.30 | 0.70 | 1.25 | 0.67 | 1.51 | 0.95 |
| iYBRCdelta19 | 1.29 | 0.64 | 1.41 | 0.82 | 1.33 | 0.95 |
| iYBRWdelta16 | 1.31 | 0.67 | 1.24 | 0.66 | 0.86 | 0.40 |
| iYBRWdelta17 | #N/A | #N/A | #N/A | #N/A | #N/A | #N/A |
| iYCL001W     | 1.20 | 0.59 | 1.37 | 0.78 | 1.36 | 0.96 |
| iYCL001W-A   | 1.31 | 0.67 | 1.47 | 0.79 | 1.23 | 0.83 |
| iYCL002C     | 1.16 | 0.48 | 1.35 | 0.71 | 1.26 | 0.81 |
| iYCL004W     | 1.44 | 0.81 | 1.78 | 0.95 | 1.05 | 0.50 |
| iYCL005W     | 1.09 | 0.39 | 1.18 | 0.58 | 1.11 | 0.67 |
| iYCL007C     | #N/A | #N/A | #N/A | #N/A | #N/A | #N/A |
| iYCL008C     | 1.58 | 0.92 | 1.09 | 0.47 | #N/A | #N/A |
| iYCL009C     | #N/A | #N/A | 1.74 | 0.76 | #N/A | #N/A |
| iYCL010C     | #N/A | #N/A | 0.98 | 0.36 | 1.29 | 0.77 |
| iYCL011C     | #N/A | #N/A | 1.28 | 0.71 | #N/A | #N/A |
| iYCL012W     | 1.10 | 0.41 | 1.45 | 0.77 | 1.22 | 0.79 |
| iYCL014W     | #N/A | #N/A | #N/A | #N/A | #N/A | #N/A |
| iYCL016C     | 1.17 | 0.49 | 1.17 | 0.58 | 1.51 | 0.88 |
| iYCL017C     | #N/A | #N/A | 1.07 | 0.48 | 1.05 | 0.59 |
| iYCL018W     | 1.32 | 0.68 | 1.27 | 0.69 | 0.98 | 0.49 |
| iYCL022C     | 0.99 | 0.31 | #N/A | #N/A | #N/A | #N/A |
| iYCL025C     | 0.46 | 0.03 | 0.46 | 0.04 | 0.51 | 0.02 |
| iYCL026C-A   | 1.15 | 0.52 | 1.43 | 0.83 | 0.86 | 0.29 |
| iYCL028W     | 1.13 | 0.48 | 1.17 | 0.55 | 1.27 | 0.73 |
| iYCL029C     | 1.14 | 0.49 | 1.11 | 0.50 | 1.01 | 0.65 |
| iYCL030C     | 0.73 | 0.13 | 0.77 | 0.17 | 0.71 | 0.12 |
| iYCL031C     | 1.03 | 0.37 | 1.14 | 0.53 | 0.93 | 0.34 |
| iYCL032W     | #N/A | #N/A | #N/A | #N/A | #N/A | #N/A |
| iYCL033C     | 1.44 | 0.84 | 1.36 | 0.78 | 1.01 | 0.45 |
| iYCL035C     | 1.24 | 0.64 | 1.20 | 0.62 | 0.94 | 0.50 |
| iYCL036W     | #N/A | #N/A | #N/A | #N/A | #N/A | #N/A |
| iYCL037C     | 1.10 | 0.44 | 1.00 | 0.38 | 0.98 | 0.47 |
| iYCL038C     | #N/A | #N/A | 1.04 | 0.44 | 1.07 | 0.60 |
| iYCL040W     | 1.44 | 0.84 | 0.93 | 0.30 | 1.13 | 0.74 |
| iYCL044C     | 1.03 | 0.32 | 1.01 | 0.41 | #N/A | #N/A |
| iYCL046W     | 1.15 | 0.49 | 1.06 | 0.47 | #N/A | #N/A |
| iYCL047C     | #N/A | #N/A | 1.27 | 0.60 | #N/A | #N/A |
| iYCL048W     | #N/A | #N/A | #N/A | #N/A | #N/A | #N/A |
| iYCL049C     | 1.22 | 0.55 | 1.40 | 0.70 | 0.87 | 0.36 |
| iYCL050C     | 1.25 | 0.59 | 1.32 | 0.66 | 0.90 | 0.46 |
| iYCL051W     | #N/A | #N/A | #N/A | #N/A | #N/A | #N/A |
| iYCL052C     | 1.27 | 0.62 | 1.35 | 0.77 | 0.99 | 0.43 |
| iYCL054W     | #N/A | #N/A | #N/A | #N/A | #N/A | #N/A |

|               |      |      |      |      |      |      |
|---------------|------|------|------|------|------|------|
| iYCL055W-0    | 0.58 | 0.06 | 0.67 | 0.12 | 0.67 | 0.10 |
| iYCL055W-1    | 0.89 | 0.23 | 1.07 | 0.47 | 0.82 | 0.26 |
| iYCL056C      | 1.00 | 0.32 | 1.11 | 0.51 | 0.99 | 0.49 |
| iYCL058C      | #N/A | #N/A | #N/A | #N/A | #N/A | #N/A |
| iYCL059C      | #N/A | #N/A | 0.87 | 0.36 | 1.10 | 0.78 |
| iYCL061C      | 1.58 | 0.90 | 1.40 | 0.78 | 1.22 | 0.69 |
| iYCL063W      | 1.39 | 0.81 | 1.52 | 0.88 | 0.82 | 0.23 |
| iYCL064C      | 0.90 | 0.24 | 0.75 | 0.16 | 0.93 | 0.52 |
| iYCL065W-0    | 1.14 | 0.46 | 1.05 | 0.43 | 0.87 | 0.28 |
| iYCL065W-1    | 1.54 | 0.91 | 1.29 | 0.65 | 1.16 | 0.84 |
| iYCL067C      | #N/A | #N/A | #N/A | #N/A | #N/A | #N/A |
| iYCL068C      | 1.45 | 0.81 | 1.15 | 0.56 | 1.01 | 0.56 |
| iYCL069W      | 1.29 | 0.70 | 1.19 | 0.61 | 0.97 | 0.45 |
| iYCL073C      | 1.43 | 0.84 | 1.66 | 0.94 | 0.88 | 0.42 |
| iYCL074W      | 1.47 | 0.86 | 1.57 | 0.90 | 0.96 | 0.44 |
| iYCL075W      | 1.56 | 0.91 | 1.33 | 0.76 | 1.12 | 0.65 |
| iYCLCdelta1   | 1.33 | 0.69 | 1.22 | 0.65 | 0.93 | 0.35 |
| iYCLWdelta5   | #N/A | #N/A | #N/A | #N/A | #N/A | #N/A |
| iYCLWomega2-0 | 1.59 | 0.93 | 1.68 | 0.93 | 0.98 | 0.60 |
| iYCLWomega2-1 | 1.66 | 0.93 | 1.89 | 0.96 | 0.90 | 0.31 |
| iYCR001W      | 1.54 | 0.90 | 1.76 | 0.96 | 1.24 | 0.81 |
| iYCR002C      | 1.02 | 0.33 | 1.07 | 0.46 | 0.90 | 0.31 |
| iYCR003W      | #N/A | #N/A | #N/A | #N/A | #N/A | #N/A |
| iYCR004C      | #N/A | #N/A | 1.24 | 0.58 | #N/A | #N/A |
| iYCR005C      | 0.92 | 0.24 | #N/A | #N/A | 0.99 | 0.62 |
| iYCR006C      | 0.66 | 0.09 | 0.68 | 0.13 | 0.75 | 0.16 |
| iYCR007C      | 1.27 | 0.62 | 1.26 | 0.67 | 1.36 | 0.87 |
| iYCR008W      | 1.78 | 0.96 | 1.49 | 0.87 | #N/A | #N/A |
| iYCR009C      | #N/A | #N/A | 1.12 | 0.52 | 1.05 | 0.71 |
| iYCR010C      | 1.19 | 0.51 | 1.20 | 0.60 | 0.81 | 0.22 |
| iYCR011C      | 0.31 | 0.01 | 0.28 | 0.01 | 0.47 | 0.02 |
| iYCR014C      | 1.60 | 0.91 | 1.29 | 0.69 | 1.08 | 0.69 |
| iYCR015C      | #N/A | #N/A | #N/A | #N/A | #N/A | #N/A |
| iYCR016W      | 1.52 | 0.90 | 1.07 | 0.46 | #N/A | #N/A |
| iYCR017C      | 1.03 | 0.35 | 1.09 | 0.48 | 0.99 | 0.43 |
| iYCR018C-A    | 1.40 | 0.81 | 1.26 | 0.64 | 1.39 | 0.83 |
| iYCR019W      | #N/A | #N/A | #N/A | #N/A | #N/A | #N/A |
| iYCR020C      | #N/A | #N/A | #N/A | #N/A | #N/A | #N/A |
| iYCR020C-A    | #N/A | #N/A | #N/A | #N/A | #N/A | #N/A |
| iYCR020W-B    | 1.57 | 0.89 | 1.17 | 0.59 | 1.57 | 0.96 |
| iYCR021C      | 1.35 | 0.76 | #N/A | #N/A | 0.96 | 0.44 |
| iYCR022C      | 1.06 | 0.39 | 1.20 | 0.60 | 0.84 | 0.24 |
| iYCR023C      | 1.40 | 0.82 | 1.10 | 0.50 | 1.11 | 0.64 |
| iYCR024C      | 0.90 | 0.21 | 0.87 | 0.24 | 1.25 | 0.90 |
| iYCR024C-A    | 0.77 | 0.14 | 0.61 | 0.08 | 0.64 | 0.08 |
| iYCR025C      | #N/A | #N/A | #N/A | #N/A | 0.76 | 0.24 |
| iYCR026C      | 1.45 | 0.85 | 1.37 | 0.78 | 0.88 | 0.31 |
| iYCR027C      | 1.26 | 0.65 | 1.15 | 0.56 | 1.08 | 0.73 |
| iYCR028C      | 1.12 | 0.42 | 1.12 | 0.51 | 0.93 | 0.51 |
| iYCR028C-A    | #N/A | #N/A | 1.53 | 0.64 | 0.89 | 0.33 |
| iYCR030C      | 1.21 | 0.60 | 1.10 | 0.50 | 0.86 | 0.28 |

|            |      |      |      |      |      |      |
|------------|------|------|------|------|------|------|
| iYCR031C   | 0.73 | 0.12 | 0.67 | 0.12 | 0.83 | 0.25 |
| iYCR032W   | 1.18 | 0.56 | 1.21 | 0.63 | 1.09 | 0.71 |
| iYCR033W   | #N/A | #N/A | 2.06 | 0.62 | 0.77 | 0.17 |
| iYCR034W   | 0.95 | 0.25 | #N/A | #N/A | 1.12 | 0.68 |
| iYCR035C   | 0.67 | 0.09 | 1.19 | 0.59 | 1.21 | 0.68 |
| iYCR036W   | #N/A | #N/A | #N/A | #N/A | #N/A | #N/A |
| iYCR037C   | 0.72 | 0.11 | 0.78 | 0.20 | 0.84 | 0.36 |
| iYCR038C   | 1.36 | 0.77 | 1.32 | 0.74 | 0.98 | 0.48 |
| iYCR039C   | #N/A | #N/A | #N/A | #N/A | #N/A | #N/A |
| iYCR042C   | 1.23 | 0.63 | 1.15 | 0.56 | 1.23 | 0.81 |
| iYCR043C   | #N/A | #N/A | 1.41 | 0.80 | #N/A | #N/A |
| iYCR044C   | 1.46 | 0.86 | 1.07 | 0.48 | 0.72 | 0.12 |
| iYCR045C   | 1.29 | 0.70 | 1.12 | 0.51 | 0.98 | 0.42 |
| iYCR046C   | 1.31 | 0.67 | 1.18 | 0.60 | 0.94 | 0.37 |
| iYCR047C   | #N/A | #N/A | 0.98 | 0.35 | 0.76 | 0.22 |
| iYCR050C   | 1.28 | 0.69 | #N/A | #N/A | #N/A | #N/A |
| iYCR051W   | #N/A | #N/A | 1.15 | 0.53 | 0.81 | 0.22 |
| iYCR052W   | 1.02 | 0.31 | 0.82 | 0.21 | 0.98 | 0.61 |
| iYCR053W   | #N/A | #N/A | #N/A | #N/A | #N/A | #N/A |
| iYCR054C   | 1.40 | 0.82 | 1.57 | 0.91 | 1.20 | 0.74 |
| iYCR057C   | #N/A | #N/A | 1.50 | 0.82 | #N/A | #N/A |
| iYCR059C   | 1.11 | 0.47 | #N/A | #N/A | #N/A | #N/A |
| iYCR060W   | 1.08 | 0.41 | 1.06 | 0.45 | 1.04 | 0.57 |
| iYCR062W   | 1.13 | 0.50 | 1.19 | 0.60 | 1.43 | 0.86 |
| iYCR063W   | 0.56 | 0.06 | 0.44 | 0.03 | 0.76 | 0.16 |
| iYCR065W   | 1.40 | 0.78 | 1.51 | 0.88 | 0.96 | 0.56 |
| iYCR066W   | #N/A | #N/A | 1.59 | 0.80 | #N/A | #N/A |
| iYCR067C   | 0.92 | 0.23 | 1.07 | 0.46 | 0.95 | 0.43 |
| iYCR068W   | 1.35 | 0.76 | 1.28 | 0.67 | 1.20 | 0.77 |
| iYCR069W   | #N/A | #N/A | 1.14 | 0.54 | #N/A | #N/A |
| iYCR071C   | #N/A | #N/A | #N/A | #N/A | #N/A | #N/A |
| iYCR072C   | 1.32 | 0.67 | 0.88 | 0.28 | 1.50 | 0.87 |
| iYCR073C   | 0.98 | 0.30 | 0.97 | 0.36 | 1.07 | 0.75 |
| iYCR073W-A | #N/A | #N/A | #N/A | #N/A | #N/A | #N/A |
| iYCR075C   | 1.44 | 0.80 | 1.39 | 0.72 | 1.35 | 0.90 |
| iYCR076C   | #N/A | #N/A | #N/A | #N/A | #N/A | #N/A |
| iYCR077C   | 1.44 | 0.85 | 1.16 | 0.57 | 0.95 | 0.42 |
| iYCR079W   | #N/A | #N/A | #N/A | #N/A | #N/A | #N/A |
| iYCR081W   | #N/A | #N/A | #N/A | #N/A | #N/A | #N/A |
| iYCR082W   | 1.31 | 0.72 | #N/A | #N/A | 0.87 | 0.29 |
| iYCR083W   | 0.92 | 0.25 | 2.10 | 0.73 | 1.46 | 0.94 |
| iYCR084C   | 1.11 | 0.42 | 0.82 | 0.20 | 1.04 | 0.68 |
| iYCR085W   | 1.54 | 0.90 | 1.34 | 0.75 | #N/A | #N/A |
| iYCR087C-A | 1.31 | 0.72 | 1.44 | 0.83 | 1.00 | 0.44 |
| iYCR088W   | #N/A | #N/A | 1.18 | 0.54 | 0.75 | 0.21 |
| iYCR090C-1 | 1.26 | 0.66 | 1.37 | 0.78 | 1.25 | 0.71 |
| iYCR091W   | #N/A | #N/A | #N/A | #N/A | #N/A | #N/A |
| iYCR092C   | 0.89 | 0.23 | 1.01 | 0.42 | 1.05 | 0.72 |
| iYCR093W   | 1.82 | 0.98 | 1.26 | 0.65 | 1.00 | 0.65 |
| iYCR094W   | #N/A | #N/A | 1.24 | 0.60 | #N/A | #N/A |
| iYCR095C-0 | 1.61 | 0.92 | 1.56 | 0.78 | 1.01 | 0.53 |

|               |      |      |      |      |      |      |
|---------------|------|------|------|------|------|------|
| iYCR095C-1    | 1.36 | 0.77 | 1.66 | 0.90 | 0.94 | 0.49 |
| iYCR096C      | 1.44 | 0.79 | 1.53 | 0.89 | 0.92 | 0.49 |
| iYCR097W      | 1.36 | 0.77 | 1.41 | 0.78 | 1.01 | 0.45 |
| iYCR098C-0    | 1.08 | 0.43 | 1.52 | 0.79 | 0.84 | 0.24 |
| iYCR100C      | #N/A | #N/A | #N/A | #N/A | #N/A | #N/A |
| iYCR101C      | 1.47 | 0.87 | 1.73 | 0.94 | 0.84 | 0.35 |
| iYCR102C      | 1.39 | 0.80 | 1.70 | 0.90 | 0.98 | 0.46 |
| iYCR102W-A    | 1.24 | 0.57 | 1.28 | 0.70 | 0.92 | 0.37 |
| iYCR103C      | 1.17 | 0.53 | 1.25 | 0.63 | 0.94 | 0.40 |
| iYCR104W      | 1.55 | 0.91 | 1.76 | 0.92 | 0.90 | 0.34 |
| iYCR105W      | #N/A | #N/A | #N/A | #N/A | 0.75 | 0.21 |
| iYCR106W      | 1.63 | 0.94 | 1.88 | 0.98 | 0.69 | 0.10 |
| iYCRCdelta14  | 1.43 | 0.79 | 1.61 | 0.91 | 0.72 | 0.13 |
| iYCRCdelta6-0 | 1.01 | 0.35 | 1.09 | 0.47 | 0.71 | 0.17 |
| iYCRCdelta6-A | 0.98 | 0.31 | 1.07 | 0.46 | 0.74 | 0.21 |
| iYCRCdelta6-B | 1.08 | 0.37 | 0.89 | 0.26 | 0.95 | 0.42 |
| iYCRCdelta7   | 1.25 | 0.59 | 1.26 | 0.68 | 1.11 | 0.67 |
| iYCRCtau1     | #N/A | #N/A | 1.40 | 0.78 | 0.94 | 0.40 |
| iYCRWdelta11  | 1.38 | 0.75 | 1.34 | 0.75 | 0.90 | 0.46 |
| iYCRWdelta12  | #N/A | #N/A | #N/A | #N/A | #N/A | #N/A |
| iYCRWdelta13  | 0.64 | 0.08 | 0.92 | 0.29 | 1.24 | 0.82 |
| iYCRWdelta8   | #N/A | #N/A | #N/A | #N/A | 0.94 | 0.53 |
| iYCRWdelta9   | #N/A | #N/A | #N/A | #N/A | #N/A | #N/A |
| iYCRWomega3   | 1.27 | 0.66 | 1.43 | 0.81 | 0.83 | 0.34 |
| iYDL001W      | 0.87 | 0.22 | #N/A | #N/A | #N/A | #N/A |
| iYDL002C      | 1.06 | 0.41 | 1.22 | 0.63 | 1.32 | 0.82 |
| iYDL003W      | 1.44 | 0.81 | 1.36 | 0.77 | 0.83 | 0.29 |
| iYDL004W      | #N/A | #N/A | 1.03 | 0.41 | 1.33 | 0.88 |
| iYDL005C      | #N/A | #N/A | 0.90 | 0.26 | 1.17 | 0.74 |
| iYDL006W      | 1.34 | 0.70 | 1.32 | 0.72 | 0.91 | 0.33 |
| iYDL007W      | 1.16 | 0.47 | 1.21 | 0.62 | 1.02 | 0.50 |
| iYDL008W      | #N/A | #N/A | #N/A | #N/A | #N/A | #N/A |
| iYDL009C      | 1.30 | 0.70 | #N/A | #N/A | 0.91 | 0.38 |
| iYDL012C      | 1.05 | 0.40 | 1.11 | 0.51 | 1.12 | 0.81 |
| iYDL013W      | 1.11 | 0.46 | 1.21 | 0.59 | #N/A | #N/A |
| iYDL014W      | 1.30 | 0.71 | 1.10 | 0.50 | 1.19 | 0.77 |
| iYDL015C      | 1.01 | 0.35 | 0.93 | 0.31 | 1.34 | 0.84 |
| iYDL016C      | 1.48 | 0.87 | 1.14 | 0.53 | #N/A | #N/A |
| iYDL018C      | 1.36 | 0.73 | 1.19 | 0.60 | 1.09 | 0.64 |
| iYDL020C      | 1.02 | 0.36 | 0.79 | 0.18 | 0.79 | 0.26 |
| iYDL021W      | #N/A | #N/A | #N/A | #N/A | #N/A | #N/A |
| iYDL022W      | 1.28 | 0.63 | 1.24 | 0.66 | 1.16 | 0.73 |
| iYDL024C      | 0.99 | 0.28 | 1.10 | 0.49 | 1.51 | 0.89 |
| iYDL025C      | 1.26 | 0.60 | 1.22 | 0.63 | 1.21 | 0.89 |
| iYDL026W      | 1.13 | 0.44 | 0.92 | 0.29 | #N/A | #N/A |
| iYDL028C      | 1.45 | 0.81 | 0.95 | 0.35 | 1.04 | 0.58 |
| iYDL029W      | 1.91 | 0.98 | 2.43 | 0.97 | #N/A | #N/A |
| iYDL030W      | 1.28 | 0.70 | 1.12 | 0.52 | #N/A | #N/A |
| iYDL031W      | 1.21 | 0.59 | 1.16 | 0.56 | 1.06 | 0.56 |
| iYDL032W      | #N/A | #N/A | #N/A | #N/A | #N/A | #N/A |
| iYDL034W      | 1.00 | 0.29 | 0.84 | 0.23 | 1.16 | 0.80 |

|            |      |      |      |      |      |      |
|------------|------|------|------|------|------|------|
| iYDL036C   | 1.03 | 0.36 | 1.21 | 0.63 | 0.76 | 0.16 |
| iYDL037C-0 | 0.80 | 0.16 | 0.84 | 0.22 | 0.77 | 0.17 |
| iYDL037C-1 | 0.80 | 0.16 | 0.93 | 0.31 | 0.73 | 0.19 |
| iYDL040C   | 1.32 | 0.73 | 1.30 | 0.73 | 0.75 | 0.18 |
| iYDL041W   | 1.22 | 0.55 | 1.08 | 0.47 | 0.72 | 0.12 |
| iYDL043C   | #N/A | #N/A | #N/A | #N/A | #N/A | #N/A |
| iYDL044C   | 1.32 | 0.74 | 1.42 | 0.82 | 0.87 | 0.28 |
| iYDL045C   | 1.25 | 0.64 | 1.05 | 0.44 | 1.43 | 0.84 |
| iYDL045W-A | #N/A | #N/A | #N/A | #N/A | #N/A | #N/A |
| iYDL046W   | 1.26 | 0.61 | 1.18 | 0.58 | 1.32 | 0.86 |
| iYDL048C-0 | 0.83 | 0.16 | 0.90 | 0.27 | 0.78 | 0.17 |
| iYDL048C-1 | 0.69 | 0.10 | 0.77 | 0.17 | 0.88 | 0.29 |
| iYDL050C   | #N/A | #N/A | #N/A | #N/A | #N/A | #N/A |
| iYDL052C   | #N/A | #N/A | 0.75 | 0.16 | 0.88 | 0.43 |
| iYDL053C   | 1.01 | 0.30 | 0.99 | 0.36 | #N/A | #N/A |
| iYDL054C   | #N/A | #N/A | #N/A | #N/A | 0.84 | 0.26 |
| iYDL055C-0 | 0.58 | 0.06 | 0.61 | 0.09 | 0.63 | 0.10 |
| iYDL055C-1 | 1.39 | 0.75 | 1.23 | 0.63 | 1.03 | 0.55 |
| iYDL056W   | #N/A | #N/A | #N/A | #N/A | #N/A | #N/A |
| iYDL057W   | 1.09 | 0.39 | 1.04 | 0.45 | 1.04 | 0.48 |
| iYDL058W   | #N/A | #N/A | 1.23 | 0.66 | 1.07 | 0.62 |
| iYDL059C   | 1.30 | 0.71 | 1.09 | 0.49 | 0.94 | 0.54 |
| iYDL060W   | #N/A | #N/A | #N/A | #N/A | #N/A | #N/A |
| iYDL061C   | 0.78 | 0.15 | 0.69 | 0.12 | 1.06 | 0.53 |
| iYDL062W   | #N/A | #N/A | 1.05 | 0.46 | 1.24 | 0.82 |
| iYDL064W   | #N/A | #N/A | #N/A | #N/A | #N/A | #N/A |
| iYDL065C   | #N/A | #N/A | 1.20 | 0.62 | 1.05 | 0.59 |
| iYDL066W   | #N/A | #N/A | #N/A | #N/A | #N/A | #N/A |
| iYDL067C   | #N/A | #N/A | 1.13 | 0.53 | 0.94 | 0.41 |
| iYDL068W   | 1.44 | 0.84 | 1.26 | 0.69 | 1.51 | 0.95 |
| iYDL070W   | #N/A | #N/A | #N/A | #N/A | #N/A | #N/A |
| iYDL072C   | #N/A | #N/A | #N/A | #N/A | #N/A | #N/A |
| iYDL073W   | #N/A | #N/A | #N/A | #N/A | #N/A | #N/A |
| iYDL074C   | 1.20 | 0.53 | 1.13 | 0.53 | 1.34 | 0.78 |
| iYDL075W   | #N/A | #N/A | #N/A | #N/A | #N/A | #N/A |
| iYDL076C   | 0.48 | 0.04 | 0.47 | 0.04 | 0.78 | 0.27 |
| iYDL077C   | 1.38 | 0.76 | 1.26 | 0.67 | 1.07 | 0.59 |
| iYDL078C   | 1.32 | 0.74 | 1.41 | 0.79 | 1.34 | 0.88 |
| iYDL079C   | 1.04 | 0.38 | 1.27 | 0.69 | 0.65 | 0.11 |
| iYDL080C   | #N/A | #N/A | 1.07 | 0.46 | 0.94 | 0.41 |
| iYDL081C   | 1.20 | 0.57 | 1.06 | 0.46 | 1.08 | 0.62 |
| iYDL082W   | 1.22 | 0.55 | 1.00 | 0.37 | #N/A | #N/A |
| iYDL083C   | 0.46 | 0.04 | 0.32 | 0.01 | 0.60 | 0.06 |
| iYDL084W   | 1.12 | 0.46 | 0.92 | 0.31 | 1.11 | 0.75 |
| iYDL085W   | 1.15 | 0.50 | #N/A | #N/A | 0.99 | 0.54 |
| iYDL086W   | #N/A | #N/A | 1.30 | 0.73 | 1.05 | 0.59 |
| iYDL087C   | 1.33 | 0.72 | 1.14 | 0.55 | 0.90 | 0.35 |
| iYDL088C   | #N/A | #N/A | #N/A | #N/A | #N/A | #N/A |
| iYDL089W   | #N/A | #N/A | #N/A | #N/A | #N/A | #N/A |
| iYDL090C   | 1.43 | 0.84 | 1.15 | 0.56 | 1.39 | 0.91 |
| iYDL091C   | 1.35 | 0.77 | 1.11 | 0.50 | 0.78 | 0.20 |

|            |      |      |      |      |      |      |
|------------|------|------|------|------|------|------|
| iYDL092W   | #N/A | #N/A | 1.15 | 0.54 | 1.03 | 0.47 |
| iYDL093W   | 1.39 | 0.80 | 1.32 | 0.69 | 0.97 | 0.59 |
| iYDL095W   | #N/A | #N/A | #N/A | #N/A | #N/A | #N/A |
| iYDL097C   | 0.93 | 0.25 | 0.81 | 0.20 | 0.90 | 0.34 |
| iYDL098C   | 0.97 | 0.30 | 1.44 | 0.77 | 1.29 | 0.90 |
| iYDL099W   | 1.20 | 0.56 | 1.57 | 0.91 | #N/A | #N/A |
| iYDL100C   | #N/A | #N/A | #N/A | #N/A | #N/A | #N/A |
| iYDL101C   | #N/A | #N/A | #N/A | #N/A | #N/A | #N/A |
| iYDL102W   | #N/A | #N/A | #N/A | #N/A | #N/A | #N/A |
| iYDL103C   | 1.25 | 0.64 | 1.07 | 0.47 | 1.11 | 0.70 |
| iYDL104C   | #N/A | #N/A | 1.00 | 0.45 | #N/A | #N/A |
| iYDL106C   | 1.03 | 0.32 | 1.09 | 0.48 | 1.16 | 0.73 |
| iYDL107W   | #N/A | #N/A | #N/A | #N/A | #N/A | #N/A |
| iYDL108W   | 1.33 | 0.75 | 1.70 | 0.73 | #N/A | #N/A |
| iYDL109C   | 1.31 | 0.66 | 1.64 | 0.92 | 0.87 | 0.30 |
| iYDL110C   | #N/A | #N/A | #N/A | #N/A | 0.71 | 0.16 |
| iYDL111C   | #N/A | #N/A | 1.07 | 0.46 | 0.96 | 0.43 |
| iYDL112W   | #N/A | #N/A | #N/A | #N/A | #N/A | #N/A |
| iYDL113C   | #N/A | #N/A | #N/A | #N/A | 0.84 | 0.26 |
| iYDL114W   | #N/A | #N/A | #N/A | #N/A | #N/A | #N/A |
| iYDL115C   | 1.16 | 0.54 | 1.16 | 0.55 | 0.95 | 0.55 |
| iYDL116W   | #N/A | #N/A | #N/A | #N/A | #N/A | #N/A |
| iYDL117W   | 0.97 | 0.29 | 1.40 | 0.66 | #N/A | #N/A |
| iYDL118W   | 1.34 | 0.75 | 1.22 | 0.64 | 1.09 | 0.78 |
| iYDL120W   | #N/A | #N/A | 1.21 | 0.62 | #N/A | #N/A |
| iYDL121C   | 1.26 | 0.66 | 0.91 | 0.30 | 0.83 | 0.34 |
| iYDL122W   | #N/A | #N/A | #N/A | #N/A | #N/A | #N/A |
| iYDL123W   | 1.17 | 0.56 | 1.00 | 0.42 | 0.92 | 0.38 |
| iYDL124W   | 1.24 | 0.65 | 0.86 | 0.23 | 1.02 | 0.61 |
| iYDL125C   | 0.80 | 0.15 | 0.81 | 0.21 | 0.97 | 0.60 |
| iYDL126C   | 1.28 | 0.63 | 1.08 | 0.47 | 1.08 | 0.70 |
| iYDL127W   | 1.30 | 0.70 | 1.43 | 0.83 | 1.05 | 0.59 |
| iYDL128W   | 0.72 | 0.12 | 0.84 | 0.23 | 0.79 | 0.23 |
| iYDL129W   | 1.17 | 0.52 | 1.10 | 0.50 | 1.65 | 0.92 |
| iYDL130W   | 1.16 | 0.54 | 1.05 | 0.43 | 1.20 | 0.67 |
| iYDL130W-A | 0.67 | 0.10 | 0.60 | 0.08 | 0.97 | 0.44 |
| iYDL131W   | #N/A | #N/A | #N/A | #N/A | 1.00 | 0.51 |
| iYDL133C-A | 0.54 | 0.05 | 0.42 | 0.03 | 0.75 | 0.15 |
| iYDL133W   | 1.04 | 0.37 | 0.93 | 0.33 | 1.10 | 0.66 |
| iYDL134C   | 1.03 | 0.33 | 0.93 | 0.30 | 1.11 | 0.67 |
| iYDL135C   | #N/A | #N/A | 0.97 | 0.34 | 0.98 | 0.41 |
| iYDL136W   | #N/A | #N/A | 1.60 | 0.89 | #N/A | #N/A |
| iYDL137W   | #N/A | #N/A | 0.67 | 0.11 | 0.70 | 0.11 |
| iYDL138W   | 1.13 | 0.49 | 1.16 | 0.56 | 1.04 | 0.70 |
| iYDL139C   | 0.82 | 0.17 | 0.86 | 0.24 | 0.75 | 0.16 |
| iYDL140C   | 1.12 | 0.47 | 0.91 | 0.31 | 1.14 | 0.61 |
| iYDL141W   | 1.44 | 0.84 | #N/A | #N/A | 0.93 | 0.50 |
| iYDL142C   | 1.27 | 0.67 | 1.32 | 0.72 | 1.03 | 0.47 |
| iYDL143W   | 0.86 | 0.20 | #N/A | #N/A | #N/A | #N/A |
| iYDL144C   | 1.04 | 0.37 | 1.03 | 0.43 | 1.14 | 0.71 |
| iYDL145C   | 1.16 | 0.51 | 1.10 | 0.51 | 0.67 | 0.12 |

|            |      |      |      |      |      |      |
|------------|------|------|------|------|------|------|
| iYDL146W   | 1.85 | 0.98 | 1.12 | 0.52 | 1.70 | 0.93 |
| iYDL147W   | 1.14 | 0.49 | 1.26 | 0.64 | 0.97 | 0.40 |
| iYDL148C   | 1.13 | 0.50 | 1.18 | 0.59 | 0.99 | 0.63 |
| iYDL149W   | #N/A | #N/A | #N/A | #N/A | #N/A | #N/A |
| iYDL150W   | 1.32 | 0.74 | 1.26 | 0.69 | 1.36 | 0.81 |
| iYDL152W   | #N/A | #N/A | 0.86 | 0.24 | #N/A | #N/A |
| iYDL154W   | #N/A | #N/A | #N/A | #N/A | #N/A | #N/A |
| iYDL155W   | #N/A | #N/A | 1.34 | 0.75 | 0.69 | 0.14 |
| iYDL156W   | 1.14 | 0.45 | 1.03 | 0.42 | 0.95 | 0.55 |
| iYDL160C   | 1.24 | 0.65 | 1.14 | 0.55 | 0.99 | 0.42 |
| iYDL163W   | #N/A | #N/A | #N/A | #N/A | #N/A | #N/A |
| iYDL165W   | 1.02 | 0.34 | 1.47 | 0.74 | #N/A | #N/A |
| iYDL166C   | 1.25 | 0.64 | 1.71 | 0.85 | 0.66 | 0.08 |
| iYDL167C   | 1.40 | 0.81 | 1.28 | 0.70 | 1.05 | 0.60 |
| iYDL168W   | #N/A | #N/A | 1.04 | 0.46 | #N/A | #N/A |
| iYDL169C   | 1.08 | 0.42 | 1.21 | 0.64 | 1.02 | 0.63 |
| iYDL170W   | #N/A | #N/A | 1.68 | 0.74 | #N/A | #N/A |
| iYDL171C   | 0.72 | 0.12 | 0.86 | 0.24 | 0.86 | 0.29 |
| iYDL172C   | #N/A | #N/A | #N/A | #N/A | #N/A | #N/A |
| iYDL175C   | #N/A | #N/A | 0.98 | 0.35 | 1.37 | 0.91 |
| iYDL176W   | #N/A | #N/A | 1.80 | 0.96 | #N/A | #N/A |
| iYDL177C   | 1.24 | 0.63 | #N/A | #N/A | 1.15 | 0.73 |
| iYDL178W   | #N/A | #N/A | #N/A | #N/A | #N/A | #N/A |
| iYDL179W   | 1.13 | 0.47 | 1.08 | 0.47 | #N/A | #N/A |
| iYDL180W   | 1.28 | 0.69 | 1.23 | 0.65 | 1.02 | 0.46 |
| iYDL181W   | 1.32 | 0.72 | #N/A | #N/A | 0.98 | 0.61 |
| iYDL182W   | 1.03 | 0.34 | 1.00 | 0.37 | 0.96 | 0.38 |
| iYDL183C-0 | 1.06 | 0.39 | 1.10 | 0.50 | 0.84 | 0.29 |
| iYDL183C-1 | 0.54 | 0.05 | 0.50 | 0.05 | 0.70 | 0.13 |
| iYDL184C   | 0.50 | 0.04 | 0.40 | 0.02 | 0.85 | 0.26 |
| iYDL185W   | 0.86 | 0.18 | #N/A | #N/A | 0.86 | 0.40 |
| iYDL186W   | #N/A | #N/A | 0.91 | 0.28 | 0.93 | 0.51 |
| iYDL188C   | #N/A | #N/A | 0.93 | 0.30 | 0.97 | 0.45 |
| iYDL189W   | #N/A | #N/A | #N/A | #N/A | #N/A | #N/A |
| iYDL190C   | 1.06 | 0.41 | 1.17 | 0.56 | 0.87 | 0.41 |
| iYDL191W   | #N/A | #N/A | #N/A | #N/A | 1.01 | 0.46 |
| iYDL192W   | 0.75 | 0.14 | 0.80 | 0.20 | 0.81 | 0.26 |
| iYDL193W   | 0.98 | 0.28 | 0.92 | 0.29 | 1.04 | 0.49 |
| iYDL194W   | 1.39 | 0.75 | 1.28 | 0.69 | 1.23 | 0.90 |
| iYDL195W   | 0.95 | 0.25 | 1.00 | 0.36 | 0.98 | 0.47 |
| iYDL196W   | 0.99 | 0.28 | 1.02 | 0.40 | 0.90 | 0.35 |
| iYDL197C   | 1.33 | 0.75 | 1.42 | 0.83 | 0.81 | 0.21 |
| iYDL198C   | 1.20 | 0.57 | 1.24 | 0.65 | 1.06 | 0.51 |
| iYDL199C   | 1.22 | 0.62 | 0.99 | 0.43 | #N/A | #N/A |
| iYDL200C   | 1.55 | 0.91 | 1.08 | 0.49 | #N/A | #N/A |
| iYDL202W   | #N/A | #N/A | 1.16 | 0.54 | 1.12 | 0.81 |
| iYDL203C   | 1.12 | 0.47 | 1.20 | 0.58 | 1.08 | 0.76 |
| iYDL204W   | #N/A | #N/A | 1.46 | 0.85 | #N/A | #N/A |
| iYDL205C   | 1.42 | 0.83 | 1.17 | 0.58 | 1.19 | 0.87 |
| iYDL206W   | #N/A | #N/A | #N/A | #N/A | #N/A | #N/A |
| iYDL207W   | 1.39 | 0.79 | #N/A | #N/A | #N/A | #N/A |



|               |      |      |      |      |      |      |
|---------------|------|------|------|------|------|------|
| iYDL208W      | 1.54 | 0.87 | 1.50 | 0.86 | 1.18 | 0.64 |
| iYDL209C      | #N/A | #N/A | #N/A | #N/A | 0.73 | 0.19 |
| iYDL210W      | #N/A | #N/A | #N/A | #N/A | 1.25 | 0.83 |
| iYDL211C-0    | 1.26 | 0.66 | 1.41 | 0.82 | 0.88 | 0.40 |
| iYDL211C-1    | 1.55 | 0.91 | 1.54 | 0.89 | 1.09 | 0.63 |
| iYDL211C-2    | 1.30 | 0.70 | 1.55 | 0.84 | 1.17 | 0.66 |
| iYDL212W      | #N/A | #N/A | #N/A | #N/A | #N/A | #N/A |
| iYDL213C      | 1.36 | 0.72 | 1.40 | 0.77 | 0.82 | 0.22 |
| iYDL214C      | 0.80 | 0.15 | 1.08 | 0.47 | 0.83 | 0.32 |
| iYDL215C      | 1.08 | 0.44 | 1.05 | 0.43 | 0.94 | 0.52 |
| iYDL216C      | #N/A | #N/A | 1.95 | 0.98 | #N/A | #N/A |
| iYDL217C      | 1.44 | 0.84 | 1.31 | 0.72 | 0.88 | 0.44 |
| iYDL218W      | 1.50 | 0.85 | 1.49 | 0.82 | 0.99 | 0.60 |
| iYDL219W      | 1.36 | 0.73 | 1.52 | 0.83 | 1.29 | 0.93 |
| iYDL220C      | #N/A | #N/A | 2.56 | 0.76 | 1.11 | 0.80 |
| iYDL222C      | #N/A | #N/A | 0.79 | 0.18 | 0.90 | 0.34 |
| iYDL223C      | #N/A | #N/A | 1.46 | 0.85 | 1.15 | 0.83 |
| iYDL224C      | 1.03 | 0.36 | 1.24 | 0.64 | 0.97 | 0.46 |
| iYDL225W      | 1.43 | 0.83 | 1.44 | 0.83 | 1.10 | 0.67 |
| iYDL226C      | 1.26 | 0.65 | 1.01 | 0.44 | 1.27 | 0.83 |
| iYDL227C-0    | 1.22 | 0.56 | 1.32 | 0.72 | 1.09 | 0.54 |
| iYDL227C-1    | 0.98 | 0.31 | 0.98 | 0.35 | 0.83 | 0.24 |
| iYDL227C-2    | 1.58 | 0.92 | 1.33 | 0.73 | 1.07 | 0.61 |
| iYDL228C      | 0.93 | 0.24 | 1.46 | 0.72 | #N/A | #N/A |
| iYDL230W      | 1.08 | 0.37 | 0.80 | 0.19 | #N/A | #N/A |
| iYDL231C      | #N/A | #N/A | 0.88 | 0.25 | 0.79 | 0.25 |
| iYDL232W      | 0.89 | 0.20 | 1.35 | 0.76 | #N/A | #N/A |
| iYDL233W      | 1.17 | 0.48 | 1.07 | 0.46 | 0.90 | 0.33 |
| iYDL234C      | 1.51 | 0.89 | 1.37 | 0.79 | 1.10 | 0.76 |
| iYDL235C      | 0.93 | 0.25 | #N/A | #N/A | 0.98 | 0.41 |
| iYDL236W      | #N/A | #N/A | #N/A | #N/A | #N/A | #N/A |
| iYDL237W      | 1.34 | 0.75 | 1.36 | 0.75 | 0.95 | 0.42 |
| iYDL238C      | #N/A | #N/A | #N/A | #N/A | #N/A | #N/A |
| iYDL239C      | 1.76 | 0.97 | 1.36 | 0.67 | 0.75 | 0.15 |
| iYDL240W      | #N/A | #N/A | 1.48 | 0.85 | 1.16 | 0.63 |
| iYDL241W-0    | 1.63 | 0.94 | 1.67 | 0.93 | 0.95 | 0.42 |
| iYDL241W-1    | 1.37 | 0.79 | 1.26 | 0.68 | 1.11 | 0.57 |
| iYDL242W      | 1.09 | 0.39 | #N/A | #N/A | 0.95 | 0.51 |
| iYDL243C      | 1.51 | 0.89 | 1.87 | 0.97 | 1.06 | 0.73 |
| iYDL244W      | 1.39 | 0.75 | 1.49 | 0.86 | 1.03 | 0.48 |
| iYDL245C-0    | 1.03 | 0.37 | 1.21 | 0.58 | #N/A | #N/A |
| iYDL245C-1    | 1.33 | 0.75 | 1.52 | 0.87 | 1.09 | 0.69 |
| iYDL246C-0    | 0.95 | 0.26 | 1.01 | 0.40 | 0.94 | 0.36 |
| iYDL246C-1    | 1.38 | 0.74 | 1.80 | 0.96 | 0.81 | 0.30 |
| iYDL247W      | 1.50 | 0.89 | 1.63 | 0.85 | 0.96 | 0.56 |
| iYDL248W-0    | 1.58 | 0.92 | 1.71 | 0.95 | 0.94 | 0.42 |
| iYDL248W-1    | 1.41 | 0.82 | 1.56 | 0.90 | 1.01 | 0.48 |
| iYDLCdelta1-0 | 1.19 | 0.58 | 1.44 | 0.75 | 0.95 | 0.56 |
| iYDLCdelta1-1 | 0.94 | 0.25 | 1.24 | 0.59 | 0.93 | 0.37 |
| iYDLWtau1     | #N/A | #N/A | #N/A | #N/A | #N/A | #N/A |
| iYDR001C      | 1.23 | 0.57 | 1.06 | 0.45 | 1.05 | 0.59 |



|            |      |      |      |      |      |      |
|------------|------|------|------|------|------|------|
| iYDR002W   | 1.15 | 0.52 | #N/A | #N/A | 0.99 | 0.49 |
| iYDR003W   | 1.25 | 0.67 | 1.07 | 0.46 | 1.08 | 0.62 |
| iYDR004W   | #N/A | #N/A | #N/A | #N/A | #N/A | #N/A |
| iYDR005C   | 1.01 | 0.33 | 1.13 | 0.53 | 0.66 | 0.12 |
| iYDR006C   | 1.32 | 0.69 | 1.18 | 0.60 | 1.08 | 0.60 |
| iYDR008C   | 1.14 | 0.46 | 1.26 | 0.65 | 1.09 | 0.65 |
| iYDR010C   | 0.81 | 0.15 | 0.73 | 0.15 | 0.94 | 0.43 |
| iYDR011W   | 1.18 | 0.54 | 1.12 | 0.52 | #N/A | #N/A |
| iYDR012W   | #N/A | #N/A | #N/A | #N/A | #N/A | #N/A |
| iYDR013W   | #N/A | #N/A | 1.14 | 0.53 | 0.84 | 0.26 |
| iYDR014W-0 | 1.25 | 0.63 | 1.46 | 0.84 | 1.03 | 0.47 |
| iYDR016C   | 1.04 | 0.34 | 1.03 | 0.40 | 1.08 | 0.77 |
| iYDR017C   | 1.04 | 0.34 | 1.01 | 0.41 | 1.03 | 0.47 |
| iYDR018C   | #N/A | #N/A | 0.80 | 0.19 | 1.07 | 0.65 |
| iYDR019C   | 0.83 | 0.17 | 1.02 | 0.39 | 0.81 | 0.22 |
| iYDR020C   | #N/A | #N/A | 1.04 | 0.44 | 1.25 | 0.91 |
| iYDR021W   | #N/A | #N/A | #N/A | #N/A | #N/A | #N/A |
| iYDR022C   | 0.83 | 0.17 | 0.86 | 0.27 | 0.95 | 0.55 |
| iYDR023W   | #N/A | #N/A | #N/A | #N/A | #N/A | #N/A |
| iYDR025W   | #N/A | #N/A | #N/A | #N/A | #N/A | #N/A |
| iYDR026C   | 1.14 | 0.45 | #N/A | #N/A | 1.10 | 0.64 |
| iYDR027C   | 1.23 | 0.56 | 0.98 | 0.35 | 0.98 | 0.60 |
| iYDR028C   | #N/A | #N/A | #N/A | #N/A | #N/A | #N/A |
| iYDR029W   | 1.20 | 0.59 | 0.94 | 0.31 | 1.17 | 0.63 |
| iYDR030C   | 1.24 | 0.64 | 1.24 | 0.66 | 1.09 | 0.65 |
| iYDR031W   | 1.45 | 0.81 | #N/A | #N/A | #N/A | #N/A |
| iYDR032C-0 | 1.02 | 0.32 | 0.94 | 0.31 | 1.07 | 0.61 |
| iYDR032C-2 | 0.79 | 0.16 | 0.82 | 0.21 | 0.66 | 0.09 |
| iYDR033W   | #N/A | #N/A | 1.17 | 0.58 | 1.25 | 0.71 |
| iYDR034C   | 1.17 | 0.56 | 0.97 | 0.34 | 1.25 | 0.82 |
| iYDR034C-A | #N/A | #N/A | #N/A | #N/A | 1.01 | 0.45 |
| iYDR034W-B | 1.18 | 0.49 | 1.07 | 0.45 | 0.82 | 0.27 |
| iYDR035W   | 1.19 | 0.55 | 1.90 | 0.86 | #N/A | #N/A |
| iYDR036C   | 0.84 | 0.18 | 0.87 | 0.27 | 0.93 | 0.50 |
| iYDR037W   | 1.58 | 0.90 | 1.05 | 0.45 | 0.76 | 0.24 |
| iYDR038C   | #N/A | #N/A | 1.04 | 0.43 | 1.32 | 0.77 |
| iYDR040C   | 0.75 | 0.13 | 0.72 | 0.14 | 0.73 | 0.13 |
| iYDR041W   | 1.09 | 0.45 | 1.05 | 0.44 | 1.06 | 0.73 |
| iYDR042C   | 1.05 | 0.35 | 0.85 | 0.23 | 1.19 | 0.77 |
| iYDR043C-0 | #N/A | #N/A | 0.98 | 0.35 | 1.05 | 0.50 |
| iYDR043C-2 | 0.77 | 0.14 | 0.88 | 0.26 | 0.77 | 0.25 |
| iYDR044W   | 1.38 | 0.79 | 1.27 | 0.65 | 1.29 | 0.74 |
| iYDR045C   | 1.14 | 0.45 | 1.11 | 0.50 | 1.24 | 0.70 |
| iYDR047W   | #N/A | #N/A | #N/A | #N/A | #N/A | #N/A |
| iYDR049W   | 1.34 | 0.71 | 1.49 | 0.77 | 1.28 | 0.74 |
| iYDR050C   | #N/A | #N/A | 0.56 | 0.07 | 0.49 | 0.03 |
| iYDR051C   | 1.20 | 0.58 | 1.18 | 0.60 | 0.94 | 0.44 |
| iYDR053W   | 1.38 | 0.77 | 1.37 | 0.79 | 1.19 | 0.76 |
| iYDR054C   | 0.89 | 0.21 | 0.78 | 0.17 | 0.79 | 0.28 |
| iYDR055W   | #N/A | #N/A | #N/A | #N/A | #N/A | #N/A |
| iYDR056C   | #N/A | #N/A | 1.24 | 0.67 | 1.02 | 0.49 |

|          |      |      |      |      |      |      |
|----------|------|------|------|------|------|------|
| iYDR057W | #N/A | #N/A | #N/A | #N/A | #N/A | #N/A |
| iYDR058C | 0.46 | 0.03 | 0.60 | 0.08 | #N/A | #N/A |
| iYDR060W | 1.07 | 0.42 | 1.17 | 0.58 | 1.00 | 0.50 |
| iYDR061W | 1.35 | 0.73 | 0.89 | 0.30 | 0.79 | 0.19 |
| iYDR062W | 1.18 | 0.53 | 1.20 | 0.60 | 1.05 | 0.71 |
| iYDR063W | 0.71 | 0.12 | 0.57 | 0.07 | #N/A | #N/A |
| iYDR064W | #N/A | #N/A | 1.31 | 0.74 | #N/A | #N/A |
| iYDR065W | #N/A | #N/A | #N/A | #N/A | #N/A | #N/A |
| iYDR066C | 1.24 | 0.63 | #N/A | #N/A | 1.02 | 0.53 |
| iYDR067C | #N/A | #N/A | 0.93 | 0.30 | 1.10 | 0.56 |
| iYDR068W | 1.18 | 0.56 | 1.07 | 0.45 | 1.21 | 0.80 |
| iYDR069C | 1.17 | 0.48 | 1.09 | 0.48 | 1.29 | 0.85 |
| iYDR070C | #N/A | #N/A | 1.39 | 0.80 | 1.62 | 0.97 |
| iYDR071C | 0.99 | 0.30 | 0.85 | 0.25 | #N/A | #N/A |
| iYDR073W | 1.15 | 0.52 | 1.17 | 0.57 | 1.00 | 0.55 |
| iYDR074W | #N/A | #N/A | 1.09 | 0.47 | 1.07 | 0.53 |
| iYDR075W | #N/A | #N/A | #N/A | #N/A | #N/A | #N/A |
| iYDR076W | 0.40 | 0.02 | 0.33 | 0.01 | 0.63 | 0.09 |
| iYDR077W | 1.29 | 0.71 | 0.92 | 0.31 | 0.84 | 0.25 |
| iYDR078C | #N/A | #N/A | #N/A | #N/A | #N/A | #N/A |
| iYDR079W | 1.42 | 0.78 | 1.34 | 0.77 | 1.10 | 0.79 |
| iYDR080W | #N/A | #N/A | 1.46 | 0.77 | 1.14 | 0.61 |
| iYDR081C | 1.01 | 0.33 | 1.13 | 0.54 | 0.87 | 0.30 |
| iYDR082W | #N/A | #N/A | #N/A | #N/A | #N/A | #N/A |
| iYDR083W | #N/A | #N/A | #N/A | #N/A | #N/A | #N/A |
| iYDR084C | 1.14 | 0.50 | 1.30 | 0.68 | #N/A | #N/A |
| iYDR085C | 1.07 | 0.37 | 1.11 | 0.51 | 0.92 | 0.38 |
| iYDR086C | #N/A | #N/A | 1.17 | 0.58 | 0.90 | 0.34 |
| iYDR087C | 1.01 | 0.30 | 1.71 | 0.75 | 0.81 | 0.21 |
| iYDR088C | 1.23 | 0.62 | 1.01 | 0.39 | 1.47 | 0.97 |
| iYDR089W | 1.41 | 0.81 | 1.51 | 0.87 | 1.23 | 0.90 |
| iYDR090C | 1.15 | 0.53 | 1.30 | 0.66 | 0.96 | 0.44 |
| iYDR091C | 0.98 | 0.29 | 1.05 | 0.43 | 0.85 | 0.26 |
| iYDR092W | 0.92 | 0.22 | 0.84 | 0.22 | 0.98 | 0.61 |
| iYDR095C | 1.11 | 0.47 | 1.01 | 0.39 | 0.99 | 0.49 |
| iYDR096W | #N/A | #N/A | #N/A | #N/A | #N/A | #N/A |
| iYDR097C | 1.47 | 0.82 | 1.71 | 0.88 | #N/A | #N/A |
| iYDR098C | #N/A | #N/A | #N/A | #N/A | #N/A | #N/A |
| iYDR099W | 1.20 | 0.57 | 1.48 | 0.80 | 0.93 | 0.35 |
| iYDR100W | #N/A | #N/A | 0.79 | 0.19 | #N/A | #N/A |
| iYDR101C | 0.90 | 0.22 | 0.69 | 0.12 | 1.03 | 0.62 |
| iYDR102C | #N/A | #N/A | 1.17 | 0.56 | 1.57 | 0.96 |
| iYDR104C | #N/A | #N/A | 1.47 | 0.84 | 0.92 | 0.36 |
| iYDR105C | 1.22 | 0.60 | 1.40 | 0.72 | #N/A | #N/A |
| iYDR106W | #N/A | #N/A | 0.62 | 0.10 | #N/A | #N/A |
| iYDR107C | 1.27 | 0.68 | 1.09 | 0.48 | #N/A | #N/A |
| iYDR109C | 1.25 | 0.67 | 1.25 | 0.68 | 0.93 | 0.41 |
| iYDR110W | #N/A | #N/A | 1.71 | 0.95 | #N/A | #N/A |
| iYDR112W | 0.94 | 0.26 | 1.23 | 0.60 | 0.97 | 0.54 |
| iYDR113C | 1.24 | 0.58 | 1.28 | 0.70 | 1.03 | 0.54 |
| iYDR115W | #N/A | #N/A | #N/A | #N/A | #N/A | #N/A |

|              |      |      |      |      |      |      |
|--------------|------|------|------|------|------|------|
| iYDR116C     | #N/A | #N/A | 1.68 | 0.90 | #N/A | #N/A |
| iYDR117C     | #N/A | #N/A | 1.05 | 0.44 | 1.01 | 0.57 |
| iYDR118W     | 0.92 | 0.24 | 1.27 | 0.69 | 0.81 | 0.28 |
| iYDR119W     | 0.98 | 0.27 | 1.16 | 0.56 | 0.78 | 0.22 |
| iYDR120C     | 1.11 | 0.47 | #N/A | #N/A | 0.71 | 0.17 |
| iYDR121W     | 1.17 | 0.53 | 1.09 | 0.49 | 1.44 | 0.84 |
| iYDR122W     | 1.60 | 0.93 | 1.54 | 0.89 | 1.08 | 0.76 |
| iYDR123C     | 1.19 | 0.51 | 1.14 | 0.54 | 0.94 | 0.53 |
| iYDR124W     | 1.36 | 0.72 | 1.27 | 0.70 | 0.76 | 0.16 |
| iYDR125C     | #N/A | #N/A | 0.97 | 0.33 | 0.81 | 0.32 |
| iYDR126W     | 0.88 | 0.20 | #N/A | #N/A | 1.24 | 0.82 |
| iYDR127W     | #N/A | #N/A | #N/A | #N/A | #N/A | #N/A |
| iYDR128W     | 1.27 | 0.61 | 1.35 | 0.75 | #N/A | #N/A |
| iYDR129C     | 1.41 | 0.77 | 1.08 | 0.47 | 1.04 | 0.54 |
| iYDR130C     | 1.61 | 0.94 | 1.10 | 0.49 | 0.84 | 0.26 |
| iYDR131C     | 1.46 | 0.86 | 1.59 | 0.91 | 1.03 | 0.55 |
| iYDR134C     | 0.47 | 0.03 | 0.49 | 0.04 | 0.66 | 0.09 |
| iYDR135C     | #N/A | #N/A | 0.76 | 0.16 | 0.65 | 0.07 |
| iYDR137W     | #N/A | #N/A | 0.93 | 0.34 | #N/A | #N/A |
| iYDR138W     | 1.72 | 0.96 | 1.53 | 0.88 | 0.92 | 0.50 |
| iYDR139C     | 1.57 | 0.92 | 1.74 | 0.75 | 0.82 | 0.23 |
| iYDR140W     | #N/A | #N/A | #N/A | #N/A | #N/A | #N/A |
| iYDR141C     | 1.16 | 0.49 | 1.12 | 0.51 | 0.77 | 0.25 |
| iYDR142C     | 1.39 | 0.80 | 1.20 | 0.61 | 1.01 | 0.50 |
| iYDR143C     | 1.49 | 0.88 | 1.42 | 0.81 | 0.84 | 0.36 |
| iYDR144C     | 1.00 | 0.34 | 1.03 | 0.42 | 1.03 | 0.47 |
| iYDR145W     | #N/A | #N/A | #N/A | #N/A | #N/A | #N/A |
| iYDR146C     | 0.96 | 0.30 | 1.01 | 0.39 | 1.14 | 0.71 |
| iYDR147W     | #N/A | #N/A | #N/A | #N/A | #N/A | #N/A |
| iYDR148C     | 1.06 | 0.42 | 0.96 | 0.33 | 1.26 | 0.75 |
| iYDR150W     | 1.56 | 0.91 | 1.15 | 0.55 | 1.16 | 0.71 |
| iYDR151C     | 0.90 | 0.21 | 0.91 | 0.28 | 0.82 | 0.23 |
| iYDR152W     | #N/A | #N/A | #N/A | #N/A | #N/A | #N/A |
| iYDR153C     | 0.90 | 0.24 | 0.76 | 0.17 | 0.97 | 0.46 |
| iYDR155C     | #N/A | #N/A | 0.38 | 0.02 | 0.69 | 0.14 |
| iYDR158W     | 1.31 | 0.66 | 0.99 | 0.36 | 1.13 | 0.70 |
| iYDR159W     | #N/A | #N/A | 1.07 | 0.46 | 0.85 | 0.31 |
| iYDR160W     | 0.63 | 0.08 | 0.62 | 0.16 | 1.10 | 0.55 |
| iYDR161W     | 1.66 | 0.95 | 1.75 | 0.95 | 1.27 | 0.73 |
| iYDR162C     | 1.19 | 0.54 | 1.30 | 0.72 | 1.21 | 0.68 |
| iYDR163W     | #N/A | #N/A | #N/A | #N/A | #N/A | #N/A |
| iYDR164C     | 1.08 | 0.41 | 1.09 | 0.49 | 0.91 | 0.48 |
| iYDR165W     | #N/A | #N/A | #N/A | #N/A | #N/A | #N/A |
| iYDR166C     | 1.69 | 0.96 | 1.35 | 0.75 | 0.98 | 0.61 |
| iYDR167W     | 1.10 | 0.44 | 1.26 | 0.68 | 0.89 | 0.35 |
| iYDR169C-0   | 1.24 | 0.64 | 1.13 | 0.53 | 1.02 | 0.46 |
| iYDR169C-1   | 1.33 | 0.74 | 1.34 | 0.76 | 1.04 | 0.57 |
| iYDR170C     | 1.09 | 0.43 | 1.14 | 0.54 | 1.24 | 0.70 |
| iYDR170W-A-0 | 1.28 | 0.69 | 1.17 | 0.59 | 1.09 | 0.57 |
| iYDR171W     | 1.04 | 0.33 | 0.93 | 0.29 | 0.99 | 0.49 |
| iYDR172W     | #N/A | #N/A | #N/A | #N/A | #N/A | #N/A |

|            |      |      |      |      |      |      |
|------------|------|------|------|------|------|------|
| iYDR173C   | 0.59 | 0.07 | 0.61 | 0.09 | 0.61 | 0.08 |
| iYDR174W   | 1.16 | 0.54 | 1.35 | 0.76 | #N/A | #N/A |
| iYDR175C   | 1.06 | 0.36 | 1.07 | 0.45 | 0.92 | 0.50 |
| iYDR176W   | 0.94 | 0.27 | #N/A | #N/A | 0.90 | 0.41 |
| iYDR177W   | 1.41 | 0.80 | 1.38 | 0.78 | 1.04 | 0.57 |
| iYDR178W   | 1.43 | 0.84 | 1.44 | 0.84 | #N/A | #N/A |
| iYDR179C   | 1.30 | 0.70 | 1.54 | 0.89 | 1.23 | 0.87 |
| iYDR179W-A | 1.18 | 0.50 | 1.49 | 0.78 | 0.98 | 0.47 |
| iYDR180W   | #N/A | #N/A | 0.90 | 0.30 | #N/A | #N/A |
| iYDR181C   | 1.02 | 0.35 | 1.33 | 0.67 | 1.38 | 0.81 |
| iYDR182W   | #N/A | #N/A | 1.12 | 0.51 | 1.38 | 0.90 |
| iYDR183W   | 1.32 | 0.74 | 1.43 | 0.83 | #N/A | #N/A |
| iYDR184C   | #N/A | #N/A | 1.18 | 0.59 | #N/A | #N/A |
| iYDR185C   | 1.29 | 0.70 | 1.57 | 0.90 | 1.04 | 0.70 |
| iYDR186C   | 0.57 | 0.05 | 0.65 | 0.11 | 0.72 | 0.12 |
| iYDR188W   | #N/A | #N/A | 1.38 | 0.80 | #N/A | #N/A |
| iYDR189W   | #N/A | #N/A | #N/A | #N/A | #N/A | #N/A |
| iYDR190C   | 0.93 | 0.25 | 0.74 | 0.16 | 0.87 | 0.30 |
| iYDR191W   | #N/A | #N/A | #N/A | #N/A | #N/A | #N/A |
| iYDR193W   | 1.17 | 0.55 | 1.10 | 0.49 | 1.07 | 0.53 |
| iYDR195W   | #N/A | #N/A | #N/A | #N/A | #N/A | #N/A |
| iYDR196C   | #N/A | #N/A | #N/A | #N/A | #N/A | #N/A |
| iYDR197W   | #N/A | #N/A | 1.87 | 0.94 | #N/A | #N/A |
| iYDR198C   | #N/A | #N/A | #N/A | #N/A | #N/A | #N/A |
| iYDR200C   | #N/A | #N/A | 1.19 | 0.61 | 0.94 | 0.53 |
| iYDR201W   | #N/A | #N/A | #N/A | #N/A | #N/A | #N/A |
| iYDR203W   | 1.15 | 0.47 | 1.15 | 0.56 | 1.15 | 0.84 |
| iYDR204W   | #N/A | #N/A | #N/A | #N/A | 1.01 | 0.45 |
| iYDR205W   | 1.49 | 0.84 | #N/A | #N/A | 1.41 | 0.84 |
| iYDR206W   | #N/A | #N/A | #N/A | #N/A | #N/A | #N/A |
| iYDR207C   | 0.91 | 0.23 | 0.95 | 0.33 | 0.85 | 0.37 |
| iYDR210W   | 1.20 | 0.59 | 1.54 | 0.89 | 1.13 | 0.76 |
| iYDR211W   | 1.68 | 0.96 | #N/A | #N/A | 0.80 | 0.21 |
| iYDR212W   | 1.14 | 0.46 | 0.95 | 0.32 | 0.77 | 0.25 |
| iYDR213W   | #N/A | #N/A | 1.05 | 0.45 | #N/A | #N/A |
| iYDR214W   | 0.61 | 0.07 | 0.60 | 0.08 | #N/A | #N/A |
| iYDR215C   | 1.30 | 0.65 | 1.20 | 0.61 | #N/A | #N/A |
| iYDR216W   | 1.35 | 0.72 | 1.41 | 0.78 | 0.91 | 0.48 |
| iYDR217C   | 1.11 | 0.42 | 1.07 | 0.46 | 0.84 | 0.25 |
| iYDR218C   | 1.55 | 0.89 | 1.69 | 0.94 | 1.25 | 0.77 |
| iYDR219C   | 1.15 | 0.50 | 0.93 | 0.32 | #N/A | #N/A |
| iYDR221W   | 0.77 | 0.15 | 0.73 | 0.15 | 0.81 | 0.21 |
| iYDR222W   | 1.14 | 0.49 | 1.50 | 0.86 | 1.00 | 0.56 |
| iYDR223W   | 1.22 | 0.61 | 1.33 | 0.75 | 1.04 | 0.49 |
| iYDR224C   | 0.71 | 0.11 | 0.97 | 0.41 | 0.89 | 0.30 |
| iYDR225W   | 0.84 | 0.17 | 0.80 | 0.19 | 0.90 | 0.46 |
| iYDR226W   | 1.21 | 0.58 | 1.12 | 0.51 | #N/A | #N/A |
| iYDR227W   | #N/A | #N/A | #N/A | #N/A | #N/A | #N/A |
| iYDR228C   | 1.14 | 0.51 | 1.19 | 0.60 | 1.11 | 0.56 |
| iYDR229W   | #N/A | #N/A | #N/A | #N/A | #N/A | #N/A |
| iYDR231C   | 1.38 | 0.74 | 1.04 | 0.41 | 1.07 | 0.69 |

|            |      |      |      |      |      |      |
|------------|------|------|------|------|------|------|
| iYDR232W   | #N/A | #N/A | 1.09 | 0.48 | 0.76 | 0.24 |
| iYDR233C   | 0.52 | 0.04 | 0.43 | 0.03 | 0.59 | 0.04 |
| iYDR234W   | 1.05 | 0.39 | 0.88 | 0.27 | 1.11 | 0.79 |
| iYDR235W   | #N/A | #N/A | #N/A | #N/A | #N/A | #N/A |
| iYDR236C   | 1.25 | 0.63 | 0.95 | 0.31 | 0.88 | 0.28 |
| iYDR237W   | 1.40 | 0.81 | 1.51 | 0.88 | 1.05 | 0.70 |
| iYDR238C   | 1.09 | 0.45 | 0.80 | 0.20 | #N/A | #N/A |
| iYDR239C   | 1.38 | 0.75 | 1.80 | 0.88 | 1.12 | 0.68 |
| iYDR242W   | #N/A | #N/A | #N/A | #N/A | #N/A | #N/A |
| iYDR243C   | #N/A | #N/A | 1.02 | 0.44 | #N/A | #N/A |
| iYDR244W   | #N/A | #N/A | 1.16 | 0.54 | #N/A | #N/A |
| iYDR245W   | 0.99 | 0.31 | 0.98 | 0.35 | 0.71 | 0.11 |
| iYDR246W   | 1.25 | 0.59 | 1.06 | 0.44 | 1.01 | 0.52 |
| iYDR247W   | 0.94 | 0.26 | 0.94 | 0.32 | 0.95 | 0.43 |
| iYDR248C   | #N/A | #N/A | 1.13 | 0.52 | 0.85 | 0.26 |
| iYDR249C   | 1.02 | 0.34 | 0.95 | 0.33 | 0.93 | 0.35 |
| iYDR250C   | #N/A | #N/A | #N/A | #N/A | 1.21 | 0.79 |
| iYDR252W   | #N/A | #N/A | 0.96 | 0.40 | #N/A | #N/A |
| iYDR253C   | 1.22 | 0.55 | 1.12 | 0.52 | 0.90 | 0.46 |
| iYDR254W   | #N/A | #N/A | #N/A | #N/A | #N/A | #N/A |
| iYDR255C   | 1.16 | 0.52 | 1.21 | 0.63 | #N/A | #N/A |
| iYDR256C   | 1.48 | 0.87 | 1.33 | 0.72 | 0.81 | 0.30 |
| iYDR257C   | 1.11 | 0.45 | 1.24 | 0.62 | #N/A | #N/A |
| iYDR258C   | 1.12 | 0.46 | 1.16 | 0.56 | 1.32 | 0.87 |
| iYDR259C   | 0.45 | 0.03 | 0.43 | 0.03 | 0.52 | 0.03 |
| iYDR260C   | #N/A | #N/A | 1.04 | 0.43 | 1.09 | 0.54 |
| iYDR261C-0 | 1.55 | 0.88 | 1.35 | 0.75 | 0.96 | 0.58 |
| iYDR261C-1 | 1.21 | 0.58 | 1.19 | 0.59 | 0.91 | 0.36 |
| iYDR262W   | 1.67 | 0.94 | 1.22 | 0.62 | #N/A | #N/A |
| iYDR263C   | 1.27 | 0.66 | 1.32 | 0.73 | 0.94 | 0.36 |
| iYDR264C   | 1.23 | 0.62 | 1.14 | 0.55 | 1.19 | 0.76 |
| iYDR265W   | #N/A | #N/A | #N/A | #N/A | #N/A | #N/A |
| iYDR267C   | 1.38 | 0.79 | 1.29 | 0.67 | 0.97 | 0.40 |
| iYDR268W   | 1.09 | 0.38 | 0.94 | 0.32 | 0.93 | 0.39 |
| iYDR271C   | #N/A | #N/A | #N/A | #N/A | #N/A | #N/A |
| iYDR272W   | 1.25 | 0.59 | 1.22 | 0.64 | 0.66 | 0.10 |
| iYDR273W   | 0.76 | 0.14 | 0.65 | 0.11 | 0.60 | 0.07 |
| iYDR274C   | #N/A | #N/A | #N/A | #N/A | 0.93 | 0.50 |
| iYDR275W   | 1.23 | 0.56 | 1.35 | 0.76 | 1.19 | 0.88 |
| iYDR276C   | 0.66 | 0.09 | 0.72 | 0.14 | 0.68 | 0.11 |
| iYDR277C   | 0.89 | 0.21 | 1.00 | 0.39 | 0.93 | 0.34 |
| iYDR279W   | 1.05 | 0.40 | 1.32 | 0.75 | 1.14 | 0.60 |
| iYDR280W   | 1.92 | 0.98 | 1.07 | 0.45 | 1.00 | 0.65 |
| iYDR281C   | 1.09 | 0.42 | 1.12 | 0.52 | 0.75 | 0.15 |
| iYDR282C   | 1.47 | 0.86 | 1.24 | 0.64 | #N/A | #N/A |
| iYDR283C   | 1.26 | 0.66 | 1.06 | 0.45 | 1.01 | 0.45 |
| iYDR284C   | #N/A | #N/A | 1.31 | 0.73 | 1.06 | 0.60 |
| iYDR285W   | #N/A | #N/A | 1.50 | 0.85 | #N/A | #N/A |
| iYDR286C   | 1.23 | 0.61 | 1.18 | 0.59 | 1.33 | 0.78 |
| iYDR287W   | 1.32 | 0.72 | 1.14 | 0.55 | 1.10 | 0.66 |
| iYDR288W   | 1.28 | 0.68 | 1.56 | 0.88 | #N/A | #N/A |

|            |      |      |      |      |      |      |
|------------|------|------|------|------|------|------|
| iYDR291W   | #N/A | #N/A | #N/A | #N/A | #N/A | #N/A |
| iYDR292C   | #N/A | #N/A | #N/A | #N/A | 0.81 | 0.25 |
| iYDR294C   | 1.13 | 0.44 | 1.13 | 0.53 | 1.15 | 0.73 |
| iYDR295C   | 1.23 | 0.56 | 1.06 | 0.45 | 0.85 | 0.37 |
| iYDR296W   | 0.82 | 0.18 | 0.71 | 0.13 | 0.54 | 0.03 |
| iYDR297W   | 1.37 | 0.79 | 1.73 | 0.95 | 0.99 | 0.62 |
| iYDR298C   | 1.31 | 0.73 | 1.21 | 0.63 | 1.01 | 0.66 |
| iYDR299W   | 1.69 | 0.94 | #N/A | #N/A | 1.05 | 0.58 |
| iYDR300C   | 1.13 | 0.49 | 1.15 | 0.56 | 0.95 | 0.42 |
| iYDR301W   | #N/A | #N/A | 1.05 | 0.43 | 1.15 | 0.80 |
| iYDR302W   | #N/A | #N/A | #N/A | #N/A | #N/A | #N/A |
| iYDR303C   | 1.34 | 0.75 | 1.22 | 0.61 | 0.87 | 0.30 |
| iYDR304C   | 1.34 | 0.75 | 1.14 | 0.52 | 1.47 | 0.98 |
| iYDR305C   | #N/A | #N/A | #N/A | #N/A | #N/A | #N/A |
| iYDR306C   | 1.29 | 0.64 | 1.03 | 0.42 | 1.38 | 0.90 |
| iYDR307W   | #N/A | #N/A | #N/A | #N/A | #N/A | #N/A |
| iYDR308C   | 1.52 | 0.90 | 1.47 | 0.80 | 1.26 | 0.72 |
| iYDR309C   | #N/A | #N/A | 0.54 | 0.06 | 0.70 | 0.10 |
| iYDR310C   | 0.94 | 0.27 | 1.11 | 0.51 | 0.85 | 0.36 |
| iYDR311W   | 0.95 | 0.26 | 1.10 | 0.50 | 1.20 | 0.66 |
| iYDR313C   | 0.88 | 0.19 | 0.93 | 0.30 | 0.76 | 0.17 |
| iYDR314C   | #N/A | #N/A | #N/A | #N/A | 1.18 | 0.73 |
| iYDR315C   | #N/A | #N/A | 1.32 | 0.64 | 1.13 | 0.79 |
| iYDR316W   | 0.87 | 0.20 | 0.65 | 0.10 | 1.13 | 0.70 |
| iYDR317W   | 1.41 | 0.82 | 1.41 | 0.79 | 1.05 | 0.69 |
| iYDR319C   | #N/A | #N/A | #N/A | #N/A | #N/A | #N/A |
| iYDR320C   | 1.33 | 0.73 | 1.15 | 0.53 | 1.02 | 0.54 |
| iYDR321W   | 1.60 | 0.91 | 1.28 | 0.52 | #N/A | #N/A |
| iYDR322W   | #N/A | #N/A | 1.33 | 0.70 | 1.20 | 0.75 |
| iYDR323C   | 1.04 | 0.37 | 1.13 | 0.53 | 0.74 | 0.14 |
| iYDR324C   | 1.23 | 0.59 | 1.09 | 0.48 | 0.54 | 0.04 |
| iYDR325W   | 1.28 | 0.63 | 0.83 | 0.29 | #N/A | #N/A |
| iYDR326C   | 1.15 | 0.51 | 0.96 | 0.32 | 1.23 | 0.78 |
| iYDR328C   | 1.13 | 0.50 | 1.14 | 0.55 | 0.82 | 0.22 |
| iYDR329C   | #N/A | #N/A | 1.00 | 0.40 | 0.86 | 0.27 |
| iYDR330W   | 0.99 | 0.32 | 1.67 | 0.91 | 1.25 | 0.91 |
| iYDR332W   | 1.27 | 0.67 | 1.93 | 0.98 | 1.25 | 0.72 |
| iYDR333C   | 0.87 | 0.22 | 0.95 | 0.32 | 0.98 | 0.60 |
| iYDR335W   | 1.52 | 0.89 | 0.90 | 0.28 | #N/A | #N/A |
| iYDR336W   | #N/A | #N/A | #N/A | #N/A | 1.17 | 0.65 |
| iYDR337W   | #N/A | #N/A | #N/A | #N/A | #N/A | #N/A |
| iYDR338C   | 1.27 | 0.66 | #N/A | #N/A | 1.26 | 0.72 |
| iYDR339C   | #N/A | #N/A | 0.58 | 0.08 | 0.87 | 0.37 |
| iYDR341C   | 1.35 | 0.72 | 1.63 | 0.89 | 1.03 | 0.59 |
| iYDR342C-0 | 0.88 | 0.20 | 0.80 | 0.19 | 0.78 | 0.23 |
| iYDR342C-1 | 1.02 | 0.34 | 1.06 | 0.44 | 0.91 | 0.33 |
| iYDR342C-2 | 1.34 | 0.76 | 1.34 | 0.69 | 0.68 | 0.13 |
| iYDR343C   | 1.18 | 0.49 | 0.91 | 0.28 | 0.62 | 0.06 |
| iYDR344C   | 1.21 | 0.58 | 1.38 | 0.75 | #N/A | #N/A |
| iYDR345C-0 | 0.61 | 0.07 | 0.67 | 0.11 | 1.00 | 0.50 |
| iYDR346C   | 1.03 | 0.37 | 0.92 | 0.29 | 0.91 | 0.35 |

|            |      |      |      |      |      |      |
|------------|------|------|------|------|------|------|
| iYDR347W   | 1.44 | 0.80 | 1.17 | 0.56 | 0.89 | 0.33 |
| iYDR348C   | 1.13 | 0.45 | 1.24 | 0.66 | 0.99 | 0.51 |
| iYDR349C   | 1.22 | 0.55 | 1.19 | 0.61 | 0.94 | 0.53 |
| iYDR350C   | 1.23 | 0.60 | 0.97 | 0.36 | 1.05 | 0.58 |
| iYDR351W   | #N/A | #N/A | 1.21 | 0.58 | 1.23 | 0.81 |
| iYDR352W   | 1.44 | 0.82 | 1.14 | 0.55 | 1.07 | 0.64 |
| iYDR353W   | 1.24 | 0.62 | 1.12 | 0.53 | 1.20 | 0.83 |
| iYDR354W   | #N/A | #N/A | #N/A | #N/A | #N/A | #N/A |
| iYDR356W   | 1.59 | 0.92 | #N/A | #N/A | 0.84 | 0.26 |
| iYDR358W   | 1.69 | 0.96 | 1.42 | 0.81 | #N/A | #N/A |
| iYDR360W   | #N/A | #N/A | 0.80 | 0.19 | 0.75 | 0.21 |
| iYDR361C   | 1.16 | 0.51 | 1.05 | 0.47 | 0.99 | 0.62 |
| iYDR362C   | 1.23 | 0.61 | 0.95 | 0.37 | 1.09 | 0.67 |
| iYDR363W   | 1.52 | 0.88 | 1.41 | 0.82 | 1.08 | 0.53 |
| iYDR363W-A | #N/A | #N/A | #N/A | #N/A | 1.02 | 0.55 |
| iYDR364C   | 1.17 | 0.55 | 1.33 | 0.72 | 0.96 | 0.53 |
| iYDR365C   | 1.08 | 0.38 | 1.04 | 0.43 | 1.00 | 0.65 |
| iYDR367W   | #N/A | #N/A | 0.77 | 0.17 | #N/A | #N/A |
| iYDR368W   | 1.28 | 0.63 | 1.57 | 0.85 | 0.78 | 0.26 |
| iYDR369C   | #N/A | #N/A | #N/A | #N/A | #N/A | #N/A |
| iYDR370C   | 1.13 | 0.44 | 1.35 | 0.76 | 1.05 | 0.72 |
| iYDR371W   | #N/A | #N/A | #N/A | #N/A | #N/A | #N/A |
| iYDR372C   | 1.15 | 0.49 | 1.16 | 0.57 | #N/A | #N/A |
| iYDR373W   | #N/A | #N/A | #N/A | #N/A | #N/A | #N/A |
| iYDR374C   | 0.96 | 0.26 | 0.91 | 0.29 | 0.79 | 0.27 |
| iYDR375C   | 1.13 | 0.49 | 1.90 | 0.98 | 0.80 | 0.20 |
| iYDR376W   | 1.02 | 0.36 | #N/A | #N/A | 0.50 | 0.03 |
| iYDR377W   | #N/A | #N/A | 1.16 | 0.52 | #N/A | #N/A |
| iYDR378C   | 1.33 | 0.69 | 1.25 | 0.68 | 1.00 | 0.51 |
| iYDR379W   | 1.16 | 0.48 | 1.04 | 0.42 | 1.01 | 0.52 |
| iYDR380W   | 0.65 | 0.08 | 0.56 | 0.06 | 0.65 | 0.08 |
| iYDR382W   | #N/A | #N/A | #N/A | #N/A | #N/A | #N/A |
| iYDR383C   | 1.18 | 0.54 | 1.30 | 0.66 | 0.99 | 0.50 |
| iYDR384C   | 0.37 | 0.01 | 0.39 | 0.03 | 0.53 | 0.03 |
| iYDR385W   | 1.38 | 0.79 | 0.96 | 0.35 | #N/A | #N/A |
| iYDR386W   | #N/A | #N/A | 1.37 | 0.77 | #N/A | #N/A |
| iYDR387C   | 1.17 | 0.49 | 0.99 | 0.40 | 0.93 | 0.39 |
| iYDR388W   | 0.92 | 0.23 | 0.96 | 0.33 | 0.64 | 0.10 |
| iYDR389W   | 1.37 | 0.78 | 1.44 | 0.80 | 0.85 | 0.37 |
| iYDR390C   | #N/A | #N/A | 0.90 | 0.27 | 0.75 | 0.21 |
| iYDR391C   | 1.41 | 0.79 | 1.21 | 0.63 | 0.90 | 0.34 |
| iYDR392W   | #N/A | #N/A | #N/A | #N/A | 1.33 | 0.78 |
| iYDR393W   | 1.30 | 0.65 | 1.21 | 0.62 | 1.19 | 0.82 |
| iYDR394W   | 1.24 | 0.58 | 1.17 | 0.58 | 1.02 | 0.61 |
| iYDR395W   | #N/A | #N/A | 0.54 | 0.07 | #N/A | #N/A |
| iYDR397C   | #N/A | #N/A | 0.92 | 0.30 | 1.03 | 0.57 |
| iYDR398W   | 0.68 | 0.10 | 0.67 | 0.11 | 0.65 | 0.11 |
| iYDR399W   | 1.27 | 0.66 | 0.99 | 0.39 | 0.72 | 0.12 |
| iYDR400W   | #N/A | #N/A | 1.78 | 0.92 | #N/A | #N/A |
| iYDR402C   | 1.25 | 0.60 | 1.33 | 0.75 | 0.75 | 0.21 |
| iYDR403W   | 1.29 | 0.64 | 1.42 | 0.82 | 0.82 | 0.33 |



|            |      |      |      |      |      |      |
|------------|------|------|------|------|------|------|
| iYDR404C   | 1.19 | 0.55 | 0.96 | 0.32 | 1.17 | 0.64 |
| iYDR405W   | 1.01 | 0.31 | 1.06 | 0.45 | 0.87 | 0.29 |
| iYDR406W   | #N/A | #N/A | #N/A | #N/A | #N/A | #N/A |
| iYDR407C   | 1.03 | 0.36 | #N/A | #N/A | 0.85 | 0.25 |
| iYDR408C   | #N/A | #N/A | 0.97 | 0.34 | 0.64 | 0.08 |
| iYDR409W   | #N/A | #N/A | 1.49 | 0.87 | 1.97 | 0.99 |
| iYDR410C   | #N/A | #N/A | 1.23 | 0.66 | 1.09 | 0.77 |
| iYDR411C   | 1.06 | 0.42 | 1.25 | 0.68 | 0.83 | 0.33 |
| iYDR413C   | 1.29 | 0.69 | 1.11 | 0.50 | 1.10 | 0.56 |
| iYDR414C   | 1.23 | 0.63 | 2.77 | 0.98 | 0.69 | 0.10 |
| iYDR415C   | #N/A | #N/A | #N/A | #N/A | 0.85 | 0.27 |
| iYDR416W   | 0.53 | 0.05 | 0.50 | 0.05 | 1.32 | 0.85 |
| iYDR418W   | 1.06 | 0.40 | 1.29 | 0.72 | 1.36 | 0.87 |
| iYDR419W   | 1.32 | 0.68 | 1.25 | 0.68 | #N/A | #N/A |
| iYDR420W   | 1.23 | 0.63 | 1.53 | 0.85 | 1.19 | 0.77 |
| iYDR421W   | 1.47 | 0.87 | 1.47 | 0.82 | 1.02 | 0.68 |
| iYDR422C   | #N/A | #N/A | #N/A | #N/A | #N/A | #N/A |
| iYDR423C   | #N/A | #N/A | #N/A | #N/A | #N/A | #N/A |
| iYDR424C   | 1.40 | 0.78 | 1.08 | 0.47 | 0.90 | 0.34 |
| iYDR426C   | 1.04 | 0.38 | 1.18 | 0.56 | #N/A | #N/A |
| iYDR427W   | #N/A | #N/A | #N/A | #N/A | #N/A | #N/A |
| iYDR429C   | #N/A | #N/A | #N/A | #N/A | #N/A | #N/A |
| iYDR431W   | #N/A | #N/A | #N/A | #N/A | #N/A | #N/A |
| iYDR433W   | 1.46 | 0.86 | 1.26 | 0.64 | 1.16 | 0.82 |
| iYDR434W   | #N/A | #N/A | #N/A | #N/A | #N/A | #N/A |
| iYDR435C   | 1.47 | 0.86 | 1.32 | 0.75 | 0.73 | 0.19 |
| iYDR436W   | #N/A | #N/A | #N/A | #N/A | 1.28 | 0.74 |
| iYDR437W   | 1.21 | 0.59 | 1.26 | 0.68 | 1.02 | 0.61 |
| iYDR438W   | #N/A | #N/A | #N/A | #N/A | #N/A | #N/A |
| iYDR439W-1 | 1.37 | 0.78 | 1.51 | 0.84 | 0.93 | 0.44 |
| iYDR440W   | #N/A | #N/A | 1.51 | 0.86 | 0.86 | 0.27 |
| iYDR441C   | 0.57 | 0.06 | #N/A | #N/A | 1.04 | 0.52 |
| iYDR443C   | 1.21 | 0.60 | 0.98 | 0.34 | 0.62 | 0.08 |
| iYDR447C   | 0.81 | 0.17 | 0.75 | 0.16 | 1.06 | 0.61 |
| iYDR448W   | #N/A | #N/A | #N/A | #N/A | #N/A | #N/A |
| iYDR449C   | 0.79 | 0.15 | 0.80 | 0.19 | 0.81 | 0.31 |
| iYDR450W   | #N/A | #N/A | 1.01 | 0.43 | #N/A | #N/A |
| iYDR452W   | #N/A | #N/A | #N/A | #N/A | #N/A | #N/A |
| iYDR453C   | 1.56 | 0.92 | 1.50 | 0.85 | 1.29 | 0.74 |
| iYDR454C   | 1.05 | 0.38 | 1.01 | 0.39 | 0.86 | 0.32 |
| iYDR456W   | 1.03 | 0.36 | #N/A | #N/A | 0.95 | 0.56 |
| iYDR458C   | #N/A | #N/A | #N/A | #N/A | #N/A | #N/A |
| iYDR459C   | 1.31 | 0.72 | 1.24 | 0.66 | 1.01 | 0.65 |
| iYDR462W   | #N/A | #N/A | #N/A | #N/A | #N/A | #N/A |
| iYDR464W   | #N/A | #N/A | #N/A | #N/A | #N/A | #N/A |
| iYDR465C   | 1.19 | 0.52 | 1.04 | 0.43 | 1.17 | 0.75 |
| iYDR467C   | #N/A | #N/A | #N/A | #N/A | 0.80 | 0.20 |
| iYDR468C   | #N/A | #N/A | #N/A | #N/A | 0.70 | 0.11 |
| iYDR469W   | #N/A | #N/A | 0.71 | 0.13 | #N/A | #N/A |
| iYDR470C   | 0.64 | 0.08 | 0.61 | 0.08 | 0.93 | 0.41 |
| iYDR471W   | #N/A | #N/A | 0.45 | 0.04 | #N/A | #N/A |



|            |      |      |      |      |      |      |
|------------|------|------|------|------|------|------|
| iYDR472W   | #N/A | #N/A | #N/A | #N/A | #N/A | #N/A |
| iYDR473C-0 | 1.38 | 0.77 | 1.35 | 0.76 | 1.45 | 0.88 |
| iYDR473C-1 | 1.53 | 0.90 | 1.71 | 0.95 | 1.28 | 0.85 |
| iYDR474C   | 1.66 | 0.94 | 1.88 | 0.97 | 1.42 | 0.85 |
| iYDR475C   | 1.34 | 0.74 | 1.17 | 0.58 | 0.92 | 0.43 |
| iYDR476C   | 1.21 | 0.58 | 1.31 | 0.74 | 1.36 | 0.87 |
| iYDR477W   | #N/A | #N/A | #N/A | #N/A | #N/A | #N/A |
| iYDR479C   | #N/A | #N/A | 1.50 | 0.85 | 0.80 | 0.29 |
| iYDR480W   | 1.29 | 0.64 | #N/A | #N/A | #N/A | #N/A |
| iYDR481C   | 0.79 | 0.15 | 0.90 | 0.27 | 0.84 | 0.25 |
| iYDR482C   | #N/A | #N/A | 0.76 | 0.16 | 0.69 | 0.10 |
| iYDR483W   | #N/A | #N/A | #N/A | #N/A | #N/A | #N/A |
| iYDR484W   | #N/A | #N/A | #N/A | #N/A | #N/A | #N/A |
| iYDR485C   | #N/A | #N/A | #N/A | #N/A | 1.26 | 0.92 |
| iYDR486C   | #N/A | #N/A | #N/A | #N/A | 1.31 | 0.87 |
| iYDR487C   | #N/A | #N/A | #N/A | #N/A | #N/A | #N/A |
| iYDR488C   | 1.08 | 0.42 | 0.88 | 0.28 | 1.31 | 0.76 |
| iYDR489W   | #N/A | #N/A | #N/A | #N/A | #N/A | #N/A |
| iYDR490C   | 1.21 | 0.58 | 1.12 | 0.52 | 1.07 | 0.67 |
| iYDR492W   | #N/A | #N/A | #N/A | #N/A | 1.31 | 0.83 |
| iYDR493W   | 1.20 | 0.53 | 1.23 | 0.65 | 0.88 | 0.40 |
| iYDR494W   | 1.51 | 0.89 | 1.42 | 0.80 | 1.45 | 0.93 |
| iYDR495C   | #N/A | #N/A | 1.26 | 0.68 | #N/A | #N/A |
| iYDR496C   | #N/A | #N/A | 1.29 | 0.70 | 0.91 | 0.36 |
| iYDR497C   | 1.17 | 0.49 | 1.08 | 0.47 | 1.07 | 0.51 |
| iYDR498C   | 1.34 | 0.76 | 1.09 | 0.48 | 0.90 | 0.47 |
| iYDR499W   | #N/A | #N/A | #N/A | #N/A | #N/A | #N/A |
| iYDR500C   | 0.72 | 0.11 | 0.69 | 0.12 | 0.84 | 0.26 |
| iYDR501W   | 1.51 | 0.85 | 1.27 | 0.63 | 1.01 | 0.66 |
| iYDR503C   | #N/A | #N/A | 1.55 | 0.90 | 1.59 | 0.90 |
| iYDR505C   | 0.80 | 0.16 | 0.76 | 0.17 | 0.89 | 0.32 |
| iYDR506C   | 0.73 | 0.12 | #N/A | #N/A | #N/A | #N/A |
| iYDR507C   | 1.04 | 0.37 | 0.94 | 0.32 | 1.11 | 0.67 |
| iYDR509W   | 0.36 | 0.02 | 0.34 | 0.02 | 0.47 | 0.02 |
| iYDR510W   | 1.46 | 0.86 | 1.61 | 0.92 | 1.04 | 0.57 |
| iYDR511W   | #N/A | #N/A | #N/A | #N/A | #N/A | #N/A |
| iYDR513W   | #N/A | #N/A | #N/A | #N/A | #N/A | #N/A |
| iYDR514C   | 1.75 | 0.97 | #N/A | #N/A | #N/A | #N/A |
| iYDR515W   | #N/A | #N/A | #N/A | #N/A | #N/A | #N/A |
| iYDR516C   | 1.08 | 0.41 | 1.14 | 0.54 | 0.87 | 0.41 |
| iYDR517W   | #N/A | #N/A | 0.87 | 0.29 | #N/A | #N/A |
| iYDR518W   | #N/A | #N/A | #N/A | #N/A | #N/A | #N/A |
| iYDR521W   | 1.09 | 0.39 | #N/A | #N/A | 0.92 | 0.50 |
| iYDR522C   | #N/A | #N/A | #N/A | #N/A | #N/A | #N/A |
| iYDR523C   | 1.05 | 0.38 | 1.21 | 0.63 | 0.80 | 0.20 |
| iYDR524C   | 0.84 | 0.18 | 0.78 | 0.19 | 1.51 | 0.87 |
| iYDR525W   | 0.35 | 0.02 | 0.32 | 0.01 | 0.39 | 0.01 |
| iYDR525W-A | 0.75 | 0.13 | 0.63 | 0.09 | 0.88 | 0.28 |
| iYDR527W-0 | 1.08 | 0.42 | 1.13 | 0.54 | 1.12 | 0.68 |
| iYDR527W-1 | 1.18 | 0.50 | 1.04 | 0.42 | 0.85 | 0.38 |
| iYDR528W   | #N/A | #N/A | 1.04 | 0.44 | #N/A | #N/A |

|               |      |      |      |      |      |      |
|---------------|------|------|------|------|------|------|
| iYDR529C      | 1.09 | 0.39 | 0.81 | 0.21 | 1.37 | 0.80 |
| iYDR530C      | 1.32 | 0.68 | 1.18 | 0.60 | 0.78 | 0.27 |
| iYDR531W      | #N/A | #N/A | #N/A | #N/A | #N/A | #N/A |
| iYDR532C      | 1.52 | 0.86 | 1.32 | 0.73 | 1.08 | 0.68 |
| iYDR533C      | 1.22 | 0.59 | 1.43 | 0.71 | 0.81 | 0.31 |
| iYDR534C-0    | 1.48 | 0.87 | 1.34 | 0.71 | 0.81 | 0.21 |
| iYDR534C-1    | 1.51 | 0.89 | 1.69 | 0.94 | 0.97 | 0.50 |
| iYDR535C      | 1.22 | 0.61 | 1.19 | 0.56 | 1.18 | 0.77 |
| iYDR536W      | 1.39 | 0.80 | 1.74 | 0.93 | 0.72 | 0.17 |
| iYDR538W      | 1.18 | 0.56 | 1.36 | 0.71 | 1.04 | 0.48 |
| iYDR539W-0    | 1.44 | 0.80 | 1.57 | 0.90 | 1.04 | 0.62 |
| iYDR539W-2    | 1.44 | 0.81 | 1.63 | 0.91 | 0.85 | 0.37 |
| iYDR540C      | 1.28 | 0.68 | 1.66 | 0.91 | 0.94 | 0.52 |
| iYDR541C-0    | 1.44 | 0.84 | 1.66 | 0.92 | 1.07 | 0.74 |
| iYDR541C-1    | 1.44 | 0.80 | 1.51 | 0.88 | 1.01 | 0.54 |
| iYDR542W      | 1.20 | 0.52 | 1.26 | 0.66 | 1.02 | 0.53 |
| iYDR543C      | 0.47 | 0.03 | 0.48 | 0.04 | 1.17 | 0.75 |
| iYDR544C      | 0.75 | 0.13 | 0.80 | 0.19 | 0.91 | 0.37 |
| iYDRCdelta3   | #N/A | #N/A | #N/A | #N/A | #N/A | #N/A |
| iYDRCdelta5   | #N/A | #N/A | #N/A | #N/A | #N/A | #N/A |
| iYDRCdelta9-0 | #N/A | #N/A | 0.68 | 0.12 | 0.94 | 0.37 |
| iYDRCsigma1   | #N/A | #N/A | 1.20 | 0.55 | #N/A | #N/A |
| iYDRCsigma2   | #N/A | #N/A | #N/A | #N/A | #N/A | #N/A |
| iYDRCTy1-2    | #N/A | #N/A | #N/A | #N/A | #N/A | #N/A |
| iYDRWdelta10  | #N/A | #N/A | #N/A | #N/A | #N/A | #N/A |
| iYDRWdelta12  | #N/A | #N/A | 1.88 | 0.89 | #N/A | #N/A |
| iYDRWdelta14  | 1.22 | 0.59 | 1.08 | 0.46 | 1.31 | 0.83 |
| iYDRWdelta24  | 0.81 | 0.16 | #N/A | #N/A | #N/A | #N/A |
| iYDRWdelta25  | #N/A | #N/A | 1.30 | 0.73 | 1.08 | 0.72 |
| iYDRWdelta26  | #N/A | #N/A | 0.70 | 0.13 | 1.84 | 0.99 |
| iYDRWdelta30  | 1.28 | 0.68 | 1.34 | 0.71 | 1.01 | 0.52 |
| iYDRWdelta31  | 1.52 | 0.86 | 1.75 | 0.96 | 0.87 | 0.30 |
| iYEL001C      | 1.40 | 0.81 | 1.49 | 0.85 | 1.04 | 0.70 |
| iYEL003W      | #N/A | #N/A | #N/A | #N/A | #N/A | #N/A |
| iYEL004W      | #N/A | #N/A | 1.26 | 0.66 | 1.23 | 0.82 |
| iYEL005C      | #N/A | #N/A | 1.45 | 0.77 | 0.76 | 0.16 |
| iYEL006W      | 1.50 | 0.89 | 1.37 | 0.73 | 0.89 | 0.44 |
| iYEL007W      | #N/A | #N/A | #N/A | #N/A | 1.20 | 0.77 |
| iYEL008W      | 0.28 | 0.01 | 0.27 | 0.01 | 0.65 | 0.08 |
| iYEL009C      | 0.74 | 0.13 | 0.70 | 0.13 | 1.08 | 0.76 |
| iYEL010W      | 1.14 | 0.45 | 1.26 | 0.67 | 0.93 | 0.45 |
| iYEL011W      | #N/A | #N/A | #N/A | #N/A | #N/A | #N/A |
| iYEL012W      | 1.30 | 0.70 | 1.25 | 0.67 | 0.85 | 0.38 |
| iYEL013W      | 1.24 | 0.63 | 1.10 | 0.49 | 0.98 | 0.47 |
| iYEL014C      | #N/A | #N/A | #N/A | #N/A | #N/A | #N/A |
| iYEL016C      | 1.22 | 0.55 | 1.05 | 0.45 | 1.21 | 0.79 |
| iYEL017C-A    | 0.38 | 0.02 | 0.45 | 0.03 | 0.62 | 0.08 |
| iYEL017W      | 1.66 | 0.95 | 1.11 | 0.51 | #N/A | #N/A |
| iYEL018W      | 1.02 | 0.33 | 1.24 | 0.64 | 1.21 | 0.89 |
| iYEL019C      | 1.18 | 0.54 | 1.13 | 0.53 | 1.01 | 0.56 |
| iYEL020C      | #N/A | #N/A | #N/A | #N/A | #N/A | #N/A |

|             |      |      |      |      |      |      |
|-------------|------|------|------|------|------|------|
| iYEL021W    | 1.27 | 0.68 | 1.16 | 0.57 | 1.13 | 0.70 |
| iYEL022W    | 0.98 | 0.27 | 0.85 | 0.27 | #N/A | #N/A |
| iYEL023C    | 1.33 | 0.70 | 1.21 | 0.63 | #N/A | #N/A |
| iYEL024W    | 1.59 | 0.93 | 1.54 | 0.88 | 0.94 | 0.52 |
| iYEL025C    | 1.18 | 0.50 | 1.09 | 0.48 | 1.00 | 0.43 |
| iYEL026W    | 1.19 | 0.51 | 1.37 | 0.65 | #N/A | #N/A |
| iYEL027W    | 1.16 | 0.54 | 0.97 | 0.34 | 1.19 | 0.75 |
| iYEL028W    | 1.29 | 0.69 | 1.12 | 0.52 | 0.99 | 0.48 |
| iYEL029C    | 1.50 | 0.88 | 1.41 | 0.82 | 1.26 | 0.79 |
| iYEL030W    | #N/A | #N/A | 1.79 | 0.96 | #N/A | #N/A |
| iYEL031W    | 1.17 | 0.55 | 1.09 | 0.48 | 1.03 | 0.54 |
| iYEL032W    | 1.39 | 0.75 | 0.99 | 0.41 | 1.17 | 0.74 |
| iYEL035C    | #N/A | #N/A | 0.53 | 0.06 | 0.84 | 0.25 |
| iYEL037C    | 1.16 | 0.53 | 1.16 | 0.57 | 1.17 | 0.75 |
| iYEL038W    | 1.12 | 0.42 | 1.65 | 0.83 | 0.78 | 0.24 |
| iYEL039C    | 1.14 | 0.45 | 1.12 | 0.52 | 0.92 | 0.36 |
| iYEL040W    | #N/A | #N/A | #N/A | #N/A | #N/A | #N/A |
| iYEL041W    | 0.94 | 0.25 | 0.81 | 0.20 | 1.19 | 0.66 |
| iYEL042W    | 1.42 | 0.83 | 1.42 | 0.82 | 1.28 | 0.85 |
| iYEL043W    | 1.16 | 0.52 | #N/A | #N/A | 0.72 | 0.13 |
| iYEL044W    | #N/A | #N/A | #N/A | #N/A | #N/A | #N/A |
| iYEL045C    | 0.25 | 0.01 | 0.24 | 0.01 | 0.53 | 0.03 |
| iYEL047C    | #N/A | #N/A | 1.29 | 0.72 | 0.82 | 0.33 |
| iYEL048C    | #N/A | #N/A | #N/A | #N/A | #N/A | #N/A |
| iYEL049W    | 1.44 | 0.84 | 1.49 | 0.83 | 1.05 | 0.51 |
| iYEL050C    | 1.15 | 0.46 | 1.04 | 0.43 | 1.01 | 0.51 |
| iYEL051W    | 1.03 | 0.36 | 1.20 | 0.61 | 1.16 | 0.74 |
| iYEL052W    | 1.13 | 0.49 | 1.07 | 0.46 | #N/A | #N/A |
| iYEL053C    | 1.55 | 0.91 | 1.43 | 0.83 | 1.05 | 0.50 |
| iYEL054C    | 0.45 | 0.03 | 0.51 | 0.05 | 0.66 | 0.08 |
| iYEL055C    | 1.08 | 0.37 | 1.03 | 0.41 | 1.07 | 0.75 |
| iYEL056W    | #N/A | #N/A | #N/A | #N/A | #N/A | #N/A |
| iYEL057C    | #N/A | #N/A | 1.14 | 0.54 | 1.12 | 0.68 |
| iYEL058W    | #N/A | #N/A | #N/A | #N/A | #N/A | #N/A |
| iYEL059W    | 0.48 | 0.03 | 0.28 | 0.01 | #N/A | #N/A |
| iYEL060C    | 0.85 | 0.19 | 0.65 | 0.10 | 0.77 | 0.17 |
| iYEL061C    | 1.16 | 0.50 | 1.11 | 0.51 | 1.14 | 0.60 |
| iYEL062W    | #N/A | #N/A | 1.36 | 0.79 | 1.03 | 0.56 |
| iYEL063C    | 1.19 | 0.58 | #N/A | #N/A | 1.21 | 0.79 |
| iYEL065W    | 0.90 | 0.22 | 0.94 | 0.38 | 1.05 | 0.49 |
| iYEL068C    | 0.91 | 0.24 | 0.86 | 0.25 | 1.04 | 0.57 |
| iYEL072W-0  | 1.98 | 0.98 | 1.68 | 0.95 | 1.13 | 0.59 |
| iYEL073C-0  | 1.53 | 0.90 | 1.54 | 0.89 | 0.91 | 0.35 |
| iYEL073C-1  | 1.35 | 0.76 | 1.68 | 0.92 | #N/A | #N/A |
| iYEL073C-2  | 1.41 | 0.82 | 1.72 | 0.95 | 0.90 | 0.47 |
| iYEL073C-3  | 1.33 | 0.72 | 1.78 | 0.93 | 0.93 | 0.45 |
| iYEL073C-4  | 1.36 | 0.73 | 1.35 | 0.77 | 0.85 | 0.38 |
| iYEL074W    | 1.22 | 0.60 | 1.36 | 0.74 | 1.05 | 0.68 |
| iYEL075C    | 1.02 | 0.34 | 1.07 | 0.46 | 1.05 | 0.59 |
| iYEL077C    | 1.38 | 0.79 | 1.24 | 0.66 | #N/A | #N/A |
| iYELCdelta3 | 1.34 | 0.70 | 1.34 | 0.69 | 1.09 | 0.64 |

|             |      |      |      |      |      |      |
|-------------|------|------|------|------|------|------|
| iYELCdelta4 | 0.88 | 0.22 | #N/A | #N/A | #N/A | #N/A |
| iYELCtau1   | #N/A | #N/A | #N/A | #N/A | #N/A | #N/A |
| iYELWdelta2 | 1.33 | 0.69 | 1.36 | 0.74 | 1.00 | 0.60 |
| iYELWdelta5 | 1.27 | 0.66 | 1.22 | 0.64 | 1.09 | 0.77 |
| iYELWdelta6 | #N/A | #N/A | 0.71 | 0.14 | #N/A | #N/A |
| iYER002W    | #N/A | #N/A | #N/A | #N/A | #N/A | #N/A |
| iYER003C    | 1.07 | 0.36 | 1.11 | 0.51 | 1.22 | 0.80 |
| iYER004W    | 1.24 | 0.65 | 1.07 | 0.47 | 0.98 | 0.47 |
| iYER005W    | 0.93 | 0.23 | 1.15 | 0.55 | 1.13 | 0.82 |
| iYER006W    | #N/A | #N/A | #N/A | #N/A | #N/A | #N/A |
| iYER007C-A  | 1.16 | 0.51 | 1.21 | 0.62 | 1.10 | 0.74 |
| iYER007W    | 1.10 | 0.41 | 1.11 | 0.51 | #N/A | #N/A |
| iYER008C    | 1.05 | 0.39 | 1.32 | 0.61 | #N/A | #N/A |
| iYER009W    | #N/A | #N/A | #N/A | #N/A | #N/A | #N/A |
| iYER010C-0  | 1.18 | 0.51 | 1.33 | 0.68 | 1.01 | 0.53 |
| iYER010C-1  | 0.51 | 0.05 | 0.63 | 0.10 | 0.50 | 0.03 |
| iYER011W    | 1.22 | 0.59 | 1.09 | 0.48 | 0.85 | 0.26 |
| iYER012W    | 0.99 | 0.33 | 0.83 | 0.22 | #N/A | #N/A |
| iYER013W    | #N/A | #N/A | #N/A | #N/A | #N/A | #N/A |
| iYER014W    | 1.18 | 0.54 | 1.32 | 0.75 | 0.54 | 0.04 |
| iYER015W    | 1.35 | 0.76 | 1.38 | 0.74 | 0.86 | 0.29 |
| iYER016W    | #N/A | #N/A | 1.64 | 0.55 | #N/A | #N/A |
| iYER017C    | #N/A | #N/A | 0.83 | 0.22 | #N/A | #N/A |
| iYER018C    | #N/A | #N/A | 0.96 | 0.34 | 1.06 | 0.73 |
| iYER019C-A  | 1.10 | 0.40 | 1.10 | 0.49 | 0.76 | 0.23 |
| iYER020W    | 1.03 | 0.35 | 1.03 | 0.41 | 0.94 | 0.36 |
| iYER021W    | #N/A | #N/A | #N/A | #N/A | #N/A | #N/A |
| iYER022W    | 0.95 | 0.28 | 1.13 | 0.53 | 1.19 | 0.82 |
| iYER023W    | #N/A | #N/A | #N/A | #N/A | #N/A | #N/A |
| iYER024W    | 1.28 | 0.68 | 1.03 | 0.45 | 1.26 | 0.77 |
| iYER025W    | 1.18 | 0.54 | 1.16 | 0.56 | 1.18 | 0.75 |
| iYER026C    | 1.34 | 0.76 | 1.26 | 0.69 | 0.94 | 0.37 |
| iYER027C    | 1.36 | 0.76 | 1.31 | 0.70 | 0.83 | 0.35 |
| iYER028C    | 0.81 | 0.17 | 0.64 | 0.10 | 0.95 | 0.38 |
| iYER029C    | #N/A | #N/A | #N/A | #N/A | #N/A | #N/A |
| iYER030W    | 1.09 | 0.44 | 0.96 | 0.33 | #N/A | #N/A |
| iYER031C    | #N/A | #N/A | 1.04 | 0.42 | 1.00 | 0.44 |
| iYER032W    | 1.36 | 0.77 | 1.22 | 0.59 | 0.87 | 0.27 |
| iYER033C    | 0.86 | 0.19 | 0.72 | 0.14 | 0.94 | 0.42 |
| iYER034W    | #N/A | #N/A | 0.47 | 0.04 | 0.75 | 0.22 |
| iYER035W    | #N/A | #N/A | 0.98 | 0.35 | #N/A | #N/A |
| iYER036C    | 0.48 | 0.04 | 0.52 | 0.05 | 0.61 | 0.08 |
| iYER038C    | #N/A | #N/A | #N/A | #N/A | #N/A | #N/A |
| iYER039C-A  | 1.31 | 0.71 | 1.10 | 0.51 | 0.98 | 0.61 |
| iYER040W    | 1.37 | 0.79 | 1.29 | 0.72 | 1.10 | 0.66 |
| iYER041W    | 1.05 | 0.39 | 1.19 | 0.61 | 1.12 | 0.59 |
| iYER042W    | #N/A | #N/A | #N/A | #N/A | #N/A | #N/A |
| iYER043C    | 0.96 | 0.30 | 0.94 | 0.31 | 0.81 | 0.31 |
| iYER044C    | 0.72 | 0.12 | 0.81 | 0.22 | 0.77 | 0.25 |
| iYER044C-A  | 1.43 | 0.79 | 1.18 | 0.54 | 0.95 | 0.43 |
| iYER045C-0  | 0.71 | 0.11 | 0.91 | 0.28 | 0.73 | 0.14 |

|            |      |      |      |      |      |      |
|------------|------|------|------|------|------|------|
| iYER045C-1 | 0.91 | 0.23 | 0.88 | 0.28 | 0.73 | 0.13 |
| iYER046W   | #N/A | #N/A | #N/A | #N/A | #N/A | #N/A |
| iYER047C   | 1.25 | 0.66 | 1.17 | 0.58 | 1.05 | 0.65 |
| iYER048C   | 1.38 | 0.78 | 1.43 | 0.83 | 0.93 | 0.49 |
| iYER048W-A | 1.28 | 0.68 | 1.23 | 0.65 | 1.22 | 0.80 |
| iYER049W   | #N/A | #N/A | 1.51 | 0.83 | #N/A | #N/A |
| iYER050C   | #N/A | #N/A | #N/A | #N/A | #N/A | #N/A |
| iYER051W   | #N/A | #N/A | #N/A | #N/A | #N/A | #N/A |
| iYER052C   | 1.18 | 0.54 | 1.21 | 0.62 | 1.28 | 0.86 |
| iYER053C-0 | 0.82 | 0.16 | 0.71 | 0.13 | 0.72 | 0.17 |
| iYER053C-1 | 0.88 | 0.21 | 0.88 | 0.26 | 0.80 | 0.20 |
| iYER054C   | 1.64 | 0.93 | 1.41 | 0.82 | 0.94 | 0.52 |
| iYER055C   | 0.92 | 0.24 | 1.02 | 0.40 | 0.69 | 0.15 |
| iYER056C   | 0.41 | 0.03 | 0.50 | 0.05 | 0.71 | 0.11 |
| iYER056C-A | 0.66 | 0.09 | 0.47 | 0.04 | 0.74 | 0.20 |
| iYER057C   | 1.33 | 0.71 | 1.29 | 0.71 | 1.05 | 0.63 |
| iYER058W   | 1.46 | 0.86 | 1.39 | 0.79 | 1.06 | 0.73 |
| iYER059W   | 1.34 | 0.70 | 1.38 | 0.80 | 1.09 | 0.73 |
| iYER060W   | 1.62 | 0.92 | 1.36 | 0.76 | 1.04 | 0.71 |
| iYER060W-A | #N/A | #N/A | #N/A | #N/A | #N/A | #N/A |
| iYER061C   | #N/A | #N/A | 1.00 | 0.39 | #N/A | #N/A |
| iYER062C   | 0.68 | 0.10 | 0.72 | 0.15 | 0.65 | 0.10 |
| iYER063W   | 1.36 | 0.77 | 1.15 | 0.56 | 0.99 | 0.61 |
| iYER066W   | 1.29 | 0.70 | 1.16 | 0.57 | #N/A | #N/A |
| iYER067W   | 1.01 | 0.32 | 0.92 | 0.32 | 0.82 | 0.32 |
| iYER068W   | 0.82 | 0.17 | 0.83 | 0.22 | 0.62 | 0.08 |
| iYER069W   | 0.88 | 0.20 | 0.91 | 0.29 | 0.58 | 0.05 |
| iYER070W   | 1.25 | 0.59 | 1.03 | 0.40 | #N/A | #N/A |
| iYER071C   | #N/A | #N/A | 0.86 | 0.24 | 0.97 | 0.48 |
| iYER072W   | 0.63 | 0.08 | 0.60 | 0.09 | 0.93 | 0.38 |
| iYER073W   | 0.62 | 0.07 | 0.52 | 0.05 | 1.26 | 0.83 |
| iYER074W   | 1.22 | 0.60 | 1.36 | 0.78 | #N/A | #N/A |
| iYER075C   | 0.68 | 0.10 | 0.78 | 0.18 | 0.88 | 0.29 |
| iYER076C   | 1.36 | 0.73 | 1.56 | 0.90 | 1.00 | 0.56 |
| iYER077C   | #N/A | #N/A | #N/A | #N/A | #N/A | #N/A |
| iYER078C   | 1.02 | 0.36 | 1.23 | 0.64 | 1.33 | 0.88 |
| iYER079W   | 1.66 | 0.95 | 1.56 | 0.90 | #N/A | #N/A |
| iYER081W   | #N/A | #N/A | #N/A | #N/A | #N/A | #N/A |
| iYER082C   | #N/A | #N/A | #N/A | #N/A | #N/A | #N/A |
| iYER084W   | 1.16 | 0.51 | 1.24 | 0.66 | 1.03 | 0.47 |
| iYER085C   | 1.12 | 0.46 | 1.01 | 0.38 | 0.70 | 0.11 |
| iYER086W   | 1.32 | 0.67 | 1.28 | 0.61 | 0.77 | 0.25 |
| iYER087C-A | 1.25 | 0.59 | 0.98 | 0.36 | 1.40 | 0.83 |
| iYER087W   | 1.11 | 0.47 | 0.90 | 0.28 | 1.32 | 0.87 |
| iYER088C   | 0.58 | 0.06 | 0.59 | 0.07 | 0.71 | 0.12 |
| iYER089C   | 1.10 | 0.41 | 1.05 | 0.44 | 1.09 | 0.64 |
| iYER090W   | #N/A | #N/A | 1.14 | 0.51 | #N/A | #N/A |
| iYER091C   | #N/A | #N/A | #N/A | #N/A | #N/A | #N/A |
| iYER091C-A | #N/A | #N/A | 0.41 | 0.03 | 0.49 | 0.03 |
| iYER092W   | 0.83 | 0.16 | 0.76 | 0.19 | #N/A | #N/A |
| iYER093C   | 1.44 | 0.80 | 1.26 | 0.69 | 0.89 | 0.41 |

|            |      |      |      |      |      |      |
|------------|------|------|------|------|------|------|
| iYER093C-A | 1.23 | 0.63 | 1.12 | 0.52 | 0.92 | 0.50 |
| iYER094C   | 1.03 | 0.35 | 0.99 | 0.36 | 0.92 | 0.38 |
| iYER095W   | 1.11 | 0.41 | 1.35 | 0.78 | #N/A | #N/A |
| iYER096W   | #N/A | #N/A | 1.00 | 0.38 | 1.33 | 0.88 |
| iYER098W   | #N/A | #N/A | #N/A | #N/A | #N/A | #N/A |
| iYER099C   | 1.29 | 0.69 | 1.13 | 0.53 | #N/A | #N/A |
| iYER100W   | 1.05 | 0.40 | 1.63 | 0.63 | #N/A | #N/A |
| iYER101C   | 0.80 | 0.17 | 0.79 | 0.18 | 0.96 | 0.38 |
| iYER102W   | 1.60 | 0.91 | 1.51 | 0.83 | 1.53 | 0.95 |
| iYER103W   | 1.49 | 0.88 | 1.38 | 0.75 | #N/A | #N/A |
| iYER104W   | 1.43 | 0.84 | 1.56 | 0.90 | 1.33 | 0.84 |
| iYER105C   | #N/A | #N/A | #N/A | #N/A | #N/A | #N/A |
| iYER106W   | 2.00 | 0.99 | #N/A | #N/A | #N/A | #N/A |
| iYER107C   | 1.34 | 0.71 | 1.10 | 0.50 | 1.00 | 0.44 |
| iYER108C   | 1.42 | 0.83 | 1.48 | 0.83 | 1.13 | 0.70 |
| iYER111C   | 0.91 | 0.22 | 0.91 | 0.31 | 0.93 | 0.46 |
| iYER112W   | #N/A | #N/A | #N/A | #N/A | #N/A | #N/A |
| iYER113C   | 1.41 | 0.82 | 1.40 | 0.81 | 1.00 | 0.64 |
| iYER114C   | 1.26 | 0.60 | 1.33 | 0.75 | 0.88 | 0.43 |
| iYER115C   | 1.42 | 0.80 | 1.50 | 0.88 | 1.14 | 0.83 |
| iYER116C   | #N/A | #N/A | #N/A | #N/A | 0.92 | 0.37 |
| iYER117W   | 0.96 | 0.28 | #N/A | #N/A | #N/A | #N/A |
| iYER118C   | 1.18 | 0.54 | 1.27 | 0.66 | 1.10 | 0.56 |
| iYER120W   | 1.34 | 0.75 | 1.16 | 0.57 | 1.26 | 0.88 |
| iYER121W   | #N/A | #N/A | 0.20 | 0.01 | #N/A | #N/A |
| iYER122C   | 1.17 | 0.52 | 1.17 | 0.59 | 1.22 | 0.71 |
| iYER123W   | 1.37 | 0.78 | 1.71 | 0.94 | 0.98 | 0.47 |
| iYER124C   | 0.88 | 0.21 | 0.92 | 0.29 | #N/A | #N/A |
| iYER125W   | 1.45 | 0.85 | 1.52 | 0.88 | 1.15 | 0.66 |
| iYER126C   | 0.90 | 0.22 | #N/A | #N/A | 1.08 | 0.60 |
| iYER127W   | 1.90 | 0.98 | 1.73 | 0.95 | #N/A | #N/A |
| iYER128W   | 1.36 | 0.73 | 1.29 | 0.71 | 1.14 | 0.61 |
| iYER129W   | 1.75 | 0.97 | 2.04 | 0.97 | 1.17 | 0.74 |
| iYER130C   | 0.68 | 0.10 | 0.79 | 0.18 | 0.86 | 0.39 |
| iYER131W   | 0.93 | 0.24 | 0.72 | 0.14 | 1.53 | 0.95 |
| iYER132C   | 0.89 | 0.21 | 0.97 | 0.34 | 0.97 | 0.45 |
| iYER134C   | #N/A | #N/A | 1.06 | 0.45 | 0.72 | 0.13 |
| iYER135C   | #N/A | #N/A | 1.23 | 0.55 | 0.74 | 0.15 |
| iYER136W   | 1.75 | 0.97 | 1.53 | 0.86 | 1.24 | 0.71 |
| iYER138W-A | 1.45 | 0.86 | 1.19 | 0.60 | 1.27 | 0.77 |
| iYER139C   | 1.15 | 0.46 | 1.43 | 0.83 | 1.06 | 0.60 |
| iYER140W   | #N/A | #N/A | 1.22 | 0.65 | 0.86 | 0.39 |
| iYER142C   | 1.45 | 0.85 | 1.10 | 0.50 | 1.26 | 0.83 |
| iYER143W   | #N/A | #N/A | 1.15 | 0.56 | #N/A | #N/A |
| iYER144C   | #N/A | #N/A | 1.35 | 0.77 | #N/A | #N/A |
| iYER145C   | 0.73 | 0.12 | 0.72 | 0.15 | 0.84 | 0.24 |
| iYER146W   | #N/A | #N/A | #N/A | #N/A | #N/A | #N/A |
| iYER147C   | 1.12 | 0.47 | 1.02 | 0.40 | 0.96 | 0.55 |
| iYER148W   | #N/A | #N/A | #N/A | #N/A | #N/A | #N/A |
| iYER149C   | 1.30 | 0.65 | 1.17 | 0.57 | 1.01 | 0.66 |
| iYER150W   | 1.10 | 0.45 | 1.28 | 0.65 | 0.93 | 0.52 |

|               |      |      |      |      |      |      |
|---------------|------|------|------|------|------|------|
| iYER151C      | 1.00 | 0.34 | 0.99 | 0.37 | 0.76 | 0.16 |
| iYER153C      | 1.22 | 0.60 | 0.93 | 0.31 | 1.04 | 0.68 |
| iYER154W      | #N/A | #N/A | 0.78 | 0.17 | #N/A | #N/A |
| iYER155C      | 0.95 | 0.25 | 0.99 | 0.36 | 0.70 | 0.11 |
| iYER156C      | 1.27 | 0.62 | 1.13 | 0.54 | 1.05 | 0.69 |
| iYER157W      | #N/A | #N/A | #N/A | #N/A | #N/A | #N/A |
| iYER158C      | 0.85 | 0.19 | 0.71 | 0.13 | 0.63 | 0.09 |
| iYER159C      | 0.86 | 0.19 | 0.85 | 0.23 | 0.99 | 0.49 |
| iYER161C      | 0.95 | 0.29 | 1.32 | 0.68 | 0.97 | 0.45 |
| iYER162C      | 1.23 | 0.63 | 1.25 | 0.66 | 0.85 | 0.38 |
| iYER163C-0    | 1.23 | 0.58 | 1.03 | 0.43 | 1.19 | 0.87 |
| iYER163C-1    | 1.27 | 0.68 | 0.91 | 0.29 | 1.15 | 0.62 |
| iYER164W      | 0.98 | 0.31 | 0.84 | 0.23 | #N/A | #N/A |
| iYER165W      | 1.27 | 0.68 | 1.31 | 0.71 | 0.94 | 0.40 |
| iYER166W      | 1.44 | 0.85 | #N/A | #N/A | 0.90 | 0.33 |
| iYER167W      | #N/A | #N/A | #N/A | #N/A | #N/A | #N/A |
| iYER168C      | 0.59 | 0.07 | 0.62 | 0.09 | 0.67 | 0.09 |
| iYER169W      | #N/A | #N/A | #N/A | #N/A | #N/A | #N/A |
| iYER170W      | #N/A | #N/A | 1.03 | 0.41 | 0.72 | 0.12 |
| iYER171W      | #N/A | #N/A | #N/A | #N/A | #N/A | #N/A |
| iYER172C      | #N/A | #N/A | 0.54 | 0.06 | #N/A | #N/A |
| iYER173W      | #N/A | #N/A | #N/A | #N/A | #N/A | #N/A |
| iYER174C      | 0.91 | 0.23 | #N/A | #N/A | 1.24 | 0.86 |
| iYER175C      | 1.36 | 0.77 | 1.43 | 0.82 | 0.88 | 0.43 |
| iYER176W      | #N/A | #N/A | 0.51 | 0.05 | 0.62 | 0.07 |
| iYER177W      | #N/A | #N/A | 1.07 | 0.46 | 1.27 | 0.73 |
| iYER178W      | 1.54 | 0.91 | 1.91 | 0.98 | 0.74 | 0.14 |
| iYER179W      | #N/A | #N/A | #N/A | #N/A | #N/A | #N/A |
| iYER180C      | 1.33 | 0.74 | 1.41 | 0.79 | 1.64 | 0.97 |
| iYER181C      | #N/A | #N/A | #N/A | #N/A | #N/A | #N/A |
| iYER182W      | #N/A | #N/A | #N/A | #N/A | #N/A | #N/A |
| iYER183C-0    | 1.59 | 0.93 | 1.64 | 0.93 | 1.10 | 0.70 |
| iYER183C-1    | 1.46 | 0.82 | 1.71 | 0.95 | 1.13 | 0.62 |
| iYER184C      | 1.13 | 0.49 | 1.25 | 0.68 | 0.73 | 0.14 |
| iYER185W      | 1.37 | 0.76 | 1.82 | 0.94 | 0.92 | 0.36 |
| iYER186C      | 1.38 | 0.79 | 1.56 | 0.82 | 0.78 | 0.24 |
| iYER187W      | 1.29 | 0.71 | 1.27 | 0.63 | 1.16 | 0.62 |
| iYERCdelta10  | 0.75 | 0.13 | 0.84 | 0.22 | 1.44 | 0.84 |
| iYERCdelta14  | 1.02 | 0.36 | 1.13 | 0.53 | 0.93 | 0.35 |
| iYERCdelta20  | #N/A | #N/A | #N/A | #N/A | #N/A | #N/A |
| iYERCdelta24  | 1.35 | 0.72 | 1.46 | 0.84 | 1.15 | 0.73 |
| iYERCdelta26  | 1.33 | 0.74 | 1.55 | 0.87 | #N/A | #N/A |
| iYERCdelta8   | #N/A | #N/A | #N/A | #N/A | #N/A | #N/A |
| iYERComega1-0 | 1.67 | 0.94 | 1.71 | 0.89 | 0.80 | 0.25 |
| iYERComega1-1 | 1.44 | 0.85 | 1.44 | 0.81 | 0.66 | 0.08 |
| iYERCsigma3   | #N/A | #N/A | #N/A | #N/A | 0.91 | 0.33 |
| iYERCtau2     | #N/A | #N/A | #N/A | #N/A | #N/A | #N/A |
| iYERCtau3     | 1.54 | 0.91 | 1.63 | 0.93 | 0.93 | 0.39 |
| iYERWdelta11  | #N/A | #N/A | 1.36 | 0.72 | 1.03 | 0.56 |
| iYERWdelta12  | 1.40 | 0.81 | 1.30 | 0.73 | 1.09 | 0.78 |
| iYERWdelta17  | #N/A | #N/A | #N/A | #N/A | #N/A | #N/A |



|                |      |      |      |      |      |      |
|----------------|------|------|------|------|------|------|
| iYERWdelta21-0 | 1.29 | 0.68 | 1.24 | 0.66 | 1.16 | 0.73 |
| iYERWdelta21-1 | 1.41 | 0.80 | 1.27 | 0.65 | 1.23 | 0.72 |
| iYERWdelta21-2 | 1.11 | 0.42 | 0.84 | 0.24 | 1.12 | 0.69 |
| iYERWdelta22   | 1.34 | 0.76 | 1.18 | 0.60 | 1.09 | 0.64 |
| iYERWdelta7    | #N/A | #N/A | 0.87 | 0.27 | #N/A | #N/A |
| iYERWdelta9    | #N/A | #N/A | #N/A | #N/A | #N/A | #N/A |
| iYERWomega2-0  | 0.62 | 0.07 | 0.58 | 0.07 | 0.98 | 0.47 |
| iYFL002C       | #N/A | #N/A | #N/A | #N/A | #N/A | #N/A |
| iYFL003C       | #N/A | #N/A | 1.09 | 0.49 | #N/A | #N/A |
| iYFL004W       | #N/A | #N/A | #N/A | #N/A | #N/A | #N/A |
| iYFL005W       | #N/A | #N/A | 1.16 | 0.55 | 0.72 | 0.17 |
| iYFL006W       | 1.06 | 0.36 | 1.20 | 0.62 | 1.19 | 0.66 |
| iYFL007W       | #N/A | #N/A | #N/A | #N/A | 1.01 | 0.67 |
| iYFL008W       | 1.22 | 0.61 | 1.13 | 0.52 | 0.88 | 0.29 |
| iYFL009W       | 0.96 | 0.26 | 1.03 | 0.41 | 1.08 | 0.53 |
| iYFL010C       | 1.31 | 0.73 | 1.27 | 0.69 | 0.74 | 0.17 |
| iYFL011W       | 1.21 | 0.58 | 1.01 | 0.38 | 1.23 | 0.72 |
| iYFL013W-A     | 1.39 | 0.78 | 1.54 | 0.86 | 0.80 | 0.29 |
| iYFL014W       | #N/A | #N/A | 1.32 | 0.71 | 1.21 | 0.68 |
| iYFL015C       | 0.92 | 0.24 | 0.98 | 0.35 | 0.93 | 0.38 |
| iYFL016C       | 0.48 | 0.04 | 0.62 | 0.08 | #N/A | #N/A |
| iYFL017C       | #N/A | #N/A | #N/A | #N/A | #N/A | #N/A |
| iYFL018C       | 0.94 | 0.27 | 0.87 | 0.24 | 1.73 | 0.94 |
| iYFL020C       | 1.41 | 0.82 | 1.47 | 0.86 | 1.03 | 0.56 |
| iYFL021W-0     | 1.27 | 0.67 | 1.34 | 0.70 | 1.08 | 0.54 |
| iYFL021W-1     | 1.10 | 0.46 | 1.18 | 0.58 | 0.94 | 0.41 |
| iYFL023W       | #N/A | #N/A | #N/A | #N/A | #N/A | #N/A |
| iYFL024C       | 0.62 | 0.08 | 0.60 | 0.08 | 0.85 | 0.38 |
| iYFL025C       | 1.18 | 0.54 | 1.17 | 0.58 | 0.97 | 0.42 |
| iYFL026W       | 1.31 | 0.72 | 1.50 | 0.78 | #N/A | #N/A |
| iYFL027C       | 0.64 | 0.08 | 0.81 | 0.20 | 0.64 | 0.08 |
| iYFL028C       | 1.32 | 0.73 | 1.33 | 0.76 | 0.80 | 0.29 |
| iYFL029C       | 1.28 | 0.69 | 1.11 | 0.50 | #N/A | #N/A |
| iYFL030W       | #N/A | #N/A | #N/A | #N/A | #N/A | #N/A |
| iYFL033C       | 0.91 | 0.23 | 0.85 | 0.23 | 0.88 | 0.31 |
| iYFL034C-A     | 0.87 | 0.22 | 0.82 | 0.21 | 0.96 | 0.40 |
| iYFL034W       | #N/A | #N/A | #N/A | #N/A | #N/A | #N/A |
| iYFL035C-A     | 1.08 | 0.43 | 0.88 | 0.28 | #N/A | #N/A |
| iYFL036W       | #N/A | #N/A | #N/A | #N/A | #N/A | #N/A |
| iYFL038C       | 0.99 | 0.30 | 1.09 | 0.47 | #N/A | #N/A |
| iYFL039C       | 0.45 | 0.03 | 0.52 | 0.05 | 0.79 | 0.19 |
| iYFL040W       | #N/A | #N/A | #N/A | #N/A | #N/A | #N/A |
| iYFL041W       | #N/A | #N/A | 1.12 | 0.51 | #N/A | #N/A |
| iYFL042C       | 1.49 | 0.88 | 1.63 | 0.92 | 1.25 | 0.86 |
| iYFL044C       | #N/A | #N/A | #N/A | #N/A | #N/A | #N/A |
| iYFL045C       | #N/A | #N/A | 1.27 | 0.65 | #N/A | #N/A |
| iYFL046W       | #N/A | #N/A | 1.38 | 0.74 | 1.23 | 0.69 |
| iYFL047W       | 1.13 | 0.48 | 1.38 | 0.65 | 1.27 | 0.92 |
| iYFL048C       | #N/A | #N/A | #N/A | #N/A | #N/A | #N/A |
| iYFL049W       | #N/A | #N/A | #N/A | #N/A | #N/A | #N/A |
| iYFL050C       | 1.42 | 0.78 | 1.39 | 0.72 | 1.42 | 0.83 |



|             |      |      |      |      |      |      |
|-------------|------|------|------|------|------|------|
| iYFL051C-0  | #N/A | #N/A | 1.02 | 0.41 | 1.00 | 0.63 |
| iYFL051C-1  | 1.07 | 0.41 | 1.31 | 0.70 | 0.80 | 0.24 |
| iYFL052W    | 1.45 | 0.85 | 1.69 | 0.92 | 0.92 | 0.44 |
| iYFL053W-0  | 1.41 | 0.82 | 1.30 | 0.73 | 1.01 | 0.52 |
| iYFL053W-1  | 1.24 | 0.65 | 1.55 | 0.86 | 0.83 | 0.23 |
| iYFL054C    | 1.58 | 0.92 | 1.62 | 0.91 | 1.16 | 0.85 |
| iYFL055W-0  | 1.27 | 0.68 | 1.40 | 0.69 | 1.04 | 0.58 |
| iYFL055W-1  | 1.28 | 0.64 | 1.44 | 0.79 | 0.94 | 0.41 |
| iYFL056C-0  | 1.61 | 0.93 | 1.85 | 0.92 | 1.19 | 0.84 |
| iYFL056C-1  | 1.51 | 0.88 | 1.76 | 0.93 | 1.05 | 0.55 |
| iYFL058W    | 1.30 | 0.71 | 1.35 | 0.76 | 1.07 | 0.57 |
| iYFL059W    | 1.55 | 0.91 | 1.81 | 0.96 | 1.21 | 0.71 |
| iYFL060C    | 1.37 | 0.79 | 1.69 | 0.88 | 0.94 | 0.54 |
| iYFL061W    | #N/A | #N/A | #N/A | #N/A | #N/A | #N/A |
| iYFL062W-0  | 1.36 | 0.73 | 1.65 | 0.88 | 0.94 | 0.40 |
| iYFL062W-1  | 1.67 | 0.95 | 1.91 | 0.97 | 1.04 | 0.60 |
| iYFL063W    | 1.23 | 0.60 | 1.28 | 0.70 | 1.12 | 0.71 |
| iYFL066C    | 1.32 | 0.74 | 1.52 | 0.87 | 0.83 | 0.34 |
| iYFL067W    | #N/A | #N/A | #N/A | #N/A | 0.74 | 0.14 |
| iYFL068W    | 1.31 | 0.71 | 1.41 | 0.78 | 0.85 | 0.26 |
| iYFLCdelta6 | 1.42 | 0.83 | #N/A | #N/A | #N/A | #N/A |
| iYFLWdelta1 | 0.99 | 0.29 | 0.85 | 0.23 | 0.71 | 0.16 |
| iYFLWdelta5 | #N/A | #N/A | #N/A | #N/A | #N/A | #N/A |
| iYFR001W    | 1.45 | 0.83 | 0.91 | 0.28 | 1.13 | 0.82 |
| iYFR002W    | #N/A | #N/A | #N/A | #N/A | #N/A | #N/A |
| iYFR003C    | 1.35 | 0.76 | #N/A | #N/A | 1.26 | 0.85 |
| iYFR004W    | #N/A | #N/A | #N/A | #N/A | #N/A | #N/A |
| iYFR005C    | 0.66 | 0.09 | 0.62 | 0.08 | 0.76 | 0.16 |
| iYFR006W    | #N/A | #N/A | #N/A | #N/A | #N/A | #N/A |
| iYFR007W    | 1.47 | 0.87 | 1.24 | 0.66 | #N/A | #N/A |
| iYFR008W    | 1.65 | 0.93 | 1.67 | 0.93 | 1.04 | 0.57 |
| iYFR009W    | 1.04 | 0.38 | 1.06 | 0.45 | 1.37 | 0.89 |
| iYFR010W    | #N/A | #N/A | #N/A | #N/A | #N/A | #N/A |
| iYFR011C    | #N/A | #N/A | #N/A | #N/A | #N/A | #N/A |
| iYFR012W    | 1.09 | 0.43 | 1.23 | 0.63 | 0.88 | 0.43 |
| iYFR013W    | #N/A | #N/A | #N/A | #N/A | 1.03 | 0.69 |
| iYFR014C    | 1.08 | 0.38 | 1.08 | 0.46 | 1.06 | 0.61 |
| iYFR015C    | 0.98 | 0.30 | 0.82 | 0.21 | 0.88 | 0.29 |
| iYFR016C    | #N/A | #N/A | #N/A | #N/A | #N/A | #N/A |
| iYFR017C    | #N/A | #N/A | 1.14 | 0.54 | 0.75 | 0.16 |
| iYFR018C    | 0.98 | 0.31 | 0.92 | 0.29 | 0.79 | 0.29 |
| iYFR019W    | #N/A | #N/A | #N/A | #N/A | #N/A | #N/A |
| iYFR020W    | 1.42 | 0.83 | 1.84 | 0.95 | 1.01 | 0.65 |
| iYFR021W    | 1.25 | 0.66 | 1.36 | 0.77 | 0.95 | 0.38 |
| iYFR022W    | 1.06 | 0.39 | 1.38 | 0.72 | 0.73 | 0.13 |
| iYFR023W    | #N/A | #N/A | 1.46 | 0.78 | #N/A | #N/A |
| iYFR024C-A  | 1.33 | 0.75 | 1.12 | 0.51 | #N/A | #N/A |
| iYFR025C    | #N/A | #N/A | #N/A | #N/A | #N/A | #N/A |
| iYFR026C    | 1.19 | 0.56 | 1.46 | 0.85 | 1.11 | 0.67 |
| iYFR027W    | #N/A | #N/A | #N/A | #N/A | #N/A | #N/A |
| iYFR029W    | #N/A | #N/A | 0.96 | 0.33 | 1.08 | 0.63 |

|              |      |      |      |      |      |      |
|--------------|------|------|------|------|------|------|
| iYFR030W     | #N/A | #N/A | #N/A | #N/A | #N/A | #N/A |
| iYFR031C     | #N/A | #N/A | 1.24 | 0.63 | 0.88 | 0.29 |
| iYFR031C-A   | 0.43 | 0.02 | 0.33 | 0.01 | 0.57 | 0.05 |
| iYFR032C     | 1.23 | 0.61 | 1.36 | 0.63 | #N/A | #N/A |
| iYFR032C-A   | #N/A | #N/A | 0.63 | 0.09 | 1.16 | 0.85 |
| iYFR033C     | #N/A | #N/A | 0.61 | 0.09 | 1.25 | 0.82 |
| iYFR034C     | #N/A | #N/A | 0.55 | 0.06 | 0.56 | 0.05 |
| iYFR035C     | #N/A | #N/A | #N/A | #N/A | #N/A | #N/A |
| iYFR036W     | 1.15 | 0.51 | 0.86 | 0.25 | 1.22 | 0.80 |
| iYFR037C     | #N/A | #N/A | 1.02 | 0.41 | #N/A | #N/A |
| iYFR038W     | 1.57 | 0.92 | 1.54 | 0.88 | 0.82 | 0.22 |
| iYFR039C     | 1.45 | 0.85 | 1.40 | 0.81 | 1.34 | 0.80 |
| iYFR040W     | #N/A | #N/A | #N/A | #N/A | #N/A | #N/A |
| iYFR041C     | #N/A | #N/A | #N/A | #N/A | #N/A | #N/A |
| iYFR043C     | #N/A | #N/A | #N/A | #N/A | #N/A | #N/A |
| iYFR044C     | 1.44 | 0.84 | 1.59 | 0.92 | 1.31 | 0.76 |
| iYFR045W     | #N/A | #N/A | #N/A | #N/A | #N/A | #N/A |
| iYFR046C     | #N/A | #N/A | #N/A | #N/A | #N/A | #N/A |
| iYFR047C     | 1.62 | 0.92 | 1.83 | 0.97 | 1.16 | 0.73 |
| iYFR048W     | 1.47 | 0.86 | 1.25 | 0.68 | 1.40 | 0.91 |
| iYFR049W     | #N/A | #N/A | #N/A | #N/A | #N/A | #N/A |
| iYFR050C     | 1.00 | 0.34 | 1.22 | 0.57 | 0.99 | 0.50 |
| iYFR051C     | 1.02 | 0.36 | 1.18 | 0.57 | 0.70 | 0.15 |
| iYFR052W     | #N/A | #N/A | #N/A | #N/A | #N/A | #N/A |
| iYFR053C-0   | 1.11 | 0.47 | 1.11 | 0.50 | 0.92 | 0.36 |
| iYFR053C-1   | 1.47 | 0.87 | 1.42 | 0.83 | 1.04 | 0.66 |
| iYFR053C-2   | 1.53 | 0.90 | 1.54 | 0.89 | 0.93 | 0.41 |
| iYFR054C-0   | 1.45 | 0.81 | 1.53 | 0.88 | 0.84 | 0.25 |
| iYFR054C-2   | #N/A | #N/A | #N/A | #N/A | 1.21 | 0.69 |
| iYFR054C-3   | 1.19 | 0.56 | 1.31 | 0.74 | 0.75 | 0.21 |
| iYFR055W-0   | 1.43 | 0.79 | 1.97 | 0.98 | 1.17 | 0.75 |
| iYFR055W-1   | 1.62 | 0.94 | 1.77 | 0.96 | 0.99 | 0.53 |
| iYFRCdelta8  | #N/A | #N/A | #N/A | #N/A | #N/A | #N/A |
| iYFRCdelta9  | 1.53 | 0.90 | 1.43 | 0.80 | 1.00 | 0.64 |
| iYFRWdelta10 | 1.22 | 0.55 | 1.21 | 0.63 | 0.86 | 0.37 |
| iYFRWdelta7  | 1.28 | 0.69 | 1.36 | 0.73 | 0.98 | 0.60 |
| iYGL001C     | 0.86 | 0.21 | #N/A | #N/A | 0.74 | 0.14 |
| iYGL002W     | #N/A | #N/A | #N/A | #N/A | #N/A | #N/A |
| iYGL003C     | 1.15 | 0.52 | 1.25 | 0.67 | 1.10 | 0.70 |
| iYGL004C     | 1.31 | 0.66 | 1.37 | 0.78 | 1.06 | 0.73 |
| iYGL005C     | #N/A | #N/A | #N/A | #N/A | #N/A | #N/A |
| iYGL006W     | #N/A | #N/A | #N/A | #N/A | #N/A | #N/A |
| iYGL007W-0   | 0.50 | 0.04 | 0.55 | 0.06 | 0.84 | 0.28 |
| iYGL007W-1   | 1.40 | 0.81 | 1.33 | 0.72 | 1.04 | 0.69 |
| iYGL008C     | 0.22 | 0.01 | 0.21 | 0.01 | 0.62 | 0.07 |
| iYGL009C     | 0.93 | 0.27 | 1.18 | 0.55 | 1.06 | 0.50 |
| iYGL010W     | 1.26 | 0.63 | 1.30 | 0.70 | 0.82 | 0.22 |
| iYGL011C     | 1.04 | 0.39 | 0.80 | 0.22 | 1.04 | 0.70 |
| iYGL012W     | #N/A | #N/A | 0.85 | 0.34 | 1.11 | 0.57 |
| iYGL013C     | 0.78 | 0.15 | 0.71 | 0.14 | 0.85 | 0.27 |
| iYGL014W     | #N/A | #N/A | #N/A | #N/A | #N/A | #N/A |

|            |      |      |      |      |      |      |
|------------|------|------|------|------|------|------|
| iYGL015C   | #N/A | #N/A | 1.02 | 0.40 | 0.86 | 0.38 |
| iYGL016W   | #N/A | #N/A | #N/A | #N/A | #N/A | #N/A |
| iYGL017W   | 1.96 | 0.99 | 0.75 | 0.15 | #N/A | #N/A |
| iYGL018C   | #N/A | #N/A | #N/A | #N/A | #N/A | #N/A |
| iYGL019W   | #N/A | #N/A | #N/A | #N/A | #N/A | #N/A |
| iYGL020C   | #N/A | #N/A | 1.02 | 0.39 | 1.05 | 0.50 |
| iYGL021W   | #N/A | #N/A | #N/A | #N/A | #N/A | #N/A |
| iYGL022W   | 1.30 | 0.71 | 0.92 | 0.32 | 1.23 | 0.69 |
| iYGL023C   | 1.01 | 0.31 | 0.83 | 0.21 | 0.85 | 0.27 |
| iYGL024W   | #N/A | #N/A | #N/A | #N/A | #N/A | #N/A |
| iYGL026C   | 1.73 | 0.95 | 1.00 | 0.38 | 0.90 | 0.32 |
| iYGL027C   | #N/A | #N/A | 1.15 | 0.54 | 1.11 | 0.80 |
| iYGL028C   | 1.12 | 0.47 | 0.90 | 0.27 | 0.96 | 0.44 |
| iYGL029W   | 0.71 | 0.11 | 0.64 | 0.10 | 0.90 | 0.39 |
| iYGL030W   | 1.22 | 0.59 | 0.95 | 0.37 | 1.17 | 0.74 |
| iYGL031C   | 0.73 | 0.12 | 0.71 | 0.13 | 1.38 | 0.90 |
| iYGL032C   | 1.00 | 0.29 | 1.03 | 0.41 | 0.97 | 0.43 |
| iYGL033W   | #N/A | #N/A | #N/A | #N/A | #N/A | #N/A |
| iYGL034C-0 | 1.03 | 0.36 | 1.14 | 0.53 | 0.86 | 0.33 |
| iYGL034C-1 | 1.43 | 0.79 | 1.34 | 0.72 | 1.14 | 0.61 |
| iYGL035C   | #N/A | #N/A | #N/A | #N/A | #N/A | #N/A |
| iYGL036W   | #N/A | #N/A | #N/A | #N/A | #N/A | #N/A |
| iYGL037C   | #N/A | #N/A | 0.64 | 0.09 | 0.62 | 0.06 |
| iYGL038C   | 1.09 | 0.44 | 0.91 | 0.29 | 0.99 | 0.62 |
| iYGL039W   | 1.57 | 0.89 | 1.20 | 0.62 | 0.98 | 0.41 |
| iYGL040C-0 | 1.20 | 0.59 | 1.25 | 0.67 | 1.23 | 0.69 |
| iYGL040C-1 | 1.07 | 0.39 | 1.07 | 0.45 | 0.98 | 0.41 |
| iYGL041C   | #N/A | #N/A | #N/A | #N/A | #N/A | #N/A |
| iYGL042C   | #N/A | #N/A | #N/A | #N/A | 0.84 | 0.29 |
| iYGL044C   | 1.19 | 0.56 | 1.17 | 0.59 | 0.88 | 0.43 |
| iYGL045W   | 1.58 | 0.92 | 1.56 | 0.90 | 0.97 | 0.41 |
| iYGL046W   | 1.59 | 0.91 | 1.06 | 0.44 | #N/A | #N/A |
| iYGL047W   | #N/A | #N/A | #N/A | #N/A | #N/A | #N/A |
| iYGL048C   | 1.40 | 0.81 | 1.36 | 0.77 | 1.08 | 0.63 |
| iYGL049C   | 1.42 | 0.81 | 1.31 | 0.74 | 1.26 | 0.84 |
| iYGL050W   | 1.42 | 0.83 | #N/A | #N/A | 1.00 | 0.58 |
| iYGL051W   | 1.14 | 0.47 | 1.27 | 0.69 | 0.97 | 0.40 |
| iYGL053W   | #N/A | #N/A | 0.78 | 0.18 | #N/A | #N/A |
| iYGL054C   | #N/A | #N/A | #N/A | #N/A | #N/A | #N/A |
| iYGL055W   | #N/A | #N/A | 1.18 | 0.59 | 1.95 | 0.99 |
| iYGL056C   | 0.62 | 0.07 | 0.60 | 0.08 | 0.81 | 0.30 |
| iYGL057C   | #N/A | #N/A | 0.74 | 0.16 | 0.76 | 0.23 |
| iYGL058W   | 1.63 | 0.93 | #N/A | #N/A | 1.08 | 0.63 |
| iYGL059W   | 1.20 | 0.53 | 1.18 | 0.58 | 1.00 | 0.52 |
| iYGL060W   | 0.89 | 0.20 | 1.14 | 0.55 | 0.84 | 0.36 |
| iYGL061C   | 1.02 | 0.34 | 0.95 | 0.34 | 1.10 | 0.55 |
| iYGL062W   | #N/A | #N/A | #N/A | #N/A | #N/A | #N/A |
| iYGL064C   | #N/A | #N/A | #N/A | #N/A | 0.84 | 0.25 |
| iYGL065C   | 1.31 | 0.73 | 1.17 | 0.59 | 1.13 | 0.70 |
| iYGL066W   | #N/A | #N/A | #N/A | #N/A | #N/A | #N/A |
| iYGL067W   | 2.07 | 0.99 | 0.94 | 0.37 | 1.09 | 0.65 |

|            |      |      |      |      |      |      |
|------------|------|------|------|------|------|------|
| iYGL068W   | 1.21 | 0.58 | #N/A | #N/A | #N/A | #N/A |
| iYGL070C   | 1.02 | 0.36 | 0.89 | 0.29 | 0.91 | 0.35 |
| iYGL071W   | 1.45 | 0.85 | 1.33 | 0.74 | 1.31 | 0.87 |
| iYGL072C   | 0.81 | 0.16 | 1.00 | 0.38 | 0.88 | 0.42 |
| iYGL075C   | 1.22 | 0.56 | 1.18 | 0.60 | 1.03 | 0.47 |
| iYGL076C   | 1.14 | 0.51 | 0.91 | 0.30 | 1.43 | 0.84 |
| iYGL077C   | #N/A | #N/A | 0.94 | 0.40 | 0.97 | 0.58 |
| iYGL078C   | 1.33 | 0.70 | 1.00 | 0.45 | 1.46 | 0.85 |
| iYGL079W   | #N/A | #N/A | #N/A | #N/A | #N/A | #N/A |
| iYGL080W   | #N/A | #N/A | #N/A | #N/A | 1.02 | 0.46 |
| iYGL081W   | #N/A | #N/A | 1.44 | 0.81 | 1.03 | 0.63 |
| iYGL082W   | 1.30 | 0.71 | 1.12 | 0.52 | 1.15 | 0.61 |
| iYGL083W   | 1.25 | 0.61 | 1.12 | 0.52 | 1.16 | 0.74 |
| iYGL084C   | #N/A | #N/A | 1.06 | 0.44 | 1.03 | 0.69 |
| iYGL085W   | #N/A | #N/A | #N/A | #N/A | #N/A | #N/A |
| iYGL087C   | #N/A | #N/A | 1.23 | 0.65 | 0.83 | 0.23 |
| iYGL088W   | 0.99 | 0.32 | 0.83 | 0.22 | 1.39 | 0.86 |
| iYGL089C   | 1.59 | 0.92 | 1.34 | 0.76 | 1.30 | 0.92 |
| iYGL090W   | 1.22 | 0.55 | #N/A | #N/A | #N/A | #N/A |
| iYGL092W   | #N/A | #N/A | #N/A | #N/A | #N/A | #N/A |
| iYGL093W   | #N/A | #N/A | #N/A | #N/A | #N/A | #N/A |
| iYGL094C   | 1.65 | 0.95 | 1.29 | 0.69 | 0.92 | 0.50 |
| iYGL095C   | 1.35 | 0.71 | 1.00 | 0.37 | 1.08 | 0.74 |
| iYGL096W-0 | #N/A | #N/A | #N/A | #N/A | 1.23 | 0.69 |
| iYGL096W-1 | 1.58 | 0.89 | 1.52 | 0.88 | 1.27 | 0.84 |
| iYGL097W-0 | 0.75 | 0.14 | 0.78 | 0.19 | 0.86 | 0.32 |
| iYGL097W-1 | 0.78 | 0.14 | 0.88 | 0.25 | 0.75 | 0.22 |
| iYGL098W   | 1.35 | 0.77 | 1.65 | 0.94 | 0.99 | 0.51 |
| iYGL099W   | 1.34 | 0.71 | 1.04 | 0.44 | 1.34 | 0.78 |
| iYGL100W   | 2.20 | 0.99 | 1.14 | 0.55 | 1.74 | 0.98 |
| iYGL101W   | 1.51 | 0.86 | 1.40 | 0.81 | 1.55 | 0.96 |
| iYGL102C   | 0.91 | 0.23 | 0.90 | 0.27 | 1.01 | 0.65 |
| iYGL104C   | 0.82 | 0.15 | 0.73 | 0.14 | #N/A | #N/A |
| iYGL105W   | #N/A | #N/A | #N/A | #N/A | #N/A | #N/A |
| iYGL106W   | #N/A | #N/A | 0.75 | 0.18 | #N/A | #N/A |
| iYGL107C   | #N/A | #N/A | #N/A | #N/A | #N/A | #N/A |
| iYGL108C   | #N/A | #N/A | #N/A | #N/A | #N/A | #N/A |
| iYGL110C   | #N/A | #N/A | #N/A | #N/A | #N/A | #N/A |
| iYGL111W   | #N/A | #N/A | #N/A | #N/A | #N/A | #N/A |
| iYGL112C   | 1.01 | 0.32 | 1.03 | 0.43 | 1.08 | 0.53 |
| iYGL114W   | 1.31 | 0.72 | 1.41 | 0.81 | 0.82 | 0.23 |
| iYGL115W   | 1.28 | 0.68 | 1.43 | 0.83 | 1.05 | 0.64 |
| iYGL116W   | 1.01 | 0.31 | 0.97 | 0.35 | 1.04 | 0.48 |
| iYGL117W   | 1.05 | 0.38 | 1.11 | 0.50 | 0.80 | 0.21 |
| iYGL118C   | #N/A | #N/A | #N/A | #N/A | #N/A | #N/A |
| iYGL119W   | #N/A | #N/A | 1.32 | 0.75 | 1.27 | 0.84 |
| iYGL120C   | 1.20 | 0.57 | 1.06 | 0.45 | 1.08 | 0.67 |
| iYGL121C   | 1.27 | 0.65 | 1.44 | 0.74 | 0.86 | 0.28 |
| iYGL122C   | 1.04 | 0.37 | #N/A | #N/A | 1.36 | 0.86 |
| iYGL123W   | 1.17 | 0.55 | 0.98 | 0.36 | 1.07 | 0.54 |
| iYGL124C   | 0.68 | 0.10 | 0.66 | 0.11 | 0.87 | 0.28 |

|            |      |      |      |      |      |      |
|------------|------|------|------|------|------|------|
| iYGL125W   | 0.93 | 0.23 | 1.08 | 0.47 | 1.07 | 0.75 |
| iYGL126W   | 0.70 | 0.11 | 0.78 | 0.18 | 0.51 | 0.03 |
| iYGL127C   | 1.20 | 0.55 | 1.10 | 0.50 | 0.80 | 0.30 |
| iYGL129C   | #N/A | #N/A | #N/A | #N/A | #N/A | #N/A |
| iYGL130W   | #N/A | #N/A | #N/A | #N/A | #N/A | #N/A |
| iYGL131C   | #N/A | #N/A | #N/A | #N/A | #N/A | #N/A |
| iYGL133W   | #N/A | #N/A | #N/A | #N/A | #N/A | #N/A |
| iYGL134W   | #N/A | #N/A | #N/A | #N/A | 1.14 | 0.83 |
| iYGL135W   | #N/A | #N/A | 0.92 | 0.30 | 0.75 | 0.16 |
| iYGL136C   | #N/A | #N/A | #N/A | #N/A | #N/A | #N/A |
| iYGL137W   | #N/A | #N/A | #N/A | #N/A | #N/A | #N/A |
| iYGL138C   | 0.96 | 0.26 | 1.18 | 0.54 | #N/A | #N/A |
| iYGL139W   | #N/A | #N/A | 1.79 | 0.96 | #N/A | #N/A |
| iYGL140C   | 1.26 | 0.60 | 1.23 | 0.65 | 1.37 | 0.83 |
| iYGL141W   | 0.15 | 0.00 | #N/A | #N/A | #N/A | #N/A |
| iYGL142C   | #N/A | #N/A | #N/A | #N/A | #N/A | #N/A |
| iYGL143C   | 1.31 | 0.72 | 1.38 | 0.79 | 0.88 | 0.33 |
| iYGL144C   | 1.10 | 0.41 | 1.08 | 0.48 | 0.71 | 0.16 |
| iYGL145W   | #N/A | #N/A | #N/A | #N/A | #N/A | #N/A |
| iYGL146C   | 1.04 | 0.34 | #N/A | #N/A | 0.92 | 0.34 |
| iYGL147C   | 0.65 | 0.09 | 0.59 | 0.08 | 0.77 | 0.17 |
| iYGL148W   | #N/A | #N/A | #N/A | #N/A | #N/A | #N/A |
| iYGL151W   | #N/A | #N/A | #N/A | #N/A | #N/A | #N/A |
| iYGL152C   | #N/A | #N/A | #N/A | #N/A | #N/A | #N/A |
| iYGL156W   | 1.23 | 0.63 | #N/A | #N/A | #N/A | #N/A |
| iYGL157W   | 1.48 | 0.87 | 1.56 | 0.90 | 0.83 | 0.23 |
| iYGL158W   | 0.95 | 0.28 | 0.99 | 0.36 | 0.75 | 0.16 |
| iYGL159W   | 1.35 | 0.77 | 1.39 | 0.74 | 0.84 | 0.25 |
| iYGL160W   | 1.20 | 0.53 | 1.66 | 0.94 | 0.90 | 0.34 |
| iYGL161C   | 1.07 | 0.38 | 1.12 | 0.52 | 0.98 | 0.41 |
| iYGL162W   | #N/A | #N/A | #N/A | #N/A | #N/A | #N/A |
| iYGL163C-0 | 1.17 | 0.54 | 1.15 | 0.56 | 0.80 | 0.19 |
| iYGL163C-1 | 0.84 | 0.17 | 0.89 | 0.27 | 0.97 | 0.45 |
| iYGL164C   | 1.51 | 0.88 | 1.24 | 0.63 | 0.99 | 0.48 |
| iYGL167C   | 1.22 | 0.59 | 1.09 | 0.48 | 1.28 | 0.85 |
| iYGL169W   | #N/A | #N/A | #N/A | #N/A | #N/A | #N/A |
| iYGL170C   | #N/A | #N/A | #N/A | #N/A | 0.60 | 0.07 |
| iYGL171W   | #N/A | #N/A | #N/A | #N/A | #N/A | #N/A |
| iYGL172W   | 1.26 | 0.65 | 1.00 | 0.42 | #N/A | #N/A |
| iYGL174W   | #N/A | #N/A | #N/A | #N/A | #N/A | #N/A |
| iYGL175C   | #N/A | #N/A | 1.19 | 0.61 | 0.91 | 0.45 |
| iYGL177W-0 | 1.59 | 0.93 | 1.64 | 0.90 | 1.06 | 0.63 |
| iYGL177W-1 | 1.56 | 0.88 | 1.48 | 0.84 | 1.04 | 0.58 |
| iYGL180W   | #N/A | #N/A | 0.94 | 0.33 | #N/A | #N/A |
| iYGL181W   | 1.16 | 0.53 | 1.12 | 0.52 | 0.80 | 0.19 |
| iYGL182C   | 1.09 | 0.40 | #N/A | #N/A | 0.88 | 0.31 |
| iYGL185C   | 1.61 | 0.93 | 1.09 | 0.48 | 0.81 | 0.21 |
| iYGL186C   | 0.84 | 0.19 | 0.78 | 0.18 | 0.88 | 0.38 |
| iYGL187C   | 1.41 | 0.82 | 1.40 | 0.78 | #N/A | #N/A |
| iYGL188C   | #N/A | #N/A | #N/A | #N/A | #N/A | #N/A |
| iYGL189C   | 0.57 | 0.06 | 0.49 | 0.05 | 0.90 | 0.31 |

|            |      |      |      |      |      |      |
|------------|------|------|------|------|------|------|
| iYGL190C   | 1.07 | 0.36 | 1.21 | 0.62 | 1.00 | 0.53 |
| iYGL192W   | 1.09 | 0.40 | 1.07 | 0.47 | 1.04 | 0.58 |
| iYGL194C   | #N/A | #N/A | #N/A | #N/A | #N/A | #N/A |
| iYGL195W   | 1.12 | 0.43 | 1.28 | 0.71 | 0.72 | 0.17 |
| iYGL196W   | 1.15 | 0.53 | 1.19 | 0.59 | 0.83 | 0.23 |
| iYGL197W   | 1.43 | 0.83 | 1.55 | 0.88 | 1.06 | 0.61 |
| iYGL198W   | 1.60 | 0.93 | 1.14 | 0.54 | 0.83 | 0.24 |
| iYGL200C   | 0.99 | 0.29 | 0.86 | 0.31 | 1.13 | 0.82 |
| iYGL201C   | 1.32 | 0.73 | 1.37 | 0.77 | 1.05 | 0.49 |
| iYGL202W   | 1.37 | 0.74 | 1.35 | 0.74 | #N/A | #N/A |
| iYGL203C   | 1.30 | 0.65 | 0.98 | 0.37 | 1.14 | 0.60 |
| iYGL204C   | #N/A | #N/A | #N/A | #N/A | 0.69 | 0.14 |
| iYGL206C   | 0.98 | 0.29 | 1.06 | 0.45 | 0.66 | 0.12 |
| iYGL207W   | #N/A | #N/A | 1.27 | 0.70 | 0.91 | 0.32 |
| iYGL209W   | 1.36 | 0.77 | 1.29 | 0.69 | 1.08 | 0.63 |
| iYGL210W   | 0.82 | 0.16 | 0.85 | 0.24 | 0.82 | 0.22 |
| iYGL213C   | #N/A | #N/A | #N/A | #N/A | #N/A | #N/A |
| iYGL216W   | 1.60 | 0.93 | 1.38 | 0.78 | 1.27 | 0.91 |
| iYGL218W   | 0.96 | 0.26 | 1.02 | 0.41 | 0.97 | 0.59 |
| iYGL220W   | #N/A | #N/A | #N/A | #N/A | #N/A | #N/A |
| iYGL221C   | #N/A | #N/A | #N/A | #N/A | #N/A | #N/A |
| iYGL222C   | 0.92 | 0.24 | 0.96 | 0.33 | 0.99 | 0.63 |
| iYGL223C   | 1.61 | 0.94 | 3.16 | 0.92 | 1.63 | 0.97 |
| iYGL224C   | #N/A | #N/A | #N/A | #N/A | #N/A | #N/A |
| iYGL225W   | #N/A | #N/A | #N/A | #N/A | #N/A | #N/A |
| iYGL226C-A | #N/A | #N/A | #N/A | #N/A | #N/A | #N/A |
| iYGL226W   | #N/A | #N/A | #N/A | #N/A | #N/A | #N/A |
| iYGL227W   | #N/A | #N/A | #N/A | #N/A | #N/A | #N/A |
| iYGL228W   | #N/A | #N/A | #N/A | #N/A | 0.85 | 0.26 |
| iYGL229C   | 0.81 | 0.16 | 0.93 | 0.30 | 0.91 | 0.43 |
| iYGL230C   | #N/A | #N/A | #N/A | #N/A | #N/A | #N/A |
| iYGL231C   | #N/A | #N/A | #N/A | #N/A | #N/A | #N/A |
| iYGL233W   | #N/A | #N/A | #N/A | #N/A | #N/A | #N/A |
| iYGL234W   | #N/A | #N/A | #N/A | #N/A | #N/A | #N/A |
| iYGL235W   | 1.24 | 0.58 | 0.96 | 0.33 | 1.34 | 0.94 |
| iYGL237C   | 1.39 | 0.80 | 1.29 | 0.72 | 1.04 | 0.71 |
| iYGL238W   | #N/A | #N/A | #N/A | #N/A | #N/A | #N/A |
| iYGL240W   | #N/A | #N/A | #N/A | #N/A | #N/A | #N/A |
| iYGL242C   | #N/A | #N/A | #N/A | #N/A | #N/A | #N/A |
| iYGL243W   | #N/A | #N/A | #N/A | #N/A | #N/A | #N/A |
| iYGL244W   | #N/A | #N/A | #N/A | #N/A | #N/A | #N/A |
| iYGL245W   | 1.37 | 0.73 | 1.66 | 0.92 | 1.15 | 0.62 |
| iYGL246C   | #N/A | #N/A | #N/A | #N/A | #N/A | #N/A |
| iYGL247W   | 0.11 | 0.00 | 0.12 | 0.00 | #N/A | #N/A |
| iYGL248W   | #N/A | #N/A | #N/A | #N/A | #N/A | #N/A |
| iYGL249W   | 1.27 | 0.62 | 1.27 | 0.69 | 0.86 | 0.31 |
| iYGL250W   | #N/A | #N/A | #N/A | #N/A | 0.84 | 0.24 |
| iYGL251C   | 1.30 | 0.70 | 1.46 | 0.79 | 1.03 | 0.54 |
| iYGL252C   | 1.19 | 0.55 | 1.29 | 0.71 | 0.87 | 0.41 |
| iYGL253W   | #N/A | #N/A | #N/A | #N/A | #N/A | #N/A |
| iYGL254W   | 0.58 | 0.06 | 0.59 | 0.10 | 0.48 | 0.02 |

|               |      |      |      |      |      |      |
|---------------|------|------|------|------|------|------|
| iYGL255W      | #N/A | #N/A | #N/A | #N/A | #N/A | #N/A |
| iYGL256W-0    | 1.26 | 0.60 | 1.40 | 0.79 | 0.94 | 0.44 |
| iYGL256W-1    | 1.46 | 0.82 | 1.30 | 0.62 | 0.98 | 0.47 |
| iYGL256W-2    | 1.35 | 0.77 | 1.63 | 0.92 | 0.98 | 0.47 |
| iYGL256W-3    | 1.34 | 0.76 | 1.27 | 0.70 | 0.90 | 0.34 |
| iYGL257C      | 1.23 | 0.64 | 1.35 | 0.77 | 1.28 | 0.74 |
| iYGL258W      | 1.49 | 0.88 | 1.59 | 0.80 | 1.26 | 0.77 |
| iYGL259W-0    | 1.63 | 0.94 | 1.64 | 0.82 | 1.00 | 0.50 |
| iYGL259W-1    | 1.09 | 0.43 | 1.33 | 0.69 | 0.75 | 0.15 |
| iYGL260W      | 1.36 | 0.77 | 1.58 | 0.89 | 1.07 | 0.63 |
| iYGL261C      | #N/A | #N/A | 1.25 | 0.68 | 1.01 | 0.56 |
| iYGL262W      | 1.88 | 0.98 | 1.79 | 0.96 | 0.88 | 0.43 |
| iYGL263W      | 1.52 | 0.90 | 1.82 | 0.89 | 0.85 | 0.38 |
| iYGLWdelta10  | 1.09 | 0.43 | 1.10 | 0.50 | 1.04 | 0.49 |
| iYGLWdelta3   | #N/A | #N/A | 0.51 | 0.05 | #N/A | #N/A |
| iYGLWdelta4   | #N/A | #N/A | #N/A | #N/A | #N/A | #N/A |
| iYGLWdelta6   | #N/A | #N/A | #N/A | #N/A | #N/A | #N/A |
| iYGLWdelta7   | 1.32 | 0.67 | 1.18 | 0.58 | 1.17 | 0.86 |
| iYGLWomega1-0 | 1.52 | 0.90 | 1.77 | 0.95 | 0.85 | 0.25 |
| iYGLWtau2     | #N/A | #N/A | #N/A | #N/A | #N/A | #N/A |
| iYGR001C      | 1.27 | 0.67 | 1.37 | 0.76 | 1.07 | 0.57 |
| iYGR002C      | #N/A | #N/A | 1.13 | 0.53 | 1.16 | 0.85 |
| iYGR003W      | 1.27 | 0.61 | 1.36 | 0.74 | 1.53 | 0.90 |
| iYGR004W      | 1.60 | 0.93 | 1.08 | 0.47 | 1.12 | 0.69 |
| iYGR005C      | 1.58 | 0.92 | 1.10 | 0.50 | 1.18 | 0.65 |
| iYGR006W      | 1.21 | 0.57 | 1.22 | 0.64 | #N/A | #N/A |
| iYGR007W      | #N/A | #N/A | #N/A | #N/A | #N/A | #N/A |
| iYGR008C      | 1.06 | 0.39 | 1.27 | 0.69 | 0.79 | 0.28 |
| iYGR009C      | 1.22 | 0.57 | 1.18 | 0.60 | 1.03 | 0.69 |
| iYGR011W      | #N/A | #N/A | 1.20 | 0.62 | 0.60 | 0.06 |
| iYGR012W      | 1.05 | 0.34 | 1.03 | 0.43 | 0.94 | 0.40 |
| iYGR013W      | 0.94 | 0.28 | 0.85 | 0.23 | 0.79 | 0.19 |
| iYGR014W      | 1.23 | 0.62 | 1.33 | 0.75 | 1.01 | 0.52 |
| iYGR015C      | 1.03 | 0.33 | 1.01 | 0.41 | #N/A | #N/A |
| iYGR016W      | 1.34 | 0.71 | 1.08 | 0.47 | 0.93 | 0.50 |
| iYGR018C      | 1.32 | 0.73 | 1.23 | 0.66 | 1.05 | 0.50 |
| iYGR019W      | #N/A | #N/A | 1.08 | 0.47 | 1.04 | 0.58 |
| iYGR020C      | 1.02 | 0.34 | 0.89 | 0.26 | 0.98 | 0.49 |
| iYGR021W      | 0.88 | 0.20 | 0.87 | 0.25 | 0.92 | 0.38 |
| iYGR023W      | 1.08 | 0.42 | 1.05 | 0.44 | 0.94 | 0.41 |
| iYGR026W      | #N/A | #N/A | 0.93 | 0.29 | 1.36 | 0.95 |
| iYGR027C      | 0.79 | 0.16 | 0.74 | 0.15 | 0.80 | 0.29 |
| iYGR028W      | 1.53 | 0.90 | 1.27 | 0.70 | 1.36 | 0.80 |
| iYGR029W      | #N/A | #N/A | 0.86 | 0.24 | 0.79 | 0.19 |
| iYGR030C      | #N/A | #N/A | #N/A | #N/A | #N/A | #N/A |
| iYGR031W      | 0.97 | 0.29 | 1.14 | 0.54 | 0.96 | 0.44 |
| iYGR032W      | #N/A | #N/A | 1.50 | 0.86 | 1.02 | 0.46 |
| iYGR033C      | 0.54 | 0.05 | 0.53 | 0.06 | 0.92 | 0.36 |
| iYGR034W      | #N/A | #N/A | 1.23 | 0.63 | 1.46 | 0.85 |
| iYGR035C      | 0.66 | 0.09 | 0.72 | 0.14 | 0.80 | 0.20 |
| iYGR036C      | 1.41 | 0.82 | 1.29 | 0.70 | 1.10 | 0.65 |



|            |      |      |      |      |      |      |
|------------|------|------|------|------|------|------|
| iYGR037C   | 1.22 | 0.58 | 1.10 | 0.49 | 1.00 | 0.52 |
| iYGR038W   | #N/A | #N/A | #N/A | #N/A | #N/A | #N/A |
| iYGR039W   | #N/A | #N/A | #N/A | #N/A | #N/A | #N/A |
| iYGR040W   | 0.78 | 0.15 | 0.80 | 0.20 | 0.84 | 0.24 |
| iYGR041W   | 1.25 | 0.66 | 1.24 | 0.63 | 0.85 | 0.37 |
| iYGR043C-1 | 1.26 | 0.65 | 1.44 | 0.84 | 1.02 | 0.55 |
| iYGR045C   | 0.98 | 0.32 | 1.06 | 0.44 | 0.59 | 0.06 |
| iYGR046W   | #N/A | #N/A | #N/A | #N/A | #N/A | #N/A |
| iYGR047C   | 1.11 | 0.46 | 0.95 | 0.33 | 0.84 | 0.26 |
| iYGR048W   | 1.26 | 0.61 | 1.08 | 0.47 | 1.12 | 0.74 |
| iYGR049W   | #N/A | #N/A | #N/A | #N/A | #N/A | #N/A |
| iYGR050C   | 0.37 | 0.02 | 0.35 | 0.02 | 0.43 | 0.02 |
| iYGR051C   | #N/A | #N/A | 1.03 | 0.41 | #N/A | #N/A |
| iYGR052W   | #N/A | #N/A | #N/A | #N/A | #N/A | #N/A |
| iYGR053C   | 1.02 | 0.32 | 1.07 | 0.46 | 0.81 | 0.25 |
| iYGR054W   | 0.69 | 0.11 | 0.64 | 0.10 | 0.55 | 0.05 |
| iYGR055W   | 0.92 | 0.24 | 1.20 | 0.62 | 1.16 | 0.63 |
| iYGR056W   | 1.86 | 0.98 | #N/A | #N/A | 1.24 | 0.84 |
| iYGR057C   | 1.30 | 0.71 | 1.35 | 0.77 | 0.92 | 0.40 |
| iYGR058W   | 1.19 | 0.51 | 1.02 | 0.40 | #N/A | #N/A |
| iYGR059W   | 0.67 | 0.09 | 0.60 | 0.08 | 1.09 | 0.61 |
| iYGR060W   | #N/A | #N/A | #N/A | #N/A | #N/A | #N/A |
| iYGR061C   | #N/A | #N/A | 0.72 | 0.14 | 1.32 | 0.86 |
| iYGR062C   | #N/A | #N/A | 1.14 | 0.55 | #N/A | #N/A |
| iYGR064W   | #N/A | #N/A | #N/A | #N/A | #N/A | #N/A |
| iYGR065C   | 1.18 | 0.56 | 1.04 | 0.42 | 1.19 | 0.65 |
| iYGR066C   | 1.19 | 0.57 | 1.45 | 0.83 | 0.77 | 0.17 |
| iYGR067C   | 1.40 | 0.76 | 1.16 | 0.57 | 0.92 | 0.49 |
| iYGR069W   | 1.10 | 0.41 | 1.01 | 0.39 | 1.11 | 0.67 |
| iYGR070W   | #N/A | #N/A | #N/A | #N/A | #N/A | #N/A |
| iYGR071C   | #N/A | #N/A | 0.97 | 0.35 | #N/A | #N/A |
| iYGR072W   | #N/A | #N/A | #N/A | #N/A | #N/A | #N/A |
| iYGR075C   | 1.29 | 0.70 | 1.17 | 0.53 | #N/A | #N/A |
| iYGR076C   | #N/A | #N/A | #N/A | #N/A | #N/A | #N/A |
| iYGR077C   | 1.00 | 0.29 | 1.25 | 0.66 | 0.82 | 0.33 |
| iYGR078C   | 0.61 | 0.07 | 0.54 | 0.06 | 0.68 | 0.10 |
| iYGR079W   | #N/A | #N/A | #N/A | #N/A | #N/A | #N/A |
| iYGR080W   | #N/A | #N/A | 0.89 | 0.26 | #N/A | #N/A |
| iYGR081C   | #N/A | #N/A | 1.12 | 0.52 | 0.90 | 0.33 |
| iYGR082W   | #N/A | #N/A | #N/A | #N/A | #N/A | #N/A |
| iYGR083C   | #N/A | #N/A | 1.21 | 0.58 | 0.96 | 0.39 |
| iYGR085C   | 0.88 | 0.22 | 0.89 | 0.26 | 1.36 | 0.80 |
| iYGR086C   | 0.66 | 0.09 | 0.64 | 0.10 | 0.71 | 0.12 |
| iYGR087C-0 | 1.16 | 0.48 | 1.44 | 0.81 | 0.83 | 0.24 |
| iYGR087C-1 | 1.22 | 0.55 | 1.28 | 0.70 | 1.03 | 0.64 |
| iYGR088W   | 0.90 | 0.23 | 0.84 | 0.23 | 1.08 | 0.62 |
| iYGR089W-0 | #N/A | #N/A | 1.65 | 0.94 | 1.16 | 0.77 |
| iYGR089W-1 | 1.48 | 0.85 | 1.80 | 0.96 | 1.11 | 0.67 |
| iYGR090W   | 1.45 | 0.81 | 1.96 | 0.98 | #N/A | #N/A |
| iYGR091W   | 1.02 | 0.36 | 0.67 | 0.11 | 1.07 | 0.59 |
| iYGR092W   | 1.43 | 0.81 | 1.34 | 0.65 | #N/A | #N/A |



|            |      |      |      |      |      |      |
|------------|------|------|------|------|------|------|
| iYGR094W   | #N/A | #N/A | #N/A | #N/A | #N/A | #N/A |
| iYGR095C   | #N/A | #N/A | #N/A | #N/A | #N/A | #N/A |
| iYGR096W   | 0.78 | 0.15 | 0.78 | 0.18 | 0.71 | 0.15 |
| iYGR097W   | 1.63 | 0.94 | 1.85 | 0.79 | 1.25 | 0.82 |
| iYGR098C   | 1.30 | 0.71 | 1.01 | 0.42 | 0.85 | 0.25 |
| iYGR099W   | 1.25 | 0.66 | 1.18 | 0.60 | 1.00 | 0.51 |
| iYGR100W   | #N/A | #N/A | #N/A | #N/A | #N/A | #N/A |
| iYGR101W   | 1.39 | 0.81 | 1.73 | 0.95 | 0.89 | 0.30 |
| iYGR102C   | 0.79 | 0.16 | #N/A | #N/A | #N/A | #N/A |
| iYGR103W   | #N/A | #N/A | #N/A | #N/A | #N/A | #N/A |
| iYGR104C   | #N/A | #N/A | 1.14 | 0.51 | #N/A | #N/A |
| iYGR105W   | #N/A | #N/A | #N/A | #N/A | #N/A | #N/A |
| iYGR106C   | 0.86 | 0.20 | 0.97 | 0.34 | 1.09 | 0.54 |
| iYGR107W   | 0.79 | 0.16 | 0.77 | 0.17 | 0.78 | 0.27 |
| iYGR108W   | #N/A | #N/A | #N/A | #N/A | #N/A | #N/A |
| iYGR109C   | 0.73 | 0.13 | 0.73 | 0.14 | 1.04 | 0.58 |
| iYGR110W   | 1.46 | 0.86 | 1.31 | 0.72 | 1.43 | 0.84 |
| iYGR111W   | 1.62 | 0.94 | 1.19 | 0.60 | 0.95 | 0.43 |
| iYGR112W   | 1.23 | 0.61 | 1.06 | 0.45 | 1.16 | 0.84 |
| iYGR113W   | 1.37 | 0.78 | 1.27 | 0.70 | 1.04 | 0.57 |
| iYGR116W   | #N/A | #N/A | #N/A | #N/A | #N/A | #N/A |
| iYGR117C   | 0.27 | 0.01 | 0.28 | 0.01 | 0.65 | 0.08 |
| iYGR118W   | #N/A | #N/A | 0.87 | 0.25 | #N/A | #N/A |
| iYGR119C   | 1.11 | 0.47 | 0.75 | 0.16 | 1.08 | 0.64 |
| iYGR120C   | #N/A | #N/A | #N/A | #N/A | #N/A | #N/A |
| iYGR121C   | 1.05 | 0.40 | 1.00 | 0.37 | 0.93 | 0.51 |
| iYGR122C-A | #N/A | #N/A | 0.72 | 0.14 | 1.01 | 0.48 |
| iYGR122W   | 1.61 | 0.91 | #N/A | #N/A | 0.87 | 0.30 |
| iYGR123C   | 1.12 | 0.46 | 0.84 | 0.23 | 1.06 | 0.51 |
| iYGR124W   | 1.59 | 0.93 | 1.41 | 0.82 | 1.09 | 0.76 |
| iYGR125W   | 1.21 | 0.53 | 1.18 | 0.60 | 0.80 | 0.29 |
| iYGR126W   | #N/A | #N/A | #N/A | #N/A | #N/A | #N/A |
| iYGR127W   | 1.03 | 0.36 | 1.24 | 0.64 | 0.64 | 0.10 |
| iYGR128C   | #N/A | #N/A | 0.78 | 0.18 | 0.87 | 0.29 |
| iYGR129W   | 1.08 | 0.40 | 1.19 | 0.61 | 0.87 | 0.30 |
| iYGR130C   | 1.15 | 0.50 | 1.27 | 0.67 | 0.97 | 0.39 |
| iYGR131W   | 1.40 | 0.76 | 1.44 | 0.76 | 1.10 | 0.70 |
| iYGR132C   | 1.24 | 0.57 | 1.01 | 0.38 | 0.89 | 0.34 |
| iYGR133W   | 1.11 | 0.46 | 1.13 | 0.53 | 1.22 | 0.79 |
| iYGR134W   | 1.37 | 0.73 | 0.80 | 0.20 | 1.09 | 0.65 |
| iYGR135W   | 1.43 | 0.83 | 1.24 | 0.58 | 1.20 | 0.78 |
| iYGR137W   | 1.36 | 0.77 | #N/A | #N/A | 1.10 | 0.65 |
| iYGR138C   | #N/A | #N/A | #N/A | #N/A | #N/A | #N/A |
| iYGR139W   | 0.87 | 0.20 | 0.90 | 0.28 | 0.61 | 0.08 |
| iYGR140W   | 1.31 | 0.66 | 1.12 | 0.51 | 0.96 | 0.38 |
| iYGR141W   | 0.95 | 0.25 | 0.80 | 0.21 | 0.81 | 0.31 |
| iYGR142W   | #N/A | #N/A | 1.07 | 0.45 | #N/A | #N/A |
| iYGR144W   | 1.33 | 0.75 | 0.91 | 0.27 | 1.08 | 0.76 |
| iYGR145W   | #N/A | #N/A | 1.25 | 0.62 | #N/A | #N/A |
| iYGR146C   | 0.83 | 0.17 | 0.89 | 0.27 | 0.80 | 0.27 |
| iYGR147C   | 1.23 | 0.61 | #N/A | #N/A | 1.46 | 0.92 |

|            |      |      |      |      |      |      |
|------------|------|------|------|------|------|------|
| iYGR149W   | #N/A | #N/A | #N/A | #N/A | #N/A | #N/A |
| iYGR150C   | 1.48 | 0.88 | 0.90 | 0.27 | #N/A | #N/A |
| iYGR152C   | 1.05 | 0.38 | 1.05 | 0.43 | 0.94 | 0.40 |
| iYGR154C   | 1.11 | 0.43 | 1.02 | 0.44 | #N/A | #N/A |
| iYGR155W   | 1.14 | 0.50 | 0.90 | 0.28 | 0.97 | 0.44 |
| iYGR156W   | 0.94 | 0.26 | 0.85 | 0.23 | 0.94 | 0.36 |
| iYGR157W   | #N/A | #N/A | #N/A | #N/A | #N/A | #N/A |
| iYGR158C   | 1.07 | 0.42 | 0.91 | 0.31 | #N/A | #N/A |
| iYGR160W   | 0.93 | 0.23 | 0.77 | 0.17 | 0.76 | 0.16 |
| iYGR161C-0 | 0.74 | 0.12 | 0.74 | 0.15 | 0.66 | 0.11 |
| iYGR161C-1 | 1.00 | 0.31 | 0.93 | 0.32 | 0.97 | 0.39 |
| iYGR162W   | #N/A | #N/A | #N/A | #N/A | 0.89 | 0.33 |
| iYGR165W   | 1.26 | 0.67 | #N/A | #N/A | 0.90 | 0.36 |
| iYGR166W   | 1.32 | 0.74 | 1.30 | 0.73 | 1.07 | 0.65 |
| iYGR167W   | #N/A | #N/A | 1.29 | 0.68 | #N/A | #N/A |
| iYGR168C   | #N/A | #N/A | #N/A | #N/A | #N/A | #N/A |
| iYGR169C   | 1.14 | 0.51 | 1.22 | 0.65 | 1.18 | 0.87 |
| iYGR170W   | 0.94 | 0.25 | 0.92 | 0.34 | 0.96 | 0.45 |
| iYGR171C   | 1.59 | 0.91 | 1.23 | 0.64 | 1.12 | 0.81 |
| iYGR172C   | #N/A | #N/A | 0.67 | 0.14 | #N/A | #N/A |
| iYGR173W   | 1.71 | 0.96 | 1.32 | 0.70 | #N/A | #N/A |
| iYGR174C   | 1.13 | 0.43 | 1.26 | 0.69 | 1.13 | 0.70 |
| iYGR175C   | 0.70 | 0.10 | 0.44 | 0.03 | #N/A | #N/A |
| iYGR177C   | 1.01 | 0.32 | 1.14 | 0.54 | 0.97 | 0.40 |
| iYGR178C   | 1.03 | 0.33 | 0.82 | 0.20 | 0.94 | 0.37 |
| iYGR179C   | #N/A | #N/A | 1.07 | 0.45 | 1.20 | 0.78 |
| iYGR180C   | 0.47 | 0.03 | 0.48 | 0.04 | 0.48 | 0.02 |
| iYGR182C   | 1.33 | 0.74 | 1.28 | 0.70 | 1.04 | 0.62 |
| iYGR183C   | #N/A | #N/A | 0.86 | 0.28 | 0.87 | 0.33 |
| iYGR184C   | 1.53 | 0.90 | 1.29 | 0.72 | 1.17 | 0.82 |
| iYGR185C   | 1.42 | 0.83 | 1.29 | 0.63 | 1.32 | 0.87 |
| iYGR186W   | #N/A | #N/A | 1.13 | 0.52 | #N/A | #N/A |
| iYGR187C   | #N/A | #N/A | 1.08 | 0.47 | 0.80 | 0.20 |
| iYGR188C   | 1.16 | 0.48 | 0.94 | 0.31 | 0.94 | 0.37 |
| iYGR189C   | 0.71 | 0.11 | 0.64 | 0.09 | 0.82 | 0.23 |
| iYGR191W   | 1.09 | 0.43 | 1.14 | 0.52 | 0.77 | 0.24 |
| iYGR192C   | 0.19 | 0.00 | 0.21 | 0.01 | 0.35 | 0.01 |
| iYGR193C   | #N/A | #N/A | 1.15 | 0.56 | 0.95 | 0.55 |
| iYGR194C   | 1.29 | 0.64 | 1.39 | 0.72 | #N/A | #N/A |
| iYGR195W   | #N/A | #N/A | #N/A | #N/A | #N/A | #N/A |
| iYGR196C   | 1.09 | 0.40 | 1.26 | 0.68 | #N/A | #N/A |
| iYGR197C   | 1.14 | 0.51 | 1.00 | 0.37 | 0.74 | 0.20 |
| iYGR198W   | #N/A | #N/A | #N/A | #N/A | #N/A | #N/A |
| iYGR199W   | #N/A | #N/A | #N/A | #N/A | #N/A | #N/A |
| iYGR200C   | 1.09 | 0.41 | 0.90 | 0.27 | 1.21 | 0.67 |
| iYGR201C   | 1.35 | 0.76 | 1.25 | 0.68 | 1.10 | 0.69 |
| iYGR202C   | 0.72 | 0.12 | 0.82 | 0.24 | 0.75 | 0.22 |
| iYGR204W   | 1.05 | 0.39 | 1.06 | 0.45 | 1.06 | 0.56 |
| iYGR205W   | #N/A | #N/A | #N/A | #N/A | #N/A | #N/A |
| iYGR206W   | #N/A | #N/A | #N/A | #N/A | #N/A | #N/A |
| iYGR207C   | 1.03 | 0.37 | 1.26 | 0.64 | 1.30 | 0.93 |

|            |      |      |      |      |      |      |
|------------|------|------|------|------|------|------|
| iYGR208W   | #N/A | #N/A | #N/A | #N/A | #N/A | #N/A |
| iYGR209C   | 1.02 | 0.31 | 0.96 | 0.38 | 1.02 | 0.50 |
| iYGR210C   | 1.03 | 0.35 | 0.86 | 0.24 | 0.80 | 0.28 |
| iYGR211W   | #N/A | #N/A | 1.13 | 0.54 | 1.04 | 0.57 |
| iYGR212W   | #N/A | #N/A | #N/A | #N/A | #N/A | #N/A |
| iYGR213C   | 0.52 | 0.05 | 0.49 | 0.05 | 0.68 | 0.10 |
| iYGR214W   | 1.02 | 0.35 | 0.85 | 0.23 | 1.13 | 0.82 |
| iYGR215W   | #N/A | #N/A | #N/A | #N/A | #N/A | #N/A |
| iYGR216C   | 1.45 | 0.81 | 1.27 | 0.68 | 1.28 | 0.92 |
| iYGR217W   | #N/A | #N/A | #N/A | #N/A | #N/A | #N/A |
| iYGR218W   | #N/A | #N/A | #N/A | #N/A | #N/A | #N/A |
| iYGR220C   | 1.04 | 0.39 | 0.96 | 0.35 | #N/A | #N/A |
| iYGR221C   | 1.11 | 0.41 | 0.51 | 0.20 | 1.16 | 0.85 |
| iYGR222W   | #N/A | #N/A | #N/A | #N/A | #N/A | #N/A |
| iYGR223C   | 0.96 | 0.28 | 1.11 | 0.50 | 0.77 | 0.17 |
| iYGR224W   | 1.06 | 0.39 | 1.05 | 0.44 | 0.61 | 0.07 |
| iYGR226C   | 1.12 | 0.46 | 1.15 | 0.54 | 1.13 | 0.59 |
| iYGR227W   | #N/A | #N/A | 1.30 | 0.68 | #N/A | #N/A |
| iYGR229C   | #N/A | #N/A | 0.90 | 0.27 | 0.92 | 0.38 |
| iYGR230W   | #N/A | #N/A | #N/A | #N/A | #N/A | #N/A |
| iYGR231C   | 1.00 | 0.32 | #N/A | #N/A | 0.93 | 0.39 |
| iYGR233C-0 | 0.94 | 0.26 | 0.87 | 0.25 | 0.72 | 0.18 |
| iYGR234W   | #N/A | #N/A | #N/A | #N/A | #N/A | #N/A |
| iYGR235C   | 1.08 | 0.44 | 1.20 | 0.62 | 0.79 | 0.19 |
| iYGR236C   | 1.61 | 0.94 | 1.54 | 0.89 | 1.15 | 0.74 |
| iYGR237C   | 1.24 | 0.65 | 1.28 | 0.69 | 0.80 | 0.30 |
| iYGR238C   | 1.25 | 0.66 | 1.47 | 0.86 | 0.99 | 0.48 |
| iYGR239C   | 1.14 | 0.49 | 1.18 | 0.59 | 0.82 | 0.32 |
| iYGR243W   | #N/A | #N/A | #N/A | #N/A | #N/A | #N/A |
| iYGR244C   | 1.21 | 0.56 | 1.13 | 0.53 | 0.88 | 0.31 |
| iYGR245C   | 1.60 | 0.93 | 1.53 | 0.89 | 0.91 | 0.33 |
| iYGR246C   | 1.36 | 0.78 | 1.30 | 0.73 | 1.11 | 0.57 |
| iYGR247W   | 1.24 | 0.64 | 1.42 | 0.81 | 0.94 | 0.37 |
| iYGR248W   | 0.46 | 0.04 | 0.52 | 0.06 | 0.64 | 0.10 |
| iYGR249W-0 | 0.85 | 0.19 | 0.92 | 0.29 | 1.10 | 0.66 |
| iYGR249W-1 | 0.98 | 0.28 | 1.02 | 0.40 | 0.87 | 0.30 |
| iYGR250C-0 | 1.20 | 0.59 | 0.98 | 0.36 | 0.88 | 0.28 |
| iYGR250C-1 | 1.37 | 0.78 | 1.32 | 0.74 | 0.69 | 0.10 |
| iYGR251W   | 1.22 | 0.61 | 1.18 | 0.58 | 1.08 | 0.64 |
| iYGR252W   | #N/A | #N/A | #N/A | #N/A | #N/A | #N/A |
| iYGR253C-0 | 1.17 | 0.49 | 1.04 | 0.43 | #N/A | #N/A |
| iYGR255C   | #N/A | #N/A | 0.61 | 0.08 | 0.78 | 0.26 |
| iYGR256W   | #N/A | #N/A | 1.37 | 0.65 | #N/A | #N/A |
| iYGR257C   | #N/A | #N/A | 1.26 | 0.66 | 0.91 | 0.39 |
| iYGR258C-0 | 0.66 | 0.09 | 0.85 | 0.29 | 1.00 | 0.51 |
| iYGR258C-1 | 1.05 | 0.41 | 1.39 | 0.77 | 1.06 | 0.60 |
| iYGR260W   | #N/A | #N/A | #N/A | #N/A | #N/A | #N/A |
| iYGR261C   | #N/A | #N/A | #N/A | #N/A | #N/A | #N/A |
| iYGR262C   | 1.35 | 0.77 | 1.05 | 0.43 | 1.15 | 0.72 |
| iYGR263C   | 1.58 | 0.92 | 1.41 | 0.75 | #N/A | #N/A |
| iYGR265W   | 1.10 | 0.44 | 1.06 | 0.44 | 0.89 | 0.45 |

|              |      |      |      |      |      |      |
|--------------|------|------|------|------|------|------|
| iYGR266W     | #N/A | #N/A | #N/A | #N/A | #N/A | #N/A |
| iYGR267C     | 1.20 | 0.54 | 1.22 | 0.63 | 0.87 | 0.38 |
| iYGR269W     | 0.60 | 0.07 | 0.79 | 0.19 | 0.95 | 0.37 |
| iYGR270W     | #N/A | #N/A | 1.19 | 0.61 | #N/A | #N/A |
| iYGR271W     | #N/A | #N/A | 1.58 | 0.88 | #N/A | #N/A |
| iYGR272C     | #N/A | #N/A | #N/A | #N/A | #N/A | #N/A |
| iYGR273C     | 1.23 | 0.61 | 0.69 | 0.13 | 0.75 | 0.15 |
| iYGR274C     | #N/A | #N/A | #N/A | #N/A | #N/A | #N/A |
| iYGR275W     | #N/A | #N/A | #N/A | #N/A | #N/A | #N/A |
| iYGR276C     | 1.29 | 0.66 | 1.11 | 0.51 | 0.97 | 0.55 |
| iYGR277C     | #N/A | #N/A | #N/A | #N/A | #N/A | #N/A |
| iYGR278W     | #N/A | #N/A | #N/A | #N/A | #N/A | #N/A |
| iYGR279C     | 0.61 | 0.07 | 0.63 | 0.11 | 0.57 | 0.05 |
| iYGR280C     | 0.86 | 0.19 | 1.21 | 0.62 | 0.86 | 0.28 |
| iYGR281W     | #N/A | #N/A | 1.32 | 0.67 | 1.14 | 0.83 |
| iYGR282C     | #N/A | #N/A | #N/A | #N/A | #N/A | #N/A |
| iYGR283C     | 1.27 | 0.66 | 1.27 | 0.66 | 1.38 | 0.82 |
| iYGR284C     | #N/A | #N/A | 1.53 | 0.84 | #N/A | #N/A |
| iYGR285C     | #N/A | #N/A | #N/A | #N/A | #N/A | #N/A |
| iYGR286C-0   | 1.17 | 0.55 | 1.29 | 0.70 | 0.83 | 0.23 |
| iYGR286C-1   | 1.59 | 0.93 | 1.70 | 0.94 | 1.20 | 0.70 |
| iYGR287C     | 1.24 | 0.62 | 1.25 | 0.67 | 0.98 | 0.42 |
| iYGR288W-0   | 1.51 | 0.85 | 1.57 | 0.88 | 1.14 | 0.75 |
| iYGR288W-1   | 1.31 | 0.72 | 1.58 | 0.80 | 1.54 | 0.92 |
| iYGR290W     | 1.19 | 0.53 | 1.16 | 0.56 | 1.25 | 0.79 |
| iYGR291C     | #N/A | #N/A | #N/A | #N/A | #N/A | #N/A |
| iYGR292W-0   | 1.38 | 0.74 | 1.45 | 0.85 | 1.09 | 0.78 |
| iYGR292W-1   | 1.62 | 0.93 | 1.50 | 0.87 | 0.85 | 0.37 |
| iYGR294W     | 1.25 | 0.64 | 1.53 | 0.81 | 1.02 | 0.45 |
| iYGRcdelta16 | #N/A | #N/A | #N/A | #N/A | 1.01 | 0.55 |
| iYGRcdelta18 | #N/A | #N/A | #N/A | #N/A | #N/A | #N/A |
| iYGRcdelta20 | 1.14 | 0.50 | 1.19 | 0.59 | 0.88 | 0.33 |
| iYGRcdelta25 | #N/A | #N/A | 0.90 | 0.31 | #N/A | #N/A |
| iYGRcdelta30 | 0.80 | 0.16 | 0.99 | 0.42 | 1.12 | 0.60 |
| iYGRctau3    | 1.28 | 0.69 | 1.15 | 0.56 | #N/A | #N/A |
| iYGRWdelta14 | #N/A | #N/A | #N/A | #N/A | #N/A | #N/A |
| iYGRWdelta19 | 1.03 | 0.37 | 1.02 | 0.40 | 0.75 | 0.15 |
| iYGRWdelta22 | #N/A | #N/A | #N/A | #N/A | #N/A | #N/A |
| iYGRWdelta26 | 1.67 | 0.95 | 1.50 | 0.85 | 1.51 | 0.91 |
| iYGRWdelta31 | #N/A | #N/A | #N/A | #N/A | #N/A | #N/A |
| iYGRWdelta32 | 1.07 | 0.39 | 1.35 | 0.69 | 1.26 | 0.82 |
| iYGRWsigma5  | 1.21 | 0.58 | 1.34 | 0.76 | 0.98 | 0.60 |
| iYHL001W     | #N/A | #N/A | 0.67 | 0.11 | 0.87 | 0.28 |
| iYHL002W     | 0.78 | 0.14 | 0.56 | 0.08 | 1.07 | 0.74 |
| iYHL003C     | 1.15 | 0.52 | 1.13 | 0.54 | 1.18 | 0.75 |
| iYHL004W     | #N/A | #N/A | #N/A | #N/A | #N/A | #N/A |
| iYHL007C     | 0.99 | 0.31 | 0.81 | 0.19 | 1.03 | 0.59 |
| iYHL008C     | 1.28 | 0.66 | 1.42 | 0.82 | #N/A | #N/A |
| iYHL009C     | #N/A | #N/A | #N/A | #N/A | #N/A | #N/A |
| iYHL010C     | 1.26 | 0.65 | 1.04 | 0.43 | 0.92 | 0.34 |
| iYHL011C     | #N/A | #N/A | 1.13 | 0.53 | 0.92 | 0.49 |

|             |      |      |      |      |      |      |
|-------------|------|------|------|------|------|------|
| iYHL012W    | #N/A | #N/A | #N/A | #N/A | #N/A | #N/A |
| iYHL013C    | 1.29 | 0.70 | 0.95 | 0.32 | 0.89 | 0.33 |
| iYHL014C    | #N/A | #N/A | #N/A | #N/A | #N/A | #N/A |
| iYHL015W    | #N/A | #N/A | #N/A | #N/A | #N/A | #N/A |
| iYHL016C    | 1.14 | 0.45 | 1.01 | 0.40 | 0.89 | 0.31 |
| iYHL017W    | #N/A | #N/A | 0.85 | 0.23 | #N/A | #N/A |
| iYHL019C    | 1.28 | 0.68 | 1.26 | 0.66 | 1.26 | 0.83 |
| iYHL020C    | 1.30 | 0.71 | 1.29 | 0.72 | 1.10 | 0.62 |
| iYHL021C    | #N/A | #N/A | 1.51 | 0.87 | 1.01 | 0.67 |
| iYHL022C    | #N/A | #N/A | #N/A | #N/A | #N/A | #N/A |
| iYHL023C    | 0.64 | 0.08 | #N/A | #N/A | #N/A | #N/A |
| iYHL024W    | 1.12 | 0.47 | #N/A | #N/A | 1.06 | 0.51 |
| iYHL025W    | 0.85 | 0.20 | 0.83 | 0.22 | 0.92 | 0.50 |
| iYHL026C    | 1.04 | 0.38 | 1.02 | 0.40 | 0.90 | 0.46 |
| iYHL027W    | 1.58 | 0.92 | 1.01 | 0.38 | #N/A | #N/A |
| iYHL028W    | 0.93 | 0.27 | 0.70 | 0.12 | 0.97 | 0.46 |
| iYHL029C    | 0.36 | 0.02 | 0.35 | 0.02 | 0.52 | 0.04 |
| iYHL030W    | #N/A | #N/A | #N/A | #N/A | #N/A | #N/A |
| iYHL031C    | 1.19 | 0.58 | 1.17 | 0.57 | 1.17 | 0.65 |
| iYHL032C    | 1.20 | 0.57 | 1.15 | 0.54 | 0.79 | 0.19 |
| iYHL033C    | #N/A | #N/A | #N/A | #N/A | #N/A | #N/A |
| iYHL035C    | 1.47 | 0.82 | 1.68 | 0.94 | 0.87 | 0.42 |
| iYHL036W    | #N/A | #N/A | #N/A | #N/A | #N/A | #N/A |
| iYHL037C    | 1.19 | 0.58 | 1.11 | 0.50 | #N/A | #N/A |
| iYHL038C    | #N/A | #N/A | #N/A | #N/A | 0.75 | 0.17 |
| iYHL039W    | #N/A | #N/A | #N/A | #N/A | #N/A | #N/A |
| iYHL040C    | 1.25 | 0.65 | 1.40 | 0.80 | 0.88 | 0.40 |
| iYHL041W    | 1.31 | 0.71 | 1.40 | 0.76 | 0.82 | 0.23 |
| iYHL042W    | 1.12 | 0.48 | 1.39 | 0.73 | 0.84 | 0.24 |
| iYHL043W    | #N/A | #N/A | #N/A | #N/A | #N/A | #N/A |
| iYHL044W    | 1.64 | 0.94 | 1.91 | 0.98 | 1.05 | 0.49 |
| iYHL045W    | 1.18 | 0.50 | 1.22 | 0.61 | 1.08 | 0.55 |
| iYHL046C    | #N/A | #N/A | #N/A | #N/A | #N/A | #N/A |
| iYHL047C-0  | 1.29 | 0.70 | 1.41 | 0.77 | 1.11 | 0.56 |
| iYHL047C-1  | 1.32 | 0.67 | 1.60 | 0.88 | 0.81 | 0.31 |
| iYHL048W    | #N/A | #N/A | 1.32 | 0.70 | #N/A | #N/A |
| iYHL049C-0  | 0.68 | 0.10 | 0.66 | 0.10 | 1.10 | 0.66 |
| iYHL049C-1  | 1.17 | 0.52 | 1.18 | 0.60 | 0.94 | 0.52 |
| iYHLCdelta1 | 1.54 | 0.91 | 1.10 | 0.49 | #N/A | #N/A |
| iYHLComega1 | #N/A | #N/A | #N/A | #N/A | #N/A | #N/A |
| iYHLWdelta2 | #N/A | #N/A | #N/A | #N/A | #N/A | #N/A |
| iYHR001W    | 1.28 | 0.62 | 1.16 | 0.57 | 1.01 | 0.66 |
| iYHR002W    | #N/A | #N/A | #N/A | #N/A | #N/A | #N/A |
| iYHR003C    | #N/A | #N/A | 1.48 | 0.59 | #N/A | #N/A |
| iYHR004C    | #N/A | #N/A | 1.36 | 0.77 | 1.17 | 0.64 |
| iYHR005C    | 0.74 | 0.12 | 0.70 | 0.13 | 0.68 | 0.13 |
| iYHR005C-A  | 0.69 | 0.10 | 0.68 | 0.12 | 1.10 | 0.79 |
| iYHR008C    | 1.27 | 0.62 | 1.03 | 0.40 | 0.87 | 0.34 |
| iYHR011W    | #N/A | #N/A | #N/A | #N/A | #N/A | #N/A |
| iYHR012W    | 1.66 | 0.93 | 1.29 | 0.71 | 1.16 | 0.76 |
| iYHR013C    | #N/A | #N/A | 1.31 | 0.73 | 0.87 | 0.30 |

|            |      |      |      |      |      |      |
|------------|------|------|------|------|------|------|
| iYHR015W   | 1.19 | 0.51 | 1.55 | 0.68 | #N/A | #N/A |
| iYHR016C   | 0.91 | 0.22 | 0.97 | 0.35 | 1.13 | 0.59 |
| iYHR017W   | #N/A | #N/A | #N/A | #N/A | 0.58 | 0.06 |
| iYHR018C   | 1.18 | 0.56 | 1.21 | 0.63 | 0.93 | 0.39 |
| iYHR019C   | 1.09 | 0.43 | 1.00 | 0.37 | 0.82 | 0.33 |
| iYHR020W   | #N/A | #N/A | 0.47 | 0.04 | 1.12 | 0.69 |
| iYHR021C   | 0.37 | 0.01 | 0.32 | 0.01 | 0.86 | 0.40 |
| iYHR023W   | #N/A | #N/A | #N/A | #N/A | #N/A | #N/A |
| iYHR024C   | 1.22 | 0.60 | 0.87 | 0.24 | 0.78 | 0.26 |
| iYHR025W   | 1.18 | 0.57 | 1.47 | 0.83 | 1.15 | 0.62 |
| iYHR026W   | #N/A | #N/A | #N/A | #N/A | #N/A | #N/A |
| iYHR027C   | #N/A | #N/A | #N/A | #N/A | #N/A | #N/A |
| iYHR028C   | #N/A | #N/A | #N/A | #N/A | #N/A | #N/A |
| iYHR029C   | 1.57 | 0.92 | 1.50 | 0.85 | 0.80 | 0.30 |
| iYHR032W   | 1.07 | 0.43 | 1.26 | 0.66 | 0.77 | 0.18 |
| iYHR033W   | #N/A | #N/A | #N/A | #N/A | #N/A | #N/A |
| iYHR034C   | #N/A | #N/A | #N/A | #N/A | #N/A | #N/A |
| iYHR035W   | #N/A | #N/A | #N/A | #N/A | #N/A | #N/A |
| iYHR038W   | #N/A | #N/A | #N/A | #N/A | #N/A | #N/A |
| iYHR039C   | #N/A | #N/A | #N/A | #N/A | #N/A | #N/A |
| iYHR039C-B | 1.02 | 0.35 | 1.06 | 0.49 | 0.93 | 0.39 |
| iYHR040W   | #N/A | #N/A | #N/A | #N/A | #N/A | #N/A |
| iYHR041C   | 1.04 | 0.37 | 1.00 | 0.37 | 0.97 | 0.45 |
| iYHR042W   | 1.21 | 0.54 | 1.24 | 0.64 | 1.08 | 0.66 |
| iYHR043C   | 1.55 | 0.91 | 1.28 | 0.69 | 1.20 | 0.78 |
| iYHR045W   | #N/A | #N/A | #N/A | #N/A | #N/A | #N/A |
| iYHR046C   | 1.21 | 0.58 | 1.13 | 0.53 | 0.97 | 0.40 |
| iYHR048W   | 0.99 | 0.31 | 0.79 | 0.18 | #N/A | #N/A |
| iYHR049C-A | #N/A | #N/A | #N/A | #N/A | #N/A | #N/A |
| iYHR050W   | 1.35 | 0.72 | 1.16 | 0.55 | 0.65 | 0.07 |
| iYHR053C   | 1.16 | 0.51 | 1.74 | 0.88 | 0.97 | 0.46 |
| iYHR054C   | 1.47 | 0.82 | 2.16 | 0.83 | 0.99 | 0.50 |
| iYHR055C   | 1.20 | 0.59 | 1.79 | 0.84 | 1.10 | 0.66 |
| iYHR056C   | 1.39 | 0.80 | 1.31 | 0.72 | 0.98 | 0.48 |
| iYHR058C   | #N/A | #N/A | 1.70 | 0.87 | #N/A | #N/A |
| iYHR059W   | #N/A | #N/A | 1.19 | 0.57 | #N/A | #N/A |
| iYHR060W   | #N/A | #N/A | 1.24 | 0.63 | #N/A | #N/A |
| iYHR061C   | #N/A | #N/A | 0.97 | 0.34 | 1.21 | 0.81 |
| iYHR062C   | 1.31 | 0.72 | 1.14 | 0.54 | 1.07 | 0.61 |
| iYHR063C   | 1.33 | 0.70 | 1.52 | 0.88 | 1.05 | 0.59 |
| iYHR064C   | 0.89 | 0.22 | 0.93 | 0.30 | 0.84 | 0.26 |
| iYHR065C   | 1.01 | 0.33 | #N/A | #N/A | #N/A | #N/A |
| iYHR066W   | 1.24 | 0.64 | 1.29 | 0.71 | #N/A | #N/A |
| iYHR067W   | #N/A | #N/A | 1.16 | 0.57 | 0.86 | 0.29 |
| iYHR068W   | #N/A | #N/A | #N/A | #N/A | #N/A | #N/A |
| iYHR069C   | #N/A | #N/A | #N/A | #N/A | #N/A | #N/A |
| iYHR070W   | 0.66 | 0.09 | 0.74 | 0.18 | 0.84 | 0.24 |
| iYHR071W   | #N/A | #N/A | #N/A | #N/A | #N/A | #N/A |
| iYHR073W   | 1.11 | 0.46 | 1.11 | 0.51 | 0.85 | 0.38 |
| iYHR074W   | #N/A | #N/A | #N/A | #N/A | #N/A | #N/A |
| iYHR076W   | 1.33 | 0.74 | 1.13 | 0.52 | #N/A | #N/A |

|            |      |      |      |      |      |      |
|------------|------|------|------|------|------|------|
| iYHR077C   | 1.13 | 0.44 | 0.98 | 0.39 | 0.80 | 0.20 |
| iYHR078W   | #N/A | #N/A | #N/A | #N/A | #N/A | #N/A |
| iYHR079C-B | 1.34 | 0.70 | 1.19 | 0.59 | 1.02 | 0.53 |
| iYHR080C   | 1.15 | 0.51 | 1.17 | 0.59 | 1.39 | 0.91 |
| iYHR081W   | 1.46 | 0.86 | 1.52 | 0.87 | #N/A | #N/A |
| iYHR083W   | 1.28 | 0.68 | 1.01 | 0.39 | 1.25 | 0.82 |
| iYHR085W   | 1.27 | 0.64 | 1.04 | 0.44 | 0.79 | 0.19 |
| iYHR087W   | 1.14 | 0.51 | 1.23 | 0.62 | 0.99 | 0.49 |
| iYHR088W   | #N/A | #N/A | #N/A | #N/A | #N/A | #N/A |
| iYHR089C   | 1.18 | 0.55 | 1.21 | 0.63 | 1.55 | 0.96 |
| iYHR090C   | #N/A | #N/A | #N/A | #N/A | #N/A | #N/A |
| iYHR092C   | 0.64 | 0.08 | 1.40 | 0.81 | #N/A | #N/A |
| iYHR094C   | 0.97 | 0.30 | #N/A | #N/A | 1.13 | 0.64 |
| iYHR097C   | 1.27 | 0.61 | 1.40 | 0.72 | 0.73 | 0.13 |
| iYHR099W   | #N/A | #N/A | #N/A | #N/A | #N/A | #N/A |
| iYHR100C   | #N/A | #N/A | 1.24 | 0.58 | #N/A | #N/A |
| iYHR101C   | 1.22 | 0.59 | 0.96 | 0.37 | 1.02 | 0.68 |
| iYHR102W   | 1.09 | 0.43 | 1.01 | 0.38 | 1.11 | 0.59 |
| iYHR103W   | 1.18 | 0.50 | #N/A | #N/A | 0.69 | 0.14 |
| iYHR104W   | 1.36 | 0.78 | 1.28 | 0.68 | 1.06 | 0.74 |
| iYHR105W   | 1.36 | 0.77 | 1.39 | 0.80 | 1.31 | 0.76 |
| iYHR106W   | 1.50 | 0.89 | #N/A | #N/A | 1.35 | 0.79 |
| iYHR107C   | 1.60 | 0.93 | 1.13 | 0.52 | 1.15 | 0.73 |
| iYHR108W   | #N/A | #N/A | #N/A | #N/A | #N/A | #N/A |
| iYHR109W   | #N/A | #N/A | #N/A | #N/A | #N/A | #N/A |
| iYHR110W   | 1.06 | 0.39 | 1.27 | 0.70 | 1.59 | 0.96 |
| iYHR111W   | 1.19 | 0.58 | 1.68 | 0.89 | #N/A | #N/A |
| iYHR112C   | 1.39 | 0.81 | 1.57 | 0.86 | 1.33 | 0.79 |
| iYHR113W   | #N/A | #N/A | #N/A | #N/A | #N/A | #N/A |
| iYHR114W   | #N/A | #N/A | #N/A | #N/A | #N/A | #N/A |
| iYHR115C   | 1.11 | 0.46 | 0.90 | 0.28 | 0.77 | 0.20 |
| iYHR116W   | 1.21 | 0.54 | 1.35 | 0.75 | 0.94 | 0.54 |
| iYHR118C   | 1.23 | 0.62 | 1.26 | 0.68 | 1.38 | 0.91 |
| iYHR119W   | #N/A | #N/A | #N/A | #N/A | 1.28 | 0.74 |
| iYHR120W   | 1.36 | 0.78 | 0.81 | 0.20 | 1.19 | 0.77 |
| iYHR121W   | #N/A | #N/A | 1.05 | 0.44 | #N/A | #N/A |
| iYHR122W   | #N/A | #N/A | 1.30 | 0.70 | 1.15 | 0.75 |
| iYHR123W   | #N/A | #N/A | 1.44 | 0.83 | 1.10 | 0.65 |
| iYHR128W   | #N/A | #N/A | #N/A | #N/A | #N/A | #N/A |
| iYHR131C   | 1.23 | 0.56 | 1.15 | 0.56 | 1.14 | 0.61 |
| iYHR133C   | #N/A | #N/A | #N/A | #N/A | #N/A | #N/A |
| iYHR134W   | #N/A | #N/A | #N/A | #N/A | #N/A | #N/A |
| iYHR135C   | 1.06 | 0.39 | 0.96 | 0.33 | 0.97 | 0.53 |
| iYHR136C   | 0.58 | 0.07 | 0.62 | 0.09 | 0.66 | 0.11 |
| iYHR137W   | #N/A | #N/A | #N/A | #N/A | #N/A | #N/A |
| iYHR139C   | 1.39 | 0.80 | 1.11 | 0.51 | 0.77 | 0.19 |
| iYHR141C   | #N/A | #N/A | #N/A | #N/A | 0.83 | 0.34 |
| iYHR142W   | 1.45 | 0.85 | 1.19 | 0.60 | 1.14 | 0.83 |
| iYHR144C   | 0.71 | 0.11 | #N/A | #N/A | #N/A | #N/A |
| iYHR147C   | 1.21 | 0.58 | 0.96 | 0.33 | #N/A | #N/A |
| iYHR148W   | 1.42 | 0.83 | 1.56 | 0.63 | #N/A | #N/A |



|          |      |      |      |      |      |      |
|----------|------|------|------|------|------|------|
| iYHR149C | 0.77 | 0.14 | 0.75 | 0.17 | 0.97 | 0.45 |
| iYHR150W | #N/A | #N/A | 1.29 | 0.63 | #N/A | #N/A |
| iYHR151C | 1.13 | 0.43 | 0.91 | 0.28 | 1.01 | 0.66 |
| iYHR152W | 1.15 | 0.52 | #N/A | #N/A | 0.73 | 0.14 |
| iYHR153C | 1.27 | 0.67 | 0.88 | 0.25 | 0.70 | 0.15 |
| iYHR155W | #N/A | #N/A | #N/A | #N/A | 0.91 | 0.36 |
| iYHR156C | 1.25 | 0.66 | 1.31 | 0.73 | 1.03 | 0.56 |
| iYHR157W | #N/A | #N/A | #N/A | #N/A | #N/A | #N/A |
| iYHR158C | 1.36 | 0.73 | 1.17 | 0.58 | 0.84 | 0.35 |
| iYHR159W | 1.16 | 0.51 | 1.17 | 0.58 | #N/A | #N/A |
| iYHR160C | #N/A | #N/A | 1.17 | 0.58 | #N/A | #N/A |
| iYHR162W | 1.14 | 0.45 | 0.95 | 0.32 | #N/A | #N/A |
| iYHR163W | 1.37 | 0.78 | 1.42 | 0.83 | 0.88 | 0.43 |
| iYHR164C | 1.57 | 0.89 | 1.28 | 0.67 | 0.86 | 0.39 |
| iYHR165C | #N/A | #N/A | 0.75 | 0.16 | 1.83 | 0.96 |
| iYHR166C | 1.48 | 0.87 | 1.23 | 0.62 | 0.98 | 0.41 |
| iYHR167W | #N/A | #N/A | #N/A | #N/A | #N/A | #N/A |
| iYHR168W | #N/A | #N/A | 1.26 | 0.58 | #N/A | #N/A |
| iYHR169W | 1.04 | 0.35 | 1.01 | 0.39 | 0.89 | 0.30 |
| iYHR170W | 1.23 | 0.56 | 0.88 | 0.25 | #N/A | #N/A |
| iYHR171W | 1.32 | 0.73 | 1.19 | 0.60 | 0.93 | 0.35 |
| iYHR173C | #N/A | #N/A | #N/A | #N/A | #N/A | #N/A |
| iYHR174W | #N/A | #N/A | 0.91 | 0.28 | 1.45 | 0.91 |
| iYHR177W | 1.38 | 0.80 | 1.28 | 0.67 | 1.25 | 0.79 |
| iYHR178W | 1.00 | 0.32 | 0.86 | 0.24 | 0.96 | 0.56 |
| iYHR179W | #N/A | #N/A | #N/A | #N/A | #N/A | #N/A |
| iYHR181W | #N/A | #N/A | 1.43 | 0.70 | #N/A | #N/A |
| iYHR182W | 1.17 | 0.49 | 0.95 | 0.32 | 0.91 | 0.35 |
| iYHR183W | 1.50 | 0.89 | #N/A | #N/A | 0.95 | 0.54 |
| iYHR184W | #N/A | #N/A | #N/A | #N/A | #N/A | #N/A |
| iYHR185C | 0.81 | 0.16 | 0.88 | 0.26 | 1.01 | 0.57 |
| iYHR186C | 1.52 | 0.89 | 0.99 | 0.41 | #N/A | #N/A |
| iYHR187W | #N/A | #N/A | #N/A | #N/A | #N/A | #N/A |
| iYHR188C | 1.43 | 0.84 | 1.26 | 0.66 | 1.01 | 0.52 |
| iYHR189W | 1.20 | 0.55 | 1.08 | 0.47 | 0.96 | 0.57 |
| iYHR191C | #N/A | #N/A | 1.00 | 0.38 | 0.92 | 0.36 |
| iYHR193C | #N/A | #N/A | 0.88 | 0.27 | 1.08 | 0.53 |
| iYHR194W | 1.40 | 0.82 | 1.28 | 0.70 | 1.29 | 0.80 |
| iYHR195W | #N/A | #N/A | 1.13 | 0.53 | #N/A | #N/A |
| iYHR196W | #N/A | #N/A | #N/A | #N/A | #N/A | #N/A |
| iYHR197W | #N/A | #N/A | #N/A | #N/A | #N/A | #N/A |
| iYHR198C | 1.27 | 0.68 | #N/A | #N/A | 0.96 | 0.57 |
| iYHR199C | 1.01 | 0.34 | 1.01 | 0.39 | 0.72 | 0.16 |
| iYHR200W | #N/A | #N/A | #N/A | #N/A | #N/A | #N/A |
| iYHR202W | #N/A | #N/A | 0.82 | 0.20 | 1.26 | 0.84 |
| iYHR203C | 0.50 | 0.04 | 0.53 | 0.05 | 0.75 | 0.16 |
| iYHR204W | 1.12 | 0.48 | 1.28 | 0.69 | 1.09 | 0.78 |
| iYHR205W | 0.88 | 0.20 | 0.88 | 0.25 | 1.07 | 0.62 |
| iYHR207C | 1.27 | 0.62 | 1.31 | 0.73 | 0.94 | 0.42 |
| iYHR208W | 1.42 | 0.78 | 1.64 | 0.93 | 1.07 | 0.75 |
| iYHR209W | 2.35 | 1.00 | 2.03 | 0.83 | 1.02 | 0.54 |



|                |      |      |      |      |      |      |
|----------------|------|------|------|------|------|------|
| iYHR210C-0     | 1.18 | 0.50 | 1.16 | 0.54 | 0.88 | 0.42 |
| iYHR210C-A     | 1.21 | 0.54 | 1.17 | 0.55 | 0.88 | 0.42 |
| iYHR210C-B     | 1.54 | 0.90 | 1.48 | 0.86 | 0.94 | 0.41 |
| iYHR211W       | 1.44 | 0.80 | 1.42 | 0.82 | 0.99 | 0.51 |
| iYHR212C       | 1.39 | 0.79 | 1.63 | 0.93 | 1.06 | 0.61 |
| iYHR213W-0     | 1.36 | 0.74 | 1.45 | 0.83 | 1.05 | 0.72 |
| iYHR213W-A     | 1.35 | 0.75 | 1.30 | 0.72 | 1.16 | 0.73 |
| iYHR213W-B     | 1.09 | 0.45 | 1.31 | 0.71 | 0.96 | 0.39 |
| iYHR214W       | 1.30 | 0.71 | 1.40 | 0.80 | 1.03 | 0.55 |
| iYHR214W-A     | #N/A | #N/A | 1.32 | 0.75 | 0.95 | 0.43 |
| iYHR215W       | 1.10 | 0.45 | 1.33 | 0.70 | 0.88 | 0.29 |
| iYHR216W       | 0.55 | 0.05 | 0.53 | 0.05 | 1.10 | 0.65 |
| iYHR217C       | 0.79 | 0.15 | 0.77 | 0.17 | 0.85 | 0.27 |
| iYHR218W       | 1.37 | 0.79 | 1.42 | 0.82 | 0.88 | 0.32 |
| iYHR219W       | 1.08 | 0.42 | 1.26 | 0.67 | 0.94 | 0.40 |
| iYHRCdelta10   | #N/A | #N/A | #N/A | #N/A | #N/A | #N/A |
| iYHRCdelta11   | 1.08 | 0.41 | #N/A | #N/A | #N/A | #N/A |
| iYHRCdelta12   | 1.51 | 0.87 | 1.42 | 0.82 | 1.16 | 0.84 |
| iYHRCdelta14-0 | 1.07 | 0.40 | 1.14 | 0.53 | 0.82 | 0.23 |
| iYHRCdelta14-A | 0.98 | 0.30 | 1.06 | 0.44 | 0.80 | 0.29 |
| iYHRCdelta14-B | 1.28 | 0.66 | 1.55 | 0.86 | 1.05 | 0.71 |
| iYHRCdelta14-C | 1.52 | 0.86 | 1.58 | 0.89 | 1.02 | 0.55 |
| iYHRCdelta16-0 | 1.26 | 0.65 | 1.39 | 0.80 | 1.01 | 0.65 |
| iYHRCdelta16-A | 1.29 | 0.70 | 1.58 | 0.86 | 1.14 | 0.79 |
| iYHRCdelta16-B | 1.44 | 0.85 | 1.80 | 0.95 | 1.04 | 0.57 |
| iYHRCdelta4    | 1.40 | 0.76 | 1.35 | 0.76 | 1.00 | 0.50 |
| iYHRCdelta5    | #N/A | #N/A | #N/A | #N/A | #N/A | #N/A |
| iYHRCsigma2    | #N/A | #N/A | #N/A | #N/A | #N/A | #N/A |
| iYHRWdelta7    | #N/A | #N/A | #N/A | #N/A | #N/A | #N/A |
| iYHRWdelta9    | #N/A | #N/A | 0.96 | 0.34 | #N/A | #N/A |
| iYHRWtau3      | 1.29 | 0.65 | 1.28 | 0.67 | 0.97 | 0.46 |
| iYIL001W       | 0.60 | 0.07 | 0.46 | 0.04 | #N/A | #N/A |
| iYIL002C       | 1.71 | 0.96 | 1.30 | 0.69 | 0.84 | 0.25 |
| iYIL003W       | 1.10 | 0.40 | 1.21 | 0.60 | 1.07 | 0.52 |
| iYIL004C       | 1.53 | 0.87 | 1.26 | 0.69 | 1.09 | 0.57 |
| iYIL006W       | 1.22 | 0.60 | 1.21 | 0.63 | 0.82 | 0.24 |
| iYIL007C       | 1.09 | 0.43 | 1.20 | 0.60 | 0.81 | 0.31 |
| iYIL008W       | #N/A | #N/A | #N/A | #N/A | #N/A | #N/A |
| iYIL009C-A     | #N/A | #N/A | 0.88 | 0.32 | 0.72 | 0.17 |
| iYIL009W       | 1.51 | 0.89 | 1.51 | 0.85 | 1.10 | 0.65 |
| iYIL010W       | #N/A | #N/A | #N/A | #N/A | #N/A | #N/A |
| iYIL011W       | #N/A | #N/A | #N/A | #N/A | #N/A | #N/A |
| iYIL012W       | 1.00 | 0.34 | 0.88 | 0.26 | 0.95 | 0.44 |
| iYIL013C       | 0.45 | 0.03 | 0.43 | 0.03 | 0.48 | 0.02 |
| iYIL014W       | 1.59 | 0.91 | 1.34 | 0.76 | 1.04 | 0.56 |
| iYIL015C-A     | #N/A | #N/A | 0.94 | 0.31 | 1.18 | 0.75 |
| iYIL015W       | #N/A | #N/A | #N/A | #N/A | #N/A | #N/A |
| iYIL016W       | 0.91 | 0.24 | 0.65 | 0.10 | 0.84 | 0.24 |
| iYIL017C       | 1.34 | 0.75 | 1.08 | 0.48 | 1.09 | 0.64 |
| iYIL019W       | 0.49 | 0.04 | 0.50 | 0.05 | 0.86 | 0.28 |
| iYIL020C       | 1.17 | 0.49 | 0.97 | 0.34 | 0.88 | 0.42 |

|          |      |      |      |      |      |      |
|----------|------|------|------|------|------|------|
| iYIL021W | 1.12 | 0.46 | #N/A | #N/A | #N/A | #N/A |
| iYIL022W | 1.20 | 0.52 | 1.07 | 0.45 | 1.24 | 0.81 |
| iYIL023C | 1.31 | 0.66 | #N/A | #N/A | 0.99 | 0.55 |
| iYIL024C | 1.47 | 0.87 | 1.24 | 0.64 | 0.81 | 0.21 |
| iYIL026C | #N/A | #N/A | #N/A | #N/A | 0.83 | 0.23 |
| iYIL027C | #N/A | #N/A | 1.25 | 0.67 | 0.80 | 0.30 |
| iYIL028W | 1.32 | 0.73 | 1.43 | 0.83 | 1.12 | 0.58 |
| iYIL030C | 0.97 | 0.28 | 1.04 | 0.47 | 1.02 | 0.68 |
| iYIL031W | #N/A | #N/A | #N/A | #N/A | #N/A | #N/A |
| iYIL032C | 1.22 | 0.59 | 1.19 | 0.61 | 1.08 | 0.65 |
| iYIL033C | 1.03 | 0.35 | 0.96 | 0.33 | 0.97 | 0.58 |
| iYIL034C | 1.34 | 0.76 | 1.34 | 0.77 | 1.42 | 0.92 |
| iYIL035C | 1.13 | 0.50 | 1.08 | 0.46 | 1.30 | 0.79 |
| iYIL036W | 1.39 | 0.80 | 1.36 | 0.75 | 0.96 | 0.57 |
| iYIL037C | 1.39 | 0.75 | 1.28 | 0.70 | 0.79 | 0.28 |
| iYIL038C | 1.20 | 0.57 | 0.98 | 0.35 | 1.08 | 0.53 |
| iYIL039W | #N/A | #N/A | #N/A | #N/A | #N/A | #N/A |
| iYIL041W | 0.65 | 0.08 | #N/A | #N/A | #N/A | #N/A |
| iYIL042C | 1.27 | 0.61 | 1.03 | 0.42 | 0.98 | 0.43 |
| iYIL044C | #N/A | #N/A | 1.33 | 0.75 | #N/A | #N/A |
| iYIL045W | #N/A | #N/A | #N/A | #N/A | #N/A | #N/A |
| iYIL046W | 1.72 | 0.96 | 1.43 | 0.83 | 1.32 | 0.87 |
| iYIL047C | 0.82 | 0.16 | 0.78 | 0.17 | 0.82 | 0.24 |
| iYIL048W | #N/A | #N/A | #N/A | #N/A | #N/A | #N/A |
| iYIL049W | 1.18 | 0.57 | 1.28 | 0.67 | 1.23 | 0.70 |
| iYIL050W | #N/A | #N/A | #N/A | #N/A | #N/A | #N/A |
| iYIL051C | 0.72 | 0.12 | 0.81 | 0.22 | 0.68 | 0.10 |
| iYIL052C | 0.35 | 0.02 | 0.41 | 0.03 | 0.78 | 0.18 |
| iYIL053W | #N/A | #N/A | 1.06 | 0.46 | #N/A | #N/A |
| iYIL054W | 0.32 | 0.02 | #N/A | #N/A | #N/A | #N/A |
| iYIL055C | 0.68 | 0.10 | 0.64 | 0.10 | 0.54 | 0.03 |
| iYIL056W | #N/A | #N/A | #N/A | #N/A | #N/A | #N/A |
| iYIL058W | 1.38 | 0.80 | 1.27 | 0.69 | 1.01 | 0.63 |
| iYIL061C | 0.74 | 0.13 | 0.76 | 0.16 | 1.16 | 0.73 |
| iYIL062C | 1.24 | 0.62 | #N/A | #N/A | #N/A | #N/A |
| iYIL063C | #N/A | #N/A | #N/A | #N/A | #N/A | #N/A |
| iYIL065C | 1.45 | 0.80 | 1.41 | 0.67 | 0.72 | 0.18 |
| iYIL066C | 1.15 | 0.51 | 1.20 | 0.62 | 1.21 | 0.79 |
| iYIL067C | 1.40 | 0.81 | 1.44 | 0.64 | 0.87 | 0.32 |
| iYIL068C | 0.99 | 0.32 | 1.22 | 0.63 | #N/A | #N/A |
| iYIL069C | 0.46 | 0.03 | 0.48 | 0.04 | 0.65 | 0.08 |
| iYIL070C | 1.12 | 0.47 | 1.14 | 0.55 | 0.91 | 0.43 |
| iYIL071C | 1.18 | 0.53 | #N/A | #N/A | #N/A | #N/A |
| iYIL072W | 1.69 | 0.95 | #N/A | #N/A | 1.10 | 0.68 |
| iYIL073C | 1.22 | 0.62 | 1.12 | 0.52 | 0.72 | 0.12 |
| iYIL074C | 0.96 | 0.28 | 0.97 | 0.33 | 0.74 | 0.15 |
| iYIL075C | #N/A | #N/A | 0.90 | 0.32 | 1.04 | 0.68 |
| iYIL076W | 1.41 | 0.83 | 1.14 | 0.55 | #N/A | #N/A |
| iYIL077C | 1.05 | 0.40 | 0.93 | 0.31 | 0.83 | 0.23 |
| iYIL078W | #N/A | #N/A | #N/A | #N/A | #N/A | #N/A |
| iYIL079C | 1.16 | 0.48 | 1.21 | 0.62 | 0.91 | 0.35 |

|            |      |      |      |      |      |      |
|------------|------|------|------|------|------|------|
| iYIL083C   | 1.17 | 0.49 | 1.28 | 0.69 | 0.96 | 0.41 |
| iYIL084C   | #N/A | #N/A | 1.68 | 0.83 | #N/A | #N/A |
| iYIL085C   | #N/A | #N/A | #N/A | #N/A | #N/A | #N/A |
| iYIL088C   | 1.46 | 0.82 | 1.10 | 0.50 | 0.99 | 0.62 |
| iYIL089W   | 1.28 | 0.68 | 1.60 | 0.92 | 1.25 | 0.91 |
| iYIL090W   | 1.23 | 0.60 | 1.26 | 0.66 | 1.09 | 0.65 |
| iYIL091C   | 1.16 | 0.50 | 1.13 | 0.53 | 1.18 | 0.72 |
| iYIL092W   | #N/A | #N/A | #N/A | #N/A | #N/A | #N/A |
| iYIL093C   | 1.38 | 0.74 | 1.29 | 0.69 | 1.01 | 0.66 |
| iYIL094C   | 1.04 | 0.38 | 1.04 | 0.43 | 1.12 | 0.58 |
| iYIL095W   | #N/A | #N/A | #N/A | #N/A | #N/A | #N/A |
| iYIL096C   | 0.67 | 0.10 | 0.92 | 0.33 | 1.44 | 0.96 |
| iYIL097W   | #N/A | #N/A | #N/A | #N/A | #N/A | #N/A |
| iYIL098C   | 1.19 | 0.55 | 1.18 | 0.58 | 0.90 | 0.32 |
| iYIL099W   | #N/A | #N/A | #N/A | #N/A | #N/A | #N/A |
| iYIL100W   | 0.54 | 0.05 | 0.48 | 0.04 | 0.71 | 0.12 |
| iYIL101C   | 1.48 | 0.87 | 1.40 | 0.73 | 1.22 | 0.84 |
| iYIL102C   | 0.65 | 0.09 | 0.68 | 0.12 | 0.75 | 0.22 |
| iYIL103W-0 | 1.20 | 0.56 | 1.15 | 0.56 | 1.03 | 0.56 |
| iYIL103W-1 | 1.33 | 0.72 | 1.16 | 0.56 | 0.89 | 0.36 |
| iYIL104C   | #N/A | #N/A | #N/A | #N/A | #N/A | #N/A |
| iYIL105C   | 1.15 | 0.47 | 0.91 | 0.28 | 0.90 | 0.33 |
| iYIL106W   | 1.00 | 0.34 | 1.20 | 0.62 | #N/A | #N/A |
| iYIL107C   | 1.23 | 0.57 | 1.25 | 0.67 | 1.30 | 0.81 |
| iYIL110W   | #N/A | #N/A | #N/A | #N/A | #N/A | #N/A |
| iYIL111W   | 1.23 | 0.58 | 1.04 | 0.42 | 1.47 | 0.94 |
| iYIL112W   | 1.23 | 0.56 | 1.28 | 0.71 | 1.03 | 0.56 |
| iYIL113W   | 1.09 | 0.42 | 1.16 | 0.56 | 0.79 | 0.27 |
| iYIL114C   | 1.02 | 0.34 | 1.18 | 0.59 | 0.88 | 0.31 |
| iYIL115C   | 1.36 | 0.77 | 0.82 | 0.20 | 0.82 | 0.31 |
| iYIL116W   | #N/A | #N/A | #N/A | #N/A | #N/A | #N/A |
| iYIL117C   | 0.76 | 0.14 | 0.75 | 0.16 | 0.93 | 0.46 |
| iYIL118W   | #N/A | #N/A | #N/A | #N/A | #N/A | #N/A |
| iYIL119C-0 | 0.32 | 0.01 | 0.33 | 0.02 | 0.52 | 0.04 |
| iYIL120W   | 1.01 | 0.33 | 1.21 | 0.63 | 0.95 | 0.44 |
| iYIL121W   | 1.71 | 0.95 | 1.51 | 0.87 | 0.85 | 0.38 |
| iYIL122W   | 0.91 | 0.25 | 1.02 | 0.39 | 0.76 | 0.20 |
| iYIL123W   | 0.85 | 0.18 | 0.79 | 0.18 | 0.77 | 0.17 |
| iYIL124W   | 0.81 | 0.16 | 0.89 | 0.26 | 0.84 | 0.28 |
| iYIL125W   | 1.34 | 0.71 | 1.38 | 0.78 | 1.08 | 0.63 |
| iYIL126W   | 1.15 | 0.50 | 1.07 | 0.46 | 0.94 | 0.42 |
| iYIL127C   | 0.82 | 0.18 | 0.81 | 0.20 | 1.06 | 0.62 |
| iYIL128W   | #N/A | #N/A | #N/A | #N/A | #N/A | #N/A |
| iYIL129C   | 0.93 | 0.25 | 1.02 | 0.40 | 1.20 | 0.67 |
| iYIL131C   | 1.04 | 0.34 | 1.01 | 0.39 | 1.11 | 0.67 |
| iYIL132C   | 1.28 | 0.69 | 1.50 | 0.85 | 1.02 | 0.54 |
| iYIL133C   | 0.59 | 0.07 | 0.44 | 0.03 | 0.49 | 0.02 |
| iYIL134W   | #N/A | #N/A | 1.54 | 0.50 | #N/A | #N/A |
| iYIL135C   | 0.91 | 0.22 | 0.85 | 0.25 | 1.21 | 0.70 |
| iYIL136W   | 1.32 | 0.74 | 1.41 | 0.79 | 1.06 | 0.55 |
| iYIL137C   | 1.56 | 0.89 | 1.38 | 0.80 | 0.92 | 0.50 |

|               |      |      |      |      |      |      |
|---------------|------|------|------|------|------|------|
| iYIL138C      | #N/A | #N/A | #N/A | #N/A | #N/A | #N/A |
| iYIL139C      | #N/A | #N/A | 1.50 | 0.87 | 1.00 | 0.65 |
| iYIL140W      | #N/A | #N/A | #N/A | #N/A | #N/A | #N/A |
| iYIL142W      | #N/A | #N/A | #N/A | #N/A | #N/A | #N/A |
| iYIL143C      | 1.15 | 0.47 | 1.04 | 0.42 | 0.98 | 0.47 |
| iYIL144W      | 1.51 | 0.89 | 1.33 | 0.76 | 1.08 | 0.53 |
| iYIL145C      | 1.13 | 0.44 | 1.11 | 0.50 | 0.90 | 0.46 |
| iYIL146C      | 1.06 | 0.36 | 1.11 | 0.51 | 0.85 | 0.26 |
| iYIL147C      | 1.18 | 0.54 | 1.19 | 0.61 | 0.83 | 0.24 |
| iYIL148W      | #N/A | #N/A | #N/A | #N/A | #N/A | #N/A |
| iYIL149C      | 0.65 | 0.09 | 0.65 | 0.10 | 1.07 | 0.62 |
| iYIL150C      | #N/A | #N/A | 1.30 | 0.72 | #N/A | #N/A |
| iYIL151C      | 1.37 | 0.78 | 1.52 | 0.86 | 0.91 | 0.44 |
| iYIL152W      | #N/A | #N/A | #N/A | #N/A | #N/A | #N/A |
| iYIL153W      | #N/A | #N/A | #N/A | #N/A | #N/A | #N/A |
| iYIL154C      | 1.21 | 0.58 | 1.13 | 0.53 | 0.95 | 0.43 |
| iYIL155C      | 1.18 | 0.57 | #N/A | #N/A | 0.91 | 0.38 |
| iYIL156W      | 1.23 | 0.62 | 1.15 | 0.55 | 1.02 | 0.67 |
| iYIL157C      | 1.24 | 0.62 | 1.40 | 0.77 | 1.30 | 0.93 |
| iYIL158W      | 0.99 | 0.33 | #N/A | #N/A | #N/A | #N/A |
| iYIL159W      | #N/A | #N/A | 0.98 | 0.35 | 0.72 | 0.12 |
| iYIL160C      | 1.15 | 0.46 | 1.18 | 0.59 | 0.91 | 0.36 |
| iYIL162W      | 1.19 | 0.58 | 1.15 | 0.56 | 1.18 | 0.76 |
| iYIL163C      | #N/A | #N/A | #N/A | #N/A | #N/A | #N/A |
| iYIL164C-0    | 1.48 | 0.86 | 1.58 | 0.91 | 0.93 | 0.39 |
| iYIL164C-1    | 1.42 | 0.83 | 1.26 | 0.68 | 0.99 | 0.56 |
| iYIL166C      | #N/A | #N/A | 1.32 | 0.71 | 0.97 | 0.46 |
| iYIL167W      | 1.46 | 0.86 | 1.53 | 0.85 | 0.91 | 0.35 |
| iYIL169C-0    | 1.66 | 0.95 | 1.49 | 0.87 | 0.96 | 0.44 |
| iYIL169C-1    | 1.46 | 0.86 | #N/A | #N/A | 1.10 | 0.55 |
| iYIL170W-0    | 0.72 | 0.12 | 0.79 | 0.19 | 0.77 | 0.16 |
| iYIL170W-1    | 0.76 | 0.13 | 0.84 | 0.22 | 0.73 | 0.15 |
| iYIL172C      | 1.11 | 0.47 | 1.19 | 0.57 | 0.99 | 0.43 |
| iYIL173W      | #N/A | #N/A | 1.48 | 0.82 | 1.04 | 0.49 |
| iYIL174W-0    | 1.45 | 0.80 | 1.67 | 0.91 | 0.93 | 0.35 |
| iYIL174W-1    | 1.53 | 0.87 | 1.64 | 0.91 | 0.83 | 0.34 |
| iYIL177C-1    | 0.85 | 0.18 | 0.99 | 0.38 | 0.99 | 0.49 |
| iYILCdelta1   | #N/A | #N/A | #N/A | #N/A | #N/A | #N/A |
| iYILCdelta3   | #N/A | #N/A | 1.24 | 0.57 | #N/A | #N/A |
| iYILCdelta5-0 | 1.39 | 0.76 | 1.23 | 0.64 | 1.36 | 0.87 |
| iYILCdelta5-1 | 1.02 | 0.33 | 1.01 | 0.38 | 0.95 | 0.55 |
| iYILCtau1     | #N/A | #N/A | #N/A | #N/A | #N/A | #N/A |
| iYIR001C      | 1.14 | 0.45 | 1.16 | 0.55 | 0.78 | 0.18 |
| iYIR002C      | 1.33 | 0.70 | 1.18 | 0.58 | 1.12 | 0.69 |
| iYIR003W      | #N/A | #N/A | #N/A | #N/A | #N/A | #N/A |
| iYIR004W      | #N/A | #N/A | 1.07 | 0.45 | #N/A | #N/A |
| iYIR005W      | #N/A | #N/A | #N/A | #N/A | #N/A | #N/A |
| iYIR006C      | 1.12 | 0.48 | 1.14 | 0.55 | 1.19 | 0.77 |
| iYIR007W      | #N/A | #N/A | #N/A | #N/A | #N/A | #N/A |
| iYIR008C      | 1.24 | 0.57 | 1.35 | 0.76 | 0.99 | 0.43 |
| iYIR010W      | #N/A | #N/A | #N/A | #N/A | #N/A | #N/A |

|               |      |      |      |      |      |      |
|---------------|------|------|------|------|------|------|
| iYIR011C      | 1.12 | 0.46 | 0.86 | 0.26 | 0.90 | 0.46 |
| iYIR012W      | #N/A | #N/A | #N/A | #N/A | #N/A | #N/A |
| iYIR013C      | #N/A | #N/A | 1.06 | 0.45 | 1.20 | 0.78 |
| iYIR014W      | 0.68 | 0.10 | 0.65 | 0.10 | 0.90 | 0.46 |
| iYIR015W      | 1.00 | 0.30 | 0.86 | 0.24 | 0.85 | 0.27 |
| iYIR016W      | 1.02 | 0.31 | 0.71 | 0.13 | 1.04 | 0.70 |
| iYIR017C      | 0.67 | 0.10 | 0.73 | 0.15 | 0.62 | 0.05 |
| iYIR018W-0    | 0.96 | 0.30 | 0.90 | 0.27 | 0.85 | 0.31 |
| iYIR018W-1    | 0.95 | 0.27 | 0.92 | 0.29 | 0.92 | 0.38 |
| iYIR020C      | 1.14 | 0.49 | 1.20 | 0.58 | 1.08 | 0.64 |
| iYIR020W-B-0  | 1.30 | 0.69 | 1.29 | 0.71 | 1.05 | 0.63 |
| iYIR020W-B-1  | 1.25 | 0.64 | 1.04 | 0.45 | 1.08 | 0.65 |
| iYIR021W      | 1.29 | 0.64 | 1.28 | 0.67 | 0.88 | 0.31 |
| iYIR022W      | 1.41 | 0.82 | 1.27 | 0.67 | 0.86 | 0.37 |
| iYIR023W      | #N/A | #N/A | #N/A | #N/A | #N/A | #N/A |
| iYIR024C      | 1.26 | 0.65 | 1.44 | 0.83 | #N/A | #N/A |
| iYIR025W      | #N/A | #N/A | #N/A | #N/A | #N/A | #N/A |
| iYIR026C      | 1.50 | 0.89 | 1.31 | 0.72 | 0.85 | 0.31 |
| iYIR027C      | 1.00 | 0.33 | 1.33 | 0.69 | 0.79 | 0.28 |
| iYIR028W      | 1.55 | 0.88 | 1.75 | 0.96 | 0.78 | 0.18 |
| iYIR029W      | #N/A | #N/A | 1.10 | 0.51 | #N/A | #N/A |
| iYIR030C      | #N/A | #N/A | 1.44 | 0.83 | #N/A | #N/A |
| iYIR031C      | #N/A | #N/A | 1.37 | 0.72 | 0.95 | 0.43 |
| iYIR032C      | 0.81 | 0.15 | 0.68 | 0.11 | 0.71 | 0.12 |
| iYIR033W      | #N/A | #N/A | #N/A | #N/A | #N/A | #N/A |
| iYIR034C      | 1.12 | 0.42 | 0.84 | 0.22 | 1.01 | 0.52 |
| iYIR035C      | #N/A | #N/A | 1.26 | 0.69 | 0.72 | 0.14 |
| iYIR036C      | 1.25 | 0.64 | 0.90 | 0.28 | 0.91 | 0.36 |
| iYIR037W      | 1.06 | 0.41 | 1.07 | 0.47 | 0.60 | 0.05 |
| iYIR038C-0    | 1.29 | 0.70 | 1.12 | 0.52 | 0.85 | 0.25 |
| iYIR038C-1    | 1.25 | 0.59 | 1.28 | 0.70 | 1.01 | 0.60 |
| iYIR039C      | 1.34 | 0.76 | 1.48 | 0.85 | 1.05 | 0.58 |
| iYIR040C      | #N/A | #N/A | 1.31 | 0.65 | 0.98 | 0.47 |
| iYIR041W      | 1.53 | 0.90 | 1.56 | 0.88 | 0.88 | 0.33 |
| iYIR042C      | 1.42 | 0.83 | 1.64 | 0.93 | 1.01 | 0.55 |
| iYIR043C      | 1.22 | 0.60 | 1.41 | 0.74 | 1.20 | 0.66 |
| iYIRCdelta6-1 | 1.46 | 0.86 | 1.45 | 0.84 | 1.10 | 0.67 |
| iYJL001W      | 0.88 | 0.21 | 1.06 | 0.46 | 0.98 | 0.60 |
| iYJL002C      | 0.96 | 0.26 | 0.90 | 0.28 | 0.60 | 0.05 |
| iYJL003W      | #N/A | #N/A | #N/A | #N/A | #N/A | #N/A |
| iYJL004C      | #N/A | #N/A | #N/A | #N/A | 0.98 | 0.50 |
| iYJL005W      | 1.31 | 0.67 | 1.40 | 0.77 | #N/A | #N/A |
| iYJL006C      | 0.71 | 0.11 | 0.62 | 0.11 | #N/A | #N/A |
| iYJL008C      | 1.65 | 0.95 | 0.69 | 0.13 | #N/A | #N/A |
| iYJL010C      | #N/A | #N/A | #N/A | #N/A | #N/A | #N/A |
| iYJL011C      | #N/A | #N/A | 0.96 | 0.37 | 1.26 | 0.92 |
| iYJL012C      | 1.09 | 0.45 | 1.29 | 0.67 | 1.14 | 0.71 |
| iYJL013C      | 1.37 | 0.73 | 1.34 | 0.76 | 1.50 | 0.94 |
| iYJL014W      | 1.86 | 0.98 | 1.57 | 0.62 | 1.15 | 0.70 |
| iYJL017W      | 1.03 | 0.32 | 1.49 | 0.87 | 1.13 | 0.82 |
| iYJL018W      | 1.44 | 0.83 | 1.21 | 0.61 | 0.79 | 0.27 |

|          |      |      |      |      |      |      |
|----------|------|------|------|------|------|------|
| iYJL020C | 1.13 | 0.43 | 0.99 | 0.36 | 0.89 | 0.32 |
| iYJL022W | #N/A | #N/A | 1.43 | 0.84 | 0.98 | 0.47 |
| iYJL024C | #N/A | #N/A | #N/A | #N/A | #N/A | #N/A |
| iYJL025W | 1.66 | 0.95 | 1.27 | 0.66 | 1.11 | 0.56 |
| iYJL026W | #N/A | #N/A | #N/A | #N/A | #N/A | #N/A |
| iYJL027C | 1.09 | 0.45 | 1.12 | 0.51 | 0.74 | 0.14 |
| iYJL028W | 0.50 | 0.04 | 0.49 | 0.05 | 0.59 | 0.06 |
| iYJL029C | #N/A | #N/A | 0.85 | 0.22 | #N/A | #N/A |
| iYJL030W | #N/A | #N/A | #N/A | #N/A | #N/A | #N/A |
| iYJL031C | 1.35 | 0.77 | 1.26 | 0.69 | 1.20 | 0.67 |
| iYJL033W | #N/A | #N/A | #N/A | #N/A | #N/A | #N/A |
| iYJL034W | 1.28 | 0.69 | 1.25 | 0.66 | 0.99 | 0.62 |
| iYJL035C | #N/A | #N/A | 0.89 | 0.26 | 0.72 | 0.13 |
| iYJL036W | #N/A | #N/A | #N/A | #N/A | #N/A | #N/A |
| iYJL037W | #N/A | #N/A | #N/A | #N/A | #N/A | #N/A |
| iYJL038C | 1.02 | 0.35 | 1.44 | 0.80 | 0.99 | 0.49 |
| iYJL039C | 1.05 | 0.40 | 1.02 | 0.41 | 0.75 | 0.17 |
| iYJL044C | 1.01 | 0.30 | 1.01 | 0.39 | 1.10 | 0.76 |
| iYJL045W | #N/A | #N/A | 1.02 | 0.40 | 1.12 | 0.69 |
| iYJL046W | 1.10 | 0.46 | 1.23 | 0.65 | 1.09 | 0.78 |
| iYJL047C | #N/A | #N/A | #N/A | #N/A | #N/A | #N/A |
| iYJL048C | 0.98 | 0.28 | 0.97 | 0.34 | 0.89 | 0.42 |
| iYJL049W | #N/A | #N/A | #N/A | #N/A | #N/A | #N/A |
| iYJL050W | 0.78 | 0.15 | 0.81 | 0.24 | #N/A | #N/A |
| iYJL052W | 1.05 | 0.38 | 0.69 | 0.14 | 0.80 | 0.20 |
| iYJL053W | 1.10 | 0.44 | 1.05 | 0.43 | 0.98 | 0.57 |
| iYJL054W | 0.97 | 0.27 | #N/A | #N/A | 1.30 | 0.86 |
| iYJL055W | #N/A | #N/A | #N/A | #N/A | #N/A | #N/A |
| iYJL056C | 1.29 | 0.64 | 1.09 | 0.49 | 0.77 | 0.17 |
| iYJL057C | 1.53 | 0.90 | 1.35 | 0.67 | 1.10 | 0.78 |
| iYJL058C | 1.47 | 0.84 | 1.22 | 0.63 | 0.95 | 0.46 |
| iYJL060W | #N/A | #N/A | #N/A | #N/A | #N/A | #N/A |
| iYJL061W | 1.31 | 0.69 | 1.39 | 0.79 | 0.99 | 0.49 |
| iYJL062W | #N/A | #N/A | #N/A | #N/A | #N/A | #N/A |
| iYJL063C | 1.35 | 0.71 | 1.01 | 0.39 | #N/A | #N/A |
| iYJL064W | #N/A | #N/A | 0.83 | 0.21 | 1.02 | 0.53 |
| iYJL066C | 1.19 | 0.52 | 1.03 | 0.41 | #N/A | #N/A |
| iYJL068C | 1.50 | 0.89 | 1.30 | 0.70 | #N/A | #N/A |
| iYJL069C | 0.97 | 0.27 | 1.20 | 0.62 | 1.01 | 0.45 |
| iYJL070C | #N/A | #N/A | #N/A | #N/A | #N/A | #N/A |
| iYJL071W | #N/A | #N/A | #N/A | #N/A | #N/A | #N/A |
| iYJL072C | #N/A | #N/A | #N/A | #N/A | #N/A | #N/A |
| iYJL073W | #N/A | #N/A | #N/A | #N/A | #N/A | #N/A |
| iYJL074C | 1.16 | 0.52 | 0.90 | 0.27 | 0.91 | 0.32 |
| iYJL075C | #N/A | #N/A | #N/A | #N/A | #N/A | #N/A |
| iYJL077C | 1.06 | 0.39 | 1.06 | 0.45 | 0.78 | 0.27 |
| iYJL078C | 0.45 | 0.03 | 0.46 | 0.05 | 0.54 | 0.04 |
| iYJL079C | 0.78 | 0.14 | 0.80 | 0.19 | 0.76 | 0.22 |
| iYJL080C | 1.08 | 0.38 | 1.19 | 0.61 | 1.15 | 0.71 |
| iYJL081C | 1.41 | 0.82 | 1.16 | 0.57 | 1.06 | 0.60 |
| iYJL082W | 1.47 | 0.86 | 1.49 | 0.87 | 1.07 | 0.55 |

|            |      |      |      |      |      |      |
|------------|------|------|------|------|------|------|
| iYJL083W   | 1.02 | 0.36 | 1.14 | 0.54 | 1.05 | 0.49 |
| iYJL084C   | 1.02 | 0.36 | 1.11 | 0.50 | 1.08 | 0.63 |
| iYJL085W   | #N/A | #N/A | 1.62 | 0.92 | #N/A | #N/A |
| iYJL088W   | #N/A | #N/A | #N/A | #N/A | #N/A | #N/A |
| iYJL089W   | 0.73 | 0.12 | 0.64 | 0.09 | 1.21 | 0.72 |
| iYJL090C   | 0.74 | 0.12 | 0.88 | 0.29 | 1.25 | 0.81 |
| iYJL091C   | #N/A | #N/A | 1.35 | 0.77 | 0.82 | 0.23 |
| iYJL092W   | #N/A | #N/A | 0.91 | 0.29 | #N/A | #N/A |
| iYJL093C   | 1.09 | 0.43 | 0.94 | 0.31 | 0.88 | 0.29 |
| iYJL094C   | 1.57 | 0.92 | 1.22 | 0.64 | #N/A | #N/A |
| iYJL095W   | #N/A | #N/A | 1.29 | 0.57 | #N/A | #N/A |
| iYJL096W   | 0.89 | 0.22 | 1.47 | 0.76 | #N/A | #N/A |
| iYJL098W   | 1.18 | 0.50 | 1.10 | 0.49 | #N/A | #N/A |
| iYJL099W   | 0.95 | 0.28 | 1.11 | 0.51 | 0.86 | 0.39 |
| iYJL100W   | #N/A | #N/A | 1.14 | 0.55 | 0.89 | 0.32 |
| iYJL101C   | 0.90 | 0.21 | 0.88 | 0.26 | 0.82 | 0.32 |
| iYJL102W   | 0.88 | 0.20 | #N/A | #N/A | #N/A | #N/A |
| iYJL103C   | 1.18 | 0.49 | 1.07 | 0.47 | 0.95 | 0.42 |
| iYJL104W   | 0.98 | 0.30 | 0.83 | 0.21 | 1.59 | 0.96 |
| iYJL106W-0 | 0.80 | 0.16 | 0.79 | 0.18 | 0.79 | 0.28 |
| iYJL106W-1 | 0.96 | 0.28 | 0.95 | 0.34 | 0.85 | 0.26 |
| iYJL107C   | 1.03 | 0.33 | 1.03 | 0.40 | 0.69 | 0.14 |
| iYJL109C   | 0.87 | 0.20 | 1.14 | 0.55 | 1.06 | 0.60 |
| iYJL110C   | 1.19 | 0.58 | 0.80 | 0.19 | 0.57 | 0.05 |
| iYJL111W   | #N/A | #N/A | #N/A | #N/A | #N/A | #N/A |
| iYJL112W   | 1.18 | 0.49 | 1.11 | 0.51 | 1.07 | 0.75 |
| iYJL113W   | #N/A | #N/A | #N/A | #N/A | #N/A | #N/A |
| iYJL115W   | #N/A | #N/A | 1.16 | 0.56 | #N/A | #N/A |
| iYJL116C   | 0.83 | 0.17 | 0.85 | 0.23 | 0.90 | 0.31 |
| iYJL117W   | 1.83 | 0.98 | 2.28 | 0.86 | 1.17 | 0.75 |
| iYJL118W   | 0.74 | 0.13 | #N/A | #N/A | 0.92 | 0.46 |
| iYJL120W   | #N/A | #N/A | #N/A | #N/A | 1.10 | 0.79 |
| iYJL122W   | #N/A | #N/A | #N/A | #N/A | #N/A | #N/A |
| iYJL123C   | 0.94 | 0.28 | 0.93 | 0.29 | 0.72 | 0.18 |
| iYJL124C   | 1.08 | 0.38 | 0.93 | 0.33 | 0.94 | 0.52 |
| iYJL125C   | 1.86 | 0.98 | 1.28 | 0.70 | 1.60 | 0.96 |
| iYJL126W   | #N/A | #N/A | #N/A | #N/A | #N/A | #N/A |
| iYJL127C   | 1.23 | 0.64 | 1.34 | 0.74 | 1.26 | 0.84 |
| iYJL128C-0 | 1.30 | 0.71 | 1.22 | 0.64 | 1.23 | 0.78 |
| iYJL128C-1 | 1.48 | 0.87 | 1.37 | 0.79 | 1.00 | 0.50 |
| iYJL129C   | 1.24 | 0.57 | 1.09 | 0.49 | 1.09 | 0.78 |
| iYJL130C   | 0.91 | 0.25 | 0.82 | 0.21 | 1.07 | 0.75 |
| iYJL131C   | 1.33 | 0.75 | 1.46 | 0.84 | 1.02 | 0.54 |
| iYJL132W   | #N/A | #N/A | #N/A | #N/A | #N/A | #N/A |
| iYJL133W   | 1.43 | 0.79 | 1.37 | 0.74 | 1.05 | 0.59 |
| iYJL134W   | 0.61 | 0.07 | 0.60 | 0.08 | 0.98 | 0.47 |
| iYJL136C   | 0.46 | 0.04 | 0.44 | 0.04 | 0.91 | 0.33 |
| iYJL137C   | 1.36 | 0.73 | 1.08 | 0.47 | 1.13 | 0.59 |
| iYJL138C   | 0.95 | 0.26 | 0.79 | 0.19 | 1.08 | 0.55 |
| iYJL139C   | 1.42 | 0.78 | 1.39 | 0.80 | #N/A | #N/A |
| iYJL140W   | #N/A | #N/A | #N/A | #N/A | #N/A | #N/A |

|            |      |      |      |      |      |      |
|------------|------|------|------|------|------|------|
| iYJL141C   | 1.03 | 0.37 | 0.88 | 0.25 | 1.17 | 0.63 |
| iYJL143W   | 1.49 | 0.88 | 1.04 | 0.46 | 1.21 | 0.79 |
| iYJL144W   | 1.23 | 0.64 | 1.21 | 0.63 | 1.11 | 0.79 |
| iYJL145W   | 1.14 | 0.51 | #N/A | #N/A | 0.73 | 0.18 |
| iYJL146W   | 1.23 | 0.57 | #N/A | #N/A | 1.03 | 0.64 |
| iYJL147C   | 1.36 | 0.77 | 1.06 | 0.45 | 1.06 | 0.60 |
| iYJL148W   | #N/A | #N/A | 1.06 | 0.45 | 1.07 | 0.59 |
| iYJL149W   | #N/A | #N/A | #N/A | #N/A | #N/A | #N/A |
| iYJL151C   | 0.91 | 0.23 | 0.77 | 0.19 | #N/A | #N/A |
| iYJL153C   | 1.03 | 0.35 | 0.96 | 0.38 | 0.81 | 0.31 |
| iYJL154C   | 1.55 | 0.88 | 1.10 | 0.50 | 1.21 | 0.68 |
| iYJL155C   | 1.77 | 0.97 | 1.18 | 0.60 | 0.99 | 0.48 |
| iYJL156C   | #N/A | #N/A | #N/A | #N/A | #N/A | #N/A |
| iYJL157C   | 1.18 | 0.54 | 1.13 | 0.54 | 1.06 | 0.73 |
| iYJL158C   | 0.58 | 0.06 | 0.52 | 0.05 | 0.79 | 0.25 |
| iYJL159W   | 1.28 | 0.68 | 1.38 | 0.78 | 1.09 | 0.64 |
| iYJL160C-0 | 1.28 | 0.68 | 1.17 | 0.58 | 1.03 | 0.55 |
| iYJL160C-1 | 0.69 | 0.10 | 0.72 | 0.16 | 0.82 | 0.25 |
| iYJL161W   | 1.55 | 0.91 | 1.45 | 0.80 | 1.24 | 0.83 |
| iYJL163C   | 1.29 | 0.64 | 1.20 | 0.62 | 0.93 | 0.35 |
| iYJL164C   | 1.26 | 0.65 | 1.15 | 0.56 | 0.98 | 0.43 |
| iYJL165C   | 1.03 | 0.32 | 0.92 | 0.31 | 1.08 | 0.63 |
| iYJL166W   | #N/A | #N/A | #N/A | #N/A | #N/A | #N/A |
| iYJL167W   | 1.13 | 0.48 | #N/A | #N/A | 1.05 | 0.59 |
| iYJL168C   | 1.31 | 0.72 | 1.29 | 0.71 | 0.94 | 0.42 |
| iYJL170C   | 1.10 | 0.44 | 1.11 | 0.50 | 0.70 | 0.11 |
| iYJL171C   | #N/A | #N/A | #N/A | #N/A | #N/A | #N/A |
| iYJL172W   | #N/A | #N/A | #N/A | #N/A | #N/A | #N/A |
| iYJL173C   | 1.53 | 0.90 | 1.45 | 0.80 | 1.23 | 0.69 |
| iYJL174W   | #N/A | #N/A | #N/A | #N/A | #N/A | #N/A |
| iYJL175W   | 0.93 | 0.26 | 1.04 | 0.43 | 1.24 | 0.89 |
| iYJL177W   | #N/A | #N/A | 1.59 | 0.89 | #N/A | #N/A |
| iYJL178C   | 0.55 | 0.06 | 0.52 | 0.05 | 0.73 | 0.13 |
| iYJL179W   | #N/A | #N/A | #N/A | #N/A | #N/A | #N/A |
| iYJL180C   | #N/A | #N/A | #N/A | #N/A | #N/A | #N/A |
| iYJL181W   | #N/A | #N/A | #N/A | #N/A | #N/A | #N/A |
| iYJL183W   | #N/A | #N/A | #N/A | #N/A | #N/A | #N/A |
| iYJL184W   | 0.97 | 0.29 | 0.95 | 0.32 | 1.01 | 0.47 |
| iYJL185C   | 1.13 | 0.48 | 1.09 | 0.48 | 0.99 | 0.62 |
| iYJL186W   | #N/A | #N/A | 1.28 | 0.66 | #N/A | #N/A |
| iYJL187C   | 1.13 | 0.48 | 0.83 | 0.21 | 1.11 | 0.76 |
| iYJL188C   | #N/A | #N/A | 1.00 | 0.37 | #N/A | #N/A |
| iYJL190C   | 0.31 | 0.02 | #N/A | #N/A | 0.73 | 0.13 |
| iYJL191W   | #N/A | #N/A | #N/A | #N/A | #N/A | #N/A |
| iYJL192C   | 0.47 | 0.04 | 0.47 | 0.04 | 0.63 | 0.06 |
| iYJL193W   | #N/A | #N/A | #N/A | #N/A | #N/A | #N/A |
| iYJL194W   | 1.24 | 0.57 | 1.13 | 0.54 | 0.94 | 0.42 |
| iYJL196C   | 0.90 | 0.22 | 0.68 | 0.12 | 0.58 | 0.06 |
| iYJL197W   | #N/A | #N/A | #N/A | #N/A | #N/A | #N/A |
| iYJL198W   | #N/A | #N/A | #N/A | #N/A | 1.05 | 0.51 |
| iYJL199C   | 1.11 | 0.46 | 1.05 | 0.43 | 0.95 | 0.40 |



|              |      |      |      |      |      |      |
|--------------|------|------|------|------|------|------|
| iYJL200C     | 1.27 | 0.67 | 1.16 | 0.58 | #N/A | #N/A |
| iYJL201W     | #N/A | #N/A | #N/A | #N/A | #N/A | #N/A |
| iYJL202C     | #N/A | #N/A | 1.04 | 0.44 | #N/A | #N/A |
| iYJL204C     | #N/A | #N/A | 1.53 | 0.86 | #N/A | #N/A |
| iYJL206C     | 1.35 | 0.71 | 1.69 | 0.90 | #N/A | #N/A |
| iYJL206C-A   | 1.45 | 0.85 | 1.39 | 0.75 | 0.99 | 0.43 |
| iYJL207C     | 1.02 | 0.35 | 1.59 | 0.84 | 1.19 | 0.66 |
| iYJL208C     | #N/A | #N/A | #N/A | #N/A | #N/A | #N/A |
| iYJL209W     | #N/A | #N/A | #N/A | #N/A | #N/A | #N/A |
| iYJL210W     | #N/A | #N/A | #N/A | #N/A | #N/A | #N/A |
| iYJL212C     | 0.80 | 0.15 | 0.77 | 0.17 | 0.73 | 0.19 |
| iYJL213W     | 1.38 | 0.74 | 1.83 | 0.95 | 1.41 | 0.88 |
| iYJL214W-0   | 1.44 | 0.85 | 1.43 | 0.77 | 1.00 | 0.64 |
| iYJL214W-1   | 1.40 | 0.81 | 1.55 | 0.89 | 0.99 | 0.42 |
| iYJL215C     | #N/A | #N/A | #N/A | #N/A | #N/A | #N/A |
| iYJL216C     | #N/A | #N/A | 1.53 | 0.89 | 0.97 | 0.40 |
| iYJL217W     | 1.15 | 0.46 | 1.34 | 0.75 | 1.04 | 0.59 |
| iYJL218W     | 1.09 | 0.44 | 1.19 | 0.58 | 0.86 | 0.28 |
| iYJL219W     | 0.90 | 0.22 | 1.21 | 0.58 | 1.04 | 0.57 |
| iYJL220W     | 1.08 | 0.41 | 1.35 | 0.69 | 0.83 | 0.24 |
| iYJL222W     | 1.39 | 0.80 | 1.51 | 0.78 | 1.04 | 0.58 |
| iYJL223C-0   | 1.30 | 0.71 | 1.43 | 0.82 | 1.02 | 0.45 |
| iYJL225C-1   | 0.88 | 0.21 | 1.01 | 0.39 | 1.09 | 0.64 |
| iYJLCdelta3  | #N/A | #N/A | #N/A | #N/A | 1.12 | 0.58 |
| iYJLCdelta5  | 0.46 | 0.04 | #N/A | #N/A | 0.96 | 0.58 |
| iYJLCdelta6  | 1.27 | 0.62 | #N/A | #N/A | 1.08 | 0.55 |
| iYJLCdelta7  | 1.05 | 0.38 | 1.23 | 0.57 | 1.22 | 0.80 |
| iYJLWdelta1  | #N/A | #N/A | #N/A | #N/A | #N/A | #N/A |
| iYJLWdelta15 | 0.84 | 0.17 | 0.68 | 0.11 | 0.93 | 0.39 |
| iYJLWdelta19 | #N/A | #N/A | #N/A | #N/A | #N/A | #N/A |
| iYJLWdelta8  | 1.12 | 0.49 | 1.05 | 0.43 | 1.31 | 0.76 |
| iYJLWdelta9  | 1.06 | 0.36 | 1.17 | 0.58 | 0.98 | 0.47 |
| iYJLWtau4    | #N/A | #N/A | #N/A | #N/A | #N/A | #N/A |
| iYJR001W     | #N/A | #N/A | #N/A | #N/A | #N/A | #N/A |
| iYJR002W     | #N/A | #N/A | #N/A | #N/A | 0.88 | 0.42 |
| iYJR003C     | 1.27 | 0.67 | #N/A | #N/A | #N/A | #N/A |
| iYJR004C     | 1.29 | 0.66 | 1.36 | 0.78 | 1.03 | 0.55 |
| iYJR005W     | 1.05 | 0.40 | 1.24 | 0.64 | 0.96 | 0.39 |
| iYJR006W     | 0.86 | 0.18 | 0.81 | 0.20 | #N/A | #N/A |
| iYJR007W     | 1.55 | 0.91 | 1.39 | 0.81 | 1.03 | 0.65 |
| iYJR008W     | #N/A | #N/A | #N/A | #N/A | #N/A | #N/A |
| iYJR009C-0   | 0.49 | 0.04 | 0.42 | 0.03 | 0.53 | 0.04 |
| iYJR010C-A   | 1.26 | 0.65 | 0.98 | 0.38 | 0.99 | 0.54 |
| iYJR010W     | 1.52 | 0.90 | 1.36 | 0.78 | 1.61 | 0.92 |
| iYJR011C     | 2.04 | 0.99 | 1.91 | 0.91 | 0.81 | 0.31 |
| iYJR012C     | 1.27 | 0.68 | 1.03 | 0.42 | 0.99 | 0.62 |
| iYJR013W     | #N/A | #N/A | #N/A | #N/A | #N/A | #N/A |
| iYJR014W     | 1.06 | 0.40 | 1.23 | 0.63 | 0.89 | 0.30 |
| iYJR015W     | #N/A | #N/A | #N/A | #N/A | #N/A | #N/A |
| iYJR016C     | 1.26 | 0.66 | 0.60 | 0.09 | #N/A | #N/A |
| iYJR018W     | #N/A | #N/A | #N/A | #N/A | #N/A | #N/A |

|          |      |      |      |      |      |      |
|----------|------|------|------|------|------|------|
| iYJR020W | 1.22 | 0.54 | 1.03 | 0.40 | 0.86 | 0.27 |
| iYJR021C | 0.91 | 0.25 | #N/A | #N/A | #N/A | #N/A |
| iYJR024C | 0.86 | 0.20 | 0.92 | 0.30 | #N/A | #N/A |
| iYJR025C | 1.38 | 0.79 | 1.32 | 0.75 | 1.15 | 0.77 |
| iYJR030C | #N/A | #N/A | 1.16 | 0.56 | 1.31 | 0.76 |
| iYJR031C | #N/A | #N/A | 1.21 | 0.61 | 0.89 | 0.44 |
| iYJR032W | #N/A | #N/A | #N/A | #N/A | #N/A | #N/A |
| iYJR034W | #N/A | #N/A | #N/A | #N/A | #N/A | #N/A |
| iYJR035W | #N/A | #N/A | #N/A | #N/A | #N/A | #N/A |
| iYJR037W | 1.50 | 0.85 | 1.08 | 0.48 | 0.88 | 0.42 |
| iYJR039W | 1.57 | 0.92 | 1.25 | 0.68 | 1.00 | 0.43 |
| iYJR040W | 1.42 | 0.83 | 1.19 | 0.61 | #N/A | #N/A |
| iYJR041C | #N/A | #N/A | #N/A | #N/A | #N/A | #N/A |
| iYJR042W | #N/A | #N/A | #N/A | #N/A | #N/A | #N/A |
| iYJR043C | 1.14 | 0.51 | 1.14 | 0.54 | 1.20 | 0.70 |
| iYJR044C | 1.13 | 0.50 | 0.96 | 0.38 | 0.92 | 0.44 |
| iYJR045C | 0.92 | 0.24 | 0.83 | 0.23 | 0.79 | 0.28 |
| iYJR046W | #N/A | #N/A | #N/A | #N/A | #N/A | #N/A |
| iYJR047C | 0.61 | 0.07 | 0.51 | 0.05 | 0.53 | 0.04 |
| iYJR048W | 1.30 | 0.72 | 1.40 | 0.66 | #N/A | #N/A |
| iYJR049C | 1.29 | 0.64 | 1.30 | 0.69 | 0.75 | 0.15 |
| iYJR050W | 1.47 | 0.86 | #N/A | #N/A | 1.30 | 0.83 |
| iYJR051W | #N/A | #N/A | #N/A | #N/A | #N/A | #N/A |
| iYJR053W | #N/A | #N/A | #N/A | #N/A | 0.90 | 0.31 |
| iYJR054W | #N/A | #N/A | #N/A | #N/A | 1.08 | 0.77 |
| iYJR055W | 1.59 | 0.91 | 1.40 | 0.80 | 1.00 | 0.64 |
| iYJR056C | 1.17 | 0.48 | 1.20 | 0.61 | 1.17 | 0.63 |
| iYJR058C | 1.27 | 0.67 | 1.04 | 0.42 | 1.05 | 0.71 |
| iYJR059W | 1.09 | 0.42 | 1.12 | 0.52 | 0.95 | 0.55 |
| iYJR060W | 1.54 | 0.90 | 1.36 | 0.78 | 1.06 | 0.61 |
| iYJR061W | #N/A | #N/A | #N/A | #N/A | #N/A | #N/A |
| iYJR062C | 0.93 | 0.25 | 0.82 | 0.21 | 0.87 | 0.30 |
| iYJR063W | 1.26 | 0.65 | 0.90 | 0.27 | 1.06 | 0.73 |
| iYJR064W | #N/A | #N/A | #N/A | #N/A | #N/A | #N/A |
| iYJR065C | 1.11 | 0.46 | 1.10 | 0.49 | 0.85 | 0.32 |
| iYJR066W | #N/A | #N/A | #N/A | #N/A | #N/A | #N/A |
| iYJR067C | 1.17 | 0.55 | 0.88 | 0.34 | 1.02 | 0.54 |
| iYJR068W | #N/A | #N/A | #N/A | #N/A | #N/A | #N/A |
| iYJR069C | 1.44 | 0.83 | 1.28 | 0.67 | 1.17 | 0.78 |
| iYJR071W | 1.11 | 0.45 | 0.99 | 0.36 | 1.05 | 0.72 |
| iYJR072C | #N/A | #N/A | 1.15 | 0.56 | #N/A | #N/A |
| iYJR073C | #N/A | #N/A | 1.06 | 0.45 | 1.19 | 0.65 |
| iYJR074W | #N/A | #N/A | #N/A | #N/A | 0.80 | 0.20 |
| iYJR075W | #N/A | #N/A | #N/A | #N/A | #N/A | #N/A |
| iYJR077C | 0.96 | 0.27 | 1.01 | 0.39 | 0.80 | 0.29 |
| iYJR080C | #N/A | #N/A | 1.31 | 0.69 | #N/A | #N/A |
| iYJR082C | 1.16 | 0.49 | 1.32 | 0.75 | 1.02 | 0.54 |
| iYJR083C | 1.28 | 0.70 | 1.12 | 0.51 | 1.42 | 0.83 |
| iYJR084W | #N/A | #N/A | #N/A | #N/A | #N/A | #N/A |
| iYJR085C | #N/A | #N/A | #N/A | #N/A | #N/A | #N/A |
| iYJR088C | 1.22 | 0.55 | 0.90 | 0.27 | 1.34 | 0.79 |

|            |      |      |      |      |      |      |
|------------|------|------|------|------|------|------|
| iYJR089W   | 1.31 | 0.72 | 1.34 | 0.66 | 0.79 | 0.19 |
| iYJR090C   | 1.25 | 0.65 | 1.29 | 0.71 | 1.04 | 0.63 |
| iYJR091C   | 1.21 | 0.60 | 1.26 | 0.67 | 1.13 | 0.67 |
| iYJR092W   | 1.44 | 0.85 | #N/A | #N/A | 0.95 | 0.55 |
| iYJR093C   | 1.34 | 0.76 | 0.96 | 0.34 | #N/A | #N/A |
| iYJR094C-0 | 1.14 | 0.48 | 1.20 | 0.62 | 0.97 | 0.58 |
| iYJR094W-A | 0.86 | 0.19 | 1.02 | 0.44 | 1.19 | 0.65 |
| iYJR095W   | 1.14 | 0.49 | 1.06 | 0.45 | 1.31 | 0.87 |
| iYJR096W   | #N/A | #N/A | 1.08 | 0.47 | 0.76 | 0.24 |
| iYJR097W   | #N/A | #N/A | #N/A | #N/A | #N/A | #N/A |
| iYJR098C   | 1.16 | 0.53 | 1.16 | 0.55 | 1.05 | 0.59 |
| iYJR099W   | #N/A | #N/A | #N/A | #N/A | #N/A | #N/A |
| iYJR100C   | 1.44 | 0.80 | 1.52 | 0.78 | 1.07 | 0.75 |
| iYJR101W   | #N/A | #N/A | #N/A | #N/A | #N/A | #N/A |
| iYJR102C   | #N/A | #N/A | 1.23 | 0.65 | 1.27 | 0.92 |
| iYJR103W   | #N/A | #N/A | #N/A | #N/A | #N/A | #N/A |
| iYJR104C   | 0.93 | 0.25 | 0.83 | 0.22 | 1.05 | 0.59 |
| iYJR105W   | 1.19 | 0.56 | 1.23 | 0.65 | 1.24 | 0.71 |
| iYJR106W   | 1.12 | 0.48 | 1.24 | 0.65 | 1.25 | 0.82 |
| iYJR107W   | 1.31 | 0.72 | 1.09 | 0.48 | 1.19 | 0.71 |
| iYJR108W   | #N/A | #N/A | #N/A | #N/A | #N/A | #N/A |
| iYJR109C   | 1.12 | 0.43 | 1.01 | 0.39 | #N/A | #N/A |
| iYJR110W   | 1.51 | 0.89 | #N/A | #N/A | #N/A | #N/A |
| iYJR111C   | 1.27 | 0.69 | 1.20 | 0.62 | 0.85 | 0.27 |
| iYJR112W   | 1.40 | 0.77 | 1.32 | 0.74 | 1.13 | 0.60 |
| iYJR114W   | 0.74 | 0.13 | 0.68 | 0.13 | 0.84 | 0.26 |
| iYJR115W   | 1.05 | 0.40 | 0.89 | 0.26 | 0.73 | 0.13 |
| iYJR116W   | 1.11 | 0.47 | 0.83 | 0.21 | 0.72 | 0.15 |
| iYJR117W   | #N/A | #N/A | 0.68 | 0.11 | #N/A | #N/A |
| iYJR118C   | #N/A | #N/A | #N/A | #N/A | #N/A | #N/A |
| iYJR119C   | 1.00 | 0.33 | 0.79 | 0.19 | 0.69 | 0.14 |
| iYJR120W   | #N/A | #N/A | 1.14 | 0.54 | #N/A | #N/A |
| iYJR121W   | #N/A | #N/A | #N/A | #N/A | #N/A | #N/A |
| iYJR122W   | 0.26 | 0.01 | 0.18 | 0.00 | 0.37 | 0.01 |
| iYJR123W   | #N/A | #N/A | #N/A | #N/A | #N/A | #N/A |
| iYJR124C   | 1.71 | 0.96 | 1.13 | 0.54 | 0.72 | 0.13 |
| iYJR125C   | 1.39 | 0.75 | 1.11 | 0.50 | #N/A | #N/A |
| iYJR126C   | 1.03 | 0.35 | 0.96 | 0.34 | 0.95 | 0.42 |
| iYJR128W   | 0.60 | 0.07 | 0.54 | 0.06 | 0.68 | 0.09 |
| iYJR129C   | 0.93 | 0.27 | #N/A | #N/A | 1.11 | 0.67 |
| iYJR130C   | 1.44 | 0.84 | 1.46 | 0.84 | 1.05 | 0.50 |
| iYJR131W   | 1.64 | 0.94 | 2.01 | 0.80 | #N/A | #N/A |
| iYJR132W   | #N/A | #N/A | #N/A | #N/A | 1.04 | 0.49 |
| iYJR133W   | #N/A | #N/A | #N/A | #N/A | #N/A | #N/A |
| iYJR134C   | #N/A | #N/A | #N/A | #N/A | #N/A | #N/A |
| iYJR135C   | 1.49 | 0.84 | 1.42 | 0.78 | 1.34 | 0.80 |
| iYJR136C   | #N/A | #N/A | #N/A | #N/A | #N/A | #N/A |
| iYJR137C   | 0.79 | 0.15 | 0.97 | 0.38 | 1.01 | 0.44 |
| iYJR138W   | #N/A | #N/A | #N/A | #N/A | #N/A | #N/A |
| iYJR139C   | 0.85 | 0.18 | 0.75 | 0.19 | #N/A | #N/A |
| iYJR140C   | #N/A | #N/A | 0.97 | 0.36 | #N/A | #N/A |

|              |      |      |      |      |      |      |
|--------------|------|------|------|------|------|------|
| iYJR141W     | #N/A | #N/A | #N/A | #N/A | #N/A | #N/A |
| iYJR142W     | 1.21 | 0.61 | #N/A | #N/A | #N/A | #N/A |
| iYJR143C     | #N/A | #N/A | #N/A | #N/A | #N/A | #N/A |
| iYJR144W     | #N/A | #N/A | 0.84 | 0.31 | 0.97 | 0.55 |
| iYJR145C     | 0.27 | 0.01 | 0.34 | 0.02 | 0.55 | 0.04 |
| iYJR147W     | #N/A | #N/A | #N/A | #N/A | #N/A | #N/A |
| iYJR148W     | #N/A | #N/A | 1.13 | 0.54 | #N/A | #N/A |
| iYJR149W     | #N/A | #N/A | 1.64 | 0.93 | 1.33 | 0.95 |
| iYJR150C-0   | 1.08 | 0.38 | 1.13 | 0.53 | 0.84 | 0.35 |
| iYJR150C-1   | 1.33 | 0.74 | 1.46 | 0.85 | 0.93 | 0.38 |
| iYJR151C-0   | 1.27 | 0.63 | 1.09 | 0.48 | 0.96 | 0.45 |
| iYJR151C-1   | 1.36 | 0.77 | 1.49 | 0.87 | 0.92 | 0.49 |
| iYJR151C-2   | 1.40 | 0.82 | 1.35 | 0.77 | 1.14 | 0.62 |
| iYJR152W     | 1.23 | 0.63 | 1.28 | 0.68 | 1.17 | 0.68 |
| iYJR153W-0   | 1.58 | 0.90 | 1.51 | 0.87 | 0.90 | 0.34 |
| iYJR153W-1   | 1.32 | 0.68 | 1.37 | 0.79 | 0.82 | 0.23 |
| iYJR154W     | 1.44 | 0.85 | 1.55 | 0.90 | 0.92 | 0.36 |
| iYJR155W     | #N/A | #N/A | #N/A | #N/A | #N/A | #N/A |
| iYJR156C     | 1.31 | 0.73 | 1.49 | 0.84 | 1.08 | 0.64 |
| iYJR157W-0   | 1.27 | 0.65 | 1.44 | 0.80 | 0.97 | 0.46 |
| iYJR157W-1   | 0.94 | 0.26 | 1.07 | 0.47 | 1.01 | 0.64 |
| iYJR158W-0   | 1.41 | 0.82 | 1.85 | 0.97 | 0.81 | 0.21 |
| iYJR158W-1   | 0.93 | 0.27 | 1.01 | 0.40 | 0.92 | 0.34 |
| iYJR159W     | #N/A | #N/A | 1.37 | 0.69 | 0.93 | 0.45 |
| iYJR160C-0   | 1.37 | 0.78 | 1.50 | 0.85 | 0.95 | 0.48 |
| iYJR160C-1   | 1.60 | 0.92 | 2.02 | 0.97 | 0.87 | 0.30 |
| iYJR161C     | 1.16 | 0.51 | 1.42 | 0.78 | 0.87 | 0.39 |
| iYJRWdelta14 | 1.25 | 0.65 | 1.39 | 0.81 | 0.88 | 0.31 |
| iYJRWdelta17 | #N/A | #N/A | #N/A | #N/A | #N/A | #N/A |
| iYJRWdelta20 | 1.31 | 0.67 | 1.50 | 0.85 | 1.18 | 0.76 |
| iYKL001C     | 0.96 | 0.26 | 0.84 | 0.25 | 0.79 | 0.19 |
| iYKL002W     | #N/A | #N/A | #N/A | #N/A | #N/A | #N/A |
| iYKL003C     | 1.46 | 0.82 | 1.31 | 0.72 | 1.02 | 0.55 |
| iYKL004W     | #N/A | #N/A | #N/A | #N/A | 0.92 | 0.50 |
| iYKL005C     | 1.14 | 0.49 | 1.05 | 0.44 | 1.13 | 0.70 |
| iYKL006C-A   | 0.58 | 0.06 | 0.49 | 0.04 | 0.65 | 0.08 |
| iYKL006W     | 0.83 | 0.17 | 1.73 | 0.95 | #N/A | #N/A |
| iYKL007W     | #N/A | #N/A | #N/A | #N/A | #N/A | #N/A |
| iYKL008C     | 0.50 | 0.04 | 0.45 | 0.04 | 0.65 | 0.08 |
| iYKL009W     | 1.46 | 0.85 | 1.26 | 0.68 | 0.83 | 0.35 |
| iYKL010C     | 1.08 | 0.44 | 1.07 | 0.46 | 0.85 | 0.37 |
| iYKL011C     | #N/A | #N/A | #N/A | #N/A | #N/A | #N/A |
| iYKL012W     | #N/A | #N/A | #N/A | #N/A | #N/A | #N/A |
| iYKL013C     | 1.61 | 0.93 | 1.23 | 0.62 | 1.15 | 0.66 |
| iYKL014C     | 1.27 | 0.67 | 1.25 | 0.67 | 1.11 | 0.57 |
| iYKL015W     | #N/A | #N/A | #N/A | #N/A | #N/A | #N/A |
| iYKL016C     | 0.80 | 0.15 | 0.76 | 0.16 | 0.98 | 0.42 |
| iYKL017C     | #N/A | #N/A | #N/A | #N/A | #N/A | #N/A |
| iYKL018W     | #N/A | #N/A | #N/A | #N/A | #N/A | #N/A |
| iYKL019W     | 1.20 | 0.59 | 1.24 | 0.63 | 1.19 | 0.77 |
| iYKL020C     | 1.12 | 0.48 | 1.09 | 0.48 | 0.93 | 0.37 |

|            |      |      |      |      |      |      |
|------------|------|------|------|------|------|------|
| iYKL021C   | #N/A | #N/A | #N/A | #N/A | #N/A | #N/A |
| iYKL022C   | #N/A | #N/A | #N/A | #N/A | #N/A | #N/A |
| iYKL023W   | 1.29 | 0.64 | #N/A | #N/A | #N/A | #N/A |
| iYKL024C   | 1.12 | 0.46 | 0.94 | 0.31 | 1.32 | 0.77 |
| iYKL025C   | #N/A | #N/A | #N/A | #N/A | #N/A | #N/A |
| iYKL026C   | #N/A | #N/A | 1.42 | 0.81 | 0.83 | 0.33 |
| iYKL027W   | #N/A | #N/A | #N/A | #N/A | 0.90 | 0.46 |
| iYKL028W   | #N/A | #N/A | #N/A | #N/A | #N/A | #N/A |
| iYKL029C   | 0.57 | 0.06 | 0.54 | 0.07 | 0.57 | 0.06 |
| iYKL032C   | 0.69 | 0.10 | 0.54 | 0.06 | 0.84 | 0.36 |
| iYKL033W   | 1.25 | 0.63 | 1.11 | 0.51 | 1.43 | 0.92 |
| iYKL033W-A | 1.33 | 0.75 | 1.41 | 0.82 | 1.26 | 0.82 |
| iYKL034W   | 1.18 | 0.49 | 0.88 | 0.26 | 0.63 | 0.09 |
| iYKL035W   | #N/A | #N/A | 1.30 | 0.71 | 0.82 | 0.33 |
| iYKL038W   | 1.35 | 0.71 | 0.91 | 0.31 | 0.84 | 0.26 |
| iYKL039W   | 1.27 | 0.66 | 1.15 | 0.55 | 1.08 | 0.77 |
| iYKL040C   | 1.19 | 0.55 | 1.13 | 0.53 | 1.17 | 0.64 |
| iYKL041W   | #N/A | #N/A | #N/A | #N/A | #N/A | #N/A |
| iYKL042W   | #N/A | #N/A | 1.19 | 0.61 | 1.06 | 0.57 |
| iYKL043W   | 1.19 | 0.50 | 1.13 | 0.54 | 1.12 | 0.71 |
| iYKL044W   | #N/A | #N/A | #N/A | #N/A | #N/A | #N/A |
| iYKL045W   | 0.44 | 0.03 | 0.48 | 0.05 | 0.44 | 0.01 |
| iYKL046C   | 1.19 | 0.56 | 1.21 | 0.61 | 0.92 | 0.38 |
| iYKL047W   | 2.17 | 0.99 | 1.53 | 0.88 | 1.07 | 0.65 |
| iYKL048C   | 1.28 | 0.63 | 1.17 | 0.57 | 1.10 | 0.79 |
| iYKL049C   | 1.41 | 0.80 | 1.20 | 0.62 | 1.29 | 0.87 |
| iYKL050C   | 1.37 | 0.74 | 1.36 | 0.77 | 1.03 | 0.60 |
| iYKL051W   | 1.13 | 0.48 | 1.06 | 0.46 | 1.09 | 0.64 |
| iYKL052C   | 0.63 | 0.08 | 0.62 | 0.09 | 0.75 | 0.15 |
| iYKL053C-A | 1.04 | 0.33 | #N/A | #N/A | #N/A | #N/A |
| iYKL054C   | 1.16 | 0.54 | 0.92 | 0.30 | 0.73 | 0.13 |
| iYKL055C   | 1.45 | 0.81 | 1.11 | 0.51 | 1.14 | 0.72 |
| iYKL056C   | 0.75 | 0.13 | 0.57 | 0.07 | #N/A | #N/A |
| iYKL057C   | 1.05 | 0.38 | 1.10 | 0.50 | 1.25 | 0.83 |
| iYKL058W   | #N/A | #N/A | #N/A | #N/A | #N/A | #N/A |
| iYKL059C   | 1.09 | 0.43 | 1.19 | 0.61 | 0.99 | 0.58 |
| iYKL060C   | 0.37 | 0.02 | 0.32 | 0.01 | 0.71 | 0.11 |
| iYKL061W   | #N/A | #N/A | #N/A | #N/A | #N/A | #N/A |
| iYKL062W   | #N/A | #N/A | 1.43 | 0.83 | 1.18 | 0.75 |
| iYKL063C-0 | 0.73 | 0.12 | 0.71 | 0.13 | 0.96 | 0.45 |
| iYKL063C-1 | 0.50 | 0.04 | 0.56 | 0.06 | 0.55 | 0.03 |
| iYKL064W   | 1.01 | 0.34 | 1.17 | 0.59 | 1.20 | 0.73 |
| iYKL065C   | 1.09 | 0.43 | 1.07 | 0.45 | 0.94 | 0.50 |
| iYKL066W   | 1.29 | 0.68 | 1.37 | 0.79 | 1.23 | 0.90 |
| iYKL068W   | 1.03 | 0.36 | 1.16 | 0.53 | 1.24 | 0.70 |
| iYKL069W   | 0.79 | 0.16 | 0.84 | 0.23 | 1.06 | 0.74 |
| iYKL070W   | 1.19 | 0.51 | 1.25 | 0.67 | 0.81 | 0.31 |
| iYKL071W   | 1.82 | 0.97 | #N/A | #N/A | 1.30 | 0.93 |
| iYKL072W   | 1.58 | 0.91 | 1.53 | 0.85 | 1.21 | 0.75 |
| iYKL073W   | 1.22 | 0.54 | 1.35 | 0.73 | 1.33 | 0.88 |
| iYKL074C   | 1.30 | 0.72 | 1.32 | 0.75 | 0.79 | 0.28 |

|              |      |      |      |      |      |      |
|--------------|------|------|------|------|------|------|
| iYKL075C     | 1.62 | 0.94 | 1.54 | 0.89 | 0.69 | 0.10 |
| iYKL077W     | #N/A | #N/A | #N/A | #N/A | #N/A | #N/A |
| iYKL078W     | 1.71 | 0.96 | 1.92 | 0.98 | 1.22 | 0.80 |
| iYKL079W     | #N/A | #N/A | #N/A | #N/A | #N/A | #N/A |
| iYKL081W     | 0.81 | 0.16 | 0.92 | 0.31 | 0.80 | 0.29 |
| iYKL082C     | 1.10 | 0.44 | 0.90 | 0.30 | 1.00 | 0.64 |
| iYKL084W     | #N/A | #N/A | #N/A | #N/A | #N/A | #N/A |
| iYKL085W     | #N/A | #N/A | 1.19 | 0.60 | 0.87 | 0.29 |
| iYKL086W     | 1.16 | 0.51 | 1.21 | 0.63 | 0.89 | 0.44 |
| iYKL087C     | #N/A | #N/A | 1.11 | 0.50 | 1.04 | 0.70 |
| iYKL088W     | #N/A | #N/A | #N/A | #N/A | #N/A | #N/A |
| iYKL089W     | 1.63 | 0.94 | 1.21 | 0.62 | 0.77 | 0.25 |
| iYKL090W     | 1.21 | 0.53 | 1.15 | 0.55 | #N/A | #N/A |
| iYKL091C     | 1.37 | 0.74 | 1.33 | 0.76 | 1.05 | 0.50 |
| iYKL092C     | 1.42 | 0.81 | 1.15 | 0.56 | #N/A | #N/A |
| iYKL093W     | 1.53 | 0.87 | 1.39 | 0.80 | 1.06 | 0.73 |
| iYKL094W     | 1.18 | 0.54 | 1.09 | 0.49 | 0.86 | 0.39 |
| iYKL095W     | #N/A | #N/A | 1.06 | 0.44 | 0.81 | 0.27 |
| iYKL096W     | #N/A | #N/A | 1.00 | 0.38 | 1.18 | 0.65 |
| iYKL097C     | 0.52 | 0.04 | 0.42 | 0.03 | 0.64 | 0.10 |
| iYKL097W-A-0 | 1.04 | 0.39 | 1.03 | 0.40 | 1.13 | 0.59 |
| iYKL097W-A-1 | 0.51 | 0.04 | 0.46 | 0.04 | 0.63 | 0.08 |
| iYKL098W     | 1.00 | 0.32 | 0.80 | 0.19 | 1.10 | 0.56 |
| iYKL099C     | 1.01 | 0.33 | 1.19 | 0.60 | 0.95 | 0.43 |
| iYKL100C     | 1.28 | 0.63 | 1.25 | 0.60 | 1.36 | 0.83 |
| iYKL101W     | #N/A | #N/A | 1.55 | 0.81 | #N/A | #N/A |
| iYKL102C     | 1.20 | 0.53 | 0.91 | 0.29 | #N/A | #N/A |
| iYKL103C     | 1.00 | 0.32 | 0.89 | 0.26 | 0.74 | 0.15 |
| iYKL104C     | 0.86 | 0.19 | 0.81 | 0.19 | 0.81 | 0.30 |
| iYKL105C     | 1.32 | 0.68 | 1.41 | 0.82 | 1.12 | 0.76 |
| iYKL106W     | #N/A | #N/A | 1.34 | 0.71 | #N/A | #N/A |
| iYKL107W     | 1.25 | 0.64 | 1.24 | 0.66 | 0.99 | 0.62 |
| iYKL108W     | 1.87 | 0.98 | 1.38 | 0.78 | 0.95 | 0.43 |
| iYKL109W     | #N/A | #N/A | 1.20 | 0.61 | 0.79 | 0.19 |
| iYKL110C-0   | 0.83 | 0.17 | 0.87 | 0.26 | 0.58 | 0.06 |
| iYKL110C-1   | 0.45 | 0.03 | 0.48 | 0.05 | 0.53 | 0.03 |
| iYKL111C     | #N/A | #N/A | #N/A | #N/A | #N/A | #N/A |
| iYKL113C     | #N/A | #N/A | 0.88 | 0.26 | 0.75 | 0.17 |
| iYKL114C     | 1.25 | 0.65 | 1.01 | 0.40 | 0.97 | 0.59 |
| iYKL115C     | #N/A | #N/A | #N/A | #N/A | #N/A | #N/A |
| iYKL117W     | 1.59 | 0.93 | 1.28 | 0.70 | 1.06 | 0.51 |
| iYKL120W     | #N/A | #N/A | 0.82 | 0.21 | #N/A | #N/A |
| iYKL121W     | 0.89 | 0.21 | 0.65 | 0.10 | 0.93 | 0.49 |
| iYKL125W     | 1.15 | 0.50 | 1.14 | 0.55 | 0.80 | 0.20 |
| iYKL126W     | 0.99 | 0.30 | 1.08 | 0.46 | 1.16 | 0.73 |
| iYKL127W     | 1.16 | 0.48 | 0.92 | 0.29 | 0.77 | 0.17 |
| iYKL128C     | 1.25 | 0.58 | 1.29 | 0.72 | #N/A | #N/A |
| iYKL130C     | #N/A | #N/A | 0.97 | 0.36 | 1.08 | 0.67 |
| iYKL131W     | 1.06 | 0.41 | 1.02 | 0.39 | 1.10 | 0.66 |
| iYKL133C     | 1.45 | 0.85 | 1.47 | 0.85 | 1.13 | 0.82 |
| iYKL134C     | #N/A | #N/A | 0.80 | 0.19 | #N/A | #N/A |

|              |      |      |      |      |      |      |
|--------------|------|------|------|------|------|------|
| iYKL135C     | 1.31 | 0.73 | #N/A | #N/A | 1.02 | 0.46 |
| iYKL137W     | #N/A | #N/A | #N/A | #N/A | #N/A | #N/A |
| iYKL138C     | #N/A | #N/A | #N/A | #N/A | 1.12 | 0.71 |
| iYKL139W     | 1.06 | 0.39 | 1.24 | 0.67 | 1.06 | 0.70 |
| iYKL140W     | #N/A | #N/A | 1.08 | 0.47 | #N/A | #N/A |
| iYKL141W     | 1.62 | 0.94 | 1.28 | 0.66 | 0.90 | 0.45 |
| iYKL142W     | 1.07 | 0.42 | 1.04 | 0.42 | 0.84 | 0.26 |
| iYKL143W     | 1.00 | 0.29 | 0.90 | 0.28 | 0.82 | 0.22 |
| iYKL144C     | 1.14 | 0.49 | 1.37 | 0.60 | #N/A | #N/A |
| iYKL145W     | #N/A | #N/A | #N/A | #N/A | #N/A | #N/A |
| iYKL146W     | #N/A | #N/A | 0.87 | 0.25 | 0.85 | 0.38 |
| iYKL148C     | 1.29 | 0.64 | 1.24 | 0.66 | 1.23 | 0.82 |
| iYKL149C     | 1.67 | 0.94 | 1.34 | 0.76 | #N/A | #N/A |
| iYKL150W     | #N/A | #N/A | #N/A | #N/A | #N/A | #N/A |
| iYKL151C     | 1.15 | 0.52 | 1.19 | 0.59 | 0.88 | 0.28 |
| iYKL152C     | 0.26 | 0.01 | 0.36 | 0.02 | 0.65 | 0.07 |
| iYKL154W     | #N/A | #N/A | #N/A | #N/A | #N/A | #N/A |
| iYKL155C     | 1.14 | 0.51 | 1.46 | 0.57 | 1.42 | 0.91 |
| iYKL156W     | #N/A | #N/A | #N/A | #N/A | #N/A | #N/A |
| iYKL157W     | #N/A | #N/A | 0.76 | 0.17 | 1.22 | 0.80 |
| iYKL158W     | 1.38 | 0.76 | 1.04 | 0.46 | 1.25 | 0.83 |
| iYKL159C     | 1.22 | 0.62 | 1.24 | 0.67 | 1.32 | 0.92 |
| iYKL160W     | 1.39 | 0.80 | 1.30 | 0.70 | #N/A | #N/A |
| iYKL161C-0   | 1.34 | 0.75 | 1.05 | 0.47 | 0.94 | 0.52 |
| iYKL162C     | 1.36 | 0.73 | 1.39 | 0.80 | 0.93 | 0.39 |
| iYKL162C-A-0 | 0.98 | 0.30 | 1.09 | 0.49 | 1.03 | 0.60 |
| iYKL162C-A-1 | 0.91 | 0.24 | 0.84 | 0.22 | 1.12 | 0.61 |
| iYKL163W     | 1.30 | 0.69 | 1.35 | 0.77 | 1.00 | 0.51 |
| iYKL164C-0   | 0.86 | 0.19 | 0.93 | 0.31 | 0.81 | 0.21 |
| iYKL164C-1   | 1.21 | 0.54 | 1.30 | 0.71 | 0.82 | 0.23 |
| iYKL165C     | #N/A | #N/A | #N/A | #N/A | #N/A | #N/A |
| iYKL166C-1   | 1.20 | 0.52 | 1.33 | 0.74 | 1.25 | 0.82 |
| iYKL167C     | 0.93 | 0.23 | 0.92 | 0.28 | 0.94 | 0.52 |
| iYKL168C     | #N/A | #N/A | #N/A | #N/A | #N/A | #N/A |
| iYKL169C     | #N/A | #N/A | #N/A | #N/A | #N/A | #N/A |
| iYKL171W     | 1.18 | 0.52 | 1.07 | 0.45 | 0.79 | 0.19 |
| iYKL172W     | 1.14 | 0.49 | 1.17 | 0.58 | 1.01 | 0.52 |
| iYKL173W     | #N/A | #N/A | #N/A | #N/A | #N/A | #N/A |
| iYKL174C     | 1.42 | 0.78 | 1.33 | 0.70 | 0.90 | 0.32 |
| iYKL175W     | #N/A | #N/A | #N/A | #N/A | #N/A | #N/A |
| iYKL176C     | 1.12 | 0.49 | 1.07 | 0.46 | 1.34 | 0.88 |
| iYKL177W     | 1.22 | 0.60 | 1.11 | 0.51 | 1.03 | 0.55 |
| iYKL179C     | 1.07 | 0.43 | 1.01 | 0.39 | 1.03 | 0.69 |
| iYKL180W     | 1.10 | 0.46 | #N/A | #N/A | #N/A | #N/A |
| iYKL181W     | 0.71 | 0.11 | #N/A | #N/A | 0.70 | 0.15 |
| iYKL182W     | 1.11 | 0.46 | 1.41 | 0.77 | 1.04 | 0.58 |
| iYKL183W     | 0.40 | 0.02 | 0.43 | 0.03 | 0.48 | 0.02 |
| iYKL184W     | 1.33 | 0.74 | 1.05 | 0.43 | 0.90 | 0.31 |
| iYKL185W     | 1.04 | 0.38 | 0.68 | 0.12 | 1.00 | 0.44 |
| iYKL186C     | 0.84 | 0.19 | 0.80 | 0.20 | 0.74 | 0.14 |
| iYKL187C     | 1.30 | 0.65 | 1.25 | 0.67 | 0.95 | 0.42 |



|             |      |      |      |      |      |      |
|-------------|------|------|------|------|------|------|
| iYKL188C    | 1.46 | 0.86 | 1.57 | 0.79 | #N/A | #N/A |
| iYKL189W    | #N/A | #N/A | 1.88 | 0.87 | #N/A | #N/A |
| iYKL190W    | 1.37 | 0.78 | 1.39 | 0.81 | 0.97 | 0.47 |
| iYKL191W    | 1.08 | 0.38 | 0.81 | 0.19 | 0.82 | 0.23 |
| iYKL192C    | 1.19 | 0.53 | 1.30 | 0.70 | 1.01 | 0.48 |
| iYKL193C    | 1.86 | 0.98 | 1.57 | 0.67 | #N/A | #N/A |
| iYKL194C    | #N/A | #N/A | 0.73 | 0.14 | #N/A | #N/A |
| iYKL195W    | #N/A | #N/A | #N/A | #N/A | #N/A | #N/A |
| iYKL196C    | #N/A | #N/A | 0.96 | 0.33 | 1.13 | 0.82 |
| iYKL197C    | #N/A | #N/A | 1.32 | 0.73 | 1.66 | 0.92 |
| iYKL198C    | #N/A | #N/A | 0.83 | 0.22 | 1.08 | 0.64 |
| iYKL200C    | 0.93 | 0.27 | 0.95 | 0.32 | 0.94 | 0.53 |
| iYKL201C    | 1.37 | 0.79 | 1.21 | 0.63 | 0.89 | 0.45 |
| iYKL203C    | 1.36 | 0.77 | 1.25 | 0.67 | 0.93 | 0.50 |
| iYKL204W    | 1.14 | 0.50 | 1.21 | 0.60 | 1.02 | 0.53 |
| iYKL205W    | 1.21 | 0.58 | 2.00 | 0.93 | #N/A | #N/A |
| iYKL206C    | #N/A | #N/A | 0.95 | 0.34 | #N/A | #N/A |
| iYKL207W    | #N/A | #N/A | #N/A | #N/A | 0.83 | 0.34 |
| iYKL208W    | #N/A | #N/A | 1.16 | 0.57 | 0.86 | 0.28 |
| iYKL209C    | #N/A | #N/A | 1.08 | 0.49 | 0.66 | 0.12 |
| iYKL210W    | #N/A | #N/A | #N/A | #N/A | #N/A | #N/A |
| iYKL211C    | 0.89 | 0.21 | 0.67 | 0.12 | 1.10 | 0.66 |
| iYKL212W    | #N/A | #N/A | #N/A | #N/A | #N/A | #N/A |
| iYKL213C    | 1.46 | 0.86 | 1.30 | 0.72 | 1.22 | 0.72 |
| iYKL214C    | 1.75 | 0.96 | 1.26 | 0.65 | #N/A | #N/A |
| iYKL215C    | 1.53 | 0.90 | 1.18 | 0.59 | 0.99 | 0.62 |
| iYKL216W    | 1.44 | 0.85 | 1.25 | 0.65 | #N/A | #N/A |
| iYKL217W    | 1.22 | 0.62 | 1.16 | 0.57 | 1.08 | 0.66 |
| iYKL218C-0  | 1.48 | 0.87 | 1.80 | 0.96 | 1.23 | 0.69 |
| iYKL218C-1  | 1.36 | 0.77 | 1.49 | 0.85 | 1.01 | 0.52 |
| iYKL218C-2  | 1.00 | 0.32 | 1.20 | 0.61 | 1.04 | 0.53 |
| iYKL219W-1  | #N/A | #N/A | 1.56 | 0.90 | 0.93 | 0.39 |
| iYKL220C-0  | 1.40 | 0.81 | 1.24 | 0.63 | 0.76 | 0.23 |
| iYKL220C-1  | 1.64 | 0.95 | 1.66 | 0.93 | 0.95 | 0.43 |
| iYKL220C-2  | 1.09 | 0.43 | 1.14 | 0.53 | 1.23 | 0.82 |
| iYKL221W-0  | 1.46 | 0.86 | 1.30 | 0.69 | 0.87 | 0.30 |
| iYKL221W-1  | 1.13 | 0.48 | 1.40 | 0.80 | 1.07 | 0.61 |
| iYKL222C    | 1.41 | 0.82 | 1.60 | 0.88 | 0.91 | 0.33 |
| iYKL223W    | #N/A | #N/A | #N/A | #N/A | #N/A | #N/A |
| iYKL224C    | #N/A | #N/A | 1.36 | 0.79 | 0.83 | 0.24 |
| iYKL225W    | 1.10 | 0.41 | 1.30 | 0.67 | 0.89 | 0.41 |
| iYKLCdelta2 | #N/A | #N/A | #N/A | #N/A | #N/A | #N/A |
| iYKLCdelta4 | 0.70 | 0.11 | #N/A | #N/A | #N/A | #N/A |
| iYKLCdelta5 | #N/A | #N/A | 1.43 | 0.58 | #N/A | #N/A |
| iYKLCdelta6 | #N/A | #N/A | 1.03 | 0.41 | 0.96 | 0.39 |
| iYKLWdelta1 | #N/A | #N/A | #N/A | #N/A | #N/A | #N/A |
| iYKLWdelta3 | 1.00 | 0.32 | 0.94 | 0.32 | 1.06 | 0.73 |
| iYKLWdelta7 | #N/A | #N/A | #N/A | #N/A | 0.83 | 0.23 |
| iYKR001C    | #N/A | #N/A | 1.13 | 0.52 | 1.00 | 0.46 |
| iYKR002W    | #N/A | #N/A | 1.23 | 0.61 | 0.89 | 0.44 |
| iYKR003W    | #N/A | #N/A | #N/A | #N/A | #N/A | #N/A |



|            |      |      |      |      |      |      |
|------------|------|------|------|------|------|------|
| iYKR004C   | 0.90 | 0.24 | 1.07 | 0.45 | 1.27 | 0.89 |
| iYKR005C   | 1.48 | 0.87 | 1.32 | 0.75 | 1.18 | 0.86 |
| iYKR006C   | #N/A | #N/A | 1.31 | 0.72 | 0.94 | 0.36 |
| iYKR007W   | #N/A | #N/A | 1.16 | 0.57 | 1.13 | 0.82 |
| iYKR008W   | #N/A | #N/A | #N/A | #N/A | #N/A | #N/A |
| iYKR009C   | 1.23 | 0.61 | 1.36 | 0.73 | 0.96 | 0.44 |
| iYKR010C   | 1.45 | 0.81 | 1.16 | 0.54 | 1.73 | 0.99 |
| iYKR011C   | 1.01 | 0.34 | 1.07 | 0.46 | 0.99 | 0.55 |
| iYKR013W   | 1.39 | 0.80 | 0.99 | 0.37 | 0.79 | 0.27 |
| iYKR014C   | 1.42 | 0.82 | 1.29 | 0.70 | 1.01 | 0.44 |
| iYKR015C   | 1.20 | 0.55 | 1.01 | 0.39 | 1.14 | 0.76 |
| iYKR016W   | 1.26 | 0.60 | #N/A | #N/A | 1.12 | 0.68 |
| iYKR017C   | 1.25 | 0.64 | 1.16 | 0.57 | 1.09 | 0.65 |
| iYKR018C   | 1.26 | 0.61 | 1.20 | 0.61 | 0.75 | 0.21 |
| iYKR019C   | 1.33 | 0.70 | #N/A | #N/A | 0.93 | 0.39 |
| iYKR020W   | 1.37 | 0.77 | 1.25 | 0.66 | 0.97 | 0.44 |
| iYKR021W   | 1.03 | 0.35 | #N/A | #N/A | #N/A | #N/A |
| iYKR022C   | 1.30 | 0.71 | 1.03 | 0.42 | 0.86 | 0.28 |
| iYKR023W   | #N/A | #N/A | #N/A | #N/A | #N/A | #N/A |
| iYKR024C   | #N/A | #N/A | 0.71 | 0.14 | 0.91 | 0.32 |
| iYKR025W   | #N/A | #N/A | 1.31 | 0.73 | 1.06 | 0.51 |
| iYKR026C   | 1.33 | 0.69 | 0.85 | 0.23 | 0.94 | 0.42 |
| iYKR027W   | 1.28 | 0.63 | 1.07 | 0.46 | 0.92 | 0.39 |
| iYKR029C   | 0.91 | 0.25 | 1.11 | 0.51 | 1.01 | 0.59 |
| iYKR030W   | #N/A | #N/A | #N/A | #N/A | #N/A | #N/A |
| iYKR031C   | 1.20 | 0.52 | 1.18 | 0.59 | 0.95 | 0.41 |
| iYKR034W   | 1.21 | 0.54 | 1.21 | 0.59 | 1.04 | 0.70 |
| iYKR035W-A | #N/A | #N/A | 0.81 | 0.23 | #N/A | #N/A |
| iYKR036C   | 1.23 | 0.56 | 1.15 | 0.55 | 0.86 | 0.39 |
| iYKR037C   | #N/A | #N/A | #N/A | #N/A | #N/A | #N/A |
| iYKR038C   | #N/A | #N/A | #N/A | #N/A | #N/A | #N/A |
| iYKR039W   | 0.82 | 0.17 | 0.66 | 0.11 | 0.95 | 0.38 |
| iYKR041W   | 0.31 | 0.01 | 0.25 | 0.01 | 0.50 | 0.03 |
| iYKR042W   | #N/A | #N/A | #N/A | #N/A | #N/A | #N/A |
| iYKR043C   | 1.00 | 0.30 | 0.97 | 0.34 | 0.94 | 0.37 |
| iYKR044W   | #N/A | #N/A | 0.76 | 0.25 | #N/A | #N/A |
| iYKR045C   | 1.54 | 0.90 | 1.45 | 0.71 | #N/A | #N/A |
| iYKR046C   | #N/A | #N/A | 1.48 | 0.81 | #N/A | #N/A |
| iYKR048C   | #N/A | #N/A | 0.94 | 0.31 | 0.84 | 0.36 |
| iYKR049C   | 1.42 | 0.83 | 1.31 | 0.71 | 1.00 | 0.61 |
| iYKR050W   | 1.43 | 0.82 | 1.13 | 0.53 | 0.88 | 0.31 |
| iYKR051W   | #N/A | #N/A | 1.56 | 0.90 | 1.02 | 0.46 |
| iYKR052C   | 1.03 | 0.36 | 1.15 | 0.56 | 0.99 | 0.62 |
| iYKR053C   | 1.06 | 0.35 | 1.08 | 0.47 | 0.71 | 0.11 |
| iYKR054C   | 1.69 | 0.96 | 1.28 | 0.70 | 0.97 | 0.46 |
| iYKR055W   | 1.26 | 0.67 | 1.30 | 0.63 | 1.06 | 0.61 |
| iYKR056W   | 0.83 | 0.17 | 1.04 | 0.43 | 1.08 | 0.63 |
| iYKR057W   | 1.22 | 0.61 | 1.20 | 0.61 | 1.23 | 0.81 |
| iYKR058W   | #N/A | #N/A | 0.70 | 0.12 | 1.03 | 0.62 |
| iYKR059W   | #N/A | #N/A | 0.97 | 0.41 | #N/A | #N/A |
| iYKR060W   | 1.36 | 0.78 | 1.44 | 0.70 | 0.89 | 0.36 |

|            |      |      |      |      |      |      |
|------------|------|------|------|------|------|------|
| iYKR061W   | #N/A | #N/A | #N/A | #N/A | #N/A | #N/A |
| iYKR062W   | #N/A | #N/A | #N/A | #N/A | 1.05 | 0.54 |
| iYKR063C   | 0.47 | 0.04 | 1.16 | 0.57 | #N/A | #N/A |
| iYKR064W   | #N/A | #N/A | 2.08 | 0.84 | #N/A | #N/A |
| iYKR065C   | #N/A | #N/A | #N/A | #N/A | #N/A | #N/A |
| iYKR066C   | 1.18 | 0.57 | 1.21 | 0.63 | 0.99 | 0.49 |
| iYKR067W   | 1.26 | 0.67 | #N/A | #N/A | 1.04 | 0.70 |
| iYKR068C   | 1.09 | 0.45 | 0.92 | 0.31 | 0.83 | 0.24 |
| iYKR069W   | 1.34 | 0.71 | 0.82 | 0.20 | #N/A | #N/A |
| iYKR070W   | #N/A | #N/A | 1.28 | 0.68 | 1.22 | 0.80 |
| iYKR071C   | 1.87 | 0.98 | 1.60 | 0.89 | 1.07 | 0.74 |
| iYKR072C   | #N/A | #N/A | #N/A | #N/A | #N/A | #N/A |
| iYKR073C   | 1.10 | 0.46 | 1.17 | 0.58 | 1.05 | 0.59 |
| iYKR074W   | #N/A | #N/A | #N/A | #N/A | #N/A | #N/A |
| iYKR075C-0 | 0.49 | 0.04 | 0.60 | 0.08 | 0.76 | 0.16 |
| iYKR075C-1 | 1.02 | 0.34 | 1.09 | 0.48 | 0.87 | 0.41 |
| iYKR076W   | 1.09 | 0.43 | 1.42 | 0.81 | 1.04 | 0.65 |
| iYKR077W   | 1.11 | 0.45 | 1.29 | 0.68 | #N/A | #N/A |
| iYKR078W   | #N/A | #N/A | #N/A | #N/A | #N/A | #N/A |
| iYKR079C   | 1.21 | 0.58 | 1.33 | 0.74 | 1.07 | 0.61 |
| iYKR080W   | #N/A | #N/A | #N/A | #N/A | #N/A | #N/A |
| iYKR081C   | 1.17 | 0.53 | 0.92 | 0.33 | 1.61 | 0.91 |
| iYKR082W   | #N/A | #N/A | 0.77 | 0.22 | #N/A | #N/A |
| iYKR083C   | #N/A | #N/A | #N/A | #N/A | #N/A | #N/A |
| iYKR084C   | 1.49 | 0.84 | 1.23 | 0.64 | 1.15 | 0.72 |
| iYKR085C   | 1.27 | 0.68 | 1.23 | 0.64 | 1.08 | 0.65 |
| iYKR086W   | #N/A | #N/A | #N/A | #N/A | #N/A | #N/A |
| iYKR087C   | 1.00 | 0.32 | 1.40 | 0.74 | #N/A | #N/A |
| iYKR088C   | #N/A | #N/A | #N/A | #N/A | #N/A | #N/A |
| iYKR089C   | #N/A | #N/A | 0.99 | 0.38 | #N/A | #N/A |
| iYKR090W   | 1.22 | 0.59 | 1.15 | 0.56 | 1.25 | 0.71 |
| iYKR092C-0 | 0.66 | 0.09 | 0.68 | 0.13 | 0.86 | 0.27 |
| iYKR092C-1 | 0.26 | 0.01 | 0.28 | 0.01 | 0.32 | 0.00 |
| iYKR093W   | 1.19 | 0.57 | 1.25 | 0.63 | 1.21 | 0.68 |
| iYKR094C   | 1.23 | 0.63 | 1.00 | 0.37 | 0.82 | 0.23 |
| iYKR095W   | 1.36 | 0.78 | 1.48 | 0.86 | 1.11 | 0.68 |
| iYKR096W   | 0.67 | 0.09 | 0.90 | 0.27 | 1.00 | 0.44 |
| iYKR097W   | #N/A | #N/A | #N/A | #N/A | #N/A | #N/A |
| iYKR098C   | 1.11 | 0.46 | 1.33 | 0.75 | 1.12 | 0.58 |
| iYKR099W   | 1.67 | 0.94 | 1.65 | 0.91 | 0.86 | 0.39 |
| iYKR100C   | 1.40 | 0.81 | 1.54 | 0.89 | 1.17 | 0.86 |
| iYKR101W-0 | 1.50 | 0.85 | 1.43 | 0.83 | 1.26 | 0.72 |
| iYKR101W-1 | 1.47 | 0.86 | 1.60 | 0.92 | 1.10 | 0.66 |
| iYKR101W-2 | 1.26 | 0.67 | 1.40 | 0.81 | 1.07 | 0.53 |
| iYKR102W-0 | 2.27 | 0.99 | 2.25 | 0.97 | 1.41 | 0.93 |
| iYKR102W-1 | 1.67 | 0.95 | 1.81 | 0.96 | 0.80 | 0.30 |
| iYKR102W-2 | 1.82 | 0.98 | 2.12 | 0.98 | 1.14 | 0.61 |
| iYKR103W   | #N/A | #N/A | #N/A | #N/A | #N/A | #N/A |
| iYKR104W   | 1.33 | 0.75 | 1.60 | 0.90 | 0.98 | 0.48 |
| iYKR105C   | 1.25 | 0.66 | #N/A | #N/A | 0.87 | 0.42 |
| iYKR106W-0 | 1.54 | 0.89 | 1.71 | 0.93 | 0.74 | 0.14 |

|              |      |      |      |      |      |      |
|--------------|------|------|------|------|------|------|
| iYKR106W-1   | 1.54 | 0.90 | 1.61 | 0.91 | 0.83 | 0.34 |
| iYKRCdelta11 | 0.96 | 0.28 | 0.84 | 0.23 | 0.86 | 0.28 |
| iYKRCdelta12 | 0.43 | 0.02 | 0.83 | 0.31 | 1.48 | 0.86 |
| iYKRCdelta8  | #N/A | #N/A | #N/A | #N/A | #N/A | #N/A |
| iYKRWdelta10 | #N/A | #N/A | #N/A | #N/A | #N/A | #N/A |
| iYLL001W     | 0.97 | 0.26 | 1.26 | 0.57 | 1.09 | 0.70 |
| iYLL002W     | 1.23 | 0.64 | 1.14 | 0.53 | 1.15 | 0.62 |
| iYLL003W     | #N/A | #N/A | #N/A | #N/A | #N/A | #N/A |
| iYLL004W     | #N/A | #N/A | #N/A | #N/A | #N/A | #N/A |
| iYLL005C     | 1.16 | 0.53 | 1.49 | 0.72 | 0.82 | 0.23 |
| iYLL006W     | #N/A | #N/A | #N/A | #N/A | #N/A | #N/A |
| iYLL007C     | 1.43 | 0.84 | 1.00 | 0.38 | 0.99 | 0.63 |
| iYLL008W     | #N/A | #N/A | #N/A | #N/A | #N/A | #N/A |
| iYLL009C     | 1.06 | 0.39 | 1.01 | 0.39 | 0.98 | 0.42 |
| iYLL010C     | 1.05 | 0.37 | 1.07 | 0.46 | 1.03 | 0.56 |
| iYLL011W     | 1.88 | 0.98 | 1.68 | 0.81 | 1.17 | 0.75 |
| iYLL012W     | 1.59 | 0.93 | #N/A | #N/A | 1.06 | 0.73 |
| iYLL014W     | 1.28 | 0.68 | 1.23 | 0.63 | 1.13 | 0.70 |
| iYLL015W     | 0.93 | 0.23 | 1.13 | 0.52 | #N/A | #N/A |
| iYLL016W     | #N/A | #N/A | 1.32 | 0.72 | 1.18 | 0.85 |
| iYLL017W     | 1.50 | 0.86 | 1.51 | 0.86 | 0.97 | 0.58 |
| iYLL018C     | 1.26 | 0.65 | 1.03 | 0.40 | 0.99 | 0.57 |
| iYLL018C-A   | 1.32 | 0.73 | 1.20 | 0.62 | 0.78 | 0.21 |
| iYLL019C     | 0.87 | 0.20 | 0.88 | 0.25 | 0.78 | 0.18 |
| iYLL022C     | #N/A | #N/A | #N/A | #N/A | #N/A | #N/A |
| iYLL023C     | #N/A | #N/A | #N/A | #N/A | #N/A | #N/A |
| iYLL024C     | 0.78 | 0.14 | 0.80 | 0.22 | 0.79 | 0.19 |
| iYLL025W     | #N/A | #N/A | #N/A | #N/A | #N/A | #N/A |
| iYLL026W     | 0.94 | 0.28 | 1.19 | 0.58 | #N/A | #N/A |
| iYLL027W     | 1.24 | 0.58 | 1.11 | 0.51 | 0.95 | 0.38 |
| iYLL028W     | 1.13 | 0.44 | 1.03 | 0.41 | 1.29 | 0.86 |
| iYLL030C     | 1.00 | 0.33 | 1.02 | 0.41 | 0.97 | 0.48 |
| iYLL031C     | #N/A | #N/A | #N/A | #N/A | #N/A | #N/A |
| iYLL032C     | #N/A | #N/A | 1.73 | 0.92 | #N/A | #N/A |
| iYLL033W     | 1.24 | 0.65 | 1.05 | 0.47 | 0.86 | 0.29 |
| iYLL034C     | 1.25 | 0.64 | 0.85 | 0.31 | 1.18 | 0.84 |
| iYLL035W     | #N/A | #N/A | #N/A | #N/A | #N/A | #N/A |
| iYLL036C     | 1.39 | 0.80 | 1.22 | 0.65 | 0.89 | 0.44 |
| iYLL039C     | 0.78 | 0.15 | 0.81 | 0.20 | 1.00 | 0.46 |
| iYLL040C     | 1.31 | 0.73 | 1.19 | 0.60 | 1.05 | 0.72 |
| iYLL041C     | 1.08 | 0.44 | 0.99 | 0.37 | 0.79 | 0.26 |
| iYLL042C     | 1.64 | 0.94 | 1.39 | 0.80 | 1.02 | 0.55 |
| iYLL043W     | #N/A | #N/A | #N/A | #N/A | #N/A | #N/A |
| iYLL044W     | 0.92 | 0.26 | 1.04 | 0.42 | 0.92 | 0.33 |
| iYLL046C     | #N/A | #N/A | 1.16 | 0.55 | 1.00 | 0.64 |
| iYLL048C     | #N/A | #N/A | 1.34 | 0.76 | 1.28 | 0.85 |
| iYLL049W     | #N/A | #N/A | #N/A | #N/A | #N/A | #N/A |
| iYLL050C     | #N/A | #N/A | 0.91 | 0.28 | #N/A | #N/A |
| iYLL051C     | 1.02 | 0.36 | 1.14 | 0.55 | 0.92 | 0.49 |
| iYLL052C     | 1.02 | 0.35 | 1.08 | 0.47 | 0.69 | 0.10 |
| iYLL054C     | #N/A | #N/A | 1.26 | 0.67 | #N/A | #N/A |

|              |      |      |      |      |      |      |
|--------------|------|------|------|------|------|------|
| iYLL055W     | 1.48 | 0.88 | 1.56 | 0.90 | 0.89 | 0.44 |
| iYLL056C-0   | 1.15 | 0.47 | 1.11 | 0.50 | 1.19 | 0.81 |
| iYLL056C-1   | 1.50 | 0.88 | 1.48 | 0.83 | 1.20 | 0.81 |
| iYLL057C     | 1.65 | 0.93 | 1.47 | 0.75 | 0.81 | 0.31 |
| iYLL058W     | 1.37 | 0.74 | 1.40 | 0.76 | 1.14 | 0.62 |
| iYLL059C     | 1.17 | 0.55 | 1.58 | 0.87 | 0.86 | 0.29 |
| iYLL060C     | 1.44 | 0.85 | 1.59 | 0.91 | 1.04 | 0.57 |
| iYLL061W     | 1.62 | 0.94 | 1.27 | 0.57 | 1.13 | 0.70 |
| iYLL062C     | 1.24 | 0.65 | 1.36 | 0.72 | 1.15 | 0.72 |
| iYLL063C     | 1.53 | 0.88 | 1.53 | 0.88 | 0.76 | 0.24 |
| iYLL064C     | 1.22 | 0.59 | 1.43 | 0.77 | 0.98 | 0.46 |
| iYLL065W     | 1.09 | 0.38 | 1.26 | 0.63 | 0.95 | 0.43 |
| iYLL066C-0   | 1.14 | 0.50 | 1.27 | 0.67 | 0.91 | 0.37 |
| iYLL066C-1   | 0.42 | 0.02 | 0.41 | 0.03 | 0.94 | 0.41 |
| iYLL067C-0   | 1.23 | 0.60 | 1.29 | 0.71 | 1.00 | 0.50 |
| iYLL067C-1   | 0.39 | 0.02 | 0.35 | 0.02 | 0.86 | 0.29 |
| iYLLCdelta1  | #N/A | #N/A | #N/A | #N/A | #N/A | #N/A |
| iYLR001C     | 1.16 | 0.52 | 1.21 | 0.61 | #N/A | #N/A |
| iYLR003C     | #N/A | #N/A | #N/A | #N/A | #N/A | #N/A |
| iYLR004C     | 1.22 | 0.55 | 1.13 | 0.54 | 0.89 | 0.33 |
| iYLR005W     | #N/A | #N/A | #N/A | #N/A | #N/A | #N/A |
| iYLR006C     | 0.99 | 0.31 | 0.81 | 0.21 | 0.76 | 0.16 |
| iYLR007W     | #N/A | #N/A | #N/A | #N/A | #N/A | #N/A |
| iYLR008C     | 1.51 | 0.85 | 1.25 | 0.68 | 1.14 | 0.60 |
| iYLR009W     | #N/A | #N/A | #N/A | #N/A | #N/A | #N/A |
| iYLR010C     | #N/A | #N/A | #N/A | #N/A | #N/A | #N/A |
| iYLR011W     | 1.37 | 0.78 | 1.36 | 0.67 | #N/A | #N/A |
| iYLR014C     | #N/A | #N/A | #N/A | #N/A | #N/A | #N/A |
| iYLR016C     | #N/A | #N/A | 1.52 | 0.88 | #N/A | #N/A |
| iYLR017W     | #N/A | #N/A | #N/A | #N/A | #N/A | #N/A |
| iYLR018C     | 1.23 | 0.56 | 1.10 | 0.51 | 1.25 | 0.86 |
| iYLR019W     | #N/A | #N/A | 1.89 | 0.64 | #N/A | #N/A |
| iYLR020C     | 1.47 | 0.83 | 1.33 | 0.70 | #N/A | #N/A |
| iYLR022C     | 1.16 | 0.47 | 1.40 | 0.80 | 1.01 | 0.67 |
| iYLR023C     | 0.73 | 0.12 | 0.70 | 0.12 | 0.89 | 0.44 |
| iYLR025W     | #N/A | #N/A | #N/A | #N/A | #N/A | #N/A |
| iYLR026C     | 1.22 | 0.61 | 1.03 | 0.40 | 1.43 | 0.97 |
| iYLR027C     | 1.00 | 0.32 | 0.72 | 0.15 | 1.09 | 0.54 |
| iYLR028C     | #N/A | #N/A | #N/A | #N/A | 0.78 | 0.18 |
| iYLR029C     | 0.90 | 0.22 | 0.91 | 0.28 | 0.86 | 0.39 |
| iYLR030W     | #N/A | #N/A | #N/A | #N/A | #N/A | #N/A |
| iYLR031W     | 1.76 | 0.97 | 0.93 | 0.35 | #N/A | #N/A |
| iYLR032W     | #N/A | #N/A | #N/A | #N/A | #N/A | #N/A |
| iYLR033W     | #N/A | #N/A | #N/A | #N/A | #N/A | #N/A |
| iYLR034C     | 0.92 | 0.26 | 0.98 | 0.35 | 0.85 | 0.37 |
| iYLR035C     | 1.23 | 0.57 | 1.06 | 0.45 | 0.97 | 0.46 |
| iYLR035C-A-0 | 1.26 | 0.67 | 1.05 | 0.46 | 1.22 | 0.76 |
| iYLR035C-A-1 | 0.96 | 0.29 | 0.95 | 0.31 | 1.13 | 0.70 |
| iYLR036C     | 1.15 | 0.52 | 1.34 | 0.75 | 1.14 | 0.61 |
| iYLR037C-0   | 1.51 | 0.88 | 1.71 | 0.95 | 0.93 | 0.35 |
| iYLR037C-1   | 1.64 | 0.95 | 1.38 | 0.79 | 1.06 | 0.61 |

|          |      |      |      |      |      |      |
|----------|------|------|------|------|------|------|
| iYLR038C | 1.09 | 0.44 | #N/A | #N/A | 0.76 | 0.16 |
| iYLR039C | 1.50 | 0.87 | 1.60 | 0.92 | 0.88 | 0.43 |
| iYLR041W | #N/A | #N/A | #N/A | #N/A | #N/A | #N/A |
| iYLR043C | 0.71 | 0.11 | 0.88 | 0.25 | 1.15 | 0.72 |
| iYLR044C | 0.40 | 0.02 | 0.40 | 0.03 | 0.45 | 0.02 |
| iYLR045C | 1.45 | 0.81 | 1.02 | 0.44 | #N/A | #N/A |
| iYLR046C | 1.18 | 0.50 | 1.24 | 0.64 | 0.85 | 0.37 |
| iYLR047C | 0.53 | 0.05 | 0.56 | 0.07 | 0.57 | 0.05 |
| iYLR048W | #N/A | #N/A | #N/A | #N/A | #N/A | #N/A |
| iYLR049C | #N/A | #N/A | 1.06 | 0.45 | 1.02 | 0.68 |
| iYLR050C | 0.99 | 0.32 | 0.91 | 0.28 | 1.10 | 0.79 |
| iYLR051C | #N/A | #N/A | 0.84 | 0.22 | 1.10 | 0.56 |
| iYLR052W | #N/A | #N/A | #N/A | #N/A | #N/A | #N/A |
| iYLR053C | 1.66 | 0.93 | 1.51 | 0.88 | 1.07 | 0.62 |
| iYLR054C | 1.21 | 0.54 | 1.10 | 0.49 | 0.74 | 0.18 |
| iYLR055C | 0.67 | 0.10 | 0.50 | 0.05 | 0.87 | 0.30 |
| iYLR056W | 1.19 | 0.56 | 0.89 | 0.26 | 0.92 | 0.37 |
| iYLR057W | #N/A | #N/A | #N/A | #N/A | #N/A | #N/A |
| iYLR058C | 0.78 | 0.15 | 0.67 | 0.11 | 0.89 | 0.32 |
| iYLR059C | 1.19 | 0.58 | 0.98 | 0.35 | 1.30 | 0.77 |
| iYLR060W | #N/A | #N/A | #N/A | #N/A | #N/A | #N/A |
| iYLR062C | #N/A | #N/A | #N/A | #N/A | #N/A | #N/A |
| iYLR064W | #N/A | #N/A | #N/A | #N/A | #N/A | #N/A |
| iYLR065C | 1.23 | 0.60 | 1.15 | 0.56 | 0.75 | 0.21 |
| iYLR066W | #N/A | #N/A | #N/A | #N/A | #N/A | #N/A |
| iYLR067C | 1.44 | 0.80 | 1.54 | 0.90 | 1.24 | 0.77 |
| iYLR068W | #N/A | #N/A | #N/A | #N/A | #N/A | #N/A |
| iYLR069C | #N/A | #N/A | #N/A | #N/A | #N/A | #N/A |
| iYLR070C | #N/A | #N/A | #N/A | #N/A | #N/A | #N/A |
| iYLR071C | #N/A | #N/A | #N/A | #N/A | 1.05 | 0.59 |
| iYLR072W | #N/A | #N/A | #N/A | #N/A | #N/A | #N/A |
| iYLR073C | 1.13 | 0.49 | 1.27 | 0.69 | 1.00 | 0.51 |
| iYLR074C | 0.67 | 0.10 | 0.68 | 0.12 | 1.01 | 0.53 |
| iYLR076C | #N/A | #N/A | #N/A | #N/A | #N/A | #N/A |
| iYLR077W | #N/A | #N/A | #N/A | #N/A | #N/A | #N/A |
| iYLR078C | 1.07 | 0.36 | 1.06 | 0.44 | 0.93 | 0.35 |
| iYLR079W | #N/A | #N/A | #N/A | #N/A | #N/A | #N/A |
| iYLR080W | 0.89 | 0.21 | 0.94 | 0.31 | 0.73 | 0.19 |
| iYLR081W | 1.52 | 0.90 | 1.59 | 0.90 | 0.94 | 0.37 |
| iYLR082C | #N/A | #N/A | 1.44 | 0.81 | 0.97 | 0.45 |
| iYLR083C | 1.39 | 0.80 | 0.94 | 0.31 | 1.03 | 0.56 |
| iYLR084C | 1.01 | 0.33 | 1.05 | 0.43 | 0.93 | 0.40 |
| iYLR085C | 1.26 | 0.65 | 1.14 | 0.53 | 0.88 | 0.31 |
| iYLR086W | 1.38 | 0.74 | 1.22 | 0.62 | 1.02 | 0.67 |
| iYLR087C | 1.43 | 0.79 | 1.35 | 0.77 | 1.00 | 0.50 |
| iYLR088W | 1.32 | 0.73 | 1.33 | 0.74 | #N/A | #N/A |
| iYLR089C | 1.16 | 0.53 | 1.15 | 0.56 | 1.07 | 0.62 |
| iYLR090W | #N/A | #N/A | #N/A | #N/A | #N/A | #N/A |
| iYLR091W | 1.11 | 0.42 | 1.19 | 0.61 | 0.90 | 0.47 |
| iYLR092W | #N/A | #N/A | 1.61 | 0.93 | 1.33 | 0.95 |
| iYLR093C | 1.34 | 0.75 | 1.37 | 0.79 | 1.14 | 0.74 |

|            |      |      |      |      |      |      |
|------------|------|------|------|------|------|------|
| iYLR094C   | 0.80 | 0.17 | 0.64 | 0.10 | 0.87 | 0.30 |
| iYLR095C   | 1.10 | 0.44 | 1.09 | 0.49 | 1.13 | 0.63 |
| iYLR096W   | #N/A | #N/A | #N/A | #N/A | #N/A | #N/A |
| iYLR097C   | 1.01 | 0.31 | 1.03 | 0.41 | 1.22 | 0.70 |
| iYLR098C   | 0.98 | 0.28 | 1.10 | 0.50 | 0.89 | 0.33 |
| iYLR099C   | 1.09 | 0.43 | 1.08 | 0.46 | 0.76 | 0.23 |
| iYLR102C   | #N/A | #N/A | 1.08 | 0.48 | #N/A | #N/A |
| iYLR103C   | 1.35 | 0.71 | 0.91 | 0.29 | 0.93 | 0.35 |
| iYLR104W   | #N/A | #N/A | #N/A | #N/A | #N/A | #N/A |
| iYLR105C   | 1.23 | 0.57 | 1.06 | 0.44 | 0.90 | 0.34 |
| iYLR106C   | 0.76 | 0.13 | 0.83 | 0.24 | #N/A | #N/A |
| iYLR107W   | 1.30 | 0.71 | 1.41 | 0.81 | 0.97 | 0.45 |
| iYLR108C   | 0.96 | 0.26 | 0.79 | 0.19 | 0.72 | 0.16 |
| iYLR109W   | #N/A | #N/A | #N/A | #N/A | #N/A | #N/A |
| iYLR110C   | 0.15 | 0.00 | 0.13 | 0.00 | 0.60 | 0.05 |
| iYLR111W   | #N/A | #N/A | #N/A | #N/A | #N/A | #N/A |
| iYLR112W   | #N/A | #N/A | #N/A | #N/A | 0.94 | 0.36 |
| iYLR113W   | 1.24 | 0.58 | 1.33 | 0.74 | 1.12 | 0.58 |
| iYLR114C   | 1.30 | 0.65 | 1.40 | 0.76 | 1.13 | 0.82 |
| iYLR115W   | 1.15 | 0.46 | 1.21 | 0.61 | 1.18 | 0.84 |
| iYLR116W   | 1.66 | 0.93 | 2.03 | 0.95 | 1.12 | 0.69 |
| iYLR117C   | #N/A | #N/A | 1.00 | 0.38 | 2.07 | 1.00 |
| iYLR118C   | #N/A | #N/A | 1.85 | 0.97 | #N/A | #N/A |
| iYLR119W   | 1.55 | 0.91 | 1.58 | 0.86 | 0.97 | 0.46 |
| iYLR120C   | 0.97 | 0.30 | 1.02 | 0.40 | 0.93 | 0.39 |
| iYLR121C   | 1.02 | 0.31 | 0.82 | 0.23 | 0.91 | 0.35 |
| iYLR123C   | 1.40 | 0.78 | 1.04 | 0.42 | 0.69 | 0.10 |
| iYLR124W-0 | 1.41 | 0.83 | 1.25 | 0.67 | 1.00 | 0.44 |
| iYLR125W   | #N/A | #N/A | 1.35 | 0.78 | 1.07 | 0.61 |
| iYLR126C   | 1.56 | 0.89 | 2.14 | 0.97 | #N/A | #N/A |
| iYLR127C   | #N/A | #N/A | #N/A | #N/A | #N/A | #N/A |
| iYLR128W   | #N/A | #N/A | #N/A | #N/A | #N/A | #N/A |
| iYLR129W   | 1.51 | 0.85 | 1.40 | 0.80 | #N/A | #N/A |
| iYLR130C   | #N/A | #N/A | 1.10 | 0.50 | 0.83 | 0.24 |
| iYLR131C   | 1.25 | 0.59 | 1.16 | 0.57 | 0.94 | 0.54 |
| iYLR132C   | 1.37 | 0.78 | 1.14 | 0.55 | 0.91 | 0.35 |
| iYLR133W   | 1.06 | 0.42 | 1.04 | 0.43 | 0.75 | 0.21 |
| iYLR134W   | 1.31 | 0.73 | 1.40 | 0.79 | 1.11 | 0.72 |
| iYLR135W   | 1.43 | 0.84 | 1.22 | 0.63 | 1.33 | 0.78 |
| iYLR136C   | 1.21 | 0.57 | 1.18 | 0.59 | 1.02 | 0.55 |
| iYLR137W   | 1.62 | 0.94 | 1.07 | 0.45 | 0.95 | 0.43 |
| iYLR138W   | 1.73 | 0.97 | #N/A | #N/A | #N/A | #N/A |
| iYLR141W   | 0.84 | 0.17 | 0.85 | 0.23 | 0.92 | 0.38 |
| iYLR142W   | 0.87 | 0.20 | 0.85 | 0.24 | 1.22 | 0.73 |
| iYLR143W   | #N/A | #N/A | #N/A | #N/A | #N/A | #N/A |
| iYLR144C   | #N/A | #N/A | #N/A | #N/A | #N/A | #N/A |
| iYLR146C   | 1.32 | 0.68 | 1.72 | 0.90 | #N/A | #N/A |
| iYLR147C   | #N/A | #N/A | #N/A | #N/A | #N/A | #N/A |
| iYLR148W   | #N/A | #N/A | #N/A | #N/A | #N/A | #N/A |
| iYLR149C   | 0.57 | 0.06 | 0.46 | 0.04 | 0.80 | 0.30 |
| iYLR150W   | #N/A | #N/A | 1.08 | 0.47 | #N/A | #N/A |

|            |      |      |      |      |      |      |
|------------|------|------|------|------|------|------|
| iYLR152C   | 1.16 | 0.54 | 1.19 | 0.60 | 0.98 | 0.42 |
| iYLR153C   | 0.67 | 0.10 | 0.72 | 0.14 | 0.72 | 0.13 |
| iYLR154C   | 0.86 | 0.21 | 0.83 | 0.23 | #N/A | #N/A |
| iYLR155C-0 | 1.32 | 0.68 | 1.29 | 0.70 | 1.28 | 0.87 |
| iYLR155C-A | 1.26 | 0.65 | 1.28 | 0.70 | 1.29 | 0.79 |
| iYLR157C-A | 1.30 | 0.71 | 1.18 | 0.58 | 1.24 | 0.81 |
| iYLR157C-B | 1.39 | 0.80 | 1.42 | 0.82 | 1.06 | 0.71 |
| iYLR158C-0 | 1.30 | 0.71 | 1.19 | 0.60 | 1.15 | 0.71 |
| iYLR159W   | 0.74 | 0.12 | 0.77 | 0.19 | 1.08 | 0.63 |
| iYLR160C-0 | 1.24 | 0.62 | 1.19 | 0.61 | 1.10 | 0.73 |
| iYLR161W   | 0.70 | 0.11 | 0.68 | 0.13 | 0.95 | 0.41 |
| iYLR162W-0 | 0.88 | 0.21 | 0.79 | 0.20 | 1.19 | 0.75 |
| iYLR162W-A | 0.90 | 0.22 | 0.89 | 0.32 | 1.32 | 0.86 |
| iYLR162W-B | 1.38 | 0.80 | 1.22 | 0.61 | 1.10 | 0.56 |
| iYLR163C   | 1.40 | 0.82 | 1.17 | 0.58 | 1.00 | 0.47 |
| iYLR164W   | #N/A | #N/A | #N/A | #N/A | #N/A | #N/A |
| iYLR165C   | #N/A | #N/A | 0.72 | 0.14 | #N/A | #N/A |
| iYLR167W   | #N/A | #N/A | #N/A | #N/A | #N/A | #N/A |
| iYLR168C   | #N/A | #N/A | #N/A | #N/A | #N/A | #N/A |
| iYLR171W   | #N/A | #N/A | 1.53 | 0.60 | #N/A | #N/A |
| iYLR172C   | #N/A | #N/A | 1.71 | 0.80 | #N/A | #N/A |
| iYLR173W   | #N/A | #N/A | #N/A | #N/A | 0.84 | 0.24 |
| iYLR174W   | #N/A | #N/A | #N/A | #N/A | #N/A | #N/A |
| iYLR175W   | #N/A | #N/A | #N/A | #N/A | #N/A | #N/A |
| iYLR176C   | 1.31 | 0.67 | 0.97 | 0.36 | 0.86 | 0.27 |
| iYLR177W   | #N/A | #N/A | #N/A | #N/A | #N/A | #N/A |
| iYLR178C   | 1.40 | 0.81 | 1.40 | 0.61 | 0.57 | 0.04 |
| iYLR179C   | #N/A | #N/A | 0.59 | 0.08 | 0.64 | 0.08 |
| iYLR180W   | 1.28 | 0.66 | #N/A | #N/A | 0.84 | 0.24 |
| iYLR181C   | #N/A | #N/A | 0.57 | 0.12 | 1.00 | 0.64 |
| iYLR182W   | #N/A | #N/A | #N/A | #N/A | #N/A | #N/A |
| iYLR183C   | #N/A | #N/A | #N/A | #N/A | #N/A | #N/A |
| iYLR184W   | #N/A | #N/A | #N/A | #N/A | #N/A | #N/A |
| iYLR186W   | 1.20 | 0.53 | 1.24 | 0.67 | 1.29 | 0.85 |
| iYLR187W   | 1.55 | 0.91 | 1.17 | 0.56 | 1.00 | 0.46 |
| iYLR188W   | #N/A | #N/A | #N/A | #N/A | 1.05 | 0.71 |
| iYLR191W   | 1.20 | 0.58 | 1.50 | 0.87 | 0.90 | 0.46 |
| iYLR194C   | #N/A | #N/A | 0.80 | 0.20 | 0.87 | 0.42 |
| iYLR196W   | #N/A | #N/A | #N/A | #N/A | #N/A | #N/A |
| iYLR199C   | #N/A | #N/A | 1.21 | 0.62 | 0.99 | 0.43 |
| iYLR200W   | #N/A | #N/A | #N/A | #N/A | #N/A | #N/A |
| iYLR203C   | 1.04 | 0.33 | 0.84 | 0.22 | 0.78 | 0.18 |
| iYLR204W   | #N/A | #N/A | #N/A | #N/A | #N/A | #N/A |
| iYLR205C   | 1.31 | 0.72 | 1.06 | 0.45 | 0.93 | 0.51 |
| iYLR207W   | 0.95 | 0.26 | 0.99 | 0.36 | 0.89 | 0.31 |
| iYLR208W   | #N/A | #N/A | #N/A | #N/A | #N/A | #N/A |
| iYLR209C   | 1.10 | 0.44 | 1.23 | 0.57 | 0.81 | 0.20 |
| iYLR211C   | 1.26 | 0.68 | 0.97 | 0.35 | 1.00 | 0.50 |
| iYLR212C   | #N/A | #N/A | #N/A | #N/A | 0.93 | 0.39 |
| iYLR213C   | 1.10 | 0.44 | 1.26 | 0.69 | 0.87 | 0.27 |
| iYLR214W   | #N/A | #N/A | #N/A | #N/A | #N/A | #N/A |

|            |      |      |      |      |      |      |
|------------|------|------|------|------|------|------|
| iYLR215C   | #N/A | #N/A | #N/A | #N/A | #N/A | #N/A |
| iYLR217W   | 1.02 | 0.37 | 1.01 | 0.38 | 0.75 | 0.15 |
| iYLR218C   | 1.25 | 0.66 | 1.02 | 0.40 | 0.81 | 0.21 |
| iYLR219W   | 1.04 | 0.38 | 0.87 | 0.24 | 0.90 | 0.44 |
| iYLR220W   | 1.50 | 0.88 | 1.10 | 0.50 | 1.07 | 0.66 |
| iYLR221C   | 1.49 | 0.84 | 1.84 | 0.97 | #N/A | #N/A |
| iYLR224W   | #N/A | #N/A | #N/A | #N/A | #N/A | #N/A |
| iYLR225C   | #N/A | #N/A | #N/A | #N/A | #N/A | #N/A |
| iYLR227C   | 1.18 | 0.50 | 1.26 | 0.64 | 0.85 | 0.37 |
| iYLR228C-0 | 0.83 | 0.17 | 0.91 | 0.32 | 0.86 | 0.28 |
| iYLR228C-1 | 1.35 | 0.76 | 1.20 | 0.57 | 0.98 | 0.42 |
| iYLR230W   | 1.08 | 0.39 | 1.02 | 0.39 | 1.16 | 0.70 |
| iYLR232W   | #N/A | #N/A | 1.55 | 0.90 | 1.25 | 0.75 |
| iYLR233C   | 1.04 | 0.37 | 1.01 | 0.39 | 0.73 | 0.19 |
| iYLR236C   | #N/A | #N/A | #N/A | #N/A | #N/A | #N/A |
| iYLR237W   | 1.91 | 0.98 | 7.20 | 0.85 | 0.89 | 0.32 |
| iYLR238W   | 1.55 | 0.88 | 1.32 | 0.69 | #N/A | #N/A |
| iYLR239C   | #N/A | #N/A | 0.92 | 0.31 | #N/A | #N/A |
| iYLR240W   | 1.26 | 0.67 | #N/A | #N/A | 1.06 | 0.59 |
| iYLR241W   | #N/A | #N/A | #N/A | #N/A | #N/A | #N/A |
| iYLR243W   | 0.88 | 0.22 | 1.89 | 0.75 | 0.85 | 0.37 |
| iYLR244C   | #N/A | #N/A | #N/A | #N/A | #N/A | #N/A |
| iYLR245C   | #N/A | #N/A | 1.07 | 0.46 | #N/A | #N/A |
| iYLR246W   | #N/A | #N/A | #N/A | #N/A | #N/A | #N/A |
| iYLR247C   | 1.36 | 0.75 | #N/A | #N/A | 0.75 | 0.15 |
| iYLR248W   | 0.47 | 0.03 | 0.57 | 0.07 | 0.60 | 0.06 |
| iYLR249W   | #N/A | #N/A | #N/A | #N/A | #N/A | #N/A |
| iYLR250W   | 1.01 | 0.33 | 1.02 | 0.39 | 1.17 | 0.63 |
| iYLR252W   | #N/A | #N/A | 0.58 | 0.11 | 1.00 | 0.50 |
| iYLR253W   | #N/A | #N/A | #N/A | #N/A | #N/A | #N/A |
| iYLR254C   | 0.76 | 0.13 | 0.92 | 0.28 | 0.90 | 0.39 |
| iYLR255C   | 0.58 | 0.07 | 0.50 | 0.05 | 0.79 | 0.18 |
| iYLR257W   | 1.23 | 0.62 | 1.55 | 0.84 | 0.69 | 0.11 |
| iYLR258W   | 1.51 | 0.89 | 1.45 | 0.72 | 0.90 | 0.33 |
| iYLR259C   | #N/A | #N/A | #N/A | #N/A | 1.14 | 0.71 |
| iYLR260W   | 1.55 | 0.91 | 1.93 | 0.98 | #N/A | #N/A |
| iYLR262C   | 1.09 | 0.39 | #N/A | #N/A | 1.06 | 0.57 |
| iYLR262C-A | 1.22 | 0.60 | 1.18 | 0.60 | 0.91 | 0.47 |
| iYLR263W   | #N/A | #N/A | 0.55 | 0.07 | #N/A | #N/A |
| iYLR265C   | 1.02 | 0.36 | 1.24 | 0.67 | #N/A | #N/A |
| iYLR266C   | 0.96 | 0.30 | 0.90 | 0.27 | 0.60 | 0.06 |
| iYLR267W   | #N/A | #N/A | 1.01 | 0.39 | #N/A | #N/A |
| iYLR270W   | 1.33 | 0.74 | 1.16 | 0.57 | 1.03 | 0.47 |
| iYLR271W   | #N/A | #N/A | #N/A | #N/A | #N/A | #N/A |
| iYLR273C   | 0.98 | 0.27 | 0.93 | 0.31 | 0.94 | 0.40 |
| iYLR274W   | 1.29 | 0.70 | 0.95 | 0.32 | 0.89 | 0.31 |
| iYLR275W   | #N/A | #N/A | #N/A | #N/A | #N/A | #N/A |
| iYLR276C   | #N/A | #N/A | 0.66 | 0.12 | #N/A | #N/A |
| iYLR277C   | #N/A | #N/A | 1.15 | 0.51 | #N/A | #N/A |
| iYLR278C   | #N/A | #N/A | 0.77 | 0.20 | #N/A | #N/A |
| iYLR281C   | #N/A | #N/A | #N/A | #N/A | #N/A | #N/A |



|            |      |      |      |      |      |      |
|------------|------|------|------|------|------|------|
| iYLR283W   | #N/A | #N/A | #N/A | #N/A | #N/A | #N/A |
| iYLR284C   | 1.53 | 0.90 | 1.30 | 0.71 | 1.02 | 0.46 |
| iYLR285W   | 1.29 | 0.64 | 1.38 | 0.75 | 1.12 | 0.68 |
| iYLR286C   | 1.11 | 0.45 | #N/A | #N/A | 1.06 | 0.72 |
| iYLR287C   | #N/A | #N/A | 1.17 | 0.57 | 1.00 | 0.51 |
| iYLR287C-A | 0.81 | 0.16 | 0.72 | 0.14 | 1.11 | 0.70 |
| iYLR288C   | 1.21 | 0.61 | 1.12 | 0.52 | #N/A | #N/A |
| iYLR289W   | #N/A | #N/A | #N/A | #N/A | #N/A | #N/A |
| iYLR290C   | #N/A | #N/A | #N/A | #N/A | #N/A | #N/A |
| iYLR291C   | 0.96 | 0.28 | 0.85 | 0.23 | 1.06 | 0.61 |
| iYLR292C   | 1.24 | 0.62 | 0.77 | 0.17 | 1.06 | 0.73 |
| iYLR293C   | #N/A | #N/A | 0.75 | 0.16 | #N/A | #N/A |
| iYLR295C   | 0.96 | 0.30 | 0.99 | 0.38 | 0.84 | 0.25 |
| iYLR296W   | 0.63 | 0.08 | 0.59 | 0.08 | 0.43 | 0.01 |
| iYLR297W   | 1.33 | 0.69 | 1.88 | 0.96 | 1.31 | 0.91 |
| iYLR298C   | 0.37 | 0.02 | 0.34 | 0.02 | 0.38 | 0.01 |
| iYLR299W   | 0.42 | 0.03 | 0.36 | 0.02 | 0.33 | 0.00 |
| iYLR301W   | #N/A | #N/A | #N/A | #N/A | #N/A | #N/A |
| iYLR303W   | #N/A | #N/A | #N/A | #N/A | #N/A | #N/A |
| iYLR304C   | 0.97 | 0.31 | 0.79 | 0.20 | 1.15 | 0.78 |
| iYLR305C   | 1.70 | 0.96 | 0.98 | 0.35 | #N/A | #N/A |
| iYLR308W   | #N/A | #N/A | #N/A | #N/A | 0.98 | 0.48 |
| iYLR309C   | 1.28 | 0.69 | #N/A | #N/A | 0.97 | 0.47 |
| iYLR310C   | 1.25 | 0.59 | 1.02 | 0.42 | 1.09 | 0.78 |
| iYLR312C   | 0.74 | 0.12 | 0.67 | 0.11 | 0.69 | 0.11 |
| iYLR312W-A | 1.77 | 0.97 | 1.42 | 0.80 | 1.12 | 0.67 |
| iYLR313C   | #N/A | #N/A | #N/A | #N/A | #N/A | #N/A |
| iYLR314C   | 1.19 | 0.58 | 1.02 | 0.39 | 0.88 | 0.42 |
| iYLR317W   | 1.37 | 0.79 | #N/A | #N/A | 0.84 | 0.36 |
| iYLR318W   | #N/A | #N/A | #N/A | #N/A | #N/A | #N/A |
| iYLR319C   | 1.23 | 0.56 | 1.25 | 0.68 | #N/A | #N/A |
| iYLR320W   | #N/A | #N/A | 0.41 | 0.03 | #N/A | #N/A |
| iYLR322W   | #N/A | #N/A | #N/A | #N/A | #N/A | #N/A |
| iYLR323C   | #N/A | #N/A | 1.00 | 0.45 | #N/A | #N/A |
| iYLR324W   | #N/A | #N/A | 1.38 | 0.65 | #N/A | #N/A |
| iYLR325C   | 0.76 | 0.13 | 0.72 | 0.14 | 0.81 | 0.20 |
| iYLR326W   | 1.35 | 0.76 | 1.20 | 0.61 | 0.85 | 0.38 |
| iYLR327C   | 0.80 | 0.16 | 0.79 | 0.19 | 0.80 | 0.30 |
| iYLR328W   | #N/A | #N/A | 1.34 | 0.76 | 1.04 | 0.57 |
| iYLR329W   | #N/A | #N/A | 0.91 | 0.29 | 0.74 | 0.14 |
| iYLR330W   | #N/A | #N/A | #N/A | #N/A | 0.91 | 0.36 |
| iYLR332W-1 | 1.13 | 0.48 | 1.07 | 0.46 | 0.84 | 0.36 |
| iYLR333C   | 0.81 | 0.15 | 0.73 | 0.15 | 1.04 | 0.48 |
| iYLR335W   | #N/A | #N/A | #N/A | #N/A | #N/A | #N/A |
| iYLR336C   | 1.40 | 0.81 | 1.08 | 0.47 | #N/A | #N/A |
| iYLR338W   | 1.04 | 0.38 | 0.89 | 0.26 | 0.92 | 0.50 |
| iYLR340W   | 1.14 | 0.49 | 1.46 | 0.84 | 0.85 | 0.25 |
| iYLR342W   | #N/A | #N/A | 1.17 | 0.57 | 0.86 | 0.26 |
| iYLR343W   | #N/A | #N/A | #N/A | #N/A | #N/A | #N/A |
| iYLR344W   | 0.98 | 0.30 | 1.14 | 0.53 | #N/A | #N/A |
| iYLR347C   | 0.85 | 0.18 | 0.82 | 0.20 | 0.82 | 0.33 |

|            |      |      |      |      |      |      |
|------------|------|------|------|------|------|------|
| iYLR349W   | 0.83 | 0.16 | 0.80 | 0.19 | 0.71 | 0.12 |
| iYLR350W   | #N/A | #N/A | #N/A | #N/A | #N/A | #N/A |
| iYLR351C   | 1.21 | 0.58 | 0.91 | 0.29 | 1.12 | 0.69 |
| iYLR352W   | 1.24 | 0.65 | 1.15 | 0.56 | 0.99 | 0.62 |
| iYLR353W   | #N/A | #N/A | #N/A | #N/A | #N/A | #N/A |
| iYLR355C   | 0.75 | 0.13 | 0.80 | 0.20 | 0.81 | 0.22 |
| iYLR356W   | #N/A | #N/A | 1.21 | 0.63 | 0.95 | 0.42 |
| iYLR358C   | 1.04 | 0.39 | 0.97 | 0.34 | 0.76 | 0.23 |
| iYLR361C   | 1.38 | 0.79 | 1.62 | 0.91 | 1.17 | 0.86 |
| iYLR362W   | 1.22 | 0.62 | 2.22 | 0.88 | 1.19 | 0.87 |
| iYLR363C   | 1.23 | 0.62 | 1.38 | 0.79 | 1.17 | 0.82 |
| iYLR366W   | 0.88 | 0.20 | 0.88 | 0.26 | 0.85 | 0.26 |
| iYLR368W   | #N/A | #N/A | #N/A | #N/A | #N/A | #N/A |
| iYLR369W   | #N/A | #N/A | #N/A | #N/A | #N/A | #N/A |
| iYLR370C   | 1.01 | 0.31 | 0.98 | 0.36 | 1.00 | 0.44 |
| iYLR372W   | #N/A | #N/A | #N/A | #N/A | #N/A | #N/A |
| iYLR373C   | 1.09 | 0.45 | 0.88 | 0.27 | #N/A | #N/A |
| iYLR375W   | #N/A | #N/A | #N/A | #N/A | #N/A | #N/A |
| iYLR376C   | #N/A | #N/A | #N/A | #N/A | #N/A | #N/A |
| iYLR377C   | 0.97 | 0.31 | 1.20 | 0.57 | 0.79 | 0.23 |
| iYLR379W   | 0.84 | 0.19 | 0.76 | 0.17 | 0.72 | 0.17 |
| iYLR380W   | 1.27 | 0.62 | 1.30 | 0.70 | #N/A | #N/A |
| iYLR381W   | #N/A | #N/A | #N/A | #N/A | #N/A | #N/A |
| iYLR382C   | 1.24 | 0.64 | 1.11 | 0.50 | 0.77 | 0.25 |
| iYLR383W   | #N/A | #N/A | #N/A | #N/A | #N/A | #N/A |
| iYLR384C   | #N/A | #N/A | #N/A | #N/A | #N/A | #N/A |
| iYLR385C   | 1.16 | 0.51 | 0.99 | 0.43 | 0.61 | 0.06 |
| iYLR386W   | #N/A | #N/A | #N/A | #N/A | #N/A | #N/A |
| iYLR387C   | 0.77 | 0.13 | 0.78 | 0.18 | 1.12 | 0.69 |
| iYLR388W   | 1.08 | 0.41 | #N/A | #N/A | 1.44 | 0.92 |
| iYLR389C   | 1.06 | 0.41 | 1.01 | 0.39 | 0.96 | 0.56 |
| iYLR390W   | 0.95 | 0.27 | 0.53 | 0.06 | #N/A | #N/A |
| iYLR391W-A | #N/A | #N/A | #N/A | #N/A | #N/A | #N/A |
| iYLR392C   | #N/A | #N/A | 1.63 | 0.80 | 0.84 | 0.36 |
| iYLR394W   | 1.13 | 0.48 | #N/A | #N/A | 0.86 | 0.37 |
| iYLR395C   | #N/A | #N/A | #N/A | #N/A | #N/A | #N/A |
| iYLR396C   | #N/A | #N/A | #N/A | #N/A | #N/A | #N/A |
| iYLR397C   | #N/A | #N/A | 0.76 | 0.16 | #N/A | #N/A |
| iYLR398C   | #N/A | #N/A | #N/A | #N/A | #N/A | #N/A |
| iYLR399C   | 0.51 | 0.04 | 0.53 | 0.05 | 0.49 | 0.03 |
| iYLR400W   | #N/A | #N/A | #N/A | #N/A | 0.88 | 0.32 |
| iYLR401C   | #N/A | #N/A | #N/A | #N/A | #N/A | #N/A |
| iYLR402W   | 1.31 | 0.72 | 1.12 | 0.52 | 1.04 | 0.67 |
| iYLR404W   | #N/A | #N/A | #N/A | #N/A | #N/A | #N/A |
| iYLR405W   | #N/A | #N/A | #N/A | #N/A | #N/A | #N/A |
| iYLR406C   | 0.59 | 0.07 | 0.56 | 0.06 | 0.91 | 0.40 |
| iYLR407W   | #N/A | #N/A | #N/A | #N/A | #N/A | #N/A |
| iYLR408C   | #N/A | #N/A | #N/A | #N/A | 0.83 | 0.24 |
| iYLR409C   | #N/A | #N/A | #N/A | #N/A | #N/A | #N/A |
| iYLR410W   | 0.81 | 0.16 | 1.39 | 0.62 | 0.67 | 0.09 |
| iYLR412W-0 | 1.09 | 0.41 | 1.18 | 0.57 | 0.98 | 0.47 |

|              |      |      |      |      |      |      |
|--------------|------|------|------|------|------|------|
| iYLR413W     | #N/A | #N/A | #N/A | #N/A | #N/A | #N/A |
| iYLR414C     | #N/A | #N/A | #N/A | #N/A | #N/A | #N/A |
| iYLR416C     | 0.90 | 0.22 | #N/A | #N/A | 0.92 | 0.33 |
| iYLR417W     | #N/A | #N/A | #N/A | #N/A | #N/A | #N/A |
| iYLR418C     | 1.34 | 0.72 | #N/A | #N/A | 0.70 | 0.11 |
| iYLR419W     | #N/A | #N/A | #N/A | #N/A | #N/A | #N/A |
| iYLR420W     | #N/A | #N/A | #N/A | #N/A | #N/A | #N/A |
| iYLR421C     | 1.09 | 0.39 | 1.24 | 0.65 | 1.23 | 0.81 |
| iYLR422W     | #N/A | #N/A | 1.09 | 0.49 | 1.10 | 0.79 |
| iYLR423C     | #N/A | #N/A | 2.06 | 0.75 | #N/A | #N/A |
| iYLR424W     | 1.22 | 0.55 | #N/A | #N/A | #N/A | #N/A |
| iYLR425W     | 1.16 | 0.53 | #N/A | #N/A | 0.97 | 0.39 |
| iYLR426W     | 1.18 | 0.54 | 1.16 | 0.56 | 0.88 | 0.31 |
| iYLR427W     | #N/A | #N/A | 1.13 | 0.53 | #N/A | #N/A |
| iYLR431C     | #N/A | #N/A | 0.79 | 0.18 | 1.08 | 0.77 |
| iYLR432W     | #N/A | #N/A | #N/A | #N/A | #N/A | #N/A |
| iYLR435W     | 1.77 | 0.97 | 1.77 | 0.81 | 1.35 | 0.95 |
| iYLR436C     | 0.94 | 0.26 | 0.99 | 0.36 | 0.87 | 0.34 |
| iYLR437C     | 0.75 | 0.13 | 0.51 | 0.05 | 0.79 | 0.19 |
| iYLR438C-A   | 0.97 | 0.27 | 1.03 | 0.41 | 1.08 | 0.72 |
| iYLR438W     | #N/A | #N/A | #N/A | #N/A | #N/A | #N/A |
| iYLR439W     | #N/A | #N/A | #N/A | #N/A | #N/A | #N/A |
| iYLR440C     | 0.92 | 0.22 | 0.86 | 0.26 | #N/A | #N/A |
| iYLR441C     | #N/A | #N/A | 0.63 | 0.10 | 0.96 | 0.44 |
| iYLR442C     | 1.36 | 0.78 | 1.23 | 0.63 | 1.08 | 0.55 |
| iYLR444C     | #N/A | #N/A | #N/A | #N/A | #N/A | #N/A |
| iYLR445W     | 1.35 | 0.76 | 1.33 | 0.71 | 0.96 | 0.44 |
| iYLR446W     | #N/A | #N/A | 0.93 | 0.30 | 1.10 | 0.56 |
| iYLR447C     | 0.52 | 0.05 | 0.62 | 0.09 | 0.75 | 0.22 |
| iYLR449W     | 1.15 | 0.52 | 1.38 | 0.73 | 1.21 | 0.83 |
| iYLR450W     | 1.18 | 0.55 | 1.22 | 0.64 | 0.83 | 0.35 |
| iYLR451W     | 1.68 | 0.96 | 1.73 | 0.90 | 0.93 | 0.39 |
| iYLR452C     | 0.74 | 0.12 | 0.80 | 0.19 | 1.02 | 0.56 |
| iYLR453C     | 1.29 | 0.66 | 1.20 | 0.60 | 1.03 | 0.47 |
| iYLR454W     | #N/A | #N/A | #N/A | #N/A | #N/A | #N/A |
| iYLR455W     | 1.28 | 0.68 | 1.56 | 0.82 | 1.01 | 0.50 |
| iYLR456W     | #N/A | #N/A | #N/A | #N/A | #N/A | #N/A |
| iYLR458W     | 1.41 | 0.78 | 1.17 | 0.57 | 1.10 | 0.61 |
| iYLR460C-1   | 1.23 | 0.62 | 1.40 | 0.76 | 0.86 | 0.40 |
| iYLR461W-0   | 0.84 | 0.18 | 0.91 | 0.32 | 0.94 | 0.42 |
| iYLR461W-1   | 0.68 | 0.09 | 0.71 | 0.14 | 0.91 | 0.35 |
| iYLR466W     | 0.50 | 0.04 | 0.53 | 0.06 | 0.86 | 0.28 |
| iYLRcdelta18 | #N/A | #N/A | #N/A | #N/A | #N/A | #N/A |
| iYLRcdelta19 | #N/A | #N/A | #N/A | #N/A | #N/A | #N/A |
| iYLRcdelta21 | #N/A | #N/A | #N/A | #N/A | #N/A | #N/A |
| iYLRcdelta24 | #N/A | #N/A | #N/A | #N/A | #N/A | #N/A |
| iYLRcdelta26 | 1.37 | 0.78 | 1.30 | 0.73 | 1.09 | 0.64 |
| iYLRcdelta5  | #N/A | #N/A | #N/A | #N/A | #N/A | #N/A |
| iYLRcdelta8  | 0.73 | 0.12 | 0.78 | 0.20 | 1.03 | 0.56 |
| iYLRcdelta9  | #N/A | #N/A | #N/A | #N/A | #N/A | #N/A |
| iYLRcsigma1  | 1.16 | 0.53 | 1.26 | 0.67 | 1.22 | 0.89 |

|               |      |      |      |      |      |      |
|---------------|------|------|------|------|------|------|
| iYLRCTau1     | #N/A | #N/A | #N/A | #N/A | #N/A | #N/A |
| iYLRWdelta11  | #N/A | #N/A | #N/A | #N/A | #N/A | #N/A |
| iYLRWdelta14  | #N/A | #N/A | #N/A | #N/A | #N/A | #N/A |
| iYLRWdelta15  | 0.67 | 0.10 | 0.56 | 0.06 | 0.68 | 0.13 |
| iYLRWdelta17  | #N/A | #N/A | #N/A | #N/A | #N/A | #N/A |
| iYLRWdelta20  | #N/A | #N/A | #N/A | #N/A | #N/A | #N/A |
| iYLRWdelta23  | #N/A | #N/A | 1.34 | 0.77 | #N/A | #N/A |
| iYLRWdelta4   | 1.22 | 0.55 | 1.44 | 0.79 | 1.21 | 0.79 |
| iYLRWdelta6-0 | 1.01 | 0.35 | 1.19 | 0.60 | 0.82 | 0.27 |
| iYLRWdelta6-A | 1.06 | 0.37 | 1.07 | 0.45 | 0.91 | 0.35 |
| iYML001W      | #N/A | #N/A | #N/A | #N/A | #N/A | #N/A |
| iYML002W      | 1.07 | 0.42 | 1.23 | 0.63 | 0.95 | 0.42 |
| iYML003W      | #N/A | #N/A | 1.11 | 0.50 | 1.13 | 0.59 |
| iYML004C      | 1.25 | 0.59 | 1.29 | 0.72 | 1.06 | 0.74 |
| iYML005W      | #N/A | #N/A | #N/A | #N/A | #N/A | #N/A |
| iYML006C      | 1.02 | 0.36 | 1.06 | 0.45 | 1.13 | 0.77 |
| iYML007W      | #N/A | #N/A | 1.12 | 0.52 | 0.92 | 0.37 |
| iYML008C      | 0.57 | 0.06 | 0.47 | 0.04 | 1.07 | 0.61 |
| iYML009C      | 0.98 | 0.32 | 1.01 | 0.39 | 1.06 | 0.61 |
| iYML010C-B    | 0.99 | 0.31 | 1.06 | 0.45 | 0.91 | 0.36 |
| iYML011C      | #N/A | #N/A | 1.40 | 0.81 | 0.95 | 0.43 |
| iYML012W      | 0.80 | 0.15 | 1.26 | 0.56 | #N/A | #N/A |
| iYML014W      | 0.49 | 0.04 | #N/A | #N/A | #N/A | #N/A |
| iYML015C      | 1.23 | 0.61 | 1.08 | 0.49 | 1.04 | 0.49 |
| iYML016C      | 1.67 | 0.95 | 1.41 | 0.66 | 0.71 | 0.13 |
| iYML018C      | 1.10 | 0.45 | 1.10 | 0.49 | 0.86 | 0.27 |
| iYML019W      | #N/A | #N/A | #N/A | #N/A | #N/A | #N/A |
| iYML020W      | 1.32 | 0.73 | 1.40 | 0.79 | #N/A | #N/A |
| iYML021C      | 1.39 | 0.80 | 1.35 | 0.67 | 1.32 | 0.87 |
| iYML022W      | 1.81 | 0.98 | 1.36 | 0.74 | 1.23 | 0.81 |
| iYML023C      | 1.26 | 0.65 | 1.19 | 0.60 | 1.07 | 0.62 |
| iYML024W      | #N/A | #N/A | #N/A | #N/A | #N/A | #N/A |
| iYML025C      | 0.31 | 0.01 | 0.34 | 0.01 | 0.73 | 0.19 |
| iYML026C      | 0.58 | 0.06 | 0.42 | 0.04 | 0.85 | 0.26 |
| iYML027W      | 1.40 | 0.81 | 1.24 | 0.66 | 1.34 | 0.95 |
| iYML028W      | 0.82 | 0.18 | 0.87 | 0.27 | 0.61 | 0.08 |
| iYML029W      | 0.82 | 0.16 | 0.75 | 0.15 | 1.24 | 0.78 |
| iYML030W      | 1.07 | 0.42 | 1.25 | 0.63 | 0.99 | 0.50 |
| iYML031W      | 1.37 | 0.76 | 1.21 | 0.62 | 0.84 | 0.30 |
| iYML033W      | 1.44 | 0.80 | 1.07 | 0.49 | 1.03 | 0.58 |
| iYML034W      | #N/A | #N/A | #N/A | #N/A | #N/A | #N/A |
| iYML035C      | 0.88 | 0.19 | 0.72 | 0.14 | 0.93 | 0.35 |
| iYML036W      | #N/A | #N/A | 0.68 | 0.21 | #N/A | #N/A |
| iYML037C      | 1.44 | 0.85 | 1.01 | 0.38 | #N/A | #N/A |
| iYML041C      | 1.02 | 0.34 | 0.67 | 0.12 | #N/A | #N/A |
| iYML042W      | #N/A | #N/A | #N/A | #N/A | #N/A | #N/A |
| iYML043C      | 0.82 | 0.16 | 1.01 | 0.39 | 0.93 | 0.34 |
| iYML046W      | 0.88 | 0.21 | 0.73 | 0.15 | 1.00 | 0.59 |
| iYML047C      | 1.21 | 0.59 | 1.24 | 0.62 | 1.22 | 0.68 |
| iYML048W      | 1.07 | 0.42 | 0.76 | 0.16 | #N/A | #N/A |
| iYML049C      | 1.09 | 0.40 | 1.07 | 0.46 | 0.76 | 0.23 |

|            |      |      |      |      |      |      |
|------------|------|------|------|------|------|------|
| iYML050W   | #N/A | #N/A | #N/A | #N/A | #N/A | #N/A |
| iYML051W   | 1.13 | 0.49 | 1.02 | 0.40 | 0.92 | 0.34 |
| iYML052W   | 1.59 | 0.93 | 1.26 | 0.68 | 1.34 | 0.88 |
| iYML053C   | 0.62 | 0.08 | 0.59 | 0.07 | 0.62 | 0.08 |
| iYML054C   | 1.26 | 0.62 | 1.32 | 0.74 | 0.87 | 0.40 |
| iYML055W   | #N/A | #N/A | #N/A | #N/A | #N/A | #N/A |
| iYML057W   | #N/A | #N/A | #N/A | #N/A | #N/A | #N/A |
| iYML058W   | 1.02 | 0.34 | 0.73 | 0.15 | #N/A | #N/A |
| iYML060W   | #N/A | #N/A | #N/A | #N/A | #N/A | #N/A |
| iYML061C   | 1.61 | 0.93 | 1.80 | 0.97 | #N/A | #N/A |
| iYML062C   | 1.29 | 0.70 | 1.21 | 0.63 | 1.16 | 0.73 |
| iYML063W   | #N/A | #N/A | #N/A | #N/A | #N/A | #N/A |
| iYML064C   | 0.39 | 0.02 | 0.41 | 0.03 | 0.59 | 0.04 |
| iYML065W   | #N/A | #N/A | #N/A | #N/A | #N/A | #N/A |
| iYML066C   | 1.10 | 0.45 | 1.22 | 0.64 | 1.07 | 0.52 |
| iYML067C   | #N/A | #N/A | #N/A | #N/A | #N/A | #N/A |
| iYML068W   | #N/A | #N/A | 0.71 | 0.13 | #N/A | #N/A |
| iYML069W   | 1.50 | 0.84 | 1.47 | 0.77 | 1.37 | 0.81 |
| iYML070W   | 1.17 | 0.53 | 1.31 | 0.68 | 1.01 | 0.46 |
| iYML071C   | #N/A | #N/A | #N/A | #N/A | #N/A | #N/A |
| iYML072C   | #N/A | #N/A | #N/A | #N/A | 1.04 | 0.50 |
| iYML074C-0 | 1.35 | 0.75 | 1.44 | 0.84 | 1.16 | 0.73 |
| iYML074C-1 | 1.42 | 0.83 | 1.43 | 0.83 | 1.10 | 0.78 |
| iYML075C   | 1.12 | 0.42 | 1.10 | 0.50 | 0.98 | 0.41 |
| iYML076C   | 1.80 | 0.98 | 1.49 | 0.87 | 0.91 | 0.48 |
| iYML077W   | #N/A | #N/A | 0.96 | 0.41 | 1.08 | 0.76 |
| iYML078W   | 1.36 | 0.73 | 1.47 | 0.86 | 1.17 | 0.84 |
| iYML079W   | #N/A | #N/A | #N/A | #N/A | #N/A | #N/A |
| iYML080W   | #N/A | #N/A | #N/A | #N/A | #N/A | #N/A |
| iYML081C-A | 0.99 | 0.31 | 0.85 | 0.23 | 0.96 | 0.38 |
| iYML081W   | 1.26 | 0.65 | 1.06 | 0.46 | 0.95 | 0.38 |
| iYML082W   | 1.08 | 0.42 | #N/A | #N/A | #N/A | #N/A |
| iYML083C   | 0.89 | 0.22 | 1.03 | 0.40 | 0.51 | 0.03 |
| iYML085C   | 0.83 | 0.19 | 0.86 | 0.23 | 0.71 | 0.12 |
| iYML086C   | 1.21 | 0.58 | 1.28 | 0.61 | 0.89 | 0.33 |
| iYML087C   | 1.43 | 0.80 | 1.23 | 0.65 | 0.85 | 0.27 |
| iYML088W   | #N/A | #N/A | #N/A | #N/A | #N/A | #N/A |
| iYML089C   | 0.75 | 0.14 | 0.76 | 0.17 | 0.96 | 0.39 |
| iYML093W   | 1.06 | 0.39 | 0.93 | 0.31 | 1.02 | 0.67 |
| iYML094W   | #N/A | #N/A | #N/A | #N/A | #N/A | #N/A |
| iYML095C   | 0.92 | 0.23 | 0.66 | 0.10 | 0.88 | 0.32 |
| iYML097C   | 1.23 | 0.60 | 1.13 | 0.53 | 1.38 | 0.93 |
| iYML098W   | #N/A | #N/A | 1.54 | 0.84 | 1.17 | 0.86 |
| iYML099C   | 1.01 | 0.31 | 0.97 | 0.34 | 1.07 | 0.61 |
| iYML100W   | #N/A | #N/A | #N/A | #N/A | #N/A | #N/A |
| iYML101C   | 0.72 | 0.11 | 0.75 | 0.15 | 0.65 | 0.08 |
| iYML103C   | 1.12 | 0.48 | 0.96 | 0.33 | 1.03 | 0.49 |
| iYML104C   | #N/A | #N/A | 0.95 | 0.34 | 0.86 | 0.39 |
| iYML105C   | #N/A | #N/A | 0.54 | 0.06 | #N/A | #N/A |
| iYML106W   | 1.30 | 0.66 | 0.96 | 0.37 | 1.21 | 0.79 |
| iYML107C   | #N/A | #N/A | #N/A | #N/A | #N/A | #N/A |

|             |      |      |      |      |      |      |
|-------------|------|------|------|------|------|------|
| iYML108W    | #N/A | #N/A | #N/A | #N/A | #N/A | #N/A |
| iYML110C    | 1.14 | 0.49 | 1.02 | 0.39 | 0.81 | 0.21 |
| iYML111W    | #N/A | #N/A | #N/A | #N/A | #N/A | #N/A |
| iYML112W    | 1.12 | 0.46 | 0.89 | 0.27 | 0.95 | 0.41 |
| iYML114C    | 0.90 | 0.22 | 0.94 | 0.32 | 1.10 | 0.56 |
| iYML115C    | #N/A | #N/A | 1.12 | 0.52 | 1.19 | 0.87 |
| iYML116W    | #N/A | #N/A | #N/A | #N/A | #N/A | #N/A |
| iYML117W-A  | 1.44 | 0.80 | 1.25 | 0.58 | 0.97 | 0.46 |
| iYML118W    | 1.26 | 0.62 | 1.40 | 0.81 | 0.96 | 0.47 |
| iYML119W    | 1.42 | 0.83 | 1.28 | 0.63 | 0.94 | 0.36 |
| iYML120C    | 1.22 | 0.59 | 1.15 | 0.56 | 0.99 | 0.62 |
| iYML121W    | 1.35 | 0.72 | 1.61 | 0.92 | 0.94 | 0.49 |
| iYML122C    | #N/A | #N/A | 0.61 | 0.08 | 0.67 | 0.09 |
| iYML123C    | 0.64 | 0.08 | #N/A | #N/A | 0.54 | 0.04 |
| iYML124C    | 0.88 | 0.20 | 1.05 | 0.45 | 0.99 | 0.63 |
| iYML125C    | 1.07 | 0.40 | 0.71 | 0.13 | 0.96 | 0.49 |
| iYML126C    | 1.18 | 0.57 | 1.04 | 0.42 | 1.19 | 0.88 |
| iYML128C    | 1.37 | 0.73 | 1.12 | 0.52 | 0.94 | 0.40 |
| iYML129C    | 1.18 | 0.54 | 0.83 | 0.23 | 1.08 | 0.63 |
| iYML131W    | #N/A | #N/A | #N/A | #N/A | #N/A | #N/A |
| iYML132W-1  | #N/A | #N/A | 1.61 | 0.90 | 1.04 | 0.59 |
| iYML133C-0  | 0.77 | 0.14 | 0.80 | 0.19 | 0.99 | 0.48 |
| iYMLCdelta1 | 1.40 | 0.76 | 1.57 | 0.91 | 1.04 | 0.58 |
| iYMLCdelta2 | #N/A | #N/A | #N/A | #N/A | #N/A | #N/A |
| iYMLWdelta4 | #N/A | #N/A | #N/A | #N/A | #N/A | #N/A |
| iYMLWdelta6 | 1.32 | 0.71 | 1.11 | 0.51 | 1.07 | 0.75 |
| iYMR001C    | 0.85 | 0.19 | 0.79 | 0.19 | 0.75 | 0.20 |
| iYMR002W    | 1.28 | 0.68 | 0.80 | 0.20 | 1.12 | 0.69 |
| iYMR003W    | #N/A | #N/A | #N/A | #N/A | #N/A | #N/A |
| iYMR004W    | 1.10 | 0.45 | 1.06 | 0.44 | 1.10 | 0.67 |
| iYMR005W    | 1.41 | 0.81 | 1.51 | 0.88 | 1.28 | 0.73 |
| iYMR006C    | #N/A | #N/A | 1.05 | 0.44 | #N/A | #N/A |
| iYMR007W    | 1.33 | 0.69 | 1.55 | 0.79 | #N/A | #N/A |
| iYMR008C    | 1.15 | 0.46 | 1.20 | 0.62 | 1.03 | 0.56 |
| iYMR009W    | 1.09 | 0.39 | 0.99 | 0.41 | #N/A | #N/A |
| iYMR010W-0  | 0.96 | 0.28 | 1.15 | 0.53 | 1.04 | 0.70 |
| iYMR010W-1  | 0.57 | 0.06 | 0.71 | 0.15 | 0.57 | 0.05 |
| iYMR011W    | 1.63 | 0.94 | 1.77 | 0.94 | #N/A | #N/A |
| iYMR012W    | #N/A | #N/A | #N/A | #N/A | #N/A | #N/A |
| iYMR013C-0  | 0.92 | 0.22 | 0.86 | 0.23 | 1.23 | 0.79 |
| iYMR013C-1  | 0.75 | 0.13 | 1.00 | 0.37 | 1.09 | 0.78 |
| iYMR014W    | 1.30 | 0.71 | 1.46 | 0.83 | 1.19 | 0.80 |
| iYMR015C    | 0.55 | 0.06 | 0.59 | 0.07 | 0.76 | 0.18 |
| iYMR016C-0  | 0.49 | 0.04 | 0.45 | 0.04 | 0.66 | 0.09 |
| iYMR017W    | 1.10 | 0.45 | 1.10 | 0.50 | 0.92 | 0.42 |
| iYMR018W    | #N/A | #N/A | 1.12 | 0.52 | #N/A | #N/A |
| iYMR019W    | 1.46 | 0.82 | 1.23 | 0.64 | 0.85 | 0.38 |
| iYMR020W    | 1.22 | 0.55 | 0.77 | 0.41 | #N/A | #N/A |
| iYMR021C    | 1.11 | 0.45 | 1.06 | 0.45 | 0.92 | 0.36 |
| iYMR022W    | 1.94 | 0.99 | 0.96 | 0.37 | #N/A | #N/A |
| iYMR023C    | #N/A | #N/A | #N/A | #N/A | #N/A | #N/A |

|            |      |      |      |      |      |      |
|------------|------|------|------|------|------|------|
| iYMR024W   | #N/A | #N/A | #N/A | #N/A | #N/A | #N/A |
| iYMR026C   | 1.27 | 0.62 | 1.05 | 0.43 | 1.02 | 0.54 |
| iYMR027W   | 1.22 | 0.60 | 0.76 | 0.19 | #N/A | #N/A |
| iYMR028W   | #N/A | #N/A | #N/A | #N/A | #N/A | #N/A |
| iYMR029C   | 1.30 | 0.71 | 1.36 | 0.75 | 1.15 | 0.73 |
| iYMR030W   | #N/A | #N/A | #N/A | #N/A | #N/A | #N/A |
| iYMR031W-A | #N/A | #N/A | 0.69 | 0.13 | 0.49 | 0.02 |
| iYMR032W   | 0.69 | 0.10 | 0.76 | 0.17 | 1.56 | 0.96 |
| iYMR033W   | #N/A | #N/A | 0.87 | 0.24 | #N/A | #N/A |
| iYMR034C   | 1.10 | 0.45 | 1.14 | 0.55 | 1.03 | 0.47 |
| iYMR035W   | #N/A | #N/A | 1.27 | 0.67 | #N/A | #N/A |
| iYMR038C   | 1.22 | 0.55 | 0.98 | 0.36 | 0.96 | 0.56 |
| iYMR039C   | 0.91 | 0.25 | 0.94 | 0.33 | 1.02 | 0.54 |
| iYMR040W   | #N/A | #N/A | #N/A | #N/A | #N/A | #N/A |
| iYMR041C   | #N/A | #N/A | 0.75 | 0.15 | 1.00 | 0.51 |
| iYMR042W   | 0.48 | 0.04 | 0.53 | 0.06 | 0.68 | 0.10 |
| iYMR043W   | 1.11 | 0.43 | 1.24 | 0.66 | 1.23 | 0.90 |
| iYMR044W   | 0.94 | 0.26 | #N/A | #N/A | #N/A | #N/A |
| iYMR046W-A | 0.94 | 0.24 | 0.69 | 0.12 | #N/A | #N/A |
| iYMR047C   | 1.12 | 0.42 | 1.02 | 0.41 | 0.83 | 0.23 |
| iYMR048W   | 1.43 | 0.81 | 1.14 | 0.53 | #N/A | #N/A |
| iYMR049C-0 | 1.23 | 0.63 | 1.45 | 0.83 | 1.18 | 0.73 |
| iYMR049C-1 | 1.18 | 0.56 | 1.05 | 0.45 | 1.18 | 0.75 |
| iYMR053C   | 0.59 | 0.07 | 0.81 | 0.22 | 0.97 | 0.46 |
| iYMR054W   | #N/A | #N/A | #N/A | #N/A | #N/A | #N/A |
| iYMR055C   | 2.06 | 0.99 | 1.46 | 0.85 | 1.10 | 0.79 |
| iYMR056C   | 0.70 | 0.11 | 0.49 | 0.06 | 0.60 | 0.06 |
| iYMR057C   | #N/A | #N/A | #N/A | #N/A | #N/A | #N/A |
| iYMR058W   | 1.51 | 0.89 | 1.24 | 0.66 | 0.83 | 0.23 |
| iYMR060C   | 0.94 | 0.25 | 0.63 | 0.11 | #N/A | #N/A |
| iYMR061W   | 1.75 | 0.97 | #N/A | #N/A | #N/A | #N/A |
| iYMR062C   | 1.44 | 0.80 | 1.30 | 0.72 | 0.88 | 0.42 |
| iYMR063W   | #N/A | #N/A | 0.91 | 0.28 | #N/A | #N/A |
| iYMR064W   | 1.38 | 0.80 | 1.32 | 0.75 | 0.94 | 0.40 |
| iYMR065W   | 1.40 | 0.77 | 1.32 | 0.70 | 1.06 | 0.51 |
| iYMR066W   | #N/A | #N/A | #N/A | #N/A | #N/A | #N/A |
| iYMR067C   | 1.31 | 0.72 | 1.43 | 0.83 | 1.11 | 0.68 |
| iYMR068W   | 0.88 | 0.21 | 1.05 | 0.46 | 0.78 | 0.18 |
| iYMR069W   | 0.44 | 0.03 | 0.41 | 0.03 | 0.53 | 0.03 |
| iYMR070W   | #N/A | #N/A | #N/A | #N/A | #N/A | #N/A |
| iYMR071C   | 0.72 | 0.12 | 0.68 | 0.12 | 0.78 | 0.20 |
| iYMR072W   | 0.71 | 0.11 | 0.71 | 0.13 | 1.10 | 0.59 |
| iYMR073C   | #N/A | #N/A | 0.79 | 0.18 | #N/A | #N/A |
| iYMR074C   | 1.10 | 0.46 | 0.95 | 0.34 | 0.86 | 0.28 |
| iYMR075C-A | 0.92 | 0.25 | #N/A | #N/A | 0.73 | 0.19 |
| iYMR076C   | 0.78 | 0.14 | 0.80 | 0.19 | 1.03 | 0.57 |
| iYMR077C   | 1.20 | 0.55 | 1.30 | 0.72 | 0.88 | 0.30 |
| iYMR078C   | 1.05 | 0.35 | 1.06 | 0.44 | 1.06 | 0.50 |
| iYMR079W   | 1.52 | 0.89 | #N/A | #N/A | 1.19 | 0.77 |
| iYMR080C   | 1.58 | 0.92 | 1.22 | 0.64 | 1.04 | 0.70 |
| iYMR081C   | 0.93 | 0.24 | 1.08 | 0.47 | 1.00 | 0.64 |



|            |      |      |      |      |      |      |
|------------|------|------|------|------|------|------|
| iYMR082C-0 | 1.16 | 0.51 | 1.28 | 0.71 | 0.84 | 0.25 |
| iYMR082C-1 | 0.62 | 0.08 | 0.71 | 0.16 | 0.54 | 0.04 |
| iYMR083W   | 1.25 | 0.64 | 1.06 | 0.45 | 0.87 | 0.38 |
| iYMR084W   | #N/A | #N/A | #N/A | #N/A | #N/A | #N/A |
| iYMR085W   | 1.08 | 0.38 | 0.84 | 0.24 | 0.91 | 0.32 |
| iYMR086C-A | #N/A | #N/A | #N/A | #N/A | 0.88 | 0.43 |
| iYMR088C   | 1.20 | 0.57 | 1.36 | 0.78 | 0.93 | 0.48 |
| iYMR089C   | 1.36 | 0.73 | 1.39 | 0.81 | 0.92 | 0.50 |
| iYMR090W   | #N/A | #N/A | #N/A | #N/A | #N/A | #N/A |
| iYMR091C   | 1.38 | 0.80 | 1.08 | 0.47 | 0.87 | 0.41 |
| iYMR092C   | 0.97 | 0.29 | 1.02 | 0.40 | 0.90 | 0.45 |
| iYMR093W   | 1.61 | 0.93 | 1.25 | 0.63 | #N/A | #N/A |
| iYMR095C   | 1.62 | 0.94 | 1.59 | 0.92 | 0.89 | 0.35 |
| iYMR096W   | 1.72 | 0.96 | 1.80 | 0.97 | 1.38 | 0.83 |
| iYMR097C   | 1.61 | 0.91 | 1.28 | 0.66 | #N/A | #N/A |
| iYMR098C   | #N/A | #N/A | 1.23 | 0.65 | 0.95 | 0.55 |
| iYMR099C   | 1.14 | 0.49 | 1.11 | 0.51 | 0.95 | 0.42 |
| iYMR100W   | #N/A | #N/A | 1.34 | 0.72 | 1.09 | 0.64 |
| iYMR101C   | #N/A | #N/A | 1.40 | 0.80 | 0.63 | 0.06 |
| iYMR102C   | 1.14 | 0.46 | 1.13 | 0.54 | 1.08 | 0.63 |
| iYMR103C   | 1.04 | 0.33 | 0.87 | 0.27 | 0.94 | 0.36 |
| iYMR104C   | 1.42 | 0.83 | 1.35 | 0.77 | 1.13 | 0.59 |
| iYMR105C   | 1.35 | 0.72 | 1.30 | 0.72 | 0.86 | 0.39 |
| iYMR106C   | 0.96 | 0.26 | 1.20 | 0.56 | 1.22 | 0.89 |
| iYMR107W   | 0.97 | 0.29 | 0.86 | 0.25 | 1.04 | 0.50 |
| iYMR108W   | 0.96 | 0.29 | 0.98 | 0.38 | #N/A | #N/A |
| iYMR109W   | #N/A | #N/A | #N/A | #N/A | #N/A | #N/A |
| iYMR110C   | 1.60 | 0.93 | 1.65 | 0.93 | 1.28 | 0.75 |
| iYMR111C   | 1.68 | 0.95 | 1.20 | 0.62 | 1.09 | 0.61 |
| iYMR112C   | 1.49 | 0.88 | 1.57 | 0.88 | 1.02 | 0.55 |
| iYMR113W   | #N/A | #N/A | #N/A | #N/A | #N/A | #N/A |
| iYMR114C   | #N/A | #N/A | 1.25 | 0.65 | 1.31 | 0.87 |
| iYMR115W   | #N/A | #N/A | #N/A | #N/A | #N/A | #N/A |
| iYMR116C   | 0.87 | 0.19 | 0.91 | 0.28 | 0.64 | 0.07 |
| iYMR117C   | 1.15 | 0.50 | 0.90 | 0.28 | 1.08 | 0.63 |
| iYMR118C   | 1.57 | 0.92 | 1.66 | 0.94 | 0.91 | 0.35 |
| iYMR119W-A | 1.23 | 0.60 | 1.16 | 0.55 | 1.14 | 0.67 |
| iYMR120C   | 1.00 | 0.32 | 0.95 | 0.32 | 1.08 | 0.63 |
| iYMR122C-1 | 1.26 | 0.68 | 1.44 | 0.84 | 0.92 | 0.40 |
| iYMR123W   | 1.25 | 0.59 | 1.10 | 0.49 | 1.19 | 0.75 |
| iYMR124W   | 1.01 | 0.30 | 1.01 | 0.38 | 1.43 | 0.89 |
| iYMR125W   | #N/A | #N/A | #N/A | #N/A | #N/A | #N/A |
| iYMR126C   | 1.28 | 0.68 | 1.23 | 0.66 | 1.12 | 0.81 |
| iYMR127C   | #N/A | #N/A | 1.87 | 0.97 | 1.68 | 0.96 |
| iYMR128W   | 0.83 | 0.18 | 1.10 | 0.50 | 1.68 | 0.97 |
| iYMR129W   | 1.63 | 0.93 | 1.35 | 0.67 | #N/A | #N/A |
| iYMR130W   | #N/A | #N/A | #N/A | #N/A | #N/A | #N/A |
| iYMR131C   | 1.07 | 0.40 | 0.73 | 0.18 | #N/A | #N/A |
| iYMR132C   | #N/A | #N/A | #N/A | #N/A | #N/A | #N/A |
| iYMR133W   | #N/A | #N/A | #N/A | #N/A | #N/A | #N/A |
| iYMR134W   | #N/A | #N/A | #N/A | #N/A | 0.99 | 0.62 |



|            |      |      |      |      |      |      |
|------------|------|------|------|------|------|------|
| iYMR135W-A | 0.39 | 0.02 | 0.37 | 0.02 | 0.42 | 0.01 |
| iYMR136W   | #N/A | #N/A | #N/A | #N/A | #N/A | #N/A |
| iYMR137C   | #N/A | #N/A | 0.86 | 0.23 | 1.17 | 0.85 |
| iYMR138W   | 1.16 | 0.48 | 0.95 | 0.32 | #N/A | #N/A |
| iYMR140W   | 1.46 | 0.86 | #N/A | #N/A | 0.92 | 0.45 |
| iYMR141C   | #N/A | #N/A | #N/A | #N/A | #N/A | #N/A |
| iYMR142C   | 0.64 | 0.08 | 0.50 | 0.05 | 1.14 | 0.63 |
| iYMR143W   | 1.14 | 0.46 | 0.85 | 0.23 | 1.30 | 0.77 |
| iYMR145C   | 0.47 | 0.03 | 0.43 | 0.03 | 0.54 | 0.04 |
| iYMR146C   | 1.04 | 0.37 | 0.91 | 0.30 | 0.90 | 0.31 |
| iYMR147W   | 1.23 | 0.60 | 1.15 | 0.55 | 1.19 | 0.77 |
| iYMR148W   | 1.02 | 0.36 | #N/A | #N/A | 0.76 | 0.23 |
| iYMR149W   | 1.05 | 0.35 | 0.75 | 0.16 | #N/A | #N/A |
| iYMR151W   | #N/A | #N/A | 1.30 | 0.73 | #N/A | #N/A |
| iYMR152W   | 1.62 | 0.94 | 1.06 | 0.44 | 0.91 | 0.47 |
| iYMR153C-A | 1.36 | 0.78 | 1.59 | 0.90 | #N/A | #N/A |
| iYMR154C   | 1.30 | 0.71 | 0.79 | 0.21 | 0.95 | 0.40 |
| iYMR155W   | #N/A | #N/A | #N/A | #N/A | #N/A | #N/A |
| iYMR156C   | 1.45 | 0.85 | 1.06 | 0.46 | 1.26 | 0.77 |
| iYMR157C   | 1.07 | 0.40 | 0.91 | 0.32 | 0.93 | 0.35 |
| iYMR158C-B | 1.49 | 0.87 | 1.55 | 0.88 | 0.94 | 0.48 |
| iYMR158W   | #N/A | #N/A | #N/A | #N/A | #N/A | #N/A |
| iYMR159C   | 1.06 | 0.35 | 1.03 | 0.42 | #N/A | #N/A |
| iYMR160W   | #N/A | #N/A | #N/A | #N/A | #N/A | #N/A |
| iYMR161W   | 1.51 | 0.89 | 1.56 | 0.90 | 1.22 | 0.80 |
| iYMR162C   | #N/A | #N/A | 1.03 | 0.44 | #N/A | #N/A |
| iYMR163C   | 1.30 | 0.65 | 1.08 | 0.47 | 1.12 | 0.60 |
| iYMR166C   | 1.42 | 0.79 | 1.15 | 0.55 | 0.97 | 0.40 |
| iYMR167W   | 1.26 | 0.60 | 1.37 | 0.73 | #N/A | #N/A |
| iYMR168C   | 1.37 | 0.73 | 1.03 | 0.43 | 1.04 | 0.57 |
| iYMR169C   | 1.42 | 0.83 | 1.39 | 0.80 | 1.02 | 0.67 |
| iYMR170C   | 1.49 | 0.88 | 1.44 | 0.83 | 0.97 | 0.59 |
| iYMR171C   | 0.96 | 0.27 | 0.80 | 0.20 | 1.06 | 0.60 |
| iYMR172C-A | 1.04 | 0.34 | 1.03 | 0.42 | 0.58 | 0.05 |
| iYMR173W-A | #N/A | #N/A | 1.31 | 0.55 | #N/A | #N/A |
| iYMR174C   | 1.35 | 0.76 | #N/A | #N/A | 1.44 | 0.97 |
| iYMR175W   | 1.40 | 0.81 | 1.30 | 0.73 | 1.32 | 0.85 |
| iYMR176W   | 1.06 | 0.35 | 1.27 | 0.69 | 0.64 | 0.08 |
| iYMR177W   | 1.39 | 0.78 | 1.24 | 0.63 | 1.02 | 0.66 |
| iYMR178W   | 1.20 | 0.59 | 1.08 | 0.47 | 0.73 | 0.19 |
| iYMR179W   | #N/A | #N/A | #N/A | #N/A | #N/A | #N/A |
| iYMR180C   | 1.21 | 0.61 | 1.59 | 0.80 | 0.97 | 0.40 |
| iYMR181C   | 1.12 | 0.46 | 0.99 | 0.37 | 0.88 | 0.31 |
| iYMR182C-0 | 0.98 | 0.27 | 0.97 | 0.34 | 1.12 | 0.69 |
| iYMR182C-1 | 0.85 | 0.18 | 0.69 | 0.12 | 0.94 | 0.52 |
| iYMR183C   | 1.13 | 0.44 | 0.99 | 0.37 | 0.90 | 0.34 |
| iYMR185W   | 0.69 | 0.10 | #N/A | #N/A | 0.86 | 0.29 |
| iYMR186W   | #N/A | #N/A | #N/A | #N/A | #N/A | #N/A |
| iYMR187C   | 1.22 | 0.61 | 1.07 | 0.46 | 1.35 | 0.89 |
| iYMR188C   | 1.14 | 0.50 | 0.82 | 0.20 | 1.17 | 0.85 |
| iYMR189W   | 1.21 | 0.58 | 1.49 | 0.87 | 0.89 | 0.42 |

|            |      |      |      |      |      |      |
|------------|------|------|------|------|------|------|
| iYMR190C   | 1.46 | 0.86 | 1.34 | 0.76 | #N/A | #N/A |
| iYMR191W   | #N/A | #N/A | #N/A | #N/A | #N/A | #N/A |
| iYMR192W   | 1.10 | 0.46 | 1.29 | 0.72 | 0.92 | 0.49 |
| iYMR193W   | 0.77 | 0.14 | #N/A | #N/A | 0.85 | 0.37 |
| iYMR194C-A | 0.32 | 0.01 | 0.49 | 0.06 | 0.47 | 0.02 |
| iYMR194W   | 0.85 | 0.18 | 0.75 | 0.16 | 1.29 | 0.85 |
| iYMR195W   | 1.31 | 0.72 | 1.21 | 0.62 | 1.07 | 0.61 |
| iYMR196W   | #N/A | #N/A | #N/A | #N/A | #N/A | #N/A |
| iYMR197C   | 1.23 | 0.61 | 1.16 | 0.56 | 1.03 | 0.51 |
| iYMR198W   | 0.58 | 0.06 | 0.54 | 0.06 | 0.65 | 0.07 |
| iYMR199W   | 1.24 | 0.63 | 1.01 | 0.43 | 1.08 | 0.61 |
| iYMR200W   | 1.79 | 0.97 | 1.69 | 0.92 | #N/A | #N/A |
| iYMR201C   | 0.78 | 0.15 | 0.75 | 0.15 | 0.76 | 0.23 |
| iYMR202W   | 0.79 | 0.16 | 1.07 | 0.46 | 0.86 | 0.28 |
| iYMR203W   | 1.57 | 0.89 | 1.71 | 0.69 | 1.06 | 0.73 |
| iYMR204C   | #N/A | #N/A | 1.04 | 0.46 | #N/A | #N/A |
| iYMR205C   | 0.72 | 0.12 | 0.53 | 0.05 | 0.71 | 0.11 |
| iYMR206W   | 1.25 | 0.66 | 1.27 | 0.70 | 0.71 | 0.16 |
| iYMR207C   | 1.38 | 0.80 | 1.22 | 0.61 | 0.96 | 0.44 |
| iYMR208W   | #N/A | #N/A | #N/A | #N/A | #N/A | #N/A |
| iYMR209C   | #N/A | #N/A | #N/A | #N/A | #N/A | #N/A |
| iYMR210W   | #N/A | #N/A | #N/A | #N/A | #N/A | #N/A |
| iYMR211W   | 1.34 | 0.74 | 1.09 | 0.48 | #N/A | #N/A |
| iYMR212C   | #N/A | #N/A | 1.18 | 0.59 | 1.01 | 0.45 |
| iYMR213W   | 1.14 | 0.45 | 1.18 | 0.60 | 1.10 | 0.63 |
| iYMR214W   | 1.30 | 0.68 | 1.10 | 0.49 | 0.93 | 0.35 |
| iYMR215W   | 1.09 | 0.45 | 1.75 | 0.95 | 1.08 | 0.59 |
| iYMR216C   | 1.12 | 0.46 | 1.06 | 0.45 | 0.90 | 0.33 |
| iYMR217W   | #N/A | #N/A | #N/A | #N/A | #N/A | #N/A |
| iYMR218C   | 1.26 | 0.65 | 1.20 | 0.62 | 1.26 | 0.72 |
| iYMR219W   | 0.90 | 0.24 | 1.23 | 0.63 | #N/A | #N/A |
| iYMR220W   | 1.53 | 0.90 | 1.48 | 0.81 | 0.83 | 0.32 |
| iYMR221C   | 1.48 | 0.83 | #N/A | #N/A | #N/A | #N/A |
| iYMR222C   | 1.49 | 0.84 | 1.43 | 0.75 | 1.08 | 0.72 |
| iYMR223W   | 2.00 | 0.99 | 1.70 | 0.95 | #N/A | #N/A |
| iYMR224C   | 1.26 | 0.65 | 1.23 | 0.63 | 0.88 | 0.31 |
| iYMR225C   | #N/A | #N/A | 1.07 | 0.46 | 0.99 | 0.43 |
| iYMR226C   | 1.07 | 0.41 | 1.24 | 0.66 | 0.96 | 0.39 |
| iYMR227C   | 0.82 | 0.16 | 1.04 | 0.43 | #N/A | #N/A |
| iYMR228W   | 1.34 | 0.75 | 1.53 | 0.69 | #N/A | #N/A |
| iYMR230W   | 0.83 | 0.18 | 0.84 | 0.26 | 1.05 | 0.49 |
| iYMR231W   | #N/A | #N/A | 1.41 | 0.80 | 1.03 | 0.69 |
| iYMR232W   | #N/A | #N/A | 0.72 | 0.15 | #N/A | #N/A |
| iYMR233W   | #N/A | #N/A | #N/A | #N/A | 0.87 | 0.28 |
| iYMR234W   | #N/A | #N/A | 1.70 | 0.88 | #N/A | #N/A |
| iYMR235C   | #N/A | #N/A | 1.08 | 0.49 | 0.91 | 0.33 |
| iYMR236W   | 1.25 | 0.59 | 1.28 | 0.65 | 0.93 | 0.35 |
| iYMR237W   | 1.15 | 0.47 | 1.00 | 0.38 | 0.94 | 0.53 |
| iYMR238W   | #N/A | #N/A | 1.11 | 0.50 | 1.01 | 0.66 |
| iYMR239C   | 1.46 | 0.86 | 1.35 | 0.76 | 0.81 | 0.23 |
| iYMR240C   | 0.90 | 0.22 | 0.88 | 0.26 | 1.11 | 0.66 |

|            |      |      |      |      |      |      |
|------------|------|------|------|------|------|------|
| iYMR241W   | #N/A | #N/A | 1.01 | 0.40 | #N/A | #N/A |
| iYMR242C   | 0.54 | 0.05 | 0.58 | 0.07 | 0.86 | 0.37 |
| iYMR243C   | 1.02 | 0.31 | 0.96 | 0.34 | 0.90 | 0.40 |
| iYMR244W   | 1.16 | 0.48 | 1.17 | 0.58 | 0.85 | 0.35 |
| iYMR245W   | 0.75 | 0.13 | 0.70 | 0.12 | 0.71 | 0.17 |
| iYMR246W   | 1.19 | 0.56 | 1.14 | 0.54 | 1.25 | 0.83 |
| iYMR247C   | #N/A | #N/A | 1.03 | 0.41 | 1.02 | 0.68 |
| iYMR250W   | 1.24 | 0.57 | 1.12 | 0.52 | 1.22 | 0.70 |
| iYMR251W   | 0.68 | 0.10 | 0.67 | 0.11 | 0.61 | 0.05 |
| iYMR251W-A | 1.10 | 0.44 | 1.17 | 0.57 | #N/A | #N/A |
| iYMR253C   | 1.11 | 0.45 | 1.18 | 0.59 | 0.71 | 0.12 |
| iYMR254C   | #N/A | #N/A | #N/A | #N/A | #N/A | #N/A |
| iYMR255W   | #N/A | #N/A | #N/A | #N/A | 1.71 | 0.97 |
| iYMR256C   | 0.96 | 0.26 | 1.16 | 0.54 | 1.02 | 0.67 |
| iYMR257C   | #N/A | #N/A | 0.94 | 0.30 | 1.10 | 0.71 |
| iYMR258C   | #N/A | #N/A | #N/A | #N/A | #N/A | #N/A |
| iYMR259C   | 1.28 | 0.62 | 1.31 | 0.67 | 0.72 | 0.13 |
| iYMR260C   | 0.83 | 0.17 | 0.97 | 0.37 | #N/A | #N/A |
| iYMR261C   | 1.44 | 0.79 | #N/A | #N/A | 0.93 | 0.38 |
| iYMR262W   | 1.29 | 0.69 | 1.20 | 0.59 | 0.76 | 0.16 |
| iYMR263W   | 1.26 | 0.65 | 1.17 | 0.58 | 1.04 | 0.70 |
| iYMR264W   | 1.63 | 0.94 | 1.49 | 0.82 | #N/A | #N/A |
| iYMR265C   | 0.75 | 0.13 | 0.57 | 0.07 | 0.60 | 0.07 |
| iYMR266W   | 1.35 | 0.76 | 1.64 | 0.88 | 0.89 | 0.32 |
| iYMR267W   | #N/A | #N/A | 1.02 | 0.40 | 0.84 | 0.36 |
| iYMR268C   | 1.06 | 0.39 | 0.97 | 0.34 | 1.00 | 0.50 |
| iYMR269W   | #N/A | #N/A | #N/A | #N/A | #N/A | #N/A |
| iYMR270C   | 1.33 | 0.75 | 1.46 | 0.83 | 1.02 | 0.50 |
| iYMR271C   | 1.37 | 0.78 | 1.14 | 0.54 | 0.86 | 0.40 |
| iYMR272C   | 0.87 | 0.20 | 1.00 | 0.37 | #N/A | #N/A |
| iYMR273C   | 1.20 | 0.52 | 1.28 | 0.70 | #N/A | #N/A |
| iYMR274C   | #N/A | #N/A | #N/A | #N/A | #N/A | #N/A |
| iYMR275C   | 1.15 | 0.49 | 1.29 | 0.71 | 0.95 | 0.54 |
| iYMR276W   | 1.24 | 0.61 | 1.18 | 0.59 | 0.93 | 0.42 |
| iYMR277W   | 1.29 | 0.70 | 1.01 | 0.39 | 1.32 | 0.87 |
| iYMR278W   | #N/A | #N/A | #N/A | #N/A | #N/A | #N/A |
| iYMR279C   | 1.26 | 0.61 | 1.28 | 0.70 | 0.94 | 0.36 |
| iYMR280C   | 0.96 | 0.27 | 0.94 | 0.30 | 0.69 | 0.10 |
| iYMR282C   | 1.50 | 0.85 | 1.31 | 0.73 | #N/A | #N/A |
| iYMR283C   | 1.30 | 0.71 | 1.20 | 0.62 | 0.94 | 0.42 |
| iYMR284W   | #N/A | #N/A | 0.94 | 0.39 | #N/A | #N/A |
| iYMR285C   | #N/A | #N/A | #N/A | #N/A | #N/A | #N/A |
| iYMR286W   | #N/A | #N/A | #N/A | #N/A | #N/A | #N/A |
| iYMR287C   | 1.54 | 0.87 | 1.20 | 0.62 | 1.01 | 0.45 |
| iYMR288W   | #N/A | #N/A | #N/A | #N/A | 0.95 | 0.43 |
| iYMR289W   | 1.20 | 0.59 | 1.17 | 0.58 | 0.85 | 0.26 |
| iYMR290W-A | 0.59 | 0.06 | 0.58 | 0.07 | 0.65 | 0.11 |
| iYMR291W   | 1.02 | 0.31 | 1.25 | 0.64 | 0.95 | 0.52 |
| iYMR292W   | #N/A | #N/A | #N/A | #N/A | #N/A | #N/A |
| iYMR293C   | 0.79 | 0.16 | 0.98 | 0.35 | #N/A | #N/A |
| iYMR294W   | #N/A | #N/A | #N/A | #N/A | #N/A | #N/A |

|                |      |      |      |      |      |      |
|----------------|------|------|------|------|------|------|
| iYMR296C       | 0.88 | 0.20 | 0.85 | 0.23 | 0.72 | 0.15 |
| iYMR297W       | #N/A | #N/A | 1.51 | 0.87 | #N/A | #N/A |
| iYMR298W       | 0.97 | 0.27 | #N/A | #N/A | 1.44 | 0.93 |
| iYMR299C       | #N/A | #N/A | #N/A | #N/A | #N/A | #N/A |
| iYMR300C       | 1.18 | 0.52 | 1.31 | 0.64 | 1.27 | 0.85 |
| iYMR301C       | 0.97 | 0.27 | 1.00 | 0.38 | 1.02 | 0.46 |
| iYMR302C       | 1.16 | 0.51 | 1.16 | 0.57 | 0.89 | 0.30 |
| iYMR303C       | 1.36 | 0.77 | 1.26 | 0.69 | 0.91 | 0.47 |
| iYMR304W       | #N/A | #N/A | #N/A | #N/A | #N/A | #N/A |
| iYMR305C       | 0.86 | 0.19 | 0.93 | 0.30 | 1.02 | 0.46 |
| iYMR306C-A     | 0.57 | 0.06 | 0.55 | 0.06 | 0.65 | 0.08 |
| iYMR307W       | #N/A | #N/A | #N/A | #N/A | #N/A | #N/A |
| iYMR308C       | #N/A | #N/A | 1.03 | 0.40 | 1.13 | 0.82 |
| iYMR309C       | 1.17 | 0.48 | 1.32 | 0.75 | 1.05 | 0.59 |
| iYMR310C       | 1.32 | 0.72 | 1.27 | 0.70 | 1.13 | 0.73 |
| iYMR311C       | 1.13 | 0.48 | 1.24 | 0.67 | 0.97 | 0.40 |
| iYMR312W       | #N/A | #N/A | #N/A | #N/A | #N/A | #N/A |
| iYMR313C       | 1.02 | 0.35 | 0.71 | 0.14 | 0.74 | 0.18 |
| iYMR314W       | 1.20 | 0.56 | 1.14 | 0.54 | 1.11 | 0.80 |
| iYMR315W       | 1.13 | 0.48 | 1.28 | 0.69 | 0.83 | 0.32 |
| iYMR316C-A     | 1.10 | 0.44 | 1.25 | 0.65 | 0.79 | 0.18 |
| iYMR317W       | 1.33 | 0.74 | #N/A | #N/A | #N/A | #N/A |
| iYMR318C       | 1.32 | 0.68 | 1.19 | 0.61 | 1.19 | 0.75 |
| iYMR319C-0     | 0.61 | 0.08 | 0.59 | 0.08 | 0.68 | 0.09 |
| iYMR319C-1     | 1.59 | 0.90 | 1.56 | 0.90 | 0.96 | 0.39 |
| iYMR320W       | 1.67 | 0.95 | 1.65 | 0.93 | 1.22 | 0.85 |
| iYMR321C       | 1.44 | 0.84 | #N/A | #N/A | 1.04 | 0.54 |
| iYMR322C       | 1.56 | 0.91 | 1.58 | 0.91 | 0.90 | 0.38 |
| iYMR323W       | 1.55 | 0.91 | 1.56 | 0.90 | 0.90 | 0.31 |
| iYMR324C       | 1.23 | 0.63 | 1.11 | 0.51 | 0.94 | 0.41 |
| iYMR325W       | 1.12 | 0.43 | 1.32 | 0.71 | 1.09 | 0.59 |
| iYMRCdelta10   | #N/A | #N/A | #N/A | #N/A | #N/A | #N/A |
| iYMRCdelta13   | #N/A | #N/A | #N/A | #N/A | #N/A | #N/A |
| iYMRCtau1      | 1.19 | 0.55 | 1.02 | 0.40 | 0.89 | 0.32 |
| iYMRWdelta12   | #N/A | #N/A | #N/A | #N/A | #N/A | #N/A |
| iYMRWdelta15   | 1.31 | 0.71 | 1.53 | 0.88 | 1.20 | 0.67 |
| iYMRWdelta16   | 1.28 | 0.68 | 1.41 | 0.78 | 1.44 | 0.92 |
| iYMRWdelta17   | #N/A | #N/A | 0.52 | 0.07 | #N/A | #N/A |
| iYMRWdelta19-0 | 1.38 | 0.75 | 1.40 | 0.78 | 0.87 | 0.42 |
| iYMRWdelta21   | 0.71 | 0.11 | #N/A | #N/A | #N/A | #N/A |
| iYMRWtau2      | #N/A | #N/A | #N/A | #N/A | #N/A | #N/A |
| iYNL001W       | #N/A | #N/A | #N/A | #N/A | #N/A | #N/A |
| iYNL002C       | 0.88 | 0.22 | 0.94 | 0.31 | #N/A | #N/A |
| iYNL003C       | 1.00 | 0.29 | 1.10 | 0.49 | #N/A | #N/A |
| iYNL004W       | #N/A | #N/A | 1.41 | 0.78 | #N/A | #N/A |
| iYNL005C       | 1.25 | 0.65 | 1.17 | 0.58 | 1.35 | 0.88 |
| iYNL006W       | 1.40 | 0.81 | 1.36 | 0.68 | #N/A | #N/A |
| iYNL007C       | #N/A | #N/A | 0.85 | 0.22 | 0.76 | 0.23 |
| iYNL008C       | 1.38 | 0.78 | 0.91 | 0.30 | 1.17 | 0.75 |
| iYNL009W       | #N/A | #N/A | 1.20 | 0.55 | #N/A | #N/A |
| iYNL011C       | 1.11 | 0.42 | 1.10 | 0.50 | 0.87 | 0.41 |

|          |      |      |      |      |      |      |
|----------|------|------|------|------|------|------|
| iYNL012W | #N/A | #N/A | #N/A | #N/A | #N/A | #N/A |
| iYNL013C | 1.37 | 0.78 | 1.22 | 0.64 | 1.32 | 0.77 |
| iYNL016W | 0.80 | 0.15 | 0.80 | 0.19 | 0.75 | 0.22 |
| iYNL018C | 0.95 | 0.29 | 1.04 | 0.43 | 0.94 | 0.36 |
| iYNL019C | 1.53 | 0.87 | 1.50 | 0.87 | 0.85 | 0.36 |
| iYNL020C | 1.49 | 0.88 | 1.44 | 0.84 | 0.77 | 0.25 |
| iYNL021W | 1.62 | 0.94 | 1.22 | 0.63 | 1.59 | 0.90 |
| iYNL022C | 1.42 | 0.78 | 1.04 | 0.43 | 0.87 | 0.30 |
| iYNL023C | 1.04 | 0.37 | 1.15 | 0.55 | 1.03 | 0.55 |
| iYNL024C | 1.18 | 0.55 | 1.16 | 0.57 | 1.06 | 0.64 |
| iYNL025C | 1.16 | 0.52 | 0.93 | 0.34 | 0.93 | 0.52 |
| iYNL026W | 1.64 | 0.95 | 1.37 | 0.77 | 1.01 | 0.66 |
| iYNL027W | 1.25 | 0.67 | 1.02 | 0.41 | #N/A | #N/A |
| iYNL028W | 1.19 | 0.51 | 1.27 | 0.68 | 0.80 | 0.20 |
| iYNL030W | #N/A | #N/A | #N/A | #N/A | #N/A | #N/A |
| iYNL031C | 0.57 | 0.06 | 0.55 | 0.06 | 0.58 | 0.06 |
| iYNL032W | #N/A | #N/A | 1.32 | 0.73 | #N/A | #N/A |
| iYNL033W | 1.44 | 0.84 | 1.39 | 0.80 | 0.94 | 0.53 |
| iYNL034W | 1.56 | 0.88 | 1.45 | 0.80 | 1.04 | 0.49 |
| iYNL035C | 0.77 | 0.14 | 0.80 | 0.20 | 1.19 | 0.76 |
| iYNL036W | #N/A | #N/A | #N/A | #N/A | #N/A | #N/A |
| iYNL037C | 0.55 | 0.05 | 0.61 | 0.08 | 0.90 | 0.31 |
| iYNL038W | 1.67 | 0.95 | 1.46 | 0.79 | 1.04 | 0.58 |
| iYNL039W | #N/A | #N/A | 0.88 | 0.25 | 1.17 | 0.75 |
| iYNL040W | #N/A | #N/A | 1.56 | 0.87 | #N/A | #N/A |
| iYNL041C | 1.59 | 0.90 | 1.43 | 0.82 | 1.06 | 0.69 |
| iYNL042W | #N/A | #N/A | 1.28 | 0.68 | 0.98 | 0.48 |
| iYNL043C | 1.02 | 0.33 | 0.89 | 0.26 | 1.10 | 0.74 |
| iYNL045W | 1.25 | 0.63 | 1.35 | 0.77 | 0.88 | 0.29 |
| iYNL046W | #N/A | #N/A | 1.11 | 0.51 | 1.09 | 0.77 |
| iYNL047C | 1.23 | 0.61 | 1.38 | 0.78 | 1.06 | 0.60 |
| iYNL048W | #N/A | #N/A | #N/A | #N/A | #N/A | #N/A |
| iYNL049C | #N/A | #N/A | 1.08 | 0.47 | 0.89 | 0.45 |
| iYNL050C | #N/A | #N/A | #N/A | #N/A | #N/A | #N/A |
| iYNL051W | #N/A | #N/A | #N/A | #N/A | #N/A | #N/A |
| iYNL052W | 1.91 | 0.98 | 1.65 | 0.87 | 1.34 | 0.78 |
| iYNL053W | 1.12 | 0.47 | 1.00 | 0.38 | 1.04 | 0.56 |
| iYNL054W | #N/A | #N/A | 0.86 | 0.24 | 0.95 | 0.55 |
| iYNL055C | 0.79 | 0.15 | 0.87 | 0.26 | 0.94 | 0.48 |
| iYNL056W | #N/A | #N/A | 1.82 | 0.55 | #N/A | #N/A |
| iYNL057W | 1.33 | 0.69 | 1.10 | 0.49 | 1.69 | 0.93 |
| iYNL059C | 1.32 | 0.68 | 1.27 | 0.69 | 1.12 | 0.69 |
| iYNL061W | #N/A | #N/A | 1.71 | 0.63 | #N/A | #N/A |
| iYNL062C | 1.21 | 0.58 | 0.98 | 0.35 | 0.92 | 0.33 |
| iYNL064C | #N/A | #N/A | 0.84 | 0.22 | 1.01 | 0.53 |
| iYNL065W | #N/A | #N/A | 1.48 | 0.86 | #N/A | #N/A |
| iYNL066W | 0.44 | 0.03 | 0.43 | 0.03 | 0.65 | 0.08 |
| iYNL067W | 0.83 | 0.18 | 0.63 | 0.09 | 1.25 | 0.74 |
| iYNL068C | 0.89 | 0.23 | 0.93 | 0.29 | 0.85 | 0.27 |
| iYNL069C | 0.66 | 0.09 | 0.73 | 0.15 | 0.57 | 0.05 |
| iYNL070W | #N/A | #N/A | #N/A | #N/A | #N/A | #N/A |

|          |      |      |      |      |      |      |
|----------|------|------|------|------|------|------|
| iYNL071W | 0.81 | 0.17 | 0.82 | 0.21 | 1.27 | 0.77 |
| iYNL072W | 1.12 | 0.43 | 0.83 | 0.23 | 0.55 | 0.04 |
| iYNL073W | #N/A | #N/A | #N/A | #N/A | #N/A | #N/A |
| iYNL074C | 1.30 | 0.71 | 1.44 | 0.83 | 0.81 | 0.31 |
| iYNL075W | #N/A | #N/A | #N/A | #N/A | #N/A | #N/A |
| iYNL076W | 0.98 | 0.29 | 0.88 | 0.29 | 1.14 | 0.83 |
| iYNL077W | 1.26 | 0.61 | 1.26 | 0.64 | 1.07 | 0.68 |
| iYNL078W | 1.29 | 0.67 | 1.10 | 0.50 | 1.30 | 0.82 |
| iYNL079C | 0.82 | 0.16 | 0.99 | 0.36 | 1.12 | 0.69 |
| iYNL080C | 1.19 | 0.55 | 1.08 | 0.47 | 1.16 | 0.71 |
| iYNL081C | 1.00 | 0.33 | 1.34 | 0.71 | #N/A | #N/A |
| iYNL082W | 0.86 | 0.19 | 1.02 | 0.40 | #N/A | #N/A |
| iYNL083W | 1.22 | 0.60 | 1.86 | 0.95 | 0.88 | 0.41 |
| iYNL084C | #N/A | #N/A | 1.02 | 0.40 | 1.09 | 0.64 |
| iYNL086W | 1.49 | 0.84 | 1.25 | 0.68 | 1.08 | 0.76 |
| iYNL089C | 1.57 | 0.92 | 1.46 | 0.85 | 0.60 | 0.07 |
| iYNL091W | 1.09 | 0.43 | 1.02 | 0.40 | 0.85 | 0.25 |
| iYNL092W | 1.09 | 0.45 | 0.96 | 0.33 | 0.84 | 0.27 |
| iYNL093W | 1.30 | 0.72 | 1.19 | 0.61 | 0.74 | 0.14 |
| iYNL094W | #N/A | #N/A | #N/A | #N/A | 1.00 | 0.51 |
| iYNL095C | 1.16 | 0.51 | 1.11 | 0.51 | 0.88 | 0.38 |
| iYNL096C | #N/A | #N/A | 0.50 | 0.05 | 1.00 | 0.50 |
| iYNL097C | 0.84 | 0.18 | 0.91 | 0.28 | 1.15 | 0.70 |
| iYNL098C | 0.54 | 0.05 | 0.66 | 0.11 | 0.54 | 0.04 |
| iYNL099C | 1.33 | 0.69 | 1.39 | 0.80 | 1.17 | 0.76 |
| iYNL100W | 1.39 | 0.76 | 1.82 | 0.95 | 1.53 | 0.96 |
| iYNL101W | 1.17 | 0.52 | 1.12 | 0.51 | 1.13 | 0.82 |
| iYNL102W | 0.91 | 0.23 | 0.97 | 0.34 | 0.99 | 0.42 |
| iYNL103W | #N/A | #N/A | #N/A | #N/A | #N/A | #N/A |
| iYNL104C | 0.78 | 0.14 | 0.90 | 0.28 | 0.54 | 0.04 |
| iYNL105W | 0.95 | 0.27 | 1.80 | 0.95 | 1.24 | 0.81 |
| iYNL107W | #N/A | #N/A | 1.08 | 0.47 | 1.24 | 0.82 |
| iYNL108C | 1.37 | 0.79 | 1.61 | 0.81 | #N/A | #N/A |
| iYNL111C | 0.86 | 0.19 | 0.71 | 0.13 | 0.89 | 0.32 |
| iYNL112W | 1.19 | 0.51 | #N/A | #N/A | 0.92 | 0.33 |
| iYNL113W | #N/A | #N/A | 0.97 | 0.38 | 0.97 | 0.40 |
| iYNL115C | 1.15 | 0.48 | 1.14 | 0.53 | 1.14 | 0.60 |
| iYNL116W | #N/A | #N/A | 1.40 | 0.81 | #N/A | #N/A |
| iYNL117W | 0.90 | 0.22 | 0.71 | 0.14 | 0.66 | 0.12 |
| iYNL118C | 1.02 | 0.36 | 0.96 | 0.33 | 0.82 | 0.28 |
| iYNL119W | 0.80 | 0.17 | #N/A | #N/A | #N/A | #N/A |
| iYNL121C | #N/A | #N/A | #N/A | #N/A | 0.94 | 0.53 |
| iYNL122C | #N/A | #N/A | #N/A | #N/A | #N/A | #N/A |
| iYNL123W | #N/A | #N/A | 1.28 | 0.66 | 1.22 | 0.80 |
| iYNL124W | #N/A | #N/A | 0.85 | 0.24 | #N/A | #N/A |
| iYNL125C | 1.03 | 0.37 | 0.94 | 0.31 | 0.85 | 0.25 |
| iYNL126W | 1.29 | 0.71 | 1.45 | 0.84 | 0.84 | 0.37 |
| iYNL127W | 1.70 | 0.95 | 1.36 | 0.77 | 0.74 | 0.14 |
| iYNL128W | 1.50 | 0.88 | 1.65 | 0.93 | 1.22 | 0.89 |
| iYNL129W | #N/A | #N/A | 1.05 | 0.47 | 1.31 | 0.84 |
| iYNL130C | 1.20 | 0.53 | 1.04 | 0.42 | 1.02 | 0.46 |

|            |      |      |      |      |      |      |
|------------|------|------|------|------|------|------|
| iYNL131W   | #N/A | #N/A | #N/A | #N/A | #N/A | #N/A |
| iYNL132W   | 1.06 | 0.36 | 1.34 | 0.74 | 0.63 | 0.09 |
| iYNL133C   | 0.57 | 0.06 | 0.94 | 0.36 | 1.72 | 0.93 |
| iYNL134C   | 1.14 | 0.51 | 1.23 | 0.65 | 1.00 | 0.59 |
| iYNL135C   | 1.00 | 0.34 | 0.79 | 0.18 | 1.11 | 0.68 |
| iYNL136W   | 1.68 | 0.94 | 1.46 | 0.70 | 1.43 | 0.92 |
| iYNL137C   | 1.22 | 0.55 | 1.18 | 0.57 | 0.94 | 0.53 |
| iYNL138W   | 1.52 | 0.87 | #N/A | #N/A | 1.01 | 0.66 |
| iYNL139C   | 1.05 | 0.37 | 1.31 | 0.74 | 0.98 | 0.44 |
| iYNL141W   | 1.54 | 0.91 | 1.42 | 0.81 | #N/A | #N/A |
| iYNL142W   | 0.78 | 0.14 | 0.87 | 0.27 | #N/A | #N/A |
| iYNL143C   | 1.39 | 0.75 | #N/A | #N/A | 1.08 | 0.53 |
| iYNL144C-0 | 0.61 | 0.07 | 0.61 | 0.10 | 0.55 | 0.05 |
| iYNL144C-1 | 1.11 | 0.41 | 1.21 | 0.63 | 1.06 | 0.62 |
| iYNL145W   | 1.17 | 0.49 | 1.22 | 0.62 | 1.77 | 0.95 |
| iYNL146W   | 0.80 | 0.15 | 0.62 | 0.09 | #N/A | #N/A |
| iYNL147W   | 1.07 | 0.36 | 0.94 | 0.31 | 1.23 | 0.70 |
| iYNL148C   | 1.18 | 0.54 | 0.73 | 0.16 | 0.90 | 0.46 |
| iYNL149C   | 0.71 | 0.11 | 0.68 | 0.11 | 0.60 | 0.05 |
| iYNL151C   | 1.37 | 0.78 | 1.37 | 0.79 | 1.20 | 0.70 |
| iYNL152W   | #N/A | #N/A | 1.57 | 0.86 | 1.22 | 0.80 |
| iYNL153C   | #N/A | #N/A | 1.16 | 0.57 | 1.16 | 0.62 |
| iYNL154C   | 1.03 | 0.37 | 0.96 | 0.33 | 1.16 | 0.81 |
| iYNL155W   | 1.41 | 0.82 | 1.50 | 0.74 | 0.89 | 0.32 |
| iYNL156C   | 1.35 | 0.77 | 1.26 | 0.66 | 1.04 | 0.70 |
| iYNL157W   | #N/A | #N/A | #N/A | #N/A | #N/A | #N/A |
| iYNL158W   | 1.05 | 0.38 | 1.15 | 0.55 | 1.12 | 0.81 |
| iYNL159C   | #N/A | #N/A | 0.99 | 0.36 | 1.10 | 0.66 |
| iYNL160W   | 1.47 | 0.86 | 1.08 | 0.48 | 1.20 | 0.79 |
| iYNL161W-0 | 1.10 | 0.44 | 1.14 | 0.54 | 1.01 | 0.46 |
| iYNL161W-1 | 1.12 | 0.43 | 0.82 | 0.21 | 1.12 | 0.69 |
| iYNL162W   | 1.17 | 0.53 | 1.06 | 0.44 | #N/A | #N/A |
| iYNL164C   | #N/A | #N/A | 0.99 | 0.37 | 0.96 | 0.50 |
| iYNL165W   | #N/A | #N/A | #N/A | #N/A | #N/A | #N/A |
| iYNL166C   | 1.35 | 0.77 | 1.09 | 0.49 | 0.87 | 0.29 |
| iYNL167C   | 1.08 | 0.38 | 1.16 | 0.57 | 0.92 | 0.46 |
| iYNL168C   | 1.35 | 0.77 | 1.33 | 0.75 | 0.87 | 0.30 |
| iYNL169C   | 1.39 | 0.76 | 1.12 | 0.52 | 0.91 | 0.48 |
| iYNL173C   | 0.91 | 0.24 | 1.03 | 0.40 | 0.69 | 0.13 |
| iYNL174W   | 1.10 | 0.43 | 1.11 | 0.50 | 0.71 | 0.16 |
| iYNL176C   | 1.17 | 0.49 | 1.09 | 0.49 | 0.98 | 0.61 |
| iYNL177C   | 1.41 | 0.82 | 1.43 | 0.81 | 1.05 | 0.59 |
| iYNL178W   | 1.36 | 0.78 | 1.50 | 0.67 | 0.78 | 0.22 |
| iYNL179C-1 | 0.72 | 0.11 | 0.79 | 0.19 | 0.86 | 0.30 |
| iYNL181W   | #N/A | #N/A | #N/A | #N/A | #N/A | #N/A |
| iYNL182C   | 1.23 | 0.56 | 1.15 | 0.54 | 1.06 | 0.74 |
| iYNL183C   | 1.25 | 0.59 | 1.11 | 0.51 | 1.23 | 0.81 |
| iYNL184C   | #N/A | #N/A | #N/A | #N/A | #N/A | #N/A |
| iYNL186W   | 1.49 | 0.86 | 1.58 | 0.86 | 1.45 | 0.93 |
| iYNL187W   | 0.84 | 0.17 | 0.94 | 0.31 | 0.82 | 0.22 |
| iYNL188W   | 1.40 | 0.82 | 1.43 | 0.82 | 1.21 | 0.68 |



|          |      |      |      |      |      |      |
|----------|------|------|------|------|------|------|
| iYNL189W | 1.30 | 0.71 | 0.99 | 0.36 | 0.79 | 0.28 |
| iYNL191W | 0.41 | 0.02 | 0.50 | 0.05 | 0.66 | 0.08 |
| iYNL192W | 0.87 | 0.19 | 0.89 | 0.27 | 1.05 | 0.50 |
| iYNL193W | 1.15 | 0.53 | 0.93 | 0.30 | 0.86 | 0.40 |
| iYNL194C | 1.44 | 0.84 | 1.32 | 0.74 | 1.10 | 0.61 |
| iYNL195C | 1.57 | 0.89 | 1.39 | 0.79 | 1.00 | 0.44 |
| iYNL196C | 1.70 | 0.96 | 1.46 | 0.84 | 0.74 | 0.20 |
| iYNL197C | 1.34 | 0.72 | 1.09 | 0.47 | 0.84 | 0.33 |
| iYNL198C | 1.29 | 0.69 | 1.19 | 0.60 | 0.86 | 0.28 |
| iYNL200C | 1.19 | 0.55 | 1.41 | 0.74 | 1.12 | 0.60 |
| iYNL201C | 1.28 | 0.69 | 1.07 | 0.46 | 0.91 | 0.48 |
| iYNL202W | #N/A | #N/A | #N/A | #N/A | #N/A | #N/A |
| iYNL204C | 1.44 | 0.84 | 1.24 | 0.59 | 0.84 | 0.25 |
| iYNL207W | #N/A | #N/A | #N/A | #N/A | #N/A | #N/A |
| iYNL208W | #N/A | #N/A | #N/A | #N/A | 1.10 | 0.79 |
| iYNL209W | 1.26 | 0.60 | 1.40 | 0.74 | 0.93 | 0.39 |
| iYNL210W | 1.11 | 0.45 | 0.88 | 0.26 | #N/A | #N/A |
| iYNL211C | 1.33 | 0.75 | 1.43 | 0.72 | 1.24 | 0.90 |
| iYNL212W | 1.23 | 0.61 | #N/A | #N/A | #N/A | #N/A |
| iYNL213C | 1.24 | 0.62 | 1.19 | 0.60 | 1.31 | 0.82 |
| iYNL214W | 1.39 | 0.80 | 1.48 | 0.87 | 0.99 | 0.50 |
| iYNL215W | 1.06 | 0.41 | 0.95 | 0.31 | 1.11 | 0.80 |
| iYNL216W | 1.43 | 0.84 | 1.24 | 0.66 | 1.48 | 0.96 |
| iYNL217W | 0.99 | 0.28 | 0.80 | 0.19 | 1.10 | 0.66 |
| iYNL218W | 0.92 | 0.22 | 1.03 | 0.42 | 0.72 | 0.12 |
| iYNL219C | 1.31 | 0.71 | 1.13 | 0.54 | 0.95 | 0.55 |
| iYNL220W | #N/A | #N/A | #N/A | #N/A | #N/A | #N/A |
| iYNL221C | 0.53 | 0.05 | 0.52 | 0.05 | 0.58 | 0.06 |
| iYNL222W | 1.08 | 0.38 | 1.00 | 0.37 | 1.54 | 0.98 |
| iYNL223W | 1.12 | 0.42 | 0.97 | 0.35 | #N/A | #N/A |
| iYNL224C | #N/A | #N/A | 1.15 | 0.54 | 0.78 | 0.26 |
| iYNL225C | 1.30 | 0.71 | 1.20 | 0.54 | 0.91 | 0.35 |
| iYNL226W | #N/A | #N/A | #N/A | #N/A | #N/A | #N/A |
| iYNL229C | 0.97 | 0.31 | 1.45 | 0.76 | 0.98 | 0.60 |
| iYNL230C | 0.98 | 0.27 | 1.44 | 0.79 | 0.84 | 0.32 |
| iYNL231C | 0.35 | 0.02 | 0.30 | 0.01 | 0.59 | 0.06 |
| iYNL232W | #N/A | #N/A | #N/A | #N/A | #N/A | #N/A |
| iYNL233W | 0.94 | 0.26 | 1.18 | 0.59 | 0.86 | 0.33 |
| iYNL234W | 1.22 | 0.62 | 1.32 | 0.75 | 1.07 | 0.52 |
| iYNL235C | 1.06 | 0.36 | 1.00 | 0.38 | 0.80 | 0.20 |
| iYNL237W | 1.53 | 0.90 | 1.23 | 0.65 | 0.99 | 0.60 |
| iYNL238W | 1.44 | 0.82 | 1.26 | 0.66 | #N/A | #N/A |
| iYNL239W | 1.25 | 0.65 | 1.10 | 0.49 | 0.88 | 0.31 |
| iYNL240C | 1.30 | 0.70 | 1.28 | 0.70 | 1.05 | 0.59 |
| iYNL241C | 1.02 | 0.32 | 0.90 | 0.26 | 0.75 | 0.22 |
| iYNL242W | 1.24 | 0.62 | 1.47 | 0.85 | 0.85 | 0.29 |
| iYNL243W | 1.27 | 0.66 | 1.40 | 0.81 | #N/A | #N/A |
| iYNL244C | 0.90 | 0.22 | 0.88 | 0.26 | 0.96 | 0.44 |
| iYNL245C | 0.98 | 0.30 | 1.35 | 0.76 | 1.03 | 0.49 |
| iYNL247W | #N/A | #N/A | 1.12 | 0.52 | 1.46 | 0.90 |
| iYNL248C | 1.04 | 0.39 | 1.19 | 0.61 | 0.82 | 0.32 |



|            |      |      |      |      |      |      |
|------------|------|------|------|------|------|------|
| iYNL249C   | 1.00 | 0.31 | 1.50 | 0.87 | #N/A | #N/A |
| iYNL251C   | 1.15 | 0.51 | 0.96 | 0.32 | 1.14 | 0.66 |
| iYNL253W   | #N/A | #N/A | #N/A | #N/A | #N/A | #N/A |
| iYNL254C   | 1.37 | 0.78 | 1.24 | 0.66 | 1.27 | 0.79 |
| iYNL255C   | 0.99 | 0.28 | 0.76 | 0.16 | 1.00 | 0.59 |
| iYNL256W   | #N/A | #N/A | #N/A | #N/A | #N/A | #N/A |
| iYNL257C   | #N/A | #N/A | 1.39 | 0.57 | #N/A | #N/A |
| iYNL258C   | #N/A | #N/A | 0.96 | 0.36 | #N/A | #N/A |
| iYNL259C   | 1.08 | 0.41 | 1.11 | 0.50 | 0.91 | 0.48 |
| iYNL260C   | #N/A | #N/A | #N/A | #N/A | #N/A | #N/A |
| iYNL261W   | 1.38 | 0.77 | 1.38 | 0.77 | 0.90 | 0.32 |
| iYNL262W   | #N/A | #N/A | #N/A | #N/A | #N/A | #N/A |
| iYNL263C   | 1.14 | 0.49 | 1.27 | 0.70 | 1.22 | 0.76 |
| iYNL264C   | #N/A | #N/A | #N/A | #N/A | #N/A | #N/A |
| iYNL265C   | 1.81 | 0.97 | 1.01 | 0.39 | 0.86 | 0.40 |
| iYNL267W   | 1.49 | 0.88 | 1.19 | 0.61 | 0.93 | 0.51 |
| iYNL268W   | 1.21 | 0.54 | 1.36 | 0.75 | 1.01 | 0.66 |
| iYNL269W   | 0.83 | 0.17 | 0.67 | 0.11 | 0.72 | 0.12 |
| iYNL271C   | 1.27 | 0.67 | 1.16 | 0.55 | 0.82 | 0.23 |
| iYNL272C   | 1.45 | 0.85 | 1.30 | 0.73 | 1.33 | 0.92 |
| iYNL273W   | #N/A | #N/A | #N/A | #N/A | #N/A | #N/A |
| iYNL274C   | 1.23 | 0.63 | 1.34 | 0.75 | 0.76 | 0.16 |
| iYNL275W   | #N/A | #N/A | #N/A | #N/A | #N/A | #N/A |
| iYNL278W   | 1.19 | 0.58 | 1.12 | 0.52 | 0.95 | 0.46 |
| iYNL279W   | 1.42 | 0.83 | 0.97 | 0.37 | 0.92 | 0.49 |
| iYNL280C   | 1.06 | 0.41 | 0.94 | 0.31 | 0.78 | 0.26 |
| iYNL281W   | 1.21 | 0.59 | 1.30 | 0.71 | 0.80 | 0.20 |
| iYNL282W   | #N/A | #N/A | 0.91 | 0.29 | 1.12 | 0.62 |
| iYNL283C   | 0.80 | 0.17 | 0.81 | 0.19 | 0.94 | 0.53 |
| iYNL284C   | 1.03 | 0.33 | 0.89 | 0.27 | 1.23 | 0.81 |
| iYNL286W   | #N/A | #N/A | #N/A | #N/A | #N/A | #N/A |
| iYNL287W   | 1.17 | 0.48 | 1.29 | 0.71 | 1.19 | 0.74 |
| iYNL288W   | 1.07 | 0.40 | 1.14 | 0.54 | 1.19 | 0.65 |
| iYNL289W-0 | #N/A | #N/A | 0.81 | 0.21 | 1.09 | 0.71 |
| iYNL289W-1 | #N/A | #N/A | 0.88 | 0.25 | 0.98 | 0.61 |
| iYNL290W   | 0.89 | 0.20 | 0.92 | 0.30 | 0.79 | 0.21 |
| iYNL291C   | #N/A | #N/A | 1.23 | 0.64 | 0.82 | 0.33 |
| iYNL292W   | #N/A | #N/A | 1.28 | 0.69 | #N/A | #N/A |
| iYNL293W   | #N/A | #N/A | 1.41 | 0.80 | 1.08 | 0.54 |
| iYNL294C   | 1.43 | 0.84 | 1.08 | 0.48 | 1.13 | 0.70 |
| iYNL295W   | #N/A | #N/A | 1.09 | 0.48 | #N/A | #N/A |
| iYNL296W   | 1.28 | 0.68 | 1.07 | 0.46 | 0.79 | 0.28 |
| iYNL298W   | #N/A | #N/A | #N/A | #N/A | #N/A | #N/A |
| iYNL299W   | 0.92 | 0.25 | 0.98 | 0.35 | 0.82 | 0.33 |
| iYNL300W   | 1.13 | 0.50 | 1.18 | 0.59 | 0.84 | 0.36 |
| iYNL302C   | 0.43 | 0.03 | 0.39 | 0.02 | 0.90 | 0.47 |
| iYNL303W   | #N/A | #N/A | #N/A | #N/A | #N/A | #N/A |
| iYNL305C   | 1.43 | 0.84 | 1.50 | 0.87 | 0.97 | 0.57 |
| iYNL306W   | #N/A | #N/A | #N/A | #N/A | #N/A | #N/A |
| iYNL307C   | 1.03 | 0.32 | 0.99 | 0.36 | 1.08 | 0.53 |
| iYNL308C   | #N/A | #N/A | #N/A | #N/A | #N/A | #N/A |

|               |      |      |      |      |      |      |
|---------------|------|------|------|------|------|------|
| iYNL309W      | #N/A | #N/A | 1.49 | 0.86 | 0.90 | 0.32 |
| iYNL311C      | 1.14 | 0.51 | 1.12 | 0.51 | 0.71 | 0.16 |
| iYNL312W      | #N/A | #N/A | #N/A | #N/A | #N/A | #N/A |
| iYNL313C      | #N/A | #N/A | #N/A | #N/A | #N/A | #N/A |
| iYNL314W      | #N/A | #N/A | #N/A | #N/A | #N/A | #N/A |
| iYNL315C      | 1.67 | 0.95 | 1.10 | 0.49 | 1.32 | 0.87 |
| iYNL316C      | #N/A | #N/A | #N/A | #N/A | #N/A | #N/A |
| iYNL318C      | 1.14 | 0.45 | 1.35 | 0.76 | 0.81 | 0.22 |
| iYNL320W      | #N/A | #N/A | #N/A | #N/A | #N/A | #N/A |
| iYNL321W      | 1.27 | 0.67 | 1.50 | 0.81 | 0.99 | 0.42 |
| iYNL322C      | 1.39 | 0.76 | 1.28 | 0.71 | 0.78 | 0.25 |
| iYNL323W      | #N/A | #N/A | #N/A | #N/A | #N/A | #N/A |
| iYNL324W      | 1.58 | 0.92 | 1.21 | 0.63 | 0.85 | 0.26 |
| iYNL326C      | #N/A | #N/A | #N/A | #N/A | #N/A | #N/A |
| iYNL327W      | #N/A | #N/A | #N/A | #N/A | #N/A | #N/A |
| iYNL328C      | 0.77 | 0.14 | 1.00 | 0.37 | 0.86 | 0.27 |
| iYNL329C      | 1.03 | 0.36 | 0.83 | 0.21 | #N/A | #N/A |
| iYNL330C      | #N/A | #N/A | #N/A | #N/A | #N/A | #N/A |
| iYNL331C      | 1.14 | 0.50 | 1.36 | 0.79 | 1.54 | 0.95 |
| iYNL332W      | 1.56 | 0.88 | 1.31 | 0.71 | 1.18 | 0.70 |
| iYNL333W      | 1.52 | 0.89 | 1.82 | 0.95 | 1.01 | 0.49 |
| iYNL334C      | 1.29 | 0.70 | 1.61 | 0.85 | 0.96 | 0.58 |
| iYNL335W      | #N/A | #N/A | #N/A | #N/A | #N/A | #N/A |
| iYNL336W-1    | 1.61 | 0.93 | 1.53 | 0.88 | 1.08 | 0.63 |
| iYNL337W      | 1.15 | 0.50 | 1.35 | 0.75 | 0.96 | 0.44 |
| iYNL338W      | 0.42 | 0.02 | 0.40 | 0.03 | 1.16 | 0.74 |
| iYNL339C      | 0.58 | 0.06 | 0.64 | 0.10 | 0.81 | 0.22 |
| iYNLCdelta1-1 | 1.28 | 0.69 | 1.12 | 0.52 | 1.19 | 0.76 |
| iYNLCdelta1-3 | 1.11 | 0.42 | 1.04 | 0.41 | 1.14 | 0.70 |
| iYNLCdelta2   | #N/A | #N/A | #N/A | #N/A | 1.20 | 0.88 |
| iYNLCdelta6   | #N/A | #N/A | #N/A | #N/A | #N/A | #N/A |
| iYNLWdelta4   | 1.51 | 0.89 | 1.36 | 0.78 | 1.10 | 0.66 |
| iYNR001C      | 0.63 | 0.08 | 0.66 | 0.11 | 0.65 | 0.11 |
| iYNR002C      | 1.31 | 0.69 | 1.41 | 0.81 | 0.94 | 0.42 |
| iYNR003C      | 1.22 | 0.59 | 1.31 | 0.70 | 0.84 | 0.24 |
| iYNR004W      | 1.30 | 0.70 | 1.59 | 0.91 | 0.75 | 0.22 |
| iYNR006W      | #N/A | #N/A | 1.62 | 0.91 | 0.98 | 0.49 |
| iYNR007C      | #N/A | #N/A | #N/A | #N/A | 1.18 | 0.65 |
| iYNR008W      | 1.00 | 0.32 | 0.98 | 0.35 | 1.01 | 0.53 |
| iYNR009W      | #N/A | #N/A | 1.11 | 0.51 | 1.04 | 0.57 |
| iYNR010W      | #N/A | #N/A | #N/A | #N/A | #N/A | #N/A |
| iYNR011C      | 0.97 | 0.31 | 1.03 | 0.40 | 0.94 | 0.45 |
| iYNR012W      | #N/A | #N/A | #N/A | #N/A | #N/A | #N/A |
| iYNR013C      | 0.57 | 0.06 | 0.54 | 0.06 | 0.48 | 0.02 |
| iYNR014W      | 1.27 | 0.67 | 1.11 | 0.52 | 1.03 | 0.47 |
| iYNR015W      | #N/A | #N/A | #N/A | #N/A | #N/A | #N/A |
| iYNR016C-0    | 0.88 | 0.20 | 0.89 | 0.26 | 0.96 | 0.39 |
| iYNR016C-1    | 0.75 | 0.13 | 0.71 | 0.13 | 1.12 | 0.69 |
| iYNR017W      | 0.66 | 0.09 | 0.72 | 0.14 | 0.76 | 0.22 |
| iYNR019W      | #N/A | #N/A | #N/A | #N/A | #N/A | #N/A |
| iYNR020C      | #N/A | #N/A | 1.04 | 0.43 | #N/A | #N/A |

|            |      |      |      |      |      |      |
|------------|------|------|------|------|------|------|
| iYNR021W   | 1.47 | 0.82 | 1.24 | 0.61 | 1.10 | 0.71 |
| iYNR022C   | #N/A | #N/A | #N/A | #N/A | #N/A | #N/A |
| iYNR023W   | 1.32 | 0.68 | 1.36 | 0.78 | 0.77 | 0.17 |
| iYNR025C   | 1.75 | 0.96 | 1.11 | 0.51 | #N/A | #N/A |
| iYNR026C   | #N/A | #N/A | 1.21 | 0.63 | 0.97 | 0.41 |
| iYNR027W   | 0.98 | 0.31 | 1.07 | 0.46 | 0.72 | 0.17 |
| iYNR028W   | #N/A | #N/A | #N/A | #N/A | #N/A | #N/A |
| iYNR029C   | 0.99 | 0.31 | 0.84 | 0.22 | 0.82 | 0.22 |
| iYNR030W   | #N/A | #N/A | #N/A | #N/A | #N/A | #N/A |
| iYNR031C   | 1.54 | 0.87 | 1.45 | 0.85 | 1.05 | 0.71 |
| iYNR032C-A | 1.14 | 0.45 | 1.20 | 0.62 | 0.85 | 0.38 |
| iYNR032W   | #N/A | #N/A | #N/A | #N/A | #N/A | #N/A |
| iYNR033W   | 1.50 | 0.88 | 1.22 | 0.63 | #N/A | #N/A |
| iYNR034W-0 | 1.21 | 0.59 | 1.29 | 0.71 | 1.00 | 0.44 |
| iYNR034W-1 | 1.50 | 0.85 | 1.53 | 0.89 | 1.10 | 0.64 |
| iYNR036C   | #N/A | #N/A | 1.06 | 0.44 | 1.12 | 0.68 |
| iYNR037C   | 1.22 | 0.59 | 0.96 | 0.33 | 0.80 | 0.21 |
| iYNR038W   | #N/A | #N/A | #N/A | #N/A | #N/A | #N/A |
| iYNR039C   | 1.40 | 0.81 | 1.07 | 0.46 | 0.90 | 0.37 |
| iYNR040W   | #N/A | #N/A | #N/A | #N/A | #N/A | #N/A |
| iYNR042W   | 1.28 | 0.69 | 1.11 | 0.52 | 0.85 | 0.35 |
| iYNR043W   | 1.23 | 0.61 | 1.10 | 0.50 | 0.93 | 0.51 |
| iYNR044W   | #N/A | #N/A | #N/A | #N/A | #N/A | #N/A |
| iYNR045W   | #N/A | #N/A | 0.89 | 0.27 | 1.17 | 0.64 |
| iYNR046W   | 1.25 | 0.64 | 1.12 | 0.52 | 1.04 | 0.70 |
| iYNR047W   | 1.16 | 0.51 | 1.38 | 0.77 | 0.76 | 0.16 |
| iYNR048W   | #N/A | #N/A | 1.22 | 0.64 | #N/A | #N/A |
| iYNR049C   | 1.27 | 0.61 | 1.01 | 0.39 | 0.77 | 0.25 |
| iYNR050C   | 0.96 | 0.26 | 0.91 | 0.29 | 1.16 | 0.63 |
| iYNR051C   | #N/A | #N/A | 1.09 | 0.48 | 0.99 | 0.48 |
| iYNR052C   | #N/A | #N/A | #N/A | #N/A | 0.94 | 0.54 |
| iYNR053C   | 1.08 | 0.38 | 1.25 | 0.67 | 0.62 | 0.07 |
| iYNR054C-0 | 1.50 | 0.88 | 1.46 | 0.85 | 1.25 | 0.91 |
| iYNR054C-1 | 1.41 | 0.82 | 1.29 | 0.71 | 1.26 | 0.83 |
| iYNR055C   | 1.28 | 0.63 | 1.47 | 0.84 | 0.98 | 0.41 |
| iYNR057C   | 1.45 | 0.85 | 1.32 | 0.72 | 0.85 | 0.31 |
| iYNR058W   | 1.35 | 0.76 | 1.63 | 0.93 | 1.13 | 0.70 |
| iYNR059W   | 1.04 | 0.37 | 0.92 | 0.29 | 0.87 | 0.39 |
| iYNR060W   | #N/A | #N/A | 1.60 | 0.90 | 1.13 | 0.63 |
| iYNR061C   | 1.07 | 0.43 | 1.21 | 0.58 | 1.04 | 0.60 |
| iYNR062C-0 | 1.34 | 0.76 | 1.36 | 0.78 | 1.10 | 0.68 |
| iYNR062C-1 | 1.42 | 0.83 | 1.26 | 0.66 | 0.95 | 0.56 |
| iYNR063W   | 1.48 | 0.87 | 1.39 | 0.65 | 0.88 | 0.42 |
| iYNR064C   | 1.21 | 0.57 | 1.18 | 0.60 | 0.78 | 0.18 |
| iYNR066C   | 1.43 | 0.84 | 1.55 | 0.88 | 1.34 | 0.78 |
| iYNR067C   | 0.95 | 0.25 | 1.01 | 0.40 | 0.74 | 0.18 |
| iYNR068C   | #N/A | #N/A | #N/A | #N/A | #N/A | #N/A |
| iYNR069C-0 | 1.25 | 0.63 | 1.41 | 0.78 | 0.77 | 0.20 |
| iYNR070W   | 1.35 | 0.77 | 1.30 | 0.73 | 0.93 | 0.35 |
| iYNR071C   | 1.01 | 0.33 | 1.17 | 0.59 | 1.04 | 0.49 |
| iYNR072W   | 1.13 | 0.49 | 1.36 | 0.75 | 0.93 | 0.39 |

|             |      |      |      |      |      |      |
|-------------|------|------|------|------|------|------|
| iYNR073C    | 1.13 | 0.44 | #N/A | #N/A | 0.82 | 0.22 |
| iYNR074C    | 1.18 | 0.55 | 1.58 | 0.85 | 1.20 | 0.67 |
| iYNR075W    | 1.42 | 0.78 | 1.47 | 0.82 | 1.13 | 0.67 |
| iYNR076W    | 1.12 | 0.42 | 1.12 | 0.52 | 1.01 | 0.52 |
| iYNRCdelta8 | 1.35 | 0.77 | 1.53 | 0.86 | 0.53 | 0.03 |
| iYNRCdelta9 | 1.70 | 0.96 | 1.55 | 0.85 | 1.05 | 0.49 |
| iYNRCtau3   | 0.49 | 0.03 | #N/A | #N/A | 1.56 | 0.96 |
| iYOL001W    | #N/A | #N/A | #N/A | #N/A | #N/A | #N/A |
| iYOL002C    | 1.23 | 0.64 | 1.43 | 0.84 | 1.02 | 0.67 |
| iYOL003C    | 1.22 | 0.62 | 1.37 | 0.79 | 1.24 | 0.81 |
| iYOL004W    | #N/A | #N/A | 1.23 | 0.65 | #N/A | #N/A |
| iYOL005C    | 1.05 | 0.40 | 0.90 | 0.27 | 1.18 | 0.81 |
| iYOL006C    | #N/A | #N/A | 0.79 | 0.19 | 0.94 | 0.54 |
| iYOL007C    | 1.14 | 0.49 | 0.94 | 0.30 | 1.11 | 0.69 |
| iYOL008W    | 1.19 | 0.56 | 1.33 | 0.75 | 1.14 | 0.69 |
| iYOL009C    | 1.63 | 0.94 | #N/A | #N/A | 0.87 | 0.29 |
| iYOL010W    | #N/A | #N/A | #N/A | #N/A | #N/A | #N/A |
| iYOL011W    | 1.13 | 0.47 | 1.27 | 0.70 | 1.19 | 0.72 |
| iYOL012C    | 0.76 | 0.14 | 0.64 | 0.10 | 0.86 | 0.29 |
| iYOL013W-A  | #N/A | #N/A | #N/A | #N/A | #N/A | #N/A |
| iYOL014W    | 1.19 | 0.51 | 1.15 | 0.55 | 1.13 | 0.59 |
| iYOL015W    | 1.12 | 0.43 | 1.09 | 0.48 | 1.24 | 0.76 |
| iYOL016C    | 1.32 | 0.67 | 0.99 | 0.41 | 0.88 | 0.29 |
| iYOL017W    | #N/A | #N/A | 1.37 | 0.78 | #N/A | #N/A |
| iYOL018C    | 1.15 | 0.50 | 1.06 | 0.45 | 0.84 | 0.25 |
| iYOL019W    | #N/A | #N/A | 1.53 | 0.89 | 0.97 | 0.59 |
| iYOL020W    | #N/A | #N/A | #N/A | #N/A | #N/A | #N/A |
| iYOL021C    | 0.71 | 0.11 | 0.61 | 0.08 | 0.86 | 0.40 |
| iYOL022C    | 1.19 | 0.51 | 1.34 | 0.72 | 0.93 | 0.52 |
| iYOL023W    | 1.46 | 0.82 | 1.17 | 0.57 | #N/A | #N/A |
| iYOL024W    | 1.19 | 0.56 | 1.20 | 0.62 | 1.32 | 0.77 |
| iYOL025W    | #N/A | #N/A | 1.54 | 0.88 | #N/A | #N/A |
| iYOL026C    | 0.64 | 0.09 | 0.67 | 0.11 | 1.36 | 0.91 |
| iYOL027C    | 1.12 | 0.48 | 1.20 | 0.60 | 0.81 | 0.30 |
| iYOL028C    | 1.26 | 0.60 | 1.43 | 0.81 | 1.30 | 0.84 |
| iYOL029C    | 1.53 | 0.90 | 1.54 | 0.89 | 0.97 | 0.40 |
| iYOL030W    | 1.53 | 0.90 | 1.92 | 0.97 | #N/A | #N/A |
| iYOL031C    | 1.09 | 0.40 | 0.83 | 0.22 | 0.96 | 0.57 |
| iYOL032W    | #N/A | #N/A | #N/A | #N/A | #N/A | #N/A |
| iYOL033W    | #N/A | #N/A | 1.26 | 0.66 | 1.18 | 0.73 |
| iYOL034W    | #N/A | #N/A | #N/A | #N/A | #N/A | #N/A |
| iYOL035C    | 1.25 | 0.64 | 1.05 | 0.44 | 1.00 | 0.65 |
| iYOL038W    | 1.15 | 0.47 | 1.08 | 0.48 | 1.05 | 0.70 |
| iYOL040C    | 0.27 | 0.01 | 0.26 | 0.01 | 0.48 | 0.03 |
| iYOL041C    | 1.04 | 0.39 | 1.22 | 0.61 | 0.81 | 0.31 |
| iYOL042W    | #N/A | #N/A | #N/A | #N/A | #N/A | #N/A |
| iYOL043C    | #N/A | #N/A | 0.99 | 0.38 | 0.99 | 0.43 |
| iYOL044W    | #N/A | #N/A | #N/A | #N/A | #N/A | #N/A |
| iYOL045W    | 1.12 | 0.46 | 0.88 | 0.30 | #N/A | #N/A |
| iYOL047C    | 1.25 | 0.59 | 1.27 | 0.68 | 0.73 | 0.13 |
| iYOL049W    | #N/A | #N/A | #N/A | #N/A | #N/A | #N/A |

|            |      |      |      |      |      |      |
|------------|------|------|------|------|------|------|
| iYOL050C   | 1.72 | 0.95 | 1.33 | 0.68 | #N/A | #N/A |
| iYOL052C   | 0.94 | 0.28 | 0.92 | 0.29 | 0.94 | 0.49 |
| iYOL053C-A | 0.91 | 0.25 | 0.82 | 0.21 | 0.74 | 0.15 |
| iYOL053W   | #N/A | #N/A | 1.31 | 0.72 | 0.98 | 0.48 |
| iYOL054W   | #N/A | #N/A | 1.27 | 0.70 | 0.97 | 0.46 |
| iYOL055C   | 1.20 | 0.53 | 1.17 | 0.59 | 1.27 | 0.73 |
| iYOL056W   | #N/A | #N/A | #N/A | #N/A | #N/A | #N/A |
| iYOL057W   | 1.21 | 0.56 | 0.98 | 0.35 | 1.00 | 0.50 |
| iYOL058W   | 1.22 | 0.59 | 1.19 | 0.61 | 0.74 | 0.14 |
| iYOL059W   | 0.90 | 0.23 | 0.96 | 0.33 | 0.74 | 0.14 |
| iYOL060C   | 0.51 | 0.05 | 0.42 | 0.03 | 0.74 | 0.14 |
| iYOL061W   | 1.43 | 0.84 | 1.32 | 0.68 | #N/A | #N/A |
| iYOL062C   | 1.12 | 0.48 | 1.02 | 0.40 | 0.91 | 0.35 |
| iYOL063C   | 1.34 | 0.75 | #N/A | #N/A | 1.13 | 0.60 |
| iYOL064C   | 1.41 | 0.77 | 1.16 | 0.56 | #N/A | #N/A |
| iYOL065C   | 1.41 | 0.82 | 1.24 | 0.65 | #N/A | #N/A |
| iYOL066C   | #N/A | #N/A | 1.51 | 0.81 | #N/A | #N/A |
| iYOL067C   | 0.96 | 0.27 | 0.95 | 0.32 | 0.92 | 0.37 |
| iYOL068C   | #N/A | #N/A | #N/A | #N/A | 1.19 | 0.77 |
| iYOL069W   | #N/A | #N/A | #N/A | #N/A | #N/A | #N/A |
| iYOL070C   | #N/A | #N/A | #N/A | #N/A | #N/A | #N/A |
| iYOL071W   | #N/A | #N/A | #N/A | #N/A | #N/A | #N/A |
| iYOL072W   | 1.15 | 0.46 | 1.57 | 0.79 | 0.92 | 0.35 |
| iYOL073C   | 1.18 | 0.54 | 1.69 | 0.59 | #N/A | #N/A |
| iYOL075C   | 1.42 | 0.78 | 1.29 | 0.72 | 1.17 | 0.72 |
| iYOL076W   | #N/A | #N/A | #N/A | #N/A | #N/A | #N/A |
| iYOL077C   | #N/A | #N/A | 0.90 | 0.28 | 0.77 | 0.17 |
| iYOL078W   | 1.21 | 0.60 | 1.20 | 0.62 | 1.02 | 0.53 |
| iYOL079W   | 1.01 | 0.33 | 1.12 | 0.52 | #N/A | #N/A |
| iYOL081W   | 1.24 | 0.63 | 1.53 | 0.63 | 0.93 | 0.51 |
| iYOL082W   | 1.00 | 0.30 | 1.13 | 0.54 | 0.80 | 0.21 |
| iYOL083W-0 | #N/A | #N/A | 1.53 | 0.78 | 0.97 | 0.52 |
| iYOL083W-1 | 0.98 | 0.32 | 0.87 | 0.24 | 0.63 | 0.09 |
| iYOL084W   | 1.67 | 0.95 | 1.24 | 0.65 | 0.83 | 0.24 |
| iYOL085C   | 1.08 | 0.41 | 1.21 | 0.59 | 1.19 | 0.66 |
| iYOL086C   | 0.61 | 0.07 | 0.41 | 0.03 | 0.72 | 0.16 |
| iYOL087C   | 0.99 | 0.31 | 1.05 | 0.45 | 0.97 | 0.46 |
| iYOL089C   | 1.33 | 0.74 | 1.19 | 0.60 | 0.96 | 0.57 |
| iYOL090W   | #N/A | #N/A | #N/A | #N/A | #N/A | #N/A |
| iYOL091W   | #N/A | #N/A | #N/A | #N/A | #N/A | #N/A |
| iYOL092W   | #N/A | #N/A | #N/A | #N/A | #N/A | #N/A |
| iYOL093W   | 1.33 | 0.72 | 1.20 | 0.61 | 0.87 | 0.41 |
| iYOL094C   | 1.48 | 0.88 | 1.38 | 0.77 | 1.06 | 0.61 |
| iYOL095C   | 1.28 | 0.68 | 1.35 | 0.74 | #N/A | #N/A |
| iYOL096C   | #N/A | #N/A | #N/A | #N/A | 0.84 | 0.36 |
| iYOL097C   | #N/A | #N/A | #N/A | #N/A | 1.55 | 0.89 |
| iYOL098C   | #N/A | #N/A | 0.86 | 0.23 | 0.94 | 0.36 |
| iYOL099C   | #N/A | #N/A | 1.19 | 0.57 | 0.83 | 0.24 |
| iYOL101C   | 1.12 | 0.46 | 1.19 | 0.60 | 0.99 | 0.48 |
| iYOL102C   | 1.20 | 0.52 | 0.99 | 0.36 | #N/A | #N/A |
| iYOL103W   | #N/A | #N/A | #N/A | #N/A | #N/A | #N/A |

|            |      |      |      |      |      |      |
|------------|------|------|------|------|------|------|
| iYOL104C   | 0.88 | 0.21 | 0.89 | 0.26 | 0.89 | 0.33 |
| iYOL105C   | 1.45 | 0.85 | 1.28 | 0.71 | 0.94 | 0.43 |
| iYOL107W   | #N/A | #N/A | 1.13 | 0.53 | #N/A | #N/A |
| iYOL108C   | #N/A | #N/A | 0.97 | 0.34 | #N/A | #N/A |
| iYOL110W   | 0.17 | 0.00 | 0.17 | 0.00 | 0.41 | 0.01 |
| iYOL111C   | 1.04 | 0.36 | 0.99 | 0.37 | #N/A | #N/A |
| iYOL112W   | #N/A | #N/A | #N/A | #N/A | #N/A | #N/A |
| iYOL113W   | 1.58 | 0.92 | 1.38 | 0.68 | 1.20 | 0.78 |
| iYOL114C   | 1.31 | 0.71 | 1.01 | 0.38 | 0.82 | 0.32 |
| iYOL115W   | #N/A | #N/A | #N/A | #N/A | #N/A | #N/A |
| iYOL116W   | 1.47 | 0.86 | 1.65 | 0.94 | 1.29 | 0.90 |
| iYOL117W   | 1.21 | 0.61 | 1.02 | 0.39 | 1.21 | 0.84 |
| iYOL118C   | 1.27 | 0.62 | 1.27 | 0.70 | 1.00 | 0.51 |
| iYOL119C   | 1.69 | 0.96 | 1.05 | 0.44 | 1.13 | 0.59 |
| iYOL120C   | #N/A | #N/A | 0.68 | 0.12 | 0.95 | 0.43 |
| iYOL121C   | 0.60 | 0.07 | 0.49 | 0.04 | 0.74 | 0.16 |
| iYOL122C   | 0.94 | 0.25 | 1.26 | 0.67 | 0.97 | 0.45 |
| iYOL123W   | #N/A | #N/A | #N/A | #N/A | #N/A | #N/A |
| iYOL124C   | 0.76 | 0.13 | 0.90 | 0.28 | 0.96 | 0.44 |
| iYOL125W   | #N/A | #N/A | #N/A | #N/A | #N/A | #N/A |
| iYOL126C   | 0.73 | 0.13 | 0.73 | 0.15 | 0.75 | 0.22 |
| iYOL127W   | 1.06 | 0.35 | 1.11 | 0.50 | 0.88 | 0.29 |
| iYOL128C   | 0.65 | 0.09 | 0.52 | 0.05 | 0.83 | 0.34 |
| iYOL129W   | 1.34 | 0.70 | 1.20 | 0.62 | 0.89 | 0.33 |
| iYOL130W   | 1.41 | 0.79 | 1.10 | 0.50 | 0.97 | 0.50 |
| iYOL131W   | 1.43 | 0.84 | 1.26 | 0.67 | #N/A | #N/A |
| iYOL132W   | 1.19 | 0.58 | 1.14 | 0.55 | 0.88 | 0.37 |
| iYOL133W   | 1.44 | 0.84 | 1.26 | 0.68 | 0.63 | 0.10 |
| iYOL135C   | #N/A | #N/A | #N/A | #N/A | 1.34 | 0.88 |
| iYOL136C   | 0.97 | 0.28 | 0.89 | 0.27 | 0.78 | 0.26 |
| iYOL137W   | 1.44 | 0.85 | 1.31 | 0.70 | 1.00 | 0.51 |
| iYOL138C   | 1.17 | 0.52 | 0.90 | 0.28 | #N/A | #N/A |
| iYOL139C   | 0.98 | 0.30 | 0.82 | 0.20 | 1.04 | 0.70 |
| iYOL140W   | 0.80 | 0.15 | 0.79 | 0.20 | 0.98 | 0.41 |
| iYOL141W   | 0.66 | 0.09 | 1.02 | 0.39 | #N/A | #N/A |
| iYOL142W   | #N/A | #N/A | 0.55 | 0.07 | #N/A | #N/A |
| iYOL143C   | 1.01 | 0.35 | 0.88 | 0.25 | 1.07 | 0.75 |
| iYOL145C   | #N/A | #N/A | #N/A | #N/A | #N/A | #N/A |
| iYOL146W   | #N/A | #N/A | #N/A | #N/A | #N/A | #N/A |
| iYOL147C   | #N/A | #N/A | #N/A | #N/A | #N/A | #N/A |
| iYOL148C   | 1.17 | 0.52 | 1.20 | 0.62 | 1.09 | 0.78 |
| iYOL149W   | #N/A | #N/A | #N/A | #N/A | #N/A | #N/A |
| iYOL150C   | #N/A | #N/A | #N/A | #N/A | #N/A | #N/A |
| iYOL152W   | 1.20 | 0.53 | 1.14 | 0.54 | 0.87 | 0.29 |
| iYOL153C-0 | 1.53 | 0.87 | 1.41 | 0.82 | 1.17 | 0.67 |
| iYOL153C-1 | 1.42 | 0.83 | 1.38 | 0.77 | 1.02 | 0.54 |
| iYOL154W   | #N/A | #N/A | 1.61 | 0.92 | 0.91 | 0.35 |
| iYOL155C-0 | 1.36 | 0.75 | 1.23 | 0.63 | 0.96 | 0.44 |
| iYOL155C-1 | 1.50 | 0.85 | 1.40 | 0.76 | 1.18 | 0.86 |
| iYOL156W-0 | 0.83 | 0.19 | 0.99 | 0.38 | 0.92 | 0.34 |
| iYOL156W-1 | 0.45 | 0.03 | 0.48 | 0.04 | 0.55 | 0.04 |

|                |      |      |      |      |      |      |
|----------------|------|------|------|------|------|------|
| iYOL157C       | 1.11 | 0.45 | 1.42 | 0.77 | 0.89 | 0.33 |
| iYOL158C       | 0.71 | 0.11 | 0.94 | 0.35 | 1.06 | 0.60 |
| iYOL159C       | 1.35 | 0.71 | 1.48 | 0.82 | 1.03 | 0.56 |
| iYOL160W-0     | 1.38 | 0.75 | 1.69 | 0.93 | 1.00 | 0.44 |
| iYOL160W-1     | 1.52 | 0.90 | 1.65 | 0.93 | 1.12 | 0.75 |
| iYOL161C-0     | 1.23 | 0.61 | 1.32 | 0.68 | 0.92 | 0.37 |
| iYOL161C-1     | 1.64 | 0.94 | 1.93 | 0.95 | 1.02 | 0.46 |
| iYOL162W       | 1.15 | 0.51 | 1.36 | 0.74 | 0.94 | 0.48 |
| iYOL164W       | 1.41 | 0.82 | 1.43 | 0.83 | 1.08 | 0.61 |
| iYOL165C       | 1.60 | 0.93 | 1.90 | 0.98 | 0.80 | 0.20 |
| iYOL166C       | #N/A | #N/A | #N/A | #N/A | #N/A | #N/A |
| iYOLCdelta1    | 1.14 | 0.51 | 1.81 | 0.95 | 0.99 | 0.49 |
| iYOLCdelta2    | 1.43 | 0.79 | 1.51 | 0.83 | 0.78 | 0.26 |
| iYOLCdelta3    | #N/A | #N/A | #N/A | #N/A | #N/A | #N/A |
| iYOLCdelta7    | #N/A | #N/A | #N/A | #N/A | #N/A | #N/A |
| iYOLCdelta9    | 2.10 | 0.99 | 1.87 | 0.78 | #N/A | #N/A |
| iYOLWdelta10-1 | 1.59 | 0.92 | 1.38 | 0.78 | 0.93 | 0.35 |
| iYOLWdelta5    | 1.18 | 0.54 | 1.13 | 0.53 | 1.18 | 0.67 |
| iYOLWdelta6    | 0.94 | 0.24 | 1.27 | 0.68 | #N/A | #N/A |
| iYOLWsigma2    | #N/A | #N/A | #N/A | #N/A | #N/A | #N/A |
| iYOLWtau1-0    | 1.75 | 0.96 | 2.02 | 0.97 | 0.96 | 0.40 |
| iYOR001W       | 1.19 | 0.58 | 1.34 | 0.76 | 0.96 | 0.38 |
| iYOR002W       | 1.78 | 0.97 | 2.06 | 0.93 | 1.26 | 0.86 |
| iYOR003W       | 1.27 | 0.66 | #N/A | #N/A | 0.94 | 0.41 |
| iYOR004W       | 1.01 | 0.35 | #N/A | #N/A | 1.33 | 0.92 |
| iYOR005C       | #N/A | #N/A | 1.00 | 0.37 | 1.00 | 0.51 |
| iYOR006C       | 1.15 | 0.50 | 1.07 | 0.47 | 0.81 | 0.24 |
| iYOR007C       | 0.98 | 0.28 | 1.07 | 0.48 | #N/A | #N/A |
| iYOR008C       | #N/A | #N/A | 0.95 | 0.33 | 1.01 | 0.65 |
| iYOR008C-A     | 1.12 | 0.47 | 1.34 | 0.76 | 0.98 | 0.61 |
| iYOR009W       | #N/A | #N/A | 1.59 | 0.69 | #N/A | #N/A |
| iYOR010C-1     | 1.28 | 0.65 | 1.14 | 0.55 | 1.03 | 0.47 |
| iYOR011W       | #N/A | #N/A | #N/A | #N/A | #N/A | #N/A |
| iYOR013W       | 1.20 | 0.52 | 1.10 | 0.50 | 1.01 | 0.52 |
| iYOR015W       | 1.03 | 0.37 | #N/A | #N/A | #N/A | #N/A |
| iYOR016C       | 1.39 | 0.80 | 1.27 | 0.69 | 0.89 | 0.30 |
| iYOR017W       | 1.18 | 0.53 | 1.23 | 0.65 | 1.07 | 0.75 |
| iYOR018W       | 1.25 | 0.64 | 1.26 | 0.69 | 0.99 | 0.63 |
| iYOR019W       | #N/A | #N/A | 0.70 | 0.14 | #N/A | #N/A |
| iYOR020C-0     | 1.07 | 0.40 | 0.98 | 0.36 | 1.09 | 0.54 |
| iYOR020C-1     | 1.50 | 0.89 | 1.39 | 0.78 | 1.33 | 0.77 |
| iYOR021C       | #N/A | #N/A | 1.04 | 0.43 | 0.60 | 0.06 |
| iYOR022C       | #N/A | #N/A | #N/A | #N/A | #N/A | #N/A |
| iYOR023C       | 1.08 | 0.38 | 0.72 | 0.16 | 0.70 | 0.11 |
| iYOR025W       | 0.95 | 0.27 | 0.78 | 0.18 | #N/A | #N/A |
| iYOR026W       | #N/A | #N/A | 1.12 | 0.51 | 1.02 | 0.54 |
| iYOR027W       | 0.98 | 0.27 | 1.04 | 0.43 | 1.01 | 0.52 |
| iYOR028C       | #N/A | #N/A | #N/A | #N/A | 0.98 | 0.41 |
| iYOR029W-0     | 0.90 | 0.21 | 0.79 | 0.19 | 0.61 | 0.05 |
| iYOR029W-1     | 1.33 | 0.74 | 1.17 | 0.59 | 1.28 | 0.85 |
| iYOR030W       | 1.51 | 0.89 | 1.33 | 0.71 | 1.07 | 0.61 |



|            |      |      |      |      |      |      |
|------------|------|------|------|------|------|------|
| iYOR031W   | #N/A | #N/A | 1.36 | 0.72 | 0.99 | 0.62 |
| iYOR032C   | 0.80 | 0.15 | 0.78 | 0.18 | 0.97 | 0.45 |
| iYOR033C   | 1.39 | 0.76 | 1.26 | 0.66 | 1.11 | 0.76 |
| iYOR034C   | 1.14 | 0.51 | 1.27 | 0.69 | 1.12 | 0.68 |
| iYOR035C   | 1.08 | 0.41 | 1.08 | 0.48 | 0.80 | 0.19 |
| iYOR036W   | #N/A | #N/A | 1.10 | 0.50 | 1.14 | 0.64 |
| iYOR037W   | #N/A | #N/A | #N/A | #N/A | #N/A | #N/A |
| iYOR038C   | 1.29 | 0.71 | 1.32 | 0.72 | 1.16 | 0.73 |
| iYOR039W   | #N/A | #N/A | 1.43 | 0.83 | 1.17 | 0.77 |
| iYOR040W   | 0.87 | 0.19 | 0.83 | 0.21 | 1.02 | 0.55 |
| iYOR042W   | 1.21 | 0.54 | 1.00 | 0.47 | 1.01 | 0.66 |
| iYOR043W   | #N/A | #N/A | 1.01 | 0.38 | 1.11 | 0.67 |
| iYOR044W   | 1.47 | 0.87 | 1.01 | 0.40 | 1.40 | 0.92 |
| iYOR045W   | #N/A | #N/A | #N/A | #N/A | 0.89 | 0.33 |
| iYOR046C   | 1.08 | 0.38 | 0.94 | 0.31 | 0.82 | 0.32 |
| iYOR047C   | 1.03 | 0.37 | 0.81 | 0.20 | 1.16 | 0.85 |
| iYOR048C   | 1.24 | 0.65 | 1.09 | 0.50 | 0.97 | 0.50 |
| iYOR049C   | 0.99 | 0.28 | 1.08 | 0.47 | 0.96 | 0.56 |
| iYOR050C   | 0.82 | 0.16 | 0.73 | 0.15 | #N/A | #N/A |
| iYOR051C   | #N/A | #N/A | #N/A | #N/A | #N/A | #N/A |
| iYOR052C   | 1.22 | 0.59 | 1.10 | 0.50 | 0.86 | 0.39 |
| iYOR055W   | #N/A | #N/A | 0.97 | 0.35 | 0.95 | 0.45 |
| iYOR056C   | 1.15 | 0.50 | 1.02 | 0.40 | 1.11 | 0.77 |
| iYOR057W   | 1.11 | 0.47 | 1.48 | 0.86 | 1.50 | 0.96 |
| iYOR058C-1 | 1.52 | 0.90 | 1.51 | 0.88 | 1.18 | 0.76 |
| iYOR059C   | #N/A | #N/A | 1.32 | 0.74 | #N/A | #N/A |
| iYOR060C   | 1.11 | 0.45 | 1.03 | 0.42 | 1.14 | 0.72 |
| iYOR064C   | 0.95 | 0.26 | 0.84 | 0.22 | 1.13 | 0.62 |
| iYOR066W   | 1.62 | 0.92 | 1.40 | 0.80 | 0.73 | 0.19 |
| iYOR068C   | 1.49 | 0.84 | 1.48 | 0.80 | 1.09 | 0.59 |
| iYOR069W   | #N/A | #N/A | #N/A | #N/A | #N/A | #N/A |
| iYOR070C-0 | 1.32 | 0.71 | 1.34 | 0.74 | 1.11 | 0.67 |
| iYOR070C-1 | 1.67 | 0.94 | 1.52 | 0.81 | 0.83 | 0.23 |
| iYOR071C   | #N/A | #N/A | #N/A | #N/A | #N/A | #N/A |
| iYOR072W-1 | 1.14 | 0.47 | 1.37 | 0.72 | 1.16 | 0.74 |
| iYOR073W   | #N/A | #N/A | #N/A | #N/A | #N/A | #N/A |
| iYOR074C   | 1.22 | 0.55 | 1.21 | 0.62 | 0.99 | 0.63 |
| iYOR075W   | #N/A | #N/A | #N/A | #N/A | #N/A | #N/A |
| iYOR076C   | 1.15 | 0.51 | 1.12 | 0.52 | 0.86 | 0.39 |
| iYOR077W   | 0.82 | 0.17 | 0.92 | 0.29 | 1.17 | 0.64 |
| iYOR078W   | #N/A | #N/A | #N/A | #N/A | #N/A | #N/A |
| iYOR079C   | #N/A | #N/A | #N/A | #N/A | #N/A | #N/A |
| iYOR081C   | #N/A | #N/A | #N/A | #N/A | #N/A | #N/A |
| iYOR084W   | 1.05 | 0.40 | 1.08 | 0.47 | 0.77 | 0.17 |
| iYOR085W   | #N/A | #N/A | #N/A | #N/A | #N/A | #N/A |
| iYOR086C   | 0.88 | 0.21 | 0.94 | 0.33 | 0.98 | 0.41 |
| iYOR088W   | #N/A | #N/A | 1.36 | 0.64 | #N/A | #N/A |
| iYOR089C   | 1.27 | 0.66 | 1.11 | 0.51 | 1.06 | 0.67 |
| iYOR090C   | 1.21 | 0.54 | 1.08 | 0.47 | 0.94 | 0.53 |
| iYOR094W   | #N/A | #N/A | #N/A | #N/A | #N/A | #N/A |
| iYOR095C   | 0.73 | 0.12 | 0.70 | 0.14 | 0.75 | 0.15 |



|            |      |      |      |      |      |      |
|------------|------|------|------|------|------|------|
| iYOR096W   | #N/A | #N/A | #N/A | #N/A | #N/A | #N/A |
| iYOR097C   | #N/A | #N/A | 1.04 | 0.42 | 0.87 | 0.29 |
| iYOR098C   | 0.63 | 0.08 | 0.61 | 0.09 | 0.69 | 0.14 |
| iYOR100C   | 0.66 | 0.09 | 0.74 | 0.16 | 0.67 | 0.13 |
| iYOR101W   | #N/A | #N/A | #N/A | #N/A | #N/A | #N/A |
| iYOR103C   | 1.37 | 0.79 | 1.55 | 0.90 | 1.20 | 0.74 |
| iYOR108W   | 1.18 | 0.55 | 1.34 | 0.76 | 1.06 | 0.74 |
| iYOR110W   | 1.18 | 0.54 | 1.34 | 0.77 | 1.13 | 0.82 |
| iYOR112W   | 1.18 | 0.55 | 1.04 | 0.42 | 0.99 | 0.48 |
| iYOR114W   | #N/A | #N/A | #N/A | #N/A | #N/A | #N/A |
| iYOR116C   | 1.20 | 0.53 | 1.09 | 0.48 | 1.04 | 0.62 |
| iYOR117W   | 1.10 | 0.44 | 1.31 | 0.69 | #N/A | #N/A |
| iYOR118W   | #N/A | #N/A | #N/A | #N/A | #N/A | #N/A |
| iYOR119C   | 1.38 | 0.75 | 1.32 | 0.71 | 0.82 | 0.22 |
| iYOR121C   | 1.42 | 0.83 | 0.99 | 0.36 | #N/A | #N/A |
| iYOR123C   | #N/A | #N/A | 1.06 | 0.45 | 0.87 | 0.30 |
| iYOR125C   | #N/A | #N/A | #N/A | #N/A | #N/A | #N/A |
| iYOR126C   | 1.23 | 0.56 | 1.35 | 0.71 | 0.89 | 0.32 |
| iYOR127W   | #N/A | #N/A | #N/A | #N/A | #N/A | #N/A |
| iYOR128C   | 1.27 | 0.61 | 1.08 | 0.47 | 1.10 | 0.66 |
| iYOR129C   | 1.34 | 0.76 | 1.38 | 0.80 | 0.94 | 0.41 |
| iYOR130C   | 1.41 | 0.77 | 1.41 | 0.80 | 1.10 | 0.79 |
| iYOR131C   | 1.33 | 0.75 | 1.03 | 0.41 | 1.25 | 0.77 |
| iYOR132W   | 1.19 | 0.51 | 0.60 | 0.11 | 1.19 | 0.68 |
| iYOR133W   | 1.29 | 0.69 | 1.41 | 0.81 | 1.13 | 0.59 |
| iYOR134W   | 0.68 | 0.10 | 0.67 | 0.11 | 0.98 | 0.60 |
| iYOR136W   | 1.62 | 0.94 | 1.64 | 0.93 | 1.18 | 0.76 |
| iYOR137C   | 1.32 | 0.67 | 1.46 | 0.85 | 1.26 | 0.85 |
| iYOR138C   | 1.16 | 0.53 | 1.16 | 0.57 | 1.25 | 0.91 |
| iYOR140W   | 1.24 | 0.58 | 1.27 | 0.69 | 0.99 | 0.62 |
| iYOR141C   | 1.02 | 0.35 | 1.17 | 0.57 | 1.10 | 0.68 |
| iYOR142W   | #N/A | #N/A | 1.23 | 0.57 | #N/A | #N/A |
| iYOR143C   | 1.11 | 0.41 | 0.96 | 0.32 | 1.11 | 0.80 |
| iYOR144C   | 1.28 | 0.62 | 1.26 | 0.69 | #N/A | #N/A |
| iYOR146W   | #N/A | #N/A | 0.64 | 0.10 | 0.52 | 0.03 |
| iYOR147W   | #N/A | #N/A | #N/A | #N/A | #N/A | #N/A |
| iYOR148C   | 1.10 | 0.44 | 1.11 | 0.50 | 0.84 | 0.26 |
| iYOR149C   | 1.33 | 0.69 | 1.15 | 0.54 | 0.83 | 0.25 |
| iYOR150W   | 1.13 | 0.48 | 1.54 | 0.72 | 1.29 | 0.90 |
| iYOR151C   | 1.11 | 0.45 | 1.15 | 0.56 | 1.08 | 0.73 |
| iYOR152C-0 | 0.79 | 0.15 | 0.81 | 0.22 | 1.00 | 0.53 |
| iYOR152C-1 | 0.27 | 0.01 | 0.32 | 0.01 | 0.46 | 0.01 |
| iYOR153W   | #N/A | #N/A | 1.17 | 0.57 | #N/A | #N/A |
| iYOR154W   | #N/A | #N/A | #N/A | #N/A | #N/A | #N/A |
| iYOR155C   | #N/A | #N/A | 1.53 | 0.88 | 1.23 | 0.81 |
| iYOR156C   | 1.15 | 0.50 | #N/A | #N/A | #N/A | #N/A |
| iYOR157C   | 0.71 | 0.11 | 0.81 | 0.20 | 1.14 | 0.83 |
| iYOR158W   | #N/A | #N/A | #N/A | #N/A | #N/A | #N/A |
| iYOR159C   | 1.47 | 0.83 | 1.34 | 0.76 | 0.96 | 0.38 |
| iYOR160W   | #N/A | #N/A | #N/A | #N/A | #N/A | #N/A |
| iYOR161C   | 0.58 | 0.06 | 0.63 | 0.09 | 0.78 | 0.27 |

|            |      |      |      |      |      |      |
|------------|------|------|------|------|------|------|
| iYOR162C   | 1.33 | 0.75 | 1.15 | 0.55 | 1.20 | 0.79 |
| iYOR163W   | #N/A | #N/A | #N/A | #N/A | #N/A | #N/A |
| iYOR164C   | 0.89 | 0.20 | 1.09 | 0.47 | 0.88 | 0.31 |
| iYOR165W   | #N/A | #N/A | #N/A | #N/A | #N/A | #N/A |
| iYOR166C   | 1.20 | 0.57 | 1.13 | 0.54 | 0.57 | 0.05 |
| iYOR167C   | 0.59 | 0.06 | 0.69 | 0.12 | 0.98 | 0.42 |
| iYOR171C   | 1.12 | 0.43 | 0.95 | 0.32 | #N/A | #N/A |
| iYOR172W   | 1.35 | 0.74 | 1.39 | 0.77 | 1.24 | 0.87 |
| iYOR173W   | #N/A | #N/A | 1.05 | 0.43 | 0.94 | 0.52 |
| iYOR174W   | #N/A | #N/A | 0.89 | 0.27 | #N/A | #N/A |
| iYOR175C   | 1.21 | 0.59 | 1.23 | 0.66 | 1.07 | 0.62 |
| iYOR176W   | #N/A | #N/A | #N/A | #N/A | #N/A | #N/A |
| iYOR178C-0 | 0.60 | 0.07 | 0.80 | 0.20 | 0.88 | 0.42 |
| iYOR178C-1 | 1.13 | 0.50 | 1.11 | 0.50 | 0.91 | 0.47 |
| iYOR179C-0 | 1.49 | 0.86 | 1.07 | 0.46 | 1.02 | 0.67 |
| iYOR180C   | 1.37 | 0.79 | 1.26 | 0.69 | 0.98 | 0.60 |
| iYOR181W   | 0.94 | 0.28 | 0.83 | 0.25 | 1.24 | 0.81 |
| iYOR182C   | #N/A | #N/A | #N/A | #N/A | #N/A | #N/A |
| iYOR183W   | #N/A | #N/A | #N/A | #N/A | #N/A | #N/A |
| iYOR184W   | 1.10 | 0.44 | 1.13 | 0.53 | 0.91 | 0.48 |
| iYOR185C   | 1.26 | 0.65 | 1.47 | 0.81 | 1.01 | 0.57 |
| iYOR186W   | 0.95 | 0.27 | 0.89 | 0.26 | 0.82 | 0.22 |
| iYOR187W   | 1.05 | 0.40 | #N/A | #N/A | 0.96 | 0.39 |
| iYOR188W   | 1.00 | 0.34 | 0.93 | 0.32 | 0.88 | 0.32 |
| iYOR189W   | 1.51 | 0.86 | 1.42 | 0.80 | 1.26 | 0.84 |
| iYOR190W   | 1.07 | 0.42 | 1.54 | 0.89 | 1.20 | 0.78 |
| iYOR192C-0 | 1.28 | 0.69 | 1.38 | 0.77 | 0.89 | 0.30 |
| iYOR192C-1 | 1.45 | 0.85 | 1.60 | 0.91 | 1.07 | 0.61 |
| iYOR193W   | #N/A | #N/A | #N/A | #N/A | #N/A | #N/A |
| iYOR194C   | 1.06 | 0.36 | 1.05 | 0.43 | 0.97 | 0.52 |
| iYOR195W   | #N/A | #N/A | 1.55 | 0.84 | #N/A | #N/A |
| iYOR196C   | #N/A | #N/A | 1.09 | 0.48 | 0.92 | 0.38 |
| iYOR197W   | #N/A | #N/A | #N/A | #N/A | #N/A | #N/A |
| iYOR198C   | #N/A | #N/A | #N/A | #N/A | 1.34 | 0.78 |
| iYOR201C   | #N/A | #N/A | 1.20 | 0.56 | 0.96 | 0.55 |
| iYOR204W   | 1.28 | 0.68 | 1.32 | 0.75 | 1.23 | 0.70 |
| iYOR205C   | 1.10 | 0.46 | 1.02 | 0.39 | #N/A | #N/A |
| iYOR206W   | 1.14 | 0.49 | 1.31 | 0.74 | 0.67 | 0.12 |
| iYOR207C   | 1.23 | 0.60 | 1.47 | 0.86 | 1.14 | 0.69 |
| iYOR208W   | #N/A | #N/A | 1.62 | 0.87 | #N/A | #N/A |
| iYOR209C   | 1.12 | 0.47 | 0.92 | 0.29 | 0.92 | 0.38 |
| iYOR210W   | #N/A | #N/A | 1.04 | 0.42 | #N/A | #N/A |
| iYOR211C   | 0.73 | 0.13 | 0.83 | 0.24 | 0.77 | 0.18 |
| iYOR212W   | 1.42 | 0.78 | #N/A | #N/A | #N/A | #N/A |
| iYOR213C   | 0.91 | 0.22 | 1.14 | 0.53 | 0.90 | 0.40 |
| iYOR214C   | 1.66 | 0.93 | 1.36 | 0.78 | 1.11 | 0.67 |
| iYOR215C   | 1.24 | 0.63 | 0.91 | 0.28 | 0.78 | 0.19 |
| iYOR216C   | 1.06 | 0.39 | 1.12 | 0.52 | 0.86 | 0.29 |
| iYOR218C   | #N/A | #N/A | 1.66 | 0.94 | 0.99 | 0.54 |
| iYOR219C   | #N/A | #N/A | #N/A | #N/A | 0.95 | 0.42 |
| iYOR220W   | 1.50 | 0.88 | 1.43 | 0.84 | 0.98 | 0.47 |

|          |      |      |      |      |      |      |
|----------|------|------|------|------|------|------|
| iYOR221C | 1.31 | 0.66 | 1.16 | 0.57 | 1.19 | 0.77 |
| iYOR222W | 1.42 | 0.83 | 0.88 | 0.25 | 0.88 | 0.31 |
| iYOR223W | #N/A | #N/A | #N/A | #N/A | #N/A | #N/A |
| iYOR224C | #N/A | #N/A | 0.90 | 0.27 | 1.27 | 0.75 |
| iYOR226C | 1.01 | 0.33 | 1.00 | 0.38 | 1.05 | 0.55 |
| iYOR227W | #N/A | #N/A | #N/A | #N/A | #N/A | #N/A |
| iYOR228C | 1.07 | 0.40 | 1.04 | 0.43 | 1.04 | 0.57 |
| iYOR229W | 0.49 | 0.04 | 0.71 | 0.13 | 0.75 | 0.22 |
| iYOR230W | 1.26 | 0.61 | 1.27 | 0.68 | 1.32 | 0.77 |
| iYOR231W | 1.14 | 0.51 | 1.51 | 0.87 | 0.97 | 0.41 |
| iYOR232W | 1.24 | 0.65 | 1.17 | 0.57 | 0.80 | 0.20 |
| iYOR233W | #N/A | #N/A | #N/A | #N/A | #N/A | #N/A |
| iYOR234C | 0.33 | 0.01 | 0.22 | 0.01 | 0.83 | 0.24 |
| iYOR235W | 0.76 | 0.13 | 0.57 | 0.08 | 1.22 | 0.68 |
| iYOR236W | 1.13 | 0.44 | 1.03 | 0.41 | 0.85 | 0.27 |
| iYOR237W | 1.29 | 0.70 | 1.07 | 0.47 | #N/A | #N/A |
| iYOR238W | #N/A | #N/A | #N/A | #N/A | 0.91 | 0.36 |
| iYOR240W | 1.51 | 0.89 | #N/A | #N/A | 0.81 | 0.22 |
| iYOR241W | #N/A | #N/A | #N/A | #N/A | #N/A | #N/A |
| iYOR242C | 1.79 | 0.97 | 1.38 | 0.75 | 0.90 | 0.45 |
| iYOR243C | 1.01 | 0.33 | 1.15 | 0.55 | 1.05 | 0.59 |
| iYOR244W | #N/A | #N/A | #N/A | #N/A | #N/A | #N/A |
| iYOR245C | 1.41 | 0.77 | 1.22 | 0.63 | 1.00 | 0.46 |
| iYOR246C | 0.93 | 0.25 | 0.89 | 0.27 | 0.75 | 0.15 |
| iYOR248W | #N/A | #N/A | 1.48 | 0.83 | 1.04 | 0.57 |
| iYOR249C | #N/A | #N/A | #N/A | #N/A | 0.96 | 0.57 |
| iYOR250C | 1.46 | 0.85 | 1.25 | 0.66 | 1.11 | 0.57 |
| iYOR252W | #N/A | #N/A | #N/A | #N/A | #N/A | #N/A |
| iYOR253W | #N/A | #N/A | #N/A | #N/A | #N/A | #N/A |
| iYOR254C | 0.83 | 0.18 | 0.86 | 0.24 | 0.84 | 0.24 |
| iYOR255W | #N/A | #N/A | #N/A | #N/A | #N/A | #N/A |
| iYOR256C | 1.68 | 0.96 | 1.34 | 0.75 | #N/A | #N/A |
| iYOR257W | #N/A | #N/A | #N/A | #N/A | #N/A | #N/A |
| iYOR260W | #N/A | #N/A | #N/A | #N/A | #N/A | #N/A |
| iYOR261C | 0.96 | 0.29 | 1.00 | 0.40 | 1.00 | 0.65 |
| iYOR262W | 1.03 | 0.36 | 1.12 | 0.52 | 1.00 | 0.50 |
| iYOR264W | 1.14 | 0.49 | 1.20 | 0.61 | 0.84 | 0.25 |
| iYOR265W | #N/A | #N/A | 1.36 | 0.78 | 0.75 | 0.20 |
| iYOR266W | #N/A | #N/A | #N/A | #N/A | #N/A | #N/A |
| iYOR267C | 1.03 | 0.37 | 0.95 | 0.32 | #N/A | #N/A |
| iYOR268C | 0.76 | 0.14 | 0.82 | 0.23 | 1.00 | 0.44 |
| iYOR269W | #N/A | #N/A | #N/A | #N/A | #N/A | #N/A |
| iYOR270C | 0.99 | 0.33 | 0.99 | 0.37 | 1.31 | 0.89 |
| iYOR271C | 0.72 | 0.11 | 0.72 | 0.14 | 0.92 | 0.36 |
| iYOR272W | 1.34 | 0.75 | 1.67 | 0.75 | 1.26 | 0.83 |
| iYOR273C | 0.97 | 0.29 | 0.96 | 0.34 | #N/A | #N/A |
| iYOR274W | #N/A | #N/A | #N/A | #N/A | #N/A | #N/A |
| iYOR275C | 1.21 | 0.54 | 0.88 | 0.25 | #N/A | #N/A |
| iYOR277C | 1.06 | 0.35 | 0.89 | 0.27 | 1.31 | 0.82 |
| iYOR279C | 1.43 | 0.84 | 1.36 | 0.79 | 1.16 | 0.63 |
| iYOR280C | 1.18 | 0.56 | 1.13 | 0.53 | 0.98 | 0.60 |

|            |      |      |      |      |      |      |
|------------|------|------|------|------|------|------|
| iYOR282W   | #N/A | #N/A | 1.30 | 0.64 | #N/A | #N/A |
| iYOR283W   | 1.71 | 0.95 | #N/A | #N/A | 1.18 | 0.77 |
| iYOR284W   | 1.43 | 0.83 | 1.17 | 0.57 | 0.97 | 0.40 |
| iYOR286W   | 1.37 | 0.79 | 0.97 | 0.34 | 1.15 | 0.72 |
| iYOR287C   | #N/A | #N/A | 1.06 | 0.45 | 0.90 | 0.47 |
| iYOR288C   | #N/A | #N/A | 0.90 | 0.27 | #N/A | #N/A |
| iYOR289W   | #N/A | #N/A | #N/A | #N/A | #N/A | #N/A |
| iYOR290C   | 0.96 | 0.30 | 1.01 | 0.41 | 0.84 | 0.35 |
| iYOR291W   | #N/A | #N/A | #N/A | #N/A | #N/A | #N/A |
| iYOR292C   | 0.65 | 0.08 | 0.45 | 0.03 | 0.81 | 0.25 |
| iYOR293W   | #N/A | #N/A | 1.06 | 0.44 | 1.09 | 0.64 |
| iYOR294W   | 1.43 | 0.84 | 1.31 | 0.73 | 1.10 | 0.61 |
| iYOR295W   | 1.43 | 0.84 | 1.62 | 0.93 | 0.92 | 0.34 |
| iYOR297C   | 0.91 | 0.23 | 1.13 | 0.53 | #N/A | #N/A |
| iYOR298C-A | 0.94 | 0.27 | 0.77 | 0.18 | 1.09 | 0.65 |
| iYOR298W   | #N/A | #N/A | 0.63 | 0.14 | #N/A | #N/A |
| iYOR300W   | #N/A | #N/A | 0.93 | 0.30 | #N/A | #N/A |
| iYOR301W   | 0.58 | 0.06 | 0.55 | 0.06 | 0.57 | 0.04 |
| iYOR303W   | 1.26 | 0.67 | 1.26 | 0.69 | 0.97 | 0.46 |
| iYOR304C-A | 1.04 | 0.39 | 0.88 | 0.27 | 1.14 | 0.73 |
| iYOR304W   | 1.39 | 0.76 | 1.32 | 0.75 | 1.14 | 0.76 |
| iYOR305W   | #N/A | #N/A | #N/A | #N/A | #N/A | #N/A |
| iYOR306C   | 0.91 | 0.23 | 1.01 | 0.40 | 0.96 | 0.39 |
| iYOR307C   | 1.24 | 0.63 | 1.28 | 0.70 | 1.34 | 0.83 |
| iYOR310C   | 1.23 | 0.56 | 1.17 | 0.58 | 1.11 | 0.70 |
| iYOR311C   | #N/A | #N/A | 1.02 | 0.39 | 1.24 | 0.76 |
| iYOR312C   | 0.51 | 0.04 | 0.43 | 0.03 | 0.59 | 0.07 |
| iYOR313C   | #N/A | #N/A | #N/A | #N/A | #N/A | #N/A |
| iYOR314W   | 0.53 | 0.05 | 0.55 | 0.09 | 0.70 | 0.10 |
| iYOR315W   | #N/A | #N/A | 1.31 | 0.72 | 1.12 | 0.58 |
| iYOR316C-0 | 1.03 | 0.32 | 1.37 | 0.78 | 0.78 | 0.17 |
| iYOR316C-1 | 0.54 | 0.05 | 0.45 | 0.04 | 0.85 | 0.27 |
| iYOR317W   | #N/A | #N/A | 0.85 | 0.25 | #N/A | #N/A |
| iYOR318C   | 0.74 | 0.12 | 0.72 | 0.14 | 0.91 | 0.32 |
| iYOR320C   | 1.11 | 0.46 | 1.01 | 0.39 | 0.90 | 0.31 |
| iYOR321W   | #N/A | #N/A | #N/A | #N/A | 0.85 | 0.26 |
| iYOR322C   | 1.33 | 0.74 | 1.08 | 0.49 | #N/A | #N/A |
| iYOR323C   | 1.36 | 0.73 | #N/A | #N/A | 1.06 | 0.61 |
| iYOR325W   | 1.07 | 0.38 | 0.87 | 0.25 | 1.13 | 0.82 |
| iYOR326W   | 1.28 | 0.63 | 1.12 | 0.53 | 1.10 | 0.61 |
| iYOR327C   | 1.00 | 0.31 | 1.01 | 0.40 | 1.11 | 0.76 |
| iYOR328W   | #N/A | #N/A | 1.83 | 0.97 | #N/A | #N/A |
| iYOR329C   | #N/A | #N/A | 1.11 | 0.51 | 0.94 | 0.41 |
| iYOR330C   | 0.99 | 0.28 | 0.89 | 0.27 | 0.96 | 0.53 |
| iYOR332W   | #N/A | #N/A | 1.00 | 0.38 | 1.23 | 0.81 |
| iYOR334W   | #N/A | #N/A | #N/A | #N/A | #N/A | #N/A |
| iYOR335C   | 0.99 | 0.28 | 1.03 | 0.41 | 1.03 | 0.55 |
| iYOR336W   | 0.98 | 0.28 | 1.10 | 0.49 | 0.92 | 0.38 |
| iYOR337W   | 1.18 | 0.49 | 0.94 | 0.31 | 0.78 | 0.17 |
| iYOR338W   | 1.34 | 0.75 | 1.65 | 0.87 | 1.16 | 0.62 |
| iYOR339C   | #N/A | #N/A | 1.55 | 0.88 | 0.73 | 0.19 |

|              |      |      |      |      |      |      |
|--------------|------|------|------|------|------|------|
| iYOR340C     | 0.98 | 0.32 | #N/A | #N/A | 1.40 | 0.93 |
| iYOR341W     | 1.10 | 0.40 | 1.13 | 0.52 | 1.03 | 0.56 |
| iYOR342C     | 0.54 | 0.05 | 0.49 | 0.05 | 0.66 | 0.08 |
| iYOR343C     | 1.12 | 0.47 | 1.11 | 0.51 | 0.89 | 0.34 |
| iYOR344C-1   | 0.74 | 0.12 | 0.76 | 0.16 | 0.70 | 0.11 |
| iYOR346W     | #N/A | #N/A | #N/A | #N/A | #N/A | #N/A |
| iYOR347C     | 1.22 | 0.55 | 0.99 | 0.37 | 1.33 | 0.91 |
| iYOR348C     | 0.61 | 0.08 | 0.62 | 0.09 | 0.63 | 0.07 |
| iYOR350C     | #N/A | #N/A | 1.30 | 0.63 | 0.71 | 0.12 |
| iYOR351C     | 1.42 | 0.83 | 1.41 | 0.82 | 1.51 | 0.87 |
| iYOR353C     | #N/A | #N/A | 0.87 | 0.26 | #N/A | #N/A |
| iYOR354C-0   | 0.84 | 0.17 | 0.84 | 0.24 | 0.84 | 0.37 |
| iYOR354C-1   | 0.77 | 0.14 | 0.91 | 0.29 | 0.96 | 0.56 |
| iYOR355W     | 1.32 | 0.73 | 1.26 | 0.68 | 0.82 | 0.22 |
| iYOR356W     | #N/A | #N/A | #N/A | #N/A | #N/A | #N/A |
| iYOR357C     | 1.24 | 0.57 | 1.00 | 0.37 | 0.99 | 0.45 |
| iYOR358W     | 1.30 | 0.70 | 0.89 | 0.30 | 0.85 | 0.27 |
| iYOR359W     | #N/A | #N/A | #N/A | #N/A | #N/A | #N/A |
| iYOR360C     | 1.07 | 0.42 | 0.94 | 0.31 | 1.30 | 0.75 |
| iYOR361C     | 0.95 | 0.25 | 1.24 | 0.66 | 1.05 | 0.50 |
| iYOR363C     | 1.34 | 0.75 | #N/A | #N/A | #N/A | #N/A |
| iYOR366W     | #N/A | #N/A | 0.92 | 0.33 | #N/A | #N/A |
| iYOR367W     | 1.15 | 0.47 | #N/A | #N/A | 0.83 | 0.24 |
| iYOR369C     | 0.77 | 0.15 | 0.50 | 0.05 | 0.75 | 0.16 |
| iYOR370C     | 1.33 | 0.75 | 1.28 | 0.70 | 1.24 | 0.81 |
| iYOR371C     | 1.40 | 0.76 | 1.12 | 0.52 | 1.26 | 0.77 |
| iYOR372C     | 1.00 | 0.32 | 0.95 | 0.33 | 0.85 | 0.26 |
| iYOR373W     | 1.13 | 0.44 | 1.17 | 0.58 | 0.82 | 0.22 |
| iYOR374W     | #N/A | #N/A | #N/A | #N/A | #N/A | #N/A |
| iYOR375C     | #N/A | #N/A | #N/A | #N/A | #N/A | #N/A |
| iYOR376W-0   | 1.15 | 0.51 | 1.28 | 0.70 | 0.92 | 0.34 |
| iYOR376W-1   | 1.51 | 0.89 | 1.29 | 0.72 | 1.08 | 0.64 |
| iYOR377W-0   | 1.35 | 0.76 | 1.52 | 0.87 | 0.94 | 0.40 |
| iYOR377W-1   | 1.08 | 0.38 | 1.21 | 0.61 | 1.04 | 0.58 |
| iYOR380W-0   | 1.13 | 0.48 | 1.53 | 0.87 | 0.90 | 0.31 |
| iYOR380W-1   | 1.21 | 0.60 | 1.24 | 0.66 | 1.02 | 0.46 |
| iYOR381W-0   | 1.27 | 0.67 | 1.32 | 0.74 | 0.87 | 0.29 |
| iYOR381W-1   | 1.16 | 0.51 | 1.24 | 0.66 | 0.93 | 0.50 |
| iYOR382W     | #N/A | #N/A | #N/A | #N/A | #N/A | #N/A |
| iYOR383C     | 1.29 | 0.70 | 1.39 | 0.77 | 1.05 | 0.72 |
| iYOR384W     | 1.33 | 0.69 | 1.13 | 0.53 | 1.03 | 0.56 |
| iYOR385W     | 1.25 | 0.66 | 1.26 | 0.68 | 1.00 | 0.51 |
| iYOR386W     | 1.50 | 0.87 | 1.39 | 0.78 | 0.73 | 0.14 |
| iYOR387C-0   | 1.15 | 0.46 | 1.32 | 0.71 | 0.76 | 0.16 |
| iYOR387C-1   | 1.40 | 0.76 | 1.34 | 0.73 | 0.89 | 0.45 |
| iYOR388C     | 0.97 | 0.29 | 1.05 | 0.47 | 0.84 | 0.35 |
| iYOR390W     | 1.53 | 0.90 | 1.58 | 0.90 | 1.20 | 0.67 |
| iYOR392W     | 1.72 | 0.96 | 1.53 | 0.86 | 1.09 | 0.55 |
| iYOR393W     | 1.38 | 0.75 | 1.61 | 0.92 | 0.95 | 0.38 |
| iYORCdelta11 | #N/A | #N/A | #N/A | #N/A | #N/A | #N/A |
| iYORCdelta25 | #N/A | #N/A | #N/A | #N/A | #N/A | #N/A |

|              |      |      |      |      |      |      |
|--------------|------|------|------|------|------|------|
| iYORWdelta14 | 1.25 | 0.64 | 1.54 | 0.83 | 0.87 | 0.41 |
| iYORWdelta16 | 1.23 | 0.56 | 1.50 | 0.79 | 0.86 | 0.38 |
| iYORWdelta17 | 1.24 | 0.64 | #N/A | #N/A | 1.09 | 0.67 |
| iYORWdelta22 | 1.24 | 0.63 | 1.12 | 0.52 | 0.84 | 0.24 |
| iYORWdelta24 | #N/A | #N/A | 0.57 | 0.12 | #N/A | #N/A |
| iYORWsigma3  | #N/A | #N/A | #N/A | #N/A | #N/A | #N/A |
| iYORWtau3    | #N/A | #N/A | #N/A | #N/A | #N/A | #N/A |
| iYPL001W     | #N/A | #N/A | #N/A | #N/A | #N/A | #N/A |
| iYPL002C     | 1.24 | 0.57 | 1.19 | 0.60 | 1.26 | 0.73 |
| iYPL003W     | #N/A | #N/A | 1.50 | 0.86 | #N/A | #N/A |
| iYPL004C     | #N/A | #N/A | 1.04 | 0.42 | 1.23 | 0.81 |
| iYPL005W     | 1.57 | 0.92 | 1.57 | 0.66 | 1.38 | 0.89 |
| iYPL006W     | 1.16 | 0.52 | 1.05 | 0.43 | 1.19 | 0.65 |
| iYPL007C     | 1.42 | 0.83 | 1.43 | 0.83 | 1.12 | 0.76 |
| iYPL008W     | #N/A | #N/A | #N/A | #N/A | #N/A | #N/A |
| iYPL009C     | 1.57 | 0.92 | 1.24 | 0.67 | 1.37 | 0.85 |
| iYPL010W     | #N/A | #N/A | #N/A | #N/A | #N/A | #N/A |
| iYPL011C     | 1.06 | 0.41 | 0.77 | 0.17 | 1.04 | 0.49 |
| iYPL012W     | #N/A | #N/A | #N/A | #N/A | #N/A | #N/A |
| iYPL013C     | 1.25 | 0.65 | 1.12 | 0.52 | 1.03 | 0.56 |
| iYPL014W     | 1.16 | 0.53 | 1.21 | 0.63 | 1.31 | 0.86 |
| iYPL015C     | 0.92 | 0.24 | 0.78 | 0.18 | 0.79 | 0.19 |
| iYPL016W     | #N/A | #N/A | 1.09 | 0.50 | 1.02 | 0.55 |
| iYPL019C     | 0.88 | 0.22 | 0.87 | 0.24 | 0.90 | 0.46 |
| iYPL020C     | 1.20 | 0.59 | 1.81 | 0.78 | 0.88 | 0.28 |
| iYPL021W     | 0.99 | 0.33 | 1.51 | 0.69 | 0.81 | 0.21 |
| iYPL023C     | 1.23 | 0.56 | 1.13 | 0.54 | 0.84 | 0.37 |
| iYPL024W     | #N/A | #N/A | #N/A | #N/A | #N/A | #N/A |
| iYPL025C     | 0.95 | 0.26 | 0.99 | 0.39 | 0.97 | 0.54 |
| iYPL026C     | 0.47 | 0.03 | 0.33 | 0.01 | 0.45 | 0.02 |
| iYPL027W     | 1.31 | 0.73 | 1.10 | 0.50 | 1.06 | 0.73 |
| iYPL028W     | #N/A | #N/A | 1.12 | 0.51 | 0.82 | 0.26 |
| iYPL029W     | #N/A | #N/A | 0.82 | 0.21 | #N/A | #N/A |
| iYPL030W     | 1.26 | 0.65 | 0.93 | 0.33 | 1.20 | 0.78 |
| iYPL031C     | 0.97 | 0.27 | 1.05 | 0.44 | 0.89 | 0.32 |
| iYPL038W     | #N/A | #N/A | #N/A | #N/A | #N/A | #N/A |
| iYPL039W     | 1.14 | 0.45 | 1.28 | 0.70 | 1.42 | 0.85 |
| iYPL040C     | 1.41 | 0.82 | 1.15 | 0.56 | 0.89 | 0.32 |
| iYPL041C     | 1.27 | 0.67 | 1.14 | 0.54 | 1.06 | 0.74 |
| iYPL042C     | 1.31 | 0.73 | 1.35 | 0.76 | 1.08 | 0.73 |
| iYPL045W     | #N/A | #N/A | 1.05 | 0.47 | #N/A | #N/A |
| iYPL046C     | 1.19 | 0.56 | 1.21 | 0.63 | 0.92 | 0.37 |
| iYPL047W     | 1.76 | 0.97 | 1.36 | 0.75 | 0.58 | 0.05 |
| iYPL048W     | #N/A | #N/A | 1.18 | 0.60 | 0.77 | 0.25 |
| iYPL049C     | 0.83 | 0.18 | 0.69 | 0.12 | 0.75 | 0.15 |
| iYPL050C     | 0.97 | 0.28 | 0.86 | 0.24 | 0.86 | 0.26 |
| iYPL051W     | #N/A | #N/A | #N/A | #N/A | #N/A | #N/A |
| iYPL052W     | #N/A | #N/A | 1.55 | 0.65 | #N/A | #N/A |
| iYPL053C     | #N/A | #N/A | #N/A | #N/A | 0.97 | 0.59 |
| iYPL054W     | 1.09 | 0.44 | 1.04 | 0.42 | 1.22 | 0.69 |
| iYPL056C     | 0.63 | 0.08 | 0.50 | 0.05 | 0.56 | 0.03 |

|            |      |      |      |      |      |      |
|------------|------|------|------|------|------|------|
| iYPL057C   | 0.87 | 0.19 | 0.76 | 0.16 | 0.85 | 0.27 |
| iYPL058C-0 | 0.58 | 0.06 | 0.59 | 0.09 | 0.53 | 0.04 |
| iYPL058C-1 | 1.05 | 0.36 | 1.04 | 0.41 | 0.85 | 0.34 |
| iYPL060W   | #N/A | #N/A | #N/A | #N/A | #N/A | #N/A |
| iYPL061W   | 0.91 | 0.23 | 1.06 | 0.45 | 1.25 | 0.73 |
| iYPL062W   | 0.54 | 0.05 | 0.43 | 0.03 | 0.70 | 0.11 |
| iYPL063W   | 0.48 | 0.03 | 0.51 | 0.05 | 0.58 | 0.04 |
| iYPL064C   | 1.42 | 0.83 | 1.16 | 0.54 | #N/A | #N/A |
| iYPL066W   | #N/A | #N/A | 1.36 | 0.69 | 1.09 | 0.59 |
| iYPL067C   | 1.16 | 0.48 | 1.07 | 0.46 | 0.90 | 0.46 |
| iYPL068C   | #N/A | #N/A | #N/A | #N/A | #N/A | #N/A |
| iYPL069C   | #N/A | #N/A | 1.13 | 0.54 | 1.16 | 0.84 |
| iYPL070W   | 1.35 | 0.77 | 1.12 | 0.52 | #N/A | #N/A |
| iYPL071C   | 1.30 | 0.65 | 1.04 | 0.45 | 1.14 | 0.72 |
| iYPL075W   | 0.98 | 0.29 | 0.91 | 0.32 | 1.01 | 0.45 |
| iYPL076W-0 | 0.89 | 0.23 | 1.12 | 0.52 | 1.22 | 0.68 |
| iYPL076W-1 | 0.82 | 0.18 | 0.90 | 0.27 | 0.97 | 0.58 |
| iYPL077C   | 1.42 | 0.83 | 1.08 | 0.47 | 0.79 | 0.19 |
| iYPL079W   | 1.15 | 0.47 | 1.36 | 0.75 | 1.18 | 0.72 |
| iYPL080C   | #N/A | #N/A | #N/A | #N/A | 1.45 | 0.93 |
| iYPL081W   | #N/A | #N/A | #N/A | #N/A | #N/A | #N/A |
| iYPL082C   | 0.92 | 0.23 | 0.86 | 0.24 | 0.90 | 0.47 |
| iYPL083C   | 1.30 | 0.70 | 1.33 | 0.68 | 0.80 | 0.29 |
| iYPL084W   | #N/A | #N/A | #N/A | #N/A | #N/A | #N/A |
| iYPL085W   | 1.12 | 0.49 | 1.12 | 0.52 | 1.15 | 0.76 |
| iYPL086C   | 1.29 | 0.65 | 1.20 | 0.61 | 1.30 | 0.87 |
| iYPL087W   | #N/A | #N/A | 1.38 | 0.78 | 0.82 | 0.22 |
| iYPL088W   | 1.29 | 0.64 | 1.12 | 0.51 | 0.92 | 0.37 |
| iYPL091W   | 0.96 | 0.29 | 1.00 | 0.38 | 0.91 | 0.47 |
| iYPL092W   | 0.97 | 0.29 | 1.12 | 0.51 | 0.68 | 0.10 |
| iYPL093W   | 0.80 | 0.15 | 0.94 | 0.33 | 1.01 | 0.46 |
| iYPL094C   | #N/A | #N/A | 0.72 | 0.14 | 0.69 | 0.14 |
| iYPL095C   | 1.27 | 0.62 | 1.37 | 0.78 | 0.77 | 0.24 |
| iYPL097W   | 1.20 | 0.59 | 1.11 | 0.51 | 1.02 | 0.53 |
| iYPL098C   | 1.26 | 0.60 | 1.03 | 0.41 | 1.15 | 0.64 |
| iYPL099C   | #N/A | #N/A | 0.99 | 0.38 | #N/A | #N/A |
| iYPL101W   | 1.14 | 0.51 | 0.63 | 0.25 | #N/A | #N/A |
| iYPL103C   | 1.42 | 0.80 | 1.03 | 0.41 | 1.10 | 0.62 |
| iYPL104W   | #N/A | #N/A | #N/A | #N/A | #N/A | #N/A |
| iYPL105C   | 1.04 | 0.39 | 0.94 | 0.31 | 0.97 | 0.59 |
| iYPL106C   | 1.15 | 0.50 | 1.13 | 0.53 | 1.28 | 0.80 |
| iYPL107W   | 1.49 | 0.84 | 1.99 | 0.98 | 1.18 | 0.75 |
| iYPL109C   | 1.31 | 0.72 | 1.76 | 0.96 | 0.88 | 0.43 |
| iYPL110C   | 1.36 | 0.77 | 1.36 | 0.75 | 1.11 | 0.72 |
| iYPL111W   | #N/A | #N/A | #N/A | #N/A | #N/A | #N/A |
| iYPL112C   | #N/A | #N/A | 0.83 | 0.23 | #N/A | #N/A |
| iYPL115C   | 1.31 | 0.67 | 1.26 | 0.68 | 1.33 | 0.78 |
| iYPL116W   | #N/A | #N/A | 1.72 | 0.93 | 0.97 | 0.45 |
| iYPL118W   | #N/A | #N/A | #N/A | #N/A | #N/A | #N/A |
| iYPL119C   | 1.50 | 0.89 | 1.08 | 0.46 | 1.18 | 0.76 |
| iYPL120W   | 1.38 | 0.74 | 1.16 | 0.57 | 1.16 | 0.73 |



|          |      |      |      |      |      |      |
|----------|------|------|------|------|------|------|
| iYPL121C | 1.26 | 0.63 | #N/A | #N/A | 0.79 | 0.28 |
| iYPL122C | 0.93 | 0.24 | 0.87 | 0.24 | 0.85 | 0.27 |
| iYPL123C | #N/A | #N/A | 1.01 | 0.41 | #N/A | #N/A |
| iYPL124W | #N/A | #N/A | #N/A | #N/A | #N/A | #N/A |
| iYPL125W | #N/A | #N/A | 1.35 | 0.77 | #N/A | #N/A |
| iYPL126W | 1.52 | 0.89 | 1.20 | 0.62 | 0.78 | 0.19 |
| iYPL127C | 0.70 | 0.11 | 0.67 | 0.11 | 0.68 | 0.12 |
| iYPL128C | 1.05 | 0.38 | 0.97 | 0.34 | 0.88 | 0.29 |
| iYPL129W | #N/A | #N/A | 1.39 | 0.81 | 1.04 | 0.57 |
| iYPL131W | 1.10 | 0.44 | 1.22 | 0.64 | 1.46 | 0.92 |
| iYPL132W | 0.86 | 0.18 | 0.70 | 0.13 | 1.05 | 0.49 |
| iYPL133C | 1.52 | 0.90 | 1.21 | 0.63 | 1.10 | 0.79 |
| iYPL134C | 1.47 | 0.84 | 1.53 | 0.87 | 0.89 | 0.44 |
| iYPL135W | 1.42 | 0.83 | 1.31 | 0.71 | 1.20 | 0.86 |
| iYPL136W | 0.79 | 0.15 | 0.65 | 0.10 | 0.83 | 0.23 |
| iYPL138C | 1.27 | 0.62 | 0.89 | 0.26 | 1.12 | 0.73 |
| iYPL139C | 1.48 | 0.87 | 1.13 | 0.54 | 1.50 | 0.87 |
| iYPL140C | 1.36 | 0.78 | 1.27 | 0.65 | 1.37 | 0.80 |
| iYPL141C | 1.25 | 0.66 | 1.16 | 0.57 | 1.16 | 0.62 |
| iYPL142C | #N/A | #N/A | #N/A | #N/A | #N/A | #N/A |
| iYPL145C | 0.72 | 0.11 | 0.67 | 0.11 | 1.04 | 0.70 |
| iYPL146C | 1.06 | 0.41 | 1.11 | 0.50 | 0.99 | 0.43 |
| iYPL147W | 1.74 | 0.97 | 1.59 | 0.86 | #N/A | #N/A |
| iYPL148C | 1.08 | 0.43 | 1.11 | 0.50 | 1.04 | 0.65 |
| iYPL149W | #N/A | #N/A | 1.18 | 0.60 | #N/A | #N/A |
| iYPL150W | 1.08 | 0.42 | 1.18 | 0.57 | 1.00 | 0.51 |
| iYPL151C | 1.10 | 0.41 | 1.11 | 0.52 | 1.33 | 0.88 |
| iYPL152W | #N/A | #N/A | #N/A | #N/A | #N/A | #N/A |
| iYPL153C | 1.10 | 0.40 | 1.21 | 0.63 | 1.11 | 0.74 |
| iYPL154C | 1.49 | 0.88 | 1.05 | 0.43 | 0.90 | 0.34 |
| iYPL155C | 1.17 | 0.53 | 1.07 | 0.46 | 0.97 | 0.46 |
| iYPL156C | 0.60 | 0.07 | 0.64 | 0.09 | 0.82 | 0.22 |
| iYPL157W | #N/A | #N/A | 0.81 | 0.22 | 1.09 | 0.77 |
| iYPL158C | 1.20 | 0.58 | 1.12 | 0.52 | 0.98 | 0.48 |
| iYPL159C | 0.84 | 0.18 | 0.99 | 0.38 | 0.89 | 0.36 |
| iYPL160W | 1.42 | 0.84 | 1.58 | 0.90 | 1.05 | 0.56 |
| iYPL161C | 1.15 | 0.50 | 1.08 | 0.48 | 0.91 | 0.47 |
| iYPL162C | 0.90 | 0.21 | 0.96 | 0.32 | 1.00 | 0.65 |
| iYPL163C | 1.09 | 0.43 | 0.93 | 0.31 | 0.79 | 0.19 |
| iYPL164C | 1.30 | 0.71 | 1.18 | 0.59 | 0.88 | 0.37 |
| iYPL165C | 1.39 | 0.80 | 1.11 | 0.50 | 0.70 | 0.11 |
| iYPL167C | #N/A | #N/A | 0.72 | 0.14 | #N/A | #N/A |
| iYPL168W | #N/A | #N/A | #N/A | #N/A | #N/A | #N/A |
| iYPL169C | 1.26 | 0.60 | 1.23 | 0.62 | #N/A | #N/A |
| iYPL170W | 1.32 | 0.73 | 1.39 | 0.80 | 0.92 | 0.38 |
| iYPL171C | 0.75 | 0.13 | 0.99 | 0.38 | 0.63 | 0.09 |
| iYPL172C | 1.05 | 0.38 | 1.25 | 0.68 | 0.76 | 0.24 |
| iYPL173W | #N/A | #N/A | 1.23 | 0.65 | #N/A | #N/A |
| iYPL174C | 1.09 | 0.44 | 1.18 | 0.58 | 0.96 | 0.57 |
| iYPL175W | #N/A | #N/A | #N/A | #N/A | #N/A | #N/A |
| iYPL176C | #N/A | #N/A | 1.30 | 0.65 | #N/A | #N/A |



|            |      |      |      |      |      |      |
|------------|------|------|------|------|------|------|
| iYPL177C-0 | 0.27 | 0.01 | 0.30 | 0.01 | 0.37 | 0.01 |
| iYPL178W   | #N/A | #N/A | #N/A | #N/A | #N/A | #N/A |
| iYPL179W   | 1.17 | 0.55 | 1.12 | 0.51 | 1.07 | 0.52 |
| iYPL180W   | 0.93 | 0.23 | 1.10 | 0.49 | 1.14 | 0.62 |
| iYPL183C   | 1.08 | 0.43 | 1.02 | 0.40 | 1.01 | 0.52 |
| iYPL183W-A | #N/A | #N/A | 0.99 | 0.38 | #N/A | #N/A |
| iYPL184C   | 1.17 | 0.53 | 1.15 | 0.55 | 1.26 | 0.86 |
| iYPL185W   | 1.10 | 0.42 | 1.36 | 0.74 | 1.39 | 0.85 |
| iYPL187W   | 1.41 | 0.82 | 1.30 | 0.73 | 0.97 | 0.46 |
| iYPL188W   | 1.06 | 0.36 | 1.22 | 0.61 | 1.07 | 0.75 |
| iYPL190C   | 1.13 | 0.46 | 1.06 | 0.44 | 0.89 | 0.33 |
| iYPL191C   | 1.13 | 0.49 | 1.14 | 0.55 | 1.22 | 0.69 |
| iYPL192C   | 1.08 | 0.41 | 1.08 | 0.48 | 0.92 | 0.34 |
| iYPL193W   | #N/A | #N/A | #N/A | #N/A | #N/A | #N/A |
| iYPL194W   | #N/A | #N/A | #N/A | #N/A | 0.92 | 0.38 |
| iYPL195W   | 0.86 | 0.21 | 0.99 | 0.37 | 0.78 | 0.18 |
| iYPL196W   | 1.27 | 0.67 | 1.25 | 0.67 | 0.74 | 0.15 |
| iYPL197C   | 1.08 | 0.42 | 1.23 | 0.60 | 0.91 | 0.32 |
| iYPL199C   | 0.80 | 0.15 | 0.68 | 0.12 | 0.85 | 0.26 |
| iYPL200W   | #N/A | #N/A | #N/A | #N/A | #N/A | #N/A |
| iYPL201C   | 1.31 | 0.67 | 1.37 | 0.79 | 0.85 | 0.38 |
| iYPL202C   | 0.86 | 0.19 | 0.88 | 0.29 | 1.00 | 0.64 |
| iYPL203W   | 1.46 | 0.86 | 1.32 | 0.70 | 1.10 | 0.79 |
| iYPL204W   | 1.05 | 0.40 | 1.08 | 0.48 | 0.98 | 0.54 |
| iYPL206C   | 0.97 | 0.27 | 0.89 | 0.26 | 0.87 | 0.30 |
| iYPL207W   | #N/A | #N/A | #N/A | #N/A | #N/A | #N/A |
| iYPL208W   | 1.03 | 0.36 | 0.98 | 0.35 | #N/A | #N/A |
| iYPL209C   | #N/A | #N/A | 0.87 | 0.29 | 1.30 | 0.93 |
| iYPL210C   | 0.92 | 0.25 | 1.10 | 0.50 | 1.14 | 0.83 |
| iYPL211W   | 1.44 | 0.80 | 1.61 | 0.92 | 1.18 | 0.68 |
| iYPL212C   | #N/A | #N/A | #N/A | #N/A | #N/A | #N/A |
| iYPL213W   | #N/A | #N/A | 1.58 | 0.90 | #N/A | #N/A |
| iYPL214C   | 1.16 | 0.52 | 1.01 | 0.38 | 1.01 | 0.61 |
| iYPL215W   | #N/A | #N/A | 1.20 | 0.61 | #N/A | #N/A |
| iYPL216W   | 1.06 | 0.39 | 0.99 | 0.36 | 0.94 | 0.42 |
| iYPL217C   | #N/A | #N/A | 1.59 | 0.92 | 1.57 | 0.89 |
| iYPL218W   | #N/A | #N/A | #N/A | #N/A | #N/A | #N/A |
| iYPL219W   | 0.81 | 0.16 | 0.88 | 0.29 | 1.07 | 0.56 |
| iYPL220W   | 0.99 | 0.29 | 0.94 | 0.37 | 0.90 | 0.46 |
| iYPL221W   | 0.76 | 0.13 | 0.88 | 0.30 | 0.64 | 0.10 |
| iYPL222W   | 0.76 | 0.13 | 0.82 | 0.20 | 0.78 | 0.23 |
| iYPL224C   | 1.35 | 0.76 | 1.46 | 0.86 | 1.02 | 0.46 |
| iYPL225W   | 1.20 | 0.59 | 2.33 | 0.99 | #N/A | #N/A |
| iYPL226W   | 1.24 | 0.63 | 1.23 | 0.64 | 0.90 | 0.46 |
| iYPL227C   | 1.13 | 0.48 | #N/A | #N/A | 0.83 | 0.34 |
| iYPL228W   | #N/A | #N/A | #N/A | #N/A | #N/A | #N/A |
| iYPL229W   | 1.25 | 0.64 | 1.23 | 0.65 | 0.78 | 0.27 |
| iYPL230W   | 1.24 | 0.58 | 1.28 | 0.70 | 0.91 | 0.48 |
| iYPL231W   | 0.94 | 0.24 | 1.18 | 0.59 | 0.93 | 0.34 |
| iYPL232W   | 0.96 | 0.28 | 0.87 | 0.24 | 0.77 | 0.24 |
| iYPL233W   | 1.02 | 0.32 | 1.03 | 0.41 | 1.17 | 0.74 |

|             |      |      |      |      |      |      |
|-------------|------|------|------|------|------|------|
| iYPL234C    | 1.21 | 0.54 | 1.13 | 0.52 | 0.94 | 0.54 |
| iYPL235W    | 1.52 | 0.90 | 1.52 | 0.89 | 1.02 | 0.63 |
| iYPL236C    | 1.25 | 0.64 | 1.47 | 0.85 | 1.21 | 0.78 |
| iYPL237W    | #N/A | #N/A | 0.92 | 0.29 | 0.96 | 0.45 |
| iYPL239W    | 1.03 | 0.33 | 0.95 | 0.32 | 1.31 | 0.93 |
| iYPL241C    | 0.87 | 0.21 | 0.92 | 0.28 | #N/A | #N/A |
| iYPL242C    | #N/A | #N/A | 0.55 | 0.06 | #N/A | #N/A |
| iYPL243W    | #N/A | #N/A | 1.69 | 0.95 | #N/A | #N/A |
| iYPL244C    | 1.13 | 0.50 | 1.25 | 0.62 | 1.13 | 0.66 |
| iYPL245W    | #N/A | #N/A | #N/A | #N/A | #N/A | #N/A |
| iYPL246C    | 0.99 | 0.33 | 0.84 | 0.24 | 0.94 | 0.54 |
| iYPL247C    | 1.48 | 0.87 | 1.28 | 0.63 | 0.97 | 0.46 |
| iYPL248C    | 1.11 | 0.46 | 1.20 | 0.60 | 0.64 | 0.09 |
| iYPL249C    | #N/A | #N/A | #N/A | #N/A | 0.97 | 0.45 |
| iYPL249C-A  | 0.60 | 0.07 | 0.48 | 0.04 | 1.07 | 0.52 |
| iYPL251W    | 1.34 | 0.75 | 0.94 | 0.36 | #N/A | #N/A |
| iYPL253C    | 1.02 | 0.31 | 0.86 | 0.26 | 1.32 | 0.87 |
| iYPL254W    | #N/A | #N/A | #N/A | #N/A | #N/A | #N/A |
| iYPL255W    | 1.08 | 0.44 | 1.14 | 0.55 | 1.00 | 0.63 |
| iYPL256C    | 0.83 | 0.18 | 0.86 | 0.24 | 0.82 | 0.22 |
| iYPL257W    | 1.40 | 0.82 | 1.43 | 0.83 | 1.10 | 0.66 |
| iYPL258C    | 1.53 | 0.90 | 1.32 | 0.72 | 1.19 | 0.66 |
| iYPL259C    | 1.57 | 0.89 | 1.42 | 0.80 | 1.25 | 0.90 |
| iYPL260W    | 1.23 | 0.60 | 1.78 | 0.96 | 1.38 | 0.90 |
| iYPL262W    | 1.71 | 0.95 | 1.81 | 0.97 | #N/A | #N/A |
| iYPL263C    | 1.52 | 0.87 | 1.30 | 0.66 | 1.07 | 0.75 |
| iYPL264C    | 1.28 | 0.69 | 1.43 | 0.72 | 0.85 | 0.38 |
| iYPL265W    | 1.10 | 0.40 | 0.88 | 0.34 | 1.03 | 0.53 |
| iYPL266W    | 0.60 | 0.07 | 0.53 | 0.05 | 0.65 | 0.08 |
| iYPL267W    | 1.15 | 0.53 | 1.44 | 0.75 | #N/A | #N/A |
| iYPL268W    | 1.03 | 0.35 | 1.08 | 0.48 | 0.84 | 0.35 |
| iYPL269W    | #N/A | #N/A | 1.06 | 0.46 | 0.86 | 0.27 |
| iYPL270W    | 1.12 | 0.43 | 1.07 | 0.47 | 1.22 | 0.80 |
| iYPL271W    | 1.20 | 0.59 | 1.52 | 0.87 | #N/A | #N/A |
| iYPL273W    | 1.57 | 0.92 | 1.59 | 0.91 | 1.01 | 0.53 |
| iYPL274W    | 0.94 | 0.26 | 0.99 | 0.39 | 0.81 | 0.21 |
| iYPL275W-1  | 1.57 | 0.89 | 1.52 | 0.87 | 1.13 | 0.70 |
| iYPL275W-2  | 1.17 | 0.52 | 1.16 | 0.57 | 0.93 | 0.37 |
| iYPL277C    | 1.26 | 0.67 | 1.53 | 0.81 | 1.33 | 0.88 |
| iYPL279C    | 1.22 | 0.55 | 1.21 | 0.63 | 1.14 | 0.72 |
| iYPL280W    | 1.41 | 0.82 | 1.46 | 0.85 | 1.08 | 0.54 |
| iYPL281C    | 1.63 | 0.94 | 1.63 | 0.92 | 1.11 | 0.61 |
| iYPL282C    | 1.47 | 0.82 | 1.62 | 0.92 | 0.96 | 0.38 |
| iYPL283C-0  | 0.57 | 0.06 | 0.58 | 0.08 | 1.06 | 0.61 |
| iYPL283C-1  | 0.92 | 0.24 | 1.06 | 0.45 | 1.07 | 0.74 |
| iYPLCdelta1 | 1.00 | 0.29 | 0.67 | 0.11 | 1.11 | 0.67 |
| iYPLCtau2   | #N/A | #N/A | 1.43 | 0.81 | 1.09 | 0.77 |
| iYPLWdelta6 | 1.28 | 0.68 | 1.16 | 0.57 | 1.30 | 0.91 |
| iYPLWdelta7 | 1.56 | 0.91 | 1.47 | 0.77 | 1.07 | 0.61 |
| iYPLWdelta8 | #N/A | #N/A | #N/A | #N/A | #N/A | #N/A |
| iYPR001W    | 0.93 | 0.23 | 0.94 | 0.31 | 0.76 | 0.23 |

|            |      |      |      |      |      |      |
|------------|------|------|------|------|------|------|
| iYPR002W   | #N/A | #N/A | #N/A | #N/A | #N/A | #N/A |
| iYPR003C   | #N/A | #N/A | #N/A | #N/A | #N/A | #N/A |
| iYPR004C   | 1.28 | 0.66 | 1.39 | 0.80 | 1.12 | 0.68 |
| iYPR005C   | 0.98 | 0.30 | #N/A | #N/A | 0.77 | 0.17 |
| iYPR006C   | 1.01 | 0.33 | 1.06 | 0.44 | 0.86 | 0.40 |
| iYPR007C   | #N/A | #N/A | #N/A | #N/A | 0.93 | 0.51 |
| iYPR009W   | #N/A | #N/A | #N/A | #N/A | #N/A | #N/A |
| iYPR011C   | 1.37 | 0.78 | 1.13 | 0.53 | 1.11 | 0.67 |
| iYPR013C-0 | 0.93 | 0.25 | 0.95 | 0.33 | 0.81 | 0.22 |
| iYPR013C-1 | 1.02 | 0.37 | 0.82 | 0.21 | 0.89 | 0.32 |
| iYPR017C   | 1.11 | 0.47 | 0.99 | 0.36 | 0.93 | 0.40 |
| iYPR018W   | 1.20 | 0.53 | 1.09 | 0.49 | 1.07 | 0.61 |
| iYPR019W   | 1.08 | 0.40 | 0.93 | 0.29 | #N/A | #N/A |
| iYPR021C   | 1.37 | 0.78 | 1.44 | 0.84 | 1.02 | 0.46 |
| iYPR023C   | 0.92 | 0.24 | 0.85 | 0.23 | 0.87 | 0.28 |
| iYPR028W   | 1.23 | 0.59 | 1.17 | 0.59 | #N/A | #N/A |
| iYPR029C   | 1.02 | 0.36 | 0.96 | 0.32 | 1.00 | 0.43 |
| iYPR030W   | 1.38 | 0.79 | 1.02 | 0.40 | 1.01 | 0.52 |
| iYPR031W   | #N/A | #N/A | #N/A | #N/A | #N/A | #N/A |
| iYPR032W   | #N/A | #N/A | #N/A | #N/A | #N/A | #N/A |
| iYPR033C   | 0.98 | 0.32 | 1.07 | 0.46 | 1.10 | 0.65 |
| iYPR040W   | 1.14 | 0.51 | 1.06 | 0.45 | 0.91 | 0.44 |
| iYPR042C   | 0.85 | 0.19 | 0.71 | 0.13 | 1.17 | 0.64 |
| iYPR045C   | 0.96 | 0.28 | 0.87 | 0.24 | 1.06 | 0.74 |
| iYPR046W   | #N/A | #N/A | #N/A | #N/A | #N/A | #N/A |
| iYPR047W   | 1.20 | 0.53 | 1.10 | 0.49 | 0.90 | 0.34 |
| iYPR048W   | #N/A | #N/A | #N/A | #N/A | #N/A | #N/A |
| iYPR049C   | 1.36 | 0.77 | #N/A | #N/A | 0.94 | 0.41 |
| iYPR054W   | 0.85 | 0.20 | 0.41 | 0.04 | 0.72 | 0.12 |
| iYPR055W   | #N/A | #N/A | 1.33 | 0.59 | #N/A | #N/A |
| iYPR056W   | 1.16 | 0.54 | 0.96 | 0.34 | 1.18 | 0.81 |
| iYPR057W   | 1.02 | 0.36 | 0.86 | 0.26 | 1.33 | 0.80 |
| iYPR059C   | 1.00 | 0.34 | 1.44 | 0.83 | 1.00 | 0.44 |
| iYPR061C   | 1.13 | 0.44 | 1.01 | 0.38 | 1.03 | 0.56 |
| iYPR062W   | #N/A | #N/A | 1.23 | 0.59 | 1.26 | 0.87 |
| iYPR063C   | 0.90 | 0.24 | 0.85 | 0.22 | 1.05 | 0.67 |
| iYPR064W   | 1.01 | 0.35 | 1.12 | 0.52 | 1.07 | 0.58 |
| iYPR065W   | #N/A | #N/A | #N/A | #N/A | 0.82 | 0.32 |
| iYPR066W   | 0.68 | 0.10 | 0.83 | 0.21 | 0.91 | 0.41 |
| iYPR067W   | #N/A | #N/A | 1.14 | 0.54 | #N/A | #N/A |
| iYPR068C   | #N/A | #N/A | #N/A | #N/A | #N/A | #N/A |
| iYPR069C   | 1.13 | 0.44 | 1.33 | 0.74 | #N/A | #N/A |
| iYPR070W   | #N/A | #N/A | 1.49 | 0.86 | 0.92 | 0.47 |
| iYPR072W   | #N/A | #N/A | #N/A | #N/A | #N/A | #N/A |
| iYPR073C   | #N/A | #N/A | 1.00 | 0.37 | #N/A | #N/A |
| iYPR074C   | 0.80 | 0.15 | 0.88 | 0.26 | 0.85 | 0.27 |
| iYPR076W   | 1.19 | 0.58 | 0.96 | 0.33 | 0.80 | 0.20 |
| iYPR079W   | 0.33 | 0.01 | 0.32 | 0.01 | 0.46 | 0.01 |
| iYPR080W   | #N/A | #N/A | #N/A | #N/A | #N/A | #N/A |
| iYPR081C   | #N/A | #N/A | 1.32 | 0.73 | #N/A | #N/A |
| iYPR082C   | 1.09 | 0.43 | 1.08 | 0.47 | 0.92 | 0.38 |

|            |      |      |      |      |      |      |
|------------|------|------|------|------|------|------|
| iYPR083W   | 1.44 | 0.80 | 1.39 | 0.79 | 1.02 | 0.56 |
| iYPR084W   | #N/A | #N/A | #N/A | #N/A | #N/A | #N/A |
| iYPR085C   | 1.47 | 0.86 | 1.24 | 0.64 | 1.03 | 0.57 |
| iYPR086W   | #N/A | #N/A | #N/A | #N/A | #N/A | #N/A |
| iYPR088C   | 1.11 | 0.47 | 1.14 | 0.54 | 1.20 | 0.67 |
| iYPR090W   | #N/A | #N/A | #N/A | #N/A | #N/A | #N/A |
| iYPR093C   | #N/A | #N/A | 1.03 | 0.43 | #N/A | #N/A |
| iYPR094W   | #N/A | #N/A | #N/A | #N/A | #N/A | #N/A |
| iYPR095C   | 1.51 | 0.86 | 0.83 | 0.21 | #N/A | #N/A |
| iYPR096C   | 1.06 | 0.39 | 0.94 | 0.31 | 1.11 | 0.68 |
| iYPR098C   | #N/A | #N/A | 1.17 | 0.59 | 1.26 | 0.84 |
| iYPR100W   | 0.92 | 0.25 | 1.06 | 0.48 | #N/A | #N/A |
| iYPR101W   | #N/A | #N/A | 1.02 | 0.41 | #N/A | #N/A |
| iYPR103W   | 1.03 | 0.36 | 0.96 | 0.42 | 0.83 | 0.34 |
| iYPR104C   | 1.32 | 0.67 | 1.22 | 0.61 | 0.92 | 0.47 |
| iYPR105C   | 1.03 | 0.38 | #N/A | #N/A | 0.57 | 0.05 |
| iYPR107C   | 1.04 | 0.34 | 1.01 | 0.39 | 1.44 | 0.97 |
| iYPR108W   | 1.07 | 0.37 | 1.32 | 0.75 | 1.17 | 0.86 |
| iYPR109W   | #N/A | #N/A | #N/A | #N/A | #N/A | #N/A |
| iYPR110C   | 1.13 | 0.45 | 1.31 | 0.73 | 0.95 | 0.54 |
| iYPR111W   | #N/A | #N/A | #N/A | #N/A | #N/A | #N/A |
| iYPR112C   | 1.03 | 0.33 | 0.88 | 0.25 | 0.68 | 0.10 |
| iYPR113W   | 1.26 | 0.65 | 1.06 | 0.46 | 1.02 | 0.67 |
| iYPR114W   | 1.21 | 0.59 | 1.17 | 0.56 | 0.99 | 0.49 |
| iYPR115W   | 1.38 | 0.79 | 1.41 | 0.82 | 1.19 | 0.77 |
| iYPR116W   | 1.16 | 0.52 | 1.10 | 0.49 | 0.91 | 0.33 |
| iYPR117W   | 1.09 | 0.42 | 1.32 | 0.74 | #N/A | #N/A |
| iYPR118W   | #N/A | #N/A | #N/A | #N/A | #N/A | #N/A |
| iYPR120C   | 0.85 | 0.18 | 0.90 | 0.33 | 0.66 | 0.11 |
| iYPR122W   | 1.18 | 0.50 | 1.17 | 0.57 | 0.95 | 0.37 |
| iYPR124W   | 1.11 | 0.46 | 1.18 | 0.59 | 1.05 | 0.71 |
| iYPR126C   | 1.16 | 0.54 | 1.15 | 0.56 | 1.22 | 0.80 |
| iYPR127W   | #N/A | #N/A | #N/A | #N/A | #N/A | #N/A |
| iYPR128C   | 1.31 | 0.72 | 0.98 | 0.34 | 1.09 | 0.64 |
| iYPR130C   | #N/A | #N/A | 1.49 | 0.87 | #N/A | #N/A |
| iYPR131C   | 0.51 | 0.04 | 0.37 | 0.02 | 0.93 | 0.35 |
| iYPR132W   | #N/A | #N/A | #N/A | #N/A | #N/A | #N/A |
| iYPR133C   | 1.12 | 0.48 | 0.93 | 0.36 | 1.01 | 0.52 |
| iYPR133W-A | 0.99 | 0.33 | 0.87 | 0.25 | #N/A | #N/A |
| iYPR134W   | 1.44 | 0.85 | 1.22 | 0.64 | 0.70 | 0.15 |
| iYPR135W   | 0.87 | 0.22 | 0.99 | 0.38 | 0.95 | 0.55 |
| iYPR139C   | 1.45 | 0.86 | 0.89 | 0.27 | 1.09 | 0.54 |
| iYPR140W   | #N/A | #N/A | #N/A | #N/A | #N/A | #N/A |
| iYPR141C   | #N/A | #N/A | #N/A | #N/A | #N/A | #N/A |
| iYPR144C   | #N/A | #N/A | 0.61 | 0.09 | 1.00 | 0.44 |
| iYPR147C   | 1.30 | 0.65 | 1.08 | 0.47 | 0.78 | 0.17 |
| iYPR148C-0 | 0.86 | 0.18 | 0.64 | 0.10 | 0.88 | 0.32 |
| iYPR149W   | 1.30 | 0.65 | 1.16 | 0.54 | 1.04 | 0.50 |
| iYPR151C   | 1.05 | 0.38 | 1.19 | 0.60 | 0.94 | 0.54 |
| iYPR153W   | 1.23 | 0.58 | 1.07 | 0.46 | 0.88 | 0.30 |
| iYPR154W   | 1.32 | 0.73 | 1.31 | 0.74 | 1.04 | 0.48 |

|              |      |      |      |      |      |      |
|--------------|------|------|------|------|------|------|
| iYPR155C     | 1.66 | 0.95 | 1.45 | 0.72 | #N/A | #N/A |
| iYPR156C     | 0.69 | 0.10 | 0.71 | 0.13 | 0.90 | 0.46 |
| iYPR157W     | 1.05 | 0.40 | 1.05 | 0.44 | 1.13 | 0.70 |
| iYPR158W     | 1.45 | 0.81 | 1.31 | 0.73 | 0.96 | 0.56 |
| iYPR159W     | 1.03 | 0.33 | 1.21 | 0.62 | 1.07 | 0.75 |
| iYPR160W     | 1.39 | 0.80 | 1.50 | 0.87 | 0.75 | 0.22 |
| iYPR161C     | #N/A | #N/A | 0.78 | 0.18 | 1.13 | 0.76 |
| iYPR162C     | #N/A | #N/A | #N/A | #N/A | #N/A | #N/A |
| iYPR163C     | 0.89 | 0.23 | 1.00 | 0.37 | 0.93 | 0.51 |
| iYPR164W     | 1.09 | 0.39 | #N/A | #N/A | 1.00 | 0.51 |
| iYPR165W     | 1.04 | 0.39 | #N/A | #N/A | 1.22 | 0.69 |
| iYPR166C     | 0.97 | 0.27 | 0.97 | 0.35 | 0.92 | 0.48 |
| iYPR167C     | 1.24 | 0.58 | 1.39 | 0.80 | 1.07 | 0.67 |
| iYPR168W     | #N/A | #N/A | #N/A | #N/A | #N/A | #N/A |
| iYPR169W     | #N/A | #N/A | #N/A | #N/A | #N/A | #N/A |
| iYPR170C     | 1.04 | 0.37 | 1.30 | 0.73 | 1.31 | 0.91 |
| iYPR171W     | 1.13 | 0.49 | 1.01 | 0.42 | 0.93 | 0.36 |
| iYPR172W     | #N/A | #N/A | #N/A | #N/A | #N/A | #N/A |
| iYPR173C     | 1.18 | 0.55 | 1.25 | 0.66 | 1.22 | 0.89 |
| iYPR174C     | 1.14 | 0.51 | 1.13 | 0.53 | 0.81 | 0.21 |
| iYPR176C     | 1.25 | 0.64 | 1.25 | 0.67 | 0.90 | 0.46 |
| iYPR178W     | #N/A | #N/A | #N/A | #N/A | #N/A | #N/A |
| iYPR179C     | #N/A | #N/A | #N/A | #N/A | #N/A | #N/A |
| iYPR180W     | 1.82 | 0.97 | #N/A | #N/A | 1.53 | 0.95 |
| iYPR181C     | 1.13 | 0.44 | 1.17 | 0.58 | 1.28 | 0.85 |
| iYPR182W     | 1.12 | 0.46 | 1.31 | 0.71 | 1.21 | 0.82 |
| iYPR183W     | 0.95 | 0.29 | 0.93 | 0.30 | 0.92 | 0.49 |
| iYPR184W     | 1.22 | 0.55 | 1.36 | 0.59 | 0.91 | 0.35 |
| iYPR185W     | #N/A | #N/A | #N/A | #N/A | #N/A | #N/A |
| iYPR186C     | #N/A | #N/A | #N/A | #N/A | #N/A | #N/A |
| iYPR187W     | #N/A | #N/A | #N/A | #N/A | #N/A | #N/A |
| iYPR188C     | #N/A | #N/A | 0.98 | 0.44 | #N/A | #N/A |
| iYPR189W     | #N/A | #N/A | #N/A | #N/A | #N/A | #N/A |
| iYPR190C     | #N/A | #N/A | 1.15 | 0.54 | 0.83 | 0.23 |
| iYPR192W     | #N/A | #N/A | #N/A | #N/A | #N/A | #N/A |
| iYPR193C     | 1.43 | 0.79 | 1.45 | 0.84 | 0.85 | 0.32 |
| iYPR195C-0   | 0.89 | 0.23 | 1.17 | 0.54 | #N/A | #N/A |
| iYPR195C-1   | 1.24 | 0.63 | 1.49 | 0.85 | #N/A | #N/A |
| iYPR196W     | #N/A | #N/A | #N/A | #N/A | #N/A | #N/A |
| iYPR198W-1   | 1.46 | 0.86 | 1.55 | 0.90 | 1.43 | 0.92 |
| iYPR199C     | #N/A | #N/A | #N/A | #N/A | #N/A | #N/A |
| iYPR200C     | #N/A | #N/A | #N/A | #N/A | #N/A | #N/A |
| iYPR201W-0   | 1.26 | 0.64 | 1.62 | 0.92 | 1.05 | 0.53 |
| iYPR201W-1   | 0.63 | 0.08 | 0.69 | 0.12 | 1.05 | 0.59 |
| iYPR203W     | 1.39 | 0.80 | 1.57 | 0.91 | 0.92 | 0.37 |
| iYPRCdelta13 | 0.61 | 0.08 | #N/A | #N/A | #N/A | #N/A |
| iYPRCdelta19 | #N/A | #N/A | #N/A | #N/A | #N/A | #N/A |
| iYPRCdelta22 | #N/A | #N/A | 0.74 | 0.15 | #N/A | #N/A |
| iYPRCtau3    | 1.37 | 0.77 | 1.38 | 0.79 | 0.93 | 0.48 |
| iYPRWdelta14 | 1.73 | 0.96 | 1.53 | 0.81 | #N/A | #N/A |
| iYPRWdelta16 | 1.23 | 0.61 | 1.03 | 0.41 | 0.98 | 0.42 |

|                  |      |      |      |      |      |      |
|------------------|------|------|------|------|------|------|
| iYPRWsigma4      | 1.24 | 0.58 | 1.47 | 0.69 | 1.03 | 0.68 |
| iYPRWtau4        | 1.54 | 0.91 | 1.73 | 0.91 | #N/A | #N/A |
| KAR3prom22       | #N/A | #N/A | #N/A | #N/A | #N/A | #N/A |
| KGD2prom         | 0.92 | 0.25 | 0.88 | 0.26 | 1.12 | 0.69 |
| LSR1             | 0.77 | 0.14 | 0.83 | 0.21 | 1.31 | 0.87 |
| MET16-r2         | #N/A | #N/A | #N/A | #N/A | #N/A | #N/A |
| MUC1prom3        | 1.40 | 0.82 | 1.01 | 0.41 | 0.67 | 0.09 |
| MUC1prom4        | 1.12 | 0.46 | 1.13 | 0.53 | 0.69 | 0.10 |
| no primers contr | #N/A | #N/A | #N/A | #N/A | #N/A | #N/A |
| PCK1prom         | 0.83 | 0.17 | #N/A | #N/A | 1.12 | 0.62 |
| POLI35Supstr     | 0.79 | 0.14 | 0.74 | 0.16 | 1.09 | 0.64 |
| POLI35Supstr2    | 0.59 | 0.07 | 0.59 | 0.09 | 1.02 | 0.55 |
| POP5             | #N/A | #N/A | 1.17 | 0.57 | 0.85 | 0.26 |
| PYK1prom         | 0.22 | 0.01 | 0.44 | 0.04 | #N/A | #N/A |
| Q0005            | #N/A | #N/A | 0.79 | 0.19 | #N/A | #N/A |
| Q0010            | #N/A | #N/A | #N/A | #N/A | #N/A | #N/A |
| Q0015            | #N/A | #N/A | 1.11 | 0.51 | 1.07 | 0.61 |
| Q0020            | #N/A | #N/A | #N/A | #N/A | #N/A | #N/A |
| Q0025            | #N/A | #N/A | 0.36 | 0.02 | 1.16 | 0.73 |
| Q0030            | #N/A | #N/A | #N/A | #N/A | #N/A | #N/A |
| Q0035            | #N/A | #N/A | #N/A | #N/A | #N/A | #N/A |
| Q0040            | #N/A | #N/A | #N/A | #N/A | #N/A | #N/A |
| Q0050            | #N/A | #N/A | #N/A | #N/A | #N/A | #N/A |
| RDN18-1          | 0.77 | 0.14 | 0.87 | 0.34 | 1.20 | 0.77 |
| RDN18-1A         | 0.73 | 0.12 | 0.82 | 0.27 | 1.22 | 0.84 |
| RDN18-1B         | 0.73 | 0.12 | 0.81 | 0.27 | 1.23 | 0.80 |
| RDN25-1          | 0.87 | 0.20 | 0.91 | 0.32 | 1.17 | 0.64 |
| RDN25-1A         | 0.86 | 0.20 | 0.94 | 0.38 | 1.16 | 0.72 |
| RDN25-1B         | 0.89 | 0.22 | 0.89 | 0.32 | 1.02 | 0.67 |
| RDN25-1C         | 0.72 | 0.11 | 0.67 | 0.14 | 1.13 | 0.76 |
| RDN37-1          | 0.78 | 0.14 | 0.83 | 0.29 | 1.08 | 0.63 |
| RDN37-1A         | 0.93 | 0.26 | 0.69 | 0.14 | 1.12 | 0.73 |
| RDN37-1B         | 0.83 | 0.17 | 0.72 | 0.16 | 1.18 | 0.75 |
| RDN37-1C         | 0.63 | 0.08 | 0.73 | 0.20 | 1.24 | 0.80 |
| RDN5-1           | 0.67 | 0.10 | 0.70 | 0.14 | 1.02 | 0.55 |
| RDN58-1          | 0.78 | 0.15 | 0.62 | 0.11 | 1.00 | 0.54 |
| RPA190           | #N/A | #N/A | #N/A | #N/A | #N/A | #N/A |
| RPL28            | 0.83 | 0.18 | #N/A | #N/A | 1.33 | 0.88 |
| RPL28prom        | 0.42 | 0.03 | 0.40 | 0.02 | 0.72 | 0.17 |
| RPL30prom        | #N/A | #N/A | 0.58 | 0.07 | #N/A | #N/A |
| RPL38orf         | 0.95 | 0.25 | 0.77 | 0.19 | #N/A | #N/A |
| RPL38prom        | 0.98 | 0.27 | 0.92 | 0.30 | 1.08 | 0.54 |
| RPP1Aorf         | 1.07 | 0.40 | 1.14 | 0.55 | 1.35 | 0.85 |
| RPP1Aprom        | 1.29 | 0.64 | 1.05 | 0.46 | 1.03 | 0.56 |
| RPR1             | #N/A | #N/A | #N/A | #N/A | #N/A | #N/A |
| RPR1orf          | #N/A | #N/A | #N/A | #N/A | #N/A | #N/A |
| RPS5-1           | 0.23 | 0.01 | 0.12 | 0.00 | 0.43 | 0.01 |
| RPS5-2           | #N/A | #N/A | 0.69 | 0.13 | 1.10 | 0.62 |
| SCR1             | 1.10 | 0.44 | 0.89 | 0.28 | 0.78 | 0.19 |
| SCR1-2           | #N/A | #N/A | 0.82 | 0.20 | #N/A | #N/A |
| SCR1-3           | 0.40 | 0.02 | 0.29 | 0.01 | #N/A | #N/A |

|            |      |      |      |      |      |      |
|------------|------|------|------|------|------|------|
| SEC23prom  | 1.12 | 0.43 | 0.92 | 0.29 | 0.98 | 0.48 |
| SFT1prom   | 1.22 | 0.55 | 1.18 | 0.57 | 0.74 | 0.14 |
| SIC1prom   | 1.10 | 0.40 | 0.98 | 0.38 | 0.80 | 0.20 |
| SIC1prom2  | 1.02 | 0.36 | #N/A | #N/A | #N/A | #N/A |
| snR128     | 0.92 | 0.24 | 0.68 | 0.12 | #N/A | #N/A |
| SNR13      | 0.53 | 0.04 | #N/A | #N/A | #N/A | #N/A |
| snR14      | #N/A | #N/A | 0.80 | 0.19 | 1.14 | 0.83 |
| SNR189     | #N/A | #N/A | 0.75 | 0.16 | #N/A | #N/A |
| SNR190     | 0.63 | 0.08 | 0.70 | 0.12 | 1.48 | 0.94 |
| snR3       | 0.66 | 0.09 | 0.58 | 0.08 | #N/A | #N/A |
| SNR33      | #N/A | #N/A | 0.80 | 0.20 | #N/A | #N/A |
| SNR34      | 0.96 | 0.29 | #N/A | #N/A | #N/A | #N/A |
| snR37      | #N/A | #N/A | #N/A | #N/A | #N/A | #N/A |
| SNR4       | 0.85 | 0.20 | 0.84 | 0.23 | #N/A | #N/A |
| SNR42      | 1.04 | 0.38 | 1.27 | 0.70 | 0.96 | 0.44 |
| SNR43      | 1.20 | 0.56 | 0.26 | 0.02 | 1.53 | 0.88 |
| SNR44      | 1.06 | 0.42 | 1.00 | 0.44 | 0.98 | 0.47 |
| SNR45      | 0.68 | 0.10 | 0.58 | 0.07 | 0.93 | 0.51 |
| SNR46      | #N/A | #N/A | 0.98 | 0.39 | #N/A | #N/A |
| SNR47      | #N/A | #N/A | #N/A | #N/A | #N/A | #N/A |
| SNR48      | #N/A | #N/A | #N/A | #N/A | #N/A | #N/A |
| SNR50      | #N/A | #N/A | #N/A | #N/A | #N/A | #N/A |
| SNR51      | #N/A | #N/A | #N/A | #N/A | #N/A | #N/A |
| SNR52      | #N/A | #N/A | #N/A | #N/A | #N/A | #N/A |
| SNR53      | #N/A | #N/A | #N/A | #N/A | #N/A | #N/A |
| SNR54      | #N/A | #N/A | #N/A | #N/A | #N/A | #N/A |
| SNR55      | #N/A | #N/A | #N/A | #N/A | #N/A | #N/A |
| SNR56      | #N/A | #N/A | #N/A | #N/A | #N/A | #N/A |
| SNR57      | #N/A | #N/A | #N/A | #N/A | #N/A | #N/A |
| SNR58      | #N/A | #N/A | #N/A | #N/A | #N/A | #N/A |
| SNR59      | #N/A | #N/A | #N/A | #N/A | #N/A | #N/A |
| SNR6       | 0.64 | 0.09 | 0.55 | 0.07 | #N/A | #N/A |
| SNR60      | #N/A | #N/A | #N/A | #N/A | #N/A | #N/A |
| SNR61      | #N/A | #N/A | #N/A | #N/A | #N/A | #N/A |
| SNR62      | #N/A | #N/A | #N/A | #N/A | #N/A | #N/A |
| SNR6-2     | #N/A | #N/A | #N/A | #N/A | #N/A | #N/A |
| SNR63      | #N/A | #N/A | 0.93 | 0.31 | #N/A | #N/A |
| SNR6-3     | 0.66 | 0.09 | 0.65 | 0.12 | #N/A | #N/A |
| SNR64      | 0.75 | 0.14 | #N/A | #N/A | 0.88 | 0.31 |
| SNR65      | #N/A | #N/A | #N/A | #N/A | #N/A | #N/A |
| SNR66      | #N/A | #N/A | #N/A | #N/A | #N/A | #N/A |
| SNR68      | 1.03 | 0.37 | 0.69 | 0.12 | #N/A | #N/A |
| SNR69      | #N/A | #N/A | 0.99 | 0.39 | 2.58 | 0.99 |
| SNR6Bbox   | #N/A | #N/A | 1.19 | 0.61 | #N/A | #N/A |
| SNR6Bdown  | 1.18 | 0.56 | 1.33 | 0.76 | 1.02 | 0.46 |
| SNR70      | 1.11 | 0.42 | 0.75 | 0.15 | 1.01 | 0.52 |
| SNR71      | #N/A | #N/A | #N/A | #N/A | #N/A | #N/A |
| SNR7-L     | 0.96 | 0.28 | 0.90 | 0.28 | #N/A | #N/A |
| SNR7-S     | 0.95 | 0.27 | 0.97 | 0.34 | 0.94 | 0.36 |
| SNR8       | #N/A | #N/A | 0.43 | 0.03 | 0.91 | 0.36 |
| SPO11prom3 | #N/A | #N/A | #N/A | #N/A | #N/A | #N/A |

|           |      |      |      |      |      |      |
|-----------|------|------|------|------|------|------|
| SPS2prom  | #N/A | #N/A | #N/A | #N/A | #N/A | #N/A |
| SRB2prom  | 1.03 | 0.36 | 0.78 | 0.18 | 0.89 | 0.32 |
| SRM1      | 1.35 | 0.76 | 1.30 | 0.72 | #N/A | #N/A |
| SSB1      | #N/A | #N/A | #N/A | #N/A | #N/A | #N/A |
| SSY5      | #N/A | #N/A | 1.26 | 0.65 | 0.75 | 0.21 |
| tA(AGC)P  | #N/A | #N/A | 0.48 | 0.04 | 1.10 | 0.55 |
| tA(UGC)O  | 0.61 | 0.07 | #N/A | #N/A | 1.41 | 0.84 |
| tC(GCA)P2 | 0.68 | 0.10 | 0.45 | 0.03 | 0.99 | 0.45 |
| tD(GUC)O  | #N/A | #N/A | 0.50 | 0.04 | 1.02 | 0.62 |
| tD(guc)o1 | 0.62 | 0.07 | 0.57 | 0.07 | 1.22 | 0.68 |
| tD(guc)o2 | #N/A | #N/A | #N/A | #N/A | 0.76 | 0.23 |
| tE(UUC)C  | 0.62 | 0.08 | 0.62 | 0.09 | 1.04 | 0.49 |
| tE(UUC)P  | 0.60 | 0.07 | 0.51 | 0.05 | 0.93 | 0.39 |
| TEL15R-1  | 0.51 | 0.04 | 0.51 | 0.05 | 1.13 | 0.69 |
| TEL15R-2  | 0.79 | 0.15 | 0.76 | 0.16 | 0.86 | 0.29 |
| TEL15R-4  | 1.35 | 0.76 | 1.54 | 0.88 | 0.92 | 0.33 |
| TEL15R-5  | 1.42 | 0.83 | 1.57 | 0.88 | 0.91 | 0.35 |
| TEL15R-6  | 1.15 | 0.50 | 1.31 | 0.71 | 0.95 | 0.43 |
| TEL1R     | 0.43 | 0.03 | 0.42 | 0.03 | 0.97 | 0.46 |
| TEL6R     | 0.38 | 0.02 | 0.42 | 0.03 | 1.43 | 0.92 |
| TEL9L     | 0.34 | 0.01 | 0.34 | 0.02 | 0.87 | 0.30 |
| tG(CCC)D  | #N/A | #N/A | #N/A | #N/A | #N/A | #N/A |
| tG(GCC)P2 | 0.59 | 0.07 | 0.53 | 0.05 | 0.97 | 0.46 |
| tG(UCC)O  | 0.55 | 0.05 | 0.53 | 0.05 | 0.95 | 0.55 |
| tH(GUG)M  | #N/A | #N/A | 0.60 | 0.08 | 0.96 | 0.53 |
| tl(AAU)P2 | 0.60 | 0.07 | 0.52 | 0.05 | 1.06 | 0.51 |
| tl(auu)b  | 0.59 | 0.07 | 0.54 | 0.06 | 1.15 | 0.83 |
| tK(CUU)P  | 0.69 | 0.10 | 0.61 | 0.08 | 1.25 | 0.82 |
| tK(guu)G1 | 0.93 | 0.25 | 0.65 | 0.10 | 1.19 | 0.77 |
| tL(GAG)G  | 0.29 | 0.01 | 0.48 | 0.05 | 0.86 | 0.28 |
| tL(UAA)N  | 0.65 | 0.08 | 0.63 | 0.09 | 1.21 | 0.79 |
| TLCprom   | 1.03 | 0.37 | 1.22 | 0.61 | 0.87 | 0.28 |
| tM(CAU)O2 | 0.53 | 0.04 | 0.60 | 0.08 | 1.33 | 0.88 |
| tM(CAU)P  | 0.59 | 0.06 | 0.42 | 0.03 | 1.14 | 0.60 |
| tN(GUU)P  | 0.61 | 0.07 | 0.66 | 0.11 | 1.16 | 0.62 |
| tP(AGG)C  | 0.31 | 0.02 | 0.30 | 0.02 | 0.88 | 0.31 |
| TPS3prom  | 1.40 | 0.76 | 1.03 | 0.41 | 0.71 | 0.11 |
| tQ(UUG)L  | 0.71 | 0.12 | 0.58 | 0.07 | 1.12 | 0.58 |
| tR(acg)J  | 0.88 | 0.20 | 0.73 | 0.14 | 1.24 | 0.82 |
| tR(ACG)O  | 0.63 | 0.08 | 0.74 | 0.15 | #N/A | #N/A |
| tR(CCG)L  | #N/A | #N/A | 0.34 | 0.03 | #N/A | #N/A |
| tR(ucu)B  | 0.56 | 0.06 | 0.57 | 0.07 | 1.18 | 0.65 |
| tR(UCU)M2 | 0.59 | 0.06 | 0.54 | 0.06 | 1.12 | 0.63 |
| tS(AGA)M  | 0.56 | 0.05 | 0.47 | 0.04 | 1.12 | 0.68 |
| tS(UGA)P  | 0.44 | 0.03 | 0.42 | 0.03 | 1.13 | 0.69 |
| tT(AGU)O2 | 0.53 | 0.05 | 0.53 | 0.05 | 1.11 | 0.60 |
| tT(CGU)K  | #N/A | #N/A | #N/A | #N/A | #N/A | #N/A |
| tT(UGU)P  | 0.59 | 0.07 | 0.50 | 0.05 | #N/A | #N/A |
| tV(AAC)M3 | 0.66 | 0.09 | 0.62 | 0.08 | 1.11 | 0.57 |
| tV(CAC)D  | 0.56 | 0.05 | 0.54 | 0.07 | 0.87 | 0.41 |
| tV(UAC)B  | #N/A | #N/A | #N/A | #N/A | #N/A | #N/A |



|               |      |      |      |      |      |      |
|---------------|------|------|------|------|------|------|
| YALCdelta2    | #N/A | #N/A | #N/A | #N/A | #N/A | #N/A |
| YARCdelta3    | #N/A | #N/A | #N/A | #N/A | #N/A | #N/A |
| YARCdelta8    | 1.15 | 0.50 | 1.59 | 0.88 | 1.07 | 0.61 |
| YBLCdelta7    | #N/A | #N/A | 0.94 | 0.32 | #N/A | #N/A |
| YBLCdelta7up  | 0.81 | 0.15 | 1.08 | 0.47 | #N/A | #N/A |
| YBLCsigma1    | 1.14 | 0.45 | 1.10 | 0.49 | 1.17 | 0.71 |
| YBLCsigma1dov | #N/A | #N/A | #N/A | #N/A | 0.84 | 0.35 |
| YBLWdelta10   | 1.16 | 0.51 | 1.14 | 0.53 | 0.99 | 0.63 |
| YBLWdelta6    | 1.17 | 0.48 | 1.23 | 0.64 | 0.78 | 0.27 |
| YBLWdelta8    | #N/A | #N/A | #N/A | #N/A | #N/A | #N/A |
| YBLWtau1      | 1.22 | 0.62 | 0.93 | 0.32 | 1.14 | 0.61 |
| YBLWty2-1A    | 1.23 | 0.62 | 1.16 | 0.57 | 1.02 | 0.50 |
| YBR028C       | 1.33 | 0.74 | 1.15 | 0.55 | 1.09 | 0.57 |
| YBR084W       | #N/A | #N/A | 1.17 | 0.58 | 1.08 | 0.54 |
| YBRCdelta11   | 1.66 | 0.95 | 1.09 | 0.48 | #N/A | #N/A |
| YBRCdelta18   | #N/A | #N/A | #N/A | #N/A | #N/A | #N/A |
| YBRCdelta19   | #N/A | #N/A | #N/A | #N/A | #N/A | #N/A |
| YBRWdelta16   | #N/A | #N/A | 1.26 | 0.68 | 1.63 | 0.96 |
| YBRWdelta17   | #N/A | #N/A | 1.05 | 0.44 | 1.02 | 0.67 |
| YCL001W-A     | 1.49 | 0.85 | 1.42 | 0.78 | 1.18 | 0.87 |
| YCL026C-A     | 1.18 | 0.50 | 1.34 | 0.71 | 0.71 | 0.16 |
| YCLCdelta1    | #N/A | #N/A | #N/A | #N/A | #N/A | #N/A |
| YCLWomega1    | 0.93 | 0.23 | 0.94 | 0.31 | 1.17 | 0.75 |
| YCLWty5-1A    | 1.45 | 0.83 | 1.31 | 0.73 | 0.91 | 0.32 |
| YCLWty5-1B    | 1.61 | 0.93 | 1.76 | 0.94 | 0.92 | 0.47 |
| YCLWty5-1C    | 1.58 | 0.92 | 2.18 | 0.99 | 0.84 | 0.25 |
| YCR020W-B     | #N/A | #N/A | #N/A | #N/A | #N/A | #N/A |
| YCR073W-A     | 1.42 | 0.78 | 1.21 | 0.60 | 1.18 | 0.76 |
| YCR097W-A     | 1.32 | 0.74 | 1.50 | 0.83 | 1.00 | 0.50 |
| YCR102W-A     | 0.82 | 0.18 | 1.13 | 0.52 | #N/A | #N/A |
| YCRCdelta14   | #N/A | #N/A | #N/A | #N/A | #N/A | #N/A |
| YCRCdelta6    | #N/A | #N/A | 0.93 | 0.32 | 1.01 | 0.52 |
| YCRWdelta11   | #N/A | #N/A | 1.15 | 0.54 | 0.65 | 0.08 |
| YCRWomega3    | 0.78 | 0.14 | #N/A | #N/A | 1.04 | 0.58 |
| YDL130W-A     | 1.08 | 0.41 | 1.01 | 0.42 | 1.31 | 0.87 |
| YDL133C-A     | #N/A | #N/A | #N/A | #N/A | #N/A | #N/A |
| YDL233W       | 1.09 | 0.42 | 1.59 | 0.75 | #N/A | #N/A |
| YDL234C       | #N/A | #N/A | #N/A | #N/A | #N/A | #N/A |
| YDR034W-B     | 0.84 | 0.19 | 0.74 | 0.15 | 0.96 | 0.38 |
| YDR170W-A     | 1.04 | 0.37 | 1.00 | 0.37 | 1.06 | 0.50 |
| YDR525W-A     | 0.73 | 0.12 | 0.69 | 0.12 | 0.88 | 0.43 |
| YDRCdelta9    | 1.35 | 0.76 | 1.39 | 0.71 | 1.58 | 0.90 |
| YDRCTy1-2B    | 1.32 | 0.72 | 1.31 | 0.73 | 1.09 | 0.65 |
| YDRCTy1-2D    | 1.01 | 0.35 | 0.99 | 0.36 | 1.14 | 0.71 |
| YDRWdelta10   | #N/A | #N/A | #N/A | #N/A | #N/A | #N/A |
| YDRWdelta23   | 1.15 | 0.52 | 1.02 | 0.40 | #N/A | #N/A |
| YDRWdelta30   | 1.39 | 0.80 | 1.40 | 0.80 | #N/A | #N/A |
| YDRWdelta7    | 0.91 | 0.23 | 0.12 | 0.00 | 0.92 | 0.49 |
| YDRWsigma4    | #N/A | #N/A | #N/A | #N/A | #N/A | #N/A |
| YE019C        | #N/A | #N/A | 1.08 | 0.47 | 1.15 | 0.61 |
| YELCdelta3    | #N/A | #N/A | 1.32 | 0.74 | 0.82 | 0.23 |

|             |      |      |      |      |      |      |
|-------------|------|------|------|------|------|------|
| YELCdelta4  | #N/A | #N/A | 1.09 | 0.49 | 1.10 | 0.69 |
| YELCtau1    | 1.10 | 0.44 | 1.07 | 0.45 | 1.10 | 0.55 |
| YER039C-A   | 1.08 | 0.42 | 1.25 | 0.65 | 1.11 | 0.80 |
| YER048W-A   | 1.12 | 0.43 | 1.55 | 0.71 | 1.66 | 0.94 |
| YER091C-A   | 0.35 | 0.01 | 0.34 | 0.01 | 0.43 | 0.01 |
| YER136W     | #N/A | #N/A | #N/A | #N/A | 0.97 | 0.40 |
| YER138W-A   | 0.64 | 0.08 | 0.58 | 0.07 | 1.03 | 0.56 |
| YERCdelta10 | 1.26 | 0.66 | 1.29 | 0.62 | 1.69 | 0.96 |
| YERCdelta26 | #N/A | #N/A | 1.63 | 0.92 | #N/A | #N/A |
| YERCdelta8  | #N/A | #N/A | #N/A | #N/A | #N/A | #N/A |
| YERComega1  | 1.13 | 0.44 | 1.29 | 0.67 | 0.80 | 0.29 |
| YERCtau3    | 1.32 | 0.71 | #N/A | #N/A | 0.62 | 0.07 |
| YERWdelta12 | #N/A | #N/A | 1.01 | 0.40 | 1.09 | 0.65 |
| YERWdelta13 | 1.25 | 0.63 | 1.14 | 0.54 | 1.10 | 0.67 |
| YERWdelta17 | 0.85 | 0.18 | 0.83 | 0.22 | #N/A | #N/A |
| YERWdelta21 | 1.30 | 0.71 | 1.18 | 0.59 | 1.16 | 0.66 |
| YERWdelta25 | 0.95 | 0.28 | 1.08 | 0.47 | 1.13 | 0.59 |
| YERWdelta9  | #N/A | #N/A | 0.57 | 0.08 | #N/A | #N/A |
| YERWomega2  | 1.57 | 0.92 | 1.85 | 0.95 | 0.77 | 0.17 |
| YFLCdelta6  | 1.11 | 0.45 | 1.80 | 0.95 | 0.90 | 0.34 |
| YFLWdelta1  | 1.54 | 0.91 | 1.58 | 0.91 | 0.94 | 0.37 |
| YFLWtau1    | 1.33 | 0.74 | 1.22 | 0.63 | #N/A | #N/A |
| YFR032C-A   | 0.94 | 0.25 | 0.86 | 0.24 | 1.02 | 0.67 |
| YFRCdelta9  | #N/A | #N/A | 1.23 | 0.54 | #N/A | #N/A |
| YFRWdelta10 | 1.49 | 0.88 | 1.15 | 0.56 | #N/A | #N/A |
| YFRWdelta7  | 1.32 | 0.68 | 1.25 | 0.59 | 0.68 | 0.09 |
| YGL197W     | #N/A | #N/A | 1.55 | 0.90 | 1.11 | 0.57 |
| YGLCdelta5  | 1.29 | 0.66 | 1.25 | 0.67 | 1.08 | 0.62 |
| YGLCtau3    | 1.34 | 0.71 | 1.04 | 0.44 | 1.36 | 0.89 |
| YGLWdelta10 | #N/A | #N/A | 0.85 | 0.23 | #N/A | #N/A |
| YGLWdelta4  | #N/A | #N/A | #N/A | #N/A | #N/A | #N/A |
| YGLWdelta6  | #N/A | #N/A | #N/A | #N/A | #N/A | #N/A |
| YGLWtau2    | 1.40 | 0.82 | 1.17 | 0.52 | 1.42 | 0.92 |
| YGRCdelta12 | #N/A | #N/A | #N/A | #N/A | #N/A | #N/A |
| YGRCdelta20 | 1.20 | 0.57 | 1.23 | 0.64 | 1.06 | 0.51 |
| YGRCTy1-2A  | 1.31 | 0.71 | 1.20 | 0.61 | 1.20 | 0.78 |
| YGRCTy1-2C  | 1.30 | 0.68 | 1.21 | 0.61 | 1.10 | 0.56 |
| YGRCTy1-2D  | 1.00 | 0.32 | 0.97 | 0.34 | 1.05 | 0.54 |
| YGRWdelta19 | #N/A | #N/A | #N/A | #N/A | #N/A | #N/A |
| YGRWdelta26 | 1.26 | 0.68 | 1.25 | 0.67 | 1.10 | 0.56 |
| YHLComega1  | #N/A | #N/A | #N/A | #N/A | #N/A | #N/A |
| YHLCsigma1  | #N/A | #N/A | 1.27 | 0.64 | 1.19 | 0.67 |
| YHLWdelta2  | #N/A | #N/A | #N/A | #N/A | #N/A | #N/A |
| YHRCdelta11 | 0.93 | 0.23 | #N/A | #N/A | #N/A | #N/A |
| YHRCdelta12 | #N/A | #N/A | #N/A | #N/A | #N/A | #N/A |
| YHRCdelta4  | 1.15 | 0.46 | 1.41 | 0.80 | 0.74 | 0.20 |
| YHRCdelta5  | #N/A | #N/A | #N/A | #N/A | #N/A | #N/A |
| YHRCdelta6  | #N/A | #N/A | #N/A | #N/A | #N/A | #N/A |
| YHRCdelta8  | #N/A | #N/A | #N/A | #N/A | #N/A | #N/A |
| YHRCtau4    | 1.37 | 0.73 | 5.68 | 0.68 | #N/A | #N/A |
| YHRCTy1-1A  | 1.41 | 0.78 | 1.31 | 0.73 | 1.30 | 0.79 |

|             |      |      |      |      |      |      |
|-------------|------|------|------|------|------|------|
| YHRCTy1-1B  | 1.33 | 0.70 | 1.31 | 0.72 | 1.34 | 0.80 |
| YHRCTy1-1D  | 1.01 | 0.34 | 1.01 | 0.38 | 1.19 | 0.77 |
| YHRWdelta9  | 1.18 | 0.56 | 1.52 | 0.83 | 1.19 | 0.65 |
| YHRWtau3    | 1.27 | 0.68 | 1.17 | 0.58 | 1.24 | 0.71 |
| YILCdelta2  | 1.23 | 0.62 | 1.27 | 0.68 | 1.35 | 0.89 |
| YILCdelta3  | 1.56 | 0.92 | 1.47 | 0.83 | 1.07 | 0.74 |
| YILCdelta5  | #N/A | #N/A | 0.44 | 0.04 | #N/A | #N/A |
| YILWTy3-1A  | 1.37 | 0.76 | 1.47 | 0.85 | 0.99 | 0.48 |
| YILWTy3-1B  | 1.26 | 0.65 | 1.34 | 0.69 | 1.11 | 0.67 |
| YILWTy3-1C  | 1.35 | 0.76 | 1.46 | 0.84 | 0.90 | 0.31 |
| YILWTy3-1D  | 1.24 | 0.64 | 1.21 | 0.61 | 0.98 | 0.47 |
| YIR020W-B   | 0.93 | 0.25 | 0.84 | 0.22 | 1.23 | 0.72 |
| YIRCdelta6  | #N/A | #N/A | 1.28 | 0.70 | 1.06 | 0.60 |
| YJL163C     | #N/A | #N/A | 1.10 | 0.49 | #N/A | #N/A |
| YJLCdelta6  | #N/A | #N/A | #N/A | #N/A | #N/A | #N/A |
| YJLCdelta7  | #N/A | #N/A | 1.23 | 0.63 | 1.20 | 0.88 |
| YJLWdelta10 | 0.94 | 0.26 | 0.86 | 0.30 | 1.18 | 0.79 |
| YJLWdelta15 | #N/A | #N/A | 0.81 | 0.21 | #N/A | #N/A |
| YJLWdelta16 | #N/A | #N/A | 1.31 | 0.60 | #N/A | #N/A |
| YJLWdelta8  | #N/A | #N/A | #N/A | #N/A | #N/A | #N/A |
| YJLWdelta9  | #N/A | #N/A | #N/A | #N/A | #N/A | #N/A |
| YJLWtau4    | 1.31 | 0.72 | 1.37 | 0.73 | 0.96 | 0.44 |
| YJRWdelta14 | #N/A | #N/A | #N/A | #N/A | #N/A | #N/A |
| YJRWdelta20 | 1.13 | 0.49 | 1.34 | 0.67 | 1.38 | 0.81 |
| YJRWtau3    | #N/A | #N/A | #N/A | #N/A | #N/A | #N/A |
| YKL033W-A   | #N/A | #N/A | 0.92 | 0.30 | #N/A | #N/A |
| YKL053C-A   | 1.12 | 0.46 | 1.03 | 0.42 | 1.11 | 0.68 |
| YKL162C-A   | #N/A | #N/A | 1.17 | 0.54 | #N/A | #N/A |
| YKLCdelta2  | 1.09 | 0.39 | 1.03 | 0.41 | 1.13 | 0.69 |
| YKLCdelta4  | 1.13 | 0.48 | 1.01 | 0.39 | 1.04 | 0.59 |
| YKLCdelta6  | 0.89 | 0.23 | 1.00 | 0.36 | 1.34 | 0.78 |
| YKLWdelta1  | #N/A | #N/A | 0.98 | 0.37 | 0.89 | 0.31 |
| YKRCdelta11 | 0.89 | 0.20 | #N/A | #N/A | 0.89 | 0.44 |
| YKRCdelta9  | #N/A | #N/A | #N/A | #N/A | #N/A | #N/A |
| YKRWdelta10 | 1.78 | 0.97 | 1.24 | 0.63 | 1.05 | 0.49 |
| YLL018C-A   | 1.02 | 0.34 | 0.89 | 0.30 | 1.08 | 0.76 |
| YLR107W     | 1.48 | 0.87 | 1.28 | 0.70 | #N/A | #N/A |
| YLR262C-A   | 1.00 | 0.32 | 0.89 | 0.26 | 0.98 | 0.41 |
| YLR438C-A   | 1.25 | 0.64 | 1.14 | 0.54 | 1.34 | 0.83 |
| YLRCdelta16 | #N/A | #N/A | #N/A | #N/A | #N/A | #N/A |
| YLRCdelta24 | 1.12 | 0.47 | #N/A | #N/A | 0.81 | 0.22 |
| YLRCdelta27 | #N/A | #N/A | #N/A | #N/A | #N/A | #N/A |
| YLRCtau1    | 1.09 | 0.43 | 1.09 | 0.48 | #N/A | #N/A |
| YLRWdelta12 | 0.90 | 0.21 | 1.42 | 0.73 | #N/A | #N/A |
| YLRWdelta15 | 1.18 | 0.54 | 1.13 | 0.53 | 1.00 | 0.44 |
| YLRWdelta17 | #N/A | #N/A | #N/A | #N/A | #N/A | #N/A |
| YML081C-A   | 1.17 | 0.52 | 0.90 | 0.28 | 1.13 | 0.59 |
| YMLCdelta1  | 1.09 | 0.45 | 1.10 | 0.49 | 1.03 | 0.68 |
| YMR046W-A   | #N/A | #N/A | #N/A | #N/A | #N/A | #N/A |
| YMR158C-B   | 0.84 | 0.17 | 0.81 | 0.22 | #N/A | #N/A |
| YMR194C-A   | 0.50 | 0.04 | #N/A | #N/A | 0.66 | 0.08 |

|             |      |      |      |      |      |      |
|-------------|------|------|------|------|------|------|
| YMRCdelta11 | 1.51 | 0.89 | 1.33 | 0.69 | #N/A | #N/A |
| YMRCdelta14 | 1.66 | 0.95 | 1.28 | 0.68 | #N/A | #N/A |
| YMRCtau1    | #N/A | #N/A | 0.86 | 0.23 | #N/A | #N/A |
| YMRWdelta15 | 1.25 | 0.66 | 1.59 | 0.91 | 1.09 | 0.64 |
| YMRWdelta16 | #N/A | #N/A | 1.07 | 0.46 | #N/A | #N/A |
| YMRWdelta20 | 1.26 | 0.67 | 1.04 | 0.42 | #N/A | #N/A |
| YMRWdelta21 | 0.99 | 0.31 | #N/A | #N/A | #N/A | #N/A |
| YNLWsigma2  | #N/A | #N/A | 0.83 | 0.21 | 1.10 | 0.56 |
| YNR032C-A   | 1.36 | 0.78 | 1.12 | 0.51 | 1.13 | 0.62 |
| YNRCdelta9  | 1.23 | 0.57 | 1.31 | 0.73 | #N/A | #N/A |
| YOL013W-A   | #N/A | #N/A | #N/A | #N/A | #N/A | #N/A |
| YOLCdelta2  | #N/A | #N/A | #N/A | #N/A | #N/A | #N/A |
| YOLCdelta8  | #N/A | #N/A | 0.96 | 0.33 | 1.20 | 0.78 |
| YOLCdelta9  | 1.13 | 0.44 | 1.11 | 0.50 | #N/A | #N/A |
| YOLWdelta6  | #N/A | #N/A | #N/A | #N/A | #N/A | #N/A |
| YOLWtau1    | #N/A | #N/A | #N/A | #N/A | #N/A | #N/A |
| YOR129C     | #N/A | #N/A | #N/A | #N/A | #N/A | #N/A |
| YOR235W     | 0.37 | 0.02 | 0.25 | 0.01 | 1.06 | 0.60 |
| YOR298C-A   | 0.87 | 0.20 | 0.74 | 0.15 | 1.02 | 0.48 |
| YORCdelta11 | 1.28 | 0.63 | #N/A | #N/A | 1.64 | 0.91 |
| YORCdelta15 | #N/A | #N/A | 1.20 | 0.59 | 0.98 | 0.60 |
| YORWdelta12 | #N/A | #N/A | #N/A | #N/A | #N/A | #N/A |
| YORWdelta16 | #N/A | #N/A | #N/A | #N/A | #N/A | #N/A |
| YORWdelta19 | #N/A | #N/A | #N/A | #N/A | #N/A | #N/A |
| YORWdelta22 | #N/A | #N/A | #N/A | #N/A | #N/A | #N/A |
| YPL144W     | 1.06 | 0.39 | 1.04 | 0.43 | 1.33 | 0.88 |
| YPL183W-A   | 1.18 | 0.55 | 1.30 | 0.72 | 0.86 | 0.29 |
| YPLCdelta1  | #N/A | #N/A | 0.79 | 0.19 | #N/A | #N/A |
| YPLCdelta10 | #N/A | #N/A | #N/A | #N/A | #N/A | #N/A |
| YPLCtau1    | 1.16 | 0.52 | 1.00 | 0.38 | 1.00 | 0.61 |
| YPLCTy4-1A  | 1.28 | 0.65 | 1.23 | 0.65 | 1.06 | 0.67 |
| YPLCTy4-1B  | 1.40 | 0.81 | 1.46 | 0.85 | 0.97 | 0.55 |
| YPLCTy4-1C  | 1.53 | 0.87 | 1.38 | 0.80 | 1.35 | 0.79 |
| YPLCTy4-1D  | 1.60 | 0.93 | 1.36 | 0.78 | 1.24 | 0.71 |
| YPLCTy4-1E  | 1.30 | 0.66 | 1.31 | 0.72 | 1.23 | 0.81 |
| YPLWdelta11 | #N/A | #N/A | #N/A | #N/A | #N/A | #N/A |
| YPLWdelta7  | #N/A | #N/A | 1.03 | 0.43 | #N/A | #N/A |
| YPLWdelta9  | #N/A | #N/A | #N/A | #N/A | #N/A | #N/A |
| YPR029C     | #N/A | #N/A | #N/A | #N/A | #N/A | #N/A |
| YPR133W-A   | 1.02 | 0.35 | 0.87 | 0.24 | 0.78 | 0.18 |
| YPRCdelta13 | 0.89 | 0.22 | 0.91 | 0.33 | #N/A | #N/A |
| YPRCdelta15 | #N/A | #N/A | #N/A | #N/A | #N/A | #N/A |
| YPRCdelta22 | 1.01 | 0.32 | 1.03 | 0.42 | #N/A | #N/A |
| YPRCtau3    | 1.39 | 0.81 | 1.26 | 0.68 | 1.13 | 0.63 |
| YPRWdelta14 | #N/A | #N/A | #N/A | #N/A | #N/A | #N/A |
| YPRWdelta16 | #N/A | #N/A | #N/A | #N/A | 1.12 | 0.68 |
| YPRWtau4    | 0.75 | 0.13 | 0.68 | 0.13 | #N/A | #N/A |
| YPT10cod    | 1.40 | 0.82 | 0.85 | 0.24 | #N/A | #N/A |
| ZRT1        | 1.54 | 0.91 | 1.44 | 0.82 | 0.99 | 0.49 |
| ZWF1prom    | 1.05 | 0.38 | #N/A | #N/A | 0.78 | 0.19 |

**³ (percentile rank, MPR) - Intergenic**

| UniGeneID    | Promoter-gene          | chromosome | dist from left end 1 |
|--------------|------------------------|------------|----------------------|
| 18S          |                        | 12         | 456307               |
| 5S           |                        | 12         | 458700               |
| ACO1prom     |                        | 12         | 738020               |
| ACT1         |                        | 6          | 54116                |
| ACT1-2       |                        | 6          | 54339                |
| CEN10        | YJR001W                | 10         | 435996               |
| CEN11        | YKL001C (MET14)        | 11         | 439777               |
| CEN12        |                        | 12         | 150827               |
| CEN13        |                        | 13         | 268031               |
| CEN14        |                        | 14         | 628757               |
| CEN15        | YOR001W (RRP6)         | 15         | 326584               |
| CEN16        | YPR001W (CIT3)         | 16         | 555952               |
| CEN2         | YBL001C (ECM15)        | 2          | 238165               |
| CEN3         | YCR001W                | 3          | 113982               |
| CEN4         |                        | 4          | 449752               |
| CEN5         | YEL001C YER001W (MNN1) | 5          | 151960               |
| CEN6         | YFR001W (LOC1)         | 6          | 148503               |
| CEN7         | YGL001C (ERG26)        | 7          | 496914               |
| CEN8         | YHR001W (OSH7)         | 8          | 105579               |
| CEN9         |                        | 9          | 355626               |
| CLN2down     |                        | 16         | 63776                |
| CLN2ds       |                        | 16         | 64989                |
| CLN2prom     |                        | 16         | 67338                |
| CLN2promlb   |                        | 16         | 66859                |
| CTS1prom2    |                        | 12         | 710871               |
| CTS1promcc'2 |                        | 12         | 710830               |
| CWP1         |                        | 11         | 261378               |
| CWP1prom     |                        | 11         | 260527               |
| CWP2         |                        | 11         | 259167               |
| DPM1prom     |                        | 16         | 900745               |
| EGT2prom     |                        | 14         | 24097                |
| f650HO2      |                        | 4          | 48859                |
| f658SOD1     |                        | 10         | 623044               |
| FBP1         |                        | 12         | 875092               |
| FLO9         |                        | #N/A       |                      |
| FUN19        |                        | 1          | 81731                |
| FUN21        |                        | 1          | 86812                |
| FUS1prom     |                        | 3          | 71782                |
| GAL10        |                        | 2          | 278545               |
| GAL10ds      |                        | 2          | 276599               |
| GAL10prom1   |                        | 2          | 278690               |
| GAL10prom2   |                        | 2          | 278663               |
| GAL1prom     |                        | 2          | 279006               |
| GAL3dse      |                        | 4          | 465027               |
| GAL3prom     |                        | 4          | 463274               |
| GAL7prom     |                        | 2          | 275814               |
| GDH3orf-1    |                        | 1          | 32184                |
| GDH3orf-2    |                        | 1          | 32879                |
| GDH3prom     |                        | 1          | 31462                |
| HAM1         |                        | 10         | 569442               |

|               |                                |      |         |
|---------------|--------------------------------|------|---------|
| HAP3prom      |                                | 2    | 182315  |
| HHT1prom2     |                                | 2    | 256068  |
| HHT1tata      |                                | 2    | 256313  |
| HHT2prom      |                                | 14   | 576498  |
| HOurs1        |                                | 4    | 49507   |
| HOurs2        |                                | 4    | 48763   |
| HOurs2-2      |                                | 4    | 56714   |
| HSP150prom    |                                | 10   | 120428  |
| HSP30prom1    |                                | 3    | 157470  |
| HSP30prom2    |                                | 3    | 157778  |
| HTB1prom      |                                | #N/A |         |
| HTB2prom      |                                | 2    | 236199  |
| HTL1prom      |                                | 3    | 155357  |
| iCEN1         | YAL001C (TFC3) YAR002W (NUP60) | 1    | 151596  |
| iCEN10        | YJR001W                        | 10   | 436112  |
| iCEN11        | YKL001C (MET14)                | 11   | 439891  |
| iCEN12        |                                | 12   | 150946  |
| iCEN13        |                                | 13   | 268141  |
| iCEN15        | YOR001W (RRP6)                 | 15   | 326702  |
| iCEN16        | YPR001W (CIT3)                 | 16   | 556069  |
| iCEN2         | YBL001C (ECM15)                | 2    | 238281  |
| iCEN3         | YCR001W                        | 3    | 114094  |
| iCEN4         |                                | 4    | 449863  |
| iCEN5         | YEL001C YER001W (MNN1)         | 5    | 152113  |
| iCEN6         | YFR001W (LOC1)                 | 6    | 148621  |
| iCEN7         | YGL001C (ERG26)                | 7    | 497032  |
| iCEN8         | YHR001W (OSH7)                 | 8    | 105696  |
| iCEN9         |                                | 9    | 355743  |
| iCWP2         |                                | 11   | 259792  |
| IDH2prom      |                                | 15   | 580094  |
| iLSR1         | YBR230C                        | 2    | 681817  |
| INO1orf       |                                | 10   | 134731  |
| INO1prom      |                                | 10   | 136010  |
| IntYBL087C    | YBL088C (TEL1)                 | 2    | 60182   |
| IntYBR048W    | YBR048W (RPS11B)               | 2    | 332833  |
| IntYBR084C-A  |                                | 2    | 414708  |
| IntYCR097W-A2 | YCR096C (HMRA2) YCR097W (HMRA) | 3    | 292962  |
| IntYDL191W    | YDL191W (RPL35A)               | 4    | 117668  |
| IntYDR064W    | YDR064W (RPS13)                | 4    | 579520  |
| IntYDR381W    | YDR381W (YRA1)                 | 4    | 1236878 |
| IntYER133W    | YER132C (PMD1) YER133W (GLC7)  | 5    | 432670  |
| IntYGL103W    | YGL104C YGL103W (RPL28)        | 7    | 311014  |
| IntYGL178W    | YGL177W YGL178W (MPT5)         | 7    | 167359  |
| IntYHR010W    | YHR009C YHR010W (RPL27A)       | 8    | 126544  |
| IntYHR021C    |                                | 8    | 148108  |
| IntYJR079W    | YJR079W                        | 10   | 580037  |
| IntYNL112W    | YNL112W (DBP2)                 | 14   | 414912  |
| IntYNL302C    |                                | 14   | 62371   |
| IntYNR053C    | YNR052C (POP2)                 | 14   | 721779  |
| IntYPL081W    | YPL082C (MOT1) YPL081W (RPS9A) | 16   | 404953  |
| IntYPL143W    | YPL143W (RPL33A)               | 16   | 282141  |

|                    |                                 |    |         |
|--------------------|---------------------------------|----|---------|
| <b>iPOP5/FUN19</b> |                                 | 1  | 82512   |
| <b>IRA1</b>        |                                 | 2  | 516339  |
| <b>iRDN37-1</b>    | YLR154C                         | 12 | 458433  |
| <b>iRDN5-1</b>     | YLR154C                         | 12 | 459797  |
| <b>iRDN5-2</b>     | YLR154C                         | 12 | 468930  |
| <b>iRDN5-3</b>     |                                 | 12 | 472582  |
| <b>irpr1</b>       |                                 | 5  | 118035  |
| <b>iSCR1</b>       | YER137C ti(aau)e1               | 5  | 442412  |
| <b>isnR128</b>     | YJL148W (RPA34)                 | 10 | 139390  |
| <b>iSNR13</b>      | YDR472W (TRS31)                 | 4  | 1403076 |
| <b>isnR14</b>      | YER007C-A                       | 5  | 167585  |
| <b>iSNR189</b>     | YCR031C (RPS14A) YCR032W (BPH1) | 3  | 177526  |
| <b>iSNR190</b>     | YJL148W (RPA34)                 | 10 | 139648  |
| <b>iSNR33</b>      | YCR015C YCR016W                 | 3  | 142145  |
| <b>iSNR34</b>      |                                 | 12 | 899535  |
| <b>isnR37</b>      |                                 | 10 | 228297  |
| <b>iSNR4</b>       |                                 | 5  | 424880  |
| <b>iSNR42</b>      | YKR062W (TFA2)                  | 11 | 559005  |
| <b>iSNR44</b>      | YLR368W                         | 12 | 856918  |
| <b>iSNR46</b>      |                                 | 7  | 545559  |
| <b>iSNR47</b>      | YDR042C                         | 4  | 541701  |
| <b>iSNR48</b>      | YGR060W (ERG25)                 | 7  | 609690  |
| <b>iSNR50</b>      | YOL035C YOL034W                 | 15 | 259578  |
| <b>iSNR51</b>      |                                 | 16 | 718803  |
| <b>iSNR52</b>      | YER132C (PMD1) YER133W (GLC7)   | 5  | 431217  |
| <b>iSNR53</b>      | YEL050C (RML2) YEL049W (PAU2)   | 5  | 61789   |
| <b>iSNR54</b>      |                                 | 13 | 163620  |
| <b>iSNR55</b>      |                                 | 12 | 794793  |
| <b>iSNR56</b>      |                                 | 2  | 88268   |
| <b>iSNR57</b>      |                                 | 12 | 795023  |
| <b>iSNR58</b>      | YOL098C                         | 15 | 136182  |
| <b>iSNR59</b>      | YPL199C YPL198W (RPL7B)         | 16 | 173903  |
| <b>iSNR6</b>       |                                 | 12 | 366347  |
| <b>iSNR60</b>      | YJL048C                         | 10 | 348929  |
| <b>iSNR61</b>      |                                 | 12 | 794574  |
| <b>iSNR62</b>      | YOR043W (WHI2)                  | 15 | 409863  |
| <b>iSNR63</b>      |                                 | 4  | 323470  |
| <b>iSNR64</b>      | YKL211C (TRP3) YKL210W (UBA1)   | 11 | 38912   |
| <b>iSNR65</b>      | YCR030C                         | 3  | 176006  |
| <b>iSNR66</b>      | YNL025C (SSN8)                  | 14 | 586173  |
| <b>iSNR67</b>      | YEL050C (RML2) YEL049W (PAU2)   | 5  | 61433   |
| <b>iSNR68</b>      | YIL135C YIL134W (FLX1)          | 9  | 97246   |
| <b>iSNR69</b>      | YKL038W (RGT1)                  | 11 | 364518  |
| <b>iSNR70</b>      |                                 | 16 | 719048  |
| <b>iSNR71</b>      |                                 | 8  | 411317  |
| <b>iSNR7-S</b>     | YGR221C (TOS2) YGR222W (PET54)  | 7  | 939665  |
| <b>iSNR8</b>       | YOR271C YOR272W (YTM1)          | 15 | 832516  |
| <b>itA(AGC)D</b>   | YDL024C (DIA3)                  | 4  | 410492  |
| <b>itA(AGC)F</b>   | YFR025C (HIS2)                  | 6  | 204983  |
| <b>itA(AGC)G</b>   | YGR143W (SKN1)                  | 7  | 774415  |
| <b>itA(AGC)K1</b>  | YKL117W (SBA1)                  | 11 | 219613  |



|             |                                 |    |         |
|-------------|---------------------------------|----|---------|
| itA(AGC)M1  | YMR023C (MSS1) YMR024W (MRPL3)  | 13 | 321218  |
| itA(AGC)M2  | YMR247C YMR250W (GAD1)          | 13 | 768440  |
| itA(AGC)P   | YPR159W (KRE6)                  | 16 | 856969  |
| itA(UGC)A   | YAR010C                         | 1  | 166340  |
| itA(UGC)E   | YER075C (PTP3)                  | 5  | 312091  |
| itA(UGC)G   | YGR150C                         | 7  | 794483  |
| itA(UGC)L   | YLR035C (MLH2)                  | 12 | 214956  |
| itC(GCA)B   | YBR210W                         | 2  | 643033  |
| itC(GCA)P1  |                                 | 16 | 435959  |
| itC(GCA)P2  | YPR120C (CLB5) YPR121W (THI22)  | 16 | 775833  |
| itD(GUC)B   | YBR081C (SPT7)                  | 2  | 405985  |
| itD(GUC)D   | YDR058C (TGL2)                  | 4  | 569075  |
| itD(GUC)G1  |                                 | 7  | 531675  |
| itD(GUC)G2  |                                 | 7  | 544642  |
| itD(GUC)I2  | YIL009C-A (EST3) YIL009W (FAA3) | 9  | 336417  |
| itD(GUC)J1  | YJL112W (MDV1)                  | 10 | 204503  |
| itD(GUC)J2  | YJL045W                         | 10 | 355223  |
| itD(GUC)J4  |                                 | 10 | 541267  |
| itD(GUC)K   | YKR038C YKR039W (GAP1)          | 11 | 513043  |
| itD(GUC)L1  | YLR143W                         | 12 | 427204  |
| itD(GUC)L2  |                                 | 12 | 793988  |
| itD(GUC)M   | YMR098C                         | 13 | 463624  |
| itE(CUC)D-0 | YDR278C YDR279W                 | 4  | 1017314 |
| itE(CUC)D-1 | YDR278C YDR279W                 | 4  | 1018359 |
| itE(CUC)I   |                                 | 9  | 197660  |
| itE(UUC)B   | YBR210W                         | 2  | 645193  |
| itE(UUC)C   | YCL022C YCL020W                 | 3  | 82495   |
| itE(UUC)E1  | YER012W (PRE1)                  | 5  | 177169  |
| itE(UUC)E2  | YER097W                         | 5  | 355001  |
| itE(UUC)E3  |                                 | 5  | 487398  |
| itE(UUC)G1  |                                 | 7  | 328652  |
| itE(UUC)G3  | YGR028W (MSP1)                  | 7  | 541915  |
| itE(UUC)I   | YIR006C (PAN1) YIR007W          | 9  | 370485  |
| itE(UUC)J   | YJL162C YJL161W                 | 10 | 116004  |
| itE(UUC)K   | YKL165C (MCD4)                  | 11 | 141094  |
| itE(UUC)L   | YLR334C YLR335W (NUP2)          | 12 | 797248  |
| itE(UUC)M   | YMR012W (CLU1)                  | 13 | 290871  |
| itE(UUC)P   | YPL178W (CBC2)                  | 16 | 210262  |
| itF(GAA)B   |                                 | 2  | 36476   |
| itF(GAA)D   | YDR316W-A                       | 4  | 1095498 |
| itF(GAA)F   | YFR007W                         | 6  | 158000  |
| itF(GAA)G   |                                 | 7  | 440803  |
| itF(GAA)H2  | YHR125W                         | 8  | 358571  |
| itF(GAA)M   | YMR041C YMR042W (ARG80)         | 13 | 352369  |
| itF(GAA)N   | YNL133C (FYV6) YNL132W (KRE33)  | 14 | 374958  |
| itF(GAA)P1  |                                 | 16 | 560284  |
| itG(CCC)D   | YDR390C (UBA2)                  | 4  | 1257113 |
| itG(GCC)D1  | YDL211C YDL210W (UGA4)          | 4  | 83619   |
| itG(GCC)D2  | YDR261C-C YDR262W               | 4  | 992938  |
| itG(GCC)E   | YEL050C (RML2) YEL049W (PAU2)   | 5  | 61960   |
| itG(GCC)F1  | YFR009W (GCN20)                 | 6  | 162291  |

|            |                                |    |         |
|------------|--------------------------------|----|---------|
| itG(GCC)F2 | YFR016C                        | 6  | 181035  |
| itG(GCC)G1 |                                | 7  | 845713  |
| itG(GCC)G2 | YGR218W (CRM1)                 | 7  | 931015  |
| itG(GCC)J1 | YJL024C (APS3)                 | 10 | 396492  |
| itG(GCC)J2 | YJR052W (RAD7)                 | 10 | 531586  |
| itG(GCC)M  | YML045W-A                      | 13 | 183968  |
| itG(GCC)O2 | YOL022C                        | 15 | 282234  |
| itG(GCC)P2 | YPR160W (GPH1)                 | 16 | 860444  |
| itG(UCC)G  | YGR144W (THI4)                 | 7  | 779681  |
| itG(UCC)N  | YNL285W                        | 14 | 96310   |
| itG(UCC)O  |                                | 15 | 111032  |
| itH(GUG)E1 |                                | 5  | 207427  |
| itH(GUG)G1 |                                | 7  | 110698  |
| itH(GUG)G2 | YGL097W (SRM1)                 | 7  | 319850  |
| itH(GUG)H  | YHL023C                        | 8  | 62823   |
| itH(GUG)K  | YKL067W (YNK1)                 | 11 | 313117  |
| itH(GUG)M  |                                | 13 | 363134  |
| itI(AAU)E1 | YER137C                        | 5  | 443272  |
| itI(AAU)E2 | YER180C (ISC10)                | 5  | 551354  |
| itI(AAU)G  | YGR123C (PPT1) YGR124W (ASN2)  | 7  | 739189  |
| itI(AAU)I1 | YIL096C YIL095W (PRK1)         | 9  | 183510  |
| itI(AAU)I2 |                                | 9  | 210735  |
| itI(AAU)L1 |                                | 12 | 734875  |
| itI(AAU)L2 | YLR455W                        | 12 | 1052139 |
| itI(AAU)N1 | YNL035C YNL034W                | 14 | 569938  |
| itI(AAU)N2 | YNL017C                        | 14 | 602383  |
| itI(AAU)P1 |                                | 16 | 819597  |
| itI(UAU)D  | YDR211W (GCD6)                 | 4  | 884530  |
| itI(UAU)L  |                                | 12 | 605432  |
| itK(CUU)C  | YCR018C (SRD1)                 | 3  | 151062  |
| itK(CUU)D1 | YDR363W-A (SEM1)               | 4  | 1201856 |
| itK(CUU)D2 | YDR445C YDR446W (ECM11)        | 4  | 1352572 |
| itK(CUU)E1 | YEL010W                        | 5  | 135497  |
| itK(CUU)E2 |                                | 5  | 435821  |
| itK(CUU)G1 | YGL201C (MCM6)                 | 7  | 122343  |
| itK(CUU)G2 | YGL170C (SPO74) YGL169W (SUA5) | 7  | 185790  |
| itK(CUU)G3 | YGR188C (BUB1)                 | 7  | 876460  |
| itK(CUU)I  | YIL030C (SSM4)                 | 9  | 300298  |
| itK(CUU)J  | YJL011C                        | 10 | 414726  |
| itK(CUU)K  | YKL128C (PMU1) YKL127W (PGM1)  | 11 | 202717  |
| itK(CUU)M  | YMR106C (YKU80) YMR107W        | 13 | 480692  |
| itK(UUU)D  |                                | 4  | 359671  |
| itK(UUU)G1 | YGL203C (KEX1) YGL202W (ARO8)  | 7  | 115585  |
| itK(UUU)K  | YKR073C YKR074W                | 11 | 578699  |
| itK(UUU)L  | YLR377C (FBP1)                 | 12 | 875469  |
| itK(UUU)O  | YOR058C (ASE1)                 | 15 | 438739  |
| itL(CAA)A  | YAR023C YAR027W (UIP3)         | 1  | 181249  |
| itL(CAA)C  | YCL018W (LEU2)                 | 3  | 90587   |
| itL(CAA)D  | YDR506C                        | 4  | 1461877 |
| itL(CAA)G2 | YGL040C (HEM2) YGL039W         | 7  | 423202  |
| itL(CAA)G3 | YGR180C (RNR4) YGR181W (TIM13) | 7  | 857485  |

|             |                               |    |         |
|-------------|-------------------------------|----|---------|
| itL(CAA)K   | YKR009C (FOX2)                | 11 | 458311  |
| itL(CAA)L   |                               | 12 | 628497  |
| itL(CAA)M   | YMR118C YMR119W (ASI1)        | 13 | 505007  |
| itL(GAG)G   | YGR106C YGR107W               | 7  | 700750  |
| itL(UAA)B1  |                               | 2  | 9666    |
| itL(UAA)B2  | YBR055C (PRP6) YBR056W        | 2  | 347642  |
| itL(UAA)D   | YDR034C (LYS14)               | 4  | 519865  |
| itL(UAA)J   | YJL006C (CTK2) YJL005W (CYR1) | 10 | 424203  |
| itL(UAA)K   | YKL189W (HYM1)                | 11 | 84296   |
| itL(UAA)L   | YLR420W (URA4)                | 12 | 963049  |
| itL(UAG)J   | YJR100C YJR101W (RSM26)       | 10 | 617707  |
| itL(UAG)L1  | YLR227C (ADY4) YLR227W-A      | 12 | 592619  |
| itL(C1)     | YBR035C (PDX3)                | 2  | 308843  |
| itM(CAU)C   | YCR018C (SRD1)                | 3  | 149697  |
| itM(CAU)D   | YDR349C (YPS7)                | 4  | 1175936 |
| itM(CAU)E   | YEL027W (CUP5)                | 5  | 100204  |
| itM(CAU)J1  | YJL029C (VPS53) YJL028W       | 10 | 390811  |
| itM(CAU)J2  | YJL007C                       | 10 | 422697  |
| itM(CAU)J3  | YJR043C (POL32)               | 10 | 517572  |
| itM(CAU)M   |                               | 13 | 572954  |
| itM(CAU)O1  | YOR192C YOR193W               | 15 | 710270  |
| itM(CAU)O2  | YOR343C                       | 15 | 976484  |
| itM(CAU)P   | YPL112C YPL111W (CAR1)        | 16 | 338918  |
| itN(GUU)C   | YCR007C YCR008W (SAT4)        | 3  | 127390  |
| itN(GUU)F   | YFL003C (MSH4) YFL002W-B      | 6  | 137553  |
| itN(GUU)G   | YGR120C (SEC35)               | 7  | 731204  |
| itN(GUU)K   | YKL197C (PEX1)                | 11 | 74702   |
| itN(GUU)L   | YLR425W (TUS1)                | 12 | 976050  |
| itN(GUU)N1  | YNL284C-A                     | 14 | 102787  |
| itN(GUU)N2  | YNR001C (CIT1)                | 14 | 632671  |
| itN(GUU)O1  | YOL055C (THI20) YOL054W       | 15 | 228402  |
| itN(GUU)O2  | YOR086C YOR087W               | 15 | 487512  |
| itN(GUU)P   |                               | 16 | 810744  |
| itP(AGG)C   | YCR006C                       | 3  | 123249  |
| itP(AGG)N   | YNR001C (CIT1)                | 14 | 631916  |
| itP(UGG)A   | YAL007C (ERP2) YAL004W        | 1  | 139257  |
| itP(UGG)F   | YFL019C                       | 6  | 101472  |
| itP(UGG)L-0 | YLL025W                       | 12 | 92649   |
| itP(UGG)M   | YML041C YML040W               | 13 | 196170  |
| itP(UGG)N1  | YNL043C YNL042W (BOP3)        | 14 | 547194  |
| itP(UGG)N2  |                               | 14 | 568215  |
| itP(UGG)O1  |                               | 15 | 301198  |
| itP(UGG)O2  | YOR073W                       | 15 | 464551  |
| itQ(CUG)M   | YMR271C (URA10)               | 13 | 808317  |
| itQ(UUG)B   |                               | 2  | 350854  |
| itQ(UUG)C   | YCR027C (RHB1)                | 3  | 168086  |
| itQ(UUG)D1  | YDR034C-A YDR034W-B           | 4  | 521082  |
| itQ(UUG)D2  | YDR098C (GRX3)                | 4  | 645262  |
| itQ(UUG)D3  | YDR170C (SEC7) YDR170W-A      | 4  | 802840  |
| itQ(UUG)E1  | YER048C (CAJ1) YER048W-A      | 5  | 250356  |
| itQ(UUG)E2  | YEL012W (UBC8)                | 5  | 131153  |

|             |                                  |    |         |
|-------------|----------------------------------|----|---------|
| itQ(UUG)H   | YHR015W (MIP6)                   | 8  | 134383  |
| itQ(UUG)L   | YLR154C                          | 12 | 448722  |
| itR(ACG)D-0 | YDR088C (SLU7) YDR089W           | 4  | 620079  |
| itR(ACG)D-1 | YDR088C (SLU7) YDR089W           | 4  | 621114  |
| itR(ACG)J   |                                  | 10 | 233708  |
| itR(ACG)K   | YKR026C (GCN3) YKR027W           | 11 | 490681  |
| itR(ACG)L   |                                  | 12 | 374428  |
| itR(ACG)O   | YOR007C (SGT2)                   | 15 | 340371  |
| itR(CCG)L   | YLR344W (RPL26A)                 | 12 | 818679  |
| itR(CCU)J   | YJR055W (HIT1)                   | 10 | 538314  |
| itR(UCU)E   |                                  | 5  | 138737  |
| itR(UCU)G1  | YGL050W                          | 7  | 405538  |
| itR(UCU)G2  | YGR165W                          | 7  | 828788  |
| itR(UCU)J2  | YJL039C (NUP192)                 | 10 | 374273  |
| itR(UCU)K   | YKL153W                          | 11 | 162563  |
| itR(UCU)M1  |                                  | 13 | 747962  |
| itR(UCU)M2  | YML071C (DOR1) YML070W (DAK1)    | 13 | 131896  |
| itS(AGA)B   | YBL004W                          | 2  | 227115  |
| itS(AGA)D1  | YDL007W (RPT2)                   | 4  | 437894  |
| itS(AGA)D2  | YDR261C (EXG2) YDR261W-A         | 4  | 981091  |
| itS(AGA)D3  | YDR420W (HKR1)                   | 4  | 1305746 |
| itS(AGA)E   | YEL032W (MCM3)                   | 5  | 86685   |
| itS(AGA)G   |                                  | 7  | 561737  |
| itS(AGA)H   | YHR015W (MIP6)                   | 8  | 133098  |
| itS(AGA)J   |                                  | 10 | 523781  |
| itS(AGA)M   | YML006C (GIS4) YML005W           | 13 | 259239  |
| itS(GCU)F   | YFR020W                          | 6  | 191600  |
| itS(GCU)L   | YLR327C YLR328W                  | 12 | 784452  |
| itS(GCU)O   | YOL026C YOL025W (LAG2)           | 15 | 274773  |
| itS(UGA)E-0 | YER065C (ICL1) YER066W           | 5  | 288522  |
| itS(UGA)E-1 | YER065C (ICL1) YER066W           | 5  | 289381  |
| itS(UGA)I   | YIL057C YIL056W                  | 9  | 248928  |
| itS(UGA)P   | YPR072W (NOT5)                   | 16 | 689641  |
| itT(AGU)B   | YBR013C                          | 2  | 266406  |
| itT(AGU)C   |                                  | 3  | 294278  |
| itT(AGU)D   | YDL007W (RPT2)                   | 4  | 434377  |
| itT(AGU)H   | YHR005C-A (MRS11) YHR006W (STP2) | 8  | 116172  |
| itT(AGU)I1  | YIL102C                          | 9  | 175100  |
| itT(AGU)I2  | YIL015C-A YIL014W (MNT3)         | 9  | 325818  |
| itT(AGU)J   | YJL200C                          | 10 | 59172   |
| itT(AGU)N1  | YNL284C (MRPL10)                 | 14 | 104875  |
| itT(AGU)N2  |                                  | 14 | 560763  |
| itT(AGU)O1  |                                  | 15 | 113873  |
| itT(CGU)K   | YKL209C (STE6) YKL208W (CBT1)    | 11 | 46807   |
| itT(UGU)G1  | YGR090W                          | 7  | 661814  |
| itT(UGU)G2  | YGR255C (COQ6) YGR256W (GND2)    | 7  | 1004283 |
| itT(UGU)H   | YHR181W                          | 8  | 467056  |
| itT(UGU)P   | YPR109W                          | 16 | 744352  |
| itV(AAC)E1  | YER135C YER136W (GDI1)           | 5  | 438770  |
| itV(AAC)E2  |                                  | 5  | 469526  |
| itV(AAC)G1  | YGL046W                          | 7  | 412364  |

|              |                                |    |         |
|--------------|--------------------------------|----|---------|
| itV(AAC)G2   | YGR161C-C YGR162W (TIF4631)    | 7  | 823549  |
| itV(AAC)G3-0 | YGL225W (VRG4)                 | 7  | 73900   |
| itV(AAC)J    | YJL036W (SNX4)                 | 10 | 378129  |
| itV(AAC)K1-0 | YKL068W (NUP100)               | 11 | 307862  |
| itV(AAC)K2   |                                | 11 | 379394  |
| itV(AAC)L    | YLR272C (YCS4)                 | 12 | 687932  |
| itV(AAC)M1   | YMR049C (ERB1)                 | 13 | 372517  |
| itV(AAC)M2   | YMR076C (PDS5)                 | 13 | 420660  |
| itV(AAC)M3   | YMR163C                        | 13 | 586708  |
| itV(AAC)O    |                                | 15 | 663883  |
| itV(CAC)D    | YDR306C YDR307W                | 4  | 1075580 |
| itV(UAC)B    | YBR044C (TCM62)                | 2  | 326822  |
| itV(UAC)D    | YDR022C (CIS1) YDR023W (SES1)  | 4  | 488910  |
| itW(CCA)G1   |                                | 7  | 287456  |
| itW(CCA)G2   | YGR189C (CRH1)                 | 7  | 878809  |
| itW(CCA)J    | YJL011C                        | 10 | 415724  |
| itW(CCA)K-0  | YKL071W                        | 11 | 302668  |
| itW(CCA)K-1  | YKL071W                        | 11 | 303713  |
| itW(CCA)M    | YMR051C YMR052W (FAR3)         | 13 | 379407  |
| itY(GUA)D    | YDR242W (AMD2)                 | 4  | 946436  |
| itY(GUA)F1   | YFR011C YFR012W                | 6  | 167517  |
| itY(GUA)F2   | YFR028C (CDC14) YFR029W (PTR3) | 6  | 210694  |
| itY(GUA)J1   | YJL045W                        | 10 | 354028  |
| itY(GUA)J2   | YJR056C YJR057W (CDC8)         | 10 | 542732  |
| itY(GUA)M1   | YML054C (CYB2)                 | 13 | 168883  |
| itY(GUA)M2   | YMR283C (RIT1) YMR284W (YKU70) | 13 | 838016  |
| itY(GUA)O    | YOL019W (TOS7)                 | 15 | 288280  |
| iYAL001C     | YAL001C (TFC3) YAR002W (NUP60) | 1  | 151168  |
| iYAL002W     |                                | 1  | 147533  |
| iYAL003W     | YAL002W (VPS8)                 | 1  | 143163  |
| iYAL004W     | YAL005C (SSA1) YAL003W (EFB1)  | 1  | 141410  |
| iYAL007C     | YAL007C (ERP2) YAL004W         | 1  | 138348  |
| iYAL008W     |                                | 1  | 137513  |
| iYAL009W     | YAL008W (FUN14)                | 1  | 136636  |
| iYAL010C     | YAL010C (MDM10) YAL009W (SPO7) | 1  | 135668  |
| iYAL011W     |                                | 1  | 134080  |
| iYAL013W     | YAL012W (CYS3)                 | 1  | 130361  |
| iYAL014C     | YAL014C (UIP2) YAL013W (DEP1)  | 1  | 129022  |
| iYAL015C     | YAL015C (NTG1)                 | 1  | 128106  |
| iYAL016W     |                                | 1  | 126790  |
| iYAL017W     | YAL016W (TPD3)                 | 1  | 124299  |
| iYAL018C     | YAL018C YAL017W (FUN31)        | 1  | 119545  |
| iYAL019W     |                                | 1  | 118318  |
| iYAL020C     | YAL020C (ATS1) YAL019W (FUN30) | 1  | 114619  |
| iYAL021C     | YAL021C (CCR4)                 | 1  | 113363  |
| iYAL022C     | YAL022C (FUN26)                | 1  | 110434  |
| iYAL023C     | YAL023C (PMT2)                 | 1  | 108555  |
| iYAL025C     | YAL025C (MAK16)                | 1  | 101152  |
| iYAL026C     | YAL026C (DRS2)                 | 1  | 99704   |
| iYAL027W     |                                | 1  | 95479   |
| iYAL028W     | YAL027W                        | 1  | 94493   |

|              |                                  |   |        |
|--------------|----------------------------------|---|--------|
| iYAL029C     | YAL029C (MYO4) YAL028W           | 1 | 92277  |
| iYAL030W     |                                  | 1 | 87759  |
| iYAL031C     | YAL031C (FUN21) YAL030W (SNC1)   | 1 | 87038  |
| iYAL032C     | YAL032C (PRP45)                  | 1 | 84481  |
| iYAL033W     |                                  | 1 | 83234  |
| iYAL034C     | YAL034C (FUN19) YAL033W (POP5)   | 1 | 82108  |
| iYAL034W-A   |                                  | 1 | 80594  |
| iYAL036C     | YAL036C (FUN11) YAL035W (FUN12)  | 1 | 76159  |
| iYAL037W     |                                  | 1 | 74830  |
| iYAL038W     | YAL037W                          | 1 | 73295  |
| iYAL039C-0   | YAL039C (CYC3) YAL038W (CDC19)   | 1 | 69532  |
| iYAL039C-1   | YAL039C (CYC3) YAL038W (CDC19)   | 1 | 70662  |
| iYAL040C     | YAL040C (CLN3)                   | 1 | 67527  |
| iYAL041W     |                                  | 1 | 65411  |
| iYAL042W     | YAL041W (CDC24)                  | 1 | 62570  |
| iYAL043C     | YAL043C (PTA1)                   | 1 | 61059  |
| iYAL044C     | YAL044C (GCV3)                   | 1 | 58490  |
| iYAL045C     | YAL045C                          | 1 | 57803  |
| iYAL046C     | YAL046C                          | 1 | 57392  |
| iYAL047C     | YAL047C (SPC72)                  | 1 | 56864  |
| iYAL048C     | YAL048C                          | 1 | 54796  |
| iYAL049C     | YAL049C                          | 1 | 52602  |
| iYAL051W     |                                  | 1 | 51757  |
| iYAL053W     | YAL051W (OAF1)                   | 1 | 48255  |
| iYAL054C     | YAL054C (ACS1) YAL053W           | 1 | 45027  |
| iYAL055W     |                                  | 1 | 42724  |
| iYAL056W     | YAL055W (PEX22)                  | 1 | 41808  |
| iYAL058C-A   | YAL058C-A (KRE20) YAL056W (KRH1) | 1 | 39052  |
| iYAL059W     | YAL058W (CNE1)                   | 1 | 37153  |
| iYAL060W     | YAL059W (ECM1)                   | 1 | 36309  |
| iYAL061W     | YAL060W (BDH1)                   | 1 | 34707  |
| iYAL062W     | YAL061W                          | 1 | 32946  |
| iYAL063C-0   | YAL063C (FLO9) YAL062W (GDH3)    | 1 | 27969  |
| iYAL063C-1   | YAL063C (FLO9) YAL062W (GDH3)    | 1 | 29170  |
| iYAL064C-A-0 | YAL064C-A YAL064W                | 1 | 13744  |
| iYAL064C-A-1 | YAL064C-A YAL064W                | 1 | 15041  |
| iYAL064C-A-2 | YAL064C-A YAL064W                | 1 | 16338  |
| iYAL064C-A-3 | YAL064C-A YAL064W                | 1 | 17635  |
| iYAL064C-A-4 | YAL064C-A YAL064W                | 1 | 18932  |
| iYAL064C-A-5 | YAL064C-A YAL064W                | 1 | 20229  |
| iYAL064W     |                                  | 1 | 21852  |
| iYAL065C     | YAL065C YAL064W-B                | 1 | 11952  |
| iYAL066W     |                                  | 1 | 10400  |
| iYAL067C     | YAL067C (SEO1) YAL066W           | 1 | 9017   |
| iYAL068C-0   | YAL068C                          | 1 | 2169   |
| iYAL068C-2   | YAL068C                          | 1 | 4701   |
| iYAL069W     |                                  | 1 | 649    |
| iYALCdelta2  | YAL007C (ERP2) YAL004W           | 1 | 138995 |
| iYALWdelta1  |                                  | 1 | 22554  |
| iYAR002C-A   | YAR002C-A (ERP1) YAR003W (SWD1)  | 1 | 154726 |
| iYAR002W     |                                  | 1 | 153878 |

|               |                                      |   |        |
|---------------|--------------------------------------|---|--------|
| iYAR003W      |                                      | 1 | 156287 |
| iYAR007C      | YAR007C (RFA1) YAR008W (SEN34)       | 1 | 158621 |
| iYAR008W      |                                      | 1 | 159794 |
| iYAR009C      | YAR009C                              | 1 | 164188 |
| iYAR014C      | YAR014C (BUD14) YAR015W (ADE1)       | 1 | 168867 |
| iYAR015W      |                                      | 1 | 170291 |
| iYAR019C-0    | YAR019C (CDC15)                      | 1 | 175134 |
| iYAR019C-1    | YAR019C (CDC15)                      | 1 | 175994 |
| iYAR020C-0    | YAR020C (PAU7)                       | 1 | 177022 |
| iYAR020C-1    | YAR020C (PAU7)                       | 1 | 178151 |
| iYAR023C      | YAR023C tl(caa)a/ts(aga)a YAR027W (l | 1 | 179819 |
| iYAR027W      | YAR028W                              | 1 | 184472 |
| iYAR028W      | YAR029W                              | 1 | 185591 |
| iYAR031W      | YAR033W                              | 1 | 187727 |
| iYAR033W      | YAR035W (YAT1)                       | 1 | 188806 |
| iYAR035W      | YAR042W (SWH1)                       | 1 | 192251 |
| iYAR042W      | YAR044W (OSH1)                       | 1 | 193384 |
| iYAR044W-0    |                                      | 1 | 196179 |
| iYAR044W-1    |                                      | 1 | 197499 |
| iYAR044W-2    |                                      | 1 | 198819 |
| iYAR044W-3    |                                      | 1 | 200139 |
| iYAR047C-0    | YAR047C YAR050W (FLO1)               | 1 | 201780 |
| iYAR047C-1    | YAR047C YAR050W (FLO1)               | 1 | 202587 |
| iYAR050W      | YAR053W                              | 1 | 208007 |
| iYAR053W      |                                      | 1 | 208654 |
| iYAR060C      | YAR060C YAR061W                      | 1 | 217484 |
| iYAR061W      | YAR062W                              | 1 | 218335 |
| iYAR062W      | YAR064W                              | 1 | 219137 |
| iYAR064W      | YAR066W                              | 1 | 220489 |
| iYAR066W      | YAR068W                              | 1 | 221652 |
| iYAR068W      |                                      | 1 | 222883 |
| iYAR069C      | YAR069C                              | 1 | 224296 |
| iYAR070C      | YAR070C YAR071W (PHO11)              | 1 | 224854 |
| iYAR071W      | YAR073W (IMD1)                       | 1 | 226855 |
| iYARCdelta5   | YAR010C                              | 1 | 166163 |
| iYARCdelta8-0 |                                      | 1 | 209769 |
| iYARCdelta8-1 |                                      | 1 | 211245 |
| iYARCdelta8-2 |                                      | 1 | 212721 |
| iYARCdelta8-3 |                                      | 1 | 214197 |
| iYARCdelta8-4 |                                      | 1 | 215673 |
| iYARWdelta6   | YAR023C YAR027W (UIP3)               | 1 | 183469 |
| iYARWdelta7   | YAR035W (YAT1)                       | 1 | 189752 |
| iYARWsigma1   | YAR023C YAR027W (UIP3)               | 1 | 182954 |
| iYBL001C      | YBL001C (ECM15)                      | 2 | 237425 |
| iYBL002W      |                                      | 2 | 236846 |
| iYBL003C      | YBL003C (HTA2) YBL002W (HTB2)        | 2 | 235751 |
| iYBL004W      |                                      | 2 | 235076 |
| iYBL005W      | YBL005W-A                            | 2 | 220359 |
| iYBL006C      | YBL006C YBL005W (PDR3)               | 2 | 217088 |
| iYBL007C      | YBL007C (SLA1)                       | 2 | 216324 |
| iYBL008W      |                                      | 2 | 212133 |

|                   |                                 |   |        |
|-------------------|---------------------------------|---|--------|
| <b>iYBL009W</b>   | YBL008W (HIR1)                  | 2 | 209182 |
| <b>iYBL010C</b>   | YBL010C YBL009W                 | 2 | 206907 |
| <b>iYBL011W</b>   |                                 | 2 | 205775 |
| <b>iYBL013W</b>   |                                 | 2 | 203196 |
| <b>iYBL014C</b>   | YBL014C (RRN6) YBL013W (FMT1)   | 2 | 201707 |
| <b>iYBL015W</b>   |                                 | 2 | 195661 |
| <b>iYBL016W</b>   | YBL015W (ACH1)                  | 2 | 193471 |
| <b>iYBL017C</b>   | YBL017C (PEP1) YBL016W (FUS3)   | 2 | 191542 |
| <b>iYBL018C</b>   | YBL018C (POP8)                  | 2 | 186433 |
| <b>iYBL019W</b>   |                                 | 2 | 185874 |
| <b>iYBL020W</b>   | YBL019W (APN2)                  | 2 | 184084 |
| <b>iYBL022C</b>   | YBL022C (PIM1)                  | 2 | 181234 |
| <b>iYBL023C</b>   | YBL023C (MCM2)                  | 2 | 177485 |
| <b>iYBL024W</b>   |                                 | 2 | 174547 |
| <b>iYBL025W</b>   | YBL024W (NCL1)                  | 2 | 171877 |
| <b>iYBL026W</b>   | YBL025W (RRN10)                 | 2 | 170997 |
| <b>iYBL027W</b>   | YBL026W (LSM2)                  | 2 | 169335 |
| <b>iYBL028C</b>   | YBL028C YBL027W (RPL19B)        | 2 | 167797 |
| <b>iYBL029W</b>   |                                 | 2 | 167223 |
| <b>iYBL030C-0</b> | YBL030C (PET9) YBL029W          | 2 | 163956 |
| <b>iYBL030C-1</b> | YBL030C (PET9) YBL029W          | 2 | 165024 |
| <b>iYBL031W</b>   |                                 | 2 | 162674 |
| <b>iYBL032W</b>   | YBL031W (SHE1)                  | 2 | 161288 |
| <b>iYBL033C</b>   | YBL033C (RIB1) YBL032W          | 2 | 159652 |
| <b>iYBL034C</b>   | YBL034C (STU1)                  | 2 | 158348 |
| <b>iYBL035C</b>   | YBL035C (POL12)                 | 2 | 153569 |
| <b>iYBL036C</b>   | YBL036C                         | 2 | 151179 |
| <b>iYBL037W</b>   |                                 | 2 | 150245 |
| <b>iYBL038W</b>   | YBL037W (APL3)                  | 2 | 146844 |
| <b>iYBL039C</b>   | YBL039C (URA7) YBL038W (MRPL16) | 2 | 145687 |
| <b>iYBL040C</b>   | YBL040C (ERD2)                  | 2 | 142827 |
| <b>iYBL041W</b>   |                                 | 2 | 141931 |
| <b>iYBL042C</b>   | YBL042C (FUI1) YBL041W (PRE7)   | 2 | 140219 |
| <b>iYBL043W</b>   |                                 | 2 | 137420 |
| <b>iYBL044W</b>   | YBL043W (ECM13)                 | 2 | 136325 |
| <b>iYBL045C</b>   | YBL045C (COR1) YBL044W          | 2 | 135475 |
| <b>iYBL046W</b>   |                                 | 2 | 133708 |
| <b>iYBL047C</b>   | YBL047C (EDE1) YBL046W          | 2 | 131999 |
| <b>iYBL048W</b>   |                                 | 2 | 127569 |
| <b>iYBL050W</b>   | YBL049W                         | 2 | 126078 |
| <b>iYBL051C</b>   | YBL051C (PIN4) YBL050W (SEC17)  | 2 | 124718 |
| <b>iYBL052C</b>   | YBL052C (SAS3)                  | 2 | 121833 |
| <b>iYBL054W</b>   | YBL053W                         | 2 | 119125 |
| <b>iYBL055C</b>   | YBL055C YBL054W                 | 2 | 116788 |
| <b>iYBL056W</b>   |                                 | 2 | 115127 |
| <b>iYBL057C</b>   | YBL057C YBL056W (PTC3)          | 2 | 113403 |
| <b>iYBL058W</b>   |                                 | 2 | 112666 |
| <b>iYBL059W</b>   | YBL058W (SHP1)                  | 2 | 111202 |
| <b>iYBL060W</b>   | YBL059W                         | 2 | 109953 |
| <b>iYBL061C</b>   | YBL061C (SKT5) YBL060W          | 2 | 107364 |
| <b>iYBL063W</b>   | YBL062W                         | 2 | 105179 |



|                     |                                  |   |        |
|---------------------|----------------------------------|---|--------|
| <b>iYBL064C</b>     | YBL064C YBL063W (KIP1)           | 2 | 101114 |
| <b>iYBL065W</b>     |                                  | 2 | 100265 |
| <b>iYBL067C</b>     | YBL067C (UBP13)                  | 2 | 95877  |
| <b>iYBL068W</b>     |                                  | 2 | 93389  |
| <b>iYBL069W</b>     | YBL068W (PRS4)                   | 2 | 91718  |
| <b>iYBL071C</b>     | YBL071C                          | 2 | 90522  |
| <b>iYBL072C</b>     | YBL072C (RPS8A)                  | 2 | 89116  |
| <b>iYBL073W</b>     |                                  | 2 | 87948  |
| <b>iYBL075C</b>     | YBL075C (SSA3)                   | 2 | 86439  |
| <b>iYBL076C</b>     | YBL076C (ILS1)                   | 2 | 84252  |
| <b>iYBL078C</b>     | YBL078C (AUT7) YBL077W           | 2 | 80721  |
| <b>iYBL079W</b>     |                                  | 2 | 79757  |
| <b>iYBL080C</b>     | YBL080C (PET112) YBL079W (NUP17) | 2 | 74685  |
| <b>iYBL081W</b>     |                                  | 2 | 72962  |
| <b>iYBL082C</b>     | YBL082C (RHK1) YBL081W           | 2 | 71117  |
| <b>iYBL084C</b>     | YBL084C (CDC27)                  | 2 | 69435  |
| <b>iYBL085W</b>     |                                  | 2 | 66808  |
| <b>iYBL086C</b>     | YBL086C YBL085W (BOI1)           | 2 | 62592  |
| <b>iYBL087C</b>     | YBL087C (RPL23A)                 | 2 | 60728  |
| <b>iYBL088C</b>     | YBL088C (TEL1)                   | 2 | 59372  |
| <b>iYBL091C</b>     | YBL091C (MAP2) YBL090W (MRP21)   | 2 | 48618  |
| <b>iYBL091C-A</b>   | YBL091C-A                        | 2 | 46854  |
| <b>iYBL092W</b>     |                                  | 2 | 46360  |
| <b>iYBL093C</b>     | YBL093C (ROX3) YBL092W (RPL32)   | 2 | 44908  |
| <b>iYBL094C</b>     | YBL094C                          | 2 | 44087  |
| <b>iYBL097W</b>     |                                  | 2 | 43085  |
| <b>iYBL098W</b>     | YBL097W (BRN1)                   | 2 | 40515  |
| <b>iYBL099W</b>     | YBL098W                          | 2 | 38678  |
| <b>iYBL101C</b>     |                                  | 2 | 28174  |
| <b>iYBL102W</b>     |                                  | 2 | 24740  |
| <b>iYBL103C</b>     | YBL103C (RTG3) YBL102W (SFT2)    | 2 | 23530  |
| <b>iYBL104C</b>     | YBL104C                          | 2 | 21094  |
| <b>iYBL105C</b>     | YBL105C (PKC1)                   | 2 | 17696  |
| <b>iYBL106C</b>     | YBL106C (SRO77)                  | 2 | 13879  |
| <b>iYBL108W</b>     | YBL107W-A                        | 2 | 8482   |
| <b>iYBL109W-0</b>   | YBL108W                          | 2 | 6125   |
| <b>iYBL109W-1</b>   | YBL108W                          | 2 | 7151   |
| <b>iYBL111C</b>     | YBL111C YBL109W                  | 2 | 5009   |
| <b>iYBLCdelta7</b>  |                                  | 2 | 197279 |
| <b>iYBLCsigma1</b>  |                                  | 2 | 198013 |
| <b>iYBLWdelta10</b> | YBL004W                          | 2 | 226911 |
| <b>iYBLWdelta3</b>  |                                  | 2 | 9518   |
| <b>iYBLWtau1</b>    |                                  | 2 | 36209  |
| <b>iYBR001C</b>     | YBR001C (NTH2)                   | 2 | 241241 |
| <b>iYBR002C</b>     | YBR002C (RER2) YBR003W (COQ1)    | 2 | 242526 |
| <b>iYBR003W</b>     |                                  | 2 | 244188 |
| <b>iYBR004C</b>     | YBR004C YBR005W                  | 2 | 245625 |
| <b>iYBR005W</b>     | YBR006W (UGA2)                   | 2 | 246505 |
| <b>iYBR006W</b>     | YBR007C                          | 2 | 248275 |
| <b>iYBR007C-0</b>   | YBR007C                          | 2 | 250973 |
| <b>iYBR007C-1</b>   | YBR007C                          | 2 | 251746 |

|                   |                                |   |        |
|-------------------|--------------------------------|---|--------|
| <b>iYBR008C</b>   | YBR008C (FLR1)                 | 2 | 254166 |
| <b>iYBR009C</b>   | YBR009C (HHF1) YBR010W (HHT1)  | 2 | 255638 |
| <b>iYBR010W</b>   |                                | 2 | 256695 |
| <b>iYBR011C</b>   | YBR011C (IPP1)                 | 2 | 257929 |
| <b>iYBR013C</b>   | YBR013C                        | 2 | 265835 |
| <b>iYBR014C</b>   | YBR014C                        | 2 | 267292 |
| <b>iYBR015C</b>   | YBR015C (MNN2) YBR016W         | 2 | 269459 |
| <b>iYBR016W</b>   |                                | 2 | 270589 |
| <b>iYBR017C</b>   | YBR017C (KAP104)               | 2 | 273659 |
| <b>iYBR018C</b>   | YBR018C (GAL7)                 | 2 | 275483 |
| <b>iYBR019C</b>   | YBR019C (GAL10) YBR020W (GAL1) | 2 | 278308 |
| <b>iYBR020W</b>   | YBR021W (FUR4)                 | 2 | 280563 |
| <b>iYBR021W</b>   | YBR022W                        | 2 | 283300 |
| <b>iYBR022W</b>   |                                | 2 | 284227 |
| <b>iYBR024W</b>   |                                | 2 | 290306 |
| <b>iYBR025C</b>   | YBR025C                        | 2 | 291821 |
| <b>iYBR027C</b>   | YBR027C                        | 2 | 294312 |
| <b>iYBR028C</b>   | YBR028C                        | 2 | 295958 |
| <b>iYBR029C</b>   | YBR029C (CDS1) YBR030W         | 2 | 297698 |
| <b>iYBR031W</b>   | YBR032W                        | 2 | 301210 |
| <b>iYBR032W</b>   | YBR033W (EDS1)                 | 2 | 301777 |
| <b>iYBR033W</b>   |                                | 2 | 304659 |
| <b>iYBR034C</b>   | YBR034C (HMT1)                 | 2 | 305932 |
| <b>iYBR035C</b>   | YBR035C (PDX3) tlc1            | 2 | 306911 |
| <b>iYBR036C</b>   | YBR036C (CSG2)                 | 2 | 310269 |
| <b>iYBR037C</b>   | YBR037C (SCO1) YBR038W (CHS2)  | 2 | 311407 |
| <b>iYBR038W</b>   | YBR039W (ATP3)                 | 2 | 314744 |
| <b>iYBR039W</b>   | YBR040W (FIG1)                 | 2 | 316466 |
| <b>iYBR040W</b>   | YBR041W (FAT1)                 | 2 | 317820 |
| <b>iYBR042C</b>   | YBR042C                        | 2 | 321567 |
| <b>iYBR043C</b>   | YBR043C                        | 2 | 323903 |
| <b>iYBR044C</b>   | YBR044C (TCM62) tv(uac)b       | 2 | 326016 |
| <b>iYBR045C</b>   | YBR045C (GIP1)                 | 2 | 330048 |
| <b>iYBR046C</b>   | YBR046C (ZTA1) YBR047W         | 2 | 331467 |
| <b>iYBR047W</b>   | YBR048W (RPS11B)               | 2 | 332316 |
| <b>iYBR048W</b>   |                                | 2 | 333768 |
| <b>iYBR049C</b>   | YBR049C (REB1)                 | 2 | 336774 |
| <b>iYBR051W</b>   |                                | 2 | 338294 |
| <b>iYBR052C</b>   | YBR052C                        | 2 | 339308 |
| <b>iYBR053C-0</b> | YBR053C YBR054W (YRO2)         | 2 | 340707 |
| <b>iYBR053C-1</b> | YBR053C YBR054W (YRO2)         | 2 | 341882 |
| <b>iYBR054W</b>   |                                | 2 | 344091 |
| <b>iYBR056W</b>   |                                | 2 | 349340 |
| <b>iYBR057C</b>   | YBR057C (MUM2)                 | 2 | 353249 |
| <b>iYBR058C</b>   | YBR058C (UBP14)                | 2 | 356039 |
| <b>iYBR059C</b>   | YBR059C (AKL1)                 | 2 | 360143 |
| <b>iYBR060C-0</b> | YBR060C (ORC2)                 | 2 | 362470 |
| <b>iYBR060C-1</b> | YBR060C (ORC2)                 | 2 | 363606 |
| <b>iYBR062C</b>   | YBR062C                        | 2 | 366279 |
| <b>iYBR064W</b>   |                                | 2 | 368148 |
| <b>iYBR065C</b>   | YBR065C (ECM2)                 | 2 | 369635 |

|            |                                  |   |        |
|------------|----------------------------------|---|--------|
| iYBR066C   | YBR066C (NRG2)                   | 2 | 370656 |
| iYBR067C   | YBR067C (TIP1)                   | 2 | 372691 |
| iYBR068C   | YBR068C (BAP2)                   | 2 | 375646 |
| iYBR069C   | YBR069C (TAT1)                   | 2 | 378389 |
| iYBR070C   | YBR070C YBR071W                  | 2 | 379889 |
| iYBR071W   | YBR072W (HSP26)                  | 2 | 381001 |
| iYBR072W   | YBR073W (RDH54)                  | 2 | 382629 |
| iYBR073W   | YBR074W                          | 2 | 385941 |
| iYBR074W   | YBR075W                          | 2 | 387480 |
| iYBR075W   | YBR076W (ECM8)                   | 2 | 389171 |
| iYBR076W   |                                  | 2 | 391348 |
| iYBR077C   | YBR077C YBR078W (ECM33)          | 2 | 392247 |
| iYBR078W   |                                  | 2 | 394814 |
| iYBR079C   | YBR079C (RPG1)                   | 2 | 398231 |
| iYBR080C   | YBR080C (SEC18)                  | 2 | 400844 |
| iYBR081C   | YBR081C (SPT7) td(guc)b/tr(ucu)b | 2 | 405205 |
| iYBR082C-0 | YBR082C (UBC4) YBR083W (TEC1)    | 2 | 407123 |
| iYBR082C-1 | YBR082C (UBC4) YBR083W (TEC1)    | 2 | 408123 |
| iYBR083W   | YBR084W (MIS1)                   | 2 | 410583 |
| iYBR084C-A | YBR084C-A (RPL19A) YBR085W (AAC) | 2 | 415215 |
| iYBR084W   |                                  | 2 | 413935 |
| iYBR085W-0 |                                  | 2 | 416860 |
| iYBR085W-1 |                                  | 2 | 417958 |
| iYBR085W-2 |                                  | 2 | 419056 |
| iYBR086C   | YBR086C (IST2) YBR087W (RFC5)    | 2 | 422995 |
| iYBR087W   |                                  | 2 | 424783 |
| iYBR089W   |                                  | 2 | 425736 |
| iYBR090C   | YBR090C                          | 2 | 427012 |
| iYBR091C   | YBR091C (MRS5)                   | 2 | 427438 |
| iYBR092C   | YBR092C (PHO3)                   | 2 | 429055 |
| iYBR094W   |                                  | 2 | 434251 |
| iYBR095C   | YBR095C YBR096W                  | 2 | 435721 |
| iYBR096W   | YBR097W (VPS15)                  | 2 | 436667 |
| iYBR097W   | YBR098W (MMS4)                   | 2 | 441269 |
| iYBR100W   |                                  | 2 | 443545 |
| iYBR101C   | YBR101C                          | 2 | 444648 |
| iYBR102C   | YBR102C (EXO84) YBR103W (SIF2)   | 2 | 447278 |
| iYBR103W   | YBR104W (YMC2)                   | 2 | 449271 |
| iYBR104W   |                                  | 2 | 450611 |
| iYBR105C   | YBR105C (VID24) YBR106W (PHO88)  | 2 | 451924 |
| iYBR108W   |                                  | 2 | 457323 |
| iYBR109C   | YBR109C (CMD1) YBR110W (ALG1)    | 2 | 458316 |
| iYBR110W   |                                  | 2 | 460175 |
| iYBR113W   | YBR114W (RAD16)                  | 2 | 466002 |
| iYBR114W   |                                  | 2 | 469574 |
| iYBR115C   | YBR115C (LYS2)                   | 2 | 473880 |
| iYBR117C   | YBR117C (TKL2) YBR118W (TEF2)    | 2 | 476391 |
| iYBR119W   |                                  | 2 | 480277 |
| iYBR120C   | YBR120C (CBP6)                   | 2 | 480877 |
| iYBR121C   | YBR121C (GRS1)                   | 2 | 483321 |
| iYBR122C   | YBR122C (MRPL36)                 | 2 | 484514 |

|                   |                                 |   |        |
|-------------------|---------------------------------|---|--------|
| <b>iYBR124W</b>   |                                 | 2 | 486820 |
| <b>iYBR126C</b>   | YBR126C (TPS1)                  | 2 | 490346 |
| <b>iYBR127C</b>   | YBR127C (VMA2)                  | 2 | 492776 |
| <b>iYBR128C</b>   | YBR128C (APG14)                 | 2 | 494069 |
| <b>iYBR129C</b>   | YBR129C (OPY1)                  | 2 | 495293 |
| <b>iYBR130C</b>   | YBR130C (SHE3) YBR131W (CCZ1)   | 2 | 496823 |
| <b>iYBR132C</b>   | YBR132C (AGP2)                  | 2 | 501396 |
| <b>iYBR134W</b>   | YBR135W (CKS1)                  | 2 | 504598 |
| <b>iYBR136W</b>   | YBR137W                         | 2 | 512728 |
| <b>iYBR137W</b>   |                                 | 2 | 513537 |
| <b>iYBR138C</b>   | YBR138C (HDR1) YBR139W          | 2 | 515290 |
| <b>iYBR139W</b>   |                                 | 2 | 517144 |
| <b>iYBR140C</b>   | YBR140C (IRA1)                  | 2 | 526582 |
| <b>iYBR141C</b>   | YBR141C YBR142W (MAK5)          | 2 | 527992 |
| <b>iYBR142W</b>   |                                 | 2 | 530592 |
| <b>iYBR143C</b>   | YBR143C (SUP45)                 | 2 | 532136 |
| <b>iYBR144C</b>   | YBR144C YBR145W (ADH5)          | 2 | 533503 |
| <b>iYBR145W</b>   | YBR146W (MRPS9)                 | 2 | 534771 |
| <b>iYBR146W</b>   | YBR147W                         | 2 | 536050 |
| <b>iYBR147W</b>   | YBR148W (YSW1)                  | 2 | 537419 |
| <b>iYBR148W</b>   | YBR149W (ARA1)                  | 2 | 539659 |
| <b>iYBR149W</b>   |                                 | 2 | 540975 |
| <b>iYBR150C</b>   | YBR150C (TBS1) YBR151W (APD1)   | 2 | 544447 |
| <b>iYBR151W</b>   | YBR152W (SPP381)                | 2 | 545932 |
| <b>iYBR152W</b>   | YBR153W (RIB7)                  | 2 | 547205 |
| <b>iYBR153W</b>   |                                 | 2 | 548148 |
| <b>iYBR154C</b>   | YBR154C (RPB5) YBR155W (CNS1)   | 2 | 548963 |
| <b>iYBR155W</b>   |                                 | 2 | 550882 |
| <b>iYBR156C</b>   | YBR156C (SLI15)                 | 2 | 553154 |
| <b>iYBR157C-0</b> | YBR157C (ICS2) YBR158W (CST13)  | 2 | 554263 |
| <b>iYBR157C-1</b> | YBR157C (ICS2) YBR158W (CST13)  | 2 | 555382 |
| <b>iYBR158W</b>   | YBR159W                         | 2 | 558151 |
| <b>iYBR159W</b>   | YBR160W (CDC28)                 | 2 | 559681 |
| <b>iYBR160W</b>   | YBR161W                         | 2 | 560927 |
| <b>iYBR161W</b>   |                                 | 2 | 562718 |
| <b>iYBR162C</b>   | YBR162C (TOS1) YBR162W-A (YSY6) | 2 | 564524 |
| <b>iYBR162W-A</b> | YBR163W (DEM1)                  | 2 | 565382 |
| <b>iYBR163W</b>   |                                 | 2 | 567434 |
| <b>iYBR164C</b>   | YBR164C (ARL1) YBR165W (UBS1)   | 2 | 568380 |
| <b>iYBR165W</b>   |                                 | 2 | 569639 |
| <b>iYBR166C</b>   | YBR166C (TYR1)                  | 2 | 571154 |
| <b>iYBR167C</b>   | YBR167C (POP7) YBR168W          | 2 | 571844 |
| <b>iYBR168W</b>   |                                 | 2 | 573566 |
| <b>iYBR169C</b>   | YBR169C (SSE2)                  | 2 | 575950 |
| <b>iYBR170C</b>   | YBR170C (NPL4) YBR171W (SEC66)  | 2 | 578040 |
| <b>iYBR171W</b>   |                                 | 2 | 578938 |
| <b>iYBR172C</b>   | YBR172C (SMY2)                  | 2 | 581476 |
| <b>iYBR173C</b>   | YBR173C (UMP1)                  | 2 | 582126 |
| <b>iYBR175W</b>   | YBR176W (ECM31)                 | 2 | 583309 |
| <b>iYBR176W</b>   |                                 | 2 | 584612 |
| <b>iYBR178W</b>   |                                 | 2 | 586399 |

|          |                                 |   |        |
|----------|---------------------------------|---|--------|
| iYBR179C | YBR179C (FZO1) YBR180W (DTR1)   | 2 | 589068 |
| iYBR180W |                                 | 2 | 591413 |
| iYBR181C | YBR181C (RPS6B)                 | 2 | 592728 |
| iYBR182C | YBR182C (SMP1) YBR183W (YPC1)   | 2 | 594818 |
| iYBR183W | YBR184W                         | 2 | 597019 |
| iYBR184W |                                 | 2 | 598888 |
| iYBR185C | YBR185C (MBA1) YBR186W (PCH2)   | 2 | 599913 |
| iYBR186W | YBR187W                         | 2 | 602117 |
| iYBR187W |                                 | 2 | 603430 |
| iYBR188C | YBR188C (NTC20) YBR189W (RPS9B) | 2 | 604061 |
| iYBR189W | YBR190W                         | 2 | 605462 |
| iYBR191W | YBR192W (RIM2)                  | 2 | 607094 |
| iYBR192W |                                 | 2 | 608739 |
| iYBR193C | YBR193C (MED8) YBR194W          | 2 | 609707 |
| iYBR194W |                                 | 2 | 610363 |
| iYBR195C | YBR195C (MSI1)                  | 2 | 611836 |
| iYBR196C | YBR196C (PGI1)                  | 2 | 613854 |
| iYBR197C | YBR197C                         | 2 | 615810 |
| iYBR198C | YBR198C (TAF90) YBR199W (KTR4)  | 2 | 618477 |
| iYBR199W | YBR200W (BEM1)                  | 2 | 620257 |
| iYBR200W | YBR201W (DER1)                  | 2 | 622481 |
| iYBR202W | YBR203W                         | 2 | 628264 |
| iYBR203W |                                 | 2 | 631897 |
| iYBR204C | YBR204C YBR205W (KTR3)          | 2 | 633336 |
| iYBR206W | YBR207W (FTH1)                  | 2 | 634879 |
| iYBR207W |                                 | 2 | 636498 |
| iYBR208C | YBR208C (DUR1,2) YBR209W        | 2 | 642165 |
| iYBR209W | YBR210W tc(gca)b                | 2 | 642855 |
| iYBR210W |                                 | 2 | 645933 |
| iYBR211C | YBR211C (AME1) YBR212W (NGR1)   | 2 | 647087 |
| iYBR212W | YBR213W (MET8)                  | 2 | 649859 |
| iYBR213W | YBR214W (SDS24)                 | 2 | 651147 |
| iYBR214W | YBR215W (HPC2)                  | 2 | 652953 |
| iYBR215W |                                 | 2 | 655272 |
| iYBR216C | YBR216C YBR217W (APG12)         | 2 | 657555 |
| iYBR217W |                                 | 2 | 658347 |
| iYBR218C | YBR218C (PYC2)                  | 2 | 662204 |
| iYBR220C | YBR220C                         | 2 | 664632 |
| iYBR221C | YBR221C (PDB1)                  | 2 | 666208 |
| iYBR222C | YBR222C (FAT2)                  | 2 | 668306 |
| iYBR227C | YBR227C (MCX1) YBR228W (SLX1)   | 2 | 675089 |
| iYBR228W |                                 | 2 | 676182 |
| iYBR229C | YBR229C (ROT2)                  | 2 | 679176 |
| iYBR230C | YBR230C Isr1/snr20              | 2 | 680005 |
| iYBR231C | YBR231C (AOR1)                  | 2 | 683045 |
| iYBR233W |                                 | 2 | 684624 |
| iYBR234C | YBR234C (ARC40) YBR235W         | 2 | 686547 |
| iYBR235W |                                 | 2 | 690218 |
| iYBR236C | YBR236C (ABD1) YBR237W (PRP5)   | 2 | 691648 |
| iYBR237W |                                 | 2 | 694473 |
| iYBR238C | YBR238C                         | 2 | 697257 |

|            |                                 |   |        |
|------------|---------------------------------|---|--------|
| iYBR239C   | YBR239C                         | 2 | 699898 |
| iYBR240C   | YBR240C (THI2)                  | 2 | 701797 |
| iYBR241C   | YBR241C YBR242W                 | 2 | 704010 |
| iYBR242W   |                                 | 2 | 705341 |
| iYBR243C   | YBR243C (ALG7) YBR244W (GPX2)   | 2 | 706748 |
| iYBR244W   |                                 | 2 | 707971 |
| iYBR246W   |                                 | 2 | 712709 |
| iYBR247C   | YBR247C (ENP1)                  | 2 | 714410 |
| iYBR248C   | YBR248C (HIS7)                  | 2 | 716420 |
| iYBR249C   | YBR249C (ARO4) YBR250W          | 2 | 717949 |
| iYBR250W   | YBR251W (MRPS5)                 | 2 | 720559 |
| iYBR251W   | YBR252W (DUT1)                  | 2 | 722268 |
| iYBR252W   | YBR253W (SRB6)                  | 2 | 723009 |
| iYBR253W   |                                 | 2 | 723590 |
| iYBR254C   | YBR254C (TRS20) YBR255W         | 2 | 724218 |
| iYBR255W   |                                 | 2 | 726495 |
| iYBR256C   | YBR256C (RIB5) YBR257W (POP4)   | 2 | 728057 |
| iYBR258C   | YBR258C (SHG1) YBR259W          | 2 | 730117 |
| iYBR259W   |                                 | 2 | 732408 |
| iYBR260C   | YBR260C (RGD1)                  | 2 | 734594 |
| iYBR261C   | YBR261C                         | 2 | 735485 |
| iYBR264C   | YBR264C (YPT10) YBR265W (TSC10) | 2 | 738381 |
| iYBR265W   |                                 | 2 | 739499 |
| iYBR267W   | YBR268W (MRPL37)                | 2 | 740979 |
| iYBR268W   |                                 | 2 | 741573 |
| iYBR269C   | YBR269C                         | 2 | 742531 |
| iYBR270C   | YBR270C YBR271W                 | 2 | 744353 |
| iYBR271W   |                                 | 2 | 746066 |
| iYBR272C   | YBR272C (HSM3)                  | 2 | 747758 |
| iYBR273C   | YBR273C YBR274W (CHK1)          | 2 | 749326 |
| iYBR274W   |                                 | 2 | 751132 |
| iYBR275C   | YBR275C (RIF1)                  | 2 | 757061 |
| iYBR276C   | YBR276C (PPS1)                  | 2 | 759999 |
| iYBR278W   | YBR279W (PAF1)                  | 2 | 760855 |
| iYBR279W   |                                 | 2 | 762550 |
| iYBR280C   | YBR280C                         | 2 | 764668 |
| iYBR281C   | YBR281C YBR282W (MRPL27)        | 2 | 767562 |
| iYBR282W   |                                 | 2 | 768636 |
| iYBR283C   | YBR283C (SSH1) YBR284W          | 2 | 770371 |
| iYBR284W   | YBR285W                         | 2 | 773588 |
| iYBR285W   | YBR286W (APE3)                  | 2 | 774312 |
| iYBR286W   | YBR287W                         | 2 | 776269 |
| iYBR287W   |                                 | 2 | 777810 |
| iYBR288C   | YBR288C (APM3) YBR289W (SNF5)   | 2 | 779419 |
| iYBR289W   | YBR290W (BSD2)                  | 2 | 782340 |
| iYBR290W   |                                 | 2 | 783512 |
| iYBR291C   | YBR291C (CTP1)                  | 2 | 784528 |
| iYBR292C-0 | YBR292C YBR293W                 | 2 | 785029 |
| iYBR292C-1 | YBR292C YBR293W                 | 2 | 785995 |
| iYBR293W   | YBR294W (SUL1)                  | 2 | 788385 |
| iYBR294W   | YBR295W (PCA1)                  | 2 | 791769 |

|                     |                                 |   |        |
|---------------------|---------------------------------|---|--------|
| <b>iYBR295W</b>     |                                 | 2 | 796453 |
| <b>iYBR296C-0</b>   | YBR296C (PHO89) YBR297W (MAL33) | 2 | 798476 |
| <b>iYBR296C-1</b>   | YBR296C (PHO89) YBR297W (MAL33) | 2 | 799476 |
| <b>iYBR297W</b>     |                                 | 2 | 801883 |
| <b>iYBR298C</b>     | YBR298C (MAL31) YBR299W (MAL32) | 2 | 804429 |
| <b>iYBR299W</b>     |                                 | 2 | 807059 |
| <b>iYBR301W</b>     |                                 | 2 | 809373 |
| <b>iYBRCdelta11</b> | YBR011C (IPP1)                  | 2 | 258930 |
| <b>iYBRCdelta14</b> | YBR013C                         | 2 | 266212 |
| <b>iYBRCdelta18</b> | YBR210W                         | 2 | 643957 |
| <b>iYBRCdelta19</b> | YBR210W                         | 2 | 644558 |
| <b>iYBRWdelta16</b> | YBR044C (TCM62)                 | 2 | 327661 |
| <b>iYBRWdelta17</b> |                                 | 2 | 350707 |
| <b>iYCL001W</b>     | YCL001W-A                       | 3 | 112086 |
| <b>iYCL001W-A</b>   | YCR001W                         | 3 | 113145 |
| <b>iYCL002C</b>     | YCL002C YCL001W (RER1)          | 3 | 110906 |
| <b>iYCL004W</b>     |                                 | 3 | 109963 |
| <b>iYCL005W</b>     | YCL004W (PGS1)                  | 3 | 108395 |
| <b>iYCL007C</b>     | YCL007C (CWH36)                 | 3 | 106977 |
| <b>iYCL008C</b>     | YCL008C (STP22)                 | 3 | 106464 |
| <b>iYCL009C</b>     | YCL009C (ILV6)                  | 3 | 105159 |
| <b>iYCL010C</b>     | YCL010C (SGF29)                 | 3 | 103961 |
| <b>iYCL011C</b>     | YCL011C (GBP2)                  | 3 | 102969 |
| <b>iYCL012W</b>     |                                 | 3 | 100808 |
| <b>iYCL014W</b>     | YCL005W                         | 3 | 100001 |
| <b>iYCL016C</b>     | YCL016C (DCC1) YCL014W (BUD3)   | 3 | 95166  |
| <b>iYCL017C</b>     | YCL017C (NFS1)                  | 3 | 93885  |
| <b>iYCL018W</b>     |                                 | 3 | 92033  |
| <b>iYCL022C</b>     | YCL022C YCL020W                 | 3 | 82047  |
| <b>iYCL025C</b>     | YCL025C (AGP1)                  | 3 | 77886  |
| <b>iYCL026C-A</b>   | YCL026C-A (FRM2)                | 3 | 75253  |
| <b>iYCL028W</b>     | YCL027W (FUS1)                  | 3 | 71339  |
| <b>iYCL029C</b>     | YCL029C (BIK1) YCL028W (RNQ1)   | 3 | 69893  |
| <b>iYCL030C</b>     | YCL030C (HIS4)                  | 3 | 68305  |
| <b>iYCL031C</b>     | YCL031C (RRP7)                  | 3 | 65540  |
| <b>iYCL032W</b>     |                                 | 3 | 64453  |
| <b>iYCL033C</b>     | YCL033C YCL032W (STE50)         | 3 | 63254  |
| <b>iYCL035C</b>     | YCL035C (GRX1) YCL034W (LSB5)   | 3 | 61146  |
| <b>iYCL036W</b>     |                                 | 3 | 60699  |
| <b>iYCL037C</b>     | YCL037C (SRO9) YCL036W (GFD2)   | 3 | 58747  |
| <b>iYCL038C</b>     | YCL038C (AUT4)                  | 3 | 56501  |
| <b>iYCL040W</b>     | YCL039W                         | 3 | 52314  |
| <b>iYCL044C</b>     | YCL044C                         | 3 | 48341  |
| <b>iYCL046W</b>     |                                 | 3 | 46940  |
| <b>iYCL047C</b>     | YCL047C                         | 3 | 44414  |
| <b>iYCL048W</b>     |                                 | 3 | 43533  |
| <b>iYCL049C</b>     | YCL049C YCL048W                 | 3 | 40701  |
| <b>iYCL050C</b>     | YCL050C (APA1)                  | 3 | 38777  |
| <b>iYCL051W</b>     |                                 | 3 | 37604  |
| <b>iYCL052C</b>     | YCL052C (PBN1) YCL051W (LRE1)   | 3 | 35376  |
| <b>iYCL054W</b>     |                                 | 3 | 33957  |

|                      |                                 |   |        |
|----------------------|---------------------------------|---|--------|
| <b>iYCL055W-0</b>    | YCL054W (SPB1)                  | 3 | 28919  |
| <b>iYCL055W-1</b>    | YCL054W (SPB1)                  | 3 | 30175  |
| <b>iYCL056C</b>      | YCL056C YCL055W (KAR4)          | 3 | 27342  |
| <b>iYCL058C</b>      | YCL058C (FYV5) YCL057W (PRD1)   | 3 | 23964  |
| <b>iYCL059C</b>      | YCL059C (KRR1)                  | 3 | 23362  |
| <b>iYCL061C</b>      | YCL061C (MRC1)                  | 3 | 21360  |
| <b>iYCL063W</b>      |                                 | 3 | 18544  |
| <b>iYCL064C</b>      | YCL064C (CHA1) YCL063W          | 3 | 16869  |
| <b>iYCL065W-0</b>    |                                 | 3 | 14108  |
| <b>iYCL065W-1</b>    |                                 | 3 | 14947  |
| <b>iYCL067C</b>      | YCL067C (HMLALPHA2) YCL066W (HI | 3 | 13007  |
| <b>iYCL068C</b>      | YCL068C                         | 3 | 12065  |
| <b>iYCL069W</b>      |                                 | 3 | 11072  |
| <b>iYCL073C</b>      | YCL073C YCL069W                 | 3 | 8317   |
| <b>iYCL074W</b>      |                                 | 3 | 3742   |
| <b>iYCL075W</b>      | YCL074W                         | 3 | 2558   |
| <b>iYCLCdelta1</b>   | YCL022C YCL020W                 | 3 | 82814  |
| <b>iYCLWdelta5</b>   | YCL018W (LEU2)                  | 3 | 90384  |
| <b>iYCLWomega2-0</b> |                                 | 3 | 4314   |
| <b>iYCLWomega2-1</b> |                                 | 3 | 5392   |
| <b>iYCR001W</b>      |                                 | 3 | 115600 |
| <b>iYCR002C</b>      | YCR002C (CDC10) YCR003W (MRPL3  | 3 | 117949 |
| <b>iYCR003W</b>      |                                 | 3 | 118772 |
| <b>iYCR004C</b>      | YCR004C (YCP4)                  | 3 | 119919 |
| <b>iYCR005C</b>      | YCR005C (CIT2)                  | 3 | 121929 |
| <b>iYCR006C</b>      | YCR006C tp(agg)c                | 3 | 122604 |
| <b>iYCR007C</b>      | YCR007C tn(guu)c YCR008W (SAT4) | 3 | 126331 |
| <b>iYCR008W</b>      |                                 | 3 | 129881 |
| <b>iYCR009C</b>      | YCR009C (RVS161)                | 3 | 131142 |
| <b>iYCR010C</b>      | YCR010C (ADY2)                  | 3 | 132724 |
| <b>iYCR011C</b>      | YCR011C (ADP1) YCR012W (PGK1)   | 3 | 136472 |
| <b>iYCR014C</b>      | YCR014C (POL4)                  | 3 | 140532 |
| <b>iYCR015C</b>      | YCR015C YCR016W                 | 3 | 141769 |
| <b>iYCR016W</b>      |                                 | 3 | 144211 |
| <b>iYCR017C</b>      | YCR017C (CWH43)                 | 3 | 147339 |
| <b>iYCR018C-A</b>    | YCR018C-A YCR019W (MAK32)       | 3 | 151568 |
| <b>iYCR019W</b>      |                                 | 3 | 153633 |
| <b>iYCR020C</b>      | YCR020C (PET18)                 | 3 | 154364 |
| <b>iYCR020C-A</b>    | YCR020C-A (MAK31) YCR020W-B (HT | 3 | 154801 |
| <b>iYCR020W-B</b>    |                                 | 3 | 155261 |
| <b>iYCR021C</b>      | YCR021C (HSP30)                 | 3 | 156815 |
| <b>iYCR022C</b>      | YCR022C                         | 3 | 157473 |
| <b>iYCR023C</b>      | YCR023C                         | 3 | 160081 |
| <b>iYCR024C</b>      | YCR024C                         | 3 | 161930 |
| <b>iYCR024C-A</b>    | YCR024C-A (PMP1)                | 3 | 162775 |
| <b>iYCR025C</b>      | YCR025C                         | 3 | 163564 |
| <b>iYCR026C</b>      | YCR026C                         | 3 | 166050 |
| <b>iYCR027C</b>      | YCR027C (RHB1)                  | 3 | 167713 |
| <b>iYCR028C</b>      | YCR028C (FEN2)                  | 3 | 171113 |
| <b>iYCR028C-A</b>    | YCR028C-A (RIM1)                | 3 | 172166 |
| <b>iYCR030C</b>      | YCR030C                         | 3 | 175163 |



|            |                                 |   |        |
|------------|---------------------------------|---|--------|
| iYCR031C   | YCR031C (RPS14A) YCR032W (BPH1  | 3 | 176944 |
| iYCR032W   | YCR033W (SNT1)                  | 3 | 184752 |
| iYCR033W   | YCR034W (FEN1)                  | 3 | 188898 |
| iYCR034W   |                                 | 3 | 190364 |
| iYCR035C   | YCR035C (RRP43) YCR036W (RBK1)  | 3 | 191747 |
| iYCR036W   |                                 | 3 | 193027 |
| iYCR037C   | YCR037C (PHO87)                 | 3 | 195914 |
| iYCR038C   | YCR038C (BUD5)                  | 3 | 197966 |
| iYCR039C   | YCR039C (MATALPHA2) YCR040W (M  | 3 | 198908 |
| iYCR042C   | YCR042C (TSM1)                  | 3 | 204127 |
| iYCR043C   | YCR043C                         | 3 | 205375 |
| iYCR044C   | YCR044C (PER1)                  | 3 | 206681 |
| iYCR045C   | YCR045C                         | 3 | 208341 |
| iYCR046C   | YCR046C (IMG1)                  | 3 | 209154 |
| iYCR047C   | YCR047C (BUD23)                 | 3 | 210276 |
| iYCR050C   | YCR050C YCR051W                 | 3 | 212503 |
| iYCR051W   | YCR052W (RSC6)                  | 3 | 213469 |
| iYCR052W   | YCR053W (THR4)                  | 3 | 215175 |
| iYCR053W   |                                 | 3 | 216971 |
| iYCR054C   | YCR054C (CTR86)                 | 3 | 218797 |
| iYCR057C   | YCR057C (PWP2)                  | 3 | 221958 |
| iYCR059C   | YCR059C (YIH1) YCR060W          | 3 | 222959 |
| iYCR060W   | YCR061W                         | 3 | 223463 |
| iYCR062W   |                                 | 3 | 226182 |
| iYCR063W   | YCR065W (HCM1)                  | 3 | 227515 |
| iYCR065W   | YCR066W (RAD18)                 | 3 | 229631 |
| iYCR066W   |                                 | 3 | 231689 |
| iYCR067C   | YCR067C (SED4) YCR068W (CVT17)  | 3 | 235048 |
| iYCR068W   | YCR069W (CPR4)                  | 3 | 237229 |
| iYCR069W   |                                 | 3 | 238736 |
| iYCR071C   | YCR071C (IMG2)                  | 3 | 239267 |
| iYCR072C   | YCR072C                         | 3 | 241075 |
| iYCR073C   | YCR073C (SSK22) YCR073W-A (SOL2 | 3 | 245308 |
| iYCR073W-A |                                 | 3 | 246635 |
| iYCR075C   | YCR075C (ERS1)                  | 3 | 247538 |
| iYCR076C   | YCR076C                         | 3 | 248768 |
| iYCR077C   | YCR077C (PAT1) YCR079W          | 3 | 251354 |
| iYCR079W   | YCR081W (SRB8)                  | 3 | 252878 |
| iYCR081W   | YCR082W                         | 3 | 257377 |
| iYCR082W   | YCR083W (TRX3)                  | 3 | 257992 |
| iYCR083W   |                                 | 3 | 258684 |
| iYCR084C   | YCR084C (TUP1) YCR085W          | 3 | 261175 |
| iYCR085W   | YCR086W (CSM1)                  | 3 | 261992 |
| iYCR087C-A | YCR087W YCR088W (ABP1)          | 3 | 263190 |
| iYCR088W   | YCR089W (FIG2)                  | 3 | 265569 |
| iYCR090C-1 | YCR090C YCR091W (KIN82)         | 3 | 272356 |
| iYCR091W   |                                 | 3 | 275307 |
| iYCR092C   | YCR092C (MSH3) YCR093W (CDC39)  | 3 | 278629 |
| iYCR093W   | YCR094W (CDC50)                 | 3 | 285165 |
| iYCR094W   |                                 | 3 | 286659 |
| iYCR095C-0 | YCR095C                         | 3 | 287980 |

|                      |                                |   |        |
|----------------------|--------------------------------|---|--------|
| <b>iYCR095C-1</b>    | YCR095C                        | 3 | 289037 |
| <b>iYCR096C</b>      | YCR096C (HMRA2) YCR097W (HMRA) | 3 | 292260 |
| <b>iYCR097W</b>      |                                | 3 | 293043 |
| <b>iYCR098C-0</b>    | YCR098C (GIT1)                 | 3 | 297327 |
| <b>iYCR100C</b>      | YCR100C                        | 3 | 300943 |
| <b>iYCR101C</b>      | YCR101C                        | 3 | 301752 |
| <b>iYCR102C</b>      | YCR102C YCR102W-A              | 3 | 304189 |
| <b>iYCR102W-A</b>    |                                | 3 | 305652 |
| <b>iYCR103C</b>      | YCR104W (PAU3)                 | 3 | 306310 |
| <b>iYCR104W</b>      | YCR105W                        | 3 | 306893 |
| <b>iYCR105W</b>      | YCR106W                        | 3 | 308874 |
| <b>iYCR106W</b>      | YCR107W (AAD3)                 | 3 | 312175 |
| <b>iYCRCdelta14</b>  |                                | 3 | 294912 |
| <b>iYCRCdelta6-0</b> | YCR006C                        | 3 | 124066 |
| <b>iYCRCdelta6-A</b> | YCR006C                        | 3 | 124066 |
| <b>iYCRCdelta6-B</b> | YCR006C                        | 3 | 124839 |
| <b>iYCRCdelta7</b>   | YCR015C YCR016W                | 3 | 142785 |
| <b>iYCRCtau1</b>     | YCR018C (SRD1)                 | 3 | 150761 |
| <b>iYCRWdelta11</b>  | YCR027C (RHB1)                 | 3 | 168579 |
| <b>iYCRWdelta12</b>  | YCR095C                        | 3 | 290434 |
| <b>iYCRWdelta13</b>  |                                | 3 | 294052 |
| <b>iYCRWdelta8</b>   | YCR018C (SRD1)                 | 3 | 149515 |
| <b>iYCRWdelta9</b>   | YCR018C (SRD1)                 | 3 | 150257 |
| <b>iYCRWomega3</b>   | YCR095C                        | 3 | 290889 |
| <b>iYDL001W</b>      |                                | 4 | 449317 |
| <b>iYDL002C</b>      | YDL002C (NHP10) YDL001W        | 4 | 447619 |
| <b>iYDL003W</b>      |                                | 4 | 446424 |
| <b>iYDL004W</b>      | YDL003W (MCD1)                 | 4 | 443552 |
| <b>iYDL005C</b>      | YDL005C (MED2) YDL004W (ATP16) | 4 | 442350 |
| <b>iYDL006W</b>      |                                | 4 | 440795 |
| <b>iYDL007W</b>      | YDL006W (PTC1)                 | 4 | 439401 |
| <b>iYDL008W</b>      | YDL007W (RPT2)                 | 4 | 434035 |
| <b>iYDL009C</b>      | YDL009C YDL008W (APC11)        | 4 | 433289 |
| <b>iYDL012C</b>      | YDL012C                        | 4 | 431558 |
| <b>iYDL013W</b>      |                                | 4 | 430967 |
| <b>iYDL014W</b>      | YDL013W (HEX3)                 | 4 | 428388 |
| <b>iYDL015C</b>      | YDL015C (TSC13) YDL014W (NOP1) | 4 | 426975 |
| <b>iYDL016C</b>      | YDL016C                        | 4 | 425913 |
| <b>iYDL018C</b>      | YDL018C (ERP3) YDL017W (CDC7)  | 4 | 423551 |
| <b>iYDL020C</b>      | YDL020C (RPN4)                 | 4 | 416749 |
| <b>iYDL021W</b>      |                                | 4 | 414929 |
| <b>iYDL022W</b>      | YDL021W (GPM2)                 | 4 | 413041 |
| <b>iYDL024C</b>      | YDL024C (DIA3) ta(agc)d        | 4 | 409898 |
| <b>iYDL025C</b>      | YDL025C                        | 4 | 407247 |
| <b>iYDL026W</b>      |                                | 4 | 405101 |
| <b>iYDL028C</b>      | YDL028C (MPS1)                 | 4 | 403332 |
| <b>iYDL029W</b>      |                                | 4 | 400679 |
| <b>iYDL030W</b>      | YDL029W (ARP2)                 | 4 | 399170 |
| <b>iYDL031W</b>      | YDL030W (PRP9)                 | 4 | 397245 |
| <b>iYDL032W</b>      | YDL031W (DBP10)                | 4 | 394042 |
| <b>iYDL034W</b>      |                                | 4 | 392168 |

|                   |                                  |   |        |
|-------------------|----------------------------------|---|--------|
| <b>iYDL036C</b>   | YDL036C                          | 4 | 388942 |
| <b>iYDL037C-0</b> | YDL037C                          | 4 | 385628 |
| <b>iYDL037C-1</b> | YDL037C                          | 4 | 386591 |
| <b>iYDL040C</b>   | YDL040C (NAT1)                   | 4 | 381479 |
| <b>iYDL041W</b>   |                                  | 4 | 378496 |
| <b>iYDL043C</b>   | YDL043C (PRP11)                  | 4 | 376521 |
| <b>iYDL044C</b>   | YDL044C (MTF2)                   | 4 | 375330 |
| <b>iYDL045C</b>   | YDL045C (FAD1)                   | 4 | 373649 |
| <b>iYDL045W-A</b> |                                  | 4 | 372576 |
| <b>iYDL046W</b>   | YDL045W-A (MRP10)                | 4 | 371802 |
| <b>iYDL048C-0</b> | YDL048C (STP4) YDL047W (SIT4)    | 4 | 368255 |
| <b>iYDL048C-1</b> | YDL048C (STP4) YDL047W (SIT4)    | 4 | 369034 |
| <b>iYDL050C</b>   | YDL050C                          | 4 | 364816 |
| <b>iYDL052C</b>   | YDL052C (SLC1) YDL051W (LHP1)    | 4 | 363582 |
| <b>iYDL053C</b>   | YDL053C                          | 4 | 362255 |
| <b>iYDL054C</b>   | YDL054C (MCH1)                   | 4 | 361284 |
| <b>iYDL055C-0</b> | YDL055C (PSA1)                   | 4 | 356758 |
| <b>iYDL055C-1</b> | YDL055C (PSA1)                   | 4 | 358167 |
| <b>iYDL056W</b>   |                                  | 4 | 355377 |
| <b>iYDL057W</b>   | YDL056W (MBP1)                   | 4 | 352419 |
| <b>iYDL058W</b>   | YDL057W                          | 4 | 351036 |
| <b>iYDL059C</b>   | YDL059C (RAD59) YDL058W (USO1)   | 4 | 344952 |
| <b>iYDL060W</b>   |                                  | 4 | 343984 |
| <b>iYDL061C</b>   | YDL061C (RPS29B) YDL060W (TSR1)  | 4 | 340797 |
| <b>iYDL062W</b>   |                                  | 4 | 340281 |
| <b>iYDL064W</b>   |                                  | 4 | 338069 |
| <b>iYDL065C</b>   | YDL065C (PEX19) YDL064W (UBC9)   | 4 | 337300 |
| <b>iYDL066W</b>   |                                  | 4 | 336120 |
| <b>iYDL067C</b>   | YDL067C (COX9) YDL066W (IDP1)    | 4 | 334395 |
| <b>iYDL068W</b>   |                                  | 4 | 333828 |
| <b>iYDL070W</b>   |                                  | 4 | 332940 |
| <b>iYDL072C</b>   | YDL072C                          | 4 | 330446 |
| <b>iYDL073W</b>   |                                  | 4 | 329566 |
| <b>iYDL074C</b>   | YDL074C (BRE1) YDL073W           | 4 | 326148 |
| <b>iYDL075W</b>   |                                  | 4 | 322987 |
| <b>iYDL076C</b>   | YDL076C YDL075W (RPL31A)         | 4 | 321551 |
| <b>iYDL077C</b>   | YDL077C (VAM6)                   | 4 | 320119 |
| <b>iYDL078C</b>   | YDL078C (MDH3)                   | 4 | 316387 |
| <b>iYDL079C</b>   | YDL079C (MRK1)                   | 4 | 314747 |
| <b>iYDL080C</b>   | YDL080C (THI3)                   | 4 | 312470 |
| <b>iYDL081C</b>   | YDL081C (RPP1A)                  | 4 | 310121 |
| <b>iYDL082W</b>   |                                  | 4 | 309387 |
| <b>iYDL083C</b>   | YDL083C (RPS16B) YDL082W (RPL13) | 4 | 307788 |
| <b>iYDL084W</b>   |                                  | 4 | 306576 |
| <b>iYDL085W</b>   | YDL084W (SUB2)                   | 4 | 304847 |
| <b>iYDL086W</b>   | YDL085W                          | 4 | 302233 |
| <b>iYDL087C</b>   | YDL087C (LUC7) YDL086W           | 4 | 300998 |
| <b>iYDL088C</b>   | YDL088C (ASM4)                   | 4 | 300002 |
| <b>iYDL089W</b>   |                                  | 4 | 298273 |
| <b>iYDL090C</b>   | YDL090C (RAM1) YDL089W           | 4 | 296328 |
| <b>iYDL091C</b>   | YDL091C                          | 4 | 294758 |

|                   |                               |   |        |
|-------------------|-------------------------------|---|--------|
| <b>iYDL092W</b>   |                               | 4 | 293220 |
| <b>iYDL093W</b>   | YDL092W (SRP14)               | 4 | 292139 |
| <b>iYDL095W</b>   |                               | 4 | 289511 |
| <b>iYDL097C</b>   | YDL097C (RPN6)                | 4 | 286694 |
| <b>iYDL098C</b>   | YDL098C (SNU23)               | 4 | 285164 |
| <b>iYDL099W</b>   |                               | 4 | 284443 |
| <b>iYDL100C</b>   | YDL100C YDL099W               | 4 | 283175 |
| <b>iYDL101C</b>   | YDL101C (DUN1)                | 4 | 281847 |
| <b>iYDL102W</b>   |                               | 4 | 280164 |
| <b>iYDL103C</b>   | YDL103C (QRI1) YDL102W (CDC2) | 4 | 276580 |
| <b>iYDL104C</b>   | YDL104C (QRI7)                | 4 | 274875 |
| <b>iYDL106C</b>   | YDL106C (PHO2) YDL105W (QRI2) | 4 | 271900 |
| <b>iYDL107W</b>   |                               | 4 | 269975 |
| <b>iYDL108W</b>   | YDL107W (MSS2)                | 4 | 268698 |
| <b>iYDL109C</b>   | YDL109C YDL108W (KIN28)       | 4 | 267200 |
| <b>iYDL110C</b>   | YDL110C                       | 4 | 264963 |
| <b>iYDL111C</b>   | YDL111C (RRP42)               | 4 | 264109 |
| <b>iYDL112W</b>   |                               | 4 | 263224 |
| <b>iYDL113C</b>   | YDL113C YDL112W (TRM3)        | 4 | 258554 |
| <b>iYDL114W</b>   |                               | 4 | 256529 |
| <b>iYDL115C</b>   | YDL115C (IWR1) YDL114W        | 4 | 254716 |
| <b>iYDL116W</b>   |                               | 4 | 253745 |
| <b>iYDL117W</b>   | YDL116W (NUP84)               | 4 | 251237 |
| <b>iYDL118W</b>   | YDL117W (CYK3)                | 4 | 247681 |
| <b>iYDL120W</b>   |                               | 4 | 246446 |
| <b>iYDL121C</b>   | YDL121C YDL120W (YFH1)        | 4 | 245581 |
| <b>iYDL122W</b>   |                               | 4 | 244980 |
| <b>iYDL123W</b>   | YDL122W (UBP1)                | 4 | 241839 |
| <b>iYDL124W</b>   | YDL123W (SNA4)                | 4 | 241196 |
| <b>iYDL125C</b>   | YDL125C (HNT1) YDL124W        | 4 | 239605 |
| <b>iYDL126C</b>   | YDL126C (CDC48)               | 4 | 238663 |
| <b>iYDL127W</b>   |                               | 4 | 235766 |
| <b>iYDL128W</b>   | YDL127W (PCL2)                | 4 | 233887 |
| <b>iYDL129W</b>   | YDL128W (VCX1)                | 4 | 231899 |
| <b>iYDL130W</b>   | YDL129W                       | 4 | 230527 |
| <b>iYDL130W-A</b> | YDL130W (RPP1B)               | 4 | 229431 |
| <b>iYDL131W</b>   | YDL130W-A (STF1)              | 4 | 228715 |
| <b>iYDL133C-A</b> | YDL133C-A (RPL41B) YDL133W    | 4 | 221801 |
| <b>iYDL133W</b>   | YDL132W (CDC53)               | 4 | 223740 |
| <b>iYDL134C</b>   | YDL134C (PPH21)               | 4 | 220771 |
| <b>iYDL135C</b>   | YDL135C (RDI1)                | 4 | 219288 |
| <b>iYDL136W</b>   |                               | 4 | 218367 |
| <b>iYDL137W</b>   | YDL136W (RPL35B)              | 4 | 217074 |
| <b>iYDL138W</b>   | YDL137W (ARF2)                | 4 | 215643 |
| <b>iYDL139C</b>   | YDL139C (SCM3) YDL138W (RGT2) | 4 | 212119 |
| <b>iYDL140C</b>   | YDL140C (RPO21)               | 4 | 210562 |
| <b>iYDL141W</b>   |                               | 4 | 205112 |
| <b>iYDL142C</b>   | YDL142C (CRD1) YDL141W (BPL1) | 4 | 202571 |
| <b>iYDL143W</b>   |                               | 4 | 201583 |
| <b>iYDL144C</b>   | YDL144C YDL143W (CCT4)        | 4 | 199742 |
| <b>iYDL145C</b>   | YDL145C (COP1)                | 4 | 198177 |

|            |                                |   |        |
|------------|--------------------------------|---|--------|
| iYDL146W   |                                | 4 | 194226 |
| iYDL147W   | YDL146W                        | 4 | 192262 |
| iYDL148C   | YDL148C (NOP14) YDL147W (RPN5) | 4 | 190587 |
| iYDL149W   |                                | 4 | 187919 |
| iYDL150W   | YDL149W (APG9)                 | 4 | 184612 |
| iYDL152W   |                                | 4 | 183188 |
| iYDL154W   |                                | 4 | 181040 |
| iYDL155W   | YDL154W (MSH5)                 | 4 | 178057 |
| iYDL156W   | YDL155W (CLB3)                 | 4 | 176487 |
| iYDL160C   | YDL160C (DHH1) YDL159W (STE7)  | 4 | 171931 |
| iYDL163W   |                                | 4 | 167259 |
| iYDL165W   |                                | 4 | 164866 |
| iYDL166C   | YDL166C (FAP7) YDL165W (CDC36) | 4 | 164043 |
| iYDL167C   | YDL167C (NRP1)                 | 4 | 163155 |
| iYDL168W   |                                | 4 | 160765 |
| iYDL169C   | YDL169C (UGX2) YDL168W (SFA1)  | 4 | 158736 |
| iYDL170W   |                                | 4 | 157905 |
| iYDL171C   | YDL171C (GLT1) YDL170W (UGA3)  | 4 | 155641 |
| iYDL172C   | YDL172C                        | 4 | 149087 |
| iYDL175C   | YDL175C                        | 4 | 145519 |
| iYDL176W   |                                | 4 | 144224 |
| iYDL177C   | YDL177C YDL176W                | 4 | 141722 |
| iYDL178W   |                                | 4 | 141115 |
| iYDL179W   | YDL178W (DLD2)                 | 4 | 139206 |
| iYDL180W   | YDL179W (PCL9)                 | 4 | 137540 |
| iYDL181W   | YDL180W                        | 4 | 135437 |
| iYDL182W   | YDL181W (INH1)                 | 4 | 134724 |
| iYDL183C-0 | YDL183C YDL182W (LYS20)        | 4 | 131834 |
| iYDL183C-1 | YDL183C YDL182W (LYS20)        | 4 | 132636 |
| iYDL184C   | YDL184C (RPL41A)               | 4 | 130485 |
| iYDL185W   |                                | 4 | 130003 |
| iYDL186W   | YDL185W (TFP1)                 | 4 | 126450 |
| iYDL188C   | YDL188C (PPH22)                | 4 | 124999 |
| iYDL189W   |                                | 4 | 123590 |
| iYDL190C   | YDL190C (UFD2) YDL189W         | 4 | 121593 |
| iYDL191W   |                                | 4 | 118518 |
| iYDL192W   | YDL191W (RPL35A)               | 4 | 116867 |
| iYDL193W   | YDL192W (ARF1)                 | 4 | 115800 |
| iYDL194W   | YDL193W                        | 4 | 114235 |
| iYDL195W   | YDL194W (SNF3)                 | 4 | 111030 |
| iYDL196W   | YDL195W (SEC31)                | 4 | 107071 |
| iYDL197C   | YDL197C (ASF2) YDL196W         | 4 | 106495 |
| iYDL198C   | YDL198C (YHM1)                 | 4 | 104552 |
| iYDL199C   | YDL199C                        | 4 | 103354 |
| iYDL200C   | YDL200C (MGT1)                 | 4 | 101122 |
| iYDL202W   | YDL201W                        | 4 | 99225  |
| iYDL203C   | YDL203C YDL202W (MRPL11)       | 4 | 97954  |
| iYDL204W   |                                | 4 | 95787  |
| iYDL205C   | YDL205C (HEM3) YDL204W         | 4 | 93746  |
| iYDL206W   |                                | 4 | 92465  |
| iYDL207W   | YDL206W                        | 4 | 89865  |

|                      |                                 |   |        |
|----------------------|---------------------------------|---|--------|
| <b>iYDL208W</b>      | YDL207W (GLE1)                  | 4 | 87983  |
| <b>iYDL209C</b>      | YDL209C YDL208W (NHP2)          | 4 | 87227  |
| <b>iYDL210W</b>      |                                 | 4 | 85986  |
| <b>iYDL211C-0</b>    | YDL211C YDL210W (UGA4)          | 4 | 80413  |
| <b>iYDL211C-1</b>    | YDL211C YDL210W (UGA4)          | 4 | 81458  |
| <b>iYDL211C-2</b>    | YDL211C YDL210W (UGA4)          | 4 | 82503  |
| <b>iYDL212W</b>      |                                 | 4 | 79059  |
| <b>iYDL213C</b>      | YDL213C (FYV14) YDL212W (SHR3)  | 4 | 77967  |
| <b>iYDL214C</b>      | YDL214C (PRR2)                  | 4 | 76546  |
| <b>iYDL215C</b>      | YDL215C (GDH2)                  | 4 | 73919  |
| <b>iYDL216C</b>      | YDL216C (RRI1)                  | 4 | 70365  |
| <b>iYDL217C</b>      | YDL217C (TIM22)                 | 4 | 68607  |
| <b>iYDL218W</b>      |                                 | 4 | 67447  |
| <b>iYDL219W</b>      | YDL218W                         | 4 | 65766  |
| <b>iYDL220C</b>      | YDL220C (CDC13) YDL219W         | 4 | 65019  |
| <b>iYDL222C</b>      | YDL222C YDL221W                 | 4 | 61802  |
| <b>iYDL223C</b>      | YDL223C                         | 4 | 60406  |
| <b>iYDL224C</b>      | YDL224C (WHI4)                  | 4 | 56347  |
| <b>iYDL225W</b>      |                                 | 4 | 54101  |
| <b>iYDL226C</b>      | YDL226C (GCS1) YDL225W (SHS1)   | 4 | 52174  |
| <b>iYDL227C-0</b>    | YDL227C (HO)                    | 4 | 48032  |
| <b>iYDL227C-1</b>    | YDL227C (HO)                    | 4 | 49060  |
| <b>iYDL227C-2</b>    | YDL227C (HO)                    | 4 | 50088  |
| <b>iYDL228C</b>      | YDL228C                         | 4 | 45919  |
| <b>iYDL230W</b>      | YDL229W (SSB1)                  | 4 | 43708  |
| <b>iYDL231C</b>      | YDL231C (BRE4) YDL230W (PTP1)   | 4 | 42245  |
| <b>iYDL232W</b>      |                                 | 4 | 38598  |
| <b>iYDL233W</b>      | YDL232W (OST4)                  | 4 | 38174  |
| <b>iYDL234C</b>      | YDL234C (GYP7) YDL233W          | 4 | 36478  |
| <b>iYDL235C</b>      | YDL235C (YPD1)                  | 4 | 33918  |
| <b>iYDL236W</b>      |                                 | 4 | 33234  |
| <b>iYDL237W</b>      | YDL236W (PHO13)                 | 4 | 31829  |
| <b>iYDL238C</b>      | YDL238C YDL237W                 | 4 | 30454  |
| <b>iYDL239C</b>      | YDL239C (ADY3)                  | 4 | 28775  |
| <b>iYDL240W</b>      |                                 | 4 | 25876  |
| <b>iYDL241W-0</b>    | YDL240W (LRG1)                  | 4 | 21006  |
| <b>iYDL241W-1</b>    | YDL240W (LRG1)                  | 4 | 21914  |
| <b>iYDL242W</b>      | YDL241W                         | 4 | 19312  |
| <b>iYDL243C</b>      | YDL243C (AAD4) YDL242W          | 4 | 18566  |
| <b>iYDL244W</b>      |                                 | 4 | 17226  |
| <b>iYDL245C-0</b>    | YDL245C (HXT15) YDL244W (THI13) | 4 | 13360  |
| <b>iYDL245C-1</b>    | YDL245C (HXT15) YDL244W (THI13) | 4 | 14782  |
| <b>iYDL246C-0</b>    | YDL246C                         | 4 | 9756   |
| <b>iYDL246C-1</b>    | YDL246C                         | 4 | 10706  |
| <b>iYDL247W</b>      |                                 | 4 | 7814   |
| <b>iYDL248W-0</b>    | YDL247W                         | 4 | 2953   |
| <b>iYDL248W-1</b>    | YDL247W                         | 4 | 4469   |
| <b>iYDLCdelta1-0</b> | YDL007W (RPT2)                  | 4 | 434780 |
| <b>iYDLCdelta1-1</b> | YDL007W (RPT2)                  | 4 | 435985 |
| <b>iYDLWtau1</b>     | YDL007W (RPT2)                  | 4 | 437559 |
| <b>iYDR001C</b>      | YDR001C (NTH1) YDR002W (YRB1)   | 4 | 452516 |

|            |                                   |   |        |
|------------|-----------------------------------|---|--------|
| iYDR002W   | YDR003W                           | 4 | 453691 |
| iYDR003W   | YDR004W (RAD57)                   | 4 | 454795 |
| iYDR004W   |                                   | 4 | 456624 |
| iYDR005C   | YDR005C (MAF1)                    | 4 | 458144 |
| iYDR006C   | YDR006C (SOK1) YDR007W (TRP1)     | 4 | 461288 |
| iYDR008C   | YDR008C YDR009W (GAL3)            | 4 | 462643 |
| iYDR010C   | YDR010C YDR011W (SNQ2)            | 4 | 465424 |
| iYDR011W   | YDR012W (RPL4B)                   | 4 | 470465 |
| iYDR012W   | YDR013W                           | 4 | 472982 |
| iYDR013W   | YDR014W (RAD61)                   | 4 | 473824 |
| iYDR014W-0 |                                   | 4 | 476030 |
| iYDR016C   | YDR016C (DAD1)                    | 4 | 478798 |
| iYDR017C   | YDR017C (KCS1)                    | 4 | 482307 |
| iYDR018C   | YDR018C                           | 4 | 483900 |
| iYDR019C   | YDR019C (GCV1)                    | 4 | 485405 |
| iYDR020C   | YDR020C YDR021W (FAL1)            | 4 | 486484 |
| iYDR021W   |                                   | 4 | 488043 |
| iYDR022C   | YDR022C (CIS1) tv(uac)dYDR023W (S | 4 | 488702 |
| iYDR023W   | YDR024W (FYV1)                    | 4 | 490936 |
| iYDR025W   |                                   | 4 | 492364 |
| iYDR026C   | YDR026C                           | 4 | 494308 |
| iYDR027C   | YDR027C (LUV1)                    | 4 | 497358 |
| iYDR028C   | YDR028C (REG1) YDR029W            | 4 | 500919 |
| iYDR029W   |                                   | 4 | 501454 |
| iYDR030C   | YDR030C (RAD28) YDR031W           | 4 | 503313 |
| iYDR031W   |                                   | 4 | 503891 |
| iYDR032C-0 | YDR032C (PST2) YDR033W (MRH1)     | 4 | 504734 |
| iYDR032C-2 | YDR032C (PST2) YDR033W (MRH1)     | 4 | 507034 |
| iYDR033W   |                                   | 4 | 509148 |
| iYDR034C   | YDR034C (LYS14)                   | 4 | 512148 |
| iYDR034C-A | YDR034C-A YDR034W-B               | 4 | 520731 |
| iYDR034W-B | YDR035W (ARO3)                    | 4 | 521508 |
| iYDR035W   |                                   | 4 | 522967 |
| iYDR036C   | YDR036C YDR037W (KRS1)            | 4 | 524752 |
| iYDR037W   |                                   | 4 | 527254 |
| iYDR038C   | YDR038C (ENA5)                    | 4 | 530736 |
| iYDR040C   | YDR040C (ENA1) YDR041W (RSM10)    | 4 | 538506 |
| iYDR041W   |                                   | 4 | 540453 |
| iYDR042C   | YDR042C                           | 4 | 541242 |
| iYDR043C-0 | YDR043C (NRG1) YDR044W (HEM13)    | 4 | 543409 |
| iYDR043C-2 | YDR043C (NRG1) YDR044W (HEM13)    | 4 | 545591 |
| iYDR044W   |                                   | 4 | 547668 |
| iYDR045C   | YDR045C (RPC11)                   | 4 | 548350 |
| iYDR047W   |                                   | 4 | 552988 |
| iYDR049W   |                                   | 4 | 555192 |
| iYDR050C   | YDR050C (TPI1)                    | 4 | 556512 |
| iYDR051C   | YDR051C                           | 4 | 558100 |
| iYDR053W   |                                   | 4 | 560684 |
| iYDR054C   | YDR054C (CDC34) YDR055W (PST1)    | 4 | 562367 |
| iYDR055W   |                                   | 4 | 564901 |
| iYDR056C   | YDR056C YDR057W                   | 4 | 565680 |

|          |                                 |   |        |
|----------|---------------------------------|---|--------|
| iYDR057W |                                 | 4 | 567595 |
| iYDR058C | YDR058C (TGL2) tr(ucu)d/tdguc)d | 4 | 568743 |
| iYDR060W | YDR061W                         | 4 | 573765 |
| iYDR061W | YDR062W (LCB2)                  | 4 | 575822 |
| iYDR062W | YDR063W                         | 4 | 578198 |
| iYDR063W | YDR064W (RPS13)                 | 4 | 579152 |
| iYDR064W | YDR065W                         | 4 | 580492 |
| iYDR065W |                                 | 4 | 581824 |
| iYDR066C | YDR066C                         | 4 | 582538 |
| iYDR067C | YDR067C YDR068W (DOS2)          | 4 | 583505 |
| iYDR068W |                                 | 4 | 584685 |
| iYDR069C | YDR069C (DOA4)                  | 4 | 587759 |
| iYDR070C | YDR070C                         | 4 | 588419 |
| iYDR071C | YDR071C                         | 4 | 589442 |
| iYDR073W | YDR074W (TPS2)                  | 4 | 592987 |
| iYDR074W | YDR075W (PPH3)                  | 4 | 596622 |
| iYDR075W | YDR076W (RAD55)                 | 4 | 598121 |
| iYDR076W | YDR077W (SED1)                  | 4 | 599727 |
| iYDR077W |                                 | 4 | 601848 |
| iYDR078C | YDR078C (SHU2) YDR079W (PET100) | 4 | 602908 |
| iYDR079W | YDR080W (VPS41)                 | 4 | 603438 |
| iYDR080W |                                 | 4 | 607025 |
| iYDR081C | YDR081C (PDC2) YDR082W (STN1)   | 4 | 610120 |
| iYDR082W | YDR083W (RRP8)                  | 4 | 611964 |
| iYDR083W |                                 | 4 | 613263 |
| iYDR084C | YDR084C                         | 4 | 614042 |
| iYDR085C | YDR085C (AFR1)                  | 4 | 616188 |
| iYDR086C | YDR086C (SSS1)                  | 4 | 617208 |
| iYDR087C | YDR087C (RRP1)                  | 4 | 618344 |
| iYDR088C | YDR088C (SLU7) YDR089W          | 4 | 619683 |
| iYDR089W |                                 | 4 | 624759 |
| iYDR090C | YDR090C                         | 4 | 626036 |
| iYDR091C | YDR091C (RLI1) YDR092W (UBC13)  | 4 | 628572 |
| iYDR092W | YDR093W (DNF2)                  | 4 | 630643 |
| iYDR095C | YDR095C YDR096W (GIS1)          | 4 | 636565 |
| iYDR096W |                                 | 4 | 639861 |
| iYDR097C | YDR097C (MSH6)                  | 4 | 643875 |
| iYDR098C | YDR098C (GRX3)                  | 4 | 645073 |
| iYDR099W | YDR100W                         | 4 | 654466 |
| iYDR100W |                                 | 4 | 655482 |
| iYDR101C | YDR101C                         | 4 | 657505 |
| iYDR102C | YDR102C YDR103W (STE5)          | 4 | 658018 |
| iYDR104C | YDR104C (SPO71)                 | 4 | 664948 |
| iYDR105C | YDR105C YDR106W (ARP10)         | 4 | 666808 |
| iYDR106W |                                 | 4 | 667896 |
| iYDR107C | YDR107C YDR108W (GSG1)          | 4 | 671072 |
| iYDR109C | YDR109C YDR110W (FOB1)          | 4 | 675705 |
| iYDR110W |                                 | 4 | 677840 |
| iYDR112W |                                 | 4 | 679890 |
| iYDR113C | YDR113C (PDS1)                  | 4 | 681655 |
| iYDR115W |                                 | 4 | 682530 |



|                     |                                   |   |        |
|---------------------|-----------------------------------|---|--------|
| <b>iYDR116C</b>     | YDR116C                           | 4 | 683619 |
| <b>iYDR117C</b>     | YDR117C YDR118W (APC4)            | 4 | 685681 |
| <b>iYDR118W</b>     | YDR119W                           | 4 | 687878 |
| <b>iYDR119W</b>     |                                   | 4 | 690571 |
| <b>iYDR120C</b>     | YDR120C (TRM1) YDR121W (DPB4)     | 4 | 693299 |
| <b>iYDR121W</b>     | YDR122W (KIN1)                    | 4 | 694213 |
| <b>iYDR122W</b>     |                                   | 4 | 697932 |
| <b>iYDR123C</b>     | YDR123C (INO2) YDR124W            | 4 | 699506 |
| <b>iYDR124W</b>     |                                   | 4 | 701327 |
| <b>iYDR125C</b>     | YDR125C (ECM18) YDR126W (PSL10)   | 4 | 702796 |
| <b>iYDR126W</b>     | YDR127W (ARO1)                    | 4 | 704282 |
| <b>iYDR127W</b>     | YDR128W                           | 4 | 709288 |
| <b>iYDR128W</b>     |                                   | 4 | 713033 |
| <b>iYDR129C</b>     | YDR129C (SAC6)                    | 4 | 715417 |
| <b>iYDR130C</b>     | YDR130C (FIN1)                    | 4 | 716660 |
| <b>iYDR131C</b>     | YDR131C                           | 4 | 718498 |
| <b>iYDR134C</b>     | YDR134C                           | 4 | 721519 |
| <b>iYDR135C</b>     | YDR135C (YCF1)                    | 4 | 727589 |
| <b>iYDR137W</b>     | YDR138W (HPR1)                    | 4 | 730288 |
| <b>iYDR138W</b>     |                                   | 4 | 732874 |
| <b>iYDR139C</b>     | YDR139C (RUB1) YDR140W (FYV9)     | 4 | 733962 |
| <b>iYDR140W</b>     |                                   | 4 | 734841 |
| <b>iYDR141C</b>     | YDR141C (DOP1)                    | 4 | 740035 |
| <b>iYDR142C</b>     | YDR142C (PEX7)                    | 4 | 741638 |
| <b>iYDR143C</b>     | YDR143C (SAN1)                    | 4 | 743912 |
| <b>iYDR144C</b>     | YDR144C (MKC7) YDR145W (TAF61)    | 4 | 746139 |
| <b>iYDR145W</b>     |                                   | 4 | 748395 |
| <b>iYDR146C</b>     | YDR146C (SWI5) YDR147W (EKI1)     | 4 | 750780 |
| <b>iYDR147W</b>     |                                   | 4 | 753273 |
| <b>iYDR148C</b>     | YDR148C (KGD2)                    | 4 | 755104 |
| <b>iYDR150W</b>     |                                   | 4 | 763912 |
| <b>iYDR151C</b>     | YDR151C (CTH1) YDR152W            | 4 | 765193 |
| <b>iYDR152W</b>     |                                   | 4 | 766541 |
| <b>iYDR153C</b>     | YDR153C                           | 4 | 768009 |
| <b>iYDR155C</b>     | YDR155C (CPR1) YDR156W (RPA14)    | 4 | 769038 |
| <b>iYDR158W</b>     | YDR159W (SAC3)                    | 4 | 771492 |
| <b>iYDR159W</b>     | YDR160W (SSY1)                    | 4 | 775820 |
| <b>iYDR160W</b>     | YDR161W (TCI1)                    | 4 | 778759 |
| <b>iYDR161W</b>     |                                   | 4 | 780244 |
| <b>iYDR162C</b>     | YDR162C (NBP2) YDR163W            | 4 | 781138 |
| <b>iYDR163W</b>     |                                   | 4 | 781988 |
| <b>iYDR164C</b>     | YDR164C (SEC1) YDR165W            | 4 | 784253 |
| <b>iYDR165W</b>     |                                   | 4 | 786243 |
| <b>iYDR166C</b>     | YDR166C (SEC5) YDR167W (TAF25)    | 4 | 789259 |
| <b>iYDR167W</b>     | YDR168W (CDC37)                   | 4 | 790107 |
| <b>iYDR169C-0</b>   | YDR169C (STB3)                    | 4 | 793927 |
| <b>iYDR169C-1</b>   | YDR169C (STB3)                    | 4 | 795079 |
| <b>iYDR170C</b>     | YDR170C tq(uug)d3 (SEC7) YDR170W- | 4 | 802260 |
| <b>iYDR170W-A-0</b> | YDR171W (HSP42)                   | 4 | 804555 |
| <b>iYDR171W</b>     | YDR172W (SUP35)                   | 4 | 807786 |
| <b>iYDR172W</b>     |                                   | 4 | 810419 |

|            |                                |   |        |
|------------|--------------------------------|---|--------|
| iYDR173C   | YDR173C (ARG82) YDR174W (HMO1) | 4 | 811670 |
| iYDR174W   |                                | 4 | 812888 |
| iYDR175C   | YDR175C (RSM24) YDR176W (NGG1) | 4 | 814190 |
| iYDR176W   | YDR177W (UBC1)                 | 4 | 816598 |
| iYDR177W   | YDR178W (SDH4)                 | 4 | 817563 |
| iYDR178W   |                                | 4 | 818533 |
| iYDR179C   | YDR179C YDR179W-A              | 4 | 819234 |
| iYDR179W-A | YDR180W (SCC2)                 | 4 | 820861 |
| iYDR180W   |                                | 4 | 825813 |
| iYDR181C   | YDR181C (SAS4) YDR182W (CDC1)  | 4 | 827392 |
| iYDR182W   | YDR183W (PLP1)                 | 4 | 829094 |
| iYDR183W   |                                | 4 | 830314 |
| iYDR184C   | YDR184C (ATC1)                 | 4 | 831550 |
| iYDR185C   | YDR185C                        | 4 | 832510 |
| iYDR186C   | YDR186C                        | 4 | 835529 |
| iYDR188W   | YDR189W (SLY1)                 | 4 | 838098 |
| iYDR189W   |                                | 4 | 840429 |
| iYDR190C   | YDR190C (RVB1) YDR191W (HST4)  | 4 | 842032 |
| iYDR191W   |                                | 4 | 843486 |
| iYDR193W   |                                | 4 | 844989 |
| iYDR195W   |                                | 4 | 850237 |
| iYDR196C   | YDR196C YDR197W (CBS2)         | 4 | 851036 |
| iYDR197W   |                                | 4 | 852434 |
| iYDR198C   | YDR198C YDR199W                | 4 | 854009 |
| iYDR200C   | YDR200C YDR201W (SPC19)        | 4 | 856130 |
| iYDR201W   |                                | 4 | 856851 |
| iYDR203W   | YDR204W (COQ4)                 | 4 | 858036 |
| iYDR204W   | YDR205W (MSC2)                 | 4 | 859181 |
| iYDR205W   | YDR206W (EBS1)                 | 4 | 861557 |
| iYDR206W   |                                | 4 | 864745 |
| iYDR207C   | YDR207C (UME6) YDR208W (MSS4)  | 4 | 867559 |
| iYDR210W   |                                | 4 | 871338 |
| iYDR211W   | YDR212W (TCP1)                 | 4 | 886902 |
| iYDR212W   | YDR213W (UPC2)                 | 4 | 888948 |
| iYDR213W   | YDR214W (AHA1)                 | 4 | 892529 |
| iYDR214W   |                                | 4 | 893964 |
| iYDR215C   | YDR215C YDR216W (ADR1)         | 4 | 894538 |
| iYDR216W   |                                | 4 | 899042 |
| iYDR217C   | YDR217C (RAD9)                 | 4 | 903516 |
| iYDR218C   | YDR218C (SPR28)                | 4 | 905088 |
| iYDR219C   | YDR219C                        | 4 | 906888 |
| iYDR221W   | YDR222W                        | 4 | 909474 |
| iYDR222W   | YDR223W                        | 4 | 911337 |
| iYDR223W   |                                | 4 | 913538 |
| iYDR224C   | YDR224C (HTB1) YDR225W (HTA1)  | 4 | 914748 |
| iYDR225W   | YDR226W (ADK1)                 | 4 | 915964 |
| iYDR226W   | YDR227W (SIR4)                 | 4 | 917190 |
| iYDR227W   |                                | 4 | 921683 |
| iYDR228C   | YDR228C (PCF11) YDR229W        | 4 | 923842 |
| iYDR229W   | YDR230W                        | 4 | 926182 |
| iYDR231C   | YDR231C (COX20) YDR232W (HEM1) | 4 | 926946 |

|            |                                |   |         |
|------------|--------------------------------|---|---------|
| iYDR232W   |                                | 4 | 929134  |
| iYDR233C   | YDR233C YDR234W (LYS4)         | 4 | 930393  |
| iYDR234W   | YDR235W (PRP42)                | 4 | 933246  |
| iYDR235W   |                                | 4 | 935174  |
| iYDR236C   | YDR236C (FMN1) YDR237W (MRPL7) | 4 | 935928  |
| iYDR237W   |                                | 4 | 937529  |
| iYDR238C   | YDR238C (SEC26)                | 4 | 940852  |
| iYDR239C   | YDR239C                        | 4 | 943456  |
| iYDR242W   |                                | 4 | 948492  |
| iYDR243C   | YDR243C (PRP28) YDR244W (PEX5) | 4 | 950320  |
| iYDR244W   | YDR245W (MNN10)                | 4 | 952437  |
| iYDR245W   | YDR246W (TRS23)                | 4 | 954017  |
| iYDR246W   | YDR247W                        | 4 | 954983  |
| iYDR247W   |                                | 4 | 957434  |
| iYDR248C   | YDR248C                        | 4 | 958375  |
| iYDR249C   | YDR249C                        | 4 | 959838  |
| iYDR250C   | YDR250C YDR251W (PAM1)         | 4 | 960397  |
| iYDR252W   |                                | 4 | 963897  |
| iYDR253C   | YDR253C (MET32) YDR254W (CHL4) | 4 | 964601  |
| iYDR254W   |                                | 4 | 966525  |
| iYDR255C   | YDR255C                        | 4 | 967858  |
| iYDR256C   | YDR256C (CTA1)                 | 4 | 969716  |
| iYDR257C   | YDR257C (RMS1)                 | 4 | 971510  |
| iYDR258C   | YDR258C (HSP78)                | 4 | 974279  |
| iYDR259C   | YDR259C (YAP6)                 | 4 | 975818  |
| iYDR260C   | YDR260C (SWM1)                 | 4 | 977265  |
| iYDR261C-0 | YDR261C (EXG2) YDR261W-A       | 4 | 979245  |
| iYDR261C-1 | YDR261C (EXG2) YDR261W-A       | 4 | 980127  |
| iYDR262W   |                                | 4 | 993988  |
| iYDR263C   | YDR263C (DIN7)                 | 4 | 995570  |
| iYDR264C   | YDR264C (AKR1) YDR265W (PEX10) | 4 | 998359  |
| iYDR265W   |                                | 4 | 999913  |
| iYDR267C   | YDR267C YDR268W (MSW1)         | 4 | 1003538 |
| iYDR268W   |                                | 4 | 1005179 |
| iYDR271C   | YDR271C YDR272W (GLO2)         | 4 | 1008802 |
| iYDR272W   | YDR273W (DON1)                 | 4 | 1009870 |
| iYDR273W   |                                | 4 | 1011309 |
| iYDR274C   | YDR274C YDR275W                | 4 | 1011996 |
| iYDR275W   |                                | 4 | 1012995 |
| iYDR276C   | YDR276C (PMP3)                 | 4 | 1013679 |
| iYDR277C   | YDR277C (MTH1)                 | 4 | 1015738 |
| iYDR279W   | YDR280W (RRP45)                | 4 | 1020456 |
| iYDR280W   |                                | 4 | 1021700 |
| iYDR281C   | YDR281C (PHM6)                 | 4 | 1022357 |
| iYDR282C   | YDR282C                        | 4 | 1024791 |
| iYDR283C   | YDR283C (GCN2)                 | 4 | 1030085 |
| iYDR284C   | YDR284C (DPP1) YDR285W (ZIP1)  | 4 | 1031455 |
| iYDR285W   |                                | 4 | 1035099 |
| iYDR286C   | YDR286C YDR287W                | 4 | 1035611 |
| iYDR287W   | YDR288W                        | 4 | 1036909 |
| iYDR288W   |                                | 4 | 1038142 |

|            |                               |   |         |
|------------|-------------------------------|---|---------|
| iYDR291W   |                               | 4 | 1042997 |
| iYDR292C   | YDR292C (SRP101)              | 4 | 1045047 |
| iYDR294C   | YDR294C (DPL1)                | 4 | 1052264 |
| iYDR295C   | YDR295C (PLO2) YDR296W (MHR1) | 4 | 1054683 |
| iYDR296W   | YDR297W (SUR2)                | 4 | 1055928 |
| iYDR297W   |                               | 4 | 1057636 |
| iYDR298C   | YDR298C (ATP5) YDR299W (BFR2) | 4 | 1058850 |
| iYDR299W   |                               | 4 | 1061267 |
| iYDR300C   | YDR300C (PRO1) YDR301W (CFT1) | 4 | 1062827 |
| iYDR301W   | YDR302W (GPI11)               | 4 | 1067461 |
| iYDR302W   |                               | 4 | 1068426 |
| iYDR303C   | YDR303C (RSC3)                | 4 | 1071422 |
| iYDR304C   | YDR304C (CPR5)                | 4 | 1072593 |
| iYDR305C   | YDR305C (HNT2)                | 4 | 1073524 |
| iYDR306C   | YDR306C tv(cac)d YDR307W      | 4 | 1075207 |
| iYDR307W   |                               | 4 | 1077889 |
| iYDR308C   | YDR308C (SRB7)                | 4 | 1078485 |
| iYDR309C   | YDR309C (GIC2)                | 4 | 1080235 |
| iYDR310C   | YDR310C (SUM1) YDR311W (TFB1) | 4 | 1084352 |
| iYDR311W   | YDR312W (SSF2)                | 4 | 1087030 |
| iYDR313C   | YDR313C (PIB1)                | 4 | 1090116 |
| iYDR314C   | YDR314C                       | 4 | 1092548 |
| iYDR315C   | YDR315C (IPK1) YDR316W        | 4 | 1093623 |
| iYDR316W   | YDR316W-A                     | 4 | 1095215 |
| iYDR317W   | YDR318W (MCM21)               | 4 | 1103465 |
| iYDR319C   | YDR319C                       | 4 | 1105864 |
| iYDR320C   | YDR320C (SWA2) YDR321W (ASP1) | 4 | 1108138 |
| iYDR321W   | YDR322W (MRPL35)              | 4 | 1109884 |
| iYDR322W   |                               | 4 | 1111729 |
| iYDR323C   | YDR323C (PEP7)                | 4 | 1114064 |
| iYDR324C   | YDR324C YDR325W (YCG1)        | 4 | 1116800 |
| iYDR325W   |                               | 4 | 1120269 |
| iYDR326C   | YDR326C YDR327W               | 4 | 1124961 |
| iYDR328C   | YDR328C (SKP1)                | 4 | 1126054 |
| iYDR329C   | YDR329C (PEX3) YDR330W        | 4 | 1127631 |
| iYDR330W   | YDR331W (GPI8)                | 4 | 1129410 |
| iYDR332W   |                               | 4 | 1133106 |
| iYDR333C   | YDR333C YDR334W (SWR1)        | 4 | 1135467 |
| iYDR335W   | YDR336W                       | 4 | 1144877 |
| iYDR336W   | YDR337W (MRPS28)              | 4 | 1146071 |
| iYDR337W   |                               | 4 | 1147214 |
| iYDR338C   | YDR338C                       | 4 | 1149501 |
| iYDR339C   | YDR339C tx(xx)d YDR340W       | 4 | 1150555 |
| iYDR341C   | YDR341C                       | 4 | 1153661 |
| iYDR342C-0 | YDR342C (HXT7)                | 4 | 1155963 |
| iYDR342C-1 | YDR342C (HXT7)                | 4 | 1157189 |
| iYDR342C-2 | YDR342C (HXT7)                | 4 | 1158415 |
| iYDR343C   | YDR343C (HXT6)                | 4 | 1161355 |
| iYDR344C   | YDR344C                       | 4 | 1162484 |
| iYDR345C-0 | YDR345C (HXT3)                | 4 | 1164695 |
| iYDR346C   | YDR346C YDR347W (MRP1)        | 4 | 1168694 |

|            |                                |   |         |
|------------|--------------------------------|---|---------|
| iYDR347W   |                                | 4 | 1170178 |
| iYDR348C   | YDR348C                        | 4 | 1171860 |
| iYDR349C   | YDR349C (YPS7)                 | 4 | 1174211 |
| iYDR350C   | YDR350C (TCM10) YDR351W (SBE2) | 4 | 1178208 |
| iYDR351W   | YDR352W                        | 4 | 1181294 |
| iYDR352W   | YDR353W (TRR1)                 | 4 | 1182788 |
| iYDR353W   | YDR354W (TRP4)                 | 4 | 1184292 |
| iYDR354W   |                                | 4 | 1185923 |
| iYDR356W   |                                | 4 | 1188975 |
| iYDR358W   |                                | 4 | 1191766 |
| iYDR360W   |                                | 4 | 1195019 |
| iYDR361C   | YDR361C (BCP1)                 | 4 | 1196297 |
| iYDR362C   | YDR362C (TFC6) YDR363W (ESC2)  | 4 | 1198731 |
| iYDR363W   | YDR363W-A (SEM1)               | 4 | 1200587 |
| iYDR363W-A |                                | 4 | 1202431 |
| iYDR364C   | YDR364C (CDC40)                | 4 | 1204244 |
| iYDR365C   | YDR365C YDR365W-A              | 4 | 1206417 |
| iYDR367W   | YDR368W (YPR1)                 | 4 | 1213648 |
| iYDR368W   |                                | 4 | 1214876 |
| iYDR369C   | YDR369C (XRS2)                 | 4 | 1217614 |
| iYDR370C   | YDR370C YDR371W (CTS2)         | 4 | 1219144 |
| iYDR371W   |                                | 4 | 1220982 |
| iYDR372C   | YDR372C YDR373W (FRQ1)         | 4 | 1222183 |
| iYDR373W   |                                | 4 | 1223365 |
| iYDR374C   | YDR374C                        | 4 | 1224428 |
| iYDR375C   | YDR375C (BCS1) YDR376W (ARH1)  | 4 | 1226570 |
| iYDR376W   | YDR377W (ATP17)                | 4 | 1228337 |
| iYDR377W   |                                | 4 | 1228950 |
| iYDR378C   | YDR378C (LSM6) YDR379W (RGA2)  | 4 | 1229754 |
| iYDR379W   | YDR380W (ARO10)                | 4 | 1233230 |
| iYDR380W   | YDR381W (YRA1)                 | 4 | 1236159 |
| iYDR382W   |                                | 4 | 1239858 |
| iYDR383C   | YDR383C                        | 4 | 1240752 |
| iYDR384C   | YDR384C YDR385W (EFT2)         | 4 | 1242065 |
| iYDR385W   | YDR386W (MUS81)                | 4 | 1245792 |
| iYDR386W   |                                | 4 | 1248016 |
| iYDR387C   | YDR387C YDR388W (RVS167)       | 4 | 1249855 |
| iYDR388W   | YDR389W (SAC7)                 | 4 | 1251668 |
| iYDR389W   |                                | 4 | 1254535 |
| iYDR390C   | YDR390C (UBA2)                 | 4 | 1256881 |
| iYDR391C   | YDR391C YDR392W (SPT3)         | 4 | 1258090 |
| iYDR392W   | YDR393W (SHE9)                 | 4 | 1259743 |
| iYDR393W   | YDR394W (RPT3)                 | 4 | 1261305 |
| iYDR394W   | YDR395W (SXM1)                 | 4 | 1263001 |
| iYDR395W   | YDR396W                        | 4 | 1266192 |
| iYDR397C   | YDR397C (NCB2) YDR398W         | 4 | 1266932 |
| iYDR398W   | YDR399W (HPT1)                 | 4 | 1269436 |
| iYDR399W   | YDR400W (URH1)                 | 4 | 1270767 |
| iYDR400W   | YDR401W                        | 4 | 1272119 |
| iYDR402C   | YDR402C (DIT2) YDR403W (DIT1)  | 4 | 1273737 |
| iYDR403W   |                                | 4 | 1276246 |

|            |                                 |   |         |
|------------|---------------------------------|---|---------|
| iYDR404C   | YDR404C (RPB7) YDR405W (MRP20)  | 4 | 1277203 |
| iYDR405W   | YDR406W (PDR15)                 | 4 | 1278471 |
| iYDR406W   |                                 | 4 | 1283833 |
| iYDR407C   | YDR407C (TRS120)                | 4 | 1287972 |
| iYDR408C   | YDR408C (ADE8) YDR409W (SIZ1)   | 4 | 1288893 |
| iYDR409W   |                                 | 4 | 1292154 |
| iYDR410C   | YDR410C (STE14)                 | 4 | 1293125 |
| iYDR411C   | YDR411C YDR412W                 | 4 | 1294428 |
| iYDR413C   | YDR413C                         | 4 | 1295445 |
| iYDR414C   | YDR414C (ERD1)                  | 4 | 1296720 |
| iYDR415C   | YDR415C YDR416W (SYF1)          | 4 | 1298195 |
| iYDR416W   |                                 | 4 | 1301045 |
| iYDR418W   | YDR419W (RAD30)                 | 4 | 1302147 |
| iYDR419W   | YDR420W (HKR1)                  | 4 | 1305106 |
| iYDR420W   | YDR421W (ARO80)                 | 4 | 1311709 |
| iYDR421W   |                                 | 4 | 1314926 |
| iYDR422C   | YDR422C (SIP1)                  | 4 | 1317951 |
| iYDR423C   | YDR423C (CAD1)                  | 4 | 1319309 |
| iYDR424C   | YDR424C (DYN2) YDR425W          | 4 | 1319875 |
| iYDR426C   | YDR426C YDR427W (RPN9)          | 4 | 1322040 |
| iYDR427W   |                                 | 4 | 1323420 |
| iYDR429C   | YDR429C (TIF35)                 | 4 | 1325335 |
| iYDR431W   | YDR432W (NPL3)                  | 4 | 1328735 |
| iYDR433W   | YDR434W (GPI17)                 | 4 | 1330074 |
| iYDR434W   |                                 | 4 | 1332875 |
| iYDR435C   | YDR435C (PPM1) YDR436W (PPZ2)   | 4 | 1334003 |
| iYDR436W   | YDR437W                         | 4 | 1336987 |
| iYDR437W   | YDR438W                         | 4 | 1337808 |
| iYDR438W   | YDR439W (LRS4)                  | 4 | 1339420 |
| iYDR439W-1 | YDR440W (DOT1)                  | 4 | 1341640 |
| iYDR440W   |                                 | 4 | 1344275 |
| iYDR441C   | YDR441C (APT2) YDR442W          | 4 | 1345096 |
| iYDR443C   | YDR443C (SSN2) YDR444W          | 4 | 1349972 |
| iYDR447C   | YDR447C (RPS17B) YDR448W (ADA2) | 4 | 1355587 |
| iYDR448W   |                                 | 4 | 1357403 |
| iYDR449C   | YDR449C YDR450W (RPS18A)        | 4 | 1358936 |
| iYDR450W   |                                 | 4 | 1360832 |
| iYDR452W   |                                 | 4 | 1364936 |
| iYDR453C   | YDR453C                         | 4 | 1365696 |
| iYDR454C   | YDR454C (GUK1)                  | 4 | 1366861 |
| iYDR456W   | YDR457W (TOM1)                  | 4 | 1369420 |
| iYDR458C   | YDR458C                         | 4 | 1382080 |
| iYDR459C   | YDR459C YDR460W (TFB3)          | 4 | 1383477 |
| iYDR462W   | YDR463W (STP1)                  | 4 | 1386550 |
| iYDR464W   |                                 | 4 | 1393213 |
| iYDR465C   | YDR465C (RMT2) YDR466W          | 4 | 1394608 |
| iYDR467C   | YDR467C                         | 4 | 1397943 |
| iYDR468C   | YDR468C (TLG1) YDR469W (SDC1)   | 4 | 1398734 |
| iYDR469W   |                                 | 4 | 1399576 |
| iYDR470C   | YDR470C (UGO1) YDR471W (RPL27B) | 4 | 1401248 |
| iYDR471W   | YDR472W (TRS31)                 | 4 | 1402598 |

|                   |                                 |   |         |
|-------------------|---------------------------------|---|---------|
| <b>iYDR472W</b>   |                                 | 4 | 1404207 |
| <b>iYDR473C-0</b> | YDR473C (PRP3)                  | 4 | 1405888 |
| <b>iYDR473C-1</b> | YDR473C (PRP3)                  | 4 | 1406693 |
| <b>iYDR474C</b>   | YDR474C                         | 4 | 1409165 |
| <b>iYDR475C</b>   | YDR475C                         | 4 | 1410126 |
| <b>iYDR476C</b>   | YDR476C YDR477W (SNF1)          | 4 | 1411159 |
| <b>iYDR477W</b>   | YDR478W (SNM1)                  | 4 | 1414306 |
| <b>iYDR479C</b>   | YDR479C YDR480W (DIG2)          | 4 | 1416906 |
| <b>iYDR480W</b>   |                                 | 4 | 1418402 |
| <b>iYDR481C</b>   | YDR481C (PHO8)                  | 4 | 1420282 |
| <b>iYDR482C</b>   | YDR482C YDR483W (KRE2)          | 4 | 1420870 |
| <b>iYDR483W</b>   | YDR484W (SAC2)                  | 4 | 1422517 |
| <b>iYDR484W</b>   |                                 | 4 | 1424720 |
| <b>iYDR485C</b>   | YDR485C                         | 4 | 1427284 |
| <b>iYDR486C</b>   | YDR486C (VPS60)                 | 4 | 1428251 |
| <b>iYDR487C</b>   | YDR487C (RIB3)                  | 4 | 1429012 |
| <b>iYDR488C</b>   | YDR488C (PAC11) YDR489W         | 4 | 1430821 |
| <b>iYDR489W</b>   |                                 | 4 | 1431928 |
| <b>iYDR490C</b>   | YDR490C (PKH1)                  | 4 | 1434300 |
| <b>iYDR492W</b>   | YDR493W                         | 4 | 1435906 |
| <b>iYDR493W</b>   | YDR494W (RSM28)                 | 4 | 1436620 |
| <b>iYDR494W</b>   |                                 | 4 | 1437828 |
| <b>iYDR495C</b>   | YDR495C (VPS3)                  | 4 | 1441198 |
| <b>iYDR496C</b>   | YDR496C (PUF6)                  | 4 | 1443451 |
| <b>iYDR497C</b>   | YDR497C (ITR1)                  | 4 | 1445515 |
| <b>iYDR498C</b>   | YDR498C (SEC20) YDR499W (LCD1)  | 4 | 1447042 |
| <b>iYDR499W</b>   |                                 | 4 | 1450121 |
| <b>iYDR500C</b>   | YDR500C (RPL37B) YDR501W (PLM2) | 4 | 1450901 |
| <b>iYDR501W</b>   |                                 | 4 | 1452966 |
| <b>iYDR503C</b>   | YDR503C (LPP1)                  | 4 | 1455914 |
| <b>iYDR505C</b>   | YDR505C (PSP1)                  | 4 | 1459268 |
| <b>iYDR506C</b>   | YDR506C                         | 4 | 1461602 |
| <b>iYDR507C</b>   | YDR507C (GIN4)                  | 4 | 1465834 |
| <b>iYDR509W</b>   | YDR510W (SMT3)                  | 4 | 1468621 |
| <b>iYDR510W</b>   | YDR511W (ACN9)                  | 4 | 1469753 |
| <b>iYDR511W</b>   |                                 | 4 | 1470466 |
| <b>iYDR513W</b>   |                                 | 4 | 1471496 |
| <b>iYDR514C</b>   | YDR514C YDR515W (SLF1)          | 4 | 1473047 |
| <b>iYDR515W</b>   |                                 | 4 | 1474820 |
| <b>iYDR516C</b>   | YDR516C YDR517W (GRH1)          | 4 | 1476524 |
| <b>iYDR517W</b>   | YDR518W (EUG1)                  | 4 | 1478405 |
| <b>iYDR518W</b>   | YDR519W (FPR2)                  | 4 | 1480209 |
| <b>iYDR521W</b>   |                                 | 4 | 1483524 |
| <b>iYDR522C</b>   | YDR522C (SPS2)                  | 4 | 1485351 |
| <b>iYDR523C</b>   | YDR523C (SPS1)                  | 4 | 1487086 |
| <b>iYDR524C</b>   | YDR524C (AGE1) YDR525W          | 4 | 1489038 |
| <b>iYDR525W</b>   | YDR525W-A (SNA2)                | 4 | 1490282 |
| <b>iYDR525W-A</b> |                                 | 4 | 1490883 |
| <b>iYDR527W-0</b> | YDR528W (HLR1)                  | 4 | 1492461 |
| <b>iYDR527W-1</b> | YDR528W (HLR1)                  | 4 | 1493547 |
| <b>iYDR528W</b>   |                                 | 4 | 1495905 |

|                      |                               |   |         |
|----------------------|-------------------------------|---|---------|
| <b>iYDR529C</b>      | YDR529C (QCR7)                | 4 | 1496596 |
| <b>iYDR530C</b>      | YDR530C (APA2) YDR531W        | 4 | 1497816 |
| <b>iYDR531W</b>      |                               | 4 | 1499383 |
| <b>iYDR532C</b>      | YDR532C (KRE28)               | 4 | 1500601 |
| <b>iYDR533C</b>      | YDR533C                       | 4 | 1502208 |
| <b>iYDR534C-0</b>    | YDR534C (FIT1)                | 4 | 1504947 |
| <b>iYDR534C-1</b>    | YDR534C (FIT1)                | 4 | 1505800 |
| <b>iYDR535C</b>      | YDR535C YDR536W (STL1)        | 4 | 1507409 |
| <b>iYDR536W</b>      |                               | 4 | 1509761 |
| <b>iYDR538W</b>      | YDR539W                       | 4 | 1511676 |
| <b>iYDR539W-0</b>    |                               | 4 | 1513651 |
| <b>iYDR539W-2</b>    |                               | 4 | 1516001 |
| <b>iYDR540C</b>      | YDR540C                       | 4 | 1517715 |
| <b>iYDR541C-0</b>    | YDR541C YDR542W               | 4 | 1520738 |
| <b>iYDR541C-1</b>    | YDR541C YDR542W               | 4 | 1522014 |
| <b>iYDR542W</b>      |                               | 4 | 1523652 |
| <b>iYDR543C</b>      | YDR543C                       | 4 | 1524974 |
| <b>iYDR544C</b>      | YDR544C YDR545W (YRF1-1)      | 4 | 1525564 |
| <b>iYDRCdelta3</b>   | YDR034C (LYS14)               | 4 | 513629  |
| <b>iYDRCdelta5</b>   | YDR034C (LYS14)               | 4 | 519686  |
| <b>iYDRCdelta9-0</b> | YDR098C-A YDR099W (BMH2)      | 4 | 652018  |
| <b>iYDRCsigma1</b>   | YDR098C-A YDR099W (BMH2)      | 4 | 651541  |
| <b>iYDRCsigma2</b>   |                               | 4 | 668474  |
| <b>iYDRCTy1-2</b>    | YDR211W (GCD6)                | 4 | 884257  |
| <b>iYDRWdelta10</b>  |                               | 4 | 668822  |
| <b>iYDRWdelta12</b>  | YDR242W (AMD2)                | 4 | 945709  |
| <b>iYDRWdelta14</b>  | YDR210W-D                     | 4 | 877816  |
| <b>iYDRWdelta24</b>  | YDR317W                       | 4 | 1101729 |
| <b>iYDRWdelta25</b>  |                               | 4 | 1151403 |
| <b>iYDRWdelta26</b>  | YDR349C (YPS7)                | 4 | 1175682 |
| <b>iYDRWdelta30</b>  | YDR445C YDR446W (ECM11)       | 4 | 1353260 |
| <b>iYDRWdelta31</b>  | YDR540C                       | 4 | 1518847 |
| <b>iYEL001C</b>      | YEL001C YER001W (MNN1)        | 5 | 150977  |
| <b>iYEL003W</b>      |                               | 5 | 148598  |
| <b>iYEL004W</b>      | YEL003W (GIM4)                | 5 | 147978  |
| <b>iYEL005C</b>      | YEL005C (VAB2) YEL004W (YEA4) | 5 | 146754  |
| <b>iYEL006W</b>      |                               | 5 | 145333  |
| <b>iYEL007W</b>      | YEL006W                       | 5 | 143891  |
| <b>iYEL008W</b>      | YEL007W (TOS9)                | 5 | 140892  |
| <b>iYEL009C</b>      | YEL009C (GCN4) YEL008W        | 5 | 139763  |
| <b>iYEL010W</b>      |                               | 5 | 136629  |
| <b>iYEL011W</b>      | YEL010W                       | 5 | 135234  |
| <b>iYEL012W</b>      | YEL011W (GLC3)                | 5 | 132551  |
| <b>iYEL013W</b>      | YEL012W (UBC8)                | 5 | 130561  |
| <b>iYEL014C</b>      | YEL014C YEL013W (VAC8)        | 5 | 128608  |
| <b>iYEL016C</b>      | YEL016C YEL015W               | 5 | 126218  |
| <b>iYEL017C-A</b>    | YEL017C-A (PMP2) YEL017W      | 5 | 122929  |
| <b>iYEL017W</b>      |                               | 5 | 124670  |
| <b>iYEL018W</b>      |                               | 5 | 122310  |
| <b>iYEL019C</b>      | YEL019C (MMS21) YEL018W       | 5 | 121301  |
| <b>iYEL020C</b>      | YEL020C                       | 5 | 120299  |



|                    |                                |   |        |
|--------------------|--------------------------------|---|--------|
| <b>iYEL021W</b>    | YEL020C                        | 5 | 116970 |
| <b>iYEL022W</b>    | YEL021W (URA3)                 | 5 | 115800 |
| <b>iYEL023C</b>    | YEL023C YEL022W (GEA2)         | 5 | 110552 |
| <b>iYEL024W</b>    |                                | 5 | 107907 |
| <b>iYEL025C</b>    | YEL025C (SRI1) YEL024W (RIP1)  | 5 | 106147 |
| <b>iYEL026W</b>    |                                | 5 | 102323 |
| <b>iYEL027W</b>    | YEL026W (SNU13)                | 5 | 101251 |
| <b>iYEL028W</b>    | YEL027W (CUP5)                 | 5 | 99129  |
| <b>iYEL029C</b>    | YEL029C (BUD16) YEL028W        | 5 | 97796  |
| <b>iYEL030W</b>    |                                | 5 | 96578  |
| <b>iYEL031W</b>    | YEL030W (ECM10)                | 5 | 93905  |
| <b>iYEL032W</b>    | YEL031W (SPF1)                 | 5 | 89852  |
| <b>iYEL035C</b>    | YEL035C (UTR5) YEL034W (HYP2)  | 5 | 85545  |
| <b>iYEL037C</b>    | YEL037C (RAD23)                | 5 | 82603  |
| <b>iYEL038W</b>    |                                | 5 | 81145  |
| <b>iYEL039C</b>    | YEL039C (CYC7) YEL038W (UTR4)  | 5 | 79977  |
| <b>iYEL040W</b>    |                                | 5 | 79456  |
| <b>iYEL041W</b>    | YEL040W (UTR2)                 | 5 | 77431  |
| <b>iYEL042W</b>    | YEL041W                        | 5 | 75327  |
| <b>iYEL043W</b>    | YEL042W (GDA1)                 | 5 | 73348  |
| <b>iYEL044W</b>    | YEL043W                        | 5 | 70257  |
| <b>iYEL045C</b>    | YEL045C YEL044W (IES6)         | 5 | 69265  |
| <b>iYEL047C</b>    | YEL047C                        | 5 | 66797  |
| <b>iYEL048C</b>    | YEL048C                        | 5 | 65167  |
| <b>iYEL049W</b>    |                                | 5 | 64090  |
| <b>iYEL050C</b>    | YEL050C (RML2) YEL049W (PAU2)  | 5 | 60851  |
| <b>iYEL051W</b>    |                                | 5 | 59148  |
| <b>iYEL052W</b>    | YEL051W (VMA8)                 | 5 | 58100  |
| <b>iYEL053C</b>    | YEL053C (MAK10) YEL052W (AFG1) | 5 | 56102  |
| <b>iYEL054C</b>    | YEL054C (RPL12A)               | 5 | 53218  |
| <b>iYEL055C</b>    | YEL055C (POL5)                 | 5 | 51539  |
| <b>iYEL056W</b>    |                                | 5 | 48373  |
| <b>iYEL057C</b>    | YEL057C YEL056W (HAT2)         | 5 | 45721  |
| <b>iYEL058W</b>    |                                | 5 | 44925  |
| <b>iYEL059W</b>    | YEL058W (PCM1)                 | 5 | 42960  |
| <b>iYEL060C</b>    | YEL060C (PRB1)                 | 5 | 41953  |
| <b>iYEL061C</b>    | YEL061C (CIN8)                 | 5 | 39651  |
| <b>iYEL062W</b>    |                                | 5 | 36254  |
| <b>iYEL063C</b>    | YEL063C (CAN1) YEL062W (NPR2)  | 5 | 33466  |
| <b>iYEL065W</b>    |                                | 5 | 29543  |
| <b>iYEL068C</b>    | YEL068C                        | 5 | 25978  |
| <b>iYEL072W-0</b>  | YEL071W (DLD3)                 | 5 | 14415  |
| <b>iYEL073C-0</b>  | YEL073C YEL072W                | 5 | 7553   |
| <b>iYEL073C-1</b>  | YEL073C YEL072W                | 5 | 8786   |
| <b>iYEL073C-2</b>  | YEL073C YEL072W                | 5 | 10019  |
| <b>iYEL073C-3</b>  | YEL073C YEL072W                | 5 | 11252  |
| <b>iYEL073C-4</b>  | YEL073C YEL072W                | 5 | 12485  |
| <b>iYEL074W</b>    |                                | 5 | 6464   |
| <b>iYEL075C</b>    | YEL075C YEL074W                | 5 | 5713   |
| <b>iYEL077C</b>    | YEL077C                        | 5 | 4097   |
| <b>iYELCdelta3</b> | YEL027W (CUP5) tM(CAU)E        | 5 | 99664  |

|                    |                                 |   |        |
|--------------------|---------------------------------|---|--------|
| <b>iYELCdelta4</b> | YEL010W                         | 5 | 135939 |
| <b>iYELCtau1</b>   |                                 | 5 | 118551 |
| <b>iYELWdelta2</b> | YEL050C (RML2) YEL049W (PAU2)   | 5 | 62474  |
| <b>iYELWdelta5</b> |                                 | 5 | 137639 |
| <b>iYELWdelta6</b> |                                 | 5 | 138553 |
| <b>iYER002W</b>    |                                 | 5 | 157497 |
| <b>iYER003C</b>    | YER003C (PMI40) YER004W         | 5 | 159117 |
| <b>iYER004W</b>    | YER005W (YND1)                  | 5 | 160274 |
| <b>iYER005W</b>    | YER006W (NUG1)                  | 5 | 162441 |
| <b>iYER006W</b>    | YER007W (PAC2)                  | 5 | 164284 |
| <b>iYER007C-A</b>  | YER007C-A                       | 5 | 166884 |
| <b>iYER007W</b>    |                                 | 5 | 166082 |
| <b>iYER008C</b>    | YER008C (SEC3) YER009W (NTF2)   | 5 | 171817 |
| <b>iYER009W</b>    |                                 | 5 | 172491 |
| <b>iYER010C-0</b>  | YER010C YER011W (TIR1)          | 5 | 173337 |
| <b>iYER010C-1</b>  | YER010C YER011W (TIR1)          | 5 | 174292 |
| <b>iYER011W</b>    | YER012W (PRE1)                  | 5 | 176011 |
| <b>iYER012W</b>    | YER013W (PRP22)                 | 5 | 178430 |
| <b>iYER013W</b>    | YER014W (HEM14)                 | 5 | 182277 |
| <b>iYER014W</b>    | YER015W (FAA2)                  | 5 | 184218 |
| <b>iYER015W</b>    | YER016W (BIM1)                  | 5 | 186774 |
| <b>iYER016W</b>    |                                 | 5 | 189310 |
| <b>iYER017C</b>    | YER017C (AFG3)                  | 5 | 191787 |
| <b>iYER018C</b>    | YER018C (SPC25) YER019W (ISC1)  | 5 | 192623 |
| <b>iYER019C-A</b>  | YER019C-A (SBH2) YER020W (GPA2) | 5 | 194538 |
| <b>iYER020W</b>    | YER021W (RPN3)                  | 5 | 196516 |
| <b>iYER021W</b>    | YER022W (SRB4)                  | 5 | 198518 |
| <b>iYER022W</b>    | YER023W (PRO3)                  | 5 | 200874 |
| <b>iYER023W</b>    | YER024W (YAT2)                  | 5 | 201935 |
| <b>iYER024W</b>    | YER025W (GCD11)                 | 5 | 204962 |
| <b>iYER025W</b>    |                                 | 5 | 206833 |
| <b>iYER026C</b>    | YER026C (CHO1)                  | 5 | 208473 |
| <b>iYER027C</b>    | YER027C (GAL83)                 | 5 | 210231 |
| <b>iYER028C</b>    | YER028C                         | 5 | 211875 |
| <b>iYER029C</b>    | YER029C (SMB1) YER030W          | 5 | 213176 |
| <b>iYER030W</b>    |                                 | 5 | 213897 |
| <b>iYER031C</b>    | YER031C (YPT31) YER032W (FIR1)  | 5 | 214746 |
| <b>iYER032W</b>    |                                 | 5 | 217692 |
| <b>iYER033C</b>    | YER033C (ZRG8) YER034W          | 5 | 221286 |
| <b>iYER034W</b>    | YER035W (EDC2)                  | 5 | 222402 |
| <b>iYER035W</b>    |                                 | 5 | 223075 |
| <b>iYER036C</b>    | YER036C (KRE30) YER037W (PHM8)  | 5 | 225198 |
| <b>iYER038C</b>    | YER038C (KRE29)                 | 5 | 228251 |
| <b>iYER039C-A</b>  | YER039C-A YER040W (GLN3)        | 5 | 229480 |
| <b>iYER040W</b>    | YER041W (YEN1)                  | 5 | 231986 |
| <b>iYER041W</b>    | YER042W (MXR1)                  | 5 | 234739 |
| <b>iYER042W</b>    |                                 | 5 | 235490 |
| <b>iYER043C</b>    | YER043C (SAH1)                  | 5 | 237118 |
| <b>iYER044C</b>    | YER044C (ERG28)                 | 5 | 238015 |
| <b>iYER044C-A</b>  | YER044C-A (MEI4)                | 5 | 239773 |
| <b>iYER045C-0</b>  | YER045C (ACA1) YER046W (SPO73)  | 5 | 241500 |

|                   |                                 |   |        |
|-------------------|---------------------------------|---|--------|
| <b>iYER045C-1</b> | YER045C (ACA1) YER046W (SPO73)  | 5 | 242339 |
| <b>iYER046W</b>   |                                 | 5 | 243610 |
| <b>iYER047C</b>   | YER047C (SAP1)                  | 5 | 246502 |
| <b>iYER048C</b>   | YER048C (CAJ1) YER048W-A        | 5 | 248156 |
| <b>iYER048W-A</b> | YER049W                         | 5 | 251001 |
| <b>iYER049W</b>   |                                 | 5 | 253661 |
| <b>iYER050C</b>   | YER050C (RSM18) YER051W         | 5 | 254578 |
| <b>iYER051W</b>   |                                 | 5 | 256133 |
| <b>iYER052C</b>   | YER052C (HOM3)                  | 5 | 257957 |
| <b>iYER053C-0</b> | YER053C                         | 5 | 259638 |
| <b>iYER053C-1</b> | YER053C                         | 5 | 260844 |
| <b>iYER054C</b>   | YER054C (GIP2)                  | 5 | 263697 |
| <b>iYER055C</b>   | YER055C (HIS1)                  | 5 | 265784 |
| <b>iYER056C</b>   | YER056C (FCY2)                  | 5 | 268112 |
| <b>iYER056C-A</b> | YER056C-A (RPL34A)              | 5 | 270183 |
| <b>iYER057C</b>   | YER057C (HMF1) YER058W (PET117) | 5 | 271124 |
| <b>iYER058W</b>   | YER059W (PCL6)                  | 5 | 272089 |
| <b>iYER059W</b>   | YER060W (FCY21)                 | 5 | 273884 |
| <b>iYER060W</b>   | YER060W-A (FCY22)               | 5 | 276151 |
| <b>iYER060W-A</b> |                                 | 5 | 278162 |
| <b>iYER061C</b>   | YER061C (CEM1)                  | 5 | 279624 |
| <b>iYER062C</b>   | YER062C (HOR2) YER063W (THO1)   | 5 | 280680 |
| <b>iYER063W</b>   |                                 | 5 | 282364 |
| <b>iYER066W</b>   |                                 | 5 | 290797 |
| <b>iYER067W</b>   | YER068W (MOT2)                  | 5 | 292549 |
| <b>iYER068W</b>   | YER069W (ARG5,6)                | 5 | 294811 |
| <b>iYER069W</b>   | YER070W (RNR1)                  | 5 | 297999 |
| <b>iYER070W</b>   |                                 | 5 | 301614 |
| <b>iYER071C</b>   | YER071C YER072W (VTC1)          | 5 | 302325 |
| <b>iYER072W</b>   | YER073W (ALD5)                  | 5 | 303193 |
| <b>iYER073W</b>   | YER074W (RPS24A)                | 5 | 305589 |
| <b>iYER074W</b>   |                                 | 5 | 307192 |
| <b>iYER075C</b>   | YER075C (PTP3)                  | 5 | 311195 |
| <b>iYER076C</b>   | YER076C                         | 5 | 313494 |
| <b>iYER077C</b>   | YER077C                         | 5 | 316596 |
| <b>iYER078C</b>   | YER078C YER079W                 | 5 | 318338 |
| <b>iYER079W</b>   | YER080W                         | 5 | 319548 |
| <b>iYER081W</b>   |                                 | 5 | 324091 |
| <b>iYER082C</b>   | YER082C (KRE31)                 | 5 | 325932 |
| <b>iYER084W</b>   |                                 | 5 | 327447 |
| <b>iYER085C</b>   | YER085C YER086W (ILV1)          | 5 | 328136 |
| <b>iYER086W</b>   | YER087W                         | 5 | 330203 |
| <b>iYER087C-A</b> | YER087C-A (SBH1)                | 5 | 332826 |
| <b>iYER087W</b>   |                                 | 5 | 332302 |
| <b>iYER088C</b>   | YER088C (DOT6)                  | 5 | 335184 |
| <b>iYER089C</b>   | YER089C (PTC2) YER090W (TRP2)   | 5 | 337336 |
| <b>iYER090W</b>   |                                 | 5 | 339468 |
| <b>iYER091C</b>   | YER091C (MET6)                  | 5 | 342163 |
| <b>iYER091C-A</b> | YER091C-A YER092W (IES5)        | 5 | 342607 |
| <b>iYER092W</b>   |                                 | 5 | 343228 |
| <b>iYER093C</b>   | YER093C                         | 5 | 347608 |

|                   |                                 |   |        |
|-------------------|---------------------------------|---|--------|
| <b>iYER093C-A</b> | YER093C-A                       | 5 | 348396 |
| <b>iYER094C</b>   | YER094C (PUP3) YER095W (RAD51)  | 5 | 349342 |
| <b>iYER095W</b>   | YER096W (SHC1)                  | 5 | 351178 |
| <b>iYER096W</b>   | YER097W                         | 5 | 353232 |
| <b>iYER098W</b>   |                                 | 5 | 357726 |
| <b>iYER099C</b>   | YER099C (PRS2) YER100W (UBC6)   | 5 | 359057 |
| <b>iYER100W</b>   |                                 | 5 | 360310 |
| <b>iYER101C</b>   | YER101C (AST2) YER102W (RPS8B)  | 5 | 361790 |
| <b>iYER102W</b>   | YER103W (SSA4)                  | 5 | 363698 |
| <b>iYER103W</b>   | YER104W (RTT105)                | 5 | 366513 |
| <b>iYER104W</b>   |                                 | 5 | 367424 |
| <b>iYER105C</b>   | YER105C (NUP157) YER106W (MAM1) | 5 | 372009 |
| <b>iYER106W</b>   |                                 | 5 | 373230 |
| <b>iYER107C</b>   | YER107C (GLE2)                  | 5 | 374541 |
| <b>iYER108C</b>   | YER107C (GLE2)                  | 5 | 376995 |
| <b>iYER111C</b>   | YER111C (SWI4) YER112W (LSM4)   | 5 | 385872 |
| <b>iYER112W</b>   |                                 | 5 | 387791 |
| <b>iYER113C</b>   | YER113C                         | 5 | 390048 |
| <b>iYER114C</b>   | YER114C (BOI2)                  | 5 | 393708 |
| <b>iYER115C</b>   | YER115C (SPR6)                  | 5 | 394863 |
| <b>iYER116C</b>   | YER116C (SLX8) YER117W (RPL23B) | 5 | 396168 |
| <b>iYER117W</b>   |                                 | 5 | 397649 |
| <b>iYER118C</b>   | YER118C (SHO1)                  | 5 | 399051 |
| <b>iYER120W</b>   | YER121W                         | 5 | 401865 |
| <b>iYER121W</b>   |                                 | 5 | 402715 |
| <b>iYER122C</b>   | YER122C (GLO3) YER123W (YCK3)   | 5 | 404348 |
| <b>iYER123W</b>   |                                 | 5 | 406428 |
| <b>iYER124C</b>   | YER124C (DSE1) YER125W (RSP5)   | 5 | 409060 |
| <b>iYER125W</b>   |                                 | 5 | 412615 |
| <b>iYER126C</b>   | YER126C (NSA2) YER127W (LCP5)   | 5 | 414176 |
| <b>iYER127W</b>   | YER128W                         | 5 | 415551 |
| <b>iYER128W</b>   | YER129W (PAK1)                  | 5 | 416467 |
| <b>iYER129W</b>   |                                 | 5 | 420706 |
| <b>iYER130C</b>   | YER130C YER131W (RPS26B)        | 5 | 422443 |
| <b>iYER131W</b>   |                                 | 5 | 424308 |
| <b>iYER132C</b>   | YER132C (PMD1) YER133W (GLC7)   | 5 | 430446 |
| <b>iYER134C</b>   | YER134C                         | 5 | 437800 |
| <b>iYER135C</b>   | YER135C ti(aau)e1YER136W (GDI1) | 5 | 438341 |
| <b>iYER136W</b>   |                                 | 5 | 440968 |
| <b>iYER138W-A</b> |                                 | 5 | 449575 |
| <b>iYER139C</b>   | YER139C YER140W                 | 5 | 451239 |
| <b>iYER140W</b>   | YER141W (COX15)                 | 5 | 453231 |
| <b>iYER142C</b>   | YER142C (MAG1) YER143W (DDI1)   | 5 | 456032 |
| <b>iYER143W</b>   |                                 | 5 | 457601 |
| <b>iYER144C</b>   | YER144C (UBP5)                  | 5 | 460219 |
| <b>iYER145C</b>   | YER145C (FTR1) YER146W (LSM5)   | 5 | 461736 |
| <b>iYER146W</b>   |                                 | 5 | 462862 |
| <b>iYER147C</b>   | YER147C (SCC4) YER148W (SPT15)  | 5 | 464838 |
| <b>iYER148W</b>   |                                 | 5 | 466021 |
| <b>iYER149C</b>   | YER149C (PEA2) YER150W (SPI1)   | 5 | 467466 |
| <b>iYER150W</b>   |                                 | 5 | 468812 |

|                      |                                 |   |        |
|----------------------|---------------------------------|---|--------|
| <b>iYER151C</b>      | YER151C (UBP3)                  | 5 | 472420 |
| <b>iYER153C</b>      | YER153C (PET122) YER154W (OXA1) | 5 | 474801 |
| <b>iYER154W</b>      |                                 | 5 | 476224 |
| <b>iYER155C</b>      | YER155C (BEM2)                  | 5 | 482844 |
| <b>iYER156C</b>      | YER156C YER157W (SEC34)         | 5 | 484337 |
| <b>iYER157W</b>      |                                 | 5 | 487189 |
| <b>iYER158C</b>      | YER158C                         | 5 | 490574 |
| <b>iYER159C</b>      | YER159C (BUR6)                  | 5 | 491954 |
| <b>iYER161C</b>      | YER161C (SPT2)                  | 5 | 500344 |
| <b>iYER162C</b>      | YER162C (RAD4)                  | 5 | 502890 |
| <b>iYER163C-0</b>    | YER163C YER164W (CHD1)          | 5 | 503778 |
| <b>iYER163C-1</b>    | YER163C YER164W (CHD1)          | 5 | 504583 |
| <b>iYER164W</b>      | YER165W (PAB1)                  | 5 | 509794 |
| <b>iYER165W</b>      | YER166W (DNF1)                  | 5 | 512102 |
| <b>iYER166W</b>      | YER167W (BCK2)                  | 5 | 517455 |
| <b>iYER167W</b>      |                                 | 5 | 520767 |
| <b>iYER168C</b>      | YER168C (CCA1) YER169W (RPH1)   | 5 | 522665 |
| <b>iYER169W</b>      | YER170W (ADK2)                  | 5 | 525755 |
| <b>iYER170W</b>      | YER171W (RAD3)                  | 5 | 526647 |
| <b>iYER171W</b>      |                                 | 5 | 529414 |
| <b>iYER172C</b>      | YER172C (BRR2) YER173W (RAD24)  | 5 | 536017 |
| <b>iYER173W</b>      |                                 | 5 | 538275 |
| <b>iYER174C</b>      | YER174C (GRX4)                  | 5 | 539164 |
| <b>iYER175C</b>      | YER175C (TMT1) YER176W (ECM32)  | 5 | 540359 |
| <b>iYER176W</b>      | YER177W (BMH1)                  | 5 | 545051 |
| <b>iYER177W</b>      | YER178W (PDA1)                  | 5 | 546410 |
| <b>iYER178W</b>      | YER179W (DMC1)                  | 5 | 548075 |
| <b>iYER179W</b>      |                                 | 5 | 549513 |
| <b>iYER180C</b>      | YER180C (ISC10)                 | 5 | 550523 |
| <b>iYER181C</b>      | YER181C YER182W                 | 5 | 551792 |
| <b>iYER182W</b>      |                                 | 5 | 553255 |
| <b>iYER183C-0</b>    | YER183C (FAU1)                  | 5 | 553965 |
| <b>iYER183C-1</b>    | YER183C (FAU1)                  | 5 | 555128 |
| <b>iYER184C</b>      | YER184C YER185W                 | 5 | 558676 |
| <b>iYER185W</b>      |                                 | 5 | 560361 |
| <b>iYER186C</b>      | YER186C YER187W                 | 5 | 562621 |
| <b>iYER187W</b>      | YER188W                         | 5 | 566651 |
| <b>iYERCdelta10</b>  | YER065C (ICL1) YER066W          | 5 | 288060 |
| <b>iYERCdelta14</b>  | YER132C (PMD1) YER133W (GLC7)   | 5 | 431819 |
| <b>iYERCdelta20</b>  | YER137C-A YER138W-A             | 5 | 449317 |
| <b>iYERCdelta24</b>  | YER159C-A                       | 5 | 498417 |
| <b>iYERCdelta26</b>  | YER181C YER182W                 | 5 | 552263 |
| <b>iYERCdelta8</b>   | YER048C (CAJ1) YER048W-A        | 5 | 249330 |
| <b>iYERComega1-0</b> | YER186C YER187W                 | 5 | 564020 |
| <b>iYERComega1-1</b> | YER186C YER187W                 | 5 | 565123 |
| <b>iYERCsigma3</b>   |                                 | 5 | 434968 |
| <b>iYERCtau2</b>     | YER097W                         | 5 | 354726 |
| <b>iYERCtau3</b>     |                                 | 5 | 436602 |
| <b>iYERWdelta11</b>  | YER075C (PTP3)                  | 5 | 312441 |
| <b>iYERWdelta12</b>  | YER097W                         | 5 | 353731 |
| <b>iYERWdelta17</b>  | YER137C                         | 5 | 443069 |

|                       |                                  |   |        |
|-----------------------|----------------------------------|---|--------|
| <b>iYERWdelta21-0</b> | YER137C                          | 5 | 445136 |
| <b>iYERWdelta21-1</b> | YER137C                          | 5 | 446417 |
| <b>iYERWdelta21-2</b> | YER137C                          | 5 | 447698 |
| <b>iYERWdelta22</b>   |                                  | 5 | 488161 |
| <b>iYERWdelta7</b>    | YER012W (PRE1)                   | 5 | 176855 |
| <b>iYERWdelta9</b>    | YER048C (CAJ1) YER048W-A         | 5 | 249751 |
| <b>iYERWomega2-0</b>  | YER189W                          | 5 | 569020 |
| <b>iYFL002C</b>       | YFL002C (SPB4) YFL001W (DEG1)    | 6 | 146928 |
| <b>iYFL003C</b>       | YFL003C (MSH4) tn(guu)fYFL002W-B | 6 | 137151 |
| <b>iYFL004W</b>       |                                  | 6 | 134290 |
| <b>iYFL005W</b>       | YFL004W (VTC2)                   | 6 | 130975 |
| <b>iYFL006W</b>       | YFL005W (SEC4)                   | 6 | 129904 |
| <b>iYFL007W</b>       | YFL006W                          | 6 | 128888 |
| <b>iYFL008W</b>       | YFL007W (BLM3)                   | 6 | 123101 |
| <b>iYFL009W</b>       | YFL008W (SMC1)                   | 6 | 118478 |
| <b>iYFL010C</b>       | YFL010C (WWM1) YFL009W (CDC4)    | 6 | 115737 |
| <b>iYFL011W</b>       | YFL010W-A (AUA1)                 | 6 | 113979 |
| <b>iYFL013W-A</b>     | YFL012W                          | 6 | 110178 |
| <b>iYFL014W</b>       |                                  | 6 | 107579 |
| <b>iYFL015C</b>       | YFL015C YFL014W (HSP12)          | 6 | 106957 |
| <b>iYFL016C</b>       | YFL016C (MDJ1)                   | 6 | 106230 |
| <b>iYFL017C</b>       | YFL017C (GNA1)                   | 6 | 104456 |
| <b>iYFL018C</b>       | YFL018C (LPD1) YFL017W-A (SMX2)  | 6 | 103121 |
| <b>iYFL020C</b>       | YFL020C (PAU5)                   | 6 | 99593  |
| <b>iYFL021W-0</b>     |                                  | 6 | 97496  |
| <b>iYFL021W-1</b>     |                                  | 6 | 98360  |
| <b>iYFL023W</b>       |                                  | 6 | 93374  |
| <b>iYFL024C</b>       | YFL024C (EPL1) YFL023W (FYV11)   | 6 | 90343  |
| <b>iYFL025C</b>       | YFL025C (BST1)                   | 6 | 87232  |
| <b>iYFL026W</b>       |                                  | 6 | 83873  |
| <b>iYFL027C</b>       | YFL027C (GYP8) YFL026W (STE2)    | 6 | 81910  |
| <b>iYFL028C</b>       | YFL028C (CAF16)                  | 6 | 80211  |
| <b>iYFL029C</b>       | YFL029C (CAK1)                   | 6 | 79159  |
| <b>iYFL030W</b>       |                                  | 6 | 77986  |
| <b>iYFL033C</b>       | YFL033C (RIM15) YFL032W          | 6 | 74426  |
| <b>iYFL034C-A</b>     | YFL034C-A (RPL22B) YFL034W       | 6 | 64932  |
| <b>iYFL034W</b>       |                                  | 6 | 68697  |
| <b>iYFL035C-A</b>     | YFL034C-B (MOB2)                 | 6 | 63993  |
| <b>iYFL036W</b>       |                                  | 6 | 62837  |
| <b>iYFL038C</b>       | YFL038C (YPT1) YFL037W (TUB2)    | 6 | 55986  |
| <b>iYFL039C</b>       | YFL039C (ACT1)                   | 6 | 54696  |
| <b>iYFL040W</b>       |                                  | 6 | 52973  |
| <b>iYFL041W</b>       | YFL040W                          | 6 | 51008  |
| <b>iYFL042C</b>       | YFL042C YFL041W (FET5)           | 6 | 47745  |
| <b>iYFL044C</b>       | YFL044C                          | 6 | 45560  |
| <b>iYFL045C</b>       | YFL045C (SEC53)                  | 6 | 44392  |
| <b>iYFL046W</b>       |                                  | 6 | 43438  |
| <b>iYFL047W</b>       | YFL046W                          | 6 | 42565  |
| <b>iYFL048C</b>       | YFL048C (EMP47) YFL047W (RGD2)   | 6 | 40180  |
| <b>iYFL049W</b>       |                                  | 6 | 38674  |
| <b>iYFL050C</b>       | YFL050C (ALR2) YFL049W           | 6 | 35848  |

|                    |                               |   |        |
|--------------------|-------------------------------|---|--------|
| <b>iYFL051C-0</b>  | YFL051C                       | 6 | 30540  |
| <b>iYFL051C-1</b>  | YFL051C                       | 6 | 31906  |
| <b>iYFL052W</b>    |                               | 6 | 29629  |
| <b>iYFL053W-0</b>  | YFL052W                       | 6 | 25198  |
| <b>iYFL053W-1</b>  | YFL052W                       | 6 | 26715  |
| <b>iYFL054C</b>    | YFL054C YFL053W (DAK2)        | 6 | 22787  |
| <b>iYFL055W-0</b>  |                               | 6 | 18680  |
| <b>iYFL055W-1</b>  |                               | 6 | 19763  |
| <b>iYFL056C-0</b>  | YFL056C (AAD6) YFL055W (AGP3) | 6 | 15431  |
| <b>iYFL056C-1</b>  | YFL056C (AAD6) YFL055W (AGP3) | 6 | 16217  |
| <b>iYFL058W</b>    |                               | 6 | 13951  |
| <b>iYFL059W</b>    | YFL058W (THI5)                | 6 | 12259  |
| <b>iYFL060C</b>    | YFL060C (SNO3) YFL059W (SNZ3) | 6 | 10969  |
| <b>iYFL061W</b>    |                               | 6 | 10222  |
| <b>iYFL062W-0</b>  | YFL061W                       | 6 | 7565   |
| <b>iYFL062W-1</b>  | YFL061W                       | 6 | 8555   |
| <b>iYFL063W</b>    | YFL062W (COS4)                | 6 | 5521   |
| <b>iYFL066C</b>    | YFL066C                       | 6 | 2615   |
| <b>iYFL067W</b>    |                               | 6 | 1363   |
| <b>iYFL068W</b>    | YFL067W                       | 6 | 535    |
| <b>iYFLCdelta6</b> |                               | 6 | 144816 |
| <b>iYFLWdelta1</b> | YFL019C                       | 6 | 100895 |
| <b>iYFLWdelta5</b> |                               | 6 | 143941 |
| <b>iYFR001W</b>    | YFR002W (NIC96)               | 6 | 149718 |
| <b>iYFR002W</b>    |                               | 6 | 152529 |
| <b>iYFR003C</b>    | YFR003C YFR004W (RPN11)       | 6 | 153118 |
| <b>iYFR004W</b>    |                               | 6 | 154307 |
| <b>iYFR005C</b>    | YFR005C (SAD1) YFR006W        | 6 | 155867 |
| <b>iYFR006W</b>    | YFR007W                       | 6 | 157745 |
| <b>iYFR007W</b>    | YFR008W                       | 6 | 160353 |
| <b>iYFR008W</b>    | YFR009W (GCN20)               | 6 | 161193 |
| <b>iYFR009W</b>    | YFR010W (UBP6)                | 6 | 164739 |
| <b>iYFR010W</b>    |                               | 6 | 166558 |
| <b>iYFR011C</b>    | YFR011C ty(gua)f1 YFR012W     | 6 | 167250 |
| <b>iYFR012W</b>    | YFR013W (IOC3)                | 6 | 168488 |
| <b>iYFR013W</b>    |                               | 6 | 172276 |
| <b>iYFR014C</b>    | YFR014C (CMK1)                | 6 | 173868 |
| <b>iYFR015C</b>    | YFR015C (GSY1)                | 6 | 176382 |
| <b>iYFR016C</b>    | YFR016C tg(gcc)f2             | 6 | 180734 |
| <b>iYFR017C</b>    | YFR017C                       | 6 | 182848 |
| <b>iYFR018C</b>    | YFR018C YFR019W (FAB1)        | 6 | 184209 |
| <b>iYFR019W</b>    | YFR020W ts(gcu)f              | 6 | 191325 |
| <b>iYFR020W</b>    | YFR021W (AUT10)               | 6 | 193423 |
| <b>iYFR021W</b>    | YFR022W                       | 6 | 196301 |
| <b>iYFR022W</b>    | YFR023W (PES4)                | 6 | 199021 |
| <b>iYFR023W</b>    |                               | 6 | 201696 |
| <b>iYFR024C-A</b>  | YFR024C-A (LSB3)              | 6 | 203420 |
| <b>iYFR025C</b>    | YFR025C (HIS2)                | 6 | 204737 |
| <b>iYFR026C</b>    | YFR026C YFR027W (ECO1)        | 6 | 206244 |
| <b>iYFR027W</b>    |                               | 6 | 208284 |
| <b>iYFR029W</b>    | YFR030W (MET10)               | 6 | 212960 |

|                     |                                  |   |        |
|---------------------|----------------------------------|---|--------|
| <b>iYFR030W</b>     |                                  | 6 | 216406 |
| <b>iYFR031C</b>     | YFR031C (SMC2)                   | 6 | 220093 |
| <b>iYFR031C-A</b>   | YFR031C-A (RPL2A)                | 6 | 221405 |
| <b>iYFR032C</b>     | YFR032C                          | 6 | 222946 |
| <b>iYFR032C-A</b>   | YFR032C-A (RPL29)                | 6 | 223424 |
| <b>iYFR033C</b>     | YFR033C (QCR6)                   | 6 | 224756 |
| <b>iYFR034C</b>     | YFR034C (PHO4)                   | 6 | 225945 |
| <b>iYFR035C</b>     | YFR035C tk(cuu)f YFR036W (CDC26) | 6 | 226452 |
| <b>iYFR036W</b>     |                                  | 6 | 227323 |
| <b>iYFR037C</b>     | YFR037C (RSC8) YFR038W           | 6 | 229172 |
| <b>iYFR038W</b>     |                                  | 6 | 231702 |
| <b>iYFR039C</b>     | YFR039C YFR040W (SAP155)         | 6 | 233531 |
| <b>iYFR040W</b>     |                                  | 6 | 237238 |
| <b>iYFR041C</b>     | YFR041C YFR042W                  | 6 | 238243 |
| <b>iYFR043C</b>     | YFR043C                          | 6 | 239815 |
| <b>iYFR044C</b>     | YFR044C YFR045W                  | 6 | 241425 |
| <b>iYFR045W</b>     |                                  | 6 | 242986 |
| <b>iYFR046C</b>     | YFR046C                          | 6 | 244146 |
| <b>iYFR047C</b>     | YFR047C YFR048W                  | 6 | 245153 |
| <b>iYFR048W</b>     | YFR049W (YMR31)                  | 6 | 248121 |
| <b>iYFR049W</b>     |                                  | 6 | 248881 |
| <b>iYFR050C</b>     | YFR050C (PRE4)                   | 6 | 249853 |
| <b>iYFR051C</b>     | YFR051C (RET2) YFR052W (RPN12)   | 6 | 251791 |
| <b>iYFR052W</b>     |                                  | 6 | 253317 |
| <b>iYFR053C-0</b>   | YFR053C (HXK1)                   | 6 | 255037 |
| <b>iYFR053C-1</b>   | YFR053C (HXK1)                   | 6 | 256305 |
| <b>iYFR053C-2</b>   | YFR053C (HXK1)                   | 6 | 257573 |
| <b>iYFR054C-0</b>   | YFR054C                          | 6 | 259421 |
| <b>iYFR054C-2</b>   | YFR054C                          | 6 | 261683 |
| <b>iYFR054C-3</b>   | YFR054C                          | 6 | 262814 |
| <b>iYFR055W-0</b>   | YFR057W                          | 6 | 265214 |
| <b>iYFR055W-1</b>   | YFR057W                          | 6 | 266492 |
| <b>iYFRCdelta8</b>  | YFR009W (GCN20)                  | 6 | 162128 |
| <b>iYFRCdelta9</b>  | YFR020W                          | 6 | 191841 |
| <b>iYFRWdelta10</b> | YFR026C YFR027W (ECO1)           | 6 | 207125 |
| <b>iYFRWdelta7</b>  | YFR007W                          | 6 | 158679 |
| <b>iYGL001C</b>     | YGL001C (ERG26)                  | 7 | 496497 |
| <b>iYGL002W</b>     |                                  | 7 | 495162 |
| <b>iYGL003C</b>     | YGL003C (CDH1) YGL002W (ERP6)    | 7 | 494169 |
| <b>iYGL004C</b>     | YGL004C                          | 7 | 491951 |
| <b>iYGL005C</b>     | YGL005C (COD5)                   | 7 | 490542 |
| <b>iYGL006W</b>     |                                  | 7 | 489437 |
| <b>iYGL007W-0</b>   | YGL006W (PMC1)                   | 7 | 483633 |
| <b>iYGL007W-1</b>   | YGL006W (PMC1)                   | 7 | 484774 |
| <b>iYGL008C</b>     | YGL008C (PMA1) YGL007W           | 7 | 482662 |
| <b>iYGL009C</b>     | YGL009C (LEU1)                   | 7 | 478648 |
| <b>iYGL010W</b>     |                                  | 7 | 476065 |
| <b>iYGL011C</b>     | YGL011C (SCL1) YGL010W           | 7 | 475243 |
| <b>iYGL012W</b>     |                                  | 7 | 474272 |
| <b>iYGL013C</b>     | YGL013C (PDR1) YGL012W (ERG4)    | 7 | 472294 |
| <b>iYGL014W</b>     |                                  | 7 | 468803 |



|                   |                                |   |        |
|-------------------|--------------------------------|---|--------|
| <b>iYGL015C</b>   | YGL015C YGL014W (PUF4)         | 7 | 465431 |
| <b>iYGL016W</b>   |                                | 7 | 464907 |
| <b>iYGL017W</b>   | YGL016W (KAP122)               | 7 | 461361 |
| <b>iYGL018C</b>   | YGL018C (JAC1) YGL017W (ATE1)  | 7 | 459660 |
| <b>iYGL019W</b>   |                                | 7 | 458988 |
| <b>iYGL020C</b>   | YGL020C YGL019W (CKB1)         | 7 | 457866 |
| <b>iYGL021W</b>   |                                | 7 | 457063 |
| <b>iYGL022W</b>   | YGL021W (ALK1)                 | 7 | 454556 |
| <b>iYGL023C</b>   | YGL023C (PIB2) YGL022W (STT3)  | 7 | 452100 |
| <b>iYGL024W</b>   |                                | 7 | 450119 |
| <b>iYGL026C</b>   | YGL026C (TRP5)                 | 7 | 448531 |
| <b>iYGL027C</b>   | YGL027C (CWH41)                | 7 | 446139 |
| <b>iYGL028C</b>   | YGL028C (SCW11)                | 7 | 442905 |
| <b>iYGL029W</b>   |                                | 7 | 440421 |
| <b>iYGL030W</b>   | YGL029W (CGR1)                 | 7 | 439634 |
| <b>iYGL031C</b>   |                                | 7 | 437930 |
| <b>iYGL032C</b>   | YGL032C (AGA2)                 | 7 | 436829 |
| <b>iYGL033W</b>   |                                | 7 | 436347 |
| <b>iYGL034C-0</b> | YGL034C YGL033W (HOP2)         | 7 | 433575 |
| <b>iYGL034C-1</b> | YGL034C YGL033W (HOP2)         | 7 | 434411 |
| <b>iYGL035C</b>   | YGL035C (MIG1)                 | 7 | 433058 |
| <b>iYGL036W</b>   |                                | 7 | 431326 |
| <b>iYGL037C</b>   | YGL037C (PNC1) YGL036W         | 7 | 427944 |
| <b>iYGL038C</b>   | YGL038C (OCH1)                 | 7 | 426801 |
| <b>iYGL039W</b>   |                                | 7 | 425004 |
| <b>iYGL040C-0</b> | YGL040C (HEM2) YGL039W         | 7 | 420552 |
| <b>iYGL040C-1</b> | YGL040C (HEM2) YGL039W         | 7 | 421820 |
| <b>iYGL041C</b>   | YGL041C                        | 7 | 419222 |
| <b>iYGL042C</b>   | YGL042C                        | 7 | 418588 |
| <b>iYGL044C</b>   | YGL044C (RNA15) YGL043W (DST1) | 7 | 417031 |
| <b>iYGL045W</b>   |                                | 7 | 415725 |
| <b>iYGL046W</b>   | YGL045W                        | 7 | 414888 |
| <b>iYGL047W</b>   | YGL046W                        | 7 | 412157 |
| <b>iYGL048C</b>   | YGL048C (RPT6) YGL047W         | 7 | 411283 |
| <b>iYGL049C</b>   | YGL049C (TIF4632)              | 7 | 409601 |
| <b>iYGL050W</b>   |                                | 7 | 406594 |
| <b>iYGL051W</b>   | YGL050W                        | 7 | 404388 |
| <b>iYGL053W</b>   | YGL052W                        | 7 | 403299 |
| <b>iYGL054C</b>   | YGL054C (ERV14) YGL053W (PRM8) | 7 | 401284 |
| <b>iYGL055W</b>   |                                | 7 | 400157 |
| <b>iYGL056C</b>   | YGL056C (SDS23) YGL055W (OLE1) | 7 | 397618 |
| <b>iYGL057C</b>   | YGL057C                        | 7 | 395829 |
| <b>iYGL058W</b>   |                                | 7 | 394504 |
| <b>iYGL059W</b>   | YGL058W (RAD6)                 | 7 | 393560 |
| <b>iYGL060W</b>   | YGL059W                        | 7 | 391990 |
| <b>iYGL061C</b>   | YGL061C (DUO1) YGL060W         | 7 | 389709 |
| <b>iYGL062W</b>   |                                | 7 | 388730 |
| <b>iYGL064C</b>   | YGL064C YGL063W (PUS2)         | 7 | 383206 |
| <b>iYGL065C</b>   | YGL065C (ALG2)                 | 7 | 381269 |
| <b>iYGL066W</b>   |                                | 7 | 379580 |
| <b>iYGL067W</b>   | YGL066W (SGF73)                | 7 | 377253 |

|                   |                                 |   |        |
|-------------------|---------------------------------|---|--------|
| <b>iYGL068W</b>   | YGL067W (NPY1)                  | 7 | 375669 |
| <b>iYGL070C</b>   | YGL070C (RPB9)                  | 7 | 374825 |
| <b>iYGL071W</b>   |                                 | 7 | 374082 |
| <b>iYGL072C</b>   | YGL072C YGL071W (RCS1)          | 7 | 371360 |
| <b>iYGL075C</b>   | YGL075C (MPS2)                  | 7 | 368086 |
| <b>iYGL076C</b>   | YGL076C (RPL7A)                 | 7 | 365994 |
| <b>iYGL077C</b>   | YGL077C (HNM1)                  | 7 | 363914 |
| <b>iYGL078C</b>   | YGL078C (DBP3)                  | 7 | 361857 |
| <b>iYGL079W</b>   |                                 | 7 | 360098 |
| <b>iYGL080W</b>   | YGL079W                         | 7 | 359026 |
| <b>iYGL081W</b>   | YGL080W                         | 7 | 358337 |
| <b>iYGL082W</b>   | YGL081W                         | 7 | 356970 |
| <b>iYGL083W</b>   | YGL082W                         | 7 | 355470 |
| <b>iYGL084C</b>   | YGL084C (GUP1) YGL083W (SCY1)   | 7 | 352296 |
| <b>iYGL085W</b>   |                                 | 7 | 350438 |
| <b>iYGL087C</b>   | YGL087C (MMS2) YGL086W (MAD1)   | 7 | 346902 |
| <b>iYGL088W</b>   |                                 | 7 | 346199 |
| <b>iYGL089C</b>   | YGL089C (MF(ALPHA)2) YGL088W    | 7 | 345151 |
| <b>iYGL090W</b>   |                                 | 7 | 344582 |
| <b>iYGL092W</b>   |                                 | 7 | 341857 |
| <b>iYGL093W</b>   | YGL092W (NUP145)                | 7 | 337637 |
| <b>iYGL094C</b>   | YGL094C (PAN2) YGL093W (SPC105) | 7 | 334463 |
| <b>iYGL095C</b>   | YGL095C (VPS45)                 | 7 | 330605 |
| <b>iYGL096W-0</b> |                                 | 7 | 326159 |
| <b>iYGL096W-1</b> |                                 | 7 | 327030 |
| <b>iYGL097W-0</b> | YGL096W (TOS8)                  | 7 | 323228 |
| <b>iYGL097W-1</b> | YGL096W (TOS8)                  | 7 | 324278 |
| <b>iYGL098W</b>   | YGL097W (SRM1)                  | 7 | 318077 |
| <b>iYGL099W</b>   | YGL098W                         | 7 | 316551 |
| <b>iYGL100W</b>   | YGL099W (KRE35)                 | 7 | 314281 |
| <b>iYGL101W</b>   | YGL100W (SEH1)                  | 7 | 312838 |
| <b>iYGL102C</b>   | YGL102C YGL101W                 | 7 | 311931 |
| <b>iYGL104C</b>   | YGL104C YGL103W (RPL28)         | 7 | 310171 |
| <b>iYGL105W</b>   |                                 | 7 | 308565 |
| <b>iYGL106W</b>   | YGL105W (ARC1)                  | 7 | 307007 |
| <b>iYGL107C</b>   | YGL107C YGL106W (MLC1)          | 7 | 306271 |
| <b>iYGL108C</b>   | YGL108C                         | 7 | 304069 |
| <b>iYGL110C</b>   | YGL110C YGL109W                 | 7 | 303409 |
| <b>iYGL111W</b>   |                                 | 7 | 301367 |
| <b>iYGL112C</b>   | YGL112C (TAF60) YGL111W (NSA1)  | 7 | 299726 |
| <b>iYGL114W</b>   | YGL113W (SLD3)                  | 7 | 295635 |
| <b>iYGL115W</b>   | YGL114W                         | 7 | 292999 |
| <b>iYGL116W</b>   | YGL115W (SNF4)                  | 7 | 291639 |
| <b>iYGL117W</b>   | YGL116W (CDC20)                 | 7 | 289310 |
| <b>iYGL118C</b>   | YGL118C YGL117W                 | 7 | 288452 |
| <b>iYGL119W</b>   |                                 | 7 | 285948 |
| <b>iYGL120C</b>   | YGL120C (PRP43) YGL119W (ABC1)  | 7 | 283938 |
| <b>iYGL121C</b>   | YGL121C                         | 7 | 281158 |
| <b>iYGL122C</b>   | YGL122C (NAB2)                  | 7 | 280524 |
| <b>iYGL123W</b>   |                                 | 7 | 278382 |
| <b>iYGL124C</b>   | YGL124C (MON1) YGL123W (RPS2)   | 7 | 276715 |

|                   |                                |   |        |
|-------------------|--------------------------------|---|--------|
| <b>iYGL125W</b>   |                                | 7 | 274323 |
| <b>iYGL126W</b>   | YGL125W (MET13)                | 7 | 272143 |
| <b>iYGL127C</b>   | YGL127C (SOH1) YGL126W (SCS3)  | 7 | 270779 |
| <b>iYGL129C</b>   | YGL129C (RSM23)                | 7 | 269192 |
| <b>iYGL130W</b>   |                                | 7 | 267527 |
| <b>iYGL131C</b>   | YGL131C YGL130W (CEG1)         | 7 | 265862 |
| <b>iYGL133W</b>   | YGL132W                        | 7 | 261504 |
| <b>iYGL134W</b>   | YGL133W (ITC1)                 | 7 | 256967 |
| <b>iYGL135W</b>   | YGL134W (PCL10)                | 7 | 255297 |
| <b>iYGL136C</b>   | YGL136C YGL135W (RPL1B)        | 7 | 253862 |
| <b>iYGL137W</b>   |                                | 7 | 252741 |
| <b>iYGL138C</b>   | YGL138C YGL137W (SEC27)        | 7 | 249534 |
| <b>iYGL139W</b>   |                                | 7 | 248127 |
| <b>iYGL140C</b>   | YGL140C YGL139W                | 7 | 245015 |
| <b>iYGL141W</b>   |                                | 7 | 241088 |
| <b>iYGL142C</b>   | YGL142C (GPI10) YGL141W (HUL5) | 7 | 238122 |
| <b>iYGL143C</b>   | YGL143C (MRF1)                 | 7 | 235961 |
| <b>iYGL144C</b>   | YGL144C                        | 7 | 234510 |
| <b>iYGL145W</b>   |                                | 7 | 232351 |
| <b>iYGL146C</b>   | YGL146C YGL145W (TIP20)        | 7 | 229689 |
| <b>iYGL147C</b>   | YGL147C (RPL9A)                | 7 | 228332 |
| <b>iYGL148W</b>   |                                | 7 | 227532 |
| <b>iYGL151W</b>   |                                | 7 | 220925 |
| <b>iYGL152C</b>   | YGL152C YGL151W (NUT1)         | 7 | 217372 |
| <b>iYGL156W</b>   | YGL155W (CDC43)                | 7 | 213670 |
| <b>iYGL157W</b>   | YGL156W (AMS1)                 | 7 | 210052 |
| <b>iYGL158W</b>   | YGL157W                        | 7 | 208574 |
| <b>iYGL159W</b>   | YGL158W (RCK1)                 | 7 | 203837 |
| <b>iYGL160W</b>   | YGL159W                        | 7 | 202277 |
| <b>iYGL161C</b>   | YGL161C YGL160W                | 7 | 200146 |
| <b>iYGL162W</b>   |                                | 7 | 199041 |
| <b>iYGL163C-0</b> | YGL163C (RAD54) YGL162W (SUT1) | 7 | 196407 |
| <b>iYGL163C-1</b> | YGL163C (RAD54) YGL162W (SUT1) | 7 | 197274 |
| <b>iYGL164C</b>   | YGL164C                        | 7 | 193304 |
| <b>iYGL167C</b>   | YGL167C (PMR1) YGL166W (CUP2)  | 7 | 190472 |
| <b>iYGL169W</b>   | YGL168W                        | 7 | 187343 |
| <b>iYGL170C</b>   | YGL170C (SPO74) YGL169W (SUA5) | 7 | 185398 |
| <b>iYGL171W</b>   |                                | 7 | 184088 |
| <b>iYGL172W</b>   | YGL171W (ROK1)                 | 7 | 182122 |
| <b>iYGL174W</b>   |                                | 7 | 175349 |
| <b>iYGL175C</b>   | YGL175C (SAE2) YGL174W (BUD13) | 7 | 174326 |
| <b>iYGL177W-0</b> | YGL178W (MPT5)                 | 7 | 167910 |
| <b>iYGL177W-1</b> | YGL178W (MPT5)                 | 7 | 169079 |
| <b>iYGL180W</b>   |                                | 7 | 162762 |
| <b>iYGL181W</b>   | YGL180W (APG1)                 | 7 | 159100 |
| <b>iYGL182C</b>   | YGL182C YGL181W (GTS1)         | 7 | 157600 |
| <b>iYGL185C</b>   | YGL185C                        | 7 | 154310 |
| <b>iYGL186C</b>   | YGL186C                        | 7 | 152780 |
| <b>iYGL187C</b>   | YGL187C (COX4)                 | 7 | 150175 |
| <b>iYGL188C</b>   | YGL188C                        | 7 | 149520 |
| <b>iYGL189C</b>   | YGL189C (RPS26A)               | 7 | 148592 |

|                   |                                |   |        |
|-------------------|--------------------------------|---|--------|
| <b>iYGL190C</b>   | YGL190C (CDC55)                | 7 | 147393 |
| <b>iYGL192W</b>   | YGL191W (COX13)                | 7 | 144052 |
| <b>iYGL194C</b>   | YGL194C (HOS2)                 | 7 | 141730 |
| <b>iYGL195W</b>   |                                | 7 | 139547 |
| <b>iYGL196W</b>   | YGL195W (GCN1)                 | 7 | 131050 |
| <b>iYGL197W</b>   | YGL196W                        | 7 | 129164 |
| <b>iYGL198W</b>   | YGL197W (MDS3)                 | 7 | 124379 |
| <b>iYGL200C</b>   | YGL200C (EMP24)                | 7 | 123308 |
| <b>iYGL201C</b>   | YGL201C (MCM6)                 | 7 | 120909 |
| <b>iYGL202W</b>   |                                | 7 | 117563 |
| <b>iYGL203C</b>   | YGL203C (KEX1) YGL202W (ARO8)  | 7 | 114666 |
| <b>iYGL204C</b>   | YGL204C                        | 7 | 112007 |
| <b>iYGL206C</b>   | YGL206C (CHC1) YGL205W (POX1)  | 7 | 107506 |
| <b>iYGL207W</b>   |                                | 7 | 102078 |
| <b>iYGL209W</b>   | YGL208W (SIP2)                 | 7 | 97008  |
| <b>iYGL210W</b>   | YGL209W (MIG2)                 | 7 | 94463  |
| <b>iYGL213C</b>   | YGL213C (SKI8) YGL212W (VAM7)  | 7 | 91250  |
| <b>iYGL216W</b>   | YGL215W (CLG1)                 | 7 | 87300  |
| <b>iYGL218W</b>   |                                | 7 | 84298  |
| <b>iYGL220W</b>   |                                | 7 | 82734  |
| <b>iYGL221C</b>   | YGL221C (NIF3) YGL220W         | 7 | 82290  |
| <b>iYGL222C</b>   | YGL222C (EDC1)                 | 7 | 81184  |
| <b>iYGL223C</b>   | YGL223C (COD3)                 | 7 | 80363  |
| <b>iYGL224C</b>   | YGL224C (SDT1)                 | 7 | 78855  |
| <b>iYGL225W</b>   |                                | 7 | 77905  |
| <b>iYGL226C-A</b> | YGL226C-A (OST5) YGL226W       | 7 | 73156  |
| <b>iYGL226W</b>   | YGL225W (VRG4)                 | 7 | 73709  |
| <b>iYGL227W</b>   |                                | 7 | 72546  |
| <b>iYGL228W</b>   | YGL227W (VID30)                | 7 | 69330  |
| <b>iYGL229C</b>   | YGL229C (SAP4) YGL228W (SHE10) | 7 | 66958  |
| <b>iYGL230C</b>   | YGL230C                        | 7 | 64214  |
| <b>iYGL231C</b>   | YGL231C                        | 7 | 63619  |
| <b>iYGL233W</b>   | YGL232W                        | 7 | 61853  |
| <b>iYGL234W</b>   | YGL233W (SEC15)                | 7 | 58889  |
| <b>iYGL235W</b>   | YGL234W (ADE5,7)               | 7 | 55814  |
| <b>iYGL237C</b>   | YGL237C (HAP2)                 | 7 | 53528  |
| <b>iYGL238W</b>   |                                | 7 | 52434  |
| <b>iYGL240W</b>   |                                | 7 | 49365  |
| <b>iYGL242C</b>   | YGL242C YGL241W (KAP114)       | 7 | 45197  |
| <b>iYGL243W</b>   |                                | 7 | 44509  |
| <b>iYGL244W</b>   | YGL243W (TAD1)                 | 7 | 43174  |
| <b>iYGL245W</b>   | YGL244W (RTF1)                 | 7 | 41149  |
| <b>iYGL246C</b>   | YGL246C (RAI1) YGL245W         | 7 | 38780  |
| <b>iYGL247W</b>   |                                | 7 | 37526  |
| <b>iYGL248W</b>   | YGL247W                        | 7 | 36762  |
| <b>iYGL249W</b>   | YGL248W (PDE1)                 | 7 | 35212  |
| <b>iYGL250W</b>   | YGL249W (ZIP2)                 | 7 | 32635  |
| <b>iYGL251C</b>   | YGL251C (HFM1) YGL250W         | 7 | 31061  |
| <b>iYGL252C</b>   | YGL252C (RTG2)                 | 7 | 27484  |
| <b>iYGL253W</b>   |                                | 7 | 25395  |
| <b>iYGL254W</b>   | YGL253W (HXK2)                 | 7 | 23203  |

|                      |                                |   |        |
|----------------------|--------------------------------|---|--------|
| <b>iYGL255W</b>      | YGL254W (FZF1)                 | 7 | 22108  |
| <b>iYGL256W-0</b>    | YGL255W (ZRT1)                 | 7 | 16307  |
| <b>iYGL256W-1</b>    | YGL255W (ZRT1)                 | 7 | 17474  |
| <b>iYGL256W-2</b>    | YGL255W (ZRT1)                 | 7 | 18641  |
| <b>iYGL256W-3</b>    | YGL255W (ZRT1)                 | 7 | 19808  |
| <b>iYGL257C</b>      | YGL257C (MNT2) YGL256W (ADH4)  | 7 | 14157  |
| <b>iYGL258W</b>      |                                | 7 | 11730  |
| <b>iYGL259W-0</b>    | YGL258W                        | 7 | 8967   |
| <b>iYGL259W-1</b>    | YGL258W                        | 7 | 10038  |
| <b>iYGL260W</b>      | YGL259W (YPS5)                 | 7 | 7090   |
| <b>iYGL261C</b>      | YGL261C YGL260W                | 7 | 6652   |
| <b>iYGL262W</b>      |                                | 7 | 5839   |
| <b>iYGL263W</b>      | YGL262W                        | 7 | 3932   |
| <b>iYGLWdelta10</b>  | YGL046W                        | 7 | 412721 |
| <b>iYGLWdelta3</b>   | YGL203C (KEX1) YGL202W (ARO8)  | 7 | 115271 |
| <b>iYGLWdelta4</b>   | YGL097W (SRM1)                 | 7 | 318858 |
| <b>iYGLWdelta6</b>   |                                | 7 | 328222 |
| <b>iYGLWdelta7</b>   | YGL054C (ERV14) YGL053W (PRM8) | 7 | 402287 |
| <b>iYGLWomega1-0</b> | YGL263W (COS12)                | 7 | 1079   |
| <b>iYGLWtau2</b>     | YGL158W (RCK1)                 | 7 | 205341 |
| <b>iYGR001C</b>      | YGR001C                        | 7 | 497802 |
| <b>iYGR002C</b>      | YGR002C YGR003W                | 7 | 499901 |
| <b>iYGR003W</b>      | YGR004W                        | 7 | 502361 |
| <b>iYGR004W</b>      |                                | 7 | 504321 |
| <b>iYGR005C</b>      | YGR005C (TFG2) YGR006W (PRP18) | 7 | 505854 |
| <b>iYGR006W</b>      | YGR007W (MUQ1)                 | 7 | 506724 |
| <b>iYGR007W</b>      |                                | 7 | 507934 |
| <b>iYGR008C</b>      | YGR008C (STF2)                 | 7 | 508358 |
| <b>iYGR009C</b>      | YGR009C (SEC9) YGR010W         | 7 | 510996 |
| <b>iYGR011W</b>      | YGR012W                        | 7 | 512817 |
| <b>iYGR012W</b>      | YGR013W (SNU71)                | 7 | 514334 |
| <b>iYGR013W</b>      | YGR014W (MSB2)                 | 7 | 516410 |
| <b>iYGR014W</b>      |                                | 7 | 520857 |
| <b>iYGR015C</b>      | YGR015C YGR016W                | 7 | 522070 |
| <b>iYGR016W</b>      | YGR017W                        | 7 | 522827 |
| <b>iYGR018C</b>      | YGR018C YGR019W (UGA1)         | 7 | 524688 |
| <b>iYGR019W</b>      |                                | 7 | 526638 |
| <b>iYGR020C</b>      | YGR020C (VMA7) YGR021W         | 7 | 527323 |
| <b>iYGR021W</b>      |                                | 7 | 528498 |
| <b>iYGR023W</b>      |                                | 7 | 530913 |
| <b>iYGR026W</b>      |                                | 7 | 533815 |
| <b>iYGR027C</b>      | YGR027C (RPS25A) YGR027W-A     | 7 | 534452 |
| <b>iYGR028W</b>      | YGR029W (ERV1)                 | 7 | 543285 |
| <b>iYGR029W</b>      |                                | 7 | 544199 |
| <b>iYGR030C</b>      | YGR030C (POP6) YGR031W         | 7 | 546151 |
| <b>iYGR031W</b>      | YGR032W (GSC2)                 | 7 | 547463 |
| <b>iYGR032W</b>      |                                | 7 | 553945 |
| <b>iYGR033C</b>      | YGR033C YGR034W (RPL26B)       | 7 | 554961 |
| <b>iYGR034W</b>      |                                | 7 | 556666 |
| <b>iYGR035C</b>      | YGR035C                        | 7 | 557416 |
| <b>iYGR036C</b>      | YGR036C (CAX4)                 | 7 | 558862 |

|                   |                               |   |        |
|-------------------|-------------------------------|---|--------|
| <b>iYGR037C</b>   | YGR037C (ACB1) YGR038W (ORM1) | 7 | 559988 |
| <b>iYGR038W</b>   |                               | 7 | 561344 |
| <b>iYGR039W</b>   | YGR040W (KSS1)                | 7 | 575193 |
| <b>iYGR040W</b>   | YGR041W (BUD9)                | 7 | 576498 |
| <b>iYGR041W</b>   | YGR042W                       | 7 | 579124 |
| <b>iYGR043C-1</b> | YGR043C                       | 7 | 582207 |
| <b>iYGR045C</b>   | YGR045C YGR046W               | 7 | 584290 |
| <b>iYGR046W</b>   |                               | 7 | 586046 |
| <b>iYGR047C</b>   | YGR047C (TFC4) YGR048W (UFD1) | 7 | 589463 |
| <b>iYGR048W</b>   | YGR049W (SCM4)                | 7 | 590905 |
| <b>iYGR049W</b>   |                               | 7 | 591871 |
| <b>iYGR050C</b>   | YGR050C                       | 7 | 592436 |
| <b>iYGR051C</b>   | YGR051C YGR052W               | 7 | 593223 |
| <b>iYGR052W</b>   |                               | 7 | 594699 |
| <b>iYGR053C</b>   | YGR053C YGR054W               | 7 | 595831 |
| <b>iYGR054W</b>   | YGR055W (MUP1)                | 7 | 598615 |
| <b>iYGR055W</b>   | YGR056W (RSC1)                | 7 | 601135 |
| <b>iYGR056W</b>   |                               | 7 | 604441 |
| <b>iYGR057C</b>   | YGR057C (LST7) YGR058W        | 7 | 605504 |
| <b>iYGR058W</b>   | YGR059W (SPR3)                | 7 | 607137 |
| <b>iYGR059W</b>   | YGR060W (ERG25)               | 7 | 609095 |
| <b>iYGR060W</b>   |                               | 7 | 611487 |
| <b>iYGR061C</b>   | YGR061C (ADE6)                | 7 | 615959 |
| <b>iYGR062C</b>   | YGR062C (COX18)               | 7 | 617272 |
| <b>iYGR064W</b>   |                               | 7 | 617983 |
| <b>iYGR065C</b>   | YGR065C (VHT1)                | 7 | 619852 |
| <b>iYGR066C</b>   | YGR066C                       | 7 | 621793 |
| <b>iYGR067C</b>   | YGR067C                       | 7 | 624780 |
| <b>iYGR069W</b>   | YGR070W (ROM1)                | 7 | 627412 |
| <b>iYGR070W</b>   |                               | 7 | 631267 |
| <b>iYGR071C</b>   | YGR071C YGR072W (UPF3)        | 7 | 634057 |
| <b>iYGR072W</b>   |                               | 7 | 635461 |
| <b>iYGR075C</b>   | YGR075C (PRP38)               | 7 | 636869 |
| <b>iYGR076C</b>   | YGR076C (MRPL25)              | 7 | 637571 |
| <b>iYGR077C</b>   | YGR077C (PEX8)                | 7 | 639507 |
| <b>iYGR078C</b>   | YGR078C (PAC10) YGR079W       | 7 | 640365 |
| <b>iYGR079W</b>   | YGR080W (TWF1)                | 7 | 641826 |
| <b>iYGR080W</b>   |                               | 7 | 643002 |
| <b>iYGR081C</b>   | YGR081C YGR082W (TOM20)       | 7 | 643774 |
| <b>iYGR082W</b>   |                               | 7 | 644589 |
| <b>iYGR083C</b>   | YGR083C (GCD2)                | 7 | 646809 |
| <b>iYGR085C</b>   | YGR085C (RPL11B)              | 7 | 648901 |
| <b>iYGR086C</b>   | YGR086C                       | 7 | 650611 |
| <b>iYGR087C-0</b> | YGR087C (PDC6) YGR088W (CTT1) | 7 | 652975 |
| <b>iYGR087C-1</b> | YGR087C (PDC6) YGR088W (CTT1) | 7 | 653785 |
| <b>iYGR088W</b>   | YGR089W                       | 7 | 656316 |
| <b>iYGR089W-0</b> | YGR090W                       | 7 | 659764 |
| <b>iYGR089W-1</b> | YGR090W                       | 7 | 660753 |
| <b>iYGR090W</b>   | YGR091W (PRP31)               | 7 | 666065 |
| <b>iYGR091W</b>   | YGR092W (DBF2)                | 7 | 667819 |
| <b>iYGR092W</b>   | YGR093W                       | 7 | 669901 |

|                   |                                    |   |        |
|-------------------|------------------------------------|---|--------|
| <b>iYGR094W</b>   |                                    | 7 | 675494 |
| <b>iYGR095C</b>   | YGR095C (RRP46) YGR096W            | 7 | 676435 |
| <b>iYGR096W</b>   | YGR097W (ASK10)                    | 7 | 677559 |
| <b>iYGR097W</b>   |                                    | 7 | 682129 |
| <b>iYGR098C</b>   | YGR098C (ESP1) YGR099W (TEL2)      | 7 | 687452 |
| <b>iYGR099W</b>   | YGR100W (MDR1)                     | 7 | 689959 |
| <b>iYGR100W</b>   | YGR101W                            | 7 | 693091 |
| <b>iYGR101W</b>   |                                    | 7 | 694397 |
| <b>iYGR102C</b>   | YGR102C YGR103W (NOP7)             | 7 | 695129 |
| <b>iYGR103W</b>   |                                    | 7 | 697228 |
| <b>iYGR104C</b>   | YGR104C (SRB5) YGR105W (VMA21)     | 7 | 698362 |
| <b>iYGR105W</b>   |                                    | 7 | 698826 |
| <b>iYGR106C</b>   | YGR106C tl(gag)g/tk(uuu)g2 YGR107W | 7 | 699780 |
| <b>iYGR107W</b>   | YGR108W (CLB1)                     | 7 | 703110 |
| <b>iYGR108W</b>   |                                    | 7 | 705045 |
| <b>iYGR109C</b>   | YGR109C (CLB6) YGR110W             | 7 | 706495 |
| <b>iYGR110W</b>   | YGR111W                            | 7 | 715040 |
| <b>iYGR111W</b>   | YGR112W (SHY1)                     | 7 | 717024 |
| <b>iYGR112W</b>   | YGR113W (DAM1)                     | 7 | 718521 |
| <b>iYGR113W</b>   |                                    | 7 | 719894 |
| <b>iYGR116W</b>   |                                    | 7 | 724757 |
| <b>iYGR117C</b>   | YGR117C YGR118W (RPS23A)           | 7 | 726472 |
| <b>iYGR118W</b>   |                                    | 7 | 727724 |
| <b>iYGR119C</b>   | YGR119C (NUP57)                    | 7 | 729665 |
| <b>iYGR120C</b>   | YGR120C (SEC35)                    | 7 | 730854 |
| <b>iYGR121C</b>   | YGR121C (MEP1) YGR122W             | 7 | 732921 |
| <b>iYGR122C-A</b> | YGR122C-A                          | 7 | 735752 |
| <b>iYGR122W</b>   |                                    | 7 | 735137 |
| <b>iYGR123C</b>   | YGR123C (PPT1)tr(ucu)g3 YGR124W (  | 7 | 738197 |
| <b>iYGR124W</b>   | YGR125W                            | 7 | 741656 |
| <b>iYGR125W</b>   | YGR126W                            | 7 | 745429 |
| <b>iYGR126W</b>   | YGR127W                            | 7 | 746521 |
| <b>iYGR127W</b>   |                                    | 7 | 747730 |
| <b>iYGR128C</b>   | YGR128C YGR129W (SYF2)             | 7 | 750085 |
| <b>iYGR129W</b>   |                                    | 7 | 751041 |
| <b>iYGR130C</b>   | YGR130C YGR131W                    | 7 | 753838 |
| <b>iYGR131W</b>   |                                    | 7 | 755244 |
| <b>iYGR132C</b>   | YGR132C (PHB1) YGR133W (PEX4)      | 7 | 756446 |
| <b>iYGR133W</b>   | YGR134W (CAF130)                   | 7 | 757441 |
| <b>iYGR134W</b>   | YGR135W (PRE9)                     | 7 | 761132 |
| <b>iYGR135W</b>   | YGR136W (LSB1)                     | 7 | 762162 |
| <b>iYGR137W</b>   |                                    | 7 | 763256 |
| <b>iYGR138C</b>   | YGR138C (TPO2) YGR139W             | 7 | 765600 |
| <b>iYGR139W</b>   | YGR140W (CBF2)                     | 7 | 766058 |
| <b>iYGR140W</b>   | YGR141W                            | 7 | 770293 |
| <b>iYGR141W</b>   | YGR142W (BTN2)                     | 7 | 771966 |
| <b>iYGR142W</b>   | YGR143W (SKN1)                     | 7 | 773680 |
| <b>iYGR144W</b>   | YGR145W                            | 7 | 781373 |
| <b>iYGR145W</b>   |                                    | 7 | 783884 |
| <b>iYGR146C</b>   | YGR146C                            | 7 | 784852 |
| <b>iYGR147C</b>   | YGR147C (NAT2)                     | 7 | 786914 |

|                   |                                |   |        |
|-------------------|--------------------------------|---|--------|
| <b>iYGR149W</b>   |                                | 7 | 790323 |
| <b>iYGR150C</b>   | YGR150C                        | 7 | 793047 |
| <b>iYGR152C</b>   | YGR152C (RSR1) YGR153W (TOS10) | 7 | 795486 |
| <b>iYGR154C</b>   | YGR154C YGR155W (CYS4)         | 7 | 797862 |
| <b>iYGR155W</b>   | YGR156W (PTI1)                 | 7 | 800060 |
| <b>iYGR156W</b>   | YGR157W (CHO2)                 | 7 | 801817 |
| <b>iYGR157W</b>   |                                | 7 | 805043 |
| <b>iYGR158C</b>   | YGR158C (MTR3)                 | 7 | 806015 |
| <b>iYGR160W</b>   |                                | 7 | 807678 |
| <b>iYGR161C-0</b> | YGR161C YGR161W-A              | 7 | 809414 |
| <b>iYGR161C-1</b> | YGR161C YGR161W-A              | 7 | 810427 |
| <b>iYGR162W</b>   | YGR163W (GTR2)                 | 7 | 826911 |
| <b>iYGR165W</b>   | YGR166W (KRE11)                | 7 | 830147 |
| <b>iYGR166W</b>   | YGR167W (CLC1)                 | 7 | 832191 |
| <b>iYGR167W</b>   |                                | 7 | 833151 |
| <b>iYGR168C</b>   | YGR168C                        | 7 | 834476 |
| <b>iYGR169C</b>   | YGR169C (PUS6) YGR170W (PSD2)  | 7 | 835897 |
| <b>iYGR170W</b>   |                                | 7 | 840552 |
| <b>iYGR171C</b>   | YGR171C (MSM1)                 | 7 | 842545 |
| <b>iYGR172C</b>   | YGR172C (YIP1) YGR173W         | 7 | 843585 |
| <b>iYGR173W</b>   |                                | 7 | 844954 |
| <b>iYGR174C</b>   | YGR174C (CBP4)                 | 7 | 846399 |
| <b>iYGR175C</b>   | YGR175C (ERG1) YGR176W         | 7 | 848417 |
| <b>iYGR177C</b>   | YGR177C (ATF2)                 | 7 | 850430 |
| <b>iYGR178C</b>   | YGR178C (PBP1)                 | 7 | 853209 |
| <b>iYGR179C</b>   | YGR179C (OKP1)                 | 7 | 854889 |
| <b>iYGR180C</b>   | YGR180C (RNR4) YGR181W (TIM13) | 7 | 856295 |
| <b>iYGR182C</b>   | YGR182C                        | 7 | 858898 |
| <b>iYGR183C</b>   | YGR183C (QCR9)                 | 7 | 859470 |
| <b>iYGR184C</b>   | YGR184C (UBR1)                 | 7 | 865747 |
| <b>iYGR185C</b>   | YGR185C (TYS1) YGR186W (TFG1)  | 7 | 867514 |
| <b>iYGR186W</b>   |                                | 7 | 869975 |
| <b>iYGR187C</b>   | YGR187C (HGH1)                 | 7 | 871410 |
| <b>iYGR188C</b>   | YGR188C (BUB1)                 | 7 | 875103 |
| <b>iYGR189C</b>   | YGR189C (CRH1)                 | 7 | 878186 |
| <b>iYGR191W</b>   |                                | 7 | 882225 |
| <b>iYGR192C</b>   | YGR192C (TDH3)                 | 7 | 883804 |
| <b>iYGR193C</b>   | YGR193C (PDX1)                 | 7 | 885735 |
| <b>iYGR194C</b>   | YGR194C (XKS1) YGR195W (SKI6)  | 7 | 887869 |
| <b>iYGR195W</b>   |                                | 7 | 889616 |
| <b>iYGR196C</b>   | YGR196C (FYV8)                 | 7 | 892180 |
| <b>iYGR197C</b>   | YGR197C (SNG1) YGR198W         | 7 | 894134 |
| <b>iYGR198W</b>   | YGR199W (PMT6)                 | 7 | 897140 |
| <b>iYGR199W</b>   |                                | 7 | 899775 |
| <b>iYGR200C</b>   | YGR200C (ELP2)                 | 7 | 902264 |
| <b>iYGR201C</b>   | YGR201C                        | 7 | 903338 |
| <b>iYGR202C</b>   | YGR202C (PCT1) YGR203W         | 7 | 904742 |
| <b>iYGR204W</b>   | YGR205W                        | 7 | 908768 |
| <b>iYGR205W</b>   | YGR206W                        | 7 | 910079 |
| <b>iYGR206W</b>   |                                | 7 | 910731 |
| <b>iYGR207C</b>   | YGR207C YGR208W (SER2)         | 7 | 911622 |



|            |                                 |   |         |
|------------|---------------------------------|---|---------|
| iYGR208W   |                                 | 7 | 912806  |
| iYGR209C   | YGR209C (TRX2)                  | 7 | 913221  |
| iYGR210C   | YGR210C YGR211W (ZPR1)          | 7 | 914732  |
| iYGR211W   | YGR212W                         | 7 | 916695  |
| iYGR212W   |                                 | 7 | 918440  |
| iYGR213C   | YGR213C (RTA1) YGR214W (RPS0A)  | 7 | 919459  |
| iYGR214W   | YGR215W (RSM27)                 | 7 | 921782  |
| iYGR215W   |                                 | 7 | 922501  |
| iYGR216C   | YGR216C (GPI1) YGR217W (CCH1)   | 7 | 924456  |
| iYGR217W   | YGR218W (CRM1)                  | 7 | 930807  |
| iYGR218W   | YGR219W                         | 7 | 935787  |
| iYGR220C   | YGR220C (MRPL9)                 | 7 | 936875  |
| iYGR221C   | YGR221C (TOS2) YGR222W (PET54)  | 7 | 938984  |
| iYGR222W   |                                 | 7 | 940796  |
| iYGR223C   | YGR223C YGR224W (AZR1)          | 7 | 942207  |
| iYGR224W   | YGR225W (AMA1)                  | 7 | 944639  |
| iYGR226C   | YGR226C YGR227W (DIE2)          | 7 | 946992  |
| iYGR227W   | YGR228W                         | 7 | 948988  |
| iYGR229C   | YGR229C (SMI1) YGR230W (BNS1)   | 7 | 950890  |
| iYGR230W   |                                 | 7 | 952298  |
| iYGR231C   | YGR231C (PHB2) YGR232W (NAS6)   | 7 | 953472  |
| iYGR233C-0 | YGR233C (PHO81) YGR234W (YHB1)  | 7 | 958202  |
| iYGR234W   |                                 | 7 | 961096  |
| iYGR235C   | YGR235C                         | 7 | 962054  |
| iYGR236C   | YGR236C (SPG1)                  | 7 | 962811  |
| iYGR237C   | YGR237C                         | 7 | 965650  |
| iYGR238C   | YGR238C (KEL2)                  | 7 | 968682  |
| iYGR239C   | YGR239C (PEX21)                 | 7 | 970048  |
| iYGR243W   |                                 | 7 | 977771  |
| iYGR244C   | YGR244C (LSC2)                  | 7 | 979314  |
| iYGR245C   | YGR245C (SDA1)                  | 7 | 982063  |
| iYGR246C   | YGR246C (BRF1) YGR247W (CPD1)   | 7 | 984267  |
| iYGR247W   | YGR248W (SOL4)                  | 7 | 985680  |
| iYGR248W   | YGR249W (MGA1)                  | 7 | 986734  |
| iYGR249W-0 |                                 | 7 | 989414  |
| iYGR249W-1 |                                 | 7 | 990292  |
| iYGR250C-0 | YGR250C YGR251W                 | 7 | 993516  |
| iYGR250C-1 | YGR250C YGR251W                 | 7 | 994575  |
| iYGR251W   | YGR252W (GCN5)                  | 7 | 996224  |
| iYGR252W   |                                 | 7 | 998183  |
| iYGR253C-0 | YGR253C (PUP2) YGR254W (ENO1)   | 7 | 999135  |
| iYGR255C   | YGR255C (COQ6)tT(ugu)g2 YGR256W | 7 | 1003957 |
| iYGR256W   |                                 | 7 | 1006098 |
| iYGR257C   | YGR257C                         | 7 | 1007301 |
| iYGR258C-0 | YGR258C (RAD2)                  | 7 | 1010762 |
| iYGR258C-1 | YGR258C (RAD2)                  | 7 | 1011619 |
| iYGR260W   |                                 | 7 | 1014085 |
| iYGR261C   | YGR261C (APL6)                  | 7 | 1016746 |
| iYGR262C   | YGR262C (BUD32)                 | 7 | 1017755 |
| iYGR263C   | YGR263C                         | 7 | 1019237 |
| iYGR265W   | YGR266W                         | 7 | 1022054 |

|                     |                                   |   |         |
|---------------------|-----------------------------------|---|---------|
| <b>iYGR266W</b>     |                                   | 7 | 1024757 |
| <b>iYGR267C</b>     | YGR267C (FOL2)                    | 7 | 1025731 |
| <b>iYGR269W</b>     | YGR270W (YTA7)                    | 7 | 1026958 |
| <b>iYGR270W</b>     | YGR271W (SLH1)                    | 7 | 1031505 |
| <b>iYGR271W</b>     |                                   | 7 | 1037690 |
| <b>iYGR272C</b>     | YGR272C                           | 7 | 1038496 |
| <b>iYGR273C</b>     | YGR273C                           | 7 | 1039234 |
| <b>iYGR274C</b>     | YGR274C (TAF145) YGR275W (RTT1C   | 7 | 1043091 |
| <b>iYGR275W</b>     |                                   | 7 | 1043745 |
| <b>iYGR276C</b>     | YGR276C (RNH70)                   | 7 | 1045476 |
| <b>iYGR277C</b>     | YGR277C YGR278W                   | 7 | 1046557 |
| <b>iYGR278W</b>     |                                   | 7 | 1048460 |
| <b>iYGR279C</b>     | YGR279C (SCW4)                    | 7 | 1049954 |
| <b>iYGR280C</b>     | YGR280C YGR281W (YOR1)            | 7 | 1051721 |
| <b>iYGR281W</b>     |                                   | 7 | 1057253 |
| <b>iYGR282C</b>     | YGR282C (BGL2)                    | 7 | 1058720 |
| <b>iYGR283C</b>     | YGR283C                           | 7 | 1060036 |
| <b>iYGR284C</b>     | YGR284C (ERV29)                   | 7 | 1061586 |
| <b>iYGR285C</b>     | YGR285C (ZUO1)                    | 7 | 1063149 |
| <b>iYGR286C-0</b>   | YGR286C (BIO2)                    | 7 | 1064936 |
| <b>iYGR286C-1</b>   | YGR286C (BIO2)                    | 7 | 1066077 |
| <b>iYGR287C</b>     | YGR287C YGR288W (MAL13)           | 7 | 1068987 |
| <b>iYGR288W-0</b>   |                                   | 7 | 1071710 |
| <b>iYGR288W-1</b>   |                                   | 7 | 1072834 |
| <b>iYGR290W</b>     |                                   | 7 | 1075921 |
| <b>iYGR291C</b>     | YGR291C YGR292W (MAL12)           | 7 | 1076500 |
| <b>iYGR292W-0</b>   |                                   | 7 | 1078349 |
| <b>iYGR292W-1</b>   |                                   | 7 | 1079115 |
| <b>iYGR294W</b>     |                                   | 7 | 1080664 |
| <b>iYGRCdelta16</b> | YGR038C-A YGR039W                 | 7 | 567754  |
| <b>iYGRCdelta18</b> | YGR038C-A YGR039W                 | 7 | 574694  |
| <b>iYGRCdelta20</b> | YGR109C (CLB6) YGR110W            | 7 | 713378  |
| <b>iYGRCdelta25</b> | YGR144W (THI4)                    | 7 | 779509  |
| <b>iYGRCdelta30</b> | YGR161C-C YGR162W (TIF4631)       | 7 | 823300  |
| <b>iYGRCtau3</b>    | YGR218W (CRM1)                    | 7 | 931532  |
| <b>iYGRWdelta14</b> | YGR028W (MSP1)                    | 7 | 541679  |
| <b>iYGRWdelta19</b> | YGR106C YGR107W                   | 7 | 701344  |
| <b>iYGRWdelta22</b> | YGR143W (SKN1)                    | 7 | 774156  |
| <b>iYGRWdelta26</b> | YGR150C                           | 7 | 793553  |
| <b>iYGRWdelta31</b> | YGR188C (BUB1)                    | 7 | 876273  |
| <b>iYGRWdelta32</b> | YGR218W (CRM1)                    | 7 | 932011  |
| <b>iYGRWsigma5</b>  | YGR109C (CLB6) YGR110W            | 7 | 712539  |
| <b>iYHL001W</b>     | YHR001W (OSH7)                    | 8 | 105084  |
| <b>iYHL002W</b>     | YHL001W (RPL14B)                  | 8 | 103963  |
| <b>iYHL003C</b>     | YHL003C (LAG1) YHL002W            | 8 | 101877  |
| <b>iYHL004W</b>     |                                   | 8 | 100397  |
| <b>iYHL007C</b>     | YHL007C (STE20)                   | 8 | 97932   |
| <b>iYHL008C</b>     | YHL008C                           | 8 | 94505   |
| <b>iYHL009C</b>     | YHL009C tv(AAC)H (YAP3) YHL009W-A | 8 | 85055   |
| <b>iYHL010C</b>     | YHL010C                           | 8 | 83716   |
| <b>iYHL011C</b>     | YHL011C (PRS3)                    | 8 | 81611   |

|                    |                                  |   |        |
|--------------------|----------------------------------|---|--------|
| <b>iYHL012W</b>    |                                  | 8 | 80412  |
| <b>iYHL013C</b>    | YHL013C YHL012W                  | 8 | 78349  |
| <b>iYHL014C</b>    | YHL014C (YLF2)                   | 8 | 77310  |
| <b>iYHL015W</b>    |                                  | 8 | 75773  |
| <b>iYHL016C</b>    | YHL016C (DUR3) YHL015W (RPS20)   | 8 | 74240  |
| <b>iYHL017W</b>    |                                  | 8 | 71870  |
| <b>iYHL019C</b>    | YHL019C (APM2) YHL018W           | 8 | 69544  |
| <b>iYHL020C</b>    | YHL020C (OPI1)                   | 8 | 67452  |
| <b>iYHL021C</b>    | YHL021C                          | 8 | 65855  |
| <b>iYHL022C</b>    | YHL022C (SPO11)                  | 8 | 64154  |
| <b>iYHL023C</b>    | YHL023C th(gug)h                 | 8 | 62560  |
| <b>iYHL024W</b>    |                                  | 8 | 58787  |
| <b>iYHL025W</b>    | YHL024W (RIM4)                   | 8 | 55846  |
| <b>iYHL026C</b>    | YHL026C YHL025W (SNF6)           | 8 | 54023  |
| <b>iYHL027W</b>    |                                  | 8 | 52986  |
| <b>iYHL028W</b>    | YHL027W (RIM101)                 | 8 | 50578  |
| <b>iYHL029C</b>    | YHL029C YHL028W (WSC4)           | 8 | 47966  |
| <b>iYHL030W</b>    |                                  | 8 | 45688  |
| <b>iYHL031C</b>    | YHL031C (GOS1) YHL030W (ECM29)   | 8 | 39484  |
| <b>iYHL032C</b>    | YHL032C (GUT1)                   | 8 | 38506  |
| <b>iYHL033C</b>    | YHL033C (RPL8A)                  | 8 | 36023  |
| <b>iYHL035C</b>    | YHL035C                          | 8 | 32754  |
| <b>iYHL036W</b>    |                                  | 8 | 27879  |
| <b>iYHL037C</b>    | YHL037C YHL036W (MUP3)           | 8 | 26177  |
| <b>iYHL038C</b>    | YHL038C (CBP2)                   | 8 | 25506  |
| <b>iYHL039W</b>    |                                  | 8 | 23537  |
| <b>iYHL040C</b>    | YHL040C (ARN1) YHL039W           | 8 | 20968  |
| <b>iYHL041W</b>    |                                  | 8 | 17839  |
| <b>iYHL042W</b>    | YHL041W                          | 8 | 16117  |
| <b>iYHL043W</b>    | YHL042W                          | 8 | 15411  |
| <b>iYHL044W</b>    | YHL043W (ECM34)                  | 8 | 14270  |
| <b>iYHL045W</b>    | YHL044W                          | 8 | 12847  |
| <b>iYHL046C</b>    | YHL046C YHL045W                  | 8 | 12283  |
| <b>iYHL047C-0</b>  | YHL047C (TAF1)                   | 8 | 10211  |
| <b>iYHL047C-1</b>  | YHL047C (TAF1)                   | 8 | 11066  |
| <b>iYHL048W</b>    |                                  | 8 | 7545   |
| <b>iYHL049C-0</b>  | YHL049C YHL048W (COS8)           | 8 | 4540   |
| <b>iYHL049C-1</b>  | YHL049C YHL048W (COS8)           | 8 | 5470   |
| <b>iYHLCdelta1</b> |                                  | 8 | 92094  |
| <b>iYHLComega1</b> |                                  | 8 | 8224   |
| <b>iYHLWdelta2</b> |                                  | 8 | 92385  |
| <b>iYHR001W</b>    | YHR001W-A (QCR10)                | 8 | 107361 |
| <b>iYHR002W</b>    |                                  | 8 | 109878 |
| <b>iYHR003C</b>    | YHR003C                          | 8 | 111310 |
| <b>iYHR004C</b>    | YHR004C (NEM1)                   | 8 | 113087 |
| <b>iYHR005C</b>    | YHR005C (GPA1)                   | 8 | 114910 |
| <b>iYHR005C-A</b>  | YHR005C-A (MRS11) YHR006W (STP2) | 8 | 115894 |
| <b>iYHR008C</b>    | YHR008C (SOD2)                   | 8 | 123583 |
| <b>iYHR011W</b>    | YHR012W (VPS29)                  | 8 | 129112 |
| <b>iYHR012W</b>    |                                  | 8 | 130440 |
| <b>iYHR013C</b>    | YHR013C (ARD1) YHR014W (SPO13)   | 8 | 131438 |

|            |                                  |   |        |
|------------|----------------------------------|---|--------|
| iYHR015W   |                                  | 8 | 136524 |
| iYHR016C   | YHR016C (YSC84) YHR017W (YSC83)  | 8 | 138446 |
| iYHR017W   |                                  | 8 | 139842 |
| iYHR018C   | YHR018C (ARG4)                   | 8 | 141393 |
| iYHR019C   | YHR019C (DED81) YHR020W          | 8 | 143549 |
| iYHR020W   |                                  | 8 | 146053 |
| iYHR021C   | YHR021C (RPS27B) YHR021W-A (ECM) | 8 | 148660 |
| iYHR023W   |                                  | 8 | 157443 |
| iYHR024C   | YHR024C (MAS2) YHR025W (THR1)    | 8 | 159183 |
| iYHR025W   | YHR026W (PPA1)                   | 8 | 160502 |
| iYHR026W   |                                  | 8 | 161476 |
| iYHR027C   | YHR027C (RPN1)                   | 8 | 164702 |
| iYHR028C   | YHR028C (DAP2)                   | 8 | 167425 |
| iYHR029C   | YHR029C                          | 8 | 168552 |
| iYHR032W   | YHR033W                          | 8 | 175080 |
| iYHR033W   |                                  | 8 | 176810 |
| iYHR034C   | YHR034C YHR035W                  | 8 | 177990 |
| iYHR035W   | YHR036W                          | 8 | 180102 |
| iYHR038W   |                                  | 8 | 184749 |
| iYHR039C   | YHR039C (MSC7)                   | 8 | 186800 |
| iYHR039C-B | YHR039C-A (VMA10) YHR040W        | 8 | 187670 |
| iYHR040W   |                                  | 8 | 189015 |
| iYHR041C   | YHR041C (SRB2) YHR042W (NCP1)    | 8 | 189855 |
| iYHR042W   |                                  | 8 | 192609 |
| iYHR043C   | YHR043C (DOG2)                   | 8 | 193536 |
| iYHR045W   |                                  | 8 | 197224 |
| iYHR046C   | YHR046C                          | 8 | 198276 |
| iYHR048W   | YHR049W                          | 8 | 206142 |
| iYHR049C-A | YHR049C-A YHR050W (SMF2)         | 8 | 207522 |
| iYHR050W   | YHR051W (COX6)                   | 8 | 209295 |
| iYHR053C   | YHR053C (CUP1-1)                 | 8 | 212720 |
| iYHR054C   | YHR054C                          | 8 | 214249 |
| iYHR055C   | YHR055C (CUP1-2)                 | 8 | 214718 |
| iYHR056C   | YHR056C (RSC30)                  | 8 | 217681 |
| iYHR058C   | YHR058C (MED6) YHR059W (FYV4)    | 8 | 219885 |
| iYHR059W   | YHR060W (VMA22)                  | 8 | 220501 |
| iYHR060W   |                                  | 8 | 221271 |
| iYHR061C   | YHR061C (GIC1)                   | 8 | 222479 |
| iYHR062C   | YHR062C (RPP1)                   | 8 | 223759 |
| iYHR063C   | YHR063C (PAN5)                   | 8 | 225170 |
| iYHR064C   | YHR064C (SSZ1)                   | 8 | 227244 |
| iYHR065C   | YHR065C (RRP3) YHR066W (SSF1)    | 8 | 229164 |
| iYHR066W   | YHR067W                          | 8 | 230697 |
| iYHR067W   | YHR068W (DYS1)                   | 8 | 231813 |
| iYHR068W   |                                  | 8 | 233297 |
| iYHR069C   | YHR069C (RRP4) YHR070W (TRM5)    | 8 | 234659 |
| iYHR070W   | YHR071W (PCL5)                   | 8 | 236381 |
| iYHR071W   | YHR072W (ERG7)                   | 8 | 237694 |
| iYHR073W   | YHR074W (QNS1)                   | 8 | 245573 |
| iYHR074W   |                                  | 8 | 248338 |
| iYHR076W   |                                  | 8 | 252226 |

|                   |                                 |   |        |
|-------------------|---------------------------------|---|--------|
| <b>iYHR077C</b>   | YHR077C (NMD2) YHR078W          | 8 | 255650 |
| <b>iYHR078W</b>   |                                 | 8 | 258019 |
| <b>iYHR079C-B</b> | YHR079C-A (SAE3)                | 8 | 262554 |
| <b>iYHR080C</b>   | YHR080C YHR081W                 | 8 | 266839 |
| <b>iYHR081W</b>   |                                 | 8 | 268093 |
| <b>iYHR083W</b>   | YHR084W (STE12)                 | 8 | 273617 |
| <b>iYHR085W</b>   | YHR086W (NAM8)                  | 8 | 277769 |
| <b>iYHR087W</b>   | YHR088W (RPF1)                  | 8 | 281156 |
| <b>iYHR088W</b>   |                                 | 8 | 282383 |
| <b>iYHR089C</b>   | YHR089C (GAR1)                  | 8 | 283299 |
| <b>iYHR090C</b>   | YHR090C (YNG2)                  | 8 | 284626 |
| <b>iYHR092C</b>   | YHR092C (HXT4) YHR093W (AHT1)   | 8 | 288813 |
| <b>iYHR094C</b>   | YHR094C (HXT1) YHR095W          | 8 | 292627 |
| <b>iYHR097C</b>   | YHR097C                         | 8 | 298611 |
| <b>iYHR099W</b>   |                                 | 8 | 313997 |
| <b>iYHR100C</b>   | YHR100C                         | 8 | 314675 |
| <b>iYHR101C</b>   | YHR101C (BIG1) YHR102W (KIC1)   | 8 | 315970 |
| <b>iYHR102W</b>   | YHR103W (SBE22)                 | 8 | 319816 |
| <b>iYHR103W</b>   | YHR104W (GRE3)                  | 8 | 322974 |
| <b>iYHR104W</b>   | YHR105W                         | 8 | 324394 |
| <b>iYHR105W</b>   | YHR106W (TRR2)                  | 8 | 325412 |
| <b>iYHR106W</b>   |                                 | 8 | 326628 |
| <b>iYHR107C</b>   | YHR107C (CDC12) YHR108W (GGA2)  | 8 | 328038 |
| <b>iYHR108W</b>   | YHR109W (CTM1)                  | 8 | 330062 |
| <b>iYHR109W</b>   | YHR110W (ERP5)                  | 8 | 332069 |
| <b>iYHR110W</b>   | YHR111W                         | 8 | 332922 |
| <b>iYHR111W</b>   |                                 | 8 | 334396 |
| <b>iYHR112C</b>   | YHR112C YHR113W                 | 8 | 335665 |
| <b>iYHR113W</b>   | YHR114W (BZZ1)                  | 8 | 337811 |
| <b>iYHR114W</b>   |                                 | 8 | 339986 |
| <b>iYHR115C</b>   | YHR115C YHR116W                 | 8 | 341361 |
| <b>iYHR116W</b>   | YHR117W (TOM71)                 | 8 | 342122 |
| <b>iYHR118C</b>   | YHR118C (ORC6) YHR119W (SET1)   | 8 | 345630 |
| <b>iYHR119W</b>   | YHR120W (MSH1)                  | 8 | 349287 |
| <b>iYHR120W</b>   | YHR121W                         | 8 | 352455 |
| <b>iYHR121W</b>   | YHR122W                         | 8 | 353321 |
| <b>iYHR122W</b>   | YHR123W (EPT1)                  | 8 | 354322 |
| <b>iYHR123W</b>   | YHR124W (NDT80)                 | 8 | 356083 |
| <b>iYHR128W</b>   |                                 | 8 | 362767 |
| <b>iYHR131C</b>   | YHR131C                         | 8 | 367864 |
| <b>iYHR133C</b>   | YHR133C YHR134W (WSS1)          | 8 | 371597 |
| <b>iYHR134W</b>   |                                 | 8 | 372558 |
| <b>iYHR135C</b>   | YHR135C (YCK1)                  | 8 | 374310 |
| <b>iYHR136C</b>   | YHR136C (SPL2) YHR137W (ARO9)   | 8 | 375100 |
| <b>iYHR137W</b>   |                                 | 8 | 377250 |
| <b>iYHR139C</b>   | YHR139C (SPS100)                | 8 | 379199 |
| <b>iYHR141C</b>   | YHR141C (RPL42B) YHR142W (CHS7) | 8 | 382751 |
| <b>iYHR142W</b>   | YHR143W (DSE2)                  | 8 | 384488 |
| <b>iYHR144C</b>   | YHR144C (DCD1) suf8trna         | 8 | 388726 |
| <b>iYHR147C</b>   | YHR147C (MRPL6) YHR148W (IMP3)  | 8 | 393283 |
| <b>iYHR148W</b>   |                                 | 8 | 394085 |

|                 |                                 |   |        |
|-----------------|---------------------------------|---|--------|
| <b>iYHR149C</b> | YHR149C YHR150W                 | 8 | 396659 |
| <b>iYHR150W</b> |                                 | 8 | 398990 |
| <b>iYHR151C</b> | YHR151C YHR152W (SPO12)         | 8 | 400848 |
| <b>iYHR152W</b> |                                 | 8 | 401955 |
| <b>iYHR153C</b> | YHR153C (SPO16) YHR154W (ESC4)  | 8 | 402682 |
| <b>iYHR155W</b> |                                 | 8 | 410789 |
| <b>iYHR156C</b> | YHR156C (LIN1) YHR157W (REC104) | 8 | 412406 |
| <b>iYHR157W</b> |                                 | 8 | 413455 |
| <b>iYHR158C</b> | YHR158C (KEL1) YHR159W          | 8 | 417179 |
| <b>iYHR159W</b> |                                 | 8 | 419063 |
| <b>iYHR160C</b> | YHR160C (PEX18)                 | 8 | 420072 |
| <b>iYHR162W</b> |                                 | 8 | 423461 |
| <b>iYHR163W</b> |                                 | 8 | 424472 |
| <b>iYHR164C</b> | YHR164C (DNA2)                  | 8 | 429177 |
| <b>iYHR165C</b> | YHR165C (PRP8)                  | 8 | 436947 |
| <b>iYHR166C</b> | YHR166C (CDC23) YHR167W (THP2)  | 8 | 439049 |
| <b>iYHR167W</b> | YHR168W                         | 8 | 440126 |
| <b>iYHR168W</b> | YHR169W (DBP8)                  | 8 | 441875 |
| <b>iYHR169W</b> | YHR170W (NMD3)                  | 8 | 443474 |
| <b>iYHR170W</b> | YHR171W (APG7)                  | 8 | 445382 |
| <b>iYHR171W</b> | YHR172W (SPC97)                 | 8 | 447602 |
| <b>iYHR173C</b> | YHR173C YHR174W (ENO2)          | 8 | 451150 |
| <b>iYHR174W</b> | YHR175W (CTR2)                  | 8 | 452637 |
| <b>iYHR177W</b> | YHR178W (STB5)                  | 8 | 457947 |
| <b>iYHR178W</b> | YHR179W (OYE2)                  | 8 | 461525 |
| <b>iYHR179W</b> | YHR180W                         | 8 | 463699 |
| <b>iYHR181W</b> | YHR182W                         | 8 | 467909 |
| <b>iYHR182W</b> | YHR183W (GND1)                  | 8 | 470571 |
| <b>iYHR183W</b> | YHR184W (SSP1)                  | 8 | 472424 |
| <b>iYHR184W</b> |                                 | 8 | 474454 |
| <b>iYHR185C</b> | YHR185C (PFS1)                  | 8 | 475335 |
| <b>iYHR186C</b> | YHR186C YHR187W (IKI1)          | 8 | 480667 |
| <b>iYHR187W</b> |                                 | 8 | 481914 |
| <b>iYHR188C</b> | YHR188C (GPI16) YHR189W         | 8 | 483832 |
| <b>iYHR189W</b> | YHR190W (ERG9)                  | 8 | 484595 |
| <b>iYHR191C</b> | YHR191C (CTF8) YHR192W          | 8 | 486626 |
| <b>iYHR193C</b> | YHR193C (EGD2) YHR194W          | 8 | 488231 |
| <b>iYHR194W</b> | YHR195W (NVJ1)                  | 8 | 490391 |
| <b>iYHR195W</b> | YHR196W                         | 8 | 491707 |
| <b>iYHR196W</b> | YHR197W                         | 8 | 493653 |
| <b>iYHR197W</b> |                                 | 8 | 496182 |
| <b>iYHR198C</b> | YHR198C                         | 8 | 497275 |
| <b>iYHR199C</b> | YHR199C YHR200W (RPN10)         | 8 | 498417 |
| <b>iYHR200W</b> |                                 | 8 | 499880 |
| <b>iYHR202W</b> |                                 | 8 | 504191 |
| <b>iYHR203C</b> | YHR203C (RPS4B) YHR204W (MNL1)  | 8 | 505525 |
| <b>iYHR204W</b> | YHR205W (SCH9)                  | 8 | 508704 |
| <b>iYHR205W</b> | YHR206W (SKN7)                  | 8 | 511832 |
| <b>iYHR207C</b> | YHR207C (SET5) YHR208W (BAT1)   | 8 | 516480 |
| <b>iYHR208W</b> | YHR209W                         | 8 | 518708 |
| <b>iYHR209W</b> |                                 | 8 | 520307 |

|                       |                                      |   |        |
|-----------------------|--------------------------------------|---|--------|
| <b>iYHR210C-0</b>     | YHR210C YHR211W (FLO5)               | 8 | 521732 |
| <b>iYHR210C-A</b>     | YHR210C YHR211W (FLO5)               | 8 | 521732 |
| <b>iYHR210C-B</b>     | YHR210C YHR211W (FLO5)               | 8 | 522952 |
| <b>iYHR211W</b>       |                                      | 8 | 528614 |
| <b>iYHR212C</b>       | YHR212C YHR213W                      | 8 | 538089 |
| <b>iYHR213W-0</b>     | YHR214W                              | 8 | 539742 |
| <b>iYHR213W-A</b>     | YHR214W                              | 8 | 539742 |
| <b>iYHR213W-B</b>     | YHR214W                              | 8 | 540694 |
| <b>iYHR214W</b>       | YHR214W-A                            | 8 | 542257 |
| <b>iYHR214W-A</b>     |                                      | 8 | 543488 |
| <b>iYHR215W</b>       | YHR216W (IMD2)                       | 8 | 553497 |
| <b>iYHR216W</b>       |                                      | 8 | 555962 |
| <b>iYHR217C</b>       | YHR217C YHR218W                      | 8 | 557037 |
| <b>iYHR218W</b>       | YHR219W                              | 8 | 559919 |
| <b>iYHR219W</b>       | YIL177C                              | 8 | 561138 |
| <b>iYHRCdelta10</b>   | YHR145C YHR146W (CRP1)               | 8 | 389509 |
| <b>iYHRCdelta11</b>   | YHR145C YHR146W (CRP1)               | 8 | 389845 |
| <b>iYHRCdelta12</b>   | YHR180W                              | 8 | 464142 |
| <b>iYHRCdelta14-0</b> |                                      | 8 | 530374 |
| <b>iYHRCdelta14-A</b> |                                      | 8 | 530374 |
| <b>iYHRCdelta14-B</b> |                                      | 8 | 531874 |
| <b>iYHRCdelta14-C</b> |                                      | 8 | 533374 |
| <b>iYHRCdelta16-0</b> | YHR214C-B YHR215W (PHO12)            | 8 | 549632 |
| <b>iYHRCdelta16-A</b> | YHR214C-B YHR215W (PHO12)            | 8 | 549632 |
| <b>iYHRCdelta16-B</b> | YHR214C-B YHR215W (PHO12)            | 8 | 550864 |
| <b>iYHRCdelta4</b>    | YHR005C-A (MRS11) YHR006W (STP2)     | 8 | 117054 |
| <b>iYHRCdelta5</b>    | YHR015W (MIP6)                       | 8 | 133433 |
| <b>iYHRCsigma2</b>    |                                      | 8 | 146662 |
| <b>iYHRWdelta7</b>    | YHR015W (MIP6)                       | 8 | 134000 |
| <b>iYHRWdelta9</b>    |                                      | 8 | 359374 |
| <b>iYHRWtau3</b>      |                                      | 8 | 147105 |
| <b>iYIL001W</b>       |                                      | 9 | 355478 |
| <b>iYIL002C</b>       | YIL002C (INP51) YIL001W              | 9 | 353428 |
| <b>iYIL003W</b>       |                                      | 9 | 350000 |
| <b>iYIL004C</b>       | YIL004C (BET1) YIL003W (DRE3)        | 9 | 348502 |
| <b>iYIL006W</b>       | YIL005W (EPS1)                       | 9 | 345180 |
| <b>iYIL007C</b>       | YIL007C YIL006W                      | 9 | 343653 |
| <b>iYIL008W</b>       |                                      | 9 | 342832 |
| <b>iYIL009C-A</b>     | YIL009C-A (EST3) td(guc)i2YIL009W (F | 9 | 336209 |
| <b>iYIL009W</b>       | YIL008W (URM1)                       | 9 | 341425 |
| <b>iYIL010W</b>       |                                      | 9 | 335526 |
| <b>iYIL011W</b>       | YIL010W (DOT5)                       | 9 | 334533 |
| <b>iYIL012W</b>       | YIL011W (TIR3)                       | 9 | 333401 |
| <b>iYIL013C</b>       | YIL013C (PDR11) YIL012W              | 9 | 332440 |
| <b>iYIL014W</b>       |                                      | 9 | 327993 |
| <b>iYIL015C-A</b>     | YIL015C-A YIL014W (MNT3)             | 9 | 325524 |
| <b>iYIL015W</b>       |                                      | 9 | 324103 |
| <b>iYIL016W</b>       | YIL015W (BAR1)                       | 9 | 321931 |
| <b>iYIL017C</b>       | YIL017C (VID28) YIL016W (SNL1)       | 9 | 320963 |
| <b>iYIL019W</b>       | YIL018W (RPL2B)                      | 9 | 316131 |
| <b>iYIL020C</b>       | YIL020C (HIS6) YIL019W               | 9 | 314818 |

|          |                                |   |        |
|----------|--------------------------------|---|--------|
| iYIL021W |                                | 9 | 313859 |
| iYIL022W | YIL021W (RPB3)                 | 9 | 312458 |
| iYIL023C | YIL023C YIL022W (TIM44)        | 9 | 310424 |
| iYIL024C | YIL024C                        | 9 | 309169 |
| iYIL026C | YIL026C (IRR1)                 | 9 | 307927 |
| iYIL027C | YIL027C (KRE27)                | 9 | 304102 |
| iYIL028W |                                | 9 | 302496 |
| iYIL030C | YIL030C (SSM4)                 | 9 | 300008 |
| iYIL031W |                                | 9 | 295736 |
| iYIL032C | YIL032C YIL031W (ULP2)         | 9 | 292316 |
| iYIL033C | YIL033C (BCY1)                 | 9 | 291668 |
| iYIL034C | YIL034C (CAP2)                 | 9 | 290088 |
| iYIL035C | YIL035C (CKA1)                 | 9 | 288907 |
| iYIL036W |                                | 9 | 287428 |
| iYIL037C | YIL037C (PRM2) YIL036W (CST6)  | 9 | 284998 |
| iYIL038C | YIL038C (NOT3)                 | 9 | 282651 |
| iYIL039W |                                | 9 | 279846 |
| iYIL041W | YIL040W                        | 9 | 277504 |
| iYIL042C | YIL042C YIL041W                | 9 | 276291 |
| iYIL044C | YIL044C (AGE2)                 | 9 | 273845 |
| iYIL045W |                                | 9 | 272776 |
| iYIL046W | YIL045W (PIG2)                 | 9 | 270572 |
| iYIL047C | YIL047C (SYG1) YIL046W (MET30) | 9 | 267822 |
| iYIL048W |                                | 9 | 264891 |
| iYIL049W | YIL048W (NEO1)                 | 9 | 260918 |
| iYIL050W | YIL049W (DFG10)                | 9 | 259769 |
| iYIL051C | YIL051C (MMF1) YIL050W (PCL7)  | 9 | 258279 |
| iYIL052C | YIL052C (RPL34B)               | 9 | 257061 |
| iYIL053W |                                | 9 | 255865 |
| iYIL054W | YIL053W (RHR2)                 | 9 | 254858 |
| iYIL055C | YIL055C YIL054W (FYV2)         | 9 | 253923 |
| iYIL056W |                                | 9 | 251911 |
| iYIL058W |                                | 9 | 247195 |
| iYIL061C | YIL061C (SNP1) YIL060W         | 9 | 245556 |
| iYIL062C | YIL062C (ARC15)                | 9 | 244459 |
| iYIL063C | YIL063C (YRB2)                 | 9 | 243741 |
| iYIL065C | YIL065C (FIS1) YIL064W         | 9 | 241772 |
| iYIL066C | YIL066C (RNR3)                 | 9 | 240705 |
| iYIL067C | YIL067C                        | 9 | 237757 |
| iYIL068C | YIL068C (SEC6)                 | 9 | 235471 |
| iYIL069C | YIL069C (RPS24B)               | 9 | 232366 |
| iYIL070C | YIL070C (MAM33)                | 9 | 231069 |
| iYIL071C | YIL071C (PCI8)                 | 9 | 229991 |
| iYIL072W |                                | 9 | 228416 |
| iYIL073C | YIL073C (SPO22) YIL072W (HOP1) | 9 | 225594 |
| iYIL074C | YIL074C (SER33)                | 9 | 222487 |
| iYIL075C | YIL075C (RPN2)                 | 9 | 220697 |
| iYIL076W |                                | 9 | 217545 |
| iYIL077C | YIL077C YIL076W (SEC28)        | 9 | 215950 |
| iYIL078W |                                | 9 | 214700 |
| iYIL079C | YIL079C YIL078W (THS1)         | 9 | 212002 |



|                   |                                |   |        |
|-------------------|--------------------------------|---|--------|
| <b>iYIL083C</b>   | YIL083C YIL082W                | 9 | 204650 |
| <b>iYIL084C</b>   | YIL084C (SDS3)                 | 9 | 203256 |
| <b>iYIL085C</b>   | YIL085C (KTR7)                 | 9 | 202040 |
| <b>iYIL088C</b>   | YIL088C                        | 9 | 199400 |
| <b>iYIL089W</b>   |                                | 9 | 196213 |
| <b>iYIL090W</b>   | YIL089W                        | 9 | 195067 |
| <b>iYIL091C</b>   | YIL091C YIL090W                | 9 | 193192 |
| <b>iYIL092W</b>   |                                | 9 | 190964 |
| <b>iYIL093C</b>   | YIL093C (RSM25) YIL092W        | 9 | 188781 |
| <b>iYIL094C</b>   | YIL094C (LYS12)                | 9 | 187629 |
| <b>iYIL095W</b>   |                                | 9 | 186366 |
| <b>iYIL096C</b>   |                                | 9 | 183124 |
| <b>iYIL097W</b>   |                                | 9 | 181974 |
| <b>iYIL098C</b>   | YIL098C (FMC1) YIL097W (FYV10) | 9 | 180236 |
| <b>iYIL099W</b>   |                                | 9 | 179650 |
| <b>iYIL100W</b>   | YIL099W (SGA1)                 | 9 | 177723 |
| <b>iYIL101C</b>   | YIL101C (XBP1) YIL100W         | 9 | 177247 |
| <b>iYIL102C</b>   | YIL102C                        | 9 | 174884 |
| <b>iYIL103W-0</b> |                                | 9 | 173025 |
| <b>iYIL103W-1</b> |                                | 9 | 173802 |
| <b>iYIL104C</b>   | YIL104C YIL103W                | 9 | 171502 |
| <b>iYIL105C</b>   | YIL105C                        | 9 | 169638 |
| <b>iYIL106W</b>   |                                | 9 | 167441 |
| <b>iYIL107C</b>   | YIL107C (PFK26) YIL106W (MOB1) | 9 | 165758 |
| <b>iYIL110W</b>   |                                | 9 | 157175 |
| <b>iYIL111W</b>   | YIL110W                        | 9 | 155762 |
| <b>iYIL112W</b>   | YIL111W (COX5B)                | 9 | 154843 |
| <b>iYIL113W</b>   | YIL112W                        | 9 | 151185 |
| <b>iYIL114C</b>   | YIL114C (POR2) YIL113W         | 9 | 149985 |
| <b>iYIL115C</b>   | YIL115C (NUP159)               | 9 | 148706 |
| <b>iYIL116W</b>   |                                | 9 | 144082 |
| <b>iYIL117C</b>   | YIL117C (PRM5) YIL116W (HIS5)  | 9 | 141566 |
| <b>iYIL118W</b>   |                                | 9 | 140444 |
| <b>iYIL119C-0</b> | YIL119C (RPI1) YIL118W (RHO3)  | 9 | 137874 |
| <b>iYIL120W</b>   |                                | 9 | 136105 |
| <b>iYIL121W</b>   | YIL120W (QDR1)                 | 9 | 133869 |
| <b>iYIL122W</b>   | YIL121W                        | 9 | 131662 |
| <b>iYIL123W</b>   | YIL122W                        | 9 | 129578 |
| <b>iYIL124W</b>   | YIL123W (SIM1)                 | 9 | 127097 |
| <b>iYIL125W</b>   | YIL124W (AYR1)                 | 9 | 125733 |
| <b>iYIL126W</b>   | YIL125W (KGD1)                 | 9 | 122071 |
| <b>iYIL127C</b>   | YIL127C YIL126W (STH1)         | 9 | 117644 |
| <b>iYIL128W</b>   |                                | 9 | 116904 |
| <b>iYIL129C</b>   | YIL129C (TAO3) YIL128W (MET18) | 9 | 113237 |
| <b>iYIL131C</b>   | YIL131C (FKH1) YIL130W (GIN1)  | 9 | 102235 |
| <b>iYIL132C</b>   | YIL132C (CSM2)                 | 9 | 100501 |
| <b>iYIL133C</b>   | YIL133C (RPL16A)               | 9 | 99416  |
| <b>iYIL134W</b>   |                                | 9 | 98330  |
| <b>iYIL135C</b>   | YIL135C YIL134W (FLX1)         | 9 | 96375  |
| <b>iYIL136W</b>   |                                | 9 | 94800  |
| <b>iYIL137C</b>   | YIL137C YIL136W (OM45)         | 9 | 92788  |

|                      |                                 |   |        |
|----------------------|---------------------------------|---|--------|
| <b>iYIL138C</b>      | YIL138C (TPM2)                  | 9 | 89715  |
| <b>iYIL139C</b>      | YIL139C (REV7)                  | 9 | 88716  |
| <b>iYIL140W</b>      |                                 | 9 | 87837  |
| <b>iYIL142W</b>      | YIL141W                         | 9 | 84885  |
| <b>iYIL143C</b>      | YIL143C (SSL2) YIL142W (CCT2)   | 9 | 83041  |
| <b>iYIL144W</b>      |                                 | 9 | 80149  |
| <b>iYIL145C</b>      | YIL145C (PAN6) YIL144W (TID3)   | 9 | 77391  |
| <b>iYIL146C</b>      | YIL146C (ECM37)                 | 9 | 75773  |
| <b>iYIL147C</b>      | YIL147C (SLN1)                  | 9 | 73453  |
| <b>iYIL148W</b>      |                                 | 9 | 69528  |
| <b>iYIL149C</b>      | YIL149C (MLP2) YIL148W (RPL40A) | 9 | 68067  |
| <b>iYIL150C</b>      | YIL150C (DNA43)                 | 9 | 62728  |
| <b>iYIL151C</b>      | YIL151C                         | 9 | 60694  |
| <b>iYIL152W</b>      |                                 | 9 | 57252  |
| <b>iYIL153W</b>      | YIL152W                         | 9 | 56379  |
| <b>iYIL154C</b>      | YIL154C (IMP2') YIL153W (RRD1)  | 9 | 55021  |
| <b>iYIL155C</b>      | YIL155C (GUT2)                  | 9 | 53708  |
| <b>iYIL156W</b>      |                                 | 9 | 51306  |
| <b>iYIL157C</b>      | YIL157C YIL156W (UBP7)          | 9 | 47542  |
| <b>iYIL158W</b>      |                                 | 9 | 46815  |
| <b>iYIL159W</b>      | YIL158W                         | 9 | 45952  |
| <b>iYIL160C</b>      | YIL160C (POT1) YIL159W (BNR1)   | 9 | 41444  |
| <b>iYIL162W</b>      | YIL161W                         | 9 | 38983  |
| <b>iYIL163C</b>      | YIL163C YIL162W (SUC2)          | 9 | 37252  |
| <b>iYIL164C-0</b>    | YIL164C (NIT1)                  | 9 | 34686  |
| <b>iYIL164C-1</b>    | YIL164C (NIT1)                  | 9 | 35792  |
| <b>iYIL166C</b>      | YIL166C                         | 9 | 32566  |
| <b>iYIL167W</b>      |                                 | 9 | 30048  |
| <b>iYIL169C-0</b>    | YIL169C YIL168W (SDL1)          | 9 | 26106  |
| <b>iYIL169C-1</b>    | YIL169C YIL168W (SDL1)          | 9 | 27569  |
| <b>iYIL170W-0</b>    |                                 | 9 | 21220  |
| <b>iYIL170W-1</b>    |                                 | 9 | 22169  |
| <b>iYIL172C</b>      | YIL172C YIL171W (HXT12)         | 9 | 18553  |
| <b>iYIL173W</b>      |                                 | 9 | 16141  |
| <b>iYIL174W-0</b>    | YIL173W (VTH1)                  | 9 | 9696   |
| <b>iYIL174W-1</b>    | YIL173W (VTH1)                  | 9 | 10594  |
| <b>iYIL177C-1</b>    | YIL177C                         | 9 | 7470   |
| <b>iYILCdelta1</b>   |                                 | 9 | 197485 |
| <b>iYILCdelta3</b>   | YIL030C (SSM4)                  | 9 | 300725 |
| <b>iYILCdelta5-0</b> | YIL009C-A (EST3) YIL009W (FAA3) | 9 | 336894 |
| <b>iYILCdelta5-1</b> | YIL009C-A (EST3) YIL009W (FAA3) | 9 | 338117 |
| <b>iYILCtau1</b>     |                                 | 9 | 197020 |
| <b>iYIR001C</b>      | YIR001C (SGN1)                  | 9 | 356892 |
| <b>iYIR002C</b>      | YIR002C (MPH1) YIR003W          | 9 | 360393 |
| <b>iYIR003W</b>      | YIR004W (DJP1)                  | 9 | 362921 |
| <b>iYIR004W</b>      | YIR005W (IST3)                  | 9 | 364516 |
| <b>iYIR005W</b>      |                                 | 9 | 365332 |
| <b>iYIR006C</b>      | YIR006C te(uuc)i (PAN1) YIR007W | 9 | 369905 |
| <b>iYIR007W</b>      |                                 | 9 | 372995 |
| <b>iYIR008C</b>      | YIR008C (PRI1) YIR009W (MSL1)   | 9 | 374303 |
| <b>iYIR010W</b>      |                                 | 9 | 377158 |

|               |                                     |    |        |
|---------------|-------------------------------------|----|--------|
| iYIR011C      | YIR011C (STS1) YIR012W (SQT1)       | 9  | 378243 |
| iYIR012W      |                                     | 9  | 379778 |
| iYIR013C      | YIR013C (GAT4) YIR014W              | 9  | 380381 |
| iYIR014W      | YIR015W (RPR2)                      | 9  | 381811 |
| iYIR015W      | YIR016W                             | 9  | 382379 |
| iYIR016W      |                                     | 9  | 383422 |
| iYIR017C      | YIR017C (MET28) YIR018W (YAP5)      | 9  | 384116 |
| iYIR018W-0    |                                     | 9  | 385343 |
| iYIR018W-1    |                                     | 9  | 386751 |
| iYIR020C      | YIR020C YIR020W-B                   | 9  | 394554 |
| iYIR020W-B-0  | YIR021W (MRS1)                      | 9  | 395156 |
| iYIR020W-B-1  | YIR021W (MRS1)                      | 9  | 396223 |
| iYIR021W      | YIR022W (SEC11)                     | 9  | 398382 |
| iYIR022W      | YIR023W (DAL81)                     | 9  | 399233 |
| iYIR023W      |                                     | 9  | 402686 |
| iYIR024C      | YIR024C (GIF1) YIR025W (MND2)       | 9  | 403488 |
| iYIR025W      |                                     | 9  | 404762 |
| iYIR026C      | YIR026C (YVH1)                      | 9  | 405964 |
| iYIR027C      | YIR027C (DAL1) YIR028W (DAL4)       | 9  | 407639 |
| iYIR028W      | YIR029W (DAL2)                      | 9  | 410372 |
| iYIR029W      |                                     | 9  | 411835 |
| iYIR030C      | YIR030C (DCG1)                      | 9  | 412767 |
| iYIR031C      | YIR031C (DAL7)                      | 9  | 414676 |
| iYIR032C      | YIR032C (DAL3) YIR033W (MGA2)       | 9  | 415614 |
| iYIR033W      |                                     | 9  | 419462 |
| iYIR034C      | YIR034C (LYS1)                      | 9  | 420733 |
| iYIR035C      | YIR035C                             | 9  | 421787 |
| iYIR036C      | YIR036C YIR037W (HYR1)              | 9  | 422862 |
| iYIR037W      |                                     | 9  | 423616 |
| iYIR038C-0    | YIR038C (GTT1)                      | 9  | 424510 |
| iYIR038C-1    | YIR038C (GTT1)                      | 9  | 425354 |
| iYIR039C      | YIR039C (YPS6)                      | 9  | 432107 |
| iYIR040C      | YIR040C YIR041W                     | 9  | 433717 |
| iYIR041W      |                                     | 9  | 434299 |
| iYIR042C      | YIR042C                             | 9  | 435980 |
| iYIR043C      | YIR043C                             | 9  | 437732 |
| iYIRCdelta6-1 | YIR038C (GTT1)                      | 9  | 427779 |
| iYJL001W      | YJR001W                             | 10 | 435614 |
| iYJL002C      | YJL002C (OST1) YJL001W (PRE3)       | 10 | 434339 |
| iYJL003W      |                                     | 10 | 432688 |
| iYJL004C      | YJL004C (SYS1) YJL003W              | 10 | 431888 |
| iYJL005W      |                                     | 10 | 430925 |
| iYJL006C      | YJL006C (CTK2) tl(uaa)j YJL005W (CY | 10 | 423797 |
| iYJL008C      | YJL008C (CCT8)                      | 10 | 421351 |
| iYJL010C      | YJL010C YJL009W                     | 10 | 419250 |
| iYJL011C      | YJL011C                             | 10 | 414458 |
| iYJL012C      | YJL012C (VTC4)                      | 10 | 413087 |
| iYJL013C      | YJL013C (MAD3)                      | 10 | 410729 |
| iYJL014W      |                                     | 10 | 408851 |
| iYJL017W      | YJL016W                             | 10 | 406256 |
| iYJL018W      | YJL017W                             | 10 | 404636 |

|          |                                      |    |        |
|----------|--------------------------------------|----|--------|
| iYJL020C | YJL020C (BBC1) YJL019W               | 10 | 402102 |
| iYJL022W |                                      | 10 | 398113 |
| iYJL024C | YJL024C (APS3)                       | 10 | 396288 |
| iYJL025W |                                      | 10 | 395207 |
| iYJL026W | YJL025W (RRN7)                       | 10 | 393299 |
| iYJL027C | YJL027C YJL026W (RNR2)               | 10 | 391945 |
| iYJL028W |                                      | 10 | 391342 |
| iYJL029C | YJL029C (VPS53) tm(cau)j1 YJL028W    | 10 | 390549 |
| iYJL030W |                                      | 10 | 387943 |
| iYJL031C | YJL031C (BET4) YJL030W (MAD2)        | 10 | 386936 |
| iYJL033W | YJL032W                              | 10 | 385845 |
| iYJL034W | YJL033W (HCA4)                       | 10 | 383071 |
| iYJL035C | YJL035C (TAD2) YJL034W (KAR2)        | 10 | 380697 |
| iYJL036W |                                      | 10 | 379792 |
| iYJL037W | YJL036W (SNX4)                       | 10 | 377032 |
| iYJL038C | YJL038C YJL037W                      | 10 | 375470 |
| iYJL039C | YJL039C (NUP192) td(guc)j3/tr(ucu)j2 | 10 | 373495 |
| iYJL044C | YJL044C (GYP6) YJL043W               | 10 | 359372 |
| iYJL045W |                                      | 10 | 357624 |
| iYJL046W | YJL045W                              | 10 | 353311 |
| iYJL047C | YJL047C (RTT101) YJL046W             | 10 | 351804 |
| iYJL048C | YJL048C                              | 10 | 348333 |
| iYJL049W |                                      | 10 | 347021 |
| iYJL050W | YJL049W                              | 10 | 345439 |
| iYJL052W | YJL051W                              | 10 | 338965 |
| iYJL053W | YJL052W (TDH1)                       | 10 | 336733 |
| iYJL054W | YJL053W (PEP8)                       | 10 | 335397 |
| iYJL055W | YJL054W (TIM54)                      | 10 | 333790 |
| iYJL056C | YJL056C (ZAP1) YJL055W               | 10 | 332769 |
| iYJL057C | YJL057C (IKS1)                       | 10 | 329817 |
| iYJL058C | YJL058C                              | 10 | 327569 |
| iYJL060W | YJL059W (YHC3)                       | 10 | 324416 |
| iYJL061W | YJL060W                              | 10 | 321853 |
| iYJL062W | YJL061W (NUP82)                      | 10 | 319472 |
| iYJL063C | YJL063C (MRPL8) YJL062W (LAS21)      | 10 | 316171 |
| iYJL064W |                                      | 10 | 315266 |
| iYJL066C | YJL066C (MPM1)                       | 10 | 314568 |
| iYJL068C | YJL068C YJL067W                      | 10 | 313611 |
| iYJL069C | YJL069C                              | 10 | 312402 |
| iYJL070C | YJL070C                              | 10 | 310333 |
| iYJL071W |                                      | 10 | 307552 |
| iYJL072C | YJL072C YJL071W (ARG2)               | 10 | 305558 |
| iYJL073W |                                      | 10 | 304814 |
| iYJL074C | YJL074C (SMC3) YJL073W (JEM1)        | 10 | 302545 |
| iYJL075C | YJL075C                              | 10 | 298572 |
| iYJL077C | YJL077C (ICS3) YJL076W (NET1)        | 10 | 294757 |
| iYJL078C | YJL078C (PRY3)                       | 10 | 293677 |
| iYJL079C | YJL079C (PRY1)                       | 10 | 290470 |
| iYJL080C | YJL080C (SCP160)                     | 10 | 288922 |
| iYJL081C | YJL081C (ARP4)                       | 10 | 284967 |
| iYJL082W |                                      | 10 | 283076 |

|            |                                |    |        |
|------------|--------------------------------|----|--------|
| iYJL083W   | YJL082W (IML2)                 | 10 | 280351 |
| iYJL084C   | YJL084C YJL083W                | 10 | 277698 |
| iYJL085W   |                                | 10 | 274394 |
| iYJL088W   |                                | 10 | 269511 |
| iYJL089W   | YJL088W (ARG3)                 | 10 | 268111 |
| iYJL090C   | YJL090C (DPB11) YJL089W (SIP4) | 10 | 264747 |
| iYJL091C   | YJL091C                        | 10 | 262272 |
| iYJL092W   |                                | 10 | 260643 |
| iYJL093C   | YJL093C (TOK1) YJL092W (HPR5)  | 10 | 256508 |
| iYJL094C   | YJL094C (KHA1)                 | 10 | 254138 |
| iYJL095W   |                                | 10 | 251387 |
| iYJL096W   | YJL095W (BCK1)                 | 10 | 246672 |
| iYJL098W   | YJL097W                        | 10 | 244955 |
| iYJL099W   | YJL098W (SAP185)               | 10 | 241351 |
| iYJL100W   | YJL099W (CHS6)                 | 10 | 238783 |
| iYJL101C   | YJL101C (GSH1) YJL100W (LSB6)  | 10 | 236053 |
| iYJL102W   |                                | 10 | 233457 |
| iYJL103C   | YJL103C YJL102W (MEF2)         | 10 | 230578 |
| iYJL104W   |                                | 10 | 227473 |
| iYJL106W-0 | YJL105W (SET4)                 | 10 | 223024 |
| iYJL106W-1 | YJL105W (SET4)                 | 10 | 223888 |
| iYJL107C   | YJL107C YJL106W (IME2)         | 10 | 219713 |
| iYJL109C   | YJL109C                        | 10 | 217006 |
| iYJL110C   | YJL110C (GZF3)                 | 10 | 211274 |
| iYJL111W   |                                | 10 | 209226 |
| iYJL112W   | YJL111W (CCT7)                 | 10 | 207146 |
| iYJL113W   | YJL112W (MDV1)                 | 10 | 203026 |
| iYJL115W   | YJL114W                        | 10 | 196825 |
| iYJL116C   | YJL116C (NCA3) YJL115W (ASF1)  | 10 | 194573 |
| iYJL117W   |                                | 10 | 193166 |
| iYJL118W   | YJL117W (PHO86)                | 10 | 191998 |
| iYJL120W   |                                | 10 | 191045 |
| iYJL122W   |                                | 10 | 189943 |
| iYJL123C   | YJL123C YJL122W                | 10 | 189140 |
| iYJL124C   | YJL124C (LSM1)                 | 10 | 187344 |
| iYJL125C   | YJL125C (GCD14)                | 10 | 186378 |
| iYJL126W   |                                | 10 | 185123 |
| iYJL127C   | YJL127C (SPT10) YJL126W (NIT2) | 10 | 183919 |
| iYJL128C-0 | YJL128C (PBS2)                 | 10 | 179801 |
| iYJL128C-1 | YJL128C (PBS2)                 | 10 | 180899 |
| iYJL129C   | YJL129C (TRK1)                 | 10 | 177004 |
| iYJL130C   | YJL130C (URA2)                 | 10 | 172065 |
| iYJL131C   | YJL131C                        | 10 | 165046 |
| iYJL132W   |                                | 10 | 163864 |
| iYJL133W   | YJL132W                        | 10 | 161261 |
| iYJL134W   | YJL133W (MRS3)                 | 10 | 159115 |
| iYJL136C   | YJL136C (RPS21B) YJL135W       | 10 | 156971 |
| iYJL137C   | YJL137C (GLG2)                 | 10 | 155825 |
| iYJL138C   | YJL138C (TIF2)                 | 10 | 154389 |
| iYJL139C   | YJL139C (YUR1)                 | 10 | 152697 |
| iYJL140W   |                                | 10 | 151324 |

|            |                                  |    |        |
|------------|----------------------------------|----|--------|
| iYJL141C   | YJL141C (YAK1) YJL140W (RPB4)    | 10 | 150088 |
| iYJL143W   |                                  | 10 | 147275 |
| iYJL144W   | YJL143W (TIM17)                  | 10 | 146371 |
| iYJL145W   | YJL144W                          | 10 | 145742 |
| iYJL146W   | YJL145W                          | 10 | 144399 |
| iYJL147C   | YJL147C YJL146W (IDS2)           | 10 | 142265 |
| iYJL148W   |                                  | 10 | 140836 |
| iYJL149W   | YJL148W (RPA34) snr190/snr128    | 10 | 139068 |
| iYJL151C   | YJL151C (SNA3) YJL150W           | 10 | 136471 |
| iYJL153C   | YJL153C (INO1) YJL152W           | 10 | 135697 |
| iYJL154C   | YJL154C (VPS35)                  | 10 | 133633 |
| iYJL155C   | YJL155C (FBP26)                  | 10 | 130341 |
| iYJL156C   | YJL156C (SSY5)                   | 10 | 128650 |
| iYJL157C   | YJL157C (FAR1)                   | 10 | 126025 |
| iYJL158C   | YJL158C (CIS3)                   | 10 | 122645 |
| iYJL159W   |                                  | 10 | 121376 |
| iYJL160C-0 | YJL160C YJL159W (HSP150)         | 10 | 118820 |
| iYJL160C-1 | YJL160C YJL159W (HSP150)         | 10 | 119632 |
| iYJL161W   |                                  | 10 | 117781 |
| iYJL163C   | YJL163C                          | 10 | 113327 |
| iYJL164C   | YJL164C (TPK1)                   | 10 | 111151 |
| iYJL165C   | YJL165C (HAL5)                   | 10 | 109453 |
| iYJL166W   |                                  | 10 | 106710 |
| iYJL167W   | YJL166W (QCR8)                   | 10 | 106064 |
| iYJL168C   | YJL168C (SET2) YJL167W (ERG20)   | 10 | 104420 |
| iYJL170C   | YJL170C (ASG7) YJL169W           | 10 | 101694 |
| iYJL171C   | YJL171C                          | 10 | 100887 |
| iYJL172W   |                                  | 10 | 99460  |
| iYJL173C   | YJL173C (RFA3) YJL172W (CPS1)    | 10 | 96526  |
| iYJL174W   |                                  | 10 | 95919  |
| iYJL175W   | YJL174W (KRE9)                   | 10 | 94558  |
| iYJL177W   |                                  | 10 | 91654  |
| iYJL178C   | YJL178C YJL177W (RPL17B)         | 10 | 89870  |
| iYJL179W   |                                  | 10 | 89114  |
| iYJL180C   | YJL180C (ATP12) YJL179W (PFD1)   | 10 | 88558  |
| iYJL181W   |                                  | 10 | 87493  |
| iYJL183W   |                                  | 10 | 85334  |
| iYJL184W   | YJL183W (MNN11)                  | 10 | 83817  |
| iYJL185C   | YJL185C YJL184W                  | 10 | 82974  |
| iYJL186W   |                                  | 10 | 81913  |
| iYJL187C   | YJL187C (SWE1) YJL186W (MNN5)    | 10 | 79261  |
| iYJL188C   | YJL188C (BUD19)                  | 10 | 76509  |
| iYJL190C   | YJL190C (RPS22A) YJL189W (RPL39) | 10 | 75301  |
| iYJL191W   |                                  | 10 | 74610  |
| iYJL192C   | YJL192C YJL191W (RPS14B)         | 10 | 73413  |
| iYJL193W   |                                  | 10 | 72573  |
| iYJL194W   | YJL193W                          | 10 | 70878  |
| iYJL196C   | YJL196C (ELO1)                   | 10 | 68781  |
| iYJL197W   |                                  | 10 | 67568  |
| iYJL198W   | YJL197W (UBP12)                  | 10 | 63488  |
| iYJL199C   | YJL199C YJL198W (PHO90)          | 10 | 60181  |

|              |                                |    |        |
|--------------|--------------------------------|----|--------|
| iYJL200C     | YJL200C                        | 10 | 58813  |
| iYJL201W     |                                | 10 | 56178  |
| iYJL202C     | YJL202C YJL201W (ECM25)        | 10 | 54290  |
| iYJL204C     | YJL204C (RCY1) YJL203W (PRP21) | 10 | 53151  |
| iYJL206C     | YJL206C                        | 10 | 49935  |
| iYJL206C-A   | YJL205C-A (NCE101)             | 10 | 50443  |
| iYJL207C     | YJL207C                        | 10 | 47433  |
| iYJL208C     | YJL208C (NUC1)                 | 10 | 41183  |
| iYJL209W     |                                | 10 | 39969  |
| iYJL210W     | YJL209W (CBP1)                 | 10 | 37734  |
| iYJL212C     | YJL212C (OPT1)                 | 10 | 36249  |
| iYJL213W     |                                | 10 | 33158  |
| iYJL214W-0   | YJL213W                        | 10 | 28596  |
| iYJL214W-1   | YJL213W                        | 10 | 29785  |
| iYJL215C     | YJL215C YJL214W (HXT8)         | 10 | 26771  |
| iYJL216C     | YJL216C                        | 10 | 26086  |
| iYJL217W     |                                | 10 | 23729  |
| iYJL218W     | YJL217W                        | 10 | 22563  |
| iYJL219W     | YJL218W                        | 10 | 21200  |
| iYJL220W     | YJL219W (HXT9)                 | 10 | 18695  |
| iYJL222W     |                                | 10 | 16124  |
| iYJL223C-0   | YJL223C (PAU1) YJL222W (VTH2)  | 10 | 9138   |
| iYJL225C-1   | YJL225C                        | 10 | 7453   |
| iYJLCdelta3  | YJL112W (MDV1)                 | 10 | 203815 |
| iYJLCdelta5  | YJL045W                        | 10 | 354871 |
| iYJLCdelta6  | YJL039C (NUP192)               | 10 | 374631 |
| iYJLCdelta7  | YJL036W (SNX4)                 | 10 | 377566 |
| iYJLWdelta1  | YJL200C                        | 10 | 59783  |
| iYJLWdelta15 | YJR052W (RAD7)                 | 10 | 531363 |
| iYJLWdelta19 |                                | 10 | 541115 |
| iYJLWdelta8  | YJL011C                        | 10 | 416338 |
| iYJLWdelta9  | YJL011C                        | 10 | 416714 |
| iYJLWtau4    | YJL008C (CCT8)                 | 10 | 421984 |
| iYJR001W     | YJR002W (MPP10)                | 10 | 438298 |
| iYJR002W     |                                | 10 | 440333 |
| iYJR003C     | YJR003C                        | 10 | 442300 |
| iYJR004C     | YJR004C (SAG1) YJR005W (APL1)  | 10 | 444548 |
| iYJR005W     | YJR006W (HYS2)                 | 10 | 447712 |
| iYJR006W     | YJR007W (SUI2)                 | 10 | 450352 |
| iYJR007W     | YJR008W                        | 10 | 451621 |
| iYJR008W     |                                | 10 | 453133 |
| iYJR009C-0   | YJR009C (TDH2) YJR010W (MET3)  | 10 | 454368 |
| iYJR010C-A   | YJR010C-A (SPC1)               | 10 | 458048 |
| iYJR010W     |                                | 10 | 457461 |
| iYJR011C     | YJR011C                        | 10 | 459113 |
| iYJR012C     | YJR012C YJR013W                | 10 | 460105 |
| iYJR013W     | YJR014W                        | 10 | 461281 |
| iYJR014W     | YJR015W                        | 10 | 462113 |
| iYJR015W     |                                | 10 | 463941 |
| iYJR016C     | YJR016C (ILV3)                 | 10 | 465896 |
| iYJR018W     |                                | 10 | 466836 |

|                 |                                  |    |        |
|-----------------|----------------------------------|----|--------|
| <b>iYJR020W</b> |                                  | 10 | 468021 |
| <b>iYJR021C</b> | YJR021C (REC107) YJR022W (LSM8)  | 10 | 469267 |
| <b>iYJR024C</b> | YJR024C                          | 10 | 470652 |
| <b>iYJR025C</b> | YJR025C (BNA1) YJR026W           | 10 | 471359 |
| <b>iYJR030C</b> | YJR030C                          | 10 | 485884 |
| <b>iYJR031C</b> | YJR031C (GEA1) YJR032W (CPR7)    | 10 | 490500 |
| <b>iYJR032W</b> |                                  | 10 | 491950 |
| <b>iYJR034W</b> | YJR035W (RAD26)                  | 10 | 496697 |
| <b>iYJR035W</b> |                                  | 10 | 500300 |
| <b>iYJR037W</b> |                                  | 10 | 503173 |
| <b>iYJR039W</b> | YJR040W (GEF1)                   | 10 | 506989 |
| <b>iYJR040W</b> |                                  | 10 | 509773 |
| <b>iYJR041C</b> | YJR041C YJR042W (NUP85)          | 10 | 513451 |
| <b>iYJR042W</b> |                                  | 10 | 515977 |
| <b>iYJR043C</b> | YJR043C (POL32)                  | 10 | 517201 |
| <b>iYJR044C</b> | YJR044C                          | 10 | 518873 |
| <b>iYJR045C</b> | YJR045C (SSC1) YJR046W (TAH11)   | 10 | 521290 |
| <b>iYJR046W</b> |                                  | 10 | 523550 |
| <b>iYJR047C</b> | YJR047C (ANB1) YJR048W (CYC1)    | 10 | 525069 |
| <b>iYJR048W</b> |                                  | 10 | 526352 |
| <b>iYJR049C</b> | YJR049C (UTR1) YJR050W (ISY1)    | 10 | 528164 |
| <b>iYJR050W</b> | YJR051W (OSM1)                   | 10 | 529092 |
| <b>iYJR051W</b> | YJR052W (RAD7)                   | 10 | 531054 |
| <b>iYJR053W</b> | YJR054W                          | 10 | 535439 |
| <b>iYJR054W</b> | YJR055W (HIT1)                   | 10 | 537237 |
| <b>iYJR055W</b> |                                  | 10 | 538954 |
| <b>iYJR056C</b> | YJR056C ty(gua)j2 YJR057W (CDC8) | 10 | 542190 |
| <b>iYJR058C</b> | YJR058C (APS2) YJR059W (PTK2)    | 10 | 544863 |
| <b>iYJR059W</b> | YJR060W (CBF1)                   | 10 | 547931 |
| <b>iYJR060W</b> | YJR061W                          | 10 | 549502 |
| <b>iYJR061W</b> |                                  | 10 | 553006 |
| <b>iYJR062C</b> | YJR062C (NTA1) YJR063W (RPA12)   | 10 | 554537 |
| <b>iYJR063W</b> | YJR064W (CCT5)                   | 10 | 555260 |
| <b>iYJR064W</b> |                                  | 10 | 557290 |
| <b>iYJR065C</b> | YJR065C (ARP3) YJR066W (TOR1)    | 10 | 558846 |
| <b>iYJR066W</b> |                                  | 10 | 566516 |
| <b>iYJR067C</b> | YJR067C (YAE1) YJR068W (RFC2)    | 10 | 567132 |
| <b>iYJR068W</b> |                                  | 10 | 568392 |
| <b>iYJR069C</b> | YJR069C (HAM1)                   | 10 | 569087 |
| <b>iYJR071W</b> |                                  | 10 | 570461 |
| <b>iYJR072C</b> | YJR072C                          | 10 | 571812 |
| <b>iYJR073C</b> | YJR073C (OPI3) YJR074W (MOG1)    | 10 | 572623 |
| <b>iYJR074W</b> | YJR075W (HOC1)                   | 10 | 573439 |
| <b>iYJR075W</b> |                                  | 10 | 574859 |
| <b>iYJR077C</b> | YJR077C (MIR1) YJR078W           | 10 | 577878 |
| <b>iYJR080C</b> | YJR080C                          | 10 | 581304 |
| <b>iYJR082C</b> | YJR082C                          | 10 | 581943 |
| <b>iYJR083C</b> | YJR083C YJR084W                  | 10 | 583225 |
| <b>iYJR084W</b> |                                  | 10 | 584692 |
| <b>iYJR085C</b> | YJR085C YJR086W (STE18)          | 10 | 585125 |
| <b>iYJR088C</b> | YJR088C YJR089W (BIR1)           | 10 | 587061 |



|                   |                                   |    |        |
|-------------------|-----------------------------------|----|--------|
| <b>iYJR089W</b>   |                                   | 10 | 590270 |
| <b>iYJR090C</b>   | YJR090C (GRR1)                    | 10 | 594015 |
| <b>iYJR091C</b>   | YJR091C (JSN1) YJR092W (BUD4)     | 10 | 598024 |
| <b>iYJR092W</b>   |                                   | 10 | 602769 |
| <b>iYJR093C</b>   | YJR093C (FIP1)                    | 10 | 603894 |
| <b>iYJR094C-0</b> | YJR094C (IME1) YJR094W-A (RPL43B) | 10 | 605342 |
| <b>iYJR094W-A</b> | YJR095W (SFC1)                    | 10 | 608549 |
| <b>iYJR095W</b>   | YJR096W                           | 10 | 610432 |
| <b>iYJR096W</b>   | YJR097W                           | 10 | 611734 |
| <b>iYJR097W</b>   |                                   | 10 | 612622 |
| <b>iYJR098C</b>   | YJR098C YJR099W (YUH1)            | 10 | 614844 |
| <b>iYJR099W</b>   |                                   | 10 | 615974 |
| <b>iYJR100C</b>   | YJR100C tl(uag)j YJR101W (RSM26)  | 10 | 617022 |
| <b>iYJR101W</b>   |                                   | 10 | 618722 |
| <b>iYJR102C</b>   | YJR102C (VPS25) YJR103W (URA8)    | 10 | 619453 |
| <b>iYJR103W</b>   |                                   | 10 | 622136 |
| <b>iYJR104C</b>   | YJR104C (SOD1) YJR105W (ADO1)     | 10 | 622701 |
| <b>iYJR105W</b>   | YJR106W (ECM27)                   | 10 | 624290 |
| <b>iYJR106W</b>   | YJR107W                           | 10 | 626702 |
| <b>iYJR107W</b>   | YJR108W (ABM1)                    | 10 | 628014 |
| <b>iYJR108W</b>   |                                   | 10 | 628772 |
| <b>iYJR109C</b>   | YJR109C (CPA2) YJR110W            | 10 | 632630 |
| <b>iYJR110W</b>   |                                   | 10 | 635370 |
| <b>iYJR111C</b>   | YJR111C YJR112W (NNF1)            | 10 | 636395 |
| <b>iYJR112W</b>   |                                   | 10 | 637324 |
| <b>iYJR114W</b>   | YJR115W                           | 10 | 638740 |
| <b>iYJR115W</b>   | YJR116W                           | 10 | 640140 |
| <b>iYJR116W</b>   | YJR117W (STE24)                   | 10 | 641353 |
| <b>iYJR117W</b>   |                                   | 10 | 643057 |
| <b>iYJR118C</b>   | YJR118C (ILM1)                    | 10 | 643790 |
| <b>iYJR119C</b>   | YJR119C YJR120W                   | 10 | 646179 |
| <b>iYJR120W</b>   | YJR121W (ATP2)                    | 10 | 647165 |
| <b>iYJR121W</b>   | YJR122W (CAF17)                   | 10 | 648831 |
| <b>iYJR122W</b>   |                                   | 10 | 650958 |
| <b>iYJR123W</b>   |                                   | 10 | 652267 |
| <b>iYJR124C</b>   | YJR124C                           | 10 | 653927 |
| <b>iYJR125C</b>   | YJR125C (ENT3)                    | 10 | 655652 |
| <b>iYJR126C</b>   | YJR126C                           | 10 | 658378 |
| <b>iYJR128W</b>   |                                   | 10 | 662969 |
| <b>iYJR129C</b>   | YJR129C                           | 10 | 664708 |
| <b>iYJR130C</b>   | YJR130C (STR2) YJR131W (MNS1)     | 10 | 666826 |
| <b>iYJR131W</b>   | YJR132W (NMD5)                    | 10 | 668982 |
| <b>iYJR132W</b>   | YJR133W (XPT1)                    | 10 | 672357 |
| <b>iYJR133W</b>   |                                   | 10 | 673309 |
| <b>iYJR134C</b>   | YJR134C (SGM1)                    | 10 | 675541 |
| <b>iYJR135C</b>   | YJR135W-A (TIM8) YJR136C          | 10 | 676467 |
| <b>iYJR136C</b>   | YJR136C                           | 10 | 678395 |
| <b>iYJR137C</b>   | YJR137C (ECM17) YJR138W (IML1)    | 10 | 682974 |
| <b>iYJR138W</b>   |                                   | 10 | 689010 |
| <b>iYJR139C</b>   | YJR139C (HOM6)                    | 10 | 690213 |
| <b>iYJR140C</b>   | YJR140C (HIR3) YJR141W            | 10 | 695385 |

|                     |                                   |    |        |
|---------------------|-----------------------------------|----|--------|
| <b>iYJR141W</b>     | YJR142W                           | 10 | 696638 |
| <b>iYJR142W</b>     |                                   | 10 | 697858 |
| <b>iYJR143C</b>     | YJR143C (PMT4) YJR144W (MGM101)   | 10 | 700303 |
| <b>iYJR144W</b>     |                                   | 10 | 701380 |
| <b>iYJR145C</b>     | YJR145C (RPS4A) YJR146W           | 10 | 702757 |
| <b>iYJR147W</b>     | YJR148W (BAT2)                    | 10 | 704961 |
| <b>iYJR148W</b>     | YJR149W                           | 10 | 706563 |
| <b>iYJR149W</b>     |                                   | 10 | 708063 |
| <b>iYJR150C-0</b>   | YJR150C (DAN1)                    | 10 | 709396 |
| <b>iYJR150C-1</b>   | YJR150C (DAN1)                    | 10 | 710670 |
| <b>iYJR151C-0</b>   | YJR151C (DAN4) YJR152W (DAL5)     | 10 | 715429 |
| <b>iYJR151C-1</b>   | YJR151C (DAN4) YJR152W (DAL5)     | 10 | 716737 |
| <b>iYJR151C-2</b>   | YJR151C (DAN4) YJR152W (DAL5)     | 10 | 718045 |
| <b>iYJR152W</b>     | YJR153W (PGU1)                    | 10 | 720986 |
| <b>iYJR153W-0</b>   | YJR154W                           | 10 | 723589 |
| <b>iYJR153W-1</b>   | YJR154W                           | 10 | 724531 |
| <b>iYJR154W</b>     | YJR155W (AAD10)                   | 10 | 726513 |
| <b>iYJR155W</b>     |                                   | 10 | 727960 |
| <b>iYJR156C</b>     | YJR156C (THI11) YJR157W           | 10 | 729285 |
| <b>iYJR157W-0</b>   | YJR158W (HXT16)                   | 10 | 730566 |
| <b>iYJR157W-1</b>   | YJR158W (HXT16)                   | 10 | 731347 |
| <b>iYJR158W-0</b>   | YJR159W (SOR1)                    | 10 | 733832 |
| <b>iYJR158W-1</b>   | YJR159W (SOR1)                    | 10 | 734782 |
| <b>iYJR159W</b>     |                                   | 10 | 736806 |
| <b>iYJR160C-0</b>   | YJR160C                           | 10 | 739505 |
| <b>iYJR160C-1</b>   | YJR160C                           | 10 | 741021 |
| <b>iYJR161C</b>     | YJR161C (COS5)                    | 10 | 743688 |
| <b>iYJRWdelta14</b> | YJR043C (POL32)                   | 10 | 517787 |
| <b>iYJRWdelta17</b> | YJR055W (HIT1)                    | 10 | 538122 |
| <b>iYJRWdelta20</b> | YJR056C YJR057W (CDC8)            | 10 | 543458 |
| <b>iYKL001C</b>     | YKL001C (MET14)                   | 11 | 439026 |
| <b>iYKL002W</b>     |                                   | 11 | 438185 |
| <b>iYKL003C</b>     | YKL003C (MRP17) YKL002W (DID4)    | 11 | 437133 |
| <b>iYKL004W</b>     |                                   | 11 | 436426 |
| <b>iYKL005C</b>     | YKL005C YKL004W (AUR1)            | 11 | 434518 |
| <b>iYKL006C-A</b>   | YKL006C-A (SFT1) YKL006W (RPL14A) | 11 | 430273 |
| <b>iYKL006W</b>     |                                   | 11 | 432361 |
| <b>iYKL007W</b>     |                                   | 11 | 429749 |
| <b>iYKL008C</b>     | YKL008C (LAC1) YKL007W (CAP1)     | 11 | 428192 |
| <b>iYKL009W</b>     |                                   | 11 | 426593 |
| <b>iYKL010C</b>     | YKL010C (UFD4) YKL009W (MRT4)     | 11 | 425516 |
| <b>iYKL011C</b>     | YKL011C (CCE1)                    | 11 | 420857 |
| <b>iYKL012W</b>     |                                   | 11 | 419702 |
| <b>iYKL013C</b>     | YKL013C (ARC19) YKL012W (PRP40)   | 11 | 417664 |
| <b>iYKL014C</b>     | YKL014C                           | 11 | 416554 |
| <b>iYKL015W</b>     |                                   | 11 | 411124 |
| <b>iYKL016C</b>     | YKL016C (ATP7) YKL015W (PUT3)     | 11 | 407630 |
| <b>iYKL017C</b>     | YKL017C (HCS1)                    | 11 | 406882 |
| <b>iYKL018W</b>     |                                   | 11 | 404732 |
| <b>iYKL019W</b>     | YKL018W (SWD2)                    | 11 | 403159 |
| <b>iYKL020C</b>     | YKL020C (SPT23) YKL019W (RAM2)    | 11 | 401721 |

|                   |                               |    |        |
|-------------------|-------------------------------|----|--------|
| <b>iYKL021C</b>   | YKL021C (MAK11)               | 11 | 398391 |
| <b>iYKL022C</b>   | YKL022C (CDC16)               | 11 | 396889 |
| <b>iYKL023W</b>   |                               | 11 | 394195 |
| <b>iYKL024C</b>   | YKL024C (URA6) YKL023W        | 11 | 392781 |
| <b>iYKL025C</b>   | YKL025C (PAN3)                | 11 | 391920 |
| <b>iYKL026C</b>   | YKL026C (GPX1)                | 11 | 389524 |
| <b>iYKL027W</b>   |                               | 11 | 388546 |
| <b>iYKL028W</b>   | YKL027W                       | 11 | 386847 |
| <b>iYKL029C</b>   | YKL029C (MAE1) YKL028W (TFA1) | 11 | 384366 |
| <b>iYKL032C</b>   | YKL032C (IXR1) YKL031W        | 11 | 381499 |
| <b>iYKL033W</b>   |                               | 11 | 378213 |
| <b>iYKL033W-A</b> | YKL033W                       | 11 | 374329 |
| <b>iYKL034W</b>   | YKL033W-A                     | 11 | 373747 |
| <b>iYKL035W</b>   | YKL034W                       | 11 | 371032 |
| <b>iYKL038W</b>   | YKL037W                       | 11 | 368759 |
| <b>iYKL039W</b>   | YKL038W (RGT1)                | 11 | 363860 |
| <b>iYKL040C</b>   | YKL040C (NFU1) YKL039W (PTM1) | 11 | 361471 |
| <b>iYKL041W</b>   |                               | 11 | 360460 |
| <b>iYKL042W</b>   | YKL041W (VPS24)               | 11 | 359210 |
| <b>iYKL043W</b>   | YKL042W (SPC42)               | 11 | 357492 |
| <b>iYKL044W</b>   | YKL043W (PHD1)                | 11 | 356286 |
| <b>iYKL045W</b>   | YKL044W                       | 11 | 354723 |
| <b>iYKL046C</b>   | YKL046C YKL045W (PRI2)        | 11 | 352268 |
| <b>iYKL047W</b>   |                               | 11 | 350657 |
| <b>iYKL048C</b>   | YKL048C (ELM1) YKL047W        | 11 | 348780 |
| <b>iYKL049C</b>   | YKL049C (CSE4)                | 11 | 346133 |
| <b>iYKL050C</b>   | YKL050C                       | 11 | 345265 |
| <b>iYKL051W</b>   |                               | 11 | 342018 |
| <b>iYKL052C</b>   | YKL052C (ASK1) YKL051W        | 11 | 340191 |
| <b>iYKL053C-A</b> | YKL053C-A YKL053W             | 11 | 339087 |
| <b>iYKL054C</b>   |                               | 11 | 338398 |
| <b>iYKL055C</b>   | YKL055C (OAR1)                | 11 | 335802 |
| <b>iYKL056C</b>   | YKL056C                       | 11 | 334560 |
| <b>iYKL057C</b>   | YKL057C (NUP120)              | 11 | 333614 |
| <b>iYKL058W</b>   |                               | 11 | 330179 |
| <b>iYKL059C</b>   | YKL059C YKL058W (TOA2)        | 11 | 329088 |
| <b>iYKL060C</b>   | YKL060C (FBA1)                | 11 | 327132 |
| <b>iYKL061W</b>   |                               | 11 | 325757 |
| <b>iYKL062W</b>   | YKL061W                       | 11 | 324765 |
| <b>iYKL063C-0</b> | YKL063C YKL062W (MSN4)        | 11 | 321163 |
| <b>iYKL063C-1</b> | YKL063C YKL062W (MSN4)        | 11 | 322018 |
| <b>iYKL064W</b>   |                               | 11 | 320318 |
| <b>iYKL065C</b>   | YKL065C (YET1) YKL064W (MNR2) | 11 | 316702 |
| <b>iYKL066W</b>   |                               | 11 | 315369 |
| <b>iYKL068W</b>   | YKL067W (YNK1)                | 11 | 312723 |
| <b>iYKL069W</b>   | YKL068W (NUP100)              | 11 | 307472 |
| <b>iYKL070W</b>   | YKL069W                       | 11 | 306365 |
| <b>iYKL071W</b>   | YKL070W                       | 11 | 305529 |
| <b>iYKL072W</b>   | YKL071W                       | 11 | 301527 |
| <b>iYKL073W</b>   | YKL072W (STB6)                | 11 | 298720 |
| <b>iYKL074C</b>   | YKL074C (MUD2) YKL073W (LHS1) | 11 | 295838 |

|                     |                                |    |        |
|---------------------|--------------------------------|----|--------|
| <b>iYKL075C</b>     | YKL075C                        | 11 | 293953 |
| <b>iYKL077W</b>     |                                | 11 | 292276 |
| <b>iYKL078W</b>     | YKL077W                        | 11 | 290697 |
| <b>iYKL079W</b>     | YKL078W                        | 11 | 288218 |
| <b>iYKL081W</b>     | YKL080W (VMA5)                 | 11 | 284100 |
| <b>iYKL082C</b>     | YKL082C YKL081W (TEF4)         | 11 | 281974 |
| <b>iYKL084W</b>     | YKL083W                        | 11 | 280504 |
| <b>iYKL085W</b>     | YKL084W                        | 11 | 279772 |
| <b>iYKL086W</b>     | YKL085W (MDH1)                 | 11 | 278309 |
| <b>iYKL087C</b>     | YKL087C (CYT2) YKL086W         | 11 | 277508 |
| <b>iYKL088W</b>     |                                | 11 | 276643 |
| <b>iYKL089W</b>     | YKL088W                        | 11 | 274688 |
| <b>iYKL090W</b>     | YKL089W (MIF2)                 | 11 | 272854 |
| <b>iYKL091C</b>     | YKL091C YKL090W                | 11 | 270295 |
| <b>iYKL092C</b>     | YKL092C (BUD2)                 | 11 | 269104 |
| <b>iYKL093W</b>     |                                | 11 | 265453 |
| <b>iYKL094W</b>     | YKL093W (MBR1)                 | 11 | 263935 |
| <b>iYKL095W</b>     | YKL094W (YJU3)                 | 11 | 262758 |
| <b>iYKL096W</b>     | YKL095W (YJU2)                 | 11 | 261496 |
| <b>iYKL097C</b>     | YKL097C YKL096W-A (CWP2)       | 11 | 258558 |
| <b>iYKL097W-A-0</b> | YKL096W (CWP1)                 | 11 | 259176 |
| <b>iYKL097W-A-1</b> | YKL096W (CWP1)                 | 11 | 259976 |
| <b>iYKL098W</b>     |                                | 11 | 257488 |
| <b>iYKL099C</b>     | YKL099C YKL098W                | 11 | 256117 |
| <b>iYKL100C</b>     | YKL100C                        | 11 | 255106 |
| <b>iYKL101W</b>     |                                | 11 | 253122 |
| <b>iYKL102C</b>     | YKL102C YKL101W (HSL1)         | 11 | 248013 |
| <b>iYKL103C</b>     | YKL103C (LAP4)                 | 11 | 247328 |
| <b>iYKL104C</b>     | YKL104C (GFA1)                 | 11 | 245019 |
| <b>iYKL105C</b>     | YKL105C                        | 11 | 242229 |
| <b>iYKL106W</b>     |                                | 11 | 238537 |
| <b>iYKL107W</b>     | YKL106W (AAT1)                 | 11 | 236716 |
| <b>iYKL108W</b>     | YKL107W                        | 11 | 235433 |
| <b>iYKL109W</b>     | YKL108W (SLD2)                 | 11 | 233537 |
| <b>iYKL110C-0</b>   | YKL110C (KTI12) YKL109W (HAP4) | 11 | 229526 |
| <b>iYKL110C-1</b>   | YKL110C (KTI12) YKL109W (HAP4) | 11 | 230699 |
| <b>iYKL111C</b>     | YKL111C                        | 11 | 228445 |
| <b>iYKL113C</b>     | YKL113C (RAD27) YKL112W (ABF1) | 11 | 225521 |
| <b>iYKL114C</b>     | YKL114C (APN1)                 | 11 | 224101 |
| <b>iYKL115C</b>     | YKL115C                        | 11 | 222931 |
| <b>iYKL117W</b>     |                                | 11 | 220620 |
| <b>iYKL120W</b>     |                                | 11 | 217964 |
| <b>iYKL121W</b>     | YKL120W (OAC1)                 | 11 | 216346 |
| <b>iYKL125W</b>     | YKL124W (SSH4)                 | 11 | 209776 |
| <b>iYKL126W</b>     | YKL125W (RRN3)                 | 11 | 207395 |
| <b>iYKL127W</b>     | YKL126W (YPK1)                 | 11 | 204899 |
| <b>iYKL128C</b>     | YKL128C (PMU1) YKL127W (PGM1)  | 11 | 201417 |
| <b>iYKL130C</b>     | YKL130C (SHE2)                 | 11 | 196029 |
| <b>iYKL131W</b>     |                                | 11 | 195000 |
| <b>iYKL133C</b>     | YKL133C                        | 11 | 193071 |
| <b>iYKL134C</b>     | YKL134C (OCT1)                 | 11 | 191443 |

|                     |                                  |    |        |
|---------------------|----------------------------------|----|--------|
| <b>iYKL135C</b>     | YKL135C (APL2)                   | 11 | 188647 |
| <b>iYKL137W</b>     | YKL136W                          | 11 | 186299 |
| <b>iYKL138C</b>     | YKL138C (MRPL31) YKL137W         | 11 | 185686 |
| <b>iYKL139W</b>     |                                  | 11 | 184549 |
| <b>iYKL140W</b>     | YKL139W (CTK1)                   | 11 | 182430 |
| <b>iYKL141W</b>     | YKL140W (TGL1)                   | 11 | 180268 |
| <b>iYKL142W</b>     | YKL141W (SDH3)                   | 11 | 179179 |
| <b>iYKL143W</b>     | YKL142W (MRP8)                   | 11 | 178177 |
| <b>iYKL144C</b>     | YKL144C (RPC25) YKL143W (LTV1)   | 11 | 176486 |
| <b>iYKL145W</b>     |                                  | 11 | 175621 |
| <b>iYKL146W</b>     | YKL145W (RPT1)                   | 11 | 173866 |
| <b>iYKL148C</b>     | YKL148C (SDH1)                   | 11 | 171134 |
| <b>iYKL149C</b>     | YKL149C (DBR1)                   | 11 | 168834 |
| <b>iYKL150W</b>     |                                  | 11 | 167457 |
| <b>iYKL151C</b>     | YKL151C YKL150W (MCR1)           | 11 | 165935 |
| <b>iYKL152C</b>     | YKL152C (GPM1)                   | 11 | 164390 |
| <b>iYKL154W</b>     | YKL153W                          | 11 | 162340 |
| <b>iYKL155C</b>     | YKL155C (RSM22) YKL154W (SRP102) | 11 | 161347 |
| <b>iYKL156W</b>     |                                  | 11 | 159217 |
| <b>iYKL157W</b>     | YKL156W (RPS27A)                 | 11 | 158186 |
| <b>iYKL158W</b>     | YKL157W (APE2)                   | 11 | 155298 |
| <b>iYKL159C</b>     | YKL159C (RCN1)                   | 11 | 154456 |
| <b>iYKL160W</b>     |                                  | 11 | 153711 |
| <b>iYKL161C-0</b>   | YKL161C YKL160W                  | 11 | 150692 |
| <b>iYKL162C</b>     | YKL162C                          | 11 | 148843 |
| <b>iYKL162C-A-0</b> | YKL162C-A                        | 11 | 146079 |
| <b>iYKL162C-A-1</b> | YKL162C-A                        | 11 | 146857 |
| <b>iYKL163W</b>     |                                  | 11 | 145383 |
| <b>iYKL164C-0</b>   | YKL164C (PIR1) YKL163W (PIR3)    | 11 | 142824 |
| <b>iYKL164C-1</b>   | YKL164C (PIR1) YKL163W (PIR3)    | 11 | 143615 |
| <b>iYKL165C</b>     | YKL165C (MCD4)                   | 11 | 140696 |
| <b>iYKL166C-1</b>   | YKL166C (TPK3)                   | 11 | 136823 |
| <b>iYKL167C</b>     | YKL167C (MRP49)                  | 11 | 134139 |
| <b>iYKL168C</b>     | YKL168C (KKQ8)                   | 11 | 133497 |
| <b>iYKL169C</b>     | YKL169C                          | 11 | 131073 |
| <b>iYKL171W</b>     | YKL170W (MRPL38)                 | 11 | 130266 |
| <b>iYKL172W</b>     | YKL171W                          | 11 | 127047 |
| <b>iYKL173W</b>     | YKL172W (EBP2)                   | 11 | 125548 |
| <b>iYKL174C</b>     | YKL174C YKL173W (SNU114)         | 11 | 122241 |
| <b>iYKL175W</b>     |                                  | 11 | 120309 |
| <b>iYKL176C</b>     | YKL176C (LST4) YKL175W (ZRT3)    | 11 | 117991 |
| <b>iYKL177W</b>     |                                  | 11 | 114699 |
| <b>iYKL179C</b>     | YKL179C                          | 11 | 112508 |
| <b>iYKL180W</b>     |                                  | 11 | 110134 |
| <b>iYKL181W</b>     | YKL180W (RPL17A)                 | 11 | 108604 |
| <b>iYKL182W</b>     | YKL181W (PRS1)                   | 11 | 106831 |
| <b>iYKL183W</b>     | YKL182W (FAS1)                   | 11 | 99646  |
| <b>iYKL184W</b>     | YKL183W (LOT5)                   | 11 | 98162  |
| <b>iYKL185W</b>     | YKL184W (SPE1)                   | 11 | 96270  |
| <b>iYKL186C</b>     | YKL186C (MTR2) YKL185W (ASH1)    | 11 | 93303  |
| <b>iYKL187C</b>     | YKL187C                          | 11 | 91541  |

|                    |                               |    |        |
|--------------------|-------------------------------|----|--------|
| <b>iYKL188C</b>    | YKL188C (PXA2)                | 11 | 88791  |
| <b>iYKL189W</b>    |                               | 11 | 85908  |
| <b>iYKL190W</b>    | YKL189W (HYM1)                | 11 | 83555  |
| <b>iYKL191W</b>    | YKL190W (CNB1)                | 11 | 82644  |
| <b>iYKL192C</b>    | YKL192C (ACP1) YKL191W (DPH2) | 11 | 80542  |
| <b>iYKL193C</b>    | YKL193C (SDS22)               | 11 | 79887  |
| <b>iYKL194C</b>    | YKL194C (MST1)                | 11 | 78651  |
| <b>iYKL195W</b>    |                               | 11 | 77037  |
| <b>iYKL196C</b>    | YKL196C (YKT6) YKL195W        | 11 | 75539  |
| <b>iYKL197C</b>    | YKL197C (PEX1)                | 11 | 73870  |
| <b>iYKL198C</b>    | YKL198C (PTK1)                | 11 | 70223  |
| <b>iYKL200C</b>    |                               | 11 | 67109  |
| <b>iYKL201C</b>    |                               | 11 | 65546  |
| <b>iYKL203C</b>    | YKL203C (TOR2) YKL202W        | 11 | 63356  |
| <b>iYKL204W</b>    |                               | 11 | 55602  |
| <b>iYKL205W</b>    | YKL204W (EAP1)                | 11 | 53353  |
| <b>iYKL206C</b>    | YKL206C YKL205W (LOS1)        | 11 | 49809  |
| <b>iYKL207W</b>    |                               | 11 | 48890  |
| <b>iYKL208W</b>    | YKL207W                       | 11 | 47973  |
| <b>iYKL209C</b>    | YKL209C (STE6) YKL208W (CBT1) | 11 | 46296  |
| <b>iYKL210W</b>    |                               | 11 | 42238  |
| <b>iYKL211C</b>    | YKL211C (TRP3) YKL210W (UBA1) | 11 | 38154  |
| <b>iYKL212W</b>    |                               | 11 | 36415  |
| <b>iYKL213C</b>    | YKL213C (DOA1) YKL212W (SAC1) | 11 | 34108  |
| <b>iYKL214C</b>    | YKL214C                       | 11 | 31694  |
| <b>iYKL215C</b>    | YKL215C                       | 11 | 30688  |
| <b>iYKL216W</b>    |                               | 11 | 26160  |
| <b>iYKL217W</b>    | YKL216W (URA1)                | 11 | 24084  |
| <b>iYKL218C-0</b>  | YKL218C (SRY1) YKL217W (JEN1) | 11 | 18339  |
| <b>iYKL218C-1</b>  | YKL218C (SRY1) YKL217W (JEN1) | 11 | 19637  |
| <b>iYKL218C-2</b>  | YKL218C (SRY1) YKL217W (JEN1) | 11 | 20935  |
| <b>iYKL219W-1</b>  |                               | 11 | 16533  |
| <b>iYKL220C-0</b>  | YKL220C (FRE2) YKL219W (COS9) | 11 | 11227  |
| <b>iYKL220C-1</b>  | YKL220C (FRE2) YKL219W (COS9) | 11 | 12313  |
| <b>iYKL220C-2</b>  | YKL220C (FRE2) YKL219W (COS9) | 11 | 13399  |
| <b>iYKL221W-0</b>  |                               | 11 | 7529   |
| <b>iYKL221W-1</b>  |                               | 11 | 8310   |
| <b>iYKL222C</b>    | YKL222C YKL221W (MCH2)        | 11 | 5621   |
| <b>iYKL223W</b>    |                               | 11 | 2722   |
| <b>iYKL224C</b>    | YKL224C YKL223W               | 11 | 2182   |
| <b>iYKL225W</b>    |                               | 11 | 799    |
| <b>iYKLCdelta2</b> | YKL189W (HYM1)                | 11 | 84120  |
| <b>iYKLCdelta4</b> | YKL117W (SBA1)                | 11 | 219369 |
| <b>iYKLCdelta5</b> | YKL071W                       | 11 | 302270 |
| <b>iYKLCdelta6</b> | YKL067W (YNK1)                | 11 | 313564 |
| <b>iYKLWdelta1</b> | YKL197C (PEX1)                | 11 | 74523  |
| <b>iYKLWdelta3</b> | YKL153W                       | 11 | 163174 |
| <b>iYKLWdelta7</b> | YKL067W (YNK1)                | 11 | 314169 |
| <b>iYKR001C</b>    | YKR001C (VPS1) YKR002W (PAP1) | 11 | 442363 |
| <b>iYKR002W</b>    | YKR003W (OSH6)                | 11 | 444579 |
| <b>iYKR003W</b>    |                               | 11 | 446368 |

|            |                                |    |        |
|------------|--------------------------------|----|--------|
| iYKR004C   | YKR004C (ECM9)                 | 11 | 447318 |
| iYKR005C   | YKR005C                        | 11 | 449505 |
| iYKR006C   | YKR006C (MRPL13) YKR007W       | 11 | 450891 |
| iYKR007W   | YKR008W (RSC4)                 | 11 | 451629 |
| iYKR008W   |                                | 11 | 453719 |
| iYKR009C   | YKR009C (FOX2)                 | 11 | 456695 |
| iYKR010C   | YKR010C (TOF2)                 | 11 | 460880 |
| iYKR011C   | YKR011C (TOS5)                 | 11 | 462337 |
| iYKR013W   |                                | 11 | 464589 |
| iYKR014C   | YKR014C (YPT52)                | 11 | 465712 |
| iYKR015C   | YKR015C YKR016W                | 11 | 468308 |
| iYKR016W   |                                | 11 | 470980 |
| iYKR017C   | YKR017C                        | 11 | 472990 |
| iYKR018C   | YKR018C                        | 11 | 475541 |
| iYKR019C   | YKR019C (IRS4) YKR020W         | 11 | 477704 |
| iYKR020W   | YKR021W                        | 11 | 478473 |
| iYKR021W   |                                | 11 | 481622 |
| iYKR022C   | YKR022C YKR023W                | 11 | 482780 |
| iYKR023W   |                                | 11 | 484652 |
| iYKR024C   | YKR024C (DBP7) YKR025W (RPC37) | 11 | 487013 |
| iYKR025W   |                                | 11 | 488259 |
| iYKR026C   | YKR026C (GCN3) YKR027W         | 11 | 489296 |
| iYKR027W   | YKR028W (SAP190)               | 11 | 493302 |
| iYKR029C   | YKR029C (SET3) YKR030W         | 11 | 499473 |
| iYKR030W   |                                | 11 | 500743 |
| iYKR031C   | YKR031C (SPO14) YKR032W        | 11 | 506035 |
| iYKR034W   | YKR035W-A (DID2)               | 11 | 507347 |
| iYKR035W-A | YKR035C                        | 11 | 508193 |
| iYKR036C   | YKR036C (CAF4)                 | 11 | 510321 |
| iYKR037C   | YKR037C (SPC34)                | 11 | 511437 |
| iYKR038C   | YKR038C YKR039W (GAP1)         | 11 | 512904 |
| iYKR039W   |                                | 11 | 516511 |
| iYKR041W   | YKR042W (UTH1)                 | 11 | 518590 |
| iYKR042W   |                                | 11 | 520264 |
| iYKR043C   | YKR043C YKR044W (UIP5)         | 11 | 521352 |
| iYKR044W   |                                | 11 | 522986 |
| iYKR045C   | YKR045C                        | 11 | 523633 |
| iYKR046C   | YKR046C YKR047W                | 11 | 524714 |
| iYKR048C   | YKR048C (NAP1)                 | 11 | 526280 |
| iYKR049C   | YKR049C YKR050W (TRK2)         | 11 | 526871 |
| iYKR050W   | YKR051W                        | 11 | 530124 |
| iYKR051W   |                                | 11 | 531842 |
| iYKR052C   | YKR052C (MRS4)                 | 11 | 533104 |
| iYKR053C   | YKR053C (YSR3)                 | 11 | 534921 |
| iYKR054C   | YKR054C (DYN1) YKR055W (RHO4)  | 11 | 547565 |
| iYKR055W   | YKR056W (TRM2)                 | 11 | 548731 |
| iYKR056W   | YKR057W (RPS21A)               | 11 | 550941 |
| iYKR057W   | YKR058W (GLG1)                 | 11 | 551881 |
| iYKR058W   | YKR059W (TIF1)                 | 11 | 554259 |
| iYKR059W   | YKR060W                        | 11 | 555813 |
| iYKR060W   | YKR061W (KTR2)                 | 11 | 556981 |

|            |                                 |    |        |
|------------|---------------------------------|----|--------|
| iYKR061W   | YKR062W (TFA2)                  | 11 | 558593 |
| iYKR062W   |                                 | 11 | 560291 |
| iYKR063C   | YKR063C (LAS1) YKR064W          | 11 | 561936 |
| iYKR064W   |                                 | 11 | 564777 |
| iYKR065C   | YKR065C                         | 11 | 565531 |
| iYKR066C   | YKR066C (CCP1) YKR067W (GPT2)   | 11 | 566837 |
| iYKR067W   |                                 | 11 | 569788 |
| iYKR068C   | YKR068C (BET3) YKR069W (MET1)   | 11 | 570548 |
| iYKR069W   | YKR070W                         | 11 | 573032 |
| iYKR070W   |                                 | 11 | 574271 |
| iYKR071C   | YKR071C (DRE2)                  | 11 | 575619 |
| iYKR072C   | YKR072C (SIS2)                  | 11 | 577762 |
| iYKR073C   | YKR073C tk(uuu)k YKR074W        | 11 | 578146 |
| iYKR074W   |                                 | 11 | 579315 |
| iYKR075C-0 | YKR075C YKR076W (ECM4)          | 11 | 580389 |
| iYKR075C-1 | YKR075C YKR076W (ECM4)          | 11 | 581155 |
| iYKR076W   | YKR077W                         | 11 | 583034 |
| iYKR077W   | YKR078W                         | 11 | 584383 |
| iYKR078W   |                                 | 11 | 586348 |
| iYKR079C   | YKR079C YKR080W (MTD1)          | 11 | 588944 |
| iYKR080W   |                                 | 11 | 590996 |
| iYKR081C   | YKR081C (RPF2) YKR082W (NUP133) | 11 | 592179 |
| iYKR082W   |                                 | 11 | 595937 |
| iYKR083C   | YKR083C (DAD2)                  | 11 | 596461 |
| iYKR084C   | YKR084C (HBS1)                  | 11 | 598529 |
| iYKR085C   | YKR085C (MRPL20) YKR086W (PRP1) | 11 | 599320 |
| iYKR086W   |                                 | 11 | 602711 |
| iYKR087C   | YKR087C                         | 11 | 603778 |
| iYKR088C   | YKR088C                         | 11 | 605056 |
| iYKR089C   | YKR089C YKR090W (PXL1)          | 11 | 608003 |
| iYKR090W   | YKR091W (SRL3)                  | 11 | 610704 |
| iYKR092C-0 | YKR092C (SRP40) YKR093W (PTR2)  | 11 | 613522 |
| iYKR092C-1 | YKR092C (SRP40) YKR093W (PTR2)  | 11 | 614444 |
| iYKR093W   |                                 | 11 | 617172 |
| iYKR094C   | YKR094C (RPL40B) YKR095W (MLP1) | 11 | 618387 |
| iYKR095W   | YKR096W                         | 11 | 625069 |
| iYKR096W   | YKR097W (PCK1)                  | 11 | 630017 |
| iYKR097W   |                                 | 11 | 632434 |
| iYKR098C   | YKR098C (UBP11) YKR099W (BAS1)  | 11 | 634812 |
| iYKR099W   |                                 | 11 | 637919 |
| iYKR100C   | YKR100C YKR101W (SIR1)          | 11 | 639600 |
| iYKR101W-0 | YKR102W (FLO10)                 | 11 | 642136 |
| iYKR101W-1 | YKR102W (FLO10)                 | 11 | 643420 |
| iYKR101W-2 | YKR102W (FLO10)                 | 11 | 644704 |
| iYKR102W-0 | YKR103W                         | 11 | 649497 |
| iYKR102W-1 | YKR103W                         | 11 | 650568 |
| iYKR102W-2 | YKR103W                         | 11 | 651639 |
| iYKR103W   | YKR104W                         | 11 | 656368 |
| iYKR104W   |                                 | 11 | 657388 |
| iYKR105C   | YKR105C YKR106W                 | 11 | 660096 |
| iYKR106W-0 |                                 | 11 | 662921 |



|              |                                |    |        |
|--------------|--------------------------------|----|--------|
| iYKR106W-1   |                                | 11 | 663991 |
| iYKRCdelta11 | YKR038C YKR039W (GAP1)         | 11 | 513486 |
| iYKRCdelta12 |                                | 11 | 517424 |
| iYKRCdelta8  | YKR009C (FOX2)                 | 11 | 458112 |
| iYKRWdelta10 | YKR026C (GCN3) YKR027W         | 11 | 490428 |
| iYLL001W     |                                | 12 | 150162 |
| iYLL002W     | YLL001W (DNM1)                 | 12 | 147600 |
| iYLL003W     | YLL002W (REM50)                | 12 | 146040 |
| iYLL004W     | YLL003W (SFI1)                 | 12 | 142922 |
| iYLL005C     | YLL005C (SPO75) YLL004W (ORC3) | 12 | 140545 |
| iYLL006W     |                                | 12 | 137865 |
| iYLL007C     | YLL007C YLL006W (MMM1)         | 12 | 136298 |
| iYLL008W     |                                | 12 | 133986 |
| iYLL009C     | YLL009C (COX17) YLL008W (DRS1) | 12 | 131413 |
| iYLL010C     | YLL010C (PSR1)                 | 12 | 130612 |
| iYLL011W     |                                | 12 | 128991 |
| iYLL012W     | YLL011W (SOF1)                 | 12 | 127254 |
| iYLL014W     |                                | 12 | 121647 |
| iYLL015W     | YLL014W                        | 12 | 121110 |
| iYLL016W     | YLL015W (BPT1)                 | 12 | 115992 |
| iYLL017W     | YLL016W (SDC25)                | 12 | 112544 |
| iYLL018C     | YLL018C (DPS1) YLL017W (SDC25) | 12 | 111574 |
| iYLL018C-A   | YLL018C-A (COX19)              | 12 | 108971 |
| iYLL019C     | YLL019C (KNS1)                 | 12 | 107898 |
| iYLL022C     | YLL022C (HIF1) YLL021W (SPA2)  | 12 | 100200 |
| iYLL023C     | YLL023C                        | 12 | 98835  |
| iYLL024C     | YLL024C (SSA2)                 | 12 | 97484  |
| iYLL025W     |                                | 12 | 95120  |
| iYLL026W     | YLL025W                        | 12 | 91348  |
| iYLL027W     | YLL026W (HSP104)               | 12 | 88154  |
| iYLL028W     | YLL027W (ISA1)                 | 12 | 86563  |
| iYLL030C     | YLL030C YLL029W                | 12 | 80696  |
| iYLL031C     | YLL031C (GPI13)                | 12 | 80204  |
| iYLL032C     | YLL032C                        | 12 | 76746  |
| iYLL033W     |                                | 12 | 74100  |
| iYLL034C     | YLL034C YLL033W                | 12 | 73145  |
| iYLL035W     |                                | 12 | 70477  |
| iYLL036C     | YLL036C (PRP19) YLL035W (GRC3) | 12 | 68255  |
| iYLL039C     | YLL039C (UBI4)                 | 12 | 65206  |
| iYLL040C     | YLL040C (VPS13)                | 12 | 63644  |
| iYLL041C     | YLL041C (SDH2)                 | 12 | 53930  |
| iYLL042C     | YLL042C (APG10)                | 12 | 52589  |
| iYLL043W     |                                | 12 | 51946  |
| iYLL044W     | YLL043W (FPS1)                 | 12 | 48661  |
| iYLL046C     | YLL046C (RNP1)                 | 12 | 47462  |
| iYLL048C     | YLL048C (YBT1) YLL047W         | 12 | 46264  |
| iYLL049W     |                                | 12 | 41204  |
| iYLL050C     | YLL050C (COF1) YLL049W         | 12 | 40413  |
| iYLL051C     | YLL051C (FRE6)                 | 12 | 39470  |
| iYLL052C     | YLL052C (AQY2)                 | 12 | 36360  |
| iYLL054C     | YLL054C                        | 12 | 35203  |

|                     |                                    |    |        |
|---------------------|------------------------------------|----|--------|
| <b>iYLL055W</b>     |                                    | 12 | 31704  |
| <b>iYLL056C-0</b>   | YLL056C YLL055W                    | 12 | 28305  |
| <b>iYLL056C-1</b>   | YLL056C YLL055W                    | 12 | 29207  |
| <b>iYLL057C</b>     | YLL057C                            | 12 | 26994  |
| <b>iYLL058W</b>     |                                    | 12 | 25296  |
| <b>iYLL059C</b>     | YLL059C YLL058W                    | 12 | 22980  |
| <b>iYLL060C</b>     | YLL060C (GTT2)                     | 12 | 21839  |
| <b>iYLL061W</b>     |                                    | 12 | 19707  |
| <b>iYLL062C</b>     | YLL062C (MHT1) YLL061W (MMP1)      | 12 | 17613  |
| <b>iYLL063C</b>     | YLL063C (AYT1)                     | 12 | 16072  |
| <b>iYLL064C</b>     | YLL064C                            | 12 | 13445  |
| <b>iYLL065W</b>     |                                    | 12 | 12076  |
| <b>iYLL066C-0</b>   | YLL066C YLL065W (GIN11)            | 12 | 9836   |
| <b>iYLL066C-1</b>   | YLL066C YLL065W (GIN11)            | 12 | 10781  |
| <b>iYLL067C-0</b>   | YLL067C                            | 12 | 4301   |
| <b>iYLL067C-1</b>   | YLL067C                            | 12 | 5210   |
| <b>iYLLCdelta1</b>  | YLL025W                            | 12 | 92380  |
| <b>iYLR001C</b>     | YLR001C                            | 12 | 153976 |
| <b>iYLR003C</b>     | YLR003C                            | 12 | 157729 |
| <b>iYLR004C</b>     | YLR004C YLR005W (SSL1)             | 12 | 159504 |
| <b>iYLR005W</b>     |                                    | 12 | 161433 |
| <b>iYLR006C</b>     | YLR006C (SSK1) YLR007W             | 12 | 163892 |
| <b>iYLR007W</b>     |                                    | 12 | 165401 |
| <b>iYLR008C</b>     | YLR008C YLR009W (RLP24)            | 12 | 166082 |
| <b>iYLR009W</b>     |                                    | 12 | 167135 |
| <b>iYLR010C</b>     | YLR010C (TEN1) ts(AGA)I YLR011W (I | 12 | 167801 |
| <b>iYLR011W</b>     |                                    | 12 | 169677 |
| <b>iYLR014C</b>     | YLR014C (PPR1) YLR015W (BRE2)      | 12 | 174981 |
| <b>iYLR016C</b>     | YLR016C YLR017W (MEU1)             | 12 | 177415 |
| <b>iYLR017W</b>     |                                    | 12 | 178620 |
| <b>iYLR018C</b>     | YLR018C (POM34) YLR019W (PSR2)     | 12 | 179605 |
| <b>iYLR019W</b>     |                                    | 12 | 181480 |
| <b>iYLR020C</b>     | YLR020C YLR021W                    | 12 | 183404 |
| <b>iYLR022C</b>     | YLR022C                            | 12 | 184925 |
| <b>iYLR023C</b>     | YLR023C                            | 12 | 187128 |
| <b>iYLR025W</b>     |                                    | 12 | 195175 |
| <b>iYLR026C</b>     | YLR026C (SED5)                     | 12 | 196473 |
| <b>iYLR027C</b>     | YLR027C (AAT2) snr30               | 12 | 198128 |
| <b>iYLR028C</b>     | YLR028C (ADE16)                    | 12 | 201316 |
| <b>iYLR029C</b>     | YLR029C (RPL15A) YLR030W           | 12 | 202591 |
| <b>iYLR030W</b>     | YLR031W                            | 12 | 204082 |
| <b>iYLR031W</b>     | YLR032W (RAD5)                     | 12 | 204786 |
| <b>iYLR032W</b>     | YLR033W (RSC58)                    | 12 | 208501 |
| <b>iYLR033W</b>     |                                    | 12 | 210270 |
| <b>iYLR034C</b>     | YLR034C (SMF3)                     | 12 | 211934 |
| <b>iYLR035C</b>     | YLR035C (MLH2) ta(ugc)I            | 12 | 214457 |
| <b>iYLR035C-A-0</b> | YLR035C-A                          | 12 | 218908 |
| <b>iYLR035C-A-1</b> | YLR035C-A                          | 12 | 219788 |
| <b>iYLR036C</b>     | YLR036C                            | 12 | 222133 |
| <b>iYLR037C-0</b>   | YLR037C (DAN2)                     | 12 | 223060 |
| <b>iYLR037C-1</b>   | YLR037C (DAN2)                     | 12 | 223991 |

|                 |                                 |    |        |
|-----------------|---------------------------------|----|--------|
| <b>iYLR038C</b> | YLR038C (COX12)                 | 12 | 225173 |
| <b>iYLR039C</b> | YLR039C (RIC1)                  | 12 | 228597 |
| <b>iYLR041W</b> |                                 | 12 | 229698 |
| <b>iYLR043C</b> | YLR043C (TRX1)                  | 12 | 232014 |
| <b>iYLR044C</b> | YLR044C (PDC1)                  | 12 | 234082 |
| <b>iYLR045C</b> | YLR045C (STU2)                  | 12 | 237704 |
| <b>iYLR046C</b> | YLR046C                         | 12 | 238814 |
| <b>iYLR047C</b> | YLR047C YLR048W (RPS0B)         | 12 | 241408 |
| <b>iYLR048W</b> |                                 | 12 | 243350 |
| <b>iYLR049C</b> | YLR049C                         | 12 | 245173 |
| <b>iYLR050C</b> | YLR050C                         | 12 | 246073 |
| <b>iYLR051C</b> | YLR051C YLR052W (IES3)          | 12 | 246978 |
| <b>iYLR052W</b> |                                 | 12 | 247954 |
| <b>iYLR053C</b> | YLR053C                         | 12 | 248427 |
| <b>iYLR054C</b> | YLR054C                         | 12 | 250256 |
| <b>iYLR055C</b> | YLR055C (SPT8) YLR056W (ERG3)   | 12 | 253081 |
| <b>iYLR056W</b> | YLR057W                         | 12 | 254959 |
| <b>iYLR057W</b> |                                 | 12 | 257856 |
| <b>iYLR058C</b> | YLR058C (SHM2)                  | 12 | 259402 |
| <b>iYLR059C</b> | YLR059C (REX2) YLR060W (FRS1)   | 12 | 260548 |
| <b>iYLR060W</b> | YLR061W (RPL22A)                | 12 | 262767 |
| <b>iYLR062C</b> | YLR062C (BUD28) YLR063W         | 12 | 263955 |
| <b>iYLR064W</b> |                                 | 12 | 266278 |
| <b>iYLR065C</b> | YLR065C YLR066W (SPC3)          | 12 | 266919 |
| <b>iYLR066W</b> |                                 | 12 | 267724 |
| <b>iYLR067C</b> | YLR067C (PET309) YLR068W (FYV7) | 12 | 270711 |
| <b>iYLR068W</b> |                                 | 12 | 271464 |
| <b>iYLR069C</b> | YLR069C (MEF1)                  | 12 | 273916 |
| <b>iYLR070C</b> | YLR070C                         | 12 | 275212 |
| <b>iYLR071C</b> | YLR071C (RGR1) YLR072W          | 12 | 278627 |
| <b>iYLR072W</b> |                                 | 12 | 280944 |
| <b>iYLR073C</b> | YLR073C                         | 12 | 281622 |
| <b>iYLR074C</b> | YLR074C (BUD20) YLR075W (RPL10) | 12 | 282457 |
| <b>iYLR076C</b> | YLR076C YLR077W                 | 12 | 283608 |
| <b>iYLR077W</b> |                                 | 12 | 285624 |
| <b>iYLR078C</b> | YLR078C (BOS1) YLR079W (SIC1)   | 12 | 286560 |
| <b>iYLR079W</b> | YLR080W (EMP46)                 | 12 | 287675 |
| <b>iYLR080W</b> | YLR081W (GAL2)                  | 12 | 289251 |
| <b>iYLR081W</b> |                                 | 12 | 291937 |
| <b>iYLR082C</b> | YLR082C (SRL2)                  | 12 | 293573 |
| <b>iYLR083C</b> | YLR083C (EMP70)                 | 12 | 296095 |
| <b>iYLR084C</b> | YLR084C (RAX2)                  | 12 | 300252 |
| <b>iYLR085C</b> | YLR085C (ARP6) YLR086W (SMC4)   | 12 | 301990 |
| <b>iYLR086W</b> |                                 | 12 | 306500 |
| <b>iYLR087C</b> | YLR087C (CSF1) YLR088W (GAA1)   | 12 | 315732 |
| <b>iYLR088W</b> |                                 | 12 | 317952 |
| <b>iYLR089C</b> | YLR089C YLR090W (XDJ1)          | 12 | 320016 |
| <b>iYLR090W</b> | YLR091W                         | 12 | 322081 |
| <b>iYLR091W</b> | YLR092W (SUL2)                  | 12 | 323179 |
| <b>iYLR092W</b> |                                 | 12 | 326226 |
| <b>iYLR093C</b> | YLR093C (NYV1)                  | 12 | 327269 |

|                   |                                |    |        |
|-------------------|--------------------------------|----|--------|
| <b>iYLR094C</b>   | YLR094C (GIS3)                 | 12 | 329239 |
| <b>iYLR095C</b>   | YLR095C (IOC2) YLR096W (KIN2)  | 12 | 332116 |
| <b>iYLR096W</b>   |                                | 12 | 336034 |
| <b>iYLR097C</b>   | YLR097C                        | 12 | 337266 |
| <b>iYLR098C</b>   | YLR098C (CHA4)                 | 12 | 339474 |
| <b>iYLR099C</b>   | YLR099C (ICT1) YLR100W (ERG27) | 12 | 340929 |
| <b>iYLR102C</b>   | YLR102C (APC9)                 | 12 | 343768 |
| <b>iYLR103C</b>   | YLR103C (CDC45) YLR104W        | 12 | 345942 |
| <b>iYLR104W</b>   |                                | 12 | 346981 |
| <b>iYLR105C</b>   | YLR105C (SEN2) snr79           | 12 | 348181 |
| <b>iYLR106C</b>   | YLR106C YLR107W (REX3)         | 12 | 363739 |
| <b>iYLR107W</b>   |                                | 12 | 365331 |
| <b>iYLR108C</b>   | YLR108C YLR109W (AHP1)         | 12 | 368125 |
| <b>iYLR109W</b>   |                                | 12 | 369312 |
| <b>iYLR110C</b>   | YLR110C (CCW12) YLR111W        | 12 | 370099 |
| <b>iYLR111W</b>   | YLR112W                        | 12 | 370724 |
| <b>iYLR112W</b>   | YLR113W (HOG1)                 | 12 | 371211 |
| <b>iYLR113W</b>   |                                | 12 | 372928 |
| <b>iYLR114C</b>   | YLR114C YLR115W (CFT2)         | 12 | 377239 |
| <b>iYLR115W</b>   | YLR116W (MSL5)                 | 12 | 380565 |
| <b>iYLR116W</b>   |                                | 12 | 382253 |
| <b>iYLR117C</b>   | YLR117C (CLF1)                 | 12 | 384535 |
| <b>iYLR118C</b>   | YLR118C YLR119W (SRN2)         | 12 | 385409 |
| <b>iYLR119W</b>   |                                | 12 | 386176 |
| <b>iYLR120C</b>   | YLR120C (YPS1)                 | 12 | 388221 |
| <b>iYLR121C</b>   | YLR121C (YPS3)                 | 12 | 390271 |
| <b>iYLR123C</b>   | YLR123C YLR124W                | 12 | 391408 |
| <b>iYLR124W-0</b> | YLR125W                        | 12 | 391945 |
| <b>iYLR125W</b>   |                                | 12 | 393895 |
| <b>iYLR126C</b>   | YLR126C                        | 12 | 395521 |
| <b>iYLR127C</b>   | YLR127C (APC2) YLR128W         | 12 | 398320 |
| <b>iYLR128W</b>   | YLR129W (DIP2)                 | 12 | 399434 |
| <b>iYLR129W</b>   |                                | 12 | 402489 |
| <b>iYLR130C</b>   | YLR130C (ZRT2)                 | 12 | 404063 |
| <b>iYLR131C</b>   | YLR131C (ACE2)                 | 12 | 406823 |
| <b>iYLR132C</b>   | YLR132C YLR133W (CKI1)         | 12 | 408156 |
| <b>iYLR133W</b>   | YLR134W (PDC5)                 | 12 | 410194 |
| <b>iYLR134W</b>   | YLR135W (SLX4)                 | 12 | 412415 |
| <b>iYLR135W</b>   |                                | 12 | 415528 |
| <b>iYLR136C</b>   | YLR136C (TIS11) YLR137W        | 12 | 416659 |
| <b>iYLR137W</b>   | YLR138W (NHA1)                 | 12 | 418110 |
| <b>iYLR138W</b>   |                                | 12 | 421395 |
| <b>iYLR141W</b>   | YLR142W (PUT1)                 | 12 | 424775 |
| <b>iYLR142W</b>   | YLR143W                        | 12 | 426617 |
| <b>iYLR143W</b>   |                                | 12 | 429387 |
| <b>iYLR144C</b>   | YLR144C (ACF2) YLR145W         | 12 | 432017 |
| <b>iYLR146C</b>   | YLR146C (SPE4)                 | 12 | 433726 |
| <b>iYLR147C</b>   | YLR147C (SMD3) YLR148W (PEP3)  | 12 | 434464 |
| <b>iYLR148W</b>   |                                | 12 | 437398 |
| <b>iYLR149C</b>   | YLR149C YLR150W (STM1)         | 12 | 439824 |
| <b>iYLR150W</b>   |                                | 12 | 441289 |

|                   |                                |    |        |
|-------------------|--------------------------------|----|--------|
| <b>iYLR152C</b>   | YLR152C                        | 12 | 444689 |
| <b>iYLR153C</b>   | YLR153C (ACS2)                 | 12 | 447576 |
| <b>iYLR154C</b>   | YLR154C tq(uug)l               | 12 | 448315 |
| <b>iYLR155C-0</b> | YLR155C (ASP3-1) YLR156W       | 12 | 470406 |
| <b>iYLR155C-A</b> | YLR155C (ASP3-1) YLR156W       | 12 | 470406 |
| <b>iYLR157C-A</b> | YLR157C (ASP3-2)               | 12 | 474058 |
| <b>iYLR157C-B</b> | YLR157C (ASP3-2)               | 12 | 475018 |
| <b>iYLR158C-0</b> | YLR158C (ASP3-3) YLR159W       | 12 | 483638 |
| <b>iYLR159W</b>   |                                | 12 | 485690 |
| <b>iYLR160C-0</b> | YLR160C (ASP3-4) YLR161W       | 12 | 487290 |
| <b>iYLR161W</b>   | YLR162W                        | 12 | 489342 |
| <b>iYLR162W-0</b> |                                | 12 | 489930 |
| <b>iYLR162W-A</b> |                                | 12 | 489930 |
| <b>iYLR162W-B</b> |                                | 12 | 490900 |
| <b>iYLR163C</b>   | YLR163C (MAS1) YLR164W         | 12 | 493256 |
| <b>iYLR164W</b>   |                                | 12 | 494391 |
| <b>iYLR165C</b>   | YLR165C (PUS5)                 | 12 | 495260 |
| <b>iYLR167W</b>   |                                | 12 | 499407 |
| <b>iYLR168C</b>   | YLR168C YLR169W                | 12 | 500272 |
| <b>iYLR171W</b>   |                                | 12 | 501124 |
| <b>iYLR172C</b>   | YLR172C (DPH5) YLR173W         | 12 | 502164 |
| <b>iYLR173W</b>   | YLR174W (IDP2)                 | 12 | 504249 |
| <b>iYLR174W</b>   | YLR175W (CBF5)                 | 12 | 505831 |
| <b>iYLR175W</b>   |                                | 12 | 507587 |
| <b>iYLR176C</b>   | YLR176C (RFX1) YLR177W         | 12 | 510234 |
| <b>iYLR177W</b>   |                                | 12 | 512942 |
| <b>iYLR178C</b>   | YLR178C (TFS1)                 | 12 | 513823 |
| <b>iYLR179C</b>   | YLR179C YLR180W (SAM1)         | 12 | 514715 |
| <b>iYLR180W</b>   |                                | 12 | 516412 |
| <b>iYLR181C</b>   | YLR181C YLR182W (SWI6)         | 12 | 517672 |
| <b>iYLR182W</b>   |                                | 12 | 520353 |
| <b>iYLR183C</b>   | YLR183C (TOS4) YLR184W         | 12 | 522014 |
| <b>iYLR184W</b>   | YLR185W (RPL37A)               | 12 | 522455 |
| <b>iYLR186W</b>   | YLR187W                        | 12 | 524392 |
| <b>iYLR187W</b>   | YLR188W (MDL1)                 | 12 | 527947 |
| <b>iYLR188W</b>   |                                | 12 | 530389 |
| <b>iYLR191W</b>   |                                | 12 | 538434 |
| <b>iYLR194C</b>   | YLR194C                        | 12 | 541575 |
| <b>iYLR196W</b>   | YLR197W (SIK1)                 | 12 | 545700 |
| <b>iYLR199C</b>   | YLR199C YLR200W (YKE2)         | 12 | 548517 |
| <b>iYLR200W</b>   |                                | 12 | 549358 |
| <b>iYLR203C</b>   | YLR203C (MSS51) YLR204W (QRI5) | 12 | 551962 |
| <b>iYLR204W</b>   |                                | 12 | 552607 |
| <b>iYLR205C</b>   | YLR205C (HMX1) YLR206W (ENT2)  | 12 | 553547 |
| <b>iYLR207W</b>   | YLR208W (SEC13)                | 12 | 559289 |
| <b>iYLR208W</b>   |                                | 12 | 560444 |
| <b>iYLR209C</b>   | YLR209C (PNP1) YLR210W (CLB4)  | 12 | 561732 |
| <b>iYLR211C</b>   | YLR211C                        | 12 | 564214 |
| <b>iYLR212C</b>   | YLR212C (TUB4)                 | 12 | 566281 |
| <b>iYLR213C</b>   | YLR213C (CRR1) YLR214W (FRE1)  | 12 | 567922 |
| <b>iYLR214W</b>   |                                | 12 | 570627 |

|            |                                |    |        |
|------------|--------------------------------|----|--------|
| iYLR215C   | YLR215C (CDC123)               | 12 | 571858 |
| iYLR217W   |                                | 12 | 573232 |
| iYLR218C   | YLR218C YLR219W (MSC3)         | 12 | 573918 |
| iYLR219W   | YLR220W (CCC1)                 | 12 | 576337 |
| iYLR220W   |                                | 12 | 577793 |
| iYLR221C   | YLR221C (RSA3)                 | 12 | 579024 |
| iYLR224W   |                                | 12 | 587573 |
| iYLR225C   | YLR225C YLR226W (BUR2)         | 12 | 588918 |
| iYLR227C   | YLR227C (ADY4) YLR227W-A       | 12 | 592043 |
| iYLR228C-0 | YLR228C (ECM22)                | 12 | 602463 |
| iYLR228C-1 | YLR228C (ECM22)                | 12 | 603337 |
| iYLR230W   | YLR229C (CDC42)                | 12 | 604879 |
| iYLR232W   |                                | 12 | 607177 |
| iYLR233C   | YLR233C (EST1) YLR234W (TOP3)  | 12 | 609524 |
| iYLR236C   | YLR236C YLR237W (THI7)         | 12 | 612117 |
| iYLR237W   | YLR238W                        | 12 | 614163 |
| iYLR238W   |                                | 12 | 616191 |
| iYLR239C   | YLR239C (LIP2) YLR240W (VPS34) | 12 | 617318 |
| iYLR240W   | YLR241W                        | 12 | 620160 |
| iYLR241W   |                                | 12 | 622821 |
| iYLR243W   |                                | 12 | 625021 |
| iYLR244C   | YLR244C (MAP1)                 | 12 | 626331 |
| iYLR245C   | YLR245C (CDD1) YLR246W (ERF2)  | 12 | 626930 |
| iYLR246W   |                                | 12 | 628197 |
| iYLR247C   | YLR247C YLR248W (RCK2)         | 12 | 633354 |
| iYLR248W   | YLR249W (YEF3)                 | 12 | 636084 |
| iYLR249W   | YLR250W (SSP120)               | 12 | 639914 |
| iYLR250W   | YLR251W                        | 12 | 641021 |
| iYLR252W   | YLR253W                        | 12 | 642262 |
| iYLR253W   |                                | 12 | 644336 |
| iYLR254C   | YLR254C                        | 12 | 644973 |
| iYLR255C   | YLR255C YLR256W (HAP1)         | 12 | 645953 |
| iYLR257W   | YLR258W (GSY2)                 | 12 | 659791 |
| iYLR258W   |                                | 12 | 662833 |
| iYLR259C   | YLR259C (HSP60) YLR260W (LCB5) | 12 | 665002 |
| iYLR260W   |                                | 12 | 667907 |
| iYLR262C   | YLR262C (YPT6)                 | 12 | 668891 |
| iYLR262C-A | YLR262C-A YLR263W (RED1)       | 12 | 669662 |
| iYLR263W   | YLR264W (RPS28B)               | 12 | 672823 |
| iYLR265C   | YLR265C (NEJ1)                 | 12 | 675455 |
| iYLR266C   | YLR266C YLR267W (BOP2)         | 12 | 677724 |
| iYLR267W   | YLR268W (SEC22)                | 12 | 679924 |
| iYLR270W   | YLR271W                        | 12 | 682238 |
| iYLR271W   |                                | 12 | 683561 |
| iYLR273C   | YLR273C (PIG1) YLR274W (CDC46) | 12 | 691029 |
| iYLR274W   | YLR275W (SMD2)                 | 12 | 693882 |
| iYLR275W   |                                | 12 | 694800 |
| iYLR276C   | YLR276C (DBP9)                 | 12 | 696830 |
| iYLR277C   | YLR277C (YSH1)                 | 12 | 699495 |
| iYLR278C   | YLR278C YLR279W                | 12 | 704024 |
| iYLR281C   | YLR281C                        | 12 | 704960 |

|                   |                                |    |        |
|-------------------|--------------------------------|----|--------|
| <b>iYLR283W</b>   |                                | 12 | 706130 |
| <b>iYLR284C</b>   | YLR284C (ECI1) YLR285W         | 12 | 707040 |
| <b>iYLR285W</b>   |                                | 12 | 708145 |
| <b>iYLR286C</b>   | YLR286C (CTS1)                 | 12 | 710136 |
| <b>iYLR287C</b>   | YLR287C                        | 12 | 712058 |
| <b>iYLR287C-A</b> | YLR287C-A (RPS30A)             | 12 | 713158 |
| <b>iYLR288C</b>   | YLR288C (MEC3) YLR289W (GUF1)  | 12 | 714904 |
| <b>iYLR289W</b>   |                                | 12 | 717026 |
| <b>iYLR290C</b>   | YLR290C                        | 12 | 717978 |
| <b>iYLR291C</b>   | YLR291C (GCD7)                 | 12 | 719462 |
| <b>iYLR292C</b>   | YLR292C (SEC72)                | 12 | 720370 |
| <b>iYLR293C</b>   | YLR293C (GSP1)                 | 12 | 721430 |
| <b>iYLR295C</b>   | YLR295C (ATP14) YLR296W        | 12 | 722373 |
| <b>iYLR296W</b>   | YLR297W                        | 12 | 723304 |
| <b>iYLR297W</b>   |                                | 12 | 724433 |
| <b>iYLR298C</b>   | YLR298C (YHC1) YLR299W (ECM38) | 12 | 725416 |
| <b>iYLR299W</b>   | YLR300W (EXG1)                 | 12 | 728051 |
| <b>iYLR301W</b>   |                                | 12 | 731559 |
| <b>iYLR303W</b>   |                                | 12 | 733876 |
| <b>iYLR304C</b>   | YLR304C (ACO1)                 | 12 | 737548 |
| <b>iYLR305C</b>   | YLR305C (STT4) YLR306W (UBC12) | 12 | 743863 |
| <b>iYLR308W</b>   |                                | 12 | 748875 |
| <b>iYLR309C</b>   | YLR309C (IMH1)                 | 12 | 751769 |
| <b>iYLR310C</b>   | YLR310C (CDC25)                | 12 | 756993 |
| <b>iYLR312C</b>   | YLR312C YLR312W-A (MRPL15)     | 12 | 758833 |
| <b>iYLR312W-A</b> |                                | 12 | 760240 |
| <b>iYLR313C</b>   | YLR313C (SPH1)                 | 12 | 762341 |
| <b>iYLR314C</b>   | YLR314C (CDC3) YLR315W         | 12 | 764136 |
| <b>iYLR317W</b>   | YLR318W (EST2)                 | 12 | 766088 |
| <b>iYLR318W</b>   |                                | 12 | 769195 |
| <b>iYLR319C</b>   | YLR319C (BUD6) YLR320W (MMS22) | 12 | 771683 |
| <b>iYLR320W</b>   |                                | 12 | 776303 |
| <b>iYLR322W</b>   |                                | 12 | 777941 |
| <b>iYLR323C</b>   | YLR323C YLR324W                | 12 | 778951 |
| <b>iYLR324W</b>   |                                | 12 | 780785 |
| <b>iYLR325C</b>   | YLR325C (RPL38) YLR326W        | 12 | 781378 |
| <b>iYLR326W</b>   |                                | 12 | 782895 |
| <b>iYLR327C</b>   | YLR327C YLR328W                | 12 | 783386 |
| <b>iYLR328W</b>   | YLR329W (REC102)               | 12 | 786117 |
| <b>iYLR329W</b>   | YLR330W (CHS5)                 | 12 | 787332 |
| <b>iYLR330W</b>   |                                | 12 | 789678 |
| <b>iYLR332W-1</b> |                                | 12 | 792678 |
| <b>iYLR333C</b>   | YLR333C (RPS25B)               | 12 | 795898 |
| <b>iYLR335W</b>   |                                | 12 | 799591 |
| <b>iYLR336C</b>   | YLR336C (SGD1)                 | 12 | 802395 |
| <b>iYLR338W</b>   |                                | 12 | 805202 |
| <b>iYLR340W</b>   | YLR341W (SPO77)                | 12 | 806824 |
| <b>iYLR342W</b>   | YLR343W                        | 12 | 815626 |
| <b>iYLR343W</b>   | YLR344W (RPL26A)               | 12 | 817760 |
| <b>iYLR344W</b>   | YLR345W                        | 12 | 820141 |
| <b>iYLR347C</b>   | YLR347C (KAP95)                | 12 | 826411 |

|                   |                                 |    |        |
|-------------------|---------------------------------|----|--------|
| <b>iYLR349W</b>   | YLR350W                         | 12 | 828025 |
| <b>iYLR350W</b>   |                                 | 12 | 829378 |
| <b>iYLR351C</b>   | YLR351C (NIT3) YLR352W          | 12 | 830362 |
| <b>iYLR352W</b>   | YLR353W (BUD8)                  | 12 | 833537 |
| <b>iYLR353W</b>   |                                 | 12 | 836161 |
| <b>iYLR355C</b>   | YLR355C (ILV5) YLR356W          | 12 | 839251 |
| <b>iYLR356W</b>   | YLR357W (RSC2)                  | 12 | 840912 |
| <b>iYLR358C</b>   | YLR358C YLR359W (ADE13)         | 12 | 844048 |
| <b>iYLR361C</b>   | YLR361C YLR362W (STE11)         | 12 | 849122 |
| <b>iYLR362W</b>   |                                 | 12 | 852017 |
| <b>iYLR363C</b>   | YLR363C (NMD4) YLR364W          | 12 | 853149 |
| <b>iYLR366W</b>   | YLR367W (RPS22B)                | 12 | 855841 |
| <b>iYLR368W</b>   | YLR369W (SSQ1)                  | 12 | 859334 |
| <b>iYLR369W</b>   |                                 | 12 | 861523 |
| <b>iYLR370C</b>   | YLR370C (ARC18) YLR371W (ROM2)  | 12 | 862252 |
| <b>iYLR372W</b>   |                                 | 12 | 868389 |
| <b>iYLR373C</b>   | YLR373C (VID22)                 | 12 | 871365 |
| <b>iYLR375W</b>   |                                 | 12 | 872726 |
| <b>iYLR376C</b>   | YLR376C                         | 12 | 873552 |
| <b>iYLR377C</b>   | YLR377C (FBP1) tk(uuu)          | 12 | 874790 |
| <b>iYLR379W</b>   | YLR380W (CSR1)                  | 12 | 877294 |
| <b>iYLR380W</b>   | YLR381W                         | 12 | 879507 |
| <b>iYLR381W</b>   |                                 | 12 | 881923 |
| <b>iYLR382C</b>   | YLR382C (NAM2) YLR383W (RHC18)  | 12 | 884750 |
| <b>iYLR383W</b>   |                                 | 12 | 888631 |
| <b>iYLR384C</b>   | YLR384C (IKI3)                  | 12 | 892899 |
| <b>iYLR385C</b>   | YLR385C YLR386W                 | 12 | 893389 |
| <b>iYLR386W</b>   |                                 | 12 | 896269 |
| <b>iYLR387C</b>   | YLR387C YLR388W (RPS29A)        | 12 | 897671 |
| <b>iYLR388W</b>   |                                 | 12 | 898820 |
| <b>iYLR389C</b>   | YLR389C (STE23) YLR390W (ECM19) | 12 | 902658 |
| <b>iYLR390W</b>   | YLR390W-A (CCW14)               | 12 | 903402 |
| <b>iYLR391W-A</b> |                                 | 12 | 904438 |
| <b>iYLR392C</b>   | YLR392C YLR393W (ATP10)         | 12 | 906303 |
| <b>iYLR394W</b>   |                                 | 12 | 909396 |
| <b>iYLR395C</b>   | YLR395C (COX8)                  | 12 | 909963 |
| <b>iYLR396C</b>   | YLR396C (VPS33)                 | 12 | 912308 |
| <b>iYLR397C</b>   | YLR397C (AFG2)                  | 12 | 914890 |
| <b>iYLR398C</b>   | YLR398C (SKI2)                  | 12 | 919017 |
| <b>iYLR399C</b>   | YLR399C (BDF1) YLR400W          | 12 | 921594 |
| <b>iYLR400W</b>   |                                 | 12 | 922534 |
| <b>iYLR401C</b>   | YLR401C YLR402W                 | 12 | 924445 |
| <b>iYLR402W</b>   | YLR403W (SFP1)                  | 12 | 925076 |
| <b>iYLR404W</b>   | YLR405W                         | 12 | 929596 |
| <b>iYLR405W</b>   |                                 | 12 | 930888 |
| <b>iYLR406C</b>   | YLR406C (RPL31B) YLR407W        | 12 | 931751 |
| <b>iYLR407W</b>   |                                 | 12 | 933652 |
| <b>iYLR408C</b>   | YLR408C                         | 12 | 934248 |
| <b>iYLR409C</b>   | YLR409C YLR410W (VIP1)          | 12 | 937228 |
| <b>iYLR410W</b>   | YLR410W-A                       | 12 | 940976 |
| <b>iYLR412W-0</b> | YLR413W                         | 12 | 949187 |



|                     |                                 |    |         |
|---------------------|---------------------------------|----|---------|
| <b>iYLR413W</b>     |                                 | 12 | 953177  |
| <b>iYLR414C</b>     | YLR414C                         | 12 | 954138  |
| <b>iYLR416C</b>     | YLR416C YLR417W (VPS36)         | 12 | 954883  |
| <b>iYLR417W</b>     |                                 | 12 | 956704  |
| <b>iYLR418C</b>     | YLR418C (CDC73) YLR419W         | 12 | 958089  |
| <b>iYLR419W</b>     | YLR420W (URA4)                  | 12 | 962729  |
| <b>iYLR420W</b>     |                                 | 12 | 964873  |
| <b>iYLR421C</b>     | YLR421C (RPN13) YLR422W         | 12 | 965554  |
| <b>iYLR422W</b>     |                                 | 12 | 971689  |
| <b>iYLR423C</b>     | YLR423C (APG17) YLR424W         | 12 | 973164  |
| <b>iYLR424W</b>     | YLR425W (TUS1)                  | 12 | 975515  |
| <b>iYLR425W</b>     | YLR426W                         | 12 | 986811  |
| <b>iYLR426W</b>     | YLR427W                         | 12 | 988107  |
| <b>iYLR427W</b>     |                                 | 12 | 990434  |
| <b>iYLR431C</b>     | YLR431C YLR432W (IMD3)          | 12 | 1001697 |
| <b>iYLR432W</b>     |                                 | 12 | 1004122 |
| <b>iYLR435W</b>     |                                 | 12 | 1006989 |
| <b>iYLR436C</b>     | YLR436C (ECM30)                 | 12 | 1011239 |
| <b>iYLR437C</b>     | YLR437C YLR438W (CAR2)          | 12 | 1012017 |
| <b>iYLR438C-A</b>   | YLR438C-A (LSM3) YLR439W (MRPL4 | 12 | 1014172 |
| <b>iYLR438W</b>     |                                 | 12 | 1013769 |
| <b>iYLR439W</b>     |                                 | 12 | 1015444 |
| <b>iYLR440C</b>     | YLR440C                         | 12 | 1017691 |
| <b>iYLR441C</b>     | YLR441C (RPS1A)                 | 12 | 1018902 |
| <b>iYLR442C</b>     | YLR442C (SIR3) YLR443W (ECM7)   | 12 | 1022245 |
| <b>iYLR444C</b>     | YLR444C YLR445W                 | 12 | 1023982 |
| <b>iYLR445W</b>     | YLR446W                         | 12 | 1024587 |
| <b>iYLR446W</b>     |                                 | 12 | 1026509 |
| <b>iYLR447C</b>     | YLR447C (VMA6) YLR448W (RPL6B)  | 12 | 1027887 |
| <b>iYLR449W</b>     | YLR450W (HMG2)                  | 12 | 1032005 |
| <b>iYLR450W</b>     | YLR451W (LEU3)                  | 12 | 1035758 |
| <b>iYLR451W</b>     |                                 | 12 | 1038747 |
| <b>iYLR452C</b>     | YLR452C (SST2)                  | 12 | 1041361 |
| <b>iYLR453C</b>     | YLR453C (RIF2) YLR454W          | 12 | 1042981 |
| <b>iYLR454W</b>     | YLR455W                         | 12 | 1051879 |
| <b>iYLR455W</b>     | YLR456W                         | 12 | 1054538 |
| <b>iYLR456W</b>     |                                 | 12 | 1055679 |
| <b>iYLR458W</b>     | YLR459W (CDC91)                 | 12 | 1056830 |
| <b>iYLR460C-1</b>   | YLR460C YLR461W (PAU4)          | 12 | 1061898 |
| <b>iYLR461W-0</b>   | YLR462W                         | 12 | 1063276 |
| <b>iYLR461W-1</b>   | YLR462W                         | 12 | 1064613 |
| <b>iYLR466W</b>     | YLR467W (YRF1-5)                | 12 | 1071230 |
| <b>iYLRCdelta18</b> |                                 | 12 | 732000  |
| <b>iYLRCdelta19</b> |                                 | 12 | 734671  |
| <b>iYLRCdelta21</b> | YLR344W (RPL26A)                | 12 | 818402  |
| <b>iYLRCdelta24</b> | YLR420W (URA4)                  | 12 | 963539  |
| <b>iYLRCdelta26</b> | YLR425W (TUS1)                  | 12 | 981694  |
| <b>iYLRCdelta5</b>  |                                 | 12 | 366145  |
| <b>iYLRCdelta8</b>  | YLR157C-A                       | 12 | 481898  |
| <b>iYLRCdelta9</b>  | YLR227C (ADY4) YLR227W-A        | 12 | 593035  |
| <b>iYLRCSigma1</b>  | YLR010C (TEN1) YLR011W (LOT6)   | 12 | 168379  |

|                      |                                 |    |        |
|----------------------|---------------------------------|----|--------|
| <b>iYLRctau1</b>     |                                 | 12 | 599844 |
| <b>iYLRWdelta11</b>  |                                 | 12 | 599062 |
| <b>iYLRWdelta14</b>  | YLR257W                         | 12 | 656743 |
| <b>iYLRWdelta15</b>  | YLR257W                         | 12 | 657767 |
| <b>iYLRWdelta17</b>  | YLR272C (YCS4)                  | 12 | 688664 |
| <b>iYLRWdelta20</b>  | YLR334C YLR335W (NUP2)          | 12 | 797087 |
| <b>iYLRWdelta23</b>  | YLR411W (CTR3)                  | 12 | 947145 |
| <b>iYLRWdelta4</b>   | YLR035C-A                       | 12 | 221267 |
| <b>iYLRWdelta6-0</b> | YLR154C                         | 12 | 449029 |
| <b>iYLRWdelta6-A</b> | YLR154C                         | 12 | 449029 |
| <b>iYML001W</b>      |                                 | 13 | 267800 |
| <b>iYML002W</b>      | YML001W (YPT7)                  | 13 | 266754 |
| <b>iYML003W</b>      | YML002W                         | 13 | 264355 |
| <b>iYML004C</b>      | YML004C (GLO1) YML003W          | 13 | 262685 |
| <b>iYML005W</b>      |                                 | 13 | 261609 |
| <b>iYML006C</b>      | YML006C ts(aga)m (GIS4) YML005W | 13 | 258416 |
| <b>iYML007W</b>      |                                 | 13 | 255800 |
| <b>iYML008C</b>      | YML008C (ERG6) YML007W (YAP1)   | 13 | 252990 |
| <b>iYML009C</b>      | YML009C (MRPL39)                | 13 | 251516 |
| <b>iYML010C-B</b>    | YML010C-B                       | 13 | 251001 |
| <b>iYML011C</b>      | YML011C YML010W (SPT5)          | 13 | 247428 |
| <b>iYML012W</b>      |                                 | 13 | 246751 |
| <b>iYML014W</b>      | YML013W                         | 13 | 244064 |
| <b>iYML015C</b>      | YML015C (TAF40) YML014W         | 13 | 243029 |
| <b>iYML016C</b>      | YML016C (PPZ1)                  | 13 | 241536 |
| <b>iYML018C</b>      | YML018C YML017W (PSP2)          | 13 | 235952 |
| <b>iYML019W</b>      |                                 | 13 | 234455 |
| <b>iYML020W</b>      | YML019W (OST6)                  | 13 | 233143 |
| <b>iYML021C</b>      | YML021C (UNG1) YML020W          | 13 | 230813 |
| <b>iYML022W</b>      |                                 | 13 | 229500 |
| <b>iYML023C</b>      | YML023C YML022W (APT1)          | 13 | 228664 |
| <b>iYML024W</b>      |                                 | 13 | 226697 |
| <b>iYML025C</b>      | YML025C YML024W (RPS17A)        | 13 | 225365 |
| <b>iYML026C</b>      |                                 | 13 | 223828 |
| <b>iYML027W</b>      |                                 | 13 | 222563 |
| <b>iYML028W</b>      | YML027W (YOX1)                  | 13 | 220728 |
| <b>iYML029W</b>      | YML028W (TSA1)                  | 13 | 219878 |
| <b>iYML030W</b>      | YML029W (USA1)                  | 13 | 216914 |
| <b>iYML031W</b>      | YML030W                         | 13 | 216156 |
| <b>iYML033W</b>      |                                 | 13 | 212155 |
| <b>iYML034W</b>      |                                 | 13 | 211495 |
| <b>iYML035C</b>      | YML035C (AMD1)                  | 13 | 208860 |
| <b>iYML036W</b>      |                                 | 13 | 206211 |
| <b>iYML037C</b>      | YML037C YML036W                 | 13 | 205408 |
| <b>iYML041C</b>      | YML041C YML040W                 | 13 | 195755 |
| <b>iYML042W</b>      |                                 | 13 | 194800 |
| <b>iYML043C</b>      | YML043C (RRN11) YML042W (CAT2)  | 13 | 191767 |
| <b>iYML046W</b>      | YML045W-A                       | 13 | 183363 |
| <b>iYML047C</b>      | YML047C (PRM6) YML046W (PRP39)  | 13 | 181075 |
| <b>iYML048W</b>      | YML048W-A                       | 13 | 179637 |
| <b>iYML049C</b>      | YML049C (RSE1) YML048W (GSF2)   | 13 | 178305 |

|                   |                                 |    |        |
|-------------------|---------------------------------|----|--------|
| <b>iYML050W</b>   |                                 | 13 | 174074 |
| <b>iYML051W</b>   | YML050W                         | 13 | 172901 |
| <b>iYML052W</b>   | YML051W (GAL80)                 | 13 | 171310 |
| <b>iYML053C</b>   | YML053C YML052W (SUR7)          | 13 | 169754 |
| <b>iYML054C</b>   | YML054C (CYB2)                  | 13 | 167308 |
| <b>iYML055W</b>   |                                 | 13 | 165326 |
| <b>iYML057W</b>   |                                 | 13 | 161994 |
| <b>iYML058W</b>   | YML057W (CMP2)                  | 13 | 159697 |
| <b>iYML060W</b>   |                                 | 13 | 153001 |
| <b>iYML061C</b>   | YML061C (PIF1) YML060W (OGG1)   | 13 | 151532 |
| <b>iYML062C</b>   | YML062C (MFT1)                  | 13 | 148683 |
| <b>iYML063W</b>   |                                 | 13 | 147249 |
| <b>iYML064C</b>   | YML064C (TEM1) YML063W (RPS1B)  | 13 | 145876 |
| <b>iYML065W</b>   |                                 | 13 | 144954 |
| <b>iYML066C</b>   | YML066C (SMA2) YML065W (ORC1)   | 13 | 141533 |
| <b>iYML067C</b>   | YML067C (ERV41)                 | 13 | 140214 |
| <b>iYML068W</b>   |                                 | 13 | 138944 |
| <b>iYML069W</b>   | YML068W                         | 13 | 137158 |
| <b>iYML070W</b>   | YML069W (POB3)                  | 13 | 135229 |
| <b>iYML071C</b>   | YML071C (DOR1) YML070W (DAK1)   | 13 | 131572 |
| <b>iYML072C</b>   | YML072C                         | 13 | 129367 |
| <b>iYML074C-0</b> | YML074C (FPR3)                  | 13 | 121324 |
| <b>iYML074C-1</b> | YML074C (FPR3)                  | 13 | 122275 |
| <b>iYML075C</b>   | YML075C (HMG1)                  | 13 | 118898 |
| <b>iYML076C</b>   | YML076C (WAR1)                  | 13 | 115347 |
| <b>iYML077W</b>   |                                 | 13 | 112344 |
| <b>iYML078W</b>   | YML077W (BET5)                  | 13 | 111550 |
| <b>iYML079W</b>   | YML078W (CPR3)                  | 13 | 110852 |
| <b>iYML080W</b>   | YML079W                         | 13 | 110077 |
| <b>iYML081C-A</b> | YML081C-A (ATP18) YML081W       | 13 | 104162 |
| <b>iYML081W</b>   | YML080W (DUS1)                  | 13 | 108532 |
| <b>iYML082W</b>   |                                 | 13 | 103811 |
| <b>iYML083C</b>   | YML083C YML082W                 | 13 | 101050 |
| <b>iYML085C</b>   | YML085C (TUB1) YML084W          | 13 | 99400  |
| <b>iYML086C</b>   | YML086C (ALO1)                  | 13 | 97371  |
| <b>iYML087C</b>   | YML087C                         | 13 | 95369  |
| <b>iYML088W</b>   |                                 | 13 | 94241  |
| <b>iYML089C</b>   | YML089C YML088W (UFO1)          | 13 | 91409  |
| <b>iYML093W</b>   |                                 | 13 | 85789  |
| <b>iYML094W</b>   | YML093W                         | 13 | 82849  |
| <b>iYML095C</b>   | YML095C (RAD10)                 | 13 | 82113  |
| <b>iYML097C</b>   | YML097C (VPS9) YML096W          | 13 | 79690  |
| <b>iYML098W</b>   |                                 | 13 | 77770  |
| <b>iYML099C</b>   | YML099C (ARG81) YML098W (TAF19) | 13 | 77040  |
| <b>iYML100W</b>   | YML100W-A                       | 13 | 73920  |
| <b>iYML101C</b>   | YML101C YML100W (TSL1)          | 13 | 70088  |
| <b>iYML103C</b>   | YML103C (NUP188) YML102W (CAC2) | 13 | 67549  |
| <b>iYML104C</b>   | YML104C (MDM1)                  | 13 | 62322  |
| <b>iYML105C</b>   | YML105C (SEC65)                 | 13 | 58687  |
| <b>iYML106W</b>   |                                 | 13 | 57453  |
| <b>iYML107C</b>   | YML107C YML106W (URA5)          | 13 | 56425  |

|                    |                                  |    |        |
|--------------------|----------------------------------|----|--------|
| <b>iYML108W</b>    |                                  | 13 | 55110  |
| <b>iYML110C</b>    | YML110C (COQ5) YML109W (ZDS2)    | 13 | 50954  |
| <b>iYML111W</b>    |                                  | 13 | 49704  |
| <b>iYML112W</b>    | YML111W (BUL2)                   | 13 | 45953  |
| <b>iYML114C</b>    | YML114C (TAF65) YML113W (DAT1)   | 13 | 43575  |
| <b>iYML115C</b>    | YML115C (VAN1)                   | 13 | 41794  |
| <b>iYML116W</b>    |                                  | 13 | 39824  |
| <b>iYML117W-A</b>  | YML116W (ATR1)                   | 13 | 37774  |
| <b>iYML118W</b>    | YML117W                          | 13 | 33851  |
| <b>iYML119W</b>    | YML118W (NGL3)                   | 13 | 31684  |
| <b>iYML120C</b>    | YML120C (NDI1) YML119W           | 13 | 29807  |
| <b>iYML121W</b>    |                                  | 13 | 27862  |
| <b>iYML122C</b>    | YML122C YML121W (GTR1)           | 13 | 26419  |
| <b>iYML123C</b>    | YML123C (PHO84)                  | 13 | 25801  |
| <b>iYML124C</b>    | YML124C (TUB3)                   | 13 | 23684  |
| <b>iYML125C</b>    | YML125C                          | 13 | 21700  |
| <b>iYML126C</b>    | YML126C (ERG13)                  | 13 | 20536  |
| <b>iYML128C</b>    | YML128C (MSC1) YML127W (RSC9)    | 13 | 16677  |
| <b>iYML129C</b>    | YML129C (COX14)                  | 13 | 14754  |
| <b>iYML131W</b>    |                                  | 13 | 11296  |
| <b>iYML132W-1</b>  | YML131W                          | 13 | 9291   |
| <b>iYML133C-0</b>  | YML133C YML132W (COS3)           | 13 | 4684   |
| <b>iYMLCdelta1</b> | YML071C (DOR1) YML070W (DAK1)    | 13 | 132321 |
| <b>iYMLCdelta2</b> | YML054C (CYB2)                   | 13 | 168681 |
| <b>iYMLWdelta4</b> |                                  | 13 | 190083 |
| <b>iYMLWdelta6</b> |                                  | 13 | 202234 |
| <b>iYMR001C</b>    | YMR001C (CDC5) YMR002W           | 13 | 271136 |
| <b>iYMR002W</b>    | YMR003W                          | 13 | 272663 |
| <b>iYMR003W</b>    | YMR004W (MVP1)                   | 13 | 273714 |
| <b>iYMR004W</b>    | YMR005W (MPT1)                   | 13 | 275552 |
| <b>iYMR005W</b>    |                                  | 13 | 277211 |
| <b>iYMR006C</b>    | YMR006C (PLB2) YMR007W           | 13 | 279681 |
| <b>iYMR007W</b>    |                                  | 13 | 280340 |
| <b>iYMR008C</b>    | YMR008C (PLB1) YMR009W           | 13 | 282584 |
| <b>iYMR009W</b>    | YMR010W                          | 13 | 284640 |
| <b>iYMR010W-0</b>  | YMR011W (HXT2)                   | 13 | 286316 |
| <b>iYMR010W-1</b>  | YMR011W (HXT2)                   | 13 | 287197 |
| <b>iYMR011W</b>    | YMR012W (CLU1)                   | 13 | 289703 |
| <b>iYMR012W</b>    |                                  | 13 | 294966 |
| <b>iYMR013C-0</b>  | YMR013C (SEC59) snr72-79 YMR014W | 13 | 296737 |
| <b>iYMR013C-1</b>  | YMR013C (SEC59) snr72-79YMR014W  | 13 | 297802 |
| <b>iYMR014W</b>    |                                  | 13 | 300426 |
| <b>iYMR015C</b>    | YMR015C (ERG5)                   | 13 | 302484 |
| <b>iYMR016C-0</b>  | YMR016C (SOK2) YMR017W (SPO20)   | 13 | 305592 |
| <b>iYMR017W</b>    | YMR018W                          | 13 | 308681 |
| <b>iYMR018W</b>    | YMR019W (STB4)                   | 13 | 311751 |
| <b>iYMR019W</b>    | YMR020W (FMS1)                   | 13 | 315004 |
| <b>iYMR020W</b>    |                                  | 13 | 316902 |
| <b>iYMR021C</b>    | YMR021C (MAC1) YMR022W (QRI8)    | 13 | 318417 |
| <b>iYMR022W</b>    |                                  | 13 | 319176 |
| <b>iYMR023C</b>    | YMR023C (MSS1) ta(agc)m1 YMR024W | 13 | 321016 |

|            |                                |    |        |
|------------|--------------------------------|----|--------|
| iYMR024W   | YMR025W                        | 13 | 323046 |
| iYMR026C   | YMR026C (PEX12) YMR027W (HRT2) | 13 | 325434 |
| iYMR027W   | YMR028W (TAP42)                | 13 | 327288 |
| iYMR028W   |                                | 13 | 328581 |
| iYMR029C   | YMR029C YMR030W                | 13 | 330230 |
| iYMR030W   |                                | 13 | 331922 |
| iYMR031W-A | YMR032W (HOF1)                 | 13 | 335034 |
| iYMR032W   | YMR033W (ARP9)                 | 13 | 337306 |
| iYMR033W   |                                | 13 | 339276 |
| iYMR034C   | YMR034C YMR035W (IMP2)         | 13 | 340721 |
| iYMR035W   |                                | 13 | 341674 |
| iYMR038C   | YMR038C (LYS7)                 | 13 | 348259 |
| iYMR039C   | YMR039C (SUB1) YMR040W         | 13 | 349521 |
| iYMR040W   |                                | 13 | 350862 |
| iYMR041C   | YMR041C tfgaa)m1YMR042W (ARG80 | 13 | 351972 |
| iYMR042W   | YMR043W (MCM1)                 | 13 | 353135 |
| iYMR043W   | YMR044W (IOC4)                 | 13 | 354730 |
| iYMR044W   |                                | 13 | 356810 |
| iYMR046W-A |                                | 13 | 362829 |
| iYMR047C   | YMR047C (NUP116) YMR048W (CSM3 | 13 | 366704 |
| iYMR048W   |                                | 13 | 367933 |
| iYMR049C-0 | YMR049C (ERB1)                 | 13 | 370516 |
| iYMR049C-1 | YMR049C (ERB1)                 | 13 | 371480 |
| iYMR053C   | YMR053C (STB2) YMR054W (STV1)  | 13 | 382897 |
| iYMR054W   |                                | 13 | 385974 |
| iYMR055C   | YMR055C (BUB2)                 | 13 | 387020 |
| iYMR056C   | YMR056C (AAC1)                 | 13 | 388243 |
| iYMR057C   | YMR057C YMR058W (FET3)         | 13 | 388729 |
| iYMR058W   | YMR059W (SEN15)                | 13 | 390731 |
| iYMR060C   | YMR060C (TOM37) YMR061W (RNA14 | 13 | 392514 |
| iYMR061W   |                                | 13 | 394787 |
| iYMR062C   | YMR062C (ECM40) YMR063W (RIM9) | 13 | 396378 |
| iYMR063W   | YMR064W (AEP1)                 | 13 | 397795 |
| iYMR064W   | YMR065W (KAR5)                 | 13 | 399458 |
| iYMR065W   | YMR066W (SOV1)                 | 13 | 401215 |
| iYMR066W   |                                | 13 | 404236 |
| iYMR067C   | YMR067C YMR068W                | 13 | 405572 |
| iYMR068W   | YMR069W                        | 13 | 407583 |
| iYMR069W   | YMR070W (MOT3)                 | 13 | 408565 |
| iYMR070W   |                                | 13 | 410625 |
| iYMR071C   | YMR071C YMR072W (ABF2)         | 13 | 411264 |
| iYMR072W   |                                | 13 | 412119 |
| iYMR073C   | YMR073C                        | 13 | 412872 |
| iYMR074C   | YMR074C YMR075W                | 13 | 413472 |
| iYMR075C-A | YMR075C-A                      | 13 | 416052 |
| iYMR076C   | YMR076C (PDS5) tv(aac)m2       | 13 | 420028 |
| iYMR077C   | YMR077C (VPS20)                | 13 | 422148 |
| iYMR078C   | YMR078C (CTF18) YMR079W (SEC14 | 13 | 424727 |
| iYMR079W   |                                | 13 | 426058 |
| iYMR080C   | YMR080C (NAM7)                 | 13 | 429626 |
| iYMR081C   | YMR081C (ISF1)                 | 13 | 431094 |

|                   |                                |    |        |
|-------------------|--------------------------------|----|--------|
| <b>iYMR082C-0</b> | YMR082C YMR083W (ADH3)         | 13 | 432124 |
| <b>iYMR082C-1</b> | YMR082C YMR083W (ADH3)         | 13 | 433455 |
| <b>iYMR083W</b>   | YMR084W                        | 13 | 435914 |
| <b>iYMR084W</b>   | YMR085W                        | 13 | 437415 |
| <b>iYMR085W</b>   | YMR086W                        | 13 | 438788 |
| <b>iYMR086C-A</b> | YMR086C-A YMR087W              | 13 | 442363 |
| <b>iYMR088C</b>   | YMR088C                        | 13 | 445101 |
| <b>iYMR089C</b>   | YMR089C (YTA12) YMR090W        | 13 | 448085 |
| <b>iYMR090W</b>   |                                | 13 | 449927 |
| <b>iYMR091C</b>   | YMR091C (NPL6)                 | 13 | 451364 |
| <b>iYMR092C</b>   | YMR092C (AIP1) YMR093W         | 13 | 453478 |
| <b>iYMR093W</b>   | YMR094W (CTF13)                | 13 | 455555 |
| <b>iYMR095C</b>   | YMR095C (SNO1) YMR096W (SNZ1)  | 13 | 457958 |
| <b>iYMR096W</b>   |                                | 13 | 459300 |
| <b>iYMR097C</b>   | YMR097C                        | 13 | 460526 |
| <b>iYMR098C</b>   | YMR098C td(guc)m               | 13 | 462608 |
| <b>iYMR099C</b>   | YMR099C YMR100W (MUB1)         | 13 | 464826 |
| <b>iYMR100W</b>   |                                | 13 | 468161 |
| <b>iYMR101C</b>   | YMR101C (SRT1)                 | 13 | 469475 |
| <b>iYMR102C</b>   | YMR102C                        | 13 | 472351 |
| <b>iYMR103C</b>   | YMR103C                        | 13 | 473263 |
| <b>iYMR104C</b>   | YMR104C (YPK2)                 | 13 | 475452 |
| <b>iYMR105C</b>   | YMR105C (PGM2)                 | 13 | 477605 |
| <b>iYMR106C</b>   | YMR106C (YKU80) YMR107W        | 13 | 480189 |
| <b>iYMR107W</b>   | YMR108W (ILV2)                 | 13 | 483360 |
| <b>iYMR108W</b>   | YMR109W (MYO5)                 | 13 | 486146 |
| <b>iYMR109W</b>   |                                | 13 | 490245 |
| <b>iYMR110C</b>   | YMR110C                        | 13 | 491991 |
| <b>iYMR111C</b>   | YMR111C                        | 13 | 493791 |
| <b>iYMR112C</b>   | YMR112C (MED11) YMR113W (FOL3) | 13 | 494494 |
| <b>iYMR113W</b>   |                                | 13 | 496281 |
| <b>iYMR114C</b>   | YMR114C YMR115W                | 13 | 497448 |
| <b>iYMR115W</b>   |                                | 13 | 499208 |
| <b>iYMR116C</b>   | YMR116C (ASC1)                 | 13 | 500687 |
| <b>iYMR117C</b>   | YMR117C (SPC24)                | 13 | 501890 |
| <b>iYMR118C</b>   | YMR118C YMR119W (ASI1)         | 13 | 502733 |
| <b>iYMR119W-A</b> |                                | 13 | 507369 |
| <b>iYMR120C</b>   | YMR120C (ADE17)                | 13 | 509279 |
| <b>iYMR122C-1</b> | YMR122C YMR123W (PKR1)         | 13 | 512333 |
| <b>iYMR123W</b>   | YMR124W                        | 13 | 513960 |
| <b>iYMR124W</b>   | YMR125W (STO1)                 | 13 | 517286 |
| <b>iYMR125W</b>   |                                | 13 | 520445 |
| <b>iYMR126C</b>   | YMR126C                        | 13 | 521788 |
| <b>iYMR127C</b>   | YMR127C (SAS2) YMR128W (ECM16) | 13 | 523344 |
| <b>iYMR128W</b>   | YMR129W (POM152)               | 13 | 527498 |
| <b>iYMR129W</b>   | YMR130W                        | 13 | 531816 |
| <b>iYMR130W</b>   |                                | 13 | 533026 |
| <b>iYMR131C</b>   | YMR131C (RRB1)                 | 13 | 534697 |
| <b>iYMR132C</b>   | YMR132C YMR133W (REC114)       | 13 | 535569 |
| <b>iYMR133W</b>   | YMR134W                        | 13 | 537608 |
| <b>iYMR134W</b>   |                                | 13 | 538550 |

|                   |                                 |    |        |
|-------------------|---------------------------------|----|--------|
| <b>iYMR135W-A</b> | YMR136W (GAT2)                  | 13 | 540443 |
| <b>iYMR136W</b>   |                                 | 13 | 542880 |
| <b>iYMR137C</b>   | YMR137C (PSO2) YMR138W (CIN4)   | 13 | 544962 |
| <b>iYMR138W</b>   | YMR139W (RIM11)                 | 13 | 545729 |
| <b>iYMR140W</b>   |                                 | 13 | 549182 |
| <b>iYMR141C</b>   | YMR141C                         | 13 | 550043 |
| <b>iYMR142C</b>   | YMR142C (RPL13B) YMR143W (RPS1) | 13 | 551206 |
| <b>iYMR143W</b>   | YMR144W                         | 13 | 552902 |
| <b>iYMR145C</b>   | YMR145C                         | 13 | 556474 |
| <b>iYMR146C</b>   | YMR146C (TIF34) YMR147W         | 13 | 558523 |
| <b>iYMR147W</b>   | YMR148W                         | 13 | 559869 |
| <b>iYMR148W</b>   | YMR149W (SWP1)                  | 13 | 560811 |
| <b>iYMR149W</b>   |                                 | 13 | 561855 |
| <b>iYMR151W</b>   | YMR152W (YIM1)                  | 13 | 562942 |
| <b>iYMR152W</b>   | YMR153W (NUP53)                 | 13 | 564192 |
| <b>iYMR153C-A</b> | YMR153C-A                       | 13 | 565908 |
| <b>iYMR154C</b>   | YMR154C (RIM13) YMR155W         | 13 | 568181 |
| <b>iYMR155W</b>   |                                 | 13 | 570193 |
| <b>iYMR156C</b>   | YMR156C (TPP1)                  | 13 | 571015 |
| <b>iYMR157C</b>   | YMR157C YMR158W                 | 13 | 572043 |
| <b>iYMR158C-B</b> | YMR158C-B YMR158W-A             | 13 | 573330 |
| <b>iYMR158W</b>   |                                 | 13 | 572714 |
| <b>iYMR159C</b>   | YMR159C (APG16) YMR160W         | 13 | 574927 |
| <b>iYMR160W</b>   | YMR161W (HLJ1)                  | 13 | 577515 |
| <b>iYMR161W</b>   |                                 | 13 | 578391 |
| <b>iYMR162C</b>   | YMR162C (DNF3)                  | 13 | 583920 |
| <b>iYMR163C</b>   | YMR163C                         | 13 | 586387 |
| <b>iYMR166C</b>   | YMR166C YMR167W (MLH1)          | 13 | 594472 |
| <b>iYMR167W</b>   |                                 | 13 | 597194 |
| <b>iYMR168C</b>   | YMR168C (CEP3)                  | 13 | 599157 |
| <b>iYMR169C</b>   | YMR169C (ALD3)                  | 13 | 600871 |
| <b>iYMR170C</b>   | YMR170C (ALD2)                  | 13 | 603081 |
| <b>iYMR171C</b>   | YMR171C YMR172W (HOT1)          | 13 | 605519 |
| <b>iYMR172C-A</b> | YMR172C-A YMR173W (DDR48)       | 13 | 608210 |
| <b>iYMR173W-A</b> |                                 | 13 | 610080 |
| <b>iYMR174C</b>   | YMR174C (PAI3) YMR175W (SIP18)  | 13 | 610364 |
| <b>iYMR175W</b>   | YMR176W (ECM5)                  | 13 | 611254 |
| <b>iYMR176W</b>   | YMR177W (MMT1)                  | 13 | 615974 |
| <b>iYMR177W</b>   | YMR178W                         | 13 | 618097 |
| <b>iYMR178W</b>   | YMR179W (SPT21)                 | 13 | 619302 |
| <b>iYMR179W</b>   |                                 | 13 | 622133 |
| <b>iYMR180C</b>   | YMR180C (CTL1)                  | 13 | 623212 |
| <b>iYMR181C</b>   | YMR181C                         | 13 | 624079 |
| <b>iYMR182C-0</b> | YMR182C (RGM1)                  | 13 | 625166 |
| <b>iYMR182C-1</b> | YMR182C (RGM1)                  | 13 | 626043 |
| <b>iYMR183C</b>   | YMR183C (SSO2) YMR184W          | 13 | 627807 |
| <b>iYMR185W</b>   | YMR186W (HSC82)                 | 13 | 631969 |
| <b>iYMR186W</b>   |                                 | 13 | 634471 |
| <b>iYMR187C</b>   | YMR187C                         | 13 | 635983 |
| <b>iYMR188C</b>   | YMR188C YMR189W (GCV2)          | 13 | 637003 |
| <b>iYMR189W</b>   |                                 | 13 | 640603 |

|            |                                 |    |        |
|------------|---------------------------------|----|--------|
| iYMR190C   | YMR190C (SGS1) YMR191W          | 13 | 645257 |
| iYMR191W   | YMR192W                         | 13 | 646776 |
| iYMR192W   | YMR193W (MRPL24)                | 13 | 649279 |
| iYMR193W   |                                 | 13 | 650811 |
| iYMR194C-A | YMR194C-A YMR195W (ICY1)        | 13 | 653135 |
| iYMR194W   |                                 | 13 | 651909 |
| iYMR195W   | YMR196W                         | 13 | 654416 |
| iYMR196W   |                                 | 13 | 658341 |
| iYMR197C   | YMR197C (VTI1) YMR198W (CIK1)   | 13 | 659197 |
| iYMR198W   | YMR199W (CLN1)                  | 13 | 661528 |
| iYMR199W   | YMR200W (ROT1)                  | 13 | 664283 |
| iYMR200W   |                                 | 13 | 665521 |
| iYMR201C   | YMR201C (RAD14) YMR202W (ERG2)  | 13 | 667043 |
| iYMR202W   | YMR203W (TOM40)                 | 13 | 668204 |
| iYMR203W   |                                 | 13 | 669654 |
| iYMR204C   | YMR204C                         | 13 | 671324 |
| iYMR205C   | YMR205C (PFK2) YMR206W          | 13 | 674765 |
| iYMR206W   |                                 | 13 | 676836 |
| iYMR207C   | YMR207C (HFA1) YMR208W (ERG12)  | 13 | 683563 |
| iYMR208W   |                                 | 13 | 685797 |
| iYMR209C   | YMR209C YMR210W                 | 13 | 687283 |
| iYMR210W   | YMR211W                         | 13 | 688864 |
| iYMR211W   |                                 | 13 | 690509 |
| iYMR212C   | YMR212C (EFR3) YMR213W (CEF1)   | 13 | 693042 |
| iYMR213W   | YMR214W (SCJ1)                  | 13 | 695152 |
| iYMR214W   | YMR215W                         | 13 | 696482 |
| iYMR215W   |                                 | 13 | 698369 |
| iYMR216C   | YMR216C (SKY1) YMR217W (GUA1)   | 13 | 701038 |
| iYMR217W   |                                 | 13 | 703366 |
| iYMR218C   | YMR218C (TRS130) YMR219W (ESC1) | 13 | 706886 |
| iYMR219W   | YMR220W (ERG8)                  | 13 | 712108 |
| iYMR220W   |                                 | 13 | 713670 |
| iYMR221C   | YMR221C                         | 13 | 715444 |
| iYMR222C   | YMR222C YMR223W (UBP8)          | 13 | 716308 |
| iYMR223W   |                                 | 13 | 718129 |
| iYMR224C   | YMR224C (MRE11)                 | 13 | 720652 |
| iYMR225C   | YMR225C (MRPL44)                | 13 | 721402 |
| iYMR226C   | YMR226C                         | 13 | 722395 |
| iYMR227C   | YMR227C (TAF67) YMR228W (MTF1)  | 13 | 724384 |
| iYMR228W   |                                 | 13 | 725650 |
| iYMR230W   | YMR231W (PEP5)                  | 13 | 733140 |
| iYMR231W   | YMR232W (FUS2)                  | 13 | 736633 |
| iYMR232W   | YMR233W (TRI1)                  | 13 | 738958 |
| iYMR233W   | YMR234W (RNH1)                  | 13 | 739864 |
| iYMR234W   |                                 | 13 | 741311 |
| iYMR235C   | YMR235C (RNA1) YMR236W (TAF17)  | 13 | 742734 |
| iYMR236W   | YMR237W                         | 13 | 743443 |
| iYMR237W   | YMR238W (DFG5)                  | 13 | 745922 |
| iYMR238W   |                                 | 13 | 747728 |
| iYMR239C   | YMR239C (RNT1)                  | 13 | 749676 |
| iYMR240C   | YMR240C (CUS1) YMR241W (YHM2)   | 13 | 751239 |



|            |                                 |    |        |
|------------|---------------------------------|----|--------|
| iYMR241W   |                                 | 13 | 752904 |
| iYMR242C   | YMR242C (RPL20A)                | 13 | 753766 |
| iYMR243C   | YMR243C (ZRC1) YMR244W          | 13 | 756165 |
| iYMR244W   |                                 | 13 | 758316 |
| iYMR245W   | YMR246W (FAA4)                  | 13 | 759182 |
| iYMR246W   |                                 | 13 | 761890 |
| iYMR247C   | YMR247C ta(agc)m2 YMR250W (GAD) | 13 | 768038 |
| iYMR250W   | YMR251W                         | 13 | 772557 |
| iYMR251W   | YMR251W-A (HOR7)                | 13 | 774014 |
| iYMR251W-A |                                 | 13 | 774930 |
| iYMR253C   | YMR253C                         | 13 | 777189 |
| iYMR254C   | YMR254C YMR255W (GFD1)          | 13 | 777922 |
| iYMR255W   |                                 | 13 | 778566 |
| iYMR256C   | YMR256C (COX7)                  | 13 | 779126 |
| iYMR257C   | YMR257C (PET111)                | 13 | 782030 |
| iYMR258C   | YMR258C                         | 13 | 784280 |
| iYMR259C   | YMR259C                         | 13 | 788882 |
| iYMR260C   | YMR260C (TIF11)                 | 13 | 789838 |
| iYMR261C   | YMR261C (TPS3) YMR262W          | 13 | 793368 |
| iYMR262W   | YMR263W (SAP30)                 | 13 | 794666 |
| iYMR263W   | YMR264W (CUE1)                  | 13 | 795523 |
| iYMR264W   |                                 | 13 | 796415 |
| iYMR265C   | YMR265C YMR266W (RSN1)          | 13 | 797924 |
| iYMR266W   | YMR267W (PPA2)                  | 13 | 801378 |
| iYMR267W   |                                 | 13 | 802703 |
| iYMR268C   | YMR268C (PRP24) YMR269W         | 13 | 804221 |
| iYMR269W   |                                 | 13 | 805091 |
| iYMR270C   | YMR270C (RRN9)                  | 13 | 806423 |
| iYMR271C   | YMR271C (URA10)                 | 13 | 807548 |
| iYMR272C   | YMR272C (SCS7)                  | 13 | 810777 |
| iYMR273C   | YMR273C (ZDS1)                  | 13 | 813980 |
| iYMR274C   | YMR274C (RCE1)                  | 13 | 815311 |
| iYMR275C   | YMR275C (BUL1) YMR276W (DSK2)   | 13 | 818581 |
| iYMR276W   | YMR277W (FCP1)                  | 13 | 819948 |
| iYMR277W   | YMR278W                         | 13 | 822454 |
| iYMR278W   |                                 | 13 | 824631 |
| iYMR279C   | YMR279C                         | 13 | 826351 |
| iYMR280C   | YMR280C (CAT8) YMR281W (GPI12)  | 13 | 831329 |
| iYMR282C   | YMR282C (AEP2)                  | 13 | 835098 |
| iYMR283C   | YMR283C (RIT1) YMR284W (YKU70)  | 13 | 836867 |
| iYMR284W   |                                 | 13 | 839995 |
| iYMR285C   | YMR285C (NGL2) YMR286W (MRPL33) | 13 | 841691 |
| iYMR286W   |                                 | 13 | 842202 |
| iYMR287C   | YMR287C (MSU1) YMR288W (HSH155) | 13 | 845345 |
| iYMR288W   | YMR289W                         | 13 | 848486 |
| iYMR289W   |                                 | 13 | 849809 |
| iYMR290W-A | YMR291W                         | 13 | 851769 |
| iYMR291W   | YMR292W (GOT1)                  | 13 | 854390 |
| iYMR292W   |                                 | 13 | 855293 |
| iYMR293C   | YMR293C YMR294W (JNM1)          | 13 | 856793 |
| iYMR294W   | YMR294W-A                       | 13 | 858087 |

|                |                                |    |        |
|----------------|--------------------------------|----|--------|
| iYMR296C       | YMR296C (LCB1) YMR297W (PRC1)  | 13 | 860891 |
| iYMR297W       | YMR298W                        | 13 | 863520 |
| iYMR298W       |                                | 13 | 864271 |
| iYMR299C       | YMR299C                        | 13 | 865350 |
| iYMR300C       | YMR300C (ADE4)                 | 13 | 867091 |
| iYMR301C       | YMR301C (ATM1)                 | 13 | 869627 |
| iYMR302C       | YMR302C (PRP12)                | 13 | 872625 |
| iYMR303C       | YMR303C (ADH2) YMR304W (UBP15) | 13 | 874337 |
| iYMR304W       |                                | 13 | 878679 |
| iYMR305C       | YMR305C (SCW10) YMR306W (FKS3) | 13 | 880232 |
| iYMR306C-A     | YMR306C-A YMR307W (GAS1)       | 13 | 886572 |
| iYMR307W       |                                | 13 | 888682 |
| iYMR308C       | YMR308C (PSE1)                 | 13 | 892221 |
| iYMR309C       | YMR309C (NIP1)                 | 13 | 895426 |
| iYMR310C       | YMR310C                        | 13 | 896669 |
| iYMR311C       | YMR311C (GLC8) YMR312W (ELP6)  | 13 | 897603 |
| iYMR312W       |                                | 13 | 899226 |
| iYMR313C       | YMR313C YMR314W (PRE5)         | 13 | 901307 |
| iYMR314W       | YMR315W                        | 13 | 902413 |
| iYMR315W       | YMR316W (DIA1)                 | 13 | 903849 |
| iYMR316C-A     | YMR316C-A                      | 13 | 905972 |
| iYMR317W       |                                | 13 | 910785 |
| iYMR318C       | YMR318C                        | 13 | 912142 |
| iYMR319C-0     | YMR319C (FET4) YMR320W         | 13 | 914537 |
| iYMR319C-1     | YMR319C (FET4) YMR320W         | 13 | 915641 |
| iYMR320W       |                                | 13 | 917050 |
| iYMR321C       | YMR321C                        | 13 | 917895 |
| iYMR322C       | YMR322C YMR323W                | 13 | 919078 |
| iYMR323W       |                                | 13 | 921400 |
| iYMR324C       | YMR324C YMR325W                | 13 | 922443 |
| iYMR325W       |                                | 13 | 923014 |
| iYMRCdelta10   | YMR051C YMR052W (FAR3)         | 13 | 378621 |
| iYMRCdelta13   | YMR098C                        | 13 | 463460 |
| iYMRCtau1      | YMR012W (CLU1)                 | 13 | 290223 |
| iYMRWdelta12   | YMR051C YMR052W (FAR3)         | 13 | 379197 |
| iYMRWdelta15   | YMR106C (YKU80) YMR107W        | 13 | 481807 |
| iYMRWdelta16   | YMR118C YMR119W (ASI1)         | 13 | 503388 |
| iYMRWdelta17   | YMR118C YMR119W (ASI1)         | 13 | 504676 |
| iYMRWdelta19-0 | YMR247C YMR250W (GAD1)         | 13 | 768878 |
| iYMRWdelta21   | YMR283C (RIT1) YMR284W (YKU70) | 13 | 837764 |
| iYMRWtau2      | YMR118C YMR119W (ASI1)         | 13 | 504140 |
| iYNL001W       |                                | 14 | 628615 |
| iYNL002C       | YNL002C (RLP7) YNL001W (DOM34) | 14 | 627141 |
| iYNL003C       | YNL003C (PET8)                 | 14 | 625828 |
| iYNL004W       |                                | 14 | 624620 |
| iYNL005C       | YNL005C (MRP7) YNL004W (HRB1)  | 14 | 622427 |
| iYNL006W       |                                | 14 | 620977 |
| iYNL007C       | YNL007C (SIS1) YNL006W (LST8)  | 14 | 619564 |
| iYNL008C       | YNL008C (ASI3)                 | 14 | 618218 |
| iYNL009W       |                                | 14 | 616081 |
| iYNL011C       | YNL011C YNL010W                | 14 | 613168 |

|          |                                 |    |        |
|----------|---------------------------------|----|--------|
| iYNL012W |                                 | 14 | 611663 |
| iYNL013C | YNL013C YNL012W (SPO1)          | 14 | 609508 |
| iYNL016W | YNL015W (PBI2)                  | 14 | 604266 |
| iYNL018C | YNL018C                         | 14 | 601772 |
| iYNL019C | YNL019C                         | 14 | 599228 |
| iYNL020C | YNL020C (ARK1)                  | 14 | 597537 |
| iYNL021W |                                 | 14 | 595345 |
| iYNL022C | YNL022C YNL021W (HDA1)          | 14 | 592897 |
| iYNL023C | YNL023C (FAP1)                  | 14 | 591158 |
| iYNL024C | YNL024C                         | 14 | 587845 |
| iYNL025C | YNL025C (SSN8)                  | 14 | 585289 |
| iYNL026W |                                 | 14 | 583372 |
| iYNL027W | YNL026W                         | 14 | 581614 |
| iYNL028W | YNL027W (CRZ1)                  | 14 | 578994 |
| iYNL030W |                                 | 14 | 577036 |
| iYNL031C | YNL031C (HHT2) YNL030W (HHF2)   | 14 | 576048 |
| iYNL032W |                                 | 14 | 575349 |
| iYNL033W | YNL032W (SIW14)                 | 14 | 573851 |
| iYNL034W | YNL033W                         | 14 | 572313 |
| iYNL035C | YNL035C ti(aau)n1YNL034W        | 14 | 569689 |
| iYNL036W |                                 | 14 | 560477 |
| iYNL037C | YNL037C (IDH1) YNL036W (NCE103) | 14 | 559000 |
| iYNL038W |                                 | 14 | 557656 |
| iYNL039W | YNL038W (GPI15)                 | 14 | 556830 |
| iYNL040W | YNL039W (BDP1)                  | 14 | 554748 |
| iYNL041C | YNL041C (COD2) YNL040W          | 14 | 551985 |
| iYNL042W |                                 | 14 | 549288 |
| iYNL043C | YNL043C YNL042W (BOP3)          | 14 | 545907 |
| iYNL045W | YNL044W (YIP3)                  | 14 | 544976 |
| iYNL046W | YNL045W                         | 14 | 542820 |
| iYNL047C | YNL047C YNL046W                 | 14 | 541879 |
| iYNL048W |                                 | 14 | 539817 |
| iYNL049C | YNL049C (SFB2) YNL048W (ALG11)  | 14 | 537909 |
| iYNL050C | YNL050C                         | 14 | 534980 |
| iYNL051W |                                 | 14 | 533868 |
| iYNL052W | YNL051W (COD4)                  | 14 | 532184 |
| iYNL053W | YNL052W (COX5A)                 | 14 | 531409 |
| iYNL054W | YNL053W (MSG5)                  | 14 | 529581 |
| iYNL055C | YNL055C (POR1) YNL054W-A        | 14 | 518843 |
| iYNL056W |                                 | 14 | 517840 |
| iYNL057W | YNL056W                         | 14 | 516733 |
| iYNL059C | YNL059C (ARP5)                  | 14 | 514933 |
| iYNL061W |                                 | 14 | 512394 |
| iYNL062C | YNL062C (GCD10) YNL061W (NOP2)  | 14 | 510210 |
| iYNL064C | YNL064C (YDJ1) YNL063W          | 14 | 507095 |
| iYNL065W |                                 | 14 | 505483 |
| iYNL066W | YNL065W (AQR1)                  | 14 | 502776 |
| iYNL067W | YNL066W (SUN4)                  | 14 | 500255 |
| iYNL068C | YNL068C (FKH2) YNL067W (RPL9B)  | 14 | 498288 |
| iYNL069C | YNL069C (RPL16B)                | 14 | 495000 |
| iYNL070W |                                 | 14 | 493547 |

|          |                               |    |        |
|----------|-------------------------------|----|--------|
| iYNL071W | YNL070W (TOM7)                | 14 | 492970 |
| iYNL072W | YNL071W (LAT1)                | 14 | 491239 |
| iYNL073W | YNL072W (RNH35)               | 14 | 490115 |
| iYNL074C | YNL074C (MLF3) YNL073W (MSK1) | 14 | 488123 |
| iYNL075W |                               | 14 | 486478 |
| iYNL076W | YNL075W (IMP4)                | 14 | 485309 |
| iYNL077W | YNL076W (MKS1)                | 14 | 482976 |
| iYNL078W | YNL077W                       | 14 | 480990 |
| iYNL079C | YNL079C (TPM1) YNL078W (JIP1) | 14 | 479164 |
| iYNL080C | YNL080C                       | 14 | 478031 |
| iYNL081C | YNL081C                       | 14 | 476618 |
| iYNL082W |                               | 14 | 476011 |
| iYNL083W | YNL082W (PMS1)                | 14 | 472860 |
| iYNL084C | YNL084C (END3) YNL083W        | 14 | 471101 |
| iYNL086W | YNL085W (MKT1)                | 14 | 466641 |
| iYNL089C | YNL089C YNL088W (TOP2)        | 14 | 457168 |
| iYNL091W | YNL090W (RHO2)                | 14 | 456129 |
| iYNL092W | YNL091W                       | 14 | 452072 |
| iYNL093W | YNL092W                       | 14 | 450529 |
| iYNL094W | YNL093W (YPT53)               | 14 | 449373 |
| iYNL095C | YNL095C YNL094W               | 14 | 446839 |
| iYNL096C | YNL096C (RPS7B)               | 14 | 444314 |
| iYNL097C | YNL097C tl(caa)n (PHO23)      | 14 | 442357 |
| iYNL098C | YNL098C (RAS2)                | 14 | 440569 |
| iYNL099C | YNL099C (OCA1)                | 14 | 439282 |
| iYNL100W |                               | 14 | 438316 |
| iYNL101W | YNL100W                       | 14 | 437139 |
| iYNL102W | YNL101W                       | 14 | 434492 |
| iYNL103W | YNL102W (POL1)                | 14 | 429752 |
| iYNL104C | YNL104C (LEU4) YNL103W (MET4) | 14 | 426753 |
| iYNL105W |                               | 14 | 424582 |
| iYNL107W |                               | 14 | 420777 |
| iYNL108C | YNL108C YNL107W (YAF9)        | 14 | 419825 |
| iYNL111C | YNL111C (CYB5)                | 14 | 417301 |
| iYNL112W |                               | 14 | 416280 |
| iYNL113W | YNL112W (DBP2)                | 14 | 413198 |
| iYNL115C | YNL115C                       | 14 | 412052 |
| iYNL116W |                               | 14 | 409908 |
| iYNL117W | YNL116W                       | 14 | 408021 |
| iYNL118C | YNL118C (DCP2) YNL117W (MLS1) | 14 | 405563 |
| iYNL119W |                               | 14 | 402520 |
| iYNL121C | YNL121C (TOM70)               | 14 | 400536 |
| iYNL122C | YNL122C                       | 14 | 398369 |
| iYNL123W |                               | 14 | 397677 |
| iYNL124W | YNL123W                       | 14 | 394369 |
| iYNL125C | YNL125C (ESBP6) YNL124W       | 14 | 392166 |
| iYNL126W |                               | 14 | 389766 |
| iYNL127W | YNL126W (SPC98)               | 14 | 386847 |
| iYNL128W | YNL127W                       | 14 | 383662 |
| iYNL129W | YNL128W (TEP1)                | 14 | 382201 |
| iYNL130C | YNL130C (CPT1) YNL129W        | 14 | 381158 |

|                   |                                    |    |        |
|-------------------|------------------------------------|----|--------|
| <b>iYNL131W</b>   |                                    | 14 | 379224 |
| <b>iYNL132W</b>   | YNL131W (TOM22)                    | 14 | 378490 |
| <b>iYNL133C</b>   | YNL133C (FYV6) tf(gaa)n YNL132W (K | 14 | 374691 |
| <b>iYNL134C</b>   | YNL134C                            | 14 | 373580 |
| <b>iYNL135C</b>   | YNL135C (FPR1)                     | 14 | 372225 |
| <b>iYNL136W</b>   |                                    | 14 | 371644 |
| <b>iYNL137C</b>   | YNL137C (NAM9) YNL136W             | 14 | 370054 |
| <b>iYNL138W</b>   |                                    | 14 | 368320 |
| <b>iYNL139C</b>   | YNL139C (RLR1) YNL138W (SRV2)      | 14 | 365716 |
| <b>iYNL141W</b>   |                                    | 14 | 360638 |
| <b>iYNL142W</b>   | YNL141W (AAH1)                     | 14 | 358951 |
| <b>iYNL143C</b>   | YNL143C YNL142W (MEP2)             | 14 | 357185 |
| <b>iYNL144C-0</b> | YNL144C                            | 14 | 355041 |
| <b>iYNL144C-1</b> | YNL144C                            | 14 | 355917 |
| <b>iYNL145W</b>   |                                    | 14 | 352529 |
| <b>iYNL146W</b>   | YNL145W (MFA2)                     | 14 | 352016 |
| <b>iYNL147W</b>   | YNL146W                            | 14 | 351382 |
| <b>iYNL148C</b>   | YNL148C (ALF1) YNL147W (LSM7)      | 14 | 350670 |
| <b>iYNL149C</b>   | YNL149C                            | 14 | 349755 |
| <b>iYNL151C</b>   | YNL151C (RPC31) YNL150W            | 14 | 348520 |
| <b>iYNL152W</b>   |                                    | 14 | 347541 |
| <b>iYNL153C</b>   | YNL153C (GIM3) YNL152W             | 14 | 346057 |
| <b>iYNL154C</b>   | YNL154C (YCK2)                     | 14 | 345275 |
| <b>iYNL155W</b>   |                                    | 14 | 343339 |
| <b>iYNL156C</b>   | YNL156C YNL155W                    | 14 | 341967 |
| <b>iYNL157W</b>   |                                    | 14 | 340857 |
| <b>iYNL158W</b>   | YNL157W                            | 14 | 340207 |
| <b>iYNL159C</b>   | YNL159C (ASI2) YNL158W             | 14 | 339346 |
| <b>iYNL160W</b>   |                                    | 14 | 337608 |
| <b>iYNL161W-0</b> | YNL160W (YGP1)                     | 14 | 334866 |
| <b>iYNL161W-1</b> | YNL160W (YGP1)                     | 14 | 335705 |
| <b>iYNL162W</b>   | YNL161W (CBK1)                     | 14 | 332153 |
| <b>iYNL164C</b>   | YNL164C                            | 14 | 326319 |
| <b>iYNL165W</b>   |                                    | 14 | 325051 |
| <b>iYNL166C</b>   | YNL166C (BNI5) YNL165W             | 14 | 323564 |
| <b>iYNL167C</b>   | YNL167C (SKO1)                     | 14 | 321358 |
| <b>iYNL168C</b>   | YNL168C                            | 14 | 318808 |
| <b>iYNL169C</b>   | YNL169C (PSD1)                     | 14 | 317670 |
| <b>iYNL173C</b>   | YNL173C (MDG1) YNL172W (APC1)      | 14 | 310056 |
| <b>iYNL174W</b>   |                                    | 14 | 308645 |
| <b>iYNL176C</b>   | YNL176C                            | 14 | 306979 |
| <b>iYNL177C</b>   | YNL177C                            | 14 | 304614 |
| <b>iYNL178W</b>   |                                    | 14 | 303401 |
| <b>iYNL179C-1</b> | YNL179C YNL178W (RPS3)             | 14 | 301890 |
| <b>iYNL181W</b>   |                                    | 14 | 299555 |
| <b>iYNL182C</b>   | YNL182C YNL181W                    | 14 | 297624 |
| <b>iYNL183C</b>   | YNL183C (NPR1)                     | 14 | 295506 |
| <b>iYNL184C</b>   | YNL184C                            | 14 | 292880 |
| <b>iYNL186W</b>   |                                    | 14 | 291873 |
| <b>iYNL187W</b>   | YNL186W (UBP10)                    | 14 | 289064 |
| <b>iYNL188W</b>   | YNL187W                            | 14 | 287605 |

|          |                                |    |        |
|----------|--------------------------------|----|--------|
| iYNL189W | YNL188W (KAR1)                 | 14 | 285884 |
| iYNL191W | YNL190W                        | 14 | 281501 |
| iYNL192W | YNL191W                        | 14 | 279893 |
| iYNL193W | YNL192W (CHS1)                 | 14 | 276040 |
| iYNL194C | YNL194C YNL193W                | 14 | 273611 |
| iYNL195C | YNL195C                        | 14 | 272304 |
| iYNL196C | YNL196C (SLZ1)                 | 14 | 271168 |
| iYNL197C | YNL197C (WHI3)                 | 14 | 269590 |
| iYNL198C | YNL198C                        | 14 | 266813 |
| iYNL200C | YNL200C                        | 14 | 264450 |
| iYNL201C | YNL201C                        | 14 | 263200 |
| iYNL202W |                                | 14 | 260453 |
| iYNL204C | YNL204C (SPS18)                | 14 | 259274 |
| iYNL207W |                                | 14 | 256627 |
| iYNL208W | YNL207W                        | 14 | 255031 |
| iYNL209W | YNL208W                        | 14 | 253899 |
| iYNL210W | YNL209W (SSB2)                 | 14 | 251742 |
| iYNL211C | YNL211C YNL210W (MER1)         | 14 | 250314 |
| iYNL212W |                                | 14 | 249808 |
| iYNL213C | YNL213C YNL212W (VID27)        | 14 | 247103 |
| iYNL214W |                                | 14 | 246215 |
| iYNL215W | YNL214W (PEX17)                | 14 | 245429 |
| iYNL216W | YNL215W (IES2)                 | 14 | 244171 |
| iYNL217W | YNL216W (RAP1)                 | 14 | 241310 |
| iYNL218W | YNL217W                        | 14 | 240000 |
| iYNL219C | YNL219C (ALG9) YNL218W (MGS1)  | 14 | 237662 |
| iYNL220W |                                | 14 | 235713 |
| iYNL221C | YNL221C (POP1) YNL220W (ADE12) | 14 | 233694 |
| iYNL222W |                                | 14 | 229713 |
| iYNL223W | YNL222W (SSU72)                | 14 | 228853 |
| iYNL224C | YNL224C YNL223W (AUT2)         | 14 | 227098 |
| iYNL225C | YNL225C (CNM67)                | 14 | 224468 |
| iYNL226W |                                | 14 | 222648 |
| iYNL229C | YNL229C (URE2) YNL228W         | 14 | 220200 |
| iYNL230C | YNL230C (ELA1)                 | 14 | 218661 |
| iYNL231C | YNL231C (PDR16)                | 14 | 217041 |
| iYNL232W |                                | 14 | 215800 |
| iYNL233W | YNL232W (CSL4)                 | 14 | 214599 |
| iYNL234W | YNL233W (BNI4)                 | 14 | 211512 |
| iYNL235C | YNL235C YNL234W                | 14 | 209978 |
| iYNL237W | YNL236W (SIN4)                 | 14 | 206566 |
| iYNL238W | YNL237W (YTP1)                 | 14 | 204871 |
| iYNL239W | YNL238W (KEX2)                 | 14 | 201932 |
| iYNL240C | YNL240C (NAR1) YNL239W (LAP3)  | 14 | 199976 |
| iYNL241C | YNL241C (ZWF1)                 | 14 | 197942 |
| iYNL242W |                                | 14 | 196101 |
| iYNL243W | YNL242W (APG2)                 | 14 | 190956 |
| iYNL244C | YNL244C (SUI1) YNL243W (SLA2)  | 14 | 187495 |
| iYNL245C | YNL245C                        | 14 | 186884 |
| iYNL247W | YNL246W                        | 14 | 185177 |
| iYNL248C | YNL248C (RPA49) YNL247W        | 14 | 182607 |

|                   |                                 |    |        |
|-------------------|---------------------------------|----|--------|
| <b>iYNL249C</b>   | YNL249C (MPA43)                 | 14 | 181021 |
| <b>iYNL251C</b>   | YNL251C (NRD1) YNL250W (RAD50)  | 14 | 174314 |
| <b>iYNL253W</b>   |                                 | 14 | 171285 |
| <b>iYNL254C</b>   | YNL254C YNL253W                 | 14 | 169247 |
| <b>iYNL255C</b>   | YNL255C (GIS2)                  | 14 | 167789 |
| <b>iYNL256W</b>   |                                 | 14 | 167096 |
| <b>iYNL257C</b>   | YNL257C (SIP3) YNL256W (FOL1)   | 14 | 164319 |
| <b>iYNL258C</b>   | YNL258C (DSL1)                  | 14 | 160372 |
| <b>iYNL259C</b>   | YNL259C (ATX1)                  | 14 | 157864 |
| <b>iYNL260C</b>   | YNL260C                         | 14 | 157454 |
| <b>iYNL261W</b>   |                                 | 14 | 156538 |
| <b>iYNL262W</b>   | YNL261W (ORC5)                  | 14 | 154879 |
| <b>iYNL263C</b>   | YNL263C (YIF1) YNL262W (POL2)   | 14 | 147839 |
| <b>iYNL264C</b>   | YNL264C (PDR17)                 | 14 | 146614 |
| <b>iYNL265C</b>   | YNL265C (IST1)                  | 14 | 145280 |
| <b>iYNL267W</b>   | YNL266W                         | 14 | 144077 |
| <b>iYNL268W</b>   | YNL267W (PIK1)                  | 14 | 140384 |
| <b>iYNL269W</b>   | YNL268W (LYP1)                  | 14 | 138093 |
| <b>iYNL271C</b>   | YNL271C (BNI1)                  | 14 | 135382 |
| <b>iYNL272C</b>   | YNL272C (SEC2)                  | 14 | 129082 |
| <b>iYNL273W</b>   |                                 | 14 | 126597 |
| <b>iYNL274C</b>   | YNL274C YNL273W (TOF1)          | 14 | 122168 |
| <b>iYNL275W</b>   |                                 | 14 | 120996 |
| <b>iYNL278W</b>   | YNL277W (MET2)                  | 14 | 116451 |
| <b>iYNL279W</b>   | YNL278W (CAF120)                | 14 | 112900 |
| <b>iYNL280C</b>   | YNL280C (ERG24) YNL279W (PRM1)  | 14 | 110409 |
| <b>iYNL281W</b>   |                                 | 14 | 108926 |
| <b>iYNL282W</b>   | YNL281W (HCH1)                  | 14 | 108272 |
| <b>iYNL283C</b>   | YNL283C (WSC2) YNL282W (POP3)   | 14 | 106693 |
| <b>iYNL284C</b>   | YNL284C (MRPL10)                | 14 | 104100 |
| <b>iYNL286W</b>   | YNL285W                         | 14 | 96078  |
| <b>iYNL287W</b>   | YNL286W (CUS2)                  | 14 | 94799  |
| <b>iYNL288W</b>   | YNL287W (SEC21)                 | 14 | 91422  |
| <b>iYNL289W-0</b> | YNL288W (CAF40)                 | 14 | 88734  |
| <b>iYNL289W-1</b> | YNL288W (CAF40)                 | 14 | 89517  |
| <b>iYNL290W</b>   | YNL289W (PCL1)                  | 14 | 87238  |
| <b>iYNL291C</b>   | YNL291C (MID1) YNL290W (RFC3)   | 14 | 85813  |
| <b>iYNL292W</b>   |                                 | 14 | 84015  |
| <b>iYNL293W</b>   | YNL292W (PUS4)                  | 14 | 82539  |
| <b>iYNL294C</b>   | YNL294C (RIM21) YNL293W (MSB3)  | 14 | 80258  |
| <b>iYNL295W</b>   |                                 | 14 | 78518  |
| <b>iYNL296W</b>   | YNL295W                         | 14 | 76585  |
| <b>iYNL298W</b>   |                                 | 14 | 71441  |
| <b>iYNL299W</b>   | YNL298W (CLA4)                  | 14 | 68393  |
| <b>iYNL300W</b>   | YNL299W (TRF5)                  | 14 | 66051  |
| <b>iYNL302C</b>   | YNL302C (RPS19B)                | 14 | 62942  |
| <b>iYNL303W</b>   |                                 | 14 | 61856  |
| <b>iYNL305C</b>   | YNL305C YNL304W (YPT11)         | 14 | 59791  |
| <b>iYNL306W</b>   |                                 | 14 | 58808  |
| <b>iYNL307C</b>   | YNL307C (MCK1) YNL306W (MRPS18) | 14 | 57573  |
| <b>iYNL308C</b>   | YNL308C (KRI1)                  | 14 | 55896  |

|                      |                                 |    |        |
|----------------------|---------------------------------|----|--------|
| <b>iYNL309W</b>      |                                 | 14 | 53923  |
| <b>iYNL311C</b>      | YNL311C                         | 14 | 51687  |
| <b>iYNL312W</b>      |                                 | 14 | 49215  |
| <b>iYNL313C</b>      | YNL313C YNL312W (RFA2)          | 14 | 48021  |
| <b>iYNL314W</b>      |                                 | 14 | 45213  |
| <b>iYNL315C</b>      | YNL315C (ATP11) YNL314W (DAL82) | 14 | 44279  |
| <b>iYNL316C</b>      | YNL316C (PHA2)                  | 14 | 43176  |
| <b>iYNL318C</b>      | YNL318C (HXT14) YNL317W (PFS2)  | 14 | 40328  |
| <b>iYNL320W</b>      | YNL319W                         | 14 | 38553  |
| <b>iYNL321W</b>      | YNL320W                         | 14 | 37421  |
| <b>iYNL322C</b>      | YNL322C (KRE1) YNL321W          | 14 | 34234  |
| <b>iYNL323W</b>      |                                 | 14 | 33187  |
| <b>iYNL324W</b>      | YNL323W (LEM3)                  | 14 | 31444  |
| <b>iYNL326C</b>      | YNL326C                         | 14 | 28346  |
| <b>iYNL327W</b>      |                                 | 14 | 27172  |
| <b>iYNL328C</b>      | YNL328C (MDJ2) YNL327W (EGT2)   | 14 | 23274  |
| <b>iYNL329C</b>      | YNL329C (PEX6)                  | 14 | 22633  |
| <b>iYNL330C</b>      | YNL330C (RPD3)                  | 14 | 19302  |
| <b>iYNL331C</b>      | YNL331C (AAD14)                 | 14 | 17248  |
| <b>iYNL332W</b>      |                                 | 14 | 15854  |
| <b>iYNL333W</b>      | YNL332W (THI12)                 | 14 | 14163  |
| <b>iYNL334C</b>      | YNL334C (SNO2) YNL333W (SNZ2)   | 14 | 12876  |
| <b>iYNL335W</b>      |                                 | 14 | 12129  |
| <b>iYNL336W-1</b>    | YNL335W                         | 14 | 10463  |
| <b>iYNL337W</b>      | YNL336W (COS1)                  | 14 | 7419   |
| <b>iYNL338W</b>      | YNL337W                         | 14 | 6719   |
| <b>iYNL339C</b>      | YNL339C (YRF1-6) YNL338W        | 14 | 6098   |
| <b>iYNLcdelta1-1</b> |                                 | 14 | 98251  |
| <b>iYNLcdelta1-3</b> |                                 | 14 | 100875 |
| <b>iYNLcdelta2</b>   | YNL284C-A                       | 14 | 102521 |
| <b>iYNLcdelta6</b>   |                                 | 14 | 567990 |
| <b>iYNLWdelta4</b>   | YNL054W (VAC7)                  | 14 | 525060 |
| <b>iYNR001C</b>      | YNR001C (CIT1) suf10 trna       | 14 | 631060 |
| <b>iYNR002C</b>      | YNR002C (FUN34)                 | 14 | 633855 |
| <b>iYNR003C</b>      | YNR003C (RPC34) YNR004W         | 14 | 635296 |
| <b>iYNR004W</b>      |                                 | 14 | 636382 |
| <b>iYNR006W</b>      |                                 | 14 | 638853 |
| <b>iYNR007C</b>      | YNR007C (AUT1) YNR008W (LRO1)   | 14 | 640113 |
| <b>iYNR008W</b>      | YNR009W                         | 14 | 642380 |
| <b>iYNR009W</b>      | YNR010W (CSE2)                  | 14 | 643438 |
| <b>iYNR010W</b>      |                                 | 14 | 644192 |
| <b>iYNR011C</b>      | YNR011C (PRP2) YNR012W (URK1)   | 14 | 646949 |
| <b>iYNR012W</b>      |                                 | 14 | 648936 |
| <b>iYNR013C</b>      | YNR013C (PHO91) YNR014W         | 14 | 651711 |
| <b>iYNR014W</b>      | YNR015W (SMM1)                  | 14 | 653102 |
| <b>iYNR015W</b>      |                                 | 14 | 654540 |
| <b>iYNR016C-0</b>    | YNR016C (ACC1) YNR017W (MAS6)   | 14 | 661373 |
| <b>iYNR016C-1</b>    | YNR016C (ACC1) YNR017W (MAS6)   | 14 | 662142 |
| <b>iYNR017W</b>      | YNR018W                         | 14 | 663580 |
| <b>iYNR019W</b>      |                                 | 14 | 667266 |
| <b>iYNR020C</b>      | YNR020C YNR021W                 | 14 | 668221 |



|            |                                 |    |        |
|------------|---------------------------------|----|--------|
| iYNR021W   |                                 | 14 | 669590 |
| iYNR022C   | YNR022C YNR023W (SNF12)         | 14 | 670192 |
| iYNR023W   | YNR024W                         | 14 | 672117 |
| iYNR025C   | YNR025C                         | 14 | 673060 |
| iYNR026C   | YNR026C (SEC12) YNR027W (BUD17) | 14 | 674688 |
| iYNR027W   | YNR028W (CPR8)                  | 14 | 675875 |
| iYNR028W   |                                 | 14 | 677102 |
| iYNR029C   | YNR029C YNR030W (ECM39)         | 14 | 678487 |
| iYNR030W   |                                 | 14 | 680453 |
| iYNR031C   | YNR031C (SSK2) YNR032W (PPG1)   | 14 | 685432 |
| iYNR032C-A | YNR032C-A (HUB1) YNR033W (ABZ1) | 14 | 687463 |
| iYNR032W   |                                 | 14 | 687115 |
| iYNR033W   | YNR034W (SOL1)                  | 14 | 689997 |
| iYNR034W-0 |                                 | 14 | 691285 |
| iYNR034W-1 |                                 | 14 | 692151 |
| iYNR036C   | YNR036C mitochond rib prot      | 14 | 694821 |
| iYNR037C   | YNR037C (RSM19) YNR038W (DBP6)  | 14 | 695326 |
| iYNR038W   |                                 | 14 | 697483 |
| iYNR039C   | YNR039C (ZRG17) YNR040W         | 14 | 699430 |
| iYNR040W   |                                 | 14 | 700459 |
| iYNR042W   | YNR043W (MVD1)                  | 14 | 701665 |
| iYNR043W   | YNR044W (AGA1)                  | 14 | 703084 |
| iYNR044W   | YNR045W (PET494)                | 14 | 705875 |
| iYNR045W   | YNR046W                         | 14 | 707607 |
| iYNR046W   | YNR047W                         | 14 | 708194 |
| iYNR047W   | YNR048W                         | 14 | 711203 |
| iYNR048W   |                                 | 14 | 712810 |
| iYNR049C   | YNR049C (MSO1)                  | 14 | 713654 |
| iYNR050C   | YNR050C (LYS9) snr49            | 14 | 715387 |
| iYNR051C   | YNR051C (BRE5)                  | 14 | 718326 |
| iYNR052C   | YNR052C (POP2)                  | 14 | 720646 |
| iYNR053C   | YNR053C (NOG2)                  | 14 | 723110 |
| iYNR054C-0 | YNR054C                         | 14 | 724304 |
| iYNR054C-1 | YNR054C                         | 14 | 725218 |
| iYNR055C   | YNR055C (HOL1)                  | 14 | 730184 |
| iYNR057C   | YNR057C (BIO4) YNR058W (BIO3)   | 14 | 734066 |
| iYNR058W   | YNR059W (MNT4)                  | 14 | 735730 |
| iYNR059W   | YNR060W (FRE4)                  | 14 | 738542 |
| iYNR060W   |                                 | 14 | 742107 |
| iYNR061C   | YNR061C                         | 14 | 743537 |
| iYNR062C-0 | YNR062C YNR063W                 | 14 | 745340 |
| iYNR062C-1 | YNR062C YNR063W                 | 14 | 746140 |
| iYNR063W   |                                 | 14 | 748763 |
| iYNR064C   | YNR064C                         | 14 | 750005 |
| iYNR066C   | YNR066C                         | 14 | 755032 |
| iYNR067C   | YNR067C (DSE4)                  | 14 | 759096 |
| iYNR068C   | YNR068C                         | 14 | 760882 |
| iYNR069C-0 | YNR069C YNR070W                 | 14 | 762589 |
| iYNR070W   |                                 | 14 | 769373 |
| iYNR071C   | YNR071C YNR072W (HXT17)         | 14 | 771465 |
| iYNR072W   |                                 | 14 | 774348 |

|             |                                 |    |        |
|-------------|---------------------------------|----|--------|
| iYNR073C    |                                 | 14 | 776297 |
| iYNR074C    | YNR074C YNR075W (COS10)         | 14 | 778735 |
| iYNR075W    | YNR076W (PAU6)                  | 14 | 781037 |
| iYNR076W    |                                 | 14 | 782277 |
| iYNRCdelta8 | YNR054C                         | 14 | 726943 |
| iYNRCdelta9 | YNR054C                         | 14 | 727659 |
| iYNRCtau3   | YNR001C (CIT1) tn(guu)n2        | 14 | 632488 |
| iYOL001W    | YOR001W (RRP6)                  | 15 | 326130 |
| iYOL002C    | YOL002C YOL001W (PHO80)         | 15 | 324394 |
| iYOL003C    | YOL003C                         | 15 | 322994 |
| iYOL004W    |                                 | 15 | 321548 |
| iYOL005C    | YOL005C (RPB11) YOL004W (SIN3)  | 15 | 316175 |
| iYOL006C    | YOL006C (TOP1)                  | 15 | 315387 |
| iYOL007C    | YOL007C                         | 15 | 312367 |
| iYOL008W    |                                 | 15 | 310935 |
| iYOL009C    | YOL009C (MDM12) YOL008W         | 15 | 310139 |
| iYOL010W    |                                 | 15 | 309041 |
| iYOL011W    | YOL010W (RCL1)                  | 15 | 307409 |
| iYOL012C    | YOL012C (HTZ1) YOL011W (PLB3)   | 15 | 303983 |
| iYOL013W-A  |                                 | 15 | 300980 |
| iYOL014W    | YOL013W-A                       | 15 | 300067 |
| iYOL015W    | YOL014W                         | 15 | 298838 |
| iYOL016C    | YOL016C (CMK2) YOL015W          | 15 | 296120 |
| iYOL017W    |                                 | 15 | 294673 |
| iYOL018C    | YOL018C (TLG2) YOL017W (ESC8)   | 15 | 292074 |
| iYOL019W    |                                 | 15 | 290553 |
| iYOL020W    | YOL019W (TOS7)                  | 15 | 287950 |
| iYOL021C    | YOL021C (DIS3) YOL020W (TAT2)   | 15 | 285426 |
| iYOL022C    | YOL022C                         | 15 | 281498 |
| iYOL023W    |                                 | 15 | 280086 |
| iYOL024W    | YOL023W (IFM1)                  | 15 | 277604 |
| iYOL025W    | YOL024W                         | 15 | 276939 |
| iYOL026C    | YOL026C ts(gcu)o YOL025W (LAG2) | 15 | 274353 |
| iYOL027C    | YOL027C                         | 15 | 273724 |
| iYOL028C    | YOL028C (YAP7)                  | 15 | 271370 |
| iYOL029C    | YOL029C                         | 15 | 270420 |
| iYOL030W    |                                 | 15 | 269641 |
| iYOL031C    | YOL031C YOL030W                 | 15 | 267529 |
| iYOL032W    |                                 | 15 | 266169 |
| iYOL033W    | YOL032W                         | 15 | 265085 |
| iYOL034W    | YOL033W (MSE1)                  | 15 | 263204 |
| iYOL035C    | YOL035C YOL034W                 | 15 | 259103 |
| iYOL038W    |                                 | 15 | 256099 |
| iYOL040C    | YOL040C (RPS15) YOL039W (RPP2A) | 15 | 253575 |
| iYOL041C    | YOL041C (NOP12)                 | 15 | 252644 |
| iYOL042W    |                                 | 15 | 250914 |
| iYOL043C    | YOL043C (NTG2) YOL042W (NGL1)   | 15 | 249532 |
| iYOL044W    |                                 | 15 | 248299 |
| iYOL045W    | YOL044W (PEX15)                 | 15 | 246800 |
| iYOL047C    | YOL047C                         | 15 | 242503 |
| iYOL049W    |                                 | 15 | 240092 |

|            |                                |    |        |
|------------|--------------------------------|----|--------|
| iYOL050C   | YOL050C YOL049W (GSH2)         | 15 | 238200 |
| iYOL052C   | YOL052C (SPE2) YOL051W (GAL11) | 15 | 233634 |
| iYOL053C-A | YOL052C-A (DDR2)               | 15 | 231753 |
| iYOL053W   |                                | 15 | 231270 |
| iYOL054W   | YOL053W                        | 15 | 229832 |
| iYOL055C   | YOL055C (THI20) YOL054W        | 15 | 226073 |
| iYOL056W   |                                | 15 | 224177 |
| iYOL057W   | YOL056W (GPM3)                 | 15 | 222900 |
| iYOL058W   | YOL057W                        | 15 | 220471 |
| iYOL059W   | YOL058W (ARG1)                 | 15 | 218447 |
| iYOL060C   | YOL060C (AMI3) YOL059W (GPD2)  | 15 | 216136 |
| iYOL061W   |                                | 15 | 213733 |
| iYOL062C   | YOL062C (APM4) YOL061W (PRS5)  | 15 | 211994 |
| iYOL063C   | YOL063C                        | 15 | 210264 |
| iYOL064C   | YOL064C (MET22)                | 15 | 207175 |
| iYOL065C   | YOL065C (INP54)                | 15 | 205884 |
| iYOL066C   | YOL066C (RIB2)                 | 15 | 204470 |
| iYOL067C   | YOL067C (RTG1)                 | 15 | 202517 |
| iYOL068C   | YOL068C (HST1)                 | 15 | 201878 |
| iYOL069W   |                                | 15 | 200296 |
| iYOL070C   | YOL070C YOL069W (NUF2)         | 15 | 198724 |
| iYOL071W   |                                | 15 | 196994 |
| iYOL072W   | YOL071W                        | 15 | 196336 |
| iYOL073C   | YOL073C YOL072W (THP1)         | 15 | 194799 |
| iYOL075C   | YOL075C                        | 15 | 193541 |
| iYOL076W   |                                | 15 | 189413 |
| iYOL077C   | YOL077C (BRX1) YOL076W (MDM20) | 15 | 186722 |
| iYOL078W   | YOL077C (BRX1)                 | 15 | 185211 |
| iYOL079W   | YOL078W                        | 15 | 181454 |
| iYOL081W   |                                | 15 | 180308 |
| iYOL082W   | YOL081W (IRA2)                 | 15 | 169973 |
| iYOL083W-0 | YOL082W (CVT19)                | 15 | 166951 |
| iYOL083W-1 | YOL082W (CVT19)                | 15 | 167838 |
| iYOL084W   | YOL083W                        | 15 | 165330 |
| iYOL085C   | YOL085C YOL084W (PHM7)         | 15 | 162013 |
| iYOL086C   | YOL086C (ADH1)                 | 15 | 160593 |
| iYOL087C   | YOL087C                        | 15 | 158636 |
| iYOL089C   | YOL089C (HAL9)                 | 15 | 153489 |
| iYOL090W   |                                | 15 | 150275 |
| iYOL091W   | YOL090W (MSH2)                 | 15 | 147162 |
| iYOL092W   | YOL091W (SPO21)                | 15 | 145129 |
| iYOL093W   | YOL092W                        | 15 | 143695 |
| iYOL094C   | YOL094C (RFC4) YOL093W         | 15 | 142554 |
| iYOL095C   | YOL095C (HMI1)                 | 15 | 141346 |
| iYOL096C   | YOL096C (COQ3)                 | 15 | 139056 |
| iYOL097C   | YOL097C (WRS1)                 | 15 | 137824 |
| iYOL098C   | YOL098C                        | 15 | 135837 |
| iYOL099C   | YOL099C                        | 15 | 132507 |
| iYOL101C   | YOL101C YOL100W (PKH2)         | 15 | 127919 |
| iYOL102C   | YOL102C (TPT1)                 | 15 | 126688 |
| iYOL103W   |                                | 15 | 125829 |

|                   |                                |    |        |
|-------------------|--------------------------------|----|--------|
| <b>iYOL104C</b>   | YOL104C (NDJ1) YOL103W (ITR2)  | 15 | 117453 |
| <b>iYOL105C</b>   | YOL105C (WSC3)                 | 15 | 115807 |
| <b>iYOL107W</b>   | YOL106W                        | 15 | 113129 |
| <b>iYOL108C</b>   | YOL108C (INO4) YOL107W         | 15 | 111885 |
| <b>iYOL110W</b>   | YOL109W                        | 15 | 109888 |
| <b>iYOL111C</b>   | YOL111C YOL110W (SHR5)         | 15 | 108895 |
| <b>iYOL112W</b>   |                                | 15 | 108187 |
| <b>iYOL113W</b>   | YOL112W (MSB4)                 | 15 | 106292 |
| <b>iYOL114C</b>   | YOL114C YOL113W (SKM1)         | 15 | 103924 |
| <b>iYOL115W</b>   |                                | 15 | 103228 |
| <b>iYOL116W</b>   | YOL115W (TRF4)                 | 15 | 100956 |
| <b>iYOL117W</b>   | YOL116W (MSN1)                 | 15 | 99487  |
| <b>iYOL118C</b>   | YOL118C YOL117W                | 15 | 96915  |
| <b>iYOL119C</b>   | YOL119C (MCH4)                 | 15 | 96360  |
| <b>iYOL120C</b>   | YOL120C (RPL18A)               | 15 | 94401  |
| <b>iYOL121C</b>   | YOL121C (RPS19A)               | 15 | 92849  |
| <b>iYOL122C</b>   | YOL122C (SMF1)                 | 15 | 91418  |
| <b>iYOL123W</b>   |                                | 15 | 89447  |
| <b>iYOL124C</b>   | YOL124C YOL123W (HRP1)         | 15 | 86756  |
| <b>iYOL125W</b>   |                                | 15 | 85263  |
| <b>iYOL126C</b>   | YOL126C (MDH2) YOL125W         | 15 | 83057  |
| <b>iYOL127W</b>   |                                | 15 | 81189  |
| <b>iYOL128C</b>   | YOL128C YOL127W (RPL25)        | 15 | 79478  |
| <b>iYOL129W</b>   |                                | 15 | 78113  |
| <b>iYOL130W</b>   | YOL129W                        | 15 | 76978  |
| <b>iYOL131W</b>   | YOL130W (ALR1)                 | 15 | 73356  |
| <b>iYOL132W</b>   | YOL131W                        | 15 | 72714  |
| <b>iYOL133W</b>   | YOL132W                        | 15 | 70689  |
| <b>iYOL135C</b>   | YOL135C (MED7)                 | 15 | 70043  |
| <b>iYOL136C</b>   | YOL136C (PFK27)                | 15 | 68753  |
| <b>iYOL137W</b>   |                                | 15 | 67113  |
| <b>iYOL138C</b>   | YOL138C YOL137W                | 15 | 65349  |
| <b>iYOL139C</b>   | YOL139C (CDC33)                | 15 | 61023  |
| <b>iYOL140W</b>   |                                | 15 | 60029  |
| <b>iYOL141W</b>   | YOL140W (ARG8)                 | 15 | 58537  |
| <b>iYOL142W</b>   | YOL141W (PPM2)                 | 15 | 56278  |
| <b>iYOL143C</b>   | YOL143C (RIB4) YOL142W (RRP40) | 15 | 55102  |
| <b>iYOL145C</b>   | YOL145C (CTR9) YOL144W (NOP8)  | 15 | 52786  |
| <b>iYOL146W</b>   |                                | 15 | 49446  |
| <b>iYOL147C</b>   | YOL147C (PEX11) YOL146W        | 15 | 48641  |
| <b>iYOL148C</b>   | YOL148C (SPT20)                | 15 | 47572  |
| <b>iYOL149W</b>   |                                | 15 | 45631  |
| <b>iYOL150C</b>   | YOL150C YOL149W (DCP1)         | 15 | 44782  |
| <b>iYOL152W</b>   | YOL151W (GRE2)                 | 15 | 42636  |
| <b>iYOL153C-0</b> |                                | 15 | 38566  |
| <b>iYOL153C-1</b> | YOL153C YOL152W (FRE7)         | 15 | 39656  |
| <b>iYOL154W</b>   |                                | 15 | 35406  |
| <b>iYOL155C-0</b> | YOL155C YOL154W                | 15 | 31605  |
| <b>iYOL155C-1</b> | YOL155C YOL154W                | 15 | 33131  |
| <b>iYOL156W-0</b> |                                | 15 | 26975  |
| <b>iYOL156W-1</b> |                                | 15 | 27838  |

|                       |                                 |    |        |
|-----------------------|---------------------------------|----|--------|
| <b>iYOL157C</b>       | YOL157C YOL156W (HXT11)         | 15 | 24293  |
| <b>iYOL158C</b>       | YOL158C (ENB1)                  | 15 | 21310  |
| <b>iYOL159C</b>       | YOL159C                         | 15 | 17795  |
| <b>iYOL160W-0</b>     |                                 | 15 | 14653  |
| <b>iYOL160W-1</b>     |                                 | 15 | 15966  |
| <b>iYOL161C-0</b>     | YOL161C YOL160W                 | 15 | 11910  |
| <b>iYOL161C-1</b>     |                                 | 15 | 13111  |
| <b>iYOL162W</b>       |                                 | 15 | 10765  |
| <b>iYOL164W</b>       | YOL163W                         | 15 | 8115   |
| <b>iYOL165C</b>       | YOL165C (AAD15) YOL164W         | 15 | 2078   |
| <b>iYOL166C</b>       | YOL166C                         | 15 | 1338   |
| <b>iYOLCdelta1</b>    | YOL165C (AAD15) YOL164W         | 15 | 3223   |
| <b>iYOLCdelta2</b>    | YOL159C                         | 15 | 18560  |
| <b>iYOLCdelta3</b>    |                                 | 15 | 113625 |
| <b>iYOLCdelta7</b>    | YOL055C (THI20) YOL054W         | 15 | 228176 |
| <b>iYOLCdelta9</b>    | YOR007C (SGT2)                  | 15 | 340898 |
| <b>iYOLWdelta10-1</b> | YOR012W                         | 15 | 355749 |
| <b>iYOLWdelta5</b>    | YOL104C (NDJ1) YOL103W (ITR2)   | 15 | 123627 |
| <b>iYOLWdelta6</b>    | YOL055C (THI20) YOL054W         | 15 | 227291 |
| <b>iYOLWsigma2</b>    | YOR012W                         | 15 | 354465 |
| <b>iYOLWtau1-0</b>    | YOL165C (AAD15) YOL164W         | 15 | 3986   |
| <b>iYOR001W</b>       | YOR002W (ALG6)                  | 15 | 329033 |
| <b>iYOR002W</b>       | YOR003W (YSP3)                  | 15 | 331051 |
| <b>iYOR003W</b>       | YOR004W                         | 15 | 332891 |
| <b>iYOR004W</b>       |                                 | 15 | 334356 |
| <b>iYOR005C</b>       | YOR005C (DNL4)                  | 15 | 337343 |
| <b>iYOR006C</b>       | YOR006C                         | 15 | 338621 |
| <b>iYOR007C</b>       | YOR007C (SGT2)                  | 15 | 339978 |
| <b>iYOR008C</b>       | YOR008C (SLG1)                  | 15 | 342414 |
| <b>iYOR008C-A</b>     | YOR008C-A YOR009W (TIR4)        | 15 | 343081 |
| <b>iYOR009W</b>       |                                 | 15 | 345797 |
| <b>iYOR010C-1</b>     | YOR010C (TIR2) YOR011W (AUS1)   | 15 | 348313 |
| <b>iYOR011W</b>       | YOR012W                         | 15 | 353862 |
| <b>iYOR013W</b>       | YOR014W (RTS1)                  | 15 | 357220 |
| <b>iYOR015W</b>       |                                 | 15 | 360351 |
| <b>iYOR016C</b>       | YOR016C (ERP4) YOR017W (PET127) | 15 | 361083 |
| <b>iYOR017W</b>       | YOR018W (ROD1)                  | 15 | 363813 |
| <b>iYOR018W</b>       | YOR019W                         | 15 | 366881 |
| <b>iYOR019W</b>       |                                 | 15 | 370318 |
| <b>iYOR020C-0</b>     | YOR020C (HSP10)                 | 15 | 370843 |
| <b>iYOR020C-1</b>     | YOR020C (HSP10)                 | 15 | 371820 |
| <b>iYOR021C</b>       | YOR021C                         | 15 | 373438 |
| <b>iYOR022C</b>       | YOR022C                         | 15 | 375856 |
| <b>iYOR023C</b>       | YOR023C (AHC1) YOR024W          | 15 | 377711 |
| <b>iYOR025W</b>       | YOR026W (BUB3)                  | 15 | 379561 |
| <b>iYOR026W</b>       | YOR027W (STI1)                  | 15 | 380805 |
| <b>iYOR027W</b>       |                                 | 15 | 382821 |
| <b>iYOR028C</b>       | YOR028C (CIN5) YOR029W          | 15 | 384419 |
| <b>iYOR029W-0</b>     | YOR030W (DFG16)                 | 15 | 384934 |
| <b>iYOR029W-1</b>     | YOR030W (DFG16)                 | 15 | 385879 |
| <b>iYOR030W</b>       | YOR031W (CRS5)                  | 15 | 388683 |

|            |                                |    |        |
|------------|--------------------------------|----|--------|
| iYOR031W   |                                | 15 | 389421 |
| iYOR032C   | YOR032C (HMS1)                 | 15 | 391074 |
| iYOR033C   | YOR033C (EXO1)                 | 15 | 394523 |
| iYOR034C   | YOR034C (AKR2)                 | 15 | 397085 |
| iYOR035C   | YOR035C (SHE4) YOR036W (PEP12) | 15 | 400103 |
| iYOR036W   | YOR037W (CYC2)                 | 15 | 401213 |
| iYOR037W   |                                | 15 | 402654 |
| iYOR038C   | YOR038C (HIR2) YOR039W (CKB2)  | 15 | 405387 |
| iYOR039W   | YOR040W (GLO4)                 | 15 | 406543 |
| iYOR040W   |                                | 15 | 407920 |
| iYOR042W   | YOR043W (WHI2)                 | 15 | 409659 |
| iYOR043W   | YOR044W                        | 15 | 412329 |
| iYOR044W   | YOR045W (TOM6)                 | 15 | 413479 |
| iYOR045W   |                                | 15 | 414036 |
| iYOR046C   | YOR046C (DBP5)                 | 15 | 415907 |
| iYOR047C   | YOR047C (STD1)                 | 15 | 417681 |
| iYOR048C   | YOR048C (RAT1)                 | 15 | 421650 |
| iYOR049C   | YOR049C                        | 15 | 423732 |
| iYOR050C   | YOR050C                        | 15 | 424618 |
| iYOR051C   | YOR051C                        | 15 | 426085 |
| iYOR052C   | YOR052C YOR053W                | 15 | 427225 |
| iYOR055W   |                                | 15 | 429913 |
| iYOR056C   | YOR056C YOR057W (SGT1)         | 15 | 431627 |
| iYOR057W   |                                | 15 | 433374 |
| iYOR058C-1 | YOR058C (ASE1)                 | 15 | 437261 |
| iYOR059C   | YOR059C                        | 15 | 440259 |
| iYOR060C   | YOR060C YOR061W (CKA2)         | 15 | 441164 |
| iYOR064C   | YOR064C (YNG1) YOR065W (CYT1)  | 15 | 446739 |
| iYOR066W   |                                | 15 | 451326 |
| iYOR068C   | YOR068C YOR069W (VPS5)         | 15 | 454213 |
| iYOR069W   |                                | 15 | 455795 |
| iYOR070C-0 | YOR070C (GYP1)                 | 15 | 457820 |
| iYOR070C-1 | YOR070C (GYP1)                 | 15 | 458650 |
| iYOR071C   | YOR071C YOR072W                | 15 | 461276 |
| iYOR072W-1 | YOR073W                        | 15 | 463133 |
| iYOR073W   |                                | 15 | 466543 |
| iYOR074C   | YOR074C (CDC21) YOR075W (UFE1) | 15 | 467589 |
| iYOR075W   |                                | 15 | 469252 |
| iYOR076C   | YOR076C (SKI7) YOR077W (RTS2)  | 15 | 471620 |
| iYOR077W   | YOR078W (BUD21)                | 15 | 472597 |
| iYOR078W   |                                | 15 | 473369 |
| iYOR079C   | YOR079C (ATX2) YOR080W (DIA2)  | 15 | 474416 |
| iYOR081C   | YOR081C                        | 15 | 479188 |
| iYOR084W   | YOR085W (OST3)                 | 15 | 481750 |
| iYOR085W   |                                | 15 | 483085 |
| iYOR086C   | YOR086C tn(guu)o2 YOR087W      | 15 | 486779 |
| iYOR088W   |                                | 15 | 489733 |
| iYOR089C   | YOR089C (VPS21)                | 15 | 490827 |
| iYOR090C   | YOR090C (PTC5) YOR091W         | 15 | 492840 |
| iYOR094W   |                                | 15 | 503344 |
| iYOR095C   | YOR095C (RKI1) YOR096W (RPS7A) | 15 | 504326 |

|            |                                 |    |        |
|------------|---------------------------------|----|--------|
| iYOR096W   |                                 | 15 | 506765 |
| iYOR097C   | YOR097C                         | 15 | 507503 |
| iYOR098C   | YOR098C (NUP1) YOR099W (KTR1)   | 15 | 511176 |
| iYOR100C   | YOR100C (CRC1) YOR101W (RAS1)   | 15 | 514276 |
| iYOR101W   | YOR102W                         | 15 | 516171 |
| iYOR103C   | YOR103C (OST2) YOR104W (PIN2)   | 15 | 516848 |
| iYOR108W   | YOR109W (INP53)                 | 15 | 524839 |
| iYOR110W   | YOR111W                         | 15 | 530246 |
| iYOR112W   | YOR113W (AZF1)                  | 15 | 533791 |
| iYOR114W   |                                 | 15 | 538452 |
| iYOR116C   | YOR116C (RPO31) YOR117W (RPT5)  | 15 | 544143 |
| iYOR117W   | YOR118W                         | 15 | 546331 |
| iYOR118W   |                                 | 15 | 548558 |
| iYOR119C   | YOR119C (RIO1) YOR120W (GCY1)   | 15 | 550244 |
| iYOR121C   | YOR121C                         | 15 | 552101 |
| iYOR123C   | YOR123C (LEO1)                  | 15 | 554568 |
| iYOR125C   | YOR125C (CAT5)                  | 15 | 559846 |
| iYOR126C   | YOR126C (IAH1) YOR127W (RGA1)   | 15 | 560675 |
| iYOR127W   |                                 | 15 | 564191 |
| iYOR128C   | YOR128C (ADE2)                  | 15 | 566189 |
| iYOR129C   | YOR129C                         | 15 | 569556 |
| iYOR130C   | YOR130C (ORT1)                  | 15 | 570805 |
| iYOR131C   | YOR131C YOR132W (VPS17)         | 15 | 572836 |
| iYOR132W   | YOR133W (EFT1)                  | 15 | 574828 |
| iYOR133W   |                                 | 15 | 577624 |
| iYOR134W   |                                 | 15 | 579791 |
| iYOR136W   |                                 | 15 | 581357 |
| iYOR137C   | YOR137C (SIA1)                  | 15 | 583679 |
| iYOR138C   | YOR138C                         | 15 | 586322 |
| iYOR140W   |                                 | 15 | 589279 |
| iYOR141C   | YOR141C (ARP8) YOR142W (LSC1)   | 15 | 592585 |
| iYOR142W   |                                 | 15 | 594044 |
| iYOR143C   | YOR143C (THI80)                 | 15 | 602340 |
| iYOR144C   | YOR144C (EFD1)                  | 15 | 605090 |
| iYOR146W   | YOR147W                         | 15 | 606176 |
| iYOR147W   |                                 | 15 | 608473 |
| iYOR148C   | YOR148C (SPP2)                  | 15 | 609195 |
| iYOR149C   | YOR149C (SMP3) YOR150W (MRPL23) | 15 | 611386 |
| iYOR150W   |                                 | 15 | 612488 |
| iYOR151C   | YOR151C (RPB2)                  | 15 | 616669 |
| iYOR152C-0 | YOR152C YOR153W (PDR5)          | 15 | 618286 |
| iYOR152C-1 | YOR152C YOR153W (PDR5)          | 15 | 619062 |
| iYOR153W   | YOR154W                         | 15 | 624373 |
| iYOR154W   |                                 | 15 | 626490 |
| iYOR155C   | YOR155C                         | 15 | 627978 |
| iYOR156C   | YOR156C (NFI1)                  | 15 | 630538 |
| iYOR157C   | YOR157C (PUP1) YOR158W (PET123) | 15 | 631749 |
| iYOR158W   |                                 | 15 | 633118 |
| iYOR159C   | YOR159C (SME1) YOR160W (MTR10)  | 15 | 633564 |
| iYOR160W   |                                 | 15 | 636755 |
| iYOR161C   | YOR161C                         | 15 | 638556 |

|            |                                 |    |        |
|------------|---------------------------------|----|--------|
| iYOR162C   | YOR162C (YRR1) YOR163W (DDP1)   | 15 | 641990 |
| iYOR163W   |                                 | 15 | 643305 |
| iYOR164C   | YOR164C YOR165W                 | 15 | 644330 |
| iYOR165W   |                                 | 15 | 646894 |
| iYOR166C   | YOR166C                         | 15 | 648500 |
| iYOR167C   | YOR167C (RPS28A) YOR168W (GLN4) | 15 | 649005 |
| iYOR171C   | YOR171C (LCB4) YOR172W          | 15 | 653882 |
| iYOR172W   | YOR173W                         | 15 | 656568 |
| iYOR173W   | YOR174W (MED4)                  | 15 | 658323 |
| iYOR174W   |                                 | 15 | 659599 |
| iYOR175C   | YOR175C YOR176W (HEM15)         | 15 | 661672 |
| iYOR176W   |                                 | 15 | 663580 |
| iYOR178C-0 | YOR178C (GAC1)                  | 15 | 670239 |
| iYOR178C-1 | YOR178C (GAC1)                  | 15 | 671041 |
| iYOR179C-0 | YOR179C                         | 15 | 672409 |
| iYOR180C   | YOR180C (DCI1) YOR181W (LAS17)  | 15 | 675165 |
| iYOR181W   |                                 | 15 | 677838 |
| iYOR182C   | YOR182C (RPS30B) YOR183W (FYV1) | 15 | 678791 |
| iYOR183W   | YOR184W (SER1)                  | 15 | 679259 |
| iYOR184W   |                                 | 15 | 680542 |
| iYOR185C   | YOR185C (GSP2) YOR186W          | 15 | 682104 |
| iYOR186W   | YOR187W (TUF1)                  | 15 | 683543 |
| iYOR187W   | YOR188W (MSB1)                  | 15 | 685341 |
| iYOR188W   | YOR189W (IES4)                  | 15 | 689178 |
| iYOR189W   | YOR190W (SPR1)                  | 15 | 689972 |
| iYOR190W   | YOR191W (RIS1)                  | 15 | 692030 |
| iYOR192C-0 | YOR192C YOR193W                 | 15 | 700565 |
| iYOR192C-1 | YOR192C YOR193W                 | 15 | 701996 |
| iYOR193W   |                                 | 15 | 711574 |
| iYOR194C   | YOR194C (TOA1) YOR195W (SLK19)  | 15 | 712541 |
| iYOR195W   |                                 | 15 | 715329 |
| iYOR196C   | YOR196C (LIP5) YOR197W (MCA1)   | 15 | 716835 |
| iYOR197W   |                                 | 15 | 718382 |
| iYOR198C   | YOR198C (BFR1) YOR199W          | 15 | 720063 |
| iYOR201C   | YOR201C (PET56) YOR202W (HIS3)  | 15 | 721706 |
| iYOR204W   |                                 | 15 | 724723 |
| iYOR205C   | YOR205C YOR206W (NOC2)          | 15 | 727232 |
| iYOR206W   |                                 | 15 | 729642 |
| iYOR207C   | YOR207C (RET1) YOR208W (PTP2)   | 15 | 733455 |
| iYOR208W   |                                 | 15 | 736175 |
| iYOR209C   | YOR209C (NPT1) YOR210W (RPB10)  | 15 | 737724 |
| iYOR210W   |                                 | 15 | 738530 |
| iYOR211C   | YOR211C (MGM1) YOR212W (STE4)   | 15 | 741630 |
| iYOR212W   |                                 | 15 | 744179 |
| iYOR213C   | YOR213C (SAS5)                  | 15 | 745279 |
| iYOR214C   | YOR214C                         | 15 | 746301 |
| iYOR215C   | YOR215C                         | 15 | 747280 |
| iYOR216C   | YOR216C (RUD3) YOR217W (RFC1)   | 15 | 748977 |
| iYOR218C   | YOR218C                         | 15 | 751893 |
| iYOR219C   | YOR219C (STE13) YOR220W         | 15 | 755007 |
| iYOR220W   |                                 | 15 | 756123 |



|          |                                  |    |        |
|----------|----------------------------------|----|--------|
| iYOR221C | YOR221C (MCT1) YOR222W (ODC2)    | 15 | 757829 |
| iYOR222W | YOR223W snr35                    | 15 | 759251 |
| iYOR223W |                                  | 15 | 760658 |
| iYOR224C | YOR224C (RPB8) YOR225W           | 15 | 761263 |
| iYOR226C | YOR226C (ISU2) YOR227W           | 15 | 762082 |
| iYOR227W |                                  | 15 | 766563 |
| iYOR228C | YOR228C YOR229W (WTM2)           | 15 | 767775 |
| iYOR229W | YOR230W (WTM1)                   | 15 | 769810 |
| iYOR230W | YOR231W (MKK1)                   | 15 | 772111 |
| iYOR231W | YOR232W (MGE1)                   | 15 | 774125 |
| iYOR232W | YOR233W (KIN4)                   | 15 | 775257 |
| iYOR233W |                                  | 15 | 778246 |
| iYOR234C | YOR234C (RPL33B) YOR235W         | 15 | 779403 |
| iYOR235W | YOR236W (DFR1) snr17a            | 15 | 780182 |
| iYOR236W | YOR237W (HES1)                   | 15 | 781539 |
| iYOR237W | YOR238W                          | 15 | 783296 |
| iYOR238W | YOR239W (ABP140)                 | 15 | 784586 |
| iYOR240W | YOR241W (MET7)                   | 15 | 786742 |
| iYOR241W |                                  | 15 | 788639 |
| iYOR242C | YOR242C (SSP2)                   | 15 | 789855 |
| iYOR243C | YOR243C YOR244W (ESA1)           | 15 | 792239 |
| iYOR244W |                                  | 15 | 793866 |
| iYOR245C | YOR245C (DGA1)                   | 15 | 795330 |
| iYOR246C | YOR246C YOR247W (SRL1)           | 15 | 796791 |
| iYOR248W |                                  | 15 | 798313 |
| iYOR249C | YOR249C (APC5)                   | 15 | 800729 |
| iYOR250C | YOR250C (CLP1)                   | 15 | 802305 |
| iYOR252W | YOR253W                          | 15 | 804200 |
| iYOR253W |                                  | 15 | 804904 |
| iYOR254C | YOR254C (SEC63) YOR255W          | 15 | 807020 |
| iYOR255W |                                  | 15 | 808104 |
| iYOR256C | YOR256C YOR257W (CDC31)          | 15 | 810679 |
| iYOR257W | YOR258W (HNT3)                   | 15 | 811489 |
| iYOR260W |                                  | 15 | 815716 |
| iYOR261C | YOR261C (RPN8) YOR262W           | 15 | 816927 |
| iYOR262W |                                  | 15 | 818330 |
| iYOR264W | YOR265W (RBL2)                   | 15 | 820153 |
| iYOR265W | YOR266W (PNT1)                   | 15 | 820769 |
| iYOR266W |                                  | 15 | 822289 |
| iYOR267C | YOR267C                          | 15 | 824862 |
| iYOR268C | YOR268C YOR269W (PAC1)           | 15 | 825927 |
| iYOR269W |                                  | 15 | 827864 |
| iYOR270C | YOR270C (VPH1)                   | 15 | 830569 |
| iYOR271C | YOR271C YOR272W (YTM1)           | 15 | 832037 |
| iYOR272W |                                  | 15 | 834190 |
| iYOR273C | YOR273C (TPO4) YOR274W (MOD5)    | 15 | 836426 |
| iYOR274W |                                  | 15 | 838955 |
| iYOR275C | YOR275C (RIM20) YOR276W (CAF20)  | 15 | 841064 |
| iYOR277C | YOR277C snr31 snr5 YOR278W (HEM- | 15 | 841818 |
| iYOR279C | YOR279C (RFM1)                   | 15 | 844625 |
| iYOR280C | YOR280C                          | 15 | 845787 |

|            |                                |    |        |
|------------|--------------------------------|----|--------|
| iYOR282W   | YOR283W                        | 15 | 847315 |
| iYOR283W   | YOR284W                        | 15 | 848140 |
| iYOR284W   | YOR285W                        | 15 | 849204 |
| iYOR286W   |                                | 15 | 850724 |
| iYOR287C   | YOR287C                        | 15 | 851834 |
| iYOR288C   | YOR288C (MPD1) YOR289W         | 15 | 853072 |
| iYOR289W   |                                | 15 | 854107 |
| iYOR290C   | YOR290C (SNF2) YOR291W         | 15 | 860253 |
| iYOR291W   |                                | 15 | 865588 |
| iYOR292C   | YOR292C YOR293W (RPS10A)       | 15 | 866577 |
| iYOR293W   | YOR294W (RRS1)                 | 15 | 867847 |
| iYOR294W   | YOR295W (UAF30)                | 15 | 868946 |
| iYOR295W   | YOR296W                        | 15 | 869889 |
| iYOR297C   | YOR297C (TIM18) YOR298W        | 15 | 875316 |
| iYOR298C-A | YOR298C-A (MBF1) YOR299W (BUD7 | 15 | 877401 |
| iYOR298W   |                                | 15 | 877033 |
| iYOR300W   | YOR301W (RAX1)                 | 15 | 880875 |
| iYOR301W   | YOR302W                        | 15 | 882264 |
| iYOR303W   | YOR304W (ISW2)                 | 15 | 884126 |
| iYOR304C-A | YOR304C-A YOR305W              | 15 | 888742 |
| iYOR304W   |                                | 15 | 887868 |
| iYOR305W   |                                | 15 | 889742 |
| iYOR306C   | YOR306C (MCH5)                 | 15 | 891424 |
| iYOR307C   | YOR307C (SLY41)                | 15 | 894083 |
| iYOR310C   | YOR310C (NOP58)                | 15 | 898351 |
| iYOR311C   | YOR311C (HSD1)                 | 15 | 899919 |
| iYOR312C   | YOR312C (RPL20B)               | 15 | 901172 |
| iYOR313C   | YOR313C (SPS4) YOR314W         | 15 | 902865 |
| iYOR314W   | YOR315W                        | 15 | 903363 |
| iYOR315W   |                                | 15 | 905791 |
| iYOR316C-0 | YOR316C (COT1) YOR317W (FAA1)  | 15 | 907546 |
| iYOR316C-1 | YOR316C (COT1) YOR317W (FAA1)  | 15 | 908440 |
| iYOR317W   |                                | 15 | 911436 |
| iYOR318C   | YOR318C YOR319W (HSH49)        | 15 | 912427 |
| iYOR320C   | YOR320C YOR321W (PMT3)         | 15 | 915085 |
| iYOR321W   |                                | 15 | 918282 |
| iYOR322C   | YOR322C                        | 15 | 921053 |
| iYOR323C   | YOR323C (PRO2)                 | 15 | 922896 |
| iYOR325W   | YOR326W (MYO2)                 | 15 | 925041 |
| iYOR326W   |                                | 15 | 930436 |
| iYOR327C   | YOR327C (SNC2) YOR328W (PDR10) | 15 | 931072 |
| iYOR328W   |                                | 15 | 936488 |
| iYOR329C   | YOR329C (SCD5)                 | 15 | 939340 |
| iYOR330C   | YOR330C (MIP1)                 | 15 | 943454 |
| iYOR332W   |                                | 15 | 944348 |
| iYOR334W   |                                | 15 | 945999 |
| iYOR335C   | YOR335C (ALA1) YOR336W (KRE5)  | 15 | 949100 |
| iYOR336W   | YOR337W (TEA1)                 | 15 | 953861 |
| iYOR337W   | YOR338W                        | 15 | 956614 |
| iYOR338W   |                                | 15 | 957980 |
| iYOR339C   | YOR339C (UBC11)                | 15 | 958823 |

|                     |                                 |    |         |
|---------------------|---------------------------------|----|---------|
| <b>iYOR340C</b>     | YOR340C (RPA43) YOR341W (RPA19) | 15 | 960173  |
| <b>iYOR341W</b>     |                                 | 15 | 965972  |
| <b>iYOR342C</b>     | YOR342C                         | 15 | 967616  |
| <b>iYOR343C</b>     | YOR343C                         | 15 | 968465  |
| <b>iYOR344C-1</b>   | YOR344C (TYE7)                  | 15 | 979155  |
| <b>iYOR346W</b>     |                                 | 15 | 984776  |
| <b>iYOR347C</b>     | YOR347C (PYK2)                  | 15 | 986453  |
| <b>iYOR348C</b>     | YOR348C (PUT4) YOR349W (CIN1)   | 15 | 988773  |
| <b>iYOR350C</b>     | YOR350C (MNE1)                  | 15 | 994846  |
| <b>iYOR351C</b>     | YOR351C (MEK1) YOR352W          | 15 | 996502  |
| <b>iYOR353C</b>     | YOR353C                         | 15 | 1000819 |
| <b>iYOR354C-0</b>   | YOR354C (MSC6) YOR355W (GDS1)   | 15 | 1003216 |
| <b>iYOR354C-1</b>   | YOR354C (MSC6) YOR355W (GDS1)   | 15 | 1004172 |
| <b>iYOR355W</b>     | YOR356W                         | 15 | 1006697 |
| <b>iYOR356W</b>     |                                 | 15 | 1009108 |
| <b>iYOR357C</b>     | YOR357C (GRD19) YOR358W (HAP5)  | 15 | 1009704 |
| <b>iYOR358W</b>     | YOR359W                         | 15 | 1010881 |
| <b>iYOR359W</b>     |                                 | 15 | 1012752 |
| <b>iYOR360C</b>     | YOR360C (PDE2)                  | 15 | 1014813 |
| <b>iYOR361C</b>     | YOR361C (PRT1)                  | 15 | 1017644 |
| <b>iYOR363C</b>     | YOR363C (PIP2) YOR364W          | 15 | 1023204 |
| <b>iYOR366W</b>     | YOR367W (SCP1)                  | 15 | 1025601 |
| <b>iYOR367W</b>     | YOR368W (RAD17)                 | 15 | 1026601 |
| <b>iYOR369C</b>     | YOR369C (RPS12)                 | 15 | 1028617 |
| <b>iYOR370C</b>     | YOR370C (MRS6)                  | 15 | 1030986 |
| <b>iYOR371C</b>     | YOR371C (KRH2)                  | 15 | 1034174 |
| <b>iYOR372C</b>     | YOR372C (NDD1) YOR373W (NUD1)   | 15 | 1036463 |
| <b>iYOR373W</b>     | YOR374W (ALD4)                  | 15 | 1039381 |
| <b>iYOR374W</b>     |                                 | 15 | 1041391 |
| <b>iYOR375C</b>     | YOR375C (GDH1) YOR376W          | 15 | 1043034 |
| <b>iYOR376W-0</b>   | YOR377W (ATF1)                  | 15 | 1043551 |
| <b>iYOR376W-1</b>   | YOR377W (ATF1)                  | 15 | 1044884 |
| <b>iYOR377W-0</b>   | YOR378W                         | 15 | 1047795 |
| <b>iYOR377W-1</b>   | YOR378W                         | 15 | 1048649 |
| <b>iYOR380W-0</b>   | YOR381W (FRE3)                  | 15 | 1052922 |
| <b>iYOR380W-1</b>   | YOR381W (FRE3)                  | 15 | 1054229 |
| <b>iYOR381W-0</b>   | YOR382W (FIT2)                  | 15 | 1057672 |
| <b>iYOR381W-1</b>   | YOR382W (FIT2)                  | 15 | 1058597 |
| <b>iYOR382W</b>     |                                 | 15 | 1059984 |
| <b>iYOR383C</b>     | YOR383C (FIT3) YOR384W (FRE5)   | 15 | 1061047 |
| <b>iYOR384W</b>     | YOR385W                         | 15 | 1063640 |
| <b>iYOR385W</b>     | YOR386W (PHR1)                  | 15 | 1065907 |
| <b>iYOR386W</b>     |                                 | 15 | 1068528 |
| <b>iYOR387C-0</b>   | YOR387C                         | 15 | 1070233 |
| <b>iYOR387C-1</b>   | YOR387C                         | 15 | 1071009 |
| <b>iYOR388C</b>     | YOR388C (FDH1) YOR389W          | 15 | 1072915 |
| <b>iYOR390W</b>     |                                 | 15 | 1077903 |
| <b>iYOR392W</b>     | YOR393W (ERR1)                  | 15 | 1079717 |
| <b>iYOR393W</b>     | YOR394W                         | 15 | 1081581 |
| <b>iYORCdelta11</b> | YOR058C (ASE1)                  | 15 | 438484  |
| <b>iYORCdelta25</b> | YOR344C (TYE7)                  | 15 | 980581  |

|                     |                                |    |        |
|---------------------|--------------------------------|----|--------|
| <b>iYORWdelta14</b> |                                | 15 | 600731 |
| <b>iYORWdelta16</b> |                                | 15 | 664467 |
| <b>iYORWdelta17</b> |                                | 15 | 665143 |
| <b>iYORWdelta22</b> | YOR343C                        | 15 | 969422 |
| <b>iYORWdelta24</b> | YOR343C                        | 15 | 976235 |
| <b>iYORWsigma3</b>  |                                | 15 | 854609 |
| <b>iYORWtau3</b>    | YOR192C YOR193W                | 15 | 710105 |
| <b>iYPL001W</b>     | YPR001W (CIT3)                 | 16 | 555724 |
| <b>iYPL002C</b>     | YPL002C (SNF8) YPL001W (HAT1)  | 16 | 554323 |
| <b>iYPL003W</b>     |                                | 16 | 553403 |
| <b>iYPL004C</b>     | YPL004C YPL003W (ULA1)         | 16 | 551652 |
| <b>iYPL005W</b>     |                                | 16 | 550301 |
| <b>iYPL006W</b>     | YPL005W                        | 16 | 548138 |
| <b>iYPL007C</b>     | YPL007C (TFC8) YPL006W (NCR1)  | 16 | 543843 |
| <b>iYPL008W</b>     |                                | 16 | 541965 |
| <b>iYPL009C</b>     | YPL009C YPL008W (CHL1)         | 16 | 538931 |
| <b>iYPL010W</b>     |                                | 16 | 535582 |
| <b>iYPL011C</b>     | YPL011C (TAF47) YPL010W (RET3) | 16 | 534698 |
| <b>iYPL012W</b>     |                                | 16 | 533404 |
| <b>iYPL013C</b>     | YPL013C YPL012W (RRP12)        | 16 | 529345 |
| <b>iYPL014W</b>     |                                | 16 | 528687 |
| <b>iYPL015C</b>     | YPL015C (HST2) YPL014W         | 16 | 526878 |
| <b>iYPL016W</b>     |                                | 16 | 524953 |
| <b>iYPL019C</b>     | YPL019C (VTC3) YPL018W (CTF19) | 16 | 517014 |
| <b>iYPL020C</b>     | YPL020C (ULP1)                 | 16 | 514174 |
| <b>iYPL021W</b>     |                                | 16 | 511660 |
| <b>iYPL023C</b>     | YPL023C (MET12) YPL022W (RAD1) | 16 | 506308 |
| <b>iYPL024W</b>     |                                | 16 | 504238 |
| <b>iYPL025C</b>     | YPL025C YPL024W (NCE4)         | 16 | 503026 |
| <b>iYPL026C</b>     | YPL026C (SKS1)                 | 16 | 502179 |
| <b>iYPL027W</b>     |                                | 16 | 500398 |
| <b>iYPL028W</b>     | YPL027W (SMA1)                 | 16 | 499288 |
| <b>iYPL029W</b>     | YPL028W (ERG10)                | 16 | 497715 |
| <b>iYPL030W</b>     | YPL029W (SUV3)                 | 16 | 495242 |
| <b>iYPL031C</b>     | YPL031C (PHO85) YPL030W        | 16 | 493033 |
| <b>iYPL038W</b>     |                                | 16 | 481063 |
| <b>iYPL039W</b>     | YPL038W (MET31)                | 16 | 480170 |
| <b>iYPL040C</b>     | YPL040C (ISM1) YPL039W         | 16 | 478996 |
| <b>iYPL041C</b>     | YPL041C                        | 16 | 475736 |
| <b>iYPL042C</b>     | YPL042C (SSN3)                 | 16 | 474702 |
| <b>iYPL045W</b>     |                                | 16 | 469651 |
| <b>iYPL046C</b>     | YPL046C (ELC1) YPL045W (VPS16) | 16 | 466938 |
| <b>iYPL047W</b>     |                                | 16 | 466256 |
| <b>iYPL048W</b>     | YPL047W                        | 16 | 465643 |
| <b>iYPL049C</b>     | YPL049C (DIG1) YPL048W (CAM1)  | 16 | 463834 |
| <b>iYPL050C</b>     | YPL050C (MNN9)                 | 16 | 461961 |
| <b>iYPL051W</b>     |                                | 16 | 460554 |
| <b>iYPL052W</b>     | YPL051W (ARL3)                 | 16 | 459673 |
| <b>iYPL053C</b>     | YPL053C (KTR6) YPL052W         | 16 | 458453 |
| <b>iYPL054W</b>     |                                | 16 | 456659 |
| <b>iYPL056C</b>     | YPL056C                        | 16 | 453730 |

|                   |                                |    |        |
|-------------------|--------------------------------|----|--------|
| <b>iYPL057C</b>   | YPL057C (SUR1)                 | 16 | 453052 |
| <b>iYPL058C-0</b> | YPL058C (PDR12)                | 16 | 450372 |
| <b>iYPL058C-1</b> | YPL058C (PDR12)                | 16 | 451138 |
| <b>iYPL060W</b>   |                                | 16 | 435759 |
| <b>iYPL061W</b>   | YPL060W (LPE10)                | 16 | 434085 |
| <b>iYPL062W</b>   | YPL061W (ALD6)                 | 16 | 432294 |
| <b>iYPL063W</b>   | YPL062W                        | 16 | 431364 |
| <b>iYPL064C</b>   | YPL064C YPL063W                | 16 | 429611 |
| <b>iYPL066W</b>   | YPL065W (VPS28)                | 16 | 427667 |
| <b>iYPL067C</b>   | YPL067C YPL066W                | 16 | 425842 |
| <b>iYPL068C</b>   | YPL068C                        | 16 | 425091 |
| <b>iYPL069C</b>   | YPL069C (BTS1)                 | 16 | 423887 |
| <b>iYPL070W</b>   |                                | 16 | 422781 |
| <b>iYPL071C</b>   | YPL071C YPL070W                | 16 | 420513 |
| <b>iYPL075W</b>   | YPL074W (YTA6)                 | 16 | 415357 |
| <b>iYPL076W-0</b> | YPL075W (GCR1)                 | 16 | 411280 |
| <b>iYPL076W-1</b> | YPL075W (GCR1)                 | 16 | 412051 |
| <b>iYPL077C</b>   | YPL077C YPL076W (GPI2)         | 16 | 410085 |
| <b>iYPL079W</b>   |                                | 16 | 407534 |
| <b>iYPL080C</b>   | YPL080C YPL079W (RPL21B)       | 16 | 406493 |
| <b>iYPL081W</b>   |                                | 16 | 406039 |
| <b>iYPL082C</b>   | YPL082C (MOT1) YPL081W (RPS9A) | 16 | 404078 |
| <b>iYPL083C</b>   | YPL083C (SEN54)                | 16 | 398100 |
| <b>iYPL084W</b>   |                                | 16 | 396567 |
| <b>iYPL085W</b>   | YPL084W (BRO1)                 | 16 | 393649 |
| <b>iYPL086C</b>   | YPL086C (ELP3) YPL085W (SEC16) | 16 | 386441 |
| <b>iYPL087W</b>   |                                | 16 | 384403 |
| <b>iYPL088W</b>   | YPL087W (YDC1)                 | 16 | 382988 |
| <b>iYPL091W</b>   |                                | 16 | 376948 |
| <b>iYPL092W</b>   | YPL091W (GLR1)                 | 16 | 375164 |
| <b>iYPL093W</b>   | YPL092W (SSU1)                 | 16 | 372916 |
| <b>iYPL094C</b>   | YPL094C (SEC62) YPL093W (NOG1) | 16 | 370685 |
| <b>iYPL095C</b>   | YPL095C                        | 16 | 369436 |
| <b>iYPL097W</b>   | YPL096W (PNG1)                 | 16 | 366425 |
| <b>iYPL098C</b>   | YPL098C YPL097W (MSY1)         | 16 | 364722 |
| <b>iYPL099C</b>   | YPL099C                        | 16 | 364063 |
| <b>iYPL101W</b>   | YPL100W                        | 16 | 361574 |
| <b>iYPL103C</b>   | YPL103C                        | 16 | 359401 |
| <b>iYPL104W</b>   |                                | 16 | 357671 |
| <b>iYPL105C</b>   | YPL105C YPL104W (MSD1)         | 16 | 355407 |
| <b>iYPL106C</b>   | YPL106C (SSE1)                 | 16 | 352270 |
| <b>iYPL107W</b>   |                                | 16 | 349860 |
| <b>iYPL109C</b>   | YPL109C YPL108W                | 16 | 347187 |
| <b>iYPL110C</b>   | YPL110C                        | 16 | 344738 |
| <b>iYPL111W</b>   |                                | 16 | 340944 |
| <b>iYPL112C</b>   | YPL112C YPL111W (CAR1)         | 16 | 338619 |
| <b>iYPL115C</b>   | YPL115C (BEM3) YPL114W         | 16 | 335485 |
| <b>iYPL116W</b>   |                                | 16 | 331698 |
| <b>iYPL118W</b>   |                                | 16 | 327661 |
| <b>iYPL119C</b>   | YPL119C (DBP1) YPL118W (MRP51) | 16 | 326263 |
| <b>iYPL120W</b>   |                                | 16 | 323743 |

|                 |                                   |    |        |
|-----------------|-----------------------------------|----|--------|
| <b>iYPL121C</b> | YPL121C (MEI5) YPL120W (VPS30)    | 16 | 321629 |
| <b>iYPL122C</b> | YPL122C (TFB2)                    | 16 | 320766 |
| <b>iYPL123C</b> | YPL123C (RNY1)                    | 16 | 318944 |
| <b>iYPL124W</b> |                                   | 16 | 317515 |
| <b>iYPL125W</b> | YPL124W (NIP29)                   | 16 | 316485 |
| <b>iYPL126W</b> | YPL125W (KAP120)                  | 16 | 312899 |
| <b>iYPL127C</b> | YPL127C (HHO1) YPL126W (NAN1)     | 16 | 309603 |
| <b>iYPL128C</b> | YPL128C (TBF1)                    | 16 | 308220 |
| <b>iYPL129W</b> |                                   | 16 | 306136 |
| <b>iYPL131W</b> | YPL130W (SPO19)                   | 16 | 304013 |
| <b>iYPL132W</b> | YPL131W (RPL5)                    | 16 | 302617 |
| <b>iYPL133C</b> | YPL133C YPL132W (COX11)           | 16 | 301227 |
| <b>iYPL134C</b> | YPL134C (ODC1)                    | 16 | 299502 |
| <b>iYPL135W</b> |                                   | 16 | 298049 |
| <b>iYPL136W</b> | YPL135W (ISU1)                    | 16 | 296653 |
| <b>iYPL138C</b> | YPL138C (SPP1)                    | 16 | 292426 |
| <b>iYPL139C</b> | YPL139C (UME1)                    | 16 | 291050 |
| <b>iYPL140C</b> | YPL140C (MKK2)                    | 16 | 289033 |
| <b>iYPL141C</b> | YPL141C                           | 16 | 286060 |
| <b>iYPL142C</b> | YPL142C                           | 16 | 283002 |
| <b>iYPL145C</b> | YPL145C (KES1) YPL144W            | 16 | 279698 |
| <b>iYPL146C</b> | YPL146C                           | 16 | 277528 |
| <b>iYPL147W</b> |                                   | 16 | 275866 |
| <b>iYPL148C</b> | YPL148C (PPT2) YPL147W (PXA1)     | 16 | 272826 |
| <b>iYPL149W</b> |                                   | 16 | 272193 |
| <b>iYPL150W</b> | YPL149W (APG5)                    | 16 | 270892 |
| <b>iYPL151C</b> | YPL151C (PRP46) YPL150W           | 16 | 267534 |
| <b>iYPL152W</b> |                                   | 16 | 266103 |
| <b>iYPL153C</b> | YPL153C (RAD53) YPL152W (RRD2)    | 16 | 264191 |
| <b>iYPL154C</b> | YPL154C (PEP4)                    | 16 | 260930 |
| <b>iYPL155C</b> | YPL155C (KIP2)                    | 16 | 259335 |
| <b>iYPL156C</b> | YPL156C (PRM4)                    | 16 | 256766 |
| <b>iYPL157W</b> |                                   | 16 | 255760 |
| <b>iYPL158C</b> | YPL158C YPL157W                   | 16 | 254309 |
| <b>iYPL159C</b> | YPL159C                           | 16 | 251667 |
| <b>iYPL160W</b> |                                   | 16 | 250261 |
| <b>iYPL161C</b> | YPL161C (BEM4) YPL160W (CDC60)    | 16 | 246219 |
| <b>iYPL162C</b> | YPL162C                           | 16 | 244026 |
| <b>iYPL163C</b> | YPL163C (SVS1)                    | 16 | 242699 |
| <b>iYPL164C</b> | YPL164C (MLH3)                    | 16 | 241496 |
| <b>iYPL165C</b> | YPL165C (SET6)                    | 16 | 239076 |
| <b>iYPL167C</b> | YPL167C (REV3) YPL166W            | 16 | 237106 |
| <b>iYPL168W</b> |                                   | 16 | 232508 |
| <b>iYPL169C</b> | YPL169C (MEX67) YPL168W           | 16 | 230837 |
| <b>iYPL170W</b> |                                   | 16 | 228771 |
| <b>iYPL171C</b> | YPL171C (OYE3) YPL170W            | 16 | 227370 |
| <b>iYPL172C</b> | YPL172C (COX10)                   | 16 | 225740 |
| <b>iYPL173W</b> |                                   | 16 | 224035 |
| <b>iYPL174C</b> | YPL174C (NIP100) YPL173W (MRPL4C) | 16 | 222772 |
| <b>iYPL175W</b> |                                   | 16 | 220087 |
| <b>iYPL176C</b> | YPL176C YPL175W (SPT14)           | 16 | 218362 |

|                   |                               |    |        |
|-------------------|-------------------------------|----|--------|
| <b>iYPL177C-0</b> | YPL177C (CUP9)                | 16 | 213961 |
| <b>iYPL178W</b>   |                               | 16 | 212783 |
| <b>iYPL179W</b>   | YPL178W (CBC2)                | 16 | 209805 |
| <b>iYPL180W</b>   | YPL179W (PPQ1)                | 16 | 207646 |
| <b>iYPL183C</b>   | YPL183C                       | 16 | 202535 |
| <b>iYPL183W-A</b> |                               | 16 | 199375 |
| <b>iYPL184C</b>   | YPL184C YPL183W-A             | 16 | 197787 |
| <b>iYPL185W</b>   |                               | 16 | 195647 |
| <b>iYPL187W</b>   |                               | 16 | 194144 |
| <b>iYPL188W</b>   | YPL187W (MF(ALPHA)1)          | 16 | 192649 |
| <b>iYPL190C</b>   | YPL190C (NAB3) YPL189W (GUP2) | 16 | 187724 |
| <b>iYPL191C</b>   | YPL191C                       | 16 | 184678 |
| <b>iYPL192C</b>   | YPL192C (PRM3)                | 16 | 183055 |
| <b>iYPL193W</b>   |                               | 16 | 182547 |
| <b>iYPL194W</b>   | YPL193W (RSA1)                | 16 | 181114 |
| <b>iYPL195W</b>   | YPL194W (DDC1)                | 16 | 179020 |
| <b>iYPL196W</b>   | YPL195W (APL5)                | 16 | 175863 |
| <b>iYPL197C</b>   | YPL197C YPL196W (OXR1)        | 16 | 174755 |
| <b>iYPL199C</b>   | YPL199C YPL198W (RPL7B)       | 16 | 172754 |
| <b>iYPL200W</b>   |                               | 16 | 171953 |
| <b>iYPL201C</b>   | YPL201C YPL200W (CSM4)        | 16 | 171154 |
| <b>iYPL202C</b>   | YPL202C (AFT2)                | 16 | 169337 |
| <b>iYPL203W</b>   |                               | 16 | 167397 |
| <b>iYPL204W</b>   | YPL203W (TPK2)                | 16 | 165759 |
| <b>iYPL206C</b>   | YPL206C                       | 16 | 163596 |
| <b>iYPL207W</b>   |                               | 16 | 162340 |
| <b>iYPL208W</b>   | YPL207W                       | 16 | 159592 |
| <b>iYPL209C</b>   | YPL209C (IPL1) YPL208W        | 16 | 157592 |
| <b>iYPL210C</b>   | YPL210C (SRP72)               | 16 | 156229 |
| <b>iYPL211W</b>   |                               | 16 | 154039 |
| <b>iYPL212C</b>   | YPL212C (PUS1) YPL211W (NIP7) | 16 | 153148 |
| <b>iYPL213W</b>   |                               | 16 | 151329 |
| <b>iYPL214C</b>   | YPL214C (THI6) YPL213W (LEA1) | 16 | 150190 |
| <b>iYPL215W</b>   |                               | 16 | 148422 |
| <b>iYPL216W</b>   | YPL215W (CBP3)                | 16 | 147128 |
| <b>iYPL217C</b>   | YPL217C (BMS1) YPL216W        | 16 | 143170 |
| <b>iYPL218W</b>   |                               | 16 | 139408 |
| <b>iYPL219W</b>   | YPL218W (SAR1)                | 16 | 138227 |
| <b>iYPL220W</b>   | YPL219W (PCL8)                | 16 | 136442 |
| <b>iYPL221W</b>   | YPL220W (RPL1A)               | 16 | 135423 |
| <b>iYPL222W</b>   | YPL221W (BOP1)                | 16 | 132227 |
| <b>iYPL224C</b>   | YPL224C (MMT2)                | 16 | 128087 |
| <b>iYPL225W</b>   |                               | 16 | 126446 |
| <b>iYPL226W</b>   | YPL225W                       | 16 | 125357 |
| <b>iYPL227C</b>   | YPL227C (ALG5) YPL226W (NEW1) | 16 | 121167 |
| <b>iYPL228W</b>   |                               | 16 | 120031 |
| <b>iYPL229W</b>   | YPL228W (CET1)                | 16 | 117687 |
| <b>iYPL230W</b>   | YPL229W                       | 16 | 116487 |
| <b>iYPL231W</b>   | YPL230W                       | 16 | 114315 |
| <b>iYPL232W</b>   | YPL231W (FAS2)                | 16 | 108147 |
| <b>iYPL233W</b>   | YPL232W (SSO1)                | 16 | 106822 |

|                    |                                  |    |        |
|--------------------|----------------------------------|----|--------|
| <b>iYPL234C</b>    | YPL234C (TFP3) YPL233W           | 16 | 105440 |
| <b>iYPL235W</b>    |                                  | 16 | 104647 |
| <b>iYPL236C</b>    | YPL236C YPL235W (RVB2)           | 16 | 102702 |
| <b>iYPL237W</b>    |                                  | 16 | 101353 |
| <b>iYPL239W</b>    |                                  | 16 | 100086 |
| <b>iYPL241C</b>    | YPL241C (CIN2)                   | 16 | 96258  |
| <b>iYPL242C</b>    | YPL242C (IQG1)                   | 16 | 95109  |
| <b>iYPL243W</b>    |                                  | 16 | 90316  |
| <b>iYPL244C</b>    | YPL244C (HUT1) YPL243W (SRP68)   | 16 | 88033  |
| <b>iYPL245W</b>    |                                  | 16 | 86950  |
| <b>iYPL246C</b>    | YPL246C YPL245W                  | 16 | 85297  |
| <b>iYPL247C</b>    | YPL247C                          | 16 | 84196  |
| <b>iYPL248C</b>    | YPL248C (GAL4)                   | 16 | 82356  |
| <b>iYPL249C</b>    | YPL249C (GYP5)                   | 16 | 79353  |
| <b>iYPL249C-A</b>  | YPL249C-A (RPL36B)               | 16 | 76239  |
| <b>iYPL251W</b>    |                                  | 16 | 73927  |
| <b>iYPL253C</b>    | YPL253C (VIK1)                   | 16 | 73006  |
| <b>iYPL254W</b>    |                                  | 16 | 70951  |
| <b>iYPL255W</b>    | YPL254W (HF11)                   | 16 | 68882  |
| <b>iYPL256C</b>    | YPL256C (CLN2) YPL255W (BBP1)    | 16 | 66614  |
| <b>iYPL257W</b>    |                                  | 16 | 63860  |
| <b>iYPL258C</b>    | YPL258C (THI21) tw(cca)p YPL257W | 16 | 55153  |
| <b>iYPL259C</b>    | YPL259C (APM1)                   | 16 | 52671  |
| <b>iYPL260W</b>    |                                  | 16 | 50958  |
| <b>iYPL262W</b>    |                                  | 16 | 48802  |
| <b>iYPL263C</b>    | YPL263C (KEL3) YPL262W (FUM1)    | 16 | 46506  |
| <b>iYPL264C</b>    | YPL264C                          | 16 | 44344  |
| <b>iYPL265W</b>    |                                  | 16 | 42869  |
| <b>iYPL266W</b>    | YPL265W (DIP5)                   | 16 | 40077  |
| <b>iYPL267W</b>    | YPL266W (DIM1)                   | 16 | 38798  |
| <b>iYPL268W</b>    | YPL267W                          | 16 | 37845  |
| <b>iYPL269W</b>    | YPL268W (PLC1)                   | 16 | 34947  |
| <b>iYPL270W</b>    | YPL269W (KAR9)                   | 16 | 32803  |
| <b>iYPL271W</b>    | YPL270W (MDL2)                   | 16 | 30267  |
| <b>iYPL273W</b>    |                                  | 16 | 26064  |
| <b>iYPL274W</b>    | YPL273W (SAM4)                   | 16 | 24701  |
| <b>iYPL275W-1</b>  | YPL274W (SAM3)                   | 16 | 20365  |
| <b>iYPL275W-2</b>  | YPL274W (SAM3)                   | 16 | 21651  |
| <b>iYPL277C</b>    | YPL277C YPL276W                  | 16 | 16868  |
| <b>iYPL279C</b>    | YPL279C                          | 16 | 14355  |
| <b>iYPL280W</b>    |                                  | 16 | 12600  |
| <b>iYPL281C</b>    | YPL281C (ERR2) YPL280W           | 16 | 10870  |
| <b>iYPL282C</b>    | YPL282C                          | 16 | 8427   |
| <b>iYPL283C-0</b>  | YPL283C (YRF1-7)                 | 16 | 6007   |
| <b>iYPL283C-1</b>  | YPL283C (YRF1-7)                 | 16 | 6970   |
| <b>iYPLCdelta1</b> | YPL258C (THI21) YPL257W          | 16 | 55858  |
| <b>iYPLCtau2</b>   | YPL060C-A YPL059W (GRX5)         | 16 | 443107 |
| <b>iYPLWdelta6</b> | YPL258C (THI21) YPL257W          | 16 | 63006  |
| <b>iYPLWdelta7</b> | YPL178W (CBC2)                   | 16 | 210770 |
| <b>iYPLWdelta8</b> | YPL178W (CBC2)                   | 16 | 211897 |
| <b>iYPR001W</b>    | YPR002W (PDH1)                   | 16 | 557832 |



|                   |                                 |    |        |
|-------------------|---------------------------------|----|--------|
| <b>iYPR002W</b>   |                                 | 16 | 559930 |
| <b>iYPR003C</b>   | YPR003C                         | 16 | 563763 |
| <b>iYPR004C</b>   | YPR004C                         | 16 | 565036 |
| <b>iYPR005C</b>   | YPR005C (HAL1)                  | 16 | 566666 |
| <b>iYPR006C</b>   | YPR006C (ICL2)                  | 16 | 568991 |
| <b>iYPR007C</b>   | YPR007C (SPO69) YPR008W (HAA1)  | 16 | 571373 |
| <b>iYPR009W</b>   |                                 | 16 | 577353 |
| <b>iYPR011C</b>   | YPR011C YPR012W                 | 16 | 584037 |
| <b>iYPR013C-0</b> | YPR013C                         | 16 | 585580 |
| <b>iYPR013C-1</b> | YPR013C                         | 16 | 586382 |
| <b>iYPR017C</b>   | YPR017C (DSS4) YPR018W (RLF2)   | 16 | 593912 |
| <b>iYPR018W</b>   | YPR019W (CDC54)                 | 16 | 596291 |
| <b>iYPR019W</b>   | YPR020W (ATP20)                 | 16 | 599546 |
| <b>iYPR021C</b>   | YPR021C                         | 16 | 603352 |
| <b>iYPR023C</b>   | YPR023C (EAF3) YPR024W (YME1)   | 16 | 610026 |
| <b>iYPR028W</b>   |                                 | 16 | 624197 |
| <b>iYPR029C</b>   | YPR029C (APL4) YPR030W (CSR2)   | 16 | 626962 |
| <b>iYPR030W</b>   | YPR031W                         | 16 | 631240 |
| <b>iYPR031W</b>   | YPR032W (SRO7)                  | 16 | 633756 |
| <b>iYPR032W</b>   |                                 | 16 | 637219 |
| <b>iYPR033C</b>   | YPR033C (HTS1) YPR034W (ARP7)   | 16 | 639014 |
| <b>iYPR040W</b>   | YPR041W (TIF5)                  | 16 | 648370 |
| <b>iYPR042C</b>   | YPR042C (PUF2) YPR043W (RPL43A) | 16 | 653657 |
| <b>iYPR045C</b>   | YPR045C YPR046W (MCM16)         | 16 | 656547 |
| <b>iYPR046W</b>   | YPR047W (MSF1)                  | 16 | 657339 |
| <b>iYPR047W</b>   | YPR048W (TAH18)                 | 16 | 658933 |
| <b>iYPR048W</b>   |                                 | 16 | 661048 |
| <b>iYPR049C</b>   | YPR049C (CVT9)                  | 16 | 664668 |
| <b>iYPR054W</b>   | YPR055W (SEC8)                  | 16 | 667441 |
| <b>iYPR055W</b>   | YPR056W (TFB4)                  | 16 | 670868 |
| <b>iYPR056W</b>   | YPR057W (BRR1)                  | 16 | 672137 |
| <b>iYPR057W</b>   | YPR058W (YMC1)                  | 16 | 673491 |
| <b>iYPR059C</b>   | YPR059C                         | 16 | 674695 |
| <b>iYPR061C</b>   | YPR061C YPR062W (FCY1)          | 16 | 676877 |
| <b>iYPR062W</b>   |                                 | 16 | 677636 |
| <b>iYPR063C</b>   | YPR063C YPR064W                 | 16 | 678315 |
| <b>iYPR064W</b>   | YPR065W (ROX1)                  | 16 | 679365 |
| <b>iYPR065W</b>   | YPR066W (UBA3)                  | 16 | 680794 |
| <b>iYPR066W</b>   | YPR067W (ISA2)                  | 16 | 682107 |
| <b>iYPR067W</b>   |                                 | 16 | 682772 |
| <b>iYPR068C</b>   | YPR068C (HOS1)                  | 16 | 684348 |
| <b>iYPR069C</b>   | YPR069C (SPE3) YPR070W (MED1)   | 16 | 685432 |
| <b>iYPR070W</b>   | YPR071W                         | 16 | 687593 |
| <b>iYPR072W</b>   |                                 | 16 | 691784 |
| <b>iYPR073C</b>   | YPR073C (LTP1)                  | 16 | 692413 |
| <b>iYPR074C</b>   | YPR074C (TKL1)                  | 16 | 694833 |
| <b>iYPR076W</b>   |                                 | 16 | 696845 |
| <b>iYPR079W</b>   | YPR080W (TEF1)                  | 16 | 700010 |
| <b>iYPR080W</b>   |                                 | 16 | 701966 |
| <b>iYPR081C</b>   | YPR081C                         | 16 | 703966 |
| <b>iYPR082C</b>   | YPR082C (DIB1) YPR083W          | 16 | 704652 |

|                   |                                   |    |        |
|-------------------|-----------------------------------|----|--------|
| <b>iYPR083W</b>   | YPR084W                           | 16 | 706589 |
| <b>iYPR084W</b>   |                                   | 16 | 708338 |
| <b>iYPR085C</b>   | YPR085C YPR086W (SUA7)            | 16 | 709839 |
| <b>iYPR086W</b>   | YPR087W                           | 16 | 711134 |
| <b>iYPR088C</b>   | YPR088C (SRP54) YPR089W           | 16 | 713024 |
| <b>iYPR090W</b>   |                                   | 16 | 715938 |
| <b>iYPR093C</b>   | YPR093C YPR094W                   | 16 | 720487 |
| <b>iYPR094W</b>   |                                   | 16 | 720957 |
| <b>iYPR095C</b>   | YPR095C (SYT1)                    | 16 | 724714 |
| <b>iYPR096C</b>   | YPR096C YPR097W                   | 16 | 725141 |
| <b>iYPR098C</b>   | YPR098C                           | 16 | 729270 |
| <b>iYPR100W</b>   | YPR101W (SNT309)                  | 16 | 730210 |
| <b>iYPR101W</b>   |                                   | 16 | 731016 |
| <b>iYPR103W</b>   |                                   | 16 | 733209 |
| <b>iYPR104C</b>   | YPR104C (FHL1)                    | 16 | 736430 |
| <b>iYPR105C</b>   | YPR105C (COD1) YPR106W (ISR1)     | 16 | 739566 |
| <b>iYPR107C</b>   | YPR107C (YTH1) YPR108W (RPN7)     | 16 | 742061 |
| <b>iYPR108W</b>   | YPR109W                           | 16 | 743740 |
| <b>iYPR109W</b>   |                                   | 16 | 745570 |
| <b>iYPR110C</b>   | YPR110C (RPC40) YPR111W (DBF20)   | 16 | 746832 |
| <b>iYPR111W</b>   |                                   | 16 | 748997 |
| <b>iYPR112C</b>   | YPR112C (MRD1) YPR113W (PIS1)     | 16 | 751916 |
| <b>iYPR113W</b>   | YPR114W                           | 16 | 752916 |
| <b>iYPR114W</b>   | YPR115W                           | 16 | 754245 |
| <b>iYPR115W</b>   | YPR116W                           | 16 | 758125 |
| <b>iYPR116W</b>   | YPR117W                           | 16 | 759478 |
| <b>iYPR117W</b>   | YPR118W                           | 16 | 767491 |
| <b>iYPR118W</b>   | YPR119W (CLB2)                    | 16 | 768984 |
| <b>iYPR120C</b>   | YPR120C (CLB5) tc(gca)p2YPR121W ( | 16 | 775179 |
| <b>iYPR122W</b>   |                                   | 16 | 785666 |
| <b>iYPR124W</b>   | YPR125W                           | 16 | 787423 |
| <b>iYPR126C</b>   | YPR126C YPR127W                   | 16 | 789380 |
| <b>iYPR127W</b>   |                                   | 16 | 791115 |
| <b>iYPR128C</b>   | YPR128C (ANT1) YPR129W (SCD6)     | 16 | 792199 |
| <b>iYPR130C</b>   | YPR130C                           | 16 | 793776 |
| <b>iYPR131C</b>   | YPR131C (NAT3) YPR132W (RPS23B)   | 16 | 794661 |
| <b>iYPR132W</b>   |                                   | 16 | 795762 |
| <b>iYPR133C</b>   | YPR133C (IWS1) YPR133W-A (TOM5)   | 16 | 797205 |
| <b>iYPR133W-A</b> | YPR134W (MSS18)                   | 16 | 797704 |
| <b>iYPR134W</b>   | YPR135W (CTF4)                    | 16 | 798852 |
| <b>iYPR135W</b>   |                                   | 16 | 802012 |
| <b>iYPR139C</b>   | YPR139C YPR140W                   | 16 | 814053 |
| <b>iYPR140W</b>   |                                   | 16 | 815531 |
| <b>iYPR141C</b>   | YPR141C (KAR3)                    | 16 | 817918 |
| <b>iYPR144C</b>   | YPR144C YPR145W (ASN1)            | 16 | 821418 |
| <b>iYPR147C</b>   | YPR147C                           | 16 | 826554 |
| <b>iYPR148C-0</b> | YPR148C YPR149W (NCE102)          | 16 | 828135 |
| <b>iYPR149W</b>   | YPR150W                           | 16 | 830434 |
| <b>iYPR151C</b>   | YPR151C                           | 16 | 831670 |
| <b>iYPR153W</b>   | YPR154W (PIN3)                    | 16 | 834240 |
| <b>iYPR154W</b>   |                                   | 16 | 835207 |

|                     |                                |    |        |
|---------------------|--------------------------------|----|--------|
| <b>iYPR155C</b>     | YPR155C (NCA2)                 | 16 | 837408 |
| <b>iYPR156C</b>     | YPR156C (TPO3) YPR157W         | 16 | 839772 |
| <b>iYPR157W</b>     | YPR158W                        | 16 | 842664 |
| <b>iYPR158W</b>     | YPR159W (KRE6)                 | 16 | 844015 |
| <b>iYPR159W</b>     | YPR160W (GPH1)                 | 16 | 859740 |
| <b>iYPR160W</b>     |                                | 16 | 864009 |
| <b>iYPR161C</b>     | YPR161C (SGV1)                 | 16 | 866417 |
| <b>iYPR162C</b>     | YPR162C (ORC4)                 | 16 | 868299 |
| <b>iYPR163C</b>     | YPR163C (TIF3) YPR164W (MMS1)  | 16 | 869950 |
| <b>iYPR164W</b>     | YPR165W (RHO1)                 | 16 | 874921 |
| <b>iYPR165W</b>     |                                | 16 | 875992 |
| <b>iYPR166C</b>     | YPR166C (MRP2)                 | 16 | 876624 |
| <b>iYPR167C</b>     | YPR167C (MET16) YPR168W (NUT2) | 16 | 877627 |
| <b>iYPR168W</b>     | YPR169W                        | 16 | 878544 |
| <b>iYPR169W</b>     |                                | 16 | 880163 |
| <b>iYPR170C</b>     | YPR170C YPR171W                | 16 | 883313 |
| <b>iYPR171W</b>     | YPR172W                        | 16 | 885553 |
| <b>iYPR172W</b>     |                                | 16 | 886393 |
| <b>iYPR173C</b>     | YPR173C (VPS4)                 | 16 | 887832 |
| <b>iYPR174C</b>     | YPR174C YPR175W (DPB2)         | 16 | 888703 |
| <b>iYPR176C</b>     | YPR176C (BET2)                 | 16 | 892073 |
| <b>iYPR178W</b>     |                                | 16 | 893724 |
| <b>iYPR179C</b>     | YPR179C (PLO1) YPR180W (AOS1)  | 16 | 895759 |
| <b>iYPR180W</b>     |                                | 16 | 896999 |
| <b>iYPR181C</b>     | YPR181C (SEC23) YPR182W (SMX3) | 16 | 899662 |
| <b>iYPR182W</b>     | YPR183W (DPM1)                 | 16 | 900449 |
| <b>iYPR183W</b>     | YPR184W (GDB1)                 | 16 | 901553 |
| <b>iYPR184W</b>     | YPR185W (APG13)                | 16 | 906649 |
| <b>iYPR185W</b>     |                                | 16 | 909429 |
| <b>iYPR186C</b>     | YPR186C (PZF1) YPR187W (RPO26) | 16 | 911017 |
| <b>iYPR187W</b>     |                                | 16 | 911795 |
| <b>iYPR188C</b>     | YPR188C (MLC2) YPR189W (SKI3)  | 16 | 912474 |
| <b>iYPR189W</b>     |                                | 16 | 916957 |
| <b>iYPR190C</b>     | YPR190C (RPC82) YPR191W (QCR2) | 16 | 919036 |
| <b>iYPR192W</b>     |                                | 16 | 922772 |
| <b>iYPR193C</b>     | YPR193C (HPA2)                 | 16 | 923374 |
| <b>iYPR195C-0</b>   | YPR195C YPR196W                | 16 | 928289 |
| <b>iYPR195C-1</b>   | YPR195C YPR196W                | 16 | 929316 |
| <b>iYPR196W</b>     |                                | 16 | 932783 |
| <b>iYPR198W-1</b>   |                                | 16 | 936901 |
| <b>iYPR199C</b>     | YPR199C (ARR1)                 | 16 | 939027 |
| <b>iYPR200C</b>     | YPR200C (ARR2) YPR201W (ARR3)  | 16 | 939666 |
| <b>iYPR201W-0</b>   | YPR202W                        | 16 | 941131 |
| <b>iYPR201W-1</b>   | YPR202W                        | 16 | 942079 |
| <b>iYPR203W</b>     | YPR204W                        | 16 | 944183 |
| <b>iYPRCdelta13</b> | YPR007C (SPO69) YPR008W (HAA1) | 16 | 572168 |
| <b>iYPRCdelta19</b> |                                | 16 | 810557 |
| <b>iYPRCdelta22</b> | YPR159W (KRE6)                 | 16 | 850507 |
| <b>iYPRCtau3</b>    |                                | 16 | 881825 |
| <b>iYPRWdelta14</b> | YPR120C (CLB5) YPR121W (THI22) | 16 | 776410 |
| <b>iYPRWdelta16</b> | YPR120C (CLB5) YPR121W (THI22) | 16 | 778151 |

|                    |         |    |        |
|--------------------|---------|----|--------|
| iYPRWsigma4        |         | 16 | 880721 |
| iYPRWtau4          |         | 16 | 933399 |
| KAR3prom22         |         | 16 | 818074 |
| KGD2prom           |         | 4  | 755423 |
| LSR1               | YBR230C | 2  | 680643 |
| MET16-r2           |         | 16 | 877424 |
| MUC1prom3          |         | 9  | 394471 |
| MUC1prom4          |         | 9  | 394470 |
| no primers control |         |    |        |
| PCK1prom           |         | 11 | 630765 |
| POLI35Supstr       |         | 12 | 459623 |
| POLI35Supstr2      |         | 12 | 458698 |
| POP5               |         | 1  | 83067  |
| PYK1prom           |         | 1  | 71839  |
| Q0005              |         |    | 1321   |
| Q0010              |         |    | 1872   |
| Q0015              |         |    | 2013   |
| Q0020              |         |    | 3260   |
| Q0025              |         |    | 3375   |
| Q0030              |         |    | 4230   |
| Q0035              |         |    | 4473   |
| Q0040              |         |    | 4630   |
| Q0050              |         |    | 6408   |
| RDN18-1            | YLR154C | 12 | 455934 |
| RDN18-1A           | YLR154C | 12 | 455934 |
| RDN18-1B           | YLR154C | 12 | 456833 |
| RDN25-1            | YLR154C | 12 | 453057 |
| RDN25-1A           | YLR154C | 12 | 451787 |
| RDN25-1B           | YLR154C | 12 | 452918 |
| RDN25-1C           | YLR154C | 12 | 454050 |
| RDN37-1            | YLR154C | 12 | 455573 |
| RDN37-1A           | YLR154C | 12 | 455183 |
| RDN37-1B           | YLR154C | 12 | 455573 |
| RDN37-1C           | YLR154C | 12 | 457734 |
| RDN5-1             | YLR154C | 12 | 459677 |
| RDN58-1            | YLR154C | 12 | 455415 |
| RPA190             |         | 15 | 961416 |
| RPL28              |         | 7  | 311804 |
| RPL28prom          |         | 7  | 310900 |
| RPL30prom          |         | 7  | 439244 |
| RPL38orf           |         | 12 | 781356 |
| RPL38prom          |         | 12 | 782072 |
| RPP1Aorf           |         | 4  | 310114 |
| RPP1Aprom          |         | 4  | 310581 |
| RPR1               |         | 5  | 118277 |
| RPR1orf            |         | 5  | 117861 |
| RPS5-1             |         | 10 | 651393 |
| RPS5-2             |         | 10 | 652015 |
| SCR1               |         | 5  | 441843 |
| SCR1-2             |         | 5  | 441883 |
| SCR1-3             |         | 5  | 442133 |

|                   |                                 |    |         |
|-------------------|---------------------------------|----|---------|
| <b>SEC23prom</b>  |                                 | 16 | 899960  |
| <b>SFT1prom</b>   |                                 | 11 | 430548  |
| <b>SIC1prom</b>   |                                 | 12 | 286769  |
| <b>SIC1prom2</b>  |                                 | 12 | 286771  |
| <b>snR128</b>     | YJL148W (RPA34)                 | 10 | 139263  |
| <b>SNR13</b>      | YDR472W (TRS31)                 | 4  | 1402953 |
| <b>snR14</b>      | YER007C-A                       | 5  | 167426  |
| <b>SNR189</b>     | YCR031C (RPS14A) YCR032W (BPH1) | 3  | 177338  |
| <b>SNR190</b>     | YJL148W (RPA34)                 | 10 | 139459  |
| <b>snR3</b>       |                                 | 10 | 663437  |
| <b>SNR33</b>      | YCR015C YCR016W                 | 3  | 141963  |
| <b>SNR34</b>      |                                 | 12 | 898986  |
| <b>snR37</b>      |                                 | 10 | 228122  |
| <b>SNR4</b>       |                                 | 5  | 424695  |
| <b>SNR42</b>      | YKR062W (TFA2)                  | 11 | 558655  |
| <b>SNR43</b>      | YCL007C (CWH36)                 | 3  | 107116  |
| <b>SNR44</b>      | YLR367W (RPS22B)                | 12 | 856708  |
| <b>SNR45</b>      | YPR144C YPR145W (ASN1)          | 16 | 821727  |
| <b>SNR46</b>      |                                 | 7  | 545363  |
| <b>SNR47</b>      | YDR042C                         | 4  | 541641  |
| <b>SNR48</b>      | YGR060W (ERG25)                 | 7  | 609578  |
| <b>SNR50</b>      | YOL035C YOL034W                 | 15 | 259489  |
| <b>SNR51</b>      |                                 | 16 | 718697  |
| <b>SNR52</b>      | YER132C (PMD1) YER133W (GLC7)   | 5  | 431126  |
| <b>SNR53</b>      | YEL050C (RML2) YEL049W (PAU2)   | 5  | 61699   |
| <b>SNR54</b>      |                                 | 13 | 163535  |
| <b>SNR55</b>      |                                 | 12 | 794696  |
| <b>SNR56</b>      |                                 | 2  | 88181   |
| <b>SNR57</b>      |                                 | 12 | 794936  |
| <b>SNR58</b>      | YOL098C                         | 15 | 136087  |
| <b>SNR59</b>      | YPL199C YPL198W (RPL7B)         | 16 | 173826  |
| <b>SNR6</b>       |                                 | 12 | 366236  |
| <b>SNR60</b>      | YJL048C                         | 10 | 348826  |
| <b>SNR61</b>      |                                 | 12 | 794485  |
| <b>SNR62</b>      | YOR043W (WHI2)                  | 15 | 409764  |
| <b>SNR6-2</b>     |                                 | 12 | 366414  |
| <b>SNR63</b>      |                                 | 4  | 323216  |
| <b>SNR6-3</b>     |                                 | 12 | 366436  |
| <b>SNR64</b>      | YKL211C (TRP3) YKL210W (UBA1)   | 11 | 38812   |
| <b>SNR65</b>      | YCR030C                         | 3  | 175907  |
| <b>SNR66</b>      | YNL025C (SSN8)                  | 14 | 586088  |
| <b>SNR68</b>      | YIL135C YIL134W (FLX1)          | 9  | 97111   |
| <b>SNR69</b>      | YKL038W (RGT1)                  | 11 | 364418  |
| <b>SNR6Bbox</b>   |                                 | 12 | 366690  |
| <b>SNR6Bdown</b>  |                                 | 12 | 366968  |
| <b>SNR70</b>      |                                 | 16 | 718884  |
| <b>SNR71</b>      |                                 | 8  | 411228  |
| <b>SNR7-L</b>     | YGR221C (TOS2) YGR222W (PET54)  | 7  | 939451  |
| <b>SNR7-S</b>     | YGR221C (TOS2) YGR222W (PET54)  | 7  | 939486  |
| <b>SNR8</b>       | YOR271C YOR272W (YTM1)          | 15 | 832327  |
| <b>SPO11prom3</b> |                                 | 8  | 64358   |

|                  |                                |    |         |
|------------------|--------------------------------|----|---------|
| <b>SPS2prom</b>  |                                | 4  | 1485633 |
| <b>SRB2prom</b>  |                                | 8  | 190159  |
| <b>SRM1</b>      |                                | 7  | 322464  |
| <b>SSB1</b>      |                                | 4  | 43800   |
| <b>SSY5</b>      |                                | 10 | 127335  |
| <b>tA(AGC)P</b>  | YPR159W (KRE6)                 | 16 | 856897  |
| <b>tA(UGC)O</b>  |                                | 15 | 854182  |
| <b>tC(GCA)P2</b> | YPR120C (CLB5) YPR121W (THI22) | 16 | 775762  |
| <b>tD(GUC)O</b>  | YOR130C (ORT1)                 | 15 | 571956  |
| <b>tD(guc)o1</b> |                                | 15 | 572060  |
| <b>tD(guc)o2</b> |                                | 15 | 572114  |
| <b>tE(UUC)C</b>  | YCL022C YCL020W                | 3  | 82424   |
| <b>tE(UUC)P</b>  | YPL178W (CBC2)                 | 16 | 210191  |
| <b>TEL15R-1</b>  |                                | 15 | 1083285 |
| <b>TEL15R-2</b>  |                                | 15 | 1084603 |
| <b>TEL15R-4</b>  |                                | 15 | 1087239 |
| <b>TEL15R-5</b>  |                                | 15 | 1088557 |
| <b>TEL15R-6</b>  |                                | 15 | 1089875 |
| <b>TEL1R</b>     |                                | 1  | 229310  |
| <b>TEL6R</b>     | YGL263W (COS12)                | 6  | 269505  |
| <b>TEL9L</b>     |                                | 9  | 80      |
| <b>tG(CCC)D</b>  | YDR390C (UBA2)                 | 4  | 1257042 |
| <b>tG(GCC)P2</b> | YPR160W (GPH1)                 | 16 | 860374  |
| <b>tG(UCC)O</b>  |                                | 15 | 110961  |
| <b>tH(GUG)M</b>  |                                | 13 | 363063  |
| <b>tl(AAU)P2</b> |                                | 16 | 880291  |
| <b>tl(auu)b</b>  |                                | 2  | 197592  |
| <b>tK(CUU)P</b>  | YPR010C (RPA135)               | 16 | 582057  |
| <b>tK(guu)G1</b> |                                | 7  | 122488  |
| <b>tL(GAG)G</b>  | YGR106C YGR107W                | 7  | 700669  |
| <b>tL(UAA)N</b>  | YNR054C                        | 14 | 726132  |
| <b>TLCprom</b>   |                                | 2  | 307366  |
| <b>tM(CAU)O2</b> | YOR343C                        | 15 | 976412  |
| <b>tM(CAU)P</b>  | YPL112C YPL111W (CAR1)         | 16 | 338847  |
| <b>tN(GUU)P</b>  |                                | 16 | 810671  |
| <b>tP(AGG)C</b>  | YCR006C                        | 3  | 123178  |
| <b>TPS3prom</b>  |                                | 13 | 793719  |
| <b>tQ(UUG)L</b>  | YLR154C                        | 12 | 448651  |
| <b>tR(acg)J</b>  |                                | 10 | 233828  |
| <b>tR(ACG)O</b>  | YOR007C (SGT2)                 | 15 | 340299  |
| <b>tR(CCG)L</b>  | YLR344W (RPL26A)               | 12 | 818608  |
| <b>tR(ucu)B</b>  |                                | 2  | 406026  |
| <b>tR(UCU)M2</b> | YML071C (DOR1) YML070W (DAK1)  | 13 | 131825  |
| <b>tS(AGA)M</b>  | YML006C (GIS4) YML005W         | 13 | 259158  |
| <b>tS(UGA)P</b>  | YPR072W (NOT5)                 | 16 | 689560  |
| <b>tT(AGU)O2</b> | YOR012W                        | 15 | 354040  |
| <b>tT(CGU)K</b>  | YKL209C (STE6) YKL208W (CBT1)  | 11 | 46736   |
| <b>tT(UGU)P</b>  | YPR109W                        | 16 | 744281  |
| <b>tV(AAC)M3</b> | YMR163C                        | 13 | 586635  |
| <b>tV(CAC)D</b>  | YDR306C YDR307W                | 4  | 1075508 |
| <b>tV(UAC)B</b>  | YBR044C (TCM62)                | 2  | 326749  |

|                |                                |   |         |
|----------------|--------------------------------|---|---------|
| YALCdelta2     | YAL007C (ERP2) YAL004W         | 1 | 138834  |
| YARCdelta3     |                                | 1 | 160106  |
| YARCdelta8     |                                | 1 | 209439  |
| YBLCdelta7     |                                | 2 | 196975  |
| YBLCdelta7up   |                                | 2 | 196999  |
| YBLCsigma1     |                                | 2 | 197893  |
| YBLCsigma1down |                                |   |         |
| YBLWdelta10    | YBL004W                        | 2 | 226580  |
| YBLWdelta6     |                                | 2 | 35592   |
| YBLWdelta8     | YBL005W-A                      | 2 | 220854  |
| YBLWtau1       |                                | 2 | 35839   |
| YBLWty2-1A     | YBL101C (ECM21) YBL101W-B      | 2 | 30282   |
| YBR028C        | YBR027C                        | 2 | 295607  |
| YBR084W        |                                | 2 | 412919  |
| YBRCdelta11    | YBR011C (IPP1)                 | 2 | 258624  |
| YBRCdelta18    | YBR210W                        | 2 | 643814  |
| YBRCdelta19    | YBR210W                        | 2 | 644317  |
| YBRWdelta16    | YBR044C (TCM62)                | 2 | 327347  |
| YBRWdelta17    |                                | 2 | 350415  |
| YCL001W-A      | YCR001W                        | 3 | 112684  |
| YCL026C-A      |                                | 3 | 74675   |
| YCLCdelta1     | YCL022C YCL020W                | 3 | 82675   |
| YCLWomega1     | YCL076W                        | 3 | 1172    |
| YCLWty5-1A     | YBR302C (COS2) YCL075W         | 3 | 1522    |
| YCLWty5-1B     | YCL074W                        | 3 | 2219    |
| YCLWty5-1C     |                                | 3 | 3266    |
| YCR020W-B      | YCR020C-A (MAK31)              | 3 | 155025  |
| YCR073W-A      | YCR073C (SSK22)                | 3 | 245688  |
| YCR097W-A      | YCR096C (HMRA2) YCR097W (HMRA) | 3 | 292557  |
| YCR102W-A      | YCR102C                        | 3 | 305455  |
| YCRCdelta14    |                                | 3 | 294680  |
| YCRCdelta6     | YCR006C                        | 3 | 123735  |
| YCRWdelta11    | YCR027C (RHB1)                 | 3 | 168259  |
| YCRWomega3     | YCR095C                        | 3 | 290644  |
| YDL130W-A      | YDL130W (RPP1B)                | 4 | 229171  |
| YDL133C-A      | YDL134C (PPH21) YDL133W        | 4 | 221724  |
| YDL233W        | YDL234C (GYP7) YDL232W (OST4)  | 4 | 36759   |
| YDL234C        |                                | 4 | 56375   |
| YDR034W-B      |                                | 4 | 521353  |
| YDR170W-A      | YDR170C (SEC7) YDR171W (HSP42) | 4 | 803233  |
| YDR525W-A      |                                | 4 | 1490644 |
| YDRCdelta9     | YDR098C-A YDR099W (BMH2)       | 4 | 651720  |
| YDRCTy1-2B     | YDR210W-D                      | 4 | 879819  |
| YDRCTy1-2D     | YDR211W (GCD6)                 | 4 | 882777  |
| YDRWdelta10    |                                | 4 | 668581  |
| YDRWdelta23    |                                | 4 | 1095804 |
| YDRWdelta30    |                                | 4 | 1353010 |
| YDRWdelta7     |                                | 4 | 520516  |
| YDRWsigma4     | YDR261C-C YDR262W              | 4 | 992776  |
| YE019C         |                                | 5 | 121087  |
| YELCdelta3     | YEL027W (CUP5)                 | 5 | 99490   |

|                    |                                 |   |        |
|--------------------|---------------------------------|---|--------|
| <b>YELCdelta4</b>  | YEL010W                         | 5 | 135612 |
| <b>YELCtau1</b>    |                                 | 5 | 118230 |
| <b>YER039C-A</b>   | YER039C (HVG1) YER040W (GLN3)   | 5 | 229262 |
| <b>YER048W-A</b>   | YER048C (CAJ1) YER049W          | 5 | 250717 |
| <b>YER091C-A</b>   | YER091C (MET6) YER092W (IES5)   | 5 | 342386 |
| <b>YER136W</b>     | YER135C                         | 5 | 440691 |
| <b>YER138W-A</b>   |                                 | 5 | 449471 |
| <b>YERCdelta10</b> | YER065C (ICL1) YER066W          | 5 | 287743 |
| <b>YERCdelta26</b> | YER181C YER182W                 | 5 | 552036 |
| <b>YERCdelta8</b>  | YER048C (CAJ1) YER048W-A        | 5 | 249108 |
| <b>YERComega1</b>  | YER186C YER187W                 | 5 | 563924 |
| <b>YERCTau3</b>    |                                 | 5 | 436276 |
| <b>YERWdelta12</b> | YER097W                         | 5 | 353395 |
| <b>YERWdelta13</b> | YER097W                         | 5 | 354132 |
| <b>YERWdelta17</b> | YER137C                         | 5 | 442731 |
| <b>YERWdelta21</b> |                                 | 5 | 444831 |
| <b>YERWdelta25</b> |                                 | 5 | 551438 |
| <b>YERWdelta9</b>  | YER048C (CAJ1) YER048W-A        | 5 | 249444 |
| <b>YERWomega2</b>  | YER189W                         | 5 | 568787 |
| <b>YFLCdelta6</b>  |                                 | 6 | 144518 |
| <b>YFLWdelta1</b>  | YFL020C (PAU5)                  | 6 | 100575 |
| <b>YFLWtau1</b>    |                                 | 6 | 144197 |
| <b>YFR032C-A</b>   | YFR032C                         | 6 | 223245 |
| <b>YFRCdelta9</b>  | YFR020W                         | 6 | 191672 |
| <b>YFRWdelta10</b> | YFR026C YFR027W (ECO1)          | 6 | 206909 |
| <b>YFRWdelta7</b>  | YFR007W                         | 6 | 158369 |
| <b>YGL197W</b>     | YGL196W                         | 7 | 125058 |
| <b>YGLCdelta5</b>  | YGL097W (SRM1)                  | 7 | 319007 |
| <b>YGLCtau3</b>    | YGL097W (SRM1)                  | 7 | 320353 |
| <b>YGLWdelta10</b> | YGL046W                         | 7 | 412452 |
| <b>YGLWdelta4</b>  | YGL097W (SRM1)                  | 7 | 318695 |
| <b>YGLWdelta6</b>  |                                 | 7 | 327902 |
| <b>YGLWtau2</b>    | YGL158W (RCK1)                  | 7 | 204986 |
| <b>YGRCdelta12</b> | YGR027C (RPS25A) YGR027W-A      | 7 | 535601 |
| <b>YGRCdelta20</b> | YGR109C (CLB6) YGR110W          | 7 | 713078 |
| <b>YGRCTy1-2A</b>  |                                 | 7 | 562187 |
| <b>YGRCTy1-2C</b>  |                                 | 7 | 564795 |
| <b>YGRCTy1-2D</b>  |                                 | 7 | 566274 |
| <b>YGRWdelta19</b> | YGR106C YGR107W                 | 7 | 701098 |
| <b>YGRWdelta26</b> | YGR150C                         | 7 | 793231 |
| <b>YHLComega1</b>  |                                 | 8 | 7993   |
| <b>YHLCsigma1</b>  | YHL009C (YAP3) YHL009W-A        | 8 | 85383  |
| <b>YHLWdelta2</b>  |                                 | 8 | 92235  |
| <b>YHRCdelta11</b> | YHR145C YHR146W (CRP1)          | 8 | 389613 |
| <b>YHRCdelta12</b> | YHR180W                         | 8 | 463915 |
| <b>YHRCdelta4</b>  | YHR005C-A (MRS11) YHR006W (STP2 | 8 | 116756 |
| <b>YHRCdelta5</b>  | YHR015W (MIP6)                  | 8 | 133192 |
| <b>YHRCdelta6</b>  | YHR015W (MIP6)                  | 8 | 133556 |
| <b>YHRCdelta8</b>  | YHR125W                         | 8 | 358674 |
| <b>YHRCtau4</b>    | YHR125W                         | 8 | 358852 |
| <b>YHRCTy1-1A</b>  |                                 | 8 | 543605 |



|                    |                                 |    |         |
|--------------------|---------------------------------|----|---------|
| <b>YHRCTy1-1B</b>  |                                 | 8  | 545105  |
| <b>YHRCTy1-1D</b>  | YHR215W (PHO12)                 | 8  | 548105  |
| <b>YHRWdelta9</b>  |                                 | 8  | 359081  |
| <b>YHRWtau3</b>    |                                 | 8  | 146835  |
| <b>YILCdelta2</b>  | YIL061C (SNP1) YIL060W          | 9  | 246217  |
| <b>YILCdelta3</b>  | YIL030C (SSM4)                  | 9  | 300407  |
| <b>YILCdelta5</b>  | YIL009C-A (EST3) YIL009W (FAA3) | 9  | 336705  |
| <b>YILWTy3-1A</b>  | YIL083C YIL082W-A               | 9  | 205567  |
| <b>YILWTy3-1B</b>  | YIL082W-A                       | 9  | 206573  |
| <b>YILWTy3-1C</b>  | YIL082W-A                       | 9  | 207929  |
| <b>YILWTy3-1D</b>  | YIL080W                         | 9  | 209285  |
| <b>YIR020W-B</b>   | YIR020C YIR021W (MRS1)          | 9  | 394914  |
| <b>YIRCdelta6</b>  | YIR038C (GTT1)                  | 9  | 426198  |
| <b>YJL163C</b>     | YJL164C (TPK1)                  | 10 | 112062  |
| <b>YJLCdelta6</b>  | YJL039C (NUP192)                | 10 | 374540  |
| <b>YJLCdelta7</b>  | YJL036W (SNX4)                  | 10 | 377294  |
| <b>YJLWdelta10</b> | YJL008C (CCT8)                  | 10 | 422289  |
| <b>YJLWdelta15</b> | YJR052W (RAD7)                  | 10 | 531204  |
| <b>YJLWdelta16</b> | YJR055W (HIT1)                  | 10 | 537429  |
| <b>YJLWdelta8</b>  | YJL011C                         | 10 | 416194  |
| <b>YJLWdelta9</b>  | YJL011C                         | 10 | 416587  |
| <b>YJLWtau4</b>    | YJL008C (CCT8)                  | 10 | 421634  |
| <b>YJRWdelta14</b> | YJR043C (POL32)                 | 10 | 517647  |
| <b>YJRWdelta20</b> | YJR056C YJR057W (CDC8)          | 10 | 543136  |
| <b>YJRWtau3</b>    | YJL011C                         | 10 | 415954  |
| <b>YKL033W-A</b>   | YKL033W                         | 11 | 374147  |
| <b>YKL053C-A</b>   | YKL054C (VID31) YKL053W         | 11 | 338827  |
| <b>YKL162C-A</b>   |                                 | 11 | 145927  |
| <b>YKLCdelta2</b>  | YKL189W (HYM1)                  | 11 | 83813   |
| <b>YKLCdelta4</b>  | YKL119C (VPH2) YKL117W (SBA1)   | 11 | 219041  |
| <b>YKLCdelta6</b>  |                                 | 11 | 313564  |
| <b>YKLWdelta1</b>  | YKL197C (PEX1)                  | 11 | 74241   |
| <b>YKRCdelta11</b> | YKR038C YKR039W (GAP1)          | 11 | 513172  |
| <b>YKRCdelta9</b>  | YKR026C (GCN3) YKR027W          | 11 | 489927  |
| <b>YKRWdelta10</b> | YKR026C (GCN3) YKR027W          | 11 | 490105  |
| <b>YLL018C-A</b>   | YLL019C (KNS1)                  | 12 | 108675  |
| <b>YLR107W</b>     |                                 | 12 | 364786  |
| <b>YLR262C-A</b>   | YLR262C (YPT6) YLR263W (RED1)   | 12 | 669468  |
| <b>YLR438C-A</b>   | YLR439W (MRPL4)                 | 12 | 1013903 |
| <b>YLRCdelta16</b> | YLR272C (YCS4)                  | 12 | 688119  |
| <b>YLRCdelta24</b> | YLR420W (URA4)                  | 12 | 963224  |
| <b>YLRCdelta27</b> | YLR455W                         | 12 | 1052298 |
| <b>YLRCtau1</b>    |                                 | 12 | 599570  |
| <b>YLRWdelta12</b> |                                 | 12 | 599268  |
| <b>YLRWdelta15</b> | YLR257W                         | 12 | 657449  |
| <b>YLRWdelta17</b> | YLR272C (YCS4)                  | 12 | 688369  |
| <b>YML081C-A</b>   | YML081W                         | 13 | 103983  |
| <b>YMLCdelta1</b>  | YML071C (DOR1) YML070W (DAK1)   | 13 | 131989  |
| <b>YMR046W-A</b>   | YMR046C                         | 13 | 362701  |
| <b>YMR158C-B</b>   | YMR158W-A                       | 13 | 573193  |
| <b>YMR194C-A</b>   | YMR195W (ICY1)                  | 13 | 652911  |

|             |                                 |    |        |
|-------------|---------------------------------|----|--------|
| YMRCDelta11 | YMR051C YMR052W (FAR3)          | 13 | 378726 |
| YMRCDelta14 | YMR106C (YKU80) YMR107W         | 13 | 481213 |
| YMRCTau1    | YMR012W (CLU1)                  | 13 | 290048 |
| YMRWdelta15 | YMR106C (YKU80) YMR107W         | 13 | 481570 |
| YMRWdelta16 | YMR118C YMR119W (ASI1)          | 13 | 503191 |
| YMRWdelta20 | YMR271C (URA10)                 | 13 | 809000 |
| YMRWdelta21 | YMR283C (RIT1) YMR284W (YKU70)  | 13 | 837450 |
| YNLWsigma2  | YNL043C YNL042W (BOP3)          | 14 | 546421 |
| YNR032C-A   | YNR033W (ABZ1)                  | 14 | 687242 |
| YNRCdelta9  | YNR054C                         | 14 | 727361 |
| YOL013W-A   |                                 | 15 | 300690 |
| YOLCdelta2  | YOL159C                         | 14 | 18301  |
| YOLCdelta8  |                                 | 15 | 300683 |
| YOLCdelta9  | YOR007C (SGT2)                  | 15 | 340598 |
| YOLWdelta6  | YOL055C (THI20) YOL054W         | 14 | 227094 |
| YOLWtau1    | YOL165C (AAD15) YOL164W         | 15 | 3809   |
| YOR129C     | YOR128C (ADE2)                  | 15 | 569202 |
| YOR235W     | YOR234C (RPL33B) YOR236W (DFR1) | 15 | 779868 |
| YOR298C-A   | YOR299W (BUD7)                  | 15 | 877225 |
| YORCdelta11 | YOR058C (ASE1)                  | 15 | 438176 |
| YORCdelta15 |                                 | 15 | 664001 |
| YORWdelta12 |                                 | 15 | 594510 |
| YORWdelta16 |                                 | 15 | 664323 |
| YORWdelta19 | YOR192C YOR193W                 | 14 | 703610 |
| YORWdelta22 | YOR343C                         | 15 | 969284 |
| YPL144W     | YPL145C (KES1) YPL143W (RPL33A) | 16 | 280479 |
| YPL183W-A   | YPL184C                         | 16 | 199094 |
| YPLCdelta1  | YPL258C (THI21) YPL257W         | 16 | 55657  |
| YPLCdelta10 |                                 | 16 | 436245 |
| YPLCTau1    |                                 | 16 | 436885 |
| YPLCTy4-1A  |                                 | 16 | 436535 |
| YPLCTy4-1B  |                                 | 16 | 438129 |
| YPLCTy4-1C  |                                 | 16 | 439373 |
| YPLCTy4-1D  |                                 | 16 | 440617 |
| YPLCTy4-1E  | YPL059W (GRX5)                  | 16 | 441861 |
| YPLWdelta11 |                                 | 16 | 436589 |
| YPLWdelta7  | YPL178W (CBC2)                  | 16 | 210450 |
| YPLWdelta9  |                                 | 16 | 436063 |
| YPR029C     | YPR030W (CSR2)                  | 16 | 626776 |
| YPR133W-A   | YPR133C (IWS1) YPR134W (MSS18)  | 16 | 797552 |
| YPRCdelta13 | YPR007C (SPO69) YPR008W (HAA1)  | 16 | 571840 |
| YPRCdelta15 | YPR120C (CLB5) YPR121W (THI22)  | 16 | 776664 |
| YPRCdelta22 | YPR159W (KRE6)                  | 16 | 850352 |
| YPRCTau3    |                                 | 16 | 881482 |
| YPRWdelta14 | YPR120C (CLB5) YPR121W (THI22)  | 16 | 776090 |
| YPRWdelta16 | YPR120C (CLB5) YPR121W (THI22)  | 16 | 777829 |
| YPRWtau4    |                                 | 16 | 933066 |
| YPT10cod    |                                 | 2  | 749232 |
| ZRT1        |                                 | 7  | 20994  |
| ZWF1prom    |                                 | 14 | 198218 |

| dist from left end | 2   | Non-ORF regi | # of promoter | WT (ratio) | WT (perce | set1 Δ | set1 Δ | H3K4A | H3K4A |
|--------------------|-----|--------------|---------------|------------|-----------|--------|--------|-------|-------|
| 456089             |     |              |               | 0.97       | 0.40      | 0.98   | 0.42   | 0.99  | 0.42  |
| 458448             |     |              |               | 0.63       | 0.22      | 0.64   | 0.18   | 0.58  | 0.17  |
| 737766             |     |              |               | 0.32       | 0.06      | 0.54   | 0.12   | 0.24  | 0.02  |
| 53886              |     |              |               | 0.35       | 0.06      | 0.38   | 0.04   | 0.27  | 0.02  |
| 54112              |     |              |               | #N/A       | #N/A      | 0.31   | 0.02   | 0.21  | 0.01  |
| 436112             | CEN |              | Sgl Promoter  | #N/A       | #N/A      | #N/A   | #N/A   | #N/A  | #N/A  |
| 439891             | CEN |              | Sgl Promoter  | #N/A       | #N/A      | #N/A   | #N/A   | #N/A  | #N/A  |
| 150946             | CEN |              | Non Promoter  | #N/A       | #N/A      | #N/A   | #N/A   | #N/A  | #N/A  |
| 268141             | CEN |              | Non Promoter  | #N/A       | #N/A      | #N/A   | #N/A   | #N/A  | #N/A  |
| 628866             | CEN |              | Non Promoter  | #N/A       | #N/A      | #N/A   | #N/A   | #N/A  | #N/A  |
| 326702             | CEN |              | Sgl Promoter  | #N/A       | #N/A      | #N/A   | #N/A   | #N/A  | #N/A  |
| 556069             | CEN |              | Sgl Promoter  | #N/A       | #N/A      | #N/A   | #N/A   | #N/A  | #N/A  |
| 238281             | CEN |              | Sgl Promoter  | #N/A       | #N/A      | #N/A   | #N/A   | #N/A  | #N/A  |
| 114094             | CEN |              | Sgl Promoter  | #N/A       | #N/A      | #N/A   | #N/A   | #N/A  | #N/A  |
| 449863             | CEN |              | Non Promoter  | #N/A       | #N/A      | #N/A   | #N/A   | #N/A  | #N/A  |
| 152113             | CEN |              | Dbl Promoter  | #N/A       | #N/A      | #N/A   | #N/A   | #N/A  | #N/A  |
| 148621             | CEN |              | Sgl Promoter  | #N/A       | #N/A      | #N/A   | #N/A   | #N/A  | #N/A  |
| 497032             | CEN |              | Sgl Promoter  | #N/A       | #N/A      | #N/A   | #N/A   | #N/A  | #N/A  |
| 105696             | CEN |              | Sgl Promoter  | #N/A       | #N/A      | #N/A   | #N/A   | #N/A  | #N/A  |
| 355743             | CEN |              | Non Promoter  | #N/A       | #N/A      | #N/A   | #N/A   | #N/A  | #N/A  |
| 63552              |     |              |               | #N/A       | #N/A      | 1.38   | 0.62   | 1.36  | 0.62  |
| 64742              |     |              |               | #N/A       | #N/A      | #N/A   | #N/A   | #N/A  | #N/A  |
| 67085              |     |              |               | 0.65       | 0.22      | 0.66   | 0.19   | 0.57  | 0.16  |
| 66519              |     |              |               | 0.71       | 0.27      | 0.70   | 0.23   | 0.97  | 0.41  |
| 710576             |     |              |               | 0.78       | 0.29      | #N/A   | #N/A   | 0.83  | 0.33  |
| 710633             |     |              |               | 1.02       | 0.43      | 1.03   | 0.45   | 0.85  | 0.34  |
| 261119             |     |              |               | 0.91       | 0.37      | 1.34   | 0.64   | #N/A  | #N/A  |
| 260277             |     |              |               | #N/A       | #N/A      | 0.51   | 0.10   | 0.14  | 0.00  |
| 258918             |     |              |               | 0.55       | 0.17      | 0.74   | 0.25   | 0.47  | 0.10  |
| 900494             |     |              |               | 1.28       | 0.56      | #N/A   | #N/A   | 1.17  | 0.52  |
| 23811              |     |              |               | #N/A       | #N/A      | 0.52   | 0.14   | #N/A  | #N/A  |
| 48614              |     |              |               | 1.20       | 0.52      | #N/A   | #N/A   | 0.86  | 0.35  |
| 623026             |     |              |               | #N/A       | #N/A      | 1.37   | 0.65   | 0.47  | 0.12  |
| 874911             |     |              |               | 2.89       | 0.79      | 10.45  | 0.94   | 2.54  | 0.70  |
|                    |     |              |               | 0.50       | 0.14      | 0.86   | 0.34   | 1.15  | 0.52  |
| 81501              |     |              |               | 0.55       | 0.17      | #N/A   | #N/A   | 0.69  | 0.24  |
| 86600              |     |              |               | #N/A       | #N/A      | #N/A   | #N/A   | #N/A  | #N/A  |
| 71514              |     |              |               | 0.74       | 0.28      | 1.10   | 0.50   | 1.41  | 0.59  |
| 278309             |     |              |               | #N/A       | #N/A      | #N/A   | #N/A   | 5.30  | 0.66  |
| 276352             |     |              |               | 1.66       | 0.71      | 1.98   | 0.88   | 3.15  | 0.89  |
| 278434             |     |              |               | #N/A       | #N/A      | #N/A   | #N/A   | #N/A  | #N/A  |
| 278407             |     |              |               | #N/A       | #N/A      | #N/A   | #N/A   | #N/A  | #N/A  |
| 278732             |     |              |               | #N/A       | #N/A      | #N/A   | #N/A   | #N/A  | #N/A  |
| 464740             |     |              |               | #N/A       | #N/A      | 0.55   | 0.15   | 0.74  | 0.27  |
| 463020             |     |              |               | 0.99       | 0.41      | 1.18   | 0.55   | 1.12  | 0.50  |
| 275584             |     |              |               | #N/A       | #N/A      | 1.47   | 0.68   | 2.04  | 0.84  |
| 31942              |     |              |               | 0.98       | 0.41      | 1.21   | 0.57   | 1.10  | 0.48  |
| 32638              |     |              |               | 1.44       | 0.60      | 0.92   | 0.38   | 0.83  | 0.32  |
| 31222              |     |              |               | #N/A       | #N/A      | #N/A   | #N/A   | #N/A  | #N/A  |
| 569423             |     |              |               | 0.65       | 0.23      | 0.61   | 0.16   | 1.01  | 0.43  |

|         |            |              |      |      |      |      |      |      |
|---------|------------|--------------|------|------|------|------|------|------|
| 182087  |            |              | 1.49 | 0.65 | 1.61 | 0.76 | 1.78 | 0.72 |
| 255810  |            |              | #N/A | #N/A | 0.39 | 0.04 | #N/A | #N/A |
| 256091  |            |              | #N/A | #N/A | 0.32 | 0.02 | #N/A | #N/A |
| 576228  |            |              | 0.22 | 0.02 | 0.38 | 0.04 | 0.30 | 0.03 |
| 49222   |            |              | 0.95 | 0.39 | 0.72 | 0.24 | 1.18 | 0.53 |
| 48546   |            |              | #N/A | #N/A | #N/A | #N/A | #N/A | #N/A |
| 48545   |            |              | #N/A | #N/A | #N/A | #N/A | #N/A | #N/A |
| 120136  |            |              | #N/A | #N/A | #N/A | #N/A | #N/A | #N/A |
| 157221  |            |              | #N/A | #N/A | #N/A | #N/A | #N/A | #N/A |
| 157507  |            |              | 1.42 | 0.61 | 1.81 | 0.79 | 1.18 | 0.53 |
|         |            |              | #N/A | #N/A | #N/A | #N/A | 0.35 | 0.05 |
| 235923  |            |              | 0.22 | 0.02 | 0.33 | 0.02 | 0.10 | 0.00 |
| 155126  |            |              | #N/A | #N/A | 1.58 | 0.66 | #N/A | #N/A |
| 152259  | INTERGENIC | Dbl Promoter | #N/A | #N/A | 0.84 | 0.31 | 0.72 | 0.26 |
| 436490  | INTERGENIC | Sgl Promoter | #N/A | #N/A | 0.64 | 0.18 | #N/A | #N/A |
| 440249  | INTERGENIC | Sgl Promoter | #N/A | #N/A | 0.76 | 0.27 | 1.00 | 0.41 |
| 151388  | INTERGENIC | Non Promoter | #N/A | #N/A | 0.87 | 0.35 | 0.37 | 0.05 |
| 269019  | INTERGENIC | Non Promoter | 0.84 | 0.32 | 0.68 | 0.22 | 0.55 | 0.15 |
| 326832  | INTERGENIC | Sgl Promoter | #N/A | #N/A | #N/A | #N/A | #N/A | #N/A |
| 556372  | INTERGENIC | Sgl Promoter | 2.31 | 0.87 | #N/A | #N/A | 1.95 | 0.83 |
| 238899  | INTERGENIC | Sgl Promoter | 1.56 | 0.66 | 1.04 | 0.46 | 0.87 | 0.35 |
| 115286  | INTERGENIC | Sgl Promoter | 1.00 | 0.42 | 0.78 | 0.28 | 0.87 | 0.35 |
| 450261  | INTERGENIC | Non Promoter | 1.06 | 0.44 | #N/A | #N/A | #N/A | #N/A |
| 153519  | INTERGENIC | Dbl Promoter | 0.49 | 0.14 | 0.65 | 0.19 | 0.48 | 0.11 |
| 149104  | INTERGENIC | Sgl Promoter | 0.91 | 0.37 | 1.12 | 0.50 | 1.06 | 0.46 |
| 497128  | INTERGENIC | Sgl Promoter | #N/A | #N/A | #N/A | #N/A | #N/A | #N/A |
| 106048  | INTERGENIC | Sgl Promoter | #N/A | #N/A | 0.74 | 0.26 | #N/A | #N/A |
| 356140  | INTERGENIC | Non Promoter | 0.96 | 0.38 | 0.58 | 0.15 | #N/A | #N/A |
| 259534  |            |              | 0.62 | 0.21 | 0.66 | 0.20 | 0.56 | 0.15 |
| 579848  |            |              | 1.53 | 0.64 | 1.47 | 0.71 | 1.09 | 0.46 |
| 682134  | INTERGENIC | Sgl Promoter | 0.72 | 0.27 | 0.73 | 0.24 | 0.73 | 0.26 |
| 134499  |            |              | 0.95 | 0.39 | 0.98 | 0.41 | #N/A | #N/A |
| 135760  |            |              | 0.47 | 0.13 | 0.60 | 0.15 | 0.33 | 0.04 |
| 60685   | INTRON     | Sgl Promoter | 0.27 | 0.03 | 0.43 | 0.06 | 0.27 | 0.03 |
| 333343  | INTRON     | Sgl Promoter | 0.21 | 0.02 | 0.38 | 0.05 | 0.42 | 0.07 |
| 415213  | INTRON     | Non Promoter | 0.32 | 0.07 | 0.30 | 0.02 | 0.31 | 0.03 |
| 293013  | INTRON     | Dbl Promoter | #N/A | #N/A | #N/A | #N/A | #N/A | #N/A |
| 118158  | INTRON     | Sgl Promoter | 0.24 | 0.03 | 0.44 | 0.08 | 0.21 | 0.02 |
| 580058  | INTRON     | Sgl Promoter | #N/A | #N/A | 0.44 | 0.06 | 0.44 | 0.09 |
| 1237643 | INTRON     | Sgl Promoter | 0.26 | 0.03 | 0.28 | 0.01 | 0.33 | 0.04 |
| 433194  | INTRON     | Dbl Promoter | 0.47 | 0.12 | 0.62 | 0.17 | 0.50 | 0.12 |
| 311524  | INTRON     | Dbl Promoter | 0.21 | 0.02 | 0.25 | 0.01 | 0.37 | 0.06 |
| 168998  | INTRON     | Dbl Promoter | 0.58 | 0.19 | 0.75 | 0.26 | 0.56 | 0.16 |
| 127104  | INTRON     | Dbl Promoter | 0.36 | 0.07 | 0.33 | 0.02 | 0.29 | 0.03 |
| 148657  | INTRON     | Non Promoter | 0.28 | 0.03 | 0.36 | 0.03 | 0.36 | 0.05 |
| 580741  | INTRON     | Sgl Promoter | 0.73 | 0.27 | 0.68 | 0.22 | 0.60 | 0.22 |
| 415913  | INTRON     | Sgl Promoter | 0.43 | 0.10 | 0.54 | 0.12 | 0.61 | 0.19 |
| 62922   | INTRON     | Non Promoter | 0.25 | 0.03 | 0.40 | 0.05 | 0.42 | 0.08 |
| 722309  | INTRON     | Sgl Promoter | #N/A | #N/A | 0.29 | 0.02 | 0.32 | 0.04 |
| 405453  | INTRON     | Dbl Promoter | #N/A | #N/A | 0.29 | 0.04 | 0.38 | 0.11 |
| 282665  | INTRON     | Sgl Promoter | 0.23 | 0.03 | 0.36 | 0.03 | #N/A | #N/A |

|         |            |              |      |      |      |      |      |      |
|---------|------------|--------------|------|------|------|------|------|------|
| 82275   |            |              | 1.60 | 0.69 | 1.71 | 0.76 | 1.28 | 0.56 |
| 516096  |            |              | 0.72 | 0.26 | 0.80 | 0.30 | 0.54 | 0.16 |
| 459677  | INTERGENIC | Sgl Promoter | 0.71 | 0.26 | 0.72 | 0.24 | 0.64 | 0.21 |
| 460917  | INTERGENIC | Sgl Promoter | 0.33 | 0.05 | 0.39 | 0.04 | 0.34 | 0.04 |
| 469318  | INTERGENIC | Sgl Promoter | #N/A | #N/A | 0.89 | 0.36 | #N/A | #N/A |
| 472970  | INTERGENIC | Non Promoter | #N/A | #N/A | 0.89 | 0.36 | #N/A | #N/A |
| 118230  | INTERGENIC | Non Promoter | 0.83 | 0.32 | 0.75 | 0.26 | 0.85 | 0.34 |
| 442731  | INTERGENIC | Sgl Promoter | 0.95 | 0.39 | 1.14 | 0.51 | 0.62 | 0.20 |
| 139459  | INTERGENIC | Sgl Promoter | #N/A | #N/A | #N/A | #N/A | #N/A | #N/A |
| 1403356 | INTERGENIC | Sgl Promoter | #N/A | #N/A | 1.00 | 0.41 | 0.59 | 0.17 |
| 167807  | INTERGENIC | Sgl Promoter | #N/A | #N/A | #N/A | #N/A | #N/A | #N/A |
| 178249  | INTERGENIC | Dbl Promoter | 1.48 | 0.64 | 1.58 | 0.75 | 1.65 | 0.71 |
| 140135  | INTERGENIC | Sgl Promoter | 0.52 | 0.16 | 0.61 | 0.16 | 0.49 | 0.12 |
| 142304  | INTERGENIC | Dbl Promoter | #N/A | #N/A | #N/A | #N/A | #N/A | #N/A |
| 899692  | INTERGENIC | Non Promoter | 0.45 | 0.11 | 0.62 | 0.17 | 0.65 | 0.22 |
| 228722  | INTERGENIC | Non Promoter | #N/A | #N/A | 0.66 | 0.20 | #N/A | #N/A |
| 425185  | INTERGENIC | Non Promoter | 0.43 | 0.10 | 0.48 | 0.08 | #N/A | #N/A |
| 559305  | INTERGENIC | Sgl Promoter | 1.50 | 0.65 | 0.98 | 0.42 | 1.65 | 0.74 |
| 857538  | INTERGENIC | Sgl Promoter | 0.76 | 0.29 | 0.48 | 0.09 | 0.57 | 0.16 |
| 545675  | INTERGENIC | Non Promoter | #N/A | #N/A | #N/A | #N/A | #N/A | #N/A |
| 542714  | INTERGENIC | Sgl Promoter | 0.63 | 0.22 | 0.65 | 0.19 | 0.48 | 0.11 |
| 610558  | INTERGENIC | Sgl Promoter | 0.13 | 0.01 | 0.24 | 0.01 | 0.16 | 0.01 |
| 259923  | INTERGENIC | Dbl Promoter | 1.18 | 0.50 | 1.01 | 0.44 | 0.93 | 0.38 |
| 718884  | INTERGENIC | Non Promoter | #N/A | #N/A | #N/A | #N/A | #N/A | #N/A |
| 431487  | INTERGENIC | Dbl Promoter | #N/A | #N/A | 0.65 | 0.21 | 0.19 | 0.01 |
| 61890   | INTERGENIC | Dbl Promoter | #N/A | #N/A | #N/A | #N/A | #N/A | #N/A |
| 164790  | INTERGENIC | Non Promoter | 0.54 | 0.16 | 0.68 | 0.21 | 0.75 | 0.28 |
| 794936  | INTERGENIC | Non Promoter | #N/A | #N/A | #N/A | #N/A | #N/A | #N/A |
| 88514   | INTERGENIC | Non Promoter | #N/A | #N/A | #N/A | #N/A | #N/A | #N/A |
| 795572  | INTERGENIC | Non Promoter | #N/A | #N/A | 0.25 | 0.01 | 0.24 | 0.02 |
| 136526  | INTERGENIC | Sgl Promoter | 1.05 | 0.44 | 1.22 | 0.57 | 1.42 | 0.64 |
| 174342  | INTERGENIC | Dbl Promoter | 0.49 | 0.14 | 0.37 | 0.04 | #N/A | #N/A |
| 366668  | INTERGENIC | Non Promoter | #N/A | #N/A | 0.39 | 0.06 | 0.99 | 0.40 |
| 349276  | INTERGENIC | Sgl Promoter | 0.78 | 0.30 | 0.68 | 0.21 | 0.30 | 0.05 |
| 794696  | INTERGENIC | Non Promoter | #N/A | #N/A | #N/A | #N/A | #N/A | #N/A |
| 410869  | INTERGENIC | Sgl Promoter | 0.73 | 0.27 | 1.02 | 0.44 | 0.87 | 0.36 |
| 324046  | INTERGENIC | Non Promoter | 0.49 | 0.13 | 0.74 | 0.25 | 0.67 | 0.23 |
| 39164   | INTERGENIC | Dbl Promoter | 1.49 | 0.64 | 1.05 | 0.47 | 1.18 | 0.53 |
| 176224  | INTERGENIC | Sgl Promoter | #N/A | #N/A | #N/A | #N/A | #N/A | #N/A |
| 587105  | INTERGENIC | Sgl Promoter | 1.78 | 0.73 | 1.22 | 0.58 | 1.17 | 0.52 |
| 61699   | INTERGENIC | Dbl Promoter | #N/A | #N/A | #N/A | #N/A | #N/A | #N/A |
| 97395   | INTERGENIC | Dbl Promoter | 1.18 | 0.51 | 1.28 | 0.57 | #N/A | #N/A |
| 365247  | INTERGENIC | Sgl Promoter | 0.95 | 0.39 | 1.23 | 0.58 | 1.19 | 0.53 |
| 719555  | INTERGENIC | Non Promoter | 0.64 | 0.22 | 0.79 | 0.29 | 0.58 | 0.17 |
| 411384  | INTERGENIC | Non Promoter | #N/A | #N/A | #N/A | #N/A | #N/A | #N/A |
| 939915  | INTERGENIC | Dbl Promoter | #N/A | #N/A | 1.84 | 0.82 | 1.53 | 0.69 |
| 832808  | INTERGENIC | Dbl Promoter | #N/A | #N/A | 1.23 | 0.58 | 2.46 | 0.90 |
| 411802  | INTERGENIC | Sgl Promoter | 0.57 | 0.18 | 0.92 | 0.38 | 0.46 | 0.10 |
| 205735  | INTERGENIC | Sgl Promoter | 1.49 | 0.64 | 1.49 | 0.72 | 1.20 | 0.54 |
| 775187  | INTERGENIC | Sgl Promoter | 0.73 | 0.27 | 0.86 | 0.34 | 1.02 | 0.44 |
| 219970  | INTERGENIC | Sgl Promoter | 1.06 | 0.45 | 1.12 | 0.51 | 1.11 | 0.46 |

|         |            |              |      |      |      |      |      |      |
|---------|------------|--------------|------|------|------|------|------|------|
| 321874  | INTERGENIC | Dbl Promoter | #N/A | #N/A | 1.73 | 0.81 | 2.16 | 0.85 |
| 768547  | INTERGENIC | Dbl Promoter | #N/A | #N/A | #N/A | #N/A | #N/A | #N/A |
| 857578  | INTERGENIC | Sgl Promoter | 0.46 | 0.12 | 0.54 | 0.11 | 0.49 | 0.11 |
| 166759  | INTERGENIC | Sgl Promoter | 0.36 | 0.07 | 0.52 | 0.11 | #N/A | #N/A |
| 312270  | INTERGENIC | Sgl Promoter | 0.31 | 0.04 | 0.85 | 0.33 | 0.59 | 0.17 |
| 794649  | INTERGENIC | Sgl Promoter | #N/A | #N/A | #N/A | #N/A | #N/A | #N/A |
| 215081  | INTERGENIC | Sgl Promoter | #N/A | #N/A | #N/A | #N/A | #N/A | #N/A |
| 643443  | INTERGENIC | Sgl Promoter | 0.70 | 0.26 | 0.78 | 0.28 | 0.78 | 0.29 |
| 436063  | INTERGENIC | Non Promoter | #N/A | #N/A | #N/A | #N/A | #N/A | #N/A |
| 776090  | INTERGENIC | Dbl Promoter | #N/A | #N/A | #N/A | #N/A | 0.85 | 0.34 |
| 406582  | INTERGENIC | Sgl Promoter | 0.65 | 0.23 | 0.79 | 0.29 | 0.77 | 0.29 |
| 569274  | INTERGENIC | Sgl Promoter | 0.91 | 0.37 | 0.81 | 0.31 | 0.84 | 0.33 |
| 531877  | INTERGENIC | Non Promoter | #N/A | #N/A | #N/A | #N/A | #N/A | #N/A |
| 545363  | INTERGENIC | Non Promoter | 0.32 | 0.05 | 0.50 | 0.10 | 0.58 | 0.17 |
| 336705  | INTERGENIC | Dbl Promoter | #N/A | #N/A | #N/A | #N/A | #N/A | #N/A |
| 205002  | INTERGENIC | Sgl Promoter | 1.05 | 0.44 | 0.93 | 0.39 | 1.24 | 0.56 |
| 355720  | INTERGENIC | Sgl Promoter | 0.91 | 0.37 | 0.75 | 0.26 | 0.72 | 0.26 |
| 541480  | INTERGENIC | Non Promoter | 0.68 | 0.25 | 0.71 | 0.23 | 0.68 | 0.23 |
| 513172  | INTERGENIC | Dbl Promoter | #N/A | #N/A | #N/A | #N/A | #N/A | #N/A |
| 427330  | INTERGENIC | Sgl Promoter | #N/A | #N/A | #N/A | #N/A | #N/A | #N/A |
| 794485  | INTERGENIC | Non Promoter | #N/A | #N/A | #N/A | #N/A | 0.57 | 0.17 |
| 463933  | INTERGENIC | Sgl Promoter | #N/A | #N/A | 0.87 | 0.35 | 0.79 | 0.30 |
| 1018359 | INTERGENIC | Dbl Promoter | 0.88 | 0.36 | 1.02 | 0.45 | 1.47 | 0.67 |
| 1019404 | INTERGENIC | Dbl Promoter | 1.75 | 0.74 | 1.35 | 0.65 | 1.71 | 0.76 |
| 197928  | INTERGENIC | Non Promoter | 0.80 | 0.31 | #N/A | #N/A | 0.98 | 0.42 |
| 645505  | INTERGENIC | Sgl Promoter | 1.27 | 0.55 | 2.01 | 0.78 | #N/A | #N/A |
| 82675   | INTERGENIC | Dbl Promoter | #N/A | #N/A | #N/A | #N/A | #N/A | #N/A |
| 177834  | INTERGENIC | Sgl Promoter | 1.00 | 0.42 | 0.83 | 0.32 | 0.75 | 0.27 |
| 355136  | INTERGENIC | Sgl Promoter | #N/A | #N/A | #N/A | #N/A | 0.59 | 0.18 |
| 487830  | INTERGENIC | Non Promoter | 2.53 | 0.91 | 1.46 | 0.70 | 1.66 | 0.75 |
| 328872  | INTERGENIC | Non Promoter | #N/A | #N/A | #N/A | #N/A | #N/A | #N/A |
| 542197  | INTERGENIC | Sgl Promoter | #N/A | #N/A | 1.08 | 0.48 | 0.60 | 0.18 |
| 370701  | INTERGENIC | Dbl Promoter | #N/A | #N/A | #N/A | #N/A | #N/A | #N/A |
| 117239  | INTERGENIC | Dbl Promoter | 1.64 | 0.71 | 1.47 | 0.71 | 1.41 | 0.64 |
| 141799  | INTERGENIC | Sgl Promoter | 1.07 | 0.45 | 0.67 | 0.21 | 0.75 | 0.28 |
| 797429  | INTERGENIC | Dbl Promoter | #N/A | #N/A | #N/A | #N/A | #N/A | #N/A |
| 291133  | INTERGENIC | Sgl Promoter | #N/A | #N/A | 0.63 | 0.18 | 0.55 | 0.16 |
| 210450  | INTERGENIC | Sgl Promoter | #N/A | #N/A | #N/A | #N/A | #N/A | #N/A |
| 36977   | INTERGENIC | Non Promoter | 0.63 | 0.21 | 0.69 | 0.22 | 0.78 | 0.30 |
| 1095804 | INTERGENIC | Sgl Promoter | 0.84 | 0.33 | 1.17 | 0.49 | 1.06 | 0.42 |
| 158369  | INTERGENIC | Sgl Promoter | #N/A | #N/A | 0.67 | 0.21 | #N/A | #N/A |
| 441277  | INTERGENIC | Non Promoter | #N/A | #N/A | 0.56 | 0.13 | 0.43 | 0.08 |
| 358674  | INTERGENIC | Sgl Promoter | #N/A | #N/A | #N/A | #N/A | #N/A | #N/A |
| 352602  | INTERGENIC | Dbl Promoter | 0.43 | 0.10 | 0.77 | 0.28 | 0.54 | 0.15 |
| 375320  | INTERGENIC | Dbl Promoter | 3.54 | 0.98 | 2.02 | 0.90 | 2.92 | 0.96 |
| 560476  | INTERGENIC | Non Promoter | #N/A | #N/A | 0.72 | 0.24 | #N/A | #N/A |
| 1257392 | INTERGENIC | Sgl Promoter | 0.72 | 0.27 | 0.59 | 0.15 | #N/A | #N/A |
| 84271   | INTERGENIC | Dbl Promoter | 2.05 | 0.82 | 1.54 | 0.74 | 2.23 | 0.88 |
| 993170  | INTERGENIC | Dbl Promoter | 1.12 | 0.47 | 1.41 | 0.68 | #N/A | #N/A |
| 62081   | INTERGENIC | Dbl Promoter | #N/A | #N/A | #N/A | #N/A | #N/A | #N/A |
| 162481  | INTERGENIC | Sgl Promoter | #N/A | #N/A | #N/A | #N/A | #N/A | #N/A |



|         |            |              |      |      |      |      |      |      |
|---------|------------|--------------|------|------|------|------|------|------|
| 182261  | INTERGENIC | Sgl Promoter | 0.73 | 0.27 | 0.80 | 0.30 | 0.93 | 0.39 |
| 845887  | INTERGENIC | Non Promoter | 1.26 | 0.55 | 1.26 | 0.60 | 0.93 | 0.39 |
| 931163  | INTERGENIC | Sgl Promoter | #N/A | #N/A | #N/A | #N/A | #N/A | #N/A |
| 397051  | INTERGENIC | Sgl Promoter | 0.90 | 0.36 | 1.07 | 0.48 | 1.05 | 0.46 |
| 531750  | INTERGENIC | Sgl Promoter | #N/A | #N/A | 1.06 | 0.46 | 0.87 | 0.35 |
| 184170  | INTERGENIC | Sgl Promoter | #N/A | #N/A | #N/A | #N/A | #N/A | #N/A |
| 282421  | INTERGENIC | Sgl Promoter | 0.52 | 0.16 | 0.78 | 0.28 | 0.75 | 0.28 |
| 861301  | INTERGENIC | Sgl Promoter | 1.42 | 0.62 | 1.16 | 0.54 | 1.56 | 0.70 |
| 780393  | INTERGENIC | Sgl Promoter | 1.37 | 0.60 | 1.19 | 0.55 | 0.90 | 0.36 |
| 96449   | INTERGENIC | Sgl Promoter | #N/A | #N/A | 0.99 | 0.41 | 0.79 | 0.30 |
| 111430  | INTERGENIC | Non Promoter | 0.82 | 0.32 | #N/A | #N/A | 1.04 | 0.46 |
| 207643  | INTERGENIC | Non Promoter | #N/A | #N/A | #N/A | #N/A | #N/A | #N/A |
| 110857  | INTERGENIC | Non Promoter | #N/A | #N/A | #N/A | #N/A | #N/A | #N/A |
| 320353  | INTERGENIC | Sgl Promoter | 3.18 | 0.96 | 1.86 | 0.87 | 2.54 | 0.90 |
| 62958   | INTERGENIC | Sgl Promoter | #N/A | #N/A | #N/A | #N/A | #N/A | #N/A |
| 313247  | INTERGENIC | Sgl Promoter | #N/A | #N/A | 1.41 | 0.68 | 1.49 | 0.68 |
| 363363  | INTERGENIC | Non Promoter | #N/A | #N/A | #N/A | #N/A | 0.65 | 0.21 |
| 443367  | INTERGENIC | Sgl Promoter | #N/A | #N/A | #N/A | #N/A | #N/A | #N/A |
| 551438  | INTERGENIC | Sgl Promoter | #N/A | #N/A | #N/A | #N/A | #N/A | #N/A |
| 739938  | INTERGENIC | Dbl Promoter | 0.81 | 0.31 | 0.88 | 0.35 | 0.64 | 0.21 |
| 183934  | INTERGENIC | Dbl Promoter | 2.01 | 0.81 | 1.80 | 0.81 | 1.75 | 0.78 |
| 210920  | INTERGENIC | Non Promoter | #N/A | #N/A | 0.64 | 0.21 | 0.77 | 0.29 |
| 735212  | INTERGENIC | Non Promoter | #N/A | #N/A | 0.89 | 0.35 | #N/A | #N/A |
| 1052298 | INTERGENIC | Sgl Promoter | #N/A | #N/A | #N/A | #N/A | #N/A | #N/A |
| 570475  | INTERGENIC | Dbl Promoter | 0.43 | 0.10 | 0.67 | 0.21 | 0.71 | 0.25 |
| 602905  | INTERGENIC | Sgl Promoter | 0.60 | 0.20 | 0.54 | 0.12 | 0.73 | 0.26 |
| 819760  | INTERGENIC | Non Promoter | #N/A | #N/A | #N/A | #N/A | #N/A | #N/A |
| 884764  | INTERGENIC | Sgl Promoter | #N/A | #N/A | 1.03 | 0.45 | 0.75 | 0.28 |
| 605758  | INTERGENIC | Non Promoter | 1.37 | 0.60 | #N/A | #N/A | 1.66 | 0.74 |
| 151227  | INTERGENIC | Sgl Promoter | #N/A | #N/A | #N/A | #N/A | #N/A | #N/A |
| 1202162 | INTERGENIC | Sgl Promoter | #N/A | #N/A | 0.81 | 0.30 | 0.49 | 0.11 |
| 1352678 | INTERGENIC | Dbl Promoter | #N/A | #N/A | #N/A | #N/A | #N/A | #N/A |
| 135612  | INTERGENIC | Sgl Promoter | #N/A | #N/A | #N/A | #N/A | #N/A | #N/A |
| 435943  | INTERGENIC | Non Promoter | #N/A | #N/A | #N/A | #N/A | #N/A | #N/A |
| 122697  | INTERGENIC | Sgl Promoter | 0.51 | 0.15 | 0.57 | 0.14 | 0.55 | 0.15 |
| 186063  | INTERGENIC | Dbl Promoter | #N/A | #N/A | #N/A | #N/A | #N/A | #N/A |
| 876663  | INTERGENIC | Sgl Promoter | #N/A | #N/A | #N/A | #N/A | #N/A | #N/A |
| 300407  | INTERGENIC | Sgl Promoter | #N/A | #N/A | #N/A | #N/A | #N/A | #N/A |
| 415619  | INTERGENIC | Sgl Promoter | 1.64 | 0.70 | 1.74 | 0.82 | 1.47 | 0.66 |
| 203187  | INTERGENIC | Dbl Promoter | 0.75 | 0.28 | #N/A | #N/A | 0.71 | 0.25 |
| 481213  | INTERGENIC | Dbl Promoter | 1.47 | 0.64 | 1.69 | 0.81 | 1.95 | 0.83 |
| 359824  |            |              | #N/A | #N/A | #N/A | #N/A | #N/A | #N/A |
| 116061  | INTERGENIC | Dbl Promoter | #N/A | #N/A | 0.84 | 0.33 | #N/A | #N/A |
| 578848  | INTERGENIC | Dbl Promoter | #N/A | #N/A | 2.26 | 0.94 | #N/A | #N/A |
| 875734  | INTERGENIC | Sgl Promoter | #N/A | #N/A | #N/A | #N/A | #N/A | #N/A |
| 438907  | INTERGENIC | Sgl Promoter | #N/A | #N/A | #N/A | #N/A | #N/A | #N/A |
| 182517  | INTERGENIC | Dbl Promoter | 1.71 | 0.72 | 1.74 | 0.82 | 1.57 | 0.69 |
| 90939   | INTERGENIC | Sgl Promoter | 0.46 | 0.12 | #N/A | #N/A | 0.45 | 0.09 |
| 1462406 | INTERGENIC | Sgl Promoter | #N/A | #N/A | #N/A | #N/A | 0.54 | 0.14 |
| 423958  | INTERGENIC | Dbl Promoter | 0.99 | 0.41 | 1.06 | 0.47 | 1.18 | 0.53 |
| 858281  | INTERGENIC | Dbl Promoter | 1.70 | 0.72 | 1.49 | 0.72 | 1.26 | 0.57 |

|         |            |              |      |      |      |      |      |      |      |
|---------|------------|--------------|------|------|------|------|------|------|------|
| 458565  | INTERGENIC | Sgl Promoter | #N/A | #N/A | #N/A | #N/A | #N/A | #N/A | #N/A |
| 628684  | INTERGENIC | Non Promoter | #N/A | #N/A | #N/A | #N/A | #N/A | #N/A | #N/A |
| 505332  | INTERGENIC | Dbl Promoter | 0.80 | 0.31 | 0.90 | 0.37 | 0.88 | 0.36 |      |
| 700947  | INTERGENIC | Dbl Promoter | #N/A | #N/A | 0.44 | 0.08 | #N/A | #N/A |      |
| 9961    | INTERGENIC | Non Promoter | #N/A | #N/A | 1.27 | 0.55 | 0.97 | 0.41 |      |
| 347835  | INTERGENIC | Dbl Promoter | #N/A | #N/A | #N/A | #N/A | 0.99 | 0.42 |      |
| 520212  | INTERGENIC | Sgl Promoter | 1.26 | 0.55 | 0.90 | 0.36 | 1.48 | 0.64 |      |
| 424845  | INTERGENIC | Dbl Promoter | 1.07 | 0.45 | 1.09 | 0.49 | 1.15 | 0.52 |      |
| 84709   | INTERGENIC | Sgl Promoter | 1.30 | 0.56 | 1.31 | 0.63 | 0.96 | 0.41 |      |
| 963224  | INTERGENIC | Sgl Promoter | #N/A | #N/A | 0.53 | 0.13 | #N/A | #N/A |      |
| 617922  | INTERGENIC | Dbl Promoter | 0.67 | 0.24 | 1.52 | 0.74 | 0.91 | 0.37 |      |
| 592706  | INTERGENIC | Dbl Promoter | #N/A | #N/A | #N/A | #N/A | #N/A | #N/A |      |
| 309037  | INTERGENIC | Sgl Promoter | #N/A | #N/A | #N/A | #N/A | #N/A | #N/A |      |
| 149926  | INTERGENIC | Sgl Promoter | 0.67 | 0.24 | 0.77 | 0.28 | 0.66 | 0.22 |      |
| 1176373 | INTERGENIC | Sgl Promoter | 0.45 | 0.11 | 0.60 | 0.17 | 0.94 | 0.39 |      |
| 100769  | INTERGENIC | Sgl Promoter | #N/A | #N/A | 0.89 | 0.36 | 0.86 | 0.35 |      |
| 391007  | INTERGENIC | Dbl Promoter | #N/A | #N/A | 0.67 | 0.23 | 0.55 | 0.15 |      |
| 422826  | INTERGENIC | Sgl Promoter | #N/A | #N/A | #N/A | #N/A | #N/A | #N/A |      |
| 517647  | INTERGENIC | Sgl Promoter | #N/A | #N/A | #N/A | #N/A | #N/A | #N/A |      |
| 573111  | INTERGENIC | Non Promoter | #N/A | #N/A | #N/A | #N/A | 0.30 | 0.03 |      |
| 710444  | INTERGENIC | Dbl Promoter | #N/A | #N/A | #N/A | #N/A | #N/A | #N/A |      |
| 977185  | INTERGENIC | Sgl Promoter | 0.48 | 0.13 | 0.71 | 0.24 | 0.68 | 0.23 |      |
| 339943  | INTERGENIC | Dbl Promoter | 0.36 | 0.07 | 0.41 | 0.05 | 0.25 | 0.02 |      |
| 128070  | INTERGENIC | Dbl Promoter | 0.51 | 0.15 | 0.66 | 0.20 | 0.75 | 0.28 |      |
| 137657  | INTERGENIC | Dbl Promoter | #N/A | #N/A | #N/A | #N/A | #N/A | #N/A |      |
| 731443  | INTERGENIC | Sgl Promoter | 1.48 | 0.65 | 1.36 | 0.63 | 1.28 | 0.58 |      |
| 74937   | INTERGENIC | Sgl Promoter | #N/A | #N/A | 0.52 | 0.12 | #N/A | #N/A |      |
| 976252  | INTERGENIC | Sgl Promoter | #N/A | #N/A | #N/A | #N/A | #N/A | #N/A |      |
| 103132  | INTERGENIC | Sgl Promoter | #N/A | #N/A | #N/A | #N/A | #N/A | #N/A |      |
| 633007  | INTERGENIC | Sgl Promoter | 0.89 | 0.36 | #N/A | #N/A | 1.06 | 0.45 |      |
| 228612  | INTERGENIC | Dbl Promoter | #N/A | #N/A | 0.79 | 0.29 | 1.03 | 0.44 |      |
| 487707  | INTERGENIC | Dbl Promoter | #N/A | #N/A | #N/A | #N/A | #N/A | #N/A |      |
| 810979  | INTERGENIC | Non Promoter | 0.57 | 0.18 | 0.77 | 0.27 | 0.57 | 0.16 |      |
| 123735  | INTERGENIC | Sgl Promoter | 0.47 | 0.12 | 0.60 | 0.15 | 0.45 | 0.09 |      |
| 631997  | INTERGENIC | Sgl Promoter | #N/A | #N/A | #N/A | #N/A | #N/A | #N/A |      |
| 139506  | INTERGENIC | Dbl Promoter | #N/A | #N/A | #N/A | #N/A | #N/A | #N/A |      |
| 101622  | INTERGENIC | Sgl Promoter | #N/A | #N/A | #N/A | #N/A | #N/A | #N/A |      |
| 93697   | INTERGENIC | Sgl Promoter | 1.09 | 0.46 | 1.27 | 0.61 | 1.34 | 0.61 |      |
| 196332  | INTERGENIC | Dbl Promoter | #N/A | #N/A | #N/A | #N/A | #N/A | #N/A |      |
| 548098  | INTERGENIC | Dbl Promoter | 0.73 | 0.27 | 0.95 | 0.40 | 0.88 | 0.35 |      |
| 568520  | INTERGENIC | Non Promoter | #N/A | #N/A | 1.25 | 0.59 | #N/A | #N/A |      |
| 301380  | INTERGENIC | Non Promoter | #N/A | #N/A | #N/A | #N/A | #N/A | #N/A |      |
| 464771  | INTERGENIC | Sgl Promoter | #N/A | #N/A | 1.55 | 0.75 | #N/A | #N/A |      |
| 808537  | INTERGENIC | Sgl Promoter | #N/A | #N/A | 0.70 | 0.23 | #N/A | #N/A |      |
| 352149  | INTERGENIC | Non Promoter | 1.48 | 0.64 | 1.35 | 0.65 | 0.96 | 0.40 |      |
| 168259  | INTERGENIC | Sgl Promoter | #N/A | #N/A | #N/A | #N/A | #N/A | #N/A |      |
| 521353  | INTERGENIC | Dbl Promoter | 0.81 | 0.32 | 1.20 | 0.56 | 0.85 | 0.34 |      |
| 645540  | INTERGENIC | Sgl Promoter | #N/A | #N/A | #N/A | #N/A | 0.67 | 0.23 |      |
| 802943  | INTERGENIC | Dbl Promoter | #N/A | #N/A | #N/A | #N/A | #N/A | #N/A |      |
| 250717  | INTERGENIC | Dbl Promoter | 1.04 | 0.44 | 1.21 | 0.54 | 1.19 | 0.54 |      |
| 131931  | INTERGENIC | Sgl Promoter | 1.61 | 0.70 | 1.33 | 0.64 | 1.64 | 0.74 |      |





|         |            |              |      |      |      |      |      |      |
|---------|------------|--------------|------|------|------|------|------|------|
| 824053  | INTERGENIC | Dbl Promoter | 0.36 | 0.07 | 0.40 | 0.04 | 0.33 | 0.04 |
| 75396   | INTERGENIC | Sgl Promoter | 0.91 | 0.37 | 0.88 | 0.35 | 1.11 | 0.49 |
| 378521  | INTERGENIC | Sgl Promoter | 1.44 | 0.63 | 1.43 | 0.66 | 1.27 | 0.58 |
| 308853  | INTERGENIC | Sgl Promoter | 0.45 | 0.11 | 0.60 | 0.15 | 0.37 | 0.07 |
| 379706  | INTERGENIC | Non Promoter | 0.60 | 0.20 | 0.70 | 0.23 | 0.74 | 0.27 |
| 688119  | INTERGENIC | Sgl Promoter | #N/A | #N/A | #N/A | #N/A | #N/A | #N/A |
| 372696  | INTERGENIC | Sgl Promoter | #N/A | #N/A | #N/A | #N/A | #N/A | #N/A |
| 421483  | INTERGENIC | Sgl Promoter | 0.95 | 0.39 | 1.01 | 0.44 | 1.03 | 0.45 |
| 587273  | INTERGENIC | Sgl Promoter | 0.43 | 0.10 | 0.46 | 0.08 | 0.42 | 0.07 |
| 664001  | INTERGENIC | Non Promoter | #N/A | #N/A | #N/A | #N/A | 0.62 | 0.20 |
| 1075901 | INTERGENIC | Dbl Promoter | 0.90 | 0.36 | 1.02 | 0.44 | 0.72 | 0.26 |
| 327026  | INTERGENIC | Sgl Promoter | #N/A | #N/A | #N/A | #N/A | #N/A | #N/A |
| 489548  | INTERGENIC | Dbl Promoter | 0.45 | 0.14 | 0.54 | 0.14 | 0.53 | 0.15 |
| 288015  | INTERGENIC | Non Promoter | #N/A | #N/A | 0.92 | 0.38 | 0.81 | 0.31 |
| 880290  | INTERGENIC | Sgl Promoter | 0.87 | 0.35 | 0.85 | 0.33 | 0.88 | 0.36 |
| 415954  | INTERGENIC | Sgl Promoter | #N/A | #N/A | 0.91 | 0.37 | #N/A | #N/A |
| 303713  | INTERGENIC | Sgl Promoter | 1.22 | 0.53 | 1.11 | 0.50 | 1.11 | 0.47 |
| 304759  | INTERGENIC | Sgl Promoter | 0.52 | 0.15 | 0.54 | 0.12 | 0.76 | 0.29 |
| 379585  | INTERGENIC | Dbl Promoter | 1.56 | 0.63 | 1.24 | 0.57 | 1.14 | 0.50 |
| 946843  | INTERGENIC | Sgl Promoter | 0.68 | 0.24 | 0.85 | 0.34 | 0.76 | 0.28 |
| 167880  | INTERGENIC | Dbl Promoter | #N/A | #N/A | #N/A | #N/A | #N/A | #N/A |
| 210924  | INTERGENIC | Dbl Promoter | 1.58 | 0.69 | 1.36 | 0.65 | #N/A | #N/A |
| 354234  | INTERGENIC | Sgl Promoter | #N/A | #N/A | #N/A | #N/A | #N/A | #N/A |
| 543136  | INTERGENIC | Dbl Promoter | 0.70 | 0.25 | 0.60 | 0.16 | 0.65 | 0.22 |
| 169116  | INTERGENIC | Sgl Promoter | #N/A | #N/A | 0.80 | 0.29 | #N/A | #N/A |
| 838187  | INTERGENIC | Dbl Promoter | 0.55 | 0.18 | 1.71 | 0.81 | #N/A | #N/A |
| 288898  | INTERGENIC | Sgl Promoter | 0.58 | 0.19 | 1.10 | 0.50 | 0.52 | 0.13 |
| 151458  | INTERGENIC | Dbl Promoter | 1.23 | 0.53 | 0.69 | 0.24 | #N/A | #N/A |
| 147596  | INTERGENIC | Non Promoter | #N/A | #N/A | #N/A | #N/A | #N/A | #N/A |
| 144003  | INTERGENIC | Sgl Promoter | 1.19 | 0.51 | 1.36 | 0.66 | 1.31 | 0.59 |
| 142177  | INTERGENIC | Dbl Promoter | #N/A | #N/A | 0.73 | 0.25 | 0.52 | 0.13 |
| 138834  | INTERGENIC | Dbl Promoter | 3.10 | 0.95 | 2.29 | 0.95 | 2.40 | 0.91 |
| 137701  | INTERGENIC | Non Promoter | #N/A | #N/A | #N/A | #N/A | #N/A | #N/A |
| 136917  | INTERGENIC | Sgl Promoter | 1.60 | 0.69 | 1.33 | 0.64 | 1.60 | 0.72 |
| 135857  | INTERGENIC | Dbl Promoter | 2.56 | 0.90 | 2.15 | 0.92 | 3.17 | 0.95 |
| 134187  | INTERGENIC | Non Promoter | #N/A | #N/A | 0.81 | 0.30 | 1.20 | 0.54 |
| 130803  | INTERGENIC | Sgl Promoter | 0.54 | 0.16 | 0.94 | 0.39 | 0.89 | 0.37 |
| 129273  | INTERGENIC | Dbl Promoter | 2.09 | 0.82 | 2.35 | 0.95 | 2.13 | 0.87 |
| 128405  | INTERGENIC | Sgl Promoter | 0.59 | 0.20 | 0.90 | 0.36 | 0.85 | 0.34 |
| 126907  | INTERGENIC | Non Promoter | #N/A | #N/A | #N/A | #N/A | #N/A | #N/A |
| 124883  | INTERGENIC | Sgl Promoter | 3.09 | 0.96 | 2.20 | 0.92 | 2.18 | 0.88 |
| 120229  | INTERGENIC | Dbl Promoter | 3.95 | 0.99 | 2.90 | 0.99 | 3.19 | 0.97 |
| 118568  | INTERGENIC | Non Promoter | #N/A | #N/A | #N/A | #N/A | #N/A | #N/A |
| 114923  | INTERGENIC | Dbl Promoter | 3.18 | 0.96 | 2.40 | 0.96 | 3.28 | 0.98 |
| 113618  | INTERGENIC | Sgl Promoter | 2.32 | 0.87 | 1.80 | 0.85 | 1.84 | 0.79 |
| 110850  | INTERGENIC | Sgl Promoter | 0.76 | 0.29 | 0.78 | 0.28 | 0.87 | 0.35 |
| 108881  | INTERGENIC | Sgl Promoter | #N/A | #N/A | 1.62 | 0.77 | 1.70 | 0.75 |
| 101572  | INTERGENIC | Sgl Promoter | 1.77 | 0.75 | 1.83 | 0.82 | 2.72 | 0.95 |
| 100232  | INTERGENIC | Sgl Promoter | 3.59 | 0.98 | 2.47 | 0.96 | 2.19 | 0.88 |
| 95637   | INTERGENIC | Non Promoter | #N/A | #N/A | #N/A | #N/A | #N/A | #N/A |
| 94694   | INTERGENIC | Sgl Promoter | #N/A | #N/A | #N/A | #N/A | #N/A | #N/A |

|        |            |              |      |      |      |      |      |      |
|--------|------------|--------------|------|------|------|------|------|------|
| 92907  | INTERGENIC | Dbl Promoter | 2.54 | 0.89 | 1.75 | 0.80 | 2.14 | 0.87 |
| 87862  | INTERGENIC | Non Promoter | #N/A | #N/A | #N/A | #N/A | #N/A | #N/A |
| 87293  | INTERGENIC | Dbl Promoter | 6.19 | 1.00 | 3.91 | 1.00 | 5.78 | 1.00 |
| 84756  | INTERGENIC | Sgl Promoter | 2.45 | 0.87 | 1.76 | 0.83 | 2.54 | 0.93 |
| 83342  | INTERGENIC | Non Promoter | #N/A | #N/A | #N/A | #N/A | #N/A | #N/A |
| 82713  | INTERGENIC | Dbl Promoter | 1.77 | 0.75 | 1.78 | 0.81 | 1.56 | 0.69 |
| 80717  | INTERGENIC | Non Promoter | #N/A | #N/A | #N/A | #N/A | #N/A | #N/A |
| 76434  | INTERGENIC | Dbl Promoter | 2.87 | 0.94 | 1.81 | 0.85 | 2.73 | 0.91 |
| 75050  | INTERGENIC | Non Promoter | #N/A | #N/A | #N/A | #N/A | #N/A | #N/A |
| 74027  | INTERGENIC | Sgl Promoter | 1.24 | 0.53 | 1.18 | 0.55 | 0.91 | 0.38 |
| 70662  | INTERGENIC | Dbl Promoter | 0.49 | 0.14 | 0.56 | 0.13 | 0.25 | 0.02 |
| 71793  | INTERGENIC | Dbl Promoter | 0.09 | 0.00 | 0.33 | 0.02 | 0.18 | 0.01 |
| 68723  | INTERGENIC | Sgl Promoter | 0.38 | 0.08 | 0.62 | 0.17 | 0.34 | 0.04 |
| 65785  | INTERGENIC | Non Promoter | #N/A | #N/A | 0.69 | 0.22 | 0.60 | 0.19 |
| 62847  | INTERGENIC | Sgl Promoter | 3.19 | 0.97 | 2.37 | 0.95 | 3.06 | 0.88 |
| 61238  | INTERGENIC | Sgl Promoter | 1.45 | 0.63 | 1.76 | 0.79 | #N/A | #N/A |
| 58702  | INTERGENIC | Sgl Promoter | 0.32 | 0.05 | #N/A | #N/A | #N/A | #N/A |
| 57957  | INTERGENIC | Sgl Promoter | #N/A | #N/A | 0.55 | 0.12 | #N/A | #N/A |
| 57495  | INTERGENIC | Sgl Promoter | #N/A | #N/A | 2.18 | 0.93 | #N/A | #N/A |
| 57036  | INTERGENIC | Sgl Promoter | #N/A | #N/A | 1.30 | 0.62 | 1.31 | 0.54 |
| 54996  | INTERGENIC | Sgl Promoter | #N/A | #N/A | #N/A | #N/A | #N/A | #N/A |
| 52808  | INTERGENIC | Sgl Promoter | 1.59 | 0.69 | 1.68 | 0.72 | 1.90 | 0.82 |
| 51862  | INTERGENIC | Non Promoter | #N/A | #N/A | #N/A | #N/A | #N/A | #N/A |
| 48569  | INTERGENIC | Sgl Promoter | 0.93 | 0.37 | #N/A | #N/A | 1.27 | 0.57 |
| 45904  | INTERGENIC | Dbl Promoter | 0.97 | 0.39 | 0.65 | 0.19 | 0.92 | 0.38 |
| 42886  | INTERGENIC | Non Promoter | #N/A | #N/A | #N/A | #N/A | 1.08 | 0.48 |
| 42182  | INTERGENIC | Sgl Promoter | 1.10 | 0.47 | 1.27 | 0.60 | 1.92 | 0.81 |
| 39265  | INTERGENIC | Dbl Promoter | 2.07 | 0.79 | #N/A | #N/A | 2.47 | 0.91 |
| 37470  | INTERGENIC | Sgl Promoter | #N/A | #N/A | 2.15 | 0.93 | #N/A | #N/A |
| 36515  | INTERGENIC | Sgl Promoter | #N/A | #N/A | 1.95 | 0.78 | 1.59 | 0.68 |
| 35161  | INTERGENIC | Sgl Promoter | 0.63 | 0.22 | 0.81 | 0.30 | 1.04 | 0.44 |
| 33454  | INTERGENIC | Sgl Promoter | 1.00 | 0.42 | 1.43 | 0.66 | 1.44 | 0.62 |
| 29170  | INTERGENIC | Dbl Promoter | 0.87 | 0.35 | 0.83 | 0.32 | 1.06 | 0.46 |
| 30371  | INTERGENIC | Dbl Promoter | 0.93 | 0.38 | 0.86 | 0.34 | 1.02 | 0.44 |
| 15041  | INTERGENIC | Dbl Promoter | 0.72 | 0.27 | 0.96 | 0.40 | 1.00 | 0.43 |
| 16338  | INTERGENIC | Dbl Promoter | 0.70 | 0.25 | 0.64 | 0.19 | 0.64 | 0.21 |
| 17635  | INTERGENIC | Dbl Promoter | 1.06 | 0.45 | 0.83 | 0.31 | 1.12 | 0.50 |
| 18932  | INTERGENIC | Dbl Promoter | 1.49 | 0.65 | 1.11 | 0.50 | 1.38 | 0.63 |
| 20229  | INTERGENIC | Dbl Promoter | 1.21 | 0.52 | 1.32 | 0.64 | 1.34 | 0.61 |
| 21526  | INTERGENIC | Dbl Promoter | 0.78 | 0.30 | 1.16 | 0.54 | 0.81 | 0.31 |
| 22232  | INTERGENIC | Non Promoter | 1.31 | 0.57 | 1.39 | 0.67 | 1.07 | 0.46 |
| 12047  | INTERGENIC | Dbl Promoter | 0.88 | 0.35 | 0.93 | 0.38 | 0.94 | 0.40 |
| 11566  | INTERGENIC | Non Promoter | 1.31 | 0.57 | 1.40 | 0.68 | 1.17 | 0.53 |
| 10092  | INTERGENIC | Dbl Promoter | 2.37 | 0.89 | 1.50 | 0.73 | 2.04 | 0.85 |
| 3435   | INTERGENIC | Sgl Promoter | 0.54 | 0.16 | 0.69 | 0.22 | 0.60 | 0.18 |
| 5967   | INTERGENIC | Sgl Promoter | 0.72 | 0.27 | 0.78 | 0.28 | 0.83 | 0.32 |
| 1807   | INTERGENIC | Non Promoter | 0.38 | 0.07 | 0.51 | 0.10 | 0.56 | 0.16 |
| 139155 | INTERGENIC | Dbl Promoter | #N/A | #N/A | #N/A | #N/A | #N/A | #N/A |
| 24001  | INTERGENIC | Non Promoter | 1.42 | 0.62 | 1.15 | 0.53 | 1.29 | 0.59 |
| 155007 | INTERGENIC | Dbl Promoter | 2.88 | 0.94 | #N/A | #N/A | #N/A | #N/A |
| 154067 | INTERGENIC | Non Promoter | #N/A | #N/A | 0.71 | 0.24 | #N/A | #N/A |

|        |            |              |      |      |      |      |      |      |
|--------|------------|--------------|------|------|------|------|------|------|
| 156756 | INTERGENIC | Non Promoter | #N/A | #N/A | 0.58 | 0.15 | 0.69 | 0.24 |
| 158967 | INTERGENIC | Dbl Promoter | 2.98 | 0.95 | 2.20 | 0.93 | 3.50 | 0.98 |
| 160106 | INTERGENIC | Non Promoter | 0.59 | 0.19 | 0.98 | 0.41 | 0.71 | 0.25 |
| 164545 | INTERGENIC | Sgl Promoter | 0.47 | 0.12 | 0.70 | 0.23 | 0.54 | 0.14 |
| 169371 | INTERGENIC | Dbl Promoter | 2.09 | 0.84 | 2.21 | 0.93 | 2.32 | 0.89 |
| 170392 | INTERGENIC | Non Promoter | #N/A | #N/A | #N/A | #N/A | #N/A | #N/A |
| 175994 | INTERGENIC | Sgl Promoter | 2.57 | 0.92 | 2.76 | 0.98 | 3.04 | 0.96 |
| 176855 | INTERGENIC | Sgl Promoter | 1.19 | 0.51 | 1.20 | 0.57 | 0.89 | 0.36 |
| 178151 | INTERGENIC | Sgl Promoter | 1.00 | 0.42 | 1.17 | 0.55 | 1.48 | 0.68 |
| 179280 | INTERGENIC | Sgl Promoter | 0.57 | 0.18 | 0.74 | 0.25 | 0.86 | 0.35 |
| 181136 | INTERGENIC | Dbl Promoter | 1.23 | 0.53 | 1.42 | 0.69 | 1.16 | 0.52 |
| 184887 | INTERGENIC | Sgl Promoter | 1.72 | 0.74 | 1.58 | 0.76 | 2.06 | 0.86 |
| 186316 | INTERGENIC | Sgl Promoter | 1.20 | 0.52 | 1.39 | 0.67 | 1.81 | 0.79 |
| 188102 | INTERGENIC | Sgl Promoter | 1.90 | 0.78 | 1.29 | 0.62 | 1.55 | 0.71 |
| 189421 | INTERGENIC | Sgl Promoter | 1.83 | 0.77 | 1.36 | 0.66 | 1.73 | 0.77 |
| 192614 | INTERGENIC | Sgl Promoter | 1.36 | 0.59 | 1.10 | 0.49 | 1.14 | 0.51 |
| 193600 | INTERGENIC | Sgl Promoter | 0.53 | 0.16 | 0.54 | 0.12 | 0.49 | 0.11 |
| 197499 | INTERGENIC | Non Promoter | 0.76 | 0.29 | 0.47 | 0.08 | 0.84 | 0.33 |
| 198819 | INTERGENIC | Non Promoter | 0.70 | 0.25 | 0.65 | 0.19 | 0.96 | 0.40 |
| 200139 | INTERGENIC | Non Promoter | #N/A | #N/A | 1.01 | 0.44 | #N/A | #N/A |
| 201460 | INTERGENIC | Non Promoter | #N/A | #N/A | 0.98 | 0.42 | 0.43 | 0.11 |
| 202587 | INTERGENIC | Dbl Promoter | #N/A | #N/A | 0.92 | 0.38 | #N/A | #N/A |
| 203394 | INTERGENIC | Dbl Promoter | 0.31 | 0.07 | 1.09 | 0.49 | 0.32 | 0.04 |
| 208358 | INTERGENIC | Sgl Promoter | #N/A | #N/A | #N/A | #N/A | #N/A | #N/A |
| 209439 | INTERGENIC | Non Promoter | 1.53 | 0.67 | 1.24 | 0.58 | 1.43 | 0.65 |
| 218132 | INTERGENIC | Dbl Promoter | 0.97 | 0.40 | 1.21 | 0.56 | 1.16 | 0.52 |
| 218541 | INTERGENIC | Sgl Promoter | 0.44 | 0.11 | 0.61 | 0.16 | 0.60 | 0.18 |
| 220190 | INTERGENIC | Sgl Promoter | 0.74 | 0.28 | 1.03 | 0.44 | 0.81 | 0.31 |
| 221041 | INTERGENIC | Sgl Promoter | 0.86 | 0.34 | 0.87 | 0.34 | 0.69 | 0.24 |
| 222398 | INTERGENIC | Sgl Promoter | 0.68 | 0.24 | 0.77 | 0.28 | 0.74 | 0.27 |
| 224003 | INTERGENIC | Non Promoter | 1.16 | 0.50 | 1.32 | 0.63 | 1.05 | 0.46 |
| 224555 | INTERGENIC | Sgl Promoter | 1.17 | 0.50 | 1.29 | 0.61 | 1.17 | 0.53 |
| 225452 | INTERGENIC | Dbl Promoter | 1.91 | 0.79 | 1.72 | 0.80 | 1.62 | 0.73 |
| 227734 | INTERGENIC | Sgl Promoter | #N/A | #N/A | 2.03 | 0.90 | #N/A | #N/A |
| 166268 | INTERGENIC | Sgl Promoter | #N/A | #N/A | #N/A | #N/A | #N/A | #N/A |
| 211245 | INTERGENIC | Non Promoter | 0.91 | 0.37 | 1.23 | 0.58 | 1.07 | 0.47 |
| 212721 | INTERGENIC | Non Promoter | 1.05 | 0.44 | 1.14 | 0.52 | 1.16 | 0.52 |
| 214197 | INTERGENIC | Non Promoter | 1.52 | 0.66 | 1.12 | 0.50 | 1.24 | 0.56 |
| 215673 | INTERGENIC | Non Promoter | 1.51 | 0.66 | 1.18 | 0.55 | 1.58 | 0.72 |
| 217149 | INTERGENIC | Non Promoter | 0.73 | 0.27 | 0.66 | 0.20 | 0.68 | 0.23 |
| 183765 | INTERGENIC | Dbl Promoter | 1.67 | 0.71 | 1.24 | 0.59 | 1.11 | 0.49 |
| 190188 | INTERGENIC | Sgl Promoter | 0.73 | 0.27 | 0.79 | 0.29 | 0.77 | 0.29 |
| 183137 | INTERGENIC | Dbl Promoter | #N/A | #N/A | #N/A | #N/A | #N/A | #N/A |
| 238165 | INTERGENIC | Sgl Promoter | 1.09 | 0.45 | 0.89 | 0.36 | 0.61 | 0.19 |
| 237111 | INTERGENIC | Non Promoter | #N/A | #N/A | #N/A | #N/A | #N/A | #N/A |
| 236451 | INTERGENIC | Dbl Promoter | 0.31 | 0.04 | 0.40 | 0.05 | 0.13 | 0.00 |
| 235353 | INTERGENIC | Non Promoter | #N/A | #N/A | #N/A | #N/A | #N/A | #N/A |
| 220854 | INTERGENIC | Sgl Promoter | 0.48 | 0.13 | 1.02 | 0.44 | 0.80 | 0.31 |
| 217429 | INTERGENIC | Dbl Promoter | 1.20 | 0.52 | 1.62 | 0.78 | 1.47 | 0.67 |
| 216651 | INTERGENIC | Sgl Promoter | 1.35 | 0.58 | 1.38 | 0.66 | 1.91 | 0.81 |
| 212590 | INTERGENIC | Non Promoter | 0.41 | 0.10 | 0.80 | 0.30 | 0.83 | 0.32 |

|        |            |              |      |      |      |      |      |      |
|--------|------------|--------------|------|------|------|------|------|------|
| 209611 | INTERGENIC | Sgl Promoter | 3.33 | 0.78 | 1.63 | 0.73 | 1.60 | 0.69 |
| 207152 | INTERGENIC | Dbl Promoter | 2.51 | 0.81 | 1.88 | 0.85 | #N/A | #N/A |
| 206065 | INTERGENIC | Non Promoter | 0.51 | 0.15 | #N/A | #N/A | 0.69 | 0.24 |
| 203364 | INTERGENIC | Non Promoter | 0.44 | 0.11 | 0.60 | 0.16 | 0.69 | 0.24 |
| 202015 | INTERGENIC | Dbl Promoter | 2.29 | 0.84 | 1.82 | 0.85 | 2.95 | 0.92 |
| 196975 | INTERGENIC | Non Promoter | 1.22 | 0.53 | 1.56 | 0.76 | 1.39 | 0.62 |
| 194081 | INTERGENIC | Sgl Promoter | 1.63 | 0.69 | 1.19 | 0.55 | 1.06 | 0.46 |
| 192410 | INTERGENIC | Dbl Promoter | 0.78 | 0.30 | 1.22 | 0.57 | 1.03 | 0.43 |
| 186803 | INTERGENIC | Sgl Promoter | 1.78 | 0.75 | 1.79 | 0.84 | 1.84 | 0.80 |
| 185957 | INTERGENIC | Non Promoter | #N/A | #N/A | #N/A | #N/A | #N/A | #N/A |
| 184312 | INTERGENIC | Sgl Promoter | #N/A | #N/A | #N/A | #N/A | #N/A | #N/A |
| 181619 | INTERGENIC | Sgl Promoter | 0.99 | 0.41 | 1.22 | 0.56 | 1.44 | 0.66 |
| 177833 | INTERGENIC | Sgl Promoter | #N/A | #N/A | 0.84 | 0.32 | 1.13 | 0.49 |
| 174879 | INTERGENIC | Non Promoter | #N/A | #N/A | 0.56 | 0.13 | 0.55 | 0.15 |
| 172493 | INTERGENIC | Sgl Promoter | 1.32 | 0.58 | 1.55 | 0.74 | 1.52 | 0.66 |
| 171440 | INTERGENIC | Sgl Promoter | 1.11 | 0.47 | 1.33 | 0.65 | 1.56 | 0.68 |
| 170582 | INTERGENIC | Sgl Promoter | 0.96 | 0.40 | 0.98 | 0.41 | 0.85 | 0.34 |
| 168382 | INTERGENIC | Dbl Promoter | 0.13 | 0.01 | 0.21 | 0.01 | 0.25 | 0.02 |
| 167477 | INTERGENIC | Non Promoter | #N/A | #N/A | 0.93 | 0.39 | #N/A | #N/A |
| 165024 | INTERGENIC | Dbl Promoter | 0.85 | 0.34 | 0.77 | 0.28 | 0.85 | 0.33 |
| 166093 | INTERGENIC | Dbl Promoter | 0.57 | 0.18 | 0.76 | 0.26 | 0.46 | 0.10 |
| 163000 | INTERGENIC | Non Promoter | #N/A | #N/A | #N/A | #N/A | #N/A | #N/A |
| 161658 | INTERGENIC | Sgl Promoter | 2.46 | 0.90 | 1.52 | 0.73 | 1.85 | 0.80 |
| 160143 | INTERGENIC | Dbl Promoter | 2.25 | 0.85 | 1.52 | 0.72 | 1.82 | 0.76 |
| 158615 | INTERGENIC | Sgl Promoter | 3.59 | 0.97 | 1.79 | 0.83 | 3.04 | 0.96 |
| 153807 | INTERGENIC | Sgl Promoter | #N/A | #N/A | 0.94 | 0.39 | #N/A | #N/A |
| 151452 | INTERGENIC | Sgl Promoter | 2.23 | 0.86 | 1.78 | 0.83 | 2.95 | 0.96 |
| 150406 | INTERGENIC | Non Promoter | #N/A | #N/A | #N/A | #N/A | #N/A | #N/A |
| 147168 | INTERGENIC | Sgl Promoter | 1.53 | 0.67 | 1.24 | 0.59 | 1.34 | 0.62 |
| 146146 | INTERGENIC | Dbl Promoter | 1.54 | 0.66 | 1.62 | 0.78 | 1.88 | 0.81 |
| 143948 | INTERGENIC | Sgl Promoter | 1.59 | 0.68 | 1.59 | 0.77 | 1.71 | 0.75 |
| 142071 | INTERGENIC | Non Promoter | #N/A | #N/A | #N/A | #N/A | #N/A | #N/A |
| 141206 | INTERGENIC | Dbl Promoter | 0.61 | 0.20 | 0.52 | 0.11 | 0.38 | 0.07 |
| 138300 | INTERGENIC | Non Promoter | 1.17 | 0.50 | 0.94 | 0.38 | 1.00 | 0.42 |
| 136647 | INTERGENIC | Sgl Promoter | 1.95 | 0.75 | 1.50 | 0.73 | 1.47 | 0.65 |
| 135957 | INTERGENIC | Dbl Promoter | 0.93 | 0.38 | 0.99 | 0.43 | 0.81 | 0.32 |
| 134102 | INTERGENIC | Non Promoter | #N/A | #N/A | 0.58 | 0.14 | #N/A | #N/A |
| 132383 | INTERGENIC | Dbl Promoter | 2.71 | 0.93 | 2.56 | 0.92 | 3.06 | 0.97 |
| 127854 | INTERGENIC | Non Promoter | 0.75 | 0.28 | 0.83 | 0.32 | 0.87 | 0.35 |
| 126787 | INTERGENIC | Sgl Promoter | 0.67 | 0.24 | 1.10 | 0.50 | 1.07 | 0.46 |
| 125084 | INTERGENIC | Dbl Promoter | 3.56 | 0.98 | 2.90 | 0.98 | 3.82 | 0.98 |
| 122712 | INTERGENIC | Sgl Promoter | 1.59 | 0.69 | 1.27 | 0.60 | 1.90 | 0.81 |
| 119294 | INTERGENIC | Sgl Promoter | #N/A | #N/A | #N/A | #N/A | 0.97 | 0.40 |
| 117548 | INTERGENIC | Dbl Promoter | 0.98 | 0.40 | 1.25 | 0.59 | 0.95 | 0.40 |
| 115532 | INTERGENIC | Non Promoter | 0.53 | 0.16 | 0.76 | 0.27 | 0.79 | 0.31 |
| 113721 | INTERGENIC | Dbl Promoter | #N/A | #N/A | #N/A | #N/A | #N/A | #N/A |
| 112759 | INTERGENIC | Non Promoter | #N/A | #N/A | #N/A | #N/A | #N/A | #N/A |
| 111395 | INTERGENIC | Sgl Promoter | #N/A | #N/A | #N/A | #N/A | #N/A | #N/A |
| 110552 | INTERGENIC | Sgl Promoter | 1.09 | 0.46 | 1.26 | 0.59 | 1.06 | 0.46 |
| 107890 | INTERGENIC | Dbl Promoter | 1.19 | 0.51 | 1.06 | 0.47 | #N/A | #N/A |
| 105266 | INTERGENIC | Sgl Promoter | #N/A | #N/A | #N/A | #N/A | #N/A | #N/A |



|        |            |              |      |      |      |      |      |      |
|--------|------------|--------------|------|------|------|------|------|------|
| 101844 | INTERGENIC | Dbl Promoter | 2.20 | 0.86 | 1.31 | 0.63 | 1.69 | 0.76 |
| 100329 | INTERGENIC | Non Promoter | #N/A | #N/A | #N/A | #N/A | #N/A | #N/A |
| 96900  | INTERGENIC | Sgl Promoter | 0.86 | 0.35 | 0.80 | 0.29 | 0.91 | 0.38 |
| 93811  | INTERGENIC | Non Promoter | #N/A | #N/A | 0.44 | 0.08 | 1.08 | 0.44 |
| 92322  | INTERGENIC | Sgl Promoter | 2.23 | 0.86 | 1.28 | 0.61 | 1.79 | 0.79 |
| 90596  | INTERGENIC | Sgl Promoter | #N/A | #N/A | #N/A | #N/A | #N/A | #N/A |
| 90214  | INTERGENIC | Sgl Promoter | 0.75 | 0.29 | 0.62 | 0.17 | 0.79 | 0.30 |
| 88181  | INTERGENIC | Non Promoter | 0.43 | 0.10 | 0.45 | 0.07 | 0.57 | 0.17 |
| 86713  | INTERGENIC | Sgl Promoter | 0.38 | 0.08 | 0.42 | 0.05 | 0.46 | 0.10 |
| 84490  | INTERGENIC | Sgl Promoter | #N/A | #N/A | #N/A | #N/A | #N/A | #N/A |
| 80888  | INTERGENIC | Dbl Promoter | #N/A | #N/A | #N/A | #N/A | #N/A | #N/A |
| 80368  | INTERGENIC | Non Promoter | 1.14 | 0.48 | 0.78 | 0.29 | 1.17 | 0.53 |
| 75249  | INTERGENIC | Dbl Promoter | 1.60 | 0.69 | 1.47 | 0.72 | 1.88 | 0.81 |
| 73060  | INTERGENIC | Non Promoter | #N/A | #N/A | #N/A | #N/A | #N/A | #N/A |
| 71856  | INTERGENIC | Dbl Promoter | 2.57 | 0.92 | 2.35 | 0.95 | 2.43 | 0.92 |
| 69703  | INTERGENIC | Sgl Promoter | 2.03 | 0.81 | 1.37 | 0.63 | 2.47 | 0.88 |
| 67159  | INTERGENIC | Non Promoter | #N/A | #N/A | #N/A | #N/A | #N/A | #N/A |
| 63866  | INTERGENIC | Dbl Promoter | 0.95 | 0.39 | 0.95 | 0.39 | 0.92 | 0.38 |
| 61192  | INTERGENIC | Sgl Promoter | 0.36 | 0.07 | 0.48 | 0.08 | 0.45 | 0.11 |
| 59811  | INTERGENIC | Sgl Promoter | 1.58 | 0.68 | 1.42 | 0.69 | 1.46 | 0.67 |
| 48815  | INTERGENIC | Dbl Promoter | #N/A | #N/A | 2.67 | 0.98 | 2.17 | 0.88 |
| 47353  | INTERGENIC | Sgl Promoter | 0.98 | 0.41 | #N/A | #N/A | 0.86 | 0.34 |
| 46555  | INTERGENIC | Non Promoter | #N/A | #N/A | #N/A | #N/A | #N/A | #N/A |
| 45968  | INTERGENIC | Dbl Promoter | 0.50 | 0.14 | 0.48 | 0.08 | 0.58 | 0.17 |
| 44246  | INTERGENIC | Sgl Promoter | 0.36 | 0.07 | 0.40 | 0.05 | 0.51 | 0.12 |
| 43164  | INTERGENIC | Non Promoter | #N/A | #N/A | #N/A | #N/A | #N/A | #N/A |
| 40899  | INTERGENIC | Sgl Promoter | #N/A | #N/A | #N/A | #N/A | 2.45 | 0.88 |
| 39133  | INTERGENIC | Sgl Promoter | #N/A | #N/A | 0.71 | 0.24 | 1.47 | 0.60 |
| 29632  | INTERGENIC | Non Promoter | 1.06 | 0.45 | 1.26 | 0.60 | 1.04 | 0.45 |
| 24941  | INTERGENIC | Non Promoter | #N/A | #N/A | #N/A | #N/A | #N/A | #N/A |
| 24093  | INTERGENIC | Dbl Promoter | 2.18 | 0.86 | 1.78 | 0.84 | 2.26 | 0.89 |
| 22070  | INTERGENIC | Sgl Promoter | 2.00 | 0.81 | 1.78 | 0.84 | 2.28 | 0.88 |
| 18317  | INTERGENIC | Sgl Promoter | 2.62 | 0.92 | 1.52 | 0.74 | 3.24 | 0.97 |
| 14241  | INTERGENIC | Sgl Promoter | 0.51 | 0.15 | 0.68 | 0.22 | 1.01 | 0.44 |
| 8848   | INTERGENIC | Sgl Promoter | #N/A | #N/A | 1.37 | 0.66 | #N/A | #N/A |
| 7151   | INTERGENIC | Sgl Promoter | 0.45 | 0.11 | 0.51 | 0.10 | 0.54 | 0.15 |
| 8177   | INTERGENIC | Sgl Promoter | 0.64 | 0.22 | 0.73 | 0.25 | 0.78 | 0.29 |
| 5790   | INTERGENIC | Dbl Promoter | 0.60 | 0.20 | 0.62 | 0.17 | 0.65 | 0.21 |
| 197453 | INTERGENIC | Non Promoter | #N/A | #N/A | #N/A | #N/A | #N/A | #N/A |
| 199023 | INTERGENIC | Non Promoter | 1.22 | 0.53 | 1.43 | 0.69 | 1.13 | 0.50 |
| 227034 | INTERGENIC | Sgl Promoter | #N/A | #N/A | #N/A | #N/A | #N/A | #N/A |
| 9583   | INTERGENIC | Non Promoter | #N/A | #N/A | #N/A | #N/A | #N/A | #N/A |
| 36386  | INTERGENIC | Non Promoter | 1.28 | 0.56 | 0.98 | 0.42 | 1.57 | 0.70 |
| 241666 | INTERGENIC | Sgl Promoter | 0.71 | 0.26 | 0.84 | 0.32 | 0.78 | 0.29 |
| 242767 | INTERGENIC | Dbl Promoter | 4.09 | 0.98 | 1.81 | 0.82 | 1.78 | 0.78 |
| 244324 | INTERGENIC | Non Promoter | #N/A | #N/A | #N/A | #N/A | #N/A | #N/A |
| 245864 | INTERGENIC | Dbl Promoter | #N/A | #N/A | 1.68 | 0.77 | 1.22 | 0.55 |
| 246968 | INTERGENIC | Sgl Promoter | 1.57 | 0.68 | 1.14 | 0.52 | 1.57 | 0.71 |
| 248763 | INTERGENIC | Sgl Promoter | 0.84 | 0.34 | 0.67 | 0.21 | 0.74 | 0.27 |
| 251746 | INTERGENIC | Sgl Promoter | 0.71 | 0.26 | 1.16 | 0.54 | 0.71 | 0.25 |
| 252520 | INTERGENIC | Sgl Promoter | 0.80 | 0.31 | 0.97 | 0.41 | 0.71 | 0.25 |

|        |            |              |      |      |      |      |      |      |
|--------|------------|--------------|------|------|------|------|------|------|
| 255327 | INTERGENIC | Sgl Promoter | 0.78 | 0.30 | 0.81 | 0.30 | 0.74 | 0.27 |
| 256285 | INTERGENIC | Dbl Promoter | #N/A | #N/A | 0.40 | 0.05 | #N/A | #N/A |
| 257066 | INTERGENIC | Non Promoter | #N/A | #N/A | #N/A | #N/A | 0.47 | 0.12 |
| 258624 | INTERGENIC | Sgl Promoter | 1.55 | 0.66 | 1.09 | 0.48 | 1.38 | 0.62 |
| 266134 | INTERGENIC | Sgl Promoter | #N/A | #N/A | 2.51 | 0.96 | #N/A | #N/A |
| 267666 | INTERGENIC | Sgl Promoter | #N/A | #N/A | 0.67 | 0.20 | 0.91 | 0.38 |
| 270203 | INTERGENIC | Dbl Promoter | 1.13 | 0.48 | 1.16 | 0.54 | 1.29 | 0.59 |
| 270903 | INTERGENIC | Non Promoter | 1.10 | 0.47 | 1.27 | 0.60 | 0.85 | 0.34 |
| 274383 | INTERGENIC | Sgl Promoter | 1.72 | 0.71 | 1.68 | 0.80 | 2.44 | 0.90 |
| 276209 | INTERGENIC | Sgl Promoter | 1.52 | 0.66 | 1.72 | 0.82 | 2.06 | 0.82 |
| 278977 | INTERGENIC | Dbl Promoter | 1.14 | 0.49 | 0.47 | 0.09 | 2.38 | 0.86 |
| 281399 | INTERGENIC | Sgl Promoter | 0.78 | 0.30 | 0.69 | 0.22 | 0.94 | 0.39 |
| 283694 | INTERGENIC | Sgl Promoter | 1.26 | 0.55 | 1.18 | 0.55 | 1.10 | 0.49 |
| 284384 | INTERGENIC | Non Promoter | #N/A | #N/A | #N/A | #N/A | #N/A | #N/A |
| 290637 | INTERGENIC | Non Promoter | 0.50 | 0.14 | 0.58 | 0.14 | 0.64 | 0.21 |
| 292833 | INTERGENIC | Sgl Promoter | 1.15 | 0.49 | 0.95 | 0.40 | 1.02 | 0.45 |
| 294381 | INTERGENIC | Sgl Promoter | #N/A | #N/A | #N/A | #N/A | #N/A | #N/A |
| 296325 | INTERGENIC | Sgl Promoter | #N/A | #N/A | 0.75 | 0.27 | #N/A | #N/A |
| 298248 | INTERGENIC | Dbl Promoter | 1.55 | 0.67 | 1.83 | 0.86 | 1.68 | 0.75 |
| 301475 | INTERGENIC | Sgl Promoter | #N/A | #N/A | #N/A | #N/A | #N/A | #N/A |
| 301900 | INTERGENIC | Sgl Promoter | #N/A | #N/A | 1.09 | 0.47 | 0.99 | 0.41 |
| 304886 | INTERGENIC | Non Promoter | #N/A | #N/A | #N/A | #N/A | #N/A | #N/A |
| 306225 | INTERGENIC | Sgl Promoter | 1.00 | 0.39 | 0.97 | 0.40 | 0.88 | 0.36 |
| 307543 | INTERGENIC | Sgl Promoter | 1.55 | 0.66 | 1.89 | 0.86 | 1.31 | 0.60 |
| 310520 | INTERGENIC | Sgl Promoter | 3.30 | 0.97 | 2.23 | 0.93 | 2.58 | 0.94 |
| 311853 | INTERGENIC | Dbl Promoter | 1.42 | 0.62 | 1.36 | 0.64 | 1.46 | 0.66 |
| 315531 | INTERGENIC | Sgl Promoter | 0.94 | 0.39 | 0.88 | 0.35 | 0.96 | 0.41 |
| 316924 | INTERGENIC | Sgl Promoter | #N/A | #N/A | #N/A | #N/A | #N/A | #N/A |
| 318222 | INTERGENIC | Sgl Promoter | #N/A | #N/A | 1.38 | 0.66 | 1.25 | 0.55 |
| 321834 | INTERGENIC | Sgl Promoter | #N/A | #N/A | 1.67 | 0.77 | 2.01 | 0.79 |
| 324295 | INTERGENIC | Sgl Promoter | 0.79 | 0.31 | 1.78 | 0.83 | 1.11 | 0.49 |
| 326749 | INTERGENIC | Sgl Promoter | 0.84 | 0.33 | 1.06 | 0.47 | 1.54 | 0.70 |
| 330463 | INTERGENIC | Sgl Promoter | #N/A | #N/A | 0.45 | 0.07 | 0.89 | 0.34 |
| 331789 | INTERGENIC | Dbl Promoter | 0.84 | 0.33 | 0.82 | 0.30 | 0.79 | 0.30 |
| 332787 | INTERGENIC | Sgl Promoter | 0.15 | 0.01 | #N/A | #N/A | 0.25 | 0.02 |
| 334342 | INTERGENIC | Non Promoter | 0.32 | 0.06 | 0.45 | 0.07 | 0.50 | 0.12 |
| 337139 | INTERGENIC | Sgl Promoter | 1.47 | 0.64 | 1.12 | 0.51 | 1.32 | 0.59 |
| 338676 | INTERGENIC | Non Promoter | 2.48 | 0.91 | 1.96 | 0.89 | 2.21 | 0.88 |
| 339631 | INTERGENIC | Sgl Promoter | #N/A | #N/A | 1.70 | 0.78 | 1.26 | 0.57 |
| 341882 | INTERGENIC | Dbl Promoter | 0.82 | 0.32 | 0.84 | 0.32 | 0.64 | 0.21 |
| 343057 | INTERGENIC | Dbl Promoter | 1.00 | 0.42 | 1.13 | 0.51 | 0.78 | 0.30 |
| 344558 | INTERGENIC | Non Promoter | 3.35 | 0.97 | 1.43 | 0.69 | #N/A | #N/A |
| 350415 | INTERGENIC | Non Promoter | 1.21 | 0.52 | 1.23 | 0.58 | 1.54 | 0.70 |
| 353628 | INTERGENIC | Sgl Promoter | 1.01 | 0.42 | 0.97 | 0.41 | 1.23 | 0.56 |
| 356817 | INTERGENIC | Sgl Promoter | 2.33 | 0.88 | 1.87 | 0.87 | 2.09 | 0.86 |
| 360608 | INTERGENIC | Sgl Promoter | 2.03 | 0.79 | 2.07 | 0.89 | 1.76 | 0.77 |
| 363606 | INTERGENIC | Sgl Promoter | 1.08 | 0.46 | 1.26 | 0.59 | 1.35 | 0.61 |
| 364743 | INTERGENIC | Sgl Promoter | 0.51 | 0.15 | 0.58 | 0.14 | 0.75 | 0.28 |
| 366927 | INTERGENIC | Sgl Promoter | 1.46 | 0.64 | 1.36 | 0.66 | 1.26 | 0.57 |
| 368541 | INTERGENIC | Non Promoter | 0.61 | 0.20 | 0.92 | 0.38 | 1.15 | 0.51 |
| 369994 | INTERGENIC | Sgl Promoter | 2.72 | 0.92 | 2.71 | 0.96 | 2.29 | 0.90 |

|        |            |              |      |      |      |      |      |      |
|--------|------------|--------------|------|------|------|------|------|------|
| 372059 | INTERGENIC | Sgl Promoter | 0.50 | 0.14 | 0.54 | 0.12 | 0.48 | 0.11 |
| 373817 | INTERGENIC | Sgl Promoter | 0.47 | 0.13 | 0.56 | 0.13 | 0.49 | 0.12 |
| 376530 | INTERGENIC | Sgl Promoter | 0.18 | 0.01 | 0.21 | 0.01 | 0.13 | 0.00 |
| 379176 | INTERGENIC | Sgl Promoter | 0.17 | 0.01 | 0.45 | 0.07 | 0.33 | 0.04 |
| 380366 | INTERGENIC | Dbl Promoter | 0.84 | 0.33 | 0.86 | 0.34 | 0.97 | 0.41 |
| 381985 | INTERGENIC | Sgl Promoter | 1.19 | 0.52 | 1.11 | 0.50 | 1.39 | 0.63 |
| 383065 | INTERGENIC | Sgl Promoter | 2.07 | 0.83 | 1.75 | 0.81 | 1.91 | 0.81 |
| 386239 | INTERGENIC | Sgl Promoter | 1.29 | 0.55 | 1.09 | 0.49 | #N/A | #N/A |
| 387789 | INTERGENIC | Sgl Promoter | 0.29 | 0.04 | 0.37 | 0.04 | 0.38 | 0.06 |
| 390329 | INTERGENIC | Sgl Promoter | 0.90 | 0.37 | 1.03 | 0.45 | 1.18 | 0.53 |
| 391759 | INTERGENIC | Non Promoter | 0.69 | 0.25 | 0.80 | 0.30 | 0.63 | 0.20 |
| 393078 | INTERGENIC | Dbl Promoter | 0.25 | 0.03 | 0.47 | 0.08 | 0.34 | 0.05 |
| 395337 | INTERGENIC | Non Promoter | #N/A | #N/A | 0.54 | 0.12 | 0.41 | 0.07 |
| 398568 | INTERGENIC | Sgl Promoter | 0.98 | 0.41 | 1.79 | 0.78 | 0.99 | 0.41 |
| 401207 | INTERGENIC | Sgl Promoter | 2.01 | 0.82 | 1.54 | 0.74 | 2.51 | 0.87 |
| 405832 | INTERGENIC | Sgl Promoter | 0.68 | 0.24 | 0.75 | 0.26 | 0.86 | 0.35 |
| 408123 | INTERGENIC | Dbl Promoter | 0.88 | 0.36 | 0.75 | 0.27 | 0.40 | 0.07 |
| 409123 | INTERGENIC | Dbl Promoter | 0.43 | 0.10 | 0.69 | 0.22 | 0.47 | 0.10 |
| 411008 | INTERGENIC | Sgl Promoter | 0.80 | 0.31 | 1.03 | 0.44 | 1.13 | 0.50 |
| 415937 | INTERGENIC | Dbl Promoter | 0.54 | 0.17 | 0.44 | 0.07 | 0.44 | 0.08 |
| 414140 | INTERGENIC | Non Promoter | #N/A | #N/A | #N/A | #N/A | #N/A | #N/A |
| 417958 | INTERGENIC | Non Promoter | 1.26 | 0.55 | 1.19 | 0.54 | 1.14 | 0.51 |
| 419056 | INTERGENIC | Non Promoter | 0.55 | 0.17 | 0.77 | 0.28 | 0.97 | 0.41 |
| 420155 | INTERGENIC | Non Promoter | 0.66 | 0.23 | 0.72 | 0.24 | 0.57 | 0.16 |
| 423719 | INTERGENIC | Dbl Promoter | 0.80 | 0.31 | 0.73 | 0.25 | 0.66 | 0.22 |
| 424944 | INTERGENIC | Non Promoter | #N/A | #N/A | #N/A | #N/A | #N/A | #N/A |
| 426144 | INTERGENIC | Non Promoter | 1.23 | 0.53 | 1.30 | 0.62 | 1.24 | 0.56 |
| 427109 | INTERGENIC | Sgl Promoter | #N/A | #N/A | #N/A | #N/A | #N/A | #N/A |
| 427652 | INTERGENIC | Sgl Promoter | #N/A | #N/A | 1.55 | 0.75 | #N/A | #N/A |
| 429502 | INTERGENIC | Sgl Promoter | 0.86 | 0.35 | 1.11 | 0.50 | 0.88 | 0.36 |
| 434360 | INTERGENIC | Non Promoter | #N/A | #N/A | #N/A | #N/A | #N/A | #N/A |
| 435975 | INTERGENIC | Dbl Promoter | 1.60 | 0.69 | 1.65 | 0.65 | 2.42 | 0.88 |
| 436905 | INTERGENIC | Sgl Promoter | #N/A | #N/A | #N/A | #N/A | #N/A | #N/A |
| 441469 | INTERGENIC | Sgl Promoter | #N/A | #N/A | #N/A | #N/A | #N/A | #N/A |
| 443776 | INTERGENIC | Non Promoter | #N/A | #N/A | 0.45 | 0.07 | 0.60 | 0.18 |
| 445017 | INTERGENIC | Sgl Promoter | 1.34 | 0.58 | 1.23 | 0.58 | 1.65 | 0.71 |
| 447664 | INTERGENIC | Dbl Promoter | 2.02 | 0.82 | 1.95 | 0.89 | 2.22 | 0.89 |
| 449622 | INTERGENIC | Sgl Promoter | 1.08 | 0.46 | 1.45 | 0.71 | 0.91 | 0.38 |
| 450836 | INTERGENIC | Non Promoter | #N/A | #N/A | 0.49 | 0.09 | #N/A | #N/A |
| 452613 | INTERGENIC | Dbl Promoter | 0.28 | 0.04 | 0.40 | 0.05 | 0.34 | 0.04 |
| 457873 | INTERGENIC | Non Promoter | 0.54 | 0.16 | 0.66 | 0.20 | 0.55 | 0.15 |
| 458826 | INTERGENIC | Dbl Promoter | 1.85 | 0.77 | 1.75 | 0.80 | 1.90 | 0.82 |
| 461132 | INTERGENIC | Non Promoter | 1.34 | 0.58 | 1.65 | 0.79 | 1.31 | 0.59 |
| 467202 | INTERGENIC | Sgl Promoter | 0.54 | 0.17 | 0.61 | 0.16 | 0.44 | 0.08 |
| 469702 | INTERGENIC | Non Promoter | #N/A | #N/A | #N/A | #N/A | #N/A | #N/A |
| 474153 | INTERGENIC | Sgl Promoter | #N/A | #N/A | 0.92 | 0.37 | #N/A | #N/A |
| 477625 | INTERGENIC | Dbl Promoter | #N/A | #N/A | 1.13 | 0.51 | #N/A | #N/A |
| 480389 | INTERGENIC | Non Promoter | #N/A | #N/A | #N/A | #N/A | #N/A | #N/A |
| 481318 | INTERGENIC | Sgl Promoter | 1.11 | 0.47 | 0.88 | 0.35 | 1.47 | 0.65 |
| 483924 | INTERGENIC | Sgl Promoter | 1.27 | 0.56 | 1.37 | 0.66 | 1.12 | 0.50 |
| 484696 | INTERGENIC | Sgl Promoter | #N/A | #N/A | 1.83 | 0.86 | 3.23 | 0.97 |



|        |            |              |      |      |      |      |      |      |
|--------|------------|--------------|------|------|------|------|------|------|
| 487153 | INTERGENIC | Non Promoter | 0.68 | 0.24 | 0.44 | 0.07 | 1.06 | 0.45 |
| 491223 | INTERGENIC | Sgl Promoter | 0.96 | 0.40 | 0.89 | 0.36 | 0.70 | 0.24 |
| 493035 | INTERGENIC | Sgl Promoter | 2.16 | 0.85 | 1.38 | 0.65 | 1.67 | 0.74 |
| 494307 | INTERGENIC | Sgl Promoter | #N/A | #N/A | #N/A | #N/A | #N/A | #N/A |
| 495546 | INTERGENIC | Sgl Promoter | 2.22 | 0.83 | 1.83 | 0.85 | 2.06 | 0.86 |
| 497117 | INTERGENIC | Dbl Promoter | #N/A | #N/A | 1.35 | 0.65 | 1.41 | 0.65 |
| 501758 | INTERGENIC | Sgl Promoter | 0.43 | 0.11 | 0.64 | 0.18 | 0.55 | 0.15 |
| 504808 | INTERGENIC | Sgl Promoter | #N/A | #N/A | 4.03 | 0.88 | 1.29 | 0.56 |
| 512998 | INTERGENIC | Sgl Promoter | 1.34 | 0.58 | 1.05 | 0.46 | 1.00 | 0.43 |
| 513716 | INTERGENIC | Non Promoter | #N/A | #N/A | 0.87 | 0.34 | #N/A | #N/A |
| 515618 | INTERGENIC | Dbl Promoter | 0.97 | 0.40 | 1.35 | 0.65 | 0.54 | 0.15 |
| 517304 | INTERGENIC | Non Promoter | #N/A | #N/A | #N/A | #N/A | #N/A | #N/A |
| 526979 | INTERGENIC | Sgl Promoter | 2.06 | 0.81 | 1.24 | 0.56 | 1.69 | 0.73 |
| 528271 | INTERGENIC | Dbl Promoter | 1.83 | 0.74 | 1.47 | 0.71 | 1.67 | 0.75 |
| 530823 | INTERGENIC | Non Promoter | #N/A | #N/A | #N/A | #N/A | #N/A | #N/A |
| 533189 | INTERGENIC | Sgl Promoter | 1.21 | 0.52 | 1.10 | 0.50 | 1.53 | 0.69 |
| 533716 | INTERGENIC | Dbl Promoter | 1.71 | 0.73 | #N/A | #N/A | #N/A | #N/A |
| 535214 | INTERGENIC | Sgl Promoter | 2.87 | 0.91 | 3.00 | 0.99 | 2.21 | 0.88 |
| 536529 | INTERGENIC | Sgl Promoter | 1.26 | 0.54 | 1.39 | 0.67 | 0.99 | 0.42 |
| 537830 | INTERGENIC | Sgl Promoter | 1.38 | 0.60 | 1.12 | 0.51 | #N/A | #N/A |
| 539941 | INTERGENIC | Sgl Promoter | 1.79 | 0.75 | 1.31 | 0.63 | 0.81 | 0.31 |
| 541163 | INTERGENIC | Non Promoter | #N/A | #N/A | #N/A | #N/A | #N/A | #N/A |
| 544982 | INTERGENIC | Dbl Promoter | 1.19 | 0.51 | 1.42 | 0.69 | 1.00 | 0.43 |
| 546330 | INTERGENIC | Sgl Promoter | #N/A | #N/A | 1.55 | 0.74 | 1.04 | 0.44 |
| 547414 | INTERGENIC | Sgl Promoter | 1.03 | 0.43 | 1.32 | 0.63 | 1.10 | 0.49 |
| 548316 | INTERGENIC | Non Promoter | #N/A | #N/A | 0.91 | 0.37 | 0.57 | 0.17 |
| 549725 | INTERGENIC | Dbl Promoter | 1.24 | 0.54 | 1.16 | 0.53 | 1.41 | 0.62 |
| 551058 | INTERGENIC | Non Promoter | 0.40 | 0.08 | 0.45 | 0.07 | 0.57 | 0.17 |
| 553943 | INTERGENIC | Sgl Promoter | 0.95 | 0.39 | 1.06 | 0.47 | 1.07 | 0.47 |
| 555382 | INTERGENIC | Dbl Promoter | 0.42 | 0.10 | 0.70 | 0.23 | 0.57 | 0.17 |
| 556502 | INTERGENIC | Dbl Promoter | 0.21 | 0.02 | 0.52 | 0.12 | 0.32 | 0.04 |
| 558638 | INTERGENIC | Sgl Promoter | 2.25 | 0.87 | 2.12 | 0.90 | 3.16 | 0.97 |
| 560031 | INTERGENIC | Sgl Promoter | #N/A | #N/A | 1.90 | 0.86 | 1.78 | 0.78 |
| 561588 | INTERGENIC | Sgl Promoter | 0.86 | 0.35 | 0.82 | 0.32 | 0.64 | 0.21 |
| 563157 | INTERGENIC | Non Promoter | #N/A | #N/A | #N/A | #N/A | #N/A | #N/A |
| 565185 | INTERGENIC | Dbl Promoter | 0.63 | 0.22 | 0.56 | 0.13 | 0.42 | 0.08 |
| 565677 | INTERGENIC | Sgl Promoter | 2.17 | 0.79 | 1.37 | 0.65 | 1.74 | 0.74 |
| 567829 | INTERGENIC | Non Promoter | #N/A | #N/A | 0.58 | 0.14 | 0.46 | 0.12 |
| 568806 | INTERGENIC | Dbl Promoter | 1.96 | 0.80 | 1.72 | 0.82 | 1.88 | 0.81 |
| 569796 | INTERGENIC | Non Promoter | #N/A | #N/A | #N/A | #N/A | #N/A | #N/A |
| 571422 | INTERGENIC | Sgl Promoter | #N/A | #N/A | 1.27 | 0.60 | #N/A | #N/A |
| 572325 | INTERGENIC | Dbl Promoter | 1.34 | 0.58 | 1.42 | 0.68 | 1.48 | 0.65 |
| 573869 | INTERGENIC | Non Promoter | #N/A | #N/A | 0.88 | 0.34 | #N/A | #N/A |
| 576298 | INTERGENIC | Sgl Promoter | 1.71 | 0.73 | 1.11 | 0.50 | 1.28 | 0.58 |
| 578318 | INTERGENIC | Dbl Promoter | 1.19 | 0.52 | 2.99 | 0.97 | 2.55 | 0.93 |
| 579104 | INTERGENIC | Non Promoter | #N/A | #N/A | #N/A | #N/A | #N/A | #N/A |
| 581680 | INTERGENIC | Sgl Promoter | #N/A | #N/A | 0.87 | 0.34 | #N/A | #N/A |
| 582292 | INTERGENIC | Sgl Promoter | 1.91 | 0.79 | 2.42 | 0.95 | 1.80 | 0.77 |
| 583674 | INTERGENIC | Sgl Promoter | 1.11 | 0.47 | 1.55 | 0.68 | 1.01 | 0.43 |
| 584761 | INTERGENIC | Non Promoter | #N/A | #N/A | #N/A | #N/A | #N/A | #N/A |
| 586501 | INTERGENIC | Non Promoter | #N/A | #N/A | #N/A | #N/A | #N/A | #N/A |

|        |            |              |      |      |      |      |      |      |
|--------|------------|--------------|------|------|------|------|------|------|
| 589695 | INTERGENIC | Dbl Promoter | 1.27 | 0.55 | 1.53 | 0.74 | 2.17 | 0.87 |
| 591666 | INTERGENIC | Non Promoter | #N/A | #N/A | #N/A | #N/A | #N/A | #N/A |
| 593460 | INTERGENIC | Sgl Promoter | 0.79 | 0.30 | 0.86 | 0.34 | 1.08 | 0.46 |
| 596069 | INTERGENIC | Dbl Promoter | 1.11 | 0.48 | 1.21 | 0.57 | 0.94 | 0.39 |
| 597317 | INTERGENIC | Sgl Promoter | #N/A | #N/A | 1.78 | 0.84 | 2.13 | 0.85 |
| 599077 | INTERGENIC | Non Promoter | #N/A | #N/A | #N/A | #N/A | #N/A | #N/A |
| 600507 | INTERGENIC | Dbl Promoter | 2.43 | 0.90 | 2.67 | 0.97 | 2.44 | 0.90 |
| 602588 | INTERGENIC | Sgl Promoter | 0.71 | 0.26 | 0.99 | 0.42 | 0.92 | 0.38 |
| 603639 | INTERGENIC | Non Promoter | 0.84 | 0.34 | 0.96 | 0.40 | 0.94 | 0.39 |
| 604462 | INTERGENIC | Dbl Promoter | 1.32 | 0.57 | 1.47 | 0.71 | 1.07 | 0.47 |
| 605920 | INTERGENIC | Sgl Promoter | 0.36 | 0.09 | #N/A | #N/A | 0.31 | 0.05 |
| 607606 | INTERGENIC | Sgl Promoter | 1.11 | 0.47 | 1.57 | 0.75 | 0.99 | 0.42 |
| 609036 | INTERGENIC | Non Promoter | #N/A | #N/A | 0.53 | 0.13 | 0.62 | 0.20 |
| 609992 | INTERGENIC | Dbl Promoter | 0.99 | 0.41 | 1.14 | 0.52 | 1.26 | 0.57 |
| 610568 | INTERGENIC | Non Promoter | 0.83 | 0.32 | 0.72 | 0.24 | 0.63 | 0.20 |
| 612190 | INTERGENIC | Sgl Promoter | #N/A | #N/A | 1.52 | 0.65 | #N/A | #N/A |
| 615157 | INTERGENIC | Sgl Promoter | 0.22 | 0.02 | 0.36 | 0.03 | 0.28 | 0.03 |
| 616081 | INTERGENIC | Sgl Promoter | #N/A | #N/A | 0.62 | 0.24 | 0.36 | 0.05 |
| 618863 | INTERGENIC | Dbl Promoter | 2.62 | 0.90 | 2.09 | 0.91 | 3.64 | 0.96 |
| 620826 | INTERGENIC | Sgl Promoter | 0.92 | 0.38 | 0.84 | 0.32 | 1.25 | 0.56 |
| 623742 | INTERGENIC | Sgl Promoter | 1.60 | 0.69 | 1.72 | 0.82 | 1.59 | 0.73 |
| 629123 | INTERGENIC | Sgl Promoter | 0.52 | 0.16 | 0.67 | 0.21 | 0.51 | 0.13 |
| 632209 | INTERGENIC | Non Promoter | #N/A | #N/A | 0.76 | 0.26 | #N/A | #N/A |
| 633577 | INTERGENIC | Dbl Promoter | 2.14 | 0.85 | 2.09 | 0.92 | 2.68 | 0.94 |
| 635101 | INTERGENIC | Sgl Promoter | #N/A | #N/A | #N/A | #N/A | #N/A | #N/A |
| 636658 | INTERGENIC | Non Promoter | #N/A | #N/A | 0.84 | 0.33 | #N/A | #N/A |
| 642538 | INTERGENIC | Dbl Promoter | 2.31 | 0.85 | 1.29 | 0.62 | 1.18 | 0.53 |
| 642962 | INTERGENIC | Sgl Promoter | #N/A | #N/A | 0.74 | 0.25 | 0.66 | 0.22 |
| 646113 | INTERGENIC | Non Promoter | #N/A | #N/A | #N/A | #N/A | #N/A | #N/A |
| 647841 | INTERGENIC | Dbl Promoter | 1.99 | 0.80 | 2.09 | 0.89 | 1.81 | 0.79 |
| 650323 | INTERGENIC | Sgl Promoter | 0.97 | 0.40 | 0.89 | 0.36 | 1.04 | 0.45 |
| 651370 | INTERGENIC | Sgl Promoter | 1.61 | 0.70 | 1.24 | 0.58 | 2.24 | 0.88 |
| 653401 | INTERGENIC | Sgl Promoter | 2.73 | 0.93 | 1.64 | 0.77 | 2.61 | 0.94 |
| 655531 | INTERGENIC | Non Promoter | #N/A | #N/A | 0.37 | 0.03 | #N/A | #N/A |
| 657787 | INTERGENIC | Dbl Promoter | 1.97 | 0.81 | 1.72 | 0.82 | 2.29 | 0.89 |
| 658662 | INTERGENIC | Non Promoter | #N/A | #N/A | 0.54 | 0.12 | 0.92 | 0.38 |
| 662454 | INTERGENIC | Sgl Promoter | #N/A | #N/A | #N/A | #N/A | #N/A | #N/A |
| 665108 | INTERGENIC | Sgl Promoter | 1.10 | 0.47 | 1.06 | 0.47 | 1.82 | 0.78 |
| 666675 | INTERGENIC | Sgl Promoter | 0.98 | 0.40 | 1.02 | 0.43 | 1.10 | 0.47 |
| 668618 | INTERGENIC | Sgl Promoter | 0.82 | 0.32 | 0.98 | 0.42 | 0.75 | 0.28 |
| 675268 | INTERGENIC | Dbl Promoter | 1.99 | 0.81 | 1.64 | 0.79 | 1.64 | 0.71 |
| 676312 | INTERGENIC | Non Promoter | #N/A | #N/A | #N/A | #N/A | #N/A | #N/A |
| 679504 | INTERGENIC | Sgl Promoter | 3.71 | 0.97 | 2.18 | 0.91 | 3.31 | 0.98 |
| 680643 | INTERGENIC | Sgl Promoter | 1.17 | 0.50 | 0.96 | 0.40 | 0.99 | 0.42 |
| 683328 | INTERGENIC | Sgl Promoter | 1.58 | 0.68 | 1.85 | 0.86 | 1.53 | 0.70 |
| 685393 | INTERGENIC | Non Promoter | 2.52 | 0.91 | 1.74 | 0.82 | 2.10 | 0.87 |
| 686856 | INTERGENIC | Dbl Promoter | 3.01 | 0.95 | 2.18 | 0.93 | 2.42 | 0.91 |
| 690338 | INTERGENIC | Non Promoter | #N/A | #N/A | #N/A | #N/A | #N/A | #N/A |
| 691924 | INTERGENIC | Dbl Promoter | 3.26 | 0.95 | #N/A | #N/A | 2.67 | 0.94 |
| 695062 | INTERGENIC | Non Promoter | #N/A | #N/A | #N/A | #N/A | #N/A | #N/A |
| 698309 | INTERGENIC | Sgl Promoter | 0.63 | 0.22 | 1.23 | 0.57 | 0.71 | 0.25 |

|        |            |              |      |      |      |      |      |      |
|--------|------------|--------------|------|------|------|------|------|------|
| 700445 | INTERGENIC | Sgl Promoter | 2.23 | 0.77 | 2.49 | 0.96 | 2.08 | 0.75 |
| 702544 | INTERGENIC | Sgl Promoter | #N/A | #N/A | 1.47 | 0.70 | 1.69 | 0.63 |
| 704625 | INTERGENIC | Dbl Promoter | 1.35 | 0.59 | 1.10 | 0.50 | 1.03 | 0.45 |
| 705402 | INTERGENIC | Non Promoter | #N/A | #N/A | #N/A | #N/A | #N/A | #N/A |
| 707483 | INTERGENIC | Dbl Promoter | 1.54 | 0.67 | 1.69 | 0.80 | 1.27 | 0.57 |
| 708105 | INTERGENIC | Non Promoter | #N/A | #N/A | #N/A | #N/A | #N/A | #N/A |
| 712959 | INTERGENIC | Non Promoter | #N/A | #N/A | #N/A | #N/A | #N/A | #N/A |
| 714762 | INTERGENIC | Sgl Promoter | 1.59 | 0.69 | #N/A | #N/A | 1.78 | 0.78 |
| 716837 | INTERGENIC | Sgl Promoter | 1.01 | 0.42 | 1.30 | 0.61 | 1.09 | 0.48 |
| 718988 | INTERGENIC | Dbl Promoter | 0.73 | 0.27 | 1.26 | 0.59 | 0.76 | 0.28 |
| 721345 | INTERGENIC | Sgl Promoter | 2.14 | 0.80 | 2.07 | 0.89 | 2.38 | 0.90 |
| 722566 | INTERGENIC | Sgl Promoter | #N/A | #N/A | 1.69 | 0.80 | #N/A | #N/A |
| 723225 | INTERGENIC | Sgl Promoter | 1.72 | 0.74 | 1.70 | 0.78 | 1.94 | 0.82 |
| 723691 | INTERGENIC | Non Promoter | #N/A | #N/A | #N/A | #N/A | #N/A | #N/A |
| 724411 | INTERGENIC | Dbl Promoter | #N/A | #N/A | #N/A | #N/A | 1.89 | 0.80 |
| 727341 | INTERGENIC | Non Promoter | 1.45 | 0.63 | 1.47 | 0.72 | 1.20 | 0.54 |
| 728840 | INTERGENIC | Dbl Promoter | 1.57 | 0.68 | 1.66 | 0.80 | 1.58 | 0.69 |
| 730342 | INTERGENIC | Dbl Promoter | #N/A | #N/A | 2.02 | 0.79 | #N/A | #N/A |
| 732594 | INTERGENIC | Non Promoter | #N/A | #N/A | #N/A | #N/A | #N/A | #N/A |
| 734787 | INTERGENIC | Sgl Promoter | 2.73 | 0.93 | 2.34 | 0.95 | 3.69 | 0.98 |
| 735675 | INTERGENIC | Sgl Promoter | 1.63 | 0.71 | 2.11 | 0.92 | 2.00 | 0.82 |
| 738537 | INTERGENIC | Dbl Promoter | 1.87 | 0.77 | 1.89 | 0.87 | 1.52 | 0.70 |
| 739782 | INTERGENIC | Non Promoter | #N/A | #N/A | 1.62 | 0.77 | 1.02 | 0.44 |
| 741256 | INTERGENIC | Sgl Promoter | 1.42 | 0.62 | #N/A | #N/A | 1.04 | 0.43 |
| 742139 | INTERGENIC | Non Promoter | 1.36 | 0.59 | 1.26 | 0.60 | 1.37 | 0.63 |
| 742716 | INTERGENIC | Sgl Promoter | #N/A | #N/A | #N/A | #N/A | #N/A | #N/A |
| 744807 | INTERGENIC | Dbl Promoter | 2.56 | 0.92 | 1.67 | 0.80 | 2.61 | 0.94 |
| 746316 | INTERGENIC | Non Promoter | 0.30 | 0.04 | #N/A | #N/A | 0.38 | 0.06 |
| 748016 | INTERGENIC | Sgl Promoter | #N/A | #N/A | #N/A | #N/A | #N/A | #N/A |
| 749549 | INTERGENIC | Dbl Promoter | 2.96 | 0.95 | 2.11 | 0.92 | 2.19 | 0.88 |
| 751311 | INTERGENIC | Non Promoter | #N/A | #N/A | #N/A | #N/A | #N/A | #N/A |
| 757576 | INTERGENIC | Sgl Promoter | 1.38 | 0.60 | 1.16 | 0.54 | #N/A | #N/A |
| 760171 | INTERGENIC | Sgl Promoter | 1.13 | 0.48 | 1.11 | 0.50 | 1.07 | 0.47 |
| 761213 | INTERGENIC | Sgl Promoter | 1.74 | 0.74 | 2.42 | 0.96 | #N/A | #N/A |
| 762740 | INTERGENIC | Non Promoter | #N/A | #N/A | 0.56 | 0.13 | 0.48 | 0.11 |
| 764926 | INTERGENIC | Sgl Promoter | #N/A | #N/A | #N/A | #N/A | #N/A | #N/A |
| 768196 | INTERGENIC | Dbl Promoter | 1.35 | 0.58 | 1.43 | 0.70 | 2.19 | 0.87 |
| 768899 | INTERGENIC | Non Promoter | #N/A | #N/A | #N/A | #N/A | #N/A | #N/A |
| 771195 | INTERGENIC | Dbl Promoter | 1.98 | 0.81 | 1.49 | 0.73 | 1.52 | 0.69 |
| 773878 | INTERGENIC | Sgl Promoter | 2.16 | 0.82 | 1.49 | 0.73 | 1.75 | 0.77 |
| 774578 | INTERGENIC | Sgl Promoter | #N/A | #N/A | #N/A | #N/A | #N/A | #N/A |
| 776527 | INTERGENIC | Sgl Promoter | #N/A | #N/A | 1.20 | 0.56 | #N/A | #N/A |
| 777968 | INTERGENIC | Non Promoter | #N/A | #N/A | #N/A | #N/A | #N/A | #N/A |
| 779623 | INTERGENIC | Dbl Promoter | #N/A | #N/A | 2.64 | 0.96 | 3.13 | 0.95 |
| 782547 | INTERGENIC | Sgl Promoter | 1.64 | 0.70 | 1.55 | 0.75 | 1.66 | 0.75 |
| 783629 | INTERGENIC | Non Promoter | #N/A | #N/A | #N/A | #N/A | #N/A | #N/A |
| 784658 | INTERGENIC | Sgl Promoter | #N/A | #N/A | 1.16 | 0.53 | 1.31 | 0.60 |
| 785995 | INTERGENIC | Dbl Promoter | 1.38 | 0.60 | 1.71 | 0.81 | 1.42 | 0.65 |
| 786961 | INTERGENIC | Dbl Promoter | 1.83 | 0.76 | 1.98 | 0.89 | 1.95 | 0.83 |
| 789190 | INTERGENIC | Sgl Promoter | 1.03 | 0.43 | 1.46 | 0.71 | 1.06 | 0.46 |
| 792803 | INTERGENIC | Sgl Promoter | 1.18 | 0.51 | 1.12 | 0.50 | 1.18 | 0.53 |

|        |            |              |      |      |      |      |      |      |
|--------|------------|--------------|------|------|------|------|------|------|
| 796752 | INTERGENIC | Non Promoter | #N/A | #N/A | #N/A | #N/A | #N/A | #N/A |
| 799476 | INTERGENIC | Dbl Promoter | 1.30 | 0.56 | #N/A | #N/A | 1.41 | 0.64 |
| 800477 | INTERGENIC | Dbl Promoter | 1.57 | 0.67 | 1.55 | 0.75 | 1.35 | 0.61 |
| 802585 | INTERGENIC | Non Promoter | 0.89 | 0.36 | 1.36 | 0.64 | 1.62 | 0.72 |
| 805305 | INTERGENIC | Dbl Promoter | 2.43 | 0.88 | 1.70 | 0.78 | 1.52 | 0.68 |
| 808554 | INTERGENIC | Non Promoter | 1.20 | 0.52 | 1.03 | 0.45 | 1.16 | 0.52 |
| 810294 | INTERGENIC | Non Promoter | 1.60 | 0.69 | 1.56 | 0.75 | 1.77 | 0.78 |
| 259101 | INTERGENIC | Sgl Promoter | #N/A | #N/A | #N/A | #N/A | #N/A | #N/A |
| 266334 | INTERGENIC | Sgl Promoter | #N/A | #N/A | #N/A | #N/A | #N/A | #N/A |
| 644317 | INTERGENIC | Sgl Promoter | 0.87 | 0.35 | 1.45 | 0.68 | 1.68 | 0.69 |
| 645122 | INTERGENIC | Sgl Promoter | 1.43 | 0.59 | 1.27 | 0.60 | 1.05 | 0.45 |
| 328327 | INTERGENIC | Sgl Promoter | 0.88 | 0.36 | 0.99 | 0.42 | 1.16 | 0.47 |
| 350783 | INTERGENIC | Non Promoter | #N/A | #N/A | #N/A | #N/A | #N/A | #N/A |
| 112684 | INTERGENIC | Sgl Promoter | 2.28 | 0.65 | 1.54 | 0.65 | 0.80 | 0.31 |
| 113982 | INTERGENIC | Sgl Promoter | 0.86 | 0.34 | 0.90 | 0.36 | 0.84 | 0.33 |
| 111520 | INTERGENIC | Dbl Promoter | 1.09 | 0.47 | 1.21 | 0.56 | 1.06 | 0.47 |
| 110526 | INTERGENIC | Non Promoter | 0.38 | 0.08 | 0.52 | 0.10 | 0.49 | 0.12 |
| 108713 | INTERGENIC | Sgl Promoter | 1.33 | 0.58 | 1.14 | 0.53 | 1.20 | 0.54 |
| 107116 | INTERGENIC | Sgl Promoter | #N/A | #N/A | #N/A | #N/A | #N/A | #N/A |
| 106585 | INTERGENIC | Sgl Promoter | 1.57 | 0.66 | 1.51 | 0.69 | #N/A | #N/A |
| 105307 | INTERGENIC | Sgl Promoter | 1.93 | 0.79 | 1.48 | 0.72 | #N/A | #N/A |
| 104230 | INTERGENIC | Sgl Promoter | 1.12 | 0.48 | 1.14 | 0.52 | 1.17 | 0.52 |
| 103182 | INTERGENIC | Sgl Promoter | 2.46 | 0.90 | 1.92 | 0.88 | 2.17 | 0.87 |
| 101686 | INTERGENIC | Non Promoter | 1.67 | 0.71 | #N/A | #N/A | 1.20 | 0.54 |
| 100113 | INTERGENIC | Sgl Promoter | #N/A | #N/A | #N/A | #N/A | #N/A | #N/A |
| 95898  | INTERGENIC | Dbl Promoter | 2.48 | 0.90 | 2.04 | 0.91 | 2.71 | 0.94 |
| 94237  | INTERGENIC | Sgl Promoter | 2.80 | 0.94 | 2.26 | 0.93 | 1.65 | 0.74 |
| 92392  | INTERGENIC | Non Promoter | 0.56 | 0.17 | 0.67 | 0.20 | 0.73 | 0.27 |
| 82424  | INTERGENIC | Dbl Promoter | 1.16 | 0.48 | 1.36 | 0.66 | 1.15 | 0.49 |
| 78912  | INTERGENIC | Sgl Promoter | 0.43 | 0.10 | 0.60 | 0.16 | 0.25 | 0.02 |
| 75985  | INTERGENIC | Sgl Promoter | 1.87 | 0.78 | 1.66 | 0.80 | 2.26 | 0.89 |
| 71774  | INTERGENIC | Sgl Promoter | 0.92 | 0.38 | 1.16 | 0.53 | 1.32 | 0.57 |
| 70122  | INTERGENIC | Dbl Promoter | 1.63 | 0.70 | 1.53 | 0.74 | 1.60 | 0.72 |
| 68571  | INTERGENIC | Sgl Promoter | 0.49 | 0.14 | 0.84 | 0.33 | 0.73 | 0.27 |
| 65906  | INTERGENIC | Sgl Promoter | 1.71 | 0.72 | 2.43 | 0.95 | 2.26 | 0.89 |
| 64647  | INTERGENIC | Non Promoter | #N/A | #N/A | #N/A | #N/A | #N/A | #N/A |
| 63413  | INTERGENIC | Dbl Promoter | 2.36 | 0.89 | 1.65 | 0.79 | 2.06 | 0.83 |
| 61897  | INTERGENIC | Dbl Promoter | 3.20 | 0.96 | 2.87 | 0.99 | 2.63 | 0.93 |
| 60814  | INTERGENIC | Non Promoter | #N/A | #N/A | 1.13 | 0.51 | #N/A | #N/A |
| 58999  | INTERGENIC | Dbl Promoter | 1.33 | 0.57 | 1.16 | 0.54 | 1.42 | 0.64 |
| 57347  | INTERGENIC | Sgl Promoter | #N/A | #N/A | 0.56 | 0.13 | 1.02 | 0.42 |
| 52619  | INTERGENIC | Sgl Promoter | 3.53 | 0.97 | 2.44 | 0.90 | 2.78 | 0.92 |
| 48630  | INTERGENIC | Sgl Promoter | #N/A | #N/A | 2.19 | 0.93 | 2.36 | 0.90 |
| 47088  | INTERGENIC | Non Promoter | 1.95 | 0.80 | 2.13 | 0.92 | 2.17 | 0.86 |
| 44600  | INTERGENIC | Sgl Promoter | 0.98 | 0.40 | #N/A | #N/A | 1.07 | 0.47 |
| 43638  | INTERGENIC | Non Promoter | #N/A | #N/A | #N/A | #N/A | #N/A | #N/A |
| 42142  | INTERGENIC | Dbl Promoter | 1.47 | 0.63 | 1.31 | 0.61 | 1.14 | 0.50 |
| 39763  | INTERGENIC | Sgl Promoter | 1.50 | 0.65 | 1.73 | 0.80 | 1.68 | 0.75 |
| 37812  | INTERGENIC | Non Promoter | #N/A | #N/A | #N/A | #N/A | #N/A | #N/A |
| 35844  | INTERGENIC | Dbl Promoter | 3.42 | 0.98 | 2.33 | 0.95 | 3.02 | 0.96 |
| 34126  | INTERGENIC | Non Promoter | #N/A | #N/A | #N/A | #N/A | #N/A | #N/A |

|        |            |              |      |      |      |      |      |      |
|--------|------------|--------------|------|------|------|------|------|------|
| 30175  | INTERGENIC | Sgl Promoter | 0.43 | 0.10 | 0.46 | 0.08 | 0.56 | 0.15 |
| 31432  | INTERGENIC | Sgl Promoter | 1.76 | 0.75 | 1.10 | 0.49 | 1.85 | 0.80 |
| 27912  | INTERGENIC | Dbl Promoter | 2.16 | 0.85 | 1.61 | 0.77 | 2.12 | 0.87 |
| 24751  | INTERGENIC | Dbl Promoter | #N/A | #N/A | #N/A | #N/A | #N/A | #N/A |
| 23506  | INTERGENIC | Sgl Promoter | #N/A | #N/A | 1.71 | 0.81 | 1.92 | 0.82 |
| 22412  | INTERGENIC | Sgl Promoter | 1.35 | 0.59 | 1.22 | 0.57 | 1.26 | 0.57 |
| 18799  | INTERGENIC | Non Promoter | #N/A | #N/A | #N/A | #N/A | #N/A | #N/A |
| 17273  | INTERGENIC | Dbl Promoter | 1.45 | 0.63 | 1.20 | 0.55 | 1.20 | 0.54 |
| 14947  | INTERGENIC | Non Promoter | #N/A | #N/A | #N/A | #N/A | #N/A | #N/A |
| 15787  | INTERGENIC | Non Promoter | #N/A | #N/A | 0.37 | 0.04 | 0.38 | 0.10 |
| 13271  | INTERGENIC | Dbl Promoter | #N/A | #N/A | #N/A | #N/A | #N/A | #N/A |
| 12375  | INTERGENIC | Sgl Promoter | 0.71 | 0.26 | 1.05 | 0.46 | 0.71 | 0.26 |
| 11493  | INTERGENIC | Non Promoter | #N/A | #N/A | 0.67 | 0.21 | #N/A | #N/A |
| 9696   | INTERGENIC | Dbl Promoter | 0.53 | 0.16 | 0.76 | 0.27 | 0.75 | 0.28 |
| 4065   | INTERGENIC | Non Promoter | 0.30 | 0.04 | 0.28 | 0.02 | 0.56 | 0.16 |
| 2816   | INTERGENIC | Sgl Promoter | 0.20 | 0.02 | 0.23 | 0.01 | 0.44 | 0.08 |
| 83681  | INTERGENIC | Dbl Promoter | 1.60 | 0.69 | 1.24 | 0.59 | 1.37 | 0.63 |
| 90474  | INTERGENIC | Sgl Promoter | #N/A | #N/A | #N/A | #N/A | #N/A | #N/A |
| 5392   | INTERGENIC | Non Promoter | 0.36 | 0.07 | 0.37 | 0.04 | 0.45 | 0.09 |
| 6470   | INTERGENIC | Non Promoter | 0.35 | 0.06 | 0.46 | 0.07 | 0.48 | 0.11 |
| 116981 | INTERGENIC | Non Promoter | 1.26 | 0.55 | 1.40 | 0.66 | 1.03 | 0.45 |
| 118221 | INTERGENIC | Dbl Promoter | 2.14 | 0.84 | 2.25 | 0.94 | 2.47 | 0.90 |
| 119176 | INTERGENIC | Non Promoter | #N/A | #N/A | #N/A | #N/A | #N/A | #N/A |
| 120547 | INTERGENIC | Sgl Promoter | 0.88 | 0.36 | 1.25 | 0.59 | 0.85 | 0.34 |
| 122131 | INTERGENIC | Sgl Promoter | #N/A | #N/A | 0.57 | 0.14 | 0.44 | 0.08 |
| 123178 | INTERGENIC | Sgl Promoter | 0.48 | 0.13 | 0.45 | 0.07 | 0.35 | 0.05 |
| 127317 | INTERGENIC | Dbl Promoter | 0.71 | 0.26 | 1.22 | 0.55 | 0.95 | 0.40 |
| 130345 | INTERGENIC | Non Promoter | 0.38 | 0.08 | 0.39 | 0.04 | 0.36 | 0.05 |
| 131873 | INTERGENIC | Sgl Promoter | 1.42 | 0.62 | 1.26 | 0.60 | 1.30 | 0.59 |
| 133323 | INTERGENIC | Sgl Promoter | 0.46 | 0.12 | 0.53 | 0.11 | 0.48 | 0.11 |
| 137345 | INTERGENIC | Dbl Promoter | 0.34 | 0.05 | 0.57 | 0.14 | 0.38 | 0.06 |
| 140816 | INTERGENIC | Sgl Promoter | 0.51 | 0.15 | 0.66 | 0.20 | 0.82 | 0.32 |
| 141963 | INTERGENIC | Dbl Promoter | #N/A | #N/A | #N/A | #N/A | #N/A | #N/A |
| 144478 | INTERGENIC | Non Promoter | #N/A | #N/A | #N/A | #N/A | #N/A | #N/A |
| 147932 | INTERGENIC | Sgl Promoter | 1.81 | 0.75 | 2.22 | 0.94 | 1.67 | 0.75 |
| 152542 | INTERGENIC | Dbl Promoter | 1.55 | 0.67 | 1.87 | 0.86 | 1.66 | 0.74 |
| 153717 | INTERGENIC | Non Promoter | #N/A | #N/A | #N/A | #N/A | #N/A | #N/A |
| 154535 | INTERGENIC | Sgl Promoter | #N/A | #N/A | #N/A | #N/A | 1.30 | 0.58 |
| 155025 | INTERGENIC | Dbl Promoter | #N/A | #N/A | 2.06 | 0.82 | 2.04 | 0.84 |
| 155817 | INTERGENIC | Non Promoter | 1.40 | 0.58 | 1.15 | 0.53 | 1.41 | 0.62 |
| 157129 | INTERGENIC | Sgl Promoter | 1.52 | 0.64 | 1.46 | 0.71 | 2.05 | 0.82 |
| 158246 | INTERGENIC | Sgl Promoter | 0.69 | 0.25 | 1.24 | 0.58 | 0.64 | 0.21 |
| 160452 | INTERGENIC | Sgl Promoter | #N/A | #N/A | 1.10 | 0.49 | 1.07 | 0.47 |
| 162653 | INTERGENIC | Sgl Promoter | 0.41 | 0.09 | 0.68 | 0.21 | 0.42 | 0.07 |
| 163154 | INTERGENIC | Sgl Promoter | 0.23 | 0.02 | #N/A | #N/A | #N/A | #N/A |
| 163819 | INTERGENIC | Sgl Promoter | #N/A | #N/A | 1.16 | 0.53 | 0.48 | 0.12 |
| 167084 | INTERGENIC | Sgl Promoter | 0.89 | 0.36 | 0.91 | 0.37 | 0.84 | 0.34 |
| 168015 | INTERGENIC | Sgl Promoter | 1.17 | 0.50 | 0.84 | 0.32 | 1.10 | 0.48 |
| 171640 | INTERGENIC | Sgl Promoter | 2.78 | 0.93 | #N/A | #N/A | 2.43 | 0.92 |
| 172551 | INTERGENIC | Sgl Promoter | #N/A | #N/A | 1.08 | 0.48 | 1.54 | 0.69 |
| 175907 | INTERGENIC | Sgl Promoter | 0.79 | 0.30 | 0.72 | 0.25 | 0.70 | 0.24 |



|        |            |              |      |      |      |      |      |      |
|--------|------------|--------------|------|------|------|------|------|------|
| 177338 | INTERGENIC | Dbl Promoter | #N/A | #N/A | 0.57 | 0.14 | 0.42 | 0.08 |
| 185218 | INTERGENIC | Sgl Promoter | 1.40 | 0.59 | 1.19 | 0.56 | 1.90 | 0.82 |
| 189321 | INTERGENIC | Sgl Promoter | 0.78 | 0.29 | 0.95 | 0.39 | 1.15 | 0.50 |
| 190563 | INTERGENIC | Non Promoter | #N/A | #N/A | #N/A | #N/A | #N/A | #N/A |
| 192026 | INTERGENIC | Dbl Promoter | 2.42 | 0.89 | 2.38 | 0.94 | 2.09 | 0.86 |
| 193143 | INTERGENIC | Non Promoter | #N/A | #N/A | #N/A | #N/A | #N/A | #N/A |
| 196350 | INTERGENIC | Sgl Promoter | 0.90 | 0.37 | 1.25 | 0.59 | 1.07 | 0.47 |
| 198276 | INTERGENIC | Sgl Promoter | 0.70 | 0.25 | 0.97 | 0.41 | 0.71 | 0.26 |
| 199172 | INTERGENIC | Dbl Promoter | #N/A | #N/A | #N/A | #N/A | #N/A | #N/A |
| 204992 | INTERGENIC | Sgl Promoter | 1.52 | 0.65 | 1.84 | 0.85 | 1.85 | 0.79 |
| 205608 | INTERGENIC | Sgl Promoter | 1.92 | 0.78 | 1.76 | 0.80 | 3.53 | 0.99 |
| 206866 | INTERGENIC | Sgl Promoter | 2.66 | 0.93 | 3.19 | 0.98 | 3.14 | 0.97 |
| 208645 | INTERGENIC | Sgl Promoter | #N/A | #N/A | #N/A | #N/A | 1.28 | 0.58 |
| 209449 | INTERGENIC | Sgl Promoter | 2.00 | 0.81 | #N/A | #N/A | 2.26 | 0.89 |
| 210602 | INTERGENIC | Sgl Promoter | 2.97 | 0.95 | 1.79 | 0.81 | 2.89 | 0.96 |
| 212801 | INTERGENIC | Dbl Promoter | 1.51 | 0.64 | 1.13 | 0.52 | 2.49 | 0.79 |
| 213724 | INTERGENIC | Sgl Promoter | #N/A | #N/A | 2.91 | 0.97 | #N/A | #N/A |
| 215427 | INTERGENIC | Sgl Promoter | 1.62 | 0.70 | 1.82 | 0.74 | #N/A | #N/A |
| 217106 | INTERGENIC | Non Promoter | #N/A | #N/A | #N/A | #N/A | #N/A | #N/A |
| 219187 | INTERGENIC | Sgl Promoter | 1.12 | 0.48 | 0.75 | 0.26 | 1.20 | 0.54 |
| 222183 | INTERGENIC | Sgl Promoter | #N/A | #N/A | #N/A | #N/A | #N/A | #N/A |
| 223128 | INTERGENIC | Dbl Promoter | 1.34 | 0.54 | 1.38 | 0.66 | #N/A | #N/A |
| 224292 | INTERGENIC | Sgl Promoter | 0.59 | 0.19 | 0.95 | 0.40 | 0.60 | 0.18 |
| 226666 | INTERGENIC | Non Promoter | 0.66 | 0.23 | 1.07 | 0.47 | 0.91 | 0.37 |
| 228033 | INTERGENIC | Sgl Promoter | 0.22 | 0.02 | 0.39 | 0.05 | 0.32 | 0.03 |
| 230226 | INTERGENIC | Sgl Promoter | 1.35 | 0.59 | 1.05 | 0.46 | 1.30 | 0.59 |
| 231851 | INTERGENIC | Non Promoter | #N/A | #N/A | #N/A | #N/A | #N/A | #N/A |
| 235940 | INTERGENIC | Dbl Promoter | 1.63 | 0.70 | 1.42 | 0.69 | 1.29 | 0.59 |
| 237780 | INTERGENIC | Sgl Promoter | 2.50 | 0.90 | 2.62 | 0.97 | 2.32 | 0.90 |
| 238902 | INTERGENIC | Non Promoter | #N/A | #N/A | 1.41 | 0.65 | 1.67 | 0.73 |
| 239528 | INTERGENIC | Sgl Promoter | 3.14 | 0.91 | #N/A | #N/A | 2.73 | 0.94 |
| 241364 | INTERGENIC | Sgl Promoter | #N/A | #N/A | 2.13 | 0.92 | 3.01 | 0.96 |
| 245688 | INTERGENIC | Dbl Promoter | 4.37 | 0.99 | 2.76 | 0.98 | 3.05 | 0.97 |
| 246756 | INTERGENIC | Non Promoter | #N/A | #N/A | #N/A | #N/A | #N/A | #N/A |
| 248016 | INTERGENIC | Sgl Promoter | 2.94 | 0.95 | 2.20 | 0.93 | 2.29 | 0.84 |
| 248961 | INTERGENIC | Sgl Promoter | #N/A | #N/A | #N/A | #N/A | #N/A | #N/A |
| 251571 | INTERGENIC | Dbl Promoter | 4.49 | 0.99 | 3.49 | 0.99 | 4.36 | 0.99 |
| 253094 | INTERGENIC | Sgl Promoter | #N/A | #N/A | 1.24 | 0.58 | 2.21 | 0.83 |
| 257606 | INTERGENIC | Sgl Promoter | #N/A | #N/A | 1.73 | 0.82 | #N/A | #N/A |
| 258301 | INTERGENIC | Sgl Promoter | 1.64 | 0.68 | #N/A | #N/A | #N/A | #N/A |
| 259034 | INTERGENIC | Non Promoter | #N/A | #N/A | 0.60 | 0.17 | #N/A | #N/A |
| 261639 | INTERGENIC | Dbl Promoter | 1.82 | 0.77 | 1.33 | 0.64 | 1.45 | 0.64 |
| 262115 | INTERGENIC | Sgl Promoter | #N/A | #N/A | 1.43 | 0.68 | 1.59 | 0.72 |
| 263791 | INTERGENIC | Dbl Promoter | 2.05 | 0.82 | 1.70 | 0.81 | 2.70 | 0.93 |
| 266157 | INTERGENIC | Sgl Promoter | #N/A | #N/A | 1.12 | 0.50 | 1.57 | 0.71 |
| 273127 | INTERGENIC | Dbl Promoter | 1.85 | 0.77 | 1.49 | 0.73 | 1.27 | 0.57 |
| 275486 | INTERGENIC | Non Promoter | #N/A | #N/A | #N/A | #N/A | #N/A | #N/A |
| 278839 | INTERGENIC | Dbl Promoter | 2.24 | 0.87 | 2.24 | 0.92 | 1.76 | 0.78 |
| 285484 | INTERGENIC | Sgl Promoter | #N/A | #N/A | 2.46 | 0.92 | 1.56 | 0.71 |
| 286892 | INTERGENIC | Non Promoter | #N/A | #N/A | 0.43 | 0.06 | 0.47 | 0.10 |
| 289037 | INTERGENIC | Sgl Promoter | 1.89 | 0.78 | 1.58 | 0.76 | 1.85 | 0.81 |

|        |            |              |      |      |      |      |      |      |
|--------|------------|--------------|------|------|------|------|------|------|
| 290095 | INTERGENIC | Sgl Promoter | 0.58 | 0.19 | 0.99 | 0.42 | 1.25 | 0.56 |
| 292557 | INTERGENIC | Dbl Promoter | 0.42 | 0.10 | 0.63 | 0.18 | 0.49 | 0.11 |
| 293725 | INTERGENIC | Non Promoter | 0.50 | 0.14 | 0.90 | 0.37 | 0.52 | 0.13 |
| 298440 | INTERGENIC | Sgl Promoter | 2.47 | 0.91 | 1.80 | 0.85 | 2.08 | 0.86 |
| 301204 | INTERGENIC | Sgl Promoter | #N/A | #N/A | 0.79 | 0.28 | #N/A | #N/A |
| 303083 | INTERGENIC | Sgl Promoter | 1.89 | 0.79 | 1.59 | 0.77 | 1.87 | 0.81 |
| 305455 | INTERGENIC | Dbl Promoter | 1.58 | 0.68 | 1.23 | 0.58 | 1.38 | 0.62 |
| 305975 | INTERGENIC | Non Promoter | 0.75 | 0.28 | 0.76 | 0.27 | 0.73 | 0.26 |
| 306519 | INTERGENIC | Dbl Promoter | 0.58 | 0.18 | #N/A | #N/A | 0.69 | 0.24 |
| 307789 | INTERGENIC | Sgl Promoter | 0.52 | 0.15 | 0.98 | 0.41 | 0.85 | 0.34 |
| 309677 | INTERGENIC | Sgl Promoter | #N/A | #N/A | 1.62 | 0.78 | 1.32 | 0.60 |
| 312609 | INTERGENIC | Sgl Promoter | 0.37 | 0.07 | 0.74 | 0.26 | 0.73 | 0.27 |
| 295771 | INTERGENIC | Non Promoter | 0.43 | 0.14 | 1.24 | 0.58 | 1.80 | 0.71 |
| 124839 | INTERGENIC | Sgl Promoter | 0.65 | 0.23 | 0.85 | 0.33 | 0.99 | 0.42 |
| 124838 | INTERGENIC | Sgl Promoter | #N/A | #N/A | 0.87 | 0.35 | 0.98 | 0.42 |
| 125612 | INTERGENIC | Sgl Promoter | 0.56 | 0.17 | 0.74 | 0.27 | 0.77 | 0.29 |
| 143339 | INTERGENIC | Dbl Promoter | 3.74 | 0.96 | 2.17 | 0.93 | 2.83 | 0.93 |
| 150990 | INTERGENIC | Sgl Promoter | 1.02 | 0.43 | 0.92 | 0.38 | 1.09 | 0.45 |
| 169575 | INTERGENIC | Sgl Promoter | 1.06 | 0.45 | 1.01 | 0.44 | 1.17 | 0.53 |
| 290644 | INTERGENIC | Sgl Promoter | #N/A | #N/A | #N/A | #N/A | #N/A | #N/A |
| 294206 | INTERGENIC | Non Promoter | #N/A | #N/A | 0.53 | 0.11 | #N/A | #N/A |
| 149626 | INTERGENIC | Sgl Promoter | #N/A | #N/A | #N/A | #N/A | #N/A | #N/A |
| 150401 | INTERGENIC | Sgl Promoter | #N/A | #N/A | #N/A | #N/A | #N/A | #N/A |
| 291901 | INTERGENIC | Sgl Promoter | 0.47 | 0.12 | 0.74 | 0.26 | 0.57 | 0.16 |
| 449752 | INTERGENIC | Non Promoter | #N/A | #N/A | #N/A | #N/A | 1.19 | 0.47 |
| 448025 | INTERGENIC | Dbl Promoter | 0.86 | 0.35 | 0.85 | 0.33 | 1.02 | 0.44 |
| 447008 | INTERGENIC | Non Promoter | 0.61 | 0.20 | 0.70 | 0.23 | 0.69 | 0.24 |
| 444724 | INTERGENIC | Sgl Promoter | 1.12 | 0.48 | 1.07 | 0.47 | 0.88 | 0.35 |
| 443070 | INTERGENIC | Dbl Promoter | 1.44 | 0.63 | 1.74 | 0.83 | 1.48 | 0.67 |
| 441055 | INTERGENIC | Non Promoter | #N/A | #N/A | #N/A | #N/A | #N/A | #N/A |
| 439950 | INTERGENIC | Sgl Promoter | 0.70 | 0.25 | 0.66 | 0.20 | 1.10 | 0.47 |
| 434305 | INTERGENIC | Sgl Promoter | #N/A | #N/A | #N/A | #N/A | #N/A | #N/A |
| 433538 | INTERGENIC | Dbl Promoter | 1.12 | 0.48 | 1.62 | 0.78 | 1.45 | 0.60 |
| 432349 | INTERGENIC | Sgl Promoter | 1.70 | 0.71 | 1.66 | 0.80 | 1.59 | 0.71 |
| 431149 | INTERGENIC | Non Promoter | 1.29 | 0.56 | #N/A | #N/A | #N/A | #N/A |
| 429108 | INTERGENIC | Sgl Promoter | 2.12 | 0.84 | 2.02 | 0.90 | 2.38 | 0.91 |
| 427405 | INTERGENIC | Dbl Promoter | 1.34 | 0.58 | 1.17 | 0.54 | 1.38 | 0.63 |
| 426043 | INTERGENIC | Sgl Promoter | #N/A | #N/A | #N/A | #N/A | 0.26 | 0.03 |
| 424250 | INTERGENIC | Dbl Promoter | 1.69 | 0.71 | 1.41 | 0.69 | 1.76 | 0.76 |
| 417704 | INTERGENIC | Sgl Promoter | 1.13 | 0.48 | #N/A | #N/A | 0.80 | 0.30 |
| 415154 | INTERGENIC | Non Promoter | #N/A | #N/A | #N/A | #N/A | #N/A | #N/A |
| 413994 | INTERGENIC | Sgl Promoter | 1.17 | 0.50 | #N/A | #N/A | 0.85 | 0.34 |
| 410420 | INTERGENIC | Sgl Promoter | 0.61 | 0.20 | 0.72 | 0.24 | 0.72 | 0.26 |
| 408492 | INTERGENIC | Sgl Promoter | 1.36 | 0.59 | 1.50 | 0.73 | 1.83 | 0.78 |
| 405385 | INTERGENIC | Non Promoter | #N/A | #N/A | 2.13 | 0.92 | 1.86 | 0.81 |
| 403736 | INTERGENIC | Sgl Promoter | #N/A | #N/A | 1.92 | 0.88 | 2.22 | 0.89 |
| 401038 | INTERGENIC | Non Promoter | #N/A | #N/A | 0.46 | 0.10 | #N/A | #N/A |
| 399381 | INTERGENIC | Sgl Promoter | 2.66 | 0.85 | 1.93 | 0.87 | 1.81 | 0.80 |
| 397578 | INTERGENIC | Sgl Promoter | 1.61 | 0.69 | 1.41 | 0.67 | 1.79 | 0.78 |
| 394258 | INTERGENIC | Sgl Promoter | #N/A | #N/A | 1.76 | 0.83 | 1.93 | 0.83 |
| 392700 | INTERGENIC | Non Promoter | 1.05 | 0.44 | 0.94 | 0.39 | 1.07 | 0.47 |

|        |            |              |      |      |      |      |      |      |
|--------|------------|--------------|------|------|------|------|------|------|
| 389213 | INTERGENIC | Sgl Promoter | 1.17 | 0.50 | 0.92 | 0.38 | 1.05 | 0.45 |
| 386591 | INTERGENIC | Sgl Promoter | 0.90 | 0.36 | 0.88 | 0.35 | 0.74 | 0.27 |
| 387554 | INTERGENIC | Sgl Promoter | 0.43 | 0.10 | 0.73 | 0.25 | 0.58 | 0.17 |
| 382027 | INTERGENIC | Sgl Promoter | 1.74 | 0.74 | #N/A | #N/A | 1.81 | 0.77 |
| 378915 | INTERGENIC | Non Promoter | 0.80 | 0.31 | 1.02 | 0.45 | 0.99 | 0.42 |
| 376798 | INTERGENIC | Sgl Promoter | #N/A | #N/A | #N/A | #N/A | #N/A | #N/A |
| 375721 | INTERGENIC | Sgl Promoter | 1.22 | 0.53 | 1.28 | 0.61 | 1.53 | 0.70 |
| 374008 | INTERGENIC | Sgl Promoter | 1.59 | 0.69 | 1.39 | 0.67 | 1.68 | 0.75 |
| 372729 | INTERGENIC | Non Promoter | #N/A | #N/A | #N/A | #N/A | #N/A | #N/A |
| 372289 | INTERGENIC | Sgl Promoter | 1.10 | 0.47 | 1.14 | 0.52 | 0.93 | 0.39 |
| 369034 | INTERGENIC | Dbl Promoter | 0.82 | 0.33 | 1.14 | 0.52 | 0.45 | 0.09 |
| 369813 | INTERGENIC | Dbl Promoter | 0.54 | 0.16 | 0.89 | 0.36 | 0.72 | 0.26 |
| 365067 | INTERGENIC | Sgl Promoter | #N/A | #N/A | #N/A | #N/A | #N/A | #N/A |
| 363951 | INTERGENIC | Dbl Promoter | #N/A | #N/A | #N/A | #N/A | 1.74 | 0.77 |
| 362671 | INTERGENIC | Sgl Promoter | 1.53 | 0.67 | 1.27 | 0.59 | #N/A | #N/A |
| 361698 | INTERGENIC | Sgl Promoter | 1.78 | 0.75 | 1.56 | 0.76 | 1.45 | 0.66 |
| 358167 | INTERGENIC | Sgl Promoter | 0.63 | 0.21 | 0.65 | 0.19 | 0.60 | 0.18 |
| 359576 | INTERGENIC | Sgl Promoter | 1.37 | 0.60 | 1.17 | 0.54 | 1.08 | 0.47 |
| 355673 | INTERGENIC | Non Promoter | #N/A | #N/A | #N/A | #N/A | #N/A | #N/A |
| 352876 | INTERGENIC | Sgl Promoter | 2.21 | 0.86 | 1.99 | 0.90 | 2.18 | 0.88 |
| 351433 | INTERGENIC | Sgl Promoter | 0.80 | 0.31 | 0.93 | 0.39 | 0.89 | 0.36 |
| 345664 | INTERGENIC | Dbl Promoter | 2.10 | 0.84 | 1.73 | 0.82 | 1.46 | 0.66 |
| 344236 | INTERGENIC | Non Promoter | #N/A | #N/A | #N/A | #N/A | #N/A | #N/A |
| 341618 | INTERGENIC | Dbl Promoter | 0.36 | 0.07 | 0.54 | 0.12 | 0.39 | 0.06 |
| 340627 | INTERGENIC | Non Promoter | #N/A | #N/A | 1.03 | 0.45 | 1.14 | 0.51 |
| 338271 | INTERGENIC | Non Promoter | #N/A | #N/A | #N/A | #N/A | #N/A | #N/A |
| 337486 | INTERGENIC | Dbl Promoter | 1.24 | 0.53 | #N/A | #N/A | #N/A | #N/A |
| 336248 | INTERGENIC | Non Promoter | #N/A | #N/A | #N/A | #N/A | #N/A | #N/A |
| 334834 | INTERGENIC | Dbl Promoter | 1.46 | 0.64 | 1.59 | 0.77 | 1.46 | 0.65 |
| 334216 | INTERGENIC | Non Promoter | 0.92 | 0.36 | 1.03 | 0.46 | 1.03 | 0.45 |
| 333120 | INTERGENIC | Non Promoter | #N/A | #N/A | #N/A | #N/A | #N/A | #N/A |
| 330666 | INTERGENIC | Sgl Promoter | #N/A | #N/A | #N/A | #N/A | #N/A | #N/A |
| 329835 | INTERGENIC | Non Promoter | #N/A | #N/A | #N/A | #N/A | #N/A | #N/A |
| 326612 | INTERGENIC | Dbl Promoter | 2.58 | 0.92 | 2.13 | 0.93 | 2.58 | 0.93 |
| 323216 | INTERGENIC | Non Promoter | #N/A | #N/A | #N/A | #N/A | #N/A | #N/A |
| 322225 | INTERGENIC | Dbl Promoter | 0.45 | 0.12 | 0.49 | 0.09 | 0.56 | 0.16 |
| 320667 | INTERGENIC | Sgl Promoter | 1.59 | 0.69 | 1.63 | 0.79 | 1.41 | 0.64 |
| 316970 | INTERGENIC | Sgl Promoter | 1.65 | 0.71 | 1.55 | 0.75 | 1.07 | 0.47 |
| 315356 | INTERGENIC | Sgl Promoter | 4.38 | 0.99 | 3.25 | 0.99 | 3.58 | 0.97 |
| 312950 | INTERGENIC | Sgl Promoter | 1.21 | 0.52 | 1.16 | 0.54 | 1.66 | 0.73 |
| 310641 | INTERGENIC | Sgl Promoter | 0.91 | 0.37 | 1.09 | 0.49 | #N/A | #N/A |
| 309801 | INTERGENIC | Non Promoter | #N/A | #N/A | 0.49 | 0.09 | #N/A | #N/A |
| 308423 | INTERGENIC | Dbl Promoter | 0.16 | 0.01 | 0.25 | 0.01 | 0.24 | 0.01 |
| 306925 | INTERGENIC | Non Promoter | #N/A | #N/A | 0.33 | 0.02 | 0.51 | 0.15 |
| 305236 | INTERGENIC | Sgl Promoter | 1.53 | 0.67 | 1.23 | 0.58 | 1.44 | 0.65 |
| 303210 | INTERGENIC | Sgl Promoter | 1.66 | 0.71 | 1.19 | 0.54 | 1.32 | 0.61 |
| 301412 | INTERGENIC | Dbl Promoter | 3.38 | 0.97 | 2.27 | 0.94 | 2.55 | 0.93 |
| 300213 | INTERGENIC | Sgl Promoter | #N/A | #N/A | 1.41 | 0.68 | #N/A | #N/A |
| 298416 | INTERGENIC | Non Promoter | #N/A | #N/A | #N/A | #N/A | #N/A | #N/A |
| 296819 | INTERGENIC | Dbl Promoter | 1.76 | 0.74 | 1.79 | 0.84 | 1.65 | 0.74 |
| 295033 | INTERGENIC | Sgl Promoter | 1.41 | 0.61 | 1.04 | 0.46 | 1.40 | 0.64 |



|        |            |              |      |      |      |      |      |      |
|--------|------------|--------------|------|------|------|------|------|------|
| 293391 | INTERGENIC | Non Promoter | 1.30 | 0.56 | 0.87 | 0.34 | 1.01 | 0.43 |
| 292780 | INTERGENIC | Sgl Promoter | 3.04 | 0.96 | 2.45 | 0.96 | 2.39 | 0.91 |
| 289571 | INTERGENIC | Non Promoter | #N/A | #N/A | #N/A | #N/A | #N/A | #N/A |
| 286997 | INTERGENIC | Sgl Promoter | 1.40 | 0.61 | 1.04 | 0.45 | 0.92 | 0.37 |
| 285390 | INTERGENIC | Sgl Promoter | 2.65 | 0.90 | 2.28 | 0.87 | 2.07 | 0.83 |
| 284580 | INTERGENIC | Non Promoter | #N/A | #N/A | #N/A | #N/A | #N/A | #N/A |
| 283418 | INTERGENIC | Dbl Promoter | #N/A | #N/A | #N/A | #N/A | #N/A | #N/A |
| 282111 | INTERGENIC | Sgl Promoter | #N/A | #N/A | #N/A | #N/A | #N/A | #N/A |
| 280306 | INTERGENIC | Non Promoter | #N/A | #N/A | #N/A | #N/A | #N/A | #N/A |
| 276871 | INTERGENIC | Dbl Promoter | 3.04 | 0.95 | 1.73 | 0.82 | 2.87 | 0.95 |
| 275147 | INTERGENIC | Sgl Promoter | #N/A | #N/A | #N/A | #N/A | #N/A | #N/A |
| 272388 | INTERGENIC | Dbl Promoter | 3.65 | 0.98 | 2.96 | 0.99 | 3.41 | 0.98 |
| 270221 | INTERGENIC | Non Promoter | #N/A | #N/A | 0.51 | 0.10 | #N/A | #N/A |
| 268920 | INTERGENIC | Sgl Promoter | 1.30 | 0.55 | 1.14 | 0.52 | 0.87 | 0.35 |
| 267697 | INTERGENIC | Dbl Promoter | 1.06 | 0.45 | 1.15 | 0.53 | 0.97 | 0.41 |
| 265257 | INTERGENIC | Sgl Promoter | 0.97 | 0.40 | 1.30 | 0.61 | 1.66 | 0.75 |
| 264511 | INTERGENIC | Sgl Promoter | 1.85 | 0.77 | 1.61 | 0.75 | 1.12 | 0.49 |
| 263312 | INTERGENIC | Non Promoter | #N/A | #N/A | #N/A | #N/A | #N/A | #N/A |
| 258914 | INTERGENIC | Dbl Promoter | 2.70 | 0.90 | #N/A | #N/A | 2.76 | 0.94 |
| 256632 | INTERGENIC | Non Promoter | #N/A | #N/A | #N/A | #N/A | #N/A | #N/A |
| 255603 | INTERGENIC | Dbl Promoter | 2.35 | 0.88 | 1.61 | 0.78 | 2.02 | 0.85 |
| 253994 | INTERGENIC | Non Promoter | #N/A | #N/A | #N/A | #N/A | #N/A | #N/A |
| 251565 | INTERGENIC | Sgl Promoter | #N/A | #N/A | 1.89 | 0.86 | 2.36 | 0.89 |
| 248580 | INTERGENIC | Sgl Promoter | 1.35 | 0.59 | 1.18 | 0.55 | 1.00 | 0.43 |
| 246688 | INTERGENIC | Non Promoter | #N/A | #N/A | 0.72 | 0.24 | 0.81 | 0.31 |
| 245922 | INTERGENIC | Dbl Promoter | 2.02 | 0.81 | 1.84 | 0.85 | 1.79 | 0.76 |
| 245132 | INTERGENIC | Non Promoter | #N/A | #N/A | #N/A | #N/A | #N/A | #N/A |
| 242551 | INTERGENIC | Sgl Promoter | 1.14 | 0.49 | 0.95 | 0.40 | 1.07 | 0.47 |
| 241417 | INTERGENIC | Sgl Promoter | 2.65 | 0.92 | 2.25 | 0.94 | 1.77 | 0.77 |
| 240258 | INTERGENIC | Dbl Promoter | 0.58 | 0.19 | 1.19 | 0.54 | 0.86 | 0.35 |
| 239018 | INTERGENIC | Sgl Promoter | 0.95 | 0.39 | 1.27 | 0.61 | 0.96 | 0.41 |
| 236156 | INTERGENIC | Non Promoter | 0.74 | 0.28 | #N/A | #N/A | 0.98 | 0.42 |
| 234927 | INTERGENIC | Sgl Promoter | 0.59 | 0.19 | 0.76 | 0.27 | 0.57 | 0.16 |
| 232652 | INTERGENIC | Sgl Promoter | 0.90 | 0.36 | 1.09 | 0.49 | 0.92 | 0.38 |
| 231024 | INTERGENIC | Sgl Promoter | 0.97 | 0.40 | 1.58 | 0.77 | 1.29 | 0.59 |
| 229906 | INTERGENIC | Sgl Promoter | 0.70 | 0.26 | 0.83 | 0.32 | 0.54 | 0.15 |
| 229171 | INTERGENIC | Sgl Promoter | 1.39 | 0.61 | #N/A | #N/A | 1.30 | 0.59 |
| 222427 | INTERGENIC | Dbl Promoter | 0.87 | 0.34 | 0.70 | 0.23 | 0.70 | 0.24 |
| 224304 | INTERGENIC | Sgl Promoter | 2.14 | 0.84 | 1.57 | 0.74 | 1.50 | 0.68 |
| 221724 | INTERGENIC | Sgl Promoter | 1.40 | 0.61 | 0.90 | 0.37 | 1.27 | 0.57 |
| 219662 | INTERGENIC | Sgl Promoter | 0.61 | 0.21 | 0.86 | 0.34 | 0.90 | 0.37 |
| 218680 | INTERGENIC | Non Promoter | #N/A | #N/A | 0.47 | 0.08 | 0.40 | 0.11 |
| 217600 | INTERGENIC | Sgl Promoter | 0.30 | 0.04 | #N/A | #N/A | 0.44 | 0.09 |
| 216529 | INTERGENIC | Sgl Promoter | 1.05 | 0.44 | 1.18 | 0.55 | 1.09 | 0.48 |
| 213352 | INTERGENIC | Dbl Promoter | 0.57 | 0.18 | 0.76 | 0.27 | 0.56 | 0.16 |
| 211376 | INTERGENIC | Sgl Promoter | 0.72 | 0.27 | 1.35 | 0.62 | 0.93 | 0.38 |
| 205361 | INTERGENIC | Non Promoter | #N/A | #N/A | 0.28 | 0.01 | 0.34 | 0.04 |
| 203040 | INTERGENIC | Dbl Promoter | 2.23 | 0.86 | 1.63 | 0.77 | 1.94 | 0.83 |
| 201720 | INTERGENIC | Non Promoter | #N/A | #N/A | 0.51 | 0.10 | #N/A | #N/A |
| 199997 | INTERGENIC | Dbl Promoter | 1.99 | 0.81 | 2.26 | 0.94 | 2.04 | 0.85 |
| 198663 | INTERGENIC | Sgl Promoter | 3.01 | 0.95 | 2.14 | 0.92 | 2.89 | 0.95 |

|        |            |              |      |      |      |      |      |      |
|--------|------------|--------------|------|------|------|------|------|------|
| 194572 | INTERGENIC | Non Promoter | 0.24 | 0.03 | 0.53 | 0.13 | 0.94 | 0.39 |
| 192751 | INTERGENIC | Sgl Promoter | 1.07 | 0.45 | 0.76 | 0.27 | 0.92 | 0.38 |
| 190925 | INTERGENIC | Dbl Promoter | 1.83 | 0.77 | 1.57 | 0.74 | 2.13 | 0.84 |
| 188155 | INTERGENIC | Non Promoter | #N/A | #N/A | #N/A | #N/A | #N/A | #N/A |
| 184926 | INTERGENIC | Sgl Promoter | 1.92 | 0.79 | 1.77 | 0.83 | 1.95 | 0.83 |
| 183319 | INTERGENIC | Non Promoter | #N/A | #N/A | 1.61 | 0.64 | 1.80 | 0.79 |
| 181187 | INTERGENIC | Non Promoter | #N/A | #N/A | #N/A | #N/A | #N/A | #N/A |
| 178335 | INTERGENIC | Sgl Promoter | 0.44 | 0.11 | #N/A | #N/A | 0.98 | 0.41 |
| 176774 | INTERGENIC | Sgl Promoter | 1.16 | 0.50 | 0.91 | 0.37 | 0.82 | 0.32 |
| 172482 | INTERGENIC | Dbl Promoter | 0.72 | 0.26 | 0.75 | 0.26 | 0.79 | 0.30 |
| 167360 | INTERGENIC | Non Promoter | #N/A | #N/A | #N/A | #N/A | #N/A | #N/A |
| 164988 | INTERGENIC | Non Promoter | #N/A | #N/A | 0.67 | 0.20 | #N/A | #N/A |
| 164291 | INTERGENIC | Dbl Promoter | #N/A | #N/A | 1.99 | 0.82 | 2.51 | 0.93 |
| 163450 | INTERGENIC | Sgl Promoter | 1.98 | 0.78 | 2.20 | 0.93 | 2.40 | 0.90 |
| 160996 | INTERGENIC | Non Promoter | #N/A | #N/A | #N/A | #N/A | #N/A | #N/A |
| 159605 | INTERGENIC | Dbl Promoter | 1.54 | 0.67 | 1.66 | 0.80 | 1.78 | 0.77 |
| 158065 | INTERGENIC | Non Promoter | #N/A | #N/A | #N/A | #N/A | #N/A | #N/A |
| 156319 | INTERGENIC | Dbl Promoter | 1.50 | 0.65 | 1.06 | 0.47 | 1.35 | 0.62 |
| 149204 | INTERGENIC | Sgl Promoter | #N/A | #N/A | #N/A | #N/A | #N/A | #N/A |
| 145827 | INTERGENIC | Sgl Promoter | 1.20 | 0.50 | #N/A | #N/A | 1.61 | 0.72 |
| 144485 | INTERGENIC | Non Promoter | #N/A | #N/A | 0.98 | 0.40 | 0.64 | 0.21 |
| 142098 | INTERGENIC | Dbl Promoter | 1.58 | 0.68 | 1.46 | 0.71 | 1.58 | 0.72 |
| 141210 | INTERGENIC | Non Promoter | #N/A | #N/A | #N/A | #N/A | #N/A | #N/A |
| 139523 | INTERGENIC | Sgl Promoter | 1.10 | 0.47 | #N/A | #N/A | 1.33 | 0.61 |
| 138292 | INTERGENIC | Sgl Promoter | 1.71 | 0.73 | 2.13 | 0.92 | #N/A | #N/A |
| 135897 | INTERGENIC | Sgl Promoter | 1.12 | 0.48 | 1.36 | 0.66 | 1.14 | 0.51 |
| 135180 | INTERGENIC | Sgl Promoter | 0.93 | 0.38 | 1.13 | 0.50 | 0.66 | 0.22 |
| 132636 | INTERGENIC | Dbl Promoter | 1.36 | 0.59 | 1.22 | 0.56 | 1.31 | 0.59 |
| 133438 | INTERGENIC | Dbl Promoter | 0.46 | 0.12 | 0.69 | 0.22 | 0.52 | 0.14 |
| 130872 | INTERGENIC | Sgl Promoter | 0.24 | 0.02 | 0.27 | 0.02 | 0.33 | 0.04 |
| 130408 | INTERGENIC | Non Promoter | #N/A | #N/A | 0.31 | 0.02 | 0.26 | 0.02 |
| 126788 | INTERGENIC | Sgl Promoter | 3.36 | 0.97 | 1.88 | 0.87 | 2.35 | 0.89 |
| 125510 | INTERGENIC | Sgl Promoter | 2.93 | 0.81 | 1.73 | 0.82 | 2.31 | 0.84 |
| 123866 | INTERGENIC | Non Promoter | #N/A | #N/A | #N/A | #N/A | #N/A | #N/A |
| 121979 | INTERGENIC | Dbl Promoter | #N/A | #N/A | 2.15 | 0.81 | #N/A | #N/A |
| 118708 | INTERGENIC | Non Promoter | #N/A | #N/A | 0.59 | 0.15 | #N/A | #N/A |
| 117665 | INTERGENIC | Sgl Promoter | 0.26 | 0.03 | 0.48 | 0.08 | 0.37 | 0.07 |
| 116322 | INTERGENIC | Sgl Promoter | 1.30 | 0.55 | 0.68 | 0.21 | 1.01 | 0.42 |
| 114673 | INTERGENIC | Sgl Promoter | 1.59 | 0.69 | 1.00 | 0.43 | 1.24 | 0.55 |
| 111581 | INTERGENIC | Sgl Promoter | 3.67 | 0.98 | 2.25 | 0.94 | 3.05 | 0.97 |
| 107209 | INTERGENIC | Sgl Promoter | 3.11 | 0.96 | 2.47 | 0.96 | 2.51 | 0.93 |
| 106742 | INTERGENIC | Dbl Promoter | 1.67 | 0.69 | 1.18 | 0.54 | 1.86 | 0.79 |
| 104918 | INTERGENIC | Sgl Promoter | 1.31 | 0.57 | 1.41 | 0.68 | 1.01 | 0.44 |
| 103650 | INTERGENIC | Sgl Promoter | #N/A | #N/A | 2.30 | 0.93 | 2.94 | 0.94 |
| 101291 | INTERGENIC | Sgl Promoter | #N/A | #N/A | 1.19 | 0.53 | 1.13 | 0.48 |
| 99562  | INTERGENIC | Sgl Promoter | 1.77 | 0.75 | 2.08 | 0.90 | 2.59 | 0.91 |
| 98476  | INTERGENIC | Dbl Promoter | 3.56 | 0.98 | 2.83 | 0.98 | 3.85 | 0.99 |
| 96083  | INTERGENIC | Non Promoter | #N/A | #N/A | #N/A | #N/A | #N/A | #N/A |
| 94606  | INTERGENIC | Dbl Promoter | 2.57 | 0.91 | 1.85 | 0.86 | 1.86 | 0.79 |
| 92763  | INTERGENIC | Non Promoter | #N/A | #N/A | #N/A | #N/A | #N/A | #N/A |
| 90177  | INTERGENIC | Sgl Promoter | #N/A | #N/A | 1.78 | 0.82 | 1.17 | 0.52 |

|        |            |              |      |      |      |      |      |      |
|--------|------------|--------------|------|------|------|------|------|------|
| 88249  | INTERGENIC | Sgl Promoter | #N/A | #N/A | #N/A | #N/A | 1.40 | 0.64 |
| 87462  | INTERGENIC | Dbl Promoter | 2.33 | 0.88 | 1.55 | 0.75 | 1.93 | 0.83 |
| 86208  | INTERGENIC | Non Promoter | #N/A | #N/A | #N/A | #N/A | 1.21 | 0.55 |
| 81458  | INTERGENIC | Dbl Promoter | 1.23 | 0.53 | 1.12 | 0.51 | 1.00 | 0.43 |
| 82503  | INTERGENIC | Dbl Promoter | 0.66 | 0.23 | 0.82 | 0.31 | 0.56 | 0.16 |
| 83549  | INTERGENIC | Dbl Promoter | 0.55 | 0.17 | 1.07 | 0.47 | 0.76 | 0.28 |
| 79295  | INTERGENIC | Non Promoter | #N/A | #N/A | #N/A | #N/A | #N/A | #N/A |
| 78427  | INTERGENIC | Dbl Promoter | 2.20 | 0.85 | 2.32 | 0.95 | 1.75 | 0.78 |
| 77290  | INTERGENIC | Sgl Promoter | 0.45 | 0.11 | 0.42 | 0.05 | 0.58 | 0.18 |
| 74447  | INTERGENIC | Sgl Promoter | 1.77 | 0.75 | 2.73 | 0.96 | 1.27 | 0.58 |
| 70641  | INTERGENIC | Sgl Promoter | #N/A | #N/A | #N/A | #N/A | #N/A | #N/A |
| 68998  | INTERGENIC | Sgl Promoter | 2.08 | 0.83 | 2.04 | 0.89 | 2.12 | 0.85 |
| 67984  | INTERGENIC | Non Promoter | 0.86 | 0.35 | 0.84 | 0.32 | 0.94 | 0.40 |
| 66494  | INTERGENIC | Sgl Promoter | 3.79 | 0.99 | 1.95 | 0.89 | 4.15 | 0.98 |
| 65243  | INTERGENIC | Dbl Promoter | 2.95 | 0.91 | 2.10 | 0.91 | 1.85 | 0.76 |
| 62012  | INTERGENIC | Dbl Promoter | 1.94 | 0.80 | 1.81 | 0.83 | 1.39 | 0.64 |
| 60873  | INTERGENIC | Sgl Promoter | 1.65 | 0.71 | 1.56 | 0.76 | 1.59 | 0.72 |
| 57266  | INTERGENIC | Sgl Promoter | 1.47 | 0.63 | 1.23 | 0.58 | 1.28 | 0.58 |
| 54398  | INTERGENIC | Non Promoter | 0.27 | 0.03 | 0.43 | 0.06 | 0.57 | 0.16 |
| 52446  | INTERGENIC | Dbl Promoter | 5.22 | 0.99 | 4.15 | 1.00 | 3.52 | 0.98 |
| 49060  | INTERGENIC | Sgl Promoter | 1.02 | 0.43 | 1.03 | 0.45 | 1.19 | 0.53 |
| 50088  | INTERGENIC | Sgl Promoter | 1.41 | 0.61 | 0.91 | 0.37 | 1.53 | 0.68 |
| 51116  | INTERGENIC | Sgl Promoter | 0.87 | 0.35 | 0.72 | 0.24 | 0.80 | 0.31 |
| 46272  | INTERGENIC | Sgl Promoter | #N/A | #N/A | #N/A | #N/A | 0.60 | 0.19 |
| 44066  | INTERGENIC | Sgl Promoter | 0.41 | 0.09 | 0.29 | 0.02 | 0.41 | 0.07 |
| 42701  | INTERGENIC | Dbl Promoter | 2.96 | 0.92 | 2.50 | 0.94 | 3.39 | 0.98 |
| 38868  | INTERGENIC | Non Promoter | #N/A | #N/A | 2.79 | 0.98 | 2.29 | 0.88 |
| 38488  | INTERGENIC | Sgl Promoter | 1.93 | 0.80 | 1.85 | 0.85 | 1.99 | 0.79 |
| 36798  | INTERGENIC | Dbl Promoter | 2.07 | 0.82 | #N/A | #N/A | 2.11 | 0.86 |
| 34238  | INTERGENIC | Sgl Promoter | #N/A | #N/A | 1.74 | 0.83 | 1.89 | 0.81 |
| 33415  | INTERGENIC | Non Promoter | #N/A | #N/A | #N/A | #N/A | #N/A | #N/A |
| 32296  | INTERGENIC | Sgl Promoter | 3.10 | 0.96 | 2.63 | 0.98 | 3.29 | 0.98 |
| 30657  | INTERGENIC | Dbl Promoter | #N/A | #N/A | 1.37 | 0.63 | 2.49 | 0.86 |
| 28985  | INTERGENIC | Sgl Promoter | #N/A | #N/A | 0.43 | 0.06 | 1.14 | 0.51 |
| 26403  | INTERGENIC | Non Promoter | 0.56 | 0.18 | 0.63 | 0.18 | 0.92 | 0.38 |
| 21914  | INTERGENIC | Sgl Promoter | 1.37 | 0.59 | 1.49 | 0.72 | 1.36 | 0.62 |
| 22823  | INTERGENIC | Sgl Promoter | 2.37 | 0.89 | 2.11 | 0.92 | 2.24 | 0.84 |
| 20635  | INTERGENIC | Sgl Promoter | 0.88 | 0.36 | 0.79 | 0.29 | 0.83 | 0.33 |
| 18959  | INTERGENIC | Dbl Promoter | 1.04 | 0.44 | 0.84 | 0.33 | 0.99 | 0.42 |
| 17577  | INTERGENIC | Non Promoter | 1.24 | 0.53 | 1.12 | 0.51 | 1.34 | 0.60 |
| 14782  | INTERGENIC | Dbl Promoter | 0.72 | 0.27 | 0.57 | 0.14 | 0.76 | 0.28 |
| 16204  | INTERGENIC | Dbl Promoter | 2.30 | 0.88 | 1.66 | 0.79 | 2.03 | 0.84 |
| 10706  | INTERGENIC | Sgl Promoter | 1.54 | 0.67 | 1.15 | 0.53 | 1.34 | 0.61 |
| 11657  | INTERGENIC | Sgl Promoter | 1.91 | 0.79 | 1.49 | 0.68 | 1.40 | 0.64 |
| 8683   | INTERGENIC | Non Promoter | 1.99 | 0.81 | 1.98 | 0.89 | 1.74 | 0.76 |
| 4469   | INTERGENIC | Sgl Promoter | 0.44 | 0.11 | 0.55 | 0.12 | 0.63 | 0.20 |
| 5985   | INTERGENIC | Sgl Promoter | 1.22 | 0.52 | 0.98 | 0.42 | 1.25 | 0.57 |
| 435985 | INTERGENIC | Sgl Promoter | 1.50 | 0.65 | 1.52 | 0.73 | 1.64 | 0.74 |
| 437190 | INTERGENIC | Sgl Promoter | 0.83 | 0.33 | 0.96 | 0.40 | 0.94 | 0.40 |
| 437813 | INTERGENIC | Sgl Promoter | #N/A | #N/A | #N/A | #N/A | #N/A | #N/A |
| 453086 | INTERGENIC | Dbl Promoter | 0.97 | 0.40 | 0.87 | 0.35 | 0.59 | 0.18 |

|        |            |              |      |      |      |      |      |      |
|--------|------------|--------------|------|------|------|------|------|------|
| 454163 | INTERGENIC | Sgl Promoter | 0.67 | 0.23 | 0.60 | 0.16 | #N/A | #N/A |
| 455242 | INTERGENIC | Sgl Promoter | 0.67 | 0.24 | 1.02 | 0.45 | 0.87 | 0.35 |
| 456877 | INTERGENIC | Non Promoter | #N/A | #N/A | #N/A | #N/A | #N/A | #N/A |
| 458583 | INTERGENIC | Sgl Promoter | 1.17 | 0.50 | 1.04 | 0.46 | 1.39 | 0.63 |
| 461883 | INTERGENIC | Dbl Promoter | 1.16 | 0.49 | 1.13 | 0.52 | 0.78 | 0.30 |
| 463475 | INTERGENIC | Dbl Promoter | 1.07 | 0.46 | 1.31 | 0.63 | 1.18 | 0.53 |
| 465960 | INTERGENIC | Dbl Promoter | 0.46 | 0.12 | 0.68 | 0.21 | 0.52 | 0.14 |
| 471894 | INTERGENIC | Sgl Promoter | 0.99 | 0.41 | 0.93 | 0.39 | 0.93 | 0.39 |
| 473198 | INTERGENIC | Sgl Promoter | #N/A | #N/A | #N/A | #N/A | #N/A | #N/A |
| 474087 | INTERGENIC | Sgl Promoter | 1.57 | 0.66 | 1.18 | 0.54 | 1.27 | 0.57 |
| 476940 | INTERGENIC | Non Promoter | 0.90 | 0.37 | 0.87 | 0.35 | 0.98 | 0.42 |
| 479155 | INTERGENIC | Sgl Promoter | 3.42 | 0.97 | 2.60 | 0.97 | 3.12 | 0.97 |
| 482710 | INTERGENIC | Sgl Promoter | 1.12 | 0.47 | 0.76 | 0.27 | 1.00 | 0.41 |
| 484203 | INTERGENIC | Sgl Promoter | #N/A | #N/A | 1.44 | 0.67 | 1.23 | 0.47 |
| 485786 | INTERGENIC | Sgl Promoter | 0.61 | 0.20 | 0.89 | 0.36 | 0.76 | 0.28 |
| 486844 | INTERGENIC | Dbl Promoter | 2.25 | 0.87 | 1.94 | 0.88 | 2.01 | 0.83 |
| 488112 | INTERGENIC | Non Promoter | #N/A | #N/A | #N/A | #N/A | #N/A | #N/A |
| 488837 | INTERGENIC | Dbl Promoter | #N/A | #N/A | 0.95 | 0.39 | 1.06 | 0.44 |
| 491057 | INTERGENIC | Sgl Promoter | #N/A | #N/A | #N/A | #N/A | #N/A | #N/A |
| 492596 | INTERGENIC | Non Promoter | #N/A | #N/A | 0.38 | 0.04 | #N/A | #N/A |
| 494689 | INTERGENIC | Sgl Promoter | 1.70 | 0.70 | 1.62 | 0.77 | 1.61 | 0.72 |
| 497875 | INTERGENIC | Sgl Promoter | 1.54 | 0.67 | 1.41 | 0.67 | 1.59 | 0.72 |
| 501140 | INTERGENIC | Dbl Promoter | #N/A | #N/A | 0.64 | 0.19 | #N/A | #N/A |
| 501793 | INTERGENIC | Non Promoter | 1.19 | 0.51 | 0.90 | 0.36 | 1.23 | 0.55 |
| 503538 | INTERGENIC | Dbl Promoter | 2.85 | 0.94 | 2.04 | 0.90 | 2.59 | 0.91 |
| 504138 | INTERGENIC | Non Promoter | #N/A | #N/A | 1.62 | 0.76 | #N/A | #N/A |
| 505884 | INTERGENIC | Dbl Promoter | 1.70 | 0.73 | 1.49 | 0.72 | 1.38 | 0.63 |
| 508186 | INTERGENIC | Dbl Promoter | 0.72 | 0.27 | 1.11 | 0.49 | 0.44 | 0.08 |
| 509776 | INTERGENIC | Non Promoter | 0.54 | 0.17 | 0.57 | 0.14 | 0.76 | 0.29 |
| 513025 | INTERGENIC | Sgl Promoter | 1.35 | 0.59 | 1.58 | 0.76 | 1.71 | 0.76 |
| 520845 | INTERGENIC | Dbl Promoter | #N/A | #N/A | #N/A | #N/A | #N/A | #N/A |
| 521855 | INTERGENIC | Sgl Promoter | 1.25 | 0.54 | 1.23 | 0.57 | 1.34 | 0.61 |
| 523250 | INTERGENIC | Non Promoter | #N/A | #N/A | #N/A | #N/A | #N/A | #N/A |
| 525479 | INTERGENIC | Dbl Promoter | 1.60 | 0.69 | 1.68 | 0.81 | 1.52 | 0.69 |
| 527461 | INTERGENIC | Non Promoter | #N/A | #N/A | 0.78 | 0.28 | 0.54 | 0.14 |
| 531346 | INTERGENIC | Sgl Promoter | #N/A | #N/A | 1.05 | 0.46 | 1.46 | 0.67 |
| 539842 | INTERGENIC | Dbl Promoter | 0.94 | 0.38 | 1.18 | 0.55 | 0.73 | 0.26 |
| 540640 | INTERGENIC | Non Promoter | #N/A | #N/A | 0.54 | 0.14 | #N/A | #N/A |
| 541641 | INTERGENIC | Sgl Promoter | 0.44 | 0.11 | 0.57 | 0.13 | 0.49 | 0.12 |
| 544500 | INTERGENIC | Dbl Promoter | 0.68 | 0.24 | 0.74 | 0.26 | 0.56 | 0.16 |
| 546682 | INTERGENIC | Dbl Promoter | 1.82 | 0.77 | 1.57 | 0.75 | 1.75 | 0.77 |
| 548018 | INTERGENIC | Non Promoter | #N/A | #N/A | #N/A | #N/A | #N/A | #N/A |
| 548802 | INTERGENIC | Sgl Promoter | 1.28 | 0.56 | 1.32 | 0.63 | 1.46 | 0.66 |
| 553124 | INTERGENIC | Non Promoter | #N/A | #N/A | #N/A | #N/A | #N/A | #N/A |
| 555766 | INTERGENIC | Non Promoter | #N/A | #N/A | 0.57 | 0.14 | 0.28 | 0.05 |
| 557096 | INTERGENIC | Sgl Promoter | 0.32 | 0.05 | 0.70 | 0.22 | 0.54 | 0.15 |
| 558551 | INTERGENIC | Sgl Promoter | 1.09 | 0.46 | 1.19 | 0.54 | 1.46 | 0.66 |
| 561480 | INTERGENIC | Non Promoter | 0.99 | 0.41 | 1.11 | 0.50 | 1.17 | 0.52 |
| 563567 | INTERGENIC | Dbl Promoter | 0.85 | 0.34 | 0.86 | 0.33 | 0.70 | 0.24 |
| 565063 | INTERGENIC | Non Promoter | #N/A | #N/A | #N/A | #N/A | #N/A | #N/A |
| 565967 | INTERGENIC | Dbl Promoter | 1.69 | 0.72 | 1.62 | 0.78 | #N/A | #N/A |

|        |            |              |      |      |      |      |      |      |
|--------|------------|--------------|------|------|------|------|------|------|
| 567763 | INTERGENIC | Non Promoter | #N/A | #N/A | #N/A | #N/A | #N/A | #N/A |
| 568922 | INTERGENIC | Sgl Promoter | #N/A | #N/A | 0.85 | 0.33 | 0.93 | 0.39 |
| 574203 | INTERGENIC | Sgl Promoter | #N/A | #N/A | 0.50 | 0.09 | 0.61 | 0.19 |
| 576513 | INTERGENIC | Sgl Promoter | 0.88 | 0.35 | 1.19 | 0.55 | 1.72 | 0.76 |
| 578703 | INTERGENIC | Sgl Promoter | 0.83 | 0.33 | 1.03 | 0.45 | 0.96 | 0.39 |
| 579498 | INTERGENIC | Sgl Promoter | #N/A | #N/A | #N/A | #N/A | #N/A | #N/A |
| 580727 | INTERGENIC | Sgl Promoter | #N/A | #N/A | #N/A | #N/A | #N/A | #N/A |
| 581948 | INTERGENIC | Non Promoter | #N/A | #N/A | #N/A | #N/A | #N/A | #N/A |
| 582831 | INTERGENIC | Sgl Promoter | 1.31 | 0.57 | 0.97 | 0.41 | 0.85 | 0.34 |
| 583753 | INTERGENIC | Dbl Promoter | #N/A | #N/A | #N/A | #N/A | 2.10 | 0.84 |
| 584979 | INTERGENIC | Non Promoter | 0.52 | 0.15 | 0.78 | 0.28 | 0.68 | 0.23 |
| 588138 | INTERGENIC | Sgl Promoter | 2.65 | 0.92 | 1.60 | 0.77 | 3.00 | 0.96 |
| 588867 | INTERGENIC | Sgl Promoter | 1.01 | 0.42 | 1.21 | 0.57 | 1.02 | 0.42 |
| 589801 | INTERGENIC | Sgl Promoter | #N/A | #N/A | 0.87 | 0.34 | 1.00 | 0.43 |
| 593932 | INTERGENIC | Sgl Promoter | 1.22 | 0.53 | 1.04 | 0.46 | 1.00 | 0.43 |
| 597195 | INTERGENIC | Sgl Promoter | 1.74 | 0.74 | 1.19 | 0.56 | 1.40 | 0.64 |
| 598507 | INTERGENIC | Sgl Promoter | #N/A | #N/A | #N/A | #N/A | #N/A | #N/A |
| 600832 | INTERGENIC | Sgl Promoter | 0.21 | 0.02 | 0.65 | 0.19 | 0.14 | 0.00 |
| 602237 | INTERGENIC | Non Promoter | 0.37 | 0.07 | 0.86 | 0.34 | 0.60 | 0.19 |
| 603103 | INTERGENIC | Dbl Promoter | #N/A | #N/A | 1.37 | 0.67 | 1.64 | 0.72 |
| 604047 | INTERGENIC | Sgl Promoter | #N/A | #N/A | 1.41 | 0.67 | 2.11 | 0.85 |
| 607343 | INTERGENIC | Non Promoter | 0.50 | 0.14 | 0.68 | 0.21 | #N/A | #N/A |
| 610480 | INTERGENIC | Dbl Promoter | 3.00 | 0.95 | 2.24 | 0.94 | 3.01 | 0.96 |
| 612055 | INTERGENIC | Sgl Promoter | #N/A | #N/A | #N/A | #N/A | #N/A | #N/A |
| 613443 | INTERGENIC | Non Promoter | #N/A | #N/A | #N/A | #N/A | #N/A | #N/A |
| 614326 | INTERGENIC | Sgl Promoter | 1.86 | 0.78 | 2.05 | 0.89 | 1.36 | 0.57 |
| 616966 | INTERGENIC | Sgl Promoter | 0.90 | 0.37 | 1.36 | 0.66 | 0.58 | 0.17 |
| 617508 | INTERGENIC | Sgl Promoter | 1.19 | 0.51 | 1.13 | 0.51 | 1.22 | 0.53 |
| 618535 | INTERGENIC | Sgl Promoter | 2.97 | 0.95 | 1.68 | 0.80 | 2.87 | 0.96 |
| 620007 | INTERGENIC | Dbl Promoter | 1.17 | 0.50 | 0.82 | 0.31 | 1.29 | 0.58 |
| 625104 | INTERGENIC | Non Promoter | 0.37 | 0.07 | 0.68 | 0.21 | 0.72 | 0.26 |
| 626746 | INTERGENIC | Sgl Promoter | 1.14 | 0.49 | 1.08 | 0.48 | 1.75 | 0.73 |
| 629914 | INTERGENIC | Dbl Promoter | 1.06 | 0.45 | 1.14 | 0.52 | 1.21 | 0.54 |
| 631320 | INTERGENIC | Sgl Promoter | 0.80 | 0.31 | 0.85 | 0.33 | 0.64 | 0.21 |
| 637177 | INTERGENIC | Dbl Promoter | 1.33 | 0.58 | 1.11 | 0.50 | 0.74 | 0.27 |
| 640147 | INTERGENIC | Non Promoter | #N/A | #N/A | #N/A | #N/A | #N/A | #N/A |
| 644216 | INTERGENIC | Sgl Promoter | 1.56 | 0.68 | 0.65 | 0.19 | 1.78 | 0.73 |
| 645191 | INTERGENIC | Sgl Promoter | #N/A | #N/A | #N/A | #N/A | #N/A | #N/A |
| 655051 | INTERGENIC | Sgl Promoter | #N/A | #N/A | #N/A | #N/A | 0.66 | 0.22 |
| 655724 | INTERGENIC | Non Promoter | #N/A | #N/A | #N/A | #N/A | #N/A | #N/A |
| 657686 | INTERGENIC | Sgl Promoter | 0.94 | 0.39 | 0.70 | 0.23 | 0.89 | 0.37 |
| 658388 | INTERGENIC | Dbl Promoter | 0.96 | 0.40 | 1.03 | 0.45 | 1.11 | 0.48 |
| 665387 | INTERGENIC | Sgl Promoter | 1.66 | 0.71 | 1.58 | 0.76 | 1.49 | 0.68 |
| 667042 | INTERGENIC | Dbl Promoter | 3.95 | 0.98 | 2.36 | 0.95 | 2.09 | 0.86 |
| 668045 | INTERGENIC | Non Promoter | #N/A | #N/A | #N/A | #N/A | #N/A | #N/A |
| 671307 | INTERGENIC | Dbl Promoter | 2.75 | 0.93 | 2.23 | 0.90 | 1.69 | 0.73 |
| 676140 | INTERGENIC | Dbl Promoter | 2.29 | 0.86 | 2.14 | 0.93 | 2.03 | 0.85 |
| 678279 | INTERGENIC | Non Promoter | #N/A | #N/A | 0.65 | 0.19 | 0.85 | 0.32 |
| 680534 | INTERGENIC | Non Promoter | 0.96 | 0.40 | 1.79 | 0.84 | 1.10 | 0.49 |
| 681962 | INTERGENIC | Sgl Promoter | 2.03 | 0.82 | 1.76 | 0.83 | 2.19 | 0.88 |
| 682762 | INTERGENIC | Non Promoter | #N/A | #N/A | #N/A | #N/A | #N/A | #N/A |



|        |            |              |      |      |      |      |      |      |
|--------|------------|--------------|------|------|------|------|------|------|
| 683984 | INTERGENIC | Sgl Promoter | 1.76 | 0.71 | 1.59 | 0.77 | 1.93 | 0.82 |
| 685920 | INTERGENIC | Dbl Promoter | #N/A | #N/A | 1.74 | 0.78 | 1.81 | 0.78 |
| 688265 | INTERGENIC | Sgl Promoter | #N/A | #N/A | 1.27 | 0.61 | 1.12 | 0.50 |
| 691587 | INTERGENIC | Non Promoter | 1.23 | 0.53 | 1.38 | 0.64 | 0.95 | 0.40 |
| 693623 | INTERGENIC | Dbl Promoter | 2.58 | 0.92 | #N/A | #N/A | #N/A | #N/A |
| 694738 | INTERGENIC | Sgl Promoter | 2.47 | 0.89 | 2.27 | 0.95 | 2.16 | 0.86 |
| 698592 | INTERGENIC | Non Promoter | 0.28 | 0.04 | 0.49 | 0.09 | 0.61 | 0.19 |
| 700353 | INTERGENIC | Dbl Promoter | 1.02 | 0.42 | 1.21 | 0.56 | 1.19 | 0.53 |
| 701435 | INTERGENIC | Non Promoter | 0.71 | 0.26 | #N/A | #N/A | #N/A | #N/A |
| 703272 | INTERGENIC | Dbl Promoter | 1.34 | 0.57 | #N/A | #N/A | #N/A | #N/A |
| 704522 | INTERGENIC | Sgl Promoter | #N/A | #N/A | 1.04 | 0.46 | 1.08 | 0.48 |
| 709587 | INTERGENIC | Sgl Promoter | #N/A | #N/A | #N/A | #N/A | #N/A | #N/A |
| 713378 | INTERGENIC | Non Promoter | 0.56 | 0.18 | 0.57 | 0.15 | 0.81 | 0.31 |
| 715785 | INTERGENIC | Sgl Promoter | 1.21 | 0.51 | 1.15 | 0.53 | #N/A | #N/A |
| 716828 | INTERGENIC | Sgl Promoter | 2.01 | 0.80 | 2.03 | 0.89 | 2.44 | 0.91 |
| 718854 | INTERGENIC | Sgl Promoter | 1.56 | 0.67 | 1.07 | 0.47 | 1.83 | 0.79 |
| 723042 | INTERGENIC | Sgl Promoter | 0.30 | 0.05 | 0.52 | 0.11 | 0.35 | 0.05 |
| 727749 | INTERGENIC | Sgl Promoter | 1.81 | 0.75 | 1.97 | 0.82 | 2.60 | 0.94 |
| 730616 | INTERGENIC | Sgl Promoter | 1.76 | 0.73 | 1.33 | 0.64 | 2.69 | 0.87 |
| 733656 | INTERGENIC | Non Promoter | 0.81 | 0.32 | 0.62 | 0.17 | 0.87 | 0.35 |
| 734176 | INTERGENIC | Dbl Promoter | 1.78 | 0.73 | 1.77 | 0.77 | 3.01 | 0.83 |
| 734939 | INTERGENIC | Non Promoter | #N/A | #N/A | #N/A | #N/A | #N/A | #N/A |
| 740511 | INTERGENIC | Sgl Promoter | 1.96 | 0.80 | 2.23 | 0.94 | 2.34 | 0.91 |
| 742080 | INTERGENIC | Sgl Promoter | 1.37 | 0.60 | 1.05 | 0.47 | 1.17 | 0.52 |
| 744349 | INTERGENIC | Sgl Promoter | 1.77 | 0.75 | 1.45 | 0.71 | 1.73 | 0.76 |
| 746776 | INTERGENIC | Dbl Promoter | 2.22 | 0.86 | 1.87 | 0.87 | 2.14 | 0.86 |
| 748651 | INTERGENIC | Non Promoter | #N/A | #N/A | #N/A | #N/A | #N/A | #N/A |
| 751669 | INTERGENIC | Dbl Promoter | 0.75 | 0.29 | 0.78 | 0.28 | 0.87 | 0.35 |
| 753713 | INTERGENIC | Non Promoter | #N/A | #N/A | #N/A | #N/A | #N/A | #N/A |
| 755593 | INTERGENIC | Sgl Promoter | 2.76 | 0.93 | 2.31 | 0.95 | 1.63 | 0.74 |
| 764216 | INTERGENIC | Non Promoter | #N/A | #N/A | 0.70 | 0.23 | 0.80 | 0.31 |
| 765744 | INTERGENIC | Dbl Promoter | 1.10 | 0.47 | 1.21 | 0.56 | 1.39 | 0.64 |
| 766774 | INTERGENIC | Non Promoter | #N/A | #N/A | #N/A | #N/A | #N/A | #N/A |
| 768441 | INTERGENIC | Sgl Promoter | 0.48 | 0.13 | 0.48 | 0.09 | 0.42 | 0.08 |
| 769563 | INTERGENIC | Dbl Promoter | 0.31 | 0.04 | 0.74 | 0.26 | 0.45 | 0.09 |
| 771915 | INTERGENIC | Sgl Promoter | 2.32 | 0.87 | 2.27 | 0.88 | 1.63 | 0.73 |
| 776201 | INTERGENIC | Sgl Promoter | 1.68 | 0.71 | 1.57 | 0.76 | 2.05 | 0.79 |
| 779081 | INTERGENIC | Sgl Promoter | 1.55 | 0.67 | 1.07 | 0.48 | 1.26 | 0.58 |
| 780428 | INTERGENIC | Non Promoter | #N/A | #N/A | 0.57 | 0.14 | 0.70 | 0.25 |
| 781461 | INTERGENIC | Dbl Promoter | 2.23 | 0.87 | 1.82 | 0.85 | 2.35 | 0.90 |
| 782079 | INTERGENIC | Non Promoter | #N/A | #N/A | #N/A | #N/A | #N/A | #N/A |
| 784909 | INTERGENIC | Dbl Promoter | 2.16 | 0.84 | 2.09 | 0.92 | 1.76 | 0.77 |
| 786344 | INTERGENIC | Non Promoter | #N/A | #N/A | #N/A | #N/A | #N/A | #N/A |
| 789487 | INTERGENIC | Dbl Promoter | 2.31 | 0.88 | 2.89 | 0.97 | 3.06 | 0.97 |
| 790366 | INTERGENIC | Sgl Promoter | 1.72 | 0.73 | 1.36 | 0.65 | 1.66 | 0.74 |
| 795079 | INTERGENIC | Sgl Promoter | 1.92 | 0.76 | 1.54 | 0.75 | 1.36 | 0.62 |
| 796231 | INTERGENIC | Sgl Promoter | 2.32 | 0.88 | 1.94 | 0.87 | 1.53 | 0.70 |
| 802769 | INTERGENIC | Dbl Promoter | 2.02 | 0.75 | 1.08 | 0.48 | 1.33 | 0.61 |
| 805607 | INTERGENIC | Sgl Promoter | 0.38 | 0.07 | 0.58 | 0.14 | 0.47 | 0.10 |
| 808362 | INTERGENIC | Sgl Promoter | 1.16 | 0.50 | 1.27 | 0.60 | 1.24 | 0.56 |
| 810603 | INTERGENIC | Non Promoter | #N/A | #N/A | #N/A | #N/A | #N/A | #N/A |

|        |            |              |      |      |      |      |      |      |
|--------|------------|--------------|------|------|------|------|------|------|
| 812148 | INTERGENIC | Dbl Promoter | 0.75 | 0.28 | 0.63 | 0.18 | 0.70 | 0.24 |
| 813231 | INTERGENIC | Non Promoter | #N/A | #N/A | 0.73 | 0.24 | 0.67 | 0.23 |
| 814490 | INTERGENIC | Dbl Promoter | 1.75 | 0.74 | 1.51 | 0.72 | 2.02 | 0.82 |
| 816916 | INTERGENIC | Sgl Promoter | 1.80 | 0.76 | 1.39 | 0.67 | 1.97 | 0.84 |
| 817988 | INTERGENIC | Sgl Promoter | 2.04 | 0.81 | 1.92 | 0.88 | 1.92 | 0.80 |
| 818746 | INTERGENIC | Non Promoter | #N/A | #N/A | 0.91 | 0.36 | 0.84 | 0.33 |
| 820055 | INTERGENIC | Dbl Promoter | 1.43 | 0.62 | 1.14 | 0.52 | 1.50 | 0.69 |
| 821332 | INTERGENIC | Sgl Promoter | 1.70 | 0.73 | 1.49 | 0.73 | 2.05 | 0.84 |
| 825947 | INTERGENIC | Non Promoter | #N/A | #N/A | #N/A | #N/A | #N/A | #N/A |
| 827619 | INTERGENIC | Dbl Promoter | 2.79 | 0.90 | 1.83 | 0.85 | #N/A | #N/A |
| 829622 | INTERGENIC | Sgl Promoter | 1.18 | 0.51 | 1.15 | 0.52 | 0.84 | 0.33 |
| 830666 | INTERGENIC | Non Promoter | #N/A | #N/A | 0.98 | 0.42 | #N/A | #N/A |
| 831971 | INTERGENIC | Sgl Promoter | 1.02 | 0.43 | #N/A | #N/A | 1.42 | 0.65 |
| 832896 | INTERGENIC | Sgl Promoter | #N/A | #N/A | 0.92 | 0.38 | 1.13 | 0.49 |
| 836265 | INTERGENIC | Sgl Promoter | 0.56 | 0.17 | 0.71 | 0.24 | 0.48 | 0.11 |
| 838429 | INTERGENIC | Sgl Promoter | 1.79 | 0.73 | 1.34 | 0.64 | 1.26 | 0.57 |
| 840641 | INTERGENIC | Non Promoter | #N/A | #N/A | #N/A | #N/A | #N/A | #N/A |
| 842374 | INTERGENIC | Dbl Promoter | 1.83 | 0.76 | 1.89 | 0.88 | 1.47 | 0.68 |
| 843606 | INTERGENIC | Non Promoter | #N/A | #N/A | #N/A | #N/A | #N/A | #N/A |
| 845989 | INTERGENIC | Non Promoter | #N/A | #N/A | 1.08 | 0.48 | 1.40 | 0.64 |
| 850311 | INTERGENIC | Non Promoter | #N/A | #N/A | #N/A | #N/A | #N/A | #N/A |
| 851265 | INTERGENIC | Dbl Promoter | #N/A | #N/A | 1.75 | 0.82 | 2.35 | 0.72 |
| 852570 | INTERGENIC | Non Promoter | #N/A | #N/A | 0.38 | 0.04 | 0.45 | 0.10 |
| 854212 | INTERGENIC | Dbl Promoter | #N/A | #N/A | #N/A | #N/A | #N/A | #N/A |
| 856354 | INTERGENIC | Dbl Promoter | 3.73 | 0.98 | 2.34 | 0.95 | 1.80 | 0.79 |
| 856935 | INTERGENIC | Non Promoter | #N/A | #N/A | #N/A | #N/A | #N/A | #N/A |
| 858174 | INTERGENIC | Sgl Promoter | 1.30 | 0.56 | 1.37 | 0.65 | 2.23 | 0.86 |
| 859335 | INTERGENIC | Sgl Promoter | 2.54 | 0.91 | 2.16 | 0.92 | 3.47 | 0.98 |
| 862091 | INTERGENIC | Sgl Promoter | 1.51 | 0.65 | 1.40 | 0.67 | 2.80 | 0.95 |
| 865049 | INTERGENIC | Non Promoter | #N/A | #N/A | #N/A | #N/A | #N/A | #N/A |
| 868261 | INTERGENIC | Dbl Promoter | 1.95 | 0.79 | 1.83 | 0.85 | 1.93 | 0.82 |
| 871858 | INTERGENIC | Non Promoter | 1.00 | 0.41 | 1.16 | 0.53 | 1.25 | 0.56 |
| 887269 | INTERGENIC | Sgl Promoter | #N/A | #N/A | 1.41 | 0.64 | 1.94 | 0.82 |
| 889788 | INTERGENIC | Sgl Promoter | 1.45 | 0.61 | 1.05 | 0.47 | 1.55 | 0.71 |
| 892912 | INTERGENIC | Sgl Promoter | 0.87 | 0.35 | 0.81 | 0.31 | 0.81 | 0.31 |
| 894155 | INTERGENIC | Non Promoter | #N/A | #N/A | 0.63 | 0.27 | 0.34 | 0.06 |
| 895071 | INTERGENIC | Dbl Promoter | #N/A | #N/A | 0.80 | 0.30 | 0.68 | 0.23 |
| 899587 | INTERGENIC | Non Promoter | 0.60 | 0.20 | 0.82 | 0.31 | 0.69 | 0.24 |
| 903817 | INTERGENIC | Sgl Promoter | #N/A | #N/A | 1.65 | 0.79 | 2.20 | 0.85 |
| 905491 | INTERGENIC | Sgl Promoter | 0.55 | 0.17 | 0.64 | 0.18 | 1.12 | 0.50 |
| 907036 | INTERGENIC | Sgl Promoter | 0.84 | 0.33 | 1.01 | 0.42 | 1.21 | 0.54 |
| 910090 | INTERGENIC | Sgl Promoter | 0.52 | 0.15 | 0.62 | 0.17 | 0.57 | 0.16 |
| 912135 | INTERGENIC | Sgl Promoter | 1.20 | 0.52 | 1.34 | 0.64 | 0.89 | 0.36 |
| 914353 | INTERGENIC | Non Promoter | 1.20 | 0.52 | 1.17 | 0.54 | 1.11 | 0.49 |
| 915566 | INTERGENIC | Dbl Promoter | 0.51 | 0.15 | 0.71 | 0.23 | 0.51 | 0.13 |
| 916522 | INTERGENIC | Sgl Promoter | 0.59 | 0.19 | 0.52 | 0.11 | 0.51 | 0.13 |
| 917607 | INTERGENIC | Sgl Promoter | #N/A | #N/A | 1.19 | 0.55 | 1.57 | 0.71 |
| 921962 | INTERGENIC | Non Promoter | #N/A | #N/A | #N/A | #N/A | #N/A | #N/A |
| 924821 | INTERGENIC | Dbl Promoter | 1.68 | 0.69 | 1.76 | 0.84 | 1.48 | 0.67 |
| 926259 | INTERGENIC | Sgl Promoter | #N/A | #N/A | #N/A | #N/A | #N/A | #N/A |
| 927488 | INTERGENIC | Dbl Promoter | 0.88 | 0.35 | 0.96 | 0.41 | 0.78 | 0.30 |

|         |            |              |      |      |      |      |      |      |
|---------|------------|--------------|------|------|------|------|------|------|
| 929506  | INTERGENIC | Non Promoter | #N/A | #N/A | 0.33 | 0.02 | #N/A | #N/A |
| 931165  | INTERGENIC | Dbl Promoter | 0.31 | 0.04 | 0.48 | 0.08 | 0.46 | 0.10 |
| 933540  | INTERGENIC | Sgl Promoter | 1.71 | 0.73 | 1.49 | 0.65 | 1.39 | 0.63 |
| 935272  | INTERGENIC | Non Promoter | #N/A | #N/A | #N/A | #N/A | #N/A | #N/A |
| 936651  | INTERGENIC | Dbl Promoter | 2.14 | 0.83 | 2.16 | 0.93 | 1.86 | 0.81 |
| 937931  | INTERGENIC | Non Promoter | #N/A | #N/A | 0.68 | 0.22 | 0.52 | 0.13 |
| 941093  | INTERGENIC | Sgl Promoter | 1.74 | 0.72 | 1.65 | 0.80 | 1.81 | 0.68 |
| 943710  | INTERGENIC | Sgl Promoter | #N/A | #N/A | #N/A | #N/A | 1.34 | 0.61 |
| 948554  | INTERGENIC | Non Promoter | #N/A | #N/A | #N/A | #N/A | #N/A | #N/A |
| 950599  | INTERGENIC | Dbl Promoter | 1.10 | 0.47 | 1.39 | 0.67 | 1.49 | 0.68 |
| 952836  | INTERGENIC | Sgl Promoter | #N/A | #N/A | 1.26 | 0.56 | #N/A | #N/A |
| 954324  | INTERGENIC | Sgl Promoter | 0.85 | 0.34 | 0.71 | 0.24 | 1.22 | 0.53 |
| 956049  | INTERGENIC | Sgl Promoter | 1.08 | 0.45 | 1.24 | 0.58 | 0.99 | 0.42 |
| 957794  | INTERGENIC | Non Promoter | #N/A | #N/A | 0.61 | 0.16 | 0.70 | 0.25 |
| 958717  | INTERGENIC | Sgl Promoter | #N/A | #N/A | 0.89 | 0.36 | #N/A | #N/A |
| 960122  | INTERGENIC | Sgl Promoter | 1.62 | 0.69 | 1.26 | 0.60 | 0.99 | 0.42 |
| 960650  | INTERGENIC | Dbl Promoter | #N/A | #N/A | 0.72 | 0.24 | 1.06 | 0.46 |
| 964026  | INTERGENIC | Non Promoter | 0.86 | 0.34 | 0.84 | 0.33 | 0.93 | 0.39 |
| 965149  | INTERGENIC | Dbl Promoter | 2.30 | 0.88 | 1.98 | 0.89 | 2.20 | 0.86 |
| 966593  | INTERGENIC | Non Promoter | #N/A | #N/A | #N/A | #N/A | #N/A | #N/A |
| 968169  | INTERGENIC | Sgl Promoter | 1.54 | 0.66 | 1.51 | 0.72 | 1.37 | 0.62 |
| 970026  | INTERGENIC | Sgl Promoter | #N/A | #N/A | 0.27 | 0.01 | 0.46 | 0.09 |
| 971844  | INTERGENIC | Sgl Promoter | #N/A | #N/A | 1.10 | 0.50 | 2.60 | 0.84 |
| 974667  | INTERGENIC | Sgl Promoter | #N/A | #N/A | 0.52 | 0.12 | 0.87 | 0.34 |
| 976753  | INTERGENIC | Sgl Promoter | 0.34 | 0.06 | 0.62 | 0.17 | 0.31 | 0.03 |
| 977557  | INTERGENIC | Sgl Promoter | 1.24 | 0.54 | 1.78 | 0.84 | 0.93 | 0.39 |
| 980127  | INTERGENIC | Dbl Promoter | 1.47 | 0.64 | 1.42 | 0.67 | 1.13 | 0.50 |
| 981010  | INTERGENIC | Dbl Promoter | 1.70 | 0.72 | 1.41 | 0.68 | 1.27 | 0.56 |
| 994278  | INTERGENIC | Non Promoter | #N/A | #N/A | 0.40 | 0.05 | 0.58 | 0.17 |
| 996065  | INTERGENIC | Sgl Promoter | 0.52 | 0.15 | 0.50 | 0.10 | 0.62 | 0.20 |
| 998900  | INTERGENIC | Dbl Promoter | 1.57 | 0.68 | 1.63 | 0.77 | #N/A | #N/A |
| 1000140 | INTERGENIC | Non Promoter | #N/A | #N/A | #N/A | #N/A | #N/A | #N/A |
| 1004040 | INTERGENIC | Dbl Promoter | 1.99 | 0.78 | 2.20 | 0.92 | 1.46 | 0.66 |
| 1005701 | INTERGENIC | Non Promoter | 0.75 | 0.28 | 0.77 | 0.28 | 1.13 | 0.50 |
| 1009046 | INTERGENIC | Dbl Promoter | #N/A | #N/A | #N/A | #N/A | #N/A | #N/A |
| 1010212 | INTERGENIC | Sgl Promoter | 1.01 | 0.42 | 0.90 | 0.37 | #N/A | #N/A |
| 1011625 | INTERGENIC | Non Promoter | 0.96 | 0.40 | 0.74 | 0.25 | 0.98 | 0.42 |
| 1012288 | INTERGENIC | Dbl Promoter | #N/A | #N/A | 0.52 | 0.10 | 0.48 | 0.11 |
| 1013512 | INTERGENIC | Non Promoter | 0.52 | 0.15 | 0.64 | 0.19 | 0.49 | 0.11 |
| 1014437 | INTERGENIC | Sgl Promoter | 0.37 | 0.07 | 0.74 | 0.26 | 0.30 | 0.03 |
| 1017037 | INTERGENIC | Sgl Promoter | 0.57 | 0.18 | 0.73 | 0.25 | 0.58 | 0.17 |
| 1020783 | INTERGENIC | Sgl Promoter | 1.88 | 0.77 | 1.93 | 0.79 | 2.45 | 0.89 |
| 1022043 | INTERGENIC | Non Promoter | 0.64 | 0.23 | 0.66 | 0.20 | 0.84 | 0.33 |
| 1023173 | INTERGENIC | Sgl Promoter | 1.09 | 0.46 | 1.18 | 0.54 | 1.18 | 0.53 |
| 1025106 | INTERGENIC | Sgl Promoter | 1.79 | 0.74 | 1.51 | 0.73 | 1.08 | 0.47 |
| 1030586 | INTERGENIC | Sgl Promoter | 1.85 | 0.76 | 1.76 | 0.83 | 2.40 | 0.91 |
| 1032472 | INTERGENIC | Dbl Promoter | 1.21 | 0.52 | 1.21 | 0.57 | 1.38 | 0.62 |
| 1035267 | INTERGENIC | Non Promoter | 1.33 | 0.56 | 1.28 | 0.61 | 1.35 | 0.61 |
| 1036031 | INTERGENIC | Dbl Promoter | 3.44 | 0.97 | 2.20 | 0.93 | 2.30 | 0.90 |
| 1037231 | INTERGENIC | Sgl Promoter | 1.76 | 0.74 | 1.67 | 0.80 | 2.01 | 0.83 |
| 1038316 | INTERGENIC | Non Promoter | #N/A | #N/A | 0.48 | 0.09 | 0.49 | 0.12 |



|         |            |              |      |      |      |      |      |      |      |
|---------|------------|--------------|------|------|------|------|------|------|------|
| 1043182 | INTERGENIC | Non Promoter | #N/A | #N/A | #N/A | #N/A | #N/A | #N/A | #N/A |
| 1045676 | INTERGENIC | Sgl Promoter | 0.70 | 0.25 | #N/A | #N/A | 0.77 | 0.29 |      |
| 1052659 | INTERGENIC | Sgl Promoter | 1.20 | 0.52 | 1.87 | 0.86 | 1.47 | 0.67 |      |
| 1055248 | INTERGENIC | Dbl Promoter | 1.69 | 0.71 | 1.54 | 0.74 | 1.43 | 0.64 |      |
| 1056587 | INTERGENIC | Sgl Promoter | #N/A | #N/A | 1.05 | 0.46 | 0.78 | 0.29 |      |
| 1058212 | INTERGENIC | Non Promoter | 0.57 | 0.18 | 0.59 | 0.15 | 0.59 | 0.18 |      |
| 1059663 | INTERGENIC | Dbl Promoter | 1.64 | 0.71 | 1.32 | 0.63 | 1.42 | 0.65 |      |
| 1061541 | INTERGENIC | Non Promoter | #N/A | #N/A | 0.38 | 0.04 | #N/A | #N/A |      |
| 1063388 | INTERGENIC | Dbl Promoter | 3.36 | 0.97 | 3.64 | 1.00 | 3.71 | 0.97 |      |
| 1067767 | INTERGENIC | Sgl Promoter | 1.59 | 0.69 | 1.59 | 0.77 | 2.29 | 0.89 |      |
| 1068765 | INTERGENIC | Non Promoter | #N/A | #N/A | #N/A | #N/A | #N/A | #N/A |      |
| 1071916 | INTERGENIC | Sgl Promoter | 1.80 | 0.76 | 1.88 | 0.87 | 1.87 | 0.81 |      |
| 1072782 | INTERGENIC | Sgl Promoter | 1.23 | 0.53 | 1.73 | 0.75 | 1.06 | 0.46 |      |
| 1073771 | INTERGENIC | Sgl Promoter | #N/A | #N/A | #N/A | #N/A | #N/A | #N/A |      |
| 1075508 | INTERGENIC | Dbl Promoter | 1.56 | 0.67 | 1.24 | 0.58 | 2.00 | 0.84 |      |
| 1078063 | INTERGENIC | Non Promoter | #N/A | #N/A | #N/A | #N/A | #N/A | #N/A |      |
| 1079084 | INTERGENIC | Sgl Promoter | 0.89 | 0.36 | 0.97 | 0.41 | 0.93 | 0.39 |      |
| 1081164 | INTERGENIC | Sgl Promoter | 0.28 | 0.03 | 0.43 | 0.06 | 0.39 | 0.06 |      |
| 1085102 | INTERGENIC | Dbl Promoter | 1.55 | 0.68 | 1.40 | 0.68 | 1.90 | 0.82 |      |
| 1087618 | INTERGENIC | Sgl Promoter | 1.83 | 0.76 | 1.78 | 0.83 | 2.09 | 0.82 |      |
| 1090470 | INTERGENIC | Sgl Promoter | 2.23 | 0.82 | 1.37 | 0.66 | 1.65 | 0.74 |      |
| 1092778 | INTERGENIC | Sgl Promoter | #N/A | #N/A | 1.97 | 0.79 | 1.56 | 0.69 |      |
| 1093800 | INTERGENIC | Dbl Promoter | #N/A | #N/A | 1.87 | 0.85 | 1.79 | 0.78 |      |
| 1095407 | INTERGENIC | Sgl Promoter | 0.39 | 0.08 | 0.50 | 0.11 | #N/A | #N/A |      |
| 1104229 | INTERGENIC | Sgl Promoter | 1.93 | 0.76 | 1.32 | 0.64 | 1.23 | 0.55 |      |
| 1106132 | INTERGENIC | Sgl Promoter | #N/A | #N/A | #N/A | #N/A | #N/A | #N/A |      |
| 1108739 | INTERGENIC | Dbl Promoter | 1.60 | 0.69 | 1.73 | 0.82 | 1.52 | 0.67 |      |
| 1110626 | INTERGENIC | Sgl Promoter | #N/A | #N/A | 1.07 | 0.48 | 1.59 | 0.72 |      |
| 1112517 | INTERGENIC | Non Promoter | 1.60 | 0.69 | 1.79 | 0.82 | 1.77 | 0.78 |      |
| 1114470 | INTERGENIC | Sgl Promoter | #N/A | #N/A | 1.46 | 0.66 | 1.41 | 0.64 |      |
| 1117114 | INTERGENIC | Dbl Promoter | 1.17 | 0.50 | 1.34 | 0.59 | #N/A | #N/A |      |
| 1120645 | INTERGENIC | Non Promoter | #N/A | #N/A | #N/A | #N/A | 1.54 | 0.70 |      |
| 1125338 | INTERGENIC | Dbl Promoter | 1.91 | 0.78 | 3.23 | 0.83 | 2.09 | 0.84 |      |
| 1126306 | INTERGENIC | Sgl Promoter | 3.17 | 0.96 | 2.28 | 0.94 | 3.51 | 0.99 |      |
| 1127908 | INTERGENIC | Dbl Promoter | 3.05 | 0.95 | 2.31 | 0.94 | 2.84 | 0.95 |      |
| 1129624 | INTERGENIC | Sgl Promoter | #N/A | #N/A | #N/A | #N/A | 1.58 | 0.70 |      |
| 1133296 | INTERGENIC | Non Promoter | 0.30 | 0.04 | 0.65 | 0.19 | #N/A | #N/A |      |
| 1135968 | INTERGENIC | Dbl Promoter | 1.03 | 0.43 | 0.94 | 0.39 | 0.98 | 0.42 |      |
| 1145127 | INTERGENIC | Sgl Promoter | #N/A | #N/A | 1.11 | 0.50 | 1.16 | 0.51 |      |
| 1146354 | INTERGENIC | Sgl Promoter | #N/A | #N/A | 1.80 | 0.84 | 1.79 | 0.79 |      |
| 1147414 | INTERGENIC | Non Promoter | #N/A | #N/A | #N/A | #N/A | #N/A | #N/A |      |
| 1149986 | INTERGENIC | Sgl Promoter | #N/A | #N/A | 1.04 | 0.46 | 1.35 | 0.60 |      |
| 1150877 | INTERGENIC | Dbl Promoter | 0.99 | 0.41 | 0.78 | 0.28 | 0.76 | 0.29 |      |
| 1154251 | INTERGENIC | Sgl Promoter | 1.78 | 0.75 | #N/A | #N/A | 1.63 | 0.74 |      |
| 1157189 | INTERGENIC | Sgl Promoter | #N/A | #N/A | #N/A | #N/A | #N/A | #N/A |      |
| 1158415 | INTERGENIC | Sgl Promoter | #N/A | #N/A | #N/A | #N/A | #N/A | #N/A |      |
| 1159643 | INTERGENIC | Sgl Promoter | #N/A | #N/A | #N/A | #N/A | #N/A | #N/A |      |
| 1162041 | INTERGENIC | Sgl Promoter | 1.01 | 0.42 | 0.68 | 0.21 | 0.23 | 0.02 |      |
| 1162992 | INTERGENIC | Sgl Promoter | 1.85 | 0.76 | 1.21 | 0.57 | 1.30 | 0.59 |      |
| 1165972 | INTERGENIC | Sgl Promoter | 0.26 | 0.03 | 0.52 | 0.10 | 0.28 | 0.03 |      |
| 1169213 | INTERGENIC | Dbl Promoter | 2.01 | 0.81 | 1.45 | 0.71 | 2.07 | 0.85 |      |

|         |            |              |      |      |      |      |      |      |
|---------|------------|--------------|------|------|------|------|------|------|
| 1170361 | INTERGENIC | Non Promoter | 0.47 | 0.13 | 0.62 | 0.17 | 0.55 | 0.16 |
| 1172421 | INTERGENIC | Sgl Promoter | 1.06 | 0.45 | 0.96 | 0.41 | 1.26 | 0.57 |
| 1175169 | INTERGENIC | Sgl Promoter | 1.86 | 0.77 | 1.42 | 0.69 | 1.60 | 0.71 |
| 1178700 | INTERGENIC | Dbl Promoter | #N/A | #N/A | 2.00 | 0.85 | 1.94 | 0.83 |
| 1181835 | INTERGENIC | Sgl Promoter | 0.92 | 0.37 | 0.81 | 0.31 | #N/A | #N/A |
| 1183333 | INTERGENIC | Sgl Promoter | 0.85 | 0.33 | 1.22 | 0.58 | 1.03 | 0.45 |
| 1184781 | INTERGENIC | Sgl Promoter | 1.07 | 0.45 | 1.21 | 0.57 | 1.10 | 0.48 |
| 1186101 | INTERGENIC | Non Promoter | #N/A | #N/A | 1.82 | 0.83 | 1.22 | 0.55 |
| 1189233 | INTERGENIC | Non Promoter | #N/A | #N/A | 1.16 | 0.53 | 0.91 | 0.37 |
| 1192040 | INTERGENIC | Non Promoter | #N/A | #N/A | #N/A | #N/A | #N/A | #N/A |
| 1195446 | INTERGENIC | Non Promoter | 0.72 | 0.27 | 0.66 | 0.20 | 1.21 | 0.55 |
| 1196713 | INTERGENIC | Sgl Promoter | #N/A | #N/A | 0.85 | 0.33 | 2.55 | 0.92 |
| 1199217 | INTERGENIC | Dbl Promoter | 2.12 | 0.84 | 2.08 | 0.91 | 2.28 | 0.88 |
| 1201784 | INTERGENIC | Sgl Promoter | 0.38 | 0.07 | 0.50 | 0.10 | 0.55 | 0.15 |
| 1202877 | INTERGENIC | Non Promoter | #N/A | #N/A | 0.44 | 0.07 | 0.74 | 0.27 |
| 1204531 | INTERGENIC | Sgl Promoter | 1.00 | 0.37 | 1.16 | 0.54 | #N/A | #N/A |
| 1206738 | INTERGENIC | Dbl Promoter | 2.81 | 0.94 | #N/A | #N/A | 3.43 | 0.96 |
| 1213938 | INTERGENIC | Sgl Promoter | #N/A | #N/A | 1.13 | 0.51 | #N/A | #N/A |
| 1215050 | INTERGENIC | Non Promoter | 0.96 | 0.39 | 0.73 | 0.25 | #N/A | #N/A |
| 1217816 | INTERGENIC | Sgl Promoter | #N/A | #N/A | #N/A | #N/A | #N/A | #N/A |
| 1219447 | INTERGENIC | Dbl Promoter | 2.08 | 0.82 | 1.61 | 0.78 | 2.07 | 0.80 |
| 1221146 | INTERGENIC | Non Promoter | #N/A | #N/A | #N/A | #N/A | #N/A | #N/A |
| 1222793 | INTERGENIC | Dbl Promoter | 2.02 | 0.81 | 1.86 | 0.87 | 2.72 | 0.94 |
| 1223508 | INTERGENIC | Non Promoter | #N/A | #N/A | #N/A | #N/A | #N/A | #N/A |
| 1225200 | INTERGENIC | Sgl Promoter | 2.15 | 0.83 | 1.63 | 0.79 | 2.20 | 0.81 |
| 1226856 | INTERGENIC | Dbl Promoter | 2.03 | 0.80 | 1.21 | 0.57 | #N/A | #N/A |
| 1228645 | INTERGENIC | Sgl Promoter | 0.89 | 0.36 | 0.70 | 0.23 | 0.94 | 0.39 |
| 1229383 | INTERGENIC | Non Promoter | #N/A | #N/A | #N/A | #N/A | #N/A | #N/A |
| 1230201 | INTERGENIC | Dbl Promoter | 1.64 | 0.71 | 1.36 | 0.65 | 1.73 | 0.74 |
| 1234252 | INTERGENIC | Sgl Promoter | 0.81 | 0.32 | 1.74 | 0.83 | 0.63 | 0.20 |
| 1236592 | INTERGENIC | Sgl Promoter | 0.36 | 0.07 | 0.61 | 0.16 | 0.31 | 0.03 |
| 1239994 | INTERGENIC | Non Promoter | #N/A | #N/A | #N/A | #N/A | #N/A | #N/A |
| 1241238 | INTERGENIC | Sgl Promoter | 0.96 | 0.40 | 0.99 | 0.42 | 0.69 | 0.24 |
| 1243264 | INTERGENIC | Dbl Promoter | 0.14 | 0.01 | 0.46 | 0.08 | 0.24 | 0.01 |
| 1246118 | INTERGENIC | Sgl Promoter | 0.98 | 0.41 | 0.82 | 0.31 | 0.71 | 0.25 |
| 1248188 | INTERGENIC | Non Promoter | #N/A | #N/A | 0.32 | 0.02 | #N/A | #N/A |
| 1250220 | INTERGENIC | Dbl Promoter | 1.81 | 0.76 | 1.37 | 0.66 | #N/A | #N/A |
| 1252571 | INTERGENIC | Sgl Promoter | 0.67 | 0.23 | 0.81 | 0.30 | 0.56 | 0.16 |
| 1254971 | INTERGENIC | Non Promoter | #N/A | #N/A | 0.77 | 0.27 | 0.47 | 0.11 |
| 1257042 | INTERGENIC | Sgl Promoter | 1.76 | 0.75 | #N/A | #N/A | 1.94 | 0.83 |
| 1258730 | INTERGENIC | Dbl Promoter | 2.46 | 0.90 | 1.73 | 0.82 | 1.96 | 0.82 |
| 1259935 | INTERGENIC | Sgl Promoter | 1.19 | 0.51 | #N/A | #N/A | #N/A | #N/A |
| 1261715 | INTERGENIC | Sgl Promoter | 1.22 | 0.52 | 1.70 | 0.76 | 1.97 | 0.80 |
| 1263358 | INTERGENIC | Sgl Promoter | 1.04 | 0.44 | 1.42 | 0.66 | 1.33 | 0.60 |
| 1266329 | INTERGENIC | Sgl Promoter | #N/A | #N/A | #N/A | #N/A | #N/A | #N/A |
| 1267505 | INTERGENIC | Dbl Promoter | 0.99 | 0.41 | 0.84 | 0.32 | 0.92 | 0.37 |
| 1270102 | INTERGENIC | Sgl Promoter | 0.50 | 0.14 | 0.44 | 0.06 | 0.45 | 0.09 |
| 1270983 | INTERGENIC | Sgl Promoter | 0.66 | 0.24 | 0.86 | 0.34 | 1.46 | 0.65 |
| 1272257 | INTERGENIC | Sgl Promoter | #N/A | #N/A | #N/A | #N/A | #N/A | #N/A |
| 1274636 | INTERGENIC | Dbl Promoter | 1.27 | 0.55 | 0.77 | 0.28 | 1.11 | 0.49 |
| 1276688 | INTERGENIC | Non Promoter | 1.03 | 0.43 | 0.98 | 0.42 | 1.28 | 0.58 |

|         |            |              |      |      |      |      |      |      |
|---------|------------|--------------|------|------|------|------|------|------|
| 1277680 | INTERGENIC | Dbl Promoter | 3.87 | 0.98 | 3.24 | 0.99 | 3.08 | 0.97 |
| 1279244 | INTERGENIC | Sgl Promoter | 0.97 | 0.40 | 1.09 | 0.48 | 0.97 | 0.41 |
| 1284103 | INTERGENIC | Non Promoter | #N/A | #N/A | #N/A | #N/A | #N/A | #N/A |
| 1288249 | INTERGENIC | Sgl Promoter | 2.90 | 0.95 | 2.30 | 0.94 | 2.70 | 0.93 |
| 1289440 | INTERGENIC | Dbl Promoter | 1.28 | 0.56 | 1.78 | 0.82 | 1.36 | 0.61 |
| 1292406 | INTERGENIC | Non Promoter | #N/A | #N/A | 0.96 | 0.40 | 1.27 | 0.56 |
| 1293403 | INTERGENIC | Sgl Promoter | 2.32 | 0.88 | #N/A | #N/A | 1.84 | 0.80 |
| 1294727 | INTERGENIC | Dbl Promoter | 3.53 | 0.98 | 3.03 | 0.99 | 4.25 | 0.99 |
| 1295632 | INTERGENIC | Sgl Promoter | 0.70 | 0.26 | 0.85 | 0.33 | 0.81 | 0.31 |
| 1297071 | INTERGENIC | Sgl Promoter | 1.56 | 0.68 | 2.61 | 0.60 | #N/A | #N/A |
| 1298466 | INTERGENIC | Dbl Promoter | 1.39 | 0.61 | 1.43 | 0.69 | #N/A | #N/A |
| 1301589 | INTERGENIC | Non Promoter | 0.25 | 0.03 | 0.58 | 0.14 | 0.48 | 0.13 |
| 1303208 | INTERGENIC | Sgl Promoter | #N/A | #N/A | 1.01 | 0.42 | 1.23 | 0.55 |
| 1305664 | INTERGENIC | Sgl Promoter | 0.39 | 0.08 | 0.50 | 0.10 | 0.46 | 0.09 |
| 1312074 | INTERGENIC | Sgl Promoter | #N/A | #N/A | 1.46 | 0.70 | 0.90 | 0.37 |
| 1315360 | INTERGENIC | Non Promoter | 0.42 | 0.09 | 0.76 | 0.27 | 0.65 | 0.21 |
| 1318080 | INTERGENIC | Sgl Promoter | #N/A | #N/A | #N/A | #N/A | #N/A | #N/A |
| 1319421 | INTERGENIC | Sgl Promoter | #N/A | #N/A | #N/A | #N/A | #N/A | #N/A |
| 1320098 | INTERGENIC | Dbl Promoter | 3.03 | 0.95 | 2.45 | 0.96 | 2.23 | 0.89 |
| 1322239 | INTERGENIC | Dbl Promoter | 2.29 | 0.87 | 1.75 | 0.83 | 1.42 | 0.65 |
| 1323488 | INTERGENIC | Non Promoter | #N/A | #N/A | #N/A | #N/A | #N/A | #N/A |
| 1325535 | INTERGENIC | Sgl Promoter | 1.82 | 0.76 | #N/A | #N/A | 2.21 | 0.89 |
| 1328817 | INTERGENIC | Sgl Promoter | #N/A | #N/A | #N/A | #N/A | #N/A | #N/A |
| 1331271 | INTERGENIC | Sgl Promoter | 0.61 | 0.20 | 0.56 | 0.13 | 0.67 | 0.23 |
| 1333017 | INTERGENIC | Non Promoter | #N/A | #N/A | #N/A | #N/A | #N/A | #N/A |
| 1334855 | INTERGENIC | Dbl Promoter | 2.74 | 0.93 | 2.06 | 0.91 | 2.37 | 0.90 |
| 1337386 | INTERGENIC | Sgl Promoter | 1.50 | 0.65 | 1.03 | 0.45 | 1.09 | 0.48 |
| 1338308 | INTERGENIC | Sgl Promoter | 0.92 | 0.38 | 1.00 | 0.43 | 1.14 | 0.51 |
| 1339710 | INTERGENIC | Sgl Promoter | #N/A | #N/A | #N/A | #N/A | #N/A | #N/A |
| 1342527 | INTERGENIC | Sgl Promoter | 1.28 | 0.55 | 1.03 | 0.45 | 1.70 | 0.75 |
| 1344551 | INTERGENIC | Non Promoter | #N/A | #N/A | 0.72 | 0.24 | 0.66 | 0.22 |
| 1345681 | INTERGENIC | Dbl Promoter | 0.21 | 0.02 | 0.34 | 0.02 | #N/A | #N/A |
| 1350324 | INTERGENIC | Dbl Promoter | 1.15 | 0.49 | 1.40 | 0.65 | 1.28 | 0.58 |
| 1356099 | INTERGENIC | Dbl Promoter | #N/A | #N/A | 0.54 | 0.12 | 0.53 | 0.14 |
| 1357614 | INTERGENIC | Non Promoter | #N/A | #N/A | 0.28 | 0.02 | #N/A | #N/A |
| 1359957 | INTERGENIC | Dbl Promoter | 0.69 | 0.25 | 0.64 | 0.18 | 0.74 | 0.27 |
| 1361154 | INTERGENIC | Non Promoter | #N/A | #N/A | #N/A | #N/A | #N/A | #N/A |
| 1365106 | INTERGENIC | Non Promoter | #N/A | #N/A | #N/A | #N/A | #N/A | #N/A |
| 1366298 | INTERGENIC | Sgl Promoter | 1.77 | 0.74 | 1.91 | 0.87 | 1.71 | 0.76 |
| 1367407 | INTERGENIC | Sgl Promoter | 1.85 | 0.77 | 1.16 | 0.54 | 1.57 | 0.71 |
| 1369824 | INTERGENIC | Sgl Promoter | 1.72 | 0.73 | 1.47 | 0.66 | 1.80 | 0.78 |
| 1382353 | INTERGENIC | Sgl Promoter | #N/A | #N/A | #N/A | #N/A | #N/A | #N/A |
| 1383845 | INTERGENIC | Dbl Promoter | 1.41 | 0.60 | 1.15 | 0.53 | 1.78 | 0.78 |
| 1386676 | INTERGENIC | Sgl Promoter | #N/A | #N/A | #N/A | #N/A | #N/A | #N/A |
| 1393370 | INTERGENIC | Non Promoter | #N/A | #N/A | #N/A | #N/A | #N/A | #N/A |
| 1395155 | INTERGENIC | Dbl Promoter | 4.37 | 0.98 | 2.08 | 0.92 | 3.08 | 0.96 |
| 1398060 | INTERGENIC | Sgl Promoter | #N/A | #N/A | 0.39 | 0.04 | 0.68 | 0.23 |
| 1399049 | INTERGENIC | Dbl Promoter | 1.30 | 0.54 | #N/A | #N/A | 1.29 | 0.58 |
| 1399740 | INTERGENIC | Non Promoter | #N/A | #N/A | #N/A | #N/A | #N/A | #N/A |
| 1401804 | INTERGENIC | Dbl Promoter | 0.56 | 0.18 | 0.80 | 0.29 | 0.49 | 0.12 |
| 1402953 | INTERGENIC | Sgl Promoter | #N/A | #N/A | 0.61 | 0.16 | #N/A | #N/A |

|         |            |              |      |      |      |      |      |      |
|---------|------------|--------------|------|------|------|------|------|------|
| 1404479 | INTERGENIC | Non Promoter | #N/A | #N/A | #N/A | #N/A | #N/A | #N/A |
| 1406693 | INTERGENIC | Sgl Promoter | 1.68 | 0.72 | 1.65 | 0.79 | 2.08 | 0.84 |
| 1407498 | INTERGENIC | Sgl Promoter | 0.36 | 0.07 | 0.46 | 0.08 | 0.43 | 0.08 |
| 1409659 | INTERGENIC | Sgl Promoter | 0.64 | 0.22 | 0.69 | 0.22 | 0.96 | 0.41 |
| 1410485 | INTERGENIC | Sgl Promoter | 1.49 | 0.60 | 1.65 | 0.78 | 0.73 | 0.26 |
| 1412405 | INTERGENIC | Dbl Promoter | 1.84 | 0.76 | 1.37 | 0.67 | 1.57 | 0.72 |
| 1414607 | INTERGENIC | Sgl Promoter | #N/A | #N/A | 1.01 | 0.44 | 1.46 | 0.65 |
| 1417431 | INTERGENIC | Dbl Promoter | 2.13 | 0.84 | 1.92 | 0.88 | 1.84 | 0.80 |
| 1418582 | INTERGENIC | Non Promoter | #N/A | #N/A | #N/A | #N/A | #N/A | #N/A |
| 1420463 | INTERGENIC | Sgl Promoter | 1.28 | 0.55 | 1.23 | 0.58 | 0.96 | 0.41 |
| 1421189 | INTERGENIC | Dbl Promoter | 1.46 | 0.63 | 1.27 | 0.60 | 1.68 | 0.75 |
| 1422795 | INTERGENIC | Sgl Promoter | #N/A | #N/A | #N/A | #N/A | #N/A | #N/A |
| 1424852 | INTERGENIC | Non Promoter | #N/A | #N/A | 0.60 | 0.19 | #N/A | #N/A |
| 1427463 | INTERGENIC | Sgl Promoter | 2.38 | 0.88 | #N/A | #N/A | #N/A | #N/A |
| 1428386 | INTERGENIC | Sgl Promoter | 1.22 | 0.51 | #N/A | #N/A | 2.01 | 0.79 |
| 1429220 | INTERGENIC | Sgl Promoter | #N/A | #N/A | #N/A | #N/A | 0.39 | 0.07 |
| 1431044 | INTERGENIC | Dbl Promoter | 2.49 | 0.88 | #N/A | #N/A | 2.01 | 0.84 |
| 1432000 | INTERGENIC | Non Promoter | #N/A | #N/A | #N/A | #N/A | #N/A | #N/A |
| 1434532 | INTERGENIC | Sgl Promoter | 3.01 | 0.96 | 2.23 | 0.93 | 2.72 | 0.93 |
| 1436249 | INTERGENIC | Sgl Promoter | #N/A | #N/A | 2.00 | 0.88 | 1.36 | 0.61 |
| 1436962 | INTERGENIC | Sgl Promoter | 2.49 | 0.89 | #N/A | #N/A | 1.96 | 0.83 |
| 1438163 | INTERGENIC | Non Promoter | 0.59 | 0.20 | 0.64 | 0.18 | 0.80 | 0.31 |
| 1441481 | INTERGENIC | Sgl Promoter | #N/A | #N/A | 0.76 | 0.27 | 1.23 | 0.55 |
| 1443761 | INTERGENIC | Sgl Promoter | #N/A | #N/A | #N/A | #N/A | 1.06 | 0.45 |
| 1445891 | INTERGENIC | Sgl Promoter | 1.01 | 0.43 | 1.06 | 0.47 | 1.32 | 0.60 |
| 1447878 | INTERGENIC | Dbl Promoter | 1.73 | 0.73 | 1.59 | 0.77 | 2.38 | 0.91 |
| 1450246 | INTERGENIC | Non Promoter | #N/A | #N/A | #N/A | #N/A | #N/A | #N/A |
| 1451401 | INTERGENIC | Dbl Promoter | 0.34 | 0.06 | 0.55 | 0.13 | 0.35 | 0.05 |
| 1453358 | INTERGENIC | Non Promoter | 0.69 | 0.24 | 0.85 | 0.33 | 0.89 | 0.36 |
| 1456359 | INTERGENIC | Sgl Promoter | 2.05 | 0.83 | 1.86 | 0.86 | 2.03 | 0.82 |
| 1459776 | INTERGENIC | Sgl Promoter | 1.10 | 0.47 | 1.12 | 0.51 | 0.92 | 0.38 |
| 1461763 | INTERGENIC | Sgl Promoter | #N/A | #N/A | 0.66 | 0.19 | #N/A | #N/A |
| 1466501 | INTERGENIC | Sgl Promoter | #N/A | #N/A | 0.64 | 0.19 | 0.71 | 0.26 |
| 1469448 | INTERGENIC | Sgl Promoter | 0.51 | 0.15 | 0.54 | 0.13 | 0.54 | 0.15 |
| 1470065 | INTERGENIC | Sgl Promoter | 0.99 | 0.41 | 1.21 | 0.57 | 0.93 | 0.39 |
| 1470548 | INTERGENIC | Non Promoter | #N/A | #N/A | #N/A | #N/A | #N/A | #N/A |
| 1471596 | INTERGENIC | Non Promoter | #N/A | #N/A | #N/A | #N/A | #N/A | #N/A |
| 1473477 | INTERGENIC | Dbl Promoter | 1.56 | 0.68 | 0.95 | 0.40 | #N/A | #N/A |
| 1475022 | INTERGENIC | Non Promoter | #N/A | #N/A | #N/A | #N/A | #N/A | #N/A |
| 1477287 | INTERGENIC | Dbl Promoter | 3.29 | 0.93 | 2.00 | 0.90 | 1.97 | 0.81 |
| 1478656 | INTERGENIC | Sgl Promoter | 1.63 | 0.63 | 1.68 | 0.76 | 0.86 | 0.34 |
| 1480473 | INTERGENIC | Sgl Promoter | #N/A | #N/A | #N/A | #N/A | 2.13 | 0.86 |
| 1483843 | INTERGENIC | Non Promoter | 3.67 | 0.98 | #N/A | #N/A | 2.69 | 0.94 |
| 1485614 | INTERGENIC | Sgl Promoter | #N/A | #N/A | #N/A | #N/A | #N/A | #N/A |
| 1487590 | INTERGENIC | Sgl Promoter | 0.53 | 0.16 | 0.79 | 0.29 | 0.92 | 0.38 |
| 1489953 | INTERGENIC | Dbl Promoter | 0.49 | 0.14 | 0.43 | 0.06 | 0.35 | 0.05 |
| 1490644 | INTERGENIC | Sgl Promoter | 0.13 | 0.01 | 0.24 | 0.02 | 0.28 | 0.05 |
| 1491123 | INTERGENIC | Non Promoter | 0.62 | 0.21 | #N/A | #N/A | 0.48 | 0.11 |
| 1493547 | INTERGENIC | Sgl Promoter | 1.52 | 0.66 | 1.41 | 0.68 | 1.49 | 0.68 |
| 1494634 | INTERGENIC | Sgl Promoter | 1.42 | 0.61 | 1.24 | 0.59 | #N/A | #N/A |
| 1496213 | INTERGENIC | Non Promoter | #N/A | #N/A | #N/A | #N/A | #N/A | #N/A |

|         |            |              |      |      |      |      |      |      |
|---------|------------|--------------|------|------|------|------|------|------|
| 1496839 | INTERGENIC | Sgl Promoter | 0.87 | 0.35 | 1.31 | 0.59 | 1.37 | 0.62 |
| 1498280 | INTERGENIC | Dbl Promoter | 1.10 | 0.47 | 1.22 | 0.57 | 1.07 | 0.47 |
| 1499444 | INTERGENIC | Non Promoter | #N/A | #N/A | #N/A | #N/A | #N/A | #N/A |
| 1501495 | INTERGENIC | Sgl Promoter | 1.27 | 0.55 | 1.22 | 0.57 | 1.09 | 0.48 |
| 1503361 | INTERGENIC | Sgl Promoter | 0.89 | 0.36 | 0.83 | 0.32 | 0.67 | 0.23 |
| 1505800 | INTERGENIC | Sgl Promoter | 0.42 | 0.10 | 0.58 | 0.15 | 0.52 | 0.14 |
| 1506653 | INTERGENIC | Sgl Promoter | 0.63 | 0.22 | 0.54 | 0.12 | 0.78 | 0.30 |
| 1508052 | INTERGENIC | Dbl Promoter | 0.73 | 0.27 | 0.73 | 0.24 | 1.01 | 0.44 |
| 1510902 | INTERGENIC | Non Promoter | 0.96 | 0.40 | 0.99 | 0.42 | 1.20 | 0.53 |
| 1512140 | INTERGENIC | Sgl Promoter | 0.67 | 0.24 | 0.74 | 0.25 | 0.84 | 0.33 |
| 1514826 | INTERGENIC | Non Promoter | 1.10 | 0.47 | 0.83 | 0.31 | #N/A | #N/A |
| 1517176 | INTERGENIC | Non Promoter | 1.56 | 0.67 | 1.42 | 0.68 | 1.88 | 0.81 |
| 1518524 | INTERGENIC | Sgl Promoter | 1.27 | 0.55 | 1.26 | 0.60 | 1.54 | 0.69 |
| 1522014 | INTERGENIC | Dbl Promoter | 1.36 | 0.59 | 1.23 | 0.58 | 1.82 | 0.73 |
| 1523290 | INTERGENIC | Dbl Promoter | 0.65 | 0.23 | 0.80 | 0.30 | 0.69 | 0.24 |
| 1524675 | INTERGENIC | Non Promoter | 0.40 | 0.09 | 0.47 | 0.08 | 0.59 | 0.18 |
| 1525136 | INTERGENIC | Sgl Promoter | 0.51 | 0.15 | 0.56 | 0.13 | 0.53 | 0.14 |
| 1526362 | INTERGENIC | Dbl Promoter | 0.56 | 0.18 | 0.67 | 0.20 | 0.68 | 0.23 |
| 513731  | INTERGENIC | Sgl Promoter | #N/A | #N/A | #N/A | #N/A | #N/A | #N/A |
| 519782  | INTERGENIC | Sgl Promoter | #N/A | #N/A | #N/A | #N/A | #N/A | #N/A |
| 652831  | INTERGENIC | Dbl Promoter | 2.32 | 0.88 | 1.30 | 0.63 | 1.85 | 0.80 |
| 651720  | INTERGENIC | Dbl Promoter | #N/A | #N/A | #N/A | #N/A | #N/A | #N/A |
| 668581  | INTERGENIC | Non Promoter | #N/A | #N/A | #N/A | #N/A | #N/A | #N/A |
| 884398  | INTERGENIC | Sgl Promoter | #N/A | #N/A | #N/A | #N/A | #N/A | #N/A |
| 669054  | INTERGENIC | Non Promoter | #N/A | #N/A | #N/A | #N/A | #N/A | #N/A |
| 945991  | INTERGENIC | Sgl Promoter | #N/A | #N/A | 1.02 | 0.43 | 1.25 | 0.57 |
| 878340  | INTERGENIC | Sgl Promoter | 0.87 | 0.35 | 1.05 | 0.46 | 0.99 | 0.43 |
| 1102221 | INTERGENIC | Sgl Promoter | #N/A | #N/A | 1.79 | 0.83 | 2.98 | 0.96 |
| 1151838 | INTERGENIC | Non Promoter | 0.77 | 0.29 | 0.66 | 0.20 | 0.80 | 0.31 |
| 1175864 | INTERGENIC | Sgl Promoter | 0.83 | 0.32 | 0.57 | 0.14 | 0.68 | 0.23 |
| 1353759 | INTERGENIC | Dbl Promoter | 2.07 | 0.83 | 2.04 | 0.90 | 2.18 | 0.87 |
| 1519704 | INTERGENIC | Sgl Promoter | 0.67 | 0.24 | 0.69 | 0.22 | 0.83 | 0.33 |
| 151960  | INTERGENIC | Dbl Promoter | 1.67 | 0.71 | 1.45 | 0.70 | 1.18 | 0.53 |
| 148721  | INTERGENIC | Non Promoter | #N/A | #N/A | #N/A | #N/A | #N/A | #N/A |
| 148227  | INTERGENIC | Sgl Promoter | 1.43 | 0.61 | #N/A | #N/A | 1.88 | 0.81 |
| 146950  | INTERGENIC | Dbl Promoter | 1.16 | 0.50 | #N/A | #N/A | 0.68 | 0.23 |
| 145906  | INTERGENIC | Non Promoter | #N/A | #N/A | #N/A | #N/A | 0.26 | 0.02 |
| 144326  | INTERGENIC | Sgl Promoter | 0.76 | 0.28 | 0.65 | 0.19 | 0.77 | 0.29 |
| 141891  | INTERGENIC | Sgl Promoter | 0.16 | 0.01 | 0.30 | 0.02 | 0.17 | 0.01 |
| 140512  | INTERGENIC | Dbl Promoter | 0.22 | 0.02 | 0.34 | 0.03 | 0.30 | 0.03 |
| 137324  | INTERGENIC | Non Promoter | 1.95 | 0.80 | 1.40 | 0.68 | 1.56 | 0.71 |
| 135425  | INTERGENIC | Sgl Promoter | #N/A | #N/A | #N/A | #N/A | #N/A | #N/A |
| 133120  | INTERGENIC | Sgl Promoter | 1.58 | 0.68 | 1.50 | 0.73 | 1.62 | 0.73 |
| 131082  | INTERGENIC | Sgl Promoter | 0.65 | 0.23 | 0.66 | 0.20 | 0.56 | 0.16 |
| 128825  | INTERGENIC | Dbl Promoter | #N/A | #N/A | #N/A | #N/A | #N/A | #N/A |
| 126629  | INTERGENIC | Dbl Promoter | 1.95 | 0.79 | 1.94 | 0.85 | 2.13 | 0.87 |
| 123657  | INTERGENIC | Dbl Promoter | 0.81 | 0.32 | 0.87 | 0.35 | 0.73 | 0.27 |
| 124737  | INTERGENIC | Non Promoter | #N/A | #N/A | #N/A | #N/A | #N/A | #N/A |
| 122798  | INTERGENIC | Non Promoter | #N/A | #N/A | 0.57 | 0.14 | 0.51 | 0.13 |
| 121471  | INTERGENIC | Dbl Promoter | 2.71 | 0.93 | 2.02 | 0.90 | 2.45 | 0.91 |
| 120498  | INTERGENIC | Sgl Promoter | #N/A | #N/A | 1.02 | 0.45 | #N/A | #N/A |



|        |            |              |      |      |      |      |      |      |
|--------|------------|--------------|------|------|------|------|------|------|
| 117667 | INTERGENIC | Sgl Promoter | 0.94 | 0.39 | 1.23 | 0.57 | 0.91 | 0.38 |
| 116167 | INTERGENIC | Sgl Promoter | 1.25 | 0.53 | 0.88 | 0.35 | 0.82 | 0.32 |
| 111421 | INTERGENIC | Dbl Promoter | 1.81 | 0.76 | 1.88 | 0.87 | 1.94 | 0.83 |
| 108504 | INTERGENIC | Non Promoter | #N/A | #N/A | 0.45 | 0.07 | 0.43 | 0.08 |
| 107260 | INTERGENIC | Dbl Promoter | 1.26 | 0.55 | 1.12 | 0.50 | 0.82 | 0.32 |
| 102581 | INTERGENIC | Non Promoter | #N/A | #N/A | #N/A | #N/A | 0.88 | 0.35 |
| 101943 | INTERGENIC | Sgl Promoter | 0.41 | 0.09 | 0.73 | 0.24 | 0.62 | 0.19 |
| 99490  | INTERGENIC | Sgl Promoter | 1.58 | 0.68 | 1.92 | 0.88 | 1.19 | 0.52 |
| 98668  | INTERGENIC | Dbl Promoter | 1.30 | 0.56 | 1.09 | 0.49 | 1.27 | 0.57 |
| 96858  | INTERGENIC | Non Promoter | #N/A | #N/A | 0.68 | 0.21 | #N/A | #N/A |
| 94644  | INTERGENIC | Sgl Promoter | 1.22 | 0.53 | 0.78 | 0.28 | 1.59 | 0.64 |
| 90258  | INTERGENIC | Sgl Promoter | 2.34 | 0.88 | 2.07 | 0.88 | 1.74 | 0.70 |
| 85676  | INTERGENIC | Dbl Promoter | #N/A | #N/A | 0.31 | 0.02 | 0.27 | 0.02 |
| 83050  | INTERGENIC | Sgl Promoter | 1.16 | 0.50 | 1.24 | 0.58 | 1.36 | 0.62 |
| 81407  | INTERGENIC | Non Promoter | #N/A | #N/A | #N/A | #N/A | 0.65 | 0.22 |
| 80420  | INTERGENIC | Dbl Promoter | 2.08 | 0.83 | 2.08 | 0.88 | 2.39 | 0.91 |
| 79636  | INTERGENIC | Non Promoter | #N/A | #N/A | #N/A | #N/A | #N/A | #N/A |
| 78053  | INTERGENIC | Sgl Promoter | 0.89 | 0.36 | 1.22 | 0.57 | 0.42 | 0.07 |
| 75944  | INTERGENIC | Sgl Promoter | 0.57 | 0.18 | 1.64 | 0.78 | 1.70 | 0.76 |
| 73771  | INTERGENIC | Sgl Promoter | 0.98 | 0.41 | 0.89 | 0.36 | #N/A | #N/A |
| 70478  | INTERGENIC | Sgl Promoter | #N/A | #N/A | 1.69 | 0.71 | #N/A | #N/A |
| 69757  | INTERGENIC | Dbl Promoter | 0.10 | 0.00 | 0.39 | 0.04 | 0.24 | 0.02 |
| 67629  | INTERGENIC | Sgl Promoter | 0.55 | 0.17 | 0.75 | 0.27 | 0.75 | 0.28 |
| 65385  | INTERGENIC | Sgl Promoter | #N/A | #N/A | #N/A | #N/A | #N/A | #N/A |
| 64709  | INTERGENIC | Non Promoter | 0.70 | 0.26 | 0.69 | 0.22 | 0.77 | 0.29 |
| 61352  | INTERGENIC | Dbl Promoter | 1.00 | 0.42 | 1.26 | 0.59 | 1.20 | 0.54 |
| 59670  | INTERGENIC | Non Promoter | #N/A | #N/A | 0.72 | 0.24 | 1.17 | 0.52 |
| 58378  | INTERGENIC | Sgl Promoter | 2.77 | 0.93 | 1.81 | 0.84 | #N/A | #N/A |
| 56571  | INTERGENIC | Dbl Promoter | 1.47 | 0.64 | 1.29 | 0.61 | 1.65 | 0.74 |
| 53901  | INTERGENIC | Sgl Promoter | 0.25 | 0.03 | 0.36 | 0.04 | 0.50 | 0.14 |
| 52721  | INTERGENIC | Sgl Promoter | 0.75 | 0.28 | 0.94 | 0.39 | 1.30 | 0.59 |
| 48471  | INTERGENIC | Non Promoter | #N/A | #N/A | #N/A | #N/A | #N/A | #N/A |
| 47168  | INTERGENIC | Dbl Promoter | 1.06 | 0.45 | 1.25 | 0.59 | 0.96 | 0.40 |
| 45020  | INTERGENIC | Non Promoter | #N/A | #N/A | #N/A | #N/A | #N/A | #N/A |
| 43252  | INTERGENIC | Sgl Promoter | #N/A | #N/A | 0.45 | 0.07 | #N/A | #N/A |
| 42400  | INTERGENIC | Sgl Promoter | 1.30 | 0.56 | 1.02 | 0.44 | 0.88 | 0.36 |
| 40046  | INTERGENIC | Sgl Promoter | 2.10 | 0.84 | 1.26 | 0.60 | 1.94 | 0.83 |
| 36535  | INTERGENIC | Non Promoter | #N/A | #N/A | #N/A | #N/A | 1.07 | 0.47 |
| 34380  | INTERGENIC | Dbl Promoter | 1.31 | 0.57 | 1.29 | 0.62 | 1.34 | 0.60 |
| 29797  | INTERGENIC | Non Promoter | 1.00 | 0.41 | 0.90 | 0.37 | 0.98 | 0.42 |
| 26189  | INTERGENIC | Sgl Promoter | 1.26 | 0.55 | 0.90 | 0.37 | 0.96 | 0.41 |
| 15385  | INTERGENIC | Sgl Promoter | #N/A | #N/A | 1.21 | 0.55 | 0.79 | 0.30 |
| 8786   | INTERGENIC | Dbl Promoter | 0.79 | 0.31 | 1.10 | 0.49 | 0.95 | 0.40 |
| 10019  | INTERGENIC | Dbl Promoter | 1.34 | 0.58 | 1.31 | 0.62 | 1.23 | 0.56 |
| 11252  | INTERGENIC | Dbl Promoter | 1.32 | 0.57 | 1.35 | 0.64 | 0.95 | 0.40 |
| 12485  | INTERGENIC | Dbl Promoter | 1.17 | 0.50 | 1.12 | 0.51 | 1.16 | 0.52 |
| 13720  | INTERGENIC | Dbl Promoter | 1.24 | 0.53 | 1.59 | 0.76 | 1.66 | 0.74 |
| 7230   | INTERGENIC | Non Promoter | 0.77 | 0.29 | 0.67 | 0.20 | 0.78 | 0.29 |
| 6126   | INTERGENIC | Dbl Promoter | 0.81 | 0.32 | 0.88 | 0.35 | 0.85 | 0.34 |
| 4185   | INTERGENIC | Sgl Promoter | 0.74 | 0.27 | 0.81 | 0.30 | #N/A | #N/A |
| 100133 | INTERGENIC | Sgl Promoter | 1.08 | 0.46 | 1.00 | 0.43 | 1.09 | 0.48 |

|        |            |              |      |      |      |      |      |      |
|--------|------------|--------------|------|------|------|------|------|------|
| 136279 | INTERGENIC | Sgl Promoter | #N/A | #N/A | 0.87 | 0.35 | #N/A | #N/A |
| 118617 | INTERGENIC | Non Promoter | #N/A | #N/A | #N/A | #N/A | #N/A | #N/A |
| 63728  | INTERGENIC | Dbl Promoter | 1.37 | 0.60 | 1.42 | 0.68 | 1.39 | 0.64 |
| 138221 | INTERGENIC | Non Promoter | 0.96 | 0.40 | 0.87 | 0.34 | #N/A | #N/A |
| 138666 | INTERGENIC | Non Promoter | #N/A | #N/A | #N/A | #N/A | #N/A | #N/A |
| 157735 | INTERGENIC | Non Promoter | #N/A | #N/A | #N/A | #N/A | #N/A | #N/A |
| 159579 | INTERGENIC | Dbl Promoter | 2.07 | 0.83 | 2.18 | 0.93 | 1.86 | 0.81 |
| 160549 | INTERGENIC | Sgl Promoter | 1.02 | 0.43 | 1.28 | 0.61 | 1.02 | 0.44 |
| 162722 | INTERGENIC | Sgl Promoter | 4.30 | 0.84 | 1.44 | 0.70 | 1.76 | 0.78 |
| 164526 | INTERGENIC | Sgl Promoter | #N/A | #N/A | #N/A | #N/A | #N/A | #N/A |
| 167426 | INTERGENIC | Sgl Promoter | 0.92 | 0.37 | 0.92 | 0.38 | 1.09 | 0.47 |
| 166236 | INTERGENIC | Non Promoter | #N/A | #N/A | 0.65 | 0.20 | 0.80 | 0.31 |
| 172114 | INTERGENIC | Dbl Promoter | 1.01 | 0.42 | 1.94 | 0.83 | 0.88 | 0.35 |
| 172633 | INTERGENIC | Non Promoter | #N/A | #N/A | #N/A | #N/A | #N/A | #N/A |
| 174292 | INTERGENIC | Dbl Promoter | 1.44 | 0.63 | 1.36 | 0.66 | 1.36 | 0.62 |
| 175247 | INTERGENIC | Dbl Promoter | 1.19 | 0.51 | 1.36 | 0.66 | 0.93 | 0.39 |
| 176704 | INTERGENIC | Sgl Promoter | 0.76 | 0.29 | 0.98 | 0.42 | 1.29 | 0.59 |
| 178840 | INTERGENIC | Sgl Promoter | 2.75 | 0.89 | 1.47 | 0.68 | 3.29 | 0.98 |
| 182599 | INTERGENIC | Sgl Promoter | #N/A | #N/A | #N/A | #N/A | 1.60 | 0.73 |
| 184540 | INTERGENIC | Sgl Promoter | 1.78 | 0.75 | #N/A | #N/A | 2.14 | 0.87 |
| 188276 | INTERGENIC | Sgl Promoter | 1.12 | 0.48 | 0.89 | 0.36 | 0.88 | 0.36 |
| 189502 | INTERGENIC | Non Promoter | #N/A | #N/A | #N/A | #N/A | #N/A | #N/A |
| 191958 | INTERGENIC | Sgl Promoter | #N/A | #N/A | 1.17 | 0.54 | #N/A | #N/A |
| 192796 | INTERGENIC | Dbl Promoter | 1.95 | 0.80 | 1.37 | 0.66 | 1.20 | 0.54 |
| 195167 | INTERGENIC | Dbl Promoter | 1.16 | 0.50 | 0.97 | 0.41 | 1.14 | 0.51 |
| 196947 | INTERGENIC | Sgl Promoter | 0.96 | 0.40 | 1.12 | 0.49 | 0.74 | 0.27 |
| 198811 | INTERGENIC | Sgl Promoter | #N/A | #N/A | #N/A | #N/A | #N/A | #N/A |
| 201075 | INTERGENIC | Sgl Promoter | 2.77 | 0.92 | 1.93 | 0.87 | 2.40 | 0.86 |
| 202191 | INTERGENIC | Sgl Promoter | #N/A | #N/A | #N/A | #N/A | #N/A | #N/A |
| 205250 | INTERGENIC | Sgl Promoter | 2.25 | 0.82 | 1.70 | 0.81 | 1.91 | 0.82 |
| 207356 | INTERGENIC | Non Promoter | 0.32 | 0.05 | 0.59 | 0.16 | 0.46 | 0.10 |
| 208978 | INTERGENIC | Sgl Promoter | 1.23 | 0.53 | 1.56 | 0.73 | 1.63 | 0.69 |
| 210691 | INTERGENIC | Sgl Promoter | 2.06 | 0.83 | 1.58 | 0.76 | 1.95 | 0.83 |
| 212586 | INTERGENIC | Sgl Promoter | 0.59 | 0.19 | 0.62 | 0.18 | 0.47 | 0.10 |
| 213415 | INTERGENIC | Dbl Promoter | #N/A | #N/A | #N/A | #N/A | #N/A | #N/A |
| 214075 | INTERGENIC | Non Promoter | 0.91 | 0.37 | 0.88 | 0.35 | 0.90 | 0.37 |
| 214915 | INTERGENIC | Dbl Promoter | 3.25 | 0.96 | #N/A | #N/A | 3.02 | 0.95 |
| 218056 | INTERGENIC | Non Promoter | 0.37 | 0.07 | 0.50 | 0.11 | 0.59 | 0.18 |
| 221845 | INTERGENIC | Dbl Promoter | 1.11 | 0.47 | 0.95 | 0.40 | 0.84 | 0.33 |
| 222638 | INTERGENIC | Sgl Promoter | 0.46 | 0.12 | 0.53 | 0.12 | 0.50 | 0.12 |
| 223366 | INTERGENIC | Non Promoter | 0.72 | 0.27 | 0.59 | 0.15 | 0.65 | 0.21 |
| 225888 | INTERGENIC | Dbl Promoter | 0.36 | 0.07 | 0.28 | 0.01 | 0.33 | 0.04 |
| 228455 | INTERGENIC | Sgl Promoter | #N/A | #N/A | #N/A | #N/A | #N/A | #N/A |
| 229794 | INTERGENIC | Dbl Promoter | 2.76 | 0.93 | 2.03 | 0.90 | 2.59 | 0.93 |
| 232460 | INTERGENIC | Sgl Promoter | 1.02 | 0.43 | 1.03 | 0.44 | 1.09 | 0.48 |
| 234936 | INTERGENIC | Sgl Promoter | 1.20 | 0.51 | 1.12 | 0.51 | 1.51 | 0.67 |
| 235769 | INTERGENIC | Non Promoter | #N/A | #N/A | #N/A | #N/A | #N/A | #N/A |
| 237569 | INTERGENIC | Sgl Promoter | 0.55 | 0.17 | 1.06 | 0.46 | 0.94 | 0.38 |
| 238459 | INTERGENIC | Sgl Promoter | 0.42 | 0.10 | 0.67 | 0.21 | 0.57 | 0.17 |
| 240031 | INTERGENIC | Sgl Promoter | #N/A | #N/A | 0.67 | 0.20 | 0.61 | 0.19 |
| 242339 | INTERGENIC | Dbl Promoter | 0.44 | 0.11 | 0.71 | 0.24 | 0.29 | 0.03 |

|        |            |              |      |      |      |      |      |      |
|--------|------------|--------------|------|------|------|------|------|------|
| 243179 | INTERGENIC | Dbl Promoter | 1.07 | 0.44 | 0.82 | 0.31 | 0.61 | 0.19 |
| 243809 | INTERGENIC | Non Promoter | #N/A | #N/A | #N/A | #N/A | #N/A | #N/A |
| 246981 | INTERGENIC | Sgl Promoter | 1.56 | 0.68 | 1.70 | 0.81 | 1.96 | 0.83 |
| 249108 | INTERGENIC | Dbl Promoter | 1.23 | 0.53 | 1.60 | 0.76 | 1.59 | 0.70 |
| 251727 | INTERGENIC | Sgl Promoter | 0.97 | 0.40 | 0.93 | 0.39 | 0.84 | 0.33 |
| 253970 | INTERGENIC | Non Promoter | #N/A | #N/A | #N/A | #N/A | 1.16 | 0.51 |
| 254655 | INTERGENIC | Dbl Promoter | #N/A | #N/A | #N/A | #N/A | #N/A | #N/A |
| 256374 | INTERGENIC | Non Promoter | #N/A | #N/A | #N/A | #N/A | #N/A | #N/A |
| 258736 | INTERGENIC | Sgl Promoter | 1.15 | 0.49 | 1.19 | 0.56 | 0.87 | 0.35 |
| 260844 | INTERGENIC | Sgl Promoter | 0.74 | 0.28 | 1.04 | 0.45 | 0.73 | 0.26 |
| 262051 | INTERGENIC | Sgl Promoter | 0.65 | 0.23 | 1.07 | 0.47 | 0.53 | 0.14 |
| 264891 | INTERGENIC | Sgl Promoter | 1.19 | 0.51 | 0.86 | 0.34 | 1.24 | 0.55 |
| 266511 | INTERGENIC | Sgl Promoter | 0.33 | 0.05 | 0.46 | 0.08 | #N/A | #N/A |
| 269421 | INTERGENIC | Sgl Promoter | #N/A | #N/A | 0.34 | 0.03 | 0.19 | 0.01 |
| 270735 | INTERGENIC | Sgl Promoter | 0.46 | 0.13 | #N/A | #N/A | 0.37 | 0.06 |
| 271766 | INTERGENIC | Dbl Promoter | 2.05 | 0.80 | 1.89 | 0.87 | 1.53 | 0.69 |
| 272622 | INTERGENIC | Sgl Promoter | 1.56 | 0.66 | 1.73 | 0.81 | 1.79 | 0.77 |
| 274565 | INTERGENIC | Sgl Promoter | 1.28 | 0.56 | 1.22 | 0.56 | 1.19 | 0.54 |
| 276570 | INTERGENIC | Sgl Promoter | 0.54 | 0.16 | 0.51 | 0.10 | 0.58 | 0.17 |
| 278296 | INTERGENIC | Non Promoter | #N/A | #N/A | #N/A | #N/A | #N/A | #N/A |
| 279928 | INTERGENIC | Sgl Promoter | #N/A | #N/A | #N/A | #N/A | 1.56 | 0.63 |
| 281708 | INTERGENIC | Dbl Promoter | 0.70 | 0.26 | 0.76 | 0.27 | 0.69 | 0.24 |
| 282703 | INTERGENIC | Non Promoter | 0.39 | 0.08 | 0.44 | 0.06 | 0.58 | 0.17 |
| 291701 | INTERGENIC | Non Promoter | 1.89 | 0.78 | 1.36 | 0.65 | 1.99 | 0.84 |
| 293048 | INTERGENIC | Sgl Promoter | 2.15 | 0.84 | 1.66 | 0.77 | 1.57 | 0.69 |
| 295408 | INTERGENIC | Sgl Promoter | 0.20 | 0.02 | 0.43 | 0.06 | 0.33 | 0.05 |
| 298948 | INTERGENIC | Sgl Promoter | 1.19 | 0.51 | 1.11 | 0.50 | 0.90 | 0.36 |
| 301945 | INTERGENIC | Non Promoter | 1.16 | 0.49 | 1.08 | 0.48 | 1.02 | 0.44 |
| 302804 | INTERGENIC | Dbl Promoter | 0.99 | 0.41 | 1.25 | 0.59 | 1.51 | 0.68 |
| 304027 | INTERGENIC | Sgl Promoter | 0.33 | 0.06 | 0.43 | 0.08 | 0.31 | 0.04 |
| 306319 | INTERGENIC | Sgl Promoter | 0.19 | 0.01 | 0.35 | 0.03 | 0.42 | 0.09 |
| 308409 | INTERGENIC | Non Promoter | 1.22 | 0.53 | 1.03 | 0.45 | 1.13 | 0.50 |
| 312019 | INTERGENIC | Sgl Promoter | 0.46 | 0.12 | 0.66 | 0.20 | 0.62 | 0.20 |
| 314530 | INTERGENIC | Sgl Promoter | 1.46 | 0.63 | 1.01 | 0.44 | 1.22 | 0.55 |
| 316803 | INTERGENIC | Sgl Promoter | #N/A | #N/A | #N/A | #N/A | #N/A | #N/A |
| 318916 | INTERGENIC | Dbl Promoter | 2.50 | 0.90 | 2.39 | 0.96 | 2.36 | 0.89 |
| 319959 | INTERGENIC | Sgl Promoter | 1.30 | 0.56 | 1.24 | 0.58 | 1.36 | 0.62 |
| 324268 | INTERGENIC | Non Promoter | #N/A | #N/A | #N/A | #N/A | #N/A | #N/A |
| 326170 | INTERGENIC | Sgl Promoter | #N/A | #N/A | 1.22 | 0.57 | #N/A | #N/A |
| 327615 | INTERGENIC | Non Promoter | 2.67 | 0.92 | 2.18 | 0.93 | 3.44 | 0.98 |
| 328473 | INTERGENIC | Dbl Promoter | 4.14 | 0.99 | 2.78 | 0.96 | 4.05 | 0.99 |
| 330572 | INTERGENIC | Sgl Promoter | 1.14 | 0.49 | 1.51 | 0.73 | 1.82 | 0.58 |
| 333172 | INTERGENIC | Sgl Promoter | 2.39 | 0.87 | 1.44 | 0.70 | #N/A | #N/A |
| 332578 | INTERGENIC | Non Promoter | 1.75 | 0.74 | 1.67 | 0.76 | 1.17 | 0.49 |
| 335942 | INTERGENIC | Sgl Promoter | 0.69 | 0.24 | 0.65 | 0.19 | 0.48 | 0.11 |
| 337945 | INTERGENIC | Dbl Promoter | 1.26 | 0.55 | 1.29 | 0.62 | #N/A | #N/A |
| 339860 | INTERGENIC | Non Promoter | #N/A | #N/A | #N/A | #N/A | #N/A | #N/A |
| 342386 | INTERGENIC | Sgl Promoter | #N/A | #N/A | #N/A | #N/A | #N/A | #N/A |
| 342851 | INTERGENIC | Dbl Promoter | 0.67 | 0.23 | 0.62 | 0.17 | 0.61 | 0.19 |
| 343316 | INTERGENIC | Non Promoter | 1.96 | 0.77 | 1.75 | 0.81 | 1.60 | 0.68 |
| 347908 | INTERGENIC | Sgl Promoter | 1.88 | 0.74 | 1.67 | 0.80 | 2.03 | 0.84 |



|        |            |              |      |      |      |      |      |      |
|--------|------------|--------------|------|------|------|------|------|------|
| 348725 | INTERGENIC | Sgl Promoter | 0.96 | 0.40 | 1.11 | 0.50 | 0.90 | 0.37 |
| 349976 | INTERGENIC | Dbl Promoter | 1.41 | 0.62 | 1.18 | 0.55 | 1.08 | 0.48 |
| 351694 | INTERGENIC | Sgl Promoter | 0.51 | 0.15 | 0.66 | 0.20 | 0.52 | 0.13 |
| 353395 | INTERGENIC | Sgl Promoter | 0.98 | 0.40 | 2.15 | 0.85 | 1.15 | 0.52 |
| 358101 | INTERGENIC | Non Promoter | #N/A | #N/A | 0.66 | 0.20 | #N/A | #N/A |
| 359558 | INTERGENIC | Dbl Promoter | 2.31 | 0.87 | 1.69 | 0.81 | 1.73 | 0.77 |
| 360498 | INTERGENIC | Non Promoter | #N/A | #N/A | 0.81 | 0.30 | 0.65 | 0.22 |
| 363096 | INTERGENIC | Dbl Promoter | 0.67 | 0.24 | 0.82 | 0.31 | 0.78 | 0.29 |
| 364585 | INTERGENIC | Sgl Promoter | 1.23 | 0.53 | 1.22 | 0.57 | 1.59 | 0.65 |
| 366798 | INTERGENIC | Sgl Promoter | 2.82 | 0.94 | 2.16 | 0.93 | 2.21 | 0.89 |
| 367834 | INTERGENIC | Non Promoter | 0.76 | 0.29 | 0.70 | 0.23 | 0.97 | 0.41 |
| 372322 | INTERGENIC | Dbl Promoter | #N/A | #N/A | 1.70 | 0.80 | #N/A | #N/A |
| 373444 | INTERGENIC | Non Promoter | #N/A | #N/A | 1.12 | 0.51 | 1.02 | 0.45 |
| 375211 | INTERGENIC | Sgl Promoter | 1.66 | 0.70 | 1.14 | 0.52 | 1.70 | 0.76 |
| 377185 | INTERGENIC | Sgl Promoter | 0.86 | 0.34 | 0.67 | 0.21 | 0.72 | 0.26 |
| 387228 | INTERGENIC | Dbl Promoter | #N/A | #N/A | 0.70 | 0.23 | 0.78 | 0.30 |
| 387928 | INTERGENIC | Non Promoter | #N/A | #N/A | #N/A | #N/A | #N/A | #N/A |
| 390586 | INTERGENIC | Sgl Promoter | 1.30 | 0.57 | 1.13 | 0.51 | 1.26 | 0.57 |
| 394288 | INTERGENIC | Sgl Promoter | 1.50 | 0.65 | 1.37 | 0.66 | 1.49 | 0.68 |
| 395344 | INTERGENIC | Sgl Promoter | 1.52 | 0.66 | 1.52 | 0.74 | 1.36 | 0.60 |
| 396765 | INTERGENIC | Dbl Promoter | 0.98 | 0.40 | 1.15 | 0.52 | 1.19 | 0.54 |
| 397948 | INTERGENIC | Non Promoter | #N/A | #N/A | 0.50 | 0.11 | 0.30 | 0.03 |
| 399492 | INTERGENIC | Sgl Promoter | 1.32 | 0.57 | 1.67 | 0.80 | 1.41 | 0.62 |
| 402371 | INTERGENIC | Sgl Promoter | 1.40 | 0.61 | 1.32 | 0.63 | 1.40 | 0.63 |
| 402867 | INTERGENIC | Non Promoter | #N/A | #N/A | #N/A | #N/A | #N/A | #N/A |
| 404809 | INTERGENIC | Dbl Promoter | 2.05 | 0.81 | 2.30 | 0.95 | 2.26 | 0.90 |
| 407339 | INTERGENIC | Non Promoter | 0.70 | 0.25 | 0.79 | 0.29 | 0.96 | 0.40 |
| 410186 | INTERGENIC | Dbl Promoter | 1.88 | 0.78 | 1.43 | 0.70 | 2.16 | 0.87 |
| 413391 | INTERGENIC | Non Promoter | 0.49 | 0.14 | 0.63 | 0.17 | 0.62 | 0.20 |
| 414478 | INTERGENIC | Dbl Promoter | 1.41 | 0.61 | 1.40 | 0.66 | 1.31 | 0.59 |
| 415856 | INTERGENIC | Sgl Promoter | 1.71 | 0.73 | #N/A | #N/A | 1.48 | 0.68 |
| 417278 | INTERGENIC | Sgl Promoter | 2.28 | 0.87 | 1.81 | 0.85 | 2.60 | 0.94 |
| 421112 | INTERGENIC | Non Promoter | #N/A | #N/A | 0.52 | 0.11 | 0.53 | 0.14 |
| 423949 | INTERGENIC | Dbl Promoter | 0.44 | 0.11 | 0.51 | 0.10 | 0.56 | 0.16 |
| 424695 | INTERGENIC | Non Promoter | #N/A | #N/A | 0.55 | 0.12 | 0.41 | 0.07 |
| 431126 | INTERGENIC | Dbl Promoter | 0.94 | 0.39 | 0.86 | 0.34 | 0.93 | 0.39 |
| 437949 | INTERGENIC | Sgl Promoter | 1.32 | 0.58 | 1.36 | 0.62 | 1.40 | 0.62 |
| 438697 | INTERGENIC | Dbl Promoter | 0.78 | 0.30 | 0.63 | 0.18 | 1.24 | 0.56 |
| 441370 | INTERGENIC | Non Promoter | 0.74 | 0.28 | 0.80 | 0.30 | #N/A | #N/A |
| 450559 | INTERGENIC | Non Promoter | 0.50 | 0.14 | 0.66 | 0.20 | 0.49 | 0.11 |
| 451561 | INTERGENIC | Dbl Promoter | 1.82 | 0.76 | 1.79 | 0.84 | 1.57 | 0.70 |
| 453455 | INTERGENIC | Sgl Promoter | 1.42 | 0.62 | 1.31 | 0.63 | 1.56 | 0.68 |
| 456315 | INTERGENIC | Dbl Promoter | 2.03 | 0.82 | 1.28 | 0.60 | 1.28 | 0.57 |
| 457802 | INTERGENIC | Non Promoter | #N/A | #N/A | #N/A | #N/A | 0.46 | 0.10 |
| 460522 | INTERGENIC | Sgl Promoter | 0.94 | 0.38 | #N/A | #N/A | 0.84 | 0.33 |
| 462581 | INTERGENIC | Dbl Promoter | 0.49 | 0.14 | 0.76 | 0.27 | 0.78 | 0.29 |
| 462964 | INTERGENIC | Non Promoter | #N/A | #N/A | #N/A | #N/A | #N/A | #N/A |
| 465299 | INTERGENIC | Dbl Promoter | 2.55 | 0.90 | 1.71 | 0.82 | 2.24 | 0.88 |
| 466204 | INTERGENIC | Non Promoter | #N/A | #N/A | #N/A | #N/A | #N/A | #N/A |
| 468366 | INTERGENIC | Dbl Promoter | 1.24 | 0.54 | 0.92 | 0.38 | 1.20 | 0.53 |
| 469453 | INTERGENIC | Non Promoter | 1.15 | 0.49 | 1.11 | 0.50 | 1.08 | 0.46 |

|        |            |              |      |      |      |      |      |      |
|--------|------------|--------------|------|------|------|------|------|------|
| 472653 | INTERGENIC | Sgl Promoter | 2.26 | 0.85 | #N/A | #N/A | 2.14 | 0.87 |
| 475016 | INTERGENIC | Dbl Promoter | 1.67 | 0.72 | 2.30 | 0.92 | 1.74 | 0.76 |
| 476341 | INTERGENIC | Non Promoter | #N/A | #N/A | 0.56 | 0.13 | #N/A | #N/A |
| 483321 | INTERGENIC | Sgl Promoter | 0.77 | 0.29 | 1.05 | 0.47 | 0.73 | 0.26 |
| 484784 | INTERGENIC | Dbl Promoter | 2.37 | 0.88 | 1.81 | 0.84 | 1.73 | 0.77 |
| 487327 | INTERGENIC | Non Promoter | #N/A | #N/A | #N/A | #N/A | #N/A | #N/A |
| 491526 | INTERGENIC | Sgl Promoter | 0.80 | 0.31 | 0.84 | 0.33 | 0.66 | 0.22 |
| 492348 | INTERGENIC | Sgl Promoter | 0.41 | 0.09 | 0.48 | 0.09 | 0.53 | 0.14 |
| 500626 | INTERGENIC | Sgl Promoter | 3.91 | 0.98 | 2.48 | 0.96 | 3.27 | 0.97 |
| 503080 | INTERGENIC | Sgl Promoter | 1.60 | 0.69 | 1.16 | 0.53 | 1.67 | 0.73 |
| 504583 | INTERGENIC | Dbl Promoter | 1.11 | 0.47 | 1.23 | 0.58 | 1.16 | 0.52 |
| 505388 | INTERGENIC | Dbl Promoter | 0.64 | 0.22 | 0.76 | 0.27 | 0.53 | 0.14 |
| 510369 | INTERGENIC | Sgl Promoter | #N/A | #N/A | 0.77 | 0.27 | 0.70 | 0.25 |
| 512740 | INTERGENIC | Sgl Promoter | 1.17 | 0.50 | 1.05 | 0.46 | 1.45 | 0.66 |
| 518212 | INTERGENIC | Sgl Promoter | 0.66 | 0.23 | #N/A | #N/A | 0.78 | 0.30 |
| 521025 | INTERGENIC | Non Promoter | #N/A | #N/A | #N/A | #N/A | #N/A | #N/A |
| 523365 | INTERGENIC | Dbl Promoter | 1.58 | 0.69 | 1.37 | 0.66 | 1.23 | 0.56 |
| 525970 | INTERGENIC | Sgl Promoter | #N/A | #N/A | #N/A | #N/A | #N/A | #N/A |
| 527078 | INTERGENIC | Sgl Promoter | 2.36 | 0.88 | 1.89 | 0.84 | #N/A | #N/A |
| 529526 | INTERGENIC | Non Promoter | #N/A | #N/A | #N/A | #N/A | #N/A | #N/A |
| 536296 | INTERGENIC | Dbl Promoter | #N/A | #N/A | 1.44 | 0.70 | 2.34 | 0.91 |
| 538430 | INTERGENIC | Non Promoter | #N/A | #N/A | #N/A | #N/A | #N/A | #N/A |
| 539460 | INTERGENIC | Sgl Promoter | #N/A | #N/A | 1.17 | 0.54 | 1.23 | 0.55 |
| 541686 | INTERGENIC | Dbl Promoter | 1.63 | 0.70 | 1.79 | 0.84 | 1.72 | 0.77 |
| 545607 | INTERGENIC | Sgl Promoter | 0.19 | 0.01 | 0.46 | 0.08 | 0.24 | 0.02 |
| 546744 | INTERGENIC | Sgl Promoter | 0.55 | 0.17 | 1.30 | 0.62 | #N/A | #N/A |
| 548417 | INTERGENIC | Sgl Promoter | #N/A | #N/A | 0.57 | 0.15 | 0.49 | 0.13 |
| 549720 | INTERGENIC | Non Promoter | #N/A | #N/A | #N/A | #N/A | #N/A | #N/A |
| 551281 | INTERGENIC | Sgl Promoter | 0.89 | 0.36 | 1.09 | 0.49 | 1.39 | 0.63 |
| 552036 | INTERGENIC | Dbl Promoter | #N/A | #N/A | 0.92 | 0.38 | 0.93 | 0.39 |
| 553330 | INTERGENIC | Non Promoter | #N/A | #N/A | #N/A | #N/A | #N/A | #N/A |
| 555128 | INTERGENIC | Sgl Promoter | 0.95 | 0.39 | 1.24 | 0.59 | 0.90 | 0.37 |
| 556292 | INTERGENIC | Sgl Promoter | 0.35 | 0.06 | 0.49 | 0.09 | 0.54 | 0.14 |
| 559450 | INTERGENIC | Dbl Promoter | 1.82 | 0.76 | 1.67 | 0.79 | 1.96 | 0.82 |
| 561701 | INTERGENIC | Non Promoter | 2.29 | 0.86 | 1.68 | 0.80 | 1.97 | 0.83 |
| 563924 | INTERGENIC | Dbl Promoter | 2.39 | 0.88 | 1.72 | 0.82 | 1.65 | 0.74 |
| 568036 | INTERGENIC | Sgl Promoter | 1.68 | 0.72 | 1.46 | 0.71 | 1.36 | 0.62 |
| 288441 | INTERGENIC | Dbl Promoter | 0.97 | 0.40 | 0.85 | 0.33 | 0.59 | 0.18 |
| 432492 | INTERGENIC | Dbl Promoter | 1.50 | 0.65 | 1.42 | 0.69 | 1.32 | 0.59 |
| 449471 | INTERGENIC | Dbl Promoter | #N/A | #N/A | #N/A | #N/A | #N/A | #N/A |
| 499343 | INTERGENIC | Sgl Promoter | 0.69 | 0.25 | 0.82 | 0.31 | 0.97 | 0.41 |
| 552521 | INTERGENIC | Dbl Promoter | #N/A | #N/A | #N/A | #N/A | 3.01 | 0.97 |
| 249444 | INTERGENIC | Dbl Promoter | #N/A | #N/A | #N/A | #N/A | #N/A | #N/A |
| 565123 | INTERGENIC | Dbl Promoter | 1.01 | 0.42 | 1.20 | 0.56 | 1.65 | 0.75 |
| 566226 | INTERGENIC | Dbl Promoter | 1.21 | 0.52 | 1.09 | 0.49 | 1.36 | 0.62 |
| 435125 | INTERGENIC | Non Promoter | #N/A | #N/A | 1.54 | 0.75 | 1.77 | 0.77 |
| 354847 | INTERGENIC | Sgl Promoter | #N/A | #N/A | #N/A | #N/A | #N/A | #N/A |
| 437264 | INTERGENIC | Non Promoter | 0.63 | 0.22 | 0.98 | 0.41 | 0.99 | 0.43 |
| 312586 | INTERGENIC | Sgl Promoter | #N/A | #N/A | 1.00 | 0.43 | 1.02 | 0.44 |
| 354132 | INTERGENIC | Sgl Promoter | 1.73 | 0.74 | 1.12 | 0.51 | 1.58 | 0.72 |
| 443199 | INTERGENIC | Sgl Promoter | #N/A | #N/A | #N/A | #N/A | #N/A | #N/A |

|        |            |              |      |      |      |      |      |      |
|--------|------------|--------------|------|------|------|------|------|------|
| 446417 | INTERGENIC | Sgl Promoter | 0.34 | 0.06 | 0.53 | 0.11 | 0.49 | 0.12 |
| 447698 | INTERGENIC | Sgl Promoter | 0.36 | 0.06 | 0.61 | 0.17 | 0.48 | 0.11 |
| 448981 | INTERGENIC | Sgl Promoter | 0.92 | 0.38 | 1.30 | 0.62 | 0.92 | 0.39 |
| 488853 | INTERGENIC | Non Promoter | 1.50 | 0.65 | 2.00 | 0.90 | 1.41 | 0.63 |
| 177098 | INTERGENIC | Sgl Promoter | #N/A | #N/A | 0.65 | 0.20 | 1.47 | 0.67 |
| 249929 | INTERGENIC | Dbl Promoter | #N/A | #N/A | #N/A | #N/A | #N/A | #N/A |
| 570085 | INTERGENIC | Sgl Promoter | 0.55 | 0.17 | 0.58 | 0.15 | 0.55 | 0.15 |
| 147125 | INTERGENIC | Dbl Promoter | 1.99 | 0.73 | #N/A | #N/A | 1.13 | 0.47 |
| 137480 | INTERGENIC | Dbl Promoter | #N/A | #N/A | 0.82 | 0.31 | #N/A | #N/A |
| 134515 | INTERGENIC | Non Promoter | #N/A | #N/A | #N/A | #N/A | #N/A | #N/A |
| 131804 | INTERGENIC | Sgl Promoter | 1.08 | 0.46 | 1.05 | 0.46 | 1.25 | 0.56 |
| 130328 | INTERGENIC | Sgl Promoter | 2.65 | 0.91 | 2.57 | 0.97 | 2.44 | 0.91 |
| 129140 | INTERGENIC | Sgl Promoter | #N/A | #N/A | 0.58 | 0.14 | 0.47 | 0.13 |
| 123474 | INTERGENIC | Sgl Promoter | 1.61 | 0.70 | 1.62 | 0.78 | 2.07 | 0.84 |
| 119424 | INTERGENIC | Sgl Promoter | 3.99 | 0.99 | 2.54 | 0.97 | 2.78 | 0.95 |
| 116139 | INTERGENIC | Dbl Promoter | 1.70 | 0.72 | 1.89 | 0.85 | 2.69 | 0.94 |
| 114984 | INTERGENIC | Sgl Promoter | 0.75 | 0.28 | 1.26 | 0.59 | 1.00 | 0.42 |
| 110641 | INTERGENIC | Sgl Promoter | 3.02 | 0.94 | 1.69 | 0.81 | 1.99 | 0.84 |
| 107846 | INTERGENIC | Non Promoter | #N/A | #N/A | 1.20 | 0.56 | 1.06 | 0.46 |
| 107250 | INTERGENIC | Dbl Promoter | 1.18 | 0.51 | 1.36 | 0.66 | 1.16 | 0.52 |
| 106463 | INTERGENIC | Sgl Promoter | 0.49 | 0.14 | 0.47 | 0.08 | 0.45 | 0.10 |
| 104695 | INTERGENIC | Sgl Promoter | #N/A | #N/A | #N/A | #N/A | #N/A | #N/A |
| 103693 | INTERGENIC | Dbl Promoter | 1.07 | 0.45 | 0.86 | 0.34 | 1.03 | 0.45 |
| 100246 | INTERGENIC | Sgl Promoter | 2.20 | 0.86 | 1.46 | 0.71 | 1.98 | 0.84 |
| 98360  | INTERGENIC | Non Promoter | 2.45 | 0.90 | 1.76 | 0.83 | 2.28 | 0.89 |
| 99225  | INTERGENIC | Non Promoter | 1.60 | 0.68 | 1.21 | 0.56 | 1.20 | 0.54 |
| 93497  | INTERGENIC | Non Promoter | #N/A | #N/A | #N/A | #N/A | #N/A | #N/A |
| 90984  | INTERGENIC | Dbl Promoter | 0.43 | 0.10 | 0.50 | 0.09 | 0.42 | 0.08 |
| 87845  | INTERGENIC | Sgl Promoter | 0.87 | 0.35 | 0.89 | 0.36 | 0.85 | 0.34 |
| 84143  | INTERGENIC | Non Promoter | 0.58 | 0.19 | 0.51 | 0.10 | 1.06 | 0.47 |
| 82578  | INTERGENIC | Dbl Promoter | 3.02 | 0.95 | 0.94 | 0.39 | 3.00 | 0.96 |
| 80417  | INTERGENIC | Sgl Promoter | 6.63 | 0.90 | #N/A | #N/A | 2.66 | 0.89 |
| 79342  | INTERGENIC | Sgl Promoter | #N/A | #N/A | #N/A | #N/A | 1.57 | 0.70 |
| 78053  | INTERGENIC | Non Promoter | #N/A | #N/A | #N/A | #N/A | #N/A | #N/A |
| 74871  | INTERGENIC | Dbl Promoter | 0.75 | 0.28 | 0.71 | 0.23 | 0.84 | 0.33 |
| 65476  | INTERGENIC | Dbl Promoter | 1.01 | 0.42 | 1.21 | 0.56 | 0.94 | 0.40 |
| 69114  | INTERGENIC | Non Promoter | #N/A | #N/A | #N/A | #N/A | #N/A | #N/A |
| 64243  | INTERGENIC | Sgl Promoter | #N/A | #N/A | 1.73 | 0.82 | 1.77 | 0.77 |
| 63016  | INTERGENIC | Non Promoter | #N/A | #N/A | #N/A | #N/A | #N/A | #N/A |
| 56336  | INTERGENIC | Dbl Promoter | 2.71 | 0.93 | 2.25 | 0.94 | 2.46 | 0.91 |
| 55366  | INTERGENIC | Sgl Promoter | 0.28 | 0.03 | 0.37 | 0.04 | 0.31 | 0.03 |
| 53261  | INTERGENIC | Non Promoter | #N/A | #N/A | #N/A | #N/A | #N/A | #N/A |
| 51351  | INTERGENIC | Sgl Promoter | #N/A | #N/A | #N/A | #N/A | #N/A | #N/A |
| 49140  | INTERGENIC | Dbl Promoter | 1.63 | 0.70 | 1.45 | 0.70 | 1.41 | 0.64 |
| 45720  | INTERGENIC | Sgl Promoter | #N/A | #N/A | 1.25 | 0.54 | #N/A | #N/A |
| 44655  | INTERGENIC | Sgl Promoter | 0.89 | 0.36 | #N/A | #N/A | #N/A | #N/A |
| 43628  | INTERGENIC | Non Promoter | #N/A | #N/A | #N/A | #N/A | #N/A | #N/A |
| 42815  | INTERGENIC | Sgl Promoter | #N/A | #N/A | 1.81 | 0.84 | 1.63 | 0.73 |
| 40421  | INTERGENIC | Dbl Promoter | #N/A | #N/A | 3.34 | 0.99 | #N/A | #N/A |
| 38843  | INTERGENIC | Non Promoter | #N/A | #N/A | #N/A | #N/A | #N/A | #N/A |
| 36803  | INTERGENIC | Dbl Promoter | 1.82 | 0.71 | 1.40 | 0.67 | 1.30 | 0.58 |

|        |            |              |      |      |      |      |      |      |
|--------|------------|--------------|------|------|------|------|------|------|
| 31906  | INTERGENIC | Sgl Promoter | 0.91 | 0.37 | 0.79 | 0.29 | 0.81 | 0.31 |
| 33272  | INTERGENIC | Sgl Promoter | 0.68 | 0.25 | 0.85 | 0.33 | 0.86 | 0.35 |
| 30058  | INTERGENIC | Non Promoter | #N/A | #N/A | 1.07 | 0.48 | 1.26 | 0.56 |
| 26715  | INTERGENIC | Sgl Promoter | 0.92 | 0.38 | 0.75 | 0.26 | 0.73 | 0.27 |
| 28232  | INTERGENIC | Sgl Promoter | 2.06 | 0.82 | 1.28 | 0.61 | 1.58 | 0.71 |
| 23423  | INTERGENIC | Dbl Promoter | 2.69 | 0.91 | 1.61 | 0.77 | 1.67 | 0.72 |
| 19763  | INTERGENIC | Non Promoter | 0.79 | 0.31 | 0.80 | 0.30 | 1.11 | 0.49 |
| 20847  | INTERGENIC | Non Promoter | 0.83 | 0.33 | 0.99 | 0.43 | 1.03 | 0.44 |
| 16217  | INTERGENIC | Dbl Promoter | 0.73 | 0.27 | 0.75 | 0.26 | 0.57 | 0.16 |
| 17004  | INTERGENIC | Dbl Promoter | 1.92 | 0.79 | 1.80 | 0.85 | 1.64 | 0.73 |
| 14305  | INTERGENIC | Non Promoter | 1.39 | 0.61 | 1.23 | 0.57 | 1.25 | 0.56 |
| 12929  | INTERGENIC | Sgl Promoter | 2.67 | 0.93 | 2.07 | 0.91 | 2.37 | 0.91 |
| 11363  | INTERGENIC | Dbl Promoter | 2.66 | 0.92 | 1.75 | 0.83 | 2.00 | 0.84 |
| 10301  | INTERGENIC | Non Promoter | #N/A | #N/A | 0.69 | 0.22 | #N/A | #N/A |
| 8555   | INTERGENIC | Sgl Promoter | 1.17 | 0.50 | 1.28 | 0.60 | 1.21 | 0.55 |
| 9545   | INTERGENIC | Sgl Promoter | 1.43 | 0.62 | 1.26 | 0.60 | 1.40 | 0.64 |
| 6426   | INTERGENIC | Sgl Promoter | 0.76 | 0.29 | 0.80 | 0.30 | 0.85 | 0.34 |
| 3030   | INTERGENIC | Sgl Promoter | 0.87 | 0.35 | 1.05 | 0.46 | 1.22 | 0.55 |
| 1437   | INTERGENIC | Non Promoter | #N/A | #N/A | 0.29 | 0.02 | #N/A | #N/A |
| 836    | INTERGENIC | Sgl Promoter | 0.38 | 0.08 | 0.45 | 0.07 | 0.45 | 0.09 |
| 145108 | INTERGENIC | Non Promoter | #N/A | #N/A | 0.99 | 0.41 | 0.61 | 0.19 |
| 101370 | INTERGENIC | Sgl Promoter | 1.41 | 0.62 | 0.97 | 0.41 | 0.74 | 0.27 |
| 144197 | INTERGENIC | Non Promoter | #N/A | #N/A | #N/A | #N/A | #N/A | #N/A |
| 150010 | INTERGENIC | Sgl Promoter | 1.87 | 0.78 | 1.71 | 0.78 | #N/A | #N/A |
| 152651 | INTERGENIC | Non Promoter | #N/A | #N/A | #N/A | #N/A | #N/A | #N/A |
| 153387 | INTERGENIC | Dbl Promoter | 2.31 | 0.88 | 1.93 | 0.88 | #N/A | #N/A |
| 154521 | INTERGENIC | Non Promoter | #N/A | #N/A | #N/A | #N/A | #N/A | #N/A |
| 156138 | INTERGENIC | Dbl Promoter | 0.65 | 0.22 | 0.69 | 0.22 | 0.45 | 0.09 |
| 157909 | INTERGENIC | Sgl Promoter | #N/A | #N/A | #N/A | #N/A | #N/A | #N/A |
| 160528 | INTERGENIC | Sgl Promoter | #N/A | #N/A | 1.44 | 0.69 | 1.23 | 0.56 |
| 161797 | INTERGENIC | Sgl Promoter | 1.01 | 0.42 | 0.93 | 0.38 | 0.97 | 0.40 |
| 165059 | INTERGENIC | Sgl Promoter | 0.82 | 0.32 | 1.18 | 0.55 | #N/A | #N/A |
| 166738 | INTERGENIC | Non Promoter | #N/A | #N/A | #N/A | #N/A | #N/A | #N/A |
| 167429 | INTERGENIC | Dbl Promoter | #N/A | #N/A | 0.75 | 0.25 | #N/A | #N/A |
| 169913 | INTERGENIC | Sgl Promoter | 3.10 | 0.95 | 1.85 | 0.86 | 2.46 | 0.91 |
| 172528 | INTERGENIC | Non Promoter | #N/A | #N/A | #N/A | #N/A | #N/A | #N/A |
| 174256 | INTERGENIC | Sgl Promoter | 2.64 | 0.92 | 1.33 | 0.64 | 1.51 | 0.68 |
| 177033 | INTERGENIC | Sgl Promoter | 1.27 | 0.55 | 1.34 | 0.65 | 1.59 | 0.69 |
| 180965 | INTERGENIC | Sgl Promoter | #N/A | #N/A | #N/A | #N/A | #N/A | #N/A |
| 183118 | INTERGENIC | Sgl Promoter | #N/A | #N/A | #N/A | #N/A | 0.94 | 0.39 |
| 184489 | INTERGENIC | Dbl Promoter | 1.85 | 0.77 | 1.61 | 0.78 | 1.92 | 0.82 |
| 191500 | INTERGENIC | Sgl Promoter | #N/A | #N/A | #N/A | #N/A | #N/A | #N/A |
| 194799 | INTERGENIC | Sgl Promoter | 1.57 | 0.68 | 1.43 | 0.69 | 1.65 | 0.74 |
| 196820 | INTERGENIC | Sgl Promoter | 1.94 | 0.78 | 1.16 | 0.53 | 1.58 | 0.72 |
| 199861 | INTERGENIC | Sgl Promoter | 0.60 | 0.20 | 0.90 | 0.36 | 1.11 | 0.49 |
| 201947 | INTERGENIC | Non Promoter | #N/A | #N/A | #N/A | #N/A | #N/A | #N/A |
| 203730 | INTERGENIC | Sgl Promoter | 1.84 | 0.74 | 1.24 | 0.59 | 1.62 | 0.69 |
| 204911 | INTERGENIC | Sgl Promoter | #N/A | #N/A | #N/A | #N/A | #N/A | #N/A |
| 206909 | INTERGENIC | Dbl Promoter | 0.97 | 0.40 | 1.08 | 0.48 | 1.08 | 0.48 |
| 208400 | INTERGENIC | Non Promoter | #N/A | #N/A | #N/A | #N/A | #N/A | #N/A |
| 213299 | INTERGENIC | Sgl Promoter | 1.35 | 0.59 | 1.18 | 0.55 | 1.25 | 0.57 |





|        |            |              |      |      |      |      |      |      |
|--------|------------|--------------|------|------|------|------|------|------|
| 466137 | INTERGENIC | Dbl Promoter | 1.16 | 0.50 | 1.14 | 0.52 | 1.36 | 0.62 |
| 465039 | INTERGENIC | Non Promoter | #N/A | #N/A | #N/A | #N/A | #N/A | #N/A |
| 461662 | INTERGENIC | Sgl Promoter | 1.17 | 0.50 | 1.63 | 0.78 | 1.13 | 0.50 |
| 459850 | INTERGENIC | Dbl Promoter | 2.98 | 0.94 | 2.36 | 0.94 | 2.78 | 0.95 |
| 459106 | INTERGENIC | Non Promoter | #N/A | #N/A | #N/A | #N/A | #N/A | #N/A |
| 458152 | INTERGENIC | Dbl Promoter | 2.33 | 0.87 | 1.98 | 0.90 | 2.25 | 0.87 |
| 457159 | INTERGENIC | Non Promoter | #N/A | #N/A | #N/A | #N/A | #N/A | #N/A |
| 454781 | INTERGENIC | Sgl Promoter | #N/A | #N/A | 0.96 | 0.40 | 0.85 | 0.34 |
| 452400 | INTERGENIC | Dbl Promoter | 5.02 | 1.00 | #N/A | #N/A | 5.75 | 1.00 |
| 450193 | INTERGENIC | Non Promoter | #N/A | #N/A | #N/A | #N/A | #N/A | #N/A |
| 448760 | INTERGENIC | Sgl Promoter | 1.91 | 0.79 | 1.48 | 0.72 | #N/A | #N/A |
| 446408 | INTERGENIC | Sgl Promoter | #N/A | #N/A | 1.66 | 0.66 | 1.09 | 0.48 |
| 443638 | INTERGENIC | Sgl Promoter | 1.48 | 0.65 | 1.55 | 0.75 | 1.73 | 0.77 |
| 440712 | INTERGENIC | Non Promoter | #N/A | #N/A | 0.54 | 0.12 | 0.94 | 0.38 |
| 440059 | INTERGENIC | Sgl Promoter | #N/A | #N/A | 0.65 | 0.19 | 0.32 | 0.04 |
| 439087 | INTERGENIC | Dbl Promoter | 0.18 | 0.01 | 0.31 | 0.02 | 0.31 | 0.04 |
| 437463 | INTERGENIC | Sgl Promoter | 1.31 | 0.56 | 1.10 | 0.50 | 1.84 | 0.78 |
| 436566 | INTERGENIC | Non Promoter | #N/A | #N/A | #N/A | #N/A | #N/A | #N/A |
| 434411 | INTERGENIC | Dbl Promoter | 2.18 | 0.86 | 1.60 | 0.77 | 1.58 | 0.72 |
| 435247 | INTERGENIC | Dbl Promoter | 1.45 | 0.63 | 1.23 | 0.58 | 1.53 | 0.68 |
| 433210 | INTERGENIC | Sgl Promoter | 1.57 | 0.68 | 0.91 | 0.37 | #N/A | #N/A |
| 431544 | INTERGENIC | Non Promoter | #N/A | #N/A | #N/A | #N/A | #N/A | #N/A |
| 428597 | INTERGENIC | Dbl Promoter | 0.71 | 0.26 | #N/A | #N/A | 0.58 | 0.17 |
| 427294 | INTERGENIC | Sgl Promoter | 0.94 | 0.38 | 1.01 | 0.44 | #N/A | #N/A |
| 425359 | INTERGENIC | Non Promoter | 0.26 | 0.03 | 0.55 | 0.12 | 0.30 | 0.03 |
| 421820 | INTERGENIC | Dbl Promoter | 1.12 | 0.48 | 1.29 | 0.62 | 0.99 | 0.42 |
| 423089 | INTERGENIC | Dbl Promoter | 1.73 | 0.74 | 1.21 | 0.57 | 1.19 | 0.53 |
| 419524 | INTERGENIC | Sgl Promoter | #N/A | #N/A | 0.72 | 0.25 | #N/A | #N/A |
| 418908 | INTERGENIC | Sgl Promoter | #N/A | #N/A | #N/A | #N/A | 1.39 | 0.63 |
| 417478 | INTERGENIC | Dbl Promoter | 3.05 | 0.96 | 1.99 | 0.87 | 2.99 | 0.96 |
| 416141 | INTERGENIC | Non Promoter | 0.62 | 0.21 | 0.68 | 0.21 | 0.68 | 0.24 |
| 415036 | INTERGENIC | Sgl Promoter | #N/A | #N/A | 0.71 | 0.23 | 0.64 | 0.21 |
| 412291 | INTERGENIC | Sgl Promoter | #N/A | #N/A | #N/A | #N/A | 0.61 | 0.19 |
| 411549 | INTERGENIC | Dbl Promoter | 2.11 | 0.78 | 1.66 | 0.79 | 1.62 | 0.70 |
| 410066 | INTERGENIC | Sgl Promoter | 0.99 | 0.41 | 1.06 | 0.47 | 1.02 | 0.44 |
| 406857 | INTERGENIC | Non Promoter | #N/A | #N/A | 0.43 | 0.06 | 0.43 | 0.09 |
| 405001 | INTERGENIC | Sgl Promoter | 1.75 | 0.75 | 1.33 | 0.64 | 1.68 | 0.75 |
| 403434 | INTERGENIC | Sgl Promoter | #N/A | #N/A | 0.83 | 0.32 | #N/A | #N/A |
| 401524 | INTERGENIC | Dbl Promoter | #N/A | #N/A | 0.89 | 0.36 | #N/A | #N/A |
| 400868 | INTERGENIC | Non Promoter | #N/A | #N/A | 0.41 | 0.05 | 0.45 | 0.09 |
| 398625 | INTERGENIC | Dbl Promoter | 0.27 | 0.03 | 0.57 | 0.14 | 0.56 | 0.16 |
| 396035 | INTERGENIC | Sgl Promoter | #N/A | #N/A | #N/A | #N/A | #N/A | #N/A |
| 394966 | INTERGENIC | Non Promoter | 1.05 | 0.44 | 0.94 | 0.39 | 1.27 | 0.57 |
| 393986 | INTERGENIC | Sgl Promoter | 1.79 | 0.75 | 1.37 | 0.66 | 1.55 | 0.71 |
| 392223 | INTERGENIC | Sgl Promoter | 1.97 | 0.81 | 2.09 | 0.89 | #N/A | #N/A |
| 390065 | INTERGENIC | Dbl Promoter | 2.05 | 0.82 | 2.02 | 0.90 | 2.19 | 0.88 |
| 388966 | INTERGENIC | Non Promoter | #N/A | #N/A | #N/A | #N/A | #N/A | #N/A |
| 383652 | INTERGENIC | Dbl Promoter | 1.95 | 0.80 | 1.65 | 0.76 | 1.57 | 0.68 |
| 381521 | INTERGENIC | Sgl Promoter | 1.76 | 0.74 | 1.56 | 0.76 | 1.64 | 0.74 |
| 379758 | INTERGENIC | Non Promoter | #N/A | #N/A | 0.96 | 0.40 | #N/A | #N/A |
| 377607 | INTERGENIC | Sgl Promoter | 2.76 | 0.92 | 1.89 | 0.83 | 2.96 | 0.96 |

|        |            |              |      |      |      |      |      |      |
|--------|------------|--------------|------|------|------|------|------|------|
| 376099 | INTERGENIC | Sgl Promoter | 1.48 | 0.63 | 1.18 | 0.55 | 1.54 | 0.70 |
| 375048 | INTERGENIC | Sgl Promoter | 3.40 | 0.96 | 3.36 | 0.99 | 3.38 | 0.97 |
| 374457 | INTERGENIC | Non Promoter | 0.93 | 0.38 | 0.90 | 0.37 | 1.22 | 0.54 |
| 372010 | INTERGENIC | Dbl Promoter | 0.62 | 0.21 | 1.01 | 0.43 | 0.68 | 0.23 |
| 368594 | INTERGENIC | Sgl Promoter | 1.50 | 0.63 | 1.12 | 0.49 | 1.38 | 0.63 |
| 366923 | INTERGENIC | Sgl Promoter | 0.87 | 0.35 | 1.02 | 0.44 | 0.85 | 0.34 |
| 364333 | INTERGENIC | Sgl Promoter | 0.46 | 0.12 | 1.17 | 0.53 | 1.31 | 0.58 |
| 362223 | INTERGENIC | Sgl Promoter | 1.05 | 0.44 | 1.00 | 0.43 | 1.34 | 0.58 |
| 360286 | INTERGENIC | Non Promoter | #N/A | #N/A | #N/A | #N/A | #N/A | #N/A |
| 359442 | INTERGENIC | Sgl Promoter | 1.05 | 0.45 | 1.65 | 0.79 | #N/A | #N/A |
| 358634 | INTERGENIC | Sgl Promoter | 2.49 | 0.89 | 1.87 | 0.86 | 2.09 | 0.86 |
| 357375 | INTERGENIC | Sgl Promoter | 1.02 | 0.43 | 1.28 | 0.61 | 1.12 | 0.49 |
| 355825 | INTERGENIC | Sgl Promoter | 1.75 | 0.74 | 1.91 | 0.87 | 1.74 | 0.73 |
| 353056 | INTERGENIC | Dbl Promoter | 1.68 | 0.72 | 1.61 | 0.77 | 1.42 | 0.65 |
| 350614 | INTERGENIC | Non Promoter | #N/A | #N/A | #N/A | #N/A | #N/A | #N/A |
| 347117 | INTERGENIC | Dbl Promoter | 3.09 | 0.96 | 2.54 | 0.97 | 3.12 | 0.97 |
| 346404 | INTERGENIC | Non Promoter | 0.61 | 0.20 | 0.66 | 0.20 | 0.49 | 0.11 |
| 345834 | INTERGENIC | Dbl Promoter | 0.54 | 0.16 | 1.08 | 0.49 | 0.85 | 0.34 |
| 344789 | INTERGENIC | Non Promoter | 0.44 | 0.11 | 0.73 | 0.25 | 1.04 | 0.46 |
| 342054 | INTERGENIC | Non Promoter | #N/A | #N/A | #N/A | #N/A | #N/A | #N/A |
| 337904 | INTERGENIC | Sgl Promoter | #N/A | #N/A | 1.13 | 0.52 | 1.06 | 0.46 |
| 334884 | INTERGENIC | Dbl Promoter | 2.44 | 0.90 | 1.99 | 0.89 | 2.35 | 0.89 |
| 331116 | INTERGENIC | Sgl Promoter | 1.34 | 0.58 | 0.99 | 0.42 | 1.09 | 0.48 |
| 327030 | INTERGENIC | Non Promoter | 0.88 | 0.35 | 0.77 | 0.28 | 0.89 | 0.37 |
| 327902 | INTERGENIC | Non Promoter | 0.60 | 0.20 | 0.68 | 0.22 | 0.85 | 0.34 |
| 324278 | INTERGENIC | Sgl Promoter | 0.35 | 0.06 | 0.82 | 0.31 | 0.34 | 0.04 |
| 325329 | INTERGENIC | Sgl Promoter | 0.50 | 0.14 | 0.81 | 0.30 | 0.40 | 0.06 |
| 318695 | INTERGENIC | Sgl Promoter | 0.63 | 0.22 | 0.60 | 0.16 | 0.68 | 0.23 |
| 317340 | INTERGENIC | Sgl Promoter | 0.62 | 0.21 | 0.88 | 0.35 | 0.72 | 0.25 |
| 314629 | INTERGENIC | Sgl Promoter | 1.41 | 0.60 | 2.33 | 0.93 | 2.17 | 0.87 |
| 313232 | INTERGENIC | Sgl Promoter | 1.46 | 0.64 | 1.42 | 0.69 | 1.33 | 0.61 |
| 312191 | INTERGENIC | Dbl Promoter | #N/A | #N/A | 0.58 | 0.14 | 0.48 | 0.11 |
| 310965 | INTERGENIC | Dbl Promoter | 1.06 | 0.45 | 0.84 | 0.33 | 1.05 | 0.46 |
| 308711 | INTERGENIC | Non Promoter | #N/A | #N/A | #N/A | #N/A | #N/A | #N/A |
| 307435 | INTERGENIC | Sgl Promoter | #N/A | #N/A | 1.46 | 0.68 | 0.96 | 0.41 |
| 306558 | INTERGENIC | Dbl Promoter | 2.94 | 0.93 | 3.18 | 0.99 | 2.34 | 0.90 |
| 304331 | INTERGENIC | Sgl Promoter | #N/A | #N/A | #N/A | #N/A | #N/A | #N/A |
| 303511 | INTERGENIC | Dbl Promoter | #N/A | #N/A | #N/A | #N/A | #N/A | #N/A |
| 301535 | INTERGENIC | Non Promoter | #N/A | #N/A | #N/A | #N/A | #N/A | #N/A |
| 299976 | INTERGENIC | Dbl Promoter | 3.37 | 0.97 | 2.86 | 0.97 | 3.35 | 0.98 |
| 295930 | INTERGENIC | Sgl Promoter | 1.72 | 0.73 | 1.47 | 0.69 | 1.60 | 0.68 |
| 293458 | INTERGENIC | Sgl Promoter | #N/A | #N/A | 1.62 | 0.78 | 1.33 | 0.60 |
| 292031 | INTERGENIC | Sgl Promoter | 1.63 | 0.70 | 1.62 | 0.78 | 1.64 | 0.74 |
| 289807 | INTERGENIC | Sgl Promoter | 0.89 | 0.36 | 1.01 | 0.44 | 0.66 | 0.22 |
| 288513 | INTERGENIC | Dbl Promoter | #N/A | #N/A | #N/A | #N/A | #N/A | #N/A |
| 287351 | INTERGENIC | Non Promoter | 0.95 | 0.39 | 0.99 | 0.43 | 0.93 | 0.39 |
| 284443 | INTERGENIC | Dbl Promoter | 1.44 | 0.63 | 1.63 | 0.78 | 1.78 | 0.78 |
| 281635 | INTERGENIC | Sgl Promoter | #N/A | #N/A | #N/A | #N/A | 1.11 | 0.49 |
| 280778 | INTERGENIC | Sgl Promoter | 0.96 | 0.40 | 1.10 | 0.49 | 1.15 | 0.52 |
| 278947 | INTERGENIC | Non Promoter | 0.39 | 0.08 | 0.54 | 0.12 | 0.36 | 0.08 |
| 277618 | INTERGENIC | Dbl Promoter | 0.82 | 0.33 | 0.84 | 0.32 | 0.64 | 0.21 |

|        |            |              |      |      |      |      |      |      |
|--------|------------|--------------|------|------|------|------|------|------|
| 274781 | INTERGENIC | Non Promoter | 0.64 | 0.22 | #N/A | #N/A | #N/A | #N/A |
| 272524 | INTERGENIC | Sgl Promoter | 0.68 | 0.24 | 0.37 | 0.03 | #N/A | #N/A |
| 271001 | INTERGENIC | Dbl Promoter | 2.88 | 0.94 | 1.82 | 0.83 | 1.86 | 0.81 |
| 269297 | INTERGENIC | Sgl Promoter | #N/A | #N/A | #N/A | #N/A | #N/A | #N/A |
| 267726 | INTERGENIC | Non Promoter | #N/A | #N/A | #N/A | #N/A | #N/A | #N/A |
| 266148 | INTERGENIC | Dbl Promoter | #N/A | #N/A | #N/A | #N/A | #N/A | #N/A |
| 261583 | INTERGENIC | Sgl Promoter | #N/A | #N/A | #N/A | #N/A | #N/A | #N/A |
| 257710 | INTERGENIC | Sgl Promoter | 1.52 | 0.66 | #N/A | #N/A | 1.07 | 0.47 |
| 255666 | INTERGENIC | Sgl Promoter | 0.43 | 0.10 | #N/A | #N/A | 0.63 | 0.20 |
| 254644 | INTERGENIC | Dbl Promoter | 1.06 | 0.45 | 1.09 | 0.48 | 0.86 | 0.35 |
| 252900 | INTERGENIC | Non Promoter | #N/A | #N/A | #N/A | #N/A | #N/A | #N/A |
| 249872 | INTERGENIC | Dbl Promoter | #N/A | #N/A | 2.12 | 0.90 | 1.43 | 0.64 |
| 248497 | INTERGENIC | Non Promoter | #N/A | #N/A | #N/A | #N/A | #N/A | #N/A |
| 245719 |            |              | 1.89 | 0.78 | 1.71 | 0.79 | 2.09 | 0.85 |
| 241356 | INTERGENIC | Non Promoter | #N/A | #N/A | #N/A | #N/A | #N/A | #N/A |
| 238356 | INTERGENIC | Dbl Promoter | #N/A | #N/A | 1.78 | 0.84 | #N/A | #N/A |
| 236272 | INTERGENIC | Sgl Promoter | #N/A | #N/A | 1.07 | 0.47 | 1.39 | 0.63 |
| 234720 | INTERGENIC | Sgl Promoter | 1.39 | 0.59 | 1.50 | 0.72 | 1.60 | 0.73 |
| 232453 | INTERGENIC | Non Promoter | #N/A | #N/A | #N/A | #N/A | #N/A | #N/A |
| 230246 | INTERGENIC | Dbl Promoter | 1.98 | 0.80 | 1.66 | 0.79 | 2.70 | 0.94 |
| 228754 | INTERGENIC | Sgl Promoter | 0.26 | 0.03 | 0.37 | 0.05 | 0.32 | 0.04 |
| 227757 | INTERGENIC | Non Promoter | #N/A | #N/A | #N/A | #N/A | #N/A | #N/A |
| 221107 | INTERGENIC | Non Promoter | #N/A | #N/A | #N/A | #N/A | #N/A | #N/A |
| 217527 | INTERGENIC | Dbl Promoter | 1.72 | 0.74 | 1.99 | 0.86 | 1.56 | 0.67 |
| 214084 | INTERGENIC | Sgl Promoter | #N/A | #N/A | 2.31 | 0.95 | 2.63 | 0.94 |
| 210419 | INTERGENIC | Sgl Promoter | 1.17 | 0.50 | 1.06 | 0.47 | 1.66 | 0.75 |
| 209009 | INTERGENIC | Sgl Promoter | #N/A | #N/A | 1.61 | 0.77 | 1.18 | 0.53 |
| 204986 | INTERGENIC | Sgl Promoter | 0.81 | 0.32 | 0.95 | 0.40 | #N/A | #N/A |
| 202725 | INTERGENIC | Sgl Promoter | 1.14 | 0.49 | 1.04 | 0.45 | 0.93 | 0.39 |
| 200565 | INTERGENIC | Dbl Promoter | 2.72 | 0.93 | 2.23 | 0.92 | 2.92 | 0.96 |
| 199214 | INTERGENIC | Non Promoter | #N/A | #N/A | #N/A | #N/A | #N/A | #N/A |
| 197274 | INTERGENIC | Dbl Promoter | 1.29 | 0.56 | 0.94 | 0.39 | 1.45 | 0.66 |
| 198142 | INTERGENIC | Dbl Promoter | 0.67 | 0.23 | 0.71 | 0.23 | 0.59 | 0.18 |
| 193711 | INTERGENIC | Sgl Promoter | 1.43 | 0.62 | 0.86 | 0.34 | 1.57 | 0.69 |
| 191133 | INTERGENIC | Dbl Promoter | 1.53 | 0.67 | 1.58 | 0.77 | 1.38 | 0.63 |
| 187468 | INTERGENIC | Sgl Promoter | #N/A | #N/A | #N/A | #N/A | #N/A | #N/A |
| 185718 | INTERGENIC | Dbl Promoter | 0.85 | 0.33 | 0.74 | 0.26 | #N/A | #N/A |
| 184157 | INTERGENIC | Non Promoter | #N/A | #N/A | #N/A | #N/A | #N/A | #N/A |
| 182394 | INTERGENIC | Sgl Promoter | #N/A | #N/A | 0.95 | 0.42 | #N/A | #N/A |
| 175531 | INTERGENIC | Non Promoter | #N/A | #N/A | #N/A | #N/A | #N/A | #N/A |
| 174549 | INTERGENIC | Dbl Promoter | 2.18 | 0.86 | 1.91 | 0.88 | 1.73 | 0.76 |
| 169079 | INTERGENIC | Sgl Promoter | 0.52 | 0.15 | 0.67 | 0.21 | 0.54 | 0.15 |
| 170248 | INTERGENIC | Sgl Promoter | 0.43 | 0.10 | 0.47 | 0.08 | 0.52 | 0.13 |
| 163413 | INTERGENIC | Non Promoter | #N/A | #N/A | 0.72 | 0.24 | 0.83 | 0.33 |
| 160069 | INTERGENIC | Sgl Promoter | 2.08 | 0.82 | 1.52 | 0.74 | 1.75 | 0.77 |
| 157910 | INTERGENIC | Dbl Promoter | 2.73 | 0.91 | 1.77 | 0.83 | 1.90 | 0.82 |
| 154619 | INTERGENIC | Sgl Promoter | 1.52 | 0.65 | 1.34 | 0.56 | 1.37 | 0.61 |
| 153171 | INTERGENIC | Sgl Promoter | 2.83 | 0.94 | 1.63 | 0.77 | #N/A | #N/A |
| 151041 | INTERGENIC | Sgl Promoter | 0.50 | 0.15 | 0.74 | 0.26 | 0.56 | 0.16 |
| 149708 | INTERGENIC | Sgl Promoter | #N/A | #N/A | #N/A | #N/A | #N/A | #N/A |
| 149347 | INTERGENIC | Sgl Promoter | 0.18 | 0.01 | 0.29 | 0.02 | 0.50 | 0.15 |



|        |            |              |      |      |      |      |      |      |
|--------|------------|--------------|------|------|------|------|------|------|
| 148233 | INTERGENIC | Sgl Promoter | 0.65 | 0.23 | 0.58 | 0.14 | 0.67 | 0.23 |
| 144812 | INTERGENIC | Sgl Promoter | 0.77 | 0.30 | 1.14 | 0.52 | 0.66 | 0.22 |
| 141920 | INTERGENIC | Sgl Promoter | #N/A | #N/A | 1.26 | 0.58 | #N/A | #N/A |
| 140372 | INTERGENIC | Non Promoter | 0.70 | 0.26 | 0.72 | 0.25 | 0.82 | 0.32 |
| 131529 | INTERGENIC | Sgl Promoter | 2.78 | 0.94 | 1.71 | 0.81 | 4.72 | 1.00 |
| 130553 | INTERGENIC | Sgl Promoter | 0.74 | 0.28 | 0.81 | 0.30 | 0.77 | 0.29 |
| 124701 | INTERGENIC | Sgl Promoter | 1.37 | 0.60 | 1.37 | 0.60 | 1.23 | 0.56 |
| 123575 | INTERGENIC | Sgl Promoter | 2.44 | 0.90 | 1.56 | 0.76 | 1.67 | 0.73 |
| 122271 | INTERGENIC | Sgl Promoter | 1.21 | 0.52 | 1.34 | 0.65 | 1.31 | 0.60 |
| 117856 | INTERGENIC | Non Promoter | #N/A | #N/A | 0.45 | 0.08 | #N/A | #N/A |
| 114941 | INTERGENIC | Dbl Promoter | 1.70 | 0.73 | 1.45 | 0.70 | 2.56 | 0.93 |
| 112477 | INTERGENIC | Sgl Promoter | 1.02 | 0.43 | 0.51 | 0.11 | 0.75 | 0.28 |
| 108160 | INTERGENIC | Dbl Promoter | 2.07 | 0.83 | 1.81 | 0.85 | 2.01 | 0.85 |
| 102545 | INTERGENIC | Non Promoter | #N/A | #N/A | 0.29 | 0.02 | 0.42 | 0.10 |
| 97340  | INTERGENIC | Sgl Promoter | 1.28 | 0.55 | 1.44 | 0.69 | 1.16 | 0.52 |
| 95860  | INTERGENIC | Sgl Promoter | 0.46 | 0.12 | 0.61 | 0.16 | 0.33 | 0.04 |
| 91435  | INTERGENIC | Dbl Promoter | #N/A | #N/A | #N/A | #N/A | #N/A | #N/A |
| 87979  | INTERGENIC | Sgl Promoter | 1.02 | 0.43 | 0.90 | 0.37 | 1.12 | 0.49 |
| 84837  | INTERGENIC | Non Promoter | 2.49 | 0.89 | 1.87 | 0.87 | 2.28 | 0.89 |
| 82876  | INTERGENIC | Non Promoter | #N/A | #N/A | #N/A | #N/A | #N/A | #N/A |
| 82372  | INTERGENIC | Dbl Promoter | #N/A | #N/A | #N/A | #N/A | #N/A | #N/A |
| 81424  | INTERGENIC | Sgl Promoter | 2.25 | 0.85 | #N/A | #N/A | 2.08 | 0.86 |
| 80657  | INTERGENIC | Sgl Promoter | #N/A | #N/A | 1.08 | 0.48 | 1.53 | 0.70 |
| 79110  | INTERGENIC | Sgl Promoter | #N/A | #N/A | #N/A | #N/A | 1.38 | 0.56 |
| 78013  | INTERGENIC | Non Promoter | #N/A | #N/A | #N/A | #N/A | #N/A | #N/A |
| 73338  | INTERGENIC | Dbl Promoter | #N/A | #N/A | #N/A | #N/A | #N/A | #N/A |
| 73827  | INTERGENIC | Sgl Promoter | #N/A | #N/A | #N/A | #N/A | #N/A | #N/A |
| 72747  | INTERGENIC | Non Promoter | #N/A | #N/A | #N/A | #N/A | #N/A | #N/A |
| 69670  | INTERGENIC | Sgl Promoter | #N/A | #N/A | #N/A | #N/A | 2.01 | 0.78 |
| 67597  | INTERGENIC | Dbl Promoter | 3.33 | 0.96 | 2.50 | 0.97 | 2.82 | 0.95 |
| 64502  | INTERGENIC | Sgl Promoter | #N/A | #N/A | #N/A | #N/A | #N/A | #N/A |
| 63771  | INTERGENIC | Sgl Promoter | #N/A | #N/A | #N/A | #N/A | #N/A | #N/A |
| 62074  | INTERGENIC | Sgl Promoter | #N/A | #N/A | #N/A | #N/A | #N/A | #N/A |
| 59121  | INTERGENIC | Sgl Promoter | #N/A | #N/A | #N/A | #N/A | #N/A | #N/A |
| 56481  | INTERGENIC | Sgl Promoter | 1.52 | 0.66 | 1.60 | 0.77 | 1.41 | 0.65 |
| 53756  | INTERGENIC | Sgl Promoter | #N/A | #N/A | 1.81 | 0.85 | 2.65 | 0.94 |
| 52731  | INTERGENIC | Non Promoter | #N/A | #N/A | #N/A | #N/A | #N/A | #N/A |
| 49431  | INTERGENIC | Non Promoter | #N/A | #N/A | #N/A | #N/A | #N/A | #N/A |
| 45445  | INTERGENIC | Dbl Promoter | #N/A | #N/A | #N/A | #N/A | #N/A | #N/A |
| 44652  | INTERGENIC | Non Promoter | #N/A | #N/A | #N/A | #N/A | #N/A | #N/A |
| 43307  | INTERGENIC | Sgl Promoter | #N/A | #N/A | #N/A | #N/A | #N/A | #N/A |
| 41498  | INTERGENIC | Sgl Promoter | 2.45 | 0.90 | 1.64 | 0.77 | 2.46 | 0.86 |
| 38975  | INTERGENIC | Dbl Promoter | #N/A | #N/A | #N/A | #N/A | #N/A | #N/A |
| 37617  | INTERGENIC | Non Promoter | #N/A | #N/A | 0.42 | 0.05 | 0.34 | 0.04 |
| 36933  | INTERGENIC | Sgl Promoter | #N/A | #N/A | #N/A | #N/A | #N/A | #N/A |
| 35653  | INTERGENIC | Sgl Promoter | 1.07 | 0.45 | 1.45 | 0.67 | 1.47 | 0.67 |
| 33098  | INTERGENIC | Sgl Promoter | 1.69 | 0.73 | 1.56 | 0.70 | 1.74 | 0.76 |
| 31898  | INTERGENIC | Dbl Promoter | 1.35 | 0.59 | 1.09 | 0.49 | 1.53 | 0.70 |
| 27921  | INTERGENIC | Sgl Promoter | 2.68 | 0.93 | 2.25 | 0.93 | 3.17 | 0.97 |
| 25718  | INTERGENIC | Non Promoter | #N/A | #N/A | #N/A | #N/A | #N/A | #N/A |
| 23935  | INTERGENIC | Sgl Promoter | 0.37 | 0.07 | 0.64 | 0.18 | 0.52 | 0.13 |

|        |            |              |      |      |      |      |      |      |
|--------|------------|--------------|------|------|------|------|------|------|
| 22304  | INTERGENIC | Sgl Promoter | #N/A | #N/A | #N/A | #N/A | 0.93 | 0.39 |
| 17474  | INTERGENIC | Sgl Promoter | 0.98 | 0.41 | 1.12 | 0.51 | 0.95 | 0.39 |
| 18641  | INTERGENIC | Sgl Promoter | 1.25 | 0.54 | #N/A | #N/A | 1.46 | 0.67 |
| 19808  | INTERGENIC | Sgl Promoter | 1.99 | 0.81 | 1.77 | 0.83 | 1.91 | 0.82 |
| 20978  | INTERGENIC | Sgl Promoter | 1.00 | 0.42 | 1.18 | 0.55 | 1.65 | 0.73 |
| 14910  | INTERGENIC | Dbl Promoter | 1.62 | 0.70 | 1.36 | 0.65 | 1.21 | 0.54 |
| 12481  | INTERGENIC | Non Promoter | 0.91 | 0.37 | 1.08 | 0.48 | 1.52 | 0.69 |
| 10038  | INTERGENIC | Sgl Promoter | 1.20 | 0.52 | 0.84 | 0.32 | 1.27 | 0.57 |
| 11110  | INTERGENIC | Sgl Promoter | 1.99 | 0.81 | 1.34 | 0.63 | 1.51 | 0.69 |
| 8470   | INTERGENIC | Sgl Promoter | 1.41 | 0.62 | 1.35 | 0.65 | 1.19 | 0.54 |
| 6860   | INTERGENIC | Dbl Promoter | 0.60 | 0.20 | 0.80 | 0.29 | #N/A | #N/A |
| 6290   | INTERGENIC | Non Promoter | #N/A | #N/A | 1.16 | 0.54 | #N/A | #N/A |
| 5312   | INTERGENIC | Sgl Promoter | #N/A | #N/A | 1.14 | 0.51 | #N/A | #N/A |
| 414100 | INTERGENIC | Sgl Promoter | 1.47 | 0.64 | 1.63 | 0.78 | 1.38 | 0.63 |
| 115490 | INTERGENIC | Dbl Promoter | #N/A | #N/A | #N/A | #N/A | #N/A | #N/A |
| 319007 | INTERGENIC | Sgl Promoter | #N/A | #N/A | #N/A | #N/A | #N/A | #N/A |
| 328581 | INTERGENIC | Non Promoter | #N/A | #N/A | #N/A | #N/A | #N/A | #N/A |
| 402586 | INTERGENIC | Dbl Promoter | 1.49 | 0.65 | 1.24 | 0.58 | 1.16 | 0.51 |
| 1934   | INTERGENIC | Sgl Promoter | #N/A | #N/A | 0.38 | 0.04 | #N/A | #N/A |
| 205525 | INTERGENIC | Sgl Promoter | #N/A | #N/A | #N/A | #N/A | #N/A | #N/A |
| 498471 | INTERGENIC | Sgl Promoter | 1.26 | 0.55 | 1.06 | 0.47 | 1.01 | 0.44 |
| 500127 | INTERGENIC | Dbl Promoter | #N/A | #N/A | 1.13 | 0.51 | 3.17 | 0.89 |
| 502933 | INTERGENIC | Sgl Promoter | 0.96 | 0.40 | 0.96 | 0.40 | 1.00 | 0.43 |
| 504652 | INTERGENIC | Non Promoter | 0.57 | 0.19 | 0.60 | 0.16 | 0.48 | 0.11 |
| 506065 | INTERGENIC | Dbl Promoter | #N/A | #N/A | 1.27 | 0.60 | 1.65 | 0.71 |
| 506963 | INTERGENIC | Sgl Promoter | 2.52 | 0.91 | 2.02 | 0.90 | 2.07 | 0.86 |
| 508104 | INTERGENIC | Non Promoter | #N/A | #N/A | #N/A | #N/A | #N/A | #N/A |
| 509041 | INTERGENIC | Sgl Promoter | 1.17 | 0.50 | 0.95 | 0.39 | 1.04 | 0.45 |
| 511539 | INTERGENIC | Dbl Promoter | 1.97 | 0.81 | 1.68 | 0.80 | 1.95 | 0.83 |
| 513153 | INTERGENIC | Sgl Promoter | 2.19 | 0.85 | 1.87 | 0.84 | 3.29 | 0.98 |
| 514548 | INTERGENIC | Sgl Promoter | #N/A | #N/A | 1.48 | 0.72 | 1.90 | 0.81 |
| 516937 | INTERGENIC | Sgl Promoter | 0.40 | 0.09 | 0.54 | 0.12 | 0.33 | 0.04 |
| 521084 | INTERGENIC | Non Promoter | #N/A | #N/A | 0.48 | 0.08 | 0.73 | 0.26 |
| 522255 | INTERGENIC | Dbl Promoter | 1.57 | 0.68 | 0.94 | 0.39 | 1.76 | 0.78 |
| 523781 | INTERGENIC | Sgl Promoter | 1.12 | 0.48 | #N/A | #N/A | 1.19 | 0.53 |
| 525223 | INTERGENIC | Dbl Promoter | 0.85 | 0.33 | 1.20 | 0.56 | 0.98 | 0.41 |
| 526967 | INTERGENIC | Non Promoter | 1.06 | 0.45 | 1.47 | 0.71 | 0.86 | 0.34 |
| 527626 | INTERGENIC | Dbl Promoter | 1.96 | 0.79 | 1.54 | 0.75 | 1.65 | 0.74 |
| 529251 | INTERGENIC | Non Promoter | 1.44 | 0.61 | 2.23 | 0.94 | 0.90 | 0.37 |
| 531604 | INTERGENIC | Non Promoter | 0.63 | 0.22 | 0.89 | 0.36 | 0.50 | 0.12 |
| 534126 | INTERGENIC | Non Promoter | #N/A | #N/A | 0.55 | 0.14 | 0.54 | 0.15 |
| 535205 | INTERGENIC | Dbl Promoter | 0.34 | 0.06 | 0.35 | 0.04 | 0.51 | 0.13 |
| 543846 | INTERGENIC | Sgl Promoter | 1.59 | 0.69 | 1.50 | 0.73 | 1.20 | 0.54 |
| 544571 | INTERGENIC | Non Promoter | 0.59 | 0.20 | 0.77 | 0.27 | 0.80 | 0.31 |
| 546435 | INTERGENIC | Dbl Promoter | #N/A | #N/A | #N/A | #N/A | #N/A | #N/A |
| 548258 | INTERGENIC | Sgl Promoter | 0.82 | 0.32 | 1.18 | 0.55 | 0.75 | 0.28 |
| 554242 | INTERGENIC | Non Promoter | 0.44 | 0.12 | 0.41 | 0.06 | 0.64 | 0.21 |
| 555923 | INTERGENIC | Dbl Promoter | #N/A | #N/A | 0.28 | 0.01 | 0.40 | 0.06 |
| 557066 | INTERGENIC | Non Promoter | 0.35 | 0.06 | 0.89 | 0.35 | #N/A | #N/A |
| 558143 | INTERGENIC | Sgl Promoter | 0.24 | 0.02 | 0.60 | 0.16 | 0.37 | 0.06 |
| 559725 | INTERGENIC | Sgl Promoter | 1.26 | 0.55 | 1.46 | 0.71 | 1.28 | 0.58 |

|        |            |              |      |      |      |      |      |      |
|--------|------------|--------------|------|------|------|------|------|------|
| 560676 | INTERGENIC | Dbl Promoter | 1.32 | 0.56 | 1.15 | 0.52 | 1.34 | 0.60 |
| 561656 | INTERGENIC | Non Promoter | #N/A | #N/A | 1.01 | 0.42 | #N/A | #N/A |
| 575392 | INTERGENIC | Sgl Promoter | #N/A | #N/A | #N/A | #N/A | #N/A | #N/A |
| 577481 | INTERGENIC | Sgl Promoter | 0.40 | 0.09 | 0.62 | 0.17 | 0.55 | 0.15 |
| 579470 | INTERGENIC | Sgl Promoter | 1.93 | 0.73 | 1.66 | 0.79 | 1.83 | 0.75 |
| 582984 | INTERGENIC | Sgl Promoter | 0.75 | 0.28 | 0.79 | 0.29 | 0.75 | 0.28 |
| 584889 | INTERGENIC | Dbl Promoter | 1.64 | 0.71 | 0.97 | 0.41 | 1.05 | 0.46 |
| 586386 | INTERGENIC | Non Promoter | #N/A | #N/A | #N/A | #N/A | #N/A | #N/A |
| 589820 | INTERGENIC | Dbl Promoter | 0.99 | 0.41 | 0.97 | 0.41 | 1.07 | 0.47 |
| 591308 | INTERGENIC | Sgl Promoter | 0.87 | 0.35 | 0.86 | 0.34 | 1.08 | 0.48 |
| 592080 | INTERGENIC | Non Promoter | #N/A | #N/A | #N/A | #N/A | #N/A | #N/A |
| 592900 | INTERGENIC | Sgl Promoter | 0.54 | 0.17 | 0.78 | 0.29 | 0.30 | 0.04 |
| 593590 | INTERGENIC | Dbl Promoter | 1.15 | 0.49 | 1.60 | 0.74 | 1.60 | 0.71 |
| 594980 | INTERGENIC | Non Promoter | #N/A | #N/A | #N/A | #N/A | #N/A | #N/A |
| 596687 | INTERGENIC | Dbl Promoter | 2.52 | 0.91 | 1.32 | 0.62 | 1.84 | 0.80 |
| 599411 | INTERGENIC | Sgl Promoter | 0.15 | 0.01 | 0.33 | 0.02 | 0.18 | 0.01 |
| 601655 | INTERGENIC | Sgl Promoter | 0.88 | 0.35 | 1.28 | 0.61 | 1.09 | 0.47 |
| 604767 | INTERGENIC | Non Promoter | 0.30 | 0.04 | #N/A | #N/A | 0.61 | 0.19 |
| 606130 | INTERGENIC | Dbl Promoter | 1.74 | 0.74 | 1.58 | 0.75 | 1.61 | 0.73 |
| 607557 | INTERGENIC | Sgl Promoter | 0.99 | 0.41 | 1.05 | 0.46 | 1.21 | 0.54 |
| 609578 | INTERGENIC | Sgl Promoter | 0.47 | 0.13 | 0.41 | 0.06 | 0.31 | 0.03 |
| 611883 | INTERGENIC | Non Promoter | #N/A | #N/A | #N/A | #N/A | #N/A | #N/A |
| 616322 | INTERGENIC | Sgl Promoter | 0.49 | 0.13 | 1.03 | 0.45 | 0.74 | 0.27 |
| 617510 | INTERGENIC | Sgl Promoter | #N/A | #N/A | 1.43 | 0.67 | 1.42 | 0.65 |
| 618071 | INTERGENIC | Non Promoter | #N/A | #N/A | #N/A | #N/A | #N/A | #N/A |
| 620915 | INTERGENIC | Sgl Promoter | 1.68 | 0.72 | 1.26 | 0.60 | 1.80 | 0.79 |
| 622396 | INTERGENIC | Sgl Promoter | 1.84 | 0.77 | 1.48 | 0.72 | 1.56 | 0.71 |
| 625318 | INTERGENIC | Sgl Promoter | 0.48 | 0.13 | 0.61 | 0.16 | 1.09 | 0.48 |
| 627800 | INTERGENIC | Sgl Promoter | #N/A | #N/A | 0.90 | 0.36 | 0.59 | 0.18 |
| 631475 | INTERGENIC | Non Promoter | #N/A | #N/A | #N/A | #N/A | #N/A | #N/A |
| 634298 | INTERGENIC | Dbl Promoter | #N/A | #N/A | #N/A | #N/A | 2.43 | 0.90 |
| 635609 | INTERGENIC | Non Promoter | #N/A | #N/A | #N/A | #N/A | #N/A | #N/A |
| 637098 | INTERGENIC | Sgl Promoter | #N/A | #N/A | #N/A | #N/A | 1.35 | 0.62 |
| 637738 | INTERGENIC | Sgl Promoter | #N/A | #N/A | #N/A | #N/A | #N/A | #N/A |
| 639766 | INTERGENIC | Sgl Promoter | 1.54 | 0.67 | #N/A | #N/A | 1.88 | 0.76 |
| 640714 | INTERGENIC | Dbl Promoter | 0.46 | 0.12 | 0.69 | 0.22 | 0.66 | 0.22 |
| 642004 | INTERGENIC | Sgl Promoter | #N/A | #N/A | #N/A | #N/A | #N/A | #N/A |
| 643142 | INTERGENIC | Non Promoter | #N/A | #N/A | 0.37 | 0.04 | #N/A | #N/A |
| 644038 | INTERGENIC | Dbl Promoter | 1.21 | 0.52 | 1.08 | 0.48 | 1.42 | 0.64 |
| 644854 | INTERGENIC | Non Promoter | #N/A | #N/A | #N/A | #N/A | #N/A | #N/A |
| 647117 | INTERGENIC | Sgl Promoter | 2.12 | 0.84 | 1.40 | 0.68 | 1.73 | 0.77 |
| 649592 | INTERGENIC | Sgl Promoter | 0.36 | 0.07 | 0.44 | 0.06 | 0.41 | 0.07 |
| 651284 | INTERGENIC | Sgl Promoter | 0.36 | 0.07 | 0.43 | 0.06 | 0.26 | 0.02 |
| 653785 | INTERGENIC | Dbl Promoter | 1.72 | 0.73 | 1.42 | 0.68 | 1.70 | 0.74 |
| 654595 | INTERGENIC | Dbl Promoter | 1.88 | 0.77 | 1.58 | 0.74 | 1.50 | 0.69 |
| 656954 | INTERGENIC | Sgl Promoter | 2.63 | 0.90 | 1.65 | 0.72 | 2.28 | 0.88 |
| 660753 | INTERGENIC | Sgl Promoter | 0.96 | 0.40 | 0.89 | 0.36 | 1.12 | 0.50 |
| 661743 | INTERGENIC | Sgl Promoter | 0.82 | 0.32 | 0.70 | 0.23 | 0.86 | 0.35 |
| 666335 | INTERGENIC | Sgl Promoter | #N/A | #N/A | #N/A | #N/A | 0.54 | 0.20 |
| 668183 | INTERGENIC | Sgl Promoter | 0.71 | 0.26 | 0.88 | 0.35 | 0.72 | 0.26 |
| 670382 | INTERGENIC | Sgl Promoter | #N/A | #N/A | 0.78 | 0.28 | 1.71 | 0.54 |

|        |            |              |      |      |      |      |      |      |      |
|--------|------------|--------------|------|------|------|------|------|------|------|
| 675665 | INTERGENIC | Non Promoter | #N/A | #N/A | #N/A | #N/A | #N/A | #N/A | #N/A |
| 676615 | INTERGENIC | Dbl Promoter | #N/A | #N/A | 1.18 | 0.55 | #N/A | #N/A | #N/A |
| 678689 | INTERGENIC | Sgl Promoter | 0.45 | 0.12 | 0.53 | 0.11 | 0.40 | 0.06 | 0.06 |
| 682560 | INTERGENIC | Non Promoter | 0.35 | 0.06 | 0.60 | 0.16 | 0.52 | 0.18 | 0.18 |
| 687893 | INTERGENIC | Dbl Promoter | 2.05 | 0.81 | 2.06 | 0.91 | 2.07 | 0.86 | 0.86 |
| 690239 | INTERGENIC | Sgl Promoter | #N/A | #N/A | #N/A | #N/A | #N/A | #N/A | #N/A |
| 693357 | INTERGENIC | Sgl Promoter | #N/A | #N/A | 1.73 | 0.76 | 1.40 | 0.65 | 0.65 |
| 694578 | INTERGENIC | Non Promoter | #N/A | #N/A | #N/A | #N/A | 0.66 | 0.22 | 0.22 |
| 695411 | INTERGENIC | Dbl Promoter | 1.32 | 0.57 | 1.80 | 0.82 | 1.83 | 0.77 | 0.77 |
| 697439 | INTERGENIC | Non Promoter | #N/A | #N/A | #N/A | #N/A | #N/A | #N/A | #N/A |
| 698593 | INTERGENIC | Dbl Promoter | #N/A | #N/A | 1.91 | 0.88 | 2.24 | 0.89 | 0.89 |
| 698983 | INTERGENIC | Non Promoter | #N/A | #N/A | #N/A | #N/A | #N/A | #N/A | #N/A |
| 700669 | INTERGENIC | Dbl Promoter | 1.32 | 0.58 | 1.00 | 0.43 | 0.77 | 0.29 | 0.29 |
| 703630 | INTERGENIC | Sgl Promoter | 0.44 | 0.11 | 1.15 | 0.53 | 0.54 | 0.14 | 0.14 |
| 705353 | INTERGENIC | Non Promoter | #N/A | #N/A | 0.68 | 0.21 | #N/A | #N/A | #N/A |
| 707102 | INTERGENIC | Dbl Promoter | 1.25 | 0.52 | 1.16 | 0.53 | 1.23 | 0.52 | 0.52 |
| 715822 | INTERGENIC | Sgl Promoter | 1.21 | 0.52 | 1.33 | 0.64 | 1.19 | 0.54 | 0.54 |
| 717352 | INTERGENIC | Sgl Promoter | 1.85 | 0.76 | 1.35 | 0.64 | 1.60 | 0.72 | 0.72 |
| 718887 | INTERGENIC | Sgl Promoter | 2.27 | 0.83 | 1.61 | 0.74 | 1.81 | 0.79 | 0.79 |
| 720258 | INTERGENIC | Non Promoter | #N/A | #N/A | 1.28 | 0.61 | 1.29 | 0.59 | 0.59 |
| 725042 | INTERGENIC | Non Promoter | #N/A | #N/A | #N/A | #N/A | #N/A | #N/A | #N/A |
| 726967 | INTERGENIC | Dbl Promoter | 0.49 | 0.14 | 0.48 | 0.08 | 0.59 | 0.18 | 0.18 |
| 728040 | INTERGENIC | Non Promoter | #N/A | #N/A | 0.16 | 0.00 | 0.29 | 0.03 | 0.03 |
| 730027 | INTERGENIC | Sgl Promoter | 1.83 | 0.77 | 1.96 | 0.86 | 1.84 | 0.80 | 0.80 |
| 731131 | INTERGENIC | Sgl Promoter | #N/A | #N/A | 0.69 | 0.22 | #N/A | #N/A | #N/A |
| 733929 | INTERGENIC | Dbl Promoter | 1.36 | 0.60 | 1.30 | 0.63 | 1.32 | 0.56 | 0.56 |
| 735976 | INTERGENIC | Sgl Promoter | 1.05 | 0.44 | 1.02 | 0.44 | 1.27 | 0.58 | 0.58 |
| 735536 | INTERGENIC | Non Promoter | 0.39 | 0.08 | #N/A | #N/A | #N/A | #N/A | #N/A |
| 739116 | INTERGENIC | Dbl Promoter | 1.18 | 0.51 | 1.43 | 0.70 | 1.46 | 0.67 | 0.67 |
| 742319 | INTERGENIC | Sgl Promoter | 1.49 | 0.63 | 1.30 | 0.62 | 1.35 | 0.62 | 0.62 |
| 745829 | INTERGENIC | Sgl Promoter | 1.38 | 0.60 | 1.62 | 0.78 | 1.14 | 0.51 | 0.51 |
| 746792 | INTERGENIC | Sgl Promoter | #N/A | #N/A | 0.94 | 0.39 | #N/A | #N/A | #N/A |
| 747944 | INTERGENIC | Non Promoter | #N/A | #N/A | 0.41 | 0.05 | 0.48 | 0.12 | 0.12 |
| 750394 | INTERGENIC | Dbl Promoter | #N/A | #N/A | #N/A | #N/A | 1.49 | 0.68 | 0.68 |
| 751388 | INTERGENIC | Non Promoter | 0.80 | 0.31 | 0.71 | 0.23 | 0.74 | 0.27 | 0.27 |
| 754720 | INTERGENIC | Dbl Promoter | 1.89 | 0.78 | 1.78 | 0.84 | 1.65 | 0.74 | 0.74 |
| 755583 | INTERGENIC | Non Promoter | #N/A | #N/A | 0.75 | 0.26 | 0.68 | 0.24 | 0.24 |
| 756890 | INTERGENIC | Dbl Promoter | 1.90 | 0.79 | 1.77 | 0.83 | 1.49 | 0.68 | 0.68 |
| 757764 | INTERGENIC | Sgl Promoter | 1.90 | 0.78 | 2.05 | 0.87 | 2.07 | 0.80 | 0.80 |
| 761386 | INTERGENIC | Sgl Promoter | #N/A | #N/A | 1.64 | 0.78 | 1.80 | 0.78 | 0.78 |
| 762422 | INTERGENIC | Sgl Promoter | 0.60 | 0.19 | #N/A | #N/A | 0.49 | 0.13 | 0.13 |
| 763756 | INTERGENIC | Non Promoter | 0.65 | 0.23 | 0.94 | 0.39 | 0.55 | 0.15 | 0.15 |
| 765720 | INTERGENIC | Dbl Promoter | #N/A | #N/A | #N/A | #N/A | #N/A | #N/A | #N/A |
| 767423 | INTERGENIC | Sgl Promoter | 1.07 | 0.45 | 0.82 | 0.31 | 0.63 | 0.21 | 0.21 |
| 770563 | INTERGENIC | Sgl Promoter | 2.30 | 0.88 | 1.93 | 0.88 | 2.28 | 0.86 | 0.86 |
| 772448 | INTERGENIC | Sgl Promoter | 0.94 | 0.39 | 0.75 | 0.26 | 0.98 | 0.42 | 0.42 |
| 774034 | INTERGENIC | Sgl Promoter | #N/A | #N/A | 0.67 | 0.21 | 1.36 | 0.60 | 0.60 |
| 781761 | INTERGENIC | Sgl Promoter | 5.12 | 1.00 | 3.43 | 0.99 | 3.80 | 0.99 | 0.99 |
| 784217 | INTERGENIC | Non Promoter | #N/A | #N/A | 1.36 | 0.64 | #N/A | #N/A | #N/A |
| 786048 | INTERGENIC | Sgl Promoter | 0.43 | 0.11 | 0.75 | 0.26 | 0.47 | 0.10 | 0.10 |
| 787306 | INTERGENIC | Sgl Promoter | 3.21 | 0.96 | 1.68 | 0.79 | 2.74 | 0.94 | 0.94 |

|        |            |              |      |      |      |      |      |      |
|--------|------------|--------------|------|------|------|------|------|------|
| 790453 | INTERGENIC | Non Promoter | #N/A | #N/A | #N/A | #N/A | #N/A | #N/A |
| 793231 | INTERGENIC | Sgl Promoter | 2.02 | 0.82 | 1.54 | 0.75 | 2.63 | 0.92 |
| 796086 | INTERGENIC | Dbl Promoter | 1.98 | 0.81 | 1.64 | 0.79 | 1.96 | 0.83 |
| 798537 | INTERGENIC | Dbl Promoter | 0.65 | 0.23 | 1.11 | 0.50 | 0.57 | 0.17 |
| 800540 | INTERGENIC | Sgl Promoter | 1.76 | 0.74 | 1.85 | 0.87 | 1.47 | 0.65 |
| 802434 | INTERGENIC | Sgl Promoter | 0.20 | 0.02 | 0.49 | 0.09 | 0.25 | 0.02 |
| 805263 | INTERGENIC | Non Promoter | #N/A | #N/A | #N/A | #N/A | #N/A | #N/A |
| 806406 | INTERGENIC | Sgl Promoter | 2.50 | 0.87 | 2.21 | 0.80 | 2.73 | 0.95 |
| 808623 | INTERGENIC | Non Promoter | 1.10 | 0.47 | 1.10 | 0.49 | 1.27 | 0.58 |
| 810427 | INTERGENIC | Dbl Promoter | 0.35 | 0.06 | 0.74 | 0.26 | 0.51 | 0.13 |
| 811441 | INTERGENIC | Dbl Promoter | 0.87 | 0.35 | 0.87 | 0.34 | 0.86 | 0.35 |
| 827546 | INTERGENIC | Sgl Promoter | 1.45 | 0.63 | 1.21 | 0.56 | 1.66 | 0.75 |
| 830509 | INTERGENIC | Sgl Promoter | 1.52 | 0.62 | 1.80 | 0.67 | 1.33 | 0.57 |
| 832450 | INTERGENIC | Sgl Promoter | 4.17 | 0.99 | 2.43 | 0.95 | 2.02 | 0.85 |
| 833346 | INTERGENIC | Non Promoter | #N/A | #N/A | 0.85 | 0.33 | #N/A | #N/A |
| 834683 | INTERGENIC | Sgl Promoter | #N/A | #N/A | #N/A | #N/A | #N/A | #N/A |
| 837136 | INTERGENIC | Dbl Promoter | 0.76 | 0.29 | 0.75 | 0.27 | 0.83 | 0.33 |
| 840818 | INTERGENIC | Non Promoter | 1.01 | 0.42 | 1.13 | 0.52 | 1.29 | 0.55 |
| 842839 | INTERGENIC | Sgl Promoter | 1.86 | 0.76 | 1.60 | 0.65 | 1.96 | 0.83 |
| 843848 | INTERGENIC | Dbl Promoter | 1.57 | 0.65 | 1.45 | 0.70 | 1.07 | 0.46 |
| 845275 | INTERGENIC | Non Promoter | #N/A | #N/A | 0.85 | 0.32 | #N/A | #N/A |
| 846927 | INTERGENIC | Sgl Promoter | 1.50 | 0.64 | 1.64 | 0.74 | 1.74 | 0.75 |
| 848714 | INTERGENIC | Dbl Promoter | #N/A | #N/A | #N/A | #N/A | #N/A | #N/A |
| 851041 | INTERGENIC | Sgl Promoter | 0.75 | 0.28 | 0.73 | 0.25 | 0.75 | 0.28 |
| 853669 | INTERGENIC | Sgl Promoter | #N/A | #N/A | 1.53 | 0.74 | 1.57 | 0.71 |
| 855258 | INTERGENIC | Sgl Promoter | 2.85 | 0.94 | #N/A | #N/A | #N/A | #N/A |
| 857372 | INTERGENIC | Dbl Promoter | 0.38 | 0.07 | 0.53 | 0.11 | 0.32 | 0.04 |
| 859057 | INTERGENIC | Sgl Promoter | #N/A | #N/A | #N/A | #N/A | #N/A | #N/A |
| 859895 | INTERGENIC | Sgl Promoter | 1.58 | 0.68 | 1.87 | 0.87 | 0.65 | 0.21 |
| 866330 | INTERGENIC | Sgl Promoter | 1.95 | 0.80 | 1.16 | 0.54 | 1.37 | 0.63 |
| 867768 | INTERGENIC | Dbl Promoter | #N/A | #N/A | 2.89 | 0.99 | 1.86 | 0.77 |
| 870226 | INTERGENIC | Non Promoter | #N/A | #N/A | #N/A | #N/A | #N/A | #N/A |
| 872038 | INTERGENIC | Sgl Promoter | 1.78 | 0.75 | 1.60 | 0.72 | 1.46 | 0.67 |
| 875945 | INTERGENIC | Sgl Promoter | 2.66 | 0.93 | 1.79 | 0.84 | 2.18 | 0.88 |
| 878704 | INTERGENIC | Sgl Promoter | 0.40 | 0.09 | 0.72 | 0.25 | 0.51 | 0.13 |
| 882806 | INTERGENIC | Non Promoter | 0.46 | 0.13 | 0.73 | 0.24 | 0.44 | 0.09 |
| 884503 | INTERGENIC | Sgl Promoter | 0.12 | 0.00 | 0.61 | 0.17 | 0.15 | 0.01 |
| 886067 | INTERGENIC | Sgl Promoter | 1.99 | 0.81 | #N/A | #N/A | 1.95 | 0.82 |
| 888876 | INTERGENIC | Dbl Promoter | 1.46 | 0.63 | 1.09 | 0.49 | 0.99 | 0.41 |
| 889727 | INTERGENIC | Non Promoter | #N/A | #N/A | #N/A | #N/A | #N/A | #N/A |
| 892491 | INTERGENIC | Sgl Promoter | 3.46 | 0.97 | 2.01 | 0.90 | 1.67 | 0.70 |
| 894687 | INTERGENIC | Dbl Promoter | 1.54 | 0.64 | 1.32 | 0.64 | 0.91 | 0.37 |
| 897496 | INTERGENIC | Sgl Promoter | #N/A | #N/A | #N/A | #N/A | #N/A | #N/A |
| 899898 | INTERGENIC | Non Promoter | #N/A | #N/A | #N/A | #N/A | #N/A | #N/A |
| 902514 | INTERGENIC | Sgl Promoter | #N/A | #N/A | 1.23 | 0.57 | 1.47 | 0.66 |
| 903468 | INTERGENIC | Sgl Promoter | 0.73 | 0.27 | 0.88 | 0.35 | #N/A | #N/A |
| 905231 | INTERGENIC | Dbl Promoter | #N/A | #N/A | 0.48 | 0.08 | #N/A | #N/A |
| 909207 | INTERGENIC | Sgl Promoter | 1.53 | 0.66 | #N/A | #N/A | 1.64 | 0.72 |
| 910426 | INTERGENIC | Sgl Promoter | #N/A | #N/A | #N/A | #N/A | #N/A | #N/A |
| 910837 | INTERGENIC | Non Promoter | #N/A | #N/A | #N/A | #N/A | #N/A | #N/A |
| 911877 | INTERGENIC | Dbl Promoter | #N/A | #N/A | 1.49 | 0.66 | #N/A | #N/A |



|         |            |              |      |      |      |      |      |      |
|---------|------------|--------------|------|------|------|------|------|------|
| 912907  | INTERGENIC | Non Promoter | #N/A | #N/A | #N/A | #N/A | #N/A | #N/A |
| 913497  | INTERGENIC | Sgl Promoter | 1.06 | 0.45 | 0.81 | 0.30 | #N/A | #N/A |
| 915235  | INTERGENIC | Dbl Promoter | 1.20 | 0.51 | 1.16 | 0.53 | 1.47 | 0.67 |
| 917034  | INTERGENIC | Sgl Promoter | 0.63 | 0.21 | 0.66 | 0.20 | 0.72 | 0.26 |
| 918506  | INTERGENIC | Non Promoter | #N/A | #N/A | #N/A | #N/A | #N/A | #N/A |
| 920569  | INTERGENIC | Dbl Promoter | 0.38 | 0.08 | 0.57 | 0.14 | #N/A | #N/A |
| 922169  | INTERGENIC | Sgl Promoter | 2.72 | 0.91 | 1.74 | 0.82 | 1.53 | 0.70 |
| 922627  | INTERGENIC | Non Promoter | #N/A | #N/A | #N/A | #N/A | #N/A | #N/A |
| 924688  | INTERGENIC | Dbl Promoter | 2.18 | 0.82 | 1.44 | 0.67 | 1.60 | 0.67 |
| 930945  | INTERGENIC | Sgl Promoter | #N/A | #N/A | #N/A | #N/A | #N/A | #N/A |
| 936027  | INTERGENIC | Sgl Promoter | #N/A | #N/A | #N/A | #N/A | #N/A | #N/A |
| 937116  | INTERGENIC | Sgl Promoter | 2.83 | 0.93 | 1.71 | 0.82 | 4.20 | 0.99 |
| 939451  | INTERGENIC | Dbl Promoter | 1.15 | 0.49 | 1.45 | 0.70 | 0.87 | 0.35 |
| 940861  | INTERGENIC | Non Promoter | #N/A | #N/A | #N/A | #N/A | #N/A | #N/A |
| 942798  | INTERGENIC | Dbl Promoter | 1.72 | 0.73 | 1.30 | 0.62 | 1.13 | 0.50 |
| 945137  | INTERGENIC | Sgl Promoter | 3.08 | 0.96 | 1.40 | 0.67 | 2.36 | 0.90 |
| 947411  | INTERGENIC | Dbl Promoter | 1.83 | 0.76 | #N/A | #N/A | 2.12 | 0.87 |
| 949356  | INTERGENIC | Sgl Promoter | #N/A | #N/A | #N/A | #N/A | #N/A | #N/A |
| 951885  | INTERGENIC | Dbl Promoter | 1.17 | 0.50 | 1.14 | 0.52 | 1.12 | 0.50 |
| 952525  | INTERGENIC | Non Promoter | #N/A | #N/A | #N/A | #N/A | #N/A | #N/A |
| 953952  | INTERGENIC | Dbl Promoter | 3.05 | 0.96 | 1.61 | 0.77 | 1.72 | 0.76 |
| 959049  | INTERGENIC | Dbl Promoter | 0.57 | 0.18 | 0.85 | 0.33 | 0.40 | 0.07 |
| 961353  | INTERGENIC | Non Promoter | #N/A | #N/A | #N/A | #N/A | #N/A | #N/A |
| 962422  | INTERGENIC | Sgl Promoter | 3.93 | 0.97 | 1.42 | 0.65 | #N/A | #N/A |
| 963293  | INTERGENIC | Sgl Promoter | 1.65 | 0.71 | 1.50 | 0.73 | 1.58 | 0.71 |
| 966034  | INTERGENIC | Sgl Promoter | 2.30 | 0.86 | 1.51 | 0.74 | 1.99 | 0.84 |
| 969182  | INTERGENIC | Sgl Promoter | 1.60 | 0.69 | 1.86 | 0.86 | 1.97 | 0.81 |
| 970766  | INTERGENIC | Sgl Promoter | 0.84 | 0.33 | 0.87 | 0.34 | 0.65 | 0.21 |
| 978031  | INTERGENIC | Non Promoter | #N/A | #N/A | #N/A | #N/A | #N/A | #N/A |
| 979760  | INTERGENIC | Sgl Promoter | 0.89 | 0.36 | 0.93 | 0.38 | 1.05 | 0.46 |
| 982477  | INTERGENIC | Sgl Promoter | 1.89 | 0.79 | 1.48 | 0.71 | 2.50 | 0.93 |
| 984961  | INTERGENIC | Dbl Promoter | 2.41 | 0.89 | 2.29 | 0.95 | 1.98 | 0.83 |
| 985967  | INTERGENIC | Sgl Promoter | 1.19 | 0.51 | 1.65 | 0.79 | 1.47 | 0.51 |
| 988044  | INTERGENIC | Sgl Promoter | 1.12 | 0.48 | 1.02 | 0.44 | 0.64 | 0.21 |
| 990292  | INTERGENIC | Non Promoter | 1.33 | 0.58 | 1.01 | 0.44 | 0.75 | 0.28 |
| 991171  | INTERGENIC | Non Promoter | 1.77 | 0.75 | 1.66 | 0.80 | 1.34 | 0.61 |
| 994575  | INTERGENIC | Dbl Promoter | 1.05 | 0.44 | 1.00 | 0.42 | 1.17 | 0.51 |
| 995634  | INTERGENIC | Dbl Promoter | 1.65 | 0.71 | 1.48 | 0.72 | 1.27 | 0.58 |
| 996864  | INTERGENIC | Sgl Promoter | 1.78 | 0.75 | 1.65 | 0.79 | 1.73 | 0.77 |
| 998353  | INTERGENIC | Non Promoter | #N/A | #N/A | #N/A | #N/A | #N/A | #N/A |
| 1000028 | INTERGENIC | Dbl Promoter | 1.94 | 0.79 | 1.25 | 0.58 | 1.14 | 0.50 |
| 1004212 | INTERGENIC | Dbl Promoter | 1.41 | 0.61 | 0.90 | 0.37 | 1.29 | 0.58 |
| 1006201 | INTERGENIC | Non Promoter | #N/A | #N/A | #N/A | #N/A | #N/A | #N/A |
| 1007667 | INTERGENIC | Sgl Promoter | 2.04 | 0.81 | 1.61 | 0.77 | 1.93 | 0.81 |
| 1011619 | INTERGENIC | Sgl Promoter | 0.74 | 0.28 | 0.67 | 0.20 | 0.47 | 0.10 |
| 1012477 | INTERGENIC | Sgl Promoter | 1.21 | 0.52 | 0.86 | 0.34 | 0.59 | 0.17 |
| 1014317 | INTERGENIC | Non Promoter | #N/A | #N/A | #N/A | #N/A | #N/A | #N/A |
| 1016970 | INTERGENIC | Sgl Promoter | #N/A | #N/A | #N/A | #N/A | #N/A | #N/A |
| 1017963 | INTERGENIC | Sgl Promoter | 2.65 | 0.92 | 2.13 | 0.90 | #N/A | #N/A |
| 1019594 | INTERGENIC | Sgl Promoter | #N/A | #N/A | 1.19 | 0.55 | 1.12 | 0.49 |
| 1022652 | INTERGENIC | Sgl Promoter | 1.83 | 0.76 | 2.16 | 0.93 | 2.09 | 0.85 |

|         |            |              |      |      |      |      |      |      |
|---------|------------|--------------|------|------|------|------|------|------|
| 1025000 | INTERGENIC | Non Promoter | #N/A | #N/A | #N/A | #N/A | #N/A | #N/A |
| 1026053 | INTERGENIC | Sgl Promoter | 1.62 | 0.70 | 1.74 | 0.83 | 2.10 | 0.84 |
| 1027366 | INTERGENIC | Sgl Promoter | 2.09 | 0.83 | 2.06 | 0.82 | 1.49 | 0.66 |
| 1031787 | INTERGENIC | Sgl Promoter | #N/A | #N/A | 1.96 | 0.87 | 2.94 | 0.96 |
| 1038038 | INTERGENIC | Non Promoter | #N/A | #N/A | 0.52 | 0.11 | 0.50 | 0.13 |
| 1038710 | INTERGENIC | Sgl Promoter | 2.20 | 0.81 | #N/A | #N/A | 1.22 | 0.55 |
| 1039891 | INTERGENIC | Sgl Promoter | 0.60 | 0.20 | 0.98 | 0.42 | #N/A | #N/A |
| 1043185 | INTERGENIC | Dbl Promoter | #N/A | #N/A | #N/A | #N/A | #N/A | #N/A |
| 1043815 | INTERGENIC | Non Promoter | #N/A | #N/A | #N/A | #N/A | #N/A | #N/A |
| 1045640 | INTERGENIC | Sgl Promoter | #N/A | #N/A | 1.76 | 0.83 | 1.71 | 0.72 |
| 1046727 | INTERGENIC | Dbl Promoter | 2.01 | 0.65 | 2.23 | 0.94 | #N/A | #N/A |
| 1048794 | INTERGENIC | Non Promoter | #N/A | #N/A | #N/A | #N/A | #N/A | #N/A |
| 1050906 | INTERGENIC | Sgl Promoter | 0.54 | 0.17 | 0.77 | 0.27 | 0.51 | 0.12 |
| 1052820 | INTERGENIC | Dbl Promoter | 1.13 | 0.48 | 1.23 | 0.58 | 1.09 | 0.48 |
| 1057779 | INTERGENIC | Non Promoter | #N/A | #N/A | #N/A | #N/A | #N/A | #N/A |
| 1059011 | INTERGENIC | Sgl Promoter | #N/A | #N/A | 0.68 | 0.22 | #N/A | #N/A |
| 1060654 | INTERGENIC | Sgl Promoter | 0.87 | 0.35 | 1.13 | 0.51 | 1.27 | 0.56 |
| 1061848 | INTERGENIC | Sgl Promoter | #N/A | #N/A | 1.02 | 0.44 | 0.87 | 0.35 |
| 1063809 | INTERGENIC | Sgl Promoter | #N/A | #N/A | #N/A | #N/A | 1.85 | 0.80 |
| 1066077 | INTERGENIC | Sgl Promoter | 2.23 | 0.85 | 1.56 | 0.76 | 1.77 | 0.78 |
| 1067218 | INTERGENIC | Sgl Promoter | 2.03 | 0.81 | 1.72 | 0.82 | 1.55 | 0.70 |
| 1070289 | INTERGENIC | Dbl Promoter | 1.99 | 0.81 | 1.57 | 0.76 | 1.38 | 0.63 |
| 1072834 | INTERGENIC | Non Promoter | 1.24 | 0.53 | 1.04 | 0.45 | 0.91 | 0.37 |
| 1073959 | INTERGENIC | Non Promoter | 1.80 | 0.76 | 1.75 | 0.83 | 1.73 | 0.77 |
| 1076279 | INTERGENIC | Non Promoter | 3.41 | 0.96 | #N/A | #N/A | 2.34 | 0.90 |
| 1076595 | INTERGENIC | Dbl Promoter | #N/A | #N/A | #N/A | #N/A | #N/A | #N/A |
| 1079115 | INTERGENIC | Non Promoter | 1.45 | 0.63 | 1.36 | 0.66 | 1.16 | 0.52 |
| 1079881 | INTERGENIC | Non Promoter | 0.89 | 0.36 | 0.85 | 0.33 | 1.05 | 0.46 |
| 1081580 | INTERGENIC | Non Promoter | 1.65 | 0.70 | 1.47 | 0.71 | 1.65 | 0.74 |
| 568734  | INTERGENIC | Dbl Promoter | 0.76 | 0.29 | #N/A | #N/A | 1.39 | 0.64 |
| 574882  | INTERGENIC | Dbl Promoter | #N/A | #N/A | #N/A | #N/A | #N/A | #N/A |
| 713703  | INTERGENIC | Dbl Promoter | 1.92 | 0.79 | 1.64 | 0.79 | 1.90 | 0.82 |
| 779610  | INTERGENIC | Sgl Promoter | #N/A | #N/A | #N/A | #N/A | #N/A | #N/A |
| 823476  | INTERGENIC | Dbl Promoter | #N/A | #N/A | 0.55 | 0.12 | #N/A | #N/A |
| 931680  | INTERGENIC | Sgl Promoter | #N/A | #N/A | #N/A | #N/A | #N/A | #N/A |
| 541844  | INTERGENIC | Sgl Promoter | #N/A | #N/A | #N/A | #N/A | #N/A | #N/A |
| 702661  | INTERGENIC | Dbl Promoter | 0.56 | 0.18 | 0.81 | 0.30 | 0.55 | 0.15 |
| 774343  | INTERGENIC | Sgl Promoter | 0.39 | 0.08 | 0.77 | 0.27 | 0.63 | 0.21 |
| 794411  | INTERGENIC | Sgl Promoter | 0.66 | 0.23 | 0.88 | 0.35 | 1.06 | 0.47 |
| 876388  | INTERGENIC | Sgl Promoter | #N/A | #N/A | #N/A | #N/A | #N/A | #N/A |
| 932533  | INTERGENIC | Sgl Promoter | 2.00 | 0.79 | 1.34 | 0.64 | 1.68 | 0.75 |
| 713078  | INTERGENIC | Dbl Promoter | 0.94 | 0.38 | 1.22 | 0.57 | 1.53 | 0.69 |
| 105579  | INTERGENIC | Sgl Promoter | 0.43 | 0.10 | 0.58 | 0.14 | 0.48 | 0.12 |
| 104270  | INTERGENIC | Sgl Promoter | 1.07 | 0.45 | 0.70 | 0.23 | #N/A | #N/A |
| 102605  | INTERGENIC | Dbl Promoter | 1.41 | 0.61 | 1.43 | 0.68 | #N/A | #N/A |
| 100642  | INTERGENIC | Non Promoter | #N/A | #N/A | #N/A | #N/A | #N/A | #N/A |
| 98310   | INTERGENIC | Sgl Promoter | 0.80 | 0.31 | 1.29 | 0.62 | 0.92 | 0.38 |
| 95113   | INTERGENIC | Sgl Promoter | 0.82 | 0.32 | 0.97 | 0.41 | 0.84 | 0.33 |
| 85293   | INTERGENIC | Dbl Promoter | #N/A | #N/A | #N/A | #N/A | #N/A | #N/A |
| 84063   | INTERGENIC | Sgl Promoter | 1.64 | 0.69 | 1.60 | 0.76 | 1.62 | 0.73 |
| 81959   | INTERGENIC | Sgl Promoter | 1.23 | 0.53 | 1.39 | 0.67 | 1.07 | 0.47 |

|        |            |              |        |      |      |      |      |      |
|--------|------------|--------------|--------|------|------|------|------|------|
| 80649  | INTERGENIC | Non Promoter | #N/A   | #N/A | #N/A | #N/A | #N/A | #N/A |
| 78931  | INTERGENIC | Dbl Promoter | 1.07   | 0.45 | 1.06 | 0.48 | 2.14 | 0.87 |
| 77426  | INTERGENIC | Sgl Promoter | #N/A   | #N/A | #N/A | #N/A | #N/A | #N/A |
| 76093  | INTERGENIC | Non Promoter | #N/A   | #N/A | #N/A | #N/A | #N/A | #N/A |
| 75408  | INTERGENIC | Dbl Promoter | 1.15   | 0.49 | 0.94 | 0.39 | 0.83 | 0.32 |
| 72033  | INTERGENIC | Non Promoter | #N/A   | #N/A | #N/A | #N/A | #N/A | #N/A |
| 69704  | INTERGENIC | Dbl Promoter | 106.35 | 0.91 | 1.88 | 0.86 | 1.68 | 0.75 |
| 67727  | INTERGENIC | Sgl Promoter | 1.61   | 0.70 | 1.50 | 0.72 | 1.65 | 0.70 |
| 66238  | INTERGENIC | Sgl Promoter | 0.86   | 0.35 | 0.93 | 0.39 | 0.89 | 0.36 |
| 64458  | INTERGENIC | Sgl Promoter | #N/A   | #N/A | #N/A | #N/A | #N/A | #N/A |
| 62752  | INTERGENIC | Sgl Promoter | #N/A   | #N/A | 1.53 | 0.73 | 2.15 | 0.85 |
| 59120  | INTERGENIC | Non Promoter | 1.11   | 0.47 | #N/A | #N/A | #N/A | #N/A |
| 56646  | INTERGENIC | Sgl Promoter | 0.89   | 0.36 | 0.97 | 0.41 | 0.71 | 0.25 |
| 54848  | INTERGENIC | Dbl Promoter | 0.98   | 0.40 | 1.07 | 0.48 | 0.81 | 0.31 |
| 53217  | INTERGENIC | Non Promoter | #N/A   | #N/A | 0.51 | 0.11 | 0.55 | 0.15 |
| 51109  | INTERGENIC | Sgl Promoter | 1.64   | 0.70 | 1.59 | 0.75 | 1.34 | 0.61 |
| 48761  | INTERGENIC | Dbl Promoter | 0.50   | 0.14 | 1.51 | 0.73 | 0.58 | 0.17 |
| 45927  | INTERGENIC | Non Promoter | #N/A   | #N/A | #N/A | #N/A | #N/A | #N/A |
| 40082  | INTERGENIC | Dbl Promoter | 2.01   | 0.81 | 1.62 | 0.77 | 1.46 | 0.67 |
| 38813  | INTERGENIC | Sgl Promoter | 2.95   | 0.95 | #N/A | #N/A | 2.23 | 0.89 |
| 36377  | INTERGENIC | Sgl Promoter | #N/A   | #N/A | #N/A | #N/A | #N/A | #N/A |
| 33191  | INTERGENIC | Sgl Promoter | 0.83   | 0.33 | 1.72 | 0.75 | 0.82 | 0.32 |
| 27976  | INTERGENIC | Non Promoter | #N/A   | #N/A | #N/A | #N/A | #N/A | #N/A |
| 26239  | INTERGENIC | Dbl Promoter | #N/A   | #N/A | #N/A | #N/A | 1.35 | 0.62 |
| 25698  | INTERGENIC | Sgl Promoter | #N/A   | #N/A | 2.48 | 0.94 | 2.06 | 0.86 |
| 23614  | INTERGENIC | Non Promoter | #N/A   | #N/A | #N/A | #N/A | #N/A | #N/A |
| 21780  | INTERGENIC | Dbl Promoter | 1.31   | 0.56 | 1.79 | 0.84 | 2.19 | 0.86 |
| 19085  | INTERGENIC | Non Promoter | 0.72   | 0.27 | 1.37 | 0.66 | 0.74 | 0.27 |
| 17390  | INTERGENIC | Sgl Promoter | 0.90   | 0.37 | 1.10 | 0.49 | 0.99 | 0.42 |
| 15665  | INTERGENIC | Sgl Promoter | #N/A   | #N/A | #N/A | #N/A | #N/A | #N/A |
| 14899  | INTERGENIC | Sgl Promoter | 0.80   | 0.31 | 0.55 | 0.13 | 1.25 | 0.56 |
| 13563  | INTERGENIC | Sgl Promoter | 1.78   | 0.75 | 1.37 | 0.65 | 1.98 | 0.78 |
| 12500  | INTERGENIC | Dbl Promoter | #N/A   | #N/A | 0.83 | 0.32 | #N/A | #N/A |
| 11066  | INTERGENIC | Sgl Promoter | 1.47   | 0.64 | 1.03 | 0.45 | 1.24 | 0.56 |
| 11921  | INTERGENIC | Sgl Promoter | 3.25   | 0.95 | 2.00 | 0.90 | 2.79 | 0.93 |
| 7993   | INTERGENIC | Non Promoter | #N/A   | #N/A | 0.94 | 0.39 | #N/A | #N/A |
| 5470   | INTERGENIC | Dbl Promoter | 0.61   | 0.20 | 0.65 | 0.19 | 0.66 | 0.22 |
| 6400   | INTERGENIC | Dbl Promoter | 0.71   | 0.26 | 0.69 | 0.22 | 0.80 | 0.31 |
| 92235  | INTERGENIC | Non Promoter | #N/A   | #N/A | 0.73 | 0.25 | #N/A | #N/A |
| 8298   | INTERGENIC | Non Promoter | #N/A   | #N/A | #N/A | #N/A | #N/A | #N/A |
| 92622  | INTERGENIC | Non Promoter | #N/A   | #N/A | #N/A | #N/A | #N/A | #N/A |
| 107819 | INTERGENIC | Sgl Promoter | 0.82   | 0.32 | 0.91 | 0.37 | 0.66 | 0.22 |
| 110021 | INTERGENIC | Non Promoter | #N/A   | #N/A | #N/A | #N/A | #N/A | #N/A |
| 111747 | INTERGENIC | Sgl Promoter | #N/A   | #N/A | 0.33 | 0.02 | #N/A | #N/A |
| 113492 | INTERGENIC | Sgl Promoter | 0.81   | 0.32 | 1.04 | 0.46 | 1.18 | 0.53 |
| 115613 | INTERGENIC | Sgl Promoter | 0.24   | 0.03 | 0.44 | 0.07 | 0.44 | 0.09 |
| 116100 | INTERGENIC | Dbl Promoter | 0.68   | 0.25 | #N/A | #N/A | 0.57 | 0.17 |
| 124102 | INTERGENIC | Sgl Promoter | 0.70   | 0.25 | 0.94 | 0.39 | 0.65 | 0.22 |
| 129473 | INTERGENIC | Sgl Promoter | #N/A   | #N/A | 1.45 | 0.70 | 1.62 | 0.69 |
| 130722 | INTERGENIC | Non Promoter | 0.70   | 0.25 | #N/A | #N/A | 0.91 | 0.37 |
| 132038 | INTERGENIC | Dbl Promoter | 1.45   | 0.63 | 1.65 | 0.75 | 2.12 | 0.85 |



|        |            |              |      |      |      |      |      |      |
|--------|------------|--------------|------|------|------|------|------|------|
| 136872 | INTERGENIC | Non Promoter | #N/A | #N/A | 0.72 | 0.24 | 1.19 | 0.54 |
| 138685 | INTERGENIC | Dbl Promoter | #N/A | #N/A | 1.73 | 0.82 | 1.68 | 0.74 |
| 140002 | INTERGENIC | Non Promoter | #N/A | #N/A | #N/A | #N/A | #N/A | #N/A |
| 141885 | INTERGENIC | Sgl Promoter | 0.70 | 0.25 | 0.89 | 0.36 | 0.82 | 0.32 |
| 143987 | INTERGENIC | Dbl Promoter | 1.20 | 0.52 | 1.41 | 0.68 | 1.19 | 0.53 |
| 146233 | INTERGENIC | Non Promoter | #N/A | #N/A | 0.36 | 0.04 | #N/A | #N/A |
| 149216 | INTERGENIC | Dbl Promoter | 0.18 | 0.01 | #N/A | #N/A | 0.31 | 0.03 |
| 157735 | INTERGENIC | Non Promoter | #N/A | #N/A | #N/A | #N/A | #N/A | #N/A |
| 159429 | INTERGENIC | Dbl Promoter | 1.78 | 0.74 | 2.26 | 0.90 | 1.06 | 0.45 |
| 160835 | INTERGENIC | Sgl Promoter | 3.42 | 0.98 | #N/A | #N/A | 2.26 | 0.88 |
| 161721 | INTERGENIC | Non Promoter | #N/A | #N/A | #N/A | #N/A | #N/A | #N/A |
| 164969 | INTERGENIC | Sgl Promoter | #N/A | #N/A | #N/A | #N/A | #N/A | #N/A |
| 167668 | INTERGENIC | Sgl Promoter | #N/A | #N/A | #N/A | #N/A | #N/A | #N/A |
| 168881 | INTERGENIC | Sgl Promoter | #N/A | #N/A | 0.87 | 0.34 | 1.05 | 0.45 |
| 175539 | INTERGENIC | Sgl Promoter | 0.31 | 0.05 | 0.30 | 0.02 | 0.51 | 0.13 |
| 176956 | INTERGENIC | Non Promoter | #N/A | #N/A | #N/A | #N/A | #N/A | #N/A |
| 178210 | INTERGENIC | Dbl Promoter | #N/A | #N/A | #N/A | #N/A | #N/A | #N/A |
| 180336 | INTERGENIC | Sgl Promoter | #N/A | #N/A | #N/A | #N/A | #N/A | #N/A |
| 184866 | INTERGENIC | Non Promoter | #N/A | #N/A | #N/A | #N/A | #N/A | #N/A |
| 187164 | INTERGENIC | Sgl Promoter | #N/A | #N/A | #N/A | #N/A | #N/A | #N/A |
| 187915 | INTERGENIC | Dbl Promoter | 3.58 | 0.98 | 1.92 | 0.88 | 2.61 | 0.94 |
| 189122 | INTERGENIC | Non Promoter | #N/A | #N/A | #N/A | #N/A | #N/A | #N/A |
| 190534 | INTERGENIC | Dbl Promoter | 2.14 | 0.82 | 1.51 | 0.74 | 1.34 | 0.61 |
| 192796 | INTERGENIC | Non Promoter | 0.64 | 0.22 | 0.69 | 0.22 | 0.83 | 0.33 |
| 194059 | INTERGENIC | Sgl Promoter | 2.05 | 0.79 | 1.28 | 0.61 | 1.40 | 0.64 |
| 197389 | INTERGENIC | Non Promoter | #N/A | #N/A | #N/A | #N/A | #N/A | #N/A |
| 198731 | INTERGENIC | Sgl Promoter | 1.06 | 0.44 | 1.39 | 0.67 | 1.02 | 0.44 |
| 206453 | INTERGENIC | Sgl Promoter | #N/A | #N/A | 1.12 | 0.51 | 0.83 | 0.33 |
| 207646 | INTERGENIC | Dbl Promoter | #N/A | #N/A | 0.66 | 0.21 | 1.07 | 0.42 |
| 209697 | INTERGENIC | Sgl Promoter | 0.83 | 0.32 | 1.26 | 0.60 | 0.84 | 0.34 |
| 213185 | INTERGENIC | Sgl Promoter | 2.02 | 0.81 | 1.92 | 0.88 | 1.80 | 0.79 |
| 214533 | INTERGENIC | Sgl Promoter | 1.99 | 0.80 | 1.20 | 0.56 | 1.29 | 0.58 |
| 215183 | INTERGENIC | Sgl Promoter | 2.21 | 0.85 | 2.04 | 0.91 | 1.89 | 0.81 |
| 218227 | INTERGENIC | Sgl Promoter | 2.37 | 0.87 | 2.36 | 0.89 | 1.97 | 0.84 |
| 220109 | INTERGENIC | Dbl Promoter | 1.20 | 0.52 | #N/A | #N/A | 1.53 | 0.70 |
| 220726 | INTERGENIC | Sgl Promoter | 1.78 | 0.73 | 1.40 | 0.67 | 1.46 | 0.66 |
| 221535 | INTERGENIC | Non Promoter | #N/A | #N/A | 0.83 | 0.32 | 0.62 | 0.19 |
| 222878 | INTERGENIC | Sgl Promoter | 1.54 | 0.66 | 1.15 | 0.53 | 1.06 | 0.46 |
| 224031 | INTERGENIC | Sgl Promoter | #N/A | #N/A | 1.83 | 0.82 | 2.27 | 0.90 |
| 225526 | INTERGENIC | Sgl Promoter | 1.22 | 0.53 | #N/A | #N/A | 1.34 | 0.61 |
| 227533 | INTERGENIC | Sgl Promoter | 0.70 | 0.25 | 0.90 | 0.37 | 1.23 | 0.55 |
| 229336 | INTERGENIC | Dbl Promoter | 2.66 | 0.91 | #N/A | #N/A | #N/A | #N/A |
| 230971 | INTERGENIC | Sgl Promoter | 1.07 | 0.44 | #N/A | #N/A | 0.98 | 0.42 |
| 232134 | INTERGENIC | Sgl Promoter | 1.43 | 0.63 | 1.27 | 0.60 | 1.04 | 0.45 |
| 233580 | INTERGENIC | Non Promoter | #N/A | #N/A | #N/A | #N/A | #N/A | #N/A |
| 234882 | INTERGENIC | Dbl Promoter | #N/A | #N/A | #N/A | #N/A | 1.28 | 0.56 |
| 237005 | INTERGENIC | Sgl Promoter | 0.54 | 0.16 | 0.41 | 0.05 | 0.24 | 0.02 |
| 237849 | INTERGENIC | Sgl Promoter | #N/A | #N/A | #N/A | #N/A | #N/A | #N/A |
| 246194 | INTERGENIC | Sgl Promoter | 1.89 | 0.77 | 1.53 | 0.74 | 1.89 | 0.81 |
| 248440 | INTERGENIC | Non Promoter | #N/A | #N/A | #N/A | #N/A | #N/A | #N/A |
| 252375 | INTERGENIC | Non Promoter | #N/A | #N/A | 0.39 | 0.05 | #N/A | #N/A |

|        |            |              |      |      |      |      |      |      |
|--------|------------|--------------|------|------|------|------|------|------|
| 256361 | INTERGENIC | Dbl Promoter | 2.17 | 0.85 | 1.91 | 0.87 | 1.75 | 0.77 |
| 258245 | INTERGENIC | Non Promoter | #N/A | #N/A | #N/A | #N/A | #N/A | #N/A |
| 262802 | INTERGENIC | Sgl Promoter | #N/A | #N/A | 1.33 | 0.63 | 1.97 | 0.75 |
| 267539 | INTERGENIC | Dbl Promoter | 1.22 | 0.53 | 1.62 | 0.78 | 1.28 | 0.58 |
| 268460 | INTERGENIC | Non Promoter | 0.52 | 0.15 | 0.61 | 0.17 | #N/A | #N/A |
| 274175 | INTERGENIC | Sgl Promoter | 1.22 | 0.52 | 1.54 | 0.74 | 1.64 | 0.74 |
| 278154 | INTERGENIC | Sgl Promoter | 2.79 | 0.93 | 1.84 | 0.84 | 2.09 | 0.86 |
| 281496 | INTERGENIC | Sgl Promoter | 2.19 | 0.85 | 1.69 | 0.76 | #N/A | #N/A |
| 282682 | INTERGENIC | Non Promoter | #N/A | #N/A | #N/A | #N/A | #N/A | #N/A |
| 283778 | INTERGENIC | Sgl Promoter | 0.75 | 0.28 | 1.75 | 0.69 | #N/A | #N/A |
| 284840 | INTERGENIC | Sgl Promoter | #N/A | #N/A | #N/A | #N/A | #N/A | #N/A |
| 289144 | INTERGENIC | Dbl Promoter | #N/A | #N/A | 0.68 | 0.21 | #N/A | #N/A |
| 292945 | INTERGENIC | Dbl Promoter | 0.56 | 0.17 | #N/A | #N/A | #N/A | #N/A |
| 299147 | INTERGENIC | Sgl Promoter | #N/A | #N/A | 0.97 | 0.40 | 0.70 | 0.25 |
| 314118 | INTERGENIC | Non Promoter | #N/A | #N/A | #N/A | #N/A | #N/A | #N/A |
| 314876 | INTERGENIC | Sgl Promoter | #N/A | #N/A | 1.49 | 0.72 | 2.82 | 0.95 |
| 316574 | INTERGENIC | Dbl Promoter | 3.15 | 0.96 | 2.40 | 0.96 | 2.34 | 0.91 |
| 320416 | INTERGENIC | Sgl Promoter | 0.99 | 0.41 | 0.85 | 0.33 | #N/A | #N/A |
| 323411 | INTERGENIC | Sgl Promoter | 1.69 | 0.72 | #N/A | #N/A | 1.27 | 0.58 |
| 324768 | INTERGENIC | Sgl Promoter | 1.96 | 0.80 | 1.61 | 0.78 | 2.12 | 0.86 |
| 325600 | INTERGENIC | Sgl Promoter | 1.19 | 0.51 | 0.90 | 0.36 | 1.04 | 0.46 |
| 326815 | INTERGENIC | Non Promoter | 0.58 | 0.19 | 0.61 | 0.17 | 0.61 | 0.19 |
| 328305 | INTERGENIC | Dbl Promoter | 2.02 | 0.82 | 2.02 | 0.88 | 1.84 | 0.80 |
| 330312 | INTERGENIC | Sgl Promoter | #N/A | #N/A | #N/A | #N/A | #N/A | #N/A |
| 332284 | INTERGENIC | Sgl Promoter | #N/A | #N/A | 1.94 | 0.88 | #N/A | #N/A |
| 333074 | INTERGENIC | Sgl Promoter | #N/A | #N/A | 1.34 | 0.58 | 1.59 | 0.65 |
| 334529 | INTERGENIC | Non Promoter | #N/A | #N/A | 0.43 | 0.06 | #N/A | #N/A |
| 336339 | INTERGENIC | Dbl Promoter | 1.77 | 0.75 | 1.92 | 0.88 | 1.55 | 0.71 |
| 338085 | INTERGENIC | Sgl Promoter | #N/A | #N/A | #N/A | #N/A | #N/A | #N/A |
| 340111 | INTERGENIC | Non Promoter | #N/A | #N/A | 0.81 | 0.31 | #N/A | #N/A |
| 341667 | INTERGENIC | Dbl Promoter | 3.31 | 0.97 | 3.24 | 0.98 | 2.41 | 0.91 |
| 342351 | INTERGENIC | Sgl Promoter | 2.08 | 0.84 | 2.11 | 0.90 | 2.18 | 0.87 |
| 346045 | INTERGENIC | Dbl Promoter | 3.48 | 0.98 | 1.70 | 0.81 | 3.11 | 0.97 |
| 349576 | INTERGENIC | Sgl Promoter | 1.63 | 0.69 | 1.25 | 0.59 | 1.46 | 0.65 |
| 352758 | INTERGENIC | Sgl Promoter | 1.24 | 0.54 | #N/A | #N/A | 1.29 | 0.59 |
| 353627 | INTERGENIC | Sgl Promoter | #N/A | #N/A | 1.63 | 0.76 | #N/A | #N/A |
| 354817 | INTERGENIC | Sgl Promoter | #N/A | #N/A | #N/A | #N/A | 0.97 | 0.41 |
| 356563 | INTERGENIC | Sgl Promoter | 0.41 | 0.09 | 0.34 | 0.04 | #N/A | #N/A |
| 363001 | INTERGENIC | Non Promoter | #N/A | #N/A | #N/A | #N/A | #N/A | #N/A |
| 368503 | INTERGENIC | Sgl Promoter | 3.08 | 0.96 | 1.47 | 0.72 | 2.81 | 0.95 |
| 371749 | INTERGENIC | Dbl Promoter | #N/A | #N/A | #N/A | #N/A | 2.05 | 0.84 |
| 372694 | INTERGENIC | Non Promoter | #N/A | #N/A | 0.37 | 0.05 | #N/A | #N/A |
| 374654 | INTERGENIC | Sgl Promoter | 2.65 | 0.92 | 2.18 | 0.93 | 2.72 | 0.95 |
| 375709 | INTERGENIC | Dbl Promoter | 0.71 | 0.26 | 1.08 | 0.48 | 0.75 | 0.27 |
| 377355 | INTERGENIC | Non Promoter | #N/A | #N/A | #N/A | #N/A | #N/A | #N/A |
| 380108 | INTERGENIC | Sgl Promoter | 1.77 | 0.74 | 1.40 | 0.68 | 1.45 | 0.67 |
| 383538 | INTERGENIC | Dbl Promoter | 0.39 | 0.08 | #N/A | #N/A | 0.49 | 0.11 |
| 385510 | INTERGENIC | Sgl Promoter | 1.44 | 0.63 | 1.48 | 0.70 | 1.81 | 0.79 |
| 388893 | INTERGENIC | Sgl Promoter | #N/A | #N/A | #N/A | #N/A | 0.75 | 0.28 |
| 393534 | INTERGENIC | Dbl Promoter | 3.51 | 0.96 | 4.25 | 0.90 | 2.00 | 0.76 |
| 394455 | INTERGENIC | Non Promoter | #N/A | #N/A | 0.83 | 0.32 | 1.01 | 0.42 |

|        |            |              |      |      |      |      |      |      |
|--------|------------|--------------|------|------|------|------|------|------|
| 397251 | INTERGENIC | Dbl Promoter | 1.53 | 0.64 | #N/A | #N/A | 1.34 | 0.61 |
| 399268 | INTERGENIC | Non Promoter | #N/A | #N/A | #N/A | #N/A | #N/A | #N/A |
| 401434 | INTERGENIC | Dbl Promoter | 1.98 | 0.81 | 1.86 | 0.86 | 1.58 | 0.71 |
| 402086 | INTERGENIC | Non Promoter | #N/A | #N/A | 0.65 | 0.19 | 0.97 | 0.41 |
| 402966 | INTERGENIC | Dbl Promoter | 2.03 | 0.82 | 1.79 | 0.82 | 2.63 | 0.89 |
| 411228 | INTERGENIC | Non Promoter | #N/A | #N/A | 0.56 | 0.14 | 0.69 | 0.23 |
| 412907 | INTERGENIC | Dbl Promoter | 0.95 | 0.38 | 0.84 | 0.33 | 0.74 | 0.27 |
| 413685 | INTERGENIC | Non Promoter | #N/A | #N/A | #N/A | #N/A | #N/A | #N/A |
| 417549 | INTERGENIC | Dbl Promoter | 2.63 | 0.92 | 2.27 | 0.94 | 3.40 | 0.97 |
| 419221 | INTERGENIC | Non Promoter | #N/A | #N/A | #N/A | #N/A | #N/A | #N/A |
| 420373 | INTERGENIC | Sgl Promoter | 0.44 | 0.11 | #N/A | #N/A | 0.65 | 0.21 |
| 423630 | INTERGENIC | Sgl Promoter | 1.49 | 0.62 | 1.78 | 0.83 | 1.36 | 0.62 |
| 424609 | INTERGENIC | Non Promoter | 0.49 | 0.14 | 0.69 | 0.22 | #N/A | #N/A |
| 429706 | INTERGENIC | Sgl Promoter | 1.39 | 0.60 | 1.29 | 0.60 | 1.10 | 0.49 |
| 437169 | INTERGENIC | Sgl Promoter | 2.08 | 0.83 | 2.15 | 0.92 | 1.76 | 0.77 |
| 439341 | INTERGENIC | Dbl Promoter | #N/A | #N/A | #N/A | #N/A | 2.42 | 0.86 |
| 440376 | INTERGENIC | Sgl Promoter | #N/A | #N/A | 1.61 | 0.75 | 0.94 | 0.40 |
| 442179 | INTERGENIC | Sgl Promoter | 1.49 | 0.63 | #N/A | #N/A | 1.39 | 0.60 |
| 443826 | INTERGENIC | Sgl Promoter | 1.55 | 0.67 | 1.42 | 0.68 | 1.69 | 0.72 |
| 445710 | INTERGENIC | Sgl Promoter | #N/A | #N/A | 1.72 | 0.71 | 1.14 | 0.50 |
| 448332 | INTERGENIC | Sgl Promoter | 2.33 | 0.88 | 1.81 | 0.80 | 2.03 | 0.84 |
| 451324 | INTERGENIC | Dbl Promoter | #N/A | #N/A | #N/A | #N/A | #N/A | #N/A |
| 452869 | INTERGENIC | Sgl Promoter | #N/A | #N/A | 1.30 | 0.60 | 0.67 | 0.22 |
| 459294 | INTERGENIC | Sgl Promoter | 1.01 | 0.42 | 0.86 | 0.34 | 0.84 | 0.33 |
| 462497 | INTERGENIC | Sgl Promoter | 0.74 | 0.28 | 0.78 | 0.28 | 0.59 | 0.18 |
| 463915 | INTERGENIC | Sgl Promoter | #N/A | #N/A | #N/A | #N/A | #N/A | #N/A |
| 468214 | INTERGENIC | Sgl Promoter | #N/A | #N/A | 2.09 | 0.87 | 1.58 | 0.72 |
| 470955 | INTERGENIC | Sgl Promoter | 0.96 | 0.40 | 1.51 | 0.73 | 1.12 | 0.50 |
| 472739 | INTERGENIC | Sgl Promoter | #N/A | #N/A | 0.84 | 0.33 | 1.02 | 0.42 |
| 474622 | INTERGENIC | Non Promoter | #N/A | #N/A | #N/A | #N/A | #N/A | #N/A |
| 475701 | INTERGENIC | Sgl Promoter | 0.49 | 0.14 | 0.55 | 0.12 | 0.69 | 0.24 |
| 480985 | INTERGENIC | Dbl Promoter | #N/A | #N/A | 2.47 | 0.96 | 2.19 | 0.83 |
| 482000 | INTERGENIC | Non Promoter | #N/A | #N/A | #N/A | #N/A | #N/A | #N/A |
| 484023 | INTERGENIC | Dbl Promoter | 2.18 | 0.85 | 2.11 | 0.92 | 1.59 | 0.72 |
| 484840 | INTERGENIC | Sgl Promoter | 1.13 | 0.48 | 1.55 | 0.75 | 1.22 | 0.55 |
| 486821 | INTERGENIC | Dbl Promoter | 2.02 | 0.81 | 1.93 | 0.88 | 2.24 | 0.88 |
| 488652 | INTERGENIC | Dbl Promoter | 2.06 | 0.80 | 1.30 | 0.63 | 2.43 | 0.91 |
| 490742 | INTERGENIC | Sgl Promoter | 2.58 | 0.92 | 1.87 | 0.86 | 2.14 | 0.86 |
| 491926 | INTERGENIC | Sgl Promoter | #N/A | #N/A | 2.75 | 0.84 | 4.87 | 0.88 |
| 493891 | INTERGENIC | Sgl Promoter | #N/A | #N/A | #N/A | #N/A | #N/A | #N/A |
| 496310 | INTERGENIC | Non Promoter | #N/A | #N/A | #N/A | #N/A | 0.97 | 0.41 |
| 497485 | INTERGENIC | Sgl Promoter | 1.18 | 0.51 | 1.70 | 0.79 | 1.85 | 0.76 |
| 499074 | INTERGENIC | Dbl Promoter | 1.07 | 0.45 | 1.10 | 0.50 | 1.04 | 0.46 |
| 499945 | INTERGENIC | Non Promoter | #N/A | #N/A | #N/A | #N/A | #N/A | #N/A |
| 504471 | INTERGENIC | Non Promoter | #N/A | #N/A | #N/A | #N/A | #N/A | #N/A |
| 506314 | INTERGENIC | Dbl Promoter | 0.49 | 0.14 | 0.61 | 0.17 | 0.80 | 0.31 |
| 509358 | INTERGENIC | Sgl Promoter | 1.59 | 0.68 | 1.59 | 0.77 | 1.67 | 0.74 |
| 512727 | INTERGENIC | Sgl Promoter | 0.97 | 0.40 | 1.15 | 0.53 | 1.05 | 0.46 |
| 517527 | INTERGENIC | Dbl Promoter | 1.32 | 0.58 | 1.14 | 0.52 | 1.30 | 0.59 |
| 519432 | INTERGENIC | Sgl Promoter | 1.14 | 0.49 | 0.99 | 0.42 | 1.05 | 0.46 |
| 520707 | INTERGENIC | Non Promoter | #N/A | #N/A | 0.66 | 0.20 | 0.74 | 0.27 |

|        |            |              |      |      |      |      |      |      |
|--------|------------|--------------|------|------|------|------|------|------|
| 522950 | INTERGENIC | Dbl Promoter | 2.07 | 0.83 | 1.75 | 0.83 | 1.65 | 0.74 |
| 522951 | INTERGENIC | Dbl Promoter | 2.14 | 0.84 | 1.77 | 0.83 | 1.71 | 0.76 |
| 524171 | INTERGENIC | Dbl Promoter | 1.30 | 0.56 | 1.23 | 0.58 | 1.30 | 0.59 |
| 530044 | INTERGENIC | Non Promoter | 1.48 | 0.65 | 1.13 | 0.52 | 1.29 | 0.59 |
| 539146 | INTERGENIC | Dbl Promoter | 0.74 | 0.28 | 1.07 | 0.48 | 1.00 | 0.43 |
| 540694 | INTERGENIC | Sgl Promoter | 0.78 | 0.30 | 1.08 | 0.48 | 0.91 | 0.38 |
| 540693 | INTERGENIC | Sgl Promoter | 0.82 | 0.32 | 1.12 | 0.51 | 0.89 | 0.36 |
| 541646 | INTERGENIC | Sgl Promoter | 0.75 | 0.28 | 0.86 | 0.33 | 0.63 | 0.20 |
| 543003 | INTERGENIC | Sgl Promoter | 0.73 | 0.27 | 0.82 | 0.31 | 0.75 | 0.28 |
| 543605 | INTERGENIC | Non Promoter | 1.29 | 0.57 | 0.74 | 0.25 | 1.32 | 0.60 |
| 554391 | INTERGENIC | Sgl Promoter | 2.21 | 0.86 | 1.35 | 0.65 | 1.73 | 0.77 |
| 556576 | INTERGENIC | Non Promoter | 0.46 | 0.12 | 0.55 | 0.12 | 0.57 | 0.17 |
| 558009 | INTERGENIC | Dbl Promoter | 0.56 | 0.17 | 0.61 | 0.17 | 0.64 | 0.21 |
| 560168 | INTERGENIC | Sgl Promoter | 0.32 | 0.05 | 0.39 | 0.04 | 0.42 | 0.07 |
| 562418 | INTERGENIC | Sgl Promoter | 0.46 | 0.12 | 0.52 | 0.10 | 0.57 | 0.17 |
| 389613 | INTERGENIC | Dbl Promoter | #N/A | #N/A | #N/A | #N/A | #N/A | #N/A |
| 390300 | INTERGENIC | Dbl Promoter | 2.11 | 0.82 | 1.93 | 0.86 | #N/A | #N/A |
| 465173 | INTERGENIC | Sgl Promoter | 1.41 | 0.62 | 1.42 | 0.66 | 1.29 | 0.58 |
| 531850 | INTERGENIC | Non Promoter | 0.98 | 0.41 | 1.22 | 0.57 | 1.07 | 0.47 |
| 531873 | INTERGENIC | Non Promoter | 1.01 | 0.42 | 1.20 | 0.56 | 1.06 | 0.46 |
| 533373 | INTERGENIC | Non Promoter | 1.07 | 0.45 | 1.16 | 0.54 | 1.20 | 0.54 |
| 534873 | INTERGENIC | Non Promoter | 1.51 | 0.66 | 1.14 | 0.52 | 1.29 | 0.58 |
| 550863 | INTERGENIC | Dbl Promoter | 1.07 | 0.45 | 1.41 | 0.69 | 1.02 | 0.44 |
| 550863 | INTERGENIC | Dbl Promoter | 1.09 | 0.46 | 1.35 | 0.65 | 1.09 | 0.48 |
| 552094 | INTERGENIC | Dbl Promoter | 1.61 | 0.70 | 1.65 | 0.79 | 1.61 | 0.73 |
| 117807 | INTERGENIC | Dbl Promoter | 1.43 | 0.62 | 1.25 | 0.59 | 1.15 | 0.51 |
| 133556 | INTERGENIC | Sgl Promoter | #N/A | #N/A | #N/A | #N/A | #N/A | #N/A |
| 146835 | INTERGENIC | Non Promoter | #N/A | #N/A | #N/A | #N/A | #N/A | #N/A |
| 134312 | INTERGENIC | Sgl Promoter | #N/A | #N/A | #N/A | #N/A | #N/A | #N/A |
| 359704 | INTERGENIC | Non Promoter | #N/A | #N/A | #N/A | #N/A | #N/A | #N/A |
| 147862 | INTERGENIC | Non Promoter | 0.91 | 0.37 | 1.32 | 0.63 | 1.19 | 0.53 |
| 355626 | INTERGENIC | Non Promoter | #N/A | #N/A | #N/A | #N/A | 0.54 | 0.17 |
| 353937 | INTERGENIC | Dbl Promoter | 1.15 | 0.48 | 1.20 | 0.56 | #N/A | #N/A |
| 350588 | INTERGENIC | Non Promoter | 2.46 | 0.90 | 1.98 | 0.89 | 2.07 | 0.85 |
| 349119 | INTERGENIC | Dbl Promoter | 1.46 | 0.64 | 1.25 | 0.57 | 1.59 | 0.69 |
| 345689 | INTERGENIC | Sgl Promoter | 1.50 | 0.65 | 1.22 | 0.57 | 1.80 | 0.79 |
| 344059 | INTERGENIC | Dbl Promoter | 2.10 | 0.84 | 2.22 | 0.92 | 1.96 | 0.83 |
| 342991 | INTERGENIC | Non Promoter | #N/A | #N/A | 0.79 | 0.29 | #N/A | #N/A |
| 336346 | INTERGENIC | Dbl Promoter | #N/A | #N/A | 0.68 | 0.21 | 0.73 | 0.26 |
| 342533 | INTERGENIC | Sgl Promoter | 1.24 | 0.53 | 1.42 | 0.69 | 1.20 | 0.52 |
| 335663 | INTERGENIC | Non Promoter | #N/A | #N/A | 0.80 | 0.30 | 0.70 | 0.24 |
| 334879 | INTERGENIC | Sgl Promoter | #N/A | #N/A | #N/A | #N/A | #N/A | #N/A |
| 333724 | INTERGENIC | Sgl Promoter | #N/A | #N/A | 0.90 | 0.36 | 0.91 | 0.37 |
| 333009 | INTERGENIC | Dbl Promoter | 0.55 | 0.17 | 0.75 | 0.27 | 0.38 | 0.06 |
| 328205 | INTERGENIC | Non Promoter | #N/A | #N/A | 0.35 | 0.04 | 0.55 | 0.16 |
| 325746 | INTERGENIC | Dbl Promoter | 0.90 | 0.37 | 1.44 | 0.68 | 1.71 | 0.76 |
| 324301 | INTERGENIC | Non Promoter | #N/A | #N/A | #N/A | #N/A | #N/A | #N/A |
| 322340 | INTERGENIC | Sgl Promoter | 0.97 | 0.40 | 1.42 | 0.68 | 0.79 | 0.30 |
| 321452 | INTERGENIC | Dbl Promoter | 3.03 | 0.95 | 2.05 | 0.91 | 1.90 | 0.78 |
| 316766 | INTERGENIC | Sgl Promoter | 0.35 | 0.06 | 0.55 | 0.13 | 0.37 | 0.05 |
| 315091 | INTERGENIC | Dbl Promoter | 2.50 | 0.91 | 1.63 | 0.75 | #N/A | #N/A |

|        |            |              |      |      |      |      |      |      |
|--------|------------|--------------|------|------|------|------|------|------|
| 314033 | INTERGENIC | Non Promoter | #N/A | #N/A | 0.75 | 0.26 | 1.16 | 0.52 |
| 312903 | INTERGENIC | Sgl Promoter | 0.83 | 0.33 | 0.98 | 0.42 | #N/A | #N/A |
| 311163 | INTERGENIC | Dbl Promoter | 1.16 | 0.50 | 1.69 | 0.78 | 1.22 | 0.55 |
| 309384 | INTERGENIC | Sgl Promoter | 0.52 | 0.15 | 1.18 | 0.55 | #N/A | #N/A |
| 308199 | INTERGENIC | Sgl Promoter | 2.30 | 0.84 | 0.91 | 0.37 | 1.66 | 0.75 |
| 304475 | INTERGENIC | Sgl Promoter | 2.97 | 0.93 | #N/A | #N/A | 1.87 | 0.81 |
| 303677 | INTERGENIC | Non Promoter | 0.67 | 0.24 | 0.57 | 0.14 | 0.65 | 0.22 |
| 300227 | INTERGENIC | Sgl Promoter | 3.57 | 0.96 | 1.92 | 0.78 | #N/A | #N/A |
| 296049 | INTERGENIC | Non Promoter | #N/A | #N/A | #N/A | #N/A | #N/A | #N/A |
| 292632 | INTERGENIC | Dbl Promoter | 1.94 | 0.79 | 1.54 | 0.74 | 1.80 | 0.79 |
| 291960 | INTERGENIC | Sgl Promoter | 1.17 | 0.50 | 1.19 | 0.56 | 1.03 | 0.45 |
| 290418 | INTERGENIC | Sgl Promoter | 2.43 | 0.90 | 2.36 | 0.95 | 2.29 | 0.90 |
| 289225 | INTERGENIC | Sgl Promoter | 2.47 | 0.90 | 2.29 | 0.94 | 2.89 | 0.90 |
| 287789 | INTERGENIC | Non Promoter | #N/A | #N/A | 0.19 | 0.00 | 0.36 | 0.05 |
| 285665 | INTERGENIC | Dbl Promoter | 1.09 | 0.46 | 1.26 | 0.58 | 3.82 | 0.98 |
| 283028 | INTERGENIC | Sgl Promoter | 2.79 | 0.91 | 2.71 | 0.98 | #N/A | #N/A |
| 280141 | INTERGENIC | Non Promoter | #N/A | #N/A | #N/A | #N/A | #N/A | #N/A |
| 277722 | INTERGENIC | Sgl Promoter | #N/A | #N/A | #N/A | #N/A | #N/A | #N/A |
| 276524 | INTERGENIC | Dbl Promoter | 3.52 | 0.97 | 2.33 | 0.95 | 3.23 | 0.98 |
| 274071 | INTERGENIC | Sgl Promoter | 2.09 | 0.81 | #N/A | #N/A | 2.30 | 0.90 |
| 272949 | INTERGENIC | Non Promoter | #N/A | #N/A | #N/A | #N/A | #N/A | #N/A |
| 271160 | INTERGENIC | Sgl Promoter | 1.13 | 0.48 | 1.02 | 0.45 | 1.50 | 0.69 |
| 268650 | INTERGENIC | Dbl Promoter | 1.64 | 0.70 | 1.65 | 0.79 | 1.37 | 0.63 |
| 265114 | INTERGENIC | Non Promoter | #N/A | #N/A | #N/A | #N/A | #N/A | #N/A |
| 261436 | INTERGENIC | Sgl Promoter | #N/A | #N/A | #N/A | #N/A | 1.42 | 0.65 |
| 260157 | INTERGENIC | Sgl Promoter | #N/A | #N/A | 1.36 | 0.66 | 1.33 | 0.61 |
| 258912 | INTERGENIC | Dbl Promoter | 0.75 | 0.28 | 0.85 | 0.33 | 0.71 | 0.25 |
| 257842 | INTERGENIC | Sgl Promoter | 0.27 | 0.03 | 0.37 | 0.04 | 0.30 | 0.03 |
| 256224 | INTERGENIC | Non Promoter | #N/A | #N/A | #N/A | #N/A | #N/A | #N/A |
| 255050 | INTERGENIC | Sgl Promoter | #N/A | #N/A | 0.32 | 0.02 | #N/A | #N/A |
| 254541 | INTERGENIC | Dbl Promoter | 0.98 | 0.40 | 0.87 | 0.34 | 0.77 | 0.29 |
| 252040 | INTERGENIC | Non Promoter | #N/A | #N/A | #N/A | #N/A | #N/A | #N/A |
| 247899 | INTERGENIC | Non Promoter | 1.55 | 0.66 | 1.47 | 0.71 | 1.50 | 0.68 |
| 246217 | INTERGENIC | Dbl Promoter | 1.68 | 0.70 | 1.86 | 0.86 | 1.72 | 0.77 |
| 244654 | INTERGENIC | Sgl Promoter | 1.79 | 0.76 | 1.75 | 0.81 | 1.61 | 0.73 |
| 243995 | INTERGENIC | Sgl Promoter | #N/A | #N/A | #N/A | #N/A | #N/A | #N/A |
| 241940 | INTERGENIC | Dbl Promoter | 1.96 | 0.76 | 1.57 | 0.76 | 2.14 | 0.87 |
| 241305 | INTERGENIC | Sgl Promoter | 2.37 | 0.88 | 1.56 | 0.76 | 1.92 | 0.79 |
| 238096 | INTERGENIC | Sgl Promoter | 2.37 | 0.88 | 1.78 | 0.84 | 2.71 | 0.94 |
| 235721 | INTERGENIC | Sgl Promoter | #N/A | #N/A | 1.81 | 0.83 | 1.87 | 0.81 |
| 233054 | INTERGENIC | Sgl Promoter | 0.19 | 0.02 | 0.34 | 0.03 | 0.17 | 0.01 |
| 231550 | INTERGENIC | Sgl Promoter | 0.92 | 0.38 | 0.78 | 0.28 | 0.96 | 0.41 |
| 230269 | INTERGENIC | Sgl Promoter | #N/A | #N/A | 0.86 | 0.34 | #N/A | #N/A |
| 228657 | INTERGENIC | Non Promoter | 0.75 | 0.28 | 0.54 | 0.12 | 0.87 | 0.35 |
| 226599 | INTERGENIC | Dbl Promoter | 1.09 | 0.46 | 1.18 | 0.54 | 1.13 | 0.49 |
| 222934 | INTERGENIC | Sgl Promoter | 0.99 | 0.41 | 0.97 | 0.41 | 0.82 | 0.32 |
| 221078 | INTERGENIC | Sgl Promoter | 1.47 | 0.64 | 1.19 | 0.55 | 1.13 | 0.50 |
| 217860 | INTERGENIC | Non Promoter | #N/A | #N/A | 0.28 | 0.03 | 0.47 | 0.12 |
| 216466 | INTERGENIC | Dbl Promoter | 1.37 | 0.60 | 1.31 | 0.63 | 0.98 | 0.40 |
| 214988 | INTERGENIC | Non Promoter | #N/A | #N/A | #N/A | #N/A | #N/A | #N/A |
| 212496 | INTERGENIC | Dbl Promoter | #N/A | #N/A | 1.81 | 0.83 | 2.23 | 0.89 |



|        |            |              |      |      |      |      |      |      |
|--------|------------|--------------|------|------|------|------|------|------|
| 205217 | INTERGENIC | Dbl Promoter | 1.93 | 0.80 | 1.73 | 0.82 | 1.93 | 0.82 |
| 203553 | INTERGENIC | Sgl Promoter | #N/A | #N/A | #N/A | #N/A | 1.30 | 0.59 |
| 202273 | INTERGENIC | Sgl Promoter | #N/A | #N/A | #N/A | #N/A | #N/A | #N/A |
| 199643 | INTERGENIC | Sgl Promoter | 1.82 | 0.75 | 1.37 | 0.67 | 1.53 | 0.68 |
| 196650 | INTERGENIC | Non Promoter | 1.70 | 0.71 | 1.41 | 0.66 | 1.46 | 0.64 |
| 195596 | INTERGENIC | Sgl Promoter | 0.55 | 0.17 | 0.67 | 0.21 | 0.60 | 0.18 |
| 193592 | INTERGENIC | Dbl Promoter | 3.30 | 0.97 | 3.15 | 0.99 | 3.46 | 0.98 |
| 191027 | INTERGENIC | Non Promoter | #N/A | #N/A | #N/A | #N/A | #N/A | #N/A |
| 189063 | INTERGENIC | Dbl Promoter | 2.49 | 0.89 | 1.92 | 0.88 | 2.50 | 0.93 |
| 187987 | INTERGENIC | Sgl Promoter | 0.70 | 0.25 | 0.88 | 0.35 | 0.94 | 0.39 |
| 186514 | INTERGENIC | Non Promoter | #N/A | #N/A | #N/A | #N/A | #N/A | #N/A |
| 183437 | INTERGENIC | Dbl Promoter | 2.03 | 0.82 | 1.45 | 0.71 | 1.59 | 0.72 |
| 182114 | INTERGENIC | Non Promoter | #N/A | #N/A | #N/A | #N/A | #N/A | #N/A |
| 180424 | INTERGENIC | Dbl Promoter | 2.35 | 0.89 | 2.50 | 0.92 | 2.08 | 0.86 |
| 179769 | INTERGENIC | Non Promoter | #N/A | #N/A | #N/A | #N/A | #N/A | #N/A |
| 178001 | INTERGENIC | Sgl Promoter | 1.10 | 0.47 | 1.31 | 0.61 | 0.77 | 0.29 |
| 177370 | INTERGENIC | Dbl Promoter | 1.90 | 0.77 | 2.15 | 0.92 | 1.26 | 0.53 |
| 175028 | INTERGENIC | Sgl Promoter | #N/A | #N/A | 0.31 | 0.02 | #N/A | #N/A |
| 173802 | INTERGENIC | Non Promoter | 1.54 | 0.65 | 1.76 | 0.82 | 1.52 | 0.66 |
| 174579 | INTERGENIC | Non Promoter | 1.06 | 0.45 | #N/A | #N/A | 1.11 | 0.48 |
| 171748 | INTERGENIC | Dbl Promoter | #N/A | #N/A | #N/A | #N/A | #N/A | #N/A |
| 169979 | INTERGENIC | Sgl Promoter | 1.99 | 0.80 | 1.63 | 0.79 | 2.30 | 0.88 |
| 167578 | INTERGENIC | Non Promoter | #N/A | #N/A | #N/A | #N/A | #N/A | #N/A |
| 166731 | INTERGENIC | Dbl Promoter | 0.92 | 0.38 | 1.04 | 0.46 | 0.94 | 0.39 |
| 157382 | INTERGENIC | Non Promoter | #N/A | #N/A | #N/A | #N/A | #N/A | #N/A |
| 156042 | INTERGENIC | Sgl Promoter | 2.34 | 0.86 | 1.62 | 0.75 | 1.69 | 0.76 |
| 155219 | INTERGENIC | Sgl Promoter | 0.94 | 0.38 | 1.46 | 0.67 | 0.75 | 0.28 |
| 151592 | INTERGENIC | Sgl Promoter | 1.88 | 0.78 | 1.53 | 0.74 | 1.66 | 0.74 |
| 150556 | INTERGENIC | Dbl Promoter | 1.19 | 0.51 | 1.33 | 0.64 | 1.54 | 0.67 |
| 149140 | INTERGENIC | Sgl Promoter | 3.38 | 0.94 | 1.63 | 0.75 | 3.31 | 0.97 |
| 144324 | INTERGENIC | Non Promoter | #N/A | #N/A | #N/A | #N/A | #N/A | #N/A |
| 142925 | INTERGENIC | Dbl Promoter | 0.55 | 0.17 | 0.58 | 0.14 | 0.55 | 0.15 |
| 140610 | INTERGENIC | Non Promoter | #N/A | #N/A | #N/A | #N/A | #N/A | #N/A |
| 138811 | INTERGENIC | Dbl Promoter | 0.32 | 0.05 | 0.62 | 0.17 | 0.31 | 0.03 |
| 136651 | INTERGENIC | Non Promoter | 0.67 | 0.24 | 0.74 | 0.26 | #N/A | #N/A |
| 134414 | INTERGENIC | Sgl Promoter | 0.77 | 0.29 | 0.95 | 0.40 | 1.62 | 0.71 |
| 132241 | INTERGENIC | Sgl Promoter | 0.90 | 0.36 | 1.14 | 0.53 | 1.35 | 0.61 |
| 130607 | INTERGENIC | Sgl Promoter | 0.40 | 0.09 | 0.55 | 0.12 | 0.48 | 0.11 |
| 128151 | INTERGENIC | Sgl Promoter | 0.79 | 0.30 | 0.77 | 0.28 | 0.60 | 0.18 |
| 126204 | INTERGENIC | Sgl Promoter | 2.06 | 0.83 | 1.71 | 0.81 | 2.01 | 0.82 |
| 122689 | INTERGENIC | Sgl Promoter | 1.60 | 0.68 | 1.50 | 0.73 | 1.57 | 0.71 |
| 117992 | INTERGENIC | Dbl Promoter | 2.14 | 0.82 | 2.02 | 0.89 | 1.97 | 0.57 |
| 117024 | INTERGENIC | Non Promoter | #N/A | #N/A | 0.66 | 0.20 | #N/A | #N/A |
| 113806 | INTERGENIC | Dbl Promoter | 3.21 | 0.96 | 2.53 | 0.97 | 3.06 | 0.97 |
| 102782 | INTERGENIC | Dbl Promoter | 2.30 | 0.88 | 2.01 | 0.90 | 2.19 | 0.88 |
| 100781 | INTERGENIC | Sgl Promoter | 0.84 | 0.33 | 0.87 | 0.35 | 0.63 | 0.20 |
| 99860  | INTERGENIC | Sgl Promoter | 0.11 | 0.00 | 0.25 | 0.01 | 1.07 | 0.45 |
| 98527  | INTERGENIC | Non Promoter | #N/A | #N/A | #N/A | #N/A | #N/A | #N/A |
| 97111  | INTERGENIC | Dbl Promoter | 0.90 | 0.36 | 0.77 | 0.28 | 1.13 | 0.49 |
| 95065  | INTERGENIC | Non Promoter | 0.65 | 0.23 | #N/A | #N/A | 0.86 | 0.35 |
| 93619  | INTERGENIC | Dbl Promoter | 1.57 | 0.68 | 1.80 | 0.84 | 2.37 | 0.90 |

|        |            |              |      |      |      |      |      |      |
|--------|------------|--------------|------|------|------|------|------|------|
| 89948  | INTERGENIC | Sgl Promoter | #N/A | #N/A | 1.49 | 0.72 | #N/A | #N/A |
| 89230  | INTERGENIC | Sgl Promoter | 1.19 | 0.51 | 1.03 | 0.45 | 0.98 | 0.42 |
| 87979  | INTERGENIC | Non Promoter | #N/A | #N/A | #N/A | #N/A | #N/A | #N/A |
| 85053  | INTERGENIC | Sgl Promoter | 1.15 | 0.48 | 0.58 | 0.14 | #N/A | #N/A |
| 83302  | INTERGENIC | Dbl Promoter | 2.56 | 0.90 | 2.71 | 0.98 | 3.46 | 0.98 |
| 80510  | INTERGENIC | Non Promoter | 0.38 | 0.08 | #N/A | #N/A | 0.62 | 0.20 |
| 78074  | INTERGENIC | Dbl Promoter | 1.71 | 0.72 | 1.47 | 0.72 | 1.49 | 0.67 |
| 76354  | INTERGENIC | Sgl Promoter | 1.27 | 0.55 | #N/A | #N/A | 1.22 | 0.55 |
| 74184  | INTERGENIC | Sgl Promoter | 1.52 | 0.66 | 1.29 | 0.62 | 1.70 | 0.76 |
| 69791  | INTERGENIC | Non Promoter | #N/A | #N/A | #N/A | #N/A | #N/A | #N/A |
| 68708  | INTERGENIC | Dbl Promoter | 1.32 | 0.57 | 0.87 | 0.34 | 1.03 | 0.44 |
| 63028  | INTERGENIC | Sgl Promoter | 1.20 | 0.52 | 1.09 | 0.49 | 1.37 | 0.62 |
| 61013  | INTERGENIC | Sgl Promoter | 2.78 | 0.92 | 2.06 | 0.91 | 1.93 | 0.83 |
| 57338  | INTERGENIC | Non Promoter | #N/A | #N/A | #N/A | #N/A | #N/A | #N/A |
| 56545  | INTERGENIC | Sgl Promoter | #N/A | #N/A | 1.66 | 0.77 | 1.84 | 0.74 |
| 55198  | INTERGENIC | Dbl Promoter | 3.43 | 0.98 | 2.93 | 0.99 | 2.44 | 0.92 |
| 53981  | INTERGENIC | Sgl Promoter | 2.64 | 0.92 | #N/A | #N/A | 2.18 | 0.87 |
| 51759  | INTERGENIC | Non Promoter | #N/A | #N/A | 0.51 | 0.10 | 0.72 | 0.26 |
| 48091  | INTERGENIC | Dbl Promoter | 2.88 | 0.95 | 2.67 | 0.98 | 2.55 | 0.92 |
| 46949  | INTERGENIC | Non Promoter | #N/A | #N/A | 0.81 | 0.30 | #N/A | #N/A |
| 46201  | INTERGENIC | Sgl Promoter | #N/A | #N/A | #N/A | #N/A | #N/A | #N/A |
| 41825  | INTERGENIC | Dbl Promoter | 1.87 | 0.78 | 1.58 | 0.76 | 2.31 | 0.90 |
| 39433  | INTERGENIC | Sgl Promoter | 2.09 | 0.83 | 1.72 | 0.81 | 1.67 | 0.74 |
| 37385  | INTERGENIC | Dbl Promoter | #N/A | #N/A | #N/A | #N/A | #N/A | #N/A |
| 35792  | INTERGENIC | Sgl Promoter | 1.44 | 0.63 | 1.13 | 0.52 | 1.14 | 0.51 |
| 36899  | INTERGENIC | Sgl Promoter | 1.35 | 0.57 | 1.50 | 0.73 | 1.35 | 0.61 |
| 33718  | INTERGENIC | Sgl Promoter | 1.34 | 0.58 | 1.65 | 0.79 | 1.07 | 0.46 |
| 30938  | INTERGENIC | Non Promoter | 1.29 | 0.56 | 0.77 | 0.28 | 0.84 | 0.33 |
| 27569  | INTERGENIC | Dbl Promoter | 0.40 | 0.09 | 0.80 | 0.30 | 0.66 | 0.22 |
| 29032  | INTERGENIC | Dbl Promoter | 0.50 | 0.14 | 0.83 | 0.32 | 0.65 | 0.21 |
| 22169  | INTERGENIC | Non Promoter | 0.80 | 0.31 | 1.09 | 0.48 | 0.65 | 0.22 |
| 23119  | INTERGENIC | Non Promoter | #N/A | #N/A | 0.78 | 0.29 | 0.31 | 0.03 |
| 19515  | INTERGENIC | Dbl Promoter | 1.47 | 0.64 | 1.03 | 0.45 | 1.17 | 0.52 |
| 16784  | INTERGENIC | Non Promoter | 0.88 | 0.35 | 0.98 | 0.42 | #N/A | #N/A |
| 10594  | INTERGENIC | Sgl Promoter | 1.12 | 0.48 | 1.18 | 0.55 | 1.28 | 0.58 |
| 11492  | INTERGENIC | Sgl Promoter | 1.88 | 0.78 | 1.37 | 0.66 | 1.77 | 0.76 |
| 8793   | INTERGENIC | Sgl Promoter | 0.43 | 0.10 | 0.48 | 0.08 | 0.55 | 0.15 |
| 197589 | INTERGENIC | Non Promoter | #N/A | #N/A | #N/A | #N/A | #N/A | #N/A |
| 300827 | INTERGENIC | Sgl Promoter | #N/A | #N/A | #N/A | #N/A | #N/A | #N/A |
| 338117 | INTERGENIC | Dbl Promoter | 1.24 | 0.54 | 1.48 | 0.72 | 1.02 | 0.43 |
| 339341 | INTERGENIC | Dbl Promoter | 0.77 | 0.30 | 1.09 | 0.49 | 0.70 | 0.25 |
| 197137 | INTERGENIC | Non Promoter | #N/A | #N/A | #N/A | #N/A | #N/A | #N/A |
| 357412 | INTERGENIC | Sgl Promoter | 0.75 | 0.29 | 1.14 | 0.53 | 0.99 | 0.42 |
| 360882 | INTERGENIC | Dbl Promoter | 1.37 | 0.58 | 1.25 | 0.59 | 1.84 | 0.78 |
| 363218 | INTERGENIC | Sgl Promoter | #N/A | #N/A | #N/A | #N/A | #N/A | #N/A |
| 364886 | INTERGENIC | Sgl Promoter | #N/A | #N/A | 1.31 | 0.62 | #N/A | #N/A |
| 365463 | INTERGENIC | Non Promoter | #N/A | #N/A | #N/A | #N/A | #N/A | #N/A |
| 370414 | INTERGENIC | Dbl Promoter | 1.79 | 0.76 | 1.68 | 0.79 | 1.41 | 0.62 |
| 373074 | INTERGENIC | Non Promoter | #N/A | #N/A | #N/A | #N/A | #N/A | #N/A |
| 374522 | INTERGENIC | Dbl Promoter | 2.40 | 0.89 | 1.74 | 0.83 | 1.81 | 0.79 |
| 377284 | INTERGENIC | Non Promoter | #N/A | #N/A | #N/A | #N/A | #N/A | #N/A |

|        |            |              |      |      |      |      |      |      |
|--------|------------|--------------|------|------|------|------|------|------|
| 378483 | INTERGENIC | Dbl Promoter | #N/A | #N/A | 2.64 | 0.97 | 2.47 | 0.92 |
| 380016 | INTERGENIC | Non Promoter | #N/A | #N/A | #N/A | #N/A | #N/A | #N/A |
| 380981 | INTERGENIC | Dbl Promoter | 1.00 | 0.41 | 1.11 | 0.50 | 1.33 | 0.57 |
| 381945 | INTERGENIC | Sgl Promoter | 0.76 | 0.29 | 0.98 | 0.42 | 0.97 | 0.42 |
| 382625 | INTERGENIC | Sgl Promoter | 0.41 | 0.09 | 0.44 | 0.07 | 0.62 | 0.20 |
| 383553 | INTERGENIC | Non Promoter | #N/A | #N/A | 0.51 | 0.11 | 0.76 | 0.28 |
| 384606 | INTERGENIC | Dbl Promoter | 0.71 | 0.26 | 0.53 | 0.11 | #N/A | #N/A |
| 386751 | INTERGENIC | Non Promoter | 0.45 | 0.11 | 0.64 | 0.19 | 0.60 | 0.18 |
| 388159 | INTERGENIC | Non Promoter | 0.74 | 0.27 | 0.90 | 0.36 | 0.69 | 0.24 |
| 394914 | INTERGENIC | Dbl Promoter | 0.30 | 0.04 | 0.35 | 0.03 | 0.50 | 0.12 |
| 396223 | INTERGENIC | Sgl Promoter | 0.56 | 0.18 | 0.62 | 0.18 | 0.63 | 0.21 |
| 397291 | INTERGENIC | Sgl Promoter | 1.65 | 0.71 | 1.62 | 0.78 | 2.16 | 0.88 |
| 398730 | INTERGENIC | Sgl Promoter | 3.18 | 0.97 | 2.51 | 0.97 | 2.96 | 0.96 |
| 399774 | INTERGENIC | Sgl Promoter | 2.32 | 0.88 | 1.98 | 0.90 | 2.30 | 0.90 |
| 402838 | INTERGENIC | Non Promoter | 0.59 | 0.19 | #N/A | #N/A | #N/A | #N/A |
| 403656 | INTERGENIC | Dbl Promoter | 1.20 | 0.52 | 1.58 | 0.70 | 2.72 | 0.94 |
| 404870 | INTERGENIC | Non Promoter | #N/A | #N/A | 0.72 | 0.24 | 1.10 | 0.44 |
| 406257 | INTERGENIC | Sgl Promoter | 2.89 | 0.94 | 2.29 | 0.95 | 3.01 | 0.96 |
| 408465 | INTERGENIC | Dbl Promoter | 1.22 | 0.53 | 1.22 | 0.58 | 1.23 | 0.56 |
| 410804 | INTERGENIC | Sgl Promoter | 2.55 | 0.90 | 1.52 | 0.74 | 1.76 | 0.78 |
| 412033 | INTERGENIC | Non Promoter | #N/A | #N/A | 1.21 | 0.57 | #N/A | #N/A |
| 413012 | INTERGENIC | Sgl Promoter | #N/A | #N/A | 0.91 | 0.37 | 0.89 | 0.36 |
| 415027 | INTERGENIC | Sgl Promoter | #N/A | #N/A | 1.41 | 0.58 | 1.88 | 0.81 |
| 416121 | INTERGENIC | Dbl Promoter | 4.24 | 0.99 | 2.45 | 0.96 | 3.57 | 0.96 |
| 419612 | INTERGENIC | Non Promoter | #N/A | #N/A | #N/A | #N/A | #N/A | #N/A |
| 421023 | INTERGENIC | Sgl Promoter | #N/A | #N/A | 0.86 | 0.34 | #N/A | #N/A |
| 422071 | INTERGENIC | Sgl Promoter | 1.76 | 0.71 | 0.99 | 0.42 | 1.81 | 0.78 |
| 423125 | INTERGENIC | Dbl Promoter | 3.62 | 0.98 | 2.54 | 0.97 | 2.85 | 0.96 |
| 423806 | INTERGENIC | Non Promoter | 0.98 | 0.41 | 0.59 | 0.15 | #N/A | #N/A |
| 425354 | INTERGENIC | Sgl Promoter | 3.04 | 0.96 | 1.94 | 0.84 | 1.55 | 0.63 |
| 426198 | INTERGENIC | Sgl Promoter | 3.02 | 0.96 | 2.58 | 0.97 | 3.28 | 0.97 |
| 433385 | INTERGENIC | Sgl Promoter | 1.45 | 0.63 | 1.38 | 0.66 | 1.28 | 0.58 |
| 433925 | INTERGENIC | Dbl Promoter | 0.61 | 0.21 | 0.74 | 0.25 | 0.68 | 0.23 |
| 435270 | INTERGENIC | Non Promoter | 0.70 | 0.26 | 0.94 | 0.39 | 1.09 | 0.48 |
| 437040 | INTERGENIC | Sgl Promoter | 1.86 | 0.78 | 1.25 | 0.59 | 1.60 | 0.72 |
| 437991 | INTERGENIC | Sgl Promoter | 1.65 | 0.71 | 1.50 | 0.73 | 1.54 | 0.71 |
| 429136 | INTERGENIC | Sgl Promoter | 1.02 | 0.42 | 0.82 | 0.31 | 1.05 | 0.46 |
| 435996 | INTERGENIC | Sgl Promoter | 0.70 | 0.25 | 0.69 | 0.22 | 0.71 | 0.25 |
| 434851 | INTERGENIC | Dbl Promoter | 1.48 | 0.64 | 1.45 | 0.68 | 1.21 | 0.54 |
| 432909 | INTERGENIC | Non Promoter | #N/A | #N/A | #N/A | #N/A | #N/A | #N/A |
| 432332 | INTERGENIC | Dbl Promoter | #N/A | #N/A | #N/A | #N/A | 1.41 | 0.63 |
| 431277 | INTERGENIC | Non Promoter | #N/A | #N/A | 0.25 | 0.01 | 0.56 | 0.16 |
| 424120 | INTERGENIC | Dbl Promoter | #N/A | #N/A | 0.50 | 0.11 | 1.18 | 0.46 |
| 421634 | INTERGENIC | Sgl Promoter | #N/A | #N/A | 1.53 | 0.75 | #N/A | #N/A |
| 419543 | INTERGENIC | Dbl Promoter | #N/A | #N/A | #N/A | #N/A | #N/A | #N/A |
| 414654 | INTERGENIC | Sgl Promoter | #N/A | #N/A | 1.84 | 0.80 | #N/A | #N/A |
| 413973 | INTERGENIC | Sgl Promoter | 0.94 | 0.39 | 1.08 | 0.48 | 1.11 | 0.49 |
| 411141 | INTERGENIC | Sgl Promoter | 0.62 | 0.21 | 1.11 | 0.50 | 0.95 | 0.40 |
| 409182 | INTERGENIC | Non Promoter | #N/A | #N/A | 0.71 | 0.24 | 0.52 | 0.13 |
| 406448 | INTERGENIC | Sgl Promoter | 0.60 | 0.20 | 0.90 | 0.37 | 0.89 | 0.36 |
| 405279 | INTERGENIC | Sgl Promoter | 1.79 | 0.73 | 1.13 | 0.52 | 1.24 | 0.56 |



|        |            |              |      |      |      |      |      |      |
|--------|------------|--------------|------|------|------|------|------|------|
| 402589 | INTERGENIC | Dbl Promoter | 2.76 | 0.93 | 2.08 | 0.91 | 2.67 | 0.92 |
| 398633 | INTERGENIC | Non Promoter | 1.84 | 0.77 | 1.40 | 0.67 | 1.89 | 0.79 |
| 396422 | INTERGENIC | Sgl Promoter | #N/A | #N/A | #N/A | #N/A | #N/A | #N/A |
| 395627 | INTERGENIC | Non Promoter | 0.48 | 0.13 | 0.52 | 0.11 | 0.62 | 0.20 |
| 393663 | INTERGENIC | Sgl Promoter | #N/A | #N/A | #N/A | #N/A | #N/A | #N/A |
| 392100 | INTERGENIC | Dbl Promoter | 1.66 | 0.71 | 2.00 | 0.89 | 1.26 | 0.52 |
| 391529 | INTERGENIC | Non Promoter | #N/A | #N/A | 0.50 | 0.09 | 0.29 | 0.03 |
| 390739 | INTERGENIC | Dbl Promoter | #N/A | #N/A | 1.89 | 0.87 | #N/A | #N/A |
| 388081 | INTERGENIC | Non Promoter | #N/A | #N/A | #N/A | #N/A | #N/A | #N/A |
| 387353 | INTERGENIC | Dbl Promoter | 1.66 | 0.63 | 1.54 | 0.73 | 1.53 | 0.70 |
| 386044 | INTERGENIC | Sgl Promoter | #N/A | #N/A | #N/A | #N/A | #N/A | #N/A |
| 383533 | INTERGENIC | Sgl Promoter | 1.21 | 0.52 | 1.11 | 0.50 | 1.23 | 0.56 |
| 381023 | INTERGENIC | Dbl Promoter | 1.15 | 0.49 | 1.23 | 0.57 | 1.13 | 0.50 |
| 379945 | INTERGENIC | Non Promoter | #N/A | #N/A | #N/A | #N/A | #N/A | #N/A |
| 377294 | INTERGENIC | Sgl Promoter | #N/A | #N/A | 1.52 | 0.73 | #N/A | #N/A |
| 376358 | INTERGENIC | Dbl Promoter | 1.56 | 0.68 | 1.35 | 0.65 | #N/A | #N/A |
| 374120 | INTERGENIC | Sgl Promoter | 1.44 | 0.63 | 1.17 | 0.54 | 1.52 | 0.68 |
| 359826 | INTERGENIC | Dbl Promoter | 1.17 | 0.50 | 1.08 | 0.48 | 1.05 | 0.46 |
| 357996 | INTERGENIC | Non Promoter | 1.46 | 0.63 | 1.14 | 0.52 | 1.10 | 0.49 |
| 353940 | INTERGENIC | Sgl Promoter | 0.46 | 0.12 | 0.39 | 0.05 | 0.48 | 0.11 |
| 351956 | INTERGENIC | Dbl Promoter | 1.64 | 0.70 | 1.31 | 0.60 | 1.70 | 0.74 |
| 348826 | INTERGENIC | Sgl Promoter | 0.48 | 0.13 | 0.65 | 0.20 | 0.40 | 0.07 |
| 347143 | INTERGENIC | Non Promoter | #N/A | #N/A | #N/A | #N/A | #N/A | #N/A |
| 345669 | INTERGENIC | Sgl Promoter | #N/A | #N/A | #N/A | #N/A | #N/A | #N/A |
| 339483 | INTERGENIC | Sgl Promoter | 0.95 | 0.39 | 0.88 | 0.35 | 0.68 | 0.24 |
| 337967 | INTERGENIC | Sgl Promoter | 1.26 | 0.54 | 1.42 | 0.68 | 1.10 | 0.47 |
| 335594 | INTERGENIC | Sgl Promoter | #N/A | #N/A | #N/A | #N/A | 1.62 | 0.71 |
| 333961 | INTERGENIC | Sgl Promoter | #N/A | #N/A | 2.31 | 0.90 | #N/A | #N/A |
| 333053 | INTERGENIC | Dbl Promoter | 2.36 | 0.88 | 2.59 | 0.97 | 1.90 | 0.82 |
| 330127 | INTERGENIC | Sgl Promoter | #N/A | #N/A | #N/A | #N/A | #N/A | #N/A |
| 327814 | INTERGENIC | Sgl Promoter | 1.31 | 0.55 | 1.35 | 0.64 | 1.39 | 0.64 |
| 324660 | INTERGENIC | Sgl Promoter | #N/A | #N/A | #N/A | #N/A | #N/A | #N/A |
| 323082 | INTERGENIC | Sgl Promoter | 1.19 | 0.51 | 1.00 | 0.43 | 1.13 | 0.50 |
| 319712 | INTERGENIC | Sgl Promoter | #N/A | #N/A | #N/A | #N/A | #N/A | #N/A |
| 316980 | INTERGENIC | Dbl Promoter | 2.98 | 0.94 | 2.05 | 0.90 | 2.64 | 0.91 |
| 315455 | INTERGENIC | Non Promoter | 2.51 | 0.90 | 2.32 | 0.95 | 3.21 | 0.95 |
| 314750 | INTERGENIC | Sgl Promoter | #N/A | #N/A | 1.49 | 0.72 | #N/A | #N/A |
| 313780 | INTERGENIC | Dbl Promoter | 2.18 | 0.85 | 2.03 | 0.88 | #N/A | #N/A |
| 312712 | INTERGENIC | Sgl Promoter | #N/A | #N/A | #N/A | #N/A | #N/A | #N/A |
| 310618 | INTERGENIC | Sgl Promoter | #N/A | #N/A | #N/A | #N/A | #N/A | #N/A |
| 307667 | INTERGENIC | Non Promoter | #N/A | #N/A | #N/A | #N/A | #N/A | #N/A |
| 305828 | INTERGENIC | Dbl Promoter | 1.85 | 0.77 | 1.88 | 0.86 | 1.34 | 0.61 |
| 304917 | INTERGENIC | Non Promoter | #N/A | #N/A | 0.86 | 0.34 | #N/A | #N/A |
| 302877 | INTERGENIC | Dbl Promoter | 2.31 | 0.88 | 2.08 | 0.90 | 1.92 | 0.80 |
| 298853 | INTERGENIC | Sgl Promoter | #N/A | #N/A | #N/A | #N/A | #N/A | #N/A |
| 294941 | INTERGENIC | Dbl Promoter | 3.15 | 0.96 | 1.49 | 0.72 | 2.59 | 0.93 |
| 294362 | INTERGENIC | Sgl Promoter | 0.37 | 0.07 | 0.51 | 0.11 | 0.43 | 0.08 |
| 291032 | INTERGENIC | Sgl Promoter | 0.81 | 0.32 | 0.87 | 0.34 | 0.81 | 0.31 |
| 289571 | INTERGENIC | Sgl Promoter | 1.47 | 0.64 | 1.18 | 0.55 | 1.42 | 0.65 |
| 285254 | INTERGENIC | Sgl Promoter | 2.73 | 0.92 | 2.20 | 0.92 | 2.39 | 0.88 |
| 283498 | INTERGENIC | Non Promoter | 0.42 | 0.09 | 0.69 | 0.22 | 0.61 | 0.19 |

|        |            |              |      |      |      |      |      |      |
|--------|------------|--------------|------|------|------|------|------|------|
| 280881 | INTERGENIC | Sgl Promoter | 0.75 | 0.28 | 1.10 | 0.49 | 0.69 | 0.24 |
| 278537 | INTERGENIC | Dbl Promoter | 1.91 | 0.78 | 1.69 | 0.81 | 1.72 | 0.76 |
| 274558 | INTERGENIC | Non Promoter | #N/A | #N/A | #N/A | #N/A | #N/A | #N/A |
| 269698 | INTERGENIC | Non Promoter | #N/A | #N/A | #N/A | #N/A | #N/A | #N/A |
| 268189 | INTERGENIC | Sgl Promoter | #N/A | #N/A | 0.61 | 0.16 | 0.24 | 0.02 |
| 265622 | INTERGENIC | Dbl Promoter | 0.67 | 0.23 | 1.01 | 0.44 | 0.88 | 0.36 |
| 262453 | INTERGENIC | Sgl Promoter | 1.20 | 0.47 | 1.33 | 0.62 | 1.54 | 0.68 |
| 260776 | INTERGENIC | Non Promoter | #N/A | #N/A | 0.67 | 0.21 | 0.90 | 0.36 |
| 257119 | INTERGENIC | Dbl Promoter | 4.47 | 0.99 | 3.20 | 0.99 | 3.39 | 0.98 |
| 254433 | INTERGENIC | Sgl Promoter | #N/A | #N/A | 1.15 | 0.50 | 0.93 | 0.39 |
| 251517 | INTERGENIC | Non Promoter | #N/A | #N/A | #N/A | #N/A | #N/A | #N/A |
| 246951 | INTERGENIC | Sgl Promoter | #N/A | #N/A | #N/A | #N/A | 1.57 | 0.71 |
| 245288 | INTERGENIC | Sgl Promoter | #N/A | #N/A | 1.74 | 0.67 | 1.69 | 0.76 |
| 241779 | INTERGENIC | Sgl Promoter | 1.19 | 0.51 | 1.24 | 0.58 | 1.00 | 0.42 |
| 239111 | INTERGENIC | Sgl Promoter | #N/A | #N/A | 1.39 | 0.66 | 1.26 | 0.57 |
| 236960 | INTERGENIC | Dbl Promoter | 0.89 | 0.36 | 1.00 | 0.44 | 0.71 | 0.25 |
| 233636 | INTERGENIC | Non Promoter | #N/A | #N/A | 0.53 | 0.11 | 0.51 | 0.13 |
| 230998 | INTERGENIC | Dbl Promoter | 3.13 | 0.96 | 2.12 | 0.90 | 1.87 | 0.79 |
| 228122 | INTERGENIC | Non Promoter | 0.65 | 0.22 | 0.93 | 0.39 | 0.57 | 0.16 |
| 223888 | INTERGENIC | Sgl Promoter | 1.55 | 0.67 | 1.05 | 0.47 | 1.41 | 0.65 |
| 224752 | INTERGENIC | Sgl Promoter | 0.51 | 0.15 | 0.61 | 0.17 | 0.76 | 0.28 |
| 221087 | INTERGENIC | Dbl Promoter | 0.74 | 0.28 | 1.18 | 0.55 | 0.44 | 0.09 |
| 217402 | INTERGENIC | Sgl Promoter | #N/A | #N/A | 1.13 | 0.49 | 1.46 | 0.64 |
| 211697 | INTERGENIC | Sgl Promoter | 1.11 | 0.46 | 0.94 | 0.39 | 0.70 | 0.25 |
| 209619 | INTERGENIC | Non Promoter | #N/A | #N/A | 0.61 | 0.16 | 0.44 | 0.09 |
| 207574 | INTERGENIC | Sgl Promoter | 1.32 | 0.57 | 1.57 | 0.76 | 1.54 | 0.70 |
| 203099 | INTERGENIC | Sgl Promoter | #N/A | #N/A | #N/A | #N/A | #N/A | #N/A |
| 197012 | INTERGENIC | Sgl Promoter | #N/A | #N/A | #N/A | #N/A | #N/A | #N/A |
| 195986 | INTERGENIC | Dbl Promoter | 0.73 | 0.27 | 0.92 | 0.38 | 0.62 | 0.20 |
| 193560 | INTERGENIC | Non Promoter | #N/A | #N/A | #N/A | #N/A | 0.95 | 0.40 |
| 192231 | INTERGENIC | Sgl Promoter | 1.17 | 0.50 | 1.18 | 0.53 | 1.01 | 0.43 |
| 191272 | INTERGENIC | Non Promoter | 1.44 | 0.63 | 1.45 | 0.70 | #N/A | #N/A |
| 190074 | INTERGENIC | Non Promoter | #N/A | #N/A | 0.92 | 0.38 | #N/A | #N/A |
| 189416 | INTERGENIC | Dbl Promoter | #N/A | #N/A | 1.61 | 0.78 | 1.88 | 0.79 |
| 187704 | INTERGENIC | Sgl Promoter | 1.37 | 0.59 | 1.52 | 0.73 | 1.40 | 0.64 |
| 186826 | INTERGENIC | Sgl Promoter | 1.30 | 0.56 | #N/A | #N/A | #N/A | #N/A |
| 185227 | INTERGENIC | Non Promoter | #N/A | #N/A | #N/A | #N/A | #N/A | #N/A |
| 184200 | INTERGENIC | Dbl Promoter | 2.04 | 0.80 | 1.75 | 0.83 | 2.90 | 0.93 |
| 180899 | INTERGENIC | Sgl Promoter | 1.15 | 0.49 | 1.27 | 0.61 | 0.86 | 0.35 |
| 181997 | INTERGENIC | Sgl Promoter | 1.30 | 0.57 | 1.48 | 0.72 | 1.02 | 0.44 |
| 177795 | INTERGENIC | Sgl Promoter | 0.95 | 0.39 | 1.02 | 0.44 | 1.29 | 0.58 |
| 173297 | INTERGENIC | Sgl Promoter | 0.50 | 0.14 | 0.67 | 0.20 | 0.48 | 0.11 |
| 165421 | INTERGENIC | Sgl Promoter | 1.58 | 0.66 | #N/A | #N/A | 1.07 | 0.47 |
| 163976 | INTERGENIC | Non Promoter | #N/A | #N/A | #N/A | #N/A | #N/A | #N/A |
| 161612 | INTERGENIC | Sgl Promoter | 0.73 | 0.27 | 0.83 | 0.32 | 0.91 | 0.37 |
| 160317 | INTERGENIC | Sgl Promoter | 0.30 | 0.04 | 0.43 | 0.06 | 0.39 | 0.06 |
| 157575 | INTERGENIC | Dbl Promoter | 0.53 | 0.16 | 0.47 | 0.08 | 0.49 | 0.13 |
| 156248 | INTERGENIC | Sgl Promoter | 0.74 | 0.28 | 1.14 | 0.52 | 0.85 | 0.34 |
| 154683 | INTERGENIC | Sgl Promoter | #N/A | #N/A | 0.92 | 0.38 | 0.86 | 0.34 |
| 153202 | INTERGENIC | Sgl Promoter | #N/A | #N/A | 0.67 | 0.23 | 0.96 | 0.41 |
| 151411 | INTERGENIC | Non Promoter | #N/A | #N/A | #N/A | #N/A | #N/A | #N/A |

|        |            |              |      |      |      |      |      |      |
|--------|------------|--------------|------|------|------|------|------|------|
| 150659 | INTERGENIC | Dbl Promoter | 1.56 | 0.65 | 1.28 | 0.61 | 1.76 | 0.77 |
| 147517 | INTERGENIC | Non Promoter | 1.86 | 0.77 | 1.55 | 0.74 | 1.26 | 0.57 |
| 146799 | INTERGENIC | Sgl Promoter | 3.21 | 0.97 | 2.29 | 0.94 | 2.58 | 0.93 |
| 146057 | INTERGENIC | Sgl Promoter | 0.88 | 0.35 | 0.79 | 0.29 | 0.73 | 0.26 |
| 144858 | INTERGENIC | Sgl Promoter | 1.00 | 0.42 | #N/A | #N/A | #N/A | #N/A |
| 142990 | INTERGENIC | Dbl Promoter | 2.21 | 0.85 | 1.77 | 0.83 | 1.52 | 0.69 |
| 141117 | INTERGENIC | Non Promoter | #N/A | #N/A | 0.56 | 0.13 | #N/A | #N/A |
| 139263 | INTERGENIC | Sgl Promoter | #N/A | #N/A | #N/A | #N/A | #N/A | #N/A |
| 136821 | INTERGENIC | Dbl Promoter | 0.71 | 0.26 | 0.64 | 0.19 | 0.77 | 0.29 |
| 135872 | INTERGENIC | Dbl Promoter | 0.43 | 0.11 | 0.58 | 0.15 | 0.32 | 0.04 |
| 134030 | INTERGENIC | Sgl Promoter | 1.19 | 0.50 | 1.17 | 0.54 | 1.29 | 0.58 |
| 130799 | INTERGENIC | Sgl Promoter | 0.95 | 0.39 | 0.89 | 0.36 | 1.24 | 0.56 |
| 128983 | INTERGENIC | Sgl Promoter | #N/A | #N/A | #N/A | #N/A | #N/A | #N/A |
| 126587 | INTERGENIC | Sgl Promoter | 0.53 | 0.16 | 0.85 | 0.33 | 0.71 | 0.25 |
| 123533 | INTERGENIC | Sgl Promoter | 0.45 | 0.12 | 0.69 | 0.22 | 0.42 | 0.07 |
| 121962 | INTERGENIC | Non Promoter | 0.65 | 0.23 | 0.97 | 0.41 | 0.69 | 0.24 |
| 119632 | INTERGENIC | Dbl Promoter | 1.41 | 0.61 | 1.50 | 0.73 | 1.49 | 0.68 |
| 120444 | INTERGENIC | Dbl Promoter | 0.68 | 0.24 | 1.10 | 0.48 | 0.79 | 0.30 |
| 118278 | INTERGENIC | Non Promoter | 1.97 | 0.81 | 1.64 | 0.79 | 1.46 | 0.67 |
| 114175 | INTERGENIC | Sgl Promoter | #N/A | #N/A | 1.19 | 0.56 | 1.29 | 0.58 |
| 111660 | INTERGENIC | Sgl Promoter | 2.35 | 0.89 | 1.64 | 0.79 | 1.50 | 0.68 |
| 109958 | INTERGENIC | Sgl Promoter | 1.65 | 0.71 | 1.81 | 0.85 | 1.52 | 0.69 |
| 106886 | INTERGENIC | Non Promoter | #N/A | #N/A | #N/A | #N/A | #N/A | #N/A |
| 106426 | INTERGENIC | Sgl Promoter | 0.76 | 0.29 | 0.69 | 0.22 | 0.97 | 0.41 |
| 105006 | INTERGENIC | Dbl Promoter | 2.25 | 0.86 | 2.07 | 0.91 | 2.37 | 0.91 |
| 102091 | INTERGENIC | Dbl Promoter | 0.74 | 0.28 | 0.94 | 0.39 | 0.62 | 0.20 |
| 101143 | INTERGENIC | Sgl Promoter | #N/A | #N/A | #N/A | #N/A | #N/A | #N/A |
| 99697  | INTERGENIC | Non Promoter | #N/A | #N/A | #N/A | #N/A | #N/A | #N/A |
| 97730  | INTERGENIC | Dbl Promoter | 2.29 | 0.87 | 1.63 | 0.78 | 1.39 | 0.64 |
| 96158  | INTERGENIC | Non Promoter | #N/A | #N/A | #N/A | #N/A | #N/A | #N/A |
| 95089  | INTERGENIC | Sgl Promoter | 3.45 | 0.97 | 3.17 | 0.99 | 3.74 | 0.96 |
| 92050  | INTERGENIC | Non Promoter | #N/A | #N/A | #N/A | #N/A | #N/A | #N/A |
| 90783  | INTERGENIC | Dbl Promoter | 0.37 | 0.07 | 0.56 | 0.13 | 0.63 | 0.20 |
| 89280  | INTERGENIC | Non Promoter | #N/A | #N/A | #N/A | #N/A | #N/A | #N/A |
| 88785  | INTERGENIC | Dbl Promoter | #N/A | #N/A | #N/A | #N/A | #N/A | #N/A |
| 87581  | INTERGENIC | Non Promoter | #N/A | #N/A | #N/A | #N/A | #N/A | #N/A |
| 85433  | INTERGENIC | Non Promoter | #N/A | #N/A | #N/A | #N/A | #N/A | #N/A |
| 84066  | INTERGENIC | Sgl Promoter | 3.93 | 0.98 | 2.69 | 0.98 | #N/A | #N/A |
| 83446  | INTERGENIC | Dbl Promoter | 2.16 | 0.85 | 1.52 | 0.74 | 1.71 | 0.76 |
| 82093  | INTERGENIC | Non Promoter | #N/A | #N/A | #N/A | #N/A | #N/A | #N/A |
| 80153  | INTERGENIC | Dbl Promoter | 0.65 | 0.22 | 1.10 | 0.49 | 0.90 | 0.37 |
| 76802  | INTERGENIC | Sgl Promoter | #N/A | #N/A | #N/A | #N/A | #N/A | #N/A |
| 75932  | INTERGENIC | Dbl Promoter | 0.12 | 0.00 | 0.08 | 0.00 | 0.11 | 0.00 |
| 74909  | INTERGENIC | Non Promoter | #N/A | #N/A | #N/A | #N/A | #N/A | #N/A |
| 73786  | INTERGENIC | Dbl Promoter | 0.52 | 0.15 | #N/A | #N/A | 0.58 | 0.19 |
| 72709  | INTERGENIC | Non Promoter | #N/A | #N/A | #N/A | #N/A | #N/A | #N/A |
| 71365  | INTERGENIC | Sgl Promoter | 2.63 | 0.92 | 2.21 | 0.93 | 2.22 | 0.89 |
| 69240  | INTERGENIC | Sgl Promoter | 0.79 | 0.31 | 0.93 | 0.38 | 1.04 | 0.45 |
| 67849  | INTERGENIC | Non Promoter | #N/A | #N/A | #N/A | #N/A | #N/A | #N/A |
| 63804  | INTERGENIC | Sgl Promoter | 2.52 | 0.89 | #N/A | #N/A | 2.11 | 0.87 |
| 60843  | INTERGENIC | Dbl Promoter | 3.71 | 0.98 | 2.02 | 0.90 | 2.20 | 0.88 |

|        |            |              |      |      |      |      |      |      |
|--------|------------|--------------|------|------|------|------|------|------|
| 59100  | INTERGENIC | Sgl Promoter | #N/A | #N/A | 0.26 | 0.01 | 0.85 | 0.34 |
| 56444  | INTERGENIC | Non Promoter | #N/A | #N/A | #N/A | #N/A | #N/A | #N/A |
| 54379  | INTERGENIC | Dbl Promoter | 1.81 | 0.75 | 2.01 | 0.90 | #N/A | #N/A |
| 53341  | INTERGENIC | Dbl Promoter | #N/A | #N/A | 2.04 | 0.91 | 1.50 | 0.60 |
| 50139  | INTERGENIC | Sgl Promoter | 1.57 | 0.68 | 1.95 | 0.83 | 1.56 | 0.71 |
| 50629  | INTERGENIC | Sgl Promoter | 2.22 | 0.85 | 1.54 | 0.72 | 1.51 | 0.68 |
| 47659  | INTERGENIC | Sgl Promoter | 1.23 | 0.53 | 1.74 | 0.81 | 1.54 | 0.70 |
| 41389  | INTERGENIC | Sgl Promoter | #N/A | #N/A | #N/A | #N/A | #N/A | #N/A |
| 40194  | INTERGENIC | Non Promoter | #N/A | #N/A | #N/A | #N/A | #N/A | #N/A |
| 38005  | INTERGENIC | Sgl Promoter | #N/A | #N/A | #N/A | #N/A | #N/A | #N/A |
| 36757  | INTERGENIC | Sgl Promoter | 0.86 | 0.34 | 1.54 | 0.73 | 1.00 | 0.43 |
| 33850  | INTERGENIC | Non Promoter | 0.40 | 0.09 | 1.26 | 0.59 | 0.99 | 0.42 |
| 29785  | INTERGENIC | Sgl Promoter | 1.40 | 0.61 | 1.22 | 0.57 | 1.18 | 0.53 |
| 30974  | INTERGENIC | Sgl Promoter | 0.90 | 0.37 | 0.73 | 0.25 | 1.16 | 0.52 |
| 26887  | INTERGENIC | Dbl Promoter | #N/A | #N/A | #N/A | #N/A | #N/A | #N/A |
| 26412  | INTERGENIC | Sgl Promoter | 0.99 | 0.41 | 1.13 | 0.51 | 1.47 | 0.67 |
| 24341  | INTERGENIC | Non Promoter | 0.75 | 0.28 | 1.11 | 0.50 | 1.26 | 0.57 |
| 23133  | INTERGENIC | Sgl Promoter | 1.25 | 0.54 | 1.41 | 0.68 | 1.06 | 0.46 |
| 21973  | INTERGENIC | Sgl Promoter | 1.44 | 0.62 | 1.45 | 0.70 | 1.54 | 0.70 |
| 19497  | INTERGENIC | Sgl Promoter | 1.37 | 0.60 | 1.01 | 0.44 | 1.19 | 0.53 |
| 16767  | INTERGENIC | Non Promoter | #N/A | #N/A | 0.94 | 0.39 | 1.12 | 0.49 |
| 10306  | INTERGENIC | Dbl Promoter | 0.77 | 0.29 | 0.81 | 0.31 | 0.83 | 0.32 |
| 8776   | INTERGENIC | Sgl Promoter | 0.45 | 0.11 | 0.52 | 0.10 | 0.59 | 0.18 |
| 204432 | INTERGENIC | Sgl Promoter | 0.71 | 0.26 | #N/A | #N/A | #N/A | #N/A |
| 355070 | INTERGENIC | Sgl Promoter | 0.62 | 0.21 | 0.82 | 0.30 | 1.48 | 0.68 |
| 374811 | INTERGENIC | Sgl Promoter | 1.80 | 0.75 | 1.73 | 0.77 | 2.10 | 0.84 |
| 378056 | INTERGENIC | Sgl Promoter | 0.77 | 0.30 | 1.05 | 0.47 | 1.09 | 0.49 |
| 59855  | INTERGENIC | Sgl Promoter | #N/A | #N/A | #N/A | #N/A | #N/A | #N/A |
| 531516 | INTERGENIC | Sgl Promoter | 0.40 | 0.08 | 1.05 | 0.46 | 0.52 | 0.13 |
| 541196 | INTERGENIC | Non Promoter | #N/A | #N/A | #N/A | #N/A | #N/A | #N/A |
| 416587 | INTERGENIC | Sgl Promoter | 1.56 | 0.68 | 1.97 | 0.89 | 1.34 | 0.61 |
| 417250 | INTERGENIC | Sgl Promoter | 1.81 | 0.73 | 1.26 | 0.60 | 1.43 | 0.65 |
| 422289 | INTERGENIC | Sgl Promoter | #N/A | #N/A | #N/A | #N/A | #N/A | #N/A |
| 438552 | INTERGENIC | Sgl Promoter | #N/A | #N/A | #N/A | #N/A | #N/A | #N/A |
| 440681 | INTERGENIC | Non Promoter | 0.40 | 0.09 | #N/A | #N/A | 0.62 | 0.20 |
| 442596 | INTERGENIC | Sgl Promoter | #N/A | #N/A | 0.96 | 0.40 | 1.02 | 0.44 |
| 445610 | INTERGENIC | Dbl Promoter | 1.12 | 0.48 | 1.24 | 0.59 | 1.29 | 0.58 |
| 448889 | INTERGENIC | Sgl Promoter | 1.08 | 0.46 | 1.26 | 0.59 | 1.26 | 0.57 |
| 450707 | INTERGENIC | Sgl Promoter | #N/A | #N/A | 1.63 | 0.75 | 1.41 | 0.65 |
| 452117 | INTERGENIC | Sgl Promoter | 0.84 | 0.33 | 0.95 | 0.40 | 0.76 | 0.29 |
| 453370 | INTERGENIC | Non Promoter | #N/A | #N/A | #N/A | #N/A | #N/A | #N/A |
| 455147 | INTERGENIC | Dbl Promoter | 0.39 | 0.08 | 0.70 | 0.23 | 0.33 | 0.06 |
| 458328 | INTERGENIC | Sgl Promoter | 1.99 | 0.80 | 1.81 | 0.85 | 2.13 | 0.87 |
| 457764 | INTERGENIC | Non Promoter | 0.76 | 0.29 | 0.96 | 0.40 | 1.29 | 0.54 |
| 459482 | INTERGENIC | Sgl Promoter | 1.89 | 0.78 | 1.77 | 0.84 | 2.38 | 0.91 |
| 460364 | INTERGENIC | Dbl Promoter | 1.36 | 0.59 | 1.43 | 0.69 | 1.44 | 0.66 |
| 461517 | INTERGENIC | Sgl Promoter | #N/A | #N/A | #N/A | #N/A | #N/A | #N/A |
| 462409 | INTERGENIC | Sgl Promoter | 0.67 | 0.24 | 0.84 | 0.32 | 0.89 | 0.36 |
| 464139 | INTERGENIC | Non Promoter | #N/A | #N/A | #N/A | #N/A | #N/A | #N/A |
| 466209 | INTERGENIC | Sgl Promoter | 0.52 | 0.16 | 0.74 | 0.25 | #N/A | #N/A |
| 466920 | INTERGENIC | Non Promoter | #N/A | #N/A | #N/A | #N/A | #N/A | #N/A |

|        |            |              |      |      |      |      |      |      |
|--------|------------|--------------|------|------|------|------|------|------|
| 468243 | INTERGENIC | Non Promoter | 1.25 | 0.54 | 1.19 | 0.55 | 1.11 | 0.49 |
| 469415 | INTERGENIC | Dbl Promoter | 1.49 | 0.64 | 1.70 | 0.81 | 1.32 | 0.60 |
| 470826 | INTERGENIC | Sgl Promoter | 0.94 | 0.39 | 1.55 | 0.75 | 1.26 | 0.57 |
| 472151 | INTERGENIC | Dbl Promoter | 0.81 | 0.32 | 1.02 | 0.44 | 0.81 | 0.32 |
| 486274 | INTERGENIC | Sgl Promoter | #N/A | #N/A | 1.05 | 0.46 | 0.69 | 0.24 |
| 490769 | INTERGENIC | Dbl Promoter | 2.69 | 0.93 | 1.78 | 0.68 | 2.81 | 0.95 |
| 492066 | INTERGENIC | Non Promoter | #N/A | #N/A | #N/A | #N/A | #N/A | #N/A |
| 497043 | INTERGENIC | Sgl Promoter | #N/A | #N/A | #N/A | #N/A | #N/A | #N/A |
| 500401 | INTERGENIC | Non Promoter | #N/A | #N/A | #N/A | #N/A | #N/A | #N/A |
| 503398 | INTERGENIC | Non Promoter | 3.03 | 0.96 | 1.95 | 0.86 | 2.68 | 0.94 |
| 507434 | INTERGENIC | Sgl Promoter | 2.26 | 0.87 | 1.92 | 0.87 | 2.28 | 0.89 |
| 509927 | INTERGENIC | Non Promoter | #N/A | #N/A | #N/A | #N/A | #N/A | #N/A |
| 513743 | INTERGENIC | Dbl Promoter | #N/A | #N/A | 1.72 | 0.81 | #N/A | #N/A |
| 516149 | INTERGENIC | Non Promoter | #N/A | #N/A | #N/A | #N/A | #N/A | #N/A |
| 517501 | INTERGENIC | Sgl Promoter | 1.93 | 0.79 | 2.04 | 0.88 | #N/A | #N/A |
| 519326 | INTERGENIC | Sgl Promoter | 2.19 | 0.85 | 1.40 | 0.68 | 1.12 | 0.48 |
| 521736 | INTERGENIC | Dbl Promoter | 1.77 | 0.75 | 1.37 | 0.66 | 1.25 | 0.56 |
| 523700 | INTERGENIC | Non Promoter | #N/A | #N/A | #N/A | #N/A | #N/A | #N/A |
| 526023 | INTERGENIC | Dbl Promoter | 0.43 | 0.10 | 0.56 | 0.13 | 0.42 | 0.08 |
| 526572 | INTERGENIC | Non Promoter | 0.80 | 0.30 | 0.87 | 0.34 | 0.90 | 0.36 |
| 528385 | INTERGENIC | Dbl Promoter | 1.25 | 0.53 | 1.97 | 0.84 | #N/A | #N/A |
| 529549 | INTERGENIC | Sgl Promoter | 1.17 | 0.51 | #N/A | #N/A | 1.83 | 0.80 |
| 531204 | INTERGENIC | Sgl Promoter | #N/A | #N/A | #N/A | #N/A | #N/A | #N/A |
| 535744 | INTERGENIC | Sgl Promoter | #N/A | #N/A | 0.80 | 0.29 | 0.77 | 0.29 |
| 537429 | INTERGENIC | Sgl Promoter | #N/A | #N/A | #N/A | #N/A | #N/A | #N/A |
| 540454 | INTERGENIC | Non Promoter | 1.33 | 0.58 | 1.07 | 0.48 | 1.25 | 0.56 |
| 542644 | INTERGENIC | Dbl Promoter | 2.19 | 0.86 | 1.80 | 0.85 | 1.91 | 0.82 |
| 545475 | INTERGENIC | Dbl Promoter | 1.39 | 0.61 | 2.11 | 0.92 | 1.65 | 0.73 |
| 548447 | INTERGENIC | Sgl Promoter | 0.97 | 0.40 | 1.14 | 0.52 | 1.07 | 0.46 |
| 550199 | INTERGENIC | Sgl Promoter | 1.05 | 0.44 | 1.02 | 0.44 | 1.16 | 0.52 |
| 553164 | INTERGENIC | Non Promoter | #N/A | #N/A | #N/A | #N/A | #N/A | #N/A |
| 554883 | INTERGENIC | Dbl Promoter | 2.93 | 0.95 | 2.38 | 0.96 | 3.24 | 0.97 |
| 555602 | INTERGENIC | Sgl Promoter | 2.35 | 0.89 | 2.30 | 0.95 | 1.89 | 0.73 |
| 557497 | INTERGENIC | Non Promoter | #N/A | #N/A | 0.60 | 0.16 | 0.72 | 0.26 |
| 559104 | INTERGENIC | Dbl Promoter | 2.89 | 0.95 | 3.08 | 0.99 | 3.14 | 0.97 |
| 566707 | INTERGENIC | Non Promoter | #N/A | #N/A | #N/A | #N/A | #N/A | #N/A |
| 567331 | INTERGENIC | Dbl Promoter | 3.29 | 0.95 | #N/A | #N/A | 2.98 | 0.96 |
| 568494 | INTERGENIC | Non Promoter | #N/A | #N/A | #N/A | #N/A | #N/A | #N/A |
| 569309 | INTERGENIC | Sgl Promoter | 0.86 | 0.35 | 0.91 | 0.37 | 1.00 | 0.43 |
| 570655 | INTERGENIC | Non Promoter | 0.71 | 0.26 | 0.84 | 0.33 | 0.74 | 0.27 |
| 572003 | INTERGENIC | Sgl Promoter | #N/A | #N/A | #N/A | #N/A | 1.54 | 0.69 |
| 572783 | INTERGENIC | Dbl Promoter | #N/A | #N/A | 1.15 | 0.53 | 1.41 | 0.60 |
| 573669 | INTERGENIC | Sgl Promoter | 1.57 | 0.66 | #N/A | #N/A | 0.98 | 0.40 |
| 575042 | INTERGENIC | Non Promoter | #N/A | #N/A | #N/A | #N/A | #N/A | #N/A |
| 578548 | INTERGENIC | Dbl Promoter | 0.86 | 0.35 | 1.13 | 0.51 | 1.00 | 0.43 |
| 581602 | INTERGENIC | Sgl Promoter | 1.83 | 0.74 | 2.14 | 0.92 | #N/A | #N/A |
| 582296 | INTERGENIC | Sgl Promoter | 1.86 | 0.77 | 2.17 | 0.92 | 2.20 | 0.86 |
| 583421 | INTERGENIC | Dbl Promoter | 2.50 | 0.90 | 2.40 | 0.96 | 3.15 | 0.95 |
| 584808 | INTERGENIC | Non Promoter | #N/A | #N/A | #N/A | #N/A | #N/A | #N/A |
| 585756 | INTERGENIC | Dbl Promoter | #N/A | #N/A | #N/A | #N/A | #N/A | #N/A |
| 587406 | INTERGENIC | Dbl Promoter | 2.13 | 0.84 | 2.14 | 0.92 | 2.77 | 0.95 |



|        |            |              |      |      |      |      |      |      |
|--------|------------|--------------|------|------|------|------|------|------|
| 590560 | INTERGENIC | Non Promoter | 0.39 | 0.08 | 0.58 | 0.14 | 0.66 | 0.22 |
| 594749 | INTERGENIC | Sgl Promoter | 0.90 | 0.36 | 0.81 | 0.31 | 1.00 | 0.43 |
| 598807 | INTERGENIC | Dbl Promoter | 0.79 | 0.31 | 0.75 | 0.27 | 0.70 | 0.24 |
| 602911 | INTERGENIC | Non Promoter | 0.55 | 0.17 | #N/A | #N/A | #N/A | #N/A |
| 604260 | INTERGENIC | Sgl Promoter | 1.90 | 0.76 | 2.31 | 0.82 | 2.83 | 0.95 |
| 606669 | INTERGENIC | Dbl Promoter | 1.12 | 0.48 | 0.79 | 0.29 | 0.97 | 0.41 |
| 609464 | INTERGENIC | Sgl Promoter | 0.83 | 0.33 | 0.77 | 0.28 | 0.83 | 0.33 |
| 610886 | INTERGENIC | Sgl Promoter | 2.31 | 0.85 | 1.77 | 0.83 | 1.64 | 0.71 |
| 612104 | INTERGENIC | Sgl Promoter | #N/A | #N/A | 1.41 | 0.68 | #N/A | #N/A |
| 612877 | INTERGENIC | Non Promoter | #N/A | #N/A | #N/A | #N/A | #N/A | #N/A |
| 615264 | INTERGENIC | Dbl Promoter | 2.90 | 0.94 | 1.54 | 0.74 | 2.52 | 0.93 |
| 616039 | INTERGENIC | Non Promoter | #N/A | #N/A | #N/A | #N/A | #N/A | #N/A |
| 617607 | INTERGENIC | Dbl Promoter | 1.19 | 0.51 | 1.12 | 0.50 | 1.63 | 0.67 |
| 618845 | INTERGENIC | Non Promoter | #N/A | #N/A | #N/A | #N/A | #N/A | #N/A |
| 620442 | INTERGENIC | Dbl Promoter | 1.26 | 0.55 | 1.64 | 0.78 | 1.41 | 0.65 |
| 622237 | INTERGENIC | Non Promoter | #N/A | #N/A | #N/A | #N/A | #N/A | #N/A |
| 623268 | INTERGENIC | Dbl Promoter | 0.61 | 0.20 | 0.94 | 0.39 | 0.53 | 0.15 |
| 624525 | INTERGENIC | Sgl Promoter | 1.14 | 0.49 | 1.54 | 0.72 | 1.21 | 0.55 |
| 627028 | INTERGENIC | Sgl Promoter | 0.41 | 0.09 | 0.58 | 0.14 | 0.64 | 0.21 |
| 628401 | INTERGENIC | Sgl Promoter | 1.31 | 0.57 | 1.27 | 0.60 | 1.51 | 0.67 |
| 629274 | INTERGENIC | Non Promoter | #N/A | #N/A | #N/A | #N/A | #N/A | #N/A |
| 633304 | INTERGENIC | Dbl Promoter | 2.19 | 0.84 | 1.80 | 0.84 | 1.67 | 0.75 |
| 635544 | INTERGENIC | Non Promoter | #N/A | #N/A | #N/A | #N/A | #N/A | #N/A |
| 636719 | INTERGENIC | Dbl Promoter | 1.59 | 0.68 | 1.22 | 0.57 | 1.40 | 0.63 |
| 637921 | INTERGENIC | Non Promoter | 1.68 | 0.71 | 1.82 | 0.85 | 1.42 | 0.65 |
| 639631 | INTERGENIC | Sgl Promoter | 0.83 | 0.33 | 0.98 | 0.42 | 0.60 | 0.18 |
| 640514 | INTERGENIC | Sgl Promoter | 2.28 | 0.87 | 1.77 | 0.84 | 1.77 | 0.78 |
| 641696 | INTERGENIC | Sgl Promoter | 2.08 | 0.81 | 1.78 | 0.84 | 1.67 | 0.75 |
| 643179 | INTERGENIC | Non Promoter | #N/A | #N/A | #N/A | #N/A | 0.75 | 0.29 |
| 643993 | INTERGENIC | Sgl Promoter | #N/A | #N/A | #N/A | #N/A | #N/A | #N/A |
| 646815 | INTERGENIC | Dbl Promoter | 1.50 | 0.65 | 1.11 | 0.50 | 1.13 | 0.50 |
| 647296 | INTERGENIC | Sgl Promoter | #N/A | #N/A | #N/A | #N/A | 0.47 | 0.10 |
| 649465 | INTERGENIC | Sgl Promoter | #N/A | #N/A | #N/A | #N/A | #N/A | #N/A |
| 651590 | INTERGENIC | Sgl Promoter | 0.40 | 0.08 | 0.43 | 0.06 | 0.28 | 0.02 |
| 652581 | INTERGENIC | Non Promoter | #N/A | #N/A | #N/A | #N/A | #N/A | #N/A |
| 654426 | INTERGENIC | Sgl Promoter | 0.96 | 0.40 | 0.86 | 0.34 | 0.73 | 0.26 |
| 655943 | INTERGENIC | Sgl Promoter | 2.49 | 0.87 | 1.40 | 0.68 | 2.82 | 0.95 |
| 658606 | INTERGENIC | Sgl Promoter | 1.52 | 0.66 | #N/A | #N/A | 1.18 | 0.52 |
| 663437 | INTERGENIC | Non Promoter | 0.39 | 0.09 | 0.54 | 0.12 | 0.50 | 0.12 |
| 664907 | INTERGENIC | Sgl Promoter | 1.54 | 0.67 | 0.66 | 0.20 | 0.91 | 0.38 |
| 667333 | INTERGENIC | Dbl Promoter | 1.94 | 0.80 | 1.76 | 0.81 | 2.41 | 0.83 |
| 669211 | INTERGENIC | Sgl Promoter | #N/A | #N/A | 0.89 | 0.36 | 0.89 | 0.37 |
| 672680 | INTERGENIC | Sgl Promoter | 1.75 | 0.72 | 1.56 | 0.75 | 1.74 | 0.77 |
| 673418 | INTERGENIC | Non Promoter | #N/A | #N/A | #N/A | #N/A | #N/A | #N/A |
| 675748 | INTERGENIC | Sgl Promoter | #N/A | #N/A | #N/A | #N/A | #N/A | #N/A |
| 677130 | INTERGENIC | Dbl Promoter | 2.23 | 0.85 | 1.60 | 0.72 | #N/A | #N/A |
| 678646 | INTERGENIC | Sgl Promoter | #N/A | #N/A | #N/A | #N/A | #N/A | #N/A |
| 684256 | INTERGENIC | Dbl Promoter | 0.72 | 0.27 | 0.76 | 0.27 | 1.09 | 0.47 |
| 689134 | INTERGENIC | Non Promoter | #N/A | #N/A | #N/A | #N/A | #N/A | #N/A |
| 690439 | INTERGENIC | Sgl Promoter | 0.76 | 0.29 | 0.88 | 0.35 | 1.09 | 0.48 |
| 695595 | INTERGENIC | Dbl Promoter | 1.36 | 0.59 | 1.39 | 0.67 | #N/A | #N/A |

|        |            |              |      |      |      |      |      |      |
|--------|------------|--------------|------|------|------|------|------|------|
| 696830 | INTERGENIC | Sgl Promoter | #N/A | #N/A | #N/A | #N/A | #N/A | #N/A |
| 698015 | INTERGENIC | Non Promoter | #N/A | #N/A | 0.62 | 0.17 | 0.65 | 0.21 |
| 700571 | INTERGENIC | Dbl Promoter | #N/A | #N/A | 1.76 | 0.83 | 1.61 | 0.65 |
| 701716 | INTERGENIC | Non Promoter | 0.63 | 0.22 | 0.67 | 0.20 | 0.47 | 0.11 |
| 703574 | INTERGENIC | Dbl Promoter | 0.19 | 0.01 | 0.31 | 0.02 | 0.29 | 0.04 |
| 705433 | INTERGENIC | Sgl Promoter | #N/A | #N/A | #N/A | #N/A | #N/A | #N/A |
| 706849 | INTERGENIC | Sgl Promoter | #N/A | #N/A | 0.94 | 0.38 | #N/A | #N/A |
| 708500 | INTERGENIC | Non Promoter | 0.73 | 0.27 | 1.24 | 0.58 | 1.29 | 0.58 |
| 710670 | INTERGENIC | Sgl Promoter | 1.49 | 0.65 | 1.15 | 0.52 | 1.30 | 0.57 |
| 711944 | INTERGENIC | Sgl Promoter | 1.65 | 0.71 | 1.03 | 0.46 | 1.69 | 0.73 |
| 716737 | INTERGENIC | Dbl Promoter | 1.13 | 0.48 | 0.69 | 0.22 | 0.92 | 0.39 |
| 718045 | INTERGENIC | Dbl Promoter | 2.45 | 0.90 | 1.72 | 0.81 | 1.77 | 0.75 |
| 719355 | INTERGENIC | Dbl Promoter | 1.02 | 0.42 | 0.76 | 0.27 | 1.21 | 0.55 |
| 722504 | INTERGENIC | Sgl Promoter | 1.65 | 0.71 | 1.12 | 0.51 | 1.52 | 0.69 |
| 724531 | INTERGENIC | Sgl Promoter | 1.42 | 0.62 | 1.32 | 0.63 | 1.25 | 0.57 |
| 725473 | INTERGENIC | Sgl Promoter | 1.50 | 0.65 | 1.15 | 0.53 | 1.44 | 0.66 |
| 727094 | INTERGENIC | Sgl Promoter | 0.60 | 0.20 | 0.90 | 0.36 | 0.89 | 0.36 |
| 728263 | INTERGENIC | Non Promoter | #N/A | #N/A | #N/A | #N/A | #N/A | #N/A |
| 730204 | INTERGENIC | Dbl Promoter | 2.74 | 0.93 | 2.05 | 0.91 | 1.96 | 0.83 |
| 731347 | INTERGENIC | Sgl Promoter | 0.82 | 0.32 | 0.67 | 0.21 | 0.92 | 0.38 |
| 732129 | INTERGENIC | Sgl Promoter | 0.71 | 0.26 | 0.47 | 0.08 | 0.66 | 0.22 |
| 734782 | INTERGENIC | Sgl Promoter | 1.85 | 0.77 | 1.45 | 0.66 | 1.44 | 0.66 |
| 735733 | INTERGENIC | Sgl Promoter | 1.53 | 0.67 | 1.14 | 0.52 | 1.40 | 0.64 |
| 737697 | INTERGENIC | Non Promoter | 1.98 | 0.81 | 1.83 | 0.85 | 1.68 | 0.74 |
| 741021 | INTERGENIC | Sgl Promoter | 1.18 | 0.50 | 0.92 | 0.38 | 1.17 | 0.53 |
| 742537 | INTERGENIC | Sgl Promoter | 0.43 | 0.10 | 0.53 | 0.11 | 0.64 | 0.21 |
| 744600 | INTERGENIC | Sgl Promoter | 0.73 | 0.27 | 0.69 | 0.22 | 0.77 | 0.29 |
| 518451 | INTERGENIC | Sgl Promoter | 1.17 | 0.50 | 1.65 | 0.79 | 1.09 | 0.48 |
| 538243 | INTERGENIC | Sgl Promoter | #N/A | #N/A | 0.68 | 0.23 | #N/A | #N/A |
| 543750 | INTERGENIC | Dbl Promoter | 1.31 | 0.57 | 1.39 | 0.67 | 1.55 | 0.71 |
| 439777 | INTERGENIC | Sgl Promoter | 0.98 | 0.41 | 0.56 | 0.13 | 0.62 | 0.20 |
| 438418 | INTERGENIC | Non Promoter | #N/A | #N/A | #N/A | #N/A | #N/A | #N/A |
| 437730 | INTERGENIC | Dbl Promoter | 1.95 | 0.79 | 1.67 | 0.80 | 1.34 | 0.55 |
| 436738 | INTERGENIC | Non Promoter | 0.97 | 0.40 | 0.71 | 0.23 | 0.88 | 0.35 |
| 435221 | INTERGENIC | Dbl Promoter | 2.74 | 0.93 | 2.18 | 0.93 | 2.08 | 0.86 |
| 431547 | INTERGENIC | Dbl Promoter | 0.22 | 0.02 | 0.34 | 0.03 | 0.37 | 0.05 |
| 432734 | INTERGENIC | Non Promoter | #N/A | #N/A | #N/A | #N/A | 0.42 | 0.08 |
| 429839 | INTERGENIC | Non Promoter | #N/A | #N/A | #N/A | #N/A | #N/A | #N/A |
| 428943 | INTERGENIC | Dbl Promoter | 0.48 | 0.13 | #N/A | #N/A | 0.53 | 0.14 |
| 426936 | INTERGENIC | Non Promoter | #N/A | #N/A | 0.85 | 0.32 | 1.06 | 0.45 |
| 425883 | INTERGENIC | Dbl Promoter | 1.57 | 0.68 | 1.94 | 0.88 | 1.79 | 0.79 |
| 421065 | INTERGENIC | Sgl Promoter | #N/A | #N/A | #N/A | #N/A | #N/A | #N/A |
| 419796 | INTERGENIC | Non Promoter | #N/A | #N/A | #N/A | #N/A | #N/A | #N/A |
| 417951 | INTERGENIC | Dbl Promoter | 2.50 | 0.91 | 2.66 | 0.96 | 2.41 | 0.85 |
| 417149 | INTERGENIC | Sgl Promoter | 1.57 | 0.67 | 1.40 | 0.68 | 1.93 | 0.80 |
| 411260 | INTERGENIC | Non Promoter | #N/A | #N/A | #N/A | #N/A | #N/A | #N/A |
| 408185 | INTERGENIC | Dbl Promoter | 1.40 | 0.59 | 1.28 | 0.62 | 1.51 | 0.69 |
| 407106 | INTERGENIC | Sgl Promoter | #N/A | #N/A | #N/A | #N/A | #N/A | #N/A |
| 404831 | INTERGENIC | Non Promoter | #N/A | #N/A | #N/A | #N/A | #N/A | #N/A |
| 403743 | INTERGENIC | Sgl Promoter | 4.57 | 0.99 | 4.36 | 1.00 | 4.43 | 1.00 |
| 402209 | INTERGENIC | Dbl Promoter | 2.11 | 0.84 | 2.57 | 0.96 | 2.37 | 0.90 |

|        |            |              |      |      |      |      |      |      |      |
|--------|------------|--------------|------|------|------|------|------|------|------|
| 398473 | INTERGENIC | Sgl Promoter | #N/A | #N/A | #N/A | #N/A | #N/A | #N/A | #N/A |
| 396985 | INTERGENIC | Sgl Promoter | #N/A | #N/A | #N/A | #N/A | #N/A | #N/A | #N/A |
| 394367 | INTERGENIC | Non Promoter | #N/A | #N/A | 0.56 | 0.13 | #N/A | #N/A | #N/A |
| 393362 | INTERGENIC | Dbl Promoter | 2.00 | 0.81 | 1.88 | 0.85 | 1.85 | 0.80 |      |
| 392167 | INTERGENIC | Sgl Promoter | #N/A | #N/A | #N/A | #N/A | #N/A | #N/A | #N/A |
| 389881 | INTERGENIC | Sgl Promoter | 1.04 | 0.44 | 0.94 | 0.39 | 1.13 | 0.50 |      |
| 389021 | INTERGENIC | Non Promoter | #N/A | #N/A | #N/A | #N/A | #N/A | #N/A | #N/A |
| 387203 | INTERGENIC | Sgl Promoter | #N/A | #N/A | 1.05 | 0.46 | #N/A | #N/A | #N/A |
| 385399 | INTERGENIC | Dbl Promoter | 0.63 | 0.21 | #N/A | #N/A | 0.76 | 0.28 |      |
| 381713 | INTERGENIC | Dbl Promoter | 0.44 | 0.11 | 0.47 | 0.08 | 0.47 | 0.10 |      |
| 379321 | INTERGENIC | Non Promoter | 1.75 | 0.74 | 1.58 | 0.76 | 1.56 | 0.71 |      |
| 375097 | INTERGENIC | Sgl Promoter | 1.38 | 0.61 | 0.93 | 0.38 | 1.12 | 0.50 |      |
| 374147 | INTERGENIC | Sgl Promoter | #N/A | #N/A | 2.87 | 0.94 | 1.98 | 0.82 |      |
| 371471 | INTERGENIC | Sgl Promoter | 1.44 | 0.63 | 1.64 | 0.75 | 1.76 | 0.77 |      |
| 369007 | INTERGENIC | Sgl Promoter | 0.74 | 0.28 | 0.75 | 0.26 | 0.45 | 0.09 |      |
| 364418 | INTERGENIC | Sgl Promoter | 0.54 | 0.17 | 0.82 | 0.31 | 0.77 | 0.29 |      |
| 362265 | INTERGENIC | Dbl Promoter | 1.16 | 0.50 | 1.06 | 0.47 | 1.51 | 0.67 |      |
| 360701 | INTERGENIC | Non Promoter | #N/A | #N/A | #N/A | #N/A | #N/A | #N/A | #N/A |
| 359786 | INTERGENIC | Sgl Promoter | 2.12 | 0.84 | 1.35 | 0.65 | 2.08 | 0.86 |      |
| 358119 | INTERGENIC | Sgl Promoter | 1.14 | 0.49 | 1.08 | 0.48 | 1.40 | 0.64 |      |
| 356392 | INTERGENIC | Sgl Promoter | #N/A | #N/A | #N/A | #N/A | 0.72 | 0.26 |      |
| 355966 | INTERGENIC | Sgl Promoter | 0.27 | 0.03 | 0.81 | 0.30 | 0.28 | 0.03 |      |
| 353137 | INTERGENIC | Dbl Promoter | 2.45 | 0.90 | 1.50 | 0.73 | 2.26 | 0.88 |      |
| 350919 | INTERGENIC | Non Promoter | #N/A | #N/A | 0.46 | 0.07 | #N/A | #N/A | #N/A |
| 349107 | INTERGENIC | Dbl Promoter | 2.09 | 0.83 | 1.60 | 0.78 | 2.27 | 0.71 |      |
| 346858 | INTERGENIC | Sgl Promoter | 1.62 | 0.70 | 1.34 | 0.65 | 1.70 | 0.76 |      |
| 345720 | INTERGENIC | Sgl Promoter | 0.72 | 0.26 | 0.59 | 0.15 | 0.95 | 0.40 |      |
| 342497 | INTERGENIC | Non Promoter | 0.84 | 0.33 | 1.36 | 0.65 | 1.84 | 0.65 |      |
| 340957 | INTERGENIC | Dbl Promoter | 0.49 | 0.14 | 1.11 | 0.50 | 0.53 | 0.14 |      |
| 339217 | INTERGENIC | Dbl Promoter | #N/A | #N/A | 1.27 | 0.60 | 0.65 | 0.21 |      |
| 338827 | INTERGENIC | Sgl Promoter | 0.65 | 0.22 | 0.90 | 0.36 | 0.42 | 0.08 |      |
| 336182 | INTERGENIC | Sgl Promoter | #N/A | #N/A | #N/A | #N/A | 0.52 | 0.14 |      |
| 334966 | INTERGENIC | Sgl Promoter | #N/A | #N/A | 0.62 | 0.17 | 0.39 | 0.07 |      |
| 334057 | INTERGENIC | Sgl Promoter | 1.73 | 0.72 | 1.67 | 0.79 | 2.65 | 0.93 |      |
| 330501 | INTERGENIC | Non Promoter | #N/A | #N/A | #N/A | #N/A | #N/A | #N/A | #N/A |
| 329811 | INTERGENIC | Dbl Promoter | 2.48 | 0.90 | 2.01 | 0.90 | 2.13 | 0.87 |      |
| 327763 | INTERGENIC | Sgl Promoter | 0.20 | 0.02 | 0.57 | 0.14 | 0.30 | 0.03 |      |
| 326053 | INTERGENIC | Non Promoter | #N/A | #N/A | #N/A | #N/A | #N/A | #N/A | #N/A |
| 325416 | INTERGENIC | Sgl Promoter | 0.94 | 0.38 | 1.08 | 0.48 | 0.80 | 0.31 |      |
| 322018 | INTERGENIC | Dbl Promoter | 0.83 | 0.33 | 1.23 | 0.58 | 0.73 | 0.27 |      |
| 322873 | INTERGENIC | Dbl Promoter | 0.37 | 0.07 | 0.84 | 0.32 | 0.32 | 0.04 |      |
| 320660 | INTERGENIC | Non Promoter | 0.89 | 0.36 | 0.91 | 0.37 | 0.74 | 0.27 |      |
| 317409 | INTERGENIC | Dbl Promoter | 1.70 | 0.73 | 1.52 | 0.71 | 1.43 | 0.65 |      |
| 316082 | INTERGENIC | Non Promoter | 0.96 | 0.40 | 0.88 | 0.35 | 1.13 | 0.50 |      |
| 313046 | INTERGENIC | Sgl Promoter | 0.85 | 0.34 | #N/A | #N/A | 0.68 | 0.23 |      |
| 307789 | INTERGENIC | Sgl Promoter | 1.37 | 0.59 | 1.22 | 0.58 | 0.98 | 0.41 |      |
| 306930 | INTERGENIC | Sgl Promoter | 1.36 | 0.58 | 1.14 | 0.52 | 1.06 | 0.46 |      |
| 305856 | INTERGENIC | Sgl Promoter | 0.38 | 0.09 | 0.39 | 0.04 | 0.57 | 0.16 |      |
| 301979 | INTERGENIC | Sgl Promoter | 0.61 | 0.21 | 0.78 | 0.28 | 0.90 | 0.37 |      |
| 299227 | INTERGENIC | Sgl Promoter | 2.80 | 0.94 | 1.80 | 0.85 | 3.31 | 0.93 |      |
| 296075 | INTERGENIC | Dbl Promoter | 2.73 | 0.90 | #N/A | #N/A | 3.62 | 0.85 |      |



|        |            |              |      |      |      |      |      |      |
|--------|------------|--------------|------|------|------|------|------|------|
| 294255 | INTERGENIC | Sgl Promoter | #N/A | #N/A | 1.83 | 0.85 | 2.59 | 0.93 |
| 292483 | INTERGENIC | Non Promoter | #N/A | #N/A | #N/A | #N/A | #N/A | #N/A |
| 291098 | INTERGENIC | Sgl Promoter | 1.64 | 0.70 | 1.12 | 0.50 | #N/A | #N/A |
| 288490 | INTERGENIC | Sgl Promoter | 1.96 | 0.74 | 2.27 | 0.94 | #N/A | #N/A |
| 284675 | INTERGENIC | Sgl Promoter | 1.37 | 0.57 | 1.37 | 0.62 | 1.38 | 0.64 |
| 282536 | INTERGENIC | Dbl Promoter | 0.87 | 0.35 | 0.92 | 0.38 | 0.87 | 0.35 |
| 280566 | INTERGENIC | Sgl Promoter | #N/A | #N/A | #N/A | #N/A | #N/A | #N/A |
| 280154 | INTERGENIC | Sgl Promoter | 0.95 | 0.39 | 0.76 | 0.27 | 0.88 | 0.35 |
| 278768 | INTERGENIC | Sgl Promoter | 0.96 | 0.40 | 1.19 | 0.55 | 1.20 | 0.53 |
| 277926 | INTERGENIC | Dbl Promoter | 1.86 | 0.77 | 1.01 | 0.43 | 1.76 | 0.75 |
| 276834 | INTERGENIC | Non Promoter | #N/A | #N/A | 0.57 | 0.15 | 0.63 | 0.20 |
| 274928 | INTERGENIC | Sgl Promoter | 2.02 | 0.75 | 1.51 | 0.72 | 1.86 | 0.79 |
| 273039 | INTERGENIC | Sgl Promoter | #N/A | #N/A | 1.88 | 0.86 | 1.72 | 0.77 |
| 271523 | INTERGENIC | Dbl Promoter | 1.19 | 0.52 | 1.51 | 0.71 | 1.31 | 0.60 |
| 269363 | INTERGENIC | Sgl Promoter | 2.12 | 0.83 | 1.29 | 0.62 | 1.47 | 0.65 |
| 265790 | INTERGENIC | Non Promoter | 1.84 | 0.77 | 1.06 | 0.47 | 1.39 | 0.64 |
| 264434 | INTERGENIC | Sgl Promoter | 0.77 | 0.29 | 0.87 | 0.35 | 1.28 | 0.58 |
| 262994 | INTERGENIC | Sgl Promoter | 0.97 | 0.40 | 1.37 | 0.66 | 1.13 | 0.50 |
| 261922 | INTERGENIC | Sgl Promoter | 1.43 | 0.62 | 1.84 | 0.86 | 1.79 | 0.78 |
| 258898 | INTERGENIC | Dbl Promoter | 0.27 | 0.03 | 0.49 | 0.09 | 0.26 | 0.02 |
| 259976 | INTERGENIC | Sgl Promoter | 0.44 | 0.11 | 0.69 | 0.22 | 0.54 | 0.14 |
| 260777 | INTERGENIC | Sgl Promoter | 0.13 | 0.01 | 0.51 | 0.10 | 0.22 | 0.01 |
| 258148 | INTERGENIC | Non Promoter | 0.76 | 0.29 | 0.79 | 0.29 | 0.60 | 0.18 |
| 256415 | INTERGENIC | Dbl Promoter | 2.39 | 0.88 | 1.88 | 0.86 | 1.52 | 0.70 |
| 255347 | INTERGENIC | Sgl Promoter | 0.99 | 0.41 | 1.08 | 0.48 | #N/A | #N/A |
| 253343 | INTERGENIC | Non Promoter | #N/A | #N/A | 0.63 | 0.18 | 0.36 | 0.05 |
| 248566 | INTERGENIC | Dbl Promoter | 1.11 | 0.47 | 1.74 | 0.82 | 1.14 | 0.51 |
| 247708 | INTERGENIC | Sgl Promoter | 0.69 | 0.25 | 0.96 | 0.40 | 0.87 | 0.35 |
| 245784 | INTERGENIC | Sgl Promoter | 0.54 | 0.17 | 0.79 | 0.29 | 0.43 | 0.08 |
| 242866 | INTERGENIC | Sgl Promoter | #N/A | #N/A | 1.14 | 0.52 | 1.39 | 0.63 |
| 238831 | INTERGENIC | Non Promoter | #N/A | #N/A | 0.60 | 0.15 | 0.74 | 0.27 |
| 237182 | INTERGENIC | Sgl Promoter | 2.55 | 0.91 | 1.44 | 0.70 | 1.79 | 0.79 |
| 235787 | INTERGENIC | Sgl Promoter | 0.66 | 0.24 | 0.74 | 0.26 | 0.76 | 0.29 |
| 234072 | INTERGENIC | Sgl Promoter | 1.52 | 0.61 | 1.03 | 0.45 | 1.53 | 0.66 |
| 230699 | INTERGENIC | Dbl Promoter | 0.39 | 0.08 | 0.55 | 0.12 | 0.30 | 0.03 |
| 231873 | INTERGENIC | Dbl Promoter | 0.16 | 0.01 | 0.69 | 0.22 | 0.32 | 0.05 |
| 228585 | INTERGENIC | Sgl Promoter | #N/A | #N/A | #N/A | #N/A | #N/A | #N/A |
| 226216 | INTERGENIC | Dbl Promoter | 0.86 | 0.35 | 0.86 | 0.34 | 1.05 | 0.46 |
| 224373 | INTERGENIC | Sgl Promoter | 1.74 | 0.74 | 1.34 | 0.65 | 1.37 | 0.61 |
| 222998 | INTERGENIC | Sgl Promoter | #N/A | #N/A | #N/A | #N/A | #N/A | #N/A |
| 220990 | INTERGENIC | Non Promoter | #N/A | #N/A | 0.56 | 0.13 | 0.77 | 0.29 |
| 218216 | INTERGENIC | Non Promoter | #N/A | #N/A | #N/A | #N/A | 0.84 | 0.33 |
| 216990 | INTERGENIC | Sgl Promoter | 0.73 | 0.27 | 0.66 | 0.20 | 0.90 | 0.37 |
| 210239 | INTERGENIC | Sgl Promoter | 1.35 | 0.59 | 1.23 | 0.57 | 1.40 | 0.63 |
| 207893 | INTERGENIC | Sgl Promoter | 0.85 | 0.34 | 0.99 | 0.42 | 1.06 | 0.45 |
| 205353 | INTERGENIC | Sgl Promoter | #N/A | #N/A | 1.41 | 0.67 | 1.49 | 0.67 |
| 202290 | INTERGENIC | Dbl Promoter | 1.04 | 0.44 | 1.04 | 0.46 | 1.43 | 0.57 |
| 196350 | INTERGENIC | Sgl Promoter | #N/A | #N/A | 1.13 | 0.50 | #N/A | #N/A |
| 195289 | INTERGENIC | Non Promoter | 2.41 | 0.84 | 2.03 | 0.90 | 2.83 | 0.91 |
| 193575 | INTERGENIC | Sgl Promoter | 1.28 | 0.56 | #N/A | #N/A | 1.13 | 0.50 |
| 191680 | INTERGENIC | Sgl Promoter | #N/A | #N/A | 1.79 | 0.83 | #N/A | #N/A |

|        |            |              |      |      |      |      |      |      |
|--------|------------|--------------|------|------|------|------|------|------|
| 189131 | INTERGENIC | Sgl Promoter | 1.90 | 0.78 | 1.75 | 0.78 | 1.97 | 0.84 |
| 186423 | INTERGENIC | Sgl Promoter | #N/A | #N/A | #N/A | #N/A | #N/A | #N/A |
| 185988 | INTERGENIC | Dbl Promoter | 1.24 | 0.53 | 1.63 | 0.78 | 1.44 | 0.66 |
| 185291 | INTERGENIC | Non Promoter | 1.65 | 0.71 | 1.88 | 0.84 | 1.63 | 0.73 |
| 182963 | INTERGENIC | Sgl Promoter | #N/A | #N/A | 1.13 | 0.47 | 1.33 | 0.61 |
| 180784 | INTERGENIC | Sgl Promoter | 1.47 | 0.63 | 1.58 | 0.75 | 1.24 | 0.55 |
| 179672 | INTERGENIC | Sgl Promoter | 0.75 | 0.28 | 1.24 | 0.58 | 1.36 | 0.62 |
| 178520 | INTERGENIC | Sgl Promoter | 0.71 | 0.26 | #N/A | #N/A | 0.81 | 0.32 |
| 176786 | INTERGENIC | Dbl Promoter | #N/A | #N/A | #N/A | #N/A | 2.78 | 0.95 |
| 175848 | INTERGENIC | Non Promoter | #N/A | #N/A | #N/A | #N/A | #N/A | #N/A |
| 174218 | INTERGENIC | Sgl Promoter | 1.09 | 0.47 | 1.04 | 0.45 | #N/A | #N/A |
| 171556 | INTERGENIC | Sgl Promoter | 1.36 | 0.60 | 1.11 | 0.50 | 1.18 | 0.53 |
| 169212 | INTERGENIC | Sgl Promoter | #N/A | #N/A | #N/A | #N/A | #N/A | #N/A |
| 167617 | INTERGENIC | Non Promoter | #N/A | #N/A | #N/A | #N/A | #N/A | #N/A |
| 166549 | INTERGENIC | Dbl Promoter | 1.33 | 0.58 | 1.23 | 0.58 | 1.33 | 0.61 |
| 164922 | INTERGENIC | Sgl Promoter | 0.17 | 0.01 | #N/A | #N/A | 0.35 | 0.04 |
| 162492 | INTERGENIC | Sgl Promoter | #N/A | #N/A | #N/A | #N/A | #N/A | #N/A |
| 161606 | INTERGENIC | Dbl Promoter | #N/A | #N/A | 1.97 | 0.89 | 6.69 | 1.00 |
| 159461 | INTERGENIC | Non Promoter | #N/A | #N/A | #N/A | #N/A | #N/A | #N/A |
| 158619 | INTERGENIC | Sgl Promoter | 0.67 | 0.24 | 0.70 | 0.22 | 0.68 | 0.23 |
| 155652 | INTERGENIC | Sgl Promoter | 1.60 | 0.69 | 1.76 | 0.83 | 1.83 | 0.79 |
| 154996 | INTERGENIC | Dbl Promoter | 2.54 | 0.87 | 2.26 | 0.94 | 2.73 | 0.93 |
| 153821 | INTERGENIC | Non Promoter | 1.04 | 0.44 | 0.99 | 0.43 | 1.23 | 0.56 |
| 151983 | INTERGENIC | Dbl Promoter | 0.73 | 0.27 | 1.10 | 0.50 | 0.70 | 0.25 |
| 149391 | INTERGENIC | Sgl Promoter | 1.50 | 0.66 | 1.66 | 0.79 | 1.15 | 0.51 |
| 146857 | INTERGENIC | Sgl Promoter | 1.91 | 0.79 | 1.96 | 0.89 | 1.65 | 0.72 |
| 147635 | INTERGENIC | Sgl Promoter | 0.65 | 0.23 | 0.75 | 0.26 | 0.46 | 0.11 |
| 145927 | INTERGENIC | Non Promoter | 1.11 | 0.47 | 1.53 | 0.73 | 1.66 | 0.74 |
| 143615 | INTERGENIC | Dbl Promoter | 1.13 | 0.48 | 0.77 | 0.28 | 0.56 | 0.16 |
| 144406 | INTERGENIC | Dbl Promoter | 0.88 | 0.36 | 0.81 | 0.30 | 0.51 | 0.12 |
| 141023 | INTERGENIC | Sgl Promoter | #N/A | #N/A | #N/A | #N/A | 1.41 | 0.64 |
| 137937 | INTERGENIC | Sgl Promoter | 1.04 | 0.43 | 0.94 | 0.39 | 0.53 | 0.14 |
| 134514 | INTERGENIC | Sgl Promoter | 2.36 | 0.89 | 2.37 | 0.96 | 3.16 | 0.97 |
| 133726 | INTERGENIC | Sgl Promoter | #N/A | #N/A | 1.49 | 0.72 | 1.33 | 0.61 |
| 131293 | INTERGENIC | Sgl Promoter | #N/A | #N/A | #N/A | #N/A | #N/A | #N/A |
| 130639 | INTERGENIC | Sgl Promoter | 1.88 | 0.78 | 1.52 | 0.74 | 1.82 | 0.79 |
| 127480 | INTERGENIC | Sgl Promoter | 1.52 | 0.66 | 1.71 | 0.79 | 1.50 | 0.67 |
| 125764 | INTERGENIC | Sgl Promoter | #N/A | #N/A | #N/A | #N/A | #N/A | #N/A |
| 122522 | INTERGENIC | Dbl Promoter | #N/A | #N/A | 1.63 | 0.75 | 1.74 | 0.78 |
| 120385 | INTERGENIC | Non Promoter | #N/A | #N/A | #N/A | #N/A | #N/A | #N/A |
| 118798 | INTERGENIC | Dbl Promoter | 2.29 | 0.87 | 1.88 | 0.87 | 1.91 | 0.82 |
| 115505 | INTERGENIC | Non Promoter | 0.85 | 0.34 | 1.39 | 0.67 | 0.58 | 0.17 |
| 113220 | INTERGENIC | Sgl Promoter | 1.18 | 0.50 | 2.37 | 0.95 | 1.67 | 0.75 |
| 110469 | INTERGENIC | Non Promoter | #N/A | #N/A | #N/A | #N/A | #N/A | #N/A |
| 109274 | INTERGENIC | Sgl Promoter | 0.16 | 0.01 | 0.23 | 0.01 | 0.45 | 0.10 |
| 107321 | INTERGENIC | Sgl Promoter | 0.67 | 0.24 | 0.95 | 0.40 | 0.66 | 0.22 |
| 100676 | INTERGENIC | Sgl Promoter | 0.18 | 0.01 | 0.58 | 0.14 | #N/A | #N/A |
| 98726  | INTERGENIC | Sgl Promoter | 0.54 | 0.16 | 0.76 | 0.27 | 0.61 | 0.19 |
| 96762  | INTERGENIC | Sgl Promoter | 0.60 | 0.20 | 1.12 | 0.49 | 0.38 | 0.07 |
| 94504  | INTERGENIC | Dbl Promoter | 1.25 | 0.54 | 1.21 | 0.57 | 1.03 | 0.45 |
| 92749  | INTERGENIC | Sgl Promoter | 1.64 | 0.71 | 1.66 | 0.78 | 1.23 | 0.56 |

|        |            |              |      |      |      |      |      |      |
|--------|------------|--------------|------|------|------|------|------|------|
| 89289  | INTERGENIC | Sgl Promoter | #N/A | #N/A | 1.32 | 0.64 | 1.79 | 0.68 |
| 86230  | INTERGENIC | Non Promoter | #N/A | #N/A | 0.56 | 0.13 | 0.58 | 0.17 |
| 83813  | INTERGENIC | Sgl Promoter | 0.60 | 0.20 | 0.76 | 0.27 | 0.79 | 0.30 |
| 82952  | INTERGENIC | Sgl Promoter | 1.12 | 0.48 | 1.19 | 0.55 | 1.44 | 0.66 |
| 81040  | INTERGENIC | Dbl Promoter | 2.40 | 0.90 | 2.10 | 0.91 | 2.06 | 0.86 |
| 80165  | INTERGENIC | Sgl Promoter | 1.66 | 0.68 | 1.74 | 0.83 | 2.04 | 0.83 |
| 78871  | INTERGENIC | Sgl Promoter | #N/A | #N/A | 2.70 | 0.96 | 2.23 | 0.86 |
| 77263  | INTERGENIC | Non Promoter | #N/A | #N/A | #N/A | #N/A | #N/A | #N/A |
| 75754  | INTERGENIC | Dbl Promoter | 1.16 | 0.48 | 1.66 | 0.76 | 2.58 | 0.91 |
| 74241  | INTERGENIC | Sgl Promoter | 1.17 | 0.50 | 1.14 | 0.52 | 1.64 | 0.74 |
| 70739  | INTERGENIC | Sgl Promoter | 0.99 | 0.41 | 0.97 | 0.40 | 0.85 | 0.34 |
| 68275  | INTERGENIC | Non Promoter | 0.45 | 0.11 | 0.57 | 0.13 | 0.54 | 0.14 |
| 65913  | INTERGENIC | Non Promoter | 0.54 | 0.16 | 0.68 | 0.22 | 0.43 | 0.10 |
| 63818  | INTERGENIC | Dbl Promoter | 1.74 | 0.72 | #N/A | #N/A | 1.70 | 0.76 |
| 55935  | INTERGENIC | Non Promoter | 0.44 | 0.11 | 0.64 | 0.19 | 0.65 | 0.22 |
| 53704  | INTERGENIC | Sgl Promoter | #N/A | #N/A | 2.15 | 0.92 | #N/A | #N/A |
| 50051  | INTERGENIC | Dbl Promoter | 1.74 | 0.72 | 2.18 | 0.93 | 1.89 | 0.78 |
| 49006  | INTERGENIC | Non Promoter | 0.52 | 0.15 | 0.63 | 0.18 | 0.47 | 0.10 |
| 48108  | INTERGENIC | Sgl Promoter | 1.90 | 0.78 | 1.62 | 0.78 | 1.52 | 0.69 |
| 46736  | INTERGENIC | Dbl Promoter | 0.61 | 0.21 | #N/A | #N/A | #N/A | #N/A |
| 42424  | INTERGENIC | Non Promoter | #N/A | #N/A | #N/A | #N/A | #N/A | #N/A |
| 38812  | INTERGENIC | Dbl Promoter | 1.00 | 0.42 | 1.15 | 0.53 | 0.88 | 0.36 |
| 36700  | INTERGENIC | Non Promoter | #N/A | #N/A | #N/A | #N/A | #N/A | #N/A |
| 34544  | INTERGENIC | Dbl Promoter | 1.79 | 0.76 | 1.38 | 0.66 | 1.88 | 0.77 |
| 31961  | INTERGENIC | Sgl Promoter | 1.51 | 0.66 | #N/A | #N/A | 1.49 | 0.60 |
| 31083  | INTERGENIC | Sgl Promoter | 2.05 | 0.82 | 1.71 | 0.81 | 1.55 | 0.70 |
| 26828  | INTERGENIC | Non Promoter | #N/A | #N/A | #N/A | #N/A | #N/A | #N/A |
| 25216  | INTERGENIC | Sgl Promoter | 1.79 | 0.75 | 0.79 | 0.29 | 1.19 | 0.53 |
| 19637  | INTERGENIC | Dbl Promoter | 1.14 | 0.49 | 1.09 | 0.49 | 1.17 | 0.52 |
| 20935  | INTERGENIC | Dbl Promoter | 0.67 | 0.24 | 1.04 | 0.46 | 1.24 | 0.56 |
| 22234  | INTERGENIC | Dbl Promoter | 0.71 | 0.26 | 0.65 | 0.19 | 0.75 | 0.28 |
| 17359  | INTERGENIC | Non Promoter | 0.63 | 0.21 | 0.79 | 0.29 | 1.02 | 0.45 |
| 12313  | INTERGENIC | Dbl Promoter | 0.84 | 0.33 | 1.02 | 0.45 | 1.19 | 0.53 |
| 13399  | INTERGENIC | Dbl Promoter | 0.90 | 0.37 | 0.99 | 0.42 | 1.27 | 0.58 |
| 14485  | INTERGENIC | Dbl Promoter | 1.24 | 0.54 | 1.09 | 0.49 | 1.11 | 0.49 |
| 8310   | INTERGENIC | Non Promoter | 2.38 | 0.83 | 1.51 | 0.66 | 1.70 | 0.68 |
| 9092   | INTERGENIC | Non Promoter | 1.16 | 0.50 | 0.98 | 0.42 | 1.13 | 0.50 |
| 6108   | INTERGENIC | Dbl Promoter | 1.67 | 0.71 | 1.37 | 0.66 | 2.00 | 0.84 |
| 3504   | INTERGENIC | Non Promoter | #N/A | #N/A | #N/A | #N/A | #N/A | #N/A |
| 2390   | INTERGENIC | Dbl Promoter | 0.61 | 0.20 | 0.61 | 0.16 | 0.56 | 0.16 |
| 1811   | INTERGENIC | Non Promoter | 0.38 | 0.07 | 0.42 | 0.06 | 0.50 | 0.12 |
| 84213  | INTERGENIC | Sgl Promoter | #N/A | #N/A | #N/A | #N/A | #N/A | #N/A |
| 219541 | INTERGENIC | Sgl Promoter | #N/A | #N/A | #N/A | #N/A | #N/A | #N/A |
| 302563 | INTERGENIC | Sgl Promoter | #N/A | #N/A | #N/A | #N/A | #N/A | #N/A |
| 313838 | INTERGENIC | Sgl Promoter | #N/A | #N/A | 1.52 | 0.70 | #N/A | #N/A |
| 74629  | INTERGENIC | Sgl Promoter | #N/A | #N/A | #N/A | #N/A | #N/A | #N/A |
| 163605 | INTERGENIC | Sgl Promoter | 1.20 | 0.52 | 1.47 | 0.72 | 1.26 | 0.57 |
| 314457 | INTERGENIC | Sgl Promoter | #N/A | #N/A | 1.35 | 0.65 | #N/A | #N/A |
| 442873 | INTERGENIC | Dbl Promoter | 2.47 | 0.90 | 2.45 | 0.96 | 2.35 | 0.91 |
| 445022 | INTERGENIC | Sgl Promoter | 1.09 | 0.46 | 0.66 | 0.20 | 0.89 | 0.35 |
| 446440 | INTERGENIC | Non Promoter | #N/A | #N/A | #N/A | #N/A | #N/A | #N/A |

|        |            |              |      |      |      |      |      |      |
|--------|------------|--------------|------|------|------|------|------|------|
| 448162 | INTERGENIC | Sgl Promoter | 1.33 | 0.58 | 1.41 | 0.68 | 1.67 | 0.75 |
| 450064 | INTERGENIC | Sgl Promoter | 0.77 | 0.29 | 0.75 | 0.26 | 0.87 | 0.35 |
| 451075 | INTERGENIC | Dbl Promoter | 3.45 | 0.98 | 2.68 | 0.97 | 2.60 | 0.91 |
| 451842 | INTERGENIC | Sgl Promoter | 3.77 | 0.98 | 2.59 | 0.97 | 2.19 | 0.88 |
| 453993 | INTERGENIC | Non Promoter | #N/A | #N/A | #N/A | #N/A | #N/A | #N/A |
| 457781 | INTERGENIC | Sgl Promoter | 1.19 | 0.51 | 1.34 | 0.65 | 1.28 | 0.58 |
| 461276 | INTERGENIC | Sgl Promoter | 1.70 | 0.73 | 1.27 | 0.60 | 1.57 | 0.71 |
| 463380 | INTERGENIC | Sgl Promoter | 1.70 | 0.73 | 1.61 | 0.78 | 1.74 | 0.73 |
| 465008 | INTERGENIC | Non Promoter | #N/A | #N/A | 1.25 | 0.59 | 0.89 | 0.36 |
| 466602 | INTERGENIC | Sgl Promoter | 1.82 | 0.77 | 1.64 | 0.79 | 2.03 | 0.85 |
| 469358 | INTERGENIC | Dbl Promoter | 0.69 | 0.25 | 0.82 | 0.31 | 0.79 | 0.30 |
| 471335 | INTERGENIC | Non Promoter | #N/A | #N/A | 0.87 | 0.34 | #N/A | #N/A |
| 473364 | INTERGENIC | Sgl Promoter | 1.38 | 0.60 | 1.12 | 0.51 | 1.16 | 0.51 |
| 475857 | INTERGENIC | Sgl Promoter | 1.74 | 0.73 | #N/A | #N/A | 1.22 | 0.55 |
| 477979 | INTERGENIC | Dbl Promoter | 2.42 | 0.90 | 1.85 | 0.86 | 1.99 | 0.83 |
| 478875 | INTERGENIC | Sgl Promoter | 1.48 | 0.64 | 1.41 | 0.68 | 1.57 | 0.70 |
| 481812 | INTERGENIC | Non Promoter | #N/A | #N/A | 0.51 | 0.18 | #N/A | #N/A |
| 483060 | INTERGENIC | Dbl Promoter | 1.98 | 0.81 | 1.54 | 0.75 | 1.98 | 0.83 |
| 484785 | INTERGENIC | Non Promoter | #N/A | #N/A | #N/A | #N/A | #N/A | #N/A |
| 487411 | INTERGENIC | Dbl Promoter | 5.41 | 1.00 | #N/A | #N/A | #N/A | #N/A |
| 488379 | INTERGENIC | Non Promoter | 0.77 | 0.29 | #N/A | #N/A | 0.98 | 0.42 |
| 489927 | INTERGENIC | Dbl Promoter | 1.67 | 0.70 | 1.42 | 0.69 | 1.83 | 0.79 |
| 493898 | INTERGENIC | Sgl Promoter | 1.89 | 0.78 | 1.59 | 0.77 | 1.65 | 0.74 |
| 499922 | INTERGENIC | Dbl Promoter | 1.94 | 0.79 | 2.11 | 0.85 | 2.06 | 0.85 |
| 500984 | INTERGENIC | Non Promoter | #N/A | #N/A | #N/A | #N/A | #N/A | #N/A |
| 506157 | INTERGENIC | Dbl Promoter | 3.20 | 0.96 | 3.12 | 0.99 | 2.73 | 0.95 |
| 507560 | INTERGENIC | Sgl Promoter | 2.51 | 0.89 | 2.04 | 0.90 | 2.46 | 0.90 |
| 508342 | INTERGENIC | Sgl Promoter | 1.03 | 0.43 | 0.76 | 0.27 | 1.25 | 0.56 |
| 510550 | INTERGENIC | Sgl Promoter | 2.32 | 0.86 | 2.12 | 0.92 | 3.01 | 0.97 |
| 511639 | INTERGENIC | Sgl Promoter | #N/A | #N/A | #N/A | #N/A | #N/A | #N/A |
| 512972 | INTERGENIC | Dbl Promoter | #N/A | #N/A | #N/A | #N/A | #N/A | #N/A |
| 517093 | INTERGENIC | Non Promoter | 0.67 | 0.24 | 1.01 | 0.44 | 0.70 | 0.25 |
| 518912 | INTERGENIC | Sgl Promoter | 0.20 | 0.02 | #N/A | #N/A | 0.26 | 0.03 |
| 520537 | INTERGENIC | Non Promoter | #N/A | #N/A | #N/A | #N/A | #N/A | #N/A |
| 521655 | INTERGENIC | Dbl Promoter | 1.72 | 0.74 | #N/A | #N/A | 1.34 | 0.61 |
| 523058 | INTERGENIC | Non Promoter | #N/A | #N/A | 1.08 | 0.48 | 0.78 | 0.30 |
| 523863 | INTERGENIC | Sgl Promoter | 1.66 | 0.70 | 1.97 | 0.88 | 1.22 | 0.55 |
| 524897 | INTERGENIC | Dbl Promoter | 2.28 | 0.85 | 1.29 | 0.61 | 1.64 | 0.71 |
| 526470 | INTERGENIC | Sgl Promoter | 3.76 | 0.97 | 2.21 | 0.93 | 3.55 | 0.98 |
| 527455 | INTERGENIC | Dbl Promoter | 1.88 | 0.78 | 1.88 | 0.87 | 1.66 | 0.75 |
| 530586 | INTERGENIC | Sgl Promoter | 1.52 | 0.66 | 1.32 | 0.63 | #N/A | #N/A |
| 532190 | INTERGENIC | Non Promoter | 0.14 | 0.01 | 0.58 | 0.14 | 0.71 | 0.25 |
| 533707 | INTERGENIC | Sgl Promoter | 1.23 | 0.53 | 1.60 | 0.71 | 1.07 | 0.47 |
| 535287 | INTERGENIC | Sgl Promoter | 0.64 | 0.22 | 0.83 | 0.32 | 0.46 | 0.11 |
| 547856 | INTERGENIC | Dbl Promoter | 3.19 | 0.97 | 2.03 | 0.90 | 2.69 | 0.93 |
| 549088 | INTERGENIC | Sgl Promoter | 1.53 | 0.66 | 1.49 | 0.70 | 1.45 | 0.67 |
| 551296 | INTERGENIC | Sgl Promoter | #N/A | #N/A | 0.51 | 0.12 | 0.83 | 0.32 |
| 552817 | INTERGENIC | Sgl Promoter | 1.11 | 0.47 | 1.19 | 0.56 | 1.12 | 0.50 |
| 554626 | INTERGENIC | Sgl Promoter | 1.14 | 0.49 | 1.33 | 0.63 | 1.60 | 0.65 |
| 556157 | INTERGENIC | Sgl Promoter | #N/A | #N/A | 0.78 | 0.28 | #N/A | #N/A |
| 557316 | INTERGENIC | Sgl Promoter | #N/A | #N/A | 2.61 | 0.83 | 1.90 | 0.79 |

|        |            |              |      |      |      |      |      |      |      |
|--------|------------|--------------|------|------|------|------|------|------|------|
| 558655 | INTERGENIC | Sgl Promoter | #N/A | #N/A | #N/A | #N/A | #N/A | #N/A | #N/A |
| 560428 | INTERGENIC | Non Promoter | 0.24 | 0.06 | 0.65 | 0.20 | #N/A | #N/A | #N/A |
| 562186 | INTERGENIC | Dbl Promoter | 2.71 | 0.84 | 1.68 | 0.80 | 1.91 | 0.77 | 0.77 |
| 564938 | INTERGENIC | Non Promoter | #N/A | #N/A | 1.09 | 0.48 | #N/A | #N/A | #N/A |
| 565752 | INTERGENIC | Sgl Promoter | #N/A | #N/A | 2.27 | 0.89 | 3.54 | 0.93 | 0.93 |
| 567557 | INTERGENIC | Dbl Promoter | 2.60 | 0.92 | 3.10 | 0.99 | 2.76 | 0.89 | 0.89 |
| 569967 | INTERGENIC | Non Promoter | 1.19 | 0.51 | #N/A | #N/A | 0.88 | 0.36 | 0.36 |
| 571251 | INTERGENIC | Dbl Promoter | 1.83 | 0.77 | 1.84 | 0.86 | #N/A | #N/A | #N/A |
| 573213 | INTERGENIC | Sgl Promoter | #N/A | #N/A | 0.90 | 0.37 | 1.05 | 0.46 | 0.46 |
| 574573 | INTERGENIC | Non Promoter | #N/A | #N/A | #N/A | #N/A | 0.44 | 0.10 | 0.10 |
| 576074 | INTERGENIC | Sgl Promoter | 0.76 | 0.29 | 0.94 | 0.39 | 1.20 | 0.54 | 0.54 |
| 577826 | INTERGENIC | Sgl Promoter | #N/A | #N/A | #N/A | #N/A | #N/A | #N/A | #N/A |
| 578604 | INTERGENIC | Dbl Promoter | 1.10 | 0.47 | 1.07 | 0.47 | 0.79 | 0.30 | 0.30 |
| 579466 | INTERGENIC | Non Promoter | #N/A | #N/A | #N/A | #N/A | #N/A | #N/A | #N/A |
| 581155 | INTERGENIC | Dbl Promoter | 0.76 | 0.29 | 0.56 | 0.13 | 0.52 | 0.13 | 0.13 |
| 581922 | INTERGENIC | Dbl Promoter | 1.55 | 0.67 | 1.30 | 0.63 | 1.19 | 0.53 | 0.53 |
| 583292 | INTERGENIC | Sgl Promoter | 1.61 | 0.68 | 1.03 | 0.45 | 1.73 | 0.74 | 0.74 |
| 584591 | INTERGENIC | Sgl Promoter | #N/A | #N/A | 1.41 | 0.66 | 3.40 | 0.95 | 0.95 |
| 586428 | INTERGENIC | Non Promoter | #N/A | #N/A | #N/A | #N/A | #N/A | #N/A | #N/A |
| 590034 | INTERGENIC | Dbl Promoter | 1.37 | 0.60 | 1.09 | 0.48 | 0.95 | 0.40 | 0.40 |
| 591145 | INTERGENIC | Non Promoter | #N/A | #N/A | #N/A | #N/A | #N/A | #N/A | #N/A |
| 592464 | INTERGENIC | Dbl Promoter | 1.95 | 0.78 | 2.69 | 0.94 | 2.60 | 0.93 | 0.93 |
| 596060 | INTERGENIC | Non Promoter | #N/A | #N/A | #N/A | #N/A | #N/A | #N/A | #N/A |
| 596694 | INTERGENIC | Sgl Promoter | #N/A | #N/A | #N/A | #N/A | #N/A | #N/A | #N/A |
| 598733 | INTERGENIC | Sgl Promoter | #N/A | #N/A | 1.72 | 0.82 | 2.23 | 0.88 | 0.88 |
| 599496 | INTERGENIC | Dbl Promoter | 2.86 | 0.93 | 2.86 | 0.99 | 4.10 | 0.99 | 0.99 |
| 602834 | INTERGENIC | Non Promoter | #N/A | #N/A | #N/A | #N/A | #N/A | #N/A | #N/A |
| 604043 | INTERGENIC | Sgl Promoter | 2.07 | 0.83 | 1.94 | 0.88 | 1.51 | 0.68 | 0.68 |
| 605271 | INTERGENIC | Sgl Promoter | #N/A | #N/A | #N/A | #N/A | #N/A | #N/A | #N/A |
| 608584 | INTERGENIC | Dbl Promoter | 1.05 | 0.42 | 1.11 | 0.50 | #N/A | #N/A | #N/A |
| 611444 | INTERGENIC | Sgl Promoter | 0.90 | 0.37 | 1.15 | 0.53 | 0.89 | 0.37 | 0.37 |
| 614444 | INTERGENIC | Dbl Promoter | 0.41 | 0.10 | 0.52 | 0.11 | 0.42 | 0.07 | 0.07 |
| 615367 | INTERGENIC | Dbl Promoter | 0.12 | 0.00 | 0.36 | 0.03 | 0.17 | 0.01 | 0.01 |
| 617633 | INTERGENIC | Non Promoter | 0.24 | 0.02 | 0.50 | 0.09 | 0.32 | 0.04 | 0.04 |
| 619442 | INTERGENIC | Dbl Promoter | 1.13 | 0.48 | 0.95 | 0.40 | 1.08 | 0.47 | 0.47 |
| 626430 | INTERGENIC | Sgl Promoter | 1.20 | 0.51 | 1.19 | 0.55 | 0.94 | 0.40 | 0.40 |
| 630785 | INTERGENIC | Sgl Promoter | 2.04 | 0.82 | 2.11 | 0.92 | 2.00 | 0.84 | 0.84 |
| 632659 | INTERGENIC | Non Promoter | #N/A | #N/A | #N/A | #N/A | #N/A | #N/A | #N/A |
| 635484 | INTERGENIC | Dbl Promoter | 3.41 | 0.97 | 2.47 | 0.96 | 3.29 | 0.98 | 0.98 |
| 638875 | INTERGENIC | Non Promoter | 0.40 | 0.09 | 0.53 | 0.11 | 0.51 | 0.13 | 0.13 |
| 640100 | INTERGENIC | Dbl Promoter | 2.95 | 0.95 | 2.39 | 0.95 | 2.47 | 0.92 | 0.92 |
| 643420 | INTERGENIC | Sgl Promoter | 1.23 | 0.53 | 1.14 | 0.52 | 1.57 | 0.69 | 0.69 |
| 644704 | INTERGENIC | Sgl Promoter | 0.65 | 0.23 | 0.52 | 0.11 | 0.65 | 0.21 | 0.21 |
| 645988 | INTERGENIC | Sgl Promoter | #N/A | #N/A | 0.61 | 0.16 | 0.81 | 0.31 | 0.31 |
| 650568 | INTERGENIC | Sgl Promoter | 1.38 | 0.59 | 1.36 | 0.66 | 1.19 | 0.53 | 0.53 |
| 651639 | INTERGENIC | Sgl Promoter | 0.42 | 0.10 | 0.53 | 0.12 | 0.58 | 0.18 | 0.18 |
| 652712 | INTERGENIC | Sgl Promoter | 0.35 | 0.06 | 0.46 | 0.08 | 0.65 | 0.21 | 0.21 |
| 656468 | INTERGENIC | Sgl Promoter | #N/A | #N/A | #N/A | #N/A | #N/A | #N/A | #N/A |
| 658348 | INTERGENIC | Non Promoter | 1.38 | 0.61 | 1.35 | 0.65 | 1.51 | 0.69 | 0.69 |
| 661074 | INTERGENIC | Dbl Promoter | 1.11 | 0.47 | 0.93 | 0.38 | 0.96 | 0.41 | 0.41 |
| 663991 | INTERGENIC | Non Promoter | 0.33 | 0.05 | 0.49 | 0.09 | 0.46 | 0.09 | 0.09 |



|        |            |              |      |      |      |      |      |      |
|--------|------------|--------------|------|------|------|------|------|------|
| 665062 | INTERGENIC | Non Promoter | 0.36 | 0.06 | 0.32 | 0.02 | 0.41 | 0.07 |
| 514703 | INTERGENIC | Dbl Promoter | 1.62 | 0.70 | 1.11 | 0.50 | 1.35 | 0.62 |
| 517628 | INTERGENIC | Non Promoter | #N/A | #N/A | 0.47 | 0.09 | 0.53 | 0.14 |
| 458198 | INTERGENIC | Sgl Promoter | #N/A | #N/A | #N/A | #N/A | #N/A | #N/A |
| 490609 | INTERGENIC | Dbl Promoter | #N/A | #N/A | #N/A | #N/A | #N/A | #N/A |
| 150827 | INTERGENIC | Non Promoter | 1.49 | 0.64 | 1.25 | 0.57 | 1.02 | 0.43 |
| 147889 | INTERGENIC | Sgl Promoter | 1.42 | 0.62 | 1.41 | 0.68 | 1.08 | 0.47 |
| 146290 | INTERGENIC | Sgl Promoter | #N/A | #N/A | #N/A | #N/A | #N/A | #N/A |
| 143200 | INTERGENIC | Sgl Promoter | #N/A | #N/A | 2.13 | 0.92 | #N/A | #N/A |
| 141072 | INTERGENIC | Dbl Promoter | 1.12 | 0.48 | 1.27 | 0.60 | 1.27 | 0.58 |
| 137939 | INTERGENIC | Non Promoter | #N/A | #N/A | #N/A | #N/A | #N/A | #N/A |
| 136585 | INTERGENIC | Dbl Promoter | 2.40 | 0.85 | 1.60 | 0.78 | 1.43 | 0.64 |
| 134301 | INTERGENIC | Non Promoter | #N/A | #N/A | #N/A | #N/A | #N/A | #N/A |
| 131728 | INTERGENIC | Dbl Promoter | 2.30 | 0.88 | 1.68 | 0.79 | 2.37 | 0.91 |
| 131204 | INTERGENIC | Sgl Promoter | 2.40 | 0.89 | 1.99 | 0.89 | 2.37 | 0.89 |
| 129329 | INTERGENIC | Non Promoter | 0.52 | 0.15 | 0.49 | 0.09 | 0.45 | 0.09 |
| 127522 | INTERGENIC | Sgl Promoter | #N/A | #N/A | 2.39 | 0.96 | 3.55 | 0.98 |
| 122074 | INTERGENIC | Non Promoter | 0.91 | 0.37 | 0.42 | 0.06 | 0.53 | 0.14 |
| 121321 | INTERGENIC | Sgl Promoter | #N/A | #N/A | 1.37 | 0.64 | #N/A | #N/A |
| 116431 | INTERGENIC | Sgl Promoter | #N/A | #N/A | #N/A | #N/A | 1.49 | 0.68 |
| 112846 | INTERGENIC | Sgl Promoter | 0.72 | 0.27 | 0.82 | 0.31 | 1.02 | 0.44 |
| 112233 | INTERGENIC | Dbl Promoter | 2.32 | 0.86 | 1.93 | 0.88 | 1.98 | 0.84 |
| 109901 | INTERGENIC | Sgl Promoter | 1.17 | 0.50 | 1.17 | 0.54 | 0.93 | 0.39 |
| 108675 | INTERGENIC | Sgl Promoter | 0.41 | 0.09 | 0.53 | 0.11 | 0.42 | 0.08 |
| 100946 | INTERGENIC | Dbl Promoter | #N/A | #N/A | #N/A | #N/A | #N/A | #N/A |
| 99043  | INTERGENIC | Sgl Promoter | #N/A | #N/A | #N/A | #N/A | #N/A | #N/A |
| 97996  | INTERGENIC | Sgl Promoter | #N/A | #N/A | 0.90 | 0.36 | 0.70 | 0.25 |
| 95565  | INTERGENIC | Non Promoter | #N/A | #N/A | #N/A | #N/A | #N/A | #N/A |
| 92049  | INTERGENIC | Sgl Promoter | #N/A | #N/A | 1.76 | 0.72 | #N/A | #N/A |
| 88622  | INTERGENIC | Sgl Promoter | 1.24 | 0.54 | 0.71 | 0.24 | 0.68 | 0.23 |
| 87402  | INTERGENIC | Sgl Promoter | 0.79 | 0.30 | 1.15 | 0.53 | 0.88 | 0.36 |
| 81460  | INTERGENIC | Dbl Promoter | 0.86 | 0.34 | 0.94 | 0.39 | 0.94 | 0.39 |
| 80355  | INTERGENIC | Sgl Promoter | #N/A | #N/A | #N/A | #N/A | #N/A | #N/A |
| 77151  | INTERGENIC | Sgl Promoter | #N/A | #N/A | 1.36 | 0.62 | 1.57 | 0.68 |
| 74269  | INTERGENIC | Non Promoter | 0.69 | 0.25 | 0.65 | 0.20 | 1.26 | 0.53 |
| 73408  | INTERGENIC | Dbl Promoter | 4.27 | 0.99 | #N/A | #N/A | 3.17 | 0.97 |
| 70632  | INTERGENIC | Non Promoter | #N/A | #N/A | #N/A | #N/A | #N/A | #N/A |
| 68579  | INTERGENIC | Dbl Promoter | 1.84 | 0.77 | 1.79 | 0.84 | 3.02 | 0.94 |
| 65774  | INTERGENIC | Sgl Promoter | 0.95 | 0.39 | 1.07 | 0.48 | 0.83 | 0.32 |
| 64061  | INTERGENIC | Sgl Promoter | 2.23 | 0.86 | 1.71 | 0.81 | 2.14 | 0.87 |
| 54210  | INTERGENIC | Sgl Promoter | #N/A | #N/A | 1.10 | 0.49 | 1.19 | 0.54 |
| 53130  | INTERGENIC | Sgl Promoter | 0.89 | 0.36 | 0.67 | 0.21 | #N/A | #N/A |
| 52086  | INTERGENIC | Non Promoter | #N/A | #N/A | #N/A | #N/A | #N/A | #N/A |
| 49937  | INTERGENIC | Sgl Promoter | 1.15 | 0.49 | 1.33 | 0.64 | 1.38 | 0.62 |
| 47858  | INTERGENIC | Sgl Promoter | #N/A | #N/A | 0.38 | 0.04 | 0.48 | 0.12 |
| 46671  | INTERGENIC | Dbl Promoter | 3.10 | 0.95 | 1.80 | 0.85 | 1.77 | 0.78 |
| 41279  | INTERGENIC | Non Promoter | #N/A | #N/A | #N/A | #N/A | #N/A | #N/A |
| 40665  | INTERGENIC | Dbl Promoter | #N/A | #N/A | 3.65 | 0.82 | 2.12 | 0.83 |
| 39803  | INTERGENIC | Sgl Promoter | 1.35 | 0.59 | 1.05 | 0.46 | 1.43 | 0.62 |
| 37332  | INTERGENIC | Sgl Promoter | 0.45 | 0.11 | 0.84 | 0.33 | 0.71 | 0.25 |
| 35502  | INTERGENIC | Sgl Promoter | 1.79 | 0.75 | #N/A | #N/A | 1.33 | 0.59 |

|        |            |              |      |      |      |      |      |      |
|--------|------------|--------------|------|------|------|------|------|------|
| 32894  | INTERGENIC | Non Promoter | 0.58 | 0.19 | 0.71 | 0.24 | 0.93 | 0.39 |
| 29207  | INTERGENIC | Dbl Promoter | 2.04 | 0.82 | 1.39 | 0.68 | 1.16 | 0.52 |
| 30109  | INTERGENIC | Dbl Promoter | 1.77 | 0.75 | 1.19 | 0.55 | 1.09 | 0.48 |
| 27409  | INTERGENIC | Sgl Promoter | 0.83 | 0.33 | 0.68 | 0.21 | 0.84 | 0.33 |
| 25756  | INTERGENIC | Non Promoter | 1.14 | 0.48 | 1.45 | 0.71 | 1.37 | 0.62 |
| 23569  | INTERGENIC | Dbl Promoter | 1.64 | 0.71 | 1.30 | 0.62 | 1.34 | 0.59 |
| 22474  | INTERGENIC | Sgl Promoter | 0.96 | 0.40 | 1.09 | 0.49 | 0.85 | 0.34 |
| 21138  | INTERGENIC | Non Promoter | 1.13 | 0.48 | #N/A | #N/A | 0.90 | 0.37 |
| 17956  | INTERGENIC | Dbl Promoter | 1.50 | 0.65 | 1.30 | 0.59 | 1.08 | 0.47 |
| 16639  | INTERGENIC | Sgl Promoter | 2.16 | 0.85 | 1.64 | 0.79 | #N/A | #N/A |
| 14648  | INTERGENIC | Sgl Promoter | 0.82 | 0.32 | 0.79 | 0.29 | 1.03 | 0.45 |
| 13083  | INTERGENIC | Non Promoter | 0.36 | 0.07 | 0.43 | 0.06 | 0.53 | 0.14 |
| 10781  | INTERGENIC | Dbl Promoter | 0.63 | 0.21 | 0.66 | 0.20 | 0.68 | 0.24 |
| 11726  | INTERGENIC | Dbl Promoter | 0.43 | 0.10 | 0.47 | 0.08 | 0.49 | 0.12 |
| 5210   | INTERGENIC | Sgl Promoter | 0.61 | 0.20 | 0.70 | 0.22 | 0.71 | 0.25 |
| 6120   | INTERGENIC | Sgl Promoter | 0.37 | 0.07 | 0.43 | 0.06 | 0.42 | 0.07 |
| 92547  | INTERGENIC | Sgl Promoter | #N/A | #N/A | #N/A | #N/A | #N/A | #N/A |
| 154342 | INTERGENIC | Sgl Promoter | 1.13 | 0.46 | 0.77 | 0.28 | 0.92 | 0.38 |
| 157933 | INTERGENIC | Sgl Promoter | #N/A | #N/A | #N/A | #N/A | #N/A | #N/A |
| 160048 | INTERGENIC | Dbl Promoter | 1.71 | 0.70 | 1.30 | 0.62 | 1.61 | 0.73 |
| 161754 | INTERGENIC | Non Promoter | #N/A | #N/A | #N/A | #N/A | #N/A | #N/A |
| 164391 | INTERGENIC | Dbl Promoter | 2.25 | 0.85 | 1.52 | 0.74 | 2.01 | 0.80 |
| 165576 | INTERGENIC | Non Promoter | #N/A | #N/A | #N/A | #N/A | 1.49 | 0.59 |
| 166536 | INTERGENIC | Dbl Promoter | #N/A | #N/A | 1.38 | 0.66 | 1.72 | 0.77 |
| 167319 | INTERGENIC | Non Promoter | #N/A | #N/A | 0.55 | 0.13 | #N/A | #N/A |
| 167943 | INTERGENIC | Dbl Promoter | #N/A | #N/A | #N/A | #N/A | #N/A | #N/A |
| 169981 | INTERGENIC | Non Promoter | #N/A | #N/A | 0.92 | 0.38 | 1.64 | 0.74 |
| 175226 | INTERGENIC | Dbl Promoter | #N/A | #N/A | #N/A | #N/A | #N/A | #N/A |
| 177607 | INTERGENIC | Dbl Promoter | 1.78 | 0.74 | 1.27 | 0.61 | 2.12 | 0.79 |
| 178706 | INTERGENIC | Non Promoter | #N/A | #N/A | #N/A | #N/A | #N/A | #N/A |
| 180287 | INTERGENIC | Dbl Promoter | 1.83 | 0.77 | 1.59 | 0.76 | 1.89 | 0.78 |
| 181788 | INTERGENIC | Non Promoter | #N/A | #N/A | 0.76 | 0.27 | 0.62 | 0.20 |
| 183622 | INTERGENIC | Dbl Promoter | 1.83 | 0.76 | 1.60 | 0.77 | 1.87 | 0.81 |
| 185497 | INTERGENIC | Sgl Promoter | 0.80 | 0.31 | 0.63 | 0.18 | 1.12 | 0.49 |
| 187664 | INTERGENIC | Sgl Promoter | 0.67 | 0.24 | 1.23 | 0.57 | 0.55 | 0.16 |
| 195451 | INTERGENIC | Non Promoter | #N/A | #N/A | #N/A | #N/A | #N/A | #N/A |
| 196830 | INTERGENIC | Sgl Promoter | 1.72 | 0.73 | 1.60 | 0.77 | #N/A | #N/A |
| 199541 | INTERGENIC | Sgl Promoter | 0.54 | 0.16 | 0.55 | 0.13 | 0.32 | 0.04 |
| 201977 | INTERGENIC | Sgl Promoter | 0.69 | 0.25 | #N/A | #N/A | 0.69 | 0.24 |
| 203291 | INTERGENIC | Dbl Promoter | #N/A | #N/A | 1.20 | 0.56 | 2.07 | 0.85 |
| 204226 | INTERGENIC | Sgl Promoter | #N/A | #N/A | #N/A | #N/A | #N/A | #N/A |
| 204992 | INTERGENIC | Sgl Promoter | #N/A | #N/A | 1.62 | 0.78 | #N/A | #N/A |
| 208762 | INTERGENIC | Sgl Promoter | #N/A | #N/A | #N/A | #N/A | 3.51 | 0.95 |
| 210513 | INTERGENIC | Non Promoter | #N/A | #N/A | #N/A | #N/A | #N/A | #N/A |
| 212370 | INTERGENIC | Sgl Promoter | 1.44 | 0.63 | 1.19 | 0.56 | 1.42 | 0.64 |
| 214884 | INTERGENIC | Sgl Promoter | 1.72 | 0.73 | 1.09 | 0.49 | 1.34 | 0.60 |
| 219788 | INTERGENIC | Sgl Promoter | 0.53 | 0.16 | 0.76 | 0.27 | 0.54 | 0.15 |
| 220669 | INTERGENIC | Sgl Promoter | 1.05 | 0.44 | 1.40 | 0.68 | 1.04 | 0.45 |
| 222686 | INTERGENIC | Sgl Promoter | 1.71 | 0.73 | 1.27 | 0.60 | 1.47 | 0.67 |
| 223991 | INTERGENIC | Sgl Promoter | 1.04 | 0.44 | 0.91 | 0.37 | 0.98 | 0.42 |
| 224922 | INTERGENIC | Sgl Promoter | 1.14 | 0.49 | 1.04 | 0.46 | 0.93 | 0.39 |

|        |            |              |      |      |      |      |      |      |
|--------|------------|--------------|------|------|------|------|------|------|
| 225427 | INTERGENIC | Sgl Promoter | 1.61 | 0.69 | 1.31 | 0.62 | 0.96 | 0.40 |
| 228909 | INTERGENIC | Sgl Promoter | 0.94 | 0.39 | 2.40 | 0.94 | 1.31 | 0.59 |
| 229967 | INTERGENIC | Non Promoter | #N/A | #N/A | #N/A | #N/A | #N/A | #N/A |
| 232391 | INTERGENIC | Sgl Promoter | 0.94 | 0.38 | 1.31 | 0.62 | 0.82 | 0.32 |
| 235038 | INTERGENIC | Sgl Promoter | 0.26 | 0.04 | 0.35 | 0.03 | 0.24 | 0.02 |
| 238002 | INTERGENIC | Sgl Promoter | #N/A | #N/A | 1.42 | 0.63 | 1.64 | 0.74 |
| 239348 | INTERGENIC | Sgl Promoter | 0.66 | 0.23 | #N/A | #N/A | #N/A | #N/A |
| 242233 | INTERGENIC | Dbl Promoter | 0.24 | 0.03 | 0.34 | 0.03 | 0.45 | 0.10 |
| 243887 | INTERGENIC | Non Promoter | #N/A | #N/A | #N/A | #N/A | #N/A | #N/A |
| 245588 | INTERGENIC | Sgl Promoter | #N/A | #N/A | 1.47 | 0.71 | 1.41 | 0.61 |
| 246325 | INTERGENIC | Sgl Promoter | 1.42 | 0.62 | 1.29 | 0.59 | 1.44 | 0.65 |
| 247202 | INTERGENIC | Dbl Promoter | 2.25 | 0.87 | 1.33 | 0.64 | #N/A | #N/A |
| 248101 | INTERGENIC | Non Promoter | #N/A | #N/A | #N/A | #N/A | #N/A | #N/A |
| 248718 | INTERGENIC | Sgl Promoter | 1.53 | 0.66 | 1.60 | 0.75 | 1.32 | 0.60 |
| 251273 | INTERGENIC | Sgl Promoter | 0.80 | 0.31 | 0.91 | 0.37 | 1.31 | 0.59 |
| 253862 | INTERGENIC | Dbl Promoter | 0.70 | 0.25 | 0.75 | 0.26 | 0.78 | 0.30 |
| 255307 | INTERGENIC | Sgl Promoter | 1.04 | 0.44 | 1.78 | 0.81 | 1.26 | 0.57 |
| 257993 | INTERGENIC | Non Promoter | #N/A | #N/A | 0.79 | 0.29 | #N/A | #N/A |
| 259739 | INTERGENIC | Sgl Promoter | 0.45 | 0.12 | 0.90 | 0.36 | 0.48 | 0.11 |
| 260980 | INTERGENIC | Dbl Promoter | 1.54 | 0.67 | 1.68 | 0.81 | 1.47 | 0.67 |
| 263195 | INTERGENIC | Sgl Promoter | #N/A | #N/A | #N/A | #N/A | #N/A | #N/A |
| 264158 | INTERGENIC | Dbl Promoter | #N/A | #N/A | #N/A | #N/A | #N/A | #N/A |
| 266374 | INTERGENIC | Non Promoter | #N/A | #N/A | #N/A | #N/A | #N/A | #N/A |
| 267170 | INTERGENIC | Dbl Promoter | 3.93 | 0.98 | 2.11 | 0.88 | 2.93 | 0.91 |
| 267814 | INTERGENIC | Non Promoter | #N/A | #N/A | #N/A | #N/A | #N/A | #N/A |
| 271009 | INTERGENIC | Dbl Promoter | 3.63 | 0.98 | 2.69 | 0.97 | 2.62 | 0.94 |
| 271631 | INTERGENIC | Non Promoter | #N/A | #N/A | #N/A | #N/A | #N/A | #N/A |
| 274142 | INTERGENIC | Sgl Promoter | #N/A | #N/A | #N/A | #N/A | #N/A | #N/A |
| 275379 | INTERGENIC | Sgl Promoter | #N/A | #N/A | 0.73 | 0.24 | #N/A | #N/A |
| 278863 | INTERGENIC | Dbl Promoter | 3.90 | 0.99 | 4.74 | 0.99 | 4.56 | 0.99 |
| 281020 | INTERGENIC | Non Promoter | #N/A | #N/A | #N/A | #N/A | #N/A | #N/A |
| 281957 | INTERGENIC | Sgl Promoter | 0.92 | 0.37 | 1.00 | 0.43 | 1.09 | 0.48 |
| 282928 | INTERGENIC | Dbl Promoter | 0.45 | 0.12 | 0.53 | 0.12 | 0.39 | 0.06 |
| 283873 | INTERGENIC | Dbl Promoter | #N/A | #N/A | #N/A | #N/A | #N/A | #N/A |
| 285737 | INTERGENIC | Non Promoter | #N/A | #N/A | #N/A | #N/A | #N/A | #N/A |
| 286821 | INTERGENIC | Dbl Promoter | 2.12 | 0.84 | 1.70 | 0.81 | 2.01 | 0.85 |
| 287917 | INTERGENIC | Sgl Promoter | #N/A | #N/A | #N/A | #N/A | #N/A | #N/A |
| 290213 | INTERGENIC | Sgl Promoter | 1.50 | 0.65 | 1.55 | 0.75 | 1.45 | 0.67 |
| 292395 | INTERGENIC | Non Promoter | #N/A | #N/A | 1.05 | 0.46 | 1.83 | 0.76 |
| 294092 | INTERGENIC | Sgl Promoter | 1.44 | 0.63 | 0.92 | 0.38 | 1.33 | 0.61 |
| 296590 | INTERGENIC | Sgl Promoter | 1.91 | 0.79 | 1.19 | 0.55 | 1.27 | 0.49 |
| 300674 | INTERGENIC | Sgl Promoter | #N/A | #N/A | 0.75 | 0.26 | 0.62 | 0.20 |
| 302244 | INTERGENIC | Dbl Promoter | 3.56 | 0.98 | 2.44 | 0.95 | 2.26 | 0.85 |
| 306856 | INTERGENIC | Non Promoter | 0.35 | 0.06 | 0.47 | 0.08 | 0.51 | 0.14 |
| 316108 | INTERGENIC | Dbl Promoter | 2.45 | 0.89 | 1.74 | 0.83 | 2.02 | 0.83 |
| 318238 | INTERGENIC | Non Promoter | 0.35 | 0.06 | #N/A | #N/A | 0.55 | 0.16 |
| 320702 | INTERGENIC | Dbl Promoter | 1.13 | 0.48 | 1.79 | 0.84 | 0.90 | 0.37 |
| 322298 | INTERGENIC | Sgl Promoter | #N/A | #N/A | 1.25 | 0.59 | #N/A | #N/A |
| 323545 | INTERGENIC | Sgl Promoter | 1.89 | 0.78 | 1.34 | 0.63 | 1.98 | 0.81 |
| 326514 | INTERGENIC | Non Promoter | #N/A | #N/A | #N/A | #N/A | #N/A | #N/A |
| 327731 | INTERGENIC | Sgl Promoter | 1.01 | 0.42 | 1.05 | 0.46 | 0.79 | 0.30 |



|        |            |              |      |      |      |      |      |      |
|--------|------------|--------------|------|------|------|------|------|------|
| 329678 | INTERGENIC | Sgl Promoter | 1.04 | 0.44 | 1.15 | 0.53 | 1.14 | 0.51 |
| 332591 | INTERGENIC | Dbl Promoter | 4.28 | 0.99 | 2.83 | 0.98 | 3.20 | 0.97 |
| 336232 | INTERGENIC | Non Promoter | #N/A | #N/A | #N/A | #N/A | #N/A | #N/A |
| 337528 | INTERGENIC | Sgl Promoter | 2.77 | 0.93 | 1.86 | 0.86 | 2.09 | 0.84 |
| 339745 | INTERGENIC | Sgl Promoter | 1.49 | 0.63 | 2.50 | 0.95 | #N/A | #N/A |
| 341811 | INTERGENIC | Dbl Promoter | 0.90 | 0.37 | 1.19 | 0.55 | 0.63 | 0.21 |
| 343990 | INTERGENIC | Sgl Promoter | #N/A | #N/A | 1.67 | 0.70 | 1.71 | 0.76 |
| 346586 | INTERGENIC | Dbl Promoter | 1.95 | 0.80 | 1.53 | 0.72 | 1.64 | 0.69 |
| 347048 | INTERGENIC | Non Promoter | #N/A | #N/A | #N/A | #N/A | #N/A | #N/A |
| 349007 | INTERGENIC | Sgl Promoter | 0.64 | 0.22 | 0.68 | 0.21 | 0.66 | 0.22 |
| 364117 | INTERGENIC | Dbl Promoter | 1.97 | 0.81 | #N/A | #N/A | 3.78 | 0.96 |
| 365811 | INTERGENIC | Non Promoter | 0.97 | 0.40 | 1.08 | 0.48 | 0.89 | 0.36 |
| 368782 | INTERGENIC | Dbl Promoter | 0.33 | 0.05 | 0.63 | 0.18 | 0.55 | 0.16 |
| 369698 | INTERGENIC | Non Promoter | #N/A | #N/A | #N/A | #N/A | #N/A | #N/A |
| 370392 | INTERGENIC | Dbl Promoter | 0.15 | 0.01 | 0.11 | 0.00 | 0.28 | 0.03 |
| 370792 | INTERGENIC | Sgl Promoter | #N/A | #N/A | #N/A | #N/A | #N/A | #N/A |
| 371621 | INTERGENIC | Sgl Promoter | 0.25 | 0.03 | 0.47 | 0.08 | 0.44 | 0.11 |
| 374000 | INTERGENIC | Non Promoter | 1.14 | 0.49 | 0.99 | 0.42 | 0.82 | 0.32 |
| 377986 | INTERGENIC | Dbl Promoter | 1.68 | 0.72 | 1.46 | 0.69 | 1.73 | 0.72 |
| 380823 | INTERGENIC | Sgl Promoter | #N/A | #N/A | 0.70 | 0.22 | 1.59 | 0.65 |
| 382472 | INTERGENIC | Non Promoter | 0.32 | 0.05 | 0.42 | 0.05 | 0.53 | 0.14 |
| 384726 | INTERGENIC | Sgl Promoter | #N/A | #N/A | #N/A | #N/A | #N/A | #N/A |
| 385535 | INTERGENIC | Dbl Promoter | #N/A | #N/A | 1.79 | 0.82 | 1.78 | 0.77 |
| 386512 | INTERGENIC | Non Promoter | 0.61 | 0.20 | 0.69 | 0.22 | 0.77 | 0.29 |
| 388745 | INTERGENIC | Sgl Promoter | 1.17 | 0.50 | 1.35 | 0.65 | 0.82 | 0.32 |
| 390955 | INTERGENIC | Sgl Promoter | 0.84 | 0.33 | 0.71 | 0.24 | 0.88 | 0.36 |
| 391601 | INTERGENIC | Dbl Promoter | 1.28 | 0.56 | 1.70 | 0.81 | 1.22 | 0.54 |
| 392715 | INTERGENIC | Sgl Promoter | 0.63 | 0.22 | 0.76 | 0.27 | 0.79 | 0.30 |
| 394766 | INTERGENIC | Non Promoter | 0.51 | 0.15 | 0.47 | 0.08 | 0.63 | 0.20 |
| 395759 | INTERGENIC | Sgl Promoter | #N/A | #N/A | #N/A | #N/A | 1.80 | 0.71 |
| 398531 | INTERGENIC | Dbl Promoter | #N/A | #N/A | 1.63 | 0.77 | #N/A | #N/A |
| 399658 | INTERGENIC | Sgl Promoter | #N/A | #N/A | #N/A | #N/A | #N/A | #N/A |
| 402795 | INTERGENIC | Non Promoter | #N/A | #N/A | 0.36 | 0.03 | 0.58 | 0.20 |
| 404511 | INTERGENIC | Sgl Promoter | 0.67 | 0.24 | 0.92 | 0.38 | 0.75 | 0.28 |
| 407284 | INTERGENIC | Sgl Promoter | 0.64 | 0.22 | 1.08 | 0.49 | 0.80 | 0.30 |
| 408446 | INTERGENIC | Dbl Promoter | 1.55 | 0.67 | 1.83 | 0.78 | #N/A | #N/A |
| 410724 | INTERGENIC | Sgl Promoter | 0.86 | 0.35 | 0.86 | 0.34 | 1.56 | 0.71 |
| 413282 | INTERGENIC | Sgl Promoter | 1.71 | 0.74 | 1.12 | 0.51 | 1.27 | 0.58 |
| 415802 | INTERGENIC | Non Promoter | 1.72 | 0.73 | 1.93 | 0.87 | 1.85 | 0.77 |
| 417007 | INTERGENIC | Dbl Promoter | 2.47 | 0.90 | 1.88 | 0.85 | 2.20 | 0.88 |
| 418438 | INTERGENIC | Sgl Promoter | 1.00 | 0.42 | 1.21 | 0.56 | 0.75 | 0.28 |
| 421543 | INTERGENIC | Non Promoter | #N/A | #N/A | #N/A | #N/A | 0.72 | 0.27 |
| 425187 | INTERGENIC | Sgl Promoter | 1.26 | 0.55 | 0.66 | 0.19 | 0.88 | 0.36 |
| 427133 | INTERGENIC | Sgl Promoter | 0.79 | 0.30 | 0.71 | 0.23 | 1.38 | 0.61 |
| 429678 | INTERGENIC | Non Promoter | #N/A | #N/A | 0.46 | 0.07 | 0.48 | 0.12 |
| 432169 | INTERGENIC | Dbl Promoter | #N/A | #N/A | #N/A | #N/A | #N/A | #N/A |
| 434159 | INTERGENIC | Sgl Promoter | #N/A | #N/A | 2.05 | 0.78 | 3.60 | 0.99 |
| 434642 | INTERGENIC | Dbl Promoter | #N/A | #N/A | 1.48 | 0.69 | 2.10 | 0.86 |
| 437632 | INTERGENIC | Non Promoter | #N/A | #N/A | #N/A | #N/A | #N/A | #N/A |
| 440468 | INTERGENIC | Dbl Promoter | 0.92 | 0.38 | 0.77 | 0.28 | 0.89 | 0.37 |
| 441716 | INTERGENIC | Non Promoter | #N/A | #N/A | 0.72 | 0.24 | #N/A | #N/A |

|        |            |              |      |      |      |      |      |      |
|--------|------------|--------------|------|------|------|------|------|------|
| 445525 | INTERGENIC | Sgl Promoter | 0.97 | 0.40 | 1.04 | 0.45 | 0.68 | 0.23 |
| 447983 | INTERGENIC | Sgl Promoter | 0.38 | 0.08 | 0.85 | 0.33 | 0.57 | 0.16 |
| 448651 | INTERGENIC | Sgl Promoter | 0.55 | 0.17 | 1.00 | 0.43 | 0.71 | 0.25 |
| 471260 | INTERGENIC | Dbl Promoter | #N/A | #N/A | 1.37 | 0.66 | #N/A | #N/A |
| 471259 | INTERGENIC | Dbl Promoter | #N/A | #N/A | 1.30 | 0.62 | #N/A | #N/A |
| 475017 | INTERGENIC | Sgl Promoter | #N/A | #N/A | 1.30 | 0.62 | #N/A | #N/A |
| 475977 | INTERGENIC | Sgl Promoter | #N/A | #N/A | 0.67 | 0.21 | #N/A | #N/A |
| 484492 | INTERGENIC | Dbl Promoter | #N/A | #N/A | 1.28 | 0.61 | #N/A | #N/A |
| 486202 | INTERGENIC | Non Promoter | 0.48 | 0.13 | 0.57 | 0.14 | 0.46 | 0.09 |
| 488144 | INTERGENIC | Dbl Promoter | #N/A | #N/A | 1.18 | 0.55 | #N/A | #N/A |
| 489574 | INTERGENIC | Sgl Promoter | 0.47 | 0.13 | 0.51 | 0.10 | 0.42 | 0.07 |
| 490899 | INTERGENIC | Non Promoter | 0.71 | 0.26 | 0.62 | 0.17 | 0.70 | 0.25 |
| 490899 | INTERGENIC | Non Promoter | 0.76 | 0.29 | 0.68 | 0.21 | 0.79 | 0.30 |
| 491868 | INTERGENIC | Non Promoter | 1.00 | 0.42 | 0.80 | 0.30 | 0.77 | 0.29 |
| 493885 | INTERGENIC | Dbl Promoter | 2.02 | 0.82 | 1.75 | 0.80 | 2.05 | 0.85 |
| 494496 | INTERGENIC | Non Promoter | #N/A | #N/A | #N/A | #N/A | #N/A | #N/A |
| 495431 | INTERGENIC | Sgl Promoter | #N/A | #N/A | 1.28 | 0.61 | #N/A | #N/A |
| 499580 | INTERGENIC | Non Promoter | #N/A | #N/A | #N/A | #N/A | #N/A | #N/A |
| 500337 | INTERGENIC | Dbl Promoter | #N/A | #N/A | #N/A | #N/A | #N/A | #N/A |
| 501262 | INTERGENIC | Non Promoter | #N/A | #N/A | #N/A | #N/A | 0.90 | 0.36 |
| 502423 | INTERGENIC | Dbl Promoter | 2.50 | 0.84 | #N/A | #N/A | 1.70 | 0.76 |
| 504593 | INTERGENIC | Sgl Promoter | 3.26 | 0.96 | 1.50 | 0.73 | 1.91 | 0.80 |
| 506136 | INTERGENIC | Sgl Promoter | #N/A | #N/A | #N/A | #N/A | #N/A | #N/A |
| 507799 | INTERGENIC | Non Promoter | #N/A | #N/A | #N/A | #N/A | #N/A | #N/A |
| 511056 | INTERGENIC | Dbl Promoter | 2.54 | 0.91 | 1.54 | 0.73 | 1.56 | 0.71 |
| 513164 | INTERGENIC | Non Promoter | #N/A | #N/A | #N/A | #N/A | #N/A | #N/A |
| 514110 | INTERGENIC | Sgl Promoter | 0.64 | 0.22 | 1.09 | 0.49 | 0.66 | 0.22 |
| 515264 | INTERGENIC | Dbl Promoter | #N/A | #N/A | 0.49 | 0.09 | #N/A | #N/A |
| 516680 | INTERGENIC | Non Promoter | 0.49 | 0.14 | 0.40 | 0.05 | 0.75 | 0.28 |
| 517942 | INTERGENIC | Dbl Promoter | 4.60 | 0.93 | #N/A | #N/A | 3.09 | 0.96 |
| 520545 | INTERGENIC | Non Promoter | #N/A | #N/A | #N/A | #N/A | #N/A | #N/A |
| 522108 | INTERGENIC | Dbl Promoter | #N/A | #N/A | #N/A | #N/A | #N/A | #N/A |
| 522665 | INTERGENIC | Sgl Promoter | #N/A | #N/A | #N/A | #N/A | #N/A | #N/A |
| 524867 | INTERGENIC | Sgl Promoter | 1.30 | 0.57 | 1.08 | 0.49 | 1.63 | 0.73 |
| 528302 | INTERGENIC | Sgl Promoter | 1.19 | 0.51 | 1.05 | 0.46 | 1.30 | 0.59 |
| 530799 | INTERGENIC | Non Promoter | #N/A | #N/A | 0.84 | 0.33 | 1.00 | 0.43 |
| 538794 | INTERGENIC | Non Promoter | 0.41 | 0.09 | 0.55 | 0.13 | 0.62 | 0.20 |
| 541939 | INTERGENIC | Sgl Promoter | #N/A | #N/A | 1.66 | 0.70 | 1.89 | 0.72 |
| 546099 | INTERGENIC | Sgl Promoter | #N/A | #N/A | 1.16 | 0.54 | 1.34 | 0.61 |
| 549014 | INTERGENIC | Dbl Promoter | 1.53 | 0.66 | 1.21 | 0.55 | 1.85 | 0.79 |
| 549513 | INTERGENIC | Non Promoter | #N/A | #N/A | 0.67 | 0.21 | #N/A | #N/A |
| 552272 | INTERGENIC | Dbl Promoter | 4.29 | 0.99 | 2.93 | 0.98 | 2.65 | 0.92 |
| 552726 | INTERGENIC | Non Promoter | #N/A | #N/A | #N/A | #N/A | #N/A | #N/A |
| 554578 | INTERGENIC | Dbl Promoter | 1.70 | 0.72 | 1.85 | 0.86 | 1.56 | 0.70 |
| 559551 | INTERGENIC | Sgl Promoter | 2.16 | 0.85 | 1.64 | 0.75 | 1.90 | 0.82 |
| 560797 | INTERGENIC | Non Promoter | #N/A | #N/A | #N/A | #N/A | #N/A | #N/A |
| 562008 | INTERGENIC | Dbl Promoter | 2.46 | 0.90 | 1.99 | 0.89 | 1.96 | 0.83 |
| 564860 | INTERGENIC | Sgl Promoter | 1.19 | 0.51 | 1.17 | 0.54 | 1.46 | 0.62 |
| 566654 | INTERGENIC | Sgl Promoter | #N/A | #N/A | #N/A | #N/A | 3.19 | 0.93 |
| 568567 | INTERGENIC | Dbl Promoter | 0.97 | 0.40 | 1.23 | 0.56 | 1.46 | 0.67 |
| 570776 | INTERGENIC | Non Promoter | #N/A | #N/A | #N/A | #N/A | #N/A | #N/A |



|        |            |              |      |      |      |      |      |      |      |
|--------|------------|--------------|------|------|------|------|------|------|------|
| 706198 | INTERGENIC | Non Promoter | #N/A | #N/A | #N/A | #N/A | #N/A | #N/A | #N/A |
| 707360 | INTERGENIC | Dbl Promoter | 2.15 | 0.85 | 1.99 | 0.89 | 1.82 | 0.79 |      |
| 708448 | INTERGENIC | Non Promoter | #N/A | #N/A | 1.30 | 0.59 | 1.23 | 0.55 |      |
| 710991 | INTERGENIC | Sgl Promoter | #N/A | #N/A | 0.48 | 0.08 | #N/A | #N/A |      |
| 712537 | INTERGENIC | Sgl Promoter | #N/A | #N/A | 0.67 | 0.21 | 0.46 | 0.10 |      |
| 713480 | INTERGENIC | Sgl Promoter | 0.57 | 0.18 | 0.72 | 0.24 | 0.77 | 0.29 |      |
| 715089 | INTERGENIC | Dbl Promoter | #N/A | #N/A | 2.08 | 0.86 | 1.08 | 0.48 |      |
| 717145 | INTERGENIC | Non Promoter | #N/A | #N/A | #N/A | #N/A | #N/A | #N/A |      |
| 718317 | INTERGENIC | Sgl Promoter | #N/A | #N/A | #N/A | #N/A | #N/A | #N/A |      |
| 719789 | INTERGENIC | Sgl Promoter | 1.39 | 0.60 | 1.50 | 0.73 | 1.78 | 0.79 |      |
| 720771 | INTERGENIC | Sgl Promoter | 1.16 | 0.50 | 1.27 | 0.57 | #N/A | #N/A |      |
| 721701 | INTERGENIC | Sgl Promoter | #N/A | #N/A | 0.73 | 0.25 | #N/A | #N/A |      |
| 722978 | INTERGENIC | Dbl Promoter | #N/A | #N/A | 0.98 | 0.42 | 0.64 | 0.21 |      |
| 724044 | INTERGENIC | Sgl Promoter | 0.45 | 0.11 | 0.41 | 0.05 | 0.44 | 0.08 |      |
| 724721 | INTERGENIC | Non Promoter | #N/A | #N/A | 1.08 | 0.49 | 0.86 | 0.34 |      |
| 726069 | INTERGENIC | Dbl Promoter | 0.14 | 0.01 | 0.33 | 0.02 | 0.22 | 0.01 |      |
| 728955 | INTERGENIC | Sgl Promoter | 0.15 | 0.01 | 0.35 | 0.03 | 0.21 | 0.01 |      |
| 731668 | INTERGENIC | Non Promoter | #N/A | #N/A | #N/A | #N/A | #N/A | #N/A |      |
| 734501 | INTERGENIC | Non Promoter | 0.77 | 0.30 | 0.82 | 0.31 | 0.70 | 0.25 |      |
| 738161 | INTERGENIC | Sgl Promoter | 0.36 | 0.08 | 0.52 | 0.10 | 0.30 | 0.03 |      |
| 744151 | INTERGENIC | Dbl Promoter | #N/A | #N/A | 1.75 | 0.81 | 1.47 | 0.65 |      |
| 749034 | INTERGENIC | Non Promoter | 2.05 | 0.81 | 1.66 | 0.78 | #N/A | #N/A |      |
| 752224 | INTERGENIC | Sgl Promoter | #N/A | #N/A | 2.00 | 0.88 | #N/A | #N/A |      |
| 757265 | INTERGENIC | Sgl Promoter | 2.52 | 0.88 | 1.83 | 0.85 | 2.19 | 0.88 |      |
| 759383 | INTERGENIC | Dbl Promoter | 2.55 | 0.91 | 1.85 | 0.85 | 1.74 | 0.73 |      |
| 760749 | INTERGENIC | Non Promoter | 0.53 | 0.16 | 0.40 | 0.04 | 0.61 | 0.19 |      |
| 762574 | INTERGENIC | Sgl Promoter | #N/A | #N/A | #N/A | #N/A | #N/A | #N/A |      |
| 764807 | INTERGENIC | Dbl Promoter | 1.02 | 0.43 | 1.02 | 0.44 | 1.28 | 0.58 |      |
| 766541 | INTERGENIC | Sgl Promoter | #N/A | #N/A | 1.39 | 0.63 | #N/A | #N/A |      |
| 769317 | INTERGENIC | Non Promoter | #N/A | #N/A | #N/A | #N/A | #N/A | #N/A |      |
| 771939 | INTERGENIC | Dbl Promoter | #N/A | #N/A | #N/A | #N/A | 1.64 | 0.66 |      |
| 776583 | INTERGENIC | Non Promoter | #N/A | #N/A | #N/A | #N/A | #N/A | #N/A |      |
| 778172 | INTERGENIC | Non Promoter | 2.65 | 0.82 | 1.24 | 0.58 | #N/A | #N/A |      |
| 779214 | INTERGENIC | Dbl Promoter | #N/A | #N/A | 0.45 | 0.08 | #N/A | #N/A |      |
| 781142 | INTERGENIC | Non Promoter | #N/A | #N/A | 0.49 | 0.09 | #N/A | #N/A |      |
| 782173 | INTERGENIC | Dbl Promoter | 1.18 | 0.51 | 1.14 | 0.52 | 0.86 | 0.34 |      |
| 783126 | INTERGENIC | Non Promoter | #N/A | #N/A | 1.34 | 0.64 | 0.71 | 0.25 |      |
| 784353 | INTERGENIC | Dbl Promoter | 1.61 | 0.69 | 1.50 | 0.73 | 0.89 | 0.36 |      |
| 786730 | INTERGENIC | Sgl Promoter | 0.88 | 0.35 | 1.03 | 0.45 | 1.43 | 0.64 |      |
| 787663 | INTERGENIC | Sgl Promoter | #N/A | #N/A | 1.15 | 0.53 | 1.45 | 0.67 |      |
| 790668 | INTERGENIC | Non Promoter | 0.22 | 0.02 | #N/A | #N/A | 0.43 | 0.08 |      |
| 793551 | INTERGENIC | Non Promoter | 1.57 | 0.68 | 1.14 | 0.51 | 1.38 | 0.62 |      |
| 796697 | INTERGENIC | Sgl Promoter | 0.24 | 0.02 | 0.37 | 0.03 | 0.37 | 0.07 |      |
| 799696 | INTERGENIC | Non Promoter | #N/A | #N/A | #N/A | #N/A | #N/A | #N/A |      |
| 802652 | INTERGENIC | Sgl Promoter | 2.31 | 0.88 | 1.26 | 0.60 | 2.10 | 0.87 |      |
| 805783 | INTERGENIC | Non Promoter | 0.92 | 0.38 | 0.78 | 0.28 | 1.15 | 0.47 |      |
| 807384 | INTERGENIC | Sgl Promoter | 0.60 | 0.19 | 0.50 | 0.09 | 1.23 | 0.49 |      |
| 816093 | INTERGENIC | Sgl Promoter | #N/A | #N/A | 0.64 | 0.18 | 0.46 | 0.09 |      |
| 818072 | INTERGENIC | Sgl Promoter | #N/A | #N/A | #N/A | #N/A | #N/A | #N/A |      |
| 820510 | INTERGENIC | Sgl Promoter | #N/A | #N/A | 0.94 | 0.39 | 0.92 | 0.37 |      |
| 826975 | INTERGENIC | Sgl Promoter | 0.80 | 0.30 | 0.61 | 0.16 | 0.80 | 0.31 |      |

|        |            |              |      |      |      |      |      |      |
|--------|------------|--------------|------|------|------|------|------|------|
| 828728 | INTERGENIC | Sgl Promoter | 0.67 | 0.24 | 0.70 | 0.22 | 0.50 | 0.13 |
| 829487 | INTERGENIC | Non Promoter | #N/A | #N/A | #N/A | #N/A | #N/A | #N/A |
| 831114 | INTERGENIC | Dbl Promoter | 1.82 | 0.74 | 1.71 | 0.81 | 1.69 | 0.74 |
| 834350 | INTERGENIC | Sgl Promoter | 1.51 | 0.66 | 1.53 | 0.75 | 1.27 | 0.58 |
| 836348 | INTERGENIC | Non Promoter | #N/A | #N/A | #N/A | #N/A | #N/A | #N/A |
| 840319 | INTERGENIC | Dbl Promoter | 0.84 | 0.33 | 0.64 | 0.18 | 0.90 | 0.37 |
| 841329 | INTERGENIC | Sgl Promoter | 1.91 | 0.77 | 1.45 | 0.71 | 2.17 | 0.88 |
| 844280 | INTERGENIC | Dbl Promoter | #N/A | #N/A | 0.85 | 0.33 | 1.48 | 0.68 |
| 849801 | INTERGENIC | Dbl Promoter | 2.04 | 0.83 | 2.08 | 0.91 | 1.83 | 0.80 |
| 852493 | INTERGENIC | Non Promoter | 0.62 | 0.21 | 0.50 | 0.11 | 0.59 | 0.18 |
| 854060 | INTERGENIC | Dbl Promoter | 1.39 | 0.60 | 1.52 | 0.74 | 1.40 | 0.64 |
| 856440 | INTERGENIC | Sgl Promoter | 0.37 | 0.07 | 0.26 | 0.01 | 0.44 | 0.09 |
| 859550 | INTERGENIC | Sgl Promoter | #N/A | #N/A | #N/A | #N/A | #N/A | #N/A |
| 861716 | INTERGENIC | Non Promoter | #N/A | #N/A | #N/A | #N/A | #N/A | #N/A |
| 862712 | INTERGENIC | Dbl Promoter | 2.61 | 0.92 | 1.70 | 0.81 | 2.17 | 0.88 |
| 868660 | INTERGENIC | Non Promoter | #N/A | #N/A | #N/A | #N/A | 0.56 | 0.16 |
| 871451 | INTERGENIC | Sgl Promoter | 4.15 | 0.99 | 1.62 | 0.78 | 3.43 | 0.98 |
| 872824 | INTERGENIC | Non Promoter | #N/A | #N/A | #N/A | #N/A | #N/A | #N/A |
| 873744 | INTERGENIC | Sgl Promoter | #N/A | #N/A | #N/A | #N/A | #N/A | #N/A |
| 875374 | INTERGENIC | Sgl Promoter | 1.32 | 0.58 | 1.44 | 0.70 | 1.55 | 0.70 |
| 878281 | INTERGENIC | Sgl Promoter | 1.32 | 0.57 | 1.13 | 0.51 | 1.37 | 0.62 |
| 879722 | INTERGENIC | Sgl Promoter | 1.52 | 0.64 | #N/A | #N/A | 1.71 | 0.76 |
| 882066 | INTERGENIC | Non Promoter | #N/A | #N/A | #N/A | #N/A | #N/A | #N/A |
| 885287 | INTERGENIC | Dbl Promoter | 2.37 | 0.88 | 1.86 | 0.86 | 1.95 | 0.83 |
| 888850 | INTERGENIC | Non Promoter | #N/A | #N/A | #N/A | #N/A | #N/A | #N/A |
| 892991 | INTERGENIC | Sgl Promoter | #N/A | #N/A | #N/A | #N/A | #N/A | #N/A |
| 893627 | INTERGENIC | Dbl Promoter | 3.48 | 0.96 | 2.58 | 0.96 | 2.29 | 0.89 |
| 896373 | INTERGENIC | Non Promoter | #N/A | #N/A | #N/A | #N/A | #N/A | #N/A |
| 898650 | INTERGENIC | Dbl Promoter | 0.40 | 0.09 | 0.50 | 0.10 | 0.46 | 0.10 |
| 898986 | INTERGENIC | Non Promoter | #N/A | #N/A | #N/A | #N/A | 1.12 | 0.50 |
| 903064 | INTERGENIC | Dbl Promoter | 0.78 | 0.30 | 1.10 | 0.49 | 0.94 | 0.40 |
| 903722 | INTERGENIC | Sgl Promoter | 0.87 | 0.33 | 0.73 | 0.25 | #N/A | #N/A |
| 904747 | INTERGENIC | Non Promoter | #N/A | #N/A | #N/A | #N/A | #N/A | #N/A |
| 907077 | INTERGENIC | Dbl Promoter | 1.53 | 0.66 | 1.39 | 0.67 | 1.54 | 0.69 |
| 909727 | INTERGENIC | Non Promoter | #N/A | #N/A | 0.93 | 0.38 | 0.77 | 0.29 |
| 910233 | INTERGENIC | Sgl Promoter | #N/A | #N/A | #N/A | #N/A | #N/A | #N/A |
| 912548 | INTERGENIC | Sgl Promoter | #N/A | #N/A | #N/A | #N/A | #N/A | #N/A |
| 915154 | INTERGENIC | Sgl Promoter | 1.02 | 0.43 | 1.23 | 0.57 | 1.39 | 0.64 |
| 919534 | INTERGENIC | Sgl Promoter | #N/A | #N/A | 0.32 | 0.09 | 1.07 | 0.46 |
| 922061 | INTERGENIC | Dbl Promoter | 0.17 | 0.01 | 0.20 | 0.00 | 0.20 | 0.02 |
| 922616 | INTERGENIC | Non Promoter | #N/A | #N/A | 0.39 | 0.05 | #N/A | #N/A |
| 924561 | INTERGENIC | Dbl Promoter | #N/A | #N/A | #N/A | #N/A | #N/A | #N/A |
| 925564 | INTERGENIC | Sgl Promoter | 0.82 | 0.32 | 1.02 | 0.44 | 0.71 | 0.26 |
| 929785 | INTERGENIC | Sgl Promoter | #N/A | #N/A | #N/A | #N/A | #N/A | #N/A |
| 931061 | INTERGENIC | Non Promoter | #N/A | #N/A | #N/A | #N/A | #N/A | #N/A |
| 932963 | INTERGENIC | Dbl Promoter | 0.42 | 0.10 | 0.53 | 0.11 | 0.46 | 0.10 |
| 933880 | INTERGENIC | Non Promoter | #N/A | #N/A | #N/A | #N/A | #N/A | #N/A |
| 934409 | INTERGENIC | Sgl Promoter | #N/A | #N/A | 1.40 | 0.67 | 1.14 | 0.50 |
| 937536 | INTERGENIC | Dbl Promoter | #N/A | #N/A | 1.18 | 0.55 | #N/A | #N/A |
| 941187 | INTERGENIC | Sgl Promoter | #N/A | #N/A | 1.47 | 0.72 | 1.45 | 0.61 |
| 950168 | INTERGENIC | Sgl Promoter | 0.49 | 0.14 | 0.90 | 0.36 | 0.62 | 0.20 |



|         |            |              |      |      |      |      |      |      |      |
|---------|------------|--------------|------|------|------|------|------|------|------|
| 953347  | INTERGENIC | Non Promoter | #N/A | #N/A | #N/A | #N/A | #N/A | #N/A | #N/A |
| 954253  | INTERGENIC | Sgl Promoter | #N/A | #N/A | #N/A | #N/A | #N/A | #N/A | #N/A |
| 955004  | INTERGENIC | Dbl Promoter | #N/A | #N/A | 1.57 | 0.76 | #N/A | #N/A | #N/A |
| 956908  | INTERGENIC | Non Promoter | #N/A | #N/A | #N/A | #N/A | #N/A | #N/A | #N/A |
| 958422  | INTERGENIC | Dbl Promoter | #N/A | #N/A | 1.29 | 0.62 | 1.57 | 0.65 | #N/A |
| 962966  | INTERGENIC | Sgl Promoter | #N/A | #N/A | #N/A | #N/A | #N/A | #N/A | #N/A |
| 965084  | INTERGENIC | Non Promoter | #N/A | #N/A | #N/A | #N/A | #N/A | #N/A | #N/A |
| 965891  | INTERGENIC | Dbl Promoter | 3.22 | 0.97 | #N/A | #N/A | 2.94 | 0.95 | #N/A |
| 971911  | INTERGENIC | Non Promoter | 0.29 | 0.04 | #N/A | #N/A | #N/A | #N/A | #N/A |
| 973389  | INTERGENIC | Dbl Promoter | 1.70 | 0.70 | 1.76 | 0.76 | 2.67 | 0.93 | #N/A |
| 975977  | INTERGENIC | Sgl Promoter | 1.33 | 0.57 | 1.09 | 0.49 | 1.26 | 0.57 | #N/A |
| 987056  | INTERGENIC | Sgl Promoter | 2.09 | 0.83 | 1.71 | 0.81 | 2.21 | 0.87 | #N/A |
| 988422  | INTERGENIC | Sgl Promoter | #N/A | #N/A | 1.93 | 0.88 | 2.28 | 0.90 | #N/A |
| 990611  | INTERGENIC | Non Promoter | #N/A | #N/A | 1.71 | 0.80 | #N/A | #N/A | #N/A |
| 1002551 | INTERGENIC | Dbl Promoter | 0.71 | 0.26 | 0.71 | 0.24 | 0.80 | 0.31 | #N/A |
| 1004341 | INTERGENIC | Non Promoter | #N/A | #N/A | #N/A | #N/A | #N/A | #N/A | #N/A |
| 1007415 | INTERGENIC | Non Promoter | #N/A | #N/A | 0.85 | 0.33 | #N/A | #N/A | #N/A |
| 1011616 | INTERGENIC | Sgl Promoter | 0.82 | 0.32 | 1.12 | 0.50 | 0.62 | 0.20 | #N/A |
| 1012495 | INTERGENIC | Dbl Promoter | 0.50 | 0.14 | 0.65 | 0.19 | 0.57 | 0.17 | #N/A |
| 1014485 | INTERGENIC | Dbl Promoter | 2.15 | 0.84 | 1.77 | 0.84 | 1.43 | 0.62 | #N/A |
| 1013903 | INTERGENIC | Non Promoter | #N/A | #N/A | #N/A | #N/A | #N/A | #N/A | #N/A |
| 1015562 | INTERGENIC | Non Promoter | #N/A | #N/A | #N/A | #N/A | #N/A | #N/A | #N/A |
| 1018135 | INTERGENIC | Sgl Promoter | #N/A | #N/A | #N/A | #N/A | #N/A | #N/A | #N/A |
| 1019309 | INTERGENIC | Sgl Promoter | 0.31 | 0.04 | 0.32 | 0.02 | 0.31 | 0.03 | #N/A |
| 1022619 | INTERGENIC | Dbl Promoter | 1.48 | 0.64 | 1.56 | 0.74 | 1.18 | 0.53 | #N/A |
| 1024183 | INTERGENIC | Dbl Promoter | #N/A | #N/A | #N/A | #N/A | #N/A | #N/A | #N/A |
| 1025208 | INTERGENIC | Sgl Promoter | 1.16 | 0.50 | 0.96 | 0.41 | 1.17 | 0.53 | #N/A |
| 1026850 | INTERGENIC | Non Promoter | 0.54 | 0.16 | 0.74 | 0.26 | #N/A | #N/A | #N/A |
| 1028847 | INTERGENIC | Dbl Promoter | 0.69 | 0.25 | 0.61 | 0.16 | 0.87 | 0.35 | #N/A |
| 1032621 | INTERGENIC | Sgl Promoter | #N/A | #N/A | 2.38 | 0.95 | 2.66 | 0.94 | #N/A |
| 1036087 | INTERGENIC | Sgl Promoter | 1.97 | 0.79 | 1.56 | 0.76 | 1.37 | 0.63 | #N/A |
| 1039265 | INTERGENIC | Non Promoter | #N/A | #N/A | 0.74 | 0.26 | 0.71 | 0.25 | #N/A |
| 1041794 | INTERGENIC | Sgl Promoter | 0.53 | 0.16 | 0.86 | 0.34 | 0.87 | 0.35 | #N/A |
| 1043993 | INTERGENIC | Dbl Promoter | 1.32 | 0.57 | 1.34 | 0.65 | 1.49 | 0.66 | #N/A |
| 1052066 | INTERGENIC | Sgl Promoter | #N/A | #N/A | #N/A | #N/A | #N/A | #N/A | #N/A |
| 1055065 | INTERGENIC | Sgl Promoter | 0.93 | 0.38 | 0.75 | 0.26 | 0.82 | 0.32 | #N/A |
| 1055807 | INTERGENIC | Non Promoter | #N/A | #N/A | 0.53 | 0.11 | #N/A | #N/A | #N/A |
| 1057329 | INTERGENIC | Sgl Promoter | 1.25 | 0.55 | 1.26 | 0.60 | 1.82 | 0.79 | #N/A |
| 1062914 | INTERGENIC | Dbl Promoter | 0.69 | 0.24 | 0.72 | 0.24 | 0.72 | 0.26 | #N/A |
| 1064613 | INTERGENIC | Sgl Promoter | 0.42 | 0.09 | 0.44 | 0.06 | 0.52 | 0.13 | #N/A |
| 1065951 | INTERGENIC | Sgl Promoter | 0.66 | 0.23 | 0.64 | 0.19 | 0.71 | 0.25 | #N/A |
| 1072503 | INTERGENIC | Sgl Promoter | 0.46 | 0.12 | 0.47 | 0.08 | 0.50 | 0.12 | #N/A |
| 732090  | INTERGENIC | Non Promoter | #N/A | #N/A | #N/A | #N/A | #N/A | #N/A | #N/A |
| 734802  | INTERGENIC | Non Promoter | #N/A | #N/A | #N/A | #N/A | #N/A | #N/A | #N/A |
| 818608  | INTERGENIC | Sgl Promoter | #N/A | #N/A | #N/A | #N/A | #N/A | #N/A | #N/A |
| 963779  | INTERGENIC | Sgl Promoter | #N/A | #N/A | #N/A | #N/A | #N/A | #N/A | #N/A |
| 982888  | INTERGENIC | Sgl Promoter | 1.72 | 0.73 | 1.09 | 0.49 | 1.54 | 0.70 | #N/A |
| 366236  | INTERGENIC | Non Promoter | #N/A | #N/A | #N/A | #N/A | #N/A | #N/A | #N/A |
| 482550  | INTERGENIC | Sgl Promoter | 0.49 | 0.14 | 0.60 | 0.16 | 0.45 | 0.09 | #N/A |
| 593145  | INTERGENIC | Dbl Promoter | #N/A | #N/A | 1.41 | 0.67 | #N/A | #N/A | #N/A |
| 169102  | INTERGENIC | Dbl Promoter | 2.11 | 0.83 | 2.02 | 0.88 | 1.91 | 0.82 | #N/A |

|        |            |              |      |      |      |      |      |      |      |
|--------|------------|--------------|------|------|------|------|------|------|------|
| 600019 | INTERGENIC | Non Promoter | #N/A | #N/A | #N/A | #N/A | #N/A | #N/A | #N/A |
| 599268 | INTERGENIC | Non Promoter | #N/A | #N/A | #N/A | #N/A | #N/A | #N/A | #N/A |
| 656934 | INTERGENIC | Sgl Promoter | #N/A | #N/A | #N/A | #N/A | #N/A | #N/A | #N/A |
| 658826 | INTERGENIC | Sgl Promoter | 0.48 | 0.13 | 0.47 | 0.08 | 0.46 | 0.11 |      |
| 689083 | INTERGENIC | Sgl Promoter | #N/A | #N/A | 1.06 | 0.47 | #N/A | #N/A |      |
| 797177 | INTERGENIC | Dbl Promoter | #N/A | #N/A | #N/A | #N/A | #N/A | #N/A |      |
| 947248 | INTERGENIC | Sgl Promoter | #N/A | #N/A | 1.42 | 0.69 | 0.99 | 0.42 |      |
| 221522 | INTERGENIC | Sgl Promoter | #N/A | #N/A | 0.69 | 0.22 | 1.14 | 0.44 |      |
| 450404 | INTERGENIC | Sgl Promoter | 0.45 | 0.11 | 0.98 | 0.42 | 0.53 | 0.14 |      |
| 450404 | INTERGENIC | Sgl Promoter | 0.49 | 0.13 | 0.98 | 0.42 | 0.54 | 0.15 |      |
| 268031 | INTERGENIC | Non Promoter | #N/A | #N/A | #N/A | #N/A | #N/A | #N/A |      |
| 267174 | INTERGENIC | Sgl Promoter | 2.17 | 0.85 | 1.56 | 0.76 | 2.16 | 0.88 |      |
| 264541 | INTERGENIC | Sgl Promoter | 0.71 | 0.26 | 0.56 | 0.13 | 0.58 | 0.17 |      |
| 263483 | INTERGENIC | Dbl Promoter | 1.93 | 0.80 | 1.95 | 0.89 | 1.70 | 0.74 |      |
| 261705 | INTERGENIC | Non Promoter | #N/A | #N/A | #N/A | #N/A | #N/A | #N/A |      |
| 259158 | INTERGENIC | Dbl Promoter | 0.58 | 0.19 | 0.79 | 0.29 | 0.63 | 0.20 |      |
| 256092 | INTERGENIC | Non Promoter | #N/A | #N/A | 0.54 | 0.12 | #N/A | #N/A |      |
| 253848 | INTERGENIC | Dbl Promoter | 0.47 | 0.13 | 0.58 | 0.14 | 0.56 | 0.16 |      |
| 251839 | INTERGENIC | Sgl Promoter | 2.51 | 0.91 | 2.43 | 0.96 | 2.06 | 0.86 |      |
| 251304 | INTERGENIC | Sgl Promoter | 1.49 | 0.65 | 1.25 | 0.59 | 1.14 | 0.51 |      |
| 247677 | INTERGENIC | Dbl Promoter | 2.13 | 0.82 | 1.62 | 0.75 | 2.41 | 0.92 |      |
| 246895 | INTERGENIC | Non Promoter | #N/A | #N/A | 0.44 | 0.07 | #N/A | #N/A |      |
| 244149 | INTERGENIC | Sgl Promoter | #N/A | #N/A | 2.14 | 0.92 | 2.31 | 0.90 |      |
| 243225 | INTERGENIC | Dbl Promoter | 3.33 | 0.97 | 3.21 | 0.99 | 3.28 | 0.95 |      |
| 241989 | INTERGENIC | Sgl Promoter | #N/A | #N/A | 1.09 | 0.49 | 1.08 | 0.45 |      |
| 236995 | INTERGENIC | Dbl Promoter | #N/A | #N/A | #N/A | #N/A | 1.45 | 0.66 |      |
| 234771 | INTERGENIC | Non Promoter | #N/A | #N/A | #N/A | #N/A | #N/A | #N/A |      |
| 233457 | INTERGENIC | Sgl Promoter | #N/A | #N/A | 1.64 | 0.77 | 2.27 | 0.90 |      |
| 231149 | INTERGENIC | Dbl Promoter | 2.33 | 0.88 | 1.81 | 0.84 | 1.80 | 0.79 |      |
| 229734 | INTERGENIC | Non Promoter | 0.43 | 0.10 | 0.60 | 0.16 | 0.63 | 0.20 |      |
| 228937 | INTERGENIC | Dbl Promoter | 1.42 | 0.62 | 1.29 | 0.62 | 1.24 | 0.53 |      |
| 226994 | INTERGENIC | Non Promoter | #N/A | #N/A | #N/A | #N/A | #N/A | #N/A |      |
| 225889 | INTERGENIC | Dbl Promoter | 0.69 | 0.25 | 0.85 | 0.33 | 0.78 | 0.30 |      |
| 224406 |            |              | 0.24 | 0.03 | 0.52 | 0.15 | 0.13 | 0.00 |      |
| 222987 | INTERGENIC | Non Promoter | 0.68 | 0.25 | 1.57 | 0.75 | 0.88 | 0.36 |      |
| 221406 | INTERGENIC | Sgl Promoter | 0.65 | 0.23 | 0.66 | 0.20 | 0.58 | 0.17 |      |
| 220138 | INTERGENIC | Sgl Promoter | 0.85 | 0.34 | 1.00 | 0.43 | 0.99 | 0.43 |      |
| 217362 | INTERGENIC | Sgl Promoter | 1.73 | 0.73 | #N/A | #N/A | 2.07 | 0.86 |      |
| 216435 | INTERGENIC | Sgl Promoter | 2.42 | 0.88 | 1.93 | 0.79 | #N/A | #N/A |      |
| 212515 | INTERGENIC | Non Promoter | #N/A | #N/A | 0.52 | 0.11 | 0.79 | 0.30 |      |
| 211715 | INTERGENIC | Sgl Promoter | #N/A | #N/A | #N/A | #N/A | #N/A | #N/A |      |
| 209428 | INTERGENIC | Sgl Promoter | 0.73 | 0.27 | 0.61 | 0.16 | 0.86 | 0.34 |      |
| 206428 | INTERGENIC | Non Promoter | #N/A | #N/A | 0.62 | 0.19 | #N/A | #N/A |      |
| 205642 | INTERGENIC | Dbl Promoter | 2.12 | 0.83 | 2.37 | 0.95 | 1.60 | 0.70 |      |
| 196068 | INTERGENIC | Dbl Promoter | #N/A | #N/A | 1.20 | 0.55 | 1.83 | 0.79 |      |
| 194913 | INTERGENIC | Non Promoter | #N/A | #N/A | #N/A | #N/A | #N/A | #N/A |      |
| 192788 | INTERGENIC | Dbl Promoter | 1.13 | 0.48 | 1.23 | 0.56 | 1.27 | 0.58 |      |
| 183898 | INTERGENIC | Sgl Promoter | 1.36 | 0.59 | #N/A | #N/A | 0.99 | 0.43 |      |
| 181474 | INTERGENIC | Dbl Promoter | 1.28 | 0.56 | 1.94 | 0.89 | 2.67 | 0.94 |      |
| 179893 | INTERGENIC | Sgl Promoter | #N/A | #N/A | 0.95 | 0.38 | #N/A | #N/A |      |
| 178426 | INTERGENIC | Dbl Promoter | 2.57 | 0.92 | 2.08 | 0.89 | 3.38 | 0.93 |      |







|        |            |              |      |      |      |      |      |      |
|--------|------------|--------------|------|------|------|------|------|------|
| 323299 | INTERGENIC | Sgl Promoter | #N/A | #N/A | 1.10 | 0.49 | #N/A | #N/A |
| 325876 | INTERGENIC | Dbl Promoter | 1.09 | 0.45 | 1.34 | 0.64 | 2.09 | 0.86 |
| 327481 | INTERGENIC | Sgl Promoter | #N/A | #N/A | #N/A | #N/A | #N/A | #N/A |
| 328659 | INTERGENIC | Non Promoter | #N/A | #N/A | #N/A | #N/A | #N/A | #N/A |
| 330792 | INTERGENIC | Dbl Promoter | 2.27 | 0.87 | 2.09 | 0.87 | 1.59 | 0.72 |
| 332211 | INTERGENIC | Non Promoter | #N/A | #N/A | 0.77 | 0.27 | 0.66 | 0.22 |
| 335297 | INTERGENIC | Sgl Promoter | 0.64 | 0.22 | #N/A | #N/A | 0.66 | 0.22 |
| 337787 | INTERGENIC | Sgl Promoter | 2.16 | 0.85 | 1.14 | 0.51 | 1.99 | 0.84 |
| 339417 | INTERGENIC | Non Promoter | #N/A | #N/A | 0.62 | 0.17 | 0.68 | 0.23 |
| 341141 | INTERGENIC | Dbl Promoter | 2.30 | 0.87 | 1.62 | 0.78 | 1.55 | 0.70 |
| 341855 | INTERGENIC | Non Promoter | #N/A | #N/A | 0.64 | 0.18 | #N/A | #N/A |
| 348643 | INTERGENIC | Sgl Promoter | 0.78 | 0.30 | 0.83 | 0.31 | 0.88 | 0.36 |
| 350380 | INTERGENIC | Dbl Promoter | 2.58 | 0.92 | 1.80 | 0.84 | 2.08 | 0.86 |
| 350965 | INTERGENIC | Non Promoter | #N/A | #N/A | #N/A | #N/A | #N/A | #N/A |
| 352279 | INTERGENIC | Dbl Promoter | #N/A | #N/A | 0.93 | 0.38 | 0.97 | 0.41 |
| 353870 | INTERGENIC | Sgl Promoter | 0.42 | 0.10 | 0.61 | 0.16 | 0.21 | 0.01 |
| 355383 | INTERGENIC | Sgl Promoter | 0.72 | 0.27 | 1.02 | 0.45 | 0.81 | 0.32 |
| 357004 | INTERGENIC | Non Promoter | 0.31 | 0.04 | 0.53 | 0.11 | 0.39 | 0.06 |
| 363063 | INTERGENIC | Non Promoter | #N/A | #N/A | 0.55 | 0.13 | #N/A | #N/A |
| 366980 | INTERGENIC | Dbl Promoter | 2.91 | 0.88 | 2.54 | 0.95 | #N/A | #N/A |
| 368093 | INTERGENIC | Non Promoter | 0.75 | 0.28 | 0.67 | 0.21 | 0.78 | 0.30 |
| 371480 | INTERGENIC | Sgl Promoter | 1.78 | 0.75 | 1.30 | 0.62 | 1.35 | 0.61 |
| 372444 | INTERGENIC | Sgl Promoter | 1.03 | 0.44 | 0.94 | 0.39 | 0.78 | 0.29 |
| 383302 | INTERGENIC | Dbl Promoter | #N/A | #N/A | 0.77 | 0.28 | 0.92 | 0.37 |
| 386100 | INTERGENIC | Non Promoter | #N/A | #N/A | #N/A | #N/A | #N/A | #N/A |
| 387314 | INTERGENIC | Sgl Promoter | 1.30 | 0.56 | 1.12 | 0.51 | 1.32 | 0.60 |
| 388358 | INTERGENIC | Sgl Promoter | #N/A | #N/A | 0.59 | 0.15 | 0.61 | 0.21 |
| 388821 | INTERGENIC | Dbl Promoter | #N/A | #N/A | 1.11 | 0.50 | 0.82 | 0.32 |
| 391038 | INTERGENIC | Sgl Promoter | 1.51 | 0.66 | 2.07 | 0.91 | 2.39 | 0.89 |
| 392754 | INTERGENIC | Dbl Promoter | #N/A | #N/A | #N/A | #N/A | 3.93 | 0.98 |
| 395053 | INTERGENIC | Non Promoter | #N/A | #N/A | 0.66 | 0.21 | 0.42 | 0.07 |
| 397076 | INTERGENIC | Dbl Promoter | 1.56 | 0.68 | 1.82 | 0.84 | 1.56 | 0.71 |
| 397902 | INTERGENIC | Sgl Promoter | #N/A | #N/A | 1.29 | 0.61 | #N/A | #N/A |
| 399701 | INTERGENIC | Sgl Promoter | #N/A | #N/A | 0.73 | 0.25 | 1.18 | 0.50 |
| 401540 | INTERGENIC | Sgl Promoter | 2.12 | 0.84 | 2.50 | 0.89 | 2.41 | 0.89 |
| 404322 | INTERGENIC | Non Promoter | #N/A | #N/A | #N/A | #N/A | #N/A | #N/A |
| 406303 | INTERGENIC | Dbl Promoter | 1.46 | 0.63 | 1.18 | 0.55 | 1.89 | 0.81 |
| 407708 | INTERGENIC | Sgl Promoter | #N/A | #N/A | 0.89 | 0.36 | 0.81 | 0.31 |
| 409153 | INTERGENIC | Sgl Promoter | 0.24 | 0.03 | 0.36 | 0.03 | 0.26 | 0.02 |
| 410761 | INTERGENIC | Non Promoter | #N/A | #N/A | #N/A | #N/A | 0.87 | 0.34 |
| 411568 | INTERGENIC | Dbl Promoter | #N/A | #N/A | 1.46 | 0.71 | #N/A | #N/A |
| 412267 | INTERGENIC | Non Promoter | 0.67 | 0.23 | 0.97 | 0.41 | 0.47 | 0.10 |
| 413035 | INTERGENIC | Sgl Promoter | 2.11 | 0.83 | 2.15 | 0.89 | 3.03 | 0.97 |
| 413981 | INTERGENIC | Dbl Promoter | 0.86 | 0.35 | 0.91 | 0.37 | 1.07 | 0.46 |
| 416195 | INTERGENIC | Sgl Promoter | #N/A | #N/A | 1.14 | 0.52 | 1.17 | 0.52 |
| 420587 | INTERGENIC | Sgl Promoter | 1.89 | 0.77 | 1.50 | 0.71 | 2.00 | 0.84 |
| 422502 | INTERGENIC | Sgl Promoter | 2.07 | 0.83 | 1.69 | 0.81 | 1.54 | 0.70 |
| 424988 | INTERGENIC | Dbl Promoter | 2.07 | 0.82 | 2.05 | 0.91 | 2.05 | 0.85 |
| 426711 | INTERGENIC | Non Promoter | 0.67 | 0.24 | 0.60 | 0.15 | #N/A | #N/A |
| 430078 | INTERGENIC | Sgl Promoter | 2.38 | 0.89 | 1.51 | 0.73 | 2.05 | 0.86 |
| 431768 | INTERGENIC | Sgl Promoter | 0.97 | 0.40 | 1.03 | 0.45 | 0.72 | 0.26 |

|        |            |              |      |      |      |      |      |      |
|--------|------------|--------------|------|------|------|------|------|------|
| 433455 | INTERGENIC | Dbl Promoter | 0.91 | 0.37 | 1.01 | 0.44 | 1.38 | 0.62 |
| 434787 | INTERGENIC | Dbl Promoter | 0.40 | 0.09 | 0.52 | 0.10 | 0.54 | 0.15 |
| 436627 | INTERGENIC | Sgl Promoter | 1.33 | 0.58 | 1.31 | 0.62 | 1.34 | 0.61 |
| 437490 | INTERGENIC | Sgl Promoter | #N/A | #N/A | #N/A | #N/A | #N/A | #N/A |
| 439207 | INTERGENIC | Sgl Promoter | 0.70 | 0.25 | 0.94 | 0.39 | 0.84 | 0.33 |
| 442526 | INTERGENIC | Dbl Promoter | #N/A | #N/A | 1.14 | 0.52 | 0.96 | 0.41 |
| 445608 | INTERGENIC | Sgl Promoter | 1.15 | 0.49 | 1.16 | 0.54 | 1.50 | 0.63 |
| 449244 | INTERGENIC | Dbl Promoter | 0.93 | 0.38 | 0.92 | 0.38 | 1.15 | 0.51 |
| 450057 | INTERGENIC | Non Promoter | #N/A | #N/A | #N/A | #N/A | #N/A | #N/A |
| 451631 | INTERGENIC | Sgl Promoter | #N/A | #N/A | 1.70 | 0.81 | 1.91 | 0.80 |
| 454014 | INTERGENIC | Dbl Promoter | #N/A | #N/A | 1.37 | 0.66 | #N/A | #N/A |
| 455824 | INTERGENIC | Sgl Promoter | #N/A | #N/A | 1.05 | 0.47 | 1.17 | 0.52 |
| 458407 | INTERGENIC | Dbl Promoter | 0.54 | 0.17 | 0.64 | 0.19 | 0.77 | 0.29 |
| 459423 | INTERGENIC | Non Promoter | #N/A | #N/A | 0.39 | 0.04 | #N/A | #N/A |
| 460770 | INTERGENIC | Sgl Promoter | 1.77 | 0.73 | 1.34 | 0.63 | 1.28 | 0.58 |
| 463127 | INTERGENIC | Sgl Promoter | 1.74 | 0.74 | 1.81 | 0.82 | 2.05 | 0.85 |
| 466299 | INTERGENIC | Dbl Promoter | #N/A | #N/A | 1.06 | 0.47 | 0.99 | 0.42 |
| 468444 | INTERGENIC | Non Promoter | #N/A | #N/A | 0.79 | 0.29 | #N/A | #N/A |
| 469847 | INTERGENIC | Sgl Promoter | 0.29 | 0.04 | 0.61 | 0.17 | 0.97 | 0.39 |
| 472901 | INTERGENIC | Sgl Promoter | 0.65 | 0.23 | 0.66 | 0.20 | 0.52 | 0.14 |
| 473419 | INTERGENIC | Sgl Promoter | 0.50 | 0.16 | 0.69 | 0.22 | 0.61 | 0.20 |
| 475896 | INTERGENIC | Sgl Promoter | 1.56 | 0.66 | 1.12 | 0.51 | 1.53 | 0.69 |
| 478300 | INTERGENIC | Sgl Promoter | 1.73 | 0.71 | 1.48 | 0.72 | 1.62 | 0.73 |
| 480620 | INTERGENIC | Dbl Promoter | 1.41 | 0.61 | 1.02 | 0.44 | 1.04 | 0.45 |
| 484083 | INTERGENIC | Sgl Promoter | 0.47 | 0.12 | 0.62 | 0.17 | 0.57 | 0.17 |
| 486586 | INTERGENIC | Sgl Promoter | 1.12 | 0.47 | 0.98 | 0.42 | 1.06 | 0.46 |
| 490393 | INTERGENIC | Non Promoter | #N/A | #N/A | #N/A | #N/A | #N/A | #N/A |
| 492403 | INTERGENIC | Sgl Promoter | 1.39 | 0.61 | 1.24 | 0.59 | 1.46 | 0.66 |
| 494099 | INTERGENIC | Sgl Promoter | 2.35 | 0.88 | 1.60 | 0.77 | 1.91 | 0.81 |
| 494998 | INTERGENIC | Dbl Promoter | #N/A | #N/A | 1.80 | 0.84 | 1.90 | 0.81 |
| 496342 | INTERGENIC | Non Promoter | #N/A | #N/A | #N/A | #N/A | #N/A | #N/A |
| 497703 | INTERGENIC | Dbl Promoter | 2.68 | 0.87 | 1.86 | 0.85 | 2.14 | 0.87 |
| 499455 | INTERGENIC | Non Promoter | #N/A | #N/A | #N/A | #N/A | #N/A | #N/A |
| 501249 | INTERGENIC | Sgl Promoter | 0.47 | 0.13 | 0.41 | 0.07 | 0.45 | 0.09 |
| 502143 | INTERGENIC | Sgl Promoter | 3.14 | 0.96 | 2.00 | 0.90 | 2.32 | 0.90 |
| 503191 | INTERGENIC | Dbl Promoter | 0.97 | 0.40 | 0.81 | 0.30 | 1.02 | 0.44 |
| 507501 | INTERGENIC | Non Promoter | 0.28 | 0.03 | 0.57 | 0.16 | 0.66 | 0.22 |
| 509733 | INTERGENIC | Sgl Promoter | 1.11 | 0.47 | 0.85 | 0.32 | 1.11 | 0.49 |
| 513592 | INTERGENIC | Dbl Promoter | 1.83 | 0.76 | 1.81 | 0.85 | 1.60 | 0.72 |
| 514455 | INTERGENIC | Sgl Promoter | 0.91 | 0.37 | 0.95 | 0.40 | 0.86 | 0.35 |
| 517869 | INTERGENIC | Sgl Promoter | 2.15 | 0.84 | 2.02 | 0.90 | 2.40 | 0.91 |
| 520760 | INTERGENIC | Non Promoter | #N/A | #N/A | #N/A | #N/A | #N/A | #N/A |
| 522328 | INTERGENIC | Sgl Promoter | 1.41 | 0.60 | 1.71 | 0.81 | 1.75 | 0.76 |
| 523695 | INTERGENIC | Dbl Promoter | 1.35 | 0.58 | 1.35 | 0.64 | 2.47 | 0.92 |
| 527803 | INTERGENIC | Sgl Promoter | 4.03 | 0.97 | 2.04 | 0.78 | 3.35 | 0.98 |
| 532118 | INTERGENIC | Sgl Promoter | #N/A | #N/A | 0.90 | 0.35 | 0.38 | 0.08 |
| 533162 | INTERGENIC | Non Promoter | #N/A | #N/A | #N/A | #N/A | #N/A | #N/A |
| 534943 | INTERGENIC | Sgl Promoter | 1.62 | 0.67 | 1.46 | 0.71 | 1.53 | 0.69 |
| 536206 | INTERGENIC | Dbl Promoter | #N/A | #N/A | #N/A | #N/A | #N/A | #N/A |
| 537837 | INTERGENIC | Sgl Promoter | #N/A | #N/A | #N/A | #N/A | #N/A | #N/A |
| 538688 | INTERGENIC | Non Promoter | 0.56 | 0.18 | #N/A | #N/A | #N/A | #N/A |

|        |            |              |      |      |      |      |      |      |
|--------|------------|--------------|------|------|------|------|------|------|
| 541198 | INTERGENIC | Sgl Promoter | 0.48 | 0.13 | 0.71 | 0.24 | 0.39 | 0.06 |
| 542977 | INTERGENIC | Non Promoter | #N/A | #N/A | #N/A | #N/A | #N/A | #N/A |
| 545154 | INTERGENIC | Dbl Promoter | 2.24 | 0.86 | 1.68 | 0.81 | 2.02 | 0.85 |
| 546124 | INTERGENIC | Sgl Promoter | 2.96 | 0.95 | 2.24 | 0.94 | 3.28 | 0.98 |
| 549735 | INTERGENIC | Non Promoter | 0.44 | 0.11 | #N/A | #N/A | 0.40 | 0.07 |
| 550205 | INTERGENIC | Sgl Promoter | #N/A | #N/A | #N/A | #N/A | #N/A | #N/A |
| 552282 | INTERGENIC | Dbl Promoter | 0.20 | 0.01 | 0.34 | 0.02 | 0.29 | 0.03 |
| 553361 | INTERGENIC | Sgl Promoter | 1.17 | 0.50 | 1.06 | 0.47 | 1.11 | 0.49 |
| 557480 | INTERGENIC | Sgl Promoter | 0.29 | 0.04 | 0.86 | 0.34 | 0.32 | 0.04 |
| 559198 | INTERGENIC | Dbl Promoter | 0.78 | 0.30 | 0.95 | 0.40 | 0.83 | 0.32 |
| 560365 | INTERGENIC | Sgl Promoter | 1.04 | 0.44 | 0.83 | 0.32 | 1.27 | 0.58 |
| 560995 | INTERGENIC | Sgl Promoter | 1.10 | 0.47 | 1.80 | 0.84 | #N/A | #N/A |
| 561955 | INTERGENIC | Non Promoter | #N/A | #N/A | #N/A | #N/A | #N/A | #N/A |
| 563095 | INTERGENIC | Sgl Promoter | 0.90 | 0.36 | 1.00 | 0.43 | 1.27 | 0.58 |
| 564434 | INTERGENIC | Sgl Promoter | 3.53 | 0.96 | #N/A | #N/A | 3.93 | 0.98 |
| 565998 | INTERGENIC | Sgl Promoter | #N/A | #N/A | 0.66 | 0.23 | #N/A | #N/A |
| 568550 | INTERGENIC | Dbl Promoter | 1.18 | 0.50 | 1.28 | 0.59 | 1.81 | 0.79 |
| 570299 | INTERGENIC | Non Promoter | #N/A | #N/A | #N/A | #N/A | #N/A | #N/A |
| 571276 | INTERGENIC | Sgl Promoter | 1.72 | 0.72 | 1.15 | 0.53 | 1.21 | 0.54 |
| 572247 | INTERGENIC | Dbl Promoter | 2.27 | 0.87 | 2.18 | 0.91 | 2.29 | 0.90 |
| 574470 | INTERGENIC | Dbl Promoter | 0.74 | 0.28 | 0.52 | 0.10 | 0.80 | 0.31 |
| 572882 | INTERGENIC | Non Promoter | #N/A | #N/A | #N/A | #N/A | #N/A | #N/A |
| 575065 | INTERGENIC | Dbl Promoter | 3.23 | 0.97 | 3.00 | 0.99 | 1.45 | 0.48 |
| 577717 | INTERGENIC | Sgl Promoter | #N/A | #N/A | #N/A | #N/A | #N/A | #N/A |
| 578950 | INTERGENIC | Non Promoter | 0.50 | 0.14 | 0.67 | 0.20 | 0.70 | 0.25 |
| 584270 | INTERGENIC | Sgl Promoter | #N/A | #N/A | 1.83 | 0.83 | 2.49 | 0.91 |
| 586635 | INTERGENIC | Sgl Promoter | 1.72 | 0.68 | 1.82 | 0.85 | 1.98 | 0.80 |
| 594885 | INTERGENIC | Dbl Promoter | 1.50 | 0.65 | 1.89 | 0.87 | 1.70 | 0.76 |
| 597331 | INTERGENIC | Non Promoter | #N/A | #N/A | #N/A | #N/A | 0.42 | 0.08 |
| 599351 | INTERGENIC | Sgl Promoter | #N/A | #N/A | 2.03 | 0.84 | 3.95 | 0.99 |
| 601561 | INTERGENIC | Sgl Promoter | 2.45 | 0.90 | 1.80 | 0.85 | 1.67 | 0.70 |
| 603867 | INTERGENIC | Sgl Promoter | 1.21 | 0.52 | 1.50 | 0.73 | 1.40 | 0.64 |
| 605980 | INTERGENIC | Dbl Promoter | 0.85 | 0.34 | 0.67 | 0.21 | 0.71 | 0.25 |
| 608688 | INTERGENIC | Dbl Promoter | 0.85 | 0.34 | 1.20 | 0.56 | 1.92 | 0.82 |
| 610158 | INTERGENIC | Non Promoter | #N/A | #N/A | #N/A | #N/A | #N/A | #N/A |
| 611015 | INTERGENIC | Dbl Promoter | 1.60 | 0.69 | 1.62 | 0.78 | 1.33 | 0.61 |
| 611739 | INTERGENIC | Sgl Promoter | 1.71 | 0.73 | 1.44 | 0.69 | 2.65 | 0.82 |
| 616565 | INTERGENIC | Sgl Promoter | 1.10 | 0.47 | 1.39 | 0.67 | 1.29 | 0.54 |
| 618478 | INTERGENIC | Sgl Promoter | 2.52 | 0.91 | 2.18 | 0.93 | 2.31 | 0.89 |
| 619857 | INTERGENIC | Sgl Promoter | 1.65 | 0.71 | 1.42 | 0.69 | 2.38 | 0.90 |
| 622250 | INTERGENIC | Non Promoter | #N/A | #N/A | #N/A | #N/A | #N/A | #N/A |
| 623615 | INTERGENIC | Sgl Promoter | 0.93 | 0.37 | 0.93 | 0.39 | 0.80 | 0.31 |
| 624531 | INTERGENIC | Sgl Promoter | 0.70 | 0.25 | 1.09 | 0.49 | 0.73 | 0.26 |
| 626043 | INTERGENIC | Sgl Promoter | #N/A | #N/A | 0.73 | 0.25 | 0.49 | 0.13 |
| 626920 | INTERGENIC | Sgl Promoter | 0.30 | 0.05 | 0.53 | 0.11 | 0.34 | 0.08 |
| 628188 | INTERGENIC | Dbl Promoter | 1.65 | 0.71 | 1.82 | 0.85 | 2.63 | 0.81 |
| 632354 | INTERGENIC | Sgl Promoter | 0.42 | 0.10 | #N/A | #N/A | 0.35 | 0.05 |
| 634688 | INTERGENIC | Non Promoter | #N/A | #N/A | #N/A | #N/A | #N/A | #N/A |
| 636290 | INTERGENIC | Sgl Promoter | 0.82 | 0.32 | 1.39 | 0.60 | 1.05 | 0.43 |
| 637499 | INTERGENIC | Dbl Promoter | 1.02 | 0.43 | 1.44 | 0.70 | 1.33 | 0.61 |
| 640914 | INTERGENIC | Non Promoter | #N/A | #N/A | 0.54 | 0.12 | 0.60 | 0.18 |

|        |            |              |      |      |      |      |      |      |
|--------|------------|--------------|------|------|------|------|------|------|
| 645400 | INTERGENIC | Dbl Promoter | 3.57 | 0.98 | 1.94 | 0.89 | 2.77 | 0.95 |
| 647117 | INTERGENIC | Sgl Promoter | #N/A | #N/A | #N/A | #N/A | 1.20 | 0.53 |
| 650035 | INTERGENIC | Sgl Promoter | 1.27 | 0.55 | 1.13 | 0.51 | 1.03 | 0.44 |
| 651071 | INTERGENIC | Non Promoter | 0.62 | 0.22 | 0.58 | 0.14 | 0.58 | 0.17 |
| 654033 | INTERGENIC | Dbl Promoter | 0.19 | 0.01 | 0.45 | 0.07 | 0.31 | 0.03 |
| 652911 | INTERGENIC | Non Promoter | 0.56 | 0.18 | 0.51 | 0.10 | 0.52 | 0.13 |
| 655075 | INTERGENIC | Sgl Promoter | 1.13 | 0.48 | 1.78 | 0.81 | 1.35 | 0.61 |
| 658544 | INTERGENIC | Non Promoter | #N/A | #N/A | #N/A | #N/A | #N/A | #N/A |
| 659744 | INTERGENIC | Dbl Promoter | 1.97 | 0.81 | 1.77 | 0.84 | 1.98 | 0.83 |
| 662643 | INTERGENIC | Sgl Promoter | 0.47 | 0.12 | 0.65 | 0.19 | 0.43 | 0.08 |
| 664751 | INTERGENIC | Sgl Promoter | 1.01 | 0.42 | 1.46 | 0.70 | 0.92 | 0.38 |
| 665844 | INTERGENIC | Non Promoter | #N/A | #N/A | 0.60 | 0.16 | 0.49 | 0.12 |
| 667536 | INTERGENIC | Dbl Promoter | 0.85 | 0.34 | 0.89 | 0.36 | 1.02 | 0.44 |
| 668491 | INTERGENIC | Sgl Promoter | 1.93 | 0.79 | #N/A | #N/A | 2.75 | 0.80 |
| 670062 | INTERGENIC | Non Promoter | #N/A | #N/A | 0.54 | 0.12 | 0.47 | 0.11 |
| 671886 | INTERGENIC | Sgl Promoter | #N/A | #N/A | #N/A | #N/A | #N/A | #N/A |
| 675895 | INTERGENIC | Dbl Promoter | 1.90 | 0.78 | 1.01 | 0.44 | 1.14 | 0.50 |
| 677192 | INTERGENIC | Non Promoter | 1.71 | 0.71 | 1.13 | 0.51 | 1.43 | 0.66 |
| 684466 | INTERGENIC | Dbl Promoter | 2.71 | 0.93 | 2.34 | 0.95 | 3.48 | 0.98 |
| 685910 | INTERGENIC | Non Promoter | #N/A | #N/A | #N/A | #N/A | #N/A | #N/A |
| 687515 | INTERGENIC | Dbl Promoter | #N/A | #N/A | 1.68 | 0.80 | #N/A | #N/A |
| 689082 | INTERGENIC | Sgl Promoter | #N/A | #N/A | #N/A | #N/A | #N/A | #N/A |
| 690694 | INTERGENIC | Non Promoter | #N/A | #N/A | 0.79 | 0.29 | 0.59 | 0.17 |
| 693380 | INTERGENIC | Dbl Promoter | 1.90 | 0.79 | 1.38 | 0.67 | 2.35 | 0.87 |
| 695268 | INTERGENIC | Sgl Promoter | 1.73 | 0.74 | 1.62 | 0.78 | 1.69 | 0.76 |
| 696795 | INTERGENIC | Sgl Promoter | 1.54 | 0.65 | 1.61 | 0.78 | 1.53 | 0.70 |
| 698810 | INTERGENIC | Non Promoter | 0.54 | 0.16 | 0.59 | 0.15 | 0.90 | 0.37 |
| 701789 | INTERGENIC | Dbl Promoter | 0.78 | 0.30 | 0.96 | 0.40 | 0.94 | 0.39 |
| 703578 | INTERGENIC | Non Promoter | #N/A | #N/A | #N/A | #N/A | #N/A | #N/A |
| 707132 | INTERGENIC | Dbl Promoter | 3.03 | 0.95 | #N/A | #N/A | 1.85 | 0.77 |
| 712315 | INTERGENIC | Sgl Promoter | 1.85 | 0.73 | #N/A | #N/A | #N/A | #N/A |
| 713930 | INTERGENIC | Non Promoter | 0.39 | 0.08 | 0.46 | 0.07 | 0.53 | 0.14 |
| 715637 | INTERGENIC | Sgl Promoter | #N/A | #N/A | 3.62 | 0.53 | #N/A | #N/A |
| 716714 | INTERGENIC | Dbl Promoter | 2.00 | 0.81 | 2.16 | 0.87 | 2.50 | 0.93 |
| 718574 | INTERGENIC | Non Promoter | #N/A | #N/A | 0.57 | 0.15 | 1.02 | 0.44 |
| 720959 | INTERGENIC | Sgl Promoter | 1.75 | 0.74 | 1.84 | 0.86 | 1.84 | 0.80 |
| 721592 | INTERGENIC | Sgl Promoter | #N/A | #N/A | 1.34 | 0.64 | 1.18 | 0.52 |
| 722612 | INTERGENIC | Sgl Promoter | 1.25 | 0.53 | 1.24 | 0.58 | 1.45 | 0.66 |
| 724625 | INTERGENIC | Dbl Promoter | 2.36 | 0.83 | 1.45 | 0.70 | 3.80 | 0.99 |
| 725933 | INTERGENIC | Non Promoter | #N/A | #N/A | #N/A | #N/A | 0.48 | 0.11 |
| 733544 | INTERGENIC | Sgl Promoter | 0.68 | 0.24 | 0.65 | 0.19 | 0.70 | 0.25 |
| 736925 | INTERGENIC | Sgl Promoter | #N/A | #N/A | 0.62 | 0.18 | #N/A | #N/A |
| 739184 | INTERGENIC | Sgl Promoter | #N/A | #N/A | #N/A | #N/A | #N/A | #N/A |
| 740265 | INTERGENIC | Sgl Promoter | #N/A | #N/A | 1.60 | 0.78 | #N/A | #N/A |
| 741511 | INTERGENIC | Non Promoter | #N/A | #N/A | #N/A | #N/A | #N/A | #N/A |
| 742970 | INTERGENIC | Dbl Promoter | #N/A | #N/A | 1.95 | 0.89 | 2.70 | 0.95 |
| 743748 | INTERGENIC | Sgl Promoter | 1.59 | 0.68 | 1.54 | 0.73 | 1.79 | 0.78 |
| 746352 | INTERGENIC | Sgl Promoter | 1.96 | 0.78 | 1.46 | 0.71 | 1.78 | 0.76 |
| 747891 | INTERGENIC | Non Promoter | 1.30 | 0.56 | 1.32 | 0.63 | 1.52 | 0.69 |
| 749929 | INTERGENIC | Sgl Promoter | 1.30 | 0.55 | 1.02 | 0.45 | 1.36 | 0.62 |
| 751960 | INTERGENIC | Dbl Promoter | 1.42 | 0.61 | 1.25 | 0.59 | 1.32 | 0.60 |



|        |            |              |      |      |      |      |      |      |
|--------|------------|--------------|------|------|------|------|------|------|
| 753224 | INTERGENIC | Non Promoter | #N/A | #N/A | #N/A | #N/A | #N/A | #N/A |
| 754837 | INTERGENIC | Sgl Promoter | 0.18 | 0.01 | 0.31 | 0.02 | 0.26 | 0.02 |
| 757249 | INTERGENIC | Dbl Promoter | 0.83 | 0.32 | 0.81 | 0.30 | 0.88 | 0.36 |
| 758516 | INTERGENIC | Non Promoter | #N/A | #N/A | 0.72 | 0.24 | 0.83 | 0.33 |
| 759806 | INTERGENIC | Sgl Promoter | 0.44 | 0.10 | 0.61 | 0.16 | 0.45 | 0.10 |
| 763350 | INTERGENIC | Non Promoter | #N/A | #N/A | 0.51 | 0.10 | 0.59 | 0.18 |
| 768368 | INTERGENIC | Dbl Promoter | #N/A | #N/A | 1.25 | 0.57 | 1.07 | 0.47 |
| 772914 | INTERGENIC | Sgl Promoter | 1.08 | 0.46 | 0.97 | 0.41 | 0.98 | 0.42 |
| 774751 | INTERGENIC | Sgl Promoter | 0.82 | 0.32 | 1.03 | 0.45 | 0.49 | 0.11 |
| 775314 | INTERGENIC | Non Promoter | 1.08 | 0.46 | 0.72 | 0.24 | 0.88 | 0.36 |
| 777614 | INTERGENIC | Sgl Promoter | 1.07 | 0.45 | 1.70 | 0.81 | 1.08 | 0.47 |
| 778000 | INTERGENIC | Dbl Promoter | #N/A | #N/A | #N/A | #N/A | #N/A | #N/A |
| 778944 | INTERGENIC | Non Promoter | #N/A | #N/A | 1.05 | 0.46 | #N/A | #N/A |
| 779628 | INTERGENIC | Sgl Promoter | #N/A | #N/A | #N/A | #N/A | #N/A | #N/A |
| 782619 | INTERGENIC | Sgl Promoter | 1.71 | 0.72 | 1.43 | 0.70 | 2.62 | 0.93 |
| 784620 | INTERGENIC | Sgl Promoter | #N/A | #N/A | 1.13 | 0.51 | 1.40 | 0.64 |
| 789377 | INTERGENIC | Sgl Promoter | #N/A | #N/A | 1.04 | 0.46 | 1.79 | 0.79 |
| 790204 | INTERGENIC | Sgl Promoter | #N/A | #N/A | #N/A | #N/A | 1.47 | 0.60 |
| 793725 | INTERGENIC | Dbl Promoter | 1.71 | 0.72 | 1.65 | 0.79 | 1.39 | 0.63 |
| 794918 | INTERGENIC | Sgl Promoter | 1.12 | 0.48 | 1.17 | 0.54 | 1.61 | 0.60 |
| 795804 | INTERGENIC | Sgl Promoter | 2.22 | 0.87 | 1.47 | 0.69 | 1.92 | 0.80 |
| 796539 | INTERGENIC | Non Promoter | #N/A | #N/A | 0.83 | 0.32 | 0.71 | 0.25 |
| 798517 | INTERGENIC | Dbl Promoter | 0.87 | 0.35 | 1.15 | 0.53 | 1.20 | 0.54 |
| 801771 | INTERGENIC | Sgl Promoter | 1.32 | 0.57 | 1.38 | 0.67 | 2.50 | 0.92 |
| 802887 | INTERGENIC | Non Promoter | 0.60 | 0.20 | 0.63 | 0.18 | 0.77 | 0.29 |
| 804663 | INTERGENIC | Dbl Promoter | 1.84 | 0.76 | 1.43 | 0.69 | 1.59 | 0.72 |
| 805326 | INTERGENIC | Non Promoter | #N/A | #N/A | #N/A | #N/A | #N/A | #N/A |
| 806865 | INTERGENIC | Sgl Promoter | 1.71 | 0.73 | 1.85 | 0.86 | 2.49 | 0.87 |
| 808246 | INTERGENIC | Sgl Promoter | 1.15 | 0.49 | 0.89 | 0.36 | 0.95 | 0.39 |
| 811233 | INTERGENIC | Sgl Promoter | 0.74 | 0.28 | 1.03 | 0.45 | 1.21 | 0.54 |
| 814364 | INTERGENIC | Sgl Promoter | 1.71 | 0.72 | 1.58 | 0.76 | 1.45 | 0.65 |
| 815651 | INTERGENIC | Sgl Promoter | #N/A | #N/A | #N/A | #N/A | #N/A | #N/A |
| 818827 | INTERGENIC | Dbl Promoter | 2.01 | 0.82 | 1.55 | 0.75 | 2.49 | 0.92 |
| 820256 | INTERGENIC | Sgl Promoter | 2.07 | 0.83 | 2.00 | 0.90 | #N/A | #N/A |
| 822763 | INTERGENIC | Sgl Promoter | 0.92 | 0.37 | 1.02 | 0.44 | 1.09 | 0.48 |
| 824729 | INTERGENIC | Non Promoter | #N/A | #N/A | #N/A | #N/A | #N/A | #N/A |
| 827028 | INTERGENIC | Sgl Promoter | 0.55 | 0.17 | 0.33 | 0.02 | 0.41 | 0.07 |
| 832339 | INTERGENIC | Dbl Promoter | 1.13 | 0.47 | 0.74 | 0.26 | 0.87 | 0.36 |
| 835326 | INTERGENIC | Sgl Promoter | #N/A | #N/A | 1.53 | 0.74 | 3.20 | 0.97 |
| 837450 | INTERGENIC | Dbl Promoter | 2.94 | 0.94 | 2.30 | 0.95 | 2.42 | 0.92 |
| 840144 | INTERGENIC | Non Promoter | #N/A | #N/A | #N/A | #N/A | #N/A | #N/A |
| 841942 | INTERGENIC | Dbl Promoter | #N/A | #N/A | 2.37 | 0.95 | #N/A | #N/A |
| 842436 | INTERGENIC | Non Promoter | #N/A | #N/A | #N/A | #N/A | #N/A | #N/A |
| 845571 | INTERGENIC | Dbl Promoter | 2.11 | 0.84 | 1.98 | 0.84 | 1.65 | 0.73 |
| 848685 | INTERGENIC | Sgl Promoter | 2.16 | 0.85 | 1.66 | 0.80 | #N/A | #N/A |
| 850074 | INTERGENIC | Non Promoter | 0.57 | 0.18 | 0.44 | 0.06 | 0.56 | 0.16 |
| 852630 | INTERGENIC | Sgl Promoter | 0.50 | 0.14 | 0.64 | 0.18 | 0.37 | 0.07 |
| 854795 | INTERGENIC | Sgl Promoter | 2.73 | 0.93 | 2.39 | 0.94 | #N/A | #N/A |
| 855399 | INTERGENIC | Non Promoter | #N/A | #N/A | #N/A | #N/A | #N/A | #N/A |
| 856966 | INTERGENIC | Dbl Promoter | #N/A | #N/A | 1.09 | 0.49 | 1.40 | 0.63 |
| 858209 | INTERGENIC | Sgl Promoter | #N/A | #N/A | #N/A | #N/A | #N/A | #N/A |

|        |            |              |      |      |      |      |      |      |
|--------|------------|--------------|------|------|------|------|------|------|
| 861922 | INTERGENIC | Dbl Promoter | 1.11 | 0.47 | 0.93 | 0.38 | 0.75 | 0.27 |
| 863819 | INTERGENIC | Sgl Promoter | #N/A | #N/A | 1.74 | 0.80 | 2.56 | 0.91 |
| 864412 | INTERGENIC | Non Promoter | #N/A | #N/A | #N/A | #N/A | #N/A | #N/A |
| 865559 | INTERGENIC | Sgl Promoter | #N/A | #N/A | #N/A | #N/A | #N/A | #N/A |
| 867555 | INTERGENIC | Sgl Promoter | 1.27 | 0.55 | 1.21 | 0.57 | 1.23 | 0.56 |
| 870073 | INTERGENIC | Sgl Promoter | 1.24 | 0.54 | 0.95 | 0.39 | 1.57 | 0.71 |
| 873291 | INTERGENIC | Sgl Promoter | 3.01 | 0.95 | 2.84 | 0.98 | 3.46 | 0.98 |
| 874987 | INTERGENIC | Dbl Promoter | 2.29 | 0.88 | 1.23 | 0.57 | 1.94 | 0.83 |
| 878780 | INTERGENIC | Non Promoter | #N/A | #N/A | #N/A | #N/A | #N/A | #N/A |
| 881159 | INTERGENIC | Dbl Promoter | 0.51 | 0.15 | 0.91 | 0.37 | 0.54 | 0.15 |
| 887003 | INTERGENIC | Dbl Promoter | 0.31 | 0.06 | 0.54 | 0.13 | 0.42 | 0.11 |
| 888952 | INTERGENIC | Non Promoter | #N/A | #N/A | #N/A | #N/A | #N/A | #N/A |
| 892988 | INTERGENIC | Sgl Promoter | 1.21 | 0.52 | 1.10 | 0.49 | 0.96 | 0.40 |
| 895716 | INTERGENIC | Sgl Promoter | 1.06 | 0.45 | 1.11 | 0.50 | 1.37 | 0.63 |
| 896914 | INTERGENIC | Sgl Promoter | 3.44 | 0.98 | 2.94 | 0.99 | 2.97 | 0.96 |
| 898405 | INTERGENIC | Dbl Promoter | 1.69 | 0.72 | 1.72 | 0.82 | 1.91 | 0.82 |
| 899379 | INTERGENIC | Non Promoter | #N/A | #N/A | #N/A | #N/A | #N/A | #N/A |
| 901709 | INTERGENIC | Dbl Promoter | 2.53 | 0.91 | 1.47 | 0.71 | 2.44 | 0.92 |
| 902800 | INTERGENIC | Sgl Promoter | #N/A | #N/A | #N/A | #N/A | 0.68 | 0.24 |
| 904824 | INTERGENIC | Sgl Promoter | 1.18 | 0.51 | 1.28 | 0.61 | 1.05 | 0.46 |
| 907320 | INTERGENIC | Sgl Promoter | 0.86 | 0.34 | 0.86 | 0.33 | 0.83 | 0.32 |
| 911060 | INTERGENIC | Non Promoter | #N/A | #N/A | 1.24 | 0.59 | 0.82 | 0.32 |
| 912879 | INTERGENIC | Sgl Promoter | 1.26 | 0.55 | 1.11 | 0.50 | 1.03 | 0.44 |
| 915641 | INTERGENIC | Dbl Promoter | 0.73 | 0.27 | 0.59 | 0.15 | 0.64 | 0.21 |
| 916745 | INTERGENIC | Dbl Promoter | 0.50 | 0.14 | 0.46 | 0.07 | 0.62 | 0.19 |
| 917578 | INTERGENIC | Non Promoter | 0.98 | 0.40 | 0.62 | 0.17 | #N/A | #N/A |
| 918365 | INTERGENIC | Sgl Promoter | 1.33 | 0.57 | 1.04 | 0.46 | 1.34 | 0.61 |
| 920087 | INTERGENIC | Dbl Promoter | 2.13 | 0.84 | 1.57 | 0.75 | 1.80 | 0.79 |
| 922201 | INTERGENIC | Non Promoter | 0.80 | 0.31 | 0.88 | 0.35 | 0.84 | 0.33 |
| 922640 | INTERGENIC | Dbl Promoter | 0.61 | 0.21 | 0.73 | 0.25 | #N/A | #N/A |
| 923493 | INTERGENIC | Non Promoter | 0.52 | 0.15 | 0.67 | 0.21 | 0.58 | 0.17 |
| 378726 | INTERGENIC | Dbl Promoter | #N/A | #N/A | #N/A | #N/A | 0.73 | 0.27 |
| 463553 | INTERGENIC | Sgl Promoter | #N/A | #N/A | #N/A | #N/A | #N/A | #N/A |
| 290800 | INTERGENIC | Sgl Promoter | 1.31 | 0.57 | 1.25 | 0.58 | 1.43 | 0.66 |
| 379302 | INTERGENIC | Dbl Promoter | #N/A | #N/A | #N/A | #N/A | #N/A | #N/A |
| 483013 | INTERGENIC | Dbl Promoter | 2.01 | 0.82 | 1.76 | 0.81 | 1.83 | 0.77 |
| 503770 | INTERGENIC | Dbl Promoter | 0.98 | 0.41 | 0.83 | 0.32 | 0.93 | 0.38 |
| 504894 | INTERGENIC | Dbl Promoter | #N/A | #N/A | 0.97 | 0.41 | 0.79 | 0.30 |
| 769839 | INTERGENIC | Dbl Promoter | 0.79 | 0.30 | 0.72 | 0.24 | 0.87 | 0.35 |
| 837928 | INTERGENIC | Dbl Promoter | #N/A | #N/A | 0.70 | 0.23 | 1.00 | 0.43 |
| 504345 | INTERGENIC | Dbl Promoter | #N/A | #N/A | #N/A | #N/A | #N/A | #N/A |
| 628757 | INTERGENIC | Non Promoter | #N/A | #N/A | #N/A | #N/A | #N/A | #N/A |
| 627455 | INTERGENIC | Dbl Promoter | 0.81 | 0.30 | 0.89 | 0.35 | #N/A | #N/A |
| 626173 | INTERGENIC | Sgl Promoter | 0.63 | 0.22 | 0.77 | 0.28 | 0.34 | 0.04 |
| 624974 | INTERGENIC | Non Promoter | 0.56 | 0.17 | 0.53 | 0.13 | 0.59 | 0.18 |
| 623331 | INTERGENIC | Dbl Promoter | 1.02 | 0.43 | 1.22 | 0.57 | 1.20 | 0.54 |
| 621312 | INTERGENIC | Non Promoter | 0.36 | 0.07 | 0.47 | 0.09 | 0.53 | 0.14 |
| 620066 | INTERGENIC | Dbl Promoter | 1.55 | 0.67 | 1.37 | 0.66 | 1.26 | 0.57 |
| 618506 | INTERGENIC | Sgl Promoter | 1.81 | 0.71 | 1.38 | 0.61 | 1.30 | 0.59 |
| 616209 | INTERGENIC | Non Promoter | #N/A | #N/A | #N/A | #N/A | #N/A | #N/A |
| 613633 | INTERGENIC | Dbl Promoter | 1.36 | 0.59 | 1.57 | 0.76 | 1.80 | 0.79 |

|        |            |              |      |      |      |      |      |      |
|--------|------------|--------------|------|------|------|------|------|------|
| 611834 | INTERGENIC | Non Promoter | #N/A | #N/A | #N/A | #N/A | #N/A | #N/A |
| 610053 | INTERGENIC | Dbl Promoter | 0.64 | 0.22 | 0.67 | 0.21 | 0.67 | 0.23 |
| 605382 | INTERGENIC | Sgl Promoter | 0.95 | 0.39 | 0.52 | 0.11 | 0.63 | 0.21 |
| 602136 | INTERGENIC | Sgl Promoter | 0.41 | 0.09 | 0.58 | 0.15 | 0.60 | 0.19 |
| 599934 | INTERGENIC | Sgl Promoter | 0.55 | 0.17 | 0.75 | 0.26 | 0.78 | 0.30 |
| 598374 | INTERGENIC | Sgl Promoter | 1.43 | 0.62 | 1.25 | 0.60 | 1.46 | 0.67 |
| 595621 | INTERGENIC | Non Promoter | #N/A | #N/A | 0.49 | 0.09 | 1.01 | 0.43 |
| 593225 | INTERGENIC | Dbl Promoter | 1.35 | 0.58 | 1.32 | 0.63 | 1.25 | 0.56 |
| 591425 | INTERGENIC | Sgl Promoter | #N/A | #N/A | 1.45 | 0.68 | 1.82 | 0.78 |
| 588261 | INTERGENIC | Sgl Promoter | 1.02 | 0.42 | 1.25 | 0.59 | 1.29 | 0.59 |
| 586088 | INTERGENIC | Sgl Promoter | 0.55 | 0.17 | 0.59 | 0.15 | 0.61 | 0.19 |
| 584318 | INTERGENIC | Non Promoter | 0.27 | 0.03 | 0.41 | 0.05 | 0.45 | 0.09 |
| 581918 | INTERGENIC | Sgl Promoter | 1.58 | 0.69 | 1.69 | 0.76 | 1.73 | 0.77 |
| 579578 | INTERGENIC | Sgl Promoter | 2.34 | 0.88 | 2.43 | 0.95 | 2.33 | 0.90 |
| 577203 | INTERGENIC | Non Promoter | #N/A | #N/A | #N/A | #N/A | #N/A | #N/A |
| 576725 | INTERGENIC | Dbl Promoter | 0.26 | 0.03 | 0.37 | 0.04 | 0.34 | 0.04 |
| 575638 | INTERGENIC | Non Promoter | #N/A | #N/A | 0.47 | 0.08 | 0.29 | 0.03 |
| 574504 | INTERGENIC | Sgl Promoter | 1.01 | 0.42 | 1.24 | 0.59 | 1.64 | 0.72 |
| 572997 | INTERGENIC | Sgl Promoter | 0.54 | 0.17 | 0.79 | 0.29 | 0.76 | 0.28 |
| 569865 | INTERGENIC | Dbl Promoter | #N/A | #N/A | 1.41 | 0.68 | 1.25 | 0.57 |
| 560691 | INTERGENIC | Non Promoter | #N/A | #N/A | #N/A | #N/A | #N/A | #N/A |
| 559812 | INTERGENIC | Dbl Promoter | #N/A | #N/A | 0.60 | 0.16 | 0.56 | 0.16 |
| 557918 | INTERGENIC | Non Promoter | #N/A | #N/A | 0.67 | 0.21 | 0.80 | 0.31 |
| 557018 | INTERGENIC | Sgl Promoter | #N/A | #N/A | 1.11 | 0.50 | #N/A | #N/A |
| 555046 | INTERGENIC | Sgl Promoter | 2.82 | 0.93 | 1.68 | 0.78 | 2.66 | 0.89 |
| 553378 | INTERGENIC | Dbl Promoter | 1.60 | 0.67 | 1.29 | 0.61 | 1.84 | 0.80 |
| 549466 | INTERGENIC | Non Promoter | 0.47 | 0.12 | 1.06 | 0.45 | 0.66 | 0.22 |
| 546421 | INTERGENIC | Dbl Promoter | 0.77 | 0.30 | 0.88 | 0.35 | 1.07 | 0.46 |
| 545399 | INTERGENIC | Sgl Promoter | 1.51 | 0.66 | 1.36 | 0.66 | 1.35 | 0.62 |
| 542961 | INTERGENIC | Sgl Promoter | #N/A | #N/A | 1.71 | 0.82 | 1.59 | 0.72 |
| 542302 | INTERGENIC | Dbl Promoter | 2.68 | 0.93 | 2.16 | 0.92 | 2.12 | 0.85 |
| 539909 | INTERGENIC | Non Promoter | #N/A | #N/A | #N/A | #N/A | #N/A | #N/A |
| 538171 | INTERGENIC | Dbl Promoter | 3.27 | 0.97 | 2.46 | 0.96 | 3.76 | 0.98 |
| 535279 | INTERGENIC | Sgl Promoter | #N/A | #N/A | #N/A | #N/A | #N/A | #N/A |
| 534077 | INTERGENIC | Non Promoter | #N/A | #N/A | #N/A | #N/A | #N/A | #N/A |
| 532657 | INTERGENIC | Sgl Promoter | #N/A | #N/A | 1.49 | 0.73 | #N/A | #N/A |
| 531723 | INTERGENIC | Sgl Promoter | 1.03 | 0.44 | 1.70 | 0.79 | 1.23 | 0.54 |
| 529940 | INTERGENIC | Sgl Promoter | 0.86 | 0.34 | 1.03 | 0.45 | 0.75 | 0.28 |
| 519097 | INTERGENIC | Dbl Promoter | 0.48 | 0.13 | 1.19 | 0.55 | 0.41 | 0.07 |
| 517992 | INTERGENIC | Non Promoter | #N/A | #N/A | #N/A | #N/A | #N/A | #N/A |
| 517247 | INTERGENIC | Sgl Promoter | 1.36 | 0.59 | 1.43 | 0.66 | 0.70 | 0.25 |
| 515761 | INTERGENIC | Sgl Promoter | 1.41 | 0.61 | 1.69 | 0.81 | 1.43 | 0.65 |
| 512666 | INTERGENIC | Non Promoter | #N/A | #N/A | 0.64 | 0.19 | #N/A | #N/A |
| 510538 | INTERGENIC | Dbl Promoter | 2.57 | 0.88 | 1.57 | 0.76 | 2.70 | 0.94 |
| 507756 | INTERGENIC | Dbl Promoter | 1.68 | 0.71 | #N/A | #N/A | 1.73 | 0.73 |
| 505866 | INTERGENIC | Non Promoter | #N/A | #N/A | 0.51 | 0.14 | 0.59 | 0.18 |
| 503723 | INTERGENIC | Sgl Promoter | 0.20 | 0.02 | 0.20 | 0.00 | 0.29 | 0.03 |
| 501514 | INTERGENIC | Sgl Promoter | 0.22 | 0.02 | 0.30 | 0.02 | 0.33 | 0.04 |
| 499680 | INTERGENIC | Dbl Promoter | 0.44 | 0.11 | 0.49 | 0.09 | 0.37 | 0.05 |
| 495700 | INTERGENIC | Sgl Promoter | 0.38 | 0.07 | 0.41 | 0.05 | 0.63 | 0.20 |
| 493955 | INTERGENIC | Non Promoter | #N/A | #N/A | 0.95 | 0.40 | #N/A | #N/A |



|        |            |              |      |      |      |      |      |      |
|--------|------------|--------------|------|------|------|------|------|------|
| 493365 | INTERGENIC | Sgl Promoter | 2.50 | 0.90 | 1.65 | 0.79 | 2.26 | 0.81 |
| 491522 | INTERGENIC | Sgl Promoter | 1.44 | 0.63 | 1.83 | 0.85 | 1.24 | 0.56 |
| 490316 | INTERGENIC | Sgl Promoter | 1.43 | 0.61 | 2.38 | 0.95 | 2.05 | 0.83 |
| 488385 | INTERGENIC | Dbl Promoter | 1.11 | 0.47 | 1.09 | 0.49 | 1.28 | 0.58 |
| 486765 | INTERGENIC | Non Promoter | #N/A | #N/A | #N/A | #N/A | #N/A | #N/A |
| 485606 | INTERGENIC | Sgl Promoter | 2.73 | 0.93 | 1.80 | 0.81 | 2.63 | 0.94 |
| 483555 | INTERGENIC | Sgl Promoter | 1.80 | 0.76 | 1.96 | 0.89 | 2.26 | 0.90 |
| 481390 | INTERGENIC | Sgl Promoter | 1.07 | 0.45 | 1.41 | 0.65 | 1.62 | 0.73 |
| 479767 | INTERGENIC | Dbl Promoter | 0.89 | 0.36 | 1.24 | 0.58 | 1.05 | 0.46 |
| 478565 | INTERGENIC | Sgl Promoter | 0.99 | 0.41 | 0.93 | 0.38 | 0.97 | 0.41 |
| 476931 | INTERGENIC | Sgl Promoter | #N/A | #N/A | 2.23 | 0.94 | 2.50 | 0.87 |
| 476187 | INTERGENIC | Non Promoter | #N/A | #N/A | #N/A | #N/A | #N/A | #N/A |
| 473297 | INTERGENIC | Sgl Promoter | 0.69 | 0.24 | 0.71 | 0.23 | 1.07 | 0.47 |
| 471376 | INTERGENIC | Dbl Promoter | 3.16 | 0.96 | 2.20 | 0.94 | 2.71 | 0.94 |
| 467130 | INTERGENIC | Sgl Promoter | 2.14 | 0.78 | 1.80 | 0.85 | 2.47 | 0.91 |
| 457703 | INTERGENIC | Dbl Promoter | 1.32 | 0.58 | 1.16 | 0.53 | 1.30 | 0.59 |
| 456564 | INTERGENIC | Sgl Promoter | 1.93 | 0.79 | 1.79 | 0.82 | 2.05 | 0.84 |
| 452407 | INTERGENIC | Sgl Promoter | 2.03 | 0.82 | 1.61 | 0.78 | 1.97 | 0.84 |
| 450870 | INTERGENIC | Sgl Promoter | 3.14 | 0.96 | 2.03 | 0.88 | 2.71 | 0.95 |
| 449867 | INTERGENIC | Sgl Promoter | 0.88 | 0.35 | 0.95 | 0.40 | 1.33 | 0.60 |
| 447610 | INTERGENIC | Dbl Promoter | 2.14 | 0.85 | 1.73 | 0.81 | 2.02 | 0.85 |
| 444911 | INTERGENIC | Sgl Promoter | 0.36 | 0.06 | 0.45 | 0.07 | 0.67 | 0.23 |
| 443005 | INTERGENIC | Sgl Promoter | 1.03 | 0.43 | 1.36 | 0.66 | 0.93 | 0.39 |
| 441365 | INTERGENIC | Sgl Promoter | 0.57 | 0.18 | 1.12 | 0.51 | 0.49 | 0.12 |
| 439601 | INTERGENIC | Sgl Promoter | 1.67 | 0.69 | 1.53 | 0.75 | 1.59 | 0.71 |
| 438566 | INTERGENIC | Non Promoter | #N/A | #N/A | #N/A | #N/A | 0.58 | 0.17 |
| 437612 | INTERGENIC | Sgl Promoter | 1.57 | 0.68 | 1.89 | 0.87 | 1.48 | 0.68 |
| 434998 | INTERGENIC | Sgl Promoter | 2.15 | 0.75 | 1.48 | 0.60 | 2.96 | 0.96 |
| 430086 | INTERGENIC | Sgl Promoter | #N/A | #N/A | #N/A | #N/A | #N/A | #N/A |
| 427734 | INTERGENIC | Dbl Promoter | 0.91 | 0.37 | 1.16 | 0.52 | 0.89 | 0.36 |
| 424894 | INTERGENIC | Non Promoter | 2.15 | 0.85 | 1.28 | 0.62 | 1.98 | 0.84 |
| 420943 | INTERGENIC | Non Promoter | 0.57 | 0.18 | 0.72 | 0.24 | 0.58 | 0.17 |
| 420097 | INTERGENIC | Dbl Promoter | 1.81 | 0.69 | 2.10 | 0.84 | 1.99 | 0.84 |
| 417825 | INTERGENIC | Sgl Promoter | 0.79 | 0.30 | 0.97 | 0.41 | 0.79 | 0.30 |
| 416939 | INTERGENIC | Non Promoter | 0.69 | 0.24 | 0.67 | 0.20 | #N/A | #N/A |
| 413638 | INTERGENIC | Sgl Promoter | #N/A | #N/A | #N/A | #N/A | #N/A | #N/A |
| 412683 | INTERGENIC | Sgl Promoter | 1.93 | 0.79 | 1.64 | 0.77 | 1.72 | 0.76 |
| 410118 | INTERGENIC | Non Promoter | #N/A | #N/A | 0.52 | 0.11 | #N/A | #N/A |
| 408340 | INTERGENIC | Sgl Promoter | 4.01 | 0.98 | 3.16 | 0.99 | 2.66 | 0.94 |
| 406357 | INTERGENIC | Dbl Promoter | 2.14 | 0.85 | 1.84 | 0.86 | 1.77 | 0.78 |
| 402651 | INTERGENIC | Non Promoter | #N/A | #N/A | #N/A | #N/A | #N/A | #N/A |
| 401032 | INTERGENIC | Sgl Promoter | 2.17 | 0.85 | 1.67 | 0.80 | 1.90 | 0.78 |
| 398683 | INTERGENIC | Sgl Promoter | #N/A | #N/A | #N/A | #N/A | #N/A | #N/A |
| 398022 | INTERGENIC | Non Promoter | 0.83 | 0.31 | 0.89 | 0.36 | 0.73 | 0.27 |
| 394684 | INTERGENIC | Sgl Promoter | #N/A | #N/A | 1.05 | 0.45 | 0.94 | 0.40 |
| 392891 | INTERGENIC | Dbl Promoter | 2.10 | 0.84 | 2.42 | 0.94 | 2.00 | 0.84 |
| 390145 | INTERGENIC | Non Promoter | 0.46 | 0.12 | 0.82 | 0.32 | 0.74 | 0.28 |
| 387226 | INTERGENIC | Sgl Promoter | 1.77 | 0.75 | 2.30 | 0.94 | 2.68 | 0.93 |
| 383986 | INTERGENIC | Sgl Promoter | 1.92 | 0.79 | 1.39 | 0.67 | 1.77 | 0.75 |
| 382358 | INTERGENIC | Sgl Promoter | 1.28 | 0.55 | 1.36 | 0.65 | #N/A | #N/A |
| 381479 | INTERGENIC | Dbl Promoter | 1.17 | 0.50 | 1.23 | 0.58 | 1.09 | 0.48 |

|        |            |              |      |      |      |      |      |      |
|--------|------------|--------------|------|------|------|------|------|------|
| 379557 | INTERGENIC | Non Promoter | #N/A | #N/A | #N/A | #N/A | #N/A | #N/A |
| 378766 | INTERGENIC | Sgl Promoter | #N/A | #N/A | 1.61 | 0.78 | 2.22 | 0.84 |
| 374868 | INTERGENIC | Dbl Promoter | 1.10 | 0.47 | 1.66 | 0.77 | 1.06 | 0.45 |
| 374170 | INTERGENIC | Sgl Promoter | 1.60 | 0.70 | 1.70 | 0.81 | 1.19 | 0.53 |
| 372450 | INTERGENIC | Sgl Promoter | 1.40 | 0.61 | 1.34 | 0.65 | #N/A | #N/A |
| 371881 | INTERGENIC | Non Promoter | 0.75 | 0.28 | 1.68 | 0.61 | 0.85 | 0.34 |
| 370367 | INTERGENIC | Dbl Promoter | 1.99 | 0.80 | 1.63 | 0.79 | 2.01 | 0.83 |
| 368594 | INTERGENIC | Non Promoter | 0.44 | 0.11 | 0.55 | 0.13 | 0.68 | 0.23 |
| 366740 | INTERGENIC | Dbl Promoter | 1.76 | 0.75 | 1.66 | 0.80 | 1.54 | 0.70 |
| 360916 | INTERGENIC | Non Promoter | 0.66 | 0.23 | 0.61 | 0.17 | 0.75 | 0.28 |
| 359595 | INTERGENIC | Sgl Promoter | 1.85 | 0.77 | 1.01 | 0.44 | 1.34 | 0.59 |
| 357452 | INTERGENIC | Dbl Promoter | 1.52 | 0.64 | 0.86 | 0.33 | 0.96 | 0.40 |
| 355917 | INTERGENIC | Sgl Promoter | 0.77 | 0.29 | 0.74 | 0.26 | 0.47 | 0.10 |
| 356793 | INTERGENIC | Sgl Promoter | 1.00 | 0.42 | 0.73 | 0.25 | 0.85 | 0.34 |
| 352819 | INTERGENIC | Non Promoter | 1.34 | 0.59 | #N/A | #N/A | 1.49 | 0.67 |
| 352413 | INTERGENIC | Sgl Promoter | 1.26 | 0.54 | 1.02 | 0.44 | 1.08 | 0.47 |
| 351714 | INTERGENIC | Sgl Promoter | 2.25 | 0.87 | 1.24 | 0.59 | 1.77 | 0.78 |
| 350939 | INTERGENIC | Dbl Promoter | 1.86 | 0.77 | 1.55 | 0.74 | 1.77 | 0.66 |
| 349906 | INTERGENIC | Sgl Promoter | 1.00 | 0.41 | 0.90 | 0.36 | 1.23 | 0.56 |
| 349250 | INTERGENIC | Dbl Promoter | 2.20 | 0.86 | 2.00 | 0.90 | 2.65 | 0.94 |
| 347765 | INTERGENIC | Non Promoter | #N/A | #N/A | 0.70 | 0.23 | 1.09 | 0.48 |
| 346312 | INTERGENIC | Dbl Promoter | 1.83 | 0.77 | 1.83 | 0.86 | 1.74 | 0.77 |
| 345668 | INTERGENIC | Sgl Promoter | 1.11 | 0.47 | 0.99 | 0.43 | 0.89 | 0.36 |
| 343635 | INTERGENIC | Non Promoter | 0.50 | 0.14 | 0.68 | 0.21 | 0.67 | 0.23 |
| 342515 | INTERGENIC | Dbl Promoter | 1.13 | 0.48 | 1.47 | 0.71 | 1.43 | 0.66 |
| 341068 | INTERGENIC | Non Promoter | #N/A | #N/A | #N/A | #N/A | #N/A | #N/A |
| 340351 | INTERGENIC | Sgl Promoter | 1.60 | 0.69 | 1.36 | 0.65 | 1.39 | 0.63 |
| 339611 | INTERGENIC | Dbl Promoter | 3.60 | 0.97 | 2.74 | 0.98 | 2.97 | 0.96 |
| 338477 | INTERGENIC | Non Promoter | 1.10 | 0.47 | 1.06 | 0.47 | 0.96 | 0.41 |
| 335705 | INTERGENIC | Sgl Promoter | 0.78 | 0.30 | 0.59 | 0.15 | 0.78 | 0.30 |
| 336544 | INTERGENIC | Sgl Promoter | 0.66 | 0.23 | 0.82 | 0.31 | 0.63 | 0.20 |
| 332596 | INTERGENIC | Sgl Promoter | 1.49 | 0.65 | 1.56 | 0.76 | 1.50 | 0.69 |
| 326740 | INTERGENIC | Sgl Promoter | #N/A | #N/A | 2.05 | 0.90 | 2.74 | 0.94 |
| 325264 | INTERGENIC | Non Promoter | #N/A | #N/A | 0.66 | 0.19 | #N/A | #N/A |
| 323831 | INTERGENIC | Dbl Promoter | 1.92 | 0.80 | 1.74 | 0.82 | 1.35 | 0.57 |
| 322218 | INTERGENIC | Sgl Promoter | 1.96 | 0.80 | 1.31 | 0.63 | 1.80 | 0.78 |
| 319415 | INTERGENIC | Sgl Promoter | 1.89 | 0.78 | 1.24 | 0.59 | 1.56 | 0.71 |
| 318029 | INTERGENIC | Sgl Promoter | 1.30 | 0.56 | 1.00 | 0.43 | 1.31 | 0.58 |
| 310635 | INTERGENIC | Dbl Promoter | 1.15 | 0.49 | 1.54 | 0.75 | 0.93 | 0.38 |
| 308956 | INTERGENIC | Non Promoter | #N/A | #N/A | 1.48 | 0.72 | #N/A | #N/A |
| 307400 | INTERGENIC | Sgl Promoter | 1.29 | 0.56 | 1.55 | 0.76 | 1.09 | 0.48 |
| 305069 | INTERGENIC | Sgl Promoter | 1.13 | 0.48 | 0.96 | 0.40 | 0.97 | 0.41 |
| 303685 | INTERGENIC | Non Promoter | #N/A | #N/A | #N/A | #N/A | #N/A | #N/A |
| 302679 | INTERGENIC | Dbl Promoter | 0.73 | 0.27 | 0.72 | 0.24 | 0.54 | 0.15 |
| 299659 | INTERGENIC | Non Promoter | #N/A | #N/A | #N/A | #N/A | #N/A | #N/A |
| 298332 | INTERGENIC | Dbl Promoter | 2.09 | 0.83 | 2.48 | 0.94 | 2.36 | 0.87 |
| 295957 | INTERGENIC | Sgl Promoter | 1.68 | 0.72 | 1.96 | 0.87 | 2.19 | 0.85 |
| 293134 | INTERGENIC | Sgl Promoter | #N/A | #N/A | #N/A | #N/A | #N/A | #N/A |
| 292190 | INTERGENIC | Non Promoter | #N/A | #N/A | 0.92 | 0.36 | 1.10 | 0.47 |
| 289495 | INTERGENIC | Sgl Promoter | 0.37 | 0.07 | 0.71 | 0.24 | 0.61 | 0.19 |
| 287991 | INTERGENIC | Sgl Promoter | #N/A | #N/A | 1.32 | 0.61 | 1.75 | 0.78 |

|        |            |              |      |      |      |      |      |      |
|--------|------------|--------------|------|------|------|------|------|------|
| 286304 | INTERGENIC | Sgl Promoter | #N/A | #N/A | 1.27 | 0.52 | 0.76 | 0.28 |
| 282391 | INTERGENIC | Sgl Promoter | 0.28 | 0.03 | 0.36 | 0.04 | 0.40 | 0.06 |
| 280428 | INTERGENIC | Sgl Promoter | 1.06 | 0.45 | 1.02 | 0.44 | 0.82 | 0.32 |
| 276498 | INTERGENIC | Sgl Promoter | 0.83 | 0.33 | 0.91 | 0.37 | 0.73 | 0.27 |
| 274364 | INTERGENIC | Dbl Promoter | 1.86 | 0.78 | 1.25 | 0.59 | 1.49 | 0.68 |
| 272706 | INTERGENIC | Sgl Promoter | 1.96 | 0.80 | 1.25 | 0.59 | 1.35 | 0.61 |
| 271573 | INTERGENIC | Sgl Promoter | 0.98 | 0.41 | 0.89 | 0.36 | 0.95 | 0.39 |
| 270272 | INTERGENIC | Sgl Promoter | 1.78 | 0.74 | 1.70 | 0.81 | 1.64 | 0.68 |
| 267605 | INTERGENIC | Sgl Promoter | 0.42 | 0.10 | 0.67 | 0.20 | 0.77 | 0.29 |
| 264923 | INTERGENIC | Sgl Promoter | 1.41 | 0.61 | 1.28 | 0.61 | 1.34 | 0.62 |
| 263710 | INTERGENIC | Sgl Promoter | 1.61 | 0.70 | 1.17 | 0.54 | 1.09 | 0.48 |
| 260624 | INTERGENIC | Non Promoter | #N/A | #N/A | #N/A | #N/A | #N/A | #N/A |
| 259436 | INTERGENIC | Sgl Promoter | 0.84 | 0.33 | 0.88 | 0.35 | 1.16 | 0.52 |
| 256785 | INTERGENIC | Non Promoter | #N/A | #N/A | #N/A | #N/A | #N/A | #N/A |
| 255350 | INTERGENIC | Sgl Promoter | #N/A | #N/A | 1.46 | 0.71 | #N/A | #N/A |
| 254417 | INTERGENIC | Sgl Promoter | 0.87 | 0.35 | 0.78 | 0.28 | 0.75 | 0.28 |
| 252058 | INTERGENIC | Sgl Promoter | 0.83 | 0.33 | 0.81 | 0.30 | 1.08 | 0.46 |
| 250930 | INTERGENIC | Dbl Promoter | 0.92 | 0.38 | 1.07 | 0.47 | 1.29 | 0.59 |
| 250054 | INTERGENIC | Non Promoter | #N/A | #N/A | 0.90 | 0.37 | #N/A | #N/A |
| 247460 | INTERGENIC | Dbl Promoter | 3.13 | 0.96 | 2.94 | 0.99 | 3.09 | 0.94 |
| 246459 | INTERGENIC | Non Promoter | 0.84 | 0.33 | 0.75 | 0.27 | 0.96 | 0.40 |
| 245616 | INTERGENIC | Sgl Promoter | 1.62 | 0.69 | 1.82 | 0.84 | 1.47 | 0.67 |
| 244467 | INTERGENIC | Sgl Promoter | #N/A | #N/A | 2.16 | 0.90 | 1.63 | 0.73 |
| 241688 | INTERGENIC | Sgl Promoter | 1.35 | 0.59 | 1.46 | 0.71 | 1.39 | 0.63 |
| 240330 | INTERGENIC | Sgl Promoter | #N/A | #N/A | 0.74 | 0.26 | 0.78 | 0.30 |
| 238237 | INTERGENIC | Dbl Promoter | 1.53 | 0.67 | 1.42 | 0.66 | 1.31 | 0.59 |
| 235995 | INTERGENIC | Non Promoter | #N/A | #N/A | #N/A | #N/A | #N/A | #N/A |
| 234412 | INTERGENIC | Dbl Promoter | 0.91 | 0.37 | 1.06 | 0.47 | 0.88 | 0.36 |
| 231067 | INTERGENIC | Non Promoter | 1.03 | 0.43 | 0.79 | 0.29 | 0.98 | 0.42 |
| 229093 | INTERGENIC | Sgl Promoter | 2.09 | 0.82 | 2.20 | 0.92 | 2.33 | 0.87 |
| 227333 | INTERGENIC | Dbl Promoter | 2.26 | 0.85 | 1.44 | 0.70 | 1.77 | 0.78 |
| 224795 | INTERGENIC | Sgl Promoter | #N/A | #N/A | 1.02 | 0.45 | 1.90 | 0.76 |
| 222723 | INTERGENIC | Non Promoter | #N/A | #N/A | #N/A | #N/A | #N/A | #N/A |
| 220644 | INTERGENIC | Dbl Promoter | 1.49 | 0.64 | 1.53 | 0.74 | 1.30 | 0.59 |
| 219136 | INTERGENIC | Sgl Promoter | 0.95 | 0.39 | 1.04 | 0.46 | 0.90 | 0.37 |
| 217522 | INTERGENIC | Sgl Promoter | 0.50 | 0.14 | 0.62 | 0.17 | 0.40 | 0.08 |
| 215986 | INTERGENIC | Non Promoter | 0.87 | 0.35 | 0.81 | 0.30 | 0.75 | 0.27 |
| 214922 | INTERGENIC | Sgl Promoter | 1.75 | 0.74 | 1.41 | 0.68 | 2.20 | 0.88 |
| 211921 | INTERGENIC | Sgl Promoter | 1.18 | 0.51 | 1.02 | 0.44 | 1.50 | 0.66 |
| 210232 | INTERGENIC | Dbl Promoter | 2.76 | 0.93 | 2.39 | 0.95 | 2.40 | 0.91 |
| 206929 | INTERGENIC | Sgl Promoter | 1.50 | 0.65 | 1.49 | 0.72 | 1.84 | 0.78 |
| 205187 | INTERGENIC | Sgl Promoter | 0.60 | 0.20 | 0.98 | 0.41 | 0.88 | 0.35 |
| 202427 | INTERGENIC | Sgl Promoter | 1.13 | 0.48 | 1.50 | 0.73 | 1.30 | 0.58 |
| 200481 | INTERGENIC | Dbl Promoter | 2.14 | 0.85 | 2.07 | 0.91 | 1.84 | 0.80 |
| 198501 | INTERGENIC | Sgl Promoter | 0.61 | 0.20 | 0.75 | 0.26 | 0.52 | 0.13 |
| 196425 | INTERGENIC | Non Promoter | 0.46 | 0.12 | 0.68 | 0.22 | 0.54 | 0.15 |
| 191323 | INTERGENIC | Sgl Promoter | #N/A | #N/A | 1.40 | 0.68 | 1.28 | 0.58 |
| 188050 | INTERGENIC | Dbl Promoter | 0.63 | 0.22 | 0.95 | 0.40 | 0.72 | 0.27 |
| 187169 | INTERGENIC | Sgl Promoter | 0.98 | 0.41 | #N/A | #N/A | #N/A | #N/A |
| 185459 | INTERGENIC | Sgl Promoter | 1.39 | 0.61 | 0.95 | 0.40 | 1.50 | 0.65 |
| 182874 | INTERGENIC | Dbl Promoter | 1.73 | 0.71 | 1.88 | 0.79 | #N/A | #N/A |

|        |            |              |      |      |      |      |      |      |
|--------|------------|--------------|------|------|------|------|------|------|
| 181360 | INTERGENIC | Sgl Promoter | #N/A | #N/A | #N/A | #N/A | 0.39 | 0.06 |
| 175409 | INTERGENIC | Dbl Promoter | 1.34 | 0.58 | 1.22 | 0.57 | 1.18 | 0.52 |
| 171440 | INTERGENIC | Non Promoter | #N/A | #N/A | #N/A | #N/A | #N/A | #N/A |
| 170017 | INTERGENIC | Dbl Promoter | 1.02 | 0.43 | 0.87 | 0.35 | 0.96 | 0.41 |
| 168042 | INTERGENIC | Sgl Promoter | 1.19 | 0.52 | 1.41 | 0.68 | 1.12 | 0.50 |
| 167328 | INTERGENIC | Non Promoter | #N/A | #N/A | #N/A | #N/A | #N/A | #N/A |
| 164502 | INTERGENIC | Dbl Promoter | #N/A | #N/A | 1.34 | 0.64 | 1.58 | 0.72 |
| 160630 | INTERGENIC | Sgl Promoter | #N/A | #N/A | #N/A | #N/A | #N/A | #N/A |
| 158108 | INTERGENIC | Sgl Promoter | 0.75 | 0.28 | #N/A | #N/A | 1.19 | 0.53 |
| 157643 | INTERGENIC | Sgl Promoter | #N/A | #N/A | #N/A | #N/A | #N/A | #N/A |
| 156858 | INTERGENIC | Non Promoter | 0.76 | 0.29 | 0.77 | 0.27 | 0.56 | 0.16 |
| 155099 | INTERGENIC | Sgl Promoter | #N/A | #N/A | #N/A | #N/A | #N/A | #N/A |
| 148211 | INTERGENIC | Dbl Promoter | 3.48 | 0.98 | 2.57 | 0.97 | 3.88 | 0.99 |
| 146895 | INTERGENIC | Sgl Promoter | #N/A | #N/A | 1.71 | 0.82 | 3.05 | 0.97 |
| 145562 | INTERGENIC | Sgl Promoter | #N/A | #N/A | 0.91 | 0.37 | 1.91 | 0.82 |
| 144244 | INTERGENIC | Sgl Promoter | #N/A | #N/A | 0.45 | 0.07 | 0.60 | 0.18 |
| 140877 | INTERGENIC | Sgl Promoter | 1.15 | 0.49 | 1.12 | 0.51 | 1.14 | 0.51 |
| 138549 | INTERGENIC | Sgl Promoter | 0.67 | 0.23 | 0.70 | 0.22 | 0.59 | 0.18 |
| 135939 | INTERGENIC | Sgl Promoter | 2.48 | 0.90 | 2.29 | 0.95 | 2.25 | 0.89 |
| 129521 | INTERGENIC | Sgl Promoter | 1.60 | 0.69 | 1.42 | 0.69 | 1.80 | 0.78 |
| 126803 | INTERGENIC | Non Promoter | #N/A | #N/A | #N/A | #N/A | #N/A | #N/A |
| 122881 | INTERGENIC | Dbl Promoter | 2.45 | 0.90 | 2.36 | 0.96 | 2.57 | 0.93 |
| 121116 | INTERGENIC | Non Promoter | #N/A | #N/A | #N/A | #N/A | #N/A | #N/A |
| 117347 | INTERGENIC | Sgl Promoter | 0.81 | 0.32 | 0.71 | 0.24 | 0.74 | 0.27 |
| 113269 | INTERGENIC | Sgl Promoter | 1.60 | 0.68 | 1.27 | 0.60 | 1.50 | 0.67 |
| 110915 | INTERGENIC | Dbl Promoter | 0.59 | 0.19 | 0.97 | 0.41 | 0.95 | 0.40 |
| 109093 | INTERGENIC | Non Promoter | #N/A | #N/A | 0.56 | 0.13 | 0.47 | 0.10 |
| 108465 | INTERGENIC | Sgl Promoter | 1.05 | 0.44 | 0.77 | 0.27 | #N/A | #N/A |
| 107685 | INTERGENIC | Dbl Promoter | 0.77 | 0.29 | 0.85 | 0.33 | 0.65 | 0.22 |
| 104803 | INTERGENIC | Sgl Promoter | 1.89 | 0.79 | 1.76 | 0.83 | 1.89 | 0.79 |
| 96171  | INTERGENIC | Sgl Promoter | #N/A | #N/A | #N/A | #N/A | #N/A | #N/A |
| 95221  | INTERGENIC | Sgl Promoter | 1.27 | 0.55 | 0.98 | 0.42 | 1.07 | 0.47 |
| 91992  | INTERGENIC | Sgl Promoter | 1.43 | 0.63 | 1.20 | 0.56 | 1.74 | 0.77 |
| 89517  | INTERGENIC | Sgl Promoter | 0.47 | 0.13 | 0.53 | 0.11 | 0.54 | 0.15 |
| 90301  | INTERGENIC | Sgl Promoter | 1.40 | 0.60 | 1.42 | 0.68 | 1.53 | 0.68 |
| 87895  | INTERGENIC | Sgl Promoter | 1.11 | 0.47 | 0.91 | 0.37 | 1.26 | 0.56 |
| 86216  | INTERGENIC | Dbl Promoter | 1.93 | 0.80 | 1.59 | 0.77 | 2.70 | 0.94 |
| 84167  | INTERGENIC | Non Promoter | #N/A | #N/A | 0.33 | 0.03 | #N/A | #N/A |
| 82804  | INTERGENIC | Sgl Promoter | 1.19 | 0.51 | #N/A | #N/A | 1.45 | 0.59 |
| 80638  | INTERGENIC | Dbl Promoter | 1.50 | 0.65 | 1.32 | 0.63 | 1.13 | 0.50 |
| 78657  | INTERGENIC | Non Promoter | 0.42 | 0.10 | 0.32 | 0.06 | 0.46 | 0.09 |
| 76944  | INTERGENIC | Sgl Promoter | 2.17 | 0.84 | 1.91 | 0.86 | 2.53 | 0.92 |
| 71671  | INTERGENIC | Non Promoter | #N/A | #N/A | #N/A | #N/A | #N/A | #N/A |
| 68913  | INTERGENIC | Sgl Promoter | 0.84 | 0.33 | 0.98 | 0.42 | 1.21 | 0.55 |
| 66516  | INTERGENIC | Sgl Promoter | 2.61 | 0.91 | 1.80 | 0.83 | 2.66 | 0.92 |
| 63569  | INTERGENIC | Sgl Promoter | 0.19 | 0.02 | 0.28 | 0.01 | 0.14 | 0.01 |
| 61957  | INTERGENIC | Non Promoter | #N/A | #N/A | #N/A | #N/A | #N/A | #N/A |
| 60482  | INTERGENIC | Dbl Promoter | 2.42 | 0.89 | 1.83 | 0.85 | 2.31 | 0.90 |
| 58898  | INTERGENIC | Non Promoter | #N/A | #N/A | #N/A | #N/A | #N/A | #N/A |
| 58155  | INTERGENIC | Dbl Promoter | 2.41 | 0.90 | 1.91 | 0.88 | 2.16 | 0.88 |
| 56446  | INTERGENIC | Sgl Promoter | #N/A | #N/A | #N/A | #N/A | #N/A | #N/A |

|        |            |              |      |      |      |      |      |      |
|--------|------------|--------------|------|------|------|------|------|------|
| 54121  | INTERGENIC | Non Promoter | 0.49 | 0.14 | 0.75 | 0.27 | 0.79 | 0.30 |
| 51906  | INTERGENIC | Sgl Promoter | 1.38 | 0.60 | 1.21 | 0.56 | 1.37 | 0.62 |
| 49396  | INTERGENIC | Non Promoter | #N/A | #N/A | #N/A | #N/A | #N/A | #N/A |
| 48286  | INTERGENIC | Dbl Promoter | #N/A | #N/A | #N/A | #N/A | #N/A | #N/A |
| 45307  | INTERGENIC | Non Promoter | #N/A | #N/A | #N/A | #N/A | #N/A | #N/A |
| 44446  | INTERGENIC | Dbl Promoter | #N/A | #N/A | 2.20 | 0.93 | 1.41 | 0.61 |
| 43323  | INTERGENIC | Sgl Promoter | #N/A | #N/A | #N/A | #N/A | #N/A | #N/A |
| 40618  | INTERGENIC | Dbl Promoter | 1.89 | 0.78 | 1.83 | 0.83 | #N/A | #N/A |
| 38641  | INTERGENIC | Sgl Promoter | #N/A | #N/A | #N/A | #N/A | #N/A | #N/A |
| 37699  | INTERGENIC | Sgl Promoter | 2.39 | 0.88 | 1.58 | 0.76 | 1.72 | 0.72 |
| 34695  | INTERGENIC | Dbl Promoter | 2.84 | 0.94 | 1.66 | 0.77 | 1.97 | 0.83 |
| 33293  | INTERGENIC | Non Promoter | #N/A | #N/A | #N/A | #N/A | #N/A | #N/A |
| 31943  | INTERGENIC | Sgl Promoter | 2.35 | 0.89 | 1.49 | 0.72 | 1.66 | 0.67 |
| 28738  | INTERGENIC | Sgl Promoter | #N/A | #N/A | 0.79 | 0.29 | #N/A | #N/A |
| 27336  | INTERGENIC | Non Promoter | #N/A | #N/A | #N/A | #N/A | #N/A | #N/A |
| 24047  | INTERGENIC | Dbl Promoter | 1.24 | 0.53 | 1.16 | 0.54 | 1.15 | 0.51 |
| 22834  | INTERGENIC | Sgl Promoter | #N/A | #N/A | 1.47 | 0.72 | 1.57 | 0.69 |
| 19541  | INTERGENIC | Sgl Promoter | #N/A | #N/A | 2.52 | 0.93 | 4.59 | 0.98 |
| 18001  | INTERGENIC | Sgl Promoter | 1.50 | 0.65 | 1.50 | 0.73 | 1.28 | 0.58 |
| 16118  | INTERGENIC | Non Promoter | 1.22 | 0.53 | 1.03 | 0.46 | 1.71 | 0.67 |
| 14832  | INTERGENIC | Sgl Promoter | 2.71 | 0.93 | 1.74 | 0.83 | 2.26 | 0.89 |
| 13267  | INTERGENIC | Dbl Promoter | 2.68 | 0.92 | 1.66 | 0.80 | 2.04 | 0.85 |
| 12208  | INTERGENIC | Non Promoter | #N/A | #N/A | #N/A | #N/A | #N/A | #N/A |
| 11452  | INTERGENIC | Sgl Promoter | 1.55 | 0.67 | 1.33 | 0.64 | 1.37 | 0.63 |
| 8330   | INTERGENIC | Sgl Promoter | 0.73 | 0.27 | 0.72 | 0.24 | 0.83 | 0.33 |
| 7165   | INTERGENIC | Sgl Promoter | 0.44 | 0.11 | 0.52 | 0.10 | 0.53 | 0.14 |
| 6561   | INTERGENIC | Dbl Promoter | 0.48 | 0.13 | 0.58 | 0.14 | 0.55 | 0.15 |
| 99563  | INTERGENIC | Non Promoter | 0.34 | 0.06 | 0.53 | 0.11 | 0.49 | 0.11 |
| 102190 | INTERGENIC | Non Promoter | 0.88 | 0.35 | 1.25 | 0.59 | 0.95 | 0.40 |
| 102630 | INTERGENIC | Sgl Promoter | #N/A | #N/A | 0.93 | 0.39 | #N/A | #N/A |
| 568113 | INTERGENIC | Non Promoter | #N/A | #N/A | #N/A | #N/A | #N/A | #N/A |
| 526084 | INTERGENIC | Sgl Promoter | 2.63 | 0.92 | 1.89 | 0.87 | 2.27 | 0.89 |
| 631845 | INTERGENIC | Sgl Promoter | 0.73 | 0.27 | 0.80 | 0.30 | 0.61 | 0.19 |
| 634343 | INTERGENIC | Sgl Promoter | 0.76 | 0.29 | 1.04 | 0.45 | 0.68 | 0.24 |
| 635942 | INTERGENIC | Dbl Promoter | 2.11 | 0.83 | 1.44 | 0.69 | 1.59 | 0.70 |
| 636930 | INTERGENIC | Non Promoter | 0.66 | 0.23 | 0.88 | 0.35 | 0.70 | 0.24 |
| 639181 | INTERGENIC | Non Promoter | 0.41 | 0.10 | 0.60 | 0.16 | 0.44 | 0.11 |
| 640395 | INTERGENIC | Dbl Promoter | 1.61 | 0.70 | 2.15 | 0.92 | #N/A | #N/A |
| 642689 | INTERGENIC | Sgl Promoter | 0.89 | 0.36 | 0.96 | 0.40 | 0.90 | 0.37 |
| 643743 | INTERGENIC | Sgl Promoter | 1.65 | 0.69 | 1.29 | 0.61 | 1.38 | 0.63 |
| 644319 | INTERGENIC | Non Promoter | #N/A | #N/A | #N/A | #N/A | #N/A | #N/A |
| 647431 | INTERGENIC | Dbl Promoter | 2.43 | 0.90 | 1.74 | 0.83 | 1.95 | 0.83 |
| 649027 | INTERGENIC | Non Promoter | #N/A | #N/A | #N/A | #N/A | #N/A | #N/A |
| 652464 | INTERGENIC | Dbl Promoter | 0.53 | 0.16 | 0.67 | 0.21 | 0.48 | 0.10 |
| 653386 | INTERGENIC | Sgl Promoter | #N/A | #N/A | 2.11 | 0.92 | 1.95 | 0.83 |
| 654672 | INTERGENIC | Non Promoter | #N/A | #N/A | #N/A | #N/A | #N/A | #N/A |
| 662142 | INTERGENIC | Dbl Promoter | 0.45 | 0.12 | 0.71 | 0.23 | 0.46 | 0.10 |
| 662912 | INTERGENIC | Dbl Promoter | 0.46 | 0.12 | 0.81 | 0.31 | 0.38 | 0.06 |
| 664269 | INTERGENIC | Sgl Promoter | 0.38 | 0.08 | 0.71 | 0.23 | 0.41 | 0.07 |
| 667409 | INTERGENIC | Non Promoter | #N/A | #N/A | #N/A | #N/A | #N/A | #N/A |
| 668376 | INTERGENIC | Dbl Promoter | 1.62 | 0.69 | #N/A | #N/A | 2.86 | 0.96 |



|        |            |              |      |      |      |      |      |      |
|--------|------------|--------------|------|------|------|------|------|------|
| 669773 | INTERGENIC | Non Promoter | 1.07 | 0.45 | #N/A | #N/A | #N/A | #N/A |
| 670417 | INTERGENIC | Dbl Promoter | #N/A | #N/A | 2.62 | 0.87 | #N/A | #N/A |
| 672408 | INTERGENIC | Sgl Promoter | 1.64 | 0.69 | 1.19 | 0.55 | 1.41 | 0.64 |
| 673273 | INTERGENIC | Sgl Promoter | #N/A | #N/A | 0.61 | 0.17 | 1.27 | 0.58 |
| 674922 | INTERGENIC | Dbl Promoter | 2.12 | 0.84 | 2.26 | 0.94 | 2.32 | 0.90 |
| 676176 | INTERGENIC | Sgl Promoter | 0.71 | 0.26 | 0.69 | 0.22 | 0.55 | 0.15 |
| 677198 | INTERGENIC | Non Promoter | #N/A | #N/A | #N/A | #N/A | #N/A | #N/A |
| 678798 | INTERGENIC | Dbl Promoter | 2.23 | 0.87 | 1.46 | 0.71 | 1.35 | 0.62 |
| 680693 | INTERGENIC | Non Promoter | #N/A | #N/A | #N/A | #N/A | #N/A | #N/A |
| 686009 | INTERGENIC | Dbl Promoter | 3.14 | 0.96 | 3.12 | 0.99 | 3.27 | 0.97 |
| 687634 | INTERGENIC | Dbl Promoter | 2.06 | 0.83 | 1.94 | 0.87 | 1.86 | 0.80 |
| 687242 | INTERGENIC | Non Promoter | #N/A | #N/A | #N/A | #N/A | #N/A | #N/A |
| 690320 | INTERGENIC | Sgl Promoter | #N/A | #N/A | 1.09 | 0.50 | 1.21 | 0.55 |
| 692151 | INTERGENIC | Non Promoter | 2.07 | 0.82 | 1.93 | 0.87 | 1.11 | 0.49 |
| 693018 | INTERGENIC | Non Promoter | 1.43 | 0.62 | 1.51 | 0.74 | 1.22 | 0.55 |
| 695051 | INTERGENIC | Sgl Promoter | 2.64 | 0.92 | 2.73 | 0.91 | 2.20 | 0.87 |
| 695594 | INTERGENIC | Dbl Promoter | 2.75 | 0.93 | 2.66 | 0.97 | 3.46 | 0.98 |
| 697613 | INTERGENIC | Non Promoter | #N/A | #N/A | #N/A | #N/A | #N/A | #N/A |
| 699689 | INTERGENIC | Dbl Promoter | 2.35 | 0.88 | 2.56 | 0.97 | 2.84 | 0.95 |
| 700540 | INTERGENIC | Non Promoter | #N/A | #N/A | #N/A | #N/A | #N/A | #N/A |
| 701894 | INTERGENIC | Sgl Promoter | 1.54 | 0.67 | 1.78 | 0.84 | 1.51 | 0.67 |
| 703698 | INTERGENIC | Sgl Promoter | 1.35 | 0.59 | 0.91 | 0.37 | 0.95 | 0.40 |
| 706138 | INTERGENIC | Sgl Promoter | #N/A | #N/A | #N/A | #N/A | #N/A | #N/A |
| 707787 | INTERGENIC | Sgl Promoter | #N/A | #N/A | 2.90 | 0.98 | #N/A | #N/A |
| 708522 | INTERGENIC | Sgl Promoter | 3.63 | 0.98 | 2.39 | 0.96 | 2.92 | 0.94 |
| 711629 | INTERGENIC | Sgl Promoter | 1.44 | 0.62 | #N/A | #N/A | 1.10 | 0.48 |
| 713022 | INTERGENIC | Non Promoter | #N/A | #N/A | 0.84 | 0.33 | 0.84 | 0.33 |
| 714047 | INTERGENIC | Sgl Promoter | 1.46 | 0.64 | 1.39 | 0.67 | 1.07 | 0.47 |
| 716779 | INTERGENIC | Sgl Promoter | 0.69 | 0.25 | 0.48 | 0.08 | 0.48 | 0.11 |
| 719345 | INTERGENIC | Sgl Promoter | 1.13 | 0.48 | 1.02 | 0.44 | 1.42 | 0.65 |
| 721119 | INTERGENIC | Sgl Promoter | 1.21 | 0.51 | 0.96 | 0.41 | #N/A | #N/A |
| 723354 | INTERGENIC | Sgl Promoter | 0.46 | 0.12 | 0.60 | 0.16 | 1.04 | 0.46 |
| 725218 | INTERGENIC | Sgl Promoter | 1.15 | 0.49 | 1.16 | 0.54 | 1.36 | 0.60 |
| 726132 | INTERGENIC | Sgl Promoter | 0.81 | 0.32 | 0.87 | 0.35 | 0.75 | 0.27 |
| 731615 | INTERGENIC | Sgl Promoter | 0.98 | 0.41 | 1.26 | 0.60 | 1.24 | 0.56 |
| 734288 | INTERGENIC | Dbl Promoter | 1.83 | 0.74 | 1.64 | 0.78 | 1.94 | 0.80 |
| 736800 | INTERGENIC | Sgl Promoter | 1.71 | 0.73 | 1.70 | 0.81 | 1.84 | 0.80 |
| 739948 | INTERGENIC | Sgl Promoter | 0.88 | 0.36 | 1.03 | 0.45 | 1.14 | 0.51 |
| 742878 | INTERGENIC | Non Promoter | 0.94 | 0.39 | 1.09 | 0.49 | 1.43 | 0.64 |
| 744357 | INTERGENIC | Sgl Promoter | 1.35 | 0.59 | 1.17 | 0.54 | 1.42 | 0.65 |
| 746140 | INTERGENIC | Dbl Promoter | 0.45 | 0.11 | 0.49 | 0.09 | 0.53 | 0.14 |
| 746940 | INTERGENIC | Dbl Promoter | 1.57 | 0.66 | #N/A | #N/A | 1.57 | 0.71 |
| 749133 | INTERGENIC | Non Promoter | 0.48 | 0.13 | 0.48 | 0.09 | 0.68 | 0.23 |
| 750347 | INTERGENIC | Sgl Promoter | 0.69 | 0.25 | 1.05 | 0.46 | 1.10 | 0.49 |
| 755743 | INTERGENIC | Sgl Promoter | 1.70 | 0.72 | 1.29 | 0.61 | 1.60 | 0.71 |
| 760064 | INTERGENIC | Sgl Promoter | 1.16 | 0.50 | 0.98 | 0.42 | 1.34 | 0.58 |
| 761120 | INTERGENIC | Sgl Promoter | #N/A | #N/A | #N/A | #N/A | #N/A | #N/A |
| 763980 | INTERGENIC | Dbl Promoter | 0.98 | 0.41 | 0.82 | 0.31 | 0.96 | 0.41 |
| 770437 | INTERGENIC | Non Promoter | 2.21 | 0.85 | 1.09 | 0.48 | 1.55 | 0.70 |
| 772654 | INTERGENIC | Dbl Promoter | 0.58 | 0.18 | 0.56 | 0.13 | 0.69 | 0.24 |
| 774789 | INTERGENIC | Non Promoter | 4.83 | 0.99 | 3.13 | 0.99 | 3.01 | 0.97 |

|        |            |              |      |      |      |      |      |      |
|--------|------------|--------------|------|------|------|------|------|------|
| 777599 |            |              | 1.18 | 0.50 | 0.97 | 0.41 | 0.97 | 0.42 |
| 779913 | INTERGENIC | Dbl Promoter | 1.46 | 0.63 | 1.40 | 0.68 | 1.68 | 0.75 |
| 781915 | INTERGENIC | Sgl Promoter | 0.62 | 0.21 | 0.80 | 0.30 | 0.76 | 0.28 |
| 783284 | INTERGENIC | Non Promoter | 0.36 | 0.06 | 0.47 | 0.08 | 0.53 | 0.14 |
| 727361 | INTERGENIC | Sgl Promoter | 2.52 | 0.86 | 1.56 | 0.76 | 1.60 | 0.72 |
| 728424 | INTERGENIC | Sgl Promoter | 1.35 | 0.59 | 1.32 | 0.63 | 1.10 | 0.48 |
| 632598 | INTERGENIC | Sgl Promoter | 1.12 | 0.48 | 0.80 | 0.30 | 0.78 | 0.29 |
| 326584 | INTERGENIC | Sgl Promoter | #N/A | #N/A | #N/A | #N/A | #N/A | #N/A |
| 325249 | INTERGENIC | Dbl Promoter | 0.82 | 0.32 | 1.10 | 0.50 | 0.88 | 0.35 |
| 323411 | INTERGENIC | Sgl Promoter | 1.65 | 0.68 | 1.65 | 0.75 | 1.07 | 0.46 |
| 321858 | INTERGENIC | Non Promoter | #N/A | #N/A | 0.92 | 0.38 | 0.57 | 0.17 |
| 316938 | INTERGENIC | Dbl Promoter | 1.29 | 0.56 | 0.99 | 0.42 | 1.05 | 0.44 |
| 315813 | INTERGENIC | Sgl Promoter | 0.63 | 0.22 | 0.65 | 0.19 | 0.68 | 0.23 |
| 313078 | INTERGENIC | Sgl Promoter | 0.91 | 0.37 | 1.05 | 0.46 | 0.81 | 0.31 |
| 311342 | INTERGENIC | Non Promoter | 0.57 | 0.18 | 0.89 | 0.36 | 0.78 | 0.30 |
| 310312 | INTERGENIC | Dbl Promoter | 1.12 | 0.48 | 1.44 | 0.70 | 1.41 | 0.63 |
| 309324 | INTERGENIC | Non Promoter | #N/A | #N/A | #N/A | #N/A | #N/A | #N/A |
| 307938 | INTERGENIC | Sgl Promoter | 2.04 | 0.82 | 1.65 | 0.78 | 1.93 | 0.81 |
| 305349 | INTERGENIC | Dbl Promoter | 0.75 | 0.28 | 0.90 | 0.36 | 0.58 | 0.18 |
| 301097 | INTERGENIC | Non Promoter | #N/A | #N/A | #N/A | #N/A | #N/A | #N/A |
| 300683 | INTERGENIC | Sgl Promoter | 1.07 | 0.45 | 1.23 | 0.57 | 1.22 | 0.54 |
| 299693 | INTERGENIC | Sgl Promoter | 0.91 | 0.37 | 0.59 | 0.16 | 0.67 | 0.23 |
| 297078 | INTERGENIC | Dbl Promoter | 1.58 | 0.68 | 1.34 | 0.64 | 1.54 | 0.67 |
| 294777 | INTERGENIC | Non Promoter | #N/A | #N/A | #N/A | #N/A | #N/A | #N/A |
| 292529 | INTERGENIC | Dbl Promoter | #N/A | #N/A | 1.55 | 0.75 | 2.17 | 0.87 |
| 290881 | INTERGENIC | Non Promoter | 0.39 | 0.08 | 0.71 | 0.24 | 0.58 | 0.17 |
| 288192 | INTERGENIC | Sgl Promoter | #N/A | #N/A | #N/A | #N/A | #N/A | #N/A |
| 286172 | INTERGENIC | Dbl Promoter | 0.36 | 0.07 | 0.65 | 0.19 | 0.55 | 0.16 |
| 282164 | INTERGENIC | Sgl Promoter | 1.19 | 0.52 | 1.54 | 0.74 | 1.12 | 0.50 |
| 280272 | INTERGENIC | Non Promoter | #N/A | #N/A | #N/A | #N/A | 0.46 | 0.10 |
| 278056 | INTERGENIC | Sgl Promoter | 1.31 | 0.57 | 1.26 | 0.58 | 1.94 | 0.83 |
| 277086 | INTERGENIC | Sgl Promoter | 0.87 | 0.34 | 0.51 | 0.15 | 0.80 | 0.31 |
| 274673 | INTERGENIC | Dbl Promoter | 1.31 | 0.57 | 1.07 | 0.48 | 1.21 | 0.55 |
| 274012 | INTERGENIC | Sgl Promoter | 2.49 | 0.89 | 1.62 | 0.78 | 1.90 | 0.81 |
| 272003 | INTERGENIC | Sgl Promoter | 0.55 | 0.17 | 0.86 | 0.33 | 0.81 | 0.31 |
| 270633 | INTERGENIC | Sgl Promoter | 0.22 | 0.02 | 0.31 | 0.03 | 0.38 | 0.06 |
| 269815 | INTERGENIC | Non Promoter | #N/A | #N/A | #N/A | #N/A | #N/A | #N/A |
| 268187 | INTERGENIC | Dbl Promoter | 1.49 | 0.64 | 1.27 | 0.60 | 1.19 | 0.54 |
| 266264 | INTERGENIC | Non Promoter | #N/A | #N/A | #N/A | #N/A | #N/A | #N/A |
| 265429 | INTERGENIC | Sgl Promoter | 1.42 | 0.62 | 1.22 | 0.57 | 1.33 | 0.59 |
| 263475 | INTERGENIC | Sgl Promoter | #N/A | #N/A | #N/A | #N/A | #N/A | #N/A |
| 259489 | INTERGENIC | Dbl Promoter | 0.64 | 0.23 | 0.69 | 0.22 | 0.76 | 0.28 |
| 256664 | INTERGENIC | Non Promoter | 1.08 | 0.46 | 1.11 | 0.50 | 1.12 | 0.50 |
| 254295 | INTERGENIC | Dbl Promoter | 0.14 | 0.01 | 0.19 | 0.00 | #N/A | #N/A |
| 253147 | INTERGENIC | Sgl Promoter | 0.76 | 0.29 | 0.96 | 0.40 | 0.91 | 0.38 |
| 251265 | INTERGENIC | Non Promoter | #N/A | #N/A | #N/A | #N/A | #N/A | #N/A |
| 249823 | INTERGENIC | Dbl Promoter | 1.72 | 0.70 | 1.29 | 0.60 | 1.76 | 0.69 |
| 248390 | INTERGENIC | Non Promoter | #N/A | #N/A | #N/A | #N/A | #N/A | #N/A |
| 247148 | INTERGENIC | Sgl Promoter | 1.98 | 0.81 | 1.81 | 0.83 | 2.70 | 0.94 |
| 243464 | INTERGENIC | Sgl Promoter | 1.21 | 0.52 | 1.28 | 0.60 | 1.56 | 0.71 |
| 240202 | INTERGENIC | Non Promoter | #N/A | #N/A | #N/A | #N/A | #N/A | #N/A |

|        |            |              |      |      |      |      |       |      |
|--------|------------|--------------|------|------|------|------|-------|------|
| 238617 | INTERGENIC | Dbl Promoter | 2.38 | 0.86 | 1.47 | 0.72 | 2.18  | 0.75 |
| 234938 | INTERGENIC | Dbl Promoter | 1.06 | 0.45 | 1.17 | 0.54 | 1.09  | 0.48 |
| 232444 | INTERGENIC | Sgl Promoter | 1.29 | 0.56 | 1.40 | 0.68 | 0.99  | 0.42 |
| 231568 | INTERGENIC | Non Promoter | 1.23 | 0.53 | 1.18 | 0.55 | 1.18  | 0.52 |
| 230083 | INTERGENIC | Sgl Promoter | 1.14 | 0.49 | 1.05 | 0.46 | 1.35  | 0.62 |
| 226609 | INTERGENIC | Dbl Promoter | 1.13 | 0.48 | 1.18 | 0.55 | 1.26  | 0.55 |
| 224418 | INTERGENIC | Non Promoter | #N/A | #N/A | #N/A | #N/A | #N/A  | #N/A |
| 223266 | INTERGENIC | Sgl Promoter | 1.81 | 0.76 | 1.65 | 0.78 | 2.16  | 0.87 |
| 220765 | INTERGENIC | Sgl Promoter | 1.47 | 0.64 | 1.46 | 0.71 | #N/A  | #N/A |
| 219209 | INTERGENIC | Sgl Promoter | 0.65 | 0.23 | 0.89 | 0.36 | 0.63  | 0.20 |
| 217125 | INTERGENIC | Dbl Promoter | 0.63 | 0.21 | 0.80 | 0.30 | 0.59  | 0.17 |
| 214016 | INTERGENIC | Non Promoter | 0.44 | 0.11 | 0.43 | 0.07 | 0.50  | 0.12 |
| 212243 | INTERGENIC | Dbl Promoter | 3.79 | 0.99 | 3.23 | 0.99 | 3.49  | 0.98 |
| 210519 | INTERGENIC | Sgl Promoter | 1.43 | 0.63 | 2.06 | 0.90 | 2.20  | 0.89 |
| 207391 | INTERGENIC | Sgl Promoter | 1.04 | 0.43 | 1.01 | 0.44 | 1.94  | 0.83 |
| 206102 | INTERGENIC | Sgl Promoter | 3.09 | 0.92 | #N/A | #N/A | 3.05  | 0.97 |
| 204730 | INTERGENIC | Sgl Promoter | #N/A | #N/A | 1.77 | 0.80 | 2.78  | 0.95 |
| 202695 | INTERGENIC | Sgl Promoter | #N/A | #N/A | 1.46 | 0.70 | 1.47  | 0.67 |
| 201984 | INTERGENIC | Sgl Promoter | #N/A | #N/A | 1.28 | 0.60 | 1.42  | 0.65 |
| 200367 | INTERGENIC | Non Promoter | #N/A | #N/A | #N/A | #N/A | #N/A  | #N/A |
| 198941 | INTERGENIC | Dbl Promoter | #N/A | #N/A | 1.14 | 0.52 | #N/A  | #N/A |
| 197219 | INTERGENIC | Non Promoter | #N/A | #N/A | #N/A | #N/A | #N/A  | #N/A |
| 196506 | INTERGENIC | Sgl Promoter | 1.63 | 0.68 | 2.03 | 0.89 | 2.08  | 0.86 |
| 194969 | INTERGENIC | Dbl Promoter | 4.32 | 0.99 | 2.55 | 0.95 | 3.09  | 0.96 |
| 193831 | INTERGENIC | Sgl Promoter | 2.66 | 0.92 | 2.06 | 0.91 | 1.76  | 0.78 |
| 189657 | INTERGENIC | Non Promoter | #N/A | #N/A | #N/A | #N/A | #N/A  | #N/A |
| 187023 | INTERGENIC | Dbl Promoter | 2.97 | 0.95 | 2.31 | 0.94 | 3.09  | 0.94 |
| 185847 | INTERGENIC | Sgl Promoter | 2.24 | 0.86 | 2.08 | 0.92 | 1.76  | 0.78 |
| 181681 | INTERGENIC | Sgl Promoter | #N/A | #N/A | 1.60 | 0.74 | 12.83 | 1.00 |
| 180557 | INTERGENIC | Non Promoter | #N/A | #N/A | 0.64 | 0.18 | 0.77  | 0.29 |
| 171069 | INTERGENIC | Sgl Promoter | 1.40 | 0.61 | 1.67 | 0.80 | 1.28  | 0.58 |
| 167838 | INTERGENIC | Sgl Promoter | 1.75 | 0.72 | 1.70 | 0.79 | 2.33  | 0.77 |
| 168726 | INTERGENIC | Sgl Promoter | 0.95 | 0.39 | 1.02 | 0.44 | 0.87  | 0.35 |
| 165713 | INTERGENIC | Sgl Promoter | 1.71 | 0.73 | 1.23 | 0.58 | 1.92  | 0.82 |
| 162355 | INTERGENIC | Dbl Promoter | #N/A | #N/A | 1.44 | 0.70 | 1.68  | 0.75 |
| 161672 | INTERGENIC | Sgl Promoter | 0.53 | 0.16 | 0.80 | 0.30 | 0.52  | 0.13 |
| 159547 | INTERGENIC | Sgl Promoter | 1.91 | 0.79 | 1.85 | 0.85 | 1.59  | 0.71 |
| 153911 | INTERGENIC | Sgl Promoter | 1.50 | 0.65 | 1.17 | 0.54 | 1.19  | 0.53 |
| 150397 | INTERGENIC | Non Promoter | #N/A | #N/A | #N/A | #N/A | #N/A  | #N/A |
| 147381 | INTERGENIC | Sgl Promoter | #N/A | #N/A | #N/A | #N/A | #N/A  | #N/A |
| 145333 | INTERGENIC | Sgl Promoter | #N/A | #N/A | #N/A | #N/A | #N/A  | #N/A |
| 144203 | INTERGENIC | Sgl Promoter | 1.66 | 0.71 | 1.54 | 0.73 | 1.92  | 0.82 |
| 142814 | INTERGENIC | Dbl Promoter | 1.52 | 0.66 | 1.38 | 0.67 | 1.68  | 0.75 |
| 141583 | INTERGENIC | Sgl Promoter | #N/A | #N/A | #N/A | #N/A | #N/A  | #N/A |
| 139226 | INTERGENIC | Sgl Promoter | 3.02 | 0.96 | 2.60 | 0.96 | 3.60  | 0.99 |
| 138106 | INTERGENIC | Sgl Promoter | #N/A | #N/A | 2.06 | 0.91 | 1.37  | 0.62 |
| 136087 | INTERGENIC | Sgl Promoter | 1.28 | 0.53 | 1.08 | 0.48 | 1.32  | 0.60 |
| 132724 | INTERGENIC | Sgl Promoter | #N/A | #N/A | 0.74 | 0.26 | #N/A  | #N/A |
| 129236 | INTERGENIC | Dbl Promoter | 1.18 | 0.51 | 1.21 | 0.56 | 1.29  | 0.59 |
| 126981 | INTERGENIC | Sgl Promoter | 1.26 | 0.53 | 1.28 | 0.60 | 1.49  | 0.63 |
| 125996 | INTERGENIC | Non Promoter | #N/A | #N/A | #N/A | #N/A | #N/A  | #N/A |



|        |            |              |      |      |      |      |      |      |
|--------|------------|--------------|------|------|------|------|------|------|
| 117702 | INTERGENIC | Dbl Promoter | 0.76 | 0.29 | 1.12 | 0.51 | #N/A | #N/A |
| 116395 | INTERGENIC | Sgl Promoter | #N/A | #N/A | 1.01 | 0.44 | 0.90 | 0.37 |
| 113225 | INTERGENIC | Sgl Promoter | #N/A | #N/A | #N/A | #N/A | #N/A | #N/A |
| 112101 | INTERGENIC | Dbl Promoter | #N/A | #N/A | 1.27 | 0.61 | 2.66 | 0.76 |
| 110296 | INTERGENIC | Sgl Promoter | 0.06 | 0.00 | 0.41 | 0.05 | 0.08 | 0.00 |
| 109175 | INTERGENIC | Dbl Promoter | #N/A | #N/A | #N/A | #N/A | 1.24 | 0.56 |
| 108257 | INTERGENIC | Non Promoter | #N/A | #N/A | #N/A | #N/A | #N/A | #N/A |
| 106709 | INTERGENIC | Sgl Promoter | 1.38 | 0.57 | 1.11 | 0.50 | 2.09 | 0.83 |
| 104325 | INTERGENIC | Dbl Promoter | 1.46 | 0.64 | 1.45 | 0.69 | 1.07 | 0.47 |
| 103316 | INTERGENIC | Non Promoter | #N/A | #N/A | #N/A | #N/A | #N/A | #N/A |
| 101474 | INTERGENIC | Sgl Promoter | 2.04 | 0.83 | 1.59 | 0.76 | 2.07 | 0.85 |
| 99808  | INTERGENIC | Sgl Promoter | 2.24 | 0.87 | 1.74 | 0.82 | 1.98 | 0.84 |
| 97550  | INTERGENIC | Dbl Promoter | #N/A | #N/A | 1.30 | 0.62 | 1.10 | 0.46 |
| 96607  | INTERGENIC | Sgl Promoter | 0.46 | 0.12 | #N/A | #N/A | 0.47 | 0.11 |
| 94855  | INTERGENIC | Sgl Promoter | 0.30 | 0.04 | 0.40 | 0.05 | 0.48 | 0.13 |
| 93394  | INTERGENIC | Sgl Promoter | 0.21 | 0.02 | 0.35 | 0.03 | 0.22 | 0.02 |
| 92025  | INTERGENIC | Sgl Promoter | 0.60 | 0.20 | 1.26 | 0.59 | 0.78 | 0.30 |
| 89691  | INTERGENIC | Non Promoter | #N/A | #N/A | #N/A | #N/A | #N/A | #N/A |
| 87843  | INTERGENIC | Dbl Promoter | #N/A | #N/A | 0.71 | 0.23 | #N/A | #N/A |
| 85455  | INTERGENIC | Non Promoter | #N/A | #N/A | #N/A | #N/A | #N/A | #N/A |
| 83833  | INTERGENIC | Dbl Promoter | 1.16 | 0.50 | 0.83 | 0.32 | 0.86 | 0.35 |
| 81786  |            |              | 0.52 | 0.15 | 0.70 | 0.23 | 0.59 | 0.17 |
| 80347  | INTERGENIC | Dbl Promoter | 0.81 | 0.32 | 0.66 | 0.20 | 0.94 | 0.40 |
| 78351  | INTERGENIC | Non Promoter | 1.15 | 0.47 | 1.23 | 0.58 | 1.33 | 0.60 |
| 77559  | INTERGENIC | Sgl Promoter | 1.44 | 0.63 | 1.50 | 0.73 | 1.40 | 0.64 |
| 74399  | INTERGENIC | Sgl Promoter | 1.34 | 0.59 | 1.50 | 0.73 | 1.32 | 0.60 |
| 73030  | INTERGENIC | Sgl Promoter | 1.30 | 0.56 | 1.20 | 0.56 | 1.14 | 0.50 |
| 71299  | INTERGENIC | Sgl Promoter | 0.99 | 0.41 | 1.27 | 0.60 | 1.15 | 0.51 |
| 70155  | INTERGENIC | Sgl Promoter | #N/A | #N/A | 2.61 | 0.97 | #N/A | #N/A |
| 69375  | INTERGENIC | Sgl Promoter | 0.59 | 0.19 | 0.71 | 0.24 | 0.57 | 0.16 |
| 67560  | INTERGENIC | Non Promoter | 0.33 | 0.06 | 0.41 | 0.05 | 0.45 | 0.09 |
| 65620  | INTERGENIC | Dbl Promoter | 2.14 | 0.76 | #N/A | #N/A | 1.69 | 0.64 |
| 61324  | INTERGENIC | Sgl Promoter | 1.24 | 0.54 | 1.67 | 0.80 | 1.50 | 0.67 |
| 60382  |            |              | #N/A | #N/A | 0.50 | 0.10 | 0.33 | 0.05 |
| 58758  | INTERGENIC | Sgl Promoter | #N/A | #N/A | 1.13 | 0.52 | #N/A | #N/A |
| 56450  | INTERGENIC | Sgl Promoter | #N/A | #N/A | #N/A | #N/A | 2.09 | 0.82 |
| 55556  | INTERGENIC | Dbl Promoter | 3.65 | 0.98 | 2.29 | 0.95 | 2.25 | 0.86 |
| 53096  | INTERGENIC | Dbl Promoter | 7.33 | 0.98 | 3.51 | 0.98 | 4.39 | 0.98 |
| 49553  | INTERGENIC | Non Promoter | #N/A | #N/A | #N/A | #N/A | #N/A | #N/A |
| 48736  | INTERGENIC | Dbl Promoter | #N/A | #N/A | #N/A | #N/A | #N/A | #N/A |
| 47931  | INTERGENIC | Sgl Promoter | 2.71 | 0.93 | #N/A | #N/A | 2.44 | 0.92 |
| 45758  | INTERGENIC | Non Promoter | #N/A | #N/A | #N/A | #N/A | #N/A | #N/A |
| 44936  | INTERGENIC | Dbl Promoter | #N/A | #N/A | #N/A | #N/A | 3.16 | 0.96 |
| 43692  | INTERGENIC | Sgl Promoter | 1.38 | 0.60 | 1.24 | 0.59 | #N/A | #N/A |
| 39656  |            |              | 1.08 | 0.46 | 1.00 | 0.43 | 1.20 | 0.54 |
| 40747  | INTERGENIC | Dbl Promoter | 1.25 | 0.54 | 1.47 | 0.70 | 1.55 | 0.70 |
| 36821  | INTERGENIC | Non Promoter | 0.63 | 0.21 | 0.64 | 0.19 | 0.51 | 0.20 |
| 33131  | INTERGENIC | Dbl Promoter | 0.43 | 0.10 | 0.68 | 0.22 | 0.51 | 0.13 |
| 34657  | INTERGENIC | Dbl Promoter | 1.25 | 0.54 | 1.12 | 0.51 | 1.22 | 0.55 |
| 27838  | INTERGENIC | Non Promoter | 1.01 | 0.43 | 1.12 | 0.51 | 0.82 | 0.32 |
| 28702  | INTERGENIC | Non Promoter | 0.29 | 0.04 | 0.90 | 0.36 | 0.27 | 0.02 |

|        |            |              |      |      |      |      |      |      |
|--------|------------|--------------|------|------|------|------|------|------|
| 25272  | INTERGENIC | Dbl Promoter | 1.27 | 0.55 | 0.93 | 0.38 | 1.12 | 0.50 |
| 22524  | INTERGENIC | Sgl Promoter | 1.11 | 0.47 | 1.12 | 0.51 | 1.23 | 0.56 |
| 18301  | INTERGENIC | Sgl Promoter | 1.24 | 0.54 | 1.48 | 0.71 | 1.20 | 0.54 |
| 15966  | INTERGENIC | Non Promoter | 1.57 | 0.68 | 1.58 | 0.77 | 1.63 | 0.73 |
| 17280  | INTERGENIC | Non Promoter | 1.26 | 0.55 | 1.38 | 0.67 | 1.21 | 0.54 |
| 13111  | INTERGENIC | Dbl Promoter | 0.79 | 0.30 | 0.94 | 0.39 | 1.06 | 0.46 |
| 14312  |            |              | 1.13 | 0.48 | 1.48 | 0.72 | 1.24 | 0.56 |
| 11548  | INTERGENIC | Non Promoter | 0.43 | 0.10 | 0.50 | 0.09 | 0.58 | 0.17 |
| 9596   | INTERGENIC | Sgl Promoter | 1.45 | 0.63 | 1.22 | 0.57 | 1.34 | 0.61 |
| 2894   | INTERGENIC | Dbl Promoter | 1.05 | 0.44 | 1.11 | 0.50 | 1.23 | 0.53 |
| 1647   | INTERGENIC | Sgl Promoter | 0.46 | 0.12 | 0.40 | 0.04 | 0.63 | 0.20 |
| 3809   | INTERGENIC | Dbl Promoter | 1.37 | 0.60 | 1.39 | 0.67 | 1.59 | 0.68 |
| 19490  | INTERGENIC | Sgl Promoter | 1.08 | 0.46 | 1.25 | 0.59 | 0.81 | 0.31 |
| 113801 | INTERGENIC | Non Promoter | #N/A | #N/A | #N/A | #N/A | #N/A | #N/A |
| 228329 | INTERGENIC | Dbl Promoter | #N/A | #N/A | 0.75 | 0.27 | #N/A | #N/A |
| 341278 | INTERGENIC | Sgl Promoter | #N/A | #N/A | 0.56 | 0.13 | 0.59 | 0.18 |
| 356542 | INTERGENIC | Sgl Promoter | 1.42 | 0.60 | 1.33 | 0.64 | 1.79 | 0.76 |
| 123991 | INTERGENIC | Dbl Promoter | 1.34 | 0.58 | 1.52 | 0.74 | 1.29 | 0.58 |
| 227849 | INTERGENIC | Dbl Promoter | 2.14 | 0.85 | 1.25 | 0.58 | 1.25 | 0.57 |
| 354680 | INTERGENIC | Sgl Promoter | #N/A | #N/A | 0.91 | 0.37 | #N/A | #N/A |
| 5080   | INTERGENIC | Dbl Promoter | 1.38 | 0.60 | 1.22 | 0.58 | 1.62 | 0.73 |
| 329417 | INTERGENIC | Sgl Promoter | 1.53 | 0.67 | #N/A | #N/A | 0.91 | 0.37 |
| 331455 | INTERGENIC | Sgl Promoter | #N/A | #N/A | 0.74 | 0.25 | 0.61 | 0.19 |
| 333592 | INTERGENIC | Sgl Promoter | 1.61 | 0.70 | 1.62 | 0.78 | #N/A | #N/A |
| 334509 | INTERGENIC | Non Promoter | 0.63 | 0.21 | 0.67 | 0.21 | #N/A | #N/A |
| 337680 | INTERGENIC | Sgl Promoter | #N/A | #N/A | 1.29 | 0.61 | 1.35 | 0.61 |
| 338938 | INTERGENIC | Sgl Promoter | 1.80 | 0.74 | 1.31 | 0.63 | 1.35 | 0.60 |
| 340299 | INTERGENIC | Sgl Promoter | 0.83 | 0.32 | 0.78 | 0.29 | #N/A | #N/A |
| 342857 | INTERGENIC | Sgl Promoter | 1.01 | 0.42 | 0.89 | 0.36 | 0.93 | 0.38 |
| 344334 | INTERGENIC | Dbl Promoter | 0.75 | 0.28 | 1.37 | 0.67 | 0.85 | 0.34 |
| 346194 | INTERGENIC | Non Promoter | #N/A | #N/A | 0.75 | 0.27 | 0.98 | 0.41 |
| 349678 | INTERGENIC | Dbl Promoter | 1.64 | 0.70 | 1.35 | 0.65 | 1.24 | 0.56 |
| 354040 | INTERGENIC | Sgl Promoter | #N/A | #N/A | #N/A | #N/A | #N/A | #N/A |
| 357673 | INTERGENIC | Sgl Promoter | 3.08 | 0.96 | 3.42 | 0.99 | 2.73 | 0.93 |
| 360460 | INTERGENIC | Non Promoter | #N/A | #N/A | 0.73 | 0.25 | #N/A | #N/A |
| 361411 | INTERGENIC | Dbl Promoter | 2.11 | 0.84 | 1.86 | 0.87 | 1.78 | 0.79 |
| 364368 | INTERGENIC | Sgl Promoter | 1.13 | 0.48 | 0.65 | 0.19 | 0.93 | 0.38 |
| 368126 | INTERGENIC | Sgl Promoter | 1.14 | 0.49 | 1.20 | 0.56 | 1.62 | 0.73 |
| 370523 | INTERGENIC | Non Promoter | #N/A | #N/A | 0.76 | 0.26 | 0.63 | 0.20 |
| 371820 | INTERGENIC | Sgl Promoter | 1.33 | 0.58 | 1.26 | 0.60 | 1.29 | 0.59 |
| 372797 | INTERGENIC | Sgl Promoter | 0.91 | 0.36 | #N/A | #N/A | 1.09 | 0.48 |
| 373709 | INTERGENIC | Sgl Promoter | 2.45 | 0.90 | 1.90 | 0.88 | #N/A | #N/A |
| 376011 | INTERGENIC | Sgl Promoter | #N/A | #N/A | #N/A | #N/A | #N/A | #N/A |
| 377846 | INTERGENIC | Dbl Promoter | 1.07 | 0.45 | 1.65 | 0.78 | #N/A | #N/A |
| 379780 | INTERGENIC | Sgl Promoter | #N/A | #N/A | 1.30 | 0.60 | 0.51 | 0.13 |
| 381052 | INTERGENIC | Sgl Promoter | #N/A | #N/A | 0.83 | 0.32 | 0.72 | 0.26 |
| 383532 | INTERGENIC | Non Promoter | 0.34 | 0.06 | 0.44 | 0.06 | 0.38 | 0.08 |
| 384599 | INTERGENIC | Dbl Promoter | #N/A | #N/A | 0.85 | 0.33 | #N/A | #N/A |
| 385879 | INTERGENIC | Sgl Promoter | 0.79 | 0.30 | 1.20 | 0.56 | 0.59 | 0.18 |
| 386824 | INTERGENIC | Sgl Promoter | 1.62 | 0.70 | 1.71 | 0.81 | 1.50 | 0.67 |
| 389212 | INTERGENIC | Sgl Promoter | 0.61 | 0.20 | 0.75 | 0.26 | 0.78 | 0.30 |

|        |            |              |      |      |      |      |      |      |
|--------|------------|--------------|------|------|------|------|------|------|
| 389770 | INTERGENIC | Non Promoter | #N/A | #N/A | 1.12 | 0.51 | 1.04 | 0.45 |
| 392415 | INTERGENIC | Sgl Promoter | 0.49 | 0.14 | 0.59 | 0.15 | 0.37 | 0.05 |
| 394836 | INTERGENIC | Sgl Promoter | 1.26 | 0.54 | 0.97 | 0.41 | 0.98 | 0.40 |
| 397734 | INTERGENIC | Sgl Promoter | 0.92 | 0.38 | 0.90 | 0.36 | 0.91 | 0.38 |
| 400347 | INTERGENIC | Dbl Promoter | 2.47 | 0.91 | 2.24 | 0.94 | 2.85 | 0.96 |
| 401440 | INTERGENIC | Sgl Promoter | 1.71 | 0.69 | 1.52 | 0.73 | 1.21 | 0.54 |
| 402760 | INTERGENIC | Non Promoter | #N/A | #N/A | #N/A | #N/A | #N/A | #N/A |
| 405767 | INTERGENIC | Dbl Promoter | 1.85 | 0.76 | 1.79 | 0.83 | 1.82 | 0.79 |
| 407063 | INTERGENIC | Sgl Promoter | #N/A | #N/A | 0.71 | 0.24 | 0.98 | 0.41 |
| 408357 | INTERGENIC | Non Promoter | 0.98 | 0.41 | 0.91 | 0.37 | 1.02 | 0.44 |
| 409764 | INTERGENIC | Sgl Promoter | 0.59 | 0.19 | 0.56 | 0.14 | 0.56 | 0.16 |
| 413006 | INTERGENIC | Sgl Promoter | 1.44 | 0.63 | #N/A | #N/A | 1.94 | 0.82 |
| 413851 | INTERGENIC | Sgl Promoter | 1.23 | 0.53 | 0.97 | 0.41 | 1.04 | 0.44 |
| 414459 | INTERGENIC | Non Promoter | 0.64 | 0.23 | #N/A | #N/A | 0.62 | 0.20 |
| 416347 | INTERGENIC | Sgl Promoter | 1.50 | 0.65 | 0.96 | 0.41 | 1.24 | 0.56 |
| 418630 | INTERGENIC | Sgl Promoter | 0.67 | 0.24 | 0.98 | 0.41 | 0.78 | 0.29 |
| 422668 | INTERGENIC | Sgl Promoter | 2.02 | 0.82 | 1.31 | 0.63 | 1.79 | 0.76 |
| 424271 | INTERGENIC | Sgl Promoter | 0.40 | 0.09 | 0.38 | 0.04 | 0.37 | 0.06 |
| 424847 | INTERGENIC | Sgl Promoter | #N/A | #N/A | 0.28 | 0.01 | 0.55 | 0.19 |
| 426773 | INTERGENIC | Sgl Promoter | 0.55 | 0.17 | 0.56 | 0.13 | 0.48 | 0.11 |
| 427818 | INTERGENIC | Dbl Promoter | 1.26 | 0.55 | 1.28 | 0.61 | 0.94 | 0.40 |
| 430248 | INTERGENIC | Non Promoter | 1.07 | 0.45 | 1.27 | 0.60 | 1.01 | 0.43 |
| 432187 | INTERGENIC | Dbl Promoter | 1.51 | 0.66 | 1.37 | 0.66 | 1.67 | 0.75 |
| 433689 | INTERGENIC | Non Promoter | #N/A | #N/A | 0.52 | 0.11 | 0.41 | 0.07 |
| 438176 | INTERGENIC | Sgl Promoter | 1.78 | 0.75 | 1.32 | 0.64 | 1.00 | 0.43 |
| 440391 | INTERGENIC | Sgl Promoter | 1.00 | 0.42 | #N/A | #N/A | 0.76 | 0.28 |
| 441535 | INTERGENIC | Dbl Promoter | 1.25 | 0.54 | 1.35 | 0.65 | 1.22 | 0.55 |
| 447440 | INTERGENIC | Dbl Promoter | 0.67 | 0.24 | 0.80 | 0.30 | 0.60 | 0.18 |
| 451730 | INTERGENIC | Non Promoter | 0.66 | 0.23 | 0.79 | 0.29 | 0.84 | 0.34 |
| 454857 | INTERGENIC | Dbl Promoter | 0.60 | 0.20 | 0.65 | 0.19 | 0.73 | 0.27 |
| 455907 | INTERGENIC | Non Promoter | #N/A | #N/A | #N/A | #N/A | #N/A | #N/A |
| 458650 | INTERGENIC | Sgl Promoter | 2.36 | 0.88 | 1.56 | 0.76 | 1.74 | 0.76 |
| 459480 | INTERGENIC | Sgl Promoter | 0.85 | 0.34 | 0.71 | 0.24 | 0.84 | 0.33 |
| 461502 | INTERGENIC | Dbl Promoter | #N/A | #N/A | #N/A | #N/A | #N/A | #N/A |
| 464450 | INTERGENIC | Sgl Promoter | 1.43 | 0.62 | 1.27 | 0.60 | 0.94 | 0.40 |
| 466675 | INTERGENIC | Non Promoter | #N/A | #N/A | #N/A | #N/A | #N/A | #N/A |
| 468212 | INTERGENIC | Dbl Promoter | 2.56 | 0.91 | 1.65 | 0.79 | 2.41 | 0.91 |
| 469377 | INTERGENIC | Non Promoter | #N/A | #N/A | #N/A | #N/A | #N/A | #N/A |
| 471899 | INTERGENIC | Dbl Promoter | 1.60 | 0.69 | #N/A | #N/A | 1.75 | 0.76 |
| 472725 | INTERGENIC | Sgl Promoter | 0.83 | 0.33 | #N/A | #N/A | 0.86 | 0.34 |
| 473475 | INTERGENIC | Non Promoter | #N/A | #N/A | #N/A | #N/A | #N/A | #N/A |
| 474552 | INTERGENIC | Dbl Promoter | #N/A | #N/A | #N/A | #N/A | #N/A | #N/A |
| 479296 | INTERGENIC | Sgl Promoter | #N/A | #N/A | 0.83 | 0.32 | #N/A | #N/A |
| 482033 | INTERGENIC | Sgl Promoter | 2.61 | 0.92 | 2.03 | 0.90 | 2.19 | 0.88 |
| 483219 | INTERGENIC | Non Promoter | #N/A | #N/A | #N/A | #N/A | #N/A | #N/A |
| 487439 | INTERGENIC | Dbl Promoter | 2.03 | 0.82 | 1.80 | 0.82 | 1.81 | 0.79 |
| 490195 | INTERGENIC | Non Promoter | #N/A | #N/A | 1.03 | 0.45 | #N/A | #N/A |
| 491122 | INTERGENIC | Sgl Promoter | 1.42 | 0.61 | 1.17 | 0.54 | 1.62 | 0.73 |
| 493263 | INTERGENIC | Dbl Promoter | 1.36 | 0.60 | 1.17 | 0.54 | 1.25 | 0.56 |
| 503550 | INTERGENIC | Non Promoter | #N/A | #N/A | #N/A | #N/A | #N/A | #N/A |
| 505792 | INTERGENIC | Dbl Promoter | 0.49 | 0.14 | 0.64 | 0.19 | 0.63 | 0.21 |

|        |            |              |      |      |      |      |      |      |
|--------|------------|--------------|------|------|------|------|------|------|
| 506976 | INTERGENIC | Non Promoter | #N/A | #N/A | #N/A | #N/A | #N/A | #N/A |
| 507946 | INTERGENIC | Sgl Promoter | 1.34 | 0.58 | 1.13 | 0.51 | 0.88 | 0.36 |
| 511823 | INTERGENIC | Dbl Promoter | 1.30 | 0.57 | 1.46 | 0.70 | 1.39 | 0.63 |
| 515242 | INTERGENIC | Dbl Promoter | 0.88 | 0.36 | 0.79 | 0.29 | 1.01 | 0.42 |
| 516421 | INTERGENIC | Sgl Promoter | #N/A | #N/A | #N/A | #N/A | #N/A | #N/A |
| 517640 | INTERGENIC | Dbl Promoter | 1.01 | 0.42 | 1.23 | 0.56 | 0.83 | 0.33 |
| 525276 | INTERGENIC | Sgl Promoter | 1.22 | 0.53 | 1.23 | 0.58 | 1.09 | 0.48 |
| 530427 | INTERGENIC | Sgl Promoter | 1.09 | 0.46 | 1.38 | 0.66 | 1.21 | 0.54 |
| 534073 | INTERGENIC | Sgl Promoter | 1.79 | 0.76 | 1.52 | 0.74 | 1.70 | 0.75 |
| 538657 | INTERGENIC | Non Promoter | #N/A | #N/A | #N/A | #N/A | #N/A | #N/A |
| 545027 | INTERGENIC | Dbl Promoter | 1.84 | 0.77 | 1.57 | 0.74 | 2.17 | 0.86 |
| 546855 | INTERGENIC | Sgl Promoter | 1.68 | 0.72 | 1.21 | 0.57 | 1.72 | 0.77 |
| 548790 | INTERGENIC | Non Promoter | #N/A | #N/A | #N/A | #N/A | #N/A | #N/A |
| 551112 | INTERGENIC | Dbl Promoter | 1.11 | 0.47 | 0.78 | 0.28 | 1.13 | 0.50 |
| 552296 | INTERGENIC | Sgl Promoter | #N/A | #N/A | #N/A | #N/A | 0.46 | 0.10 |
| 554822 | INTERGENIC | Sgl Promoter | 3.06 | 0.96 | 1.75 | 0.81 | 2.28 | 0.88 |
| 559959 | INTERGENIC | Sgl Promoter | #N/A | #N/A | #N/A | #N/A | #N/A | #N/A |
| 561168 | INTERGENIC | Dbl Promoter | 1.35 | 0.59 | 1.15 | 0.53 | 1.37 | 0.63 |
| 564474 | INTERGENIC | Non Promoter | #N/A | #N/A | #N/A | #N/A | #N/A | #N/A |
| 566875 | INTERGENIC | Sgl Promoter | 0.75 | 0.28 | 0.77 | 0.28 | 0.93 | 0.39 |
| 569927 | INTERGENIC | Sgl Promoter | 1.68 | 0.71 | 1.63 | 0.78 | 2.49 | 0.92 |
| 571956 | INTERGENIC | Sgl Promoter | 1.86 | 0.78 | 2.00 | 0.90 | 1.78 | 0.78 |
| 573173 | INTERGENIC | Dbl Promoter | 2.03 | 0.82 | 1.87 | 0.87 | 2.14 | 0.87 |
| 575096 | INTERGENIC | Sgl Promoter | 1.21 | 0.52 | 0.90 | 0.37 | 0.64 | 0.21 |
| 578562 | INTERGENIC | Sgl Promoter | 0.85 | 0.33 | 1.17 | 0.54 | 0.51 | 0.13 |
| 580157 | INTERGENIC | Non Promoter | 1.76 | 0.70 | 1.64 | 0.76 | 1.12 | 0.48 |
| 581811 | INTERGENIC | Non Promoter | #N/A | #N/A | 0.45 | 0.07 | 0.69 | 0.24 |
| 584307 | INTERGENIC | Sgl Promoter | 0.95 | 0.39 | 0.98 | 0.41 | 1.02 | 0.44 |
| 586948 | INTERGENIC | Sgl Promoter | 1.51 | 0.66 | 1.22 | 0.58 | 1.47 | 0.67 |
| 589940 | INTERGENIC | Non Promoter | 0.45 | 0.11 | 0.50 | 0.10 | #N/A | #N/A |
| 593055 | INTERGENIC | Dbl Promoter | 2.39 | 0.89 | 1.80 | 0.84 | 2.47 | 0.90 |
| 594352 | INTERGENIC | Non Promoter | #N/A | #N/A | 1.01 | 0.43 | #N/A | #N/A |
| 602715 | INTERGENIC | Sgl Promoter | 2.41 | 0.90 | 1.86 | 0.87 | 2.08 | 0.86 |
| 605345 | INTERGENIC | Sgl Promoter | #N/A | #N/A | 0.95 | 0.40 | 1.92 | 0.79 |
| 606512 | INTERGENIC | Sgl Promoter | 0.87 | 0.35 | 1.30 | 0.62 | 1.22 | 0.54 |
| 608638 | INTERGENIC | Non Promoter | #N/A | #N/A | #N/A | #N/A | #N/A | #N/A |
| 609836 | INTERGENIC | Sgl Promoter | 2.52 | 0.91 | 2.15 | 0.92 | 3.00 | 0.96 |
| 611997 | INTERGENIC | Dbl Promoter | 2.97 | 0.95 | 2.28 | 0.95 | 2.51 | 0.92 |
| 612995 | INTERGENIC | Non Promoter | #N/A | #N/A | #N/A | #N/A | #N/A | #N/A |
| 617516 | INTERGENIC | Sgl Promoter | 1.73 | 0.74 | 1.32 | 0.64 | 1.81 | 0.78 |
| 619062 | INTERGENIC | Dbl Promoter | 0.97 | 0.40 | 1.28 | 0.61 | 0.90 | 0.37 |
| 619838 | INTERGENIC | Dbl Promoter | 0.28 | 0.04 | 0.66 | 0.20 | 0.31 | 0.03 |
| 624727 | INTERGENIC | Sgl Promoter | #N/A | #N/A | #N/A | #N/A | #N/A | #N/A |
| 626626 | INTERGENIC | Non Promoter | #N/A | #N/A | #N/A | #N/A | #N/A | #N/A |
| 628358 | INTERGENIC | Sgl Promoter | 1.74 | 0.74 | 1.88 | 0.87 | 1.71 | 0.75 |
| 630964 | INTERGENIC | Sgl Promoter | 1.51 | 0.66 | 1.29 | 0.61 | 1.71 | 0.76 |
| 632162 | INTERGENIC | Dbl Promoter | 1.39 | 0.61 | 1.44 | 0.68 | 1.21 | 0.54 |
| 633280 | INTERGENIC | Non Promoter | #N/A | #N/A | 1.59 | 0.72 | #N/A | #N/A |
| 633837 | INTERGENIC | Dbl Promoter | #N/A | #N/A | 2.53 | 0.96 | 2.17 | 0.83 |
| 636937 | INTERGENIC | Non Promoter | #N/A | #N/A | #N/A | #N/A | #N/A | #N/A |
| 639558 | INTERGENIC | Sgl Promoter | 0.46 | 0.12 | 0.69 | 0.22 | 0.51 | 0.13 |

|        |            |              |      |      |      |      |      |      |
|--------|------------|--------------|------|------|------|------|------|------|
| 642739 | INTERGENIC | Dbl Promoter | 1.87 | 0.78 | 1.95 | 0.89 | 1.49 | 0.68 |
| 643392 | INTERGENIC | Non Promoter | #N/A | #N/A | #N/A | #N/A | #N/A | #N/A |
| 644564 | INTERGENIC | Dbl Promoter | #N/A | #N/A | 1.94 | 0.88 | 2.64 | 0.93 |
| 647124 | INTERGENIC | Non Promoter | #N/A | #N/A | #N/A | #N/A | #N/A | #N/A |
| 648802 | INTERGENIC | Sgl Promoter | 0.75 | 0.28 | 1.05 | 0.45 | 0.66 | 0.22 |
| 649301 | INTERGENIC | Dbl Promoter | 0.62 | 0.21 | 1.10 | 0.49 | 0.89 | 0.36 |
| 654208 | INTERGENIC | Dbl Promoter | 2.88 | 0.95 | 2.31 | 0.91 | 2.75 | 0.91 |
| 657130 | INTERGENIC | Sgl Promoter | 0.74 | 0.27 | 0.66 | 0.20 | 0.80 | 0.31 |
| 658745 | INTERGENIC | Sgl Promoter | 1.68 | 0.70 | 1.45 | 0.69 | 1.85 | 0.76 |
| 659813 | INTERGENIC | Non Promoter | #N/A | #N/A | #N/A | #N/A | #N/A | #N/A |
| 662399 | INTERGENIC | Dbl Promoter | 1.82 | 0.77 | 1.18 | 0.55 | 1.36 | 0.62 |
| 663810 | INTERGENIC | Non Promoter | #N/A | #N/A | #N/A | #N/A | #N/A | #N/A |
| 671041 | INTERGENIC | Sgl Promoter | 0.83 | 0.33 | 0.91 | 0.37 | 0.55 | 0.15 |
| 671843 | INTERGENIC | Sgl Promoter | 0.57 | 0.18 | 0.69 | 0.22 | 0.73 | 0.26 |
| 673379 | INTERGENIC | Sgl Promoter | 2.23 | 0.86 | 1.48 | 0.72 | 1.36 | 0.63 |
| 675937 | INTERGENIC | Dbl Promoter | 1.63 | 0.70 | 1.48 | 0.72 | 1.70 | 0.76 |
| 678189 | INTERGENIC | Non Promoter | #N/A | #N/A | 0.43 | 0.06 | 0.57 | 0.16 |
| 678870 | INTERGENIC | Dbl Promoter | #N/A | #N/A | #N/A | #N/A | #N/A | #N/A |
| 679355 | INTERGENIC | Sgl Promoter | #N/A | #N/A | #N/A | #N/A | #N/A | #N/A |
| 681442 | INTERGENIC | Non Promoter | 0.61 | 0.21 | 0.72 | 0.24 | 0.59 | 0.18 |
| 683109 | INTERGENIC | Dbl Promoter | 2.14 | 0.85 | 1.57 | 0.75 | 1.27 | 0.57 |
| 684028 | INTERGENIC | Sgl Promoter | 0.96 | 0.40 | 1.04 | 0.46 | 0.84 | 0.33 |
| 685765 | INTERGENIC | Sgl Promoter | 1.30 | 0.57 | 1.13 | 0.52 | 0.92 | 0.38 |
| 689622 | INTERGENIC | Sgl Promoter | #N/A | #N/A | #N/A | #N/A | 1.09 | 0.48 |
| 690693 | INTERGENIC | Sgl Promoter | 1.55 | 0.67 | 1.63 | 0.77 | 1.60 | 0.73 |
| 692473 | INTERGENIC | Sgl Promoter | 1.93 | 0.79 | 1.45 | 0.69 | 1.66 | 0.73 |
| 701996 | INTERGENIC | Dbl Promoter | 1.56 | 0.68 | 1.76 | 0.83 | 1.50 | 0.68 |
| 703427 | INTERGENIC | Dbl Promoter | 1.14 | 0.49 | 0.92 | 0.38 | 1.23 | 0.56 |
| 711681 | INTERGENIC | Non Promoter | #N/A | #N/A | #N/A | #N/A | #N/A | #N/A |
| 712864 | INTERGENIC | Dbl Promoter | 4.65 | 0.95 | 2.04 | 0.91 | 2.38 | 0.91 |
| 715591 | INTERGENIC | Non Promoter | #N/A | #N/A | 0.33 | 0.04 | #N/A | #N/A |
| 717021 | INTERGENIC | Dbl Promoter | 2.70 | 0.93 | 1.78 | 0.78 | 2.26 | 0.89 |
| 718651 | INTERGENIC | Non Promoter | #N/A | #N/A | #N/A | #N/A | #N/A | #N/A |
| 720179 | INTERGENIC | Dbl Promoter | #N/A | #N/A | 1.09 | 0.49 | #N/A | #N/A |
| 721944 | INTERGENIC | Dbl Promoter | #N/A | #N/A | 0.72 | 0.24 | #N/A | #N/A |
| 725562 | INTERGENIC | Non Promoter | 0.43 | 0.10 | 0.41 | 0.05 | 0.49 | 0.12 |
| 727510 | INTERGENIC | Dbl Promoter | 2.01 | 0.81 | 2.36 | 0.95 | 3.04 | 0.97 |
| 730006 | INTERGENIC | Non Promoter | #N/A | #N/A | #N/A | #N/A | #N/A | #N/A |
| 733923 | INTERGENIC | Dbl Promoter | 2.50 | 0.90 | 2.18 | 0.93 | 1.76 | 0.77 |
| 736435 | INTERGENIC | Non Promoter | 0.16 | 0.01 | 0.34 | 0.03 | #N/A | #N/A |
| 738318 | INTERGENIC | Dbl Promoter | 1.78 | 0.74 | 1.36 | 0.66 | 1.56 | 0.70 |
| 738922 | INTERGENIC | Non Promoter | #N/A | #N/A | 1.69 | 0.75 | #N/A | #N/A |
| 742908 | INTERGENIC | Dbl Promoter | 0.48 | 0.13 | 1.03 | 0.46 | 0.99 | 0.42 |
| 744533 | INTERGENIC | Non Promoter | 0.45 | 0.11 | 0.50 | 0.09 | #N/A | #N/A |
| 745591 | INTERGENIC | Sgl Promoter | 2.40 | 0.89 | 1.95 | 0.88 | 2.45 | 0.92 |
| 746723 | INTERGENIC | Sgl Promoter | 0.62 | 0.21 | 0.79 | 0.29 | 0.81 | 0.31 |
| 747523 | INTERGENIC | Sgl Promoter | 1.14 | 0.47 | 1.00 | 0.43 | 1.29 | 0.59 |
| 749299 | INTERGENIC | Dbl Promoter | 1.79 | 0.76 | 1.84 | 0.86 | 2.54 | 0.82 |
| 752212 | INTERGENIC | Sgl Promoter | #N/A | #N/A | 0.51 | 0.15 | #N/A | #N/A |
| 755326 | INTERGENIC | Dbl Promoter | 1.34 | 0.59 | 2.19 | 0.87 | #N/A | #N/A |
| 756474 | INTERGENIC | Non Promoter | 0.36 | 0.07 | 0.51 | 0.10 | 0.52 | 0.13 |



|        |            |              |      |      |      |      |      |      |
|--------|------------|--------------|------|------|------|------|------|------|
| 758328 | INTERGENIC | Dbl Promoter | 0.54 | 0.16 | 1.07 | 0.48 | 0.75 | 0.28 |
| 759780 | INTERGENIC | Sgl Promoter | 0.90 | 0.35 | 1.12 | 0.51 | 0.99 | 0.42 |
| 760823 | INTERGENIC | Non Promoter | #N/A | #N/A | 1.46 | 0.65 | #N/A | #N/A |
| 761390 | INTERGENIC | Dbl Promoter | 1.85 | 0.77 | 2.69 | 0.97 | 1.95 | 0.78 |
| 762823 | INTERGENIC | Dbl Promoter | 2.21 | 0.86 | 1.37 | 0.66 | 1.83 | 0.79 |
| 766867 | INTERGENIC | Non Promoter | #N/A | #N/A | #N/A | #N/A | #N/A | #N/A |
| 768407 | INTERGENIC | Dbl Promoter | 1.66 | 0.71 | 2.09 | 0.92 | 1.45 | 0.67 |
| 770798 | INTERGENIC | Sgl Promoter | 0.29 | 0.04 | 0.74 | 0.26 | 0.22 | 0.01 |
| 772599 | INTERGENIC | Sgl Promoter | 2.58 | 0.92 | 1.99 | 0.89 | 2.10 | 0.86 |
| 774571 | INTERGENIC | Sgl Promoter | 2.14 | 0.84 | 2.17 | 0.91 | 1.90 | 0.77 |
| 775844 | INTERGENIC | Sgl Promoter | 1.30 | 0.57 | 0.99 | 0.42 | 1.74 | 0.78 |
| 778553 | INTERGENIC | Non Promoter | #N/A | #N/A | #N/A | #N/A | #N/A | #N/A |
| 779868 | INTERGENIC | Dbl Promoter | 0.11 | 0.00 | 0.17 | 0.00 | 0.41 | 0.12 |
| 780904 | INTERGENIC | Sgl Promoter | 0.49 | 0.13 | 0.58 | 0.14 | 0.43 | 0.08 |
| 781992 | INTERGENIC | Sgl Promoter | 3.25 | 0.97 | 2.07 | 0.91 | 2.52 | 0.93 |
| 783666 | INTERGENIC | Sgl Promoter | #N/A | #N/A | 1.30 | 0.62 | 1.92 | 0.79 |
| 784855 | INTERGENIC | Sgl Promoter | 1.35 | 0.59 | 1.40 | 0.68 | 1.55 | 0.71 |
| 786993 | INTERGENIC | Sgl Promoter | #N/A | #N/A | #N/A | #N/A | 0.47 | 0.14 |
| 788740 | INTERGENIC | Non Promoter | #N/A | #N/A | #N/A | #N/A | #N/A | #N/A |
| 790209 | INTERGENIC | Sgl Promoter | 0.40 | 0.08 | 0.70 | 0.22 | 0.71 | 0.25 |
| 792529 | INTERGENIC | Dbl Promoter | 1.83 | 0.77 | 1.64 | 0.77 | 2.26 | 0.88 |
| 794074 | INTERGENIC | Non Promoter | #N/A | #N/A | #N/A | #N/A | #N/A | #N/A |
| 795799 | INTERGENIC | Sgl Promoter | 1.58 | 0.68 | 1.18 | 0.54 | 1.06 | 0.45 |
| 797674 | INTERGENIC | Dbl Promoter | 0.99 | 0.41 | 0.78 | 0.28 | 1.05 | 0.45 |
| 798672 | INTERGENIC | Non Promoter | #N/A | #N/A | 0.79 | 0.29 | 0.78 | 0.30 |
| 800968 | INTERGENIC | Sgl Promoter | 1.45 | 0.62 | 1.57 | 0.75 | 2.03 | 0.85 |
| 802548 | INTERGENIC | Sgl Promoter | 2.01 | 0.79 | 1.77 | 0.84 | #N/A | #N/A |
| 804374 | INTERGENIC | Sgl Promoter | #N/A | #N/A | #N/A | #N/A | #N/A | #N/A |
| 805029 | INTERGENIC | Non Promoter | #N/A | #N/A | #N/A | #N/A | #N/A | #N/A |
| 807268 | INTERGENIC | Dbl Promoter | 1.89 | 0.79 | 2.38 | 0.96 | 2.44 | 0.92 |
| 808250 | INTERGENIC | Non Promoter | #N/A | #N/A | #N/A | #N/A | #N/A | #N/A |
| 811004 | INTERGENIC | Dbl Promoter | 1.76 | 0.74 | 1.19 | 0.47 | 1.61 | 0.71 |
| 811667 | INTERGENIC | Sgl Promoter | #N/A | #N/A | 1.52 | 0.72 | 1.53 | 0.70 |
| 815911 | INTERGENIC | Non Promoter | #N/A | #N/A | #N/A | #N/A | #N/A | #N/A |
| 817287 | INTERGENIC | Dbl Promoter | 1.69 | 0.72 | 2.09 | 0.86 | 2.12 | 0.87 |
| 818752 | INTERGENIC | Non Promoter | 2.18 | 0.86 | 1.79 | 0.84 | 1.96 | 0.83 |
| 820449 | INTERGENIC | Sgl Promoter | 2.14 | 0.76 | #N/A | #N/A | 2.11 | 0.87 |
| 821018 | INTERGENIC | Sgl Promoter | 2.69 | 0.93 | 2.04 | 0.91 | 2.44 | 0.91 |
| 822583 | INTERGENIC | Non Promoter | #N/A | #N/A | #N/A | #N/A | #N/A | #N/A |
| 825529 | INTERGENIC | Sgl Promoter | 1.05 | 0.44 | 1.20 | 0.56 | 0.87 | 0.35 |
| 826380 | INTERGENIC | Dbl Promoter | 0.94 | 0.39 | 1.16 | 0.53 | 1.39 | 0.63 |
| 828047 | INTERGENIC | Non Promoter | #N/A | #N/A | #N/A | #N/A | #N/A | #N/A |
| 831054 | INTERGENIC | Sgl Promoter | #N/A | #N/A | 0.96 | 0.41 | 1.31 | 0.60 |
| 832327 | INTERGENIC | Dbl Promoter | #N/A | #N/A | 0.69 | 0.22 | 0.76 | 0.29 |
| 834447 | INTERGENIC | Non Promoter | #N/A | #N/A | 0.38 | 0.05 | 0.59 | 0.17 |
| 837669 | INTERGENIC | Dbl Promoter | 0.74 | 0.28 | 0.79 | 0.29 | 0.50 | 0.12 |
| 839079 | INTERGENIC | Non Promoter | #N/A | #N/A | #N/A | #N/A | #N/A | #N/A |
| 841328 | INTERGENIC | Dbl Promoter | 1.31 | 0.57 | 1.63 | 0.78 | 1.45 | 0.65 |
| 842812 | INTERGENIC | Dbl Promoter | 0.50 | 0.14 | 0.75 | 0.27 | 0.55 | 0.15 |
| 844987 | INTERGENIC | Sgl Promoter | 2.09 | 0.84 | #N/A | #N/A | 1.59 | 0.72 |
| 846264 | INTERGENIC | Sgl Promoter | 1.15 | 0.49 | 1.05 | 0.46 | 1.37 | 0.63 |

|        |            |              |      |      |      |      |      |      |
|--------|------------|--------------|------|------|------|------|------|------|
| 847448 | INTERGENIC | Sgl Promoter | 1.59 | 0.67 | 1.36 | 0.64 | 1.81 | 0.73 |
| 848473 | INTERGENIC | Sgl Promoter | 1.66 | 0.70 | 1.66 | 0.72 | 1.77 | 0.74 |
| 849630 | INTERGENIC | Sgl Promoter | 2.14 | 0.85 | 2.01 | 0.90 | 2.27 | 0.89 |
| 850932 | INTERGENIC | Non Promoter | #N/A | #N/A | 0.76 | 0.28 | 0.44 | 0.09 |
| 852116 | INTERGENIC | Sgl Promoter | 2.58 | 0.91 | 1.82 | 0.85 | 1.90 | 0.82 |
| 853352 | INTERGENIC | Dbl Promoter | 1.42 | 0.62 | 1.92 | 0.88 | 2.74 | 0.85 |
| 854182 | INTERGENIC | Non Promoter | #N/A | #N/A | #N/A | #N/A | #N/A | #N/A |
| 861170 | INTERGENIC | Dbl Promoter | 1.89 | 0.78 | 1.25 | 0.59 | 1.88 | 0.81 |
| 865648 | INTERGENIC | Non Promoter | #N/A | #N/A | #N/A | #N/A | #N/A | #N/A |
| 867093 | INTERGENIC | Dbl Promoter | 0.51 | 0.15 | 0.72 | 0.24 | 0.33 | 0.04 |
| 868335 | INTERGENIC | Sgl Promoter | 1.49 | 0.65 | 1.08 | 0.48 | 1.94 | 0.82 |
| 869203 | INTERGENIC | Sgl Promoter | 0.86 | 0.34 | 0.91 | 0.37 | 0.96 | 0.40 |
| 870197 | INTERGENIC | Sgl Promoter | #N/A | #N/A | 1.12 | 0.51 | 1.24 | 0.55 |
| 875594 | INTERGENIC | Dbl Promoter | 1.82 | 0.72 | 1.49 | 0.65 | 1.68 | 0.68 |
| 878427 | INTERGENIC | Dbl Promoter | 0.58 | 0.19 | 0.73 | 0.25 | 0.53 | 0.14 |
| 877225 | INTERGENIC | Non Promoter | #N/A | #N/A | 0.33 | 0.03 | #N/A | #N/A |
| 880957 | INTERGENIC | Sgl Promoter | #N/A | #N/A | 1.15 | 0.51 | 1.28 | 0.58 |
| 882757 | INTERGENIC | Sgl Promoter | 0.22 | 0.02 | 0.43 | 0.06 | 0.34 | 0.05 |
| 884506 | INTERGENIC | Sgl Promoter | 1.11 | 0.47 | 1.16 | 0.53 | 1.57 | 0.70 |
| 889014 | INTERGENIC | Dbl Promoter | #N/A | #N/A | 1.70 | 0.80 | 1.68 | 0.75 |
| 888512 | INTERGENIC | Non Promoter | 0.87 | 0.35 | 0.87 | 0.34 | 1.11 | 0.49 |
| 889859 | INTERGENIC | Non Promoter | #N/A | #N/A | #N/A | #N/A | #N/A | #N/A |
| 892722 | INTERGENIC | Sgl Promoter | 0.50 | 0.14 | 0.46 | 0.07 | 0.51 | 0.13 |
| 894615 | INTERGENIC | Sgl Promoter | 1.05 | 0.44 | 1.16 | 0.53 | 1.48 | 0.68 |
| 899047 | INTERGENIC | Sgl Promoter | 1.04 | 0.44 | 1.17 | 0.54 | 1.23 | 0.55 |
| 900241 | INTERGENIC | Sgl Promoter | 1.17 | 0.50 | 1.64 | 0.73 | 1.29 | 0.58 |
| 901849 | INTERGENIC | Sgl Promoter | 0.31 | 0.04 | 0.29 | 0.01 | 0.51 | 0.14 |
| 903034 | INTERGENIC | Dbl Promoter | #N/A | #N/A | 0.39 | 0.04 | #N/A | #N/A |
| 904751 | INTERGENIC | Sgl Promoter | 0.77 | 0.30 | 0.68 | 0.22 | 0.65 | 0.22 |
| 906227 | INTERGENIC | Non Promoter | #N/A | #N/A | #N/A | #N/A | #N/A | #N/A |
| 908440 | INTERGENIC | Dbl Promoter | 1.15 | 0.49 | 1.03 | 0.45 | 1.05 | 0.45 |
| 909334 | INTERGENIC | Dbl Promoter | 0.15 | 0.01 | 0.55 | 0.12 | 0.31 | 0.07 |
| 911775 | INTERGENIC | Non Promoter | 0.85 | 0.34 | 0.81 | 0.30 | 0.77 | 0.29 |
| 912813 | INTERGENIC | Dbl Promoter | 2.26 | 0.82 | 1.77 | 0.84 | 2.03 | 0.84 |
| 916021 | INTERGENIC | Dbl Promoter | 2.10 | 0.84 | 1.45 | 0.71 | 2.14 | 0.88 |
| 918597 | INTERGENIC | Non Promoter | 0.27 | 0.03 | #N/A | #N/A | 0.67 | 0.23 |
| 921526 | INTERGENIC | Sgl Promoter | 2.07 | 0.78 | 1.64 | 0.79 | 1.92 | 0.81 |
| 923223 | INTERGENIC | Sgl Promoter | 2.27 | 0.87 | #N/A | #N/A | 2.09 | 0.86 |
| 925712 | INTERGENIC | Sgl Promoter | 2.25 | 0.87 | 2.21 | 0.94 | 2.43 | 0.91 |
| 930725 | INTERGENIC | Non Promoter | 1.86 | 0.77 | 1.59 | 0.76 | 1.75 | 0.78 |
| 931794 | INTERGENIC | Dbl Promoter | 0.75 | 0.28 | 1.03 | 0.45 | 0.65 | 0.22 |
| 936722 | INTERGENIC | Non Promoter | #N/A | #N/A | #N/A | #N/A | #N/A | #N/A |
| 939612 | INTERGENIC | Sgl Promoter | #N/A | #N/A | 1.18 | 0.52 | #N/A | #N/A |
| 943556 | INTERGENIC | Sgl Promoter | 4.30 | 0.99 | 3.00 | 0.99 | 2.96 | 0.96 |
| 944532 | INTERGENIC | Non Promoter | 1.47 | 0.63 | 1.44 | 0.70 | 1.31 | 0.59 |
| 946224 | INTERGENIC | Non Promoter | #N/A | #N/A | #N/A | #N/A | #N/A | #N/A |
| 949764 | INTERGENIC | Dbl Promoter | 1.43 | 0.62 | 1.40 | 0.67 | 1.54 | 0.70 |
| 954335 | INTERGENIC | Sgl Promoter | 1.11 | 0.47 | 1.22 | 0.55 | 1.17 | 0.52 |
| 956889 | INTERGENIC | Sgl Promoter | 0.38 | 0.09 | 0.62 | 0.17 | 0.40 | 0.07 |
| 958353 | INTERGENIC | Non Promoter | #N/A | #N/A | 1.35 | 0.65 | 1.45 | 0.66 |
| 959193 | INTERGENIC | Sgl Promoter | 1.19 | 0.51 | 1.14 | 0.52 | 1.21 | 0.54 |

|         |            |              |      |      |      |      |      |      |
|---------|------------|--------------|------|------|------|------|------|------|
| 960978  | INTERGENIC | Dbl Promoter | 0.94 | 0.38 | 1.18 | 0.55 | 1.07 | 0.47 |
| 966657  | INTERGENIC | Non Promoter | 0.65 | 0.23 | 0.69 | 0.22 | 0.73 | 0.26 |
| 968139  | INTERGENIC | Sgl Promoter | 0.27 | 0.03 | #N/A | #N/A | 0.27 | 0.03 |
| 968982  | INTERGENIC | Sgl Promoter | 1.01 | 0.42 | 1.00 | 0.43 | 0.66 | 0.22 |
| 980250  | INTERGENIC | Sgl Promoter | 0.74 | 0.28 | 1.13 | 0.52 | #N/A | #N/A |
| 984933  | INTERGENIC | Non Promoter | #N/A | #N/A | #N/A | #N/A | #N/A | #N/A |
| 986890  | INTERGENIC | Sgl Promoter | 0.77 | 0.30 | 0.93 | 0.38 | 0.81 | 0.31 |
| 989780  | INTERGENIC | Dbl Promoter | #N/A | #N/A | 0.56 | 0.13 | 0.32 | 0.04 |
| 995009  | INTERGENIC | Sgl Promoter | #N/A | #N/A | 1.82 | 0.79 | 1.47 | 0.67 |
| 997204  | INTERGENIC | Dbl Promoter | 1.27 | 0.55 | 1.33 | 0.64 | 1.40 | 0.64 |
| 1001138 | INTERGENIC | Sgl Promoter | 1.99 | 0.81 | 2.23 | 0.89 | 1.87 | 0.79 |
| 1004172 | INTERGENIC | Dbl Promoter | 0.73 | 0.28 | 0.68 | 0.21 | 0.93 | 0.39 |
| 1005129 | INTERGENIC | Dbl Promoter | 0.53 | 0.16 | 0.38 | 0.04 | 0.33 | 0.04 |
| 1007213 | INTERGENIC | Sgl Promoter | 0.73 | 0.27 | 0.58 | 0.15 | 0.81 | 0.32 |
| 1009216 | INTERGENIC | Non Promoter | #N/A | #N/A | #N/A | #N/A | #N/A | #N/A |
| 1010153 | INTERGENIC | Dbl Promoter | 2.16 | 0.85 | 2.44 | 0.96 | 2.18 | 0.88 |
| 1011181 | INTERGENIC | Sgl Promoter | 1.60 | 0.64 | 1.06 | 0.47 | 1.31 | 0.60 |
| 1013233 | INTERGENIC | Non Promoter | #N/A | #N/A | #N/A | #N/A | #N/A | #N/A |
| 1015353 | INTERGENIC | Sgl Promoter | #N/A | #N/A | 0.88 | 0.35 | 1.02 | 0.44 |
| 1017872 | INTERGENIC | Sgl Promoter | 1.16 | 0.49 | 0.76 | 0.27 | 0.99 | 0.43 |
| 1023363 | INTERGENIC | Dbl Promoter | 0.58 | 0.19 | 1.12 | 0.51 | 0.79 | 0.31 |
| 1025999 | INTERGENIC | Sgl Promoter | #N/A | #N/A | 0.74 | 0.25 | 0.80 | 0.30 |
| 1026835 | INTERGENIC | Sgl Promoter | #N/A | #N/A | #N/A | #N/A | #N/A | #N/A |
| 1029175 | INTERGENIC | Sgl Promoter | 0.31 | 0.04 | 0.37 | 0.04 | 0.56 | 0.16 |
| 1031481 | INTERGENIC | Sgl Promoter | 0.63 | 0.22 | 0.83 | 0.31 | 0.60 | 0.18 |
| 1034799 | INTERGENIC | Sgl Promoter | 2.01 | 0.82 | 1.54 | 0.75 | 1.96 | 0.83 |
| 1036826 | INTERGENIC | Dbl Promoter | 3.61 | 0.98 | 2.50 | 0.96 | 2.94 | 0.96 |
| 1039832 | INTERGENIC | Sgl Promoter | 1.76 | 0.75 | 1.80 | 0.83 | 1.61 | 0.70 |
| 1041670 | INTERGENIC | Non Promoter | #N/A | #N/A | #N/A | #N/A | #N/A | #N/A |
| 1043183 | INTERGENIC | Dbl Promoter | #N/A | #N/A | 0.66 | 0.20 | #N/A | #N/A |
| 1044884 | INTERGENIC | Sgl Promoter | 1.66 | 0.71 | 1.11 | 0.50 | 1.44 | 0.66 |
| 1046218 | INTERGENIC | Sgl Promoter | 0.98 | 0.40 | 0.86 | 0.34 | 0.88 | 0.36 |
| 1048649 | INTERGENIC | Sgl Promoter | 0.84 | 0.33 | 0.83 | 0.32 | 1.00 | 0.41 |
| 1049503 | INTERGENIC | Sgl Promoter | 0.84 | 0.33 | 1.25 | 0.58 | 0.97 | 0.41 |
| 1054229 | INTERGENIC | Sgl Promoter | 1.04 | 0.44 | 0.99 | 0.42 | 1.21 | 0.55 |
| 1055537 | INTERGENIC | Sgl Promoter | 1.61 | 0.70 | 1.03 | 0.45 | 1.19 | 0.53 |
| 1058597 | INTERGENIC | Sgl Promoter | 0.89 | 0.36 | 0.97 | 0.41 | 1.01 | 0.43 |
| 1059523 | INTERGENIC | Sgl Promoter | 2.44 | 0.90 | 1.44 | 0.69 | 1.55 | 0.69 |
| 1060433 | INTERGENIC | Non Promoter | #N/A | #N/A | 0.91 | 0.37 | 0.76 | 0.28 |
| 1061556 | INTERGENIC | Dbl Promoter | 0.48 | 0.13 | 0.60 | 0.15 | 0.46 | 0.10 |
| 1065035 | INTERGENIC | Sgl Promoter | 1.26 | 0.55 | 1.08 | 0.48 | 1.23 | 0.56 |
| 1066831 | INTERGENIC | Sgl Promoter | 1.18 | 0.51 | 1.10 | 0.49 | 1.05 | 0.46 |
| 1069613 | INTERGENIC | Non Promoter | 0.68 | 0.24 | 0.63 | 0.18 | 0.84 | 0.33 |
| 1071009 | INTERGENIC | Sgl Promoter | 2.09 | 0.83 | 1.13 | 0.51 | 1.38 | 0.63 |
| 1071785 | INTERGENIC | Sgl Promoter | 1.76 | 0.75 | 1.23 | 0.58 | 1.64 | 0.74 |
| 1074205 | INTERGENIC | Dbl Promoter | 1.37 | 0.60 | 0.68 | 0.22 | 1.13 | 0.50 |
| 1078537 | INTERGENIC | Non Promoter | 1.39 | 0.61 | 1.21 | 0.56 | 1.45 | 0.66 |
| 1080268 | INTERGENIC | Sgl Promoter | 2.50 | 0.91 | 1.84 | 0.86 | 2.25 | 0.89 |
| 1082710 | INTERGENIC | Sgl Promoter | 0.74 | 0.28 | 0.83 | 0.32 | 0.82 | 0.32 |
| 438644  | INTERGENIC | Sgl Promoter | #N/A | #N/A | #N/A | #N/A | #N/A | #N/A |
| 980674  | INTERGENIC | Sgl Promoter | #N/A | #N/A | #N/A | #N/A | #N/A | #N/A |



|        |            |              |      |      |      |      |      |      |
|--------|------------|--------------|------|------|------|------|------|------|
| 601381 | INTERGENIC | Non Promoter | #N/A | #N/A | 0.88 | 0.35 | 0.81 | 0.31 |
| 664811 | INTERGENIC | Non Promoter | 1.93 | 0.80 | 2.00 | 0.90 | 1.53 | 0.69 |
| 665783 | INTERGENIC | Non Promoter | 1.26 | 0.55 | 1.12 | 0.50 | 1.61 | 0.73 |
| 970277 | INTERGENIC | Sgl Promoter | 1.29 | 0.55 | 1.54 | 0.75 | 1.44 | 0.65 |
| 976412 | INTERGENIC | Sgl Promoter | #N/A | #N/A | #N/A | #N/A | #N/A | #N/A |
| 855142 | INTERGENIC | Non Promoter | #N/A | #N/A | #N/A | #N/A | #N/A | #N/A |
| 710199 | INTERGENIC | Dbl Promoter | #N/A | #N/A | #N/A | #N/A | #N/A | #N/A |
| 555952 | INTERGENIC | Sgl Promoter | #N/A | #N/A | #N/A | #N/A | #N/A | #N/A |
| 554600 | INTERGENIC | Dbl Promoter | 1.85 | 0.75 | 1.48 | 0.71 | #N/A | #N/A |
| 553622 | INTERGENIC | Non Promoter | #N/A | #N/A | 1.32 | 0.60 | #N/A | #N/A |
| 552015 | INTERGENIC | Dbl Promoter | 0.59 | 0.19 | 0.76 | 0.27 | 0.77 | 0.29 |
| 550627 | INTERGENIC | Non Promoter | #N/A | #N/A | 0.43 | 0.08 | 0.64 | 0.21 |
| 548481 | INTERGENIC | Sgl Promoter | 2.19 | 0.85 | 1.36 | 0.64 | 1.38 | 0.61 |
| 544626 | INTERGENIC | Dbl Promoter | 2.12 | 0.84 | 2.23 | 0.93 | 1.90 | 0.82 |
| 542077 | INTERGENIC | Non Promoter | #N/A | #N/A | #N/A | #N/A | #N/A | #N/A |
| 539380 | INTERGENIC | Dbl Promoter | 1.54 | 0.67 | 1.45 | 0.67 | 2.06 | 0.86 |
| 535815 | INTERGENIC | Non Promoter | #N/A | #N/A | #N/A | #N/A | #N/A | #N/A |
| 535013 | INTERGENIC | Dbl Promoter | 2.28 | 0.87 | 1.86 | 0.86 | 2.23 | 0.89 |
| 533637 | INTERGENIC | Non Promoter | #N/A | #N/A | #N/A | #N/A | #N/A | #N/A |
| 529718 | INTERGENIC | Dbl Promoter | 1.86 | 0.78 | 1.40 | 0.67 | 1.66 | 0.75 |
| 528980 | INTERGENIC | Non Promoter | 0.85 | 0.34 | 0.87 | 0.34 | 0.82 | 0.32 |
| 527542 | INTERGENIC | Dbl Promoter | 0.75 | 0.28 | 1.11 | 0.50 | 0.54 | 0.14 |
| 525805 | INTERGENIC | Non Promoter | 0.62 | 0.21 | #N/A | #N/A | 0.78 | 0.30 |
| 517647 | INTERGENIC | Dbl Promoter | 1.56 | 0.68 | 1.76 | 0.83 | 1.54 | 0.70 |
| 514507 | INTERGENIC | Sgl Promoter | 1.66 | 0.71 | 1.70 | 0.79 | 2.72 | 0.94 |
| 512309 | INTERGENIC | Non Promoter | 1.27 | 0.55 | 1.43 | 0.69 | 1.24 | 0.56 |
| 506693 | INTERGENIC | Dbl Promoter | 1.79 | 0.76 | 1.48 | 0.72 | 1.60 | 0.72 |
| 504335 | INTERGENIC | Non Promoter | #N/A | #N/A | #N/A | #N/A | #N/A | #N/A |
| 503513 | INTERGENIC | Dbl Promoter | 0.73 | 0.27 | 1.04 | 0.45 | 0.58 | 0.17 |
| 502469 | INTERGENIC | Sgl Promoter | 0.31 | 0.06 | 0.73 | 0.25 | 0.41 | 0.11 |
| 500671 | INTERGENIC | Non Promoter | 0.63 | 0.21 | 1.03 | 0.45 | 0.85 | 0.34 |
| 499661 | INTERGENIC | Sgl Promoter | 0.62 | 0.21 | 0.98 | 0.41 | 1.11 | 0.49 |
| 498092 | INTERGENIC | Sgl Promoter | 1.32 | 0.58 | 1.30 | 0.62 | 1.37 | 0.62 |
| 495502 | INTERGENIC | Sgl Promoter | 2.81 | 0.89 | 1.56 | 0.76 | 1.76 | 0.78 |
| 493539 | INTERGENIC | Dbl Promoter | 3.16 | 0.96 | 2.82 | 0.98 | 3.10 | 0.95 |
| 481423 | INTERGENIC | Non Promoter | #N/A | #N/A | #N/A | #N/A | #N/A | #N/A |
| 480530 | INTERGENIC | Sgl Promoter | 1.80 | 0.74 | 1.63 | 0.77 | 2.00 | 0.84 |
| 479220 | INTERGENIC | Dbl Promoter | 3.69 | 0.96 | 1.97 | 0.89 | 2.98 | 0.96 |
| 475988 | INTERGENIC | Sgl Promoter | 1.37 | 0.59 | 1.64 | 0.75 | 1.63 | 0.73 |
| 475113 | INTERGENIC | Sgl Promoter | 0.78 | 0.30 | 0.99 | 0.43 | 1.06 | 0.46 |
| 469921 | INTERGENIC | Non Promoter | #N/A | #N/A | #N/A | #N/A | 2.02 | 0.76 |
| 467255 | INTERGENIC | Dbl Promoter | 1.70 | 0.73 | 1.83 | 0.86 | 1.74 | 0.76 |
| 466639 | INTERGENIC | Non Promoter | 1.27 | 0.53 | 1.29 | 0.61 | 1.05 | 0.44 |
| 465957 | INTERGENIC | Sgl Promoter | 1.30 | 0.56 | #N/A | #N/A | 1.25 | 0.57 |
| 464396 | INTERGENIC | Dbl Promoter | #N/A | #N/A | 0.79 | 0.29 | 0.47 | 0.10 |
| 462476 | INTERGENIC | Sgl Promoter | 0.82 | 0.32 | 1.03 | 0.45 | 0.75 | 0.27 |
| 460774 | INTERGENIC | Non Promoter | #N/A | #N/A | #N/A | #N/A | #N/A | #N/A |
| 459958 | INTERGENIC | Sgl Promoter | #N/A | #N/A | 1.35 | 0.56 | #N/A | #N/A |
| 459068 | INTERGENIC | Dbl Promoter | 1.96 | 0.80 | 1.79 | 0.84 | 1.75 | 0.77 |
| 457113 | INTERGENIC | Non Promoter | #N/A | #N/A | 1.14 | 0.52 | #N/A | #N/A |
| 453987 | INTERGENIC | Sgl Promoter | 0.35 | 0.06 | 0.46 | 0.07 | 0.36 | 0.05 |

|        |            |              |      |      |      |      |      |      |
|--------|------------|--------------|------|------|------|------|------|------|
| 453425 | INTERGENIC | Sgl Promoter | 0.23 | 0.02 | 0.44 | 0.06 | 0.26 | 0.02 |
| 451138 | INTERGENIC | Sgl Promoter | 0.20 | 0.02 | 0.58 | 0.14 | 0.32 | 0.04 |
| 451904 | INTERGENIC | Sgl Promoter | 0.59 | 0.20 | 0.53 | 0.11 | 0.42 | 0.07 |
| 435888 | INTERGENIC | Non Promoter | #N/A | #N/A | #N/A | #N/A | #N/A | #N/A |
| 434518 | INTERGENIC | Sgl Promoter | 1.06 | 0.45 | 1.04 | 0.46 | 1.49 | 0.68 |
| 432583 | INTERGENIC | Sgl Promoter | 0.31 | 0.04 | 0.58 | 0.14 | 0.26 | 0.02 |
| 431890 | INTERGENIC | Sgl Promoter | 0.60 | 0.20 | 0.62 | 0.17 | 0.78 | 0.30 |
| 429934 | INTERGENIC | Dbl Promoter | 1.69 | 0.70 | 1.83 | 0.80 | 1.46 | 0.66 |
| 427922 | INTERGENIC | Sgl Promoter | 2.14 | 0.78 | 1.66 | 0.80 | #N/A | #N/A |
| 426228 | INTERGENIC | Dbl Promoter | 0.74 | 0.27 | 1.23 | 0.58 | 0.51 | 0.13 |
| 425246 | INTERGENIC | Sgl Promoter | #N/A | #N/A | #N/A | #N/A | #N/A | #N/A |
| 424210 | INTERGENIC | Sgl Promoter | 1.14 | 0.49 | 1.43 | 0.66 | 1.49 | 0.68 |
| 422880 | INTERGENIC | Non Promoter | #N/A | #N/A | 0.90 | 0.35 | 0.73 | 0.26 |
| 420943 | INTERGENIC | Dbl Promoter | 1.36 | 0.59 | 1.34 | 0.64 | 1.04 | 0.45 |
| 415758 | INTERGENIC | Sgl Promoter | #N/A | #N/A | 1.00 | 0.43 | #N/A | #N/A |
| 412051 | INTERGENIC | Sgl Promoter | 1.10 | 0.47 | 1.03 | 0.45 | 1.05 | 0.46 |
| 412823 | INTERGENIC | Sgl Promoter | 0.35 | 0.06 | 0.62 | 0.17 | 0.53 | 0.14 |
| 410438 | INTERGENIC | Dbl Promoter | 1.89 | 0.78 | 1.33 | 0.63 | 1.97 | 0.80 |
| 408005 | INTERGENIC | Non Promoter | 0.39 | 0.08 | 0.38 | 0.04 | 0.45 | 0.09 |
| 406631 | INTERGENIC | Dbl Promoter | #N/A | #N/A | #N/A | #N/A | #N/A | #N/A |
| 406167 | INTERGENIC | Non Promoter | #N/A | #N/A | #N/A | #N/A | #N/A | #N/A |
| 404945 | INTERGENIC | Dbl Promoter | 0.36 | 0.07 | 0.42 | 0.05 | 0.39 | 0.06 |
| 398475 | INTERGENIC | Sgl Promoter | 0.91 | 0.37 | 1.27 | 0.60 | 1.35 | 0.61 |
| 396697 | INTERGENIC | Non Promoter | #N/A | #N/A | #N/A | #N/A | #N/A | #N/A |
| 394033 | INTERGENIC | Sgl Promoter | 1.40 | 0.61 | 1.37 | 0.66 | 1.45 | 0.66 |
| 387062 | INTERGENIC | Dbl Promoter | 2.08 | 0.84 | 1.82 | 0.85 | 2.97 | 0.96 |
| 384768 | INTERGENIC | Non Promoter | #N/A | #N/A | #N/A | #N/A | 1.08 | 0.47 |
| 383450 | INTERGENIC | Sgl Promoter | 1.40 | 0.59 | 1.99 | 0.90 | 0.77 | 0.29 |
| 377286 | INTERGENIC | Non Promoter | #N/A | #N/A | 0.86 | 0.34 | 0.68 | 0.23 |
| 375497 | INTERGENIC | Sgl Promoter | 1.76 | 0.74 | 0.97 | 0.41 | 0.66 | 0.22 |
| 373788 | INTERGENIC | Sgl Promoter | 1.23 | 0.53 | 0.76 | 0.27 | 1.21 | 0.53 |
| 370973 | INTERGENIC | Dbl Promoter | 1.82 | 0.75 | 1.34 | 0.64 | 1.12 | 0.50 |
| 369834 | INTERGENIC | Sgl Promoter | #N/A | #N/A | 0.95 | 0.39 | 0.58 | 0.17 |
| 366922 | INTERGENIC | Sgl Promoter | 1.75 | 0.74 | 1.34 | 0.62 | 1.27 | 0.57 |
| 364947 | INTERGENIC | Dbl Promoter | 2.01 | 0.81 | 2.03 | 0.90 | 1.74 | 0.76 |
| 364381 | INTERGENIC | Sgl Promoter | 1.09 | 0.47 | 1.22 | 0.57 | 1.23 | 0.55 |
| 361867 | INTERGENIC | Sgl Promoter | #N/A | #N/A | 1.26 | 0.60 | 1.43 | 0.66 |
| 359998 | INTERGENIC | Sgl Promoter | 2.01 | 0.79 | 1.80 | 0.83 | 1.65 | 0.73 |
| 357995 | INTERGENIC | Non Promoter | #N/A | #N/A | #N/A | #N/A | #N/A | #N/A |
| 355695 | INTERGENIC | Dbl Promoter | 1.19 | 0.51 | 2.11 | 0.90 | 1.26 | 0.57 |
| 352858 | INTERGENIC | Sgl Promoter | 0.94 | 0.39 | 1.26 | 0.57 | 0.85 | 0.33 |
| 350189 | INTERGENIC | Non Promoter | #N/A | #N/A | 0.56 | 0.13 | 0.60 | 0.18 |
| 348441 | INTERGENIC | Dbl Promoter | 0.95 | 0.39 | 1.14 | 0.52 | 1.03 | 0.45 |
| 345556 | INTERGENIC | Sgl Promoter | 0.83 | 0.33 | 0.87 | 0.34 | 1.07 | 0.47 |
| 341067 | INTERGENIC | Non Promoter | #N/A | #N/A | #N/A | #N/A | #N/A | #N/A |
| 338847 | INTERGENIC | Dbl Promoter | #N/A | #N/A | 0.64 | 0.20 | 0.89 | 0.36 |
| 335947 | INTERGENIC | Dbl Promoter | #N/A | #N/A | 2.11 | 0.90 | 2.09 | 0.86 |
| 332099 | INTERGENIC | Non Promoter | #N/A | #N/A | #N/A | #N/A | 0.58 | 0.17 |
| 327863 | INTERGENIC | Non Promoter | #N/A | #N/A | #N/A | #N/A | #N/A | #N/A |
| 326627 | INTERGENIC | Dbl Promoter | #N/A | #N/A | 3.34 | 0.99 | 3.75 | 0.99 |
| 324410 | INTERGENIC | Non Promoter | 0.94 | 0.39 | 0.63 | 0.17 | 0.75 | 0.28 |

|        |            |              |      |      |      |      |      |      |
|--------|------------|--------------|------|------|------|------|------|------|
| 322070 | INTERGENIC | Dbl Promoter | 1.82 | 0.76 | 1.22 | 0.57 | 1.00 | 0.43 |
| 320961 | INTERGENIC | Sgl Promoter | 1.54 | 0.63 | 1.98 | 0.90 | 1.96 | 0.81 |
| 319225 | INTERGENIC | Sgl Promoter | #N/A | #N/A | 2.66 | 0.96 | #N/A | #N/A |
| 317640 | INTERGENIC | Non Promoter | #N/A | #N/A | #N/A | #N/A | #N/A | #N/A |
| 316754 | INTERGENIC | Sgl Promoter | #N/A | #N/A | 1.19 | 0.54 | #N/A | #N/A |
| 313387 | INTERGENIC | Sgl Promoter | 1.24 | 0.53 | #N/A | #N/A | 1.35 | 0.62 |
| 310209 | INTERGENIC | Dbl Promoter | 0.48 | 0.14 | 0.80 | 0.30 | 0.71 | 0.25 |
| 308827 | INTERGENIC | Sgl Promoter | 2.05 | 0.82 | 1.35 | 0.64 | 1.75 | 0.78 |
| 306532 | INTERGENIC | Non Promoter | 0.35 | 0.06 | 0.50 | 0.09 | 0.71 | 0.25 |
| 304386 | INTERGENIC | Sgl Promoter | 0.48 | 0.13 | 0.74 | 0.26 | 0.86 | 0.35 |
| 303120 | INTERGENIC | Sgl Promoter | 0.36 | 0.06 | 0.50 | 0.10 | 0.49 | 0.11 |
| 301715 | INTERGENIC | Dbl Promoter | 1.29 | 0.56 | 1.17 | 0.54 | 1.17 | 0.52 |
| 299887 | INTERGENIC | Sgl Promoter | 0.86 | 0.34 | 0.76 | 0.27 | 0.87 | 0.35 |
| 298570 | INTERGENIC | Non Promoter | 0.47 | 0.12 | 0.52 | 0.11 | 0.53 | 0.14 |
| 297552 | INTERGENIC | Sgl Promoter | 0.40 | 0.09 | 0.65 | 0.19 | 0.34 | 0.04 |
| 292816 | INTERGENIC | Sgl Promoter | 1.62 | 0.68 | 1.50 | 0.67 | 1.36 | 0.63 |
| 291365 | INTERGENIC | Sgl Promoter | 1.82 | 0.77 | 1.07 | 0.48 | 1.56 | 0.71 |
| 289668 | INTERGENIC | Sgl Promoter | #N/A | #N/A | 1.54 | 0.73 | 2.23 | 0.88 |
| 287513 | INTERGENIC | Sgl Promoter | 0.62 | 0.21 | 0.88 | 0.35 | 0.50 | 0.12 |
| 283463 | INTERGENIC | Sgl Promoter | #N/A | #N/A | #N/A | #N/A | #N/A | #N/A |
| 280479 | INTERGENIC | Dbl Promoter | 0.88 | 0.35 | 1.03 | 0.45 | 0.78 | 0.30 |
| 278394 | INTERGENIC | Sgl Promoter | 1.03 | 0.43 | 0.92 | 0.38 | 1.27 | 0.58 |
| 276161 | INTERGENIC | Non Promoter | #N/A | #N/A | #N/A | #N/A | #N/A | #N/A |
| 273254 | INTERGENIC | Dbl Promoter | 1.34 | 0.58 | 1.38 | 0.66 | 1.45 | 0.65 |
| 272293 | INTERGENIC | Non Promoter | #N/A | #N/A | #N/A | #N/A | #N/A | #N/A |
| 271309 | INTERGENIC | Sgl Promoter | 1.10 | 0.47 | 1.00 | 0.43 | 2.05 | 0.85 |
| 268187 | INTERGENIC | Dbl Promoter | 2.31 | 0.88 | 1.93 | 0.88 | 2.56 | 0.93 |
| 266179 | INTERGENIC | Non Promoter | #N/A | #N/A | #N/A | #N/A | #N/A | #N/A |
| 265027 | INTERGENIC | Dbl Promoter | 1.43 | 0.63 | 1.08 | 0.48 | 1.44 | 0.66 |
| 261726 | INTERGENIC | Sgl Promoter | 1.12 | 0.47 | 1.20 | 0.56 | 1.17 | 0.53 |
| 259713 | INTERGENIC | Sgl Promoter | 1.71 | 0.73 | 1.50 | 0.71 | 1.37 | 0.63 |
| 257215 | INTERGENIC | Sgl Promoter | 0.80 | 0.31 | 0.79 | 0.29 | 0.69 | 0.24 |
| 255912 | INTERGENIC | Non Promoter | 0.70 | 0.26 | 0.82 | 0.31 | 0.73 | 0.26 |
| 254813 | INTERGENIC | Dbl Promoter | 2.23 | 0.86 | 1.72 | 0.82 | 2.44 | 0.90 |
| 252033 | INTERGENIC | Sgl Promoter | 1.83 | 0.77 | 1.99 | 0.83 | 1.71 | 0.72 |
| 250906 | INTERGENIC | Non Promoter | 0.53 | 0.16 | 0.57 | 0.14 | 0.63 | 0.20 |
| 246989 | INTERGENIC | Dbl Promoter | 1.69 | 0.73 | 1.33 | 0.63 | 2.27 | 0.89 |
| 244318 | INTERGENIC | Sgl Promoter | 2.01 | 0.82 | 1.58 | 0.76 | 1.81 | 0.80 |
| 243205 | INTERGENIC | Sgl Promoter | #N/A | #N/A | 0.75 | 0.26 | 0.73 | 0.26 |
| 241917 | INTERGENIC | Sgl Promoter | 1.70 | 0.71 | 1.45 | 0.70 | 1.64 | 0.74 |
| 239349 | INTERGENIC | Sgl Promoter | 0.86 | 0.33 | 1.93 | 0.69 | #N/A | #N/A |
| 237337 | INTERGENIC | Dbl Promoter | #N/A | #N/A | 1.42 | 0.67 | 1.75 | 0.65 |
| 232592 | INTERGENIC | Non Promoter | #N/A | #N/A | #N/A | #N/A | #N/A | #N/A |
| 231216 | INTERGENIC | Dbl Promoter | #N/A | #N/A | 1.47 | 0.71 | 1.24 | 0.53 |
| 229038 | INTERGENIC | Non Promoter | 0.48 | 0.13 | #N/A | #N/A | 0.63 | 0.20 |
| 228313 | INTERGENIC | Dbl Promoter | 0.90 | 0.37 | 0.80 | 0.30 | 0.90 | 0.37 |
| 226168 | INTERGENIC | Sgl Promoter | 1.32 | 0.57 | 1.49 | 0.71 | 1.15 | 0.50 |
| 224352 | INTERGENIC | Non Promoter | #N/A | #N/A | 0.80 | 0.30 | #N/A | #N/A |
| 223142 | INTERGENIC | Dbl Promoter | 1.80 | 0.76 | 1.98 | 0.89 | 2.17 | 0.87 |
| 220166 | INTERGENIC | Non Promoter | #N/A | #N/A | #N/A | #N/A | #N/A | #N/A |
| 218648 | INTERGENIC | Dbl Promoter | #N/A | #N/A | 1.27 | 0.59 | 2.61 | 0.94 |

|        |            |              |      |      |      |      |      |      |
|--------|------------|--------------|------|------|------|------|------|------|
| 214986 | INTERGENIC | Sgl Promoter | 0.22 | 0.02 | 0.33 | 0.02 | 0.26 | 0.02 |
| 213041 | INTERGENIC | Non Promoter | #N/A | #N/A | #N/A | #N/A | #N/A | #N/A |
| 210191 | INTERGENIC | Sgl Promoter | 0.44 | 0.11 | 0.40 | 0.05 | 0.53 | 0.14 |
| 208156 | INTERGENIC | Sgl Promoter | 1.26 | 0.54 | 0.75 | 0.26 | 1.47 | 0.65 |
| 203305 | INTERGENIC | Sgl Promoter | 0.90 | 0.36 | 0.85 | 0.33 | 1.02 | 0.44 |
| 199494 | INTERGENIC | Non Promoter | #N/A | #N/A | #N/A | #N/A | #N/A | #N/A |
| 199094 | INTERGENIC | Dbl Promoter | 1.40 | 0.61 | 1.31 | 0.63 | 1.31 | 0.60 |
| 195949 | INTERGENIC | Non Promoter | 1.11 | 0.47 | 1.17 | 0.54 | 1.25 | 0.56 |
| 194511 | INTERGENIC | Non Promoter | 0.86 | 0.34 | 1.46 | 0.70 | 0.77 | 0.29 |
| 193647 | INTERGENIC | Sgl Promoter | 0.63 | 0.22 | 0.94 | 0.39 | 0.91 | 0.38 |
| 189153 | INTERGENIC | Dbl Promoter | #N/A | #N/A | 0.91 | 0.37 | 0.75 | 0.28 |
| 185316 | INTERGENIC | Sgl Promoter | 0.59 | 0.20 | 0.63 | 0.18 | 0.78 | 0.29 |
| 183596 | INTERGENIC | Sgl Promoter | 1.86 | 0.76 | 1.53 | 0.69 | 1.61 | 0.73 |
| 182654 | INTERGENIC | Non Promoter | #N/A | #N/A | 0.55 | 0.21 | #N/A | #N/A |
| 181402 | INTERGENIC | Sgl Promoter | #N/A | #N/A | 0.90 | 0.37 | 1.53 | 0.65 |
| 179276 | INTERGENIC | Sgl Promoter | 2.79 | 0.90 | 1.80 | 0.85 | 2.64 | 0.94 |
| 176222 | INTERGENIC | Sgl Promoter | 2.19 | 0.81 | 1.37 | 0.67 | 2.08 | 0.86 |
| 175042 | INTERGENIC | Dbl Promoter | 1.12 | 0.48 | #N/A | #N/A | 1.18 | 0.48 |
| 173151 | INTERGENIC | Dbl Promoter | 0.79 | 0.29 | #N/A | #N/A | 0.64 | 0.21 |
| 172032 | INTERGENIC | Non Promoter | #N/A | #N/A | #N/A | #N/A | #N/A | #N/A |
| 171483 | INTERGENIC | Dbl Promoter | 0.59 | 0.19 | 0.47 | 0.08 | 0.66 | 0.22 |
| 169769 | INTERGENIC | Sgl Promoter | 0.83 | 0.33 | 0.77 | 0.28 | 0.76 | 0.28 |
| 168087 | INTERGENIC | Non Promoter | 0.33 | 0.07 | 0.44 | 0.06 | 0.55 | 0.15 |
| 166255 | INTERGENIC | Sgl Promoter | 1.80 | 0.76 | 1.63 | 0.78 | 1.71 | 0.75 |
| 163921 | INTERGENIC | Sgl Promoter | 1.22 | 0.53 | 1.60 | 0.77 | 1.50 | 0.69 |
| 162631 | INTERGENIC | Non Promoter | #N/A | #N/A | #N/A | #N/A | #N/A | #N/A |
| 159908 | INTERGENIC | Sgl Promoter | 1.48 | 0.64 | 1.66 | 0.77 | 1.66 | 0.72 |
| 157841 | INTERGENIC | Dbl Promoter | #N/A | #N/A | 1.29 | 0.62 | #N/A | #N/A |
| 156489 | INTERGENIC | Sgl Promoter | 1.19 | 0.51 | 1.23 | 0.58 | 1.42 | 0.64 |
| 154289 | INTERGENIC | Non Promoter | 0.57 | 0.18 | 1.02 | 0.44 | 1.42 | 0.64 |
| 153494 | INTERGENIC | Dbl Promoter | #N/A | #N/A | #N/A | #N/A | #N/A | #N/A |
| 151514 | INTERGENIC | Non Promoter | #N/A | #N/A | 0.44 | 0.07 | #N/A | #N/A |
| 150613 | INTERGENIC | Dbl Promoter | 2.35 | 0.89 | 2.20 | 0.93 | 2.17 | 0.87 |
| 148568 | INTERGENIC | Non Promoter | #N/A | #N/A | #N/A | #N/A | 0.72 | 0.26 |
| 147415 | INTERGENIC | Sgl Promoter | 2.72 | 0.92 | 1.81 | 0.85 | 2.22 | 0.88 |
| 143820 | INTERGENIC | Dbl Promoter | 1.42 | 0.62 | 1.55 | 0.75 | 2.48 | 0.92 |
| 139619 | INTERGENIC | Non Promoter | #N/A | #N/A | #N/A | #N/A | #N/A | #N/A |
| 138697 | INTERGENIC | Sgl Promoter | 2.40 | 0.87 | 1.53 | 0.75 | 1.44 | 0.66 |
| 136749 | INTERGENIC | Sgl Promoter | 1.23 | 0.53 | 1.05 | 0.46 | 0.87 | 0.35 |
| 135789 | INTERGENIC | Sgl Promoter | #N/A | #N/A | 0.44 | 0.07 | 0.38 | 0.07 |
| 133042 | INTERGENIC | Sgl Promoter | 0.41 | 0.09 | 0.46 | 0.07 | 0.29 | 0.03 |
| 128631 | INTERGENIC | Sgl Promoter | 2.63 | 0.92 | 2.28 | 0.94 | 2.21 | 0.88 |
| 126738 | INTERGENIC | Non Promoter | #N/A | #N/A | 0.73 | 0.27 | 0.40 | 0.08 |
| 126006 | INTERGENIC | Sgl Promoter | 1.42 | 0.62 | 1.44 | 0.70 | 1.50 | 0.66 |
| 121767 | INTERGENIC | Dbl Promoter | 1.64 | 0.71 | 2.08 | 0.92 | 1.70 | 0.71 |
| 120163 | INTERGENIC | Non Promoter | #N/A | #N/A | #N/A | #N/A | #N/A | #N/A |
| 118382 | INTERGENIC | Sgl Promoter | 2.32 | 0.88 | 1.47 | 0.71 | 2.37 | 0.90 |
| 117067 | INTERGENIC | Sgl Promoter | 2.35 | 0.85 | 1.89 | 0.87 | 1.94 | 0.83 |
| 115312 | INTERGENIC | Sgl Promoter | 0.79 | 0.31 | 1.03 | 0.46 | 0.73 | 0.26 |
| 108652 | INTERGENIC | Sgl Promoter | 0.47 | 0.13 | 0.85 | 0.33 | 0.47 | 0.10 |
| 107275 | INTERGENIC | Sgl Promoter | 0.62 | 0.20 | 0.64 | 0.19 | 0.71 | 0.25 |

|        |            |              |      |      |      |      |      |      |
|--------|------------|--------------|------|------|------|------|------|------|
| 106172 | INTERGENIC | Dbl Promoter | 0.98 | 0.40 | 1.01 | 0.44 | 0.89 | 0.37 |
| 104946 | INTERGENIC | Non Promoter | 1.82 | 0.76 | 1.38 | 0.66 | 1.37 | 0.63 |
| 103232 | INTERGENIC | Dbl Promoter | 1.99 | 0.80 | 1.84 | 0.85 | 1.68 | 0.75 |
| 101608 | INTERGENIC | Non Promoter | #N/A | #N/A | 0.43 | 0.06 | 0.47 | 0.11 |
| 100474 | INTERGENIC | Non Promoter | 1.27 | 0.55 | 1.10 | 0.50 | 1.34 | 0.57 |
| 96496  | INTERGENIC | Sgl Promoter | #N/A | #N/A | 1.28 | 0.57 | #N/A | #N/A |
| 95372  | INTERGENIC | Sgl Promoter | #N/A | #N/A | #N/A | #N/A | #N/A | #N/A |
| 90622  | INTERGENIC | Non Promoter | #N/A | #N/A | #N/A | #N/A | #N/A | #N/A |
| 88517  | INTERGENIC | Dbl Promoter | 2.68 | 0.92 | 2.49 | 0.96 | 2.91 | 0.96 |
| 87014  | INTERGENIC | Non Promoter | #N/A | #N/A | #N/A | #N/A | #N/A | #N/A |
| 85586  | INTERGENIC | Dbl Promoter | 2.01 | 0.81 | 1.64 | 0.79 | 1.72 | 0.76 |
| 84509  | INTERGENIC | Sgl Promoter | 1.88 | 0.79 | 1.78 | 0.84 | #N/A | #N/A |
| 82625  | INTERGENIC | Sgl Promoter | 1.03 | 0.43 | 1.17 | 0.54 | 1.37 | 0.63 |
| 79711  | INTERGENIC | Sgl Promoter | 1.35 | 0.59 | 1.28 | 0.61 | 1.34 | 0.61 |
| 76669  | INTERGENIC | Sgl Promoter | 0.69 | 0.25 | 0.63 | 0.19 | 0.88 | 0.36 |
| 74309  | INTERGENIC | Non Promoter | 0.47 | 0.12 | 0.65 | 0.19 | 0.78 | 0.29 |
| 73363  | INTERGENIC | Sgl Promoter | 2.24 | 0.86 | 2.08 | 0.91 | 2.22 | 0.89 |
| 71063  | INTERGENIC | Non Promoter | #N/A | #N/A | #N/A | #N/A | #N/A | #N/A |
| 69485  | INTERGENIC | Sgl Promoter | 2.43 | 0.90 | 2.02 | 0.90 | 2.59 | 0.93 |
| 67725  | INTERGENIC | Dbl Promoter | 1.24 | 0.54 | 0.94 | 0.39 | 1.05 | 0.46 |
| 64977  | INTERGENIC | Non Promoter | 1.14 | 0.49 | 0.84 | 0.31 | 0.95 | 0.40 |
| 55657  | INTERGENIC | Dbl Promoter | 1.02 | 0.43 | 1.11 | 0.50 | 1.16 | 0.52 |
| 53498  | INTERGENIC | Sgl Promoter | #N/A | #N/A | 1.04 | 0.45 | 1.35 | 0.62 |
| 51244  | INTERGENIC | Non Promoter | #N/A | #N/A | 0.32 | 0.02 | 0.51 | 0.13 |
| 48996  | INTERGENIC | Non Promoter | 1.29 | 0.54 | 1.53 | 0.73 | 1.49 | 0.66 |
| 47336  | INTERGENIC | Dbl Promoter | 1.53 | 0.66 | 1.96 | 0.80 | 1.34 | 0.60 |
| 44551  | INTERGENIC | Sgl Promoter | 1.83 | 0.75 | 1.39 | 0.64 | #N/A | #N/A |
| 43283  | INTERGENIC | Non Promoter | #N/A | #N/A | 0.99 | 0.42 | #N/A | #N/A |
| 41043  | INTERGENIC | Sgl Promoter | 0.29 | 0.04 | 0.43 | 0.06 | 0.35 | 0.05 |
| 39121  | INTERGENIC | Sgl Promoter | 2.96 | 0.95 | #N/A | #N/A | 3.36 | 0.98 |
| 38169  | INTERGENIC | Sgl Promoter | #N/A | #N/A | 0.71 | 0.24 | 1.18 | 0.53 |
| 35236  | INTERGENIC | Sgl Promoter | 3.01 | 0.95 | 1.66 | 0.78 | 1.81 | 0.79 |
| 33013  | INTERGENIC | Sgl Promoter | 3.39 | 0.95 | 3.19 | 0.99 | 4.12 | 0.99 |
| 30341  | INTERGENIC | Sgl Promoter | 1.32 | 0.57 | 1.37 | 0.66 | #N/A | #N/A |
| 26611  | INTERGENIC | Non Promoter | 1.24 | 0.54 | 2.43 | 0.96 | 1.24 | 0.56 |
| 25087  | INTERGENIC | Sgl Promoter | 0.54 | 0.17 | 1.03 | 0.42 | 0.79 | 0.30 |
| 21651  | INTERGENIC | Sgl Promoter | 0.59 | 0.20 | 0.56 | 0.13 | 0.52 | 0.14 |
| 22938  | INTERGENIC | Sgl Promoter | 0.58 | 0.19 | 0.81 | 0.30 | 0.59 | 0.18 |
| 17948  | INTERGENIC | Dbl Promoter | 1.40 | 0.61 | 0.85 | 0.33 | 1.14 | 0.48 |
| 15053  | INTERGENIC | Sgl Promoter | 3.66 | 0.98 | 2.52 | 0.97 | 3.25 | 0.98 |
| 13228  | INTERGENIC | Non Promoter | 1.30 | 0.57 | 1.17 | 0.54 | 1.35 | 0.62 |
| 11887  | INTERGENIC | Dbl Promoter | 2.14 | 0.85 | 1.82 | 0.85 | 1.88 | 0.81 |
| 9557   | INTERGENIC | Sgl Promoter | 0.71 | 0.26 | 0.82 | 0.31 | 0.80 | 0.31 |
| 6970   | INTERGENIC | Sgl Promoter | 0.55 | 0.17 | 0.57 | 0.14 | 0.64 | 0.21 |
| 7933   | INTERGENIC | Sgl Promoter | 0.46 | 0.12 | 0.59 | 0.15 | 0.61 | 0.19 |
| 56169  | INTERGENIC | Dbl Promoter | 0.55 | 0.17 | 0.60 | 0.16 | 0.74 | 0.28 |
| 444574 | INTERGENIC | Dbl Promoter | 1.78 | 0.73 | 1.28 | 0.60 | 1.26 | 0.57 |
| 63279  | INTERGENIC | Dbl Promoter | 2.39 | 0.87 | 1.51 | 0.67 | 1.87 | 0.81 |
| 211576 | INTERGENIC | Sgl Promoter | 1.44 | 0.63 | 1.06 | 0.46 | 1.08 | 0.48 |
| 212157 | INTERGENIC | Sgl Promoter | #N/A | #N/A | #N/A | #N/A | #N/A | #N/A |
| 558380 | INTERGENIC | Sgl Promoter | 2.11 | 0.79 | 1.69 | 0.80 | 0.98 | 0.41 |



|        |            |              |      |      |      |      |      |      |
|--------|------------|--------------|------|------|------|------|------|------|
| 560193 | INTERGENIC | Non Promoter | #N/A | #N/A | 0.97 | 0.40 | #N/A | #N/A |
| 564002 | INTERGENIC | Sgl Promoter | #N/A | #N/A | 1.06 | 0.46 | #N/A | #N/A |
| 565782 | INTERGENIC | Sgl Promoter | 1.45 | 0.63 | 1.34 | 0.65 | 1.30 | 0.59 |
| 567264 | INTERGENIC | Sgl Promoter | 0.73 | 0.28 | 0.95 | 0.39 | 0.71 | 0.25 |
| 569331 | INTERGENIC | Sgl Promoter | 1.22 | 0.52 | 1.12 | 0.51 | 1.23 | 0.55 |
| 571840 | INTERGENIC | Dbl Promoter | 0.73 | 0.27 | 0.88 | 0.35 | 0.96 | 0.41 |
| 577580 | INTERGENIC | Non Promoter | #N/A | #N/A | #N/A | #N/A | #N/A | #N/A |
| 584304 | INTERGENIC | Dbl Promoter | 1.50 | 0.65 | 1.50 | 0.73 | 2.03 | 0.85 |
| 586382 | INTERGENIC | Sgl Promoter | 0.54 | 0.16 | 1.17 | 0.54 | 0.45 | 0.09 |
| 587184 | INTERGENIC | Sgl Promoter | 0.52 | 0.15 | 0.87 | 0.35 | 0.45 | 0.09 |
| 594471 | INTERGENIC | Dbl Promoter | 2.29 | 0.88 | 2.12 | 0.92 | 2.37 | 0.91 |
| 596745 | INTERGENIC | Sgl Promoter | 1.98 | 0.80 | 1.57 | 0.76 | 1.33 | 0.61 |
| 599865 | INTERGENIC | Sgl Promoter | #N/A | #N/A | 0.80 | 0.29 | 0.44 | 0.12 |
| 603906 | INTERGENIC | Sgl Promoter | 0.98 | 0.40 | 0.88 | 0.35 | 0.89 | 0.37 |
| 610476 | INTERGENIC | Dbl Promoter | 3.15 | 0.96 | 1.88 | 0.86 | 2.80 | 0.95 |
| 624464 | INTERGENIC | Non Promoter | 0.42 | 0.11 | 0.37 | 0.04 | 0.49 | 0.12 |
| 627875 | INTERGENIC | Dbl Promoter | #N/A | #N/A | 1.77 | 0.84 | 1.86 | 0.80 |
| 631510 | INTERGENIC | Sgl Promoter | 2.19 | 0.85 | #N/A | #N/A | 1.54 | 0.69 |
| 634118 | INTERGENIC | Sgl Promoter | #N/A | #N/A | 0.95 | 0.40 | #N/A | #N/A |
| 637374 | INTERGENIC | Non Promoter | #N/A | #N/A | #N/A | #N/A | #N/A | #N/A |
| 639520 | INTERGENIC | Dbl Promoter | 1.39 | 0.60 | 1.35 | 0.64 | 1.26 | 0.57 |
| 648699 | INTERGENIC | Sgl Promoter | 1.65 | 0.71 | 1.57 | 0.76 | 1.69 | 0.75 |
| 654161 | INTERGENIC | Dbl Promoter | 1.14 | 0.49 | 1.22 | 0.58 | 0.97 | 0.41 |
| 656794 | INTERGENIC | Dbl Promoter | 3.36 | 0.91 | 2.40 | 0.95 | 3.26 | 0.97 |
| 657509 | INTERGENIC | Sgl Promoter | #N/A | #N/A | #N/A | #N/A | #N/A | #N/A |
| 659177 | INTERGENIC | Sgl Promoter | 2.15 | 0.83 | 1.70 | 0.81 | 1.71 | 0.76 |
| 661132 | INTERGENIC | Non Promoter | #N/A | #N/A | #N/A | #N/A | #N/A | #N/A |
| 664948 | INTERGENIC | Sgl Promoter | 1.45 | 0.63 | 1.33 | 0.64 | 1.59 | 0.71 |
| 667671 | INTERGENIC | Sgl Promoter | 2.26 | 0.87 | 2.96 | 0.96 | 2.79 | 0.95 |
| 671121 | INTERGENIC | Sgl Promoter | #N/A | #N/A | 1.46 | 0.71 | 1.37 | 0.63 |
| 672466 | INTERGENIC | Sgl Promoter | 1.15 | 0.49 | 0.87 | 0.34 | 0.94 | 0.39 |
| 673746 | INTERGENIC | Sgl Promoter | 2.30 | 0.88 | 2.23 | 0.93 | 1.73 | 0.77 |
| 674856 | INTERGENIC | Sgl Promoter | 0.56 | 0.18 | 0.43 | 0.06 | #N/A | #N/A |
| 677160 | INTERGENIC | Dbl Promoter | 3.49 | 0.98 | 2.64 | 0.96 | 3.09 | 0.96 |
| 677807 | INTERGENIC | Non Promoter | 1.38 | 0.60 | 1.12 | 0.51 | 1.63 | 0.72 |
| 678946 | INTERGENIC | Dbl Promoter | 1.12 | 0.48 | 1.66 | 0.80 | 1.44 | 0.65 |
| 679688 | INTERGENIC | Sgl Promoter | 0.45 | 0.11 | 0.55 | 0.14 | #N/A | #N/A |
| 681208 | INTERGENIC | Sgl Promoter | #N/A | #N/A | 0.80 | 0.30 | #N/A | #N/A |
| 682215 | INTERGENIC | Sgl Promoter | 2.26 | 0.83 | 1.73 | 0.81 | 2.13 | 0.86 |
| 682936 | INTERGENIC | Non Promoter | #N/A | #N/A | 0.63 | 0.18 | 1.27 | 0.58 |
| 684551 | INTERGENIC | Sgl Promoter | #N/A | #N/A | #N/A | #N/A | #N/A | #N/A |
| 685893 | INTERGENIC | Dbl Promoter | #N/A | #N/A | 1.19 | 0.54 | #N/A | #N/A |
| 688167 | INTERGENIC | Sgl Promoter | 0.76 | 0.29 | 0.93 | 0.39 | 0.84 | 0.33 |
| 691928 | INTERGENIC | Non Promoter | #N/A | #N/A | #N/A | #N/A | #N/A | #N/A |
| 692791 | INTERGENIC | Sgl Promoter | #N/A | #N/A | 0.97 | 0.41 | 1.08 | 0.47 |
| 695732 | INTERGENIC | Sgl Promoter | 0.41 | 0.09 | 0.48 | 0.09 | 0.47 | 0.10 |
| 697126 | INTERGENIC | Non Promoter | 2.09 | 0.84 | 1.72 | 0.79 | 1.29 | 0.59 |
| 700590 | INTERGENIC | Sgl Promoter | 0.39 | 0.08 | 0.39 | 0.04 | 0.39 | 0.06 |
| 702110 | INTERGENIC | Non Promoter | #N/A | #N/A | #N/A | #N/A | #N/A | #N/A |
| 704221 | INTERGENIC | Sgl Promoter | #N/A | #N/A | 1.45 | 0.69 | 1.95 | 0.69 |
| 704850 | INTERGENIC | Dbl Promoter | 2.08 | 0.79 | 1.74 | 0.82 | 1.93 | 0.80 |

|        |            |              |      |      |      |      |      |      |
|--------|------------|--------------|------|------|------|------|------|------|
| 706968 | INTERGENIC | Sgl Promoter | 2.26 | 0.87 | 2.16 | 0.93 | 2.37 | 0.91 |
| 708493 | INTERGENIC | Non Promoter | #N/A | #N/A | #N/A | #N/A | #N/A | #N/A |
| 710097 | INTERGENIC | Dbl Promoter | 2.97 | 0.95 | 2.41 | 0.96 | 3.28 | 0.98 |
| 711350 | INTERGENIC | Sgl Promoter | #N/A | #N/A | #N/A | #N/A | #N/A | #N/A |
| 713271 | INTERGENIC | Dbl Promoter | 4.18 | 0.99 | 3.00 | 0.98 | 4.54 | 1.00 |
| 716153 | INTERGENIC | Non Promoter | #N/A | #N/A | #N/A | #N/A | #N/A | #N/A |
| 720634 | INTERGENIC | Dbl Promoter | #N/A | #N/A | 0.91 | 0.37 | 1.22 | 0.55 |
| 721034 | INTERGENIC | Non Promoter | #N/A | #N/A | #N/A | #N/A | #N/A | #N/A |
| 724839 | INTERGENIC | Sgl Promoter | #N/A | #N/A | 1.43 | 0.66 | 0.87 | 0.35 |
| 725391 | INTERGENIC | Dbl Promoter | 3.68 | 0.98 | 1.83 | 0.86 | 2.58 | 0.93 |
| 729754 | INTERGENIC | Sgl Promoter | #N/A | #N/A | 1.22 | 0.57 | #N/A | #N/A |
| 730489 | INTERGENIC | Sgl Promoter | #N/A | #N/A | 1.39 | 0.66 | 1.04 | 0.45 |
| 731221 | INTERGENIC | Non Promoter | #N/A | #N/A | #N/A | #N/A | #N/A | #N/A |
| 733620 | INTERGENIC | Non Promoter | 0.27 | 0.04 | 0.59 | 0.16 | 0.59 | 0.18 |
| 736981 | INTERGENIC | Sgl Promoter | 2.00 | 0.81 | 1.30 | 0.62 | 2.06 | 0.86 |
| 740058 | INTERGENIC | Dbl Promoter | 1.66 | 0.71 | #N/A | #N/A | 1.53 | 0.67 |
| 742451 | INTERGENIC | Dbl Promoter | 1.66 | 0.72 | 1.39 | 0.67 | 2.32 | 0.83 |
| 744281 | INTERGENIC | Sgl Promoter | 0.45 | 0.12 | 0.58 | 0.15 | 0.70 | 0.25 |
| 745825 | INTERGENIC | Non Promoter | #N/A | #N/A | #N/A | #N/A | #N/A | #N/A |
| 747303 | INTERGENIC | Dbl Promoter | 1.69 | 0.72 | 1.46 | 0.71 | 1.87 | 0.81 |
| 749253 | INTERGENIC | Non Promoter | #N/A | #N/A | #N/A | #N/A | #N/A | #N/A |
| 752254 | INTERGENIC | Dbl Promoter | 0.78 | 0.29 | 0.93 | 0.38 | 1.09 | 0.48 |
| 753298 | INTERGENIC | Sgl Promoter | 0.78 | 0.30 | 1.24 | 0.59 | 0.76 | 0.28 |
| 754874 | INTERGENIC | Sgl Promoter | 1.18 | 0.51 | 1.22 | 0.57 | 1.18 | 0.53 |
| 758645 | INTERGENIC | Sgl Promoter | #N/A | #N/A | 1.28 | 0.61 | 0.89 | 0.37 |
| 760022 | INTERGENIC | Sgl Promoter | 1.49 | 0.65 | 1.22 | 0.58 | 1.79 | 0.79 |
| 767749 | INTERGENIC | Sgl Promoter | 1.14 | 0.49 | 1.20 | 0.56 | 1.56 | 0.70 |
| 769204 | INTERGENIC | Sgl Promoter | #N/A | #N/A | #N/A | #N/A | #N/A | #N/A |
| 775762 | INTERGENIC | Dbl Promoter | #N/A | #N/A | 1.03 | 0.44 | 0.57 | 0.17 |
| 786136 | INTERGENIC | Non Promoter | 0.71 | 0.26 | 0.84 | 0.32 | 0.62 | 0.19 |
| 787956 | INTERGENIC | Sgl Promoter | 1.49 | 0.65 | 1.06 | 0.47 | 1.78 | 0.74 |
| 790078 | INTERGENIC | Dbl Promoter | 0.77 | 0.29 | 0.84 | 0.31 | 0.87 | 0.35 |
| 791213 | INTERGENIC | Non Promoter | #N/A | #N/A | #N/A | #N/A | #N/A | #N/A |
| 792682 | INTERGENIC | Dbl Promoter | 2.74 | 0.93 | 1.99 | 0.90 | 2.71 | 0.95 |
| 793906 | INTERGENIC | Sgl Promoter | #N/A | #N/A | #N/A | #N/A | #N/A | #N/A |
| 794960 | INTERGENIC | Dbl Promoter | 0.21 | 0.02 | 0.26 | 0.01 | 0.38 | 0.05 |
| 795973 | INTERGENIC | Non Promoter | #N/A | #N/A | #N/A | #N/A | #N/A | #N/A |
| 797552 | INTERGENIC | Dbl Promoter | 2.21 | 0.86 | 1.43 | 0.68 | 1.51 | 0.69 |
| 798046 | INTERGENIC | Sgl Promoter | 1.14 | 0.49 | 1.29 | 0.60 | 1.06 | 0.46 |
| 799229 | INTERGENIC | Sgl Promoter | #N/A | #N/A | 1.18 | 0.55 | 1.39 | 0.63 |
| 802320 | INTERGENIC | Non Promoter | 1.65 | 0.71 | 0.93 | 0.39 | 1.70 | 0.76 |
| 814386 | INTERGENIC | Dbl Promoter | #N/A | #N/A | 1.54 | 0.74 | 1.68 | 0.75 |
| 815729 | INTERGENIC | Non Promoter | #N/A | #N/A | #N/A | #N/A | #N/A | #N/A |
| 818125 | INTERGENIC | Sgl Promoter | #N/A | #N/A | 1.35 | 0.65 | #N/A | #N/A |
| 821727 | INTERGENIC | Dbl Promoter | 1.16 | 0.50 | 0.76 | 0.27 | 1.04 | 0.45 |
| 826828 | INTERGENIC | Sgl Promoter | 1.96 | 0.80 | #N/A | #N/A | 1.33 | 0.58 |
| 829024 | INTERGENIC | Dbl Promoter | 0.55 | 0.17 | 0.64 | 0.19 | 0.44 | 0.09 |
| 830994 | INTERGENIC | Sgl Promoter | #N/A | #N/A | 0.74 | 0.25 | 0.51 | 0.13 |
| 832056 | INTERGENIC | Sgl Promoter | 1.22 | 0.53 | 1.17 | 0.54 | 1.09 | 0.48 |
| 834560 | INTERGENIC | Sgl Promoter | 2.20 | 0.86 | 1.62 | 0.78 | 2.11 | 0.87 |
| 835558 | INTERGENIC | Non Promoter | 0.61 | 0.20 | 0.64 | 0.20 | 0.76 | 0.28 |

|        |            |              |      |      |      |      |      |      |
|--------|------------|--------------|------|------|------|------|------|------|
| 837904 | INTERGENIC | Sgl Promoter | 0.95 | 0.39 | 0.96 | 0.38 | 1.09 | 0.48 |
| 841261 | INTERGENIC | Dbl Promoter | 0.52 | 0.15 | 0.61 | 0.17 | 0.38 | 0.05 |
| 843257 | INTERGENIC | Sgl Promoter | 0.82 | 0.32 | 0.94 | 0.39 | 0.88 | 0.36 |
| 844407 | INTERGENIC | Sgl Promoter | 0.71 | 0.26 | 0.85 | 0.33 | 0.85 | 0.34 |
| 860374 | INTERGENIC | Sgl Promoter | 0.37 | 0.07 | 0.65 | 0.19 | 0.42 | 0.07 |
| 864444 | INTERGENIC | Non Promoter | 0.89 | 0.36 | 0.83 | 0.32 | 1.01 | 0.44 |
| 866710 | INTERGENIC | Sgl Promoter | 1.92 | 0.79 | 1.51 | 0.74 | 1.34 | 0.61 |
| 868640 | INTERGENIC | Sgl Promoter | #N/A | #N/A | #N/A | #N/A | #N/A | #N/A |
| 870698 | INTERGENIC | Dbl Promoter | 4.09 | 0.99 | 3.07 | 0.99 | 4.14 | 0.99 |
| 875363 | INTERGENIC | Sgl Promoter | 2.27 | 0.86 | 1.44 | 0.68 | 1.32 | 0.60 |
| 876277 | INTERGENIC | Non Promoter | 0.35 | 0.06 | 0.72 | 0.24 | 0.97 | 0.41 |
| 876842 | INTERGENIC | Sgl Promoter | #N/A | #N/A | #N/A | #N/A | 1.82 | 0.79 |
| 878071 | INTERGENIC | Dbl Promoter | 1.67 | 0.71 | 1.90 | 0.87 | 1.86 | 0.80 |
| 878619 | INTERGENIC | Sgl Promoter | #N/A | #N/A | #N/A | #N/A | #N/A | #N/A |
| 880291 | INTERGENIC | Non Promoter | #N/A | #N/A | #N/A | #N/A | #N/A | #N/A |
| 883823 | INTERGENIC | Dbl Promoter | 2.15 | 0.81 | 1.76 | 0.81 | 1.39 | 0.63 |
| 885791 | INTERGENIC | Sgl Promoter | 1.03 | 0.43 | 1.32 | 0.63 | 1.32 | 0.60 |
| 886519 | INTERGENIC | Non Promoter | #N/A | #N/A | #N/A | #N/A | #N/A | #N/A |
| 888038 | INTERGENIC | Sgl Promoter | #N/A | #N/A | 1.44 | 0.69 | 1.98 | 0.80 |
| 888960 | INTERGENIC | Dbl Promoter | 2.02 | 0.82 | 1.60 | 0.77 | 2.40 | 0.90 |
| 892308 | INTERGENIC | Sgl Promoter | 2.64 | 0.92 | #N/A | #N/A | 1.93 | 0.71 |
| 893792 | INTERGENIC | Non Promoter | #N/A | #N/A | #N/A | #N/A | #N/A | #N/A |
| 895956 | INTERGENIC | Dbl Promoter | #N/A | #N/A | 1.65 | 0.78 | 1.85 | 0.80 |
| 897356 | INTERGENIC | Non Promoter | #N/A | #N/A | 0.41 | 0.05 | 0.41 | 0.07 |
| 900189 | INTERGENIC | Dbl Promoter | 1.59 | 0.68 | 1.43 | 0.69 | 1.33 | 0.61 |
| 900750 | INTERGENIC | Sgl Promoter | 1.39 | 0.60 | 1.80 | 0.84 | 1.12 | 0.49 |
| 902039 | INTERGENIC | Sgl Promoter | 0.90 | 0.37 | 1.39 | 0.67 | 0.96 | 0.41 |
| 907213 | INTERGENIC | Sgl Promoter | 3.14 | 0.96 | 1.85 | 0.83 | 2.93 | 0.96 |
| 909728 | INTERGENIC | Non Promoter | #N/A | #N/A | #N/A | #N/A | #N/A | #N/A |
| 911252 | INTERGENIC | Dbl Promoter | #N/A | #N/A | 3.04 | 0.98 | 2.23 | 0.89 |
| 911983 | INTERGENIC | Non Promoter | #N/A | #N/A | #N/A | #N/A | #N/A | #N/A |
| 912659 | INTERGENIC | Dbl Promoter | #N/A | #N/A | 2.86 | 0.91 | #N/A | #N/A |
| 917072 | INTERGENIC | Non Promoter | #N/A | #N/A | #N/A | #N/A | #N/A | #N/A |
| 919376 | INTERGENIC | Dbl Promoter | 1.41 | 0.61 | 1.54 | 0.72 | 1.15 | 0.50 |
| 922904 | INTERGENIC | Non Promoter | #N/A | #N/A | #N/A | #N/A | #N/A | #N/A |
| 924299 | INTERGENIC | Sgl Promoter | 1.25 | 0.54 | 1.03 | 0.45 | 1.57 | 0.70 |
| 929316 | INTERGENIC | Dbl Promoter | 0.50 | 0.14 | 0.67 | 0.21 | 0.58 | 0.17 |
| 930343 | INTERGENIC | Dbl Promoter | 0.64 | 0.22 | 0.84 | 0.33 | 0.61 | 0.19 |
| 933066 | INTERGENIC | Non Promoter | #N/A | #N/A | #N/A | #N/A | #N/A | #N/A |
| 938143 | INTERGENIC | Non Promoter | 1.06 | 0.45 | 1.15 | 0.52 | 1.06 | 0.47 |
| 939274 | INTERGENIC | Sgl Promoter | #N/A | #N/A | #N/A | #N/A | #N/A | #N/A |
| 939917 | INTERGENIC | Dbl Promoter | #N/A | #N/A | #N/A | #N/A | #N/A | #N/A |
| 942079 | INTERGENIC | Sgl Promoter | 0.82 | 0.32 | 1.08 | 0.49 | 1.36 | 0.62 |
| 943027 | INTERGENIC | Sgl Promoter | 0.70 | 0.25 | 0.61 | 0.16 | 0.84 | 0.34 |
| 944598 | INTERGENIC | Sgl Promoter | 0.92 | 0.38 | 1.07 | 0.48 | 1.33 | 0.61 |
| 572264 | INTERGENIC | Dbl Promoter | #N/A | #N/A | 0.96 | 0.40 | 1.15 | 0.51 |
| 810671 | INTERGENIC | Non Promoter | #N/A | #N/A | #N/A | #N/A | #N/A | #N/A |
| 850624 | INTERGENIC | Sgl Promoter | #N/A | #N/A | 1.28 | 0.58 | #N/A | #N/A |
| 882978 | INTERGENIC | Non Promoter | 1.49 | 0.65 | 1.60 | 0.76 | 1.67 | 0.74 |
| 776664 | INTERGENIC | Dbl Promoter | #N/A | #N/A | 0.89 | 0.35 | 1.31 | 0.60 |
| 778578 | INTERGENIC | Dbl Promoter | 0.52 | 0.15 | 0.68 | 0.22 | 0.86 | 0.35 |



|        |            |              |   |      |      |      |      |      |      |
|--------|------------|--------------|---|------|------|------|------|------|------|
| 881482 | INTERGENIC | Non Promoter |   | 1.05 | 0.44 | #N/A | #N/A | 1.06 | 0.46 |
| 933893 | INTERGENIC | Non Promoter |   | 1.88 | 0.69 | 1.05 | 0.46 | 2.45 | 0.88 |
| 818074 |            |              |   | #N/A | #N/A | 3.37 | 0.80 | #N/A | #N/A |
| 755161 |            |              |   | #N/A | #N/A | 2.08 | 0.90 | 1.53 | 0.70 |
| 681817 | SNRNA      | Sgl Promoter |   | 0.40 | 0.09 | 0.37 | 0.04 | 0.33 | 0.04 |
| 877261 |            |              |   | #N/A | #N/A | #N/A | #N/A | #N/A | #N/A |
| 394296 |            |              |   | 0.29 | 0.04 | 0.36 | 0.03 | 0.59 | 0.18 |
| 394296 |            |              |   | 0.34 | 0.06 | 0.38 | 0.04 | 0.69 | 0.24 |
|        |            |              |   | #N/A | #N/A | #N/A | #N/A | #N/A | #N/A |
| 630479 |            |              |   | 1.99 | 0.81 | #N/A | #N/A | 1.91 | 0.82 |
| 459438 |            |              |   | #N/A | #N/A | 0.61 | 0.16 | 0.55 | 0.15 |
| 458463 |            |              |   | 0.66 | 0.23 | 0.63 | 0.18 | 0.62 | 0.20 |
| 82824  |            |              |   | 2.35 | 0.88 | 2.27 | 0.93 | 1.90 | 0.67 |
| 71562  |            |              |   | 0.18 | 0.02 | 0.42 | 0.06 | #N/A | #N/A |
| 1393   | MIT        |              | 0 | #N/A | #N/A | 0.87 | 0.35 | 1.08 | 0.47 |
| 1944   | MIT        |              | 0 | #N/A | #N/A | #N/A | #N/A | #N/A | #N/A |
| 2084   | MIT        |              | 0 | 0.63 | 0.21 | #N/A | #N/A | 0.70 | 0.25 |
| 3341   | MIT        |              | 0 | #N/A | #N/A | #N/A | #N/A | #N/A | #N/A |
| 3446   | MIT        |              | 0 | 0.63 | 0.22 | 0.49 | 0.09 | 0.53 | 0.14 |
| 4301   | MIT        |              | 0 | #N/A | #N/A | #N/A | #N/A | #N/A | #N/A |
| 4545   | MIT        |              | 0 | #N/A | #N/A | #N/A | #N/A | #N/A | #N/A |
| 4701   | MIT        |              | 0 | #N/A | #N/A | #N/A | #N/A | #N/A | #N/A |
| 6490   | MIT        |              | 0 | #N/A | #N/A | #N/A | #N/A | #N/A | #N/A |
| 456833 | RRNA       | Sgl Promoter |   | 1.00 | 0.42 | 0.86 | 0.34 | 0.85 | 0.34 |
| 456832 | RRNA       | Sgl Promoter |   | 0.96 | 0.40 | 0.92 | 0.38 | 0.97 | 0.41 |
| 457733 | RRNA       | Sgl Promoter |   | 1.08 | 0.46 | 0.87 | 0.35 | 1.03 | 0.45 |
| 454326 | RRNA       | Sgl Promoter |   | 1.34 | 0.59 | 0.85 | 0.33 | 1.04 | 0.45 |
| 452917 | RRNA       | Sgl Promoter |   | 0.76 | 0.29 | 0.67 | 0.21 | 0.75 | 0.28 |
| 454049 | RRNA       | Sgl Promoter |   | 1.27 | 0.55 | 0.80 | 0.30 | 0.98 | 0.42 |
| 455182 | RRNA       | Sgl Promoter |   | 1.64 | 0.71 | 1.07 | 0.47 | 1.14 | 0.51 |
| 455933 | RRNA       | Sgl Promoter |   | 0.71 | 0.26 | 0.54 | 0.12 | 0.67 | 0.23 |
| 455414 | RRNA       | Sgl Promoter |   | 1.04 | 0.44 | 0.71 | 0.24 | 0.78 | 0.30 |
| 455933 | RRNA       | Sgl Promoter |   | 0.71 | 0.26 | 0.57 | 0.14 | 0.70 | 0.24 |
| 458433 | RRNA       | Sgl Promoter |   | 0.69 | 0.25 | 0.86 | 0.34 | 0.84 | 0.34 |
| 459797 | RRNA       | Sgl Promoter |   | 0.51 | 0.15 | 0.50 | 0.09 | 0.46 | 0.09 |
| 455572 | RRNA       | Sgl Promoter |   | 0.75 | 0.28 | 0.57 | 0.14 | 0.65 | 0.21 |
| 961208 |            |              |   | #N/A | #N/A | #N/A | #N/A | #N/A | #N/A |
| 311555 |            |              |   | 0.22 | 0.02 | 0.25 | 0.01 | 0.27 | 0.03 |
| 310608 |            |              |   | 0.46 | 0.12 | 0.49 | 0.10 | 0.63 | 0.20 |
| 439000 |            |              |   | #N/A | #N/A | #N/A | #N/A | 0.18 | 0.01 |
| 781109 |            |              |   | #N/A | #N/A | #N/A | #N/A | 0.24 | 0.02 |
| 781814 |            |              |   | 1.18 | 0.51 | 1.16 | 0.54 | 0.95 | 0.39 |
| 309866 |            |              |   | #N/A | #N/A | 0.54 | 0.14 | 1.03 | 0.45 |
| 310327 |            |              |   | 0.84 | 0.33 | 1.10 | 0.50 | 1.15 | 0.50 |
| 118013 |            |              |   | 0.50 | 0.17 | 0.72 | 0.25 | 0.78 | 0.30 |
| 117709 |            |              |   | #N/A | #N/A | #N/A | #N/A | #N/A | #N/A |
| 651138 |            |              |   | 0.25 | 0.03 | 0.39 | 0.04 | 0.33 | 0.04 |
| 651761 |            |              |   | #N/A | #N/A | 0.51 | 0.10 | 0.26 | 0.02 |
| 441608 |            |              |   | 1.63 | 0.69 | 1.45 | 0.70 | 1.11 | 0.48 |
| 441637 |            |              |   | 1.81 | 0.76 | 1.70 | 0.81 | #N/A | #N/A |
| 442133 |            |              |   | 0.54 | 0.16 | 0.80 | 0.30 | 0.54 | 0.15 |

|         |       |              |      |      |      |      |      |      |
|---------|-------|--------------|------|------|------|------|------|------|
| 899707  |       | 1.36         | 0.59 | 1.26 | 0.60 | 1.18 | 0.53 |      |
| 430300  |       | 0.66         | 0.23 | #N/A | #N/A | 0.76 | 0.28 |      |
| 286545  |       | 1.98         | 0.81 | 1.55 | 0.75 | 1.55 | 0.70 |      |
| 286545  |       | 2.44         | 0.90 | 2.04 | 0.91 | 2.56 | 0.92 |      |
| 139390  | SNRNA | Sgl Promoter | #N/A | #N/A | 0.52 | 0.11 | #N/A | #N/A |
| 1403076 | SNRNA | Sgl Promoter | #N/A | #N/A | #N/A | #N/A | 0.49 | 0.11 |
| 167585  | SNRNA | Sgl Promoter | 1.25 | 0.54 | 1.41 | 0.69 | 1.85 | 0.65 |
| 177526  | SNRNA | Dbl Promoter | #N/A | #N/A | 0.63 | 0.18 | 0.44 | 0.10 |
| 139648  | SNRNA | Sgl Promoter | #N/A | #N/A | 0.55 | 0.13 | 0.30 | 0.03 |
| 663630  | SNRNA | Non Promoter | #N/A | #N/A | 0.39 | 0.05 | #N/A | #N/A |
| 142145  | SNRNA | Dbl Promoter | #N/A | #N/A | 0.57 | 0.15 | 0.52 | 0.14 |
| 899535  | SNRNA | Non Promoter | 0.65 | 0.23 | 0.84 | 0.32 | #N/A | #N/A |
| 228297  | SNRNA | Non Promoter | #N/A | #N/A | #N/A | #N/A | #N/A | #N/A |
| 424880  | SNRNA | Non Promoter | 0.49 | 0.14 | 0.70 | 0.23 | 0.54 | 0.15 |
| 559005  | SNRNA | Sgl Promoter | 0.49 | 0.14 | 0.59 | 0.16 | 0.55 | 0.16 |
| 107324  | SNRNA | Sgl Promoter | #N/A | #N/A | 1.22 | 0.57 | 0.86 | 0.35 |
| 856918  | SNRNA | Sgl Promoter | 0.48 | 0.13 | 0.35 | 0.04 | #N/A | #N/A |
| 821898  | SNRNA | Dbl Promoter | 0.34 | 0.06 | 0.39 | 0.05 | 0.34 | 0.05 |
| 545559  | SNRNA | Non Promoter | #N/A | #N/A | 0.59 | 0.15 | #N/A | #N/A |
| 541701  | SNRNA | Sgl Promoter | #N/A | #N/A | #N/A | #N/A | #N/A | #N/A |
| 609690  | SNRNA | Sgl Promoter | #N/A | #N/A | #N/A | #N/A | #N/A | #N/A |
| 259578  | SNRNA | Dbl Promoter | #N/A | #N/A | #N/A | #N/A | #N/A | #N/A |
| 718803  | SNRNA | Non Promoter | #N/A | #N/A | #N/A | #N/A | #N/A | #N/A |
| 431217  | SNRNA | Dbl Promoter | #N/A | #N/A | #N/A | #N/A | #N/A | #N/A |
| 61789   | SNRNA | Dbl Promoter | #N/A | #N/A | #N/A | #N/A | #N/A | #N/A |
| 163620  | SNRNA | Non Promoter | #N/A | #N/A | #N/A | #N/A | #N/A | #N/A |
| 794793  | SNRNA | Non Promoter | #N/A | #N/A | #N/A | #N/A | #N/A | #N/A |
| 88268   | SNRNA | Non Promoter | #N/A | #N/A | #N/A | #N/A | #N/A | #N/A |
| 795023  | SNRNA | Non Promoter | #N/A | #N/A | #N/A | #N/A | #N/A | #N/A |
| 136182  | SNRNA | Sgl Promoter | #N/A | #N/A | #N/A | #N/A | #N/A | #N/A |
| 173903  | SNRNA | Dbl Promoter | #N/A | #N/A | #N/A | #N/A | #N/A | #N/A |
| 366347  | SNRNA | Non Promoter | 1.13 | 0.48 | 0.72 | 0.24 | 0.57 | 0.17 |
| 348929  | SNRNA | Sgl Promoter | #N/A | #N/A | #N/A | #N/A | #N/A | #N/A |
| 794574  | SNRNA | Non Promoter | #N/A | #N/A | #N/A | #N/A | #N/A | #N/A |
| 409863  | SNRNA | Sgl Promoter | #N/A | #N/A | #N/A | #N/A | #N/A | #N/A |
| 366189  |       |              | #N/A | #N/A | #N/A | #N/A | #N/A | #N/A |
| 323470  | SNRNA | Non Promoter | #N/A | #N/A | 0.62 | 0.17 | #N/A | #N/A |
| 366189  |       |              | #N/A | #N/A | 0.64 | 0.18 | 0.50 | 0.12 |
| 38912   | SNRNA | Dbl Promoter | 1.01 | 0.42 | 1.01 | 0.44 | #N/A | #N/A |
| 176006  | SNRNA | Sgl Promoter | #N/A | #N/A | #N/A | #N/A | #N/A | #N/A |
| 586173  | SNRNA | Sgl Promoter | 1.03 | 0.43 | #N/A | #N/A | 1.31 | 0.59 |
| 97246   | SNRNA | Dbl Promoter | #N/A | #N/A | #N/A | #N/A | #N/A | #N/A |
| 364518  | SNRNA | Sgl Promoter | #N/A | #N/A | #N/A | #N/A | 1.10 | 0.48 |
| 366414  |       |              | 0.33 | 0.06 | 0.36 | 0.06 | 0.67 | 0.24 |
| 366708  |       |              | 0.38 | 0.07 | 0.54 | 0.12 | 0.38 | 0.06 |
| 719048  | SNRNA | Non Promoter | 0.46 | 0.12 | 0.55 | 0.13 | 0.33 | 0.04 |
| 411317  | SNRNA | Non Promoter | #N/A | #N/A | #N/A | #N/A | #N/A | #N/A |
| 939665  | SNRNA | Dbl Promoter | #N/A | #N/A | 0.61 | 0.17 | 0.35 | 0.08 |
| 939665  | SNRNA | Dbl Promoter | 0.47 | 0.13 | 0.49 | 0.09 | 0.40 | 0.07 |
| 832516  | SNRNA | Dbl Promoter | #N/A | #N/A | 0.39 | 0.05 | 0.75 | 0.28 |
| 64117   |       |              | #N/A | #N/A | #N/A | #N/A | #N/A | #N/A |



|         |      |      |      |      |      |      |
|---------|------|------|------|------|------|------|
| 138995  | #N/A | #N/A | #N/A | #N/A | #N/A | #N/A |
| 160238  | #N/A | #N/A | 1.39 | 0.67 | #N/A | #N/A |
| 209769  | #N/A | #N/A | 0.78 | 0.28 | 1.11 | 0.48 |
| 197279  | #N/A | #N/A | 1.37 | 0.54 | #N/A | #N/A |
| 196755  | 0.78 | 0.30 | #N/A | #N/A | #N/A | #N/A |
| 197637  | 0.76 | 0.29 | 0.73 | 0.25 | 0.63 | 0.20 |
|         | #N/A | #N/A | 0.73 | 0.24 | #N/A | #N/A |
| 226911  | 0.75 | 0.28 | 0.90 | 0.37 | 0.88 | 0.36 |
| 35784   | 0.84 | 0.34 | 0.93 | 0.39 | 0.91 | 0.37 |
| 220995  | #N/A | #N/A | #N/A | #N/A | #N/A | #N/A |
| 36209   | 0.98 | 0.41 | 0.93 | 0.38 | 1.03 | 0.45 |
| 31332   | 1.16 | 0.50 | 1.15 | 0.52 | 1.08 | 0.48 |
| 295407  | 0.76 | 0.29 | 0.80 | 0.30 | 0.86 | 0.35 |
| 412700  | 0.27 | 0.03 | 0.47 | 0.08 | 0.61 | 0.19 |
| 258930  | #N/A | #N/A | 1.03 | 0.45 | #N/A | #N/A |
| 643957  | #N/A | #N/A | #N/A | #N/A | #N/A | #N/A |
| 644558  | #N/A | #N/A | #N/A | #N/A | #N/A | #N/A |
| 327661  | #N/A | #N/A | 1.46 | 0.66 | 1.07 | 0.46 |
| 350707  | #N/A | #N/A | 0.93 | 0.39 | 1.02 | 0.43 |
| 113145  | 0.81 | 0.32 | 0.77 | 0.27 | 0.54 | 0.14 |
| 75253   | 2.15 | 0.84 | 1.85 | 0.85 | 1.58 | 0.71 |
| 82814   | #N/A | #N/A | #N/A | #N/A | #N/A | #N/A |
| 1422    | #N/A | #N/A | 2.19 | 0.76 | #N/A | #N/A |
| 2219    | 0.24 | 0.03 | 0.22 | 0.01 | 0.42 | 0.08 |
| 3266    | 0.19 | 0.02 | 0.21 | 0.00 | 0.44 | 0.08 |
| 3964    | 0.34 | 0.06 | 0.36 | 0.03 | 0.51 | 0.14 |
| 155261  | #N/A | #N/A | #N/A | #N/A | #N/A | #N/A |
| 246635  | 2.78 | 0.94 | 2.14 | 0.92 | 2.22 | 0.87 |
| 293003  | 0.29 | 0.04 | 0.73 | 0.25 | 0.38 | 0.05 |
| 305652  | #N/A | #N/A | 0.44 | 0.06 | #N/A | #N/A |
| 294912  | #N/A | #N/A | #N/A | #N/A | #N/A | #N/A |
| 124066  | #N/A | #N/A | 0.88 | 0.36 | 0.86 | 0.35 |
| 168579  | #N/A | #N/A | 1.19 | 0.55 | 1.32 | 0.60 |
| 290889  | #N/A | #N/A | 0.72 | 0.24 | 0.97 | 0.41 |
| 229431  | 2.18 | 0.85 | 1.89 | 0.87 | 1.34 | 0.61 |
| 221801  | #N/A | #N/A | #N/A | #N/A | #N/A | #N/A |
| 36542   | 2.65 | 0.92 | 1.27 | 0.58 | 1.71 | 0.76 |
| 44031   | #N/A | #N/A | #N/A | #N/A | #N/A | #N/A |
| 521508  | 1.15 | 0.49 | 1.48 | 0.72 | 1.27 | 0.58 |
| 804555  | 0.85 | 0.34 | 1.33 | 0.64 | 0.90 | 0.37 |
| 1490883 | 0.45 | 0.11 | 0.37 | 0.03 | #N/A | #N/A |
| 652018  | #N/A | #N/A | 1.22 | 0.57 | #N/A | #N/A |
| 881298  | 0.34 | 0.06 | 0.52 | 0.11 | 0.43 | 0.08 |
| 883907  | 1.00 | 0.42 | 1.43 | 0.70 | 1.04 | 0.46 |
| 668822  | #N/A | #N/A | #N/A | #N/A | #N/A | #N/A |
| 1096141 | 0.84 | 0.33 | 0.79 | 0.29 | 0.92 | 0.38 |
| 1353260 | #N/A | #N/A | 1.14 | 0.52 | 1.28 | 0.58 |
| 520844  | 0.69 | 0.25 | 0.65 | 0.19 | 1.06 | 0.46 |
| 992851  | #N/A | #N/A | #N/A | #N/A | #N/A | #N/A |
| 121068  | #N/A | #N/A | 1.75 | 0.83 | 1.75 | 0.78 |
| 99664   | 1.55 | 0.66 | #N/A | #N/A | 1.45 | 0.63 |

|        |      |      |      |      |      |      |
|--------|------|------|------|------|------|------|
| 135939 | 0.76 | 0.29 | 0.87 | 0.35 | 0.95 | 0.40 |
| 118551 | #N/A | #N/A | 0.98 | 0.40 | 1.13 | 0.50 |
| 229480 | 2.13 | 0.84 | 2.80 | 0.98 | 2.66 | 0.94 |
| 251001 | #N/A | #N/A | 1.23 | 0.55 | 2.26 | 0.70 |
| 342607 | 0.40 | 0.09 | 0.36 | 0.03 | 0.35 | 0.04 |
| 440457 | 0.30 | 0.05 | #N/A | #N/A | 0.47 | 0.11 |
| 449575 | 0.60 | 0.20 | 0.62 | 0.17 | 0.63 | 0.21 |
| 288060 | 1.52 | 0.65 | 1.32 | 0.63 | 1.31 | 0.60 |
| 552263 | #N/A | #N/A | #N/A | #N/A | #N/A | #N/A |
| 249330 | #N/A | #N/A | #N/A | #N/A | #N/A | #N/A |
| 564020 | #N/A | #N/A | 1.63 | 0.78 | 1.14 | 0.51 |
| 436602 | 0.67 | 0.24 | 0.99 | 0.42 | 1.29 | 0.59 |
| 353731 | 1.27 | 0.54 | 1.27 | 0.58 | 1.22 | 0.55 |
| 354846 | 1.06 | 0.45 | 0.97 | 0.41 | 1.09 | 0.48 |
| 443069 | #N/A | #N/A | 1.64 | 0.67 | 0.75 | 0.27 |
| 445136 | 0.29 | 0.04 | 0.37 | 0.04 | 0.40 | 0.06 |
| 551769 | 0.55 | 0.17 | 0.82 | 0.31 | #N/A | #N/A |
| 249751 | #N/A | #N/A | #N/A | #N/A | #N/A | #N/A |
| 569020 | #N/A | #N/A | 0.93 | 0.37 | #N/A | #N/A |
| 144816 | #N/A | #N/A | 1.39 | 0.67 | 1.07 | 0.47 |
| 100895 | 1.96 | 0.80 | 4.53 | 0.72 | 1.61 | 0.71 |
| 144517 | #N/A | #N/A | 1.41 | 0.61 | 0.92 | 0.37 |
| 223424 | 0.33 | 0.06 | 0.33 | 0.03 | 0.29 | 0.03 |
| 191841 | 1.95 | 0.80 | 0.85 | 0.33 | 0.72 | 0.26 |
| 207125 | 3.02 | 0.94 | #N/A | #N/A | #N/A | #N/A |
| 158679 | #N/A | #N/A | 1.28 | 0.60 | 1.01 | 0.41 |
| 124828 | 0.90 | 0.37 | 0.50 | 0.10 | #N/A | #N/A |
| 319339 | 0.85 | 0.34 | 0.97 | 0.41 | 1.28 | 0.58 |
| 320705 | 1.37 | 0.59 | 1.04 | 0.46 | 1.44 | 0.57 |
| 412721 | #N/A | #N/A | 0.86 | 0.34 | 0.77 | 0.29 |
| 318858 | #N/A | #N/A | #N/A | #N/A | #N/A | #N/A |
| 328222 | #N/A | #N/A | #N/A | #N/A | #N/A | #N/A |
| 205341 | #N/A | #N/A | 0.33 | 0.03 | 0.56 | 0.16 |
| 535753 | #N/A | #N/A | #N/A | #N/A | #N/A | #N/A |
| 713378 | 1.99 | 0.81 | 1.44 | 0.70 | 1.96 | 0.83 |
| 563316 | 0.28 | 0.03 | 0.37 | 0.03 | 0.44 | 0.09 |
| 566274 | 0.38 | 0.07 | 0.57 | 0.13 | 0.46 | 0.10 |
| 567404 | 1.01 | 0.42 | 1.38 | 0.67 | 0.94 | 0.39 |
| 701344 | #N/A | #N/A | #N/A | #N/A | #N/A | #N/A |
| 793553 | 1.68 | 0.71 | 1.70 | 0.81 | 1.58 | 0.71 |
| 8224   | #N/A | #N/A | #N/A | #N/A | #N/A | #N/A |
| 85533  | 0.67 | 0.24 | 0.63 | 0.19 | 0.68 | 0.24 |
| 92385  | #N/A | #N/A | #N/A | #N/A | #N/A | #N/A |
| 389845 | #N/A | #N/A | #N/A | #N/A | #N/A | #N/A |
| 464142 | #N/A | #N/A | #N/A | #N/A | #N/A | #N/A |
| 117054 | 0.61 | 0.21 | 0.72 | 0.23 | 0.98 | 0.41 |
| 133433 | #N/A | #N/A | #N/A | #N/A | #N/A | #N/A |
| 133675 | #N/A | #N/A | #N/A | #N/A | #N/A | #N/A |
| 358852 | #N/A | #N/A | #N/A | #N/A | #N/A | #N/A |
| 359069 | #N/A | #N/A | 0.93 | 0.38 | #N/A | #N/A |
| 545104 | 0.35 | 0.07 | 0.46 | 0.07 | 0.50 | 0.12 |

|         |      |      |      |      |      |      |
|---------|------|------|------|------|------|------|
| 546604  | 0.35 | 0.07 | 0.57 | 0.13 | 0.49 | 0.11 |
| 549632  | 1.00 | 0.41 | 1.44 | 0.70 | 1.06 | 0.47 |
| 359374  | 0.80 | 0.31 | 1.00 | 0.44 | 1.24 | 0.56 |
| 147105  | 0.74 | 0.28 | 0.99 | 0.42 | 1.02 | 0.43 |
| 246549  | #N/A | #N/A | 0.87 | 0.34 | 1.06 | 0.47 |
| 300725  | #N/A | #N/A | 0.94 | 0.39 | 0.67 | 0.23 |
| 336894  | #N/A | #N/A | #N/A | #N/A | #N/A | #N/A |
| 206573  | 0.78 | 0.30 | 0.78 | 0.28 | 0.81 | 0.32 |
| 207929  | 2.88 | 0.94 | 2.70 | 0.98 | 2.91 | 0.96 |
| 209285  | 0.63 | 0.21 | 0.64 | 0.18 | 0.80 | 0.31 |
| 210294  | 0.51 | 0.15 | 0.63 | 0.18 | 0.67 | 0.23 |
| 395156  | 0.35 | 0.07 | 0.44 | 0.07 | 0.38 | 0.06 |
| 426422  | 1.77 | 0.75 | 1.86 | 0.86 | 1.71 | 0.74 |
| 111838  | 1.40 | 0.61 | 1.92 | 0.84 | 1.57 | 0.69 |
| 374631  | #N/A | #N/A | #N/A | #N/A | #N/A | #N/A |
| 377566  | 1.43 | 0.62 | 1.86 | 0.86 | 1.10 | 0.49 |
| 422575  | 0.98 | 0.41 | 0.99 | 0.42 | 0.95 | 0.40 |
| 531363  | 0.42 | 0.10 | 0.56 | 0.13 | 0.79 | 0.30 |
| 537729  | #N/A | #N/A | #N/A | #N/A | #N/A | #N/A |
| 416338  | #N/A | #N/A | #N/A | #N/A | #N/A | #N/A |
| 416714  | #N/A | #N/A | #N/A | #N/A | #N/A | #N/A |
| 421984  | 1.26 | 0.55 | 1.19 | 0.55 | 1.19 | 0.50 |
| 517787  | #N/A | #N/A | #N/A | #N/A | #N/A | #N/A |
| 543458  | #N/A | #N/A | #N/A | #N/A | 1.93 | 0.66 |
| 416129  | #N/A | #N/A | #N/A | #N/A | #N/A | #N/A |
| 374329  | 0.92 | 0.37 | 2.56 | 0.79 | 1.66 | 0.73 |
| 339087  | 1.05 | 0.44 | 1.24 | 0.57 | 0.95 | 0.40 |
| 146079  | 1.50 | 0.61 | 2.39 | 0.96 | #N/A | #N/A |
| 84120   | 0.71 | 0.26 | 0.75 | 0.27 | 0.69 | 0.24 |
| 219369  | 1.25 | 0.54 | 1.09 | 0.49 | 1.45 | 0.66 |
| 313838  | 1.83 | 0.77 | 1.25 | 0.59 | 1.53 | 0.70 |
| 74523   | 1.27 | 0.55 | 1.12 | 0.51 | 0.84 | 0.34 |
| 513486  | 1.34 | 0.56 | 1.12 | 0.51 | #N/A | #N/A |
| 490057  | #N/A | #N/A | #N/A | #N/A | #N/A | #N/A |
| 490428  | 1.05 | 0.44 | 0.99 | 0.43 | 1.80 | 0.65 |
| 108971  | 0.77 | 0.30 | 0.70 | 0.23 | 0.77 | 0.28 |
| 364552  | 1.05 | 0.44 | 0.48 | 0.09 | 0.94 | 0.39 |
| 669662  | 1.44 | 0.63 | 1.24 | 0.57 | 1.03 | 0.45 |
| 1014172 | 3.13 | 0.96 | 1.96 | 0.88 | 1.98 | 0.83 |
| 688368  | #N/A | #N/A | #N/A | #N/A | #N/A | #N/A |
| 963539  | 0.94 | 0.38 | 0.69 | 0.22 | #N/A | #N/A |
| 1052627 | #N/A | #N/A | #N/A | #N/A | #N/A | #N/A |
| 599844  | #N/A | #N/A | #N/A | #N/A | #N/A | #N/A |
| 599544  | #N/A | #N/A | 0.98 | 0.42 | 1.37 | 0.62 |
| 657767  | 0.78 | 0.30 | 0.85 | 0.33 | 0.95 | 0.40 |
| 688664  | #N/A | #N/A | #N/A | #N/A | #N/A | #N/A |
| 104162  | 2.21 | 0.83 | 2.05 | 0.89 | 1.56 | 0.69 |
| 132321  | 1.38 | 0.60 | 1.20 | 0.56 | 1.48 | 0.68 |
| 362829  | #N/A | #N/A | #N/A | #N/A | #N/A | #N/A |
| 573330  | #N/A | #N/A | #N/A | #N/A | #N/A | #N/A |
| 653135  | #N/A | #N/A | 0.50 | 0.10 | 0.37 | 0.06 |

|        |      |      |      |      |      |      |
|--------|------|------|------|------|------|------|
| 379060 | 1.28 | 0.56 | 1.23 | 0.53 | 1.84 | 0.79 |
| 481546 | #N/A | #N/A | 1.42 | 0.69 | 1.50 | 0.67 |
| 290223 | #N/A | #N/A | 1.47 | 0.69 | #N/A | #N/A |
| 481807 | 1.73 | 0.72 | 2.14 | 0.87 | 0.99 | 0.42 |
| 503388 | #N/A | #N/A | 0.70 | 0.22 | #N/A | #N/A |
| 809233 | 1.98 | 0.81 | 1.68 | 0.79 | 1.74 | 0.77 |
| 837764 | 1.18 | 0.50 | 1.59 | 0.76 | 1.99 | 0.80 |
| 546712 | 0.64 | 0.24 | 0.91 | 0.37 | 0.49 | 0.11 |
| 687463 | 2.01 | 0.82 | 1.92 | 0.88 | 1.32 | 0.60 |
| 727659 | 1.68 | 0.72 | 2.61 | 0.97 | 1.85 | 0.81 |
| 300980 | #N/A | #N/A | #N/A | #N/A | #N/A | #N/A |
| 18560  | #N/A | #N/A | 0.99 | 0.43 | 0.87 | 0.34 |
| 301021 | #N/A | #N/A | 0.79 | 0.29 | #N/A | #N/A |
| 340898 | #N/A | #N/A | 1.15 | 0.51 | 1.14 | 0.51 |
| 227291 | #N/A | #N/A | #N/A | #N/A | #N/A | #N/A |
| 3986   | #N/A | #N/A | #N/A | #N/A | 1.14 | 0.51 |
| 568977 | #N/A | #N/A | #N/A | #N/A | #N/A | #N/A |
| 780182 | 0.16 | 0.01 | 0.27 | 0.02 | 0.36 | 0.05 |
| 877401 | 0.35 | 0.06 | 0.42 | 0.07 | 0.42 | 0.08 |
| 438484 | #N/A | #N/A | 0.87 | 0.34 | 0.79 | 0.30 |
| 664322 | 1.24 | 0.54 | 1.09 | 0.49 | #N/A | #N/A |
| 594817 | #N/A | #N/A | #N/A | #N/A | #N/A | #N/A |
| 664467 | #N/A | #N/A | #N/A | #N/A | #N/A | #N/A |
| 703760 | #N/A | #N/A | #N/A | #N/A | #N/A | #N/A |
| 969422 | #N/A | #N/A | #N/A | #N/A | #N/A | #N/A |
| 280925 | 1.29 | 0.56 | 1.23 | 0.57 | 1.06 | 0.47 |
| 199375 | 1.40 | 0.61 | 1.60 | 0.70 | 1.65 | 0.74 |
| 55858  | #N/A | #N/A | 0.80 | 0.30 | #N/A | #N/A |
| 436582 | #N/A | #N/A | 1.19 | 0.55 | #N/A | #N/A |
| 437255 | 0.96 | 0.40 | 0.97 | 0.41 | 1.06 | 0.47 |
| 438129 | 0.73 | 0.27 | 0.74 | 0.26 | 0.83 | 0.33 |
| 439373 | 0.49 | 0.14 | 0.50 | 0.09 | 0.58 | 0.17 |
| 440617 | 0.53 | 0.16 | 0.49 | 0.09 | 0.60 | 0.18 |
| 441861 | 0.68 | 0.24 | 0.61 | 0.16 | 0.81 | 0.31 |
| 442757 | 1.17 | 0.50 | 0.86 | 0.34 | 1.05 | 0.46 |
| 436726 | #N/A | #N/A | #N/A | #N/A | #N/A | #N/A |
| 210770 | #N/A | #N/A | 1.14 | 0.52 | 0.92 | 0.38 |
| 436244 | #N/A | #N/A | #N/A | #N/A | #N/A | #N/A |
| 626560 | #N/A | #N/A | #N/A | #N/A | #N/A | #N/A |
| 797704 | 2.53 | 0.91 | 2.04 | 0.91 | #N/A | #N/A |
| 572168 | 0.87 | 0.35 | 0.98 | 0.42 | #N/A | #N/A |
| 776793 | #N/A | #N/A | #N/A | #N/A | #N/A | #N/A |
| 850507 | #N/A | #N/A | 0.89 | 0.36 | 1.99 | 0.81 |
| 881825 | 0.87 | 0.34 | 1.46 | 0.70 | 1.93 | 0.78 |
| 776410 | #N/A | #N/A | #N/A | #N/A | #N/A | #N/A |
| 778151 | #N/A | #N/A | #N/A | #N/A | #N/A | #N/A |
| 933399 | #N/A | #N/A | #N/A | #N/A | #N/A | #N/A |
| 749014 | #N/A | #N/A | #N/A | #N/A | 1.42 | 0.65 |
| 20697  | #N/A | #N/A | #N/A | #N/A | 1.00 | 0.43 |
| 197988 | 0.69 | 0.24 | 0.85 | 0.33 | 0.49 | 0.11 |



| H3K4R | H3K4R | WT (ratio) | WT (perce | H3K14Q | H3K14Q | H3K14G | H3K14G | H3K14R | H3K14R | H4K16R |
|-------|-------|------------|-----------|--------|--------|--------|--------|--------|--------|--------|
| 0.90  | 0.34  | 0.97       | 0.36      | 1.09   | 0.40   | 0.94   | 0.39   | 0.92   | 0.37   | 0.98   |
| 0.86  | 0.31  | 0.61       | 0.19      | 0.66   | 0.19   | 0.81   | 0.31   | 0.80   | 0.30   | 0.78   |
| 0.85  | 0.29  | 0.26       | 0.04      | #N/A   | #N/A   | 0.27   | 0.03   | 0.27   | 0.02   | 0.37   |
| 0.37  | 0.04  | #N/A       | #N/A      | #N/A   | #N/A   | 0.25   | 0.02   | 0.34   | 0.04   | 0.62   |
| 0.29  | 0.02  | #N/A       | #N/A      | #N/A   | #N/A   | #N/A   | #N/A   | #N/A   | #N/A   | 0.71   |
| #N/A  | #N/A  | #N/A       | #N/A      | #N/A   | #N/A   | #N/A   | #N/A   | #N/A   | #N/A   | #N/A   |
| #N/A  | #N/A  | #N/A       | #N/A      | #N/A   | #N/A   | #N/A   | #N/A   | #N/A   | #N/A   | #N/A   |
| #N/A  | #N/A  | #N/A       | #N/A      | #N/A   | #N/A   | #N/A   | #N/A   | #N/A   | #N/A   | #N/A   |
| #N/A  | #N/A  | #N/A       | #N/A      | #N/A   | #N/A   | #N/A   | #N/A   | #N/A   | #N/A   | #N/A   |
| #N/A  | #N/A  | #N/A       | #N/A      | #N/A   | #N/A   | #N/A   | #N/A   | #N/A   | #N/A   | #N/A   |
| #N/A  | #N/A  | #N/A       | #N/A      | #N/A   | #N/A   | #N/A   | #N/A   | #N/A   | #N/A   | #N/A   |
| #N/A  | #N/A  | #N/A       | #N/A      | #N/A   | #N/A   | #N/A   | #N/A   | #N/A   | #N/A   | #N/A   |
| #N/A  | #N/A  | #N/A       | #N/A      | #N/A   | #N/A   | #N/A   | #N/A   | #N/A   | #N/A   | #N/A   |
| #N/A  | #N/A  | #N/A       | #N/A      | #N/A   | #N/A   | #N/A   | #N/A   | #N/A   | #N/A   | #N/A   |
| #N/A  | #N/A  | #N/A       | #N/A      | #N/A   | #N/A   | #N/A   | #N/A   | #N/A   | #N/A   | #N/A   |
| #N/A  | #N/A  | #N/A       | #N/A      | #N/A   | #N/A   | #N/A   | #N/A   | #N/A   | #N/A   | #N/A   |
| #N/A  | #N/A  | #N/A       | #N/A      | #N/A   | #N/A   | #N/A   | #N/A   | #N/A   | #N/A   | #N/A   |
| #N/A  | #N/A  | #N/A       | #N/A      | #N/A   | #N/A   | #N/A   | #N/A   | #N/A   | #N/A   | #N/A   |
| #N/A  | #N/A  | #N/A       | #N/A      | #N/A   | #N/A   | #N/A   | #N/A   | #N/A   | #N/A   | #N/A   |
| #N/A  | #N/A  | #N/A       | #N/A      | #N/A   | #N/A   | #N/A   | #N/A   | #N/A   | #N/A   | #N/A   |
| #N/A  | #N/A  | #N/A       | #N/A      | #N/A   | #N/A   | #N/A   | #N/A   | #N/A   | #N/A   | #N/A   |
| #N/A  | #N/A  | #N/A       | #N/A      | #N/A   | #N/A   | #N/A   | #N/A   | #N/A   | #N/A   | #N/A   |
| 1.13  | 0.48  | 1.84       | 0.69      | 1.17   | 0.43   | 1.67   | 0.69   | 1.48   | 0.64   | 0.96   |
| #N/A  | #N/A  | #N/A       | #N/A      | #N/A   | #N/A   | #N/A   | #N/A   | #N/A   | #N/A   | #N/A   |
| 0.73  | 0.22  | 0.57       | 0.18      | 0.72   | 0.22   | 0.87   | 0.34   | 0.77   | 0.29   | 0.58   |
| 0.73  | 0.22  | 0.83       | 0.29      | #N/A   | #N/A   | 0.77   | 0.29   | 0.79   | 0.30   | 0.75   |
| 1.07  | 0.44  | #N/A       | #N/A      | #N/A   | #N/A   | 0.77   | 0.28   | 0.91   | 0.36   | 0.83   |
| 0.91  | 0.34  | 0.66       | 0.22      | 0.81   | 0.27   | 0.73   | 0.26   | 0.97   | 0.40   | 0.88   |
| 0.80  | 0.26  | #N/A       | #N/A      | #N/A   | #N/A   | #N/A   | #N/A   | #N/A   | #N/A   | 0.96   |
| #N/A  | #N/A  | #N/A       | #N/A      | #N/A   | #N/A   | #N/A   | #N/A   | #N/A   | #N/A   | #N/A   |
| 0.60  | 0.15  | 0.44       | 0.11      | 0.45   | 0.09   | 0.45   | 0.10   | 0.45   | 0.09   | 0.59   |
| 1.29  | 0.57  | 1.57       | 0.60      | 1.53   | 0.59   | 1.68   | 0.74   | 1.68   | 0.72   | 1.14   |
| #N/A  | #N/A  | #N/A       | #N/A      | #N/A   | #N/A   | #N/A   | #N/A   | #N/A   | #N/A   | #N/A   |
| 1.07  | 0.44  | #N/A       | #N/A      | #N/A   | #N/A   | #N/A   | #N/A   | #N/A   | #N/A   | #N/A   |
| 0.57  | 0.17  | #N/A       | #N/A      | #N/A   | #N/A   | #N/A   | #N/A   | #N/A   | #N/A   | 0.48   |
| #N/A  | #N/A  | #N/A       | #N/A      | #N/A   | #N/A   | #N/A   | #N/A   | 1.79   | 0.75   | 1.25   |
| 1.05  | 0.42  | #N/A       | #N/A      | #N/A   | #N/A   | 0.83   | 0.33   | 0.51   | 0.13   | #N/A   |
| 0.56  | 0.12  | #N/A       | #N/A      | #N/A   | #N/A   | 0.43   | 0.09   | 0.51   | 0.13   | #N/A   |
| 2.46  | 0.69  | #N/A       | #N/A      | #N/A   | #N/A   | #N/A   | #N/A   | #N/A   | #N/A   | 1.36   |
| 1.11  | 0.45  | 1.59       | 0.60      | 1.59   | 0.61   | 1.35   | 0.60   | 1.17   | 0.50   | #N/A   |
| #N/A  | #N/A  | #N/A       | #N/A      | #N/A   | #N/A   | #N/A   | #N/A   | #N/A   | #N/A   | #N/A   |
| 2.71  | 0.83  | 2.58       | 0.87      | 2.52   | 0.85   | #N/A   | #N/A   | 2.29   | 0.85   | 1.34   |
| #N/A  | #N/A  | #N/A       | #N/A      | #N/A   | #N/A   | #N/A   | #N/A   | #N/A   | #N/A   | #N/A   |
| #N/A  | #N/A  | #N/A       | #N/A      | #N/A   | #N/A   | #N/A   | #N/A   | #N/A   | #N/A   | 0.77   |
| #N/A  | #N/A  | #N/A       | #N/A      | #N/A   | #N/A   | #N/A   | #N/A   | #N/A   | #N/A   | #N/A   |
| 0.82  | 0.28  | 1.40       | 0.55      | #N/A   | #N/A   | 0.56   | 0.15   | 0.73   | 0.26   | 1.00   |
| 1.09  | 0.46  | 1.38       | 0.53      | 1.17   | 0.44   | 1.17   | 0.51   | 1.14   | 0.48   | 0.92   |
| #N/A  | #N/A  | 2.18       | 0.78      | #N/A   | #N/A   | #N/A   | #N/A   | 1.17   | 0.51   | 1.23   |
| 1.11  | 0.47  | 0.93       | 0.34      | 1.10   | 0.39   | 1.07   | 0.46   | 1.11   | 0.47   | #N/A   |
| 1.05  | 0.43  | #N/A       | #N/A      | #N/A   | #N/A   | #N/A   | #N/A   | #N/A   | #N/A   | 1.55   |
| #N/A  | #N/A  | #N/A       | #N/A      | #N/A   | #N/A   | #N/A   | #N/A   | #N/A   | #N/A   | 1.44   |
| 0.60  | 0.15  | 0.81       | 0.29      | 1.07   | 0.37   | 0.85   | 0.33   | 0.91   | 0.36   | 0.87   |



|      |      |      |      |      |      |      |      |      |      |      |
|------|------|------|------|------|------|------|------|------|------|------|
| 1.93 | 0.81 | 1.76 | 0.66 | 1.94 | 0.73 | 1.42 | 0.63 | 1.40 | 0.61 | #N/A |
| #N/A | #N/A | #N/A | #N/A | #N/A | #N/A | #N/A | #N/A | #N/A | #N/A | #N/A |
| #N/A | #N/A | #N/A | #N/A | #N/A | #N/A | #N/A | #N/A | #N/A | #N/A | #N/A |
| 0.29 | 0.02 | 0.21 | 0.03 | 0.30 | 0.04 | 0.25 | 0.02 | 0.30 | 0.03 | 0.34 |
| #N/A | #N/A | #N/A | #N/A | #N/A | #N/A | #N/A | #N/A | 1.21 | 0.51 | 0.97 |
| #N/A | #N/A | #N/A | #N/A | #N/A | #N/A | #N/A | #N/A | #N/A | #N/A | #N/A |
| #N/A | #N/A | #N/A | #N/A | #N/A | #N/A | #N/A | #N/A | #N/A | #N/A | #N/A |
| #N/A | #N/A | #N/A | #N/A | #N/A | #N/A | #N/A | #N/A | #N/A | #N/A | #N/A |
| #N/A | #N/A | #N/A | #N/A | #N/A | #N/A | #N/A | #N/A | #N/A | #N/A | 1.07 |
| 0.79 | 0.26 | #N/A | #N/A | #N/A | #N/A | #N/A | #N/A | #N/A | #N/A | #N/A |
| 0.31 | 0.03 | 0.74 | 0.25 | #N/A | #N/A | #N/A | #N/A | 0.98 | 0.39 | 0.62 |
| 0.49 | 0.09 | 0.37 | 0.08 | #N/A | #N/A | #N/A | #N/A | 0.51 | 0.13 | 0.26 |
| #N/A | #N/A | #N/A | #N/A | #N/A | #N/A | #N/A | #N/A | 2.45 | 0.90 | 1.61 |
| 1.36 | 0.57 | 1.04 | 0.39 | #N/A | #N/A | 0.82 | 0.31 | 1.16 | 0.50 | 0.75 |
| #N/A | #N/A | #N/A | #N/A | #N/A | #N/A | #N/A | #N/A | 1.08 | 0.45 | #N/A |
| 1.09 | 0.45 | #N/A | #N/A | #N/A | #N/A | #N/A | #N/A | #N/A | #N/A | 0.69 |
| 1.33 | 0.58 | 0.77 | 0.26 | #N/A | #N/A | 0.56 | 0.15 | 0.59 | 0.18 | 0.94 |
| 0.58 | 0.13 | 0.57 | 0.17 | #N/A | #N/A | 0.32 | 0.04 | 0.51 | 0.13 | #N/A |
| #N/A | #N/A | #N/A | #N/A | #N/A | #N/A | #N/A | #N/A | #N/A | #N/A | #N/A |
| #N/A | #N/A | 2.61 | 0.87 | 1.47 | 0.53 | 1.33 | 0.59 | 2.33 | 0.85 | 1.26 |
| 0.89 | 0.34 | 1.45 | 0.56 | 1.11 | 0.42 | 1.32 | 0.58 | 1.24 | 0.53 | 1.54 |
| 0.88 | 0.31 | 1.16 | 0.45 | 0.89 | 0.30 | 0.79 | 0.30 | 0.96 | 0.39 | 1.02 |
| #N/A | #N/A | 1.14 | 0.42 | #N/A | #N/A | #N/A | #N/A | #N/A | #N/A | #N/A |
| 0.51 | 0.09 | 0.51 | 0.14 | 0.47 | 0.10 | 0.45 | 0.10 | 0.59 | 0.17 | 0.62 |
| 0.69 | 0.20 | #N/A | #N/A | #N/A | #N/A | 0.75 | 0.27 | 1.68 | 0.71 | #N/A |
| #N/A | #N/A | #N/A | #N/A | #N/A | #N/A | #N/A | #N/A | #N/A | #N/A | #N/A |
| #N/A | #N/A | #N/A | #N/A | #N/A | #N/A | #N/A | #N/A | #N/A | #N/A | 0.98 |
| 0.80 | 0.27 | 0.76 | 0.26 | #N/A | #N/A | 0.64 | 0.21 | 0.83 | 0.32 | 0.90 |
| 1.15 | 0.45 | #N/A | #N/A | #N/A | #N/A | #N/A | #N/A | #N/A | #N/A | 0.68 |
| 0.62 | 0.15 | 1.35 | 0.53 | 1.37 | 0.53 | 1.55 | 0.69 | 1.39 | 0.60 | 0.87 |
| 0.88 | 0.33 | 0.69 | 0.23 | 0.58 | 0.15 | 0.50 | 0.13 | 0.55 | 0.15 | 0.91 |
| 0.59 | 0.14 | 0.99 | 0.37 | 1.14 | 0.42 | 0.83 | 0.32 | 1.05 | 0.44 | 0.80 |
| 0.55 | 0.14 | 0.33 | 0.06 | #N/A | #N/A | 0.38 | 0.07 | 0.38 | 0.06 | 0.58 |
| 0.54 | 0.12 | #N/A | #N/A | 0.38 | 0.06 | 0.25 | 0.02 | 0.23 | 0.01 | 0.57 |
| 0.37 | 0.04 | 0.23 | 0.02 | 0.27 | 0.02 | 0.23 | 0.02 | 0.22 | 0.01 | 0.48 |
| 0.35 | 0.03 | 0.21 | 0.02 | 0.20 | 0.01 | 0.15 | 0.00 | 0.19 | 0.01 | 0.38 |
| #N/A | #N/A | #N/A | #N/A | #N/A | #N/A | #N/A | #N/A | #N/A | #N/A | #N/A |
| 0.23 | 0.02 | 0.29 | 0.04 | #N/A | #N/A | 0.27 | 0.02 | 0.19 | 0.01 | 0.52 |
| 0.31 | 0.03 | 0.26 | 0.03 | 0.18 | 0.01 | 0.15 | 0.00 | 0.28 | 0.02 | #N/A |
| 0.38 | 0.04 | 0.20 | 0.01 | 0.19 | 0.01 | 0.25 | 0.02 | 0.35 | 0.06 | 0.48 |
| 0.54 | 0.11 | 0.60 | 0.19 | 0.55 | 0.14 | 0.77 | 0.29 | 0.70 | 0.24 | 0.58 |
| 0.33 | 0.03 | 0.22 | 0.02 | #N/A | #N/A | 0.19 | 0.01 | 0.17 | 0.00 | #N/A |
| 0.66 | 0.18 | 0.46 | 0.12 | 0.49 | 0.11 | 0.47 | 0.11 | 0.53 | 0.14 | 0.71 |
| 0.35 | 0.03 | 0.21 | 0.02 | 0.27 | 0.02 | 0.26 | 0.02 | 0.24 | 0.01 | 0.43 |
| #N/A | #N/A | 0.20 | 0.02 | 0.25 | 0.02 | 0.28 | 0.03 | 0.32 | 0.04 | #N/A |
| 0.87 | 0.32 | 0.65 | 0.21 | 0.54 | 0.13 | 0.70 | 0.24 | 0.51 | 0.13 | 0.82 |
| 0.56 | 0.13 | 0.38 | 0.08 | 0.38 | 0.06 | 0.56 | 0.16 | 0.44 | 0.09 | #N/A |
| 0.35 | 0.03 | 0.21 | 0.02 | #N/A | #N/A | 0.17 | 0.00 | 0.13 | 0.00 | #N/A |
| 0.31 | 0.03 | 0.19 | 0.01 | #N/A | #N/A | 0.19 | 0.01 | 0.30 | 0.03 | 0.46 |
| 0.92 | 0.35 | #N/A | #N/A | #N/A | #N/A | #N/A | #N/A | #N/A | #N/A | #N/A |
| #N/A | #N/A | 0.22 | 0.02 | #N/A | #N/A | 0.17 | 0.01 | 0.25 | 0.01 | #N/A |

|      |      |      |      |      |      |      |      |      |      |      |
|------|------|------|------|------|------|------|------|------|------|------|
| #N/A | #N/A | 1.66 | 0.63 | 1.59 | 0.61 | 1.36 | 0.61 | 1.55 | 0.67 | 1.38 |
| 0.41 | 0.05 | 0.49 | 0.14 | 0.39 | 0.07 | 0.32 | 0.04 | 0.43 | 0.08 | 0.77 |
| 0.79 | 0.27 | 0.51 | 0.15 | 0.56 | 0.14 | 0.75 | 0.27 | 0.67 | 0.22 | 0.84 |
| 0.40 | 0.05 | 0.23 | 0.02 | 0.26 | 0.02 | 0.32 | 0.04 | 0.31 | 0.03 | 0.47 |
| #N/A | #N/A | #N/A | #N/A | #N/A | #N/A | #N/A | #N/A | #N/A | #N/A | #N/A |
| #N/A | #N/A | #N/A | #N/A | #N/A | #N/A | #N/A | #N/A | #N/A | #N/A | 0.84 |
| 0.69 | 0.21 | 0.77 | 0.27 | 1.29 | 0.50 | 0.91 | 0.36 | 1.28 | 0.55 | 0.86 |
| 0.90 | 0.33 | 0.95 | 0.35 | 1.92 | 0.73 | 0.74 | 0.27 | 1.22 | 0.51 | 1.31 |
| #N/A | #N/A | #N/A | #N/A | #N/A | #N/A | #N/A | #N/A | #N/A | #N/A | #N/A |
| 0.58 | 0.14 | #N/A | #N/A | #N/A | #N/A | #N/A | #N/A | 0.90 | 0.36 | #N/A |
| #N/A | #N/A | #N/A | #N/A | #N/A | #N/A | #N/A | #N/A | 2.57 | 0.90 | #N/A |
| 1.41 | 0.62 | 1.53 | 0.59 | 1.84 | 0.71 | 1.46 | 0.65 | 1.55 | 0.66 | 1.38 |
| 0.94 | 0.37 | 0.78 | 0.27 | 0.93 | 0.32 | 0.95 | 0.39 | 0.76 | 0.28 | #N/A |
| #N/A | #N/A | #N/A | #N/A | #N/A | #N/A | #N/A | #N/A | #N/A | #N/A | #N/A |
| 0.65 | 0.18 | 0.61 | 0.19 | 0.49 | 0.11 | 0.62 | 0.20 | 0.98 | 0.40 | 0.71 |
| 0.92 | 0.33 | #N/A | #N/A | #N/A | #N/A | #N/A | #N/A | #N/A | #N/A | 0.71 |
| 0.75 | 0.23 | 0.43 | 0.10 | #N/A | #N/A | 0.72 | 0.26 | 0.49 | 0.12 | 0.60 |
| 1.75 | 0.71 | 1.93 | 0.70 | 1.42 | 0.55 | 1.84 | 0.71 | 1.36 | 0.59 | 1.02 |
| 0.62 | 0.17 | 0.65 | 0.21 | 0.88 | 0.31 | 0.66 | 0.22 | 0.65 | 0.21 | 0.86 |
| #N/A | #N/A | #N/A | #N/A | #N/A | #N/A | #N/A | #N/A | #N/A | #N/A | #N/A |
| 0.69 | 0.20 | 0.58 | 0.18 | 0.65 | 0.18 | 0.52 | 0.13 | 0.61 | 0.19 | 0.72 |
| 0.19 | 0.01 | 0.10 | 0.00 | 0.19 | 0.01 | 0.23 | 0.02 | 0.17 | 0.00 | 0.16 |
| 1.16 | 0.50 | 1.16 | 0.44 | 1.26 | 0.48 | 0.86 | 0.34 | 1.51 | 0.64 | 1.06 |
| #N/A | #N/A | #N/A | #N/A | #N/A | #N/A | #N/A | #N/A | #N/A | #N/A | #N/A |
| #N/A | #N/A | #N/A | #N/A | #N/A | #N/A | #N/A | #N/A | #N/A | #N/A | #N/A |
| #N/A | #N/A | #N/A | #N/A | #N/A | #N/A | #N/A | #N/A | #N/A | #N/A | #N/A |
| 0.77 | 0.25 | 0.60 | 0.19 | 0.76 | 0.24 | 0.68 | 0.23 | 0.67 | 0.22 | 0.82 |
| #N/A | #N/A | #N/A | #N/A | #N/A | #N/A | #N/A | #N/A | #N/A | #N/A | #N/A |
| #N/A | #N/A | #N/A | #N/A | #N/A | #N/A | #N/A | #N/A | #N/A | #N/A | #N/A |
| 0.67 | 0.19 | #N/A | #N/A | #N/A | #N/A | 0.31 | 0.04 | 0.38 | 0.06 | #N/A |
| 1.37 | 0.59 | 0.97 | 0.36 | 1.52 | 0.56 | 1.06 | 0.46 | 1.32 | 0.57 | 1.00 |
| 0.51 | 0.09 | 0.39 | 0.09 | 0.40 | 0.07 | 0.48 | 0.12 | 0.42 | 0.08 | #N/A |
| 0.97 | 0.38 | #N/A | #N/A | #N/A | #N/A | #N/A | #N/A | 0.61 | 0.19 | 1.03 |
| 0.41 | 0.05 | 0.63 | 0.20 | 0.92 | 0.30 | 0.63 | 0.20 | 0.65 | 0.21 | 0.56 |
| #N/A | #N/A | #N/A | #N/A | #N/A | #N/A | #N/A | #N/A | #N/A | #N/A | #N/A |
| 0.93 | 0.36 | 0.74 | 0.26 | 0.72 | 0.22 | 0.66 | 0.22 | 0.74 | 0.26 | 0.79 |
| 0.74 | 0.23 | 0.73 | 0.25 | 0.68 | 0.20 | 0.73 | 0.26 | 0.72 | 0.25 | 0.77 |
| 1.51 | 0.65 | 2.18 | 0.79 | 2.03 | 0.76 | 1.69 | 0.74 | 1.59 | 0.69 | 1.21 |
| #N/A | #N/A | #N/A | #N/A | #N/A | #N/A | #N/A | #N/A | #N/A | #N/A | #N/A |
| 1.60 | 0.70 | 1.89 | 0.71 | 2.06 | 0.76 | 1.75 | 0.74 | 1.86 | 0.78 | 1.88 |
| #N/A | #N/A | #N/A | #N/A | #N/A | #N/A | #N/A | #N/A | #N/A | #N/A | #N/A |
| 1.15 | 0.49 | 1.74 | 0.66 | #N/A | #N/A | 1.06 | 0.46 | 1.21 | 0.52 | #N/A |
| 1.11 | 0.46 | 0.90 | 0.33 | 1.23 | 0.46 | 1.25 | 0.56 | 1.12 | 0.48 | 1.18 |
| 0.87 | 0.32 | 0.98 | 0.37 | 1.18 | 0.44 | 0.68 | 0.23 | 0.72 | 0.25 | 0.77 |
| #N/A | #N/A | #N/A | #N/A | #N/A | #N/A | #N/A | #N/A | #N/A | #N/A | #N/A |
| 1.40 | 0.60 | 1.95 | 0.72 | #N/A | #N/A | 1.39 | 0.61 | 1.66 | 0.69 | 0.81 |
| 1.90 | 0.75 | 2.07 | 0.76 | 2.85 | 0.90 | 1.79 | 0.77 | 2.45 | 0.90 | 1.76 |
| 0.57 | 0.13 | 0.43 | 0.10 | 0.48 | 0.11 | 0.48 | 0.11 | 0.55 | 0.15 | 0.52 |
| 1.55 | 0.68 | 1.55 | 0.60 | 1.53 | 0.60 | 1.30 | 0.56 | 1.14 | 0.49 | 1.24 |
| 0.62 | 0.16 | 0.68 | 0.22 | 0.73 | 0.23 | 0.73 | 0.26 | 0.58 | 0.17 | 0.75 |
| 1.49 | 0.60 | 1.93 | 0.67 | 2.37 | 0.80 | 1.58 | 0.70 | 1.39 | 0.61 | 1.28 |



|      |      |      |      |      |      |      |      |      |      |      |
|------|------|------|------|------|------|------|------|------|------|------|
| 0.92 | 0.35 | 0.93 | 0.34 | 0.90 | 0.32 | 0.80 | 0.31 | 0.82 | 0.31 | 0.81 |
| 1.45 | 0.63 | 1.06 | 0.40 | 1.08 | 0.40 | 0.92 | 0.38 | 1.07 | 0.45 | 1.17 |
| #N/A | #N/A | #N/A | #N/A | #N/A | #N/A | #N/A | #N/A | #N/A | #N/A | #N/A |
| 1.22 | 0.53 | 1.12 | 0.43 | 0.94 | 0.34 | 0.90 | 0.36 | 0.75 | 0.27 | 0.86 |
| #N/A | #N/A | #N/A | #N/A | #N/A | #N/A | 0.92 | 0.37 | 0.87 | 0.34 | 0.86 |
| #N/A | #N/A | #N/A | #N/A | #N/A | #N/A | #N/A | #N/A | #N/A | #N/A | #N/A |
| 0.72 | 0.22 | 0.39 | 0.09 | 0.86 | 0.30 | 0.69 | 0.24 | 0.52 | 0.14 | #N/A |
| 1.12 | 0.48 | 1.06 | 0.41 | 0.92 | 0.32 | 0.76 | 0.28 | 0.93 | 0.37 | 0.89 |
| 1.20 | 0.50 | 1.67 | 0.64 | 1.30 | 0.50 | 1.23 | 0.55 | 1.68 | 0.72 | 1.39 |
| 1.06 | 0.43 | #N/A | #N/A | #N/A | #N/A | 0.71 | 0.25 | 0.81 | 0.30 | 0.75 |
| 0.96 | 0.38 | 0.67 | 0.22 | 0.75 | 0.23 | 0.76 | 0.28 | 0.81 | 0.30 | 0.72 |
| #N/A | #N/A | #N/A | #N/A | #N/A | #N/A | #N/A | #N/A | #N/A | #N/A | #N/A |
| #N/A | #N/A | #N/A | #N/A | #N/A | #N/A | #N/A | #N/A | #N/A | #N/A | #N/A |
| 1.88 | 0.74 | 3.15 | 0.94 | 2.85 | 0.90 | 2.38 | 0.89 | 2.16 | 0.85 | 2.33 |
| #N/A | #N/A | #N/A | #N/A | #N/A | #N/A | #N/A | #N/A | #N/A | #N/A | #N/A |
| 2.32 | 0.83 | 1.49 | 0.57 | #N/A | #N/A | 2.02 | 0.80 | 2.20 | 0.86 | 0.71 |
| #N/A | #N/A | #N/A | #N/A | #N/A | #N/A | #N/A | #N/A | #N/A | #N/A | 0.47 |
| #N/A | #N/A | #N/A | #N/A | #N/A | #N/A | #N/A | #N/A | #N/A | #N/A | #N/A |
| #N/A | #N/A | #N/A | #N/A | #N/A | #N/A | #N/A | #N/A | #N/A | #N/A | #N/A |
| 1.07 | 0.43 | 0.73 | 0.25 | 0.97 | 0.34 | 0.69 | 0.23 | 0.88 | 0.34 | 0.94 |
| 1.88 | 0.79 | 1.91 | 0.71 | 2.29 | 0.81 | 1.64 | 0.70 | 1.91 | 0.79 | 1.49 |
| #N/A | #N/A | #N/A | #N/A | #N/A | #N/A | #N/A | #N/A | #N/A | #N/A | #N/A |
| #N/A | #N/A | #N/A | #N/A | #N/A | #N/A | #N/A | #N/A | #N/A | #N/A | #N/A |
| #N/A | #N/A | #N/A | #N/A | #N/A | #N/A | #N/A | #N/A | #N/A | #N/A | #N/A |
| 0.62 | 0.16 | 0.38 | 0.08 | 0.58 | 0.15 | 0.52 | 0.13 | 0.45 | 0.10 | 0.55 |
| 0.71 | 0.22 | 0.59 | 0.18 | 0.79 | 0.26 | 0.95 | 0.39 | 0.75 | 0.27 | 0.60 |
| #N/A | #N/A | #N/A | #N/A | #N/A | #N/A | #N/A | #N/A | #N/A | #N/A | #N/A |
| 1.12 | 0.47 | 1.28 | 0.50 | #N/A | #N/A | #N/A | #N/A | 0.95 | 0.38 | #N/A |
| 2.56 | 0.91 | 1.19 | 0.40 | 2.79 | 0.90 | 1.51 | 0.66 | 1.86 | 0.75 | 1.72 |
| #N/A | #N/A | #N/A | #N/A | #N/A | #N/A | #N/A | #N/A | #N/A | #N/A | #N/A |
| 0.86 | 0.30 | #N/A | #N/A | 0.98 | 0.35 | 0.63 | 0.20 | 0.63 | 0.20 | 0.55 |
| #N/A | #N/A | #N/A | #N/A | #N/A | #N/A | #N/A | #N/A | #N/A | #N/A | #N/A |
| #N/A | #N/A | #N/A | #N/A | #N/A | #N/A | #N/A | #N/A | #N/A | #N/A | #N/A |
| 2.16 | 0.87 | 2.24 | 0.80 | 3.54 | 0.95 | 2.74 | 0.94 | 2.42 | 0.90 | #N/A |
| 0.65 | 0.18 | 0.66 | 0.22 | 0.63 | 0.18 | 0.57 | 0.16 | #N/A | #N/A | 0.61 |
| #N/A | #N/A | #N/A | #N/A | #N/A | #N/A | #N/A | #N/A | #N/A | #N/A | #N/A |
| #N/A | #N/A | #N/A | #N/A | #N/A | #N/A | #N/A | #N/A | #N/A | #N/A | #N/A |
| #N/A | #N/A | #N/A | #N/A | #N/A | #N/A | #N/A | #N/A | #N/A | #N/A | #N/A |
| 1.59 | 0.66 | 2.53 | 0.84 | 2.54 | 0.86 | 2.37 | 0.79 | 2.15 | 0.85 | 1.37 |
| 0.75 | 0.24 | 0.91 | 0.33 | 1.03 | 0.38 | 0.65 | 0.21 | 0.76 | 0.28 | 0.95 |
| 1.44 | 0.64 | 1.96 | 0.72 | 3.50 | 0.95 | 1.77 | 0.77 | 1.73 | 0.74 | 1.20 |
| #N/A | #N/A | #N/A | #N/A | #N/A | #N/A | #N/A | #N/A | #N/A | #N/A | #N/A |
| 0.78 | 0.27 | 0.79 | 0.28 | 0.90 | 0.31 | 0.92 | 0.38 | 1.01 | 0.42 | 0.69 |
| #N/A | #N/A | 3.45 | 0.94 | #N/A | #N/A | #N/A | #N/A | 2.18 | 0.85 | 1.72 |
| #N/A | #N/A | #N/A | #N/A | #N/A | #N/A | #N/A | #N/A | #N/A | #N/A | #N/A |
| #N/A | #N/A | #N/A | #N/A | #N/A | #N/A | #N/A | #N/A | #N/A | #N/A | #N/A |
| 1.53 | 0.67 | 1.54 | 0.60 | 1.67 | 0.65 | 1.23 | 0.55 | 1.59 | 0.69 | 1.41 |
| 0.37 | 0.06 | 0.60 | 0.19 | #N/A | #N/A | 0.51 | 0.13 | 0.49 | 0.12 | 0.53 |
| 0.97 | 0.38 | 0.30 | 0.05 | #N/A | #N/A | 0.25 | 0.02 | 0.35 | 0.05 | 0.60 |
| 1.10 | 0.47 | 1.04 | 0.39 | 1.11 | 0.41 | 0.97 | 0.41 | 1.17 | 0.50 | 1.01 |
| 1.22 | 0.53 | 1.59 | 0.61 | 1.71 | 0.66 | 1.29 | 0.58 | 1.52 | 0.66 | 1.34 |

|      |      |      |      |      |      |      |      |      |      |      |
|------|------|------|------|------|------|------|------|------|------|------|
| #N/A | #N/A | #N/A | #N/A | #N/A | #N/A | #N/A | #N/A | #N/A | #N/A | #N/A |
| #N/A | #N/A | #N/A | #N/A | #N/A | #N/A | #N/A | #N/A | #N/A | #N/A | #N/A |
| #N/A | #N/A | 1.00 | 0.38 | 1.08 | 0.40 | 0.86 | 0.34 | 0.93 | 0.37 | #N/A |
| #N/A | #N/A | #N/A | #N/A | #N/A | #N/A | #N/A | #N/A | #N/A | #N/A | 0.60 |
| 0.76 | 0.25 | 0.71 | 0.24 | #N/A | #N/A | 0.50 | 0.12 | 0.61 | 0.19 | #N/A |
| #N/A | #N/A | 0.71 | 0.24 | #N/A | #N/A | #N/A | #N/A | 0.86 | 0.33 | #N/A |
| #N/A | #N/A | 1.38 | 0.53 | 3.31 | 0.83 | 1.58 | 0.70 | 1.17 | 0.50 | 1.21 |
| 1.36 | 0.57 | 1.06 | 0.40 | 1.24 | 0.47 | 1.19 | 0.52 | 1.18 | 0.51 | 1.05 |
| 1.36 | 0.59 | 1.32 | 0.51 | 1.10 | 0.41 | 0.94 | 0.39 | 0.87 | 0.34 | 0.99 |
| 0.37 | 0.04 | #N/A | #N/A | #N/A | #N/A | #N/A | #N/A | 0.50 | 0.13 | 0.40 |
| 1.17 | 0.49 | 1.19 | 0.46 | #N/A | #N/A | #N/A | #N/A | 1.65 | 0.70 | 0.77 |
| #N/A | #N/A | #N/A | #N/A | #N/A | #N/A | #N/A | #N/A | #N/A | #N/A | #N/A |
| #N/A | #N/A | #N/A | #N/A | #N/A | #N/A | #N/A | #N/A | #N/A | #N/A | #N/A |
| 0.85 | 0.31 | 0.59 | 0.18 | 0.58 | 0.15 | 0.65 | 0.21 | 0.64 | 0.21 | 0.70 |
| 0.63 | 0.16 | 0.57 | 0.17 | #N/A | #N/A | 0.40 | 0.07 | 0.53 | 0.14 | 0.74 |
| 2.06 | 0.72 | 0.79 | 0.28 | #N/A | #N/A | 0.91 | 0.36 | 0.90 | 0.36 | 0.89 |
| 0.61 | 0.16 | #N/A | #N/A | #N/A | #N/A | #N/A | #N/A | 0.67 | 0.23 | #N/A |
| #N/A | #N/A | #N/A | #N/A | #N/A | #N/A | #N/A | #N/A | #N/A | #N/A | #N/A |
| #N/A | #N/A | #N/A | #N/A | #N/A | #N/A | #N/A | #N/A | #N/A | #N/A | #N/A |
| #N/A | #N/A | #N/A | #N/A | #N/A | #N/A | #N/A | #N/A | #N/A | #N/A | #N/A |
| #N/A | #N/A | #N/A | #N/A | #N/A | #N/A | #N/A | #N/A | #N/A | #N/A | #N/A |
| 0.60 | 0.15 | 0.36 | 0.07 | #N/A | #N/A | #N/A | #N/A | #N/A | #N/A | 0.65 |
| 0.34 | 0.03 | 0.49 | 0.13 | 0.38 | 0.06 | 0.30 | 0.03 | 0.42 | 0.08 | 0.39 |
| 0.61 | 0.15 | 0.43 | 0.10 | 0.45 | 0.09 | 0.50 | 0.13 | 0.52 | 0.14 | 0.56 |
| #N/A | #N/A | #N/A | #N/A | #N/A | #N/A | #N/A | #N/A | #N/A | #N/A | #N/A |
| 1.70 | 0.65 | #N/A | #N/A | #N/A | #N/A | 1.02 | 0.44 | 1.45 | 0.63 | 1.86 |
| #N/A | #N/A | #N/A | #N/A | #N/A | #N/A | #N/A | #N/A | #N/A | #N/A | #N/A |
| #N/A | #N/A | #N/A | #N/A | #N/A | #N/A | #N/A | #N/A | #N/A | #N/A | #N/A |
| #N/A | #N/A | #N/A | #N/A | #N/A | #N/A | #N/A | #N/A | #N/A | #N/A | #N/A |
| 0.91 | 0.35 | 1.35 | 0.53 | #N/A | #N/A | 0.76 | 0.28 | 0.91 | 0.36 | 0.79 |
| 0.77 | 0.24 | #N/A | #N/A | #N/A | #N/A | #N/A | #N/A | #N/A | #N/A | 0.98 |
| #N/A | #N/A | #N/A | #N/A | #N/A | #N/A | #N/A | #N/A | 1.00 | 0.41 | #N/A |
| 0.62 | 0.16 | 0.44 | 0.11 | #N/A | #N/A | 0.47 | 0.11 | 0.57 | 0.17 | 0.65 |
| 0.69 | 0.21 | 0.56 | 0.17 | 0.83 | 0.29 | 0.71 | 0.25 | 0.71 | 0.25 | 0.69 |
| #N/A | #N/A | #N/A | #N/A | #N/A | #N/A | #N/A | #N/A | #N/A | #N/A | #N/A |
| #N/A | #N/A | #N/A | #N/A | #N/A | #N/A | #N/A | #N/A | #N/A | #N/A | #N/A |
| #N/A | #N/A | #N/A | #N/A | #N/A | #N/A | #N/A | #N/A | #N/A | #N/A | #N/A |
| 1.18 | 0.51 | 1.45 | 0.56 | 1.24 | 0.47 | 1.31 | 0.59 | 1.23 | 0.53 | 1.18 |
| #N/A | #N/A | #N/A | #N/A | #N/A | #N/A | #N/A | #N/A | #N/A | #N/A | #N/A |
| 0.77 | 0.25 | 0.87 | 0.32 | 1.01 | 0.36 | 0.74 | 0.27 | 0.92 | 0.37 | 0.81 |
| 1.51 | 0.66 | 1.33 | 0.52 | #N/A | #N/A | 1.34 | 0.59 | 1.22 | 0.53 | 0.76 |
| #N/A | #N/A | #N/A | #N/A | #N/A | #N/A | #N/A | #N/A | #N/A | #N/A | #N/A |
| 3.07 | 0.96 | 2.52 | 0.85 | 2.41 | 0.83 | 1.67 | 0.68 | 2.16 | 0.82 | 2.12 |
| #N/A | #N/A | 0.98 | 0.36 | #N/A | #N/A | #N/A | #N/A | 0.86 | 0.34 | #N/A |
| 1.17 | 0.51 | 1.29 | 0.50 | 0.94 | 0.33 | 1.21 | 0.53 | 0.86 | 0.33 | 1.14 |
| #N/A | #N/A | #N/A | #N/A | #N/A | #N/A | #N/A | #N/A | #N/A | #N/A | #N/A |
| 1.46 | 0.60 | 1.36 | 0.53 | #N/A | #N/A | #N/A | #N/A | 1.62 | 0.70 | 1.41 |
| #N/A | #N/A | 0.75 | 0.26 | 0.76 | 0.24 | 0.76 | 0.28 | 0.81 | 0.31 | 0.66 |
| #N/A | #N/A | #N/A | #N/A | #N/A | #N/A | #N/A | #N/A | #N/A | #N/A | #N/A |
| 1.42 | 0.55 | 1.21 | 0.46 | 0.99 | 0.36 | 0.71 | 0.25 | 0.75 | 0.27 | 0.94 |
| 1.23 | 0.54 | 1.61 | 0.62 | 1.43 | 0.55 | 1.22 | 0.54 | 1.64 | 0.70 | 1.47 |



|      |      |      |      |      |      |      |      |      |      |      |
|------|------|------|------|------|------|------|------|------|------|------|
| 0.44 | 0.06 | 0.25 | 0.03 | 0.35 | 0.05 | 0.35 | 0.05 | 0.43 | 0.09 | 0.37 |
| 1.06 | 0.43 | 1.00 | 0.38 | 1.25 | 0.47 | 0.89 | 0.36 | 1.21 | 0.53 | 1.08 |
| 1.18 | 0.51 | 1.48 | 0.57 | 1.29 | 0.50 | 1.09 | 0.47 | 1.36 | 0.59 | 1.07 |
| 0.59 | 0.14 | 0.45 | 0.11 | 0.68 | 0.20 | 0.47 | 0.11 | 0.64 | 0.21 | 0.59 |
| 0.79 | 0.27 | 0.39 | 0.09 | 0.48 | 0.10 | 0.52 | 0.14 | 0.52 | 0.13 | 0.56 |
| #N/A | #N/A | #N/A | #N/A | #N/A | #N/A | #N/A | #N/A | 1.04 | 0.43 | 1.00 |
| #N/A | #N/A | #N/A | #N/A | #N/A | #N/A | #N/A | #N/A | #N/A | #N/A | #N/A |
| 1.30 | 0.57 | 1.08 | 0.41 | 1.01 | 0.37 | 0.94 | 0.39 | 0.94 | 0.38 | 0.88 |
| 0.49 | 0.08 | 0.34 | 0.07 | 0.45 | 0.09 | 0.37 | 0.06 | 0.43 | 0.09 | 0.51 |
| #N/A | #N/A | #N/A | #N/A | #N/A | #N/A | #N/A | #N/A | #N/A | #N/A | 0.65 |
| 1.21 | 0.50 | 1.14 | 0.43 | 1.66 | 0.62 | 1.12 | 0.49 | 1.52 | 0.63 | 1.08 |
| #N/A | #N/A | #N/A | #N/A | #N/A | #N/A | #N/A | #N/A | #N/A | #N/A | 0.62 |
| 0.28 | 0.02 | 0.60 | 0.19 | 0.59 | 0.15 | 0.51 | 0.13 | 0.66 | 0.22 | #N/A |
| 0.50 | 0.09 | 0.98 | 0.37 | 1.02 | 0.36 | 0.78 | 0.29 | 0.90 | 0.36 | 0.96 |
| 1.02 | 0.42 | 0.89 | 0.33 | 0.93 | 0.32 | 0.77 | 0.28 | 0.97 | 0.40 | 0.90 |
| 0.99 | 0.40 | #N/A | #N/A | #N/A | #N/A | #N/A | #N/A | #N/A | #N/A | 0.74 |
| 1.15 | 0.49 | 1.26 | 0.49 | 1.22 | 0.46 | 0.94 | 0.39 | 0.97 | 0.39 | 1.12 |
| 0.59 | 0.15 | 0.65 | 0.21 | 0.71 | 0.21 | 0.55 | 0.15 | 0.64 | 0.20 | 0.73 |
| #N/A | #N/A | 1.19 | 0.46 | #N/A | #N/A | 0.94 | 0.39 | 1.11 | 0.47 | #N/A |
| 0.95 | 0.37 | 0.82 | 0.29 | 0.92 | 0.33 | 0.77 | 0.29 | 0.85 | 0.33 | 0.79 |
| #N/A | #N/A | #N/A | #N/A | #N/A | #N/A | #N/A | #N/A | 1.12 | 0.47 | 0.60 |
| 1.87 | 0.78 | 1.97 | 0.73 | 2.14 | 0.77 | 1.56 | 0.69 | 2.03 | 0.83 | 2.02 |
| #N/A | #N/A | #N/A | #N/A | #N/A | #N/A | #N/A | #N/A | #N/A | #N/A | #N/A |
| 0.60 | 0.14 | 0.61 | 0.19 | #N/A | #N/A | 0.78 | 0.29 | 0.70 | 0.24 | 0.65 |
| #N/A | #N/A | #N/A | #N/A | #N/A | #N/A | #N/A | #N/A | #N/A | #N/A | #N/A |
| #N/A | #N/A | #N/A | #N/A | #N/A | #N/A | #N/A | #N/A | 1.32 | 0.58 | 0.80 |
| 0.63 | 0.17 | 0.47 | 0.13 | 1.04 | 0.38 | 0.56 | 0.15 | 0.63 | 0.20 | 0.66 |
| 1.51 | 0.53 | 1.04 | 0.39 | #N/A | #N/A | 0.78 | 0.29 | 0.73 | 0.26 | #N/A |
| #N/A | #N/A | #N/A | #N/A | #N/A | #N/A | #N/A | #N/A | #N/A | #N/A | #N/A |
| 1.33 | 0.54 | 1.31 | 0.51 | 1.38 | 0.53 | 1.39 | 0.62 | 1.18 | 0.51 | 0.97 |
| 0.68 | 0.19 | 0.51 | 0.14 | 0.73 | 0.22 | 0.52 | 0.13 | 0.56 | 0.16 | 0.47 |
| 2.55 | 0.91 | 2.58 | 0.86 | 3.13 | 0.93 | 2.51 | 0.92 | 2.46 | 0.90 | 2.06 |
| #N/A | #N/A | #N/A | #N/A | #N/A | #N/A | #N/A | #N/A | #N/A | #N/A | 1.04 |
| 1.49 | 0.66 | 1.73 | 0.65 | 1.36 | 0.52 | 1.54 | 0.68 | 1.82 | 0.74 | 1.33 |
| 2.33 | 0.90 | 4.23 | 0.88 | 2.32 | 0.82 | 2.34 | 0.88 | 2.37 | 0.88 | 1.85 |
| 1.42 | 0.61 | 1.07 | 0.41 | 1.24 | 0.47 | 1.26 | 0.56 | 1.35 | 0.59 | 0.53 |
| 1.10 | 0.46 | 0.56 | 0.17 | 0.70 | 0.21 | 0.80 | 0.31 | 0.83 | 0.32 | 0.87 |
| 2.21 | 0.88 | 2.39 | 0.83 | 2.31 | 0.82 | 2.61 | 0.93 | 2.57 | 0.92 | 1.80 |
| 1.09 | 0.45 | 0.70 | 0.24 | 0.80 | 0.26 | 0.80 | 0.30 | 0.95 | 0.39 | 0.69 |
| #N/A | #N/A | #N/A | #N/A | #N/A | #N/A | #N/A | #N/A | #N/A | #N/A | #N/A |
| 2.51 | 0.91 | 2.56 | 0.86 | 3.18 | 0.91 | 2.95 | 0.96 | 2.97 | 0.95 | 2.32 |
| 3.17 | 0.96 | 3.73 | 0.97 | 3.17 | 0.94 | 3.37 | 0.98 | 3.04 | 0.96 | 2.39 |
| #N/A | #N/A | #N/A | #N/A | #N/A | #N/A | #N/A | #N/A | #N/A | #N/A | #N/A |
| 2.92 | 0.94 | 3.73 | 0.97 | 3.28 | 0.94 | 3.34 | 0.98 | 3.58 | 0.98 | 2.50 |
| 2.06 | 0.84 | 2.12 | 0.77 | 2.69 | 0.88 | 2.61 | 0.93 | 2.52 | 0.91 | 1.56 |
| 0.69 | 0.21 | 0.67 | 0.22 | 0.78 | 0.25 | 0.76 | 0.28 | 0.86 | 0.34 | 0.71 |
| 1.76 | 0.76 | 1.73 | 0.65 | 1.80 | 0.68 | 1.69 | 0.73 | 2.23 | 0.85 | 1.52 |
| 3.89 | 0.91 | 1.63 | 0.62 | 2.05 | 0.74 | 1.74 | 0.76 | 1.83 | 0.77 | 2.05 |
| 2.70 | 0.94 | 3.42 | 0.95 | 3.14 | 0.90 | 2.77 | 0.95 | 3.00 | 0.96 | 2.02 |
| #N/A | #N/A | #N/A | #N/A | #N/A | #N/A | #N/A | #N/A | #N/A | #N/A | #N/A |
| #N/A | #N/A | #N/A | #N/A | #N/A | #N/A | #N/A | #N/A | 1.95 | 0.79 | #N/A |



|      |      |      |      |      |      |      |      |      |      |      |
|------|------|------|------|------|------|------|------|------|------|------|
| 2.20 | 0.87 | 2.75 | 0.89 | 2.81 | 0.90 | 2.64 | 0.92 | 2.25 | 0.87 | #N/A |
| #N/A | #N/A | #N/A | #N/A | #N/A | #N/A | #N/A | #N/A | #N/A | #N/A | #N/A |
| 6.53 | 1.00 | 6.70 | 1.00 | 4.13 | 0.98 | 4.83 | 1.00 | 5.27 | 1.00 | #N/A |
| 2.78 | 0.94 | 3.30 | 0.94 | 2.58 | 0.86 | 2.32 | 0.89 | 1.91 | 0.79 | 1.92 |
| #N/A | #N/A | #N/A | #N/A | #N/A | #N/A | #N/A | #N/A | #N/A | #N/A | #N/A |
| 1.70 | 0.73 | 1.66 | 0.63 | 1.51 | 0.58 | 1.54 | 0.68 | 1.50 | 0.65 | 1.60 |
| #N/A | #N/A | #N/A | #N/A | #N/A | #N/A | #N/A | #N/A | #N/A | #N/A | #N/A |
| 2.24 | 0.88 | 3.74 | 0.97 | 3.52 | 0.95 | 2.93 | 0.95 | 3.28 | 0.97 | 2.37 |
| #N/A | #N/A | 0.61 | 0.19 | #N/A | #N/A | 0.71 | 0.25 | 0.65 | 0.21 | #N/A |
| 1.06 | 0.44 | 1.27 | 0.49 | 1.25 | 0.47 | 0.98 | 0.41 | 1.65 | 0.67 | 0.83 |
| 0.66 | 0.19 | 0.42 | 0.10 | 0.44 | 0.09 | 0.34 | 0.04 | 0.41 | 0.07 | 0.65 |
| 0.15 | 0.00 | 0.10 | 0.00 | 0.15 | 0.00 | 0.21 | 0.01 | 0.18 | 0.00 | 0.16 |
| 0.62 | 0.16 | 0.29 | 0.04 | 0.35 | 0.04 | 0.38 | 0.06 | 0.36 | 0.05 | 0.50 |
| 0.64 | 0.19 | 0.28 | 0.04 | #N/A | #N/A | 0.33 | 0.04 | 0.32 | 0.04 | 0.55 |
| 3.63 | 0.98 | 2.65 | 0.84 | 3.71 | 0.97 | 2.61 | 0.92 | 3.38 | 0.97 | 2.80 |
| #N/A | #N/A | 1.82 | 0.69 | #N/A | #N/A | 2.01 | 0.81 | #N/A | #N/A | 2.13 |
| 0.53 | 0.10 | #N/A | #N/A | #N/A | #N/A | #N/A | #N/A | 0.72 | 0.25 | 0.53 |
| 0.45 | 0.08 | 1.13 | 0.44 | #N/A | #N/A | #N/A | #N/A | #N/A | #N/A | 0.57 |
| #N/A | #N/A | 1.74 | 0.62 | #N/A | #N/A | 1.53 | 0.68 | 1.64 | 0.69 | #N/A |
| 1.11 | 0.45 | 0.97 | 0.36 | #N/A | #N/A | 1.07 | 0.47 | 1.39 | 0.61 | #N/A |
| #N/A | #N/A | 1.37 | 0.52 | #N/A | #N/A | 2.23 | 0.86 | 1.30 | 0.56 | #N/A |
| 1.64 | 0.71 | 1.75 | 0.66 | 1.49 | 0.58 | 1.55 | 0.66 | 2.34 | 0.88 | #N/A |
| #N/A | #N/A | #N/A | #N/A | #N/A | #N/A | #N/A | #N/A | #N/A | #N/A | #N/A |
| 0.99 | 0.39 | 0.94 | 0.35 | 1.00 | 0.36 | 1.16 | 0.51 | 1.18 | 0.50 | 0.97 |
| 1.46 | 0.65 | 1.46 | 0.56 | 1.35 | 0.52 | 1.19 | 0.53 | 1.22 | 0.53 | 0.81 |
| #N/A | #N/A | #N/A | #N/A | #N/A | #N/A | 1.05 | 0.45 | 1.08 | 0.46 | #N/A |
| 2.80 | 0.89 | 1.22 | 0.47 | 1.63 | 0.63 | 1.70 | 0.75 | 1.47 | 0.64 | #N/A |
| 1.97 | 0.81 | 2.93 | 0.87 | 2.91 | 0.87 | 2.16 | 0.86 | 3.76 | 0.98 | 2.27 |
| 1.25 | 0.54 | #N/A | #N/A | #N/A | #N/A | #N/A | #N/A | #N/A | #N/A | 1.50 |
| #N/A | #N/A | #N/A | #N/A | #N/A | #N/A | #N/A | #N/A | #N/A | #N/A | 1.32 |
| 0.55 | 0.12 | 0.99 | 0.37 | 0.98 | 0.35 | 0.97 | 0.40 | 0.73 | 0.26 | 0.74 |
| 1.34 | 0.59 | 1.64 | 0.63 | 1.52 | 0.59 | 1.40 | 0.59 | 1.69 | 0.67 | 1.41 |
| 1.15 | 0.49 | 0.91 | 0.33 | 0.75 | 0.22 | 0.76 | 0.28 | 0.73 | 0.26 | 1.08 |
| 1.14 | 0.48 | 1.43 | 0.55 | 1.20 | 0.45 | 0.89 | 0.36 | 1.66 | 0.70 | 1.35 |
| 1.02 | 0.41 | 0.79 | 0.28 | 0.75 | 0.24 | 0.67 | 0.23 | 0.72 | 0.25 | 0.88 |
| 0.75 | 0.23 | 0.66 | 0.21 | 0.32 | 0.07 | 0.59 | 0.18 | 0.56 | 0.16 | 0.79 |
| 1.07 | 0.44 | 1.13 | 0.43 | 0.94 | 0.33 | 0.85 | 0.34 | 0.91 | 0.37 | 0.82 |
| 1.55 | 0.68 | 1.78 | 0.67 | 1.66 | 0.63 | 1.36 | 0.61 | 1.52 | 0.66 | 1.19 |
| 1.11 | 0.47 | 1.18 | 0.45 | 1.01 | 0.36 | 1.03 | 0.44 | 1.01 | 0.41 | 1.22 |
| 0.91 | 0.35 | 0.94 | 0.35 | 1.01 | 0.37 | 0.78 | 0.29 | 0.91 | 0.36 | 0.87 |
| 1.12 | 0.47 | 1.27 | 0.49 | 1.60 | 0.62 | 1.49 | 0.66 | 1.47 | 0.64 | 0.97 |
| 0.93 | 0.36 | 0.91 | 0.33 | 0.86 | 0.30 | 0.81 | 0.31 | 0.85 | 0.33 | 1.12 |
| 1.24 | 0.54 | 1.65 | 0.63 | 1.39 | 0.54 | 1.11 | 0.48 | 1.41 | 0.62 | 1.34 |
| 1.84 | 0.78 | 2.44 | 0.83 | 2.00 | 0.75 | 1.99 | 0.83 | 1.78 | 0.75 | 0.96 |
| 0.73 | 0.23 | 0.56 | 0.17 | 0.52 | 0.12 | 0.55 | 0.15 | 0.58 | 0.17 | 0.88 |
| 0.97 | 0.38 | 0.74 | 0.26 | 0.86 | 0.30 | 0.80 | 0.30 | 0.72 | 0.25 | 0.92 |
| 0.67 | 0.19 | 0.31 | 0.05 | 0.40 | 0.07 | 0.44 | 0.09 | 0.42 | 0.08 | 0.87 |
| #N/A | #N/A | #N/A | #N/A | #N/A | #N/A | #N/A | #N/A | 1.25 | 0.54 | 0.77 |
| 1.08 | 0.45 | 1.50 | 0.57 | #N/A | #N/A | 1.24 | 0.55 | 1.26 | 0.54 | 0.95 |
| 2.07 | 0.83 | 3.29 | 0.94 | 2.84 | 0.90 | 2.26 | 0.88 | 1.99 | 0.81 | 2.03 |
| #N/A | #N/A | #N/A | #N/A | #N/A | #N/A | #N/A | #N/A | 0.61 | 0.19 | #N/A |



|      |      |      |      |      |      |      |      |      |      |      |
|------|------|------|------|------|------|------|------|------|------|------|
| 0.47 | 0.07 | 0.34 | 0.07 | #N/A | #N/A | 0.48 | 0.12 | 0.42 | 0.08 | 0.62 |
| 2.23 | 0.87 | 3.03 | 0.93 | 2.48 | 0.85 | 2.51 | 0.92 | 2.44 | 0.90 | 2.01 |
| 1.25 | 0.54 | 0.66 | 0.22 | 0.79 | 0.26 | 0.69 | 0.24 | 0.82 | 0.31 | #N/A |
| 0.61 | 0.15 | 0.36 | 0.07 | 0.37 | 0.06 | 0.48 | 0.11 | 0.42 | 0.08 | 0.53 |
| 2.36 | 0.89 | 3.27 | 0.94 | 3.74 | 0.97 | 2.35 | 0.90 | 2.58 | 0.92 | 2.05 |
| #N/A | #N/A | #N/A | #N/A | #N/A | #N/A | #N/A | #N/A | #N/A | #N/A | #N/A |
| 3.07 | 0.96 | 3.24 | 0.94 | 3.15 | 0.92 | 2.60 | 0.92 | 2.63 | 0.92 | 2.26 |
| 1.04 | 0.42 | 0.97 | 0.36 | 1.12 | 0.41 | 0.97 | 0.41 | 0.92 | 0.37 | 1.12 |
| 1.25 | 0.55 | 0.87 | 0.32 | 1.47 | 0.57 | 1.40 | 0.62 | 1.09 | 0.47 | 0.93 |
| 0.83 | 0.29 | 0.50 | 0.14 | 0.66 | 0.20 | 0.69 | 0.24 | 0.51 | 0.13 | 0.70 |
| 1.25 | 0.54 | 1.32 | 0.51 | 1.21 | 0.46 | 1.34 | 0.60 | 1.22 | 0.53 | 1.09 |
| 1.82 | 0.78 | 2.47 | 0.85 | 2.05 | 0.77 | 2.02 | 0.83 | 2.29 | 0.87 | 1.63 |
| 1.45 | 0.62 | 1.34 | 0.52 | 1.11 | 0.41 | 1.02 | 0.43 | 1.13 | 0.48 | 1.13 |
| 1.38 | 0.61 | 2.40 | 0.83 | 1.75 | 0.67 | 1.27 | 0.56 | 1.22 | 0.53 | 1.73 |
| 1.35 | 0.60 | 1.99 | 0.73 | 1.99 | 0.75 | 1.94 | 0.79 | 2.02 | 0.82 | 1.85 |
| 1.03 | 0.41 | 1.21 | 0.47 | 1.26 | 0.48 | 1.48 | 0.66 | 1.28 | 0.55 | 1.15 |
| 0.53 | 0.10 | 0.48 | 0.13 | #N/A | #N/A | #N/A | #N/A | #N/A | #N/A | 0.92 |
| 0.80 | 0.26 | 0.64 | 0.20 | 0.56 | 0.14 | 0.54 | 0.15 | 0.49 | 0.12 | 0.64 |
| 0.81 | 0.28 | 0.80 | 0.28 | 0.63 | 0.17 | 0.58 | 0.17 | 0.59 | 0.18 | 0.82 |
| #N/A | #N/A | #N/A | #N/A | #N/A | #N/A | #N/A | #N/A | #N/A | #N/A | #N/A |
| #N/A | #N/A | 0.72 | 0.24 | #N/A | #N/A | 0.64 | 0.21 | 0.63 | 0.20 | 0.72 |
| #N/A | #N/A | #N/A | #N/A | #N/A | #N/A | #N/A | #N/A | #N/A | #N/A | #N/A |
| 0.74 | 0.23 | 0.43 | 0.11 | #N/A | #N/A | #N/A | #N/A | #N/A | #N/A | 1.36 |
| #N/A | #N/A | #N/A | #N/A | #N/A | #N/A | 1.05 | 0.45 | 0.98 | 0.41 | #N/A |
| 1.15 | 0.49 | 1.56 | 0.60 | 1.26 | 0.48 | 1.33 | 0.60 | 1.26 | 0.55 | 1.08 |
| 1.16 | 0.50 | 1.06 | 0.40 | 1.12 | 0.41 | 0.86 | 0.34 | 0.84 | 0.32 | 1.04 |
| 0.67 | 0.19 | 0.61 | 0.19 | 0.51 | 0.12 | 0.55 | 0.15 | 0.53 | 0.14 | 0.77 |
| 0.82 | 0.29 | 0.84 | 0.30 | 0.78 | 0.25 | 0.89 | 0.36 | 0.74 | 0.26 | 0.89 |
| 0.70 | 0.20 | 0.83 | 0.30 | 0.72 | 0.23 | 0.83 | 0.32 | 0.74 | 0.26 | 0.84 |
| 0.75 | 0.24 | 0.55 | 0.16 | 0.52 | 0.12 | 0.64 | 0.21 | 0.54 | 0.14 | 0.79 |
| 1.29 | 0.57 | 1.46 | 0.56 | 1.23 | 0.47 | 1.08 | 0.47 | 1.21 | 0.52 | 1.16 |
| #N/A | #N/A | 1.53 | 0.59 | 1.61 | 0.63 | 1.44 | 0.64 | 1.21 | 0.52 | 1.25 |
| 1.93 | 0.82 | 2.41 | 0.84 | 2.06 | 0.77 | 2.65 | 0.93 | 2.18 | 0.85 | 2.14 |
| #N/A | #N/A | #N/A | #N/A | #N/A | #N/A | #N/A | #N/A | 1.29 | 0.55 | 1.21 |
| #N/A | #N/A | #N/A | #N/A | #N/A | #N/A | #N/A | #N/A | #N/A | #N/A | #N/A |
| 1.10 | 0.46 | 1.11 | 0.42 | 1.26 | 0.48 | 1.02 | 0.43 | 1.12 | 0.48 | 1.02 |
| 1.07 | 0.44 | 1.10 | 0.42 | 1.02 | 0.37 | 0.96 | 0.40 | 0.96 | 0.39 | 0.98 |
| 1.33 | 0.58 | 1.55 | 0.60 | 1.33 | 0.50 | 1.30 | 0.58 | 1.33 | 0.58 | 1.20 |
| 1.50 | 0.67 | 1.63 | 0.63 | 1.60 | 0.63 | 1.24 | 0.55 | 1.48 | 0.65 | 1.16 |
| 0.77 | 0.24 | 0.71 | 0.24 | 0.63 | 0.17 | 0.66 | 0.22 | 0.63 | 0.20 | 0.82 |
| 1.30 | 0.57 | 1.48 | 0.57 | 1.55 | 0.60 | 1.63 | 0.72 | 1.61 | 0.69 | 1.42 |
| 0.76 | 0.24 | 0.61 | 0.19 | 0.50 | 0.11 | 0.62 | 0.20 | 0.52 | 0.13 | 1.01 |
| #N/A | #N/A | #N/A | #N/A | #N/A | #N/A | #N/A | #N/A | #N/A | #N/A | #N/A |
| 0.77 | 0.26 | 0.78 | 0.27 | 0.67 | 0.20 | 0.80 | 0.31 | 0.76 | 0.28 | 0.85 |
| #N/A | #N/A | #N/A | #N/A | #N/A | #N/A | #N/A | #N/A | #N/A | #N/A | #N/A |
| 0.58 | 0.14 | 0.36 | 0.08 | 0.56 | 0.14 | 0.28 | 0.03 | 0.52 | 0.14 | 0.39 |
| #N/A | #N/A | #N/A | #N/A | #N/A | #N/A | #N/A | #N/A | #N/A | #N/A | #N/A |
| 0.91 | 0.34 | 0.45 | 0.12 | 0.56 | 0.14 | 0.50 | 0.12 | 0.54 | 0.15 | 0.64 |
| 1.44 | 0.62 | 1.56 | 0.60 | 1.72 | 0.61 | 0.68 | 0.23 | 1.39 | 0.60 | 1.11 |
| 1.71 | 0.74 | 1.71 | 0.65 | 1.95 | 0.74 | 1.71 | 0.75 | 1.66 | 0.71 | 1.45 |
| 0.74 | 0.22 | 0.50 | 0.14 | 0.56 | 0.14 | 0.48 | 0.12 | 0.38 | 0.06 | 0.65 |



|      |      |      |      |      |      |      |      |      |      |      |
|------|------|------|------|------|------|------|------|------|------|------|
| 1.59 | 0.70 | 2.36 | 0.82 | 1.68 | 0.65 | 1.96 | 0.81 | 2.00 | 0.81 | 1.57 |
| #N/A | #N/A | #N/A | #N/A | #N/A | #N/A | #N/A | #N/A | #N/A | #N/A | #N/A |
| 0.84 | 0.29 | 0.93 | 0.34 | 0.83 | 0.28 | #N/A | #N/A | 0.74 | 0.27 | 0.79 |
| #N/A | #N/A | #N/A | #N/A | #N/A | #N/A | #N/A | #N/A | 0.50 | 0.13 | 0.51 |
| 2.48 | 0.91 | 2.12 | 0.77 | 2.07 | 0.76 | 1.55 | 0.69 | 2.04 | 0.81 | 1.68 |
| #N/A | #N/A | #N/A | #N/A | #N/A | #N/A | #N/A | #N/A | #N/A | #N/A | #N/A |
| 0.75 | 0.23 | 0.86 | 0.31 | 0.86 | 0.30 | 0.76 | 0.28 | 0.92 | 0.37 | 0.73 |
| 0.82 | 0.30 | 0.49 | 0.14 | 0.52 | 0.12 | 0.54 | 0.15 | 0.65 | 0.21 | #N/A |
| 0.51 | 0.10 | 0.28 | 0.04 | 0.32 | 0.03 | 0.28 | 0.03 | 0.28 | 0.03 | 0.51 |
| #N/A | #N/A | #N/A | #N/A | #N/A | #N/A | #N/A | #N/A | #N/A | #N/A | #N/A |
| #N/A | #N/A | #N/A | #N/A | #N/A | #N/A | #N/A | #N/A | #N/A | #N/A | #N/A |
| 1.21 | 0.48 | 0.98 | 0.37 | #N/A | #N/A | 0.59 | 0.18 | 0.86 | 0.33 | 0.98 |
| 2.07 | 0.85 | 2.30 | 0.81 | 2.18 | 0.77 | 1.47 | 0.65 | 2.08 | 0.83 | 1.22 |
| #N/A | #N/A | #N/A | #N/A | #N/A | #N/A | #N/A | #N/A | #N/A | #N/A | #N/A |
| 2.36 | 0.90 | 2.45 | 0.78 | 2.62 | 0.88 | 2.68 | 0.93 | 2.89 | 0.94 | 1.97 |
| 1.53 | 0.67 | 2.86 | 0.91 | 2.59 | 0.87 | 2.48 | 0.92 | 1.89 | 0.78 | 1.83 |
| #N/A | #N/A | #N/A | #N/A | #N/A | #N/A | #N/A | #N/A | #N/A | #N/A | #N/A |
| 1.08 | 0.45 | 0.98 | 0.37 | 0.91 | 0.31 | 0.92 | 0.38 | 0.92 | 0.37 | 0.80 |
| 0.53 | 0.10 | 0.29 | 0.04 | 0.36 | 0.06 | 0.35 | 0.05 | 0.42 | 0.08 | 0.41 |
| 1.61 | 0.70 | 1.15 | 0.44 | 1.41 | 0.54 | 1.63 | 0.71 | 1.22 | 0.53 | 0.84 |
| 1.81 | 0.77 | 2.23 | 0.80 | 2.13 | 0.76 | 2.03 | 0.84 | 1.94 | 0.80 | 1.47 |
| 0.94 | 0.35 | 0.96 | 0.36 | 1.07 | 0.39 | 0.69 | 0.24 | 0.92 | 0.37 | 0.93 |
| #N/A | #N/A | #N/A | #N/A | #N/A | #N/A | #N/A | #N/A | #N/A | #N/A | #N/A |
| 0.64 | 0.17 | 0.48 | 0.13 | 0.72 | 0.22 | 0.63 | 0.20 | 0.58 | 0.17 | 0.49 |
| 0.76 | 0.25 | #N/A | #N/A | 0.41 | 0.07 | 0.50 | 0.13 | 0.63 | 0.20 | 0.62 |
| #N/A | #N/A | #N/A | #N/A | #N/A | #N/A | #N/A | #N/A | #N/A | #N/A | #N/A |
| #N/A | #N/A | 2.17 | 0.78 | #N/A | #N/A | 1.52 | 0.67 | 1.32 | 0.57 | #N/A |
| 0.74 | 0.24 | #N/A | #N/A | #N/A | #N/A | #N/A | #N/A | #N/A | #N/A | 0.53 |
| 1.06 | 0.44 | 1.06 | 0.40 | 1.01 | 0.37 | 0.90 | 0.37 | 1.09 | 0.46 | 0.88 |
| #N/A | #N/A | #N/A | #N/A | #N/A | #N/A | #N/A | #N/A | 0.53 | 0.14 | #N/A |
| 1.55 | 0.69 | 2.24 | 0.80 | 1.97 | 0.74 | 1.62 | 0.72 | 1.85 | 0.77 | 1.88 |
| 2.00 | 0.81 | 2.01 | 0.74 | 2.13 | 0.78 | 1.66 | 0.73 | 1.45 | 0.63 | 1.29 |
| 2.48 | 0.89 | 3.31 | 0.94 | 2.97 | 0.87 | 2.16 | 0.86 | 2.49 | 0.90 | 2.00 |
| 0.65 | 0.18 | 0.39 | 0.09 | #N/A | #N/A | 0.32 | 0.04 | 0.36 | 0.05 | #N/A |
| #N/A | #N/A | 1.46 | 0.57 | 1.70 | 0.63 | 1.35 | 0.60 | 1.37 | 0.60 | 2.02 |
| 0.62 | 0.16 | 0.32 | 0.05 | 0.41 | 0.07 | 0.48 | 0.11 | 0.45 | 0.09 | 0.87 |
| 0.75 | 0.23 | 0.61 | 0.19 | 0.63 | 0.17 | 0.66 | 0.22 | 0.67 | 0.22 | 0.96 |
| 0.67 | 0.19 | 0.55 | 0.17 | 0.59 | 0.16 | 0.58 | 0.17 | 0.54 | 0.15 | 0.71 |
| #N/A | #N/A | #N/A | #N/A | #N/A | #N/A | #N/A | #N/A | #N/A | #N/A | #N/A |
| 1.48 | 0.65 | 1.09 | 0.42 | 1.11 | 0.41 | 0.97 | 0.41 | 1.04 | 0.44 | 1.02 |
| #N/A | #N/A | #N/A | #N/A | #N/A | #N/A | #N/A | #N/A | #N/A | #N/A | #N/A |
| #N/A | #N/A | #N/A | #N/A | #N/A | #N/A | #N/A | #N/A | #N/A | #N/A | #N/A |
| 1.41 | 0.62 | 1.08 | 0.41 | 1.19 | 0.45 | 1.24 | 0.55 | 1.42 | 0.62 | 0.70 |
| #N/A | #N/A | 0.68 | 0.22 | #N/A | #N/A | 0.85 | 0.34 | 0.92 | 0.37 | #N/A |
| 2.13 | 0.86 | 2.29 | 0.79 | 1.99 | 0.66 | 2.21 | 0.87 | 2.44 | 0.87 | 2.76 |
| #N/A | #N/A | #N/A | #N/A | #N/A | #N/A | #N/A | #N/A | #N/A | #N/A | #N/A |
| 1.21 | 0.53 | #N/A | #N/A | #N/A | #N/A | #N/A | #N/A | #N/A | #N/A | #N/A |
| 1.57 | 0.69 | 0.87 | 0.33 | 1.10 | 0.41 | 1.23 | 0.55 | 1.27 | 0.55 | 1.27 |
| 0.85 | 0.31 | 0.83 | 0.30 | 0.69 | 0.20 | 0.58 | 0.18 | 0.60 | 0.18 | #N/A |
| 0.97 | 0.38 | 0.66 | 0.21 | 0.68 | 0.20 | 0.60 | 0.19 | 0.76 | 0.27 | 0.75 |
| 0.71 | 0.21 | 0.98 | 0.37 | 1.02 | 0.37 | 0.73 | 0.26 | 1.05 | 0.43 | #N/A |

|      |      |      |      |      |      |      |      |      |      |      |
|------|------|------|------|------|------|------|------|------|------|------|
| 0.66 | 0.19 | 0.76 | 0.26 | 0.90 | 0.31 | 0.82 | 0.32 | 0.81 | 0.30 | 0.78 |
| #N/A | #N/A | #N/A | #N/A | #N/A | #N/A | #N/A | #N/A | #N/A | #N/A | #N/A |
| 0.45 | 0.08 | #N/A | #N/A | #N/A | #N/A | #N/A | #N/A | 0.47 | 0.11 | 0.61 |
| 1.02 | 0.41 | 1.36 | 0.53 | 1.80 | 0.69 | 1.45 | 0.65 | 1.43 | 0.62 | 1.36 |
| #N/A | #N/A | #N/A | #N/A | #N/A | #N/A | #N/A | #N/A | #N/A | #N/A | #N/A |
| 1.20 | 0.51 | #N/A | #N/A | #N/A | #N/A | #N/A | #N/A | 0.63 | 0.20 | 0.70 |
| 1.20 | 0.52 | 1.06 | 0.40 | 1.32 | 0.51 | 1.16 | 0.51 | 1.22 | 0.53 | 1.16 |
| 1.11 | 0.47 | 0.73 | 0.25 | 0.60 | 0.16 | 0.84 | 0.33 | 0.86 | 0.34 | #N/A |
| 1.98 | 0.82 | 1.19 | 0.46 | 1.69 | 0.65 | 1.32 | 0.59 | 1.55 | 0.67 | 1.05 |
| 1.86 | 0.77 | 1.82 | 0.69 | 1.76 | 0.68 | 1.38 | 0.62 | 1.39 | 0.60 | 1.26 |
| 1.48 | 0.65 | 1.54 | 0.59 | 1.02 | 0.38 | 1.12 | 0.48 | 0.99 | 0.40 | 0.93 |
| 0.85 | 0.32 | 0.87 | 0.32 | 0.82 | 0.26 | 0.65 | 0.22 | 0.65 | 0.21 | 0.80 |
| 1.28 | 0.56 | 1.44 | 0.55 | 1.36 | 0.52 | 1.18 | 0.52 | 1.18 | 0.51 | #N/A |
| #N/A | #N/A | #N/A | #N/A | #N/A | #N/A | #N/A | #N/A | #N/A | #N/A | #N/A |
| 0.43 | 0.06 | 0.53 | 0.15 | 0.49 | 0.11 | 0.40 | 0.07 | 0.49 | 0.12 | 0.68 |
| 1.16 | 0.48 | 1.66 | 0.63 | 1.36 | 0.53 | 1.12 | 0.49 | 1.24 | 0.53 | 1.21 |
| #N/A | #N/A | #N/A | #N/A | #N/A | #N/A | #N/A | #N/A | #N/A | #N/A | #N/A |
| 1.23 | 0.52 | #N/A | #N/A | #N/A | #N/A | #N/A | #N/A | #N/A | #N/A | 0.92 |
| 1.86 | 0.77 | 1.90 | 0.71 | 1.91 | 0.72 | 1.40 | 0.63 | 1.60 | 0.66 | 1.52 |
| #N/A | #N/A | #N/A | #N/A | #N/A | #N/A | #N/A | #N/A | #N/A | #N/A | #N/A |
| 1.30 | 0.56 | #N/A | #N/A | #N/A | #N/A | #N/A | #N/A | 0.89 | 0.35 | 0.68 |
| 0.68 | 0.22 | #N/A | #N/A | #N/A | #N/A | 0.50 | 0.12 | 0.56 | 0.16 | 0.50 |
| 1.17 | 0.51 | 1.14 | 0.44 | #N/A | #N/A | #N/A | #N/A | 1.15 | 0.49 | #N/A |
| 1.63 | 0.71 | 1.57 | 0.60 | 1.88 | 0.71 | 1.84 | 0.79 | 1.72 | 0.73 | 1.49 |
| 2.71 | 0.93 | 2.95 | 0.91 | 3.74 | 0.97 | 2.83 | 0.95 | 3.46 | 0.98 | 2.06 |
| 1.41 | 0.62 | 1.34 | 0.52 | 1.14 | 0.42 | 1.27 | 0.56 | 1.42 | 0.62 | 1.13 |
| 1.10 | 0.45 | 0.97 | 0.36 | 1.09 | 0.41 | 0.90 | 0.37 | 0.71 | 0.25 | 1.05 |
| 1.51 | 0.63 | #N/A | #N/A | #N/A | #N/A | #N/A | #N/A | 0.55 | 0.15 | #N/A |
| #N/A | #N/A | 1.14 | 0.42 | #N/A | #N/A | #N/A | #N/A | 1.08 | 0.42 | 1.99 |
| 0.56 | 0.21 | 2.00 | 0.72 | #N/A | #N/A | 1.41 | 0.63 | 1.33 | 0.58 | 1.49 |
| 1.11 | 0.46 | 1.29 | 0.50 | 0.99 | 0.36 | 1.08 | 0.46 | 1.19 | 0.50 | 0.94 |
| 1.05 | 0.39 | 1.38 | 0.53 | 1.27 | 0.48 | 1.27 | 0.56 | 0.92 | 0.37 | 1.27 |
| 1.66 | 0.71 | 1.03 | 0.38 | #N/A | #N/A | #N/A | #N/A | 0.82 | 0.31 | 0.63 |
| 0.76 | 0.27 | 1.69 | 0.63 | #N/A | #N/A | 0.76 | 0.28 | 1.08 | 0.45 | 1.27 |
| 0.43 | 0.07 | 0.22 | 0.02 | 0.33 | 0.04 | 0.23 | 0.01 | 0.27 | 0.02 | 0.34 |
| 0.39 | 0.05 | 0.28 | 0.04 | 0.23 | 0.02 | 0.31 | 0.04 | 0.27 | 0.02 | 0.47 |
| 1.42 | 0.62 | 1.69 | 0.65 | 1.53 | 0.60 | 1.64 | 0.72 | 1.65 | 0.69 | 1.32 |
| 1.93 | 0.80 | 2.16 | 0.78 | 1.81 | 0.66 | 1.50 | 0.67 | 1.76 | 0.75 | 1.64 |
| 1.53 | 0.67 | 1.70 | 0.65 | 1.66 | 0.65 | 1.52 | 0.66 | 1.40 | 0.60 | 1.59 |
| 0.71 | 0.21 | 0.79 | 0.28 | 0.89 | 0.30 | 0.76 | 0.28 | 0.80 | 0.30 | 0.95 |
| 0.75 | 0.23 | 0.79 | 0.28 | 0.82 | 0.26 | 0.67 | 0.23 | 0.79 | 0.29 | 0.92 |
| 1.45 | 0.59 | 6.89 | 0.91 | 4.01 | 0.86 | 1.87 | 0.78 | 1.35 | 0.58 | 1.79 |
| 1.12 | 0.47 | 1.78 | 0.67 | 1.65 | 0.64 | 1.15 | 0.51 | 1.05 | 0.45 | 1.22 |
| 0.97 | 0.38 | 1.01 | 0.38 | 1.00 | 0.36 | 0.99 | 0.42 | 1.04 | 0.44 | 1.15 |
| 2.26 | 0.88 | 2.65 | 0.88 | 2.41 | 0.84 | 2.38 | 0.90 | 2.08 | 0.83 | 1.90 |
| 1.99 | 0.83 | 2.00 | 0.74 | 2.00 | 0.75 | 2.09 | 0.85 | 2.09 | 0.83 | 1.67 |
| 1.12 | 0.47 | 1.13 | 0.43 | 1.24 | 0.46 | 0.97 | 0.41 | 1.11 | 0.47 | 1.11 |
| 0.61 | 0.15 | 0.44 | 0.11 | 0.40 | 0.07 | 0.45 | 0.10 | 0.43 | 0.09 | 0.66 |
| 1.63 | 0.70 | 1.27 | 0.50 | 1.10 | 0.41 | 1.13 | 0.49 | 1.10 | 0.47 | 1.26 |
| 1.02 | 0.41 | 0.92 | 0.34 | 1.19 | 0.44 | 0.74 | 0.27 | 0.73 | 0.26 | 0.81 |
| 3.26 | 0.96 | 2.38 | 0.83 | 2.58 | 0.83 | 2.23 | 0.87 | 2.63 | 0.89 | 2.20 |

|      |      |      |      |      |      |      |      |      |      |      |
|------|------|------|------|------|------|------|------|------|------|------|
| 0.46 | 0.08 | 0.45 | 0.12 | 0.58 | 0.15 | 0.52 | 0.14 | 0.65 | 0.21 | 0.59 |
| 0.49 | 0.09 | 0.34 | 0.06 | 0.44 | 0.09 | 0.37 | 0.06 | 0.38 | 0.06 | 0.49 |
| 0.37 | 0.06 | 0.20 | 0.02 | 0.19 | 0.01 | 0.27 | 0.02 | 0.26 | 0.02 | 0.17 |
| 0.12 | 0.00 | 0.38 | 0.08 | 0.45 | 0.08 | 0.45 | 0.11 | 0.46 | 0.10 | 0.40 |
| #N/A | #N/A | 0.88 | 0.32 | 0.78 | 0.24 | 1.02 | 0.43 | 0.92 | 0.37 | 0.76 |
| 1.16 | 0.49 | 1.22 | 0.47 | 1.14 | 0.43 | 1.03 | 0.44 | 0.99 | 0.40 | 1.00 |
| 1.51 | 0.66 | 2.27 | 0.81 | 2.42 | 0.84 | 1.65 | 0.72 | 1.88 | 0.77 | 1.82 |
| 1.30 | 0.56 | 1.33 | 0.52 | 1.37 | 0.53 | 1.02 | 0.43 | 1.03 | 0.43 | 1.07 |
| 0.41 | 0.07 | 0.31 | 0.05 | 0.31 | 0.03 | 0.36 | 0.05 | 0.27 | 0.02 | 0.54 |
| 1.04 | 0.43 | 0.94 | 0.35 | 0.89 | 0.30 | 0.80 | 0.31 | 0.83 | 0.32 | 0.90 |
| 0.53 | 0.10 | #N/A | #N/A | 0.54 | 0.13 | 0.37 | 0.05 | 0.50 | 0.13 | 0.67 |
| 0.32 | 0.02 | 0.18 | 0.01 | 0.30 | 0.04 | 0.27 | 0.02 | 0.26 | 0.02 | 0.22 |
| 0.69 | 0.20 | #N/A | #N/A | #N/A | #N/A | #N/A | #N/A | #N/A | #N/A | 0.24 |
| 2.04 | 0.83 | 1.18 | 0.45 | 1.22 | 0.46 | 1.01 | 0.43 | 1.90 | 0.77 | 1.05 |
| 2.32 | 0.88 | 2.52 | 0.85 | #N/A | #N/A | 1.61 | 0.71 | 2.32 | 0.87 | 1.54 |
| 1.12 | 0.48 | 0.81 | 0.29 | 0.71 | 0.21 | 0.66 | 0.22 | 0.79 | 0.30 | 0.95 |
| 0.63 | 0.20 | 0.70 | 0.24 | 0.75 | 0.23 | 0.71 | 0.25 | 0.84 | 0.32 | 0.84 |
| 0.38 | 0.04 | 0.37 | 0.08 | 0.41 | 0.07 | 0.33 | 0.04 | 0.42 | 0.08 | 0.38 |
| 0.77 | 0.26 | 0.73 | 0.25 | 0.69 | 0.20 | 0.69 | 0.24 | 0.86 | 0.33 | 0.72 |
| 0.49 | 0.08 | 0.68 | 0.22 | 0.66 | 0.19 | 0.77 | 0.28 | 0.62 | 0.20 | 0.60 |
| #N/A | #N/A | #N/A | #N/A | #N/A | #N/A | #N/A | #N/A | #N/A | #N/A | #N/A |
| 1.03 | 0.42 | 1.65 | 0.63 | 1.20 | 0.45 | 1.06 | 0.46 | 1.01 | 0.42 | 1.12 |
| 0.54 | 0.11 | 0.80 | 0.28 | 0.69 | 0.22 | 0.59 | 0.18 | 0.55 | 0.15 | 0.83 |
| 0.54 | 0.11 | 0.67 | 0.22 | 0.55 | 0.14 | 0.53 | 0.14 | 0.50 | 0.12 | 0.75 |
| 0.72 | 0.22 | 0.80 | 0.28 | 0.95 | 0.34 | 0.71 | 0.25 | 1.13 | 0.47 | 0.90 |
| #N/A | #N/A | #N/A | #N/A | #N/A | #N/A | #N/A | #N/A | #N/A | #N/A | #N/A |
| 1.05 | 0.43 | 1.04 | 0.40 | 1.02 | 0.37 | 0.99 | 0.42 | 1.19 | 0.52 | 0.77 |
| #N/A | #N/A | #N/A | #N/A | #N/A | #N/A | 1.83 | 0.77 | 1.89 | 0.77 | #N/A |
| #N/A | #N/A | 2.38 | 0.83 | 3.37 | 0.95 | 2.43 | 0.89 | 2.19 | 0.84 | #N/A |
| 0.92 | 0.35 | 0.95 | 0.35 | 0.99 | 0.36 | 0.92 | 0.38 | 0.90 | 0.36 | 0.83 |
| #N/A | #N/A | #N/A | #N/A | #N/A | #N/A | #N/A | #N/A | #N/A | #N/A | #N/A |
| 1.68 | 0.73 | 2.02 | 0.75 | 1.46 | 0.56 | 1.51 | 0.67 | 1.95 | 0.78 | #N/A |
| #N/A | #N/A | #N/A | #N/A | #N/A | #N/A | #N/A | #N/A | #N/A | #N/A | #N/A |
| #N/A | #N/A | #N/A | #N/A | #N/A | #N/A | #N/A | #N/A | #N/A | #N/A | #N/A |
| #N/A | #N/A | #N/A | #N/A | #N/A | #N/A | #N/A | #N/A | #N/A | #N/A | #N/A |
| 1.03 | 0.42 | 1.26 | 0.49 | 1.52 | 0.59 | 1.13 | 0.50 | 1.11 | 0.47 | 1.17 |
| 2.09 | 0.85 | 2.13 | 0.76 | 1.90 | 0.72 | 2.22 | 0.87 | 2.22 | 0.86 | 1.62 |
| 1.35 | 0.60 | 1.72 | 0.66 | 1.49 | 0.58 | 1.05 | 0.45 | 1.23 | 0.53 | 1.35 |
| 0.49 | 0.09 | #N/A | #N/A | #N/A | #N/A | #N/A | #N/A | 0.32 | 0.03 | 0.53 |
| 0.31 | 0.03 | 0.27 | 0.04 | 0.40 | 0.06 | 0.30 | 0.03 | 0.36 | 0.05 | 0.37 |
| 0.52 | 0.10 | 0.48 | 0.13 | 0.44 | 0.09 | 0.41 | 0.08 | 0.60 | 0.18 | 0.81 |
| 1.58 | 0.69 | 1.66 | 0.63 | 1.38 | 0.53 | 1.30 | 0.58 | 1.41 | 0.62 | 1.50 |
| 0.99 | 0.38 | 1.27 | 0.50 | 1.00 | 0.37 | 0.93 | 0.38 | 1.08 | 0.46 | 1.62 |
| 0.65 | 0.18 | 0.48 | 0.13 | 0.51 | 0.12 | 0.51 | 0.13 | 0.58 | 0.17 | 0.58 |
| #N/A | #N/A | #N/A | #N/A | #N/A | #N/A | #N/A | #N/A | #N/A | #N/A | #N/A |
| #N/A | #N/A | #N/A | #N/A | #N/A | #N/A | #N/A | #N/A | #N/A | #N/A | #N/A |
| #N/A | #N/A | #N/A | #N/A | #N/A | #N/A | #N/A | #N/A | 0.58 | 0.17 | 0.90 |
| #N/A | #N/A | #N/A | #N/A | #N/A | #N/A | #N/A | #N/A | #N/A | #N/A | #N/A |
| 1.38 | 0.58 | 1.28 | 0.50 | 1.66 | 0.62 | 0.89 | 0.36 | 1.24 | 0.53 | 0.89 |
| 2.12 | 0.80 | #N/A | #N/A | 1.30 | 0.48 | 1.26 | 0.56 | 1.24 | 0.54 | 1.47 |
| 2.89 | 0.94 | 2.37 | 0.81 | 2.01 | 0.73 | 1.67 | 0.70 | 2.70 | 0.92 | 1.73 |





|      |      |      |      |      |      |      |      |      |      |      |
|------|------|------|------|------|------|------|------|------|------|------|
| 1.70 | 0.74 | 1.90 | 0.71 | 1.27 | 0.48 | 1.21 | 0.54 | 1.57 | 0.68 | 1.68 |
| #N/A | #N/A | #N/A | #N/A | #N/A | #N/A | #N/A | #N/A | #N/A | #N/A | #N/A |
| 0.95 | 0.37 | 0.79 | 0.28 | 0.78 | 0.26 | 0.99 | 0.41 | 0.85 | 0.33 | 0.69 |
| 0.92 | 0.34 | 1.08 | 0.41 | 0.83 | 0.28 | 0.90 | 0.36 | 0.92 | 0.37 | 0.96 |
| 2.51 | 0.72 | #N/A | #N/A | #N/A | #N/A | #N/A | #N/A | 1.04 | 0.42 | 0.76 |
| #N/A | #N/A | #N/A | #N/A | #N/A | #N/A | #N/A | #N/A | #N/A | #N/A | #N/A |
| 2.54 | 0.89 | 3.02 | 0.92 | 2.71 | 0.86 | 2.76 | 0.95 | 3.17 | 0.95 | 1.94 |
| 0.64 | 0.17 | 0.73 | 0.25 | 0.77 | 0.24 | 0.78 | 0.29 | 0.68 | 0.23 | 0.88 |
| 0.88 | 0.31 | 0.81 | 0.28 | 0.55 | 0.14 | 0.94 | 0.39 | 0.87 | 0.34 | #N/A |
| 1.97 | 0.83 | 1.65 | 0.63 | 1.83 | 0.63 | 1.46 | 0.64 | 1.50 | 0.65 | 1.12 |
| 0.56 | 0.13 | 0.40 | 0.09 | #N/A | #N/A | #N/A | #N/A | 0.39 | 0.07 | 0.67 |
| #N/A | #N/A | 1.42 | 0.55 | 1.32 | 0.51 | 0.92 | 0.38 | 1.13 | 0.48 | #N/A |
| #N/A | #N/A | #N/A | #N/A | #N/A | #N/A | #N/A | #N/A | 0.45 | 0.10 | 0.52 |
| 1.03 | 0.42 | 0.89 | 0.32 | 1.04 | 0.38 | 1.04 | 0.45 | 0.98 | 0.40 | 0.96 |
| #N/A | #N/A | 0.44 | 0.11 | 0.42 | 0.08 | 0.61 | 0.19 | 0.47 | 0.11 | 0.73 |
| #N/A | #N/A | #N/A | #N/A | #N/A | #N/A | #N/A | #N/A | 1.48 | 0.61 | #N/A |
| 0.35 | 0.03 | 0.21 | 0.02 | 0.30 | 0.03 | 0.26 | 0.02 | 0.34 | 0.05 | 0.28 |
| 0.77 | 0.25 | 0.72 | 0.25 | #N/A | #N/A | #N/A | #N/A | 1.14 | 0.49 | #N/A |
| 2.65 | 0.89 | 3.23 | 0.94 | 2.50 | 0.85 | 2.94 | 0.96 | 3.22 | 0.97 | 2.09 |
| 1.03 | 0.42 | 1.08 | 0.41 | 1.22 | 0.47 | 0.89 | 0.36 | 1.10 | 0.46 | 0.92 |
| 1.83 | 0.74 | 1.70 | 0.65 | 1.52 | 0.58 | 1.24 | 0.55 | 1.40 | 0.61 | 1.36 |
| 0.55 | 0.12 | 0.52 | 0.15 | #N/A | #N/A | 0.59 | 0.18 | 0.58 | 0.17 | 0.59 |
| #N/A | #N/A | #N/A | #N/A | #N/A | #N/A | #N/A | #N/A | #N/A | #N/A | #N/A |
| 1.67 | 0.73 | 2.75 | 0.88 | 2.14 | 0.79 | 1.89 | 0.80 | 2.19 | 0.86 | 1.54 |
| #N/A | #N/A | #N/A | #N/A | #N/A | #N/A | #N/A | #N/A | #N/A | #N/A | #N/A |
| #N/A | #N/A | #N/A | #N/A | #N/A | #N/A | #N/A | #N/A | #N/A | #N/A | #N/A |
| 1.10 | 0.46 | 2.05 | 0.75 | 1.65 | 0.64 | 1.47 | 0.65 | 1.99 | 0.81 | 1.45 |
| 0.68 | 0.20 | #N/A | #N/A | #N/A | #N/A | 0.66 | 0.22 | #N/A | #N/A | 0.68 |
| #N/A | #N/A | #N/A | #N/A | #N/A | #N/A | #N/A | #N/A | #N/A | #N/A | #N/A |
| 2.05 | 0.84 | 1.87 | 0.70 | 1.51 | 0.58 | 1.83 | 0.78 | 1.96 | 0.80 | 1.53 |
| 1.23 | 0.53 | #N/A | #N/A | 0.81 | 0.27 | 0.86 | 0.35 | 0.83 | 0.32 | 0.88 |
| 1.66 | 0.72 | 2.26 | 0.80 | 2.08 | 0.77 | 2.23 | 0.85 | 1.42 | 0.62 | 1.72 |
| 2.91 | 0.95 | 2.64 | 0.88 | 1.93 | 0.73 | 1.82 | 0.78 | 2.25 | 0.87 | #N/A |
| #N/A | #N/A | #N/A | #N/A | #N/A | #N/A | #N/A | #N/A | #N/A | #N/A | #N/A |
| 3.11 | 0.94 | 2.19 | 0.79 | 4.11 | 0.97 | 1.95 | 0.80 | 2.24 | 0.86 | 2.37 |
| 1.16 | 0.48 | 0.60 | 0.19 | #N/A | #N/A | #N/A | #N/A | 0.64 | 0.21 | 0.73 |
| #N/A | #N/A | #N/A | #N/A | #N/A | #N/A | #N/A | #N/A | #N/A | #N/A | #N/A |
| 1.74 | 0.75 | 1.76 | 0.67 | 1.78 | 0.69 | 1.37 | 0.60 | 1.31 | 0.56 | 1.15 |
| 1.52 | 0.67 | 1.10 | 0.42 | 1.30 | 0.50 | 0.87 | 0.34 | 0.90 | 0.35 | 1.18 |
| 1.38 | 0.60 | 1.04 | 0.39 | 0.94 | 0.34 | 0.63 | 0.20 | 0.65 | 0.21 | 0.69 |
| 1.45 | 0.60 | 1.52 | 0.59 | #N/A | #N/A | 1.53 | 0.68 | 1.43 | 0.62 | 1.26 |
| #N/A | #N/A | #N/A | #N/A | #N/A | #N/A | #N/A | #N/A | #N/A | #N/A | #N/A |
| 3.97 | 0.98 | 3.65 | 0.96 | 3.19 | 0.94 | 2.76 | 0.95 | 3.14 | 0.96 | 2.22 |
| 0.92 | 0.35 | 0.88 | 0.32 | 0.84 | 0.29 | 0.93 | 0.38 | 1.14 | 0.48 | 0.80 |
| 1.69 | 0.74 | 1.66 | 0.63 | 1.63 | 0.64 | 1.63 | 0.71 | 1.69 | 0.72 | 1.27 |
| 1.99 | 0.83 | 2.49 | 0.86 | 2.40 | 0.83 | 2.53 | 0.92 | 2.29 | 0.88 | 2.08 |
| 2.09 | 0.85 | 3.21 | 0.94 | 2.59 | 0.87 | 2.74 | 0.94 | 2.84 | 0.95 | 2.38 |
| #N/A | #N/A | #N/A | #N/A | #N/A | #N/A | #N/A | #N/A | #N/A | #N/A | 0.46 |
| 3.86 | 0.99 | 2.37 | 0.83 | 1.84 | 0.70 | 2.68 | 0.92 | 2.46 | 0.89 | 1.80 |
| #N/A | #N/A | #N/A | #N/A | #N/A | #N/A | #N/A | #N/A | 0.29 | 0.03 | #N/A |
| 1.02 | 0.42 | 0.77 | 0.27 | 0.95 | 0.34 | 0.95 | 0.40 | 0.73 | 0.26 | 1.04 |

|      |      |      |      |      |      |      |      |      |      |      |
|------|------|------|------|------|------|------|------|------|------|------|
| #N/A | #N/A | 2.09 | 0.76 | 4.27 | 0.93 | 2.26 | 0.86 | 2.38 | 0.87 | 1.73 |
| 0.83 | 0.28 | 1.66 | 0.64 | 1.43 | 0.55 | 1.05 | 0.45 | 1.34 | 0.59 | 1.30 |
| 1.14 | 0.49 | 1.38 | 0.53 | 1.63 | 0.62 | 1.05 | 0.44 | 0.93 | 0.37 | 0.95 |
| #N/A | #N/A | #N/A | #N/A | #N/A | #N/A | #N/A | #N/A | #N/A | #N/A | #N/A |
| 1.39 | 0.61 | 1.61 | 0.62 | 2.02 | 0.76 | 1.48 | 0.66 | 1.22 | 0.53 | 1.37 |
| #N/A | #N/A | #N/A | #N/A | #N/A | #N/A | #N/A | #N/A | #N/A | #N/A | #N/A |
| #N/A | #N/A | #N/A | #N/A | #N/A | #N/A | #N/A | #N/A | #N/A | #N/A | 0.54 |
| 1.71 | 0.74 | 1.79 | 0.68 | 2.07 | 0.77 | 1.55 | 0.68 | 2.09 | 0.84 | 1.63 |
| #N/A | #N/A | 1.18 | 0.46 | 1.11 | 0.40 | 1.27 | 0.56 | 1.47 | 0.64 | 0.96 |
| 0.90 | 0.33 | 1.03 | 0.39 | 0.99 | 0.36 | 0.88 | 0.35 | 0.95 | 0.39 | 0.73 |
| 1.87 | 0.80 | 2.84 | 0.90 | 2.28 | 0.82 | 1.98 | 0.82 | 1.97 | 0.81 | 1.96 |
| #N/A | #N/A | 1.11 | 0.43 | #N/A | #N/A | #N/A | #N/A | 1.44 | 0.62 | 1.23 |
| 1.42 | 0.63 | 2.69 | 0.89 | 2.53 | 0.86 | 2.00 | 0.83 | 2.07 | 0.81 | #N/A |
| #N/A | #N/A | #N/A | #N/A | #N/A | #N/A | #N/A | #N/A | #N/A | #N/A | #N/A |
| 3.10 | 0.94 | 3.42 | 0.95 | #N/A | #N/A | 2.79 | 0.94 | 3.40 | 0.97 | 2.17 |
| 1.36 | 0.59 | 1.73 | 0.66 | 1.82 | 0.69 | 1.37 | 0.61 | 1.26 | 0.55 | 1.62 |
| 1.45 | 0.63 | 2.12 | 0.77 | 1.65 | 0.63 | 1.59 | 0.70 | 1.40 | 0.61 | 1.44 |
| #N/A | #N/A | #N/A | #N/A | #N/A | #N/A | #N/A | #N/A | 1.88 | 0.75 | 1.81 |
| #N/A | #N/A | #N/A | #N/A | #N/A | #N/A | #N/A | #N/A | #N/A | #N/A | #N/A |
| 3.61 | 0.95 | 3.78 | 0.97 | 3.15 | 0.93 | 3.26 | 0.97 | 4.52 | 1.00 | 1.94 |
| 2.17 | 0.87 | 1.45 | 0.54 | 1.54 | 0.59 | 1.95 | 0.81 | 2.02 | 0.82 | #N/A |
| 3.79 | 0.96 | 2.18 | 0.78 | 2.37 | 0.83 | 8.76 | 0.91 | 2.57 | 0.88 | 2.37 |
| #N/A | #N/A | 1.39 | 0.54 | 1.99 | 0.75 | 1.38 | 0.60 | 1.61 | 0.69 | 1.03 |
| 1.33 | 0.58 | 1.98 | 0.74 | #N/A | #N/A | 1.64 | 0.72 | 1.28 | 0.56 | 1.32 |
| 1.67 | 0.72 | 1.34 | 0.52 | 1.25 | 0.47 | 1.10 | 0.48 | 1.44 | 0.63 | 1.33 |
| #N/A | #N/A | #N/A | #N/A | #N/A | #N/A | #N/A | #N/A | #N/A | #N/A | #N/A |
| 2.01 | 0.83 | 2.95 | 0.91 | 2.87 | 0.91 | 3.20 | 0.97 | 3.02 | 0.96 | 2.38 |
| 0.65 | 0.18 | #N/A | #N/A | #N/A | #N/A | 0.47 | 0.11 | 0.35 | 0.06 | 0.48 |
| #N/A | #N/A | #N/A | #N/A | #N/A | #N/A | #N/A | #N/A | 1.22 | 0.53 | #N/A |
| 3.23 | 0.97 | 3.69 | 0.96 | 6.06 | 0.99 | 2.29 | 0.88 | 2.51 | 0.91 | 1.29 |
| #N/A | #N/A | #N/A | #N/A | #N/A | #N/A | #N/A | #N/A | #N/A | #N/A | #N/A |
| 1.68 | 0.61 | 1.63 | 0.62 | #N/A | #N/A | 1.00 | 0.42 | 1.12 | 0.48 | #N/A |
| 1.47 | 0.60 | #N/A | #N/A | #N/A | #N/A | 1.70 | 0.74 | 1.76 | 0.74 | #N/A |
| #N/A | #N/A | #N/A | #N/A | 3.18 | 0.93 | 1.79 | 0.74 | 1.90 | 0.78 | 1.58 |
| 0.69 | 0.21 | #N/A | #N/A | #N/A | #N/A | #N/A | #N/A | #N/A | #N/A | #N/A |
| #N/A | #N/A | #N/A | #N/A | #N/A | #N/A | #N/A | #N/A | #N/A | #N/A | #N/A |
| 1.49 | 0.66 | 1.90 | 0.71 | 1.77 | 0.66 | 1.62 | 0.71 | 1.60 | 0.68 | 1.38 |
| #N/A | #N/A | #N/A | #N/A | #N/A | #N/A | #N/A | #N/A | #N/A | #N/A | #N/A |
| 1.75 | 0.73 | 1.99 | 0.74 | 2.04 | 0.75 | 1.52 | 0.68 | 1.79 | 0.76 | 1.51 |
| 1.84 | 0.78 | 1.39 | 0.54 | 1.39 | 0.53 | 1.44 | 0.64 | 1.44 | 0.63 | 0.96 |
| #N/A | #N/A | #N/A | #N/A | #N/A | #N/A | #N/A | #N/A | #N/A | #N/A | 1.11 |
| 1.53 | 0.67 | 1.42 | 0.55 | #N/A | #N/A | 0.99 | 0.42 | 1.16 | 0.47 | 1.15 |
| #N/A | #N/A | #N/A | #N/A | #N/A | #N/A | #N/A | #N/A | #N/A | #N/A | #N/A |
| 2.62 | 0.93 | #N/A | #N/A | #N/A | #N/A | 3.30 | 0.98 | 2.91 | 0.95 | 2.82 |
| 1.79 | 0.76 | 1.17 | 0.45 | 1.10 | 0.39 | 1.27 | 0.57 | 1.34 | 0.58 | 1.20 |
| #N/A | #N/A | #N/A | #N/A | #N/A | #N/A | #N/A | #N/A | #N/A | #N/A | #N/A |
| #N/A | #N/A | #N/A | #N/A | #N/A | #N/A | 1.46 | 0.63 | 1.25 | 0.53 | #N/A |
| 1.56 | 0.69 | 1.32 | 0.52 | 2.01 | 0.75 | 1.62 | 0.71 | 1.66 | 0.71 | 1.50 |
| 2.01 | 0.83 | 2.06 | 0.76 | 2.81 | 0.90 | 1.76 | 0.76 | 2.15 | 0.85 | 1.98 |
| 1.45 | 0.64 | 0.87 | 0.32 | 1.10 | 0.40 | 1.24 | 0.55 | 0.93 | 0.37 | 1.17 |
| 0.98 | 0.39 | 1.58 | 0.61 | 1.24 | 0.47 | 0.89 | 0.36 | 1.01 | 0.42 | 1.39 |





|      |      |      |      |      |      |      |      |      |      |      |
|------|------|------|------|------|------|------|------|------|------|------|
| 0.76 | 0.26 | 0.51 | 0.15 | 0.42 | 0.07 | 0.52 | 0.14 | 0.44 | 0.09 | #N/A |
| #N/A | #N/A | 2.05 | 0.75 | 1.79 | 0.68 | 1.76 | 0.75 | 1.77 | 0.75 | 1.37 |
| 1.97 | 0.83 | 1.61 | 0.62 | 1.69 | 0.65 | 1.93 | 0.81 | #N/A | #N/A | 1.39 |
| #N/A | #N/A | #N/A | #N/A | #N/A | #N/A | #N/A | #N/A | #N/A | #N/A | 2.39 |
| 2.15 | 0.86 | 2.34 | 0.82 | #N/A | #N/A | 1.91 | 0.80 | 2.80 | 0.85 | 1.77 |
| 1.30 | 0.57 | 1.13 | 0.43 | 1.13 | 0.42 | 1.14 | 0.50 | 1.11 | 0.47 | 1.24 |
| #N/A | #N/A | #N/A | #N/A | #N/A | #N/A | #N/A | #N/A | #N/A | #N/A | #N/A |
| 1.48 | 0.65 | 2.17 | 0.79 | 1.81 | 0.68 | 1.64 | 0.72 | 1.73 | 0.73 | 1.28 |
| #N/A | #N/A | #N/A | #N/A | #N/A | #N/A | #N/A | #N/A | #N/A | #N/A | #N/A |
| 0.65 | 0.20 | #N/A | #N/A | #N/A | #N/A | 0.52 | 0.14 | 0.65 | 0.21 | 0.62 |
| #N/A | #N/A | #N/A | #N/A | #N/A | #N/A | #N/A | #N/A | #N/A | #N/A | #N/A |
| 0.93 | 0.35 | 0.72 | 0.24 | 0.79 | 0.27 | 0.89 | 0.36 | 0.91 | 0.36 | 0.98 |
| #N/A | #N/A | #N/A | #N/A | #N/A | #N/A | 0.79 | 0.30 | 0.70 | 0.24 | 0.84 |
| 0.68 | 0.19 | 0.55 | 0.16 | 0.68 | 0.20 | 0.62 | 0.19 | 0.58 | 0.17 | 0.87 |
| 0.53 | 0.11 | 0.23 | 0.02 | 0.28 | 0.03 | 0.39 | 0.08 | 0.34 | 0.04 | #N/A |
| 0.37 | 0.04 | 0.23 | 0.02 | 0.29 | 0.03 | 0.21 | 0.01 | 0.30 | 0.03 | 0.73 |
| 1.36 | 0.60 | 1.99 | 0.73 | 1.62 | 0.63 | 1.77 | 0.77 | 1.78 | 0.75 | 1.28 |
| #N/A | #N/A | #N/A | #N/A | #N/A | #N/A | #N/A | #N/A | #N/A | #N/A | #N/A |
| 0.44 | 0.06 | 0.29 | 0.04 | 0.32 | 0.04 | 0.35 | 0.05 | 0.34 | 0.04 | 0.86 |
| 0.53 | 0.10 | 0.31 | 0.05 | 0.32 | 0.04 | 0.38 | 0.06 | 0.41 | 0.07 | 0.78 |
| 1.33 | 0.59 | 1.37 | 0.53 | 1.07 | 0.39 | 0.99 | 0.41 | 0.94 | 0.38 | 1.02 |
| 3.30 | 0.97 | 2.64 | 0.87 | 2.04 | 0.75 | 2.01 | 0.82 | 2.53 | 0.89 | 2.27 |
| #N/A | #N/A | #N/A | #N/A | #N/A | #N/A | #N/A | #N/A | #N/A | #N/A | 0.45 |
| 1.15 | 0.49 | 1.54 | 0.59 | #N/A | #N/A | 0.95 | 0.39 | 1.03 | 0.42 | 1.01 |
| 0.45 | 0.09 | #N/A | #N/A | #N/A | #N/A | #N/A | #N/A | 0.49 | 0.12 | 0.24 |
| 0.43 | 0.06 | 0.43 | 0.11 | 0.54 | 0.14 | 0.78 | 0.29 | 0.61 | 0.19 | 0.49 |
| 0.98 | 0.39 | 0.96 | 0.36 | 1.30 | 0.50 | 0.73 | 0.26 | 0.95 | 0.39 | 0.86 |
| 0.43 | 0.07 | #N/A | #N/A | #N/A | #N/A | #N/A | #N/A | 0.34 | 0.04 | 0.49 |
| 1.43 | 0.62 | 1.13 | 0.43 | 1.19 | 0.44 | 1.25 | 0.56 | 1.55 | 0.67 | 1.05 |
| 0.60 | 0.15 | 0.46 | 0.12 | 0.31 | 0.03 | 0.34 | 0.04 | 0.50 | 0.12 | 0.70 |
| 0.35 | 0.03 | 0.41 | 0.09 | 0.44 | 0.08 | 0.36 | 0.06 | 0.59 | 0.18 | 0.35 |
| 0.91 | 0.33 | 0.68 | 0.22 | #N/A | #N/A | 0.79 | 0.30 | 0.54 | 0.14 | 0.58 |
| #N/A | #N/A | #N/A | #N/A | #N/A | #N/A | #N/A | #N/A | #N/A | #N/A | #N/A |
| 0.63 | 0.16 | #N/A | #N/A | #N/A | #N/A | #N/A | #N/A | 0.52 | 0.14 | 0.50 |
| 2.00 | 0.83 | 2.55 | 0.86 | 2.24 | 0.80 | 1.46 | 0.65 | #N/A | #N/A | 1.73 |
| 2.02 | 0.84 | 1.56 | 0.60 | 1.61 | 0.63 | 1.78 | 0.77 | 1.59 | 0.69 | 1.62 |
| #N/A | #N/A | #N/A | #N/A | #N/A | #N/A | #N/A | #N/A | #N/A | #N/A | #N/A |
| #N/A | #N/A | 1.42 | 0.55 | #N/A | #N/A | 1.80 | 0.73 | 1.25 | 0.54 | #N/A |
| #N/A | #N/A | 3.63 | 0.95 | #N/A | #N/A | #N/A | #N/A | #N/A | #N/A | #N/A |
| 1.65 | 0.71 | 1.27 | 0.49 | #N/A | #N/A | 1.40 | 0.63 | 0.86 | 0.34 | 1.06 |
| 1.50 | 0.65 | 1.73 | 0.65 | #N/A | #N/A | 1.61 | 0.69 | 1.62 | 0.69 | 1.14 |
| 0.97 | 0.38 | 0.88 | 0.32 | 1.10 | 0.41 | 0.86 | 0.34 | 1.02 | 0.41 | 1.16 |
| 1.07 | 0.45 | 1.61 | 0.62 | 1.31 | 0.50 | 1.25 | 0.55 | 1.20 | 0.52 | 1.19 |
| 0.48 | 0.08 | 0.34 | 0.07 | 0.32 | 0.04 | 0.43 | 0.09 | 0.39 | 0.06 | 0.48 |
| 0.52 | 0.11 | 0.26 | 0.04 | #N/A | #N/A | 0.30 | 0.03 | 0.31 | 0.03 | #N/A |
| #N/A | #N/A | 0.62 | 0.20 | 0.87 | 0.30 | 0.68 | 0.23 | #N/A | #N/A | 0.65 |
| 1.00 | 0.40 | 1.07 | 0.41 | 0.92 | 0.32 | 1.04 | 0.45 | 1.13 | 0.48 | 0.94 |
| #N/A | #N/A | 1.23 | 0.47 | 1.62 | 0.63 | 1.34 | 0.60 | 1.36 | 0.59 | 1.67 |
| 2.87 | 0.94 | 2.59 | 0.86 | 2.87 | 0.90 | 2.51 | 0.92 | 2.92 | 0.95 | 2.39 |
| #N/A | #N/A | 1.48 | 0.57 | 2.25 | 0.81 | 1.11 | 0.48 | 0.89 | 0.35 | 1.08 |
| 0.90 | 0.34 | 0.90 | 0.32 | 0.93 | 0.31 | 0.74 | 0.27 | 0.72 | 0.25 | 0.62 |

|      |      |      |      |      |      |      |      |      |      |      |
|------|------|------|------|------|------|------|------|------|------|------|
| 0.45 | 0.06 | 0.40 | 0.09 | 0.50 | 0.12 | 0.47 | 0.11 | 0.50 | 0.13 | 0.61 |
| #N/A | #N/A | 1.69 | 0.64 | 1.92 | 0.72 | 1.49 | 0.66 | 1.75 | 0.74 | 1.54 |
| 0.85 | 0.31 | 0.77 | 0.27 | 0.93 | 0.32 | 0.71 | 0.25 | 0.82 | 0.31 | 0.92 |
| #N/A | #N/A | #N/A | #N/A | #N/A | #N/A | #N/A | #N/A | #N/A | #N/A | 0.42 |
| 2.08 | 0.85 | 1.75 | 0.66 | 2.54 | 0.85 | 1.42 | 0.63 | 1.66 | 0.71 | #N/A |
| #N/A | #N/A | #N/A | #N/A | #N/A | #N/A | #N/A | #N/A | #N/A | #N/A | #N/A |
| 1.15 | 0.49 | 1.14 | 0.44 | 1.52 | 0.59 | 1.69 | 0.74 | 1.21 | 0.52 | 0.90 |
| 0.92 | 0.35 | 0.66 | 0.21 | 0.76 | 0.25 | 0.96 | 0.40 | 0.92 | 0.37 | 0.93 |
| #N/A | #N/A | #N/A | #N/A | #N/A | #N/A | #N/A | #N/A | #N/A | #N/A | 1.05 |
| 1.72 | 0.74 | 1.51 | 0.58 | 1.66 | 0.64 | 1.20 | 0.53 | 1.39 | 0.61 | 1.20 |
| 4.19 | 0.51 | 2.55 | 0.85 | 2.33 | 0.82 | 1.84 | 0.77 | 2.82 | 0.92 | 2.54 |
| 2.91 | 0.94 | 2.65 | 0.88 | 3.12 | 0.93 | 2.45 | 0.91 | 2.49 | 0.91 | 2.46 |
| 1.08 | 0.43 | 1.44 | 0.56 | 1.63 | 0.63 | 1.45 | 0.64 | 1.34 | 0.58 | 1.20 |
| 1.94 | 0.82 | 2.55 | 0.86 | 2.83 | 0.89 | 2.31 | 0.89 | 2.22 | 0.86 | 2.14 |
| 2.02 | 0.83 | 3.10 | 0.93 | 3.64 | 0.96 | 3.17 | 0.97 | 3.27 | 0.97 | 2.01 |
| 1.51 | 0.60 | 2.29 | 0.80 | 2.45 | 0.82 | 2.62 | 0.92 | 3.03 | 0.96 | #N/A |
| #N/A | #N/A | 2.53 | 0.86 | 2.06 | 0.74 | 1.93 | 0.80 | 2.17 | 0.85 | 1.56 |
| 2.01 | 0.84 | 1.78 | 0.68 | 2.02 | 0.76 | 1.54 | 0.68 | 1.87 | 0.78 | 1.53 |
| #N/A | #N/A | #N/A | #N/A | #N/A | #N/A | #N/A | #N/A | #N/A | #N/A | #N/A |
| 1.15 | 0.46 | 0.97 | 0.36 | 1.25 | 0.47 | 1.08 | 0.47 | 0.97 | 0.40 | 0.94 |
| 3.45 | 0.97 | #N/A | #N/A | #N/A | #N/A | #N/A | #N/A | 2.84 | 0.94 | 1.95 |
| 1.89 | 0.80 | #N/A | #N/A | #N/A | #N/A | #N/A | #N/A | 2.58 | 0.91 | 1.74 |
| 0.79 | 0.27 | 0.52 | 0.15 | 0.61 | 0.17 | 0.69 | 0.24 | 0.58 | 0.17 | 0.62 |
| 1.13 | 0.47 | 0.64 | 0.20 | 0.85 | 0.28 | 0.85 | 0.33 | 0.89 | 0.35 | 0.64 |
| 0.39 | 0.04 | 0.29 | 0.04 | 0.39 | 0.06 | 0.38 | 0.06 | 0.36 | 0.05 | 0.40 |
| 1.21 | 0.52 | 1.10 | 0.42 | 0.86 | 0.29 | 0.95 | 0.40 | 0.84 | 0.32 | 1.20 |
| #N/A | #N/A | #N/A | #N/A | #N/A | #N/A | #N/A | #N/A | #N/A | #N/A | #N/A |
| 1.37 | 0.60 | 1.67 | 0.64 | 1.79 | 0.69 | 1.63 | 0.71 | 1.80 | 0.76 | 1.42 |
| 2.92 | 0.95 | 2.73 | 0.89 | 2.75 | 0.89 | 2.42 | 0.90 | 2.32 | 0.88 | 2.35 |
| 1.47 | 0.64 | 1.27 | 0.48 | #N/A | #N/A | 0.89 | 0.36 | 1.84 | 0.77 | 1.78 |
| 3.48 | 0.90 | 3.35 | 0.95 | #N/A | #N/A | 2.42 | 0.91 | 3.29 | 0.97 | 2.19 |
| 2.46 | 0.91 | #N/A | #N/A | 3.07 | 0.92 | 3.00 | 0.96 | 2.80 | 0.94 | #N/A |
| 3.06 | 0.96 | 4.70 | 0.99 | 3.93 | 0.95 | 3.00 | 0.96 | 3.18 | 0.97 | 2.83 |
| #N/A | #N/A | #N/A | #N/A | #N/A | #N/A | #N/A | #N/A | #N/A | #N/A | #N/A |
| 2.21 | 0.87 | 2.79 | 0.89 | 2.88 | 0.91 | 2.52 | 0.92 | 2.71 | 0.93 | 2.25 |
| #N/A | #N/A | #N/A | #N/A | #N/A | #N/A | #N/A | #N/A | #N/A | #N/A | #N/A |
| 3.81 | 0.98 | 3.91 | 0.97 | 4.58 | 0.96 | 4.03 | 0.99 | 3.68 | 0.99 | 2.69 |
| 3.31 | 0.97 | #N/A | #N/A | #N/A | #N/A | #N/A | #N/A | 1.44 | 0.60 | 1.18 |
| #N/A | #N/A | 2.91 | 0.91 | 2.26 | 0.80 | 2.59 | 0.93 | 2.06 | 0.83 | #N/A |
| 1.02 | 0.40 | 2.05 | 0.76 | 2.54 | 0.86 | 1.32 | 0.58 | 1.65 | 0.70 | 1.08 |
| #N/A | #N/A | 0.54 | 0.16 | 0.49 | 0.10 | 0.53 | 0.14 | 0.48 | 0.11 | 0.74 |
| 1.70 | 0.74 | 1.63 | 0.63 | 1.80 | 0.66 | 1.78 | 0.76 | 2.05 | 0.83 | 1.56 |
| 1.39 | 0.62 | 1.57 | 0.60 | #N/A | #N/A | 2.24 | 0.88 | 1.84 | 0.77 | 1.62 |
| 1.78 | 0.77 | 2.27 | 0.80 | 2.67 | 0.88 | 1.60 | 0.69 | 2.32 | 0.88 | 1.69 |
| 1.42 | 0.58 | 1.31 | 0.51 | 1.32 | 0.50 | 1.15 | 0.51 | 0.98 | 0.40 | 1.09 |
| 1.54 | 0.68 | 1.47 | 0.57 | 1.39 | 0.54 | 1.45 | 0.65 | 1.24 | 0.54 | 1.66 |
| #N/A | #N/A | #N/A | #N/A | #N/A | #N/A | #N/A | #N/A | #N/A | #N/A | #N/A |
| 2.35 | 0.89 | 1.75 | 0.66 | 2.50 | 0.83 | 1.99 | 0.83 | 2.04 | 0.82 | #N/A |
| 1.93 | 0.63 | 1.97 | 0.70 | #N/A | #N/A | #N/A | #N/A | 1.60 | 0.69 | 1.56 |
| 0.56 | 0.14 | #N/A | #N/A | #N/A | #N/A | #N/A | #N/A | #N/A | #N/A | 0.66 |
| 1.69 | 0.68 | 1.87 | 0.70 | 1.54 | 0.60 | 1.71 | 0.75 | 1.79 | 0.76 | 1.72 |

|      |      |      |      |      |      |      |      |      |      |      |
|------|------|------|------|------|------|------|------|------|------|------|
| 1.34 | 0.56 | 0.73 | 0.25 | 0.80 | 0.27 | 0.75 | 0.28 | 0.77 | 0.28 | 1.00 |
| 0.47 | 0.07 | 0.37 | 0.08 | 0.45 | 0.09 | #N/A | #N/A | 0.62 | 0.19 | 0.96 |
| 0.59 | 0.14 | 0.52 | 0.15 | 0.63 | 0.18 | 0.59 | 0.18 | 0.59 | 0.18 | 1.21 |
| 1.69 | 0.74 | 2.70 | 0.89 | 1.89 | 0.72 | 1.69 | 0.74 | 2.42 | 0.90 | 1.98 |
| #N/A | #N/A | #N/A | #N/A | #N/A | #N/A | #N/A | #N/A | 0.70 | 0.24 | #N/A |
| 1.62 | 0.71 | 2.11 | 0.77 | 1.43 | 0.56 | 1.39 | 0.62 | 1.48 | 0.64 | 1.15 |
| 1.17 | 0.50 | 1.54 | 0.59 | 1.28 | 0.49 | 0.99 | 0.42 | 1.29 | 0.56 | 1.40 |
| 0.85 | 0.31 | 0.75 | 0.26 | 0.62 | 0.17 | 0.60 | 0.18 | 0.67 | 0.23 | 1.09 |
| 0.67 | 0.19 | 0.61 | 0.19 | 0.65 | 0.18 | 0.61 | 0.19 | 0.64 | 0.20 | 1.07 |
| 0.75 | 0.23 | 0.54 | 0.16 | 0.44 | 0.09 | 0.50 | 0.13 | 0.49 | 0.12 | 1.14 |
| 1.54 | 0.68 | 1.95 | 0.72 | 1.22 | 0.46 | 0.88 | 0.35 | 1.29 | 0.56 | 1.28 |
| 0.58 | 0.14 | 0.45 | 0.11 | 0.51 | 0.12 | 0.49 | 0.12 | 0.49 | 0.12 | 1.00 |
| 1.07 | 0.44 | 0.91 | 0.33 | 0.84 | 0.28 | 0.83 | 0.32 | 0.79 | 0.29 | 0.78 |
| 0.95 | 0.36 | 0.79 | 0.28 | 1.12 | 0.42 | 0.91 | 0.37 | 0.84 | 0.33 | 0.99 |
| 0.91 | 0.34 | 0.80 | 0.28 | 1.03 | 0.38 | 0.92 | 0.38 | 0.86 | 0.33 | #N/A |
| 0.65 | 0.18 | 0.79 | 0.28 | 0.71 | 0.21 | 0.87 | 0.35 | 0.72 | 0.26 | 0.70 |
| 2.86 | 0.95 | 4.21 | 0.98 | 2.99 | 0.92 | 3.50 | 0.97 | 3.62 | 0.96 | 2.74 |
| #N/A | #N/A | 1.32 | 0.51 | 0.94 | 0.33 | 0.97 | 0.40 | 0.96 | 0.39 | #N/A |
| 1.11 | 0.47 | 1.18 | 0.46 | 0.98 | 0.35 | 0.94 | 0.39 | 1.16 | 0.50 | 1.14 |
| #N/A | #N/A | #N/A | #N/A | #N/A | #N/A | #N/A | #N/A | #N/A | #N/A | #N/A |
| 0.48 | 0.08 | #N/A | #N/A | #N/A | #N/A | #N/A | #N/A | #N/A | #N/A | 0.60 |
| #N/A | #N/A | #N/A | #N/A | #N/A | #N/A | #N/A | #N/A | 0.98 | 0.40 | 0.75 |
| #N/A | #N/A | #N/A | #N/A | #N/A | #N/A | #N/A | #N/A | #N/A | #N/A | #N/A |
| 0.74 | 0.23 | 0.49 | 0.14 | #N/A | #N/A | 0.53 | 0.14 | 0.70 | 0.24 | 0.89 |
| #N/A | #N/A | #N/A | #N/A | #N/A | #N/A | #N/A | #N/A | #N/A | #N/A | #N/A |
| 0.90 | 0.33 | 0.92 | 0.34 | 1.11 | 0.42 | 0.93 | 0.38 | 0.81 | 0.30 | 0.87 |
| 0.94 | 0.36 | 0.44 | 0.11 | 0.61 | 0.16 | 0.44 | 0.09 | 0.46 | 0.11 | 0.61 |
| 1.13 | 0.47 | 1.02 | 0.38 | 0.89 | 0.30 | 0.99 | 0.42 | 0.90 | 0.36 | 0.99 |
| 1.49 | 0.66 | 1.61 | 0.62 | 1.42 | 0.55 | 1.23 | 0.55 | 1.30 | 0.56 | 1.38 |
| 0.49 | 0.09 | #N/A | #N/A | #N/A | #N/A | 0.37 | 0.06 | 0.43 | 0.08 | 0.46 |
| 0.89 | 0.32 | 0.60 | 0.19 | 0.63 | 0.17 | 0.59 | 0.18 | 0.55 | 0.15 | 0.68 |
| #N/A | #N/A | #N/A | #N/A | #N/A | #N/A | #N/A | #N/A | #N/A | #N/A | #N/A |
| 0.93 | 0.35 | 1.41 | 0.54 | 1.17 | 0.43 | 0.80 | 0.30 | 1.35 | 0.59 | #N/A |
| 1.41 | 0.62 | 1.82 | 0.69 | 1.88 | 0.72 | 1.72 | 0.75 | 1.95 | 0.80 | 1.55 |
| 2.14 | 0.84 | 1.65 | 0.63 | 1.60 | 0.61 | 1.76 | 0.75 | 1.74 | 0.74 | #N/A |
| 2.14 | 0.86 | 2.35 | 0.83 | 2.72 | 0.85 | 1.97 | 0.82 | 2.00 | 0.81 | 1.98 |
| 1.29 | 0.57 | 1.10 | 0.42 | 1.57 | 0.60 | 1.25 | 0.56 | 1.20 | 0.52 | 1.15 |
| #N/A | #N/A | #N/A | #N/A | #N/A | #N/A | #N/A | #N/A | #N/A | #N/A | 0.41 |
| 1.53 | 0.67 | 2.10 | 0.76 | 2.61 | 0.87 | 1.70 | 0.74 | 2.48 | 0.91 | 1.58 |
| 0.88 | 0.31 | 1.20 | 0.47 | 1.05 | 0.39 | 0.92 | 0.38 | 0.93 | 0.38 | 0.97 |
| #N/A | #N/A | #N/A | #N/A | #N/A | #N/A | #N/A | #N/A | #N/A | #N/A | #N/A |
| 0.99 | 0.39 | 1.49 | 0.57 | 1.24 | 0.47 | 1.16 | 0.51 | 1.02 | 0.42 | 1.21 |
| 0.70 | 0.22 | 0.76 | 0.27 | 0.69 | 0.20 | 0.85 | 0.34 | 1.07 | 0.45 | 0.70 |
| 1.16 | 0.50 | 1.55 | 0.60 | 1.52 | 0.59 | 1.55 | 0.69 | 1.88 | 0.78 | 1.56 |
| 3.13 | 0.87 | 1.36 | 0.53 | #N/A | #N/A | 1.35 | 0.55 | 1.83 | 0.72 | 1.23 |
| 3.07 | 0.96 | 2.92 | 0.91 | 2.32 | 0.82 | 1.89 | 0.80 | 2.51 | 0.91 | 2.98 |
| #N/A | #N/A | #N/A | #N/A | #N/A | #N/A | #N/A | #N/A | #N/A | #N/A | 0.61 |
| 2.77 | 0.90 | 1.97 | 0.73 | #N/A | #N/A | 1.91 | 0.80 | 2.34 | 0.88 | 1.75 |
| 1.58 | 0.66 | 2.27 | 0.80 | 2.53 | 0.78 | 1.80 | 0.77 | 1.47 | 0.64 | #N/A |
| #N/A | #N/A | 2.92 | 0.91 | 3.95 | 0.89 | 2.58 | 0.90 | 2.98 | 0.95 | 1.78 |
| 1.18 | 0.51 | 1.26 | 0.49 | 1.22 | 0.46 | 1.12 | 0.49 | 1.26 | 0.54 | 1.02 |

|      |      |      |      |      |      |      |      |      |      |      |
|------|------|------|------|------|------|------|------|------|------|------|
| 1.22 | 0.53 | 1.19 | 0.46 | 1.08 | 0.39 | 1.00 | 0.42 | 0.98 | 0.40 | #N/A |
| 0.80 | 0.28 | 0.85 | 0.31 | 0.80 | 0.26 | 0.65 | 0.21 | 0.70 | 0.24 | 0.74 |
| #N/A | #N/A | 0.46 | 0.12 | 0.36 | 0.05 | 0.38 | 0.07 | 0.57 | 0.16 | 0.45 |
| 2.15 | 0.84 | 2.03 | 0.75 | 1.58 | 0.62 | 1.41 | 0.62 | 1.51 | 0.66 | 1.86 |
| 1.18 | 0.49 | 1.01 | 0.38 | 0.93 | 0.33 | 1.12 | 0.49 | 0.79 | 0.29 | 0.83 |
| #N/A | #N/A | #N/A | #N/A | #N/A | #N/A | #N/A | #N/A | #N/A | #N/A | #N/A |
| 1.30 | 0.56 | 1.28 | 0.50 | 1.48 | 0.57 | 1.46 | 0.65 | 1.14 | 0.49 | 1.13 |
| 1.46 | 0.65 | 1.90 | 0.71 | 1.78 | 0.68 | 1.46 | 0.65 | 1.66 | 0.71 | #N/A |
| #N/A | #N/A | #N/A | #N/A | #N/A | #N/A | #N/A | #N/A | #N/A | #N/A | #N/A |
| 1.01 | 0.41 | 1.07 | 0.41 | 0.98 | 0.35 | 0.92 | 0.38 | 1.04 | 0.44 | 1.03 |
| 0.51 | 0.09 | 0.43 | 0.11 | 0.42 | 0.08 | 0.42 | 0.08 | 0.37 | 0.06 | 0.51 |
| 0.82 | 0.28 | 0.60 | 0.18 | 0.64 | 0.18 | 0.72 | 0.26 | 0.68 | 0.23 | 0.55 |
| #N/A | #N/A | #N/A | #N/A | #N/A | #N/A | #N/A | #N/A | #N/A | #N/A | #N/A |
| 1.31 | 0.57 | 1.87 | 0.70 | 2.11 | 0.75 | 1.89 | 0.80 | 1.74 | 0.74 | 1.27 |
| 1.30 | 0.56 | 1.29 | 0.50 | 1.24 | 0.47 | 1.26 | 0.55 | 1.02 | 0.43 | 1.09 |
| 1.82 | 0.78 | 1.74 | 0.66 | 1.38 | 0.53 | 1.26 | 0.56 | 1.40 | 0.61 | #N/A |
| 0.46 | 0.07 | 0.54 | 0.16 | 0.80 | 0.26 | 0.65 | 0.21 | 0.59 | 0.17 | 0.60 |
| 1.03 | 0.41 | 1.17 | 0.44 | 1.26 | 0.48 | 0.97 | 0.41 | 0.89 | 0.35 | 0.94 |
| #N/A | #N/A | #N/A | #N/A | #N/A | #N/A | #N/A | #N/A | #N/A | #N/A | #N/A |
| 1.77 | 0.76 | 2.37 | 0.83 | 2.80 | 0.90 | 1.91 | 0.81 | 2.38 | 0.89 | 1.87 |
| 1.17 | 0.50 | 0.76 | 0.26 | 1.09 | 0.41 | 0.82 | 0.32 | 0.95 | 0.38 | 1.09 |
| 1.77 | 0.76 | 2.19 | 0.79 | 2.09 | 0.77 | 1.85 | 0.78 | 1.79 | 0.76 | 1.65 |
| #N/A | #N/A | #N/A | #N/A | #N/A | #N/A | #N/A | #N/A | #N/A | #N/A | #N/A |
| #N/A | #N/A | 0.47 | 0.12 | 0.55 | 0.14 | 0.55 | 0.15 | 0.46 | 0.10 | 0.56 |
| 1.27 | 0.55 | 0.85 | 0.31 | #N/A | #N/A | 0.63 | 0.20 | 0.51 | 0.13 | 0.80 |
| #N/A | #N/A | #N/A | #N/A | #N/A | #N/A | #N/A | #N/A | #N/A | #N/A | #N/A |
| 0.83 | 0.30 | 1.63 | 0.62 | 1.73 | 0.67 | 1.37 | 0.61 | 1.60 | 0.68 | #N/A |
| #N/A | #N/A | #N/A | #N/A | #N/A | #N/A | #N/A | #N/A | #N/A | #N/A | #N/A |
| 1.20 | 0.51 | 1.33 | 0.52 | 1.60 | 0.63 | 1.17 | 0.52 | 1.57 | 0.68 | 1.07 |
| 0.83 | 0.29 | 1.25 | 0.49 | #N/A | #N/A | 0.91 | 0.37 | 1.16 | 0.50 | 1.06 |
| #N/A | #N/A | #N/A | #N/A | #N/A | #N/A | #N/A | #N/A | #N/A | #N/A | #N/A |
| #N/A | #N/A | #N/A | #N/A | #N/A | #N/A | #N/A | #N/A | #N/A | #N/A | #N/A |
| #N/A | #N/A | #N/A | #N/A | #N/A | #N/A | #N/A | #N/A | #N/A | #N/A | #N/A |
| 1.89 | 0.81 | 2.76 | 0.90 | 2.78 | 0.88 | 2.52 | 0.89 | 2.54 | 0.91 | 1.95 |
| #N/A | #N/A | #N/A | #N/A | #N/A | #N/A | #N/A | #N/A | #N/A | #N/A | #N/A |
| 0.57 | 0.14 | 0.49 | 0.14 | 0.49 | 0.11 | 0.68 | 0.23 | 0.61 | 0.18 | 0.56 |
| 1.54 | 0.67 | 1.60 | 0.61 | 1.34 | 0.51 | 1.39 | 0.62 | 1.39 | 0.61 | 1.45 |
| 1.35 | 0.60 | 1.46 | 0.57 | 1.33 | 0.50 | 1.59 | 0.70 | 1.60 | 0.66 | 2.06 |
| 2.55 | 0.92 | 4.48 | 0.99 | 3.11 | 0.93 | 3.55 | 0.97 | 3.19 | 0.93 | 2.47 |
| 1.60 | 0.68 | 1.29 | 0.50 | 1.88 | 0.66 | 1.39 | 0.62 | 1.49 | 0.65 | 1.22 |
| #N/A | #N/A | 0.92 | 0.34 | 0.92 | 0.32 | 0.82 | 0.32 | 1.17 | 0.50 | 1.00 |
| #N/A | #N/A | #N/A | #N/A | #N/A | #N/A | #N/A | #N/A | #N/A | #N/A | 0.45 |
| 0.16 | 0.00 | 0.16 | 0.01 | 0.16 | 0.00 | 0.19 | 0.01 | 0.22 | 0.01 | 0.23 |
| 0.58 | 0.14 | 0.23 | 0.03 | #N/A | #N/A | 0.29 | 0.03 | 0.26 | 0.02 | 0.54 |
| 1.41 | 0.62 | 2.56 | 0.87 | 2.69 | 0.85 | 1.75 | 0.75 | 2.25 | 0.85 | 1.88 |
| 1.35 | 0.59 | 1.70 | 0.65 | 1.77 | 0.68 | 1.86 | 0.79 | 1.82 | 0.76 | 1.57 |
| 2.11 | 0.84 | 3.20 | 0.94 | 3.60 | 0.95 | 3.32 | 0.98 | 3.58 | 0.98 | 2.42 |
| #N/A | #N/A | #N/A | #N/A | #N/A | #N/A | 1.72 | 0.75 | 1.85 | 0.77 | 1.45 |
| #N/A | #N/A | #N/A | #N/A | #N/A | #N/A | #N/A | #N/A | #N/A | #N/A | #N/A |
| 1.92 | 0.81 | 1.60 | 0.62 | 1.83 | 0.70 | 1.43 | 0.64 | 1.50 | 0.65 | 1.57 |
| 1.72 | 0.74 | 2.06 | 0.76 | 1.27 | 0.49 | 1.08 | 0.47 | 1.33 | 0.58 | 0.99 |

|      |      |      |      |      |      |      |      |      |      |      |
|------|------|------|------|------|------|------|------|------|------|------|
| 1.15 | 0.47 | 0.97 | 0.36 | #N/A | #N/A | 0.82 | 0.32 | 0.76 | 0.28 | #N/A |
| 2.29 | 0.88 | 3.24 | 0.94 | 3.20 | 0.94 | 2.42 | 0.90 | 2.91 | 0.93 | 2.48 |
| #N/A | #N/A | #N/A | #N/A | #N/A | #N/A | #N/A | #N/A | #N/A | #N/A | #N/A |
| 1.01 | 0.41 | 1.46 | 0.57 | 1.45 | 0.57 | 1.41 | 0.63 | 1.60 | 0.69 | 1.05 |
| 2.06 | 0.82 | 1.11 | 0.43 | 1.12 | 0.41 | 1.30 | 0.57 | 1.41 | 0.61 | #N/A |
| 0.90 | 0.34 | #N/A | #N/A | #N/A | #N/A | #N/A | #N/A | #N/A | #N/A | 0.67 |
| #N/A | #N/A | #N/A | #N/A | #N/A | #N/A | #N/A | #N/A | #N/A | #N/A | #N/A |
| #N/A | #N/A | #N/A | #N/A | #N/A | #N/A | #N/A | #N/A | #N/A | #N/A | 1.54 |
| #N/A | #N/A | #N/A | #N/A | #N/A | #N/A | #N/A | #N/A | #N/A | #N/A | #N/A |
| 2.83 | 0.93 | 2.62 | 0.88 | 2.32 | 0.82 | 2.38 | 0.90 | 2.57 | 0.91 | 1.89 |
| #N/A | #N/A | #N/A | #N/A | #N/A | #N/A | #N/A | #N/A | #N/A | #N/A | #N/A |
| 3.04 | 0.96 | 4.09 | 0.98 | 3.52 | 0.96 | 4.41 | 1.00 | 3.97 | 0.99 | 2.52 |
| #N/A | #N/A | #N/A | #N/A | #N/A | #N/A | #N/A | #N/A | #N/A | #N/A | #N/A |
| 2.76 | 0.81 | #N/A | #N/A | #N/A | #N/A | #N/A | #N/A | #N/A | #N/A | #N/A |
| 1.17 | 0.50 | 1.34 | 0.52 | 1.79 | 0.68 | 1.40 | 0.62 | 1.19 | 0.51 | 1.04 |
| 2.25 | 0.86 | 1.01 | 0.38 | 2.17 | 0.76 | 1.19 | 0.53 | 1.38 | 0.60 | 0.78 |
| 1.61 | 0.69 | 1.94 | 0.72 | 1.75 | 0.68 | 1.43 | 0.64 | 1.56 | 0.67 | 1.52 |
| #N/A | #N/A | #N/A | #N/A | #N/A | #N/A | #N/A | #N/A | #N/A | #N/A | #N/A |
| 1.81 | 0.77 | 3.00 | 0.92 | 2.78 | 0.89 | 2.40 | 0.85 | 2.30 | 0.84 | 1.94 |
| #N/A | #N/A | #N/A | #N/A | #N/A | #N/A | #N/A | #N/A | #N/A | #N/A | #N/A |
| 2.33 | 0.89 | 2.05 | 0.75 | 1.95 | 0.74 | 1.55 | 0.68 | 1.64 | 0.70 | 1.71 |
| #N/A | #N/A | #N/A | #N/A | #N/A | #N/A | #N/A | #N/A | #N/A | #N/A | #N/A |
| 7.85 | 0.88 | 2.17 | 0.79 | 2.94 | 0.91 | 2.65 | 0.92 | 2.19 | 0.85 | 1.12 |
| 1.55 | 0.68 | 1.13 | 0.43 | 1.24 | 0.47 | 1.13 | 0.49 | 1.45 | 0.63 | 1.03 |
| 0.64 | 0.17 | #N/A | #N/A | #N/A | #N/A | #N/A | #N/A | 0.91 | 0.36 | 0.75 |
| 2.09 | 0.85 | 3.87 | 0.96 | 3.74 | 0.94 | 2.50 | 0.90 | 2.94 | 0.93 | 2.12 |
| #N/A | #N/A | #N/A | #N/A | #N/A | #N/A | #N/A | #N/A | #N/A | #N/A | #N/A |
| 0.88 | 0.32 | 1.18 | 0.46 | 1.15 | 0.42 | 1.26 | 0.55 | 1.15 | 0.49 | 1.15 |
| 1.73 | 0.75 | 2.63 | 0.88 | 3.02 | 0.91 | 2.01 | 0.82 | 2.48 | 0.90 | 1.79 |
| 0.72 | 0.23 | 0.86 | 0.31 | 0.80 | 0.25 | 0.53 | 0.14 | 0.63 | 0.20 | 0.65 |
| 1.02 | 0.42 | 1.09 | 0.42 | 1.17 | 0.43 | 0.99 | 0.42 | 1.15 | 0.50 | 1.04 |
| 0.95 | 0.37 | 0.62 | 0.19 | 0.81 | 0.27 | #N/A | #N/A | 1.02 | 0.40 | 0.75 |
| 0.78 | 0.27 | 0.52 | 0.15 | 0.56 | 0.14 | 0.48 | 0.11 | 0.50 | 0.13 | 0.64 |
| 0.93 | 0.36 | 0.85 | 0.30 | 1.13 | 0.40 | 0.91 | 0.38 | 0.93 | 0.38 | 0.73 |
| 1.00 | 0.37 | 1.07 | 0.41 | 1.24 | 0.47 | 0.88 | 0.35 | 1.17 | 0.50 | #N/A |
| 0.75 | 0.25 | 0.63 | 0.20 | 0.68 | 0.19 | 0.56 | 0.17 | 0.57 | 0.16 | 0.63 |
| 1.03 | 0.42 | 1.74 | 0.66 | 1.30 | 0.50 | 0.97 | 0.40 | 1.19 | 0.51 | 1.22 |
| 0.81 | 0.28 | 0.74 | 0.25 | 1.04 | 0.37 | 0.71 | 0.25 | 0.81 | 0.31 | 0.63 |
| 1.65 | 0.72 | 2.15 | 0.78 | 2.14 | 0.79 | 1.58 | 0.70 | 1.69 | 0.72 | 1.76 |
| 1.19 | 0.48 | 1.18 | 0.46 | 1.27 | 0.47 | 0.69 | 0.24 | 0.82 | 0.32 | 1.05 |
| 1.08 | 0.43 | 0.94 | 0.35 | 0.85 | 0.28 | 0.94 | 0.39 | 0.83 | 0.32 | 0.75 |
| #N/A | #N/A | #N/A | #N/A | #N/A | #N/A | 0.40 | 0.08 | 0.50 | 0.13 | 0.52 |
| #N/A | #N/A | 0.27 | 0.04 | #N/A | #N/A | 0.32 | 0.04 | 0.42 | 0.08 | 0.42 |
| 1.02 | 0.41 | 1.22 | 0.48 | 1.21 | 0.46 | 1.08 | 0.47 | 1.07 | 0.45 | 0.99 |
| 0.62 | 0.16 | 0.87 | 0.32 | 0.67 | 0.19 | 0.64 | 0.21 | 0.68 | 0.23 | 0.48 |
| 1.09 | 0.46 | 0.76 | 0.26 | 1.46 | 0.57 | 0.72 | 0.25 | 1.00 | 0.40 | 0.90 |
| 0.42 | 0.06 | #N/A | #N/A | #N/A | #N/A | #N/A | #N/A | 0.22 | 0.01 | 0.42 |
| 1.76 | 0.76 | 2.07 | 0.75 | 2.02 | 0.75 | 1.68 | 0.73 | 1.72 | 0.73 | 1.54 |
| 0.94 | 0.35 | #N/A | #N/A | #N/A | #N/A | #N/A | #N/A | 0.61 | 0.18 | 0.84 |
| 1.79 | 0.76 | 3.46 | 0.95 | 5.91 | 0.99 | 3.56 | 0.98 | 3.13 | 0.96 | 2.13 |
| 2.36 | 0.89 | 3.21 | 0.94 | #N/A | #N/A | 2.39 | 0.90 | 2.81 | 0.93 | 2.27 |



|      |      |      |      |      |      |      |      |      |      |      |
|------|------|------|------|------|------|------|------|------|------|------|
| 0.59 | 0.14 | 0.38 | 0.08 | #N/A | #N/A | 0.40 | 0.07 | 0.28 | 0.02 | #N/A |
| 1.06 | 0.44 | 1.26 | 0.49 | #N/A | #N/A | 0.76 | 0.28 | 1.04 | 0.41 | 0.96 |
| 1.91 | 0.81 | 2.51 | 0.83 | 1.93 | 0.73 | 2.30 | 0.89 | 2.16 | 0.85 | 1.74 |
| #N/A | #N/A | #N/A | #N/A | #N/A | #N/A | #N/A | #N/A | #N/A | #N/A | #N/A |
| 2.23 | 0.88 | 2.45 | 0.85 | 2.42 | 0.80 | 2.54 | 0.91 | 2.17 | 0.85 | 1.51 |
| 2.09 | 0.85 | 1.72 | 0.66 | #N/A | #N/A | 1.68 | 0.74 | 1.79 | 0.70 | #N/A |
| #N/A | #N/A | #N/A | #N/A | #N/A | #N/A | #N/A | #N/A | #N/A | #N/A | #N/A |
| #N/A | #N/A | 0.32 | 0.05 | #N/A | #N/A | 0.38 | 0.06 | 0.40 | 0.08 | 0.45 |
| 0.97 | 0.37 | 1.11 | 0.43 | 1.02 | 0.35 | 1.05 | 0.45 | 0.95 | 0.38 | 1.23 |
| 0.71 | 0.21 | 0.69 | 0.23 | 0.72 | 0.22 | 0.78 | 0.29 | 0.76 | 0.27 | 0.74 |
| #N/A | #N/A | #N/A | #N/A | #N/A | #N/A | #N/A | #N/A | 2.25 | 0.83 | #N/A |
| 1.09 | 0.46 | #N/A | #N/A | #N/A | #N/A | #N/A | #N/A | #N/A | #N/A | 0.80 |
| 1.45 | 0.62 | #N/A | #N/A | #N/A | #N/A | #N/A | #N/A | #N/A | #N/A | 1.22 |
| #N/A | #N/A | 2.15 | 0.78 | 3.23 | 0.89 | 1.53 | 0.68 | 1.92 | 0.79 | 1.37 |
| #N/A | #N/A | #N/A | #N/A | #N/A | #N/A | #N/A | #N/A | #N/A | #N/A | #N/A |
| 1.73 | 0.75 | 1.82 | 0.69 | 1.64 | 0.63 | 1.34 | 0.60 | 1.56 | 0.68 | 1.24 |
| #N/A | #N/A | #N/A | #N/A | #N/A | #N/A | 1.17 | 0.50 | 1.04 | 0.43 | 0.82 |
| 1.29 | 0.57 | 1.63 | 0.63 | 1.46 | 0.57 | 1.40 | 0.62 | 1.68 | 0.70 | 1.20 |
| #N/A | #N/A | #N/A | #N/A | #N/A | #N/A | #N/A | #N/A | #N/A | #N/A | #N/A |
| 2.03 | 0.84 | 2.07 | 0.75 | 2.40 | 0.80 | 1.78 | 0.76 | 2.11 | 0.84 | 1.38 |
| #N/A | #N/A | #N/A | #N/A | #N/A | #N/A | #N/A | #N/A | 0.34 | 0.04 | 0.59 |
| 1.93 | 0.81 | 1.97 | 0.73 | 2.54 | 0.86 | 1.86 | 0.79 | 1.93 | 0.79 | 1.66 |
| #N/A | #N/A | #N/A | #N/A | #N/A | #N/A | #N/A | #N/A | #N/A | #N/A | #N/A |
| 1.47 | 0.65 | 1.61 | 0.62 | 2.26 | 0.80 | 1.40 | 0.62 | 1.22 | 0.53 | 1.09 |
| 2.24 | 0.86 | 2.03 | 0.75 | 1.66 | 0.65 | 1.58 | 0.70 | 1.92 | 0.79 | 1.64 |
| 1.13 | 0.46 | 0.76 | 0.27 | 0.70 | 0.21 | 0.77 | 0.29 | 1.00 | 0.41 | 0.85 |
| 1.27 | 0.56 | 0.84 | 0.30 | 0.90 | 0.31 | 0.88 | 0.36 | 0.95 | 0.38 | 0.86 |
| 1.30 | 0.57 | 1.63 | 0.62 | 1.64 | 0.64 | 1.59 | 0.70 | 1.45 | 0.63 | 1.09 |
| 0.62 | 0.16 | 0.57 | 0.17 | 0.60 | 0.16 | 0.64 | 0.20 | 0.61 | 0.19 | #N/A |
| 0.42 | 0.07 | 0.21 | 0.02 | 0.42 | 0.09 | 0.32 | 0.04 | 0.34 | 0.04 | 0.40 |
| #N/A | #N/A | 0.30 | 0.05 | #N/A | #N/A | 0.35 | 0.05 | 0.45 | 0.10 | #N/A |
| 3.25 | 0.97 | 3.48 | 0.96 | 3.86 | 0.97 | 4.19 | 0.99 | 3.52 | 0.98 | 3.21 |
| 1.75 | 0.76 | 2.27 | 0.81 | 1.86 | 0.68 | 1.77 | 0.77 | 2.57 | 0.91 | 1.73 |
| #N/A | #N/A | #N/A | #N/A | #N/A | #N/A | #N/A | #N/A | #N/A | #N/A | #N/A |
| 3.44 | 0.94 | 3.69 | 0.96 | 5.03 | 0.99 | 2.92 | 0.95 | 2.39 | 0.89 | 2.00 |
| 0.61 | 0.21 | #N/A | #N/A | #N/A | #N/A | #N/A | #N/A | #N/A | #N/A | #N/A |
| 0.47 | 0.08 | 0.33 | 0.06 | 0.41 | 0.07 | 0.42 | 0.10 | 0.42 | 0.08 | 0.46 |
| 1.36 | 0.57 | 1.14 | 0.44 | 1.42 | 0.54 | 1.03 | 0.44 | 1.41 | 0.61 | 1.00 |
| 2.68 | 0.93 | 1.33 | 0.51 | 1.52 | 0.55 | 1.43 | 0.64 | 1.21 | 0.52 | 1.03 |
| 3.10 | 0.94 | 3.37 | 0.95 | 2.72 | 0.88 | 2.13 | 0.85 | 2.14 | 0.85 | 1.98 |
| 3.28 | 0.96 | 3.24 | 0.94 | 5.67 | 0.99 | 3.91 | 0.99 | 3.78 | 0.99 | 2.58 |
| 1.01 | 0.40 | 1.31 | 0.51 | 1.34 | 0.52 | 1.34 | 0.59 | 1.93 | 0.78 | 1.43 |
| 1.21 | 0.53 | 1.18 | 0.45 | 1.33 | 0.51 | 1.37 | 0.61 | 1.31 | 0.57 | 0.95 |
| 1.82 | 0.78 | 3.05 | 0.92 | #N/A | #N/A | 1.97 | 0.82 | 1.67 | 0.72 | 1.58 |
| 1.67 | 0.73 | #N/A | #N/A | #N/A | #N/A | #N/A | #N/A | 1.07 | 0.45 | 1.54 |
| 1.93 | 0.81 | 1.92 | 0.72 | 2.27 | 0.81 | 2.28 | 0.88 | 2.25 | 0.86 | 1.77 |
| 4.47 | 0.99 | 4.82 | 0.99 | 4.95 | 0.99 | 3.51 | 0.98 | 3.68 | 0.98 | 2.54 |
| #N/A | #N/A | #N/A | #N/A | #N/A | #N/A | #N/A | #N/A | #N/A | #N/A | 0.43 |
| 1.75 | 0.73 | 2.41 | 0.83 | 2.40 | 0.84 | 1.84 | 0.79 | 1.73 | 0.74 | 1.56 |
| #N/A | #N/A | #N/A | #N/A | #N/A | #N/A | #N/A | #N/A | #N/A | #N/A | #N/A |
| 2.06 | 0.84 | 1.81 | 0.68 | 1.49 | 0.58 | 1.15 | 0.51 | 1.47 | 0.61 | 1.22 |

|      |      |      |      |      |      |      |      |      |      |      |
|------|------|------|------|------|------|------|------|------|------|------|
| 1.63 | 0.71 | 2.55 | 0.87 | 1.49 | 0.57 | 1.50 | 0.66 | 1.97 | 0.81 | 1.89 |
| 2.40 | 0.89 | 2.45 | 0.84 | 2.86 | 0.91 | 2.53 | 0.91 | 2.18 | 0.85 | 1.62 |
| 0.75 | 0.25 | 1.25 | 0.48 | #N/A | #N/A | 0.98 | 0.41 | 0.74 | 0.27 | 0.79 |
| 1.16 | 0.50 | 1.33 | 0.51 | 1.07 | 0.40 | 1.07 | 0.47 | 1.02 | 0.43 | 0.98 |
| 0.92 | 0.35 | 0.67 | 0.22 | 0.52 | 0.12 | 0.69 | 0.24 | 0.51 | 0.13 | 0.71 |
| 0.70 | 0.21 | 0.75 | 0.26 | 0.89 | 0.31 | 0.71 | 0.26 | 0.53 | 0.14 | 0.81 |
| #N/A | #N/A | #N/A | #N/A | #N/A | #N/A | #N/A | #N/A | #N/A | #N/A | #N/A |
| 2.06 | 0.82 | 2.45 | 0.85 | 1.87 | 0.71 | 1.75 | 0.76 | 2.21 | 0.86 | 1.75 |
| 0.78 | 0.26 | 0.54 | 0.16 | 0.43 | 0.09 | 0.45 | 0.10 | 0.42 | 0.08 | 0.49 |
| 1.84 | 0.78 | 2.49 | 0.85 | 1.87 | 0.71 | 1.68 | 0.73 | 1.91 | 0.79 | 1.26 |
| #N/A | #N/A | #N/A | #N/A | #N/A | #N/A | #N/A | #N/A | #N/A | #N/A | #N/A |
| 2.20 | 0.86 | 2.37 | 0.82 | 1.57 | 0.61 | 1.79 | 0.77 | 1.87 | 0.77 | 1.54 |
| 1.08 | 0.45 | 0.79 | 0.28 | 0.64 | 0.18 | 0.81 | 0.31 | 0.69 | 0.23 | 0.84 |
| 3.25 | 0.97 | 4.19 | 0.98 | 3.56 | 0.96 | 2.65 | 0.93 | 2.68 | 0.92 | #N/A |
| 2.84 | 0.94 | 2.98 | 0.92 | 2.47 | 0.84 | 2.11 | 0.85 | 3.48 | 0.98 | 2.09 |
| 1.83 | 0.79 | 2.17 | 0.78 | 1.69 | 0.65 | 1.44 | 0.64 | 1.44 | 0.63 | #N/A |
| 1.65 | 0.71 | 1.59 | 0.61 | 1.30 | 0.50 | 1.29 | 0.57 | 1.22 | 0.53 | 1.05 |
| 1.36 | 0.60 | 1.59 | 0.61 | 1.73 | 0.67 | 1.42 | 0.63 | 1.42 | 0.62 | 1.26 |
| 0.64 | 0.17 | 0.37 | 0.08 | #N/A | #N/A | 0.44 | 0.09 | 0.42 | 0.08 | #N/A |
| 3.67 | 0.98 | 5.45 | 1.00 | 3.17 | 0.93 | 3.50 | 0.98 | #N/A | #N/A | 4.07 |
| 1.08 | 0.44 | 0.96 | 0.36 | 0.75 | 0.25 | 0.73 | 0.26 | 0.95 | 0.38 | 1.16 |
| 1.58 | 0.69 | 1.50 | 0.58 | 1.35 | 0.51 | 1.11 | 0.48 | 1.27 | 0.55 | 1.41 |
| 0.97 | 0.37 | 1.08 | 0.41 | 0.94 | 0.33 | 0.84 | 0.33 | 1.01 | 0.42 | 0.98 |
| 0.64 | 0.17 | #N/A | #N/A | #N/A | #N/A | #N/A | #N/A | #N/A | #N/A | #N/A |
| #N/A | #N/A | #N/A | #N/A | #N/A | #N/A | #N/A | #N/A | 0.34 | 0.04 | 0.51 |
| 2.63 | 0.93 | 3.44 | 0.95 | 4.47 | 0.98 | 2.97 | 0.95 | 3.79 | 0.99 | 2.52 |
| 3.45 | 0.92 | #N/A | #N/A | #N/A | #N/A | 2.63 | 0.90 | 3.12 | 0.93 | 1.65 |
| 2.44 | 0.82 | 1.73 | 0.66 | 1.41 | 0.55 | 1.71 | 0.73 | 1.56 | 0.67 | 1.42 |
| 2.17 | 0.87 | 2.28 | 0.81 | 2.24 | 0.80 | 1.41 | 0.63 | 1.97 | 0.78 | 2.11 |
| #N/A | #N/A | 2.19 | 0.77 | 1.64 | 0.64 | 1.65 | 0.66 | 1.55 | 0.67 | #N/A |
| #N/A | #N/A | #N/A | #N/A | #N/A | #N/A | #N/A | #N/A | #N/A | #N/A | #N/A |
| 3.05 | 0.96 | 3.12 | 0.93 | 3.94 | 0.97 | 2.44 | 0.91 | 3.12 | 0.96 | 2.05 |
| #N/A | #N/A | 5.06 | 0.99 | #N/A | #N/A | 1.62 | 0.72 | 3.43 | 0.97 | 2.70 |
| 0.58 | 0.14 | 0.54 | 0.16 | #N/A | #N/A | 0.43 | 0.09 | 0.39 | 0.06 | 0.46 |
| 0.87 | 0.31 | 0.37 | 0.08 | #N/A | #N/A | 0.33 | 0.04 | 0.29 | 0.03 | 0.55 |
| 1.18 | 0.51 | 1.72 | 0.65 | 1.39 | 0.53 | 1.30 | 0.58 | 1.25 | 0.54 | 1.29 |
| 2.29 | 0.89 | 2.18 | 0.79 | 2.08 | 0.76 | 2.21 | 0.87 | 2.04 | 0.82 | 2.27 |
| 0.92 | 0.35 | 0.98 | 0.37 | 0.99 | 0.36 | 0.98 | 0.41 | 0.88 | 0.35 | 1.00 |
| 0.91 | 0.34 | 1.11 | 0.43 | 1.06 | 0.38 | 0.95 | 0.39 | 0.86 | 0.33 | 1.03 |
| 1.24 | 0.54 | 1.67 | 0.64 | 1.44 | 0.56 | 1.31 | 0.59 | 1.34 | 0.59 | 0.98 |
| 0.66 | 0.18 | 0.70 | 0.24 | 0.83 | 0.27 | 0.76 | 0.28 | 0.69 | 0.23 | 0.77 |
| 1.85 | 0.79 | 2.82 | 0.90 | 2.49 | 0.85 | 2.40 | 0.90 | 2.20 | 0.86 | 1.50 |
| 1.51 | 0.67 | 1.62 | 0.62 | 1.57 | 0.61 | 1.36 | 0.61 | 1.63 | 0.70 | 1.39 |
| 1.61 | 0.70 | 2.07 | 0.75 | 1.90 | 0.72 | 1.69 | 0.74 | 2.11 | 0.84 | 1.11 |
| 1.40 | 0.62 | 2.37 | 0.82 | 2.05 | 0.75 | 1.72 | 0.75 | 1.65 | 0.71 | 1.46 |
| 0.72 | 0.21 | 0.48 | 0.13 | 0.45 | 0.08 | 0.47 | 0.10 | 0.41 | 0.07 | 0.67 |
| 1.32 | 0.58 | 1.04 | 0.40 | 1.01 | 0.37 | 1.04 | 0.45 | 0.85 | 0.33 | 1.47 |
| 1.86 | 0.80 | 1.55 | 0.60 | 1.49 | 0.58 | 1.64 | 0.72 | 1.53 | 0.66 | 1.14 |
| 1.14 | 0.49 | 0.89 | 0.33 | 1.07 | 0.40 | 1.02 | 0.43 | 1.07 | 0.44 | 0.82 |
| #N/A | #N/A | #N/A | #N/A | #N/A | #N/A | #N/A | #N/A | #N/A | #N/A | #N/A |
| 0.94 | 0.36 | 0.75 | 0.26 | 0.53 | 0.13 | 0.73 | 0.26 | 0.53 | 0.14 | 0.80 |



|      |      |      |      |      |      |      |      |      |      |      |
|------|------|------|------|------|------|------|------|------|------|------|
| #N/A | #N/A | 0.62 | 0.19 | 0.51 | 0.12 | 0.48 | 0.12 | 0.45 | 0.10 | 0.65 |
| 0.91 | 0.34 | 0.94 | 0.35 | 1.06 | 0.38 | 0.50 | 0.13 | 0.67 | 0.22 | 0.69 |
| #N/A | #N/A | #N/A | #N/A | #N/A | #N/A | #N/A | #N/A | #N/A | #N/A | #N/A |
| 1.02 | 0.42 | 1.65 | 0.63 | 1.54 | 0.58 | 1.15 | 0.51 | 1.27 | 0.55 | 1.34 |
| 1.04 | 0.43 | 0.91 | 0.33 | 0.91 | 0.32 | 0.82 | 0.32 | 0.81 | 0.30 | 0.85 |
| 1.34 | 0.58 | 1.22 | 0.47 | 1.28 | 0.49 | 1.06 | 0.46 | 1.03 | 0.42 | 1.21 |
| 0.48 | 0.08 | 0.52 | 0.15 | 0.50 | 0.12 | 0.53 | 0.15 | 0.44 | 0.09 | 0.54 |
| 0.97 | 0.39 | 0.94 | 0.35 | 1.08 | 0.40 | 0.83 | 0.32 | 0.74 | 0.26 | 0.91 |
| #N/A | #N/A | #N/A | #N/A | #N/A | #N/A | #N/A | #N/A | #N/A | #N/A | #N/A |
| 1.40 | 0.59 | 1.41 | 0.54 | #N/A | #N/A | 1.11 | 0.46 | 1.13 | 0.48 | 1.13 |
| 0.92 | 0.36 | 0.97 | 0.36 | 1.14 | 0.42 | 0.75 | 0.28 | 0.99 | 0.40 | #N/A |
| 2.91 | 0.95 | 4.02 | 0.98 | 3.86 | 0.97 | 3.05 | 0.96 | 3.86 | 0.99 | 2.30 |
| 1.32 | 0.57 | 1.35 | 0.52 | 1.96 | 0.61 | 1.17 | 0.51 | 1.28 | 0.56 | 0.85 |
| 1.04 | 0.42 | #N/A | #N/A | #N/A | #N/A | #N/A | #N/A | #N/A | #N/A | 0.73 |
| 0.79 | 0.26 | 0.75 | 0.26 | 0.86 | 0.30 | 0.65 | 0.21 | 0.73 | 0.26 | 0.76 |
| #N/A | #N/A | 2.70 | 0.89 | 2.10 | 0.78 | 1.84 | 0.78 | 2.16 | 0.85 | 1.72 |
| #N/A | #N/A | #N/A | #N/A | #N/A | #N/A | #N/A | #N/A | #N/A | #N/A | #N/A |
| 0.93 | 0.34 | 0.69 | 0.23 | 0.89 | 0.30 | 1.03 | 0.44 | 0.80 | 0.30 | 0.89 |
| #N/A | #N/A | #N/A | #N/A | #N/A | #N/A | #N/A | #N/A | #N/A | #N/A | #N/A |
| #N/A | #N/A | #N/A | #N/A | #N/A | #N/A | #N/A | #N/A | #N/A | #N/A | #N/A |
| 1.25 | 0.54 | 1.81 | 0.68 | 2.73 | 0.88 | 2.04 | 0.83 | 2.07 | 0.83 | 1.55 |
| 1.51 | 0.67 | 1.55 | 0.59 | 1.50 | 0.58 | 1.41 | 0.63 | 1.06 | 0.43 | 1.40 |
| #N/A | #N/A | #N/A | #N/A | #N/A | #N/A | #N/A | #N/A | #N/A | #N/A | #N/A |
| 1.26 | 0.56 | 1.40 | 0.54 | 1.05 | 0.39 | 1.29 | 0.53 | 1.00 | 0.42 | 1.50 |
| 1.69 | 0.74 | 3.83 | 0.97 | 2.55 | 0.86 | 2.07 | 0.83 | 2.75 | 0.92 | 2.60 |
| #N/A | #N/A | #N/A | #N/A | #N/A | #N/A | #N/A | #N/A | #N/A | #N/A | 1.21 |
| 1.21 | 0.52 | 1.49 | 0.58 | 1.33 | 0.51 | 1.26 | 0.56 | 1.31 | 0.57 | 1.30 |
| 0.77 | 0.25 | 0.45 | 0.12 | 0.47 | 0.10 | 0.50 | 0.13 | 0.70 | 0.24 | 0.56 |
| 0.73 | 0.23 | #N/A | #N/A | #N/A | #N/A | #N/A | #N/A | 0.47 | 0.11 | #N/A |
| 1.78 | 0.75 | 1.83 | 0.69 | 2.28 | 0.81 | 1.63 | 0.72 | 2.11 | 0.83 | 1.39 |
| #N/A | #N/A | #N/A | #N/A | #N/A | #N/A | 1.00 | 0.42 | 1.12 | 0.47 | #N/A |
| 1.22 | 0.53 | 2.15 | 0.78 | 1.49 | 0.58 | 1.17 | 0.52 | 1.40 | 0.61 | 1.27 |
| #N/A | #N/A | #N/A | #N/A | #N/A | #N/A | #N/A | #N/A | #N/A | #N/A | #N/A |
| 1.52 | 0.67 | 1.60 | 0.62 | 1.73 | 0.67 | 1.57 | 0.69 | 1.75 | 0.74 | 1.58 |
| 1.20 | 0.51 | 0.38 | 0.08 | 0.37 | 0.06 | 0.43 | 0.08 | 0.39 | 0.06 | #N/A |
| 1.21 | 0.53 | 1.61 | 0.62 | 1.54 | 0.60 | 1.27 | 0.56 | 1.28 | 0.56 | 1.14 |
| 0.96 | 0.38 | 1.34 | 0.52 | 1.16 | 0.43 | 0.90 | 0.37 | 1.45 | 0.63 | 1.03 |
| #N/A | #N/A | #N/A | #N/A | #N/A | #N/A | #N/A | #N/A | #N/A | #N/A | 0.55 |
| 0.61 | 0.16 | 0.35 | 0.07 | 0.35 | 0.05 | 0.53 | 0.14 | 0.45 | 0.10 | 0.53 |
| 0.61 | 0.16 | 0.65 | 0.21 | 0.59 | 0.15 | 0.60 | 0.18 | 0.68 | 0.23 | 0.74 |
| 1.50 | 0.66 | 2.23 | 0.79 | 2.09 | 0.78 | 1.93 | 0.81 | 1.93 | 0.80 | 1.92 |
| 0.79 | 0.26 | #N/A | #N/A | #N/A | #N/A | #N/A | #N/A | #N/A | #N/A | 0.91 |
| 1.34 | 0.60 | 1.51 | 0.58 | 1.34 | 0.50 | 1.30 | 0.57 | 1.24 | 0.54 | 1.24 |
| #N/A | #N/A | #N/A | #N/A | #N/A | #N/A | #N/A | #N/A | 0.85 | 0.33 | 0.88 |
| 1.02 | 0.37 | #N/A | #N/A | #N/A | #N/A | #N/A | #N/A | #N/A | #N/A | #N/A |
| 0.58 | 0.14 | 0.44 | 0.11 | 0.54 | 0.13 | 0.56 | 0.17 | 0.65 | 0.21 | #N/A |
| 1.12 | 0.44 | 1.40 | 0.54 | 1.15 | 0.43 | 1.20 | 0.53 | 1.26 | 0.55 | 1.32 |
| 1.32 | 0.58 | 1.00 | 0.38 | 0.99 | 0.36 | 1.27 | 0.56 | 1.03 | 0.43 | #N/A |
| 0.75 | 0.23 | 1.00 | 0.38 | 0.89 | 0.30 | 1.02 | 0.43 | 0.95 | 0.39 | 0.81 |
| #N/A | #N/A | #N/A | #N/A | #N/A | #N/A | #N/A | #N/A | #N/A | #N/A | #N/A |
| #N/A | #N/A | 2.41 | 0.84 | 2.40 | 0.83 | 1.74 | 0.76 | 2.04 | 0.82 | 1.93 |





|      |      |      |      |      |      |      |      |      |      |      |
|------|------|------|------|------|------|------|------|------|------|------|
| 0.89 | 0.33 | 0.83 | 0.30 | 0.76 | 0.24 | 0.70 | 0.25 | 1.03 | 0.43 | 0.73 |
| 0.52 | 0.10 | #N/A | #N/A | #N/A | #N/A | #N/A | #N/A | #N/A | #N/A | 0.47 |
| 1.64 | 0.72 | 1.94 | 0.72 | 2.17 | 0.74 | 2.21 | 0.87 | 2.50 | 0.91 | 1.60 |
| 1.93 | 0.81 | 2.30 | 0.81 | 2.62 | 0.86 | 2.03 | 0.84 | 2.29 | 0.87 | 1.50 |
| 2.49 | 0.91 | 2.11 | 0.77 | 1.30 | 0.49 | 1.57 | 0.70 | 1.47 | 0.63 | 1.71 |
| 1.20 | 0.51 | 1.18 | 0.45 | #N/A | #N/A | #N/A | #N/A | 1.16 | 0.49 | 0.76 |
| 1.27 | 0.55 | 1.48 | 0.57 | 1.38 | 0.52 | 1.47 | 0.65 | 1.47 | 0.63 | 1.13 |
| 1.89 | 0.80 | 2.39 | 0.84 | 3.28 | 0.94 | 2.47 | 0.91 | 1.65 | 0.71 | 1.33 |
| #N/A | #N/A | #N/A | #N/A | #N/A | #N/A | #N/A | #N/A | #N/A | #N/A | #N/A |
| 2.12 | 0.85 | 2.79 | 0.90 | 2.49 | 0.85 | 2.80 | 0.93 | 2.38 | 0.89 | 1.76 |
| #N/A | #N/A | 1.27 | 0.49 | 1.06 | 0.39 | 0.92 | 0.38 | 0.76 | 0.27 | 1.43 |
| 0.89 | 0.33 | 0.80 | 0.28 | #N/A | #N/A | #N/A | #N/A | 0.75 | 0.27 | 0.55 |
| #N/A | #N/A | 1.28 | 0.50 | 1.20 | 0.45 | 1.11 | 0.48 | 1.14 | 0.48 | #N/A |
| 1.54 | 0.64 | 0.92 | 0.33 | #N/A | #N/A | 0.90 | 0.36 | 1.12 | 0.48 | 0.75 |
| 0.56 | 0.13 | 0.48 | 0.13 | 0.58 | 0.16 | 0.68 | 0.23 | 0.70 | 0.24 | 0.62 |
| 2.22 | 0.87 | #N/A | #N/A | #N/A | #N/A | 1.80 | 0.77 | 2.08 | 0.82 | 1.07 |
| #N/A | #N/A | #N/A | #N/A | #N/A | #N/A | #N/A | #N/A | #N/A | #N/A | #N/A |
| #N/A | #N/A | 2.07 | 0.76 | 2.48 | 0.82 | 1.98 | 0.81 | 2.03 | 0.82 | 1.47 |
| #N/A | #N/A | #N/A | #N/A | #N/A | #N/A | #N/A | #N/A | #N/A | #N/A | #N/A |
| 1.29 | 0.56 | 1.44 | 0.56 | 1.50 | 0.59 | 1.17 | 0.52 | 1.15 | 0.49 | 1.11 |
| #N/A | #N/A | #N/A | #N/A | #N/A | #N/A | #N/A | #N/A | #N/A | #N/A | #N/A |
| 3.48 | 0.87 | 2.39 | 0.80 | #N/A | #N/A | 2.56 | 0.93 | 1.83 | 0.77 | 1.60 |
| 1.19 | 0.48 | #N/A | #N/A | #N/A | #N/A | #N/A | #N/A | 0.40 | 0.07 | 0.70 |
| #N/A | #N/A | #N/A | #N/A | #N/A | #N/A | #N/A | #N/A | #N/A | #N/A | #N/A |
| 2.66 | 0.93 | 2.84 | 0.90 | 2.92 | 0.88 | 2.24 | 0.88 | 2.62 | 0.92 | 1.99 |
| #N/A | #N/A | #N/A | #N/A | #N/A | #N/A | #N/A | #N/A | #N/A | #N/A | #N/A |
| #N/A | #N/A | 2.19 | 0.78 | #N/A | #N/A | 1.76 | 0.76 | 2.92 | 0.95 | 1.19 |
| #N/A | #N/A | 3.28 | 0.94 | 3.65 | 0.96 | 2.70 | 0.94 | 3.42 | 0.98 | #N/A |
| 2.59 | 0.93 | 2.05 | 0.75 | 2.60 | 0.86 | 2.00 | 0.80 | 1.97 | 0.80 | 1.64 |
| #N/A | #N/A | #N/A | #N/A | #N/A | #N/A | #N/A | #N/A | #N/A | #N/A | #N/A |
| 1.79 | 0.77 | 2.15 | 0.78 | 2.28 | 0.82 | 2.28 | 0.87 | 2.05 | 0.82 | 1.48 |
| 1.19 | 0.45 | 1.40 | 0.54 | #N/A | #N/A | 0.85 | 0.33 | #N/A | #N/A | 1.22 |
| 1.46 | 0.64 | 1.70 | 0.65 | #N/A | #N/A | 2.11 | 0.85 | 2.15 | 0.84 | #N/A |
| 1.32 | 0.56 | 1.54 | 0.59 | 1.60 | 0.63 | 1.16 | 0.51 | 1.27 | 0.55 | 1.10 |
| 0.85 | 0.30 | 1.21 | 0.46 | 1.13 | 0.41 | 1.14 | 0.50 | 0.96 | 0.39 | 1.05 |
| #N/A | #N/A | 0.31 | 0.05 | #N/A | #N/A | #N/A | #N/A | #N/A | #N/A | #N/A |
| 1.10 | 0.46 | 0.96 | 0.36 | #N/A | #N/A | 0.94 | 0.39 | 0.79 | 0.29 | 0.68 |
| 0.43 | 0.06 | 0.55 | 0.16 | 0.40 | 0.07 | 0.37 | 0.06 | 0.32 | 0.03 | 0.71 |
| 2.41 | 0.86 | 2.38 | 0.83 | 2.29 | 0.80 | 2.17 | 0.86 | 2.24 | 0.87 | 1.66 |
| 0.73 | 0.23 | 0.57 | 0.17 | #N/A | #N/A | 0.79 | 0.30 | 0.66 | 0.22 | 0.74 |
| 1.93 | 0.51 | 1.37 | 0.53 | 1.93 | 0.73 | 1.08 | 0.45 | 1.09 | 0.46 | #N/A |
| 0.65 | 0.18 | 0.61 | 0.19 | 0.82 | 0.27 | 0.73 | 0.26 | 0.56 | 0.16 | 0.60 |
| 1.08 | 0.45 | 1.27 | 0.50 | 1.14 | 0.42 | 0.86 | 0.34 | 0.96 | 0.40 | 1.37 |
| 1.09 | 0.45 | 1.24 | 0.48 | 1.11 | 0.41 | 0.92 | 0.38 | 0.96 | 0.39 | 1.01 |
| 0.37 | 0.04 | 0.61 | 0.19 | 0.79 | 0.27 | 0.69 | 0.24 | 0.64 | 0.20 | 0.60 |
| 0.85 | 0.30 | 0.53 | 0.16 | 0.60 | 0.16 | 0.72 | 0.26 | 0.72 | 0.25 | 0.54 |
| 1.50 | 0.66 | #N/A | #N/A | 1.33 | 0.51 | 1.56 | 0.67 | #N/A | #N/A | 1.26 |
| #N/A | #N/A | #N/A | #N/A | #N/A | #N/A | #N/A | #N/A | #N/A | #N/A | #N/A |
| 2.13 | 0.85 | 1.88 | 0.70 | 2.02 | 0.76 | 1.98 | 0.82 | 1.87 | 0.78 | 1.83 |
| #N/A | #N/A | #N/A | #N/A | #N/A | #N/A | #N/A | #N/A | #N/A | #N/A | #N/A |
| 0.97 | 0.38 | 0.96 | 0.36 | 0.94 | 0.33 | 0.86 | 0.34 | 0.98 | 0.40 | 0.76 |

|      |      |      |      |      |      |      |      |      |      |      |
|------|------|------|------|------|------|------|------|------|------|------|
| #N/A | #N/A | #N/A | #N/A | #N/A | #N/A | 0.36 | 0.05 | #N/A | #N/A | 0.43 |
| 0.42 | 0.07 | 0.44 | 0.12 | 0.70 | 0.21 | 0.67 | 0.22 | 0.53 | 0.14 | 0.43 |
| 2.08 | 0.82 | 1.42 | 0.54 | 2.04 | 0.75 | 1.60 | 0.71 | 1.65 | 0.70 | 1.21 |
| #N/A | #N/A | #N/A | #N/A | #N/A | #N/A | #N/A | #N/A | #N/A | #N/A | #N/A |
| 2.01 | 0.83 | 2.50 | 0.85 | 2.52 | 0.86 | 2.26 | 0.88 | 2.35 | 0.88 | 2.12 |
| #N/A | #N/A | 0.55 | 0.16 | #N/A | #N/A | 0.46 | 0.10 | 0.58 | 0.17 | 0.60 |
| 1.36 | 0.60 | 3.01 | 0.90 | #N/A | #N/A | 2.38 | 0.90 | 1.60 | 0.64 | 1.51 |
| 1.85 | 0.79 | 2.18 | 0.77 | 1.56 | 0.61 | 1.02 | 0.44 | 1.33 | 0.57 | 1.31 |
| #N/A | #N/A | #N/A | #N/A | #N/A | #N/A | #N/A | #N/A | #N/A | #N/A | #N/A |
| 3.30 | 0.94 | 1.92 | 0.72 | 1.75 | 0.68 | 1.43 | 0.64 | 1.52 | 0.65 | 1.19 |
| #N/A | #N/A | #N/A | #N/A | #N/A | #N/A | #N/A | #N/A | 0.87 | 0.34 | 0.95 |
| 1.05 | 0.42 | 0.92 | 0.34 | 0.94 | 0.34 | 0.82 | 0.32 | 0.80 | 0.30 | 1.00 |
| 1.00 | 0.40 | 0.84 | 0.30 | 0.79 | 0.26 | 0.83 | 0.32 | 0.97 | 0.39 | 0.96 |
| 0.74 | 0.24 | 0.39 | 0.09 | 0.41 | 0.07 | 0.62 | 0.20 | 0.49 | 0.12 | 0.60 |
| 0.94 | 0.36 | 1.10 | 0.42 | 0.79 | 0.26 | #N/A | #N/A | 0.79 | 0.30 | 0.86 |
| 0.86 | 0.30 | 1.25 | 0.49 | 1.45 | 0.57 | 1.05 | 0.45 | 1.35 | 0.58 | 1.03 |
| #N/A | #N/A | 0.72 | 0.24 | 0.80 | 0.26 | 0.71 | 0.25 | 0.85 | 0.33 | 0.85 |
| 1.09 | 0.42 | 0.66 | 0.22 | 1.33 | 0.51 | 0.89 | 0.36 | 0.84 | 0.32 | 1.11 |
| 2.19 | 0.87 | 2.27 | 0.80 | 2.13 | 0.78 | 1.85 | 0.79 | 1.84 | 0.77 | 1.63 |
| #N/A | #N/A | #N/A | #N/A | #N/A | #N/A | #N/A | #N/A | #N/A | #N/A | #N/A |
| 1.68 | 0.73 | 1.40 | 0.55 | 1.41 | 0.55 | 1.42 | 0.63 | 1.35 | 0.59 | 1.17 |
| 0.47 | 0.09 | #N/A | #N/A | #N/A | #N/A | #N/A | #N/A | 0.33 | 0.05 | 0.47 |
| 1.72 | 0.74 | #N/A | #N/A | 1.51 | 0.59 | #N/A | #N/A | 1.07 | 0.45 | 0.96 |
| 1.29 | 0.54 | 0.89 | 0.33 | #N/A | #N/A | 0.66 | 0.22 | 0.65 | 0.21 | 0.76 |
| 0.38 | 0.04 | 0.43 | 0.10 | 0.43 | 0.08 | 0.41 | 0.07 | 0.36 | 0.05 | 0.41 |
| 1.66 | 0.67 | 2.10 | 0.77 | 1.71 | 0.67 | 1.45 | 0.64 | 1.50 | 0.65 | 1.36 |
| 1.43 | 0.63 | 1.24 | 0.48 | 1.12 | 0.42 | 0.88 | 0.35 | 0.95 | 0.39 | 1.22 |
| 1.18 | 0.51 | 1.53 | 0.59 | 1.78 | 0.67 | 1.18 | 0.52 | 1.60 | 0.68 | 1.23 |
| 1.28 | 0.44 | 0.45 | 0.12 | #N/A | #N/A | 0.57 | 0.16 | 0.41 | 0.07 | 0.62 |
| 0.71 | 0.21 | 0.45 | 0.11 | #N/A | #N/A | 0.45 | 0.10 | 0.41 | 0.08 | 0.72 |
| 1.58 | 0.69 | 2.25 | 0.80 | 2.03 | 0.75 | 1.36 | 0.61 | 1.76 | 0.74 | 1.55 |
| #N/A | #N/A | #N/A | #N/A | #N/A | #N/A | #N/A | #N/A | #N/A | #N/A | #N/A |
| 1.89 | 0.75 | 2.34 | 0.82 | 1.85 | 0.71 | 1.48 | 0.66 | 2.15 | 0.83 | 1.30 |
| 1.02 | 0.42 | 0.93 | 0.34 | 1.48 | 0.57 | 0.83 | 0.32 | 0.85 | 0.33 | 0.85 |
| #N/A | #N/A | #N/A | #N/A | #N/A | #N/A | #N/A | #N/A | #N/A | #N/A | #N/A |
| #N/A | #N/A | 1.07 | 0.41 | 0.92 | 0.32 | 0.88 | 0.36 | 1.02 | 0.42 | 0.98 |
| 0.71 | 0.22 | 1.06 | 0.41 | 1.05 | 0.38 | 1.25 | 0.55 | 1.18 | 0.50 | 0.93 |
| #N/A | #N/A | 0.45 | 0.11 | 0.66 | 0.19 | 0.66 | 0.22 | 0.58 | 0.17 | 0.48 |
| 0.74 | 0.24 | 0.30 | 0.05 | 0.38 | 0.07 | 0.38 | 0.06 | 0.38 | 0.06 | 0.76 |
| 0.58 | 0.15 | 0.33 | 0.06 | 0.38 | 0.06 | 0.24 | 0.02 | 0.30 | 0.03 | 0.44 |
| 0.47 | 0.08 | 0.42 | 0.10 | 0.44 | 0.09 | 0.38 | 0.07 | 0.46 | 0.10 | 0.58 |
| 2.62 | 0.93 | 2.95 | 0.91 | 3.13 | 0.92 | 2.48 | 0.91 | 2.31 | 0.87 | 1.75 |
| 0.89 | 0.31 | 0.48 | 0.13 | #N/A | #N/A | 0.65 | 0.22 | 0.60 | 0.18 | 0.63 |
| 1.33 | 0.57 | 1.14 | 0.44 | 1.21 | 0.45 | 1.32 | 0.59 | 1.02 | 0.42 | 1.08 |
| #N/A | #N/A | 1.72 | 0.66 | 1.33 | 0.51 | 1.34 | 0.55 | 1.24 | 0.53 | 1.45 |
| 1.90 | 0.81 | 2.81 | 0.90 | 2.95 | 0.92 | 2.31 | 0.89 | 2.31 | 0.88 | #N/A |
| 1.51 | 0.67 | 1.32 | 0.51 | 1.17 | 0.44 | 1.01 | 0.43 | 1.14 | 0.49 | 1.15 |
| 1.67 | 0.69 | 1.49 | 0.58 | #N/A | #N/A | 1.33 | 0.59 | 1.13 | 0.49 | 1.14 |
| 2.13 | 0.86 | 3.11 | 0.93 | 2.56 | 0.87 | 2.55 | 0.92 | 2.55 | 0.91 | 2.36 |
| 1.77 | 0.75 | 2.13 | 0.77 | 1.65 | 0.64 | 1.81 | 0.77 | 1.63 | 0.70 | 1.78 |
| 0.44 | 0.08 | #N/A | #N/A | #N/A | #N/A | #N/A | #N/A | 0.39 | 0.07 | #N/A |

|      |      |      |      |      |      |      |      |      |      |      |
|------|------|------|------|------|------|------|------|------|------|------|
| #N/A | #N/A | #N/A | #N/A | #N/A | #N/A | #N/A | #N/A | #N/A | #N/A | #N/A |
| #N/A | #N/A | 0.69 | 0.23 | #N/A | #N/A | 0.57 | 0.17 | 0.49 | 0.12 | 0.60 |
| 1.45 | 0.64 | 1.17 | 0.45 | 1.76 | 0.63 | 0.84 | 0.33 | 1.08 | 0.45 | 0.82 |
| 1.92 | 0.79 | 1.86 | 0.70 | 1.53 | 0.59 | 1.81 | 0.78 | 1.75 | 0.74 | 1.36 |
| 1.08 | 0.45 | 0.81 | 0.29 | 0.48 | 0.10 | 0.59 | 0.18 | 0.55 | 0.15 | 0.76 |
| #N/A | #N/A | 0.55 | 0.17 | #N/A | #N/A | 0.56 | 0.17 | 0.51 | 0.13 | 0.68 |
| 1.47 | 0.65 | 1.55 | 0.60 | 1.80 | 0.68 | 1.45 | 0.65 | 1.78 | 0.75 | 1.60 |
| #N/A | #N/A | #N/A | #N/A | #N/A | #N/A | #N/A | #N/A | #N/A | #N/A | 0.68 |
| 3.33 | 0.96 | 3.71 | 0.96 | 3.42 | 0.95 | 2.95 | 0.96 | 2.96 | 0.95 | 2.77 |
| #N/A | #N/A | 1.98 | 0.73 | 1.67 | 0.62 | 1.73 | 0.76 | 1.86 | 0.76 | 1.62 |
| #N/A | #N/A | #N/A | #N/A | #N/A | #N/A | #N/A | #N/A | #N/A | #N/A | #N/A |
| 2.75 | 0.94 | 2.26 | 0.81 | 2.14 | 0.76 | #N/A | #N/A | #N/A | #N/A | 1.86 |
| 1.61 | 0.70 | #N/A | #N/A | #N/A | #N/A | #N/A | #N/A | 1.57 | 0.65 | #N/A |
| #N/A | #N/A | #N/A | #N/A | #N/A | #N/A | #N/A | #N/A | #N/A | #N/A | #N/A |
| 2.09 | 0.85 | 1.48 | 0.57 | 1.92 | 0.73 | 1.50 | 0.66 | 1.62 | 0.70 | 1.62 |
| #N/A | #N/A | #N/A | #N/A | #N/A | #N/A | #N/A | #N/A | #N/A | #N/A | #N/A |
| 0.89 | 0.32 | 0.79 | 0.28 | 0.72 | 0.22 | 0.59 | 0.18 | 0.64 | 0.21 | 0.91 |
| 0.62 | 0.16 | 0.29 | 0.05 | 0.38 | 0.06 | 0.59 | 0.17 | 0.45 | 0.09 | 0.39 |
| 1.79 | 0.77 | 1.73 | 0.66 | 1.77 | 0.68 | 1.18 | 0.52 | 1.26 | 0.55 | 1.15 |
| 2.30 | 0.82 | 2.82 | 0.90 | 2.14 | 0.79 | 1.66 | 0.72 | 1.71 | 0.72 | 1.56 |
| 2.12 | 0.86 | 1.66 | 0.64 | 1.68 | 0.65 | 1.51 | 0.67 | 1.69 | 0.73 | 1.31 |
| 1.42 | 0.61 | #N/A | #N/A | #N/A | #N/A | #N/A | #N/A | #N/A | #N/A | #N/A |
| #N/A | #N/A | 2.33 | 0.82 | 2.31 | 0.79 | 1.61 | 0.71 | 1.93 | 0.80 | #N/A |
| 0.64 | 0.20 | 0.39 | 0.09 | #N/A | #N/A | 0.40 | 0.09 | 0.47 | 0.11 | 0.54 |
| 1.37 | 0.59 | 1.45 | 0.56 | 1.49 | 0.58 | 1.49 | 0.65 | 1.31 | 0.57 | 1.41 |
| #N/A | #N/A | #N/A | #N/A | #N/A | #N/A | #N/A | #N/A | #N/A | #N/A | #N/A |
| 1.97 | 0.82 | 2.17 | 0.78 | 2.25 | 0.81 | 1.93 | 0.81 | 2.18 | 0.81 | 1.39 |
| 1.51 | 0.67 | #N/A | #N/A | #N/A | #N/A | 1.53 | 0.67 | 1.11 | 0.47 | 0.72 |
| 1.75 | 0.76 | 1.50 | 0.58 | 1.27 | 0.48 | 1.40 | 0.63 | 1.24 | 0.54 | 1.42 |
| #N/A | #N/A | 1.90 | 0.71 | 1.46 | 0.56 | 1.49 | 0.66 | 1.52 | 0.66 | 1.34 |
| #N/A | #N/A | 1.92 | 0.71 | 2.31 | 0.81 | 1.50 | 0.65 | 1.07 | 0.45 | #N/A |
| #N/A | #N/A | #N/A | #N/A | #N/A | #N/A | #N/A | #N/A | #N/A | #N/A | #N/A |
| 2.45 | 0.88 | 5.07 | 0.96 | 3.03 | 0.90 | 2.46 | 0.89 | 2.12 | 0.84 | 1.73 |
| 2.94 | 0.91 | 3.83 | 0.97 | 3.49 | 0.96 | 3.66 | 0.99 | 3.91 | 0.99 | 2.43 |
| 2.45 | 0.91 | 3.01 | 0.92 | 4.17 | 0.98 | 2.84 | 0.95 | 2.71 | 0.93 | 2.37 |
| #N/A | #N/A | 1.85 | 0.70 | 1.40 | 0.54 | 1.96 | 0.81 | 1.65 | 0.69 | #N/A |
| #N/A | #N/A | #N/A | #N/A | #N/A | #N/A | #N/A | #N/A | #N/A | #N/A | #N/A |
| 1.59 | 0.69 | 1.17 | 0.45 | 1.22 | 0.46 | 0.96 | 0.40 | 1.57 | 0.67 | 0.90 |
| 1.61 | 0.61 | 1.12 | 0.43 | 1.05 | 0.39 | 1.05 | 0.45 | 1.05 | 0.44 | 1.30 |
| 2.07 | 0.85 | 2.21 | 0.79 | 2.91 | 0.91 | 2.51 | 0.92 | 2.43 | 0.90 | 1.73 |
| #N/A | #N/A | #N/A | #N/A | #N/A | #N/A | #N/A | #N/A | #N/A | #N/A | #N/A |
| 0.53 | 0.17 | 1.96 | 0.71 | 1.80 | 0.66 | 1.26 | 0.55 | 1.55 | 0.67 | #N/A |
| 0.85 | 0.30 | 1.05 | 0.40 | 1.51 | 0.59 | 1.05 | 0.44 | 1.04 | 0.43 | 0.78 |
| 1.91 | 0.78 | 2.15 | 0.78 | 2.31 | 0.81 | 1.55 | 0.68 | 1.75 | 0.74 | 1.32 |
| #N/A | #N/A | #N/A | #N/A | #N/A | #N/A | #N/A | #N/A | #N/A | #N/A | 0.81 |
| #N/A | #N/A | #N/A | #N/A | #N/A | #N/A | #N/A | #N/A | #N/A | #N/A | #N/A |
| #N/A | #N/A | #N/A | #N/A | #N/A | #N/A | #N/A | #N/A | #N/A | #N/A | #N/A |
| 1.20 | 0.51 | 1.11 | 0.42 | 0.54 | 0.12 | 0.45 | 0.09 | 0.55 | 0.15 | 0.80 |
| 0.99 | 0.40 | 1.79 | 0.68 | 1.10 | 0.40 | 1.03 | 0.44 | 0.93 | 0.37 | 1.52 |
| 0.29 | 0.02 | 0.26 | 0.03 | 0.28 | 0.02 | 0.29 | 0.03 | 0.35 | 0.05 | 0.37 |
| 1.88 | 0.80 | 2.12 | 0.77 | 2.21 | 0.80 | 1.70 | 0.73 | 1.94 | 0.77 | 1.72 |



|      |      |      |      |      |      |      |      |      |      |      |
|------|------|------|------|------|------|------|------|------|------|------|
| 0.60 | 0.15 | 0.34 | 0.07 | #N/A | #N/A | 0.49 | 0.12 | 0.38 | 0.06 | #N/A |
| 1.22 | 0.53 | 1.08 | 0.41 | 1.13 | 0.42 | 0.95 | 0.40 | 0.80 | 0.30 | 1.02 |
| 1.56 | 0.69 | 1.72 | 0.66 | 2.09 | 0.77 | 1.55 | 0.69 | 1.76 | 0.75 | 1.45 |
| 1.81 | 0.77 | 2.52 | 0.86 | 1.87 | 0.72 | 1.86 | 0.79 | 1.56 | 0.66 | #N/A |
| 1.71 | 0.66 | 1.17 | 0.45 | 1.01 | 0.37 | 0.59 | 0.18 | 0.92 | 0.37 | 0.98 |
| 0.90 | 0.34 | 0.94 | 0.35 | 1.01 | 0.36 | 1.19 | 0.53 | 1.02 | 0.43 | 0.84 |
| 0.75 | 0.24 | 1.32 | 0.51 | 0.89 | 0.31 | 1.02 | 0.44 | 1.19 | 0.51 | 1.11 |
| #N/A | #N/A | 1.97 | 0.73 | #N/A | #N/A | 1.69 | 0.71 | 1.81 | 0.76 | #N/A |
| 0.81 | 0.27 | 0.65 | 0.21 | #N/A | #N/A | 1.07 | 0.44 | 0.66 | 0.22 | 0.71 |
| #N/A | #N/A | 0.28 | 0.04 | #N/A | #N/A | 0.40 | 0.07 | 0.34 | 0.04 | 0.52 |
| 1.19 | 0.51 | 0.95 | 0.35 | 0.93 | 0.33 | 0.73 | 0.26 | 0.78 | 0.29 | 0.89 |
| #N/A | #N/A | 1.51 | 0.58 | #N/A | #N/A | 1.10 | 0.48 | 1.87 | 0.77 | 1.16 |
| 2.44 | 0.89 | 2.44 | 0.85 | 2.86 | 0.91 | 2.16 | 0.86 | 2.28 | 0.87 | 2.14 |
| 0.77 | 0.25 | 0.28 | 0.04 | 0.41 | 0.08 | 0.39 | 0.07 | 0.39 | 0.07 | 0.58 |
| 1.41 | 0.46 | #N/A | #N/A | #N/A | #N/A | #N/A | #N/A | 0.41 | 0.07 | #N/A |
| 1.48 | 0.65 | 1.61 | 0.62 | 1.24 | 0.48 | 1.20 | 0.53 | 1.04 | 0.44 | #N/A |
| #N/A | #N/A | 3.93 | 0.97 | 3.64 | 0.92 | 2.50 | 0.92 | 3.26 | 0.97 | 2.76 |
| 1.59 | 0.70 | 2.19 | 0.79 | 2.74 | 0.87 | #N/A | #N/A | 1.48 | 0.65 | 1.90 |
| 0.90 | 0.34 | 0.63 | 0.20 | #N/A | #N/A | 0.63 | 0.20 | 0.61 | 0.19 | #N/A |
| #N/A | #N/A | #N/A | #N/A | #N/A | #N/A | #N/A | #N/A | #N/A | #N/A | #N/A |
| 2.09 | 0.85 | 2.07 | 0.76 | 2.33 | 0.79 | 1.43 | 0.63 | 1.77 | 0.75 | 1.29 |
| #N/A | #N/A | #N/A | #N/A | #N/A | #N/A | #N/A | #N/A | #N/A | #N/A | #N/A |
| 2.08 | 0.85 | 2.53 | 0.86 | 1.87 | 0.71 | 1.60 | 0.71 | 2.05 | 0.83 | 1.79 |
| #N/A | #N/A | #N/A | #N/A | #N/A | #N/A | #N/A | #N/A | #N/A | #N/A | #N/A |
| 2.03 | 0.82 | 2.24 | 0.80 | 2.14 | 0.77 | 1.26 | 0.55 | 1.67 | 0.69 | 2.05 |
| 1.87 | 0.75 | 2.08 | 0.75 | 1.54 | 0.58 | 1.40 | 0.62 | 2.00 | 0.80 | 1.17 |
| 0.72 | 0.23 | 0.75 | 0.26 | #N/A | #N/A | 0.55 | 0.15 | 0.72 | 0.25 | 0.89 |
| #N/A | #N/A | #N/A | #N/A | #N/A | #N/A | #N/A | #N/A | #N/A | #N/A | 0.98 |
| 1.95 | 0.80 | 1.61 | 0.62 | 1.64 | 0.63 | 1.33 | 0.59 | 1.64 | 0.70 | 1.41 |
| 0.82 | 0.28 | 0.72 | 0.24 | 0.91 | 0.32 | 1.02 | 0.44 | 1.29 | 0.56 | 0.69 |
| 0.61 | 0.15 | 0.33 | 0.06 | 0.54 | 0.13 | 0.49 | 0.12 | 0.52 | 0.14 | 0.56 |
| #N/A | #N/A | #N/A | #N/A | #N/A | #N/A | #N/A | #N/A | #N/A | #N/A | #N/A |
| #N/A | #N/A | 0.78 | 0.27 | #N/A | #N/A | 0.71 | 0.25 | 0.81 | 0.30 | 0.81 |
| 0.30 | 0.02 | 0.36 | 0.07 | 0.37 | 0.06 | 0.38 | 0.07 | 0.34 | 0.04 | 0.26 |
| 0.69 | 0.20 | 0.93 | 0.34 | #N/A | #N/A | 0.69 | 0.24 | 0.78 | 0.28 | 0.67 |
| #N/A | #N/A | #N/A | #N/A | #N/A | #N/A | #N/A | #N/A | #N/A | #N/A | 0.42 |
| 1.25 | 0.55 | 2.13 | 0.78 | 3.49 | 0.89 | 1.50 | 0.66 | 2.11 | 0.84 | 1.29 |
| 0.61 | 0.15 | 0.58 | 0.18 | 0.73 | 0.23 | 0.42 | 0.08 | 0.53 | 0.14 | 0.54 |
| 0.42 | 0.06 | #N/A | #N/A | #N/A | #N/A | #N/A | #N/A | 0.24 | 0.01 | 0.56 |
| 1.51 | 0.67 | 1.93 | 0.72 | 2.80 | 0.90 | 1.76 | 0.77 | 1.74 | 0.71 | #N/A |
| 2.16 | 0.83 | 2.36 | 0.83 | 2.32 | 0.82 | 2.51 | 0.91 | 2.60 | 0.92 | 1.83 |
| 1.45 | 0.62 | 1.87 | 0.70 | 1.93 | 0.67 | 1.50 | 0.67 | 1.40 | 0.61 | #N/A |
| 1.26 | 0.55 | 1.65 | 0.63 | 2.22 | 0.77 | 1.29 | 0.56 | 1.52 | 0.66 | 1.01 |
| 1.36 | 0.60 | 1.12 | 0.43 | 1.23 | 0.47 | 1.09 | 0.47 | 1.15 | 0.49 | 1.12 |
| #N/A | #N/A | #N/A | #N/A | #N/A | #N/A | #N/A | #N/A | #N/A | #N/A | #N/A |
| 1.20 | 0.51 | 1.09 | 0.42 | 1.14 | 0.43 | 1.09 | 0.47 | 1.11 | 0.47 | 0.82 |
| 0.57 | 0.13 | 0.39 | 0.09 | 0.42 | 0.07 | 0.48 | 0.11 | 0.76 | 0.28 | 0.51 |
| 0.58 | 0.14 | 0.85 | 0.31 | #N/A | #N/A | #N/A | #N/A | 0.72 | 0.25 | 1.08 |
| #N/A | #N/A | #N/A | #N/A | #N/A | #N/A | #N/A | #N/A | #N/A | #N/A | 0.62 |
| 1.09 | 0.45 | 1.31 | 0.50 | 1.18 | 0.44 | 1.13 | 0.49 | 0.97 | 0.40 | 1.20 |
| 1.08 | 0.45 | 1.15 | 0.44 | 1.08 | 0.40 | 0.98 | 0.42 | 0.71 | 0.25 | 1.01 |







|      |      |      |      |      |      |      |      |      |      |      |
|------|------|------|------|------|------|------|------|------|------|------|
| 0.87 | 0.31 | 1.30 | 0.51 | #N/A | #N/A | 0.96 | 0.39 | 1.31 | 0.57 | 1.16 |
| 1.34 | 0.59 | 1.29 | 0.50 | #N/A | #N/A | 1.08 | 0.47 | 1.11 | 0.47 | 0.95 |
| #N/A | #N/A | #N/A | #N/A | #N/A | #N/A | #N/A | #N/A | #N/A | #N/A | #N/A |
| 1.12 | 0.46 | 1.21 | 0.47 | 1.17 | 0.43 | 1.31 | 0.58 | 1.13 | 0.48 | 1.12 |
| 0.73 | 0.23 | 0.75 | 0.26 | 0.78 | 0.26 | 0.51 | 0.13 | 0.62 | 0.19 | 0.91 |
| 0.72 | 0.23 | 0.50 | 0.14 | 0.50 | 0.12 | 0.40 | 0.07 | 0.44 | 0.10 | 0.65 |
| 0.60 | 0.15 | 0.58 | 0.18 | 0.63 | 0.17 | 0.60 | 0.18 | 0.49 | 0.12 | 0.87 |
| 0.78 | 0.25 | 0.88 | 0.32 | 0.77 | 0.25 | 0.54 | 0.15 | 0.63 | 0.20 | 0.99 |
| 1.26 | 0.50 | 1.32 | 0.51 | 1.36 | 0.53 | 0.81 | 0.31 | 1.10 | 0.46 | 1.06 |
| 1.14 | 0.48 | 1.10 | 0.42 | 1.56 | 0.58 | 0.91 | 0.37 | 0.67 | 0.23 | 1.02 |
| 1.32 | 0.57 | 1.67 | 0.64 | 1.49 | 0.54 | 1.33 | 0.59 | 1.14 | 0.49 | 1.23 |
| 1.20 | 0.52 | 2.26 | 0.79 | 1.63 | 0.64 | 1.49 | 0.65 | 1.51 | 0.66 | 1.31 |
| 1.35 | 0.55 | 1.90 | 0.71 | 1.24 | 0.47 | 1.50 | 0.67 | 1.50 | 0.64 | 1.01 |
| 1.34 | 0.58 | 1.74 | 0.66 | 1.14 | 0.42 | 1.24 | 0.55 | 1.17 | 0.50 | 1.60 |
| 0.83 | 0.29 | 0.70 | 0.23 | 0.61 | 0.18 | 0.56 | 0.16 | 0.51 | 0.13 | 1.20 |
| 0.62 | 0.16 | 0.29 | 0.04 | 0.40 | 0.07 | 0.41 | 0.08 | 0.41 | 0.07 | 0.83 |
| 0.61 | 0.16 | 0.30 | 0.05 | 0.41 | 0.08 | 0.52 | 0.14 | 0.47 | 0.11 | 1.41 |
| 0.69 | 0.20 | 0.56 | 0.17 | 0.58 | 0.15 | 0.60 | 0.19 | 0.57 | 0.16 | 0.74 |
| #N/A | #N/A | #N/A | #N/A | #N/A | #N/A | #N/A | #N/A | #N/A | #N/A | #N/A |
| #N/A | #N/A | #N/A | #N/A | #N/A | #N/A | #N/A | #N/A | #N/A | #N/A | #N/A |
| 2.16 | 0.81 | 2.66 | 0.87 | 2.88 | 0.88 | 1.95 | 0.74 | 1.93 | 0.79 | 1.41 |
| #N/A | #N/A | 1.15 | 0.44 | #N/A | #N/A | 1.15 | 0.51 | 1.09 | 0.46 | #N/A |
| #N/A | #N/A | #N/A | #N/A | #N/A | #N/A | #N/A | #N/A | #N/A | #N/A | #N/A |
| #N/A | #N/A | #N/A | #N/A | #N/A | #N/A | #N/A | #N/A | #N/A | #N/A | #N/A |
| #N/A | #N/A | #N/A | #N/A | #N/A | #N/A | #N/A | #N/A | #N/A | #N/A | #N/A |
| 1.42 | 0.61 | 1.02 | 0.38 | #N/A | #N/A | 1.30 | 0.58 | 1.10 | 0.47 | 0.94 |
| 1.02 | 0.41 | 1.04 | 0.39 | 0.95 | 0.34 | 0.88 | 0.35 | 0.88 | 0.35 | 0.98 |
| 2.26 | 0.71 | 1.00 | 0.38 | #N/A | #N/A | #N/A | #N/A | 1.03 | 0.43 | 0.88 |
| #N/A | #N/A | 1.19 | 0.45 | #N/A | #N/A | 0.77 | 0.29 | 0.94 | 0.38 | 0.84 |
| 1.18 | 0.48 | 0.82 | 0.29 | #N/A | #N/A | 0.68 | 0.23 | 0.74 | 0.26 | 0.84 |
| 2.15 | 0.85 | 2.33 | 0.82 | 2.48 | 0.84 | 2.89 | 0.93 | 2.35 | 0.88 | 1.53 |
| 0.87 | 0.32 | #N/A | #N/A | 0.64 | 0.18 | 0.63 | 0.20 | #N/A | #N/A | 0.79 |
| 1.73 | 0.75 | 1.83 | 0.69 | 1.55 | 0.61 | 1.17 | 0.50 | 1.40 | 0.61 | 1.36 |
| #N/A | #N/A | #N/A | #N/A | #N/A | #N/A | #N/A | #N/A | #N/A | #N/A | #N/A |
| 1.15 | 0.49 | 1.97 | 0.72 | 1.94 | 0.73 | 1.46 | 0.65 | 1.71 | 0.73 | 1.37 |
| #N/A | #N/A | 2.24 | 0.80 | #N/A | #N/A | #N/A | #N/A | 1.32 | 0.57 | 1.38 |
| 0.86 | 0.30 | 0.58 | 0.18 | #N/A | #N/A | #N/A | #N/A | 0.39 | 0.06 | 0.67 |
| 0.79 | 0.27 | 0.58 | 0.18 | #N/A | #N/A | 0.47 | 0.11 | 0.65 | 0.21 | 0.74 |
| 0.24 | 0.01 | 0.11 | 0.01 | 0.15 | 0.00 | 0.21 | 0.01 | 0.20 | 0.01 | 0.23 |
| #N/A | #N/A | 0.36 | 0.07 | #N/A | #N/A | 0.57 | 0.17 | 0.55 | 0.15 | 0.29 |
| 1.55 | 0.68 | 2.18 | 0.79 | 1.99 | 0.75 | 1.47 | 0.64 | 1.70 | 0.72 | 1.25 |
| #N/A | #N/A | #N/A | #N/A | #N/A | #N/A | #N/A | #N/A | #N/A | #N/A | #N/A |
| 1.80 | 0.77 | 1.76 | 0.66 | 2.00 | 0.75 | 1.35 | 0.60 | 1.39 | 0.61 | 1.28 |
| 1.32 | 0.57 | 0.59 | 0.18 | #N/A | #N/A | 0.43 | 0.08 | 0.45 | 0.10 | #N/A |
| #N/A | #N/A | #N/A | #N/A | #N/A | #N/A | #N/A | #N/A | 3.18 | 0.93 | #N/A |
| 2.38 | 0.90 | 2.17 | 0.78 | 2.78 | 0.86 | 1.90 | 0.80 | 1.72 | 0.73 | 1.87 |
| 0.76 | 0.24 | 0.99 | 0.38 | 1.01 | 0.37 | 1.31 | 0.58 | 1.26 | 0.55 | 0.65 |
| #N/A | #N/A | #N/A | #N/A | #N/A | #N/A | #N/A | #N/A | #N/A | #N/A | 0.91 |
| 0.59 | 0.14 | 0.26 | 0.03 | 0.31 | 0.03 | 0.56 | 0.16 | 0.40 | 0.07 | 0.47 |
| 2.35 | 0.90 | 2.09 | 0.76 | 2.21 | 0.80 | 2.17 | 0.86 | 2.16 | 0.84 | 1.61 |
| #N/A | #N/A | #N/A | #N/A | #N/A | #N/A | 1.47 | 0.65 | 1.19 | 0.51 | #N/A |

|      |      |      |      |      |      |      |      |      |      |      |
|------|------|------|------|------|------|------|------|------|------|------|
| 1.23 | 0.50 | 0.80 | 0.29 | 1.38 | 0.54 | 1.28 | 0.56 | 1.37 | 0.60 | 0.95 |
| 1.24 | 0.52 | 1.07 | 0.41 | 1.17 | 0.44 | 1.02 | 0.43 | 1.38 | 0.59 | 0.81 |
| 1.75 | 0.75 | 2.23 | 0.80 | 2.40 | 0.83 | 1.86 | 0.79 | 2.08 | 0.83 | 1.45 |
| 0.51 | 0.10 | #N/A | #N/A | #N/A | #N/A | 0.32 | 0.04 | 0.37 | 0.06 | 0.39 |
| 1.07 | 0.45 | 0.92 | 0.34 | 1.26 | 0.48 | 1.11 | 0.48 | 1.05 | 0.44 | 1.10 |
| 0.40 | 0.05 | #N/A | #N/A | #N/A | #N/A | #N/A | #N/A | #N/A | #N/A | 0.42 |
| 0.70 | 0.21 | 0.58 | 0.18 | #N/A | #N/A | 0.61 | 0.19 | 0.68 | 0.23 | 0.60 |
| 1.84 | 0.79 | 2.41 | 0.83 | 1.85 | 0.71 | 1.86 | 0.78 | 1.88 | 0.78 | 1.93 |
| 1.25 | 0.53 | 1.55 | 0.60 | 1.46 | 0.56 | 1.39 | 0.62 | 1.44 | 0.61 | 1.39 |
| #N/A | #N/A | #N/A | #N/A | #N/A | #N/A | #N/A | #N/A | #N/A | #N/A | 0.69 |
| 1.00 | 0.39 | 1.07 | 0.41 | #N/A | #N/A | 0.88 | 0.35 | 1.10 | 0.46 | 0.99 |
| 2.40 | 0.89 | 2.68 | 0.85 | 1.37 | 0.53 | 1.47 | 0.65 | 1.65 | 0.71 | 1.60 |
| 0.27 | 0.02 | #N/A | #N/A | #N/A | #N/A | 0.25 | 0.02 | 0.29 | 0.03 | #N/A |
| 1.41 | 0.63 | 1.08 | 0.41 | 1.02 | 0.37 | 1.14 | 0.50 | 0.97 | 0.39 | 1.14 |
| 1.26 | 0.54 | #N/A | #N/A | #N/A | #N/A | #N/A | #N/A | #N/A | #N/A | 0.87 |
| 2.19 | 0.87 | 2.73 | 0.89 | 2.41 | 0.84 | 2.22 | 0.87 | 1.98 | 0.81 | 1.97 |
| #N/A | #N/A | #N/A | #N/A | #N/A | #N/A | #N/A | #N/A | #N/A | #N/A | #N/A |
| 0.73 | 0.22 | 0.38 | 0.11 | 0.70 | 0.22 | 0.56 | 0.16 | 0.70 | 0.24 | 0.58 |
| 1.23 | 0.54 | 1.23 | 0.47 | 1.42 | 0.55 | 1.18 | 0.52 | 1.12 | 0.48 | 1.15 |
| 1.19 | 0.48 | 1.03 | 0.39 | 1.18 | 0.45 | 0.94 | 0.39 | 0.85 | 0.33 | 0.84 |
| #N/A | #N/A | 2.25 | 0.80 | 2.67 | 0.87 | 2.16 | 0.83 | 2.28 | 0.87 | 1.24 |
| 0.20 | 0.01 | 0.21 | 0.02 | 0.30 | 0.03 | 0.33 | 0.05 | 0.33 | 0.04 | 0.22 |
| 0.77 | 0.26 | 0.54 | 0.16 | 0.82 | 0.28 | 0.65 | 0.22 | 0.63 | 0.20 | 0.72 |
| #N/A | #N/A | #N/A | #N/A | #N/A | #N/A | #N/A | #N/A | #N/A | #N/A | #N/A |
| 0.96 | 0.38 | 0.68 | 0.23 | 0.70 | 0.21 | 0.82 | 0.32 | 0.87 | 0.34 | 0.87 |
| 1.40 | 0.61 | 1.20 | 0.46 | 1.42 | 0.55 | 1.06 | 0.46 | 1.45 | 0.63 | 1.21 |
| 1.59 | 0.69 | 0.94 | 0.35 | #N/A | #N/A | 0.90 | 0.36 | 0.96 | 0.39 | 0.97 |
| 2.24 | 0.87 | 2.25 | 0.81 | 2.84 | 0.90 | 2.34 | 0.89 | 2.82 | 0.93 | 2.40 |
| 1.61 | 0.70 | 2.00 | 0.74 | 1.78 | 0.69 | 1.69 | 0.73 | 1.53 | 0.67 | 1.38 |
| 0.55 | 0.12 | 0.27 | 0.04 | 0.25 | 0.02 | 0.33 | 0.04 | 0.22 | 0.01 | 0.36 |
| 1.09 | 0.46 | 0.91 | 0.34 | 0.88 | 0.30 | 0.78 | 0.29 | 0.90 | 0.36 | #N/A |
| #N/A | #N/A | #N/A | #N/A | #N/A | #N/A | #N/A | #N/A | #N/A | #N/A | #N/A |
| 1.19 | 0.51 | 1.43 | 0.55 | 1.24 | 0.47 | 1.13 | 0.49 | 1.22 | 0.53 | 1.08 |
| #N/A | #N/A | #N/A | #N/A | #N/A | #N/A | #N/A | #N/A | #N/A | #N/A | #N/A |
| 0.34 | 0.03 | 0.44 | 0.11 | 0.31 | 0.03 | 0.54 | 0.17 | 0.29 | 0.03 | 0.64 |
| 0.86 | 0.31 | 1.06 | 0.41 | 0.87 | 0.30 | 0.83 | 0.33 | 0.98 | 0.41 | 1.05 |
| 1.67 | 0.73 | 2.21 | 0.79 | 1.89 | 0.72 | 2.16 | 0.86 | 1.75 | 0.74 | #N/A |
| 0.54 | 0.11 | 0.38 | 0.08 | #N/A | #N/A | 0.40 | 0.08 | 0.29 | 0.02 | 0.56 |
| 1.57 | 0.67 | 1.40 | 0.54 | 1.61 | 0.63 | 1.36 | 0.61 | 1.65 | 0.71 | 1.59 |
| #N/A | #N/A | 1.17 | 0.45 | 1.29 | 0.49 | 1.35 | 0.60 | 1.32 | 0.57 | 0.93 |
| 1.01 | 0.41 | 1.06 | 0.39 | 1.06 | 0.39 | 0.91 | 0.37 | 1.02 | 0.42 | 1.03 |
| 1.19 | 0.50 | 0.62 | 0.21 | #N/A | #N/A | 0.87 | 0.34 | 0.88 | 0.35 | 0.86 |
| 0.94 | 0.35 | 1.07 | 0.40 | 0.72 | 0.21 | 0.80 | 0.31 | 0.67 | 0.22 | #N/A |
| 1.53 | 0.68 | 1.46 | 0.56 | 1.22 | 0.46 | 1.19 | 0.52 | 1.28 | 0.56 | 1.37 |
| 0.95 | 0.36 | 1.34 | 0.52 | 1.21 | 0.46 | 0.92 | 0.37 | 1.29 | 0.56 | 0.89 |
| 1.05 | 0.43 | 1.31 | 0.50 | 1.13 | 0.43 | #N/A | #N/A | 1.06 | 0.45 | 0.84 |
| 1.26 | 0.55 | 1.63 | 0.63 | 1.51 | 0.58 | 1.17 | 0.51 | 1.27 | 0.55 | 1.57 |
| 0.83 | 0.30 | 0.65 | 0.21 | 0.65 | 0.18 | 0.62 | 0.19 | 0.64 | 0.20 | 0.91 |
| 0.95 | 0.37 | 0.91 | 0.33 | 0.86 | 0.29 | 0.84 | 0.33 | 0.86 | 0.33 | 1.04 |
| 0.74 | 0.23 | 0.90 | 0.33 | 0.82 | 0.27 | 0.93 | 0.39 | 0.85 | 0.33 | 0.92 |
| 1.19 | 0.51 | 1.12 | 0.43 | 1.18 | 0.44 | 0.92 | 0.38 | 1.42 | 0.62 | 0.96 |

|      |      |      |      |      |      |      |      |      |      |      |
|------|------|------|------|------|------|------|------|------|------|------|
| 0.98 | 0.37 | 1.22 | 0.47 | 1.60 | 0.62 | 1.34 | 0.60 | 1.00 | 0.42 | 0.84 |
| #N/A | #N/A | #N/A | #N/A | #N/A | #N/A | #N/A | #N/A | #N/A | #N/A | #N/A |
| 1.25 | 0.54 | 1.39 | 0.54 | 1.39 | 0.54 | 1.25 | 0.55 | 1.31 | 0.56 | 1.29 |
| #N/A | #N/A | 0.89 | 0.33 | 0.88 | 0.30 | 0.75 | 0.28 | 0.81 | 0.31 | 0.80 |
| #N/A | #N/A | #N/A | #N/A | #N/A | #N/A | #N/A | #N/A | #N/A | #N/A | #N/A |
| #N/A | #N/A | #N/A | #N/A | #N/A | #N/A | #N/A | #N/A | #N/A | #N/A | #N/A |
| 1.77 | 0.75 | 1.99 | 0.74 | 2.20 | 0.79 | 1.52 | 0.68 | 1.83 | 0.77 | 1.63 |
| 1.29 | 0.56 | 1.20 | 0.47 | 1.67 | 0.65 | 1.09 | 0.47 | 1.32 | 0.57 | 1.32 |
| 1.46 | 0.65 | 1.84 | 0.69 | 1.61 | 0.63 | 1.62 | 0.70 | 1.59 | 0.69 | 1.32 |
| #N/A | #N/A | #N/A | #N/A | #N/A | #N/A | #N/A | #N/A | #N/A | #N/A | #N/A |
| 1.24 | 0.54 | 1.38 | 0.54 | #N/A | #N/A | 1.56 | 0.68 | 1.02 | 0.42 | #N/A |
| 0.73 | 0.23 | #N/A | #N/A | #N/A | #N/A | #N/A | #N/A | 0.92 | 0.36 | #N/A |
| 3.47 | 0.97 | 2.18 | 0.79 | 1.88 | 0.72 | 1.44 | 0.64 | 1.97 | 0.80 | 1.40 |
| #N/A | #N/A | #N/A | #N/A | #N/A | #N/A | #N/A | #N/A | #N/A | #N/A | #N/A |
| 1.58 | 0.69 | 1.44 | 0.56 | 1.85 | 0.70 | 1.54 | 0.69 | 1.59 | 0.69 | 1.11 |
| 0.92 | 0.35 | 1.38 | 0.53 | 1.46 | 0.57 | 1.23 | 0.54 | 1.40 | 0.61 | 1.24 |
| 0.81 | 0.29 | 1.16 | 0.45 | 1.05 | 0.38 | 1.09 | 0.48 | 0.93 | 0.38 | 0.84 |
| 3.14 | 0.93 | 3.23 | 0.93 | 2.56 | 0.87 | 2.97 | 0.84 | 2.95 | 0.95 | #N/A |
| #N/A | #N/A | #N/A | #N/A | #N/A | #N/A | #N/A | #N/A | #N/A | #N/A | #N/A |
| 1.72 | 0.75 | 2.76 | 0.89 | 2.07 | 0.76 | 1.87 | 0.78 | 1.78 | 0.75 | #N/A |
| 0.92 | 0.35 | 1.24 | 0.48 | #N/A | #N/A | 1.13 | 0.50 | 1.05 | 0.43 | 1.08 |
| #N/A | #N/A | #N/A | #N/A | #N/A | #N/A | #N/A | #N/A | #N/A | #N/A | #N/A |
| #N/A | #N/A | #N/A | #N/A | #N/A | #N/A | #N/A | #N/A | #N/A | #N/A | #N/A |
| 1.46 | 0.65 | 1.56 | 0.60 | 1.58 | 0.62 | 1.79 | 0.76 | 1.64 | 0.71 | #N/A |
| 1.12 | 0.47 | 1.13 | 0.43 | 1.48 | 0.57 | 0.95 | 0.39 | 1.22 | 0.53 | 0.98 |
| 1.32 | 0.58 | 0.95 | 0.35 | 0.96 | 0.33 | 0.77 | 0.29 | 1.17 | 0.50 | #N/A |
| #N/A | #N/A | #N/A | #N/A | #N/A | #N/A | #N/A | #N/A | 1.76 | 0.69 | 1.09 |
| 3.56 | 0.97 | 2.94 | 0.91 | 2.23 | 0.80 | 2.53 | 0.92 | 2.57 | 0.92 | 1.87 |
| #N/A | #N/A | #N/A | #N/A | #N/A | #N/A | #N/A | #N/A | 2.04 | 0.82 | 1.15 |
| 2.14 | 0.86 | 2.62 | 0.86 | 2.44 | 0.85 | 2.55 | 0.92 | 1.99 | 0.80 | 1.55 |
| 0.57 | 0.13 | 0.31 | 0.05 | 0.35 | 0.05 | 0.39 | 0.07 | 0.46 | 0.10 | 0.66 |
| 1.57 | 0.68 | 1.54 | 0.59 | 1.50 | 0.58 | 1.17 | 0.50 | 1.19 | 0.50 | 1.02 |
| 1.69 | 0.74 | 2.56 | 0.86 | 1.99 | 0.75 | 2.09 | 0.85 | 1.92 | 0.79 | 1.89 |
| 0.76 | 0.24 | 0.80 | 0.28 | 0.69 | 0.20 | 0.68 | 0.23 | 0.67 | 0.22 | #N/A |
| #N/A | #N/A | #N/A | #N/A | #N/A | #N/A | #N/A | #N/A | #N/A | #N/A | #N/A |
| 1.08 | 0.45 | 0.71 | 0.24 | 0.74 | 0.24 | 0.95 | 0.40 | 0.96 | 0.39 | 0.75 |
| 2.70 | 0.94 | 2.84 | 0.90 | 2.58 | 0.85 | 2.25 | 0.88 | 3.04 | 0.96 | 2.13 |
| 0.42 | 0.05 | 0.31 | 0.05 | #N/A | #N/A | 0.32 | 0.04 | 0.34 | 0.04 | 0.49 |
| #N/A | #N/A | 0.96 | 0.36 | 0.83 | 0.28 | 0.93 | 0.38 | 0.86 | 0.33 | 0.96 |
| 0.57 | 0.13 | 0.40 | 0.09 | 0.36 | 0.06 | 0.40 | 0.07 | 0.40 | 0.07 | 0.53 |
| 0.49 | 0.09 | 0.64 | 0.21 | 0.71 | 0.22 | 0.49 | 0.12 | 0.49 | 0.12 | 0.68 |
| 0.45 | 0.08 | #N/A | #N/A | #N/A | #N/A | 0.74 | 0.27 | 0.67 | 0.22 | 0.35 |
| #N/A | #N/A | #N/A | #N/A | #N/A | #N/A | #N/A | #N/A | #N/A | #N/A | #N/A |
| 2.04 | 0.84 | 3.39 | 0.95 | 3.10 | 0.93 | 3.28 | 0.98 | 3.21 | 0.97 | 2.48 |
| 1.25 | 0.55 | 0.94 | 0.35 | 0.85 | 0.29 | 0.85 | 0.34 | 0.87 | 0.34 | #N/A |
| 1.47 | 0.65 | 1.05 | 0.40 | 1.15 | 0.43 | 1.41 | 0.63 | 1.09 | 0.45 | 1.09 |
| #N/A | #N/A | #N/A | #N/A | #N/A | #N/A | #N/A | #N/A | #N/A | #N/A | #N/A |
| 0.83 | 0.30 | 0.61 | 0.19 | 0.74 | 0.23 | 0.72 | 0.26 | 0.75 | 0.27 | 0.81 |
| 0.59 | 0.14 | 0.38 | 0.08 | 0.77 | 0.25 | 0.72 | 0.26 | 0.65 | 0.21 | 0.55 |
| #N/A | #N/A | 0.48 | 0.13 | #N/A | #N/A | 0.49 | 0.11 | 0.42 | 0.09 | 0.69 |
| 0.46 | 0.07 | 0.31 | 0.05 | 0.26 | 0.02 | 0.32 | 0.04 | #N/A | #N/A | 0.43 |

|      |      |      |      |      |      |      |      |      |      |      |
|------|------|------|------|------|------|------|------|------|------|------|
| 0.59 | 0.14 | 0.82 | 0.29 | 0.81 | 0.25 | 0.57 | 0.16 | 0.67 | 0.22 | 1.00 |
| #N/A | #N/A | #N/A | #N/A | #N/A | #N/A | #N/A | #N/A | #N/A | #N/A | #N/A |
| 2.13 | 0.86 | 1.90 | 0.71 | 1.88 | 0.71 | 1.18 | 0.52 | 1.72 | 0.74 | 1.46 |
| 1.33 | 0.58 | 1.17 | 0.45 | 1.25 | 0.48 | 1.19 | 0.52 | 1.10 | 0.47 | 1.18 |
| 1.04 | 0.43 | 1.11 | 0.42 | 1.05 | 0.38 | 0.73 | 0.26 | 0.99 | 0.41 | 0.80 |
| #N/A | #N/A | #N/A | #N/A | #N/A | #N/A | #N/A | #N/A | 0.70 | 0.24 | #N/A |
| #N/A | #N/A | #N/A | #N/A | #N/A | #N/A | #N/A | #N/A | #N/A | #N/A | #N/A |
| #N/A | #N/A | #N/A | #N/A | #N/A | #N/A | #N/A | #N/A | #N/A | #N/A | #N/A |
| 1.14 | 0.49 | 0.91 | 0.34 | 1.18 | 0.44 | 0.96 | 0.40 | 1.00 | 0.41 | 1.09 |
| 0.70 | 0.20 | 0.62 | 0.20 | 0.72 | 0.22 | 0.53 | 0.14 | 0.66 | 0.22 | 0.61 |
| 0.60 | 0.15 | 0.38 | 0.08 | 0.47 | 0.10 | 0.44 | 0.09 | 0.58 | 0.17 | 0.55 |
| 0.87 | 0.32 | 1.14 | 0.44 | 1.06 | 0.39 | 1.00 | 0.43 | 0.94 | 0.38 | 1.10 |
| 0.37 | 0.05 | 0.42 | 0.11 | 0.37 | 0.06 | 0.28 | 0.04 | 0.44 | 0.09 | #N/A |
| 0.31 | 0.03 | 0.19 | 0.01 | 0.29 | 0.03 | #N/A | #N/A | 0.35 | 0.05 | 0.28 |
| 0.87 | 0.33 | 0.45 | 0.11 | #N/A | #N/A | 0.40 | 0.07 | 0.44 | 0.09 | 0.44 |
| 1.64 | 0.72 | 1.89 | 0.71 | 2.26 | 0.81 | 1.83 | 0.78 | 2.13 | 0.85 | 1.63 |
| 1.89 | 0.80 | 2.12 | 0.76 | 2.08 | 0.76 | 1.95 | 0.82 | 1.77 | 0.75 | #N/A |
| 1.26 | 0.55 | 1.33 | 0.52 | 1.16 | 0.43 | 0.95 | 0.39 | 0.94 | 0.38 | 1.27 |
| 0.62 | 0.16 | 0.44 | 0.11 | 0.31 | 0.03 | 0.45 | 0.09 | 0.35 | 0.05 | 0.64 |
| #N/A | #N/A | #N/A | #N/A | #N/A | #N/A | #N/A | #N/A | #N/A | #N/A | #N/A |
| 1.20 | 0.52 | 1.21 | 0.45 | #N/A | #N/A | #N/A | #N/A | 0.96 | 0.39 | #N/A |
| 0.97 | 0.39 | 0.85 | 0.31 | 0.95 | 0.34 | 0.63 | 0.20 | 0.81 | 0.30 | 0.83 |
| 0.61 | 0.15 | 0.26 | 0.03 | 0.33 | 0.04 | 0.35 | 0.07 | 0.46 | 0.10 | #N/A |
| 1.65 | 0.72 | 2.68 | 0.88 | 2.11 | 0.77 | 1.70 | 0.73 | 1.58 | 0.69 | 1.52 |
| 1.47 | 0.65 | 2.18 | 0.79 | 1.91 | 0.71 | 1.29 | 0.57 | 1.59 | 0.69 | 1.69 |
| 0.29 | 0.02 | 0.41 | 0.10 | #N/A | #N/A | 0.34 | 0.05 | 0.52 | 0.14 | 0.33 |
| #N/A | #N/A | 1.60 | 0.62 | 1.00 | 0.36 | 1.13 | 0.48 | 1.35 | 0.58 | 1.20 |
| 1.51 | 0.56 | 1.15 | 0.44 | 1.10 | 0.40 | 1.07 | 0.47 | 1.15 | 0.49 | 1.08 |
| 0.95 | 0.37 | 1.16 | 0.45 | 1.69 | 0.65 | 1.43 | 0.62 | 1.41 | 0.62 | 1.31 |
| 0.27 | 0.02 | 0.60 | 0.18 | #N/A | #N/A | 0.44 | 0.09 | 0.40 | 0.08 | 0.47 |
| 0.26 | 0.02 | 0.15 | 0.01 | 0.20 | 0.01 | 0.23 | 0.02 | 0.22 | 0.01 | 0.32 |
| 1.39 | 0.61 | 1.42 | 0.55 | 1.23 | 0.47 | 0.90 | 0.37 | 1.30 | 0.56 | 1.19 |
| 0.65 | 0.18 | 0.54 | 0.16 | 0.61 | 0.16 | 0.51 | 0.13 | 0.66 | 0.21 | 0.59 |
| 1.15 | 0.48 | 1.35 | 0.53 | 1.21 | 0.45 | 1.25 | 0.54 | 1.25 | 0.54 | #N/A |
| #N/A | #N/A | #N/A | #N/A | #N/A | #N/A | #N/A | #N/A | #N/A | #N/A | 0.50 |
| 1.99 | 0.83 | 1.73 | 0.65 | 2.49 | 0.85 | 2.91 | 0.94 | 2.76 | 0.94 | 1.74 |
| 1.50 | 0.66 | 1.91 | 0.72 | 1.52 | 0.59 | 1.61 | 0.70 | 1.40 | 0.61 | 1.28 |
| #N/A | #N/A | #N/A | #N/A | #N/A | #N/A | #N/A | #N/A | #N/A | #N/A | #N/A |
| #N/A | #N/A | #N/A | #N/A | #N/A | #N/A | 1.33 | 0.59 | 1.37 | 0.60 | #N/A |
| 3.22 | 0.97 | 2.56 | 0.86 | #N/A | #N/A | 2.92 | 0.96 | 3.67 | 0.98 | 1.79 |
| 3.40 | 0.97 | 5.88 | 1.00 | 4.29 | 0.98 | 5.21 | 1.00 | 4.82 | 1.00 | 3.38 |
| 1.34 | 0.56 | 1.60 | 0.61 | #N/A | #N/A | #N/A | #N/A | 1.05 | 0.44 | 1.06 |
| 2.21 | 0.87 | 1.75 | 0.66 | 1.58 | 0.60 | 1.65 | 0.73 | 1.54 | 0.66 | 1.56 |
| #N/A | #N/A | 1.83 | 0.69 | 1.59 | 0.62 | 1.29 | 0.58 | 1.67 | 0.71 | 1.54 |
| 0.56 | 0.12 | 0.46 | 0.12 | 0.68 | 0.21 | 0.62 | 0.20 | 0.70 | 0.24 | 0.54 |
| 1.40 | 0.60 | 1.76 | 0.67 | 1.96 | 0.74 | 1.35 | 0.60 | 1.56 | 0.67 | 1.12 |
| #N/A | #N/A | #N/A | #N/A | #N/A | #N/A | #N/A | #N/A | #N/A | #N/A | 0.69 |
| #N/A | #N/A | #N/A | #N/A | #N/A | #N/A | #N/A | #N/A | #N/A | #N/A | #N/A |
| #N/A | #N/A | 1.15 | 0.44 | #N/A | #N/A | 1.01 | 0.43 | 1.35 | 0.59 | #N/A |
| 2.02 | 0.80 | 1.81 | 0.68 | 2.34 | 0.82 | #N/A | #N/A | 1.97 | 0.80 | 1.39 |
| 2.40 | 0.90 | 3.49 | 0.96 | 4.40 | 0.98 | 2.59 | 0.93 | #N/A | #N/A | #N/A |

|      |      |      |      |      |      |      |      |      |      |      |
|------|------|------|------|------|------|------|------|------|------|------|
| 0.97 | 0.39 | 1.09 | 0.42 | 0.87 | 0.29 | 1.00 | 0.43 | 1.02 | 0.43 | 1.04 |
| 1.16 | 0.49 | 1.41 | 0.55 | 1.63 | 0.61 | 1.16 | 0.51 | 1.25 | 0.54 | 1.10 |
| #N/A | #N/A | 0.54 | 0.16 | 0.43 | 0.08 | 0.45 | 0.10 | 0.50 | 0.13 | #N/A |
| #N/A | #N/A | 1.38 | 0.54 | 1.30 | 0.50 | 1.35 | 0.59 | 0.91 | 0.36 | 1.49 |
| #N/A | #N/A | #N/A | #N/A | #N/A | #N/A | #N/A | #N/A | 0.63 | 0.20 | 0.60 |
| 1.90 | 0.80 | 3.50 | 0.95 | 2.98 | 0.86 | 2.64 | 0.91 | 2.45 | 0.90 | 2.05 |
| #N/A | #N/A | #N/A | #N/A | #N/A | #N/A | #N/A | #N/A | #N/A | #N/A | #N/A |
| 0.85 | 0.31 | 0.92 | 0.34 | 0.92 | 0.32 | 1.17 | 0.52 | 0.86 | 0.33 | 0.82 |
| 1.26 | 0.54 | 1.36 | 0.53 | 1.27 | 0.49 | 1.44 | 0.64 | 1.22 | 0.52 | 1.36 |
| 2.30 | 0.88 | 2.89 | 0.91 | 2.44 | 0.85 | 2.31 | 0.89 | 2.27 | 0.87 | 2.03 |
| 0.61 | 0.15 | 0.94 | 0.35 | 0.78 | 0.25 | 0.57 | 0.16 | 0.66 | 0.22 | 0.87 |
| 3.11 | 0.89 | 3.15 | 0.93 | #N/A | #N/A | 2.74 | 0.94 | 2.31 | 0.88 | 1.48 |
| 1.29 | 0.57 | 0.98 | 0.37 | #N/A | #N/A | 0.84 | 0.33 | 0.89 | 0.35 | #N/A |
| #N/A | #N/A | 1.69 | 0.64 | 1.48 | 0.57 | 1.42 | 0.63 | 1.43 | 0.62 | 1.42 |
| 0.84 | 0.30 | 0.57 | 0.17 | 0.53 | 0.13 | 0.78 | 0.29 | 0.77 | 0.28 | 0.65 |
| #N/A | #N/A | 0.81 | 0.29 | 0.87 | 0.29 | 0.78 | 0.29 | 0.93 | 0.38 | 0.75 |
| #N/A | #N/A | #N/A | #N/A | #N/A | #N/A | #N/A | #N/A | #N/A | #N/A | #N/A |
| 1.37 | 0.60 | 1.41 | 0.55 | 1.46 | 0.56 | 1.19 | 0.53 | 1.22 | 0.52 | 1.36 |
| #N/A | #N/A | 1.49 | 0.57 | 1.61 | 0.62 | 1.11 | 0.49 | 1.24 | 0.53 | #N/A |
| 1.25 | 0.55 | 1.69 | 0.64 | 1.16 | 0.44 | 1.07 | 0.46 | 1.06 | 0.45 | 1.17 |
| 1.01 | 0.41 | 1.24 | 0.48 | 1.22 | 0.46 | 1.45 | 0.64 | 1.53 | 0.66 | 0.92 |
| 0.53 | 0.11 | #N/A | #N/A | #N/A | #N/A | #N/A | #N/A | #N/A | #N/A | #N/A |
| 1.12 | 0.47 | 1.78 | 0.67 | 1.40 | 0.54 | 1.27 | 0.56 | 1.21 | 0.49 | 1.40 |
| 1.37 | 0.60 | 1.49 | 0.58 | 1.63 | 0.64 | 1.17 | 0.51 | 1.47 | 0.64 | 1.48 |
| #N/A | #N/A | #N/A | #N/A | #N/A | #N/A | #N/A | #N/A | #N/A | #N/A | #N/A |
| 2.21 | 0.87 | 2.68 | 0.88 | 2.57 | 0.87 | 2.27 | 0.88 | 2.78 | 0.94 | 2.04 |
| 0.93 | 0.35 | 0.71 | 0.24 | 0.61 | 0.16 | 0.68 | 0.23 | 0.64 | 0.20 | 0.70 |
| 1.80 | 0.77 | 2.37 | 0.83 | 2.34 | 0.83 | 2.14 | 0.85 | 2.05 | 0.81 | 1.68 |
| 0.63 | 0.16 | 0.53 | 0.16 | 0.52 | 0.12 | 0.70 | 0.24 | 0.69 | 0.24 | 0.72 |
| 1.52 | 0.67 | 1.68 | 0.64 | 1.85 | 0.71 | 1.54 | 0.68 | 1.63 | 0.70 | #N/A |
| 1.96 | 0.82 | 1.88 | 0.69 | 1.62 | 0.63 | 2.04 | 0.84 | 1.95 | 0.80 | 1.63 |
| 2.46 | 0.91 | 2.32 | 0.82 | 2.19 | 0.80 | 2.33 | 0.89 | 2.01 | 0.81 | 1.78 |
| 0.66 | 0.18 | #N/A | #N/A | #N/A | #N/A | #N/A | #N/A | #N/A | #N/A | #N/A |
| 0.64 | 0.18 | 0.43 | 0.11 | 0.46 | 0.09 | 0.52 | 0.14 | 0.47 | 0.10 | 0.53 |
| 0.62 | 0.16 | 0.34 | 0.06 | 0.71 | 0.20 | 0.64 | 0.21 | 0.49 | 0.12 | 0.44 |
| 0.80 | 0.27 | 0.73 | 0.25 | 1.02 | 0.38 | 0.96 | 0.40 | 0.95 | 0.38 | 0.76 |
| #N/A | #N/A | 1.12 | 0.42 | 2.12 | 0.78 | 1.34 | 0.60 | 1.72 | 0.73 | #N/A |
| #N/A | #N/A | 0.90 | 0.33 | #N/A | #N/A | 0.75 | 0.27 | 0.73 | 0.26 | 0.96 |
| #N/A | #N/A | 0.85 | 0.31 | 0.65 | 0.18 | 0.75 | 0.27 | 0.80 | 0.30 | 0.81 |
| 0.52 | 0.10 | 0.56 | 0.17 | 0.58 | 0.15 | 0.56 | 0.16 | 0.58 | 0.17 | 0.60 |
| 1.48 | 0.65 | 1.87 | 0.69 | 1.83 | 0.70 | 1.65 | 0.72 | 1.47 | 0.64 | 1.38 |
| 2.00 | 0.83 | 1.80 | 0.68 | 1.50 | 0.58 | 1.07 | 0.46 | 1.18 | 0.51 | 0.95 |
| 1.93 | 0.74 | 2.03 | 0.75 | 1.75 | 0.67 | 1.69 | 0.73 | 1.73 | 0.74 | 1.79 |
| 0.62 | 0.17 | #N/A | #N/A | 0.54 | 0.14 | 0.48 | 0.12 | 0.50 | 0.12 | 0.77 |
| #N/A | #N/A | 1.21 | 0.47 | #N/A | #N/A | 0.99 | 0.40 | 0.81 | 0.30 | 0.80 |
| 0.49 | 0.09 | 0.80 | 0.28 | 0.93 | 0.32 | 0.60 | 0.19 | 0.76 | 0.27 | 0.43 |
| #N/A | #N/A | #N/A | #N/A | #N/A | #N/A | #N/A | #N/A | #N/A | #N/A | #N/A |
| 2.32 | 0.89 | 2.48 | 0.84 | 2.43 | 0.83 | 2.07 | 0.85 | 2.16 | 0.85 | 1.64 |
| #N/A | #N/A | #N/A | #N/A | #N/A | #N/A | #N/A | #N/A | #N/A | #N/A | #N/A |
| 0.99 | 0.39 | 1.34 | 0.52 | 1.20 | 0.45 | 1.21 | 0.53 | 1.23 | 0.53 | 1.07 |
| 1.23 | 0.53 | 1.19 | 0.46 | 1.29 | 0.49 | 1.14 | 0.50 | 0.91 | 0.36 | 1.03 |





|      |      |      |      |      |      |      |      |      |      |      |
|------|------|------|------|------|------|------|------|------|------|------|
| 0.51 | 0.10 | 0.22 | 0.02 | 0.20 | 0.01 | 0.26 | 0.02 | 0.25 | 0.01 | 0.50 |
| 0.57 | 0.13 | 0.26 | 0.03 | 0.28 | 0.02 | 0.32 | 0.04 | 0.28 | 0.02 | 0.50 |
| 1.00 | 0.40 | 0.82 | 0.29 | 0.82 | 0.27 | 0.91 | 0.37 | 0.85 | 0.33 | 0.81 |
| 1.25 | 0.53 | 1.47 | 0.57 | 1.22 | 0.46 | 1.16 | 0.51 | 1.09 | 0.46 | 1.65 |
| 0.76 | 0.24 | 1.14 | 0.44 | 1.57 | 0.60 | 0.97 | 0.40 | 1.17 | 0.50 | #N/A |
| #N/A | #N/A | #N/A | #N/A | #N/A | #N/A | #N/A | #N/A | #N/A | #N/A | #N/A |
| 0.69 | 0.21 | 0.38 | 0.08 | 0.45 | 0.09 | 0.52 | 0.14 | 0.50 | 0.12 | 0.90 |
| #N/A | #N/A | 2.55 | 0.84 | #N/A | #N/A | #N/A | #N/A | 2.62 | 0.91 | 1.05 |
| 1.89 | 0.68 | 0.80 | 0.28 | #N/A | #N/A | 0.75 | 0.27 | 0.73 | 0.26 | #N/A |
| #N/A | #N/A | #N/A | #N/A | #N/A | #N/A | #N/A | #N/A | #N/A | #N/A | #N/A |
| 1.40 | 0.61 | 1.34 | 0.51 | 1.44 | 0.56 | 1.32 | 0.59 | 1.40 | 0.61 | 1.30 |
| 2.18 | 0.87 | 2.89 | 0.91 | 2.64 | 0.88 | 2.61 | 0.93 | 2.59 | 0.92 | 1.81 |
| #N/A | #N/A | #N/A | #N/A | #N/A | #N/A | #N/A | #N/A | #N/A | #N/A | 0.70 |
| 1.94 | 0.81 | 2.28 | 0.81 | 2.34 | 0.82 | 1.76 | 0.76 | 1.89 | 0.79 | 1.63 |
| 2.89 | 0.95 | 3.68 | 0.97 | 3.45 | 0.95 | 3.22 | 0.97 | 3.06 | 0.96 | 2.55 |
| 2.05 | 0.83 | 2.18 | 0.78 | 2.69 | 0.88 | 2.21 | 0.85 | 2.21 | 0.85 | 2.31 |
| 1.21 | 0.48 | 1.00 | 0.37 | 1.05 | 0.39 | 1.26 | 0.55 | 1.02 | 0.43 | 1.08 |
| 2.56 | 0.86 | 4.02 | 0.98 | 3.77 | 0.97 | 3.45 | 0.97 | 3.10 | 0.95 | 2.09 |
| 1.51 | 0.67 | 0.77 | 0.27 | #N/A | #N/A | 1.00 | 0.42 | 0.85 | 0.33 | 0.78 |
| 1.30 | 0.57 | 1.26 | 0.49 | 1.15 | 0.43 | 1.37 | 0.61 | 1.03 | 0.43 | 0.93 |
| #N/A | #N/A | #N/A | #N/A | #N/A | #N/A | #N/A | #N/A | 0.65 | 0.21 | 0.40 |
| #N/A | #N/A | #N/A | #N/A | #N/A | #N/A | #N/A | #N/A | 1.30 | 0.56 | 0.96 |
| 0.80 | 0.27 | 1.03 | 0.39 | 0.91 | 0.32 | 0.86 | 0.34 | 1.24 | 0.54 | 1.17 |
| 1.29 | 0.55 | 2.09 | 0.76 | 1.86 | 0.71 | 1.73 | 0.75 | 1.55 | 0.67 | 1.56 |
| 1.65 | 0.72 | 2.44 | 0.84 | 2.22 | 0.80 | 1.83 | 0.79 | 1.84 | 0.77 | 1.89 |
| 1.36 | 0.58 | 1.71 | 0.65 | 1.77 | 0.69 | 1.22 | 0.55 | 1.34 | 0.59 | 1.35 |
| #N/A | #N/A | #N/A | #N/A | #N/A | #N/A | #N/A | #N/A | #N/A | #N/A | #N/A |
| 0.57 | 0.13 | 0.49 | 0.14 | 0.61 | 0.16 | 0.46 | 0.10 | 0.55 | 0.15 | 0.45 |
| 0.84 | 0.30 | 0.82 | 0.29 | 0.76 | 0.24 | 0.64 | 0.21 | 0.75 | 0.27 | #N/A |
| 1.09 | 0.46 | 0.61 | 0.19 | #N/A | #N/A | 0.88 | 0.36 | 0.61 | 0.19 | #N/A |
| 2.31 | 0.89 | 3.15 | 0.93 | 3.13 | 0.93 | 2.07 | 0.85 | 2.69 | 0.93 | 1.94 |
| #N/A | #N/A | 1.90 | 0.71 | #N/A | #N/A | 1.55 | 0.67 | 1.84 | 0.75 | #N/A |
| 1.47 | 0.64 | 2.51 | 0.86 | 2.29 | 0.82 | 2.20 | 0.87 | 1.88 | 0.78 | 1.41 |
| #N/A | #N/A | #N/A | #N/A | #N/A | #N/A | #N/A | #N/A | #N/A | #N/A | #N/A |
| 0.94 | 0.36 | 0.70 | 0.24 | 0.72 | 0.22 | 0.88 | 0.35 | 0.77 | 0.28 | 0.65 |
| 1.36 | 0.60 | 1.05 | 0.40 | 1.11 | 0.40 | 0.87 | 0.35 | 1.14 | 0.49 | 0.91 |
| #N/A | #N/A | #N/A | #N/A | #N/A | #N/A | #N/A | #N/A | #N/A | #N/A | #N/A |
| 2.01 | 0.82 | 1.68 | 0.64 | 1.30 | 0.49 | 2.19 | 0.84 | 1.43 | 0.61 | #N/A |
| #N/A | #N/A | #N/A | #N/A | #N/A | #N/A | #N/A | #N/A | #N/A | #N/A | #N/A |
| 2.42 | 0.91 | 3.21 | 0.94 | 2.67 | 0.88 | 3.13 | 0.97 | 2.62 | 0.91 | 2.18 |
| 0.37 | 0.04 | 0.24 | 0.03 | 0.33 | 0.04 | 0.29 | 0.03 | 0.32 | 0.04 | 0.34 |
| #N/A | #N/A | #N/A | #N/A | #N/A | #N/A | #N/A | #N/A | #N/A | #N/A | #N/A |
| #N/A | #N/A | #N/A | #N/A | #N/A | #N/A | #N/A | #N/A | #N/A | #N/A | #N/A |
| 1.40 | 0.62 | 1.78 | 0.67 | 1.66 | 0.63 | 1.44 | 0.64 | 1.65 | 0.71 | 1.52 |
| #N/A | #N/A | #N/A | #N/A | #N/A | #N/A | 1.00 | 0.41 | 1.03 | 0.42 | 0.66 |
| 1.43 | 0.63 | 1.71 | 0.64 | #N/A | #N/A | 1.33 | 0.59 | 1.54 | 0.67 | 0.97 |
| 0.81 | 0.28 | 0.72 | 0.24 | #N/A | #N/A | 0.82 | 0.32 | 0.48 | 0.12 | 0.73 |
| #N/A | #N/A | 1.56 | 0.60 | #N/A | #N/A | 1.22 | 0.53 | 1.27 | 0.55 | 1.46 |
| #N/A | #N/A | 7.00 | 0.99 | #N/A | #N/A | 1.88 | 0.76 | 2.83 | 0.94 | 2.98 |
| #N/A | #N/A | #N/A | #N/A | #N/A | #N/A | #N/A | #N/A | #N/A | #N/A | #N/A |
| 1.69 | 0.74 | 1.90 | 0.71 | 1.71 | 0.66 | 1.34 | 0.60 | 1.49 | 0.65 | 1.56 |



|      |      |      |      |      |      |      |      |      |      |      |
|------|------|------|------|------|------|------|------|------|------|------|
| 0.81 | 0.28 | 0.70 | 0.24 | 0.58 | 0.15 | 0.75 | 0.27 | 0.62 | 0.19 | 0.73 |
| 0.82 | 0.29 | 0.76 | 0.26 | 0.55 | 0.14 | 0.57 | 0.17 | 0.55 | 0.15 | 0.75 |
| #N/A | #N/A | 1.11 | 0.43 | 0.69 | 0.20 | 0.64 | 0.21 | 0.51 | 0.13 | 0.84 |
| 0.82 | 0.28 | 0.79 | 0.28 | 0.55 | 0.14 | 0.56 | 0.16 | 0.46 | 0.10 | 0.83 |
| 1.51 | 0.67 | 2.03 | 0.75 | 1.48 | 0.58 | 1.28 | 0.57 | 1.45 | 0.63 | 1.41 |
| 1.57 | 0.69 | 2.33 | 0.82 | 1.82 | 0.69 | 1.28 | 0.57 | 1.35 | 0.58 | 1.53 |
| 0.95 | 0.36 | 1.04 | 0.39 | 1.08 | 0.40 | 1.06 | 0.46 | 0.97 | 0.40 | 0.93 |
| 0.98 | 0.39 | 0.65 | 0.21 | 0.73 | 0.21 | 0.56 | 0.16 | 0.75 | 0.27 | 0.96 |
| 0.80 | 0.27 | 0.72 | 0.24 | 0.67 | 0.21 | 0.72 | 0.25 | 0.67 | 0.22 | 1.02 |
| 1.62 | 0.71 | 1.98 | 0.73 | 1.73 | 0.67 | 1.50 | 0.67 | 1.71 | 0.73 | 1.53 |
| 1.22 | 0.53 | 1.84 | 0.69 | 1.36 | 0.52 | 1.33 | 0.59 | 1.33 | 0.58 | 0.89 |
| 2.38 | 0.90 | 2.92 | 0.91 | 2.64 | 0.88 | 2.31 | 0.89 | 2.34 | 0.88 | 1.97 |
| 1.74 | 0.76 | 2.76 | 0.89 | 2.43 | 0.84 | 2.05 | 0.84 | 1.81 | 0.76 | 1.37 |
| #N/A | #N/A | #N/A | #N/A | #N/A | #N/A | #N/A | #N/A | #N/A | #N/A | #N/A |
| 1.27 | 0.56 | 1.52 | 0.59 | 1.25 | 0.48 | 1.26 | 0.56 | 1.22 | 0.53 | 1.24 |
| 1.23 | 0.54 | 1.64 | 0.63 | 1.29 | 0.49 | 1.29 | 0.57 | 1.16 | 0.50 | 1.76 |
| 0.96 | 0.37 | 0.74 | 0.26 | 0.79 | 0.26 | 0.69 | 0.24 | 0.76 | 0.27 | 1.30 |
| 0.97 | 0.39 | 1.23 | 0.48 | 1.15 | 0.43 | 1.11 | 0.49 | 0.99 | 0.41 | 1.21 |
| #N/A | #N/A | 0.26 | 0.03 | 0.25 | 0.02 | 0.33 | 0.05 | 0.27 | 0.02 | #N/A |
| 0.46 | 0.07 | 0.27 | 0.04 | 0.30 | 0.03 | 0.36 | 0.05 | 0.32 | 0.03 | 0.59 |
| 0.79 | 0.27 | #N/A | #N/A | #N/A | #N/A | #N/A | #N/A | 0.85 | 0.33 | #N/A |
| 0.91 | 0.35 | 1.58 | 0.61 | 1.72 | 0.65 | 0.87 | 0.35 | 1.09 | 0.46 | 1.07 |
| #N/A | #N/A | #N/A | #N/A | #N/A | #N/A | #N/A | #N/A | #N/A | #N/A | #N/A |
| 1.49 | 0.58 | 2.17 | 0.78 | 1.60 | 0.62 | 1.41 | 0.62 | 1.71 | 0.73 | 1.53 |
| #N/A | #N/A | #N/A | #N/A | #N/A | #N/A | #N/A | #N/A | #N/A | #N/A | #N/A |
| 1.68 | 0.73 | 2.23 | 0.79 | #N/A | #N/A | #N/A | #N/A | 1.95 | 0.80 | 4.17 |
| #N/A | #N/A | #N/A | #N/A | #N/A | #N/A | #N/A | #N/A | #N/A | #N/A | #N/A |
| 0.46 | 0.07 | 0.48 | 0.13 | 0.66 | 0.20 | 0.72 | 0.26 | 0.85 | 0.33 | 0.57 |
| #N/A | #N/A | #N/A | #N/A | #N/A | #N/A | #N/A | #N/A | #N/A | #N/A | #N/A |
| 1.42 | 0.63 | 1.97 | 0.73 | 1.74 | 0.66 | 1.71 | 0.75 | 1.99 | 0.81 | #N/A |
| 0.64 | 0.17 | 0.81 | 0.28 | #N/A | #N/A | 0.74 | 0.27 | 0.82 | 0.31 | 0.79 |
| 1.43 | 0.58 | 0.80 | 0.28 | 0.84 | 0.28 | 0.64 | 0.21 | 0.86 | 0.33 | 1.00 |
| #N/A | #N/A | #N/A | #N/A | #N/A | #N/A | #N/A | #N/A | #N/A | #N/A | #N/A |
| #N/A | #N/A | #N/A | #N/A | #N/A | #N/A | #N/A | #N/A | 1.65 | 0.71 | 1.11 |
| 2.00 | 0.83 | 2.47 | 0.85 | 2.82 | 0.90 | 2.43 | 0.90 | 2.47 | 0.90 | 1.91 |
| 1.22 | 0.47 | #N/A | #N/A | #N/A | #N/A | #N/A | #N/A | #N/A | #N/A | 0.72 |
| 1.35 | 0.59 | 2.11 | 0.77 | 1.69 | 0.64 | 1.93 | 0.81 | 1.57 | 0.68 | 1.68 |
| 1.26 | 0.54 | 1.36 | 0.53 | 1.29 | 0.48 | 1.24 | 0.55 | 1.04 | 0.43 | 1.16 |
| #N/A | #N/A | #N/A | #N/A | #N/A | #N/A | #N/A | #N/A | #N/A | #N/A | #N/A |
| 1.07 | 0.45 | 2.07 | 0.75 | #N/A | #N/A | 1.40 | 0.62 | 1.34 | 0.59 | 0.82 |
| 1.81 | 0.77 | 2.22 | 0.80 | 2.00 | 0.75 | 2.06 | 0.84 | 2.14 | 0.84 | 1.93 |
| #N/A | #N/A | #N/A | #N/A | #N/A | #N/A | 0.77 | 0.29 | 0.64 | 0.20 | #N/A |
| 1.67 | 0.73 | 2.06 | 0.75 | 1.98 | 0.75 | #N/A | #N/A | 1.77 | 0.75 | 1.84 |
| 1.84 | 0.78 | 1.93 | 0.71 | 1.56 | 0.60 | 1.51 | 0.67 | 1.55 | 0.68 | 1.56 |
| 1.03 | 0.42 | 0.74 | 0.25 | 0.87 | 0.31 | 0.75 | 0.27 | 0.75 | 0.27 | 0.80 |
| #N/A | #N/A | #N/A | #N/A | #N/A | #N/A | #N/A | #N/A | #N/A | #N/A | #N/A |
| 1.03 | 0.41 | 2.12 | 0.77 | 1.56 | 0.61 | 1.35 | 0.60 | 1.40 | 0.60 | 1.40 |
| #N/A | #N/A | #N/A | #N/A | #N/A | #N/A | #N/A | #N/A | #N/A | #N/A | #N/A |
| 1.13 | 0.48 | 1.18 | 0.45 | 1.04 | 0.37 | 1.19 | 0.52 | 0.99 | 0.41 | 1.18 |
| #N/A | #N/A | #N/A | #N/A | #N/A | #N/A | #N/A | #N/A | #N/A | #N/A | #N/A |
| 0.88 | 0.33 | 1.76 | 0.67 | 1.68 | 0.65 | 1.04 | 0.45 | 1.32 | 0.57 | 1.21 |



|      |      |      |      |      |      |      |      |      |      |      |
|------|------|------|------|------|------|------|------|------|------|------|
| 1.50 | 0.66 | 1.14 | 0.43 | 1.08 | 0.39 | 1.31 | 0.59 | 1.16 | 0.49 | 1.19 |
| #N/A | #N/A | #N/A | #N/A | #N/A | #N/A | #N/A | #N/A | #N/A | #N/A | #N/A |
| 2.94 | 0.87 | 2.12 | 0.77 | #N/A | #N/A | #N/A | #N/A | 1.90 | 0.79 | 1.43 |
| 2.91 | 0.94 | 5.06 | 0.98 | 5.55 | 0.99 | 4.33 | 0.99 | 3.59 | 0.98 | 2.41 |
| #N/A | #N/A | #N/A | #N/A | #N/A | #N/A | #N/A | #N/A | #N/A | #N/A | #N/A |
| 2.01 | 0.83 | 2.87 | 0.91 | 2.70 | 0.88 | 2.09 | 0.80 | 2.48 | 0.91 | #N/A |
| #N/A | #N/A | #N/A | #N/A | #N/A | #N/A | #N/A | #N/A | #N/A | #N/A | #N/A |
| 1.79 | 0.54 | #N/A | #N/A | #N/A | #N/A | #N/A | #N/A | #N/A | #N/A | 0.91 |
| 4.38 | 0.99 | 5.72 | 1.00 | 7.90 | 1.00 | 7.38 | 1.00 | 6.29 | 1.00 | 4.60 |
| #N/A | #N/A | #N/A | #N/A | #N/A | #N/A | #N/A | #N/A | #N/A | #N/A | #N/A |
| 1.51 | 0.64 | 1.54 | 0.59 | 1.41 | 0.55 | 1.74 | 0.75 | 1.76 | 0.75 | 1.09 |
| 1.01 | 0.40 | #N/A | #N/A | #N/A | #N/A | #N/A | #N/A | 1.32 | 0.58 | 0.88 |
| 1.79 | 0.77 | 2.01 | 0.74 | 1.88 | 0.72 | 1.92 | 0.81 | 1.84 | 0.77 | 1.38 |
| 0.70 | 0.21 | #N/A | #N/A | #N/A | #N/A | #N/A | #N/A | #N/A | #N/A | #N/A |
| 0.57 | 0.13 | #N/A | #N/A | #N/A | #N/A | #N/A | #N/A | 0.76 | 0.28 | 0.64 |
| 0.34 | 0.03 | 0.24 | 0.03 | 0.18 | 0.01 | 0.21 | 0.01 | 0.26 | 0.02 | 0.43 |
| 1.58 | 0.65 | 1.10 | 0.41 | 1.33 | 0.50 | 1.30 | 0.58 | 1.22 | 0.53 | 0.96 |
| #N/A | #N/A | #N/A | #N/A | #N/A | #N/A | #N/A | #N/A | #N/A | #N/A | #N/A |
| 1.31 | 0.58 | 1.97 | 0.73 | 1.41 | 0.52 | 1.64 | 0.71 | 1.31 | 0.57 | 1.70 |
| 1.30 | 0.57 | 1.48 | 0.57 | 1.70 | 0.65 | 1.29 | 0.57 | 1.22 | 0.52 | 1.26 |
| #N/A | #N/A | #N/A | #N/A | 0.94 | 0.34 | 0.93 | 0.37 | 0.68 | 0.23 | 0.70 |
| #N/A | #N/A | #N/A | #N/A | #N/A | #N/A | #N/A | #N/A | #N/A | #N/A | #N/A |
| 0.59 | 0.14 | #N/A | #N/A | #N/A | #N/A | #N/A | #N/A | 0.93 | 0.37 | 0.39 |
| 0.75 | 0.25 | 1.07 | 0.40 | 1.16 | 0.43 | 1.08 | 0.47 | 1.10 | 0.46 | 0.81 |
| #N/A | #N/A | #N/A | #N/A | #N/A | #N/A | #N/A | #N/A | #N/A | #N/A | 0.62 |
| 1.05 | 0.43 | 1.23 | 0.48 | 1.44 | 0.56 | 1.26 | 0.56 | 1.57 | 0.68 | 1.26 |
| 1.22 | 0.51 | 1.79 | 0.68 | 1.34 | 0.51 | 1.24 | 0.55 | 1.34 | 0.59 | 1.39 |
| #N/A | #N/A | #N/A | #N/A | #N/A | #N/A | #N/A | #N/A | #N/A | #N/A | 0.64 |
| 1.80 | 0.78 | 1.74 | 0.66 | 1.82 | 0.70 | 1.52 | 0.68 | 1.39 | 0.60 | #N/A |
| #N/A | #N/A | 3.09 | 0.93 | 2.51 | 0.84 | 2.59 | 0.93 | 2.69 | 0.93 | 1.96 |
| 0.67 | 0.19 | 0.48 | 0.13 | 0.40 | 0.07 | 0.42 | 0.08 | 0.49 | 0.12 | 0.67 |
| 0.75 | 0.24 | #N/A | #N/A | #N/A | #N/A | #N/A | #N/A | 0.60 | 0.18 | 0.88 |
| 0.64 | 0.17 | #N/A | #N/A | #N/A | #N/A | 0.69 | 0.23 | 0.69 | 0.23 | 0.63 |
| 1.70 | 0.74 | 1.50 | 0.58 | 1.52 | 0.59 | 1.54 | 0.68 | 1.69 | 0.72 | #N/A |
| 1.27 | 0.54 | 0.96 | 0.36 | 1.08 | 0.40 | 0.90 | 0.37 | 0.78 | 0.29 | 0.80 |
| 0.64 | 0.17 | #N/A | #N/A | #N/A | #N/A | 0.49 | 0.12 | 0.47 | 0.11 | 0.74 |
| 1.27 | 0.56 | 2.15 | 0.78 | 1.82 | 0.70 | 2.04 | 0.83 | 2.11 | 0.84 | 1.65 |
| 0.77 | 0.25 | #N/A | #N/A | #N/A | #N/A | #N/A | #N/A | #N/A | #N/A | #N/A |
| #N/A | #N/A | #N/A | #N/A | #N/A | #N/A | #N/A | #N/A | #N/A | #N/A | 0.79 |
| 0.75 | 0.24 | 0.30 | 0.05 | #N/A | #N/A | 0.40 | 0.08 | 0.39 | 0.06 | 0.54 |
| 0.54 | 0.12 | 0.48 | 0.13 | 0.61 | 0.17 | 0.54 | 0.15 | 0.61 | 0.19 | 0.50 |
| 0.75 | 0.25 | #N/A | #N/A | #N/A | #N/A | #N/A | #N/A | #N/A | #N/A | 0.72 |
| 1.22 | 0.53 | #N/A | #N/A | 1.01 | 0.35 | 0.83 | 0.32 | 1.07 | 0.46 | 0.93 |
| 1.87 | 0.79 | 2.30 | 0.82 | 2.00 | 0.75 | 2.26 | 0.88 | 2.04 | 0.82 | 1.98 |
| 1.88 | 0.79 | 3.01 | 0.90 | 3.01 | 0.89 | 2.45 | 0.91 | 2.57 | 0.91 | 1.34 |
| 2.46 | 0.91 | 2.99 | 0.92 | 2.35 | 0.81 | 3.20 | 0.97 | 2.66 | 0.93 | 2.01 |
| #N/A | #N/A | #N/A | #N/A | #N/A | #N/A | #N/A | #N/A | #N/A | #N/A | #N/A |
| 1.52 | 0.67 | 3.47 | 0.96 | 3.01 | 0.92 | 2.51 | 0.92 | 2.84 | 0.93 | 2.18 |
| 1.59 | 0.70 | 1.51 | 0.58 | 1.29 | 0.49 | 1.51 | 0.66 | 1.36 | 0.59 | 1.44 |
| #N/A | #N/A | #N/A | #N/A | #N/A | #N/A | #N/A | #N/A | 0.39 | 0.06 | #N/A |
| 3.06 | 0.96 | 3.18 | 0.92 | 2.69 | 0.86 | 3.23 | 0.97 | 2.84 | 0.94 | 2.30 |

|      |      |      |      |      |      |      |      |      |      |      |
|------|------|------|------|------|------|------|------|------|------|------|
| 1.25 | 0.55 | 1.51 | 0.58 | 1.22 | 0.46 | 1.28 | 0.56 | 1.03 | 0.42 | 1.24 |
| 3.99 | 0.97 | 4.14 | 0.98 | 3.75 | 0.97 | 3.46 | 0.98 | 4.01 | 0.99 | 2.42 |
| 1.22 | 0.51 | 1.02 | 0.39 | 0.95 | 0.33 | 0.92 | 0.37 | 1.03 | 0.43 | 0.94 |
| 0.75 | 0.25 | 0.72 | 0.24 | 0.98 | 0.35 | 0.66 | 0.22 | 0.66 | 0.22 | 0.65 |
| 1.45 | 0.64 | 1.53 | 0.59 | 1.14 | 0.42 | 1.32 | 0.59 | 1.23 | 0.53 | 1.34 |
| 0.80 | 0.27 | 0.89 | 0.32 | 1.20 | 0.44 | 0.85 | 0.34 | 0.85 | 0.33 | 0.90 |
| 1.10 | 0.46 | 0.67 | 0.22 | #N/A | #N/A | 0.66 | 0.23 | 0.53 | 0.14 | 0.69 |
| 1.70 | 0.74 | 1.03 | 0.38 | #N/A | #N/A | 1.08 | 0.47 | 0.99 | 0.40 | 0.86 |
| #N/A | #N/A | #N/A | #N/A | #N/A | #N/A | #N/A | #N/A | #N/A | #N/A | #N/A |
| 1.14 | 0.48 | 1.39 | 0.53 | 0.87 | 0.31 | 1.15 | 0.49 | 1.36 | 0.58 | #N/A |
| 2.07 | 0.85 | 1.95 | 0.73 | 1.88 | 0.72 | 1.57 | 0.69 | 1.79 | 0.75 | 1.47 |
| 1.27 | 0.55 | 0.88 | 0.31 | 1.22 | 0.45 | 1.01 | 0.43 | 1.13 | 0.49 | 0.95 |
| 1.85 | 0.79 | 1.72 | 0.65 | 1.61 | 0.63 | 1.71 | 0.74 | 1.79 | 0.75 | 1.47 |
| 1.44 | 0.64 | 1.84 | 0.69 | 1.82 | 0.69 | 1.63 | 0.72 | 1.73 | 0.74 | 1.46 |
| #N/A | #N/A | #N/A | #N/A | #N/A | #N/A | #N/A | #N/A | #N/A | #N/A | #N/A |
| #N/A | #N/A | 2.74 | 0.88 | 3.20 | 0.94 | 2.32 | 0.83 | 2.61 | 0.91 | #N/A |
| 0.64 | 0.17 | 0.61 | 0.19 | 0.70 | 0.22 | 0.81 | 0.31 | 0.85 | 0.33 | #N/A |
| 0.88 | 0.33 | 0.56 | 0.17 | 0.70 | 0.21 | 0.70 | 0.24 | 0.87 | 0.34 | 0.73 |
| 0.68 | 0.19 | #N/A | #N/A | #N/A | #N/A | 0.69 | 0.23 | 0.61 | 0.19 | #N/A |
| #N/A | #N/A | #N/A | #N/A | #N/A | #N/A | #N/A | #N/A | #N/A | #N/A | #N/A |
| #N/A | #N/A | #N/A | #N/A | #N/A | #N/A | 1.35 | 0.60 | 1.67 | 0.71 | 1.41 |
| 1.95 | 0.81 | 2.75 | 0.89 | 2.35 | 0.81 | 2.07 | 0.84 | 2.11 | 0.84 | 1.79 |
| 1.50 | 0.62 | 1.55 | 0.60 | 1.10 | 0.41 | 0.94 | 0.38 | 1.46 | 0.63 | 1.28 |
| 1.01 | 0.41 | 0.72 | 0.24 | 0.69 | 0.21 | 0.53 | 0.14 | 0.59 | 0.18 | 0.85 |
| 0.64 | 0.17 | 0.57 | 0.17 | 0.56 | 0.14 | 0.44 | 0.09 | 0.48 | 0.11 | 0.74 |
| 0.43 | 0.06 | 0.33 | 0.06 | 0.25 | 0.02 | 0.33 | 0.05 | 0.26 | 0.02 | 0.46 |
| 0.64 | 0.17 | 0.39 | 0.09 | 0.30 | 0.03 | 0.29 | 0.03 | 0.33 | 0.04 | 0.54 |
| 0.73 | 0.22 | 0.40 | 0.09 | 0.45 | 0.09 | 0.47 | 0.10 | 0.40 | 0.07 | 0.71 |
| 0.91 | 0.35 | 0.54 | 0.15 | 0.80 | 0.27 | 0.73 | 0.26 | 0.96 | 0.39 | 0.90 |
| 2.81 | 0.77 | 2.19 | 0.79 | 2.33 | 0.82 | 1.92 | 0.80 | 2.03 | 0.80 | 2.21 |
| #N/A | #N/A | 1.44 | 0.56 | 1.29 | 0.49 | 1.30 | 0.58 | 1.26 | 0.54 | 1.25 |
| 0.43 | 0.06 | #N/A | #N/A | #N/A | #N/A | #N/A | #N/A | 0.37 | 0.06 | 0.57 |
| 1.03 | 0.42 | 1.25 | 0.48 | 1.36 | 0.52 | 1.26 | 0.56 | 1.61 | 0.70 | 0.97 |
| #N/A | #N/A | #N/A | #N/A | #N/A | #N/A | #N/A | #N/A | #N/A | #N/A | #N/A |
| 2.54 | 0.80 | 1.52 | 0.59 | #N/A | #N/A | #N/A | #N/A | 1.03 | 0.42 | #N/A |
| 4.81 | 0.97 | 4.26 | 0.98 | #N/A | #N/A | 3.41 | 0.98 | 4.09 | 0.99 | 2.51 |
| #N/A | #N/A | #N/A | #N/A | #N/A | #N/A | 2.04 | 0.83 | 2.25 | 0.86 | #N/A |
| #N/A | #N/A | #N/A | #N/A | #N/A | #N/A | #N/A | #N/A | #N/A | #N/A | #N/A |
| #N/A | #N/A | #N/A | #N/A | #N/A | #N/A | #N/A | #N/A | #N/A | #N/A | #N/A |
| 3.36 | 0.97 | 4.05 | 0.98 | 5.04 | 0.99 | 3.29 | 0.98 | 3.76 | 0.99 | 2.21 |
| 1.52 | 0.66 | 1.71 | 0.65 | 2.33 | 0.83 | 1.43 | 0.64 | 1.19 | 0.46 | 1.19 |
| 1.92 | 0.78 | 1.60 | 0.61 | 1.40 | 0.54 | 1.70 | 0.75 | 1.59 | 0.69 | 1.50 |
| 1.78 | 0.77 | 1.68 | 0.64 | 1.37 | 0.53 | 1.50 | 0.66 | 1.28 | 0.55 | 1.45 |
| 0.81 | 0.28 | 0.94 | 0.35 | #N/A | #N/A | 0.73 | 0.26 | 0.75 | 0.27 | 0.92 |
| #N/A | #N/A | #N/A | #N/A | #N/A | #N/A | #N/A | #N/A | #N/A | #N/A | #N/A |
| 1.01 | 0.40 | 1.20 | 0.46 | 1.58 | 0.62 | 1.17 | 0.51 | 1.32 | 0.58 | 1.21 |
| #N/A | #N/A | 2.04 | 0.75 | 1.57 | 0.61 | 1.55 | 0.68 | 1.61 | 0.69 | 1.55 |
| 0.94 | 0.36 | 1.27 | 0.49 | 1.03 | 0.38 | 1.16 | 0.50 | 1.19 | 0.51 | 0.78 |
| 1.18 | 0.51 | 1.05 | 0.40 | 1.30 | 0.50 | 0.92 | 0.38 | 1.44 | 0.63 | 0.80 |
| 0.54 | 0.11 | 0.37 | 0.08 | 0.27 | 0.02 | 0.26 | 0.02 | 0.30 | 0.03 | 0.64 |
| 0.76 | 0.24 | 0.72 | 0.25 | 0.99 | 0.36 | 0.80 | 0.30 | 0.98 | 0.41 | 0.73 |

|      |      |      |      |      |      |      |      |      |      |      |
|------|------|------|------|------|------|------|------|------|------|------|
| #N/A | #N/A | 0.53 | 0.15 | 0.50 | 0.11 | 0.56 | 0.16 | 0.43 | 0.08 | 0.70 |
| 0.42 | 0.06 | 0.47 | 0.13 | 0.63 | 0.17 | 0.55 | 0.15 | 0.59 | 0.17 | 0.44 |
| 2.07 | 0.85 | 2.87 | 0.91 | 3.59 | 0.95 | 3.17 | 0.97 | 3.60 | 0.98 | 2.32 |
| #N/A | #N/A | #N/A | #N/A | #N/A | #N/A | #N/A | #N/A | #N/A | #N/A | #N/A |
| #N/A | #N/A | #N/A | #N/A | #N/A | #N/A | #N/A | #N/A | 0.34 | 0.05 | #N/A |
| #N/A | #N/A | #N/A | #N/A | #N/A | #N/A | #N/A | #N/A | #N/A | #N/A | #N/A |
| #N/A | #N/A | #N/A | #N/A | #N/A | #N/A | #N/A | #N/A | #N/A | #N/A | #N/A |
| #N/A | #N/A | 1.23 | 0.48 | 1.47 | 0.57 | 1.43 | 0.63 | 1.31 | 0.57 | 1.04 |
| 0.56 | 0.13 | 0.63 | 0.20 | 0.66 | 0.20 | 0.64 | 0.21 | 0.65 | 0.21 | 0.66 |
| 1.03 | 0.42 | 0.80 | 0.28 | 1.24 | 0.47 | 0.79 | 0.30 | 0.94 | 0.38 | #N/A |
| #N/A | #N/A | #N/A | #N/A | #N/A | #N/A | #N/A | #N/A | #N/A | #N/A | #N/A |
| 2.45 | 0.91 | 2.26 | 0.80 | 3.01 | 0.91 | 2.49 | 0.89 | 2.24 | 0.85 | 1.50 |
| #N/A | #N/A | #N/A | #N/A | #N/A | #N/A | 0.51 | 0.13 | 0.40 | 0.07 | 0.95 |
| 1.74 | 0.76 | 2.14 | 0.78 | 1.92 | 0.73 | 1.84 | 0.78 | 1.68 | 0.72 | 1.57 |
| #N/A | #N/A | #N/A | #N/A | #N/A | #N/A | #N/A | #N/A | #N/A | #N/A | #N/A |
| 1.19 | 0.52 | 3.16 | 0.91 | #N/A | #N/A | #N/A | #N/A | 3.21 | 0.95 | 1.83 |
| 1.17 | 0.51 | 1.43 | 0.55 | 1.45 | 0.56 | 1.34 | 0.60 | 1.30 | 0.57 | 1.09 |
| 1.35 | 0.60 | 1.57 | 0.61 | 2.02 | 0.74 | 1.55 | 0.68 | 1.70 | 0.73 | 1.27 |
| #N/A | #N/A | #N/A | #N/A | #N/A | #N/A | #N/A | #N/A | #N/A | #N/A | #N/A |
| #N/A | #N/A | 2.94 | 0.91 | 2.25 | 0.81 | 1.88 | 0.79 | 2.12 | 0.84 | 1.53 |
| 0.40 | 0.05 | 0.28 | 0.04 | #N/A | #N/A | 0.33 | 0.04 | 0.38 | 0.06 | 0.43 |
| #N/A | #N/A | #N/A | #N/A | #N/A | #N/A | #N/A | #N/A | #N/A | #N/A | #N/A |
| #N/A | #N/A | #N/A | #N/A | #N/A | #N/A | #N/A | #N/A | #N/A | #N/A | #N/A |
| 1.67 | 0.72 | 3.89 | 0.98 | 4.61 | 0.99 | 2.17 | 0.86 | 2.41 | 0.89 | #N/A |
| 2.27 | 0.88 | 2.60 | 0.87 | 2.28 | 0.81 | 2.58 | 0.93 | 2.67 | 0.93 | 2.12 |
| 1.35 | 0.57 | 1.39 | 0.54 | 1.46 | 0.56 | 1.44 | 0.64 | 1.38 | 0.60 | 0.98 |
| 1.14 | 0.46 | 1.81 | 0.69 | 1.57 | 0.59 | 1.36 | 0.60 | 1.12 | 0.47 | 1.26 |
| 0.93 | 0.36 | 0.97 | 0.36 | 1.17 | 0.43 | 0.87 | 0.35 | 0.95 | 0.38 | #N/A |
| 1.23 | 0.53 | 1.39 | 0.54 | 1.07 | 0.39 | 0.89 | 0.36 | 0.96 | 0.38 | 0.93 |
| 2.68 | 0.93 | 3.27 | 0.94 | 3.41 | 0.95 | 2.26 | 0.88 | 3.07 | 0.95 | 2.68 |
| #N/A | #N/A | #N/A | #N/A | #N/A | #N/A | #N/A | #N/A | #N/A | #N/A | #N/A |
| 1.31 | 0.57 | 1.47 | 0.57 | 1.77 | 0.68 | 1.72 | 0.75 | 1.43 | 0.61 | 1.27 |
| 0.73 | 0.22 | 0.70 | 0.23 | 0.54 | 0.13 | 0.55 | 0.16 | 0.57 | 0.16 | 0.68 |
| 1.34 | 0.56 | 1.53 | 0.59 | 1.46 | 0.56 | 1.54 | 0.68 | 1.14 | 0.49 | 1.11 |
| 1.55 | 0.68 | 1.64 | 0.63 | 1.42 | 0.55 | 1.53 | 0.68 | 1.88 | 0.78 | 1.42 |
| #N/A | #N/A | #N/A | #N/A | #N/A | #N/A | #N/A | #N/A | #N/A | #N/A | #N/A |
| 1.76 | 0.76 | 0.83 | 0.30 | 2.02 | 0.74 | 1.31 | 0.58 | 1.03 | 0.43 | 1.50 |
| #N/A | #N/A | #N/A | #N/A | #N/A | #N/A | #N/A | #N/A | #N/A | #N/A | #N/A |
| 1.10 | 0.46 | 1.83 | 0.69 | 2.17 | 0.75 | 2.42 | 0.90 | 1.84 | 0.77 | 1.42 |
| #N/A | #N/A | #N/A | #N/A | #N/A | #N/A | #N/A | #N/A | #N/A | #N/A | #N/A |
| 1.82 | 0.79 | 2.32 | 0.82 | 2.16 | 0.79 | 2.31 | 0.89 | 2.04 | 0.82 | 1.62 |
| 0.56 | 0.12 | 0.39 | 0.09 | 0.45 | 0.09 | 0.42 | 0.08 | 0.46 | 0.10 | 0.64 |
| 0.52 | 0.10 | 0.28 | 0.04 | 0.30 | 0.03 | 0.33 | 0.04 | 0.35 | 0.05 | 0.50 |
| 0.90 | 0.34 | 0.86 | 0.31 | #N/A | #N/A | 0.86 | 0.34 | 0.57 | 0.16 | 0.75 |
| 1.95 | 0.82 | 2.52 | 0.84 | 1.89 | 0.72 | 1.89 | 0.80 | 2.00 | 0.82 | 1.65 |
| 2.22 | 0.84 | 3.02 | 0.92 | 3.17 | 0.89 | 2.17 | 0.86 | 2.64 | 0.92 | 1.90 |
| 1.11 | 0.47 | 1.19 | 0.46 | #N/A | #N/A | 1.79 | 0.77 | 1.44 | 0.63 | 1.36 |
| 2.18 | 0.82 | 2.67 | 0.88 | 2.49 | 0.85 | 2.14 | 0.85 | 2.34 | 0.88 | #N/A |
| 0.69 | 0.21 | 0.37 | 0.08 | 0.41 | 0.08 | 0.38 | 0.06 | 0.43 | 0.09 | 0.62 |
| #N/A | #N/A | #N/A | #N/A | #N/A | #N/A | #N/A | #N/A | #N/A | #N/A | #N/A |
| 0.35 | 0.05 | 0.18 | 0.01 | 0.12 | 0.00 | 0.16 | 0.00 | 0.19 | 0.01 | 0.30 |

|      |      |      |      |      |      |      |      |      |      |      |
|------|------|------|------|------|------|------|------|------|------|------|
| 0.76 | 0.26 | 0.48 | 0.13 | 0.66 | 0.19 | 0.58 | 0.17 | 0.60 | 0.18 | 0.66 |
| 1.02 | 0.42 | 0.69 | 0.23 | 0.88 | 0.30 | 0.89 | 0.36 | 1.11 | 0.47 | 0.91 |
| 1.65 | 0.70 | 4.54 | 0.99 | #N/A | #N/A | 1.72 | 0.75 | 2.57 | 0.92 | 2.09 |
| 0.93 | 0.36 | 1.14 | 0.43 | 0.98 | 0.36 | 0.97 | 0.39 | 0.84 | 0.32 | 1.07 |
| 2.94 | 0.95 | 3.77 | 0.97 | 4.36 | 0.98 | 4.19 | 1.00 | 4.18 | 0.99 | 2.80 |
| 0.89 | 0.33 | 0.92 | 0.34 | 0.72 | 0.21 | 0.57 | 0.16 | 0.63 | 0.20 | 0.77 |
| 1.15 | 0.49 | 1.54 | 0.59 | 1.28 | 0.49 | 2.13 | 0.74 | #N/A | #N/A | 1.41 |
| 2.12 | 0.84 | 2.33 | 0.80 | 2.30 | 0.80 | 2.34 | 0.89 | 2.50 | 0.90 | #N/A |
| 0.99 | 0.40 | 1.38 | 0.53 | 1.54 | 0.60 | 1.21 | 0.53 | 1.26 | 0.54 | 1.14 |
| 0.33 | 0.03 | #N/A | #N/A | #N/A | #N/A | #N/A | #N/A | #N/A | #N/A | 0.44 |
| 1.13 | 0.43 | 1.70 | 0.65 | 1.82 | 0.69 | 1.51 | 0.67 | 1.76 | 0.75 | 1.48 |
| 0.95 | 0.37 | 0.73 | 0.25 | #N/A | #N/A | 0.95 | 0.39 | 0.72 | 0.25 | 0.70 |
| #N/A | #N/A | 3.01 | 0.90 | 2.97 | 0.91 | 1.90 | 0.80 | 2.28 | 0.87 | 2.00 |
| 0.48 | 0.08 | 0.13 | 0.01 | #N/A | #N/A | 0.29 | 0.03 | 0.28 | 0.02 | 0.43 |
| 1.21 | 0.52 | 1.72 | 0.65 | 1.09 | 0.40 | 1.26 | 0.56 | 1.02 | 0.43 | 1.17 |
| 0.41 | 0.05 | 0.54 | 0.16 | 0.30 | 0.03 | 0.37 | 0.05 | 0.49 | 0.12 | 0.48 |
| #N/A | #N/A | #N/A | #N/A | #N/A | #N/A | #N/A | #N/A | #N/A | #N/A | #N/A |
| 1.04 | 0.42 | 1.06 | 0.40 | 1.00 | 0.34 | 0.87 | 0.35 | 0.96 | 0.39 | 1.07 |
| 2.50 | 0.92 | 2.45 | 0.85 | 3.06 | 0.92 | 2.56 | 0.92 | 2.64 | 0.92 | 1.77 |
| #N/A | #N/A | #N/A | #N/A | #N/A | #N/A | 1.65 | 0.71 | 2.47 | 0.89 | 0.80 |
| #N/A | #N/A | #N/A | #N/A | #N/A | #N/A | #N/A | #N/A | #N/A | #N/A | #N/A |
| 2.12 | 0.86 | 1.78 | 0.67 | 1.70 | 0.66 | 1.88 | 0.80 | 2.00 | 0.81 | 1.90 |
| 1.05 | 0.44 | #N/A | #N/A | #N/A | #N/A | 0.79 | 0.30 | 0.96 | 0.40 | #N/A |
| 1.15 | 0.50 | #N/A | #N/A | #N/A | #N/A | #N/A | #N/A | #N/A | #N/A | 1.61 |
| #N/A | #N/A | #N/A | #N/A | #N/A | #N/A | #N/A | #N/A | #N/A | #N/A | #N/A |
| #N/A | #N/A | 3.08 | 0.93 | #N/A | #N/A | #N/A | #N/A | 3.54 | 0.96 | #N/A |
| #N/A | #N/A | #N/A | #N/A | #N/A | #N/A | #N/A | #N/A | #N/A | #N/A | #N/A |
| #N/A | #N/A | #N/A | #N/A | #N/A | #N/A | #N/A | #N/A | #N/A | #N/A | #N/A |
| 1.61 | 0.71 | 2.59 | 0.86 | 2.65 | 0.83 | 1.96 | 0.82 | 1.97 | 0.80 | #N/A |
| 2.67 | 0.92 | 3.54 | 0.96 | 3.93 | 0.97 | 3.70 | 0.99 | 4.09 | 0.99 | 2.13 |
| #N/A | #N/A | #N/A | #N/A | #N/A | #N/A | #N/A | #N/A | #N/A | #N/A | #N/A |
| #N/A | #N/A | #N/A | #N/A | #N/A | #N/A | #N/A | #N/A | #N/A | #N/A | #N/A |
| #N/A | #N/A | #N/A | #N/A | #N/A | #N/A | #N/A | #N/A | #N/A | #N/A | #N/A |
| #N/A | #N/A | #N/A | #N/A | #N/A | #N/A | #N/A | #N/A | #N/A | #N/A | #N/A |
| #N/A | #N/A | #N/A | #N/A | #N/A | #N/A | #N/A | #N/A | #N/A | #N/A | #N/A |
| 1.36 | 0.60 | 1.60 | 0.61 | 2.24 | 0.80 | 2.08 | 0.85 | 2.35 | 0.88 | 1.36 |
| 1.88 | 0.77 | 3.21 | 0.94 | 3.02 | 0.92 | 2.76 | 0.92 | 2.30 | 0.83 | #N/A |
| #N/A | #N/A | #N/A | #N/A | #N/A | #N/A | #N/A | #N/A | #N/A | #N/A | #N/A |
| #N/A | #N/A | #N/A | #N/A | #N/A | #N/A | #N/A | #N/A | #N/A | #N/A | #N/A |
| #N/A | #N/A | #N/A | #N/A | #N/A | #N/A | #N/A | #N/A | #N/A | #N/A | #N/A |
| #N/A | #N/A | #N/A | #N/A | #N/A | #N/A | #N/A | #N/A | #N/A | #N/A | #N/A |
| #N/A | #N/A | #N/A | #N/A | #N/A | #N/A | #N/A | #N/A | #N/A | #N/A | #N/A |
| 3.14 | 0.94 | 2.77 | 0.90 | 2.39 | 0.78 | 1.59 | 0.69 | 2.65 | 0.92 | 2.07 |
| #N/A | #N/A | #N/A | #N/A | #N/A | #N/A | #N/A | #N/A | #N/A | #N/A | #N/A |
| 0.35 | 0.04 | #N/A | #N/A | #N/A | #N/A | #N/A | #N/A | #N/A | #N/A | 0.36 |
| #N/A | #N/A | 2.26 | 0.79 | #N/A | #N/A | #N/A | #N/A | 2.90 | 0.87 | #N/A |
| 1.31 | 0.56 | 1.26 | 0.49 | 1.03 | 0.38 | 0.83 | 0.32 | 1.34 | 0.59 | #N/A |
| 1.72 | 0.75 | 1.81 | 0.68 | 1.49 | 0.58 | 2.01 | 0.79 | 1.55 | 0.67 | 1.23 |
| 1.58 | 0.68 | 1.39 | 0.54 | 1.35 | 0.52 | 1.43 | 0.64 | 1.34 | 0.58 | 1.30 |
| 3.21 | 0.97 | 2.98 | 0.92 | 2.99 | 0.92 | 2.79 | 0.95 | 3.41 | 0.98 | 2.24 |
| #N/A | #N/A | #N/A | #N/A | #N/A | #N/A | #N/A | #N/A | #N/A | #N/A | #N/A |
| 0.63 | 0.16 | 0.55 | 0.16 | 0.65 | 0.18 | 0.45 | 0.09 | 0.58 | 0.17 | 0.49 |



|      |      |      |      |      |      |      |      |      |      |      |
|------|------|------|------|------|------|------|------|------|------|------|
| 0.71 | 0.23 | #N/A | #N/A | #N/A | #N/A | #N/A | #N/A | 1.40 | 0.61 | 1.30 |
| 1.09 | 0.46 | 1.10 | 0.42 | 0.78 | 0.25 | 1.21 | 0.54 | 0.94 | 0.38 | 0.91 |
| 1.24 | 0.55 | #N/A | #N/A | 1.25 | 0.47 | 1.26 | 0.55 | 1.33 | 0.58 | 1.02 |
| 1.78 | 0.76 | 1.87 | 0.70 | 1.89 | 0.72 | 1.78 | 0.77 | 1.52 | 0.66 | 1.47 |
| 1.36 | 0.60 | 1.43 | 0.55 | 1.27 | 0.49 | 1.24 | 0.55 | 0.88 | 0.35 | 1.57 |
| 1.78 | 0.77 | 1.44 | 0.56 | 1.45 | 0.57 | 1.57 | 0.70 | 1.44 | 0.63 | 1.35 |
| 1.14 | 0.49 | 1.18 | 0.46 | 1.11 | 0.42 | 1.06 | 0.45 | 0.82 | 0.31 | 0.93 |
| 0.85 | 0.30 | 1.22 | 0.47 | 0.78 | 0.25 | 0.91 | 0.37 | 1.04 | 0.42 | 1.29 |
| 1.71 | 0.74 | 2.10 | 0.77 | 1.79 | 0.69 | 1.22 | 0.54 | 1.40 | 0.61 | 1.55 |
| 1.22 | 0.53 | 1.37 | 0.53 | 1.03 | 0.38 | 1.13 | 0.49 | 1.15 | 0.49 | 1.24 |
| #N/A | #N/A | 0.66 | 0.21 | 0.68 | 0.20 | #N/A | #N/A | 0.66 | 0.22 | #N/A |
| #N/A | #N/A | #N/A | #N/A | #N/A | #N/A | #N/A | #N/A | #N/A | #N/A | #N/A |
| #N/A | #N/A | #N/A | #N/A | #N/A | #N/A | #N/A | #N/A | #N/A | #N/A | #N/A |
| 1.28 | 0.56 | 1.48 | 0.57 | 1.28 | 0.49 | 1.08 | 0.47 | 1.06 | 0.45 | 1.33 |
| #N/A | #N/A | #N/A | #N/A | #N/A | #N/A | #N/A | #N/A | #N/A | #N/A | 0.96 |
| #N/A | #N/A | #N/A | #N/A | #N/A | #N/A | #N/A | #N/A | #N/A | #N/A | #N/A |
| #N/A | #N/A | #N/A | #N/A | #N/A | #N/A | #N/A | #N/A | #N/A | #N/A | 0.47 |
| 1.36 | 0.60 | 1.46 | 0.57 | 1.52 | 0.59 | 1.67 | 0.73 | 1.54 | 0.67 | 1.28 |
| #N/A | #N/A | #N/A | #N/A | #N/A | #N/A | #N/A | #N/A | #N/A | #N/A | #N/A |
| #N/A | #N/A | #N/A | #N/A | #N/A | #N/A | #N/A | #N/A | #N/A | #N/A | #N/A |
| 1.04 | 0.43 | 1.33 | 0.51 | 1.27 | 0.48 | 0.98 | 0.42 | 1.13 | 0.48 | 1.15 |
| 2.05 | 0.84 | 3.31 | 0.91 | #N/A | #N/A | #N/A | #N/A | 2.56 | 0.89 | 2.20 |
| #N/A | #N/A | 1.47 | 0.57 | 1.17 | 0.44 | 0.79 | 0.30 | 0.95 | 0.39 | 0.86 |
| 0.51 | 0.12 | 0.40 | 0.09 | 0.47 | 0.10 | 0.64 | 0.21 | 0.48 | 0.11 | 0.56 |
| #N/A | #N/A | 2.43 | 0.84 | 2.60 | 0.87 | 2.20 | 0.87 | 1.73 | 0.73 | 1.80 |
| 2.51 | 0.91 | 2.06 | 0.76 | 1.79 | 0.64 | 1.72 | 0.75 | 1.92 | 0.79 | 1.61 |
| #N/A | #N/A | #N/A | #N/A | #N/A | #N/A | #N/A | #N/A | 0.49 | 0.13 | #N/A |
| 0.81 | 0.28 | 0.84 | 0.30 | 0.63 | 0.18 | 0.76 | 0.28 | 0.72 | 0.25 | 0.74 |
| 1.75 | 0.76 | 2.06 | 0.75 | 2.07 | 0.75 | 1.67 | 0.73 | 1.82 | 0.76 | 1.74 |
| 2.28 | 0.82 | 3.86 | 0.97 | 2.94 | 0.90 | 2.65 | 0.93 | 2.22 | 0.85 | 2.25 |
| 1.69 | 0.74 | 1.99 | 0.73 | 1.61 | 0.61 | 1.72 | 0.75 | 1.60 | 0.69 | 1.34 |
| 0.56 | 0.12 | 0.31 | 0.05 | 0.35 | 0.04 | 0.25 | 0.02 | 0.40 | 0.07 | 0.41 |
| 0.57 | 0.13 | 0.54 | 0.16 | #N/A | #N/A | 0.55 | 0.15 | 0.64 | 0.21 | 0.36 |
| 1.55 | 0.68 | 1.88 | 0.71 | #N/A | #N/A | 1.96 | 0.81 | 1.80 | 0.74 | 1.18 |
| 1.32 | 0.57 | 1.61 | 0.62 | 1.27 | 0.49 | 1.27 | 0.55 | 1.18 | 0.51 | 1.13 |
| #N/A | #N/A | 0.94 | 0.35 | 1.21 | 0.46 | 0.81 | 0.31 | 1.09 | 0.46 | 1.09 |
| #N/A | #N/A | 1.10 | 0.42 | 0.84 | 0.29 | 1.05 | 0.45 | 1.19 | 0.51 | 1.08 |
| 1.54 | 0.67 | 1.33 | 0.51 | 1.32 | 0.50 | 1.64 | 0.72 | 1.67 | 0.71 | 1.35 |
| 0.94 | 0.36 | 0.92 | 0.34 | 0.86 | 0.29 | 0.67 | 0.23 | 0.98 | 0.40 | 0.74 |
| 1.11 | 0.47 | 0.54 | 0.16 | 0.63 | 0.17 | 0.61 | 0.19 | 0.61 | 0.19 | 0.78 |
| #N/A | #N/A | 0.47 | 0.12 | #N/A | #N/A | 0.43 | 0.09 | 0.36 | 0.05 | 0.56 |
| 0.58 | 0.16 | 0.31 | 0.05 | 0.49 | 0.10 | 0.28 | 0.03 | 0.33 | 0.05 | 0.33 |
| 1.10 | 0.45 | 1.87 | 0.70 | 1.89 | 0.72 | 1.57 | 0.69 | 1.90 | 0.79 | 1.36 |
| #N/A | #N/A | 0.73 | 0.25 | #N/A | #N/A | 1.12 | 0.48 | 1.11 | 0.47 | 0.61 |
| 1.71 | 0.60 | #N/A | #N/A | #N/A | #N/A | #N/A | #N/A | #N/A | #N/A | 1.62 |
| 0.77 | 0.26 | 0.91 | 0.33 | 0.80 | 0.25 | 0.86 | 0.34 | 0.81 | 0.31 | 0.85 |
| #N/A | #N/A | 0.30 | 0.05 | #N/A | #N/A | 0.30 | 0.03 | 0.36 | 0.05 | 0.53 |
| #N/A | #N/A | 0.24 | 0.03 | 0.35 | 0.05 | 0.34 | 0.04 | 0.25 | 0.01 | 0.36 |
| 0.89 | 0.32 | 0.29 | 0.07 | 0.48 | 0.11 | 0.46 | 0.10 | 0.40 | 0.07 | 0.79 |
| #N/A | #N/A | 0.33 | 0.06 | 0.29 | 0.03 | 0.41 | 0.08 | 0.43 | 0.09 | 0.44 |
| 1.26 | 0.54 | 1.47 | 0.57 | 1.65 | 0.63 | 1.11 | 0.48 | 1.55 | 0.67 | 1.23 |

|      |      |      |      |      |      |      |      |      |      |      |
|------|------|------|------|------|------|------|------|------|------|------|
| 1.26 | 0.55 | 1.20 | 0.47 | 1.11 | 0.41 | 0.94 | 0.39 | 1.08 | 0.46 | 1.40 |
| 1.60 | 0.70 | #N/A | #N/A | #N/A | #N/A | #N/A | #N/A | #N/A | #N/A | 0.63 |
| #N/A | #N/A | #N/A | #N/A | #N/A | #N/A | #N/A | #N/A | #N/A | #N/A | #N/A |
| 0.52 | 0.10 | 0.36 | 0.07 | 0.38 | 0.06 | 0.39 | 0.06 | 0.44 | 0.09 | 0.54 |
| 1.98 | 0.80 | 2.02 | 0.75 | 2.95 | 0.91 | 2.45 | 0.91 | 1.66 | 0.70 | 1.75 |
| 0.73 | 0.24 | 0.95 | 0.35 | 0.78 | 0.24 | 0.96 | 0.40 | 0.77 | 0.28 | 0.79 |
| 1.38 | 0.61 | 1.39 | 0.53 | 1.20 | 0.46 | 1.02 | 0.43 | 0.94 | 0.38 | 1.29 |
| #N/A | #N/A | #N/A | #N/A | #N/A | #N/A | #N/A | #N/A | #N/A | #N/A | #N/A |
| #N/A | #N/A | 1.12 | 0.42 | 1.10 | 0.40 | 1.24 | 0.53 | 1.04 | 0.44 | 0.78 |
| 0.85 | 0.31 | 0.79 | 0.28 | 0.81 | 0.26 | 0.95 | 0.39 | 0.87 | 0.34 | #N/A |
| #N/A | #N/A | #N/A | #N/A | #N/A | #N/A | #N/A | #N/A | #N/A | #N/A | #N/A |
| 0.46 | 0.07 | 0.55 | 0.16 | 0.74 | 0.24 | 0.47 | 0.12 | 0.77 | 0.28 | 0.56 |
| 1.18 | 0.50 | 1.87 | 0.70 | 1.89 | 0.70 | 2.03 | 0.81 | 1.45 | 0.62 | 1.13 |
| #N/A | #N/A | #N/A | #N/A | #N/A | #N/A | #N/A | #N/A | #N/A | #N/A | #N/A |
| 1.70 | 0.74 | 2.90 | 0.91 | 2.13 | 0.79 | 2.25 | 0.88 | 2.45 | 0.90 | 1.86 |
| 0.25 | 0.01 | 0.18 | 0.02 | 0.21 | 0.01 | 0.24 | 0.01 | 0.23 | 0.01 | #N/A |
| 1.32 | 0.58 | 1.02 | 0.38 | 1.30 | 0.50 | 0.90 | 0.36 | 1.17 | 0.51 | 0.96 |
| #N/A | #N/A | 0.33 | 0.06 | #N/A | #N/A | 0.57 | 0.16 | 0.42 | 0.08 | 0.71 |
| 1.51 | 0.66 | 1.96 | 0.72 | 1.87 | 0.71 | 1.78 | 0.76 | 1.66 | 0.70 | 1.87 |
| 1.41 | 0.59 | 1.31 | 0.51 | 0.88 | 0.30 | 0.98 | 0.41 | 0.66 | 0.22 | 0.80 |
| 0.28 | 0.02 | 0.27 | 0.04 | #N/A | #N/A | #N/A | #N/A | 0.26 | 0.02 | 0.42 |
| #N/A | #N/A | #N/A | #N/A | #N/A | #N/A | #N/A | #N/A | #N/A | #N/A | #N/A |
| 1.22 | 0.53 | 1.18 | 0.44 | #N/A | #N/A | 0.74 | 0.27 | 0.82 | 0.31 | 0.91 |
| #N/A | #N/A | #N/A | #N/A | #N/A | #N/A | #N/A | #N/A | 2.18 | 0.85 | 1.47 |
| #N/A | #N/A | #N/A | #N/A | #N/A | #N/A | #N/A | #N/A | #N/A | #N/A | #N/A |
| 1.40 | 0.62 | 2.16 | 0.78 | 1.98 | 0.75 | 1.46 | 0.65 | 1.85 | 0.77 | 1.71 |
| 1.16 | 0.49 | 2.51 | 0.86 | 2.12 | 0.78 | 1.74 | 0.76 | 1.65 | 0.70 | 1.36 |
| 0.81 | 0.28 | 0.69 | 0.23 | 0.83 | 0.28 | 0.81 | 0.31 | 0.92 | 0.37 | 0.65 |
| 1.33 | 0.58 | 0.81 | 0.29 | #N/A | #N/A | 0.95 | 0.39 | 1.03 | 0.43 | 0.79 |
| #N/A | #N/A | #N/A | #N/A | #N/A | #N/A | #N/A | #N/A | #N/A | #N/A | #N/A |
| 3.32 | 0.97 | 2.85 | 0.91 | #N/A | #N/A | #N/A | #N/A | 1.87 | 0.78 | 1.76 |
| #N/A | #N/A | #N/A | #N/A | #N/A | #N/A | #N/A | #N/A | #N/A | #N/A | #N/A |
| 1.17 | 0.49 | #N/A | #N/A | #N/A | #N/A | #N/A | #N/A | #N/A | #N/A | 1.52 |
| #N/A | #N/A | #N/A | #N/A | #N/A | #N/A | #N/A | #N/A | #N/A | #N/A | #N/A |
| 1.47 | 0.64 | 2.62 | 0.86 | #N/A | #N/A | 1.77 | 0.75 | 2.02 | 0.82 | 1.20 |
| 0.85 | 0.29 | 0.79 | 0.27 | 1.07 | 0.40 | 1.18 | 0.52 | 1.03 | 0.43 | 0.59 |
| #N/A | #N/A | #N/A | #N/A | #N/A | #N/A | #N/A | #N/A | #N/A | #N/A | #N/A |
| #N/A | #N/A | #N/A | #N/A | #N/A | #N/A | #N/A | #N/A | #N/A | #N/A | 0.26 |
| 1.15 | 0.49 | 2.28 | 0.80 | 1.55 | 0.60 | 1.81 | 0.78 | 1.77 | 0.75 | #N/A |
| #N/A | #N/A | #N/A | #N/A | #N/A | #N/A | #N/A | #N/A | #N/A | #N/A | #N/A |
| 1.72 | 0.74 | 1.68 | 0.64 | 1.69 | 0.65 | 2.06 | 0.83 | 2.01 | 0.81 | 1.53 |
| 0.49 | 0.09 | 0.26 | 0.03 | 0.23 | 0.01 | 0.26 | 0.02 | 0.31 | 0.03 | #N/A |
| 0.51 | 0.09 | 0.34 | 0.06 | #N/A | #N/A | 0.31 | 0.03 | 0.40 | 0.07 | 0.39 |
| 1.34 | 0.58 | 2.18 | 0.77 | 2.07 | 0.76 | 2.18 | 0.86 | 1.71 | 0.73 | 1.48 |
| 1.22 | 0.53 | 1.62 | 0.62 | 1.53 | 0.58 | 1.36 | 0.61 | 1.52 | 0.66 | 1.30 |
| 3.18 | 0.97 | 2.58 | 0.87 | 2.08 | 0.77 | 2.31 | 0.86 | 2.25 | 0.87 | 2.48 |
| 0.99 | 0.39 | 0.89 | 0.33 | 0.86 | 0.28 | 0.84 | 0.33 | 0.73 | 0.26 | 0.97 |
| 0.86 | 0.32 | 0.69 | 0.23 | 0.63 | 0.17 | 0.56 | 0.16 | 0.56 | 0.16 | 0.79 |
| #N/A | #N/A | #N/A | #N/A | #N/A | #N/A | #N/A | #N/A | #N/A | #N/A | #N/A |
| 0.98 | 0.39 | 0.73 | 0.25 | 0.60 | 0.16 | 0.52 | 0.14 | 0.62 | 0.19 | 0.51 |
| 1.61 | 0.70 | 1.20 | 0.46 | #N/A | #N/A | 0.89 | 0.36 | 0.95 | 0.37 | #N/A |



|      |      |      |      |      |      |      |      |      |      |      |
|------|------|------|------|------|------|------|------|------|------|------|
| #N/A | #N/A | #N/A | #N/A | #N/A | #N/A | #N/A | #N/A | #N/A | #N/A | #N/A |
| #N/A | #N/A | 7.96 | 0.96 | 3.07 | 0.92 | 1.60 | 0.71 | 2.42 | 0.90 | 1.20 |
| 0.56 | 0.14 | 0.44 | 0.11 | 0.53 | 0.14 | 0.50 | 0.13 | 0.54 | 0.15 | 0.43 |
| #N/A | #N/A | 0.38 | 0.08 | 0.40 | 0.06 | 0.32 | 0.04 | 0.35 | 0.05 | #N/A |
| 2.63 | 0.93 | 2.68 | 0.89 | 2.85 | 0.91 | 2.37 | 0.88 | 2.30 | 0.87 | 1.95 |
| #N/A | #N/A | #N/A | #N/A | 2.28 | 0.80 | 1.64 | 0.73 | 1.99 | 0.79 | 1.21 |
| #N/A | #N/A | #N/A | #N/A | #N/A | #N/A | #N/A | #N/A | #N/A | #N/A | #N/A |
| 0.83 | 0.29 | #N/A | #N/A | #N/A | #N/A | #N/A | #N/A | 0.84 | 0.32 | 0.87 |
| 1.88 | 0.79 | 3.27 | 0.90 | 2.52 | 0.86 | 1.60 | 0.71 | 1.89 | 0.74 | 1.09 |
| #N/A | #N/A | #N/A | #N/A | #N/A | #N/A | #N/A | #N/A | #N/A | #N/A | #N/A |
| 2.72 | 0.94 | 2.42 | 0.83 | 2.32 | 0.80 | 2.16 | 0.86 | 1.78 | 0.75 | 1.36 |
| #N/A | #N/A | #N/A | #N/A | #N/A | #N/A | #N/A | #N/A | #N/A | #N/A | #N/A |
| 1.32 | 0.55 | 1.29 | 0.50 | 1.30 | 0.50 | 1.65 | 0.72 | 1.74 | 0.73 | 1.13 |
| 0.52 | 0.10 | 0.45 | 0.11 | 0.50 | 0.12 | 0.47 | 0.11 | 0.43 | 0.08 | 0.50 |
| #N/A | #N/A | #N/A | #N/A | #N/A | #N/A | #N/A | #N/A | #N/A | #N/A | #N/A |
| 1.05 | 0.43 | 1.05 | 0.40 | 1.21 | 0.44 | 0.80 | 0.30 | 1.03 | 0.43 | 0.76 |
| 1.68 | 0.73 | 1.33 | 0.51 | 1.65 | 0.64 | 1.72 | 0.74 | 1.08 | 0.45 | 1.38 |
| 1.68 | 0.72 | 1.98 | 0.73 | 1.68 | 0.66 | 1.74 | 0.76 | 1.81 | 0.76 | 1.61 |
| 2.23 | 0.86 | 3.03 | 0.92 | 1.76 | 0.68 | 2.07 | 0.83 | 2.14 | 0.85 | 1.61 |
| 1.45 | 0.62 | 1.28 | 0.49 | 1.34 | 0.52 | 1.21 | 0.54 | 1.57 | 0.68 | 1.22 |
| #N/A | #N/A | #N/A | #N/A | #N/A | #N/A | #N/A | #N/A | #N/A | #N/A | #N/A |
| 0.66 | 0.18 | 0.35 | 0.07 | 0.58 | 0.15 | 0.46 | 0.10 | 0.57 | 0.17 | 0.32 |
| 0.56 | 0.13 | #N/A | #N/A | #N/A | #N/A | #N/A | #N/A | #N/A | #N/A | 0.46 |
| 2.42 | 0.91 | 2.25 | 0.80 | 2.73 | 0.88 | 2.17 | 0.87 | 2.40 | 0.90 | 2.09 |
| #N/A | #N/A | #N/A | #N/A | #N/A | #N/A | #N/A | #N/A | #N/A | #N/A | #N/A |
| 1.04 | 0.42 | 1.28 | 0.49 | 1.77 | 0.68 | 1.37 | 0.61 | 1.40 | 0.61 | 1.05 |
| #N/A | #N/A | 1.05 | 0.40 | 1.08 | 0.40 | 1.00 | 0.42 | 1.18 | 0.50 | 0.90 |
| #N/A | #N/A | 0.50 | 0.14 | #N/A | #N/A | 0.48 | 0.12 | 0.49 | 0.12 | 0.50 |
| 1.24 | 0.54 | 1.42 | 0.55 | 1.56 | 0.61 | 1.47 | 0.65 | 1.71 | 0.73 | 1.42 |
| 1.24 | 0.54 | 1.41 | 0.54 | 1.33 | 0.51 | 1.19 | 0.52 | 1.19 | 0.51 | 1.29 |
| 1.32 | 0.58 | 1.61 | 0.61 | 1.93 | 0.69 | 1.34 | 0.59 | 1.18 | 0.51 | 1.15 |
| #N/A | #N/A | #N/A | #N/A | #N/A | #N/A | #N/A | #N/A | #N/A | #N/A | 1.01 |
| 0.86 | 0.31 | 0.18 | 0.01 | #N/A | #N/A | 0.27 | 0.03 | 0.28 | 0.03 | #N/A |
| #N/A | #N/A | 3.67 | 0.96 | 1.44 | 0.56 | 1.96 | 0.81 | 1.80 | 0.73 | #N/A |
| 0.77 | 0.26 | 0.65 | 0.21 | 0.54 | 0.13 | 0.59 | 0.17 | 0.57 | 0.17 | 0.76 |
| 2.07 | 0.82 | 2.05 | 0.75 | 2.11 | 0.78 | 1.65 | 0.73 | 1.98 | 0.80 | 1.34 |
| 0.82 | 0.28 | 0.76 | 0.26 | #N/A | #N/A | 0.61 | 0.19 | 0.81 | 0.31 | 0.86 |
| 1.86 | 0.78 | 2.08 | 0.76 | 1.95 | 0.73 | 1.83 | 0.79 | 1.95 | 0.80 | 1.54 |
| #N/A | #N/A | 2.74 | 0.89 | 2.04 | 0.75 | 1.80 | 0.76 | 2.09 | 0.83 | 1.97 |
| 1.90 | 0.81 | 2.27 | 0.81 | 3.18 | 0.93 | 1.85 | 0.78 | 2.56 | 0.91 | 1.77 |
| 0.94 | 0.35 | 1.19 | 0.46 | #N/A | #N/A | 0.79 | 0.30 | 0.65 | 0.21 | 0.80 |
| 0.57 | 0.13 | 0.75 | 0.26 | 0.74 | 0.24 | 0.49 | 0.12 | 0.51 | 0.13 | 0.68 |
| #N/A | #N/A | #N/A | #N/A | #N/A | #N/A | #N/A | #N/A | #N/A | #N/A | #N/A |
| 0.60 | 0.15 | 0.79 | 0.28 | 0.55 | 0.14 | 0.64 | 0.21 | 0.57 | 0.16 | 0.80 |
| 4.57 | 0.97 | 2.80 | 0.88 | 3.11 | 0.93 | 1.88 | 0.79 | #N/A | #N/A | 1.57 |
| 0.95 | 0.37 | 1.00 | 0.37 | 0.85 | 0.28 | 0.89 | 0.36 | 1.41 | 0.62 | 0.73 |
| 1.12 | 0.45 | #N/A | #N/A | #N/A | #N/A | 0.53 | 0.14 | 0.48 | 0.11 | 0.63 |
| 4.40 | 0.98 | 6.04 | 1.00 | 4.20 | 0.98 | 4.03 | 0.99 | 4.74 | 1.00 | 2.84 |
| #N/A | #N/A | #N/A | #N/A | #N/A | #N/A | #N/A | #N/A | #N/A | #N/A | 0.99 |
| 0.48 | 0.08 | 0.45 | 0.12 | 0.39 | 0.06 | 0.41 | 0.07 | 0.48 | 0.11 | 0.46 |
| 3.08 | 0.95 | 3.87 | 0.97 | 3.82 | 0.92 | 2.60 | 0.90 | 3.32 | 0.97 | 2.17 |

|      |      |      |      |      |      |      |      |      |      |      |
|------|------|------|------|------|------|------|------|------|------|------|
| #N/A | #N/A | #N/A | #N/A | #N/A | #N/A | #N/A | #N/A | #N/A | #N/A | #N/A |
| 3.50 | 0.89 | 1.74 | 0.66 | 2.99 | 0.87 | 1.78 | 0.77 | 1.99 | 0.81 | 1.65 |
| 1.73 | 0.75 | 1.99 | 0.74 | 1.92 | 0.73 | 2.02 | 0.83 | 1.88 | 0.78 | 1.58 |
| 0.76 | 0.25 | 0.60 | 0.18 | 0.80 | 0.26 | 0.63 | 0.20 | 0.60 | 0.18 | 0.69 |
| 1.17 | 0.47 | 1.99 | 0.73 | 1.92 | 0.73 | 1.94 | 0.82 | 2.35 | 0.89 | 1.60 |
| 0.30 | 0.03 | 0.40 | 0.09 | #N/A | #N/A | 0.32 | 0.04 | 0.34 | 0.04 | 0.33 |
| #N/A | #N/A | #N/A | #N/A | #N/A | #N/A | #N/A | #N/A | #N/A | #N/A | #N/A |
| 3.50 | 0.97 | 3.99 | 0.98 | 3.30 | 0.94 | 2.94 | 0.96 | 2.95 | 0.95 | 1.90 |
| 1.18 | 0.51 | 1.18 | 0.46 | 1.03 | 0.38 | 0.84 | 0.33 | 0.90 | 0.35 | 0.94 |
| 0.45 | 0.07 | 0.44 | 0.11 | 0.42 | 0.07 | 0.33 | 0.04 | 0.50 | 0.12 | 0.46 |
| 0.86 | 0.30 | 1.12 | 0.43 | 0.91 | 0.31 | 0.83 | 0.32 | 0.98 | 0.40 | 0.93 |
| 1.81 | 0.77 | 1.53 | 0.59 | 1.17 | 0.44 | 1.38 | 0.61 | 1.33 | 0.58 | 1.10 |
| 2.13 | 0.86 | 2.31 | 0.82 | 1.95 | 0.70 | 1.45 | 0.64 | 1.23 | 0.53 | 1.54 |
| 2.55 | 0.92 | 2.96 | 0.92 | 3.14 | 0.93 | 1.94 | 0.82 | 2.55 | 0.92 | 1.95 |
| #N/A | #N/A | #N/A | #N/A | #N/A | #N/A | #N/A | #N/A | #N/A | #N/A | 0.88 |
| #N/A | #N/A | #N/A | #N/A | #N/A | #N/A | #N/A | #N/A | #N/A | #N/A | #N/A |
| 0.83 | 0.29 | 0.57 | 0.17 | 0.63 | 0.18 | 0.81 | 0.31 | 0.71 | 0.25 | 0.69 |
| #N/A | #N/A | 1.02 | 0.39 | #N/A | #N/A | 1.12 | 0.49 | 0.82 | 0.31 | 0.80 |
| 1.63 | 0.70 | 1.96 | 0.73 | 2.08 | 0.75 | 1.62 | 0.72 | 1.33 | 0.58 | 1.31 |
| 1.01 | 0.41 | #N/A | #N/A | #N/A | #N/A | #N/A | #N/A | #N/A | #N/A | #N/A |
| 0.46 | 0.08 | #N/A | #N/A | #N/A | #N/A | #N/A | #N/A | #N/A | #N/A | #N/A |
| 1.33 | 0.59 | 1.68 | 0.64 | #N/A | #N/A | 1.13 | 0.49 | 0.98 | 0.41 | 1.20 |
| #N/A | #N/A | #N/A | #N/A | #N/A | #N/A | #N/A | #N/A | #N/A | #N/A | #N/A |
| 0.98 | 0.38 | 0.81 | 0.29 | 1.06 | 0.37 | 0.70 | 0.24 | 0.88 | 0.34 | 0.73 |
| 1.69 | 0.74 | 1.57 | 0.60 | 1.61 | 0.63 | 1.80 | 0.78 | 1.70 | 0.73 | 1.26 |
| 3.21 | 0.86 | 3.08 | 0.93 | 3.25 | 0.84 | 2.00 | 0.80 | 2.50 | 0.91 | 2.00 |
| 0.43 | 0.06 | 0.38 | 0.08 | 0.44 | 0.09 | 0.50 | 0.12 | 0.38 | 0.06 | 0.52 |
| 1.38 | 0.52 | 0.68 | 0.22 | #N/A | #N/A | 0.68 | 0.23 | 0.81 | 0.31 | 0.52 |
| 0.93 | 0.36 | 1.16 | 0.44 | 1.42 | 0.54 | 0.93 | 0.37 | 1.04 | 0.44 | #N/A |
| 1.38 | 0.61 | 1.68 | 0.64 | 1.57 | 0.60 | 1.24 | 0.55 | 1.57 | 0.68 | 1.34 |
| 3.58 | 0.98 | 3.86 | 0.97 | 3.60 | 0.94 | 2.88 | 0.95 | 2.70 | 0.93 | 1.91 |
| #N/A | #N/A | #N/A | #N/A | #N/A | #N/A | #N/A | #N/A | #N/A | #N/A | #N/A |
| 1.48 | 0.65 | 1.70 | 0.65 | 2.15 | 0.78 | 1.25 | 0.56 | 1.37 | 0.60 | 1.44 |
| 1.95 | 0.81 | 2.71 | 0.88 | 2.28 | 0.81 | 2.60 | 0.93 | #N/A | #N/A | 1.58 |
| 0.43 | 0.06 | 0.48 | 0.13 | 0.38 | 0.06 | 0.31 | 0.03 | 0.41 | 0.07 | 0.41 |
| 0.31 | 0.02 | 0.32 | 0.06 | #N/A | #N/A | 0.35 | 0.06 | 0.34 | 0.04 | 0.63 |
| 0.30 | 0.03 | 0.11 | 0.00 | 0.22 | 0.02 | 0.19 | 0.01 | 0.22 | 0.01 | 0.15 |
| 2.30 | 0.89 | 2.46 | 0.85 | 2.17 | 0.77 | 2.24 | 0.87 | 2.42 | 0.90 | 1.43 |
| 1.26 | 0.55 | 1.32 | 0.51 | 1.26 | 0.48 | 1.21 | 0.54 | 1.44 | 0.63 | 1.15 |
| #N/A | #N/A | #N/A | #N/A | #N/A | #N/A | #N/A | #N/A | #N/A | #N/A | #N/A |
| #N/A | #N/A | 3.57 | 0.96 | 3.51 | 0.96 | 2.29 | 0.86 | 3.66 | 0.98 | 2.01 |
| 1.27 | 0.56 | 1.66 | 0.64 | 1.73 | 0.67 | 1.57 | 0.70 | 1.57 | 0.66 | 0.94 |
| #N/A | #N/A | #N/A | #N/A | #N/A | #N/A | #N/A | #N/A | #N/A | #N/A | 1.37 |
| #N/A | #N/A | #N/A | #N/A | #N/A | #N/A | #N/A | #N/A | #N/A | #N/A | 0.63 |
| 2.04 | 0.84 | 1.93 | 0.72 | 2.94 | 0.87 | 1.85 | 0.75 | 1.77 | 0.73 | 1.45 |
| #N/A | #N/A | 0.65 | 0.21 | 0.71 | 0.21 | 0.70 | 0.25 | 0.84 | 0.32 | 0.80 |
| 0.52 | 0.11 | 0.52 | 0.15 | 0.52 | 0.13 | 0.53 | 0.15 | 0.58 | 0.17 | #N/A |
| #N/A | #N/A | 1.57 | 0.60 | 1.33 | 0.50 | 1.73 | 0.75 | 1.45 | 0.62 | 1.14 |
| #N/A | #N/A | #N/A | #N/A | #N/A | #N/A | #N/A | #N/A | #N/A | #N/A | #N/A |
| #N/A | #N/A | #N/A | #N/A | #N/A | #N/A | #N/A | #N/A | #N/A | #N/A | #N/A |
| 1.73 | 0.71 | #N/A | #N/A | #N/A | #N/A | #N/A | #N/A | 1.35 | 0.57 | 1.15 |

|      |      |      |      |      |      |      |      |      |      |      |
|------|------|------|------|------|------|------|------|------|------|------|
| #N/A | #N/A | #N/A | #N/A | #N/A | #N/A | #N/A | #N/A | #N/A | #N/A | #N/A |
| 1.17 | 0.49 | 1.17 | 0.45 | #N/A | #N/A | #N/A | #N/A | 1.06 | 0.44 | #N/A |
| #N/A | #N/A | 1.40 | 0.54 | 1.56 | 0.61 | 1.87 | 0.73 | 1.74 | 0.74 | 1.09 |
| #N/A | #N/A | 0.56 | 0.17 | 0.61 | 0.17 | 0.64 | 0.21 | 0.63 | 0.20 | 0.72 |
| #N/A | #N/A | #N/A | #N/A | #N/A | #N/A | #N/A | #N/A | #N/A | #N/A | #N/A |
| 0.34 | 0.03 | 0.55 | 0.16 | 0.54 | 0.13 | 0.49 | 0.12 | 0.46 | 0.10 | 0.51 |
| 4.04 | 0.99 | 2.95 | 0.92 | 3.51 | 0.96 | 2.41 | 0.73 | 2.87 | 0.95 | 1.56 |
| #N/A | #N/A | #N/A | #N/A | #N/A | #N/A | #N/A | #N/A | #N/A | #N/A | 0.75 |
| 3.29 | 0.96 | 3.41 | 0.94 | 2.04 | 0.75 | 2.19 | 0.87 | 1.57 | 0.68 | 1.49 |
| #N/A | #N/A | #N/A | #N/A | #N/A | #N/A | #N/A | #N/A | #N/A | #N/A | #N/A |
| #N/A | #N/A | #N/A | #N/A | #N/A | #N/A | #N/A | #N/A | #N/A | #N/A | #N/A |
| 2.26 | 0.87 | 3.48 | 0.96 | 3.17 | 0.93 | 3.00 | 0.96 | 3.33 | 0.96 | 2.40 |
| 0.95 | 0.36 | 0.87 | 0.31 | 1.46 | 0.56 | 0.96 | 0.39 | 1.00 | 0.40 | 0.86 |
| #N/A | #N/A | #N/A | #N/A | #N/A | #N/A | #N/A | #N/A | #N/A | #N/A | #N/A |
| 1.29 | 0.57 | 1.41 | 0.55 | 1.06 | 0.38 | 1.02 | 0.44 | 0.96 | 0.39 | 1.10 |
| 2.78 | 0.94 | 3.56 | 0.96 | 2.88 | 0.91 | 2.91 | 0.95 | 2.80 | 0.94 | 2.15 |
| 1.67 | 0.73 | 2.50 | 0.85 | 2.11 | 0.76 | 2.44 | 0.91 | 2.09 | 0.83 | 1.42 |
| #N/A | #N/A | #N/A | #N/A | #N/A | #N/A | #N/A | #N/A | #N/A | #N/A | #N/A |
| 1.03 | 0.42 | 1.24 | 0.48 | 0.87 | 0.29 | 0.68 | 0.23 | 0.83 | 0.32 | 1.26 |
| #N/A | #N/A | #N/A | #N/A | #N/A | #N/A | #N/A | #N/A | 0.82 | 0.31 | #N/A |
| 1.61 | 0.71 | 3.87 | 0.97 | 3.46 | 0.93 | 2.59 | 0.93 | 3.13 | 0.96 | 2.22 |
| 0.81 | 0.28 | 0.73 | 0.25 | 1.01 | 0.37 | 0.69 | 0.24 | 0.85 | 0.33 | 0.54 |
| #N/A | #N/A | #N/A | #N/A | #N/A | #N/A | #N/A | #N/A | #N/A | #N/A | #N/A |
| 3.13 | 0.96 | 2.83 | 0.90 | 3.48 | 0.93 | 1.71 | 0.72 | 2.33 | 0.88 | 1.99 |
| 1.57 | 0.69 | 1.56 | 0.60 | 1.31 | 0.50 | 1.45 | 0.64 | 1.42 | 0.62 | 1.15 |
| 1.99 | 0.82 | 2.70 | 0.89 | 2.73 | 0.89 | 2.15 | 0.84 | 1.77 | 0.75 | 1.35 |
| 1.93 | 0.79 | 1.77 | 0.66 | 1.66 | 0.64 | 1.51 | 0.66 | 1.78 | 0.75 | 1.20 |
| 0.96 | 0.37 | 0.98 | 0.36 | #N/A | #N/A | 0.76 | 0.28 | 1.10 | 0.46 | 0.85 |
| #N/A | #N/A | #N/A | #N/A | #N/A | #N/A | #N/A | #N/A | #N/A | #N/A | #N/A |
| 1.21 | 0.50 | 1.13 | 0.44 | 1.14 | 0.43 | 1.07 | 0.46 | 0.94 | 0.38 | 0.86 |
| 1.95 | 0.82 | 2.54 | 0.86 | 2.41 | 0.84 | 2.34 | 0.88 | 1.93 | 0.79 | 1.93 |
| 2.43 | 0.91 | 3.42 | 0.95 | 2.46 | 0.84 | 2.38 | 0.90 | 2.44 | 0.90 | 2.31 |
| 1.26 | 0.55 | 1.58 | 0.61 | 1.36 | 0.52 | 1.37 | 0.61 | 1.39 | 0.61 | 1.09 |
| 0.64 | 0.17 | 1.05 | 0.40 | 0.94 | 0.33 | 0.89 | 0.35 | 0.79 | 0.29 | 0.74 |
| 0.90 | 0.33 | 1.09 | 0.42 | 1.19 | 0.44 | 0.94 | 0.38 | 0.88 | 0.34 | 0.96 |
| 0.94 | 0.36 | 1.90 | 0.71 | 1.60 | 0.62 | 0.92 | 0.38 | 0.95 | 0.39 | #N/A |
| 0.96 | 0.37 | 1.08 | 0.41 | 0.76 | 0.24 | 0.85 | 0.33 | 1.03 | 0.43 | 0.94 |
| 1.59 | 0.70 | 2.04 | 0.75 | 1.71 | 0.67 | 1.98 | 0.83 | 1.95 | 0.80 | 1.42 |
| 1.78 | 0.77 | 2.01 | 0.74 | 1.65 | 0.64 | 2.22 | 0.87 | 1.73 | 0.74 | 1.78 |
| #N/A | #N/A | #N/A | #N/A | #N/A | #N/A | #N/A | #N/A | #N/A | #N/A | 0.36 |
| 1.11 | 0.45 | 1.26 | 0.49 | 1.49 | 0.58 | 1.02 | 0.43 | 1.35 | 0.59 | 1.04 |
| 1.67 | 0.69 | 1.34 | 0.52 | 1.08 | 0.39 | 1.17 | 0.51 | 1.69 | 0.72 | 0.91 |
| #N/A | #N/A | #N/A | #N/A | #N/A | #N/A | #N/A | #N/A | #N/A | #N/A | #N/A |
| 1.77 | 0.76 | 2.37 | 0.83 | 2.38 | 0.83 | 1.90 | 0.80 | 2.24 | 0.85 | 1.37 |
| 0.83 | 0.29 | 0.77 | 0.27 | 0.95 | 0.34 | 1.20 | 0.53 | 1.23 | 0.54 | 0.87 |
| 0.87 | 0.31 | 1.01 | 0.38 | 0.82 | 0.27 | 0.98 | 0.42 | 0.81 | 0.31 | 0.82 |
| #N/A | #N/A | #N/A | #N/A | #N/A | #N/A | #N/A | #N/A | #N/A | #N/A | #N/A |
| #N/A | #N/A | 1.93 | 0.71 | #N/A | #N/A | 2.02 | 0.81 | 1.77 | 0.75 | #N/A |
| 3.18 | 0.95 | 3.01 | 0.92 | 4.70 | 0.99 | 3.19 | 0.97 | 2.30 | 0.87 | 2.36 |
| 0.99 | 0.37 | 1.18 | 0.45 | #N/A | #N/A | #N/A | #N/A | 1.01 | 0.42 | #N/A |
| 2.26 | 0.84 | 2.30 | 0.82 | 2.56 | 0.86 | 2.39 | 0.90 | 2.69 | 0.93 | 1.82 |

|      |      |      |      |      |      |      |      |      |      |      |
|------|------|------|------|------|------|------|------|------|------|------|
| #N/A | #N/A | #N/A | #N/A | #N/A | #N/A | #N/A | #N/A | #N/A | #N/A | #N/A |
| 2.14 | 0.86 | 1.75 | 0.66 | 1.98 | 0.74 | 1.72 | 0.74 | 1.96 | 0.80 | 1.23 |
| 1.81 | 0.78 | 2.19 | 0.79 | 2.05 | 0.74 | 1.86 | 0.79 | 1.60 | 0.69 | 1.51 |
| 2.35 | 0.89 | 1.72 | 0.65 | 1.98 | 0.70 | 1.71 | 0.73 | 1.46 | 0.64 | 1.27 |
| 0.67 | 0.18 | #N/A | #N/A | #N/A | #N/A | #N/A | #N/A | 0.62 | 0.19 | 0.68 |
| 1.19 | 0.50 | 2.03 | 0.75 | 1.40 | 0.54 | 1.86 | 0.76 | 1.73 | 0.74 | 0.97 |
| 0.91 | 0.33 | 0.49 | 0.14 | 0.54 | 0.13 | 0.60 | 0.18 | 0.57 | 0.17 | #N/A |
| #N/A | #N/A | #N/A | #N/A | #N/A | #N/A | #N/A | #N/A | #N/A | #N/A | #N/A |
| #N/A | #N/A | #N/A | #N/A | #N/A | #N/A | #N/A | #N/A | #N/A | #N/A | #N/A |
| 1.81 | 0.78 | #N/A | #N/A | 1.73 | 0.67 | 1.63 | 0.71 | 1.49 | 0.64 | 1.34 |
| 4.79 | 0.99 | 2.35 | 0.82 | 3.30 | 0.93 | 2.48 | 0.92 | 2.52 | 0.90 | 2.20 |
| #N/A | #N/A | #N/A | #N/A | #N/A | #N/A | #N/A | #N/A | #N/A | #N/A | #N/A |
| 0.72 | 0.22 | 0.43 | 0.10 | 0.48 | 0.10 | 0.68 | 0.23 | 0.54 | 0.14 | 0.57 |
| 0.96 | 0.36 | 1.27 | 0.49 | 1.45 | 0.56 | 1.46 | 0.64 | 1.32 | 0.57 | 1.02 |
| #N/A | #N/A | #N/A | #N/A | #N/A | #N/A | #N/A | #N/A | #N/A | #N/A | #N/A |
| #N/A | #N/A | #N/A | #N/A | #N/A | #N/A | #N/A | #N/A | #N/A | #N/A | #N/A |
| 1.37 | 0.58 | 1.10 | 0.42 | 0.96 | 0.35 | 0.81 | 0.31 | 0.80 | 0.30 | 1.15 |
| #N/A | #N/A | #N/A | #N/A | #N/A | #N/A | 1.12 | 0.47 | 0.89 | 0.35 | #N/A |
| 1.89 | 0.74 | #N/A | #N/A | #N/A | #N/A | 1.59 | 0.68 | 1.80 | 0.76 | 1.36 |
| 1.62 | 0.71 | 2.15 | 0.78 | 2.30 | 0.82 | 2.08 | 0.83 | 2.27 | 0.87 | 2.02 |
| 1.84 | 0.77 | 1.91 | 0.71 | 1.99 | 0.75 | 1.83 | 0.76 | 1.87 | 0.76 | 1.57 |
| 1.28 | 0.56 | 1.71 | 0.65 | 1.65 | 0.64 | 1.48 | 0.66 | 1.59 | 0.69 | 1.78 |
| 1.33 | 0.59 | 1.19 | 0.46 | 0.98 | 0.33 | 0.82 | 0.32 | 0.86 | 0.33 | 1.14 |
| 1.65 | 0.72 | 2.26 | 0.81 | 1.50 | 0.58 | 1.37 | 0.61 | 1.50 | 0.64 | 1.71 |
| 2.31 | 0.89 | 4.11 | 0.98 | 2.72 | 0.89 | 2.01 | 0.81 | 2.12 | 0.84 | 2.53 |
| #N/A | #N/A | #N/A | #N/A | #N/A | #N/A | #N/A | #N/A | #N/A | #N/A | #N/A |
| 1.76 | 0.76 | 1.90 | 0.71 | 1.65 | 0.63 | 1.42 | 0.63 | 1.56 | 0.67 | 1.78 |
| 1.22 | 0.52 | 1.49 | 0.57 | 1.04 | 0.38 | 1.00 | 0.42 | 1.12 | 0.48 | 1.17 |
| 2.02 | 0.84 | 2.32 | 0.82 | 2.07 | 0.76 | 1.85 | 0.79 | 2.01 | 0.82 | 1.58 |
| 1.28 | 0.53 | 0.99 | 0.37 | 0.99 | 0.36 | 1.12 | 0.49 | 1.00 | 0.42 | 0.81 |
| #N/A | #N/A | #N/A | #N/A | #N/A | #N/A | #N/A | #N/A | #N/A | #N/A | #N/A |
| 1.90 | 0.81 | 2.34 | 0.82 | 3.02 | 0.92 | 2.81 | 0.94 | 2.23 | 0.86 | 1.73 |
| #N/A | #N/A | #N/A | #N/A | #N/A | #N/A | #N/A | #N/A | #N/A | #N/A | #N/A |
| 0.77 | 0.25 | #N/A | #N/A | #N/A | #N/A | 0.57 | 0.17 | 0.68 | 0.23 | 0.41 |
| 1.09 | 0.45 | #N/A | #N/A | #N/A | #N/A | #N/A | #N/A | #N/A | #N/A | 0.61 |
| #N/A | #N/A | #N/A | #N/A | #N/A | #N/A | #N/A | #N/A | #N/A | #N/A | #N/A |
| 0.77 | 0.26 | 0.62 | 0.20 | 0.68 | 0.21 | 0.50 | 0.12 | 0.63 | 0.20 | 0.74 |
| 0.92 | 0.34 | #N/A | #N/A | #N/A | #N/A | #N/A | #N/A | 0.63 | 0.20 | #N/A |
| 0.71 | 0.21 | 0.65 | 0.21 | 0.59 | 0.15 | 0.67 | 0.23 | 0.82 | 0.31 | 0.90 |
| #N/A | #N/A | #N/A | #N/A | #N/A | #N/A | #N/A | #N/A | #N/A | #N/A | #N/A |
| 2.01 | 0.82 | 1.69 | 0.65 | 2.08 | 0.75 | 1.73 | 0.76 | 1.92 | 0.79 | 1.47 |
| 0.95 | 0.37 | 1.20 | 0.46 | 1.08 | 0.40 | 1.01 | 0.43 | 1.04 | 0.44 | 1.07 |
| #N/A | #N/A | #N/A | #N/A | #N/A | #N/A | 0.35 | 0.05 | 0.46 | 0.10 | 0.69 |
| #N/A | #N/A | 0.96 | 0.36 | 0.82 | 0.28 | 0.70 | 0.24 | 0.91 | 0.36 | 0.56 |
| 1.88 | 0.78 | 1.50 | 0.58 | 1.83 | 0.71 | 1.42 | 0.63 | 1.57 | 0.68 | 1.21 |
| #N/A | #N/A | #N/A | #N/A | #N/A | #N/A | #N/A | #N/A | #N/A | #N/A | #N/A |
| 1.04 | 0.43 | 0.75 | 0.26 | 1.28 | 0.49 | 1.18 | 0.51 | 1.10 | 0.47 | 0.87 |
| 0.87 | 0.32 | 0.74 | 0.25 | 1.02 | 0.37 | 0.68 | 0.23 | 0.67 | 0.22 | 0.84 |
| #N/A | #N/A | #N/A | #N/A | #N/A | #N/A | #N/A | #N/A | #N/A | #N/A | #N/A |
| 1.75 | 0.75 | 1.87 | 0.70 | 1.78 | 0.67 | 1.74 | 0.75 | 1.65 | 0.71 | 1.29 |
| 1.23 | 0.54 | 1.08 | 0.41 | 1.05 | 0.39 | 1.18 | 0.52 | 1.14 | 0.49 | 1.27 |

|      |      |      |      |      |      |      |      |      |      |      |
|------|------|------|------|------|------|------|------|------|------|------|
| #N/A | #N/A | #N/A | #N/A | #N/A | #N/A | #N/A | #N/A | #N/A | #N/A | #N/A |
| 1.59 | 0.70 | 1.36 | 0.52 | #N/A | #N/A | 1.50 | 0.67 | 1.09 | 0.47 | 0.88 |
| #N/A | #N/A | #N/A | #N/A | #N/A | #N/A | #N/A | #N/A | #N/A | #N/A | 0.88 |
| #N/A | #N/A | #N/A | #N/A | #N/A | #N/A | #N/A | #N/A | #N/A | #N/A | #N/A |
| 1.09 | 0.45 | 1.04 | 0.39 | 1.17 | 0.44 | 0.81 | 0.31 | 1.28 | 0.56 | 0.98 |
| #N/A | #N/A | #N/A | #N/A | #N/A | #N/A | #N/A | #N/A | #N/A | #N/A | #N/A |
| #N/A | #N/A | 2.09 | 0.77 | 2.46 | 0.84 | 2.63 | 0.92 | 2.57 | 0.90 | 1.71 |
| 1.31 | 0.58 | 1.65 | 0.63 | 1.49 | 0.58 | 1.22 | 0.54 | 1.64 | 0.71 | 1.21 |
| 0.93 | 0.36 | 0.76 | 0.27 | 0.52 | 0.12 | 0.67 | 0.23 | 0.74 | 0.26 | 0.55 |
| #N/A | #N/A | #N/A | #N/A | #N/A | #N/A | #N/A | #N/A | 1.29 | 0.56 | #N/A |
| 2.00 | 0.83 | #N/A | #N/A | #N/A | #N/A | 2.15 | 0.81 | 2.76 | 0.93 | #N/A |
| 0.90 | 0.34 | 1.05 | 0.40 | #N/A | #N/A | 0.79 | 0.30 | 0.54 | 0.15 | 0.87 |
| 0.80 | 0.27 | 0.65 | 0.21 | 0.59 | 0.15 | 0.48 | 0.11 | 0.62 | 0.19 | 0.64 |
| 0.89 | 0.33 | 0.91 | 0.34 | 0.90 | 0.32 | 0.95 | 0.40 | 0.95 | 0.38 | 0.91 |
| 0.46 | 0.07 | #N/A | #N/A | #N/A | #N/A | 0.38 | 0.06 | 0.32 | 0.04 | 0.47 |
| 1.58 | 0.69 | 1.32 | 0.51 | 1.23 | 0.46 | 1.12 | 0.49 | 1.17 | 0.50 | 1.26 |
| 0.89 | 0.33 | 0.41 | 0.10 | 0.58 | 0.16 | 0.63 | 0.20 | 0.55 | 0.15 | 0.59 |
| #N/A | #N/A | #N/A | #N/A | #N/A | #N/A | #N/A | #N/A | #N/A | #N/A | #N/A |
| #N/A | #N/A | 2.04 | 0.74 | 2.19 | 0.78 | 2.60 | 0.92 | 1.95 | 0.80 | 1.47 |
| 2.27 | 0.88 | 2.99 | 0.92 | 3.05 | 0.92 | 2.88 | 0.95 | 2.69 | 0.93 | 2.37 |
| #N/A | #N/A | #N/A | #N/A | #N/A | #N/A | #N/A | #N/A | #N/A | #N/A | #N/A |
| 0.95 | 0.37 | 1.21 | 0.47 | #N/A | #N/A | #N/A | #N/A | 0.80 | 0.30 | 0.80 |
| #N/A | #N/A | #N/A | #N/A | #N/A | #N/A | #N/A | #N/A | #N/A | #N/A | #N/A |
| 1.75 | 0.76 | 1.69 | 0.63 | #N/A | #N/A | 1.44 | 0.60 | #N/A | #N/A | #N/A |
| 2.33 | 0.88 | #N/A | #N/A | #N/A | #N/A | 2.99 | 0.96 | 3.97 | 0.95 | #N/A |
| #N/A | #N/A | #N/A | #N/A | #N/A | #N/A | #N/A | #N/A | #N/A | #N/A | #N/A |
| 1.72 | 0.75 | 1.63 | 0.62 | 2.11 | 0.78 | 1.81 | 0.76 | 1.97 | 0.80 | 1.95 |
| 0.69 | 0.20 | 0.98 | 0.36 | 0.75 | 0.22 | 0.49 | 0.12 | 0.55 | 0.15 | 0.82 |
| 1.06 | 0.44 | 0.99 | 0.37 | 0.94 | 0.33 | 0.85 | 0.33 | 1.11 | 0.46 | 1.06 |
| #N/A | #N/A | #N/A | #N/A | #N/A | #N/A | #N/A | #N/A | #N/A | #N/A | #N/A |
| 0.84 | 0.29 | 0.84 | 0.30 | 0.58 | 0.15 | 0.72 | 0.25 | 0.81 | 0.31 | 0.90 |
| 1.46 | 0.65 | 2.22 | 0.80 | 2.01 | 0.74 | 1.44 | 0.64 | 1.95 | 0.80 | #N/A |
| #N/A | #N/A | 0.93 | 0.34 | #N/A | #N/A | 0.62 | 0.19 | 0.83 | 0.31 | #N/A |
| 1.17 | 0.50 | 1.38 | 0.54 | 1.53 | 0.60 | 1.36 | 0.61 | 1.61 | 0.70 | 1.18 |
| 2.51 | 0.90 | 4.29 | 0.99 | 3.48 | 0.96 | 2.76 | 0.95 | 3.37 | 0.97 | 2.50 |
| 1.31 | 0.57 | #N/A | #N/A | #N/A | #N/A | #N/A | #N/A | 0.70 | 0.24 | 0.62 |
| 0.75 | 0.24 | 0.50 | 0.14 | 0.58 | 0.15 | 0.61 | 0.19 | 0.60 | 0.18 | 1.00 |
| 0.98 | 0.39 | 0.73 | 0.25 | 0.83 | 0.28 | 0.70 | 0.24 | 0.76 | 0.27 | 1.16 |
| 0.66 | 0.26 | #N/A | #N/A | #N/A | #N/A | #N/A | #N/A | #N/A | #N/A | 0.73 |
| #N/A | #N/A | #N/A | #N/A | #N/A | #N/A | #N/A | #N/A | #N/A | #N/A | #N/A |
| #N/A | #N/A | #N/A | #N/A | #N/A | #N/A | #N/A | #N/A | #N/A | #N/A | #N/A |
| 0.92 | 0.36 | 1.05 | 0.40 | 0.79 | 0.25 | 0.78 | 0.30 | 0.86 | 0.33 | 0.91 |
| #N/A | #N/A | #N/A | #N/A | #N/A | #N/A | #N/A | #N/A | #N/A | #N/A | #N/A |
| 0.62 | 0.17 | #N/A | #N/A | #N/A | #N/A | #N/A | #N/A | #N/A | #N/A | 1.03 |
| 1.12 | 0.48 | 0.96 | 0.36 | 1.12 | 0.42 | 0.80 | 0.30 | 1.22 | 0.53 | 0.98 |
| 0.42 | 0.08 | 0.28 | 0.04 | #N/A | #N/A | 0.32 | 0.04 | 0.43 | 0.09 | 0.39 |
| #N/A | #N/A | 0.51 | 0.14 | 0.59 | 0.15 | 0.59 | 0.18 | 0.53 | 0.14 | #N/A |
| 0.73 | 0.23 | 0.60 | 0.18 | 0.52 | 0.12 | 0.51 | 0.13 | 0.59 | 0.17 | 0.52 |
| #N/A | #N/A | 2.76 | 0.90 | #N/A | #N/A | 2.02 | 0.83 | 2.25 | 0.87 | 1.43 |
| #N/A | #N/A | 1.17 | 0.45 | 0.47 | 0.16 | 1.01 | 0.43 | 1.04 | 0.43 | 0.88 |
| 1.75 | 0.74 | 2.26 | 0.80 | 1.61 | 0.62 | 1.81 | 0.78 | 2.01 | 0.81 | 1.38 |





|      |      |      |      |      |      |      |      |      |      |      |
|------|------|------|------|------|------|------|------|------|------|------|
| 2.33 | 0.87 | 2.55 | 0.85 | 2.26 | 0.80 | 2.33 | 0.89 | 2.15 | 0.85 | 1.83 |
| #N/A | #N/A | #N/A | #N/A | #N/A | #N/A | #N/A | #N/A | #N/A | #N/A | #N/A |
| 1.76 | 0.76 | 2.02 | 0.74 | #N/A | #N/A | #N/A | #N/A | 1.34 | 0.58 | 1.73 |
| 1.11 | 0.47 | 1.60 | 0.62 | 1.24 | 0.47 | 1.03 | 0.44 | 1.05 | 0.44 | 1.16 |
| #N/A | #N/A | 0.48 | 0.13 | 0.49 | 0.11 | 0.48 | 0.11 | 0.48 | 0.11 | #N/A |
| 1.41 | 0.58 | 1.41 | 0.55 | 2.01 | 0.73 | 1.01 | 0.43 | 1.34 | 0.58 | 1.41 |
| 1.72 | 0.75 | 2.45 | 0.84 | 2.24 | 0.80 | 1.72 | 0.75 | 1.95 | 0.80 | 1.88 |
| 2.05 | 0.83 | 3.38 | 0.95 | 3.01 | 0.89 | 2.30 | 0.87 | 2.80 | 0.94 | 1.95 |
| #N/A | #N/A | #N/A | #N/A | #N/A | #N/A | #N/A | #N/A | #N/A | #N/A | #N/A |
| 2.02 | 0.80 | 1.45 | 0.56 | 1.08 | 0.40 | 0.92 | 0.38 | 1.33 | 0.57 | 1.05 |
| #N/A | #N/A | #N/A | #N/A | #N/A | #N/A | 1.35 | 0.50 | 3.79 | 0.96 | #N/A |
| #N/A | #N/A | #N/A | #N/A | #N/A | #N/A | #N/A | #N/A | #N/A | #N/A | #N/A |
| #N/A | #N/A | #N/A | #N/A | 1.11 | 0.41 | 1.28 | 0.56 | 1.51 | 0.66 | 0.72 |
| 0.61 | 0.15 | 0.88 | 0.32 | 0.84 | 0.28 | 0.64 | 0.20 | 0.84 | 0.32 | 0.83 |
| #N/A | #N/A | #N/A | #N/A | #N/A | #N/A | #N/A | #N/A | #N/A | #N/A | #N/A |
| 2.32 | 0.89 | 1.96 | 0.73 | 2.41 | 0.84 | 1.91 | 0.79 | 2.30 | 0.87 | 1.71 |
| 2.72 | 0.94 | 3.52 | 0.96 | 3.35 | 0.95 | 3.24 | 0.97 | 3.06 | 0.96 | 2.94 |
| 1.25 | 0.55 | 1.01 | 0.38 | 1.34 | 0.52 | 0.89 | 0.35 | 1.09 | 0.45 | 0.81 |
| 1.51 | 0.62 | 1.36 | 0.53 | 1.07 | 0.39 | 1.25 | 0.55 | 1.30 | 0.56 | 0.95 |
| 1.70 | 0.74 | 2.63 | 0.88 | 2.53 | 0.86 | #N/A | #N/A | 1.99 | 0.81 | 1.73 |
| #N/A | #N/A | 1.69 | 0.64 | 1.39 | 0.54 | 1.41 | 0.63 | 1.67 | 0.71 | 1.67 |
| 0.59 | 0.14 | 0.45 | 0.11 | #N/A | #N/A | 0.52 | 0.13 | 0.51 | 0.13 | 0.67 |
| 2.24 | 0.88 | 3.06 | 0.93 | 2.86 | 0.91 | 2.35 | 0.90 | 2.76 | 0.93 | 2.45 |
| #N/A | #N/A | #N/A | #N/A | #N/A | #N/A | #N/A | #N/A | #N/A | #N/A | #N/A |
| #N/A | #N/A | #N/A | #N/A | #N/A | #N/A | #N/A | #N/A | #N/A | #N/A | #N/A |
| 2.53 | 0.90 | #N/A | #N/A | #N/A | #N/A | #N/A | #N/A | 4.34 | 0.99 | 1.35 |
| #N/A | #N/A | #N/A | #N/A | #N/A | #N/A | #N/A | #N/A | #N/A | #N/A | 0.69 |
| 1.65 | 0.72 | 2.07 | 0.76 | 2.05 | 0.75 | 1.66 | 0.73 | 1.54 | 0.67 | 1.73 |
| #N/A | #N/A | #N/A | #N/A | #N/A | #N/A | #N/A | #N/A | #N/A | #N/A | #N/A |
| #N/A | #N/A | #N/A | #N/A | #N/A | #N/A | #N/A | #N/A | #N/A | #N/A | #N/A |
| 3.27 | 0.97 | 3.38 | 0.95 | 4.07 | 0.97 | 2.95 | 0.96 | 3.17 | 0.97 | 2.91 |
| 2.95 | 0.93 | #N/A | #N/A | 2.45 | 0.80 | #N/A | #N/A | 3.39 | 0.93 | 1.79 |
| 2.44 | 0.90 | 3.80 | 0.97 | 3.10 | 0.92 | 3.62 | 0.99 | 3.53 | 0.98 | 2.72 |
| 2.05 | 0.81 | 2.11 | 0.76 | 1.27 | 0.49 | 1.43 | 0.64 | 1.18 | 0.50 | 1.50 |
| #N/A | #N/A | 1.97 | 0.73 | 1.90 | 0.72 | 1.91 | 0.81 | 1.57 | 0.68 | 1.28 |
| #N/A | #N/A | 2.15 | 0.77 | 2.01 | 0.76 | 1.35 | 0.60 | 1.64 | 0.71 | 1.53 |
| #N/A | #N/A | 1.64 | 0.63 | 1.75 | 0.67 | 1.40 | 0.59 | 1.17 | 0.49 | 1.02 |
| 0.59 | 0.14 | #N/A | #N/A | #N/A | #N/A | 0.24 | 0.02 | 0.49 | 0.12 | 0.45 |
| #N/A | #N/A | #N/A | #N/A | #N/A | #N/A | #N/A | #N/A | #N/A | #N/A | #N/A |
| 2.36 | 0.90 | 3.53 | 0.96 | 3.10 | 0.93 | 3.58 | 0.99 | 3.58 | 0.98 | #N/A |
| #N/A | #N/A | #N/A | #N/A | #N/A | #N/A | #N/A | #N/A | #N/A | #N/A | #N/A |
| 0.42 | 0.05 | #N/A | #N/A | #N/A | #N/A | #N/A | #N/A | 0.58 | 0.17 | 0.53 |
| 2.67 | 0.92 | 2.88 | 0.91 | 3.28 | 0.94 | 2.78 | 0.95 | 3.42 | 0.98 | 2.05 |
| 0.67 | 0.18 | 0.76 | 0.27 | 1.17 | 0.43 | #N/A | #N/A | 1.20 | 0.51 | 0.67 |
| #N/A | #N/A | #N/A | #N/A | #N/A | #N/A | #N/A | #N/A | #N/A | #N/A | #N/A |
| 1.25 | 0.54 | 2.20 | 0.79 | 1.53 | 0.57 | 1.27 | 0.56 | 1.64 | 0.71 | 1.36 |
| #N/A | #N/A | #N/A | #N/A | #N/A | #N/A | #N/A | #N/A | #N/A | #N/A | #N/A |
| 1.61 | 0.70 | #N/A | #N/A | #N/A | #N/A | 1.58 | 0.70 | 1.72 | 0.73 | #N/A |
| #N/A | #N/A | #N/A | #N/A | #N/A | #N/A | #N/A | #N/A | #N/A | #N/A | #N/A |
| #N/A | #N/A | 3.01 | 0.92 | 3.30 | 0.93 | 2.83 | 0.95 | 2.45 | 0.89 | 2.16 |
| 1.00 | 0.39 | #N/A | #N/A | #N/A | #N/A | 0.87 | 0.35 | 0.65 | 0.21 | 1.05 |

|      |      |      |      |      |      |      |      |      |      |      |
|------|------|------|------|------|------|------|------|------|------|------|
| #N/A | #N/A | 1.69 | 0.62 | 1.64 | 0.62 | 1.23 | 0.54 | 1.32 | 0.57 | 1.02 |
| #N/A | #N/A | #N/A | #N/A | #N/A | #N/A | #N/A | #N/A | #N/A | #N/A | 0.52 |
| 1.41 | 0.63 | 2.08 | 0.76 | 1.82 | 0.69 | 1.99 | 0.78 | 1.95 | 0.79 | 2.00 |
| 1.08 | 0.43 | #N/A | #N/A | #N/A | #N/A | #N/A | #N/A | #N/A | #N/A | #N/A |
| 2.17 | 0.87 | 1.90 | 0.71 | 2.56 | 0.85 | 2.38 | 0.90 | 1.87 | 0.78 | 1.44 |
| 0.97 | 0.38 | #N/A | #N/A | #N/A | #N/A | 0.69 | 0.24 | 0.73 | 0.26 | 0.67 |
| 1.27 | 0.50 | 1.60 | 0.61 | 1.32 | 0.51 | #N/A | #N/A | 1.39 | 0.61 | 1.10 |
| #N/A | #N/A | #N/A | #N/A | #N/A | #N/A | #N/A | #N/A | #N/A | #N/A | #N/A |
| 2.65 | 0.92 | 3.31 | 0.94 | 3.62 | 0.95 | 2.60 | 0.93 | 2.40 | 0.89 | 1.94 |
| #N/A | #N/A | #N/A | #N/A | #N/A | #N/A | #N/A | #N/A | #N/A | #N/A | 0.54 |
| 0.56 | 0.12 | 0.53 | 0.15 | 0.53 | 0.13 | 0.60 | 0.18 | 0.48 | 0.11 | 0.59 |
| 1.31 | 0.57 | 2.44 | 0.83 | 1.55 | 0.57 | 1.56 | 0.68 | 1.62 | 0.69 | #N/A |
| 0.73 | 0.22 | 0.55 | 0.16 | #N/A | #N/A | 0.49 | 0.12 | 0.48 | 0.11 | #N/A |
| 1.32 | 0.56 | 1.39 | 0.54 | 1.64 | 0.57 | 1.05 | 0.45 | 1.01 | 0.42 | 1.08 |
| 3.17 | 0.94 | 2.13 | 0.78 | 2.10 | 0.78 | 2.42 | 0.90 | 1.79 | 0.75 | 1.98 |
| 1.86 | 0.75 | 2.39 | 0.79 | 3.91 | 0.96 | 2.12 | 0.85 | 2.18 | 0.85 | 1.75 |
| #N/A | #N/A | 1.63 | 0.62 | #N/A | #N/A | 1.34 | 0.59 | 1.40 | 0.61 | 1.37 |
| #N/A | #N/A | 2.69 | 0.88 | #N/A | #N/A | #N/A | #N/A | 1.42 | 0.61 | 1.08 |
| 1.06 | 0.44 | 1.90 | 0.71 | 1.80 | 0.69 | 1.71 | 0.73 | 1.53 | 0.66 | 1.35 |
| 1.85 | 0.78 | 1.47 | 0.57 | 1.24 | 0.47 | 1.16 | 0.51 | 1.26 | 0.51 | 0.94 |
| 2.08 | 0.85 | 3.02 | 0.92 | 2.56 | 0.86 | 2.57 | 0.93 | 1.91 | 0.78 | 2.03 |
| #N/A | #N/A | #N/A | #N/A | #N/A | #N/A | #N/A | #N/A | #N/A | #N/A | #N/A |
| 0.63 | 0.16 | #N/A | #N/A | #N/A | #N/A | #N/A | #N/A | 0.92 | 0.37 | #N/A |
| 0.93 | 0.36 | 0.93 | 0.34 | 0.63 | 0.17 | 0.73 | 0.26 | 0.75 | 0.27 | 1.15 |
| #N/A | #N/A | 0.78 | 0.28 | 0.71 | 0.21 | 0.82 | 0.32 | 0.85 | 0.33 | 0.77 |
| #N/A | #N/A | #N/A | #N/A | #N/A | #N/A | #N/A | #N/A | #N/A | #N/A | #N/A |
| 2.71 | 0.84 | 1.61 | 0.62 | 1.96 | 0.74 | 1.75 | 0.76 | 1.81 | 0.74 | 1.20 |
| 1.05 | 0.42 | 0.98 | 0.37 | 1.20 | 0.45 | 1.51 | 0.67 | 1.21 | 0.52 | 0.93 |
| 0.92 | 0.36 | 0.71 | 0.24 | #N/A | #N/A | 1.01 | 0.43 | 0.77 | 0.28 | 0.58 |
| #N/A | #N/A | #N/A | #N/A | #N/A | #N/A | #N/A | #N/A | #N/A | #N/A | #N/A |
| 0.76 | 0.24 | 0.45 | 0.12 | #N/A | #N/A | 0.56 | 0.17 | 0.59 | 0.18 | 0.60 |
| 4.02 | 0.98 | 3.61 | 0.96 | 3.74 | 0.94 | 2.46 | 0.91 | 3.41 | 0.97 | 2.35 |
| 0.33 | 0.04 | #N/A | #N/A | #N/A | #N/A | #N/A | #N/A | #N/A | #N/A | #N/A |
| 2.33 | 0.89 | 1.98 | 0.73 | 1.64 | 0.64 | 1.81 | 0.78 | 2.48 | 0.90 | 1.93 |
| 1.12 | 0.48 | 0.97 | 0.36 | 1.12 | 0.42 | 1.34 | 0.60 | 1.24 | 0.54 | 0.99 |
| 1.99 | 0.83 | 2.74 | 0.87 | #N/A | #N/A | 1.92 | 0.77 | 2.49 | 0.90 | #N/A |
| 1.19 | 0.51 | 2.62 | 0.87 | 2.79 | 0.89 | 2.02 | 0.83 | 2.69 | 0.92 | 2.01 |
| 1.90 | 0.80 | 2.48 | 0.85 | 2.19 | 0.80 | 1.75 | 0.74 | 2.26 | 0.87 | 1.85 |
| 3.34 | 0.97 | 3.62 | 0.93 | 3.52 | 0.95 | 3.13 | 0.95 | 2.75 | 0.94 | 1.93 |
| #N/A | #N/A | #N/A | #N/A | #N/A | #N/A | #N/A | #N/A | #N/A | #N/A | #N/A |
| #N/A | #N/A | #N/A | #N/A | #N/A | #N/A | #N/A | #N/A | #N/A | #N/A | #N/A |
| 2.30 | 0.89 | 1.75 | 0.66 | 2.39 | 0.84 | 1.49 | 0.61 | 1.89 | 0.77 | 1.23 |
| 1.20 | 0.51 | 1.28 | 0.50 | 1.31 | 0.50 | 1.17 | 0.52 | 1.19 | 0.51 | 1.10 |
| #N/A | #N/A | #N/A | #N/A | #N/A | #N/A | #N/A | #N/A | #N/A | #N/A | #N/A |
| 1.92 | 0.65 | 1.36 | 0.53 | #N/A | #N/A | 1.31 | 0.59 | 1.25 | 0.53 | 1.37 |
| 0.81 | 0.28 | 0.51 | 0.14 | 0.75 | 0.24 | 0.64 | 0.21 | 0.66 | 0.22 | 0.61 |
| 1.61 | 0.69 | 1.89 | 0.71 | 1.44 | 0.56 | 1.60 | 0.69 | 1.37 | 0.60 | 1.59 |
| 1.04 | 0.43 | 1.04 | 0.40 | 1.46 | 0.56 | 1.04 | 0.44 | 1.18 | 0.51 | 1.07 |
| 1.34 | 0.59 | 1.65 | 0.63 | 1.81 | 0.70 | 1.60 | 0.71 | 1.73 | 0.72 | 1.52 |
| 0.99 | 0.39 | 0.98 | 0.37 | 0.89 | 0.30 | 0.90 | 0.37 | 0.79 | 0.30 | 1.02 |
| 1.09 | 0.43 | #N/A | #N/A | #N/A | #N/A | #N/A | #N/A | 0.63 | 0.20 | 0.41 |



|      |      |      |      |      |      |      |      |      |      |      |
|------|------|------|------|------|------|------|------|------|------|------|
| 1.41 | 0.63 | 1.80 | 0.68 | 1.36 | 0.52 | 1.12 | 0.49 | 1.32 | 0.57 | 1.73 |
| 1.44 | 0.64 | 1.72 | 0.66 | 1.66 | 0.64 | 1.13 | 0.50 | 1.36 | 0.58 | 1.72 |
| 1.10 | 0.46 | 1.07 | 0.40 | 0.96 | 0.34 | 0.93 | 0.38 | 1.05 | 0.44 | 1.14 |
| 1.24 | 0.54 | 1.57 | 0.60 | 1.34 | 0.51 | 1.38 | 0.61 | 1.32 | 0.58 | 1.39 |
| 1.11 | 0.47 | 0.80 | 0.29 | 0.82 | 0.27 | 0.68 | 0.23 | 0.73 | 0.26 | 1.01 |
| 0.85 | 0.30 | 0.83 | 0.30 | 0.75 | 0.24 | 0.89 | 0.36 | 0.71 | 0.25 | 0.88 |
| 0.90 | 0.34 | 0.83 | 0.30 | 0.78 | 0.25 | 0.88 | 0.36 | 0.72 | 0.25 | 0.85 |
| 0.73 | 0.22 | 0.80 | 0.28 | 0.69 | 0.21 | 0.75 | 0.27 | 0.69 | 0.23 | 0.88 |
| 0.75 | 0.24 | 0.56 | 0.17 | 0.55 | 0.14 | 0.67 | 0.23 | 0.59 | 0.18 | 0.88 |
| 1.25 | 0.52 | #N/A | #N/A | #N/A | #N/A | 1.51 | 0.67 | 1.85 | 0.77 | 1.10 |
| 1.74 | 0.76 | 2.39 | 0.83 | 2.24 | 0.80 | 2.17 | 0.87 | 2.06 | 0.83 | 2.06 |
| 0.69 | 0.21 | 0.33 | 0.06 | 0.43 | 0.08 | 0.52 | 0.14 | 0.49 | 0.12 | 0.96 |
| 0.66 | 0.18 | 0.55 | 0.17 | 0.58 | 0.15 | 0.57 | 0.17 | 0.57 | 0.17 | 0.74 |
| 0.45 | 0.07 | 0.28 | 0.04 | 0.31 | 0.04 | 0.35 | 0.05 | 0.32 | 0.03 | 0.54 |
| 0.59 | 0.14 | 0.37 | 0.08 | 0.41 | 0.07 | 0.47 | 0.11 | 0.42 | 0.08 | 0.64 |
| #N/A | #N/A | #N/A | #N/A | #N/A | #N/A | #N/A | #N/A | #N/A | #N/A | #N/A |
| 1.98 | 0.78 | 4.66 | 0.99 | 4.01 | 0.97 | 1.94 | 0.81 | 3.04 | 0.96 | #N/A |
| 1.34 | 0.59 | 1.55 | 0.60 | 1.76 | 0.67 | 1.37 | 0.61 | 1.48 | 0.64 | 1.20 |
| 1.05 | 0.43 | 1.17 | 0.45 | 1.32 | 0.51 | 1.04 | 0.44 | 1.15 | 0.49 | 0.99 |
| 1.01 | 0.41 | 1.20 | 0.46 | 1.36 | 0.52 | 1.12 | 0.49 | 1.14 | 0.49 | 0.99 |
| 1.05 | 0.43 | 1.06 | 0.41 | 1.01 | 0.37 | 0.92 | 0.38 | 0.96 | 0.39 | 0.98 |
| 1.28 | 0.56 | 1.59 | 0.61 | 1.36 | 0.52 | 1.25 | 0.55 | 1.37 | 0.60 | 1.20 |
| 1.34 | 0.59 | 1.35 | 0.53 | 1.17 | 0.44 | 1.06 | 0.46 | 1.14 | 0.48 | 1.18 |
| 1.30 | 0.57 | 1.33 | 0.52 | 1.09 | 0.40 | 1.08 | 0.47 | 1.15 | 0.49 | 1.18 |
| 1.50 | 0.67 | 1.93 | 0.71 | 1.82 | 0.70 | 2.04 | 0.83 | 1.64 | 0.71 | 1.73 |
| 1.18 | 0.51 | 1.30 | 0.51 | 0.95 | 0.34 | 1.21 | 0.54 | 1.13 | 0.48 | 1.12 |
| #N/A | #N/A | #N/A | #N/A | #N/A | #N/A | #N/A | #N/A | #N/A | #N/A | #N/A |
| #N/A | #N/A | #N/A | #N/A | #N/A | #N/A | #N/A | #N/A | #N/A | #N/A | 0.85 |
| #N/A | #N/A | #N/A | #N/A | #N/A | #N/A | #N/A | #N/A | #N/A | #N/A | #N/A |
| 2.41 | 0.90 | 1.79 | 0.68 | 1.73 | 0.66 | 1.84 | 0.79 | 2.61 | 0.92 | #N/A |
| 1.14 | 0.48 | 0.95 | 0.35 | 1.41 | 0.54 | 1.02 | 0.44 | 1.12 | 0.47 | 1.01 |
| #N/A | #N/A | #N/A | #N/A | #N/A | #N/A | #N/A | #N/A | #N/A | #N/A | #N/A |
| 1.07 | 0.43 | 1.95 | 0.71 | #N/A | #N/A | 0.95 | 0.40 | 0.96 | 0.40 | 0.90 |
| 2.03 | 0.84 | 2.61 | 0.87 | 2.71 | 0.87 | 2.04 | 0.82 | 1.90 | 0.79 | 1.90 |
| 1.46 | 0.64 | 2.08 | 0.76 | 1.66 | 0.65 | 1.37 | 0.61 | 1.52 | 0.66 | 1.44 |
| 1.36 | 0.61 | 1.25 | 0.48 | 1.28 | 0.49 | 1.14 | 0.50 | 1.17 | 0.50 | 1.15 |
| 2.03 | 0.83 | 2.56 | 0.86 | 4.08 | 0.97 | 2.28 | 0.89 | 2.87 | 0.95 | #N/A |
| #N/A | #N/A | #N/A | #N/A | #N/A | #N/A | #N/A | #N/A | #N/A | #N/A | #N/A |
| 1.05 | 0.44 | #N/A | #N/A | #N/A | #N/A | 0.96 | 0.38 | 1.81 | 0.76 | #N/A |
| 1.03 | 0.42 | 1.45 | 0.56 | 1.52 | 0.59 | 1.30 | 0.58 | 1.17 | 0.50 | 1.18 |
| 1.56 | 0.59 | #N/A | #N/A | #N/A | #N/A | #N/A | #N/A | #N/A | #N/A | 0.94 |
| #N/A | #N/A | #N/A | #N/A | #N/A | #N/A | #N/A | #N/A | #N/A | #N/A | #N/A |
| 1.09 | 0.44 | 1.05 | 0.40 | 1.08 | 0.39 | 0.91 | 0.38 | 0.81 | 0.30 | 0.81 |
| 0.45 | 0.07 | 0.54 | 0.16 | 0.57 | 0.14 | 0.45 | 0.10 | 0.55 | 0.15 | 0.61 |
| 0.47 | 0.10 | #N/A | #N/A | #N/A | #N/A | #N/A | #N/A | 0.33 | 0.04 | #N/A |
| 0.93 | 0.36 | 1.28 | 0.49 | #N/A | #N/A | 1.24 | 0.55 | 1.48 | 0.65 | #N/A |
| 1.25 | 0.55 | #N/A | #N/A | #N/A | #N/A | #N/A | #N/A | #N/A | #N/A | #N/A |
| 0.74 | 0.23 | 0.96 | 0.36 | 0.82 | 0.28 | 1.08 | 0.47 | 1.08 | 0.46 | #N/A |
| 2.77 | 0.94 | 4.09 | 0.98 | 3.26 | 0.93 | 2.44 | 0.90 | 2.87 | 0.95 | 2.83 |
| 0.53 | 0.11 | 0.31 | 0.05 | 0.46 | 0.10 | 0.43 | 0.08 | 0.48 | 0.12 | 0.39 |
| 1.76 | 0.75 | 2.59 | 0.87 | 2.80 | 0.88 | 2.68 | 0.94 | 2.99 | 0.95 | 2.11 |

|      |      |      |      |      |      |      |      |      |      |      |
|------|------|------|------|------|------|------|------|------|------|------|
| 1.10 | 0.45 | #N/A | #N/A | #N/A | #N/A | #N/A | #N/A | 0.78 | 0.29 | 0.62 |
| 0.96 | 0.38 | 0.94 | 0.35 | 0.97 | 0.35 | 0.86 | 0.35 | 0.85 | 0.33 | 1.15 |
| 1.33 | 0.58 | 1.23 | 0.48 | 1.38 | 0.53 | 1.39 | 0.62 | 1.65 | 0.71 | 1.58 |
| #N/A | #N/A | 0.71 | 0.24 | 0.97 | 0.35 | 0.90 | 0.37 | 0.72 | 0.25 | 0.72 |
| 1.62 | 0.71 | 2.14 | 0.76 | 1.72 | 0.67 | 1.68 | 0.72 | 1.73 | 0.74 | 0.94 |
| 1.98 | 0.81 | 2.32 | 0.82 | #N/A | #N/A | 2.17 | 0.86 | 1.93 | 0.79 | 1.83 |
| 0.73 | 0.22 | 0.76 | 0.27 | #N/A | #N/A | 0.68 | 0.24 | 0.63 | 0.20 | 0.82 |
| 1.79 | 0.77 | 3.51 | 0.96 | 3.72 | 0.96 | 5.29 | 0.97 | 3.28 | 0.97 | #N/A |
| #N/A | #N/A | #N/A | #N/A | #N/A | #N/A | #N/A | #N/A | #N/A | #N/A | #N/A |
| 1.84 | 0.77 | 2.47 | 0.84 | 3.11 | 0.89 | 1.70 | 0.74 | 1.95 | 0.80 | 1.91 |
| 1.04 | 0.43 | 1.21 | 0.47 | 1.47 | 0.57 | 1.35 | 0.60 | 1.42 | 0.62 | 0.98 |
| 1.72 | 0.75 | 2.05 | 0.75 | 2.35 | 0.83 | 2.15 | 0.86 | 1.89 | 0.79 | #N/A |
| 2.05 | 0.84 | 2.73 | 0.88 | 3.42 | 0.95 | 2.51 | 0.92 | 3.01 | 0.96 | #N/A |
| 0.60 | 0.14 | #N/A | #N/A | #N/A | #N/A | #N/A | #N/A | 0.22 | 0.01 | 0.56 |
| 2.19 | 0.83 | 1.90 | 0.69 | 1.71 | 0.66 | 1.45 | 0.63 | 1.61 | 0.69 | 1.08 |
| 2.96 | 0.95 | 5.48 | 0.98 | 4.12 | 0.98 | 2.89 | 0.94 | 2.68 | 0.93 | 2.15 |
| #N/A | #N/A | #N/A | #N/A | #N/A | #N/A | #N/A | #N/A | #N/A | #N/A | #N/A |
| #N/A | #N/A | #N/A | #N/A | #N/A | #N/A | #N/A | #N/A | #N/A | #N/A | #N/A |
| 2.81 | 0.94 | 3.30 | 0.94 | 3.38 | 0.94 | 4.32 | 0.99 | 3.69 | 0.99 | 1.94 |
| #N/A | #N/A | 2.46 | 0.84 | 2.80 | 0.90 | 2.62 | 0.92 | 2.19 | 0.85 | #N/A |
| #N/A | #N/A | #N/A | #N/A | #N/A | #N/A | #N/A | #N/A | #N/A | #N/A | #N/A |
| 1.29 | 0.55 | 1.18 | 0.45 | 1.22 | 0.46 | 1.35 | 0.60 | 1.25 | 0.54 | 1.11 |
| 1.44 | 0.64 | 1.34 | 0.52 | 1.40 | 0.54 | 1.46 | 0.65 | 1.54 | 0.67 | 1.15 |
| #N/A | #N/A | #N/A | #N/A | #N/A | #N/A | #N/A | #N/A | #N/A | #N/A | #N/A |
| 1.46 | 0.65 | 2.02 | 0.74 | 1.75 | 0.67 | 1.70 | 0.75 | 1.55 | 0.67 | 1.68 |
| 2.20 | 0.81 | #N/A | #N/A | #N/A | #N/A | 1.39 | 0.62 | 1.15 | 0.49 | #N/A |
| 1.15 | 0.50 | 0.93 | 0.34 | 1.29 | 0.49 | 0.92 | 0.37 | 0.94 | 0.38 | 0.68 |
| 0.37 | 0.04 | 0.22 | 0.02 | 0.42 | 0.07 | 0.23 | 0.01 | 0.37 | 0.05 | 0.30 |
| #N/A | #N/A | #N/A | #N/A | #N/A | #N/A | #N/A | #N/A | #N/A | #N/A | #N/A |
| 0.40 | 0.05 | #N/A | #N/A | #N/A | #N/A | #N/A | #N/A | #N/A | #N/A | #N/A |
| 0.89 | 0.32 | 0.89 | 0.32 | 0.76 | 0.24 | 0.92 | 0.38 | 0.69 | 0.23 | 0.78 |
| #N/A | #N/A | #N/A | #N/A | #N/A | #N/A | #N/A | #N/A | 0.39 | 0.06 | #N/A |
| 1.41 | 0.62 | 1.79 | 0.68 | 1.62 | 0.63 | 1.69 | 0.74 | 1.50 | 0.65 | 1.37 |
| 1.94 | 0.81 | #N/A | #N/A | 1.99 | 0.73 | #N/A | #N/A | 2.14 | 0.85 | 1.99 |
| 1.43 | 0.63 | #N/A | #N/A | #N/A | #N/A | #N/A | #N/A | #N/A | #N/A | #N/A |
| #N/A | #N/A | #N/A | #N/A | #N/A | #N/A | #N/A | #N/A | #N/A | #N/A | #N/A |
| #N/A | #N/A | 3.32 | 0.94 | 2.71 | 0.89 | 2.57 | 0.80 | 2.14 | 0.84 | 2.25 |
| 1.70 | 0.64 | 2.22 | 0.79 | 2.25 | 0.78 | 1.51 | 0.64 | 1.31 | 0.57 | 1.95 |
| 2.22 | 0.87 | 3.39 | 0.95 | 2.98 | 0.90 | 1.97 | 0.82 | 2.26 | 0.87 | 1.82 |
| 1.56 | 0.68 | 2.95 | 0.91 | #N/A | #N/A | 1.53 | 0.67 | 1.93 | 0.80 | 1.64 |
| 0.38 | 0.04 | 0.23 | 0.03 | 0.35 | 0.05 | 0.28 | 0.03 | 0.29 | 0.02 | 0.30 |
| 0.91 | 0.34 | 1.23 | 0.48 | 0.93 | 0.33 | 0.80 | 0.31 | 1.35 | 0.59 | 0.82 |
| 0.95 | 0.37 | #N/A | #N/A | #N/A | #N/A | #N/A | #N/A | 1.16 | 0.49 | 1.32 |
| 0.63 | 0.17 | 0.66 | 0.22 | 0.56 | 0.14 | 0.59 | 0.17 | 0.58 | 0.17 | 0.77 |
| 1.55 | 0.68 | 1.52 | 0.59 | 1.32 | 0.51 | 1.20 | 0.53 | 1.25 | 0.55 | 1.28 |
| 0.72 | 0.23 | 1.42 | 0.55 | 1.17 | 0.42 | 0.88 | 0.35 | 0.93 | 0.38 | 0.69 |
| #N/A | #N/A | 1.57 | 0.60 | 1.93 | 0.73 | 1.79 | 0.76 | 1.86 | 0.77 | #N/A |
| 0.47 | 0.11 | #N/A | #N/A | #N/A | #N/A | #N/A | #N/A | 0.43 | 0.08 | #N/A |
| 1.48 | 0.65 | 1.48 | 0.57 | 1.35 | 0.52 | 1.40 | 0.62 | 1.36 | 0.59 | 1.48 |
| #N/A | #N/A | #N/A | #N/A | #N/A | #N/A | #N/A | #N/A | #N/A | #N/A | #N/A |
| 1.94 | 0.82 | 2.70 | 0.88 | 2.64 | 0.88 | 1.95 | 0.81 | 2.36 | 0.88 | #N/A |

|      |      |      |      |      |      |      |      |      |      |      |
|------|------|------|------|------|------|------|------|------|------|------|
| #N/A | #N/A | 2.49 | 0.85 | 3.11 | 0.93 | 2.14 | 0.81 | 2.12 | 0.84 | 1.83 |
| #N/A | #N/A | #N/A | #N/A | #N/A | #N/A | #N/A | #N/A | 1.13 | 0.48 | 1.00 |
| #N/A | #N/A | #N/A | #N/A | #N/A | #N/A | 1.74 | 0.76 | 1.52 | 0.65 | #N/A |
| 2.30 | 0.88 | 2.18 | 0.78 | 2.24 | 0.79 | 1.68 | 0.74 | 1.84 | 0.77 | 1.57 |
| 1.68 | 0.65 | 1.84 | 0.69 | 1.39 | 0.53 | 1.26 | 0.55 | 1.56 | 0.67 | 1.22 |
| #N/A | #N/A | 0.61 | 0.19 | 0.52 | 0.12 | 0.58 | 0.17 | 0.66 | 0.22 | 0.75 |
| 4.06 | 0.99 | 3.65 | 0.96 | 4.11 | 0.98 | 3.81 | 0.99 | 3.03 | 0.96 | 2.97 |
| #N/A | #N/A | #N/A | #N/A | #N/A | #N/A | #N/A | #N/A | #N/A | #N/A | #N/A |
| 2.15 | 0.87 | 2.93 | 0.91 | 2.80 | 0.90 | 2.22 | 0.87 | 2.50 | 0.91 | 1.85 |
| 1.06 | 0.44 | 0.80 | 0.28 | 0.90 | 0.30 | 1.11 | 0.48 | 0.90 | 0.36 | 0.99 |
| #N/A | #N/A | #N/A | #N/A | #N/A | #N/A | #N/A | #N/A | #N/A | #N/A | #N/A |
| 3.02 | 0.92 | 2.10 | 0.77 | 2.67 | 0.88 | 3.04 | 0.96 | 2.46 | 0.88 | 1.65 |
| #N/A | #N/A | #N/A | #N/A | #N/A | #N/A | #N/A | #N/A | #N/A | #N/A | #N/A |
| 2.42 | 0.91 | 2.63 | 0.88 | 3.25 | 0.94 | 2.24 | 0.88 | 2.85 | 0.94 | 2.14 |
| #N/A | #N/A | #N/A | #N/A | #N/A | #N/A | #N/A | #N/A | #N/A | #N/A | #N/A |
| #N/A | #N/A | 1.00 | 0.38 | 0.75 | 0.24 | 0.72 | 0.26 | 0.74 | 0.26 | 0.75 |
| 2.20 | 0.82 | 1.52 | 0.59 | 1.56 | 0.61 | 1.22 | 0.54 | 1.40 | 0.61 | 1.24 |
| #N/A | #N/A | #N/A | #N/A | #N/A | #N/A | #N/A | #N/A | #N/A | #N/A | 0.47 |
| 1.58 | 0.69 | 1.50 | 0.58 | 1.44 | 0.56 | 1.39 | 0.62 | 1.29 | 0.56 | 1.23 |
| 1.02 | 0.41 | 1.34 | 0.52 | 1.14 | 0.42 | 1.04 | 0.44 | 1.10 | 0.47 | 1.09 |
| #N/A | #N/A | 2.56 | 0.84 | #N/A | #N/A | 1.98 | 0.82 | 1.77 | 0.73 | #N/A |
| 1.99 | 0.83 | 2.27 | 0.81 | 1.80 | 0.69 | 1.92 | 0.80 | 2.34 | 0.88 | 1.41 |
| #N/A | #N/A | #N/A | #N/A | #N/A | #N/A | #N/A | #N/A | #N/A | #N/A | #N/A |
| 0.92 | 0.35 | 0.91 | 0.34 | 0.67 | 0.19 | 0.80 | 0.31 | 0.73 | 0.26 | 0.99 |
| #N/A | #N/A | #N/A | #N/A | #N/A | #N/A | #N/A | #N/A | #N/A | #N/A | #N/A |
| 1.77 | 0.76 | 2.54 | 0.86 | 2.27 | 0.80 | 1.71 | 0.74 | 1.65 | 0.71 | 1.78 |
| 1.05 | 0.43 | 0.99 | 0.37 | 1.02 | 0.37 | 0.67 | 0.23 | 0.79 | 0.29 | 0.76 |
| 1.79 | 0.77 | 2.26 | 0.80 | 2.01 | 0.76 | 1.73 | 0.76 | 1.74 | 0.73 | 1.29 |
| 1.20 | 0.52 | 1.85 | 0.69 | 1.85 | 0.68 | 1.18 | 0.52 | 2.12 | 0.74 | 1.38 |
| 3.70 | 0.98 | 3.77 | 0.96 | 3.99 | 0.94 | 2.00 | 0.77 | 2.99 | 0.96 | 2.22 |
| #N/A | #N/A | #N/A | #N/A | #N/A | #N/A | #N/A | #N/A | #N/A | #N/A | #N/A |
| 0.73 | 0.23 | 0.52 | 0.15 | 0.49 | 0.11 | 0.44 | 0.09 | 0.48 | 0.11 | 0.78 |
| #N/A | #N/A | #N/A | #N/A | #N/A | #N/A | #N/A | #N/A | #N/A | #N/A | #N/A |
| 0.45 | 0.07 | 0.36 | 0.07 | 0.36 | 0.05 | 0.45 | 0.10 | 0.49 | 0.12 | 0.31 |
| 0.67 | 0.18 | 0.58 | 0.18 | 0.59 | 0.15 | 0.65 | 0.21 | 0.63 | 0.20 | 0.63 |
| 1.19 | 0.51 | 0.63 | 0.20 | 1.15 | 0.43 | 1.13 | 0.48 | 0.98 | 0.40 | 0.70 |
| 1.12 | 0.47 | 0.85 | 0.31 | 1.02 | 0.35 | 0.69 | 0.24 | 0.74 | 0.26 | 0.80 |
| 0.52 | 0.10 | 0.38 | 0.08 | 0.45 | 0.08 | 0.41 | 0.08 | 0.44 | 0.09 | 0.51 |
| 0.73 | 0.23 | 0.65 | 0.21 | 0.68 | 0.20 | 0.60 | 0.18 | 0.70 | 0.24 | 0.68 |
| 2.21 | 0.78 | 2.59 | 0.87 | 3.84 | 0.96 | 2.07 | 0.82 | 2.37 | 0.89 | 1.96 |
| 1.88 | 0.80 | 1.62 | 0.62 | 1.51 | 0.59 | 1.09 | 0.47 | 1.29 | 0.56 | 1.62 |
| 1.76 | 0.76 | 3.16 | 0.93 | 3.17 | 0.94 | 3.50 | 0.98 | 2.99 | 0.96 | 2.25 |
| #N/A | #N/A | #N/A | #N/A | #N/A | #N/A | #N/A | #N/A | #N/A | #N/A | #N/A |
| 3.40 | 0.97 | 3.62 | 0.96 | 3.10 | 0.92 | 3.25 | 0.97 | 3.71 | 0.99 | 2.65 |
| 2.13 | 0.85 | 2.77 | 0.89 | 2.63 | 0.88 | 2.57 | 0.93 | 2.60 | 0.92 | 1.71 |
| 0.89 | 0.33 | 1.11 | 0.43 | #N/A | #N/A | 1.01 | 0.42 | 0.91 | 0.36 | 1.14 |
| 0.38 | 0.05 | 0.26 | 0.03 | 0.43 | 0.11 | 0.36 | 0.05 | 0.47 | 0.11 | 0.25 |
| #N/A | #N/A | #N/A | #N/A | #N/A | #N/A | #N/A | #N/A | #N/A | #N/A | 0.53 |
| 0.86 | 0.31 | 0.89 | 0.32 | 0.96 | 0.34 | 1.11 | 0.48 | 0.97 | 0.40 | 0.83 |
| 0.76 | 0.25 | 0.57 | 0.17 | 0.47 | 0.10 | 0.54 | 0.15 | 0.63 | 0.20 | 0.60 |
| 1.82 | 0.77 | 2.03 | 0.75 | 2.54 | 0.86 | 1.78 | 0.76 | 1.68 | 0.72 | 1.89 |



|      |      |      |      |      |      |      |      |      |      |      |
|------|------|------|------|------|------|------|------|------|------|------|
| 3.07 | 0.96 | 4.41 | 0.99 | 4.85 | 0.98 | 3.90 | 0.99 | 3.19 | 0.96 | 2.78 |
| #N/A | #N/A | #N/A | #N/A | #N/A | #N/A | #N/A | #N/A | #N/A | #N/A | #N/A |
| 0.91 | 0.35 | 1.47 | 0.57 | 1.40 | 0.52 | 1.11 | 0.48 | 1.27 | 0.55 | 1.27 |
| 0.77 | 0.26 | 0.95 | 0.35 | 1.05 | 0.39 | 1.66 | 0.73 | 1.16 | 0.49 | 0.77 |
| #N/A | #N/A | 0.53 | 0.15 | 0.64 | 0.18 | 0.52 | 0.14 | 0.65 | 0.21 | #N/A |
| 0.70 | 0.26 | #N/A | #N/A | #N/A | #N/A | #N/A | #N/A | #N/A | #N/A | 0.79 |
| 0.45 | 0.06 | 0.81 | 0.29 | 0.68 | 0.21 | 0.70 | 0.24 | 0.60 | 0.18 | 0.59 |
| 0.69 | 0.20 | 0.48 | 0.13 | 0.52 | 0.12 | 0.40 | 0.07 | 0.59 | 0.17 | 0.55 |
| 0.76 | 0.24 | 0.73 | 0.25 | 0.68 | 0.20 | 0.72 | 0.25 | 0.74 | 0.27 | 0.76 |
| 0.51 | 0.10 | 0.29 | 0.04 | 0.32 | 0.04 | 0.38 | 0.06 | 0.40 | 0.07 | 0.46 |
| 0.58 | 0.14 | 0.52 | 0.15 | 0.46 | 0.09 | 0.57 | 0.17 | 0.54 | 0.15 | 0.73 |
| 1.75 | 0.76 | 2.69 | 0.89 | 2.04 | 0.75 | 2.01 | 0.83 | 2.13 | 0.84 | 2.05 |
| 2.96 | 0.95 | 3.04 | 0.93 | 2.55 | 0.85 | 2.85 | 0.95 | 2.64 | 0.92 | 2.06 |
| 2.49 | 0.91 | 3.29 | 0.94 | 2.64 | 0.77 | 2.74 | 0.93 | #N/A | #N/A | 1.59 |
| 0.66 | 0.18 | #N/A | #N/A | #N/A | #N/A | #N/A | #N/A | #N/A | #N/A | #N/A |
| 1.60 | 0.60 | #N/A | #N/A | #N/A | #N/A | #N/A | #N/A | 1.82 | 0.76 | 1.03 |
| 1.05 | 0.42 | #N/A | #N/A | #N/A | #N/A | 0.67 | 0.23 | #N/A | #N/A | 0.98 |
| 2.82 | 0.95 | 4.02 | 0.98 | 4.81 | 0.99 | 3.34 | 0.98 | 3.65 | 0.98 | 2.63 |
| 1.51 | 0.67 | 1.33 | 0.51 | 1.29 | 0.50 | 1.29 | 0.58 | 1.22 | 0.53 | 1.11 |
| 1.80 | 0.76 | 2.48 | 0.85 | 1.70 | 0.66 | 1.89 | 0.80 | 1.74 | 0.74 | 1.35 |
| 1.74 | 0.74 | #N/A | #N/A | #N/A | #N/A | #N/A | #N/A | 1.29 | 0.56 | 0.92 |
| #N/A | #N/A | 1.00 | 0.37 | #N/A | #N/A | 0.88 | 0.35 | 1.09 | 0.46 | #N/A |
| 2.37 | 0.71 | 2.19 | 0.79 | 1.63 | 0.62 | 1.71 | 0.75 | 2.21 | 0.86 | 1.35 |
| 3.73 | 0.98 | 4.24 | 0.98 | 3.78 | 0.97 | 3.52 | 0.97 | 3.89 | 0.99 | 2.65 |
| #N/A | #N/A | #N/A | #N/A | #N/A | #N/A | #N/A | #N/A | #N/A | #N/A | #N/A |
| 0.92 | 0.35 | 1.05 | 0.40 | 1.00 | 0.34 | 0.83 | 0.32 | 1.07 | 0.45 | #N/A |
| 1.16 | 0.49 | 1.73 | 0.64 | 1.90 | 0.72 | 1.23 | 0.54 | 1.57 | 0.68 | #N/A |
| 2.78 | 0.92 | 4.09 | 0.98 | 4.60 | 0.98 | 3.43 | 0.98 | 3.39 | 0.98 | 2.31 |
| 0.94 | 0.36 | 1.35 | 0.52 | 1.13 | 0.42 | 1.01 | 0.42 | 1.71 | 0.72 | #N/A |
| 2.28 | 0.87 | 4.00 | 0.98 | 3.19 | 0.93 | 2.97 | 0.96 | 3.21 | 0.97 | 2.87 |
| 2.80 | 0.94 | 3.41 | 0.95 | 3.43 | 0.95 | 2.90 | 0.96 | 3.25 | 0.97 | 2.61 |
| 1.16 | 0.49 | 1.56 | 0.60 | 1.10 | 0.41 | 1.18 | 0.52 | 1.22 | 0.52 | 1.14 |
| 0.70 | 0.21 | 0.64 | 0.21 | 0.63 | 0.18 | 0.60 | 0.18 | 0.65 | 0.21 | #N/A |
| 1.14 | 0.49 | 0.80 | 0.28 | 0.71 | 0.22 | 0.60 | 0.18 | 0.60 | 0.18 | 0.79 |
| 1.35 | 0.59 | 1.96 | 0.72 | 1.46 | 0.56 | 1.61 | 0.70 | 1.46 | 0.64 | 1.45 |
| 1.48 | 0.65 | 2.03 | 0.75 | 1.99 | 0.74 | 1.97 | 0.82 | 1.94 | 0.80 | 1.55 |
| 0.77 | 0.24 | 1.29 | 0.50 | 0.80 | 0.26 | 0.95 | 0.40 | 0.91 | 0.37 | 1.13 |
| 0.81 | 0.27 | 0.72 | 0.24 | 0.78 | 0.26 | 0.59 | 0.17 | 0.64 | 0.20 | 0.83 |
| 1.61 | 0.70 | 1.75 | 0.64 | 1.60 | 0.61 | 1.34 | 0.58 | 1.14 | 0.49 | 1.24 |
| #N/A | #N/A | #N/A | #N/A | #N/A | #N/A | #N/A | #N/A | #N/A | #N/A | #N/A |
| 1.66 | 0.72 | 1.97 | 0.73 | 1.41 | 0.55 | 1.49 | 0.66 | 1.93 | 0.78 | 1.52 |
| 0.79 | 0.29 | #N/A | #N/A | #N/A | #N/A | 0.51 | 0.13 | 0.42 | 0.08 | 0.73 |
| #N/A | #N/A | 1.08 | 0.41 | #N/A | #N/A | 0.94 | 0.39 | 0.98 | 0.39 | #N/A |
| #N/A | #N/A | #N/A | #N/A | #N/A | #N/A | #N/A | #N/A | #N/A | #N/A | 1.32 |
| #N/A | #N/A | #N/A | #N/A | #N/A | #N/A | #N/A | #N/A | #N/A | #N/A | #N/A |
| 2.28 | 0.89 | 1.78 | 0.67 | 2.56 | 0.85 | 2.49 | 0.91 | 2.12 | 0.84 | 1.27 |
| 1.05 | 0.43 | 1.34 | 0.52 | 1.24 | 0.47 | 1.43 | 0.64 | 1.20 | 0.52 | 1.01 |
| #N/A | #N/A | 0.76 | 0.26 | 1.04 | 0.37 | 0.75 | 0.28 | 0.65 | 0.21 | 1.02 |
| #N/A | #N/A | #N/A | #N/A | #N/A | #N/A | #N/A | #N/A | 0.44 | 0.09 | #N/A |
| #N/A | #N/A | 0.91 | 0.34 | 0.85 | 0.30 | 0.64 | 0.21 | 0.84 | 0.32 | #N/A |
| 1.00 | 0.41 | 1.35 | 0.53 | 1.56 | 0.61 | 1.47 | 0.65 | 1.36 | 0.59 | 1.26 |

|      |      |      |      |      |      |      |      |      |      |      |
|------|------|------|------|------|------|------|------|------|------|------|
| 2.58 | 0.92 | 2.91 | 0.91 | 3.31 | 0.94 | 2.21 | 0.87 | 2.78 | 0.93 | 1.89 |
| 1.35 | 0.60 | 1.85 | 0.69 | 1.58 | 0.62 | 1.40 | 0.62 | 1.37 | 0.59 | 1.62 |
| #N/A | #N/A | #N/A | #N/A | #N/A | #N/A | #N/A | #N/A | #N/A | #N/A | #N/A |
| 0.68 | 0.19 | 0.55 | 0.16 | #N/A | #N/A | 0.35 | 0.05 | 0.49 | 0.12 | 0.63 |
| #N/A | #N/A | #N/A | #N/A | #N/A | #N/A | #N/A | #N/A | #N/A | #N/A | #N/A |
| #N/A | #N/A | 1.99 | 0.74 | 1.36 | 0.53 | 1.29 | 0.58 | 1.36 | 0.59 | #N/A |
| #N/A | #N/A | 0.39 | 0.09 | 0.59 | 0.15 | 0.35 | 0.05 | 0.34 | 0.04 | 0.42 |
| #N/A | #N/A | 2.06 | 0.74 | #N/A | #N/A | #N/A | #N/A | 1.56 | 0.67 | #N/A |
| #N/A | #N/A | #N/A | #N/A | #N/A | #N/A | #N/A | #N/A | #N/A | #N/A | #N/A |
| 1.22 | 0.52 | 2.36 | 0.82 | #N/A | #N/A | 1.37 | 0.60 | 1.50 | 0.63 | 1.57 |
| #N/A | #N/A | #N/A | #N/A | #N/A | #N/A | #N/A | #N/A | #N/A | #N/A | #N/A |
| 1.02 | 0.41 | 1.63 | 0.62 | 1.72 | 0.64 | 1.60 | 0.71 | 1.35 | 0.58 | 1.51 |
| 1.71 | 0.74 | 1.62 | 0.62 | 2.02 | 0.74 | 1.34 | 0.56 | 1.45 | 0.63 | 1.20 |
| #N/A | #N/A | #N/A | #N/A | #N/A | #N/A | #N/A | #N/A | #N/A | #N/A | #N/A |
| #N/A | #N/A | #N/A | #N/A | #N/A | #N/A | #N/A | #N/A | #N/A | #N/A | 1.22 |
| 1.49 | 0.66 | 1.92 | 0.71 | 1.91 | 0.72 | 1.61 | 0.71 | 1.84 | 0.77 | 1.34 |
| #N/A | #N/A | 1.42 | 0.55 | 1.82 | 0.69 | 1.35 | 0.61 | 1.51 | 0.66 | 1.08 |
| 1.25 | 0.55 | 1.50 | 0.58 | 1.16 | 0.43 | 1.11 | 0.48 | 1.27 | 0.55 | 1.15 |
| 1.24 | 0.54 | 1.26 | 0.49 | 0.96 | 0.34 | 1.58 | 0.70 | 1.28 | 0.56 | 1.08 |
| 0.62 | 0.16 | 0.41 | 0.10 | 0.49 | 0.11 | 0.36 | 0.06 | 0.50 | 0.12 | 0.56 |
| 2.26 | 0.88 | 2.50 | 0.85 | 1.74 | 0.68 | 1.37 | 0.59 | 1.66 | 0.71 | #N/A |
| 0.49 | 0.09 | 0.47 | 0.13 | 0.67 | 0.19 | 0.66 | 0.22 | 0.58 | 0.17 | 0.57 |
| #N/A | #N/A | #N/A | #N/A | #N/A | #N/A | #N/A | #N/A | #N/A | #N/A | #N/A |
| 2.00 | 0.82 | #N/A | #N/A | #N/A | #N/A | #N/A | #N/A | 1.57 | 0.65 | #N/A |
| #N/A | #N/A | 0.76 | 0.26 | 1.11 | 0.40 | 0.90 | 0.37 | 0.99 | 0.41 | 0.90 |
| 1.33 | 0.59 | 1.11 | 0.43 | 1.28 | 0.49 | 1.09 | 0.47 | 1.38 | 0.60 | 1.43 |
| 1.07 | 0.41 | #N/A | #N/A | #N/A | #N/A | #N/A | #N/A | #N/A | #N/A | 1.04 |
| #N/A | #N/A | #N/A | #N/A | #N/A | #N/A | #N/A | #N/A | #N/A | #N/A | #N/A |
| 1.76 | 0.76 | 3.03 | 0.92 | 2.83 | 0.89 | 2.90 | 0.95 | 2.35 | 0.88 | 1.97 |
| 1.39 | 0.62 | 1.53 | 0.58 | #N/A | #N/A | 1.39 | 0.61 | 1.39 | 0.61 | 1.12 |
| 1.46 | 0.61 | 1.67 | 0.64 | 1.73 | 0.66 | #N/A | #N/A | #N/A | #N/A | 1.20 |
| #N/A | #N/A | #N/A | #N/A | #N/A | #N/A | #N/A | #N/A | #N/A | #N/A | #N/A |
| 1.29 | 0.57 | 1.09 | 0.42 | 1.29 | 0.49 | 1.13 | 0.49 | 1.12 | 0.48 | 1.08 |
| #N/A | #N/A | #N/A | #N/A | #N/A | #N/A | #N/A | #N/A | #N/A | #N/A | #N/A |
| 2.12 | 0.85 | 3.16 | 0.93 | 2.76 | 0.89 | 2.76 | 0.94 | 3.01 | 0.95 | 2.70 |
| 2.07 | 0.85 | 2.44 | 0.83 | 3.14 | 0.92 | 3.16 | 0.91 | 3.39 | 0.98 | #N/A |
| 2.85 | 0.90 | 1.79 | 0.68 | 2.19 | 0.79 | 1.78 | 0.77 | 2.07 | 0.83 | #N/A |
| 2.74 | 0.81 | 2.47 | 0.84 | 2.35 | 0.83 | 1.94 | 0.79 | 2.47 | 0.88 | #N/A |
| 1.83 | 0.79 | 2.24 | 0.80 | 2.33 | 0.82 | 1.97 | 0.81 | 2.47 | 0.90 | 1.86 |
| #N/A | #N/A | #N/A | #N/A | #N/A | #N/A | #N/A | #N/A | #N/A | #N/A | #N/A |
| #N/A | #N/A | #N/A | #N/A | #N/A | #N/A | #N/A | #N/A | #N/A | #N/A | #N/A |
| 2.61 | 0.93 | 2.62 | 0.87 | #N/A | #N/A | #N/A | #N/A | 2.43 | 0.87 | 1.38 |
| #N/A | #N/A | #N/A | #N/A | #N/A | #N/A | #N/A | #N/A | 0.70 | 0.24 | #N/A |
| 1.83 | 0.78 | 2.38 | 0.83 | 2.41 | 0.84 | 2.47 | 0.91 | 2.76 | 0.94 | 1.99 |
| #N/A | #N/A | #N/A | #N/A | #N/A | #N/A | #N/A | #N/A | #N/A | #N/A | #N/A |
| 2.84 | 0.94 | 3.11 | 0.93 | 4.80 | 0.99 | 2.65 | 0.93 | 2.83 | 0.93 | 2.31 |
| 0.62 | 0.16 | 0.46 | 0.12 | 0.45 | 0.09 | 0.33 | 0.04 | 0.52 | 0.14 | 0.45 |
| 0.90 | 0.34 | 0.76 | 0.26 | 0.75 | 0.24 | 0.70 | 0.25 | 0.79 | 0.29 | 0.68 |
| 1.51 | 0.66 | 1.09 | 0.41 | 1.23 | 0.46 | 1.18 | 0.52 | 1.11 | 0.47 | 1.24 |
| 2.05 | 0.82 | 1.92 | 0.72 | 2.11 | 0.78 | 2.43 | 0.91 | 2.13 | 0.84 | 2.72 |
| 0.69 | 0.20 | 0.32 | 0.06 | 0.32 | 0.04 | 0.43 | 0.09 | 0.32 | 0.03 | 0.56 |





|      |      |      |      |      |      |      |      |      |      |      |
|------|------|------|------|------|------|------|------|------|------|------|
| 2.09 | 0.85 | 2.13 | 0.77 | 1.76 | 0.68 | 1.37 | 0.61 | 1.67 | 0.71 | 1.43 |
| 1.74 | 0.74 | 2.00 | 0.74 | 2.36 | 0.81 | 2.36 | 0.86 | 2.47 | 0.90 | #N/A |
| 3.28 | 0.97 | 3.20 | 0.94 | 2.91 | 0.91 | 3.20 | 0.97 | 3.20 | 0.96 | 2.60 |
| 0.83 | 0.29 | 1.01 | 0.38 | 0.78 | 0.25 | 1.06 | 0.46 | 0.82 | 0.31 | #N/A |
| 1.05 | 0.42 | 1.21 | 0.46 | 1.04 | 0.38 | 1.10 | 0.48 | 1.08 | 0.46 | 1.00 |
| 1.79 | 0.77 | 2.29 | 0.81 | 1.78 | 0.68 | 2.10 | 0.85 | 2.10 | 0.84 | 1.62 |
| 0.54 | 0.11 | 0.40 | 0.09 | 0.41 | 0.07 | 0.52 | 0.14 | 0.51 | 0.13 | 0.64 |
| #N/A | #N/A | #N/A | #N/A | #N/A | #N/A | #N/A | #N/A | #N/A | #N/A | #N/A |
| 0.43 | 0.06 | 0.79 | 0.28 | #N/A | #N/A | #N/A | #N/A | 0.68 | 0.23 | 0.67 |
| 0.57 | 0.17 | 0.34 | 0.06 | 0.45 | 0.09 | 0.41 | 0.08 | 0.41 | 0.07 | 0.56 |
| 1.26 | 0.55 | #N/A | #N/A | #N/A | #N/A | 1.85 | 0.79 | 1.70 | 0.72 | #N/A |
| 1.43 | 0.60 | 0.98 | 0.37 | #N/A | #N/A | 0.62 | 0.19 | 0.82 | 0.31 | 0.89 |
| #N/A | #N/A | #N/A | #N/A | #N/A | #N/A | #N/A | #N/A | #N/A | #N/A | #N/A |
| 0.63 | 0.16 | 0.62 | 0.20 | 0.58 | 0.17 | 0.63 | 0.20 | 0.58 | 0.17 | 0.65 |
| 0.56 | 0.13 | 0.60 | 0.19 | 0.51 | 0.12 | 0.51 | 0.13 | 0.44 | 0.09 | 0.53 |
| 0.77 | 0.26 | 0.51 | 0.14 | 0.36 | 0.05 | 0.43 | 0.09 | 0.60 | 0.18 | 0.58 |
| 1.08 | 0.45 | #N/A | #N/A | #N/A | #N/A | #N/A | #N/A | #N/A | #N/A | 1.60 |
| 0.45 | 0.07 | 0.75 | 0.26 | 0.59 | 0.16 | 0.50 | 0.13 | 0.63 | 0.20 | 0.61 |
| 1.78 | 0.77 | 2.05 | 0.74 | 1.68 | 0.65 | 1.49 | 0.66 | 1.28 | 0.56 | 1.55 |
| #N/A | #N/A | 2.10 | 0.77 | 1.95 | 0.74 | 2.04 | 0.83 | 1.96 | 0.80 | #N/A |
| 1.65 | 0.72 | 1.89 | 0.71 | 1.84 | 0.70 | 2.12 | 0.86 | 1.82 | 0.77 | 1.63 |
| 1.78 | 0.76 | 2.32 | 0.81 | 2.25 | 0.81 | 1.75 | 0.76 | 1.85 | 0.77 | 1.33 |
| #N/A | #N/A | #N/A | #N/A | #N/A | #N/A | #N/A | #N/A | #N/A | #N/A | #N/A |
| #N/A | #N/A | 0.76 | 0.27 | 0.91 | 0.31 | 0.66 | 0.22 | 0.61 | 0.19 | #N/A |
| 2.21 | 0.88 | 2.72 | 0.89 | 2.76 | 0.90 | 2.52 | 0.92 | #N/A | #N/A | 1.71 |
| 0.75 | 0.26 | 0.82 | 0.30 | 0.71 | 0.20 | 0.78 | 0.29 | 0.63 | 0.20 | 0.82 |
| #N/A | #N/A | #N/A | #N/A | #N/A | #N/A | #N/A | #N/A | #N/A | #N/A | #N/A |
| #N/A | #N/A | #N/A | #N/A | #N/A | #N/A | #N/A | #N/A | #N/A | #N/A | #N/A |
| 2.08 | 0.83 | 2.24 | 0.80 | 2.31 | 0.82 | 1.77 | 0.77 | 1.95 | 0.80 | 1.70 |
| #N/A | #N/A | #N/A | #N/A | #N/A | #N/A | #N/A | #N/A | #N/A | #N/A | 1.06 |
| 3.18 | 0.97 | 3.42 | 0.95 | 3.90 | 0.96 | 2.98 | 0.96 | 3.91 | 0.99 | 2.38 |
| #N/A | #N/A | #N/A | #N/A | #N/A | #N/A | #N/A | #N/A | #N/A | #N/A | #N/A |
| 0.64 | 0.17 | 0.51 | 0.15 | 0.65 | 0.19 | 0.48 | 0.12 | 0.50 | 0.12 | 0.54 |
| #N/A | #N/A | #N/A | #N/A | #N/A | #N/A | #N/A | #N/A | #N/A | #N/A | #N/A |
| #N/A | #N/A | #N/A | #N/A | #N/A | #N/A | #N/A | #N/A | #N/A | #N/A | #N/A |
| #N/A | #N/A | #N/A | #N/A | #N/A | #N/A | #N/A | #N/A | #N/A | #N/A | #N/A |
| #N/A | #N/A | #N/A | #N/A | #N/A | #N/A | #N/A | #N/A | #N/A | #N/A | #N/A |
| 2.50 | 0.91 | 3.57 | 0.96 | 4.11 | 0.97 | 3.02 | 0.96 | 3.64 | 0.97 | 2.20 |
| 1.87 | 0.78 | 2.07 | 0.76 | 1.36 | 0.52 | 1.38 | 0.61 | 1.86 | 0.78 | 1.60 |
| 0.84 | 0.29 | 1.07 | 0.41 | #N/A | #N/A | 0.67 | 0.22 | 0.56 | 0.16 | #N/A |
| 1.04 | 0.43 | 0.85 | 0.30 | 0.80 | 0.26 | 0.78 | 0.29 | 0.79 | 0.30 | 1.00 |
| #N/A | #N/A | #N/A | #N/A | #N/A | #N/A | #N/A | #N/A | #N/A | #N/A | #N/A |
| 0.20 | 0.01 | #N/A | #N/A | #N/A | #N/A | #N/A | #N/A | #N/A | #N/A | 0.28 |
| #N/A | #N/A | #N/A | #N/A | #N/A | #N/A | #N/A | #N/A | #N/A | #N/A | #N/A |
| #N/A | #N/A | 0.58 | 0.18 | #N/A | #N/A | 0.50 | 0.13 | 0.70 | 0.24 | 0.61 |
| #N/A | #N/A | #N/A | #N/A | #N/A | #N/A | #N/A | #N/A | 0.85 | 0.33 | #N/A |
| 2.33 | 0.87 | 2.60 | 0.86 | 3.12 | 0.91 | 2.68 | 0.92 | 2.32 | 0.88 | 2.19 |
| 0.76 | 0.25 | 0.66 | 0.21 | 0.84 | 0.28 | 0.83 | 0.32 | 0.93 | 0.38 | #N/A |
| #N/A | #N/A | #N/A | #N/A | #N/A | #N/A | #N/A | #N/A | #N/A | #N/A | #N/A |
| 2.36 | 0.89 | 2.23 | 0.80 | 3.09 | 0.92 | 2.39 | 0.90 | 2.42 | 0.88 | 1.89 |
| 2.21 | 0.84 | 3.71 | 0.97 | 3.23 | 0.94 | 3.14 | 0.97 | 2.97 | 0.96 | 2.58 |





|      |      |      |      |      |      |      |      |      |      |      |
|------|------|------|------|------|------|------|------|------|------|------|
| 1.10 | 0.46 | 1.36 | 0.53 | 1.57 | 0.61 | 1.19 | 0.52 | 1.18 | 0.51 | 1.21 |
| 1.48 | 0.66 | #N/A | #N/A | #N/A | #N/A | 2.28 | 0.87 | 1.66 | 0.71 | 1.46 |
| 2.00 | 0.69 | 1.89 | 0.70 | #N/A | #N/A | #N/A | #N/A | 3.29 | 0.95 | 1.04 |
| 0.82 | 0.29 | 0.94 | 0.35 | 0.82 | 0.27 | 0.73 | 0.26 | 0.97 | 0.40 | #N/A |
| 1.32 | 0.58 | 1.24 | 0.47 | #N/A | #N/A | 0.98 | 0.41 | 1.00 | 0.41 | 0.88 |
| 2.10 | 0.85 | 3.59 | 0.92 | 2.42 | 0.84 | #N/A | #N/A | 2.62 | 0.92 | #N/A |
| #N/A | #N/A | #N/A | #N/A | #N/A | #N/A | #N/A | #N/A | #N/A | #N/A | #N/A |
| #N/A | #N/A | #N/A | #N/A | #N/A | #N/A | #N/A | #N/A | #N/A | #N/A | #N/A |
| #N/A | #N/A | #N/A | #N/A | #N/A | #N/A | #N/A | #N/A | #N/A | #N/A | #N/A |
| 3.42 | 0.97 | 4.42 | 0.99 | 4.28 | 0.98 | 2.95 | 0.96 | #N/A | #N/A | #N/A |
| 1.84 | 0.78 | 3.16 | 0.94 | 2.95 | 0.91 | 2.40 | 0.91 | 2.21 | 0.85 | 1.49 |
| #N/A | #N/A | #N/A | #N/A | #N/A | #N/A | #N/A | #N/A | #N/A | #N/A | #N/A |
| 2.53 | 0.89 | #N/A | #N/A | #N/A | #N/A | #N/A | #N/A | #N/A | #N/A | 2.69 |
| #N/A | #N/A | #N/A | #N/A | #N/A | #N/A | #N/A | #N/A | #N/A | #N/A | #N/A |
| 2.33 | 0.86 | 1.89 | 0.71 | 2.18 | 0.79 | 1.78 | 0.77 | 1.87 | 0.77 | 1.60 |
| 1.20 | 0.52 | 1.99 | 0.73 | 1.35 | 0.52 | 1.84 | 0.79 | 1.77 | 0.75 | 1.41 |
| 1.60 | 0.69 | 1.80 | 0.68 | 1.96 | 0.74 | 1.42 | 0.63 | 1.87 | 0.78 | 1.22 |
| #N/A | #N/A | #N/A | #N/A | #N/A | #N/A | #N/A | #N/A | #N/A | #N/A | #N/A |
| 0.43 | 0.06 | 0.46 | 0.12 | 0.39 | 0.06 | 0.54 | 0.15 | 0.43 | 0.09 | 0.37 |
| 1.15 | 0.49 | #N/A | #N/A | #N/A | #N/A | #N/A | #N/A | #N/A | #N/A | #N/A |
| 2.06 | 0.71 | 2.70 | 0.88 | 3.26 | 0.92 | 2.13 | 0.85 | 1.95 | 0.80 | #N/A |
| 1.42 | 0.63 | 1.65 | 0.63 | 1.72 | 0.65 | 1.40 | 0.62 | 1.59 | 0.69 | 1.07 |
| #N/A | #N/A | #N/A | #N/A | #N/A | #N/A | #N/A | #N/A | #N/A | #N/A | 0.83 |
| 0.70 | 0.22 | 1.89 | 0.69 | #N/A | #N/A | #N/A | #N/A | #N/A | #N/A | 0.89 |
| #N/A | #N/A | #N/A | #N/A | #N/A | #N/A | #N/A | #N/A | #N/A | #N/A | #N/A |
| 1.32 | 0.57 | 1.22 | 0.46 | 1.11 | 0.41 | 1.17 | 0.52 | 1.25 | 0.54 | 1.07 |
| 2.14 | 0.86 | 1.88 | 0.71 | 2.04 | 0.76 | 1.99 | 0.83 | 2.01 | 0.82 | 1.68 |
| 1.67 | 0.73 | 1.71 | 0.65 | 1.76 | 0.68 | 1.57 | 0.69 | 1.87 | 0.77 | 1.65 |
| 1.17 | 0.50 | 0.86 | 0.31 | 0.85 | 0.29 | 0.78 | 0.29 | 0.97 | 0.40 | 0.88 |
| 1.09 | 0.45 | 1.10 | 0.42 | 1.01 | 0.37 | 1.23 | 0.55 | 0.97 | 0.39 | 0.95 |
| #N/A | #N/A | #N/A | #N/A | #N/A | #N/A | #N/A | #N/A | #N/A | #N/A | #N/A |
| 3.58 | 0.98 | 5.10 | 0.98 | 3.67 | 0.96 | 3.30 | 0.98 | 4.20 | 0.99 | 2.34 |
| 2.75 | 0.94 | 3.13 | 0.93 | 3.53 | 0.96 | #N/A | #N/A | 2.82 | 0.93 | 2.08 |
| 0.73 | 0.22 | 0.42 | 0.10 | #N/A | #N/A | 0.42 | 0.08 | 0.40 | 0.07 | 0.52 |
| #N/A | #N/A | 3.21 | 0.92 | 3.70 | 0.96 | 2.61 | 0.89 | 2.87 | 0.95 | 2.15 |
| #N/A | #N/A | #N/A | #N/A | #N/A | #N/A | #N/A | #N/A | #N/A | #N/A | #N/A |
| 2.58 | 0.87 | 4.67 | 0.98 | 2.67 | 0.86 | 2.91 | 0.95 | 2.57 | 0.91 | 1.85 |
| #N/A | #N/A | #N/A | #N/A | #N/A | #N/A | #N/A | #N/A | #N/A | #N/A | #N/A |
| 0.83 | 0.29 | 0.67 | 0.22 | 0.75 | 0.23 | 0.66 | 0.22 | 0.72 | 0.26 | 1.01 |
| 1.14 | 0.49 | 0.74 | 0.26 | 0.63 | 0.18 | 0.94 | 0.39 | 0.95 | 0.38 | 0.69 |
| 4.48 | 0.91 | #N/A | #N/A | #N/A | #N/A | 2.57 | 0.92 | 2.60 | 0.92 | 1.56 |
| 0.74 | 0.23 | 1.49 | 0.57 | 1.55 | 0.60 | 1.37 | 0.60 | 1.91 | 0.74 | 1.17 |
| 1.22 | 0.52 | 1.50 | 0.57 | #N/A | #N/A | 1.68 | 0.74 | 2.07 | 0.83 | #N/A |
| #N/A | #N/A | #N/A | #N/A | #N/A | #N/A | #N/A | #N/A | #N/A | #N/A | #N/A |
| 1.06 | 0.44 | 0.81 | 0.29 | 0.91 | 0.32 | 0.81 | 0.31 | 0.85 | 0.33 | 0.84 |
| 1.59 | 0.70 | 1.56 | 0.60 | 1.62 | 0.63 | 1.61 | 0.70 | 1.61 | 0.69 | 1.43 |
| 1.98 | 0.83 | 1.84 | 0.69 | 1.98 | 0.75 | 1.82 | 0.78 | 2.01 | 0.82 | 1.56 |
| 2.32 | 0.89 | 3.11 | 0.92 | 2.64 | 0.87 | 3.11 | 0.97 | 2.63 | 0.92 | 2.22 |
| #N/A | #N/A | #N/A | #N/A | #N/A | #N/A | #N/A | #N/A | #N/A | #N/A | #N/A |
| #N/A | #N/A | #N/A | #N/A | #N/A | #N/A | #N/A | #N/A | #N/A | #N/A | #N/A |
| #N/A | #N/A | 2.80 | 0.90 | 2.91 | 0.91 | 2.42 | 0.88 | 2.83 | 0.94 | 2.28 |



|      |      |      |      |      |      |      |      |      |      |      |
|------|------|------|------|------|------|------|------|------|------|------|
| #N/A | #N/A | #N/A | #N/A | #N/A | #N/A | #N/A | #N/A | #N/A | #N/A | #N/A |
| #N/A | #N/A | #N/A | #N/A | #N/A | #N/A | #N/A | #N/A | #N/A | #N/A | 1.08 |
| #N/A | #N/A | #N/A | #N/A | #N/A | #N/A | #N/A | #N/A | 2.50 | 0.91 | 1.64 |
| 0.78 | 0.25 | 0.45 | 0.11 | #N/A | #N/A | #N/A | #N/A | 0.68 | 0.23 | 0.94 |
| 0.31 | 0.03 | 0.19 | 0.01 | 0.30 | 0.03 | 0.23 | 0.02 | 0.34 | 0.04 | 0.34 |
| #N/A | #N/A | #N/A | #N/A | #N/A | #N/A | #N/A | #N/A | #N/A | #N/A | #N/A |
| 0.48 | 0.10 | 0.39 | 0.09 | #N/A | #N/A | 0.51 | 0.13 | 0.33 | 0.04 | 0.48 |
| 1.12 | 0.45 | #N/A | #N/A | #N/A | #N/A | 1.17 | 0.52 | 0.69 | 0.23 | 0.60 |
| 1.21 | 0.52 | 1.93 | 0.71 | 1.69 | 0.65 | 1.38 | 0.62 | 1.56 | 0.68 | 1.04 |
| 1.05 | 0.44 | 2.50 | 0.84 | 1.76 | 0.66 | 1.26 | 0.56 | 1.49 | 0.65 | 1.44 |
| 0.87 | 0.32 | 1.20 | 0.47 | 0.82 | 0.28 | 0.74 | 0.26 | 1.07 | 0.44 | 1.15 |
| 2.03 | 0.83 | 2.95 | 0.91 | 2.55 | 0.86 | 2.29 | 0.85 | 2.13 | 0.85 | 2.50 |
| 1.13 | 0.47 | 1.15 | 0.44 | 1.39 | 0.54 | 1.07 | 0.46 | 1.10 | 0.47 | 1.11 |
| 1.34 | 0.59 | 1.65 | 0.63 | 1.53 | 0.60 | 1.30 | 0.58 | 1.36 | 0.59 | 1.42 |
| 1.32 | 0.54 | 1.57 | 0.60 | 1.15 | 0.43 | 1.07 | 0.47 | 1.05 | 0.44 | 1.37 |
| 1.42 | 0.63 | 1.70 | 0.65 | 1.46 | 0.57 | 0.97 | 0.40 | 1.29 | 0.56 | 1.36 |
| 0.64 | 0.17 | 0.68 | 0.22 | 0.79 | 0.26 | 0.63 | 0.20 | 0.80 | 0.30 | 0.72 |
| #N/A | #N/A | #N/A | #N/A | #N/A | #N/A | #N/A | #N/A | #N/A | #N/A | #N/A |
| 2.25 | 0.88 | 3.23 | 0.94 | 2.92 | 0.91 | 2.86 | 0.95 | 2.75 | 0.94 | 1.56 |
| 0.73 | 0.22 | 0.89 | 0.33 | 1.08 | 0.40 | 0.93 | 0.39 | 0.81 | 0.31 | 0.80 |
| 0.65 | 0.18 | 0.61 | 0.19 | 0.66 | 0.19 | 0.71 | 0.25 | 0.68 | 0.23 | 0.75 |
| 1.69 | 0.74 | 2.04 | 0.74 | 1.94 | 0.74 | 1.73 | 0.75 | 2.10 | 0.84 | 1.16 |
| 1.49 | 0.66 | 1.78 | 0.67 | 1.66 | 0.64 | 1.50 | 0.67 | 1.67 | 0.71 | 1.41 |
| 1.40 | 0.62 | 2.35 | 0.82 | 2.20 | 0.78 | 1.73 | 0.76 | 1.66 | 0.71 | 1.48 |
| 1.29 | 0.57 | 1.06 | 0.40 | 1.00 | 0.36 | 1.05 | 0.45 | 0.87 | 0.34 | 1.43 |
| 0.65 | 0.17 | 0.42 | 0.11 | 0.42 | 0.07 | 0.43 | 0.08 | 0.39 | 0.06 | 0.58 |
| 0.92 | 0.35 | 0.76 | 0.26 | 0.83 | 0.28 | 0.67 | 0.22 | 0.76 | 0.28 | 1.16 |
| 1.24 | 0.51 | 1.62 | 0.62 | 2.58 | 0.86 | 1.22 | 0.54 | 1.06 | 0.45 | 1.32 |
| #N/A | #N/A | #N/A | #N/A | #N/A | #N/A | #N/A | #N/A | #N/A | #N/A | #N/A |
| 1.42 | 0.63 | 1.34 | 0.52 | 1.38 | 0.54 | 1.31 | 0.59 | 1.08 | 0.46 | 1.22 |
| 0.79 | 0.29 | 1.03 | 0.39 | 1.13 | 0.42 | 0.67 | 0.22 | 0.84 | 0.32 | 1.06 |
| #N/A | #N/A | #N/A | #N/A | #N/A | #N/A | #N/A | #N/A | #N/A | #N/A | #N/A |
| 1.73 | 0.75 | 1.85 | 0.70 | 1.39 | 0.54 | 1.68 | 0.74 | 1.48 | 0.65 | 1.48 |
| #N/A | #N/A | 0.74 | 0.26 | #N/A | #N/A | 0.67 | 0.23 | 0.79 | 0.29 | 0.68 |
| 2.25 | 0.88 | 2.92 | 0.91 | 2.41 | 0.83 | 2.51 | 0.91 | 2.63 | 0.92 | 2.12 |
| 0.39 | 0.04 | 0.26 | 0.03 | 0.41 | 0.07 | 0.36 | 0.05 | 0.44 | 0.09 | 0.31 |
| #N/A | #N/A | #N/A | #N/A | #N/A | #N/A | #N/A | #N/A | #N/A | #N/A | 0.77 |
| #N/A | #N/A | #N/A | #N/A | #N/A | #N/A | #N/A | #N/A | #N/A | #N/A | #N/A |
| 0.57 | 0.13 | 0.52 | 0.15 | 0.41 | 0.07 | 0.41 | 0.08 | 0.53 | 0.14 | 0.51 |
| 0.64 | 0.18 | #N/A | #N/A | #N/A | #N/A | #N/A | #N/A | 0.75 | 0.27 | 0.65 |
| 1.65 | 0.72 | 2.09 | 0.76 | 2.34 | 0.83 | 1.68 | 0.74 | 2.32 | 0.88 | 1.82 |
| #N/A | #N/A | #N/A | #N/A | #N/A | #N/A | #N/A | #N/A | #N/A | #N/A | #N/A |
| #N/A | #N/A | #N/A | #N/A | #N/A | #N/A | #N/A | #N/A | #N/A | #N/A | #N/A |
| 3.68 | 0.97 | 3.35 | 0.95 | 2.77 | 0.90 | 3.07 | 0.97 | 2.94 | 0.95 | 2.48 |
| 1.48 | 0.65 | 1.97 | 0.73 | 1.68 | 0.65 | 1.76 | 0.76 | 1.72 | 0.73 | 1.46 |
| #N/A | #N/A | #N/A | #N/A | #N/A | #N/A | #N/A | #N/A | #N/A | #N/A | 0.46 |
| 1.14 | 0.47 | 1.52 | 0.58 | 1.54 | 0.60 | 1.44 | 0.64 | 1.27 | 0.56 | 1.05 |
| #N/A | #N/A | #N/A | #N/A | #N/A | #N/A | #N/A | #N/A | 0.98 | 0.40 | #N/A |
| #N/A | #N/A | #N/A | #N/A | #N/A | #N/A | #N/A | #N/A | #N/A | #N/A | #N/A |
| 3.96 | 0.99 | 3.81 | 0.97 | 3.70 | 0.97 | 3.84 | 0.99 | 3.37 | 0.98 | 3.09 |
| 2.60 | 0.93 | 2.97 | 0.92 | 2.91 | 0.90 | 2.63 | 0.93 | 2.52 | 0.91 | 2.11 |

|      |      |      |      |      |      |      |      |      |      |      |
|------|------|------|------|------|------|------|------|------|------|------|
| #N/A | #N/A | #N/A | #N/A | #N/A | #N/A | #N/A | #N/A | #N/A | #N/A | #N/A |
| #N/A | #N/A | #N/A | #N/A | #N/A | #N/A | #N/A | #N/A | #N/A | #N/A | #N/A |
| 0.67 | 0.19 | #N/A | #N/A | #N/A | #N/A | 0.72 | 0.26 | 0.75 | 0.27 | 0.46 |
| 1.88 | 0.80 | 2.44 | 0.84 | 2.35 | 0.82 | 2.06 | 0.84 | 2.41 | 0.90 | 1.71 |
| #N/A | #N/A | #N/A | #N/A | #N/A | #N/A | #N/A | #N/A | #N/A | #N/A | #N/A |
| 1.13 | 0.47 | 1.17 | 0.45 | 1.16 | 0.43 | 0.77 | 0.28 | 0.82 | 0.31 | 0.95 |
| 1.12 | 0.47 | 1.10 | 0.41 | 1.70 | 0.61 | 0.76 | 0.28 | 0.97 | 0.40 | #N/A |
| #N/A | #N/A | #N/A | #N/A | #N/A | #N/A | #N/A | #N/A | 1.64 | 0.70 | 1.20 |
| 0.76 | 0.25 | 0.93 | 0.34 | 0.99 | 0.36 | 0.86 | 0.34 | 0.96 | 0.39 | 0.66 |
| 0.60 | 0.15 | 0.33 | 0.06 | 0.38 | 0.06 | 0.53 | 0.14 | 0.46 | 0.10 | 0.51 |
| 1.73 | 0.75 | 1.61 | 0.62 | 1.41 | 0.54 | 1.23 | 0.54 | 1.19 | 0.52 | 1.27 |
| 1.04 | 0.40 | 1.43 | 0.56 | 0.96 | 0.35 | 1.18 | 0.51 | 1.19 | 0.51 | 1.45 |
| 1.89 | 0.78 | 2.48 | 0.85 | 2.46 | 0.83 | 1.26 | 0.56 | 2.71 | 0.90 | 1.56 |
| 1.86 | 0.78 | 1.84 | 0.68 | 1.84 | 0.70 | 1.36 | 0.61 | 1.38 | 0.60 | 1.65 |
| 0.91 | 0.35 | 0.87 | 0.32 | 1.25 | 0.47 | 0.59 | 0.18 | 0.61 | 0.19 | 0.84 |
| 0.83 | 0.29 | 0.45 | 0.13 | 0.73 | 0.23 | 0.68 | 0.23 | 0.76 | 0.27 | 0.96 |
| 1.17 | 0.50 | 1.43 | 0.55 | 1.76 | 0.68 | 1.16 | 0.50 | 1.18 | 0.51 | 1.24 |
| #N/A | #N/A | #N/A | #N/A | #N/A | #N/A | #N/A | #N/A | #N/A | #N/A | #N/A |
| 1.70 | 0.73 | #N/A | #N/A | 1.94 | 0.73 | 1.31 | 0.59 | 1.62 | 0.70 | 1.69 |
| 1.29 | 0.56 | 1.02 | 0.39 | 0.98 | 0.35 | 1.04 | 0.44 | 1.15 | 0.49 | 0.93 |
| 0.94 | 0.37 | #N/A | #N/A | #N/A | #N/A | 0.53 | 0.14 | 0.54 | 0.15 | #N/A |
| 0.28 | 0.02 | 0.21 | 0.02 | 0.26 | 0.02 | 0.22 | 0.01 | 0.26 | 0.02 | 0.32 |
| 2.36 | 0.90 | 2.42 | 0.84 | 2.61 | 0.85 | 1.89 | 0.77 | 2.28 | 0.87 | 1.72 |
| #N/A | #N/A | #N/A | #N/A | #N/A | #N/A | #N/A | #N/A | #N/A | #N/A | #N/A |
| #N/A | #N/A | 2.76 | 0.89 | 2.47 | 0.84 | 1.91 | 0.80 | 2.17 | 0.83 | 1.78 |
| 1.61 | 0.71 | 1.82 | 0.69 | 1.64 | 0.64 | 1.84 | 0.79 | 1.55 | 0.67 | 1.45 |
| 0.91 | 0.34 | 0.85 | 0.31 | 1.03 | 0.38 | 0.84 | 0.33 | 0.75 | 0.27 | 0.87 |
| #N/A | #N/A | 0.66 | 0.21 | 0.71 | 0.22 | 0.67 | 0.23 | 0.76 | 0.27 | #N/A |
| 0.56 | 0.13 | 0.41 | 0.10 | 0.56 | 0.14 | 0.63 | 0.20 | 0.91 | 0.36 | 0.46 |
| 1.02 | 0.41 | #N/A | #N/A | #N/A | #N/A | #N/A | #N/A | 0.91 | 0.35 | 0.98 |
| 1.08 | 0.43 | 0.81 | 0.28 | #N/A | #N/A | #N/A | #N/A | 0.47 | 0.11 | 0.68 |
| 0.73 | 0.24 | 0.54 | 0.16 | #N/A | #N/A | #N/A | #N/A | 0.49 | 0.12 | 0.68 |
| 0.41 | 0.05 | #N/A | #N/A | #N/A | #N/A | #N/A | #N/A | 0.60 | 0.18 | 0.67 |
| 1.76 | 0.76 | 1.99 | 0.74 | 2.01 | 0.75 | 1.57 | 0.69 | 1.44 | 0.62 | #N/A |
| #N/A | #N/A | #N/A | #N/A | #N/A | #N/A | #N/A | #N/A | #N/A | #N/A | #N/A |
| 2.02 | 0.80 | 2.54 | 0.86 | 2.55 | 0.86 | 1.65 | 0.73 | 2.23 | 0.86 | 1.73 |
| 0.42 | 0.06 | 0.33 | 0.06 | 0.42 | 0.07 | 0.53 | 0.14 | 0.51 | 0.13 | 0.31 |
| #N/A | #N/A | #N/A | #N/A | #N/A | #N/A | #N/A | #N/A | #N/A | #N/A | #N/A |
| 1.19 | 0.51 | 0.76 | 0.26 | 0.76 | 0.24 | 0.60 | 0.18 | 0.56 | 0.16 | 1.10 |
| 0.71 | 0.22 | 0.75 | 0.26 | 0.65 | 0.20 | 0.60 | 0.19 | 0.72 | 0.25 | 0.71 |
| 0.50 | 0.11 | 0.29 | 0.04 | 0.29 | 0.03 | 0.18 | 0.01 | 0.29 | 0.03 | 0.37 |
| 0.87 | 0.31 | 0.71 | 0.24 | 0.55 | 0.14 | 0.67 | 0.23 | 0.58 | 0.17 | #N/A |
| 1.47 | 0.64 | 1.45 | 0.56 | 1.40 | 0.54 | 1.43 | 0.63 | 1.33 | 0.57 | 1.27 |
| 0.93 | 0.36 | 1.04 | 0.40 | 0.84 | 0.27 | 0.79 | 0.30 | 0.67 | 0.22 | 0.93 |
| #N/A | #N/A | #N/A | #N/A | #N/A | #N/A | #N/A | #N/A | 0.69 | 0.24 | 0.53 |
| 1.31 | 0.57 | 1.53 | 0.59 | 1.33 | 0.51 | 1.19 | 0.53 | 1.30 | 0.57 | 0.94 |
| #N/A | #N/A | 1.65 | 0.62 | 0.99 | 0.36 | 1.16 | 0.51 | 1.15 | 0.49 | 1.07 |
| 0.77 | 0.27 | 0.38 | 0.08 | #N/A | #N/A | 0.41 | 0.07 | 0.43 | 0.08 | 0.46 |
| 0.93 | 0.34 | 0.55 | 0.16 | 0.74 | 0.22 | 0.49 | 0.11 | 0.60 | 0.18 | 0.63 |
| 3.22 | 0.95 | 3.67 | 0.96 | 2.70 | 0.88 | 2.99 | 0.96 | 2.86 | 0.94 | 2.15 |
| 1.87 | 0.78 | 3.15 | 0.92 | 3.12 | 0.93 | 2.32 | 0.89 | 2.15 | 0.84 | 1.79 |

|      |      |      |      |      |      |      |      |      |      |      |
|------|------|------|------|------|------|------|------|------|------|------|
| 3.48 | 0.94 | 2.53 | 0.86 | 2.74 | 0.89 | 1.97 | 0.82 | 1.75 | 0.73 | 1.61 |
| #N/A | #N/A | #N/A | #N/A | #N/A | #N/A | #N/A | #N/A | #N/A | #N/A | #N/A |
| 1.75 | 0.76 | 2.40 | 0.82 | 3.24 | 0.94 | 2.48 | 0.91 | 2.16 | 0.85 | #N/A |
| #N/A | #N/A | 3.14 | 0.93 | 2.09 | 0.76 | 2.89 | 0.95 | 2.02 | 0.82 | 1.66 |
| 1.32 | 0.57 | 1.32 | 0.51 | 1.48 | 0.57 | 1.20 | 0.53 | 1.61 | 0.68 | 1.36 |
| 1.26 | 0.56 | 0.86 | 0.31 | 1.23 | 0.46 | 1.38 | 0.61 | 0.99 | 0.40 | 0.82 |
| #N/A | #N/A | #N/A | #N/A | #N/A | #N/A | #N/A | #N/A | #N/A | #N/A | #N/A |
| 1.06 | 0.44 | 0.59 | 0.18 | 0.53 | 0.13 | 0.69 | 0.24 | 0.67 | 0.22 | 0.66 |
| 1.38 | 0.61 | 0.92 | 0.34 | 0.94 | 0.32 | 0.82 | 0.32 | 1.10 | 0.46 | 0.77 |
| 1.34 | 0.57 | 1.79 | 0.68 | 1.79 | 0.69 | 1.51 | 0.67 | 1.71 | 0.73 | 1.27 |
| 0.95 | 0.36 | #N/A | #N/A | #N/A | #N/A | #N/A | #N/A | #N/A | #N/A | #N/A |
| #N/A | #N/A | 2.79 | 0.90 | 1.96 | 0.72 | 2.19 | 0.87 | 1.65 | 0.70 | 1.28 |
| #N/A | #N/A | #N/A | #N/A | #N/A | #N/A | 1.36 | 0.57 | 2.12 | 0.83 | 0.61 |
| 1.56 | 0.68 | 1.47 | 0.57 | 1.51 | 0.57 | 1.44 | 0.64 | 1.35 | 0.59 | 1.11 |
| 1.85 | 0.79 | 1.95 | 0.72 | 1.79 | 0.69 | 1.75 | 0.76 | 2.65 | 0.93 | 1.63 |
| 1.30 | 0.57 | 1.26 | 0.49 | 0.93 | 0.32 | 0.91 | 0.37 | 0.83 | 0.32 | #N/A |
| 0.97 | 0.37 | 0.88 | 0.32 | 1.09 | 0.40 | 1.05 | 0.46 | 0.92 | 0.37 | 0.61 |
| 1.20 | 0.52 | 1.21 | 0.46 | 1.19 | 0.43 | 0.87 | 0.35 | 1.10 | 0.47 | 1.10 |
| 1.10 | 0.46 | 1.36 | 0.53 | 1.34 | 0.51 | 1.25 | 0.56 | 1.28 | 0.55 | 1.08 |
| 0.22 | 0.01 | 0.14 | 0.01 | 0.20 | 0.01 | 0.17 | 0.00 | 0.22 | 0.01 | 0.27 |
| 0.69 | 0.20 | 0.30 | 0.05 | 0.42 | 0.08 | 0.37 | 0.06 | 0.35 | 0.05 | 0.50 |
| 0.29 | 0.02 | 0.24 | 0.02 | 0.23 | 0.01 | 0.20 | 0.01 | 0.21 | 0.01 | 0.33 |
| 0.75 | 0.23 | 0.64 | 0.21 | 0.76 | 0.24 | #N/A | #N/A | 0.58 | 0.17 | 0.74 |
| 1.63 | 0.72 | 4.07 | 0.97 | 2.34 | 0.82 | 2.20 | 0.87 | 2.65 | 0.92 | 2.51 |
| #N/A | #N/A | 1.52 | 0.58 | #N/A | #N/A | 1.28 | 0.55 | 1.28 | 0.55 | 1.05 |
| 0.57 | 0.13 | #N/A | #N/A | #N/A | #N/A | #N/A | #N/A | 0.27 | 0.02 | 0.46 |
| 1.21 | 0.50 | 0.98 | 0.37 | 1.04 | 0.37 | 0.81 | 0.31 | 0.90 | 0.35 | 1.04 |
| 0.64 | 0.17 | 0.64 | 0.20 | 0.56 | 0.14 | 0.51 | 0.14 | 0.47 | 0.11 | #N/A |
| 0.40 | 0.05 | 0.37 | 0.08 | 0.43 | 0.08 | 0.33 | 0.05 | 0.36 | 0.05 | 0.44 |
| 1.34 | 0.58 | 1.75 | 0.66 | 1.72 | 0.67 | 1.59 | 0.69 | 1.37 | 0.59 | #N/A |
| 1.01 | 0.40 | #N/A | #N/A | #N/A | #N/A | #N/A | #N/A | 0.36 | 0.05 | 0.46 |
| 1.72 | 0.75 | 2.51 | 0.86 | 2.44 | 0.85 | 1.93 | 0.80 | 1.91 | 0.77 | 1.49 |
| #N/A | #N/A | 0.63 | 0.20 | 0.62 | 0.17 | 0.72 | 0.26 | 0.77 | 0.28 | #N/A |
| 1.19 | 0.50 | 0.98 | 0.36 | #N/A | #N/A | 1.11 | 0.49 | 1.00 | 0.39 | #N/A |
| 0.34 | 0.03 | 0.34 | 0.06 | 0.32 | 0.04 | 0.31 | 0.04 | 0.30 | 0.03 | 0.46 |
| 0.27 | 0.02 | 0.17 | 0.01 | 0.23 | 0.01 | 0.19 | 0.01 | 0.23 | 0.01 | 0.23 |
| #N/A | #N/A | #N/A | #N/A | #N/A | #N/A | #N/A | #N/A | #N/A | #N/A | #N/A |
| 1.27 | 0.56 | 0.91 | 0.34 | 0.96 | 0.34 | 0.95 | 0.39 | 1.03 | 0.43 | 0.88 |
| 0.99 | 0.38 | 1.62 | 0.62 | 1.56 | 0.61 | 1.63 | 0.72 | 1.27 | 0.55 | 1.51 |
| #N/A | #N/A | #N/A | #N/A | #N/A | #N/A | #N/A | #N/A | #N/A | #N/A | #N/A |
| #N/A | #N/A | 0.40 | 0.09 | #N/A | #N/A | 0.60 | 0.18 | 0.55 | 0.16 | 0.59 |
| #N/A | #N/A | #N/A | #N/A | #N/A | #N/A | #N/A | #N/A | #N/A | #N/A | #N/A |
| 1.05 | 0.44 | 0.80 | 0.28 | 0.85 | 0.28 | 0.77 | 0.28 | 0.74 | 0.26 | 0.72 |
| 1.36 | 0.59 | 1.51 | 0.58 | 1.67 | 0.65 | 1.16 | 0.51 | 1.53 | 0.64 | 1.17 |
| #N/A | #N/A | 1.06 | 0.40 | 1.25 | 0.47 | 0.92 | 0.37 | 1.12 | 0.48 | 0.93 |
| 1.15 | 0.49 | 1.93 | 0.72 | 1.54 | 0.60 | 1.14 | 0.49 | 1.45 | 0.63 | #N/A |
| 0.92 | 0.35 | 1.18 | 0.45 | 0.88 | 0.29 | 0.93 | 0.39 | 1.41 | 0.61 | 0.88 |
| 1.65 | 0.72 | 1.62 | 0.62 | #N/A | #N/A | #N/A | #N/A | #N/A | #N/A | 1.20 |
| 1.81 | 0.76 | 2.58 | 0.87 | 2.75 | 0.89 | 1.93 | 0.72 | 2.61 | 0.85 | 2.60 |
| 2.05 | 0.84 | 2.04 | 0.75 | 2.21 | 0.77 | 1.20 | 0.53 | 1.11 | 0.47 | 1.22 |
| 1.21 | 0.53 | 2.92 | 0.91 | #N/A | #N/A | #N/A | #N/A | 2.14 | 0.84 | 1.53 |



|      |      |      |      |      |      |      |      |      |      |      |
|------|------|------|------|------|------|------|------|------|------|------|
| #N/A | #N/A | 2.69 | 0.89 | 3.00 | 0.88 | 1.71 | 0.73 | 2.19 | 0.85 | 1.81 |
| #N/A | #N/A | #N/A | #N/A | #N/A | #N/A | #N/A | #N/A | #N/A | #N/A | #N/A |
| 2.98 | 0.90 | #N/A | #N/A | #N/A | #N/A | #N/A | #N/A | 1.30 | 0.56 | 1.30 |
| 1.62 | 0.70 | 1.38 | 0.54 | 1.43 | 0.55 | 1.85 | 0.78 | 1.38 | 0.60 | 1.16 |
| 4.85 | 0.64 | 1.34 | 0.51 | #N/A | #N/A | #N/A | #N/A | 0.76 | 0.28 | 1.01 |
| 1.61 | 0.70 | 1.48 | 0.57 | 1.35 | 0.52 | 1.30 | 0.58 | 1.16 | 0.50 | 1.23 |
| 1.12 | 0.47 | 1.00 | 0.38 | 0.99 | 0.34 | 0.89 | 0.36 | 1.25 | 0.53 | 1.15 |
| 0.78 | 0.25 | 0.66 | 0.21 | 1.21 | 0.46 | 0.91 | 0.37 | 0.96 | 0.39 | 0.76 |
| 2.49 | 0.88 | 3.83 | 0.94 | 3.93 | 0.94 | 1.54 | 0.68 | 2.57 | 0.91 | 3.17 |
| #N/A | #N/A | #N/A | #N/A | #N/A | #N/A | #N/A | #N/A | #N/A | #N/A | #N/A |
| 1.86 | 0.78 | 1.30 | 0.50 | 1.26 | 0.48 | 1.45 | 0.65 | 1.20 | 0.51 | 1.20 |
| 1.53 | 0.68 | 1.72 | 0.65 | 1.74 | 0.67 | 1.13 | 0.49 | 1.17 | 0.50 | 1.47 |
| #N/A | #N/A | #N/A | #N/A | #N/A | #N/A | #N/A | #N/A | #N/A | #N/A | #N/A |
| #N/A | #N/A | #N/A | #N/A | #N/A | #N/A | #N/A | #N/A | #N/A | #N/A | #N/A |
| 0.86 | 0.31 | 1.17 | 0.45 | 1.47 | 0.56 | 1.28 | 0.57 | 1.36 | 0.59 | 1.23 |
| #N/A | #N/A | 0.22 | 0.02 | #N/A | #N/A | #N/A | #N/A | 0.47 | 0.11 | 0.34 |
| #N/A | #N/A | #N/A | #N/A | #N/A | #N/A | #N/A | #N/A | #N/A | #N/A | #N/A |
| #N/A | #N/A | 3.40 | 0.95 | 2.82 | 0.89 | #N/A | #N/A | 2.58 | 0.91 | 1.88 |
| #N/A | #N/A | #N/A | #N/A | #N/A | #N/A | #N/A | #N/A | #N/A | #N/A | #N/A |
| 0.49 | 0.08 | 0.74 | 0.25 | 0.78 | 0.23 | 0.35 | 0.05 | 0.51 | 0.13 | 0.65 |
| 1.22 | 0.53 | 1.89 | 0.69 | 2.00 | 0.75 | 1.53 | 0.68 | 1.78 | 0.74 | #N/A |
| 2.45 | 0.91 | 2.38 | 0.83 | 4.06 | 0.98 | 2.21 | 0.87 | 2.30 | 0.88 | 3.14 |
| 1.49 | 0.65 | 1.27 | 0.49 | #N/A | #N/A | 1.17 | 0.51 | 1.41 | 0.61 | 1.15 |
| 0.86 | 0.31 | 0.67 | 0.22 | 0.65 | 0.19 | 0.51 | 0.13 | 0.60 | 0.18 | 0.63 |
| 1.38 | 0.61 | 1.47 | 0.57 | 1.03 | 0.38 | 1.01 | 0.43 | 0.95 | 0.39 | 1.22 |
| 1.48 | 0.65 | 2.30 | 0.81 | 2.70 | 0.87 | 1.60 | 0.70 | 2.07 | 0.83 | 1.51 |
| 0.67 | 0.20 | 0.95 | 0.34 | 0.94 | 0.34 | 0.78 | 0.29 | 0.54 | 0.15 | 0.62 |
| 1.16 | 0.50 | 1.23 | 0.48 | 1.14 | 0.43 | 1.12 | 0.49 | 1.02 | 0.43 | 1.08 |
| 0.72 | 0.23 | 0.75 | 0.26 | 0.65 | 0.18 | 0.57 | 0.16 | 0.82 | 0.31 | 0.67 |
| 0.82 | 0.30 | 0.72 | 0.24 | 0.54 | 0.13 | 0.56 | 0.16 | 0.77 | 0.28 | 0.74 |
| 0.77 | 0.26 | #N/A | #N/A | #N/A | #N/A | #N/A | #N/A | 1.49 | 0.63 | 1.35 |
| 1.04 | 0.43 | 1.05 | 0.40 | 1.35 | 0.52 | 0.77 | 0.28 | 0.88 | 0.35 | 1.03 |
| 2.45 | 0.91 | 2.45 | 0.85 | 2.54 | 0.86 | 2.61 | 0.93 | 2.64 | 0.92 | 2.13 |
| #N/A | #N/A | #N/A | #N/A | #N/A | #N/A | #N/A | #N/A | #N/A | #N/A | #N/A |
| #N/A | #N/A | #N/A | #N/A | #N/A | #N/A | #N/A | #N/A | #N/A | #N/A | #N/A |
| 1.93 | 0.80 | 2.69 | 0.88 | 2.04 | 0.75 | 1.60 | 0.71 | 1.43 | 0.62 | 1.56 |
| 1.77 | 0.75 | 1.84 | 0.69 | 1.83 | 0.69 | 1.67 | 0.70 | 1.65 | 0.70 | 1.81 |
| #N/A | #N/A | #N/A | #N/A | #N/A | #N/A | #N/A | #N/A | #N/A | #N/A | #N/A |
| 1.77 | 0.74 | 2.36 | 0.83 | 2.42 | 0.83 | 1.59 | 0.70 | 2.35 | 0.88 | 1.71 |
| #N/A | #N/A | #N/A | #N/A | #N/A | #N/A | #N/A | #N/A | #N/A | #N/A | #N/A |
| 1.70 | 0.74 | 2.21 | 0.79 | 2.48 | 0.85 | 2.56 | 0.93 | 2.56 | 0.92 | 1.82 |
| 1.06 | 0.43 | 0.67 | 0.22 | 0.87 | 0.30 | 0.64 | 0.21 | 1.01 | 0.41 | 0.73 |
| 2.22 | 0.87 | 1.26 | 0.49 | 2.32 | 0.73 | 1.18 | 0.52 | 1.34 | 0.58 | 1.63 |
| #N/A | #N/A | #N/A | #N/A | #N/A | #N/A | #N/A | #N/A | #N/A | #N/A | #N/A |
| #N/A | #N/A | 0.19 | 0.01 | 0.17 | 0.01 | 0.22 | 0.02 | 0.42 | 0.08 | #N/A |
| 0.67 | 0.19 | 0.90 | 0.33 | #N/A | #N/A | 0.41 | 0.08 | 0.66 | 0.22 | 0.81 |
| 0.21 | 0.01 | 0.14 | 0.01 | 0.27 | 0.02 | 0.33 | 0.04 | 0.22 | 0.01 | 0.24 |
| 0.79 | 0.26 | 0.74 | 0.25 | 0.89 | 0.30 | 1.19 | 0.53 | 0.88 | 0.34 | 0.67 |
| 1.04 | 0.43 | 0.67 | 0.22 | #N/A | #N/A | 0.49 | 0.12 | 0.71 | 0.24 | #N/A |
| 0.89 | 0.33 | 1.46 | 0.57 | 1.15 | 0.43 | 1.20 | 0.53 | 1.30 | 0.56 | 1.12 |
| 1.27 | 0.55 | 1.64 | 0.63 | 1.47 | 0.57 | 1.51 | 0.67 | 1.48 | 0.64 | 1.59 |





|      |      |      |      |      |      |      |      |      |      |      |
|------|------|------|------|------|------|------|------|------|------|------|
| 1.45 | 0.64 | 1.27 | 0.50 | 1.37 | 0.53 | 1.39 | 0.62 | 1.13 | 0.48 | 1.16 |
| 1.05 | 0.42 | 0.92 | 0.34 | 0.81 | 0.26 | 0.85 | 0.34 | 0.82 | 0.31 | 1.09 |
| 2.98 | 0.93 | 3.58 | 0.96 | 3.46 | 0.95 | 3.58 | 0.99 | 3.68 | 0.98 | 2.37 |
| 3.16 | 0.96 | 2.90 | 0.91 | 2.54 | 0.86 | 3.53 | 0.99 | 3.13 | 0.96 | #N/A |
| #N/A | #N/A | #N/A | #N/A | #N/A | #N/A | #N/A | #N/A | #N/A | #N/A | #N/A |
| 1.61 | 0.71 | 1.25 | 0.48 | 1.47 | 0.56 | 1.51 | 0.67 | 1.26 | 0.54 | 0.95 |
| 1.99 | 0.76 | 3.54 | 0.96 | 1.78 | 0.68 | 1.82 | 0.69 | 1.60 | 0.69 | #N/A |
| 1.70 | 0.73 | 1.55 | 0.60 | 1.71 | 0.66 | 1.42 | 0.63 | 1.51 | 0.66 | 1.51 |
| 0.69 | 0.19 | 0.76 | 0.26 | #N/A | #N/A | 0.75 | 0.27 | 0.66 | 0.22 | 0.69 |
| 1.96 | 0.82 | 2.07 | 0.76 | 1.52 | 0.59 | 1.60 | 0.71 | 1.64 | 0.70 | 1.58 |
| 0.80 | 0.28 | 0.75 | 0.26 | 0.71 | 0.21 | 0.65 | 0.22 | 0.64 | 0.20 | 0.94 |
| 0.60 | 0.15 | 0.48 | 0.13 | #N/A | #N/A | 0.75 | 0.27 | 0.48 | 0.11 | #N/A |
| #N/A | #N/A | 1.59 | 0.61 | 1.35 | 0.52 | 1.24 | 0.55 | 1.54 | 0.67 | 1.42 |
| 1.33 | 0.58 | 2.18 | 0.79 | 1.87 | 0.72 | 1.70 | 0.74 | 1.57 | 0.68 | 1.91 |
| 2.09 | 0.85 | 2.52 | 0.85 | 2.24 | 0.80 | 2.34 | 0.89 | 2.75 | 0.93 | 1.86 |
| 1.40 | 0.62 | 1.90 | 0.71 | 1.26 | 0.48 | 1.67 | 0.73 | 1.60 | 0.69 | 1.48 |
| 0.74 | 0.23 | 0.51 | 0.15 | #N/A | #N/A | 0.54 | 0.15 | 0.44 | 0.09 | #N/A |
| 1.87 | 0.79 | 2.46 | 0.83 | 2.55 | 0.82 | 2.71 | 0.94 | 2.27 | 0.86 | 1.45 |
| #N/A | #N/A | #N/A | #N/A | #N/A | #N/A | #N/A | #N/A | #N/A | #N/A | #N/A |
| 5.38 | 0.98 | 6.65 | 1.00 | 5.15 | 0.99 | 5.15 | 1.00 | 4.31 | 1.00 | #N/A |
| 0.95 | 0.35 | #N/A | #N/A | #N/A | #N/A | 1.42 | 0.63 | #N/A | #N/A | #N/A |
| 1.62 | 0.70 | 3.01 | 0.92 | 3.48 | 0.95 | 2.18 | 0.87 | 2.72 | 0.93 | 1.61 |
| 1.98 | 0.79 | 2.00 | 0.74 | 2.16 | 0.74 | 1.76 | 0.76 | 1.89 | 0.78 | 1.45 |
| 2.52 | 0.91 | 2.46 | 0.84 | 2.49 | 0.85 | 2.14 | 0.86 | 2.23 | 0.86 | 1.82 |
| #N/A | #N/A | #N/A | #N/A | #N/A | #N/A | #N/A | #N/A | #N/A | #N/A | #N/A |
| 2.66 | 0.93 | 3.69 | 0.97 | 3.58 | 0.96 | 3.17 | 0.97 | 3.16 | 0.97 | 2.52 |
| 2.04 | 0.83 | 2.39 | 0.83 | 1.92 | 0.73 | 2.34 | 0.89 | 2.43 | 0.90 | 1.80 |
| 1.38 | 0.58 | 0.65 | 0.23 | #N/A | #N/A | 0.73 | 0.26 | 0.92 | 0.37 | #N/A |
| 2.24 | 0.86 | 3.57 | 0.96 | 3.01 | 0.92 | 2.59 | 0.93 | 2.47 | 0.90 | #N/A |
| #N/A | #N/A | #N/A | #N/A | #N/A | #N/A | #N/A | #N/A | #N/A | #N/A | #N/A |
| #N/A | #N/A | #N/A | #N/A | #N/A | #N/A | #N/A | #N/A | #N/A | #N/A | #N/A |
| #N/A | #N/A | 0.83 | 0.30 | #N/A | #N/A | 0.53 | 0.14 | 0.58 | 0.17 | 0.61 |
| 0.24 | 0.02 | 0.10 | 0.00 | 0.15 | 0.00 | 0.19 | 0.01 | 0.23 | 0.01 | 0.19 |
| #N/A | #N/A | #N/A | #N/A | #N/A | #N/A | #N/A | #N/A | #N/A | #N/A | #N/A |
| #N/A | #N/A | 1.79 | 0.68 | 1.68 | 0.66 | 1.58 | 0.70 | 1.72 | 0.73 | 1.53 |
| #N/A | #N/A | 0.72 | 0.24 | #N/A | #N/A | 0.80 | 0.30 | 0.87 | 0.34 | #N/A |
| 1.30 | 0.54 | 1.88 | 0.68 | #N/A | #N/A | 1.16 | 0.51 | 1.29 | 0.56 | 1.29 |
| 1.74 | 0.75 | 1.70 | 0.65 | 2.54 | 0.86 | 1.64 | 0.71 | 1.91 | 0.77 | #N/A |
| #N/A | #N/A | #N/A | #N/A | 2.59 | 0.86 | 3.01 | 0.96 | 3.18 | 0.95 | 2.73 |
| 1.67 | 0.73 | 2.18 | 0.78 | 1.58 | 0.62 | 1.92 | 0.81 | 1.77 | 0.75 | 1.44 |
| 2.11 | 0.86 | 2.40 | 0.84 | 1.77 | 0.67 | 1.73 | 0.74 | 1.55 | 0.67 | 1.28 |
| 0.42 | 0.06 | 0.54 | 0.16 | 0.48 | 0.10 | 0.42 | 0.08 | 0.53 | 0.14 | 0.46 |
| 1.46 | 0.64 | 1.23 | 0.47 | 1.78 | 0.68 | 1.29 | 0.57 | 1.39 | 0.59 | 0.80 |
| 1.11 | 0.43 | 0.66 | 0.21 | 0.55 | 0.14 | 0.51 | 0.13 | 0.48 | 0.11 | 0.62 |
| 2.79 | 0.94 | 3.99 | 0.98 | 2.95 | 0.91 | 2.83 | 0.95 | 3.19 | 0.96 | 2.27 |
| 1.80 | 0.76 | 1.48 | 0.57 | 1.43 | 0.56 | 0.94 | 0.39 | 1.06 | 0.45 | 1.12 |
| 0.80 | 0.29 | 0.66 | 0.22 | #N/A | #N/A | #N/A | #N/A | 0.48 | 0.12 | 0.61 |
| 0.83 | 0.29 | 1.14 | 0.44 | 1.13 | 0.42 | 0.84 | 0.33 | 0.92 | 0.37 | 1.20 |
| 1.30 | 0.57 | 1.22 | 0.47 | 1.45 | 0.55 | 1.10 | 0.48 | 1.18 | 0.51 | 0.97 |
| 0.81 | 0.28 | #N/A | #N/A | #N/A | #N/A | #N/A | #N/A | 0.84 | 0.32 | 0.87 |
| #N/A | #N/A | #N/A | #N/A | #N/A | #N/A | #N/A | #N/A | 2.13 | 0.73 | 1.30 |

|      |      |      |      |      |      |      |      |      |      |      |
|------|------|------|------|------|------|------|------|------|------|------|
| #N/A | #N/A | #N/A | #N/A | #N/A | #N/A | #N/A | #N/A | #N/A | #N/A | #N/A |
| 0.83 | 0.30 | #N/A | #N/A | #N/A | #N/A | #N/A | #N/A | 0.45 | 0.10 | 0.59 |
| 2.49 | 0.91 | 2.76 | 0.89 | 2.16 | 0.78 | 2.79 | 0.95 | 2.03 | 0.82 | #N/A |
| #N/A | #N/A | #N/A | #N/A | #N/A | #N/A | #N/A | #N/A | 1.34 | 0.58 | #N/A |
| #N/A | #N/A | 4.10 | 0.98 | #N/A | #N/A | 3.10 | 0.97 | 3.58 | 0.98 | 2.00 |
| 2.27 | 0.87 | 3.60 | 0.96 | 2.97 | 0.91 | 2.41 | 0.90 | 2.98 | 0.96 | 2.63 |
| 1.20 | 0.51 | #N/A | #N/A | #N/A | #N/A | 0.87 | 0.35 | 0.80 | 0.30 | #N/A |
| 2.17 | 0.87 | 2.22 | 0.79 | 1.98 | 0.74 | 1.83 | 0.78 | 1.96 | 0.80 | 1.51 |
| 2.44 | 0.84 | 1.07 | 0.41 | #N/A | #N/A | 0.94 | 0.38 | 1.18 | 0.51 | 0.93 |
| #N/A | #N/A | #N/A | #N/A | #N/A | #N/A | #N/A | #N/A | 0.67 | 0.22 | 0.49 |
| 0.74 | 0.26 | 0.97 | 0.36 | #N/A | #N/A | 0.92 | 0.37 | 0.71 | 0.25 | 1.01 |
| #N/A | #N/A | #N/A | #N/A | #N/A | #N/A | #N/A | #N/A | #N/A | #N/A | #N/A |
| #N/A | #N/A | 1.16 | 0.45 | 1.09 | 0.40 | 1.14 | 0.50 | 1.09 | 0.46 | 1.14 |
| #N/A | #N/A | #N/A | #N/A | #N/A | #N/A | #N/A | #N/A | #N/A | #N/A | #N/A |
| 0.73 | 0.22 | 0.69 | 0.23 | 0.64 | 0.18 | 0.69 | 0.24 | 0.69 | 0.23 | 0.63 |
| 1.49 | 0.65 | 1.45 | 0.56 | 1.41 | 0.55 | 1.42 | 0.63 | 1.41 | 0.61 | 1.27 |
| 1.61 | 0.71 | 1.74 | 0.66 | 1.41 | 0.54 | 1.14 | 0.50 | 1.48 | 0.65 | 1.10 |
| 1.26 | 0.54 | 2.19 | 0.79 | #N/A | #N/A | 1.41 | 0.63 | 1.78 | 0.73 | 1.55 |
| #N/A | #N/A | #N/A | #N/A | #N/A | #N/A | #N/A | #N/A | #N/A | #N/A | #N/A |
| 1.23 | 0.54 | 1.38 | 0.54 | 1.16 | 0.43 | 1.17 | 0.51 | 1.37 | 0.60 | 1.18 |
| #N/A | #N/A | #N/A | #N/A | #N/A | #N/A | #N/A | #N/A | #N/A | #N/A | #N/A |
| 2.85 | 0.84 | 3.98 | 0.96 | 3.35 | 0.94 | 2.68 | 0.93 | 2.20 | 0.85 | 1.91 |
| #N/A | #N/A | #N/A | #N/A | #N/A | #N/A | #N/A | #N/A | #N/A | #N/A | 0.80 |
| #N/A | #N/A | #N/A | #N/A | #N/A | #N/A | 2.18 | 0.85 | #N/A | #N/A | #N/A |
| #N/A | #N/A | 3.15 | 0.93 | 2.79 | 0.89 | 2.12 | 0.86 | 2.84 | 0.93 | 3.03 |
| #N/A | #N/A | 4.30 | 0.98 | 5.15 | 0.77 | 3.93 | 0.99 | 4.84 | 1.00 | 1.94 |
| #N/A | #N/A | #N/A | #N/A | #N/A | #N/A | #N/A | #N/A | 0.51 | 0.13 | 0.60 |
| #N/A | #N/A | 2.80 | 0.90 | 3.31 | 0.91 | 1.44 | 0.60 | 2.05 | 0.80 | 1.38 |
| #N/A | #N/A | #N/A | #N/A | #N/A | #N/A | #N/A | #N/A | #N/A | #N/A | #N/A |
| #N/A | #N/A | 1.14 | 0.44 | #N/A | #N/A | 1.03 | 0.44 | 1.21 | 0.52 | 0.91 |
| 0.79 | 0.28 | 0.72 | 0.25 | 0.62 | 0.17 | 0.49 | 0.13 | 0.48 | 0.11 | 0.87 |
| 0.41 | 0.06 | 0.46 | 0.12 | 0.40 | 0.06 | 0.49 | 0.11 | 0.57 | 0.16 | 0.64 |
| 0.23 | 0.01 | 0.11 | 0.00 | 0.21 | 0.01 | 0.20 | 0.01 | 0.18 | 0.01 | 0.18 |
| 0.45 | 0.06 | 0.16 | 0.01 | #N/A | #N/A | #N/A | #N/A | 0.26 | 0.02 | 0.32 |
| 1.15 | 0.49 | 1.33 | 0.52 | 1.35 | 0.52 | 1.08 | 0.46 | 1.11 | 0.47 | 1.03 |
| 1.15 | 0.49 | 1.19 | 0.46 | 1.22 | 0.46 | 1.22 | 0.54 | 1.19 | 0.51 | 1.26 |
| 2.33 | 0.89 | 1.86 | 0.70 | 2.08 | 0.77 | 1.58 | 0.69 | 1.91 | 0.79 | 1.76 |
| #N/A | #N/A | #N/A | #N/A | #N/A | #N/A | #N/A | #N/A | #N/A | #N/A | #N/A |
| 2.71 | 0.94 | 3.46 | 0.95 | 2.60 | 0.87 | 3.09 | 0.97 | 2.44 | 0.90 | #N/A |
| 0.43 | 0.06 | 0.60 | 0.19 | 0.42 | 0.08 | 0.39 | 0.07 | 0.44 | 0.09 | 0.62 |
| 2.37 | 0.89 | 2.87 | 0.91 | 2.56 | 0.87 | 2.60 | 0.92 | 2.56 | 0.91 | 2.38 |
| 1.11 | 0.47 | 1.43 | 0.56 | 1.12 | 0.42 | 0.86 | 0.34 | 0.84 | 0.32 | 1.13 |
| 0.76 | 0.25 | 0.65 | 0.21 | 0.59 | 0.15 | 0.54 | 0.15 | 0.56 | 0.16 | 0.82 |
| 0.81 | 0.28 | 0.74 | 0.26 | 0.48 | 0.10 | 0.48 | 0.12 | 0.48 | 0.11 | 1.10 |
| 1.26 | 0.55 | #N/A | #N/A | #N/A | #N/A | #N/A | #N/A | #N/A | #N/A | 1.48 |
| 0.58 | 0.14 | 0.47 | 0.13 | 0.43 | 0.08 | 0.48 | 0.11 | 0.47 | 0.11 | 0.61 |
| 0.66 | 0.18 | 0.32 | 0.06 | 0.34 | 0.04 | 0.49 | 0.12 | 0.33 | 0.04 | 0.59 |
| #N/A | #N/A | #N/A | #N/A | #N/A | #N/A | #N/A | #N/A | #N/A | #N/A | #N/A |
| 1.10 | 0.46 | 1.68 | 0.64 | 1.45 | 0.56 | 1.06 | 0.45 | 1.20 | 0.52 | 1.02 |
| 0.79 | 0.27 | 0.93 | 0.34 | 0.97 | 0.35 | 0.98 | 0.41 | 0.88 | 0.34 | 0.90 |
| 0.49 | 0.09 | 0.31 | 0.05 | 0.34 | 0.05 | 0.39 | 0.07 | 0.42 | 0.08 | 0.73 |

|      |      |      |      |      |      |      |      |      |      |      |
|------|------|------|------|------|------|------|------|------|------|------|
| 0.44 | 0.06 | 0.29 | 0.04 | 0.34 | 0.05 | 0.34 | 0.05 | 0.34 | 0.04 | 0.75 |
| 1.40 | 0.61 | 2.02 | 0.75 | 1.55 | 0.60 | 1.32 | 0.59 | 1.66 | 0.71 | 1.64 |
| 0.48 | 0.08 | #N/A | #N/A | #N/A | #N/A | #N/A | #N/A | #N/A | #N/A | 0.55 |
| #N/A | #N/A | #N/A | #N/A | #N/A | #N/A | #N/A | #N/A | #N/A | #N/A | #N/A |
| #N/A | #N/A | #N/A | #N/A | #N/A | #N/A | #N/A | #N/A | #N/A | #N/A | #N/A |
| #N/A | #N/A | 1.21 | 0.47 | 1.12 | 0.41 | 0.66 | 0.22 | 0.73 | 0.26 | #N/A |
| 1.24 | 0.53 | 1.87 | 0.70 | 2.14 | 0.77 | 1.46 | 0.64 | 2.31 | 0.84 | 1.33 |
| #N/A | #N/A | #N/A | #N/A | #N/A | #N/A | #N/A | #N/A | #N/A | #N/A | #N/A |
| 1.53 | 0.68 | 3.00 | 0.92 | #N/A | #N/A | 2.45 | 0.91 | #N/A | #N/A | #N/A |
| 1.31 | 0.56 | 2.38 | 0.82 | 1.76 | 0.68 | 1.43 | 0.62 | 1.45 | 0.63 | 1.43 |
| #N/A | #N/A | #N/A | #N/A | #N/A | #N/A | #N/A | #N/A | #N/A | #N/A | #N/A |
| 1.50 | 0.64 | 1.71 | 0.65 | 2.01 | 0.74 | 1.90 | 0.80 | 1.79 | 0.75 | 1.49 |
| #N/A | #N/A | #N/A | #N/A | #N/A | #N/A | #N/A | #N/A | #N/A | #N/A | 0.62 |
| 2.54 | 0.92 | 2.70 | 0.89 | 2.53 | 0.86 | 2.47 | 0.91 | 2.62 | 0.92 | 1.96 |
| 2.51 | 0.90 | 2.43 | 0.84 | 2.58 | 0.87 | 1.81 | 0.78 | 2.47 | 0.90 | 1.58 |
| 0.78 | 0.25 | 0.35 | 0.07 | #N/A | #N/A | 0.45 | 0.09 | 0.47 | 0.11 | 0.61 |
| 3.07 | 0.95 | 3.79 | 0.97 | 3.56 | 0.91 | 2.51 | 0.91 | #N/A | #N/A | #N/A |
| #N/A | #N/A | #N/A | #N/A | #N/A | #N/A | #N/A | #N/A | 0.71 | 0.25 | #N/A |
| 2.02 | 0.81 | 2.20 | 0.79 | 1.81 | 0.69 | 1.29 | 0.58 | 1.78 | 0.75 | #N/A |
| 1.53 | 0.65 | 2.19 | 0.79 | 1.81 | 0.69 | 1.91 | 0.81 | 1.61 | 0.70 | 1.24 |
| #N/A | #N/A | 0.63 | 0.20 | 0.75 | 0.23 | 0.69 | 0.24 | 0.69 | 0.24 | 0.85 |
| 2.74 | 0.93 | 2.55 | 0.86 | 5.01 | 0.91 | 2.16 | 0.86 | 2.34 | 0.88 | 2.13 |
| 0.94 | 0.36 | 1.14 | 0.44 | 0.98 | 0.35 | 0.81 | 0.31 | 0.83 | 0.32 | 1.14 |
| 0.53 | 0.10 | 0.29 | 0.04 | 0.33 | 0.04 | 0.46 | 0.10 | 0.39 | 0.06 | 0.54 |
| #N/A | #N/A | #N/A | #N/A | #N/A | #N/A | #N/A | #N/A | #N/A | #N/A | #N/A |
| #N/A | #N/A | #N/A | #N/A | #N/A | #N/A | #N/A | #N/A | #N/A | #N/A | #N/A |
| 0.85 | 0.31 | 0.60 | 0.19 | 0.84 | 0.27 | 0.91 | 0.37 | 0.78 | 0.29 | 0.48 |
| #N/A | #N/A | #N/A | #N/A | #N/A | #N/A | #N/A | #N/A | #N/A | #N/A | #N/A |
| 1.24 | 0.53 | 1.41 | 0.54 | #N/A | #N/A | #N/A | #N/A | 0.82 | 0.31 | 0.62 |
| 1.57 | 0.62 | 1.07 | 0.41 | 0.91 | 0.32 | 0.86 | 0.34 | 0.70 | 0.24 | 1.16 |
| 1.09 | 0.46 | 0.68 | 0.22 | 0.94 | 0.33 | 0.74 | 0.27 | 0.98 | 0.41 | 0.98 |
| 0.93 | 0.35 | 0.95 | 0.35 | 0.79 | 0.25 | 0.96 | 0.41 | 0.94 | 0.38 | 0.90 |
| #N/A | #N/A | #N/A | #N/A | #N/A | #N/A | #N/A | #N/A | #N/A | #N/A | 1.22 |
| 2.91 | 0.95 | #N/A | #N/A | #N/A | #N/A | #N/A | #N/A | 1.79 | 0.73 | 1.34 |
| 0.66 | 0.18 | 0.66 | 0.21 | #N/A | #N/A | 0.59 | 0.18 | 1.05 | 0.41 | 0.80 |
| 3.98 | 0.99 | 4.38 | 0.99 | 4.59 | 0.99 | 3.68 | 0.99 | 3.48 | 0.98 | 3.23 |
| #N/A | #N/A | #N/A | #N/A | #N/A | #N/A | #N/A | #N/A | #N/A | #N/A | #N/A |
| 2.88 | 0.95 | 2.74 | 0.89 | 3.18 | 0.94 | 2.28 | 0.88 | 2.51 | 0.89 | 1.54 |
| 0.68 | 0.19 | 0.82 | 0.30 | #N/A | #N/A | #N/A | #N/A | #N/A | #N/A | 0.89 |
| 2.25 | 0.87 | 2.31 | 0.82 | 3.93 | 0.97 | 1.79 | 0.77 | 2.29 | 0.87 | 1.85 |
| #N/A | #N/A | 1.23 | 0.47 | 1.18 | 0.44 | 1.00 | 0.42 | 1.19 | 0.51 | 1.24 |
| 1.12 | 0.46 | 1.00 | 0.38 | #N/A | #N/A | 0.70 | 0.24 | 0.71 | 0.25 | 0.76 |
| #N/A | #N/A | #N/A | #N/A | #N/A | #N/A | #N/A | #N/A | #N/A | #N/A | #N/A |
| 1.01 | 0.41 | 1.48 | 0.57 | 1.45 | 0.56 | 1.10 | 0.48 | 1.16 | 0.50 | 1.24 |
| 0.42 | 0.06 | #N/A | #N/A | #N/A | #N/A | #N/A | #N/A | #N/A | #N/A | 0.70 |
| 1.32 | 0.58 | 2.65 | 0.88 | 2.42 | 0.82 | 2.22 | 0.87 | 2.32 | 0.88 | 1.88 |
| #N/A | #N/A | #N/A | #N/A | #N/A | #N/A | #N/A | #N/A | #N/A | #N/A | #N/A |
| 5.28 | 0.99 | 2.67 | 0.88 | 3.08 | 0.93 | 2.38 | 0.90 | 3.28 | 0.97 | 1.52 |
| 1.15 | 0.49 | 1.40 | 0.55 | 1.68 | 0.64 | 1.29 | 0.57 | 1.30 | 0.55 | 0.96 |
| 0.70 | 0.22 | 0.60 | 0.19 | 0.53 | 0.13 | 0.48 | 0.11 | 0.54 | 0.15 | 0.61 |
| 2.95 | 0.94 | 2.17 | 0.78 | #N/A | #N/A | 1.56 | 0.69 | 1.65 | 0.71 | #N/A |

|      |      |      |      |      |      |      |      |      |      |      |
|------|------|------|------|------|------|------|------|------|------|------|
| 0.94 | 0.37 | 0.62 | 0.20 | 0.73 | 0.23 | 0.75 | 0.27 | 0.63 | 0.20 | 0.70 |
| 1.38 | 0.61 | 1.88 | 0.71 | 1.70 | 0.65 | 1.52 | 0.68 | 1.54 | 0.66 | 1.59 |
| 1.88 | 0.76 | 2.18 | 0.79 | 1.83 | 0.70 | 1.55 | 0.68 | 1.25 | 0.54 | 1.97 |
| 0.76 | 0.26 | 0.83 | 0.30 | 0.85 | 0.29 | 0.81 | 0.31 | 0.98 | 0.40 | 0.83 |
| 1.22 | 0.50 | 1.60 | 0.61 | #N/A | #N/A | #N/A | #N/A | 0.90 | 0.36 | 1.24 |
| 0.80 | 0.27 | 1.91 | 0.71 | 1.63 | 0.63 | 1.58 | 0.70 | 1.51 | 0.65 | 1.25 |
| 0.79 | 0.26 | 0.92 | 0.34 | 0.90 | 0.32 | 0.93 | 0.38 | 1.02 | 0.41 | 1.04 |
| 1.18 | 0.51 | 1.38 | 0.54 | 0.95 | 0.34 | 1.21 | 0.52 | 1.04 | 0.44 | 1.23 |
| 1.32 | 0.56 | 1.60 | 0.61 | 1.21 | 0.45 | 1.39 | 0.62 | 1.19 | 0.51 | 0.98 |
| 1.55 | 0.68 | 2.29 | 0.81 | 1.94 | 0.73 | 1.99 | 0.82 | 1.75 | 0.74 | 1.48 |
| 0.85 | 0.31 | 0.85 | 0.31 | 0.81 | 0.27 | 0.73 | 0.26 | 0.78 | 0.29 | 1.13 |
| 0.54 | 0.11 | 0.30 | 0.04 | 0.38 | 0.06 | 0.41 | 0.07 | 0.41 | 0.08 | 0.73 |
| 0.74 | 0.23 | 0.73 | 0.25 | 0.68 | 0.20 | 0.68 | 0.23 | 0.69 | 0.24 | 0.81 |
| 0.48 | 0.08 | 0.30 | 0.05 | 0.37 | 0.06 | 0.43 | 0.09 | 0.41 | 0.07 | 0.67 |
| 0.70 | 0.21 | 0.75 | 0.26 | 0.66 | 0.19 | 0.66 | 0.22 | 0.67 | 0.22 | 0.80 |
| 0.45 | 0.06 | 0.32 | 0.06 | 0.39 | 0.06 | 0.43 | 0.08 | 0.41 | 0.07 | 0.55 |
| #N/A | #N/A | #N/A | #N/A | #N/A | #N/A | #N/A | #N/A | #N/A | #N/A | 0.62 |
| 1.16 | 0.45 | 1.34 | 0.52 | 1.13 | 0.43 | 0.70 | 0.25 | 0.96 | 0.39 | 0.84 |
| 1.13 | 0.47 | #N/A | #N/A | #N/A | #N/A | #N/A | #N/A | 1.76 | 0.72 | 0.89 |
| 1.47 | 0.65 | 2.35 | 0.83 | 2.23 | 0.80 | 1.73 | 0.73 | 1.80 | 0.76 | 1.58 |
| #N/A | #N/A | #N/A | #N/A | #N/A | #N/A | #N/A | #N/A | #N/A | #N/A | #N/A |
| 2.00 | 0.83 | 2.61 | 0.87 | 2.05 | 0.77 | 1.80 | 0.77 | 2.23 | 0.86 | 1.63 |
| #N/A | #N/A | #N/A | #N/A | #N/A | #N/A | #N/A | #N/A | 0.69 | 0.23 | #N/A |
| 1.46 | 0.65 | 1.34 | 0.52 | 1.78 | 0.68 | 1.62 | 0.72 | 1.60 | 0.69 | 1.31 |
| #N/A | #N/A | #N/A | #N/A | #N/A | #N/A | #N/A | #N/A | 0.94 | 0.38 | 0.71 |
| #N/A | #N/A | #N/A | #N/A | #N/A | #N/A | #N/A | #N/A | #N/A | #N/A | #N/A |
| 1.35 | 0.57 | 1.53 | 0.59 | #N/A | #N/A | 1.23 | 0.54 | 1.13 | 0.48 | #N/A |
| #N/A | #N/A | #N/A | #N/A | #N/A | #N/A | #N/A | #N/A | #N/A | #N/A | #N/A |
| #N/A | #N/A | 2.96 | 0.90 | 3.52 | 0.95 | 2.65 | 0.93 | 4.09 | 0.99 | #N/A |
| #N/A | #N/A | #N/A | #N/A | #N/A | #N/A | #N/A | #N/A | #N/A | #N/A | #N/A |
| 1.91 | 0.81 | 1.85 | 0.70 | 1.42 | 0.55 | 1.62 | 0.71 | 1.83 | 0.77 | 1.53 |
| #N/A | #N/A | #N/A | #N/A | #N/A | #N/A | #N/A | #N/A | 0.52 | 0.13 | 0.86 |
| 1.83 | 0.78 | 2.05 | 0.75 | 1.93 | 0.73 | 2.11 | 0.84 | 1.91 | 0.79 | #N/A |
| 0.78 | 0.25 | 0.72 | 0.24 | #N/A | #N/A | #N/A | #N/A | 0.50 | 0.12 | 0.75 |
| 0.58 | 0.13 | 0.51 | 0.14 | 0.52 | 0.12 | 0.52 | 0.13 | 0.52 | 0.13 | 0.57 |
| #N/A | #N/A | #N/A | #N/A | #N/A | #N/A | #N/A | #N/A | #N/A | #N/A | #N/A |
| #N/A | #N/A | 1.82 | 0.69 | 1.94 | 0.73 | 1.77 | 0.76 | 1.89 | 0.78 | 1.38 |
| 0.45 | 0.07 | 0.41 | 0.10 | 0.49 | 0.12 | 0.57 | 0.17 | 0.61 | 0.19 | 0.56 |
| 0.79 | 0.28 | 0.63 | 0.20 | 0.84 | 0.29 | 0.62 | 0.20 | 0.80 | 0.30 | #N/A |
| 1.72 | 0.75 | 2.24 | 0.79 | 2.28 | 0.80 | 1.36 | 0.61 | 1.51 | 0.65 | 1.69 |
| #N/A | #N/A | 0.90 | 0.33 | #N/A | #N/A | #N/A | #N/A | 0.84 | 0.32 | #N/A |
| 3.10 | 0.95 | 1.49 | 0.58 | #N/A | #N/A | #N/A | #N/A | 1.91 | 0.75 | 1.27 |
| 9.50 | 0.97 | #N/A | #N/A | #N/A | #N/A | 2.23 | 0.87 | 1.76 | 0.71 | 1.57 |
| #N/A | #N/A | #N/A | #N/A | #N/A | #N/A | #N/A | #N/A | #N/A | #N/A | #N/A |
| 1.37 | 0.60 | 1.23 | 0.48 | 1.35 | 0.52 | 1.14 | 0.50 | 0.97 | 0.40 | 1.04 |
| 1.17 | 0.50 | 1.86 | 0.69 | 2.15 | 0.75 | 1.50 | 0.66 | 1.64 | 0.71 | 1.43 |
| 0.63 | 0.16 | 0.39 | 0.09 | 0.39 | 0.07 | 0.53 | 0.14 | 0.45 | 0.10 | 0.59 |
| 1.09 | 0.46 | 0.99 | 0.37 | 1.08 | 0.40 | 1.16 | 0.51 | 1.08 | 0.46 | 0.88 |
| 1.55 | 0.68 | 1.57 | 0.61 | 1.76 | 0.68 | 1.17 | 0.50 | 1.44 | 0.62 | #N/A |
| 0.86 | 0.31 | 1.06 | 0.40 | 0.87 | 0.31 | 0.71 | 0.25 | 0.78 | 0.29 | 0.94 |
| 0.98 | 0.38 | 1.23 | 0.47 | 0.98 | 0.35 | 0.89 | 0.36 | 0.89 | 0.35 | 1.00 |

|      |      |      |      |      |      |      |      |      |      |      |
|------|------|------|------|------|------|------|------|------|------|------|
| 1.20 | 0.51 | 1.56 | 0.60 | #N/A | #N/A | 1.31 | 0.57 | 1.39 | 0.60 | #N/A |
| 1.32 | 0.58 | 1.13 | 0.43 | 1.05 | 0.38 | 1.13 | 0.49 | 1.48 | 0.64 | 1.18 |
| #N/A | #N/A | #N/A | #N/A | #N/A | #N/A | #N/A | #N/A | #N/A | #N/A | #N/A |
| 0.86 | 0.31 | 1.08 | 0.41 | 1.29 | 0.49 | 1.80 | 0.71 | 1.13 | 0.48 | 1.18 |
| 0.36 | 0.03 | 0.33 | 0.06 | 0.31 | 0.03 | 0.22 | 0.01 | 0.28 | 0.02 | 0.29 |
| #N/A | #N/A | 0.97 | 0.36 | #N/A | #N/A | 0.93 | 0.38 | #N/A | #N/A | 1.25 |
| 0.82 | 0.28 | 0.78 | 0.28 | 0.80 | 0.25 | 0.65 | 0.22 | 0.57 | 0.16 | 0.74 |
| #N/A | #N/A | 0.37 | 0.08 | 0.50 | 0.11 | 0.39 | 0.08 | 0.45 | 0.10 | 0.41 |
| #N/A | #N/A | #N/A | #N/A | #N/A | #N/A | #N/A | #N/A | #N/A | #N/A | #N/A |
| 1.33 | 0.57 | 1.66 | 0.63 | 1.21 | 0.46 | 1.25 | 0.55 | 1.92 | 0.78 | 1.10 |
| 2.68 | 0.77 | 1.41 | 0.54 | 1.85 | 0.67 | 1.46 | 0.65 | 1.31 | 0.57 | 1.12 |
| 1.86 | 0.78 | 2.04 | 0.75 | 2.57 | 0.85 | 2.09 | 0.85 | 1.70 | 0.73 | 1.49 |
| #N/A | #N/A | #N/A | #N/A | #N/A | #N/A | #N/A | #N/A | #N/A | #N/A | #N/A |
| #N/A | #N/A | 2.05 | 0.73 | 2.63 | 0.87 | 1.70 | 0.73 | 1.85 | 0.77 | #N/A |
| 1.25 | 0.52 | 0.83 | 0.30 | 0.85 | 0.29 | 1.11 | 0.48 | 1.00 | 0.42 | 0.78 |
| 0.78 | 0.25 | 0.75 | 0.26 | 0.95 | 0.33 | 0.94 | 0.39 | 0.92 | 0.37 | 0.82 |
| 1.76 | 0.65 | 2.16 | 0.77 | 1.96 | 0.74 | 1.79 | 0.70 | 1.26 | 0.53 | 1.19 |
| #N/A | #N/A | #N/A | #N/A | #N/A | #N/A | #N/A | #N/A | #N/A | #N/A | #N/A |
| 0.43 | 0.06 | 0.45 | 0.12 | #N/A | #N/A | 0.35 | 0.06 | 0.40 | 0.07 | 0.41 |
| 1.80 | 0.77 | 1.33 | 0.52 | 1.40 | 0.54 | 1.44 | 0.63 | 1.61 | 0.68 | 1.27 |
| #N/A | #N/A | #N/A | #N/A | #N/A | #N/A | #N/A | #N/A | #N/A | #N/A | #N/A |
| #N/A | #N/A | #N/A | #N/A | #N/A | #N/A | #N/A | #N/A | #N/A | #N/A | 0.80 |
| #N/A | #N/A | #N/A | #N/A | #N/A | #N/A | #N/A | #N/A | #N/A | #N/A | #N/A |
| 2.55 | 0.90 | 3.63 | 0.96 | #N/A | #N/A | 2.19 | 0.87 | 2.17 | 0.84 | 3.13 |
| #N/A | #N/A | #N/A | #N/A | #N/A | #N/A | #N/A | #N/A | #N/A | #N/A | #N/A |
| 1.90 | 0.79 | 4.39 | 0.98 | 3.42 | 0.95 | 3.07 | 0.97 | 2.95 | 0.95 | 2.00 |
| #N/A | #N/A | #N/A | #N/A | #N/A | #N/A | #N/A | #N/A | #N/A | #N/A | #N/A |
| #N/A | #N/A | #N/A | #N/A | #N/A | #N/A | #N/A | #N/A | #N/A | #N/A | #N/A |
| #N/A | #N/A | #N/A | #N/A | #N/A | #N/A | #N/A | #N/A | 0.70 | 0.24 | 0.69 |
| #N/A | #N/A | #N/A | #N/A | #N/A | #N/A | 4.69 | 0.99 | 5.38 | 1.00 | 2.82 |
| #N/A | #N/A | #N/A | #N/A | #N/A | #N/A | #N/A | #N/A | #N/A | #N/A | #N/A |
| 1.03 | 0.42 | 1.32 | 0.50 | 1.15 | 0.42 | 1.46 | 0.65 | 1.29 | 0.56 | 0.92 |
| #N/A | #N/A | 0.51 | 0.15 | 0.57 | 0.14 | 0.80 | 0.31 | 0.54 | 0.15 | 0.40 |
| #N/A | #N/A | #N/A | #N/A | #N/A | #N/A | #N/A | #N/A | #N/A | #N/A | #N/A |
| #N/A | #N/A | #N/A | #N/A | #N/A | #N/A | #N/A | #N/A | #N/A | #N/A | #N/A |
| 1.77 | 0.74 | 2.05 | 0.75 | 2.69 | 0.87 | 2.04 | 0.79 | 2.35 | 0.85 | 1.40 |
| #N/A | #N/A | #N/A | #N/A | #N/A | #N/A | #N/A | #N/A | #N/A | #N/A | #N/A |
| 1.39 | 0.61 | 1.83 | 0.69 | 2.08 | 0.77 | 1.12 | 0.49 | 1.69 | 0.72 | 1.49 |
| #N/A | #N/A | 1.03 | 0.39 | 0.82 | 0.27 | 0.84 | 0.33 | 1.12 | 0.48 | 1.15 |
| #N/A | #N/A | 1.16 | 0.45 | 1.57 | 0.59 | 1.19 | 0.53 | 1.13 | 0.49 | 1.20 |
| 2.47 | 0.90 | 1.67 | 0.64 | #N/A | #N/A | 1.28 | 0.57 | 1.47 | 0.64 | #N/A |
| 0.45 | 0.07 | 0.60 | 0.19 | 0.53 | 0.12 | 0.47 | 0.11 | 0.56 | 0.16 | 0.63 |
| 1.71 | 0.72 | 3.73 | 0.97 | 3.91 | 0.95 | 2.90 | 0.95 | 2.55 | 0.90 | 2.40 |
| 0.37 | 0.04 | 0.28 | 0.04 | 0.37 | 0.05 | 0.41 | 0.07 | 0.30 | 0.03 | 0.59 |
| 1.83 | 0.79 | 2.86 | 0.90 | 2.99 | 0.91 | 2.41 | 0.90 | 2.79 | 0.93 | 1.61 |
| 0.52 | 0.10 | 0.43 | 0.11 | #N/A | #N/A | 0.30 | 0.03 | 0.26 | 0.02 | 0.63 |
| 1.35 | 0.60 | 1.04 | 0.39 | 1.37 | 0.52 | 1.35 | 0.61 | 1.05 | 0.44 | 0.90 |
| #N/A | #N/A | #N/A | #N/A | #N/A | #N/A | #N/A | #N/A | #N/A | #N/A | 0.51 |
| 1.96 | 0.82 | 2.21 | 0.80 | 2.41 | 0.81 | 1.69 | 0.73 | 1.88 | 0.78 | 1.17 |
| #N/A | #N/A | #N/A | #N/A | #N/A | #N/A | #N/A | #N/A | #N/A | #N/A | #N/A |
| 1.21 | 0.52 | 0.87 | 0.32 | 0.62 | 0.16 | 0.77 | 0.29 | 0.92 | 0.37 | 0.79 |

|      |      |      |      |      |      |      |      |      |      |      |
|------|------|------|------|------|------|------|------|------|------|------|
| 1.25 | 0.55 | 1.11 | 0.42 | 1.26 | 0.48 | 1.03 | 0.44 | 1.13 | 0.48 | 1.08 |
| 3.86 | 0.98 | 4.93 | 0.99 | 4.74 | 0.99 | 4.63 | 1.00 | 3.66 | 0.99 | 3.37 |
| #N/A | #N/A | #N/A | #N/A | #N/A | #N/A | #N/A | #N/A | #N/A | #N/A | #N/A |
| 2.74 | 0.93 | 3.77 | 0.97 | 3.77 | 0.97 | 2.43 | 0.89 | 2.06 | 0.82 | 2.13 |
| 1.54 | 0.66 | 1.79 | 0.68 | 1.56 | 0.59 | 2.03 | 0.76 | 1.44 | 0.63 | 1.39 |
| 0.76 | 0.24 | 0.71 | 0.24 | 1.05 | 0.38 | 0.81 | 0.31 | 0.90 | 0.36 | 0.71 |
| #N/A | #N/A | 2.27 | 0.79 | #N/A | #N/A | 2.03 | 0.83 | 2.00 | 0.81 | 1.35 |
| 1.63 | 0.72 | 2.40 | 0.83 | 1.99 | 0.75 | 2.07 | 0.83 | 2.16 | 0.85 | 1.58 |
| #N/A | #N/A | #N/A | #N/A | #N/A | #N/A | #N/A | #N/A | #N/A | #N/A | #N/A |
| 0.72 | 0.22 | 0.56 | 0.17 | 1.28 | 0.48 | 0.70 | 0.25 | 0.76 | 0.27 | 0.78 |
| 2.57 | 0.83 | 2.69 | 0.88 | 2.21 | 0.79 | 1.69 | 0.74 | 2.01 | 0.81 | #N/A |
| 0.81 | 0.28 | 1.27 | 0.49 | 0.91 | 0.31 | 0.64 | 0.21 | 0.84 | 0.32 | #N/A |
| 0.41 | 0.06 | 0.46 | 0.12 | 0.51 | 0.12 | 0.57 | 0.16 | 0.56 | 0.16 | 0.50 |
| #N/A | #N/A | #N/A | #N/A | #N/A | #N/A | #N/A | #N/A | #N/A | #N/A | #N/A |
| 0.11 | 0.00 | #N/A | #N/A | #N/A | #N/A | #N/A | #N/A | 0.13 | 0.00 | 0.18 |
| #N/A | #N/A | #N/A | #N/A | #N/A | #N/A | #N/A | #N/A | #N/A | #N/A | #N/A |
| 0.56 | 0.12 | 0.40 | 0.09 | 0.45 | 0.09 | 0.50 | 0.12 | 0.57 | 0.16 | 0.43 |
| 1.21 | 0.53 | 1.17 | 0.45 | 1.18 | 0.44 | 1.19 | 0.53 | 1.12 | 0.48 | 1.14 |
| 1.62 | 0.71 | 2.15 | 0.78 | 2.21 | 0.79 | 1.88 | 0.80 | 1.44 | 0.62 | 1.93 |
| 0.71 | 0.21 | #N/A | #N/A | #N/A | #N/A | #N/A | #N/A | #N/A | #N/A | 0.55 |
| 0.79 | 0.26 | 0.30 | 0.05 | #N/A | #N/A | 0.46 | 0.10 | 0.37 | 0.05 | #N/A |
| #N/A | #N/A | 3.38 | 0.95 | 3.46 | 0.96 | 2.29 | 0.89 | 3.41 | 0.95 | #N/A |
| #N/A | #N/A | 2.21 | 0.79 | #N/A | #N/A | 2.01 | 0.83 | 1.94 | 0.79 | 1.75 |
| 0.65 | 0.21 | 0.54 | 0.16 | #N/A | #N/A | 0.63 | 0.20 | 0.56 | 0.16 | 0.71 |
| 1.04 | 0.43 | 1.05 | 0.39 | 1.15 | 0.43 | 1.01 | 0.43 | 0.92 | 0.37 | 0.97 |
| 0.82 | 0.28 | 1.17 | 0.44 | 0.75 | 0.23 | 1.07 | 0.46 | 0.85 | 0.33 | 0.95 |
| 1.07 | 0.45 | 2.31 | 0.79 | 1.74 | 0.67 | 1.78 | 0.77 | 1.69 | 0.71 | #N/A |
| 0.67 | 0.18 | 0.91 | 0.33 | 0.83 | 0.29 | 0.73 | 0.26 | 0.79 | 0.30 | 0.92 |
| 0.64 | 0.18 | 0.59 | 0.18 | 0.35 | 0.04 | 0.45 | 0.09 | 0.49 | 0.12 | 0.58 |
| #N/A | #N/A | #N/A | #N/A | #N/A | #N/A | #N/A | #N/A | 1.73 | 0.74 | 0.98 |
| #N/A | #N/A | 2.00 | 0.73 | #N/A | #N/A | #N/A | #N/A | 1.40 | 0.61 | 1.77 |
| #N/A | #N/A | #N/A | #N/A | #N/A | #N/A | 1.72 | 0.75 | 2.38 | 0.88 | 1.20 |
| 0.67 | 0.21 | #N/A | #N/A | #N/A | #N/A | #N/A | #N/A | 0.19 | 0.01 | 0.81 |
| 1.07 | 0.42 | 0.92 | 0.34 | 1.09 | 0.40 | 0.83 | 0.32 | 0.74 | 0.27 | 0.89 |
| 0.88 | 0.32 | 0.85 | 0.31 | 0.92 | 0.32 | 0.86 | 0.34 | 0.75 | 0.27 | 0.65 |
| 2.55 | 0.92 | 2.76 | 0.88 | 3.69 | 0.96 | 1.70 | 0.75 | 1.77 | 0.74 | 1.16 |
| 1.23 | 0.51 | 1.54 | 0.59 | #N/A | #N/A | 1.03 | 0.44 | 1.36 | 0.59 | 0.82 |
| 1.58 | 0.69 | 2.05 | 0.75 | 1.50 | 0.58 | 1.43 | 0.63 | 1.34 | 0.58 | #N/A |
| 2.10 | 0.84 | 1.85 | 0.69 | 1.89 | 0.72 | 2.08 | 0.84 | 2.33 | 0.88 | #N/A |
| 2.86 | 0.95 | 3.06 | 0.93 | 3.26 | 0.94 | 3.16 | 0.97 | 3.07 | 0.96 | 2.05 |
| 0.60 | 0.16 | 1.24 | 0.46 | #N/A | #N/A | #N/A | #N/A | 1.49 | 0.64 | #N/A |
| #N/A | #N/A | #N/A | #N/A | #N/A | #N/A | #N/A | #N/A | #N/A | #N/A | 0.46 |
| 0.76 | 0.25 | 1.35 | 0.53 | 1.00 | 0.36 | 0.91 | 0.37 | 0.90 | 0.36 | 0.78 |
| 0.95 | 0.37 | 1.07 | 0.41 | 0.91 | 0.30 | 0.93 | 0.37 | 0.64 | 0.21 | 0.89 |
| 0.82 | 0.28 | 0.35 | 0.07 | #N/A | #N/A | 0.26 | 0.02 | 0.36 | 0.05 | 0.48 |
| #N/A | #N/A | #N/A | #N/A | #N/A | #N/A | #N/A | #N/A | #N/A | #N/A | #N/A |
| 2.50 | 0.91 | 3.04 | 0.89 | #N/A | #N/A | 2.02 | 0.80 | 2.03 | 0.82 | 2.10 |
| #N/A | #N/A | #N/A | #N/A | #N/A | #N/A | #N/A | #N/A | #N/A | #N/A | #N/A |
| #N/A | #N/A | #N/A | #N/A | #N/A | #N/A | #N/A | #N/A | #N/A | #N/A | #N/A |
| 0.72 | 0.21 | 1.22 | 0.47 | 0.78 | 0.26 | 0.57 | 0.16 | 0.59 | 0.17 | #N/A |
| 1.05 | 0.43 | #N/A | #N/A | #N/A | #N/A | #N/A | #N/A | 0.63 | 0.20 | 0.67 |









|      |      |      |      |      |      |      |      |      |      |      |
|------|------|------|------|------|------|------|------|------|------|------|
| #N/A | #N/A | #N/A | #N/A | #N/A | #N/A | #N/A | #N/A | #N/A | #N/A | #N/A |
| 1.28 | 0.56 | 2.29 | 0.81 | 1.76 | 0.64 | 1.60 | 0.70 | 2.08 | 0.83 | 1.49 |
| 1.00 | 0.39 | 0.91 | 0.33 | #N/A | #N/A | 0.74 | 0.27 | 0.79 | 0.29 | 0.76 |
| #N/A | #N/A | #N/A | #N/A | #N/A | #N/A | #N/A | #N/A | 0.63 | 0.20 | 0.61 |
| 0.60 | 0.15 | #N/A | #N/A | #N/A | #N/A | #N/A | #N/A | 0.59 | 0.18 | 0.70 |
| #N/A | #N/A | 0.88 | 0.32 | 0.78 | 0.24 | #N/A | #N/A | 0.67 | 0.22 | 0.67 |
| 1.26 | 0.52 | #N/A | #N/A | #N/A | #N/A | #N/A | #N/A | 2.42 | 0.89 | 2.40 |
| #N/A | #N/A | #N/A | #N/A | #N/A | #N/A | #N/A | #N/A | #N/A | #N/A | #N/A |
| #N/A | #N/A | #N/A | #N/A | #N/A | #N/A | #N/A | #N/A | #N/A | #N/A | #N/A |
| 1.58 | 0.64 | 2.00 | 0.74 | 1.49 | 0.58 | 1.71 | 0.74 | 1.76 | 0.73 | 1.74 |
| 1.31 | 0.58 | 1.86 | 0.69 | #N/A | #N/A | 1.18 | 0.52 | 1.12 | 0.48 | 1.16 |
| #N/A | #N/A | #N/A | #N/A | #N/A | #N/A | #N/A | #N/A | #N/A | #N/A | 0.47 |
| 0.91 | 0.35 | 0.75 | 0.26 | 0.95 | 0.33 | 1.00 | 0.42 | 0.92 | 0.37 | 0.92 |
| 0.31 | 0.02 | 0.55 | 0.16 | 0.43 | 0.08 | 0.66 | 0.22 | 0.52 | 0.14 | 0.46 |
| 1.17 | 0.50 | 0.86 | 0.31 | #N/A | #N/A | 0.78 | 0.29 | 0.76 | 0.28 | #N/A |
| 0.26 | 0.04 | 0.15 | 0.01 | 0.19 | 0.01 | 0.25 | 0.02 | 0.40 | 0.07 | 0.23 |
| 0.26 | 0.03 | 0.15 | 0.01 | #N/A | #N/A | 0.19 | 0.01 | 0.40 | 0.07 | 0.23 |
| #N/A | #N/A | #N/A | #N/A | #N/A | #N/A | #N/A | #N/A | #N/A | #N/A | #N/A |
| #N/A | #N/A | 0.73 | 0.25 | 0.81 | 0.27 | 0.66 | 0.22 | 0.64 | 0.21 | 0.67 |
| 0.92 | 0.34 | 0.30 | 0.05 | 0.35 | 0.04 | 0.40 | 0.08 | 0.30 | 0.03 | #N/A |
| 2.78 | 0.91 | 2.16 | 0.78 | #N/A | #N/A | 1.99 | 0.83 | 1.56 | 0.67 | 2.36 |
| #N/A | #N/A | 2.30 | 0.80 | 3.17 | 0.88 | 2.04 | 0.81 | 2.24 | 0.86 | 1.62 |
| #N/A | #N/A | 2.37 | 0.83 | 1.59 | 0.61 | 2.03 | 0.83 | 2.38 | 0.87 | 1.29 |
| 2.73 | 0.94 | 2.71 | 0.89 | 2.51 | 0.86 | 2.57 | 0.93 | 2.48 | 0.91 | 2.16 |
| #N/A | #N/A | 2.19 | 0.78 | 2.39 | 0.80 | 1.77 | 0.76 | 1.92 | 0.79 | 1.42 |
| 0.58 | 0.14 | 0.58 | 0.18 | #N/A | #N/A | 0.36 | 0.06 | 0.48 | 0.11 | 0.66 |
| #N/A | #N/A | #N/A | #N/A | #N/A | #N/A | #N/A | #N/A | #N/A | #N/A | #N/A |
| 0.85 | 0.30 | 1.60 | 0.61 | 1.53 | 0.60 | 1.27 | 0.57 | 1.33 | 0.57 | 1.23 |
| 1.24 | 0.51 | 2.28 | 0.79 | #N/A | #N/A | 1.78 | 0.76 | 2.25 | 0.87 | 1.22 |
| #N/A | #N/A | #N/A | #N/A | #N/A | #N/A | #N/A | #N/A | #N/A | #N/A | #N/A |
| 2.27 | 0.86 | 2.74 | 0.89 | 6.74 | 0.95 | 3.49 | 0.94 | 2.66 | 0.93 | 1.44 |
| #N/A | #N/A | #N/A | #N/A | #N/A | #N/A | #N/A | #N/A | #N/A | #N/A | #N/A |
| 1.78 | 0.66 | 3.52 | 0.95 | #N/A | #N/A | #N/A | #N/A | 2.85 | 0.93 | 1.36 |
| #N/A | #N/A | #N/A | #N/A | #N/A | #N/A | #N/A | #N/A | #N/A | #N/A | #N/A |
| #N/A | #N/A | #N/A | #N/A | #N/A | #N/A | #N/A | #N/A | #N/A | #N/A | 0.45 |
| 0.98 | 0.39 | 0.98 | 0.37 | 1.11 | 0.41 | 0.83 | 0.32 | 0.98 | 0.40 | 0.89 |
| 5.91 | 0.73 | 1.09 | 0.41 | #N/A | #N/A | 0.90 | 0.37 | 0.59 | 0.18 | 0.94 |
| 1.03 | 0.41 | 1.19 | 0.45 | 0.91 | 0.32 | 0.68 | 0.23 | 0.68 | 0.23 | 1.13 |
| 0.79 | 0.26 | 0.78 | 0.27 | 0.77 | 0.25 | 0.72 | 0.25 | 0.70 | 0.24 | 0.79 |
| #N/A | #N/A | 1.88 | 0.70 | 2.07 | 0.70 | 1.21 | 0.52 | 1.65 | 0.70 | 1.33 |
| 0.52 | 0.10 | 0.29 | 0.04 | 0.36 | 0.05 | 0.33 | 0.04 | 0.39 | 0.07 | 0.40 |
| 1.20 | 0.50 | 1.67 | 0.64 | 1.57 | 0.61 | 1.38 | 0.62 | 1.33 | 0.58 | 1.31 |
| 0.49 | 0.09 | 0.29 | 0.05 | 0.32 | 0.04 | 0.35 | 0.05 | 0.37 | 0.06 | 0.45 |
| #N/A | #N/A | #N/A | #N/A | #N/A | #N/A | #N/A | #N/A | #N/A | #N/A | #N/A |
| 1.90 | 0.81 | 2.63 | 0.88 | 2.93 | 0.91 | 3.23 | 0.96 | 2.08 | 0.83 | #N/A |
| 1.54 | 0.68 | 1.11 | 0.43 | 0.99 | 0.34 | 0.91 | 0.38 | 0.88 | 0.33 | 0.96 |
| 0.54 | 0.11 | 0.51 | 0.15 | #N/A | #N/A | 0.55 | 0.15 | 0.58 | 0.17 | 0.52 |
| 0.44 | 0.07 | #N/A | #N/A | #N/A | #N/A | #N/A | #N/A | 0.33 | 0.04 | 0.51 |
| #N/A | #N/A | #N/A | #N/A | #N/A | #N/A | #N/A | #N/A | #N/A | #N/A | #N/A |
| 0.93 | 0.34 | 0.91 | 0.34 | #N/A | #N/A | 0.82 | 0.32 | 0.76 | 0.27 | #N/A |
| 0.49 | 0.09 | 0.79 | 0.28 | 1.44 | 0.56 | 1.20 | 0.53 | 1.31 | 0.57 | 0.73 |

|      |      |      |      |      |      |      |      |      |      |      |
|------|------|------|------|------|------|------|------|------|------|------|
| 0.61 | 0.15 | 0.75 | 0.26 | 0.98 | 0.35 | 0.82 | 0.31 | 1.03 | 0.43 | 0.71 |
| #N/A | #N/A | #N/A | #N/A | #N/A | #N/A | #N/A | #N/A | #N/A | #N/A | #N/A |
| 1.99 | 0.82 | 2.72 | 0.89 | 2.33 | 0.82 | 2.32 | 0.89 | 2.29 | 0.88 | 1.64 |
| #N/A | #N/A | 1.80 | 0.68 | 1.70 | 0.66 | 1.45 | 0.65 | 1.56 | 0.68 | 1.17 |
| #N/A | #N/A | #N/A | #N/A | #N/A | #N/A | #N/A | #N/A | #N/A | #N/A | #N/A |
| 0.60 | 0.15 | 1.08 | 0.41 | 0.77 | 0.24 | 0.87 | 0.35 | 0.98 | 0.40 | 1.00 |
| 1.95 | 0.82 | 1.93 | 0.72 | 1.94 | 0.74 | 1.91 | 0.81 | 2.02 | 0.82 | 1.50 |
| 1.33 | 0.59 | 1.60 | 0.61 | 1.44 | 0.55 | 1.23 | 0.53 | 1.42 | 0.59 | 1.40 |
| 2.00 | 0.81 | 1.89 | 0.71 | 2.35 | 0.78 | 1.88 | 0.80 | 2.22 | 0.86 | #N/A |
| 0.84 | 0.29 | #N/A | #N/A | #N/A | #N/A | #N/A | #N/A | 0.61 | 0.19 | 0.68 |
| 1.71 | 0.74 | 1.58 | 0.61 | 1.91 | 0.70 | 1.77 | 0.77 | 1.57 | 0.68 | 1.60 |
| 0.48 | 0.08 | 0.37 | 0.08 | 0.44 | 0.08 | 0.48 | 0.13 | 0.43 | 0.09 | 0.59 |
| #N/A | #N/A | #N/A | #N/A | #N/A | #N/A | #N/A | #N/A | #N/A | #N/A | #N/A |
| #N/A | #N/A | #N/A | #N/A | #N/A | #N/A | #N/A | #N/A | #N/A | #N/A | #N/A |
| 2.23 | 0.87 | 2.86 | 0.90 | 2.64 | 0.88 | 2.47 | 0.91 | 2.81 | 0.92 | 2.03 |
| #N/A | #N/A | #N/A | #N/A | #N/A | #N/A | #N/A | #N/A | #N/A | #N/A | 0.64 |
| 4.43 | 0.98 | #N/A | #N/A | 4.98 | 0.99 | 3.48 | 0.98 | 4.16 | 0.99 | #N/A |
| #N/A | #N/A | #N/A | #N/A | #N/A | #N/A | #N/A | #N/A | #N/A | #N/A | #N/A |
| #N/A | #N/A | #N/A | #N/A | #N/A | #N/A | #N/A | #N/A | #N/A | #N/A | #N/A |
| 1.39 | 0.61 | 1.29 | 0.50 | 1.48 | 0.58 | 1.38 | 0.60 | 1.40 | 0.61 | 1.12 |
| 1.25 | 0.53 | 1.28 | 0.50 | 1.23 | 0.46 | 1.11 | 0.49 | 1.42 | 0.62 | 1.12 |
| 2.39 | 0.88 | 1.80 | 0.68 | 1.92 | 0.70 | 1.65 | 0.73 | 1.26 | 0.54 | 1.35 |
| #N/A | #N/A | #N/A | #N/A | #N/A | #N/A | #N/A | #N/A | #N/A | #N/A | #N/A |
| 1.82 | 0.78 | 2.55 | 0.85 | 2.38 | 0.83 | 1.98 | 0.82 | 2.11 | 0.84 | 1.68 |
| #N/A | #N/A | #N/A | #N/A | #N/A | #N/A | #N/A | #N/A | #N/A | #N/A | #N/A |
| #N/A | #N/A | 2.27 | 0.78 | #N/A | #N/A | 2.43 | 0.90 | 2.46 | 0.90 | #N/A |
| 2.40 | 0.90 | 3.24 | 0.94 | 3.54 | 0.96 | 3.21 | 0.97 | 3.16 | 0.94 | #N/A |
| #N/A | #N/A | #N/A | #N/A | #N/A | #N/A | #N/A | #N/A | #N/A | #N/A | #N/A |
| 0.58 | 0.14 | 0.43 | 0.11 | 0.58 | 0.15 | 0.53 | 0.14 | 0.58 | 0.17 | 0.61 |
| 1.04 | 0.38 | #N/A | #N/A | #N/A | #N/A | #N/A | #N/A | #N/A | #N/A | 0.40 |
| 0.97 | 0.38 | 1.13 | 0.43 | 1.89 | 0.58 | 0.91 | 0.37 | 1.10 | 0.46 | 0.90 |
| 0.67 | 0.20 | 0.76 | 0.26 | 0.61 | 0.16 | 0.50 | 0.12 | 0.67 | 0.23 | 0.59 |
| #N/A | #N/A | #N/A | #N/A | #N/A | #N/A | #N/A | #N/A | #N/A | #N/A | #N/A |
| 1.22 | 0.53 | 1.80 | 0.68 | 2.39 | 0.84 | 1.87 | 0.80 | 1.67 | 0.71 | 1.31 |
| 0.84 | 0.30 | 0.69 | 0.23 | 0.74 | 0.24 | 0.90 | 0.37 | 0.85 | 0.33 | 0.81 |
| #N/A | #N/A | #N/A | #N/A | #N/A | #N/A | #N/A | #N/A | #N/A | #N/A | #N/A |
| #N/A | #N/A | #N/A | #N/A | #N/A | #N/A | #N/A | #N/A | #N/A | #N/A | #N/A |
| 1.38 | 0.61 | 1.28 | 0.50 | 0.85 | 0.30 | 1.07 | 0.46 | 1.13 | 0.48 | 0.77 |
| #N/A | #N/A | #N/A | #N/A | #N/A | #N/A | #N/A | #N/A | #N/A | #N/A | 1.38 |
| 0.28 | 0.02 | 0.19 | 0.01 | 0.44 | 0.08 | 0.25 | 0.02 | 0.29 | 0.03 | 0.45 |
| 0.48 | 0.08 | #N/A | #N/A | #N/A | #N/A | #N/A | #N/A | #N/A | #N/A | #N/A |
| #N/A | #N/A | #N/A | #N/A | #N/A | #N/A | #N/A | #N/A | #N/A | #N/A | #N/A |
| 1.16 | 0.49 | 0.94 | 0.35 | 1.25 | 0.48 | 1.16 | 0.51 | 1.06 | 0.44 | 0.85 |
| #N/A | #N/A | #N/A | #N/A | #N/A | #N/A | #N/A | #N/A | #N/A | #N/A | 0.88 |
| #N/A | #N/A | #N/A | #N/A | #N/A | #N/A | #N/A | #N/A | #N/A | #N/A | #N/A |
| 0.51 | 0.10 | 0.49 | 0.13 | 0.57 | 0.15 | 1.25 | 0.45 | 0.60 | 0.18 | 0.52 |
| #N/A | #N/A | #N/A | #N/A | #N/A | #N/A | #N/A | #N/A | #N/A | #N/A | #N/A |
| #N/A | #N/A | 1.53 | 0.59 | #N/A | #N/A | 2.60 | 0.93 | 1.86 | 0.75 | #N/A |
| #N/A | #N/A | 2.88 | 0.85 | #N/A | #N/A | 2.42 | 0.91 | 2.12 | 0.82 | #N/A |
| 1.05 | 0.43 | #N/A | #N/A | #N/A | #N/A | 1.24 | 0.55 | 1.19 | 0.50 | #N/A |
| 0.85 | 0.30 | 0.60 | 0.19 | 0.54 | 0.13 | 0.62 | 0.20 | 0.59 | 0.17 | 0.72 |

|      |      |      |      |      |      |      |      |      |      |      |
|------|------|------|------|------|------|------|------|------|------|------|
| #N/A | #N/A | #N/A | #N/A | #N/A | #N/A | #N/A | #N/A | #N/A | #N/A | #N/A |
| #N/A | #N/A | #N/A | #N/A | #N/A | #N/A | #N/A | #N/A | #N/A | #N/A | #N/A |
| #N/A | #N/A | 1.44 | 0.55 | 0.75 | 0.26 | 1.23 | 0.54 | 1.63 | 0.69 | 1.20 |
| #N/A | #N/A | #N/A | #N/A | #N/A | #N/A | #N/A | #N/A | #N/A | #N/A | #N/A |
| #N/A | #N/A | 2.30 | 0.81 | 2.23 | 0.81 | 2.15 | 0.86 | 1.74 | 0.74 | 1.35 |
| #N/A | #N/A | #N/A | #N/A | #N/A | #N/A | #N/A | #N/A | #N/A | #N/A | #N/A |
| #N/A | #N/A | #N/A | #N/A | #N/A | #N/A | #N/A | #N/A | #N/A | #N/A | 0.63 |
| #N/A | #N/A | 4.18 | 0.98 | 3.03 | 0.92 | 3.05 | 0.96 | 4.00 | 0.99 | #N/A |
| 1.10 | 0.45 | #N/A | #N/A | #N/A | #N/A | #N/A | #N/A | 0.46 | 0.10 | 0.66 |
| 2.34 | 0.87 | 2.74 | 0.87 | 2.29 | 0.82 | 2.59 | 0.92 | 1.82 | 0.76 | 2.41 |
| 1.82 | 0.66 | 1.85 | 0.65 | #N/A | #N/A | 1.18 | 0.52 | 0.97 | 0.40 | #N/A |
| 2.25 | 0.86 | 2.98 | 0.91 | #N/A | #N/A | 2.15 | 0.86 | 2.35 | 0.88 | 1.32 |
| 2.24 | 0.77 | 3.21 | 0.94 | 2.72 | 0.87 | 2.29 | 0.86 | 2.16 | 0.85 | 1.72 |
| 1.78 | 0.77 | 1.48 | 0.57 | 1.66 | 0.65 | 1.55 | 0.68 | 1.39 | 0.60 | 1.37 |
| 0.65 | 0.17 | 0.82 | 0.29 | 1.06 | 0.39 | 0.86 | 0.34 | 0.90 | 0.36 | #N/A |
| #N/A | #N/A | #N/A | #N/A | #N/A | #N/A | #N/A | #N/A | #N/A | #N/A | #N/A |
| 0.61 | 0.17 | #N/A | #N/A | #N/A | #N/A | #N/A | #N/A | #N/A | #N/A | #N/A |
| 1.12 | 0.47 | 1.23 | 0.47 | 1.34 | 0.52 | 1.18 | 0.52 | 0.91 | 0.37 | 0.86 |
| 0.47 | 0.07 | 0.50 | 0.14 | 0.61 | 0.17 | 0.83 | 0.32 | 0.60 | 0.18 | 0.52 |
| 1.63 | 0.71 | 2.50 | 0.85 | 3.19 | 0.94 | 3.13 | 0.97 | 2.54 | 0.91 | 1.79 |
| #N/A | #N/A | #N/A | #N/A | #N/A | #N/A | #N/A | #N/A | #N/A | #N/A | #N/A |
| #N/A | #N/A | #N/A | #N/A | #N/A | #N/A | #N/A | #N/A | #N/A | #N/A | #N/A |
| #N/A | #N/A | #N/A | #N/A | #N/A | #N/A | #N/A | #N/A | #N/A | #N/A | 0.74 |
| 0.54 | 0.12 | 0.25 | 0.03 | #N/A | #N/A | 0.25 | 0.02 | 0.33 | 0.04 | #N/A |
| 1.29 | 0.57 | 1.87 | 0.70 | 1.19 | 0.44 | 1.24 | 0.54 | 1.55 | 0.67 | 1.35 |
| #N/A | #N/A | #N/A | #N/A | #N/A | #N/A | #N/A | #N/A | #N/A | #N/A | #N/A |
| 0.81 | 0.28 | 1.47 | 0.57 | 1.52 | 0.59 | 1.21 | 0.54 | 1.18 | 0.50 | 1.09 |
| 0.86 | 0.31 | 0.79 | 0.28 | #N/A | #N/A | 0.58 | 0.18 | 0.64 | 0.20 | 0.78 |
| 0.68 | 0.20 | 0.82 | 0.29 | 0.78 | 0.24 | 0.75 | 0.27 | 0.90 | 0.36 | 0.61 |
| 2.77 | 0.93 | 4.26 | 0.98 | 4.99 | 0.99 | 3.23 | 0.97 | 3.03 | 0.96 | 2.43 |
| 1.67 | 0.73 | 2.20 | 0.79 | 2.37 | 0.83 | 2.04 | 0.82 | 1.83 | 0.76 | 1.41 |
| 1.15 | 0.46 | 0.45 | 0.12 | #N/A | #N/A | 0.51 | 0.13 | 0.46 | 0.10 | 0.63 |
| 1.03 | 0.42 | 0.77 | 0.27 | 0.73 | 0.22 | 0.78 | 0.29 | 0.75 | 0.27 | 0.71 |
| 1.26 | 0.55 | 1.49 | 0.58 | 1.57 | 0.62 | 1.25 | 0.55 | 1.44 | 0.63 | 1.35 |
| #N/A | #N/A | #N/A | #N/A | #N/A | #N/A | #N/A | #N/A | #N/A | #N/A | #N/A |
| 1.15 | 0.49 | #N/A | #N/A | #N/A | #N/A | #N/A | #N/A | 0.85 | 0.33 | 0.78 |
| #N/A | #N/A | #N/A | #N/A | #N/A | #N/A | #N/A | #N/A | #N/A | #N/A | 0.69 |
| 1.54 | 0.67 | 2.00 | 0.73 | 2.09 | 0.76 | 1.92 | 0.81 | 2.07 | 0.83 | 1.17 |
| 0.75 | 0.24 | 0.73 | 0.25 | 0.70 | 0.21 | 0.63 | 0.20 | 0.68 | 0.23 | 1.10 |
| 0.55 | 0.12 | 0.32 | 0.06 | 0.42 | 0.08 | 0.47 | 0.11 | 0.44 | 0.09 | 0.79 |
| 0.73 | 0.23 | 0.68 | 0.23 | 0.67 | 0.20 | 0.65 | 0.21 | 0.66 | 0.22 | 0.78 |
| 0.53 | 0.11 | 0.45 | 0.12 | 0.47 | 0.10 | 0.52 | 0.14 | 0.50 | 0.12 | 0.58 |
| #N/A | #N/A | #N/A | #N/A | #N/A | #N/A | #N/A | #N/A | #N/A | #N/A | #N/A |
| #N/A | #N/A | #N/A | #N/A | #N/A | #N/A | #N/A | #N/A | #N/A | #N/A | #N/A |
| #N/A | #N/A | #N/A | #N/A | #N/A | #N/A | #N/A | #N/A | #N/A | #N/A | #N/A |
| #N/A | #N/A | #N/A | #N/A | #N/A | #N/A | #N/A | #N/A | #N/A | #N/A | 1.55 |
| 1.49 | 0.66 | 2.14 | 0.78 | 1.67 | 0.64 | 1.52 | 0.67 | 1.80 | 0.76 | 1.55 |
| #N/A | #N/A | #N/A | #N/A | #N/A | #N/A | #N/A | #N/A | #N/A | #N/A | #N/A |
| 0.52 | 0.10 | 0.35 | 0.07 | 0.41 | 0.07 | 0.54 | 0.15 | 0.47 | 0.11 | 0.61 |
| 0.99 | 0.40 | #N/A | #N/A | #N/A | #N/A | #N/A | #N/A | 1.15 | 0.49 | 0.60 |
| 2.64 | 0.93 | 2.69 | 0.88 | 2.38 | 0.83 | 2.20 | 0.86 | 2.35 | 0.88 | 1.96 |

|      |      |      |      |      |      |      |      |      |      |      |
|------|------|------|------|------|------|------|------|------|------|------|
| #N/A | #N/A | #N/A | #N/A | #N/A | #N/A | #N/A | #N/A | #N/A | #N/A | #N/A |
| #N/A | #N/A | #N/A | #N/A | #N/A | #N/A | #N/A | #N/A | #N/A | #N/A | #N/A |
| #N/A | #N/A | #N/A | #N/A | #N/A | #N/A | #N/A | #N/A | #N/A | #N/A | #N/A |
| 0.57 | 0.13 | 0.43 | 0.11 | 0.55 | 0.14 | 0.62 | 0.20 | 0.60 | 0.18 | 0.44 |
| #N/A | #N/A | #N/A | #N/A | #N/A | #N/A | #N/A | #N/A | 0.95 | 0.38 | #N/A |
| #N/A | #N/A | #N/A | #N/A | #N/A | #N/A | #N/A | #N/A | #N/A | #N/A | #N/A |
| 1.21 | 0.47 | #N/A | #N/A | #N/A | #N/A | 1.28 | 0.55 | #N/A | #N/A | #N/A |
| 0.80 | 0.27 | #N/A | #N/A | #N/A | #N/A | #N/A | #N/A | #N/A | #N/A | #N/A |
| 0.68 | 0.20 | 0.39 | 0.09 | 0.41 | 0.07 | 0.32 | 0.04 | 0.47 | 0.11 | 0.51 |
| 0.75 | 0.24 | 0.40 | 0.10 | 0.41 | 0.07 | 0.31 | 0.04 | 0.46 | 0.10 | 0.63 |
| #N/A | #N/A | #N/A | #N/A | #N/A | #N/A | #N/A | #N/A | #N/A | #N/A | #N/A |
| 1.86 | 0.80 | 2.32 | 0.81 | 1.54 | 0.60 | 1.43 | 0.63 | 1.84 | 0.77 | #N/A |
| 1.00 | 0.39 | 0.62 | 0.20 | #N/A | #N/A | #N/A | #N/A | 0.57 | 0.17 | 0.68 |
| 1.60 | 0.70 | 1.81 | 0.68 | 1.56 | 0.61 | 1.18 | 0.52 | 1.29 | 0.56 | #N/A |
| #N/A | #N/A | #N/A | #N/A | #N/A | #N/A | #N/A | #N/A | #N/A | #N/A | #N/A |
| 0.66 | 0.18 | 0.58 | 0.18 | 0.66 | 0.20 | 0.68 | 0.23 | 0.69 | 0.24 | 0.61 |
| 0.71 | 0.22 | #N/A | #N/A | #N/A | #N/A | #N/A | #N/A | #N/A | #N/A | 0.53 |
| 0.57 | 0.13 | 0.53 | 0.15 | 0.51 | 0.12 | 0.62 | 0.19 | 0.63 | 0.20 | 0.54 |
| 2.40 | 0.90 | 2.03 | 0.75 | 2.59 | 0.87 | 2.35 | 0.90 | 2.65 | 0.92 | 2.52 |
| #N/A | #N/A | 1.89 | 0.71 | 1.42 | 0.55 | 1.55 | 0.69 | 1.58 | 0.68 | 1.34 |
| 3.78 | 0.98 | 3.37 | 0.94 | #N/A | #N/A | 2.95 | 0.96 | 2.69 | 0.91 | #N/A |
| #N/A | #N/A | #N/A | #N/A | #N/A | #N/A | #N/A | #N/A | #N/A | #N/A | 0.69 |
| 1.65 | 0.72 | 2.51 | 0.85 | 3.35 | 0.94 | 2.49 | 0.91 | 2.08 | 0.83 | 2.22 |
| 3.52 | 0.98 | 3.67 | 0.97 | 3.92 | 0.97 | 2.56 | 0.93 | 2.86 | 0.94 | 2.53 |
| 1.56 | 0.66 | #N/A | #N/A | #N/A | #N/A | #N/A | #N/A | #N/A | #N/A | #N/A |
| 1.60 | 0.70 | 1.73 | 0.66 | 1.86 | 0.69 | 1.74 | 0.76 | 1.64 | 0.71 | 1.30 |
| #N/A | #N/A | #N/A | #N/A | #N/A | #N/A | #N/A | #N/A | #N/A | #N/A | 0.64 |
| 2.48 | 0.89 | 2.19 | 0.79 | 2.51 | 0.78 | 1.52 | 0.68 | 1.58 | 0.68 | 1.28 |
| 1.83 | 0.76 | 1.96 | 0.73 | 1.90 | 0.72 | 1.91 | 0.80 | 1.84 | 0.76 | 1.36 |
| 0.58 | 0.13 | #N/A | #N/A | #N/A | #N/A | 0.73 | 0.26 | 0.70 | 0.24 | #N/A |
| 2.11 | 0.76 | 1.44 | 0.56 | 1.44 | 0.56 | 1.49 | 0.66 | 1.33 | 0.58 | 1.25 |
| #N/A | #N/A | #N/A | #N/A | #N/A | #N/A | #N/A | #N/A | #N/A | #N/A | #N/A |
| 1.14 | 0.47 | 0.93 | 0.34 | 1.08 | 0.39 | 1.19 | 0.52 | 1.26 | 0.55 | 0.65 |
| 0.27 | 0.01 | 0.37 | 0.08 | #N/A | #N/A | 0.27 | 0.02 | 0.44 | 0.10 | 0.31 |
| 1.01 | 0.41 | 0.56 | 0.17 | 0.67 | 0.19 | 0.54 | 0.15 | 0.62 | 0.19 | 0.80 |
| 0.52 | 0.10 | 0.59 | 0.18 | 0.74 | 0.24 | 0.59 | 0.17 | 0.63 | 0.20 | 0.82 |
| 0.54 | 0.11 | 0.98 | 0.37 | 1.27 | 0.48 | 0.84 | 0.33 | 0.90 | 0.36 | 0.81 |
| #N/A | #N/A | 1.98 | 0.73 | 1.94 | 0.70 | 1.45 | 0.64 | 1.55 | 0.67 | 1.33 |
| 2.53 | 0.84 | 3.07 | 0.93 | 2.68 | 0.89 | 2.26 | 0.88 | 2.41 | 0.88 | 2.12 |
| 0.80 | 0.27 | 0.39 | 0.09 | #N/A | #N/A | 0.32 | 0.04 | 0.42 | 0.08 | #N/A |
| #N/A | #N/A | #N/A | #N/A | #N/A | #N/A | #N/A | #N/A | #N/A | #N/A | #N/A |
| 0.72 | 0.23 | 1.24 | 0.47 | 0.72 | 0.22 | 0.62 | 0.19 | 0.77 | 0.28 | 0.74 |
| #N/A | #N/A | #N/A | #N/A | #N/A | #N/A | #N/A | #N/A | #N/A | #N/A | 0.59 |
| #N/A | #N/A | 2.39 | 0.83 | 1.82 | 0.70 | 2.67 | 0.94 | 2.21 | 0.86 | 1.95 |
| 1.74 | 0.74 | 2.85 | 0.90 | 2.33 | 0.82 | 2.39 | 0.89 | 2.42 | 0.81 | 1.52 |
| #N/A | #N/A | #N/A | #N/A | #N/A | #N/A | #N/A | #N/A | #N/A | #N/A | #N/A |
| 1.32 | 0.58 | 1.58 | 0.61 | 1.54 | 0.59 | 1.59 | 0.71 | 1.57 | 0.68 | 1.32 |
| 1.19 | 0.52 | 0.97 | 0.36 | 1.03 | 0.38 | 0.85 | 0.33 | 0.96 | 0.39 | 1.09 |
| 2.30 | 0.88 | 1.54 | 0.59 | 2.08 | 0.76 | 1.80 | 0.76 | 1.75 | 0.74 | 1.33 |
| #N/A | #N/A | #N/A | #N/A | #N/A | #N/A | #N/A | #N/A | #N/A | #N/A | #N/A |
| 1.97 | 0.76 | 3.56 | 0.96 | 2.46 | 0.76 | #N/A | #N/A | 1.43 | 0.61 | #N/A |







|       |      |      |      |      |      |      |      |      |      |      |
|-------|------|------|------|------|------|------|------|------|------|------|
| 1.06  | 0.42 | #N/A | #N/A | #N/A | #N/A | 1.42 | 0.63 | 1.08 | 0.45 | 1.38 |
| 1.30  | 0.56 | 1.50 | 0.58 | 1.88 | 0.72 | 1.62 | 0.71 | 1.77 | 0.75 | 1.14 |
| #N/A  | #N/A | #N/A | #N/A | #N/A | #N/A | #N/A | #N/A | 1.21 | 0.53 | #N/A |
| #N/A  | #N/A | #N/A | #N/A | #N/A | #N/A | #N/A | #N/A | #N/A | #N/A | #N/A |
| 2.48  | 0.91 | 2.59 | 0.87 | 2.69 | 0.89 | 2.30 | 0.88 | 2.64 | 0.93 | 1.75 |
| #N/A  | #N/A | #N/A | #N/A | #N/A | #N/A | #N/A | #N/A | #N/A | #N/A | #N/A |
| 0.48  | 0.08 | 0.70 | 0.24 | 0.99 | 0.36 | 0.50 | 0.12 | 0.62 | 0.19 | 0.66 |
| 2.07  | 0.75 | 2.33 | 0.82 | #N/A | #N/A | 1.60 | 0.71 | 1.59 | 0.67 | 1.60 |
| 0.76  | 0.24 | #N/A | #N/A | #N/A | #N/A | #N/A | #N/A | 0.55 | 0.15 | 0.51 |
| 1.66  | 0.72 | 2.08 | 0.76 | 1.38 | 0.52 | 1.71 | 0.75 | 2.00 | 0.81 | 1.36 |
| #N/A  | #N/A | 0.89 | 0.33 | #N/A | #N/A | #N/A | #N/A | 0.73 | 0.26 | 0.94 |
| 0.76  | 0.24 | 0.91 | 0.34 | 0.82 | 0.27 | 0.99 | 0.42 | 0.86 | 0.33 | #N/A |
| 2.22  | 0.88 | 2.44 | 0.84 | 2.34 | 0.82 | 1.85 | 0.79 | 2.02 | 0.82 | 2.02 |
| #N/A  | #N/A | #N/A | #N/A | #N/A | #N/A | #N/A | #N/A | #N/A | #N/A | #N/A |
| 1.24  | 0.50 | 0.53 | 0.17 | 0.84 | 0.27 | 1.02 | 0.42 | 0.89 | 0.36 | #N/A |
| 0.35  | 0.03 | 0.39 | 0.09 | 0.51 | 0.11 | 0.54 | 0.15 | 0.56 | 0.16 | 0.36 |
| 0.83  | 0.29 | 0.62 | 0.20 | 0.59 | 0.16 | 0.80 | 0.31 | 0.73 | 0.26 | 0.79 |
| 0.84  | 0.30 | 0.30 | 0.05 | 0.27 | 0.02 | 0.38 | 0.06 | 0.44 | 0.09 | #N/A |
| #N/A  | #N/A | #N/A | #N/A | #N/A | #N/A | #N/A | #N/A | 0.83 | 0.32 | 0.42 |
| 2.98  | 0.95 | 3.80 | 0.97 | 3.92 | 0.97 | 2.84 | 0.94 | 2.96 | 0.95 | 2.73 |
| 0.78  | 0.25 | 0.73 | 0.25 | 0.73 | 0.23 | 0.64 | 0.21 | 0.59 | 0.18 | #N/A |
| 1.46  | 0.65 | 1.95 | 0.72 | 1.82 | 0.68 | 1.57 | 0.69 | 1.75 | 0.74 | 1.33 |
| 1.18  | 0.50 | 1.04 | 0.39 | 1.05 | 0.39 | 1.07 | 0.46 | 1.13 | 0.49 | 1.08 |
| #N/A  | #N/A | 0.63 | 0.20 | 0.98 | 0.35 | 0.83 | 0.32 | 0.82 | 0.31 | #N/A |
| #N/A  | #N/A | #N/A | #N/A | #N/A | #N/A | #N/A | #N/A | #N/A | #N/A | #N/A |
| 1.67  | 0.73 | 1.71 | 0.64 | #N/A | #N/A | 1.45 | 0.64 | 1.59 | 0.68 | #N/A |
| 0.79  | 0.26 | #N/A | #N/A | #N/A | #N/A | #N/A | #N/A | #N/A | #N/A | #N/A |
| 0.81  | 0.28 | #N/A | #N/A | #N/A | #N/A | #N/A | #N/A | #N/A | #N/A | 0.88 |
| 2.22  | 0.80 | 2.34 | 0.82 | 2.12 | 0.77 | 1.38 | 0.61 | 1.49 | 0.65 | 1.29 |
| #N/A  | #N/A | 5.41 | 0.99 | 4.38 | 0.98 | 3.92 | 0.99 | 3.31 | 0.97 | 2.84 |
| 0.74  | 0.23 | #N/A | #N/A | #N/A | #N/A | #N/A | #N/A | #N/A | #N/A | #N/A |
| 1.77  | 0.74 | 2.79 | 0.90 | 2.33 | 0.82 | 1.51 | 0.67 | 1.89 | 0.77 | 1.55 |
| #N/A  | #N/A | #N/A | #N/A | #N/A | #N/A | #N/A | #N/A | #N/A | #N/A | #N/A |
| 1.42  | 0.61 | #N/A | #N/A | #N/A | #N/A | #N/A | #N/A | #N/A | #N/A | 0.65 |
| 2.16  | 0.87 | 2.39 | 0.82 | 2.13 | 0.76 | 1.75 | 0.73 | 1.95 | 0.79 | 1.52 |
| #N/A  | #N/A | #N/A | #N/A | #N/A | #N/A | #N/A | #N/A | #N/A | #N/A | #N/A |
| 1.40  | 0.60 | 2.02 | 0.75 | 1.52 | 0.59 | 1.47 | 0.66 | 1.78 | 0.72 | 1.61 |
| 1.22  | 0.53 | #N/A | #N/A | #N/A | #N/A | 0.91 | 0.38 | 0.99 | 0.40 | 1.31 |
| 0.30  | 0.03 | #N/A | #N/A | 0.26 | 0.02 | 0.38 | 0.07 | 0.30 | 0.03 | 0.34 |
| #N/A  | #N/A | #N/A | #N/A | #N/A | #N/A | #N/A | #N/A | #N/A | #N/A | #N/A |
| 1.12  | 0.48 | 1.28 | 0.50 | 1.82 | 0.70 | 1.78 | 0.77 | 1.51 | 0.66 | 1.19 |
| 0.71  | 0.22 | #N/A | #N/A | #N/A | #N/A | #N/A | #N/A | #N/A | #N/A | 0.53 |
| 11.64 | 0.88 | 2.70 | 0.89 | #N/A | #N/A | 1.71 | 0.74 | 1.92 | 0.79 | 1.63 |
| 0.85  | 0.30 | 0.98 | 0.37 | 1.04 | 0.38 | 0.86 | 0.34 | 0.96 | 0.39 | 1.00 |
| 1.25  | 0.52 | 1.00 | 0.38 | #N/A | #N/A | 1.44 | 0.63 | 0.78 | 0.29 | #N/A |
| 1.90  | 0.80 | 1.97 | 0.73 | 2.12 | 0.76 | 1.59 | 0.71 | 1.80 | 0.76 | 1.44 |
| 1.51  | 0.66 | 2.35 | 0.83 | 2.10 | 0.77 | 1.99 | 0.80 | 1.57 | 0.68 | 1.61 |
| #N/A  | #N/A | 2.84 | 0.91 | 3.19 | 0.94 | 3.22 | 0.97 | 2.49 | 0.90 | 1.66 |
| #N/A  | #N/A | 0.66 | 0.21 | 0.87 | 0.29 | 0.83 | 0.32 | 0.77 | 0.28 | 0.66 |
| 1.92  | 0.81 | 2.56 | 0.87 | 2.07 | 0.77 | 1.83 | 0.78 | 1.94 | 0.80 | 1.50 |
| 0.74  | 0.24 | 0.80 | 0.28 | 0.80 | 0.26 | 0.77 | 0.28 | 0.77 | 0.28 | 1.06 |

|      |      |      |      |      |      |      |      |      |      |      |
|------|------|------|------|------|------|------|------|------|------|------|
| 1.25 | 0.54 | 0.83 | 0.30 | 1.21 | 0.46 | 1.08 | 0.47 | 0.99 | 0.40 | 0.95 |
| 0.43 | 0.06 | 0.49 | 0.13 | 0.65 | 0.18 | 0.60 | 0.18 | 0.66 | 0.22 | 0.53 |
| 1.52 | 0.63 | 1.61 | 0.62 | 1.64 | 0.64 | 1.11 | 0.49 | 1.44 | 0.62 | 1.46 |
| #N/A | #N/A | #N/A | #N/A | #N/A | #N/A | #N/A | #N/A | #N/A | #N/A | #N/A |
| 1.09 | 0.44 | 0.90 | 0.33 | 0.94 | 0.34 | 0.78 | 0.29 | 1.04 | 0.44 | 0.72 |
| 1.17 | 0.50 | 0.98 | 0.37 | #N/A | #N/A | 0.86 | 0.34 | 0.94 | 0.38 | 0.97 |
| 1.53 | 0.68 | 1.15 | 0.44 | 1.07 | 0.38 | 1.43 | 0.64 | 1.16 | 0.50 | 1.29 |
| 1.26 | 0.55 | 1.10 | 0.42 | 0.70 | 0.28 | 1.09 | 0.47 | 1.06 | 0.45 | 1.31 |
| #N/A | #N/A | #N/A | #N/A | #N/A | #N/A | #N/A | #N/A | #N/A | #N/A | #N/A |
| 3.11 | 0.85 | 1.84 | 0.69 | #N/A | #N/A | 1.39 | 0.62 | 1.38 | 0.60 | 1.13 |
| 1.91 | 0.80 | 1.80 | 0.68 | 2.21 | 0.80 | 1.72 | 0.74 | 2.16 | 0.85 | 1.31 |
| 0.83 | 0.28 | 1.67 | 0.64 | #N/A | #N/A | 0.91 | 0.37 | 1.10 | 0.46 | #N/A |
| 0.68 | 0.20 | 0.66 | 0.22 | 0.65 | 0.18 | 0.75 | 0.27 | 0.74 | 0.26 | 0.78 |
| 0.77 | 0.25 | #N/A | #N/A | #N/A | #N/A | #N/A | #N/A | 0.41 | 0.08 | 0.88 |
| 1.87 | 0.80 | 1.87 | 0.70 | 2.02 | 0.72 | 1.54 | 0.68 | 1.31 | 0.56 | 1.14 |
| 1.67 | 0.73 | 1.80 | 0.68 | 1.57 | 0.61 | 2.11 | 0.85 | 1.86 | 0.77 | 1.60 |
| 1.13 | 0.48 | 1.22 | 0.47 | 1.28 | 0.49 | 1.04 | 0.44 | 1.29 | 0.56 | 1.17 |
| 0.68 | 0.19 | #N/A | #N/A | #N/A | #N/A | 0.69 | 0.25 | 0.82 | 0.31 | #N/A |
| 0.56 | 0.13 | 0.45 | 0.12 | #N/A | #N/A | #N/A | #N/A | 0.44 | 0.09 | 0.67 |
| 0.57 | 0.13 | 0.45 | 0.12 | 0.46 | 0.09 | 0.62 | 0.19 | 0.45 | 0.10 | 0.56 |
| 0.37 | 0.04 | 0.55 | 0.16 | #N/A | #N/A | 0.32 | 0.04 | 0.37 | 0.06 | 0.61 |
| 1.53 | 0.67 | 1.44 | 0.56 | #N/A | #N/A | 0.67 | 0.22 | 0.85 | 0.33 | 0.77 |
| 1.37 | 0.60 | 1.90 | 0.71 | 1.31 | 0.50 | 1.33 | 0.60 | 1.48 | 0.64 | 1.27 |
| 1.19 | 0.51 | 1.70 | 0.64 | 1.65 | 0.61 | 1.59 | 0.70 | 1.56 | 0.67 | 1.15 |
| 0.65 | 0.18 | 0.52 | 0.15 | 0.60 | 0.17 | 0.62 | 0.20 | 0.53 | 0.14 | 0.53 |
| 1.47 | 0.65 | #N/A | #N/A | 0.78 | 0.28 | #N/A | #N/A | #N/A | #N/A | 1.20 |
| #N/A | #N/A | #N/A | #N/A | #N/A | #N/A | #N/A | #N/A | #N/A | #N/A | #N/A |
| 1.71 | 0.74 | 1.34 | 0.51 | 1.33 | 0.51 | 1.48 | 0.66 | 1.30 | 0.57 | #N/A |
| #N/A | #N/A | 2.16 | 0.78 | 2.11 | 0.76 | 2.30 | 0.89 | 1.97 | 0.80 | 1.63 |
| #N/A | #N/A | 2.33 | 0.82 | 2.57 | 0.81 | 2.03 | 0.83 | 2.16 | 0.85 | 1.95 |
| #N/A | #N/A | #N/A | #N/A | #N/A | #N/A | #N/A | #N/A | #N/A | #N/A | #N/A |
| 2.05 | 0.84 | 3.65 | 0.95 | 2.35 | 0.82 | 2.60 | 0.93 | 2.27 | 0.87 | 2.52 |
| #N/A | #N/A | #N/A | #N/A | #N/A | #N/A | #N/A | #N/A | #N/A | #N/A | #N/A |
| 0.81 | 0.28 | 0.57 | 0.17 | 0.67 | 0.21 | 0.60 | 0.19 | 0.54 | 0.15 | 0.55 |
| 2.79 | 0.94 | 3.14 | 0.93 | 2.70 | 0.84 | 2.57 | 0.93 | 2.65 | 0.92 | 2.44 |
| 0.99 | 0.39 | 1.14 | 0.43 | 1.00 | 0.35 | 0.81 | 0.31 | 0.93 | 0.38 | 1.01 |
| 0.39 | 0.06 | 0.40 | 0.09 | #N/A | #N/A | #N/A | #N/A | 0.24 | 0.02 | 0.71 |
| 0.93 | 0.34 | 1.02 | 0.38 | 0.74 | 0.23 | 0.81 | 0.31 | 1.07 | 0.44 | 0.90 |
| 1.68 | 0.73 | 1.97 | 0.73 | 1.76 | 0.67 | 1.53 | 0.68 | 1.59 | 0.69 | 1.50 |
| 1.07 | 0.44 | 0.94 | 0.35 | 0.77 | 0.25 | 1.05 | 0.45 | 0.92 | 0.37 | 0.98 |
| 3.03 | 0.96 | 2.17 | 0.78 | 2.51 | 0.86 | 1.78 | 0.76 | 2.47 | 0.90 | #N/A |
| #N/A | #N/A | #N/A | #N/A | #N/A | #N/A | #N/A | #N/A | #N/A | #N/A | #N/A |
| 1.46 | 0.64 | 2.09 | 0.76 | 2.00 | 0.73 | 1.75 | 0.76 | 1.37 | 0.60 | 1.67 |
| 1.78 | 0.75 | 2.46 | 0.84 | 2.29 | 0.77 | 1.74 | 0.74 | 1.60 | 0.68 | 1.09 |
| 6.59 | 0.98 | 4.47 | 0.94 | 3.77 | 0.96 | 3.39 | 0.96 | 3.48 | 0.98 | 2.74 |
| #N/A | #N/A | #N/A | #N/A | #N/A | #N/A | #N/A | #N/A | #N/A | #N/A | #N/A |
| #N/A | #N/A | #N/A | #N/A | #N/A | #N/A | #N/A | #N/A | 0.44 | 0.09 | #N/A |
| 1.51 | 0.67 | 1.52 | 0.59 | 1.53 | 0.59 | 1.54 | 0.68 | 1.42 | 0.62 | 1.28 |
| #N/A | #N/A | #N/A | #N/A | #N/A | #N/A | #N/A | #N/A | 0.89 | 0.35 | #N/A |
| #N/A | #N/A | #N/A | #N/A | #N/A | #N/A | #N/A | #N/A | #N/A | #N/A | #N/A |
| #N/A | #N/A | 0.58 | 0.18 | 0.48 | 0.10 | 0.61 | 0.19 | 0.64 | 0.21 | #N/A |



|       |      |      |      |      |      |      |      |      |      |      |
|-------|------|------|------|------|------|------|------|------|------|------|
| 0.31  | 0.03 | 0.30 | 0.05 | 0.23 | 0.01 | 0.40 | 0.07 | 0.38 | 0.06 | 0.37 |
| #N/A  | #N/A | #N/A | #N/A | #N/A | #N/A | #N/A | #N/A | #N/A | #N/A | #N/A |
| 1.96  | 0.82 | 3.04 | 0.92 | 3.02 | 0.87 | 2.01 | 0.83 | 2.38 | 0.89 | 1.74 |
| 2.34  | 0.89 | 3.41 | 0.95 | 3.42 | 0.93 | 2.31 | 0.88 | 2.57 | 0.91 | 2.48 |
| 0.46  | 0.07 | 0.41 | 0.10 | 0.34 | 0.04 | 0.40 | 0.07 | 0.46 | 0.10 | 0.49 |
| #N/A  | #N/A | #N/A | #N/A | #N/A | #N/A | #N/A | #N/A | #N/A | #N/A | #N/A |
| 0.33  | 0.03 | 0.21 | 0.02 | 0.26 | 0.02 | 0.24 | 0.02 | 0.20 | 0.01 | 0.39 |
| 1.06  | 0.43 | 1.37 | 0.53 | 0.90 | 0.32 | 0.89 | 0.36 | 1.20 | 0.51 | 1.08 |
| 0.26  | 0.01 | 0.14 | 0.01 | 0.25 | 0.02 | 0.23 | 0.01 | 0.20 | 0.01 | 0.25 |
| 0.83  | 0.29 | 0.78 | 0.27 | 0.82 | 0.27 | 1.06 | 0.46 | 0.96 | 0.39 | 0.78 |
| 1.15  | 0.49 | 1.03 | 0.38 | 1.06 | 0.39 | 1.02 | 0.43 | 0.97 | 0.40 | 1.00 |
| 1.40  | 0.61 | 1.32 | 0.51 | 1.30 | 0.49 | 1.13 | 0.49 | 1.44 | 0.63 | #N/A |
| #N/A  | #N/A | 0.97 | 0.37 | 0.91 | 0.32 | 0.99 | 0.42 | 0.94 | 0.38 | #N/A |
| 1.00  | 0.40 | 1.25 | 0.49 | #N/A | #N/A | 1.28 | 0.56 | 1.28 | 0.53 | 0.90 |
| 2.66  | 0.93 | 4.53 | 0.97 | 3.36 | 0.93 | 2.08 | 0.82 | 2.82 | 0.94 | 2.34 |
| 0.52  | 0.11 | #N/A | #N/A | #N/A | #N/A | #N/A | #N/A | #N/A | #N/A | #N/A |
| 1.36  | 0.58 | 1.78 | 0.67 | 1.33 | 0.51 | 1.68 | 0.70 | 1.64 | 0.71 | 1.31 |
| #N/A  | #N/A | #N/A | #N/A | #N/A | #N/A | #N/A | #N/A | #N/A | #N/A | #N/A |
| 1.45  | 0.64 | 1.93 | 0.72 | 1.61 | 0.62 | 1.54 | 0.68 | 1.53 | 0.65 | 1.31 |
| 2.31  | 0.89 | 2.98 | 0.91 | 3.43 | 0.95 | 2.49 | 0.88 | 3.18 | 0.97 | 2.04 |
| 0.74  | 0.24 | 0.77 | 0.27 | 0.70 | 0.21 | 0.80 | 0.30 | 0.72 | 0.26 | 0.71 |
| #N/A  | #N/A | #N/A | #N/A | #N/A | #N/A | #N/A | #N/A | #N/A | #N/A | #N/A |
| 4.06  | 0.98 | 3.11 | 0.93 | 3.31 | 0.94 | 3.39 | 0.98 | 2.75 | 0.94 | #N/A |
| #N/A  | #N/A | #N/A | #N/A | #N/A | #N/A | #N/A | #N/A | #N/A | #N/A | 1.21 |
| 1.33  | 0.59 | #N/A | #N/A | #N/A | #N/A | 0.47 | 0.11 | 0.48 | 0.12 | #N/A |
| 11.67 | 0.95 | 1.64 | 0.63 | #N/A | #N/A | #N/A | #N/A | #N/A | #N/A | 1.43 |
| 1.87  | 0.79 | 1.55 | 0.60 | 2.25 | 0.77 | 1.90 | 0.77 | 1.42 | 0.62 | #N/A |
| 1.63  | 0.72 | 1.54 | 0.59 | 1.60 | 0.62 | 1.44 | 0.64 | 1.46 | 0.64 | 1.25 |
| #N/A  | #N/A | #N/A | #N/A | #N/A | #N/A | #N/A | #N/A | #N/A | #N/A | 0.22 |
| 1.75  | 0.76 | #N/A | #N/A | #N/A | #N/A | 2.53 | 0.91 | 2.73 | 0.93 | 1.41 |
| 1.44  | 0.64 | 2.65 | 0.88 | 2.17 | 0.78 | 2.15 | 0.86 | 2.53 | 0.91 | 1.72 |
| 1.19  | 0.51 | 1.52 | 0.59 | 1.21 | 0.46 | 1.37 | 0.61 | 1.47 | 0.64 | #N/A |
| 1.18  | 0.48 | 0.81 | 0.29 | 1.24 | 0.47 | 0.68 | 0.23 | 0.89 | 0.35 | 0.82 |
| 1.02  | 0.42 | 0.89 | 0.33 | 1.32 | 0.48 | 0.77 | 0.29 | 0.85 | 0.33 | 0.92 |
| 1.03  | 0.43 | #N/A | #N/A | #N/A | #N/A | #N/A | #N/A | #N/A | #N/A | #N/A |
| 1.39  | 0.61 | #N/A | #N/A | #N/A | #N/A | #N/A | #N/A | #N/A | #N/A | 1.49 |
| 2.65  | 0.92 | 2.39 | 0.82 | 2.26 | 0.81 | 2.22 | 0.87 | 1.68 | 0.66 | 1.41 |
| 1.58  | 0.65 | 1.27 | 0.50 | 1.18 | 0.44 | 1.09 | 0.47 | 0.98 | 0.40 | 1.26 |
| 2.84  | 0.95 | 2.32 | 0.82 | 2.40 | 0.84 | 2.30 | 0.89 | 1.84 | 0.77 | 1.86 |
| 2.09  | 0.85 | 1.81 | 0.68 | 1.71 | 0.66 | 1.61 | 0.71 | 1.75 | 0.74 | 1.32 |
| #N/A  | #N/A | #N/A | #N/A | #N/A | #N/A | #N/A | #N/A | #N/A | #N/A | #N/A |
| 0.97  | 0.37 | 0.87 | 0.31 | 0.59 | 0.15 | 0.84 | 0.33 | 0.72 | 0.25 | 0.73 |
| 0.78  | 0.25 | 0.55 | 0.16 | 0.76 | 0.24 | 0.77 | 0.28 | 0.77 | 0.28 | 0.66 |
| 0.61  | 0.16 | 0.46 | 0.12 | 0.43 | 0.09 | 0.45 | 0.09 | 0.45 | 0.10 | 0.60 |
| 0.50  | 0.09 | 0.45 | 0.11 | 0.32 | 0.05 | 0.31 | 0.04 | 0.39 | 0.07 | 0.40 |
| 1.96  | 0.80 | #N/A | #N/A | 2.71 | 0.81 | 2.32 | 0.89 | 2.95 | 0.94 | 1.64 |
| 0.58  | 0.14 | 0.36 | 0.07 | #N/A | #N/A | 0.35 | 0.06 | 0.33 | 0.04 | 0.40 |
| #N/A  | #N/A | #N/A | #N/A | #N/A | #N/A | #N/A | #N/A | #N/A | #N/A | #N/A |
| 1.31  | 0.55 | 1.05 | 0.40 | 1.17 | 0.44 | 1.08 | 0.46 | 0.95 | 0.39 | 1.08 |
| 1.22  | 0.53 | 1.48 | 0.57 | 1.12 | 0.42 | 1.18 | 0.52 | 1.27 | 0.55 | 1.20 |
| 0.55  | 0.12 | 0.29 | 0.04 | #N/A | #N/A | 0.32 | 0.04 | 0.30 | 0.03 | 0.54 |

|      |      |      |      |      |      |      |      |      |      |      |
|------|------|------|------|------|------|------|------|------|------|------|
| 2.48 | 0.90 | 3.59 | 0.96 | 3.57 | 0.93 | 2.41 | 0.91 | 2.95 | 0.94 | #N/A |
| 0.68 | 0.19 | 1.89 | 0.71 | #N/A | #N/A | 1.17 | 0.52 | 1.43 | 0.61 | 1.26 |
| 1.27 | 0.56 | 1.20 | 0.46 | 1.12 | 0.41 | 1.10 | 0.48 | 1.18 | 0.51 | 1.10 |
| 0.92 | 0.35 | 0.50 | 0.14 | #N/A | #N/A | 0.56 | 0.16 | 0.48 | 0.12 | 0.59 |
| 0.39 | 0.04 | 0.23 | 0.02 | 0.32 | 0.04 | 0.42 | 0.08 | 0.33 | 0.04 | 0.44 |
| 0.61 | 0.16 | 0.50 | 0.14 | 0.50 | 0.11 | 0.56 | 0.16 | 0.52 | 0.14 | 0.56 |
| 1.48 | 0.64 | 1.76 | 0.67 | 1.37 | 0.52 | 1.58 | 0.70 | 1.37 | 0.60 | #N/A |
| #N/A | #N/A | #N/A | #N/A | #N/A | #N/A | #N/A | #N/A | #N/A | #N/A | #N/A |
| 1.91 | 0.81 | 2.54 | 0.86 | 1.95 | 0.74 | 1.81 | 0.77 | 2.13 | 0.84 | 1.68 |
| 0.61 | 0.17 | 0.43 | 0.11 | 0.54 | 0.14 | 0.52 | 0.13 | 0.46 | 0.10 | 0.48 |
| 1.42 | 0.62 | 1.03 | 0.39 | 1.50 | 0.59 | 0.98 | 0.41 | 1.07 | 0.45 | 1.30 |
| 0.48 | 0.08 | #N/A | #N/A | #N/A | #N/A | #N/A | #N/A | 0.27 | 0.02 | 0.55 |
| 0.80 | 0.28 | 0.93 | 0.34 | 1.12 | 0.42 | 0.98 | 0.41 | 0.92 | 0.37 | 0.83 |
| 2.92 | 0.92 | 2.78 | 0.88 | 2.17 | 0.75 | 1.84 | 0.79 | 1.86 | 0.77 | 1.57 |
| 0.40 | 0.05 | #N/A | #N/A | #N/A | #N/A | #N/A | #N/A | 0.47 | 0.11 | 0.49 |
| #N/A | #N/A | 1.37 | 0.53 | #N/A | #N/A | 1.37 | 0.61 | 1.10 | 0.47 | #N/A |
| 1.25 | 0.55 | 1.62 | 0.62 | 1.42 | 0.54 | 1.45 | 0.64 | 1.59 | 0.69 | 1.37 |
| 1.15 | 0.49 | #N/A | #N/A | 1.44 | 0.55 | 1.52 | 0.67 | 1.51 | 0.65 | 1.27 |
| 2.40 | 0.90 | 3.50 | 0.96 | 3.02 | 0.92 | 3.03 | 0.96 | 3.54 | 0.98 | 2.33 |
| #N/A | #N/A | #N/A | #N/A | #N/A | #N/A | #N/A | #N/A | #N/A | #N/A | #N/A |
| 1.53 | 0.66 | #N/A | #N/A | #N/A | #N/A | 1.81 | 0.77 | 2.25 | 0.86 | #N/A |
| #N/A | #N/A | #N/A | #N/A | #N/A | #N/A | #N/A | #N/A | 1.45 | 0.64 | #N/A |
| #N/A | #N/A | #N/A | #N/A | #N/A | #N/A | 0.91 | 0.37 | 0.35 | 0.06 | #N/A |
| 2.30 | 0.88 | 2.35 | 0.80 | 3.22 | 0.94 | 1.62 | 0.72 | 2.15 | 0.85 | #N/A |
| 1.96 | 0.82 | 2.24 | 0.80 | #N/A | #N/A | 1.27 | 0.56 | 1.50 | 0.63 | 1.55 |
| 2.06 | 0.84 | 2.51 | 0.85 | 1.95 | 0.74 | 1.99 | 0.81 | 2.16 | 0.81 | 1.52 |
| 0.69 | 0.20 | #N/A | #N/A | #N/A | #N/A | #N/A | #N/A | 0.58 | 0.17 | 0.65 |
| 0.97 | 0.39 | 0.85 | 0.31 | 0.84 | 0.29 | 0.81 | 0.31 | 0.83 | 0.32 | 0.90 |
| #N/A | #N/A | #N/A | #N/A | #N/A | #N/A | #N/A | #N/A | #N/A | #N/A | #N/A |
| 2.33 | 0.89 | 1.33 | 0.49 | #N/A | #N/A | 2.30 | 0.89 | 2.12 | 0.84 | 1.81 |
| #N/A | #N/A | 0.84 | 0.30 | 0.89 | 0.30 | #N/A | #N/A | 1.19 | 0.51 | 0.80 |
| 0.79 | 0.26 | 0.30 | 0.05 | #N/A | #N/A | 0.41 | 0.07 | 0.40 | 0.07 | 0.43 |
| #N/A | #N/A | 8.54 | 0.94 | #N/A | #N/A | 1.80 | 0.77 | 2.29 | 0.86 | #N/A |
| 2.76 | 0.94 | 2.47 | 0.82 | 2.32 | 0.82 | 2.64 | 0.93 | 2.46 | 0.90 | 1.32 |
| #N/A | #N/A | #N/A | #N/A | #N/A | #N/A | #N/A | #N/A | #N/A | #N/A | 0.63 |
| 1.63 | 0.70 | #N/A | #N/A | #N/A | #N/A | #N/A | #N/A | 1.58 | 0.68 | 1.35 |
| 5.30 | 0.97 | #N/A | #N/A | #N/A | #N/A | #N/A | #N/A | 1.49 | 0.65 | 1.05 |
| 1.44 | 0.63 | 1.24 | 0.48 | 1.35 | 0.51 | 1.38 | 0.61 | 1.08 | 0.45 | 1.31 |
| #N/A | #N/A | 2.56 | 0.86 | 3.26 | 0.92 | 2.15 | 0.86 | 2.36 | 0.89 | 1.71 |
| #N/A | #N/A | #N/A | #N/A | #N/A | #N/A | #N/A | #N/A | 0.54 | 0.15 | 0.58 |
| 0.72 | 0.21 | 0.82 | 0.29 | 0.81 | 0.27 | 0.75 | 0.28 | 0.75 | 0.27 | #N/A |
| 0.52 | 0.10 | 0.80 | 0.28 | #N/A | #N/A | #N/A | #N/A | 0.92 | 0.37 | #N/A |
| #N/A | #N/A | #N/A | #N/A | #N/A | #N/A | #N/A | #N/A | 1.88 | 0.74 | #N/A |
| 1.94 | 0.80 | 2.18 | 0.79 | 1.87 | 0.72 | 1.91 | 0.81 | 1.97 | 0.81 | 1.68 |
| #N/A | #N/A | #N/A | #N/A | #N/A | #N/A | #N/A | #N/A | #N/A | #N/A | #N/A |
| 2.78 | 0.94 | 2.86 | 0.89 | 3.84 | 0.97 | 2.48 | 0.91 | 3.03 | 0.96 | 2.05 |
| 1.83 | 0.75 | 3.18 | 0.92 | 1.99 | 0.75 | 1.65 | 0.73 | 2.22 | 0.86 | 1.89 |
| #N/A | #N/A | 2.26 | 0.81 | 1.63 | 0.63 | 1.15 | 0.51 | 1.28 | 0.56 | 1.58 |
| 1.38 | 0.61 | 1.37 | 0.53 | 1.19 | 0.44 | 1.31 | 0.58 | 1.08 | 0.46 | 1.23 |
| 1.44 | 0.63 | 2.14 | 0.78 | #N/A | #N/A | 1.77 | 0.75 | 1.61 | 0.69 | 0.85 |
| 1.44 | 0.64 | 1.57 | 0.60 | 1.86 | 0.71 | 1.76 | 0.76 | 1.84 | 0.77 | 1.17 |



|      |      |      |      |      |      |      |      |      |      |      |
|------|------|------|------|------|------|------|------|------|------|------|
| 1.00 | 0.40 | 1.14 | 0.44 | 0.99 | 0.36 | 0.98 | 0.41 | 0.97 | 0.39 | 0.89 |
| 2.23 | 0.75 | 3.14 | 0.86 | #N/A | #N/A | 2.19 | 0.87 | 1.86 | 0.76 | 1.49 |
| #N/A | #N/A | #N/A | #N/A | #N/A | #N/A | #N/A | #N/A | #N/A | #N/A | #N/A |
| #N/A | #N/A | #N/A | #N/A | #N/A | #N/A | #N/A | #N/A | #N/A | #N/A | #N/A |
| 1.18 | 0.51 | 1.01 | 0.38 | 0.86 | 0.29 | 0.82 | 0.32 | 1.17 | 0.50 | 1.08 |
| 1.63 | 0.71 | 1.47 | 0.57 | 1.64 | 0.64 | 1.10 | 0.48 | 1.27 | 0.55 | 1.12 |
| 3.19 | 0.97 | 3.74 | 0.97 | 3.31 | 0.95 | 2.94 | 0.96 | 3.39 | 0.98 | 2.36 |
| 1.69 | 0.73 | 2.38 | 0.83 | 2.19 | 0.79 | 1.89 | 0.80 | 2.46 | 0.90 | 1.85 |
| #N/A | #N/A | #N/A | #N/A | #N/A | #N/A | #N/A | #N/A | #N/A | #N/A | #N/A |
| 0.51 | 0.09 | 0.62 | 0.19 | 0.63 | 0.18 | 0.41 | 0.08 | 0.48 | 0.11 | 0.64 |
| 0.32 | 0.03 | 0.41 | 0.10 | 0.48 | 0.10 | 0.36 | 0.05 | 0.40 | 0.07 | 0.54 |
| #N/A | #N/A | #N/A | #N/A | #N/A | #N/A | #N/A | #N/A | #N/A | #N/A | #N/A |
| 1.16 | 0.49 | 1.23 | 0.48 | 1.19 | 0.45 | 1.20 | 0.52 | 1.03 | 0.42 | #N/A |
| 0.99 | 0.38 | 0.99 | 0.37 | 1.24 | 0.47 | 1.01 | 0.42 | 0.98 | 0.38 | 0.90 |
| 3.05 | 0.96 | 3.72 | 0.97 | 2.16 | 0.78 | 2.78 | 0.94 | 2.93 | 0.95 | 2.07 |
| 1.73 | 0.74 | 2.05 | 0.75 | 2.06 | 0.76 | 1.80 | 0.78 | 1.91 | 0.78 | 1.50 |
| #N/A | #N/A | #N/A | #N/A | #N/A | #N/A | #N/A | #N/A | #N/A | #N/A | #N/A |
| 2.60 | 0.89 | 2.67 | 0.87 | 3.07 | 0.79 | 2.32 | 0.89 | 2.83 | 0.94 | #N/A |
| 0.42 | 0.05 | 0.93 | 0.34 | 0.66 | 0.20 | 0.68 | 0.24 | 1.02 | 0.41 | #N/A |
| 1.07 | 0.44 | 1.47 | 0.57 | 1.27 | 0.48 | 0.77 | 0.29 | 0.89 | 0.35 | 0.87 |
| 0.73 | 0.22 | 1.18 | 0.46 | 1.25 | 0.47 | 0.92 | 0.37 | 0.95 | 0.38 | 0.89 |
| #N/A | #N/A | #N/A | #N/A | #N/A | #N/A | 1.12 | 0.49 | 0.80 | 0.30 | 0.93 |
| 1.25 | 0.55 | 1.06 | 0.40 | 1.14 | 0.42 | 1.19 | 0.53 | 1.07 | 0.46 | 0.96 |
| 0.87 | 0.31 | 0.96 | 0.36 | 1.26 | 0.47 | 1.08 | 0.47 | 1.04 | 0.44 | 0.87 |
| #N/A | #N/A | #N/A | #N/A | 0.51 | 0.12 | 0.64 | 0.20 | 0.60 | 0.18 | 0.68 |
| 1.35 | 0.60 | 1.08 | 0.41 | 1.18 | 0.44 | 1.11 | 0.49 | 1.07 | 0.45 | 1.09 |
| #N/A | #N/A | 1.34 | 0.52 | 1.10 | 0.41 | 1.41 | 0.63 | 1.24 | 0.54 | 1.10 |
| 2.03 | 0.83 | 2.21 | 0.80 | 1.90 | 0.71 | 2.07 | 0.84 | 2.31 | 0.88 | 1.48 |
| 1.07 | 0.45 | 0.81 | 0.29 | 0.81 | 0.27 | 0.97 | 0.41 | 0.84 | 0.32 | 0.95 |
| 0.69 | 0.20 | 0.61 | 0.19 | #N/A | #N/A | 0.61 | 0.19 | 0.64 | 0.20 | #N/A |
| 0.84 | 0.30 | 0.38 | 0.08 | 0.44 | 0.09 | 0.53 | 0.14 | 0.42 | 0.08 | 0.98 |
| #N/A | #N/A | #N/A | #N/A | #N/A | #N/A | #N/A | #N/A | #N/A | #N/A | #N/A |
| #N/A | #N/A | #N/A | #N/A | #N/A | #N/A | #N/A | #N/A | #N/A | #N/A | #N/A |
| 1.08 | 0.45 | 1.68 | 0.64 | 1.66 | 0.63 | 1.07 | 0.47 | 1.07 | 0.45 | 1.13 |
| #N/A | #N/A | #N/A | #N/A | #N/A | #N/A | #N/A | #N/A | #N/A | #N/A | #N/A |
| 1.55 | 0.68 | 2.26 | 0.80 | 1.84 | 0.65 | 1.64 | 0.72 | 1.94 | 0.80 | 1.47 |
| 1.20 | 0.49 | #N/A | #N/A | #N/A | #N/A | 1.50 | 0.67 | 1.06 | 0.45 | #N/A |
| 0.73 | 0.23 | 0.69 | 0.23 | #N/A | #N/A | #N/A | #N/A | 0.71 | 0.25 | 0.67 |
| 0.55 | 0.12 | 0.73 | 0.25 | 0.74 | 0.24 | 0.57 | 0.16 | 0.76 | 0.28 | 0.73 |
| #N/A | #N/A | #N/A | #N/A | #N/A | #N/A | #N/A | #N/A | #N/A | #N/A | #N/A |
| #N/A | #N/A | #N/A | #N/A | #N/A | #N/A | #N/A | #N/A | #N/A | #N/A | #N/A |
| #N/A | #N/A | #N/A | #N/A | #N/A | #N/A | #N/A | #N/A | #N/A | #N/A | #N/A |
| 1.05 | 0.43 | 1.05 | 0.40 | #N/A | #N/A | 0.86 | 0.35 | 0.78 | 0.29 | 0.67 |
| 0.78 | 0.27 | 0.79 | 0.28 | 0.67 | 0.19 | 0.85 | 0.34 | 0.76 | 0.28 | 0.81 |
| 0.57 | 0.13 | 0.52 | 0.15 | #N/A | #N/A | 0.74 | 0.27 | 0.41 | 0.08 | 0.74 |
| 1.18 | 0.51 | 1.04 | 0.39 | 1.11 | 0.41 | 1.11 | 0.48 | 1.15 | 0.50 | 1.12 |
| 0.50 | 0.11 | 0.35 | 0.07 | #N/A | #N/A | #N/A | #N/A | 0.45 | 0.12 | 0.41 |
| 2.44 | 0.70 | 1.73 | 0.65 | 2.17 | 0.78 | #N/A | #N/A | 1.55 | 0.68 | #N/A |
| 1.92 | 0.81 | 2.00 | 0.74 | 1.95 | 0.73 | 1.31 | 0.58 | 1.36 | 0.58 | 0.91 |
| #N/A | #N/A | #N/A | #N/A | #N/A | #N/A | #N/A | #N/A | #N/A | #N/A | #N/A |
| 1.47 | 0.65 | 1.72 | 0.65 | 1.87 | 0.68 | 1.51 | 0.66 | 1.53 | 0.66 | 1.55 |



|      |      |      |      |      |      |      |      |      |      |      |
|------|------|------|------|------|------|------|------|------|------|------|
| 2.64 | 0.92 | 2.13 | 0.76 | 2.18 | 0.80 | 1.85 | 0.79 | 1.82 | 0.75 | #N/A |
| 1.74 | 0.76 | 1.90 | 0.71 | 1.76 | 0.68 | 1.65 | 0.72 | 1.74 | 0.74 | 1.43 |
| 1.47 | 0.65 | 2.35 | 0.77 | #N/A | #N/A | 1.96 | 0.82 | 1.66 | 0.71 | 2.99 |
| 0.84 | 0.30 | 1.42 | 0.55 | 1.21 | 0.45 | 1.07 | 0.45 | 1.37 | 0.60 | 1.07 |
| #N/A | #N/A | #N/A | #N/A | #N/A | #N/A | #N/A | #N/A | #N/A | #N/A | 0.63 |
| 2.97 | 0.90 | 2.83 | 0.90 | 3.13 | 0.93 | 2.21 | 0.86 | 1.94 | 0.80 | #N/A |
| 1.88 | 0.80 | 2.08 | 0.76 | 2.16 | 0.77 | 1.59 | 0.70 | 1.83 | 0.77 | 1.74 |
| 1.16 | 0.47 | 1.18 | 0.45 | 1.43 | 0.55 | 1.25 | 0.56 | 0.84 | 0.33 | 1.04 |
| 1.17 | 0.50 | 0.89 | 0.33 | 0.87 | 0.30 | 1.13 | 0.50 | 1.02 | 0.42 | 0.79 |
| 0.92 | 0.35 | 1.19 | 0.46 | 0.90 | 0.32 | 1.05 | 0.46 | 1.38 | 0.60 | 1.04 |
| 3.64 | 0.96 | 2.56 | 0.87 | #N/A | #N/A | 1.91 | 0.81 | 2.33 | 0.87 | 2.15 |
| 0.96 | 0.37 | #N/A | #N/A | #N/A | #N/A | #N/A | #N/A | #N/A | #N/A | #N/A |
| 1.00 | 0.40 | 1.12 | 0.42 | #N/A | #N/A | #N/A | #N/A | 0.88 | 0.35 | 0.78 |
| 3.83 | 0.96 | 3.78 | 0.95 | 3.14 | 0.91 | 2.60 | 0.92 | 3.17 | 0.97 | 2.04 |
| 2.76 | 0.93 | 2.96 | 0.91 | 3.05 | 0.92 | 1.99 | 0.83 | 3.08 | 0.95 | 1.94 |
| 1.56 | 0.67 | 1.68 | 0.64 | 1.72 | 0.61 | 1.48 | 0.65 | 1.31 | 0.57 | 1.35 |
| 2.30 | 0.86 | 2.47 | 0.84 | 2.49 | 0.81 | 2.50 | 0.92 | 2.45 | 0.90 | 1.67 |
| 1.52 | 0.67 | 2.36 | 0.83 | 2.06 | 0.77 | 1.59 | 0.70 | 1.79 | 0.75 | 1.66 |
| #N/A | #N/A | 4.13 | 0.97 | 2.95 | 0.92 | 3.68 | 0.99 | 3.75 | 0.98 | 2.31 |
| 1.21 | 0.51 | 1.11 | 0.42 | 0.79 | 0.26 | 0.82 | 0.31 | 0.93 | 0.38 | 0.77 |
| 1.75 | 0.74 | 2.32 | 0.82 | 2.38 | 0.83 | 1.75 | 0.74 | 2.18 | 0.85 | 1.90 |
| 0.40 | 0.07 | 0.28 | 0.04 | 0.44 | 0.09 | 0.31 | 0.04 | 0.43 | 0.09 | 0.38 |
| 1.11 | 0.47 | 1.15 | 0.45 | 1.42 | 0.55 | 1.35 | 0.60 | 1.32 | 0.57 | 1.15 |
| 0.64 | 0.17 | 0.42 | 0.10 | 0.61 | 0.17 | 0.62 | 0.20 | 0.76 | 0.28 | 0.50 |
| 1.68 | 0.73 | 1.57 | 0.60 | 1.61 | 0.62 | 1.36 | 0.60 | 1.45 | 0.63 | 1.16 |
| 0.91 | 0.35 | #N/A | #N/A | #N/A | #N/A | #N/A | #N/A | #N/A | #N/A | #N/A |
| 1.75 | 0.76 | 1.69 | 0.64 | 1.52 | 0.59 | 1.24 | 0.55 | 1.57 | 0.68 | 1.41 |
| 1.77 | 0.70 | 2.34 | 0.80 | 2.78 | 0.80 | 1.57 | 0.69 | #N/A | #N/A | 1.92 |
| #N/A | #N/A | #N/A | #N/A | #N/A | #N/A | #N/A | #N/A | #N/A | #N/A | #N/A |
| 0.85 | 0.30 | 1.05 | 0.40 | 0.99 | 0.36 | 0.88 | 0.35 | 1.14 | 0.49 | 0.84 |
| 1.80 | 0.77 | 2.78 | 0.90 | 2.13 | 0.79 | 2.41 | 0.87 | 2.32 | 0.88 | 1.73 |
| 0.61 | 0.15 | 0.48 | 0.13 | 0.51 | 0.12 | 0.63 | 0.20 | 0.57 | 0.16 | #N/A |
| 1.60 | 0.70 | 3.10 | 0.93 | 3.53 | 0.92 | 1.83 | 0.76 | 2.20 | 0.86 | 1.79 |
| 0.85 | 0.31 | 0.82 | 0.29 | 0.83 | 0.28 | 0.84 | 0.33 | 0.89 | 0.35 | 0.69 |
| 0.67 | 0.21 | 0.87 | 0.32 | #N/A | #N/A | 0.66 | 0.22 | 0.62 | 0.20 | #N/A |
| #N/A | #N/A | 1.50 | 0.58 | 1.40 | 0.54 | #N/A | #N/A | 1.36 | 0.59 | 0.48 |
| 1.62 | 0.71 | 2.00 | 0.74 | 1.62 | 0.63 | 1.72 | 0.75 | 1.67 | 0.72 | 1.52 |
| #N/A | #N/A | #N/A | #N/A | #N/A | #N/A | #N/A | #N/A | #N/A | #N/A | 0.55 |
| 4.40 | 0.99 | 5.88 | 1.00 | 6.53 | 1.00 | 4.73 | 1.00 | 4.63 | 1.00 | 3.62 |
| 1.80 | 0.77 | 2.43 | 0.84 | 2.36 | 0.83 | 1.83 | 0.78 | 1.76 | 0.75 | 1.73 |
| #N/A | #N/A | #N/A | #N/A | #N/A | #N/A | #N/A | #N/A | #N/A | #N/A | 0.37 |
| 2.46 | 0.91 | 2.37 | 0.83 | 3.11 | 0.92 | 2.35 | 0.89 | 1.91 | 0.79 | 1.63 |
| #N/A | #N/A | #N/A | #N/A | #N/A | #N/A | #N/A | #N/A | #N/A | #N/A | #N/A |
| 1.11 | 0.47 | 0.89 | 0.32 | 0.78 | 0.27 | 0.76 | 0.28 | 0.73 | 0.26 | 0.89 |
| #N/A | #N/A | 1.06 | 0.40 | #N/A | #N/A | 0.82 | 0.32 | #N/A | #N/A | #N/A |
| 1.67 | 0.73 | 1.98 | 0.74 | 2.06 | 0.76 | 1.79 | 0.76 | 2.20 | 0.86 | 1.64 |
| 0.85 | 0.30 | 0.49 | 0.13 | #N/A | #N/A | #N/A | #N/A | 0.37 | 0.05 | 0.64 |
| 1.87 | 0.79 | 1.79 | 0.68 | 1.93 | 0.69 | 1.37 | 0.61 | 1.75 | 0.74 | 1.42 |
| 3.05 | 0.95 | 2.96 | 0.92 | 2.97 | 0.91 | 2.41 | 0.90 | 2.36 | 0.85 | #N/A |
| #N/A | #N/A | #N/A | #N/A | #N/A | #N/A | 0.82 | 0.32 | 0.87 | 0.34 | 0.77 |
| 1.08 | 0.45 | 1.31 | 0.51 | 1.46 | 0.55 | 1.19 | 0.53 | #N/A | #N/A | 1.11 |



|      |      |      |      |      |      |      |      |      |      |      |
|------|------|------|------|------|------|------|------|------|------|------|
| #N/A | #N/A | #N/A | #N/A | #N/A | #N/A | #N/A | #N/A | #N/A | #N/A | #N/A |
| #N/A | #N/A | 1.90 | 0.71 | 2.50 | 0.85 | 1.98 | 0.82 | 1.49 | 0.63 | 1.18 |
| 1.38 | 0.55 | 2.08 | 0.70 | 2.38 | 0.83 | 1.87 | 0.79 | 2.61 | 0.92 | #N/A |
| 1.51 | 0.65 | 1.21 | 0.47 | 1.38 | 0.53 | 1.12 | 0.49 | 1.45 | 0.63 | 1.15 |
| 1.54 | 0.58 | 1.89 | 0.71 | 1.96 | 0.72 | 1.88 | 0.80 | 1.49 | 0.63 | #N/A |
| 1.02 | 0.42 | 0.64 | 0.20 | 0.83 | 0.28 | #N/A | #N/A | 0.90 | 0.35 | 0.90 |
| 1.89 | 0.80 | 2.34 | 0.82 | 2.17 | 0.80 | 2.17 | 0.86 | 2.12 | 0.84 | 1.72 |
| #N/A | #N/A | 0.47 | 0.13 | #N/A | #N/A | #N/A | #N/A | 0.39 | 0.06 | #N/A |
| 1.68 | 0.73 | 1.91 | 0.71 | 1.79 | 0.68 | 1.79 | 0.76 | 1.89 | 0.79 | 1.68 |
| 0.75 | 0.24 | 0.38 | 0.08 | #N/A | #N/A | 0.56 | 0.16 | 0.43 | 0.08 | 0.72 |
| 1.99 | 0.80 | 2.30 | 0.82 | 2.50 | 0.85 | 1.89 | 0.79 | 1.64 | 0.71 | #N/A |
| 0.91 | 0.33 | 1.03 | 0.39 | 1.22 | 0.46 | 0.90 | 0.37 | 1.08 | 0.46 | 0.92 |
| 0.76 | 0.25 | 0.69 | 0.23 | 0.70 | 0.21 | 0.80 | 0.31 | 0.70 | 0.24 | 0.63 |
| 0.98 | 0.39 | 1.01 | 0.38 | 0.97 | 0.33 | 0.93 | 0.38 | 1.07 | 0.45 | 0.79 |
| 1.87 | 0.79 | 1.53 | 0.59 | 1.17 | 0.44 | 1.08 | 0.47 | 1.25 | 0.54 | 0.98 |
| 1.23 | 0.49 | 1.21 | 0.47 | 1.08 | 0.38 | 0.99 | 0.42 | 1.17 | 0.50 | 1.00 |
| 2.21 | 0.87 | 3.16 | 0.93 | 2.90 | 0.90 | 1.71 | 0.74 | 1.98 | 0.78 | 1.91 |
| 1.53 | 0.67 | 2.00 | 0.74 | 2.18 | 0.79 | 2.18 | 0.87 | 1.96 | 0.81 | 1.82 |
| 1.11 | 0.46 | 1.20 | 0.47 | 1.36 | 0.52 | 1.29 | 0.57 | 1.35 | 0.59 | 0.91 |
| 2.17 | 0.84 | 2.85 | 0.91 | 2.58 | 0.87 | 3.31 | 0.97 | 2.77 | 0.94 | 2.11 |
| #N/A | #N/A | #N/A | #N/A | #N/A | #N/A | 0.98 | 0.42 | 0.80 | 0.30 | #N/A |
| 1.50 | 0.66 | 2.15 | 0.78 | 2.31 | 0.81 | 1.76 | 0.75 | 2.29 | 0.86 | 1.81 |
| 1.14 | 0.48 | 0.88 | 0.32 | 0.98 | 0.35 | 0.91 | 0.37 | 0.91 | 0.36 | 0.79 |
| 0.68 | 0.20 | 0.36 | 0.08 | #N/A | #N/A | 0.45 | 0.09 | 0.34 | 0.04 | 0.87 |
| 1.38 | 0.61 | 1.45 | 0.56 | 1.35 | 0.52 | 1.11 | 0.48 | 1.34 | 0.58 | 0.97 |
| #N/A | #N/A | #N/A | #N/A | #N/A | #N/A | #N/A | #N/A | #N/A | #N/A | #N/A |
| 1.43 | 0.63 | 1.79 | 0.67 | 1.22 | 0.46 | 1.54 | 0.67 | 1.65 | 0.71 | 1.17 |
| 3.43 | 0.97 | 1.88 | 0.53 | 4.20 | 0.95 | 2.44 | 0.91 | 3.43 | 0.98 | 2.21 |
| 1.13 | 0.48 | 1.07 | 0.41 | 0.90 | 0.32 | 0.96 | 0.40 | 0.95 | 0.38 | 1.12 |
| 0.92 | 0.35 | 0.73 | 0.25 | 0.68 | 0.19 | 0.59 | 0.18 | 0.90 | 0.35 | 0.81 |
| 0.70 | 0.20 | 0.76 | 0.26 | 0.88 | 0.31 | 0.64 | 0.21 | 0.80 | 0.30 | 0.93 |
| 1.48 | 0.62 | 1.96 | 0.73 | 1.62 | 0.63 | 1.47 | 0.66 | 1.50 | 0.65 | 1.41 |
| 3.37 | 0.97 | 3.92 | 0.97 | 3.55 | 0.94 | 2.90 | 0.96 | 2.38 | 0.89 | 2.04 |
| #N/A | #N/A | #N/A | #N/A | #N/A | #N/A | #N/A | #N/A | 0.52 | 0.14 | 0.86 |
| 1.72 | 0.75 | 1.85 | 0.70 | 2.77 | 0.89 | 1.59 | 0.70 | 2.17 | 0.83 | 1.19 |
| 1.65 | 0.72 | 1.89 | 0.70 | 1.75 | 0.67 | 1.37 | 0.61 | 1.40 | 0.61 | 1.48 |
| 1.45 | 0.64 | 1.47 | 0.57 | 1.56 | 0.60 | 1.34 | 0.60 | 1.27 | 0.55 | 1.21 |
| 1.36 | 0.60 | 1.45 | 0.56 | 1.78 | 0.64 | 0.97 | 0.40 | 1.18 | 0.51 | #N/A |
| 0.80 | 0.27 | 1.44 | 0.56 | 1.49 | 0.58 | 1.05 | 0.45 | 1.09 | 0.44 | 1.33 |
| 1.44 | 0.63 | 1.74 | 0.66 | 1.73 | 0.61 | 1.70 | 0.74 | 1.14 | 0.49 | 1.29 |
| 1.45 | 0.64 | 1.29 | 0.50 | 1.19 | 0.45 | 1.24 | 0.55 | 1.13 | 0.48 | 1.18 |
| 1.17 | 0.51 | 1.26 | 0.48 | 1.22 | 0.46 | 0.99 | 0.42 | 1.16 | 0.50 | 1.09 |
| #N/A | #N/A | #N/A | #N/A | #N/A | #N/A | #N/A | #N/A | #N/A | #N/A | 0.57 |
| 0.69 | 0.21 | 0.11 | 0.01 | 0.62 | 0.17 | 0.55 | 0.15 | 0.65 | 0.21 | 0.66 |
| #N/A | #N/A | #N/A | #N/A | #N/A | #N/A | #N/A | #N/A | #N/A | #N/A | #N/A |
| 2.42 | 0.91 | 2.44 | 0.84 | 2.13 | 0.77 | 1.83 | 0.78 | 1.76 | 0.75 | 1.82 |
| 2.13 | 0.86 | 2.31 | 0.81 | 1.53 | 0.56 | 1.71 | 0.75 | 1.53 | 0.67 | 1.82 |
| #N/A | #N/A | #N/A | #N/A | #N/A | #N/A | #N/A | #N/A | #N/A | #N/A | 1.18 |
| 0.78 | 0.25 | #N/A | #N/A | #N/A | #N/A | #N/A | #N/A | 0.70 | 0.24 | #N/A |
| 0.75 | 0.25 | 0.46 | 0.12 | 0.50 | 0.11 | 0.54 | 0.15 | 0.46 | 0.11 | 0.62 |
| #N/A | #N/A | 1.71 | 0.65 | 1.53 | 0.59 | 1.61 | 0.71 | 1.72 | 0.73 | 1.51 |

|      |      |      |      |      |      |      |      |      |      |      |
|------|------|------|------|------|------|------|------|------|------|------|
| 0.89 | 0.32 | 1.15 | 0.44 | #N/A | #N/A | 1.18 | 0.52 | 0.89 | 0.35 | 1.11 |
| 0.32 | 0.03 | 0.29 | 0.04 | 0.44 | 0.09 | 0.45 | 0.10 | 0.46 | 0.10 | 0.36 |
| 1.09 | 0.46 | 1.16 | 0.44 | 0.99 | 0.36 | 1.18 | 0.52 | 1.25 | 0.54 | 0.82 |
| 0.95 | 0.35 | 0.76 | 0.26 | 0.56 | 0.14 | 0.58 | 0.17 | 0.65 | 0.21 | 0.79 |
| 1.54 | 0.68 | 2.48 | 0.85 | 2.30 | 0.81 | 2.50 | 0.92 | 1.82 | 0.77 | 1.68 |
| 1.22 | 0.53 | 1.87 | 0.70 | 1.75 | 0.68 | 1.40 | 0.63 | 1.38 | 0.59 | 1.50 |
| #N/A | #N/A | 1.15 | 0.44 | 1.00 | 0.36 | 1.13 | 0.49 | 0.94 | 0.38 | 0.94 |
| 1.53 | 0.68 | 2.02 | 0.74 | 2.01 | 0.75 | 1.91 | 0.80 | 2.00 | 0.82 | 1.66 |
| #N/A | #N/A | 0.47 | 0.13 | #N/A | #N/A | 0.50 | 0.13 | 0.51 | 0.13 | 0.71 |
| 1.35 | 0.59 | 1.60 | 0.62 | 1.58 | 0.60 | 1.13 | 0.49 | 1.29 | 0.56 | 1.14 |
| 1.56 | 0.68 | 1.39 | 0.54 | 0.94 | 0.33 | 1.07 | 0.46 | 1.05 | 0.44 | 1.09 |
| #N/A | #N/A | #N/A | #N/A | #N/A | #N/A | #N/A | #N/A | #N/A | #N/A | #N/A |
| 0.97 | 0.37 | 0.99 | 0.37 | 1.35 | 0.52 | 1.06 | 0.45 | 1.23 | 0.53 | 0.92 |
| #N/A | #N/A | #N/A | #N/A | #N/A | #N/A | #N/A | #N/A | #N/A | #N/A | #N/A |
| 1.71 | 0.74 | 4.26 | 0.99 | #N/A | #N/A | #N/A | #N/A | #N/A | #N/A | #N/A |
| 0.73 | 0.22 | 0.85 | 0.31 | 0.94 | 0.33 | 0.72 | 0.26 | 0.81 | 0.30 | 0.72 |
| 0.83 | 0.29 | 0.85 | 0.30 | #N/A | #N/A | #N/A | #N/A | 1.00 | 0.41 | 0.95 |
| 1.43 | 0.63 | 1.16 | 0.44 | 1.22 | 0.46 | 1.10 | 0.48 | 1.10 | 0.47 | 1.08 |
| #N/A | #N/A | #N/A | #N/A | #N/A | #N/A | #N/A | #N/A | #N/A | #N/A | 1.10 |
| 2.92 | 0.95 | 4.05 | 0.98 | 2.58 | 0.87 | 2.68 | 0.92 | 3.18 | 0.97 | 2.37 |
| 0.79 | 0.26 | 0.92 | 0.34 | #N/A | #N/A | #N/A | #N/A | 0.88 | 0.35 | 0.86 |
| 2.56 | 0.92 | 1.70 | 0.65 | 0.68 | 0.27 | 1.48 | 0.66 | 1.66 | 0.71 | 1.02 |
| 1.46 | 0.65 | 1.53 | 0.59 | 1.66 | 0.65 | 1.73 | 0.76 | 1.82 | 0.76 | #N/A |
| 1.53 | 0.66 | 1.63 | 0.62 | 1.69 | 0.66 | 1.99 | 0.82 | 1.70 | 0.71 | 1.38 |
| #N/A | #N/A | 1.19 | 0.46 | 1.24 | 0.45 | 0.90 | 0.36 | 0.66 | 0.22 | 0.93 |
| 1.71 | 0.74 | 2.03 | 0.74 | 1.83 | 0.70 | 1.72 | 0.74 | 1.57 | 0.68 | 1.42 |
| #N/A | #N/A | #N/A | #N/A | #N/A | #N/A | #N/A | #N/A | #N/A | #N/A | #N/A |
| 0.94 | 0.37 | 0.93 | 0.34 | 1.11 | 0.41 | 0.88 | 0.36 | 1.29 | 0.56 | 0.74 |
| 1.26 | 0.55 | 0.86 | 0.31 | 1.01 | 0.37 | 1.09 | 0.47 | 0.99 | 0.41 | 0.89 |
| 3.19 | 0.96 | 2.54 | 0.85 | 2.21 | 0.78 | 2.22 | 0.87 | 2.65 | 0.90 | 2.21 |
| 1.83 | 0.77 | 2.38 | 0.83 | 1.80 | 0.69 | 1.69 | 0.74 | 1.70 | 0.73 | 1.44 |
| #N/A | #N/A | #N/A | #N/A | #N/A | #N/A | #N/A | #N/A | 1.14 | 0.49 | 0.87 |
| #N/A | #N/A | #N/A | #N/A | #N/A | #N/A | #N/A | #N/A | #N/A | #N/A | 0.77 |
| 1.54 | 0.68 | 1.41 | 0.54 | 1.61 | 0.62 | 1.54 | 0.68 | 1.42 | 0.62 | 1.36 |
| 1.27 | 0.55 | 1.23 | 0.48 | 1.28 | 0.44 | 0.96 | 0.40 | 0.93 | 0.38 | 0.92 |
| 0.65 | 0.17 | 0.59 | 0.18 | 0.78 | 0.27 | 0.63 | 0.20 | 0.80 | 0.30 | 0.50 |
| 1.11 | 0.47 | #N/A | #N/A | #N/A | #N/A | #N/A | #N/A | 0.79 | 0.29 | #N/A |
| 2.02 | 0.83 | 2.14 | 0.78 | 2.09 | 0.71 | 1.63 | 0.71 | 1.84 | 0.77 | 1.60 |
| 1.19 | 0.52 | 1.37 | 0.53 | 1.36 | 0.51 | 1.12 | 0.49 | 1.20 | 0.52 | 1.20 |
| 2.69 | 0.93 | 2.81 | 0.90 | 2.15 | 0.78 | 1.57 | 0.68 | 2.25 | 0.87 | 1.78 |
| #N/A | #N/A | 1.59 | 0.61 | 1.50 | 0.58 | 1.32 | 0.58 | 1.29 | 0.56 | 1.20 |
| 0.89 | 0.33 | 0.52 | 0.15 | #N/A | #N/A | 0.73 | 0.26 | 0.42 | 0.08 | #N/A |
| 1.21 | 0.50 | 1.59 | 0.61 | 1.15 | 0.43 | 1.07 | 0.46 | 0.93 | 0.37 | 1.14 |
| 2.31 | 0.88 | 2.63 | 0.88 | 2.73 | 0.88 | 1.92 | 0.80 | 2.29 | 0.87 | 1.71 |
| 0.73 | 0.23 | 0.56 | 0.17 | 0.62 | 0.17 | 0.70 | 0.24 | 0.72 | 0.25 | 0.62 |
| 0.76 | 0.24 | 0.45 | 0.12 | 0.46 | 0.10 | 0.48 | 0.11 | 0.49 | 0.12 | #N/A |
| 1.76 | 0.76 | 2.20 | 0.79 | 2.05 | 0.76 | 1.38 | 0.62 | 1.45 | 0.63 | 1.58 |
| 0.74 | 0.24 | 0.73 | 0.25 | 0.85 | 0.29 | 0.76 | 0.28 | 0.95 | 0.39 | 0.75 |
| #N/A | #N/A | #N/A | #N/A | #N/A | #N/A | 0.73 | 0.26 | 0.66 | 0.22 | #N/A |
| #N/A | #N/A | 1.56 | 0.60 | 1.60 | 0.62 | 1.26 | 0.56 | 1.48 | 0.65 | 1.15 |
| 1.83 | 0.75 | 2.60 | 0.87 | 2.68 | 0.88 | 2.06 | 0.85 | 2.53 | 0.91 | 2.00 |



|      |      |      |      |      |      |      |      |      |      |      |
|------|------|------|------|------|------|------|------|------|------|------|
| #N/A | #N/A | #N/A | #N/A | #N/A | #N/A | #N/A | #N/A | #N/A | #N/A | 1.02 |
| 1.19 | 0.51 | 1.83 | 0.69 | 1.71 | 0.66 | 1.23 | 0.55 | 1.24 | 0.54 | 1.38 |
| #N/A | #N/A | #N/A | #N/A | #N/A | #N/A | #N/A | #N/A | #N/A | #N/A | #N/A |
| 1.06 | 0.44 | 1.11 | 0.42 | 1.11 | 0.41 | 0.93 | 0.39 | 1.22 | 0.53 | 0.98 |
| 1.40 | 0.62 | 1.67 | 0.63 | 2.08 | 0.77 | 1.31 | 0.58 | 1.59 | 0.68 | 0.82 |
| #N/A | #N/A | #N/A | #N/A | #N/A | #N/A | #N/A | #N/A | #N/A | #N/A | #N/A |
| 2.10 | 0.77 | 4.71 | 0.91 | #N/A | #N/A | 1.45 | 0.65 | 2.30 | 0.87 | #N/A |
| #N/A | #N/A | 3.00 | 0.90 | #N/A | #N/A | #N/A | #N/A | 2.29 | 0.82 | 2.19 |
| 1.21 | 0.51 | 0.82 | 0.29 | 1.38 | 0.53 | 0.90 | 0.37 | 0.89 | 0.35 | 0.79 |
| #N/A | #N/A | #N/A | #N/A | #N/A | #N/A | #N/A | #N/A | #N/A | #N/A | #N/A |
| 0.72 | 0.25 | 0.53 | 0.16 | 0.70 | 0.21 | 0.76 | 0.28 | 0.64 | 0.20 | 0.98 |
| #N/A | #N/A | #N/A | #N/A | #N/A | #N/A | #N/A | #N/A | #N/A | #N/A | 1.60 |
| 4.47 | 0.99 | 4.72 | 0.99 | 3.84 | 0.97 | 3.83 | 0.99 | 4.21 | 0.99 | 3.00 |
| 4.02 | 0.99 | 3.21 | 0.92 | #N/A | #N/A | 1.83 | 0.77 | 2.47 | 0.90 | 1.99 |
| 1.17 | 0.45 | #N/A | #N/A | #N/A | #N/A | 1.45 | 0.65 | 2.03 | 0.78 | #N/A |
| 0.72 | 0.23 | #N/A | #N/A | #N/A | #N/A | 0.64 | 0.20 | #N/A | #N/A | 0.68 |
| 1.35 | 0.60 | 1.10 | 0.42 | 1.18 | 0.45 | #N/A | #N/A | 1.09 | 0.46 | #N/A |
| 0.65 | 0.18 | 0.45 | 0.12 | 0.65 | 0.19 | 0.60 | 0.18 | 0.65 | 0.21 | 0.63 |
| 2.39 | 0.90 | 2.38 | 0.83 | 2.40 | 0.84 | 2.47 | 0.91 | 2.02 | 0.82 | 2.52 |
| 2.25 | 0.88 | 1.78 | 0.67 | 1.52 | 0.57 | 1.58 | 0.70 | 1.41 | 0.62 | #N/A |
| #N/A | #N/A | #N/A | #N/A | #N/A | #N/A | #N/A | #N/A | #N/A | #N/A | #N/A |
| 2.26 | 0.85 | 3.18 | 0.93 | 2.68 | 0.88 | 2.15 | 0.86 | 2.82 | 0.93 | 2.08 |
| #N/A | #N/A | #N/A | #N/A | #N/A | #N/A | #N/A | #N/A | #N/A | #N/A | #N/A |
| 0.89 | 0.33 | 0.87 | 0.32 | 0.92 | 0.32 | 0.76 | 0.28 | 0.87 | 0.34 | 0.93 |
| 1.90 | 0.80 | 1.91 | 0.72 | 1.89 | 0.72 | 1.55 | 0.68 | 1.58 | 0.69 | 1.99 |
| 0.87 | 0.31 | 0.76 | 0.26 | 0.74 | 0.23 | 0.79 | 0.30 | 0.73 | 0.26 | 0.70 |
| 0.32 | 0.03 | #N/A | #N/A | #N/A | #N/A | #N/A | #N/A | 0.47 | 0.11 | #N/A |
| #N/A | #N/A | 0.86 | 0.31 | 0.87 | 0.28 | 1.02 | 0.42 | 0.97 | 0.40 | 0.65 |
| 0.78 | 0.25 | 0.70 | 0.24 | 0.79 | 0.26 | 0.90 | 0.36 | 0.72 | 0.25 | 0.65 |
| 2.02 | 0.83 | 2.32 | 0.82 | 2.10 | 0.77 | 1.70 | 0.75 | 2.02 | 0.81 | 1.70 |
| #N/A | #N/A | #N/A | #N/A | #N/A | #N/A | #N/A | #N/A | #N/A | #N/A | #N/A |
| 0.96 | 0.37 | 1.07 | 0.41 | 0.83 | 0.28 | 1.20 | 0.53 | 0.95 | 0.38 | 1.21 |
| 1.49 | 0.66 | 1.41 | 0.55 | 1.42 | 0.55 | 1.19 | 0.53 | 1.22 | 0.53 | 1.10 |
| 0.88 | 0.33 | 0.63 | 0.20 | 1.04 | 0.38 | 0.70 | 0.24 | 0.62 | 0.19 | 0.67 |
| 1.73 | 0.75 | 1.76 | 0.67 | 1.79 | 0.69 | 1.22 | 0.54 | #N/A | #N/A | 1.52 |
| 1.25 | 0.54 | 1.18 | 0.45 | 1.48 | 0.58 | 1.20 | 0.53 | 1.12 | 0.47 | 0.87 |
| 2.20 | 0.87 | 2.28 | 0.81 | 2.55 | 0.86 | 1.77 | 0.77 | 1.77 | 0.75 | 1.45 |
| #N/A | #N/A | #N/A | #N/A | #N/A | #N/A | #N/A | #N/A | #N/A | #N/A | #N/A |
| #N/A | #N/A | 2.05 | 0.73 | #N/A | #N/A | 1.18 | 0.52 | 1.25 | 0.54 | 1.85 |
| 1.80 | 0.75 | 1.97 | 0.73 | 1.56 | 0.60 | 1.28 | 0.57 | 1.48 | 0.64 | 1.49 |
| 0.55 | 0.12 | 0.36 | 0.07 | 0.29 | 0.03 | 0.43 | 0.08 | 0.37 | 0.06 | #N/A |
| 2.21 | 0.86 | 3.53 | 0.96 | 3.57 | 0.96 | 2.28 | 0.86 | 3.20 | 0.97 | 2.07 |
| #N/A | #N/A | #N/A | #N/A | #N/A | #N/A | #N/A | #N/A | #N/A | #N/A | #N/A |
| 0.85 | 0.30 | 0.96 | 0.36 | 0.99 | 0.36 | 0.84 | 0.33 | 0.92 | 0.37 | 0.82 |
| 2.00 | 0.83 | 3.07 | 0.93 | 2.36 | 0.83 | 2.26 | 0.88 | 2.89 | 0.94 | 2.04 |
| 0.27 | 0.01 | 0.17 | 0.01 | 0.26 | 0.02 | 0.24 | 0.01 | 0.23 | 0.01 | 0.33 |
| #N/A | #N/A | #N/A | #N/A | #N/A | #N/A | #N/A | #N/A | #N/A | #N/A | #N/A |
| 2.31 | 0.89 | 2.45 | 0.84 | 2.57 | 0.84 | 2.10 | 0.85 | 2.44 | 0.90 | 2.04 |
| #N/A | #N/A | #N/A | #N/A | #N/A | #N/A | #N/A | #N/A | #N/A | #N/A | #N/A |
| 2.62 | 0.93 | 2.80 | 0.90 | 2.96 | 0.92 | 2.52 | 0.92 | 2.54 | 0.91 | 2.27 |
| #N/A | #N/A | #N/A | #N/A | #N/A | #N/A | 1.26 | 0.53 | 1.67 | 0.71 | #N/A |

|       |      |      |      |      |      |      |      |      |      |      |
|-------|------|------|------|------|------|------|------|------|------|------|
| 0.87  | 0.31 | 0.54 | 0.16 | 0.36 | 0.05 | 0.48 | 0.11 | 0.59 | 0.17 | 0.63 |
| 1.17  | 0.51 | 1.50 | 0.58 | 1.10 | 0.41 | 1.55 | 0.69 | 1.47 | 0.63 | 1.22 |
| #N/A  | #N/A | #N/A | #N/A | #N/A | #N/A | #N/A | #N/A | #N/A | #N/A | #N/A |
| #N/A  | #N/A | #N/A | #N/A | #N/A | #N/A | #N/A | #N/A | #N/A | #N/A | #N/A |
| #N/A  | #N/A | #N/A | #N/A | #N/A | #N/A | #N/A | #N/A | #N/A | #N/A | #N/A |
| 2.27  | 0.88 | 2.61 | 0.87 | 2.94 | 0.85 | 1.83 | 0.78 | 2.93 | 0.94 | 1.74 |
| #N/A  | #N/A | #N/A | #N/A | #N/A | #N/A | #N/A | #N/A | #N/A | #N/A | #N/A |
| 1.85  | 0.77 | 1.63 | 0.63 | 1.57 | 0.61 | 2.08 | 0.83 | 1.71 | 0.73 | #N/A |
| #N/A  | #N/A | #N/A | #N/A | #N/A | #N/A | #N/A | #N/A | #N/A | #N/A | #N/A |
| 1.70  | 0.74 | 3.12 | 0.92 | 2.58 | 0.87 | 1.95 | 0.81 | 2.11 | 0.84 | 1.89 |
| #N/A  | #N/A | 3.17 | 0.93 | 2.89 | 0.91 | 2.25 | 0.88 | 2.17 | 0.85 | #N/A |
| #N/A  | #N/A | #N/A | #N/A | #N/A | #N/A | #N/A | #N/A | #N/A | #N/A | #N/A |
| 2.89  | 0.91 | 2.76 | 0.87 | 3.26 | 0.90 | 2.61 | 0.90 | 2.55 | 0.91 | 2.25 |
| #N/A  | #N/A | #N/A | #N/A | #N/A | #N/A | #N/A | #N/A | 1.41 | 0.62 | 1.22 |
| #N/A  | #N/A | #N/A | #N/A | #N/A | #N/A | #N/A | #N/A | #N/A | #N/A | #N/A |
| 1.08  | 0.45 | 1.08 | 0.41 | 1.26 | 0.48 | 1.19 | 0.52 | 1.18 | 0.51 | 1.10 |
| 1.43  | 0.60 | 2.16 | 0.76 | #N/A | #N/A | 1.39 | 0.62 | 1.44 | 0.63 | 1.00 |
| 10.42 | 0.97 | 4.98 | 0.99 | 6.88 | 1.00 | 2.72 | 0.90 | 3.25 | 0.96 | 2.50 |
| 1.43  | 0.63 | 1.26 | 0.49 | 1.40 | 0.53 | 1.04 | 0.45 | 1.01 | 0.42 | 1.29 |
| 1.10  | 0.46 | 1.25 | 0.49 | 1.88 | 0.70 | 1.33 | 0.59 | 1.22 | 0.52 | #N/A |
| 2.27  | 0.88 | 3.08 | 0.93 | 2.65 | 0.88 | 2.33 | 0.89 | 2.38 | 0.89 | 1.91 |
| 1.77  | 0.77 | 2.77 | 0.89 | 2.35 | 0.83 | 2.19 | 0.87 | 1.81 | 0.76 | 1.43 |
| #N/A  | #N/A | #N/A | #N/A | #N/A | #N/A | #N/A | #N/A | #N/A | #N/A | #N/A |
| 1.26  | 0.55 | 1.70 | 0.65 | 1.36 | 0.52 | 1.33 | 0.59 | 1.16 | 0.50 | 1.70 |
| 0.93  | 0.36 | 0.78 | 0.27 | 0.81 | 0.27 | 0.74 | 0.27 | 0.76 | 0.28 | 1.79 |
| 0.55  | 0.12 | 0.30 | 0.05 | 0.39 | 0.07 | 0.49 | 0.12 | 0.44 | 0.09 | 0.84 |
| 0.58  | 0.14 | 0.46 | 0.12 | 0.49 | 0.11 | 0.52 | 0.14 | 0.52 | 0.14 | 0.63 |
| 0.55  | 0.12 | 0.21 | 0.02 | 0.19 | 0.01 | 0.26 | 0.02 | 0.24 | 0.01 | 0.53 |
| 0.98  | 0.38 | 0.76 | 0.27 | 0.80 | 0.26 | 0.91 | 0.37 | 0.78 | 0.29 | 0.82 |
| #N/A  | #N/A | #N/A | #N/A | #N/A | #N/A | 1.27 | 0.56 | 1.29 | 0.55 | 1.00 |
| #N/A  | #N/A | #N/A | #N/A | #N/A | #N/A | #N/A | #N/A | #N/A | #N/A | #N/A |
| 1.89  | 0.80 | 3.21 | 0.94 | 3.58 | 0.95 | 2.80 | 0.95 | 3.42 | 0.97 | 2.33 |
| 0.47  | 0.07 | 0.69 | 0.23 | 0.65 | 0.19 | 0.51 | 0.13 | 0.72 | 0.25 | 0.66 |
| 0.85  | 0.30 | 0.82 | 0.29 | 0.88 | 0.30 | 0.73 | 0.26 | 0.86 | 0.33 | 0.85 |
| 1.28  | 0.57 | 2.76 | 0.86 | 2.66 | 0.85 | 1.29 | 0.57 | #N/A | #N/A | #N/A |
| 0.88  | 0.33 | 1.29 | 0.50 | 0.81 | 0.27 | 0.74 | 0.27 | 0.89 | 0.35 | 0.93 |
| 0.42  | 0.06 | #N/A | #N/A | #N/A | #N/A | #N/A | #N/A | #N/A | #N/A | #N/A |
| 1.58  | 0.68 | 2.65 | 0.87 | 1.67 | 0.64 | 2.34 | 0.84 | 1.51 | 0.66 | #N/A |
| 0.99  | 0.39 | 0.84 | 0.30 | 0.82 | 0.27 | 0.98 | 0.41 | 1.00 | 0.41 | 0.76 |
| 1.26  | 0.55 | 1.38 | 0.54 | 1.28 | 0.49 | 1.45 | 0.64 | 1.46 | 0.64 | 1.17 |
| #N/A  | #N/A | #N/A | #N/A | #N/A | #N/A | #N/A | #N/A | #N/A | #N/A | #N/A |
| 2.02  | 0.83 | 2.68 | 0.87 | 3.22 | 0.92 | 2.66 | 0.93 | 2.27 | 0.87 | 1.42 |
| #N/A  | #N/A | #N/A | #N/A | #N/A | #N/A | #N/A | #N/A | #N/A | #N/A | #N/A |
| 0.59  | 0.14 | 0.53 | 0.15 | 0.53 | 0.12 | 0.58 | 0.17 | 0.51 | 0.13 | 0.50 |
| 2.48  | 0.89 | 2.66 | 0.88 | 2.18 | 0.79 | 2.44 | 0.91 | 2.48 | 0.90 | 2.12 |
| #N/A  | #N/A | #N/A | #N/A | #N/A | #N/A | #N/A | #N/A | #N/A | #N/A | #N/A |
| 0.64  | 0.17 | 0.30 | 0.05 | 0.49 | 0.11 | 0.56 | 0.16 | 0.55 | 0.15 | 0.42 |
| 0.69  | 0.20 | 0.33 | 0.06 | 0.66 | 0.19 | 0.67 | 0.23 | 0.66 | 0.22 | 0.44 |
| 0.61  | 0.15 | 0.34 | 0.07 | 0.54 | 0.13 | 0.53 | 0.14 | 0.53 | 0.14 | 0.44 |
| #N/A  | #N/A | #N/A | #N/A | #N/A | #N/A | #N/A | #N/A | #N/A | #N/A | #N/A |
| 75.38 | 0.94 | #N/A | #N/A | #N/A | #N/A | 3.11 | 0.96 | 4.01 | 0.99 | 2.14 |

|      |      |      |      |      |      |      |      |      |      |      |
|------|------|------|------|------|------|------|------|------|------|------|
| 1.12 | 0.42 | 1.28 | 0.49 | #N/A | #N/A | 1.81 | 0.78 | 1.35 | 0.58 | #N/A |
| 2.50 | 0.91 | #N/A | #N/A | 3.35 | 0.95 | 3.56 | 0.99 | 3.11 | 0.96 | 2.69 |
| #N/A | #N/A | 1.57 | 0.61 | 1.39 | 0.54 | 1.51 | 0.67 | 1.78 | 0.73 | 1.21 |
| 0.75 | 0.23 | 0.72 | 0.24 | #N/A | #N/A | #N/A | #N/A | 0.67 | 0.22 | 0.90 |
| 2.35 | 0.90 | 3.05 | 0.93 | 3.03 | 0.90 | 2.79 | 0.95 | 2.78 | 0.94 | 2.15 |
| 0.75 | 0.26 | 0.86 | 0.31 | #N/A | #N/A | #N/A | #N/A | 0.64 | 0.21 | #N/A |
| #N/A | #N/A | #N/A | #N/A | #N/A | #N/A | #N/A | #N/A | #N/A | #N/A | #N/A |
| 2.16 | 0.87 | 2.50 | 0.85 | #N/A | #N/A | 1.76 | 0.74 | 1.72 | 0.73 | 1.34 |
| #N/A | #N/A | #N/A | #N/A | #N/A | #N/A | #N/A | #N/A | #N/A | #N/A | 0.90 |
| 3.13 | 0.96 | 3.08 | 0.92 | 3.55 | 0.96 | 2.90 | 0.95 | 3.36 | 0.98 | 2.63 |
| 1.27 | 0.56 | 2.19 | 0.78 | 2.40 | 0.81 | 1.64 | 0.71 | 1.98 | 0.79 | 1.47 |
| #N/A | #N/A | #N/A | #N/A | #N/A | #N/A | #N/A | #N/A | #N/A | #N/A | #N/A |
| 1.23 | 0.50 | #N/A | #N/A | #N/A | #N/A | #N/A | #N/A | 1.71 | 0.73 | 1.01 |
| 1.41 | 0.62 | 1.89 | 0.71 | 1.31 | 0.50 | 1.24 | 0.55 | 1.27 | 0.55 | 1.49 |
| 1.39 | 0.62 | 1.37 | 0.53 | 1.08 | 0.39 | 1.21 | 0.54 | 1.15 | 0.49 | 1.05 |
| 5.09 | 0.97 | 3.91 | 0.97 | 3.20 | 0.93 | 3.55 | 0.98 | 3.26 | 0.97 | 2.79 |
| 2.98 | 0.94 | 3.83 | 0.97 | 3.74 | 0.97 | 3.90 | 0.99 | 3.18 | 0.97 | 2.49 |
| #N/A | #N/A | #N/A | #N/A | #N/A | #N/A | #N/A | #N/A | #N/A | #N/A | #N/A |
| 2.69 | 0.91 | 4.11 | 0.98 | 2.18 | 0.79 | 2.69 | 0.93 | 3.01 | 0.94 | 1.66 |
| #N/A | #N/A | #N/A | #N/A | #N/A | #N/A | #N/A | #N/A | #N/A | #N/A | 0.72 |
| 1.61 | 0.71 | 1.65 | 0.63 | 2.18 | 0.78 | 1.49 | 0.66 | 1.69 | 0.72 | 1.26 |
| 1.15 | 0.49 | 1.27 | 0.49 | 0.93 | 0.32 | 0.91 | 0.37 | 0.99 | 0.41 | 0.99 |
| #N/A | #N/A | #N/A | #N/A | #N/A | #N/A | #N/A | #N/A | #N/A | #N/A | #N/A |
| 3.40 | 0.96 | #N/A | #N/A | 2.87 | 0.91 | 2.33 | 0.89 | 2.34 | 0.88 | #N/A |
| 3.05 | 0.96 | 3.31 | 0.95 | 3.22 | 0.94 | 3.35 | 0.98 | 3.44 | 0.98 | 2.38 |
| 1.12 | 0.46 | 1.56 | 0.60 | 1.86 | 0.71 | 1.13 | 0.49 | 1.31 | 0.57 | 1.20 |
| #N/A | #N/A | 0.80 | 0.28 | #N/A | #N/A | 0.80 | 0.30 | 0.85 | 0.33 | #N/A |
| 2.14 | 0.83 | 1.57 | 0.60 | 1.42 | 0.55 | 1.46 | 0.63 | 1.09 | 0.46 | #N/A |
| 0.56 | 0.12 | 0.56 | 0.17 | 0.57 | 0.14 | 0.61 | 0.19 | 0.50 | 0.12 | 0.65 |
| 1.19 | 0.50 | 1.09 | 0.42 | 1.42 | 0.55 | 1.02 | 0.43 | 1.26 | 0.55 | 1.07 |
| 0.72 | 0.22 | 1.47 | 0.56 | #N/A | #N/A | 1.18 | 0.52 | 1.35 | 0.58 | #N/A |
| 0.93 | 0.34 | 0.68 | 0.22 | #N/A | #N/A | 0.70 | 0.24 | 0.75 | 0.27 | 0.57 |
| 1.36 | 0.61 | 1.34 | 0.52 | 1.36 | 0.52 | 1.29 | 0.57 | 1.44 | 0.62 | 1.36 |
| 0.79 | 0.26 | 0.69 | 0.23 | 0.69 | 0.20 | 0.84 | 0.33 | 0.95 | 0.38 | 0.76 |
| 0.82 | 0.29 | 1.26 | 0.49 | 1.33 | 0.50 | 1.10 | 0.46 | 0.99 | 0.41 | 0.98 |
| 2.54 | 0.90 | 3.10 | 0.93 | 2.78 | 0.88 | 3.17 | 0.97 | 2.21 | 0.84 | 1.69 |
| 1.79 | 0.77 | 1.83 | 0.69 | 2.25 | 0.80 | 1.67 | 0.72 | 1.93 | 0.80 | 1.77 |
| 1.04 | 0.41 | 1.16 | 0.44 | 1.16 | 0.43 | 1.15 | 0.50 | 1.16 | 0.50 | 1.08 |
| 1.32 | 0.58 | 1.21 | 0.46 | 1.22 | 0.46 | 1.25 | 0.55 | 1.04 | 0.43 | 1.24 |
| 1.24 | 0.54 | 1.68 | 0.64 | 1.35 | 0.52 | 1.27 | 0.57 | 1.72 | 0.73 | #N/A |
| 0.62 | 0.16 | 0.36 | 0.07 | 0.28 | 0.03 | 0.39 | 0.07 | 0.39 | 0.06 | 0.53 |
| 1.11 | 0.47 | 2.16 | 0.78 | 1.52 | 0.59 | 1.41 | 0.63 | 1.55 | 0.66 | 1.52 |
| 0.76 | 0.25 | 0.39 | 0.09 | 0.46 | 0.09 | 0.53 | 0.14 | 0.49 | 0.12 | 0.58 |
| 1.23 | 0.54 | 0.59 | 0.18 | 0.98 | 0.35 | 1.02 | 0.44 | 0.78 | 0.29 | 0.75 |
| 1.12 | 0.47 | 2.26 | 0.77 | 1.54 | 0.60 | 1.33 | 0.60 | 1.39 | 0.61 | 1.19 |
| 1.55 | 0.60 | 2.30 | 0.81 | 1.78 | 0.64 | 1.46 | 0.65 | 1.93 | 0.80 | 1.57 |
| #N/A | #N/A | #N/A | #N/A | #N/A | #N/A | #N/A | #N/A | #N/A | #N/A | #N/A |
| 0.89 | 0.33 | 1.36 | 0.53 | 1.13 | 0.43 | 0.94 | 0.39 | 1.26 | 0.55 | 1.02 |
| 1.76 | 0.74 | 2.62 | 0.87 | 2.37 | 0.83 | 1.63 | 0.72 | 1.96 | 0.80 | 1.56 |
| 0.50 | 0.09 | 0.58 | 0.18 | 0.63 | 0.17 | 0.89 | 0.36 | 0.79 | 0.29 | 0.68 |
| 2.82 | 0.95 | 5.07 | 0.99 | 3.85 | 0.96 | 3.88 | 0.99 | 4.18 | 0.99 | 2.72 |





|      |      |      |      |      |      |      |      |      |      |      |
|------|------|------|------|------|------|------|------|------|------|------|
| 1.05 | 0.42 | 1.23 | 0.47 | #N/A | #N/A | #N/A | #N/A | 1.13 | 0.48 | #N/A |
| 0.70 | 0.21 | 1.02 | 0.38 | 0.94 | 0.32 | 0.63 | 0.20 | 0.81 | 0.31 | 0.72 |
| #N/A | #N/A | #N/A | #N/A | #N/A | #N/A | #N/A | #N/A | #N/A | #N/A | #N/A |
| 1.71 | 0.74 | #N/A | #N/A | #N/A | #N/A | #N/A | #N/A | #N/A | #N/A | 0.95 |
| 0.11 | 0.00 | 0.06 | 0.00 | 0.11 | 0.00 | 0.13 | 0.00 | 0.14 | 0.00 | 0.12 |
| 1.44 | 0.64 | 1.46 | 0.57 | 1.50 | 0.58 | 1.69 | 0.74 | 1.49 | 0.65 | #N/A |
| #N/A | #N/A | #N/A | #N/A | #N/A | #N/A | #N/A | #N/A | #N/A | #N/A | #N/A |
| 2.04 | 0.79 | 1.25 | 0.48 | #N/A | #N/A | #N/A | #N/A | 0.81 | 0.31 | #N/A |
| 0.89 | 0.33 | 1.08 | 0.41 | 0.77 | 0.25 | 0.83 | 0.32 | 0.80 | 0.30 | 0.90 |
| #N/A | #N/A | #N/A | #N/A | #N/A | #N/A | #N/A | #N/A | #N/A | #N/A | #N/A |
| 1.63 | 0.71 | 2.24 | 0.80 | 2.46 | 0.85 | 1.71 | 0.74 | 1.69 | 0.72 | 1.56 |
| 1.89 | 0.81 | 2.91 | 0.91 | 2.55 | 0.86 | 1.88 | 0.80 | 1.60 | 0.69 | 1.90 |
| 0.75 | 0.23 | 1.13 | 0.43 | 1.00 | 0.36 | 0.95 | 0.39 | 0.93 | 0.37 | 0.90 |
| 0.51 | 0.09 | 0.86 | 0.31 | #N/A | #N/A | 0.54 | 0.16 | 0.77 | 0.28 | 0.49 |
| 0.41 | 0.06 | 0.27 | 0.04 | 0.29 | 0.03 | 0.29 | 0.03 | 0.23 | 0.01 | 0.35 |
| 0.51 | 0.11 | 0.16 | 0.01 | #N/A | #N/A | 0.17 | 0.00 | 0.25 | 0.01 | 0.37 |
| 0.71 | 0.21 | 1.09 | 0.41 | #N/A | #N/A | #N/A | #N/A | 1.00 | 0.42 | 0.66 |
| #N/A | #N/A | #N/A | #N/A | #N/A | #N/A | #N/A | #N/A | #N/A | #N/A | #N/A |
| 0.74 | 0.24 | 0.83 | 0.30 | 0.81 | 0.26 | 0.74 | 0.27 | 0.88 | 0.35 | 0.79 |
| #N/A | #N/A | #N/A | #N/A | #N/A | #N/A | #N/A | #N/A | #N/A | #N/A | #N/A |
| 0.77 | 0.25 | 1.66 | 0.63 | 1.37 | 0.53 | 1.37 | 0.61 | 1.33 | 0.56 | 0.82 |
| 0.62 | 0.16 | 0.64 | 0.21 | 0.51 | 0.12 | 0.52 | 0.13 | 0.43 | 0.09 | 0.58 |
| 0.60 | 0.16 | 0.80 | 0.28 | 1.23 | 0.47 | 1.08 | 0.46 | 1.16 | 0.49 | 0.69 |
| 1.14 | 0.49 | 1.28 | 0.50 | #N/A | #N/A | 0.84 | 0.33 | 0.93 | 0.37 | 1.04 |
| 1.81 | 0.78 | 1.58 | 0.61 | 1.67 | 0.64 | 1.45 | 0.65 | 1.57 | 0.68 | 1.27 |
| 1.19 | 0.51 | 1.78 | 0.67 | 1.71 | 0.66 | 1.36 | 0.61 | 1.42 | 0.61 | 1.38 |
| 1.04 | 0.43 | 1.20 | 0.46 | 1.01 | 0.36 | 1.22 | 0.54 | 1.28 | 0.56 | 0.76 |
| 0.98 | 0.37 | 1.14 | 0.43 | 0.91 | 0.31 | 1.04 | 0.45 | 1.07 | 0.46 | #N/A |
| 2.73 | 0.84 | 3.23 | 0.94 | 4.56 | 0.99 | 3.58 | 0.97 | 2.92 | 0.91 | 2.03 |
| 0.65 | 0.18 | 0.60 | 0.19 | 0.58 | 0.15 | 0.58 | 0.18 | 0.57 | 0.17 | 0.47 |
| 0.57 | 0.13 | 0.29 | 0.04 | 0.30 | 0.03 | 0.40 | 0.07 | 0.42 | 0.08 | #N/A |
| 2.91 | 0.88 | 2.73 | 0.88 | 3.37 | 0.95 | 1.86 | 0.77 | 2.20 | 0.83 | 1.43 |
| 1.84 | 0.79 | 1.88 | 0.70 | 1.36 | 0.52 | 0.96 | 0.40 | 1.75 | 0.73 | 1.30 |
| 0.88 | 0.33 | #N/A | #N/A | #N/A | #N/A | #N/A | #N/A | #N/A | #N/A | 0.56 |
| 0.55 | 0.12 | #N/A | #N/A | #N/A | #N/A | #N/A | #N/A | #N/A | #N/A | 0.54 |
| #N/A | #N/A | #N/A | #N/A | #N/A | #N/A | 1.70 | 0.75 | 2.19 | 0.84 | 1.46 |
| 2.91 | 0.95 | 4.00 | 0.97 | 3.91 | 0.97 | 2.03 | 0.83 | 3.04 | 0.96 | 2.82 |
| 7.87 | 0.98 | 4.77 | 0.99 | 4.02 | 0.95 | 3.18 | 0.97 | 4.02 | 0.98 | #N/A |
| #N/A | #N/A | #N/A | #N/A | #N/A | #N/A | #N/A | #N/A | #N/A | #N/A | #N/A |
| #N/A | #N/A | #N/A | #N/A | #N/A | #N/A | #N/A | #N/A | #N/A | #N/A | #N/A |
| 2.26 | 0.88 | 3.11 | 0.93 | 2.62 | 0.86 | 2.69 | 0.94 | 2.70 | 0.93 | #N/A |
| #N/A | #N/A | #N/A | #N/A | #N/A | #N/A | #N/A | #N/A | #N/A | #N/A | #N/A |
| 2.62 | 0.86 | 6.41 | 1.00 | #N/A | #N/A | 5.81 | 1.00 | 3.56 | 0.98 | 4.85 |
| 1.11 | 0.47 | 1.57 | 0.60 | 1.56 | 0.60 | 1.25 | 0.56 | 1.28 | 0.56 | 1.29 |
| 1.26 | 0.55 | 1.43 | 0.55 | 1.37 | 0.53 | 1.11 | 0.48 | 1.39 | 0.61 | 1.18 |
| 1.24 | 0.54 | 1.60 | 0.61 | 1.68 | 0.65 | 1.23 | 0.55 | 1.61 | 0.69 | 1.26 |
| 0.85 | 0.30 | 0.86 | 0.31 | 0.77 | 0.24 | 0.62 | 0.20 | 0.72 | 0.25 | 0.93 |
| 0.33 | 0.03 | 0.42 | 0.10 | 0.46 | 0.10 | 0.31 | 0.04 | 0.43 | 0.08 | 0.71 |
| 1.27 | 0.55 | 1.18 | 0.45 | 0.94 | 0.33 | 0.99 | 0.42 | 1.09 | 0.46 | 1.30 |
| 1.02 | 0.42 | 1.17 | 0.45 | 1.12 | 0.42 | 1.07 | 0.46 | 1.07 | 0.45 | 0.91 |
| 0.34 | 0.03 | 0.21 | 0.02 | 0.25 | 0.02 | 0.24 | 0.02 | 0.32 | 0.03 | 0.53 |



|      |      |      |      |      |      |      |      |      |      |      |
|------|------|------|------|------|------|------|------|------|------|------|
| 0.92 | 0.35 | 1.47 | 0.57 | 1.33 | 0.51 | 1.22 | 0.54 | 1.18 | 0.51 | 1.04 |
| 1.37 | 0.61 | 1.34 | 0.52 | 2.02 | 0.75 | 1.56 | 0.69 | 1.62 | 0.70 | 1.55 |
| 1.23 | 0.45 | 2.19 | 0.78 | #N/A | #N/A | 0.83 | 0.32 | 0.97 | 0.39 | 1.26 |
| 1.57 | 0.67 | 1.65 | 0.63 | 1.97 | 0.73 | 1.80 | 0.78 | 1.69 | 0.72 | 1.42 |
| 1.19 | 0.52 | 1.39 | 0.54 | 1.07 | 0.40 | 1.16 | 0.51 | 1.15 | 0.49 | 1.13 |
| 0.98 | 0.38 | 0.77 | 0.27 | 0.73 | 0.22 | 0.61 | 0.19 | 0.63 | 0.20 | 0.85 |
| 1.51 | 0.66 | 1.26 | 0.49 | 1.24 | 0.48 | 1.34 | 0.60 | 1.31 | 0.57 | 0.85 |
| 0.56 | 0.12 | 0.36 | 0.08 | 0.45 | 0.09 | 0.50 | 0.12 | 0.47 | 0.11 | 0.76 |
| 1.09 | 0.46 | 1.70 | 0.65 | 1.44 | 0.56 | 1.30 | 0.58 | 1.18 | 0.51 | 0.82 |
| 0.82 | 0.28 | 1.39 | 0.54 | 1.24 | 0.47 | 1.17 | 0.52 | 1.24 | 0.52 | 1.19 |
| 1.16 | 0.46 | 0.57 | 0.17 | 0.64 | 0.18 | 0.63 | 0.20 | 0.81 | 0.30 | 1.02 |
| 1.23 | 0.51 | 2.18 | 0.79 | 1.48 | 0.57 | 1.61 | 0.71 | 1.36 | 0.59 | 1.09 |
| #N/A | #N/A | 0.93 | 0.34 | 1.36 | 0.52 | 0.71 | 0.25 | 0.90 | 0.35 | 0.80 |
| #N/A | #N/A | #N/A | #N/A | #N/A | #N/A | #N/A | #N/A | #N/A | #N/A | 0.62 |
| #N/A | #N/A | #N/A | #N/A | #N/A | #N/A | #N/A | #N/A | #N/A | #N/A | 0.53 |
| 0.65 | 0.18 | #N/A | #N/A | #N/A | #N/A | #N/A | #N/A | #N/A | #N/A | 0.54 |
| 1.30 | 0.56 | 1.58 | 0.60 | 1.15 | 0.42 | 1.05 | 0.45 | 1.40 | 0.61 | 1.40 |
| 1.64 | 0.72 | 1.44 | 0.56 | 1.35 | 0.52 | 1.56 | 0.69 | 1.47 | 0.64 | 1.17 |
| 2.06 | 0.84 | 1.66 | 0.63 | #N/A | #N/A | 1.42 | 0.63 | 1.58 | 0.68 | #N/A |
| 0.83 | 0.29 | #N/A | #N/A | #N/A | #N/A | #N/A | #N/A | #N/A | #N/A | 0.72 |
| 1.19 | 0.51 | 1.75 | 0.67 | 1.39 | 0.54 | 1.68 | 0.73 | 1.41 | 0.62 | 0.93 |
| #N/A | #N/A | 1.23 | 0.48 | 1.48 | 0.57 | 0.91 | 0.37 | 1.47 | 0.64 | 1.07 |
| #N/A | #N/A | 0.81 | 0.29 | #N/A | #N/A | #N/A | #N/A | 0.81 | 0.30 | 0.61 |
| 1.82 | 0.76 | #N/A | #N/A | 1.83 | 0.71 | 1.64 | 0.72 | 1.78 | 0.75 | 1.25 |
| 0.92 | 0.34 | 0.47 | 0.13 | 0.60 | 0.16 | 0.84 | 0.33 | 0.56 | 0.16 | #N/A |
| 1.12 | 0.46 | #N/A | #N/A | #N/A | #N/A | 0.90 | 0.37 | 0.69 | 0.23 | 0.88 |
| 1.62 | 0.70 | 1.47 | 0.57 | 1.50 | 0.58 | 1.34 | 0.60 | 1.44 | 0.63 | #N/A |
| 0.61 | 0.15 | 0.81 | 0.29 | 1.01 | 0.34 | 0.60 | 0.19 | 0.86 | 0.34 | 0.84 |
| 0.81 | 0.28 | 0.81 | 0.29 | 1.48 | 0.57 | 0.89 | 0.36 | 1.03 | 0.43 | 0.81 |
| 0.90 | 0.33 | 0.68 | 0.23 | 0.65 | 0.19 | 0.67 | 0.22 | 0.57 | 0.17 | 0.83 |
| 1.13 | 0.48 | #N/A | #N/A | #N/A | #N/A | #N/A | #N/A | #N/A | #N/A | 0.80 |
| 1.52 | 0.67 | 2.16 | 0.77 | 1.69 | 0.65 | 1.56 | 0.69 | 1.49 | 0.65 | 1.59 |
| #N/A | #N/A | #N/A | #N/A | #N/A | #N/A | #N/A | #N/A | #N/A | #N/A | #N/A |
| 2.67 | 0.93 | 2.37 | 0.82 | 2.13 | 0.79 | 2.22 | 0.87 | 2.37 | 0.89 | 1.47 |
| #N/A | #N/A | #N/A | #N/A | #N/A | #N/A | #N/A | #N/A | #N/A | #N/A | #N/A |
| 1.95 | 0.81 | 2.02 | 0.74 | 2.39 | 0.79 | 2.37 | 0.90 | 2.14 | 0.85 | 1.56 |
| 0.95 | 0.36 | 1.40 | 0.54 | 1.09 | 0.39 | 1.13 | 0.49 | 1.04 | 0.44 | 1.01 |
| 1.79 | 0.77 | 1.25 | 0.49 | 1.48 | 0.57 | 1.26 | 0.56 | 1.13 | 0.48 | #N/A |
| 0.92 | 0.35 | 0.75 | 0.26 | #N/A | #N/A | #N/A | #N/A | 1.03 | 0.42 | 0.71 |
| #N/A | #N/A | 1.58 | 0.61 | 1.59 | 0.62 | 1.35 | 0.61 | 1.32 | 0.57 | 1.27 |
| 1.09 | 0.44 | 0.96 | 0.35 | 0.90 | 0.31 | 1.03 | 0.44 | 1.13 | 0.48 | 0.89 |
| 2.45 | 0.90 | 3.40 | 0.94 | 3.12 | 0.92 | 2.88 | 0.95 | 2.65 | 0.93 | 1.68 |
| #N/A | #N/A | #N/A | #N/A | #N/A | #N/A | #N/A | #N/A | #N/A | #N/A | #N/A |
| 1.46 | 0.65 | 1.95 | 0.72 | 1.75 | 0.67 | 1.07 | 0.46 | 1.23 | 0.53 | 1.41 |
| 1.62 | 0.65 | 1.51 | 0.58 | #N/A | #N/A | 1.13 | 0.49 | 1.05 | 0.44 | 1.01 |
| 0.94 | 0.36 | #N/A | #N/A | #N/A | #N/A | #N/A | #N/A | 0.74 | 0.27 | 0.54 |
| #N/A | #N/A | 0.34 | 0.07 | #N/A | #N/A | 0.33 | 0.05 | 0.24 | 0.02 | 0.41 |
| #N/A | #N/A | #N/A | #N/A | #N/A | #N/A | #N/A | #N/A | #N/A | #N/A | #N/A |
| 0.69 | 0.21 | 0.88 | 0.32 | 0.83 | 0.27 | 0.83 | 0.33 | 0.81 | 0.31 | 0.65 |
| 1.55 | 0.66 | 2.00 | 0.73 | 1.75 | 0.68 | 1.56 | 0.68 | 1.69 | 0.72 | 1.60 |
| 0.88 | 0.32 | 0.50 | 0.14 | 0.52 | 0.12 | 0.51 | 0.13 | 0.40 | 0.07 | 0.70 |

|      |      |      |      |      |      |      |      |      |      |      |
|------|------|------|------|------|------|------|------|------|------|------|
| 0.88 | 0.33 | 0.86 | 0.31 | 0.71 | 0.21 | 0.58 | 0.17 | 0.68 | 0.23 | #N/A |
| 0.46 | 0.07 | 0.43 | 0.11 | 0.40 | 0.06 | 0.48 | 0.11 | 0.49 | 0.12 | 0.60 |
| 1.39 | 0.62 | #N/A | #N/A | #N/A | #N/A | #N/A | #N/A | #N/A | #N/A | 0.93 |
| 0.84 | 0.30 | 1.22 | 0.47 | 0.96 | 0.33 | 0.85 | 0.34 | 0.81 | 0.31 | 0.92 |
| 2.51 | 0.92 | 2.62 | 0.87 | 2.26 | 0.81 | 1.80 | 0.77 | #N/A | #N/A | 2.38 |
| 1.60 | 0.70 | 1.67 | 0.63 | 1.27 | 0.48 | 1.05 | 0.45 | #N/A | #N/A | 1.24 |
| #N/A | #N/A | #N/A | #N/A | #N/A | #N/A | #N/A | #N/A | #N/A | #N/A | #N/A |
| 1.73 | 0.70 | 1.58 | 0.61 | 1.75 | 0.67 | 1.32 | 0.59 | 1.80 | 0.75 | 1.45 |
| 0.75 | 0.24 | 0.99 | 0.38 | #N/A | #N/A | #N/A | #N/A | 0.89 | 0.35 | 0.89 |
| 1.03 | 0.42 | 1.12 | 0.43 | 1.09 | 0.41 | 1.54 | 0.68 | 1.30 | 0.57 | 0.98 |
| 0.70 | 0.20 | #N/A | #N/A | #N/A | #N/A | #N/A | #N/A | 0.53 | 0.14 | 0.54 |
| #N/A | #N/A | 1.41 | 0.54 | 1.40 | 0.54 | 1.33 | 0.59 | 1.41 | 0.61 | 1.07 |
| 1.22 | 0.53 | #N/A | #N/A | #N/A | #N/A | 1.03 | 0.44 | 1.09 | 0.46 | 1.24 |
| #N/A | #N/A | 0.65 | 0.21 | #N/A | #N/A | #N/A | #N/A | 0.38 | 0.08 | #N/A |
| 1.74 | 0.75 | 1.35 | 0.52 | 1.12 | 0.42 | 1.28 | 0.57 | 1.40 | 0.61 | 0.90 |
| 0.90 | 0.33 | 0.72 | 0.24 | 0.72 | 0.23 | 0.74 | 0.27 | 0.75 | 0.27 | 0.76 |
| 1.93 | 0.81 | 1.49 | 0.55 | 2.18 | 0.79 | 1.83 | 0.78 | 1.82 | 0.77 | 1.86 |
| 0.51 | 0.10 | 0.34 | 0.07 | #N/A | #N/A | 0.42 | 0.08 | #N/A | #N/A | 0.21 |
| 0.43 | 0.06 | #N/A | #N/A | #N/A | #N/A | #N/A | #N/A | #N/A | #N/A | #N/A |
| #N/A | #N/A | 0.46 | 0.12 | #N/A | #N/A | #N/A | #N/A | #N/A | #N/A | #N/A |
| 1.07 | 0.43 | 1.18 | 0.46 | 1.06 | 0.39 | 1.01 | 0.43 | 1.06 | 0.45 | 0.89 |
| 1.09 | 0.45 | 1.37 | 0.53 | 1.10 | 0.41 | 1.32 | 0.58 | 1.41 | 0.61 | 0.95 |
| 1.81 | 0.73 | 1.72 | 0.65 | 1.41 | 0.55 | 1.14 | 0.50 | 1.61 | 0.69 | 1.19 |
| 0.53 | 0.10 | #N/A | #N/A | #N/A | #N/A | 0.32 | 0.04 | 0.36 | 0.05 | 0.44 |
| 1.09 | 0.46 | 1.49 | 0.58 | 1.90 | 0.71 | 1.49 | 0.66 | 1.60 | 0.69 | 1.50 |
| 0.79 | 0.27 | 0.82 | 0.29 | 1.12 | 0.40 | 0.79 | 0.30 | 0.91 | 0.36 | #N/A |
| 1.22 | 0.53 | 1.21 | 0.47 | 0.99 | 0.35 | 1.40 | 0.63 | 1.33 | 0.57 | 1.08 |
| 0.80 | 0.28 | 0.63 | 0.20 | 0.73 | 0.23 | 0.53 | 0.14 | 0.58 | 0.17 | 0.64 |
| 0.96 | 0.38 | 0.60 | 0.18 | #N/A | #N/A | 0.47 | 0.11 | 0.64 | 0.21 | 0.58 |
| 0.62 | 0.16 | 0.52 | 0.15 | 0.54 | 0.14 | 0.64 | 0.21 | 0.53 | 0.14 | 0.65 |
| #N/A | #N/A | #N/A | #N/A | #N/A | #N/A | #N/A | #N/A | #N/A | #N/A | #N/A |
| 1.85 | 0.79 | 2.22 | 0.80 | 2.13 | 0.77 | 1.92 | 0.81 | 1.99 | 0.81 | 1.49 |
| 0.94 | 0.37 | 0.92 | 0.34 | 1.00 | 0.34 | 0.90 | 0.37 | 0.81 | 0.31 | 1.08 |
| #N/A | #N/A | #N/A | #N/A | #N/A | #N/A | #N/A | #N/A | #N/A | #N/A | #N/A |
| 0.98 | 0.39 | 1.36 | 0.53 | 1.21 | 0.46 | 1.37 | 0.61 | 1.31 | 0.56 | 1.08 |
| #N/A | #N/A | #N/A | #N/A | #N/A | #N/A | #N/A | #N/A | #N/A | #N/A | #N/A |
| 2.70 | 0.94 | 2.49 | 0.85 | 2.17 | 0.79 | 2.32 | 0.89 | 2.28 | 0.87 | 1.65 |
| #N/A | #N/A | #N/A | #N/A | #N/A | #N/A | #N/A | #N/A | #N/A | #N/A | #N/A |
| 1.92 | 0.78 | 2.12 | 0.77 | 1.79 | 0.68 | 1.66 | 0.73 | 2.02 | 0.80 | 1.63 |
| #N/A | #N/A | 0.92 | 0.34 | 1.14 | 0.42 | 0.99 | 0.42 | 1.21 | 0.52 | 0.75 |
| #N/A | #N/A | #N/A | #N/A | #N/A | #N/A | #N/A | #N/A | #N/A | #N/A | #N/A |
| #N/A | #N/A | 1.18 | 0.40 | #N/A | #N/A | #N/A | #N/A | #N/A | #N/A | #N/A |
| 0.60 | 0.15 | #N/A | #N/A | #N/A | #N/A | #N/A | #N/A | #N/A | #N/A | 1.06 |
| 1.91 | 0.81 | 3.72 | 0.97 | 2.61 | 0.86 | 2.14 | 0.86 | 2.46 | 0.90 | 2.85 |
| #N/A | #N/A | #N/A | #N/A | #N/A | #N/A | #N/A | #N/A | #N/A | #N/A | #N/A |
| 1.95 | 0.80 | 2.41 | 0.84 | 2.26 | 0.81 | 1.99 | 0.83 | 1.88 | 0.78 | #N/A |
| 1.71 | 0.54 | #N/A | #N/A | #N/A | #N/A | #N/A | #N/A | #N/A | #N/A | 0.63 |
| 1.24 | 0.54 | 1.09 | 0.41 | 1.15 | 0.42 | 1.08 | 0.47 | 1.14 | 0.48 | 1.02 |
| 1.17 | 0.50 | 1.58 | 0.61 | 1.59 | 0.62 | 1.40 | 0.62 | 1.46 | 0.63 | 1.03 |
| #N/A | #N/A | #N/A | #N/A | #N/A | #N/A | #N/A | #N/A | 0.79 | 0.29 | 0.94 |
| 0.66 | 0.18 | 0.56 | 0.17 | 0.67 | 0.20 | 0.64 | 0.20 | 0.66 | 0.22 | 0.63 |



|      |      |      |      |      |      |      |      |      |      |      |
|------|------|------|------|------|------|------|------|------|------|------|
| #N/A | #N/A | #N/A | #N/A | #N/A | #N/A | #N/A | #N/A | #N/A | #N/A | #N/A |
| 1.22 | 0.53 | 1.42 | 0.55 | 1.29 | 0.49 | 0.94 | 0.39 | 1.28 | 0.56 | 1.11 |
| 1.52 | 0.67 | 1.84 | 0.69 | 1.75 | 0.67 | 1.83 | 0.78 | 1.70 | 0.71 | 1.39 |
| 1.02 | 0.41 | 0.88 | 0.32 | 0.85 | 0.29 | 1.04 | 0.45 | 0.82 | 0.31 | 0.89 |
| #N/A | #N/A | #N/A | #N/A | #N/A | #N/A | #N/A | #N/A | #N/A | #N/A | #N/A |
| 1.04 | 0.42 | 1.06 | 0.40 | 0.86 | 0.28 | 1.07 | 0.46 | 0.98 | 0.40 | 0.94 |
| 1.21 | 0.52 | 1.20 | 0.47 | 1.92 | 0.71 | 1.19 | 0.52 | 1.31 | 0.56 | 1.26 |
| 1.25 | 0.55 | 1.34 | 0.51 | 1.09 | 0.41 | 1.16 | 0.51 | 0.92 | 0.37 | 1.25 |
| 1.86 | 0.78 | 1.83 | 0.69 | 1.76 | 0.67 | 1.67 | 0.73 | 1.51 | 0.66 | 1.45 |
| #N/A | #N/A | #N/A | #N/A | #N/A | #N/A | #N/A | #N/A | #N/A | #N/A | #N/A |
| 1.52 | 0.67 | 2.62 | 0.87 | 2.21 | 0.79 | 1.89 | 0.80 | 1.93 | 0.80 | 1.59 |
| 1.43 | 0.62 | 1.92 | 0.72 | 1.78 | 0.68 | 1.04 | 0.45 | 1.52 | 0.66 | 1.31 |
| #N/A | #N/A | #N/A | #N/A | #N/A | #N/A | #N/A | #N/A | #N/A | #N/A | #N/A |
| 0.98 | 0.37 | 1.13 | 0.44 | 1.17 | 0.43 | 0.91 | 0.38 | 1.13 | 0.49 | 1.11 |
| 1.48 | 0.51 | #N/A | #N/A | #N/A | #N/A | #N/A | #N/A | #N/A | #N/A | 0.78 |
| 2.91 | 0.95 | 3.10 | 0.93 | 3.07 | 0.92 | 3.18 | 0.96 | 2.66 | 0.93 | 1.75 |
| #N/A | #N/A | #N/A | #N/A | #N/A | #N/A | #N/A | #N/A | #N/A | #N/A | #N/A |
| 1.49 | 0.66 | 1.22 | 0.47 | 0.95 | 0.34 | 0.97 | 0.41 | 0.96 | 0.39 | 1.24 |
| #N/A | #N/A | #N/A | #N/A | #N/A | #N/A | #N/A | #N/A | #N/A | #N/A | #N/A |
| 0.90 | 0.33 | 0.84 | 0.30 | 0.78 | 0.24 | 0.83 | 0.32 | 0.77 | 0.28 | 0.87 |
| 2.16 | 0.85 | 3.05 | 0.92 | 2.53 | 0.83 | 2.25 | 0.88 | 2.38 | 0.88 | 1.77 |
| 1.87 | 0.79 | 2.06 | 0.76 | 1.82 | 0.67 | 1.85 | 0.79 | 1.75 | 0.73 | 1.55 |
| 2.12 | 0.86 | 2.20 | 0.79 | 2.50 | 0.86 | 2.12 | 0.86 | 2.27 | 0.87 | 1.78 |
| 0.92 | 0.35 | 1.15 | 0.44 | #N/A | #N/A | 1.02 | 0.43 | 0.90 | 0.36 | #N/A |
| 0.83 | 0.30 | 1.23 | 0.48 | 0.60 | 0.17 | 0.62 | 0.19 | 0.68 | 0.23 | 0.69 |
| 0.66 | 0.18 | 1.30 | 0.50 | 1.83 | 0.70 | 1.90 | 0.76 | 1.40 | 0.60 | 0.97 |
| 0.67 | 0.19 | #N/A | #N/A | #N/A | #N/A | #N/A | #N/A | #N/A | #N/A | 0.33 |
| 1.05 | 0.44 | 0.86 | 0.31 | 0.53 | 0.15 | 0.72 | 0.26 | 0.68 | 0.23 | #N/A |
| 1.53 | 0.66 | 1.49 | 0.58 | 1.35 | 0.52 | 1.42 | 0.62 | 1.63 | 0.69 | 1.37 |
| 0.67 | 0.19 | 0.40 | 0.09 | 0.42 | 0.08 | 0.69 | 0.24 | 0.51 | 0.13 | 0.46 |
| 2.20 | 0.87 | 2.63 | 0.88 | 2.37 | 0.83 | 2.39 | 0.89 | 1.91 | 0.79 | 1.71 |
| #N/A | #N/A | #N/A | #N/A | #N/A | #N/A | #N/A | #N/A | #N/A | #N/A | 0.71 |
| 2.16 | 0.87 | 2.43 | 0.84 | 1.74 | 0.66 | 2.22 | 0.87 | 2.22 | 0.86 | 1.68 |
| 1.09 | 0.43 | #N/A | #N/A | #N/A | #N/A | #N/A | #N/A | #N/A | #N/A | 0.91 |
| 0.94 | 0.36 | #N/A | #N/A | 1.04 | 0.38 | #N/A | #N/A | #N/A | #N/A | 1.01 |
| #N/A | #N/A | #N/A | #N/A | #N/A | #N/A | #N/A | #N/A | #N/A | #N/A | #N/A |
| 2.33 | 0.89 | 2.96 | 0.92 | 2.74 | 0.88 | 2.31 | 0.89 | 2.48 | 0.91 | 1.86 |
| 2.19 | 0.87 | 3.49 | 0.96 | 3.89 | 0.96 | 2.54 | 0.92 | 3.34 | 0.97 | 2.38 |
| #N/A | #N/A | #N/A | #N/A | #N/A | #N/A | #N/A | #N/A | #N/A | #N/A | #N/A |
| 1.37 | 0.60 | 1.80 | 0.68 | 1.65 | 0.63 | 1.61 | 0.71 | 1.78 | 0.75 | 1.46 |
| 1.08 | 0.45 | 0.88 | 0.32 | 0.81 | 0.27 | 0.93 | 0.38 | 0.88 | 0.34 | 0.77 |
| 0.50 | 0.09 | 0.27 | 0.03 | 0.42 | 0.08 | 0.39 | 0.07 | 0.34 | 0.04 | 0.31 |
| #N/A | #N/A | #N/A | #N/A | #N/A | #N/A | #N/A | #N/A | #N/A | #N/A | 1.01 |
| #N/A | #N/A | #N/A | #N/A | #N/A | #N/A | #N/A | #N/A | #N/A | #N/A | #N/A |
| 1.61 | 0.68 | 1.72 | 0.66 | 1.78 | 0.68 | 1.95 | 0.81 | 1.59 | 0.69 | 1.68 |
| 1.57 | 0.66 | 1.84 | 0.69 | 2.03 | 0.74 | 1.55 | 0.66 | 1.82 | 0.69 | 1.29 |
| 1.53 | 0.67 | 1.83 | 0.69 | 2.20 | 0.77 | 1.51 | 0.67 | 2.04 | 0.82 | 1.22 |
| #N/A | #N/A | #N/A | #N/A | #N/A | #N/A | 1.87 | 0.77 | #N/A | #N/A | 1.04 |
| 3.46 | 0.98 | 2.81 | 0.89 | 2.63 | 0.86 | 3.25 | 0.98 | 2.40 | 0.89 | #N/A |
| #N/A | #N/A | #N/A | #N/A | #N/A | #N/A | #N/A | #N/A | #N/A | #N/A | #N/A |
| 0.44 | 0.07 | 0.44 | 0.11 | 0.49 | 0.11 | 0.53 | 0.14 | 0.38 | 0.06 | #N/A |

|      |      |      |      |      |      |      |      |      |      |      |
|------|------|------|------|------|------|------|------|------|------|------|
| 2.04 | 0.84 | 2.24 | 0.80 | 2.23 | 0.81 | 1.96 | 0.82 | 1.71 | 0.73 | 1.72 |
| #N/A | #N/A | #N/A | #N/A | #N/A | #N/A | #N/A | #N/A | #N/A | #N/A | 0.76 |
| 5.79 | 0.99 | 3.57 | 0.96 | 2.79 | 0.87 | 3.11 | 0.97 | 2.34 | 0.88 | #N/A |
| #N/A | #N/A | #N/A | #N/A | #N/A | #N/A | #N/A | #N/A | #N/A | #N/A | #N/A |
| 1.03 | 0.41 | 0.97 | 0.36 | #N/A | #N/A | 0.72 | 0.25 | #N/A | #N/A | #N/A |
| 0.84 | 0.31 | 1.11 | 0.43 | 1.38 | 0.50 | 0.97 | 0.41 | 1.12 | 0.48 | #N/A |
| 3.38 | 0.97 | 3.10 | 0.93 | 3.33 | 0.95 | 3.09 | 0.95 | 2.80 | 0.94 | 2.20 |
| #N/A | #N/A | 0.89 | 0.33 | 0.66 | 0.19 | 0.72 | 0.26 | 0.78 | 0.29 | 0.74 |
| 1.75 | 0.72 | 2.78 | 0.88 | 1.64 | 0.63 | 1.84 | 0.78 | 1.97 | 0.80 | 1.76 |
| #N/A | #N/A | #N/A | #N/A | #N/A | #N/A | #N/A | #N/A | #N/A | #N/A | #N/A |
| 1.57 | 0.69 | 2.08 | 0.76 | 2.14 | 0.74 | 1.97 | 0.82 | 1.89 | 0.78 | 1.46 |
| #N/A | #N/A | #N/A | #N/A | #N/A | #N/A | 0.90 | 0.36 | 0.88 | 0.35 | #N/A |
| 0.60 | 0.15 | 0.82 | 0.29 | 0.45 | 0.09 | 0.54 | 0.15 | 0.60 | 0.18 | 0.77 |
| 0.79 | 0.26 | 0.62 | 0.19 | 0.63 | 0.18 | 0.58 | 0.17 | 0.57 | 0.17 | 0.81 |
| 1.65 | 0.72 | 2.32 | 0.82 | 1.90 | 0.72 | 1.69 | 0.74 | 1.89 | 0.78 | 2.03 |
| 1.65 | 0.72 | 1.70 | 0.65 | 1.40 | 0.54 | 1.24 | 0.56 | 1.50 | 0.65 | #N/A |
| 0.50 | 0.10 | #N/A | #N/A | #N/A | #N/A | #N/A | #N/A | 0.34 | 0.05 | 0.50 |
| #N/A | #N/A | #N/A | #N/A | #N/A | #N/A | #N/A | #N/A | #N/A | #N/A | #N/A |
| #N/A | #N/A | #N/A | #N/A | #N/A | #N/A | #N/A | #N/A | #N/A | #N/A | #N/A |
| 0.99 | 0.39 | 0.54 | 0.16 | 0.63 | 0.17 | 0.61 | 0.19 | 0.58 | 0.17 | 0.65 |
| 1.95 | 0.82 | 2.36 | 0.83 | 1.81 | 0.70 | 1.44 | 0.63 | 1.49 | 0.64 | 1.43 |
| 0.93 | 0.36 | 0.63 | 0.20 | 0.75 | 0.23 | 0.78 | 0.29 | 0.77 | 0.28 | 0.68 |
| 1.11 | 0.45 | 1.16 | 0.45 | 1.03 | 0.38 | 1.12 | 0.49 | 1.23 | 0.53 | #N/A |
| 1.70 | 0.74 | 1.62 | 0.62 | 1.65 | 0.63 | 1.57 | 0.69 | 1.74 | 0.74 | 1.13 |
| 1.61 | 0.71 | 1.78 | 0.67 | 1.83 | 0.70 | 1.34 | 0.60 | 1.39 | 0.60 | 1.18 |
| 1.50 | 0.66 | 1.84 | 0.69 | 1.64 | 0.61 | 1.57 | 0.68 | 1.68 | 0.72 | 1.49 |
| 1.55 | 0.68 | 2.34 | 0.82 | 2.61 | 0.88 | 1.71 | 0.74 | 2.18 | 0.84 | 1.36 |
| 0.82 | 0.29 | 1.23 | 0.47 | 1.42 | 0.55 | 1.46 | 0.65 | 1.32 | 0.57 | 0.92 |
| #N/A | #N/A | #N/A | #N/A | #N/A | #N/A | #N/A | #N/A | #N/A | #N/A | #N/A |
| 5.53 | 0.99 | 3.86 | 0.97 | 3.16 | 0.93 | 3.09 | 0.97 | 3.35 | 0.97 | 2.50 |
| 0.46 | 0.07 | #N/A | #N/A | #N/A | #N/A | #N/A | #N/A | #N/A | #N/A | 0.48 |
| 3.22 | 0.89 | 6.46 | 1.00 | 3.92 | 0.97 | 2.96 | 0.94 | 5.33 | 1.00 | #N/A |
| #N/A | #N/A | #N/A | #N/A | #N/A | #N/A | #N/A | #N/A | #N/A | #N/A | #N/A |
| #N/A | #N/A | 1.73 | 0.66 | #N/A | #N/A | 1.21 | 0.54 | 1.18 | 0.51 | 0.82 |
| #N/A | #N/A | #N/A | #N/A | #N/A | #N/A | #N/A | #N/A | #N/A | #N/A | #N/A |
| 0.59 | 0.14 | 0.23 | 0.02 | 0.26 | 0.02 | 0.40 | 0.07 | 0.33 | 0.04 | #N/A |
| 2.63 | 0.93 | 2.81 | 0.89 | 2.88 | 0.91 | 1.73 | 0.75 | 2.36 | 0.89 | #N/A |
| #N/A | #N/A | #N/A | #N/A | #N/A | #N/A | #N/A | #N/A | #N/A | #N/A | #N/A |
| 1.88 | 0.78 | 2.56 | 0.87 | 1.88 | 0.72 | 1.76 | 0.76 | 1.87 | 0.78 | 1.69 |
| 0.13 | 0.00 | #N/A | #N/A | #N/A | #N/A | #N/A | #N/A | #N/A | #N/A | #N/A |
| 2.13 | 0.86 | 2.10 | 0.77 | 2.19 | 0.80 | 2.27 | 0.88 | 2.42 | 0.89 | 1.50 |
| 6.22 | 0.98 | 2.35 | 0.80 | #N/A | #N/A | 2.06 | 0.84 | 2.10 | 0.84 | 1.30 |
| 0.78 | 0.25 | 0.71 | 0.24 | 0.82 | 0.27 | 0.70 | 0.24 | 0.92 | 0.37 | 0.63 |
| 0.36 | 0.05 | 0.60 | 0.19 | #N/A | #N/A | 0.47 | 0.11 | 0.64 | 0.20 | #N/A |
| 2.20 | 0.87 | 2.44 | 0.84 | 3.88 | 0.97 | 2.37 | 0.90 | 2.25 | 0.87 | 1.92 |
| 0.82 | 0.28 | 0.63 | 0.20 | 0.57 | 0.15 | 0.70 | 0.24 | 0.67 | 0.22 | 0.76 |
| 1.43 | 0.62 | 1.02 | 0.39 | 1.25 | 0.47 | 1.03 | 0.44 | 0.99 | 0.41 | 0.91 |
| 3.37 | 0.93 | 2.93 | 0.90 | #N/A | #N/A | 2.53 | 0.92 | 2.72 | 0.91 | #N/A |
| 0.80 | 0.28 | 0.26 | 0.03 | #N/A | #N/A | #N/A | #N/A | 0.24 | 0.01 | #N/A |
| 2.01 | 0.79 | 1.73 | 0.66 | 1.19 | 0.44 | 1.41 | 0.63 | 1.32 | 0.57 | 1.19 |
| 0.39 | 0.04 | 0.40 | 0.10 | 0.45 | 0.09 | 0.35 | 0.05 | 0.33 | 0.04 | 0.46 |

|      |      |      |      |      |      |      |      |      |      |      |
|------|------|------|------|------|------|------|------|------|------|------|
| 0.69 | 0.20 | 0.64 | 0.21 | 0.85 | 0.29 | 0.76 | 0.28 | 0.83 | 0.32 | 0.78 |
| 1.09 | 0.46 | 1.31 | 0.51 | 1.19 | 0.45 | 1.22 | 0.54 | 1.42 | 0.62 | 1.27 |
| #N/A | #N/A | #N/A | #N/A | #N/A | #N/A | #N/A | #N/A | 1.52 | 0.66 | 1.17 |
| 2.61 | 0.92 | 2.68 | 0.88 | 3.65 | 0.95 | 2.13 | 0.86 | 3.08 | 0.96 | #N/A |
| 1.52 | 0.67 | 1.85 | 0.70 | 2.01 | 0.75 | 1.76 | 0.76 | 1.82 | 0.76 | 1.52 |
| #N/A | #N/A | #N/A | #N/A | #N/A | #N/A | #N/A | #N/A | #N/A | #N/A | #N/A |
| 1.93 | 0.79 | 1.87 | 0.70 | 2.34 | 0.82 | 1.42 | 0.63 | 1.70 | 0.72 | 1.39 |
| 0.46 | 0.07 | 0.30 | 0.04 | 0.40 | 0.07 | 0.38 | 0.07 | 0.34 | 0.04 | 0.44 |
| 2.01 | 0.81 | 2.08 | 0.76 | 2.40 | 0.83 | 2.49 | 0.91 | 2.38 | 0.89 | 2.42 |
| 2.04 | 0.81 | 1.82 | 0.68 | 2.87 | 0.79 | 1.36 | 0.61 | 1.93 | 0.79 | #N/A |
| 1.39 | 0.61 | 2.05 | 0.75 | 1.27 | 0.45 | 1.65 | 0.69 | 1.51 | 0.65 | 1.31 |
| #N/A | #N/A | #N/A | #N/A | #N/A | #N/A | #N/A | #N/A | #N/A | #N/A | #N/A |
| 0.20 | 0.01 | 0.15 | 0.01 | 0.20 | 0.01 | 0.18 | 0.01 | 0.14 | 0.00 | 0.22 |
| 0.59 | 0.14 | 0.50 | 0.14 | 0.51 | 0.12 | 0.52 | 0.13 | 0.56 | 0.16 | 0.63 |
| 2.32 | 0.89 | 4.09 | 0.96 | 3.93 | 0.97 | 2.61 | 0.92 | 3.07 | 0.96 | 2.39 |
| 1.34 | 0.57 | 1.99 | 0.71 | #N/A | #N/A | 1.20 | 0.51 | 1.72 | 0.71 | 1.95 |
| 1.09 | 0.44 | 1.48 | 0.57 | 1.60 | 0.62 | 1.36 | 0.60 | 1.43 | 0.62 | 1.21 |
| 1.61 | 0.62 | #N/A | #N/A | #N/A | #N/A | #N/A | #N/A | 1.06 | 0.44 | #N/A |
| #N/A | #N/A | #N/A | #N/A | #N/A | #N/A | #N/A | #N/A | #N/A | #N/A | #N/A |
| 1.00 | 0.40 | #N/A | #N/A | #N/A | #N/A | 0.40 | 0.07 | #N/A | #N/A | 0.59 |
| 2.97 | 0.94 | 3.07 | 0.91 | #N/A | #N/A | #N/A | #N/A | #N/A | #N/A | 2.58 |
| #N/A | #N/A | #N/A | #N/A | #N/A | #N/A | #N/A | #N/A | #N/A | #N/A | #N/A |
| 1.51 | 0.67 | 1.44 | 0.56 | 1.27 | 0.48 | #N/A | #N/A | 1.31 | 0.56 | 1.28 |
| 1.03 | 0.42 | 1.08 | 0.41 | 1.07 | 0.40 | 0.85 | 0.33 | 0.95 | 0.39 | 0.99 |
| 0.81 | 0.28 | 0.47 | 0.12 | 0.64 | 0.19 | 0.65 | 0.21 | 0.48 | 0.11 | #N/A |
| 3.54 | 0.97 | 1.84 | 0.69 | #N/A | #N/A | 1.44 | 0.64 | 1.61 | 0.68 | 1.46 |
| 2.38 | 0.89 | 2.87 | 0.90 | 2.16 | 0.79 | 2.85 | 0.95 | 2.64 | 0.88 | 1.58 |
| #N/A | #N/A | #N/A | #N/A | #N/A | #N/A | #N/A | #N/A | #N/A | #N/A | #N/A |
| #N/A | #N/A | #N/A | #N/A | #N/A | #N/A | #N/A | #N/A | #N/A | #N/A | #N/A |
| 2.48 | 0.91 | 2.64 | 0.88 | 3.56 | 0.96 | 2.88 | 0.95 | 3.03 | 0.96 | 1.96 |
| #N/A | #N/A | #N/A | #N/A | #N/A | #N/A | #N/A | #N/A | #N/A | #N/A | #N/A |
| 1.87 | 0.79 | 1.98 | 0.74 | 1.60 | 0.62 | 1.59 | 0.70 | 1.65 | 0.71 | 1.42 |
| 1.56 | 0.68 | #N/A | #N/A | #N/A | #N/A | #N/A | #N/A | #N/A | #N/A | #N/A |
| #N/A | #N/A | #N/A | #N/A | #N/A | #N/A | #N/A | #N/A | #N/A | #N/A | #N/A |
| 1.96 | 0.81 | 2.30 | 0.81 | 3.50 | 0.92 | 2.15 | 0.86 | 2.69 | 0.93 | 1.79 |
| 2.03 | 0.84 | 2.10 | 0.76 | 2.33 | 0.83 | 2.04 | 0.83 | 2.30 | 0.87 | 1.54 |
| 2.43 | 0.89 | 2.72 | 0.87 | 2.10 | 0.78 | 1.72 | 0.75 | 2.44 | 0.90 | 1.49 |
| 2.29 | 0.79 | 2.97 | 0.92 | 4.24 | 0.90 | 2.30 | 0.89 | 2.61 | 0.92 | 1.80 |
| #N/A | #N/A | #N/A | #N/A | #N/A | #N/A | #N/A | #N/A | #N/A | #N/A | #N/A |
| 0.98 | 0.39 | 0.71 | 0.24 | 0.83 | 0.28 | 0.78 | 0.29 | 0.89 | 0.35 | 0.90 |
| 0.86 | 0.31 | 1.24 | 0.48 | 1.41 | 0.55 | 1.01 | 0.43 | 1.23 | 0.54 | 1.24 |
| #N/A | #N/A | #N/A | #N/A | #N/A | #N/A | #N/A | #N/A | #N/A | #N/A | #N/A |
| 1.49 | 0.65 | 1.33 | 0.52 | 1.51 | 0.59 | 1.49 | 0.66 | 1.43 | 0.62 | 1.42 |
| 0.62 | 0.16 | 0.59 | 0.18 | 0.73 | 0.21 | 0.57 | 0.16 | 0.76 | 0.27 | 0.65 |
| 0.66 | 0.18 | 0.37 | 0.09 | #N/A | #N/A | #N/A | #N/A | 0.44 | 0.09 | #N/A |
| 0.77 | 0.26 | 0.59 | 0.18 | 0.83 | 0.29 | 0.60 | 0.18 | 0.59 | 0.17 | 0.56 |
| 0.26 | 0.02 | #N/A | #N/A | #N/A | #N/A | #N/A | #N/A | #N/A | #N/A | 0.50 |
| 2.97 | 0.95 | 1.81 | 0.68 | #N/A | #N/A | 1.21 | 0.54 | 2.08 | 0.80 | 1.07 |
| 0.77 | 0.25 | 0.47 | 0.13 | 0.63 | 0.17 | 0.50 | 0.13 | 0.66 | 0.22 | 0.65 |
| 1.78 | 0.73 | 2.12 | 0.76 | #N/A | #N/A | 1.40 | 0.62 | 1.53 | 0.66 | #N/A |
| 1.19 | 0.51 | 1.11 | 0.43 | 1.21 | 0.45 | 0.95 | 0.40 | 1.15 | 0.49 | 0.97 |

|      |      |      |      |      |      |      |      |      |      |      |
|------|------|------|------|------|------|------|------|------|------|------|
| 1.89 | 0.78 | 2.09 | 0.77 | #N/A | #N/A | 1.60 | 0.71 | 1.68 | 0.72 | #N/A |
| 1.89 | 0.77 | 2.23 | 0.79 | #N/A | #N/A | 1.43 | 0.64 | 2.08 | 0.82 | #N/A |
| 2.42 | 0.91 | 2.55 | 0.85 | 2.46 | 0.85 | 1.73 | 0.75 | 1.87 | 0.78 | 1.90 |
| 1.01 | 0.40 | #N/A | #N/A | #N/A | #N/A | 0.86 | 0.34 | 0.81 | 0.31 | 0.83 |
| #N/A | #N/A | 2.55 | 0.86 | 2.62 | 0.86 | 1.70 | 0.74 | 2.25 | 0.87 | 1.58 |
| #N/A | #N/A | 2.97 | 0.90 | #N/A | #N/A | #N/A | #N/A | 1.73 | 0.74 | 1.23 |
| #N/A | #N/A | #N/A | #N/A | #N/A | #N/A | #N/A | #N/A | #N/A | #N/A | #N/A |
| 2.20 | 0.87 | 1.96 | 0.73 | 2.21 | 0.80 | 2.31 | 0.89 | 2.05 | 0.83 | 1.47 |
| #N/A | #N/A | #N/A | #N/A | #N/A | #N/A | #N/A | #N/A | #N/A | #N/A | #N/A |
| 0.59 | 0.15 | 0.75 | 0.26 | 0.85 | 0.28 | 0.49 | 0.12 | 0.71 | 0.25 | 0.58 |
| #N/A | #N/A | 2.05 | 0.75 | 2.45 | 0.83 | 1.64 | 0.70 | 1.88 | 0.78 | 1.50 |
| 0.98 | 0.39 | 0.91 | 0.33 | 1.10 | 0.41 | 1.36 | 0.61 | 1.12 | 0.48 | 0.96 |
| 1.49 | 0.61 | 1.78 | 0.67 | 2.07 | 0.66 | 1.22 | 0.51 | 1.37 | 0.57 | 1.48 |
| 1.43 | 0.64 | 2.26 | 0.80 | 2.54 | 0.86 | 2.21 | 0.87 | 1.95 | 0.77 | 1.33 |
| 0.72 | 0.22 | 0.49 | 0.14 | 0.57 | 0.15 | 0.50 | 0.12 | 0.81 | 0.31 | 0.70 |
| 0.38 | 0.04 | #N/A | #N/A | #N/A | #N/A | #N/A | #N/A | 0.61 | 0.19 | #N/A |
| 1.67 | 0.73 | 1.83 | 0.69 | #N/A | #N/A | #N/A | #N/A | #N/A | #N/A | #N/A |
| 0.26 | 0.01 | 0.33 | 0.06 | 0.30 | 0.03 | 0.35 | 0.05 | 0.38 | 0.06 | 0.37 |
| 1.35 | 0.60 | 1.72 | 0.65 | 1.22 | 0.46 | 1.24 | 0.55 | 1.33 | 0.57 | 1.05 |
| 1.80 | 0.76 | 2.42 | 0.84 | 2.07 | 0.77 | 2.56 | 0.92 | 2.60 | 0.92 | 1.89 |
| 0.84 | 0.30 | 0.82 | 0.29 | 0.79 | 0.25 | 0.79 | 0.30 | 0.88 | 0.34 | 1.00 |
| #N/A | #N/A | #N/A | #N/A | #N/A | #N/A | #N/A | #N/A | #N/A | #N/A | #N/A |
| 0.74 | 0.23 | 0.51 | 0.15 | 0.60 | 0.17 | 0.51 | 0.14 | 0.51 | 0.13 | 0.57 |
| 1.42 | 0.63 | 1.23 | 0.47 | 1.60 | 0.62 | 1.33 | 0.58 | 1.30 | 0.57 | 1.18 |
| 1.22 | 0.53 | 1.39 | 0.54 | 1.31 | 0.50 | 1.00 | 0.42 | 1.04 | 0.43 | 1.24 |
| 1.47 | 0.64 | 2.05 | 0.75 | 1.54 | 0.60 | 1.64 | 0.72 | 1.39 | 0.61 | 1.09 |
| 0.43 | 0.06 | 0.22 | 0.02 | 0.39 | 0.07 | #N/A | #N/A | 0.43 | 0.08 | 0.41 |
| #N/A | #N/A | #N/A | #N/A | #N/A | #N/A | #N/A | #N/A | #N/A | #N/A | #N/A |
| 0.81 | 0.28 | 0.67 | 0.22 | 0.73 | 0.22 | 0.59 | 0.17 | 0.77 | 0.28 | 0.67 |
| #N/A | #N/A | #N/A | #N/A | #N/A | #N/A | #N/A | #N/A | #N/A | #N/A | #N/A |
| 1.24 | 0.54 | 1.32 | 0.51 | 1.20 | 0.45 | 1.01 | 0.43 | 1.41 | 0.62 | 0.98 |
| 0.44 | 0.06 | 0.24 | 0.02 | 0.21 | 0.01 | 0.21 | 0.01 | 0.21 | 0.01 | 0.29 |
| 1.10 | 0.45 | #N/A | #N/A | #N/A | #N/A | #N/A | #N/A | 0.77 | 0.28 | #N/A |
| 1.79 | 0.77 | 2.87 | 0.90 | 2.74 | 0.89 | 2.15 | 0.86 | 2.40 | 0.89 | 1.78 |
| 1.95 | 0.80 | 1.75 | 0.65 | 2.34 | 0.82 | 2.22 | 0.87 | 1.99 | 0.81 | 1.86 |
| 0.58 | 0.13 | 0.42 | 0.11 | #N/A | #N/A | 0.58 | 0.17 | 0.38 | 0.06 | 0.51 |
| 2.38 | 0.90 | 2.30 | 0.81 | 2.08 | 0.76 | 1.88 | 0.80 | 2.30 | 0.87 | 2.34 |
| 1.82 | 0.78 | 2.17 | 0.78 | 2.28 | 0.82 | 1.91 | 0.81 | 1.57 | 0.68 | #N/A |
| 2.02 | 0.81 | 2.27 | 0.80 | 2.69 | 0.88 | 1.58 | 0.69 | 1.97 | 0.81 | 1.43 |
| 1.79 | 0.77 | 1.72 | 0.65 | 1.33 | 0.51 | 1.82 | 0.76 | 1.67 | 0.72 | 1.35 |
| 0.68 | 0.19 | 0.83 | 0.30 | 0.70 | 0.22 | 0.94 | 0.39 | 0.94 | 0.38 | 0.70 |
| 0.79 | 0.28 | #N/A | #N/A | #N/A | #N/A | #N/A | #N/A | #N/A | #N/A | 0.48 |
| 2.59 | 0.93 | 2.05 | 0.75 | #N/A | #N/A | 2.12 | 0.85 | 1.86 | 0.76 | #N/A |
| #N/A | #N/A | 3.99 | 0.98 | 4.30 | 0.98 | 3.25 | 0.97 | 4.32 | 0.99 | 3.02 |
| 1.52 | 0.67 | 2.26 | 0.81 | 1.91 | 0.72 | 2.27 | 0.88 | 2.44 | 0.89 | #N/A |
| #N/A | #N/A | #N/A | #N/A | #N/A | #N/A | #N/A | #N/A | #N/A | #N/A | #N/A |
| 1.64 | 0.72 | 2.06 | 0.76 | 2.29 | 0.82 | 1.85 | 0.79 | 2.12 | 0.84 | 1.35 |
| 0.95 | 0.37 | 1.91 | 0.71 | 1.24 | 0.47 | 1.32 | 0.59 | 1.36 | 0.59 | 1.04 |
| 0.47 | 0.08 | 0.37 | 0.08 | #N/A | #N/A | 0.30 | 0.03 | 0.30 | 0.03 | 0.65 |
| 1.47 | 0.63 | 1.84 | 0.69 | 1.93 | 0.73 | 1.17 | 0.52 | 1.19 | 0.50 | 1.05 |
| 1.06 | 0.44 | 0.97 | 0.37 | 1.00 | 0.36 | 0.90 | 0.37 | 0.57 | 0.17 | 0.89 |



|      |      |      |      |      |      |      |      |      |      |      |
|------|------|------|------|------|------|------|------|------|------|------|
| 1.06 | 0.44 | 0.63 | 0.20 | 0.72 | 0.24 | 0.75 | 0.27 | 0.59 | 0.18 | #N/A |
| 1.30 | 0.57 | 4.04 | 0.90 | 2.60 | 0.85 | 1.90 | 0.80 | 1.83 | 0.76 | 1.53 |
| 1.32 | 0.58 | 2.25 | 0.79 | 1.62 | 0.63 | 1.34 | 0.59 | 1.07 | 0.44 | #N/A |
| 1.56 | 0.66 | 1.45 | 0.56 | 1.38 | 0.53 | #N/A | #N/A | #N/A | #N/A | 1.23 |
| #N/A | #N/A | #N/A | #N/A | #N/A | #N/A | #N/A | #N/A | #N/A | #N/A | #N/A |
| #N/A | #N/A | #N/A | #N/A | #N/A | #N/A | #N/A | #N/A | #N/A | #N/A | #N/A |
| #N/A | #N/A | #N/A | #N/A | #N/A | #N/A | #N/A | #N/A | #N/A | #N/A | #N/A |
| #N/A | #N/A | #N/A | #N/A | #N/A | #N/A | #N/A | #N/A | #N/A | #N/A | #N/A |
| 1.70 | 0.74 | 2.94 | 0.82 | 2.31 | 0.81 | 1.43 | 0.63 | 2.04 | 0.82 | 1.82 |
| 0.99 | 0.40 | #N/A | #N/A | #N/A | #N/A | #N/A | #N/A | #N/A | #N/A | #N/A |
| 0.92 | 0.33 | 0.86 | 0.31 | 0.73 | 0.24 | 0.71 | 0.25 | 0.69 | 0.24 | 0.75 |
| 0.71 | 0.21 | 0.34 | 0.06 | #N/A | #N/A | #N/A | #N/A | 0.35 | 0.05 | 0.71 |
| 2.11 | 0.86 | 2.53 | 0.85 | 1.93 | 0.65 | 1.53 | 0.68 | 1.63 | 0.70 | 1.07 |
| 1.88 | 0.80 | 2.56 | 0.87 | 2.30 | 0.82 | 2.41 | 0.91 | 2.30 | 0.87 | 1.87 |
| #N/A | #N/A | #N/A | #N/A | #N/A | #N/A | #N/A | #N/A | #N/A | #N/A | #N/A |
| #N/A | #N/A | 1.53 | 0.59 | 2.26 | 0.80 | 1.75 | 0.74 | 1.72 | 0.72 | 1.58 |
| #N/A | #N/A | #N/A | #N/A | #N/A | #N/A | #N/A | #N/A | #N/A | #N/A | 0.52 |
| 2.74 | 0.94 | 3.36 | 0.95 | 2.71 | 0.89 | 2.22 | 0.88 | 2.47 | 0.90 | 2.28 |
| #N/A | #N/A | #N/A | #N/A | #N/A | #N/A | #N/A | #N/A | #N/A | #N/A | #N/A |
| 1.61 | 0.71 | 1.89 | 0.71 | 1.98 | 0.72 | 1.75 | 0.76 | 1.84 | 0.77 | 1.50 |
| 0.88 | 0.33 | 0.71 | 0.24 | 0.74 | 0.24 | 0.85 | 0.34 | 0.84 | 0.32 | 0.83 |
| 0.65 | 0.17 | 0.56 | 0.17 | 0.52 | 0.12 | 0.59 | 0.18 | 0.68 | 0.23 | 0.63 |
| 0.95 | 0.36 | #N/A | #N/A | #N/A | #N/A | #N/A | #N/A | #N/A | #N/A | 0.77 |
| 1.22 | 0.53 | 1.84 | 0.69 | 2.28 | 0.82 | 1.98 | 0.82 | 1.88 | 0.78 | 1.14 |
| 1.85 | 0.76 | 2.31 | 0.81 | #N/A | #N/A | 2.46 | 0.89 | 2.00 | 0.81 | 1.83 |
| 3.40 | 0.92 | 2.32 | 0.79 | #N/A | #N/A | #N/A | #N/A | #N/A | #N/A | 0.96 |
| 1.56 | 0.68 | 1.97 | 0.73 | 1.51 | 0.58 | 1.55 | 0.69 | 1.94 | 0.76 | 1.58 |
| #N/A | #N/A | #N/A | #N/A | #N/A | #N/A | #N/A | #N/A | #N/A | #N/A | #N/A |
| #N/A | #N/A | 0.88 | 0.32 | 0.94 | 0.33 | 0.92 | 0.38 | 0.87 | 0.34 | 0.67 |
| 1.00 | 0.37 | #N/A | #N/A | #N/A | #N/A | #N/A | #N/A | #N/A | #N/A | #N/A |
| 0.57 | 0.13 | 0.49 | 0.13 | 0.51 | 0.12 | 0.50 | 0.13 | 0.45 | 0.10 | 0.67 |
| 0.99 | 0.39 | 0.89 | 0.33 | 0.86 | 0.29 | #N/A | #N/A | #N/A | #N/A | 1.02 |
| 1.35 | 0.59 | 1.51 | 0.57 | 2.46 | 0.84 | 1.18 | 0.52 | 1.74 | 0.74 | 1.20 |
| 2.16 | 0.83 | 1.20 | 0.41 | 2.37 | 0.83 | 1.84 | 0.78 | 2.05 | 0.82 | 1.46 |
| 2.64 | 0.93 | 2.92 | 0.91 | 2.71 | 0.87 | 3.57 | 0.99 | 3.11 | 0.96 | 2.58 |
| #N/A | #N/A | #N/A | #N/A | #N/A | #N/A | #N/A | #N/A | #N/A | #N/A | 1.04 |
| 1.96 | 0.82 | 1.87 | 0.70 | 2.48 | 0.83 | 2.23 | 0.86 | 1.73 | 0.74 | 1.29 |
| 2.89 | 0.94 | 3.97 | 0.97 | 3.82 | 0.95 | 2.39 | 0.90 | 2.90 | 0.93 | 2.85 |
| 1.82 | 0.73 | 1.91 | 0.71 | 1.41 | 0.54 | 1.33 | 0.60 | 1.21 | 0.52 | 1.22 |
| 1.12 | 0.48 | 0.75 | 0.26 | 0.74 | 0.23 | 0.91 | 0.37 | 0.91 | 0.36 | 0.89 |
| 1.84 | 0.79 | 1.60 | 0.61 | 1.36 | 0.52 | 1.24 | 0.55 | 1.21 | 0.52 | #N/A |
| 1.94 | 0.81 | 1.96 | 0.73 | 2.89 | 0.91 | 2.00 | 0.83 | 2.30 | 0.87 | 1.72 |
| 0.84 | 0.30 | 1.49 | 0.57 | 0.88 | 0.30 | 0.76 | 0.28 | 1.39 | 0.60 | 0.68 |
| 1.18 | 0.48 | 1.77 | 0.67 | 1.24 | 0.47 | 1.06 | 0.46 | 1.13 | 0.48 | #N/A |
| 0.46 | 0.07 | 0.58 | 0.18 | 0.57 | 0.14 | 0.44 | 0.09 | 0.66 | 0.22 | 0.62 |
| 0.95 | 0.37 | 0.64 | 0.20 | 0.71 | 0.21 | 0.70 | 0.25 | 0.71 | 0.25 | 0.67 |
| #N/A | #N/A | #N/A | #N/A | #N/A | #N/A | #N/A | #N/A | #N/A | #N/A | #N/A |
| 0.88 | 0.32 | 4.45 | 0.99 | #N/A | #N/A | #N/A | #N/A | 2.45 | 0.89 | 1.80 |
| 1.47 | 0.64 | 2.47 | 0.85 | 2.06 | 0.76 | 1.62 | 0.72 | 1.53 | 0.66 | 1.39 |
| 2.47 | 0.79 | 1.13 | 0.43 | #N/A | #N/A | 1.03 | 0.44 | 0.87 | 0.34 | #N/A |
| 0.27 | 0.02 | 0.32 | 0.06 | 0.30 | 0.03 | 0.36 | 0.05 | 0.34 | 0.05 | 0.35 |



|      |      |      |      |      |      |      |      |      |      |      |
|------|------|------|------|------|------|------|------|------|------|------|
| 0.28 | 0.02 | 0.26 | 0.03 | 0.22 | 0.01 | 0.22 | 0.01 | 0.24 | 0.01 | 0.32 |
| 0.41 | 0.05 | 0.15 | 0.01 | 0.17 | 0.01 | 0.26 | 0.02 | 0.30 | 0.03 | 0.32 |
| 0.65 | 0.18 | 0.40 | 0.09 | 0.35 | 0.05 | 0.43 | 0.08 | 0.46 | 0.10 | 0.58 |
| #N/A | #N/A | #N/A | #N/A | #N/A | #N/A | #N/A | #N/A | #N/A | #N/A | #N/A |
| 1.05 | 0.43 | 1.40 | 0.54 | 1.21 | 0.45 | 1.50 | 0.67 | 1.55 | 0.67 | 1.10 |
| 0.38 | 0.04 | 0.65 | 0.21 | #N/A | #N/A | 0.68 | 0.23 | 0.64 | 0.21 | 0.35 |
| 0.86 | 0.31 | 0.81 | 0.29 | 0.87 | 0.29 | 0.94 | 0.39 | 1.08 | 0.46 | 0.55 |
| 1.74 | 0.75 | 2.25 | 0.80 | 2.22 | 0.80 | 1.90 | 0.80 | 2.28 | 0.86 | 1.39 |
| #N/A | #N/A | 2.01 | 0.74 | 1.30 | 0.44 | 1.59 | 0.70 | 1.38 | 0.61 | 1.31 |
| 0.49 | 0.09 | 0.54 | 0.16 | 0.69 | 0.21 | 0.65 | 0.21 | 0.93 | 0.37 | 0.57 |
| 0.83 | 0.29 | #N/A | #N/A | #N/A | #N/A | #N/A | #N/A | #N/A | #N/A | #N/A |
| #N/A | #N/A | 1.56 | 0.60 | 1.41 | 0.55 | 1.15 | 0.51 | 1.24 | 0.53 | 1.07 |
| 0.56 | 0.13 | #N/A | #N/A | #N/A | #N/A | #N/A | #N/A | 0.55 | 0.15 | #N/A |
| 1.31 | 0.57 | 1.33 | 0.52 | 1.26 | 0.48 | 1.06 | 0.46 | 1.27 | 0.55 | 1.15 |
| 0.72 | 0.21 | 0.88 | 0.32 | 1.36 | 0.53 | 1.09 | 0.47 | 0.97 | 0.40 | 0.83 |
| 1.06 | 0.44 | #N/A | #N/A | 1.05 | 0.38 | 0.86 | 0.34 | 1.11 | 0.47 | 1.09 |
| 0.56 | 0.12 | 0.43 | 0.11 | 0.38 | 0.06 | 0.32 | 0.04 | 0.34 | 0.04 | 0.49 |
| 1.42 | 0.60 | 2.97 | 0.91 | 2.04 | 0.76 | 1.83 | 0.76 | 1.80 | 0.76 | 1.22 |
| 0.42 | 0.06 | 0.28 | 0.04 | #N/A | #N/A | 0.35 | 0.06 | 0.36 | 0.05 | 0.49 |
| #N/A | #N/A | #N/A | #N/A | #N/A | #N/A | #N/A | #N/A | #N/A | #N/A | #N/A |
| #N/A | #N/A | #N/A | #N/A | #N/A | #N/A | #N/A | #N/A | #N/A | #N/A | #N/A |
| 0.63 | 0.17 | 0.36 | 0.08 | 0.30 | 0.03 | 0.29 | 0.03 | 0.37 | 0.06 | 0.43 |
| 1.30 | 0.57 | 1.35 | 0.53 | #N/A | #N/A | 1.22 | 0.54 | 1.34 | 0.58 | 1.75 |
| #N/A | #N/A | #N/A | #N/A | #N/A | #N/A | #N/A | #N/A | #N/A | #N/A | #N/A |
| 1.70 | 0.74 | 1.57 | 0.60 | 1.60 | 0.62 | 1.34 | 0.60 | 1.44 | 0.63 | #N/A |
| 2.83 | 0.95 | 2.24 | 0.80 | 2.86 | 0.86 | 1.97 | 0.82 | 2.26 | 0.87 | 1.89 |
| 1.08 | 0.45 | #N/A | #N/A | #N/A | #N/A | #N/A | #N/A | #N/A | #N/A | 0.53 |
| 1.27 | 0.50 | 1.74 | 0.66 | 1.32 | 0.49 | 1.11 | 0.48 | 0.97 | 0.40 | #N/A |
| #N/A | #N/A | #N/A | #N/A | #N/A | #N/A | 0.44 | 0.10 | #N/A | #N/A | 1.71 |
| 1.19 | 0.46 | 2.35 | 0.81 | 1.49 | 0.58 | 1.42 | 0.62 | 1.22 | 0.53 | 1.12 |
| #N/A | #N/A | 1.11 | 0.42 | #N/A | #N/A | 0.97 | 0.41 | 0.90 | 0.36 | 0.92 |
| 1.39 | 0.60 | 1.63 | 0.62 | 1.81 | 0.67 | 1.88 | 0.78 | 1.90 | 0.77 | 1.03 |
| 0.82 | 0.28 | 0.97 | 0.36 | 1.02 | 0.37 | 0.84 | 0.33 | 0.90 | 0.36 | 1.04 |
| 1.45 | 0.64 | 2.21 | 0.79 | 2.58 | 0.85 | 1.95 | 0.82 | 2.00 | 0.82 | 1.87 |
| 2.19 | 0.87 | 1.97 | 0.73 | 2.09 | 0.78 | 2.10 | 0.85 | 2.38 | 0.89 | 1.53 |
| 1.40 | 0.57 | 1.16 | 0.45 | 1.08 | 0.40 | 1.32 | 0.59 | 1.72 | 0.69 | 1.11 |
| #N/A | #N/A | 3.69 | 0.96 | #N/A | #N/A | 3.22 | 0.91 | 2.48 | 0.91 | 1.66 |
| 2.37 | 0.84 | #N/A | #N/A | 2.71 | 0.89 | 1.63 | 0.69 | 2.50 | 0.89 | 1.71 |
| #N/A | #N/A | #N/A | #N/A | #N/A | #N/A | #N/A | #N/A | #N/A | #N/A | #N/A |
| 2.41 | 0.90 | 2.64 | 0.84 | 3.11 | 0.91 | 2.25 | 0.81 | 1.61 | 0.68 | 1.65 |
| 1.00 | 0.39 | 0.78 | 0.27 | 1.00 | 0.36 | 0.72 | 0.25 | 1.03 | 0.43 | 0.75 |
| 1.05 | 0.43 | #N/A | #N/A | #N/A | #N/A | #N/A | #N/A | #N/A | #N/A | 0.64 |
| 0.96 | 0.38 | 1.37 | 0.53 | 1.26 | 0.48 | 1.15 | 0.50 | 1.17 | 0.49 | 1.37 |
| 1.09 | 0.45 | 0.95 | 0.35 | 0.78 | 0.25 | 0.85 | 0.34 | 0.79 | 0.29 | #N/A |
| #N/A | #N/A | #N/A | #N/A | #N/A | #N/A | #N/A | #N/A | #N/A | #N/A | #N/A |
| 0.79 | 0.26 | 1.01 | 0.38 | #N/A | #N/A | 0.86 | 0.34 | 0.91 | 0.36 | 1.27 |
| 2.03 | 0.84 | 2.18 | 0.78 | 2.06 | 0.77 | 2.60 | 0.91 | 2.62 | 0.92 | 1.77 |
| 0.63 | 0.16 | #N/A | #N/A | #N/A | #N/A | #N/A | #N/A | #N/A | #N/A | 0.37 |
| #N/A | #N/A | #N/A | #N/A | #N/A | #N/A | #N/A | #N/A | #N/A | #N/A | #N/A |
| 4.36 | 0.99 | 4.25 | 0.98 | 4.05 | 0.98 | 2.96 | 0.96 | 3.16 | 0.97 | 3.19 |
| 0.83 | 0.30 | 1.07 | 0.41 | 0.81 | 0.26 | 0.92 | 0.38 | 0.71 | 0.24 | #N/A |

|      |      |      |      |      |      |      |      |      |      |      |
|------|------|------|------|------|------|------|------|------|------|------|
| 1.68 | 0.73 | 1.75 | 0.66 | 1.74 | 0.66 | 1.56 | 0.69 | 1.75 | 0.73 | 1.40 |
| #N/A | #N/A | 2.25 | 0.80 | 1.46 | 0.57 | 2.06 | 0.84 | 1.97 | 0.81 | #N/A |
| 1.84 | 0.78 | 4.72 | 0.97 | #N/A | #N/A | #N/A | #N/A | 1.76 | 0.74 | 2.73 |
| #N/A | #N/A | #N/A | #N/A | #N/A | #N/A | #N/A | #N/A | #N/A | #N/A | #N/A |
| 2.16 | 0.84 | 1.83 | 0.68 | 1.24 | 0.47 | 1.25 | 0.56 | 1.42 | 0.62 | 1.33 |
| 1.69 | 0.73 | 1.68 | 0.64 | 3.11 | 0.90 | 1.34 | 0.58 | 1.61 | 0.69 | 1.15 |
| 0.88 | 0.32 | 0.67 | 0.22 | 1.00 | 0.36 | 0.82 | 0.32 | 0.78 | 0.29 | 0.62 |
| 1.71 | 0.72 | 1.76 | 0.67 | 1.77 | 0.68 | 1.54 | 0.68 | 1.75 | 0.74 | 1.28 |
| #N/A | #N/A | 0.36 | 0.07 | #N/A | #N/A | 0.57 | 0.17 | 0.43 | 0.09 | #N/A |
| 0.85 | 0.31 | 0.44 | 0.11 | #N/A | #N/A | 0.86 | 0.34 | 0.58 | 0.17 | #N/A |
| 0.68 | 0.20 | 0.36 | 0.07 | #N/A | #N/A | 0.42 | 0.08 | 0.62 | 0.19 | 0.56 |
| 1.34 | 0.57 | 1.20 | 0.46 | 1.37 | 0.53 | 1.08 | 0.47 | 1.23 | 0.53 | 1.07 |
| 1.17 | 0.50 | 0.94 | 0.35 | 0.94 | 0.33 | 0.76 | 0.28 | 0.65 | 0.21 | 0.83 |
| 0.72 | 0.22 | 0.34 | 0.07 | 0.43 | 0.09 | 0.44 | 0.09 | 0.38 | 0.06 | 0.62 |
| 0.38 | 0.04 | 0.43 | 0.10 | 0.56 | 0.14 | 0.57 | 0.17 | 0.54 | 0.14 | 0.48 |
| 1.88 | 0.75 | 2.12 | 0.77 | 2.14 | 0.77 | 1.53 | 0.67 | 1.77 | 0.75 | 2.57 |
| 1.86 | 0.72 | 2.45 | 0.84 | 2.15 | 0.68 | 1.43 | 0.61 | 1.75 | 0.74 | 1.30 |
| 1.87 | 0.79 | 2.94 | 0.91 | 2.55 | 0.86 | 2.27 | 0.88 | 1.77 | 0.75 | #N/A |
| 0.78 | 0.26 | 0.90 | 0.33 | 0.55 | 0.14 | 0.61 | 0.19 | 0.73 | 0.26 | 0.82 |
| #N/A | #N/A | #N/A | #N/A | #N/A | #N/A | #N/A | #N/A | #N/A | #N/A | #N/A |
| 0.71 | 0.22 | 0.99 | 0.37 | 1.02 | 0.36 | 0.72 | 0.26 | 0.93 | 0.38 | 0.91 |
| 1.29 | 0.56 | 1.02 | 0.38 | #N/A | #N/A | 1.06 | 0.46 | 0.79 | 0.30 | 1.11 |
| #N/A | #N/A | #N/A | #N/A | #N/A | #N/A | #N/A | #N/A | #N/A | #N/A | #N/A |
| 1.23 | 0.52 | 2.00 | 0.74 | 1.68 | 0.64 | 1.48 | 0.64 | 1.69 | 0.69 | 1.33 |
| #N/A | #N/A | #N/A | #N/A | #N/A | #N/A | #N/A | #N/A | #N/A | #N/A | #N/A |
| #N/A | #N/A | 1.86 | 0.70 | 2.66 | 0.85 | 1.61 | 0.69 | 1.34 | 0.58 | #N/A |
| 2.73 | 0.94 | 3.97 | 0.97 | 3.22 | 0.94 | 1.93 | 0.81 | 2.74 | 0.93 | 2.65 |
| #N/A | #N/A | #N/A | #N/A | #N/A | #N/A | #N/A | #N/A | #N/A | #N/A | #N/A |
| 1.34 | 0.59 | 1.80 | 0.68 | 1.66 | 0.65 | 1.56 | 0.69 | 1.69 | 0.72 | 1.36 |
| 1.07 | 0.45 | 1.20 | 0.47 | 0.99 | 0.34 | #N/A | #N/A | 0.82 | 0.31 | 0.94 |
| 1.27 | 0.56 | 2.07 | 0.76 | 2.13 | 0.78 | 2.05 | 0.84 | 1.63 | 0.70 | 1.23 |
| 0.63 | 0.16 | 0.77 | 0.27 | 0.68 | 0.20 | 0.71 | 0.25 | 0.67 | 0.22 | 0.71 |
| 0.90 | 0.34 | 0.65 | 0.21 | 1.01 | 0.36 | 0.71 | 0.25 | 0.73 | 0.26 | #N/A |
| 1.70 | 0.73 | 2.23 | 0.80 | 2.06 | 0.77 | 1.69 | 0.73 | 1.89 | 0.79 | 1.64 |
| 1.86 | 0.79 | 2.54 | 0.86 | 2.31 | 0.81 | 1.98 | 0.81 | 1.77 | 0.75 | 1.56 |
| 0.66 | 0.18 | 0.46 | 0.12 | #N/A | #N/A | 0.60 | 0.19 | 0.43 | 0.09 | 0.65 |
| 1.89 | 0.77 | 2.21 | 0.80 | 2.70 | 0.86 | 2.10 | 0.84 | 2.01 | 0.82 | 1.52 |
| 1.63 | 0.71 | 1.82 | 0.69 | 2.00 | 0.75 | 1.92 | 0.80 | 1.67 | 0.72 | #N/A |
| 0.86 | 0.31 | 0.75 | 0.26 | 0.92 | 0.32 | 0.90 | 0.37 | 0.89 | 0.36 | 0.73 |
| 1.49 | 0.66 | 1.86 | 0.70 | 1.95 | 0.74 | 2.05 | 0.84 | 1.50 | 0.64 | 1.47 |
| #N/A | #N/A | #N/A | #N/A | #N/A | #N/A | #N/A | #N/A | #N/A | #N/A | 0.82 |
| #N/A | #N/A | 3.61 | 0.96 | #N/A | #N/A | #N/A | #N/A | #N/A | #N/A | #N/A |
| #N/A | #N/A | #N/A | #N/A | #N/A | #N/A | #N/A | #N/A | #N/A | #N/A | #N/A |
| 1.40 | 0.62 | 2.04 | 0.75 | 1.63 | 0.64 | 1.08 | 0.47 | 1.56 | 0.67 | 1.50 |
| 0.79 | 0.27 | 0.44 | 0.11 | 0.52 | 0.12 | 0.55 | 0.15 | 0.54 | 0.15 | 0.60 |
| 1.02 | 0.41 | 1.14 | 0.43 | 1.07 | 0.39 | 0.86 | 0.34 | 1.02 | 0.43 | 0.71 |
| 1.92 | 0.80 | 1.77 | 0.67 | 1.87 | 0.67 | 1.35 | 0.60 | 1.68 | 0.72 | 0.97 |
| #N/A | #N/A | #N/A | #N/A | #N/A | #N/A | #N/A | #N/A | 0.49 | 0.12 | 0.70 |
| 1.87 | 0.80 | 2.55 | 0.86 | 3.76 | 0.96 | 2.15 | 0.86 | 2.70 | 0.93 | 1.58 |
| #N/A | #N/A | #N/A | #N/A | #N/A | #N/A | #N/A | #N/A | #N/A | #N/A | #N/A |
| #N/A | #N/A | 2.48 | 0.85 | #N/A | #N/A | 1.60 | 0.70 | 1.92 | 0.79 | 1.21 |



|      |      |      |      |      |      |      |      |      |      |      |
|------|------|------|------|------|------|------|------|------|------|------|
| 0.29 | 0.02 | 0.17 | 0.01 | 0.22 | 0.01 | 0.20 | 0.01 | 0.27 | 0.02 | 0.26 |
| #N/A | #N/A | #N/A | #N/A | #N/A | #N/A | #N/A | #N/A | #N/A | #N/A | #N/A |
| 0.53 | 0.11 | #N/A | #N/A | #N/A | #N/A | #N/A | #N/A | 0.39 | 0.06 | #N/A |
| 1.37 | 0.61 | 1.17 | 0.45 | 1.25 | 0.47 | 0.82 | 0.32 | 1.34 | 0.58 | 0.87 |
| 1.41 | 0.63 | 1.03 | 0.39 | 1.00 | 0.36 | 0.87 | 0.35 | 1.02 | 0.43 | 0.93 |
| #N/A | #N/A | #N/A | #N/A | #N/A | #N/A | #N/A | #N/A | 2.06 | 0.80 | #N/A |
| 1.35 | 0.60 | 1.30 | 0.51 | 1.36 | 0.52 | 1.39 | 0.62 | 1.53 | 0.66 | 1.18 |
| 1.37 | 0.56 | 1.08 | 0.41 | 1.22 | 0.46 | 1.22 | 0.53 | 1.05 | 0.44 | 0.85 |
| 0.80 | 0.27 | 0.84 | 0.30 | 0.74 | 0.23 | 0.72 | 0.26 | 0.88 | 0.35 | 0.79 |
| 0.63 | 0.16 | 0.73 | 0.25 | #N/A | #N/A | #N/A | #N/A | 0.78 | 0.28 | #N/A |
| 0.87 | 0.32 | 0.94 | 0.35 | 0.82 | 0.27 | 0.66 | 0.22 | 0.86 | 0.33 | 0.83 |
| 0.79 | 0.26 | 0.46 | 0.12 | 0.54 | 0.13 | 0.56 | 0.16 | 0.48 | 0.11 | 0.67 |
| 1.58 | 0.66 | 2.48 | 0.85 | 1.89 | 0.70 | 2.33 | 0.88 | 1.86 | 0.77 | 1.33 |
| #N/A | #N/A | #N/A | #N/A | #N/A | #N/A | #N/A | #N/A | #N/A | #N/A | #N/A |
| 2.40 | 0.90 | 1.33 | 0.50 | #N/A | #N/A | #N/A | #N/A | 1.89 | 0.73 | #N/A |
| 2.64 | 0.93 | 3.13 | 0.93 | 3.35 | 0.94 | 2.53 | 0.76 | 3.53 | 0.98 | 1.94 |
| 1.96 | 0.81 | 1.97 | 0.73 | 1.73 | 0.65 | 1.90 | 0.80 | 1.62 | 0.70 | 1.61 |
| #N/A | #N/A | 1.08 | 0.41 | 0.82 | 0.27 | 1.12 | 0.48 | 0.87 | 0.34 | 1.10 |
| 0.73 | 0.24 | 1.29 | 0.50 | 0.93 | 0.33 | 1.08 | 0.46 | 0.95 | 0.38 | 0.91 |
| #N/A | #N/A | #N/A | #N/A | #N/A | #N/A | #N/A | #N/A | #N/A | #N/A | #N/A |
| 0.68 | 0.20 | 0.45 | 0.11 | 0.46 | 0.10 | 0.67 | 0.23 | 0.49 | 0.12 | 0.58 |
| 0.86 | 0.31 | 0.61 | 0.19 | 0.90 | 0.31 | 0.89 | 0.36 | 0.82 | 0.31 | 0.81 |
| 0.61 | 0.15 | 0.31 | 0.05 | #N/A | #N/A | 0.38 | 0.06 | 0.29 | 0.03 | 0.46 |
| 1.54 | 0.67 | 1.65 | 0.63 | 1.66 | 0.65 | 1.40 | 0.62 | 1.51 | 0.66 | 1.43 |
| 1.49 | 0.66 | 1.37 | 0.53 | 1.69 | 0.64 | 1.21 | 0.53 | 1.31 | 0.56 | 1.19 |
| #N/A | #N/A | #N/A | #N/A | #N/A | #N/A | #N/A | #N/A | #N/A | #N/A | #N/A |
| 1.84 | 0.79 | 1.74 | 0.66 | 1.90 | 0.71 | 1.80 | 0.77 | 1.61 | 0.69 | 1.41 |
| 1.30 | 0.56 | 2.87 | 0.90 | 2.24 | 0.81 | 1.84 | 0.79 | 1.51 | 0.66 | 2.09 |
| #N/A | #N/A | 2.13 | 0.78 | 1.83 | 0.67 | 1.87 | 0.79 | 1.28 | 0.55 | 1.34 |
| 1.24 | 0.51 | 1.09 | 0.42 | #N/A | #N/A | 1.04 | 0.45 | 1.00 | 0.41 | 0.91 |
| #N/A | #N/A | #N/A | #N/A | #N/A | #N/A | 2.21 | 0.87 | #N/A | #N/A | #N/A |
| #N/A | #N/A | #N/A | #N/A | #N/A | #N/A | #N/A | #N/A | #N/A | #N/A | #N/A |
| 2.89 | 0.95 | 3.45 | 0.95 | 4.05 | 0.97 | 2.23 | 0.88 | 2.69 | 0.92 | 1.89 |
| #N/A | #N/A | #N/A | #N/A | #N/A | #N/A | #N/A | #N/A | #N/A | #N/A | #N/A |
| 2.33 | 0.90 | 3.27 | 0.94 | 2.82 | 0.89 | #N/A | #N/A | 2.14 | 0.85 | 1.75 |
| 1.04 | 0.42 | 2.04 | 0.74 | 2.31 | 0.79 | 1.59 | 0.69 | 1.61 | 0.69 | 1.31 |
| #N/A | #N/A | #N/A | #N/A | #N/A | #N/A | #N/A | #N/A | #N/A | #N/A | #N/A |
| 1.80 | 0.77 | 2.23 | 0.80 | 2.98 | 0.92 | 1.95 | 0.81 | 1.92 | 0.79 | 1.41 |
| 0.92 | 0.35 | 1.05 | 0.39 | 1.50 | 0.50 | 0.58 | 0.17 | 1.08 | 0.45 | 1.16 |
| 0.36 | 0.04 | #N/A | #N/A | #N/A | #N/A | #N/A | #N/A | #N/A | #N/A | 0.62 |
| 0.46 | 0.08 | 0.47 | 0.12 | 0.46 | 0.10 | 0.46 | 0.10 | 0.39 | 0.06 | 0.37 |
| 2.11 | 0.86 | 2.77 | 0.90 | 2.25 | 0.81 | 2.44 | 0.91 | 2.45 | 0.90 | 1.76 |
| #N/A | #N/A | #N/A | #N/A | #N/A | #N/A | #N/A | #N/A | #N/A | #N/A | 0.72 |
| 1.92 | 0.80 | 2.14 | 0.78 | 2.36 | 0.83 | 1.70 | 0.74 | 1.93 | 0.80 | 1.69 |
| 1.79 | 0.77 | 2.57 | 0.87 | 2.34 | 0.72 | 2.02 | 0.84 | 1.71 | 0.73 | 1.48 |
| #N/A | #N/A | #N/A | #N/A | #N/A | #N/A | #N/A | #N/A | #N/A | #N/A | #N/A |
| 2.15 | 0.85 | 1.90 | 0.71 | 1.91 | 0.73 | 2.19 | 0.87 | 2.07 | 0.83 | 1.55 |
| 1.68 | 0.70 | 2.08 | 0.76 | 1.74 | 0.66 | 1.85 | 0.77 | 2.03 | 0.81 | 1.52 |
| 0.88 | 0.33 | 0.91 | 0.33 | 0.61 | 0.16 | 0.56 | 0.16 | 0.70 | 0.24 | 0.88 |
| 0.52 | 0.11 | 0.37 | 0.08 | 0.39 | 0.07 | 0.36 | 0.05 | 0.54 | 0.15 | 0.47 |
| 0.96 | 0.38 | 0.51 | 0.14 | 0.55 | 0.14 | 0.59 | 0.18 | 0.60 | 0.18 | 0.65 |

|      |      |      |      |      |      |      |      |      |      |      |
|------|------|------|------|------|------|------|------|------|------|------|
| 1.20 | 0.52 | 1.18 | 0.45 | 1.42 | 0.55 | 1.26 | 0.54 | 1.07 | 0.45 | 1.20 |
| 1.65 | 0.72 | 1.88 | 0.69 | 1.40 | 0.54 | 1.51 | 0.67 | 1.51 | 0.66 | 1.06 |
| 1.97 | 0.83 | 2.32 | 0.80 | 1.81 | 0.69 | 1.52 | 0.68 | 1.91 | 0.78 | 1.41 |
| 1.01 | 0.41 | 0.85 | 0.30 | #N/A | #N/A | #N/A | #N/A | #N/A | #N/A | 0.68 |
| 1.24 | 0.54 | 0.79 | 0.28 | 1.16 | 0.42 | 1.84 | 0.76 | 1.43 | 0.62 | 1.16 |
| 2.16 | 0.86 | 1.63 | 0.62 | 1.83 | 0.58 | #N/A | #N/A | 1.09 | 0.46 | #N/A |
| #N/A | #N/A | #N/A | #N/A | #N/A | #N/A | #N/A | #N/A | #N/A | #N/A | #N/A |
| 0.45 | 0.07 | #N/A | #N/A | #N/A | #N/A | #N/A | #N/A | #N/A | #N/A | 0.74 |
| 2.56 | 0.92 | 3.08 | 0.93 | 2.88 | 0.89 | 2.71 | 0.94 | 3.10 | 0.96 | 2.11 |
| #N/A | #N/A | #N/A | #N/A | #N/A | #N/A | #N/A | #N/A | #N/A | #N/A | #N/A |
| 1.86 | 0.80 | 1.94 | 0.72 | 2.18 | 0.77 | 2.53 | 0.92 | 2.06 | 0.83 | 1.38 |
| 1.70 | 0.71 | 1.95 | 0.73 | 2.30 | 0.81 | 1.77 | 0.77 | 1.82 | 0.76 | 1.41 |
| 1.30 | 0.58 | 1.26 | 0.49 | 1.23 | 0.47 | 1.31 | 0.57 | 1.05 | 0.43 | 1.20 |
| 1.13 | 0.48 | 1.57 | 0.61 | 1.78 | 0.69 | 1.33 | 0.59 | 1.42 | 0.61 | 1.21 |
| 0.69 | 0.20 | 0.45 | 0.12 | 0.69 | 0.20 | 0.71 | 0.25 | 0.66 | 0.22 | 0.57 |
| 0.74 | 0.23 | 0.80 | 0.28 | #N/A | #N/A | 1.06 | 0.45 | 0.92 | 0.36 | 0.91 |
| 2.29 | 0.87 | 1.91 | 0.71 | 1.95 | 0.74 | 2.23 | 0.88 | 1.74 | 0.74 | 0.75 |
| #N/A | #N/A | #N/A | #N/A | #N/A | #N/A | #N/A | #N/A | #N/A | #N/A | #N/A |
| 2.93 | 0.95 | 2.66 | 0.86 | 3.14 | 0.93 | 2.29 | 0.80 | 2.86 | 0.94 | 2.35 |
| 1.25 | 0.54 | 1.00 | 0.37 | 1.33 | 0.51 | 1.48 | 0.65 | 1.34 | 0.58 | 0.71 |
| 0.89 | 0.33 | 0.97 | 0.36 | 0.88 | 0.30 | 0.93 | 0.39 | 0.87 | 0.34 | 0.94 |
| 0.94 | 0.36 | 1.18 | 0.45 | 1.00 | 0.36 | 0.76 | 0.28 | 0.79 | 0.29 | 1.03 |
| 1.34 | 0.59 | 1.86 | 0.68 | 1.28 | 0.49 | 1.24 | 0.55 | 1.25 | 0.54 | 1.32 |
| #N/A | #N/A | #N/A | #N/A | #N/A | #N/A | #N/A | #N/A | #N/A | #N/A | 0.74 |
| 1.95 | 0.78 | 2.64 | 0.87 | #N/A | #N/A | #N/A | #N/A | 1.89 | 0.78 | 1.36 |
| 1.42 | 0.62 | 1.52 | 0.59 | 1.64 | 0.61 | 1.53 | 0.68 | 1.74 | 0.73 | 1.22 |
| 2.10 | 0.75 | 1.69 | 0.65 | 1.35 | 0.49 | 1.49 | 0.66 | 1.33 | 0.57 | 1.05 |
| 1.01 | 0.39 | #N/A | #N/A | #N/A | #N/A | #N/A | #N/A | 1.35 | 0.59 | 0.74 |
| 0.32 | 0.02 | 0.39 | 0.09 | 0.48 | 0.11 | 0.54 | 0.15 | 0.68 | 0.23 | 0.34 |
| #N/A | #N/A | 4.51 | 0.98 | 3.46 | 0.95 | 2.33 | 0.89 | 3.93 | 0.99 | #N/A |
| 1.27 | 0.54 | 1.80 | 0.67 | #N/A | #N/A | 1.06 | 0.46 | 1.42 | 0.61 | 1.08 |
| 2.25 | 0.88 | 2.49 | 0.85 | 2.08 | 0.77 | 2.58 | 0.93 | 2.31 | 0.87 | 1.81 |
| 3.51 | 0.98 | #N/A | #N/A | 2.86 | 0.90 | 2.96 | 0.96 | #N/A | #N/A | 1.97 |
| 1.39 | 0.60 | #N/A | #N/A | #N/A | #N/A | #N/A | #N/A | #N/A | #N/A | 1.18 |
| #N/A | #N/A | 1.31 | 0.51 | 1.68 | 0.65 | 1.78 | 0.75 | 1.11 | 0.47 | 1.70 |
| 0.70 | 0.23 | 0.70 | 0.23 | #N/A | #N/A | 0.56 | 0.16 | 1.05 | 0.43 | 0.95 |
| 0.56 | 0.13 | 0.60 | 0.19 | 0.42 | 0.09 | 0.54 | 0.15 | 0.50 | 0.13 | 0.60 |
| 0.73 | 0.23 | 0.71 | 0.24 | 0.89 | 0.31 | 0.75 | 0.28 | 0.78 | 0.29 | 0.72 |
| 0.84 | 0.29 | 1.51 | 0.59 | 1.35 | 0.52 | 1.09 | 0.47 | 1.24 | 0.54 | #N/A |
| 3.26 | 0.97 | 3.81 | 0.97 | 3.52 | 0.95 | 3.33 | 0.98 | 3.14 | 0.97 | 2.71 |
| 1.15 | 0.49 | 1.36 | 0.53 | 1.11 | 0.41 | 1.41 | 0.63 | 1.19 | 0.51 | 1.14 |
| 2.15 | 0.86 | 2.50 | 0.85 | 2.08 | 0.76 | 2.13 | 0.86 | 2.17 | 0.85 | 1.61 |
| 0.92 | 0.35 | 0.68 | 0.23 | 0.64 | 0.18 | 0.76 | 0.28 | 0.73 | 0.26 | 0.91 |
| 0.69 | 0.20 | 0.46 | 0.12 | 0.52 | 0.12 | 0.57 | 0.17 | 0.53 | 0.14 | 0.90 |
| 0.72 | 0.22 | 0.34 | 0.06 | 0.41 | 0.08 | 0.49 | 0.12 | 0.45 | 0.09 | 0.94 |
| 1.52 | 0.55 | 1.01 | 0.38 | 1.03 | 0.38 | #N/A | #N/A | 0.89 | 0.35 | 0.72 |
| 1.17 | 0.47 | 1.57 | 0.60 | 1.32 | 0.51 | 1.25 | 0.55 | 1.40 | 0.61 | 1.31 |
| 1.49 | 0.65 | 4.14 | 0.92 | 1.82 | 0.62 | 1.70 | 0.71 | 2.07 | 0.83 | 1.25 |
| 1.15 | 0.50 | 1.46 | 0.57 | 1.27 | 0.48 | 1.15 | 0.51 | 1.14 | 0.49 | 1.29 |
| #N/A | #N/A | #N/A | #N/A | #N/A | #N/A | #N/A | #N/A | #N/A | #N/A | #N/A |
| 1.03 | 0.40 | 1.68 | 0.64 | 1.23 | 0.46 | 1.03 | 0.44 | 1.28 | 0.55 | 1.09 |

|      |      |      |      |      |      |      |      |      |      |      |
|------|------|------|------|------|------|------|------|------|------|------|
| #N/A | #N/A | #N/A | #N/A | #N/A | #N/A | #N/A | #N/A | #N/A | #N/A | 0.74 |
| 0.69 | 0.19 | #N/A | #N/A | #N/A | #N/A | #N/A | #N/A | #N/A | #N/A | 0.60 |
| 1.24 | 0.54 | 1.46 | 0.56 | 1.13 | 0.42 | 1.17 | 0.51 | 1.15 | 0.50 | 1.10 |
| 0.86 | 0.31 | 0.82 | 0.29 | 0.60 | 0.16 | 0.56 | 0.16 | 0.65 | 0.21 | 0.81 |
| #N/A | #N/A | 1.61 | 0.62 | 1.41 | 0.55 | 1.28 | 0.57 | 1.51 | 0.66 | #N/A |
| 1.30 | 0.56 | 1.09 | 0.42 | 0.89 | 0.30 | 1.09 | 0.48 | 0.97 | 0.40 | #N/A |
| #N/A | #N/A | #N/A | #N/A | #N/A | #N/A | #N/A | #N/A | #N/A | #N/A | #N/A |
| 1.32 | 0.58 | 1.48 | 0.57 | 1.58 | 0.61 | 1.55 | 0.68 | 1.51 | 0.66 | 1.38 |
| 0.50 | 0.09 | 0.57 | 0.17 | 0.68 | 0.21 | 0.52 | 0.13 | 0.56 | 0.16 | 0.72 |
| 0.54 | 0.11 | 0.52 | 0.15 | 0.70 | 0.22 | 0.48 | 0.11 | 0.51 | 0.13 | 0.64 |
| 2.28 | 0.89 | 2.14 | 0.78 | 2.08 | 0.77 | 2.22 | 0.87 | 2.55 | 0.91 | 1.64 |
| 1.37 | 0.61 | 1.57 | 0.60 | 1.27 | 0.49 | 1.44 | 0.64 | 1.51 | 0.65 | 1.49 |
| #N/A | #N/A | 0.91 | 0.34 | #N/A | #N/A | #N/A | #N/A | 0.70 | 0.24 | #N/A |
| 1.01 | 0.41 | 1.02 | 0.39 | 1.43 | 0.55 | 0.68 | 0.23 | 0.89 | 0.34 | 1.10 |
| 2.42 | 0.90 | 3.64 | 0.96 | 3.14 | 0.91 | 3.10 | 0.97 | 2.79 | 0.94 | 2.00 |
| 0.63 | 0.17 | 0.36 | 0.07 | 0.39 | 0.06 | 0.34 | 0.05 | 0.45 | 0.10 | 0.67 |
| 1.98 | 0.82 | 1.59 | 0.61 | 2.04 | 0.76 | 1.73 | 0.75 | 1.64 | 0.69 | 1.38 |
| 1.84 | 0.77 | 1.96 | 0.73 | 2.55 | 0.80 | 1.36 | 0.61 | 1.83 | 0.77 | #N/A |
| #N/A | #N/A | #N/A | #N/A | #N/A | #N/A | #N/A | #N/A | #N/A | #N/A | #N/A |
| #N/A | #N/A | #N/A | #N/A | #N/A | #N/A | #N/A | #N/A | #N/A | #N/A | #N/A |
| 1.49 | 0.65 | 1.60 | 0.62 | 1.58 | 0.62 | 2.13 | 0.86 | 1.84 | 0.77 | 1.26 |
| 1.58 | 0.69 | 1.65 | 0.63 | 1.76 | 0.67 | 1.76 | 0.76 | 1.62 | 0.69 | 1.20 |
| 1.62 | 0.70 | 1.42 | 0.55 | 1.46 | 0.57 | 1.28 | 0.57 | 1.42 | 0.62 | 1.10 |
| 3.28 | 0.96 | 3.58 | 0.96 | #N/A | #N/A | #N/A | #N/A | #N/A | #N/A | 2.06 |
| #N/A | #N/A | #N/A | #N/A | #N/A | #N/A | #N/A | #N/A | #N/A | #N/A | #N/A |
| 2.03 | 0.83 | 2.82 | 0.90 | 3.69 | 0.97 | 2.05 | 0.84 | 2.73 | 0.93 | 1.60 |
| #N/A | #N/A | #N/A | #N/A | #N/A | #N/A | #N/A | #N/A | #N/A | #N/A | #N/A |
| 1.79 | 0.72 | 2.20 | 0.79 | #N/A | #N/A | 2.40 | 0.89 | 1.56 | 0.67 | 1.16 |
| 4.40 | 0.97 | 3.38 | 0.94 | 3.94 | 0.97 | 2.27 | 0.88 | 3.88 | 0.98 | 2.10 |
| 2.96 | 0.76 | #N/A | #N/A | #N/A | #N/A | #N/A | #N/A | 1.47 | 0.61 | 1.70 |
| 1.24 | 0.54 | 1.06 | 0.40 | 0.53 | 0.20 | 0.89 | 0.36 | 0.83 | 0.32 | 1.07 |
| 1.33 | 0.55 | 2.06 | 0.76 | #N/A | #N/A | 1.61 | 0.71 | #N/A | #N/A | #N/A |
| 0.45 | 0.10 | #N/A | #N/A | #N/A | #N/A | #N/A | #N/A | #N/A | #N/A | 0.27 |
| 3.81 | 0.98 | 4.61 | 0.99 | 4.38 | 0.99 | 3.58 | 0.98 | 3.44 | 0.97 | 3.43 |
| 1.65 | 0.72 | 1.54 | 0.58 | 2.03 | 0.76 | 1.64 | 0.70 | 1.92 | 0.75 | #N/A |
| 1.73 | 0.75 | 1.40 | 0.54 | 1.51 | 0.59 | 1.14 | 0.50 | 1.32 | 0.58 | 1.44 |
| #N/A | #N/A | 0.28 | 0.04 | #N/A | #N/A | 0.48 | 0.11 | 0.44 | 0.09 | 0.50 |
| #N/A | #N/A | #N/A | #N/A | #N/A | #N/A | #N/A | #N/A | 1.48 | 0.65 | #N/A |
| 2.37 | 0.88 | 2.94 | 0.91 | 2.75 | 0.88 | 3.14 | 0.97 | 4.75 | 1.00 | 2.66 |
| 0.98 | 0.39 | #N/A | #N/A | #N/A | #N/A | 1.28 | 0.56 | 1.09 | 0.46 | #N/A |
| #N/A | #N/A | #N/A | #N/A | #N/A | #N/A | #N/A | #N/A | #N/A | #N/A | #N/A |
| 1.37 | 0.57 | #N/A | #N/A | #N/A | #N/A | #N/A | #N/A | 1.16 | 0.50 | 0.87 |
| 0.95 | 0.37 | 0.76 | 0.27 | 0.86 | 0.28 | 0.78 | 0.29 | 0.95 | 0.38 | 0.74 |
| #N/A | #N/A | #N/A | #N/A | #N/A | #N/A | #N/A | #N/A | #N/A | #N/A | #N/A |
| 1.39 | 0.51 | #N/A | #N/A | #N/A | #N/A | #N/A | #N/A | 0.89 | 0.35 | #N/A |
| 0.66 | 0.20 | #N/A | #N/A | #N/A | #N/A | 0.52 | 0.13 | 0.51 | 0.13 | #N/A |
| 1.29 | 0.54 | 2.73 | 0.88 | 1.32 | 0.51 | 1.56 | 0.66 | 1.69 | 0.71 | 1.56 |
| 0.40 | 0.05 | 0.41 | 0.10 | 0.47 | 0.10 | 0.35 | 0.05 | 0.48 | 0.11 | 0.39 |
| #N/A | #N/A | #N/A | #N/A | #N/A | #N/A | #N/A | #N/A | #N/A | #N/A | #N/A |
| 2.01 | 0.82 | 1.94 | 0.72 | #N/A | #N/A | 1.92 | 0.81 | 1.65 | 0.71 | 1.21 |
| #N/A | #N/A | 3.79 | 0.97 | 2.55 | 0.86 | 2.32 | 0.89 | 3.00 | 0.95 | 1.94 |

|      |      |      |      |      |      |      |      |      |      |      |
|------|------|------|------|------|------|------|------|------|------|------|
| 1.98 | 0.83 | 2.74 | 0.89 | 2.34 | 0.83 | 2.38 | 0.89 | 1.89 | 0.78 | 1.82 |
| #N/A | #N/A | #N/A | #N/A | #N/A | #N/A | #N/A | #N/A | #N/A | #N/A | #N/A |
| 2.71 | 0.94 | 4.22 | 0.98 | 3.38 | 0.95 | 3.17 | 0.97 | 3.45 | 0.98 | 2.31 |
| #N/A | #N/A | #N/A | #N/A | #N/A | #N/A | #N/A | #N/A | #N/A | #N/A | #N/A |
| 4.03 | 0.99 | 5.60 | 1.00 | 5.45 | 1.00 | 4.91 | 1.00 | 4.55 | 0.99 | 3.26 |
| #N/A | #N/A | #N/A | #N/A | #N/A | #N/A | #N/A | #N/A | #N/A | #N/A | 0.62 |
| 1.05 | 0.43 | #N/A | #N/A | #N/A | #N/A | 1.40 | 0.62 | #N/A | #N/A | 1.28 |
| #N/A | #N/A | #N/A | #N/A | #N/A | #N/A | #N/A | #N/A | #N/A | #N/A | #N/A |
| 1.53 | 0.67 | 1.74 | 0.66 | 1.90 | 0.65 | 1.68 | 0.73 | 1.61 | 0.69 | 1.48 |
| 2.02 | 0.74 | 2.76 | 0.88 | 2.81 | 0.88 | 2.49 | 0.91 | 2.38 | 0.89 | 1.40 |
| 1.34 | 0.52 | 2.05 | 0.75 | 1.96 | 0.73 | 1.29 | 0.56 | 1.43 | 0.62 | #N/A |
| 1.71 | 0.69 | 2.32 | 0.81 | #N/A | #N/A | 0.99 | 0.42 | 1.36 | 0.59 | #N/A |
| #N/A | #N/A | #N/A | #N/A | #N/A | #N/A | #N/A | #N/A | #N/A | #N/A | 0.56 |
| #N/A | #N/A | #N/A | #N/A | #N/A | #N/A | #N/A | #N/A | 0.38 | 0.06 | 0.58 |
| 2.27 | 0.87 | 2.40 | 0.83 | 1.89 | 0.72 | 2.48 | 0.91 | 1.81 | 0.76 | 1.73 |
| 1.57 | 0.69 | 2.03 | 0.75 | #N/A | #N/A | 1.36 | 0.61 | 1.53 | 0.65 | 1.44 |
| 1.33 | 0.59 | 1.66 | 0.63 | 1.92 | 0.72 | 1.72 | 0.74 | 1.65 | 0.70 | 1.09 |
| 0.99 | 0.40 | 0.47 | 0.13 | 0.52 | 0.12 | 0.48 | 0.12 | 0.45 | 0.10 | 0.63 |
| #N/A | #N/A | #N/A | #N/A | #N/A | #N/A | #N/A | #N/A | #N/A | #N/A | #N/A |
| 1.95 | 0.79 | 2.16 | 0.78 | 2.10 | 0.75 | 1.44 | 0.64 | 1.59 | 0.69 | 1.38 |
| #N/A | #N/A | #N/A | #N/A | #N/A | #N/A | #N/A | #N/A | #N/A | #N/A | #N/A |
| 1.27 | 0.55 | 1.21 | 0.46 | 1.19 | 0.45 | 1.13 | 0.50 | 1.14 | 0.49 | 0.86 |
| 0.90 | 0.34 | 0.89 | 0.33 | 0.79 | 0.26 | 0.88 | 0.35 | 1.04 | 0.44 | 0.78 |
| 1.25 | 0.53 | 1.28 | 0.49 | 1.26 | 0.48 | 0.99 | 0.42 | 1.02 | 0.43 | 1.21 |
| 0.85 | 0.30 | 1.05 | 0.40 | 0.85 | 0.28 | #N/A | #N/A | 0.78 | 0.29 | 0.93 |
| 1.27 | 0.55 | 1.65 | 0.63 | 2.08 | 0.77 | #N/A | #N/A | 1.39 | 0.61 | 1.06 |
| 1.37 | 0.59 | 2.19 | 0.77 | 1.81 | 0.70 | 1.39 | 0.62 | 1.62 | 0.69 | 1.17 |
| #N/A | #N/A | #N/A | #N/A | #N/A | #N/A | #N/A | #N/A | #N/A | #N/A | #N/A |
| 0.63 | 0.16 | 0.46 | 0.12 | 0.44 | 0.09 | 0.57 | 0.17 | 0.63 | 0.20 | 0.61 |
| 0.97 | 0.39 | 0.85 | 0.31 | 0.76 | 0.25 | 0.77 | 0.29 | 0.56 | 0.16 | 0.64 |
| 1.10 | 0.46 | 1.63 | 0.62 | 2.09 | 0.75 | 1.46 | 0.65 | 1.42 | 0.62 | 1.02 |
| 0.99 | 0.39 | 0.79 | 0.27 | 0.98 | 0.35 | 0.65 | 0.22 | 0.73 | 0.26 | 1.23 |
| #N/A | #N/A | #N/A | #N/A | #N/A | #N/A | #N/A | #N/A | #N/A | #N/A | #N/A |
| 1.96 | 0.82 | 2.85 | 0.90 | 2.82 | 0.90 | 2.85 | 0.95 | 3.05 | 0.96 | 2.42 |
| 0.96 | 0.38 | #N/A | #N/A | #N/A | #N/A | #N/A | #N/A | #N/A | #N/A | 0.58 |
| 0.22 | 0.01 | 0.23 | 0.02 | #N/A | #N/A | #N/A | #N/A | 0.25 | 0.02 | 0.29 |
| #N/A | #N/A | #N/A | #N/A | #N/A | #N/A | #N/A | #N/A | #N/A | #N/A | #N/A |
| 2.14 | 0.78 | 2.61 | 0.86 | 2.05 | 0.74 | 2.43 | 0.90 | 1.88 | 0.78 | 1.63 |
| 1.90 | 0.77 | 2.30 | 0.82 | 2.41 | 0.69 | 1.95 | 0.81 | 2.70 | 0.93 | 1.39 |
| 1.62 | 0.68 | 1.74 | 0.66 | 5.91 | 0.78 | 1.41 | 0.63 | 1.51 | 0.65 | 1.12 |
| 1.54 | 0.68 | 2.13 | 0.77 | #N/A | #N/A | #N/A | #N/A | 1.76 | 0.75 | 1.44 |
| 1.70 | 0.72 | 1.69 | 0.64 | 1.99 | 0.74 | 1.82 | 0.78 | 1.66 | 0.71 | 1.44 |
| #N/A | #N/A | #N/A | #N/A | #N/A | #N/A | #N/A | #N/A | #N/A | #N/A | 0.61 |
| #N/A | #N/A | 5.30 | 0.99 | #N/A | #N/A | #N/A | #N/A | 2.76 | 0.94 | 3.61 |
| 1.33 | 0.59 | 1.79 | 0.67 | #N/A | #N/A | 1.25 | 0.56 | 1.26 | 0.53 | 0.89 |
| #N/A | #N/A | 2.31 | 0.77 | 2.29 | 0.81 | 2.14 | 0.85 | 1.73 | 0.73 | 1.64 |
| 0.45 | 0.07 | 0.46 | 0.12 | 0.48 | 0.10 | 0.60 | 0.19 | 0.55 | 0.15 | 0.54 |
| 1.26 | 0.55 | #N/A | #N/A | #N/A | #N/A | #N/A | #N/A | 0.59 | 0.18 | #N/A |
| 1.12 | 0.47 | 1.27 | 0.49 | 1.25 | 0.48 | 1.20 | 0.52 | 1.45 | 0.63 | 1.29 |
| 2.28 | 0.85 | 2.57 | 0.87 | 1.63 | 0.62 | 2.00 | 0.80 | 1.91 | 0.79 | 1.67 |
| 0.76 | 0.25 | 0.65 | 0.21 | #N/A | #N/A | 0.60 | 0.19 | 0.56 | 0.16 | 0.89 |

|      |      |      |      |      |      |      |      |      |      |      |
|------|------|------|------|------|------|------|------|------|------|------|
| 0.88 | 0.31 | 1.19 | 0.46 | #N/A | #N/A | 0.93 | 0.37 | 0.79 | 0.29 | 1.04 |
| 0.53 | 0.11 | 0.43 | 0.11 | 0.43 | 0.08 | 0.45 | 0.10 | 0.51 | 0.13 | 0.56 |
| #N/A | #N/A | 0.67 | 0.22 | 0.65 | 0.18 | #N/A | #N/A | 0.66 | 0.22 | 0.84 |
| 0.84 | 0.30 | 0.74 | 0.25 | 0.73 | 0.23 | #N/A | #N/A | 0.67 | 0.22 | 1.01 |
| 0.53 | 0.11 | 0.34 | 0.07 | #N/A | #N/A | #N/A | #N/A | 0.34 | 0.04 | #N/A |
| 1.01 | 0.41 | 0.79 | 0.28 | 0.79 | 0.27 | 0.72 | 0.26 | 0.66 | 0.22 | 0.76 |
| 2.37 | 0.88 | 1.96 | 0.72 | 2.14 | 0.79 | 1.81 | 0.78 | 1.38 | 0.60 | 1.37 |
| #N/A | #N/A | #N/A | #N/A | #N/A | #N/A | #N/A | #N/A | #N/A | #N/A | #N/A |
| 3.98 | 0.98 | 3.81 | 0.97 | 3.61 | 0.96 | 3.95 | 0.99 | 4.17 | 0.99 | 2.62 |
| 2.12 | 0.85 | 2.50 | 0.86 | 2.24 | 0.78 | 1.66 | 0.73 | 2.18 | 0.83 | 1.54 |
| 0.85 | 0.29 | 0.63 | 0.20 | #N/A | #N/A | 0.87 | 0.35 | 0.68 | 0.23 | #N/A |
| 2.44 | 0.88 | 2.65 | 0.88 | 2.48 | 0.85 | 2.62 | 0.93 | 2.36 | 0.87 | #N/A |
| 1.45 | 0.64 | 1.76 | 0.67 | 2.34 | 0.83 | 1.73 | 0.74 | #N/A | #N/A | 1.34 |
| #N/A | #N/A | #N/A | #N/A | #N/A | #N/A | #N/A | #N/A | #N/A | #N/A | #N/A |
| #N/A | #N/A | #N/A | #N/A | #N/A | #N/A | #N/A | #N/A | #N/A | #N/A | #N/A |
| 1.87 | 0.80 | 1.87 | 0.70 | 2.16 | 0.78 | 1.88 | 0.79 | 2.31 | 0.87 | 1.60 |
| 1.57 | 0.68 | 1.47 | 0.57 | 1.26 | 0.48 | 1.21 | 0.52 | 1.26 | 0.54 | 1.22 |
| #N/A | #N/A | #N/A | #N/A | #N/A | #N/A | #N/A | #N/A | #N/A | #N/A | #N/A |
| 1.63 | 0.71 | 2.46 | 0.85 | 2.32 | 0.82 | 1.97 | 0.82 | 1.99 | 0.81 | 1.80 |
| 1.44 | 0.63 | 2.15 | 0.78 | 2.66 | 0.85 | 1.93 | 0.81 | 2.59 | 0.89 | 1.74 |
| 2.25 | 0.86 | 3.11 | 0.93 | 2.31 | 0.82 | 2.15 | 0.86 | 2.48 | 0.91 | #N/A |
| #N/A | #N/A | #N/A | #N/A | #N/A | #N/A | #N/A | #N/A | #N/A | #N/A | #N/A |
| #N/A | #N/A | #N/A | #N/A | #N/A | #N/A | #N/A | #N/A | 1.65 | 0.68 | 0.30 |
| #N/A | #N/A | #N/A | #N/A | #N/A | #N/A | #N/A | #N/A | #N/A | #N/A | #N/A |
| 1.36 | 0.59 | 1.47 | 0.57 | 1.90 | 0.72 | 1.28 | 0.57 | 1.86 | 0.78 | 1.27 |
| 1.49 | 0.66 | 1.72 | 0.66 | 1.52 | 0.59 | 1.74 | 0.75 | 1.51 | 0.66 | 1.08 |
| 1.09 | 0.44 | 0.79 | 0.28 | 1.03 | 0.37 | 1.08 | 0.47 | 0.86 | 0.33 | 0.78 |
| 3.19 | 0.96 | 3.83 | 0.97 | 3.59 | 0.96 | 3.02 | 0.94 | 3.02 | 0.96 | 3.61 |
| #N/A | #N/A | #N/A | #N/A | #N/A | #N/A | #N/A | #N/A | #N/A | #N/A | 0.44 |
| 4.30 | 0.99 | 2.08 | 0.60 | #N/A | #N/A | 3.61 | 0.99 | 3.96 | 0.99 | 2.74 |
| #N/A | #N/A | #N/A | #N/A | #N/A | #N/A | #N/A | #N/A | #N/A | #N/A | 0.72 |
| #N/A | #N/A | #N/A | #N/A | #N/A | #N/A | 2.86 | 0.95 | 2.33 | 0.88 | 1.64 |
| #N/A | #N/A | #N/A | #N/A | #N/A | #N/A | #N/A | #N/A | #N/A | #N/A | #N/A |
| 1.26 | 0.54 | 1.25 | 0.49 | 1.19 | 0.44 | 1.39 | 0.61 | 1.27 | 0.55 | 1.10 |
| #N/A | #N/A | #N/A | #N/A | #N/A | #N/A | #N/A | #N/A | #N/A | #N/A | #N/A |
| 1.11 | 0.47 | 1.19 | 0.46 | 1.43 | 0.55 | 1.41 | 0.62 | 1.53 | 0.67 | 1.13 |
| 0.48 | 0.08 | 0.50 | 0.14 | 0.58 | 0.15 | 0.41 | 0.09 | 0.67 | 0.23 | #N/A |
| 0.52 | 0.10 | 0.54 | 0.16 | 0.66 | 0.19 | 0.59 | 0.18 | 1.08 | 0.44 | 1.05 |
| #N/A | #N/A | #N/A | #N/A | #N/A | #N/A | #N/A | #N/A | #N/A | #N/A | #N/A |
| 1.14 | 0.48 | 1.16 | 0.45 | 1.12 | 0.42 | 1.27 | 0.56 | 1.19 | 0.51 | 1.22 |
| #N/A | #N/A | #N/A | #N/A | #N/A | #N/A | #N/A | #N/A | #N/A | #N/A | #N/A |
| #N/A | #N/A | #N/A | #N/A | #N/A | #N/A | #N/A | #N/A | #N/A | #N/A | #N/A |
| 1.16 | 0.50 | 0.78 | 0.27 | 1.01 | 0.36 | 0.92 | 0.38 | 0.91 | 0.36 | 0.91 |
| 0.82 | 0.29 | 0.69 | 0.23 | 0.71 | 0.22 | 0.71 | 0.25 | 0.69 | 0.24 | 1.00 |
| 1.07 | 0.44 | 1.26 | 0.49 | 1.15 | 0.43 | 1.24 | 0.55 | 1.08 | 0.45 | 1.20 |
| 0.95 | 0.37 | #N/A | #N/A | #N/A | #N/A | #N/A | #N/A | #N/A | #N/A | 0.74 |
| #N/A | #N/A | #N/A | #N/A | #N/A | #N/A | #N/A | #N/A | #N/A | #N/A | #N/A |
| #N/A | #N/A | #N/A | #N/A | #N/A | #N/A | #N/A | #N/A | #N/A | #N/A | 0.52 |
| 1.43 | 0.64 | 1.77 | 0.67 | 1.76 | 0.68 | 1.45 | 0.65 | 1.54 | 0.67 | 1.44 |
| 1.81 | 0.76 | #N/A | #N/A | #N/A | #N/A | 1.74 | 0.75 | 1.75 | 0.73 | 1.02 |
| 0.79 | 0.26 | 0.61 | 0.19 | #N/A | #N/A | 0.46 | 0.10 | 0.57 | 0.16 | 0.90 |











|      |      |      |      |      |      |      |      |      |      |      |
|------|------|------|------|------|------|------|------|------|------|------|
| #N/A | #N/A | #N/A | #N/A | #N/A | #N/A | #N/A | #N/A | #N/A | #N/A | #N/A |
| #N/A | #N/A | #N/A | #N/A | #N/A | #N/A | #N/A | #N/A | #N/A | #N/A | #N/A |
| 1.09 | 0.42 | 1.41 | 0.55 | #N/A | #N/A | 1.22 | 0.54 | 1.10 | 0.45 | #N/A |
| 0.84 | 0.31 | #N/A | #N/A | #N/A | #N/A | #N/A | #N/A | #N/A | #N/A | 0.86 |
| 1.77 | 0.67 | 1.03 | 0.39 | #N/A | #N/A | #N/A | #N/A | 0.82 | 0.31 | 0.86 |
| 0.89 | 0.33 | 0.74 | 0.25 | 0.71 | 0.22 | 0.82 | 0.32 | 0.76 | 0.28 | 0.75 |
| #N/A | #N/A | #N/A | #N/A | #N/A | #N/A | #N/A | #N/A | #N/A | #N/A | #N/A |
| 0.78 | 0.26 | 0.98 | 0.37 | 0.89 | 0.31 | 0.82 | 0.31 | 0.85 | 0.32 | #N/A |
| 0.97 | 0.38 | 1.24 | 0.48 | 1.07 | 0.39 | 1.21 | 0.53 | 1.13 | 0.48 | #N/A |
| #N/A | #N/A | #N/A | #N/A | #N/A | #N/A | #N/A | #N/A | #N/A | #N/A | #N/A |
| 1.15 | 0.49 | 1.32 | 0.51 | #N/A | #N/A | 1.03 | 0.44 | 1.09 | 0.46 | 1.01 |
| 0.98 | 0.39 | 1.08 | 0.41 | 1.04 | 0.38 | 1.39 | 0.62 | 1.13 | 0.48 | 0.97 |
| #N/A | #N/A | 0.76 | 0.26 | 0.93 | 0.32 | 0.79 | 0.30 | 0.72 | 0.25 | 0.82 |
| 0.48 | 0.08 | 0.24 | 0.03 | 0.29 | 0.03 | 0.36 | 0.05 | 0.34 | 0.05 | 0.66 |
| #N/A | #N/A | #N/A | #N/A | #N/A | #N/A | #N/A | #N/A | #N/A | #N/A | #N/A |
| #N/A | #N/A | #N/A | #N/A | #N/A | #N/A | #N/A | #N/A | #N/A | #N/A | #N/A |
| #N/A | #N/A | #N/A | #N/A | #N/A | #N/A | #N/A | #N/A | #N/A | #N/A | #N/A |
| #N/A | #N/A | 1.74 | 0.66 | #N/A | #N/A | 1.49 | 0.60 | 1.23 | 0.53 | #N/A |
| 2.68 | 0.89 | #N/A | #N/A | #N/A | #N/A | #N/A | #N/A | #N/A | #N/A | #N/A |
| 0.72 | 0.23 | 0.62 | 0.19 | #N/A | #N/A | 0.42 | 0.10 | 0.70 | 0.24 | 0.80 |
| 1.57 | 0.69 | 2.23 | 0.79 | 2.05 | 0.77 | 1.71 | 0.75 | 2.22 | 0.86 | 1.93 |
| #N/A | #N/A | #N/A | #N/A | #N/A | #N/A | #N/A | #N/A | #N/A | #N/A | #N/A |
| #N/A | #N/A | #N/A | #N/A | #N/A | #N/A | 0.69 | 0.24 | 0.62 | 0.19 | #N/A |
| 0.38 | 0.05 | 0.23 | 0.02 | 0.35 | 0.04 | 0.28 | 0.03 | 0.53 | 0.14 | 1.04 |
| 0.38 | 0.04 | 0.20 | 0.02 | 0.30 | 0.03 | 0.28 | 0.02 | 0.31 | 0.03 | 0.82 |
| 0.39 | 0.04 | 0.27 | 0.04 | 0.29 | 0.03 | 0.37 | 0.06 | 0.35 | 0.05 | 0.94 |
| #N/A | #N/A | 2.59 | 0.87 | #N/A | #N/A | 2.32 | 0.89 | 2.36 | 0.88 | 3.31 |
| 2.12 | 0.86 | 3.11 | 0.93 | 2.30 | 0.82 | 2.64 | 0.92 | 2.88 | 0.95 | 2.22 |
| 0.49 | 0.09 | #N/A | #N/A | #N/A | #N/A | #N/A | #N/A | 0.34 | 0.04 | 1.15 |
| 0.74 | 0.23 | #N/A | #N/A | #N/A | #N/A | #N/A | #N/A | #N/A | #N/A | 0.91 |
| #N/A | #N/A | #N/A | #N/A | #N/A | #N/A | #N/A | #N/A | #N/A | #N/A | #N/A |
| 0.87 | 0.32 | 1.05 | 0.40 | 0.99 | 0.36 | 0.93 | 0.39 | 0.94 | 0.38 | 0.92 |
| 1.71 | 0.66 | 2.05 | 0.74 | 2.03 | 0.73 | 1.61 | 0.70 | 2.12 | 0.82 | #N/A |
| 0.95 | 0.37 | #N/A | #N/A | #N/A | #N/A | 0.91 | 0.37 | 1.23 | 0.52 | 1.43 |
| 1.46 | 0.65 | 2.00 | 0.74 | 1.35 | 0.52 | 1.38 | 0.61 | 1.52 | 0.65 | #N/A |
| #N/A | #N/A | #N/A | #N/A | #N/A | #N/A | #N/A | #N/A | #N/A | #N/A | #N/A |
| #N/A | #N/A | #N/A | #N/A | #N/A | #N/A | #N/A | #N/A | 2.11 | 0.80 | 1.45 |
| #N/A | #N/A | #N/A | #N/A | #N/A | #N/A | #N/A | #N/A | #N/A | #N/A | #N/A |
| 1.35 | 0.60 | 1.84 | 0.69 | 1.66 | 0.64 | 1.11 | 0.48 | 1.77 | 0.75 | 1.66 |
| 0.92 | 0.35 | 0.79 | 0.28 | 0.83 | 0.28 | 0.91 | 0.37 | 0.84 | 0.32 | 0.82 |
| 0.39 | 0.04 | 0.31 | 0.05 | 0.39 | 0.06 | 0.32 | 0.04 | 0.38 | 0.06 | 0.40 |
| 1.00 | 0.38 | 1.76 | 0.67 | #N/A | #N/A | #N/A | #N/A | 1.82 | 0.68 | 0.60 |
| 0.53 | 0.11 | 0.21 | 0.02 | 0.20 | 0.01 | 0.27 | 0.02 | 0.24 | 0.01 | 0.44 |
| 1.03 | 0.42 | 0.92 | 0.34 | 0.96 | 0.34 | 1.10 | 0.48 | 0.95 | 0.39 | 0.86 |
| #N/A | #N/A | #N/A | #N/A | #N/A | #N/A | #N/A | #N/A | #N/A | #N/A | #N/A |
| 0.77 | 0.26 | 0.97 | 0.36 | 0.88 | 0.31 | 0.87 | 0.35 | 0.87 | 0.34 | 0.79 |
| 1.58 | 0.69 | #N/A | #N/A | #N/A | #N/A | #N/A | #N/A | 1.48 | 0.64 | #N/A |
| #N/A | #N/A | #N/A | #N/A | #N/A | #N/A | 0.84 | 0.33 | 0.76 | 0.28 | #N/A |
| #N/A | #N/A | #N/A | #N/A | #N/A | #N/A | #N/A | #N/A | #N/A | #N/A | #N/A |
| 1.72 | 0.75 | 1.36 | 0.53 | 1.94 | 0.73 | 1.82 | 0.78 | 1.69 | 0.72 | 1.43 |
| 1.75 | 0.74 | 2.11 | 0.75 | #N/A | #N/A | 1.77 | 0.76 | 1.71 | 0.73 | 1.18 |

|      |      |      |      |      |      |      |      |      |      |      |
|------|------|------|------|------|------|------|------|------|------|------|
| 0.96 | 0.37 | 1.07 | 0.41 | #N/A | #N/A | 0.87 | 0.34 | 0.86 | 0.33 | #N/A |
| 1.25 | 0.53 | 1.87 | 0.70 | #N/A | #N/A | 1.40 | 0.61 | 1.80 | 0.75 | 1.33 |
| 2.64 | 0.93 | 2.62 | 0.88 | 2.57 | 0.87 | 2.36 | 0.90 | 2.96 | 0.95 | 1.84 |
| 1.11 | 0.46 | 1.52 | 0.59 | 1.30 | 0.50 | 1.07 | 0.46 | 0.98 | 0.40 | 1.15 |
| 0.48 | 0.09 | 0.45 | 0.12 | 0.57 | 0.15 | 0.50 | 0.12 | 0.60 | 0.19 | #N/A |
| #N/A | #N/A | #N/A | #N/A | #N/A | #N/A | #N/A | #N/A | #N/A | #N/A | 0.38 |
| 0.58 | 0.14 | 0.50 | 0.14 | 0.56 | 0.14 | 0.58 | 0.18 | 0.55 | 0.15 | 0.63 |
| 1.44 | 0.63 | 1.78 | 0.66 | #N/A | #N/A | #N/A | #N/A | 1.69 | 0.72 | 1.14 |
| #N/A | #N/A | #N/A | #N/A | #N/A | #N/A | #N/A | #N/A | #N/A | #N/A | 1.00 |
| #N/A | #N/A | #N/A | #N/A | #N/A | #N/A | #N/A | #N/A | #N/A | #N/A | #N/A |
| 1.10 | 0.47 | #N/A | #N/A | 2.05 | 0.50 | 1.76 | 0.76 | 1.40 | 0.58 | #N/A |
| 1.08 | 0.45 | 0.86 | 0.31 | #N/A | #N/A | 0.73 | 0.26 | 0.81 | 0.31 | #N/A |
| 1.46 | 0.65 | 1.70 | 0.64 | 1.68 | 0.65 | 1.19 | 0.53 | 1.38 | 0.60 | 1.20 |
| 1.16 | 0.49 | 1.22 | 0.47 | 1.17 | 0.44 | 0.98 | 0.42 | 1.07 | 0.45 | 1.03 |
| 1.26 | 0.54 | 1.08 | 0.41 | #N/A | #N/A | 1.03 | 0.44 | 1.08 | 0.46 | 0.60 |
| 0.40 | 0.05 | 0.22 | 0.02 | 0.20 | 0.01 | 0.25 | 0.02 | 0.21 | 0.01 | 0.40 |
| 0.60 | 0.15 | 0.93 | 0.34 | #N/A | #N/A | 0.64 | 0.21 | 0.57 | 0.16 | #N/A |
| #N/A | #N/A | #N/A | #N/A | #N/A | #N/A | #N/A | #N/A | #N/A | #N/A | #N/A |
| 1.77 | 0.75 | #N/A | #N/A | #N/A | #N/A | #N/A | #N/A | 0.81 | 0.30 | 0.91 |
| 0.94 | 0.37 | #N/A | #N/A | #N/A | #N/A | #N/A | #N/A | #N/A | #N/A | 0.85 |
| 1.22 | 0.52 | 1.95 | 0.73 | #N/A | #N/A | 1.19 | 0.53 | 1.36 | 0.59 | 1.19 |
| 1.23 | 0.49 | 1.61 | 0.62 | #N/A | #N/A | #N/A | #N/A | #N/A | #N/A | 0.75 |
| 0.42 | 0.05 | #N/A | #N/A | #N/A | #N/A | #N/A | #N/A | #N/A | #N/A | 0.40 |
| 1.65 | 0.72 | #N/A | #N/A | #N/A | #N/A | #N/A | #N/A | 1.47 | 0.64 | 0.91 |
| 2.41 | 0.90 | 2.53 | 0.86 | 1.94 | 0.74 | 2.41 | 0.90 | 2.14 | 0.85 | 1.47 |
| 0.83 | 0.29 | #N/A | #N/A | #N/A | #N/A | #N/A | #N/A | #N/A | #N/A | 0.77 |
| #N/A | #N/A | 0.94 | 0.35 | #N/A | #N/A | #N/A | #N/A | 0.68 | 0.24 | #N/A |
| 0.84 | 0.31 | 0.93 | 0.35 | #N/A | #N/A | 0.82 | 0.31 | 1.15 | 0.49 | #N/A |
| 1.29 | 0.55 | 1.95 | 0.71 | 2.68 | 0.85 | 1.56 | 0.69 | 1.56 | 0.68 | #N/A |
| #N/A | #N/A | 1.25 | 0.47 | #N/A | #N/A | #N/A | #N/A | #N/A | #N/A | 0.75 |
| #N/A | #N/A | #N/A | #N/A | #N/A | #N/A | #N/A | #N/A | #N/A | #N/A | #N/A |
| #N/A | #N/A | #N/A | #N/A | #N/A | #N/A | #N/A | #N/A | #N/A | #N/A | 0.59 |
| 1.23 | 0.50 | #N/A | #N/A | #N/A | #N/A | #N/A | #N/A | #N/A | #N/A | #N/A |
| #N/A | #N/A | #N/A | #N/A | #N/A | #N/A | #N/A | #N/A | #N/A | #N/A | #N/A |
| 1.51 | 0.67 | 2.44 | 0.80 | 2.01 | 0.73 | 2.25 | 0.87 | 2.26 | 0.85 | 1.73 |
| 0.41 | 0.05 | 0.27 | 0.03 | 0.24 | 0.02 | 0.30 | 0.03 | 0.25 | 0.01 | 0.54 |
| 0.55 | 0.12 | 0.26 | 0.03 | 0.27 | 0.02 | 0.31 | 0.04 | 0.29 | 0.03 | 0.51 |
| 1.00 | 0.40 | 0.91 | 0.34 | 0.95 | 0.34 | 1.06 | 0.46 | 0.91 | 0.36 | 0.86 |
| #N/A | #N/A | #N/A | #N/A | #N/A | #N/A | #N/A | #N/A | #N/A | #N/A | #N/A |
| 1.73 | 0.73 | 1.57 | 0.61 | 2.12 | 0.74 | 1.73 | 0.74 | 1.36 | 0.60 | 1.52 |
| #N/A | #N/A | #N/A | #N/A | #N/A | #N/A | #N/A | #N/A | #N/A | #N/A | #N/A |
| #N/A | #N/A | 0.85 | 0.30 | #N/A | #N/A | 0.81 | 0.31 | 0.79 | 0.29 | 0.65 |
| #N/A | #N/A | #N/A | #N/A | #N/A | #N/A | #N/A | #N/A | #N/A | #N/A | #N/A |
| #N/A | #N/A | #N/A | #N/A | #N/A | #N/A | #N/A | #N/A | #N/A | #N/A | 1.25 |
| #N/A | #N/A | #N/A | #N/A | #N/A | #N/A | #N/A | #N/A | #N/A | #N/A | #N/A |
| 0.84 | 0.29 | 1.02 | 0.39 | #N/A | #N/A | 0.85 | 0.34 | 1.11 | 0.47 | #N/A |
| #N/A | #N/A | #N/A | #N/A | #N/A | #N/A | #N/A | #N/A | #N/A | #N/A | #N/A |
| #N/A | #N/A | #N/A | #N/A | #N/A | #N/A | #N/A | #N/A | #N/A | #N/A | #N/A |
| #N/A | #N/A | #N/A | #N/A | #N/A | #N/A | #N/A | #N/A | #N/A | #N/A | #N/A |
| #N/A | #N/A | #N/A | #N/A | #N/A | #N/A | #N/A | #N/A | #N/A | #N/A | #N/A |
| 0.47 | 0.07 | 0.36 | 0.07 | 0.31 | 0.03 | 0.41 | 0.07 | 0.35 | 0.05 | 0.56 |

|      |      |      |      |      |      |      |      |      |      |      |
|------|------|------|------|------|------|------|------|------|------|------|
| 0.54 | 0.11 | 0.21 | 0.02 | 0.20 | 0.01 | 0.26 | 0.02 | 0.24 | 0.01 | 0.52 |
| 1.09 | 0.45 | 0.96 | 0.36 | 0.94 | 0.33 | 1.09 | 0.47 | 0.96 | 0.40 | 0.87 |
| 1.49 | 0.62 | 1.36 | 0.53 | #N/A | #N/A | 1.32 | 0.59 | 1.34 | 0.57 | 0.87 |
| 0.75 | 0.23 | 0.95 | 0.35 | #N/A | #N/A | 0.78 | 0.29 | 0.77 | 0.28 | 1.12 |
| #N/A | #N/A | 1.03 | 0.38 | 0.89 | 0.31 | 0.88 | 0.35 | 0.88 | 0.34 | #N/A |
| 1.02 | 0.41 | #N/A | #N/A | #N/A | #N/A | 0.75 | 0.28 | 0.69 | 0.24 | #N/A |
| #N/A | #N/A | #N/A | #N/A | #N/A | #N/A | #N/A | #N/A | #N/A | #N/A | #N/A |
| 0.88 | 0.32 | 0.61 | 0.19 | 0.54 | 0.13 | 0.82 | 0.32 | 0.72 | 0.25 | 0.73 |
| 2.63 | 0.93 | 2.52 | 0.85 | 2.37 | 0.83 | 2.86 | 0.95 | 2.61 | 0.92 | 2.11 |
| 0.71 | 0.21 | 0.50 | 0.14 | 0.43 | 0.09 | 0.69 | 0.23 | 0.57 | 0.17 | 0.64 |
| 0.67 | 0.19 | 0.36 | 0.07 | 0.37 | 0.06 | 0.52 | 0.14 | 0.44 | 0.09 | 0.60 |
| 0.32 | 0.02 | 0.35 | 0.07 | #N/A | #N/A | 0.25 | 0.02 | 0.34 | 0.04 | 0.45 |
| 1.85 | 0.78 | 2.01 | 0.74 | 1.69 | 0.66 | 2.16 | 0.86 | 2.05 | 0.83 | 1.42 |
| 2.00 | 0.81 | #N/A | #N/A | #N/A | #N/A | #N/A | #N/A | #N/A | #N/A | 1.58 |
| #N/A | #N/A | #N/A | #N/A | #N/A | #N/A | #N/A | #N/A | #N/A | #N/A | #N/A |
| 2.01 | 0.71 | 1.85 | 0.70 | 1.80 | 0.69 | 1.67 | 0.73 | 1.66 | 0.71 | 1.08 |
| 0.83 | 0.29 | 0.82 | 0.29 | 1.09 | 0.40 | 0.88 | 0.36 | 1.07 | 0.45 | 1.04 |
| 1.18 | 0.46 | #N/A | #N/A | #N/A | #N/A | #N/A | #N/A | 0.29 | 0.03 | 0.46 |
| #N/A | #N/A | #N/A | #N/A | #N/A | #N/A | #N/A | #N/A | #N/A | #N/A | #N/A |
| #N/A | #N/A | #N/A | #N/A | #N/A | #N/A | #N/A | #N/A | #N/A | #N/A | #N/A |
| #N/A | #N/A | #N/A | #N/A | #N/A | #N/A | #N/A | #N/A | #N/A | #N/A | #N/A |
| 1.02 | 0.41 | 1.61 | 0.62 | 1.41 | 0.55 | #N/A | #N/A | 1.31 | 0.56 | #N/A |
| #N/A | #N/A | #N/A | #N/A | #N/A | #N/A | #N/A | #N/A | #N/A | #N/A | #N/A |
| #N/A | #N/A | #N/A | #N/A | #N/A | #N/A | #N/A | #N/A | #N/A | #N/A | #N/A |
| #N/A | #N/A | #N/A | #N/A | #N/A | #N/A | #N/A | #N/A | #N/A | #N/A | #N/A |
| 1.17 | 0.45 | 3.04 | 0.91 | #N/A | #N/A | 1.38 | 0.61 | 2.79 | 0.91 | #N/A |
| 0.91 | 0.35 | 1.10 | 0.42 | #N/A | #N/A | 1.11 | 0.48 | #N/A | #N/A | #N/A |
| 1.74 | 0.76 | #N/A | #N/A | #N/A | #N/A | 2.14 | 0.69 | 2.63 | 0.87 | 1.31 |
| 0.85 | 0.31 | 0.70 | 0.24 | 0.72 | 0.22 | 0.79 | 0.30 | 0.75 | 0.27 | #N/A |
| 1.18 | 0.50 | 1.20 | 0.47 | 1.19 | 0.45 | 1.16 | 0.51 | 1.14 | 0.49 | #N/A |
| 1.48 | 0.66 | 1.93 | 0.72 | 2.36 | 0.82 | 1.51 | 0.66 | 1.60 | 0.69 | #N/A |
| 1.00 | 0.41 | 1.04 | 0.39 | 1.26 | 0.48 | 0.90 | 0.37 | 1.02 | 0.43 | 1.04 |
| 1.40 | 0.62 | #N/A | #N/A | #N/A | #N/A | #N/A | #N/A | 0.98 | 0.40 | 0.99 |
| #N/A | #N/A | #N/A | #N/A | #N/A | #N/A | #N/A | #N/A | #N/A | #N/A | #N/A |
| 0.90 | 0.34 | #N/A | #N/A | #N/A | #N/A | 1.52 | 0.68 | 1.54 | 0.66 | #N/A |
| 1.01 | 0.41 | 0.57 | 0.17 | 0.66 | 0.19 | 0.70 | 0.24 | 0.62 | 0.20 | 0.84 |
| #N/A | #N/A | #N/A | #N/A | #N/A | #N/A | #N/A | #N/A | 0.64 | 0.20 | 0.70 |
| 1.28 | 0.55 | 1.04 | 0.40 | #N/A | #N/A | 1.61 | 0.71 | 1.43 | 0.62 | 1.08 |
| 2.18 | 0.86 | 2.83 | 0.90 | 3.35 | 0.95 | 3.44 | 0.96 | 3.12 | 0.96 | 1.58 |
| #N/A | #N/A | #N/A | #N/A | #N/A | #N/A | #N/A | #N/A | #N/A | #N/A | #N/A |
| 1.49 | 0.66 | 1.10 | 0.42 | 1.22 | 0.46 | 0.59 | 0.19 | 0.80 | 0.30 | #N/A |
| #N/A | #N/A | #N/A | #N/A | #N/A | #N/A | #N/A | #N/A | #N/A | #N/A | #N/A |
| #N/A | #N/A | #N/A | #N/A | #N/A | #N/A | #N/A | #N/A | #N/A | #N/A | 0.57 |
| 1.27 | 0.51 | #N/A | #N/A | #N/A | #N/A | #N/A | #N/A | 0.49 | 0.12 | 0.63 |
| 1.06 | 0.43 | 1.31 | 0.51 | 1.66 | 0.63 | 0.97 | 0.40 | 0.94 | 0.38 | #N/A |
| #N/A | #N/A | #N/A | #N/A | #N/A | #N/A | #N/A | #N/A | #N/A | #N/A | #N/A |
| 1.93 | 0.80 | 1.07 | 0.39 | 2.79 | 0.90 | 2.03 | 0.84 | 1.48 | 0.64 | #N/A |
| 1.03 | 0.42 | 1.15 | 0.44 | 1.24 | 0.47 | 1.15 | 0.50 | 1.07 | 0.45 | #N/A |
| #N/A | #N/A | #N/A | #N/A | #N/A | #N/A | #N/A | #N/A | #N/A | #N/A | #N/A |
| #N/A | #N/A | #N/A | #N/A | #N/A | #N/A | #N/A | #N/A | #N/A | #N/A | #N/A |
| 0.43 | 0.06 | 0.30 | 0.05 | 0.56 | 0.14 | 0.32 | 0.04 | #N/A | #N/A | 0.49 |

|      |      |       |      |      |      |      |      |      |      |      |
|------|------|-------|------|------|------|------|------|------|------|------|
| 1.74 | 0.70 | 11.42 | 0.90 | #N/A | #N/A | #N/A | #N/A | 1.51 | 0.66 | 2.33 |
| 1.65 | 0.71 | 1.95  | 0.73 | #N/A | #N/A | 1.61 | 0.70 | 2.05 | 0.74 | #N/A |
| 0.98 | 0.39 | #N/A  | #N/A | #N/A | #N/A | #N/A | #N/A | 1.35 | 0.59 | 1.00 |
| 1.44 | 0.56 | 1.54  | 0.59 | #N/A | #N/A | #N/A | #N/A | 1.70 | 0.73 | 1.03 |
| #N/A | #N/A | #N/A  | #N/A | #N/A | #N/A | #N/A | #N/A | #N/A | #N/A | #N/A |
| 1.76 | 0.69 | 3.38  | 0.95 | 1.63 | 0.57 | 1.86 | 0.78 | 1.61 | 0.70 | 1.49 |
| 1.39 | 0.58 | #N/A  | #N/A | #N/A | #N/A | 1.28 | 0.57 | 1.30 | 0.56 | 0.87 |
| 1.25 | 0.55 | 0.81  | 0.29 | #N/A | #N/A | 0.86 | 0.34 | 0.61 | 0.19 | #N/A |
| #N/A | #N/A | 2.71  | 0.89 | 2.89 | 0.86 | 1.90 | 0.80 | 2.01 | 0.81 | 1.35 |
| #N/A | #N/A | 1.44  | 0.56 | #N/A | #N/A | 0.93 | 0.38 | #N/A | #N/A | 1.49 |
| #N/A | #N/A | #N/A  | #N/A | #N/A | #N/A | #N/A | #N/A | #N/A | #N/A | #N/A |
| #N/A | #N/A | #N/A  | #N/A | #N/A | #N/A | #N/A | #N/A | #N/A | #N/A | 0.92 |
| #N/A | #N/A | #N/A  | #N/A | #N/A | #N/A | #N/A | #N/A | #N/A | #N/A | #N/A |
| 0.68 | 0.19 | #N/A  | #N/A | #N/A | #N/A | #N/A | #N/A | #N/A | #N/A | 0.54 |
| #N/A | #N/A | #N/A  | #N/A | #N/A | #N/A | #N/A | #N/A | #N/A | #N/A | #N/A |
| #N/A | #N/A | #N/A  | #N/A | #N/A | #N/A | #N/A | #N/A | 1.42 | 0.62 | #N/A |
| #N/A | #N/A | #N/A  | #N/A | #N/A | #N/A | #N/A | #N/A | #N/A | #N/A | #N/A |
| 0.44 | 0.06 | 0.12  | 0.01 | #N/A | #N/A | 0.30 | 0.03 | 0.25 | 0.02 | 0.23 |
| 0.47 | 0.08 | #N/A  | #N/A | #N/A | #N/A | #N/A | #N/A | 0.72 | 0.25 | 0.58 |
| 1.35 | 0.57 | #N/A  | #N/A | #N/A | #N/A | #N/A | #N/A | 1.13 | 0.48 | #N/A |
| 1.28 | 0.56 | 1.68  | 0.64 | #N/A | #N/A | 1.06 | 0.46 | 1.02 | 0.41 | #N/A |
| #N/A | #N/A | #N/A  | #N/A | #N/A | #N/A | #N/A | #N/A | #N/A | #N/A | #N/A |
| #N/A | #N/A | #N/A  | #N/A | #N/A | #N/A | #N/A | #N/A | #N/A | #N/A | #N/A |
| #N/A | #N/A | #N/A  | #N/A | #N/A | #N/A | #N/A | #N/A | #N/A | #N/A | #N/A |
| #N/A | #N/A | #N/A  | #N/A | #N/A | #N/A | #N/A | #N/A | #N/A | #N/A | #N/A |
| 1.26 | 0.55 | 1.86  | 0.70 | 1.61 | 0.63 | 1.31 | 0.58 | 1.30 | 0.57 | 1.16 |
| 1.74 | 0.76 | 1.60  | 0.61 | 2.14 | 0.75 | 1.35 | 0.60 | 2.13 | 0.83 | 1.47 |
| #N/A | #N/A | #N/A  | #N/A | #N/A | #N/A | #N/A | #N/A | #N/A | #N/A | 0.94 |
| 0.93 | 0.33 | #N/A  | #N/A | #N/A | #N/A | #N/A | #N/A | #N/A | #N/A | #N/A |
| 1.17 | 0.50 | 1.25  | 0.48 | 1.22 | 0.47 | 0.98 | 0.41 | 1.07 | 0.45 | 0.98 |
| 0.85 | 0.30 | 0.75  | 0.26 | 0.76 | 0.25 | 0.70 | 0.24 | 0.68 | 0.23 | 0.84 |
| 0.59 | 0.14 | 0.40  | 0.09 | 0.42 | 0.08 | 0.57 | 0.17 | 0.40 | 0.07 | 0.56 |
| #N/A | #N/A | 0.47  | 0.12 | 0.57 | 0.15 | 0.71 | 0.25 | 0.47 | 0.11 | 0.63 |
| 0.67 | 0.19 | 0.53  | 0.15 | 0.69 | 0.21 | 0.82 | 0.31 | 0.58 | 0.17 | 0.77 |
| 0.87 | 0.32 | 1.15  | 0.45 | 1.10 | 0.41 | 1.22 | 0.53 | 1.08 | 0.46 | 0.99 |
| #N/A | #N/A | #N/A  | #N/A | #N/A | #N/A | #N/A | #N/A | #N/A | #N/A | #N/A |
| 2.75 | 0.88 | 1.21  | 0.47 | #N/A | #N/A | #N/A | #N/A | 1.05 | 0.45 | 0.71 |
| #N/A | #N/A | #N/A  | #N/A | #N/A | #N/A | #N/A | #N/A | #N/A | #N/A | #N/A |
| #N/A | #N/A | #N/A  | #N/A | #N/A | #N/A | #N/A | #N/A | #N/A | #N/A | #N/A |
| #N/A | #N/A | 2.57  | 0.86 | 2.54 | 0.85 | 2.34 | 0.90 | 3.19 | 0.97 | 1.78 |
| 1.20 | 0.52 | 1.09  | 0.41 | 1.02 | 0.37 | 0.95 | 0.39 | 1.06 | 0.45 | 0.98 |
| #N/A | #N/A | #N/A  | #N/A | #N/A | #N/A | #N/A | #N/A | #N/A | #N/A | #N/A |
| #N/A | #N/A | #N/A  | #N/A | #N/A | #N/A | #N/A | #N/A | #N/A | #N/A | #N/A |
| 1.10 | 0.43 | 2.01  | 0.74 | #N/A | #N/A | 1.86 | 0.79 | #N/A | #N/A | #N/A |
| #N/A | #N/A | #N/A  | #N/A | #N/A | #N/A | #N/A | #N/A | #N/A | #N/A | #N/A |
| #N/A | #N/A | #N/A  | #N/A | #N/A | #N/A | #N/A | #N/A | #N/A | #N/A | #N/A |
| #N/A | #N/A | #N/A  | #N/A | #N/A | #N/A | #N/A | #N/A | #N/A | #N/A | 0.41 |
| #N/A | #N/A | 1.63  | 0.63 | 2.11 | 0.77 | 1.86 | 0.79 | 1.86 | 0.78 | #N/A |
| #N/A | #N/A | #N/A  | #N/A | #N/A | #N/A | #N/A | #N/A | #N/A | #N/A | #N/A |
| 0.70 | 0.21 | #N/A  | #N/A | 0.62 | 0.17 | 0.82 | 0.31 | 0.71 | 0.25 | #N/A |

| H4K16R | H4K16Q | H4K16Q | H4K5+12R | H4K5+12R | H4K8+16R | H4K8+16R (percentile rank, MPR) |
|--------|--------|--------|----------|----------|----------|---------------------------------|
| 0.45   | 1.03   | 0.50   | 1.06     | 0.49     | 0.99     | 0.50                            |
| 0.30   | 0.74   | 0.31   | 0.81     | 0.31     | 0.96     | 0.47                            |
| 0.04   | 0.32   | 0.04   | 0.39     | 0.05     | 0.53     | 0.12                            |
| 0.18   | 0.47   | 0.13   | 0.61     | 0.17     | 0.49     | 0.10                            |
| 0.25   | 0.70   | 0.28   | 0.49     | 0.10     | 0.48     | 0.09                            |
| #N/A   | #N/A   | #N/A   | #N/A     | #N/A     | #N/A     | #N/A                            |
| #N/A   | #N/A   | #N/A   | #N/A     | #N/A     | #N/A     | #N/A                            |
| #N/A   | #N/A   | #N/A   | #N/A     | #N/A     | #N/A     | #N/A                            |
| #N/A   | #N/A   | #N/A   | #N/A     | #N/A     | #N/A     | #N/A                            |
| #N/A   | #N/A   | #N/A   | #N/A     | #N/A     | #N/A     | #N/A                            |
| #N/A   | #N/A   | #N/A   | #N/A     | #N/A     | #N/A     | #N/A                            |
| #N/A   | #N/A   | #N/A   | #N/A     | #N/A     | #N/A     | #N/A                            |
| #N/A   | #N/A   | #N/A   | #N/A     | #N/A     | #N/A     | #N/A                            |
| #N/A   | #N/A   | #N/A   | #N/A     | #N/A     | #N/A     | #N/A                            |
| #N/A   | #N/A   | #N/A   | #N/A     | #N/A     | #N/A     | #N/A                            |
| #N/A   | #N/A   | #N/A   | #N/A     | #N/A     | #N/A     | #N/A                            |
| #N/A   | #N/A   | #N/A   | #N/A     | #N/A     | #N/A     | #N/A                            |
| #N/A   | #N/A   | #N/A   | #N/A     | #N/A     | #N/A     | #N/A                            |
| #N/A   | #N/A   | #N/A   | #N/A     | #N/A     | #N/A     | #N/A                            |
| 0.44   | 1.19   | 0.58   | #N/A     | #N/A     | #N/A     | #N/A                            |
| #N/A   | #N/A   | #N/A   | #N/A     | #N/A     | #N/A     | #N/A                            |
| 0.15   | 0.60   | 0.21   | 0.98     | 0.43     | 0.56     | 0.14                            |
| 0.27   | 0.78   | 0.33   | 0.88     | 0.36     | 0.76     | 0.31                            |
| 0.35   | 0.64   | 0.24   | 1.10     | 0.49     | 0.84     | 0.37                            |
| 0.38   | 0.84   | 0.38   | 1.10     | 0.51     | 0.90     | 0.42                            |
| 0.44   | 1.54   | 0.74   | #N/A     | #N/A     | #N/A     | #N/A                            |
| #N/A   | 0.21   | 0.02   | 0.15     | 0.00     | 0.15     | 0.00                            |
| 0.15   | #N/A   | #N/A   | 0.67     | 0.21     | 0.72     | 0.28                            |
| 0.54   | 1.10   | 0.54   | 0.72     | 0.25     | 1.03     | 0.52                            |
| #N/A   | 0.55   | 0.18   | #N/A     | #N/A     | 0.63     | 0.20                            |
| #N/A   | #N/A   | #N/A   | #N/A     | #N/A     | 1.03     | 0.53                            |
| 0.08   | 0.47   | 0.13   | 0.70     | 0.25     | 0.44     | 0.06                            |
| 0.61   | 1.55   | 0.74   | 1.82     | 0.72     | #N/A     | #N/A                            |
| #N/A   | 0.93   | 0.42   | 0.63     | 0.18     | 0.99     | 0.50                            |
| #N/A   | #N/A   | #N/A   | 0.64     | 0.18     | #N/A     | #N/A                            |
| 0.64   | 1.77   | 0.76   | 2.20     | 0.82     | 1.19     | 0.63                            |
| #N/A   | 1.28   | 0.64   | 1.59     | 0.76     | 0.96     | 0.48                            |
| #N/A   | #N/A   | #N/A   | 1.32     | 0.62     | 1.00     | 0.50                            |
| 0.70   | 1.62   | 0.73   | 1.91     | 0.74     | 1.04     | 0.53                            |
| #N/A   | #N/A   | #N/A   | #N/A     | #N/A     | #N/A     | #N/A                            |
| 0.30   | 0.69   | 0.27   | 1.29     | 0.58     | 0.73     | 0.29                            |
| #N/A   | #N/A   | #N/A   | #N/A     | #N/A     | 0.69     | 0.25                            |
| 0.46   | 1.01   | 0.48   | #N/A     | #N/A     | 0.85     | 0.38                            |
| 0.42   | #N/A   | #N/A   | 1.13     | 0.52     | 1.15     | 0.61                            |
| 0.62   | 1.34   | 0.66   | 1.81     | 0.83     | 1.11     | 0.58                            |
| #N/A   | 1.06   | 0.51   | 0.95     | 0.41     | 0.99     | 0.50                            |
| 0.79   | 1.27   | 0.63   | 1.24     | 0.57     | #N/A     | #N/A                            |
| 0.74   | #N/A   | #N/A   | 2.19     | 0.79     | 1.68     | 0.85                            |
| 0.38   | 0.68   | 0.27   | #N/A     | #N/A     | 0.70     | 0.26                            |

|      |      |      |      |      |      |      |
|------|------|------|------|------|------|------|
| #N/A | 1.18 | 0.59 | #N/A | #N/A | 1.80 | 0.89 |
| #N/A | #N/A | #N/A | #N/A | #N/A | #N/A | #N/A |
| #N/A | #N/A | #N/A | #N/A | #N/A | #N/A | #N/A |
| 0.03 | 0.37 | 0.07 | 0.40 | 0.05 | 0.43 | 0.06 |
| 0.45 | 0.97 | 0.46 | 1.43 | 0.69 | 1.10 | 0.57 |
| #N/A | 0.75 | 0.31 | #N/A | #N/A | 1.23 | 0.65 |
| #N/A | #N/A | #N/A | #N/A | #N/A | #N/A | #N/A |
| #N/A | #N/A | #N/A | #N/A | #N/A | #N/A | #N/A |
| 0.53 | #N/A | #N/A | #N/A | #N/A | 1.59 | 0.82 |
| #N/A | 1.24 | 0.61 | #N/A | #N/A | 1.14 | 0.60 |
| 0.18 | 0.53 | 0.17 | 0.35 | 0.03 | 0.88 | 0.40 |
| 0.02 | 0.32 | 0.04 | 0.43 | 0.06 | 0.73 | 0.29 |
| 0.80 | 2.10 | 0.91 | 1.27 | 0.60 | 2.05 | 0.93 |
| 0.28 | 0.97 | 0.46 | 1.33 | 0.63 | 0.89 | 0.41 |
| #N/A | 0.73 | 0.30 | #N/A | #N/A | 1.13 | 0.59 |
| 0.23 | 0.72 | 0.30 | 1.01 | 0.44 | 0.43 | 0.06 |
| 0.43 | 0.75 | 0.31 | 0.77 | 0.27 | #N/A | #N/A |
| #N/A | 0.59 | 0.21 | 0.74 | 0.25 | 0.67 | 0.24 |
| #N/A | #N/A | #N/A | #N/A | #N/A | #N/A | #N/A |
| 0.65 | #N/A | #N/A | #N/A | #N/A | 1.56 | 0.81 |
| 0.78 | 1.29 | 0.64 | 1.24 | 0.57 | 1.12 | 0.58 |
| 0.50 | 0.99 | 0.48 | 1.13 | 0.53 | 1.08 | 0.56 |
| #N/A | 1.13 | 0.54 | 1.55 | 0.74 | 2.01 | 0.92 |
| 0.18 | 0.50 | 0.14 | 0.73 | 0.25 | 0.74 | 0.30 |
| #N/A | #N/A | #N/A | 1.11 | 0.48 | 0.93 | 0.45 |
| #N/A | #N/A | #N/A | #N/A | #N/A | #N/A | #N/A |
| 0.46 | 0.65 | 0.25 | 1.52 | 0.68 | 1.39 | 0.74 |
| 0.40 | 0.67 | 0.26 | 1.01 | 0.44 | 0.73 | 0.29 |
| 0.25 | #N/A | #N/A | 0.52 | 0.11 | 0.41 | 0.05 |
| 0.36 | 0.98 | 0.47 | 0.81 | 0.31 | 0.98 | 0.49 |
| 0.39 | 0.67 | 0.27 | 0.86 | 0.35 | 1.02 | 0.52 |
| 0.32 | 0.67 | 0.27 | #N/A | #N/A | #N/A | #N/A |
| 0.16 | 0.60 | 0.22 | 0.61 | 0.16 | 0.70 | 0.27 |
| 0.14 | 0.37 | 0.07 | 0.58 | 0.14 | 0.48 | 0.09 |
| 0.09 | 0.33 | 0.05 | 0.49 | 0.08 | 0.50 | 0.10 |
| 0.04 | 0.40 | 0.08 | 0.34 | 0.02 | 0.34 | 0.02 |
| #N/A | #N/A | #N/A | #N/A | #N/A | 0.06 | 0.00 |
| 0.12 | 0.48 | 0.14 | 0.43 | 0.06 | 0.46 | 0.08 |
| #N/A | 0.34 | 0.05 | 0.60 | 0.17 | 0.40 | 0.04 |
| 0.09 | 0.44 | 0.10 | 0.45 | 0.07 | 0.43 | 0.06 |
| 0.15 | 0.53 | 0.17 | 0.48 | 0.08 | 0.73 | 0.29 |
| #N/A | 0.34 | 0.05 | 0.36 | 0.04 | 0.37 | 0.03 |
| 0.25 | 0.61 | 0.22 | 0.62 | 0.17 | 0.67 | 0.24 |
| 0.06 | 0.42 | 0.10 | 0.43 | 0.06 | 0.49 | 0.09 |
| #N/A | 0.38 | 0.07 | 0.44 | 0.06 | 0.45 | 0.07 |
| 0.33 | 0.65 | 0.25 | 0.68 | 0.21 | 0.68 | 0.25 |
| #N/A | 0.51 | 0.15 | 0.61 | 0.17 | 0.53 | 0.12 |
| #N/A | 0.43 | 0.11 | 0.47 | 0.08 | 0.44 | 0.07 |
| 0.08 | 0.46 | 0.12 | 0.44 | 0.06 | 0.33 | 0.02 |
| #N/A | 0.29 | 0.04 | 0.27 | 0.01 | 0.50 | 0.10 |
| #N/A | 0.27 | 0.03 | 0.46 | 0.07 | 0.38 | 0.03 |

|      |      |      |      |      |      |      |
|------|------|------|------|------|------|------|
| 0.72 | 1.06 | 0.51 | 1.05 | 0.47 | 1.62 | 0.84 |
| 0.30 | 0.79 | 0.34 | 0.57 | 0.13 | 0.61 | 0.18 |
| 0.35 | 0.87 | 0.40 | 0.75 | 0.27 | 0.97 | 0.48 |
| 0.07 | 0.38 | 0.07 | 0.39 | 0.04 | 0.49 | 0.09 |
| #N/A | #N/A | #N/A | #N/A | #N/A | #N/A | #N/A |
| 0.35 | 0.84 | 0.38 | #N/A | #N/A | 0.72 | 0.28 |
| 0.37 | #N/A | #N/A | #N/A | #N/A | 0.94 | 0.46 |
| 0.67 | 1.17 | 0.56 | 0.96 | 0.41 | 1.40 | 0.74 |
| #N/A | #N/A | #N/A | #N/A | #N/A | #N/A | #N/A |
| #N/A | 0.99 | 0.47 | 0.93 | 0.38 | 0.51 | 0.10 |
| #N/A | #N/A | #N/A | #N/A | #N/A | #N/A | #N/A |
| 0.72 | 1.34 | 0.66 | 1.46 | 0.69 | 1.46 | 0.77 |
| #N/A | 0.71 | 0.29 | 1.19 | 0.56 | 0.57 | 0.15 |
| #N/A | #N/A | #N/A | #N/A | #N/A | #N/A | #N/A |
| 0.26 | 0.53 | 0.16 | 0.74 | 0.26 | 0.76 | 0.31 |
| 0.25 | 0.54 | 0.17 | 1.00 | 0.45 | 0.42 | 0.05 |
| 0.17 | 0.45 | 0.11 | 0.65 | 0.19 | 0.50 | 0.10 |
| 0.48 | 1.56 | 0.76 | 1.31 | 0.63 | #N/A | #N/A |
| 0.37 | 0.56 | 0.19 | 1.02 | 0.46 | #N/A | #N/A |
| #N/A | #N/A | #N/A | #N/A | #N/A | #N/A | #N/A |
| 0.26 | 0.56 | 0.19 | 0.81 | 0.31 | 0.68 | 0.24 |
| 0.00 | 0.16 | 0.01 | 0.23 | 0.00 | 0.18 | 0.00 |
| 0.52 | #N/A | #N/A | #N/A | #N/A | 0.83 | 0.37 |
| #N/A | #N/A | #N/A | #N/A | #N/A | #N/A | #N/A |
| #N/A | 0.27 | 0.03 | 0.40 | 0.05 | 0.82 | 0.36 |
| #N/A | #N/A | #N/A | #N/A | #N/A | #N/A | #N/A |
| 0.34 | 0.75 | 0.31 | 1.13 | 0.51 | 0.59 | 0.17 |
| #N/A | #N/A | #N/A | #N/A | #N/A | #N/A | #N/A |
| #N/A | #N/A | #N/A | #N/A | #N/A | #N/A | #N/A |
| #N/A | 0.50 | 0.15 | 0.52 | 0.11 | 0.47 | 0.08 |
| 0.46 | 1.03 | 0.50 | #N/A | #N/A | #N/A | #N/A |
| #N/A | 0.53 | 0.17 | 0.57 | 0.13 | 0.58 | 0.17 |
| 0.50 | 0.78 | 0.34 | 0.93 | 0.38 | 0.84 | 0.37 |
| 0.15 | 0.60 | 0.21 | 0.71 | 0.23 | 0.73 | 0.28 |
| #N/A | #N/A | #N/A | #N/A | #N/A | 0.65 | 0.22 |
| 0.31 | 0.64 | 0.24 | 0.67 | 0.20 | 1.17 | 0.61 |
| 0.30 | 0.78 | 0.34 | 0.67 | 0.20 | 0.79 | 0.33 |
| 0.62 | 1.31 | 0.66 | #N/A | #N/A | 1.44 | 0.76 |
| #N/A | #N/A | #N/A | #N/A | #N/A | #N/A | #N/A |
| 0.89 | 1.62 | 0.77 | 1.93 | 0.84 | 1.59 | 0.82 |
| #N/A | #N/A | #N/A | #N/A | #N/A | #N/A | #N/A |
| #N/A | 1.48 | 0.66 | 1.26 | 0.58 | 1.87 | 0.90 |
| 0.60 | 1.26 | 0.62 | 1.29 | 0.62 | 1.12 | 0.59 |
| 0.29 | #N/A | #N/A | 0.92 | 0.39 | 0.90 | 0.42 |
| #N/A | #N/A | #N/A | #N/A | #N/A | 0.59 | 0.17 |
| 0.33 | 1.72 | 0.81 | 1.58 | 0.62 | 0.60 | 0.17 |
| 0.86 | #N/A | #N/A | 3.26 | 0.94 | #N/A | #N/A |
| 0.10 | 0.50 | 0.15 | 0.49 | 0.09 | 0.72 | 0.28 |
| 0.63 | 1.20 | 0.59 | 1.09 | 0.50 | 1.02 | 0.52 |
| 0.28 | 0.80 | 0.35 | 0.55 | 0.12 | 0.80 | 0.34 |
| 0.62 | #N/A | #N/A | 0.87 | 0.35 | 1.02 | 0.52 |



|      |      |      |      |      |      |      |
|------|------|------|------|------|------|------|
| 0.87 | 2.09 | 0.90 | 1.99 | 0.87 | #N/A | #N/A |
| #N/A | #N/A | #N/A | #N/A | #N/A | #N/A | #N/A |
| 0.11 | 0.41 | 0.09 | 0.53 | 0.11 | 0.46 | 0.07 |
| 0.13 | 0.47 | 0.12 | 0.69 | 0.22 | 0.81 | 0.34 |
| #N/A | #N/A | #N/A | #N/A | #N/A | #N/A | #N/A |
| #N/A | #N/A | #N/A | #N/A | #N/A | #N/A | #N/A |
| #N/A | 0.39 | 0.07 | 0.76 | 0.27 | 0.45 | 0.07 |
| 0.41 | 0.83 | 0.38 | 0.81 | 0.31 | 0.89 | 0.41 |
| #N/A | #N/A | #N/A | #N/A | #N/A | 1.22 | 0.65 |
| #N/A | 0.67 | 0.26 | #N/A | #N/A | #N/A | #N/A |
| #N/A | 0.78 | 0.34 | 0.61 | 0.16 | 0.64 | 0.21 |
| #N/A | #N/A | #N/A | #N/A | #N/A | 0.86 | 0.39 |
| #N/A | #N/A | #N/A | #N/A | #N/A | #N/A | #N/A |
| 0.28 | 0.48 | 0.13 | 0.65 | 0.19 | 0.44 | 0.06 |
| #N/A | #N/A | #N/A | #N/A | #N/A | #N/A | #N/A |
| 0.53 | 1.04 | 0.50 | 1.00 | 0.43 | 1.34 | 0.71 |
| 0.35 | 0.75 | 0.32 | #N/A | #N/A | #N/A | #N/A |
| #N/A | 0.67 | 0.26 | 0.91 | 0.38 | 0.80 | 0.34 |
| #N/A | #N/A | #N/A | #N/A | #N/A | 0.96 | 0.47 |
| #N/A | #N/A | #N/A | #N/A | #N/A | 0.94 | 0.46 |
| 0.04 | 0.36 | 0.06 | 0.42 | 0.05 | 0.49 | 0.09 |
| 0.26 | 0.58 | 0.20 | 0.74 | 0.26 | 0.46 | 0.08 |
| 0.54 | 0.94 | 0.44 | 0.93 | 0.40 | 0.93 | 0.45 |
| 0.63 | 1.47 | 0.72 | 1.66 | 0.78 | 1.24 | 0.66 |
| #N/A | 0.74 | 0.31 | 0.86 | 0.34 | 0.82 | 0.36 |
| 0.79 | 1.05 | 0.51 | 1.45 | 0.69 | 1.34 | 0.71 |
| #N/A | #N/A | #N/A | #N/A | #N/A | #N/A | #N/A |
| 0.50 | 0.92 | 0.43 | 1.17 | 0.55 | 1.09 | 0.56 |
| #N/A | 0.66 | 0.26 | 1.08 | 0.48 | 0.62 | 0.19 |
| 0.80 | 1.78 | 0.83 | 2.15 | 0.90 | 1.20 | 0.64 |
| 0.21 | #N/A | #N/A | #N/A | #N/A | 0.35 | 0.03 |
| 0.53 | 0.92 | 0.42 | #N/A | #N/A | 0.97 | 0.48 |
| #N/A | #N/A | #N/A | #N/A | #N/A | #N/A | #N/A |
| 0.78 | 1.68 | 0.80 | 0.93 | 0.39 | 1.76 | 0.87 |
| #N/A | 0.78 | 0.33 | 0.77 | 0.28 | 0.89 | 0.41 |
| #N/A | #N/A | #N/A | #N/A | #N/A | #N/A | #N/A |
| #N/A | 0.78 | 0.33 | 0.81 | 0.31 | 0.72 | 0.28 |
| #N/A | #N/A | #N/A | #N/A | #N/A | #N/A | #N/A |
| 0.12 | 0.55 | 0.18 | 0.63 | 0.18 | 0.60 | 0.18 |
| #N/A | #N/A | #N/A | 1.11 | 0.48 | 0.66 | 0.22 |
| #N/A | 0.48 | 0.14 | 0.91 | 0.38 | 0.89 | 0.41 |
| 0.25 | 0.42 | 0.09 | 0.47 | 0.08 | 0.42 | 0.06 |
| #N/A | #N/A | #N/A | #N/A | #N/A | #N/A | #N/A |
| 0.25 | 0.47 | 0.12 | 0.63 | 0.17 | 0.77 | 0.32 |
| 0.92 | 2.01 | 0.89 | 2.87 | 0.97 | 1.98 | 0.92 |
| 0.33 | 0.74 | 0.31 | 1.26 | 0.54 | 0.90 | 0.42 |
| 0.37 | 0.50 | 0.15 | 0.74 | 0.25 | 0.52 | 0.12 |
| 0.67 | 1.58 | 0.75 | 1.82 | 0.82 | 1.19 | 0.63 |
| #N/A | 1.37 | 0.67 | 1.15 | 0.51 | 0.86 | 0.39 |
| #N/A | #N/A | #N/A | #N/A | #N/A | #N/A | #N/A |
| #N/A | #N/A | #N/A | #N/A | #N/A | #N/A | #N/A |



|      |      |      |      |      |      |      |
|------|------|------|------|------|------|------|
| 0.32 | 0.82 | 0.37 | 0.85 | 0.34 | 0.90 | 0.42 |
| 0.59 | 1.40 | 0.69 | 1.15 | 0.53 | 1.02 | 0.52 |
| #N/A | #N/A | #N/A | #N/A | #N/A | 0.84 | 0.37 |
| 0.37 | 0.72 | 0.30 | #N/A | #N/A | 0.81 | 0.35 |
| 0.35 | 0.75 | 0.32 | #N/A | #N/A | #N/A | #N/A |
| #N/A | #N/A | #N/A | #N/A | #N/A | #N/A | #N/A |
| #N/A | 0.52 | 0.16 | #N/A | #N/A | 0.54 | 0.13 |
| 0.39 | 0.90 | 0.42 | 1.09 | 0.50 | 0.81 | 0.35 |
| 0.68 | 1.19 | 0.57 | 1.11 | 0.50 | 1.57 | 0.82 |
| 0.29 | 1.13 | 0.56 | 0.62 | 0.17 | 1.31 | 0.69 |
| 0.26 | 0.69 | 0.28 | 0.77 | 0.27 | 0.69 | 0.25 |
| #N/A | #N/A | #N/A | #N/A | #N/A | #N/A | #N/A |
| #N/A | #N/A | #N/A | #N/A | #N/A | #N/A | #N/A |
| 0.93 | 2.37 | 0.87 | 2.48 | 0.93 | 1.79 | 0.88 |
| #N/A | #N/A | #N/A | #N/A | #N/A | #N/A | #N/A |
| 0.25 | #N/A | #N/A | 1.22 | 0.58 | 1.22 | 0.64 |
| 0.08 | #N/A | #N/A | #N/A | #N/A | #N/A | #N/A |
| #N/A | #N/A | #N/A | #N/A | #N/A | #N/A | #N/A |
| #N/A | #N/A | #N/A | #N/A | #N/A | 0.70 | 0.26 |
| 0.43 | 0.74 | 0.31 | 0.99 | 0.43 | 0.99 | 0.49 |
| 0.77 | 1.65 | 0.79 | 1.27 | 0.60 | 1.42 | 0.75 |
| #N/A | #N/A | #N/A | 1.07 | 0.49 | 0.65 | 0.22 |
| #N/A | #N/A | #N/A | #N/A | #N/A | 0.51 | 0.11 |
| #N/A | 0.55 | 0.19 | 1.15 | 0.52 | 0.62 | 0.19 |
| 0.13 | 0.52 | 0.16 | 0.61 | 0.16 | 0.74 | 0.30 |
| 0.16 | #N/A | #N/A | 0.72 | 0.24 | 0.70 | 0.26 |
| #N/A | #N/A | #N/A | #N/A | #N/A | #N/A | #N/A |
| #N/A | 0.85 | 0.38 | 0.95 | 0.40 | 0.71 | 0.27 |
| 0.80 | #N/A | #N/A | 2.03 | 0.77 | 2.42 | 0.97 |
| #N/A | #N/A | #N/A | #N/A | #N/A | #N/A | #N/A |
| 0.13 | 0.57 | 0.19 | 0.62 | 0.17 | #N/A | #N/A |
| #N/A | #N/A | #N/A | #N/A | #N/A | #N/A | #N/A |
| #N/A | 0.64 | 0.24 | 1.29 | 0.50 | 0.64 | 0.21 |
| #N/A | #N/A | #N/A | 1.99 | 0.87 | 0.95 | 0.46 |
| 0.17 | 0.53 | 0.17 | #N/A | #N/A | 0.66 | 0.22 |
| #N/A | #N/A | #N/A | #N/A | #N/A | #N/A | #N/A |
| #N/A | #N/A | #N/A | #N/A | #N/A | #N/A | #N/A |
| #N/A | #N/A | #N/A | #N/A | #N/A | #N/A | #N/A |
| 0.71 | 2.28 | 0.93 | 1.75 | 0.81 | 1.24 | 0.66 |
| 0.44 | 0.91 | 0.42 | 1.18 | 0.56 | #N/A | #N/A |
| 0.61 | 1.45 | 0.70 | #N/A | #N/A | 1.24 | 0.66 |
| #N/A | #N/A | #N/A | #N/A | #N/A | #N/A | #N/A |
| 0.23 | #N/A | #N/A | 0.76 | 0.27 | 0.59 | 0.17 |
| 0.72 | 1.00 | 0.48 | #N/A | #N/A | 1.75 | 0.87 |
| #N/A | #N/A | #N/A | #N/A | #N/A | #N/A | #N/A |
| #N/A | 0.22 | 0.02 | #N/A | #N/A | 0.64 | 0.21 |
| 0.73 | 1.31 | 0.65 | 1.49 | 0.72 | 1.14 | 0.60 |
| 0.12 | #N/A | #N/A | 0.50 | 0.09 | #N/A | #N/A |
| 0.16 | 0.43 | 0.10 | 0.61 | 0.18 | 0.68 | 0.25 |
| 0.46 | 0.93 | 0.43 | 1.03 | 0.46 | 0.89 | 0.41 |
| 0.70 | 1.44 | 0.72 | 1.43 | 0.69 | 1.64 | 0.84 |

|      |      |      |      |      |      |      |
|------|------|------|------|------|------|------|
| #N/A | #N/A | #N/A | #N/A | #N/A | #N/A | #N/A |
| #N/A | #N/A | #N/A | #N/A | #N/A | #N/A | #N/A |
| #N/A | 0.81 | 0.36 | 0.62 | 0.17 | 0.92 | 0.44 |
| 0.16 | 0.69 | 0.27 | 0.54 | 0.13 | 0.51 | 0.11 |
| #N/A | 0.48 | 0.15 | 1.24 | 0.50 | 0.85 | 0.38 |
| #N/A | 0.89 | 0.41 | #N/A | #N/A | #N/A | #N/A |
| 0.62 | 1.03 | 0.50 | 1.23 | 0.57 | 1.16 | 0.61 |
| 0.50 | 1.37 | 0.67 | 1.08 | 0.49 | 1.21 | 0.64 |
| 0.47 | 0.95 | 0.45 | 1.15 | 0.54 | 0.82 | 0.36 |
| 0.10 | 0.50 | 0.17 | 0.62 | 0.18 | 0.61 | 0.18 |
| 0.30 | #N/A | #N/A | 0.71 | 0.23 | 1.01 | 0.51 |
| #N/A | #N/A | #N/A | #N/A | #N/A | #N/A | #N/A |
| #N/A | #N/A | #N/A | #N/A | #N/A | #N/A | #N/A |
| 0.24 | 0.67 | 0.26 | 0.82 | 0.32 | 0.62 | 0.19 |
| 0.27 | 0.60 | 0.21 | 0.60 | 0.17 | 0.72 | 0.28 |
| 0.38 | #N/A | #N/A | 0.99 | 0.44 | 0.45 | 0.07 |
| #N/A | 0.72 | 0.29 | #N/A | #N/A | 1.14 | 0.60 |
| #N/A | #N/A | #N/A | #N/A | #N/A | #N/A | #N/A |
| #N/A | #N/A | #N/A | #N/A | #N/A | #N/A | #N/A |
| #N/A | #N/A | #N/A | #N/A | #N/A | 0.25 | 0.01 |
| #N/A | #N/A | #N/A | #N/A | #N/A | #N/A | #N/A |
| 0.20 | #N/A | #N/A | 0.52 | 0.12 | 0.47 | 0.08 |
| 0.04 | 0.42 | 0.10 | 0.46 | 0.07 | 0.51 | 0.10 |
| 0.13 | 0.50 | 0.14 | 0.69 | 0.22 | 0.51 | 0.11 |
| #N/A | #N/A | #N/A | #N/A | #N/A | 0.25 | 0.01 |
| 0.78 | 1.28 | 0.63 | 1.06 | 0.48 | 1.83 | 0.89 |
| #N/A | #N/A | #N/A | #N/A | #N/A | 0.63 | 0.21 |
| #N/A | #N/A | #N/A | #N/A | #N/A | #N/A | #N/A |
| #N/A | #N/A | #N/A | #N/A | #N/A | #N/A | #N/A |
| 0.30 | #N/A | #N/A | #N/A | #N/A | 0.81 | 0.35 |
| 0.44 | 0.75 | 0.32 | 0.51 | 0.11 | 1.14 | 0.60 |
| #N/A | #N/A | #N/A | #N/A | #N/A | #N/A | #N/A |
| 0.20 | 0.57 | 0.19 | 0.65 | 0.19 | 0.46 | 0.08 |
| 0.22 | 0.49 | 0.14 | 0.62 | 0.17 | 0.49 | 0.09 |
| #N/A | #N/A | #N/A | #N/A | #N/A | #N/A | #N/A |
| #N/A | #N/A | #N/A | #N/A | #N/A | #N/A | #N/A |
| #N/A | #N/A | #N/A | #N/A | #N/A | #N/A | #N/A |
| 0.58 | 1.19 | 0.58 | 1.13 | 0.52 | 1.41 | 0.75 |
| #N/A | #N/A | #N/A | #N/A | #N/A | 0.67 | 0.24 |
| 0.33 | 0.95 | 0.44 | 0.69 | 0.23 | 0.96 | 0.48 |
| 0.28 | 1.11 | 0.54 | 1.06 | 0.47 | 1.02 | 0.52 |
| #N/A | #N/A | #N/A | #N/A | #N/A | #N/A | #N/A |
| 0.86 | 1.75 | 0.82 | #N/A | #N/A | 1.85 | 0.90 |
| #N/A | #N/A | #N/A | #N/A | #N/A | 0.81 | 0.35 |
| 0.56 | 1.22 | 0.60 | 0.96 | 0.41 | 1.17 | 0.62 |
| #N/A | #N/A | #N/A | #N/A | #N/A | 1.02 | 0.52 |
| 0.73 | 1.18 | 0.57 | 0.80 | 0.30 | 1.56 | 0.81 |
| 0.20 | #N/A | #N/A | 0.71 | 0.23 | 0.75 | 0.30 |
| #N/A | #N/A | #N/A | #N/A | #N/A | #N/A | #N/A |
| 0.42 | 0.86 | 0.39 | 0.66 | 0.19 | 0.75 | 0.30 |
| 0.74 | 1.32 | 0.66 | 1.41 | 0.68 | 1.24 | 0.66 |

|      |      |      |      |      |      |      |
|------|------|------|------|------|------|------|
| 0.13 | 0.76 | 0.32 | #N/A | #N/A | 0.94 | 0.45 |
| #N/A | 0.51 | 0.15 | #N/A | #N/A | 0.64 | 0.21 |
| 0.42 | 1.17 | 0.57 | 1.08 | 0.49 | 0.77 | 0.31 |
| 0.20 | 0.66 | 0.26 | 0.72 | 0.24 | 0.70 | 0.26 |
| 0.30 | 0.66 | 0.26 | #N/A | #N/A | 0.64 | 0.21 |
| 0.65 | #N/A | #N/A | #N/A | #N/A | #N/A | #N/A |
| 0.14 | 0.28 | 0.04 | 0.53 | 0.11 | 0.58 | 0.17 |
| #N/A | #N/A | #N/A | #N/A | #N/A | #N/A | #N/A |
| #N/A | 0.40 | 0.08 | 0.60 | 0.16 | 0.42 | 0.05 |
| #N/A | 1.45 | 0.63 | #N/A | #N/A | 2.50 | 0.97 |
| #N/A | #N/A | #N/A | #N/A | #N/A | #N/A | #N/A |
| #N/A | #N/A | #N/A | 0.79 | 0.29 | 0.73 | 0.29 |
| 0.32 | #N/A | #N/A | 1.10 | 0.51 | #N/A | #N/A |
| #N/A | 0.87 | 0.40 | #N/A | #N/A | 1.03 | 0.53 |
| 0.47 | 0.47 | 0.13 | 0.83 | 0.32 | 0.55 | 0.14 |
| #N/A | #N/A | #N/A | #N/A | #N/A | #N/A | #N/A |
| #N/A | #N/A | #N/A | #N/A | #N/A | #N/A | #N/A |
| 0.86 | 2.35 | 0.89 | 2.75 | 0.96 | 2.26 | 0.96 |
| 0.45 | 0.91 | 0.42 | 0.72 | 0.24 | 1.51 | 0.79 |
| #N/A | #N/A | #N/A | #N/A | #N/A | #N/A | #N/A |
| 0.20 | 0.58 | 0.20 | 0.63 | 0.20 | #N/A | #N/A |
| #N/A | #N/A | #N/A | #N/A | #N/A | 1.11 | 0.58 |
| 0.07 | #N/A | #N/A | 1.05 | 0.47 | 0.40 | 0.04 |
| #N/A | #N/A | #N/A | #N/A | #N/A | #N/A | #N/A |
| 0.46 | 0.90 | 0.42 | 1.06 | 0.48 | 0.99 | 0.50 |
| 0.68 | 1.26 | 0.63 | 1.24 | 0.59 | 1.12 | 0.58 |
| #N/A | #N/A | #N/A | #N/A | #N/A | #N/A | #N/A |
| 0.08 | #N/A | #N/A | 0.49 | 0.12 | 0.52 | 0.11 |
| #N/A | 1.00 | 0.48 | 0.98 | 0.43 | 1.10 | 0.57 |
| 0.58 | 1.29 | 0.64 | 1.52 | 0.72 | 1.15 | 0.60 |
| 0.32 | 0.69 | 0.27 | 0.80 | 0.30 | 0.76 | 0.31 |
| 0.02 | 0.29 | 0.03 | 0.35 | 0.03 | 0.37 | 0.03 |
| #N/A | 0.66 | 0.26 | 0.56 | 0.13 | 1.02 | 0.52 |
| #N/A | #N/A | #N/A | 0.99 | 0.43 | 0.57 | 0.16 |
| 0.31 | 1.02 | 0.48 | 0.71 | 0.23 | 0.73 | 0.29 |
| #N/A | #N/A | #N/A | #N/A | #N/A | #N/A | #N/A |
| #N/A | #N/A | #N/A | #N/A | #N/A | 0.54 | 0.13 |
| #N/A | #N/A | #N/A | #N/A | #N/A | #N/A | #N/A |
| 0.51 | 1.18 | 0.58 | #N/A | #N/A | 1.44 | 0.76 |
| 0.84 | 2.02 | 0.83 | 2.18 | 0.91 | 1.82 | 0.89 |
| 0.20 | 1.48 | 0.55 | 0.89 | 0.36 | 0.70 | 0.26 |
| #N/A | 1.09 | 0.53 | #N/A | #N/A | 1.19 | 0.63 |
| 0.14 | #N/A | #N/A | #N/A | #N/A | 0.31 | 0.02 |
| #N/A | 0.95 | 0.45 | #N/A | #N/A | #N/A | #N/A |
| 0.19 | 0.40 | 0.08 | 0.55 | 0.12 | 0.55 | 0.14 |
| #N/A | 1.30 | 0.63 | 2.18 | 0.87 | 1.19 | 0.63 |
| #N/A | #N/A | #N/A | #N/A | #N/A | 1.43 | 0.76 |
| #N/A | 0.98 | 0.47 | 0.82 | 0.32 | 0.89 | 0.41 |
| 0.26 | 0.68 | 0.27 | 0.91 | 0.37 | 0.92 | 0.44 |
| 0.04 | #N/A | #N/A | 0.65 | 0.19 | #N/A | #N/A |
| #N/A | #N/A | #N/A | #N/A | #N/A | #N/A | #N/A |





|      |      |      |      |      |      |      |
|------|------|------|------|------|------|------|
| 0.18 | 0.46 | 0.12 | #N/A | #N/A | 0.61 | 0.19 |
| 0.91 | 2.59 | 0.96 | 2.30 | 0.91 | 2.14 | 0.95 |
| #N/A | #N/A | #N/A | 1.16 | 0.50 | 0.66 | 0.23 |
| 0.11 | 0.47 | 0.13 | 0.56 | 0.13 | 0.56 | 0.15 |
| 0.92 | 2.21 | 0.92 | 1.82 | 0.84 | 2.54 | 0.98 |
| #N/A | #N/A | #N/A | #N/A | #N/A | 0.55 | 0.14 |
| 0.95 | 2.39 | 0.95 | 2.10 | 0.90 | 1.78 | 0.88 |
| 0.56 | 1.08 | 0.53 | 1.04 | 0.47 | 1.07 | 0.55 |
| 0.42 | 0.89 | 0.41 | 1.19 | 0.56 | 1.01 | 0.51 |
| 0.24 | 0.53 | 0.17 | 0.69 | 0.22 | 0.52 | 0.11 |
| 0.54 | 1.13 | 0.55 | 1.06 | 0.48 | 1.25 | 0.67 |
| 0.82 | 1.46 | 0.72 | 1.45 | 0.70 | 1.40 | 0.75 |
| 0.56 | 1.09 | 0.53 | 1.97 | 0.87 | 1.09 | 0.56 |
| 0.83 | 1.48 | 0.71 | 1.31 | 0.62 | 1.63 | 0.84 |
| 0.88 | 2.05 | 0.90 | 2.00 | 0.88 | 2.02 | 0.93 |
| 0.57 | 1.09 | 0.53 | 0.80 | 0.29 | 1.29 | 0.69 |
| 0.42 | #N/A | #N/A | 0.71 | 0.24 | 0.74 | 0.30 |
| 0.20 | 0.61 | 0.22 | 0.58 | 0.14 | 0.55 | 0.14 |
| 0.34 | 0.88 | 0.40 | 0.92 | 0.38 | 0.77 | 0.32 |
| #N/A | #N/A | #N/A | #N/A | #N/A | #N/A | #N/A |
| 0.25 | #N/A | #N/A | 0.99 | 0.43 | 0.53 | 0.12 |
| #N/A | #N/A | #N/A | #N/A | #N/A | #N/A | #N/A |
| 0.71 | 0.52 | 0.16 | 0.72 | 0.24 | 0.83 | 0.36 |
| #N/A | #N/A | #N/A | #N/A | #N/A | #N/A | #N/A |
| 0.53 | 1.34 | 0.67 | 1.11 | 0.51 | 0.94 | 0.45 |
| 0.51 | 0.96 | 0.45 | 1.35 | 0.65 | 1.13 | 0.59 |
| 0.29 | 0.56 | 0.19 | 0.81 | 0.30 | 0.79 | 0.33 |
| 0.39 | 0.79 | 0.34 | 0.96 | 0.41 | 0.81 | 0.35 |
| 0.35 | 0.67 | 0.26 | 1.12 | 0.52 | 0.84 | 0.37 |
| 0.30 | 0.73 | 0.31 | 0.81 | 0.31 | 0.92 | 0.44 |
| 0.58 | 1.06 | 0.52 | 1.17 | 0.55 | 1.24 | 0.66 |
| 0.64 | #N/A | #N/A | 1.45 | 0.70 | 1.74 | 0.87 |
| 0.93 | 1.75 | 0.82 | 2.26 | 0.92 | 2.04 | 0.93 |
| 0.59 | 0.58 | 0.20 | 2.06 | 0.89 | 1.14 | 0.60 |
| #N/A | #N/A | #N/A | #N/A | #N/A | 0.19 | 0.00 |
| 0.49 | 0.94 | 0.44 | 1.35 | 0.65 | 0.97 | 0.48 |
| 0.46 | 0.97 | 0.46 | 1.09 | 0.50 | 0.94 | 0.45 |
| 0.61 | 1.24 | 0.62 | 1.47 | 0.71 | 1.11 | 0.58 |
| 0.59 | 1.24 | 0.61 | 1.53 | 0.74 | 1.04 | 0.53 |
| 0.34 | 0.72 | 0.30 | 0.84 | 0.33 | 0.71 | 0.27 |
| 0.74 | 1.30 | 0.65 | 1.15 | 0.54 | 1.18 | 0.62 |
| 0.47 | 1.01 | 0.48 | 0.68 | 0.21 | 0.92 | 0.44 |
| #N/A | #N/A | #N/A | #N/A | #N/A | #N/A | #N/A |
| 0.36 | 0.88 | 0.40 | 0.91 | 0.38 | 0.98 | 0.49 |
| #N/A | #N/A | #N/A | #N/A | #N/A | 0.89 | 0.41 |
| 0.05 | 0.37 | 0.07 | 0.44 | 0.06 | 0.73 | 0.29 |
| #N/A | #N/A | #N/A | #N/A | #N/A | #N/A | #N/A |
| 0.19 | 0.51 | 0.15 | 0.65 | 0.19 | 0.57 | 0.15 |
| 0.54 | 1.39 | 0.68 | 0.89 | 0.36 | 1.49 | 0.78 |
| 0.74 | 1.63 | 0.78 | 1.29 | 0.62 | 1.82 | 0.89 |
| 0.19 | 0.62 | 0.23 | 0.56 | 0.13 | 0.49 | 0.09 |

|      |      |      |      |      |      |      |
|------|------|------|------|------|------|------|
| #N/A | 2.35 | 0.93 | 2.00 | 0.88 | 1.37 | 0.73 |
| 0.85 | 2.93 | 0.97 | 2.11 | 0.88 | 2.45 | 0.97 |
| #N/A | 0.53 | 0.17 | #N/A | #N/A | #N/A | #N/A |
| 0.16 | 0.72 | 0.29 | 0.80 | 0.30 | #N/A | #N/A |
| 0.94 | 2.51 | 0.95 | #N/A | #N/A | 2.53 | 0.98 |
| 0.54 | 1.20 | 0.59 | 1.35 | 0.65 | 0.87 | 0.40 |
| 0.67 | 1.04 | 0.50 | 1.27 | 0.61 | 0.81 | 0.35 |
| 0.36 | 1.08 | 0.52 | 0.99 | 0.44 | 1.13 | 0.59 |
| 0.94 | #N/A | #N/A | 1.95 | 0.86 | 1.87 | 0.90 |
| #N/A | #N/A | #N/A | #N/A | #N/A | #N/A | #N/A |
| #N/A | #N/A | #N/A | #N/A | #N/A | #N/A | #N/A |
| 0.59 | 1.33 | 0.66 | 1.01 | 0.45 | 1.35 | 0.72 |
| 0.49 | 0.54 | 0.17 | 0.92 | 0.38 | 0.66 | 0.23 |
| 0.10 | #N/A | #N/A | #N/A | #N/A | 0.55 | 0.14 |
| 0.68 | 1.29 | 0.64 | 1.49 | 0.72 | 1.26 | 0.67 |
| 0.61 | 1.15 | 0.56 | 1.17 | 0.54 | 1.12 | 0.58 |
| 0.56 | 1.17 | 0.57 | 0.87 | 0.35 | 0.85 | 0.38 |
| 0.01 | 0.19 | 0.01 | 0.26 | 0.01 | 0.37 | 0.03 |
| 0.44 | #N/A | #N/A | #N/A | #N/A | #N/A | #N/A |
| 0.39 | 0.75 | 0.32 | 0.76 | 0.27 | 0.70 | 0.26 |
| 0.22 | 0.49 | 0.14 | 0.73 | 0.24 | 0.93 | 0.44 |
| 0.32 | 0.53 | 0.17 | #N/A | #N/A | 0.11 | 0.00 |
| 0.63 | 1.52 | 0.75 | 1.53 | 0.73 | 1.06 | 0.55 |
| 0.72 | 2.05 | 0.89 | 1.83 | 0.84 | 1.43 | 0.76 |
| 0.77 | 2.02 | 0.89 | 1.77 | 0.80 | #N/A | #N/A |
| 0.33 | 1.10 | 0.53 | 1.52 | 0.70 | 1.68 | 0.86 |
| 0.92 | 1.65 | 0.79 | 1.46 | 0.70 | 1.53 | 0.80 |
| #N/A | #N/A | #N/A | #N/A | #N/A | #N/A | #N/A |
| 0.64 | 1.45 | 0.71 | 1.09 | 0.50 | #N/A | #N/A |
| 0.58 | 1.27 | 0.63 | 1.51 | 0.71 | #N/A | #N/A |
| 0.70 | 1.48 | 0.72 | 1.65 | 0.78 | 1.14 | 0.60 |
| #N/A | #N/A | #N/A | #N/A | #N/A | #N/A | #N/A |
| 0.10 | 0.55 | 0.18 | 0.60 | 0.16 | 0.64 | 0.21 |
| 0.44 | 1.29 | 0.64 | 1.07 | 0.48 | 0.88 | 0.40 |
| 0.55 | #N/A | #N/A | 1.82 | 0.81 | 7.53 | 1.00 |
| 0.36 | 0.77 | 0.33 | 0.83 | 0.32 | 0.62 | 0.20 |
| #N/A | 0.39 | 0.07 | 0.81 | 0.30 | 0.44 | 0.06 |
| 0.91 | 2.25 | 0.92 | 2.03 | 0.88 | 1.62 | 0.83 |
| 0.59 | 0.96 | 0.45 | 0.74 | 0.25 | 1.08 | 0.56 |
| 0.19 | 0.74 | 0.31 | 0.91 | 0.37 | 0.98 | 0.49 |
| 0.98 | 3.26 | 0.99 | 3.06 | 0.98 | 3.27 | 0.99 |
| 0.69 | 1.15 | 0.56 | 1.34 | 0.64 | 1.27 | 0.68 |
| #N/A | #N/A | #N/A | #N/A | #N/A | 0.79 | 0.33 |
| 0.34 | 1.20 | 0.58 | 1.03 | 0.46 | 0.95 | 0.46 |
| 0.18 | #N/A | #N/A | 0.76 | 0.27 | #N/A | #N/A |
| 0.92 | 2.19 | 0.90 | 2.47 | 0.92 | 1.96 | 0.92 |
| #N/A | #N/A | #N/A | #N/A | #N/A | #N/A | #N/A |
| #N/A | #N/A | #N/A | #N/A | #N/A | #N/A | #N/A |
| 0.52 | 1.21 | 0.60 | 1.12 | 0.51 | 0.83 | 0.37 |
| 0.45 | 1.07 | 0.52 | 1.10 | 0.49 | 0.86 | 0.39 |
| #N/A | #N/A | #N/A | #N/A | #N/A | #N/A | #N/A |

|      |      |      |      |      |      |      |
|------|------|------|------|------|------|------|
| 0.80 | 1.66 | 0.80 | 1.66 | 0.78 | 1.81 | 0.89 |
| #N/A | #N/A | #N/A | #N/A | #N/A | #N/A | #N/A |
| 0.31 | 0.83 | 0.37 | 0.93 | 0.39 | 0.85 | 0.38 |
| 0.10 | #N/A | #N/A | 0.46 | 0.09 | 0.54 | 0.13 |
| 0.82 | 1.42 | 0.69 | 1.52 | 0.73 | 1.77 | 0.88 |
| #N/A | #N/A | #N/A | #N/A | #N/A | #N/A | #N/A |
| 0.26 | 0.81 | 0.35 | 0.82 | 0.32 | 0.81 | 0.35 |
| #N/A | 0.60 | 0.21 | 0.69 | 0.22 | 0.54 | 0.13 |
| 0.10 | 0.43 | 0.10 | 0.49 | 0.09 | 0.56 | 0.14 |
| #N/A | #N/A | #N/A | #N/A | #N/A | #N/A | #N/A |
| #N/A | #N/A | #N/A | #N/A | #N/A | #N/A | #N/A |
| 0.46 | 0.78 | 0.34 | 0.80 | 0.30 | 0.78 | 0.32 |
| 0.61 | 1.80 | 0.84 | 1.67 | 0.78 | 1.84 | 0.90 |
| #N/A | #N/A | #N/A | #N/A | #N/A | #N/A | #N/A |
| 0.90 | 2.44 | 0.95 | 2.68 | 0.96 | 2.07 | 0.94 |
| 0.87 | 2.09 | 0.84 | 2.33 | 0.89 | 1.67 | 0.85 |
| #N/A | #N/A | #N/A | #N/A | #N/A | #N/A | #N/A |
| 0.31 | 0.90 | 0.42 | 0.82 | 0.32 | 0.86 | 0.39 |
| 0.05 | 0.34 | 0.05 | 0.41 | 0.05 | 0.40 | 0.04 |
| 0.34 | #N/A | #N/A | 0.86 | 0.34 | 1.03 | 0.53 |
| 0.75 | 2.44 | 0.95 | 1.93 | 0.86 | #N/A | #N/A |
| 0.42 | 0.95 | 0.45 | 0.86 | 0.34 | 1.17 | 0.62 |
| #N/A | #N/A | #N/A | #N/A | #N/A | #N/A | #N/A |
| 0.09 | 0.43 | 0.10 | 0.53 | 0.11 | 0.41 | 0.05 |
| 0.18 | 0.66 | 0.26 | 0.66 | 0.20 | 0.70 | 0.25 |
| #N/A | #N/A | #N/A | #N/A | #N/A | #N/A | #N/A |
| #N/A | 2.31 | 0.90 | #N/A | #N/A | 1.08 | 0.56 |
| 0.11 | 0.57 | 0.20 | 0.85 | 0.33 | 0.41 | 0.05 |
| 0.38 | 0.98 | 0.47 | 1.05 | 0.47 | 1.00 | 0.50 |
| #N/A | #N/A | #N/A | #N/A | #N/A | #N/A | #N/A |
| 0.87 | 1.66 | 0.78 | 1.59 | 0.76 | 1.20 | 0.64 |
| 0.67 | 1.58 | 0.77 | 1.19 | 0.55 | 1.34 | 0.71 |
| 0.91 | 2.25 | 0.93 | 1.66 | 0.77 | 2.21 | 0.95 |
| #N/A | 0.48 | 0.13 | 0.42 | 0.06 | 0.41 | 0.05 |
| 0.92 | 1.65 | 0.80 | 1.03 | 0.46 | 2.00 | 0.92 |
| 0.38 | 0.92 | 0.43 | 0.44 | 0.06 | 0.90 | 0.42 |
| 0.44 | 1.04 | 0.50 | 0.86 | 0.34 | 1.05 | 0.54 |
| 0.24 | 0.68 | 0.27 | 0.69 | 0.22 | 0.70 | 0.26 |
| #N/A | #N/A | #N/A | #N/A | #N/A | #N/A | #N/A |
| 0.48 | 1.00 | 0.48 | 1.09 | 0.50 | 0.98 | 0.49 |
| #N/A | #N/A | #N/A | #N/A | #N/A | #N/A | #N/A |
| #N/A | #N/A | #N/A | #N/A | #N/A | #N/A | #N/A |
| 0.23 | 1.05 | 0.50 | 0.95 | 0.41 | 0.80 | 0.34 |
| #N/A | 0.80 | 0.35 | #N/A | #N/A | 0.57 | 0.15 |
| 0.98 | 1.94 | 0.87 | #N/A | #N/A | 2.58 | 0.98 |
| #N/A | #N/A | #N/A | #N/A | #N/A | #N/A | #N/A |
| #N/A | #N/A | #N/A | 0.91 | 0.38 | #N/A | #N/A |
| 0.64 | 1.18 | 0.58 | 1.34 | 0.64 | #N/A | #N/A |
| #N/A | 0.79 | 0.34 | 0.62 | 0.17 | 0.65 | 0.22 |
| 0.27 | 0.70 | 0.28 | 0.86 | 0.34 | 0.91 | 0.43 |
| #N/A | 0.80 | 0.35 | 0.92 | 0.39 | 0.80 | 0.34 |



|      |      |      |      |      |      |      |
|------|------|------|------|------|------|------|
| 0.30 | 0.78 | 0.34 | 0.92 | 0.39 | 0.98 | 0.49 |
| #N/A | #N/A | #N/A | #N/A | #N/A | #N/A | #N/A |
| 0.16 | 0.40 | 0.09 | 0.67 | 0.21 | 0.47 | 0.08 |
| 0.71 | 1.44 | 0.71 | 1.25 | 0.60 | 1.53 | 0.80 |
| #N/A | #N/A | #N/A | #N/A | #N/A | #N/A | #N/A |
| 0.24 | 0.61 | 0.22 | 0.96 | 0.41 | 0.73 | 0.29 |
| 0.59 | 1.14 | 0.56 | 1.23 | 0.58 | 1.22 | 0.65 |
| #N/A | 1.00 | 0.48 | 1.01 | 0.44 | 0.93 | 0.44 |
| 0.49 | 1.54 | 0.74 | 1.77 | 0.82 | 1.43 | 0.76 |
| 0.65 | 1.40 | 0.67 | 1.65 | 0.78 | 1.31 | 0.70 |
| 0.42 | 0.73 | 0.30 | 1.45 | 0.69 | 1.08 | 0.56 |
| 0.32 | 0.80 | 0.35 | 0.56 | 0.14 | 0.61 | 0.19 |
| #N/A | 1.39 | 0.69 | 1.24 | 0.59 | 0.94 | 0.45 |
| #N/A | #N/A | #N/A | #N/A | #N/A | #N/A | #N/A |
| 0.22 | #N/A | #N/A | 0.70 | 0.23 | 0.59 | 0.17 |
| 0.62 | 1.27 | 0.63 | 1.25 | 0.60 | 1.09 | 0.56 |
| #N/A | #N/A | #N/A | #N/A | #N/A | #N/A | #N/A |
| 0.40 | 0.70 | 0.28 | 1.23 | 0.59 | #N/A | #N/A |
| 0.78 | 1.68 | 0.80 | 1.91 | 0.84 | 1.45 | 0.77 |
| #N/A | #N/A | #N/A | #N/A | #N/A | #N/A | #N/A |
| 0.22 | 0.98 | 0.46 | #N/A | #N/A | 0.85 | 0.38 |
| 0.09 | #N/A | #N/A | 1.28 | 0.56 | 0.61 | 0.19 |
| #N/A | #N/A | #N/A | 0.91 | 0.38 | 0.87 | 0.40 |
| 0.77 | 1.54 | 0.75 | 1.56 | 0.75 | 1.16 | 0.61 |
| 0.91 | 2.34 | 0.93 | 2.14 | 0.91 | 1.76 | 0.87 |
| 0.56 | 1.14 | 0.56 | 1.34 | 0.65 | 1.32 | 0.70 |
| 0.51 | 1.12 | 0.54 | 0.93 | 0.39 | 0.75 | 0.30 |
| #N/A | 0.62 | 0.23 | 0.89 | 0.36 | 0.47 | 0.08 |
| 0.75 | 1.20 | 0.60 | 1.28 | 0.61 | 0.60 | 0.18 |
| 0.72 | 1.13 | 0.55 | 1.81 | 0.83 | 1.53 | 0.80 |
| 0.42 | 1.35 | 0.67 | 0.98 | 0.42 | 1.32 | 0.70 |
| 0.65 | 1.18 | 0.58 | 1.02 | 0.45 | 1.14 | 0.60 |
| 0.21 | 0.76 | 0.32 | 0.86 | 0.34 | 0.95 | 0.46 |
| 0.65 | 0.68 | 0.26 | #N/A | #N/A | 0.77 | 0.32 |
| 0.03 | 0.22 | 0.02 | 0.30 | 0.01 | 0.35 | 0.03 |
| 0.08 | 0.47 | 0.13 | #N/A | #N/A | 0.46 | 0.07 |
| 0.69 | 1.28 | 0.63 | 1.17 | 0.55 | 1.31 | 0.70 |
| 0.82 | 1.74 | 0.82 | 1.66 | 0.77 | 1.66 | 0.85 |
| 0.80 | 1.42 | 0.71 | 1.45 | 0.69 | 1.03 | 0.52 |
| 0.44 | 0.87 | 0.39 | 0.80 | 0.29 | 1.06 | 0.55 |
| 0.42 | 0.68 | 0.27 | 0.86 | 0.34 | 1.07 | 0.55 |
| 0.87 | #N/A | #N/A | 1.76 | 0.81 | #N/A | #N/A |
| 0.63 | 1.35 | 0.67 | 1.17 | 0.55 | 1.22 | 0.64 |
| 0.58 | 1.24 | 0.62 | 1.11 | 0.51 | 1.28 | 0.68 |
| 0.88 | 2.53 | 0.95 | 1.80 | 0.83 | 1.70 | 0.86 |
| 0.83 | 1.46 | 0.72 | 1.20 | 0.56 | 1.20 | 0.64 |
| 0.55 | 1.28 | 0.63 | 1.46 | 0.70 | 1.01 | 0.51 |
| 0.21 | 0.59 | 0.21 | 0.73 | 0.24 | 0.71 | 0.27 |
| 0.65 | 1.26 | 0.63 | 1.18 | 0.55 | 1.07 | 0.55 |
| 0.32 | 0.76 | 0.32 | 0.89 | 0.35 | 0.97 | 0.48 |
| 0.94 | 2.61 | 0.90 | 1.98 | 0.87 | 1.47 | 0.77 |

|      |      |      |      |      |      |      |
|------|------|------|------|------|------|------|
| 0.15 | 0.46 | 0.12 | 0.54 | 0.12 | 0.59 | 0.17 |
| 0.09 | 0.47 | 0.13 | 0.51 | 0.10 | 0.51 | 0.10 |
| 0.00 | 0.16 | 0.01 | 0.21 | 0.00 | 0.21 | 0.00 |
| 0.05 | 0.31 | 0.04 | 0.36 | 0.05 | 0.33 | 0.02 |
| 0.29 | 0.74 | 0.31 | 0.76 | 0.27 | 0.97 | 0.48 |
| 0.47 | 1.31 | 0.65 | 1.08 | 0.49 | 1.05 | 0.54 |
| 0.87 | 1.38 | 0.69 | 1.93 | 0.86 | 1.49 | 0.78 |
| 0.50 | 1.09 | 0.53 | #N/A | #N/A | 0.68 | 0.25 |
| 0.12 | 0.46 | 0.12 | 0.56 | 0.13 | 0.37 | 0.03 |
| 0.40 | 0.86 | 0.38 | 0.96 | 0.41 | 0.89 | 0.41 |
| 0.23 | 0.72 | 0.30 | 0.58 | 0.15 | 0.68 | 0.24 |
| 0.01 | 0.23 | 0.02 | 0.32 | 0.02 | 0.24 | 0.01 |
| 0.01 | 0.31 | 0.04 | 0.63 | 0.20 | #N/A | #N/A |
| 0.50 | 1.05 | 0.51 | 1.61 | 0.75 | 1.41 | 0.75 |
| 0.79 | 2.27 | 0.87 | 1.55 | 0.74 | 1.38 | 0.73 |
| 0.44 | 0.81 | 0.36 | 0.85 | 0.33 | 0.71 | 0.27 |
| 0.35 | 0.65 | 0.25 | 0.57 | 0.14 | 0.39 | 0.04 |
| 0.04 | 0.42 | 0.10 | 0.71 | 0.23 | 0.37 | 0.03 |
| 0.25 | 0.83 | 0.37 | 1.04 | 0.47 | 0.70 | 0.26 |
| 0.16 | 0.48 | 0.13 | 0.55 | 0.13 | 0.47 | 0.08 |
| #N/A | 0.38 | 0.08 | #N/A | #N/A | 1.05 | 0.54 |
| 0.55 | 1.29 | 0.64 | 0.94 | 0.40 | 1.18 | 0.62 |
| 0.35 | 0.80 | 0.35 | 0.73 | 0.25 | 0.67 | 0.23 |
| 0.28 | 0.68 | 0.27 | 0.54 | 0.12 | 0.71 | 0.27 |
| 0.40 | 0.64 | 0.24 | 0.86 | 0.34 | 0.73 | 0.28 |
| #N/A | #N/A | #N/A | #N/A | #N/A | #N/A | #N/A |
| 0.30 | 0.98 | 0.47 | 1.29 | 0.62 | 0.88 | 0.40 |
| #N/A | #N/A | #N/A | #N/A | #N/A | #N/A | #N/A |
| #N/A | 1.75 | 0.81 | #N/A | #N/A | 1.32 | 0.70 |
| 0.34 | 0.79 | 0.34 | #N/A | #N/A | 0.92 | 0.43 |
| #N/A | #N/A | #N/A | #N/A | #N/A | #N/A | #N/A |
| #N/A | 1.90 | 0.84 | 1.59 | 0.75 | 0.03 | 0.00 |
| #N/A | #N/A | #N/A | #N/A | #N/A | #N/A | #N/A |
| #N/A | #N/A | #N/A | #N/A | #N/A | 1.12 | 0.59 |
| #N/A | #N/A | #N/A | #N/A | #N/A | 0.52 | 0.11 |
| 0.53 | 1.10 | 0.54 | 1.10 | 0.50 | 1.04 | 0.53 |
| 0.82 | 1.82 | 0.85 | 1.76 | 0.82 | 1.66 | 0.85 |
| 0.64 | 1.41 | 0.67 | 1.66 | 0.75 | 1.13 | 0.59 |
| 0.11 | 0.33 | 0.05 | 0.44 | 0.07 | 0.71 | 0.27 |
| 0.04 | 0.24 | 0.02 | 0.31 | 0.02 | 0.35 | 0.03 |
| 0.33 | 0.65 | 0.25 | 0.62 | 0.17 | 0.69 | 0.25 |
| 0.76 | 1.63 | 0.78 | 1.13 | 0.53 | 1.55 | 0.81 |
| 0.82 | 1.22 | 0.61 | 1.23 | 0.58 | 1.55 | 0.81 |
| 0.15 | 0.52 | 0.16 | 0.57 | 0.14 | 0.68 | 0.25 |
| #N/A | #N/A | #N/A | #N/A | #N/A | #N/A | #N/A |
| #N/A | #N/A | #N/A | #N/A | #N/A | #N/A | #N/A |
| 0.39 | 0.47 | 0.13 | 1.01 | 0.45 | 0.42 | 0.05 |
| #N/A | #N/A | #N/A | #N/A | #N/A | #N/A | #N/A |
| 0.40 | 0.88 | 0.40 | #N/A | #N/A | 0.85 | 0.38 |
| 0.76 | 1.33 | 0.66 | 1.36 | 0.65 | 1.16 | 0.61 |
| 0.85 | #N/A | #N/A | #N/A | #N/A | #N/A | #N/A |



|      |      |      |      |      |      |      |
|------|------|------|------|------|------|------|
| 0.83 | 1.50 | 0.74 | 1.82 | 0.82 | 1.66 | 0.85 |
| #N/A | #N/A | #N/A | #N/A | #N/A | #N/A | #N/A |
| 0.23 | 0.76 | 0.33 | 1.00 | 0.44 | 0.71 | 0.28 |
| 0.44 | 1.01 | 0.48 | 0.82 | 0.32 | 0.79 | 0.33 |
| 0.28 | 1.11 | 0.54 | 1.61 | 0.76 | 1.00 | 0.50 |
| #N/A | #N/A | #N/A | #N/A | #N/A | #N/A | #N/A |
| 0.88 | 1.95 | 0.88 | 2.68 | 0.96 | 1.55 | 0.81 |
| 0.37 | 0.60 | 0.22 | 0.82 | 0.32 | 0.83 | 0.36 |
| #N/A | 0.93 | 0.43 | 1.32 | 0.59 | 1.06 | 0.55 |
| 0.54 | 1.27 | 0.62 | 1.55 | 0.70 | #N/A | #N/A |
| 0.21 | 0.70 | 0.28 | 0.54 | 0.13 | 0.53 | 0.12 |
| #N/A | #N/A | #N/A | 1.63 | 0.73 | #N/A | #N/A |
| 0.14 | 0.54 | 0.17 | #N/A | #N/A | #N/A | #N/A |
| 0.44 | 0.97 | 0.46 | 0.79 | 0.29 | 0.99 | 0.50 |
| 0.27 | 0.60 | 0.22 | 0.70 | 0.23 | 0.82 | 0.35 |
| #N/A | #N/A | #N/A | 0.97 | 0.42 | #N/A | #N/A |
| 0.02 | 0.24 | 0.02 | 0.28 | 0.01 | 0.42 | 0.05 |
| #N/A | #N/A | #N/A | 0.71 | 0.23 | 0.53 | 0.12 |
| 0.93 | #N/A | #N/A | 2.42 | 0.94 | 1.96 | 0.92 |
| 0.42 | 1.02 | 0.49 | 0.98 | 0.42 | 0.99 | 0.49 |
| 0.69 | 1.51 | 0.74 | 1.60 | 0.76 | 1.39 | 0.74 |
| 0.16 | 0.50 | 0.15 | 0.60 | 0.16 | 0.55 | 0.14 |
| #N/A | 0.29 | 0.03 | 0.75 | 0.26 | 0.40 | 0.04 |
| 0.78 | 2.18 | 0.91 | 1.58 | 0.75 | 1.95 | 0.92 |
| #N/A | #N/A | #N/A | 1.63 | 0.76 | 0.91 | 0.43 |
| #N/A | 0.38 | 0.07 | #N/A | #N/A | 0.31 | 0.02 |
| 0.74 | 1.60 | 0.78 | 1.40 | 0.67 | 1.48 | 0.78 |
| 0.22 | 0.69 | 0.28 | 0.37 | 0.03 | 0.72 | 0.28 |
| #N/A | #N/A | #N/A | #N/A | #N/A | #N/A | #N/A |
| 0.78 | 1.69 | 0.81 | 1.31 | 0.63 | 1.75 | 0.87 |
| 0.39 | 0.83 | 0.37 | #N/A | #N/A | #N/A | #N/A |
| 0.82 | 1.43 | 0.71 | 1.88 | 0.84 | #N/A | #N/A |
| #N/A | 2.30 | 0.94 | 2.27 | 0.92 | 1.99 | 0.92 |
| #N/A | #N/A | #N/A | #N/A | #N/A | 0.47 | 0.09 |
| 0.96 | 2.78 | 0.92 | 2.65 | 0.86 | 1.80 | 0.89 |
| 0.27 | 0.55 | 0.18 | 0.83 | 0.31 | 0.53 | 0.12 |
| #N/A | #N/A | #N/A | #N/A | #N/A | #N/A | #N/A |
| 0.57 | 1.45 | 0.72 | 1.53 | 0.72 | #N/A | #N/A |
| 0.61 | 1.46 | 0.72 | 1.25 | 0.60 | 1.43 | 0.76 |
| 0.22 | 1.08 | 0.52 | 0.77 | 0.28 | 0.84 | 0.37 |
| 0.65 | 1.77 | 0.76 | 1.48 | 0.70 | 1.22 | 0.65 |
| #N/A | #N/A | #N/A | #N/A | #N/A | #N/A | #N/A |
| 0.95 | 2.51 | 0.96 | 2.61 | 0.96 | 1.82 | 0.89 |
| 0.31 | 0.95 | 0.45 | 0.83 | 0.32 | 0.82 | 0.35 |
| 0.66 | 1.41 | 0.70 | #N/A | #N/A | 1.57 | 0.81 |
| 0.93 | 2.36 | 0.94 | 2.11 | 0.89 | 3.02 | 0.99 |
| 0.96 | 2.30 | 0.93 | 2.49 | 0.94 | 2.02 | 0.93 |
| 0.08 | 0.39 | 0.07 | 0.62 | 0.17 | 0.42 | 0.05 |
| 0.87 | #N/A | #N/A | 1.82 | 0.83 | 1.57 | 0.82 |
| #N/A | 0.34 | 0.06 | #N/A | #N/A | 0.55 | 0.14 |
| 0.50 | 0.97 | 0.46 | 1.27 | 0.60 | 1.04 | 0.53 |

|      |      |      |      |      |      |      |
|------|------|------|------|------|------|------|
| 0.80 | #N/A | #N/A | #N/A | #N/A | 1.37 | 0.73 |
| 0.67 | 1.47 | 0.64 | 1.25 | 0.60 | 1.67 | 0.85 |
| 0.44 | 0.85 | 0.39 | 0.97 | 0.41 | #N/A | #N/A |
| #N/A | #N/A | #N/A | #N/A | #N/A | #N/A | #N/A |
| 0.71 | 1.76 | 0.77 | 1.41 | 0.67 | 0.94 | 0.46 |
| #N/A | #N/A | #N/A | #N/A | #N/A | #N/A | #N/A |
| 0.12 | #N/A | #N/A | #N/A | #N/A | 0.64 | 0.21 |
| 0.81 | 1.11 | 0.54 | 1.74 | 0.81 | #N/A | #N/A |
| 0.45 | #N/A | #N/A | #N/A | #N/A | 0.87 | 0.40 |
| 0.26 | 0.77 | 0.33 | 0.86 | 0.34 | 0.85 | 0.38 |
| 0.91 | 2.69 | 0.96 | 1.90 | 0.81 | 1.66 | 0.85 |
| 0.62 | 1.18 | 0.56 | 1.57 | 0.73 | 0.74 | 0.30 |
| #N/A | #N/A | #N/A | #N/A | #N/A | 2.15 | 0.95 |
| #N/A | #N/A | #N/A | #N/A | #N/A | #N/A | #N/A |
| 0.94 | #N/A | #N/A | 3.07 | 0.97 | 2.96 | 0.99 |
| 0.82 | 1.51 | 0.74 | 1.24 | 0.59 | 1.37 | 0.73 |
| 0.72 | 1.68 | 0.80 | 1.73 | 0.81 | 1.36 | 0.72 |
| 0.86 | #N/A | #N/A | #N/A | #N/A | #N/A | #N/A |
| #N/A | #N/A | #N/A | #N/A | #N/A | #N/A | #N/A |
| 0.90 | 2.56 | 0.95 | 2.10 | 0.89 | 2.27 | 0.96 |
| #N/A | 1.93 | 0.86 | 1.82 | 0.83 | 1.65 | 0.84 |
| 0.96 | 1.84 | 0.85 | 2.08 | 0.88 | #N/A | #N/A |
| 0.50 | 1.24 | 0.61 | #N/A | #N/A | #N/A | #N/A |
| 0.68 | 1.41 | 0.69 | 1.38 | 0.66 | 1.04 | 0.53 |
| 0.69 | 1.12 | 0.54 | 1.26 | 0.59 | 1.19 | 0.63 |
| #N/A | #N/A | #N/A | 1.30 | 0.61 | 1.58 | 0.82 |
| 0.96 | #N/A | #N/A | 2.48 | 0.95 | 1.77 | 0.88 |
| 0.08 | 0.68 | 0.26 | 0.54 | 0.12 | #N/A | #N/A |
| #N/A | #N/A | #N/A | #N/A | #N/A | 1.03 | 0.52 |
| 0.65 | 2.39 | 0.94 | 1.74 | 0.78 | 2.07 | 0.94 |
| #N/A | #N/A | #N/A | #N/A | #N/A | #N/A | #N/A |
| #N/A | 0.93 | 0.43 | 1.45 | 0.70 | 0.94 | 0.45 |
| #N/A | 1.34 | 0.66 | 1.26 | 0.60 | 1.15 | 0.60 |
| 0.80 | 1.81 | 0.83 | #N/A | #N/A | #N/A | #N/A |
| #N/A | 0.50 | 0.15 | 0.50 | 0.09 | 0.57 | 0.15 |
| #N/A | #N/A | #N/A | #N/A | #N/A | #N/A | #N/A |
| 0.72 | 1.30 | 0.65 | 1.74 | 0.81 | 1.32 | 0.70 |
| #N/A | #N/A | #N/A | #N/A | #N/A | #N/A | #N/A |
| 0.77 | 1.68 | 0.81 | 1.31 | 0.63 | 1.45 | 0.77 |
| 0.44 | 1.04 | 0.50 | 1.27 | 0.59 | 1.61 | 0.83 |
| 0.53 | #N/A | #N/A | #N/A | #N/A | #N/A | #N/A |
| 0.58 | 1.46 | 0.70 | 0.92 | 0.39 | 0.58 | 0.16 |
| #N/A | #N/A | #N/A | #N/A | #N/A | #N/A | #N/A |
| 0.93 | 2.55 | 0.96 | 2.16 | 0.90 | 2.19 | 0.95 |
| 0.59 | 1.23 | 0.61 | 0.98 | 0.43 | 1.01 | 0.51 |
| #N/A | #N/A | #N/A | #N/A | #N/A | #N/A | #N/A |
| #N/A | 1.56 | 0.67 | #N/A | #N/A | 1.21 | 0.64 |
| 0.77 | 1.32 | 0.66 | 1.49 | 0.71 | 1.43 | 0.76 |
| 0.91 | 1.92 | 0.87 | 1.98 | 0.87 | 2.07 | 0.94 |
| 0.59 | 0.82 | 0.36 | 0.85 | 0.34 | 0.95 | 0.46 |
| 0.72 | 1.20 | 0.59 | 0.99 | 0.44 | 1.18 | 0.62 |



|      |      |      |      |      |      |      |
|------|------|------|------|------|------|------|
| #N/A | 0.58 | 0.20 | 0.65 | 0.19 | 0.57 | 0.15 |
| 0.71 | #N/A | #N/A | 1.47 | 0.70 | #N/A | #N/A |
| 0.72 | 1.47 | 0.73 | 1.81 | 0.83 | 1.39 | 0.74 |
| 0.93 | #N/A | #N/A | #N/A | #N/A | #N/A | #N/A |
| 0.85 | 2.85 | 0.96 | 2.03 | 0.88 | 2.02 | 0.93 |
| 0.63 | 1.28 | 0.64 | 1.31 | 0.63 | 1.07 | 0.55 |
| #N/A | #N/A | #N/A | #N/A | #N/A | 0.49 | 0.10 |
| 0.65 | 1.64 | 0.79 | 1.30 | 0.62 | 1.52 | 0.80 |
| #N/A | 1.17 | 0.57 | 0.37 | 0.05 | 0.92 | 0.43 |
| 0.18 | 0.93 | 0.43 | 0.40 | 0.04 | 1.01 | 0.51 |
| #N/A | #N/A | #N/A | #N/A | #N/A | #N/A | #N/A |
| 0.46 | 1.15 | 0.57 | 0.83 | 0.32 | 1.12 | 0.59 |
| 0.36 | #N/A | #N/A | 0.91 | 0.37 | 1.07 | 0.56 |
| 0.38 | 1.10 | 0.54 | 0.64 | 0.19 | 1.01 | 0.51 |
| #N/A | #N/A | #N/A | #N/A | #N/A | 1.00 | 0.50 |
| 0.26 | 1.25 | 0.62 | 0.80 | 0.30 | #N/A | #N/A |
| 0.66 | 1.14 | 0.56 | 1.43 | 0.68 | 1.16 | 0.61 |
| #N/A | #N/A | #N/A | #N/A | #N/A | #N/A | #N/A |
| 0.37 | 1.43 | 0.71 | 0.53 | 0.11 | 1.10 | 0.57 |
| 0.30 | 0.90 | 0.41 | 0.51 | 0.10 | 0.88 | 0.41 |
| 0.49 | 1.07 | 0.52 | 1.10 | 0.51 | 1.23 | 0.65 |
| 0.95 | 1.98 | 0.87 | 1.89 | 0.86 | 2.35 | 0.96 |
| 0.07 | #N/A | #N/A | #N/A | #N/A | 1.24 | 0.66 |
| 0.48 | 0.72 | 0.30 | 0.82 | 0.32 | 0.68 | 0.24 |
| 0.01 | 0.38 | 0.07 | #N/A | #N/A | 0.39 | 0.04 |
| 0.09 | 0.52 | 0.16 | 0.43 | 0.06 | 0.66 | 0.23 |
| 0.37 | 0.92 | 0.43 | 1.01 | 0.44 | 0.81 | 0.35 |
| 0.09 | 0.40 | 0.08 | 0.36 | 0.04 | 0.43 | 0.06 |
| 0.51 | 1.11 | 0.54 | 1.13 | 0.52 | 1.00 | 0.50 |
| 0.24 | 0.53 | 0.17 | 0.80 | 0.30 | 0.69 | 0.25 |
| 0.03 | 0.36 | 0.06 | 0.35 | 0.03 | 0.39 | 0.04 |
| 0.15 | 0.69 | 0.28 | 1.04 | 0.46 | 0.89 | 0.41 |
| #N/A | #N/A | #N/A | #N/A | #N/A | 0.71 | 0.27 |
| 0.10 | 0.45 | 0.11 | #N/A | #N/A | 0.91 | 0.43 |
| 0.85 | 1.74 | 0.82 | 1.66 | 0.78 | 1.60 | 0.82 |
| 0.82 | 1.47 | 0.73 | 1.62 | 0.77 | 1.40 | 0.74 |
| #N/A | #N/A | #N/A | #N/A | #N/A | #N/A | #N/A |
| #N/A | #N/A | #N/A | 1.69 | 0.78 | 1.05 | 0.54 |
| #N/A | #N/A | #N/A | 2.11 | 0.86 | 1.86 | 0.90 |
| 0.52 | 0.93 | 0.43 | 1.32 | 0.61 | 1.03 | 0.52 |
| 0.57 | 1.38 | 0.69 | 1.25 | 0.59 | 1.22 | 0.64 |
| 0.58 | 1.01 | 0.48 | 1.24 | 0.59 | 0.85 | 0.38 |
| 0.61 | 1.32 | 0.66 | 1.21 | 0.58 | 0.84 | 0.37 |
| 0.09 | 0.44 | 0.11 | 0.53 | 0.12 | 0.56 | 0.14 |
| #N/A | 0.26 | 0.02 | 0.35 | 0.02 | 0.30 | 0.02 |
| 0.20 | 0.70 | 0.28 | #N/A | #N/A | #N/A | #N/A |
| 0.43 | 0.75 | 0.31 | 0.75 | 0.26 | 0.96 | 0.47 |
| 0.82 | 1.62 | 0.78 | 1.36 | 0.58 | 0.39 | 0.04 |
| 0.96 | 1.77 | 0.78 | #N/A | #N/A | 1.56 | 0.81 |
| 0.54 | #N/A | #N/A | 1.21 | 0.56 | #N/A | #N/A |
| 0.18 | 0.70 | 0.28 | 0.63 | 0.18 | 0.86 | 0.39 |

|      |      |      |      |      |      |      |
|------|------|------|------|------|------|------|
| 0.18 | 0.38 | 0.07 | #N/A | #N/A | 0.42 | 0.05 |
| 0.76 | 1.64 | 0.78 | 1.38 | 0.66 | 1.59 | 0.82 |
| 0.42 | 1.05 | 0.50 | 1.02 | 0.45 | 0.74 | 0.30 |
| 0.08 | 0.44 | 0.11 | #N/A | #N/A | 0.45 | 0.07 |
| #N/A | #N/A | #N/A | 2.25 | 0.92 | 2.43 | 0.97 |
| #N/A | #N/A | #N/A | #N/A | #N/A | #N/A | #N/A |
| 0.39 | 0.96 | 0.45 | 0.99 | 0.43 | 1.03 | 0.53 |
| 0.42 | 1.10 | 0.53 | 0.72 | 0.24 | 1.13 | 0.59 |
| 0.52 | #N/A | #N/A | 0.76 | 0.27 | 0.81 | 0.35 |
| 0.61 | 1.27 | 0.62 | 1.54 | 0.73 | 1.44 | 0.76 |
| 0.96 | 5.71 | 0.99 | 3.00 | 0.98 | 0.18 | 0.00 |
| 0.96 | 2.31 | 0.92 | 1.98 | 0.87 | 2.62 | 0.98 |
| 0.61 | 1.10 | 0.53 | 1.42 | 0.68 | 1.38 | 0.73 |
| 0.94 | 1.94 | 0.86 | 1.77 | 0.82 | 1.92 | 0.91 |
| 0.92 | 2.27 | 0.93 | 2.22 | 0.91 | 2.32 | 0.96 |
| #N/A | 1.71 | 0.82 | 1.62 | 0.77 | 1.58 | 0.82 |
| 0.79 | #N/A | #N/A | 2.40 | 0.87 | 2.10 | 0.94 |
| 0.78 | 1.30 | 0.65 | #N/A | #N/A | 1.32 | 0.70 |
| #N/A | #N/A | #N/A | #N/A | #N/A | #N/A | #N/A |
| 0.43 | #N/A | #N/A | 1.01 | 0.45 | 0.79 | 0.33 |
| 0.88 | 3.31 | 0.87 | 2.19 | 0.91 | 1.75 | 0.87 |
| 0.73 | 1.54 | 0.73 | 1.41 | 0.55 | 1.16 | 0.61 |
| 0.18 | 0.52 | 0.16 | 0.59 | 0.15 | 0.87 | 0.39 |
| 0.19 | 0.79 | 0.35 | 0.86 | 0.34 | 0.71 | 0.27 |
| 0.05 | 0.41 | 0.09 | 0.52 | 0.11 | 0.28 | 0.01 |
| 0.61 | 1.00 | 0.48 | 1.12 | 0.52 | 1.18 | 0.62 |
| #N/A | #N/A | #N/A | #N/A | #N/A | 0.49 | 0.09 |
| 0.73 | 1.37 | 0.68 | 1.36 | 0.66 | 1.65 | 0.84 |
| 0.96 | 2.86 | 0.98 | 2.01 | 0.87 | 2.33 | 0.96 |
| 0.87 | #N/A | #N/A | 1.00 | 0.44 | 1.37 | 0.73 |
| 0.94 | 2.11 | 0.90 | 1.93 | 0.86 | 1.92 | 0.91 |
| #N/A | #N/A | #N/A | 2.73 | 0.97 | 1.78 | 0.88 |
| 0.99 | #N/A | #N/A | 2.74 | 0.97 | 3.16 | 0.99 |
| #N/A | #N/A | #N/A | #N/A | #N/A | #N/A | #N/A |
| 0.95 | 2.40 | 0.94 | 2.84 | 0.96 | 2.21 | 0.95 |
| #N/A | #N/A | #N/A | #N/A | #N/A | #N/A | #N/A |
| 0.98 | 3.83 | 1.00 | 3.13 | 0.98 | 3.26 | 0.99 |
| 0.60 | 1.45 | 0.72 | 1.37 | 0.66 | 0.93 | 0.44 |
| #N/A | #N/A | #N/A | #N/A | #N/A | 1.20 | 0.64 |
| 0.52 | 1.62 | 0.79 | 0.88 | 0.35 | #N/A | #N/A |
| 0.27 | 0.57 | 0.19 | 0.77 | 0.27 | #N/A | #N/A |
| 0.80 | 1.74 | 0.83 | 1.64 | 0.78 | 1.44 | 0.76 |
| 0.81 | 1.50 | 0.72 | 1.80 | 0.82 | 2.90 | 0.99 |
| 0.84 | 2.19 | 0.92 | 2.01 | 0.86 | 1.45 | 0.77 |
| 0.54 | #N/A | #N/A | 1.36 | 0.65 | 1.04 | 0.53 |
| 0.83 | 1.51 | 0.74 | 1.94 | 0.87 | 1.52 | 0.79 |
| #N/A | #N/A | #N/A | #N/A | #N/A | #N/A | #N/A |
| #N/A | 1.62 | 0.78 | 1.64 | 0.77 | 1.50 | 0.79 |
| 0.80 | 1.53 | 0.75 | 1.91 | 0.86 | 1.50 | 0.79 |
| 0.22 | 0.37 | 0.06 | 0.59 | 0.15 | 0.52 | 0.11 |
| 0.84 | 1.86 | 0.86 | 1.85 | 0.83 | 1.62 | 0.84 |



|      |      |      |      |      |      |      |
|------|------|------|------|------|------|------|
| 0.48 | 0.96 | 0.45 | 1.07 | 0.48 | 0.83 | 0.36 |
| 0.45 | 1.13 | 0.56 | 0.62 | 0.17 | 1.07 | 0.55 |
| 0.62 | 1.51 | 0.74 | 0.79 | 0.29 | 1.04 | 0.53 |
| 0.91 | 1.60 | 0.78 | 1.94 | 0.86 | 1.36 | 0.72 |
| #N/A | 0.67 | 0.26 | 0.92 | 0.38 | 0.83 | 0.37 |
| 0.57 | 1.85 | 0.85 | 1.51 | 0.72 | 1.17 | 0.61 |
| 0.73 | 1.44 | 0.72 | 1.51 | 0.72 | 1.31 | 0.70 |
| 0.54 | 0.84 | 0.38 | 1.07 | 0.49 | 0.98 | 0.49 |
| 0.52 | 0.95 | 0.45 | #N/A | #N/A | 1.10 | 0.57 |
| 0.56 | 0.56 | 0.19 | 0.93 | 0.39 | 1.05 | 0.54 |
| 0.64 | 1.94 | 0.85 | 1.35 | 0.65 | #N/A | #N/A |
| 0.47 | 0.53 | 0.16 | 0.73 | 0.25 | 1.01 | 0.51 |
| 0.31 | 0.97 | 0.46 | 0.66 | 0.20 | 0.65 | 0.22 |
| 0.47 | 0.76 | 0.32 | 0.78 | 0.28 | 0.60 | 0.18 |
| #N/A | 0.69 | 0.28 | 0.79 | 0.29 | 0.64 | 0.21 |
| 0.25 | 0.82 | 0.36 | 0.74 | 0.26 | 0.57 | 0.15 |
| 0.97 | 3.18 | 0.98 | 3.12 | 0.97 | 2.76 | 0.98 |
| #N/A | 1.27 | 0.63 | 0.94 | 0.40 | 0.88 | 0.40 |
| 0.57 | 1.13 | 0.55 | 1.13 | 0.53 | 1.27 | 0.67 |
| #N/A | #N/A | #N/A | #N/A | #N/A | 1.70 | 0.86 |
| 0.16 | 0.50 | 0.14 | 0.63 | 0.19 | 0.75 | 0.31 |
| 0.28 | 0.88 | 0.40 | 1.24 | 0.55 | 0.93 | 0.45 |
| #N/A | #N/A | #N/A | #N/A | #N/A | #N/A | #N/A |
| 0.39 | 1.42 | 0.71 | 0.55 | 0.13 | 1.17 | 0.61 |
| #N/A | #N/A | #N/A | 2.10 | 0.90 | 0.71 | 0.27 |
| 0.38 | 0.89 | 0.41 | 1.09 | 0.50 | 0.84 | 0.37 |
| 0.18 | 0.71 | 0.29 | 0.69 | 0.22 | 0.51 | 0.11 |
| 0.47 | 0.94 | 0.44 | 1.25 | 0.60 | #N/A | #N/A |
| 0.72 | 1.84 | 0.80 | 1.73 | 0.81 | 1.53 | 0.80 |
| 0.08 | #N/A | #N/A | #N/A | #N/A | 0.55 | 0.14 |
| 0.22 | 0.64 | 0.24 | 0.66 | 0.20 | 0.71 | 0.27 |
| #N/A | #N/A | #N/A | #N/A | #N/A | #N/A | #N/A |
| #N/A | #N/A | #N/A | #N/A | #N/A | #N/A | #N/A |
| 0.79 | 1.90 | 0.87 | 1.44 | 0.69 | 1.67 | 0.85 |
| #N/A | 1.45 | 0.72 | #N/A | #N/A | 1.41 | 0.75 |
| 0.91 | 1.84 | 0.85 | 2.14 | 0.90 | 1.82 | 0.89 |
| 0.58 | #N/A | #N/A | 1.45 | 0.69 | 1.10 | 0.57 |
| 0.05 | 0.22 | 0.01 | #N/A | #N/A | 0.57 | 0.15 |
| 0.80 | 1.92 | 0.87 | 1.82 | 0.83 | 2.20 | 0.95 |
| 0.44 | 1.00 | 0.48 | 1.35 | 0.65 | 0.85 | 0.38 |
| #N/A | #N/A | #N/A | #N/A | #N/A | #N/A | #N/A |
| 0.61 | 1.16 | 0.58 | 1.11 | 0.50 | 0.89 | 0.41 |
| 0.23 | 0.70 | 0.28 | 0.82 | 0.32 | 1.03 | 0.53 |
| 0.80 | 1.51 | 0.74 | 1.70 | 0.80 | 1.51 | 0.79 |
| 0.55 | 1.25 | 0.62 | 1.91 | 0.86 | 1.72 | 0.87 |
| 0.97 | #N/A | #N/A | 2.77 | 0.97 | 1.74 | 0.87 |
| 0.20 | 0.36 | 0.06 | #N/A | #N/A | 0.46 | 0.08 |
| 0.86 | 1.63 | 0.78 | 1.52 | 0.73 | 1.26 | 0.67 |
| #N/A | 1.56 | 0.73 | #N/A | #N/A | 1.00 | 0.50 |
| 0.87 | #N/A | #N/A | #N/A | #N/A | #N/A | #N/A |
| 0.48 | 1.05 | 0.51 | 1.01 | 0.45 | 0.85 | 0.38 |

|      |      |      |      |      |      |      |
|------|------|------|------|------|------|------|
| #N/A | 0.83 | 0.37 | 1.08 | 0.49 | 0.84 | 0.37 |
| 0.27 | 0.97 | 0.46 | 1.10 | 0.51 | 0.88 | 0.41 |
| 0.06 | 0.40 | 0.08 | 0.53 | 0.11 | 0.40 | 0.04 |
| 0.89 | 1.87 | 0.86 | 2.13 | 0.90 | #N/A | #N/A |
| 0.34 | #N/A | #N/A | 0.91 | 0.38 | #N/A | #N/A |
| #N/A | #N/A | #N/A | #N/A | #N/A | #N/A | #N/A |
| 0.56 | 1.28 | 0.64 | 1.27 | 0.60 | 1.32 | 0.70 |
| #N/A | 1.49 | 0.74 | 1.25 | 0.60 | 1.21 | 0.64 |
| #N/A | #N/A | #N/A | #N/A | #N/A | #N/A | #N/A |
| 0.50 | 1.04 | 0.50 | 0.90 | 0.37 | 1.08 | 0.56 |
| 0.10 | 0.45 | 0.12 | 0.62 | 0.17 | 0.84 | 0.38 |
| 0.13 | 0.45 | 0.11 | 0.66 | 0.20 | 0.58 | 0.16 |
| #N/A | #N/A | #N/A | #N/A | #N/A | #N/A | #N/A |
| 0.65 | 1.39 | 0.68 | #N/A | #N/A | 1.62 | 0.83 |
| 0.52 | 1.14 | 0.56 | 1.54 | 0.73 | 1.18 | 0.62 |
| #N/A | 1.46 | 0.72 | 1.50 | 0.71 | 1.42 | 0.75 |
| 0.16 | 0.62 | 0.23 | 0.80 | 0.30 | 0.53 | 0.12 |
| 0.43 | 1.01 | 0.48 | 1.03 | 0.46 | 0.81 | 0.35 |
| #N/A | #N/A | #N/A | #N/A | #N/A | #N/A | #N/A |
| 0.89 | 2.17 | 0.91 | 2.39 | 0.94 | 2.11 | 0.94 |
| 0.53 | 0.80 | 0.35 | 0.94 | 0.40 | 0.73 | 0.29 |
| 0.83 | 1.89 | 0.85 | 1.65 | 0.77 | 1.60 | 0.83 |
| #N/A | #N/A | #N/A | #N/A | #N/A | #N/A | #N/A |
| 0.13 | 0.46 | 0.12 | 0.60 | 0.16 | 0.42 | 0.05 |
| 0.33 | 0.77 | 0.32 | 1.12 | 0.50 | 0.76 | 0.31 |
| #N/A | #N/A | #N/A | #N/A | #N/A | #N/A | #N/A |
| #N/A | #N/A | #N/A | 1.58 | 0.75 | 1.39 | 0.74 |
| #N/A | #N/A | #N/A | #N/A | #N/A | #N/A | #N/A |
| 0.53 | 1.45 | 0.70 | 1.17 | 0.55 | 1.54 | 0.80 |
| 0.51 | #N/A | #N/A | 0.81 | 0.31 | 0.77 | 0.32 |
| #N/A | #N/A | #N/A | #N/A | #N/A | #N/A | #N/A |
| #N/A | #N/A | #N/A | #N/A | #N/A | #N/A | #N/A |
| #N/A | #N/A | #N/A | #N/A | #N/A | #N/A | #N/A |
| 0.89 | 2.14 | 0.91 | 2.13 | 0.90 | 1.62 | 0.83 |
| #N/A | #N/A | #N/A | #N/A | #N/A | #N/A | #N/A |
| 0.14 | 0.34 | 0.05 | 0.53 | 0.11 | 0.57 | 0.16 |
| 0.75 | 1.35 | 0.67 | 1.36 | 0.65 | 1.19 | 0.63 |
| 0.87 | 1.61 | 0.77 | 1.98 | 0.88 | 1.89 | 0.90 |
| 0.97 | 3.18 | 0.98 | 2.42 | 0.92 | 2.79 | 0.99 |
| 0.63 | #N/A | #N/A | #N/A | #N/A | #N/A | #N/A |
| 0.47 | 0.96 | 0.46 | 1.04 | 0.47 | 0.60 | 0.18 |
| 0.07 | 0.10 | 0.00 | #N/A | #N/A | 0.42 | 0.05 |
| 0.01 | 0.17 | 0.01 | 0.28 | 0.01 | 0.20 | 0.00 |
| 0.12 | 0.27 | 0.03 | 0.46 | 0.07 | 0.28 | 0.01 |
| 0.89 | 1.48 | 0.73 | 1.76 | 0.82 | 1.61 | 0.83 |
| 0.79 | 1.81 | 0.84 | 1.53 | 0.72 | 1.63 | 0.84 |
| 0.96 | 2.21 | 0.92 | 2.80 | 0.97 | 1.92 | 0.91 |
| 0.73 | #N/A | #N/A | #N/A | #N/A | #N/A | #N/A |
| #N/A | #N/A | #N/A | #N/A | #N/A | #N/A | #N/A |
| 0.78 | 1.49 | 0.74 | 1.39 | 0.67 | 1.76 | 0.87 |
| 0.46 | 1.36 | 0.68 | 1.59 | 0.74 | 0.94 | 0.46 |

|      |      |      |      |      |      |      |
|------|------|------|------|------|------|------|
| #N/A | 0.78 | 0.34 | 1.30 | 0.62 | 0.89 | 0.41 |
| 0.97 | 2.90 | 0.98 | 2.36 | 0.92 | 1.97 | 0.92 |
| #N/A | #N/A | #N/A | #N/A | #N/A | #N/A | #N/A |
| 0.50 | 1.15 | 0.56 | 1.17 | 0.55 | 1.07 | 0.55 |
| #N/A | 1.33 | 0.66 | 1.84 | 0.78 | 1.42 | 0.75 |
| 0.22 | 0.73 | 0.31 | #N/A | #N/A | 0.74 | 0.29 |
| #N/A | 1.38 | 0.69 | #N/A | #N/A | 1.31 | 0.70 |
| 0.79 | #N/A | #N/A | #N/A | #N/A | #N/A | #N/A |
| #N/A | #N/A | #N/A | #N/A | #N/A | 0.50 | 0.10 |
| 0.90 | 1.89 | 0.86 | 1.86 | 0.85 | 2.19 | 0.95 |
| #N/A | #N/A | #N/A | #N/A | #N/A | 0.99 | 0.49 |
| 0.96 | 3.12 | 0.98 | 2.50 | 0.95 | 2.22 | 0.95 |
| #N/A | #N/A | #N/A | #N/A | #N/A | 0.40 | 0.05 |
| #N/A | 1.71 | 0.80 | 1.00 | 0.43 | 1.68 | 0.86 |
| 0.51 | #N/A | #N/A | 1.01 | 0.45 | 0.90 | 0.42 |
| 0.30 | 0.63 | 0.24 | 1.36 | 0.65 | 0.87 | 0.40 |
| 0.78 | #N/A | #N/A | 1.53 | 0.70 | 0.94 | 0.45 |
| #N/A | #N/A | #N/A | #N/A | #N/A | #N/A | #N/A |
| 0.91 | #N/A | #N/A | #N/A | #N/A | #N/A | #N/A |
| #N/A | #N/A | #N/A | #N/A | #N/A | #N/A | #N/A |
| 0.85 | 1.71 | 0.81 | 1.93 | 0.86 | 1.66 | 0.85 |
| #N/A | #N/A | #N/A | #N/A | #N/A | #N/A | #N/A |
| 0.51 | 2.37 | 0.92 | 2.21 | 0.90 | 1.73 | 0.87 |
| 0.50 | 0.96 | 0.45 | 1.07 | 0.49 | 1.06 | 0.55 |
| 0.29 | 0.73 | 0.30 | 0.81 | 0.30 | 0.98 | 0.49 |
| 0.90 | 1.88 | 0.86 | 2.58 | 0.96 | 2.61 | 0.98 |
| #N/A | #N/A | #N/A | #N/A | #N/A | #N/A | #N/A |
| 0.58 | 1.11 | 0.54 | 0.87 | 0.35 | 1.13 | 0.59 |
| 0.87 | #N/A | #N/A | 1.73 | 0.80 | 1.67 | 0.85 |
| 0.20 | 0.59 | 0.21 | 0.49 | 0.09 | 0.48 | 0.09 |
| 0.51 | 0.95 | 0.45 | 0.75 | 0.26 | 0.82 | 0.36 |
| 0.28 | 0.84 | 0.38 | #N/A | #N/A | 0.66 | 0.22 |
| 0.20 | 0.70 | 0.28 | 0.72 | 0.24 | 0.55 | 0.14 |
| 0.26 | 0.77 | 0.33 | 0.92 | 0.38 | 0.94 | 0.45 |
| #N/A | 1.36 | 0.68 | 1.70 | 0.64 | 1.17 | 0.62 |
| 0.18 | 0.50 | 0.15 | 0.42 | 0.05 | 0.53 | 0.12 |
| 0.62 | #N/A | #N/A | #N/A | #N/A | 1.24 | 0.66 |
| 0.19 | 0.64 | 0.25 | 0.77 | 0.28 | 0.71 | 0.27 |
| 0.86 | 2.11 | 0.91 | 1.11 | 0.51 | 1.18 | 0.63 |
| 0.52 | 1.07 | 0.52 | 1.06 | 0.47 | 1.15 | 0.60 |
| 0.27 | #N/A | #N/A | 0.80 | 0.30 | 0.88 | 0.40 |
| 0.11 | #N/A | #N/A | #N/A | #N/A | #N/A | #N/A |
| 0.05 | 0.26 | 0.02 | 0.39 | 0.04 | 0.42 | 0.05 |
| 0.47 | 1.09 | 0.53 | 0.95 | 0.41 | 1.10 | 0.57 |
| 0.08 | 0.63 | 0.23 | 0.68 | 0.21 | 0.59 | 0.17 |
| 0.38 | 0.98 | 0.46 | 0.86 | 0.34 | 0.82 | 0.35 |
| 0.06 | 0.34 | 0.06 | 0.38 | 0.04 | 0.53 | 0.12 |
| 0.79 | 1.67 | 0.80 | 1.40 | 0.68 | 1.35 | 0.72 |
| 0.35 | #N/A | #N/A | 0.65 | 0.20 | #N/A | #N/A |
| 0.94 | 2.64 | 0.96 | 2.68 | 0.96 | 2.02 | 0.93 |
| 0.95 | 2.79 | 0.97 | 2.44 | 0.94 | 2.45 | 0.97 |

|      |      |      |      |      |      |      |
|------|------|------|------|------|------|------|
| #N/A | 0.48 | 0.14 | 0.49 | 0.09 | #N/A | #N/A |
| 0.45 | 1.06 | 0.50 | #N/A | #N/A | 0.82 | 0.36 |
| 0.86 | 1.80 | 0.84 | 1.46 | 0.70 | 1.28 | 0.68 |
| #N/A | #N/A | #N/A | #N/A | #N/A | #N/A | #N/A |
| 0.78 | 1.76 | 0.83 | 1.85 | 0.84 | 1.84 | 0.90 |
| #N/A | 2.52 | 0.96 | #N/A | #N/A | 2.11 | 0.94 |
| #N/A | #N/A | #N/A | #N/A | #N/A | #N/A | #N/A |
| 0.07 | #N/A | #N/A | #N/A | #N/A | #N/A | #N/A |
| 0.62 | 1.09 | 0.53 | 1.39 | 0.67 | 0.97 | 0.48 |
| 0.27 | 0.80 | 0.35 | 0.80 | 0.30 | 0.84 | 0.37 |
| #N/A | #N/A | #N/A | #N/A | #N/A | 0.14 | 0.00 |
| 0.31 | #N/A | #N/A | 0.82 | 0.31 | 0.81 | 0.35 |
| 0.61 | #N/A | #N/A | 2.09 | 0.84 | 1.45 | 0.77 |
| 0.71 | 1.73 | 0.82 | 1.91 | 0.86 | 1.08 | 0.56 |
| #N/A | #N/A | #N/A | #N/A | #N/A | 0.63 | 0.20 |
| 0.62 | 1.12 | 0.55 | 1.74 | 0.81 | #N/A | #N/A |
| 0.33 | 0.54 | 0.17 | 0.93 | 0.39 | 0.59 | 0.17 |
| 0.61 | 1.25 | 0.62 | 1.12 | 0.52 | 1.25 | 0.67 |
| #N/A | #N/A | #N/A | #N/A | #N/A | #N/A | #N/A |
| 0.72 | 1.62 | 0.79 | 1.50 | 0.72 | 1.97 | 0.92 |
| 0.16 | #N/A | #N/A | 0.65 | 0.19 | 0.69 | 0.25 |
| 0.83 | 1.69 | 0.81 | 1.65 | 0.77 | 1.38 | 0.74 |
| #N/A | #N/A | #N/A | #N/A | #N/A | #N/A | #N/A |
| 0.55 | 0.99 | 0.47 | #N/A | #N/A | 1.32 | 0.70 |
| 0.79 | 1.74 | 0.83 | 1.95 | 0.86 | 1.26 | 0.67 |
| 0.36 | #N/A | #N/A | 1.19 | 0.55 | 0.84 | 0.37 |
| 0.37 | 0.77 | 0.33 | 0.88 | 0.36 | 0.89 | 0.41 |
| 0.53 | 1.08 | 0.52 | 1.01 | 0.44 | 1.26 | 0.67 |
| #N/A | 0.46 | 0.12 | 0.52 | 0.11 | 0.67 | 0.23 |
| 0.05 | 0.30 | 0.03 | 0.45 | 0.07 | 0.38 | 0.04 |
| #N/A | 0.24 | 0.02 | 0.58 | 0.14 | 0.56 | 0.14 |
| 0.99 | 2.96 | 0.98 | 3.59 | 0.99 | 3.17 | 0.99 |
| 0.82 | 1.88 | 0.85 | 1.70 | 0.80 | 2.09 | 0.94 |
| #N/A | #N/A | #N/A | #N/A | #N/A | #N/A | #N/A |
| 0.91 | 2.30 | 0.93 | 1.99 | 0.88 | 4.12 | 1.00 |
| #N/A | 0.46 | 0.13 | 0.71 | 0.23 | 0.27 | 0.01 |
| 0.07 | 0.32 | 0.05 | 0.47 | 0.08 | 0.39 | 0.04 |
| 0.47 | #N/A | #N/A | 1.01 | 0.44 | 0.77 | 0.32 |
| 0.50 | 1.06 | 0.51 | 1.37 | 0.66 | 0.79 | 0.33 |
| 0.91 | 2.13 | 0.90 | 2.49 | 0.95 | 2.03 | 0.93 |
| 0.97 | 2.43 | 0.95 | 2.09 | 0.90 | 2.47 | 0.97 |
| 0.71 | 1.24 | 0.62 | 1.02 | 0.45 | 1.50 | 0.79 |
| 0.44 | 1.00 | 0.48 | 0.99 | 0.44 | 1.17 | 0.61 |
| 0.80 | #N/A | #N/A | #N/A | #N/A | 1.49 | 0.78 |
| 0.67 | 0.76 | 0.32 | 0.98 | 0.43 | 1.15 | 0.60 |
| 0.86 | 1.89 | 0.87 | 2.83 | 0.97 | 1.86 | 0.90 |
| 0.97 | 3.89 | 1.00 | 3.95 | 0.99 | 2.90 | 0.99 |
| 0.06 | #N/A | #N/A | #N/A | #N/A | 0.34 | 0.03 |
| 0.79 | 1.79 | 0.84 | 1.66 | 0.78 | 2.07 | 0.94 |
| #N/A | #N/A | #N/A | #N/A | #N/A | #N/A | #N/A |
| 0.60 | #N/A | #N/A | 1.31 | 0.61 | #N/A | #N/A |

|      |      |      |      |      |       |      |
|------|------|------|------|------|-------|------|
| 0.88 | #N/A | #N/A | #N/A | #N/A | 1.49  | 0.78 |
| 0.82 | #N/A | #N/A | 1.35 | 0.65 | 1.43  | 0.76 |
| 0.30 | 0.71 | 0.29 | 0.74 | 0.25 | 1.35  | 0.72 |
| 0.46 | 1.04 | 0.50 | 1.06 | 0.48 | 1.21  | 0.64 |
| 0.25 | 0.65 | 0.25 | 0.73 | 0.25 | 0.60  | 0.18 |
| 0.33 | 0.66 | 0.25 | 0.89 | 0.36 | 0.76  | 0.31 |
| #N/A | #N/A | #N/A | #N/A | #N/A | 0.44  | 0.07 |
| 0.86 | 1.99 | 0.88 | 1.97 | 0.87 | #N/A  | #N/A |
| 0.09 | 0.47 | 0.13 | 0.51 | 0.12 | 0.56  | 0.14 |
| 0.63 | 1.18 | 0.58 | 1.63 | 0.75 | 1.31  | 0.69 |
| #N/A | 1.10 | 0.54 | #N/A | #N/A | 0.84  | 0.37 |
| 0.79 | 2.04 | 0.88 | #N/A | #N/A | 1.84  | 0.90 |
| 0.36 | 0.74 | 0.31 | 0.71 | 0.23 | 0.76  | 0.31 |
| #N/A | 2.53 | 0.96 | 3.07 | 0.98 | 2.60  | 0.98 |
| 0.93 | 2.62 | 0.96 | #N/A | #N/A | 1.81  | 0.89 |
| #N/A | 2.45 | 0.95 | #N/A | #N/A | 2.76  | 0.98 |
| 0.52 | 1.36 | 0.68 | #N/A | #N/A | #N/A  | #N/A |
| 0.65 | 1.19 | 0.59 | 1.21 | 0.58 | 1.00  | 0.50 |
| #N/A | 0.37 | 0.07 | 0.54 | 0.12 | 0.55  | 0.14 |
| 1.00 | 4.20 | 1.00 | 3.39 | 0.97 | 2.12  | 0.94 |
| 0.59 | 0.89 | 0.41 | 1.62 | 0.76 | 1.11  | 0.58 |
| 0.73 | 1.32 | 0.66 | 1.92 | 0.86 | 1.50  | 0.79 |
| 0.44 | 0.80 | 0.35 | 1.06 | 0.48 | 0.99  | 0.49 |
| #N/A | 0.83 | 0.37 | #N/A | #N/A | 0.83  | 0.36 |
| 0.10 | 0.61 | 0.22 | #N/A | #N/A | 0.48  | 0.09 |
| 0.97 | 3.14 | 0.98 | 2.98 | 0.97 | #N/A  | #N/A |
| 0.82 | 1.29 | 0.62 | 2.48 | 0.85 | 1.89  | 0.90 |
| 0.73 | 1.35 | 0.67 | 1.42 | 0.68 | 1.32  | 0.70 |
| 0.93 | 2.27 | 0.93 | 1.63 | 0.78 | 1.39  | 0.74 |
| #N/A | 1.31 | 0.62 | #N/A | #N/A | #N/A  | #N/A |
| #N/A | #N/A | #N/A | #N/A | #N/A | #N/A  | #N/A |
| 0.93 | 2.23 | 0.89 | 1.78 | 0.82 | #N/A  | #N/A |
| 0.98 | #N/A | #N/A | #N/A | #N/A | 11.22 | 1.00 |
| 0.07 | 0.54 | 0.17 | 0.62 | 0.20 | 0.34  | 0.03 |
| 0.13 | 0.31 | 0.04 | 0.48 | 0.08 | #N/A  | #N/A |
| 0.67 | 1.29 | 0.64 | 1.56 | 0.73 | 1.37  | 0.73 |
| 0.95 | 2.20 | 0.92 | 2.23 | 0.92 | 2.70  | 0.98 |
| 0.47 | 0.97 | 0.46 | 1.03 | 0.45 | 1.07  | 0.56 |
| 0.50 | 1.04 | 0.50 | 0.98 | 0.42 | 1.11  | 0.57 |
| 0.46 | 1.31 | 0.65 | #N/A | #N/A | 1.10  | 0.57 |
| 0.30 | 0.76 | 0.32 | 0.85 | 0.33 | 0.80  | 0.34 |
| 0.77 | 2.21 | 0.92 | 2.40 | 0.94 | 1.46  | 0.77 |
| 0.72 | 1.41 | 0.69 | 1.33 | 0.64 | 1.51  | 0.79 |
| 0.56 | 1.37 | 0.68 | 1.35 | 0.65 | 1.00  | 0.50 |
| 0.76 | 1.88 | 0.85 | 1.84 | 0.83 | 1.47  | 0.77 |
| 0.22 | 0.49 | 0.14 | 0.63 | 0.18 | 0.55  | 0.14 |
| 0.73 | 1.09 | 0.53 | 1.57 | 0.74 | 1.44  | 0.77 |
| 0.56 | 1.21 | 0.60 | 1.59 | 0.76 | 1.26  | 0.67 |
| 0.33 | 0.83 | 0.37 | 1.34 | 0.64 | 0.74  | 0.30 |
| #N/A | #N/A | #N/A | #N/A | #N/A | #N/A  | #N/A |
| 0.32 | 0.71 | 0.29 | 0.54 | 0.12 | 0.68  | 0.25 |

|      |      |      |      |      |      |      |
|------|------|------|------|------|------|------|
| 0.20 | 0.57 | 0.20 | 0.60 | 0.16 | 0.62 | 0.19 |
| 0.23 | 1.06 | 0.51 | 0.84 | 0.33 | 0.78 | 0.33 |
| #N/A | #N/A | #N/A | #N/A | #N/A | #N/A | #N/A |
| 0.67 | 1.21 | 0.59 | 1.34 | 0.62 | 1.73 | 0.87 |
| 0.37 | 0.83 | 0.37 | 0.80 | 0.29 | 0.75 | 0.30 |
| 0.62 | 1.55 | 0.76 | 1.56 | 0.73 | 1.27 | 0.68 |
| 0.12 | 0.44 | 0.11 | 0.53 | 0.11 | 0.64 | 0.21 |
| 0.41 | 0.88 | 0.40 | 1.02 | 0.46 | 0.99 | 0.49 |
| #N/A | #N/A | #N/A | #N/A | #N/A | 1.17 | 0.62 |
| 0.56 | 1.34 | 0.67 | 1.08 | 0.48 | 0.91 | 0.42 |
| #N/A | 0.92 | 0.43 | 0.88 | 0.36 | 0.78 | 0.33 |
| 0.95 | 2.55 | 0.96 | 3.10 | 0.98 | #N/A | #N/A |
| 0.36 | 1.10 | 0.54 | 1.36 | 0.65 | #N/A | #N/A |
| 0.26 | #N/A | #N/A | #N/A | #N/A | 0.86 | 0.39 |
| 0.29 | 0.94 | 0.43 | 0.74 | 0.26 | 0.71 | 0.27 |
| 0.83 | 1.54 | 0.74 | 2.14 | 0.90 | #N/A | #N/A |
| #N/A | #N/A | #N/A | #N/A | #N/A | #N/A | #N/A |
| 0.39 | #N/A | #N/A | 1.30 | 0.60 | #N/A | #N/A |
| #N/A | #N/A | #N/A | #N/A | #N/A | #N/A | #N/A |
| #N/A | #N/A | #N/A | #N/A | #N/A | 0.33 | 0.02 |
| 0.78 | 1.21 | 0.60 | 1.72 | 0.80 | #N/A | #N/A |
| 0.71 | #N/A | #N/A | 1.55 | 0.74 | 1.39 | 0.74 |
| #N/A | #N/A | #N/A | #N/A | #N/A | #N/A | #N/A |
| 0.77 | 1.33 | 0.66 | 1.19 | 0.56 | 0.71 | 0.27 |
| 0.98 | 1.72 | 0.81 | #N/A | #N/A | 2.19 | 0.95 |
| 0.59 | 1.34 | 0.66 | 1.83 | 0.81 | 1.54 | 0.80 |
| 0.66 | 1.42 | 0.70 | 1.58 | 0.75 | 1.69 | 0.86 |
| 0.13 | 0.43 | 0.10 | 0.64 | 0.18 | 0.58 | 0.16 |
| #N/A | 0.58 | 0.20 | 0.61 | 0.16 | 0.48 | 0.09 |
| 0.72 | 1.43 | 0.70 | 1.44 | 0.69 | 1.45 | 0.77 |
| #N/A | #N/A | #N/A | #N/A | #N/A | 1.31 | 0.70 |
| 0.65 | 1.24 | 0.62 | 0.99 | 0.42 | 1.15 | 0.61 |
| #N/A | #N/A | #N/A | 0.37 | 0.04 | #N/A | #N/A |
| 0.80 | 1.82 | 0.85 | 1.57 | 0.73 | 1.72 | 0.87 |
| #N/A | 0.39 | 0.08 | #N/A | #N/A | 0.67 | 0.23 |
| 0.57 | 1.21 | 0.60 | 1.25 | 0.60 | 1.07 | 0.55 |
| 0.50 | 1.09 | 0.53 | 1.08 | 0.49 | 0.93 | 0.44 |
| 0.13 | 0.43 | 0.10 | 0.79 | 0.30 | 0.54 | 0.13 |
| 0.11 | 0.53 | 0.17 | 0.84 | 0.33 | 0.63 | 0.20 |
| 0.27 | 0.75 | 0.31 | 0.66 | 0.20 | 0.70 | 0.26 |
| 0.90 | 2.08 | 0.90 | 1.90 | 0.86 | 2.03 | 0.93 |
| 0.41 | 0.63 | 0.24 | 0.90 | 0.37 | 1.17 | 0.62 |
| 0.63 | 0.96 | 0.45 | 1.53 | 0.74 | 1.30 | 0.69 |
| 0.38 | #N/A | #N/A | #N/A | #N/A | 0.69 | 0.25 |
| #N/A | 0.30 | 0.04 | 0.52 | 0.11 | 0.49 | 0.10 |
| #N/A | 0.44 | 0.11 | #N/A | #N/A | 0.45 | 0.07 |
| 0.68 | 1.01 | 0.49 | 1.28 | 0.61 | 1.11 | 0.58 |
| #N/A | 1.04 | 0.50 | 1.18 | 0.55 | 1.11 | 0.58 |
| 0.33 | 0.93 | 0.44 | 0.72 | 0.24 | 0.88 | 0.40 |
| #N/A | #N/A | #N/A | #N/A | #N/A | #N/A | #N/A |
| 0.90 | #N/A | #N/A | 1.53 | 0.73 | 1.47 | 0.77 |

|      |      |      |      |      |      |      |
|------|------|------|------|------|------|------|
| #N/A | #N/A | #N/A | #N/A | #N/A | #N/A | #N/A |
| 0.37 | #N/A | #N/A | #N/A | #N/A | 0.89 | 0.41 |
| 0.07 | 0.42 | 0.10 | 0.51 | 0.10 | 0.51 | 0.11 |
| 0.57 | 1.05 | 0.50 | 1.06 | 0.48 | 0.72 | 0.28 |
| #N/A | 0.75 | 0.31 | 0.86 | 0.34 | 0.56 | 0.15 |
| 0.01 | 0.16 | 0.01 | 0.62 | 0.22 | 0.32 | 0.02 |
| #N/A | #N/A | #N/A | 1.12 | 0.51 | 0.85 | 0.38 |
| #N/A | #N/A | #N/A | #N/A | #N/A | #N/A | #N/A |
| 0.56 | 0.76 | 0.33 | 0.81 | 0.31 | 0.82 | 0.35 |
| 0.78 | 1.20 | 0.59 | #N/A | #N/A | 1.26 | 0.67 |
| 0.16 | 0.55 | 0.18 | 0.61 | 0.17 | 0.74 | 0.29 |
| 0.95 | 2.06 | 0.90 | 2.41 | 0.94 | 1.83 | 0.89 |
| 0.54 | 1.10 | 0.53 | 0.92 | 0.39 | 0.89 | 0.41 |
| 0.23 | 0.72 | 0.29 | #N/A | #N/A | 0.86 | 0.39 |
| 0.45 | 1.15 | 0.56 | 0.80 | 0.30 | 0.90 | 0.42 |
| 0.88 | 1.41 | 0.70 | 2.05 | 0.89 | 1.83 | 0.89 |
| #N/A | #N/A | #N/A | #N/A | #N/A | #N/A | #N/A |
| 0.01 | 0.20 | 0.01 | 0.19 | 0.00 | 0.20 | 0.00 |
| 0.21 | 0.49 | 0.13 | 0.61 | 0.17 | 0.51 | 0.11 |
| 0.79 | 1.62 | 0.78 | 1.70 | 0.77 | 1.13 | 0.59 |
| #N/A | 1.79 | 0.84 | #N/A | #N/A | 1.32 | 0.70 |
| 0.11 | #N/A | #N/A | #N/A | #N/A | 0.66 | 0.22 |
| 0.93 | 2.04 | 0.89 | 2.41 | 0.94 | 2.45 | 0.97 |
| #N/A | #N/A | #N/A | #N/A | #N/A | 0.88 | 0.40 |
| #N/A | #N/A | #N/A | #N/A | #N/A | #N/A | #N/A |
| #N/A | 1.60 | 0.77 | 1.51 | 0.72 | 0.93 | 0.44 |
| 0.28 | 0.84 | 0.38 | 0.69 | 0.22 | 0.65 | 0.21 |
| 0.26 | 1.02 | 0.49 | 0.88 | 0.36 | 0.84 | 0.37 |
| 0.83 | #N/A | #N/A | 2.49 | 0.95 | 1.34 | 0.71 |
| 0.44 | 0.83 | 0.37 | 1.21 | 0.56 | 0.89 | 0.41 |
| #N/A | 0.50 | 0.14 | 0.61 | 0.16 | 0.54 | 0.13 |
| 0.48 | 1.04 | 0.50 | 0.98 | 0.42 | 0.88 | 0.40 |
| 0.66 | 1.23 | 0.60 | 1.42 | 0.68 | 1.40 | 0.74 |
| 0.30 | 0.67 | 0.26 | 0.60 | 0.16 | 0.70 | 0.26 |
| 0.41 | 0.81 | 0.35 | 0.98 | 0.43 | 0.89 | 0.41 |
| #N/A | #N/A | #N/A | #N/A | #N/A | #N/A | #N/A |
| 0.45 | 1.05 | 0.51 | 1.45 | 0.70 | 1.52 | 0.80 |
| #N/A | 0.63 | 0.24 | #N/A | #N/A | #N/A | #N/A |
| 0.30 | 0.66 | 0.25 | 0.59 | 0.15 | #N/A | #N/A |
| 0.11 | #N/A | #N/A | #N/A | #N/A | 0.42 | 0.05 |
| 0.43 | 0.99 | 0.47 | 0.75 | 0.26 | 0.99 | 0.49 |
| #N/A | 1.04 | 0.51 | 1.08 | 0.50 | 1.13 | 0.59 |
| 0.71 | 1.34 | 0.67 | 1.67 | 0.74 | 1.34 | 0.71 |
| 0.95 | 2.42 | 0.95 | 2.07 | 0.89 | 1.91 | 0.91 |
| #N/A | #N/A | #N/A | #N/A | #N/A | 2.04 | 0.93 |
| 0.72 | 2.04 | 0.89 | 2.09 | 0.89 | 2.60 | 0.98 |
| 0.96 | 2.17 | 0.92 | 2.18 | 0.91 | 1.62 | 0.83 |
| 0.26 | 0.50 | 0.14 | #N/A | #N/A | #N/A | #N/A |
| 0.32 | 0.83 | 0.36 | 1.00 | 0.43 | 0.98 | 0.49 |
| 0.87 | 1.55 | 0.76 | 2.33 | 0.92 | 1.61 | 0.83 |
| #N/A | #N/A | #N/A | #N/A | #N/A | #N/A | #N/A |





|      |      |      |      |      |      |      |
|------|------|------|------|------|------|------|
| 0.26 | 0.68 | 0.27 | 0.54 | 0.13 | 0.71 | 0.27 |
| 0.07 | 0.49 | 0.14 | 0.46 | 0.07 | 0.47 | 0.08 |
| 0.81 | 1.49 | 0.74 | 1.63 | 0.77 | 1.44 | 0.76 |
| 0.76 | #N/A | #N/A | #N/A | #N/A | 1.55 | 0.81 |
| 0.85 | 1.66 | 0.76 | 1.36 | 0.65 | 1.52 | 0.80 |
| 0.29 | 0.99 | 0.47 | #N/A | #N/A | #N/A | #N/A |
| 0.57 | 1.39 | 0.69 | 1.24 | 0.59 | 1.47 | 0.78 |
| 0.68 | 1.80 | 0.84 | 2.13 | 0.91 | 1.55 | 0.81 |
| #N/A | #N/A | #N/A | #N/A | #N/A | #N/A | #N/A |
| 0.84 | #N/A | #N/A | 1.75 | 0.80 | 2.02 | 0.93 |
| 0.73 | 1.35 | 0.67 | 1.15 | 0.53 | #N/A | #N/A |
| 0.13 | 0.91 | 0.42 | 1.20 | 0.53 | 0.46 | 0.07 |
| #N/A | 0.99 | 0.45 | 1.57 | 0.69 | 1.11 | 0.58 |
| 0.28 | 0.97 | 0.46 | 0.91 | 0.38 | 0.57 | 0.16 |
| 0.18 | 0.61 | 0.22 | 0.57 | 0.13 | 0.84 | 0.37 |
| 0.48 | 1.07 | 0.51 | 1.57 | 0.74 | 1.12 | 0.58 |
| #N/A | #N/A | #N/A | #N/A | #N/A | #N/A | #N/A |
| 0.75 | 1.47 | 0.72 | 1.91 | 0.85 | 1.33 | 0.71 |
| #N/A | #N/A | #N/A | #N/A | #N/A | #N/A | #N/A |
| 0.54 | 1.26 | 0.62 | 1.20 | 0.57 | #N/A | #N/A |
| #N/A | #N/A | #N/A | #N/A | #N/A | #N/A | #N/A |
| 0.81 | 1.49 | 0.73 | 1.66 | 0.78 | 1.33 | 0.71 |
| 0.26 | #N/A | #N/A | 0.74 | 0.26 | 0.50 | 0.10 |
| #N/A | #N/A | #N/A | #N/A | #N/A | 1.32 | 0.70 |
| 0.91 | 2.20 | 0.92 | 2.30 | 0.89 | 1.37 | 0.73 |
| #N/A | #N/A | #N/A | #N/A | #N/A | #N/A | #N/A |
| 0.61 | #N/A | #N/A | 1.96 | 0.87 | #N/A | #N/A |
| #N/A | 2.30 | 0.94 | #N/A | #N/A | 3.52 | 1.00 |
| 0.82 | #N/A | #N/A | #N/A | #N/A | 1.67 | 0.85 |
| #N/A | #N/A | #N/A | #N/A | #N/A | #N/A | #N/A |
| 0.76 | 1.89 | 0.86 | 1.48 | 0.71 | 1.52 | 0.79 |
| 0.63 | 0.84 | 0.38 | 0.92 | 0.38 | 1.40 | 0.75 |
| #N/A | 1.68 | 0.80 | #N/A | #N/A | 2.63 | 0.98 |
| 0.55 | 1.45 | 0.71 | 1.11 | 0.52 | 1.57 | 0.81 |
| 0.51 | 0.80 | 0.35 | 1.14 | 0.53 | 0.78 | 0.32 |
| #N/A | 0.52 | 0.18 | 0.60 | 0.18 | 1.29 | 0.68 |
| 0.22 | 0.63 | 0.23 | 0.54 | 0.11 | 0.63 | 0.20 |
| 0.25 | 0.46 | 0.12 | 0.56 | 0.13 | 0.49 | 0.09 |
| 0.83 | #N/A | #N/A | 2.13 | 0.89 | #N/A | #N/A |
| 0.27 | 0.63 | 0.24 | 0.78 | 0.28 | 0.55 | 0.14 |
| #N/A | #N/A | #N/A | 0.99 | 0.44 | 1.48 | 0.78 |
| 0.16 | 0.57 | 0.19 | 0.62 | 0.17 | 0.55 | 0.13 |
| 0.71 | 1.28 | 0.63 | 1.05 | 0.47 | 0.83 | 0.36 |
| 0.48 | 0.95 | 0.45 | 0.95 | 0.40 | 1.02 | 0.52 |
| 0.16 | 0.53 | 0.17 | 0.35 | 0.03 | 0.77 | 0.32 |
| 0.12 | 0.49 | 0.14 | 0.52 | 0.11 | 0.54 | 0.13 |
| 0.65 | #N/A | #N/A | #N/A | #N/A | 1.15 | 0.60 |
| #N/A | #N/A | #N/A | #N/A | #N/A | #N/A | #N/A |
| 0.87 | 2.03 | 0.89 | 1.91 | 0.85 | 1.50 | 0.79 |
| #N/A | #N/A | #N/A | #N/A | #N/A | #N/A | #N/A |
| 0.28 | 1.08 | 0.53 | 1.04 | 0.47 | 1.30 | 0.69 |

|      |      |      |      |      |      |      |
|------|------|------|------|------|------|------|
| 0.06 | #N/A | #N/A | #N/A | #N/A | 0.56 | 0.15 |
| 0.05 | 0.41 | 0.08 | 0.54 | 0.12 | 0.38 | 0.04 |
| 0.61 | 1.35 | 0.67 | 1.41 | 0.68 | 0.93 | 0.44 |
| #N/A | #N/A | #N/A | #N/A | #N/A | 0.79 | 0.33 |
| 0.93 | 2.48 | 0.95 | 2.06 | 0.89 | 1.60 | 0.82 |
| 0.16 | 0.61 | 0.22 | 0.67 | 0.20 | 0.51 | 0.11 |
| 0.72 | 1.58 | 0.77 | 1.13 | 0.51 | 0.94 | 0.46 |
| 0.68 | 1.64 | 0.78 | 1.38 | 0.66 | 1.20 | 0.63 |
| #N/A | #N/A | #N/A | #N/A | #N/A | #N/A | #N/A |
| 0.60 | #N/A | #N/A | 1.39 | 0.64 | 0.77 | 0.32 |
| 0.44 | 0.79 | 0.34 | 0.79 | 0.30 | 0.57 | 0.15 |
| 0.47 | #N/A | #N/A | 1.03 | 0.46 | #N/A | #N/A |
| 0.43 | 0.90 | 0.41 | 0.90 | 0.37 | 0.90 | 0.42 |
| 0.16 | 0.50 | 0.15 | 0.60 | 0.15 | 0.53 | 0.12 |
| 0.37 | #N/A | #N/A | 0.81 | 0.31 | 0.80 | 0.34 |
| 0.50 | 1.13 | 0.56 | 1.32 | 0.63 | #N/A | #N/A |
| 0.36 | #N/A | #N/A | #N/A | #N/A | 0.52 | 0.12 |
| 0.53 | 1.21 | 0.58 | 1.18 | 0.50 | 1.03 | 0.53 |
| 0.81 | 2.05 | 0.90 | 1.79 | 0.83 | 1.89 | 0.90 |
| #N/A | #N/A | #N/A | #N/A | #N/A | #N/A | #N/A |
| 0.59 | 1.11 | 0.54 | 1.12 | 0.52 | 1.03 | 0.53 |
| 0.09 | 0.38 | 0.07 | 0.40 | 0.04 | 0.33 | 0.02 |
| 0.45 | 1.08 | 0.53 | 1.19 | 0.56 | 0.69 | 0.25 |
| 0.30 | 0.69 | 0.28 | 0.97 | 0.41 | 0.56 | 0.14 |
| 0.05 | 0.36 | 0.06 | 0.33 | 0.02 | 0.37 | 0.03 |
| 0.71 | #N/A | #N/A | 1.01 | 0.44 | 1.54 | 0.80 |
| 0.63 | 1.07 | 0.51 | 1.27 | 0.60 | 0.93 | 0.44 |
| 0.63 | 1.19 | 0.59 | 1.20 | 0.57 | 1.14 | 0.60 |
| 0.17 | #N/A | #N/A | 0.60 | 0.18 | 0.54 | 0.13 |
| 0.25 | 0.47 | 0.12 | 0.55 | 0.13 | 0.38 | 0.04 |
| 0.79 | 1.72 | 0.81 | 1.22 | 0.57 | 1.49 | 0.78 |
| #N/A | #N/A | #N/A | #N/A | #N/A | 0.29 | 0.01 |
| 0.64 | 1.87 | 0.78 | 1.62 | 0.77 | 1.55 | 0.81 |
| 0.36 | 0.75 | 0.32 | 0.85 | 0.33 | 0.97 | 0.48 |
| #N/A | #N/A | #N/A | #N/A | #N/A | #N/A | #N/A |
| 0.46 | #N/A | #N/A | 0.93 | 0.39 | 0.90 | 0.42 |
| 0.41 | 0.88 | 0.40 | 0.94 | 0.40 | 0.95 | 0.46 |
| 0.11 | #N/A | #N/A | 0.46 | 0.07 | 0.43 | 0.06 |
| 0.28 | 0.48 | 0.13 | #N/A | #N/A | 0.47 | 0.09 |
| 0.07 | 0.41 | 0.08 | 0.42 | 0.05 | 0.49 | 0.09 |
| 0.15 | 0.68 | 0.27 | 0.54 | 0.12 | 0.54 | 0.13 |
| 0.85 | #N/A | #N/A | 2.21 | 0.89 | 1.63 | 0.84 |
| 0.20 | 0.61 | 0.22 | 0.79 | 0.29 | 0.56 | 0.14 |
| 0.52 | 1.09 | 0.53 | 1.06 | 0.48 | 0.86 | 0.39 |
| 0.71 | 1.57 | 0.77 | 0.98 | 0.43 | 0.97 | 0.48 |
| #N/A | 1.89 | 0.86 | 1.86 | 0.85 | 2.29 | 0.96 |
| 0.58 | 1.03 | 0.50 | 1.11 | 0.51 | 1.18 | 0.62 |
| 0.57 | 1.12 | 0.55 | #N/A | #N/A | 0.94 | 0.46 |
| 0.96 | 2.29 | 0.93 | 2.54 | 0.94 | 2.02 | 0.93 |
| 0.86 | #N/A | #N/A | 1.58 | 0.75 | 1.70 | 0.86 |
| #N/A | #N/A | #N/A | 0.91 | 0.37 | #N/A | #N/A |

|      |      |      |      |      |      |      |
|------|------|------|------|------|------|------|
| #N/A | #N/A | #N/A | #N/A | #N/A | 0.26 | 0.01 |
| 0.16 | #N/A | #N/A | 0.79 | 0.29 | #N/A | #N/A |
| 0.32 | #N/A | #N/A | 1.08 | 0.49 | #N/A | #N/A |
| 0.66 | 1.68 | 0.80 | 1.27 | 0.61 | 1.25 | 0.67 |
| 0.28 | 0.64 | 0.24 | 0.69 | 0.22 | 0.85 | 0.38 |
| 0.23 | #N/A | #N/A | #N/A | #N/A | 0.57 | 0.16 |
| 0.80 | 1.67 | 0.80 | 1.65 | 0.78 | 1.84 | 0.90 |
| 0.22 | 0.29 | 0.03 | 1.03 | 0.44 | 0.33 | 0.02 |
| 0.99 | 3.61 | 0.99 | 3.24 | 0.98 | 2.81 | 0.99 |
| 0.82 | 1.51 | 0.73 | 2.23 | 0.92 | 1.55 | 0.81 |
| #N/A | #N/A | #N/A | #N/A | #N/A | 0.39 | 0.04 |
| 0.88 | 2.22 | 0.90 | 1.87 | 0.78 | 2.21 | 0.95 |
| #N/A | 1.77 | 0.83 | #N/A | #N/A | 0.95 | 0.47 |
| #N/A | 1.06 | 0.51 | #N/A | #N/A | 0.89 | 0.41 |
| 0.82 | 1.62 | 0.77 | 1.79 | 0.80 | 1.78 | 0.88 |
| #N/A | #N/A | #N/A | #N/A | #N/A | 0.53 | 0.12 |
| 0.41 | 0.91 | 0.42 | #N/A | #N/A | 0.59 | 0.17 |
| 0.04 | 0.35 | 0.07 | 0.50 | 0.09 | 0.34 | 0.03 |
| 0.57 | 1.60 | 0.78 | 1.60 | 0.76 | 1.41 | 0.75 |
| 0.77 | 2.20 | 0.92 | 2.59 | 0.94 | 2.02 | 0.93 |
| 0.67 | 1.23 | 0.61 | 1.12 | 0.52 | 1.66 | 0.85 |
| #N/A | 1.45 | 0.72 | 1.17 | 0.55 | 1.32 | 0.71 |
| #N/A | #N/A | #N/A | 1.39 | 0.67 | 1.92 | 0.91 |
| 0.12 | #N/A | #N/A | #N/A | #N/A | 0.59 | 0.17 |
| 0.73 | 1.30 | 0.65 | 1.23 | 0.59 | 1.06 | 0.54 |
| #N/A | 0.87 | 0.39 | 1.13 | 0.52 | 0.42 | 0.06 |
| 0.72 | 1.90 | 0.87 | 1.40 | 0.66 | 1.58 | 0.82 |
| 0.26 | 1.06 | 0.52 | #N/A | #N/A | 0.76 | 0.31 |
| 0.73 | 1.77 | 0.82 | 1.60 | 0.76 | 1.56 | 0.81 |
| 0.69 | 1.83 | 0.85 | #N/A | #N/A | 1.26 | 0.67 |
| #N/A | #N/A | #N/A | 1.81 | 0.82 | 0.87 | 0.40 |
| #N/A | #N/A | #N/A | 1.49 | 0.71 | 0.56 | 0.15 |
| 0.85 | 1.87 | 0.82 | 2.74 | 0.96 | 1.95 | 0.91 |
| 0.96 | 2.14 | 0.91 | 1.95 | 0.86 | 2.53 | 0.97 |
| 0.96 | 2.38 | 0.94 | #N/A | #N/A | #N/A | #N/A |
| #N/A | 1.49 | 0.70 | 2.96 | 0.96 | 1.23 | 0.65 |
| #N/A | 0.45 | 0.12 | #N/A | #N/A | 0.33 | 0.02 |
| 0.40 | 1.09 | 0.52 | 0.82 | 0.31 | 0.88 | 0.41 |
| 0.64 | 1.51 | 0.74 | 1.08 | 0.48 | 1.19 | 0.63 |
| 0.85 | #N/A | #N/A | 1.99 | 0.83 | 1.52 | 0.79 |
| #N/A | #N/A | #N/A | #N/A | #N/A | #N/A | #N/A |
| #N/A | 1.23 | 0.61 | 1.22 | 0.58 | 1.09 | 0.56 |
| 0.29 | 0.87 | 0.40 | #N/A | #N/A | 0.91 | 0.43 |
| 0.68 | 1.42 | 0.70 | 1.87 | 0.84 | 1.24 | 0.66 |
| 0.31 | #N/A | #N/A | #N/A | #N/A | #N/A | #N/A |
| #N/A | #N/A | #N/A | #N/A | #N/A | #N/A | #N/A |
| #N/A | #N/A | #N/A | #N/A | #N/A | #N/A | #N/A |
| 0.33 | 0.59 | 0.21 | 0.98 | 0.43 | 0.70 | 0.26 |
| 0.77 | 1.31 | 0.65 | 1.49 | 0.71 | 1.48 | 0.78 |
| 0.04 | 0.32 | 0.04 | 0.30 | 0.01 | 0.29 | 0.01 |
| 0.85 | 1.86 | 0.86 | 1.64 | 0.77 | 1.44 | 0.76 |

|      |      |      |      |      |      |      |
|------|------|------|------|------|------|------|
| #N/A | 0.56 | 0.19 | 0.58 | 0.16 | 0.56 | 0.14 |
| 0.49 | 1.03 | 0.50 | 1.11 | 0.51 | 1.02 | 0.52 |
| 0.75 | 1.67 | 0.80 | 1.45 | 0.70 | 1.27 | 0.67 |
| #N/A | 1.76 | 0.83 | 1.62 | 0.77 | 1.69 | 0.86 |
| 0.46 | 0.95 | 0.45 | 0.84 | 0.33 | 1.69 | 0.86 |
| 0.35 | 0.99 | 0.47 | 0.73 | 0.25 | 0.74 | 0.30 |
| 0.53 | 0.82 | 0.36 | 0.91 | 0.38 | 0.80 | 0.34 |
| #N/A | 1.02 | 0.44 | #N/A | #N/A | 1.19 | 0.63 |
| 0.24 | 0.66 | 0.26 | 0.74 | 0.25 | 0.79 | 0.33 |
| 0.10 | 0.39 | 0.09 | #N/A | #N/A | 0.72 | 0.28 |
| 0.39 | 0.93 | 0.44 | 0.78 | 0.28 | 1.01 | 0.51 |
| 0.59 | 1.07 | 0.51 | 1.95 | 0.75 | 1.06 | 0.54 |
| 0.94 | 2.07 | 0.90 | 1.89 | 0.85 | 2.58 | 0.98 |
| 0.15 | 0.43 | 0.10 | 0.58 | 0.14 | 0.45 | 0.07 |
| #N/A | 0.49 | 0.17 | #N/A | #N/A | 0.39 | 0.04 |
| #N/A | 1.23 | 0.61 | 1.45 | 0.70 | #N/A | #N/A |
| 0.98 | #N/A | #N/A | 2.77 | 0.95 | #N/A | #N/A |
| 0.89 | 1.78 | 0.83 | 1.61 | 0.76 | 1.26 | 0.67 |
| #N/A | #N/A | #N/A | #N/A | #N/A | #N/A | #N/A |
| #N/A | #N/A | #N/A | #N/A | #N/A | #N/A | #N/A |
| 0.67 | #N/A | #N/A | 1.45 | 0.69 | 1.38 | 0.74 |
| #N/A | #N/A | #N/A | #N/A | #N/A | #N/A | #N/A |
| 0.87 | 1.71 | 0.82 | 1.64 | 0.77 | 1.23 | 0.65 |
| #N/A | #N/A | #N/A | #N/A | #N/A | #N/A | #N/A |
| 0.88 | 1.78 | 0.83 | 1.96 | 0.85 | #N/A | #N/A |
| 0.58 | 1.79 | 0.84 | #N/A | #N/A | 0.67 | 0.23 |
| 0.39 | #N/A | #N/A | 1.21 | 0.48 | 0.79 | 0.33 |
| 0.46 | #N/A | #N/A | #N/A | #N/A | 1.64 | 0.84 |
| 0.69 | 1.72 | 0.82 | 1.32 | 0.63 | 1.07 | 0.55 |
| 0.22 | 0.74 | 0.31 | 0.95 | 0.41 | 0.90 | 0.42 |
| 0.13 | 0.39 | 0.07 | 0.54 | 0.12 | #N/A | #N/A |
| #N/A | #N/A | #N/A | #N/A | #N/A | #N/A | #N/A |
| 0.33 | #N/A | #N/A | 0.74 | 0.25 | 0.71 | 0.27 |
| 0.01 | 0.26 | 0.02 | 0.27 | 0.01 | 0.31 | 0.02 |
| 0.22 | 0.73 | 0.30 | 0.78 | 0.28 | 0.61 | 0.19 |
| 0.05 | 0.24 | 0.02 | 0.36 | 0.04 | 0.36 | 0.03 |
| 0.66 | 1.33 | 0.66 | 1.39 | 0.66 | 1.05 | 0.54 |
| 0.12 | 0.51 | 0.15 | 0.50 | 0.10 | 0.54 | 0.13 |
| 0.14 | 0.34 | 0.05 | 0.29 | 0.01 | #N/A | #N/A |
| #N/A | #N/A | #N/A | #N/A | #N/A | 1.74 | 0.87 |
| 0.88 | 1.99 | 0.88 | 2.12 | 0.90 | 2.26 | 0.96 |
| #N/A | #N/A | #N/A | #N/A | #N/A | 1.67 | 0.85 |
| 0.46 | 1.30 | 0.64 | 1.35 | 0.63 | 0.99 | 0.50 |
| 0.56 | 1.14 | 0.55 | 1.28 | 0.61 | 0.66 | 0.22 |
| #N/A | #N/A | #N/A | #N/A | #N/A | #N/A | #N/A |
| 0.34 | 1.41 | 0.70 | 1.12 | 0.52 | 0.77 | 0.32 |
| 0.11 | 0.47 | 0.12 | 0.92 | 0.38 | 0.55 | 0.14 |
| 0.50 | 0.81 | 0.36 | 0.96 | 0.41 | 0.70 | 0.26 |
| 0.17 | #N/A | #N/A | #N/A | #N/A | 0.57 | 0.16 |
| 0.61 | 0.94 | 0.45 | 1.70 | 0.79 | 0.96 | 0.47 |
| 0.49 | 1.00 | 0.48 | 0.99 | 0.43 | 0.86 | 0.38 |

|      |      |      |      |      |      |      |
|------|------|------|------|------|------|------|
| 0.95 | 2.45 | 0.95 | 2.02 | 0.88 | 2.34 | 0.96 |
| 0.60 | 0.96 | 0.45 | 0.80 | 0.30 | 1.01 | 0.51 |
| #N/A | #N/A | #N/A | #N/A | #N/A | #N/A | #N/A |
| 0.91 | #N/A | #N/A | #N/A | #N/A | 2.05 | 0.93 |
| 0.71 | 1.26 | 0.62 | 1.29 | 0.61 | 1.26 | 0.67 |
| 0.36 | 0.98 | 0.46 | 0.77 | 0.28 | 0.59 | 0.17 |
| 0.70 | 1.61 | 0.74 | 2.04 | 0.87 | 1.42 | 0.76 |
| 0.99 | 3.40 | 0.99 | 3.39 | 0.99 | 2.40 | 0.97 |
| 0.30 | 0.63 | 0.23 | 1.04 | 0.47 | 0.68 | 0.24 |
| 0.60 | 1.57 | 0.74 | 1.74 | 0.80 | 0.98 | 0.48 |
| 0.59 | #N/A | #N/A | #N/A | #N/A | #N/A | #N/A |
| 0.04 | #N/A | #N/A | #N/A | #N/A | 0.40 | 0.04 |
| 0.36 | 0.75 | 0.32 | 0.88 | 0.36 | 0.58 | 0.16 |
| #N/A | 0.50 | 0.15 | 0.59 | 0.15 | 0.53 | 0.12 |
| 0.45 | 0.82 | 0.36 | 0.87 | 0.35 | 0.80 | 0.34 |
| #N/A | 0.47 | 0.13 | 0.59 | 0.15 | 0.70 | 0.26 |
| #N/A | #N/A | #N/A | #N/A | #N/A | 1.60 | 0.83 |
| #N/A | #N/A | #N/A | #N/A | #N/A | 1.27 | 0.67 |
| #N/A | #N/A | #N/A | 2.32 | 0.93 | 2.35 | 0.96 |
| 0.77 | 2.58 | 0.95 | 1.08 | 0.50 | 1.63 | 0.84 |
| #N/A | #N/A | #N/A | #N/A | #N/A | #N/A | #N/A |
| 0.78 | 1.37 | 0.63 | 1.71 | 0.79 | #N/A | #N/A |
| #N/A | #N/A | #N/A | #N/A | #N/A | #N/A | #N/A |
| 0.34 | 0.68 | 0.27 | 0.61 | 0.16 | 0.65 | 0.22 |
| #N/A | #N/A | #N/A | #N/A | #N/A | #N/A | #N/A |
| 0.92 | 1.56 | 0.76 | 1.78 | 0.82 | 1.59 | 0.82 |
| #N/A | 1.03 | 0.49 | 1.00 | 0.44 | 0.65 | 0.22 |
| 0.40 | 0.99 | 0.47 | 0.86 | 0.35 | 1.01 | 0.51 |
| #N/A | #N/A | #N/A | #N/A | #N/A | #N/A | #N/A |
| 0.51 | 1.05 | 0.51 | 1.01 | 0.45 | 0.81 | 0.35 |
| 0.24 | 0.37 | 0.07 | 0.42 | 0.07 | #N/A | #N/A |
| 0.02 | 0.34 | 0.05 | 0.45 | 0.07 | 0.40 | 0.04 |
| #N/A | 1.22 | 0.60 | 1.40 | 0.67 | 1.44 | 0.76 |
| 0.06 | 0.39 | 0.08 | 0.44 | 0.06 | 0.47 | 0.08 |
| 0.05 | #N/A | #N/A | #N/A | #N/A | #N/A | #N/A |
| 0.20 | 0.65 | 0.25 | 0.93 | 0.39 | 0.83 | 0.37 |
| #N/A | 0.31 | 0.04 | 0.70 | 0.23 | 1.12 | 0.58 |
| #N/A | #N/A | #N/A | #N/A | #N/A | #N/A | #N/A |
| 0.91 | 2.00 | 0.89 | 1.54 | 0.74 | 1.47 | 0.78 |
| 0.83 | 1.71 | 0.79 | 2.22 | 0.91 | 1.41 | 0.75 |
| 0.63 | 1.39 | 0.69 | 1.39 | 0.67 | 1.39 | 0.74 |
| #N/A | #N/A | #N/A | #N/A | #N/A | #N/A | #N/A |
| 0.68 | 1.63 | 0.79 | #N/A | #N/A | 1.00 | 0.51 |
| #N/A | #N/A | #N/A | #N/A | #N/A | #N/A | #N/A |
| #N/A | #N/A | #N/A | #N/A | #N/A | #N/A | #N/A |
| 0.98 | 3.38 | 0.99 | 3.21 | 0.98 | 2.55 | 0.98 |
| #N/A | 0.42 | 0.09 | #N/A | #N/A | 0.52 | 0.11 |
| #N/A | #N/A | #N/A | 1.44 | 0.69 | 1.25 | 0.66 |
| #N/A | #N/A | #N/A | #N/A | #N/A | #N/A | #N/A |
| 0.20 | 0.67 | 0.26 | 0.58 | 0.15 | 0.65 | 0.22 |
| #N/A | 0.56 | 0.19 | 0.76 | 0.31 | 0.31 | 0.02 |

|      |      |      |      |      |      |      |
|------|------|------|------|------|------|------|
| #N/A | #N/A | #N/A | #N/A | #N/A | #N/A | #N/A |
| 0.73 | 1.54 | 0.76 | 1.11 | 0.51 | 1.31 | 0.69 |
| 0.24 | 0.56 | 0.19 | 0.66 | 0.20 | 0.62 | 0.20 |
| 0.40 | 0.59 | 0.21 | 0.75 | 0.26 | 0.62 | 0.20 |
| 0.49 | 1.11 | 0.55 | 0.84 | 0.32 | 0.72 | 0.28 |
| 0.78 | 1.49 | 0.73 | 1.19 | 0.56 | 1.43 | 0.76 |
| 0.68 | 1.32 | 0.66 | #N/A | #N/A | 1.15 | 0.61 |
| 0.80 | 1.70 | 0.81 | 1.78 | 0.82 | 1.60 | 0.83 |
| 0.25 | 0.67 | 0.26 | 0.81 | 0.30 | 0.47 | 0.08 |
| 0.53 | 1.13 | 0.55 | 1.38 | 0.66 | 0.69 | 0.25 |
| 0.66 | #N/A | #N/A | 1.11 | 0.51 | #N/A | #N/A |
| #N/A | #N/A | #N/A | #N/A | #N/A | #N/A | #N/A |
| #N/A | #N/A | #N/A | #N/A | #N/A | 0.44 | 0.06 |
| 0.87 | 1.42 | 0.70 | 1.73 | 0.81 | 2.01 | 0.92 |
| #N/A | 1.06 | 0.52 | 2.15 | 0.82 | 0.92 | 0.44 |
| #N/A | 0.60 | 0.22 | #N/A | #N/A | 0.95 | 0.47 |
| 0.86 | 2.59 | 0.96 | 2.17 | 0.91 | 1.11 | 0.57 |
| #N/A | #N/A | #N/A | #N/A | #N/A | #N/A | #N/A |
| 0.98 | 2.32 | 0.93 | 3.88 | 0.99 | #N/A | #N/A |
| 0.81 | #N/A | #N/A | #N/A | #N/A | 1.27 | 0.68 |
| 0.89 | #N/A | #N/A | 2.49 | 0.94 | 1.82 | 0.89 |
| 0.32 | 0.58 | 0.20 | 0.92 | 0.37 | 0.66 | 0.23 |
| 0.28 | 0.82 | 0.36 | 1.02 | 0.44 | 1.07 | 0.56 |
| 0.56 | 1.02 | 0.49 | 1.82 | 0.82 | 0.80 | 0.34 |
| 0.52 | 1.02 | 0.49 | 1.04 | 0.47 | 1.28 | 0.68 |
| 0.81 | 1.70 | 0.79 | 1.73 | 0.81 | 1.52 | 0.79 |
| #N/A | #N/A | #N/A | #N/A | #N/A | #N/A | #N/A |
| 0.15 | 0.39 | 0.08 | 0.64 | 0.18 | 0.43 | 0.06 |
| 0.16 | 0.51 | 0.15 | 0.80 | 0.30 | 0.53 | 0.12 |
| 0.61 | 1.62 | 0.77 | 1.45 | 0.70 | 1.25 | 0.67 |
| 0.43 | 0.97 | 0.46 | 0.95 | 0.40 | 1.12 | 0.59 |
| 0.21 | 0.73 | 0.31 | 1.12 | 0.51 | 0.62 | 0.19 |
| 0.18 | 0.53 | 0.17 | 0.59 | 0.15 | 0.53 | 0.12 |
| 0.05 | 0.42 | 0.09 | 0.39 | 0.04 | 0.39 | 0.04 |
| 0.39 | 1.03 | 0.50 | 0.81 | 0.31 | 0.72 | 0.28 |
| #N/A | #N/A | #N/A | #N/A | #N/A | #N/A | #N/A |
| #N/A | #N/A | #N/A | #N/A | #N/A | #N/A | #N/A |
| 0.45 | 1.00 | 0.47 | 1.26 | 0.60 | 0.71 | 0.27 |
| #N/A | #N/A | #N/A | #N/A | #N/A | #N/A | #N/A |
| 0.83 | 1.68 | 0.81 | 1.76 | 0.81 | 2.14 | 0.95 |
| 0.53 | 1.14 | 0.55 | 1.38 | 0.60 | 1.60 | 0.83 |
| 0.95 | 2.45 | 0.95 | #N/A | #N/A | 0.32 | 0.02 |
| #N/A | 2.87 | 0.98 | 2.50 | 0.93 | 2.33 | 0.96 |
| #N/A | #N/A | #N/A | #N/A | #N/A | #N/A | #N/A |
| #N/A | #N/A | #N/A | 0.62 | 0.17 | 0.47 | 0.09 |
| #N/A | #N/A | #N/A | 0.54 | 0.12 | 0.57 | 0.15 |
| 0.02 | 0.23 | 0.02 | 0.34 | 0.02 | 0.49 | 0.09 |
| 0.12 | 0.36 | 0.06 | 0.37 | 0.03 | 0.56 | 0.15 |
| 0.72 | 1.48 | 0.73 | 1.90 | 0.85 | 1.22 | 0.64 |
| 0.50 | 1.15 | 0.56 | 1.26 | 0.59 | 0.93 | 0.44 |
| 0.25 | #N/A | #N/A | #N/A | #N/A | #N/A | #N/A |

|      |      |      |      |      |      |      |
|------|------|------|------|------|------|------|
| 0.56 | 1.32 | 0.64 | 1.40 | 0.65 | 1.53 | 0.80 |
| 0.44 | 1.05 | 0.49 | 1.03 | 0.46 | 0.96 | 0.47 |
| #N/A | #N/A | #N/A | #N/A | #N/A | #N/A | #N/A |
| 0.56 | 1.21 | 0.60 | 1.15 | 0.53 | 1.25 | 0.66 |
| 0.41 | 0.81 | 0.36 | 0.84 | 0.33 | 0.50 | 0.10 |
| 0.20 | 0.65 | 0.25 | 0.82 | 0.31 | 0.54 | 0.13 |
| 0.38 | 0.69 | 0.28 | 0.66 | 0.20 | 0.80 | 0.34 |
| 0.47 | 1.15 | 0.57 | 1.18 | 0.55 | 1.06 | 0.55 |
| 0.51 | 1.07 | 0.51 | 1.13 | 0.53 | 1.03 | 0.52 |
| 0.49 | 1.27 | 0.62 | 0.86 | 0.34 | 1.36 | 0.72 |
| 0.63 | 1.07 | 0.51 | 1.20 | 0.55 | 0.81 | 0.35 |
| 0.67 | 1.68 | 0.80 | 1.22 | 0.58 | 1.21 | 0.64 |
| 0.48 | 1.71 | 0.81 | 1.54 | 0.73 | 1.58 | 0.82 |
| 0.81 | 1.65 | 0.79 | 1.47 | 0.71 | 1.39 | 0.74 |
| 0.61 | 1.47 | 0.73 | 0.78 | 0.28 | 1.06 | 0.55 |
| 0.35 | 0.83 | 0.37 | 0.54 | 0.12 | 0.86 | 0.39 |
| 0.70 | 0.93 | 0.43 | 0.49 | 0.09 | 1.00 | 0.50 |
| 0.27 | 0.72 | 0.29 | 0.66 | 0.20 | 0.74 | 0.29 |
| #N/A | #N/A | #N/A | #N/A | #N/A | #N/A | #N/A |
| #N/A | #N/A | #N/A | #N/A | #N/A | #N/A | #N/A |
| 0.72 | 1.78 | 0.81 | 2.20 | 0.91 | 2.42 | 0.97 |
| #N/A | 0.99 | 0.47 | #N/A | #N/A | 0.73 | 0.28 |
| #N/A | #N/A | #N/A | #N/A | #N/A | #N/A | #N/A |
| #N/A | #N/A | #N/A | #N/A | #N/A | #N/A | #N/A |
| #N/A | #N/A | #N/A | #N/A | #N/A | #N/A | #N/A |
| 0.43 | 0.89 | 0.40 | 1.11 | 0.51 | 1.07 | 0.55 |
| 0.45 | 0.80 | 0.35 | #N/A | #N/A | 0.83 | 0.37 |
| 0.38 | 0.65 | 0.25 | 1.05 | 0.46 | 0.71 | 0.27 |
| 0.36 | #N/A | #N/A | 1.01 | 0.44 | 0.67 | 0.24 |
| 0.36 | #N/A | #N/A | 0.72 | 0.24 | 0.56 | 0.15 |
| 0.78 | 1.88 | 0.86 | 2.47 | 0.95 | 2.22 | 0.95 |
| 0.32 | 0.79 | 0.35 | 0.75 | 0.26 | 0.84 | 0.37 |
| 0.71 | 1.27 | 0.63 | 1.75 | 0.80 | 1.14 | 0.60 |
| #N/A | #N/A | #N/A | #N/A | #N/A | #N/A | #N/A |
| 0.71 | 1.75 | 0.82 | #N/A | #N/A | 1.38 | 0.73 |
| 0.72 | 1.14 | 0.54 | #N/A | #N/A | 0.66 | 0.23 |
| 0.21 | #N/A | #N/A | 0.64 | 0.18 | 0.33 | 0.02 |
| 0.27 | 0.51 | 0.16 | 0.51 | 0.10 | 0.73 | 0.28 |
| 0.01 | 0.17 | 0.01 | 0.23 | 0.01 | 0.29 | 0.01 |
| 0.02 | 0.19 | 0.01 | 0.45 | 0.07 | 0.31 | 0.02 |
| 0.65 | 1.64 | 0.77 | 1.45 | 0.70 | 1.49 | 0.78 |
| #N/A | #N/A | #N/A | #N/A | #N/A | 0.65 | 0.22 |
| 0.65 | 1.62 | 0.76 | 1.50 | 0.72 | 1.36 | 0.72 |
| #N/A | 0.63 | 0.24 | 0.64 | 0.18 | 0.67 | 0.24 |
| #N/A | #N/A | #N/A | #N/A | #N/A | #N/A | #N/A |
| 0.83 | 2.08 | 0.90 | 2.68 | 0.96 | 1.71 | 0.86 |
| 0.20 | 0.59 | 0.21 | 0.61 | 0.17 | 0.92 | 0.44 |
| 0.41 | #N/A | #N/A | 0.79 | 0.29 | 0.71 | 0.27 |
| 0.08 | 0.43 | 0.09 | 0.44 | 0.06 | 0.53 | 0.12 |
| 0.80 | 1.97 | 0.86 | 1.62 | 0.75 | 1.95 | 0.91 |
| #N/A | #N/A | #N/A | #N/A | #N/A | 0.58 | 0.17 |

|      |      |      |      |      |      |      |
|------|------|------|------|------|------|------|
| 0.44 | 1.05 | 0.51 | 1.04 | 0.47 | 0.95 | 0.46 |
| 0.33 | 0.65 | 0.25 | #N/A | #N/A | 0.83 | 0.36 |
| 0.75 | 1.78 | 0.84 | 1.77 | 0.81 | 1.44 | 0.76 |
| 0.04 | 0.27 | 0.03 | 0.43 | 0.07 | 0.43 | 0.06 |
| 0.55 | 1.17 | 0.58 | 1.61 | 0.77 | 0.98 | 0.49 |
| 0.06 | 0.32 | 0.04 | #N/A | #N/A | 0.41 | 0.05 |
| 0.16 | 0.60 | 0.22 | 0.63 | 0.18 | 0.84 | 0.37 |
| 0.89 | 1.66 | 0.80 | 1.77 | 0.81 | 1.50 | 0.79 |
| 0.70 | 1.44 | 0.71 | 1.63 | 0.76 | 1.32 | 0.71 |
| 0.25 | #N/A | #N/A | #N/A | #N/A | 0.58 | 0.16 |
| 0.47 | 0.80 | 0.35 | 0.82 | 0.32 | 0.67 | 0.23 |
| 0.81 | 2.26 | 0.92 | 1.89 | 0.85 | 1.35 | 0.72 |
| #N/A | 0.25 | 0.02 | 0.29 | 0.01 | 0.37 | 0.03 |
| 0.57 | 1.02 | 0.49 | 1.10 | 0.51 | 0.91 | 0.43 |
| 0.38 | 0.59 | 0.21 | #N/A | #N/A | 0.91 | 0.43 |
| 0.89 | 2.38 | 0.94 | 2.35 | 0.94 | 1.80 | 0.89 |
| #N/A | #N/A | #N/A | #N/A | #N/A | #N/A | #N/A |
| 0.15 | #N/A | #N/A | 0.96 | 0.42 | 0.74 | 0.30 |
| 0.57 | 1.45 | 0.71 | 1.46 | 0.68 | 1.33 | 0.71 |
| 0.34 | #N/A | #N/A | #N/A | #N/A | 0.62 | 0.20 |
| 0.64 | 1.36 | 0.66 | 1.96 | 0.81 | 1.00 | 0.50 |
| 0.01 | 0.21 | 0.01 | 0.24 | 0.01 | 0.29 | 0.01 |
| 0.25 | 0.71 | 0.28 | 0.66 | 0.20 | 0.84 | 0.37 |
| #N/A | #N/A | #N/A | #N/A | #N/A | #N/A | #N/A |
| 0.38 | 0.87 | 0.40 | 0.99 | 0.43 | 1.03 | 0.52 |
| 0.61 | 1.06 | 0.52 | #N/A | #N/A | 1.22 | 0.65 |
| 0.45 | 0.88 | 0.40 | #N/A | #N/A | 0.97 | 0.48 |
| 0.89 | 1.80 | 0.80 | 2.92 | 0.96 | 1.88 | 0.90 |
| 0.71 | 1.54 | 0.73 | 1.80 | 0.83 | 1.38 | 0.73 |
| 0.04 | 0.27 | 0.02 | 0.39 | 0.05 | 0.39 | 0.04 |
| #N/A | 0.98 | 0.46 | 1.33 | 0.63 | 1.54 | 0.80 |
| #N/A | #N/A | #N/A | #N/A | #N/A | #N/A | #N/A |
| 0.52 | 1.06 | 0.52 | 1.25 | 0.59 | 1.28 | 0.68 |
| #N/A | #N/A | #N/A | #N/A | #N/A | #N/A | #N/A |
| 0.19 | 0.70 | 0.28 | 0.70 | 0.24 | 0.88 | 0.40 |
| 0.50 | 0.86 | 0.39 | 0.83 | 0.32 | 1.09 | 0.56 |
| #N/A | 1.89 | 0.86 | #N/A | #N/A | #N/A | #N/A |
| 0.13 | 0.51 | 0.15 | 0.55 | 0.12 | 0.72 | 0.28 |
| 0.80 | 1.41 | 0.70 | 1.37 | 0.66 | 1.24 | 0.66 |
| 0.42 | #N/A | #N/A | #N/A | #N/A | #N/A | #N/A |
| 0.49 | 1.05 | 0.51 | 0.82 | 0.31 | 1.18 | 0.62 |
| 0.37 | 0.90 | 0.41 | 0.80 | 0.30 | 0.58 | 0.17 |
| #N/A | 0.87 | 0.40 | 0.69 | 0.22 | 0.57 | 0.15 |
| 0.69 | 1.26 | 0.63 | 1.40 | 0.67 | 1.15 | 0.60 |
| 0.39 | 1.15 | 0.56 | 1.03 | 0.46 | 1.02 | 0.52 |
| 0.36 | 1.22 | 0.60 | 1.01 | 0.44 | 1.18 | 0.62 |
| 0.80 | 1.29 | 0.64 | 1.25 | 0.59 | 1.84 | 0.90 |
| 0.40 | 0.94 | 0.44 | 0.73 | 0.25 | 0.91 | 0.43 |
| 0.50 | 0.99 | 0.47 | 0.99 | 0.43 | 0.93 | 0.44 |
| 0.41 | #N/A | #N/A | #N/A | #N/A | #N/A | #N/A |
| 0.44 | 1.18 | 0.57 | 1.25 | 0.59 | 1.22 | 0.65 |



|      |      |      |      |      |      |      |
|------|------|------|------|------|------|------|
| 0.36 | #N/A | #N/A | 1.10 | 0.50 | 0.98 | 0.49 |
| #N/A | #N/A | #N/A | #N/A | #N/A | #N/A | #N/A |
| 0.67 | 1.54 | 0.75 | 1.43 | 0.69 | 1.42 | 0.75 |
| 0.32 | 0.68 | 0.27 | 0.72 | 0.24 | 0.95 | 0.47 |
| #N/A | #N/A | #N/A | #N/A | #N/A | 0.56 | 0.15 |
| #N/A | #N/A | #N/A | #N/A | #N/A | #N/A | #N/A |
| 0.79 | 2.10 | 0.91 | 1.89 | 0.85 | 1.93 | 0.91 |
| 0.69 | #N/A | #N/A | 0.93 | 0.39 | 1.25 | 0.66 |
| 0.66 | #N/A | #N/A | 1.57 | 0.75 | #N/A | #N/A |
| #N/A | #N/A | #N/A | #N/A | #N/A | #N/A | #N/A |
| #N/A | 1.02 | 0.48 | 1.16 | 0.54 | 1.11 | 0.57 |
| #N/A | #N/A | #N/A | 0.55 | 0.12 | 0.45 | 0.07 |
| 0.72 | 2.04 | 0.89 | 1.83 | 0.79 | #N/A | #N/A |
| #N/A | #N/A | #N/A | #N/A | #N/A | #N/A | #N/A |
| 0.56 | 1.29 | 0.64 | 1.33 | 0.64 | 1.11 | 0.58 |
| 0.64 | 1.11 | 0.54 | 1.39 | 0.67 | 1.34 | 0.71 |
| 0.35 | 0.89 | 0.41 | 0.76 | 0.27 | 0.95 | 0.47 |
| #N/A | #N/A | #N/A | 2.96 | 0.97 | 2.45 | 0.97 |
| #N/A | #N/A | #N/A | #N/A | #N/A | #N/A | #N/A |
| #N/A | 1.71 | 0.81 | #N/A | #N/A | #N/A | #N/A |
| 0.53 | 1.19 | 0.58 | 1.05 | 0.47 | 1.12 | 0.58 |
| #N/A | #N/A | #N/A | #N/A | #N/A | 0.74 | 0.29 |
| #N/A | 2.16 | 0.69 | #N/A | #N/A | 0.77 | 0.32 |
| #N/A | 1.61 | 0.78 | 1.37 | 0.66 | 1.42 | 0.75 |
| 0.45 | 1.20 | 0.60 | 0.84 | 0.33 | 1.17 | 0.62 |
| #N/A | 0.86 | 0.39 | 0.67 | 0.21 | 0.78 | 0.32 |
| 0.53 | 1.29 | 0.64 | 1.04 | 0.46 | 0.95 | 0.47 |
| 0.89 | 2.38 | 0.93 | 3.42 | 0.98 | 3.55 | 1.00 |
| 0.57 | #N/A | #N/A | 1.64 | 0.78 | 1.34 | 0.71 |
| 0.78 | 1.93 | 0.87 | 1.77 | 0.82 | 1.77 | 0.88 |
| 0.22 | 0.42 | 0.09 | 0.60 | 0.16 | 0.54 | 0.13 |
| 0.49 | 1.05 | 0.51 | 1.06 | 0.48 | 1.11 | 0.57 |
| 0.88 | 1.85 | 0.86 | 1.94 | 0.86 | 1.95 | 0.91 |
| #N/A | 0.45 | 0.11 | 0.65 | 0.19 | 0.60 | 0.18 |
| #N/A | #N/A | #N/A | #N/A | #N/A | #N/A | #N/A |
| 0.28 | 1.02 | 0.48 | 0.85 | 0.34 | 0.61 | 0.19 |
| 0.94 | 2.73 | 0.97 | #N/A | #N/A | 2.31 | 0.96 |
| 0.09 | 0.40 | 0.08 | #N/A | #N/A | #N/A | #N/A |
| 0.44 | 0.89 | 0.41 | 1.04 | 0.47 | 0.88 | 0.40 |
| 0.11 | 0.44 | 0.11 | 0.40 | 0.05 | 0.46 | 0.08 |
| 0.23 | #N/A | #N/A | #N/A | #N/A | 0.70 | 0.26 |
| 0.03 | 0.22 | 0.01 | 0.35 | 0.03 | 0.37 | 0.03 |
| #N/A | #N/A | #N/A | #N/A | #N/A | #N/A | #N/A |
| 0.97 | 2.78 | 0.97 | 2.64 | 0.94 | 2.45 | 0.97 |
| #N/A | 0.96 | 0.45 | 1.15 | 0.52 | 0.79 | 0.33 |
| 0.53 | 1.08 | 0.52 | 1.13 | 0.52 | 1.14 | 0.59 |
| #N/A | #N/A | #N/A | #N/A | #N/A | #N/A | #N/A |
| 0.33 | 0.78 | 0.34 | 0.83 | 0.32 | 0.69 | 0.25 |
| 0.13 | 0.43 | 0.10 | 0.60 | 0.16 | 0.51 | 0.11 |
| 0.24 | 0.45 | 0.12 | 0.69 | 0.22 | 0.53 | 0.12 |
| 0.06 | 0.33 | 0.05 | 0.45 | 0.07 | 0.34 | 0.02 |

|      |      |      |      |      |      |      |
|------|------|------|------|------|------|------|
| 0.48 | 0.94 | 0.43 | 0.89 | 0.36 | 0.67 | 0.24 |
| #N/A | #N/A | #N/A | #N/A | #N/A | 0.48 | 0.09 |
| 0.74 | 1.44 | 0.71 | 1.36 | 0.65 | 1.23 | 0.65 |
| 0.59 | 1.31 | 0.65 | 1.12 | 0.52 | 1.09 | 0.57 |
| 0.32 | 0.76 | 0.32 | 1.17 | 0.55 | 0.64 | 0.21 |
| #N/A | #N/A | #N/A | #N/A | #N/A | #N/A | #N/A |
| #N/A | #N/A | #N/A | #N/A | #N/A | #N/A | #N/A |
| #N/A | #N/A | #N/A | #N/A | #N/A | 0.96 | 0.48 |
| 0.54 | 0.96 | 0.46 | 1.18 | 0.55 | 0.82 | 0.35 |
| 0.18 | 0.67 | 0.26 | 0.67 | 0.21 | 0.58 | 0.16 |
| 0.13 | 0.46 | 0.11 | 0.61 | 0.16 | 0.60 | 0.17 |
| 0.55 | 0.98 | 0.47 | 1.11 | 0.51 | 0.87 | 0.40 |
| #N/A | #N/A | #N/A | 0.52 | 0.11 | #N/A | #N/A |
| 0.01 | 0.23 | 0.02 | 0.31 | 0.02 | 0.34 | 0.03 |
| 0.06 | 0.49 | 0.16 | 0.60 | 0.16 | #N/A | #N/A |
| 0.81 | 1.93 | 0.87 | 1.91 | 0.85 | 1.81 | 0.89 |
| #N/A | 1.59 | 0.77 | 1.76 | 0.81 | 1.95 | 0.91 |
| 0.66 | 1.23 | 0.61 | 0.91 | 0.38 | 0.90 | 0.42 |
| 0.19 | 0.50 | 0.14 | 0.63 | 0.17 | 0.53 | 0.12 |
| #N/A | #N/A | #N/A | #N/A | #N/A | #N/A | #N/A |
| #N/A | 0.86 | 0.38 | #N/A | #N/A | 0.98 | 0.48 |
| 0.34 | 0.64 | 0.24 | 0.71 | 0.24 | 1.06 | 0.54 |
| #N/A | 0.45 | 0.11 | 0.51 | 0.10 | 0.46 | 0.08 |
| 0.77 | 1.40 | 0.69 | 2.05 | 0.88 | 1.33 | 0.71 |
| 0.84 | 2.04 | 0.89 | #N/A | #N/A | 1.50 | 0.79 |
| 0.03 | 0.37 | 0.08 | 0.36 | 0.03 | 0.37 | 0.03 |
| 0.61 | #N/A | #N/A | 1.18 | 0.54 | 1.08 | 0.56 |
| 0.52 | 0.67 | 0.26 | 1.17 | 0.52 | #N/A | #N/A |
| 0.67 | 1.20 | 0.58 | 1.05 | 0.47 | 1.34 | 0.71 |
| 0.09 | 0.30 | 0.04 | 0.46 | 0.07 | 0.55 | 0.14 |
| 0.02 | 0.37 | 0.08 | 0.48 | 0.10 | 0.32 | 0.02 |
| 0.60 | 1.14 | 0.56 | 0.99 | 0.42 | 1.42 | 0.76 |
| 0.15 | 0.62 | 0.23 | 0.67 | 0.21 | 0.85 | 0.38 |
| #N/A | 1.14 | 0.56 | 1.18 | 0.55 | 1.21 | 0.64 |
| 0.10 | #N/A | #N/A | #N/A | #N/A | #N/A | #N/A |
| 0.86 | 1.83 | 0.85 | 1.73 | 0.81 | 2.00 | 0.92 |
| 0.65 | 1.24 | 0.61 | 1.09 | 0.50 | 1.06 | 0.55 |
| #N/A | #N/A | #N/A | #N/A | #N/A | #N/A | #N/A |
| #N/A | #N/A | #N/A | #N/A | #N/A | 1.52 | 0.80 |
| 0.87 | 2.41 | 0.94 | 2.73 | 0.97 | 2.18 | 0.95 |
| 0.99 | 3.17 | 0.98 | 3.92 | 0.99 | 3.31 | 0.99 |
| 0.50 | 1.07 | 0.51 | 1.13 | 0.51 | 0.78 | 0.32 |
| 0.77 | 1.54 | 0.74 | 1.54 | 0.74 | 0.97 | 0.48 |
| 0.75 | 1.70 | 0.82 | 1.59 | 0.76 | 1.60 | 0.83 |
| 0.13 | 0.46 | 0.12 | 0.67 | 0.20 | 0.79 | 0.33 |
| 0.56 | 1.28 | 0.63 | 1.27 | 0.61 | 0.86 | 0.39 |
| 0.23 | #N/A | #N/A | #N/A | #N/A | 0.95 | 0.46 |
| #N/A | #N/A | #N/A | #N/A | #N/A | 0.45 | 0.07 |
| #N/A | #N/A | #N/A | 0.62 | 0.17 | 0.74 | 0.30 |
| 0.72 | 2.03 | 0.88 | 0.93 | 0.39 | 1.39 | 0.74 |
| #N/A | 2.29 | 0.94 | 1.90 | 0.85 | 2.05 | 0.93 |

|      |      |      |      |      |      |      |
|------|------|------|------|------|------|------|
| 0.49 | #N/A | #N/A | 0.88 | 0.35 | 0.86 | 0.39 |
| 0.54 | 1.13 | 0.56 | 1.04 | 0.47 | 1.54 | 0.80 |
| #N/A | #N/A | #N/A | #N/A | #N/A | 0.67 | 0.24 |
| 0.72 | 1.52 | 0.69 | 1.61 | 0.71 | 1.37 | 0.73 |
| 0.16 | #N/A | #N/A | #N/A | #N/A | 0.80 | 0.34 |
| 0.93 | 2.34 | 0.94 | 2.34 | 0.93 | 2.80 | 0.99 |
| #N/A | 0.66 | 0.25 | #N/A | #N/A | 0.75 | 0.30 |
| 0.34 | 0.63 | 0.24 | 0.94 | 0.40 | 0.82 | 0.35 |
| 0.69 | 1.30 | 0.64 | 0.97 | 0.42 | 1.34 | 0.71 |
| 0.89 | 1.78 | 0.82 | 2.30 | 0.93 | 2.00 | 0.92 |
| 0.38 | 1.23 | 0.61 | 1.04 | 0.47 | 0.79 | 0.33 |
| 0.76 | 1.85 | 0.83 | 2.44 | 0.95 | 1.75 | 0.87 |
| #N/A | 1.11 | 0.54 | 1.11 | 0.51 | 0.68 | 0.24 |
| 0.73 | 1.18 | 0.58 | 1.38 | 0.67 | 1.42 | 0.76 |
| 0.20 | 0.71 | 0.29 | 0.61 | 0.16 | 0.73 | 0.29 |
| 0.29 | 0.75 | 0.32 | 0.88 | 0.36 | 1.00 | 0.51 |
| #N/A | #N/A | #N/A | #N/A | #N/A | #N/A | #N/A |
| 0.71 | 1.22 | 0.61 | 1.16 | 0.54 | 1.13 | 0.59 |
| #N/A | 1.13 | 0.56 | 1.25 | 0.59 | 1.22 | 0.65 |
| 0.59 | 1.37 | 0.68 | 1.25 | 0.60 | 1.01 | 0.51 |
| 0.42 | 0.71 | 0.29 | 0.80 | 0.30 | 0.85 | 0.38 |
| #N/A | 0.43 | 0.09 | #N/A | #N/A | #N/A | #N/A |
| 0.68 | 1.45 | 0.72 | 1.59 | 0.76 | 1.51 | 0.79 |
| 0.76 | 1.22 | 0.60 | 1.38 | 0.66 | 1.47 | 0.77 |
| #N/A | #N/A | #N/A | #N/A | #N/A | #N/A | #N/A |
| 0.91 | #N/A | #N/A | 1.65 | 0.77 | 1.75 | 0.87 |
| 0.24 | 0.52 | 0.16 | 0.76 | 0.27 | 0.68 | 0.24 |
| 0.84 | 1.67 | 0.79 | 2.21 | 0.92 | 1.72 | 0.87 |
| 0.25 | 0.51 | 0.15 | #N/A | #N/A | #N/A | #N/A |
| #N/A | 1.50 | 0.73 | 2.00 | 0.88 | 1.68 | 0.85 |
| 0.81 | #N/A | #N/A | 1.31 | 0.61 | 1.32 | 0.70 |
| 0.85 | 2.29 | 0.94 | 2.16 | 0.91 | 1.61 | 0.83 |
| #N/A | 0.48 | 0.14 | 0.50 | 0.09 | 0.39 | 0.04 |
| 0.11 | 0.55 | 0.18 | 0.48 | 0.08 | 0.50 | 0.10 |
| 0.08 | 0.44 | 0.11 | 0.47 | 0.08 | 0.52 | 0.11 |
| 0.28 | 0.75 | 0.31 | 0.75 | 0.26 | 0.98 | 0.49 |
| #N/A | 1.20 | 0.59 | 0.95 | 0.41 | 1.24 | 0.66 |
| 0.45 | 1.25 | 0.59 | 0.66 | 0.20 | 1.18 | 0.62 |
| 0.33 | 0.79 | 0.35 | 0.74 | 0.26 | 0.59 | 0.17 |
| 0.17 | 0.58 | 0.20 | 0.73 | 0.25 | 0.57 | 0.15 |
| 0.71 | 1.33 | 0.66 | 1.62 | 0.77 | 1.56 | 0.81 |
| 0.43 | 1.32 | 0.65 | #N/A | #N/A | 1.24 | 0.66 |
| 0.85 | 1.37 | 0.68 | 1.15 | 0.54 | 1.21 | 0.64 |
| 0.29 | 0.49 | 0.14 | 0.52 | 0.11 | 0.74 | 0.30 |
| 0.32 | 0.79 | 0.35 | 0.78 | 0.29 | 0.61 | 0.18 |
| 0.06 | 0.57 | 0.20 | 0.61 | 0.17 | 0.79 | 0.33 |
| #N/A | #N/A | #N/A | #N/A | #N/A | #N/A | #N/A |
| 0.82 | 2.21 | 0.91 | 2.03 | 0.89 | 2.17 | 0.95 |
| #N/A | #N/A | #N/A | #N/A | #N/A | #N/A | #N/A |
| 0.52 | 1.11 | 0.55 | 1.37 | 0.66 | 1.09 | 0.56 |
| 0.50 | 1.24 | 0.61 | 0.87 | 0.35 | 1.10 | 0.57 |



|      |      |      |      |      |      |      |
|------|------|------|------|------|------|------|
| 0.09 | 0.42 | 0.09 | 0.44 | 0.07 | 0.48 | 0.09 |
| 0.10 | 0.43 | 0.10 | 0.49 | 0.09 | 0.47 | 0.08 |
| 0.33 | 0.81 | 0.36 | 0.86 | 0.34 | 0.85 | 0.38 |
| 0.83 | 1.56 | 0.75 | 1.59 | 0.76 | 1.48 | 0.78 |
| #N/A | 1.44 | 0.70 | 1.28 | 0.61 | 1.32 | 0.70 |
| #N/A | #N/A | #N/A | #N/A | #N/A | 0.74 | 0.29 |
| 0.40 | 1.05 | 0.51 | 0.48 | 0.08 | 1.06 | 0.55 |
| 0.51 | #N/A | #N/A | 1.38 | 0.61 | 1.79 | 0.88 |
| #N/A | 0.61 | 0.23 | 1.71 | 0.80 | 0.61 | 0.19 |
| #N/A | #N/A | #N/A | #N/A | #N/A | #N/A | #N/A |
| 0.67 | 1.22 | 0.60 | 1.23 | 0.59 | 1.25 | 0.66 |
| 0.87 | #N/A | #N/A | 1.48 | 0.71 | 1.93 | 0.91 |
| 0.23 | #N/A | #N/A | 0.67 | 0.20 | 0.81 | 0.35 |
| 0.82 | 1.27 | 0.63 | #N/A | #N/A | 1.53 | 0.80 |
| 0.97 | 2.30 | 0.93 | 2.81 | 0.96 | 2.30 | 0.96 |
| 0.95 | 1.95 | 0.87 | 1.75 | 0.80 | 2.13 | 0.94 |
| 0.53 | 1.01 | 0.47 | 0.81 | 0.30 | 0.81 | 0.35 |
| 0.93 | 2.67 | 0.96 | #N/A | #N/A | 2.74 | 0.98 |
| 0.31 | #N/A | #N/A | #N/A | #N/A | 1.01 | 0.51 |
| 0.42 | 0.95 | 0.45 | 1.17 | 0.55 | 0.86 | 0.39 |
| 0.05 | 0.42 | 0.10 | 0.46 | 0.08 | 0.56 | 0.15 |
| 0.40 | #N/A | #N/A | #N/A | #N/A | 0.89 | 0.41 |
| 0.58 | 1.13 | 0.55 | 0.95 | 0.41 | 1.13 | 0.59 |
| 0.80 | 1.70 | 0.81 | 1.44 | 0.68 | 1.52 | 0.79 |
| 0.90 | 2.54 | 0.96 | 2.09 | 0.88 | 1.53 | 0.80 |
| 0.70 | 1.35 | 0.67 | 1.74 | 0.81 | 1.18 | 0.63 |
| #N/A | #N/A | #N/A | #N/A | #N/A | #N/A | #N/A |
| 0.07 | 0.54 | 0.18 | 0.44 | 0.06 | 0.60 | 0.17 |
| #N/A | 0.91 | 0.42 | 0.91 | 0.38 | 0.72 | 0.28 |
| #N/A | 0.78 | 0.34 | 0.50 | 0.09 | 0.95 | 0.46 |
| 0.91 | 3.51 | 0.99 | 1.98 | 0.85 | 1.92 | 0.91 |
| #N/A | 1.44 | 0.71 | 1.88 | 0.85 | 1.30 | 0.69 |
| 0.73 | #N/A | #N/A | 2.33 | 0.94 | #N/A | #N/A |
| #N/A | #N/A | #N/A | #N/A | #N/A | #N/A | #N/A |
| 0.20 | 0.56 | 0.18 | 0.55 | 0.12 | 0.64 | 0.21 |
| 0.39 | 0.88 | 0.40 | 0.98 | 0.43 | 0.95 | 0.47 |
| #N/A | #N/A | #N/A | #N/A | #N/A | #N/A | #N/A |
| #N/A | 1.27 | 0.62 | 1.65 | 0.77 | 1.05 | 0.54 |
| #N/A | #N/A | #N/A | #N/A | #N/A | #N/A | #N/A |
| 0.93 | 2.64 | 0.96 | 2.37 | 0.94 | 2.08 | 0.94 |
| 0.03 | 0.32 | 0.04 | 0.26 | 0.01 | 0.33 | 0.02 |
| #N/A | #N/A | #N/A | #N/A | #N/A | #N/A | #N/A |
| #N/A | #N/A | #N/A | #N/A | #N/A | 0.79 | 0.33 |
| 0.77 | 1.47 | 0.72 | 1.48 | 0.71 | 1.46 | 0.77 |
| 0.25 | 0.78 | 0.33 | #N/A | #N/A | 1.19 | 0.63 |
| 0.46 | 0.89 | 0.40 | #N/A | #N/A | 0.87 | 0.39 |
| 0.27 | 0.81 | 0.35 | 0.70 | 0.23 | #N/A | #N/A |
| 0.75 | 1.17 | 0.56 | 1.14 | 0.53 | 1.65 | 0.84 |
| 0.99 | #N/A | #N/A | #N/A | #N/A | 1.49 | 0.78 |
| #N/A | #N/A | #N/A | #N/A | #N/A | #N/A | #N/A |
| 0.76 | 1.65 | 0.79 | 1.73 | 0.78 | 1.30 | 0.69 |

|      |      |      |      |      |      |      |
|------|------|------|------|------|------|------|
| 0.26 | 0.80 | 0.35 | 0.91 | 0.38 | 0.82 | 0.35 |
| 0.28 | 0.83 | 0.37 | 0.91 | 0.37 | 0.91 | 0.42 |
| 0.35 | 0.88 | 0.40 | #N/A | #N/A | 0.93 | 0.45 |
| 0.34 | 0.75 | 0.31 | 0.73 | 0.25 | 0.85 | 0.38 |
| 0.73 | 1.42 | 0.70 | 1.52 | 0.73 | 1.69 | 0.86 |
| 0.78 | 2.04 | 0.90 | 1.83 | 0.82 | 1.81 | 0.89 |
| 0.43 | 0.83 | 0.37 | 1.15 | 0.54 | 1.00 | 0.50 |
| 0.45 | 0.61 | 0.22 | 0.57 | 0.13 | 0.57 | 0.16 |
| 0.49 | 0.74 | 0.31 | 1.00 | 0.44 | 0.94 | 0.45 |
| 0.78 | 1.40 | 0.69 | 1.56 | 0.75 | 1.77 | 0.88 |
| 0.39 | 1.19 | 0.59 | 1.26 | 0.60 | 1.01 | 0.51 |
| 0.91 | 2.20 | 0.92 | 3.16 | 0.98 | 2.17 | 0.95 |
| 0.71 | 1.80 | 0.84 | 2.02 | 0.88 | 1.62 | 0.84 |
| #N/A | #N/A | #N/A | #N/A | #N/A | 1.01 | 0.51 |
| 0.64 | 1.32 | 0.66 | 1.32 | 0.63 | 1.15 | 0.61 |
| 0.86 | 1.44 | 0.71 | 1.50 | 0.71 | 1.40 | 0.74 |
| 0.68 | 1.63 | 0.79 | 0.79 | 0.29 | 1.23 | 0.65 |
| 0.61 | 1.17 | 0.58 | 1.22 | 0.58 | 0.94 | 0.45 |
| #N/A | 0.36 | 0.06 | #N/A | #N/A | 0.51 | 0.10 |
| 0.15 | 0.50 | 0.14 | 0.58 | 0.15 | 0.63 | 0.20 |
| #N/A | 0.50 | 0.15 | #N/A | #N/A | 0.42 | 0.05 |
| 0.51 | 1.39 | 0.69 | 1.48 | 0.71 | 0.95 | 0.46 |
| #N/A | #N/A | #N/A | #N/A | #N/A | #N/A | #N/A |
| 0.70 | #N/A | #N/A | #N/A | #N/A | 1.62 | 0.84 |
| #N/A | #N/A | #N/A | #N/A | #N/A | #N/A | #N/A |
| 0.86 | 1.92 | 0.73 | 1.54 | 0.71 | 1.19 | 0.63 |
| #N/A | #N/A | #N/A | #N/A | #N/A | #N/A | #N/A |
| 0.14 | 0.53 | 0.17 | 0.66 | 0.20 | 0.58 | 0.16 |
| #N/A | #N/A | #N/A | #N/A | #N/A | #N/A | #N/A |
| #N/A | #N/A | #N/A | #N/A | #N/A | #N/A | #N/A |
| 0.32 | 0.80 | 0.35 | 0.79 | 0.29 | 0.77 | 0.31 |
| 0.48 | 1.07 | 0.51 | #N/A | #N/A | #N/A | #N/A |
| #N/A | #N/A | #N/A | #N/A | #N/A | #N/A | #N/A |
| 0.54 | #N/A | #N/A | #N/A | #N/A | 0.77 | 0.32 |
| 0.90 | 1.85 | 0.85 | 2.13 | 0.90 | 2.00 | 0.92 |
| 0.25 | 0.85 | 0.39 | #N/A | #N/A | 0.66 | 0.23 |
| 0.81 | 1.47 | 0.73 | 1.56 | 0.74 | 1.62 | 0.83 |
| 0.58 | 0.83 | 0.37 | 1.09 | 0.50 | 0.95 | 0.46 |
| #N/A | #N/A | #N/A | #N/A | #N/A | #N/A | #N/A |
| 0.33 | 1.19 | 0.59 | #N/A | #N/A | #N/A | #N/A |
| 0.90 | 1.66 | 0.80 | 1.42 | 0.68 | 1.95 | 0.91 |
| #N/A | #N/A | #N/A | #N/A | #N/A | 1.09 | 0.56 |
| 0.88 | 1.64 | 0.79 | 1.89 | 0.85 | 1.67 | 0.85 |
| 0.80 | 1.46 | 0.73 | 1.23 | 0.58 | 1.14 | 0.60 |
| 0.32 | 0.60 | 0.21 | 0.88 | 0.35 | 0.81 | 0.35 |
| #N/A | #N/A | #N/A | #N/A | #N/A | #N/A | #N/A |
| 0.72 | 1.66 | 0.78 | 1.60 | 0.76 | 1.22 | 0.64 |
| #N/A | #N/A | #N/A | #N/A | #N/A | #N/A | #N/A |
| 0.60 | 1.14 | 0.55 | 0.90 | 0.37 | 1.35 | 0.72 |
| #N/A | #N/A | #N/A | #N/A | #N/A | #N/A | #N/A |
| 0.62 | 0.91 | 0.43 | #N/A | #N/A | 1.15 | 0.60 |

|      |      |      |      |      |      |      |
|------|------|------|------|------|------|------|
| #N/A | #N/A | #N/A | #N/A | #N/A | #N/A | #N/A |
| 0.31 | #N/A | #N/A | 0.80 | 0.30 | 0.77 | 0.32 |
| 0.07 | 0.36 | 0.06 | 0.41 | 0.05 | 0.31 | 0.02 |
| 0.35 | 0.73 | 0.30 | #N/A | #N/A | 0.58 | 0.16 |
| 0.03 | 0.29 | 0.03 | 0.45 | 0.06 | 0.49 | 0.10 |
| #N/A | 0.26 | 0.02 | 0.36 | 0.03 | 0.58 | 0.16 |
| 0.44 | #N/A | #N/A | #N/A | #N/A | #N/A | #N/A |
| #N/A | 0.32 | 0.04 | #N/A | #N/A | 0.78 | 0.33 |
| 0.38 | #N/A | #N/A | 0.88 | 0.36 | #N/A | #N/A |
| 0.98 | #N/A | #N/A | #N/A | #N/A | 3.19 | 0.99 |
| 0.29 | 0.40 | 0.08 | 0.51 | 0.11 | 0.44 | 0.07 |
| 0.89 | 1.69 | 0.80 | 1.74 | 0.81 | 2.06 | 0.93 |
| #N/A | #N/A | #N/A | #N/A | #N/A | #N/A | #N/A |
| 0.98 | #N/A | #N/A | 3.26 | 0.96 | 1.80 | 0.89 |
| #N/A | #N/A | #N/A | #N/A | #N/A | 0.44 | 0.07 |
| 0.77 | 1.93 | 0.87 | 1.46 | 0.70 | 2.18 | 0.95 |
| #N/A | #N/A | #N/A | #N/A | #N/A | #N/A | #N/A |
| #N/A | #N/A | #N/A | #N/A | #N/A | #N/A | #N/A |
| 0.76 | 1.45 | 0.72 | 1.64 | 0.77 | 1.58 | 0.82 |
| 0.91 | 2.07 | 0.89 | 1.94 | 0.87 | 1.56 | 0.81 |
| #N/A | #N/A | #N/A | #N/A | #N/A | #N/A | #N/A |
| 0.67 | #N/A | #N/A | #N/A | #N/A | 2.36 | 0.96 |
| 0.97 | 2.46 | 0.94 | 2.08 | 0.90 | 2.54 | 0.98 |
| #N/A | #N/A | #N/A | #N/A | #N/A | #N/A | #N/A |
| 0.51 | 0.92 | 0.43 | 0.81 | 0.31 | 0.90 | 0.42 |
| 0.43 | 1.11 | 0.54 | 1.12 | 0.52 | 0.87 | 0.39 |
| 0.34 | 0.93 | 0.43 | 0.95 | 0.40 | 0.91 | 0.43 |
| 0.54 | 1.33 | 0.63 | 1.20 | 0.56 | 0.90 | 0.42 |
| 0.63 | #N/A | #N/A | 1.37 | 0.66 | 0.99 | 0.49 |
| 0.68 | 0.83 | 0.37 | 1.02 | 0.45 | 0.95 | 0.46 |
| 0.49 | 0.75 | 0.32 | 0.82 | 0.31 | 1.12 | 0.59 |
| 0.54 | 0.66 | 0.25 | 0.74 | 0.25 | 1.20 | 0.63 |
| #N/A | #N/A | #N/A | #N/A | #N/A | #N/A | #N/A |
| 0.58 | 1.18 | 0.58 | 1.16 | 0.55 | 1.06 | 0.55 |
| 0.92 | 2.00 | 0.89 | 1.94 | 0.87 | 2.19 | 0.95 |
| 0.43 | 0.97 | 0.45 | 0.83 | 0.32 | 1.24 | 0.66 |
| 0.13 | 0.69 | 0.28 | #N/A | #N/A | 0.55 | 0.14 |
| #N/A | #N/A | #N/A | #N/A | #N/A | #N/A | #N/A |
| 0.67 | 1.60 | 0.78 | 1.78 | 0.81 | 1.55 | 0.81 |
| 0.59 | 1.18 | 0.58 | 1.33 | 0.63 | 1.26 | 0.67 |
| 0.41 | 1.22 | 0.59 | 1.28 | 0.61 | 1.42 | 0.75 |
| #N/A | #N/A | #N/A | #N/A | #N/A | #N/A | #N/A |
| #N/A | 0.36 | 0.06 | 0.40 | 0.04 | 0.37 | 0.03 |
| 0.56 | 1.10 | 0.53 | 1.10 | 0.51 | 1.06 | 0.54 |
| 0.00 | 0.10 | 0.00 | 0.21 | 0.00 | 0.17 | 0.00 |
| 0.29 | 0.64 | 0.25 | 0.77 | 0.28 | 0.80 | 0.34 |
| 0.29 | 0.76 | 0.32 | 0.55 | 0.13 | #N/A | #N/A |
| 0.93 | 2.21 | 0.90 | 1.57 | 0.75 | 1.98 | 0.92 |
| 0.24 | 0.63 | 0.24 | 0.67 | 0.21 | 0.97 | 0.48 |
| 0.61 | 1.13 | 0.56 | 1.19 | 0.56 | 0.96 | 0.47 |
| #N/A | #N/A | #N/A | #N/A | #N/A | #N/A | #N/A |

|      |      |      |      |      |      |      |
|------|------|------|------|------|------|------|
| 0.60 | 0.98 | 0.46 | 1.10 | 0.50 | #N/A | #N/A |
| #N/A | #N/A | #N/A | #N/A | #N/A | #N/A | #N/A |
| 0.72 | 1.76 | 0.81 | 1.57 | 0.74 | 0.93 | 0.45 |
| 0.96 | #N/A | #N/A | 3.79 | 0.99 | 2.15 | 0.95 |
| #N/A | #N/A | #N/A | #N/A | #N/A | #N/A | #N/A |
| #N/A | 2.24 | 0.93 | 2.07 | 0.88 | 1.80 | 0.89 |
| #N/A | #N/A | #N/A | #N/A | #N/A | #N/A | #N/A |
| 0.41 | 0.52 | 0.16 | 0.86 | 0.34 | 0.60 | 0.18 |
| 1.00 | 4.54 | 1.00 | 4.29 | 1.00 | #N/A | #N/A |
| #N/A | #N/A | #N/A | #N/A | #N/A | #N/A | #N/A |
| 0.54 | 1.39 | 0.69 | 1.52 | 0.73 | 1.25 | 0.67 |
| 0.38 | 1.51 | 0.74 | 1.05 | 0.47 | 1.09 | 0.56 |
| 0.71 | 1.52 | 0.75 | 1.90 | 0.85 | 1.37 | 0.73 |
| #N/A | 0.64 | 0.24 | 0.59 | 0.15 | #N/A | #N/A |
| 0.20 | 0.68 | 0.27 | 0.81 | 0.30 | 0.65 | 0.22 |
| 0.05 | 0.26 | 0.02 | 0.38 | 0.03 | 0.50 | 0.10 |
| 0.45 | 0.75 | 0.31 | 1.09 | 0.48 | 1.11 | 0.58 |
| #N/A | #N/A | #N/A | #N/A | #N/A | #N/A | #N/A |
| 0.83 | 1.45 | 0.72 | 1.80 | 0.83 | 1.67 | 0.85 |
| 0.65 | 1.31 | 0.65 | 1.89 | 0.85 | 0.98 | 0.49 |
| 0.23 | 0.80 | 0.35 | 0.71 | 0.23 | 0.89 | 0.41 |
| #N/A | #N/A | #N/A | #N/A | #N/A | #N/A | #N/A |
| 0.04 | #N/A | #N/A | 0.37 | 0.03 | 0.57 | 0.15 |
| 0.33 | #N/A | #N/A | #N/A | #N/A | 0.54 | 0.13 |
| 0.19 | #N/A | #N/A | #N/A | #N/A | 0.49 | 0.09 |
| 0.65 | 1.00 | 0.48 | 1.34 | 0.64 | 1.08 | 0.56 |
| 0.72 | 1.22 | 0.61 | 1.34 | 0.64 | 1.13 | 0.59 |
| 0.20 | 1.26 | 0.60 | 1.30 | 0.62 | 0.89 | 0.41 |
| #N/A | #N/A | #N/A | #N/A | #N/A | #N/A | #N/A |
| 0.91 | 1.98 | 0.88 | 1.81 | 0.83 | 2.12 | 0.94 |
| 0.21 | 0.59 | 0.21 | 0.69 | 0.22 | 0.59 | 0.17 |
| 0.38 | 0.73 | 0.30 | 0.62 | 0.17 | 0.77 | 0.32 |
| 0.21 | 0.69 | 0.28 | 0.68 | 0.21 | 0.58 | 0.16 |
| #N/A | 1.71 | 0.81 | 1.15 | 0.52 | 0.23 | 0.01 |
| 0.32 | 1.11 | 0.54 | 1.06 | 0.48 | 1.25 | 0.67 |
| 0.27 | 0.59 | 0.21 | #N/A | #N/A | 0.52 | 0.12 |
| 0.82 | 2.02 | 0.89 | 1.64 | 0.78 | 1.97 | 0.92 |
| #N/A | #N/A | #N/A | #N/A | #N/A | #N/A | #N/A |
| 0.30 | #N/A | #N/A | #N/A | #N/A | 0.43 | 0.06 |
| 0.12 | 0.43 | 0.10 | 0.45 | 0.07 | 0.33 | 0.02 |
| 0.09 | 0.39 | 0.07 | 0.57 | 0.14 | 0.29 | 0.01 |
| 0.26 | #N/A | #N/A | 0.59 | 0.16 | 0.45 | 0.07 |
| 0.42 | 0.87 | 0.39 | 0.92 | 0.39 | #N/A | #N/A |
| 0.92 | 1.68 | 0.81 | 1.56 | 0.74 | 1.48 | 0.78 |
| 0.70 | 1.79 | 0.84 | 2.24 | 0.92 | #N/A | #N/A |
| 0.91 | 2.11 | 0.90 | 2.22 | 0.92 | 1.83 | 0.89 |
| #N/A | #N/A | #N/A | #N/A | #N/A | #N/A | #N/A |
| 0.94 | 2.08 | 0.83 | #N/A | #N/A | 1.26 | 0.67 |
| 0.74 | #N/A | #N/A | #N/A | #N/A | #N/A | #N/A |
| #N/A | 0.32 | 0.06 | #N/A | #N/A | 0.87 | 0.40 |
| 0.95 | 2.62 | 0.96 | 3.64 | 0.89 | 1.86 | 0.90 |



|      |      |      |      |      |      |      |
|------|------|------|------|------|------|------|
| 0.63 | 1.33 | 0.66 | 1.20 | 0.56 | 1.14 | 0.60 |
| 0.97 | 3.57 | 0.99 | 3.82 | 0.99 | 3.17 | 0.99 |
| 0.43 | 1.07 | 0.52 | 1.08 | 0.50 | 1.14 | 0.60 |
| 0.20 | 0.72 | 0.29 | 0.68 | 0.21 | 0.96 | 0.47 |
| 0.68 | 1.54 | 0.75 | 1.61 | 0.74 | 1.18 | 0.62 |
| 0.40 | 0.87 | 0.40 | 1.13 | 0.52 | 0.84 | 0.37 |
| 0.23 | 0.65 | 0.25 | 0.90 | 0.37 | 0.61 | 0.18 |
| 0.37 | 0.74 | 0.31 | 0.74 | 0.26 | 0.73 | 0.28 |
| #N/A | #N/A | #N/A | #N/A | #N/A | #N/A | #N/A |
| #N/A | 1.20 | 0.59 | 1.43 | 0.69 | 0.84 | 0.37 |
| 0.75 | 1.70 | 0.81 | 1.77 | 0.82 | 1.56 | 0.81 |
| 0.41 | 0.90 | 0.41 | 1.13 | 0.53 | 0.75 | 0.31 |
| 0.76 | 1.54 | 0.76 | 1.61 | 0.76 | 1.30 | 0.69 |
| 0.76 | 1.58 | 0.77 | 1.28 | 0.61 | 1.38 | 0.74 |
| #N/A | #N/A | #N/A | #N/A | #N/A | #N/A | #N/A |
| #N/A | 1.84 | 0.83 | 2.02 | 0.88 | 2.70 | 0.98 |
| #N/A | 0.75 | 0.31 | 0.73 | 0.25 | 0.67 | 0.23 |
| 0.25 | 0.65 | 0.25 | 1.07 | 0.49 | 0.70 | 0.27 |
| #N/A | #N/A | #N/A | 0.69 | 0.22 | 0.82 | 0.35 |
| #N/A | #N/A | #N/A | #N/A | #N/A | #N/A | #N/A |
| 0.73 | 1.30 | 0.65 | 1.20 | 0.56 | 1.56 | 0.81 |
| 0.87 | 2.26 | 0.90 | 1.98 | 0.87 | 1.46 | 0.77 |
| 0.66 | 1.21 | 0.60 | 1.19 | 0.55 | 1.14 | 0.60 |
| 0.35 | 0.71 | 0.29 | 0.89 | 0.36 | 0.53 | 0.12 |
| 0.27 | 0.64 | 0.24 | 0.76 | 0.27 | 0.51 | 0.11 |
| 0.07 | 0.39 | 0.08 | 0.53 | 0.11 | 0.57 | 0.16 |
| 0.12 | 0.56 | 0.19 | 0.47 | 0.08 | 0.58 | 0.16 |
| 0.24 | 0.63 | 0.24 | 0.67 | 0.20 | 0.63 | 0.20 |
| 0.40 | 0.76 | 0.32 | 0.79 | 0.29 | 0.84 | 0.37 |
| 0.93 | 2.06 | 0.89 | 2.30 | 0.93 | 1.69 | 0.86 |
| 0.65 | #N/A | #N/A | 1.31 | 0.63 | 1.39 | 0.74 |
| 0.15 | 0.49 | 0.13 | 0.54 | 0.12 | #N/A | #N/A |
| 0.45 | 0.82 | 0.37 | 1.12 | 0.51 | 0.88 | 0.40 |
| #N/A | #N/A | #N/A | #N/A | #N/A | #N/A | #N/A |
| #N/A | 1.05 | 0.50 | 1.61 | 0.70 | 1.01 | 0.51 |
| 0.96 | #N/A | #N/A | 3.00 | 0.98 | #N/A | #N/A |
| #N/A | 1.49 | 0.67 | #N/A | #N/A | 0.95 | 0.46 |
| #N/A | #N/A | #N/A | #N/A | #N/A | #N/A | #N/A |
| #N/A | #N/A | #N/A | #N/A | #N/A | 0.50 | 0.10 |
| 0.94 | #N/A | #N/A | 3.79 | 0.99 | 2.77 | 0.98 |
| 0.60 | 1.29 | 0.64 | 1.99 | 0.86 | 1.54 | 0.80 |
| 0.77 | 1.52 | 0.74 | 1.34 | 0.64 | 1.12 | 0.58 |
| 0.73 | #N/A | #N/A | 1.24 | 0.59 | 1.53 | 0.80 |
| 0.41 | 0.88 | 0.40 | #N/A | #N/A | 0.80 | 0.34 |
| #N/A | #N/A | #N/A | #N/A | #N/A | #N/A | #N/A |
| 0.62 | 1.08 | 0.52 | 1.30 | 0.62 | 0.88 | 0.41 |
| 0.79 | 1.35 | 0.65 | #N/A | #N/A | 1.46 | 0.77 |
| 0.30 | #N/A | #N/A | 0.98 | 0.43 | 0.83 | 0.36 |
| 0.32 | 1.16 | 0.57 | #N/A | #N/A | 1.20 | 0.63 |
| 0.19 | 0.51 | 0.16 | 0.60 | 0.16 | 0.89 | 0.41 |
| 0.26 | 0.71 | 0.29 | 0.78 | 0.28 | 0.71 | 0.27 |

|      |      |      |      |      |      |      |
|------|------|------|------|------|------|------|
| 0.24 | 0.53 | 0.16 | 0.72 | 0.24 | #N/A | #N/A |
| 0.06 | #N/A | #N/A | 0.54 | 0.12 | 0.66 | 0.23 |
| 0.96 | 2.11 | 0.87 | 1.91 | 0.86 | 2.22 | 0.95 |
| #N/A | #N/A | #N/A | #N/A | #N/A | #N/A | #N/A |
| #N/A | #N/A | #N/A | #N/A | #N/A | 0.82 | 0.36 |
| #N/A | #N/A | #N/A | #N/A | #N/A | #N/A | #N/A |
| #N/A | #N/A | #N/A | #N/A | #N/A | #N/A | #N/A |
| 0.49 | #N/A | #N/A | 1.10 | 0.50 | #N/A | #N/A |
| 0.21 | 0.77 | 0.33 | 0.72 | 0.25 | #N/A | #N/A |
| #N/A | 0.88 | 0.40 | 0.88 | 0.35 | #N/A | #N/A |
| #N/A | #N/A | #N/A | #N/A | #N/A | 0.45 | 0.07 |
| 0.76 | 1.53 | 0.75 | #N/A | #N/A | 1.79 | 0.88 |
| 0.43 | 0.35 | 0.06 | #N/A | #N/A | 0.54 | 0.13 |
| 0.80 | 1.98 | 0.88 | 1.48 | 0.70 | 1.69 | 0.86 |
| #N/A | #N/A | #N/A | #N/A | #N/A | 0.38 | 0.03 |
| 0.87 | 1.42 | 0.63 | 2.50 | 0.94 | 1.41 | 0.75 |
| 0.54 | 0.90 | 0.41 | 1.27 | 0.60 | 0.82 | 0.36 |
| 0.64 | 1.44 | 0.71 | #N/A | #N/A | 1.15 | 0.60 |
| #N/A | #N/A | #N/A | #N/A | #N/A | #N/A | #N/A |
| 0.77 | 1.80 | 0.84 | 2.17 | 0.90 | 1.58 | 0.82 |
| 0.06 | 0.36 | 0.06 | 0.35 | 0.03 | 0.45 | 0.07 |
| #N/A | #N/A | #N/A | #N/A | #N/A | #N/A | #N/A |
| #N/A | #N/A | #N/A | #N/A | #N/A | #N/A | #N/A |
| #N/A | 2.40 | 0.94 | 3.39 | 0.98 | 2.08 | 0.94 |
| 0.93 | 1.92 | 0.86 | #N/A | #N/A | 1.94 | 0.91 |
| 0.45 | 0.82 | 0.36 | 1.20 | 0.57 | 1.03 | 0.52 |
| 0.63 | 1.15 | 0.57 | 1.11 | 0.49 | 0.94 | 0.45 |
| #N/A | #N/A | #N/A | 0.91 | 0.38 | #N/A | #N/A |
| 0.41 | #N/A | #N/A | 1.11 | 0.51 | #N/A | #N/A |
| 0.96 | 2.84 | 0.97 | 2.62 | 0.96 | 1.54 | 0.80 |
| #N/A | #N/A | #N/A | #N/A | #N/A | #N/A | #N/A |
| 0.65 | 1.36 | 0.67 | 1.20 | 0.57 | 1.43 | 0.76 |
| 0.22 | 0.53 | 0.16 | 0.45 | 0.06 | 0.77 | 0.32 |
| 0.54 | 1.22 | 0.61 | 1.09 | 0.50 | 0.97 | 0.48 |
| 0.74 | 1.66 | 0.80 | 0.96 | 0.41 | 1.49 | 0.78 |
| #N/A | #N/A | #N/A | #N/A | #N/A | #N/A | #N/A |
| 0.77 | 0.99 | 0.45 | #N/A | #N/A | 0.83 | 0.36 |
| #N/A | #N/A | #N/A | #N/A | #N/A | #N/A | #N/A |
| 0.73 | 1.07 | 0.51 | #N/A | #N/A | 1.66 | 0.85 |
| #N/A | #N/A | #N/A | #N/A | #N/A | #N/A | #N/A |
| 0.82 | #N/A | #N/A | 1.42 | 0.68 | #N/A | #N/A |
| 0.19 | 0.57 | 0.19 | 0.54 | 0.11 | 0.68 | 0.25 |
| 0.09 | 0.46 | 0.11 | 0.42 | 0.05 | 0.57 | 0.15 |
| 0.27 | 0.69 | 0.27 | #N/A | #N/A | 0.46 | 0.08 |
| 0.82 | 1.79 | 0.84 | 1.57 | 0.75 | 1.63 | 0.84 |
| 0.89 | #N/A | #N/A | 2.31 | 0.92 | 1.69 | 0.86 |
| 0.67 | 1.27 | 0.63 | 1.51 | 0.73 | 0.72 | 0.28 |
| #N/A | 1.86 | 0.86 | #N/A | #N/A | 1.98 | 0.92 |
| 0.18 | 0.65 | 0.25 | 0.79 | 0.30 | 0.57 | 0.15 |
| #N/A | #N/A | #N/A | #N/A | #N/A | #N/A | #N/A |
| 0.02 | 0.23 | 0.02 | 0.36 | 0.03 | 0.40 | 0.05 |

|      |      |      |      |      |      |      |
|------|------|------|------|------|------|------|
| 0.21 | 0.62 | 0.23 | 0.61 | 0.16 | 0.64 | 0.21 |
| 0.41 | 0.91 | 0.42 | 1.11 | 0.51 | 0.98 | 0.49 |
| 0.92 | #N/A | #N/A | 1.40 | 0.67 | #N/A | #N/A |
| 0.51 | 0.85 | 0.38 | #N/A | #N/A | 0.79 | 0.33 |
| 0.98 | 2.85 | 0.97 | 3.81 | 0.99 | 2.18 | 0.95 |
| 0.30 | 0.80 | 0.35 | 0.71 | 0.24 | 0.66 | 0.22 |
| 0.71 | #N/A | #N/A | #N/A | #N/A | 0.75 | 0.30 |
| #N/A | 1.97 | 0.88 | #N/A | #N/A | #N/A | #N/A |
| 0.58 | 1.07 | 0.52 | 1.29 | 0.62 | 0.99 | 0.49 |
| 0.06 | #N/A | #N/A | 0.59 | 0.15 | #N/A | #N/A |
| 0.75 | 1.64 | 0.79 | 1.82 | 0.84 | 1.22 | 0.65 |
| 0.25 | 0.67 | 0.26 | 0.64 | 0.18 | 1.57 | 0.82 |
| 0.89 | #N/A | #N/A | #N/A | #N/A | 2.08 | 0.94 |
| 0.07 | 0.41 | 0.09 | 0.38 | 0.04 | 0.33 | 0.02 |
| 0.58 | 1.12 | 0.54 | 1.12 | 0.52 | 1.07 | 0.55 |
| 0.08 | 0.42 | 0.10 | 0.52 | 0.11 | 0.56 | 0.14 |
| #N/A | #N/A | #N/A | #N/A | #N/A | #N/A | #N/A |
| 0.52 | 0.88 | 0.40 | 0.83 | 0.32 | 0.76 | 0.31 |
| 0.86 | 1.93 | 0.86 | 1.65 | 0.78 | #N/A | #N/A |
| 0.32 | #N/A | #N/A | #N/A | #N/A | 0.94 | 0.46 |
| #N/A | #N/A | #N/A | #N/A | #N/A | #N/A | #N/A |
| 0.89 | 1.72 | 0.81 | #N/A | #N/A | 1.49 | 0.78 |
| #N/A | #N/A | #N/A | #N/A | #N/A | 0.82 | 0.35 |
| 0.81 | 1.19 | 0.58 | 1.32 | 0.63 | 1.15 | 0.60 |
| #N/A | #N/A | #N/A | #N/A | #N/A | #N/A | #N/A |
| #N/A | 1.87 | 0.82 | #N/A | #N/A | #N/A | #N/A |
| #N/A | #N/A | #N/A | #N/A | #N/A | #N/A | #N/A |
| #N/A | #N/A | #N/A | #N/A | #N/A | #N/A | #N/A |
| #N/A | 1.47 | 0.72 | #N/A | #N/A | 1.79 | 0.88 |
| 0.93 | 2.40 | 0.95 | 2.44 | 0.94 | 2.40 | 0.97 |
| #N/A | #N/A | #N/A | #N/A | #N/A | #N/A | #N/A |
| #N/A | #N/A | #N/A | #N/A | #N/A | #N/A | #N/A |
| #N/A | #N/A | #N/A | #N/A | #N/A | #N/A | #N/A |
| #N/A | #N/A | #N/A | #N/A | #N/A | 0.93 | 0.45 |
| 0.70 | 1.58 | 0.77 | 1.77 | 0.82 | 1.44 | 0.76 |
| #N/A | 1.73 | 0.80 | 1.62 | 0.76 | 1.36 | 0.72 |
| #N/A | #N/A | #N/A | #N/A | #N/A | #N/A | #N/A |
| #N/A | #N/A | #N/A | #N/A | #N/A | #N/A | #N/A |
| #N/A | #N/A | #N/A | #N/A | #N/A | #N/A | #N/A |
| #N/A | #N/A | #N/A | #N/A | #N/A | #N/A | #N/A |
| #N/A | #N/A | #N/A | #N/A | #N/A | #N/A | #N/A |
| 0.89 | 1.56 | 0.76 | 2.59 | 0.96 | 1.54 | 0.80 |
| #N/A | #N/A | #N/A | #N/A | #N/A | 0.90 | 0.42 |
| 0.04 | 0.38 | 0.09 | 0.35 | 0.03 | 0.19 | 0.00 |
| #N/A | #N/A | #N/A | 1.01 | 0.44 | 1.33 | 0.71 |
| #N/A | 1.03 | 0.49 | 0.83 | 0.32 | 0.99 | 0.50 |
| 0.63 | 1.33 | 0.66 | 1.29 | 0.62 | 1.13 | 0.59 |
| 0.66 | 1.22 | 0.60 | 1.61 | 0.77 | 1.15 | 0.60 |
| 0.94 | 1.97 | 0.88 | 2.33 | 0.92 | 2.71 | 0.98 |
| #N/A | #N/A | #N/A | #N/A | #N/A | #N/A | #N/A |
| 0.09 | 0.49 | 0.14 | 1.19 | 0.53 | 0.67 | 0.23 |

|      |      |      |      |      |      |      |
|------|------|------|------|------|------|------|
| 0.66 | #N/A | #N/A | 1.37 | 0.66 | 1.69 | 0.86 |
| 0.40 | 1.09 | 0.53 | 0.94 | 0.38 | 0.79 | 0.33 |
| 0.48 | 1.21 | 0.60 | 1.34 | 0.64 | 0.84 | 0.37 |
| 0.75 | 1.55 | 0.76 | 1.61 | 0.76 | 1.67 | 0.85 |
| 0.80 | 0.71 | 0.29 | 2.23 | 0.89 | 1.61 | 0.83 |
| 0.69 | 1.25 | 0.62 | 1.53 | 0.73 | 1.47 | 0.78 |
| 0.43 | 1.05 | 0.50 | 0.90 | 0.37 | 1.23 | 0.66 |
| 0.66 | 0.81 | 0.35 | 0.70 | 0.23 | 1.07 | 0.56 |
| 0.79 | 1.57 | 0.77 | 1.42 | 0.68 | 1.51 | 0.79 |
| 0.63 | 1.30 | 0.65 | 1.09 | 0.50 | 1.18 | 0.63 |
| #N/A | 1.20 | 0.60 | #N/A | #N/A | #N/A | #N/A |
| #N/A | #N/A | #N/A | #N/A | #N/A | #N/A | #N/A |
| #N/A | #N/A | #N/A | #N/A | #N/A | #N/A | #N/A |
| 0.69 | 1.29 | 0.64 | 1.03 | 0.45 | 1.18 | 0.62 |
| 0.45 | 0.65 | 0.25 | #N/A | #N/A | 0.51 | 0.10 |
| #N/A | #N/A | #N/A | #N/A | #N/A | #N/A | #N/A |
| 0.12 | #N/A | #N/A | #N/A | #N/A | #N/A | #N/A |
| 0.67 | 1.32 | 0.65 | 1.18 | 0.56 | 1.14 | 0.60 |
| #N/A | #N/A | #N/A | #N/A | #N/A | #N/A | #N/A |
| #N/A | #N/A | #N/A | #N/A | #N/A | #N/A | #N/A |
| 0.58 | 1.04 | 0.50 | #N/A | #N/A | 1.42 | 0.75 |
| 0.94 | #N/A | #N/A | #N/A | #N/A | 1.86 | 0.90 |
| 0.37 | 0.95 | 0.45 | #N/A | #N/A | 0.73 | 0.29 |
| 0.14 | 0.69 | 0.28 | 0.65 | 0.19 | 0.56 | 0.15 |
| 0.87 | 1.59 | 0.74 | 1.70 | 0.80 | 1.21 | 0.64 |
| 0.81 | 2.10 | 0.91 | 1.44 | 0.69 | 1.82 | 0.89 |
| #N/A | #N/A | #N/A | #N/A | #N/A | 0.95 | 0.46 |
| 0.26 | 1.03 | 0.50 | 0.69 | 0.22 | 0.83 | 0.36 |
| 0.85 | 1.75 | 0.83 | 1.39 | 0.67 | 1.60 | 0.83 |
| 0.94 | #N/A | #N/A | 2.00 | 0.88 | 2.45 | 0.97 |
| 0.68 | 1.26 | 0.62 | 1.54 | 0.74 | 1.73 | 0.87 |
| 0.05 | 0.41 | 0.09 | 0.53 | 0.11 | 0.51 | 0.11 |
| 0.04 | 0.48 | 0.13 | 0.72 | 0.24 | 0.63 | 0.20 |
| 0.58 | 1.60 | 0.78 | 1.19 | 0.56 | 1.14 | 0.60 |
| 0.57 | 1.39 | 0.67 | 1.15 | 0.53 | 1.12 | 0.59 |
| 0.53 | 1.02 | 0.47 | 1.02 | 0.44 | 1.05 | 0.54 |
| 0.53 | 0.97 | 0.46 | 1.15 | 0.54 | 1.03 | 0.52 |
| 0.70 | 1.16 | 0.57 | 1.32 | 0.63 | 1.20 | 0.63 |
| 0.28 | 0.86 | 0.39 | 0.85 | 0.34 | 1.24 | 0.66 |
| 0.30 | 0.65 | 0.26 | 0.78 | 0.29 | 0.66 | 0.23 |
| 0.15 | 0.56 | 0.18 | 0.61 | 0.16 | #N/A | #N/A |
| 0.03 | 0.32 | 0.04 | 0.47 | 0.08 | 0.49 | 0.09 |
| 0.70 | 1.51 | 0.74 | #N/A | #N/A | 1.63 | 0.84 |
| 0.18 | #N/A | #N/A | 0.79 | 0.29 | #N/A | #N/A |
| 0.81 | 0.94 | 0.42 | 1.33 | 0.62 | 1.46 | 0.77 |
| 0.36 | 0.79 | 0.34 | 0.65 | 0.19 | 0.95 | 0.47 |
| 0.11 | 0.56 | 0.19 | 0.37 | 0.03 | 0.60 | 0.18 |
| 0.03 | 0.31 | 0.04 | #N/A | #N/A | #N/A | #N/A |
| 0.30 | 0.46 | 0.13 | 0.54 | 0.12 | 0.55 | 0.14 |
| 0.06 | 0.30 | 0.04 | 0.53 | 0.11 | 0.52 | 0.12 |
| 0.63 | 1.33 | 0.66 | 1.06 | 0.48 | 1.08 | 0.56 |

|      |      |      |      |      |      |      |
|------|------|------|------|------|------|------|
| 0.70 | 0.96 | 0.45 | 0.93 | 0.39 | 1.44 | 0.76 |
| 0.18 | 0.32 | 0.09 | #N/A | #N/A | 0.78 | 0.32 |
| #N/A | #N/A | #N/A | #N/A | #N/A | 0.52 | 0.11 |
| 0.12 | 0.49 | 0.14 | 0.52 | 0.10 | 0.57 | 0.15 |
| 0.81 | 2.22 | 0.92 | 2.12 | 0.90 | 2.04 | 0.93 |
| 0.32 | 0.89 | 0.41 | 0.97 | 0.42 | 0.71 | 0.27 |
| 0.65 | 1.28 | 0.63 | 1.40 | 0.66 | 1.06 | 0.55 |
| #N/A | #N/A | #N/A | #N/A | #N/A | #N/A | #N/A |
| 0.30 | 0.79 | 0.35 | 0.69 | 0.22 | 1.02 | 0.52 |
| #N/A | 0.75 | 0.31 | 0.88 | 0.36 | 0.75 | 0.30 |
| #N/A | 0.76 | 0.32 | #N/A | #N/A | 1.17 | 0.62 |
| 0.14 | 0.43 | 0.10 | 0.67 | 0.21 | 0.49 | 0.10 |
| 0.56 | 1.16 | 0.56 | 1.81 | 0.82 | 1.74 | 0.87 |
| #N/A | #N/A | #N/A | #N/A | #N/A | #N/A | #N/A |
| 0.88 | 2.14 | 0.91 | 1.91 | 0.86 | 1.78 | 0.88 |
| #N/A | 0.21 | 0.01 | #N/A | #N/A | 0.30 | 0.02 |
| 0.45 | 0.97 | 0.46 | 0.86 | 0.34 | 0.79 | 0.33 |
| 0.26 | #N/A | #N/A | 0.55 | 0.13 | #N/A | #N/A |
| 0.89 | 1.51 | 0.74 | 1.71 | 0.80 | 1.65 | 0.85 |
| 0.32 | 1.50 | 0.73 | 1.06 | 0.47 | 0.94 | 0.46 |
| 0.06 | #N/A | #N/A | 0.39 | 0.04 | 0.35 | 0.03 |
| #N/A | #N/A | #N/A | #N/A | #N/A | #N/A | #N/A |
| 0.41 | #N/A | #N/A | 0.86 | 0.34 | 0.63 | 0.20 |
| 0.72 | 1.17 | 0.58 | 1.57 | 0.72 | 1.28 | 0.68 |
| #N/A | #N/A | #N/A | #N/A | #N/A | #N/A | #N/A |
| 0.85 | 1.66 | 0.80 | 1.82 | 0.84 | 1.46 | 0.77 |
| 0.67 | 1.62 | 0.77 | 1.67 | 0.79 | 1.55 | 0.81 |
| 0.20 | 0.57 | 0.20 | 0.99 | 0.43 | 0.72 | 0.28 |
| 0.31 | 0.72 | 0.30 | 0.91 | 0.38 | 1.04 | 0.53 |
| #N/A | #N/A | #N/A | #N/A | #N/A | #N/A | #N/A |
| 0.84 | 2.34 | 0.93 | 2.21 | 0.79 | 1.61 | 0.83 |
| #N/A | #N/A | #N/A | #N/A | #N/A | #N/A | #N/A |
| 0.64 | 1.36 | 0.65 | 1.51 | 0.60 | 1.42 | 0.75 |
| #N/A | #N/A | #N/A | #N/A | #N/A | 0.89 | 0.42 |
| 0.60 | 1.80 | 0.83 | #N/A | #N/A | #N/A | #N/A |
| 0.16 | 0.61 | 0.22 | 0.77 | 0.28 | 0.60 | 0.18 |
| #N/A | #N/A | #N/A | #N/A | #N/A | 0.61 | 0.18 |
| 0.01 | #N/A | #N/A | #N/A | #N/A | 0.51 | 0.11 |
| #N/A | 1.41 | 0.70 | #N/A | #N/A | 1.30 | 0.69 |
| #N/A | #N/A | #N/A | #N/A | #N/A | #N/A | #N/A |
| 0.77 | #N/A | #N/A | #N/A | #N/A | 1.00 | 0.50 |
| #N/A | 0.32 | 0.04 | 0.37 | 0.03 | 0.41 | 0.05 |
| 0.05 | 0.32 | 0.04 | 0.37 | 0.03 | 0.41 | 0.05 |
| 0.76 | 1.62 | 0.78 | 1.20 | 0.57 | 1.45 | 0.77 |
| 0.67 | 1.53 | 0.75 | 1.42 | 0.68 | 1.76 | 0.87 |
| 0.96 | 1.40 | 0.70 | 2.93 | 0.98 | 2.56 | 0.98 |
| 0.45 | 0.98 | 0.47 | 0.93 | 0.39 | 0.95 | 0.47 |
| 0.30 | 0.81 | 0.36 | 0.76 | 0.27 | 0.87 | 0.40 |
| #N/A | 1.66 | 0.79 | #N/A | #N/A | 1.13 | 0.59 |
| 0.10 | 0.65 | 0.25 | 0.66 | 0.20 | 0.73 | 0.29 |
| #N/A | 0.93 | 0.43 | 0.71 | 0.23 | 1.01 | 0.51 |

|      |      |      |      |      |      |      |
|------|------|------|------|------|------|------|
| #N/A | #N/A | #N/A | #N/A | #N/A | #N/A | #N/A |
| 0.58 | #N/A | #N/A | #N/A | #N/A | #N/A | #N/A |
| 0.07 | 0.41 | 0.09 | 0.49 | 0.09 | 0.46 | 0.08 |
| #N/A | 0.53 | 0.17 | 0.68 | 0.22 | 0.40 | 0.05 |
| 0.90 | #N/A | #N/A | 2.21 | 0.92 | 2.11 | 0.94 |
| 0.58 | 1.54 | 0.75 | 1.37 | 0.65 | 1.87 | 0.90 |
| #N/A | 0.92 | 0.43 | #N/A | #N/A | #N/A | #N/A |
| 0.38 | 0.84 | 0.38 | #N/A | #N/A | 0.76 | 0.31 |
| 0.54 | #N/A | #N/A | 1.13 | 0.45 | #N/A | #N/A |
| #N/A | #N/A | #N/A | #N/A | #N/A | #N/A | #N/A |
| 0.71 | #N/A | #N/A | 1.97 | 0.87 | 1.70 | 0.86 |
| #N/A | #N/A | #N/A | #N/A | #N/A | #N/A | #N/A |
| 0.56 | 1.11 | 0.55 | 1.28 | 0.61 | 1.05 | 0.54 |
| 0.09 | 0.46 | 0.13 | 0.86 | 0.35 | 0.53 | 0.12 |
| #N/A | 0.61 | 0.22 | 0.94 | 0.40 | 0.63 | 0.20 |
| 0.29 | 1.31 | 0.65 | 1.40 | 0.66 | 0.76 | 0.31 |
| 0.67 | 1.11 | 0.54 | 1.21 | 0.57 | 1.09 | 0.56 |
| 0.81 | 1.15 | 0.57 | 1.32 | 0.63 | #N/A | #N/A |
| 0.81 | 1.77 | 0.81 | 1.96 | 0.87 | 1.35 | 0.72 |
| 0.62 | 1.28 | 0.63 | 1.28 | 0.61 | 1.03 | 0.53 |
| #N/A | #N/A | #N/A | #N/A | #N/A | #N/A | #N/A |
| 0.02 | 0.40 | 0.08 | 0.36 | 0.03 | 0.44 | 0.06 |
| 0.09 | 0.37 | 0.08 | 0.35 | 0.04 | 0.45 | 0.07 |
| 0.92 | 2.07 | 0.90 | 2.05 | 0.88 | 1.79 | 0.88 |
| #N/A | #N/A | #N/A | #N/A | #N/A | #N/A | #N/A |
| 0.51 | 1.12 | 0.55 | 1.01 | 0.45 | 1.32 | 0.70 |
| 0.40 | #N/A | #N/A | 1.00 | 0.44 | 1.00 | 0.50 |
| 0.09 | #N/A | #N/A | #N/A | #N/A | #N/A | #N/A |
| 0.73 | 1.13 | 0.55 | 1.69 | 0.79 | 1.29 | 0.68 |
| 0.66 | 1.28 | 0.64 | #N/A | #N/A | 0.86 | 0.39 |
| 0.58 | 1.05 | 0.51 | 1.41 | 0.67 | 0.91 | 0.43 |
| 0.47 | 0.99 | 0.47 | 1.00 | 0.44 | 1.00 | 0.50 |
| #N/A | 0.39 | 0.09 | 0.67 | 0.21 | #N/A | #N/A |
| #N/A | #N/A | #N/A | #N/A | #N/A | 1.43 | 0.76 |
| 0.29 | 0.67 | 0.26 | 0.73 | 0.25 | 0.60 | 0.18 |
| 0.70 | 1.73 | 0.82 | 1.49 | 0.71 | 1.63 | 0.84 |
| 0.37 | 0.78 | 0.33 | 0.61 | 0.16 | 0.93 | 0.44 |
| 0.79 | 1.72 | 0.82 | 1.75 | 0.81 | 1.32 | 0.70 |
| 0.91 | 2.01 | 0.88 | 1.80 | 0.83 | 1.67 | 0.85 |
| 0.86 | #N/A | #N/A | 1.90 | 0.85 | 1.39 | 0.74 |
| 0.32 | 0.43 | 0.11 | 0.50 | 0.10 | #N/A | #N/A |
| 0.23 | #N/A | #N/A | #N/A | #N/A | #N/A | #N/A |
| #N/A | #N/A | #N/A | #N/A | #N/A | #N/A | #N/A |
| 0.31 | 0.78 | 0.34 | 0.82 | 0.31 | 0.86 | 0.39 |
| 0.80 | 2.21 | 0.92 | 1.83 | 0.84 | 2.01 | 0.92 |
| 0.26 | 0.74 | 0.31 | 0.90 | 0.37 | 0.65 | 0.22 |
| 0.19 | 0.57 | 0.19 | #N/A | #N/A | 0.53 | 0.12 |
| 0.98 | #N/A | #N/A | #N/A | #N/A | 2.64 | 0.98 |
| 0.47 | 0.92 | 0.43 | #N/A | #N/A | 0.68 | 0.24 |
| 0.07 | 0.48 | 0.13 | 0.39 | 0.04 | 0.45 | 0.07 |
| 0.93 | 1.80 | 0.84 | 2.03 | 0.88 | 1.94 | 0.91 |

|      |      |      |      |      |      |      |
|------|------|------|------|------|------|------|
| #N/A | #N/A | #N/A | 0.58 | 0.17 | 0.53 | 0.12 |
| 0.83 | 1.69 | 0.81 | 1.64 | 0.77 | 1.28 | 0.68 |
| 0.80 | 1.82 | 0.84 | 1.79 | 0.83 | 1.24 | 0.66 |
| 0.24 | 0.57 | 0.20 | 0.88 | 0.35 | 0.69 | 0.25 |
| 0.81 | 1.42 | 0.70 | 2.11 | 0.90 | 1.06 | 0.55 |
| 0.02 | 0.24 | 0.02 | 0.31 | 0.02 | #N/A | #N/A |
| #N/A | #N/A | #N/A | #N/A | #N/A | #N/A | #N/A |
| 0.89 | #N/A | #N/A | #N/A | #N/A | 1.40 | 0.74 |
| 0.43 | 1.01 | 0.49 | 0.78 | 0.29 | 1.10 | 0.57 |
| 0.08 | 0.40 | 0.08 | 0.43 | 0.06 | 0.57 | 0.16 |
| 0.43 | 0.83 | 0.37 | 1.02 | 0.46 | 0.74 | 0.30 |
| 0.53 | #N/A | #N/A | #N/A | #N/A | 0.99 | 0.50 |
| 0.76 | 1.10 | 0.53 | 1.54 | 0.66 | 1.61 | 0.83 |
| 0.88 | #N/A | #N/A | #N/A | #N/A | 1.54 | 0.80 |
| 0.39 | 0.53 | 0.16 | 0.86 | 0.34 | 0.55 | 0.14 |
| #N/A | #N/A | #N/A | #N/A | #N/A | #N/A | #N/A |
| 0.23 | 0.71 | 0.29 | 0.78 | 0.28 | 0.82 | 0.36 |
| 0.33 | #N/A | #N/A | 1.05 | 0.46 | 0.77 | 0.32 |
| 0.67 | #N/A | #N/A | 1.53 | 0.71 | 1.61 | 0.83 |
| #N/A | 1.67 | 0.78 | 1.54 | 0.73 | #N/A | #N/A |
| #N/A | 0.59 | 0.23 | 0.55 | 0.12 | 0.46 | 0.08 |
| 0.60 | #N/A | #N/A | 1.16 | 0.54 | 0.85 | 0.38 |
| #N/A | 0.25 | 0.02 | 0.58 | 0.15 | 0.47 | 0.08 |
| 0.27 | 0.68 | 0.27 | 0.98 | 0.43 | 0.62 | 0.20 |
| 0.61 | 1.23 | 0.61 | 1.44 | 0.69 | 1.19 | 0.63 |
| 0.91 | 1.78 | 0.83 | 1.64 | 0.78 | 2.37 | 0.97 |
| 0.11 | 0.49 | 0.13 | 0.41 | 0.05 | 0.61 | 0.19 |
| 0.11 | #N/A | #N/A | 0.59 | 0.15 | 0.59 | 0.17 |
| #N/A | 1.34 | 0.66 | 1.44 | 0.69 | 0.65 | 0.22 |
| 0.69 | 1.21 | 0.60 | 1.07 | 0.49 | 1.02 | 0.52 |
| 0.89 | 3.15 | 0.99 | #N/A | #N/A | 2.38 | 0.97 |
| #N/A | #N/A | #N/A | #N/A | #N/A | 0.32 | 0.02 |
| 0.75 | 1.65 | 0.78 | #N/A | #N/A | #N/A | #N/A |
| 0.80 | 1.89 | 0.86 | 2.12 | 0.90 | #N/A | #N/A |
| 0.05 | 0.39 | 0.08 | 0.31 | 0.02 | 0.32 | 0.02 |
| 0.20 | 0.55 | 0.18 | 0.45 | 0.07 | 0.48 | 0.09 |
| 0.00 | 0.14 | 0.00 | 0.25 | 0.01 | 0.24 | 0.01 |
| 0.74 | #N/A | #N/A | 1.53 | 0.73 | #N/A | #N/A |
| 0.58 | 1.32 | 0.66 | 1.27 | 0.60 | 1.43 | 0.76 |
| #N/A | #N/A | #N/A | #N/A | #N/A | 0.78 | 0.33 |
| 0.91 | 3.30 | 0.98 | 3.07 | 0.98 | 1.73 | 0.87 |
| 0.43 | 1.32 | 0.64 | 1.00 | 0.44 | 1.22 | 0.65 |
| 0.71 | 1.16 | 0.56 | 1.92 | 0.71 | 1.23 | 0.65 |
| 0.20 | #N/A | #N/A | #N/A | #N/A | 0.28 | 0.01 |
| 0.70 | 1.07 | 0.52 | 1.69 | 0.79 | 1.36 | 0.72 |
| 0.32 | #N/A | #N/A | 0.77 | 0.28 | 0.85 | 0.38 |
| #N/A | 0.53 | 0.16 | 0.49 | 0.09 | 0.72 | 0.28 |
| 0.58 | #N/A | #N/A | #N/A | #N/A | 1.24 | 0.66 |
| #N/A | #N/A | #N/A | #N/A | #N/A | #N/A | #N/A |
| #N/A | #N/A | #N/A | #N/A | #N/A | 0.35 | 0.03 |
| 0.58 | 0.93 | 0.43 | #N/A | #N/A | 1.11 | 0.57 |

|      |      |      |      |      |      |      |
|------|------|------|------|------|------|------|
| #N/A | #N/A | #N/A | #N/A | #N/A | #N/A | #N/A |
| #N/A | #N/A | #N/A | #N/A | #N/A | 0.90 | 0.42 |
| 0.52 | #N/A | #N/A | 1.44 | 0.69 | 1.33 | 0.71 |
| 0.26 | 0.60 | 0.22 | 0.78 | 0.28 | #N/A | #N/A |
| #N/A | #N/A | #N/A | #N/A | #N/A | #N/A | #N/A |
| 0.10 | 0.39 | 0.07 | 0.41 | 0.05 | 0.62 | 0.19 |
| 0.78 | #N/A | #N/A | 2.77 | 0.95 | 1.95 | 0.91 |
| 0.28 | #N/A | #N/A | #N/A | #N/A | #N/A | #N/A |
| 0.72 | 1.79 | 0.83 | #N/A | #N/A | 1.86 | 0.90 |
| #N/A | #N/A | #N/A | #N/A | #N/A | 0.70 | 0.26 |
| #N/A | #N/A | #N/A | #N/A | #N/A | #N/A | #N/A |
| 0.94 | 2.72 | 0.97 | 2.06 | 0.89 | #N/A | #N/A |
| 0.37 | 0.92 | 0.43 | 0.97 | 0.42 | 0.91 | 0.43 |
| #N/A | #N/A | #N/A | #N/A | #N/A | #N/A | #N/A |
| 0.54 | 1.17 | 0.58 | 1.23 | 0.57 | 1.11 | 0.58 |
| 0.93 | 1.96 | 0.88 | 2.39 | 0.94 | 1.95 | 0.92 |
| 0.73 | 1.50 | 0.74 | 1.43 | 0.69 | 1.42 | 0.75 |
| #N/A | #N/A | #N/A | #N/A | #N/A | 0.79 | 0.33 |
| 0.62 | 0.92 | 0.43 | 0.92 | 0.38 | 1.11 | 0.57 |
| #N/A | #N/A | #N/A | #N/A | #N/A | #N/A | #N/A |
| 0.95 | 1.87 | 0.86 | #N/A | #N/A | 2.29 | 0.96 |
| 0.12 | 0.59 | 0.21 | 0.51 | 0.10 | 0.61 | 0.19 |
| #N/A | 0.42 | 0.10 | 0.78 | 0.28 | 0.39 | 0.04 |
| 0.92 | #N/A | #N/A | #N/A | #N/A | 1.32 | 0.70 |
| 0.58 | 1.51 | 0.73 | 1.11 | 0.51 | 1.14 | 0.60 |
| 0.70 | 1.43 | 0.71 | 1.29 | 0.58 | 1.29 | 0.68 |
| 0.61 | 1.68 | 0.79 | 1.84 | 0.82 | 2.11 | 0.94 |
| 0.36 | 1.14 | 0.54 | 0.94 | 0.39 | 0.75 | 0.30 |
| #N/A | #N/A | #N/A | #N/A | #N/A | #N/A | #N/A |
| 0.36 | 1.11 | 0.54 | 1.11 | 0.51 | 0.94 | 0.45 |
| 0.90 | 1.96 | 0.87 | 2.51 | 0.95 | 1.72 | 0.87 |
| 0.95 | 2.34 | 0.92 | 2.01 | 0.88 | 2.86 | 0.99 |
| 0.51 | 0.94 | 0.44 | #N/A | #N/A | 0.79 | 0.34 |
| 0.27 | 0.76 | 0.32 | 0.98 | 0.43 | 0.67 | 0.23 |
| 0.43 | 0.98 | 0.46 | 1.19 | 0.56 | 0.95 | 0.46 |
| #N/A | 1.80 | 0.84 | 1.60 | 0.76 | #N/A | #N/A |
| 0.43 | 1.02 | 0.49 | 1.16 | 0.52 | 0.74 | 0.30 |
| 0.73 | 1.31 | 0.65 | 1.80 | 0.82 | 1.80 | 0.89 |
| 0.87 | 2.03 | 0.89 | 1.59 | 0.75 | 1.59 | 0.82 |
| 0.03 | 0.36 | 0.09 | #N/A | #N/A | 0.57 | 0.15 |
| 0.49 | 1.05 | 0.50 | 1.12 | 0.52 | 0.94 | 0.45 |
| 0.41 | #N/A | #N/A | 0.99 | 0.43 | 1.10 | 0.57 |
| #N/A | 0.57 | 0.19 | #N/A | #N/A | 0.77 | 0.32 |
| 0.70 | 1.63 | 0.79 | 1.61 | 0.76 | 1.44 | 0.76 |
| 0.38 | 0.68 | 0.27 | 0.72 | 0.25 | 0.67 | 0.23 |
| 0.33 | 0.93 | 0.43 | 0.87 | 0.35 | 0.77 | 0.32 |
| #N/A | #N/A | #N/A | #N/A | #N/A | #N/A | #N/A |
| #N/A | #N/A | #N/A | #N/A | #N/A | #N/A | #N/A |
| 0.96 | 2.22 | 0.93 | 2.79 | 0.97 | 1.44 | 0.77 |
| #N/A | 1.02 | 0.48 | 0.99 | 0.43 | 0.68 | 0.24 |
| 0.88 | 2.27 | 0.92 | 2.00 | 0.88 | 1.57 | 0.82 |



|      |      |      |      |      |      |      |
|------|------|------|------|------|------|------|
| #N/A | #N/A | #N/A | #N/A | #N/A | #N/A | #N/A |
| 0.63 | 1.35 | 0.67 | 1.26 | 0.60 | 1.39 | 0.74 |
| 0.77 | 2.08 | 0.90 | 1.61 | 0.77 | 1.30 | 0.69 |
| 0.66 | 1.87 | 0.86 | 1.45 | 0.70 | 1.82 | 0.89 |
| 0.22 | 0.56 | 0.20 | 0.58 | 0.14 | 0.58 | 0.16 |
| 0.46 | 1.31 | 0.65 | 1.42 | 0.68 | 1.38 | 0.74 |
| #N/A | 0.62 | 0.23 | #N/A | #N/A | 0.95 | 0.46 |
| #N/A | #N/A | #N/A | #N/A | #N/A | #N/A | #N/A |
| #N/A | #N/A | #N/A | #N/A | #N/A | #N/A | #N/A |
| 0.68 | 1.76 | 0.82 | 1.60 | 0.75 | 1.55 | 0.81 |
| 0.94 | 2.24 | 0.92 | 2.59 | 0.94 | 1.82 | 0.89 |
| #N/A | #N/A | #N/A | #N/A | #N/A | 0.68 | 0.24 |
| 0.15 | 0.48 | 0.13 | 0.84 | 0.33 | 0.72 | 0.28 |
| 0.49 | 1.22 | 0.61 | 1.23 | 0.59 | 1.02 | 0.52 |
| #N/A | 0.33 | 0.05 | 0.38 | 0.04 | 0.46 | 0.07 |
| #N/A | #N/A | #N/A | #N/A | #N/A | #N/A | #N/A |
| 0.57 | 1.07 | 0.52 | 1.05 | 0.47 | 1.20 | 0.63 |
| #N/A | 1.42 | 0.69 | #N/A | #N/A | 1.71 | 0.86 |
| 0.65 | 1.18 | 0.58 | 1.93 | 0.77 | 1.53 | 0.80 |
| 0.92 | 1.95 | 0.88 | 2.48 | 0.95 | 2.38 | 0.97 |
| 0.80 | 1.55 | 0.76 | 1.49 | 0.69 | 1.39 | 0.74 |
| 0.86 | 1.82 | 0.85 | 1.43 | 0.69 | 1.42 | 0.75 |
| 0.58 | 1.05 | 0.51 | 1.32 | 0.63 | 0.87 | 0.40 |
| 0.84 | 1.64 | 0.79 | 1.78 | 0.82 | 1.59 | 0.82 |
| 0.97 | #N/A | #N/A | 2.70 | 0.97 | 2.08 | 0.94 |
| #N/A | #N/A | #N/A | #N/A | #N/A | 1.18 | 0.62 |
| 0.87 | 1.71 | 0.81 | 2.12 | 0.90 | 1.90 | 0.91 |
| 0.59 | 1.14 | 0.55 | 1.31 | 0.63 | 1.00 | 0.50 |
| 0.80 | 1.70 | 0.81 | 2.00 | 0.88 | 1.46 | 0.77 |
| 0.33 | 0.75 | 0.32 | 0.79 | 0.29 | #N/A | #N/A |
| #N/A | #N/A | #N/A | #N/A | #N/A | #N/A | #N/A |
| 0.84 | #N/A | #N/A | 2.64 | 0.94 | 1.56 | 0.81 |
| #N/A | 0.75 | 0.32 | #N/A | #N/A | 0.84 | 0.37 |
| 0.05 | 0.46 | 0.12 | 0.55 | 0.13 | #N/A | #N/A |
| 0.23 | 1.42 | 0.60 | 1.38 | 0.64 | 0.68 | 0.25 |
| #N/A | #N/A | #N/A | #N/A | #N/A | #N/A | #N/A |
| 0.27 | 0.69 | 0.28 | 0.74 | 0.25 | 0.78 | 0.32 |
| #N/A | 0.64 | 0.24 | #N/A | #N/A | 0.86 | 0.39 |
| 0.40 | 0.81 | 0.36 | 0.91 | 0.38 | 0.77 | 0.31 |
| #N/A | #N/A | #N/A | #N/A | #N/A | #N/A | #N/A |
| 0.76 | #N/A | #N/A | 1.42 | 0.68 | 1.27 | 0.68 |
| 0.52 | 0.97 | 0.46 | 1.25 | 0.59 | 0.77 | 0.32 |
| 0.24 | 0.70 | 0.29 | #N/A | #N/A | #N/A | #N/A |
| 0.14 | 0.58 | 0.20 | #N/A | #N/A | 0.51 | 0.11 |
| 0.62 | 1.34 | 0.66 | 1.78 | 0.83 | 1.58 | 0.82 |
| #N/A | #N/A | #N/A | #N/A | #N/A | #N/A | #N/A |
| 0.37 | 0.98 | 0.46 | 1.09 | 0.50 | 1.51 | 0.79 |
| 0.36 | 0.88 | 0.40 | 0.84 | 0.32 | 0.62 | 0.19 |
| #N/A | #N/A | #N/A | #N/A | #N/A | #N/A | #N/A |
| 0.67 | 1.47 | 0.67 | 1.54 | 0.72 | 1.21 | 0.64 |
| 0.61 | 1.05 | 0.50 | 1.17 | 0.55 | 0.89 | 0.41 |

|      |      |      |      |      |      |      |
|------|------|------|------|------|------|------|
| #N/A | #N/A | #N/A | #N/A | #N/A | 0.28 | 0.01 |
| 0.39 | 1.09 | 0.52 | 1.32 | 0.63 | 1.28 | 0.68 |
| 0.38 | #N/A | #N/A | #N/A | #N/A | 1.79 | 0.88 |
| #N/A | #N/A | #N/A | 0.64 | 0.19 | 0.28 | 0.01 |
| 0.47 | 1.18 | 0.59 | 1.00 | 0.44 | 1.18 | 0.63 |
| #N/A | 0.44 | 0.11 | #N/A | #N/A | #N/A | #N/A |
| 0.84 | 1.87 | 0.84 | 1.70 | 0.80 | 1.78 | 0.88 |
| 0.62 | #N/A | #N/A | 1.51 | 0.72 | 1.31 | 0.70 |
| 0.13 | 0.58 | 0.20 | 0.63 | 0.18 | 0.63 | 0.20 |
| #N/A | #N/A | #N/A | #N/A | #N/A | #N/A | #N/A |
| #N/A | 2.07 | 0.90 | 2.50 | 0.93 | 1.66 | 0.85 |
| 0.38 | #N/A | #N/A | 0.63 | 0.18 | 0.64 | 0.21 |
| 0.19 | 0.67 | 0.26 | 0.51 | 0.10 | 0.69 | 0.25 |
| 0.41 | 0.97 | 0.46 | 0.91 | 0.38 | 0.93 | 0.45 |
| 0.08 | 0.32 | 0.04 | 0.40 | 0.04 | 0.50 | 0.10 |
| 0.65 | 1.32 | 0.65 | 1.46 | 0.70 | 1.26 | 0.67 |
| 0.15 | 0.63 | 0.24 | 0.90 | 0.37 | 0.69 | 0.25 |
| #N/A | #N/A | #N/A | #N/A | #N/A | #N/A | #N/A |
| 0.74 | 1.56 | 0.77 | 2.15 | 0.90 | 1.48 | 0.78 |
| 0.96 | #N/A | #N/A | 3.09 | 0.98 | 2.70 | 0.98 |
| #N/A | #N/A | #N/A | #N/A | #N/A | 1.23 | 0.65 |
| 0.32 | 0.76 | 0.32 | 0.73 | 0.25 | 0.64 | 0.21 |
| #N/A | #N/A | #N/A | #N/A | #N/A | #N/A | #N/A |
| #N/A | 1.26 | 0.63 | 1.26 | 0.58 | 1.17 | 0.61 |
| #N/A | 2.03 | 0.89 | 2.55 | 0.95 | 2.30 | 0.96 |
| #N/A | #N/A | #N/A | #N/A | #N/A | #N/A | #N/A |
| 0.88 | 1.44 | 0.71 | 1.98 | 0.87 | 1.62 | 0.84 |
| 0.34 | 0.90 | 0.41 | 0.87 | 0.35 | 0.71 | 0.27 |
| 0.53 | 0.97 | 0.46 | 1.06 | 0.48 | 1.18 | 0.62 |
| #N/A | #N/A | #N/A | #N/A | #N/A | #N/A | #N/A |
| 0.40 | 0.92 | 0.42 | 0.78 | 0.29 | 0.80 | 0.34 |
| #N/A | 1.77 | 0.83 | 2.09 | 0.86 | 1.58 | 0.82 |
| #N/A | 0.88 | 0.40 | #N/A | #N/A | 1.09 | 0.56 |
| 0.59 | 1.16 | 0.57 | 1.23 | 0.58 | 1.22 | 0.65 |
| 0.97 | 3.05 | 0.98 | 2.83 | 0.97 | 2.26 | 0.96 |
| 0.18 | 0.59 | 0.22 | #N/A | #N/A | 0.53 | 0.12 |
| 0.47 | 0.92 | 0.43 | 0.67 | 0.20 | 0.94 | 0.45 |
| 0.58 | 1.63 | 0.79 | 0.72 | 0.24 | 1.21 | 0.64 |
| 0.25 | 0.87 | 0.38 | #N/A | #N/A | 0.40 | 0.05 |
| #N/A | #N/A | #N/A | #N/A | #N/A | #N/A | #N/A |
| #N/A | #N/A | #N/A | #N/A | #N/A | #N/A | #N/A |
| 0.41 | 1.08 | 0.52 | 1.23 | 0.58 | #N/A | #N/A |
| #N/A | 0.41 | 0.08 | #N/A | #N/A | #N/A | #N/A |
| 0.49 | 0.56 | 0.19 | 0.59 | 0.16 | 1.03 | 0.52 |
| 0.47 | 0.92 | 0.42 | 1.08 | 0.47 | 0.89 | 0.41 |
| 0.05 | 0.40 | 0.08 | 0.53 | 0.13 | 0.40 | 0.04 |
| #N/A | 0.64 | 0.24 | #N/A | #N/A | 0.70 | 0.26 |
| 0.11 | 0.75 | 0.32 | 0.74 | 0.26 | 0.63 | 0.21 |
| 0.74 | #N/A | #N/A | 1.99 | 0.88 | 1.31 | 0.69 |
| 0.38 | 0.74 | 0.31 | #N/A | #N/A | 0.88 | 0.40 |
| 0.72 | 1.40 | 0.69 | 1.66 | 0.77 | 1.32 | 0.70 |

|      |      |      |      |      |      |      |
|------|------|------|------|------|------|------|
| 0.35 | #N/A | #N/A | #N/A | #N/A | 0.58 | 0.16 |
| 0.66 | 1.38 | 0.69 | #N/A | #N/A | #N/A | #N/A |
| #N/A | #N/A | #N/A | #N/A | #N/A | 0.38 | 0.04 |
| 0.19 | 0.74 | 0.31 | 0.71 | 0.23 | 0.62 | 0.20 |
| 0.59 | 1.27 | 0.63 | 1.28 | 0.60 | 0.94 | 0.46 |
| 0.09 | 0.50 | 0.14 | 0.83 | 0.32 | 0.49 | 0.10 |
| 0.02 | #N/A | #N/A | 0.43 | 0.06 | 0.21 | 0.00 |
| #N/A | #N/A | #N/A | #N/A | #N/A | #N/A | #N/A |
| 0.70 | 1.76 | 0.83 | 1.62 | 0.77 | 1.50 | 0.79 |
| 0.97 | 2.49 | 0.95 | 2.19 | 0.91 | 2.70 | 0.98 |
| #N/A | #N/A | #N/A | #N/A | #N/A | #N/A | #N/A |
| #N/A | #N/A | #N/A | #N/A | #N/A | 2.10 | 0.94 |
| #N/A | #N/A | #N/A | #N/A | #N/A | #N/A | #N/A |
| 0.16 | 0.47 | 0.13 | 1.65 | 0.73 | 0.62 | 0.20 |
| 0.03 | #N/A | #N/A | 0.44 | 0.07 | 0.43 | 0.06 |
| #N/A | #N/A | #N/A | #N/A | #N/A | 0.66 | 0.23 |
| 0.91 | #N/A | #N/A | #N/A | #N/A | 2.12 | 0.94 |
| #N/A | #N/A | #N/A | #N/A | #N/A | #N/A | #N/A |
| #N/A | #N/A | #N/A | #N/A | #N/A | #N/A | #N/A |
| #N/A | #N/A | #N/A | #N/A | #N/A | #N/A | #N/A |
| 0.85 | #N/A | #N/A | 2.08 | 0.88 | 2.66 | 0.98 |
| #N/A | #N/A | #N/A | #N/A | #N/A | #N/A | #N/A |
| 0.92 | 1.79 | 0.84 | 1.97 | 0.87 | 2.39 | 0.97 |
| 0.48 | 0.60 | 0.21 | 0.79 | 0.29 | 0.83 | 0.36 |
| 0.77 | 1.37 | 0.68 | 1.32 | 0.63 | 1.36 | 0.72 |
| #N/A | 0.51 | 0.16 | #N/A | #N/A | 0.67 | 0.23 |
| #N/A | 0.61 | 0.30 | 1.15 | 0.54 | 0.86 | 0.38 |
| 0.33 | #N/A | #N/A | 1.11 | 0.52 | 0.70 | 0.26 |
| 0.51 | #N/A | #N/A | 0.79 | 0.29 | #N/A | #N/A |
| 0.28 | 0.81 | 0.35 | #N/A | #N/A | 1.16 | 0.61 |
| 0.86 | 1.71 | 0.81 | 1.93 | 0.87 | 1.55 | 0.81 |
| 0.68 | 1.02 | 0.49 | 1.32 | 0.63 | 1.22 | 0.65 |
| 0.91 | 1.73 | 0.82 | 2.24 | 0.92 | 1.62 | 0.83 |
| 0.92 | 2.12 | 0.91 | 1.58 | 0.75 | 2.20 | 0.95 |
| 0.39 | #N/A | #N/A | 1.44 | 0.69 | #N/A | #N/A |
| #N/A | #N/A | #N/A | 1.88 | 0.82 | #N/A | #N/A |
| #N/A | 0.81 | 0.36 | #N/A | #N/A | 1.25 | 0.67 |
| 0.46 | 0.98 | 0.46 | 1.23 | 0.58 | 1.18 | 0.62 |
| 0.82 | 1.29 | 0.63 | 1.92 | 0.86 | 1.98 | 0.92 |
| 0.37 | 1.20 | 0.59 | 0.87 | 0.35 | 1.33 | 0.71 |
| 0.29 | 0.73 | 0.31 | 0.94 | 0.39 | 0.81 | 0.35 |
| 0.81 | 2.96 | 0.95 | 3.74 | 0.97 | 2.21 | 0.95 |
| 0.52 | 0.93 | 0.43 | #N/A | #N/A | 1.02 | 0.52 |
| 0.51 | #N/A | #N/A | 1.06 | 0.48 | 1.10 | 0.57 |
| #N/A | #N/A | #N/A | #N/A | #N/A | #N/A | #N/A |
| #N/A | 2.26 | 0.83 | 1.91 | 0.86 | 1.25 | 0.67 |
| 0.06 | 0.32 | 0.04 | 0.44 | 0.07 | 0.38 | 0.03 |
| #N/A | #N/A | #N/A | #N/A | #N/A | #N/A | #N/A |
| 0.80 | 1.41 | 0.70 | 1.33 | 0.64 | 1.48 | 0.78 |
| #N/A | #N/A | #N/A | #N/A | #N/A | #N/A | #N/A |
| #N/A | 0.63 | 0.23 | #N/A | #N/A | 0.50 | 0.10 |

|      |      |      |      |      |      |      |
|------|------|------|------|------|------|------|
| 0.88 | 1.77 | 0.83 | 2.42 | 0.94 | 2.28 | 0.96 |
| #N/A | #N/A | #N/A | #N/A | #N/A | #N/A | #N/A |
| 0.85 | 1.01 | 0.47 | #N/A | #N/A | #N/A | #N/A |
| 0.57 | 1.44 | 0.70 | 1.36 | 0.65 | 1.13 | 0.59 |
| #N/A | #N/A | #N/A | 0.55 | 0.12 | 0.63 | 0.20 |
| 0.73 | 1.28 | 0.63 | 1.75 | 0.80 | 1.97 | 0.92 |
| 0.89 | 1.89 | 0.85 | 2.06 | 0.89 | 2.37 | 0.97 |
| 0.91 | 2.17 | 0.92 | 1.86 | 0.82 | #N/A | #N/A |
| #N/A | #N/A | #N/A | #N/A | #N/A | #N/A | #N/A |
| 0.51 | 1.30 | 0.62 | 1.25 | 0.59 | #N/A | #N/A |
| #N/A | #N/A | #N/A | #N/A | #N/A | #N/A | #N/A |
| #N/A | #N/A | #N/A | #N/A | #N/A | 0.64 | 0.21 |
| 0.25 | 0.69 | 0.27 | #N/A | #N/A | 0.92 | 0.44 |
| 0.34 | 0.75 | 0.32 | 0.84 | 0.33 | 0.85 | 0.38 |
| #N/A | #N/A | #N/A | #N/A | #N/A | #N/A | #N/A |
| 0.83 | 1.46 | 0.72 | 1.99 | 0.85 | 2.61 | 0.98 |
| 0.98 | 2.64 | 0.97 | 2.40 | 0.94 | 2.96 | 0.99 |
| 0.33 | 0.84 | 0.38 | #N/A | #N/A | 0.98 | 0.48 |
| 0.43 | #N/A | #N/A | #N/A | #N/A | 0.76 | 0.31 |
| 0.85 | #N/A | #N/A | 1.55 | 0.74 | #N/A | #N/A |
| 0.83 | 1.40 | 0.69 | 1.23 | 0.58 | 1.29 | 0.68 |
| 0.21 | 0.53 | 0.17 | 0.63 | 0.18 | 0.60 | 0.18 |
| 0.96 | #N/A | #N/A | #N/A | #N/A | 2.08 | 0.94 |
| #N/A | #N/A | #N/A | #N/A | #N/A | #N/A | #N/A |
| #N/A | #N/A | #N/A | #N/A | #N/A | 2.39 | 0.97 |
| 0.63 | #N/A | #N/A | 2.58 | 0.95 | 1.26 | 0.67 |
| 0.23 | 0.53 | 0.17 | #N/A | #N/A | 0.57 | 0.16 |
| 0.85 | 1.96 | 0.86 | 1.78 | 0.82 | 1.61 | 0.83 |
| #N/A | #N/A | #N/A | #N/A | #N/A | #N/A | #N/A |
| #N/A | #N/A | #N/A | #N/A | #N/A | 0.39 | 0.04 |
| 0.99 | 2.79 | 0.97 | 2.59 | 0.96 | 2.55 | 0.98 |
| 0.86 | 2.00 | 0.88 | 1.72 | 0.81 | 2.05 | 0.93 |
| 0.98 | 3.09 | 0.98 | 3.44 | 0.99 | 3.58 | 1.00 |
| 0.77 | 1.55 | 0.75 | 2.07 | 0.89 | 1.65 | 0.85 |
| 0.66 | 1.33 | 0.66 | 1.67 | 0.75 | 1.43 | 0.76 |
| 0.76 | 2.11 | 0.90 | 1.27 | 0.59 | 1.52 | 0.80 |
| 0.48 | 1.38 | 0.68 | #N/A | #N/A | #N/A | #N/A |
| 0.07 | #N/A | #N/A | 0.57 | 0.14 | 0.56 | 0.15 |
| #N/A | #N/A | #N/A | #N/A | #N/A | #N/A | #N/A |
| #N/A | 3.16 | 0.98 | 3.24 | 0.98 | 3.19 | 0.99 |
| #N/A | 1.29 | 0.64 | #N/A | #N/A | 0.91 | 0.43 |
| 0.12 | #N/A | #N/A | #N/A | #N/A | 0.44 | 0.07 |
| 0.93 | 2.43 | 0.95 | 2.05 | 0.88 | 1.93 | 0.91 |
| 0.21 | 0.61 | 0.23 | 0.63 | 0.18 | 0.80 | 0.34 |
| #N/A | #N/A | #N/A | #N/A | #N/A | #N/A | #N/A |
| 0.68 | 1.35 | 0.65 | 1.96 | 0.86 | 1.42 | 0.75 |
| #N/A | 0.33 | 0.05 | #N/A | #N/A | 0.31 | 0.02 |
| #N/A | 1.37 | 0.68 | 0.91 | 0.37 | 1.42 | 0.75 |
| #N/A | #N/A | #N/A | 0.94 | 0.39 | 0.40 | 0.05 |
| 0.94 | 3.80 | 0.99 | 1.52 | 0.49 | 3.78 | 1.00 |
| 0.50 | #N/A | #N/A | 1.03 | 0.45 | 0.58 | 0.17 |

|      |      |      |      |      |      |      |
|------|------|------|------|------|------|------|
| 0.49 | 1.32 | 0.66 | 1.21 | 0.56 | 0.95 | 0.46 |
| 0.16 | #N/A | #N/A | 0.71 | 0.23 | 0.66 | 0.22 |
| 0.92 | 1.72 | 0.82 | 1.92 | 0.86 | 1.33 | 0.71 |
| #N/A | 0.73 | 0.30 | 1.35 | 0.57 | 0.63 | 0.20 |
| 0.74 | 2.05 | 0.88 | 2.19 | 0.92 | 1.35 | 0.72 |
| 0.21 | 0.68 | 0.27 | 0.83 | 0.32 | 0.54 | 0.13 |
| 0.54 | 1.09 | 0.53 | 1.29 | 0.62 | 0.95 | 0.47 |
| #N/A | #N/A | #N/A | #N/A | #N/A | #N/A | #N/A |
| 0.87 | 2.28 | 0.93 | 3.21 | 0.98 | 1.53 | 0.80 |
| 0.13 | 0.48 | 0.14 | 1.03 | 0.46 | 0.51 | 0.11 |
| 0.16 | 0.56 | 0.19 | 0.59 | 0.15 | 0.67 | 0.23 |
| #N/A | 1.44 | 0.71 | 1.36 | 0.65 | 1.08 | 0.56 |
| #N/A | 0.59 | 0.21 | 0.56 | 0.13 | 0.67 | 0.24 |
| 0.54 | 1.10 | 0.54 | 1.28 | 0.61 | 1.19 | 0.63 |
| 0.90 | 2.05 | 0.89 | 3.37 | 0.99 | 1.37 | 0.73 |
| 0.84 | 1.61 | 0.77 | #N/A | #N/A | 1.58 | 0.82 |
| 0.68 | #N/A | #N/A | #N/A | #N/A | 1.06 | 0.54 |
| 0.53 | 1.42 | 0.67 | 1.65 | 0.78 | 0.95 | 0.46 |
| 0.70 | #N/A | #N/A | 1.71 | 0.80 | 1.36 | 0.72 |
| 0.43 | 1.27 | 0.59 | 1.08 | 0.48 | 1.52 | 0.80 |
| 0.92 | 2.22 | 0.92 | 2.45 | 0.95 | 2.00 | 0.92 |
| #N/A | #N/A | #N/A | #N/A | #N/A | #N/A | #N/A |
| #N/A | 0.90 | 0.42 | 1.38 | 0.67 | 0.86 | 0.39 |
| 0.58 | 1.03 | 0.49 | 1.00 | 0.44 | 1.00 | 0.50 |
| 0.29 | 0.78 | 0.34 | 0.90 | 0.37 | 0.93 | 0.45 |
| #N/A | #N/A | #N/A | #N/A | #N/A | #N/A | #N/A |
| 0.61 | 1.84 | 0.73 | 1.32 | 0.63 | 0.99 | 0.49 |
| 0.42 | 0.97 | 0.46 | 1.14 | 0.53 | 1.10 | 0.57 |
| 0.15 | 0.80 | 0.35 | 0.82 | 0.32 | 0.48 | 0.09 |
| #N/A | #N/A | #N/A | #N/A | #N/A | #N/A | #N/A |
| 0.17 | 0.48 | 0.13 | 0.77 | 0.28 | 0.62 | 0.20 |
| 0.89 | 1.93 | 0.87 | 3.02 | 0.97 | 1.59 | 0.82 |
| #N/A | #N/A | #N/A | #N/A | #N/A | 0.59 | 0.17 |
| 0.90 | 2.13 | 0.91 | 2.42 | 0.95 | 1.37 | 0.73 |
| 0.47 | 0.98 | 0.47 | #N/A | #N/A | 1.40 | 0.75 |
| #N/A | 2.20 | 0.92 | #N/A | #N/A | 1.61 | 0.83 |
| 0.89 | #N/A | #N/A | 1.65 | 0.78 | 1.39 | 0.74 |
| 0.89 | 2.22 | 0.91 | 2.24 | 0.92 | 1.72 | 0.87 |
| 0.90 | #N/A | #N/A | #N/A | #N/A | 1.22 | 0.64 |
| #N/A | #N/A | #N/A | #N/A | #N/A | #N/A | #N/A |
| #N/A | #N/A | #N/A | #N/A | #N/A | 0.74 | 0.30 |
| 0.63 | 1.84 | 0.85 | 1.79 | 0.83 | 1.15 | 0.61 |
| 0.54 | 1.05 | 0.50 | 1.02 | 0.45 | 1.31 | 0.70 |
| #N/A | #N/A | #N/A | #N/A | #N/A | 0.64 | 0.21 |
| 0.71 | 1.75 | 0.82 | 1.27 | 0.60 | 1.05 | 0.54 |
| 0.17 | 0.45 | 0.11 | 0.66 | 0.21 | 0.46 | 0.07 |
| 0.80 | 1.54 | 0.76 | 1.48 | 0.71 | 1.47 | 0.78 |
| 0.53 | 1.16 | 0.57 | 1.00 | 0.44 | 1.45 | 0.77 |
| 0.78 | 1.37 | 0.66 | 1.51 | 0.73 | 1.40 | 0.74 |
| 0.48 | 0.96 | 0.45 | 0.79 | 0.29 | 1.08 | 0.56 |
| 0.05 | 0.56 | 0.19 | 0.56 | 0.14 | 0.53 | 0.12 |

|      |      |      |      |      |      |      |
|------|------|------|------|------|------|------|
| 0.85 | 2.18 | 0.91 | 1.68 | 0.79 | 1.52 | 0.79 |
| 0.85 | 2.09 | 0.90 | 1.52 | 0.73 | 1.69 | 0.86 |
| 0.56 | 1.05 | 0.51 | 1.03 | 0.46 | 0.89 | 0.41 |
| 0.70 | 1.36 | 0.67 | 1.23 | 0.59 | 0.92 | 0.44 |
| 0.49 | 0.81 | 0.36 | 1.27 | 0.60 | 1.03 | 0.52 |
| 0.38 | 0.88 | 0.40 | 0.91 | 0.38 | 0.84 | 0.37 |
| 0.36 | 0.94 | 0.44 | 1.07 | 0.49 | 0.86 | 0.39 |
| 0.37 | 0.67 | 0.26 | 1.15 | 0.54 | 0.80 | 0.34 |
| 0.38 | 0.78 | 0.34 | 0.85 | 0.34 | 0.92 | 0.44 |
| 0.55 | #N/A | #N/A | 1.42 | 0.68 | 1.49 | 0.78 |
| 0.93 | 1.68 | 0.81 | 2.32 | 0.93 | 2.37 | 0.97 |
| 0.44 | 0.97 | 0.46 | 0.49 | 0.09 | 0.92 | 0.44 |
| 0.26 | 0.69 | 0.28 | 0.65 | 0.19 | 0.71 | 0.27 |
| 0.12 | 0.45 | 0.11 | 0.54 | 0.12 | 0.52 | 0.12 |
| 0.19 | 0.56 | 0.19 | 0.51 | 0.11 | 0.61 | 0.18 |
| #N/A | #N/A | #N/A | #N/A | #N/A | #N/A | #N/A |
| #N/A | 1.32 | 0.66 | #N/A | #N/A | #N/A | #N/A |
| 0.61 | 1.55 | 0.76 | 1.19 | 0.56 | 1.36 | 0.72 |
| 0.47 | 0.93 | 0.44 | 1.15 | 0.54 | 0.93 | 0.45 |
| 0.46 | 0.87 | 0.39 | 1.26 | 0.60 | 0.94 | 0.45 |
| 0.47 | 0.94 | 0.44 | 1.06 | 0.48 | 1.09 | 0.56 |
| 0.61 | 1.24 | 0.62 | 1.43 | 0.69 | 1.11 | 0.58 |
| 0.60 | 1.13 | 0.56 | 1.32 | 0.63 | 1.27 | 0.68 |
| 0.60 | 1.14 | 0.56 | 1.26 | 0.60 | 1.42 | 0.75 |
| 0.85 | 1.66 | 0.80 | 1.94 | 0.86 | 1.97 | 0.92 |
| 0.56 | 1.05 | 0.51 | 0.97 | 0.42 | 0.99 | 0.49 |
| #N/A | #N/A | #N/A | #N/A | #N/A | #N/A | #N/A |
| 0.36 | #N/A | #N/A | #N/A | #N/A | 0.82 | 0.35 |
| #N/A | #N/A | #N/A | #N/A | #N/A | 0.78 | 0.33 |
| #N/A | 1.40 | 0.69 | #N/A | #N/A | 1.16 | 0.61 |
| 0.48 | 0.99 | 0.47 | 0.77 | 0.27 | 1.03 | 0.53 |
| #N/A | #N/A | #N/A | 1.17 | 0.54 | 1.06 | 0.55 |
| 0.37 | 0.95 | 0.45 | #N/A | #N/A | 1.00 | 0.51 |
| 0.88 | 1.71 | 0.80 | 1.65 | 0.78 | 1.49 | 0.78 |
| 0.75 | 1.57 | 0.75 | 1.73 | 0.80 | 1.32 | 0.70 |
| 0.57 | 1.26 | 0.63 | 1.14 | 0.53 | 1.38 | 0.74 |
| #N/A | 2.37 | 0.93 | 2.13 | 0.90 | 1.95 | 0.92 |
| #N/A | #N/A | #N/A | #N/A | #N/A | 0.92 | 0.44 |
| #N/A | 0.78 | 0.34 | #N/A | #N/A | 1.40 | 0.74 |
| 0.59 | 1.12 | 0.55 | 1.16 | 0.55 | 0.82 | 0.36 |
| 0.43 | 1.06 | 0.50 | 1.12 | 0.52 | 0.67 | 0.23 |
| #N/A | #N/A | #N/A | #N/A | #N/A | #N/A | #N/A |
| 0.33 | 0.82 | 0.37 | 1.10 | 0.50 | 1.13 | 0.59 |
| 0.17 | 0.44 | 0.11 | 0.56 | 0.13 | 0.64 | 0.21 |
| #N/A | #N/A | #N/A | 0.39 | 0.04 | 0.57 | 0.15 |
| #N/A | 1.39 | 0.69 | 1.17 | 0.54 | 1.28 | 0.68 |
| #N/A | #N/A | #N/A | #N/A | #N/A | 0.88 | 0.40 |
| #N/A | #N/A | #N/A | 1.27 | 0.59 | 0.85 | 0.38 |
| 0.98 | 2.55 | 0.95 | 2.99 | 0.98 | 3.12 | 0.99 |
| 0.04 | 0.28 | 0.03 | 0.41 | 0.05 | 0.33 | 0.02 |
| 0.93 | #N/A | #N/A | #N/A | #N/A | 2.27 | 0.96 |

|      |      |      |      |      |      |      |
|------|------|------|------|------|------|------|
| 0.17 | 0.67 | 0.26 | 0.93 | 0.40 | 0.57 | 0.15 |
| 0.58 | 1.09 | 0.52 | 1.21 | 0.57 | 1.10 | 0.57 |
| 0.79 | 1.24 | 0.61 | 1.64 | 0.78 | 1.48 | 0.78 |
| 0.26 | #N/A | #N/A | #N/A | #N/A | #N/A | #N/A |
| 0.43 | #N/A | #N/A | 1.62 | 0.77 | 1.86 | 0.90 |
| 0.88 | 1.73 | 0.82 | #N/A | #N/A | #N/A | #N/A |
| 0.34 | 0.68 | 0.27 | 0.81 | 0.30 | 0.69 | 0.25 |
| #N/A | 2.13 | 0.90 | #N/A | #N/A | 1.54 | 0.80 |
| #N/A | #N/A | #N/A | #N/A | #N/A | #N/A | #N/A |
| 0.89 | #N/A | #N/A | 1.61 | 0.77 | 1.81 | 0.89 |
| 0.46 | 0.97 | 0.46 | 0.88 | 0.36 | 1.33 | 0.71 |
| #N/A | 2.07 | 0.90 | 1.75 | 0.81 | 1.70 | 0.86 |
| #N/A | 1.87 | 0.86 | 2.18 | 0.91 | 1.53 | 0.80 |
| 0.15 | 0.28 | 0.03 | 0.46 | 0.07 | 0.56 | 0.14 |
| 0.53 | 1.35 | 0.60 | 1.39 | 0.67 | 1.20 | 0.64 |
| 0.94 | 2.30 | 0.94 | 2.39 | 0.94 | 3.39 | 1.00 |
| #N/A | #N/A | #N/A | #N/A | #N/A | #N/A | #N/A |
| #N/A | 0.25 | 0.04 | #N/A | #N/A | 0.63 | 0.21 |
| 0.90 | 3.18 | 0.99 | 2.28 | 0.93 | 2.46 | 0.97 |
| #N/A | #N/A | #N/A | 2.02 | 0.88 | #N/A | #N/A |
| #N/A | #N/A | #N/A | #N/A | #N/A | #N/A | #N/A |
| 0.55 | 1.41 | 0.70 | 1.34 | 0.64 | 1.23 | 0.65 |
| 0.57 | 1.41 | 0.70 | 0.97 | 0.42 | 1.44 | 0.76 |
| #N/A | #N/A | #N/A | #N/A | #N/A | #N/A | #N/A |
| 0.83 | 1.36 | 0.66 | 1.24 | 0.59 | 1.20 | 0.63 |
| #N/A | #N/A | #N/A | 0.88 | 0.35 | 0.97 | 0.48 |
| 0.23 | 0.88 | 0.41 | 0.94 | 0.39 | 0.63 | 0.20 |
| 0.02 | 0.30 | 0.04 | 0.44 | 0.06 | 0.43 | 0.06 |
| #N/A | #N/A | #N/A | #N/A | #N/A | #N/A | #N/A |
| #N/A | 0.17 | 0.01 | 0.33 | 0.02 | 0.22 | 0.01 |
| 0.30 | 0.68 | 0.27 | 0.53 | 0.11 | 0.57 | 0.16 |
| #N/A | #N/A | #N/A | #N/A | #N/A | #N/A | #N/A |
| 0.71 | 1.25 | 0.62 | 1.42 | 0.68 | 1.19 | 0.63 |
| 0.91 | 1.88 | 0.86 | 1.93 | 0.86 | 1.92 | 0.91 |
| #N/A | #N/A | #N/A | #N/A | #N/A | 1.10 | 0.57 |
| #N/A | 1.07 | 0.51 | #N/A | #N/A | 1.01 | 0.51 |
| 0.95 | 2.62 | 0.96 | 2.40 | 0.93 | 2.07 | 0.94 |
| 0.91 | 2.33 | 0.94 | 2.20 | 0.91 | 1.63 | 0.84 |
| 0.86 | 1.99 | 0.88 | 2.10 | 0.90 | 1.60 | 0.83 |
| 0.75 | 2.34 | 0.76 | 1.88 | 0.85 | 1.44 | 0.76 |
| 0.02 | 0.18 | 0.01 | 0.38 | 0.03 | 0.34 | 0.03 |
| 0.34 | 0.79 | 0.34 | 1.13 | 0.52 | 0.88 | 0.40 |
| 0.68 | 0.80 | 0.34 | #N/A | #N/A | 1.04 | 0.54 |
| 0.30 | 0.57 | 0.20 | 1.16 | 0.54 | #N/A | #N/A |
| 0.64 | 1.09 | 0.52 | 1.26 | 0.60 | 0.97 | 0.48 |
| 0.23 | #N/A | #N/A | #N/A | #N/A | #N/A | #N/A |
| #N/A | 1.10 | 0.54 | 1.06 | 0.47 | 1.63 | 0.84 |
| #N/A | #N/A | #N/A | 0.92 | 0.39 | 0.54 | 0.13 |
| 0.75 | 1.88 | 0.86 | 1.42 | 0.68 | 1.16 | 0.61 |
| #N/A | #N/A | #N/A | #N/A | #N/A | #N/A | #N/A |
| #N/A | 1.99 | 0.89 | 2.01 | 0.87 | 1.82 | 0.89 |

|      |      |      |      |      |      |      |
|------|------|------|------|------|------|------|
| 0.88 | 1.45 | 0.72 | 1.74 | 0.81 | 1.60 | 0.83 |
| 0.47 | 1.05 | 0.51 | #N/A | #N/A | 0.75 | 0.31 |
| #N/A | #N/A | #N/A | #N/A | #N/A | #N/A | #N/A |
| 0.75 | #N/A | #N/A | 1.99 | 0.87 | 1.38 | 0.73 |
| 0.63 | 1.96 | 0.88 | 1.90 | 0.85 | 2.38 | 0.97 |
| 0.28 | 0.71 | 0.29 | 0.61 | 0.16 | 0.69 | 0.25 |
| 0.99 | 3.75 | 0.99 | 3.59 | 0.99 | 3.14 | 0.99 |
| #N/A | #N/A | #N/A | #N/A | #N/A | #N/A | #N/A |
| 0.88 | 2.12 | 0.91 | 2.22 | 0.92 | 1.92 | 0.91 |
| 0.47 | 0.91 | 0.42 | 1.11 | 0.51 | 0.93 | 0.44 |
| #N/A | #N/A | #N/A | #N/A | #N/A | 0.45 | 0.07 |
| 0.83 | 2.31 | 0.92 | 2.14 | 0.90 | 2.02 | 0.93 |
| #N/A | #N/A | #N/A | #N/A | #N/A | 0.73 | 0.29 |
| 0.94 | 2.43 | 0.94 | 2.12 | 0.90 | 2.00 | 0.92 |
| #N/A | #N/A | #N/A | #N/A | #N/A | #N/A | #N/A |
| 0.28 | 0.67 | 0.26 | 0.63 | 0.18 | 1.53 | 0.80 |
| 0.62 | 1.64 | 0.77 | 0.99 | 0.41 | 1.22 | 0.65 |
| 0.08 | 0.54 | 0.18 | 0.27 | 0.01 | 0.54 | 0.13 |
| 0.63 | 1.35 | 0.68 | 1.19 | 0.56 | 1.18 | 0.62 |
| 0.54 | 1.08 | 0.53 | 1.03 | 0.46 | 1.05 | 0.54 |
| #N/A | #N/A | #N/A | #N/A | #N/A | #N/A | #N/A |
| 0.73 | 1.68 | 0.81 | 1.58 | 0.75 | 1.27 | 0.68 |
| #N/A | 0.36 | 0.07 | #N/A | #N/A | 0.43 | 0.06 |
| 0.47 | 1.11 | 0.54 | 0.74 | 0.26 | 0.84 | 0.37 |
| #N/A | #N/A | #N/A | #N/A | #N/A | #N/A | #N/A |
| 0.87 | 2.16 | 0.91 | #N/A | #N/A | 1.65 | 0.84 |
| 0.30 | 0.75 | 0.32 | 0.91 | 0.37 | 0.78 | 0.33 |
| 0.66 | 1.62 | 0.78 | 1.34 | 0.65 | 0.81 | 0.35 |
| 0.70 | 1.12 | 0.55 | 1.67 | 0.78 | 1.72 | 0.87 |
| 0.95 | 3.06 | 0.98 | 2.74 | 0.96 | 2.54 | 0.98 |
| #N/A | #N/A | #N/A | #N/A | #N/A | #N/A | #N/A |
| 0.32 | #N/A | #N/A | 0.55 | 0.12 | 0.60 | 0.18 |
| #N/A | #N/A | #N/A | #N/A | #N/A | 0.51 | 0.11 |
| 0.02 | 0.25 | 0.02 | 0.31 | 0.02 | 0.45 | 0.07 |
| 0.18 | 0.57 | 0.20 | 0.84 | 0.33 | 0.56 | 0.15 |
| 0.24 | 0.52 | 0.16 | 1.00 | 0.43 | 0.62 | 0.19 |
| 0.32 | 0.82 | 0.36 | 1.09 | 0.50 | 0.77 | 0.32 |
| 0.10 | 0.43 | 0.10 | 0.59 | 0.15 | 0.51 | 0.11 |
| 0.22 | 0.60 | 0.22 | 0.58 | 0.14 | 0.67 | 0.24 |
| 0.86 | 1.84 | 0.84 | 1.23 | 0.58 | 1.23 | 0.65 |
| 0.82 | 1.81 | 0.83 | 1.49 | 0.71 | 1.55 | 0.81 |
| 0.94 | 2.66 | 0.95 | 3.16 | 0.96 | 1.95 | 0.91 |
| #N/A | #N/A | #N/A | #N/A | #N/A | #N/A | #N/A |
| 0.98 | 2.52 | 0.95 | 3.02 | 0.98 | 2.76 | 0.98 |
| 0.85 | 1.85 | 0.85 | 2.01 | 0.88 | 1.87 | 0.90 |
| 0.57 | 0.85 | 0.38 | 1.14 | 0.52 | 0.57 | 0.16 |
| 0.01 | 0.24 | 0.02 | 0.40 | 0.04 | 0.18 | 0.00 |
| 0.13 | 0.51 | 0.15 | 0.89 | 0.35 | 0.56 | 0.14 |
| 0.35 | 0.76 | 0.32 | 0.82 | 0.31 | 0.90 | 0.42 |
| 0.16 | 0.59 | 0.21 | 0.58 | 0.15 | 0.62 | 0.20 |
| 0.89 | 1.49 | 0.74 | 1.52 | 0.72 | 1.75 | 0.87 |



|      |      |      |      |      |      |      |
|------|------|------|------|------|------|------|
| #N/A | #N/A | #N/A | #N/A | #N/A | #N/A | #N/A |
| 0.52 | #N/A | #N/A | #N/A | #N/A | 1.17 | 0.62 |
| #N/A | #N/A | #N/A | #N/A | #N/A | #N/A | #N/A |
| #N/A | #N/A | #N/A | 0.76 | 0.27 | #N/A | #N/A |
| 0.94 | #N/A | #N/A | 2.09 | 0.90 | 1.70 | 0.86 |
| 0.17 | 0.38 | 0.07 | 0.53 | 0.11 | 0.39 | 0.04 |
| 0.72 | 1.67 | 0.79 | 1.49 | 0.71 | 1.73 | 0.87 |
| 0.69 | 1.34 | 0.65 | 1.46 | 0.70 | 1.25 | 0.67 |
| 0.73 | 1.81 | 0.82 | 1.34 | 0.64 | 1.25 | 0.66 |
| #N/A | 0.32 | 0.05 | #N/A | #N/A | #N/A | #N/A |
| 0.59 | 1.24 | 0.61 | 0.97 | 0.42 | 1.33 | 0.71 |
| 0.37 | 0.93 | 0.43 | #N/A | #N/A | 0.72 | 0.28 |
| 0.97 | 2.14 | 0.91 | 2.19 | 0.92 | 2.27 | 0.96 |
| #N/A | #N/A | #N/A | #N/A | #N/A | 0.33 | 0.02 |
| 0.24 | #N/A | #N/A | #N/A | #N/A | 1.37 | 0.73 |
| 0.91 | 3.04 | 0.98 | 2.20 | 0.92 | 1.95 | 0.91 |
| #N/A | #N/A | #N/A | 1.41 | 0.68 | 3.11 | 0.99 |
| 0.13 | 0.57 | 0.19 | 0.65 | 0.20 | 0.46 | 0.08 |
| 0.98 | 2.29 | 0.93 | 2.47 | 0.95 | 2.46 | 0.97 |
| 0.25 | 0.92 | 0.40 | 1.06 | 0.46 | 0.59 | 0.17 |
| 0.50 | #N/A | #N/A | 1.07 | 0.47 | 0.79 | 0.33 |
| 0.76 | 1.30 | 0.64 | 1.44 | 0.69 | 1.50 | 0.79 |
| #N/A | 1.16 | 0.57 | 1.69 | 0.80 | 1.10 | 0.57 |
| #N/A | #N/A | #N/A | #N/A | #N/A | 0.03 | 0.00 |
| 0.62 | 1.25 | 0.62 | 1.47 | 0.71 | 1.06 | 0.55 |
| 0.50 | 1.06 | 0.51 | 1.39 | 0.67 | 1.45 | 0.77 |
| 0.69 | 1.37 | 0.68 | 2.06 | 0.88 | 1.77 | 0.88 |
| 0.76 | #N/A | #N/A | 1.07 | 0.49 | #N/A | #N/A |
| 0.22 | 0.44 | 0.10 | 0.53 | 0.11 | 0.62 | 0.19 |
| #N/A | 0.61 | 0.22 | 0.80 | 0.30 | 0.92 | 0.43 |
| 0.34 | 0.71 | 0.29 | 0.86 | 0.34 | 0.90 | 0.42 |
| 0.12 | 0.35 | 0.06 | 0.49 | 0.08 | 0.76 | 0.31 |
| 0.63 | 1.30 | 0.65 | 1.24 | 0.59 | 1.20 | 0.64 |
| #N/A | #N/A | #N/A | #N/A | #N/A | 1.20 | 0.64 |
| 0.53 | 1.34 | 0.67 | 1.29 | 0.62 | 1.10 | 0.57 |
| 0.66 | 1.79 | 0.84 | 1.75 | 0.81 | 1.23 | 0.66 |
| 0.32 | 0.90 | 0.42 | 0.49 | 0.09 | 0.90 | 0.42 |
| #N/A | #N/A | #N/A | #N/A | #N/A | #N/A | #N/A |
| #N/A | 0.49 | 0.14 | 0.69 | 0.22 | 0.43 | 0.06 |
| 0.66 | 1.19 | 0.59 | 1.36 | 0.65 | 1.04 | 0.53 |
| 0.29 | 0.72 | 0.29 | 0.93 | 0.39 | 0.80 | 0.34 |
| #N/A | #N/A | #N/A | #N/A | #N/A | 1.23 | 0.65 |
| 0.35 | 1.18 | 0.58 | 0.91 | 0.38 | 1.21 | 0.64 |
| 0.80 | 1.34 | 0.67 | 1.54 | 0.74 | 2.02 | 0.93 |
| #N/A | #N/A | #N/A | #N/A | #N/A | #N/A | #N/A |
| 0.71 | #N/A | #N/A | #N/A | #N/A | 1.18 | 0.62 |
| #N/A | #N/A | #N/A | #N/A | #N/A | 0.30 | 0.02 |
| 0.73 | 1.43 | 0.71 | 1.16 | 0.54 | 1.38 | 0.73 |
| #N/A | #N/A | #N/A | #N/A | #N/A | #N/A | #N/A |
| 0.88 | 1.78 | 0.83 | 2.38 | 0.89 | 1.70 | 0.86 |
| #N/A | #N/A | #N/A | #N/A | #N/A | #N/A | #N/A |

|      |      |      |      |      |      |      |
|------|------|------|------|------|------|------|
| 0.98 | #N/A | #N/A | 2.37 | 0.94 | 2.15 | 0.95 |
| #N/A | #N/A | #N/A | #N/A | #N/A | #N/A | #N/A |
| 0.66 | 1.18 | 0.57 | 1.34 | 0.64 | 0.99 | 0.50 |
| 0.29 | #N/A | #N/A | 0.94 | 0.39 | 0.78 | 0.33 |
| #N/A | #N/A | #N/A | 0.68 | 0.21 | 0.80 | 0.34 |
| 0.30 | 0.90 | 0.41 | 0.81 | 0.31 | #N/A | #N/A |
| 0.16 | 0.61 | 0.22 | #N/A | #N/A | 0.51 | 0.11 |
| 0.13 | 0.49 | 0.14 | 0.53 | 0.11 | 0.49 | 0.09 |
| 0.28 | 0.64 | 0.24 | 0.63 | 0.17 | 0.71 | 0.27 |
| 0.07 | 0.38 | 0.07 | 0.45 | 0.07 | 0.36 | 0.03 |
| 0.27 | 0.58 | 0.20 | 0.66 | 0.20 | 0.84 | 0.37 |
| 0.93 | 1.85 | 0.85 | 2.00 | 0.88 | 1.75 | 0.87 |
| 0.93 | 2.43 | 0.94 | 3.38 | 0.98 | 2.52 | 0.97 |
| 0.81 | 2.22 | 0.92 | 2.06 | 0.89 | 2.56 | 0.98 |
| #N/A | #N/A | #N/A | #N/A | #N/A | 0.58 | 0.17 |
| 0.50 | #N/A | #N/A | 1.77 | 0.82 | 1.26 | 0.67 |
| 0.46 | 0.52 | 0.16 | #N/A | #N/A | #N/A | #N/A |
| 0.97 | 2.57 | 0.96 | 3.03 | 0.97 | 1.92 | 0.91 |
| 0.54 | 0.99 | 0.47 | 1.36 | 0.65 | 1.37 | 0.73 |
| 0.70 | 1.80 | 0.84 | 1.52 | 0.73 | 1.31 | 0.69 |
| 0.40 | 0.73 | 0.30 | 1.15 | 0.54 | 0.93 | 0.45 |
| #N/A | 0.71 | 0.29 | #N/A | #N/A | 0.67 | 0.24 |
| 0.67 | 1.27 | 0.63 | 1.87 | 0.84 | 1.01 | 0.51 |
| 0.98 | 2.82 | 0.97 | 3.25 | 0.98 | 3.32 | 1.00 |
| #N/A | #N/A | #N/A | #N/A | #N/A | #N/A | #N/A |
| #N/A | #N/A | #N/A | 0.97 | 0.42 | 1.09 | 0.56 |
| #N/A | 1.20 | 0.59 | #N/A | #N/A | 1.53 | 0.80 |
| 0.96 | #N/A | #N/A | 2.52 | 0.95 | 2.46 | 0.97 |
| #N/A | #N/A | #N/A | #N/A | #N/A | 0.97 | 0.48 |
| 0.99 | 3.75 | 0.99 | 3.23 | 0.98 | 2.65 | 0.98 |
| 0.98 | 2.99 | 0.98 | 3.33 | 0.99 | 2.70 | 0.98 |
| 0.57 | 1.31 | 0.65 | 1.10 | 0.51 | 1.17 | 0.62 |
| #N/A | #N/A | #N/A | #N/A | #N/A | #N/A | #N/A |
| 0.32 | 0.68 | 0.27 | 0.72 | 0.24 | 0.77 | 0.32 |
| 0.74 | 1.37 | 0.68 | 0.92 | 0.39 | 1.49 | 0.78 |
| 0.79 | 1.73 | 0.82 | 0.92 | 0.39 | 1.28 | 0.68 |
| 0.57 | 1.06 | 0.52 | 1.21 | 0.57 | 1.14 | 0.59 |
| 0.34 | 0.64 | 0.24 | 1.63 | 0.75 | #N/A | #N/A |
| 0.63 | 1.48 | 0.72 | 1.17 | 0.54 | 1.96 | 0.92 |
| #N/A | #N/A | #N/A | #N/A | #N/A | #N/A | #N/A |
| 0.78 | 1.48 | 0.72 | #N/A | #N/A | 1.23 | 0.65 |
| 0.26 | 0.51 | 0.15 | 0.97 | 0.42 | 0.55 | 0.13 |
| #N/A | 0.83 | 0.37 | 0.94 | 0.38 | 0.77 | 0.32 |
| 0.68 | 1.36 | 0.67 | 1.23 | 0.56 | 2.07 | 0.93 |
| #N/A | #N/A | #N/A | #N/A | #N/A | #N/A | #N/A |
| 0.66 | #N/A | #N/A | 1.70 | 0.77 | #N/A | #N/A |
| 0.48 | 0.95 | 0.45 | 1.11 | 0.51 | 0.87 | 0.39 |
| 0.48 | 0.74 | 0.31 | 0.86 | 0.34 | 0.90 | 0.42 |
| #N/A | 0.58 | 0.21 | 0.63 | 0.18 | 0.53 | 0.12 |
| #N/A | 0.75 | 0.32 | #N/A | #N/A | #N/A | #N/A |
| 0.65 | 1.12 | 0.55 | 0.94 | 0.40 | 1.31 | 0.69 |

|      |      |      |      |      |      |      |
|------|------|------|------|------|------|------|
| 0.90 | 2.60 | 0.95 | 2.49 | 0.95 | 2.26 | 0.96 |
| 0.82 | 1.41 | 0.69 | 1.27 | 0.61 | 1.65 | 0.85 |
| #N/A | #N/A | #N/A | #N/A | #N/A | 0.97 | 0.48 |
| 0.18 | 0.57 | 0.19 | 0.55 | 0.12 | 0.43 | 0.06 |
| #N/A | #N/A | #N/A | #N/A | #N/A | #N/A | #N/A |
| #N/A | #N/A | #N/A | 1.24 | 0.59 | 1.48 | 0.78 |
| 0.07 | 0.56 | 0.18 | 0.40 | 0.05 | 0.76 | 0.31 |
| #N/A | 1.12 | 0.54 | 1.98 | 0.87 | 0.96 | 0.47 |
| #N/A | #N/A | #N/A | #N/A | #N/A | #N/A | #N/A |
| 0.79 | 1.57 | 0.77 | 1.48 | 0.71 | 1.35 | 0.72 |
| #N/A | #N/A | #N/A | #N/A | #N/A | #N/A | #N/A |
| 0.75 | 1.29 | 0.64 | 1.47 | 0.70 | 1.16 | 0.61 |
| 0.61 | #N/A | #N/A | 1.23 | 0.57 | 1.08 | 0.56 |
| #N/A | #N/A | #N/A | #N/A | #N/A | #N/A | #N/A |
| 0.63 | 1.52 | 0.73 | #N/A | #N/A | 0.95 | 0.46 |
| 0.70 | 1.46 | 0.72 | 1.84 | 0.84 | 1.28 | 0.68 |
| 0.53 | 0.94 | 0.44 | #N/A | #N/A | 0.95 | 0.46 |
| 0.57 | 1.29 | 0.64 | 1.35 | 0.64 | 0.81 | 0.35 |
| 0.51 | 0.96 | 0.45 | 1.04 | 0.47 | 1.08 | 0.56 |
| 0.15 | 0.44 | 0.10 | #N/A | #N/A | 0.48 | 0.09 |
| #N/A | 2.54 | 0.95 | #N/A | #N/A | 1.15 | 0.61 |
| 0.16 | 0.54 | 0.18 | 0.79 | 0.29 | 0.44 | 0.06 |
| #N/A | #N/A | #N/A | #N/A | #N/A | #N/A | #N/A |
| #N/A | 1.47 | 0.70 | #N/A | #N/A | 1.04 | 0.53 |
| 0.41 | 0.53 | 0.17 | 0.89 | 0.36 | #N/A | #N/A |
| 0.74 | 1.20 | 0.59 | 1.09 | 0.48 | 1.20 | 0.64 |
| 0.50 | 0.87 | 0.39 | #N/A | #N/A | 0.67 | 0.23 |
| #N/A | 2.29 | 0.92 | #N/A | #N/A | 2.05 | 0.93 |
| 0.91 | 1.89 | 0.86 | 1.72 | 0.80 | 1.58 | 0.82 |
| 0.55 | #N/A | #N/A | 1.19 | 0.55 | 1.21 | 0.64 |
| 0.61 | 1.32 | 0.66 | 1.42 | 0.68 | 1.02 | 0.52 |
| #N/A | #N/A | #N/A | #N/A | #N/A | #N/A | #N/A |
| 0.53 | 1.09 | 0.53 | 0.96 | 0.41 | 1.01 | 0.51 |
| #N/A | #N/A | #N/A | #N/A | #N/A | 1.27 | 0.68 |
| 0.98 | 2.86 | 0.98 | 2.17 | 0.89 | 1.77 | 0.88 |
| #N/A | #N/A | #N/A | 1.70 | 0.76 | 1.84 | 0.90 |
| #N/A | #N/A | #N/A | 1.30 | 0.62 | 2.33 | 0.96 |
| #N/A | 1.74 | 0.81 | 1.49 | 0.72 | 2.21 | 0.95 |
| 0.88 | 2.05 | 0.90 | #N/A | #N/A | 1.68 | 0.85 |
| #N/A | #N/A | #N/A | #N/A | #N/A | #N/A | #N/A |
| #N/A | #N/A | #N/A | #N/A | #N/A | #N/A | #N/A |
| 0.71 | 1.51 | 0.74 | 2.84 | 0.96 | 1.95 | 0.91 |
| #N/A | #N/A | #N/A | #N/A | #N/A | #N/A | #N/A |
| 0.90 | 1.75 | 0.82 | 2.09 | 0.90 | 1.71 | 0.86 |
| #N/A | #N/A | #N/A | #N/A | #N/A | #N/A | #N/A |
| 0.96 | 2.50 | 0.94 | 2.33 | 0.93 | 2.46 | 0.97 |
| 0.06 | 0.56 | 0.19 | 0.55 | 0.13 | 0.66 | 0.23 |
| 0.22 | 0.86 | 0.39 | 0.87 | 0.35 | 0.81 | 0.35 |
| 0.63 | 1.15 | 0.56 | 1.53 | 0.74 | 0.96 | 0.47 |
| 0.94 | 2.42 | 0.94 | 2.32 | 0.92 | 1.59 | 0.82 |
| 0.13 | 0.50 | 0.14 | 0.51 | 0.10 | 0.57 | 0.16 |



|      |      |      |      |      |      |      |
|------|------|------|------|------|------|------|
| 0.73 | 1.46 | 0.72 | 1.40 | 0.67 | 1.15 | 0.60 |
| #N/A | 1.73 | 0.82 | 1.91 | 0.81 | 2.08 | 0.94 |
| 0.98 | 2.36 | 0.93 | 2.24 | 0.92 | 2.32 | 0.96 |
| #N/A | 0.74 | 0.31 | 0.73 | 0.25 | 0.71 | 0.27 |
| 0.47 | #N/A | #N/A | 0.93 | 0.40 | 0.72 | 0.28 |
| 0.80 | 1.34 | 0.66 | 1.94 | 0.85 | 1.75 | 0.87 |
| 0.19 | 0.53 | 0.17 | #N/A | #N/A | 0.68 | 0.24 |
| #N/A | #N/A | #N/A | #N/A | #N/A | 0.61 | 0.18 |
| 0.21 | 0.72 | 0.30 | 0.62 | 0.18 | 0.72 | 0.28 |
| 0.14 | 0.51 | 0.16 | 0.61 | 0.16 | 0.71 | 0.27 |
| #N/A | 1.24 | 0.61 | 1.16 | 0.54 | 0.86 | 0.39 |
| 0.39 | 0.87 | 0.39 | 0.79 | 0.29 | 0.86 | 0.38 |
| #N/A | 2.93 | 0.87 | #N/A | #N/A | 1.55 | 0.81 |
| 0.22 | 0.66 | 0.26 | 0.76 | 0.27 | 0.65 | 0.22 |
| 0.11 | 0.45 | 0.11 | 0.65 | 0.19 | 0.52 | 0.11 |
| 0.16 | 0.56 | 0.19 | #N/A | #N/A | 0.76 | 0.31 |
| 0.79 | 1.38 | 0.69 | 1.34 | 0.64 | 1.39 | 0.74 |
| 0.17 | 0.75 | 0.32 | 0.71 | 0.23 | 0.67 | 0.23 |
| 0.79 | 1.76 | 0.83 | 2.03 | 0.89 | 1.69 | 0.86 |
| #N/A | 1.25 | 0.62 | #N/A | #N/A | #N/A | #N/A |
| 0.81 | 1.40 | 0.69 | 1.38 | 0.66 | 1.35 | 0.72 |
| 0.65 | 1.80 | 0.84 | 1.54 | 0.73 | 1.22 | 0.65 |
| #N/A | #N/A | #N/A | #N/A | #N/A | #N/A | #N/A |
| #N/A | 0.73 | 0.30 | 0.64 | 0.19 | #N/A | #N/A |
| 0.85 | 1.71 | 0.81 | #N/A | #N/A | 2.03 | 0.93 |
| 0.32 | 0.58 | 0.20 | 0.65 | 0.19 | 0.65 | 0.21 |
| #N/A | 1.42 | 0.70 | #N/A | #N/A | #N/A | #N/A |
| #N/A | #N/A | #N/A | #N/A | #N/A | #N/A | #N/A |
| 0.84 | 1.95 | 0.88 | 1.74 | 0.81 | 1.79 | 0.89 |
| 0.52 | 0.68 | 0.27 | 1.03 | 0.43 | 1.20 | 0.63 |
| 0.96 | 3.07 | 0.98 | 2.78 | 0.97 | 3.05 | 0.99 |
| #N/A | 0.29 | 0.06 | #N/A | #N/A | 0.54 | 0.13 |
| 0.12 | 0.46 | 0.11 | 0.52 | 0.10 | 0.56 | 0.14 |
| #N/A | #N/A | #N/A | #N/A | #N/A | 0.86 | 0.38 |
| #N/A | #N/A | #N/A | #N/A | #N/A | #N/A | #N/A |
| #N/A | #N/A | #N/A | #N/A | #N/A | #N/A | #N/A |
| #N/A | #N/A | #N/A | #N/A | #N/A | #N/A | #N/A |
| 0.95 | #N/A | #N/A | 2.47 | 0.95 | 1.96 | 0.92 |
| 0.81 | 1.67 | 0.79 | 1.58 | 0.75 | 1.57 | 0.82 |
| #N/A | 0.88 | 0.40 | 0.91 | 0.38 | 0.95 | 0.47 |
| 0.48 | 0.86 | 0.39 | 1.24 | 0.59 | 0.72 | 0.28 |
| #N/A | #N/A | #N/A | #N/A | #N/A | 0.60 | 0.18 |
| 0.02 | 0.12 | 0.00 | 0.23 | 0.00 | #N/A | #N/A |
| #N/A | #N/A | #N/A | #N/A | #N/A | #N/A | #N/A |
| 0.18 | 0.48 | 0.13 | 0.48 | 0.08 | 0.64 | 0.21 |
| #N/A | #N/A | #N/A | #N/A | #N/A | 0.70 | 0.26 |
| 0.94 | 2.37 | 0.93 | 2.27 | 0.93 | 2.23 | 0.96 |
| #N/A | 0.66 | 0.26 | 0.78 | 0.29 | 0.91 | 0.43 |
| #N/A | #N/A | #N/A | #N/A | #N/A | #N/A | #N/A |
| 0.89 | 1.83 | 0.83 | 1.71 | 0.80 | 1.95 | 0.92 |
| 0.98 | 2.70 | 0.96 | 2.97 | 0.98 | 2.97 | 0.99 |



|      |       |      |      |      |      |      |
|------|-------|------|------|------|------|------|
| 0.61 | 1.33  | 0.65 | 1.00 | 0.45 | 1.10 | 0.57 |
| 0.70 | 1.84  | 0.81 | #N/A | #N/A | #N/A | #N/A |
| 0.49 | 0.85  | 0.38 | 1.23 | 0.59 | 1.31 | 0.70 |
| #N/A | 0.73  | 0.30 | 0.97 | 0.42 | 0.65 | 0.21 |
| 0.38 | 0.81  | 0.35 | 1.13 | 0.49 | 0.67 | 0.24 |
| #N/A | 3.01  | 0.94 | 1.86 | 0.78 | 1.61 | 0.83 |
| #N/A | #N/A  | #N/A | #N/A | #N/A | #N/A | #N/A |
| #N/A | #N/A  | #N/A | #N/A | #N/A | #N/A | #N/A |
| #N/A | #N/A  | #N/A | #N/A | #N/A | 0.67 | 0.23 |
| #N/A | #N/A  | #N/A | 2.41 | 0.93 | 2.01 | 0.92 |
| 0.77 | 1.87  | 0.83 | 1.81 | 0.83 | 1.55 | 0.81 |
| #N/A | #N/A  | #N/A | #N/A | #N/A | 0.25 | 0.01 |
| 0.95 | 1.20  | 0.49 | 2.02 | 0.78 | 1.66 | 0.85 |
| #N/A | #N/A  | #N/A | #N/A | #N/A | #N/A | #N/A |
| 0.80 | 1.70  | 0.81 | 2.12 | 0.87 | 1.44 | 0.76 |
| 0.66 | 1.19  | 0.59 | 1.61 | 0.75 | 1.22 | 0.65 |
| 0.63 | 1.20  | 0.59 | 1.29 | 0.62 | 1.16 | 0.61 |
| #N/A | #N/A  | #N/A | #N/A | #N/A | 0.60 | 0.18 |
| 0.04 | 0.45  | 0.11 | 0.48 | 0.08 | 0.41 | 0.05 |
| #N/A | 0.55  | 0.18 | 0.65 | 0.19 | 0.57 | 0.16 |
| #N/A | #N/A  | #N/A | 2.07 | 0.89 | 1.69 | 0.86 |
| 0.52 | 1.37  | 0.68 | 1.31 | 0.63 | #N/A | #N/A |
| 0.34 | #N/A  | #N/A | #N/A | #N/A | 0.35 | 0.03 |
| 0.39 | 0.92  | 0.42 | 0.73 | 0.25 | 0.83 | 0.36 |
| #N/A | #N/A  | #N/A | #N/A | #N/A | #N/A | #N/A |
| 0.53 | 1.17  | 0.58 | 1.19 | 0.56 | 1.18 | 0.62 |
| 0.84 | 1.96  | 0.88 | 1.77 | 0.82 | 1.93 | 0.91 |
| 0.83 | 1.63  | 0.78 | 1.27 | 0.60 | 1.60 | 0.83 |
| 0.38 | 0.89  | 0.41 | 0.85 | 0.34 | 0.80 | 0.34 |
| 0.44 | 0.89  | 0.41 | 1.19 | 0.56 | 0.86 | 0.39 |
| #N/A | #N/A  | #N/A | 0.70 | 0.22 | 0.43 | 0.06 |
| 0.96 | #N/A  | #N/A | 2.84 | 0.97 | #N/A | #N/A |
| 0.92 | 1.98  | 0.88 | 2.61 | 0.95 | 2.09 | 0.94 |
| 0.12 | 0.44  | 0.10 | 0.63 | 0.19 | 0.56 | 0.14 |
| 0.94 | 2.40  | 0.93 | 2.32 | 0.93 | #N/A | #N/A |
| #N/A | #N/A  | #N/A | #N/A | #N/A | #N/A | #N/A |
| 0.76 | 2.32  | 0.94 | #N/A | #N/A | #N/A | #N/A |
| #N/A | #N/A  | #N/A | #N/A | #N/A | #N/A | #N/A |
| 0.48 | 0.80  | 0.35 | 0.99 | 0.43 | 0.77 | 0.32 |
| 0.23 | 0.58  | 0.20 | 1.06 | 0.48 | 1.30 | 0.69 |
| 0.70 | #N/A  | #N/A | 2.11 | 0.90 | #N/A | #N/A |
| 0.59 | 1.15  | 0.57 | #N/A | #N/A | #N/A | #N/A |
| #N/A | #N/A  | #N/A | 0.97 | 0.41 | 1.19 | 0.63 |
| #N/A | #N/A  | #N/A | #N/A | #N/A | #N/A | #N/A |
| 0.35 | 1.04  | 0.49 | 1.01 | 0.45 | 1.28 | 0.68 |
| 0.73 | 1.50  | 0.71 | 1.34 | 0.64 | 1.26 | 0.67 |
| 0.79 | 11.73 | 0.88 | 1.81 | 0.83 | 1.37 | 0.73 |
| 0.95 | 2.19  | 0.92 | #N/A | #N/A | 1.76 | 0.87 |
| #N/A | #N/A  | #N/A | #N/A | #N/A | #N/A | #N/A |
| #N/A | #N/A  | #N/A | #N/A | #N/A | #N/A | #N/A |
| 0.95 | 2.06  | 0.89 | #N/A | #N/A | 2.33 | 0.96 |

|      |      |      |      |      |      |      |
|------|------|------|------|------|------|------|
| 0.15 | 0.53 | 0.16 | 0.62 | 0.17 | 0.34 | 0.03 |
| 0.37 | 0.76 | 0.32 | 0.80 | 0.30 | 1.11 | 0.58 |
| 0.41 | 0.87 | 0.39 | 0.91 | 0.38 | 0.81 | 0.35 |
| #N/A | #N/A | #N/A | 0.56 | 0.14 | #N/A | #N/A |
| 0.88 | #N/A | #N/A | 1.85 | 0.84 | 2.59 | 0.98 |
| 0.47 | 1.03 | 0.50 | 1.31 | 0.62 | 1.18 | 0.62 |
| 0.39 | 0.59 | 0.21 | 1.24 | 0.59 | 0.71 | 0.27 |
| 0.81 | 1.55 | 0.76 | 1.49 | 0.70 | 1.19 | 0.63 |
| 0.93 | #N/A | #N/A | #N/A | #N/A | 1.61 | 0.83 |
| #N/A | #N/A | #N/A | #N/A | #N/A | #N/A | #N/A |
| 0.88 | 1.99 | 0.88 | 1.61 | 0.75 | 1.85 | 0.90 |
| #N/A | #N/A | #N/A | #N/A | #N/A | #N/A | #N/A |
| 0.49 | 1.20 | 0.59 | 1.32 | 0.63 | 0.87 | 0.39 |
| #N/A | #N/A | #N/A | #N/A | #N/A | 0.22 | 0.01 |
| 0.70 | 1.07 | 0.52 | 1.31 | 0.62 | #N/A | #N/A |
| #N/A | #N/A | #N/A | #N/A | #N/A | #N/A | #N/A |
| 0.15 | 0.57 | 0.20 | 0.68 | 0.22 | 0.66 | 0.23 |
| 0.50 | 1.30 | 0.63 | 1.08 | 0.50 | 1.16 | 0.61 |
| 0.06 | 0.40 | 0.08 | 0.52 | 0.10 | 0.57 | 0.16 |
| 0.51 | 1.46 | 0.72 | 1.06 | 0.48 | 1.47 | 0.78 |
| #N/A | #N/A | #N/A | #N/A | #N/A | #N/A | #N/A |
| 0.86 | #N/A | #N/A | 1.58 | 0.73 | 1.41 | 0.75 |
| 0.23 | 0.55 | 0.18 | #N/A | #N/A | 0.61 | 0.19 |
| 0.66 | 1.17 | 0.57 | 1.57 | 0.75 | 1.21 | 0.64 |
| 0.86 | 2.07 | 0.89 | 1.58 | 0.75 | 1.65 | 0.84 |
| 0.27 | 0.66 | 0.25 | 0.63 | 0.18 | 0.96 | 0.47 |
| 0.87 | 2.07 | 0.90 | 2.05 | 0.89 | 2.31 | 0.96 |
| 0.85 | 1.78 | 0.82 | 1.77 | 0.82 | #N/A | #N/A |
| 0.21 | 0.52 | 0.16 | 0.68 | 0.21 | #N/A | #N/A |
| #N/A | #N/A | #N/A | #N/A | #N/A | #N/A | #N/A |
| 0.43 | 1.09 | 0.52 | 1.06 | 0.48 | 0.97 | 0.48 |
| 0.09 | #N/A | #N/A | 0.68 | 0.23 | 0.34 | 0.02 |
| #N/A | #N/A | #N/A | #N/A | #N/A | #N/A | #N/A |
| 0.02 | 0.28 | 0.03 | 0.34 | 0.03 | 0.54 | 0.13 |
| #N/A | #N/A | #N/A | #N/A | #N/A | #N/A | #N/A |
| 0.41 | 1.11 | 0.54 | #N/A | #N/A | 0.53 | 0.12 |
| 0.91 | #N/A | #N/A | #N/A | #N/A | 2.06 | 0.93 |
| #N/A | 1.39 | 0.69 | #N/A | #N/A | 1.25 | 0.66 |
| 0.10 | 0.51 | 0.15 | #N/A | #N/A | 0.47 | 0.08 |
| 0.62 | 1.84 | 0.84 | #N/A | #N/A | 0.94 | 0.45 |
| 0.74 | 1.15 | 0.57 | 2.34 | 0.91 | 2.10 | 0.94 |
| 0.46 | 1.14 | 0.56 | 1.10 | 0.47 | 0.89 | 0.41 |
| #N/A | #N/A | #N/A | 1.55 | 0.73 | #N/A | #N/A |
| #N/A | #N/A | #N/A | #N/A | #N/A | #N/A | #N/A |
| #N/A | #N/A | #N/A | #N/A | #N/A | #N/A | #N/A |
| 0.91 | 1.88 | 0.86 | 1.98 | 0.87 | 2.01 | 0.92 |
| #N/A | #N/A | #N/A | #N/A | #N/A | #N/A | #N/A |
| 0.28 | 0.74 | 0.31 | 0.89 | 0.36 | 0.59 | 0.17 |
| #N/A | #N/A | #N/A | #N/A | #N/A | #N/A | #N/A |
| 0.42 | 0.74 | 0.31 | 0.69 | 0.22 | 0.75 | 0.30 |
| 0.66 | 2.27 | 0.82 | 1.31 | 0.63 | 1.44 | 0.77 |



|      |      |      |      |      |      |      |
|------|------|------|------|------|------|------|
| #N/A | #N/A | #N/A | #N/A | #N/A | #N/A | #N/A |
| 0.51 | 0.59 | 0.24 | #N/A | #N/A | 0.86 | 0.39 |
| 0.78 | 1.27 | 0.62 | #N/A | #N/A | 1.28 | 0.68 |
| 0.42 | 0.80 | 0.35 | 0.64 | 0.19 | 0.54 | 0.13 |
| 0.03 | 0.18 | 0.01 | 0.38 | 0.03 | 0.37 | 0.03 |
| #N/A | #N/A | #N/A | #N/A | #N/A | #N/A | #N/A |
| 0.09 | 0.59 | 0.21 | 0.47 | 0.07 | 0.68 | 0.24 |
| 0.17 | 0.53 | 0.17 | 0.59 | 0.15 | 0.62 | 0.19 |
| 0.49 | 1.16 | 0.57 | 1.37 | 0.64 | 0.96 | 0.47 |
| 0.75 | 1.66 | 0.79 | 1.36 | 0.66 | 1.70 | 0.86 |
| 0.58 | 1.00 | 0.48 | 1.34 | 0.64 | 1.35 | 0.72 |
| 0.97 | 2.41 | 0.95 | 2.94 | 0.98 | 1.78 | 0.88 |
| 0.55 | 1.05 | 0.51 | 1.23 | 0.58 | 1.39 | 0.74 |
| 0.74 | 1.25 | 0.61 | 1.51 | 0.72 | 1.29 | 0.69 |
| 0.71 | 1.44 | 0.71 | 1.42 | 0.69 | 1.32 | 0.70 |
| 0.71 | 1.60 | 0.78 | 1.74 | 0.80 | 1.37 | 0.73 |
| 0.25 | 0.88 | 0.40 | 0.83 | 0.32 | 0.93 | 0.44 |
| #N/A | #N/A | #N/A | #N/A | #N/A | #N/A | #N/A |
| 0.80 | 2.53 | 0.96 | 2.56 | 0.96 | 1.53 | 0.80 |
| 0.33 | 0.86 | 0.39 | 1.08 | 0.48 | 0.81 | 0.35 |
| 0.28 | 0.71 | 0.29 | 0.84 | 0.33 | 0.82 | 0.36 |
| 0.59 | 1.35 | 0.67 | 1.33 | 0.64 | 0.94 | 0.45 |
| 0.73 | 1.47 | 0.72 | 1.37 | 0.66 | 1.58 | 0.82 |
| 0.76 | 1.71 | 0.80 | 1.80 | 0.82 | 1.33 | 0.71 |
| 0.73 | 1.03 | 0.50 | 1.45 | 0.70 | 1.42 | 0.75 |
| 0.15 | 0.46 | 0.12 | 0.55 | 0.12 | 0.53 | 0.12 |
| 0.58 | 1.59 | 0.77 | 0.64 | 0.18 | 1.21 | 0.64 |
| 0.68 | 1.50 | 0.74 | 1.07 | 0.48 | 1.29 | 0.68 |
| #N/A | #N/A | #N/A | #N/A | #N/A | #N/A | #N/A |
| 0.63 | 1.48 | 0.71 | 1.24 | 0.59 | 1.21 | 0.64 |
| 0.49 | 0.97 | 0.46 | 1.10 | 0.50 | 0.68 | 0.24 |
| #N/A | #N/A | #N/A | #N/A | #N/A | #N/A | #N/A |
| 0.76 | 1.87 | 0.86 | 1.34 | 0.64 | 1.36 | 0.72 |
| 0.23 | #N/A | #N/A | 0.80 | 0.30 | 0.61 | 0.18 |
| 0.93 | 2.10 | 0.91 | 1.79 | 0.82 | 1.71 | 0.86 |
| 0.02 | 0.30 | 0.04 | 0.54 | 0.12 | 0.40 | 0.04 |
| 0.29 | 0.42 | 0.12 | 0.83 | 0.32 | #N/A | #N/A |
| #N/A | #N/A | #N/A | #N/A | #N/A | #N/A | #N/A |
| 0.10 | 0.41 | 0.09 | 0.41 | 0.05 | 0.55 | 0.13 |
| 0.21 | 0.59 | 0.21 | 0.42 | 0.06 | 0.79 | 0.33 |
| 0.86 | 1.70 | 0.81 | 1.49 | 0.71 | 1.40 | 0.74 |
| #N/A | #N/A | #N/A | #N/A | #N/A | 0.56 | 0.14 |
| #N/A | #N/A | #N/A | #N/A | #N/A | 0.57 | 0.15 |
| 0.96 | 2.76 | 0.97 | 2.61 | 0.93 | 3.30 | 0.99 |
| 0.70 | 1.46 | 0.72 | 1.49 | 0.71 | 1.43 | 0.76 |
| 0.09 | #N/A | #N/A | #N/A | #N/A | 0.62 | 0.19 |
| 0.51 | 1.02 | 0.48 | 1.38 | 0.66 | 1.10 | 0.57 |
| #N/A | #N/A | #N/A | #N/A | #N/A | #N/A | #N/A |
| #N/A | #N/A | #N/A | #N/A | #N/A | 1.05 | 0.54 |
| 0.99 | 3.47 | 0.99 | 3.38 | 0.98 | 2.72 | 0.98 |
| 0.93 | 1.69 | 0.81 | 1.76 | 0.81 | 1.60 | 0.83 |

|      |      |      |      |      |      |      |
|------|------|------|------|------|------|------|
| #N/A | #N/A | #N/A | #N/A | #N/A | #N/A | #N/A |
| #N/A | #N/A | #N/A | #N/A | #N/A | #N/A | #N/A |
| 0.09 | 0.42 | 0.09 | 0.66 | 0.20 | 0.61 | 0.19 |
| 0.84 | 1.84 | 0.84 | 1.85 | 0.83 | 2.20 | 0.95 |
| #N/A | #N/A | #N/A | #N/A | #N/A | #N/A | #N/A |
| 0.43 | #N/A | #N/A | 0.95 | 0.39 | #N/A | #N/A |
| #N/A | #N/A | #N/A | 0.70 | 0.22 | #N/A | #N/A |
| 0.61 | #N/A | #N/A | #N/A | #N/A | 1.25 | 0.66 |
| 0.20 | 0.53 | 0.17 | 0.73 | 0.24 | 0.64 | 0.21 |
| 0.10 | 0.44 | 0.11 | 0.55 | 0.12 | 0.53 | 0.12 |
| 0.65 | 1.49 | 0.73 | 1.25 | 0.59 | 1.18 | 0.62 |
| 0.72 | 1.06 | 0.52 | 1.37 | 0.65 | 0.97 | 0.48 |
| 0.76 | 1.39 | 0.69 | #N/A | #N/A | 1.80 | 0.89 |
| 0.81 | 1.69 | 0.81 | 1.46 | 0.70 | 1.44 | 0.76 |
| 0.34 | 1.17 | 0.58 | 0.91 | 0.37 | 1.32 | 0.70 |
| 0.45 | 0.75 | 0.32 | 0.85 | 0.33 | 0.55 | 0.13 |
| 0.64 | 1.21 | 0.60 | 1.16 | 0.54 | 0.81 | 0.34 |
| #N/A | #N/A | #N/A | #N/A | #N/A | #N/A | #N/A |
| 0.81 | 1.47 | 0.73 | 1.55 | 0.74 | 1.22 | 0.64 |
| 0.42 | 1.05 | 0.51 | 1.02 | 0.46 | 0.99 | 0.49 |
| #N/A | #N/A | #N/A | #N/A | #N/A | 0.76 | 0.31 |
| 0.02 | 0.25 | 0.02 | 0.35 | 0.02 | 0.43 | 0.06 |
| 0.85 | 2.01 | 0.89 | 1.92 | 0.86 | 2.03 | 0.93 |
| #N/A | 0.28 | 0.03 | #N/A | #N/A | 0.36 | 0.03 |
| 0.87 | #N/A | #N/A | #N/A | #N/A | 2.13 | 0.94 |
| 0.75 | 1.38 | 0.69 | 1.56 | 0.75 | 1.43 | 0.76 |
| 0.37 | 0.89 | 0.40 | 1.14 | 0.53 | 0.88 | 0.40 |
| #N/A | #N/A | #N/A | 0.55 | 0.13 | #N/A | #N/A |
| 0.07 | 0.45 | 0.11 | 0.44 | 0.06 | 0.56 | 0.15 |
| 0.45 | #N/A | #N/A | 0.88 | 0.36 | 0.46 | 0.07 |
| 0.23 | #N/A | #N/A | 0.58 | 0.15 | 0.78 | 0.33 |
| 0.23 | 0.59 | 0.21 | 0.50 | 0.10 | 1.03 | 0.52 |
| 0.21 | 0.45 | 0.11 | 0.61 | 0.17 | 0.45 | 0.07 |
| #N/A | #N/A | #N/A | 2.11 | 0.90 | 1.32 | 0.70 |
| #N/A | #N/A | #N/A | #N/A | #N/A | #N/A | #N/A |
| 0.84 | 1.83 | 0.85 | 1.42 | 0.68 | 1.70 | 0.86 |
| 0.02 | 0.35 | 0.05 | 0.36 | 0.03 | 0.27 | 0.01 |
| #N/A | #N/A | #N/A | #N/A | #N/A | #N/A | #N/A |
| 0.55 | 1.01 | 0.48 | 0.95 | 0.41 | #N/A | #N/A |
| 0.25 | 0.78 | 0.34 | 0.82 | 0.32 | 0.72 | 0.28 |
| 0.03 | 0.38 | 0.07 | 0.54 | 0.12 | 0.34 | 0.03 |
| #N/A | 0.70 | 0.29 | 0.61 | 0.17 | 0.75 | 0.30 |
| 0.65 | 1.57 | 0.76 | 1.01 | 0.45 | 1.32 | 0.70 |
| 0.43 | 0.87 | 0.40 | 0.92 | 0.38 | 0.65 | 0.22 |
| 0.12 | #N/A | #N/A | #N/A | #N/A | 0.60 | 0.17 |
| 0.43 | 1.21 | 0.60 | 1.20 | 0.57 | 1.29 | 0.69 |
| 0.51 | 1.26 | 0.63 | #N/A | #N/A | 1.20 | 0.63 |
| 0.08 | #N/A | #N/A | 0.66 | 0.20 | 0.65 | 0.21 |
| 0.19 | 0.58 | 0.20 | 0.71 | 0.23 | 0.53 | 0.13 |
| 0.94 | 1.75 | 0.82 | 2.46 | 0.94 | 1.85 | 0.90 |
| 0.86 | 1.57 | 0.77 | #N/A | #N/A | 1.37 | 0.73 |

|      |      |      |      |      |      |      |
|------|------|------|------|------|------|------|
| 0.79 | 1.83 | 0.84 | 2.00 | 0.88 | 1.16 | 0.61 |
| #N/A | #N/A | #N/A | #N/A | #N/A | #N/A | #N/A |
| #N/A | #N/A | #N/A | #N/A | #N/A | 1.09 | 0.56 |
| 0.83 | #N/A | #N/A | 3.36 | 0.97 | #N/A | #N/A |
| 0.70 | 1.40 | 0.67 | 1.36 | 0.61 | 1.31 | 0.70 |
| 0.33 | 0.90 | 0.42 | 0.95 | 0.40 | 0.97 | 0.48 |
| #N/A | #N/A | #N/A | #N/A | #N/A | 1.36 | 0.72 |
| 0.21 | 0.65 | 0.25 | 0.79 | 0.29 | 0.61 | 0.18 |
| 0.30 | 0.82 | 0.36 | #N/A | #N/A | 1.31 | 0.69 |
| 0.65 | 1.66 | 0.79 | 1.33 | 0.64 | 1.34 | 0.71 |
| #N/A | 0.55 | 0.18 | 0.73 | 0.25 | #N/A | #N/A |
| 0.66 | #N/A | #N/A | 1.21 | 0.56 | 1.68 | 0.85 |
| 0.18 | 1.60 | 0.75 | #N/A | #N/A | 1.41 | 0.75 |
| 0.56 | 1.06 | 0.51 | 1.10 | 0.50 | 1.21 | 0.64 |
| 0.81 | 1.88 | 0.85 | 1.28 | 0.57 | 1.83 | 0.89 |
| #N/A | #N/A | #N/A | 0.69 | 0.22 | #N/A | #N/A |
| 0.17 | 0.64 | 0.25 | 1.07 | 0.48 | 0.72 | 0.28 |
| 0.55 | 1.13 | 0.55 | 0.99 | 0.43 | 0.88 | 0.40 |
| 0.53 | 1.10 | 0.54 | 1.33 | 0.64 | 1.12 | 0.59 |
| 0.01 | #N/A | #N/A | 0.33 | 0.02 | 0.31 | 0.02 |
| 0.10 | 0.41 | 0.08 | 0.50 | 0.09 | 0.58 | 0.16 |
| 0.03 | 0.19 | 0.01 | 0.29 | 0.01 | 0.21 | 0.01 |
| 0.28 | 0.62 | 0.23 | 0.75 | 0.26 | 0.63 | 0.20 |
| 0.97 | 2.56 | 0.96 | 2.65 | 0.95 | 2.52 | 0.97 |
| 0.51 | #N/A | #N/A | 0.92 | 0.39 | 0.90 | 0.42 |
| 0.10 | 0.31 | 0.04 | #N/A | #N/A | 0.50 | 0.10 |
| 0.49 | 1.45 | 0.72 | 1.22 | 0.57 | 0.92 | 0.43 |
| #N/A | 0.57 | 0.20 | 0.56 | 0.13 | 0.62 | 0.19 |
| 0.06 | 0.38 | 0.07 | 0.35 | 0.03 | 0.46 | 0.08 |
| #N/A | 1.26 | 0.62 | 1.42 | 0.68 | 1.11 | 0.58 |
| 0.09 | 0.52 | 0.16 | 0.55 | 0.12 | 0.47 | 0.08 |
| 0.76 | 2.25 | 0.91 | 1.89 | 0.86 | 1.58 | 0.82 |
| #N/A | #N/A | #N/A | #N/A | #N/A | #N/A | #N/A |
| #N/A | #N/A | #N/A | #N/A | #N/A | 0.64 | 0.21 |
| 0.07 | 0.45 | 0.11 | 0.43 | 0.06 | 0.44 | 0.06 |
| 0.01 | #N/A | #N/A | 0.29 | 0.02 | 0.22 | 0.01 |
| #N/A | #N/A | #N/A | #N/A | #N/A | #N/A | #N/A |
| 0.37 | 0.82 | 0.37 | 0.89 | 0.36 | 0.70 | 0.26 |
| 0.77 | 1.43 | 0.71 | 1.58 | 0.76 | 1.29 | 0.68 |
| #N/A | #N/A | #N/A | #N/A | #N/A | #N/A | #N/A |
| 0.16 | 0.45 | 0.12 | 0.41 | 0.05 | #N/A | #N/A |
| #N/A | #N/A | #N/A | #N/A | #N/A | #N/A | #N/A |
| 0.26 | 0.62 | 0.23 | 0.77 | 0.28 | 0.92 | 0.43 |
| 0.59 | 1.27 | 0.63 | 1.22 | 0.58 | 1.31 | 0.70 |
| 0.42 | 1.01 | 0.49 | 0.91 | 0.37 | 1.06 | 0.55 |
| #N/A | 1.38 | 0.68 | 1.29 | 0.61 | 1.31 | 0.70 |
| 0.38 | 1.17 | 0.57 | 0.97 | 0.42 | 1.33 | 0.71 |
| 0.61 | 1.73 | 0.82 | 1.96 | 0.71 | 0.75 | 0.31 |
| 0.97 | 1.66 | 0.76 | 1.79 | 0.82 | 1.53 | 0.80 |
| 0.60 | 1.92 | 0.86 | 1.47 | 0.70 | 1.47 | 0.78 |
| 0.77 | 2.26 | 0.92 | 2.01 | 0.88 | #N/A | #N/A |

|      |      |      |      |      |      |      |
|------|------|------|------|------|------|------|
| 0.88 | 1.68 | 0.80 | 2.09 | 0.88 | 1.80 | 0.89 |
| #N/A | #N/A | #N/A | #N/A | #N/A | #N/A | #N/A |
| 0.67 | 1.40 | 0.69 | #N/A | #N/A | 1.44 | 0.76 |
| 0.59 | 1.34 | 0.67 | 1.17 | 0.55 | 1.42 | 0.75 |
| 0.49 | 0.82 | 0.36 | #N/A | #N/A | 0.80 | 0.34 |
| 0.62 | 1.01 | 0.48 | 1.21 | 0.58 | 1.37 | 0.73 |
| 0.57 | 0.84 | 0.38 | 0.99 | 0.43 | 0.95 | 0.46 |
| 0.29 | 0.75 | 0.32 | #N/A | #N/A | 0.84 | 0.37 |
| 0.99 | 2.05 | 0.87 | 2.50 | 0.95 | 3.80 | 1.00 |
| #N/A | #N/A | #N/A | #N/A | #N/A | #N/A | #N/A |
| 0.61 | 1.33 | 0.66 | #N/A | #N/A | 0.93 | 0.44 |
| 0.76 | 1.86 | 0.86 | 1.77 | 0.82 | 1.24 | 0.66 |
| #N/A | 1.51 | 0.74 | #N/A | #N/A | 1.28 | 0.68 |
| #N/A | #N/A | #N/A | #N/A | #N/A | #N/A | #N/A |
| 0.63 | 1.24 | 0.61 | 1.11 | 0.51 | 1.03 | 0.53 |
| 0.03 | 0.31 | 0.04 | 0.30 | 0.01 | 0.39 | 0.04 |
| #N/A | #N/A | #N/A | #N/A | #N/A | 0.47 | 0.08 |
| 0.88 | #N/A | #N/A | 3.23 | 0.97 | 2.10 | 0.94 |
| #N/A | #N/A | #N/A | #N/A | #N/A | #N/A | #N/A |
| 0.20 | 0.53 | 0.17 | 0.74 | 0.27 | 0.98 | 0.49 |
| #N/A | 1.54 | 0.75 | 1.61 | 0.77 | 1.42 | 0.75 |
| 0.98 | 2.16 | 0.90 | 1.95 | 0.87 | 2.03 | 0.93 |
| 0.58 | 1.35 | 0.65 | #N/A | #N/A | 0.94 | 0.45 |
| 0.18 | 0.79 | 0.34 | 0.64 | 0.18 | 0.57 | 0.15 |
| 0.62 | 1.26 | 0.63 | 1.04 | 0.47 | 1.13 | 0.59 |
| 0.78 | 1.88 | 0.86 | 2.32 | 0.93 | 1.37 | 0.73 |
| 0.17 | 0.65 | 0.25 | 0.76 | 0.27 | 1.13 | 0.59 |
| 0.54 | 1.29 | 0.63 | 1.08 | 0.49 | 1.17 | 0.62 |
| 0.21 | 0.73 | 0.31 | #N/A | #N/A | #N/A | #N/A |
| 0.26 | 0.62 | 0.23 | 0.67 | 0.21 | 0.70 | 0.26 |
| 0.68 | #N/A | #N/A | 3.57 | 0.90 | 0.52 | 0.12 |
| 0.50 | 0.87 | 0.39 | 0.99 | 0.44 | 0.79 | 0.33 |
| 0.94 | 2.32 | 0.89 | 1.96 | 0.86 | 1.64 | 0.84 |
| #N/A | #N/A | #N/A | #N/A | #N/A | 1.27 | 0.68 |
| #N/A | #N/A | #N/A | 0.84 | 0.33 | #N/A | #N/A |
| 0.80 | 2.37 | 0.87 | 1.95 | 0.86 | 1.48 | 0.78 |
| 0.88 | 2.03 | 0.89 | 1.78 | 0.82 | 1.48 | 0.78 |
| #N/A | #N/A | #N/A | #N/A | #N/A | #N/A | #N/A |
| 0.82 | 1.66 | 0.80 | 1.74 | 0.81 | 1.43 | 0.76 |
| #N/A | #N/A | #N/A | #N/A | #N/A | #N/A | #N/A |
| 0.88 | 1.99 | 0.89 | 1.88 | 0.85 | 1.37 | 0.73 |
| 0.27 | 0.61 | 0.22 | 0.94 | 0.39 | 0.70 | 0.26 |
| 0.81 | 1.26 | 0.62 | 1.96 | 0.86 | 1.49 | 0.78 |
| #N/A | 0.46 | 0.12 | 0.35 | 0.03 | #N/A | #N/A |
| #N/A | #N/A | #N/A | 0.43 | 0.06 | #N/A | #N/A |
| 0.32 | 0.88 | 0.40 | 1.10 | 0.50 | 0.90 | 0.42 |
| 0.01 | 0.24 | 0.02 | 0.40 | 0.04 | 0.32 | 0.02 |
| 0.21 | 0.65 | 0.25 | 0.58 | 0.15 | 0.96 | 0.47 |
| #N/A | 0.62 | 0.23 | 0.90 | 0.37 | 0.88 | 0.41 |
| 0.56 | 0.96 | 0.45 | 1.17 | 0.55 | 1.14 | 0.60 |
| 0.81 | 1.59 | 0.77 | 1.60 | 0.76 | 1.55 | 0.81 |



|      |      |      |      |      |      |      |
|------|------|------|------|------|------|------|
| 0.58 | 1.14 | 0.56 | 1.36 | 0.65 | 0.91 | 0.43 |
| 0.52 | 1.04 | 0.50 | 1.17 | 0.55 | 0.77 | 0.32 |
| 0.95 | 3.49 | 0.99 | 2.30 | 0.92 | 2.51 | 0.97 |
| #N/A | 2.15 | 0.91 | 1.68 | 0.79 | 2.27 | 0.96 |
| #N/A | #N/A | #N/A | #N/A | #N/A | #N/A | #N/A |
| 0.44 | 1.06 | 0.51 | 1.63 | 0.77 | 1.17 | 0.61 |
| #N/A | 1.95 | 0.84 | #N/A | #N/A | 1.36 | 0.72 |
| 0.78 | 1.61 | 0.78 | 1.30 | 0.62 | 1.63 | 0.84 |
| 0.23 | #N/A | #N/A | 0.70 | 0.23 | 1.29 | 0.69 |
| 0.79 | 1.73 | 0.82 | 1.53 | 0.73 | 1.36 | 0.72 |
| 0.43 | 0.89 | 0.41 | 0.86 | 0.34 | 0.81 | 0.35 |
| #N/A | 0.19 | 0.01 | 0.60 | 0.16 | 0.42 | 0.05 |
| 0.73 | 1.43 | 0.69 | #N/A | #N/A | 1.50 | 0.79 |
| 0.89 | #N/A | #N/A | 1.34 | 0.64 | 1.32 | 0.71 |
| 0.89 | #N/A | #N/A | 1.72 | 0.80 | 2.24 | 0.96 |
| 0.75 | 1.35 | 0.67 | 1.40 | 0.65 | 1.56 | 0.81 |
| #N/A | 0.49 | 0.14 | 0.56 | 0.13 | 0.37 | 0.03 |
| 0.74 | 2.09 | 0.89 | 1.83 | 0.81 | 1.35 | 0.72 |
| #N/A | #N/A | #N/A | #N/A | #N/A | #N/A | #N/A |
| #N/A | 3.71 | 0.99 | 4.02 | 0.99 | 4.36 | 1.00 |
| #N/A | #N/A | #N/A | #N/A | #N/A | 1.07 | 0.55 |
| 0.80 | #N/A | #N/A | 2.71 | 0.96 | 1.78 | 0.88 |
| 0.75 | 1.36 | 0.68 | 1.75 | 0.81 | 1.61 | 0.83 |
| 0.86 | #N/A | #N/A | 1.80 | 0.82 | 1.79 | 0.88 |
| #N/A | #N/A | #N/A | #N/A | #N/A | #N/A | #N/A |
| 0.97 | 2.99 | 0.98 | 2.76 | 0.96 | 3.11 | 0.99 |
| 0.86 | #N/A | #N/A | 2.02 | 0.88 | 2.38 | 0.97 |
| #N/A | #N/A | #N/A | 0.96 | 0.41 | 1.07 | 0.55 |
| #N/A | 2.53 | 0.96 | 2.11 | 0.90 | 1.56 | 0.81 |
| #N/A | #N/A | #N/A | #N/A | #N/A | 0.95 | 0.46 |
| #N/A | #N/A | #N/A | #N/A | #N/A | #N/A | #N/A |
| 0.17 | 0.70 | 0.28 | 0.70 | 0.23 | 0.45 | 0.07 |
| 0.01 | 0.17 | 0.01 | 0.34 | 0.04 | 0.32 | 0.02 |
| #N/A | #N/A | #N/A | #N/A | #N/A | #N/A | #N/A |
| 0.78 | 1.23 | 0.61 | #N/A | #N/A | 1.34 | 0.71 |
| #N/A | #N/A | #N/A | 0.87 | 0.35 | 1.08 | 0.56 |
| 0.66 | 1.34 | 0.66 | 1.08 | 0.50 | 1.41 | 0.75 |
| #N/A | #N/A | #N/A | #N/A | #N/A | #N/A | #N/A |
| 0.98 | 2.63 | 0.96 | #N/A | #N/A | 2.56 | 0.98 |
| 0.74 | 1.96 | 0.87 | 2.11 | 0.90 | 1.90 | 0.90 |
| 0.66 | #N/A | #N/A | #N/A | #N/A | #N/A | #N/A |
| 0.07 | 0.51 | 0.15 | 0.48 | 0.09 | 0.53 | 0.12 |
| 0.31 | 1.20 | 0.58 | 1.02 | 0.44 | 0.95 | 0.46 |
| 0.18 | 0.73 | 0.30 | 0.76 | 0.28 | 0.84 | 0.37 |
| 0.95 | 3.20 | 0.98 | 2.42 | 0.94 | 3.06 | 0.99 |
| 0.56 | 1.29 | 0.60 | 1.40 | 0.67 | 1.25 | 0.66 |
| 0.18 | 0.42 | 0.10 | #N/A | #N/A | 0.51 | 0.11 |
| 0.62 | 1.11 | 0.54 | 1.25 | 0.59 | 1.28 | 0.68 |
| 0.46 | #N/A | #N/A | 1.49 | 0.72 | 0.93 | 0.44 |
| 0.38 | 0.97 | 0.46 | 1.05 | 0.47 | 0.97 | 0.48 |
| 0.67 | #N/A | #N/A | 1.17 | 0.55 | 1.11 | 0.58 |

|      |      |      |      |      |      |      |
|------|------|------|------|------|------|------|
| #N/A | #N/A | #N/A | #N/A | #N/A | #N/A | #N/A |
| 0.17 | 0.57 | 0.19 | 0.73 | 0.25 | 0.58 | 0.17 |
| #N/A | #N/A | #N/A | #N/A | #N/A | 1.74 | 0.87 |
| #N/A | 0.71 | 0.28 | #N/A | #N/A | 1.41 | 0.75 |
| 0.92 | #N/A | #N/A | #N/A | #N/A | 2.37 | 0.96 |
| 0.98 | 3.14 | 0.97 | 1.96 | 0.85 | 3.79 | 1.00 |
| #N/A | #N/A | #N/A | 0.82 | 0.31 | #N/A | #N/A |
| 0.74 | 1.50 | 0.74 | 1.56 | 0.74 | 1.54 | 0.80 |
| 0.41 | 0.86 | 0.39 | 0.71 | 0.23 | 0.70 | 0.26 |
| 0.09 | 0.84 | 0.36 | 0.94 | 0.40 | 0.62 | 0.19 |
| 0.46 | 0.89 | 0.41 | 0.84 | 0.33 | 1.24 | 0.66 |
| #N/A | #N/A | #N/A | #N/A | #N/A | #N/A | #N/A |
| 0.57 | 0.95 | 0.45 | 1.16 | 0.54 | 1.46 | 0.77 |
| #N/A | #N/A | #N/A | #N/A | #N/A | #N/A | #N/A |
| 0.19 | 0.59 | 0.21 | 0.62 | 0.17 | 0.62 | 0.19 |
| 0.66 | 1.53 | 0.75 | 1.39 | 0.67 | 1.44 | 0.76 |
| 0.52 | 0.85 | 0.38 | 1.38 | 0.64 | 0.89 | 0.41 |
| 0.79 | 1.79 | 0.81 | 1.04 | 0.46 | 1.05 | 0.54 |
| #N/A | #N/A | #N/A | #N/A | #N/A | #N/A | #N/A |
| 0.60 | 1.22 | 0.60 | 1.10 | 0.51 | 0.89 | 0.41 |
| #N/A | #N/A | #N/A | #N/A | #N/A | 0.31 | 0.02 |
| 0.90 | 2.25 | 0.92 | 2.66 | 0.95 | #N/A | #N/A |
| 0.32 | #N/A | #N/A | #N/A | #N/A | 0.84 | 0.37 |
| #N/A | #N/A | #N/A | #N/A | #N/A | #N/A | #N/A |
| 0.99 | 2.61 | 0.91 | #N/A | #N/A | 2.14 | 0.94 |
| 0.89 | 2.81 | 0.97 | #N/A | #N/A | 1.95 | 0.92 |
| 0.17 | #N/A | #N/A | #N/A | #N/A | 0.37 | 0.03 |
| 0.71 | 2.60 | 0.89 | #N/A | #N/A | #N/A | #N/A |
| #N/A | #N/A | #N/A | 0.91 | 0.38 | 1.17 | 0.61 |
| 0.41 | 0.83 | 0.37 | 0.72 | 0.24 | 0.68 | 0.24 |
| 0.37 | 0.66 | 0.26 | 0.62 | 0.17 | 0.61 | 0.18 |
| 0.19 | 0.47 | 0.13 | 0.57 | 0.14 | 0.63 | 0.21 |
| 0.00 | 0.10 | 0.00 | 0.26 | 0.01 | 0.22 | 0.01 |
| 0.03 | 0.35 | 0.06 | 0.33 | 0.03 | 0.38 | 0.04 |
| 0.49 | 1.03 | 0.49 | 1.10 | 0.50 | 1.01 | 0.51 |
| 0.65 | 1.26 | 0.63 | 1.05 | 0.47 | 1.11 | 0.57 |
| 0.86 | 1.41 | 0.69 | 1.95 | 0.87 | 1.71 | 0.86 |
| #N/A | #N/A | #N/A | #N/A | #N/A | #N/A | #N/A |
| #N/A | 2.40 | 0.94 | 2.48 | 0.94 | 2.03 | 0.93 |
| 0.18 | 0.57 | 0.19 | 0.65 | 0.19 | 0.38 | 0.04 |
| 0.96 | 2.26 | 0.93 | 1.82 | 0.84 | 2.20 | 0.95 |
| 0.57 | 1.34 | 0.67 | 1.25 | 0.59 | 1.06 | 0.54 |
| 0.34 | 0.61 | 0.23 | 0.74 | 0.25 | 0.91 | 0.43 |
| 0.55 | 0.61 | 0.22 | 0.77 | 0.27 | 0.70 | 0.26 |
| 0.75 | #N/A | #N/A | 1.87 | 0.83 | 1.17 | 0.62 |
| 0.17 | 0.60 | 0.22 | 0.56 | 0.13 | 0.64 | 0.21 |
| 0.15 | 0.41 | 0.09 | 0.59 | 0.15 | 0.51 | 0.11 |
| #N/A | #N/A | #N/A | #N/A | #N/A | #N/A | #N/A |
| 0.49 | 1.19 | 0.58 | 1.16 | 0.54 | 1.03 | 0.52 |
| 0.40 | 1.15 | 0.56 | 0.72 | 0.24 | 0.95 | 0.46 |
| 0.26 | 0.80 | 0.35 | 0.50 | 0.09 | 0.90 | 0.42 |

|      |      |      |      |      |      |      |
|------|------|------|------|------|------|------|
| 0.29 | 1.39 | 0.69 | 0.45 | 0.06 | 1.04 | 0.53 |
| 0.82 | 1.98 | 0.87 | 1.57 | 0.75 | 1.52 | 0.80 |
| 0.13 | 0.42 | 0.09 | 0.62 | 0.17 | 0.69 | 0.25 |
| #N/A | #N/A | #N/A | #N/A | #N/A | #N/A | #N/A |
| #N/A | #N/A | #N/A | #N/A | #N/A | #N/A | #N/A |
| #N/A | 1.31 | 0.64 | 1.32 | 0.63 | 0.71 | 0.28 |
| 0.67 | 1.28 | 0.62 | 1.25 | 0.58 | 1.15 | 0.60 |
| #N/A | #N/A | #N/A | #N/A | #N/A | #N/A | #N/A |
| #N/A | 1.91 | 0.81 | 1.39 | 0.67 | 1.18 | 0.62 |
| 0.73 | 0.97 | 0.46 | 1.33 | 0.63 | 1.48 | 0.78 |
| #N/A | #N/A | #N/A | #N/A | #N/A | #N/A | #N/A |
| 0.74 | 1.87 | 0.85 | 1.88 | 0.84 | 1.15 | 0.60 |
| 0.18 | #N/A | #N/A | #N/A | #N/A | 0.23 | 0.01 |
| 0.90 | 2.02 | 0.87 | 2.24 | 0.92 | 2.18 | 0.95 |
| 0.78 | 2.04 | 0.88 | 2.14 | 0.90 | 2.33 | 0.96 |
| 0.17 | 0.44 | 0.11 | 0.60 | 0.16 | 0.64 | 0.21 |
| #N/A | #N/A | #N/A | 2.16 | 0.91 | 2.51 | 0.97 |
| #N/A | 0.72 | 0.30 | 0.69 | 0.22 | 0.62 | 0.19 |
| #N/A | 1.28 | 0.63 | #N/A | #N/A | #N/A | #N/A |
| 0.64 | 1.27 | 0.63 | 1.58 | 0.75 | 1.37 | 0.73 |
| 0.36 | 0.83 | 0.37 | 1.06 | 0.48 | 0.94 | 0.45 |
| 0.94 | 1.88 | 0.86 | 2.67 | 0.96 | 1.86 | 0.90 |
| 0.57 | 1.14 | 0.56 | 1.09 | 0.50 | 1.04 | 0.53 |
| 0.12 | 0.43 | 0.10 | 0.46 | 0.07 | 0.46 | 0.08 |
| #N/A | 0.71 | 0.28 | #N/A | #N/A | #N/A | #N/A |
| #N/A | #N/A | #N/A | #N/A | #N/A | #N/A | #N/A |
| 0.08 | 0.61 | 0.22 | 0.77 | 0.28 | 0.65 | 0.21 |
| #N/A | #N/A | #N/A | #N/A | #N/A | #N/A | #N/A |
| 0.20 | 0.96 | 0.45 | 0.82 | 0.32 | 0.63 | 0.20 |
| 0.59 | 0.89 | 0.40 | 0.94 | 0.40 | 0.61 | 0.19 |
| 0.46 | 0.91 | 0.42 | 0.70 | 0.23 | 0.75 | 0.31 |
| 0.40 | 0.99 | 0.47 | 1.16 | 0.55 | 0.86 | 0.39 |
| 0.62 | 2.23 | 0.79 | #N/A | #N/A | 1.31 | 0.69 |
| 0.61 | 1.32 | 0.66 | 1.69 | 0.79 | #N/A | #N/A |
| 0.32 | #N/A | #N/A | #N/A | #N/A | 0.54 | 0.13 |
| 0.98 | 4.01 | 0.99 | 3.61 | 0.99 | 3.74 | 1.00 |
| #N/A | #N/A | #N/A | #N/A | #N/A | #N/A | #N/A |
| 0.77 | 2.31 | 0.93 | 2.03 | 0.88 | 1.88 | 0.90 |
| 0.38 | 0.76 | 0.32 | 0.68 | 0.21 | 0.95 | 0.46 |
| 0.89 | #N/A | #N/A | 1.56 | 0.74 | 1.36 | 0.72 |
| 0.63 | 1.08 | 0.52 | 1.20 | 0.57 | 0.87 | 0.40 |
| 0.28 | 0.77 | 0.33 | 0.80 | 0.30 | 0.67 | 0.23 |
| #N/A | #N/A | #N/A | #N/A | #N/A | #N/A | #N/A |
| 0.64 | 1.77 | 0.83 | 1.16 | 0.55 | 1.35 | 0.71 |
| 0.24 | 0.63 | 0.23 | #N/A | #N/A | 0.46 | 0.08 |
| 0.85 | 1.87 | 0.84 | 2.20 | 0.91 | 1.80 | 0.89 |
| #N/A | #N/A | #N/A | #N/A | #N/A | #N/A | #N/A |
| 0.77 | 2.03 | 0.89 | 2.40 | 0.94 | #N/A | #N/A |
| 0.44 | 1.57 | 0.77 | 0.75 | 0.26 | 1.29 | 0.69 |
| 0.17 | 0.57 | 0.19 | 0.56 | 0.13 | 0.70 | 0.26 |
| #N/A | 1.81 | 0.84 | #N/A | #N/A | 1.53 | 0.80 |



|      |      |      |      |      |      |      |
|------|------|------|------|------|------|------|
| 0.23 | 0.65 | 0.25 | 0.96 | 0.41 | 0.63 | 0.20 |
| 0.80 | 1.80 | 0.84 | 1.56 | 0.75 | 1.53 | 0.80 |
| 0.90 | 2.00 | 0.87 | 1.90 | 0.85 | 1.26 | 0.67 |
| 0.35 | 0.82 | 0.36 | 0.81 | 0.31 | 0.65 | 0.22 |
| 0.64 | 1.96 | 0.87 | 1.44 | 0.68 | 1.00 | 0.51 |
| 0.63 | 1.58 | 0.77 | 1.36 | 0.65 | 1.45 | 0.77 |
| 0.49 | 1.19 | 0.59 | 1.08 | 0.49 | 1.11 | 0.58 |
| 0.63 | 1.12 | 0.55 | 1.13 | 0.53 | 0.96 | 0.47 |
| 0.45 | 1.65 | 0.74 | 1.63 | 0.77 | 0.87 | 0.40 |
| 0.76 | 1.50 | 0.73 | 1.71 | 0.80 | 1.63 | 0.84 |
| 0.57 | 1.23 | 0.61 | 0.95 | 0.40 | 1.11 | 0.58 |
| 0.26 | 0.73 | 0.30 | 0.47 | 0.08 | 0.83 | 0.36 |
| 0.33 | 0.74 | 0.32 | 0.78 | 0.29 | 0.70 | 0.26 |
| 0.21 | 0.62 | 0.23 | 0.43 | 0.06 | 0.74 | 0.30 |
| 0.32 | 0.78 | 0.34 | 0.73 | 0.25 | 0.74 | 0.29 |
| 0.12 | 0.48 | 0.13 | 0.42 | 0.05 | 0.54 | 0.13 |
| 0.17 | 0.67 | 0.27 | #N/A | #N/A | 0.97 | 0.48 |
| 0.35 | 0.91 | 0.42 | #N/A | #N/A | #N/A | #N/A |
| 0.38 | #N/A | #N/A | #N/A | #N/A | 1.51 | 0.79 |
| 0.80 | 1.71 | 0.82 | 1.42 | 0.68 | 1.53 | 0.80 |
| #N/A | #N/A | #N/A | #N/A | #N/A | #N/A | #N/A |
| 0.82 | 1.73 | 0.81 | 1.84 | 0.84 | 1.41 | 0.75 |
| #N/A | 0.56 | 0.18 | 0.77 | 0.28 | 0.77 | 0.31 |
| 0.68 | 1.32 | 0.66 | 1.34 | 0.64 | 1.40 | 0.74 |
| 0.26 | #N/A | #N/A | 0.82 | 0.32 | 0.65 | 0.22 |
| #N/A | #N/A | #N/A | #N/A | #N/A | 1.34 | 0.71 |
| #N/A | 0.92 | 0.42 | 1.57 | 0.75 | 1.49 | 0.78 |
| #N/A | #N/A | #N/A | 2.43 | 0.94 | 1.47 | 0.77 |
| #N/A | 2.69 | 0.97 | #N/A | #N/A | 2.36 | 0.96 |
| #N/A | #N/A | #N/A | #N/A | #N/A | #N/A | #N/A |
| 0.74 | 1.57 | 0.77 | 1.18 | 0.56 | 1.71 | 0.86 |
| 0.37 | #N/A | #N/A | #N/A | #N/A | 0.65 | 0.21 |
| #N/A | 1.66 | 0.79 | 1.77 | 0.81 | 1.68 | 0.85 |
| 0.28 | 0.73 | 0.31 | 0.59 | 0.15 | 0.58 | 0.17 |
| 0.14 | 0.68 | 0.27 | 0.41 | 0.05 | 0.81 | 0.35 |
| #N/A | #N/A | #N/A | #N/A | #N/A | #N/A | #N/A |
| 0.72 | #N/A | #N/A | 1.27 | 0.60 | 1.45 | 0.77 |
| 0.13 | 0.64 | 0.24 | 0.59 | 0.15 | 0.61 | 0.18 |
| #N/A | 0.77 | 0.34 | 0.62 | 0.17 | #N/A | #N/A |
| 0.83 | 1.75 | 0.81 | 1.59 | 0.75 | 1.69 | 0.86 |
| #N/A | 1.02 | 0.45 | 1.02 | 0.45 | #N/A | #N/A |
| 0.65 | #N/A | #N/A | 2.07 | 0.88 | 1.42 | 0.76 |
| 0.79 | 1.75 | 0.83 | 1.58 | 0.72 | 1.38 | 0.74 |
| #N/A | #N/A | #N/A | #N/A | #N/A | #N/A | #N/A |
| 0.48 | 1.14 | 0.56 | 1.08 | 0.48 | 1.04 | 0.53 |
| 0.74 | 0.95 | 0.45 | 1.39 | 0.66 | 1.37 | 0.73 |
| 0.15 | 0.51 | 0.15 | 0.58 | 0.15 | 0.57 | 0.16 |
| 0.38 | 0.88 | 0.40 | 0.94 | 0.40 | 0.95 | 0.47 |
| #N/A | #N/A | #N/A | 1.56 | 0.74 | 0.90 | 0.42 |
| 0.43 | 1.08 | 0.53 | 1.03 | 0.45 | 1.00 | 0.50 |
| 0.47 | 1.39 | 0.68 | 1.26 | 0.59 | 0.83 | 0.36 |

|      |      |      |      |      |      |      |
|------|------|------|------|------|------|------|
| #N/A | 0.73 | 0.30 | 0.94 | 0.40 | 0.89 | 0.41 |
| 0.60 | #N/A | #N/A | 1.33 | 0.63 | 1.17 | 0.62 |
| #N/A | #N/A | #N/A | #N/A | #N/A | 0.47 | 0.08 |
| 0.59 | 0.84 | 0.37 | 0.80 | 0.30 | 1.00 | 0.50 |
| 0.02 | 0.23 | 0.02 | 0.38 | 0.03 | 0.35 | 0.03 |
| 0.61 | 1.01 | 0.48 | 1.29 | 0.60 | 0.87 | 0.40 |
| 0.26 | 0.68 | 0.27 | #N/A | #N/A | 0.66 | 0.23 |
| 0.05 | 0.28 | 0.03 | 0.52 | 0.11 | #N/A | #N/A |
| #N/A | #N/A | #N/A | #N/A | #N/A | #N/A | #N/A |
| 0.55 | 1.13 | 0.56 | 1.58 | 0.75 | 1.01 | 0.51 |
| 0.54 | 1.21 | 0.60 | 1.64 | 0.78 | 1.13 | 0.59 |
| 0.76 | 1.97 | 0.88 | 1.64 | 0.78 | 1.30 | 0.69 |
| #N/A | #N/A | #N/A | #N/A | #N/A | #N/A | #N/A |
| #N/A | 1.64 | 0.77 | 1.02 | 0.45 | 1.18 | 0.62 |
| 0.30 | 0.84 | 0.38 | 1.10 | 0.51 | 0.87 | 0.40 |
| 0.33 | 0.65 | 0.25 | 0.70 | 0.23 | 0.75 | 0.30 |
| 0.60 | 2.20 | 0.92 | 1.11 | 0.52 | #N/A | #N/A |
| #N/A | #N/A | #N/A | #N/A | #N/A | 0.40 | 0.04 |
| 0.05 | #N/A | #N/A | 0.54 | 0.12 | 0.41 | 0.05 |
| 0.65 | 1.59 | 0.77 | 1.53 | 0.73 | 1.17 | 0.61 |
| #N/A | #N/A | #N/A | #N/A | #N/A | #N/A | #N/A |
| 0.32 | #N/A | #N/A | #N/A | #N/A | 0.40 | 0.04 |
| #N/A | #N/A | #N/A | #N/A | #N/A | #N/A | #N/A |
| 0.99 | 3.01 | 0.98 | 2.51 | 0.93 | 2.56 | 0.98 |
| #N/A | #N/A | #N/A | #N/A | #N/A | #N/A | #N/A |
| 0.92 | 2.63 | 0.96 | 2.31 | 0.93 | 2.48 | 0.97 |
| #N/A | #N/A | #N/A | #N/A | #N/A | #N/A | #N/A |
| #N/A | #N/A | #N/A | #N/A | #N/A | #N/A | #N/A |
| 0.23 | 0.41 | 0.10 | 1.20 | 0.54 | 0.40 | 0.04 |
| 0.99 | 2.93 | 0.98 | 2.40 | 0.94 | 3.01 | 0.99 |
| #N/A | #N/A | #N/A | #N/A | #N/A | #N/A | #N/A |
| 0.40 | 1.03 | 0.49 | 1.07 | 0.49 | 0.64 | 0.21 |
| 0.04 | #N/A | #N/A | 0.55 | 0.12 | 0.55 | 0.13 |
| #N/A | #N/A | #N/A | #N/A | #N/A | #N/A | #N/A |
| #N/A | 0.83 | 0.36 | #N/A | #N/A | #N/A | #N/A |
| 0.72 | 1.34 | 0.66 | #N/A | #N/A | 2.03 | 0.93 |
| #N/A | #N/A | #N/A | #N/A | #N/A | #N/A | #N/A |
| 0.76 | 2.04 | 0.89 | 1.60 | 0.76 | 1.71 | 0.86 |
| 0.58 | 0.91 | 0.42 | 0.96 | 0.42 | 0.88 | 0.40 |
| 0.58 | #N/A | #N/A | 1.18 | 0.55 | #N/A | #N/A |
| #N/A | 1.81 | 0.81 | 1.35 | 0.65 | 1.01 | 0.51 |
| 0.20 | 0.55 | 0.18 | 0.74 | 0.25 | 0.81 | 0.35 |
| 0.96 | 2.86 | 0.97 | #N/A | #N/A | 1.84 | 0.89 |
| 0.19 | 0.34 | 0.05 | 0.45 | 0.06 | 0.53 | 0.12 |
| 0.81 | 2.22 | 0.91 | 1.85 | 0.82 | 1.93 | 0.91 |
| 0.20 | 0.46 | 0.13 | 0.48 | 0.08 | 0.33 | 0.02 |
| 0.40 | 0.83 | 0.37 | 0.81 | 0.31 | 0.88 | 0.40 |
| 0.10 | 0.74 | 0.31 | #N/A | #N/A | 1.02 | 0.52 |
| 0.59 | 1.09 | 0.53 | 1.46 | 0.69 | 1.14 | 0.60 |
| #N/A | 0.44 | 0.11 | 0.50 | 0.09 | 0.81 | 0.35 |
| 0.31 | 0.67 | 0.26 | 0.62 | 0.17 | 0.82 | 0.36 |

|      |      |      |      |      |      |      |
|------|------|------|------|------|------|------|
| 0.52 | 0.91 | 0.42 | 1.28 | 0.61 | 1.02 | 0.52 |
| 1.00 | 3.62 | 0.99 | 3.90 | 0.99 | 3.41 | 1.00 |
| #N/A | #N/A | #N/A | #N/A | #N/A | 1.22 | 0.65 |
| 0.93 | #N/A | #N/A | #N/A | #N/A | 2.00 | 0.92 |
| 0.72 | #N/A | #N/A | #N/A | #N/A | 1.36 | 0.72 |
| 0.25 | 0.79 | 0.34 | 0.73 | 0.25 | 0.73 | 0.28 |
| 0.69 | 3.98 | 0.80 | #N/A | #N/A | 1.14 | 0.60 |
| 0.76 | 1.93 | 0.87 | 1.65 | 0.75 | 1.14 | 0.60 |
| #N/A | #N/A | #N/A | #N/A | #N/A | #N/A | #N/A |
| 0.30 | 0.66 | 0.26 | 0.66 | 0.20 | 0.65 | 0.22 |
| #N/A | 1.33 | 0.66 | 2.10 | 0.84 | 1.36 | 0.72 |
| #N/A | 0.82 | 0.36 | #N/A | #N/A | 0.95 | 0.46 |
| 0.10 | 0.49 | 0.14 | 0.51 | 0.10 | 0.71 | 0.27 |
| #N/A | #N/A | #N/A | #N/A | #N/A | #N/A | #N/A |
| 0.00 | #N/A | #N/A | 0.16 | 0.00 | 0.24 | 0.01 |
| #N/A | #N/A | #N/A | #N/A | #N/A | #N/A | #N/A |
| 0.06 | 0.41 | 0.09 | #N/A | #N/A | #N/A | #N/A |
| 0.57 | #N/A | #N/A | 0.98 | 0.42 | 0.91 | 0.43 |
| 0.88 | 2.24 | 0.89 | 1.59 | 0.76 | 1.99 | 0.92 |
| 0.13 | 0.61 | 0.22 | 0.97 | 0.42 | 0.46 | 0.08 |
| #N/A | 0.56 | 0.19 | #N/A | #N/A | 0.59 | 0.17 |
| #N/A | #N/A | #N/A | #N/A | #N/A | 1.91 | 0.91 |
| 0.85 | #N/A | #N/A | 2.68 | 0.93 | 1.78 | 0.88 |
| 0.25 | 0.53 | 0.16 | #N/A | #N/A | 0.61 | 0.19 |
| 0.43 | 1.05 | 0.51 | 0.91 | 0.38 | 0.92 | 0.44 |
| 0.44 | 1.14 | 0.55 | 0.87 | 0.34 | 0.86 | 0.38 |
| #N/A | #N/A | #N/A | #N/A | #N/A | #N/A | #N/A |
| 0.41 | 0.95 | 0.44 | 0.96 | 0.40 | 1.06 | 0.55 |
| 0.15 | 0.48 | 0.14 | 0.76 | 0.27 | 0.60 | 0.18 |
| 0.43 | 1.30 | 0.62 | #N/A | #N/A | 1.96 | 0.92 |
| 0.86 | #N/A | #N/A | #N/A | #N/A | 1.37 | 0.73 |
| 0.61 | 2.38 | 0.76 | 2.74 | 0.94 | #N/A | #N/A |
| 0.31 | 0.53 | 0.17 | 0.63 | 0.18 | #N/A | #N/A |
| 0.40 | #N/A | #N/A | 0.89 | 0.36 | 0.73 | 0.29 |
| 0.22 | 0.88 | 0.40 | 1.28 | 0.60 | 0.93 | 0.45 |
| 0.59 | 1.23 | 0.61 | 1.70 | 0.80 | 1.69 | 0.86 |
| 0.33 | #N/A | #N/A | 1.36 | 0.64 | 0.93 | 0.44 |
| #N/A | 1.53 | 0.75 | 1.40 | 0.67 | 1.17 | 0.62 |
| #N/A | #N/A | #N/A | #N/A | #N/A | 1.03 | 0.53 |
| 0.93 | 2.32 | 0.93 | 1.85 | 0.85 | 1.79 | 0.88 |
| #N/A | 1.18 | 0.57 | #N/A | #N/A | 0.84 | 0.38 |
| 0.08 | 0.51 | 0.17 | 0.42 | 0.07 | 0.59 | 0.17 |
| 0.30 | 0.92 | 0.43 | 0.56 | 0.14 | 0.97 | 0.48 |
| 0.39 | 0.95 | 0.45 | #N/A | #N/A | 1.63 | 0.84 |
| 0.08 | 0.50 | 0.14 | 0.46 | 0.09 | 0.35 | 0.03 |
| #N/A | #N/A | #N/A | #N/A | #N/A | #N/A | #N/A |
| 0.93 | #N/A | #N/A | #N/A | #N/A | 1.27 | 0.67 |
| #N/A | 2.13 | 0.87 | 2.08 | 0.88 | #N/A | #N/A |
| #N/A | #N/A | #N/A | #N/A | #N/A | #N/A | #N/A |
| #N/A | 0.97 | 0.46 | 0.74 | 0.25 | 0.67 | 0.24 |
| 0.23 | 1.16 | 0.57 | 0.82 | 0.31 | 0.76 | 0.31 |

|      |      |      |      |      |      |      |
|------|------|------|------|------|------|------|
| 0.27 | #N/A | #N/A | 0.92 | 0.39 | 0.66 | 0.22 |
| 0.07 | #N/A | #N/A | 0.63 | 0.18 | #N/A | #N/A |
| 0.26 | 0.78 | 0.34 | 0.99 | 0.43 | 0.70 | 0.26 |
| #N/A | #N/A | #N/A | #N/A | #N/A | 0.49 | 0.09 |
| #N/A | #N/A | #N/A | #N/A | #N/A | #N/A | #N/A |
| #N/A | #N/A | #N/A | #N/A | #N/A | #N/A | #N/A |
| #N/A | #N/A | #N/A | #N/A | #N/A | #N/A | #N/A |
| #N/A | #N/A | #N/A | #N/A | #N/A | #N/A | #N/A |
| 0.16 | 0.61 | 0.22 | 0.53 | 0.11 | 0.71 | 0.27 |
| #N/A | #N/A | #N/A | #N/A | #N/A | #N/A | #N/A |
| 0.15 | 0.57 | 0.20 | 0.50 | 0.10 | 0.73 | 0.29 |
| 0.33 | 0.75 | 0.31 | 0.67 | 0.21 | 0.80 | 0.34 |
| 0.39 | 0.84 | 0.38 | 0.77 | 0.28 | 0.86 | 0.39 |
| 0.44 | 0.92 | 0.42 | 0.88 | 0.36 | 0.96 | 0.48 |
| 0.90 | 1.93 | 0.87 | 2.03 | 0.89 | 1.72 | 0.87 |
| #N/A | #N/A | #N/A | #N/A | #N/A | #N/A | #N/A |
| #N/A | 1.34 | 0.66 | 1.45 | 0.61 | 1.15 | 0.61 |
| #N/A | #N/A | #N/A | #N/A | #N/A | #N/A | #N/A |
| #N/A | #N/A | #N/A | #N/A | #N/A | #N/A | #N/A |
| #N/A | #N/A | #N/A | 1.17 | 0.55 | #N/A | #N/A |
| #N/A | 1.61 | 0.78 | 1.66 | 0.78 | 1.42 | 0.76 |
| 0.92 | #N/A | #N/A | 1.51 | 0.72 | 1.64 | 0.84 |
| #N/A | #N/A | #N/A | #N/A | #N/A | #N/A | #N/A |
| #N/A | #N/A | #N/A | #N/A | #N/A | #N/A | #N/A |
| 0.86 | 1.79 | 0.82 | 2.18 | 0.91 | 1.79 | 0.88 |
| #N/A | #N/A | #N/A | #N/A | #N/A | #N/A | #N/A |
| 0.32 | 0.72 | 0.29 | 0.82 | 0.31 | 0.80 | 0.34 |
| 0.06 | 0.49 | 0.14 | #N/A | #N/A | #N/A | #N/A |
| 0.13 | 0.51 | 0.16 | #N/A | #N/A | 0.51 | 0.11 |
| 0.92 | 3.86 | 0.99 | 3.65 | 0.99 | 1.94 | 0.91 |
| #N/A | #N/A | #N/A | #N/A | #N/A | #N/A | #N/A |
| #N/A | #N/A | #N/A | #N/A | #N/A | 0.58 | 0.16 |
| #N/A | #N/A | #N/A | #N/A | #N/A | #N/A | #N/A |
| 0.62 | 1.28 | 0.63 | 1.24 | 0.59 | 1.12 | 0.58 |
| 0.38 | 1.01 | 0.48 | 1.11 | 0.51 | 0.88 | 0.41 |
| 0.41 | #N/A | #N/A | 0.51 | 0.10 | 0.60 | 0.18 |
| 0.16 | 0.54 | 0.17 | 0.50 | 0.09 | 0.69 | 0.25 |
| 0.45 | 1.28 | 0.63 | #N/A | #N/A | #N/A | #N/A |
| 0.34 | 0.63 | 0.24 | #N/A | #N/A | 1.25 | 0.67 |
| 0.73 | 1.48 | 0.72 | 1.32 | 0.63 | #N/A | #N/A |
| #N/A | 0.88 | 0.40 | #N/A | #N/A | 0.62 | 0.19 |
| 1.00 | 3.37 | 0.99 | 3.49 | 0.99 | 3.16 | 0.99 |
| #N/A | #N/A | #N/A | #N/A | #N/A | 1.26 | 0.67 |
| 0.59 | 1.45 | 0.71 | 1.18 | 0.56 | 1.14 | 0.60 |
| 0.88 | 1.74 | 0.82 | #N/A | #N/A | #N/A | #N/A |
| 0.19 | 0.90 | 0.40 | #N/A | #N/A | 0.61 | 0.18 |
| 0.84 | 1.87 | 0.85 | 2.53 | 0.88 | 1.30 | 0.69 |
| #N/A | 1.26 | 0.63 | 1.26 | 0.60 | 1.46 | 0.77 |
| 0.80 | 1.74 | 0.80 | #N/A | #N/A | #N/A | #N/A |
| 0.53 | 1.27 | 0.63 | 1.52 | 0.73 | 1.19 | 0.63 |
| #N/A | #N/A | #N/A | #N/A | #N/A | 0.69 | 0.25 |

|      |      |      |      |      |      |      |
|------|------|------|------|------|------|------|
| #N/A | 1.12 | 0.52 | #N/A | #N/A | 1.42 | 0.75 |
| 0.73 | #N/A | #N/A | #N/A | #N/A | 0.96 | 0.48 |
| 0.98 | 2.53 | 0.94 | 2.21 | 0.92 | 2.05 | 0.93 |
| 0.25 | 0.72 | 0.30 | 0.69 | 0.22 | 0.82 | 0.35 |
| 0.24 | 0.66 | 0.25 | 0.53 | 0.11 | 0.79 | 0.33 |
| 0.68 | #N/A | #N/A | 1.38 | 0.67 | 1.55 | 0.81 |
| #N/A | #N/A | #N/A | #N/A | #N/A | #N/A | #N/A |
| 0.35 | 0.70 | 0.28 | #N/A | #N/A | 0.76 | 0.31 |
| 0.42 | 1.10 | 0.54 | 1.01 | 0.45 | 0.74 | 0.30 |
| 0.29 | 0.83 | 0.37 | 0.71 | 0.23 | 0.96 | 0.47 |
| 0.33 | 0.99 | 0.47 | 0.82 | 0.31 | #N/A | #N/A |
| 0.77 | 1.50 | 0.74 | 1.55 | 0.74 | 1.35 | 0.71 |
| 0.47 | 0.75 | 0.31 | 1.19 | 0.56 | 0.91 | 0.42 |
| 0.98 | #N/A | #N/A | 3.93 | 0.99 | 3.17 | 0.99 |
| #N/A | #N/A | #N/A | #N/A | #N/A | 1.04 | 0.53 |
| 0.74 | 1.78 | 0.83 | 1.64 | 0.76 | 1.44 | 0.76 |
| #N/A | #N/A | #N/A | 0.78 | 0.29 | 0.50 | 0.10 |
| 0.79 | 1.90 | 0.80 | 1.42 | 0.57 | 1.80 | 0.89 |
| 0.59 | #N/A | #N/A | 1.14 | 0.52 | 1.08 | 0.56 |
| #N/A | #N/A | #N/A | #N/A | #N/A | #N/A | #N/A |
| 0.11 | #N/A | #N/A | 0.44 | 0.09 | 0.73 | 0.29 |
| #N/A | #N/A | #N/A | #N/A | #N/A | 0.54 | 0.13 |
| 0.89 | 1.52 | 0.74 | #N/A | #N/A | 0.95 | 0.46 |
| #N/A | #N/A | #N/A | #N/A | #N/A | #N/A | #N/A |
| 0.79 | #N/A | #N/A | 1.89 | 0.85 | 1.86 | 0.90 |
| 0.03 | 0.31 | 0.04 | 0.34 | 0.02 | 0.41 | 0.05 |
| 0.65 | 1.03 | 0.50 | #N/A | #N/A | 0.92 | 0.44 |
| 0.39 | 1.14 | 0.54 | 1.43 | 0.69 | 1.22 | 0.65 |
| 0.73 | 1.20 | 0.59 | 1.04 | 0.46 | 0.85 | 0.38 |
| #N/A | #N/A | #N/A | #N/A | #N/A | #N/A | #N/A |
| 0.87 | 1.84 | 0.85 | 1.63 | 0.77 | 1.58 | 0.82 |
| 0.03 | 0.36 | 0.06 | 0.39 | 0.04 | 0.65 | 0.22 |
| 0.46 | 1.25 | 0.61 | 0.94 | 0.40 | 0.99 | 0.49 |
| 0.27 | #N/A | #N/A | 0.53 | 0.13 | 0.64 | 0.21 |
| #N/A | #N/A | #N/A | #N/A | #N/A | 0.67 | 0.24 |
| #N/A | #N/A | #N/A | 0.40 | 0.04 | 0.90 | 0.42 |
| 0.65 | #N/A | #N/A | 1.45 | 0.69 | #N/A | #N/A |
| 0.45 | 0.77 | 0.33 | 0.97 | 0.42 | 0.92 | 0.43 |
| #N/A | 0.66 | 0.25 | 0.88 | 0.34 | 0.64 | 0.21 |
| 0.56 | 1.24 | 0.61 | 1.04 | 0.46 | 1.04 | 0.53 |
| 0.52 | 1.62 | 0.79 | 1.09 | 0.50 | 1.48 | 0.78 |
| 0.92 | 2.91 | 0.93 | #N/A | #N/A | 1.29 | 0.68 |
| 0.53 | 0.91 | 0.42 | 0.99 | 0.44 | 1.12 | 0.58 |
| #N/A | #N/A | #N/A | #N/A | #N/A | #N/A | #N/A |
| 0.51 | 1.45 | 0.69 | 2.12 | 0.87 | 0.87 | 0.39 |
| 0.81 | 1.75 | 0.83 | #N/A | #N/A | 1.68 | 0.86 |
| #N/A | #N/A | #N/A | #N/A | #N/A | #N/A | #N/A |
| 0.93 | #N/A | #N/A | 3.55 | 0.99 | 0.92 | 0.43 |
| 0.45 | 1.11 | 0.54 | 1.57 | 0.75 | 0.90 | 0.42 |
| 0.07 | #N/A | #N/A | 0.42 | 0.05 | #N/A | #N/A |
| #N/A | #N/A | #N/A | #N/A | #N/A | 1.54 | 0.80 |

|      |      |      |      |      |      |      |
|------|------|------|------|------|------|------|
| #N/A | #N/A | #N/A | #N/A | #N/A | 0.89 | 0.41 |
| 0.75 | #N/A | #N/A | 2.30 | 0.93 | 1.72 | 0.87 |
| 0.29 | 0.62 | 0.23 | 1.04 | 0.46 | 0.61 | 0.19 |
| 0.18 | 1.09 | 0.51 | 0.59 | 0.16 | 0.67 | 0.23 |
| 0.24 | 0.74 | 0.31 | 0.65 | 0.19 | 0.37 | 0.03 |
| 0.22 | 0.79 | 0.35 | 0.72 | 0.24 | 0.74 | 0.30 |
| 0.96 | 1.24 | 0.61 | 2.09 | 0.90 | 1.50 | 0.79 |
| #N/A | #N/A | #N/A | #N/A | #N/A | #N/A | #N/A |
| #N/A | #N/A | #N/A | #N/A | #N/A | #N/A | #N/A |
| 0.86 | 1.36 | 0.67 | 1.56 | 0.74 | 1.42 | 0.75 |
| 0.59 | 1.19 | 0.58 | 1.27 | 0.60 | 1.11 | 0.57 |
| 0.08 | #N/A | #N/A | #N/A | #N/A | 0.54 | 0.13 |
| 0.40 | 0.78 | 0.34 | #N/A | #N/A | 1.06 | 0.54 |
| 0.08 | 0.48 | 0.13 | 0.75 | 0.26 | 0.59 | 0.17 |
| #N/A | 0.45 | 0.12 | 0.59 | 0.16 | 0.55 | 0.14 |
| 0.01 | 0.11 | 0.00 | 0.24 | 0.01 | 0.17 | 0.00 |
| 0.01 | 0.12 | 0.00 | #N/A | #N/A | 0.21 | 0.00 |
| #N/A | #N/A | #N/A | #N/A | #N/A | #N/A | #N/A |
| 0.21 | 0.60 | 0.22 | #N/A | #N/A | 0.65 | 0.22 |
| #N/A | 0.34 | 0.05 | 0.45 | 0.06 | 0.58 | 0.16 |
| 0.96 | 1.78 | 0.83 | 1.88 | 0.85 | 1.81 | 0.89 |
| 0.79 | #N/A | #N/A | 3.14 | 0.93 | 2.12 | 0.94 |
| 0.66 | #N/A | #N/A | #N/A | #N/A | 1.90 | 0.90 |
| 0.94 | 2.40 | 0.91 | 1.98 | 0.87 | 1.81 | 0.89 |
| 0.72 | 1.59 | 0.77 | 1.80 | 0.83 | 1.27 | 0.68 |
| 0.21 | 0.53 | 0.17 | 0.61 | 0.17 | 0.51 | 0.11 |
| #N/A | #N/A | #N/A | #N/A | #N/A | #N/A | #N/A |
| 0.63 | 1.22 | 0.60 | 1.32 | 0.63 | 0.85 | 0.38 |
| 0.61 | 1.65 | 0.66 | 1.29 | 0.61 | 1.40 | 0.75 |
| #N/A | #N/A | #N/A | 0.36 | 0.03 | #N/A | #N/A |
| 0.73 | 1.54 | 0.74 | 1.97 | 0.86 | 1.11 | 0.57 |
| #N/A | #N/A | #N/A | #N/A | #N/A | #N/A | #N/A |
| 0.71 | 1.96 | 0.87 | 2.03 | 0.73 | 2.28 | 0.96 |
| #N/A | 0.68 | 0.27 | 0.83 | 0.33 | 0.50 | 0.10 |
| 0.10 | #N/A | #N/A | #N/A | #N/A | 1.00 | 0.50 |
| 0.40 | 0.97 | 0.46 | 1.08 | 0.49 | 0.86 | 0.39 |
| 0.43 | 0.74 | 0.31 | #N/A | #N/A | 0.84 | 0.37 |
| 0.56 | 0.93 | 0.43 | 0.87 | 0.35 | 0.96 | 0.47 |
| 0.32 | 0.92 | 0.43 | 0.93 | 0.38 | 0.65 | 0.22 |
| 0.60 | #N/A | #N/A | #N/A | #N/A | 0.93 | 0.44 |
| 0.06 | 0.31 | 0.04 | #N/A | #N/A | 0.34 | 0.03 |
| 0.68 | 1.47 | 0.70 | 1.50 | 0.72 | 1.11 | 0.57 |
| 0.07 | 0.43 | 0.09 | 0.44 | 0.06 | 0.38 | 0.04 |
| #N/A | #N/A | #N/A | #N/A | #N/A | #N/A | #N/A |
| #N/A | 2.06 | 0.86 | 2.58 | 0.95 | 2.01 | 0.92 |
| 0.44 | 1.17 | 0.56 | 0.91 | 0.37 | 1.03 | 0.52 |
| 0.11 | 0.52 | 0.16 | 0.90 | 0.37 | 0.46 | 0.08 |
| 0.10 | 0.45 | 0.11 | 0.78 | 0.29 | 0.48 | 0.09 |
| #N/A | #N/A | #N/A | #N/A | #N/A | #N/A | #N/A |
| #N/A | 0.71 | 0.29 | 0.80 | 0.30 | #N/A | #N/A |
| 0.26 | 0.59 | 0.21 | 0.95 | 0.41 | #N/A | #N/A |

|      |      |      |      |      |      |      |
|------|------|------|------|------|------|------|
| 0.25 | 0.58 | 0.20 | 0.59 | 0.15 | 0.59 | 0.17 |
| #N/A | #N/A | #N/A | #N/A | #N/A | #N/A | #N/A |
| 0.81 | 1.86 | 0.86 | 1.80 | 0.83 | 1.78 | 0.88 |
| 0.59 | 1.24 | 0.62 | #N/A | #N/A | 1.29 | 0.69 |
| #N/A | #N/A | #N/A | #N/A | #N/A | #N/A | #N/A |
| 0.48 | 0.85 | 0.38 | 0.86 | 0.35 | 0.80 | 0.34 |
| 0.77 | 1.49 | 0.74 | 1.69 | 0.79 | 1.21 | 0.64 |
| 0.64 | 1.07 | 0.51 | 1.04 | 0.46 | 1.08 | 0.56 |
| #N/A | 1.88 | 0.86 | 1.26 | 0.60 | 1.79 | 0.88 |
| 0.23 | 0.51 | 0.15 | 0.52 | 0.11 | #N/A | #N/A |
| 0.81 | 1.46 | 0.72 | 1.66 | 0.78 | 1.70 | 0.86 |
| 0.15 | 0.47 | 0.13 | 0.57 | 0.14 | 0.69 | 0.25 |
| #N/A | #N/A | #N/A | #N/A | #N/A | #N/A | #N/A |
| #N/A | #N/A | #N/A | #N/A | #N/A | #N/A | #N/A |
| 0.92 | 2.11 | 0.90 | 1.68 | 0.78 | 2.49 | 0.97 |
| 0.19 | #N/A | #N/A | #N/A | #N/A | 0.56 | 0.14 |
| #N/A | 3.04 | 0.98 | #N/A | #N/A | 1.56 | 0.81 |
| #N/A | #N/A | #N/A | #N/A | #N/A | #N/A | #N/A |
| #N/A | #N/A | #N/A | #N/A | #N/A | #N/A | #N/A |
| 0.55 | 1.51 | 0.74 | 1.57 | 0.74 | 0.94 | 0.45 |
| 0.55 | 1.61 | 0.78 | 1.38 | 0.66 | 1.29 | 0.69 |
| 0.68 | 1.04 | 0.50 | 1.09 | 0.50 | 1.61 | 0.83 |
| #N/A | #N/A | #N/A | #N/A | #N/A | #N/A | #N/A |
| 0.83 | 1.82 | 0.84 | 1.72 | 0.81 | 1.93 | 0.91 |
| #N/A | #N/A | #N/A | #N/A | #N/A | #N/A | #N/A |
| #N/A | #N/A | #N/A | #N/A | #N/A | 1.82 | 0.89 |
| #N/A | 2.34 | 0.91 | 2.41 | 0.94 | 2.53 | 0.97 |
| #N/A | #N/A | #N/A | #N/A | #N/A | #N/A | #N/A |
| 0.17 | 0.52 | 0.16 | 0.57 | 0.14 | 0.61 | 0.19 |
| 0.07 | 0.58 | 0.20 | 0.83 | 0.32 | 0.92 | 0.44 |
| 0.40 | 1.14 | 0.56 | 1.10 | 0.51 | 0.80 | 0.34 |
| 0.16 | 0.62 | 0.23 | 0.58 | 0.14 | 0.75 | 0.30 |
| #N/A | #N/A | #N/A | #N/A | #N/A | #N/A | #N/A |
| 0.68 | 1.38 | 0.69 | 1.45 | 0.67 | #N/A | #N/A |
| 0.33 | 0.79 | 0.34 | #N/A | #N/A | #N/A | #N/A |
| #N/A | #N/A | #N/A | #N/A | #N/A | #N/A | #N/A |
| #N/A | #N/A | #N/A | #N/A | #N/A | #N/A | #N/A |
| 0.30 | 1.19 | 0.56 | #N/A | #N/A | 1.22 | 0.64 |
| 0.71 | #N/A | #N/A | #N/A | #N/A | #N/A | #N/A |
| 0.09 | 0.26 | 0.02 | #N/A | #N/A | 0.25 | 0.01 |
| #N/A | 0.37 | 0.06 | 0.58 | 0.15 | 0.49 | 0.10 |
| #N/A | #N/A | #N/A | #N/A | #N/A | #N/A | #N/A |
| 0.36 | 0.92 | 0.42 | 0.87 | 0.35 | 1.06 | 0.55 |
| 0.37 | #N/A | #N/A | #N/A | #N/A | 1.83 | 0.89 |
| #N/A | #N/A | #N/A | #N/A | #N/A | #N/A | #N/A |
| 0.11 | 0.42 | 0.10 | 0.66 | 0.20 | 0.64 | 0.21 |
| #N/A | #N/A | #N/A | #N/A | #N/A | #N/A | #N/A |
| #N/A | 1.68 | 0.71 | 2.49 | 0.95 | 2.18 | 0.95 |
| #N/A | #N/A | #N/A | #N/A | #N/A | 0.69 | 0.25 |
| #N/A | 0.69 | 0.27 | 0.93 | 0.37 | 0.65 | 0.22 |
| 0.26 | 0.50 | 0.15 | 0.85 | 0.33 | 0.68 | 0.25 |

|      |      |      |      |      |      |      |
|------|------|------|------|------|------|------|
| #N/A | #N/A | #N/A | #N/A | #N/A | #N/A | #N/A |
| #N/A | #N/A | #N/A | #N/A | #N/A | #N/A | #N/A |
| 0.61 | 1.52 | 0.75 | #N/A | #N/A | #N/A | #N/A |
| #N/A | #N/A | #N/A | #N/A | #N/A | #N/A | #N/A |
| 0.70 | 1.25 | 0.62 | 1.42 | 0.68 | 1.14 | 0.60 |
| #N/A | #N/A | #N/A | #N/A | #N/A | #N/A | #N/A |
| 0.19 | 0.50 | 0.14 | 0.81 | 0.32 | 0.74 | 0.29 |
| #N/A | #N/A | #N/A | #N/A | #N/A | 1.88 | 0.90 |
| 0.22 | 0.78 | 0.33 | 0.65 | 0.20 | 0.52 | 0.11 |
| 0.89 | 1.58 | 0.71 | 1.90 | 0.85 | 1.29 | 0.69 |
| #N/A | 0.86 | 0.39 | 1.06 | 0.48 | 0.82 | 0.35 |
| 0.68 | 1.70 | 0.81 | 1.28 | 0.61 | 1.77 | 0.88 |
| 0.85 | 2.06 | 0.90 | 2.17 | 0.91 | 1.65 | 0.85 |
| 0.70 | #N/A | #N/A | #N/A | #N/A | #N/A | #N/A |
| #N/A | 0.79 | 0.34 | 1.00 | 0.44 | 0.77 | 0.32 |
| #N/A | 0.29 | 0.03 | #N/A | #N/A | #N/A | #N/A |
| #N/A | 0.76 | 0.33 | #N/A | #N/A | 0.87 | 0.40 |
| 0.37 | 0.97 | 0.46 | 0.73 | 0.25 | 1.50 | 0.79 |
| 0.11 | 0.53 | 0.17 | 0.60 | 0.16 | 0.68 | 0.24 |
| 0.86 | 2.02 | 0.89 | 1.99 | 0.87 | #N/A | #N/A |
| #N/A | #N/A | #N/A | #N/A | #N/A | #N/A | #N/A |
| #N/A | #N/A | #N/A | #N/A | #N/A | #N/A | #N/A |
| 0.26 | #N/A | #N/A | 0.70 | 0.23 | 0.97 | 0.48 |
| #N/A | 0.33 | 0.05 | 0.36 | 0.03 | 0.46 | 0.08 |
| 0.70 | 1.47 | 0.72 | 1.30 | 0.62 | 1.32 | 0.70 |
| #N/A | #N/A | #N/A | #N/A | #N/A | #N/A | #N/A |
| 0.53 | 1.01 | 0.48 | 1.40 | 0.68 | 0.94 | 0.46 |
| 0.31 | #N/A | #N/A | #N/A | #N/A | #N/A | #N/A |
| 0.17 | 0.52 | 0.16 | 0.63 | 0.18 | 0.72 | 0.28 |
| 0.96 | 2.20 | 0.92 | 2.38 | 0.93 | 2.49 | 0.97 |
| 0.73 | 1.57 | 0.75 | 1.67 | 0.76 | 1.93 | 0.91 |
| 0.19 | #N/A | #N/A | 0.57 | 0.13 | 0.45 | 0.07 |
| 0.25 | 0.75 | 0.31 | 0.75 | 0.26 | 0.42 | 0.05 |
| 0.69 | 1.21 | 0.60 | 1.37 | 0.65 | 1.02 | 0.52 |
| #N/A | #N/A | #N/A | #N/A | #N/A | #N/A | #N/A |
| 0.31 | 0.84 | 0.38 | 0.79 | 0.29 | 0.62 | 0.19 |
| 0.23 | 0.70 | 0.28 | #N/A | #N/A | 0.66 | 0.22 |
| 0.60 | 1.32 | 0.66 | 1.36 | 0.65 | 1.33 | 0.71 |
| 0.55 | 0.98 | 0.47 | 0.89 | 0.36 | 1.02 | 0.51 |
| 0.31 | 0.78 | 0.34 | 0.42 | 0.05 | 0.92 | 0.43 |
| 0.29 | 0.77 | 0.33 | 0.60 | 0.16 | 0.84 | 0.37 |
| 0.14 | 0.55 | 0.18 | 0.46 | 0.07 | 0.63 | 0.20 |
| #N/A | #N/A | #N/A | #N/A | #N/A | #N/A | #N/A |
| #N/A | #N/A | #N/A | #N/A | #N/A | #N/A | #N/A |
| #N/A | #N/A | #N/A | #N/A | #N/A | #N/A | #N/A |
| 0.77 | #N/A | #N/A | #N/A | #N/A | 0.91 | 0.43 |
| 0.79 | 1.64 | 0.79 | 1.36 | 0.65 | 1.32 | 0.70 |
| #N/A | #N/A | #N/A | #N/A | #N/A | #N/A | #N/A |
| 0.17 | 0.60 | 0.22 | 0.54 | 0.12 | 0.71 | 0.27 |
| 0.21 | #N/A | #N/A | 0.83 | 0.32 | 0.79 | 0.33 |
| 0.90 | 2.59 | 0.96 | 2.69 | 0.96 | 2.18 | 0.95 |



|      |      |      |      |      |      |      |
|------|------|------|------|------|------|------|
| #N/A | #N/A | #N/A | #N/A | #N/A | 0.95 | 0.46 |
| #N/A | #N/A | #N/A | #N/A | #N/A | #N/A | #N/A |
| #N/A | #N/A | #N/A | #N/A | #N/A | #N/A | #N/A |
| 0.06 | #N/A | #N/A | 0.45 | 0.06 | 0.67 | 0.24 |
| #N/A | #N/A | #N/A | #N/A | #N/A | #N/A | #N/A |
| #N/A | #N/A | #N/A | #N/A | #N/A | #N/A | #N/A |
| #N/A | #N/A | #N/A | 1.70 | 0.78 | 0.85 | 0.38 |
| #N/A | #N/A | #N/A | 0.89 | 0.36 | 0.70 | 0.26 |
| 0.10 | 0.39 | 0.08 | 0.62 | 0.17 | 0.58 | 0.17 |
| 0.18 | 0.40 | 0.08 | 0.71 | 0.23 | 0.57 | 0.16 |
| #N/A | #N/A | #N/A | #N/A | #N/A | #N/A | #N/A |
| #N/A | 1.61 | 0.78 | 1.52 | 0.73 | 1.37 | 0.73 |
| 0.22 | 0.49 | 0.14 | 0.56 | 0.15 | 0.74 | 0.30 |
| #N/A | 1.33 | 0.66 | 1.48 | 0.71 | 1.67 | 0.85 |
| #N/A | #N/A | #N/A | #N/A | #N/A | #N/A | #N/A |
| 0.17 | 0.68 | 0.27 | 0.65 | 0.19 | 0.61 | 0.19 |
| 0.11 | 0.36 | 0.06 | 0.61 | 0.18 | 0.62 | 0.20 |
| 0.12 | 0.46 | 0.12 | 0.71 | 0.23 | 0.57 | 0.16 |
| 0.97 | 2.32 | 0.94 | 2.60 | 0.96 | 1.57 | 0.82 |
| 0.70 | 1.44 | 0.71 | 1.57 | 0.73 | 1.41 | 0.75 |
| #N/A | 2.57 | 0.96 | 1.69 | 0.79 | 1.72 | 0.87 |
| 0.23 | 0.63 | 0.23 | #N/A | #N/A | #N/A | #N/A |
| 0.92 | 1.66 | 0.80 | #N/A | #N/A | 1.40 | 0.74 |
| 0.97 | 2.99 | 0.98 | 2.29 | 0.92 | 2.75 | 0.98 |
| #N/A | 1.31 | 0.64 | 0.91 | 0.38 | 0.83 | 0.36 |
| 0.67 | 1.70 | 0.81 | 1.43 | 0.68 | 1.43 | 0.76 |
| 0.22 | #N/A | #N/A | #N/A | #N/A | #N/A | #N/A |
| 0.66 | 1.30 | 0.62 | 1.26 | 0.54 | 1.37 | 0.73 |
| 0.69 | 1.49 | 0.73 | 1.48 | 0.70 | 1.28 | 0.68 |
| #N/A | 0.54 | 0.17 | 0.75 | 0.27 | 0.73 | 0.29 |
| 0.64 | 0.69 | 0.28 | 1.43 | 0.66 | 1.00 | 0.50 |
| #N/A | #N/A | #N/A | #N/A | #N/A | #N/A | #N/A |
| 0.20 | 0.81 | 0.36 | 0.88 | 0.36 | 1.01 | 0.51 |
| 0.02 | 0.29 | 0.03 | 0.32 | 0.03 | 0.32 | 0.02 |
| 0.32 | 0.49 | 0.14 | 0.80 | 0.30 | 0.55 | 0.14 |
| 0.34 | 0.53 | 0.16 | 0.60 | 0.16 | 0.62 | 0.20 |
| 0.33 | 0.69 | 0.28 | 0.85 | 0.34 | 0.92 | 0.44 |
| 0.69 | 1.07 | 0.52 | 1.54 | 0.74 | 1.16 | 0.61 |
| 0.93 | 1.91 | 0.86 | 1.74 | 0.81 | 1.61 | 0.83 |
| #N/A | 0.51 | 0.15 | 0.72 | 0.25 | 0.37 | 0.03 |
| #N/A | #N/A | #N/A | #N/A | #N/A | 0.39 | 0.04 |
| 0.27 | 0.88 | 0.40 | 0.61 | 0.16 | 1.12 | 0.59 |
| 0.16 | #N/A | #N/A | 0.82 | 0.32 | 0.62 | 0.20 |
| 0.90 | 1.79 | 0.83 | #N/A | #N/A | 1.15 | 0.60 |
| 0.77 | #N/A | #N/A | 2.17 | 0.89 | 2.85 | 0.99 |
| #N/A | #N/A | #N/A | #N/A | #N/A | #N/A | #N/A |
| 0.67 | 1.40 | 0.69 | 2.01 | 0.87 | #N/A | #N/A |
| 0.51 | #N/A | #N/A | 1.16 | 0.54 | 1.24 | 0.66 |
| 0.68 | 1.26 | 0.63 | 2.07 | 0.88 | 1.58 | 0.82 |
| #N/A | 0.46 | 0.12 | 1.27 | 0.60 | 0.67 | 0.24 |
| #N/A | 2.18 | 0.92 | 2.56 | 0.95 | 2.11 | 0.94 |

|      |      |      |      |      |      |      |
|------|------|------|------|------|------|------|
| #N/A | #N/A | #N/A | #N/A | #N/A | #N/A | #N/A |
| #N/A | #N/A | #N/A | 2.56 | 0.84 | 1.06 | 0.55 |
| 0.56 | 1.28 | 0.63 | 1.29 | 0.62 | 1.05 | 0.54 |
| 0.09 | 0.42 | 0.09 | 0.61 | 0.16 | 0.49 | 0.09 |
| 0.57 | 1.16 | 0.57 | 1.11 | 0.51 | 0.99 | 0.50 |
| #N/A | #N/A | #N/A | #N/A | #N/A | #N/A | #N/A |
| #N/A | #N/A | #N/A | #N/A | #N/A | 0.52 | 0.12 |
| #N/A | 0.65 | 0.25 | 0.77 | 0.28 | 0.98 | 0.49 |
| #N/A | #N/A | #N/A | #N/A | #N/A | 0.59 | 0.17 |
| 0.78 | 1.86 | 0.86 | 2.07 | 0.85 | 1.51 | 0.79 |
| 0.76 | 1.44 | 0.71 | 1.44 | 0.69 | 1.58 | 0.82 |
| #N/A | #N/A | #N/A | #N/A | #N/A | #N/A | #N/A |
| 0.03 | 0.36 | 0.07 | 0.25 | 0.01 | 0.30 | 0.02 |
| 0.14 | #N/A | #N/A | #N/A | #N/A | 0.56 | 0.14 |
| 0.91 | 2.01 | 0.89 | 2.29 | 0.93 | 2.41 | 0.97 |
| 0.96 | 1.36 | 0.67 | 2.14 | 0.82 | 1.38 | 0.73 |
| #N/A | #N/A | #N/A | #N/A | #N/A | #N/A | #N/A |
| 0.43 | #N/A | #N/A | #N/A | #N/A | 0.61 | 0.19 |
| 0.95 | 1.56 | 0.76 | 1.79 | 0.81 | 1.69 | 0.86 |
| #N/A | #N/A | #N/A | #N/A | #N/A | #N/A | #N/A |
| 0.32 | 0.80 | 0.35 | 1.08 | 0.49 | 0.75 | 0.31 |
| 0.46 | 0.86 | 0.39 | 1.10 | 0.51 | 0.92 | 0.44 |
| 0.26 | 0.80 | 0.35 | 0.80 | 0.30 | 0.76 | 0.31 |
| #N/A | 0.58 | 0.20 | 0.72 | 0.24 | 0.60 | 0.18 |
| #N/A | 0.85 | 0.38 | #N/A | #N/A | 0.85 | 0.38 |
| 0.13 | #N/A | #N/A | 0.48 | 0.11 | #N/A | #N/A |
| 0.33 | 1.34 | 0.67 | 1.39 | 0.59 | 1.23 | 0.65 |
| #N/A | #N/A | #N/A | #N/A | #N/A | 0.44 | 0.06 |
| #N/A | 1.37 | 0.66 | 1.51 | 0.61 | 0.70 | 0.27 |
| 0.96 | 2.16 | 0.91 | 2.53 | 0.96 | 2.08 | 0.94 |
| 0.95 | 2.28 | 0.93 | 2.74 | 0.97 | 2.25 | 0.96 |
| #N/A | 1.77 | 0.77 | 1.52 | 0.71 | 1.30 | 0.69 |
| 0.75 | 1.45 | 0.71 | 1.84 | 0.81 | 1.40 | 0.74 |
| 0.98 | #N/A | #N/A | 5.61 | 1.00 | 2.87 | 0.99 |
| 0.67 | #N/A | #N/A | 1.21 | 0.58 | 0.96 | 0.47 |
| 0.45 | 1.02 | 0.48 | 0.82 | 0.32 | 0.82 | 0.36 |
| #N/A | #N/A | #N/A | #N/A | #N/A | #N/A | #N/A |
| #N/A | 0.60 | 0.22 | 0.72 | 0.24 | 0.39 | 0.04 |
| #N/A | 0.48 | 0.13 | 0.49 | 0.10 | 0.86 | 0.39 |
| 0.80 | 1.25 | 0.62 | 1.82 | 0.84 | 1.45 | 0.77 |
| 0.94 | #N/A | #N/A | 1.53 | 0.69 | 1.56 | 0.81 |
| 0.72 | 1.84 | 0.85 | #N/A | #N/A | 0.99 | 0.49 |
| 0.31 | 0.71 | 0.29 | 0.71 | 0.24 | 0.90 | 0.42 |
| 0.44 | #N/A | #N/A | 0.85 | 0.34 | 0.91 | 0.43 |
| 0.42 | #N/A | #N/A | #N/A | #N/A | #N/A | #N/A |
| 0.33 | 0.76 | 0.32 | 0.74 | 0.25 | 0.84 | 0.38 |
| 0.55 | 0.97 | 0.46 | 1.14 | 0.53 | 0.82 | 0.35 |
| #N/A | 1.73 | 0.82 | #N/A | #N/A | 1.66 | 0.85 |
| #N/A | 2.67 | 0.97 | 5.81 | 0.91 | 1.74 | 0.87 |
| #N/A | #N/A | #N/A | 0.54 | 0.13 | #N/A | #N/A |
| #N/A | #N/A | #N/A | #N/A | #N/A | #N/A | #N/A |

|      |      |      |      |      |      |      |
|------|------|------|------|------|------|------|
| #N/A | #N/A | #N/A | #N/A | #N/A | #N/A | #N/A |
| 0.74 | 1.12 | 0.55 | 1.29 | 0.62 | 1.69 | 0.86 |
| #N/A | #N/A | #N/A | #N/A | #N/A | #N/A | #N/A |
| 0.26 | 0.85 | 0.38 | 0.72 | 0.24 | 0.91 | 0.43 |
| 0.81 | #N/A | #N/A | 1.60 | 0.76 | 1.96 | 0.92 |
| 0.80 | #N/A | #N/A | #N/A | #N/A | 2.06 | 0.93 |
| #N/A | #N/A | #N/A | #N/A | #N/A | #N/A | #N/A |
| 0.31 | 0.51 | 0.15 | #N/A | #N/A | #N/A | #N/A |
| 0.71 | 1.34 | 0.67 | 1.15 | 0.54 | 1.23 | 0.65 |
| 0.63 | 1.21 | 0.60 | 1.10 | 0.51 | 0.76 | 0.31 |
| 0.24 | 0.65 | 0.25 | 0.78 | 0.29 | 0.72 | 0.28 |
| #N/A | 0.59 | 0.21 | 0.53 | 0.11 | 0.50 | 0.10 |
| #N/A | #N/A | #N/A | 0.86 | 0.34 | 0.74 | 0.29 |
| 0.30 | #N/A | #N/A | 0.79 | 0.29 | #N/A | #N/A |
| 0.80 | #N/A | #N/A | 1.85 | 0.83 | 1.82 | 0.89 |
| 0.49 | 0.97 | 0.46 | 1.00 | 0.44 | 1.28 | 0.68 |
| 0.28 | 0.90 | 0.41 | 0.60 | 0.16 | 0.76 | 0.31 |
| 0.94 | 2.08 | 0.89 | 1.93 | 0.86 | 2.26 | 0.96 |
| #N/A | 3.10 | 0.98 | 2.74 | 0.97 | #N/A | #N/A |
| #N/A | #N/A | #N/A | #N/A | #N/A | #N/A | #N/A |
| 0.52 | 1.22 | 0.61 | 1.01 | 0.43 | 0.93 | 0.45 |
| 0.46 | 0.90 | 0.41 | 0.78 | 0.29 | 0.94 | 0.45 |
| 0.85 | 1.77 | 0.81 | 1.79 | 0.82 | 1.99 | 0.92 |
| #N/A | #N/A | #N/A | #N/A | #N/A | #N/A | #N/A |
| #N/A | #N/A | #N/A | #N/A | #N/A | #N/A | #N/A |
| 0.18 | 0.74 | 0.31 | 0.78 | 0.29 | 0.60 | 0.18 |
| 0.21 | 0.62 | 0.23 | 0.63 | 0.18 | 0.69 | 0.25 |
| 0.45 | 1.12 | 0.54 | 1.45 | 0.69 | 0.92 | 0.44 |
| #N/A | 1.95 | 0.87 | 1.92 | 0.84 | 1.14 | 0.59 |
| 0.94 | 2.33 | 0.94 | 2.71 | 0.97 | 2.86 | 0.99 |
| 0.26 | #N/A | #N/A | 0.76 | 0.27 | 0.55 | 0.13 |
| 0.52 | #N/A | #N/A | 1.18 | 0.54 | #N/A | #N/A |
| 0.18 | 0.35 | 0.06 | 0.55 | 0.13 | 0.62 | 0.19 |
| 0.33 | 0.91 | 0.42 | 0.68 | 0.22 | 0.88 | 0.41 |
| 0.38 | 0.85 | 0.39 | 0.95 | 0.40 | #N/A | #N/A |
| 0.18 | 0.51 | 0.15 | 0.73 | 0.25 | 0.51 | 0.10 |
| 0.07 | 0.40 | 0.08 | 0.54 | 0.12 | 0.48 | 0.09 |
| 0.37 | #N/A | #N/A | 1.06 | 0.48 | 1.45 | 0.77 |
| #N/A | #N/A | #N/A | #N/A | #N/A | #N/A | #N/A |
| #N/A | 0.48 | 0.13 | 0.67 | 0.21 | 0.61 | 0.18 |
| 0.37 | 0.61 | 0.22 | 0.78 | 0.28 | 0.72 | 0.28 |
| 0.24 | 0.72 | 0.30 | 0.78 | 0.28 | 0.68 | 0.24 |
| 0.29 | 0.62 | 0.23 | 0.81 | 0.30 | 0.77 | 0.31 |
| 0.05 | 0.47 | 0.12 | 0.48 | 0.08 | 0.57 | 0.15 |
| 0.31 | 0.76 | 0.33 | 0.80 | 0.30 | 0.82 | 0.35 |
| #N/A | 2.45 | 0.94 | 2.42 | 0.92 | 2.55 | 0.98 |
| 0.69 | 1.45 | 0.72 | 1.19 | 0.56 | 1.02 | 0.52 |
| #N/A | 0.54 | 0.18 | 0.82 | 0.32 | 0.63 | 0.20 |
| 0.99 | 2.28 | 0.92 | 3.01 | 0.96 | 2.16 | 0.95 |
| 0.45 | 1.18 | 0.59 | 0.85 | 0.34 | 1.03 | 0.52 |
| #N/A | #N/A | #N/A | #N/A | #N/A | #N/A | #N/A |

|      |      |      |      |      |      |      |
|------|------|------|------|------|------|------|
| 0.68 | #N/A | #N/A | 1.12 | 0.52 | 1.12 | 0.58 |
| 0.57 | 1.44 | 0.71 | 1.02 | 0.45 | 1.51 | 0.79 |
| #N/A | 1.21 | 0.60 | 1.46 | 0.70 | 1.36 | 0.72 |
| #N/A | #N/A | #N/A | #N/A | #N/A | #N/A | #N/A |
| 0.84 | 1.80 | 0.84 | 1.83 | 0.84 | 1.35 | 0.72 |
| #N/A | #N/A | #N/A | #N/A | #N/A | #N/A | #N/A |
| 0.20 | 0.58 | 0.20 | 0.72 | 0.24 | 0.67 | 0.23 |
| 0.79 | 1.80 | 0.80 | 2.12 | 0.87 | 1.47 | 0.77 |
| 0.11 | 0.81 | 0.36 | 0.58 | 0.14 | 0.67 | 0.23 |
| 0.70 | 1.85 | 0.85 | 1.27 | 0.60 | 1.60 | 0.83 |
| 0.43 | 0.70 | 0.28 | #N/A | #N/A | 0.69 | 0.25 |
| #N/A | 0.80 | 0.35 | 0.69 | 0.22 | 0.80 | 0.34 |
| 0.92 | 2.08 | 0.90 | 2.01 | 0.88 | 2.17 | 0.95 |
| #N/A | #N/A | #N/A | #N/A | #N/A | #N/A | #N/A |
| #N/A | #N/A | #N/A | #N/A | #N/A | 0.72 | 0.28 |
| 0.03 | 0.41 | 0.10 | 0.49 | 0.08 | 0.45 | 0.07 |
| 0.31 | 0.74 | 0.31 | 0.72 | 0.24 | 0.84 | 0.37 |
| #N/A | 0.42 | 0.10 | 0.42 | 0.05 | #N/A | #N/A |
| 0.05 | 0.53 | 0.17 | 1.00 | 0.40 | 0.44 | 0.07 |
| 0.98 | 3.01 | 0.98 | #N/A | #N/A | 2.31 | 0.96 |
| #N/A | 0.71 | 0.29 | 0.81 | 0.30 | #N/A | #N/A |
| 0.69 | #N/A | #N/A | 1.39 | 0.67 | #N/A | #N/A |
| 0.53 | 1.05 | 0.51 | 1.20 | 0.56 | 0.87 | 0.40 |
| #N/A | 0.71 | 0.29 | 0.81 | 0.30 | 0.85 | 0.38 |
| #N/A | #N/A | #N/A | #N/A | #N/A | #N/A | #N/A |
| #N/A | 1.71 | 0.81 | #N/A | #N/A | 1.35 | 0.72 |
| #N/A | 0.70 | 0.28 | 0.48 | 0.08 | 0.64 | 0.21 |
| 0.39 | #N/A | #N/A | 0.76 | 0.27 | #N/A | #N/A |
| 0.66 | 1.71 | 0.81 | 1.20 | 0.57 | 1.54 | 0.80 |
| 0.99 | 2.93 | 0.98 | #N/A | #N/A | 4.47 | 1.00 |
| #N/A | #N/A | #N/A | 0.54 | 0.12 | #N/A | #N/A |
| 0.75 | 2.05 | 0.87 | 1.76 | 0.81 | 1.74 | 0.87 |
| #N/A | 1.36 | 0.67 | #N/A | #N/A | 1.55 | 0.81 |
| 0.20 | 0.80 | 0.35 | 0.91 | 0.38 | 0.84 | 0.37 |
| 0.78 | 2.35 | 0.93 | 2.09 | 0.90 | 1.51 | 0.79 |
| #N/A | #N/A | #N/A | #N/A | #N/A | #N/A | #N/A |
| 0.81 | 1.49 | 0.74 | 1.65 | 0.78 | 1.18 | 0.62 |
| 0.68 | 0.91 | 0.41 | 1.33 | 0.62 | 1.12 | 0.58 |
| 0.03 | 0.19 | 0.01 | 0.33 | 0.03 | 0.25 | 0.01 |
| #N/A | #N/A | #N/A | #N/A | #N/A | 1.03 | 0.52 |
| 0.60 | #N/A | #N/A | #N/A | #N/A | 1.27 | 0.67 |
| 0.13 | 0.39 | 0.08 | #N/A | #N/A | #N/A | #N/A |
| 0.72 | 2.47 | 0.95 | 2.43 | 0.94 | 1.90 | 0.91 |
| 0.48 | 1.09 | 0.53 | #N/A | #N/A | 1.59 | 0.82 |
| #N/A | #N/A | #N/A | 0.83 | 0.32 | #N/A | #N/A |
| 0.74 | 1.33 | 0.66 | 1.81 | 0.83 | 1.63 | 0.84 |
| 0.81 | 1.72 | 0.82 | 1.67 | 0.79 | 1.93 | 0.91 |
| 0.75 | 2.14 | 0.89 | #N/A | #N/A | #N/A | #N/A |
| 0.21 | 0.62 | 0.23 | #N/A | #N/A | 0.68 | 0.25 |
| 0.76 | 1.78 | 0.79 | 1.68 | 0.78 | 1.73 | 0.87 |
| 0.52 | 0.80 | 0.35 | 1.00 | 0.44 | 0.84 | 0.37 |

|      |      |      |      |      |      |      |
|------|------|------|------|------|------|------|
| 0.44 | 1.14 | 0.56 | 1.10 | 0.51 | 1.06 | 0.54 |
| 0.11 | 0.45 | 0.11 | 0.47 | 0.08 | 0.46 | 0.08 |
| 0.75 | 1.80 | 0.83 | 1.53 | 0.73 | 1.41 | 0.75 |
| #N/A | #N/A | #N/A | #N/A | #N/A | 0.73 | 0.29 |
| 0.25 | 0.68 | 0.27 | 0.77 | 0.28 | 0.78 | 0.32 |
| 0.41 | 0.90 | 0.42 | 0.94 | 0.40 | 0.93 | 0.44 |
| 0.64 | 0.97 | 0.46 | 1.10 | 0.51 | 1.41 | 0.75 |
| 0.67 | 1.08 | 0.52 | 1.04 | 0.47 | 1.03 | 0.53 |
| #N/A | #N/A | #N/A | #N/A | #N/A | #N/A | #N/A |
| 0.56 | #N/A | #N/A | 1.32 | 0.63 | 1.67 | 0.85 |
| 0.67 | 1.55 | 0.76 | 1.60 | 0.76 | 1.82 | 0.89 |
| #N/A | 1.60 | 0.73 | 1.29 | 0.61 | 1.66 | 0.85 |
| 0.31 | 0.64 | 0.24 | 0.67 | 0.20 | 0.61 | 0.18 |
| 0.38 | 0.54 | 0.17 | 0.65 | 0.20 | 1.12 | 0.59 |
| 0.56 | 1.26 | 0.62 | 1.38 | 0.66 | 1.03 | 0.53 |
| 0.81 | 1.47 | 0.73 | 1.33 | 0.64 | 1.57 | 0.81 |
| 0.59 | 1.04 | 0.50 | 0.92 | 0.38 | 0.91 | 0.43 |
| #N/A | 0.61 | 0.22 | 0.64 | 0.19 | 0.54 | 0.13 |
| 0.21 | 0.53 | 0.17 | #N/A | #N/A | 0.42 | 0.06 |
| 0.14 | #N/A | #N/A | #N/A | #N/A | #N/A | #N/A |
| 0.17 | 0.76 | 0.32 | 0.73 | 0.25 | 0.47 | 0.08 |
| 0.29 | 1.16 | 0.57 | 1.00 | 0.44 | 0.91 | 0.43 |
| 0.64 | 1.86 | 0.86 | 1.27 | 0.60 | 1.31 | 0.70 |
| 0.58 | 1.09 | 0.52 | 1.29 | 0.62 | 1.28 | 0.68 |
| 0.11 | 0.44 | 0.11 | 0.53 | 0.11 | 0.40 | 0.04 |
| 0.61 | 1.42 | 0.70 | 1.33 | 0.63 | 1.58 | 0.82 |
| #N/A | #N/A | #N/A | #N/A | #N/A | #N/A | #N/A |
| #N/A | 1.05 | 0.51 | 1.05 | 0.47 | 0.94 | 0.46 |
| 0.81 | 1.68 | 0.78 | #N/A | #N/A | 1.44 | 0.77 |
| 0.91 | 1.46 | 0.72 | 1.82 | 0.83 | 1.56 | 0.81 |
| #N/A | #N/A | #N/A | #N/A | #N/A | 0.54 | 0.13 |
| 0.95 | 2.15 | 0.91 | 1.90 | 0.86 | 1.32 | 0.70 |
| #N/A | #N/A | #N/A | #N/A | #N/A | #N/A | #N/A |
| 0.13 | #N/A | #N/A | #N/A | #N/A | #N/A | #N/A |
| 0.97 | 2.23 | 0.92 | 2.88 | 0.96 | 2.00 | 0.92 |
| 0.49 | 0.88 | 0.40 | 0.99 | 0.43 | 0.77 | 0.32 |
| 0.24 | 0.43 | 0.10 | 0.43 | 0.06 | 0.42 | 0.05 |
| 0.40 | 0.94 | 0.44 | #N/A | #N/A | 1.15 | 0.61 |
| 0.77 | 1.65 | 0.79 | 1.63 | 0.77 | 1.45 | 0.77 |
| 0.46 | 1.09 | 0.52 | 0.91 | 0.38 | 0.91 | 0.43 |
| #N/A | 2.17 | 0.92 | 2.67 | 0.95 | 2.02 | 0.93 |
| #N/A | #N/A | #N/A | #N/A | #N/A | 0.85 | 0.38 |
| 0.83 | 1.75 | 0.82 | 1.63 | 0.76 | 1.60 | 0.83 |
| 0.54 | 1.64 | 0.78 | 1.29 | 0.62 | 1.06 | 0.55 |
| 0.95 | 1.97 | 0.88 | 2.73 | 0.96 | 1.98 | 0.92 |
| #N/A | #N/A | #N/A | 1.44 | 0.63 | 1.03 | 0.52 |
| #N/A | 0.35 | 0.05 | #N/A | #N/A | 0.54 | 0.13 |
| 0.66 | 1.03 | 0.49 | 1.53 | 0.72 | 1.12 | 0.58 |
| #N/A | #N/A | #N/A | #N/A | #N/A | #N/A | #N/A |
| #N/A | #N/A | #N/A | #N/A | #N/A | #N/A | #N/A |
| #N/A | #N/A | #N/A | #N/A | #N/A | 0.70 | 0.26 |

|      |      |      |      |      |      |      |
|------|------|------|------|------|------|------|
| 0.04 | 0.35 | 0.06 | 0.45 | 0.07 | 0.55 | 0.14 |
| #N/A | #N/A | #N/A | #N/A | #N/A | #N/A | #N/A |
| 0.85 | 1.86 | 0.86 | 1.96 | 0.85 | 2.01 | 0.93 |
| 0.97 | 2.79 | 0.97 | 2.04 | 0.89 | 2.61 | 0.98 |
| 0.09 | 0.44 | 0.10 | #N/A | #N/A | 0.62 | 0.19 |
| #N/A | #N/A | #N/A | #N/A | #N/A | #N/A | #N/A |
| 0.04 | 0.23 | 0.02 | 0.41 | 0.05 | 0.31 | 0.02 |
| 0.53 | 1.07 | 0.52 | #N/A | #N/A | 0.75 | 0.30 |
| 0.01 | 0.21 | 0.02 | 0.35 | 0.03 | 0.42 | 0.05 |
| 0.31 | 0.84 | 0.38 | 0.87 | 0.35 | 0.73 | 0.29 |
| 0.47 | 1.27 | 0.63 | 1.24 | 0.59 | 0.96 | 0.47 |
| #N/A | 0.69 | 0.32 | #N/A | #N/A | 1.13 | 0.59 |
| #N/A | #N/A | #N/A | #N/A | #N/A | #N/A | #N/A |
| 0.40 | 0.87 | 0.40 | 1.09 | 0.50 | 0.95 | 0.46 |
| 0.95 | #N/A | #N/A | 2.57 | 0.94 | 1.40 | 0.74 |
| #N/A | 0.42 | 0.09 | #N/A | #N/A | 0.65 | 0.22 |
| 0.68 | 1.74 | 0.80 | 1.58 | 0.75 | 1.05 | 0.54 |
| #N/A | #N/A | #N/A | #N/A | #N/A | 0.91 | 0.43 |
| 0.67 | 1.44 | 0.71 | 1.53 | 0.73 | 1.30 | 0.69 |
| 0.92 | 2.22 | 0.92 | #N/A | #N/A | #N/A | #N/A |
| 0.25 | 0.71 | 0.29 | 0.75 | 0.26 | 0.82 | 0.35 |
| #N/A | #N/A | #N/A | #N/A | #N/A | #N/A | #N/A |
| #N/A | #N/A | #N/A | 2.80 | 0.97 | 1.88 | 0.90 |
| 0.58 | 2.02 | 0.87 | #N/A | #N/A | #N/A | #N/A |
| #N/A | 0.50 | 0.15 | #N/A | #N/A | 0.39 | 0.04 |
| 0.74 | 2.02 | 0.89 | 1.46 | 0.70 | 1.19 | 0.63 |
| #N/A | #N/A | #N/A | #N/A | #N/A | #N/A | #N/A |
| 0.62 | 1.28 | 0.64 | 1.52 | 0.73 | 1.24 | 0.66 |
| 0.01 | 0.38 | 0.08 | 0.46 | 0.07 | 0.51 | 0.10 |
| 0.71 | 1.39 | 0.68 | 1.99 | 0.87 | 1.27 | 0.67 |
| 0.85 | 1.92 | 0.87 | 2.04 | 0.88 | 1.79 | 0.88 |
| #N/A | 1.30 | 0.65 | 1.32 | 0.63 | 0.94 | 0.45 |
| 0.33 | 0.78 | 0.33 | 0.66 | 0.20 | 0.60 | 0.18 |
| 0.42 | 0.79 | 0.35 | 1.14 | 0.53 | 1.38 | 0.73 |
| #N/A | 1.19 | 0.59 | 0.85 | 0.34 | 0.71 | 0.27 |
| 0.76 | #N/A | #N/A | 2.20 | 0.89 | 1.48 | 0.78 |
| 0.73 | 1.51 | 0.74 | 1.56 | 0.74 | 1.21 | 0.64 |
| 0.65 | 1.20 | 0.59 | 1.31 | 0.63 | 1.35 | 0.72 |
| 0.89 | 1.73 | 0.82 | 2.28 | 0.93 | 1.61 | 0.83 |
| 0.68 | 1.84 | 0.85 | 1.91 | 0.84 | 1.36 | 0.72 |
| #N/A | #N/A | #N/A | #N/A | #N/A | #N/A | #N/A |
| 0.27 | #N/A | #N/A | #N/A | #N/A | 0.52 | 0.12 |
| 0.20 | 0.69 | 0.28 | 0.85 | 0.33 | 0.69 | 0.25 |
| 0.16 | 0.60 | 0.22 | 0.79 | 0.29 | 0.51 | 0.11 |
| 0.05 | 0.42 | 0.10 | 0.40 | 0.04 | 0.45 | 0.07 |
| 0.76 | 2.23 | 0.90 | 2.03 | 0.88 | #N/A | #N/A |
| 0.05 | #N/A | #N/A | 0.49 | 0.09 | #N/A | #N/A |
| #N/A | #N/A | #N/A | #N/A | #N/A | #N/A | #N/A |
| 0.53 | 1.24 | 0.61 | 1.31 | 0.62 | 1.38 | 0.74 |
| 0.61 | 1.31 | 0.65 | 1.05 | 0.47 | 0.92 | 0.43 |
| 0.12 | 0.49 | 0.14 | 0.58 | 0.15 | 0.39 | 0.04 |

|      |      |      |      |      |      |      |
|------|------|------|------|------|------|------|
| #N/A | 2.49 | 0.95 | 2.66 | 0.95 | 2.24 | 0.96 |
| 0.65 | #N/A | #N/A | #N/A | #N/A | 1.18 | 0.62 |
| 0.55 | 1.20 | 0.59 | 1.05 | 0.47 | 1.06 | 0.54 |
| 0.17 | 0.47 | 0.13 | 0.60 | 0.16 | #N/A | #N/A |
| 0.06 | 0.24 | 0.02 | 0.26 | 0.01 | 0.45 | 0.07 |
| 0.14 | 0.54 | 0.17 | 0.58 | 0.14 | 0.44 | 0.06 |
| #N/A | 1.13 | 0.56 | 1.26 | 0.60 | 1.30 | 0.69 |
| #N/A | #N/A | #N/A | #N/A | #N/A | #N/A | #N/A |
| 0.83 | 2.04 | 0.89 | 1.83 | 0.84 | 1.81 | 0.89 |
| 0.09 | 0.40 | 0.08 | 0.67 | 0.20 | 0.58 | 0.17 |
| 0.67 | 1.21 | 0.60 | #N/A | #N/A | 0.85 | 0.38 |
| 0.13 | 0.33 | 0.05 | 0.74 | 0.28 | 0.39 | 0.04 |
| 0.34 | 0.78 | 0.34 | 0.91 | 0.37 | 1.11 | 0.57 |
| 0.69 | 2.58 | 0.95 | 1.74 | 0.79 | #N/A | #N/A |
| 0.09 | 0.41 | 0.09 | 0.54 | 0.14 | 0.52 | 0.12 |
| #N/A | 1.40 | 0.66 | 1.13 | 0.50 | 1.55 | 0.81 |
| 0.68 | 1.44 | 0.72 | 1.91 | 0.81 | 1.34 | 0.71 |
| 0.65 | 1.26 | 0.62 | 1.23 | 0.58 | 1.12 | 0.58 |
| 0.95 | 2.91 | 0.98 | 2.41 | 0.94 | 2.23 | 0.96 |
| #N/A | #N/A | #N/A | #N/A | #N/A | #N/A | #N/A |
| #N/A | #N/A | #N/A | 1.81 | 0.82 | 1.11 | 0.58 |
| #N/A | 0.71 | 0.30 | #N/A | #N/A | 0.98 | 0.49 |
| #N/A | 0.53 | 0.16 | 0.58 | 0.20 | 0.39 | 0.04 |
| #N/A | 1.79 | 0.83 | 2.11 | 0.90 | 2.22 | 0.95 |
| 0.76 | 1.83 | 0.85 | 1.91 | 0.85 | 1.62 | 0.83 |
| 0.78 | 1.85 | 0.85 | 2.39 | 0.90 | 1.41 | 0.75 |
| 0.20 | 0.45 | 0.12 | 0.52 | 0.12 | 0.48 | 0.09 |
| 0.40 | 0.90 | 0.41 | 1.00 | 0.43 | 0.84 | 0.37 |
| #N/A | #N/A | #N/A | #N/A | #N/A | #N/A | #N/A |
| 0.86 | #N/A | #N/A | #N/A | #N/A | 1.37 | 0.73 |
| 0.32 | 1.06 | 0.51 | 0.75 | 0.27 | 0.93 | 0.44 |
| 0.06 | 0.45 | 0.11 | 0.55 | 0.13 | 0.44 | 0.07 |
| #N/A | #N/A | #N/A | #N/A | #N/A | 1.87 | 0.90 |
| 0.68 | 1.25 | 0.62 | #N/A | #N/A | 1.66 | 0.85 |
| 0.19 | 0.40 | 0.08 | 0.67 | 0.22 | 0.31 | 0.02 |
| 0.69 | 1.40 | 0.70 | 1.52 | 0.72 | 1.20 | 0.64 |
| 0.49 | 1.12 | 0.55 | 0.95 | 0.39 | 1.25 | 0.67 |
| 0.67 | 0.90 | 0.42 | 1.00 | 0.43 | 0.99 | 0.50 |
| 0.84 | 2.02 | 0.89 | 3.17 | 0.97 | #N/A | #N/A |
| 0.16 | 0.55 | 0.18 | 0.67 | 0.21 | 0.51 | 0.11 |
| #N/A | 0.66 | 0.26 | #N/A | #N/A | 0.80 | 0.34 |
| #N/A | #N/A | #N/A | #N/A | #N/A | 0.86 | 0.39 |
| #N/A | #N/A | #N/A | #N/A | #N/A | 0.87 | 0.39 |
| 0.84 | #N/A | #N/A | 1.71 | 0.80 | 1.67 | 0.85 |
| #N/A | #N/A | #N/A | #N/A | #N/A | 0.43 | 0.06 |
| 0.93 | 2.76 | 0.95 | #N/A | #N/A | 2.06 | 0.93 |
| 0.90 | 2.65 | 0.93 | 1.99 | 0.88 | 1.58 | 0.82 |
| 0.77 | 2.38 | 0.90 | 1.60 | 0.76 | 1.46 | 0.77 |
| 0.63 | 1.07 | 0.52 | 1.08 | 0.49 | 1.30 | 0.69 |
| 0.37 | 1.20 | 0.59 | 1.77 | 0.81 | #N/A | #N/A |
| 0.60 | 1.16 | 0.58 | 1.23 | 0.58 | 1.32 | 0.71 |





|      |      |      |      |      |      |      |
|------|------|------|------|------|------|------|
| 0.39 | 0.98 | 0.46 | 0.83 | 0.32 | 1.08 | 0.56 |
| 0.76 | #N/A | #N/A | 2.20 | 0.90 | 1.63 | 0.84 |
| #N/A | #N/A | #N/A | #N/A | #N/A | 0.65 | 0.22 |
| #N/A | #N/A | #N/A | #N/A | #N/A | #N/A | #N/A |
| 0.53 | 1.10 | 0.54 | 1.57 | 0.74 | 1.40 | 0.74 |
| 0.54 | 1.26 | 0.62 | 1.49 | 0.72 | 1.32 | 0.70 |
| 0.95 | 2.52 | 0.96 | 2.93 | 0.97 | 1.94 | 0.91 |
| 0.89 | 1.79 | 0.84 | 1.79 | 0.83 | 1.65 | 0.85 |
| #N/A | #N/A | #N/A | #N/A | #N/A | #N/A | #N/A |
| 0.19 | 0.57 | 0.19 | 0.89 | 0.37 | 0.83 | 0.36 |
| 0.13 | 0.45 | 0.11 | 0.79 | 0.30 | 0.27 | 0.01 |
| #N/A | #N/A | #N/A | #N/A | #N/A | #N/A | #N/A |
| #N/A | 1.02 | 0.49 | 1.41 | 0.67 | 0.67 | 0.23 |
| 0.40 | 0.85 | 0.39 | 1.20 | 0.57 | 0.83 | 0.36 |
| 0.93 | 2.74 | 0.97 | 2.24 | 0.92 | 2.33 | 0.96 |
| 0.77 | 1.55 | 0.75 | 1.38 | 0.66 | 2.23 | 0.96 |
| #N/A | #N/A | #N/A | #N/A | #N/A | #N/A | #N/A |
| #N/A | 1.72 | 0.80 | 1.71 | 0.76 | 1.89 | 0.90 |
| #N/A | #N/A | #N/A | 0.74 | 0.25 | 0.75 | 0.31 |
| 0.37 | 1.09 | 0.53 | 0.91 | 0.38 | 1.16 | 0.61 |
| 0.40 | #N/A | #N/A | 0.90 | 0.37 | 0.85 | 0.38 |
| 0.43 | 1.08 | 0.53 | 0.54 | 0.12 | 0.84 | 0.37 |
| 0.44 | 1.11 | 0.54 | 0.97 | 0.42 | 1.30 | 0.69 |
| 0.36 | 0.79 | 0.34 | 0.83 | 0.32 | 0.96 | 0.47 |
| 0.24 | 0.60 | 0.21 | 0.53 | 0.11 | 0.60 | 0.18 |
| 0.53 | 1.52 | 0.74 | 0.88 | 0.36 | 1.02 | 0.52 |
| 0.55 | #N/A | #N/A | 0.87 | 0.35 | 1.01 | 0.51 |
| 0.76 | 1.96 | 0.88 | 1.35 | 0.65 | 1.55 | 0.80 |
| 0.44 | 1.32 | 0.66 | 0.81 | 0.31 | 1.00 | 0.50 |
| #N/A | 1.02 | 0.49 | 0.87 | 0.35 | 1.12 | 0.58 |
| 0.46 | 1.04 | 0.50 | 0.51 | 0.10 | 1.12 | 0.59 |
| #N/A | #N/A | #N/A | #N/A | #N/A | #N/A | #N/A |
| #N/A | #N/A | #N/A | #N/A | #N/A | #N/A | #N/A |
| 0.57 | #N/A | #N/A | 1.26 | 0.60 | 0.96 | 0.47 |
| #N/A | 1.51 | 0.66 | #N/A | #N/A | 0.84 | 0.37 |
| 0.76 | 1.88 | 0.85 | 1.65 | 0.78 | 1.56 | 0.81 |
| #N/A | 1.10 | 0.51 | 0.79 | 0.30 | 0.48 | 0.09 |
| 0.22 | 1.84 | 0.64 | 0.86 | 0.34 | 0.42 | 0.05 |
| 0.27 | 0.80 | 0.35 | #N/A | #N/A | 0.59 | 0.17 |
| #N/A | 0.77 | 0.33 | 0.72 | 0.24 | 0.83 | 0.36 |
| #N/A | #N/A | #N/A | #N/A | #N/A | #N/A | #N/A |
| #N/A | #N/A | #N/A | 1.56 | 0.75 | #N/A | #N/A |
| 0.22 | 0.61 | 0.22 | 0.88 | 0.35 | 0.52 | 0.11 |
| 0.32 | #N/A | #N/A | 0.69 | 0.22 | 0.64 | 0.21 |
| 0.27 | 0.57 | 0.20 | 0.66 | 0.20 | 0.89 | 0.41 |
| 0.56 | 1.12 | 0.55 | 1.20 | 0.57 | 1.14 | 0.60 |
| 0.08 | 0.48 | 0.13 | 0.45 | 0.06 | 0.38 | 0.04 |
| #N/A | 1.04 | 0.50 | 1.00 | 0.43 | #N/A | #N/A |
| 0.41 | #N/A | #N/A | 1.06 | 0.48 | #N/A | #N/A |
| #N/A | 0.60 | 0.21 | #N/A | #N/A | 0.83 | 0.36 |
| 0.79 | 1.80 | 0.82 | 1.44 | 0.69 | 2.10 | 0.94 |

|      |      |      |      |      |      |      |
|------|------|------|------|------|------|------|
| #N/A | #N/A | #N/A | #N/A | #N/A | #N/A | #N/A |
| 0.31 | 0.72 | 0.30 | 1.03 | 0.45 | 0.63 | 0.20 |
| 0.40 | 0.94 | 0.43 | 1.11 | 0.50 | 0.68 | 0.24 |
| 0.11 | 0.47 | 0.12 | 0.60 | 0.16 | 0.75 | 0.30 |
| 0.22 | 0.56 | 0.19 | 0.78 | 0.29 | 0.67 | 0.23 |
| 0.61 | 1.22 | 0.60 | 1.28 | 0.61 | 1.22 | 0.65 |
| 0.11 | 0.37 | 0.07 | 0.83 | 0.32 | 0.40 | 0.05 |
| 0.65 | 1.42 | 0.70 | 1.30 | 0.61 | 1.05 | 0.54 |
| 0.54 | 1.10 | 0.53 | 1.24 | 0.57 | 1.06 | 0.54 |
| 0.65 | 1.17 | 0.58 | 1.21 | 0.56 | 1.21 | 0.64 |
| 0.22 | 0.54 | 0.18 | 0.77 | 0.28 | 0.91 | 0.43 |
| 0.08 | 0.37 | 0.07 | 0.55 | 0.12 | 0.29 | 0.01 |
| 0.69 | 1.82 | 0.84 | #N/A | #N/A | 1.30 | 0.69 |
| 0.90 | 2.57 | 0.96 | 2.18 | 0.91 | 2.06 | 0.93 |
| #N/A | #N/A | #N/A | #N/A | #N/A | #N/A | #N/A |
| 0.03 | 0.38 | 0.07 | 0.46 | 0.08 | 0.42 | 0.06 |
| 0.06 | 0.35 | 0.06 | 0.47 | 0.07 | #N/A | #N/A |
| 0.70 | 1.33 | 0.66 | 1.39 | 0.67 | 0.99 | 0.49 |
| 0.28 | 0.60 | 0.21 | 0.92 | 0.39 | 0.69 | 0.25 |
| 0.57 | 1.43 | 0.71 | #N/A | #N/A | 0.71 | 0.27 |
| #N/A | #N/A | #N/A | #N/A | #N/A | #N/A | #N/A |
| 0.13 | 0.49 | 0.15 | 0.44 | 0.06 | 0.38 | 0.04 |
| 0.11 | 0.58 | 0.20 | #N/A | #N/A | #N/A | #N/A |
| 0.33 | #N/A | #N/A | 0.73 | 0.25 | 0.95 | 0.47 |
| 0.72 | 2.30 | 0.86 | 1.94 | 0.86 | 1.87 | 0.90 |
| 0.83 | 1.59 | 0.76 | 1.72 | 0.81 | 1.62 | 0.84 |
| #N/A | 0.73 | 0.30 | 0.64 | 0.19 | #N/A | #N/A |
| 0.35 | 0.95 | 0.45 | #N/A | #N/A | 0.70 | 0.26 |
| 0.72 | 1.18 | 0.58 | 1.67 | 0.79 | 1.11 | 0.58 |
| 0.59 | #N/A | #N/A | 1.24 | 0.59 | 1.51 | 0.79 |
| 0.83 | 2.19 | 0.92 | 1.82 | 0.84 | 2.00 | 0.92 |
| #N/A | #N/A | #N/A | #N/A | #N/A | 0.29 | 0.01 |
| 0.96 | 2.39 | 0.94 | 2.27 | 0.93 | 2.18 | 0.95 |
| 0.29 | #N/A | #N/A | #N/A | #N/A | #N/A | #N/A |
| #N/A | #N/A | #N/A | #N/A | #N/A | #N/A | #N/A |
| 0.58 | #N/A | #N/A | 1.31 | 0.62 | 0.76 | 0.31 |
| 0.50 | 1.01 | 0.48 | 1.37 | 0.65 | 1.34 | 0.71 |
| 0.35 | #N/A | #N/A | 0.76 | 0.27 | 0.55 | 0.13 |
| 0.11 | 0.54 | 0.17 | 0.60 | 0.16 | 0.51 | 0.11 |
| #N/A | #N/A | #N/A | #N/A | #N/A | 0.60 | 0.18 |
| #N/A | 1.00 | 0.48 | 1.42 | 0.67 | 0.78 | 0.33 |
| 0.68 | 1.39 | 0.69 | 1.42 | 0.68 | 1.06 | 0.55 |
| #N/A | 0.57 | 0.20 | #N/A | #N/A | 0.60 | 0.18 |
| 0.94 | 2.49 | 0.92 | 2.78 | 0.97 | 1.73 | 0.87 |
| 0.49 | 1.35 | 0.66 | 1.10 | 0.48 | #N/A | #N/A |
| 0.26 | 0.31 | 0.04 | 0.36 | 0.04 | 0.74 | 0.30 |
| 0.01 | 0.21 | 0.01 | 0.33 | 0.02 | 0.25 | 0.01 |
| 0.05 | 0.28 | 0.03 | 0.41 | 0.05 | 0.45 | 0.07 |
| 0.11 | 0.43 | 0.10 | 0.50 | 0.09 | 0.56 | 0.15 |
| 0.05 | 0.31 | 0.04 | 0.46 | 0.07 | 0.48 | 0.09 |
| 0.41 | #N/A | #N/A | #N/A | #N/A | 1.65 | 0.84 |

|      |      |      |      |      |      |      |
|------|------|------|------|------|------|------|
| #N/A | 1.24 | 0.61 | 1.59 | 0.74 | 1.22 | 0.65 |
| 0.74 | 1.32 | 0.66 | 1.61 | 0.77 | 1.28 | 0.68 |
| 0.91 | 2.81 | 0.90 | 1.38 | 0.65 | 1.23 | 0.65 |
| 0.53 | 1.23 | 0.61 | 1.02 | 0.46 | 1.11 | 0.57 |
| 0.18 | #N/A | #N/A | #N/A | #N/A | 0.96 | 0.48 |
| #N/A | 2.61 | 0.96 | 2.74 | 0.97 | 2.39 | 0.97 |
| 0.85 | 2.04 | 0.89 | 1.75 | 0.81 | 1.62 | 0.83 |
| 0.50 | 1.09 | 0.53 | 1.09 | 0.49 | 0.83 | 0.36 |
| 0.30 | 0.78 | 0.34 | 0.70 | 0.23 | 0.73 | 0.29 |
| 0.50 | 1.32 | 0.66 | 0.95 | 0.40 | 1.32 | 0.70 |
| 0.92 | 1.94 | 0.85 | 2.69 | 0.96 | 1.44 | 0.77 |
| #N/A | 1.18 | 0.54 | 0.60 | 0.17 | 0.97 | 0.48 |
| 0.30 | 0.71 | 0.29 | 1.08 | 0.49 | 0.69 | 0.25 |
| 0.92 | 2.43 | 0.95 | 2.33 | 0.94 | #N/A | #N/A |
| 0.90 | 2.19 | 0.91 | 1.83 | 0.84 | 1.82 | 0.89 |
| 0.70 | 1.12 | 0.55 | 1.34 | 0.65 | 1.11 | 0.58 |
| 0.82 | 1.59 | 0.77 | 2.25 | 0.92 | 2.07 | 0.94 |
| 0.82 | 1.63 | 0.78 | 1.72 | 0.80 | 1.48 | 0.78 |
| 0.93 | 2.47 | 0.95 | 2.68 | 0.95 | 1.69 | 0.86 |
| 0.29 | 0.88 | 0.40 | 0.81 | 0.31 | 0.67 | 0.24 |
| 0.88 | 1.70 | 0.81 | 1.65 | 0.76 | 2.09 | 0.94 |
| 0.04 | 0.41 | 0.09 | 0.39 | 0.04 | 0.43 | 0.06 |
| 0.55 | 1.12 | 0.54 | 1.07 | 0.49 | 1.06 | 0.55 |
| 0.10 | 0.50 | 0.15 | 0.40 | 0.04 | 0.82 | 0.35 |
| 0.59 | 1.32 | 0.65 | 1.10 | 0.51 | 0.97 | 0.48 |
| #N/A | 0.69 | 0.30 | 0.54 | 0.12 | 0.95 | 0.47 |
| 0.73 | 1.61 | 0.78 | 1.27 | 0.61 | 1.48 | 0.78 |
| 0.88 | 1.74 | 0.81 | 1.90 | 0.85 | 2.04 | 0.93 |
| #N/A | #N/A | #N/A | #N/A | #N/A | #N/A | #N/A |
| 0.35 | 0.75 | 0.32 | 0.86 | 0.34 | 0.85 | 0.38 |
| 0.83 | 2.15 | 0.91 | 1.60 | 0.75 | 1.78 | 0.88 |
| #N/A | 0.55 | 0.18 | 0.60 | 0.16 | 0.71 | 0.27 |
| 0.86 | 1.84 | 0.79 | 1.56 | 0.73 | 1.36 | 0.72 |
| 0.23 | 0.86 | 0.38 | 0.92 | 0.39 | 0.74 | 0.29 |
| #N/A | 0.47 | 0.13 | 0.66 | 0.20 | 0.51 | 0.11 |
| 0.15 | #N/A | #N/A | #N/A | #N/A | 0.98 | 0.49 |
| 0.78 | 2.05 | 0.89 | 1.30 | 0.61 | #N/A | #N/A |
| 0.13 | 0.19 | 0.01 | #N/A | #N/A | 0.82 | 0.35 |
| 1.00 | 3.39 | 0.99 | 3.83 | 0.99 | 3.46 | 1.00 |
| 0.85 | 1.89 | 0.86 | 1.74 | 0.79 | 1.41 | 0.75 |
| 0.05 | 0.45 | 0.12 | #N/A | #N/A | 0.37 | 0.03 |
| 0.82 | 1.77 | 0.82 | #N/A | #N/A | 1.65 | 0.84 |
| #N/A | #N/A | #N/A | #N/A | #N/A | #N/A | #N/A |
| 0.39 | 0.79 | 0.34 | #N/A | #N/A | 0.53 | 0.12 |
| #N/A | 0.59 | 0.21 | 0.95 | 0.40 | 0.91 | 0.43 |
| 0.82 | 1.41 | 0.70 | 2.25 | 0.91 | 2.05 | 0.93 |
| 0.20 | 0.53 | 0.16 | 0.44 | 0.06 | 0.69 | 0.25 |
| 0.74 | 1.28 | 0.63 | 1.50 | 0.72 | 1.31 | 0.70 |
| #N/A | #N/A | #N/A | 1.64 | 0.78 | 1.45 | 0.77 |
| 0.29 | 0.94 | 0.44 | 0.90 | 0.37 | 0.77 | 0.31 |
| 0.55 | 1.02 | 0.49 | 1.42 | 0.68 | 1.02 | 0.52 |

|      |      |      |      |      |      |      |
|------|------|------|------|------|------|------|
| #N/A | 0.81 | 0.36 | #N/A | #N/A | #N/A | #N/A |
| 0.58 | 1.32 | 0.62 | 1.40 | 0.67 | 1.55 | 0.81 |
| #N/A | 1.50 | 0.74 | 1.32 | 0.63 | #N/A | #N/A |
| 0.57 | 1.20 | 0.60 | 1.08 | 0.49 | 1.25 | 0.66 |
| #N/A | 0.99 | 0.47 | 1.44 | 0.69 | 1.43 | 0.76 |
| 0.40 | #N/A | #N/A | 0.90 | 0.37 | 1.15 | 0.60 |
| 0.85 | 1.43 | 0.70 | 1.56 | 0.73 | 1.85 | 0.90 |
| #N/A | 0.42 | 0.09 | 0.58 | 0.15 | 0.76 | 0.31 |
| 0.84 | 1.70 | 0.81 | 1.54 | 0.74 | 1.83 | 0.89 |
| 0.25 | 0.40 | 0.09 | 0.66 | 0.20 | 0.44 | 0.06 |
| #N/A | 1.15 | 0.57 | 2.31 | 0.92 | 1.42 | 0.75 |
| 0.38 | 0.79 | 0.34 | 0.86 | 0.34 | 0.83 | 0.37 |
| 0.19 | 0.57 | 0.19 | 0.72 | 0.24 | 0.70 | 0.27 |
| 0.31 | 0.92 | 0.43 | 0.91 | 0.37 | 0.94 | 0.45 |
| 0.46 | 1.22 | 0.59 | 1.05 | 0.46 | #N/A | #N/A |
| 0.48 | 0.89 | 0.41 | 1.24 | 0.58 | 1.55 | 0.80 |
| 0.90 | 1.62 | 0.77 | 2.17 | 0.91 | 1.89 | 0.90 |
| 0.87 | 1.68 | 0.80 | 2.39 | 0.94 | 1.64 | 0.84 |
| 0.40 | 1.12 | 0.54 | 0.85 | 0.34 | 1.24 | 0.66 |
| 0.93 | 2.53 | 0.96 | 2.19 | 0.91 | 1.64 | 0.84 |
| #N/A | 0.87 | 0.39 | 0.64 | 0.19 | 0.74 | 0.29 |
| 0.87 | 1.41 | 0.70 | 1.35 | 0.64 | 1.04 | 0.53 |
| 0.32 | 0.71 | 0.29 | 1.02 | 0.45 | 0.68 | 0.24 |
| 0.36 | 0.51 | 0.15 | 0.58 | 0.14 | 0.51 | 0.11 |
| 0.46 | 1.18 | 0.59 | 0.97 | 0.42 | 0.89 | 0.41 |
| #N/A | #N/A | #N/A | #N/A | #N/A | #N/A | #N/A |
| 0.59 | 1.46 | 0.72 | 1.54 | 0.74 | 1.22 | 0.65 |
| 0.94 | 2.44 | 0.95 | 2.60 | 0.96 | 2.43 | 0.97 |
| 0.55 | 0.96 | 0.45 | 1.19 | 0.56 | 0.85 | 0.38 |
| 0.33 | 0.70 | 0.28 | 0.70 | 0.22 | 0.93 | 0.44 |
| 0.43 | 0.65 | 0.25 | 0.72 | 0.24 | 0.74 | 0.30 |
| 0.70 | 1.51 | 0.75 | 1.23 | 0.58 | 1.50 | 0.79 |
| 0.92 | 2.47 | 0.95 | 2.24 | 0.92 | 2.58 | 0.98 |
| 0.37 | #N/A | #N/A | 1.15 | 0.51 | #N/A | #N/A |
| 0.59 | 1.86 | 0.86 | 2.00 | 0.88 | 1.31 | 0.70 |
| 0.76 | #N/A | #N/A | 1.56 | 0.75 | 1.44 | 0.77 |
| 0.62 | 1.53 | 0.75 | 1.24 | 0.59 | #N/A | #N/A |
| #N/A | 1.03 | 0.50 | 0.99 | 0.43 | 0.97 | 0.48 |
| 0.68 | 1.15 | 0.56 | 1.35 | 0.63 | 0.93 | 0.44 |
| 0.66 | 1.32 | 0.65 | 1.77 | 0.79 | 1.00 | 0.51 |
| 0.60 | 1.07 | 0.52 | 1.08 | 0.50 | 1.12 | 0.59 |
| 0.54 | 1.40 | 0.69 | 0.95 | 0.41 | 1.03 | 0.53 |
| 0.14 | 0.67 | 0.26 | 0.74 | 0.26 | 0.62 | 0.19 |
| 0.20 | 0.77 | 0.33 | 0.63 | 0.17 | 0.73 | 0.29 |
| #N/A | #N/A | #N/A | #N/A | #N/A | #N/A | #N/A |
| 0.88 | 2.33 | 0.94 | 2.37 | 0.94 | 1.99 | 0.92 |
| 0.85 | 1.66 | 0.79 | 1.73 | 0.81 | 1.78 | 0.88 |
| 0.58 | #N/A | #N/A | #N/A | #N/A | #N/A | #N/A |
| #N/A | 0.64 | 0.24 | 0.97 | 0.41 | 0.44 | 0.06 |
| 0.18 | 0.46 | 0.11 | 0.58 | 0.15 | 0.59 | 0.17 |
| 0.77 | 1.30 | 0.65 | 1.57 | 0.75 | 1.43 | 0.76 |

|      |      |      |      |      |      |      |
|------|------|------|------|------|------|------|
| 0.54 | 0.96 | 0.45 | 0.96 | 0.39 | 0.79 | 0.33 |
| 0.03 | 0.33 | 0.05 | 0.44 | 0.06 | 0.27 | 0.01 |
| 0.33 | 0.94 | 0.44 | 0.96 | 0.41 | 0.88 | 0.40 |
| 0.31 | 0.72 | 0.30 | 0.61 | 0.17 | 0.55 | 0.14 |
| 0.81 | 1.73 | 0.82 | 2.12 | 0.88 | 2.03 | 0.93 |
| 0.77 | 1.50 | 0.73 | #N/A | #N/A | 1.21 | 0.64 |
| 0.43 | 0.78 | 0.34 | 1.06 | 0.48 | 0.97 | 0.48 |
| 0.82 | 1.86 | 0.85 | 1.48 | 0.71 | 1.70 | 0.86 |
| 0.24 | 0.49 | 0.14 | 0.50 | 0.10 | 0.60 | 0.18 |
| 0.55 | 1.25 | 0.62 | #N/A | #N/A | 1.06 | 0.55 |
| 0.52 | 1.06 | 0.51 | 1.49 | 0.72 | 0.82 | 0.36 |
| #N/A | #N/A | #N/A | #N/A | #N/A | 0.41 | 0.05 |
| 0.42 | 0.80 | 0.35 | 1.29 | 0.61 | 0.84 | 0.37 |
| #N/A | #N/A | #N/A | #N/A | #N/A | 1.06 | 0.54 |
| #N/A | 2.10 | 0.89 | 1.82 | 0.82 | 1.68 | 0.85 |
| 0.26 | 0.79 | 0.34 | 1.03 | 0.44 | 0.97 | 0.48 |
| 0.44 | #N/A | #N/A | 1.02 | 0.46 | 1.11 | 0.57 |
| 0.54 | 1.12 | 0.54 | 1.60 | 0.76 | 1.03 | 0.52 |
| 0.55 | #N/A | #N/A | #N/A | #N/A | #N/A | #N/A |
| 0.96 | 3.03 | 0.98 | 2.29 | 0.89 | 2.41 | 0.97 |
| 0.37 | 0.87 | 0.39 | 0.85 | 0.34 | 0.78 | 0.32 |
| 0.47 | #N/A | #N/A | 1.13 | 0.52 | 1.25 | 0.66 |
| #N/A | 1.50 | 0.74 | 1.41 | 0.68 | 1.32 | 0.70 |
| 0.72 | 1.39 | 0.69 | 1.34 | 0.64 | 1.42 | 0.75 |
| 0.40 | 0.92 | 0.43 | 0.78 | 0.28 | 0.69 | 0.25 |
| 0.74 | 1.48 | 0.73 | 1.37 | 0.65 | 1.55 | 0.81 |
| #N/A | #N/A | #N/A | #N/A | #N/A | #N/A | #N/A |
| 0.27 | 0.78 | 0.34 | 0.87 | 0.35 | 0.92 | 0.44 |
| 0.40 | 0.78 | 0.34 | 1.03 | 0.46 | 0.80 | 0.34 |
| 0.95 | 1.95 | 0.88 | 2.57 | 0.96 | 1.50 | 0.79 |
| 0.75 | 1.65 | 0.79 | 1.50 | 0.72 | #N/A | #N/A |
| 0.38 | 0.68 | 0.27 | 0.66 | 0.20 | #N/A | #N/A |
| 0.29 | #N/A | #N/A | #N/A | #N/A | #N/A | #N/A |
| 0.71 | 1.53 | 0.75 | 1.09 | 0.49 | 1.22 | 0.65 |
| 0.39 | 0.77 | 0.33 | 0.93 | 0.39 | 0.86 | 0.39 |
| 0.12 | 0.40 | 0.09 | 0.47 | 0.08 | 0.52 | 0.12 |
| #N/A | 0.85 | 0.37 | 0.96 | 0.40 | 1.18 | 0.63 |
| 0.81 | 1.90 | 0.86 | 1.96 | 0.86 | 1.52 | 0.80 |
| 0.60 | 1.19 | 0.58 | 1.24 | 0.59 | 1.05 | 0.54 |
| 0.85 | 1.52 | 0.75 | 1.52 | 0.73 | 2.33 | 0.96 |
| 0.61 | 1.10 | 0.54 | 1.40 | 0.66 | 1.33 | 0.71 |
| #N/A | 0.67 | 0.26 | #N/A | #N/A | #N/A | #N/A |
| 0.57 | 1.48 | 0.73 | 1.73 | 0.81 | 1.14 | 0.60 |
| 0.85 | 2.09 | 0.90 | 1.62 | 0.77 | 2.11 | 0.94 |
| 0.19 | 0.64 | 0.24 | 0.52 | 0.11 | 0.57 | 0.15 |
| #N/A | 0.50 | 0.15 | 0.44 | 0.07 | 0.40 | 0.04 |
| 0.80 | 1.79 | 0.81 | 1.45 | 0.69 | 1.79 | 0.88 |
| 0.27 | 0.69 | 0.27 | 0.86 | 0.34 | #N/A | #N/A |
| #N/A | 0.64 | 0.25 | 0.59 | 0.15 | #N/A | #N/A |
| 0.56 | 1.80 | 0.84 | #N/A | #N/A | #N/A | #N/A |
| 0.92 | 1.37 | 0.68 | 2.56 | 0.93 | 1.51 | 0.79 |

|      |      |      |      |      |      |      |
|------|------|------|------|------|------|------|
| 0.48 | #N/A | #N/A | #N/A | #N/A | 0.54 | 0.13 |
| 0.71 | 1.40 | 0.70 | 1.51 | 0.72 | 1.37 | 0.73 |
| #N/A | #N/A | #N/A | #N/A | #N/A | #N/A | #N/A |
| 0.45 | 1.03 | 0.49 | 1.02 | 0.46 | 0.93 | 0.44 |
| 0.33 | 1.31 | 0.63 | 1.25 | 0.59 | 1.60 | 0.83 |
| #N/A | #N/A | #N/A | #N/A | #N/A | #N/A | #N/A |
| #N/A | 1.42 | 0.70 | 1.70 | 0.77 | 2.09 | 0.94 |
| 0.93 | #N/A | #N/A | #N/A | #N/A | 1.07 | 0.55 |
| 0.31 | #N/A | #N/A | 1.22 | 0.58 | 0.63 | 0.20 |
| #N/A | #N/A | #N/A | #N/A | #N/A | 0.54 | 0.13 |
| 0.47 | 0.72 | 0.30 | 0.67 | 0.21 | 0.83 | 0.36 |
| 0.76 | #N/A | #N/A | #N/A | #N/A | 0.80 | 0.34 |
| 0.97 | 2.96 | 0.98 | 3.03 | 0.98 | 3.56 | 1.00 |
| 0.91 | 3.04 | 0.98 | 2.03 | 0.88 | 2.04 | 0.93 |
| #N/A | 1.54 | 0.68 | 1.51 | 0.72 | 1.56 | 0.81 |
| 0.24 | 0.53 | 0.17 | 0.63 | 0.18 | 0.64 | 0.21 |
| #N/A | 1.08 | 0.53 | 0.97 | 0.42 | 1.34 | 0.71 |
| 0.18 | 0.59 | 0.21 | 0.47 | 0.08 | 0.64 | 0.21 |
| 0.97 | 2.41 | 0.94 | 2.43 | 0.95 | 2.05 | 0.93 |
| #N/A | 1.76 | 0.83 | 1.54 | 0.72 | 1.44 | 0.77 |
| #N/A | #N/A | #N/A | #N/A | #N/A | #N/A | #N/A |
| 0.93 | 2.39 | 0.93 | 2.02 | 0.88 | 2.10 | 0.94 |
| #N/A | #N/A | #N/A | #N/A | #N/A | #N/A | #N/A |
| 0.42 | 0.80 | 0.35 | 0.90 | 0.37 | 0.78 | 0.32 |
| 0.91 | 1.51 | 0.74 | 1.78 | 0.82 | 1.09 | 0.56 |
| 0.24 | 0.64 | 0.25 | 0.84 | 0.33 | 0.85 | 0.38 |
| #N/A | #N/A | #N/A | 0.49 | 0.09 | 0.39 | 0.04 |
| 0.19 | #N/A | #N/A | #N/A | #N/A | 0.90 | 0.42 |
| 0.20 | 0.62 | 0.23 | 0.74 | 0.26 | 0.73 | 0.29 |
| 0.84 | 1.96 | 0.87 | 1.92 | 0.86 | 2.30 | 0.96 |
| #N/A | #N/A | #N/A | #N/A | #N/A | #N/A | #N/A |
| 0.62 | 1.08 | 0.53 | 0.75 | 0.27 | 0.73 | 0.29 |
| 0.53 | 1.15 | 0.57 | 1.04 | 0.47 | 0.80 | 0.34 |
| 0.21 | 0.62 | 0.23 | 0.79 | 0.29 | 0.70 | 0.26 |
| 0.77 | 1.70 | 0.81 | 1.40 | 0.67 | 1.48 | 0.78 |
| 0.37 | 0.88 | 0.40 | 1.15 | 0.54 | 0.82 | 0.36 |
| 0.73 | #N/A | #N/A | 1.57 | 0.73 | #N/A | #N/A |
| #N/A | #N/A | #N/A | #N/A | #N/A | 0.59 | 0.17 |
| 0.88 | 0.99 | 0.47 | 1.29 | 0.57 | 1.06 | 0.55 |
| 0.75 | 1.55 | 0.75 | 1.04 | 0.47 | 1.42 | 0.75 |
| #N/A | 0.40 | 0.08 | #N/A | #N/A | 0.57 | 0.15 |
| 0.88 | 2.36 | 0.94 | 1.64 | 0.75 | 2.00 | 0.92 |
| #N/A | #N/A | #N/A | #N/A | #N/A | #N/A | #N/A |
| 0.33 | 0.89 | 0.41 | 0.90 | 0.38 | 1.02 | 0.52 |
| 0.92 | 1.71 | 0.82 | 2.14 | 0.91 | 1.84 | 0.90 |
| 0.02 | 0.30 | 0.04 | 0.36 | 0.03 | 0.31 | 0.02 |
| #N/A | #N/A | #N/A | #N/A | #N/A | #N/A | #N/A |
| 0.91 | 2.38 | 0.94 | 1.68 | 0.79 | 2.09 | 0.94 |
| #N/A | #N/A | #N/A | #N/A | #N/A | #N/A | #N/A |
| 0.94 | 2.33 | 0.94 | 2.57 | 0.94 | 2.31 | 0.96 |
| #N/A | #N/A | #N/A | #N/A | #N/A | 1.61 | 0.83 |

|      |      |      |      |      |      |      |
|------|------|------|------|------|------|------|
| 0.19 | 0.79 | 0.34 | 0.79 | 0.29 | 0.79 | 0.33 |
| 0.62 | 1.43 | 0.71 | 1.20 | 0.55 | 1.40 | 0.74 |
| #N/A | 0.35 | 0.09 | #N/A | #N/A | #N/A | #N/A |
| #N/A | #N/A | #N/A | #N/A | #N/A | #N/A | #N/A |
| #N/A | #N/A | #N/A | #N/A | #N/A | #N/A | #N/A |
| 0.82 | 2.42 | 0.94 | 1.78 | 0.82 | 1.05 | 0.54 |
| #N/A | #N/A | #N/A | #N/A | #N/A | #N/A | #N/A |
| #N/A | #N/A | #N/A | 1.52 | 0.72 | 2.19 | 0.95 |
| #N/A | #N/A | #N/A | #N/A | #N/A | #N/A | #N/A |
| 0.89 | 1.92 | 0.86 | 1.81 | 0.83 | 1.55 | 0.80 |
| #N/A | 2.89 | 0.97 | #N/A | #N/A | 2.13 | 0.94 |
| #N/A | #N/A | #N/A | #N/A | #N/A | #N/A | #N/A |
| 0.91 | #N/A | #N/A | 1.82 | 0.81 | 2.15 | 0.95 |
| 0.63 | #N/A | #N/A | 1.15 | 0.54 | 0.83 | 0.36 |
| #N/A | #N/A | #N/A | #N/A | #N/A | #N/A | #N/A |
| 0.54 | 1.00 | 0.48 | 1.13 | 0.53 | 1.03 | 0.53 |
| 0.48 | 0.89 | 0.41 | #N/A | #N/A | 1.97 | 0.92 |
| 0.97 | 1.86 | 0.85 | #N/A | #N/A | 2.38 | 0.97 |
| 0.67 | 1.30 | 0.65 | 1.37 | 0.66 | 1.07 | 0.55 |
| #N/A | #N/A | #N/A | 0.96 | 0.41 | 1.06 | 0.55 |
| 0.90 | 1.98 | 0.88 | 2.62 | 0.96 | 1.95 | 0.91 |
| 0.74 | 1.86 | 0.86 | 1.99 | 0.87 | 1.61 | 0.83 |
| #N/A | #N/A | #N/A | #N/A | #N/A | 0.83 | 0.36 |
| 0.85 | 1.45 | 0.72 | 1.47 | 0.70 | 1.44 | 0.76 |
| 0.76 | 1.51 | 0.74 | 0.72 | 0.24 | 1.21 | 0.64 |
| 0.36 | 0.78 | 0.34 | 0.47 | 0.08 | 0.86 | 0.39 |
| 0.18 | 0.55 | 0.18 | 0.53 | 0.11 | 0.63 | 0.20 |
| 0.11 | 0.40 | 0.08 | 0.47 | 0.08 | 0.49 | 0.09 |
| 0.34 | 0.80 | 0.35 | 0.84 | 0.33 | 0.87 | 0.40 |
| 0.48 | 0.77 | 0.33 | 1.37 | 0.66 | 1.19 | 0.63 |
| #N/A | #N/A | #N/A | #N/A | #N/A | #N/A | #N/A |
| 0.96 | 2.84 | 0.97 | 2.69 | 0.96 | 2.96 | 0.99 |
| 0.20 | 0.61 | 0.22 | 0.53 | 0.12 | 0.75 | 0.30 |
| 0.36 | 0.79 | 0.35 | 1.16 | 0.55 | 0.89 | 0.41 |
| #N/A | #N/A | #N/A | 1.76 | 0.81 | 1.29 | 0.69 |
| 0.43 | 0.99 | 0.47 | 0.82 | 0.31 | #N/A | #N/A |
| #N/A | 0.42 | 0.10 | 0.47 | 0.07 | 0.75 | 0.30 |
| #N/A | #N/A | #N/A | 1.25 | 0.59 | 1.36 | 0.72 |
| 0.28 | 0.81 | 0.36 | 1.28 | 0.61 | 0.99 | 0.49 |
| 0.58 | 1.10 | 0.54 | 1.20 | 0.57 | 1.23 | 0.65 |
| #N/A | #N/A | #N/A | #N/A | #N/A | #N/A | #N/A |
| 0.74 | 1.90 | 0.86 | 2.08 | 0.89 | 1.48 | 0.78 |
| #N/A | #N/A | #N/A | #N/A | #N/A | #N/A | #N/A |
| 0.10 | 0.50 | 0.15 | 0.41 | 0.05 | 0.49 | 0.10 |
| 0.93 | 2.16 | 0.92 | 1.99 | 0.88 | 1.76 | 0.87 |
| #N/A | #N/A | #N/A | #N/A | #N/A | #N/A | #N/A |
| 0.05 | 0.46 | 0.12 | 0.43 | 0.06 | 0.49 | 0.10 |
| 0.07 | 0.45 | 0.11 | 0.44 | 0.06 | 0.50 | 0.10 |
| 0.06 | 0.38 | 0.07 | 0.53 | 0.11 | 0.52 | 0.11 |
| #N/A | #N/A | #N/A | #N/A | #N/A | 0.68 | 0.24 |
| 0.93 | 2.12 | 0.91 | #N/A | #N/A | 1.41 | 0.75 |

|      |      |      |      |      |      |      |
|------|------|------|------|------|------|------|
| #N/A | 1.03 | 0.49 | #N/A | #N/A | 1.26 | 0.67 |
| 0.98 | 1.99 | 0.85 | 2.50 | 0.93 | 1.35 | 0.72 |
| 0.61 | 1.43 | 0.68 | 1.62 | 0.77 | 0.93 | 0.45 |
| 0.38 | 0.57 | 0.20 | 0.61 | 0.16 | 0.68 | 0.25 |
| 0.94 | #N/A | #N/A | 2.20 | 0.91 | 2.64 | 0.98 |
| #N/A | #N/A | #N/A | 0.86 | 0.35 | 0.66 | 0.22 |
| #N/A | #N/A | #N/A | #N/A | #N/A | #N/A | #N/A |
| 0.70 | 1.49 | 0.72 | 2.10 | 0.86 | #N/A | #N/A |
| 0.37 | #N/A | #N/A | #N/A | #N/A | 0.74 | 0.29 |
| 0.98 | 2.98 | 0.98 | 3.39 | 0.99 | 2.33 | 0.96 |
| 0.75 | 1.55 | 0.74 | 1.43 | 0.68 | 1.55 | 0.80 |
| #N/A | #N/A | #N/A | #N/A | #N/A | #N/A | #N/A |
| 0.48 | 1.02 | 0.48 | #N/A | #N/A | 1.20 | 0.64 |
| 0.75 | 1.47 | 0.72 | 1.54 | 0.73 | 1.45 | 0.77 |
| 0.51 | 1.24 | 0.61 | 0.97 | 0.42 | 1.13 | 0.59 |
| 0.97 | 2.16 | 0.91 | 2.41 | 0.94 | 2.61 | 0.98 |
| 0.97 | 2.91 | 0.98 | 2.30 | 0.92 | 2.82 | 0.99 |
| #N/A | #N/A | #N/A | #N/A | #N/A | #N/A | #N/A |
| 0.82 | 2.55 | 0.94 | 1.40 | 0.67 | 2.03 | 0.93 |
| 0.26 | #N/A | #N/A | #N/A | #N/A | 0.45 | 0.07 |
| 0.63 | 1.54 | 0.76 | 1.66 | 0.79 | 1.42 | 0.75 |
| 0.47 | 1.08 | 0.52 | 1.18 | 0.55 | 0.63 | 0.20 |
| #N/A | #N/A | #N/A | #N/A | #N/A | #N/A | #N/A |
| #N/A | 2.14 | 0.89 | #N/A | #N/A | #N/A | #N/A |
| 0.96 | 2.69 | 0.97 | 2.26 | 0.91 | 2.47 | 0.97 |
| 0.61 | 1.41 | 0.69 | 1.15 | 0.53 | 1.11 | 0.58 |
| #N/A | 0.54 | 0.18 | #N/A | #N/A | 0.98 | 0.49 |
| #N/A | 1.74 | 0.77 | 1.42 | 0.67 | 1.12 | 0.58 |
| 0.22 | 0.70 | 0.28 | 0.70 | 0.23 | 0.66 | 0.23 |
| 0.53 | 1.04 | 0.50 | 1.03 | 0.46 | #N/A | #N/A |
| #N/A | 0.98 | 0.46 | #N/A | #N/A | #N/A | #N/A |
| 0.14 | 0.66 | 0.25 | 0.72 | 0.24 | 0.79 | 0.34 |
| 0.70 | 1.42 | 0.70 | 1.49 | 0.72 | 1.04 | 0.53 |
| 0.29 | 0.77 | 0.33 | 0.97 | 0.42 | 0.90 | 0.42 |
| 0.45 | 1.00 | 0.48 | 1.22 | 0.57 | 1.07 | 0.55 |
| 0.84 | 2.12 | 0.91 | 2.19 | 0.92 | 1.91 | 0.91 |
| 0.81 | 1.57 | 0.77 | 1.57 | 0.75 | 1.42 | 0.76 |
| 0.53 | 0.96 | 0.45 | 1.17 | 0.55 | 1.15 | 0.61 |
| 0.64 | 1.15 | 0.57 | 1.31 | 0.63 | 1.05 | 0.54 |
| #N/A | 1.09 | 0.53 | 1.21 | 0.57 | 1.23 | 0.65 |
| 0.11 | 0.53 | 0.17 | 0.57 | 0.14 | 0.54 | 0.13 |
| 0.78 | 1.53 | 0.75 | 1.30 | 0.61 | 1.30 | 0.69 |
| 0.16 | 0.41 | 0.08 | 0.59 | 0.15 | 0.52 | 0.11 |
| 0.28 | 0.65 | 0.25 | 0.78 | 0.28 | 0.84 | 0.37 |
| 0.60 | 1.32 | 0.65 | 1.17 | 0.55 | 0.94 | 0.45 |
| 0.79 | 1.38 | 0.68 | 1.96 | 0.87 | #N/A | #N/A |
| #N/A | #N/A | #N/A | #N/A | #N/A | 0.54 | 0.13 |
| 0.49 | 1.03 | 0.50 | 0.91 | 0.37 | 1.14 | 0.60 |
| 0.79 | 1.46 | 0.72 | 1.52 | 0.73 | 1.69 | 0.86 |
| 0.23 | #N/A | #N/A | 0.74 | 0.26 | 0.68 | 0.25 |
| 0.98 | 3.09 | 0.98 | #N/A | #N/A | 2.55 | 0.98 |



|      |      |      |      |      |      |      |
|------|------|------|------|------|------|------|
| 0.42 | 0.86 | 0.39 | 0.94 | 0.39 | 1.01 | 0.51 |
| 0.78 | 1.24 | 0.62 | 0.97 | 0.42 | 1.26 | 0.67 |
| 0.60 | 1.03 | 0.50 | 1.00 | 0.45 | 1.25 | 0.66 |
| 0.31 | 0.81 | 0.36 | 0.52 | 0.10 | 0.80 | 0.34 |
| 0.66 | 1.23 | 0.61 | 1.49 | 0.72 | 0.90 | 0.42 |
| 0.64 | 1.09 | 0.53 | 1.24 | 0.59 | 1.03 | 0.52 |
| #N/A | 0.65 | 0.25 | 0.65 | 0.20 | 0.68 | 0.24 |
| #N/A | #N/A | #N/A | #N/A | #N/A | 0.67 | 0.23 |
| 0.36 | 0.89 | 0.41 | 1.03 | 0.46 | 0.76 | 0.31 |
| 0.56 | 1.34 | 0.65 | 1.65 | 0.77 | 1.26 | 0.67 |
| #N/A | 0.45 | 0.11 | 0.60 | 0.16 | 0.41 | 0.05 |
| 0.72 | 1.31 | 0.65 | 1.27 | 0.61 | 1.73 | 0.87 |
| 0.17 | 0.65 | 0.25 | 0.61 | 0.16 | 0.58 | 0.16 |
| 0.44 | 1.00 | 0.48 | 1.11 | 0.51 | 0.98 | 0.49 |
| 0.34 | 0.70 | 0.28 | 0.85 | 0.33 | 0.85 | 0.38 |
| 0.48 | 1.16 | 0.57 | 1.01 | 0.44 | 1.18 | 0.62 |
| #N/A | #N/A | #N/A | #N/A | #N/A | #N/A | #N/A |
| 0.84 | 1.80 | 0.84 | 2.29 | 0.92 | 2.17 | 0.95 |
| 0.30 | 0.84 | 0.38 | 0.82 | 0.31 | 0.94 | 0.46 |
| #N/A | #N/A | #N/A | #N/A | #N/A | #N/A | #N/A |
| 0.44 | 0.97 | 0.46 | 0.97 | 0.42 | #N/A | #N/A |
| 0.26 | 0.80 | 0.35 | 0.93 | 0.39 | 0.71 | 0.27 |
| 0.78 | 1.62 | 0.79 | 1.31 | 0.62 | 1.80 | 0.89 |
| #N/A | #N/A | #N/A | #N/A | #N/A | 0.85 | 0.38 |
| 0.89 | 2.41 | 0.94 | 1.88 | 0.85 | 1.54 | 0.80 |
| 0.22 | #N/A | #N/A | #N/A | #N/A | 0.45 | 0.07 |
| #N/A | #N/A | #N/A | #N/A | #N/A | #N/A | #N/A |
| 0.11 | 0.51 | 0.16 | 0.45 | 0.06 | 0.48 | 0.09 |
| 0.59 | 1.51 | 0.73 | 1.19 | 0.56 | 1.18 | 0.62 |
| 0.10 | 0.39 | 0.08 | 0.48 | 0.11 | 0.66 | 0.22 |
| #N/A | 1.20 | 0.59 | 1.07 | 0.48 | 1.18 | 0.63 |
| 0.14 | 0.56 | 0.19 | 0.55 | 0.13 | 0.58 | 0.16 |
| 0.69 | 1.34 | 0.66 | 1.22 | 0.58 | 1.27 | 0.68 |
| 0.79 | 2.49 | 0.95 | 1.97 | 0.86 | 1.98 | 0.92 |
| 0.28 | 0.78 | 0.34 | 1.03 | 0.46 | 0.70 | 0.26 |
| 0.05 | 0.51 | 0.15 | 0.58 | 0.15 | 0.50 | 0.10 |
| 0.08 | 0.49 | 0.14 | #N/A | #N/A | 0.44 | 0.06 |
| 0.60 | 1.21 | 0.60 | 1.28 | 0.61 | 0.93 | 0.45 |
| #N/A | #N/A | #N/A | #N/A | #N/A | #N/A | #N/A |
| #N/A | 1.06 | 0.51 | #N/A | #N/A | 0.86 | 0.39 |
| #N/A | #N/A | #N/A | #N/A | #N/A | #N/A | #N/A |
| 0.32 | 0.96 | 0.45 | 0.87 | 0.34 | 1.00 | 0.51 |
| 0.41 | 0.97 | 0.45 | 0.94 | 0.40 | 0.89 | 0.41 |
| 0.01 | 0.17 | 0.01 | 0.24 | 0.01 | 0.21 | 0.00 |
| 0.25 | 0.76 | 0.33 | 0.94 | 0.39 | #N/A | #N/A |
| #N/A | #N/A | #N/A | #N/A | #N/A | #N/A | #N/A |
| 0.58 | 1.16 | 0.57 | 1.06 | 0.49 | 1.00 | 0.50 |
| #N/A | #N/A | #N/A | #N/A | #N/A | #N/A | #N/A |
| 0.76 | 1.90 | 0.87 | 1.79 | 0.83 | 1.26 | 0.67 |
| 0.54 | 1.18 | 0.59 | 1.03 | 0.46 | 1.14 | 0.59 |
| #N/A | #N/A | #N/A | #N/A | #N/A | #N/A | #N/A |

|      |      |      |      |      |      |      |
|------|------|------|------|------|------|------|
| #N/A | #N/A | #N/A | 1.65 | 0.78 | #N/A | #N/A |
| 0.53 | 1.27 | 0.62 | 1.01 | 0.45 | 0.97 | 0.48 |
| 0.37 | 0.93 | 0.43 | 0.98 | 0.43 | 1.50 | 0.79 |
| 0.43 | 0.92 | 0.43 | 0.89 | 0.37 | 0.90 | 0.42 |
| 0.34 | 1.01 | 0.49 | 0.94 | 0.40 | 1.14 | 0.59 |
| 0.63 | 1.09 | 0.53 | 1.32 | 0.62 | #N/A | #N/A |
| #N/A | #N/A | #N/A | #N/A | #N/A | #N/A | #N/A |
| #N/A | 1.41 | 0.70 | 1.48 | 0.71 | 1.25 | 0.67 |
| 0.71 | #N/A | #N/A | 1.25 | 0.59 | #N/A | #N/A |
| 0.23 | 0.73 | 0.31 | 0.66 | 0.20 | 0.73 | 0.29 |
| 0.11 | 0.49 | 0.14 | 0.56 | 0.13 | 0.56 | 0.14 |
| 0.16 | 0.56 | 0.19 | 0.57 | 0.13 | 0.59 | 0.17 |
| 1.00 | 3.65 | 0.99 | 3.27 | 0.99 | 3.54 | 1.00 |
| 0.73 | 1.61 | 0.78 | #N/A | #N/A | 1.72 | 0.87 |
| 0.76 | #N/A | #N/A | 1.17 | 0.55 | #N/A | #N/A |
| 0.82 | 2.36 | 0.94 | #N/A | #N/A | 2.25 | 0.96 |
| 0.83 | 1.32 | 0.65 | #N/A | #N/A | 1.41 | 0.75 |
| 0.52 | #N/A | #N/A | 1.33 | 0.64 | 1.07 | 0.55 |
| 0.51 | 1.33 | 0.64 | 1.16 | 0.49 | 2.17 | 0.95 |
| #N/A | #N/A | #N/A | #N/A | #N/A | #N/A | #N/A |
| #N/A | #N/A | #N/A | #N/A | #N/A | 1.01 | 0.51 |
| #N/A | #N/A | #N/A | #N/A | #N/A | #N/A | #N/A |
| #N/A | #N/A | #N/A | 1.24 | 0.58 | 1.69 | 0.86 |
| #N/A | 3.14 | 0.98 | #N/A | #N/A | 2.88 | 0.99 |
| 0.95 | 2.60 | 0.96 | 2.23 | 0.92 | 2.11 | 0.94 |
| #N/A | #N/A | #N/A | #N/A | #N/A | 0.41 | 0.05 |
| 0.98 | 2.84 | 0.97 | 2.31 | 0.93 | 2.94 | 0.99 |
| 0.76 | 1.50 | 0.74 | 1.68 | 0.79 | 1.79 | 0.88 |
| #N/A | #N/A | #N/A | 4.02 | 0.98 | #N/A | #N/A |
| 0.35 | 0.59 | 0.21 | 0.99 | 0.41 | #N/A | #N/A |
| 0.67 | 1.36 | 0.67 | 1.18 | 0.56 | 1.59 | 0.82 |
| 0.83 | 1.23 | 0.61 | 1.50 | 0.72 | 1.31 | 0.70 |
| 0.47 | 0.83 | 0.37 | 1.11 | 0.52 | 1.12 | 0.58 |
| 0.55 | 1.84 | 0.85 | 1.85 | 0.84 | 1.08 | 0.56 |
| 0.64 | 1.53 | 0.74 | 1.54 | 0.73 | 1.64 | 0.84 |
| 0.08 | 0.53 | 0.16 | 0.68 | 0.21 | 0.50 | 0.10 |
| 0.85 | 1.79 | 0.84 | 1.44 | 0.69 | 1.63 | 0.84 |
| 0.68 | 1.21 | 0.60 | 1.27 | 0.60 | 1.16 | 0.61 |
| #N/A | #N/A | #N/A | #N/A | #N/A | #N/A | #N/A |
| 0.92 | #N/A | #N/A | #N/A | #N/A | #N/A | #N/A |
| #N/A | #N/A | #N/A | #N/A | #N/A | #N/A | #N/A |
| 0.79 | 1.90 | 0.86 | 2.10 | 0.90 | 1.42 | 0.75 |
| 0.62 | 1.13 | 0.56 | 1.38 | 0.67 | 1.12 | 0.59 |
| 0.45 | 1.42 | 0.67 | #N/A | #N/A | 2.34 | 0.96 |
| #N/A | 2.96 | 0.97 | 3.79 | 0.98 | 2.11 | 0.94 |
| #N/A | 1.13 | 0.50 | 2.42 | 0.88 | 1.37 | 0.73 |
| 0.45 | #N/A | #N/A | 1.46 | 0.70 | 1.10 | 0.57 |
| #N/A | 0.37 | 0.07 | 0.39 | 0.04 | 0.41 | 0.05 |
| 0.54 | 1.20 | 0.59 | 1.08 | 0.49 | 1.35 | 0.72 |
| 0.69 | 1.44 | 0.71 | 2.04 | 0.88 | #N/A | #N/A |
| #N/A | #N/A | #N/A | #N/A | #N/A | #N/A | #N/A |

|      |      |      |      |      |      |      |
|------|------|------|------|------|------|------|
| #N/A | 0.94 | 0.44 | 1.03 | 0.46 | 0.87 | 0.40 |
| 0.25 | 0.60 | 0.22 | 0.80 | 0.30 | 0.78 | 0.32 |
| #N/A | #N/A | #N/A | #N/A | #N/A | 0.48 | 0.09 |
| 0.43 | 1.21 | 0.58 | 1.09 | 0.47 | 1.38 | 0.74 |
| 0.00 | 0.11 | 0.00 | 0.16 | 0.00 | 0.18 | 0.00 |
| #N/A | 1.48 | 0.72 | 0.93 | 0.40 | 0.83 | 0.36 |
| #N/A | #N/A | #N/A | #N/A | #N/A | #N/A | #N/A |
| #N/A | 1.18 | 0.58 | 1.75 | 0.63 | 0.97 | 0.48 |
| 0.40 | 0.91 | 0.42 | 0.79 | 0.29 | 0.87 | 0.39 |
| #N/A | #N/A | #N/A | #N/A | #N/A | #N/A | #N/A |
| 0.79 | 1.61 | 0.77 | 1.42 | 0.67 | 1.22 | 0.64 |
| 0.89 | 1.93 | 0.87 | 2.38 | 0.94 | 1.79 | 0.88 |
| 0.40 | 1.01 | 0.48 | 0.77 | 0.28 | 0.79 | 0.33 |
| 0.09 | 0.80 | 0.35 | 0.58 | 0.15 | 0.75 | 0.31 |
| 0.03 | 0.33 | 0.05 | #N/A | #N/A | 0.47 | 0.08 |
| 0.04 | 0.24 | 0.02 | 0.32 | 0.02 | 0.28 | 0.01 |
| 0.21 | 0.73 | 0.30 | 1.04 | 0.45 | 0.93 | 0.45 |
| #N/A | #N/A | #N/A | #N/A | #N/A | #N/A | #N/A |
| 0.30 | 0.63 | 0.23 | #N/A | #N/A | #N/A | #N/A |
| #N/A | #N/A | #N/A | #N/A | #N/A | #N/A | #N/A |
| 0.34 | 0.83 | 0.37 | 0.91 | 0.38 | 1.07 | 0.56 |
| 0.14 | 0.44 | 0.11 | 0.46 | 0.07 | 0.45 | 0.07 |
| 0.23 | 0.57 | 0.19 | 0.67 | 0.20 | 0.75 | 0.30 |
| 0.49 | 0.91 | 0.41 | 1.35 | 0.65 | 1.18 | 0.62 |
| 0.66 | 1.04 | 0.50 | 1.47 | 0.71 | 1.34 | 0.71 |
| 0.71 | 1.64 | 0.79 | 1.75 | 0.81 | 1.34 | 0.71 |
| 0.29 | 0.92 | 0.43 | 0.96 | 0.42 | #N/A | #N/A |
| #N/A | 1.09 | 0.53 | 0.97 | 0.41 | 0.78 | 0.33 |
| 0.90 | #N/A | #N/A | 2.90 | 0.90 | 3.65 | 1.00 |
| 0.08 | 0.47 | 0.13 | 0.52 | 0.10 | 0.57 | 0.16 |
| #N/A | 0.42 | 0.10 | 0.48 | 0.09 | 0.52 | 0.12 |
| 0.72 | 1.97 | 0.86 | 1.99 | 0.87 | #N/A | #N/A |
| 0.62 | 1.60 | 0.73 | 1.43 | 0.69 | 1.33 | 0.71 |
| 0.14 | 0.47 | 0.12 | 0.41 | 0.06 | 0.46 | 0.08 |
| 0.15 | 0.43 | 0.10 | 0.87 | 0.34 | 0.50 | 0.10 |
| 0.75 | 2.35 | 0.94 | #N/A | #N/A | 1.58 | 0.82 |
| 0.98 | 2.61 | 0.96 | 3.54 | 0.99 | 2.15 | 0.95 |
| #N/A | 2.98 | 0.98 | 4.15 | 0.99 | 2.05 | 0.93 |
| #N/A | #N/A | #N/A | #N/A | #N/A | #N/A | #N/A |
| #N/A | #N/A | #N/A | 0.51 | 0.10 | 0.31 | 0.02 |
| #N/A | #N/A | #N/A | 2.43 | 0.95 | 2.09 | 0.94 |
| #N/A | #N/A | #N/A | #N/A | #N/A | #N/A | #N/A |
| 0.98 | 3.29 | 0.99 | 3.49 | 0.99 | 3.16 | 0.99 |
| 0.67 | 1.55 | 0.75 | 1.23 | 0.58 | 1.16 | 0.61 |
| 0.60 | 1.10 | 0.54 | 1.06 | 0.48 | 1.08 | 0.56 |
| 0.65 | 1.51 | 0.73 | 1.48 | 0.70 | 1.29 | 0.69 |
| 0.43 | #N/A | #N/A | #N/A | #N/A | 0.80 | 0.34 |
| 0.25 | 0.50 | 0.15 | 0.53 | 0.11 | 0.60 | 0.18 |
| 0.67 | 1.06 | 0.51 | 1.36 | 0.66 | 1.45 | 0.77 |
| 0.41 | 0.82 | 0.37 | 0.98 | 0.42 | 1.00 | 0.50 |
| 0.12 | 0.26 | 0.02 | 0.46 | 0.07 | 0.72 | 0.28 |

|      |      |      |      |      |      |      |
|------|------|------|------|------|------|------|
| 0.50 | 1.08 | 0.53 | 1.02 | 0.45 | 1.12 | 0.59 |
| 0.79 | 1.04 | 0.50 | 1.40 | 0.67 | 1.35 | 0.72 |
| 0.62 | 1.49 | 0.70 | 0.76 | 0.27 | 0.79 | 0.34 |
| 0.73 | 1.61 | 0.78 | 1.57 | 0.75 | 1.36 | 0.72 |
| 0.56 | 1.14 | 0.56 | 1.16 | 0.55 | 1.23 | 0.65 |
| 0.36 | 0.74 | 0.31 | 0.93 | 0.39 | 0.97 | 0.48 |
| 0.36 | #N/A | #N/A | 1.01 | 0.45 | 1.01 | 0.51 |
| 0.29 | 0.81 | 0.36 | 0.63 | 0.18 | 0.80 | 0.34 |
| 0.33 | 1.38 | 0.69 | 0.77 | 0.28 | 0.97 | 0.48 |
| 0.59 | 1.29 | 0.64 | 0.97 | 0.41 | 1.20 | 0.63 |
| 0.49 | 1.05 | 0.51 | 0.65 | 0.19 | 0.95 | 0.46 |
| 0.54 | 1.57 | 0.76 | 0.86 | 0.34 | 0.88 | 0.41 |
| 0.32 | 0.92 | 0.43 | 1.02 | 0.44 | #N/A | #N/A |
| 0.17 | #N/A | #N/A | #N/A | #N/A | 0.45 | 0.07 |
| 0.12 | 0.59 | 0.21 | 1.07 | 0.45 | 0.75 | 0.30 |
| 0.12 | #N/A | #N/A | #N/A | #N/A | 0.30 | 0.02 |
| 0.72 | 1.10 | 0.53 | 1.33 | 0.64 | 1.04 | 0.54 |
| 0.60 | 1.19 | 0.59 | 1.28 | 0.61 | 0.81 | 0.35 |
| #N/A | 2.05 | 0.86 | 1.23 | 0.58 | 1.32 | 0.70 |
| 0.25 | 1.06 | 0.51 | 1.10 | 0.49 | 0.73 | 0.29 |
| 0.42 | 1.31 | 0.65 | 1.17 | 0.54 | 0.86 | 0.39 |
| 0.52 | 1.06 | 0.51 | 0.92 | 0.38 | 0.99 | 0.50 |
| 0.18 | 0.58 | 0.20 | 1.00 | 0.44 | 0.80 | 0.34 |
| 0.65 | 1.43 | 0.71 | 1.68 | 0.79 | #N/A | #N/A |
| #N/A | 0.54 | 0.18 | #N/A | #N/A | 0.68 | 0.24 |
| 0.39 | 0.68 | 0.27 | 0.95 | 0.39 | 0.63 | 0.20 |
| #N/A | #N/A | #N/A | 1.03 | 0.46 | 1.13 | 0.59 |
| 0.35 | #N/A | #N/A | 0.64 | 0.18 | #N/A | #N/A |
| 0.31 | 1.11 | 0.54 | 1.10 | 0.48 | 0.62 | 0.19 |
| 0.34 | 0.81 | 0.36 | 1.11 | 0.51 | 0.93 | 0.44 |
| 0.35 | 0.91 | 0.42 | #N/A | #N/A | 0.91 | 0.43 |
| 0.79 | 1.30 | 0.65 | 1.68 | 0.78 | 1.63 | 0.84 |
| #N/A | #N/A | #N/A | #N/A | #N/A | 1.10 | 0.57 |
| 0.74 | 2.25 | 0.93 | 1.87 | 0.84 | 1.85 | 0.90 |
| #N/A | #N/A | #N/A | 0.95 | 0.39 | 0.65 | 0.22 |
| 0.79 | 1.76 | 0.83 | 1.41 | 0.68 | 1.26 | 0.67 |
| 0.48 | 1.23 | 0.61 | 1.26 | 0.60 | 0.91 | 0.43 |
| #N/A | 1.20 | 0.60 | 2.07 | 0.89 | 1.24 | 0.66 |
| 0.25 | 1.02 | 0.49 | 0.85 | 0.34 | 0.96 | 0.47 |
| 0.66 | 1.18 | 0.58 | 1.07 | 0.49 | 1.01 | 0.51 |
| 0.39 | 1.01 | 0.48 | 0.94 | 0.40 | #N/A | #N/A |
| 0.83 | 1.84 | 0.85 | #N/A | #N/A | #N/A | #N/A |
| #N/A | #N/A | #N/A | #N/A | #N/A | #N/A | #N/A |
| 0.72 | 1.61 | 0.77 | 1.53 | 0.73 | 1.32 | 0.70 |
| 0.46 | 1.09 | 0.51 | 1.27 | 0.60 | #N/A | #N/A |
| 0.12 | 0.44 | 0.10 | 0.71 | 0.23 | 0.54 | 0.13 |
| 0.05 | 0.32 | 0.04 | 0.37 | 0.04 | 0.51 | 0.11 |
| #N/A | #N/A | #N/A | 0.83 | 0.32 | 0.76 | 0.31 |
| 0.20 | 0.64 | 0.24 | 0.89 | 0.36 | 0.73 | 0.29 |
| 0.79 | 1.57 | 0.77 | 1.83 | 0.84 | 1.66 | 0.85 |
| 0.24 | 0.72 | 0.29 | 0.78 | 0.28 | 0.68 | 0.24 |

|      |      |      |      |      |      |      |
|------|------|------|------|------|------|------|
| #N/A | 0.94 | 0.44 | 0.92 | 0.39 | 1.17 | 0.61 |
| 0.16 | 0.45 | 0.11 | 0.64 | 0.18 | 0.60 | 0.18 |
| 0.42 | 0.89 | 0.41 | 0.91 | 0.38 | 0.55 | 0.14 |
| 0.42 | 0.87 | 0.39 | 0.90 | 0.37 | 0.80 | 0.34 |
| 0.96 | 2.28 | 0.93 | 1.79 | 0.83 | 1.89 | 0.90 |
| 0.61 | 1.15 | 0.57 | 0.98 | 0.43 | 1.15 | 0.60 |
| #N/A | #N/A | #N/A | #N/A | #N/A | #N/A | #N/A |
| 0.73 | 1.48 | 0.73 | 1.53 | 0.73 | 1.59 | 0.82 |
| 0.39 | 0.90 | 0.41 | 0.69 | 0.22 | 0.70 | 0.26 |
| 0.46 | 0.93 | 0.43 | 1.00 | 0.44 | 1.08 | 0.56 |
| 0.12 | #N/A | #N/A | 0.68 | 0.21 | 0.44 | 0.07 |
| 0.53 | 0.96 | 0.45 | #N/A | #N/A | 1.24 | 0.66 |
| 0.64 | 1.47 | 0.72 | 1.38 | 0.66 | 1.50 | 0.79 |
| #N/A | #N/A | #N/A | 0.75 | 0.26 | 0.97 | 0.48 |
| 0.40 | 0.94 | 0.44 | 1.04 | 0.46 | 1.51 | 0.79 |
| 0.29 | 0.55 | 0.18 | 0.89 | 0.36 | 0.65 | 0.22 |
| 0.89 | 1.97 | 0.88 | 1.80 | 0.83 | 1.74 | 0.87 |
| 0.03 | 0.37 | 0.06 | 0.52 | 0.12 | 0.43 | 0.06 |
| #N/A | 0.28 | 0.03 | 0.95 | 0.37 | 0.20 | 0.00 |
| #N/A | 0.50 | 0.14 | #N/A | #N/A | #N/A | #N/A |
| 0.39 | 1.09 | 0.53 | 0.76 | 0.27 | 0.95 | 0.46 |
| 0.44 | 1.26 | 0.62 | 0.91 | 0.37 | 0.98 | 0.49 |
| 0.61 | 1.39 | 0.69 | 1.55 | 0.73 | 1.28 | 0.68 |
| 0.06 | #N/A | #N/A | 0.43 | 0.06 | 0.39 | 0.04 |
| 0.77 | 1.20 | 0.58 | 1.32 | 0.63 | 1.62 | 0.84 |
| #N/A | #N/A | #N/A | 1.15 | 0.53 | 0.81 | 0.35 |
| 0.52 | 1.06 | 0.52 | 1.14 | 0.53 | 1.05 | 0.54 |
| 0.19 | 0.66 | 0.26 | 0.82 | 0.31 | 0.73 | 0.28 |
| 0.15 | #N/A | #N/A | 0.70 | 0.22 | 0.56 | 0.14 |
| 0.20 | 0.65 | 0.25 | 0.71 | 0.23 | 0.68 | 0.24 |
| #N/A | #N/A | #N/A | #N/A | #N/A | #N/A | #N/A |
| 0.77 | 1.88 | 0.85 | 1.82 | 0.84 | 1.36 | 0.72 |
| 0.54 | 0.87 | 0.40 | 1.00 | 0.45 | 0.97 | 0.48 |
| #N/A | #N/A | #N/A | #N/A | #N/A | #N/A | #N/A |
| 0.54 | 1.07 | 0.52 | #N/A | #N/A | 1.00 | 0.50 |
| #N/A | #N/A | #N/A | #N/A | #N/A | 0.47 | 0.08 |
| 0.82 | 1.75 | 0.83 | 2.49 | 0.94 | 1.48 | 0.78 |
| #N/A | #N/A | #N/A | #N/A | #N/A | #N/A | #N/A |
| 0.81 | #N/A | #N/A | 1.69 | 0.77 | 1.16 | 0.61 |
| 0.27 | 0.75 | 0.32 | 1.04 | 0.46 | 1.38 | 0.74 |
| #N/A | #N/A | #N/A | #N/A | #N/A | #N/A | #N/A |
| #N/A | #N/A | #N/A | #N/A | #N/A | 1.07 | 0.55 |
| 0.50 | #N/A | #N/A | #N/A | #N/A | 0.71 | 0.27 |
| 0.98 | 2.61 | 0.95 | 2.59 | 0.95 | 2.40 | 0.97 |
| #N/A | #N/A | #N/A | #N/A | #N/A | 0.89 | 0.41 |
| #N/A | 1.88 | 0.86 | 1.82 | 0.83 | 1.55 | 0.81 |
| 0.18 | #N/A | #N/A | 0.56 | 0.13 | 0.43 | 0.06 |
| 0.49 | 1.15 | 0.56 | 0.91 | 0.38 | 0.97 | 0.48 |
| 0.50 | 1.24 | 0.62 | 1.23 | 0.59 | 1.32 | 0.70 |
| 0.43 | #N/A | #N/A | #N/A | #N/A | #N/A | #N/A |
| 0.18 | 0.56 | 0.19 | 0.66 | 0.20 | 0.73 | 0.29 |

|      |      |      |      |      |      |      |
|------|------|------|------|------|------|------|
| #N/A | #N/A | #N/A | #N/A | #N/A | #N/A | #N/A |
| 0.56 | 1.13 | 0.55 | 1.14 | 0.52 | 1.42 | 0.75 |
| 0.72 | 1.58 | 0.77 | 1.11 | 0.50 | 1.19 | 0.63 |
| 0.40 | 0.85 | 0.39 | 0.86 | 0.34 | 0.99 | 0.49 |
| #N/A | #N/A | #N/A | #N/A | #N/A | 0.61 | 0.18 |
| 0.43 | 1.19 | 0.58 | 0.90 | 0.37 | 1.04 | 0.53 |
| 0.65 | 1.13 | 0.56 | 1.09 | 0.50 | 1.03 | 0.53 |
| 0.63 | 1.18 | 0.58 | 1.02 | 0.45 | 1.38 | 0.74 |
| 0.74 | 1.39 | 0.69 | 1.47 | 0.71 | 2.09 | 0.94 |
| #N/A | #N/A | #N/A | #N/A | #N/A | #N/A | #N/A |
| 0.80 | 1.46 | 0.73 | 1.49 | 0.72 | 1.17 | 0.61 |
| 0.67 | 1.12 | 0.55 | 1.41 | 0.67 | 1.19 | 0.63 |
| #N/A | #N/A | #N/A | #N/A | #N/A | 0.35 | 0.03 |
| 0.56 | 1.19 | 0.58 | 0.96 | 0.41 | 1.17 | 0.62 |
| 0.31 | #N/A | #N/A | #N/A | #N/A | 0.33 | 0.02 |
| 0.84 | 2.64 | 0.95 | 1.76 | 0.73 | #N/A | #N/A |
| #N/A | #N/A | #N/A | #N/A | #N/A | #N/A | #N/A |
| 0.64 | #N/A | #N/A | 1.00 | 0.44 | 1.06 | 0.55 |
| #N/A | #N/A | #N/A | #N/A | #N/A | #N/A | #N/A |
| 0.38 | 0.83 | 0.37 | 0.99 | 0.43 | 0.74 | 0.29 |
| 0.86 | 1.82 | 0.84 | 2.51 | 0.95 | 1.47 | 0.77 |
| 0.79 | 1.72 | 0.81 | 1.76 | 0.82 | 1.44 | 0.77 |
| 0.86 | 1.96 | 0.86 | 1.94 | 0.86 | 1.56 | 0.81 |
| #N/A | 0.64 | 0.24 | 0.86 | 0.34 | #N/A | #N/A |
| 0.23 | 0.96 | 0.43 | 0.64 | 0.18 | 0.77 | 0.32 |
| 0.45 | 1.14 | 0.56 | 0.77 | 0.28 | 1.08 | 0.56 |
| 0.02 | 0.33 | 0.04 | 0.32 | 0.02 | 0.23 | 0.01 |
| #N/A | 0.69 | 0.28 | 0.78 | 0.28 | 0.68 | 0.24 |
| 0.71 | 1.84 | 0.85 | 1.41 | 0.68 | 1.21 | 0.64 |
| 0.07 | 0.41 | 0.09 | 0.49 | 0.08 | 0.44 | 0.07 |
| 0.85 | 1.93 | 0.87 | 1.85 | 0.83 | 1.67 | 0.85 |
| 0.26 | 0.51 | 0.15 | #N/A | #N/A | #N/A | #N/A |
| 0.83 | 1.81 | 0.83 | 2.14 | 0.90 | 1.84 | 0.90 |
| 0.40 | 1.15 | 0.56 | 1.08 | 0.46 | 1.40 | 0.74 |
| 0.49 | #N/A | #N/A | 1.12 | 0.51 | 0.93 | 0.45 |
| #N/A | #N/A | #N/A | #N/A | #N/A | #N/A | #N/A |
| 0.88 | 1.95 | 0.87 | 2.18 | 0.91 | 2.04 | 0.93 |
| 0.96 | 2.84 | 0.97 | 2.61 | 0.96 | 3.37 | 1.00 |
| #N/A | 0.67 | 0.26 | #N/A | #N/A | 0.42 | 0.05 |
| 0.75 | 1.47 | 0.70 | 1.48 | 0.71 | 1.29 | 0.68 |
| 0.29 | 0.80 | 0.35 | 0.58 | 0.15 | 0.89 | 0.41 |
| 0.02 | 0.29 | 0.03 | 0.36 | 0.03 | 0.42 | 0.05 |
| 0.42 | #N/A | #N/A | #N/A | #N/A | #N/A | #N/A |
| #N/A | #N/A | #N/A | 0.72 | 0.24 | 0.52 | 0.11 |
| 0.83 | 1.45 | 0.71 | 2.19 | 0.91 | 1.31 | 0.69 |
| 0.63 | 1.62 | 0.79 | 1.42 | 0.68 | 1.01 | 0.51 |
| 0.62 | 1.69 | 0.81 | 1.09 | 0.50 | 1.22 | 0.65 |
| 0.48 | 1.09 | 0.53 | 1.56 | 0.73 | 1.24 | 0.66 |
| #N/A | 2.15 | 0.91 | 2.05 | 0.88 | 2.03 | 0.93 |
| #N/A | #N/A | #N/A | #N/A | #N/A | #N/A | #N/A |
| #N/A | 0.46 | 0.12 | 0.56 | 0.13 | 0.62 | 0.19 |

|      |      |      |      |      |      |      |
|------|------|------|------|------|------|------|
| 0.85 | 1.94 | 0.88 | 1.56 | 0.75 | 1.91 | 0.91 |
| 0.29 | 0.73 | 0.30 | 0.73 | 0.25 | 0.96 | 0.47 |
| #N/A | 2.76 | 0.96 | #N/A | #N/A | 1.76 | 0.88 |
| #N/A | #N/A | #N/A | #N/A | #N/A | #N/A | #N/A |
| #N/A | #N/A | #N/A | 0.63 | 0.18 | 0.71 | 0.27 |
| #N/A | 0.70 | 0.29 | 1.08 | 0.47 | 0.97 | 0.48 |
| 0.95 | 2.73 | 0.97 | 2.76 | 0.97 | 2.74 | 0.98 |
| 0.27 | 0.72 | 0.30 | 0.95 | 0.41 | 0.99 | 0.49 |
| 0.85 | 2.49 | 0.94 | 1.39 | 0.66 | 1.07 | 0.55 |
| #N/A | 0.60 | 0.22 | #N/A | #N/A | 0.49 | 0.09 |
| 0.70 | 1.69 | 0.81 | 1.52 | 0.70 | 1.52 | 0.80 |
| #N/A | #N/A | #N/A | #N/A | #N/A | #N/A | #N/A |
| 0.30 | 0.77 | 0.33 | 0.53 | 0.11 | 0.80 | 0.34 |
| 0.32 | 0.75 | 0.32 | 0.67 | 0.21 | 0.74 | 0.30 |
| 0.91 | 2.09 | 0.90 | 2.03 | 0.88 | 1.65 | 0.85 |
| #N/A | 1.44 | 0.71 | 1.61 | 0.76 | 1.18 | 0.62 |
| 0.10 | 0.38 | 0.07 | 0.55 | 0.13 | 0.67 | 0.24 |
| #N/A | #N/A | #N/A | #N/A | #N/A | #N/A | #N/A |
| #N/A | #N/A | #N/A | #N/A | #N/A | #N/A | #N/A |
| 0.19 | 0.52 | 0.16 | 0.65 | 0.19 | 0.56 | 0.15 |
| 0.71 | 1.73 | 0.82 | 1.95 | 0.86 | 1.69 | 0.86 |
| 0.22 | #N/A | #N/A | 0.90 | 0.37 | 0.65 | 0.22 |
| #N/A | 0.91 | 0.42 | 0.98 | 0.41 | 1.12 | 0.58 |
| 0.56 | 1.29 | 0.64 | 2.06 | 0.80 | 1.38 | 0.73 |
| 0.60 | 1.36 | 0.68 | 1.76 | 0.81 | 1.47 | 0.77 |
| 0.74 | 1.39 | 0.69 | 1.69 | 0.80 | 0.93 | 0.44 |
| 0.68 | 1.73 | 0.82 | 1.59 | 0.74 | 1.50 | 0.79 |
| 0.42 | 1.04 | 0.50 | 0.88 | 0.36 | 0.90 | 0.42 |
| #N/A | #N/A | #N/A | #N/A | #N/A | #N/A | #N/A |
| 0.96 | 2.91 | 0.98 | 2.40 | 0.94 | 2.44 | 0.97 |
| 0.08 | 0.44 | 0.10 | 0.75 | 0.27 | 0.57 | 0.15 |
| #N/A | 3.13 | 0.95 | 1.68 | 0.79 | 2.22 | 0.95 |
| #N/A | #N/A | #N/A | #N/A | #N/A | #N/A | #N/A |
| 0.32 | 1.33 | 0.66 | 1.62 | 0.74 | 0.87 | 0.40 |
| #N/A | #N/A | #N/A | #N/A | #N/A | #N/A | #N/A |
| #N/A | 0.38 | 0.07 | 0.37 | 0.03 | 0.51 | 0.11 |
| #N/A | 1.54 | 0.76 | #N/A | #N/A | 1.35 | 0.72 |
| #N/A | #N/A | #N/A | #N/A | #N/A | 0.51 | 0.11 |
| 0.84 | 1.80 | 0.81 | 1.43 | 0.69 | 1.86 | 0.90 |
| #N/A | #N/A | #N/A | #N/A | #N/A | 0.80 | 0.34 |
| 0.73 | 1.46 | 0.70 | 1.59 | 0.76 | 1.43 | 0.76 |
| 0.64 | 1.44 | 0.71 | 2.00 | 0.85 | 1.67 | 0.85 |
| 0.18 | 0.64 | 0.24 | 0.70 | 0.22 | 0.57 | 0.16 |
| #N/A | 0.64 | 0.24 | 0.54 | 0.12 | #N/A | #N/A |
| 0.89 | 1.75 | 0.83 | 1.78 | 0.83 | 2.30 | 0.96 |
| 0.29 | 0.51 | 0.15 | 0.96 | 0.40 | 0.74 | 0.30 |
| 0.41 | 1.03 | 0.50 | 1.05 | 0.47 | 0.96 | 0.47 |
| #N/A | 1.89 | 0.86 | 2.13 | 0.90 | 1.60 | 0.83 |
| #N/A | 0.34 | 0.06 | 0.40 | 0.04 | 0.28 | 0.01 |
| 0.60 | 1.21 | 0.59 | #N/A | #N/A | #N/A | #N/A |
| 0.07 | 0.49 | 0.14 | 0.46 | 0.07 | 0.43 | 0.06 |

|      |      |      |      |      |      |      |
|------|------|------|------|------|------|------|
| 0.31 | 0.65 | 0.25 | 0.76 | 0.27 | 0.70 | 0.26 |
| 0.64 | 1.35 | 0.65 | 1.06 | 0.48 | 0.82 | 0.36 |
| 0.52 | 0.85 | 0.37 | #N/A | #N/A | 1.13 | 0.59 |
| #N/A | #N/A | #N/A | 3.11 | 0.97 | 2.19 | 0.95 |
| 0.78 | 1.87 | 0.86 | 1.48 | 0.71 | 1.43 | 0.76 |
| #N/A | #N/A | #N/A | #N/A | #N/A | #N/A | #N/A |
| 0.72 | 1.81 | 0.84 | 1.66 | 0.78 | 1.31 | 0.69 |
| 0.07 | 0.36 | 0.06 | 0.36 | 0.03 | 0.46 | 0.08 |
| 0.96 | 2.36 | 0.94 | 1.96 | 0.86 | 2.11 | 0.94 |
| #N/A | #N/A | #N/A | 2.72 | 0.89 | 1.59 | 0.82 |
| 0.68 | 1.40 | 0.70 | 1.39 | 0.64 | 0.98 | 0.49 |
| #N/A | #N/A | #N/A | #N/A | #N/A | #N/A | #N/A |
| 0.01 | 0.18 | 0.01 | 0.31 | 0.02 | 0.22 | 0.01 |
| 0.18 | 0.53 | 0.16 | 0.69 | 0.22 | 0.70 | 0.27 |
| 0.96 | 2.09 | 0.90 | 1.91 | 0.86 | 1.92 | 0.91 |
| 0.84 | 1.45 | 0.72 | 1.66 | 0.78 | 1.76 | 0.87 |
| 0.61 | 1.34 | 0.66 | 1.34 | 0.64 | #N/A | #N/A |
| #N/A | #N/A | #N/A | 1.34 | 0.63 | 1.27 | 0.68 |
| #N/A | #N/A | #N/A | #N/A | #N/A | #N/A | #N/A |
| 0.16 | 0.61 | 0.22 | 0.79 | 0.30 | 0.56 | 0.15 |
| 0.97 | 1.89 | 0.86 | 2.81 | 0.97 | 1.77 | 0.88 |
| #N/A | #N/A | #N/A | #N/A | #N/A | #N/A | #N/A |
| 0.66 | 1.42 | 0.71 | 1.25 | 0.58 | 1.37 | 0.73 |
| 0.47 | 0.90 | 0.42 | 0.95 | 0.40 | 0.92 | 0.44 |
| #N/A | 0.47 | 0.12 | 0.68 | 0.21 | 0.43 | 0.06 |
| 0.76 | 1.43 | 0.71 | 3.18 | 0.93 | 1.20 | 0.64 |
| 0.80 | 1.62 | 0.78 | 2.02 | 0.84 | 1.56 | 0.81 |
| #N/A | #N/A | #N/A | #N/A | #N/A | 0.91 | 0.43 |
| #N/A | #N/A | #N/A | #N/A | #N/A | #N/A | #N/A |
| 0.90 | 2.04 | 0.89 | 2.30 | 0.93 | #N/A | #N/A |
| #N/A | #N/A | #N/A | #N/A | #N/A | 0.97 | 0.48 |
| 0.73 | #N/A | #N/A | 1.38 | 0.66 | 1.09 | 0.57 |
| #N/A | #N/A | #N/A | #N/A | #N/A | 0.84 | 0.37 |
| #N/A | #N/A | #N/A | #N/A | #N/A | #N/A | #N/A |
| 0.86 | 1.26 | 0.62 | 2.07 | 0.89 | 1.60 | 0.83 |
| 0.77 | 1.55 | 0.76 | 2.43 | 0.93 | 1.62 | 0.83 |
| 0.74 | 1.48 | 0.73 | #N/A | #N/A | 1.63 | 0.84 |
| 0.86 | #N/A | #N/A | 1.91 | 0.84 | 1.28 | 0.68 |
| #N/A | #N/A | #N/A | #N/A | #N/A | #N/A | #N/A |
| 0.40 | 0.88 | 0.40 | 0.92 | 0.38 | 0.90 | 0.42 |
| 0.64 | 1.24 | 0.62 | 1.34 | 0.64 | 1.05 | 0.54 |
| #N/A | #N/A | #N/A | #N/A | #N/A | #N/A | #N/A |
| 0.74 | #N/A | #N/A | 1.49 | 0.70 | 0.95 | 0.46 |
| 0.20 | 0.59 | 0.21 | 0.81 | 0.30 | 0.76 | 0.31 |
| #N/A | 0.56 | 0.19 | 0.56 | 0.13 | #N/A | #N/A |
| 0.13 | 0.75 | 0.32 | 0.67 | 0.20 | 0.55 | 0.14 |
| 0.10 | #N/A | #N/A | #N/A | #N/A | 0.37 | 0.03 |
| 0.48 | 1.25 | 0.61 | 1.30 | 0.62 | 1.04 | 0.53 |
| 0.20 | 0.52 | 0.16 | 0.59 | 0.15 | 0.46 | 0.08 |
| #N/A | #N/A | #N/A | 1.32 | 0.63 | 1.67 | 0.85 |
| 0.46 | 0.90 | 0.41 | #N/A | #N/A | 1.01 | 0.51 |



|      |      |      |      |      |      |      |
|------|------|------|------|------|------|------|
| #N/A | 1.90 | 0.82 | 1.57 | 0.73 | 1.49 | 0.78 |
| #N/A | 1.67 | 0.76 | 1.61 | 0.77 | 1.08 | 0.56 |
| 0.89 | 2.18 | 0.92 | 1.67 | 0.78 | 1.93 | 0.91 |
| 0.35 | #N/A | #N/A | 0.83 | 0.32 | 0.75 | 0.30 |
| 0.79 | 2.06 | 0.89 | 1.79 | 0.79 | 1.67 | 0.85 |
| 0.61 | 1.46 | 0.72 | 1.21 | 0.54 | #N/A | #N/A |
| #N/A | #N/A | #N/A | #N/A | #N/A | #N/A | #N/A |
| 0.76 | 1.72 | 0.81 | 1.63 | 0.77 | 1.30 | 0.69 |
| #N/A | #N/A | #N/A | #N/A | #N/A | #N/A | #N/A |
| 0.14 | 0.41 | 0.09 | 0.62 | 0.17 | 0.70 | 0.26 |
| 0.75 | 1.40 | 0.69 | 2.19 | 0.92 | 1.59 | 0.82 |
| 0.44 | #N/A | #N/A | 1.02 | 0.46 | 0.86 | 0.38 |
| 0.76 | 0.84 | 0.37 | #N/A | #N/A | #N/A | #N/A |
| 0.68 | #N/A | #N/A | 1.80 | 0.83 | 1.59 | 0.82 |
| 0.23 | 0.59 | 0.21 | 0.68 | 0.21 | 0.63 | 0.20 |
| #N/A | 0.49 | 0.15 | #N/A | #N/A | 0.44 | 0.06 |
| #N/A | 0.91 | 0.42 | 1.43 | 0.61 | #N/A | #N/A |
| 0.04 | 0.26 | 0.02 | 0.39 | 0.04 | 0.35 | 0.03 |
| 0.49 | 0.99 | 0.47 | 1.14 | 0.53 | 0.79 | 0.33 |
| 0.87 | 1.85 | 0.84 | 2.19 | 0.91 | #N/A | #N/A |
| 0.47 | 0.98 | 0.46 | 0.92 | 0.39 | 0.89 | 0.41 |
| #N/A | #N/A | #N/A | #N/A | #N/A | #N/A | #N/A |
| 0.14 | 0.60 | 0.21 | 0.53 | 0.12 | 0.70 | 0.26 |
| 0.60 | 0.96 | 0.45 | 1.34 | 0.64 | 1.00 | 0.50 |
| 0.64 | 1.28 | 0.63 | 1.28 | 0.61 | 1.18 | 0.63 |
| 0.53 | 1.53 | 0.75 | 1.36 | 0.62 | 1.47 | 0.77 |
| 0.05 | 0.32 | 0.05 | 0.49 | 0.09 | 0.30 | 0.02 |
| #N/A | #N/A | #N/A | #N/A | #N/A | #N/A | #N/A |
| 0.21 | 0.59 | 0.21 | 0.86 | 0.35 | 0.63 | 0.20 |
| #N/A | #N/A | #N/A | #N/A | #N/A | #N/A | #N/A |
| 0.46 | 0.99 | 0.47 | 0.75 | 0.26 | 1.06 | 0.55 |
| 0.02 | 0.20 | 0.01 | 0.36 | 0.04 | 0.28 | 0.01 |
| #N/A | #N/A | #N/A | 1.13 | 0.51 | 0.98 | 0.49 |
| 0.86 | 1.99 | 0.87 | 1.91 | 0.86 | 1.78 | 0.88 |
| 0.88 | 1.86 | 0.85 | 1.94 | 0.87 | 1.84 | 0.89 |
| 0.10 | #N/A | #N/A | #N/A | #N/A | #N/A | #N/A |
| 0.95 | 2.54 | 0.96 | 2.28 | 0.92 | 1.52 | 0.79 |
| #N/A | 2.05 | 0.88 | 2.38 | 0.93 | 1.77 | 0.88 |
| 0.74 | 1.61 | 0.78 | 1.49 | 0.70 | 1.69 | 0.86 |
| 0.70 | 1.56 | 0.76 | 1.22 | 0.58 | 1.38 | 0.74 |
| 0.24 | 0.83 | 0.37 | 0.94 | 0.40 | 0.88 | 0.40 |
| 0.08 | #N/A | #N/A | 0.69 | 0.23 | #N/A | #N/A |
| #N/A | 1.77 | 0.76 | 1.42 | 0.65 | 1.38 | 0.74 |
| 0.99 | 3.17 | 0.98 | 2.99 | 0.97 | 3.35 | 1.00 |
| #N/A | 1.63 | 0.79 | 1.52 | 0.72 | 1.68 | 0.86 |
| #N/A | #N/A | #N/A | #N/A | #N/A | #N/A | #N/A |
| 0.70 | 1.55 | 0.75 | 1.26 | 0.60 | 1.64 | 0.84 |
| 0.50 | 1.06 | 0.52 | 1.32 | 0.63 | 1.32 | 0.70 |
| 0.21 | 0.41 | 0.08 | 0.60 | 0.16 | 0.56 | 0.14 |
| 0.52 | 1.22 | 0.60 | 1.38 | 0.66 | 0.85 | 0.38 |
| 0.36 | 0.95 | 0.45 | #N/A | #N/A | 0.96 | 0.47 |

|      |      |      |      |      |      |      |
|------|------|------|------|------|------|------|
| 0.31 | 0.80 | 0.35 | 1.28 | 0.61 | 0.91 | 0.43 |
| 0.25 | 0.54 | 0.17 | 0.57 | 0.14 | 0.76 | 0.31 |
| 0.02 | 0.23 | 0.02 | #N/A | #N/A | #N/A | #N/A |
| 0.45 | 0.94 | 0.44 | 1.04 | 0.46 | 0.94 | 0.45 |
| 0.44 | 0.88 | 0.40 | 0.74 | 0.25 | 0.66 | 0.23 |
| #N/A | #N/A | #N/A | #N/A | #N/A | #N/A | #N/A |
| #N/A | 1.18 | 0.58 | 1.20 | 0.54 | 0.73 | 0.29 |
| 0.07 | 0.34 | 0.05 | 0.38 | 0.04 | 0.36 | 0.03 |
| 0.66 | 1.41 | 0.69 | 1.55 | 0.74 | 1.82 | 0.89 |
| 0.63 | 1.59 | 0.73 | 2.15 | 0.90 | 1.09 | 0.57 |
| 0.72 | 1.70 | 0.74 | 1.88 | 0.85 | 1.60 | 0.83 |
| 0.29 | 0.74 | 0.31 | 0.75 | 0.26 | 0.62 | 0.19 |
| 0.17 | 0.38 | 0.07 | 0.43 | 0.06 | 0.50 | 0.10 |
| 0.25 | 0.60 | 0.21 | 0.70 | 0.23 | 0.61 | 0.18 |
| #N/A | #N/A | #N/A | #N/A | #N/A | #N/A | #N/A |
| 0.92 | 1.86 | 0.85 | 1.83 | 0.84 | 1.82 | 0.89 |
| 0.41 | 0.93 | 0.44 | #N/A | #N/A | 1.04 | 0.53 |
| #N/A | #N/A | #N/A | #N/A | #N/A | #N/A | #N/A |
| 0.46 | 0.84 | 0.37 | 0.75 | 0.26 | 0.82 | 0.36 |
| 0.25 | 1.23 | 0.60 | 0.79 | 0.29 | 0.65 | 0.22 |
| 0.46 | 0.70 | 0.28 | #N/A | #N/A | 1.10 | 0.57 |
| 0.30 | #N/A | #N/A | 0.72 | 0.24 | 0.58 | 0.16 |
| 0.60 | 0.68 | 0.27 | 1.43 | 0.67 | 0.90 | 0.42 |
| 0.04 | 0.27 | 0.03 | 0.45 | 0.06 | #N/A | #N/A |
| #N/A | 0.70 | 0.29 | 0.90 | 0.37 | 0.86 | 0.39 |
| 0.79 | 1.99 | 0.88 | 1.85 | 0.84 | 1.20 | 0.63 |
| 0.96 | 3.05 | 0.98 | 3.34 | 0.97 | 3.12 | 0.99 |
| 0.72 | 1.41 | 0.70 | 1.16 | 0.55 | 1.38 | 0.73 |
| #N/A | #N/A | #N/A | #N/A | #N/A | #N/A | #N/A |
| #N/A | #N/A | #N/A | 1.07 | 0.48 | #N/A | #N/A |
| 0.78 | 1.61 | 0.78 | 1.72 | 0.80 | 1.56 | 0.81 |
| 0.32 | 0.84 | 0.38 | 0.80 | 0.30 | 0.71 | 0.28 |
| 0.31 | 0.80 | 0.35 | 0.82 | 0.31 | 0.64 | 0.21 |
| 0.52 | 0.98 | 0.47 | 1.17 | 0.54 | 0.85 | 0.38 |
| 0.37 | 0.99 | 0.47 | 1.11 | 0.50 | 1.04 | 0.53 |
| 0.70 | 1.38 | 0.69 | 1.34 | 0.64 | 1.25 | 0.66 |
| #N/A | 0.82 | 0.37 | 1.05 | 0.48 | 1.16 | 0.61 |
| 0.90 | 1.64 | 0.79 | 1.90 | 0.85 | 1.53 | 0.80 |
| 0.37 | #N/A | #N/A | #N/A | #N/A | 1.12 | 0.58 |
| 0.13 | 0.41 | 0.09 | 0.58 | 0.14 | 0.64 | 0.21 |
| 0.53 | 1.19 | 0.59 | 1.14 | 0.52 | 1.18 | 0.62 |
| 0.49 | 1.03 | 0.50 | 1.23 | 0.58 | 0.98 | 0.49 |
| 0.30 | 0.65 | 0.25 | 0.59 | 0.15 | 0.63 | 0.20 |
| 0.73 | 1.37 | 0.68 | 1.43 | 0.69 | 1.31 | 0.70 |
| 0.66 | 1.36 | 0.67 | 2.14 | 0.91 | 1.11 | 0.58 |
| 0.45 | 0.89 | 0.41 | 1.28 | 0.61 | 0.96 | 0.47 |
| 0.62 | 1.38 | 0.69 | 1.10 | 0.51 | 1.19 | 0.63 |
| 0.84 | 2.43 | 0.95 | 1.70 | 0.80 | 1.90 | 0.91 |
| 0.40 | 1.14 | 0.56 | 0.68 | 0.21 | 0.98 | 0.49 |
| #N/A | #N/A | #N/A | #N/A | #N/A | #N/A | #N/A |
| #N/A | #N/A | #N/A | #N/A | #N/A | 0.95 | 0.47 |

|      |      |      |      |      |      |      |
|------|------|------|------|------|------|------|
| #N/A | 0.58 | 0.20 | 0.76 | 0.27 | 0.62 | 0.19 |
| 0.75 | 1.50 | 0.74 | 1.65 | 0.77 | 1.64 | 0.84 |
| #N/A | 1.23 | 0.61 | 1.22 | 0.57 | 1.21 | 0.64 |
| 0.63 | 1.31 | 0.65 | 1.28 | 0.61 | 1.16 | 0.61 |
| #N/A | 0.32 | 0.08 | #N/A | #N/A | 0.22 | 0.01 |
| #N/A | #N/A | #N/A | #N/A | #N/A | #N/A | #N/A |
| #N/A | #N/A | #N/A | #N/A | #N/A | #N/A | #N/A |
| #N/A | #N/A | #N/A | #N/A | #N/A | #N/A | #N/A |
| 0.87 | 2.01 | 0.87 | #N/A | #N/A | #N/A | #N/A |
| #N/A | 0.69 | 0.28 | #N/A | #N/A | 1.47 | 0.78 |
| 0.28 | 0.66 | 0.25 | #N/A | #N/A | #N/A | #N/A |
| 0.24 | 0.50 | 0.15 | 0.72 | 0.24 | 0.55 | 0.14 |
| 0.52 | 1.16 | 0.57 | 1.03 | 0.46 | 1.16 | 0.61 |
| 0.88 | 1.92 | 0.87 | 1.84 | 0.84 | 1.83 | 0.89 |
| #N/A | #N/A | #N/A | #N/A | #N/A | #N/A | #N/A |
| 0.80 | 1.61 | 0.78 | 1.83 | 0.84 | 1.27 | 0.68 |
| 0.14 | #N/A | #N/A | #N/A | #N/A | 0.60 | 0.18 |
| 0.94 | 2.77 | 0.97 | 2.22 | 0.90 | 2.27 | 0.96 |
| #N/A | #N/A | #N/A | #N/A | #N/A | #N/A | #N/A |
| 0.77 | 1.65 | 0.79 | 1.60 | 0.76 | 1.29 | 0.69 |
| 0.34 | 0.75 | 0.32 | 0.74 | 0.26 | 0.66 | 0.22 |
| 0.18 | 0.56 | 0.19 | 0.66 | 0.20 | 0.56 | 0.14 |
| 0.29 | #N/A | #N/A | 0.77 | 0.27 | 0.78 | 0.33 |
| 0.56 | 1.49 | 0.74 | 1.19 | 0.57 | 1.34 | 0.71 |
| 0.87 | 1.48 | 0.73 | 1.63 | 0.76 | 1.16 | 0.61 |
| 0.45 | #N/A | #N/A | 1.66 | 0.71 | 0.94 | 0.46 |
| 0.80 | 1.34 | 0.66 | 1.26 | 0.60 | 1.07 | 0.55 |
| #N/A | #N/A | #N/A | #N/A | #N/A | 0.84 | 0.37 |
| 0.21 | 0.69 | 0.28 | 0.54 | 0.13 | 0.89 | 0.41 |
| #N/A | 0.25 | 0.02 | 0.23 | 0.01 | 0.30 | 0.02 |
| 0.22 | #N/A | #N/A | #N/A | #N/A | 0.60 | 0.18 |
| 0.46 | 1.08 | 0.53 | 1.01 | 0.45 | 0.79 | 0.33 |
| 0.61 | 0.97 | 0.46 | 1.23 | 0.59 | 0.85 | 0.38 |
| 0.73 | 1.54 | 0.76 | #N/A | #N/A | 2.17 | 0.95 |
| 0.98 | 3.17 | 0.98 | 2.53 | 0.95 | 3.17 | 0.99 |
| 0.49 | 1.43 | 0.52 | #N/A | #N/A | #N/A | #N/A |
| 0.67 | 1.71 | 0.82 | 1.30 | 0.62 | 1.40 | 0.74 |
| 0.98 | 2.18 | 0.92 | 2.15 | 0.89 | 2.05 | 0.93 |
| 0.62 | 1.58 | 0.76 | 1.24 | 0.58 | 1.02 | 0.52 |
| 0.39 | 0.86 | 0.39 | 0.99 | 0.43 | 0.87 | 0.39 |
| #N/A | 0.87 | 0.39 | 1.14 | 0.53 | 1.28 | 0.68 |
| 0.82 | #N/A | #N/A | #N/A | #N/A | 1.84 | 0.90 |
| 0.22 | 1.13 | 0.56 | #N/A | #N/A | #N/A | #N/A |
| #N/A | #N/A | #N/A | 1.07 | 0.47 | 1.79 | 0.88 |
| 0.18 | 0.58 | 0.20 | 0.50 | 0.10 | 0.75 | 0.30 |
| 0.21 | 0.72 | 0.29 | 0.70 | 0.23 | 0.77 | 0.32 |
| #N/A | #N/A | #N/A | #N/A | #N/A | #N/A | #N/A |
| 0.87 | 1.37 | 0.68 | 1.25 | 0.60 | 1.33 | 0.71 |
| 0.72 | 1.81 | 0.84 | 1.55 | 0.73 | #N/A | #N/A |
| #N/A | 0.72 | 0.30 | 1.08 | 0.50 | 0.91 | 0.43 |
| 0.03 | 0.31 | 0.04 | 0.31 | 0.02 | 0.49 | 0.09 |

|      |      |      |      |      |      |      |
|------|------|------|------|------|------|------|
| 0.02 | 0.25 | 0.02 | 0.35 | 0.03 | 0.25 | 0.01 |
| 0.02 | 0.27 | 0.03 | 0.43 | 0.06 | 0.27 | 0.01 |
| 0.14 | 0.46 | 0.12 | 0.57 | 0.14 | 0.63 | 0.20 |
| #N/A | #N/A | #N/A | #N/A | #N/A | 1.08 | 0.56 |
| 0.54 | 1.22 | 0.60 | 1.13 | 0.53 | 0.93 | 0.44 |
| 0.03 | #N/A | #N/A | 0.65 | 0.19 | 0.60 | 0.18 |
| 0.13 | 0.51 | 0.15 | 0.69 | 0.22 | 0.77 | 0.32 |
| 0.72 | 1.68 | 0.80 | #N/A | #N/A | 1.26 | 0.67 |
| 0.67 | 1.22 | 0.60 | 1.24 | 0.58 | 1.50 | 0.79 |
| 0.14 | 0.66 | 0.25 | 0.61 | 0.16 | 0.91 | 0.43 |
| #N/A | 0.79 | 0.34 | #N/A | #N/A | 0.66 | 0.23 |
| 0.51 | 1.14 | 0.56 | 1.05 | 0.46 | 1.24 | 0.66 |
| #N/A | 0.49 | 0.14 | #N/A | #N/A | 0.69 | 0.25 |
| 0.58 | 1.01 | 0.48 | 1.13 | 0.52 | 1.11 | 0.58 |
| 0.34 | 0.90 | 0.41 | #N/A | #N/A | 0.97 | 0.48 |
| 0.54 | 1.05 | 0.51 | 1.13 | 0.53 | 1.23 | 0.65 |
| 0.09 | #N/A | #N/A | 0.41 | 0.05 | #N/A | #N/A |
| 0.62 | 1.53 | 0.75 | 1.36 | 0.65 | 1.48 | 0.78 |
| 0.09 | 0.51 | 0.15 | 0.60 | 0.16 | 0.63 | 0.21 |
| #N/A | 0.28 | 0.03 | 0.53 | 0.11 | 0.26 | 0.01 |
| #N/A | #N/A | #N/A | #N/A | #N/A | #N/A | #N/A |
| 0.06 | 0.40 | 0.08 | 0.44 | 0.06 | 0.43 | 0.06 |
| 0.81 | #N/A | #N/A | #N/A | #N/A | 0.90 | 0.42 |
| #N/A | #N/A | #N/A | #N/A | #N/A | #N/A | #N/A |
| #N/A | 1.31 | 0.65 | 1.36 | 0.65 | 1.38 | 0.73 |
| 0.89 | 2.31 | 0.92 | 1.74 | 0.79 | 1.95 | 0.91 |
| 0.11 | 0.45 | 0.11 | 0.71 | 0.24 | 0.72 | 0.28 |
| #N/A | 1.51 | 0.74 | 0.94 | 0.39 | 1.03 | 0.52 |
| 0.54 | 0.63 | 0.24 | 0.84 | 0.33 | 0.96 | 0.47 |
| 0.55 | 1.01 | 0.48 | 1.36 | 0.65 | 1.26 | 0.67 |
| 0.42 | #N/A | #N/A | #N/A | #N/A | 0.86 | 0.39 |
| 0.48 | #N/A | #N/A | 1.37 | 0.66 | 1.17 | 0.61 |
| 0.47 | 0.74 | 0.31 | 0.96 | 0.42 | 0.58 | 0.16 |
| 0.89 | 1.43 | 0.71 | 1.45 | 0.70 | 1.58 | 0.82 |
| 0.77 | 1.68 | 0.81 | 1.84 | 0.84 | 1.74 | 0.87 |
| 0.55 | #N/A | #N/A | 1.02 | 0.45 | 0.89 | 0.41 |
| 0.83 | 1.93 | 0.84 | 1.99 | 0.87 | 1.40 | 0.74 |
| 0.84 | 2.03 | 0.89 | 1.90 | 0.86 | #N/A | #N/A |
| #N/A | #N/A | #N/A | #N/A | #N/A | #N/A | #N/A |
| 0.80 | 1.81 | 0.83 | 1.67 | 0.77 | 1.24 | 0.66 |
| 0.28 | 0.73 | 0.29 | 0.84 | 0.33 | 0.57 | 0.15 |
| 0.19 | 0.54 | 0.17 | 0.35 | 0.03 | 0.48 | 0.09 |
| 0.71 | 1.28 | 0.64 | 1.14 | 0.51 | 0.98 | 0.49 |
| #N/A | 0.80 | 0.35 | 0.74 | 0.25 | 0.70 | 0.26 |
| #N/A | #N/A | #N/A | #N/A | #N/A | #N/A | #N/A |
| 0.64 | 0.75 | 0.32 | 0.84 | 0.33 | 1.04 | 0.53 |
| 0.86 | 1.76 | 0.83 | 1.77 | 0.82 | 1.77 | 0.88 |
| 0.05 | 0.53 | 0.17 | 0.71 | 0.24 | 0.69 | 0.25 |
| #N/A | #N/A | #N/A | #N/A | #N/A | #N/A | #N/A |
| 0.99 | 3.31 | 0.99 | 3.54 | 0.99 | 2.24 | 0.96 |
| #N/A | 1.01 | 0.49 | 0.57 | 0.14 | #N/A | #N/A |

|      |      |      |      |      |      |      |
|------|------|------|------|------|------|------|
| 0.73 | 1.75 | 0.82 | 1.41 | 0.68 | 1.23 | 0.65 |
| #N/A | #N/A | #N/A | #N/A | #N/A | #N/A | #N/A |
| 0.95 | 1.41 | 0.70 | 2.91 | 0.98 | 1.37 | 0.73 |
| #N/A | #N/A | #N/A | #N/A | #N/A | #N/A | #N/A |
| 0.66 | 0.94 | 0.44 | 1.62 | 0.76 | 1.01 | 0.51 |
| 0.58 | 2.03 | 0.88 | 1.52 | 0.73 | 1.24 | 0.66 |
| 0.18 | 0.77 | 0.33 | 0.74 | 0.25 | 0.86 | 0.38 |
| 0.66 | 1.33 | 0.66 | 1.38 | 0.66 | 1.34 | 0.71 |
| #N/A | #N/A | #N/A | 0.67 | 0.20 | 0.52 | 0.11 |
| #N/A | 0.82 | 0.37 | 0.93 | 0.39 | 0.66 | 0.22 |
| 0.14 | 0.40 | 0.08 | 0.66 | 0.20 | 0.57 | 0.16 |
| 0.53 | 1.23 | 0.61 | 1.20 | 0.55 | 1.10 | 0.57 |
| 0.35 | 0.77 | 0.33 | 1.19 | 0.56 | 0.77 | 0.32 |
| 0.19 | 0.43 | 0.10 | 0.53 | 0.11 | 0.47 | 0.08 |
| 0.08 | 0.51 | 0.15 | 0.40 | 0.05 | 0.62 | 0.19 |
| 0.93 | 1.62 | 0.78 | 1.46 | 0.69 | 1.48 | 0.78 |
| 0.67 | 1.53 | 0.69 | 1.48 | 0.71 | 1.27 | 0.68 |
| #N/A | 1.96 | 0.84 | 2.20 | 0.91 | 1.68 | 0.85 |
| 0.34 | 0.75 | 0.32 | 0.90 | 0.37 | 0.70 | 0.26 |
| #N/A | #N/A | #N/A | #N/A | #N/A | #N/A | #N/A |
| 0.41 | 0.93 | 0.44 | 0.99 | 0.43 | 0.94 | 0.46 |
| 0.55 | 0.89 | 0.41 | 0.90 | 0.37 | 0.84 | 0.37 |
| #N/A | 0.36 | 0.06 | 0.59 | 0.16 | 0.45 | 0.07 |
| 0.69 | 1.33 | 0.66 | 1.46 | 0.70 | 1.17 | 0.62 |
| #N/A | 0.37 | 0.07 | #N/A | #N/A | 0.68 | 0.24 |
| #N/A | 0.99 | 0.47 | 1.09 | 0.49 | 1.87 | 0.90 |
| 0.98 | 2.48 | 0.95 | 2.59 | 0.96 | 1.77 | 0.88 |
| #N/A | #N/A | #N/A | #N/A | #N/A | 0.93 | 0.45 |
| 0.71 | 1.40 | 0.68 | 1.36 | 0.65 | 1.34 | 0.71 |
| 0.43 | 1.02 | 0.49 | 0.94 | 0.39 | 0.77 | 0.32 |
| 0.63 | 1.48 | 0.72 | 1.51 | 0.70 | 1.24 | 0.66 |
| 0.25 | 0.73 | 0.31 | #N/A | #N/A | 0.70 | 0.26 |
| #N/A | 0.70 | 0.28 | #N/A | #N/A | 0.88 | 0.40 |
| 0.82 | 1.74 | 0.82 | 1.70 | 0.79 | 1.36 | 0.73 |
| 0.80 | 1.88 | 0.86 | 1.57 | 0.75 | 1.72 | 0.87 |
| 0.19 | 0.58 | 0.20 | 0.54 | 0.12 | 0.63 | 0.21 |
| 0.77 | 1.67 | 0.80 | 1.79 | 0.83 | 1.42 | 0.75 |
| #N/A | 1.73 | 0.82 | 1.40 | 0.66 | 1.56 | 0.81 |
| 0.27 | 0.76 | 0.32 | 0.73 | 0.25 | 0.82 | 0.36 |
| 0.76 | 1.42 | 0.71 | 1.64 | 0.78 | 1.74 | 0.87 |
| 0.32 | 0.71 | 0.29 | 0.92 | 0.38 | 0.83 | 0.36 |
| #N/A | 3.92 | 0.98 | 1.33 | 0.59 | 1.77 | 0.88 |
| #N/A | #N/A | #N/A | #N/A | #N/A | #N/A | #N/A |
| 0.69 | 1.53 | 0.72 | 1.36 | 0.64 | 1.06 | 0.54 |
| 0.17 | 0.56 | 0.18 | 0.58 | 0.14 | 0.61 | 0.19 |
| 0.24 | 0.89 | 0.40 | 0.77 | 0.28 | 0.98 | 0.49 |
| 0.45 | 1.06 | 0.51 | 0.91 | 0.38 | 0.85 | 0.38 |
| 0.25 | 0.81 | 0.35 | 0.80 | 0.29 | 0.83 | 0.36 |
| 0.78 | 1.82 | 0.84 | 2.12 | 0.89 | 2.03 | 0.93 |
| #N/A | #N/A | #N/A | #N/A | #N/A | #N/A | #N/A |
| 0.57 | 1.70 | 0.81 | #N/A | #N/A | 1.36 | 0.72 |

|      |      |      |      |      |      |      |
|------|------|------|------|------|------|------|
| 0.01 | 0.18 | 0.01 | 0.31 | 0.02 | 0.31 | 0.02 |
| #N/A | #N/A | #N/A | #N/A | #N/A | #N/A | #N/A |
| #N/A | 0.44 | 0.11 | 0.60 | 0.16 | 0.64 | 0.21 |
| 0.37 | 1.19 | 0.59 | 0.92 | 0.38 | 1.19 | 0.63 |
| 0.41 | 0.85 | 0.39 | 1.23 | 0.58 | 0.91 | 0.43 |
| #N/A | 1.12 | 0.53 | 1.19 | 0.56 | 1.11 | 0.58 |
| 0.59 | 1.35 | 0.67 | 1.48 | 0.71 | 1.36 | 0.72 |
| 0.36 | 0.84 | 0.38 | 1.01 | 0.44 | 1.08 | 0.56 |
| 0.32 | 0.80 | 0.35 | 0.86 | 0.34 | 0.68 | 0.24 |
| #N/A | 0.78 | 0.33 | 0.80 | 0.30 | 0.47 | 0.08 |
| 0.35 | 0.78 | 0.34 | 0.85 | 0.34 | 0.78 | 0.32 |
| 0.21 | 0.74 | 0.31 | 0.69 | 0.22 | 0.78 | 0.32 |
| 0.69 | 1.73 | 0.81 | #N/A | #N/A | #N/A | #N/A |
| #N/A | #N/A | #N/A | #N/A | #N/A | #N/A | #N/A |
| #N/A | 0.93 | 0.41 | 1.09 | 0.49 | 0.54 | 0.13 |
| 0.91 | 1.90 | 0.85 | #N/A | #N/A | 2.57 | 0.98 |
| 0.80 | 1.47 | 0.72 | 1.20 | 0.57 | 1.77 | 0.88 |
| 0.54 | 1.13 | 0.56 | 0.77 | 0.28 | 0.70 | 0.26 |
| 0.41 | 0.86 | 0.39 | 1.48 | 0.64 | 1.10 | 0.57 |
| #N/A | #N/A | #N/A | #N/A | #N/A | #N/A | #N/A |
| 0.15 | #N/A | #N/A | 0.74 | 0.26 | 0.56 | 0.15 |
| 0.33 | 0.73 | 0.31 | 0.78 | 0.28 | 0.65 | 0.22 |
| 0.08 | 0.48 | 0.14 | 0.43 | 0.06 | 0.51 | 0.11 |
| 0.74 | 1.76 | 0.83 | 1.68 | 0.79 | 1.27 | 0.67 |
| 0.61 | 1.38 | 0.69 | 1.24 | 0.59 | 1.37 | 0.73 |
| #N/A | #N/A | #N/A | #N/A | #N/A | #N/A | #N/A |
| 0.73 | 1.12 | 0.55 | 1.35 | 0.65 | 1.33 | 0.71 |
| 0.93 | 1.40 | 0.69 | 1.75 | 0.81 | #N/A | #N/A |
| 0.68 | 1.53 | 0.75 | 2.20 | 0.92 | 0.93 | 0.45 |
| 0.41 | 0.78 | 0.34 | #N/A | #N/A | 0.96 | 0.47 |
| #N/A | #N/A | #N/A | 2.94 | 0.84 | 1.19 | 0.63 |
| #N/A | #N/A | #N/A | 0.34 | 0.03 | #N/A | #N/A |
| 0.84 | 2.00 | 0.88 | 2.70 | 0.93 | 1.78 | 0.88 |
| #N/A | 0.46 | 0.12 | #N/A | #N/A | 0.81 | 0.35 |
| 0.86 | 2.23 | 0.91 | 2.45 | 0.92 | 2.06 | 0.93 |
| 0.68 | 1.40 | 0.70 | 1.55 | 0.73 | 2.05 | 0.93 |
| #N/A | #N/A | #N/A | #N/A | #N/A | #N/A | #N/A |
| 0.68 | 1.49 | 0.73 | 1.45 | 0.70 | 1.89 | 0.90 |
| 0.58 | 1.26 | 0.63 | 0.90 | 0.37 | 1.11 | 0.58 |
| 0.17 | 0.44 | 0.11 | 0.37 | 0.03 | 0.68 | 0.25 |
| 0.04 | 0.36 | 0.06 | 0.31 | 0.01 | 0.39 | 0.04 |
| 0.86 | 2.06 | 0.90 | 1.83 | 0.84 | 1.91 | 0.91 |
| 0.26 | #N/A | #N/A | #N/A | #N/A | 0.72 | 0.28 |
| 0.84 | #N/A | #N/A | 1.65 | 0.78 | 1.30 | 0.69 |
| 0.75 | 1.82 | 0.83 | 1.87 | 0.85 | 1.56 | 0.81 |
| #N/A | #N/A | #N/A | #N/A | #N/A | #N/A | #N/A |
| 0.79 | 1.66 | 0.80 | 1.44 | 0.69 | 1.71 | 0.86 |
| 0.78 | 1.70 | 0.81 | 1.35 | 0.65 | 1.55 | 0.81 |
| 0.38 | 0.83 | 0.37 | 0.81 | 0.31 | 0.72 | 0.28 |
| 0.08 | 0.42 | 0.09 | 0.51 | 0.11 | 0.43 | 0.06 |
| 0.20 | 0.59 | 0.21 | 0.65 | 0.19 | 0.68 | 0.25 |

|      |      |      |      |      |      |      |
|------|------|------|------|------|------|------|
| 0.61 | 1.12 | 0.54 | 1.14 | 0.53 | #N/A | #N/A |
| 0.51 | #N/A | #N/A | 0.86 | 0.34 | 1.09 | 0.56 |
| 0.73 | 1.76 | 0.83 | 1.43 | 0.69 | 1.28 | 0.68 |
| 0.24 | 0.85 | 0.38 | 0.60 | 0.16 | 0.53 | 0.12 |
| 0.55 | 1.07 | 0.51 | 1.29 | 0.61 | 0.84 | 0.37 |
| #N/A | #N/A | #N/A | 1.46 | 0.70 | 0.71 | 0.27 |
| #N/A | 0.78 | 0.33 | #N/A | #N/A | 0.54 | 0.13 |
| 0.27 | 0.44 | 0.12 | #N/A | #N/A | 0.59 | 0.17 |
| 0.93 | 2.64 | 0.96 | 2.34 | 0.94 | 2.02 | 0.93 |
| #N/A | #N/A | #N/A | #N/A | #N/A | #N/A | #N/A |
| 0.71 | 1.42 | 0.70 | 1.93 | 0.86 | 1.96 | 0.92 |
| 0.72 | 1.37 | 0.68 | 1.43 | 0.68 | 1.38 | 0.73 |
| 0.60 | 1.01 | 0.49 | 1.42 | 0.67 | 1.24 | 0.66 |
| 0.62 | 1.33 | 0.66 | #N/A | #N/A | 1.26 | 0.67 |
| 0.14 | 0.56 | 0.19 | 0.55 | 0.12 | 0.64 | 0.21 |
| 0.41 | 0.65 | 0.25 | 0.80 | 0.30 | 0.53 | 0.12 |
| 0.36 | 1.88 | 0.86 | 1.85 | 0.80 | 1.90 | 0.90 |
| #N/A | #N/A | #N/A | #N/A | #N/A | 1.01 | 0.51 |
| 0.96 | 2.19 | 0.92 | 1.97 | 0.86 | 1.97 | 0.92 |
| 0.25 | 0.91 | 0.42 | 1.36 | 0.65 | 1.04 | 0.53 |
| 0.43 | 1.01 | 0.48 | 0.96 | 0.42 | 1.03 | 0.53 |
| 0.49 | 1.01 | 0.48 | 0.84 | 0.33 | 0.76 | 0.31 |
| 0.69 | 1.44 | 0.71 | 1.36 | 0.66 | 1.10 | 0.57 |
| 0.26 | 0.32 | 0.05 | 0.58 | 0.14 | 0.31 | 0.02 |
| 0.70 | 1.54 | 0.73 | 1.58 | 0.68 | 1.57 | 0.82 |
| 0.62 | 1.46 | 0.72 | 1.37 | 0.65 | 1.55 | 0.80 |
| 0.49 | 1.42 | 0.68 | 2.23 | 0.89 | 1.13 | 0.59 |
| 0.27 | 0.78 | 0.34 | 1.21 | 0.57 | 0.74 | 0.30 |
| 0.03 | 0.30 | 0.04 | 0.41 | 0.05 | 0.34 | 0.03 |
| #N/A | 2.54 | 0.95 | 3.60 | 0.99 | 2.81 | 0.99 |
| 0.52 | 1.14 | 0.55 | 1.20 | 0.56 | 1.01 | 0.51 |
| 0.87 | 1.34 | 0.67 | #N/A | #N/A | 1.60 | 0.82 |
| 0.89 | 3.18 | 0.99 | 2.90 | 0.97 | 2.87 | 0.99 |
| 0.57 | 2.16 | 0.83 | 1.32 | 0.63 | 1.59 | 0.82 |
| 0.84 | 1.18 | 0.58 | 1.42 | 0.68 | 1.46 | 0.77 |
| 0.44 | 0.69 | 0.28 | 0.70 | 0.23 | 0.44 | 0.06 |
| 0.16 | 0.68 | 0.26 | 0.71 | 0.23 | 0.67 | 0.23 |
| 0.26 | 0.70 | 0.28 | 0.98 | 0.43 | 0.70 | 0.26 |
| #N/A | 0.89 | 0.41 | 1.22 | 0.57 | 0.96 | 0.47 |
| 0.98 | 2.98 | 0.98 | 2.76 | 0.97 | 2.38 | 0.97 |
| 0.56 | 1.30 | 0.65 | 1.01 | 0.45 | 1.16 | 0.61 |
| 0.82 | 2.33 | 0.94 | 1.61 | 0.77 | 1.63 | 0.84 |
| 0.40 | 1.16 | 0.57 | 0.70 | 0.23 | 1.01 | 0.51 |
| 0.40 | 0.81 | 0.36 | 0.54 | 0.12 | 0.87 | 0.40 |
| 0.43 | 1.01 | 0.49 | 0.50 | 0.09 | 1.06 | 0.54 |
| 0.25 | 0.85 | 0.38 | 1.09 | 0.50 | 0.70 | 0.26 |
| 0.67 | 1.58 | 0.77 | 1.14 | 0.53 | 1.17 | 0.61 |
| 0.64 | #N/A | #N/A | 1.69 | 0.78 | 1.35 | 0.72 |
| 0.67 | 0.99 | 0.47 | 0.92 | 0.38 | 0.92 | 0.44 |
| #N/A | #N/A | #N/A | #N/A | #N/A | #N/A | #N/A |
| 0.54 | 1.32 | 0.66 | 1.09 | 0.50 | 1.89 | 0.90 |

|      |      |      |      |      |      |      |
|------|------|------|------|------|------|------|
| 0.26 | 1.58 | 0.66 | #N/A | #N/A | 0.75 | 0.30 |
| 0.17 | 0.90 | 0.42 | 0.86 | 0.34 | 0.59 | 0.17 |
| 0.55 | 1.12 | 0.55 | 1.10 | 0.50 | 1.20 | 0.64 |
| 0.33 | 0.75 | 0.32 | 0.90 | 0.37 | 0.79 | 0.34 |
| #N/A | 1.28 | 0.63 | 1.41 | 0.67 | 1.20 | 0.64 |
| #N/A | #N/A | #N/A | 1.11 | 0.51 | 0.90 | 0.42 |
| #N/A | #N/A | #N/A | #N/A | #N/A | #N/A | #N/A |
| 0.72 | 1.38 | 0.69 | 1.65 | 0.78 | 1.16 | 0.61 |
| 0.26 | 0.67 | 0.27 | 0.60 | 0.16 | 0.80 | 0.34 |
| 0.19 | 0.71 | 0.29 | 0.72 | 0.24 | 0.70 | 0.27 |
| 0.83 | 1.84 | 0.85 | 1.88 | 0.85 | 1.91 | 0.91 |
| 0.77 | 1.44 | 0.71 | 1.35 | 0.65 | 1.35 | 0.71 |
| #N/A | 0.68 | 0.27 | 1.89 | 0.76 | #N/A | #N/A |
| 0.55 | 1.02 | 0.49 | 0.95 | 0.41 | 0.66 | 0.22 |
| 0.92 | 2.30 | 0.93 | 1.75 | 0.79 | 2.25 | 0.96 |
| 0.22 | 0.49 | 0.14 | 0.45 | 0.06 | 0.76 | 0.31 |
| 0.72 | 1.57 | 0.76 | 1.47 | 0.71 | #N/A | #N/A |
| #N/A | 1.66 | 0.78 | 2.20 | 0.92 | 1.20 | 0.64 |
| #N/A | 0.87 | 0.39 | 1.77 | 0.75 | 0.56 | 0.15 |
| #N/A | #N/A | #N/A | #N/A | #N/A | #N/A | #N/A |
| 0.65 | 1.48 | 0.73 | 1.52 | 0.71 | 1.11 | 0.57 |
| 0.61 | 1.51 | 0.72 | #N/A | #N/A | 1.30 | 0.69 |
| 0.55 | 1.25 | 0.62 | 1.11 | 0.52 | 1.18 | 0.62 |
| 0.92 | 1.70 | 0.80 | 2.23 | 0.92 | 1.73 | 0.87 |
| #N/A | #N/A | #N/A | #N/A | #N/A | #N/A | #N/A |
| 0.80 | #N/A | #N/A | 1.69 | 0.77 | 1.14 | 0.60 |
| #N/A | #N/A | #N/A | #N/A | #N/A | #N/A | #N/A |
| 0.58 | 1.27 | 0.63 | 1.24 | 0.59 | 1.03 | 0.52 |
| 0.93 | 2.42 | 0.93 | 3.50 | 0.98 | 1.28 | 0.68 |
| 0.84 | 1.21 | 0.59 | 1.63 | 0.77 | 1.03 | 0.53 |
| 0.52 | 0.76 | 0.32 | 1.02 | 0.46 | 0.94 | 0.45 |
| #N/A | 2.38 | 0.88 | 1.58 | 0.72 | 1.17 | 0.62 |
| 0.04 | 0.61 | 0.22 | #N/A | #N/A | 0.73 | 0.28 |
| 1.00 | 4.00 | 1.00 | 3.66 | 0.99 | 2.82 | 0.99 |
| #N/A | 1.50 | 0.73 | 1.55 | 0.74 | 1.84 | 0.90 |
| 0.74 | 1.19 | 0.59 | 1.20 | 0.57 | 1.70 | 0.86 |
| 0.09 | 0.43 | 0.10 | 0.55 | 0.18 | 0.48 | 0.09 |
| #N/A | 0.89 | 0.39 | 1.26 | 0.56 | 0.84 | 0.37 |
| 0.98 | 3.29 | 0.97 | 3.44 | 0.99 | 2.64 | 0.98 |
| #N/A | #N/A | #N/A | #N/A | #N/A | 0.80 | 0.34 |
| #N/A | #N/A | #N/A | #N/A | #N/A | #N/A | #N/A |
| 0.38 | 1.09 | 0.53 | #N/A | #N/A | 1.37 | 0.73 |
| 0.27 | 0.67 | 0.26 | 0.71 | 0.24 | 0.62 | 0.20 |
| #N/A | #N/A | #N/A | #N/A | #N/A | #N/A | #N/A |
| #N/A | 0.86 | 0.38 | 0.86 | 0.34 | 1.06 | 0.54 |
| #N/A | #N/A | #N/A | 0.50 | 0.09 | #N/A | #N/A |
| 0.79 | 1.51 | 0.74 | 1.15 | 0.53 | #N/A | #N/A |
| 0.04 | 0.36 | 0.06 | 0.44 | 0.07 | 0.49 | 0.10 |
| #N/A | #N/A | #N/A | #N/A | #N/A | #N/A | #N/A |
| 0.60 | #N/A | #N/A | 1.71 | 0.80 | 1.24 | 0.66 |
| 0.90 | 2.23 | 0.92 | 1.62 | 0.77 | 1.83 | 0.89 |



|      |      |      |      |      |      |      |
|------|------|------|------|------|------|------|
| 0.88 | 2.00 | 0.89 | 1.75 | 0.81 | 1.70 | 0.86 |
| #N/A | #N/A | #N/A | #N/A | #N/A | #N/A | #N/A |
| 0.95 | 2.24 | 0.93 | 2.28 | 0.93 | 2.80 | 0.99 |
| #N/A | #N/A | #N/A | #N/A | #N/A | 0.80 | 0.34 |
| 0.99 | 4.70 | 1.00 | 3.59 | 0.99 | 4.35 | 1.00 |
| 0.28 | #N/A | #N/A | #N/A | #N/A | #N/A | #N/A |
| 0.66 | #N/A | #N/A | 1.44 | 0.69 | 1.11 | 0.57 |
| #N/A | #N/A | #N/A | #N/A | #N/A | #N/A | #N/A |
| 0.75 | #N/A | #N/A | 1.24 | 0.58 | 1.25 | 0.66 |
| 0.73 | 1.76 | 0.80 | 1.95 | 0.86 | 2.23 | 0.95 |
| #N/A | #N/A | #N/A | 1.39 | 0.67 | #N/A | #N/A |
| #N/A | 1.48 | 0.68 | #N/A | #N/A | 0.69 | 0.25 |
| 0.14 | 0.41 | 0.09 | 0.54 | 0.12 | 0.44 | 0.06 |
| 0.15 | 0.39 | 0.07 | #N/A | #N/A | 0.45 | 0.07 |
| 0.85 | 1.61 | 0.78 | 1.84 | 0.84 | 1.72 | 0.87 |
| 0.73 | 1.40 | 0.69 | 1.38 | 0.66 | 1.92 | 0.91 |
| 0.54 | 1.07 | 0.51 | 1.21 | 0.57 | 1.31 | 0.69 |
| 0.19 | 0.54 | 0.17 | 0.68 | 0.21 | 0.58 | 0.17 |
| #N/A | #N/A | #N/A | #N/A | #N/A | #N/A | #N/A |
| 0.71 | 1.60 | 0.78 | 1.44 | 0.69 | 1.35 | 0.71 |
| #N/A | #N/A | #N/A | #N/A | #N/A | #N/A | #N/A |
| 0.37 | 1.07 | 0.52 | 1.05 | 0.48 | 1.00 | 0.50 |
| 0.32 | 0.76 | 0.32 | 0.85 | 0.34 | 0.94 | 0.46 |
| 0.62 | 1.15 | 0.57 | 1.31 | 0.62 | 0.98 | 0.49 |
| 0.43 | 0.95 | 0.44 | 1.00 | 0.44 | 0.96 | 0.47 |
| 0.52 | 1.32 | 0.66 | 1.16 | 0.53 | 1.00 | 0.51 |
| 0.59 | 1.03 | 0.49 | 1.20 | 0.56 | 1.03 | 0.52 |
| #N/A | #N/A | #N/A | #N/A | #N/A | #N/A | #N/A |
| 0.17 | 0.56 | 0.19 | 0.69 | 0.22 | 0.51 | 0.11 |
| 0.19 | #N/A | #N/A | 0.77 | 0.28 | 0.70 | 0.26 |
| 0.49 | 0.97 | 0.46 | 1.06 | 0.48 | 1.06 | 0.55 |
| 0.63 | 0.84 | 0.38 | 1.05 | 0.48 | 0.68 | 0.24 |
| #N/A | #N/A | #N/A | #N/A | #N/A | #N/A | #N/A |
| 0.97 | 2.18 | 0.92 | 2.10 | 0.90 | 2.69 | 0.98 |
| 0.28 | 0.50 | 0.15 | #N/A | #N/A | 0.42 | 0.05 |
| 0.02 | 0.25 | 0.02 | 0.32 | 0.02 | 0.43 | 0.06 |
| #N/A | #N/A | #N/A | #N/A | #N/A | #N/A | #N/A |
| 0.82 | 1.88 | 0.85 | 2.12 | 0.88 | 1.49 | 0.78 |
| 0.72 | 1.58 | 0.76 | 1.33 | 0.64 | 1.11 | 0.58 |
| 0.55 | 1.19 | 0.59 | 1.30 | 0.62 | 1.38 | 0.74 |
| 0.67 | 1.40 | 0.70 | 1.83 | 0.81 | 1.08 | 0.56 |
| 0.69 | 1.16 | 0.57 | 1.75 | 0.82 | 1.51 | 0.79 |
| 0.20 | 0.51 | 0.15 | #N/A | #N/A | 0.42 | 0.06 |
| 0.98 | #N/A | #N/A | #N/A | #N/A | 1.79 | 0.88 |
| 0.39 | 0.79 | 0.34 | 1.09 | 0.48 | 1.29 | 0.68 |
| 0.81 | 1.67 | 0.80 | 1.18 | 0.54 | 1.05 | 0.54 |
| 0.12 | 0.49 | 0.14 | 0.64 | 0.18 | 0.67 | 0.24 |
| #N/A | #N/A | #N/A | 0.74 | 0.25 | 0.66 | 0.23 |
| 0.67 | 1.32 | 0.65 | 1.43 | 0.67 | 1.62 | 0.83 |
| 0.77 | 2.08 | 0.90 | 1.94 | 0.85 | 2.47 | 0.97 |
| 0.39 | 0.62 | 0.23 | 0.82 | 0.31 | 0.70 | 0.26 |

|      |      |      |      |      |      |      |
|------|------|------|------|------|------|------|
| 0.49 | 1.03 | 0.49 | 0.92 | 0.38 | 0.69 | 0.25 |
| 0.13 | 0.51 | 0.15 | 0.60 | 0.15 | 0.56 | 0.14 |
| 0.35 | 0.68 | 0.27 | 0.73 | 0.25 | 0.69 | 0.25 |
| 0.49 | 0.58 | 0.20 | 0.66 | 0.20 | 0.57 | 0.15 |
| #N/A | 0.44 | 0.11 | 0.71 | 0.24 | 0.58 | 0.17 |
| 0.29 | 0.76 | 0.32 | 0.91 | 0.38 | 0.70 | 0.26 |
| 0.71 | 1.18 | 0.57 | 1.92 | 0.86 | 1.10 | 0.57 |
| #N/A | #N/A | #N/A | #N/A | #N/A | #N/A | #N/A |
| 0.98 | 3.28 | 0.98 | 2.89 | 0.97 | 2.94 | 0.99 |
| 0.79 | 1.58 | 0.77 | 1.42 | 0.69 | #N/A | #N/A |
| #N/A | 0.96 | 0.45 | 1.02 | 0.45 | 0.80 | 0.34 |
| #N/A | 1.88 | 0.86 | #N/A | #N/A | 1.42 | 0.75 |
| 0.66 | 1.45 | 0.72 | 1.43 | 0.68 | 1.21 | 0.64 |
| #N/A | #N/A | #N/A | #N/A | #N/A | #N/A | #N/A |
| #N/A | #N/A | #N/A | #N/A | #N/A | #N/A | #N/A |
| 0.79 | 1.40 | 0.69 | 1.29 | 0.62 | 1.51 | 0.79 |
| 0.62 | #N/A | #N/A | 1.04 | 0.47 | 1.04 | 0.53 |
| #N/A | #N/A | #N/A | #N/A | #N/A | #N/A | #N/A |
| 0.87 | 2.09 | 0.90 | 1.82 | 0.83 | 1.77 | 0.88 |
| 0.85 | #N/A | #N/A | 1.82 | 0.84 | 1.78 | 0.88 |
| #N/A | #N/A | #N/A | 1.65 | 0.76 | #N/A | #N/A |
| #N/A | #N/A | #N/A | #N/A | #N/A | #N/A | #N/A |
| 0.08 | 2.59 | 0.95 | #N/A | #N/A | 1.43 | 0.76 |
| #N/A | 0.35 | 0.06 | 0.36 | 0.03 | #N/A | #N/A |
| 0.65 | 1.43 | 0.71 | 1.31 | 0.63 | 1.36 | 0.72 |
| 0.52 | 1.25 | 0.62 | 1.12 | 0.52 | 1.29 | 0.68 |
| 0.30 | 0.81 | 0.36 | 0.89 | 0.36 | 1.19 | 0.63 |
| 1.00 | 3.07 | 0.97 | 2.23 | 0.92 | 2.50 | 0.97 |
| 0.08 | #N/A | #N/A | #N/A | #N/A | #N/A | #N/A |
| 0.97 | 3.02 | 0.92 | #N/A | #N/A | 3.10 | 0.99 |
| 0.26 | #N/A | #N/A | #N/A | #N/A | 0.51 | 0.11 |
| 0.80 | #N/A | #N/A | #N/A | #N/A | 2.98 | 0.99 |
| #N/A | #N/A | #N/A | #N/A | #N/A | #N/A | #N/A |
| 0.54 | 1.08 | 0.53 | #N/A | #N/A | 1.52 | 0.80 |
| #N/A | #N/A | #N/A | #N/A | #N/A | #N/A | #N/A |
| 0.57 | 1.36 | 0.68 | 1.16 | 0.54 | 1.13 | 0.59 |
| #N/A | 0.61 | 0.22 | 0.68 | 0.22 | 0.86 | 0.39 |
| 0.51 | 0.86 | 0.38 | 0.76 | 0.27 | 0.78 | 0.32 |
| #N/A | #N/A | #N/A | #N/A | #N/A | #N/A | #N/A |
| 0.63 | 1.15 | 0.56 | 1.12 | 0.52 | 0.90 | 0.42 |
| #N/A | #N/A | #N/A | #N/A | #N/A | #N/A | #N/A |
| #N/A | #N/A | #N/A | #N/A | #N/A | #N/A | #N/A |
| 0.41 | 0.81 | 0.36 | 0.75 | 0.26 | 0.92 | 0.44 |
| 0.47 | 0.97 | 0.46 | 0.63 | 0.18 | 0.96 | 0.47 |
| 0.61 | 1.20 | 0.60 | 1.32 | 0.63 | 0.96 | 0.47 |
| 0.29 | #N/A | #N/A | 1.15 | 0.52 | 1.14 | 0.60 |
| #N/A | 0.20 | 0.01 | 0.71 | 0.23 | 0.58 | 0.16 |
| 0.15 | 0.61 | 0.22 | #N/A | #N/A | 0.75 | 0.30 |
| 0.73 | 1.77 | 0.83 | 1.64 | 0.78 | 1.89 | 0.90 |
| 0.48 | 1.35 | 0.65 | 1.15 | 0.52 | 1.03 | 0.52 |
| 0.39 | 0.59 | 0.21 | 0.81 | 0.31 | 0.61 | 0.19 |

|      |      |      |      |      |      |      |
|------|------|------|------|------|------|------|
| 0.67 | #N/A | #N/A | #N/A | #N/A | 0.99 | 0.49 |
| #N/A | 1.38 | 0.68 | 1.73 | 0.80 | 1.63 | 0.84 |
| 0.93 | #N/A | #N/A | 3.57 | 0.99 | 3.36 | 1.00 |
| 0.80 | 1.60 | 0.77 | 1.38 | 0.66 | 1.38 | 0.73 |
| 0.05 | 0.37 | 0.07 | 0.39 | 0.04 | 0.47 | 0.08 |
| #N/A | #N/A | #N/A | #N/A | #N/A | #N/A | #N/A |
| 0.15 | 0.38 | 0.07 | #N/A | #N/A | 0.42 | 0.05 |
| 0.11 | 0.40 | 0.08 | 0.52 | 0.11 | 0.45 | 0.07 |
| #N/A | #N/A | #N/A | #N/A | #N/A | #N/A | #N/A |
| 0.84 | #N/A | #N/A | #N/A | #N/A | #N/A | #N/A |
| 0.26 | 0.76 | 0.32 | 0.63 | 0.18 | 0.90 | 0.42 |
| 0.29 | 0.73 | 0.31 | 0.75 | 0.26 | 0.92 | 0.44 |
| 0.86 | 2.33 | 0.94 | 2.12 | 0.90 | 1.89 | 0.90 |
| 0.04 | #N/A | #N/A | 0.42 | 0.05 | 0.31 | 0.02 |
| 0.57 | #N/A | #N/A | 0.94 | 0.40 | 0.96 | 0.47 |
| #N/A | #N/A | #N/A | #N/A | #N/A | #N/A | #N/A |
| 0.22 | 0.66 | 0.26 | 0.67 | 0.21 | 0.73 | 0.29 |
| #N/A | #N/A | #N/A | #N/A | #N/A | 1.27 | 0.67 |
| 0.48 | #N/A | #N/A | 0.54 | 0.12 | 0.63 | 0.20 |
| #N/A | #N/A | #N/A | #N/A | #N/A | #N/A | #N/A |
| #N/A | #N/A | #N/A | #N/A | #N/A | #N/A | #N/A |
| #N/A | #N/A | #N/A | #N/A | #N/A | #N/A | #N/A |
| #N/A | #N/A | #N/A | #N/A | #N/A | #N/A | #N/A |
| 0.54 | 0.97 | 0.46 | 0.95 | 0.41 | 0.91 | 0.43 |
| 0.64 | 0.95 | 0.45 | 1.16 | 0.54 | 1.04 | 0.53 |
| 0.50 | 1.09 | 0.53 | 1.11 | 0.52 | 1.13 | 0.59 |
| 0.55 | 1.20 | 0.60 | 0.93 | 0.39 | 1.24 | 0.66 |
| 0.36 | 0.77 | 0.33 | 0.69 | 0.22 | 0.85 | 0.38 |
| 0.54 | 1.09 | 0.53 | 0.90 | 0.37 | 1.06 | 0.55 |
| 0.80 | 1.57 | 0.77 | 1.57 | 0.75 | 1.69 | 0.86 |
| 0.32 | 0.72 | 0.30 | 0.71 | 0.23 | 0.72 | 0.28 |
| 0.54 | 1.06 | 0.51 | 1.07 | 0.49 | 0.91 | 0.43 |
| 0.35 | 0.78 | 0.34 | 0.75 | 0.26 | 0.73 | 0.29 |
| 0.40 | 0.94 | 0.44 | 1.14 | 0.53 | 1.10 | 0.57 |
| 0.17 | 0.61 | 0.22 | 0.55 | 0.13 | 0.63 | 0.20 |
| 0.35 | 0.82 | 0.36 | 0.88 | 0.36 | 0.78 | 0.33 |
| 0.34 | #N/A | #N/A | #N/A | #N/A | 0.46 | 0.07 |
| 0.03 | 0.30 | 0.04 | 0.29 | 0.01 | 0.39 | 0.04 |
| 0.12 | 0.44 | 0.10 | 0.63 | 0.18 | 0.54 | 0.13 |
| 0.03 | #N/A | #N/A | #N/A | #N/A | 0.34 | 0.03 |
| #N/A | 0.37 | 0.08 | 0.31 | 0.02 | 0.41 | 0.05 |
| 0.16 | 1.17 | 0.58 | 1.17 | 0.55 | 0.87 | 0.40 |
| 0.12 | #N/A | #N/A | #N/A | #N/A | #N/A | #N/A |
| 0.40 | #N/A | #N/A | 1.15 | 0.51 | 0.59 | 0.17 |
| 0.66 | 0.97 | 0.46 | 0.69 | 0.22 | 1.05 | 0.54 |
| #N/A | #N/A | #N/A | #N/A | #N/A | #N/A | #N/A |
| 0.01 | 0.26 | 0.03 | 0.23 | 0.01 | 0.47 | 0.09 |
| 0.01 | 0.35 | 0.06 | 0.62 | 0.17 | #N/A | #N/A |
| 0.71 | 1.58 | 0.76 | 1.25 | 0.59 | 1.49 | 0.78 |
| 0.79 | 1.86 | 0.86 | 1.57 | 0.69 | 1.57 | 0.81 |
| #N/A | 0.58 | 0.20 | 0.65 | 0.20 | 0.99 | 0.50 |

|      |      |      |      |      |      |      |
|------|------|------|------|------|------|------|
| 0.49 | 1.17 | 0.58 | 0.99 | 0.43 | 1.32 | 0.70 |
| 0.31 | #N/A | #N/A | 1.06 | 0.48 | #N/A | #N/A |
| 0.68 | 1.26 | 0.62 | 1.79 | 0.83 | 1.59 | 0.82 |
| 0.72 | 1.45 | 0.69 | 1.67 | 0.72 | 2.08 | 0.94 |
| 0.05 | 0.38 | 0.08 | 0.46 | 0.10 | 0.57 | 0.15 |
| 0.11 | #N/A | #N/A | #N/A | #N/A | #N/A | #N/A |
| 0.79 | 1.45 | 0.70 | 1.29 | 0.61 | 1.93 | 0.91 |
| #N/A | 0.41 | 0.09 | #N/A | #N/A | 0.28 | 0.01 |
| 0.12 | 0.49 | 0.14 | 0.66 | 0.20 | 0.25 | 0.01 |
| 0.05 | #N/A | #N/A | #N/A | #N/A | 0.44 | 0.06 |
| 0.23 | #N/A | #N/A | 1.16 | 0.54 | 0.55 | 0.13 |
| 0.37 | 0.62 | 0.23 | #N/A | #N/A | 0.99 | 0.50 |
| #N/A | #N/A | #N/A | #N/A | #N/A | #N/A | #N/A |
| #N/A | #N/A | #N/A | 0.68 | 0.21 | 0.82 | 0.36 |
| 0.10 | 0.49 | 0.14 | 0.64 | 0.19 | 0.61 | 0.18 |
| 0.35 | 0.83 | 0.37 | 1.08 | 0.50 | 1.06 | 0.55 |
| #N/A | #N/A | #N/A | 0.55 | 0.14 | 0.76 | 0.31 |
| #N/A | #N/A | #N/A | 0.41 | 0.06 | 0.48 | 0.09 |
| #N/A | 0.49 | 0.14 | 0.58 | 0.15 | 0.49 | 0.10 |
| #N/A | #N/A | #N/A | #N/A | #N/A | #N/A | #N/A |
| #N/A | #N/A | #N/A | #N/A | #N/A | #N/A | #N/A |
| #N/A | #N/A | #N/A | #N/A | #N/A | 0.19 | 0.00 |
| #N/A | #N/A | #N/A | #N/A | #N/A | #N/A | #N/A |
| #N/A | #N/A | #N/A | #N/A | #N/A | #N/A | #N/A |
| #N/A | #N/A | #N/A | #N/A | #N/A | #N/A | #N/A |
| #N/A | #N/A | #N/A | #N/A | #N/A | #N/A | #N/A |
| #N/A | #N/A | #N/A | #N/A | #N/A | #N/A | #N/A |
| #N/A | #N/A | #N/A | #N/A | #N/A | #N/A | #N/A |
| #N/A | #N/A | #N/A | #N/A | #N/A | #N/A | #N/A |
| #N/A | #N/A | #N/A | #N/A | #N/A | #N/A | #N/A |
| #N/A | #N/A | #N/A | #N/A | #N/A | #N/A | #N/A |
| #N/A | #N/A | #N/A | #N/A | #N/A | #N/A | #N/A |
| #N/A | #N/A | #N/A | #N/A | #N/A | #N/A | #N/A |
| #N/A | #N/A | #N/A | #N/A | #N/A | #N/A | #N/A |
| 0.36 | 0.73 | 0.30 | 0.85 | 0.33 | 1.15 | 0.60 |
| #N/A | #N/A | #N/A | #N/A | #N/A | #N/A | #N/A |
| #N/A | #N/A | #N/A | #N/A | #N/A | #N/A | #N/A |
| #N/A | #N/A | #N/A | #N/A | #N/A | #N/A | #N/A |
| #N/A | 0.54 | 0.17 | 0.35 | 0.06 | 1.17 | 0.62 |
| #N/A | 0.47 | 0.13 | 0.68 | 0.21 | 0.47 | 0.08 |
| 0.40 | 0.80 | 0.35 | #N/A | #N/A | 1.05 | 0.54 |
| 0.32 | 0.92 | 0.43 | #N/A | #N/A | #N/A | #N/A |
| #N/A | #N/A | #N/A | #N/A | #N/A | #N/A | #N/A |
| #N/A | 1.22 | 0.59 | 1.13 | 0.53 | 0.94 | 0.45 |
| #N/A | 0.34 | 0.05 | #N/A | #N/A | 0.63 | 0.20 |
| #N/A | 0.81 | 0.36 | #N/A | #N/A | 0.56 | 0.15 |
| #N/A | #N/A | #N/A | #N/A | #N/A | 0.81 | 0.35 |
| 0.08 | 0.58 | 0.20 | 0.53 | 0.11 | 0.51 | 0.11 |
| 0.09 | 0.50 | 0.15 | 0.66 | 0.20 | 0.56 | 0.15 |
| #N/A | #N/A | #N/A | #N/A | #N/A | #N/A | #N/A |
| 0.43 | 0.30 | 0.04 | 0.56 | 0.13 | 0.47 | 0.08 |
| 0.42 | 0.36 | 0.06 | 0.56 | 0.13 | 0.48 | 0.09 |
| 0.09 | 0.77 | 0.33 | 0.88 | 0.36 | 0.88 | 0.40 |
| #N/A | #N/A | #N/A | #N/A | #N/A | #N/A | #N/A |



|      |      |      |      |      |      |      |
|------|------|------|------|------|------|------|
| #N/A | 0.52 | 0.17 | #N/A | #N/A | 0.79 | 0.33 |
| #N/A | #N/A | #N/A | #N/A | #N/A | 0.52 | 0.12 |
| #N/A | 1.00 | 0.45 | 1.13 | 0.49 | 1.04 | 0.53 |
| 0.35 | 0.54 | 0.17 | 0.72 | 0.24 | 1.19 | 0.63 |
| 0.37 | 0.88 | 0.40 | #N/A | #N/A | 0.71 | 0.27 |
| 0.27 | 0.62 | 0.23 | 0.77 | 0.28 | 0.54 | 0.13 |
| #N/A | #N/A | #N/A | #N/A | #N/A | 0.50 | 0.10 |
| #N/A | 0.73 | 0.30 | 0.80 | 0.30 | 0.66 | 0.23 |
| #N/A | #N/A | #N/A | #N/A | #N/A | #N/A | #N/A |
| #N/A | #N/A | #N/A | #N/A | #N/A | #N/A | #N/A |
| 0.47 | 0.93 | 0.44 | 0.94 | 0.40 | 0.84 | 0.37 |
| 0.45 | 0.98 | 0.47 | 0.90 | 0.37 | 0.98 | 0.49 |
| 0.32 | 0.64 | 0.24 | #N/A | #N/A | 0.97 | 0.48 |
| 0.21 | 0.50 | 0.14 | 0.54 | 0.12 | 0.50 | 0.10 |
| #N/A | #N/A | #N/A | #N/A | #N/A | #N/A | #N/A |
| #N/A | #N/A | #N/A | #N/A | #N/A | #N/A | #N/A |
| #N/A | #N/A | #N/A | #N/A | #N/A | #N/A | #N/A |
| #N/A | 1.33 | 0.65 | 1.25 | 0.59 | 0.86 | 0.39 |
| #N/A | 1.29 | 0.64 | 0.83 | 0.32 | 1.45 | 0.77 |
| 0.31 | 0.80 | 0.35 | #N/A | #N/A | 0.82 | 0.35 |
| 0.90 | 1.98 | 0.88 | 2.43 | 0.95 | 1.15 | 0.60 |
| #N/A | #N/A | #N/A | #N/A | #N/A | 0.72 | 0.28 |
| #N/A | #N/A | #N/A | #N/A | #N/A | 1.25 | 0.67 |
| 0.51 | 2.17 | 0.92 | 0.53 | 0.11 | 0.83 | 0.36 |
| 0.34 | 1.15 | 0.57 | 0.53 | 0.11 | 1.13 | 0.59 |
| 0.43 | 0.71 | 0.29 | 0.50 | 0.09 | 1.10 | 0.57 |
| 0.86 | 1.27 | 0.63 | 1.54 | 0.69 | 1.62 | 0.83 |
| 0.95 | 2.51 | 0.96 | 2.61 | 0.96 | 2.19 | 0.95 |
| 0.57 | 1.52 | 0.75 | 0.50 | 0.09 | #N/A | #N/A |
| 0.41 | 0.54 | 0.17 | 0.86 | 0.34 | 0.73 | 0.29 |
| #N/A | #N/A | #N/A | #N/A | #N/A | #N/A | #N/A |
| 0.42 | 0.92 | 0.42 | 0.86 | 0.34 | 0.86 | 0.39 |
| #N/A | #N/A | #N/A | #N/A | #N/A | #N/A | #N/A |
| 0.72 | 1.02 | 0.49 | 0.86 | 0.35 | #N/A | #N/A |
| #N/A | 1.77 | 0.83 | 1.60 | 0.75 | 1.35 | 0.72 |
| #N/A | #N/A | #N/A | #N/A | #N/A | #N/A | #N/A |
| 0.73 | 1.51 | 0.74 | 0.97 | 0.41 | 1.23 | 0.65 |
| #N/A | #N/A | #N/A | #N/A | #N/A | #N/A | #N/A |
| 0.81 | 1.42 | 0.71 | 1.80 | 0.81 | 1.36 | 0.72 |
| 0.33 | 0.77 | 0.33 | 0.73 | 0.25 | 0.78 | 0.32 |
| 0.05 | #N/A | #N/A | #N/A | #N/A | #N/A | #N/A |
| 0.16 | 1.24 | 0.61 | 1.45 | 0.64 | 0.77 | 0.32 |
| 0.06 | 0.40 | 0.08 | 0.43 | 0.06 | 0.44 | 0.06 |
| 0.37 | 0.86 | 0.39 | 0.85 | 0.34 | 0.88 | 0.40 |
| #N/A | #N/A | #N/A | #N/A | #N/A | #N/A | #N/A |
| 0.32 | 0.77 | 0.33 | 0.76 | 0.27 | 0.71 | 0.27 |
| #N/A | 0.77 | 0.33 | 1.37 | 0.65 | 1.00 | 0.50 |
| #N/A | 0.54 | 0.18 | 1.00 | 0.44 | 0.87 | 0.39 |
| #N/A | #N/A | #N/A | #N/A | #N/A | #N/A | #N/A |
| 0.74 | 1.34 | 0.67 | 1.22 | 0.57 | 1.36 | 0.72 |
| 0.58 | #N/A | #N/A | #N/A | #N/A | #N/A | #N/A |

|      |      |      |      |      |      |      |
|------|------|------|------|------|------|------|
| #N/A | 0.78 | 0.33 | 0.99 | 0.43 | 0.71 | 0.27 |
| 0.68 | 1.93 | 0.81 | 1.36 | 0.66 | 1.68 | 0.85 |
| 0.88 | 2.41 | 0.94 | 2.34 | 0.94 | 2.33 | 0.96 |
| 0.57 | #N/A | #N/A | 0.96 | 0.41 | 0.95 | 0.46 |
| #N/A | 0.43 | 0.10 | 0.43 | 0.05 | 0.36 | 0.03 |
| 0.04 | 0.38 | 0.08 | 0.38 | 0.03 | 0.26 | 0.01 |
| 0.18 | 0.61 | 0.22 | 0.61 | 0.16 | #N/A | #N/A |
| 0.56 | 1.37 | 0.68 | 1.67 | 0.77 | 1.56 | 0.81 |
| 0.48 | 0.79 | 0.34 | 1.10 | 0.47 | 1.67 | 0.85 |
| #N/A | #N/A | #N/A | #N/A | #N/A | #N/A | #N/A |
| #N/A | #N/A | #N/A | #N/A | #N/A | #N/A | #N/A |
| #N/A | #N/A | #N/A | 1.19 | 0.56 | #N/A | #N/A |
| 0.61 | 1.30 | 0.65 | 1.55 | 0.74 | 1.42 | 0.76 |
| 0.49 | 0.99 | 0.47 | 1.07 | 0.48 | 1.03 | 0.52 |
| 0.18 | 1.22 | 0.57 | 0.84 | 0.33 | 1.01 | 0.51 |
| 0.04 | 0.34 | 0.05 | 0.38 | 0.04 | 0.38 | 0.04 |
| #N/A | 0.81 | 0.36 | 0.66 | 0.20 | 1.11 | 0.58 |
| #N/A | 0.98 | 0.42 | #N/A | #N/A | #N/A | #N/A |
| 0.41 | 1.41 | 0.69 | 0.80 | 0.30 | 1.12 | 0.58 |
| 0.36 | 1.11 | 0.54 | 0.97 | 0.41 | 0.51 | 0.10 |
| 0.61 | 1.37 | 0.66 | 1.09 | 0.50 | 0.83 | 0.36 |
| 0.30 | #N/A | #N/A | 0.80 | 0.30 | 1.06 | 0.55 |
| 0.05 | 0.36 | 0.06 | 0.40 | 0.05 | 0.43 | 0.06 |
| 0.40 | 0.98 | 0.45 | #N/A | #N/A | 1.10 | 0.57 |
| 0.75 | 1.37 | 0.68 | 1.45 | 0.70 | 1.59 | 0.82 |
| 0.30 | 0.96 | 0.45 | 0.61 | 0.17 | 1.76 | 0.87 |
| #N/A | #N/A | #N/A | 0.57 | 0.14 | 0.52 | 0.11 |
| #N/A | 0.72 | 0.30 | 0.65 | 0.19 | 0.77 | 0.31 |
| #N/A | 0.84 | 0.36 | 1.55 | 0.74 | #N/A | #N/A |
| 0.28 | 0.37 | 0.10 | 0.71 | 0.23 | 0.68 | 0.24 |
| #N/A | #N/A | #N/A | #N/A | #N/A | #N/A | #N/A |
| 0.16 | 0.48 | 0.17 | #N/A | #N/A | 0.49 | 0.10 |
| #N/A | 0.73 | 0.30 | #N/A | #N/A | 0.53 | 0.13 |
| #N/A | #N/A | #N/A | #N/A | #N/A | #N/A | #N/A |
| 0.85 | 1.78 | 0.82 | #N/A | #N/A | 1.17 | 0.61 |
| 0.12 | 0.35 | 0.06 | 0.42 | 0.05 | 0.38 | 0.03 |
| 0.10 | 0.38 | 0.07 | 0.44 | 0.06 | 0.44 | 0.07 |
| 0.37 | 0.78 | 0.34 | 0.85 | 0.34 | 0.86 | 0.39 |
| #N/A | #N/A | #N/A | #N/A | #N/A | #N/A | #N/A |
| 0.78 | 1.46 | 0.70 | 1.45 | 0.70 | 1.41 | 0.75 |
| #N/A | #N/A | #N/A | #N/A | #N/A | #N/A | #N/A |
| 0.20 | #N/A | #N/A | 0.51 | 0.10 | 0.74 | 0.30 |
| #N/A | 0.61 | 0.23 | #N/A | #N/A | #N/A | #N/A |
| 0.63 | 1.90 | 0.85 | #N/A | #N/A | 1.96 | 0.92 |
| #N/A | #N/A | #N/A | #N/A | #N/A | #N/A | #N/A |
| #N/A | 0.56 | 0.19 | 1.05 | 0.46 | 0.83 | 0.36 |
| #N/A | #N/A | #N/A | #N/A | #N/A | #N/A | #N/A |
| #N/A | #N/A | #N/A | #N/A | #N/A | #N/A | #N/A |
| #N/A | #N/A | #N/A | #N/A | #N/A | 0.71 | 0.27 |
| #N/A | #N/A | #N/A | 1.23 | 0.58 | 0.63 | 0.20 |
| 0.14 | 0.38 | 0.07 | 0.46 | 0.07 | 0.43 | 0.06 |

|      |      |      |      |      |      |      |
|------|------|------|------|------|------|------|
| 0.11 | 0.41 | 0.08 | 0.50 | 0.09 | 0.49 | 0.09 |
| 0.38 | 0.83 | 0.37 | 0.90 | 0.37 | 0.90 | 0.42 |
| 0.38 | 1.04 | 0.50 | 1.21 | 0.56 | 0.73 | 0.29 |
| 0.55 | 0.95 | 0.44 | 1.14 | 0.52 | 0.99 | 0.50 |
| #N/A | 0.79 | 0.34 | #N/A | #N/A | #N/A | #N/A |
| #N/A | 0.61 | 0.22 | 0.64 | 0.19 | 0.58 | 0.16 |
| #N/A | 0.41 | 0.09 | #N/A | #N/A | 0.13 | 0.00 |
| 0.26 | 0.71 | 0.29 | 0.66 | 0.20 | 0.78 | 0.32 |
| 0.93 | 2.38 | 0.94 | 2.22 | 0.91 | 2.17 | 0.95 |
| 0.19 | 0.61 | 0.22 | 0.61 | 0.16 | 0.71 | 0.27 |
| 0.16 | 0.51 | 0.15 | 0.58 | 0.14 | 0.57 | 0.15 |
| 0.07 | 0.36 | 0.07 | 0.34 | 0.03 | #N/A | #N/A |
| 0.73 | 2.15 | 0.91 | 2.03 | 0.87 | 1.42 | 0.75 |
| 0.80 | 1.99 | 0.88 | 1.44 | 0.66 | 2.16 | 0.95 |
| #N/A | #N/A | #N/A | #N/A | #N/A | #N/A | #N/A |
| 0.54 | 1.35 | 0.67 | 1.53 | 0.73 | 1.06 | 0.54 |
| 0.50 | 0.98 | 0.46 | 0.88 | 0.36 | 1.05 | 0.54 |
| 0.07 | #N/A | #N/A | #N/A | #N/A | 0.39 | 0.04 |
| #N/A | #N/A | #N/A | #N/A | #N/A | #N/A | #N/A |
| #N/A | #N/A | #N/A | #N/A | #N/A | #N/A | #N/A |
| #N/A | #N/A | #N/A | #N/A | #N/A | #N/A | #N/A |
| #N/A | 0.89 | 0.41 | 1.05 | 0.45 | 1.05 | 0.54 |
| #N/A | #N/A | #N/A | #N/A | #N/A | #N/A | #N/A |
| #N/A | #N/A | #N/A | #N/A | #N/A | 0.71 | 0.27 |
| #N/A | #N/A | #N/A | #N/A | #N/A | #N/A | #N/A |
| #N/A | 1.54 | 0.75 | #N/A | #N/A | 2.10 | 0.94 |
| #N/A | 0.86 | 0.39 | 0.65 | 0.19 | 0.80 | 0.34 |
| 0.67 | 3.33 | 0.97 | 1.98 | 0.85 | 1.38 | 0.74 |
| #N/A | 0.65 | 0.25 | 1.07 | 0.49 | 0.67 | 0.23 |
| #N/A | 1.12 | 0.55 | 0.97 | 0.42 | 1.17 | 0.61 |
| #N/A | #N/A | #N/A | #N/A | #N/A | 1.35 | 0.72 |
| 0.48 | 1.07 | 0.51 | 1.05 | 0.45 | #N/A | #N/A |
| 0.46 | #N/A | #N/A | #N/A | #N/A | 1.30 | 0.69 |
| #N/A | #N/A | #N/A | #N/A | #N/A | #N/A | #N/A |
| #N/A | 0.86 | 0.38 | 1.40 | 0.67 | 0.83 | 0.36 |
| 0.35 | 0.83 | 0.37 | 0.69 | 0.22 | 0.74 | 0.29 |
| 0.25 | 0.73 | 0.30 | 0.80 | 0.30 | 0.90 | 0.42 |
| 0.54 | 1.17 | 0.58 | 1.42 | 0.69 | 1.29 | 0.69 |
| 0.74 | 2.19 | 0.92 | 2.24 | 0.92 | 2.65 | 0.98 |
| #N/A | #N/A | #N/A | #N/A | #N/A | #N/A | #N/A |
| #N/A | #N/A | #N/A | 1.18 | 0.55 | 0.60 | 0.18 |
| #N/A | #N/A | #N/A | #N/A | #N/A | #N/A | #N/A |
| 0.15 | 0.61 | 0.22 | 0.91 | 0.37 | 0.42 | 0.05 |
| 0.19 | 0.77 | 0.33 | 0.97 | 0.40 | 0.62 | 0.19 |
| #N/A | 0.81 | 0.35 | #N/A | #N/A | 0.84 | 0.37 |
| #N/A | #N/A | #N/A | #N/A | #N/A | #N/A | #N/A |
| #N/A | 2.14 | 0.91 | 2.25 | 0.92 | 2.02 | 0.93 |
| #N/A | 0.93 | 0.44 | #N/A | #N/A | 1.13 | 0.59 |
| #N/A | #N/A | #N/A | #N/A | #N/A | #N/A | #N/A |
| #N/A | 0.55 | 0.19 | #N/A | #N/A | #N/A | #N/A |
| 0.08 | 0.31 | 0.04 | 0.35 | 0.02 | 0.46 | 0.08 |



|      |      |      |      |      |      |      |
|------|------|------|------|------|------|------|
| 0.94 | 1.60 | 0.78 | 1.39 | 0.67 | 1.65 | 0.84 |
| #N/A | 1.19 | 0.58 | 1.00 | 0.44 | 0.93 | 0.45 |
| 0.46 | 1.01 | 0.48 | 1.28 | 0.61 | 1.15 | 0.60 |
| 0.49 | 1.77 | 0.75 | 1.37 | 0.65 | 1.23 | 0.65 |
| #N/A | 0.85 | 0.38 | #N/A | #N/A | 1.68 | 0.85 |
| 0.71 | 1.40 | 0.67 | 1.82 | 0.79 | #N/A | #N/A |
| 0.38 | 1.27 | 0.61 | 1.06 | 0.48 | 0.70 | 0.26 |
| #N/A | 1.12 | 0.54 | 1.05 | 0.48 | 0.65 | 0.22 |
| 0.68 | 2.18 | 0.92 | 1.40 | 0.67 | 1.59 | 0.82 |
| 0.76 | 0.75 | 0.32 | 1.76 | 0.81 | 0.99 | 0.50 |
| #N/A | #N/A | #N/A | #N/A | #N/A | 0.68 | 0.24 |
| 0.41 | 1.12 | 0.54 | #N/A | #N/A | #N/A | #N/A |
| #N/A | #N/A | #N/A | 0.73 | 0.25 | 0.56 | 0.14 |
| 0.13 | 0.47 | 0.13 | 0.47 | 0.08 | 0.47 | 0.08 |
| #N/A | #N/A | #N/A | #N/A | #N/A | #N/A | #N/A |
| #N/A | #N/A | #N/A | #N/A | #N/A | 0.94 | 0.45 |
| #N/A | #N/A | #N/A | #N/A | #N/A | 0.96 | 0.47 |
| 0.01 | 0.21 | 0.01 | 0.34 | 0.02 | 0.23 | 0.01 |
| 0.15 | 0.44 | 0.10 | 0.38 | 0.04 | 0.49 | 0.10 |
| #N/A | #N/A | #N/A | #N/A | #N/A | 0.95 | 0.46 |
| #N/A | #N/A | #N/A | #N/A | #N/A | 1.25 | 0.66 |
| #N/A | 0.65 | 0.25 | 1.12 | 0.50 | 0.65 | 0.22 |
| #N/A | #N/A | #N/A | #N/A | #N/A | 1.67 | 0.85 |
| #N/A | #N/A | #N/A | #N/A | #N/A | #N/A | #N/A |
| #N/A | #N/A | #N/A | #N/A | #N/A | #N/A | #N/A |
| 0.59 | 1.48 | 0.73 | 1.90 | 0.85 | 1.22 | 0.65 |
| 0.76 | 1.54 | 0.76 | 1.32 | 0.63 | 1.15 | 0.60 |
| 0.43 | #N/A | #N/A | 0.93 | 0.37 | 0.61 | 0.18 |
| #N/A | 0.88 | 0.40 | #N/A | #N/A | 1.00 | 0.51 |
| 0.45 | 0.89 | 0.41 | 0.95 | 0.41 | 0.88 | 0.40 |
| 0.35 | 0.67 | 0.26 | 0.75 | 0.26 | 0.73 | 0.28 |
| 0.14 | 0.43 | 0.10 | 0.51 | 0.10 | 0.49 | 0.09 |
| 0.18 | 0.54 | 0.17 | 0.75 | 0.27 | 0.49 | 0.09 |
| 0.29 | 0.58 | 0.20 | 0.82 | 0.31 | 0.72 | 0.28 |
| 0.46 | 0.92 | 0.43 | 1.09 | 0.50 | 1.07 | 0.56 |
| #N/A | #N/A | #N/A | #N/A | #N/A | #N/A | #N/A |
| 0.25 | #N/A | #N/A | #N/A | #N/A | 1.37 | 0.73 |
| #N/A | #N/A | #N/A | #N/A | #N/A | #N/A | #N/A |
| #N/A | #N/A | #N/A | #N/A | #N/A | 2.05 | 0.93 |
| 0.85 | 2.16 | 0.92 | #N/A | #N/A | #N/A | #N/A |
| 0.43 | #N/A | #N/A | 1.38 | 0.66 | 0.78 | 0.33 |
| #N/A | #N/A | #N/A | #N/A | #N/A | #N/A | #N/A |
| #N/A | 0.72 | 0.30 | #N/A | #N/A | 0.96 | 0.48 |
| #N/A | #N/A | #N/A | #N/A | #N/A | 1.57 | 0.82 |
| #N/A | #N/A | #N/A | #N/A | #N/A | #N/A | #N/A |
| #N/A | #N/A | #N/A | #N/A | #N/A | #N/A | #N/A |
| 0.09 | 0.41 | 0.09 | 0.88 | 0.36 | 0.46 | 0.08 |
| #N/A | 1.27 | 0.63 | #N/A | #N/A | #N/A | #N/A |
| #N/A | 0.56 | 0.19 | 1.69 | 0.79 | 1.83 | 0.89 |
| #N/A | 0.64 | 0.25 | 0.66 | 0.20 | 0.49 | 0.09 |

| UniGeneID    | Htz1 CHIP (r | Htz1 CHIP (p | Htz1, <i>gcn5</i> Δ | Htz1, <i>gcn5</i> Δ | Htz1, <i>sas3</i> Δ | Htz1, <i>sas3</i> Δ |
|--------------|--------------|--------------|---------------------|---------------------|---------------------|---------------------|
| 18S          | 0.85         | 0.35         | 0.76                | 0.24                | 0.87                | 0.38                |
| 5S           | 0.60         | 0.21         | 1.05                | 0.43                | 0.77                | 0.32                |
| ACO1prom     | 0.25         | 0.03         | 0.43                | 0.09                | #N/A                | #N/A                |
| ACT1         | 0.39         | 0.09         | 0.43                | 0.07                | 0.41                | 0.10                |
| ACT1-2       | 0.31         | 0.05         | #N/A                | #N/A                | #N/A                | #N/A                |
| CEN10        | #N/A         | #N/A         | #N/A                | #N/A                | #N/A                | #N/A                |
| CEN11        | #N/A         | #N/A         | #N/A                | #N/A                | #N/A                | #N/A                |
| CEN12        | #N/A         | #N/A         | #N/A                | #N/A                | #N/A                | #N/A                |
| CEN13        | #N/A         | #N/A         | #N/A                | #N/A                | #N/A                | #N/A                |
| CEN14        | #N/A         | #N/A         | #N/A                | #N/A                | #N/A                | #N/A                |
| CEN15        | #N/A         | #N/A         | #N/A                | #N/A                | #N/A                | #N/A                |
| CEN16        | #N/A         | #N/A         | #N/A                | #N/A                | #N/A                | #N/A                |
| CEN2         | #N/A         | #N/A         | #N/A                | #N/A                | #N/A                | #N/A                |
| CEN3         | #N/A         | #N/A         | #N/A                | #N/A                | #N/A                | #N/A                |
| CEN4         | #N/A         | #N/A         | #N/A                | #N/A                | #N/A                | #N/A                |
| CEN5         | #N/A         | #N/A         | #N/A                | #N/A                | #N/A                | #N/A                |
| CEN6         | #N/A         | #N/A         | #N/A                | #N/A                | #N/A                | #N/A                |
| CEN7         | #N/A         | #N/A         | #N/A                | #N/A                | #N/A                | #N/A                |
| CEN8         | #N/A         | #N/A         | #N/A                | #N/A                | #N/A                | #N/A                |
| CEN9         | #N/A         | #N/A         | #N/A                | #N/A                | #N/A                | #N/A                |
| CLN2down     | #N/A         | #N/A         | 1.33                | 0.59                | 1.81                | 0.83                |
| CLN2ds       | #N/A         | #N/A         | #N/A                | #N/A                | #N/A                | #N/A                |
| CLN2prom     | 0.50         | 0.15         | 0.87                | 0.33                | 0.86                | 0.33                |
| CLN2promlb   | 0.90         | 0.36         | 1.35                | 0.58                | 1.07                | 0.50                |
| CTS1prom2    | 0.62         | 0.21         | 0.62                | 0.19                | 0.81                | 0.36                |
| CTS1promcc'2 | 0.72         | 0.28         | 0.67                | 0.20                | 0.64                | 0.25                |
| CWP1         | 1.02         | 0.44         | #N/A                | #N/A                | #N/A                | #N/A                |
| CWP1prom     | 0.27         | 0.03         | #N/A                | #N/A                | #N/A                | #N/A                |
| CWP2         | 0.47         | 0.14         | 0.66                | 0.21                | 0.51                | 0.14                |
| DPM1prom     | 1.75         | 0.74         | 2.41                | 0.95                | 1.51                | 0.67                |
| EGT2prom     | #N/A         | #N/A         | 0.74                | 0.22                | 0.87                | 0.33                |
| f650HO2      | #N/A         | #N/A         | 0.89                | 0.34                | 0.84                | 0.38                |
| f658SOD1     | #N/A         | #N/A         | #N/A                | #N/A                | #N/A                | #N/A                |
| FBP1         | #N/A         | #N/A         | #N/A                | #N/A                | 1.64                | 0.74                |
| FLO9         | 0.40         | 0.09         | 0.35                | 0.05                | 0.59                | 0.21                |
| FUN19        | 0.58         | 0.20         | 0.40                | 0.07                | 0.43                | 0.11                |
| FUN21        | 1.41         | 0.63         | #N/A                | #N/A                | #N/A                | #N/A                |
| FUS1prom     | 1.44         | 0.66         | 2.04                | 0.91                | 1.23                | 0.57                |
| GAL10        | #N/A         | #N/A         | #N/A                | #N/A                | #N/A                | #N/A                |
| GAL10ds      | 2.70         | 0.96         | 1.95                | 0.83                | 1.97                | 0.88                |
| GAL10prom1   | #N/A         | #N/A         | #N/A                | #N/A                | #N/A                | #N/A                |
| GAL10prom2   | #N/A         | #N/A         | #N/A                | #N/A                | #N/A                | #N/A                |
| GAL1prom     | #N/A         | #N/A         | #N/A                | #N/A                | #N/A                | #N/A                |
| GAL3dse      | 0.99         | 0.41         | 0.62                | 0.15                | 0.88                | 0.41                |
| GAL3prom     | 1.92         | 0.80         | 2.08                | 0.87                | 2.28                | 0.92                |
| GAL7prom     | 2.55         | 0.92         | #N/A                | #N/A                | 3.19                | 0.99                |
| GDH3orf-1    | 1.05         | 0.47         | 0.95                | 0.38                | 1.10                | 0.47                |
| GDH3orf-2    | 1.83         | 0.81         | 1.56                | 0.68                | 2.42                | 0.94                |
| GDH3prom     | #N/A         | #N/A         | #N/A                | #N/A                | 1.41                | 0.64                |
| HAM1         | 0.88         | 0.37         | 0.62                | 0.19                | 0.55                | 0.19                |

|               |      |      |      |      |      |      |
|---------------|------|------|------|------|------|------|
| HAP3prom      | 1.29 | 0.59 | 1.80 | 0.77 | 1.62 | 0.69 |
| HHT1prom2     | 0.26 | 0.03 | #N/A | #N/A | 0.21 | 0.01 |
| HHT1tata      | 0.28 | 0.04 | #N/A | #N/A | #N/A | #N/A |
| HHT2prom      | 0.30 | 0.05 | #N/A | #N/A | 0.30 | 0.03 |
| HOurs1        | 1.15 | 0.52 | 2.06 | 0.86 | #N/A | #N/A |
| HOurs2        | #N/A | #N/A | #N/A | #N/A | #N/A | #N/A |
| HOurs2-2      | #N/A | #N/A | #N/A | #N/A | #N/A | #N/A |
| HSP150prom    | #N/A | #N/A | #N/A | #N/A | #N/A | #N/A |
| HSP30prom1    | #N/A | #N/A | #N/A | #N/A | 2.04 | 0.83 |
| HSP30prom2    | 2.10 | 0.87 | 1.46 | 0.71 | 1.32 | 0.57 |
| HTB1prom      | 0.29 | 0.04 | 0.39 | 0.06 | 0.32 | 0.04 |
| HTB2prom      | 0.43 | 0.11 | 0.50 | 0.12 | 0.52 | 0.16 |
| HTL1prom      | 2.13 | 0.88 | #N/A | #N/A | 2.48 | 0.96 |
| iCEN1         | 0.91 | 0.39 | 1.18 | 0.57 | 0.86 | 0.33 |
| iCEN10        | 0.88 | 0.35 | 1.43 | 0.61 | 0.78 | 0.33 |
| iCEN11        | 0.74 | 0.28 | 0.63 | 0.21 | 0.73 | 0.26 |
| iCEN12        | 0.56 | 0.18 | 0.68 | 0.18 | 0.76 | 0.28 |
| iCEN13        | #N/A | #N/A | 0.91 | 0.35 | 0.81 | 0.33 |
| iCEN15        | #N/A | #N/A | #N/A | #N/A | #N/A | #N/A |
| iCEN16        | 1.98 | 0.84 | 2.17 | 0.89 | 1.56 | 0.71 |
| iCEN2         | 1.09 | 0.48 | 1.40 | 0.60 | 0.89 | 0.41 |
| iCEN3         | 0.92 | 0.40 | 1.45 | 0.64 | 1.25 | 0.57 |
| iCEN4         | 0.89 | 0.35 | 0.43 | 0.08 | #N/A | #N/A |
| iCEN5         | 0.55 | 0.17 | 1.04 | 0.42 | 0.66 | 0.25 |
| iCEN6         | 1.08 | 0.45 | 1.27 | 0.54 | 0.87 | 0.40 |
| iCEN7         | #N/A | #N/A | #N/A | #N/A | #N/A | #N/A |
| iCEN8         | 1.16 | 0.49 | 1.27 | 0.57 | 0.96 | 0.43 |
| iCEN9         | 1.00 | 0.42 | 0.94 | 0.42 | 0.96 | 0.39 |
| iCWP2         | 0.55 | 0.19 | 0.64 | 0.20 | #N/A | #N/A |
| IDH2prom      | 1.48 | 0.66 | 1.56 | 0.68 | 1.67 | 0.71 |
| iLSR1         | 0.64 | 0.24 | 0.62 | 0.16 | 0.50 | 0.16 |
| INO1orf       | 0.99 | 0.44 | 1.09 | 0.47 | 1.07 | 0.44 |
| INO1prom      | 0.67 | 0.23 | 0.56 | 0.15 | 0.68 | 0.23 |
| IntYBL087C    | 0.22 | 0.02 | 0.35 | 0.04 | 0.48 | 0.14 |
| IntYBR048W    | 0.26 | 0.03 | 0.25 | 0.01 | 0.24 | 0.02 |
| IntYBR084C-A  | 0.23 | 0.02 | #N/A | #N/A | #N/A | #N/A |
| IntYCR097W-A2 | #N/A | #N/A | #N/A | #N/A | #N/A | #N/A |
| IntYDL191W    | #N/A | #N/A | #N/A | #N/A | 0.15 | 0.00 |
| IntYDR064W    | 0.28 | 0.04 | 0.27 | 0.01 | #N/A | #N/A |
| IntYDR381W    | 0.32 | 0.06 | 0.60 | 0.14 | 0.33 | 0.05 |
| IntYER133W    | 0.62 | 0.22 | 0.70 | 0.23 | 0.52 | 0.17 |
| IntYGL103W    | 0.40 | 0.10 | 0.32 | 0.03 | 0.26 | 0.02 |
| IntYGL178W    | 0.65 | 0.22 | 0.62 | 0.20 | 0.62 | 0.21 |
| IntYHR010W    | 0.26 | 0.03 | 0.34 | 0.04 | #N/A | #N/A |
| IntYHR021C    | 0.20 | 0.01 | 0.43 | 0.07 | 0.42 | 0.09 |
| IntYJR079W    | 0.69 | 0.27 | 1.00 | 0.46 | 0.56 | 0.19 |
| IntYNL112W    | 0.39 | 0.09 | 0.62 | 0.20 | 0.52 | 0.16 |
| IntYNL302C    | 0.31 | 0.05 | 0.62 | 0.15 | 0.17 | 0.01 |
| IntYNR053C    | 0.27 | 0.03 | 0.33 | 0.02 | 0.30 | 0.03 |
| IntYPL081W    | 0.15 | 0.01 | #N/A | #N/A | 0.20 | 0.01 |
| IntYPL143W    | #N/A | #N/A | 0.35 | 0.04 | 0.31 | 0.04 |

|             |      |      |      |      |      |      |
|-------------|------|------|------|------|------|------|
| iPOP5/FUN19 | 1.54 | 0.66 | 1.34 | 0.66 | 1.43 | 0.65 |
| IRA1        | 0.56 | 0.19 | 0.50 | 0.12 | 0.71 | 0.30 |
| iRDN37-1    | 0.55 | 0.18 | 0.76 | 0.26 | 0.66 | 0.26 |
| iRDN5-1     | 0.36 | 0.07 | 0.45 | 0.07 | 0.34 | 0.05 |
| iRDN5-2     | 0.74 | 0.29 | 0.93 | 0.36 | 0.82 | 0.35 |
| iRDN5-3     | 0.78 | 0.32 | 0.94 | 0.37 | 0.83 | 0.36 |
| irpr1       | 0.99 | 0.43 | 1.20 | 0.49 | 0.82 | 0.36 |
| iSCR1       | 1.17 | 0.53 | 1.16 | 0.47 | 1.02 | 0.49 |
| isnR128     | #N/A | #N/A | #N/A | #N/A | #N/A | #N/A |
| iSNR13      | 0.59 | 0.20 | #N/A | #N/A | 0.77 | 0.29 |
| isnR14      | #N/A | #N/A | #N/A | #N/A | #N/A | #N/A |
| iSNR189     | 1.63 | 0.73 | 2.07 | 0.86 | 1.19 | 0.55 |
| iSNR190     | 0.47 | 0.13 | 0.85 | 0.31 | 0.58 | 0.18 |
| iSNR33      | #N/A | #N/A | #N/A | #N/A | #N/A | #N/A |
| iSNR34      | 0.57 | 0.20 | 0.65 | 0.22 | 0.60 | 0.21 |
| isnR37      | 1.29 | 0.59 | 1.04 | 0.48 | 0.91 | 0.42 |
| iSNR4       | 0.45 | 0.13 | 0.53 | 0.11 | 0.51 | 0.16 |
| iSNR42      | 1.27 | 0.54 | 1.19 | 0.50 | 1.09 | 0.53 |
| iSNR44      | 0.52 | 0.17 | 0.59 | 0.16 | 0.63 | 0.20 |
| iSNR46      | #N/A | #N/A | #N/A | #N/A | #N/A | #N/A |
| iSNR47      | 0.61 | 0.21 | 1.12 | 0.47 | 0.48 | 0.14 |
| iSNR48      | 0.16 | 0.01 | 0.13 | 0.00 | 0.18 | 0.01 |
| iSNR50      | 1.24 | 0.56 | 0.84 | 0.29 | 1.92 | 0.86 |
| iSNR51      | #N/A | #N/A | #N/A | #N/A | #N/A | #N/A |
| iSNR52      | #N/A | #N/A | #N/A | #N/A | 0.40 | 0.07 |
| iSNR53      | #N/A | #N/A | #N/A | #N/A | #N/A | #N/A |
| iSNR54      | #N/A | #N/A | 0.86 | 0.34 | 0.69 | 0.24 |
| iSNR55      | #N/A | #N/A | #N/A | #N/A | #N/A | #N/A |
| iSNR56      | #N/A | #N/A | #N/A | #N/A | #N/A | #N/A |
| iSNR57      | #N/A | #N/A | #N/A | #N/A | #N/A | #N/A |
| iSNR58      | 1.07 | 0.45 | 1.04 | 0.48 | #N/A | #N/A |
| iSNR59      | 0.38 | 0.08 | #N/A | #N/A | 0.40 | 0.09 |
| iSNR6       | 0.57 | 0.19 | 1.25 | 0.52 | 0.51 | 0.16 |
| iSNR60      | 0.61 | 0.22 | 1.01 | 0.46 | 0.83 | 0.37 |
| iSNR61      | #N/A | #N/A | #N/A | #N/A | #N/A | #N/A |
| iSNR62      | 0.49 | 0.15 | 1.10 | 0.46 | 0.58 | 0.20 |
| iSNR63      | 0.62 | 0.23 | 0.68 | 0.25 | 0.55 | 0.19 |
| iSNR64      | 1.82 | 0.76 | 1.55 | 0.73 | 1.28 | 0.55 |
| iSNR65      | #N/A | #N/A | 0.79 | 0.32 | #N/A | #N/A |
| iSNR66      | 1.45 | 0.66 | 1.49 | 0.65 | 1.41 | 0.62 |
| iSNR67      | #N/A | #N/A | #N/A | #N/A | #N/A | #N/A |
| iSNR68      | 1.15 | 0.49 | 1.31 | 0.64 | 1.14 | 0.52 |
| iSNR69      | 1.50 | 0.68 | 1.75 | 0.78 | 1.31 | 0.64 |
| iSNR70      | 0.65 | 0.25 | 0.68 | 0.22 | 0.74 | 0.31 |
| iSNR71      | #N/A | #N/A | #N/A | #N/A | #N/A | #N/A |
| iSNR7-S     | 1.14 | 0.48 | 1.07 | 0.41 | 1.66 | 0.71 |
| iSNR8       | 1.51 | 0.64 | 2.19 | 0.89 | 1.44 | 0.66 |
| itA(AGC)D   | 0.50 | 0.15 | 0.69 | 0.22 | 0.36 | 0.06 |
| itA(AGC)F   | 1.72 | 0.72 | 2.02 | 0.85 | #N/A | #N/A |
| itA(AGC)G   | 0.82 | 0.32 | 0.91 | 0.38 | 0.63 | 0.21 |
| itA(AGC)K1  | 1.59 | 0.72 | 1.45 | 0.62 | 1.10 | 0.50 |

|             |      |      |      |      |      |      |
|-------------|------|------|------|------|------|------|
| itA(AGC)M1  | 2.47 | 0.94 | 2.16 | 0.93 | 2.67 | 0.97 |
| itA(AGC)M2  | #N/A | #N/A | #N/A | #N/A | #N/A | #N/A |
| itA(AGC)P   | 0.48 | 0.14 | 0.69 | 0.23 | 0.52 | 0.16 |
| itA(UGC)A   | 0.40 | 0.09 | 0.45 | 0.10 | #N/A | #N/A |
| itA(UGC)E   | 0.70 | 0.27 | 0.55 | 0.16 | 0.95 | 0.42 |
| itA(UGC)G   | #N/A | #N/A | #N/A | #N/A | #N/A | #N/A |
| itA(UGC)L   | #N/A | #N/A | 0.65 | 0.22 | 0.63 | 0.24 |
| itC(GCA)B   | 0.81 | 0.31 | 0.61 | 0.20 | #N/A | #N/A |
| itC(GCA)P1  | 0.64 | 0.22 | #N/A | #N/A | #N/A | #N/A |
| itC(GCA)P2  | 1.15 | 0.49 | 1.01 | 0.46 | 0.74 | 0.31 |
| itD(GUC)B   | 0.93 | 0.40 | 0.77 | 0.30 | 0.76 | 0.32 |
| itD(GUC)D   | 0.88 | 0.37 | 0.98 | 0.36 | 0.79 | 0.33 |
| itD(GUC)G1  | #N/A | #N/A | #N/A | #N/A | #N/A | #N/A |
| itD(GUC)G2  | 0.54 | 0.17 | 0.77 | 0.27 | 0.30 | 0.03 |
| itD(GUC)I2  | #N/A | #N/A | #N/A | #N/A | #N/A | #N/A |
| itD(GUC)J1  | 1.12 | 0.49 | #N/A | #N/A | 1.17 | 0.52 |
| itD(GUC)J2  | 0.89 | 0.35 | 1.00 | 0.46 | 1.15 | 0.55 |
| itD(GUC)J4  | 0.49 | 0.14 | #N/A | #N/A | 0.48 | 0.12 |
| itD(GUC)K   | 1.09 | 0.48 | #N/A | #N/A | 0.73 | 0.30 |
| itD(GUC)L1  | #N/A | #N/A | 1.84 | 0.79 | 0.75 | 0.31 |
| itD(GUC)L2  | #N/A | #N/A | 0.62 | 0.15 | #N/A | #N/A |
| itD(GUC)M   | #N/A | #N/A | #N/A | #N/A | 0.64 | 0.25 |
| itE(CUC)D-0 | 1.47 | 0.67 | #N/A | #N/A | 1.15 | 0.56 |
| itE(CUC)D-1 | 1.76 | 0.74 | 1.30 | 0.63 | 2.07 | 0.90 |
| itE(CUC)I   | 0.88 | 0.38 | 1.30 | 0.56 | 0.86 | 0.37 |
| itE(UUC)B   | 1.64 | 0.70 | 1.94 | 0.83 | 1.72 | 0.76 |
| itE(UUC)C   | #N/A | #N/A | #N/A | #N/A | #N/A | #N/A |
| itE(UUC)E1  | 1.12 | 0.50 | 1.21 | 0.52 | 0.78 | 0.33 |
| itE(UUC)E2  | 0.76 | 0.30 | #N/A | #N/A | 0.69 | 0.28 |
| itE(UUC)E3  | 2.03 | 0.86 | 2.59 | 0.95 | 1.33 | 0.61 |
| itE(UUC)G1  | #N/A | #N/A | #N/A | #N/A | #N/A | #N/A |
| itE(UUC)G3  | #N/A | #N/A | 1.50 | 0.64 | 0.97 | 0.43 |
| itE(UUC)I   | #N/A | #N/A | #N/A | #N/A | #N/A | #N/A |
| itE(UUC)J   | 2.18 | 0.87 | 1.95 | 0.82 | 1.96 | 0.85 |
| itE(UUC)K   | 1.15 | 0.52 | 1.42 | 0.68 | 0.96 | 0.46 |
| itE(UUC)L   | #N/A | #N/A | #N/A | #N/A | #N/A | #N/A |
| itE(UUC)M   | 0.31 | 0.05 | 0.66 | 0.17 | 0.46 | 0.13 |
| itE(UUC)P   | #N/A | #N/A | #N/A | #N/A | #N/A | #N/A |
| itF(GAA)B   | 0.54 | 0.18 | 0.58 | 0.18 | 0.51 | 0.16 |
| itF(GAA)D   | 0.74 | 0.30 | 0.83 | 0.34 | 0.77 | 0.32 |
| itF(GAA)F   | 0.67 | 0.26 | 0.51 | 0.12 | 0.52 | 0.17 |
| itF(GAA)G   | 0.29 | 0.04 | 0.62 | 0.19 | 0.41 | 0.08 |
| itF(GAA)H2  | #N/A | #N/A | #N/A | #N/A | #N/A | #N/A |
| itF(GAA)M   | 0.53 | 0.16 | 0.97 | 0.43 | 0.42 | 0.10 |
| itF(GAA)N   | 1.60 | 0.71 | 2.60 | 0.95 | 2.21 | 0.91 |
| itF(GAA)P1  | 1.09 | 0.45 | #N/A | #N/A | 1.21 | 0.51 |
| itG(CCC)D   | #N/A | #N/A | 0.62 | 0.15 | 0.64 | 0.25 |
| itG(GCC)D1  | 1.71 | 0.76 | 1.85 | 0.79 | 2.01 | 0.88 |
| itG(GCC)D2  | 1.15 | 0.51 | 0.74 | 0.26 | 1.41 | 0.61 |
| itG(GCC)E   | #N/A | #N/A | #N/A | #N/A | #N/A | #N/A |
| itG(GCC)F1  | #N/A | #N/A | #N/A | #N/A | #N/A | #N/A |

|            |      |      |      |      |      |      |
|------------|------|------|------|------|------|------|
| itG(GCC)F2 | 0.95 | 0.42 | 1.31 | 0.56 | 0.84 | 0.36 |
| itG(GCC)G1 | 1.58 | 0.67 | 1.26 | 0.61 | 1.47 | 0.66 |
| itG(GCC)G2 | #N/A | #N/A | #N/A | #N/A | #N/A | #N/A |
| itG(GCC)J1 | 1.04 | 0.46 | 1.26 | 0.52 | 1.05 | 0.47 |
| itG(GCC)J2 | #N/A | #N/A | 0.74 | 0.29 | 0.82 | 0.36 |
| itG(GCC)M  | 0.66 | 0.23 | #N/A | #N/A | 0.73 | 0.28 |
| itG(GCC)O2 | 0.54 | 0.17 | 0.67 | 0.19 | #N/A | #N/A |
| itG(GCC)P2 | 1.41 | 0.63 | 1.25 | 0.60 | 1.25 | 0.58 |
| itG(UCC)G  | 1.56 | 0.71 | 1.79 | 0.77 | 1.83 | 0.81 |
| itG(UCC)N  | 0.93 | 0.38 | 1.60 | 0.69 | #N/A | #N/A |
| itG(UCC)O  | 0.61 | 0.22 | 0.58 | 0.18 | 0.70 | 0.28 |
| itH(GUG)E1 | #N/A | #N/A | #N/A | #N/A | #N/A | #N/A |
| itH(GUG)G1 | #N/A | #N/A | #N/A | #N/A | #N/A | #N/A |
| itH(GUG)G2 | 2.01 | 0.85 | 1.94 | 0.82 | 2.39 | 0.90 |
| itH(GUG)H  | #N/A | #N/A | #N/A | #N/A | #N/A | #N/A |
| itH(GUG)K  | 1.36 | 0.61 | 1.86 | 0.79 | 1.30 | 0.61 |
| itH(GUG)M  | #N/A | #N/A | #N/A | #N/A | #N/A | #N/A |
| itI(AAU)E1 | #N/A | #N/A | #N/A | #N/A | #N/A | #N/A |
| itI(AAU)E2 | #N/A | #N/A | #N/A | #N/A | #N/A | #N/A |
| itI(AAU)G  | 0.91 | 0.39 | 1.26 | 0.52 | 1.13 | 0.50 |
| itI(AAU)I1 | 1.34 | 0.60 | 1.25 | 0.61 | 1.25 | 0.61 |
| itI(AAU)I2 | 0.61 | 0.22 | 0.75 | 0.26 | 0.63 | 0.24 |
| itI(AAU)L1 | 0.62 | 0.21 | 1.07 | 0.48 | 0.54 | 0.18 |
| itI(AAU)L2 | #N/A | #N/A | #N/A | #N/A | 0.40 | 0.08 |
| itI(AAU)N1 | 0.50 | 0.15 | 0.48 | 0.11 | 0.50 | 0.15 |
| itI(AAU)N2 | 0.64 | 0.24 | 0.74 | 0.28 | 0.53 | 0.17 |
| itI(AAU)P1 | #N/A | #N/A | #N/A | #N/A | #N/A | #N/A |
| itI(UAU)D  | 1.22 | 0.52 | 1.25 | 0.51 | 1.16 | 0.57 |
| itI(UAU)L  | 1.31 | 0.60 | 1.28 | 0.56 | 1.56 | 0.67 |
| itK(CUU)C  | #N/A | #N/A | #N/A | #N/A | #N/A | #N/A |
| itK(CUU)D1 | 0.57 | 0.20 | 0.56 | 0.17 | 0.60 | 0.20 |
| itK(CUU)D2 | #N/A | #N/A | #N/A | #N/A | #N/A | #N/A |
| itK(CUU)E1 | 0.72 | 0.29 | #N/A | #N/A | 0.63 | 0.21 |
| itK(CUU)E2 | 1.35 | 0.60 | 1.44 | 0.63 | 1.41 | 0.61 |
| itK(CUU)G1 | 0.78 | 0.30 | 0.73 | 0.21 | 0.68 | 0.23 |
| itK(CUU)G2 | #N/A | #N/A | #N/A | #N/A | #N/A | #N/A |
| itK(CUU)G3 | #N/A | #N/A | #N/A | #N/A | #N/A | #N/A |
| itK(CUU)I  | #N/A | #N/A | #N/A | #N/A | #N/A | #N/A |
| itK(CUU)J  | 1.91 | 0.82 | 3.02 | 0.98 | 1.64 | 0.70 |
| itK(CUU)K  | 0.78 | 0.32 | 1.02 | 0.41 | 0.80 | 0.34 |
| itK(CUU)M  | 2.78 | 0.96 | 3.41 | 0.99 | 2.88 | 0.98 |
| itK(UUU)D  | #N/A | #N/A | #N/A | #N/A | #N/A | #N/A |
| itK(UUU)G1 | 0.72 | 0.28 | 0.88 | 0.33 | 1.06 | 0.47 |
| itK(UUU)K  | 2.07 | 0.86 | 1.09 | 0.51 | 1.60 | 0.73 |
| itK(UUU)L  | #N/A | #N/A | #N/A | #N/A | #N/A | #N/A |
| itK(UUU)O  | #N/A | #N/A | #N/A | #N/A | #N/A | #N/A |
| itL(CAA)A  | 2.43 | 0.94 | 2.38 | 0.93 | #N/A | #N/A |
| itL(CAA)C  | #N/A | #N/A | #N/A | #N/A | #N/A | #N/A |
| itL(CAA)D  | 0.35 | 0.07 | 0.41 | 0.06 | 0.41 | 0.09 |
| itL(CAA)G2 | 1.03 | 0.45 | 0.96 | 0.43 | 1.09 | 0.47 |
| itL(CAA)G3 | 1.88 | 0.81 | 1.58 | 0.69 | 1.65 | 0.77 |

|             |      |      |      |      |      |      |
|-------------|------|------|------|------|------|------|
| itL(CAA)K   | #N/A | #N/A | #N/A | #N/A | #N/A | #N/A |
| itL(CAA)L   | #N/A | #N/A | #N/A | #N/A | #N/A | #N/A |
| itL(CAA)M   | #N/A | #N/A | 0.66 | 0.20 | 0.80 | 0.31 |
| itL(GAG)G   | #N/A | #N/A | #N/A | #N/A | #N/A | #N/A |
| itL(UAA)B1  | 0.46 | 0.13 | 0.81 | 0.26 | 0.85 | 0.38 |
| itL(UAA)B2  | 0.50 | 0.15 | 0.82 | 0.30 | 0.63 | 0.24 |
| itL(UAA)D   | 1.13 | 0.51 | 1.24 | 0.51 | 1.14 | 0.53 |
| itL(UAA)J   | 1.08 | 0.49 | 1.56 | 0.67 | 0.97 | 0.46 |
| itL(UAA)K   | 1.17 | 0.52 | 1.40 | 0.59 | 1.57 | 0.75 |
| itL(UAA)L   | #N/A | #N/A | 0.46 | 0.10 | 0.30 | 0.03 |
| itL(UAG)J   | 0.98 | 0.40 | #N/A | #N/A | 0.79 | 0.34 |
| itL(UAG)L1  | #N/A | #N/A | #N/A | #N/A | #N/A | #N/A |
| iTLC1       | 0.60 | 0.20 | #N/A | #N/A | #N/A | #N/A |
| itM(CAU)C   | 0.55 | 0.18 | 0.55 | 0.15 | 0.55 | 0.19 |
| itM(CAU)D   | 0.48 | 0.13 | 0.41 | 0.07 | 0.42 | 0.09 |
| itM(CAU)E   | 0.89 | 0.35 | 0.94 | 0.41 | #N/A | #N/A |
| itM(CAU)J1  | 0.64 | 0.24 | 0.90 | 0.39 | 0.83 | 0.33 |
| itM(CAU)J2  | #N/A | #N/A | #N/A | #N/A | #N/A | #N/A |
| itM(CAU)J3  | #N/A | #N/A | #N/A | #N/A | #N/A | #N/A |
| itM(CAU)M   | #N/A | #N/A | #N/A | #N/A | #N/A | #N/A |
| itM(CAU)O1  | #N/A | #N/A | #N/A | #N/A | #N/A | #N/A |
| itM(CAU)O2  | #N/A | #N/A | 0.66 | 0.19 | #N/A | #N/A |
| itM(CAU)P   | 0.41 | 0.10 | 0.62 | 0.19 | 0.43 | 0.11 |
| itN(GUU)C   | 0.40 | 0.09 | 0.66 | 0.23 | #N/A | #N/A |
| itN(GUU)F   | #N/A | #N/A | #N/A | #N/A | 0.70 | 0.24 |
| itN(GUU)G   | 1.05 | 0.46 | 0.97 | 0.43 | 0.95 | 0.38 |
| itN(GUU)K   | 0.75 | 0.30 | 0.96 | 0.35 | 1.04 | 0.48 |
| itN(GUU)L   | #N/A | #N/A | #N/A | #N/A | #N/A | #N/A |
| itN(GUU)N1  | #N/A | #N/A | #N/A | #N/A | #N/A | #N/A |
| itN(GUU)N2  | 0.95 | 0.41 | 0.93 | 0.41 | 0.79 | 0.34 |
| itN(GUU)O1  | 0.57 | 0.20 | 1.01 | 0.41 | #N/A | #N/A |
| itN(GUU)O2  | #N/A | #N/A | #N/A | #N/A | 1.08 | 0.52 |
| itN(GUU)P   | 0.29 | 0.04 | 0.52 | 0.10 | 0.40 | 0.07 |
| itP(AGG)C   | 0.57 | 0.19 | 0.52 | 0.14 | 0.53 | 0.17 |
| itP(AGG)N   | #N/A | #N/A | #N/A | #N/A | #N/A | #N/A |
| itP(UGG)A   | #N/A | #N/A | #N/A | #N/A | #N/A | #N/A |
| itP(UGG)F   | #N/A | #N/A | #N/A | #N/A | #N/A | #N/A |
| itP(UGG)L-0 | 1.18 | 0.50 | 1.03 | 0.42 | 1.42 | 0.67 |
| itP(UGG)M   | #N/A | #N/A | #N/A | #N/A | #N/A | #N/A |
| itP(UGG)N1  | 0.88 | 0.38 | 0.92 | 0.40 | 0.83 | 0.37 |
| itP(UGG)N2  | 0.96 | 0.42 | 1.03 | 0.41 | 1.23 | 0.55 |
| itP(UGG)O1  | #N/A | #N/A | 0.76 | 0.26 | 0.94 | 0.44 |
| itP(UGG)O2  | 1.74 | 0.76 | 0.92 | 0.40 | 1.78 | 0.82 |
| itQ(CUG)M   | #N/A | #N/A | #N/A | #N/A | 0.91 | 0.36 |
| itQ(UUG)B   | 1.86 | 0.81 | 1.34 | 0.58 | 1.66 | 0.77 |
| itQ(UUG)C   | #N/A | #N/A | #N/A | #N/A | 0.68 | 0.25 |
| itQ(UUG)D1  | 1.44 | 0.62 | 1.78 | 0.83 | 1.83 | 0.81 |
| itQ(UUG)D2  | 0.94 | 0.38 | 1.11 | 0.46 | 0.87 | 0.38 |
| itQ(UUG)D3  | #N/A | #N/A | #N/A | #N/A | #N/A | #N/A |
| itQ(UUG)E1  | 0.96 | 0.39 | 0.94 | 0.42 | 0.97 | 0.43 |
| itQ(UUG)E2  | 2.10 | 0.85 | #N/A | #N/A | 1.54 | 0.70 |

|             |      |      |      |      |      |      |
|-------------|------|------|------|------|------|------|
| itQ(UUG)H   | 0.58 | 0.20 | #N/A | #N/A | 0.76 | 0.32 |
| itQ(UUG)L   | 0.95 | 0.42 | 0.93 | 0.36 | 0.59 | 0.21 |
| itR(ACG)D-0 | 1.26 | 0.57 | 2.13 | 0.88 | 1.41 | 0.61 |
| itR(ACG)D-1 | 0.63 | 0.24 | 0.98 | 0.38 | 0.60 | 0.19 |
| itR(ACG)J   | 0.76 | 0.31 | 0.69 | 0.19 | 0.75 | 0.27 |
| itR(ACG)K   | 1.13 | 0.51 | 1.35 | 0.66 | 1.11 | 0.51 |
| itR(ACG)L   | 0.36 | 0.08 | #N/A | #N/A | 0.34 | 0.05 |
| itR(ACG)O   | #N/A | #N/A | #N/A | #N/A | 0.87 | 0.40 |
| itR(CCG)L   | 0.22 | 0.02 | 0.44 | 0.06 | 0.33 | 0.05 |
| itR(CCU)J   | #N/A | #N/A | #N/A | #N/A | #N/A | #N/A |
| itR(UCU)E   | #N/A | #N/A | #N/A | #N/A | #N/A | #N/A |
| itR(UCU)G1  | 0.76 | 0.31 | 0.64 | 0.16 | 0.64 | 0.25 |
| itR(UCU)G2  | 1.09 | 0.49 | 1.00 | 0.45 | 0.96 | 0.42 |
| itR(UCU)J2  | 1.17 | 0.50 | #N/A | #N/A | 0.83 | 0.32 |
| itR(UCU)K   | 0.66 | 0.25 | 0.66 | 0.23 | 0.57 | 0.17 |
| itR(UCU)M1  | 0.51 | 0.15 | 1.09 | 0.42 | #N/A | #N/A |
| itR(UCU)M2  | #N/A | #N/A | #N/A | #N/A | #N/A | #N/A |
| itS(AGA)B   | 1.38 | 0.62 | 1.49 | 0.73 | 1.53 | 0.65 |
| itS(AGA)D1  | 0.78 | 0.32 | 1.04 | 0.39 | 0.76 | 0.28 |
| itS(AGA)D2  | #N/A | #N/A | #N/A | #N/A | #N/A | #N/A |
| itS(AGA)D3  | #N/A | #N/A | 0.66 | 0.23 | 0.35 | 0.06 |
| itS(AGA)E   | 0.67 | 0.25 | 0.73 | 0.24 | 0.74 | 0.31 |
| itS(AGA)G   | #N/A | #N/A | #N/A | #N/A | #N/A | #N/A |
| itS(AGA)H   | #N/A | #N/A | #N/A | #N/A | #N/A | #N/A |
| itS(AGA)J   | 1.08 | 0.48 | 0.78 | 0.30 | 0.95 | 0.42 |
| itS(AGA)M   | 1.71 | 0.73 | 1.45 | 0.70 | 1.66 | 0.72 |
| itS(GCU)F   | #N/A | #N/A | #N/A | #N/A | #N/A | #N/A |
| itS(GCU)L   | 0.43 | 0.11 | 0.54 | 0.11 | 0.59 | 0.21 |
| itS(GCU)O   | 1.12 | 0.47 | 1.01 | 0.37 | 1.59 | 0.76 |
| itS(UGA)E-0 | 1.46 | 0.63 | 1.08 | 0.42 | 1.44 | 0.62 |
| itS(UGA)E-1 | 0.86 | 0.36 | 0.61 | 0.15 | 0.95 | 0.39 |
| itS(UGA)I   | 0.47 | 0.14 | 0.42 | 0.07 | 0.38 | 0.07 |
| itS(UGA)P   | 0.54 | 0.18 | #N/A | #N/A | 0.89 | 0.38 |
| itT(AGU)B   | 0.72 | 0.26 | 0.62 | 0.18 | 0.98 | 0.47 |
| itT(AGU)C   | 0.50 | 0.15 | 1.18 | 0.51 | 0.61 | 0.22 |
| itT(AGU)D   | #N/A | #N/A | #N/A | #N/A | #N/A | #N/A |
| itT(AGU)H   | #N/A | #N/A | #N/A | #N/A | #N/A | #N/A |
| itT(AGU)I1  | #N/A | #N/A | #N/A | #N/A | #N/A | #N/A |
| itT(AGU)I2  | 1.10 | 0.50 | 0.98 | 0.36 | 1.05 | 0.43 |
| itT(AGU)J   | 1.50 | 0.64 | 1.01 | 0.38 | 1.54 | 0.66 |
| itT(AGU)N1  | 0.81 | 0.33 | 0.80 | 0.25 | 0.73 | 0.29 |
| itT(AGU)N2  | 1.10 | 0.48 | 1.39 | 0.59 | 1.48 | 0.63 |
| itT(AGU)O1  | 0.69 | 0.24 | #N/A | #N/A | #N/A | #N/A |
| itT(CGU)K   | 1.30 | 0.58 | 1.82 | 0.79 | 1.19 | 0.55 |
| itT(UGU)G1  | 0.25 | 0.02 | 0.29 | 0.02 | 0.65 | 0.25 |
| itT(UGU)G2  | 1.08 | 0.49 | 2.50 | 0.97 | 1.15 | 0.48 |
| itT(UGU)H   | #N/A | #N/A | #N/A | #N/A | #N/A | #N/A |
| itT(UGU)P   | 0.83 | 0.34 | 0.95 | 0.37 | 1.02 | 0.46 |
| itV(AAC)E1  | 0.69 | 0.27 | 0.90 | 0.31 | 0.66 | 0.23 |
| itV(AAC)E2  | #N/A | #N/A | 0.63 | 0.19 | #N/A | #N/A |
| itV(AAC)G1  | #N/A | #N/A | #N/A | #N/A | #N/A | #N/A |



|              |      |      |      |      |      |      |
|--------------|------|------|------|------|------|------|
| itV(AAC)G2   | 0.36 | 0.07 | 0.49 | 0.11 | 0.30 | 0.03 |
| itV(AAC)G3-0 | 1.10 | 0.47 | 0.84 | 0.34 | 1.10 | 0.53 |
| itV(AAC)J    | 1.51 | 0.65 | 1.25 | 0.54 | 1.25 | 0.61 |
| itV(AAC)K1-0 | 0.37 | 0.08 | 0.55 | 0.16 | 0.33 | 0.04 |
| itV(AAC)K2   | 0.47 | 0.14 | 0.59 | 0.17 | 0.58 | 0.19 |
| itV(AAC)L    | 0.81 | 0.34 | 1.36 | 0.67 | 0.70 | 0.28 |
| itV(AAC)M1   | #N/A | #N/A | #N/A | #N/A | #N/A | #N/A |
| itV(AAC)M2   | 1.25 | 0.57 | #N/A | #N/A | #N/A | #N/A |
| itV(AAC)M3   | 0.38 | 0.08 | 0.39 | 0.06 | 0.33 | 0.05 |
| itV(AAC)O    | #N/A | #N/A | #N/A | #N/A | #N/A | #N/A |
| itV(CAC)D    | 1.00 | 0.41 | 1.10 | 0.46 | 0.99 | 0.44 |
| itV(UAC)B    | 1.08 | 0.46 | #N/A | #N/A | 1.07 | 0.49 |
| itV(UAC)D    | 0.50 | 0.14 | 0.80 | 0.28 | 0.57 | 0.17 |
| itW(CCA)G1   | 1.35 | 0.58 | 1.42 | 0.60 | 1.31 | 0.61 |
| itW(CCA)G2   | 1.05 | 0.45 | 2.41 | 0.92 | 0.92 | 0.43 |
| itW(CCA)J    | 0.94 | 0.38 | #N/A | #N/A | 1.02 | 0.46 |
| itW(CCA)K-0  | 1.36 | 0.62 | 1.23 | 0.56 | 1.03 | 0.49 |
| itW(CCA)K-1  | 0.68 | 0.27 | 0.49 | 0.09 | 0.48 | 0.14 |
| itW(CCA)M    | 0.99 | 0.41 | #N/A | #N/A | 1.37 | 0.64 |
| itY(GUA)D    | 0.96 | 0.42 | 0.93 | 0.33 | 0.89 | 0.36 |
| itY(GUA)F1   | 1.03 | 0.45 | 1.93 | 0.82 | #N/A | #N/A |
| itY(GUA)F2   | 1.51 | 0.66 | 1.13 | 0.47 | 1.45 | 0.66 |
| itY(GUA)J1   | #N/A | #N/A | #N/A | #N/A | #N/A | #N/A |
| itY(GUA)J2   | 0.81 | 0.31 | 0.70 | 0.26 | 0.58 | 0.21 |
| itY(GUA)M1   | 0.57 | 0.20 | 0.60 | 0.14 | 0.51 | 0.17 |
| itY(GUA)M2   | #N/A | #N/A | 1.10 | 0.43 | 1.01 | 0.45 |
| itY(GUA)O    | 0.58 | 0.19 | 1.14 | 0.52 | 0.76 | 0.31 |
| iYAL001C     | 0.72 | 0.29 | 1.07 | 0.40 | 0.58 | 0.18 |
| iYAL002W     | #N/A | #N/A | #N/A | #N/A | #N/A | #N/A |
| iYAL003W     | 0.74 | 0.30 | 1.01 | 0.40 | 1.07 | 0.44 |
| iYAL004W     | 0.54 | 0.18 | 0.47 | 0.08 | 0.36 | 0.06 |
| iYAL007C     | 2.45 | 0.93 | 2.68 | 0.95 | #N/A | #N/A |
| iYAL008W     | 1.06 | 0.48 | 0.95 | 0.38 | 1.19 | 0.50 |
| iYAL009W     | 2.02 | 0.84 | 2.16 | 0.88 | 1.91 | 0.83 |
| iYAL010C     | 1.95 | 0.83 | 2.43 | 0.93 | 2.14 | 0.89 |
| iYAL011W     | 0.98 | 0.43 | 1.40 | 0.65 | 0.81 | 0.35 |
| iYAL013W     | 0.88 | 0.35 | 0.75 | 0.26 | 0.61 | 0.23 |
| iYAL014C     | 2.08 | 0.86 | 2.24 | 0.89 | 2.04 | 0.83 |
| iYAL015C     | 0.75 | 0.30 | 0.80 | 0.31 | 0.61 | 0.22 |
| iYAL016W     | #N/A | #N/A | #N/A | #N/A | #N/A | #N/A |
| iYAL017W     | #N/A | #N/A | 1.28 | 0.59 | 1.56 | 0.71 |
| iYAL018C     | 2.42 | 0.93 | 2.65 | 0.96 | 2.17 | 0.90 |
| iYAL019W     | 0.69 | 0.27 | 1.44 | 0.71 | #N/A | #N/A |
| iYAL020C     | 3.33 | 0.99 | 2.32 | 0.91 | 3.20 | 0.98 |
| iYAL021C     | 1.69 | 0.73 | 1.62 | 0.71 | 1.52 | 0.69 |
| iYAL022C     | 0.61 | 0.22 | 0.78 | 0.31 | 0.79 | 0.31 |
| iYAL023C     | 1.35 | 0.60 | 1.18 | 0.56 | 1.22 | 0.55 |
| iYAL025C     | 1.22 | 0.55 | 1.39 | 0.59 | #N/A | #N/A |
| iYAL026C     | 1.88 | 0.80 | 1.77 | 0.83 | 2.44 | 0.93 |
| iYAL027W     | 0.43 | 0.12 | 0.55 | 0.16 | 0.49 | 0.14 |
| iYAL028W     | 1.33 | 0.57 | 1.23 | 0.52 | 1.80 | 0.83 |

|              |      |      |      |      |      |      |
|--------------|------|------|------|------|------|------|
| iYAL029C     | 1.69 | 0.72 | 1.69 | 0.74 | 1.52 | 0.73 |
| iYAL030W     | #N/A | #N/A | #N/A | #N/A | #N/A | #N/A |
| iYAL031C     | 3.86 | 1.00 | 2.97 | 0.98 | #N/A | #N/A |
| iYAL032C     | 1.82 | 0.79 | #N/A | #N/A | 1.68 | 0.76 |
| iYAL033W     | #N/A | #N/A | #N/A | #N/A | #N/A | #N/A |
| iYAL034C     | 1.62 | 0.69 | 1.52 | 0.67 | 1.42 | 0.65 |
| iYAL034W-A   | #N/A | #N/A | #N/A | #N/A | #N/A | #N/A |
| iYAL036C     | 2.18 | 0.87 | 2.16 | 0.88 | 2.22 | 0.88 |
| iYAL037W     | 0.89 | 0.37 | #N/A | #N/A | 0.85 | 0.32 |
| iYAL038W     | 1.53 | 0.68 | 1.40 | 0.60 | #N/A | #N/A |
| iYAL039C-0   | 0.63 | 0.23 | 0.74 | 0.25 | 0.63 | 0.24 |
| iYAL039C-1   | 0.11 | 0.00 | 0.22 | 0.00 | 0.09 | 0.00 |
| iYAL040C     | 0.55 | 0.18 | 0.68 | 0.23 | 0.47 | 0.13 |
| iYAL041W     | 0.28 | 0.04 | 0.38 | 0.04 | 0.35 | 0.06 |
| iYAL042W     | 1.92 | 0.79 | 2.01 | 0.85 | 1.83 | 0.77 |
| iYAL043C     | 1.60 | 0.68 | 1.36 | 0.59 | #N/A | #N/A |
| iYAL044C     | 0.60 | 0.21 | 0.79 | 0.32 | 0.78 | 0.29 |
| iYAL045C     | 0.61 | 0.22 | 1.16 | 0.55 | 0.96 | 0.43 |
| iYAL046C     | 2.13 | 0.85 | 2.40 | 0.96 | 2.53 | 0.95 |
| iYAL047C     | 1.90 | 0.79 | 1.69 | 0.82 | 1.86 | 0.85 |
| iYAL048C     | #N/A | #N/A | 1.49 | 0.65 | 1.68 | 0.76 |
| iYAL049C     | 1.28 | 0.56 | 1.13 | 0.49 | 1.79 | 0.83 |
| iYAL051W     | #N/A | #N/A | #N/A | #N/A | #N/A | #N/A |
| iYAL053W     | 0.83 | 0.35 | 0.60 | 0.18 | 1.21 | 0.51 |
| iYAL054C     | 0.77 | 0.32 | 0.76 | 0.26 | 0.67 | 0.22 |
| iYAL055W     | 1.01 | 0.45 | 1.81 | 0.78 | 0.86 | 0.38 |
| iYAL056W     | 1.14 | 0.52 | 1.33 | 0.65 | #N/A | #N/A |
| iYAL058C-A   | 1.61 | 0.73 | 1.08 | 0.42 | 1.56 | 0.71 |
| iYAL059W     | #N/A | #N/A | 2.11 | 0.87 | 1.97 | 0.81 |
| iYAL060W     | 1.36 | 0.61 | 2.34 | 0.94 | 1.38 | 0.67 |
| iYAL061W     | 1.46 | 0.66 | 1.77 | 0.77 | 1.28 | 0.54 |
| iYAL062W     | 2.02 | 0.84 | 1.28 | 0.62 | 1.46 | 0.66 |
| iYAL063C-0   | 0.77 | 0.32 | 0.71 | 0.22 | 0.78 | 0.33 |
| iYAL063C-1   | 1.12 | 0.51 | 1.20 | 0.51 | #N/A | #N/A |
| iYAL064C-A-0 | 0.72 | 0.28 | 0.63 | 0.21 | 0.87 | 0.38 |
| iYAL064C-A-1 | 0.47 | 0.14 | 0.61 | 0.19 | 0.61 | 0.23 |
| iYAL064C-A-2 | 0.97 | 0.42 | 0.82 | 0.26 | 1.21 | 0.55 |
| iYAL064C-A-3 | 1.85 | 0.79 | 1.32 | 0.56 | 2.06 | 0.87 |
| iYAL064C-A-4 | 1.75 | 0.78 | 1.39 | 0.65 | 1.57 | 0.72 |
| iYAL064C-A-5 | 1.30 | 0.59 | 1.04 | 0.48 | 1.66 | 0.75 |
| iYAL064W     | 1.63 | 0.69 | 1.32 | 0.65 | 1.74 | 0.78 |
| iYAL065C     | 1.09 | 0.49 | 0.78 | 0.24 | #N/A | #N/A |
| iYAL066W     | 2.18 | 0.88 | 1.95 | 0.83 | 1.76 | 0.79 |
| iYAL067C     | 3.45 | 0.99 | 4.69 | 1.00 | 3.10 | 0.99 |
| iYAL068C-0   | 0.65 | 0.23 | 0.73 | 0.25 | #N/A | #N/A |
| iYAL068C-2   | 0.79 | 0.31 | 0.68 | 0.22 | 0.85 | 0.39 |
| iYAL069W     | 0.37 | 0.08 | 0.47 | 0.11 | 0.43 | 0.09 |
| iYALCdelta2  | 0.80 | 0.33 | 1.46 | 0.63 | 1.03 | 0.47 |
| iYALWdelta1  | 1.97 | 0.84 | 1.77 | 0.84 | 1.81 | 0.77 |
| iYAR002C-A   | 2.14 | 0.88 | 1.80 | 0.79 | 2.32 | 0.94 |
| iYAR002W     | 0.45 | 0.13 | #N/A | #N/A | 0.55 | 0.19 |

|               |      |      |      |      |      |      |
|---------------|------|------|------|------|------|------|
| iYAR003W      | 0.49 | 0.14 | 0.41 | 0.07 | 0.39 | 0.07 |
| iYAR007C      | 2.39 | 0.92 | 2.03 | 0.86 | 2.26 | 0.92 |
| iYAR008W      | 0.99 | 0.41 | 1.24 | 0.60 | 0.96 | 0.45 |
| iYAR009C      | 0.48 | 0.15 | 0.38 | 0.06 | 0.54 | 0.18 |
| iYAR014C      | 1.98 | 0.82 | 1.67 | 0.76 | 1.77 | 0.79 |
| iYAR015W      | #N/A | #N/A | #N/A | #N/A | 0.54 | 0.18 |
| iYAR019C-0    | 2.07 | 0.83 | 2.73 | 0.96 | 2.48 | 0.94 |
| iYAR019C-1    | 1.09 | 0.48 | 1.02 | 0.44 | 1.06 | 0.48 |
| iYAR020C-0    | 0.73 | 0.29 | 0.83 | 0.27 | 0.92 | 0.40 |
| iYAR020C-1    | 0.55 | 0.19 | 0.55 | 0.13 | 0.73 | 0.26 |
| iYAR023C      | 2.12 | 0.86 | 1.87 | 0.80 | 2.18 | 0.90 |
| iYAR027W      | 2.25 | 0.89 | 1.85 | 0.80 | 2.04 | 0.86 |
| iYAR028W      | 1.32 | 0.59 | 1.10 | 0.45 | 1.37 | 0.63 |
| iYAR031W      | 2.07 | 0.86 | 1.76 | 0.76 | 1.77 | 0.79 |
| iYAR033W      | 1.84 | 0.77 | 2.73 | 0.98 | 1.93 | 0.81 |
| iYAR035W      | 1.83 | 0.77 | 1.33 | 0.57 | 1.42 | 0.69 |
| iYAR042W      | 0.49 | 0.15 | #N/A | #N/A | 0.44 | 0.11 |
| iYAR044W-0    | 0.49 | 0.15 | 0.59 | 0.19 | 0.46 | 0.11 |
| iYAR044W-1    | 0.97 | 0.40 | #N/A | #N/A | 0.91 | 0.40 |
| iYAR044W-2    | 1.21 | 0.51 | 0.85 | 0.31 | 1.24 | 0.54 |
| iYAR044W-3    | 1.08 | 0.45 | 0.75 | 0.28 | 1.25 | 0.61 |
| iYAR047C-0    | 0.57 | 0.20 | 0.59 | 0.19 | 0.89 | 0.41 |
| iYAR047C-1    | 0.57 | 0.20 | 0.59 | 0.17 | 0.86 | 0.38 |
| iYAR050W      | 1.95 | 0.84 | 1.45 | 0.69 | 1.39 | 0.66 |
| iYAR053W      | 2.08 | 0.88 | 1.93 | 0.87 | 2.04 | 0.83 |
| iYAR060C      | #N/A | #N/A | 0.85 | 0.30 | 1.17 | 0.49 |
| iYAR061W      | 0.50 | 0.15 | 0.50 | 0.11 | 0.56 | 0.19 |
| iYAR062W      | 0.85 | 0.33 | 0.79 | 0.31 | 0.95 | 0.38 |
| iYAR064W      | 0.78 | 0.32 | 0.86 | 0.32 | 0.90 | 0.39 |
| iYAR066W      | 0.63 | 0.23 | 0.52 | 0.14 | 0.59 | 0.21 |
| iYAR068W      | #N/A | #N/A | 1.91 | 0.86 | 1.60 | 0.68 |
| iYAR069C      | 1.85 | 0.80 | 2.45 | 0.93 | 1.86 | 0.83 |
| iYAR070C      | 1.20 | 0.51 | 2.07 | 0.85 | 1.17 | 0.53 |
| iYAR071W      | 2.86 | 0.97 | 2.73 | 0.98 | 2.82 | 0.97 |
| iYARCdelta5   | #N/A | #N/A | #N/A | #N/A | #N/A | #N/A |
| iYARCdelta8-0 | 1.55 | 0.70 | 1.27 | 0.61 | 1.79 | 0.76 |
| iYARCdelta8-1 | 1.57 | 0.71 | 1.43 | 0.61 | 1.60 | 0.73 |
| iYARCdelta8-2 | 1.88 | 0.81 | 1.41 | 0.62 | 1.90 | 0.84 |
| iYARCdelta8-3 | 1.42 | 0.61 | 1.11 | 0.45 | 1.63 | 0.74 |
| iYARCdelta8-4 | 0.53 | 0.17 | 0.50 | 0.12 | 0.59 | 0.19 |
| iYARWdelta6   | 2.17 | 0.89 | 1.93 | 0.83 | 1.66 | 0.75 |
| iYARWdelta7   | 0.82 | 0.34 | 0.67 | 0.21 | 0.96 | 0.42 |
| iYARWsigma1   | 0.74 | 0.28 | 0.74 | 0.27 | 0.71 | 0.28 |
| iYBL001C      | 1.17 | 0.52 | 1.52 | 0.75 | 1.06 | 0.48 |
| iYBL002W      | 0.82 | 0.34 | 0.97 | 0.35 | 0.84 | 0.36 |
| iYBL003C      | 0.41 | 0.10 | 0.63 | 0.21 | 0.56 | 0.19 |
| iYBL004W      | 0.51 | 0.16 | 0.60 | 0.17 | #N/A | #N/A |
| iYBL005W      | 0.67 | 0.24 | 0.77 | 0.31 | 0.80 | 0.34 |
| iYBL006C      | 1.38 | 0.62 | 1.56 | 0.76 | 1.07 | 0.48 |
| iYBL007C      | 1.27 | 0.57 | 1.07 | 0.44 | 1.27 | 0.59 |
| iYBL008W      | 0.47 | 0.14 | 0.68 | 0.22 | 0.48 | 0.14 |

|            |      |      |      |      |      |      |
|------------|------|------|------|------|------|------|
| iYBL009W   | 1.65 | 0.73 | 1.61 | 0.69 | 1.81 | 0.83 |
| iYBL010C   | 2.43 | 0.93 | 2.07 | 0.86 | 1.66 | 0.78 |
| iYBL011W   | 0.56 | 0.19 | 0.63 | 0.19 | 0.43 | 0.11 |
| iYBL013W   | 0.74 | 0.27 | #N/A | #N/A | 0.57 | 0.17 |
| iYBL014C   | 2.10 | 0.86 | 1.85 | 0.80 | 2.05 | 0.83 |
| iYBL015W   | 2.02 | 0.85 | 2.49 | 0.94 | 1.76 | 0.79 |
| iYBL016W   | 0.97 | 0.43 | 0.80 | 0.32 | 1.59 | 0.74 |
| iYBL017C   | 1.24 | 0.53 | 1.82 | 0.86 | 1.01 | 0.48 |
| iYBL018C   | 1.83 | 0.80 | 1.84 | 0.86 | 1.96 | 0.85 |
| iYBL019W   | #N/A | #N/A | #N/A | #N/A | #N/A | #N/A |
| iYBL020W   | 1.62 | 0.72 | 1.95 | 0.83 | 1.93 | 0.82 |
| iYBL022C   | 1.15 | 0.48 | 1.34 | 0.58 | 0.95 | 0.42 |
| iYBL023C   | 1.11 | 0.50 | 0.88 | 0.38 | 0.70 | 0.28 |
| iYBL024W   | 0.36 | 0.07 | #N/A | #N/A | 0.48 | 0.13 |
| iYBL025W   | 1.12 | 0.47 | 1.00 | 0.37 | 1.01 | 0.45 |
| iYBL026W   | 1.36 | 0.58 | 1.35 | 0.58 | 1.59 | 0.68 |
| iYBL027W   | 1.44 | 0.61 | 1.60 | 0.68 | 0.99 | 0.48 |
| iYBL028C   | 0.10 | 0.00 | 0.20 | 0.00 | 0.25 | 0.02 |
| iYBL029W   | 0.53 | 0.17 | 0.78 | 0.27 | 0.89 | 0.34 |
| iYBL030C-0 | 0.85 | 0.34 | 0.85 | 0.36 | 0.77 | 0.32 |
| iYBL030C-1 | 0.26 | 0.03 | 0.29 | 0.02 | 0.28 | 0.03 |
| iYBL031W   | #N/A | #N/A | #N/A | #N/A | 0.47 | 0.11 |
| iYBL032W   | 1.52 | 0.68 | 1.11 | 0.53 | 1.40 | 0.67 |
| iYBL033C   | 1.42 | 0.61 | 1.10 | 0.52 | 0.86 | 0.39 |
| iYBL034C   | 2.26 | 0.91 | 1.70 | 0.76 | 1.64 | 0.78 |
| iYBL035C   | 1.25 | 0.55 | #N/A | #N/A | #N/A | #N/A |
| iYBL036C   | 1.89 | 0.78 | 1.47 | 0.72 | #N/A | #N/A |
| iYBL037W   | #N/A | #N/A | #N/A | #N/A | #N/A | #N/A |
| iYBL038W   | 1.11 | 0.47 | 1.20 | 0.50 | 1.30 | 0.61 |
| iYBL039C   | 1.33 | 0.57 | 1.42 | 0.62 | 1.27 | 0.56 |
| iYBL040C   | 1.77 | 0.79 | 1.54 | 0.66 | 1.42 | 0.65 |
| iYBL041W   | #N/A | #N/A | #N/A | #N/A | #N/A | #N/A |
| iYBL042C   | 0.54 | 0.17 | 0.61 | 0.14 | 0.53 | 0.17 |
| iYBL043W   | 1.55 | 0.70 | 1.14 | 0.54 | 1.54 | 0.74 |
| iYBL044W   | 2.33 | 0.92 | #N/A | #N/A | 2.15 | 0.91 |
| iYBL045C   | 1.01 | 0.42 | 0.83 | 0.32 | 1.03 | 0.49 |
| iYBL046W   | 0.30 | 0.04 | 0.38 | 0.04 | 0.37 | 0.06 |
| iYBL047C   | 2.09 | 0.88 | 1.75 | 0.76 | 1.92 | 0.84 |
| iYBL048W   | 0.83 | 0.35 | 0.84 | 0.35 | 0.84 | 0.32 |
| iYBL050W   | 0.59 | 0.20 | 0.68 | 0.22 | 0.72 | 0.30 |
| iYBL051C   | 2.29 | 0.92 | 1.99 | 0.84 | 2.39 | 0.94 |
| iYBL052C   | 1.33 | 0.57 | 1.13 | 0.45 | 0.89 | 0.39 |
| iYBL054W   | 0.30 | 0.04 | 0.45 | 0.07 | 0.61 | 0.22 |
| iYBL055C   | 1.06 | 0.47 | 1.43 | 0.70 | 1.56 | 0.70 |
| iYBL056W   | 0.37 | 0.08 | 0.44 | 0.07 | 0.33 | 0.05 |
| iYBL057C   | 1.86 | 0.82 | 1.35 | 0.62 | 1.66 | 0.71 |
| iYBL058W   | #N/A | #N/A | #N/A | #N/A | 0.63 | 0.20 |
| iYBL059W   | 2.11 | 0.87 | #N/A | #N/A | 1.33 | 0.61 |
| iYBL060W   | 1.17 | 0.51 | 1.19 | 0.57 | 1.16 | 0.53 |
| iYBL061C   | 1.43 | 0.65 | 2.33 | 0.91 | 1.32 | 0.56 |
| iYBL063W   | #N/A | #N/A | #N/A | #N/A | #N/A | #N/A |

|              |      |      |      |      |      |      |
|--------------|------|------|------|------|------|------|
| iYBL064C     | 1.94 | 0.83 | 1.72 | 0.76 | 1.50 | 0.64 |
| iYBL065W     | #N/A | #N/A | #N/A | #N/A | #N/A | #N/A |
| iYBL067C     | 0.78 | 0.32 | 0.76 | 0.30 | 0.82 | 0.35 |
| iYBL068W     | 0.29 | 0.04 | 0.57 | 0.13 | 0.38 | 0.07 |
| iYBL069W     | 1.03 | 0.45 | 1.22 | 0.52 | 1.28 | 0.58 |
| iYBL071C     | #N/A | #N/A | #N/A | #N/A | 0.81 | 0.30 |
| iYBL072C     | 0.80 | 0.31 | 1.11 | 0.48 | 0.82 | 0.35 |
| iYBL073W     | 0.51 | 0.16 | 0.68 | 0.24 | 0.45 | 0.10 |
| iYBL075C     | 0.29 | 0.04 | 0.35 | 0.04 | 0.32 | 0.04 |
| iYBL076C     | #N/A | #N/A | #N/A | #N/A | #N/A | #N/A |
| iYBL078C     | #N/A | #N/A | #N/A | #N/A | #N/A | #N/A |
| iYBL079W     | 0.88 | 0.35 | 0.69 | 0.25 | 0.94 | 0.41 |
| iYBL080C     | 1.95 | 0.84 | 1.70 | 0.82 | 1.86 | 0.79 |
| iYBL081W     | #N/A | #N/A | #N/A | #N/A | #N/A | #N/A |
| iYBL082C     | 2.19 | 0.89 | 3.11 | 0.99 | 2.46 | 0.95 |
| iYBL084C     | 1.72 | 0.76 | 1.23 | 0.57 | 1.65 | 0.75 |
| iYBL085W     | #N/A | #N/A | #N/A | #N/A | #N/A | #N/A |
| iYBL086C     | 0.97 | 0.42 | 0.95 | 0.39 | 1.00 | 0.41 |
| iYBL087C     | 0.35 | 0.07 | 0.31 | 0.03 | 0.39 | 0.07 |
| iYBL088C     | 1.35 | 0.58 | 1.28 | 0.55 | 1.28 | 0.54 |
| iYBL091C     | 2.15 | 0.89 | 1.81 | 0.82 | 2.29 | 0.92 |
| iYBL091C-A   | 1.05 | 0.47 | 1.10 | 0.52 | 1.09 | 0.45 |
| iYBL092W     | #N/A | #N/A | #N/A | #N/A | #N/A | #N/A |
| iYBL093C     | 0.44 | 0.12 | 0.50 | 0.10 | 0.44 | 0.12 |
| iYBL094C     | 0.31 | 0.05 | 0.43 | 0.08 | 0.53 | 0.15 |
| iYBL097W     | #N/A | #N/A | #N/A | #N/A | #N/A | #N/A |
| iYBL098W     | 1.55 | 0.69 | #N/A | #N/A | 2.32 | 0.89 |
| iYBL099W     | 0.71 | 0.28 | 0.85 | 0.35 | 0.69 | 0.27 |
| iYBL101C     | 1.48 | 0.64 | 1.44 | 0.63 | 1.47 | 0.67 |
| iYBL102W     | 0.90 | 0.38 | #N/A | #N/A | 0.66 | 0.26 |
| iYBL103C     | 1.57 | 0.71 | 1.65 | 0.72 | 1.71 | 0.77 |
| iYBL104C     | 1.79 | 0.78 | 1.32 | 0.63 | 1.42 | 0.69 |
| iYBL105C     | 1.90 | 0.79 | 1.67 | 0.73 | 1.64 | 0.77 |
| iYBL106C     | 0.52 | 0.17 | 0.53 | 0.14 | 0.53 | 0.17 |
| iYBL108W     | 0.93 | 0.40 | 1.24 | 0.55 | 1.21 | 0.56 |
| iYBL109W-0   | 0.38 | 0.09 | 0.39 | 0.06 | 0.40 | 0.09 |
| iYBL109W-1   | 0.73 | 0.28 | 0.84 | 0.29 | 0.72 | 0.25 |
| iYBL111C     | 0.54 | 0.18 | 0.55 | 0.15 | 0.53 | 0.17 |
| iYBLCdelta7  | #N/A | #N/A | #N/A | #N/A | #N/A | #N/A |
| iYBLCsigma1  | 1.76 | 0.75 | 1.55 | 0.76 | 1.66 | 0.71 |
| iYBLWdelta10 | #N/A | #N/A | #N/A | #N/A | #N/A | #N/A |
| iYBLWdelta3  | #N/A | #N/A | #N/A | #N/A | #N/A | #N/A |
| iYBLWtau1    | 0.93 | 0.40 | 1.19 | 0.57 | 0.91 | 0.36 |
| iYBR001C     | 0.65 | 0.23 | 0.61 | 0.14 | 0.66 | 0.22 |
| iYBR002C     | 2.29 | 0.88 | #N/A | #N/A | 2.32 | 0.89 |
| iYBR003W     | #N/A | #N/A | #N/A | #N/A | #N/A | #N/A |
| iYBR004C     | 2.42 | 0.91 | 2.36 | 0.95 | 2.38 | 0.93 |
| iYBR005W     | 1.88 | 0.83 | 2.01 | 0.85 | 1.79 | 0.80 |
| iYBR006W     | 0.99 | 0.41 | 0.69 | 0.22 | 0.88 | 0.34 |
| iYBR007C-0   | 0.50 | 0.15 | 0.37 | 0.05 | 0.64 | 0.25 |
| iYBR007C-1   | 0.72 | 0.29 | 1.17 | 0.54 | 0.86 | 0.37 |

|            |      |      |      |      |      |      |
|------------|------|------|------|------|------|------|
| iYBR008C   | 0.81 | 0.33 | 1.05 | 0.43 | 0.80 | 0.30 |
| iYBR009C   | 0.27 | 0.03 | 0.32 | 0.03 | 0.23 | 0.02 |
| iYBR010W   | #N/A | #N/A | #N/A | #N/A | 0.64 | 0.25 |
| iYBR011C   | 1.64 | 0.72 | 1.37 | 0.68 | 1.43 | 0.65 |
| iYBR013C   | 1.41 | 0.63 | 1.95 | 0.82 | 1.52 | 0.65 |
| iYBR014C   | 0.72 | 0.26 | 0.78 | 0.28 | 0.65 | 0.25 |
| iYBR015C   | 1.65 | 0.70 | 1.23 | 0.50 | 1.12 | 0.53 |
| iYBR016W   | 1.13 | 0.48 | 0.67 | 0.21 | 1.03 | 0.44 |
| iYBR017C   | 1.81 | 0.76 | 1.86 | 0.79 | 1.69 | 0.76 |
| iYBR018C   | 2.17 | 0.86 | 2.87 | 0.97 | 2.35 | 0.90 |
| iYBR019C   | 0.43 | 0.10 | 0.60 | 0.19 | 0.65 | 0.21 |
| iYBR020W   | 0.57 | 0.19 | 0.88 | 0.34 | 0.73 | 0.31 |
| iYBR021W   | 1.80 | 0.80 | 1.69 | 0.74 | 1.76 | 0.82 |
| iYBR022W   | #N/A | #N/A | #N/A | #N/A | #N/A | #N/A |
| iYBR024W   | 0.66 | 0.23 | 0.66 | 0.21 | 0.80 | 0.34 |
| iYBR025C   | 1.19 | 0.54 | 1.57 | 0.69 | 1.22 | 0.51 |
| iYBR027C   | #N/A | #N/A | #N/A | #N/A | #N/A | #N/A |
| iYBR028C   | 0.95 | 0.40 | 1.13 | 0.47 | 0.78 | 0.29 |
| iYBR029C   | 1.80 | 0.76 | 1.31 | 0.59 | 1.78 | 0.77 |
| iYBR031W   | #N/A | #N/A | #N/A | #N/A | #N/A | #N/A |
| iYBR032W   | 1.31 | 0.56 | 1.20 | 0.58 | #N/A | #N/A |
| iYBR033W   | 0.77 | 0.29 | 0.45 | 0.09 | 0.47 | 0.13 |
| iYBR034C   | 1.40 | 0.60 | 1.33 | 0.57 | 1.02 | 0.44 |
| iYBR035C   | 1.99 | 0.82 | 1.96 | 0.88 | 1.63 | 0.74 |
| iYBR036C   | 2.57 | 0.93 | 2.30 | 0.95 | 2.33 | 0.94 |
| iYBR037C   | #N/A | #N/A | 1.71 | 0.81 | 1.49 | 0.72 |
| iYBR038W   | #N/A | #N/A | 1.31 | 0.61 | 1.09 | 0.52 |
| iYBR039W   | 1.52 | 0.65 | 1.41 | 0.62 | 1.26 | 0.62 |
| iYBR040W   | 1.03 | 0.45 | 1.24 | 0.55 | 1.27 | 0.58 |
| iYBR042C   | 1.27 | 0.55 | 1.11 | 0.50 | 1.30 | 0.62 |
| iYBR043C   | 1.58 | 0.72 | 1.11 | 0.52 | 1.88 | 0.83 |
| iYBR044C   | 1.54 | 0.66 | 1.52 | 0.66 | 1.42 | 0.69 |
| iYBR045C   | 0.77 | 0.29 | 1.35 | 0.64 | 0.62 | 0.23 |
| iYBR046C   | 1.43 | 0.61 | 1.84 | 0.78 | 0.96 | 0.39 |
| iYBR047W   | 0.32 | 0.05 | 0.31 | 0.02 | 0.38 | 0.08 |
| iYBR048W   | 0.37 | 0.08 | 0.36 | 0.05 | 0.31 | 0.04 |
| iYBR049C   | 1.46 | 0.65 | 1.13 | 0.47 | 1.25 | 0.57 |
| iYBR051W   | 2.38 | 0.92 | 1.87 | 0.87 | 1.76 | 0.74 |
| iYBR052C   | 1.69 | 0.74 | #N/A | #N/A | 2.16 | 0.90 |
| iYBR053C-0 | 1.10 | 0.48 | 0.99 | 0.41 | 1.17 | 0.57 |
| iYBR053C-1 | 1.22 | 0.54 | 1.31 | 0.63 | 1.07 | 0.52 |
| iYBR054W   | 1.76 | 0.78 | 2.00 | 0.84 | 1.69 | 0.77 |
| iYBR056W   | 1.78 | 0.79 | 1.95 | 0.83 | 1.89 | 0.86 |
| iYBR057C   | 0.86 | 0.36 | 0.99 | 0.39 | 0.98 | 0.46 |
| iYBR058C   | 2.79 | 0.95 | 2.36 | 0.95 | 2.40 | 0.94 |
| iYBR059C   | 1.60 | 0.73 | 1.45 | 0.63 | 1.43 | 0.65 |
| iYBR060C-0 | 0.76 | 0.31 | 1.06 | 0.42 | 1.02 | 0.49 |
| iYBR060C-1 | 0.42 | 0.11 | 0.54 | 0.15 | 0.43 | 0.11 |
| iYBR062C   | 1.16 | 0.51 | 0.88 | 0.38 | 1.15 | 0.52 |
| iYBR064W   | 0.93 | 0.38 | 0.79 | 0.26 | 0.66 | 0.22 |
| iYBR065C   | 1.62 | 0.72 | 2.00 | 0.87 | 2.17 | 0.90 |

|            |      |      |      |      |      |      |
|------------|------|------|------|------|------|------|
| iYBR066C   | 0.51 | 0.16 | 0.86 | 0.29 | 0.48 | 0.12 |
| iYBR067C   | 0.35 | 0.06 | 0.56 | 0.14 | 0.32 | 0.04 |
| iYBR068C   | 0.18 | 0.01 | 0.30 | 0.02 | 0.22 | 0.01 |
| iYBR069C   | 0.25 | 0.02 | 0.39 | 0.04 | 0.22 | 0.01 |
| iYBR070C   | 1.21 | 0.54 | 1.28 | 0.53 | 0.81 | 0.30 |
| iYBR071W   | 1.79 | 0.77 | 1.27 | 0.55 | 1.30 | 0.59 |
| iYBR072W   | 3.11 | 0.98 | 2.30 | 0.93 | 2.28 | 0.93 |
| iYBR073W   | 1.50 | 0.64 | 1.38 | 0.67 | 1.26 | 0.56 |
| iYBR074W   | 0.28 | 0.04 | 0.36 | 0.05 | 0.35 | 0.06 |
| iYBR075W   | 1.09 | 0.48 | 1.48 | 0.65 | 1.10 | 0.50 |
| iYBR076W   | 0.85 | 0.36 | #N/A | #N/A | 0.90 | 0.39 |
| iYBR077C   | 0.29 | 0.04 | 0.39 | 0.06 | 0.24 | 0.02 |
| iYBR078W   | 0.26 | 0.03 | 0.40 | 0.07 | 0.27 | 0.02 |
| iYBR079C   | 0.63 | 0.23 | 1.29 | 0.55 | 0.94 | 0.44 |
| iYBR080C   | 1.53 | 0.65 | 1.37 | 0.61 | 1.38 | 0.63 |
| iYBR081C   | 0.75 | 0.28 | 0.71 | 0.26 | 0.75 | 0.30 |
| iYBR082C-0 | 0.72 | 0.26 | 1.01 | 0.46 | 0.84 | 0.32 |
| iYBR082C-1 | 0.52 | 0.16 | 0.82 | 0.34 | 0.40 | 0.09 |
| iYBR083W   | 0.75 | 0.30 | 0.82 | 0.28 | 0.71 | 0.28 |
| iYBR084C-A | 0.53 | 0.17 | 0.36 | 0.05 | 0.56 | 0.19 |
| iYBR084W   | 0.32 | 0.06 | #N/A | #N/A | 0.49 | 0.15 |
| iYBR085W-0 | 1.84 | 0.81 | 1.67 | 0.73 | 1.74 | 0.80 |
| iYBR085W-1 | 1.30 | 0.55 | 1.23 | 0.51 | 1.09 | 0.53 |
| iYBR085W-2 | 0.90 | 0.39 | 1.32 | 0.55 | 0.76 | 0.31 |
| iYBR086C   | 0.77 | 0.29 | 0.83 | 0.28 | 0.91 | 0.42 |
| iYBR087W   | #N/A | #N/A | #N/A | #N/A | #N/A | #N/A |
| iYBR089W   | 1.09 | 0.45 | 1.21 | 0.52 | 1.18 | 0.49 |
| iYBR090C   | 1.19 | 0.53 | #N/A | #N/A | 1.20 | 0.51 |
| iYBR091C   | 2.41 | 0.91 | #N/A | #N/A | 2.55 | 0.95 |
| iYBR092C   | 0.90 | 0.38 | 1.00 | 0.46 | 0.77 | 0.33 |
| iYBR094W   | #N/A | #N/A | #N/A | #N/A | #N/A | #N/A |
| iYBR095C   | 1.72 | 0.73 | 1.07 | 0.50 | 1.93 | 0.80 |
| iYBR096W   | #N/A | #N/A | #N/A | #N/A | #N/A | #N/A |
| iYBR097W   | 1.57 | 0.70 | #N/A | #N/A | 1.04 | 0.43 |
| iYBR100W   | 0.39 | 0.10 | 0.39 | 0.06 | #N/A | #N/A |
| iYBR101C   | 0.89 | 0.37 | 1.40 | 0.59 | 1.01 | 0.42 |
| iYBR102C   | 1.80 | 0.75 | 1.57 | 0.74 | 1.71 | 0.80 |
| iYBR103W   | 1.43 | 0.64 | 1.20 | 0.57 | 1.23 | 0.52 |
| iYBR104W   | #N/A | #N/A | 0.32 | 0.03 | 0.46 | 0.11 |
| iYBR105C   | 0.43 | 0.11 | 0.37 | 0.05 | 0.40 | 0.09 |
| iYBR108W   | 0.61 | 0.21 | 0.50 | 0.13 | 0.61 | 0.19 |
| iYBR109C   | 2.62 | 0.94 | 1.84 | 0.86 | 2.49 | 0.95 |
| iYBR110W   | 2.14 | 0.85 | 2.03 | 0.86 | 1.83 | 0.77 |
| iYBR113W   | 0.51 | 0.16 | 0.47 | 0.11 | 0.51 | 0.14 |
| iYBR114W   | #N/A | #N/A | #N/A | #N/A | #N/A | #N/A |
| iYBR115C   | #N/A | #N/A | #N/A | #N/A | 0.76 | 0.32 |
| iYBR117C   | 0.95 | 0.42 | 1.30 | 0.62 | 0.91 | 0.36 |
| iYBR119W   | #N/A | #N/A | #N/A | #N/A | #N/A | #N/A |
| iYBR120C   | 0.84 | 0.33 | 0.78 | 0.28 | 0.67 | 0.26 |
| iYBR121C   | 1.05 | 0.47 | 1.24 | 0.53 | 1.20 | 0.55 |
| iYBR122C   | 2.67 | 0.96 | 2.08 | 0.92 | 2.03 | 0.89 |



|            |      |      |      |      |      |      |
|------------|------|------|------|------|------|------|
| iYBR124W   | 0.58 | 0.20 | 0.41 | 0.07 | 0.47 | 0.13 |
| iYBR126C   | 1.22 | 0.56 | 1.19 | 0.57 | 0.95 | 0.45 |
| iYBR127C   | 1.64 | 0.72 | 1.81 | 0.85 | 1.60 | 0.75 |
| iYBR128C   | 1.88 | 0.83 | 2.24 | 0.89 | 1.80 | 0.79 |
| iYBR129C   | 1.89 | 0.83 | 1.70 | 0.73 | 1.97 | 0.84 |
| iYBR130C   | 1.37 | 0.59 | 1.00 | 0.40 | 1.55 | 0.73 |
| iYBR132C   | 0.47 | 0.14 | 0.48 | 0.09 | 0.45 | 0.11 |
| iYBR134W   | 1.71 | 0.75 | #N/A | #N/A | 1.02 | 0.46 |
| iYBR136W   | 1.44 | 0.61 | 1.28 | 0.53 | 1.37 | 0.59 |
| iYBR137W   | #N/A | #N/A | 0.69 | 0.25 | #N/A | #N/A |
| iYBR138C   | 1.23 | 0.52 | 0.86 | 0.30 | 1.12 | 0.55 |
| iYBR139W   | #N/A | #N/A | #N/A | #N/A | #N/A | #N/A |
| iYBR140C   | 1.21 | 0.52 | 1.08 | 0.50 | 1.48 | 0.65 |
| iYBR141C   | 1.55 | 0.66 | 1.65 | 0.72 | 1.69 | 0.76 |
| iYBR142W   | #N/A | #N/A | #N/A | #N/A | #N/A | #N/A |
| iYBR143C   | 1.72 | 0.75 | 1.52 | 0.69 | #N/A | #N/A |
| iYBR144C   | 1.98 | 0.85 | 1.80 | 0.78 | 1.84 | 0.84 |
| iYBR145W   | 2.40 | 0.94 | 2.47 | 0.94 | 2.38 | 0.93 |
| iYBR146W   | 1.70 | 0.72 | 1.44 | 0.63 | 1.21 | 0.59 |
| iYBR147W   | 1.80 | 0.80 | 1.60 | 0.78 | 1.60 | 0.74 |
| iYBR148W   | 1.80 | 0.76 | 1.39 | 0.61 | 1.74 | 0.74 |
| iYBR149W   | 0.59 | 0.21 | #N/A | #N/A | #N/A | #N/A |
| iYBR150C   | 1.05 | 0.47 | 1.20 | 0.51 | 1.16 | 0.48 |
| iYBR151W   | 1.05 | 0.47 | 1.10 | 0.51 | 1.07 | 0.49 |
| iYBR152W   | 0.82 | 0.34 | 1.36 | 0.63 | 0.88 | 0.41 |
| iYBR153W   | #N/A | #N/A | 0.72 | 0.24 | 0.49 | 0.12 |
| iYBR154C   | 1.08 | 0.47 | 1.59 | 0.68 | 1.12 | 0.53 |
| iYBR155W   | 0.28 | 0.03 | 0.34 | 0.04 | 0.24 | 0.02 |
| iYBR156C   | 0.93 | 0.40 | 0.89 | 0.34 | 0.69 | 0.28 |
| iYBR157C-0 | 0.33 | 0.06 | 0.50 | 0.11 | 0.31 | 0.04 |
| iYBR157C-1 | 0.18 | 0.01 | 0.62 | 0.21 | 0.19 | 0.01 |
| iYBR158W   | 1.69 | 0.75 | 1.89 | 0.88 | 1.49 | 0.68 |
| iYBR159W   | #N/A | #N/A | 1.30 | 0.56 | 0.93 | 0.37 |
| iYBR160W   | 1.00 | 0.42 | 1.83 | 0.79 | 0.77 | 0.28 |
| iYBR161W   | #N/A | #N/A | #N/A | #N/A | 0.38 | 0.07 |
| iYBR162C   | 0.50 | 0.15 | 0.68 | 0.22 | 0.47 | 0.13 |
| iYBR162W-A | 1.35 | 0.60 | 1.56 | 0.70 | 1.30 | 0.63 |
| iYBR163W   | 0.44 | 0.12 | #N/A | #N/A | 0.72 | 0.30 |
| iYBR164C   | 2.20 | 0.87 | 1.50 | 0.66 | 1.84 | 0.81 |
| iYBR165W   | #N/A | #N/A | #N/A | #N/A | #N/A | #N/A |
| iYBR166C   | 1.57 | 0.70 | 1.79 | 0.81 | 1.79 | 0.82 |
| iYBR167C   | 1.50 | 0.67 | 1.96 | 0.89 | 1.87 | 0.79 |
| iYBR168W   | 0.61 | 0.22 | 0.34 | 0.04 | 0.63 | 0.24 |
| iYBR169C   | 1.43 | 0.66 | 0.86 | 0.31 | 1.24 | 0.60 |
| iYBR170C   | 2.13 | 0.89 | 1.43 | 0.61 | 1.30 | 0.59 |
| iYBR171W   | #N/A | #N/A | #N/A | #N/A | #N/A | #N/A |
| iYBR172C   | 1.33 | 0.61 | 1.22 | 0.50 | 1.85 | 0.80 |
| iYBR173C   | 2.32 | 0.89 | 1.69 | 0.73 | 1.63 | 0.69 |
| iYBR175W   | 1.70 | 0.76 | 1.37 | 0.58 | 1.67 | 0.76 |
| iYBR176W   | #N/A | #N/A | 0.59 | 0.13 | #N/A | #N/A |
| iYBR178W   | #N/A | #N/A | #N/A | #N/A | #N/A | #N/A |



|          |      |      |      |      |      |      |
|----------|------|------|------|------|------|------|
| iYBR179C | 1.94 | 0.84 | 1.75 | 0.77 | 1.96 | 0.84 |
| iYBR180W | #N/A | #N/A | #N/A | #N/A | #N/A | #N/A |
| iYBR181C | 0.91 | 0.38 | 1.02 | 0.40 | 0.87 | 0.33 |
| iYBR182C | 1.63 | 0.69 | 1.25 | 0.51 | 1.32 | 0.64 |
| iYBR183W | 2.12 | 0.85 | 2.11 | 0.87 | 1.38 | 0.67 |
| iYBR184W | #N/A | #N/A | #N/A | #N/A | #N/A | #N/A |
| iYBR185C | 3.16 | 0.98 | 3.98 | 1.00 | 2.64 | 0.96 |
| iYBR186W | 0.72 | 0.26 | 0.78 | 0.31 | 0.55 | 0.19 |
| iYBR187W | 0.73 | 0.28 | 0.54 | 0.15 | 0.83 | 0.37 |
| iYBR188C | 1.05 | 0.44 | 0.97 | 0.38 | 0.85 | 0.35 |
| iYBR189W | 0.41 | 0.10 | #N/A | #N/A | 0.52 | 0.16 |
| iYBR191W | 0.68 | 0.26 | 0.88 | 0.38 | 0.80 | 0.34 |
| iYBR192W | 0.58 | 0.20 | #N/A | #N/A | 0.64 | 0.24 |
| iYBR193C | 1.18 | 0.50 | 1.23 | 0.59 | 1.27 | 0.60 |
| iYBR194W | 0.75 | 0.30 | 0.60 | 0.18 | 0.52 | 0.17 |
| iYBR195C | 0.34 | 0.06 | #N/A | #N/A | 0.57 | 0.20 |
| iYBR196C | 0.20 | 0.01 | 0.29 | 0.02 | 0.18 | 0.01 |
| iYBR197C | 0.74 | 0.27 | 1.09 | 0.45 | 0.78 | 0.30 |
| iYBR198C | 1.67 | 0.71 | 1.12 | 0.53 | 1.21 | 0.55 |
| iYBR199W | 0.94 | 0.41 | 0.82 | 0.30 | 0.91 | 0.42 |
| iYBR200W | 1.63 | 0.69 | 1.67 | 0.81 | 1.51 | 0.69 |
| iYBR202W | 0.68 | 0.24 | 0.59 | 0.15 | 0.69 | 0.24 |
| iYBR203W | 0.81 | 0.34 | 0.79 | 0.32 | 0.88 | 0.40 |
| iYBR204C | 2.31 | 0.92 | 1.55 | 0.68 | 2.03 | 0.87 |
| iYBR206W | 1.41 | 0.60 | #N/A | #N/A | #N/A | #N/A |
| iYBR207W | #N/A | #N/A | 0.76 | 0.26 | 0.37 | 0.07 |
| iYBR208C | 1.25 | 0.53 | 1.59 | 0.70 | 1.30 | 0.55 |
| iYBR209W | #N/A | #N/A | 1.00 | 0.41 | 0.56 | 0.17 |
| iYBR210W | #N/A | #N/A | #N/A | #N/A | #N/A | #N/A |
| iYBR211C | 1.99 | 0.84 | 1.16 | 0.47 | 1.56 | 0.71 |
| iYBR212W | 0.96 | 0.41 | 1.00 | 0.39 | 0.96 | 0.46 |
| iYBR213W | 1.77 | 0.79 | 1.05 | 0.49 | 1.57 | 0.71 |
| iYBR214W | 2.26 | 0.88 | 1.39 | 0.59 | 1.88 | 0.81 |
| iYBR215W | 0.39 | 0.09 | #N/A | #N/A | 0.45 | 0.12 |
| iYBR216C | 1.53 | 0.69 | 1.63 | 0.72 | 1.58 | 0.72 |
| iYBR217W | 0.74 | 0.30 | 0.57 | 0.16 | 0.78 | 0.29 |
| iYBR218C | #N/A | #N/A | #N/A | #N/A | #N/A | #N/A |
| iYBR220C | 1.17 | 0.52 | 1.12 | 0.44 | 1.20 | 0.57 |
| iYBR221C | 1.03 | 0.43 | 1.05 | 0.49 | 0.81 | 0.36 |
| iYBR222C | 0.66 | 0.25 | 1.08 | 0.42 | 0.72 | 0.30 |
| iYBR227C | 1.65 | 0.70 | 1.33 | 0.65 | 1.84 | 0.81 |
| iYBR228W | #N/A | #N/A | #N/A | #N/A | #N/A | #N/A |
| iYBR229C | 3.41 | 0.99 | #N/A | #N/A | 3.01 | 0.97 |
| iYBR230C | 1.25 | 0.55 | 1.07 | 0.44 | 1.03 | 0.49 |
| iYBR231C | 1.81 | 0.80 | 1.59 | 0.77 | 1.82 | 0.83 |
| iYBR233W | 2.39 | 0.92 | 1.64 | 0.70 | 1.95 | 0.87 |
| iYBR234C | 2.24 | 0.89 | 1.73 | 0.80 | 2.38 | 0.94 |
| iYBR235W | 0.39 | 0.09 | 0.38 | 0.06 | 0.40 | 0.09 |
| iYBR236C | 2.50 | 0.92 | 1.54 | 0.67 | 2.18 | 0.92 |
| iYBR237W | 0.30 | 0.04 | #N/A | #N/A | 0.30 | 0.03 |
| iYBR238C | 0.57 | 0.20 | 1.35 | 0.58 | 0.69 | 0.27 |

|            |      |      |      |      |      |      |
|------------|------|------|------|------|------|------|
| iYBR239C   | 2.60 | 0.96 | 2.35 | 0.92 | 2.66 | 0.97 |
| iYBR240C   | 1.99 | 0.84 | 1.29 | 0.54 | #N/A | #N/A |
| iYBR241C   | 1.77 | 0.79 | 1.78 | 0.77 | 2.14 | 0.86 |
| iYBR242W   | #N/A | #N/A | #N/A | #N/A | #N/A | #N/A |
| iYBR243C   | 1.62 | 0.72 | 1.49 | 0.70 | 1.77 | 0.75 |
| iYBR244W   | #N/A | #N/A | #N/A | #N/A | #N/A | #N/A |
| iYBR246W   | 0.41 | 0.10 | 0.37 | 0.05 | 0.43 | 0.11 |
| iYBR247C   | 1.47 | 0.66 | 1.45 | 0.65 | 1.46 | 0.67 |
| iYBR248C   | 1.34 | 0.57 | 1.43 | 0.62 | 1.52 | 0.67 |
| iYBR249C   | 1.40 | 0.64 | 1.90 | 0.81 | 1.26 | 0.61 |
| iYBR250W   | 2.52 | 0.95 | 2.05 | 0.85 | 2.10 | 0.90 |
| iYBR251W   | 1.27 | 0.58 | 1.92 | 0.81 | 1.02 | 0.49 |
| iYBR252W   | 1.80 | 0.76 | 1.53 | 0.75 | 1.75 | 0.74 |
| iYBR253W   | #N/A | #N/A | #N/A | #N/A | 1.20 | 0.51 |
| iYBR254C   | 3.10 | 0.98 | 2.66 | 0.97 | 2.26 | 0.92 |
| iYBR255W   | 1.89 | 0.83 | 1.54 | 0.75 | 1.63 | 0.74 |
| iYBR256C   | 1.59 | 0.72 | 1.59 | 0.70 | 1.64 | 0.74 |
| iYBR258C   | 2.23 | 0.90 | 2.04 | 0.85 | 1.92 | 0.84 |
| iYBR259W   | #N/A | #N/A | #N/A | #N/A | #N/A | #N/A |
| iYBR260C   | 2.77 | 0.96 | 3.14 | 0.98 | 3.17 | 0.99 |
| iYBR261C   | 2.11 | 0.87 | 2.02 | 0.91 | 2.06 | 0.84 |
| iYBR264C   | 1.63 | 0.69 | 1.76 | 0.76 | 1.41 | 0.66 |
| iYBR265W   | 1.19 | 0.52 | 1.60 | 0.70 | 1.16 | 0.56 |
| iYBR267W   | 1.80 | 0.75 | 1.92 | 0.82 | 1.01 | 0.48 |
| iYBR268W   | 1.18 | 0.51 | 1.54 | 0.71 | 1.24 | 0.55 |
| iYBR269C   | #N/A | #N/A | #N/A | #N/A | 1.28 | 0.58 |
| iYBR270C   | 2.73 | 0.96 | 2.55 | 0.96 | 3.33 | 0.98 |
| iYBR271W   | 0.47 | 0.13 | 0.49 | 0.11 | 0.44 | 0.10 |
| iYBR272C   | 0.79 | 0.32 | #N/A | #N/A | 0.94 | 0.44 |
| iYBR273C   | 2.55 | 0.92 | 1.84 | 0.83 | 2.44 | 0.94 |
| iYBR274W   | #N/A | #N/A | #N/A | #N/A | #N/A | #N/A |
| iYBR275C   | 1.76 | 0.77 | 1.15 | 0.46 | 1.74 | 0.79 |
| iYBR276C   | #N/A | #N/A | 1.48 | 0.64 | 1.21 | 0.56 |
| iYBR278W   | 1.70 | 0.76 | 1.53 | 0.66 | 1.68 | 0.76 |
| iYBR279W   | #N/A | #N/A | #N/A | #N/A | 0.44 | 0.10 |
| iYBR280C   | #N/A | #N/A | #N/A | #N/A | #N/A | #N/A |
| iYBR281C   | 1.60 | 0.72 | 2.47 | 0.93 | 1.94 | 0.87 |
| iYBR282W   | #N/A | #N/A | #N/A | #N/A | 0.73 | 0.28 |
| iYBR283C   | 1.73 | 0.77 | 1.17 | 0.56 | 1.75 | 0.78 |
| iYBR284W   | 1.82 | 0.80 | 1.63 | 0.72 | 1.61 | 0.74 |
| iYBR285W   | 1.17 | 0.51 | 1.57 | 0.68 | 1.66 | 0.72 |
| iYBR286W   | 0.95 | 0.42 | 1.09 | 0.49 | 1.01 | 0.43 |
| iYBR287W   | #N/A | #N/A | #N/A | #N/A | #N/A | #N/A |
| iYBR288C   | 1.69 | 0.75 | #N/A | #N/A | 2.17 | 0.90 |
| iYBR289W   | 1.03 | 0.43 | 0.81 | 0.31 | 1.04 | 0.50 |
| iYBR290W   | 0.52 | 0.16 | #N/A | #N/A | 0.51 | 0.16 |
| iYBR291C   | 1.75 | 0.78 | 1.18 | 0.51 | 1.42 | 0.61 |
| iYBR292C-0 | 1.64 | 0.72 | 1.53 | 0.66 | 1.69 | 0.72 |
| iYBR292C-1 | 1.88 | 0.82 | 1.69 | 0.80 | 1.88 | 0.79 |
| iYBR293W   | 0.95 | 0.41 | 0.74 | 0.28 | 1.43 | 0.64 |
| iYBR294W   | 1.82 | 0.78 | 1.34 | 0.64 | 2.07 | 0.87 |

|              |      |      |      |      |      |      |
|--------------|------|------|------|------|------|------|
| iYBR295W     | 0.92 | 0.37 | 1.35 | 0.67 | 1.04 | 0.50 |
| iYBR296C-0   | 1.92 | 0.80 | 2.44 | 0.93 | 2.12 | 0.91 |
| iYBR296C-1   | 2.85 | 0.95 | 1.98 | 0.84 | 2.54 | 0.93 |
| iYBR297W     | 1.80 | 0.75 | 1.12 | 0.44 | 1.28 | 0.57 |
| iYBR298C     | 2.27 | 0.91 | 1.80 | 0.78 | 2.30 | 0.92 |
| iYBR299W     | 1.23 | 0.56 | 1.01 | 0.41 | 1.11 | 0.49 |
| iYBR301W     | 2.06 | 0.87 | 2.00 | 0.90 | 1.65 | 0.74 |
| iYBRCdelta11 | #N/A | #N/A | #N/A | #N/A | #N/A | #N/A |
| iYBRCdelta14 | #N/A | #N/A | 0.86 | 0.32 | 0.71 | 0.28 |
| iYBRCdelta18 | 1.29 | 0.59 | 0.66 | 0.23 | 1.14 | 0.47 |
| iYBRCdelta19 | 1.55 | 0.69 | 1.64 | 0.70 | 1.85 | 0.82 |
| iYBRWdelta16 | 1.55 | 0.69 | 2.23 | 0.92 | #N/A | #N/A |
| iYBRWdelta17 | #N/A | #N/A | #N/A | #N/A | #N/A | #N/A |
| iYCL001W     | 0.96 | 0.43 | 1.38 | 0.60 | 0.95 | 0.45 |
| iYCL001W-A   | 0.95 | 0.42 | 1.01 | 0.41 | 0.77 | 0.32 |
| iYCL002C     | #N/A | #N/A | 1.40 | 0.59 | 1.17 | 0.49 |
| iYCL004W     | 0.51 | 0.15 | 0.27 | 0.01 | 0.44 | 0.11 |
| iYCL005W     | 1.36 | 0.58 | 1.43 | 0.62 | 1.40 | 0.65 |
| iYCL007C     | #N/A | #N/A | 0.97 | 0.39 | #N/A | #N/A |
| iYCL008C     | 1.39 | 0.63 | 1.32 | 0.65 | 1.15 | 0.48 |
| iYCL009C     | 2.16 | 0.89 | 2.62 | 0.95 | 2.01 | 0.82 |
| iYCL010C     | 1.59 | 0.68 | 1.25 | 0.57 | 1.03 | 0.46 |
| iYCL011C     | 2.05 | 0.86 | 1.62 | 0.71 | 1.69 | 0.73 |
| iYCL012W     | 1.64 | 0.74 | #N/A | #N/A | #N/A | #N/A |
| iYCL014W     | #N/A | #N/A | #N/A | #N/A | #N/A | #N/A |
| iYCL016C     | 2.54 | 0.95 | 2.10 | 0.87 | 2.57 | 0.96 |
| iYCL017C     | 1.52 | 0.68 | 1.41 | 0.70 | 1.54 | 0.66 |
| iYCL018W     | 0.97 | 0.40 | 1.15 | 0.46 | 0.94 | 0.38 |
| iYCL022C     | 0.88 | 0.37 | 1.12 | 0.53 | 1.05 | 0.43 |
| iYCL025C     | 0.36 | 0.07 | 0.49 | 0.10 | 0.34 | 0.05 |
| iYCL026C-A   | 3.02 | 0.98 | 3.18 | 0.99 | 2.73 | 0.95 |
| iYCL028W     | 1.52 | 0.65 | 1.63 | 0.76 | 1.18 | 0.55 |
| iYCL029C     | 1.61 | 0.73 | 1.71 | 0.82 | 1.53 | 0.65 |
| iYCL030C     | #N/A | #N/A | 0.58 | 0.18 | 0.33 | 0.05 |
| iYCL031C     | 1.14 | 0.52 | 1.21 | 0.49 | 1.06 | 0.46 |
| iYCL032W     | #N/A | #N/A | #N/A | #N/A | #N/A | #N/A |
| iYCL033C     | 2.64 | 0.95 | 1.95 | 0.84 | 2.64 | 0.96 |
| iYCL035C     | 2.43 | 0.93 | 2.19 | 0.89 | 2.84 | 0.97 |
| iYCL036W     | 1.16 | 0.50 | 1.20 | 0.57 | 0.99 | 0.40 |
| iYCL037C     | 0.99 | 0.41 | 1.46 | 0.63 | 1.08 | 0.49 |
| iYCL038C     | 0.75 | 0.30 | 0.65 | 0.23 | 0.71 | 0.29 |
| iYCL040W     | 2.44 | 0.93 | 1.11 | 0.53 | 2.06 | 0.88 |
| iYCL044C     | 1.94 | 0.84 | 1.44 | 0.65 | 1.64 | 0.77 |
| iYCL046W     | 1.57 | 0.71 | 0.91 | 0.39 | 1.54 | 0.74 |
| iYCL047C     | 1.51 | 0.68 | 0.98 | 0.37 | 0.96 | 0.42 |
| iYCL048W     | #N/A | #N/A | #N/A | #N/A | #N/A | #N/A |
| iYCL049C     | 2.19 | 0.89 | 3.56 | 0.99 | 2.54 | 0.93 |
| iYCL050C     | 1.77 | 0.77 | 2.34 | 0.92 | 1.94 | 0.85 |
| iYCL051W     | #N/A | #N/A | #N/A | #N/A | #N/A | #N/A |
| iYCL052C     | 2.37 | 0.93 | 1.78 | 0.83 | 2.01 | 0.89 |
| iYCL054W     | #N/A | #N/A | #N/A | #N/A | #N/A | #N/A |

|               |      |      |      |      |      |      |
|---------------|------|------|------|------|------|------|
| iYCL055W-0    | 0.18 | 0.01 | 0.81 | 0.26 | 0.20 | 0.01 |
| iYCL055W-1    | 0.95 | 0.42 | 1.37 | 0.59 | 0.84 | 0.33 |
| iYCL056C      | 1.29 | 0.56 | 1.74 | 0.76 | 1.17 | 0.49 |
| iYCL058C      | #N/A | #N/A | #N/A | #N/A | #N/A | #N/A |
| iYCL059C      | #N/A | #N/A | 2.35 | 0.95 | 2.04 | 0.86 |
| iYCL061C      | 0.95 | 0.42 | 0.80 | 0.30 | 0.96 | 0.42 |
| iYCL063W      | 0.48 | 0.14 | 0.32 | 0.03 | 0.43 | 0.11 |
| iYCL064C      | 0.85 | 0.36 | 0.96 | 0.38 | 0.98 | 0.40 |
| iYCL065W-0    | 0.33 | 0.06 | 0.33 | 0.04 | 0.31 | 0.04 |
| iYCL065W-1    | 0.32 | 0.05 | 0.34 | 0.03 | 0.34 | 0.05 |
| iYCL067C      | #N/A | #N/A | #N/A | #N/A | #N/A | #N/A |
| iYCL068C      | 0.89 | 0.37 | 0.83 | 0.27 | 0.79 | 0.34 |
| iYCL069W      | 0.57 | 0.20 | 0.49 | 0.12 | 0.49 | 0.15 |
| iYCL073C      | 0.60 | 0.20 | 0.59 | 0.18 | 0.74 | 0.31 |
| iYCL074W      | 0.22 | 0.01 | 0.29 | 0.01 | 0.22 | 0.01 |
| iYCL075W      | 0.22 | 0.02 | 0.27 | 0.01 | 0.30 | 0.03 |
| iYCLCdelta1   | 1.20 | 0.55 | 2.08 | 0.86 | 1.50 | 0.67 |
| iYCLWdelta5   | #N/A | #N/A | #N/A | #N/A | #N/A | #N/A |
| iYCLWomega2-0 | 0.28 | 0.04 | 0.31 | 0.02 | 0.28 | 0.03 |
| iYCLWomega2-1 | 0.35 | 0.07 | 0.29 | 0.02 | 0.39 | 0.07 |
| iYCR001W      | 1.78 | 0.79 | 1.43 | 0.71 | 1.60 | 0.73 |
| iYCR002C      | 2.69 | 0.94 | 1.54 | 0.66 | 1.36 | 0.62 |
| iYCR003W      | #N/A | #N/A | #N/A | #N/A | #N/A | #N/A |
| iYCR004C      | 1.49 | 0.67 | 1.06 | 0.42 | 1.08 | 0.49 |
| iYCR005C      | 0.45 | 0.13 | #N/A | #N/A | #N/A | #N/A |
| iYCR006C      | 0.39 | 0.09 | 0.53 | 0.14 | 0.42 | 0.10 |
| iYCR007C      | 1.08 | 0.48 | 1.25 | 0.53 | 1.12 | 0.51 |
| iYCR008W      | 0.37 | 0.08 | 0.36 | 0.05 | 0.18 | 0.01 |
| iYCR009C      | 1.64 | 0.70 | 1.79 | 0.77 | 1.22 | 0.56 |
| iYCR010C      | 0.50 | 0.15 | 0.65 | 0.22 | #N/A | #N/A |
| iYCR011C      | 0.26 | 0.03 | 0.26 | 0.01 | 0.18 | 0.01 |
| iYCR014C      | 0.46 | 0.12 | 0.40 | 0.07 | 0.52 | 0.16 |
| iYCR015C      | #N/A | #N/A | #N/A | #N/A | #N/A | #N/A |
| iYCR016W      | 0.33 | 0.06 | #N/A | #N/A | 0.46 | 0.13 |
| iYCR017C      | 2.05 | 0.87 | 1.80 | 0.85 | 1.77 | 0.75 |
| iYCR018C-A    | 1.72 | 0.76 | 1.90 | 0.88 | 2.09 | 0.84 |
| iYCR019W      | #N/A | #N/A | #N/A | #N/A | #N/A | #N/A |
| iYCR020C      | 1.76 | 0.76 | 1.53 | 0.70 | 1.22 | 0.53 |
| iYCR020C-A    | 2.41 | 0.92 | #N/A | #N/A | 2.31 | 0.89 |
| iYCR020W-B    | 1.24 | 0.55 | 1.53 | 0.67 | 1.36 | 0.64 |
| iYCR021C      | 1.68 | 0.74 | 1.63 | 0.79 | 1.77 | 0.76 |
| iYCR022C      | 1.31 | 0.56 | 1.18 | 0.57 | 0.94 | 0.41 |
| iYCR023C      | 1.58 | 0.72 | 1.36 | 0.59 | 1.47 | 0.67 |
| iYCR024C      | 0.38 | 0.09 | 0.58 | 0.13 | 0.40 | 0.09 |
| iYCR024C-A    | 0.35 | 0.07 | 0.52 | 0.14 | 0.23 | 0.02 |
| iYCR025C      | 0.47 | 0.13 | 0.90 | 0.39 | 0.67 | 0.26 |
| iYCR026C      | 0.82 | 0.34 | 0.98 | 0.38 | 0.88 | 0.37 |
| iYCR027C      | 0.72 | 0.26 | 1.48 | 0.63 | 1.16 | 0.48 |
| iYCR028C      | 1.86 | 0.78 | 1.72 | 0.75 | 2.20 | 0.90 |
| iYCR028C-A    | 1.38 | 0.59 | 0.95 | 0.43 | 1.04 | 0.47 |
| iYCR030C      | 0.77 | 0.31 | 0.88 | 0.33 | 0.67 | 0.22 |

|            |      |      |      |      |      |      |
|------------|------|------|------|------|------|------|
| iYCR031C   | 0.33 | 0.06 | 0.61 | 0.18 | 0.41 | 0.08 |
| iYCR032W   | 1.32 | 0.57 | 0.74 | 0.26 | 1.33 | 0.64 |
| iYCR033W   | 0.41 | 0.10 | 0.44 | 0.09 | 0.56 | 0.19 |
| iYCR034W   | #N/A | #N/A | #N/A | #N/A | #N/A | #N/A |
| iYCR035C   | 1.67 | 0.74 | 1.33 | 0.62 | 1.55 | 0.70 |
| iYCR036W   | #N/A | #N/A | #N/A | #N/A | #N/A | #N/A |
| iYCR037C   | 0.33 | 0.06 | 1.19 | 0.55 | 0.42 | 0.09 |
| iYCR038C   | 0.90 | 0.38 | 0.87 | 0.31 | 0.76 | 0.32 |
| iYCR039C   | #N/A | #N/A | #N/A | #N/A | #N/A | #N/A |
| iYCR042C   | 2.01 | 0.83 | 1.86 | 0.80 | 1.74 | 0.81 |
| iYCR043C   | 1.87 | 0.81 | 2.49 | 0.96 | 2.06 | 0.87 |
| iYCR044C   | 2.25 | 0.88 | 2.20 | 0.91 | 2.37 | 0.94 |
| iYCR045C   | 1.20 | 0.53 | 1.14 | 0.48 | 1.25 | 0.57 |
| iYCR046C   | 2.28 | 0.90 | 2.34 | 0.91 | 1.95 | 0.85 |
| iYCR047C   | 2.30 | 0.88 | 1.85 | 0.81 | 2.02 | 0.85 |
| iYCR050C   | 2.33 | 0.89 | #N/A | #N/A | 2.33 | 0.90 |
| iYCR051W   | 1.78 | 0.79 | 1.46 | 0.72 | 1.90 | 0.83 |
| iYCR052W   | #N/A | #N/A | 1.07 | 0.50 | 1.49 | 0.67 |
| iYCR053W   | #N/A | #N/A | #N/A | #N/A | #N/A | #N/A |
| iYCR054C   | 0.69 | 0.25 | 0.72 | 0.27 | 1.03 | 0.46 |
| iYCR057C   | 2.34 | 0.93 | #N/A | #N/A | 2.41 | 0.91 |
| iYCR059C   | #N/A | #N/A | #N/A | #N/A | 2.28 | 0.93 |
| iYCR060W   | 0.84 | 0.36 | 1.03 | 0.47 | 0.75 | 0.31 |
| iYCR062W   | 0.79 | 0.30 | 0.71 | 0.24 | 0.86 | 0.37 |
| iYCR063W   | 0.50 | 0.15 | 0.49 | 0.12 | 0.25 | 0.02 |
| iYCR065W   | 0.82 | 0.34 | 0.78 | 0.24 | 0.83 | 0.36 |
| iYCR066W   | #N/A | #N/A | 0.47 | 0.11 | #N/A | #N/A |
| iYCR067C   | 1.36 | 0.62 | 1.15 | 0.48 | 1.54 | 0.71 |
| iYCR068W   | 2.38 | 0.93 | 1.77 | 0.76 | 2.26 | 0.93 |
| iYCR069W   | 1.10 | 0.50 | #N/A | #N/A | 0.90 | 0.39 |
| iYCR071C   | 3.04 | 0.98 | 1.76 | 0.84 | 2.20 | 0.90 |
| iYCR072C   | 1.78 | 0.78 | 2.00 | 0.83 | 1.80 | 0.81 |
| iYCR073C   | 3.55 | 0.99 | 2.76 | 0.97 | 3.06 | 0.98 |
| iYCR073W-A | #N/A | #N/A | #N/A | #N/A | #N/A | #N/A |
| iYCR075C   | 2.86 | 0.95 | 2.60 | 0.94 | 2.31 | 0.89 |
| iYCR076C   | #N/A | #N/A | #N/A | #N/A | #N/A | #N/A |
| iYCR077C   | 2.57 | 0.94 | 2.23 | 0.93 | 3.41 | 0.99 |
| iYCR079W   | 1.57 | 0.71 | 1.27 | 0.52 | 1.50 | 0.68 |
| iYCR081W   | 2.12 | 0.88 | 1.82 | 0.78 | #N/A | #N/A |
| iYCR082W   | 1.79 | 0.78 | #N/A | #N/A | 1.78 | 0.82 |
| iYCR083W   | 0.23 | 0.02 | 0.93 | 0.36 | 0.84 | 0.37 |
| iYCR084C   | 1.07 | 0.45 | 1.10 | 0.46 | 0.98 | 0.46 |
| iYCR085W   | 2.11 | 0.87 | 2.67 | 0.96 | 1.77 | 0.75 |
| iYCR087C-A | 2.17 | 0.89 | 2.47 | 0.94 | 1.77 | 0.75 |
| iYCR088W   | 0.86 | 0.34 | 0.99 | 0.36 | 0.89 | 0.39 |
| iYCR090C-1 | 1.50 | 0.67 | 1.46 | 0.64 | 1.99 | 0.82 |
| iYCR091W   | #N/A | #N/A | #N/A | #N/A | #N/A | #N/A |
| iYCR092C   | 1.27 | 0.57 | 1.23 | 0.53 | 1.27 | 0.54 |
| iYCR093W   | 1.27 | 0.56 | 1.16 | 0.47 | 1.39 | 0.63 |
| iYCR094W   | 0.26 | 0.03 | 0.54 | 0.15 | 0.48 | 0.14 |
| iYCR095C-0 | 1.42 | 0.61 | 1.25 | 0.60 | 1.37 | 0.63 |

|               |      |      |      |      |      |      |
|---------------|------|------|------|------|------|------|
| iYCR095C-1    | 0.80 | 0.33 | 0.63 | 0.21 | 0.60 | 0.21 |
| iYCR096C      | 0.51 | 0.15 | 0.66 | 0.17 | 0.58 | 0.21 |
| iYCR097W      | 0.90 | 0.36 | 0.60 | 0.18 | 0.82 | 0.31 |
| iYCR098C-0    | 1.93 | 0.83 | 1.94 | 0.84 | #N/A | #N/A |
| iYCR100C      | #N/A | #N/A | #N/A | #N/A | #N/A | #N/A |
| iYCR101C      | 2.46 | 0.91 | 1.44 | 0.71 | 2.27 | 0.93 |
| iYCR102C      | 1.51 | 0.64 | 1.17 | 0.50 | 1.28 | 0.54 |
| iYCR102W-A    | 0.82 | 0.32 | 0.87 | 0.33 | 0.92 | 0.37 |
| iYCR103C      | 0.79 | 0.32 | 0.78 | 0.30 | 0.77 | 0.28 |
| iYCR104W      | 0.90 | 0.36 | 0.65 | 0.23 | 1.17 | 0.53 |
| iYCR105W      | 2.68 | 0.94 | 2.16 | 0.92 | 1.39 | 0.67 |
| iYCR106W      | 0.38 | 0.09 | 0.34 | 0.04 | 0.29 | 0.03 |
| iYCRCdelta14  | 0.75 | 0.30 | 1.13 | 0.47 | 0.63 | 0.24 |
| iYCRCdelta6-0 | 0.94 | 0.41 | 0.96 | 0.42 | 0.73 | 0.30 |
| iYCRCdelta6-A | 0.91 | 0.39 | 1.10 | 0.50 | #N/A | #N/A |
| iYCRCdelta6-B | 0.98 | 0.42 | #N/A | #N/A | 0.87 | 0.33 |
| iYCRCdelta7   | 2.32 | 0.91 | 2.81 | 0.98 | 2.75 | 0.95 |
| iYCRCtau1     | 0.98 | 0.40 | 0.83 | 0.34 | 0.89 | 0.38 |
| iYCRWdelta11  | 0.68 | 0.24 | 1.03 | 0.42 | 0.87 | 0.38 |
| iYCRWdelta12  | 0.81 | 0.33 | #N/A | #N/A | #N/A | #N/A |
| iYCRWdelta13  | 0.46 | 0.13 | #N/A | #N/A | 0.56 | 0.17 |
| iYCRWdelta8   | 0.58 | 0.19 | 0.81 | 0.26 | 0.84 | 0.36 |
| iYCRWdelta9   | #N/A | #N/A | #N/A | #N/A | #N/A | #N/A |
| iYCRWomega3   | 0.47 | 0.14 | 0.66 | 0.23 | 0.47 | 0.13 |
| iYDL001W      | #N/A | #N/A | 1.07 | 0.44 | #N/A | #N/A |
| iYDL002C      | 0.86 | 0.35 | 1.12 | 0.44 | 0.91 | 0.38 |
| iYDL003W      | 0.63 | 0.22 | 0.33 | 0.04 | 0.58 | 0.18 |
| iYDL004W      | 1.44 | 0.64 | 1.18 | 0.56 | 1.34 | 0.60 |
| iYDL005C      | 1.74 | 0.76 | 1.47 | 0.65 | 1.42 | 0.65 |
| iYDL006W      | 0.53 | 0.17 | 0.46 | 0.07 | 0.39 | 0.08 |
| iYDL007W      | 0.74 | 0.27 | 0.73 | 0.21 | 0.62 | 0.24 |
| iYDL008W      | #N/A | #N/A | #N/A | #N/A | 0.65 | 0.25 |
| iYDL009C      | #N/A | #N/A | 0.90 | 0.32 | 1.46 | 0.69 |
| iYDL012C      | 2.68 | 0.96 | 1.70 | 0.82 | 2.11 | 0.86 |
| iYDL013W      | 1.45 | 0.66 | 0.78 | 0.25 | 1.21 | 0.56 |
| iYDL014W      | 1.96 | 0.81 | 1.89 | 0.83 | 1.90 | 0.80 |
| iYDL015C      | 0.99 | 0.41 | 0.98 | 0.39 | 0.92 | 0.40 |
| iYDL016C      | 0.33 | 0.06 | #N/A | #N/A | 0.36 | 0.06 |
| iYDL018C      | 2.86 | 0.95 | 2.38 | 0.92 | 2.57 | 0.95 |
| iYDL020C      | 0.98 | 0.40 | 0.94 | 0.41 | 0.86 | 0.39 |
| iYDL021W      | #N/A | #N/A | #N/A | #N/A | #N/A | #N/A |
| iYDL022W      | 1.64 | 0.74 | 1.71 | 0.73 | 1.54 | 0.70 |
| iYDL024C      | 0.99 | 0.44 | 1.05 | 0.49 | 0.73 | 0.30 |
| iYDL025C      | 2.17 | 0.86 | 1.92 | 0.82 | 2.20 | 0.87 |
| iYDL026W      | 1.34 | 0.61 | 1.61 | 0.70 | 1.10 | 0.50 |
| iYDL028C      | 1.79 | 0.79 | 1.47 | 0.73 | 2.02 | 0.89 |
| iYDL029W      | #N/A | #N/A | #N/A | #N/A | 0.38 | 0.07 |
| iYDL030W      | 1.93 | 0.83 | 1.27 | 0.54 | 1.98 | 0.81 |
| iYDL031W      | 1.32 | 0.59 | 1.56 | 0.68 | 1.53 | 0.65 |
| iYDL032W      | 2.19 | 0.90 | 1.45 | 0.64 | 2.35 | 0.94 |
| iYDL034W      | 1.18 | 0.50 | 1.23 | 0.59 | 0.98 | 0.46 |

|            |      |      |      |      |      |      |
|------------|------|------|------|------|------|------|
| iYDL036C   | 1.03 | 0.46 | 0.84 | 0.31 | 0.86 | 0.37 |
| iYDL037C-0 | 0.83 | 0.35 | 1.11 | 0.44 | 0.96 | 0.43 |
| iYDL037C-1 | 0.55 | 0.18 | 0.42 | 0.08 | 0.37 | 0.07 |
| iYDL040C   | 2.05 | 0.87 | 1.76 | 0.77 | 1.77 | 0.76 |
| iYDL041W   | 1.09 | 0.49 | 1.06 | 0.50 | 1.08 | 0.44 |
| iYDL043C   | #N/A | #N/A | #N/A | #N/A | #N/A | #N/A |
| iYDL044C   | 1.21 | 0.53 | 1.09 | 0.45 | 1.42 | 0.67 |
| iYDL045C   | 1.50 | 0.68 | 1.84 | 0.79 | 1.94 | 0.85 |
| iYDL045W-A | #N/A | #N/A | 0.63 | 0.19 | #N/A | #N/A |
| iYDL046W   | 1.22 | 0.55 | 0.96 | 0.35 | 1.14 | 0.52 |
| iYDL048C-0 | 0.89 | 0.35 | 0.99 | 0.36 | 0.71 | 0.29 |
| iYDL048C-1 | 0.53 | 0.17 | 0.58 | 0.16 | 0.49 | 0.13 |
| iYDL050C   | #N/A | #N/A | #N/A | #N/A | #N/A | #N/A |
| iYDL052C   | 1.15 | 0.48 | 1.06 | 0.50 | 0.93 | 0.41 |
| iYDL053C   | 1.35 | 0.59 | 1.29 | 0.62 | 1.17 | 0.57 |
| iYDL054C   | 1.78 | 0.75 | 1.36 | 0.59 | 1.46 | 0.71 |
| iYDL055C-0 | 0.73 | 0.29 | 1.07 | 0.46 | 0.64 | 0.25 |
| iYDL055C-1 | 1.53 | 0.69 | 1.95 | 0.85 | 1.27 | 0.62 |
| iYDL056W   | #N/A | #N/A | #N/A | #N/A | #N/A | #N/A |
| iYDL057W   | 2.24 | 0.90 | 1.84 | 0.83 | 1.91 | 0.83 |
| iYDL058W   | 0.79 | 0.32 | 0.99 | 0.40 | 0.79 | 0.33 |
| iYDL059C   | 2.47 | 0.93 | 2.64 | 0.96 | 2.59 | 0.96 |
| iYDL060W   | #N/A | #N/A | #N/A | #N/A | #N/A | #N/A |
| iYDL061C   | 0.34 | 0.07 | 0.53 | 0.14 | 0.42 | 0.08 |
| iYDL062W   | 0.58 | 0.19 | 0.62 | 0.21 | 0.49 | 0.12 |
| iYDL064W   | #N/A | #N/A | #N/A | #N/A | #N/A | #N/A |
| iYDL065C   | 1.40 | 0.60 | #N/A | #N/A | 1.45 | 0.66 |
| iYDL066W   | #N/A | #N/A | #N/A | #N/A | #N/A | #N/A |
| iYDL067C   | 1.90 | 0.82 | 1.77 | 0.76 | 2.04 | 0.83 |
| iYDL068W   | 1.34 | 0.60 | 1.41 | 0.62 | 1.50 | 0.68 |
| iYDL070W   | #N/A | #N/A | #N/A | #N/A | #N/A | #N/A |
| iYDL072C   | #N/A | #N/A | #N/A | #N/A | #N/A | #N/A |
| iYDL073W   | #N/A | #N/A | #N/A | #N/A | #N/A | #N/A |
| iYDL074C   | 1.85 | 0.77 | 1.75 | 0.83 | 1.92 | 0.84 |
| iYDL075W   | #N/A | #N/A | #N/A | #N/A | #N/A | #N/A |
| iYDL076C   | 0.47 | 0.13 | 0.47 | 0.11 | 0.46 | 0.13 |
| iYDL077C   | 1.80 | 0.79 | 1.60 | 0.70 | #N/A | #N/A |
| iYDL078C   | 1.72 | 0.75 | 2.51 | 0.94 | 1.80 | 0.81 |
| iYDL079C   | 4.72 | 1.00 | 2.73 | 0.98 | 3.92 | 1.00 |
| iYDL080C   | 1.80 | 0.78 | 1.38 | 0.66 | 1.62 | 0.73 |
| iYDL081C   | 0.82 | 0.34 | 0.76 | 0.26 | 0.82 | 0.31 |
| iYDL082W   | #N/A | #N/A | #N/A | #N/A | #N/A | #N/A |
| iYDL083C   | 0.09 | 0.00 | 0.32 | 0.03 | 0.16 | 0.00 |
| iYDL084W   | 0.31 | 0.05 | 0.42 | 0.06 | 0.33 | 0.05 |
| iYDL085W   | 1.53 | 0.65 | 1.24 | 0.51 | 0.95 | 0.42 |
| iYDL086W   | 1.98 | 0.82 | 1.88 | 0.80 | 1.84 | 0.79 |
| iYDL087C   | 3.67 | 0.99 | 3.19 | 1.00 | 3.44 | 0.99 |
| iYDL088C   | #N/A | #N/A | 1.27 | 0.62 | #N/A | #N/A |
| iYDL089W   | 0.52 | 0.15 | #N/A | #N/A | #N/A | #N/A |
| iYDL090C   | 1.84 | 0.81 | 1.65 | 0.80 | 2.05 | 0.88 |
| iYDL091C   | 1.52 | 0.66 | 1.22 | 0.57 | 1.68 | 0.76 |



|            |      |      |      |      |      |      |
|------------|------|------|------|------|------|------|
| iYDL092W   | 0.69 | 0.27 | 1.00 | 0.37 | 0.73 | 0.27 |
| iYDL093W   | 2.69 | 0.95 | 2.00 | 0.88 | 2.07 | 0.90 |
| iYDL095W   | #N/A | #N/A | #N/A | #N/A | #N/A | #N/A |
| iYDL097C   | 1.27 | 0.56 | 0.91 | 0.39 | 0.83 | 0.31 |
| iYDL098C   | 1.35 | 0.60 | 1.33 | 0.62 | 1.39 | 0.67 |
| iYDL099W   | #N/A | #N/A | #N/A | #N/A | 0.98 | 0.39 |
| iYDL100C   | 1.58 | 0.68 | #N/A | #N/A | #N/A | #N/A |
| iYDL101C   | 0.92 | 0.37 | 1.10 | 0.43 | 1.24 | 0.52 |
| iYDL102W   | 0.43 | 0.11 | #N/A | #N/A | #N/A | #N/A |
| iYDL103C   | 2.30 | 0.88 | 1.98 | 0.89 | 2.27 | 0.88 |
| iYDL104C   | 0.51 | 0.16 | 0.53 | 0.10 | #N/A | #N/A |
| iYDL106C   | 3.04 | 0.98 | 2.47 | 0.94 | 3.04 | 0.99 |
| iYDL107W   | 0.62 | 0.23 | #N/A | #N/A | 0.53 | 0.17 |
| iYDL108W   | 1.63 | 0.69 | 2.53 | 0.94 | 1.49 | 0.63 |
| iYDL109C   | 1.14 | 0.52 | 1.26 | 0.53 | 1.03 | 0.48 |
| iYDL110C   | 1.16 | 0.51 | 0.96 | 0.35 | 0.82 | 0.36 |
| iYDL111C   | 1.40 | 0.63 | 1.37 | 0.60 | 1.52 | 0.65 |
| iYDL112W   | #N/A | #N/A | #N/A | #N/A | #N/A | #N/A |
| iYDL113C   | 1.76 | 0.77 | 1.30 | 0.63 | 1.95 | 0.87 |
| iYDL114W   | #N/A | #N/A | #N/A | #N/A | #N/A | #N/A |
| iYDL115C   | 1.80 | 0.80 | 1.44 | 0.67 | 1.56 | 0.69 |
| iYDL116W   | 0.59 | 0.21 | #N/A | #N/A | #N/A | #N/A |
| iYDL117W   | 1.31 | 0.56 | 1.93 | 0.82 | 1.68 | 0.73 |
| iYDL118W   | 1.44 | 0.62 | 1.84 | 0.79 | 1.61 | 0.73 |
| iYDL120W   | 1.27 | 0.57 | 0.95 | 0.37 | 1.22 | 0.60 |
| iYDL121C   | 2.73 | 0.96 | 1.93 | 0.89 | 3.00 | 0.98 |
| iYDL122W   | #N/A | #N/A | #N/A | #N/A | #N/A | #N/A |
| iYDL123W   | 1.31 | 0.56 | 1.11 | 0.52 | 1.22 | 0.60 |
| iYDL124W   | 1.51 | 0.67 | 1.80 | 0.82 | 2.45 | 0.92 |
| iYDL125C   | 1.06 | 0.46 | 1.04 | 0.41 | 0.79 | 0.34 |
| iYDL126C   | 1.01 | 0.45 | 1.02 | 0.40 | 1.00 | 0.48 |
| iYDL127W   | 0.91 | 0.38 | 0.99 | 0.40 | 1.09 | 0.45 |
| iYDL128W   | 0.66 | 0.25 | 0.74 | 0.29 | 0.63 | 0.24 |
| iYDL129W   | 0.86 | 0.36 | 1.10 | 0.49 | 0.84 | 0.36 |
| iYDL130W   | 0.99 | 0.41 | 1.07 | 0.41 | 0.70 | 0.28 |
| iYDL130W-A | 0.91 | 0.37 | 0.76 | 0.26 | 0.79 | 0.34 |
| iYDL131W   | 2.55 | 0.92 | 1.73 | 0.83 | 1.93 | 0.83 |
| iYDL133C-A | 0.72 | 0.29 | 0.53 | 0.14 | 0.52 | 0.17 |
| iYDL133W   | 1.10 | 0.46 | 1.09 | 0.51 | 1.31 | 0.60 |
| iYDL134C   | 0.93 | 0.40 | 1.00 | 0.40 | 0.72 | 0.30 |
| iYDL135C   | 0.95 | 0.41 | 0.84 | 0.35 | 0.82 | 0.36 |
| iYDL136W   | 0.33 | 0.06 | 0.55 | 0.15 | 0.51 | 0.14 |
| iYDL137W   | 0.23 | 0.02 | 0.39 | 0.06 | 0.32 | 0.05 |
| iYDL138W   | 0.89 | 0.35 | 0.85 | 0.30 | 0.85 | 0.38 |
| iYDL139C   | 0.78 | 0.32 | 1.19 | 0.52 | 0.70 | 0.26 |
| iYDL140C   | 0.73 | 0.27 | 0.76 | 0.23 | 0.77 | 0.32 |
| iYDL141W   | 0.22 | 0.01 | 0.30 | 0.03 | 0.24 | 0.02 |
| iYDL142C   | 1.85 | 0.80 | 1.67 | 0.72 | 1.51 | 0.69 |
| iYDL143W   | 0.54 | 0.18 | 0.38 | 0.06 | #N/A | #N/A |
| iYDL144C   | 2.30 | 0.91 | 2.51 | 0.93 | 2.70 | 0.96 |
| iYDL145C   | 2.04 | 0.87 | 1.37 | 0.67 | 2.20 | 0.87 |



|            |      |      |      |      |      |      |
|------------|------|------|------|------|------|------|
| iYDL146W   | 0.33 | 0.06 | 0.48 | 0.11 | 0.30 | 0.03 |
| iYDL147W   | 0.82 | 0.34 | 0.82 | 0.26 | 0.83 | 0.31 |
| iYDL148C   | 1.42 | 0.61 | 1.07 | 0.45 | 1.49 | 0.64 |
| iYDL149W   | #N/A | #N/A | #N/A | #N/A | 0.34 | 0.05 |
| iYDL150W   | 1.57 | 0.71 | 2.32 | 0.95 | 1.23 | 0.60 |
| iYDL152W   | 1.20 | 0.54 | #N/A | #N/A | 1.29 | 0.61 |
| iYDL154W   | #N/A | #N/A | #N/A | #N/A | #N/A | #N/A |
| iYDL155W   | 0.45 | 0.13 | 0.30 | 0.03 | 0.19 | 0.01 |
| iYDL156W   | 1.09 | 0.46 | 0.75 | 0.26 | 0.70 | 0.28 |
| iYDL160C   | 0.76 | 0.31 | 0.80 | 0.26 | 0.73 | 0.29 |
| iYDL163W   | 1.94 | 0.84 | 2.58 | 0.96 | 2.07 | 0.84 |
| iYDL165W   | 0.69 | 0.26 | #N/A | #N/A | 0.90 | 0.40 |
| iYDL166C   | 1.39 | 0.60 | #N/A | #N/A | 1.41 | 0.65 |
| iYDL167C   | 1.06 | 0.46 | 1.30 | 0.63 | 1.43 | 0.65 |
| iYDL168W   | #N/A | #N/A | #N/A | #N/A | #N/A | #N/A |
| iYDL169C   | 1.66 | 0.73 | 1.67 | 0.81 | 1.98 | 0.86 |
| iYDL170W   | 0.55 | 0.18 | 1.00 | 0.40 | 0.85 | 0.37 |
| iYDL171C   | 1.17 | 0.51 | 1.10 | 0.45 | 1.13 | 0.52 |
| iYDL172C   | #N/A | #N/A | #N/A | #N/A | #N/A | #N/A |
| iYDL175C   | 1.92 | 0.83 | 1.25 | 0.56 | 1.59 | 0.68 |
| iYDL176W   | 0.43 | 0.10 | 0.34 | 0.04 | 0.50 | 0.15 |
| iYDL177C   | #N/A | #N/A | 1.72 | 0.82 | 2.08 | 0.88 |
| iYDL178W   | #N/A | #N/A | #N/A | #N/A | #N/A | #N/A |
| iYDL179W   | 1.25 | 0.57 | 1.41 | 0.60 | 1.43 | 0.65 |
| iYDL180W   | 1.80 | 0.75 | 2.29 | 0.90 | 1.56 | 0.74 |
| iYDL181W   | 1.11 | 0.49 | 1.57 | 0.77 | 0.92 | 0.42 |
| iYDL182W   | 1.12 | 0.47 | 1.26 | 0.60 | 0.98 | 0.45 |
| iYDL183C-0 | 1.58 | 0.67 | 2.27 | 0.90 | 1.44 | 0.64 |
| iYDL183C-1 | 0.53 | 0.17 | 0.84 | 0.30 | 0.57 | 0.20 |
| iYDL184C   | 0.28 | 0.04 | 0.44 | 0.06 | 0.46 | 0.11 |
| iYDL185W   | 0.25 | 0.02 | 0.48 | 0.11 | 0.27 | 0.02 |
| iYDL186W   | 2.17 | 0.89 | 2.02 | 0.88 | 2.18 | 0.92 |
| iYDL188C   | 1.48 | 0.67 | 0.95 | 0.37 | 1.29 | 0.59 |
| iYDL189W   | 0.45 | 0.13 | #N/A | #N/A | 0.52 | 0.16 |
| iYDL190C   | 2.09 | 0.84 | 1.42 | 0.70 | 2.63 | 0.95 |
| iYDL191W   | 0.30 | 0.04 | #N/A | #N/A | #N/A | #N/A |
| iYDL192W   | 0.39 | 0.09 | 0.57 | 0.17 | 0.31 | 0.04 |
| iYDL193W   | 0.72 | 0.26 | 0.92 | 0.41 | 0.67 | 0.26 |
| iYDL194W   | 1.40 | 0.63 | 0.91 | 0.40 | 1.11 | 0.46 |
| iYDL195W   | 1.89 | 0.83 | 1.20 | 0.57 | 1.67 | 0.77 |
| iYDL196W   | 1.75 | 0.78 | 1.91 | 0.82 | 2.09 | 0.88 |
| iYDL197C   | 1.38 | 0.62 | 1.33 | 0.57 | 1.26 | 0.53 |
| iYDL198C   | 1.39 | 0.60 | 1.30 | 0.56 | 1.42 | 0.61 |
| iYDL199C   | 1.55 | 0.69 | 1.75 | 0.76 | 1.95 | 0.85 |
| iYDL200C   | 0.76 | 0.29 | #N/A | #N/A | 0.90 | 0.38 |
| iYDL202W   | 1.62 | 0.69 | 2.03 | 0.91 | 1.77 | 0.75 |
| iYDL203C   | 2.85 | 0.95 | 2.95 | 0.97 | 2.79 | 0.96 |
| iYDL204W   | 0.68 | 0.27 | 0.61 | 0.15 | 0.67 | 0.22 |
| iYDL205C   | 1.54 | 0.69 | 1.85 | 0.79 | 1.50 | 0.68 |
| iYDL206W   | #N/A | #N/A | #N/A | #N/A | #N/A | #N/A |
| iYDL207W   | 1.30 | 0.59 | 0.85 | 0.36 | 1.63 | 0.71 |

|               |      |      |      |      |      |      |
|---------------|------|------|------|------|------|------|
| iYDL208W      | 1.32 | 0.59 | 1.19 | 0.51 | 1.23 | 0.60 |
| iYDL209C      | 1.80 | 0.80 | 1.82 | 0.82 | 1.74 | 0.74 |
| iYDL210W      | 1.01 | 0.42 | 0.87 | 0.29 | #N/A | #N/A |
| iYDL211C-0    | 1.72 | 0.72 | 1.20 | 0.55 | 1.57 | 0.71 |
| iYDL211C-1    | 0.88 | 0.38 | 1.00 | 0.37 | 0.90 | 0.42 |
| iYDL211C-2    | 0.72 | 0.29 | 1.04 | 0.42 | 1.01 | 0.48 |
| iYDL212W      | 0.93 | 0.38 | #N/A | #N/A | 0.99 | 0.40 |
| iYDL213C      | 2.57 | 0.95 | 2.68 | 0.97 | 2.35 | 0.93 |
| iYDL214C      | 0.64 | 0.24 | 0.56 | 0.14 | 0.51 | 0.14 |
| iYDL215C      | 2.33 | 0.89 | 2.46 | 0.93 | 2.54 | 0.95 |
| iYDL216C      | 0.94 | 0.41 | #N/A | #N/A | 0.67 | 0.23 |
| iYDL217C      | 1.74 | 0.77 | 0.89 | 0.33 | 1.83 | 0.80 |
| iYDL218W      | 0.79 | 0.32 | 0.56 | 0.12 | 0.88 | 0.34 |
| iYDL219W      | 3.75 | 0.99 | 3.29 | 0.99 | 3.26 | 0.99 |
| iYDL220C      | 3.20 | 0.97 | 2.64 | 0.95 | 3.87 | 1.00 |
| iYDL222C      | 1.74 | 0.76 | 1.66 | 0.73 | 1.86 | 0.78 |
| iYDL223C      | 2.02 | 0.85 | 1.57 | 0.77 | 1.97 | 0.86 |
| iYDL224C      | 1.07 | 0.48 | 0.96 | 0.38 | 1.13 | 0.53 |
| iYDL225W      | 0.29 | 0.04 | #N/A | #N/A | 0.39 | 0.08 |
| iYDL226C      | 2.89 | 0.96 | 2.40 | 0.93 | 3.07 | 0.99 |
| iYDL227C-0    | 1.27 | 0.54 | 1.00 | 0.46 | 1.03 | 0.46 |
| iYDL227C-1    | 1.84 | 0.77 | 1.92 | 0.82 | 1.73 | 0.78 |
| iYDL227C-2    | 0.95 | 0.41 | 0.86 | 0.29 | 0.86 | 0.39 |
| iYDL228C      | 0.92 | 0.39 | #N/A | #N/A | 0.85 | 0.37 |
| iYDL230W      | 0.27 | 0.03 | 0.31 | 0.03 | 0.30 | 0.04 |
| iYDL231C      | 2.49 | 0.93 | 2.60 | 0.95 | 2.47 | 0.95 |
| iYDL232W      | 1.04 | 0.45 | #N/A | #N/A | 1.28 | 0.59 |
| iYDL233W      | 1.87 | 0.82 | 1.85 | 0.87 | 1.63 | 0.69 |
| iYDL234C      | 2.24 | 0.87 | 2.08 | 0.88 | 2.29 | 0.92 |
| iYDL235C      | 1.54 | 0.69 | 1.57 | 0.75 | 1.42 | 0.61 |
| iYDL236W      | #N/A | #N/A | #N/A | #N/A | #N/A | #N/A |
| iYDL237W      | 2.56 | 0.95 | 2.51 | 0.93 | 2.26 | 0.91 |
| iYDL238C      | 2.50 | 0.94 | 1.89 | 0.84 | 1.93 | 0.82 |
| iYDL239C      | 0.54 | 0.18 | 0.39 | 0.05 | 0.38 | 0.08 |
| iYDL240W      | 0.32 | 0.06 | 0.52 | 0.14 | 0.43 | 0.11 |
| iYDL241W-0    | 2.35 | 0.92 | 2.26 | 0.91 | 2.27 | 0.92 |
| iYDL241W-1    | 2.74 | 0.94 | 1.90 | 0.81 | 2.67 | 0.96 |
| iYDL242W      | 1.60 | 0.71 | 1.52 | 0.69 | 1.40 | 0.62 |
| iYDL243C      | 1.30 | 0.59 | 1.09 | 0.44 | 1.51 | 0.69 |
| iYDL244W      | 2.70 | 0.95 | 2.53 | 0.97 | 2.33 | 0.93 |
| iYDL245C-0    | 0.62 | 0.23 | 0.47 | 0.11 | #N/A | #N/A |
| iYDL245C-1    | 3.28 | 0.99 | 3.07 | 0.99 | 3.23 | 0.98 |
| iYDL246C-0    | 1.42 | 0.65 | 1.50 | 0.65 | 1.64 | 0.74 |
| iYDL246C-1    | 2.20 | 0.88 | 2.18 | 0.93 | 2.50 | 0.92 |
| iYDL247W      | 2.60 | 0.96 | #N/A | #N/A | 2.96 | 0.97 |
| iYDL248W-0    | 0.49 | 0.15 | 0.50 | 0.12 | 0.51 | 0.16 |
| iYDL248W-1    | 1.01 | 0.42 | 0.64 | 0.22 | 1.26 | 0.57 |
| iYDLCdelta1-0 | 1.50 | 0.66 | 2.21 | 0.90 | 1.57 | 0.75 |
| iYDLCdelta1-1 | 0.95 | 0.40 | 1.43 | 0.61 | 1.01 | 0.48 |
| iYDLWtau1     | #N/A | #N/A | #N/A | #N/A | #N/A | #N/A |
| iYDR001C      | 1.16 | 0.49 | 0.75 | 0.22 | 0.71 | 0.29 |

|            |      |      |      |      |      |      |
|------------|------|------|------|------|------|------|
| iYDR002W   | 0.64 | 0.24 | 1.23 | 0.50 | 0.78 | 0.33 |
| iYDR003W   | 0.81 | 0.34 | 1.09 | 0.42 | 0.92 | 0.43 |
| iYDR004W   | #N/A | #N/A | #N/A | #N/A | 0.59 | 0.19 |
| iYDR005C   | 0.89 | 0.37 | 1.04 | 0.39 | 0.68 | 0.23 |
| iYDR006C   | 1.38 | 0.62 | 1.42 | 0.61 | 1.33 | 0.61 |
| iYDR008C   | 2.18 | 0.86 | 2.09 | 0.89 | 2.00 | 0.86 |
| iYDR010C   | 0.45 | 0.13 | 0.55 | 0.12 | 0.57 | 0.17 |
| iYDR011W   | 0.90 | 0.39 | 0.92 | 0.38 | 0.99 | 0.41 |
| iYDR012W   | #N/A | #N/A | #N/A | #N/A | 0.59 | 0.21 |
| iYDR013W   | 1.12 | 0.49 | 2.08 | 0.86 | 1.16 | 0.53 |
| iYDR014W-0 | 1.04 | 0.47 | 0.95 | 0.42 | 1.03 | 0.46 |
| iYDR016C   | 2.69 | 0.95 | 2.01 | 0.89 | 2.44 | 0.94 |
| iYDR017C   | 0.98 | 0.40 | 1.19 | 0.51 | 1.05 | 0.47 |
| iYDR018C   | 1.05 | 0.44 | #N/A | #N/A | 0.94 | 0.41 |
| iYDR019C   | 0.77 | 0.29 | 0.87 | 0.37 | 0.79 | 0.31 |
| iYDR020C   | 1.47 | 0.66 | 1.76 | 0.78 | 1.65 | 0.70 |
| iYDR021W   | #N/A | #N/A | #N/A | #N/A | #N/A | #N/A |
| iYDR022C   | 0.57 | 0.20 | 0.70 | 0.22 | 0.71 | 0.27 |
| iYDR023W   | #N/A | #N/A | #N/A | #N/A | #N/A | #N/A |
| iYDR025W   | 0.37 | 0.07 | #N/A | #N/A | 0.38 | 0.08 |
| iYDR026C   | 1.12 | 0.47 | #N/A | #N/A | 1.50 | 0.64 |
| iYDR027C   | 1.08 | 0.45 | 0.99 | 0.45 | 1.31 | 0.64 |
| iYDR028C   | #N/A | #N/A | #N/A | #N/A | #N/A | #N/A |
| iYDR029W   | 1.64 | 0.72 | 1.83 | 0.80 | 1.59 | 0.74 |
| iYDR030C   | 3.29 | 0.99 | 2.03 | 0.91 | 3.74 | 0.99 |
| iYDR031W   | 2.24 | 0.88 | #N/A | #N/A | 1.83 | 0.81 |
| iYDR032C-0 | 1.41 | 0.64 | 1.64 | 0.72 | 1.26 | 0.58 |
| iYDR032C-2 | 0.50 | 0.15 | 0.99 | 0.37 | 0.48 | 0.12 |
| iYDR033W   | 0.37 | 0.08 | 0.49 | 0.12 | 0.54 | 0.18 |
| iYDR034C   | 1.41 | 0.65 | 1.36 | 0.59 | 1.59 | 0.69 |
| iYDR034C-A | 1.17 | 0.51 | 1.28 | 0.55 | 1.20 | 0.59 |
| iYDR034W-B | 2.24 | 0.91 | 1.86 | 0.82 | 2.17 | 0.88 |
| iYDR035W   | #N/A | #N/A | 0.71 | 0.20 | 0.45 | 0.11 |
| iYDR036C   | 1.31 | 0.59 | 1.42 | 0.61 | 1.55 | 0.66 |
| iYDR037W   | 0.46 | 0.13 | 0.38 | 0.06 | 0.48 | 0.14 |
| iYDR038C   | 1.40 | 0.63 | 1.38 | 0.62 | 1.72 | 0.77 |
| iYDR040C   | 1.23 | 0.53 | 1.38 | 0.58 | 1.33 | 0.63 |
| iYDR041W   | 0.71 | 0.25 | 0.84 | 0.31 | 0.70 | 0.29 |
| iYDR042C   | 0.43 | 0.12 | 0.76 | 0.30 | 0.58 | 0.19 |
| iYDR043C-0 | 0.89 | 0.37 | 1.00 | 0.37 | 0.77 | 0.29 |
| iYDR043C-2 | 1.25 | 0.53 | 1.35 | 0.58 | 1.25 | 0.57 |
| iYDR044W   | 0.56 | 0.18 | 0.91 | 0.35 | 0.43 | 0.11 |
| iYDR045C   | 1.07 | 0.45 | 1.15 | 0.54 | 1.04 | 0.47 |
| iYDR047W   | 0.72 | 0.28 | #N/A | #N/A | 0.72 | 0.30 |
| iYDR049W   | 0.36 | 0.07 | #N/A | #N/A | 0.45 | 0.11 |
| iYDR050C   | 0.50 | 0.16 | 0.68 | 0.18 | 0.83 | 0.31 |
| iYDR051C   | 1.00 | 0.41 | 1.14 | 0.48 | 1.23 | 0.55 |
| iYDR053W   | 0.75 | 0.28 | 0.85 | 0.30 | 0.88 | 0.38 |
| iYDR054C   | 0.87 | 0.37 | 1.62 | 0.73 | 0.88 | 0.34 |
| iYDR055W   | #N/A | #N/A | #N/A | #N/A | 1.32 | 0.56 |
| iYDR056C   | 2.23 | 0.88 | 1.84 | 0.86 | 1.67 | 0.78 |

|          |      |      |      |      |      |      |
|----------|------|------|------|------|------|------|
| iYDR057W | #N/A | #N/A | #N/A | #N/A | #N/A | #N/A |
| iYDR058C | 0.98 | 0.44 | 1.55 | 0.72 | 0.75 | 0.31 |
| iYDR060W | 0.34 | 0.07 | 0.48 | 0.12 | 0.57 | 0.20 |
| iYDR061W | 0.76 | 0.31 | 0.80 | 0.25 | 0.68 | 0.26 |
| iYDR062W | 0.81 | 0.33 | 0.79 | 0.28 | 0.63 | 0.20 |
| iYDR063W | #N/A | #N/A | #N/A | #N/A | #N/A | #N/A |
| iYDR064W | 0.39 | 0.08 | #N/A | #N/A | #N/A | #N/A |
| iYDR065W | 0.55 | 0.17 | 0.52 | 0.12 | 0.70 | 0.29 |
| iYDR066C | 1.21 | 0.55 | 1.17 | 0.49 | 1.10 | 0.53 |
| iYDR067C | 1.44 | 0.64 | 1.36 | 0.67 | 1.23 | 0.56 |
| iYDR068W | 0.34 | 0.07 | 0.45 | 0.10 | 0.44 | 0.11 |
| iYDR069C | 2.49 | 0.92 | 2.53 | 0.94 | 2.53 | 0.93 |
| iYDR070C | 1.31 | 0.56 | 1.04 | 0.48 | 1.05 | 0.49 |
| iYDR071C | 1.16 | 0.49 | 1.43 | 0.62 | 0.82 | 0.31 |
| iYDR073W | 1.46 | 0.66 | 1.03 | 0.39 | 0.86 | 0.34 |
| iYDR074W | 1.48 | 0.63 | 1.81 | 0.78 | 1.25 | 0.61 |
| iYDR075W | #N/A | #N/A | #N/A | #N/A | 1.15 | 0.51 |
| iYDR076W | 0.24 | 0.02 | 0.31 | 0.03 | 0.23 | 0.01 |
| iYDR077W | 0.76 | 0.31 | 0.51 | 0.13 | 0.71 | 0.28 |
| iYDR078C | 1.52 | 0.68 | 1.67 | 0.74 | 1.85 | 0.85 |
| iYDR079W | 2.00 | 0.84 | 2.35 | 0.91 | 2.57 | 0.96 |
| iYDR080W | 0.54 | 0.17 | 0.51 | 0.13 | 0.45 | 0.12 |
| iYDR081C | 1.91 | 0.79 | 1.72 | 0.76 | 2.18 | 0.90 |
| iYDR082W | 0.65 | 0.22 | #N/A | #N/A | #N/A | #N/A |
| iYDR083W | #N/A | #N/A | #N/A | #N/A | #N/A | #N/A |
| iYDR084C | 1.98 | 0.85 | 1.91 | 0.81 | 1.62 | 0.74 |
| iYDR085C | 1.53 | 0.66 | 1.94 | 0.82 | #N/A | #N/A |
| iYDR086C | 0.89 | 0.38 | 1.07 | 0.44 | 1.14 | 0.52 |
| iYDR087C | 1.84 | 0.80 | 1.83 | 0.80 | 2.15 | 0.91 |
| iYDR088C | 1.34 | 0.58 | 1.00 | 0.42 | #N/A | #N/A |
| iYDR089W | 0.61 | 0.22 | 0.47 | 0.08 | 0.51 | 0.14 |
| iYDR090C | 0.84 | 0.35 | 0.91 | 0.36 | 0.98 | 0.44 |
| iYDR091C | 1.12 | 0.49 | 1.71 | 0.82 | 1.27 | 0.54 |
| iYDR092W | 0.52 | 0.16 | 0.78 | 0.24 | 0.72 | 0.27 |
| iYDR095C | 1.06 | 0.48 | 1.17 | 0.49 | 1.19 | 0.55 |
| iYDR096W | #N/A | #N/A | #N/A | #N/A | #N/A | #N/A |
| iYDR097C | 1.33 | 0.59 | 1.14 | 0.54 | 1.07 | 0.48 |
| iYDR098C | 0.97 | 0.42 | #N/A | #N/A | 1.06 | 0.43 |
| iYDR099W | 0.72 | 0.26 | 0.51 | 0.13 | 0.59 | 0.21 |
| iYDR100W | #N/A | #N/A | #N/A | #N/A | 0.53 | 0.17 |
| iYDR101C | 0.72 | 0.27 | 0.55 | 0.11 | 0.66 | 0.23 |
| iYDR102C | 0.78 | 0.29 | 1.08 | 0.51 | 0.87 | 0.40 |
| iYDR104C | 1.58 | 0.72 | 1.01 | 0.46 | 1.87 | 0.80 |
| iYDR105C | 2.66 | 0.94 | 2.33 | 0.91 | 2.58 | 0.96 |
| iYDR106W | 1.36 | 0.61 | #N/A | #N/A | #N/A | #N/A |
| iYDR107C | 1.60 | 0.68 | 1.43 | 0.63 | 2.39 | 0.94 |
| iYDR109C | 2.68 | 0.96 | 2.87 | 0.97 | 2.53 | 0.93 |
| iYDR110W | 1.17 | 0.53 | 0.75 | 0.23 | 0.96 | 0.39 |
| iYDR112W | 0.94 | 0.40 | 1.21 | 0.50 | 1.27 | 0.62 |
| iYDR113C | 2.18 | 0.86 | 2.01 | 0.90 | 2.39 | 0.95 |
| iYDR115W | #N/A | #N/A | #N/A | #N/A | #N/A | #N/A |

|              |      |      |      |      |      |      |
|--------------|------|------|------|------|------|------|
| iYDR116C     | 1.74 | 0.78 | 1.41 | 0.60 | 1.24 | 0.57 |
| iYDR117C     | 2.28 | 0.92 | 1.63 | 0.79 | 2.09 | 0.88 |
| iYDR118W     | 0.94 | 0.41 | 1.00 | 0.45 | 1.29 | 0.55 |
| iYDR119W     | 1.84 | 0.77 | 1.55 | 0.67 | 1.63 | 0.69 |
| iYDR120C     | 2.33 | 0.91 | 1.76 | 0.76 | 2.06 | 0.88 |
| iYDR121W     | 2.21 | 0.90 | 1.49 | 0.65 | 1.83 | 0.77 |
| iYDR122W     | 0.33 | 0.06 | 0.38 | 0.05 | 0.54 | 0.17 |
| iYDR123C     | 1.30 | 0.58 | 1.33 | 0.65 | 1.18 | 0.54 |
| iYDR124W     | 0.43 | 0.11 | 0.57 | 0.17 | 0.62 | 0.20 |
| iYDR125C     | 1.40 | 0.64 | 1.88 | 0.81 | 1.44 | 0.70 |
| iYDR126W     | #N/A | #N/A | 1.51 | 0.65 | 1.07 | 0.48 |
| iYDR127W     | #N/A | #N/A | #N/A | #N/A | #N/A | #N/A |
| iYDR128W     | 0.38 | 0.09 | 0.40 | 0.06 | 0.61 | 0.22 |
| iYDR129C     | 1.02 | 0.43 | 0.86 | 0.32 | 0.86 | 0.34 |
| iYDR130C     | 2.12 | 0.88 | 2.75 | 0.96 | 2.16 | 0.90 |
| iYDR131C     | 1.68 | 0.74 | 1.21 | 0.49 | 1.75 | 0.78 |
| iYDR134C     | 0.26 | 0.03 | 0.26 | 0.01 | #N/A | #N/A |
| iYDR135C     | 1.32 | 0.57 | 1.68 | 0.81 | 1.89 | 0.79 |
| iYDR137W     | 1.75 | 0.74 | 1.26 | 0.52 | 1.10 | 0.51 |
| iYDR138W     | 0.73 | 0.29 | 0.72 | 0.21 | 0.79 | 0.29 |
| iYDR139C     | 2.41 | 0.93 | #N/A | #N/A | 1.70 | 0.77 |
| iYDR140W     | #N/A | #N/A | #N/A | #N/A | 0.77 | 0.28 |
| iYDR141C     | 1.55 | 0.66 | 1.09 | 0.51 | 1.50 | 0.72 |
| iYDR142C     | 1.17 | 0.53 | 1.38 | 0.59 | 1.09 | 0.50 |
| iYDR143C     | 1.28 | 0.54 | 1.12 | 0.53 | 1.44 | 0.70 |
| iYDR144C     | 2.06 | 0.86 | 1.60 | 0.77 | 1.49 | 0.72 |
| iYDR145W     | #N/A | #N/A | #N/A | #N/A | #N/A | #N/A |
| iYDR146C     | 0.75 | 0.30 | 0.80 | 0.33 | 0.71 | 0.26 |
| iYDR147W     | 0.68 | 0.27 | #N/A | #N/A | 0.57 | 0.20 |
| iYDR148C     | 1.92 | 0.81 | 1.59 | 0.68 | 1.93 | 0.80 |
| iYDR150W     | 0.81 | 0.34 | 0.82 | 0.29 | 0.72 | 0.29 |
| iYDR151C     | 1.05 | 0.46 | 0.89 | 0.38 | 0.84 | 0.36 |
| iYDR152W     | #N/A | #N/A | #N/A | #N/A | #N/A | #N/A |
| iYDR153C     | 0.34 | 0.06 | 0.62 | 0.15 | 0.33 | 0.05 |
| iYDR155C     | 0.42 | 0.10 | 0.52 | 0.10 | 0.50 | 0.13 |
| iYDR158W     | 1.60 | 0.68 | 1.94 | 0.89 | 1.58 | 0.70 |
| iYDR159W     | 1.51 | 0.68 | 1.73 | 0.74 | 1.93 | 0.81 |
| iYDR160W     | 1.37 | 0.62 | 1.04 | 0.42 | 1.26 | 0.58 |
| iYDR161W     | 0.46 | 0.13 | #N/A | #N/A | 0.96 | 0.43 |
| iYDR162C     | 2.06 | 0.87 | 1.67 | 0.73 | 1.86 | 0.85 |
| iYDR163W     | 0.61 | 0.22 | 0.83 | 0.35 | 1.04 | 0.50 |
| iYDR164C     | 1.79 | 0.79 | 2.50 | 0.94 | 2.71 | 0.95 |
| iYDR165W     | #N/A | #N/A | #N/A | #N/A | #N/A | #N/A |
| iYDR166C     | 2.83 | 0.97 | 2.79 | 0.96 | 1.93 | 0.86 |
| iYDR167W     | 1.60 | 0.71 | 1.36 | 0.57 | 1.44 | 0.66 |
| iYDR169C-0   | 1.13 | 0.51 | #N/A | #N/A | 1.44 | 0.62 |
| iYDR169C-1   | 1.91 | 0.79 | 1.74 | 0.83 | 1.78 | 0.80 |
| iYDR170C     | 0.91 | 0.39 | #N/A | #N/A | 0.93 | 0.41 |
| iYDR170W-A-0 | 0.35 | 0.07 | 0.34 | 0.03 | 0.39 | 0.07 |
| iYDR171W     | 1.34 | 0.59 | 1.50 | 0.65 | 1.26 | 0.58 |
| iYDR172W     | #N/A | #N/A | #N/A | #N/A | #N/A | #N/A |

|            |      |      |      |      |      |      |
|------------|------|------|------|------|------|------|
| iYDR173C   | 0.73 | 0.27 | 0.61 | 0.18 | 0.62 | 0.23 |
| iYDR174W   | 0.66 | 0.25 | #N/A | #N/A | 0.54 | 0.15 |
| iYDR175C   | 1.37 | 0.63 | 1.21 | 0.58 | 1.59 | 0.69 |
| iYDR176W   | 1.42 | 0.65 | 1.24 | 0.59 | 1.68 | 0.72 |
| iYDR177W   | 2.46 | 0.91 | 1.35 | 0.65 | 2.05 | 0.87 |
| iYDR178W   | 1.03 | 0.45 | 0.67 | 0.20 | 1.12 | 0.55 |
| iYDR179C   | 1.40 | 0.64 | 1.52 | 0.75 | 1.50 | 0.66 |
| iYDR179W-A | 2.24 | 0.90 | 3.01 | 0.98 | 1.85 | 0.81 |
| iYDR180W   | #N/A | #N/A | #N/A | #N/A | #N/A | #N/A |
| iYDR181C   | 1.87 | 0.78 | 1.60 | 0.78 | 2.26 | 0.90 |
| iYDR182W   | 1.33 | 0.61 | 1.13 | 0.49 | #N/A | #N/A |
| iYDR183W   | 0.84 | 0.35 | 0.97 | 0.35 | 0.95 | 0.42 |
| iYDR184C   | 1.45 | 0.66 | 2.37 | 0.91 | 1.54 | 0.70 |
| iYDR185C   | 1.14 | 0.50 | 1.20 | 0.58 | 0.93 | 0.44 |
| iYDR186C   | 0.45 | 0.13 | 0.54 | 0.15 | 0.57 | 0.20 |
| iYDR188W   | 1.33 | 0.59 | 1.27 | 0.52 | 1.30 | 0.63 |
| iYDR189W   | #N/A | #N/A | #N/A | #N/A | #N/A | #N/A |
| iYDR190C   | 1.53 | 0.68 | 1.42 | 0.60 | 1.48 | 0.66 |
| iYDR191W   | #N/A | #N/A | #N/A | #N/A | #N/A | #N/A |
| iYDR193W   | 1.42 | 0.64 | 1.16 | 0.54 | 1.27 | 0.56 |
| iYDR195W   | #N/A | #N/A | #N/A | #N/A | #N/A | #N/A |
| iYDR196C   | 2.09 | 0.87 | 1.82 | 0.78 | 2.12 | 0.89 |
| iYDR197W   | 0.39 | 0.09 | #N/A | #N/A | 0.36 | 0.06 |
| iYDR198C   | 2.10 | 0.88 | #N/A | #N/A | #N/A | #N/A |
| iYDR200C   | 2.45 | 0.94 | 2.14 | 0.88 | 2.47 | 0.94 |
| iYDR201W   | #N/A | #N/A | #N/A | #N/A | #N/A | #N/A |
| iYDR203W   | 2.29 | 0.91 | #N/A | #N/A | 2.60 | 0.96 |
| iYDR204W   | 3.35 | 0.99 | 2.26 | 0.94 | 2.93 | 0.98 |
| iYDR205W   | #N/A | #N/A | 1.53 | 0.67 | 1.34 | 0.65 |
| iYDR206W   | #N/A | #N/A | #N/A | #N/A | #N/A | #N/A |
| iYDR207C   | 1.69 | 0.75 | 1.85 | 0.80 | 1.75 | 0.79 |
| iYDR210W   | 1.01 | 0.42 | 1.36 | 0.59 | 0.96 | 0.43 |
| iYDR211W   | 1.28 | 0.58 | 1.29 | 0.54 | 1.20 | 0.59 |
| iYDR212W   | 1.07 | 0.46 | 1.08 | 0.41 | 1.10 | 0.46 |
| iYDR213W   | 1.58 | 0.67 | 0.88 | 0.38 | 1.16 | 0.48 |
| iYDR214W   | 0.74 | 0.30 | #N/A | #N/A | #N/A | #N/A |
| iYDR215C   | 0.72 | 0.26 | 0.78 | 0.28 | 0.63 | 0.24 |
| iYDR216W   | 0.43 | 0.12 | 0.26 | 0.01 | 0.59 | 0.21 |
| iYDR217C   | 2.32 | 0.89 | 2.11 | 0.87 | 1.86 | 0.82 |
| iYDR218C   | 0.73 | 0.29 | 0.64 | 0.20 | 1.07 | 0.51 |
| iYDR219C   | 0.87 | 0.36 | 0.78 | 0.24 | 1.35 | 0.62 |
| iYDR221W   | 0.51 | 0.15 | 0.76 | 0.28 | 0.54 | 0.18 |
| iYDR222W   | 1.45 | 0.62 | 1.81 | 0.78 | 1.40 | 0.63 |
| iYDR223W   | 1.31 | 0.56 | 1.99 | 0.84 | 1.17 | 0.49 |
| iYDR224C   | 0.41 | 0.10 | 0.42 | 0.08 | 0.50 | 0.14 |
| iYDR225W   | 0.60 | 0.21 | 0.73 | 0.21 | 0.52 | 0.16 |
| iYDR226W   | 1.07 | 0.47 | 0.94 | 0.35 | 0.95 | 0.40 |
| iYDR227W   | #N/A | #N/A | #N/A | #N/A | #N/A | #N/A |
| iYDR228C   | 1.82 | 0.78 | 1.53 | 0.67 | 1.61 | 0.70 |
| iYDR229W   | #N/A | #N/A | #N/A | #N/A | #N/A | #N/A |
| iYDR231C   | 1.20 | 0.53 | 1.15 | 0.46 | 1.05 | 0.43 |

|            |      |      |      |      |      |      |
|------------|------|------|------|------|------|------|
| iYDR232W   | 0.23 | 0.02 | 0.36 | 0.05 | 0.43 | 0.11 |
| iYDR233C   | 0.43 | 0.11 | 0.44 | 0.09 | 0.39 | 0.07 |
| iYDR234W   | 0.97 | 0.40 | 1.11 | 0.44 | 1.08 | 0.53 |
| iYDR235W   | 0.55 | 0.18 | #N/A | #N/A | #N/A | #N/A |
| iYDR236C   | 2.43 | 0.93 | 2.11 | 0.87 | 2.64 | 0.96 |
| iYDR237W   | 0.39 | 0.09 | 0.43 | 0.08 | 0.42 | 0.09 |
| iYDR238C   | 1.54 | 0.70 | 1.28 | 0.55 | 1.38 | 0.59 |
| iYDR239C   | 1.35 | 0.61 | 2.06 | 0.86 | 1.73 | 0.78 |
| iYDR242W   | #N/A | #N/A | #N/A | #N/A | #N/A | #N/A |
| iYDR243C   | 1.02 | 0.45 | 1.29 | 0.62 | 1.55 | 0.66 |
| iYDR244W   | 0.48 | 0.14 | #N/A | #N/A | 0.53 | 0.18 |
| iYDR245W   | 0.90 | 0.38 | 0.97 | 0.38 | 0.78 | 0.33 |
| iYDR246W   | 1.13 | 0.50 | 1.16 | 0.53 | 0.90 | 0.41 |
| iYDR247W   | 0.56 | 0.18 | 0.51 | 0.13 | 0.46 | 0.11 |
| iYDR248C   | 1.06 | 0.47 | 1.19 | 0.50 | 1.25 | 0.57 |
| iYDR249C   | 1.53 | 0.69 | 1.57 | 0.71 | #N/A | #N/A |
| iYDR250C   | 0.98 | 0.42 | 1.03 | 0.47 | 1.08 | 0.49 |
| iYDR252W   | 0.96 | 0.42 | 0.60 | 0.18 | 0.77 | 0.33 |
| iYDR253C   | 2.03 | 0.82 | 1.49 | 0.64 | 2.00 | 0.86 |
| iYDR254W   | #N/A | #N/A | #N/A | #N/A | #N/A | #N/A |
| iYDR255C   | 1.55 | 0.69 | 1.37 | 0.64 | 1.60 | 0.73 |
| iYDR256C   | 0.24 | 0.02 | 0.28 | 0.01 | 0.37 | 0.07 |
| iYDR257C   | 1.64 | 0.74 | 0.76 | 0.26 | 1.18 | 0.54 |
| iYDR258C   | 2.20 | 0.88 | 1.37 | 0.68 | 1.24 | 0.57 |
| iYDR259C   | 0.45 | 0.12 | 0.63 | 0.16 | 0.52 | 0.14 |
| iYDR260C   | 1.80 | 0.76 | 1.44 | 0.62 | 1.36 | 0.61 |
| iYDR261C-0 | 1.61 | 0.71 | 1.63 | 0.71 | 1.70 | 0.80 |
| iYDR261C-1 | 1.74 | 0.77 | 1.62 | 0.76 | 1.61 | 0.73 |
| iYDR262W   | 0.40 | 0.09 | 0.49 | 0.11 | 0.49 | 0.13 |
| iYDR263C   | 0.39 | 0.09 | 0.51 | 0.13 | 0.52 | 0.17 |
| iYDR264C   | 1.84 | 0.80 | 1.50 | 0.73 | 1.64 | 0.74 |
| iYDR265W   | #N/A | #N/A | 0.91 | 0.40 | 0.30 | 0.03 |
| iYDR267C   | 2.23 | 0.90 | 2.24 | 0.89 | 1.89 | 0.83 |
| iYDR268W   | 0.98 | 0.43 | 0.78 | 0.30 | 0.84 | 0.37 |
| iYDR271C   | #N/A | #N/A | #N/A | #N/A | #N/A | #N/A |
| iYDR272W   | 1.42 | 0.64 | 1.10 | 0.43 | 1.16 | 0.56 |
| iYDR273W   | 0.87 | 0.36 | 0.90 | 0.31 | 0.79 | 0.33 |
| iYDR274C   | 0.40 | 0.10 | 0.77 | 0.23 | 0.41 | 0.10 |
| iYDR275W   | 0.40 | 0.10 | 0.46 | 0.09 | 0.34 | 0.05 |
| iYDR276C   | 0.58 | 0.20 | 0.54 | 0.15 | 0.51 | 0.16 |
| iYDR277C   | 0.66 | 0.25 | 0.69 | 0.25 | 0.62 | 0.23 |
| iYDR279W   | 1.91 | 0.79 | 1.05 | 0.39 | 2.03 | 0.83 |
| iYDR280W   | 0.51 | 0.16 | 0.65 | 0.23 | 0.51 | 0.14 |
| iYDR281C   | 0.99 | 0.43 | 2.18 | 0.89 | 1.04 | 0.47 |
| iYDR282C   | 1.14 | 0.50 | 1.50 | 0.74 | 1.54 | 0.70 |
| iYDR283C   | 2.39 | 0.93 | 1.90 | 0.80 | 1.86 | 0.82 |
| iYDR284C   | 1.56 | 0.71 | 1.59 | 0.73 | 1.51 | 0.65 |
| iYDR285W   | 1.47 | 0.63 | 0.90 | 0.35 | 1.61 | 0.73 |
| iYDR286C   | 3.08 | 0.97 | 1.99 | 0.90 | 2.71 | 0.97 |
| iYDR287W   | 1.56 | 0.71 | 1.18 | 0.49 | 1.63 | 0.69 |
| iYDR288W   | 0.54 | 0.18 | 0.55 | 0.15 | 0.66 | 0.22 |



|            |      |      |      |      |      |      |
|------------|------|------|------|------|------|------|
| iYDR291W   | #N/A | #N/A | #N/A | #N/A | #N/A | #N/A |
| iYDR292C   | 0.57 | 0.20 | 0.53 | 0.15 | 0.60 | 0.22 |
| iYDR294C   | 1.09 | 0.46 | 1.11 | 0.43 | 1.35 | 0.62 |
| iYDR295C   | 1.40 | 0.64 | 1.44 | 0.66 | 1.18 | 0.49 |
| iYDR296W   | 0.62 | 0.22 | 0.81 | 0.29 | 0.50 | 0.15 |
| iYDR297W   | 0.49 | 0.15 | 0.47 | 0.11 | 0.56 | 0.19 |
| iYDR298C   | 1.61 | 0.73 | 2.18 | 0.93 | 1.76 | 0.80 |
| iYDR299W   | 0.30 | 0.05 | 0.31 | 0.02 | 0.39 | 0.08 |
| iYDR300C   | 2.74 | 0.94 | 2.96 | 0.98 | 3.06 | 0.97 |
| iYDR301W   | 1.31 | 0.60 | 1.32 | 0.57 | 1.73 | 0.76 |
| iYDR302W   | #N/A | #N/A | 0.39 | 0.06 | #N/A | #N/A |
| iYDR303C   | 1.80 | 0.77 | 1.52 | 0.65 | 1.75 | 0.78 |
| iYDR304C   | 1.67 | 0.73 | 1.29 | 0.53 | 1.49 | 0.67 |
| iYDR305C   | 1.29 | 0.55 | #N/A | #N/A | 1.42 | 0.68 |
| iYDR306C   | 1.40 | 0.64 | 0.97 | 0.44 | 1.18 | 0.50 |
| iYDR307W   | 0.63 | 0.23 | #N/A | #N/A | #N/A | #N/A |
| iYDR308C   | 0.73 | 0.29 | 0.74 | 0.28 | 0.64 | 0.24 |
| iYDR309C   | 0.30 | 0.05 | 0.44 | 0.07 | #N/A | #N/A |
| iYDR310C   | 1.34 | 0.57 | 1.40 | 0.61 | 1.39 | 0.61 |
| iYDR311W   | 1.30 | 0.59 | 1.17 | 0.49 | 1.44 | 0.62 |
| iYDR313C   | 1.29 | 0.58 | 1.05 | 0.43 | 1.55 | 0.74 |
| iYDR314C   | 1.54 | 0.70 | 1.69 | 0.74 | 1.92 | 0.84 |
| iYDR315C   | 2.04 | 0.87 | 2.18 | 0.88 | 1.83 | 0.84 |
| iYDR316W   | 0.45 | 0.12 | 0.49 | 0.10 | 0.57 | 0.20 |
| iYDR317W   | 1.34 | 0.58 | 1.28 | 0.53 | 1.74 | 0.77 |
| iYDR319C   | 1.49 | 0.67 | #N/A | #N/A | 1.06 | 0.51 |
| iYDR320C   | 2.12 | 0.88 | 1.51 | 0.69 | 1.92 | 0.84 |
| iYDR321W   | 0.67 | 0.24 | 0.79 | 0.25 | 1.05 | 0.50 |
| iYDR322W   | 1.82 | 0.80 | 1.81 | 0.85 | 1.67 | 0.75 |
| iYDR323C   | 1.30 | 0.59 | 1.35 | 0.58 | 1.77 | 0.81 |
| iYDR324C   | 1.07 | 0.48 | 2.37 | 0.92 | 1.29 | 0.57 |
| iYDR325W   | 0.58 | 0.20 | 0.89 | 0.35 | 0.70 | 0.28 |
| iYDR326C   | 2.13 | 0.89 | 1.37 | 0.60 | 2.53 | 0.95 |
| iYDR328C   | 2.57 | 0.95 | 2.34 | 0.93 | 2.36 | 0.93 |
| iYDR329C   | 2.38 | 0.92 | 2.01 | 0.84 | 2.51 | 0.93 |
| iYDR330W   | 1.35 | 0.60 | #N/A | #N/A | 1.59 | 0.72 |
| iYDR332W   | 0.18 | 0.01 | 0.32 | 0.03 | 0.27 | 0.02 |
| iYDR333C   | 1.02 | 0.46 | 1.05 | 0.43 | 0.88 | 0.38 |
| iYDR335W   | 0.90 | 0.37 | 0.85 | 0.29 | 1.20 | 0.50 |
| iYDR336W   | 1.57 | 0.70 | 1.60 | 0.72 | 1.91 | 0.84 |
| iYDR337W   | #N/A | #N/A | #N/A | #N/A | #N/A | #N/A |
| iYDR338C   | 0.98 | 0.42 | 2.39 | 0.96 | 1.44 | 0.63 |
| iYDR339C   | 0.67 | 0.24 | 0.73 | 0.28 | 0.72 | 0.30 |
| iYDR341C   | 1.93 | 0.83 | 1.71 | 0.75 | 1.93 | 0.84 |
| iYDR342C-0 | 0.72 | 0.26 | 0.63 | 0.21 | 0.89 | 0.38 |
| iYDR342C-1 | 1.41 | 0.61 | 0.88 | 0.38 | 1.20 | 0.59 |
| iYDR342C-2 | 1.11 | 0.49 | 0.90 | 0.34 | 0.81 | 0.34 |
| iYDR343C   | 0.86 | 0.36 | 0.62 | 0.15 | 0.61 | 0.19 |
| iYDR344C   | 1.53 | 0.65 | 1.90 | 0.81 | 1.52 | 0.73 |
| iYDR345C-0 | 0.24 | 0.02 | 0.45 | 0.07 | 0.33 | 0.05 |
| iYDR346C   | 1.27 | 0.56 | 1.30 | 0.59 | 1.77 | 0.75 |



|            |      |      |      |      |      |      |
|------------|------|------|------|------|------|------|
| iYDR347W   | 0.28 | 0.04 | 0.64 | 0.18 | 0.40 | 0.09 |
| iYDR348C   | 0.95 | 0.41 | 0.88 | 0.34 | 0.98 | 0.45 |
| iYDR349C   | 1.76 | 0.76 | 1.89 | 0.87 | 1.95 | 0.85 |
| iYDR350C   | 1.91 | 0.79 | 1.44 | 0.71 | 1.63 | 0.72 |
| iYDR351W   | 0.86 | 0.34 | 1.13 | 0.45 | 1.04 | 0.50 |
| iYDR352W   | 0.93 | 0.39 | 0.88 | 0.38 | 0.77 | 0.33 |
| iYDR353W   | #N/A | #N/A | 1.30 | 0.56 | 1.23 | 0.58 |
| iYDR354W   | 1.29 | 0.57 | 1.33 | 0.56 | 2.17 | 0.92 |
| iYDR356W   | 0.42 | 0.11 | #N/A | #N/A | #N/A | #N/A |
| iYDR358W   | 0.33 | 0.06 | #N/A | #N/A | 0.37 | 0.07 |
| iYDR360W   | 1.04 | 0.43 | 0.86 | 0.29 | 1.03 | 0.42 |
| iYDR361C   | 1.65 | 0.70 | 1.09 | 0.42 | 2.41 | 0.91 |
| iYDR362C   | 1.95 | 0.84 | 1.73 | 0.76 | 1.73 | 0.74 |
| iYDR363W   | 0.31 | 0.05 | 0.45 | 0.10 | 0.41 | 0.09 |
| iYDR363W-A | 0.25 | 0.03 | 0.49 | 0.11 | 0.45 | 0.12 |
| iYDR364C   | 0.84 | 0.35 | 1.02 | 0.38 | 0.91 | 0.40 |
| iYDR365C   | 1.34 | 0.60 | 1.78 | 0.77 | 1.39 | 0.68 |
| iYDR367W   | 2.12 | 0.85 | 1.47 | 0.72 | #N/A | #N/A |
| iYDR368W   | 0.58 | 0.20 | 0.60 | 0.18 | 0.73 | 0.31 |
| iYDR369C   | #N/A | #N/A | #N/A | #N/A | 1.03 | 0.47 |
| iYDR370C   | 1.94 | 0.82 | 1.34 | 0.66 | 1.72 | 0.73 |
| iYDR371W   | #N/A | #N/A | #N/A | #N/A | #N/A | #N/A |
| iYDR372C   | 1.63 | 0.73 | 1.24 | 0.60 | 1.44 | 0.66 |
| iYDR373W   | #N/A | #N/A | #N/A | #N/A | #N/A | #N/A |
| iYDR374C   | 1.58 | 0.71 | 1.57 | 0.72 | 2.05 | 0.86 |
| iYDR375C   | 1.76 | 0.74 | #N/A | #N/A | 1.47 | 0.67 |
| iYDR376W   | 0.80 | 0.30 | 0.88 | 0.34 | 1.11 | 0.51 |
| iYDR377W   | 1.62 | 0.73 | #N/A | #N/A | #N/A | #N/A |
| iYDR378C   | 1.78 | 0.78 | 1.56 | 0.68 | 1.65 | 0.78 |
| iYDR379W   | 1.55 | 0.66 | 1.35 | 0.59 | 1.41 | 0.60 |
| iYDR380W   | 0.59 | 0.20 | 0.66 | 0.21 | 0.43 | 0.11 |
| iYDR382W   | #N/A | #N/A | #N/A | #N/A | #N/A | #N/A |
| iYDR383C   | 0.93 | 0.40 | 1.32 | 0.57 | 0.87 | 0.38 |
| iYDR384C   | 0.15 | 0.01 | 0.58 | 0.18 | 0.19 | 0.01 |
| iYDR385W   | 0.67 | 0.26 | 0.65 | 0.20 | 0.79 | 0.34 |
| iYDR386W   | 0.25 | 0.03 | #N/A | #N/A | 0.33 | 0.04 |
| iYDR387C   | 1.69 | 0.72 | 1.22 | 0.58 | 1.52 | 0.70 |
| iYDR388W   | 0.46 | 0.13 | 0.39 | 0.06 | 0.50 | 0.13 |
| iYDR389W   | 0.26 | 0.03 | #N/A | #N/A | 0.32 | 0.04 |
| iYDR390C   | 0.95 | 0.39 | 1.29 | 0.63 | 0.90 | 0.35 |
| iYDR391C   | 2.06 | 0.86 | 2.25 | 0.90 | 2.15 | 0.89 |
| iYDR392W   | 1.22 | 0.55 | 1.12 | 0.53 | 1.41 | 0.68 |
| iYDR393W   | 1.19 | 0.53 | 0.98 | 0.39 | 1.18 | 0.53 |
| iYDR394W   | 0.82 | 0.34 | 0.94 | 0.34 | 0.87 | 0.38 |
| iYDR395W   | #N/A | #N/A | #N/A | #N/A | #N/A | #N/A |
| iYDR397C   | 1.00 | 0.42 | 1.45 | 0.72 | 1.05 | 0.43 |
| iYDR398W   | 0.26 | 0.03 | 0.69 | 0.22 | 0.28 | 0.03 |
| iYDR399W   | 0.75 | 0.30 | 1.09 | 0.51 | 0.82 | 0.31 |
| iYDR400W   | 0.87 | 0.37 | 0.86 | 0.36 | 1.17 | 0.53 |
| iYDR402C   | 0.83 | 0.35 | 1.25 | 0.59 | 1.04 | 0.42 |
| iYDR403W   | 0.97 | 0.43 | 0.84 | 0.35 | 1.12 | 0.51 |

|            |      |      |      |      |      |      |
|------------|------|------|------|------|------|------|
| iYDR404C   | 2.14 | 0.86 | 1.63 | 0.70 | 1.82 | 0.84 |
| iYDR405W   | 1.43 | 0.63 | 1.05 | 0.49 | 1.02 | 0.43 |
| iYDR406W   | #N/A | #N/A | #N/A | #N/A | #N/A | #N/A |
| iYDR407C   | 2.18 | 0.87 | 1.26 | 0.61 | 2.37 | 0.91 |
| iYDR408C   | 0.92 | 0.38 | 1.27 | 0.58 | 0.96 | 0.42 |
| iYDR409W   | 1.31 | 0.58 | 0.64 | 0.20 | 1.12 | 0.46 |
| iYDR410C   | 2.32 | 0.92 | 1.88 | 0.81 | #N/A | #N/A |
| iYDR411C   | 2.93 | 0.97 | 2.10 | 0.87 | 3.00 | 0.98 |
| iYDR413C   | 0.72 | 0.28 | 0.59 | 0.18 | 0.82 | 0.31 |
| iYDR414C   | 1.53 | 0.68 | #N/A | #N/A | 1.73 | 0.78 |
| iYDR415C   | 1.36 | 0.61 | 1.48 | 0.66 | 1.46 | 0.71 |
| iYDR416W   | 0.28 | 0.04 | 0.60 | 0.18 | 0.26 | 0.02 |
| iYDR418W   | 0.85 | 0.33 | 0.72 | 0.27 | 0.81 | 0.34 |
| iYDR419W   | 0.47 | 0.13 | 0.45 | 0.10 | 0.36 | 0.06 |
| iYDR420W   | 1.25 | 0.55 | 0.84 | 0.35 | 1.19 | 0.54 |
| iYDR421W   | 0.45 | 0.12 | 0.32 | 0.03 | 0.38 | 0.07 |
| iYDR422C   | 1.40 | 0.63 | 1.43 | 0.63 | 2.20 | 0.90 |
| iYDR423C   | #N/A | #N/A | #N/A | #N/A | 1.44 | 0.70 |
| iYDR424C   | 3.04 | 0.97 | 1.81 | 0.80 | 2.46 | 0.95 |
| iYDR426C   | 1.88 | 0.78 | #N/A | #N/A | 1.38 | 0.63 |
| iYDR427W   | #N/A | #N/A | #N/A | #N/A | 0.72 | 0.27 |
| iYDR429C   | 1.35 | 0.62 | 1.60 | 0.68 | 1.74 | 0.76 |
| iYDR431W   | #N/A | #N/A | #N/A | #N/A | #N/A | #N/A |
| iYDR433W   | 0.63 | 0.23 | 0.55 | 0.16 | 0.68 | 0.25 |
| iYDR434W   | #N/A | #N/A | #N/A | #N/A | #N/A | #N/A |
| iYDR435C   | 2.52 | 0.94 | 2.05 | 0.85 | 2.37 | 0.92 |
| iYDR436W   | 1.62 | 0.69 | 1.11 | 0.44 | 1.34 | 0.57 |
| iYDR437W   | 1.22 | 0.55 | 0.92 | 0.33 | 1.17 | 0.53 |
| iYDR438W   | 1.25 | 0.55 | #N/A | #N/A | 1.62 | 0.77 |
| iYDR439W-1 | 1.31 | 0.59 | 0.99 | 0.45 | 1.22 | 0.54 |
| iYDR440W   | 0.63 | 0.24 | 0.53 | 0.10 | 0.60 | 0.21 |
| iYDR441C   | 0.30 | 0.05 | 0.38 | 0.05 | 0.40 | 0.08 |
| iYDR443C   | 1.26 | 0.57 | 1.21 | 0.49 | 1.64 | 0.74 |
| iYDR447C   | 0.48 | 0.13 | 0.53 | 0.13 | 0.45 | 0.11 |
| iYDR448W   | #N/A | #N/A | #N/A | #N/A | #N/A | #N/A |
| iYDR449C   | 0.59 | 0.20 | 0.85 | 0.32 | 0.61 | 0.22 |
| iYDR450W   | 0.58 | 0.20 | #N/A | #N/A | 0.56 | 0.18 |
| iYDR452W   | #N/A | #N/A | #N/A | #N/A | #N/A | #N/A |
| iYDR453C   | 2.07 | 0.86 | 2.97 | 0.99 | 2.22 | 0.87 |
| iYDR454C   | 1.86 | 0.77 | 1.51 | 0.69 | 2.00 | 0.82 |
| iYDR456W   | 1.48 | 0.65 | 1.02 | 0.43 | 1.45 | 0.64 |
| iYDR458C   | 1.48 | 0.66 | #N/A | #N/A | 1.40 | 0.61 |
| iYDR459C   | 1.40 | 0.63 | 1.44 | 0.63 | 1.57 | 0.72 |
| iYDR462W   | #N/A | #N/A | #N/A | #N/A | #N/A | #N/A |
| iYDR464W   | #N/A | #N/A | #N/A | #N/A | #N/A | #N/A |
| iYDR465C   | 3.11 | 0.98 | 2.36 | 0.95 | 3.05 | 0.97 |
| iYDR467C   | 0.61 | 0.22 | 0.39 | 0.06 | 0.51 | 0.14 |
| iYDR468C   | 1.16 | 0.52 | 1.09 | 0.45 | 1.45 | 0.66 |
| iYDR469W   | #N/A | #N/A | #N/A | #N/A | #N/A | #N/A |
| iYDR470C   | 0.62 | 0.23 | 0.61 | 0.20 | 0.50 | 0.15 |
| iYDR471W   | 0.27 | 0.03 | 0.49 | 0.08 | #N/A | #N/A |

|            |      |      |      |      |      |      |
|------------|------|------|------|------|------|------|
| iYDR472W   | #N/A | #N/A | #N/A | #N/A | #N/A | #N/A |
| iYDR473C-0 | 1.32 | 0.56 | 1.33 | 0.57 | 1.58 | 0.72 |
| iYDR473C-1 | 0.38 | 0.08 | 0.54 | 0.14 | 0.44 | 0.11 |
| iYDR474C   | 0.70 | 0.27 | 0.46 | 0.07 | 0.46 | 0.12 |
| iYDR475C   | 1.07 | 0.47 | 1.14 | 0.48 | 1.06 | 0.51 |
| iYDR476C   | 1.58 | 0.71 | 1.45 | 0.64 | 1.64 | 0.72 |
| iYDR477W   | 1.13 | 0.51 | 1.84 | 0.86 | 1.40 | 0.68 |
| iYDR479C   | 2.17 | 0.89 | 1.92 | 0.88 | 2.16 | 0.91 |
| iYDR480W   | #N/A | #N/A | #N/A | #N/A | 1.04 | 0.50 |
| iYDR481C   | 0.93 | 0.40 | 1.61 | 0.76 | 1.09 | 0.45 |
| iYDR482C   | 0.82 | 0.35 | 2.47 | 0.97 | 0.78 | 0.29 |
| iYDR483W   | #N/A | #N/A | #N/A | #N/A | #N/A | #N/A |
| iYDR484W   | #N/A | #N/A | #N/A | #N/A | #N/A | #N/A |
| iYDR485C   | #N/A | #N/A | 1.50 | 0.74 | 1.74 | 0.78 |
| iYDR486C   | 1.59 | 0.71 | 1.16 | 0.55 | 1.18 | 0.52 |
| iYDR487C   | 0.53 | 0.17 | #N/A | #N/A | 0.43 | 0.11 |
| iYDR488C   | 2.15 | 0.86 | 2.02 | 0.87 | 1.66 | 0.74 |
| iYDR489W   | #N/A | #N/A | #N/A | #N/A | #N/A | #N/A |
| iYDR490C   | 1.93 | 0.84 | 1.79 | 0.77 | 2.31 | 0.90 |
| iYDR492W   | 1.64 | 0.70 | 1.80 | 0.77 | 2.58 | 0.96 |
| iYDR493W   | 2.93 | 0.97 | 1.75 | 0.83 | 2.51 | 0.95 |
| iYDR494W   | 0.43 | 0.11 | 0.33 | 0.04 | 0.33 | 0.05 |
| iYDR495C   | 0.79 | 0.33 | 0.61 | 0.18 | 0.90 | 0.40 |
| iYDR496C   | 0.74 | 0.30 | 0.96 | 0.43 | 0.69 | 0.27 |
| iYDR497C   | 1.11 | 0.47 | 1.10 | 0.46 | 1.01 | 0.42 |
| iYDR498C   | 1.88 | 0.82 | 2.07 | 0.88 | 1.48 | 0.71 |
| iYDR499W   | #N/A | #N/A | #N/A | #N/A | #N/A | #N/A |
| iYDR500C   | 0.40 | 0.10 | 0.41 | 0.07 | 0.33 | 0.05 |
| iYDR501W   | 1.00 | 0.43 | 0.73 | 0.21 | 1.01 | 0.43 |
| iYDR503C   | 1.94 | 0.84 | 1.16 | 0.47 | 1.86 | 0.85 |
| iYDR505C   | 1.05 | 0.46 | 1.06 | 0.40 | 1.09 | 0.49 |
| iYDR506C   | 1.20 | 0.55 | #N/A | #N/A | 1.61 | 0.76 |
| iYDR507C   | 0.51 | 0.16 | 0.60 | 0.14 | 0.62 | 0.20 |
| iYDR509W   | 0.32 | 0.05 | 0.50 | 0.12 | 0.27 | 0.02 |
| iYDR510W   | 1.33 | 0.61 | 1.38 | 0.58 | 1.07 | 0.49 |
| iYDR511W   | #N/A | #N/A | #N/A | #N/A | #N/A | #N/A |
| iYDR513W   | #N/A | #N/A | #N/A | #N/A | #N/A | #N/A |
| iYDR514C   | 0.99 | 0.41 | 1.15 | 0.54 | 1.26 | 0.58 |
| iYDR515W   | #N/A | #N/A | #N/A | #N/A | #N/A | #N/A |
| iYDR516C   | 2.54 | 0.95 | 2.04 | 0.86 | 1.86 | 0.80 |
| iYDR517W   | 1.31 | 0.56 | 1.75 | 0.75 | 1.27 | 0.58 |
| iYDR518W   | 2.16 | 0.88 | 1.78 | 0.77 | 2.29 | 0.92 |
| iYDR521W   | 2.78 | 0.95 | 2.36 | 0.96 | #N/A | #N/A |
| iYDR522C   | 1.05 | 0.47 | #N/A | #N/A | 1.24 | 0.54 |
| iYDR523C   | 0.58 | 0.19 | 0.78 | 0.27 | 0.47 | 0.12 |
| iYDR524C   | 0.37 | 0.08 | 0.47 | 0.11 | 0.52 | 0.15 |
| iYDR525W   | 0.13 | 0.00 | 0.22 | 0.01 | 0.11 | 0.00 |
| iYDR525W-A | 0.39 | 0.09 | 0.72 | 0.27 | 0.36 | 0.06 |
| iYDR527W-0 | 1.16 | 0.49 | 1.16 | 0.50 | 1.29 | 0.55 |
| iYDR527W-1 | 1.38 | 0.63 | 1.48 | 0.65 | 1.43 | 0.66 |
| iYDR528W   | 0.70 | 0.27 | #N/A | #N/A | #N/A | #N/A |

|               |      |      |      |      |      |      |
|---------------|------|------|------|------|------|------|
| iYDR529C      | 1.62 | 0.69 | 1.63 | 0.72 | 1.51 | 0.66 |
| iYDR530C      | 1.67 | 0.71 | 1.32 | 0.55 | 1.42 | 0.69 |
| iYDR531W      | #N/A | #N/A | #N/A | #N/A | #N/A | #N/A |
| iYDR532C      | 1.72 | 0.77 | 1.94 | 0.85 | 1.30 | 0.63 |
| iYDR533C      | 0.95 | 0.42 | 1.09 | 0.47 | 0.73 | 0.26 |
| iYDR534C-0    | 0.69 | 0.27 | 0.36 | 0.05 | 0.84 | 0.38 |
| iYDR534C-1    | 0.64 | 0.24 | 0.52 | 0.12 | 0.62 | 0.22 |
| iYDR535C      | 0.95 | 0.41 | 0.61 | 0.19 | 1.22 | 0.56 |
| iYDR536W      | 1.87 | 0.78 | 1.48 | 0.63 | 1.74 | 0.74 |
| iYDR538W      | 1.08 | 0.47 | 1.05 | 0.43 | 0.83 | 0.31 |
| iYDR539W-0    | 1.48 | 0.63 | 1.56 | 0.68 | 1.61 | 0.68 |
| iYDR539W-2    | 3.28 | 0.98 | 2.47 | 0.95 | 2.17 | 0.92 |
| iYDR540C      | 1.97 | 0.85 | 1.60 | 0.69 | 1.89 | 0.83 |
| iYDR541C-0    | 1.41 | 0.63 | 1.03 | 0.47 | 1.17 | 0.52 |
| iYDR541C-1    | 0.56 | 0.19 | 0.63 | 0.19 | 0.64 | 0.24 |
| iYDR542W      | 0.34 | 0.06 | 0.50 | 0.11 | 0.40 | 0.09 |
| iYDR543C      | 0.40 | 0.10 | 0.38 | 0.06 | 0.42 | 0.10 |
| iYDR544C      | 0.52 | 0.17 | 0.55 | 0.16 | 0.59 | 0.18 |
| iYDRCdelta3   | #N/A | #N/A | #N/A | #N/A | #N/A | #N/A |
| iYDRCdelta5   | #N/A | #N/A | #N/A | #N/A | 0.83 | 0.31 |
| iYDRCdelta9-0 | 1.63 | 0.72 | 1.74 | 0.75 | 1.83 | 0.84 |
| iYDRCsigma1   | 0.94 | 0.41 | 1.66 | 0.73 | 1.37 | 0.59 |
| iYDRCsigma2   | #N/A | #N/A | #N/A | #N/A | #N/A | #N/A |
| iYDRCTy1-2    | #N/A | #N/A | #N/A | #N/A | #N/A | #N/A |
| iYDRWdelta10  | #N/A | #N/A | 0.90 | 0.34 | 0.72 | 0.27 |
| iYDRWdelta12  | 0.76 | 0.28 | 1.13 | 0.47 | 1.02 | 0.48 |
| iYDRWdelta14  | 1.11 | 0.49 | 1.40 | 0.59 | 1.09 | 0.48 |
| iYDRWdelta24  | 0.75 | 0.30 | 1.63 | 0.70 | 0.92 | 0.37 |
| iYDRWdelta25  | 0.98 | 0.40 | 0.95 | 0.43 | 1.06 | 0.45 |
| iYDRWdelta26  | 0.69 | 0.27 | 0.81 | 0.29 | 0.49 | 0.14 |
| iYDRWdelta30  | 2.15 | 0.89 | 3.25 | 0.99 | 2.44 | 0.91 |
| iYDRWdelta31  | 0.97 | 0.43 | 0.98 | 0.39 | 0.90 | 0.35 |
| iYEL001C      | 1.68 | 0.75 | 2.02 | 0.91 | 1.85 | 0.82 |
| iYEL003W      | #N/A | #N/A | #N/A | #N/A | #N/A | #N/A |
| iYEL004W      | 1.84 | 0.80 | 2.16 | 0.88 | 1.78 | 0.81 |
| iYEL005C      | 1.47 | 0.67 | 1.30 | 0.56 | 1.26 | 0.58 |
| iYEL006W      | 0.53 | 0.17 | 0.75 | 0.26 | 0.43 | 0.09 |
| iYEL007W      | 0.61 | 0.21 | 0.54 | 0.15 | 0.52 | 0.17 |
| iYEL008W      | 0.16 | 0.01 | 0.23 | 0.01 | 0.14 | 0.00 |
| iYEL009C      | 0.28 | 0.04 | 0.43 | 0.08 | 0.41 | 0.08 |
| iYEL010W      | 2.65 | 0.96 | 3.51 | 0.99 | 2.92 | 0.98 |
| iYEL011W      | #N/A | #N/A | #N/A | #N/A | #N/A | #N/A |
| iYEL012W      | 1.52 | 0.65 | 1.37 | 0.64 | 1.78 | 0.82 |
| iYEL013W      | 0.41 | 0.10 | 0.44 | 0.09 | 0.53 | 0.17 |
| iYEL014C      | 1.15 | 0.52 | 1.64 | 0.70 | 1.60 | 0.76 |
| iYEL016C      | 1.73 | 0.77 | 1.79 | 0.83 | 1.71 | 0.77 |
| iYEL017C-A    | 0.59 | 0.21 | 0.72 | 0.23 | 0.56 | 0.19 |
| iYEL017W      | #N/A | #N/A | #N/A | #N/A | 0.61 | 0.23 |
| iYEL018W      | 0.34 | 0.06 | 0.64 | 0.20 | 0.31 | 0.03 |
| iYEL019C      | 1.95 | 0.80 | 2.28 | 0.95 | 1.78 | 0.82 |
| iYEL020C      | 1.78 | 0.78 | 1.38 | 0.60 | 1.28 | 0.58 |

|             |      |      |      |      |      |      |
|-------------|------|------|------|------|------|------|
| iYEL021W    | 1.08 | 0.49 | 1.34 | 0.58 | 0.84 | 0.32 |
| iYEL022W    | 1.18 | 0.50 | 1.93 | 0.82 | 0.76 | 0.33 |
| iYEL023C    | 1.49 | 0.68 | 1.52 | 0.67 | 1.32 | 0.60 |
| iYEL024W    | 0.28 | 0.03 | 0.38 | 0.06 | 0.28 | 0.03 |
| iYEL025C    | 1.87 | 0.81 | 2.21 | 0.89 | 1.66 | 0.75 |
| iYEL026W    | 0.46 | 0.13 | 0.60 | 0.17 | 0.36 | 0.06 |
| iYEL027W    | 0.43 | 0.11 | 0.97 | 0.37 | 0.50 | 0.13 |
| iYEL028W    | 1.27 | 0.56 | 2.15 | 0.89 | 1.47 | 0.71 |
| iYEL029C    | 1.40 | 0.64 | 1.59 | 0.68 | #N/A | #N/A |
| iYEL030W    | 0.62 | 0.23 | #N/A | #N/A | 0.82 | 0.35 |
| iYEL031W    | #N/A | #N/A | 1.10 | 0.46 | 1.03 | 0.49 |
| iYEL032W    | 1.62 | 0.69 | 1.29 | 0.55 | 1.34 | 0.65 |
| iYEL035C    | #N/A | #N/A | 0.48 | 0.12 | 0.30 | 0.04 |
| iYEL037C    | 1.10 | 0.47 | 0.88 | 0.33 | 1.17 | 0.50 |
| iYEL038W    | 0.41 | 0.09 | 0.35 | 0.05 | 0.40 | 0.09 |
| iYEL039C    | 2.69 | 0.95 | 1.91 | 0.81 | 2.17 | 0.90 |
| iYEL040W    | #N/A | #N/A | #N/A | #N/A | #N/A | #N/A |
| iYEL041W    | 1.05 | 0.44 | 0.75 | 0.29 | 0.89 | 0.39 |
| iYEL042W    | 1.81 | 0.79 | 2.03 | 0.84 | 1.76 | 0.75 |
| iYEL043W    | 0.88 | 0.37 | 0.55 | 0.16 | 0.96 | 0.39 |
| iYEL044W    | 1.45 | 0.62 | 1.97 | 0.84 | 1.92 | 0.80 |
| iYEL045C    | 0.18 | 0.01 | 0.41 | 0.07 | 0.18 | 0.01 |
| iYEL047C    | 0.57 | 0.20 | 0.65 | 0.20 | 0.49 | 0.14 |
| iYEL048C    | #N/A | #N/A | #N/A | #N/A | #N/A | #N/A |
| iYEL049W    | 0.73 | 0.29 | 0.62 | 0.16 | 0.64 | 0.21 |
| iYEL050C    | 1.15 | 0.52 | 1.46 | 0.63 | 1.12 | 0.51 |
| iYEL051W    | 0.57 | 0.19 | 0.70 | 0.25 | 0.43 | 0.09 |
| iYEL052W    | 2.11 | 0.87 | 1.39 | 0.59 | 1.99 | 0.82 |
| iYEL053C    | 1.77 | 0.74 | 1.57 | 0.75 | 1.98 | 0.82 |
| iYEL054C    | 0.31 | 0.05 | 0.35 | 0.04 | 0.30 | 0.04 |
| iYEL055C    | 0.63 | 0.23 | 0.85 | 0.29 | 0.87 | 0.34 |
| iYEL056W    | #N/A | #N/A | #N/A | #N/A | #N/A | #N/A |
| iYEL057C    | 1.59 | 0.70 | 1.71 | 0.78 | 1.53 | 0.70 |
| iYEL058W    | #N/A | #N/A | #N/A | #N/A | 1.10 | 0.49 |
| iYEL059W    | #N/A | #N/A | 0.80 | 0.33 | #N/A | #N/A |
| iYEL060C    | 1.20 | 0.51 | 1.04 | 0.42 | 0.89 | 0.39 |
| iYEL061C    | 1.73 | 0.77 | 1.29 | 0.55 | 1.78 | 0.77 |
| iYEL062W    | 0.32 | 0.06 | 0.31 | 0.03 | 0.30 | 0.03 |
| iYEL063C    | 2.24 | 0.87 | 1.99 | 0.88 | 1.82 | 0.84 |
| iYEL065W    | 0.96 | 0.42 | 0.91 | 0.35 | 0.99 | 0.43 |
| iYEL068C    | 0.85 | 0.35 | 0.53 | 0.12 | 0.75 | 0.27 |
| iYEL072W-0  | 1.19 | 0.53 | 1.68 | 0.72 | 1.03 | 0.50 |
| iYEL073C-0  | 1.27 | 0.56 | 1.28 | 0.55 | 1.10 | 0.50 |
| iYEL073C-1  | 1.39 | 0.63 | 1.36 | 0.67 | 1.46 | 0.71 |
| iYEL073C-2  | 1.81 | 0.79 | 1.20 | 0.58 | 1.57 | 0.67 |
| iYEL073C-3  | 1.80 | 0.75 | 1.58 | 0.69 | 1.19 | 0.58 |
| iYEL073C-4  | 2.02 | 0.83 | 2.53 | 0.94 | 1.92 | 0.84 |
| iYEL074W    | 0.74 | 0.28 | 0.60 | 0.19 | 0.77 | 0.33 |
| iYEL075C    | 0.81 | 0.31 | 0.83 | 0.30 | 0.80 | 0.34 |
| iYEL077C    | 0.87 | 0.35 | 0.64 | 0.20 | 0.77 | 0.30 |
| iYELCdelta3 | 1.14 | 0.48 | 1.68 | 0.72 | 0.92 | 0.40 |

|             |      |      |      |      |      |      |
|-------------|------|------|------|------|------|------|
| iYELCdelta4 | 1.22 | 0.55 | 1.86 | 0.80 | 1.11 | 0.51 |
| iYELCtau1   | #N/A | #N/A | #N/A | #N/A | #N/A | #N/A |
| iYELWdelta2 | 1.15 | 0.52 | 1.16 | 0.47 | 1.25 | 0.53 |
| iYELWdelta5 | 1.35 | 0.62 | 1.46 | 0.65 | 1.21 | 0.55 |
| iYELWdelta6 | 0.74 | 0.30 | #N/A | #N/A | 0.46 | 0.13 |
| iYER002W    | #N/A | #N/A | #N/A | #N/A | #N/A | #N/A |
| iYER003C    | 2.17 | 0.89 | 2.54 | 0.97 | 2.42 | 0.91 |
| iYER004W    | 1.05 | 0.46 | 1.07 | 0.50 | 1.01 | 0.48 |
| iYER005W    | 1.43 | 0.63 | 1.35 | 0.65 | 1.59 | 0.72 |
| iYER006W    | #N/A | #N/A | #N/A | #N/A | 1.01 | 0.48 |
| iYER007C-A  | 1.10 | 0.50 | 1.10 | 0.48 | 1.05 | 0.47 |
| iYER007W    | 0.35 | 0.07 | 0.49 | 0.12 | 0.46 | 0.13 |
| iYER008C    | 1.32 | 0.60 | 1.70 | 0.73 | 1.10 | 0.48 |
| iYER009W    | #N/A | #N/A | #N/A | #N/A | #N/A | #N/A |
| iYER010C-0  | 1.83 | 0.81 | 1.90 | 0.81 | 1.64 | 0.74 |
| iYER010C-1  | 1.13 | 0.50 | 1.27 | 0.54 | 1.02 | 0.48 |
| iYER011W    | 1.43 | 0.65 | 1.43 | 0.63 | 1.75 | 0.74 |
| iYER012W    | 1.40 | 0.60 | 0.96 | 0.43 | 2.01 | 0.84 |
| iYER013W    | 1.06 | 0.46 | #N/A | #N/A | 1.27 | 0.62 |
| iYER014W    | 1.80 | 0.76 | 1.06 | 0.43 | 1.75 | 0.76 |
| iYER015W    | 1.55 | 0.68 | 1.06 | 0.47 | 1.34 | 0.60 |
| iYER016W    | 0.35 | 0.07 | #N/A | #N/A | #N/A | #N/A |
| iYER017C    | 1.08 | 0.45 | #N/A | #N/A | 0.82 | 0.36 |
| iYER018C    | 1.51 | 0.64 | 1.53 | 0.67 | 1.36 | 0.62 |
| iYER019C-A  | 1.18 | 0.50 | 1.77 | 0.78 | 1.06 | 0.48 |
| iYER020W    | 0.72 | 0.29 | 0.75 | 0.23 | 0.67 | 0.24 |
| iYER021W    | 0.67 | 0.25 | #N/A | #N/A | 0.78 | 0.29 |
| iYER022W    | 1.44 | 0.61 | 1.77 | 0.77 | 1.34 | 0.61 |
| iYER023W    | 1.06 | 0.47 | #N/A | #N/A | 1.72 | 0.73 |
| iYER024W    | 2.01 | 0.82 | 1.34 | 0.58 | 1.66 | 0.71 |
| iYER025W    | 0.25 | 0.02 | 0.40 | 0.06 | 0.41 | 0.08 |
| iYER026C    | 1.00 | 0.43 | 1.07 | 0.49 | 1.44 | 0.67 |
| iYER027C    | 1.86 | 0.80 | 1.67 | 0.74 | 1.77 | 0.77 |
| iYER028C    | 0.63 | 0.22 | 0.66 | 0.21 | 0.60 | 0.19 |
| iYER029C    | #N/A | #N/A | #N/A | #N/A | #N/A | #N/A |
| iYER030W    | 0.62 | 0.22 | 0.68 | 0.25 | 0.76 | 0.28 |
| iYER031C    | 2.23 | 0.91 | 1.84 | 0.84 | 2.06 | 0.88 |
| iYER032W    | 0.35 | 0.07 | 0.27 | 0.01 | 0.41 | 0.09 |
| iYER033C    | 1.01 | 0.44 | 0.73 | 0.28 | 0.93 | 0.41 |
| iYER034W    | 0.52 | 0.16 | 0.52 | 0.13 | 0.41 | 0.09 |
| iYER035W    | 0.57 | 0.20 | 0.77 | 0.23 | 0.53 | 0.17 |
| iYER036C    | 0.33 | 0.06 | 0.40 | 0.05 | 0.37 | 0.07 |
| iYER038C    | #N/A | #N/A | #N/A | #N/A | #N/A | #N/A |
| iYER039C-A  | 2.34 | 0.90 | 1.90 | 0.81 | 2.24 | 0.91 |
| iYER040W    | 0.88 | 0.37 | 0.83 | 0.28 | 0.95 | 0.45 |
| iYER041W    | 1.39 | 0.59 | 1.25 | 0.61 | 1.42 | 0.69 |
| iYER042W    | 0.47 | 0.14 | 0.53 | 0.14 | #N/A | #N/A |
| iYER043C    | 0.77 | 0.31 | 1.00 | 0.37 | 0.82 | 0.36 |
| iYER044C    | 0.91 | 0.36 | 1.76 | 0.76 | 0.77 | 0.33 |
| iYER044C-A  | 0.81 | 0.33 | 0.77 | 0.25 | 0.81 | 0.31 |
| iYER045C-0  | 0.82 | 0.34 | 0.46 | 0.10 | 0.76 | 0.28 |

|            |      |      |      |      |      |      |
|------------|------|------|------|------|------|------|
| iYER045C-1 | 0.99 | 0.44 | 0.75 | 0.23 | 1.07 | 0.48 |
| iYER046W   | #N/A | #N/A | #N/A | #N/A | #N/A | #N/A |
| iYER047C   | 1.24 | 0.56 | 1.45 | 0.62 | 1.09 | 0.53 |
| iYER048C   | 1.27 | 0.55 | 1.04 | 0.44 | 1.42 | 0.65 |
| iYER048W-A | 0.93 | 0.39 | 1.19 | 0.48 | 0.78 | 0.30 |
| iYER049W   | 0.71 | 0.28 | #N/A | #N/A | 0.71 | 0.29 |
| iYER050C   | #N/A | #N/A | #N/A | #N/A | #N/A | #N/A |
| iYER051W   | 0.49 | 0.15 | 0.79 | 0.31 | 0.40 | 0.09 |
| iYER052C   | 1.28 | 0.58 | 1.39 | 0.69 | 1.08 | 0.49 |
| iYER053C-0 | 1.24 | 0.53 | 1.30 | 0.57 | 0.97 | 0.43 |
| iYER053C-1 | 1.17 | 0.51 | 0.92 | 0.40 | 0.83 | 0.32 |
| iYER054C   | 1.40 | 0.64 | 1.37 | 0.67 | 1.39 | 0.64 |
| iYER055C   | 0.28 | 0.03 | 0.37 | 0.05 | 0.30 | 0.04 |
| iYER056C   | 0.17 | 0.01 | 0.46 | 0.10 | 0.18 | 0.01 |
| iYER056C-A | 0.44 | 0.12 | 0.36 | 0.03 | 0.42 | 0.09 |
| iYER057C   | 2.58 | 0.93 | 2.27 | 0.91 | 2.12 | 0.91 |
| iYER058W   | 2.04 | 0.86 | 1.80 | 0.85 | 1.65 | 0.77 |
| iYER059W   | 1.30 | 0.58 | 0.81 | 0.30 | 1.01 | 0.44 |
| iYER060W   | 0.35 | 0.07 | 0.40 | 0.07 | 0.50 | 0.15 |
| iYER060W-A | #N/A | #N/A | #N/A | #N/A | #N/A | #N/A |
| iYER061C   | #N/A | #N/A | 1.07 | 0.50 | 1.09 | 0.48 |
| iYER062C   | 0.79 | 0.30 | 0.92 | 0.39 | 0.62 | 0.23 |
| iYER063W   | 0.28 | 0.04 | 0.32 | 0.02 | 0.49 | 0.14 |
| iYER066W   | 2.04 | 0.87 | 1.85 | 0.86 | 1.83 | 0.81 |
| iYER067W   | 2.06 | 0.87 | 1.43 | 0.65 | 1.81 | 0.77 |
| iYER068W   | 0.41 | 0.10 | 0.73 | 0.21 | 0.47 | 0.13 |
| iYER069W   | 1.77 | 0.74 | 1.92 | 0.81 | 1.58 | 0.67 |
| iYER070W   | 1.37 | 0.59 | 1.27 | 0.52 | 1.06 | 0.48 |
| iYER071C   | 0.66 | 0.25 | 1.39 | 0.68 | 0.77 | 0.32 |
| iYER072W   | 0.44 | 0.11 | 0.47 | 0.10 | 0.16 | 0.00 |
| iYER073W   | 0.16 | 0.01 | 0.25 | 0.01 | 0.36 | 0.06 |
| iYER074W   | 1.19 | 0.53 | 1.03 | 0.48 | 1.21 | 0.56 |
| iYER075C   | 0.45 | 0.12 | 0.61 | 0.15 | 0.54 | 0.18 |
| iYER076C   | 1.39 | 0.63 | 1.30 | 0.56 | 1.64 | 0.77 |
| iYER077C   | 1.48 | 0.67 | #N/A | #N/A | 1.22 | 0.59 |
| iYER078C   | 2.00 | 0.82 | 1.75 | 0.78 | 1.86 | 0.85 |
| iYER079W   | #N/A | #N/A | 1.82 | 0.78 | 1.49 | 0.64 |
| iYER081W   | #N/A | #N/A | #N/A | #N/A | #N/A | #N/A |
| iYER082C   | 1.26 | 0.54 | 1.48 | 0.65 | 1.50 | 0.64 |
| iYER084W   | 2.23 | 0.87 | 2.21 | 0.89 | 2.32 | 0.94 |
| iYER085C   | 3.43 | 0.99 | 2.92 | 0.98 | 3.57 | 0.99 |
| iYER086W   | 1.35 | 0.60 | 0.84 | 0.31 | 1.17 | 0.53 |
| iYER087C-A | 1.75 | 0.74 | 1.09 | 0.51 | 1.44 | 0.62 |
| iYER087W   | 1.32 | 0.56 | 1.08 | 0.47 | 1.55 | 0.73 |
| iYER088C   | 0.47 | 0.14 | 0.45 | 0.07 | 0.31 | 0.04 |
| iYER089C   | 1.25 | 0.55 | 1.16 | 0.46 | 1.18 | 0.49 |
| iYER090W   | 0.42 | 0.10 | #N/A | #N/A | 0.38 | 0.06 |
| iYER091C   | 0.61 | 0.20 | 1.08 | 0.51 | 0.63 | 0.24 |
| iYER091C-A | 0.83 | 0.35 | 0.57 | 0.16 | 0.69 | 0.28 |
| iYER092W   | 1.70 | 0.76 | 1.30 | 0.63 | 1.41 | 0.63 |
| iYER093C   | 2.66 | 0.96 | 2.38 | 0.92 | 2.63 | 0.97 |



|            |      |      |      |      |      |      |
|------------|------|------|------|------|------|------|
| iYER093C-A | 1.27 | 0.56 | 0.93 | 0.36 | #N/A | #N/A |
| iYER094C   | 1.55 | 0.66 | 1.13 | 0.49 | 1.36 | 0.62 |
| iYER095W   | 0.83 | 0.33 | 0.77 | 0.23 | 0.73 | 0.29 |
| iYER096W   | 1.60 | 0.72 | 1.41 | 0.70 | 2.15 | 0.90 |
| iYER098W   | #N/A | #N/A | 0.34 | 0.03 | 0.53 | 0.17 |
| iYER099C   | 2.39 | 0.94 | 2.60 | 0.96 | 2.12 | 0.89 |
| iYER100W   | #N/A | #N/A | #N/A | #N/A | #N/A | #N/A |
| iYER101C   | 1.04 | 0.45 | 1.05 | 0.43 | 0.84 | 0.38 |
| iYER102W   | 1.30 | 0.56 | 1.19 | 0.50 | 1.50 | 0.68 |
| iYER103W   | 2.08 | 0.88 | 1.72 | 0.75 | 2.15 | 0.86 |
| iYER104W   | 0.68 | 0.24 | 0.65 | 0.21 | 0.85 | 0.32 |
| iYER105C   | 2.76 | 0.95 | 2.63 | 0.97 | 2.05 | 0.87 |
| iYER106W   | 1.44 | 0.61 | 1.24 | 0.60 | 0.98 | 0.45 |
| iYER107C   | 1.27 | 0.56 | 0.91 | 0.35 | 1.35 | 0.59 |
| iYER108C   | 0.58 | 0.20 | 0.41 | 0.07 | 0.58 | 0.17 |
| iYER111C   | 0.71 | 0.28 | 0.93 | 0.33 | 0.77 | 0.32 |
| iYER112W   | #N/A | #N/A | #N/A | #N/A | #N/A | #N/A |
| iYER113C   | 0.95 | 0.38 | 1.01 | 0.46 | 1.15 | 0.56 |
| iYER114C   | 1.34 | 0.57 | 0.75 | 0.30 | 1.03 | 0.42 |
| iYER115C   | 1.53 | 0.69 | 0.72 | 0.24 | #N/A | #N/A |
| iYER116C   | 1.39 | 0.62 | 0.67 | 0.24 | 0.93 | 0.41 |
| iYER117W   | 0.28 | 0.04 | 0.63 | 0.19 | 0.43 | 0.10 |
| iYER118C   | 1.71 | 0.76 | 1.30 | 0.54 | 1.44 | 0.62 |
| iYER120W   | 2.28 | 0.92 | 2.00 | 0.90 | 1.99 | 0.86 |
| iYER121W   | #N/A | #N/A | #N/A | #N/A | 0.51 | 0.16 |
| iYER122C   | 1.99 | 0.82 | 1.43 | 0.61 | 1.67 | 0.79 |
| iYER123W   | 0.71 | 0.28 | 0.80 | 0.28 | 0.80 | 0.30 |
| iYER124C   | 1.42 | 0.64 | 1.27 | 0.52 | 1.33 | 0.65 |
| iYER125W   | 0.54 | 0.17 | 0.49 | 0.09 | 0.55 | 0.17 |
| iYER126C   | 1.01 | 0.45 | #N/A | #N/A | 1.19 | 0.55 |
| iYER127W   | 1.96 | 0.80 | 1.70 | 0.73 | 2.01 | 0.86 |
| iYER128W   | 1.92 | 0.82 | 1.85 | 0.79 | 2.52 | 0.94 |
| iYER129W   | 0.34 | 0.06 | 0.54 | 0.13 | 0.41 | 0.10 |
| iYER130C   | 0.43 | 0.12 | 0.54 | 0.14 | 0.48 | 0.14 |
| iYER131W   | 0.31 | 0.05 | 0.44 | 0.09 | 0.27 | 0.03 |
| iYER132C   | 1.14 | 0.48 | 1.00 | 0.40 | 0.92 | 0.40 |
| iYER134C   | 1.20 | 0.53 | 1.10 | 0.50 | 1.23 | 0.56 |
| iYER135C   | 0.80 | 0.31 | 1.06 | 0.43 | 0.68 | 0.27 |
| iYER136W   | 0.72 | 0.26 | 0.82 | 0.30 | 1.10 | 0.47 |
| iYER138W-A | 0.73 | 0.29 | 0.95 | 0.37 | 0.68 | 0.23 |
| iYER139C   | 1.47 | 0.67 | 1.59 | 0.73 | 1.43 | 0.62 |
| iYER140W   | 1.06 | 0.48 | 1.56 | 0.72 | 1.51 | 0.72 |
| iYER142C   | 1.92 | 0.80 | 1.78 | 0.76 | 1.88 | 0.84 |
| iYER143W   | 0.40 | 0.09 | 0.49 | 0.09 | 0.34 | 0.05 |
| iYER144C   | 1.28 | 0.54 | 1.03 | 0.42 | 1.08 | 0.46 |
| iYER145C   | 0.83 | 0.35 | 0.92 | 0.40 | 0.70 | 0.29 |
| iYER146W   | #N/A | #N/A | #N/A | #N/A | #N/A | #N/A |
| iYER147C   | 2.13 | 0.89 | 1.98 | 0.84 | 1.75 | 0.81 |
| iYER148W   | #N/A | #N/A | #N/A | #N/A | #N/A | #N/A |
| iYER149C   | 1.30 | 0.59 | 1.44 | 0.67 | 1.23 | 0.56 |
| iYER150W   | 1.30 | 0.58 | 1.51 | 0.66 | 1.38 | 0.67 |



|               |      |      |      |      |      |      |
|---------------|------|------|------|------|------|------|
| iYER151C      | 1.50 | 0.67 | 1.53 | 0.66 | 1.58 | 0.72 |
| iYER153C      | 2.13 | 0.88 | 1.98 | 0.84 | 1.52 | 0.65 |
| iYER154W      | #N/A | #N/A | #N/A | #N/A | #N/A | #N/A |
| iYER155C      | 0.65 | 0.24 | 0.75 | 0.29 | 0.60 | 0.21 |
| iYER156C      | 1.96 | 0.80 | 2.26 | 0.94 | 1.93 | 0.85 |
| iYER157W      | #N/A | #N/A | #N/A | #N/A | #N/A | #N/A |
| iYER158C      | 0.64 | 0.22 | 0.54 | 0.15 | 0.68 | 0.27 |
| iYER159C      | 0.39 | 0.08 | 0.31 | 0.02 | 0.31 | 0.03 |
| iYER161C      | #N/A | #N/A | 1.74 | 0.78 | 3.02 | 0.98 |
| iYER162C      | #N/A | #N/A | 1.27 | 0.61 | 2.05 | 0.88 |
| iYER163C-0    | 0.94 | 0.40 | 1.08 | 0.42 | 0.83 | 0.35 |
| iYER163C-1    | 0.62 | 0.22 | 0.73 | 0.25 | 0.60 | 0.20 |
| iYER164W      | 0.43 | 0.11 | 0.92 | 0.34 | 0.60 | 0.20 |
| iYER165W      | 0.67 | 0.26 | 0.78 | 0.24 | 0.71 | 0.29 |
| iYER166W      | 0.73 | 0.29 | 0.65 | 0.18 | 0.60 | 0.22 |
| iYER167W      | #N/A | #N/A | #N/A | #N/A | #N/A | #N/A |
| iYER168C      | 1.19 | 0.53 | 1.35 | 0.66 | 1.25 | 0.57 |
| iYER169W      | 1.92 | 0.82 | #N/A | #N/A | #N/A | #N/A |
| iYER170W      | 2.23 | 0.89 | 1.40 | 0.59 | 1.70 | 0.77 |
| iYER171W      | #N/A | #N/A | #N/A | #N/A | #N/A | #N/A |
| iYER172C      | 1.83 | 0.81 | #N/A | #N/A | 2.40 | 0.95 |
| iYER173W      | #N/A | #N/A | #N/A | #N/A | #N/A | #N/A |
| iYER174C      | 1.02 | 0.45 | 1.10 | 0.43 | 1.18 | 0.58 |
| iYER175C      | 1.34 | 0.57 | 1.24 | 0.53 | 1.42 | 0.69 |
| iYER176W      | 0.20 | 0.01 | 0.38 | 0.04 | 0.13 | 0.00 |
| iYER177W      | 0.76 | 0.31 | 0.79 | 0.28 | 0.45 | 0.12 |
| iYER178W      | 0.37 | 0.08 | 0.95 | 0.34 | 0.77 | 0.29 |
| iYER179W      | #N/A | #N/A | #N/A | #N/A | #N/A | #N/A |
| iYER180C      | 0.81 | 0.31 | 0.81 | 0.33 | 0.80 | 0.33 |
| iYER181C      | 1.03 | 0.46 | 1.54 | 0.66 | 1.18 | 0.54 |
| iYER182W      | #N/A | #N/A | #N/A | #N/A | #N/A | #N/A |
| iYER183C-0    | 0.93 | 0.38 | 0.87 | 0.37 | 0.94 | 0.39 |
| iYER183C-1    | 0.35 | 0.07 | 0.44 | 0.09 | 0.41 | 0.10 |
| iYER184C      | 1.88 | 0.83 | 1.72 | 0.74 | 2.09 | 0.85 |
| iYER185W      | 2.39 | 0.93 | 1.71 | 0.82 | 2.31 | 0.90 |
| iYER186C      | 1.92 | 0.82 | 2.13 | 0.91 | 2.36 | 0.93 |
| iYER187W      | 1.80 | 0.80 | 1.83 | 0.78 | 1.79 | 0.80 |
| iYERCdelta10  | 0.62 | 0.22 | 1.11 | 0.46 | 0.93 | 0.41 |
| iYERCdelta14  | 1.68 | 0.74 | 1.65 | 0.79 | 1.04 | 0.47 |
| iYERCdelta20  | #N/A | #N/A | 1.16 | 0.46 | 0.90 | 0.35 |
| iYERCdelta24  | 0.70 | 0.27 | 0.79 | 0.31 | 0.68 | 0.27 |
| iYERCdelta26  | 2.09 | 0.85 | 2.36 | 0.91 | 1.59 | 0.74 |
| iYERCdelta8   | #N/A | #N/A | #N/A | #N/A | #N/A | #N/A |
| iYERComega1-0 | 1.28 | 0.58 | #N/A | #N/A | 1.34 | 0.61 |
| iYERComega1-1 | 1.43 | 0.65 | 1.35 | 0.57 | 1.31 | 0.64 |
| iYERCsigma3   | 1.45 | 0.65 | 1.60 | 0.70 | 1.71 | 0.77 |
| iYERCtau2     | #N/A | #N/A | #N/A | #N/A | #N/A | #N/A |
| iYERCtau3     | 0.69 | 0.27 | 0.52 | 0.11 | #N/A | #N/A |
| iYERWdelta11  | 0.57 | 0.19 | 0.58 | 0.18 | 0.79 | 0.30 |
| iYERWdelta12  | 1.95 | 0.80 | 1.77 | 0.76 | 1.35 | 0.64 |
| iYERWdelta17  | #N/A | #N/A | #N/A | #N/A | 0.87 | 0.40 |

|                |      |      |      |      |      |      |
|----------------|------|------|------|------|------|------|
| iYERWdelta21-0 | 0.29 | 0.04 | 0.26 | 0.01 | 0.31 | 0.04 |
| iYERWdelta21-1 | 0.35 | 0.07 | 0.30 | 0.03 | 0.40 | 0.09 |
| iYERWdelta21-2 | 1.00 | 0.43 | 0.94 | 0.37 | 1.21 | 0.56 |
| iYERWdelta22   | 1.63 | 0.73 | 1.56 | 0.68 | 1.65 | 0.78 |
| iYERWdelta7    | 1.30 | 0.59 | 0.88 | 0.38 | 1.29 | 0.59 |
| iYERWdelta9    | #N/A | #N/A | #N/A | #N/A | #N/A | #N/A |
| iYERWomega2-0  | 0.46 | 0.13 | 0.43 | 0.09 | 0.46 | 0.13 |
| iYFL002C       | 1.00 | 0.43 | 1.55 | 0.76 | 1.88 | 0.79 |
| iYFL003C       | 0.95 | 0.40 | 0.90 | 0.35 | 0.93 | 0.37 |
| iYFL004W       | #N/A | #N/A | #N/A | #N/A | #N/A | #N/A |
| iYFL005W       | 1.04 | 0.44 | 1.59 | 0.69 | 0.86 | 0.38 |
| iYFL006W       | 2.56 | 0.94 | 2.18 | 0.88 | 2.25 | 0.91 |
| iYFL007W       | 0.42 | 0.10 | 0.69 | 0.25 | #N/A | #N/A |
| iYFL008W       | 1.48 | 0.67 | 1.10 | 0.44 | 1.39 | 0.63 |
| iYFL009W       | 2.69 | 0.94 | 2.57 | 0.94 | 2.37 | 0.94 |
| iYFL010C       | 1.66 | 0.75 | 2.16 | 0.88 | 1.81 | 0.80 |
| iYFL011W       | 1.21 | 0.52 | 1.58 | 0.69 | 1.04 | 0.50 |
| iYFL013W-A     | 2.98 | 0.97 | 2.68 | 0.95 | 2.88 | 0.96 |
| iYFL014W       | 0.96 | 0.39 | 0.75 | 0.29 | 0.80 | 0.35 |
| iYFL015C       | 1.33 | 0.61 | 1.75 | 0.75 | 1.23 | 0.56 |
| iYFL016C       | 0.58 | 0.20 | 0.70 | 0.26 | 0.52 | 0.16 |
| iYFL017C       | #N/A | #N/A | 1.40 | 0.61 | 1.35 | 0.63 |
| iYFL018C       | 1.91 | 0.79 | 1.68 | 0.79 | 1.74 | 0.78 |
| iYFL020C       | 2.65 | 0.96 | 1.66 | 0.79 | 2.96 | 0.97 |
| iYFL021W-0     | 2.90 | 0.97 | 2.48 | 0.94 | 3.30 | 0.98 |
| iYFL021W-1     | 1.93 | 0.83 | 1.57 | 0.69 | 2.07 | 0.88 |
| iYFL023W       | #N/A | #N/A | #N/A | #N/A | #N/A | #N/A |
| iYFL024C       | 0.37 | 0.07 | 0.49 | 0.12 | 0.43 | 0.10 |
| iYFL025C       | 0.79 | 0.32 | 0.80 | 0.25 | 0.84 | 0.37 |
| iYFL026W       | 0.45 | 0.13 | 0.49 | 0.12 | 0.62 | 0.20 |
| iYFL027C       | 0.69 | 0.27 | 2.22 | 0.94 | 0.79 | 0.34 |
| iYFL028C       | 1.04 | 0.43 | 1.56 | 0.70 | 1.86 | 0.85 |
| iYFL029C       | 2.15 | 0.89 | 1.71 | 0.75 | 2.89 | 0.97 |
| iYFL030W       | #N/A | #N/A | #N/A | #N/A | #N/A | #N/A |
| iYFL033C       | 0.61 | 0.22 | 0.66 | 0.23 | 0.60 | 0.22 |
| iYFL034C-A     | 0.79 | 0.32 | 0.95 | 0.37 | 0.96 | 0.42 |
| iYFL034W       | #N/A | #N/A | #N/A | #N/A | #N/A | #N/A |
| iYFL035C-A     | 1.15 | 0.49 | 1.10 | 0.45 | 0.94 | 0.37 |
| iYFL036W       | #N/A | #N/A | #N/A | #N/A | #N/A | #N/A |
| iYFL038C       | 2.11 | 0.84 | 1.61 | 0.78 | 1.89 | 0.85 |
| iYFL039C       | 0.29 | 0.04 | 0.31 | 0.02 | 0.22 | 0.01 |
| iYFL040W       | 0.68 | 0.26 | #N/A | #N/A | #N/A | #N/A |
| iYFL041W       | #N/A | #N/A | #N/A | #N/A | #N/A | #N/A |
| iYFL042C       | 1.78 | 0.79 | 1.68 | 0.76 | 1.87 | 0.82 |
| iYFL044C       | 1.39 | 0.60 | 1.73 | 0.79 | #N/A | #N/A |
| iYFL045C       | 0.78 | 0.30 | 0.87 | 0.37 | 0.94 | 0.42 |
| iYFL046W       | 0.54 | 0.18 | 0.60 | 0.14 | 0.67 | 0.22 |
| iYFL047W       | 1.53 | 0.68 | 1.15 | 0.48 | 1.26 | 0.62 |
| iYFL048C       | 2.27 | 0.88 | #N/A | #N/A | 2.71 | 0.97 |
| iYFL049W       | #N/A | #N/A | #N/A | #N/A | #N/A | #N/A |
| iYFL050C       | 1.81 | 0.76 | 1.51 | 0.74 | 1.66 | 0.70 |

|             |      |      |      |      |      |      |
|-------------|------|------|------|------|------|------|
| iYFL051C-0  | 0.85 | 0.35 | #N/A | #N/A | 0.80 | 0.33 |
| iYFL051C-1  | 1.14 | 0.48 | 1.02 | 0.41 | 0.98 | 0.40 |
| iYFL052W    | 2.34 | 0.89 | 2.09 | 0.86 | 1.97 | 0.85 |
| iYFL053W-0  | 1.15 | 0.52 | 0.69 | 0.20 | 1.28 | 0.60 |
| iYFL053W-1  | 2.89 | 0.96 | 1.51 | 0.74 | 2.69 | 0.95 |
| iYFL054C    | 2.63 | 0.94 | 1.43 | 0.64 | 2.30 | 0.90 |
| iYFL055W-0  | 0.96 | 0.41 | 0.76 | 0.27 | 1.02 | 0.44 |
| iYFL055W-1  | 0.41 | 0.10 | 0.38 | 0.06 | 0.57 | 0.20 |
| iYFL056C-0  | 0.76 | 0.30 | 0.70 | 0.23 | 0.66 | 0.25 |
| iYFL056C-1  | 1.94 | 0.83 | 1.78 | 0.76 | 1.93 | 0.87 |
| iYFL058W    | 2.57 | 0.95 | 2.66 | 0.97 | 2.19 | 0.92 |
| iYFL059W    | 3.70 | 0.99 | 3.52 | 0.99 | 3.73 | 1.00 |
| iYFL060C    | 3.60 | 0.99 | 2.89 | 0.99 | 3.47 | 0.99 |
| iYFL061W    | #N/A | #N/A | #N/A | #N/A | #N/A | #N/A |
| iYFL062W-0  | 1.33 | 0.59 | 1.64 | 0.71 | 1.05 | 0.48 |
| iYFL062W-1  | 1.37 | 0.59 | 1.55 | 0.68 | 1.50 | 0.72 |
| iYFL063W    | 0.68 | 0.27 | 0.69 | 0.25 | 0.74 | 0.27 |
| iYFL066C    | 1.14 | 0.48 | 0.77 | 0.29 | 1.07 | 0.49 |
| iYFL067W    | 0.24 | 0.02 | 0.29 | 0.02 | 0.31 | 0.04 |
| iYFL068W    | 0.30 | 0.05 | 0.28 | 0.02 | 0.27 | 0.03 |
| iYFLCdelta6 | 0.88 | 0.38 | 1.08 | 0.44 | #N/A | #N/A |
| iYFLWdelta1 | 1.45 | 0.62 | 1.30 | 0.63 | 1.31 | 0.63 |
| iYFLWdelta5 | #N/A | #N/A | #N/A | #N/A | #N/A | #N/A |
| iYFR001W    | 1.51 | 0.65 | 1.85 | 0.80 | 1.10 | 0.54 |
| iYFR002W    | #N/A | #N/A | #N/A | #N/A | #N/A | #N/A |
| iYFR003C    | 1.94 | 0.83 | 1.13 | 0.47 | 1.41 | 0.67 |
| iYFR004W    | #N/A | #N/A | #N/A | #N/A | #N/A | #N/A |
| iYFR005C    | 0.62 | 0.21 | 1.24 | 0.57 | 0.55 | 0.18 |
| iYFR006W    | #N/A | #N/A | #N/A | #N/A | #N/A | #N/A |
| iYFR007W    | 2.01 | 0.86 | 2.00 | 0.87 | 1.68 | 0.79 |
| iYFR008W    | 1.20 | 0.53 | 1.29 | 0.54 | 0.99 | 0.44 |
| iYFR009W    | 0.85 | 0.35 | 0.63 | 0.21 | 0.84 | 0.37 |
| iYFR010W    | #N/A | #N/A | #N/A | #N/A | #N/A | #N/A |
| iYFR011C    | #N/A | #N/A | 1.41 | 0.62 | 1.12 | 0.51 |
| iYFR012W    | 3.25 | 0.98 | 2.97 | 0.98 | 3.31 | 0.99 |
| iYFR013W    | 0.54 | 0.17 | 0.71 | 0.23 | 0.57 | 0.20 |
| iYFR014C    | 2.40 | 0.94 | 1.51 | 0.68 | 1.86 | 0.78 |
| iYFR015C    | 1.30 | 0.58 | 1.18 | 0.56 | 1.54 | 0.70 |
| iYFR016C    | #N/A | #N/A | #N/A | #N/A | #N/A | #N/A |
| iYFR017C    | 1.57 | 0.70 | 0.95 | 0.42 | 1.32 | 0.60 |
| iYFR018C    | 2.27 | 0.91 | 1.91 | 0.85 | 1.76 | 0.82 |
| iYFR019W    | #N/A | #N/A | 0.66 | 0.23 | #N/A | #N/A |
| iYFR020W    | 1.92 | 0.82 | 2.01 | 0.88 | 1.96 | 0.85 |
| iYFR021W    | 1.67 | 0.74 | 1.55 | 0.68 | 2.03 | 0.87 |
| iYFR022W    | 1.00 | 0.43 | 1.22 | 0.57 | 0.85 | 0.37 |
| iYFR023W    | #N/A | #N/A | #N/A | #N/A | 0.91 | 0.42 |
| iYFR024C-A  | 1.56 | 0.71 | 1.36 | 0.65 | 1.78 | 0.82 |
| iYFR025C    | #N/A | #N/A | #N/A | #N/A | #N/A | #N/A |
| iYFR026C    | 1.26 | 0.55 | 0.95 | 0.39 | 0.94 | 0.42 |
| iYFR027W    | #N/A | #N/A | #N/A | #N/A | #N/A | #N/A |
| iYFR029W    | 1.84 | 0.81 | 1.21 | 0.53 | 1.42 | 0.65 |

|              |      |      |      |      |      |      |
|--------------|------|------|------|------|------|------|
| iYFR030W     | #N/A | #N/A | #N/A | #N/A | #N/A | #N/A |
| iYFR031C     | 1.04 | 0.45 | 0.81 | 0.33 | 0.58 | 0.18 |
| iYFR031C-A   | 0.34 | 0.06 | 0.47 | 0.08 | 0.32 | 0.04 |
| iYFR032C     | 0.56 | 0.18 | 1.06 | 0.47 | 0.83 | 0.31 |
| iYFR032C-A   | 0.21 | 0.01 | 0.25 | 0.01 | 0.35 | 0.06 |
| iYFR033C     | 0.31 | 0.05 | #N/A | #N/A | #N/A | #N/A |
| iYFR034C     | 0.63 | 0.23 | 1.17 | 0.56 | 0.44 | 0.10 |
| iYFR035C     | 0.68 | 0.24 | #N/A | #N/A | #N/A | #N/A |
| iYFR036W     | 1.04 | 0.45 | 1.07 | 0.44 | 0.75 | 0.31 |
| iYFR037C     | 2.03 | 0.82 | 2.34 | 0.95 | 2.22 | 0.87 |
| iYFR038W     | 0.29 | 0.04 | 0.36 | 0.05 | 0.30 | 0.03 |
| iYFR039C     | 1.39 | 0.63 | 1.34 | 0.58 | 1.19 | 0.54 |
| iYFR040W     | #N/A | #N/A | #N/A | #N/A | #N/A | #N/A |
| iYFR041C     | 2.99 | 0.98 | 3.14 | 1.00 | 2.35 | 0.91 |
| iYFR043C     | #N/A | #N/A | #N/A | #N/A | #N/A | #N/A |
| iYFR044C     | 1.98 | 0.84 | 2.22 | 0.89 | 1.93 | 0.84 |
| iYFR045W     | #N/A | #N/A | #N/A | #N/A | #N/A | #N/A |
| iYFR046C     | #N/A | #N/A | #N/A | #N/A | #N/A | #N/A |
| iYFR047C     | 2.14 | 0.89 | 2.40 | 0.92 | 2.26 | 0.91 |
| iYFR048W     | 1.89 | 0.81 | 1.27 | 0.57 | 1.49 | 0.67 |
| iYFR049W     | #N/A | #N/A | #N/A | #N/A | #N/A | #N/A |
| iYFR050C     | 1.19 | 0.50 | 0.89 | 0.31 | 1.01 | 0.45 |
| iYFR051C     | 3.24 | 0.99 | 2.50 | 0.97 | 3.02 | 0.97 |
| iYFR052W     | #N/A | #N/A | #N/A | #N/A | #N/A | #N/A |
| iYFR053C-0   | 1.90 | 0.79 | 1.72 | 0.75 | 1.86 | 0.85 |
| iYFR053C-1   | 1.60 | 0.71 | 1.56 | 0.67 | 1.38 | 0.63 |
| iYFR053C-2   | 1.18 | 0.52 | 1.10 | 0.47 | 1.56 | 0.72 |
| iYFR054C-0   | 2.39 | 0.93 | 2.07 | 0.86 | 2.04 | 0.87 |
| iYFR054C-2   | 2.02 | 0.86 | 1.70 | 0.74 | 1.88 | 0.80 |
| iYFR054C-3   | 1.12 | 0.49 | 1.63 | 0.72 | 1.15 | 0.56 |
| iYFR055W-0   | 1.40 | 0.64 | 1.05 | 0.43 | 1.17 | 0.49 |
| iYFR055W-1   | 1.14 | 0.51 | 1.16 | 0.51 | 0.81 | 0.35 |
| iYFRCdelta8  | #N/A | #N/A | #N/A | #N/A | #N/A | #N/A |
| iYFRCdelta9  | 1.39 | 0.62 | 1.29 | 0.63 | 1.50 | 0.67 |
| iYFRWdelta10 | 2.94 | 0.97 | 2.51 | 0.95 | 3.09 | 0.99 |
| iYFRWdelta7  | 1.08 | 0.48 | 1.99 | 0.84 | 1.08 | 0.48 |
| iYGL001C     | 0.78 | 0.32 | 1.02 | 0.47 | 0.58 | 0.18 |
| iYGL002W     | 0.59 | 0.20 | 0.70 | 0.23 | 0.54 | 0.18 |
| iYGL003C     | 1.69 | 0.73 | 1.45 | 0.63 | 1.59 | 0.76 |
| iYGL004C     | 1.07 | 0.45 | 1.18 | 0.56 | 0.97 | 0.44 |
| iYGL005C     | 2.11 | 0.87 | 1.93 | 0.81 | 1.65 | 0.78 |
| iYGL006W     | #N/A | #N/A | #N/A | #N/A | #N/A | #N/A |
| iYGL007W-0   | 0.26 | 0.03 | 0.64 | 0.20 | 0.31 | 0.04 |
| iYGL007W-1   | 1.10 | 0.46 | 1.12 | 0.47 | 0.89 | 0.40 |
| iYGL008C     | #N/A | #N/A | 0.21 | 0.00 | 0.08 | 0.00 |
| iYGL009C     | 0.49 | 0.15 | 0.62 | 0.21 | 0.44 | 0.11 |
| iYGL010W     | 0.65 | 0.25 | 0.69 | 0.23 | 0.70 | 0.29 |
| iYGL011C     | #N/A | #N/A | 1.70 | 0.78 | 1.62 | 0.75 |
| iYGL012W     | 0.54 | 0.18 | 0.71 | 0.23 | 0.48 | 0.14 |
| iYGL013C     | 0.96 | 0.39 | 0.98 | 0.44 | 1.01 | 0.43 |
| iYGL014W     | #N/A | #N/A | #N/A | #N/A | #N/A | #N/A |

|            |      |      |      |      |      |      |
|------------|------|------|------|------|------|------|
| iYGL015C   | 0.77 | 0.32 | 0.80 | 0.31 | 0.77 | 0.33 |
| iYGL016W   | #N/A | #N/A | #N/A | #N/A | #N/A | #N/A |
| iYGL017W   | 1.77 | 0.78 | 1.94 | 0.82 | 1.48 | 0.67 |
| iYGL018C   | 3.62 | 0.99 | 3.54 | 1.00 | 3.24 | 0.99 |
| iYGL019W   | #N/A | #N/A | #N/A | #N/A | #N/A | #N/A |
| iYGL020C   | 1.76 | 0.77 | 1.49 | 0.68 | 1.87 | 0.85 |
| iYGL021W   | #N/A | #N/A | #N/A | #N/A | #N/A | #N/A |
| iYGL022W   | 0.89 | 0.35 | 0.55 | 0.16 | 0.84 | 0.37 |
| iYGL023C   | 4.07 | 1.00 | 4.20 | 1.00 | 4.87 | 1.00 |
| iYGL024W   | #N/A | #N/A | #N/A | #N/A | #N/A | #N/A |
| iYGL026C   | 1.25 | 0.54 | 1.04 | 0.42 | 1.31 | 0.58 |
| iYGL027C   | 1.11 | 0.49 | #N/A | #N/A | 1.07 | 0.52 |
| iYGL028C   | 1.26 | 0.55 | 1.21 | 0.52 | 1.49 | 0.64 |
| iYGL029W   | 0.44 | 0.11 | 0.89 | 0.36 | #N/A | #N/A |
| iYGL030W   | 0.86 | 0.34 | 0.88 | 0.36 | 0.62 | 0.23 |
| iYGL031C   | 0.15 | 0.01 | 0.27 | 0.01 | 0.20 | 0.01 |
| iYGL032C   | 1.21 | 0.53 | 2.73 | 0.96 | 0.85 | 0.38 |
| iYGL033W   | #N/A | #N/A | #N/A | #N/A | #N/A | #N/A |
| iYGL034C-0 | 1.56 | 0.67 | 1.76 | 0.84 | 1.54 | 0.70 |
| iYGL034C-1 | 1.40 | 0.64 | 1.32 | 0.57 | 1.33 | 0.57 |
| iYGL035C   | 0.63 | 0.23 | 0.85 | 0.33 | 0.50 | 0.15 |
| iYGL036W   | #N/A | #N/A | #N/A | #N/A | #N/A | #N/A |
| iYGL037C   | 0.96 | 0.39 | 0.77 | 0.23 | #N/A | #N/A |
| iYGL038C   | 0.39 | 0.09 | 0.84 | 0.35 | 0.58 | 0.18 |
| iYGL039W   | 0.48 | 0.14 | #N/A | #N/A | 0.39 | 0.08 |
| iYGL040C-0 | 1.51 | 0.69 | 1.94 | 0.87 | 1.36 | 0.62 |
| iYGL040C-1 | 2.51 | 0.93 | 2.86 | 0.98 | 2.36 | 0.90 |
| iYGL041C   | #N/A | #N/A | #N/A | #N/A | 0.91 | 0.40 |
| iYGL042C   | 1.34 | 0.60 | #N/A | #N/A | 1.60 | 0.73 |
| iYGL044C   | 2.30 | 0.90 | 1.50 | 0.66 | 2.08 | 0.87 |
| iYGL045W   | 0.61 | 0.22 | 0.49 | 0.12 | 0.60 | 0.22 |
| iYGL046W   | 1.07 | 0.48 | 0.68 | 0.20 | 1.09 | 0.50 |
| iYGL047W   | 0.57 | 0.20 | 0.67 | 0.18 | 0.55 | 0.19 |
| iYGL048C   | 1.38 | 0.63 | 1.64 | 0.72 | 1.38 | 0.59 |
| iYGL049C   | 0.95 | 0.41 | 1.03 | 0.41 | 1.00 | 0.46 |
| iYGL050W   | 0.68 | 0.26 | 0.38 | 0.06 | #N/A | #N/A |
| iYGL051W   | 1.87 | 0.78 | 2.72 | 0.97 | 2.09 | 0.84 |
| iYGL053W   | 1.10 | 0.47 | 1.02 | 0.47 | 1.13 | 0.52 |
| iYGL054C   | #N/A | #N/A | 1.12 | 0.46 | 0.50 | 0.15 |
| iYGL055W   | 0.35 | 0.06 | 0.68 | 0.22 | 0.52 | 0.16 |
| iYGL056C   | 0.32 | 0.05 | 0.68 | 0.22 | 0.54 | 0.16 |
| iYGL057C   | 0.66 | 0.23 | 0.86 | 0.29 | 0.64 | 0.24 |
| iYGL058W   | 0.71 | 0.25 | 0.69 | 0.23 | 0.75 | 0.27 |
| iYGL059W   | #N/A | #N/A | 1.90 | 0.88 | 2.11 | 0.88 |
| iYGL060W   | #N/A | #N/A | 2.09 | 0.86 | 1.67 | 0.75 |
| iYGL061C   | 2.14 | 0.88 | 1.94 | 0.86 | 2.01 | 0.82 |
| iYGL062W   | #N/A | #N/A | #N/A | #N/A | #N/A | #N/A |
| iYGL064C   | 1.80 | 0.80 | 2.26 | 0.90 | 1.99 | 0.88 |
| iYGL065C   | 1.56 | 0.69 | 1.27 | 0.60 | 1.48 | 0.67 |
| iYGL066W   | #N/A | #N/A | #N/A | #N/A | #N/A | #N/A |
| iYGL067W   | 2.00 | 0.85 | 1.99 | 0.85 | 1.59 | 0.76 |

|            |      |      |      |      |      |      |
|------------|------|------|------|------|------|------|
| iYGL068W   | 1.18 | 0.54 | 1.16 | 0.54 | 1.29 | 0.59 |
| iYGL070C   | 2.93 | 0.98 | 2.42 | 0.93 | 2.21 | 0.91 |
| iYGL071W   | 0.79 | 0.32 | 0.57 | 0.17 | 0.78 | 0.33 |
| iYGL072C   | 0.51 | 0.16 | 0.85 | 0.31 | 0.48 | 0.12 |
| iYGL075C   | 1.14 | 0.52 | 1.75 | 0.84 | 1.22 | 0.59 |
| iYGL076C   | 0.70 | 0.27 | 1.03 | 0.42 | 0.66 | 0.24 |
| iYGL077C   | 0.53 | 0.17 | 0.78 | 0.24 | 0.56 | 0.19 |
| iYGL078C   | 0.68 | 0.26 | 0.84 | 0.30 | 0.70 | 0.28 |
| iYGL079W   | #N/A | #N/A | #N/A | #N/A | #N/A | #N/A |
| iYGL080W   | 1.02 | 0.45 | 1.72 | 0.79 | 1.74 | 0.81 |
| iYGL081W   | 2.17 | 0.89 | 2.13 | 0.89 | 2.45 | 0.93 |
| iYGL082W   | 1.88 | 0.78 | 1.26 | 0.54 | 1.38 | 0.67 |
| iYGL083W   | 1.68 | 0.75 | 1.29 | 0.62 | 1.83 | 0.84 |
| iYGL084C   | 1.86 | 0.82 | 1.71 | 0.78 | 1.69 | 0.74 |
| iYGL085W   | #N/A | #N/A | #N/A | #N/A | #N/A | #N/A |
| iYGL087C   | 1.81 | 0.76 | 2.52 | 0.94 | 1.65 | 0.75 |
| iYGL088W   | 0.86 | 0.36 | 0.95 | 0.37 | 0.94 | 0.41 |
| iYGL089C   | 1.32 | 0.60 | 1.06 | 0.48 | 1.03 | 0.49 |
| iYGL090W   | 0.61 | 0.22 | 0.44 | 0.09 | 0.58 | 0.21 |
| iYGL092W   | #N/A | #N/A | #N/A | #N/A | #N/A | #N/A |
| iYGL093W   | 1.02 | 0.44 | 1.08 | 0.41 | 1.49 | 0.72 |
| iYGL094C   | 1.92 | 0.82 | 1.48 | 0.73 | 2.03 | 0.89 |
| iYGL095C   | 1.41 | 0.60 | 1.18 | 0.53 | 1.09 | 0.49 |
| iYGL096W-0 | 1.16 | 0.52 | 0.58 | 0.18 | 0.73 | 0.30 |
| iYGL096W-1 | 0.33 | 0.06 | 0.77 | 0.24 | 0.42 | 0.10 |
| iYGL097W-0 | 0.62 | 0.21 | 1.01 | 0.40 | 0.59 | 0.21 |
| iYGL097W-1 | 0.73 | 0.29 | 0.74 | 0.26 | 0.52 | 0.15 |
| iYGL098W   | 0.56 | 0.19 | 0.56 | 0.17 | 0.51 | 0.16 |
| iYGL099W   | 0.90 | 0.36 | 0.95 | 0.36 | 0.77 | 0.32 |
| iYGL100W   | 1.84 | 0.80 | 1.43 | 0.67 | 1.57 | 0.73 |
| iYGL101W   | 1.24 | 0.56 | 1.44 | 0.63 | 1.41 | 0.61 |
| iYGL102C   | 0.36 | 0.07 | #N/A | #N/A | 0.50 | 0.13 |
| iYGL104C   | 1.38 | 0.62 | 1.86 | 0.85 | 1.24 | 0.60 |
| iYGL105W   | #N/A | #N/A | #N/A | #N/A | #N/A | #N/A |
| iYGL106W   | 1.10 | 0.48 | #N/A | #N/A | 0.92 | 0.36 |
| iYGL107C   | 2.20 | 0.90 | #N/A | #N/A | #N/A | #N/A |
| iYGL108C   | 1.15 | 0.50 | 1.05 | 0.49 | 1.37 | 0.59 |
| iYGL110C   | #N/A | #N/A | #N/A | #N/A | #N/A | #N/A |
| iYGL111W   | #N/A | #N/A | 0.51 | 0.13 | 0.43 | 0.11 |
| iYGL112C   | 1.98 | 0.81 | 2.27 | 0.90 | 2.34 | 0.93 |
| iYGL114W   | 1.17 | 0.52 | 1.46 | 0.63 | 1.05 | 0.43 |
| iYGL115W   | 1.90 | 0.83 | 2.12 | 0.88 | 2.03 | 0.87 |
| iYGL116W   | 1.51 | 0.65 | 1.20 | 0.53 | 1.33 | 0.65 |
| iYGL117W   | 1.12 | 0.49 | 1.37 | 0.58 | 0.99 | 0.44 |
| iYGL118C   | #N/A | #N/A | #N/A | #N/A | #N/A | #N/A |
| iYGL119W   | 1.72 | 0.72 | 2.05 | 0.85 | 1.39 | 0.63 |
| iYGL120C   | 1.37 | 0.61 | 2.14 | 0.87 | 1.70 | 0.76 |
| iYGL121C   | 1.20 | 0.54 | 1.38 | 0.68 | 1.39 | 0.60 |
| iYGL122C   | 0.87 | 0.34 | 1.13 | 0.45 | 0.90 | 0.40 |
| iYGL123W   | 0.35 | 0.07 | 0.34 | 0.04 | 0.33 | 0.04 |
| iYGL124C   | 0.65 | 0.23 | 0.84 | 0.28 | 0.79 | 0.32 |

|            |      |      |      |      |      |      |
|------------|------|------|------|------|------|------|
| iYGL125W   | 0.85 | 0.36 | 0.49 | 0.12 | 0.50 | 0.15 |
| iYGL126W   | 0.75 | 0.28 | 0.76 | 0.23 | 0.78 | 0.33 |
| iYGL127C   | 2.00 | 0.86 | 2.06 | 0.88 | 2.38 | 0.90 |
| iYGL129C   | #N/A | #N/A | #N/A | #N/A | #N/A | #N/A |
| iYGL130W   | #N/A | #N/A | #N/A | #N/A | #N/A | #N/A |
| iYGL131C   | 1.51 | 0.68 | #N/A | #N/A | 2.18 | 0.90 |
| iYGL133W   | #N/A | #N/A | #N/A | #N/A | #N/A | #N/A |
| iYGL134W   | 1.18 | 0.53 | 1.15 | 0.46 | 1.13 | 0.52 |
| iYGL135W   | 0.69 | 0.27 | 0.78 | 0.25 | 0.61 | 0.19 |
| iYGL136C   | 0.74 | 0.30 | 0.90 | 0.34 | 0.85 | 0.37 |
| iYGL137W   | #N/A | #N/A | #N/A | #N/A | #N/A | #N/A |
| iYGL138C   | 1.14 | 0.51 | 1.94 | 0.82 | 1.20 | 0.51 |
| iYGL139W   | 0.46 | 0.13 | 0.40 | 0.05 | 0.43 | 0.09 |
| iYGL140C   | 1.51 | 0.69 | 1.20 | 0.55 | 1.69 | 0.76 |
| iYGL141W   | #N/A | #N/A | #N/A | #N/A | #N/A | #N/A |
| iYGL142C   | 1.75 | 0.78 | #N/A | #N/A | #N/A | #N/A |
| iYGL143C   | 1.43 | 0.62 | 1.38 | 0.58 | 1.39 | 0.60 |
| iYGL144C   | 1.46 | 0.65 | 1.26 | 0.54 | 1.71 | 0.74 |
| iYGL145W   | #N/A | #N/A | #N/A | #N/A | #N/A | #N/A |
| iYGL146C   | 2.27 | 0.91 | 2.90 | 0.97 | 2.19 | 0.90 |
| iYGL147C   | #N/A | #N/A | #N/A | #N/A | 0.37 | 0.07 |
| iYGL148W   | #N/A | #N/A | #N/A | #N/A | #N/A | #N/A |
| iYGL151W   | #N/A | #N/A | #N/A | #N/A | #N/A | #N/A |
| iYGL152C   | 1.46 | 0.66 | 1.78 | 0.85 | 2.88 | 0.98 |
| iYGL156W   | 2.30 | 0.91 | 1.84 | 0.79 | 1.97 | 0.87 |
| iYGL157W   | 1.63 | 0.69 | 1.28 | 0.55 | 1.39 | 0.60 |
| iYGL158W   | 1.61 | 0.73 | 1.25 | 0.51 | 1.49 | 0.70 |
| iYGL159W   | 0.78 | 0.32 | 0.49 | 0.11 | 1.03 | 0.43 |
| iYGL160W   | 1.25 | 0.56 | 1.26 | 0.52 | 1.44 | 0.62 |
| iYGL161C   | 2.95 | 0.96 | 1.63 | 0.75 | 2.49 | 0.95 |
| iYGL162W   | #N/A | #N/A | #N/A | #N/A | #N/A | #N/A |
| iYGL163C-0 | 1.65 | 0.73 | 1.29 | 0.61 | 1.66 | 0.71 |
| iYGL163C-1 | 0.72 | 0.27 | 1.07 | 0.42 | 0.63 | 0.24 |
| iYGL164C   | 1.50 | 0.68 | 0.91 | 0.35 | 1.62 | 0.69 |
| iYGL167C   | 1.61 | 0.69 | 1.49 | 0.64 | 1.45 | 0.70 |
| iYGL169W   | #N/A | #N/A | #N/A | #N/A | #N/A | #N/A |
| iYGL170C   | 1.00 | 0.44 | 1.11 | 0.43 | 0.84 | 0.36 |
| iYGL171W   | #N/A | #N/A | #N/A | #N/A | #N/A | #N/A |
| iYGL172W   | 1.24 | 0.56 | 1.22 | 0.59 | 1.17 | 0.53 |
| iYGL174W   | #N/A | #N/A | #N/A | #N/A | #N/A | #N/A |
| iYGL175C   | 2.66 | 0.96 | 2.28 | 0.90 | 2.34 | 0.94 |
| iYGL177W-0 | 0.55 | 0.17 | 0.53 | 0.13 | 0.55 | 0.16 |
| iYGL177W-1 | 0.40 | 0.10 | 0.34 | 0.04 | 0.40 | 0.08 |
| iYGL180W   | 0.82 | 0.34 | 0.98 | 0.36 | 0.76 | 0.30 |
| iYGL181W   | 2.64 | 0.95 | 1.92 | 0.82 | 2.61 | 0.94 |
| iYGL182C   | 2.47 | 0.93 | 1.84 | 0.80 | 2.25 | 0.91 |
| iYGL185C   | 1.07 | 0.44 | 1.24 | 0.53 | 1.24 | 0.52 |
| iYGL186C   | 1.66 | 0.73 | 1.87 | 0.82 | 1.43 | 0.65 |
| iYGL187C   | 0.52 | 0.15 | 0.83 | 0.30 | 0.58 | 0.18 |
| iYGL188C   | #N/A | #N/A | #N/A | #N/A | #N/A | #N/A |
| iYGL189C   | 0.15 | 0.01 | 0.26 | 0.01 | 0.27 | 0.02 |



|            |      |      |      |      |      |      |
|------------|------|------|------|------|------|------|
| iYGL190C   | 0.47 | 0.13 | 0.75 | 0.26 | 0.62 | 0.20 |
| iYGL192W   | 1.16 | 0.49 | 0.97 | 0.44 | 1.01 | 0.45 |
| iYGL194C   | 1.73 | 0.75 | 1.46 | 0.72 | 1.48 | 0.67 |
| iYGL195W   | 1.08 | 0.47 | 0.99 | 0.37 | 1.03 | 0.46 |
| iYGL196W   | 1.91 | 0.79 | 2.10 | 0.87 | 2.00 | 0.82 |
| iYGL197W   | 0.73 | 0.29 | 0.79 | 0.32 | 0.82 | 0.36 |
| iYGL198W   | 1.32 | 0.57 | 1.08 | 0.45 | 1.30 | 0.55 |
| iYGL200C   | 1.62 | 0.73 | 1.75 | 0.84 | 1.83 | 0.84 |
| iYGL201C   | 1.56 | 0.68 | 1.96 | 0.89 | 1.43 | 0.70 |
| iYGL202W   | 0.33 | 0.06 | 0.28 | 0.02 | 0.35 | 0.06 |
| iYGL203C   | 1.56 | 0.70 | 1.68 | 0.74 | 1.81 | 0.80 |
| iYGL204C   | 0.71 | 0.28 | 0.82 | 0.30 | 0.67 | 0.25 |
| iYGL206C   | 2.06 | 0.87 | 1.68 | 0.81 | 2.30 | 0.89 |
| iYGL207W   | 0.30 | 0.05 | 0.23 | 0.01 | 0.33 | 0.05 |
| iYGL209W   | 1.40 | 0.60 | 1.07 | 0.45 | 1.57 | 0.69 |
| iYGL210W   | 0.35 | 0.07 | 0.56 | 0.14 | 0.40 | 0.07 |
| iYGL213C   | #N/A | #N/A | #N/A | #N/A | #N/A | #N/A |
| iYGL216W   | 0.82 | 0.33 | 0.91 | 0.32 | 0.78 | 0.29 |
| iYGL218W   | 1.80 | 0.80 | 2.01 | 0.85 | 2.01 | 0.82 |
| iYGL220W   | 1.55 | 0.68 | 1.23 | 0.50 | 1.48 | 0.72 |
| iYGL221C   | #N/A | #N/A | #N/A | #N/A | #N/A | #N/A |
| iYGL222C   | 2.23 | 0.90 | 2.02 | 0.86 | 1.81 | 0.77 |
| iYGL223C   | 0.89 | 0.36 | 1.01 | 0.41 | 0.91 | 0.42 |
| iYGL224C   | 1.44 | 0.66 | 1.52 | 0.65 | 2.52 | 0.93 |
| iYGL225W   | #N/A | #N/A | #N/A | #N/A | #N/A | #N/A |
| iYGL226C-A | #N/A | #N/A | #N/A | #N/A | #N/A | #N/A |
| iYGL226W   | #N/A | #N/A | #N/A | #N/A | #N/A | #N/A |
| iYGL227W   | #N/A | #N/A | #N/A | #N/A | #N/A | #N/A |
| iYGL228W   | 1.61 | 0.72 | 1.65 | 0.71 | 1.55 | 0.70 |
| iYGL229C   | 2.54 | 0.93 | 2.06 | 0.91 | 2.18 | 0.89 |
| iYGL230C   | #N/A | #N/A | #N/A | #N/A | #N/A | #N/A |
| iYGL231C   | #N/A | #N/A | #N/A | #N/A | #N/A | #N/A |
| iYGL233W   | #N/A | #N/A | #N/A | #N/A | #N/A | #N/A |
| iYGL234W   | #N/A | #N/A | #N/A | #N/A | 1.39 | 0.60 |
| iYGL235W   | 1.33 | 0.59 | 2.05 | 0.85 | 1.49 | 0.68 |
| iYGL237C   | 2.13 | 0.89 | #N/A | #N/A | 2.52 | 0.95 |
| iYGL238W   | #N/A | #N/A | #N/A | #N/A | #N/A | #N/A |
| iYGL240W   | #N/A | #N/A | #N/A | #N/A | #N/A | #N/A |
| iYGL242C   | #N/A | #N/A | #N/A | #N/A | 1.49 | 0.64 |
| iYGL243W   | #N/A | #N/A | #N/A | #N/A | #N/A | #N/A |
| iYGL244W   | #N/A | #N/A | #N/A | #N/A | #N/A | #N/A |
| iYGL245W   | 1.06 | 0.45 | 0.92 | 0.40 | 1.34 | 0.65 |
| iYGL246C   | #N/A | #N/A | #N/A | #N/A | #N/A | #N/A |
| iYGL247W   | #N/A | #N/A | #N/A | #N/A | #N/A | #N/A |
| iYGL248W   | 1.83 | 0.80 | #N/A | #N/A | 2.06 | 0.87 |
| iYGL249W   | 1.54 | 0.70 | 1.50 | 0.70 | 1.88 | 0.85 |
| iYGL250W   | 1.60 | 0.72 | 1.30 | 0.54 | 1.11 | 0.53 |
| iYGL251C   | 1.42 | 0.65 | 1.21 | 0.52 | 1.16 | 0.50 |
| iYGL252C   | 2.68 | 0.96 | 1.69 | 0.74 | 2.48 | 0.95 |
| iYGL253W   | #N/A | #N/A | 0.52 | 0.14 | 0.40 | 0.09 |
| iYGL254W   | 0.31 | 0.05 | 0.40 | 0.05 | 0.47 | 0.13 |



|               |      |      |      |      |      |      |
|---------------|------|------|------|------|------|------|
| iYGL255W      | 1.01 | 0.44 | 2.97 | 0.99 | 1.87 | 0.83 |
| iYGL256W-0    | 1.86 | 0.82 | 2.09 | 0.92 | 1.53 | 0.74 |
| iYGL256W-1    | 1.31 | 0.58 | 1.88 | 0.83 | 1.50 | 0.68 |
| iYGL256W-2    | 1.49 | 0.66 | 1.09 | 0.51 | 1.43 | 0.69 |
| iYGL256W-3    | 0.75 | 0.28 | 1.07 | 0.47 | #N/A | #N/A |
| iYGL257C      | 1.33 | 0.60 | 1.05 | 0.47 | 1.71 | 0.73 |
| iYGL258W      | 1.68 | 0.71 | 1.48 | 0.73 | 0.83 | 0.36 |
| iYGL259W-0    | 1.56 | 0.71 | 1.21 | 0.58 | 1.28 | 0.62 |
| iYGL259W-1    | 1.83 | 0.79 | 1.63 | 0.70 | 1.83 | 0.81 |
| iYGL260W      | 1.87 | 0.81 | 1.62 | 0.79 | 1.43 | 0.70 |
| iYGL261C      | 0.81 | 0.34 | #N/A | #N/A | 0.78 | 0.30 |
| iYGL262W      | 0.80 | 0.31 | 0.74 | 0.24 | 0.64 | 0.25 |
| iYGL263W      | 0.86 | 0.36 | 0.74 | 0.26 | 0.41 | 0.09 |
| iYGLWdelta10  | 1.94 | 0.83 | 1.31 | 0.61 | 1.62 | 0.72 |
| iYGLWdelta3   | 0.58 | 0.20 | #N/A | #N/A | 0.67 | 0.27 |
| iYGLWdelta4   | #N/A | #N/A | #N/A | #N/A | #N/A | #N/A |
| iYGLWdelta6   | #N/A | #N/A | #N/A | #N/A | #N/A | #N/A |
| iYGLWdelta7   | 2.16 | 0.89 | 2.18 | 0.89 | 1.67 | 0.76 |
| iYGLWomega1-0 | 0.27 | 0.03 | 0.38 | 0.06 | #N/A | #N/A |
| iYGLWtau2     | #N/A | #N/A | #N/A | #N/A | #N/A | #N/A |
| iYGR001C      | 1.17 | 0.50 | 1.21 | 0.58 | 1.10 | 0.46 |
| iYGR002C      | 2.78 | 0.97 | #N/A | #N/A | #N/A | #N/A |
| iYGR003W      | 1.21 | 0.52 | 1.45 | 0.63 | 1.22 | 0.60 |
| iYGR004W      | 0.53 | 0.17 | 0.54 | 0.15 | 0.36 | 0.06 |
| iYGR005C      | 1.88 | 0.83 | 1.73 | 0.75 | 1.74 | 0.74 |
| iYGR006W      | #N/A | #N/A | 1.62 | 0.79 | 1.69 | 0.72 |
| iYGR007W      | #N/A | #N/A | #N/A | #N/A | #N/A | #N/A |
| iYGR008C      | 1.23 | 0.54 | 0.94 | 0.38 | 1.06 | 0.43 |
| iYGR009C      | 2.09 | 0.84 | 1.50 | 0.74 | 1.86 | 0.82 |
| iYGR011W      | 2.35 | 0.90 | 1.72 | 0.74 | 2.00 | 0.88 |
| iYGR012W      | 1.84 | 0.80 | 1.59 | 0.69 | 1.71 | 0.79 |
| iYGR013W      | 0.33 | 0.06 | 0.52 | 0.13 | 0.33 | 0.05 |
| iYGR014W      | 0.57 | 0.19 | 0.56 | 0.16 | 0.76 | 0.29 |
| iYGR015C      | 1.86 | 0.77 | 1.25 | 0.58 | 1.98 | 0.86 |
| iYGR016W      | 1.17 | 0.50 | 1.55 | 0.66 | 1.15 | 0.53 |
| iYGR018C      | 1.18 | 0.53 | 1.19 | 0.52 | 0.98 | 0.40 |
| iYGR019W      | 1.46 | 0.66 | 1.17 | 0.47 | 0.92 | 0.40 |
| iYGR020C      | 1.54 | 0.70 | 1.48 | 0.65 | 1.27 | 0.59 |
| iYGR021W      | 2.01 | 0.82 | 1.58 | 0.69 | 1.66 | 0.75 |
| iYGR023W      | 0.95 | 0.41 | 1.29 | 0.59 | 0.77 | 0.30 |
| iYGR026W      | 0.45 | 0.12 | 0.53 | 0.11 | 0.63 | 0.24 |
| iYGR027C      | 0.26 | 0.03 | 0.40 | 0.04 | 0.43 | 0.11 |
| iYGR028W      | 2.05 | 0.83 | 1.69 | 0.82 | 2.06 | 0.87 |
| iYGR029W      | 0.71 | 0.28 | 1.15 | 0.55 | 0.83 | 0.37 |
| iYGR030C      | 0.81 | 0.31 | #N/A | #N/A | 0.91 | 0.35 |
| iYGR031W      | 0.85 | 0.35 | 1.09 | 0.51 | #N/A | #N/A |
| iYGR032W      | 0.38 | 0.08 | 0.25 | 0.01 | 0.38 | 0.07 |
| iYGR033C      | 0.28 | 0.04 | 0.27 | 0.02 | 0.16 | 0.00 |
| iYGR034W      | 0.63 | 0.24 | 0.63 | 0.19 | 0.56 | 0.16 |
| iYGR035C      | 0.24 | 0.02 | 0.53 | 0.14 | 0.32 | 0.04 |
| iYGR036C      | 1.14 | 0.52 | 1.59 | 0.72 | 1.13 | 0.47 |

|            |      |      |      |      |      |      |
|------------|------|------|------|------|------|------|
| iYGR037C   | 1.08 | 0.47 | 1.22 | 0.52 | 0.72 | 0.29 |
| iYGR038W   | 0.67 | 0.26 | #N/A | #N/A | 0.68 | 0.24 |
| iYGR039W   | #N/A | #N/A | #N/A | #N/A | #N/A | #N/A |
| iYGR040W   | 0.45 | 0.13 | 0.58 | 0.13 | 0.60 | 0.21 |
| iYGR041W   | 2.42 | 0.94 | 2.17 | 0.93 | 2.49 | 0.93 |
| iYGR043C-1 | 0.92 | 0.39 | 0.96 | 0.39 | 0.97 | 0.45 |
| iYGR045C   | 1.50 | 0.67 | 1.43 | 0.61 | 1.36 | 0.62 |
| iYGR046W   | #N/A | #N/A | #N/A | #N/A | #N/A | #N/A |
| iYGR047C   | 1.07 | 0.47 | 1.20 | 0.51 | 1.14 | 0.47 |
| iYGR048W   | 1.27 | 0.54 | 1.22 | 0.53 | 1.27 | 0.59 |
| iYGR049W   | 1.19 | 0.54 | #N/A | #N/A | 0.79 | 0.33 |
| iYGR050C   | 0.52 | 0.16 | 0.47 | 0.09 | 0.37 | 0.07 |
| iYGR051C   | 1.43 | 0.61 | 1.42 | 0.62 | #N/A | #N/A |
| iYGR052W   | #N/A | #N/A | #N/A | #N/A | #N/A | #N/A |
| iYGR053C   | 1.65 | 0.74 | 1.47 | 0.65 | 1.55 | 0.69 |
| iYGR054W   | 0.20 | 0.01 | 0.31 | 0.03 | 0.22 | 0.02 |
| iYGR055W   | 1.00 | 0.45 | 1.62 | 0.71 | 1.14 | 0.56 |
| iYGR056W   | 0.34 | 0.06 | 0.40 | 0.06 | 0.36 | 0.06 |
| iYGR057C   | 1.74 | 0.77 | 1.78 | 0.83 | 1.91 | 0.83 |
| iYGR058W   | 1.18 | 0.52 | 1.01 | 0.38 | 1.41 | 0.64 |
| iYGR059W   | 0.27 | 0.03 | 0.73 | 0.22 | 0.35 | 0.06 |
| iYGR060W   | #N/A | #N/A | #N/A | #N/A | #N/A | #N/A |
| iYGR061C   | 0.43 | 0.10 | #N/A | #N/A | #N/A | #N/A |
| iYGR062C   | 1.65 | 0.70 | 1.71 | 0.75 | 1.51 | 0.73 |
| iYGR064W   | #N/A | #N/A | #N/A | #N/A | #N/A | #N/A |
| iYGR065C   | 2.24 | 0.91 | 2.00 | 0.84 | 2.12 | 0.90 |
| iYGR066C   | 2.96 | 0.98 | 1.84 | 0.79 | 2.49 | 0.95 |
| iYGR067C   | 0.73 | 0.29 | 0.64 | 0.22 | 0.56 | 0.17 |
| iYGR069W   | 0.96 | 0.41 | 1.13 | 0.50 | 1.07 | 0.49 |
| iYGR070W   | #N/A | #N/A | #N/A | #N/A | #N/A | #N/A |
| iYGR071C   | 2.14 | 0.85 | 1.59 | 0.70 | 1.88 | 0.83 |
| iYGR072W   | #N/A | #N/A | #N/A | #N/A | #N/A | #N/A |
| iYGR075C   | 1.78 | 0.78 | 1.82 | 0.78 | 1.82 | 0.77 |
| iYGR076C   | #N/A | #N/A | #N/A | #N/A | #N/A | #N/A |
| iYGR077C   | 1.66 | 0.73 | 1.45 | 0.70 | 1.27 | 0.58 |
| iYGR078C   | 0.52 | 0.15 | 0.88 | 0.38 | 0.49 | 0.13 |
| iYGR079W   | #N/A | #N/A | #N/A | #N/A | 1.82 | 0.78 |
| iYGR080W   | 0.50 | 0.15 | #N/A | #N/A | 0.48 | 0.12 |
| iYGR081C   | 1.10 | 0.48 | 1.26 | 0.54 | #N/A | #N/A |
| iYGR082W   | #N/A | #N/A | #N/A | #N/A | #N/A | #N/A |
| iYGR083C   | 1.30 | 0.58 | 1.41 | 0.62 | 1.34 | 0.61 |
| iYGR085C   | 0.25 | 0.03 | 0.35 | 0.04 | 0.31 | 0.04 |
| iYGR086C   | 0.35 | 0.07 | 0.46 | 0.10 | 0.65 | 0.24 |
| iYGR087C-0 | 2.90 | 0.96 | 3.30 | 0.99 | 2.26 | 0.92 |
| iYGR087C-1 | 2.13 | 0.88 | 1.42 | 0.69 | 1.82 | 0.84 |
| iYGR088W   | 2.36 | 0.92 | 1.74 | 0.81 | 1.82 | 0.83 |
| iYGR089W-0 | 1.18 | 0.50 | 0.81 | 0.29 | 0.89 | 0.40 |
| iYGR089W-1 | 0.61 | 0.22 | 0.48 | 0.12 | 0.76 | 0.30 |
| iYGR090W   | 1.58 | 0.72 | 0.94 | 0.41 | 1.38 | 0.65 |
| iYGR091W   | 0.62 | 0.22 | 0.98 | 0.36 | 0.55 | 0.19 |
| iYGR092W   | 0.94 | 0.40 | 0.94 | 0.37 | 0.91 | 0.42 |

|            |      |      |      |      |      |      |
|------------|------|------|------|------|------|------|
| iYGR094W   | #N/A | #N/A | #N/A | #N/A | #N/A | #N/A |
| iYGR095C   | 1.80 | 0.79 | 1.70 | 0.82 | 1.18 | 0.58 |
| iYGR096W   | 0.74 | 0.28 | 1.11 | 0.52 | 0.70 | 0.24 |
| iYGR097W   | 0.54 | 0.17 | 0.73 | 0.25 | 0.42 | 0.10 |
| iYGR098C   | 2.33 | 0.92 | 1.68 | 0.81 | 2.18 | 0.88 |
| iYGR099W   | 1.79 | 0.79 | 1.28 | 0.58 | 1.43 | 0.69 |
| iYGR100W   | #N/A | #N/A | #N/A | #N/A | 1.38 | 0.63 |
| iYGR101W   | 0.77 | 0.32 | 0.76 | 0.23 | 0.86 | 0.38 |
| iYGR102C   | 1.68 | 0.71 | 1.12 | 0.53 | 1.27 | 0.58 |
| iYGR103W   | #N/A | #N/A | #N/A | #N/A | #N/A | #N/A |
| iYGR104C   | 2.19 | 0.86 | 1.82 | 0.86 | 2.27 | 0.88 |
| iYGR105W   | #N/A | #N/A | #N/A | #N/A | #N/A | #N/A |
| iYGR106C   | 1.18 | 0.50 | 1.32 | 0.57 | 0.86 | 0.37 |
| iYGR107W   | 0.30 | 0.04 | 0.50 | 0.12 | 0.38 | 0.08 |
| iYGR108W   | 0.47 | 0.13 | #N/A | #N/A | 0.66 | 0.22 |
| iYGR109C   | 1.29 | 0.57 | 1.40 | 0.65 | 1.02 | 0.46 |
| iYGR110W   | 1.31 | 0.59 | 1.29 | 0.55 | 1.35 | 0.65 |
| iYGR111W   | 1.85 | 0.77 | 1.56 | 0.76 | 1.75 | 0.81 |
| iYGR112W   | 2.07 | 0.84 | 1.60 | 0.69 | 2.77 | 0.95 |
| iYGR113W   | 1.10 | 0.50 | 0.85 | 0.36 | 1.12 | 0.55 |
| iYGR116W   | #N/A | #N/A | #N/A | #N/A | #N/A | #N/A |
| iYGR117C   | 0.22 | 0.02 | 0.27 | 0.02 | 0.45 | 0.11 |
| iYGR118W   | 0.38 | 0.08 | 0.36 | 0.05 | 0.32 | 0.04 |
| iYGR119C   | 1.45 | 0.62 | 2.11 | 0.86 | 1.65 | 0.75 |
| iYGR120C   | 0.86 | 0.34 | #N/A | #N/A | 0.72 | 0.26 |
| iYGR121C   | 1.42 | 0.65 | 1.45 | 0.64 | 1.25 | 0.54 |
| iYGR122C-A | 1.24 | 0.53 | 1.35 | 0.63 | 1.35 | 0.60 |
| iYGR122W   | 0.55 | 0.18 | 0.50 | 0.12 | 0.58 | 0.20 |
| iYGR123C   | 1.23 | 0.52 | 1.37 | 0.61 | 1.14 | 0.55 |
| iYGR124W   | 1.26 | 0.56 | 1.73 | 0.75 | 1.39 | 0.60 |
| iYGR125W   | 1.31 | 0.60 | 1.97 | 0.84 | 1.46 | 0.63 |
| iYGR126W   | 1.22 | 0.52 | #N/A | #N/A | 1.22 | 0.51 |
| iYGR127W   | 0.27 | 0.03 | 0.39 | 0.06 | 0.47 | 0.13 |
| iYGR128C   | 1.73 | 0.76 | 2.10 | 0.87 | 1.88 | 0.79 |
| iYGR129W   | 0.75 | 0.29 | 0.53 | 0.14 | 0.67 | 0.27 |
| iYGR130C   | 2.50 | 0.94 | 1.98 | 0.83 | 2.54 | 0.95 |
| iYGR131W   | 1.04 | 0.46 | 0.93 | 0.36 | 0.81 | 0.35 |
| iYGR132C   | 2.35 | 0.90 | 1.64 | 0.70 | 1.85 | 0.79 |
| iYGR133W   | 2.21 | 0.88 | 2.39 | 0.92 | 1.98 | 0.86 |
| iYGR134W   | 1.68 | 0.75 | 1.64 | 0.80 | 1.54 | 0.73 |
| iYGR135W   | 0.92 | 0.37 | 1.06 | 0.43 | 0.80 | 0.34 |
| iYGR137W   | 0.77 | 0.32 | 0.91 | 0.36 | 0.85 | 0.39 |
| iYGR138C   | #N/A | #N/A | #N/A | #N/A | #N/A | #N/A |
| iYGR139W   | 0.96 | 0.41 | 1.08 | 0.45 | 0.90 | 0.35 |
| iYGR140W   | 2.20 | 0.87 | 1.46 | 0.63 | 1.98 | 0.83 |
| iYGR141W   | 0.63 | 0.24 | 1.08 | 0.41 | 0.67 | 0.24 |
| iYGR142W   | 0.46 | 0.12 | 0.88 | 0.33 | 0.83 | 0.33 |
| iYGR144W   | 3.51 | 0.99 | 3.35 | 0.99 | 4.30 | 1.00 |
| iYGR145W   | 0.79 | 0.33 | 0.55 | 0.15 | 0.98 | 0.40 |
| iYGR146C   | 0.41 | 0.10 | 0.62 | 0.18 | 0.46 | 0.12 |
| iYGR147C   | 1.57 | 0.67 | 1.24 | 0.53 | 1.58 | 0.72 |

|            |      |      |      |      |      |      |
|------------|------|------|------|------|------|------|
| iYGR149W   | #N/A | #N/A | 0.50 | 0.13 | #N/A | #N/A |
| iYGR150C   | 1.32 | 0.56 | 1.48 | 0.71 | 1.86 | 0.78 |
| iYGR152C   | 2.76 | 0.95 | 2.50 | 0.94 | 2.84 | 0.97 |
| iYGR154C   | 0.70 | 0.28 | 0.89 | 0.38 | 0.55 | 0.17 |
| iYGR155W   | 1.27 | 0.58 | 1.56 | 0.76 | 1.08 | 0.49 |
| iYGR156W   | 0.27 | 0.03 | 0.37 | 0.05 | 0.39 | 0.08 |
| iYGR157W   | #N/A | #N/A | #N/A | #N/A | #N/A | #N/A |
| iYGR158C   | 1.76 | 0.78 | 1.82 | 0.78 | 2.00 | 0.86 |
| iYGR160W   | 1.26 | 0.55 | 1.43 | 0.61 | 0.91 | 0.40 |
| iYGR161C-0 | 0.76 | 0.30 | 0.71 | 0.25 | 0.64 | 0.22 |
| iYGR161C-1 | 1.32 | 0.56 | 1.04 | 0.43 | 1.03 | 0.44 |
| iYGR162W   | 0.87 | 0.37 | 1.01 | 0.41 | 1.03 | 0.44 |
| iYGR165W   | 1.73 | 0.76 | 1.23 | 0.56 | 1.16 | 0.53 |
| iYGR166W   | 2.35 | 0.92 | 1.29 | 0.59 | 2.08 | 0.90 |
| iYGR167W   | 0.58 | 0.20 | #N/A | #N/A | 0.74 | 0.31 |
| iYGR168C   | #N/A | #N/A | #N/A | #N/A | #N/A | #N/A |
| iYGR169C   | 0.67 | 0.26 | 0.85 | 0.28 | 0.67 | 0.23 |
| iYGR170W   | 0.90 | 0.36 | 0.77 | 0.23 | 0.86 | 0.34 |
| iYGR171C   | 1.48 | 0.66 | 1.59 | 0.70 | 1.36 | 0.62 |
| iYGR172C   | 1.32 | 0.57 | #N/A | #N/A | 1.60 | 0.73 |
| iYGR173W   | 0.51 | 0.15 | 1.22 | 0.59 | 0.60 | 0.19 |
| iYGR174C   | 1.30 | 0.58 | 1.89 | 0.81 | 1.72 | 0.73 |
| iYGR175C   | #N/A | #N/A | 0.86 | 0.32 | 0.58 | 0.20 |
| iYGR177C   | 0.71 | 0.28 | 1.28 | 0.62 | 0.74 | 0.27 |
| iYGR178C   | 1.32 | 0.60 | 0.91 | 0.39 | 1.10 | 0.51 |
| iYGR179C   | 1.60 | 0.71 | 1.19 | 0.50 | 1.65 | 0.76 |
| iYGR180C   | 0.49 | 0.14 | 0.48 | 0.11 | 0.37 | 0.06 |
| iYGR182C   | 1.05 | 0.44 | 0.58 | 0.17 | #N/A | #N/A |
| iYGR183C   | 1.27 | 0.57 | 1.11 | 0.46 | 1.07 | 0.51 |
| iYGR184C   | 1.03 | 0.45 | 0.85 | 0.28 | 1.21 | 0.54 |
| iYGR185C   | 1.95 | 0.85 | 2.58 | 0.95 | 2.52 | 0.93 |
| iYGR186W   | #N/A | #N/A | #N/A | #N/A | 0.40 | 0.09 |
| iYGR187C   | 1.76 | 0.78 | 1.51 | 0.67 | 2.11 | 0.91 |
| iYGR188C   | 2.06 | 0.83 | 1.99 | 0.86 | #N/A | #N/A |
| iYGR189C   | 0.88 | 0.35 | 1.16 | 0.46 | 0.94 | 0.41 |
| iYGR191W   | 0.31 | 0.05 | #N/A | #N/A | 0.45 | 0.12 |
| iYGR192C   | 0.22 | 0.02 | 0.17 | 0.00 | 0.25 | 0.02 |
| iYGR193C   | 1.75 | 0.78 | 1.68 | 0.72 | 1.60 | 0.76 |
| iYGR194C   | 1.20 | 0.54 | 1.51 | 0.74 | 1.25 | 0.58 |
| iYGR195W   | #N/A | #N/A | #N/A | #N/A | #N/A | #N/A |
| iYGR196C   | 1.80 | 0.78 | 1.65 | 0.77 | 1.86 | 0.85 |
| iYGR197C   | 1.11 | 0.50 | 1.96 | 0.82 | 1.32 | 0.60 |
| iYGR198W   | 1.20 | 0.53 | #N/A | #N/A | 1.26 | 0.58 |
| iYGR199W   | #N/A | #N/A | #N/A | #N/A | #N/A | #N/A |
| iYGR200C   | 1.73 | 0.73 | 1.22 | 0.52 | 1.41 | 0.63 |
| iYGR201C   | 1.00 | 0.41 | 0.82 | 0.30 | 0.79 | 0.29 |
| iYGR202C   | 0.46 | 0.13 | 0.45 | 0.09 | 0.32 | 0.04 |
| iYGR204W   | 1.10 | 0.47 | 1.01 | 0.44 | #N/A | #N/A |
| iYGR205W   | 1.23 | 0.54 | 1.10 | 0.46 | 1.25 | 0.57 |
| iYGR206W   | #N/A | #N/A | #N/A | #N/A | #N/A | #N/A |
| iYGR207C   | 1.25 | 0.53 | 1.41 | 0.61 | 1.10 | 0.46 |

|            |      |      |      |      |      |      |
|------------|------|------|------|------|------|------|
| iYGR208W   | #N/A | #N/A | #N/A | #N/A | #N/A | #N/A |
| iYGR209C   | 0.99 | 0.43 | 1.14 | 0.45 | 1.29 | 0.57 |
| iYGR210C   | 1.17 | 0.51 | 1.36 | 0.58 | 1.08 | 0.49 |
| iYGR211W   | 0.82 | 0.35 | 0.89 | 0.31 | 0.71 | 0.26 |
| iYGR212W   | #N/A | #N/A | 0.57 | 0.17 | #N/A | #N/A |
| iYGR213C   | 0.56 | 0.19 | 0.68 | 0.25 | 0.52 | 0.16 |
| iYGR214W   | 1.71 | 0.72 | 2.09 | 0.86 | 1.73 | 0.74 |
| iYGR215W   | #N/A | #N/A | #N/A | #N/A | #N/A | #N/A |
| iYGR216C   | 1.86 | 0.81 | 1.89 | 0.80 | 1.66 | 0.77 |
| iYGR217W   | #N/A | #N/A | #N/A | #N/A | #N/A | #N/A |
| iYGR218W   | #N/A | #N/A | #N/A | #N/A | #N/A | #N/A |
| iYGR220C   | 2.24 | 0.90 | 1.69 | 0.81 | 1.62 | 0.73 |
| iYGR221C   | 1.63 | 0.72 | 1.15 | 0.46 | 0.88 | 0.35 |
| iYGR222W   | #N/A | #N/A | #N/A | #N/A | #N/A | #N/A |
| iYGR223C   | 1.51 | 0.67 | 0.99 | 0.43 | 1.60 | 0.68 |
| iYGR224W   | 3.06 | 0.97 | 2.62 | 0.97 | 2.81 | 0.97 |
| iYGR226C   | 2.42 | 0.93 | 2.56 | 0.94 | #N/A | #N/A |
| iYGR227W   | #N/A | #N/A | #N/A | #N/A | 0.57 | 0.20 |
| iYGR229C   | 1.35 | 0.62 | 1.13 | 0.48 | 0.96 | 0.41 |
| iYGR230W   | 1.35 | 0.58 | 0.72 | 0.24 | 0.84 | 0.32 |
| iYGR231C   | 2.89 | 0.97 | 2.12 | 0.92 | 2.60 | 0.96 |
| iYGR233C-0 | 0.42 | 0.11 | 1.41 | 0.60 | 0.51 | 0.14 |
| iYGR234W   | 0.84 | 0.36 | 0.48 | 0.11 | 0.63 | 0.20 |
| iYGR235C   | 3.27 | 0.98 | 1.59 | 0.78 | 2.43 | 0.95 |
| iYGR236C   | 2.37 | 0.93 | 2.05 | 0.85 | 2.50 | 0.95 |
| iYGR237C   | 1.52 | 0.65 | 1.42 | 0.69 | 1.68 | 0.75 |
| iYGR238C   | 1.72 | 0.75 | 1.68 | 0.81 | 1.56 | 0.68 |
| iYGR239C   | 1.25 | 0.55 | 1.14 | 0.48 | 1.28 | 0.62 |
| iYGR243W   | #N/A | #N/A | #N/A | #N/A | #N/A | #N/A |
| iYGR244C   | 0.75 | 0.28 | 0.75 | 0.29 | #N/A | #N/A |
| iYGR245C   | 1.66 | 0.74 | 1.60 | 0.70 | 1.95 | 0.86 |
| iYGR246C   | 3.07 | 0.98 | 3.13 | 0.98 | 3.77 | 0.99 |
| iYGR247W   | 1.39 | 0.62 | #N/A | #N/A | 1.35 | 0.59 |
| iYGR248W   | 0.88 | 0.37 | 0.83 | 0.30 | 0.81 | 0.35 |
| iYGR249W-0 | 1.41 | 0.64 | 1.30 | 0.54 | 1.55 | 0.67 |
| iYGR249W-1 | 2.01 | 0.82 | 1.92 | 0.88 | 1.90 | 0.84 |
| iYGR250C-0 | 1.47 | 0.67 | 1.35 | 0.58 | 1.09 | 0.53 |
| iYGR250C-1 | 2.27 | 0.89 | 2.20 | 0.89 | #N/A | #N/A |
| iYGR251W   | 1.87 | 0.79 | 1.62 | 0.70 | 1.81 | 0.83 |
| iYGR252W   | 0.33 | 0.06 | 0.75 | 0.26 | 0.41 | 0.08 |
| iYGR253C-0 | 1.00 | 0.45 | 1.12 | 0.53 | 0.78 | 0.33 |
| iYGR255C   | 1.13 | 0.50 | 1.06 | 0.44 | 0.96 | 0.43 |
| iYGR256W   | 0.98 | 0.44 | 1.18 | 0.54 | 1.05 | 0.43 |
| iYGR257C   | 1.59 | 0.72 | 1.50 | 0.66 | 1.74 | 0.78 |
| iYGR258C-0 | 0.83 | 0.34 | 0.94 | 0.38 | 0.75 | 0.27 |
| iYGR258C-1 | 1.16 | 0.51 | 2.15 | 0.91 | 1.23 | 0.56 |
| iYGR260W   | #N/A | #N/A | #N/A | #N/A | #N/A | #N/A |
| iYGR261C   | #N/A | #N/A | 1.39 | 0.62 | 2.21 | 0.87 |
| iYGR262C   | 3.11 | 0.98 | 2.15 | 0.93 | 2.34 | 0.92 |
| iYGR263C   | 1.06 | 0.44 | 0.88 | 0.38 | 0.97 | 0.43 |
| iYGR265W   | 2.71 | 0.96 | 2.43 | 0.93 | 2.39 | 0.93 |

|              |      |      |      |      |      |      |
|--------------|------|------|------|------|------|------|
| iYGR266W     | #N/A | #N/A | #N/A | #N/A | #N/A | #N/A |
| iYGR267C     | 1.97 | 0.84 | 1.39 | 0.59 | 1.55 | 0.66 |
| iYGR269W     | 1.34 | 0.60 | 1.48 | 0.65 | 1.43 | 0.69 |
| iYGR270W     | 1.31 | 0.59 | 1.20 | 0.58 | 1.29 | 0.55 |
| iYGR271W     | 0.51 | 0.16 | #N/A | #N/A | 0.43 | 0.11 |
| iYGR272C     | 1.67 | 0.74 | 1.76 | 0.76 | 2.13 | 0.85 |
| iYGR273C     | 0.36 | 0.08 | 0.84 | 0.31 | 0.57 | 0.17 |
| iYGR274C     | #N/A | #N/A | #N/A | #N/A | #N/A | #N/A |
| iYGR275W     | #N/A | #N/A | #N/A | #N/A | #N/A | #N/A |
| iYGR276C     | 1.74 | 0.74 | 1.36 | 0.59 | 1.55 | 0.71 |
| iYGR277C     | 2.07 | 0.88 | 2.54 | 0.97 | 2.90 | 0.97 |
| iYGR278W     | #N/A | #N/A | #N/A | #N/A | 0.43 | 0.11 |
| iYGR279C     | 0.21 | 0.02 | 0.41 | 0.07 | 0.29 | 0.03 |
| iYGR280C     | 1.16 | 0.51 | 1.21 | 0.54 | 1.05 | 0.50 |
| iYGR281W     | 0.30 | 0.05 | 0.57 | 0.16 | #N/A | #N/A |
| iYGR282C     | #N/A | #N/A | 0.54 | 0.11 | #N/A | #N/A |
| iYGR283C     | 0.91 | 0.37 | 1.30 | 0.56 | 0.78 | 0.33 |
| iYGR284C     | 1.07 | 0.46 | 1.02 | 0.41 | 0.99 | 0.47 |
| iYGR285C     | 1.31 | 0.60 | 1.38 | 0.60 | 1.57 | 0.75 |
| iYGR286C-0   | 2.62 | 0.95 | 2.28 | 0.92 | 2.62 | 0.96 |
| iYGR286C-1   | 3.12 | 0.98 | 2.98 | 0.97 | 2.95 | 0.98 |
| iYGR287C     | 2.86 | 0.97 | 1.73 | 0.77 | 2.53 | 0.95 |
| iYGR288W-0   | 1.31 | 0.56 | 1.31 | 0.57 | 1.44 | 0.65 |
| iYGR288W-1   | 1.96 | 0.85 | 2.17 | 0.92 | 2.06 | 0.90 |
| iYGR290W     | 3.24 | 0.98 | 2.47 | 0.94 | 3.31 | 0.99 |
| iYGR291C     | #N/A | #N/A | #N/A | #N/A | #N/A | #N/A |
| iYGR292W-0   | 1.44 | 0.62 | 1.14 | 0.48 | 1.11 | 0.51 |
| iYGR292W-1   | 1.41 | 0.63 | 1.06 | 0.43 | 1.33 | 0.57 |
| iYGR294W     | 2.16 | 0.89 | 2.03 | 0.89 | 1.69 | 0.76 |
| iYGRcdelta16 | 1.32 | 0.56 | 1.83 | 0.79 | 1.33 | 0.62 |
| iYGRcdelta18 | #N/A | #N/A | #N/A | #N/A | #N/A | #N/A |
| iYGRcdelta20 | 1.99 | 0.81 | 2.11 | 0.90 | 1.92 | 0.87 |
| iYGRcdelta25 | #N/A | #N/A | 0.94 | 0.39 | 0.82 | 0.35 |
| iYGRcdelta30 | 0.46 | 0.13 | 0.62 | 0.19 | 0.53 | 0.18 |
| iYGRctau3    | 0.63 | 0.23 | #N/A | #N/A | #N/A | #N/A |
| iYGRWdelta14 | #N/A | #N/A | #N/A | #N/A | #N/A | #N/A |
| iYGRWdelta19 | 0.98 | 0.42 | 1.44 | 0.68 | 0.79 | 0.34 |
| iYGRWdelta22 | 0.56 | 0.19 | #N/A | #N/A | 0.46 | 0.13 |
| iYGRWdelta26 | 0.81 | 0.33 | 0.62 | 0.19 | 0.71 | 0.28 |
| iYGRWdelta31 | #N/A | #N/A | #N/A | #N/A | #N/A | #N/A |
| iYGRWdelta32 | 1.53 | 0.68 | 1.82 | 0.78 | #N/A | #N/A |
| iYGRWsigma5  | 1.47 | 0.67 | 1.32 | 0.64 | 1.17 | 0.53 |
| iYHL001W     | 0.35 | 0.06 | 0.64 | 0.18 | 0.37 | 0.07 |
| iYHL002W     | 0.64 | 0.24 | 0.49 | 0.12 | 0.54 | 0.18 |
| iYHL003C     | 1.51 | 0.64 | 1.21 | 0.56 | 1.04 | 0.45 |
| iYHL004W     | #N/A | #N/A | #N/A | #N/A | #N/A | #N/A |
| iYHL007C     | #N/A | #N/A | 1.30 | 0.60 | #N/A | #N/A |
| iYHL008C     | 1.01 | 0.45 | 0.98 | 0.40 | 0.81 | 0.34 |
| iYHL009C     | #N/A | #N/A | #N/A | #N/A | #N/A | #N/A |
| iYHL010C     | 1.75 | 0.78 | 1.36 | 0.59 | 1.81 | 0.77 |
| iYHL011C     | 0.97 | 0.43 | 0.99 | 0.40 | 0.99 | 0.44 |

|             |      |      |      |      |      |      |
|-------------|------|------|------|------|------|------|
| iYHL012W    | #N/A | #N/A | #N/A | #N/A | #N/A | #N/A |
| iYHL013C    | 1.13 | 0.50 | #N/A | #N/A | 1.30 | 0.60 |
| iYHL014C    | #N/A | #N/A | #N/A | #N/A | #N/A | #N/A |
| iYHL015W    | #N/A | #N/A | #N/A | #N/A | #N/A | #N/A |
| iYHL016C    | 1.19 | 0.53 | 1.35 | 0.57 | 0.93 | 0.43 |
| iYHL017W    | #N/A | #N/A | #N/A | #N/A | #N/A | #N/A |
| iYHL019C    | 2.43 | 0.93 | 1.94 | 0.89 | 2.51 | 0.93 |
| iYHL020C    | 1.47 | 0.66 | 1.55 | 0.67 | 1.40 | 0.68 |
| iYHL021C    | 0.97 | 0.43 | 0.91 | 0.32 | 1.01 | 0.48 |
| iYHL022C    | 0.97 | 0.43 | #N/A | #N/A | #N/A | #N/A |
| iYHL023C    | 1.36 | 0.62 | 1.94 | 0.82 | 1.71 | 0.78 |
| iYHL024W    | 1.45 | 0.65 | 1.30 | 0.54 | 1.73 | 0.76 |
| iYHL025W    | 1.02 | 0.44 | 0.86 | 0.36 | 0.92 | 0.43 |
| iYHL026C    | 0.89 | 0.38 | 1.31 | 0.56 | 0.88 | 0.38 |
| iYHL027W    | 0.47 | 0.14 | 0.37 | 0.05 | 0.53 | 0.17 |
| iYHL028W    | 1.02 | 0.44 | 0.64 | 0.22 | 0.86 | 0.36 |
| iYHL029C    | 0.25 | 0.03 | 0.22 | 0.01 | 0.26 | 0.02 |
| iYHL030W    | #N/A | #N/A | #N/A | #N/A | #N/A | #N/A |
| iYHL031C    | 1.70 | 0.73 | 2.01 | 0.86 | 1.74 | 0.80 |
| iYHL032C    | 2.08 | 0.88 | 2.01 | 0.88 | 2.00 | 0.82 |
| iYHL033C    | #N/A | #N/A | #N/A | #N/A | #N/A | #N/A |
| iYHL035C    | 0.94 | 0.41 | 0.87 | 0.29 | 0.86 | 0.39 |
| iYHL036W    | #N/A | #N/A | #N/A | #N/A | #N/A | #N/A |
| iYHL037C    | 1.74 | 0.73 | #N/A | #N/A | 1.89 | 0.79 |
| iYHL038C    | 1.72 | 0.75 | #N/A | #N/A | 2.06 | 0.87 |
| iYHL039W    | #N/A | #N/A | #N/A | #N/A | #N/A | #N/A |
| iYHL040C    | 1.45 | 0.65 | 1.47 | 0.72 | 1.91 | 0.83 |
| iYHL041W    | 1.10 | 0.48 | 1.04 | 0.42 | 0.93 | 0.41 |
| iYHL042W    | 1.41 | 0.64 | 1.17 | 0.52 | 1.25 | 0.57 |
| iYHL043W    | 0.77 | 0.29 | #N/A | #N/A | #N/A | #N/A |
| iYHL044W    | 1.20 | 0.53 | 0.82 | 0.30 | 1.11 | 0.48 |
| iYHL045W    | 2.40 | 0.93 | 2.63 | 0.95 | 2.16 | 0.90 |
| iYHL046C    | 1.00 | 0.45 | 0.99 | 0.45 | 1.05 | 0.47 |
| iYHL047C-0  | 1.56 | 0.71 | 0.99 | 0.41 | 1.48 | 0.72 |
| iYHL047C-1  | 4.28 | 1.00 | 3.64 | 1.00 | 3.98 | 1.00 |
| iYHL048W    | 0.40 | 0.10 | 0.66 | 0.23 | 0.27 | 0.03 |
| iYHL049C-0  | 0.58 | 0.20 | 0.62 | 0.19 | 0.58 | 0.21 |
| iYHL049C-1  | 0.65 | 0.24 | 0.70 | 0.23 | 0.66 | 0.25 |
| iYHLCdelta1 | 0.79 | 0.32 | #N/A | #N/A | 1.13 | 0.47 |
| iYHLComega1 | #N/A | #N/A | #N/A | #N/A | #N/A | #N/A |
| iYHLWdelta2 | #N/A | #N/A | #N/A | #N/A | #N/A | #N/A |
| iYHR001W    | 1.26 | 0.53 | 1.22 | 0.54 | 1.06 | 0.48 |
| iYHR002W    | 0.35 | 0.07 | #N/A | #N/A | #N/A | #N/A |
| iYHR003C    | 0.72 | 0.28 | 1.00 | 0.46 | 0.89 | 0.39 |
| iYHR004C    | 1.05 | 0.43 | 1.57 | 0.68 | 0.82 | 0.31 |
| iYHR005C    | 0.31 | 0.05 | 0.75 | 0.26 | 0.27 | 0.02 |
| iYHR005C-A  | 0.57 | 0.19 | 0.79 | 0.28 | 0.62 | 0.20 |
| iYHR008C    | 0.70 | 0.27 | 0.86 | 0.29 | #N/A | #N/A |
| iYHR011W    | 1.52 | 0.69 | 2.04 | 0.85 | 1.41 | 0.66 |
| iYHR012W    | 0.81 | 0.34 | 1.06 | 0.44 | 0.83 | 0.36 |
| iYHR013C    | 1.35 | 0.60 | 1.44 | 0.71 | 1.40 | 0.60 |



|            |      |      |      |      |      |      |
|------------|------|------|------|------|------|------|
| iYHR015W   | 1.07 | 0.48 | 0.92 | 0.39 | 1.02 | 0.46 |
| iYHR016C   | 2.18 | 0.89 | 2.18 | 0.91 | 1.88 | 0.83 |
| iYHR017W   | 0.51 | 0.16 | 0.44 | 0.09 | 0.50 | 0.13 |
| iYHR018C   | 0.89 | 0.37 | 1.26 | 0.54 | 0.94 | 0.44 |
| iYHR019C   | 1.07 | 0.48 | 1.21 | 0.54 | 1.27 | 0.59 |
| iYHR020W   | 0.30 | 0.05 | #N/A | #N/A | #N/A | #N/A |
| iYHR021C   | 0.25 | 0.03 | 0.21 | 0.00 | 0.20 | 0.01 |
| iYHR023W   | #N/A | #N/A | #N/A | #N/A | #N/A | #N/A |
| iYHR024C   | 1.66 | 0.70 | 1.65 | 0.76 | 1.78 | 0.82 |
| iYHR025W   | 1.78 | 0.78 | 1.71 | 0.82 | 1.94 | 0.85 |
| iYHR026W   | #N/A | #N/A | #N/A | #N/A | #N/A | #N/A |
| iYHR027C   | 1.39 | 0.63 | #N/A | #N/A | 1.44 | 0.62 |
| iYHR028C   | #N/A | #N/A | #N/A | #N/A | 0.90 | 0.35 |
| iYHR029C   | 0.96 | 0.41 | #N/A | #N/A | 0.80 | 0.30 |
| iYHR032W   | 0.22 | 0.02 | 0.40 | 0.05 | #N/A | #N/A |
| iYHR033W   | #N/A | #N/A | #N/A | #N/A | #N/A | #N/A |
| iYHR034C   | #N/A | #N/A | 3.35 | 0.99 | 3.08 | 0.98 |
| iYHR035W   | #N/A | #N/A | #N/A | #N/A | #N/A | #N/A |
| iYHR038W   | #N/A | #N/A | #N/A | #N/A | #N/A | #N/A |
| iYHR039C   | #N/A | #N/A | #N/A | #N/A | #N/A | #N/A |
| iYHR039C-B | 2.35 | 0.93 | 2.30 | 0.93 | 2.14 | 0.89 |
| iYHR040W   | 0.73 | 0.29 | 1.59 | 0.73 | 0.90 | 0.35 |
| iYHR041C   | 2.18 | 0.90 | 1.72 | 0.74 | 2.42 | 0.91 |
| iYHR042W   | 0.87 | 0.37 | 0.80 | 0.29 | 0.98 | 0.43 |
| iYHR043C   | 2.14 | 0.85 | 2.33 | 0.91 | 2.43 | 0.94 |
| iYHR045W   | #N/A | #N/A | #N/A | #N/A | 0.37 | 0.07 |
| iYHR046C   | 1.04 | 0.46 | 1.33 | 0.58 | 1.27 | 0.58 |
| iYHR048W   | 0.84 | 0.36 | 0.84 | 0.35 | 0.59 | 0.21 |
| iYHR049C-A | 0.76 | 0.31 | 0.57 | 0.17 | 0.81 | 0.35 |
| iYHR050W   | 1.23 | 0.54 | 1.06 | 0.50 | 1.01 | 0.42 |
| iYHR053C   | 3.31 | 0.99 | 2.90 | 0.98 | #N/A | #N/A |
| iYHR054C   | 2.75 | 0.96 | 2.72 | 0.96 | 2.51 | 0.93 |
| iYHR055C   | 3.67 | 0.99 | 3.05 | 0.98 | 3.37 | 0.99 |
| iYHR056C   | 2.23 | 0.90 | 2.22 | 0.93 | 2.40 | 0.94 |
| iYHR058C   | #N/A | #N/A | 2.37 | 0.94 | 1.95 | 0.85 |
| iYHR059W   | 1.47 | 0.67 | 2.26 | 0.90 | 1.91 | 0.80 |
| iYHR060W   | 0.80 | 0.31 | 0.75 | 0.26 | 0.79 | 0.34 |
| iYHR061C   | 0.92 | 0.39 | 0.95 | 0.37 | 0.87 | 0.33 |
| iYHR062C   | 1.73 | 0.77 | 2.15 | 0.88 | 1.56 | 0.75 |
| iYHR063C   | 0.78 | 0.32 | 0.77 | 0.24 | 0.71 | 0.29 |
| iYHR064C   | 0.61 | 0.20 | 0.62 | 0.20 | 0.84 | 0.33 |
| iYHR065C   | 1.59 | 0.71 | 2.20 | 0.88 | 1.74 | 0.78 |
| iYHR066W   | 0.85 | 0.35 | 0.75 | 0.28 | 0.91 | 0.39 |
| iYHR067W   | 1.19 | 0.52 | 1.19 | 0.56 | 1.09 | 0.46 |
| iYHR068W   | #N/A | #N/A | #N/A | #N/A | #N/A | #N/A |
| iYHR069C   | 1.27 | 0.58 | #N/A | #N/A | 2.62 | 0.94 |
| iYHR070W   | 0.28 | 0.04 | 0.50 | 0.09 | 0.30 | 0.03 |
| iYHR071W   | #N/A | #N/A | #N/A | #N/A | #N/A | #N/A |
| iYHR073W   | 1.75 | 0.78 | 1.81 | 0.78 | 1.49 | 0.68 |
| iYHR074W   | #N/A | #N/A | #N/A | #N/A | #N/A | #N/A |
| iYHR076W   | 0.49 | 0.15 | 0.51 | 0.13 | 0.43 | 0.11 |



|            |      |      |      |      |      |      |
|------------|------|------|------|------|------|------|
| iYHR077C   | 1.86 | 0.82 | 1.61 | 0.69 | 1.94 | 0.85 |
| iYHR078W   | #N/A | #N/A | 0.46 | 0.10 | #N/A | #N/A |
| iYHR079C-B | 2.69 | 0.95 | #N/A | #N/A | #N/A | #N/A |
| iYHR080C   | 1.53 | 0.70 | 1.50 | 0.64 | 1.66 | 0.75 |
| iYHR081W   | 0.53 | 0.16 | 0.44 | 0.09 | 0.52 | 0.15 |
| iYHR083W   | 0.93 | 0.40 | 1.22 | 0.52 | 1.07 | 0.48 |
| iYHR085W   | 1.65 | 0.73 | 1.07 | 0.44 | 1.77 | 0.79 |
| iYHR087W   | 2.12 | 0.85 | 2.56 | 0.97 | 1.94 | 0.87 |
| iYHR088W   | #N/A | #N/A | 0.60 | 0.19 | 1.01 | 0.41 |
| iYHR089C   | 0.63 | 0.24 | 1.12 | 0.44 | 0.72 | 0.29 |
| iYHR090C   | 2.26 | 0.91 | #N/A | #N/A | 2.50 | 0.95 |
| iYHR092C   | 0.90 | 0.39 | 1.20 | 0.51 | #N/A | #N/A |
| iYHR094C   | 0.35 | 0.07 | 0.78 | 0.24 | 0.60 | 0.22 |
| iYHR097C   | #N/A | #N/A | 0.68 | 0.22 | 0.80 | 0.34 |
| iYHR099W   | #N/A | #N/A | #N/A | #N/A | #N/A | #N/A |
| iYHR100C   | 2.14 | 0.85 | 1.71 | 0.79 | 2.00 | 0.88 |
| iYHR101C   | 2.97 | 0.97 | 2.58 | 0.94 | 3.38 | 0.98 |
| iYHR102W   | 0.79 | 0.30 | 1.19 | 0.57 | 0.99 | 0.44 |
| iYHR103W   | 1.27 | 0.56 | 1.11 | 0.43 | 1.24 | 0.52 |
| iYHR104W   | 2.36 | 0.91 | 1.82 | 0.85 | 1.82 | 0.83 |
| iYHR105W   | 1.73 | 0.76 | 2.05 | 0.86 | 1.81 | 0.83 |
| iYHR106W   | 0.48 | 0.13 | 0.51 | 0.13 | 0.65 | 0.25 |
| iYHR107C   | 1.90 | 0.79 | 1.80 | 0.78 | 1.72 | 0.77 |
| iYHR108W   | #N/A | #N/A | #N/A | #N/A | #N/A | #N/A |
| iYHR109W   | #N/A | #N/A | #N/A | #N/A | 1.87 | 0.78 |
| iYHR110W   | 2.35 | 0.91 | 1.58 | 0.68 | 2.66 | 0.96 |
| iYHR111W   | 0.46 | 0.13 | 0.44 | 0.09 | 0.50 | 0.15 |
| iYHR112C   | 2.15 | 0.86 | 1.58 | 0.68 | 1.75 | 0.75 |
| iYHR113W   | #N/A | #N/A | #N/A | #N/A | #N/A | #N/A |
| iYHR114W   | #N/A | #N/A | #N/A | #N/A | 0.49 | 0.14 |
| iYHR115C   | 3.29 | 0.98 | 2.90 | 0.99 | 3.18 | 0.98 |
| iYHR116W   | 2.59 | 0.94 | 2.31 | 0.91 | 2.85 | 0.98 |
| iYHR118C   | 2.69 | 0.96 | 2.58 | 0.96 | 2.71 | 0.96 |
| iYHR119W   | 1.64 | 0.74 | 1.53 | 0.67 | 1.29 | 0.55 |
| iYHR120W   | 1.45 | 0.65 | 1.52 | 0.69 | 1.06 | 0.51 |
| iYHR121W   | 1.26 | 0.54 | 1.41 | 0.62 | 1.50 | 0.68 |
| iYHR122W   | 1.30 | 0.59 | 1.75 | 0.80 | 1.11 | 0.46 |
| iYHR123W   | 0.31 | 0.05 | 0.33 | 0.04 | 0.30 | 0.03 |
| iYHR128W   | #N/A | #N/A | #N/A | #N/A | #N/A | #N/A |
| iYHR131C   | 2.74 | 0.96 | 2.45 | 0.95 | 2.64 | 0.94 |
| iYHR133C   | 0.87 | 0.37 | #N/A | #N/A | 1.29 | 0.59 |
| iYHR134W   | #N/A | #N/A | 0.49 | 0.12 | 0.53 | 0.15 |
| iYHR135C   | 1.19 | 0.52 | 1.90 | 0.88 | 1.21 | 0.57 |
| iYHR136C   | 0.37 | 0.07 | 1.33 | 0.57 | 0.35 | 0.05 |
| iYHR137W   | #N/A | #N/A | #N/A | #N/A | #N/A | #N/A |
| iYHR139C   | 2.12 | 0.86 | 2.04 | 0.90 | 1.41 | 0.61 |
| iYHR141C   | 0.35 | 0.07 | #N/A | #N/A | 0.31 | 0.04 |
| iYHR142W   | 1.59 | 0.71 | 1.54 | 0.75 | 1.45 | 0.66 |
| iYHR144C   | 0.61 | 0.22 | #N/A | #N/A | #N/A | #N/A |
| iYHR147C   | 1.86 | 0.82 | #N/A | #N/A | 1.61 | 0.72 |
| iYHR148W   | 0.61 | 0.22 | 0.54 | 0.15 | 0.68 | 0.27 |

|          |      |      |      |      |      |      |
|----------|------|------|------|------|------|------|
| iYHR149C | 1.06 | 0.48 | 1.53 | 0.75 | 1.12 | 0.47 |
| iYHR150W | #N/A | #N/A | #N/A | #N/A | 0.31 | 0.03 |
| iYHR151C | 1.51 | 0.68 | 2.60 | 0.94 | 1.52 | 0.69 |
| iYHR152W | 0.59 | 0.20 | 0.64 | 0.22 | #N/A | #N/A |
| iYHR153C | 1.67 | 0.75 | 1.78 | 0.77 | 1.33 | 0.60 |
| iYHR155W | 0.56 | 0.18 | 0.76 | 0.23 | 0.73 | 0.30 |
| iYHR156C | 1.79 | 0.79 | #N/A | #N/A | 1.28 | 0.54 |
| iYHR157W | #N/A | #N/A | #N/A | #N/A | #N/A | #N/A |
| iYHR158C | 2.90 | 0.97 | 1.62 | 0.71 | 2.63 | 0.97 |
| iYHR159W | 0.35 | 0.07 | 0.58 | 0.17 | #N/A | #N/A |
| iYHR160C | 0.54 | 0.18 | 0.63 | 0.17 | 0.55 | 0.19 |
| iYHR162W | 1.31 | 0.58 | 1.91 | 0.81 | 1.01 | 0.46 |
| iYHR163W | 0.47 | 0.14 | 0.55 | 0.15 | 0.63 | 0.21 |
| iYHR164C | 1.36 | 0.62 | 1.43 | 0.71 | 1.64 | 0.71 |
| iYHR165C | 1.62 | 0.73 | 1.31 | 0.56 | 2.05 | 0.89 |
| iYHR166C | 1.94 | 0.83 | 1.60 | 0.70 | 1.90 | 0.81 |
| iYHR167W | 1.76 | 0.77 | 1.44 | 0.71 | 1.53 | 0.74 |
| iYHR168W | 1.47 | 0.66 | 1.32 | 0.65 | 1.09 | 0.51 |
| iYHR169W | 1.21 | 0.53 | 1.13 | 0.52 | 1.91 | 0.83 |
| iYHR170W | 0.97 | 0.42 | 0.78 | 0.31 | 1.11 | 0.54 |
| iYHR171W | 2.42 | 0.93 | 2.28 | 0.90 | 2.42 | 0.92 |
| iYHR173C | #N/A | #N/A | #N/A | #N/A | #N/A | #N/A |
| iYHR174W | 0.90 | 0.36 | #N/A | #N/A | 0.92 | 0.43 |
| iYHR177W | 1.33 | 0.59 | 1.09 | 0.45 | 1.37 | 0.63 |
| iYHR178W | 0.66 | 0.23 | 0.86 | 0.29 | 0.52 | 0.15 |
| iYHR179W | #N/A | #N/A | #N/A | #N/A | #N/A | #N/A |
| iYHR181W | 1.48 | 0.66 | 1.36 | 0.59 | 1.36 | 0.62 |
| iYHR182W | 0.92 | 0.40 | 1.32 | 0.57 | 1.14 | 0.52 |
| iYHR183W | 0.73 | 0.29 | 0.87 | 0.33 | 0.59 | 0.18 |
| iYHR184W | #N/A | #N/A | #N/A | #N/A | #N/A | #N/A |
| iYHR185C | #N/A | #N/A | 0.71 | 0.20 | 0.63 | 0.24 |
| iYHR186C | 2.31 | 0.91 | 1.98 | 0.87 | 1.92 | 0.86 |
| iYHR187W | #N/A | #N/A | #N/A | #N/A | #N/A | #N/A |
| iYHR188C | 2.02 | 0.82 | 1.54 | 0.72 | 2.06 | 0.87 |
| iYHR189W | 1.41 | 0.60 | 1.23 | 0.51 | #N/A | #N/A |
| iYHR191C | 1.93 | 0.80 | 2.42 | 0.96 | 2.45 | 0.91 |
| iYHR193C | 1.44 | 0.65 | 1.48 | 0.65 | 1.26 | 0.53 |
| iYHR194W | 2.08 | 0.87 | 2.12 | 0.91 | 2.08 | 0.88 |
| iYHR195W | 1.86 | 0.81 | 1.18 | 0.52 | 2.03 | 0.87 |
| iYHR196W | #N/A | #N/A | #N/A | #N/A | #N/A | #N/A |
| iYHR197W | #N/A | #N/A | #N/A | #N/A | 0.58 | 0.21 |
| iYHR198C | 1.66 | 0.73 | 1.18 | 0.48 | 1.28 | 0.59 |
| iYHR199C | 1.25 | 0.53 | 1.56 | 0.68 | 1.05 | 0.50 |
| iYHR200W | #N/A | #N/A | #N/A | #N/A | #N/A | #N/A |
| iYHR202W | 1.10 | 0.49 | 1.08 | 0.45 | 1.28 | 0.54 |
| iYHR203C | 0.36 | 0.07 | 0.53 | 0.14 | 0.56 | 0.18 |
| iYHR204W | 1.09 | 0.50 | 1.37 | 0.59 | 1.16 | 0.53 |
| iYHR205W | 0.95 | 0.41 | 0.86 | 0.35 | #N/A | #N/A |
| iYHR207C | 1.14 | 0.50 | 2.01 | 0.90 | 1.31 | 0.58 |
| iYHR208W | 1.49 | 0.67 | 1.27 | 0.62 | 1.38 | 0.60 |
| iYHR209W | 1.36 | 0.62 | 0.67 | 0.20 | 1.10 | 0.50 |

|                |      |      |      |      |      |      |
|----------------|------|------|------|------|------|------|
| iYHR210C-0     | 2.21 | 0.87 | 1.41 | 0.62 | 2.02 | 0.88 |
| iYHR210C-A     | 2.21 | 0.90 | 1.49 | 0.65 | 2.17 | 0.89 |
| iYHR210C-B     | 1.06 | 0.44 | 0.71 | 0.26 | 0.90 | 0.38 |
| iYHR211W       | 1.90 | 0.83 | 2.00 | 0.86 | 1.93 | 0.80 |
| iYHR212C       | 0.73 | 0.29 | 0.72 | 0.27 | 0.86 | 0.36 |
| iYHR213W-0     | 0.78 | 0.32 | 0.81 | 0.29 | 0.94 | 0.40 |
| iYHR213W-A     | 0.85 | 0.33 | 0.87 | 0.33 | 0.94 | 0.41 |
| iYHR213W-B     | 0.73 | 0.28 | 0.89 | 0.36 | 0.94 | 0.38 |
| iYHR214W       | 0.67 | 0.26 | #N/A | #N/A | 0.65 | 0.25 |
| iYHR214W-A     | #N/A | #N/A | 1.41 | 0.61 | #N/A | #N/A |
| iYHR215W       | 2.29 | 0.91 | 2.34 | 0.95 | 1.75 | 0.81 |
| iYHR216W       | 0.41 | 0.10 | 0.41 | 0.07 | 0.42 | 0.10 |
| iYHR217C       | 0.54 | 0.17 | 0.56 | 0.16 | #N/A | #N/A |
| iYHR218W       | 0.38 | 0.09 | 0.32 | 0.02 | 0.35 | 0.06 |
| iYHR219W       | 0.40 | 0.10 | 0.41 | 0.07 | 0.41 | 0.08 |
| iYHRCdelta10   | #N/A | #N/A | #N/A | #N/A | #N/A | #N/A |
| iYHRCdelta11   | 2.23 | 0.91 | 2.33 | 0.92 | 2.55 | 0.95 |
| iYHRCdelta12   | 1.85 | 0.77 | 1.68 | 0.72 | 2.11 | 0.86 |
| iYHRCdelta14-0 | 1.55 | 0.70 | 1.21 | 0.58 | 1.72 | 0.77 |
| iYHRCdelta14-A | 1.67 | 0.75 | 1.35 | 0.66 | 1.84 | 0.81 |
| iYHRCdelta14-B | 1.54 | 0.70 | 1.44 | 0.61 | 1.45 | 0.70 |
| iYHRCdelta14-C | 1.87 | 0.82 | 1.40 | 0.59 | #N/A | #N/A |
| iYHRCdelta16-0 | 1.59 | 0.70 | 1.87 | 0.84 | 1.39 | 0.63 |
| iYHRCdelta16-A | 1.45 | 0.65 | 2.00 | 0.83 | 1.48 | 0.71 |
| iYHRCdelta16-B | 1.57 | 0.67 | 2.31 | 0.91 | 1.58 | 0.72 |
| iYHRCdelta4    | 1.78 | 0.78 | 1.85 | 0.79 | 1.75 | 0.79 |
| iYHRCdelta5    | #N/A | #N/A | #N/A | #N/A | #N/A | #N/A |
| iYHRCsigma2    | 1.00 | 0.43 | #N/A | #N/A | 1.16 | 0.48 |
| iYHRWdelta7    | 1.16 | 0.49 | #N/A | #N/A | 0.75 | 0.27 |
| iYHRWdelta9    | 1.79 | 0.75 | 2.84 | 0.97 | 1.60 | 0.73 |
| iYHRWtau3      | 1.14 | 0.50 | 1.13 | 0.44 | 1.16 | 0.50 |
| iYIL001W       | #N/A | #N/A | #N/A | #N/A | #N/A | #N/A |
| iYIL002C       | 0.96 | 0.43 | #N/A | #N/A | 1.20 | 0.52 |
| iYIL003W       | 2.40 | 0.90 | 1.38 | 0.63 | 1.63 | 0.77 |
| iYIL004C       | 2.01 | 0.85 | 1.88 | 0.80 | 1.89 | 0.79 |
| iYIL006W       | 1.35 | 0.62 | 1.03 | 0.47 | 1.37 | 0.63 |
| iYIL007C       | 3.14 | 0.97 | 2.55 | 0.94 | 3.48 | 0.99 |
| iYIL008W       | #N/A | #N/A | #N/A | #N/A | #N/A | #N/A |
| iYIL009C-A     | #N/A | #N/A | 1.09 | 0.46 | 0.75 | 0.31 |
| iYIL009W       | 1.29 | 0.57 | 1.75 | 0.76 | 1.42 | 0.65 |
| iYIL010W       | 1.01 | 0.45 | 0.85 | 0.31 | 1.27 | 0.53 |
| iYIL011W       | 1.49 | 0.68 | #N/A | #N/A | #N/A | #N/A |
| iYIL012W       | 0.99 | 0.43 | 0.78 | 0.31 | 1.05 | 0.49 |
| iYIL013C       | 0.64 | 0.24 | 0.27 | 0.02 | 0.51 | 0.15 |
| iYIL014W       | 0.26 | 0.03 | #N/A | #N/A | 0.47 | 0.13 |
| iYIL015C-A     | 1.64 | 0.74 | 2.73 | 0.98 | 1.47 | 0.71 |
| iYIL015W       | #N/A | #N/A | #N/A | #N/A | #N/A | #N/A |
| iYIL016W       | 0.68 | 0.27 | 1.35 | 0.58 | 0.65 | 0.22 |
| iYIL017C       | 1.73 | 0.77 | 2.56 | 0.94 | 1.75 | 0.74 |
| iYIL019W       | 0.32 | 0.06 | 0.37 | 0.05 | 0.45 | 0.11 |
| iYIL020C       | 1.98 | 0.85 | 2.34 | 0.95 | 2.34 | 0.93 |

|          |      |      |      |      |      |      |
|----------|------|------|------|------|------|------|
| iYIL021W | #N/A | #N/A | 0.41 | 0.07 | 0.74 | 0.27 |
| iYIL022W | 0.74 | 0.30 | 0.61 | 0.17 | 0.68 | 0.25 |
| iYIL023C | 1.46 | 0.66 | 1.73 | 0.83 | 1.55 | 0.66 |
| iYIL024C | 0.82 | 0.33 | 0.98 | 0.36 | 0.81 | 0.31 |
| iYIL026C | 1.37 | 0.62 | #N/A | #N/A | 1.54 | 0.70 |
| iYIL027C | 1.92 | 0.84 | 1.40 | 0.62 | 2.24 | 0.88 |
| iYIL028W | 0.89 | 0.38 | 0.76 | 0.30 | 0.77 | 0.32 |
| iYIL030C | 1.47 | 0.67 | 1.77 | 0.76 | 1.66 | 0.75 |
| iYIL031W | #N/A | #N/A | #N/A | #N/A | #N/A | #N/A |
| iYIL032C | 1.42 | 0.64 | 1.17 | 0.51 | 1.39 | 0.62 |
| iYIL033C | 1.34 | 0.61 | 1.28 | 0.53 | 1.35 | 0.58 |
| iYIL034C | 1.78 | 0.78 | 1.57 | 0.77 | 1.86 | 0.82 |
| iYIL035C | 1.43 | 0.61 | 1.23 | 0.59 | 1.74 | 0.77 |
| iYIL036W | 0.24 | 0.02 | #N/A | #N/A | 0.28 | 0.03 |
| iYIL037C | 1.93 | 0.83 | 1.60 | 0.70 | 1.31 | 0.60 |
| iYIL038C | 2.29 | 0.91 | 1.33 | 0.63 | 2.18 | 0.92 |
| iYIL039W | #N/A | #N/A | #N/A | #N/A | #N/A | #N/A |
| iYIL041W | 0.52 | 0.16 | #N/A | #N/A | 0.74 | 0.26 |
| iYIL042C | 2.74 | 0.96 | 1.89 | 0.81 | 2.46 | 0.95 |
| iYIL044C | 2.91 | 0.97 | 1.79 | 0.85 | 1.83 | 0.77 |
| iYIL045W | #N/A | #N/A | #N/A | #N/A | #N/A | #N/A |
| iYIL046W | 1.58 | 0.69 | 1.44 | 0.69 | 1.65 | 0.70 |
| iYIL047C | 1.58 | 0.70 | 1.52 | 0.66 | 1.43 | 0.63 |
| iYIL048W | #N/A | #N/A | #N/A | #N/A | #N/A | #N/A |
| iYIL049W | 1.97 | 0.81 | 1.69 | 0.81 | 1.64 | 0.70 |
| iYIL050W | 1.57 | 0.70 | #N/A | #N/A | 1.19 | 0.57 |
| iYIL051C | 0.36 | 0.07 | 0.60 | 0.14 | 0.40 | 0.08 |
| iYIL052C | 0.15 | 0.01 | 0.34 | 0.04 | 0.18 | 0.01 |
| iYIL053W | #N/A | #N/A | #N/A | #N/A | #N/A | #N/A |
| iYIL054W | #N/A | #N/A | 0.80 | 0.26 | #N/A | #N/A |
| iYIL055C | 0.85 | 0.36 | 0.87 | 0.37 | 0.89 | 0.38 |
| iYIL056W | #N/A | #N/A | 0.42 | 0.08 | 0.43 | 0.11 |
| iYIL058W | 1.87 | 0.81 | 2.43 | 0.96 | 2.07 | 0.84 |
| iYIL061C | 1.83 | 0.80 | #N/A | #N/A | 2.06 | 0.87 |
| iYIL062C | 2.12 | 0.87 | 1.50 | 0.66 | 1.87 | 0.79 |
| iYIL063C | 1.47 | 0.63 | #N/A | #N/A | 1.30 | 0.63 |
| iYIL065C | 2.34 | 0.93 | 1.83 | 0.78 | 2.10 | 0.90 |
| iYIL066C | 2.14 | 0.88 | 2.04 | 0.91 | 2.35 | 0.90 |
| iYIL067C | 3.08 | 0.98 | 2.14 | 0.93 | 3.14 | 0.98 |
| iYIL068C | 2.70 | 0.96 | 1.87 | 0.87 | 2.12 | 0.91 |
| iYIL069C | 0.24 | 0.02 | 0.27 | 0.02 | 0.22 | 0.01 |
| iYIL070C | 0.70 | 0.27 | 0.66 | 0.21 | 0.95 | 0.38 |
| iYIL071C | 1.33 | 0.59 | 1.06 | 0.44 | 0.74 | 0.31 |
| iYIL072W | 0.66 | 0.23 | 0.54 | 0.15 | 0.48 | 0.14 |
| iYIL073C | 1.14 | 0.50 | 1.22 | 0.59 | 1.27 | 0.57 |
| iYIL074C | 0.69 | 0.25 | 0.79 | 0.28 | 0.73 | 0.30 |
| iYIL075C | 1.44 | 0.63 | #N/A | #N/A | 1.31 | 0.58 |
| iYIL076W | 0.32 | 0.05 | 0.41 | 0.07 | 0.28 | 0.03 |
| iYIL077C | 1.88 | 0.81 | 1.59 | 0.77 | 1.62 | 0.73 |
| iYIL078W | #N/A | #N/A | #N/A | #N/A | #N/A | #N/A |
| iYIL079C | 1.54 | 0.66 | 1.53 | 0.66 | 1.69 | 0.76 |

|            |      |      |      |      |      |      |
|------------|------|------|------|------|------|------|
| iYIL083C   | 1.71 | 0.72 | 1.98 | 0.84 | 1.87 | 0.82 |
| iYIL084C   | #N/A | #N/A | #N/A | #N/A | 1.88 | 0.79 |
| iYIL085C   | #N/A | #N/A | #N/A | #N/A | #N/A | #N/A |
| iYIL088C   | 1.80 | 0.79 | 1.90 | 0.83 | 1.95 | 0.82 |
| iYIL089W   | 2.18 | 0.90 | 1.17 | 0.56 | 1.45 | 0.62 |
| iYIL090W   | 0.85 | 0.36 | 0.95 | 0.40 | 0.81 | 0.35 |
| iYIL091C   | 2.37 | 0.93 | 2.12 | 0.90 | 2.64 | 0.97 |
| iYIL092W   | #N/A | #N/A | #N/A | #N/A | #N/A | #N/A |
| iYIL093C   | 2.20 | 0.87 | #N/A | #N/A | 2.46 | 0.95 |
| iYIL094C   | 1.09 | 0.50 | 1.37 | 0.60 | 0.76 | 0.32 |
| iYIL095W   | #N/A | #N/A | #N/A | #N/A | #N/A | #N/A |
| iYIL096C   | 1.61 | 0.71 | 2.10 | 0.92 | 1.99 | 0.83 |
| iYIL097W   | 0.54 | 0.17 | #N/A | #N/A | 0.37 | 0.07 |
| iYIL098C   | 3.16 | 0.97 | 2.81 | 0.96 | 3.07 | 0.99 |
| iYIL099W   | #N/A | #N/A | #N/A | #N/A | #N/A | #N/A |
| iYIL100W   | 0.70 | 0.28 | 0.66 | 0.17 | 0.89 | 0.39 |
| iYIL101C   | 2.10 | 0.88 | 1.01 | 0.45 | 1.69 | 0.72 |
| iYIL102C   | 0.43 | 0.12 | #N/A | #N/A | 0.50 | 0.13 |
| iYIL103W-0 | 1.44 | 0.65 | 1.15 | 0.46 | 1.56 | 0.74 |
| iYIL103W-1 | 1.16 | 0.51 | 1.11 | 0.46 | 1.21 | 0.59 |
| iYIL104C   | 1.27 | 0.56 | #N/A | #N/A | 2.50 | 0.92 |
| iYIL105C   | 1.36 | 0.61 | 0.89 | 0.38 | 1.32 | 0.64 |
| iYIL106W   | #N/A | #N/A | 0.47 | 0.08 | 0.33 | 0.05 |
| iYIL107C   | 0.96 | 0.43 | 0.85 | 0.30 | 0.99 | 0.40 |
| iYIL110W   | #N/A | #N/A | #N/A | #N/A | #N/A | #N/A |
| iYIL111W   | 1.42 | 0.64 | 1.35 | 0.58 | 1.20 | 0.59 |
| iYIL112W   | 0.86 | 0.34 | 1.25 | 0.53 | 0.74 | 0.30 |
| iYIL113W   | 2.26 | 0.88 | 1.94 | 0.83 | #N/A | #N/A |
| iYIL114C   | 2.16 | 0.89 | #N/A | #N/A | 1.23 | 0.56 |
| iYIL115C   | 2.15 | 0.88 | 2.52 | 0.94 | 2.37 | 0.93 |
| iYIL116W   | #N/A | #N/A | #N/A | #N/A | #N/A | #N/A |
| iYIL117C   | 0.58 | 0.20 | 0.56 | 0.16 | 0.56 | 0.16 |
| iYIL118W   | #N/A | #N/A | #N/A | #N/A | #N/A | #N/A |
| iYIL119C-0 | 0.32 | 0.05 | 0.37 | 0.05 | 0.28 | 0.03 |
| iYIL120W   | 0.63 | 0.23 | 0.35 | 0.04 | 0.60 | 0.22 |
| iYIL121W   | 0.66 | 0.24 | 0.81 | 0.33 | 0.74 | 0.27 |
| iYIL122W   | 0.92 | 0.39 | 1.04 | 0.43 | 1.11 | 0.47 |
| iYIL123W   | 0.56 | 0.19 | 0.62 | 0.18 | 0.53 | 0.16 |
| iYIL124W   | 0.76 | 0.30 | 0.77 | 0.26 | 0.56 | 0.17 |
| iYIL125W   | 1.63 | 0.73 | #N/A | #N/A | 1.16 | 0.52 |
| iYIL126W   | 1.51 | 0.68 | 0.81 | 0.33 | 1.10 | 0.47 |
| iYIL127C   | 1.59 | 0.69 | 1.34 | 0.61 | 1.76 | 0.79 |
| iYIL128W   | #N/A | #N/A | #N/A | #N/A | #N/A | #N/A |
| iYIL129C   | 3.06 | 0.98 | 2.99 | 0.97 | 2.95 | 0.98 |
| iYIL131C   | 1.99 | 0.85 | 2.38 | 0.96 | 1.50 | 0.72 |
| iYIL132C   | 1.59 | 0.68 | 1.79 | 0.85 | 1.41 | 0.63 |
| iYIL133C   | 0.27 | 0.03 | 0.25 | 0.01 | #N/A | #N/A |
| iYIL134W   | #N/A | #N/A | #N/A | #N/A | 0.44 | 0.11 |
| iYIL135C   | 0.79 | 0.33 | 0.84 | 0.31 | 0.75 | 0.27 |
| iYIL136W   | 0.84 | 0.36 | 0.42 | 0.08 | 0.90 | 0.35 |
| iYIL137C   | 2.41 | 0.91 | 1.67 | 0.81 | 2.21 | 0.91 |

|               |      |      |      |      |      |      |
|---------------|------|------|------|------|------|------|
| iYIL138C      | 1.49 | 0.67 | #N/A | #N/A | 1.33 | 0.56 |
| iYIL139C      | 1.06 | 0.47 | 1.09 | 0.47 | 0.88 | 0.39 |
| iYIL140W      | #N/A | #N/A | #N/A | #N/A | 0.65 | 0.21 |
| iYIL142W      | 0.75 | 0.30 | 0.84 | 0.31 | 0.82 | 0.35 |
| iYIL143C      | 2.16 | 0.89 | 2.19 | 0.91 | 2.56 | 0.94 |
| iYIL144W      | 0.51 | 0.16 | #N/A | #N/A | 0.34 | 0.05 |
| iYIL145C      | 1.67 | 0.74 | 1.54 | 0.67 | 1.59 | 0.73 |
| iYIL146C      | 1.29 | 0.57 | 0.80 | 0.25 | 0.85 | 0.37 |
| iYIL147C      | 1.30 | 0.55 | 1.23 | 0.52 | 1.38 | 0.63 |
| iYIL148W      | #N/A | #N/A | #N/A | #N/A | 0.44 | 0.11 |
| iYIL149C      | 0.57 | 0.20 | 0.81 | 0.29 | 0.82 | 0.35 |
| iYIL150C      | 1.00 | 0.43 | 0.99 | 0.37 | 1.26 | 0.62 |
| iYIL151C      | 1.72 | 0.73 | 1.66 | 0.76 | 1.85 | 0.82 |
| iYIL152W      | #N/A | #N/A | #N/A | #N/A | #N/A | #N/A |
| iYIL153W      | #N/A | #N/A | 1.34 | 0.65 | 2.06 | 0.88 |
| iYIL154C      | 3.21 | 0.99 | 2.59 | 0.94 | 3.11 | 0.99 |
| iYIL155C      | 2.78 | 0.95 | 1.95 | 0.88 | 2.40 | 0.91 |
| iYIL156W      | 0.50 | 0.16 | 0.48 | 0.11 | 0.54 | 0.18 |
| iYIL157C      | 3.42 | 0.99 | 2.21 | 0.93 | 2.51 | 0.96 |
| iYIL158W      | #N/A | #N/A | 1.02 | 0.47 | #N/A | #N/A |
| iYIL159W      | 1.46 | 0.66 | 1.08 | 0.44 | 1.09 | 0.49 |
| iYIL160C      | 1.26 | 0.55 | 1.21 | 0.51 | 1.42 | 0.64 |
| iYIL162W      | 1.63 | 0.72 | 1.56 | 0.76 | #N/A | #N/A |
| iYIL163C      | #N/A | #N/A | #N/A | #N/A | #N/A | #N/A |
| iYIL164C-0    | 1.45 | 0.66 | 1.19 | 0.50 | 1.44 | 0.65 |
| iYIL164C-1    | 1.20 | 0.51 | 1.19 | 0.48 | 1.04 | 0.42 |
| iYIL166C      | #N/A | #N/A | 1.02 | 0.47 | 1.64 | 0.72 |
| iYIL167W      | 1.74 | 0.73 | 1.31 | 0.57 | 1.65 | 0.75 |
| iYIL169C-0    | 0.40 | 0.09 | 0.47 | 0.11 | 0.46 | 0.11 |
| iYIL169C-1    | 0.64 | 0.24 | 0.71 | 0.27 | 0.78 | 0.32 |
| iYIL170W-0    | 0.95 | 0.42 | 1.04 | 0.47 | 1.04 | 0.48 |
| iYIL170W-1    | 0.27 | 0.03 | 0.32 | 0.03 | 0.35 | 0.06 |
| iYIL172C      | 1.97 | 0.81 | 2.07 | 0.86 | 2.02 | 0.85 |
| iYIL173W      | 1.82 | 0.76 | 1.80 | 0.81 | 1.93 | 0.80 |
| iYIL174W-0    | 1.20 | 0.53 | 0.74 | 0.28 | 1.07 | 0.49 |
| iYIL174W-1    | 1.91 | 0.79 | 1.44 | 0.70 | 1.91 | 0.83 |
| iYIL177C-1    | 0.38 | 0.08 | 0.44 | 0.09 | 0.42 | 0.08 |
| iYILCdelta1   | #N/A | #N/A | #N/A | #N/A | #N/A | #N/A |
| iYILCdelta3   | #N/A | #N/A | 0.93 | 0.36 | 0.50 | 0.15 |
| iYILCdelta5-0 | 1.80 | 0.79 | 2.33 | 0.92 | 1.83 | 0.81 |
| iYILCdelta5-1 | 0.94 | 0.40 | 1.44 | 0.66 | 1.05 | 0.44 |
| iYILCtau1     | 1.12 | 0.51 | #N/A | #N/A | 1.07 | 0.48 |
| iYIR001C      | 1.45 | 0.62 | 1.21 | 0.55 | 1.11 | 0.54 |
| iYIR002C      | 1.95 | 0.84 | 1.86 | 0.86 | 1.70 | 0.77 |
| iYIR003W      | #N/A | #N/A | #N/A | #N/A | #N/A | #N/A |
| iYIR004W      | 1.58 | 0.70 | 1.51 | 0.66 | 1.27 | 0.56 |
| iYIR005W      | #N/A | #N/A | #N/A | #N/A | #N/A | #N/A |
| iYIR006C      | 1.46 | 0.62 | 1.22 | 0.54 | 1.56 | 0.71 |
| iYIR007W      | #N/A | #N/A | #N/A | #N/A | #N/A | #N/A |
| iYIR008C      | 2.02 | 0.85 | 1.79 | 0.77 | 2.43 | 0.93 |
| iYIR010W      | #N/A | #N/A | #N/A | #N/A | #N/A | #N/A |

|               |      |      |      |      |      |      |
|---------------|------|------|------|------|------|------|
| iYIR011C      | 2.48 | 0.94 | #N/A | #N/A | 2.54 | 0.95 |
| iYIR012W      | #N/A | #N/A | #N/A | #N/A | #N/A | #N/A |
| iYIR013C      | 1.41 | 0.64 | 1.68 | 0.73 | 1.20 | 0.54 |
| iYIR014W      | 1.24 | 0.56 | 1.38 | 0.58 | 0.76 | 0.29 |
| iYIR015W      | 0.32 | 0.05 | 0.50 | 0.13 | 0.51 | 0.14 |
| iYIR016W      | 1.18 | 0.52 | #N/A | #N/A | 1.00 | 0.42 |
| iYIR017C      | 0.84 | 0.36 | 0.68 | 0.18 | 0.57 | 0.19 |
| iYIR018W-0    | 0.55 | 0.18 | 0.65 | 0.22 | 0.48 | 0.14 |
| iYIR018W-1    | 0.62 | 0.23 | 0.62 | 0.16 | 0.58 | 0.19 |
| iYIR020C      | 0.38 | 0.08 | 0.40 | 0.07 | 0.40 | 0.08 |
| iYIR020W-B-0  | 0.42 | 0.10 | 0.49 | 0.11 | 0.53 | 0.16 |
| iYIR020W-B-1  | 1.26 | 0.55 | 0.98 | 0.38 | 1.43 | 0.66 |
| iYIR021W      | 2.87 | 0.97 | 2.52 | 0.97 | 3.20 | 0.98 |
| iYIR022W      | 2.04 | 0.86 | 1.61 | 0.77 | 1.81 | 0.80 |
| iYIR023W      | 0.63 | 0.24 | #N/A | #N/A | 0.72 | 0.29 |
| iYIR024C      | 2.12 | 0.88 | #N/A | #N/A | 1.94 | 0.85 |
| iYIR025W      | 0.70 | 0.25 | 0.45 | 0.10 | 0.96 | 0.39 |
| iYIR026C      | 3.03 | 0.97 | 2.92 | 0.97 | 3.49 | 0.99 |
| iYIR027C      | 1.29 | 0.59 | 1.14 | 0.48 | 1.40 | 0.64 |
| iYIR028W      | 2.94 | 0.97 | 2.66 | 0.96 | 2.79 | 0.96 |
| iYIR029W      | 1.22 | 0.53 | #N/A | #N/A | 2.37 | 0.90 |
| iYIR030C      | 1.12 | 0.51 | 1.57 | 0.68 | 1.43 | 0.69 |
| iYIR031C      | 1.74 | 0.73 | 1.72 | 0.74 | 1.48 | 0.71 |
| iYIR032C      | 2.38 | 0.92 | 3.18 | 0.98 | 2.48 | 0.92 |
| iYIR033W      | #N/A | #N/A | #N/A | #N/A | #N/A | #N/A |
| iYIR034C      | 1.30 | 0.56 | 1.16 | 0.49 | 1.03 | 0.47 |
| iYIR035C      | 1.79 | 0.79 | 1.64 | 0.72 | 1.50 | 0.64 |
| iYIR036C      | 3.29 | 0.99 | 2.95 | 0.99 | 3.05 | 0.98 |
| iYIR037W      | 1.34 | 0.60 | 0.84 | 0.28 | 1.45 | 0.62 |
| iYIR038C-0    | 4.07 | 1.00 | 3.31 | 0.99 | 3.91 | 1.00 |
| iYIR038C-1    | 3.47 | 0.99 | 3.70 | 1.00 | 2.85 | 0.98 |
| iYIR039C      | 2.02 | 0.85 | 1.67 | 0.78 | 1.69 | 0.77 |
| iYIR040C      | 0.77 | 0.31 | 0.85 | 0.32 | 0.72 | 0.28 |
| iYIR041W      | 0.80 | 0.33 | 1.10 | 0.46 | 1.10 | 0.47 |
| iYIR042C      | 2.28 | 0.90 | 1.28 | 0.62 | #N/A | #N/A |
| iYIR043C      | 1.31 | 0.58 | 1.21 | 0.56 | 1.31 | 0.60 |
| iYIRCdelta6-1 | 1.09 | 0.46 | #N/A | #N/A | 1.20 | 0.55 |
| iYJL001W      | 0.60 | 0.21 | 0.50 | 0.10 | 0.54 | 0.16 |
| iYJL002C      | 2.10 | 0.84 | 1.66 | 0.80 | 1.79 | 0.76 |
| iYJL003W      | #N/A | #N/A | #N/A | #N/A | #N/A | #N/A |
| iYJL004C      | 2.16 | 0.89 | 1.91 | 0.88 | 1.71 | 0.75 |
| iYJL005W      | 0.46 | 0.12 | 0.91 | 0.35 | 0.57 | 0.20 |
| iYJL006C      | 0.41 | 0.10 | 0.91 | 0.39 | 1.21 | 0.51 |
| iYJL008C      | 1.38 | 0.63 | #N/A | #N/A | 1.13 | 0.50 |
| iYJL010C      | #N/A | #N/A | #N/A | #N/A | #N/A | #N/A |
| iYJL011C      | 1.38 | 0.63 | 1.94 | 0.85 | #N/A | #N/A |
| iYJL012C      | 0.85 | 0.33 | 1.58 | 0.72 | 0.72 | 0.29 |
| iYJL013C      | 0.47 | 0.14 | 0.67 | 0.20 | 0.43 | 0.11 |
| iYJL014W      | 0.41 | 0.10 | 0.38 | 0.06 | 0.42 | 0.10 |
| iYJL017W      | 0.86 | 0.34 | 0.57 | 0.13 | 0.84 | 0.36 |
| iYJL018W      | 1.35 | 0.58 | 0.96 | 0.43 | 1.14 | 0.51 |



|          |      |      |      |      |      |      |
|----------|------|------|------|------|------|------|
| iYJL020C | 2.53 | 0.94 | 1.86 | 0.79 | 2.30 | 0.93 |
| iYJL022W | 2.06 | 0.83 | 1.53 | 0.67 | 1.98 | 0.85 |
| iYJL024C | #N/A | #N/A | #N/A | #N/A | #N/A | #N/A |
| iYJL025W | 0.38 | 0.08 | 0.42 | 0.06 | 0.55 | 0.18 |
| iYJL026W | 0.95 | 0.41 | #N/A | #N/A | #N/A | #N/A |
| iYJL027C | 1.23 | 0.56 | 1.35 | 0.67 | #N/A | #N/A |
| iYJL028W | 0.52 | 0.15 | 0.71 | 0.24 | 0.46 | 0.13 |
| iYJL029C | 0.86 | 0.37 | 1.17 | 0.49 | #N/A | #N/A |
| iYJL030W | #N/A | #N/A | #N/A | #N/A | #N/A | #N/A |
| iYJL031C | #N/A | #N/A | 1.39 | 0.61 | 1.71 | 0.77 |
| iYJL033W | #N/A | #N/A | #N/A | #N/A | 0.52 | 0.17 |
| iYJL034W | 0.95 | 0.42 | 0.93 | 0.36 | 0.82 | 0.35 |
| iYJL035C | 1.61 | 0.71 | 1.83 | 0.79 | 1.38 | 0.59 |
| iYJL036W | #N/A | #N/A | #N/A | #N/A | #N/A | #N/A |
| iYJL037W | 2.56 | 0.92 | #N/A | #N/A | 3.54 | 1.00 |
| iYJL038C | 2.64 | 0.94 | 1.51 | 0.71 | 2.92 | 0.98 |
| iYJL039C | 1.19 | 0.52 | 0.79 | 0.32 | 0.92 | 0.43 |
| iYJL044C | 1.49 | 0.66 | 1.52 | 0.66 | 1.06 | 0.47 |
| iYJL045W | 1.32 | 0.58 | 1.27 | 0.57 | 1.11 | 0.53 |
| iYJL046W | 0.40 | 0.10 | 0.42 | 0.08 | 0.39 | 0.08 |
| iYJL047C | 1.81 | 0.78 | 2.33 | 0.92 | 1.88 | 0.82 |
| iYJL048C | 1.14 | 0.48 | 1.23 | 0.53 | 1.06 | 0.43 |
| iYJL049W | #N/A | #N/A | #N/A | #N/A | #N/A | #N/A |
| iYJL050W | 1.29 | 0.58 | #N/A | #N/A | 1.01 | 0.41 |
| iYJL052W | 0.78 | 0.32 | 1.30 | 0.56 | 0.71 | 0.25 |
| iYJL053W | 1.67 | 0.74 | 1.70 | 0.82 | 1.34 | 0.61 |
| iYJL054W | 1.08 | 0.49 | 0.84 | 0.35 | 1.54 | 0.68 |
| iYJL055W | 2.76 | 0.95 | 1.71 | 0.75 | 2.09 | 0.89 |
| iYJL056C | 2.03 | 0.85 | 2.01 | 0.89 | 2.02 | 0.89 |
| iYJL057C | #N/A | #N/A | 1.44 | 0.64 | 2.25 | 0.89 |
| iYJL058C | 1.71 | 0.72 | 1.40 | 0.61 | 1.68 | 0.76 |
| iYJL060W | #N/A | #N/A | #N/A | #N/A | #N/A | #N/A |
| iYJL061W | 1.26 | 0.56 | 0.82 | 0.33 | 0.94 | 0.41 |
| iYJL062W | #N/A | #N/A | #N/A | #N/A | 1.55 | 0.73 |
| iYJL063C | 2.97 | 0.98 | 2.39 | 0.93 | 2.93 | 0.98 |
| iYJL064W | 2.26 | 0.91 | 2.32 | 0.91 | 1.86 | 0.78 |
| iYJL066C | 2.29 | 0.91 | 1.85 | 0.86 | 1.70 | 0.77 |
| iYJL068C | 2.48 | 0.94 | 1.45 | 0.63 | 2.16 | 0.90 |
| iYJL069C | 1.89 | 0.83 | 2.21 | 0.94 | 1.89 | 0.83 |
| iYJL070C | #N/A | #N/A | #N/A | #N/A | 1.17 | 0.49 |
| iYJL071W | #N/A | #N/A | #N/A | #N/A | #N/A | #N/A |
| iYJL072C | 2.89 | 0.96 | 2.40 | 0.93 | 2.13 | 0.85 |
| iYJL073W | #N/A | #N/A | 0.66 | 0.21 | 0.69 | 0.28 |
| iYJL074C | 2.64 | 0.93 | 2.41 | 0.93 | 2.42 | 0.91 |
| iYJL075C | #N/A | #N/A | #N/A | #N/A | #N/A | #N/A |
| iYJL077C | 2.22 | 0.90 | 1.14 | 0.54 | 1.39 | 0.60 |
| iYJL078C | 0.38 | 0.08 | 0.47 | 0.11 | 0.52 | 0.14 |
| iYJL079C | 0.81 | 0.34 | 0.73 | 0.25 | 0.74 | 0.27 |
| iYJL080C | 0.99 | 0.41 | 0.94 | 0.34 | 0.95 | 0.39 |
| iYJL081C | 1.42 | 0.64 | 1.21 | 0.52 | 1.51 | 0.64 |
| iYJL082W | 0.40 | 0.09 | 0.39 | 0.06 | 0.54 | 0.18 |



|            |      |      |      |      |      |      |
|------------|------|------|------|------|------|------|
| iYJL083W   | 0.61 | 0.20 | 0.83 | 0.27 | 0.65 | 0.25 |
| iYJL084C   | 2.29 | 0.92 | 2.89 | 0.98 | 2.13 | 0.88 |
| iYJL085W   | #N/A | #N/A | #N/A | #N/A | #N/A | #N/A |
| iYJL088W   | #N/A | #N/A | #N/A | #N/A | #N/A | #N/A |
| iYJL089W   | 1.03 | 0.43 | 1.38 | 0.60 | 0.92 | 0.39 |
| iYJL090C   | 0.98 | 0.40 | 0.76 | 0.30 | 0.89 | 0.34 |
| iYJL091C   | 1.69 | 0.72 | 1.17 | 0.56 | 1.62 | 0.73 |
| iYJL092W   | 1.01 | 0.44 | #N/A | #N/A | 1.30 | 0.58 |
| iYJL093C   | 3.93 | 1.00 | 2.57 | 0.95 | 3.71 | 1.00 |
| iYJL094C   | 1.27 | 0.55 | 0.52 | 0.14 | 0.94 | 0.42 |
| iYJL095W   | #N/A | #N/A | #N/A | #N/A | #N/A | #N/A |
| iYJL096W   | 1.33 | 0.59 | #N/A | #N/A | 1.57 | 0.71 |
| iYJL098W   | 1.03 | 0.46 | 1.43 | 0.61 | 1.20 | 0.50 |
| iYJL099W   | 0.78 | 0.32 | 0.89 | 0.39 | 1.11 | 0.54 |
| iYJL100W   | 1.38 | 0.63 | 1.02 | 0.43 | 1.24 | 0.58 |
| iYJL101C   | 1.52 | 0.68 | 1.69 | 0.77 | 1.04 | 0.42 |
| iYJL102W   | 0.43 | 0.11 | 0.53 | 0.14 | 0.34 | 0.05 |
| iYJL103C   | 2.84 | 0.95 | 2.06 | 0.88 | 2.45 | 0.94 |
| iYJL104W   | 0.73 | 0.29 | 0.88 | 0.30 | 0.61 | 0.19 |
| iYJL106W-0 | 1.95 | 0.84 | 1.74 | 0.76 | 1.89 | 0.86 |
| iYJL106W-1 | 0.88 | 0.36 | 0.83 | 0.34 | 0.74 | 0.31 |
| iYJL107C   | 1.76 | 0.74 | 1.13 | 0.48 | 1.33 | 0.64 |
| iYJL109C   | 0.99 | 0.43 | #N/A | #N/A | 1.08 | 0.52 |
| iYJL110C   | 0.90 | 0.38 | 0.87 | 0.33 | 0.93 | 0.41 |
| iYJL111W   | 0.60 | 0.20 | #N/A | #N/A | 0.59 | 0.21 |
| iYJL112W   | 1.33 | 0.61 | 1.22 | 0.52 | 1.28 | 0.57 |
| iYJL113W   | #N/A | #N/A | #N/A | #N/A | #N/A | #N/A |
| iYJL115W   | #N/A | #N/A | 0.88 | 0.33 | 0.85 | 0.35 |
| iYJL116C   | 0.77 | 0.31 | 1.06 | 0.44 | 0.93 | 0.41 |
| iYJL117W   | 1.51 | 0.65 | 1.57 | 0.77 | 1.16 | 0.55 |
| iYJL118W   | 0.82 | 0.32 | #N/A | #N/A | 1.36 | 0.58 |
| iYJL120W   | 1.78 | 0.78 | 2.28 | 0.95 | 1.42 | 0.65 |
| iYJL122W   | 1.15 | 0.51 | 0.75 | 0.29 | 0.87 | 0.40 |
| iYJL123C   | 1.57 | 0.71 | 1.53 | 0.67 | 1.58 | 0.67 |
| iYJL124C   | 1.10 | 0.46 | 0.98 | 0.36 | 1.10 | 0.53 |
| iYJL125C   | 0.97 | 0.43 | 1.00 | 0.45 | 0.92 | 0.37 |
| iYJL126W   | #N/A | #N/A | #N/A | #N/A | #N/A | #N/A |
| iYJL127C   | 2.14 | 0.86 | 1.93 | 0.87 | 2.18 | 0.89 |
| iYJL128C-0 | 1.30 | 0.56 | 1.39 | 0.67 | 1.20 | 0.54 |
| iYJL128C-1 | #N/A | #N/A | 1.10 | 0.52 | 1.28 | 0.60 |
| iYJL129C   | 0.82 | 0.34 | 0.89 | 0.33 | 0.82 | 0.35 |
| iYJL130C   | 0.55 | 0.18 | 0.64 | 0.20 | 0.58 | 0.20 |
| iYJL131C   | 1.96 | 0.81 | 1.04 | 0.45 | 1.54 | 0.70 |
| iYJL132W   | #N/A | #N/A | 0.65 | 0.19 | 0.70 | 0.29 |
| iYJL133W   | 1.02 | 0.42 | #N/A | #N/A | 1.01 | 0.47 |
| iYJL134W   | 0.27 | 0.03 | 0.28 | 0.01 | 0.26 | 0.02 |
| iYJL136C   | 0.38 | 0.08 | 0.84 | 0.31 | 0.42 | 0.10 |
| iYJL137C   | 1.16 | 0.51 | 0.65 | 0.20 | 1.09 | 0.53 |
| iYJL138C   | 1.10 | 0.48 | 0.95 | 0.38 | 0.91 | 0.36 |
| iYJL139C   | 0.65 | 0.23 | 0.84 | 0.28 | 0.78 | 0.29 |
| iYJL140W   | #N/A | #N/A | #N/A | #N/A | #N/A | #N/A |

|            |      |      |      |      |      |      |
|------------|------|------|------|------|------|------|
| iYJL141C   | 1.55 | 0.69 | 1.20 | 0.51 | 1.13 | 0.55 |
| iYJL143W   | 1.18 | 0.53 | 1.10 | 0.52 | 1.06 | 0.48 |
| iYJL144W   | 2.03 | 0.85 | 1.93 | 0.82 | 2.36 | 0.93 |
| iYJL145W   | #N/A | #N/A | 1.01 | 0.37 | 0.79 | 0.30 |
| iYJL146W   | 1.11 | 0.50 | 1.40 | 0.61 | 1.14 | 0.52 |
| iYJL147C   | 2.90 | 0.96 | 2.17 | 0.89 | 2.01 | 0.88 |
| iYJL148W   | 0.43 | 0.12 | 0.46 | 0.07 | 0.42 | 0.10 |
| iYJL149W   | #N/A | #N/A | #N/A | #N/A | #N/A | #N/A |
| iYJL151C   | 1.01 | 0.44 | 1.38 | 0.58 | 0.93 | 0.42 |
| iYJL153C   | 0.67 | 0.24 | 0.58 | 0.17 | 0.69 | 0.26 |
| iYJL154C   | 1.34 | 0.61 | 1.43 | 0.61 | 1.40 | 0.68 |
| iYJL155C   | 1.08 | 0.46 | 0.77 | 0.30 | 0.91 | 0.40 |
| iYJL156C   | 2.17 | 0.86 | #N/A | #N/A | 1.68 | 0.79 |
| iYJL157C   | 0.40 | 0.09 | 0.91 | 0.39 | 0.43 | 0.11 |
| iYJL158C   | 0.44 | 0.12 | 0.66 | 0.21 | 0.39 | 0.08 |
| iYJL159W   | 0.79 | 0.33 | 1.07 | 0.43 | 0.91 | 0.42 |
| iYJL160C-0 | 2.40 | 0.90 | 2.59 | 0.94 | 2.20 | 0.89 |
| iYJL160C-1 | 1.41 | 0.61 | 1.32 | 0.57 | 0.97 | 0.46 |
| iYJL161W   | 2.30 | 0.91 | 1.84 | 0.83 | 1.77 | 0.82 |
| iYJL163C   | 1.65 | 0.73 | 1.85 | 0.86 | 1.50 | 0.68 |
| iYJL164C   | 2.31 | 0.90 | 1.50 | 0.71 | 1.82 | 0.77 |
| iYJL165C   | 1.92 | 0.82 | 1.76 | 0.77 | 1.60 | 0.73 |
| iYJL166W   | #N/A | #N/A | #N/A | #N/A | #N/A | #N/A |
| iYJL167W   | #N/A | #N/A | 0.87 | 0.33 | 0.91 | 0.36 |
| iYJL168C   | 2.12 | 0.88 | #N/A | #N/A | 2.02 | 0.84 |
| iYJL170C   | 0.99 | 0.44 | 1.32 | 0.57 | 0.91 | 0.39 |
| iYJL171C   | #N/A | #N/A | #N/A | #N/A | #N/A | #N/A |
| iYJL172W   | #N/A | #N/A | #N/A | #N/A | #N/A | #N/A |
| iYJL173C   | 3.23 | 0.98 | 2.23 | 0.92 | 2.91 | 0.97 |
| iYJL174W   | 0.73 | 0.27 | #N/A | #N/A | 0.92 | 0.43 |
| iYJL175W   | 2.35 | 0.93 | 1.95 | 0.89 | 2.19 | 0.92 |
| iYJL177W   | 0.44 | 0.12 | #N/A | #N/A | 0.31 | 0.04 |
| iYJL178C   | 0.34 | 0.06 | 0.50 | 0.13 | 0.50 | 0.13 |
| iYJL179W   | 0.79 | 0.33 | #N/A | #N/A | 0.96 | 0.43 |
| iYJL180C   | #N/A | #N/A | #N/A | #N/A | #N/A | #N/A |
| iYJL181W   | #N/A | #N/A | #N/A | #N/A | #N/A | #N/A |
| iYJL183W   | #N/A | #N/A | #N/A | #N/A | #N/A | #N/A |
| iYJL184W   | 3.17 | 0.98 | 2.77 | 0.98 | 2.73 | 0.95 |
| iYJL185C   | 2.76 | 0.97 | 1.67 | 0.81 | 2.33 | 0.93 |
| iYJL186W   | 0.84 | 0.36 | 0.86 | 0.32 | 1.15 | 0.53 |
| iYJL187C   | 0.83 | 0.33 | 1.33 | 0.57 | 0.72 | 0.29 |
| iYJL188C   | #N/A | #N/A | #N/A | #N/A | #N/A | #N/A |
| iYJL190C   | 0.13 | 0.01 | #N/A | #N/A | 0.11 | 0.00 |
| iYJL191W   | #N/A | #N/A | #N/A | #N/A | #N/A | #N/A |
| iYJL192C   | 0.43 | 0.10 | 0.55 | 0.16 | 0.48 | 0.14 |
| iYJL193W   | #N/A | #N/A | 0.56 | 0.17 | 0.55 | 0.19 |
| iYJL194W   | 2.06 | 0.87 | 2.20 | 0.92 | 2.04 | 0.87 |
| iYJL196C   | 0.73 | 0.27 | 0.62 | 0.21 | 0.43 | 0.11 |
| iYJL197W   | #N/A | #N/A | #N/A | #N/A | #N/A | #N/A |
| iYJL198W   | 1.95 | 0.84 | 2.17 | 0.89 | 1.41 | 0.68 |
| iYJL199C   | 3.19 | 0.97 | 3.49 | 0.99 | 2.62 | 0.97 |

|              |      |      |      |      |      |      |
|--------------|------|------|------|------|------|------|
| iYJL200C     | 0.65 | 0.25 | #N/A | #N/A | 1.01 | 0.48 |
| iYJL201W     | #N/A | #N/A | #N/A | #N/A | #N/A | #N/A |
| iYJL202C     | 1.40 | 0.64 | 1.63 | 0.72 | 1.15 | 0.52 |
| iYJL204C     | 1.99 | 0.82 | 1.67 | 0.75 | 1.71 | 0.80 |
| iYJL206C     | 2.14 | 0.85 | 1.53 | 0.67 | 2.02 | 0.83 |
| iYJL206C-A   | 2.25 | 0.91 | 1.38 | 0.58 | 2.20 | 0.88 |
| iYJL207C     | 1.80 | 0.79 | #N/A | #N/A | #N/A | #N/A |
| iYJL208C     | 1.58 | 0.71 | 1.62 | 0.76 | #N/A | #N/A |
| iYJL209W     | #N/A | #N/A | #N/A | #N/A | #N/A | #N/A |
| iYJL210W     | 0.67 | 0.25 | #N/A | #N/A | #N/A | #N/A |
| iYJL212C     | 0.87 | 0.36 | 1.16 | 0.50 | 0.72 | 0.29 |
| iYJL213W     | 0.70 | 0.26 | 0.71 | 0.23 | 1.14 | 0.48 |
| iYJL214W-0   | 1.43 | 0.61 | 1.12 | 0.53 | 1.50 | 0.71 |
| iYJL214W-1   | 0.87 | 0.37 | #N/A | #N/A | 0.92 | 0.40 |
| iYJL215C     | #N/A | #N/A | #N/A | #N/A | #N/A | #N/A |
| iYJL216C     | 0.79 | 0.30 | 0.81 | 0.33 | 1.17 | 0.53 |
| iYJL217W     | 0.93 | 0.38 | 1.26 | 0.53 | 0.92 | 0.38 |
| iYJL218W     | 2.19 | 0.88 | 1.53 | 0.72 | 1.76 | 0.74 |
| iYJL219W     | 1.86 | 0.82 | 1.72 | 0.75 | 1.69 | 0.75 |
| iYJL220W     | 1.88 | 0.83 | 1.68 | 0.74 | 1.71 | 0.80 |
| iYJL222W     | 1.85 | 0.77 | 1.31 | 0.64 | 1.75 | 0.79 |
| iYJL223C-0   | 0.84 | 0.35 | 0.83 | 0.31 | 0.89 | 0.35 |
| iYJL225C-1   | 0.39 | 0.09 | 0.44 | 0.09 | 0.44 | 0.10 |
| iYJLCdelta3  | 0.82 | 0.33 | 1.08 | 0.45 | 0.80 | 0.35 |
| iYJLCdelta5  | 0.88 | 0.37 | #N/A | #N/A | 0.70 | 0.25 |
| iYJLCdelta6  | 1.73 | 0.77 | 3.03 | 0.99 | 1.85 | 0.82 |
| iYJLCdelta7  | 1.89 | 0.81 | 3.57 | 0.99 | 1.63 | 0.74 |
| iYJLWdelta1  | 2.27 | 0.91 | 1.92 | 0.81 | 3.65 | 1.00 |
| iYJLWdelta15 | 0.45 | 0.13 | 0.72 | 0.24 | 0.37 | 0.06 |
| iYJLWdelta19 | #N/A | #N/A | #N/A | #N/A | #N/A | #N/A |
| iYJLWdelta8  | 1.65 | 0.74 | 2.15 | 0.93 | 1.66 | 0.73 |
| iYJLWdelta9  | 1.39 | 0.63 | 2.18 | 0.88 | 1.67 | 0.77 |
| iYJLWtau4    | #N/A | #N/A | #N/A | #N/A | #N/A | #N/A |
| iYJR001W     | #N/A | #N/A | #N/A | #N/A | #N/A | #N/A |
| iYJR002W     | 0.44 | 0.12 | 0.55 | 0.15 | 0.42 | 0.08 |
| iYJR003C     | 0.76 | 0.31 | #N/A | #N/A | 0.73 | 0.31 |
| iYJR004C     | 1.81 | 0.77 | 1.27 | 0.61 | 1.55 | 0.70 |
| iYJR005W     | 1.14 | 0.52 | 1.23 | 0.51 | 1.11 | 0.54 |
| iYJR006W     | 0.97 | 0.43 | 1.06 | 0.50 | 0.98 | 0.47 |
| iYJR007W     | 0.87 | 0.37 | 0.73 | 0.27 | 0.87 | 0.38 |
| iYJR008W     | #N/A | #N/A | #N/A | #N/A | 0.71 | 0.27 |
| iYJR009C-0   | 0.88 | 0.35 | 0.63 | 0.16 | 0.65 | 0.25 |
| iYJR010C-A   | 2.08 | 0.84 | 1.80 | 0.77 | 1.82 | 0.77 |
| iYJR010W     | 1.01 | 0.45 | 1.21 | 0.58 | 1.23 | 0.52 |
| iYJR011C     | 1.66 | 0.73 | 2.52 | 0.94 | 2.16 | 0.87 |
| iYJR012C     | 1.93 | 0.84 | #N/A | #N/A | 1.91 | 0.84 |
| iYJR013W     | #N/A | #N/A | #N/A | #N/A | 0.94 | 0.41 |
| iYJR014W     | 0.60 | 0.20 | 0.93 | 0.33 | 0.62 | 0.22 |
| iYJR015W     | #N/A | #N/A | #N/A | #N/A | #N/A | #N/A |
| iYJR016C     | 1.00 | 0.44 | 0.76 | 0.26 | 0.50 | 0.16 |
| iYJR018W     | #N/A | #N/A | #N/A | #N/A | #N/A | #N/A |

|          |      |      |      |      |      |      |
|----------|------|------|------|------|------|------|
| iYJR020W | 1.52 | 0.69 | 1.20 | 0.51 | 1.36 | 0.62 |
| iYJR021C | 1.73 | 0.77 | 1.80 | 0.85 | 1.86 | 0.82 |
| iYJR024C | 1.82 | 0.80 | 2.27 | 0.90 | 2.58 | 0.94 |
| iYJR025C | 1.07 | 0.48 | 1.03 | 0.41 | 1.22 | 0.53 |
| iYJR030C | 0.90 | 0.36 | 1.20 | 0.51 | 0.86 | 0.35 |
| iYJR031C | 2.18 | 0.89 | 1.96 | 0.82 | 2.16 | 0.90 |
| iYJR032W | #N/A | #N/A | #N/A | #N/A | #N/A | #N/A |
| iYJR034W | 1.61 | 0.72 | #N/A | #N/A | #N/A | #N/A |
| iYJR035W | #N/A | #N/A | #N/A | #N/A | #N/A | #N/A |
| iYJR037W | #N/A | #N/A | 2.06 | 0.90 | 3.53 | 0.99 |
| iYJR039W | 2.45 | 0.93 | 1.32 | 0.64 | 1.97 | 0.88 |
| iYJR040W | #N/A | #N/A | #N/A | #N/A | 0.39 | 0.07 |
| iYJR041C | 1.78 | 0.75 | #N/A | #N/A | 1.90 | 0.86 |
| iYJR042W | #N/A | #N/A | #N/A | #N/A | #N/A | #N/A |
| iYJR043C | 2.07 | 0.87 | 1.69 | 0.73 | 1.58 | 0.72 |
| iYJR044C | 1.63 | 0.72 | 1.38 | 0.60 | 1.42 | 0.61 |
| iYJR045C | 1.50 | 0.64 | 1.09 | 0.45 | 1.42 | 0.63 |
| iYJR046W | #N/A | #N/A | #N/A | #N/A | #N/A | #N/A |
| iYJR047C | 0.71 | 0.25 | 0.89 | 0.31 | 0.63 | 0.24 |
| iYJR048W | 1.63 | 0.74 | 1.38 | 0.58 | 1.49 | 0.64 |
| iYJR049C | 1.56 | 0.69 | 1.84 | 0.81 | 1.65 | 0.74 |
| iYJR050W | 1.72 | 0.77 | 1.55 | 0.67 | 1.66 | 0.71 |
| iYJR051W | #N/A | #N/A | #N/A | #N/A | 0.47 | 0.13 |
| iYJR053W | 1.13 | 0.50 | #N/A | #N/A | 1.04 | 0.44 |
| iYJR054W | 0.43 | 0.11 | 0.88 | 0.30 | #N/A | #N/A |
| iYJR055W | 1.34 | 0.61 | 1.25 | 0.60 | 1.34 | 0.63 |
| iYJR056C | 1.56 | 0.70 | 1.72 | 0.75 | 1.43 | 0.61 |
| iYJR058C | 1.55 | 0.68 | 1.80 | 0.78 | 1.43 | 0.64 |
| iYJR059W | 0.56 | 0.19 | 0.71 | 0.20 | 0.56 | 0.19 |
| iYJR060W | 0.60 | 0.21 | 0.56 | 0.12 | 0.48 | 0.14 |
| iYJR061W | #N/A | #N/A | #N/A | #N/A | 0.42 | 0.10 |
| iYJR062C | 2.18 | 0.86 | 2.11 | 0.87 | 2.20 | 0.89 |
| iYJR063W | 1.47 | 0.66 | 1.42 | 0.60 | 1.72 | 0.76 |
| iYJR064W | 0.40 | 0.09 | 0.33 | 0.04 | 0.48 | 0.13 |
| iYJR065C | 1.96 | 0.84 | 1.78 | 0.76 | 2.09 | 0.88 |
| iYJR066W | #N/A | #N/A | #N/A | #N/A | #N/A | #N/A |
| iYJR067C | 2.61 | 0.95 | 2.42 | 0.92 | 2.59 | 0.97 |
| iYJR068W | #N/A | #N/A | #N/A | #N/A | #N/A | #N/A |
| iYJR069C | 0.85 | 0.34 | 0.77 | 0.25 | 0.70 | 0.27 |
| iYJR071W | 0.76 | 0.29 | 0.70 | 0.23 | 0.76 | 0.28 |
| iYJR072C | 1.55 | 0.69 | #N/A | #N/A | 2.10 | 0.88 |
| iYJR073C | 1.93 | 0.83 | 1.17 | 0.56 | 1.29 | 0.62 |
| iYJR074W | 1.63 | 0.72 | 2.06 | 0.85 | 1.74 | 0.75 |
| iYJR075W | #N/A | #N/A | #N/A | #N/A | #N/A | #N/A |
| iYJR077C | 1.37 | 0.63 | 2.04 | 0.84 | 1.25 | 0.61 |
| iYJR080C | 1.63 | 0.72 | 2.06 | 0.91 | 1.51 | 0.69 |
| iYJR082C | 2.39 | 0.91 | 2.12 | 0.87 | 2.08 | 0.84 |
| iYJR083C | 2.35 | 0.93 | 2.66 | 0.95 | 2.23 | 0.87 |
| iYJR084W | #N/A | #N/A | #N/A | #N/A | #N/A | #N/A |
| iYJR085C | #N/A | #N/A | #N/A | #N/A | #N/A | #N/A |
| iYJR088C | 1.91 | 0.80 | 1.82 | 0.86 | 2.36 | 0.91 |

|            |      |      |      |      |      |      |
|------------|------|------|------|------|------|------|
| iYJR089W   | 0.29 | 0.04 | 0.39 | 0.06 | #N/A | #N/A |
| iYJR090C   | 0.69 | 0.26 | 0.50 | 0.10 | #N/A | #N/A |
| iYJR091C   | 0.81 | 0.34 | 0.64 | 0.22 | 0.78 | 0.33 |
| iYJR092W   | 0.63 | 0.23 | 0.52 | 0.10 | 0.66 | 0.22 |
| iYJR093C   | 1.47 | 0.67 | 1.84 | 0.79 | 1.90 | 0.86 |
| iYJR094C-0 | 1.33 | 0.57 | 1.20 | 0.51 | 1.12 | 0.50 |
| iYJR094W-A | 0.92 | 0.37 | 0.95 | 0.40 | 0.84 | 0.36 |
| iYJR095W   | 2.28 | 0.91 | 2.76 | 0.96 | 2.39 | 0.92 |
| iYJR096W   | 2.02 | 0.82 | 2.27 | 0.92 | 2.10 | 0.85 |
| iYJR097W   | #N/A | #N/A | #N/A | #N/A | #N/A | #N/A |
| iYJR098C   | 2.22 | 0.90 | 2.18 | 0.93 | 2.58 | 0.94 |
| iYJR099W   | #N/A | #N/A | #N/A | #N/A | #N/A | #N/A |
| iYJR100C   | 2.11 | 0.84 | 1.47 | 0.65 | 1.84 | 0.78 |
| iYJR101W   | 0.58 | 0.19 | #N/A | #N/A | 0.84 | 0.32 |
| iYJR102C   | 1.84 | 0.77 | 1.90 | 0.81 | 1.92 | 0.84 |
| iYJR103W   | #N/A | #N/A | #N/A | #N/A | 0.72 | 0.30 |
| iYJR104C   | 1.05 | 0.47 | 0.82 | 0.34 | 0.63 | 0.24 |
| iYJR105W   | 1.51 | 0.65 | 1.45 | 0.67 | 1.16 | 0.49 |
| iYJR106W   | 0.35 | 0.07 | 0.45 | 0.07 | 0.28 | 0.03 |
| iYJR107W   | 1.08 | 0.47 | 1.04 | 0.39 | 1.19 | 0.52 |
| iYJR108W   | #N/A | #N/A | #N/A | #N/A | #N/A | #N/A |
| iYJR109C   | 1.83 | 0.80 | 2.00 | 0.84 | 2.34 | 0.94 |
| iYJR110W   | 0.46 | 0.12 | #N/A | #N/A | #N/A | #N/A |
| iYJR111C   | 1.45 | 0.63 | 1.66 | 0.77 | #N/A | #N/A |
| iYJR112W   | 2.15 | 0.89 | 1.49 | 0.68 | 1.94 | 0.81 |
| iYJR114W   | #N/A | #N/A | 0.99 | 0.40 | 0.78 | 0.33 |
| iYJR115W   | 2.17 | 0.89 | 2.00 | 0.89 | 2.67 | 0.96 |
| iYJR116W   | 2.38 | 0.93 | 2.48 | 0.93 | 1.79 | 0.81 |
| iYJR117W   | 0.50 | 0.16 | #N/A | #N/A | 0.58 | 0.18 |
| iYJR118C   | #N/A | #N/A | #N/A | #N/A | #N/A | #N/A |
| iYJR119C   | 1.18 | 0.54 | 1.11 | 0.46 | 1.39 | 0.62 |
| iYJR120W   | #N/A | #N/A | 0.66 | 0.23 | 0.44 | 0.10 |
| iYJR121W   | #N/A | #N/A | #N/A | #N/A | #N/A | #N/A |
| iYJR122W   | 0.30 | 0.04 | 0.23 | 0.00 | 0.25 | 0.02 |
| iYJR123W   | #N/A | #N/A | #N/A | #N/A | #N/A | #N/A |
| iYJR124C   | 1.10 | 0.46 | 1.01 | 0.45 | 1.03 | 0.45 |
| iYJR125C   | 1.96 | 0.83 | 1.26 | 0.59 | 2.12 | 0.86 |
| iYJR126C   | 1.28 | 0.55 | 1.31 | 0.55 | 1.18 | 0.52 |
| iYJR128W   | 0.35 | 0.07 | 0.47 | 0.08 | 0.25 | 0.02 |
| iYJR129C   | 1.41 | 0.63 | 1.12 | 0.53 | 1.37 | 0.62 |
| iYJR130C   | 1.80 | 0.76 | 1.44 | 0.62 | 2.22 | 0.87 |
| iYJR131W   | 1.00 | 0.45 | 0.71 | 0.24 | 1.15 | 0.49 |
| iYJR132W   | 1.78 | 0.78 | #N/A | #N/A | 1.74 | 0.76 |
| iYJR133W   | #N/A | #N/A | #N/A | #N/A | #N/A | #N/A |
| iYJR134C   | #N/A | #N/A | #N/A | #N/A | #N/A | #N/A |
| iYJR135C   | 2.25 | 0.88 | 1.87 | 0.84 | 2.07 | 0.88 |
| iYJR136C   | #N/A | #N/A | #N/A | #N/A | #N/A | #N/A |
| iYJR137C   | 0.70 | 0.25 | 0.78 | 0.31 | #N/A | #N/A |
| iYJR138W   | #N/A | #N/A | #N/A | #N/A | #N/A | #N/A |
| iYJR139C   | 0.94 | 0.41 | 0.85 | 0.35 | 1.13 | 0.51 |
| iYJR140C   | 1.95 | 0.85 | #N/A | #N/A | 1.54 | 0.72 |

|              |      |      |      |      |      |      |
|--------------|------|------|------|------|------|------|
| iYJR141W     | #N/A | #N/A | #N/A | #N/A | #N/A | #N/A |
| iYJR142W     | 0.42 | 0.11 | #N/A | #N/A | 0.89 | 0.39 |
| iYJR143C     | 1.91 | 0.82 | #N/A | #N/A | 1.63 | 0.77 |
| iYJR144W     | 0.55 | 0.19 | 1.02 | 0.38 | 0.51 | 0.14 |
| iYJR145C     | 0.12 | 0.00 | 0.32 | 0.03 | 0.16 | 0.00 |
| iYJR147W     | #N/A | #N/A | #N/A | #N/A | #N/A | #N/A |
| iYJR148W     | 0.57 | 0.20 | 0.61 | 0.20 | 0.50 | 0.13 |
| iYJR149W     | 1.10 | 0.48 | 1.07 | 0.50 | 1.09 | 0.50 |
| iYJR150C-0   | 2.00 | 0.86 | 2.54 | 0.94 | 1.88 | 0.86 |
| iYJR150C-1   | 2.49 | 0.94 | 2.01 | 0.90 | 2.30 | 0.89 |
| iYJR151C-0   | 0.95 | 0.39 | 0.76 | 0.28 | 1.30 | 0.58 |
| iYJR151C-1   | 3.48 | 0.99 | 2.16 | 0.88 | 2.55 | 0.96 |
| iYJR151C-2   | 1.28 | 0.58 | 0.85 | 0.30 | 1.15 | 0.48 |
| iYJR152W     | 1.46 | 0.66 | 1.08 | 0.45 | 1.49 | 0.71 |
| iYJR153W-0   | 1.89 | 0.81 | 1.59 | 0.68 | 1.51 | 0.69 |
| iYJR153W-1   | 2.31 | 0.89 | 1.99 | 0.85 | 2.27 | 0.92 |
| iYJR154W     | 1.03 | 0.44 | 0.82 | 0.27 | 0.94 | 0.41 |
| iYJR155W     | #N/A | #N/A | #N/A | #N/A | #N/A | #N/A |
| iYJR156C     | 3.70 | 0.99 | 3.73 | 1.00 | 3.25 | 0.99 |
| iYJR157W-0   | 1.00 | 0.43 | 0.73 | 0.27 | 1.17 | 0.49 |
| iYJR157W-1   | 0.46 | 0.13 | 0.40 | 0.06 | 0.69 | 0.28 |
| iYJR158W-0   | 2.26 | 0.91 | 2.26 | 0.93 | #N/A | #N/A |
| iYJR158W-1   | 1.49 | 0.68 | 1.62 | 0.69 | 1.64 | 0.76 |
| iYJR159W     | 2.55 | 0.95 | 1.91 | 0.82 | 2.69 | 0.95 |
| iYJR160C-0   | 1.10 | 0.48 | 0.69 | 0.25 | 1.25 | 0.57 |
| iYJR160C-1   | 0.46 | 0.12 | 0.50 | 0.11 | 0.47 | 0.13 |
| iYJR161C     | 0.61 | 0.22 | 0.70 | 0.23 | 0.62 | 0.23 |
| iYJRWdelta14 | 1.93 | 0.83 | 1.70 | 0.82 | 1.74 | 0.78 |
| iYJRWdelta17 | #N/A | #N/A | #N/A | #N/A | #N/A | #N/A |
| iYJRWdelta20 | 1.86 | 0.81 | 1.87 | 0.80 | 1.68 | 0.76 |
| iYKL001C     | 0.97 | 0.42 | 1.19 | 0.48 | 1.25 | 0.61 |
| iYKL002W     | #N/A | #N/A | #N/A | #N/A | #N/A | #N/A |
| iYKL003C     | 1.96 | 0.81 | 1.78 | 0.76 | 2.10 | 0.90 |
| iYKL004W     | 0.74 | 0.30 | 0.56 | 0.17 | #N/A | #N/A |
| iYKL005C     | #N/A | #N/A | 1.58 | 0.74 | 1.90 | 0.79 |
| iYKL006C-A   | 0.25 | 0.03 | 0.48 | 0.11 | 0.29 | 0.03 |
| iYKL006W     | #N/A | #N/A | #N/A | #N/A | 0.41 | 0.09 |
| iYKL007W     | #N/A | #N/A | #N/A | #N/A | #N/A | #N/A |
| iYKL008C     | 0.46 | 0.13 | 0.45 | 0.09 | 0.31 | 0.04 |
| iYKL009W     | 0.62 | 0.21 | 0.39 | 0.04 | 0.61 | 0.23 |
| iYKL010C     | 1.16 | 0.53 | 1.18 | 0.47 | 1.48 | 0.67 |
| iYKL011C     | #N/A | #N/A | #N/A | #N/A | 0.79 | 0.34 |
| iYKL012W     | #N/A | #N/A | #N/A | #N/A | #N/A | #N/A |
| iYKL013C     | 2.47 | 0.94 | 2.65 | 0.96 | 2.56 | 0.94 |
| iYKL014C     | 1.55 | 0.66 | 1.29 | 0.54 | 1.48 | 0.72 |
| iYKL015W     | #N/A | #N/A | #N/A | #N/A | #N/A | #N/A |
| iYKL016C     | 1.24 | 0.53 | 0.97 | 0.35 | 1.08 | 0.49 |
| iYKL017C     | #N/A | #N/A | #N/A | #N/A | 1.08 | 0.48 |
| iYKL018W     | #N/A | #N/A | 0.47 | 0.11 | #N/A | #N/A |
| iYKL019W     | 3.42 | 0.99 | 2.51 | 0.96 | 3.38 | 0.99 |
| iYKL020C     | 3.26 | 0.98 | 2.55 | 0.97 | 3.54 | 0.99 |

|            |      |      |      |      |      |      |
|------------|------|------|------|------|------|------|
| iYKL021C   | #N/A | #N/A | #N/A | #N/A | #N/A | #N/A |
| iYKL022C   | #N/A | #N/A | #N/A | #N/A | #N/A | #N/A |
| iYKL023W   | 0.44 | 0.12 | 0.36 | 0.05 | 0.35 | 0.05 |
| iYKL024C   | 1.43 | 0.66 | 1.44 | 0.71 | 1.42 | 0.65 |
| iYKL025C   | #N/A | #N/A | #N/A | #N/A | #N/A | #N/A |
| iYKL026C   | #N/A | #N/A | 1.50 | 0.66 | 0.96 | 0.43 |
| iYKL027W   | 1.03 | 0.45 | 1.36 | 0.58 | 1.82 | 0.79 |
| iYKL028W   | 0.99 | 0.44 | #N/A | #N/A | 0.82 | 0.36 |
| iYKL029C   | 0.59 | 0.20 | 0.81 | 0.29 | 0.67 | 0.26 |
| iYKL032C   | 0.34 | 0.06 | 0.52 | 0.13 | 0.37 | 0.06 |
| iYKL033W   | 2.19 | 0.89 | 2.68 | 0.96 | 2.13 | 0.90 |
| iYKL033W-A | 1.21 | 0.53 | 0.81 | 0.29 | 1.15 | 0.53 |
| iYKL034W   | 1.52 | 0.68 | 1.39 | 0.66 | 1.58 | 0.67 |
| iYKL035W   | 1.53 | 0.66 | 1.15 | 0.48 | 1.64 | 0.75 |
| iYKL038W   | 0.85 | 0.33 | 0.93 | 0.36 | 0.96 | 0.43 |
| iYKL039W   | 0.69 | 0.27 | 1.09 | 0.47 | 0.78 | 0.33 |
| iYKL040C   | 1.37 | 0.62 | 1.93 | 0.86 | 1.31 | 0.64 |
| iYKL041W   | #N/A | #N/A | #N/A | #N/A | #N/A | #N/A |
| iYKL042W   | 1.83 | 0.80 | 1.44 | 0.71 | 1.60 | 0.73 |
| iYKL043W   | 1.30 | 0.58 | 1.25 | 0.61 | 1.10 | 0.53 |
| iYKL044W   | 0.58 | 0.20 | 0.52 | 0.13 | 0.59 | 0.21 |
| iYKL045W   | 0.21 | 0.01 | 0.28 | 0.01 | 0.21 | 0.01 |
| iYKL046C   | 2.54 | 0.92 | 1.94 | 0.89 | 2.02 | 0.86 |
| iYKL047W   | #N/A | #N/A | #N/A | #N/A | 0.58 | 0.18 |
| iYKL048C   | 1.99 | 0.85 | 1.23 | 0.59 | 2.14 | 0.91 |
| iYKL049C   | 1.12 | 0.49 | 1.12 | 0.46 | 1.03 | 0.46 |
| iYKL050C   | 0.55 | 0.17 | 0.48 | 0.11 | 0.50 | 0.14 |
| iYKL051W   | 0.64 | 0.22 | 1.63 | 0.72 | 0.74 | 0.26 |
| iYKL052C   | 0.67 | 0.24 | 1.42 | 0.67 | 0.51 | 0.14 |
| iYKL053C-A | 1.10 | 0.49 | 1.01 | 0.38 | 1.12 | 0.55 |
| iYKL054C   | 0.49 | 0.15 | 0.64 | 0.20 | 0.59 | 0.21 |
| iYKL055C   | 0.57 | 0.19 | 1.09 | 0.42 | 0.55 | 0.18 |
| iYKL056C   | 0.47 | 0.13 | #N/A | #N/A | 0.37 | 0.06 |
| iYKL057C   | 0.92 | 0.40 | 1.19 | 0.50 | 0.94 | 0.43 |
| iYKL058W   | #N/A | #N/A | #N/A | #N/A | #N/A | #N/A |
| iYKL059C   | 1.99 | 0.81 | 1.98 | 0.84 | 1.54 | 0.73 |
| iYKL060C   | 0.24 | 0.02 | 0.42 | 0.08 | 0.28 | 0.03 |
| iYKL061W   | #N/A | #N/A | #N/A | #N/A | #N/A | #N/A |
| iYKL062W   | 1.03 | 0.43 | 1.02 | 0.43 | 1.05 | 0.51 |
| iYKL063C-0 | 0.99 | 0.43 | 1.12 | 0.44 | 0.63 | 0.23 |
| iYKL063C-1 | 0.49 | 0.15 | 0.39 | 0.06 | 0.36 | 0.06 |
| iYKL064W   | 0.81 | 0.34 | 0.83 | 0.34 | #N/A | #N/A |
| iYKL065C   | 2.05 | 0.87 | 1.97 | 0.87 | 1.87 | 0.82 |
| iYKL066W   | 1.59 | 0.68 | 1.29 | 0.62 | 1.35 | 0.66 |
| iYKL068W   | 0.66 | 0.25 | 1.10 | 0.44 | 0.95 | 0.40 |
| iYKL069W   | 1.26 | 0.56 | 0.86 | 0.36 | 1.10 | 0.50 |
| iYKL070W   | 1.05 | 0.43 | 1.26 | 0.54 | 1.28 | 0.59 |
| iYKL071W   | 0.29 | 0.04 | 0.32 | 0.02 | 0.31 | 0.03 |
| iYKL072W   | 0.56 | 0.18 | 0.64 | 0.22 | 0.53 | 0.17 |
| iYKL073W   | 2.64 | 0.96 | 2.02 | 0.85 | 2.74 | 0.95 |
| iYKL074C   | 1.74 | 0.78 | 2.08 | 0.86 | 1.81 | 0.77 |



|              |      |      |      |      |      |      |
|--------------|------|------|------|------|------|------|
| iYKL075C     | 1.79 | 0.78 | 1.76 | 0.76 | #N/A | #N/A |
| iYKL077W     | #N/A | #N/A | #N/A | #N/A | #N/A | #N/A |
| iYKL078W     | 1.65 | 0.73 | 1.60 | 0.74 | 1.78 | 0.79 |
| iYKL079W     | 1.59 | 0.68 | 1.48 | 0.71 | 1.61 | 0.68 |
| iYKL081W     | 0.52 | 0.15 | 1.31 | 0.64 | 1.11 | 0.50 |
| iYKL082C     | 0.90 | 0.38 | 1.56 | 0.67 | #N/A | #N/A |
| iYKL084W     | #N/A | #N/A | #N/A | #N/A | #N/A | #N/A |
| iYKL085W     | 1.01 | 0.42 | 0.81 | 0.32 | 1.03 | 0.46 |
| iYKL086W     | 1.45 | 0.63 | 1.24 | 0.60 | 1.27 | 0.60 |
| iYKL087C     | 1.71 | 0.74 | 1.94 | 0.83 | 1.84 | 0.81 |
| iYKL088W     | 0.46 | 0.13 | #N/A | #N/A | 0.61 | 0.20 |
| iYKL089W     | 2.32 | 0.91 | 1.38 | 0.65 | 1.96 | 0.88 |
| iYKL090W     | 1.56 | 0.69 | 1.45 | 0.62 | 1.58 | 0.67 |
| iYKL091C     | 1.35 | 0.61 | 1.30 | 0.61 | 1.33 | 0.61 |
| iYKL092C     | 2.14 | 0.85 | 1.70 | 0.73 | 1.66 | 0.78 |
| iYKL093W     | 1.17 | 0.51 | 0.80 | 0.28 | 1.09 | 0.45 |
| iYKL094W     | 0.60 | 0.22 | 0.95 | 0.38 | 0.88 | 0.35 |
| iYKL095W     | 1.57 | 0.71 | 1.13 | 0.45 | 1.45 | 0.70 |
| iYKL096W     | 1.95 | 0.84 | 1.62 | 0.79 | 1.68 | 0.72 |
| iYKL097C     | 0.22 | 0.02 | 0.37 | 0.05 | 0.26 | 0.02 |
| iYKL097W-A-0 | 0.63 | 0.22 | 0.70 | 0.25 | 0.46 | 0.13 |
| iYKL097W-A-1 | 0.34 | 0.07 | 0.46 | 0.10 | 0.27 | 0.03 |
| iYKL098W     | 0.64 | 0.22 | 0.53 | 0.11 | 0.88 | 0.34 |
| iYKL099C     | 1.93 | 0.84 | #N/A | #N/A | 1.77 | 0.82 |
| iYKL100C     | 0.94 | 0.41 | 1.19 | 0.48 | 1.16 | 0.57 |
| iYKL101W     | #N/A | #N/A | 0.43 | 0.06 | 0.40 | 0.07 |
| iYKL102C     | 1.52 | 0.68 | 1.55 | 0.76 | 1.50 | 0.68 |
| iYKL103C     | 1.43 | 0.61 | 1.24 | 0.51 | 1.07 | 0.49 |
| iYKL104C     | 0.96 | 0.42 | 0.87 | 0.33 | 0.69 | 0.28 |
| iYKL105C     | 1.23 | 0.55 | 0.89 | 0.38 | 1.07 | 0.51 |
| iYKL106W     | 0.36 | 0.07 | #N/A | #N/A | #N/A | #N/A |
| iYKL107W     | 1.62 | 0.73 | 2.22 | 0.89 | 2.07 | 0.85 |
| iYKL108W     | 0.70 | 0.28 | 0.84 | 0.31 | 0.67 | 0.26 |
| iYKL109W     | 1.00 | 0.45 | 1.09 | 0.45 | 1.10 | 0.45 |
| iYKL110C-0   | 0.55 | 0.19 | 0.66 | 0.17 | 0.56 | 0.16 |
| iYKL110C-1   | 0.26 | 0.03 | #N/A | #N/A | 0.33 | 0.04 |
| iYKL111C     | #N/A | #N/A | #N/A | #N/A | #N/A | #N/A |
| iYKL113C     | 0.86 | 0.37 | 0.75 | 0.22 | 0.82 | 0.36 |
| iYKL114C     | 2.13 | 0.88 | 1.65 | 0.77 | 1.85 | 0.78 |
| iYKL115C     | #N/A | #N/A | 2.29 | 0.91 | #N/A | #N/A |
| iYKL117W     | 0.41 | 0.11 | 0.52 | 0.13 | 0.46 | 0.12 |
| iYKL120W     | 0.51 | 0.16 | 0.71 | 0.24 | 0.51 | 0.16 |
| iYKL121W     | 0.42 | 0.10 | 0.92 | 0.33 | 0.37 | 0.07 |
| iYKL125W     | 1.48 | 0.66 | 1.30 | 0.63 | #N/A | #N/A |
| iYKL126W     | 0.74 | 0.30 | 0.76 | 0.25 | 0.94 | 0.39 |
| iYKL127W     | 1.57 | 0.70 | 1.40 | 0.69 | 1.36 | 0.62 |
| iYKL128C     | 1.09 | 0.48 | 0.95 | 0.34 | 1.10 | 0.46 |
| iYKL130C     | 1.72 | 0.73 | 1.57 | 0.75 | 1.18 | 0.54 |
| iYKL131W     | 2.58 | 0.93 | 1.36 | 0.59 | 1.70 | 0.77 |
| iYKL133C     | 1.22 | 0.54 | 1.62 | 0.69 | 1.26 | 0.56 |
| iYKL134C     | 2.17 | 0.87 | 1.97 | 0.85 | 1.41 | 0.68 |



|              |      |      |      |      |      |      |
|--------------|------|------|------|------|------|------|
| iYKL135C     | 2.12 | 0.88 | 1.87 | 0.81 | 2.35 | 0.91 |
| iYKL137W     | #N/A | #N/A | #N/A | #N/A | #N/A | #N/A |
| iYKL138C     | 1.48 | 0.63 | 1.61 | 0.71 | 1.39 | 0.64 |
| iYKL139W     | 1.77 | 0.79 | 1.96 | 0.89 | 1.88 | 0.83 |
| iYKL140W     | 0.94 | 0.40 | #N/A | #N/A | #N/A | #N/A |
| iYKL141W     | 1.59 | 0.72 | 1.78 | 0.77 | 1.22 | 0.59 |
| iYKL142W     | 1.37 | 0.61 | #N/A | #N/A | 1.04 | 0.43 |
| iYKL143W     | 1.02 | 0.42 | 0.69 | 0.22 | 0.98 | 0.39 |
| iYKL144C     | 1.74 | 0.77 | 2.35 | 0.91 | 1.59 | 0.72 |
| iYKL145W     | #N/A | #N/A | #N/A | #N/A | #N/A | #N/A |
| iYKL146W     | 0.96 | 0.39 | 0.82 | 0.34 | 0.70 | 0.26 |
| iYKL148C     | 2.53 | 0.94 | 1.42 | 0.61 | 2.56 | 0.94 |
| iYKL149C     | 1.58 | 0.71 | #N/A | #N/A | #N/A | #N/A |
| iYKL150W     | #N/A | #N/A | #N/A | #N/A | #N/A | #N/A |
| iYKL151C     | 1.57 | 0.69 | 1.68 | 0.80 | 1.31 | 0.60 |
| iYKL152C     | 0.22 | 0.02 | 0.72 | 0.24 | 0.17 | 0.01 |
| iYKL154W     | #N/A | #N/A | #N/A | #N/A | #N/A | #N/A |
| iYKL155C     | 2.19 | 0.89 | 1.93 | 0.82 | 2.06 | 0.86 |
| iYKL156W     | #N/A | #N/A | #N/A | #N/A | #N/A | #N/A |
| iYKL157W     | 0.39 | 0.09 | 0.49 | 0.12 | 0.53 | 0.18 |
| iYKL158W     | 2.23 | 0.91 | 1.81 | 0.78 | 1.83 | 0.77 |
| iYKL159C     | 3.72 | 0.99 | 2.85 | 0.97 | 2.74 | 0.97 |
| iYKL160W     | 1.26 | 0.55 | 0.84 | 0.28 | 0.98 | 0.44 |
| iYKL161C-0   | 1.09 | 0.46 | 0.86 | 0.36 | 1.33 | 0.59 |
| iYKL162C     | 1.87 | 0.82 | 1.23 | 0.56 | 1.53 | 0.70 |
| iYKL162C-A-0 | 3.41 | 0.99 | 3.04 | 0.98 | 2.63 | 0.96 |
| iYKL162C-A-1 | 0.92 | 0.39 | 0.70 | 0.19 | 0.67 | 0.26 |
| iYKL163W     | 1.67 | 0.73 | 1.47 | 0.72 | 1.62 | 0.71 |
| iYKL164C-0   | 1.07 | 0.47 | 1.25 | 0.57 | 0.88 | 0.35 |
| iYKL164C-1   | 0.66 | 0.25 | 1.26 | 0.54 | 0.80 | 0.34 |
| iYKL165C     | 0.79 | 0.32 | 1.21 | 0.51 | 0.99 | 0.47 |
| iYKL166C-1   | 1.18 | 0.52 | 1.16 | 0.49 | 1.20 | 0.55 |
| iYKL167C     | 2.44 | 0.94 | 2.42 | 0.93 | 2.33 | 0.93 |
| iYKL168C     | 1.66 | 0.71 | #N/A | #N/A | 1.84 | 0.84 |
| iYKL169C     | #N/A | #N/A | #N/A | #N/A | 0.61 | 0.22 |
| iYKL171W     | 1.56 | 0.66 | 1.26 | 0.54 | 1.92 | 0.82 |
| iYKL172W     | 1.17 | 0.53 | 0.90 | 0.39 | 1.30 | 0.59 |
| iYKL173W     | 1.45 | 0.62 | #N/A | #N/A | #N/A | #N/A |
| iYKL174C     | 1.50 | 0.67 | 1.42 | 0.70 | 2.15 | 0.86 |
| iYKL175W     | #N/A | #N/A | #N/A | #N/A | #N/A | #N/A |
| iYKL176C     | 1.84 | 0.80 | 1.60 | 0.73 | 1.75 | 0.75 |
| iYKL177W     | 2.07 | 0.84 | 1.38 | 0.58 | 2.06 | 0.84 |
| iYKL179C     | 2.64 | 0.95 | 1.58 | 0.72 | 3.24 | 0.98 |
| iYKL180W     | 0.24 | 0.02 | #N/A | #N/A | 0.36 | 0.06 |
| iYKL181W     | #N/A | #N/A | 0.32 | 0.03 | 0.25 | 0.02 |
| iYKL182W     | 0.43 | 0.10 | 0.61 | 0.19 | 0.60 | 0.19 |
| iYKL183W     | 0.19 | 0.01 | 0.43 | 0.08 | 0.14 | 0.00 |
| iYKL184W     | 0.63 | 0.23 | 0.85 | 0.33 | 0.64 | 0.21 |
| iYKL185W     | 0.67 | 0.26 | 0.84 | 0.28 | 0.82 | 0.36 |
| iYKL186C     | 1.26 | 0.57 | 1.39 | 0.69 | 1.23 | 0.56 |
| iYKL187C     | 1.78 | 0.76 | 2.06 | 0.86 | 1.85 | 0.83 |

|             |      |      |      |      |      |      |
|-------------|------|------|------|------|------|------|
| iYKL188C    | 1.99 | 0.85 | 2.05 | 0.85 | 1.71 | 0.77 |
| iYKL189W    | 0.54 | 0.17 | 0.35 | 0.04 | 0.67 | 0.26 |
| iYKL190W    | 0.70 | 0.28 | 0.67 | 0.24 | 0.65 | 0.22 |
| iYKL191W    | 0.86 | 0.34 | #N/A | #N/A | 0.95 | 0.42 |
| iYKL192C    | 2.41 | 0.94 | 2.97 | 0.99 | 2.74 | 0.96 |
| iYKL193C    | 1.46 | 0.67 | #N/A | #N/A | 1.64 | 0.77 |
| iYKL194C    | 2.15 | 0.86 | 2.15 | 0.88 | 2.88 | 0.96 |
| iYKL195W    | 0.43 | 0.10 | 0.44 | 0.07 | 0.41 | 0.08 |
| iYKL196C    | 1.64 | 0.72 | 2.21 | 0.90 | 1.82 | 0.82 |
| iYKL197C    | 1.63 | 0.69 | 1.48 | 0.65 | 2.08 | 0.87 |
| iYKL198C    | 0.74 | 0.30 | 1.06 | 0.49 | 0.64 | 0.24 |
| iYKL200C    | 0.47 | 0.13 | 0.44 | 0.09 | 0.43 | 0.10 |
| iYKL201C    | 0.43 | 0.12 | 0.37 | 0.03 | 0.41 | 0.09 |
| iYKL203C    | 1.25 | 0.57 | 1.36 | 0.65 | 1.39 | 0.67 |
| iYKL204W    | 0.40 | 0.09 | 0.39 | 0.06 | 0.45 | 0.12 |
| iYKL205W    | 1.51 | 0.67 | 0.67 | 0.19 | 1.50 | 0.64 |
| iYKL206C    | 1.63 | 0.69 | 1.57 | 0.77 | 1.72 | 0.73 |
| iYKL207W    | 0.53 | 0.17 | 0.40 | 0.05 | 0.79 | 0.30 |
| iYKL208W    | 2.21 | 0.90 | 1.42 | 0.62 | 2.29 | 0.92 |
| iYKL209C    | 0.29 | 0.04 | 0.51 | 0.13 | 0.41 | 0.09 |
| iYKL210W    | #N/A | #N/A | #N/A | #N/A | #N/A | #N/A |
| iYKL211C    | 1.16 | 0.53 | 1.41 | 0.64 | 1.06 | 0.51 |
| iYKL212W    | #N/A | #N/A | #N/A | #N/A | #N/A | #N/A |
| iYKL213C    | 1.83 | 0.81 | 1.29 | 0.63 | 1.75 | 0.78 |
| iYKL214C    | 1.27 | 0.57 | 1.24 | 0.51 | 1.01 | 0.45 |
| iYKL215C    | 2.17 | 0.88 | 1.78 | 0.77 | 2.16 | 0.89 |
| iYKL216W    | #N/A | #N/A | 0.38 | 0.06 | 0.47 | 0.11 |
| iYKL217W    | 1.01 | 0.44 | 1.00 | 0.46 | 1.38 | 0.59 |
| iYKL218C-0  | 2.04 | 0.87 | 1.29 | 0.55 | 1.82 | 0.84 |
| iYKL218C-1  | 0.96 | 0.43 | 0.51 | 0.13 | 1.33 | 0.61 |
| iYKL218C-2  | 0.50 | 0.15 | #N/A | #N/A | 0.63 | 0.24 |
| iYKL219W-1  | 1.18 | 0.50 | 1.11 | 0.51 | 0.98 | 0.42 |
| iYKL220C-0  | 0.97 | 0.40 | 0.77 | 0.27 | 1.35 | 0.65 |
| iYKL220C-1  | 1.34 | 0.59 | 1.14 | 0.46 | 1.60 | 0.76 |
| iYKL220C-2  | 1.29 | 0.59 | 1.08 | 0.44 | 1.27 | 0.58 |
| iYKL221W-0  | 2.40 | 0.94 | 2.04 | 0.91 | 1.87 | 0.85 |
| iYKL221W-1  | 1.48 | 0.63 | 1.04 | 0.48 | 1.12 | 0.51 |
| iYKL222C    | 2.16 | 0.86 | 1.89 | 0.85 | 1.93 | 0.86 |
| iYKL223W    | #N/A | #N/A | #N/A | #N/A | #N/A | #N/A |
| iYKL224C    | 0.73 | 0.29 | 0.82 | 0.34 | 0.70 | 0.29 |
| iYKL225W    | 0.36 | 0.07 | 0.45 | 0.09 | 0.40 | 0.07 |
| iYKLCdelta2 | #N/A | #N/A | #N/A | #N/A | #N/A | #N/A |
| iYKLCdelta4 | 0.87 | 0.37 | 0.78 | 0.27 | 0.66 | 0.23 |
| iYKLCdelta5 | 0.96 | 0.42 | 1.88 | 0.80 | 1.04 | 0.42 |
| iYKLCdelta6 | 1.79 | 0.78 | 1.66 | 0.73 | 1.74 | 0.74 |
| iYKLWdelta1 | #N/A | #N/A | #N/A | #N/A | #N/A | #N/A |
| iYKLWdelta3 | 1.19 | 0.50 | 1.80 | 0.78 | 1.20 | 0.58 |
| iYKLWdelta7 | 1.82 | 0.78 | 1.63 | 0.79 | 1.84 | 0.81 |
| iYKR001C    | 2.15 | 0.88 | 1.92 | 0.82 | 2.31 | 0.89 |
| iYKR002W    | 0.69 | 0.26 | 0.86 | 0.29 | 0.72 | 0.30 |
| iYKR003W    | #N/A | #N/A | #N/A | #N/A | #N/A | #N/A |

|            |      |      |      |      |      |      |
|------------|------|------|------|------|------|------|
| iYKR004C   | 1.12 | 0.48 | 1.42 | 0.68 | 1.19 | 0.54 |
| iYKR005C   | 0.70 | 0.28 | 0.71 | 0.20 | 0.91 | 0.37 |
| iYKR006C   | 3.11 | 0.97 | 1.99 | 0.84 | 2.92 | 0.98 |
| iYKR007W   | 1.70 | 0.75 | 1.77 | 0.84 | 2.06 | 0.85 |
| iYKR008W   | #N/A | #N/A | #N/A | #N/A | #N/A | #N/A |
| iYKR009C   | 1.42 | 0.64 | 1.59 | 0.78 | 1.46 | 0.71 |
| iYKR010C   | 1.88 | 0.78 | 1.17 | 0.56 | 1.36 | 0.62 |
| iYKR011C   | 2.10 | 0.88 | 2.35 | 0.91 | 1.56 | 0.72 |
| iYKR013W   | 1.06 | 0.48 | 1.48 | 0.70 | 1.21 | 0.59 |
| iYKR014C   | 1.83 | 0.80 | 1.05 | 0.49 | 1.65 | 0.77 |
| iYKR015C   | 0.97 | 0.43 | 0.84 | 0.31 | 0.85 | 0.37 |
| iYKR016W   | 0.34 | 0.06 | 0.67 | 0.23 | 0.49 | 0.15 |
| iYKR017C   | 1.31 | 0.60 | 1.30 | 0.54 | 1.35 | 0.58 |
| iYKR018C   | 1.83 | 0.81 | 1.75 | 0.76 | 2.35 | 0.91 |
| iYKR019C   | 2.15 | 0.89 | 2.52 | 0.96 | 2.32 | 0.93 |
| iYKR020W   | 1.34 | 0.60 | 1.57 | 0.77 | 1.42 | 0.69 |
| iYKR021W   | 0.47 | 0.14 | 0.38 | 0.05 | 0.51 | 0.16 |
| iYKR022C   | 2.06 | 0.86 | 2.20 | 0.93 | 1.72 | 0.80 |
| iYKR023W   | #N/A | #N/A | #N/A | #N/A | #N/A | #N/A |
| iYKR024C   | 3.06 | 0.98 | 2.91 | 0.99 | 2.92 | 0.97 |
| iYKR025W   | 0.77 | 0.31 | 0.92 | 0.40 | 0.55 | 0.18 |
| iYKR026C   | 2.31 | 0.91 | 2.46 | 0.94 | 2.17 | 0.87 |
| iYKR027W   | 1.13 | 0.51 | 1.38 | 0.64 | 1.87 | 0.83 |
| iYKR029C   | 2.37 | 0.93 | 1.63 | 0.79 | 2.18 | 0.90 |
| iYKR030W   | #N/A | #N/A | #N/A | #N/A | #N/A | #N/A |
| iYKR031C   | 2.64 | 0.95 | 2.12 | 0.87 | 3.10 | 0.99 |
| iYKR034W   | 2.24 | 0.90 | 1.52 | 0.75 | 1.63 | 0.77 |
| iYKR035W-A | 0.83 | 0.32 | 0.57 | 0.17 | 0.96 | 0.40 |
| iYKR036C   | 2.23 | 0.88 | 2.32 | 0.91 | 2.02 | 0.86 |
| iYKR037C   | 1.29 | 0.57 | #N/A | #N/A | 1.40 | 0.68 |
| iYKR038C   | #N/A | #N/A | #N/A | #N/A | #N/A | #N/A |
| iYKR039W   | 0.59 | 0.21 | 1.10 | 0.48 | 0.67 | 0.26 |
| iYKR041W   | 0.33 | 0.06 | 0.20 | 0.00 | 0.21 | 0.01 |
| iYKR042W   | #N/A | #N/A | 0.52 | 0.14 | 0.58 | 0.20 |
| iYKR043C   | 1.64 | 0.72 | 1.59 | 0.68 | #N/A | #N/A |
| iYKR044W   | 0.68 | 0.24 | 0.68 | 0.18 | 0.75 | 0.30 |
| iYKR045C   | 1.96 | 0.82 | 1.79 | 0.77 | 1.64 | 0.78 |
| iYKR046C   | 1.53 | 0.65 | 1.39 | 0.61 | 1.84 | 0.81 |
| iYKR048C   | 2.58 | 0.93 | 2.45 | 0.96 | 2.45 | 0.93 |
| iYKR049C   | 2.24 | 0.91 | 1.63 | 0.71 | 2.36 | 0.93 |
| iYKR050W   | 2.14 | 0.86 | 1.58 | 0.77 | 1.85 | 0.79 |
| iYKR051W   | 0.33 | 0.06 | 0.36 | 0.05 | 0.42 | 0.10 |
| iYKR052C   | 1.63 | 0.69 | 1.70 | 0.73 | 1.40 | 0.68 |
| iYKR053C   | 0.85 | 0.36 | 0.61 | 0.15 | 0.81 | 0.35 |
| iYKR054C   | 1.97 | 0.82 | 2.04 | 0.85 | 2.45 | 0.95 |
| iYKR055W   | 1.24 | 0.56 | 0.85 | 0.32 | 1.23 | 0.59 |
| iYKR056W   | 0.49 | 0.14 | #N/A | #N/A | 0.44 | 0.11 |
| iYKR057W   | 1.25 | 0.57 | 0.85 | 0.36 | 1.34 | 0.58 |
| iYKR058W   | 1.15 | 0.52 | 0.94 | 0.42 | 0.85 | 0.37 |
| iYKR059W   | 0.71 | 0.28 | 1.12 | 0.53 | 1.03 | 0.46 |
| iYKR060W   | #N/A | #N/A | 1.85 | 0.79 | 1.00 | 0.45 |

|            |      |      |      |      |      |      |
|------------|------|------|------|------|------|------|
| iYKR061W   | #N/A | #N/A | #N/A | #N/A | #N/A | #N/A |
| iYKR062W   | 0.30 | 0.05 | 0.28 | 0.02 | 0.46 | 0.13 |
| iYKR063C   | 1.57 | 0.71 | #N/A | #N/A | 1.57 | 0.75 |
| iYKR064W   | 0.96 | 0.42 | 0.82 | 0.27 | 0.88 | 0.41 |
| iYKR065C   | 2.91 | 0.96 | #N/A | #N/A | 3.51 | 0.99 |
| iYKR066C   | 3.14 | 0.98 | 2.42 | 0.92 | 2.85 | 0.97 |
| iYKR067W   | 0.71 | 0.28 | 0.51 | 0.13 | 0.71 | 0.29 |
| iYKR068C   | 1.94 | 0.81 | 1.73 | 0.76 | 1.80 | 0.76 |
| iYKR069W   | 1.24 | 0.56 | #N/A | #N/A | 0.95 | 0.42 |
| iYKR070W   | 0.44 | 0.11 | 0.36 | 0.03 | 0.54 | 0.17 |
| iYKR071C   | 0.88 | 0.35 | 0.73 | 0.21 | 0.76 | 0.28 |
| iYKR072C   | #N/A | #N/A | #N/A | #N/A | #N/A | #N/A |
| iYKR073C   | 0.93 | 0.41 | 1.18 | 0.51 | 1.26 | 0.58 |
| iYKR074W   | #N/A | #N/A | #N/A | #N/A | #N/A | #N/A |
| iYKR075C-0 | 0.77 | 0.29 | 0.52 | 0.14 | 0.84 | 0.36 |
| iYKR075C-1 | 1.76 | 0.74 | 2.08 | 0.87 | #N/A | #N/A |
| iYKR076W   | 1.50 | 0.67 | 1.85 | 0.87 | 1.80 | 0.83 |
| iYKR077W   | 2.24 | 0.91 | 1.41 | 0.65 | 2.33 | 0.94 |
| iYKR078W   | #N/A | #N/A | #N/A | #N/A | #N/A | #N/A |
| iYKR079C   | 0.75 | 0.30 | 1.04 | 0.42 | 0.92 | 0.40 |
| iYKR080W   | #N/A | #N/A | #N/A | #N/A | #N/A | #N/A |
| iYKR081C   | 1.85 | 0.82 | 1.66 | 0.73 | #N/A | #N/A |
| iYKR082W   | #N/A | #N/A | #N/A | #N/A | #N/A | #N/A |
| iYKR083C   | 1.18 | 0.52 | #N/A | #N/A | 2.23 | 0.89 |
| iYKR084C   | 2.10 | 0.87 | 2.31 | 0.95 | 2.72 | 0.97 |
| iYKR085C   | 2.68 | 0.96 | 3.29 | 1.00 | 2.76 | 0.97 |
| iYKR086W   | 0.35 | 0.07 | 0.46 | 0.10 | #N/A | #N/A |
| iYKR087C   | 1.62 | 0.69 | 1.81 | 0.79 | 1.84 | 0.81 |
| iYKR088C   | 1.38 | 0.63 | #N/A | #N/A | 1.17 | 0.49 |
| iYKR089C   | 0.98 | 0.40 | 0.96 | 0.43 | 1.00 | 0.40 |
| iYKR090W   | 1.36 | 0.59 | 1.44 | 0.64 | 1.30 | 0.63 |
| iYKR092C-0 | 0.40 | 0.10 | 0.62 | 0.19 | 0.33 | 0.04 |
| iYKR092C-1 | 0.15 | 0.01 | 0.24 | 0.01 | 0.17 | 0.01 |
| iYKR093W   | 0.31 | 0.05 | 0.35 | 0.03 | 0.24 | 0.02 |
| iYKR094C   | 1.08 | 0.47 | 1.07 | 0.44 | 0.88 | 0.39 |
| iYKR095W   | 1.36 | 0.59 | 1.35 | 0.59 | 1.11 | 0.51 |
| iYKR096W   | 1.42 | 0.63 | 0.91 | 0.39 | 1.69 | 0.72 |
| iYKR097W   | #N/A | #N/A | #N/A | #N/A | 1.50 | 0.67 |
| iYKR098C   | 2.57 | 0.93 | 1.74 | 0.83 | #N/A | #N/A |
| iYKR099W   | 0.37 | 0.07 | 0.24 | 0.01 | 0.43 | 0.11 |
| iYKR100C   | 2.39 | 0.90 | 1.37 | 0.60 | 2.13 | 0.89 |
| iYKR101W-0 | 1.28 | 0.57 | 1.14 | 0.54 | 1.22 | 0.60 |
| iYKR101W-1 | 0.60 | 0.21 | 0.49 | 0.12 | 0.70 | 0.28 |
| iYKR101W-2 | 0.53 | 0.17 | 0.43 | 0.08 | 0.67 | 0.26 |
| iYKR102W-0 | 1.31 | 0.59 | #N/A | #N/A | 1.29 | 0.63 |
| iYKR102W-1 | 0.43 | 0.12 | 0.44 | 0.09 | 0.49 | 0.14 |
| iYKR102W-2 | 0.36 | 0.07 | 0.34 | 0.03 | 0.45 | 0.11 |
| iYKR103W   | #N/A | #N/A | #N/A | #N/A | #N/A | #N/A |
| iYKR104W   | 1.70 | 0.76 | 1.65 | 0.72 | 1.59 | 0.68 |
| iYKR105C   | 1.17 | 0.50 | 0.97 | 0.39 | 1.02 | 0.43 |
| iYKR106W-0 | 0.34 | 0.06 | 0.31 | 0.02 | 0.41 | 0.08 |

|              |      |      |      |      |      |      |
|--------------|------|------|------|------|------|------|
| iYKR106W-1   | 0.26 | 0.03 | 0.33 | 0.03 | 0.28 | 0.03 |
| iYKRCdelta11 | 1.69 | 0.75 | 1.51 | 0.70 | 1.47 | 0.64 |
| iYKRCdelta12 | 0.53 | 0.17 | 0.77 | 0.27 | 0.47 | 0.12 |
| iYKRCdelta8  | #N/A | #N/A | #N/A | #N/A | #N/A | #N/A |
| iYKRWdelta10 | #N/A | #N/A | #N/A | #N/A | #N/A | #N/A |
| iYLL001W     | 1.08 | 0.49 | 1.52 | 0.75 | 0.85 | 0.35 |
| iYLL002W     | 1.63 | 0.69 | 1.27 | 0.62 | 1.24 | 0.57 |
| iYLL003W     | #N/A | #N/A | #N/A | #N/A | #N/A | #N/A |
| iYLL004W     | 1.21 | 0.53 | 1.47 | 0.73 | 1.26 | 0.59 |
| iYLL005C     | 1.04 | 0.43 | 0.92 | 0.40 | 0.90 | 0.39 |
| iYLL006W     | #N/A | #N/A | #N/A | #N/A | #N/A | #N/A |
| iYLL007C     | 1.88 | 0.80 | 1.77 | 0.79 | 1.79 | 0.79 |
| iYLL008W     | #N/A | #N/A | #N/A | #N/A | 0.42 | 0.10 |
| iYLL009C     | 1.80 | 0.76 | 1.78 | 0.80 | 2.12 | 0.89 |
| iYLL010C     | 1.86 | 0.78 | 1.67 | 0.74 | 1.36 | 0.62 |
| iYLL011W     | 0.37 | 0.08 | 0.44 | 0.08 | 0.42 | 0.09 |
| iYLL012W     | 1.95 | 0.84 | 2.29 | 0.90 | 2.58 | 0.94 |
| iYLL014W     | 1.07 | 0.47 | #N/A | #N/A | 0.60 | 0.19 |
| iYLL015W     | 1.78 | 0.75 | 1.05 | 0.45 | 1.84 | 0.81 |
| iYLL016W     | 1.60 | 0.71 | 1.54 | 0.73 | 1.95 | 0.85 |
| iYLL017W     | 0.60 | 0.21 | #N/A | #N/A | 0.58 | 0.18 |
| iYLL018C     | 2.29 | 0.92 | 2.36 | 0.92 | 1.82 | 0.81 |
| iYLL018C-A   | 1.22 | 0.55 | 1.70 | 0.73 | 1.30 | 0.63 |
| iYLL019C     | 0.44 | 0.12 | 0.51 | 0.13 | 0.37 | 0.06 |
| iYLL022C     | #N/A | #N/A | #N/A | #N/A | #N/A | #N/A |
| iYLL023C     | #N/A | #N/A | #N/A | #N/A | #N/A | #N/A |
| iYLL024C     | 0.72 | 0.26 | 0.72 | 0.24 | 0.44 | 0.11 |
| iYLL025W     | 0.88 | 0.37 | #N/A | #N/A | 0.95 | 0.42 |
| iYLL026W     | 1.27 | 0.58 | 1.15 | 0.46 | 0.93 | 0.41 |
| iYLL027W     | 1.37 | 0.63 | 1.19 | 0.56 | #N/A | #N/A |
| iYLL028W     | 0.97 | 0.40 | 1.01 | 0.43 | 0.99 | 0.43 |
| iYLL030C     | 1.19 | 0.54 | 0.96 | 0.38 | 0.95 | 0.38 |
| iYLL031C     | 1.17 | 0.50 | #N/A | #N/A | 1.38 | 0.59 |
| iYLL032C     | 1.36 | 0.62 | 1.51 | 0.66 | 1.65 | 0.75 |
| iYLL033W     | 0.58 | 0.20 | 0.50 | 0.13 | 0.46 | 0.11 |
| iYLL034C     | 3.25 | 0.98 | 2.40 | 0.94 | 3.51 | 0.99 |
| iYLL035W     | #N/A | #N/A | #N/A | #N/A | #N/A | #N/A |
| iYLL036C     | 1.93 | 0.84 | 1.84 | 0.79 | 2.15 | 0.86 |
| iYLL039C     | 1.20 | 0.51 | 0.80 | 0.31 | #N/A | #N/A |
| iYLL040C     | 1.56 | 0.71 | 1.07 | 0.40 | #N/A | #N/A |
| iYLL041C     | 1.37 | 0.59 | 0.84 | 0.28 | 1.25 | 0.53 |
| iYLL042C     | 1.00 | 0.43 | 0.79 | 0.28 | 0.73 | 0.30 |
| iYLL043W     | #N/A | #N/A | #N/A | #N/A | #N/A | #N/A |
| iYLL044W     | 1.64 | 0.72 | 0.96 | 0.43 | 1.40 | 0.68 |
| iYLL046C     | 0.88 | 0.37 | 0.46 | 0.10 | 0.58 | 0.21 |
| iYLL048C     | 2.32 | 0.92 | 1.83 | 0.85 | 1.76 | 0.79 |
| iYLL049W     | #N/A | #N/A | #N/A | #N/A | #N/A | #N/A |
| iYLL050C     | 2.94 | 0.96 | 2.50 | 0.93 | 2.59 | 0.96 |
| iYLL051C     | 1.24 | 0.54 | 0.83 | 0.30 | 1.28 | 0.54 |
| iYLL052C     | 0.53 | 0.17 | 0.48 | 0.11 | 0.75 | 0.27 |
| iYLL054C     | 1.40 | 0.61 | 1.56 | 0.68 | 2.09 | 0.88 |

|              |      |      |      |      |      |      |
|--------------|------|------|------|------|------|------|
| iYLL055W     | 0.61 | 0.22 | 0.84 | 0.31 | #N/A | #N/A |
| iYLL056C-0   | 2.19 | 0.89 | 1.90 | 0.81 | 2.10 | 0.85 |
| iYLL056C-1   | 1.96 | 0.85 | 1.51 | 0.74 | 2.07 | 0.90 |
| iYLL057C     | 1.06 | 0.46 | 0.99 | 0.39 | 1.20 | 0.55 |
| iYLL058W     | 1.80 | 0.80 | 1.64 | 0.72 | 2.14 | 0.89 |
| iYLL059C     | 2.50 | 0.95 | 2.10 | 0.87 | 2.18 | 0.90 |
| iYLL060C     | 1.25 | 0.57 | 1.18 | 0.57 | 1.11 | 0.51 |
| iYLL061W     | 1.47 | 0.64 | 1.37 | 0.62 | 1.32 | 0.58 |
| iYLL062C     | 2.23 | 0.90 | 1.40 | 0.61 | 1.68 | 0.76 |
| iYLL063C     | 2.73 | 0.96 | 1.88 | 0.80 | 2.14 | 0.90 |
| iYLL064C     | 0.97 | 0.43 | 1.03 | 0.47 | 0.93 | 0.38 |
| iYLL065W     | 0.35 | 0.06 | 0.44 | 0.09 | 0.41 | 0.08 |
| iYLL066C-0   | 0.72 | 0.27 | 0.63 | 0.19 | 0.70 | 0.28 |
| iYLL066C-1   | 0.39 | 0.09 | 0.35 | 0.04 | 0.42 | 0.08 |
| iYLL067C-0   | 0.71 | 0.27 | 0.63 | 0.17 | 0.68 | 0.27 |
| iYLL067C-1   | 0.38 | 0.09 | 0.40 | 0.06 | 0.40 | 0.09 |
| iYLLCdelta1  | 0.76 | 0.31 | #N/A | #N/A | 0.78 | 0.33 |
| iYLR001C     | 1.21 | 0.54 | 1.16 | 0.47 | 0.96 | 0.45 |
| iYLR003C     | 1.26 | 0.55 | 1.55 | 0.67 | 1.59 | 0.68 |
| iYLR004C     | 2.34 | 0.90 | 2.30 | 0.91 | 2.17 | 0.88 |
| iYLR005W     | #N/A | #N/A | #N/A | #N/A | #N/A | #N/A |
| iYLR006C     | 2.08 | 0.87 | 2.76 | 0.96 | 1.70 | 0.73 |
| iYLR007W     | #N/A | #N/A | #N/A | #N/A | 0.47 | 0.13 |
| iYLR008C     | 1.30 | 0.56 | #N/A | #N/A | 1.24 | 0.57 |
| iYLR009W     | #N/A | #N/A | 0.85 | 0.31 | #N/A | #N/A |
| iYLR010C     | #N/A | #N/A | #N/A | #N/A | #N/A | #N/A |
| iYLR011W     | 1.37 | 0.59 | 1.01 | 0.46 | 1.58 | 0.72 |
| iYLR014C     | #N/A | #N/A | #N/A | #N/A | #N/A | #N/A |
| iYLR016C     | 2.78 | 0.97 | 2.35 | 0.95 | 2.11 | 0.89 |
| iYLR017W     | #N/A | #N/A | #N/A | #N/A | #N/A | #N/A |
| iYLR018C     | 1.55 | 0.70 | 1.49 | 0.64 | 1.23 | 0.60 |
| iYLR019W     | 0.43 | 0.10 | #N/A | #N/A | 0.49 | 0.15 |
| iYLR020C     | 1.73 | 0.76 | 1.68 | 0.80 | 1.91 | 0.84 |
| iYLR022C     | 0.65 | 0.24 | 0.56 | 0.16 | 0.69 | 0.24 |
| iYLR023C     | 0.71 | 0.26 | 0.69 | 0.25 | 0.83 | 0.31 |
| iYLR025W     | #N/A | #N/A | #N/A | #N/A | #N/A | #N/A |
| iYLR026C     | 1.03 | 0.46 | 1.15 | 0.48 | 1.04 | 0.46 |
| iYLR027C     | 0.45 | 0.12 | #N/A | #N/A | 0.36 | 0.06 |
| iYLR028C     | 0.65 | 0.22 | 1.50 | 0.65 | 0.59 | 0.18 |
| iYLR029C     | 1.79 | 0.80 | 1.66 | 0.75 | 1.67 | 0.75 |
| iYLR030W     | 1.15 | 0.52 | 0.79 | 0.30 | 0.62 | 0.23 |
| iYLR031W     | 1.97 | 0.81 | 1.27 | 0.62 | 1.79 | 0.76 |
| iYLR032W     | 2.15 | 0.89 | 1.74 | 0.75 | 2.27 | 0.89 |
| iYLR033W     | #N/A | #N/A | #N/A | #N/A | #N/A | #N/A |
| iYLR034C     | 1.05 | 0.47 | 0.80 | 0.25 | 1.01 | 0.48 |
| iYLR035C     | 1.41 | 0.63 | 1.70 | 0.75 | 2.01 | 0.82 |
| iYLR035C-A-0 | 0.53 | 0.17 | 0.43 | 0.09 | 0.59 | 0.21 |
| iYLR035C-A-1 | 1.24 | 0.54 | 1.26 | 0.56 | 1.54 | 0.70 |
| iYLR036C     | 1.81 | 0.76 | #N/A | #N/A | 1.54 | 0.70 |
| iYLR037C-0   | 1.55 | 0.67 | #N/A | #N/A | 1.65 | 0.70 |
| iYLR037C-1   | 1.90 | 0.82 | 1.93 | 0.82 | 1.79 | 0.79 |

|          |      |      |      |      |      |      |
|----------|------|------|------|------|------|------|
| iYLR038C | 1.09 | 0.48 | 1.18 | 0.50 | 1.44 | 0.66 |
| iYLR039C | 2.35 | 0.93 | 1.85 | 0.80 | 2.87 | 0.97 |
| iYLR041W | 1.74 | 0.76 | #N/A | #N/A | 1.54 | 0.66 |
| iYLR043C | 1.16 | 0.49 | 1.79 | 0.77 | 1.09 | 0.50 |
| iYLR044C | 0.17 | 0.01 | 0.40 | 0.04 | 0.22 | 0.01 |
| iYLR045C | 1.35 | 0.58 | 0.86 | 0.29 | 1.00 | 0.44 |
| iYLR046C | 0.68 | 0.24 | 0.69 | 0.24 | 0.66 | 0.22 |
| iYLR047C | 0.33 | 0.05 | 0.39 | 0.06 | 0.31 | 0.04 |
| iYLR048W | #N/A | #N/A | #N/A | #N/A | #N/A | #N/A |
| iYLR049C | 1.71 | 0.75 | 2.68 | 0.96 | 2.16 | 0.90 |
| iYLR050C | 1.46 | 0.66 | 1.69 | 0.74 | 1.17 | 0.49 |
| iYLR051C | 1.94 | 0.83 | 1.98 | 0.85 | 1.87 | 0.78 |
| iYLR052W | #N/A | #N/A | #N/A | #N/A | 0.49 | 0.14 |
| iYLR053C | 1.95 | 0.82 | 2.08 | 0.86 | 1.59 | 0.74 |
| iYLR054C | 0.91 | 0.38 | 1.00 | 0.40 | 0.94 | 0.44 |
| iYLR055C | 0.62 | 0.23 | 0.78 | 0.30 | 0.67 | 0.25 |
| iYLR056W | #N/A | #N/A | 1.21 | 0.49 | 0.93 | 0.43 |
| iYLR057W | #N/A | #N/A | 0.34 | 0.04 | #N/A | #N/A |
| iYLR058C | 0.40 | 0.10 | 0.72 | 0.21 | 0.32 | 0.04 |
| iYLR059C | 1.31 | 0.59 | 1.74 | 0.78 | 1.39 | 0.60 |
| iYLR060W | #N/A | #N/A | #N/A | #N/A | #N/A | #N/A |
| iYLR062C | #N/A | #N/A | 0.93 | 0.36 | 0.64 | 0.21 |
| iYLR064W | #N/A | #N/A | #N/A | #N/A | #N/A | #N/A |
| iYLR065C | 2.70 | 0.94 | 2.14 | 0.93 | 3.00 | 0.97 |
| iYLR066W | #N/A | #N/A | #N/A | #N/A | #N/A | #N/A |
| iYLR067C | 2.34 | 0.92 | 2.27 | 0.94 | 2.48 | 0.96 |
| iYLR068W | #N/A | #N/A | #N/A | #N/A | 0.72 | 0.26 |
| iYLR069C | #N/A | #N/A | #N/A | #N/A | #N/A | #N/A |
| iYLR070C | 1.03 | 0.46 | 0.85 | 0.28 | #N/A | #N/A |
| iYLR071C | 3.33 | 0.99 | 2.46 | 0.96 | #N/A | #N/A |
| iYLR072W | #N/A | #N/A | 0.75 | 0.22 | #N/A | #N/A |
| iYLR073C | 1.11 | 0.47 | 1.39 | 0.69 | 1.43 | 0.61 |
| iYLR074C | 0.43 | 0.10 | 0.91 | 0.32 | 0.52 | 0.16 |
| iYLR076C | #N/A | #N/A | #N/A | #N/A | #N/A | #N/A |
| iYLR077W | #N/A | #N/A | #N/A | #N/A | #N/A | #N/A |
| iYLR078C | 2.46 | 0.91 | 1.88 | 0.80 | 2.51 | 0.95 |
| iYLR079W | #N/A | #N/A | #N/A | #N/A | #N/A | #N/A |
| iYLR080W | 1.87 | 0.82 | 2.39 | 0.92 | 1.94 | 0.81 |
| iYLR081W | 1.11 | 0.49 | 0.97 | 0.39 | 1.10 | 0.53 |
| iYLR082C | 0.63 | 0.24 | 0.72 | 0.24 | 0.71 | 0.25 |
| iYLR083C | 1.23 | 0.56 | 0.94 | 0.37 | 1.39 | 0.64 |
| iYLR084C | 0.62 | 0.23 | 0.86 | 0.29 | 0.65 | 0.25 |
| iYLR085C | 2.83 | 0.97 | 2.25 | 0.89 | 2.56 | 0.96 |
| iYLR086W | 0.33 | 0.06 | 0.28 | 0.02 | 0.41 | 0.10 |
| iYLR087C | 1.92 | 0.84 | 2.21 | 0.89 | 1.91 | 0.84 |
| iYLR088W | 0.24 | 0.02 | 0.29 | 0.01 | 0.31 | 0.04 |
| iYLR089C | 1.54 | 0.70 | 1.54 | 0.69 | 1.38 | 0.63 |
| iYLR090W | 1.51 | 0.68 | #N/A | #N/A | 1.11 | 0.51 |
| iYLR091W | 1.47 | 0.66 | 1.17 | 0.49 | 1.68 | 0.76 |
| iYLR092W | #N/A | #N/A | #N/A | #N/A | 1.16 | 0.48 |
| iYLR093C | 0.87 | 0.37 | 1.51 | 0.66 | 0.92 | 0.36 |



|            |      |      |      |      |      |      |
|------------|------|------|------|------|------|------|
| iYLR094C   | 0.70 | 0.25 | 0.91 | 0.35 | 0.82 | 0.36 |
| iYLR095C   | 2.32 | 0.91 | 2.44 | 0.93 | 2.30 | 0.91 |
| iYLR096W   | #N/A | #N/A | #N/A | #N/A | #N/A | #N/A |
| iYLR097C   | 2.67 | 0.96 | 1.83 | 0.86 | #N/A | #N/A |
| iYLR098C   | 1.77 | 0.78 | 1.73 | 0.82 | 1.75 | 0.79 |
| iYLR099C   | 0.94 | 0.41 | 1.51 | 0.68 | 0.90 | 0.39 |
| iYLR102C   | 1.95 | 0.83 | 1.77 | 0.80 | 1.80 | 0.83 |
| iYLR103C   | 1.94 | 0.80 | 2.08 | 0.89 | 2.10 | 0.85 |
| iYLR104W   | #N/A | #N/A | #N/A | #N/A | #N/A | #N/A |
| iYLR105C   | 0.70 | 0.27 | 0.76 | 0.23 | #N/A | #N/A |
| iYLR106C   | 1.41 | 0.64 | 1.61 | 0.77 | 2.00 | 0.88 |
| iYLR107W   | 1.25 | 0.55 | 1.58 | 0.73 | 1.07 | 0.51 |
| iYLR108C   | 0.63 | 0.23 | 0.63 | 0.21 | 0.53 | 0.15 |
| iYLR109W   | #N/A | #N/A | 0.75 | 0.29 | #N/A | #N/A |
| iYLR110C   | 0.10 | 0.00 | #N/A | #N/A | #N/A | #N/A |
| iYLR111W   | #N/A | #N/A | #N/A | #N/A | #N/A | #N/A |
| iYLR112W   | 0.52 | 0.17 | 0.83 | 0.34 | 0.35 | 0.06 |
| iYLR113W   | 1.17 | 0.49 | 1.61 | 0.79 | 1.25 | 0.61 |
| iYLR114C   | 1.99 | 0.81 | 1.54 | 0.68 | 1.80 | 0.80 |
| iYLR115W   | 0.37 | 0.08 | 1.09 | 0.45 | 0.69 | 0.28 |
| iYLR116W   | 0.44 | 0.12 | 0.30 | 0.02 | 0.45 | 0.12 |
| iYLR117C   | 2.38 | 0.90 | 2.08 | 0.87 | 2.84 | 0.97 |
| iYLR118C   | 2.34 | 0.92 | 2.66 | 0.96 | 2.38 | 0.93 |
| iYLR119W   | 0.79 | 0.30 | 0.67 | 0.22 | 0.69 | 0.24 |
| iYLR120C   | 2.82 | 0.97 | 1.77 | 0.78 | #N/A | #N/A |
| iYLR121C   | 0.96 | 0.42 | 1.10 | 0.43 | 1.29 | 0.63 |
| iYLR123C   | 1.48 | 0.63 | 1.21 | 0.58 | 2.12 | 0.85 |
| iYLR124W-0 | 0.71 | 0.28 | 0.74 | 0.24 | 0.89 | 0.38 |
| iYLR125W   | 0.80 | 0.33 | 0.69 | 0.21 | 0.67 | 0.23 |
| iYLR126C   | 1.95 | 0.84 | #N/A | #N/A | #N/A | #N/A |
| iYLR127C   | 2.07 | 0.83 | 2.84 | 0.98 | 2.42 | 0.91 |
| iYLR128W   | #N/A | #N/A | 1.48 | 0.73 | 1.67 | 0.78 |
| iYLR129W   | 0.19 | 0.01 | 0.38 | 0.06 | #N/A | #N/A |
| iYLR130C   | 0.75 | 0.30 | 0.73 | 0.26 | 0.55 | 0.19 |
| iYLR131C   | 0.84 | 0.35 | 0.83 | 0.34 | 0.63 | 0.24 |
| iYLR132C   | 1.80 | 0.80 | 1.65 | 0.79 | 1.47 | 0.67 |
| iYLR133W   | 1.15 | 0.52 | 1.11 | 0.46 | 1.11 | 0.54 |
| iYLR134W   | 1.89 | 0.82 | 1.50 | 0.69 | 1.61 | 0.76 |
| iYLR135W   | 1.89 | 0.79 | 1.83 | 0.78 | #N/A | #N/A |
| iYLR136C   | 3.19 | 0.98 | 3.83 | 1.00 | 2.71 | 0.97 |
| iYLR137W   | 1.21 | 0.54 | #N/A | #N/A | 1.18 | 0.54 |
| iYLR138W   | 0.34 | 0.06 | 0.50 | 0.12 | #N/A | #N/A |
| iYLR141W   | 1.99 | 0.84 | 1.32 | 0.64 | 1.52 | 0.69 |
| iYLR142W   | 0.82 | 0.34 | 1.71 | 0.75 | 0.98 | 0.47 |
| iYLR143W   | 0.30 | 0.05 | 0.37 | 0.03 | 0.45 | 0.12 |
| iYLR144C   | #N/A | #N/A | #N/A | #N/A | #N/A | #N/A |
| iYLR146C   | 2.59 | 0.95 | 1.96 | 0.84 | #N/A | #N/A |
| iYLR147C   | 2.20 | 0.90 | #N/A | #N/A | 2.60 | 0.97 |
| iYLR148W   | #N/A | #N/A | #N/A | #N/A | #N/A | #N/A |
| iYLR149C   | 0.71 | 0.26 | 0.61 | 0.19 | 0.80 | 0.30 |
| iYLR150W   | 1.02 | 0.44 | 0.95 | 0.42 | 0.68 | 0.27 |



|            |      |      |      |      |      |      |
|------------|------|------|------|------|------|------|
| iYLR152C   | 1.47 | 0.67 | 0.84 | 0.28 | 1.51 | 0.69 |
| iYLR153C   | 0.66 | 0.25 | 0.65 | 0.18 | 0.50 | 0.16 |
| iYLR154C   | #N/A | #N/A | #N/A | #N/A | #N/A | #N/A |
| iYLR155C-0 | 1.30 | 0.58 | 0.88 | 0.35 | 1.12 | 0.51 |
| iYLR155C-A | 1.26 | 0.56 | 0.86 | 0.34 | 1.06 | 0.50 |
| iYLR157C-A | 1.20 | 0.51 | 0.78 | 0.31 | 1.06 | 0.44 |
| iYLR157C-B | 0.56 | 0.19 | 0.60 | 0.14 | 0.58 | 0.19 |
| iYLR158C-0 | 1.21 | 0.52 | 0.93 | 0.41 | 1.07 | 0.49 |
| iYLR159W   | 0.47 | 0.14 | 0.63 | 0.19 | 0.50 | 0.15 |
| iYLR160C-0 | 1.25 | 0.55 | 0.80 | 0.32 | 1.09 | 0.49 |
| iYLR161W   | 0.40 | 0.10 | 0.54 | 0.14 | 0.43 | 0.10 |
| iYLR162W-0 | 0.47 | 0.13 | 0.42 | 0.08 | 0.48 | 0.14 |
| iYLR162W-A | 0.49 | 0.14 | 0.45 | 0.10 | 0.47 | 0.13 |
| iYLR162W-B | 0.97 | 0.39 | 0.70 | 0.26 | #N/A | #N/A |
| iYLR163C   | 2.50 | 0.95 | 1.80 | 0.77 | 2.20 | 0.92 |
| iYLR164W   | #N/A | #N/A | #N/A | #N/A | #N/A | #N/A |
| iYLR165C   | #N/A | #N/A | #N/A | #N/A | #N/A | #N/A |
| iYLR167W   | #N/A | #N/A | #N/A | #N/A | #N/A | #N/A |
| iYLR168C   | #N/A | #N/A | #N/A | #N/A | #N/A | #N/A |
| iYLR171W   | 1.49 | 0.67 | 1.52 | 0.71 | 1.97 | 0.81 |
| iYLR172C   | 1.73 | 0.73 | 1.75 | 0.76 | 1.81 | 0.83 |
| iYLR173W   | 2.33 | 0.92 | 2.27 | 0.91 | 2.56 | 0.94 |
| iYLR174W   | #N/A | #N/A | #N/A | #N/A | #N/A | #N/A |
| iYLR175W   | #N/A | #N/A | #N/A | #N/A | #N/A | #N/A |
| iYLR176C   | 2.29 | 0.92 | 1.61 | 0.69 | 2.05 | 0.83 |
| iYLR177W   | #N/A | #N/A | 1.27 | 0.52 | #N/A | #N/A |
| iYLR178C   | 1.03 | 0.43 | 0.99 | 0.45 | 0.92 | 0.40 |
| iYLR179C   | 0.46 | 0.13 | 0.62 | 0.15 | 0.47 | 0.13 |
| iYLR180W   | 0.35 | 0.07 | 0.47 | 0.11 | 0.41 | 0.09 |
| iYLR181C   | 1.75 | 0.74 | 1.69 | 0.78 | 1.90 | 0.84 |
| iYLR182W   | #N/A | #N/A | #N/A | #N/A | #N/A | #N/A |
| iYLR183C   | #N/A | #N/A | #N/A | #N/A | #N/A | #N/A |
| iYLR184W   | #N/A | #N/A | #N/A | #N/A | #N/A | #N/A |
| iYLR186W   | 1.01 | 0.44 | 1.37 | 0.59 | 1.05 | 0.47 |
| iYLR187W   | 1.06 | 0.44 | 0.93 | 0.36 | 1.22 | 0.51 |
| iYLR188W   | 0.46 | 0.13 | 0.52 | 0.11 | 0.59 | 0.22 |
| iYLR191W   | #N/A | #N/A | 0.49 | 0.09 | 0.70 | 0.24 |
| iYLR194C   | 1.26 | 0.57 | 1.47 | 0.65 | 1.37 | 0.63 |
| iYLR196W   | 1.14 | 0.51 | 1.35 | 0.58 | 1.12 | 0.51 |
| iYLR199C   | 1.45 | 0.65 | 1.52 | 0.67 | 1.49 | 0.68 |
| iYLR200W   | 0.87 | 0.34 | 0.65 | 0.20 | 0.89 | 0.35 |
| iYLR203C   | 3.89 | 1.00 | 2.40 | 0.93 | 3.15 | 0.98 |
| iYLR204W   | #N/A | #N/A | #N/A | #N/A | #N/A | #N/A |
| iYLR205C   | 3.22 | 0.98 | 2.80 | 0.97 | 2.42 | 0.92 |
| iYLR207W   | 1.45 | 0.62 | 1.72 | 0.83 | 1.79 | 0.76 |
| iYLR208W   | 0.77 | 0.32 | 0.84 | 0.35 | 0.84 | 0.32 |
| iYLR209C   | 2.05 | 0.86 | 1.49 | 0.67 | 1.91 | 0.85 |
| iYLR211C   | 1.41 | 0.60 | 1.25 | 0.53 | 1.45 | 0.62 |
| iYLR212C   | 1.72 | 0.77 | 1.81 | 0.77 | 1.48 | 0.67 |
| iYLR213C   | 1.36 | 0.58 | 1.40 | 0.68 | 1.42 | 0.61 |
| iYLR214W   | #N/A | #N/A | 0.72 | 0.21 | 0.71 | 0.30 |

|            |      |      |      |      |      |      |
|------------|------|------|------|------|------|------|
| iYLR215C   | 1.47 | 0.66 | #N/A | #N/A | 1.37 | 0.67 |
| iYLR217W   | 2.38 | 0.92 | 1.86 | 0.87 | 1.65 | 0.70 |
| iYLR218C   | #N/A | #N/A | 2.71 | 0.96 | 2.20 | 0.87 |
| iYLR219W   | 0.79 | 0.32 | 0.72 | 0.24 | 0.83 | 0.36 |
| iYLR220W   | 0.49 | 0.14 | 0.63 | 0.21 | 0.46 | 0.12 |
| iYLR221C   | 1.13 | 0.51 | 0.87 | 0.33 | 1.07 | 0.52 |
| iYLR224W   | #N/A | #N/A | #N/A | #N/A | #N/A | #N/A |
| iYLR225C   | 1.07 | 0.47 | 1.59 | 0.68 | 1.00 | 0.41 |
| iYLR227C   | 0.77 | 0.31 | #N/A | #N/A | 1.23 | 0.56 |
| iYLR228C-0 | 0.72 | 0.27 | 0.80 | 0.32 | 0.76 | 0.30 |
| iYLR228C-1 | 1.21 | 0.51 | 1.15 | 0.51 | 1.11 | 0.50 |
| iYLR230W   | 1.67 | 0.74 | 1.34 | 0.66 | 1.60 | 0.73 |
| iYLR232W   | 1.09 | 0.49 | 0.91 | 0.39 | 1.34 | 0.61 |
| iYLR233C   | 3.85 | 1.00 | 2.44 | 0.96 | 2.95 | 0.98 |
| iYLR236C   | 1.33 | 0.57 | 1.15 | 0.46 | 0.93 | 0.43 |
| iYLR237W   | 1.60 | 0.72 | 1.64 | 0.78 | 1.58 | 0.72 |
| iYLR238W   | 0.59 | 0.21 | 0.46 | 0.08 | 0.77 | 0.33 |
| iYLR239C   | 1.51 | 0.65 | 2.15 | 0.88 | 2.33 | 0.90 |
| iYLR240W   | 1.40 | 0.64 | 1.70 | 0.73 | 1.52 | 0.73 |
| iYLR241W   | #N/A | #N/A | #N/A | #N/A | #N/A | #N/A |
| iYLR243W   | #N/A | #N/A | #N/A | #N/A | #N/A | #N/A |
| iYLR244C   | #N/A | #N/A | #N/A | #N/A | #N/A | #N/A |
| iYLR245C   | 0.98 | 0.43 | 1.88 | 0.81 | 1.02 | 0.49 |
| iYLR246W   | #N/A | #N/A | #N/A | #N/A | #N/A | #N/A |
| iYLR247C   | 1.95 | 0.84 | 2.00 | 0.85 | 1.72 | 0.73 |
| iYLR248W   | #N/A | #N/A | 0.30 | 0.03 | 0.32 | 0.04 |
| iYLR249W   | 0.72 | 0.29 | #N/A | #N/A | 0.87 | 0.40 |
| iYLR250W   | 1.08 | 0.47 | 1.07 | 0.43 | 1.11 | 0.46 |
| iYLR252W   | 1.41 | 0.63 | 1.38 | 0.68 | 1.77 | 0.75 |
| iYLR253W   | #N/A | #N/A | #N/A | #N/A | #N/A | #N/A |
| iYLR254C   | 1.92 | 0.84 | 2.58 | 0.97 | 1.68 | 0.76 |
| iYLR255C   | 0.32 | 0.05 | 0.31 | 0.03 | 0.25 | 0.02 |
| iYLR257W   | 1.75 | 0.77 | 1.85 | 0.83 | 1.70 | 0.77 |
| iYLR258W   | 0.93 | 0.38 | 0.80 | 0.33 | 0.92 | 0.43 |
| iYLR259C   | #N/A | #N/A | 0.64 | 0.19 | 0.38 | 0.07 |
| iYLR260W   | 0.44 | 0.12 | 0.71 | 0.24 | 0.38 | 0.08 |
| iYLR262C   | 1.74 | 0.76 | 1.33 | 0.63 | 1.65 | 0.70 |
| iYLR262C-A | 0.84 | 0.35 | 1.11 | 0.46 | 0.76 | 0.31 |
| iYLR263W   | 0.81 | 0.34 | 0.84 | 0.32 | 0.55 | 0.19 |
| iYLR265C   | 1.32 | 0.58 | #N/A | #N/A | 2.06 | 0.90 |
| iYLR266C   | 1.85 | 0.78 | 2.11 | 0.87 | 1.65 | 0.78 |
| iYLR267W   | 2.17 | 0.86 | 2.52 | 0.94 | 2.04 | 0.87 |
| iYLR270W   | 1.55 | 0.70 | 1.45 | 0.62 | 1.40 | 0.64 |
| iYLR271W   | #N/A | #N/A | #N/A | #N/A | #N/A | #N/A |
| iYLR273C   | 1.42 | 0.64 | 1.44 | 0.68 | 1.16 | 0.55 |
| iYLR274W   | 1.99 | 0.83 | 1.42 | 0.64 | 1.74 | 0.74 |
| iYLR275W   | #N/A | #N/A | #N/A | #N/A | #N/A | #N/A |
| iYLR276C   | 1.48 | 0.66 | #N/A | #N/A | 1.93 | 0.81 |
| iYLR277C   | 1.25 | 0.57 | 0.94 | 0.37 | 1.33 | 0.63 |
| iYLR278C   | 0.58 | 0.19 | 0.55 | 0.16 | 0.38 | 0.07 |
| iYLR281C   | #N/A | #N/A | 1.65 | 0.80 | #N/A | #N/A |

|            |      |      |      |      |      |      |
|------------|------|------|------|------|------|------|
| iYLR283W   | 0.70 | 0.27 | #N/A | #N/A | #N/A | #N/A |
| iYLR284C   | 1.70 | 0.76 | 1.84 | 0.86 | 2.17 | 0.86 |
| iYLR285W   | 1.07 | 0.45 | #N/A | #N/A | 1.01 | 0.41 |
| iYLR286C   | 0.45 | 0.12 | 0.41 | 0.06 | 0.40 | 0.08 |
| iYLR287C   | 0.48 | 0.14 | 0.60 | 0.18 | 0.44 | 0.11 |
| iYLR287C-A | 0.75 | 0.30 | 0.62 | 0.18 | 0.90 | 0.39 |
| iYLR288C   | 2.33 | 0.92 | 2.28 | 0.91 | 2.70 | 0.95 |
| iYLR289W   | #N/A | #N/A | #N/A | #N/A | #N/A | #N/A |
| iYLR290C   | #N/A | #N/A | #N/A | #N/A | #N/A | #N/A |
| iYLR291C   | 1.34 | 0.59 | 1.49 | 0.68 | 1.05 | 0.50 |
| iYLR292C   | #N/A | #N/A | 1.19 | 0.50 | 0.94 | 0.44 |
| iYLR293C   | 0.36 | 0.07 | 1.06 | 0.45 | 0.60 | 0.22 |
| iYLR295C   | 0.85 | 0.36 | 1.16 | 0.49 | 0.76 | 0.31 |
| iYLR296W   | 0.87 | 0.37 | 1.07 | 0.44 | 0.81 | 0.35 |
| iYLR297W   | 1.29 | 0.55 | #N/A | #N/A | 0.86 | 0.38 |
| iYLR298C   | 0.21 | 0.02 | #N/A | #N/A | 0.28 | 0.02 |
| iYLR299W   | #N/A | #N/A | 0.35 | 0.04 | 0.22 | 0.01 |
| iYLR301W   | #N/A | #N/A | #N/A | #N/A | #N/A | #N/A |
| iYLR303W   | #N/A | #N/A | 1.80 | 0.78 | #N/A | #N/A |
| iYLR304C   | 0.41 | 0.11 | 0.44 | 0.06 | #N/A | #N/A |
| iYLR305C   | 1.41 | 0.60 | 1.60 | 0.78 | 1.85 | 0.82 |
| iYLR308W   | 1.63 | 0.72 | 1.65 | 0.71 | 1.72 | 0.80 |
| iYLR309C   | #N/A | #N/A | 1.35 | 0.61 | 1.69 | 0.76 |
| iYLR310C   | 2.49 | 0.95 | 1.59 | 0.73 | 2.30 | 0.93 |
| iYLR312C   | 1.87 | 0.81 | 1.43 | 0.71 | 1.90 | 0.83 |
| iYLR312W-A | 0.50 | 0.15 | 0.45 | 0.10 | 0.44 | 0.11 |
| iYLR313C   | #N/A | #N/A | #N/A | #N/A | #N/A | #N/A |
| iYLR314C   | 1.08 | 0.48 | 1.11 | 0.53 | 0.88 | 0.40 |
| iYLR317W   | 1.31 | 0.60 | 0.95 | 0.41 | 1.40 | 0.64 |
| iYLR318W   | #N/A | #N/A | #N/A | #N/A | #N/A | #N/A |
| iYLR319C   | 1.13 | 0.48 | 1.42 | 0.62 | 2.08 | 0.88 |
| iYLR320W   | #N/A | #N/A | #N/A | #N/A | #N/A | #N/A |
| iYLR322W   | 1.99 | 0.86 | #N/A | #N/A | #N/A | #N/A |
| iYLR323C   | 0.63 | 0.24 | #N/A | #N/A | 0.45 | 0.10 |
| iYLR324W   | 0.45 | 0.13 | 0.49 | 0.12 | 0.55 | 0.18 |
| iYLR325C   | 1.42 | 0.61 | 1.56 | 0.76 | 1.37 | 0.62 |
| iYLR326W   | 1.50 | 0.67 | 0.90 | 0.39 | 1.50 | 0.72 |
| iYLR327C   | 1.74 | 0.73 | 1.36 | 0.62 | 1.17 | 0.54 |
| iYLR328W   | 0.68 | 0.26 | 0.53 | 0.10 | 0.78 | 0.33 |
| iYLR329W   | 1.17 | 0.53 | 1.15 | 0.49 | 1.02 | 0.49 |
| iYLR330W   | 0.40 | 0.10 | 0.61 | 0.20 | 0.35 | 0.05 |
| iYLR332W-1 | 1.66 | 0.73 | 2.18 | 0.93 | 1.61 | 0.73 |
| iYLR333C   | 0.28 | 0.04 | 0.47 | 0.08 | 0.28 | 0.03 |
| iYLR335W   | #N/A | #N/A | #N/A | #N/A | #N/A | #N/A |
| iYLR336C   | 0.99 | 0.41 | 1.07 | 0.49 | 1.06 | 0.48 |
| iYLR338W   | 0.70 | 0.28 | 0.72 | 0.27 | 0.63 | 0.24 |
| iYLR340W   | 0.48 | 0.15 | 0.77 | 0.26 | 0.52 | 0.17 |
| iYLR342W   | 0.35 | 0.07 | 0.40 | 0.06 | 0.38 | 0.07 |
| iYLR343W   | #N/A | #N/A | #N/A | #N/A | #N/A | #N/A |
| iYLR344W   | 1.00 | 0.45 | 0.81 | 0.29 | 1.02 | 0.45 |
| iYLR347C   | 0.85 | 0.34 | 1.37 | 0.67 | 0.64 | 0.21 |

|            |      |      |      |      |      |      |
|------------|------|------|------|------|------|------|
| iYLR349W   | 0.72 | 0.29 | 1.14 | 0.50 | 0.87 | 0.36 |
| iYLR350W   | #N/A | #N/A | #N/A | #N/A | #N/A | #N/A |
| iYLR351C   | 2.07 | 0.85 | 2.01 | 0.84 | 1.96 | 0.87 |
| iYLR352W   | 1.35 | 0.62 | 1.12 | 0.45 | 1.36 | 0.62 |
| iYLR353W   | #N/A | #N/A | #N/A | #N/A | #N/A | #N/A |
| iYLR355C   | 0.75 | 0.30 | 1.04 | 0.42 | 0.60 | 0.22 |
| iYLR356W   | 1.33 | 0.59 | 1.38 | 0.60 | 1.41 | 0.60 |
| iYLR358C   | 0.88 | 0.35 | 1.40 | 0.68 | 0.98 | 0.47 |
| iYLR361C   | 2.45 | 0.93 | 2.25 | 0.90 | 2.89 | 0.98 |
| iYLR362W   | 0.37 | 0.09 | #N/A | #N/A | 0.47 | 0.13 |
| iYLR363C   | 1.85 | 0.82 | 1.71 | 0.75 | 1.43 | 0.61 |
| iYLR366W   | 0.37 | 0.08 | 0.53 | 0.14 | 0.45 | 0.12 |
| iYLR368W   | #N/A | #N/A | #N/A | #N/A | #N/A | #N/A |
| iYLR369W   | #N/A | #N/A | #N/A | #N/A | 1.06 | 0.43 |
| iYLR370C   | 2.24 | 0.90 | 1.68 | 0.81 | 2.12 | 0.89 |
| iYLR372W   | #N/A | #N/A | 0.70 | 0.23 | 0.35 | 0.06 |
| iYLR373C   | 2.04 | 0.83 | 1.99 | 0.83 | 1.92 | 0.80 |
| iYLR375W   | #N/A | #N/A | #N/A | #N/A | #N/A | #N/A |
| iYLR376C   | #N/A | #N/A | #N/A | #N/A | #N/A | #N/A |
| iYLR377C   | 1.26 | 0.53 | 1.19 | 0.57 | 1.33 | 0.59 |
| iYLR379W   | 1.49 | 0.64 | 1.60 | 0.77 | 1.36 | 0.64 |
| iYLR380W   | 1.87 | 0.79 | 1.01 | 0.46 | 1.37 | 0.67 |
| iYLR381W   | #N/A | #N/A | #N/A | #N/A | #N/A | #N/A |
| iYLR382C   | 2.55 | 0.95 | 1.46 | 0.71 | 2.41 | 0.91 |
| iYLR383W   | #N/A | #N/A | #N/A | #N/A | #N/A | #N/A |
| iYLR384C   | 1.18 | 0.53 | 1.94 | 0.89 | 2.04 | 0.89 |
| iYLR385C   | 3.43 | 0.99 | 2.22 | 0.94 | 2.88 | 0.98 |
| iYLR386W   | #N/A | #N/A | #N/A | #N/A | #N/A | #N/A |
| iYLR387C   | 0.32 | 0.05 | 0.51 | 0.13 | 0.38 | 0.07 |
| iYLR388W   | 0.62 | 0.23 | #N/A | #N/A | 0.55 | 0.19 |
| iYLR389C   | 1.51 | 0.68 | 1.42 | 0.70 | 1.24 | 0.57 |
| iYLR390W   | 1.04 | 0.45 | 0.65 | 0.20 | 0.96 | 0.43 |
| iYLR391W-A | #N/A | #N/A | #N/A | #N/A | #N/A | #N/A |
| iYLR392C   | 2.59 | 0.93 | 1.77 | 0.84 | 1.78 | 0.79 |
| iYLR394W   | 1.03 | 0.45 | 1.02 | 0.38 | 1.21 | 0.55 |
| iYLR395C   | #N/A | #N/A | #N/A | #N/A | #N/A | #N/A |
| iYLR396C   | #N/A | #N/A | #N/A | #N/A | #N/A | #N/A |
| iYLR397C   | 0.86 | 0.37 | 1.03 | 0.47 | 0.92 | 0.43 |
| iYLR398C   | 0.59 | 0.19 | #N/A | #N/A | 0.75 | 0.27 |
| iYLR399C   | 0.11 | 0.00 | 0.50 | 0.11 | 0.26 | 0.02 |
| iYLR400W   | #N/A | #N/A | 0.55 | 0.15 | #N/A | #N/A |
| iYLR401C   | #N/A | #N/A | #N/A | #N/A | 1.02 | 0.46 |
| iYLR402W   | 0.66 | 0.23 | 0.93 | 0.36 | 0.56 | 0.19 |
| iYLR404W   | 0.73 | 0.29 | #N/A | #N/A | 1.16 | 0.48 |
| iYLR405W   | #N/A | #N/A | #N/A | #N/A | #N/A | #N/A |
| iYLR406C   | 0.33 | 0.05 | 0.91 | 0.32 | 0.43 | 0.09 |
| iYLR407W   | #N/A | #N/A | #N/A | #N/A | 1.08 | 0.44 |
| iYLR408C   | 1.86 | 0.78 | 2.13 | 0.88 | 1.59 | 0.72 |
| iYLR409C   | #N/A | #N/A | 1.68 | 0.74 | #N/A | #N/A |
| iYLR410W   | 0.97 | 0.40 | 1.07 | 0.44 | 1.25 | 0.53 |
| iYLR412W-0 | 0.41 | 0.10 | 0.70 | 0.23 | 0.43 | 0.11 |

|              |      |      |      |      |      |      |
|--------------|------|------|------|------|------|------|
| iYLR413W     | #N/A | #N/A | #N/A | #N/A | #N/A | #N/A |
| iYLR414C     | #N/A | #N/A | #N/A | #N/A | #N/A | #N/A |
| iYLR416C     | 1.12 | 0.50 | #N/A | #N/A | 1.05 | 0.43 |
| iYLR417W     | #N/A | #N/A | #N/A | #N/A | #N/A | #N/A |
| iYLR418C     | #N/A | #N/A | 1.11 | 0.44 | 1.07 | 0.49 |
| iYLR419W     | #N/A | #N/A | #N/A | #N/A | #N/A | #N/A |
| iYLR420W     | 0.44 | 0.11 | #N/A | #N/A | #N/A | #N/A |
| iYLR421C     | 2.07 | 0.86 | 2.03 | 0.85 | 1.91 | 0.86 |
| iYLR422W     | 0.68 | 0.26 | #N/A | #N/A | 0.71 | 0.30 |
| iYLR423C     | 3.20 | 0.98 | 1.46 | 0.71 | 2.20 | 0.87 |
| iYLR424W     | 0.86 | 0.37 | 1.29 | 0.53 | 1.60 | 0.68 |
| iYLR425W     | 1.93 | 0.84 | #N/A | #N/A | 2.18 | 0.87 |
| iYLR426W     | #N/A | #N/A | 1.84 | 0.79 | 1.77 | 0.77 |
| iYLR427W     | 1.04 | 0.45 | 1.06 | 0.41 | #N/A | #N/A |
| iYLR431C     | 0.77 | 0.31 | 1.29 | 0.55 | 1.10 | 0.50 |
| iYLR432W     | #N/A | #N/A | #N/A | #N/A | #N/A | #N/A |
| iYLR435W     | 0.73 | 0.29 | 1.03 | 0.38 | 0.45 | 0.12 |
| iYLR436C     | 0.77 | 0.32 | 1.00 | 0.40 | 0.89 | 0.39 |
| iYLR437C     | 0.58 | 0.20 | 1.00 | 0.45 | 0.61 | 0.22 |
| iYLR438C-A   | 1.99 | 0.84 | 1.87 | 0.87 | 1.66 | 0.75 |
| iYLR438W     | #N/A | #N/A | #N/A | #N/A | #N/A | #N/A |
| iYLR439W     | #N/A | #N/A | #N/A | #N/A | #N/A | #N/A |
| iYLR440C     | 0.55 | 0.19 | #N/A | #N/A | 0.57 | 0.20 |
| iYLR441C     | 0.36 | 0.07 | 0.36 | 0.03 | 0.28 | 0.03 |
| iYLR442C     | 1.85 | 0.82 | 1.46 | 0.66 | 1.85 | 0.81 |
| iYLR444C     | #N/A | #N/A | #N/A | #N/A | #N/A | #N/A |
| iYLR445W     | 1.48 | 0.67 | 1.85 | 0.86 | 1.27 | 0.62 |
| iYLR446W     | 0.64 | 0.22 | #N/A | #N/A | 0.59 | 0.21 |
| iYLR447C     | 0.60 | 0.21 | 0.74 | 0.23 | 0.64 | 0.21 |
| iYLR449W     | 1.88 | 0.83 | 1.52 | 0.68 | 1.79 | 0.80 |
| iYLR450W     | 1.29 | 0.57 | 1.36 | 0.59 | 1.73 | 0.78 |
| iYLR451W     | 0.32 | 0.06 | 0.52 | 0.14 | 0.38 | 0.07 |
| iYLR452C     | 0.60 | 0.21 | 1.33 | 0.57 | 0.91 | 0.38 |
| iYLR453C     | 1.38 | 0.59 | #N/A | #N/A | 1.33 | 0.56 |
| iYLR454W     | #N/A | #N/A | #N/A | #N/A | #N/A | #N/A |
| iYLR455W     | 0.95 | 0.41 | #N/A | #N/A | #N/A | #N/A |
| iYLR456W     | #N/A | #N/A | #N/A | #N/A | 1.03 | 0.49 |
| iYLR458W     | 1.52 | 0.68 | 1.38 | 0.60 | 1.56 | 0.71 |
| iYLR460C-1   | 0.88 | 0.37 | 0.85 | 0.30 | 0.77 | 0.32 |
| iYLR461W-0   | 0.40 | 0.10 | 0.48 | 0.09 | 0.43 | 0.09 |
| iYLR461W-1   | 0.56 | 0.19 | 0.53 | 0.14 | 0.58 | 0.20 |
| iYLR466W     | 0.46 | 0.13 | 0.49 | 0.11 | 0.48 | 0.14 |
| iYLRcdelta18 | #N/A | #N/A | #N/A | #N/A | #N/A | #N/A |
| iYLRcdelta19 | #N/A | #N/A | #N/A | #N/A | #N/A | #N/A |
| iYLRcdelta21 | #N/A | #N/A | #N/A | #N/A | #N/A | #N/A |
| iYLRcdelta24 | #N/A | #N/A | #N/A | #N/A | 1.12 | 0.51 |
| iYLRcdelta26 | 1.36 | 0.61 | 1.08 | 0.42 | #N/A | #N/A |
| iYLRcdelta5  | #N/A | #N/A | #N/A | #N/A | #N/A | #N/A |
| iYLRcdelta8  | 0.48 | 0.15 | 0.73 | 0.21 | #N/A | #N/A |
| iYLRcdelta9  | 1.23 | 0.54 | 1.35 | 0.57 | 1.46 | 0.63 |
| iYLRcsigma1  | 2.65 | 0.96 | 2.49 | 0.94 | 2.66 | 0.95 |

|               |      |      |      |      |      |      |
|---------------|------|------|------|------|------|------|
| iYLRCTau1     | #N/A | #N/A | #N/A | #N/A | #N/A | #N/A |
| iYLRWdelta11  | #N/A | #N/A | #N/A | #N/A | #N/A | #N/A |
| iYLRWdelta14  | #N/A | #N/A | #N/A | #N/A | #N/A | #N/A |
| iYLRWdelta15  | 0.41 | 0.10 | 0.70 | 0.23 | #N/A | #N/A |
| iYLRWdelta17  | 0.81 | 0.33 | 1.30 | 0.63 | 0.69 | 0.27 |
| iYLRWdelta20  | #N/A | #N/A | #N/A | #N/A | #N/A | #N/A |
| iYLRWdelta23  | 1.24 | 0.56 | 1.69 | 0.74 | 1.35 | 0.62 |
| iYLRWdelta4   | 0.82 | 0.33 | 1.22 | 0.59 | 0.96 | 0.42 |
| iYLRWdelta6-0 | 0.89 | 0.35 | 0.90 | 0.35 | 0.86 | 0.39 |
| iYLRWdelta6-A | 0.91 | 0.36 | 0.98 | 0.39 | #N/A | #N/A |
| iYML001W      | #N/A | #N/A | #N/A | #N/A | #N/A | #N/A |
| iYML002W      | 1.69 | 0.74 | 2.02 | 0.90 | 1.58 | 0.71 |
| iYML003W      | 0.38 | 0.09 | 0.40 | 0.05 | 0.47 | 0.12 |
| iYML004C      | 2.16 | 0.89 | 2.30 | 0.95 | 2.47 | 0.93 |
| iYML005W      | #N/A | #N/A | #N/A | #N/A | #N/A | #N/A |
| iYML006C      | 0.69 | 0.27 | 0.92 | 0.41 | 0.61 | 0.23 |
| iYML007W      | 0.47 | 0.13 | #N/A | #N/A | 0.23 | 0.02 |
| iYML008C      | 0.66 | 0.23 | 0.63 | 0.16 | 0.47 | 0.12 |
| iYML009C      | 2.13 | 0.86 | 1.71 | 0.80 | 2.19 | 0.88 |
| iYML010C-B    | 1.39 | 0.60 | 1.18 | 0.48 | 1.28 | 0.59 |
| iYML011C      | 2.11 | 0.87 | 1.79 | 0.78 | 1.43 | 0.65 |
| iYML012W      | 0.91 | 0.36 | #N/A | #N/A | 0.46 | 0.13 |
| iYML014W      | 1.68 | 0.75 | 1.52 | 0.69 | 1.60 | 0.76 |
| iYML015C      | 1.75 | 0.78 | 3.08 | 0.98 | 3.16 | 0.99 |
| iYML016C      | 1.26 | 0.54 | #N/A | #N/A | 1.15 | 0.56 |
| iYML018C      | 1.12 | 0.49 | 1.22 | 0.52 | 0.97 | 0.44 |
| iYML019W      | #N/A | #N/A | #N/A | #N/A | #N/A | #N/A |
| iYML020W      | 1.54 | 0.69 | 1.81 | 0.78 | 1.31 | 0.60 |
| iYML021C      | 1.62 | 0.72 | 1.25 | 0.52 | 1.84 | 0.84 |
| iYML022W      | 0.61 | 0.22 | #N/A | #N/A | 0.65 | 0.25 |
| iYML023C      | 0.89 | 0.37 | 1.08 | 0.42 | 1.08 | 0.44 |
| iYML024W      | #N/A | #N/A | #N/A | #N/A | #N/A | #N/A |
| iYML025C      | 0.59 | 0.20 | 0.67 | 0.18 | 0.79 | 0.32 |
| iYML026C      | 0.31 | 0.05 | #N/A | #N/A | 0.30 | 0.03 |
| iYML027W      | 1.16 | 0.51 | 0.70 | 0.26 | 0.94 | 0.39 |
| iYML028W      | 0.70 | 0.27 | 0.79 | 0.27 | #N/A | #N/A |
| iYML029W      | 0.81 | 0.33 | 1.35 | 0.58 | 1.06 | 0.48 |
| iYML030W      | 1.56 | 0.70 | 1.26 | 0.54 | 2.10 | 0.85 |
| iYML031W      | 2.05 | 0.87 | 1.70 | 0.76 | 1.87 | 0.82 |
| iYML033W      | 0.32 | 0.05 | 0.41 | 0.07 | 0.40 | 0.07 |
| iYML034W      | #N/A | #N/A | #N/A | #N/A | #N/A | #N/A |
| iYML035C      | #N/A | #N/A | 0.60 | 0.19 | 0.56 | 0.19 |
| iYML036W      | #N/A | #N/A | #N/A | #N/A | #N/A | #N/A |
| iYML037C      | #N/A | #N/A | 1.83 | 0.78 | 1.82 | 0.81 |
| iYML041C      | 1.11 | 0.47 | 1.61 | 0.78 | 1.41 | 0.69 |
| iYML042W      | #N/A | #N/A | #N/A | #N/A | #N/A | #N/A |
| iYML043C      | 1.72 | 0.73 | 2.49 | 0.94 | 1.71 | 0.77 |
| iYML046W      | 0.78 | 0.32 | 0.70 | 0.23 | 0.74 | 0.28 |
| iYML047C      | 1.52 | 0.69 | 1.75 | 0.76 | 1.33 | 0.63 |
| iYML048W      | 0.52 | 0.16 | 0.61 | 0.18 | 0.66 | 0.26 |
| iYML049C      | 1.75 | 0.78 | #N/A | #N/A | 1.44 | 0.66 |

|            |      |      |      |      |      |      |
|------------|------|------|------|------|------|------|
| iYML050W   | #N/A | #N/A | #N/A | #N/A | #N/A | #N/A |
| iYML051W   | 1.95 | 0.81 | #N/A | #N/A | 1.61 | 0.73 |
| iYML052W   | 1.30 | 0.58 | 1.06 | 0.49 | 1.13 | 0.55 |
| iYML053C   | 0.59 | 0.21 | 0.42 | 0.05 | 0.71 | 0.25 |
| iYML054C   | 1.54 | 0.69 | 1.48 | 0.73 | 1.31 | 0.57 |
| iYML055W   | #N/A | #N/A | #N/A | #N/A | #N/A | #N/A |
| iYML057W   | #N/A | #N/A | #N/A | #N/A | #N/A | #N/A |
| iYML058W   | 0.80 | 0.32 | 1.14 | 0.45 | 0.73 | 0.26 |
| iYML060W   | #N/A | #N/A | #N/A | #N/A | #N/A | #N/A |
| iYML061C   | 1.90 | 0.79 | 3.55 | 0.99 | 2.48 | 0.92 |
| iYML062C   | 2.05 | 0.83 | 1.72 | 0.77 | 1.96 | 0.85 |
| iYML063W   | #N/A | #N/A | #N/A | #N/A | #N/A | #N/A |
| iYML064C   | 0.36 | 0.08 | 0.39 | 0.05 | 0.29 | 0.03 |
| iYML065W   | 0.22 | 0.02 | 0.34 | 0.04 | #N/A | #N/A |
| iYML066C   | 2.16 | 0.88 | 2.00 | 0.90 | 1.99 | 0.87 |
| iYML067C   | #N/A | #N/A | #N/A | #N/A | #N/A | #N/A |
| iYML068W   | #N/A | #N/A | #N/A | #N/A | #N/A | #N/A |
| iYML069W   | 0.69 | 0.27 | 0.94 | 0.37 | #N/A | #N/A |
| iYML070W   | 2.12 | 0.88 | 1.51 | 0.69 | 1.57 | 0.75 |
| iYML071C   | #N/A | #N/A | #N/A | #N/A | 0.68 | 0.25 |
| iYML072C   | 0.84 | 0.33 | 0.85 | 0.36 | 0.68 | 0.27 |
| iYML074C-0 | 0.81 | 0.33 | 1.07 | 0.41 | 1.02 | 0.46 |
| iYML074C-1 | 0.54 | 0.18 | 0.68 | 0.22 | 0.52 | 0.16 |
| iYML075C   | 0.83 | 0.32 | 1.29 | 0.54 | #N/A | #N/A |
| iYML076C   | 0.67 | 0.26 | #N/A | #N/A | 1.12 | 0.55 |
| iYML077W   | 0.54 | 0.18 | 0.59 | 0.19 | 0.60 | 0.22 |
| iYML078W   | 1.45 | 0.65 | 1.40 | 0.62 | 1.83 | 0.81 |
| iYML079W   | #N/A | #N/A | #N/A | #N/A | #N/A | #N/A |
| iYML080W   | 1.29 | 0.57 | #N/A | #N/A | 1.59 | 0.76 |
| iYML081C-A | 2.09 | 0.84 | 1.30 | 0.56 | 1.68 | 0.76 |
| iYML081W   | 2.25 | 0.90 | 2.66 | 0.95 | 1.97 | 0.86 |
| iYML082W   | 1.07 | 0.48 | 1.00 | 0.40 | 1.31 | 0.55 |
| iYML083C   | 1.96 | 0.84 | 1.29 | 0.58 | 1.54 | 0.70 |
| iYML085C   | 3.35 | 0.99 | #N/A | #N/A | 2.83 | 0.96 |
| iYML086C   | 1.20 | 0.55 | 1.18 | 0.56 | 1.34 | 0.61 |
| iYML087C   | 1.61 | 0.70 | 1.64 | 0.72 | 1.57 | 0.67 |
| iYML088W   | #N/A | #N/A | #N/A | #N/A | #N/A | #N/A |
| iYML089C   | 0.55 | 0.17 | 0.45 | 0.09 | 0.58 | 0.18 |
| iYML093W   | 0.39 | 0.09 | 0.41 | 0.07 | 0.55 | 0.19 |
| iYML094W   | 2.07 | 0.85 | #N/A | #N/A | 2.01 | 0.89 |
| iYML095C   | 1.31 | 0.58 | #N/A | #N/A | #N/A | #N/A |
| iYML097C   | 1.88 | 0.82 | 2.68 | 0.96 | 1.73 | 0.78 |
| iYML098W   | 0.86 | 0.34 | 1.01 | 0.41 | 0.92 | 0.43 |
| iYML099C   | 1.24 | 0.56 | 1.54 | 0.68 | 1.11 | 0.51 |
| iYML100W   | #N/A | #N/A | #N/A | #N/A | #N/A | #N/A |
| iYML101C   | 1.06 | 0.46 | 1.03 | 0.46 | 1.16 | 0.48 |
| iYML103C   | 1.08 | 0.46 | 1.12 | 0.47 | 1.04 | 0.48 |
| iYML104C   | 1.59 | 0.72 | 1.32 | 0.57 | 1.58 | 0.72 |
| iYML105C   | 1.89 | 0.83 | 1.49 | 0.65 | #N/A | #N/A |
| iYML106W   | 0.60 | 0.21 | 0.44 | 0.09 | #N/A | #N/A |
| iYML107C   | #N/A | #N/A | #N/A | #N/A | 0.73 | 0.30 |



|             |      |      |      |      |      |      |
|-------------|------|------|------|------|------|------|
| iYML108W    | #N/A | #N/A | #N/A | #N/A | 0.13 | 0.00 |
| iYML110C    | 2.18 | 0.90 | 1.90 | 0.88 | 2.47 | 0.95 |
| iYML111W    | #N/A | #N/A | 0.64 | 0.22 | #N/A | #N/A |
| iYML112W    | 0.96 | 0.39 | 1.39 | 0.68 | 1.02 | 0.46 |
| iYML114C    | 2.14 | 0.85 | 1.85 | 0.86 | #N/A | #N/A |
| iYML115C    | 1.67 | 0.74 | 1.66 | 0.80 | 1.38 | 0.67 |
| iYML116W    | #N/A | #N/A | #N/A | #N/A | #N/A | #N/A |
| iYML117W-A  | 0.63 | 0.22 | 0.55 | 0.16 | 0.53 | 0.17 |
| iYML118W    | 1.86 | 0.81 | 1.44 | 0.71 | 1.87 | 0.85 |
| iYML119W    | 1.57 | 0.70 | 2.00 | 0.84 | #N/A | #N/A |
| iYML120C    | 1.11 | 0.49 | 1.47 | 0.71 | 1.02 | 0.46 |
| iYML121W    | 0.57 | 0.19 | 0.31 | 0.03 | 0.53 | 0.15 |
| iYML122C    | 0.59 | 0.21 | 0.73 | 0.25 | 0.35 | 0.05 |
| iYML123C    | 0.25 | 0.03 | 0.93 | 0.41 | 0.19 | 0.01 |
| iYML124C    | 1.37 | 0.62 | 2.10 | 0.87 | 1.30 | 0.59 |
| iYML125C    | #N/A | #N/A | 0.95 | 0.38 | 0.92 | 0.43 |
| iYML126C    | 0.47 | 0.13 | 0.79 | 0.30 | 0.71 | 0.28 |
| iYML128C    | 1.91 | 0.82 | 1.66 | 0.73 | 1.84 | 0.84 |
| iYML129C    | 2.59 | 0.96 | 2.48 | 0.94 | 3.41 | 0.99 |
| iYML131W    | #N/A | #N/A | #N/A | #N/A | #N/A | #N/A |
| iYML132W-1  | 2.64 | 0.95 | 1.74 | 0.77 | #N/A | #N/A |
| iYML133C-0  | 0.66 | 0.23 | 0.65 | 0.20 | 0.68 | 0.27 |
| iYMLCdelta1 | 2.81 | 0.97 | 2.42 | 0.92 | 2.50 | 0.95 |
| iYMLCdelta2 | #N/A | #N/A | #N/A | #N/A | #N/A | #N/A |
| iYMLWdelta4 | #N/A | #N/A | #N/A | #N/A | #N/A | #N/A |
| iYMLWdelta6 | 0.62 | 0.21 | 1.02 | 0.41 | 0.72 | 0.30 |
| iYMR001C    | 0.55 | 0.19 | 0.94 | 0.34 | 0.63 | 0.24 |
| iYMR002W    | 1.04 | 0.45 | 0.90 | 0.35 | 1.53 | 0.70 |
| iYMR003W    | #N/A | #N/A | #N/A | #N/A | #N/A | #N/A |
| iYMR004W    | 1.67 | 0.71 | 1.96 | 0.84 | 1.74 | 0.78 |
| iYMR005W    | 0.43 | 0.10 | 0.35 | 0.04 | 0.60 | 0.19 |
| iYMR006C    | 0.96 | 0.42 | #N/A | #N/A | 0.86 | 0.33 |
| iYMR007W    | 0.52 | 0.17 | 0.68 | 0.18 | 0.49 | 0.15 |
| iYMR008C    | 1.68 | 0.71 | 1.32 | 0.56 | 1.35 | 0.60 |
| iYMR009W    | 1.21 | 0.55 | 1.10 | 0.51 | 1.51 | 0.69 |
| iYMR010W-0  | 0.51 | 0.16 | 1.01 | 0.37 | 0.42 | 0.09 |
| iYMR010W-1  | 0.74 | 0.28 | 1.15 | 0.48 | 0.77 | 0.33 |
| iYMR011W    | 1.57 | 0.71 | 1.64 | 0.72 | 2.00 | 0.86 |
| iYMR012W    | #N/A | #N/A | #N/A | #N/A | #N/A | #N/A |
| iYMR013C-0  | 0.41 | 0.09 | 0.62 | 0.20 | 0.56 | 0.19 |
| iYMR013C-1  | 0.57 | 0.19 | 0.82 | 0.29 | 0.60 | 0.22 |
| iYMR014W    | 0.56 | 0.19 | 0.69 | 0.19 | 0.55 | 0.19 |
| iYMR015C    | 0.73 | 0.29 | #N/A | #N/A | 0.69 | 0.24 |
| iYMR016C-0  | 0.39 | 0.09 | 0.80 | 0.33 | 0.45 | 0.12 |
| iYMR017W    | 0.95 | 0.42 | 0.98 | 0.45 | 0.97 | 0.43 |
| iYMR018W    | 2.45 | 0.94 | 1.51 | 0.66 | 2.47 | 0.95 |
| iYMR019W    | 1.31 | 0.56 | 1.05 | 0.43 | 1.62 | 0.74 |
| iYMR020W    | 0.81 | 0.31 | 0.47 | 0.11 | 0.42 | 0.10 |
| iYMR021C    | 3.00 | 0.96 | 2.26 | 0.94 | 2.58 | 0.94 |
| iYMR022W    | 0.87 | 0.34 | 0.55 | 0.16 | 0.74 | 0.32 |
| iYMR023C    | #N/A | #N/A | #N/A | #N/A | #N/A | #N/A |



|            |      |      |      |      |      |      |
|------------|------|------|------|------|------|------|
| iYMR024W   | 1.33 | 0.57 | 1.62 | 0.71 | 0.89 | 0.41 |
| iYMR026C   | 1.49 | 0.67 | 1.18 | 0.49 | 1.59 | 0.69 |
| iYMR027W   | #N/A | #N/A | #N/A | #N/A | #N/A | #N/A |
| iYMR028W   | #N/A | #N/A | #N/A | #N/A | #N/A | #N/A |
| iYMR029C   | 3.14 | 0.98 | 2.64 | 0.95 | 2.22 | 0.92 |
| iYMR030W   | #N/A | #N/A | #N/A | #N/A | #N/A | #N/A |
| iYMR031W-A | 0.71 | 0.28 | 0.73 | 0.21 | 0.77 | 0.28 |
| iYMR032W   | 1.56 | 0.71 | 1.70 | 0.75 | 1.64 | 0.70 |
| iYMR033W   | 0.56 | 0.18 | 0.53 | 0.14 | 0.62 | 0.23 |
| iYMR034C   | 2.21 | 0.87 | 2.40 | 0.92 | 1.88 | 0.79 |
| iYMR035W   | 0.65 | 0.24 | #N/A | #N/A | 0.73 | 0.30 |
| iYMR038C   | 0.66 | 0.25 | 0.99 | 0.45 | 0.78 | 0.33 |
| iYMR039C   | 2.64 | 0.95 | 1.65 | 0.73 | #N/A | #N/A |
| iYMR040W   | #N/A | #N/A | #N/A | #N/A | #N/A | #N/A |
| iYMR041C   | 0.74 | 0.30 | #N/A | #N/A | 0.72 | 0.29 |
| iYMR042W   | 0.38 | 0.08 | 0.70 | 0.23 | 0.37 | 0.07 |
| iYMR043W   | 0.74 | 0.30 | 0.81 | 0.29 | 0.61 | 0.20 |
| iYMR044W   | 0.29 | 0.04 | 0.58 | 0.13 | 0.35 | 0.05 |
| iYMR046W-A | 0.65 | 0.24 | 0.86 | 0.36 | 0.63 | 0.22 |
| iYMR047C   | 2.36 | 0.92 | 2.08 | 0.87 | #N/A | #N/A |
| iYMR048W   | 0.56 | 0.19 | 0.53 | 0.15 | 0.70 | 0.24 |
| iYMR049C-0 | #N/A | #N/A | 2.09 | 0.92 | 1.78 | 0.76 |
| iYMR049C-1 | 1.27 | 0.56 | 1.47 | 0.64 | 1.39 | 0.62 |
| iYMR053C   | #N/A | #N/A | 0.33 | 0.04 | 0.64 | 0.21 |
| iYMR054W   | #N/A | #N/A | #N/A | #N/A | #N/A | #N/A |
| iYMR055C   | 1.42 | 0.62 | 1.48 | 0.73 | 1.61 | 0.77 |
| iYMR056C   | 0.44 | 0.12 | #N/A | #N/A | #N/A | #N/A |
| iYMR057C   | #N/A | #N/A | #N/A | #N/A | #N/A | #N/A |
| iYMR058W   | 1.52 | 0.65 | 1.53 | 0.67 | 1.31 | 0.56 |
| iYMR060C   | 3.53 | 0.99 | 2.34 | 0.93 | 2.72 | 0.97 |
| iYMR061W   | 0.52 | 0.17 | #N/A | #N/A | 0.64 | 0.21 |
| iYMR062C   | 2.79 | 0.95 | 2.00 | 0.85 | 2.87 | 0.98 |
| iYMR063W   | 1.43 | 0.64 | 1.03 | 0.48 | 2.36 | 0.93 |
| iYMR064W   | 0.63 | 0.21 | 0.71 | 0.26 | 1.08 | 0.50 |
| iYMR065W   | 2.00 | 0.86 | 1.78 | 0.77 | 2.49 | 0.95 |
| iYMR066W   | #N/A | #N/A | #N/A | #N/A | #N/A | #N/A |
| iYMR067C   | 1.53 | 0.69 | 1.59 | 0.70 | 1.84 | 0.77 |
| iYMR068W   | 1.46 | 0.65 | 1.22 | 0.50 | 0.97 | 0.46 |
| iYMR069W   | 0.27 | 0.03 | 0.34 | 0.04 | 0.26 | 0.02 |
| iYMR070W   | #N/A | #N/A | 0.67 | 0.24 | 0.74 | 0.31 |
| iYMR071C   | 1.29 | 0.56 | 1.69 | 0.76 | 1.00 | 0.43 |
| iYMR072W   | #N/A | #N/A | 0.68 | 0.22 | 0.69 | 0.24 |
| iYMR073C   | 2.19 | 0.90 | #N/A | #N/A | 1.56 | 0.67 |
| iYMR074C   | 1.05 | 0.47 | 0.94 | 0.37 | 0.98 | 0.46 |
| iYMR075C-A | 0.81 | 0.34 | 0.53 | 0.13 | 0.77 | 0.31 |
| iYMR076C   | 1.44 | 0.64 | 1.21 | 0.49 | 1.26 | 0.58 |
| iYMR077C   | 2.33 | 0.89 | 1.86 | 0.87 | 1.95 | 0.84 |
| iYMR078C   | 1.87 | 0.81 | 1.66 | 0.73 | 1.90 | 0.80 |
| iYMR079W   | 0.65 | 0.24 | 0.76 | 0.23 | 0.56 | 0.19 |
| iYMR080C   | 1.66 | 0.70 | 1.60 | 0.72 | 1.89 | 0.83 |
| iYMR081C   | 1.07 | 0.48 | 1.06 | 0.43 | #N/A | #N/A |

|            |      |      |      |      |      |      |
|------------|------|------|------|------|------|------|
| iYMR082C-0 | 1.29 | 0.55 | 1.29 | 0.58 | #N/A | #N/A |
| iYMR082C-1 | 0.53 | 0.17 | 1.07 | 0.50 | 0.52 | 0.17 |
| iYMR083W   | #N/A | #N/A | #N/A | #N/A | 1.08 | 0.52 |
| iYMR084W   | #N/A | #N/A | #N/A | #N/A | #N/A | #N/A |
| iYMR085W   | 1.05 | 0.47 | #N/A | #N/A | 1.00 | 0.40 |
| iYMR086C-A | 1.05 | 0.46 | 1.06 | 0.43 | 1.34 | 0.57 |
| iYMR088C   | 1.17 | 0.52 | 1.09 | 0.51 | 1.24 | 0.52 |
| iYMR089C   | 0.87 | 0.36 | 1.00 | 0.45 | 1.09 | 0.52 |
| iYMR090W   | #N/A | #N/A | #N/A | #N/A | #N/A | #N/A |
| iYMR091C   | 1.57 | 0.70 | 1.13 | 0.47 | 1.43 | 0.65 |
| iYMR092C   | 1.57 | 0.70 | 1.42 | 0.62 | 1.43 | 0.70 |
| iYMR093W   | 1.30 | 0.58 | #N/A | #N/A | 1.10 | 0.51 |
| iYMR095C   | 0.60 | 0.20 | 0.63 | 0.18 | 0.52 | 0.16 |
| iYMR096W   | #N/A | #N/A | 0.51 | 0.13 | 0.48 | 0.14 |
| iYMR097C   | 1.35 | 0.58 | 1.02 | 0.46 | 1.37 | 0.58 |
| iYMR098C   | #N/A | #N/A | 2.35 | 0.95 | 2.20 | 0.87 |
| iYMR099C   | 1.22 | 0.53 | 1.63 | 0.72 | 1.20 | 0.55 |
| iYMR100W   | 0.59 | 0.20 | 0.61 | 0.18 | 0.60 | 0.22 |
| iYMR101C   | 0.53 | 0.16 | 0.56 | 0.16 | 0.65 | 0.25 |
| iYMR102C   | 0.53 | 0.17 | 1.02 | 0.41 | 0.76 | 0.32 |
| iYMR103C   | 0.72 | 0.28 | 0.68 | 0.22 | 0.65 | 0.25 |
| iYMR104C   | 1.40 | 0.64 | 0.97 | 0.41 | 1.53 | 0.70 |
| iYMR105C   | #N/A | #N/A | 1.13 | 0.53 | 1.44 | 0.62 |
| iYMR106C   | 1.18 | 0.50 | 1.42 | 0.62 | 0.95 | 0.42 |
| iYMR107W   | 0.52 | 0.16 | #N/A | #N/A | #N/A | #N/A |
| iYMR108W   | 0.98 | 0.43 | 1.07 | 0.41 | #N/A | #N/A |
| iYMR109W   | #N/A | #N/A | #N/A | #N/A | #N/A | #N/A |
| iYMR110C   | 1.02 | 0.42 | 1.32 | 0.56 | 1.33 | 0.57 |
| iYMR111C   | 2.17 | 0.89 | 2.10 | 0.87 | 2.39 | 0.91 |
| iYMR112C   | 2.64 | 0.96 | 2.86 | 0.97 | 2.63 | 0.96 |
| iYMR113W   | 0.75 | 0.30 | #N/A | #N/A | #N/A | #N/A |
| iYMR114C   | 2.36 | 0.90 | 2.45 | 0.93 | #N/A | #N/A |
| iYMR115W   | #N/A | #N/A | #N/A | #N/A | #N/A | #N/A |
| iYMR116C   | 0.41 | 0.09 | 0.56 | 0.15 | 0.39 | 0.08 |
| iYMR117C   | 3.17 | 0.98 | 2.10 | 0.90 | 3.03 | 0.98 |
| iYMR118C   | 0.78 | 0.32 | 0.72 | 0.24 | 0.90 | 0.35 |
| iYMR119W-A | 0.34 | 0.06 | 0.29 | 0.02 | 0.26 | 0.02 |
| iYMR120C   | 0.62 | 0.22 | 1.09 | 0.45 | 0.58 | 0.21 |
| iYMR122C-1 | 2.60 | 0.95 | #N/A | #N/A | 2.05 | 0.87 |
| iYMR123W   | 1.06 | 0.46 | 1.17 | 0.47 | 1.08 | 0.49 |
| iYMR124W   | 1.65 | 0.71 | 1.12 | 0.53 | 1.36 | 0.62 |
| iYMR125W   | #N/A | #N/A | 0.82 | 0.34 | #N/A | #N/A |
| iYMR126C   | 1.70 | 0.72 | 1.51 | 0.66 | 1.62 | 0.73 |
| iYMR127C   | 1.42 | 0.65 | 1.67 | 0.77 | 1.54 | 0.66 |
| iYMR128W   | 2.54 | 0.95 | 2.26 | 0.90 | 2.32 | 0.94 |
| iYMR129W   | 1.33 | 0.61 | 1.31 | 0.56 | #N/A | #N/A |
| iYMR130W   | #N/A | #N/A | 0.48 | 0.08 | 0.51 | 0.17 |
| iYMR131C   | 0.98 | 0.44 | 1.04 | 0.42 | 1.20 | 0.55 |
| iYMR132C   | 0.82 | 0.34 | #N/A | #N/A | 0.73 | 0.27 |
| iYMR133W   | 2.13 | 0.89 | 1.89 | 0.80 | #N/A | #N/A |
| iYMR134W   | #N/A | #N/A | 0.63 | 0.17 | 0.63 | 0.24 |

|            |      |      |      |      |      |      |
|------------|------|------|------|------|------|------|
| iYMR135W-A | 0.33 | 0.05 | #N/A | #N/A | 0.38 | 0.07 |
| iYMR136W   | #N/A | #N/A | #N/A | #N/A | #N/A | #N/A |
| iYMR137C   | 2.60 | 0.95 | 2.41 | 0.92 | 2.68 | 0.97 |
| iYMR138W   | 2.10 | 0.84 | 1.97 | 0.84 | 2.23 | 0.91 |
| iYMR140W   | 0.42 | 0.10 | 0.40 | 0.07 | 0.52 | 0.14 |
| iYMR141C   | #N/A | #N/A | #N/A | #N/A | #N/A | #N/A |
| iYMR142C   | 0.21 | 0.01 | 0.28 | 0.02 | 0.25 | 0.02 |
| iYMR143W   | 1.00 | 0.43 | 0.95 | 0.42 | 0.79 | 0.34 |
| iYMR145C   | 0.51 | 0.16 | #N/A | #N/A | 0.51 | 0.16 |
| iYMR146C   | #N/A | #N/A | 1.83 | 0.85 | 0.82 | 0.32 |
| iYMR147W   | 1.25 | 0.57 | 2.34 | 0.93 | 1.07 | 0.48 |
| iYMR148W   | 1.39 | 0.63 | 1.54 | 0.68 | 1.24 | 0.60 |
| iYMR149W   | #N/A | #N/A | #N/A | #N/A | #N/A | #N/A |
| iYMR151W   | 1.09 | 0.46 | 1.32 | 0.56 | 1.50 | 0.64 |
| iYMR152W   | 2.67 | 0.96 | 1.84 | 0.79 | 2.46 | 0.94 |
| iYMR153C-A | #N/A | #N/A | 0.44 | 0.09 | 0.84 | 0.37 |
| iYMR154C   | 2.01 | 0.86 | 1.99 | 0.83 | 1.97 | 0.81 |
| iYMR155W   | #N/A | #N/A | #N/A | #N/A | #N/A | #N/A |
| iYMR156C   | 1.94 | 0.83 | 1.85 | 0.79 | 1.69 | 0.76 |
| iYMR157C   | 2.02 | 0.82 | 1.56 | 0.72 | 2.21 | 0.92 |
| iYMR158C-B | 0.71 | 0.26 | 0.64 | 0.16 | 0.77 | 0.28 |
| iYMR158W   | #N/A | #N/A | #N/A | #N/A | #N/A | #N/A |
| iYMR159C   | 2.14 | 0.89 | 1.44 | 0.71 | 1.82 | 0.84 |
| iYMR160W   | 1.74 | 0.73 | #N/A | #N/A | #N/A | #N/A |
| iYMR161W   | 0.52 | 0.16 | #N/A | #N/A | 0.58 | 0.20 |
| iYMR162C   | 1.67 | 0.74 | #N/A | #N/A | 1.74 | 0.78 |
| iYMR163C   | 1.05 | 0.46 | 1.10 | 0.42 | 1.32 | 0.64 |
| iYMR166C   | 1.56 | 0.71 | 1.48 | 0.63 | 1.69 | 0.76 |
| iYMR167W   | 0.32 | 0.05 | #N/A | #N/A | 0.31 | 0.04 |
| iYMR168C   | 1.68 | 0.71 | #N/A | #N/A | #N/A | #N/A |
| iYMR169C   | 2.49 | 0.94 | 2.12 | 0.87 | 2.24 | 0.93 |
| iYMR170C   | 1.99 | 0.85 | 1.80 | 0.79 | 2.00 | 0.82 |
| iYMR171C   | 0.69 | 0.24 | 1.15 | 0.54 | 1.13 | 0.51 |
| iYMR172C-A | 0.82 | 0.35 | 0.85 | 0.36 | 1.17 | 0.50 |
| iYMR173W-A | 1.73 | 0.76 | #N/A | #N/A | 2.28 | 0.93 |
| iYMR174C   | 2.54 | 0.94 | 1.88 | 0.87 | 3.03 | 0.98 |
| iYMR175W   | 3.17 | 0.98 | #N/A | #N/A | 2.74 | 0.97 |
| iYMR176W   | 1.87 | 0.81 | 1.24 | 0.58 | 1.76 | 0.75 |
| iYMR177W   | 2.11 | 0.88 | 1.51 | 0.71 | 1.73 | 0.78 |
| iYMR178W   | 2.07 | 0.83 | 1.34 | 0.66 | 1.81 | 0.77 |
| iYMR179W   | #N/A | #N/A | #N/A | #N/A | 0.74 | 0.31 |
| iYMR180C   | #N/A | #N/A | 0.95 | 0.38 | #N/A | #N/A |
| iYMR181C   | 0.69 | 0.26 | 1.56 | 0.68 | 0.66 | 0.24 |
| iYMR182C-0 | 0.55 | 0.19 | 1.13 | 0.47 | 0.50 | 0.15 |
| iYMR182C-1 | 0.38 | 0.09 | 0.45 | 0.07 | 0.29 | 0.03 |
| iYMR183C   | 1.75 | 0.74 | 1.78 | 0.76 | 1.76 | 0.81 |
| iYMR185W   | 0.56 | 0.18 | 0.50 | 0.13 | 0.40 | 0.08 |
| iYMR186W   | #N/A | #N/A | #N/A | #N/A | #N/A | #N/A |
| iYMR187C   | 1.11 | 0.47 | 0.72 | 0.27 | 0.96 | 0.45 |
| iYMR188C   | 1.06 | 0.44 | 1.21 | 0.49 | 1.05 | 0.45 |
| iYMR189W   | 0.35 | 0.07 | 0.34 | 0.04 | 0.20 | 0.01 |

|            |      |      |      |      |      |      |
|------------|------|------|------|------|------|------|
| iYMR190C   | 2.12 | 0.85 | #N/A | #N/A | 2.28 | 0.92 |
| iYMR191W   | 2.49 | 0.92 | 1.56 | 0.67 | 2.11 | 0.91 |
| iYMR192W   | 1.45 | 0.65 | 1.61 | 0.69 | 1.56 | 0.68 |
| iYMR193W   | 0.42 | 0.11 | 0.43 | 0.06 | 0.52 | 0.14 |
| iYMR194C-A | 0.20 | 0.01 | 0.30 | 0.02 | 0.17 | 0.01 |
| iYMR194W   | 0.50 | 0.16 | 0.52 | 0.13 | 0.57 | 0.20 |
| iYMR195W   | 1.24 | 0.56 | 1.38 | 0.60 | 1.16 | 0.57 |
| iYMR196W   | #N/A | #N/A | #N/A | #N/A | #N/A | #N/A |
| iYMR197C   | 2.03 | 0.86 | 1.53 | 0.66 | 1.77 | 0.82 |
| iYMR198W   | 0.39 | 0.09 | 0.54 | 0.15 | 0.44 | 0.12 |
| iYMR199W   | 1.32 | 0.57 | 1.31 | 0.60 | 1.14 | 0.53 |
| iYMR200W   | 0.38 | 0.08 | 0.56 | 0.12 | 0.44 | 0.11 |
| iYMR201C   | 1.27 | 0.56 | 1.27 | 0.62 | 1.09 | 0.53 |
| iYMR202W   | 1.62 | 0.71 | 1.03 | 0.42 | 1.78 | 0.77 |
| iYMR203W   | 0.46 | 0.13 | 0.38 | 0.06 | 0.45 | 0.12 |
| iYMR204C   | 0.86 | 0.36 | 1.02 | 0.41 | 1.17 | 0.49 |
| iYMR205C   | 1.27 | 0.56 | 0.88 | 0.34 | 1.22 | 0.51 |
| iYMR206W   | 1.93 | 0.83 | 2.22 | 0.94 | 2.63 | 0.96 |
| iYMR207C   | 3.99 | 1.00 | 2.68 | 0.96 | 3.44 | 0.99 |
| iYMR208W   | #N/A | #N/A | #N/A | #N/A | #N/A | #N/A |
| iYMR209C   | 1.47 | 0.63 | #N/A | #N/A | 1.34 | 0.61 |
| iYMR210W   | 0.83 | 0.35 | 0.89 | 0.32 | 1.19 | 0.55 |
| iYMR211W   | 0.16 | 0.01 | 0.23 | 0.01 | #N/A | #N/A |
| iYMR212C   | 1.65 | 0.74 | 1.90 | 0.81 | #N/A | #N/A |
| iYMR213W   | 1.19 | 0.54 | 1.61 | 0.70 | #N/A | #N/A |
| iYMR214W   | 1.36 | 0.62 | 1.59 | 0.72 | 1.72 | 0.79 |
| iYMR215W   | 0.36 | 0.08 | #N/A | #N/A | 0.48 | 0.12 |
| iYMR216C   | 0.68 | 0.26 | 1.14 | 0.48 | 0.95 | 0.42 |
| iYMR217W   | #N/A | #N/A | #N/A | #N/A | #N/A | #N/A |
| iYMR218C   | 2.09 | 0.87 | 1.60 | 0.74 | 2.42 | 0.95 |
| iYMR219W   | 1.25 | 0.55 | 1.14 | 0.49 | 1.05 | 0.47 |
| iYMR220W   | 0.34 | 0.06 | 0.45 | 0.10 | 0.43 | 0.11 |
| iYMR221C   | 1.84 | 0.77 | 1.86 | 0.87 | 2.47 | 0.95 |
| iYMR222C   | #N/A | #N/A | 1.43 | 0.71 | 1.42 | 0.69 |
| iYMR223W   | 0.49 | 0.15 | 0.43 | 0.08 | 0.33 | 0.05 |
| iYMR224C   | 1.79 | 0.79 | #N/A | #N/A | 1.67 | 0.75 |
| iYMR225C   | 1.06 | 0.45 | #N/A | #N/A | 1.34 | 0.65 |
| iYMR226C   | #N/A | #N/A | 1.06 | 0.50 | 1.05 | 0.43 |
| iYMR227C   | 1.98 | 0.83 | 1.45 | 0.62 | 1.52 | 0.73 |
| iYMR228W   | 0.46 | 0.13 | #N/A | #N/A | 0.54 | 0.18 |
| iYMR230W   | 0.68 | 0.26 | 0.62 | 0.19 | 0.65 | 0.22 |
| iYMR231W   | 0.67 | 0.26 | 0.60 | 0.19 | 0.64 | 0.21 |
| iYMR232W   | 1.67 | 0.75 | #N/A | #N/A | #N/A | #N/A |
| iYMR233W   | 1.79 | 0.79 | 1.58 | 0.77 | 1.88 | 0.81 |
| iYMR234W   | #N/A | #N/A | #N/A | #N/A | #N/A | #N/A |
| iYMR235C   | 2.09 | 0.87 | 2.27 | 0.93 | #N/A | #N/A |
| iYMR236W   | 1.65 | 0.74 | 1.38 | 0.67 | 1.64 | 0.70 |
| iYMR237W   | 1.79 | 0.75 | 1.64 | 0.74 | 1.87 | 0.80 |
| iYMR238W   | 0.96 | 0.42 | 1.22 | 0.59 | 1.17 | 0.49 |
| iYMR239C   | 1.35 | 0.60 | 1.26 | 0.53 | 1.13 | 0.55 |
| iYMR240C   | 1.07 | 0.48 | 1.39 | 0.61 | 1.08 | 0.49 |

|            |      |      |      |      |      |      |
|------------|------|------|------|------|------|------|
| iYMR241W   | #N/A | #N/A | #N/A | #N/A | #N/A | #N/A |
| iYMR242C   | 0.21 | 0.01 | 0.32 | 0.03 | #N/A | #N/A |
| iYMR243C   | 0.77 | 0.31 | 1.09 | 0.51 | #N/A | #N/A |
| iYMR244W   | 0.97 | 0.42 | 1.27 | 0.54 | 0.79 | 0.30 |
| iYMR245W   | 0.37 | 0.08 | 1.27 | 0.57 | 0.48 | 0.12 |
| iYMR246W   | 0.51 | 0.15 | 0.62 | 0.21 | #N/A | #N/A |
| iYMR247C   | 0.92 | 0.39 | 0.96 | 0.43 | 1.07 | 0.44 |
| iYMR250W   | 1.34 | 0.61 | 1.40 | 0.69 | 1.02 | 0.46 |
| iYMR251W   | 0.77 | 0.31 | 0.83 | 0.27 | 0.69 | 0.24 |
| iYMR251W-A | 0.99 | 0.43 | 0.99 | 0.36 | 0.94 | 0.41 |
| iYMR253C   | 1.82 | 0.77 | 2.16 | 0.92 | 1.15 | 0.56 |
| iYMR254C   | #N/A | #N/A | #N/A | #N/A | #N/A | #N/A |
| iYMR255W   | 0.68 | 0.26 | 0.93 | 0.33 | 0.71 | 0.25 |
| iYMR256C   | 0.69 | 0.27 | 0.67 | 0.21 | 0.65 | 0.23 |
| iYMR257C   | 1.53 | 0.69 | 2.14 | 0.88 | 1.54 | 0.70 |
| iYMR258C   | 1.04 | 0.46 | 0.87 | 0.29 | #N/A | #N/A |
| iYMR259C   | 1.67 | 0.75 | 1.10 | 0.52 | 1.64 | 0.70 |
| iYMR260C   | 0.83 | 0.34 | 1.22 | 0.52 | 1.06 | 0.44 |
| iYMR261C   | 2.44 | 0.94 | 2.09 | 0.87 | 1.92 | 0.87 |
| iYMR262W   | 1.85 | 0.77 | 1.41 | 0.62 | 1.31 | 0.56 |
| iYMR263W   | 2.19 | 0.86 | 1.59 | 0.68 | 2.19 | 0.90 |
| iYMR264W   | 0.69 | 0.26 | #N/A | #N/A | 1.07 | 0.52 |
| iYMR265C   | 0.67 | 0.24 | 0.85 | 0.35 | 0.80 | 0.30 |
| iYMR266W   | #N/A | #N/A | 1.46 | 0.63 | 1.63 | 0.69 |
| iYMR267W   | 0.46 | 0.13 | 0.34 | 0.04 | 0.49 | 0.14 |
| iYMR268C   | 1.33 | 0.59 | 1.46 | 0.65 | 1.43 | 0.65 |
| iYMR269W   | #N/A | #N/A | #N/A | #N/A | #N/A | #N/A |
| iYMR270C   | 1.35 | 0.62 | 1.43 | 0.71 | 1.50 | 0.68 |
| iYMR271C   | 1.38 | 0.62 | 1.20 | 0.58 | 1.18 | 0.54 |
| iYMR272C   | 0.87 | 0.37 | 0.79 | 0.32 | 0.80 | 0.34 |
| iYMR273C   | 1.67 | 0.71 | 1.18 | 0.50 | 1.89 | 0.79 |
| iYMR274C   | #N/A | #N/A | 1.36 | 0.57 | #N/A | #N/A |
| iYMR275C   | 2.08 | 0.84 | 1.92 | 0.88 | 2.11 | 0.90 |
| iYMR276W   | 1.48 | 0.68 | 1.38 | 0.62 | 1.60 | 0.72 |
| iYMR277W   | 0.89 | 0.35 | 0.65 | 0.22 | 0.88 | 0.41 |
| iYMR278W   | #N/A | #N/A | #N/A | #N/A | #N/A | #N/A |
| iYMR279C   | 0.27 | 0.03 | 0.44 | 0.09 | 0.43 | 0.11 |
| iYMR280C   | 1.36 | 0.60 | 0.94 | 0.37 | 1.25 | 0.53 |
| iYMR282C   | #N/A | #N/A | #N/A | #N/A | 3.62 | 1.00 |
| iYMR283C   | 2.94 | 0.97 | 2.69 | 0.97 | 3.12 | 0.99 |
| iYMR284W   | 0.57 | 0.19 | #N/A | #N/A | 0.50 | 0.14 |
| iYMR285C   | 2.18 | 0.90 | 1.55 | 0.76 | 2.96 | 0.98 |
| iYMR286W   | #N/A | #N/A | #N/A | #N/A | 1.55 | 0.66 |
| iYMR287C   | 1.78 | 0.78 | 1.93 | 0.84 | 2.00 | 0.88 |
| iYMR288W   | 1.52 | 0.68 | 1.47 | 0.64 | 1.49 | 0.67 |
| iYMR289W   | 0.40 | 0.09 | 0.42 | 0.08 | 0.42 | 0.09 |
| iYMR290W-A | 0.46 | 0.13 | 0.53 | 0.15 | 0.46 | 0.12 |
| iYMR291W   | 1.76 | 0.79 | 1.72 | 0.74 | #N/A | #N/A |
| iYMR292W   | #N/A | #N/A | #N/A | #N/A | #N/A | #N/A |
| iYMR293C   | 1.55 | 0.67 | 1.27 | 0.54 | 1.84 | 0.81 |
| iYMR294W   | #N/A | #N/A | #N/A | #N/A | #N/A | #N/A |

|                |      |      |      |      |      |      |
|----------------|------|------|------|------|------|------|
| iYMR296C       | 0.95 | 0.39 | 0.91 | 0.34 | 0.72 | 0.28 |
| iYMR297W       | 1.99 | 0.85 | #N/A | #N/A | 2.10 | 0.85 |
| iYMR298W       | #N/A | #N/A | #N/A | #N/A | 0.85 | 0.39 |
| iYMR299C       | #N/A | #N/A | #N/A | #N/A | #N/A | #N/A |
| iYMR300C       | 1.04 | 0.43 | 0.85 | 0.32 | 1.23 | 0.52 |
| iYMR301C       | 1.07 | 0.48 | 1.27 | 0.62 | 1.35 | 0.62 |
| iYMR302C       | 2.02 | 0.85 | 2.37 | 0.91 | 1.76 | 0.80 |
| iYMR303C       | 1.57 | 0.71 | 1.81 | 0.78 | 1.73 | 0.76 |
| iYMR304W       | #N/A | #N/A | #N/A | #N/A | #N/A | #N/A |
| iYMR305C       | 0.67 | 0.26 | 0.75 | 0.27 | 0.87 | 0.33 |
| iYMR306C-A     | 0.58 | 0.19 | 0.45 | 0.09 | 0.56 | 0.19 |
| iYMR307W       | #N/A | #N/A | #N/A | #N/A | #N/A | #N/A |
| iYMR308C       | 0.98 | 0.43 | #N/A | #N/A | 0.70 | 0.29 |
| iYMR309C       | 0.63 | 0.23 | 0.65 | 0.23 | 0.78 | 0.33 |
| iYMR310C       | 2.63 | 0.96 | 2.06 | 0.85 | 2.46 | 0.94 |
| iYMR311C       | 1.86 | 0.81 | 1.75 | 0.76 | 1.70 | 0.78 |
| iYMR312W       | #N/A | #N/A | #N/A | #N/A | #N/A | #N/A |
| iYMR313C       | 2.10 | 0.86 | 1.85 | 0.80 | 1.33 | 0.65 |
| iYMR314W       | 0.75 | 0.30 | 0.82 | 0.34 | 0.67 | 0.26 |
| iYMR315W       | 1.92 | 0.82 | 2.15 | 0.87 | 1.98 | 0.87 |
| iYMR316C-A     | 0.80 | 0.32 | 0.95 | 0.34 | 0.82 | 0.36 |
| iYMR317W       | 1.73 | 0.77 | 1.37 | 0.60 | 1.34 | 0.61 |
| iYMR318C       | 1.06 | 0.47 | 1.09 | 0.50 | 0.93 | 0.44 |
| iYMR319C-0     | 0.56 | 0.19 | 0.90 | 0.39 | 0.39 | 0.07 |
| iYMR319C-1     | 0.48 | 0.14 | 0.51 | 0.09 | #N/A | #N/A |
| iYMR320W       | 1.78 | 0.77 | 0.73 | 0.28 | 1.03 | 0.46 |
| iYMR321C       | 1.63 | 0.72 | 1.59 | 0.71 | 1.62 | 0.69 |
| iYMR322C       | 2.51 | 0.95 | 2.34 | 0.94 | 2.06 | 0.89 |
| iYMR323W       | 0.86 | 0.36 | 0.91 | 0.36 | 0.92 | 0.40 |
| iYMR324C       | 0.76 | 0.30 | 0.77 | 0.31 | 0.75 | 0.29 |
| iYMR325W       | 0.49 | 0.14 | 0.57 | 0.16 | 0.45 | 0.12 |
| iYMRCdelta10   | 0.92 | 0.39 | #N/A | #N/A | #N/A | #N/A |
| iYMRCdelta13   | #N/A | #N/A | #N/A | #N/A | #N/A | #N/A |
| iYMRCtau1      | 1.94 | 0.80 | 3.28 | 0.99 | 1.66 | 0.77 |
| iYMRWdelta12   | 1.19 | 0.53 | #N/A | #N/A | #N/A | #N/A |
| iYMRWdelta15   | #N/A | #N/A | 2.24 | 0.93 | 2.11 | 0.88 |
| iYMRWdelta16   | 1.13 | 0.50 | 1.42 | 0.61 | 0.95 | 0.45 |
| iYMRWdelta17   | 1.15 | 0.49 | 0.68 | 0.24 | 1.42 | 0.65 |
| iYMRWdelta19-0 | 1.00 | 0.41 | #N/A | #N/A | 1.24 | 0.54 |
| iYMRWdelta21   | 0.65 | 0.24 | #N/A | #N/A | 0.79 | 0.29 |
| iYMRWtau2      | #N/A | #N/A | #N/A | #N/A | #N/A | #N/A |
| iYNL001W       | #N/A | #N/A | #N/A | #N/A | #N/A | #N/A |
| iYNL002C       | 0.81 | 0.34 | 0.89 | 0.35 | 1.30 | 0.59 |
| iYNL003C       | 0.70 | 0.28 | 1.09 | 0.45 | 0.86 | 0.37 |
| iYNL004W       | 0.69 | 0.27 | 0.67 | 0.24 | 0.58 | 0.18 |
| iYNL005C       | 1.26 | 0.54 | 1.71 | 0.79 | 1.36 | 0.61 |
| iYNL006W       | 0.37 | 0.08 | 0.65 | 0.19 | 0.44 | 0.10 |
| iYNL007C       | 1.67 | 0.74 | 1.34 | 0.65 | 1.18 | 0.50 |
| iYNL008C       | 1.24 | 0.56 | 0.90 | 0.32 | 1.13 | 0.51 |
| iYNL009W       | 0.73 | 0.28 | #N/A | #N/A | #N/A | #N/A |
| iYNL011C       | 2.28 | 0.88 | 1.95 | 0.89 | 1.97 | 0.85 |

|          |      |      |      |      |      |      |
|----------|------|------|------|------|------|------|
| iYNL012W | #N/A | #N/A | #N/A | #N/A | #N/A | #N/A |
| iYNL013C | 0.86 | 0.34 | 0.69 | 0.25 | 0.98 | 0.44 |
| iYNL016W | 1.00 | 0.41 | 0.99 | 0.45 | 0.69 | 0.28 |
| iYNL018C | 0.51 | 0.15 | 0.49 | 0.12 | 0.50 | 0.14 |
| iYNL019C | 0.66 | 0.25 | 0.51 | 0.13 | 0.72 | 0.27 |
| iYNL020C | 1.72 | 0.76 | 1.50 | 0.66 | 1.86 | 0.85 |
| iYNL021W | 0.34 | 0.06 | 0.33 | 0.02 | 0.31 | 0.04 |
| iYNL022C | 1.45 | 0.62 | 1.62 | 0.79 | 1.20 | 0.58 |
| iYNL023C | 1.33 | 0.59 | 1.62 | 0.71 | 1.66 | 0.72 |
| iYNL024C | 1.17 | 0.53 | 1.30 | 0.54 | #N/A | #N/A |
| iYNL025C | 0.50 | 0.15 | 0.52 | 0.14 | 0.59 | 0.21 |
| iYNL026W | 0.42 | 0.11 | 0.29 | 0.02 | 0.23 | 0.02 |
| iYNL027W | 1.52 | 0.68 | 1.03 | 0.47 | 1.21 | 0.56 |
| iYNL028W | 3.24 | 0.98 | 2.21 | 0.94 | 2.62 | 0.96 |
| iYNL030W | #N/A | #N/A | #N/A | #N/A | #N/A | #N/A |
| iYNL031C | 0.29 | 0.04 | 0.21 | 0.00 | 0.35 | 0.05 |
| iYNL032W | 0.26 | 0.03 | 0.40 | 0.07 | #N/A | #N/A |
| iYNL033W | 1.85 | 0.80 | 1.70 | 0.78 | 1.78 | 0.80 |
| iYNL034W | 0.68 | 0.26 | 0.54 | 0.15 | 0.72 | 0.30 |
| iYNL035C | 1.65 | 0.73 | 1.02 | 0.47 | 1.15 | 0.56 |
| iYNL036W | #N/A | #N/A | 0.67 | 0.21 | #N/A | #N/A |
| iYNL037C | 0.77 | 0.32 | 1.04 | 0.40 | 0.59 | 0.21 |
| iYNL038W | 0.66 | 0.23 | 0.54 | 0.15 | 0.67 | 0.26 |
| iYNL039W | 0.91 | 0.36 | 0.86 | 0.33 | #N/A | #N/A |
| iYNL040W | 1.63 | 0.71 | 1.78 | 0.85 | 1.46 | 0.67 |
| iYNL041C | 1.41 | 0.65 | 1.01 | 0.37 | 1.50 | 0.68 |
| iYNL042W | 0.57 | 0.19 | 0.49 | 0.12 | 0.79 | 0.32 |
| iYNL043C | 1.01 | 0.42 | 1.31 | 0.56 | 1.06 | 0.51 |
| iYNL045W | 1.29 | 0.59 | #N/A | #N/A | 1.33 | 0.56 |
| iYNL046W | 1.83 | 0.78 | #N/A | #N/A | 1.67 | 0.71 |
| iYNL047C | 2.40 | 0.92 | 2.02 | 0.89 | 2.64 | 0.96 |
| iYNL048W | #N/A | #N/A | #N/A | #N/A | #N/A | #N/A |
| iYNL049C | 2.63 | 0.94 | 1.72 | 0.77 | 3.13 | 0.98 |
| iYNL050C | #N/A | #N/A | #N/A | #N/A | #N/A | #N/A |
| iYNL051W | #N/A | #N/A | #N/A | #N/A | #N/A | #N/A |
| iYNL052W | 1.05 | 0.44 | 1.91 | 0.81 | #N/A | #N/A |
| iYNL053W | 1.55 | 0.66 | 1.40 | 0.61 | #N/A | #N/A |
| iYNL054W | 0.66 | 0.25 | 0.93 | 0.33 | 0.95 | 0.42 |
| iYNL055C | 0.65 | 0.24 | 0.62 | 0.15 | 0.44 | 0.11 |
| iYNL056W | #N/A | #N/A | #N/A | #N/A | #N/A | #N/A |
| iYNL057W | 1.81 | 0.76 | 2.45 | 0.96 | 1.80 | 0.76 |
| iYNL059C | 2.11 | 0.85 | 1.58 | 0.70 | 1.63 | 0.69 |
| iYNL061W | 0.34 | 0.06 | #N/A | #N/A | #N/A | #N/A |
| iYNL062C | 2.23 | 0.91 | 1.93 | 0.82 | 2.06 | 0.87 |
| iYNL064C | 0.90 | 0.39 | 1.19 | 0.51 | 0.92 | 0.36 |
| iYNL065W | 0.35 | 0.06 | #N/A | #N/A | #N/A | #N/A |
| iYNL066W | 0.14 | 0.00 | 0.35 | 0.03 | 0.22 | 0.01 |
| iYNL067W | 0.32 | 0.05 | 0.60 | 0.19 | 0.26 | 0.02 |
| iYNL068C | 0.41 | 0.11 | 0.82 | 0.30 | 0.42 | 0.10 |
| iYNL069C | 0.29 | 0.04 | 0.42 | 0.08 | 0.31 | 0.04 |
| iYNL070W | #N/A | #N/A | #N/A | #N/A | #N/A | #N/A |



|          |      |      |      |      |      |      |
|----------|------|------|------|------|------|------|
| iYNL071W | 1.21 | 0.53 | 0.93 | 0.41 | 1.11 | 0.54 |
| iYNL072W | 1.53 | 0.65 | 1.58 | 0.69 | 1.70 | 0.78 |
| iYNL073W | #N/A | #N/A | 1.87 | 0.82 | 1.81 | 0.76 |
| iYNL074C | 1.49 | 0.64 | 1.31 | 0.55 | 1.59 | 0.67 |
| iYNL075W | #N/A | #N/A | #N/A | #N/A | #N/A | #N/A |
| iYNL076W | 1.45 | 0.66 | 1.19 | 0.57 | 1.75 | 0.79 |
| iYNL077W | 1.99 | 0.85 | 1.64 | 0.75 | 1.76 | 0.79 |
| iYNL078W | 2.04 | 0.85 | 1.82 | 0.78 | 1.71 | 0.77 |
| iYNL079C | 0.97 | 0.41 | 1.03 | 0.48 | 0.82 | 0.36 |
| iYNL080C | 1.00 | 0.45 | 1.12 | 0.49 | 1.34 | 0.57 |
| iYNL081C | 3.55 | 0.99 | #N/A | #N/A | #N/A | #N/A |
| iYNL082W | 0.74 | 0.30 | #N/A | #N/A | 0.63 | 0.21 |
| iYNL083W | 0.70 | 0.25 | 0.64 | 0.22 | 0.73 | 0.30 |
| iYNL084C | 2.56 | 0.95 | 1.71 | 0.82 | 2.22 | 0.91 |
| iYNL086W | 2.22 | 0.90 | 2.25 | 0.90 | #N/A | #N/A |
| iYNL089C | 1.60 | 0.69 | 1.21 | 0.53 | 1.38 | 0.60 |
| iYNL091W | 1.68 | 0.74 | 1.09 | 0.48 | 1.73 | 0.75 |
| iYNL092W | 2.10 | 0.85 | 1.64 | 0.71 | 1.79 | 0.81 |
| iYNL093W | 4.39 | 1.00 | 3.58 | 0.99 | 3.87 | 0.99 |
| iYNL094W | 1.16 | 0.50 | #N/A | #N/A | 1.00 | 0.45 |
| iYNL095C | 2.19 | 0.90 | #N/A | #N/A | 1.82 | 0.80 |
| iYNL096C | 0.26 | 0.03 | 0.31 | 0.03 | 0.39 | 0.08 |
| iYNL097C | 0.97 | 0.43 | 1.23 | 0.55 | 1.16 | 0.48 |
| iYNL098C | 0.54 | 0.17 | 0.68 | 0.22 | 0.57 | 0.17 |
| iYNL099C | #N/A | #N/A | 1.23 | 0.52 | 1.72 | 0.79 |
| iYNL100W | 0.70 | 0.25 | 0.64 | 0.22 | 0.70 | 0.27 |
| iYNL101W | 1.44 | 0.62 | 1.29 | 0.62 | 1.47 | 0.67 |
| iYNL102W | 1.44 | 0.66 | 1.46 | 0.68 | 1.59 | 0.76 |
| iYNL103W | #N/A | #N/A | #N/A | #N/A | 0.87 | 0.37 |
| iYNL104C | 0.68 | 0.26 | 0.58 | 0.13 | 0.62 | 0.20 |
| iYNL105W | 2.63 | 0.93 | 1.65 | 0.71 | #N/A | #N/A |
| iYNL107W | 0.52 | 0.16 | #N/A | #N/A | 0.56 | 0.19 |
| iYNL108C | 2.21 | 0.90 | 2.01 | 0.91 | #N/A | #N/A |
| iYNL111C | 0.81 | 0.34 | 0.85 | 0.31 | 0.80 | 0.34 |
| iYNL112W | 0.90 | 0.38 | 0.71 | 0.26 | 0.63 | 0.21 |
| iYNL113W | 0.96 | 0.41 | 0.82 | 0.33 | 1.04 | 0.45 |
| iYNL115C | 2.55 | 0.95 | 2.11 | 0.92 | 2.37 | 0.91 |
| iYNL116W | #N/A | #N/A | #N/A | #N/A | #N/A | #N/A |
| iYNL117W | 2.49 | 0.94 | 2.91 | 0.97 | 2.62 | 0.96 |
| iYNL118C | 2.02 | 0.85 | 1.51 | 0.66 | 1.62 | 0.77 |
| iYNL119W | #N/A | #N/A | #N/A | #N/A | #N/A | #N/A |
| iYNL121C | 1.70 | 0.74 | 1.22 | 0.55 | 1.37 | 0.63 |
| iYNL122C | #N/A | #N/A | #N/A | #N/A | #N/A | #N/A |
| iYNL123W | 0.67 | 0.23 | 0.85 | 0.36 | 0.86 | 0.37 |
| iYNL124W | 0.74 | 0.30 | 0.57 | 0.17 | 0.75 | 0.31 |
| iYNL125C | 2.13 | 0.85 | 2.22 | 0.94 | 1.52 | 0.73 |
| iYNL126W | 0.73 | 0.29 | 0.34 | 0.03 | 0.52 | 0.17 |
| iYNL127W | #N/A | #N/A | 1.41 | 0.70 | 1.88 | 0.85 |
| iYNL128W | 2.31 | 0.92 | 2.26 | 0.92 | 3.11 | 0.98 |
| iYNL129W | 1.53 | 0.69 | #N/A | #N/A | 1.47 | 0.63 |
| iYNL130C | 1.73 | 0.77 | 1.47 | 0.68 | 2.16 | 0.89 |



|            |      |      |      |      |      |      |
|------------|------|------|------|------|------|------|
| iYNL131W   | 0.35 | 0.07 | #N/A | #N/A | 0.44 | 0.11 |
| iYNL132W   | 1.33 | 0.57 | #N/A | #N/A | 1.66 | 0.78 |
| iYNL133C   | 1.44 | 0.66 | 2.05 | 0.86 | 1.73 | 0.73 |
| iYNL134C   | 1.84 | 0.77 | 1.63 | 0.79 | 1.42 | 0.66 |
| iYNL135C   | 1.08 | 0.48 | 1.32 | 0.56 | 1.09 | 0.53 |
| iYNL136W   | 0.82 | 0.33 | 0.59 | 0.16 | 0.63 | 0.24 |
| iYNL137C   | 2.02 | 0.82 | 1.78 | 0.77 | 1.81 | 0.77 |
| iYNL138W   | 0.42 | 0.11 | #N/A | #N/A | 0.48 | 0.14 |
| iYNL139C   | 2.02 | 0.82 | 1.44 | 0.63 | 1.79 | 0.76 |
| iYNL141W   | 0.50 | 0.15 | 0.50 | 0.13 | 0.46 | 0.11 |
| iYNL142W   | 1.66 | 0.70 | 2.09 | 0.87 | 1.18 | 0.49 |
| iYNL143C   | 1.09 | 0.48 | 1.07 | 0.45 | 1.03 | 0.50 |
| iYNL144C-0 | 0.74 | 0.30 | 0.79 | 0.25 | 0.61 | 0.22 |
| iYNL144C-1 | 0.97 | 0.39 | #N/A | #N/A | 0.88 | 0.36 |
| iYNL145W   | #N/A | #N/A | 1.33 | 0.65 | 0.86 | 0.39 |
| iYNL146W   | 0.84 | 0.33 | 1.31 | 0.56 | 0.71 | 0.29 |
| iYNL147W   | 1.27 | 0.58 | 1.75 | 0.75 | 1.14 | 0.52 |
| iYNL148C   | 1.80 | 0.75 | 2.40 | 0.96 | 1.43 | 0.65 |
| iYNL149C   | 1.03 | 0.46 | 1.04 | 0.42 | 0.77 | 0.32 |
| iYNL151C   | 2.22 | 0.90 | 2.01 | 0.86 | 2.19 | 0.88 |
| iYNL152W   | 0.54 | 0.16 | 0.41 | 0.07 | 0.68 | 0.25 |
| iYNL153C   | 1.88 | 0.81 | 1.75 | 0.81 | 1.35 | 0.61 |
| iYNL154C   | 0.76 | 0.29 | 0.87 | 0.33 | 0.73 | 0.26 |
| iYNL155W   | 0.41 | 0.10 | 0.51 | 0.13 | 0.47 | 0.13 |
| iYNL156C   | 1.71 | 0.76 | #N/A | #N/A | 1.47 | 0.63 |
| iYNL157W   | #N/A | #N/A | #N/A | #N/A | #N/A | #N/A |
| iYNL158W   | 1.33 | 0.58 | #N/A | #N/A | 1.24 | 0.57 |
| iYNL159C   | 2.89 | 0.97 | 2.15 | 0.93 | 2.58 | 0.96 |
| iYNL160W   | 1.11 | 0.50 | 1.04 | 0.39 | 1.09 | 0.49 |
| iYNL161W-0 | 0.71 | 0.28 | #N/A | #N/A | 0.61 | 0.23 |
| iYNL161W-1 | 0.58 | 0.20 | 0.93 | 0.36 | 0.67 | 0.23 |
| iYNL162W   | 0.86 | 0.36 | 0.72 | 0.24 | 1.18 | 0.55 |
| iYNL164C   | 1.78 | 0.79 | 1.61 | 0.79 | 1.64 | 0.77 |
| iYNL165W   | #N/A | #N/A | 0.55 | 0.12 | 0.62 | 0.20 |
| iYNL166C   | 1.71 | 0.77 | 1.81 | 0.78 | 1.47 | 0.71 |
| iYNL167C   | 1.24 | 0.53 | 0.98 | 0.36 | 1.15 | 0.53 |
| iYNL168C   | 1.27 | 0.58 | 1.04 | 0.45 | #N/A | #N/A |
| iYNL169C   | 0.88 | 0.38 | 1.07 | 0.50 | 1.13 | 0.55 |
| iYNL173C   | 1.43 | 0.65 | 1.39 | 0.59 | 1.40 | 0.60 |
| iYNL174W   | 1.69 | 0.76 | 1.89 | 0.83 | 1.47 | 0.63 |
| iYNL176C   | 1.04 | 0.43 | 1.74 | 0.78 | 1.07 | 0.44 |
| iYNL177C   | 0.92 | 0.39 | 0.82 | 0.26 | 0.71 | 0.29 |
| iYNL178W   | 0.47 | 0.14 | 0.48 | 0.11 | 0.63 | 0.24 |
| iYNL179C-1 | 0.56 | 0.19 | 1.03 | 0.39 | 0.42 | 0.09 |
| iYNL181W   | #N/A | #N/A | #N/A | #N/A | #N/A | #N/A |
| iYNL182C   | 2.73 | 0.95 | 2.57 | 0.95 | 2.50 | 0.95 |
| iYNL183C   | 1.64 | 0.74 | 1.29 | 0.57 | 1.76 | 0.79 |
| iYNL184C   | #N/A | #N/A | 0.73 | 0.28 | #N/A | #N/A |
| iYNL186W   | 0.52 | 0.17 | 0.58 | 0.18 | 0.53 | 0.17 |
| iYNL187W   | 0.44 | 0.12 | 0.74 | 0.29 | 0.38 | 0.06 |
| iYNL188W   | 1.31 | 0.60 | 1.84 | 0.83 | 1.36 | 0.62 |

|          |      |      |      |      |      |      |
|----------|------|------|------|------|------|------|
| iYNL189W | 0.56 | 0.19 | 1.16 | 0.50 | 0.76 | 0.27 |
| iYNL191W | 0.29 | 0.04 | #N/A | #N/A | 0.35 | 0.06 |
| iYNL192W | 0.96 | 0.39 | 1.34 | 0.63 | 0.99 | 0.47 |
| iYNL193W | 1.44 | 0.64 | 1.03 | 0.47 | 1.34 | 0.61 |
| iYNL194C | 2.14 | 0.89 | 2.16 | 0.93 | 2.28 | 0.93 |
| iYNL195C | 1.95 | 0.84 | 1.34 | 0.56 | 2.02 | 0.87 |
| iYNL196C | 1.10 | 0.50 | 1.16 | 0.55 | 1.14 | 0.51 |
| iYNL197C | 1.62 | 0.73 | #N/A | #N/A | 1.38 | 0.59 |
| iYNL198C | #N/A | #N/A | 0.55 | 0.11 | 0.59 | 0.21 |
| iYNL200C | 1.52 | 0.68 | 1.18 | 0.57 | 1.18 | 0.54 |
| iYNL201C | 0.90 | 0.39 | 0.88 | 0.38 | 1.03 | 0.42 |
| iYNL202W | #N/A | #N/A | #N/A | #N/A | #N/A | #N/A |
| iYNL204C | 0.72 | 0.26 | 0.52 | 0.14 | 1.06 | 0.51 |
| iYNL207W | #N/A | #N/A | #N/A | #N/A | #N/A | #N/A |
| iYNL208W | 1.42 | 0.65 | 1.53 | 0.66 | #N/A | #N/A |
| iYNL209W | 0.80 | 0.33 | #N/A | #N/A | 0.88 | 0.39 |
| iYNL210W | 0.94 | 0.40 | 1.42 | 0.61 | 1.01 | 0.48 |
| iYNL211C | 0.96 | 0.42 | 1.19 | 0.52 | #N/A | #N/A |
| iYNL212W | 0.89 | 0.38 | 0.90 | 0.32 | 1.05 | 0.43 |
| iYNL213C | 2.85 | 0.97 | 2.21 | 0.90 | 2.58 | 0.96 |
| iYNL214W | 0.94 | 0.41 | 0.95 | 0.38 | 1.10 | 0.45 |
| iYNL215W | 1.75 | 0.75 | 1.55 | 0.67 | 2.00 | 0.87 |
| iYNL216W | 1.76 | 0.77 | 1.04 | 0.39 | 1.50 | 0.72 |
| iYNL217W | 1.13 | 0.48 | 1.24 | 0.51 | #N/A | #N/A |
| iYNL218W | #N/A | #N/A | 1.00 | 0.37 | 0.70 | 0.27 |
| iYNL219C | 2.00 | 0.84 | 1.72 | 0.74 | 1.51 | 0.69 |
| iYNL220W | #N/A | #N/A | 0.56 | 0.16 | #N/A | #N/A |
| iYNL221C | 0.53 | 0.16 | 0.55 | 0.15 | #N/A | #N/A |
| iYNL222W | 0.62 | 0.23 | 0.92 | 0.36 | 0.69 | 0.24 |
| iYNL223W | 2.35 | 0.91 | 1.68 | 0.72 | 1.76 | 0.77 |
| iYNL224C | 2.42 | 0.92 | 1.78 | 0.77 | 1.94 | 0.81 |
| iYNL225C | 1.07 | 0.47 | #N/A | #N/A | 0.96 | 0.43 |
| iYNL226W | #N/A | #N/A | 1.00 | 0.40 | #N/A | #N/A |
| iYNL229C | 1.43 | 0.63 | 1.18 | 0.48 | 1.38 | 0.67 |
| iYNL230C | 0.81 | 0.32 | 0.88 | 0.32 | 0.78 | 0.34 |
| iYNL231C | 0.43 | 0.11 | 0.42 | 0.05 | 0.57 | 0.20 |
| iYNL232W | 0.63 | 0.23 | 0.62 | 0.18 | 0.62 | 0.23 |
| iYNL233W | 1.39 | 0.63 | 1.42 | 0.70 | 1.50 | 0.72 |
| iYNL234W | 0.98 | 0.43 | 1.11 | 0.46 | 1.15 | 0.54 |
| iYNL235C | 1.29 | 0.56 | 1.41 | 0.60 | 1.54 | 0.70 |
| iYNL237W | 1.47 | 0.64 | 1.29 | 0.55 | 1.50 | 0.68 |
| iYNL238W | 0.65 | 0.25 | 0.82 | 0.34 | 0.51 | 0.16 |
| iYNL239W | 0.84 | 0.33 | 1.27 | 0.55 | 1.10 | 0.46 |
| iYNL240C | 2.45 | 0.93 | 2.37 | 0.96 | 2.39 | 0.92 |
| iYNL241C | 0.65 | 0.24 | 0.86 | 0.36 | 0.54 | 0.18 |
| iYNL242W | 0.56 | 0.18 | #N/A | #N/A | 0.57 | 0.20 |
| iYNL243W | 1.38 | 0.59 | 1.12 | 0.48 | 1.36 | 0.62 |
| iYNL244C | 0.76 | 0.29 | 1.04 | 0.39 | 0.90 | 0.36 |
| iYNL245C | 0.76 | 0.31 | 1.07 | 0.49 | 0.61 | 0.23 |
| iYNL247W | 1.16 | 0.52 | 1.28 | 0.60 | 1.16 | 0.56 |
| iYNL248C | 1.52 | 0.69 | 2.02 | 0.85 | 1.65 | 0.75 |

|            |      |      |      |      |      |      |
|------------|------|------|------|------|------|------|
| iYNL249C   | 0.61 | 0.22 | 0.61 | 0.18 | 0.81 | 0.30 |
| iYNL251C   | 1.23 | 0.55 | 1.20 | 0.53 | 1.44 | 0.62 |
| iYNL253W   | #N/A | #N/A | #N/A | #N/A | #N/A | #N/A |
| iYNL254C   | 1.27 | 0.58 | #N/A | #N/A | 1.63 | 0.69 |
| iYNL255C   | 1.04 | 0.43 | 1.40 | 0.61 | 1.06 | 0.48 |
| iYNL256W   | #N/A | #N/A | #N/A | #N/A | #N/A | #N/A |
| iYNL257C   | 1.72 | 0.76 | 1.36 | 0.62 | 1.90 | 0.83 |
| iYNL258C   | 1.47 | 0.67 | #N/A | #N/A | #N/A | #N/A |
| iYNL259C   | 0.90 | 0.38 | 1.07 | 0.44 | 0.88 | 0.40 |
| iYNL260C   | #N/A | #N/A | #N/A | #N/A | #N/A | #N/A |
| iYNL261W   | 0.72 | 0.26 | 0.79 | 0.32 | 0.68 | 0.27 |
| iYNL262W   | 1.19 | 0.53 | #N/A | #N/A | #N/A | #N/A |
| iYNL263C   | 3.13 | 0.98 | 2.67 | 0.95 | 3.08 | 0.99 |
| iYNL264C   | #N/A | #N/A | 1.72 | 0.75 | 1.82 | 0.80 |
| iYNL265C   | 1.41 | 0.65 | 1.50 | 0.66 | 1.73 | 0.80 |
| iYNL267W   | #N/A | #N/A | 0.76 | 0.30 | #N/A | #N/A |
| iYNL268W   | 0.95 | 0.40 | 0.83 | 0.34 | #N/A | #N/A |
| iYNL269W   | 0.64 | 0.24 | 0.76 | 0.28 | 0.63 | 0.21 |
| iYNL271C   | 1.50 | 0.64 | 1.37 | 0.63 | 1.43 | 0.69 |
| iYNL272C   | 1.53 | 0.68 | #N/A | #N/A | 1.27 | 0.54 |
| iYNL273W   | #N/A | #N/A | #N/A | #N/A | #N/A | #N/A |
| iYNL274C   | 3.53 | 0.99 | 2.15 | 0.88 | 2.69 | 0.96 |
| iYNL275W   | #N/A | #N/A | #N/A | #N/A | #N/A | #N/A |
| iYNL278W   | 0.98 | 0.42 | 1.08 | 0.42 | 0.81 | 0.32 |
| iYNL279W   | 1.98 | 0.84 | 1.48 | 0.65 | 1.62 | 0.77 |
| iYNL280C   | 0.85 | 0.33 | 0.78 | 0.26 | 0.68 | 0.26 |
| iYNL281W   | 0.63 | 0.22 | 0.59 | 0.19 | 0.55 | 0.18 |
| iYNL282W   | 1.10 | 0.46 | 1.17 | 0.49 | 0.81 | 0.35 |
| iYNL283C   | 1.00 | 0.45 | 1.20 | 0.49 | 0.84 | 0.35 |
| iYNL284C   | 2.16 | 0.89 | 1.91 | 0.88 | 1.99 | 0.87 |
| iYNL286W   | #N/A | #N/A | #N/A | #N/A | #N/A | #N/A |
| iYNL287W   | 1.20 | 0.53 | 1.51 | 0.69 | 1.33 | 0.57 |
| iYNL288W   | 1.01 | 0.43 | 1.08 | 0.50 | 1.12 | 0.47 |
| iYNL289W-0 | 0.55 | 0.18 | 0.74 | 0.28 | 0.66 | 0.26 |
| iYNL289W-1 | 1.33 | 0.61 | 1.17 | 0.56 | 1.20 | 0.59 |
| iYNL290W   | 0.96 | 0.39 | 1.41 | 0.62 | 1.09 | 0.53 |
| iYNL291C   | 1.77 | 0.74 | 1.68 | 0.74 | #N/A | #N/A |
| iYNL292W   | #N/A | #N/A | #N/A | #N/A | #N/A | #N/A |
| iYNL293W   | 1.54 | 0.70 | 1.45 | 0.63 | 1.52 | 0.72 |
| iYNL294C   | 1.77 | 0.77 | 1.40 | 0.60 | 1.58 | 0.70 |
| iYNL295W   | 0.35 | 0.07 | 0.37 | 0.05 | 0.41 | 0.10 |
| iYNL296W   | 2.48 | 0.92 | 1.29 | 0.53 | 2.01 | 0.86 |
| iYNL298W   | #N/A | #N/A | #N/A | #N/A | #N/A | #N/A |
| iYNL299W   | 0.73 | 0.29 | 0.84 | 0.31 | 0.89 | 0.34 |
| iYNL300W   | 2.28 | 0.91 | 2.03 | 0.90 | 2.17 | 0.92 |
| iYNL302C   | 0.16 | 0.01 | 0.26 | 0.01 | 0.14 | 0.00 |
| iYNL303W   | #N/A | #N/A | #N/A | #N/A | #N/A | #N/A |
| iYNL305C   | 1.95 | 0.80 | 1.51 | 0.66 | 2.32 | 0.89 |
| iYNL306W   | #N/A | #N/A | #N/A | #N/A | #N/A | #N/A |
| iYNL307C   | 2.20 | 0.90 | #N/A | #N/A | 2.08 | 0.84 |
| iYNL308C   | #N/A | #N/A | #N/A | #N/A | #N/A | #N/A |

|               |      |      |      |      |      |      |
|---------------|------|------|------|------|------|------|
| iYNL309W      | 0.62 | 0.23 | 0.52 | 0.13 | 0.66 | 0.26 |
| iYNL311C      | 1.86 | 0.82 | 1.80 | 0.85 | 1.64 | 0.73 |
| iYNL312W      | #N/A | #N/A | #N/A | #N/A | #N/A | #N/A |
| iYNL313C      | 2.45 | 0.93 | #N/A | #N/A | 2.54 | 0.93 |
| iYNL314W      | #N/A | #N/A | #N/A | #N/A | #N/A | #N/A |
| iYNL315C      | 2.07 | 0.83 | 1.83 | 0.86 | 1.69 | 0.72 |
| iYNL316C      | #N/A | #N/A | #N/A | #N/A | #N/A | #N/A |
| iYNL318C      | 1.24 | 0.55 | 1.79 | 0.77 | 1.38 | 0.63 |
| iYNL320W      | #N/A | #N/A | #N/A | #N/A | #N/A | #N/A |
| iYNL321W      | 2.33 | 0.89 | 1.60 | 0.71 | 1.88 | 0.84 |
| iYNL322C      | 2.69 | 0.94 | 1.67 | 0.80 | 1.86 | 0.82 |
| iYNL323W      | #N/A | #N/A | #N/A | #N/A | #N/A | #N/A |
| iYNL324W      | 2.56 | 0.93 | 1.60 | 0.70 | 2.39 | 0.91 |
| iYNL326C      | 1.20 | 0.51 | 1.28 | 0.55 | 1.24 | 0.52 |
| iYNL327W      | #N/A | #N/A | #N/A | #N/A | #N/A | #N/A |
| iYNL328C      | 1.17 | 0.52 | 1.25 | 0.56 | 1.13 | 0.52 |
| iYNL329C      | 0.83 | 0.35 | 1.09 | 0.50 | 1.34 | 0.61 |
| iYNL330C      | 1.78 | 0.75 | 2.04 | 0.91 | 2.39 | 0.95 |
| iYNL331C      | 1.36 | 0.61 | 1.52 | 0.65 | 1.36 | 0.64 |
| iYNL332W      | 1.69 | 0.71 | 1.75 | 0.84 | 2.24 | 0.88 |
| iYNL333W      | 3.26 | 0.98 | 3.21 | 0.99 | 3.51 | 0.99 |
| iYNL334C      | 3.71 | 0.99 | 2.94 | 0.99 | 3.40 | 0.99 |
| iYNL335W      | 0.89 | 0.38 | #N/A | #N/A | 0.98 | 0.47 |
| iYNL336W-1    | 1.33 | 0.59 | 1.57 | 0.69 | 1.54 | 0.70 |
| iYNL337W      | 0.70 | 0.27 | #N/A | #N/A | 0.70 | 0.28 |
| iYNL338W      | 0.38 | 0.09 | 0.37 | 0.05 | 0.41 | 0.10 |
| iYNL339C      | 0.47 | 0.14 | #N/A | #N/A | 0.49 | 0.13 |
| iYNLcdelta1-1 | 0.31 | 0.05 | #N/A | #N/A | 0.32 | 0.05 |
| iYNLcdelta1-3 | 0.91 | 0.39 | 0.81 | 0.29 | 1.13 | 0.52 |
| iYNLcdelta2   | 1.26 | 0.54 | 0.85 | 0.35 | 1.04 | 0.47 |
| iYNLcdelta6   | #N/A | #N/A | #N/A | #N/A | #N/A | #N/A |
| iYNLWdelta4   | 2.76 | 0.97 | 2.64 | 0.95 | 3.18 | 0.98 |
| iYNR001C      | 1.06 | 0.46 | 1.32 | 0.55 | 0.93 | 0.41 |
| iYNR002C      | 0.78 | 0.32 | 0.94 | 0.38 | 1.07 | 0.46 |
| iYNR003C      | 2.30 | 0.91 | 2.71 | 0.96 | 1.84 | 0.78 |
| iYNR004W      | 1.05 | 0.47 | 0.87 | 0.33 | 1.03 | 0.42 |
| iYNR006W      | 0.72 | 0.26 | 0.77 | 0.23 | 0.92 | 0.36 |
| iYNR007C      | 2.21 | 0.87 | 1.91 | 0.88 | 2.17 | 0.92 |
| iYNR008W      | 0.97 | 0.40 | 1.37 | 0.60 | 0.75 | 0.31 |
| iYNR009W      | 1.73 | 0.73 | 1.46 | 0.65 | 1.49 | 0.68 |
| iYNR010W      | #N/A | #N/A | #N/A | #N/A | #N/A | #N/A |
| iYNR011C      | 2.15 | 0.89 | 2.14 | 0.87 | 2.46 | 0.95 |
| iYNR012W      | #N/A | #N/A | #N/A | #N/A | #N/A | #N/A |
| iYNR013C      | 0.56 | 0.19 | 0.41 | 0.06 | #N/A | #N/A |
| iYNR014W      | 2.91 | 0.97 | 2.32 | 0.91 | 2.88 | 0.98 |
| iYNR015W      | #N/A | #N/A | #N/A | #N/A | #N/A | #N/A |
| iYNR016C-0    | 0.34 | 0.06 | 0.70 | 0.24 | 0.35 | 0.05 |
| iYNR016C-1    | 0.37 | 0.08 | 0.91 | 0.40 | 0.44 | 0.10 |
| iYNR017W      | 0.37 | 0.07 | 0.61 | 0.18 | 0.49 | 0.15 |
| iYNR019W      | #N/A | #N/A | #N/A | #N/A | #N/A | #N/A |
| iYNR020C      | 2.69 | 0.96 | #N/A | #N/A | 2.11 | 0.85 |

|            |      |      |      |      |      |      |
|------------|------|------|------|------|------|------|
| iYNR021W   | 0.92 | 0.39 | #N/A | #N/A | 0.76 | 0.32 |
| iYNR022C   | 2.89 | 0.96 | 1.94 | 0.84 | 2.22 | 0.91 |
| iYNR023W   | 1.60 | 0.72 | 1.05 | 0.49 | 1.42 | 0.65 |
| iYNR025C   | 0.82 | 0.34 | #N/A | #N/A | 0.69 | 0.24 |
| iYNR026C   | 2.52 | 0.92 | 1.93 | 0.86 | 2.35 | 0.93 |
| iYNR027W   | 0.69 | 0.24 | #N/A | #N/A | 0.59 | 0.19 |
| iYNR028W   | #N/A | #N/A | #N/A | #N/A | #N/A | #N/A |
| iYNR029C   | 1.59 | 0.68 | 1.76 | 0.80 | 1.68 | 0.79 |
| iYNR030W   | #N/A | #N/A | 0.54 | 0.15 | 0.26 | 0.02 |
| iYNR031C   | 2.69 | 0.95 | 2.51 | 0.94 | 2.90 | 0.98 |
| iYNR032C-A | 2.12 | 0.88 | 2.40 | 0.93 | 2.24 | 0.92 |
| iYNR032W   | #N/A | #N/A | 1.49 | 0.73 | 0.89 | 0.41 |
| iYNR033W   | 1.51 | 0.67 | 2.06 | 0.86 | 1.45 | 0.66 |
| iYNR034W-0 | #N/A | #N/A | 1.68 | 0.81 | 1.59 | 0.72 |
| iYNR034W-1 | 1.88 | 0.78 | 1.51 | 0.72 | 1.64 | 0.70 |
| iYNR036C   | 2.53 | 0.93 | 2.15 | 0.87 | 2.73 | 0.96 |
| iYNR037C   | 2.34 | 0.93 | 3.18 | 0.98 | 3.09 | 0.99 |
| iYNR038W   | #N/A | #N/A | #N/A | #N/A | #N/A | #N/A |
| iYNR039C   | 3.15 | 0.98 | 1.40 | 0.69 | 2.62 | 0.97 |
| iYNR040W   | #N/A | #N/A | #N/A | #N/A | #N/A | #N/A |
| iYNR042W   | 1.48 | 0.66 | 1.45 | 0.72 | 1.90 | 0.82 |
| iYNR043W   | 1.30 | 0.57 | 1.57 | 0.69 | 1.35 | 0.58 |
| iYNR044W   | #N/A | #N/A | #N/A | #N/A | #N/A | #N/A |
| iYNR045W   | 2.02 | 0.84 | 1.19 | 0.54 | 2.11 | 0.90 |
| iYNR046W   | 1.95 | 0.81 | 1.31 | 0.64 | 2.16 | 0.89 |
| iYNR047W   | 1.55 | 0.70 | #N/A | #N/A | 1.31 | 0.56 |
| iYNR048W   | 0.62 | 0.23 | 0.54 | 0.13 | 0.84 | 0.38 |
| iYNR049C   | 1.64 | 0.73 | 1.56 | 0.70 | 1.44 | 0.66 |
| iYNR050C   | 0.72 | 0.29 | #N/A | #N/A | 0.59 | 0.22 |
| iYNR051C   | 0.60 | 0.21 | 0.72 | 0.23 | 0.77 | 0.32 |
| iYNR052C   | 1.00 | 0.41 | 0.63 | 0.19 | 0.85 | 0.38 |
| iYNR053C   | 0.58 | 0.20 | #N/A | #N/A | 0.78 | 0.34 |
| iYNR054C-0 | 1.06 | 0.46 | 1.16 | 0.55 | 1.24 | 0.54 |
| iYNR054C-1 | 0.55 | 0.18 | 0.78 | 0.27 | 0.70 | 0.24 |
| iYNR055C   | 1.38 | 0.63 | 1.20 | 0.57 | 1.47 | 0.67 |
| iYNR057C   | 2.92 | 0.98 | 3.13 | 0.99 | 3.13 | 0.98 |
| iYNR058W   | 2.40 | 0.91 | 2.28 | 0.90 | 2.01 | 0.82 |
| iYNR059W   | 1.14 | 0.50 | 1.86 | 0.80 | 1.32 | 0.56 |
| iYNR060W   | 1.37 | 0.59 | #N/A | #N/A | 1.59 | 0.67 |
| iYNR061C   | 1.37 | 0.61 | 1.37 | 0.67 | 1.69 | 0.79 |
| iYNR062C-0 | 0.36 | 0.08 | 0.39 | 0.04 | 0.47 | 0.13 |
| iYNR062C-1 | 1.72 | 0.73 | 1.84 | 0.78 | 1.80 | 0.83 |
| iYNR063W   | 0.30 | 0.04 | 0.36 | 0.05 | 0.41 | 0.10 |
| iYNR064C   | 0.62 | 0.23 | 0.77 | 0.24 | 1.17 | 0.54 |
| iYNR066C   | 1.86 | 0.82 | 1.45 | 0.72 | 1.84 | 0.81 |
| iYNR067C   | 1.41 | 0.61 | 1.56 | 0.73 | 1.50 | 0.72 |
| iYNR068C   | #N/A | #N/A | #N/A | #N/A | #N/A | #N/A |
| iYNR069C-0 | 1.53 | 0.68 | 1.14 | 0.54 | 1.54 | 0.74 |
| iYNR070W   | 2.20 | 0.90 | 1.33 | 0.64 | 2.30 | 0.90 |
| iYNR071C   | 0.68 | 0.26 | 0.78 | 0.31 | 0.64 | 0.25 |
| iYNR072W   | 5.16 | 1.00 | 3.42 | 0.99 | 4.55 | 1.00 |

|             |      |      |      |      |      |      |
|-------------|------|------|------|------|------|------|
| iYNR073C    | 1.16 | 0.51 | 0.88 | 0.30 | 0.98 | 0.44 |
| iYNR074C    | 1.76 | 0.77 | 1.46 | 0.67 | 1.75 | 0.79 |
| iYNR075W    | 0.79 | 0.30 | 0.81 | 0.33 | 0.73 | 0.30 |
| iYNR076W    | 0.34 | 0.06 | 0.48 | 0.09 | 0.41 | 0.09 |
| iYNRCdelta8 | 2.06 | 0.83 | 2.08 | 0.92 | 2.30 | 0.92 |
| iYNRCdelta9 | 1.47 | 0.65 | 1.59 | 0.78 | 1.46 | 0.71 |
| iYNRCtau3   | 0.84 | 0.32 | 0.97 | 0.39 | 0.90 | 0.39 |
| iYOL001W    | 0.75 | 0.30 | #N/A | #N/A | #N/A | #N/A |
| iYOL002C    | 1.03 | 0.43 | 1.14 | 0.50 | 0.98 | 0.44 |
| iYOL003C    | 1.59 | 0.71 | 1.83 | 0.79 | 1.61 | 0.70 |
| iYOL004W    | 0.52 | 0.16 | 0.67 | 0.24 | 0.44 | 0.10 |
| iYOL005C    | 1.66 | 0.70 | 1.86 | 0.79 | 1.17 | 0.57 |
| iYOL006C    | 0.82 | 0.34 | 0.86 | 0.32 | 0.73 | 0.26 |
| iYOL007C    | 1.00 | 0.41 | 1.04 | 0.42 | 0.86 | 0.39 |
| iYOL008W    | 1.34 | 0.61 | 0.80 | 0.26 | 1.13 | 0.50 |
| iYOL009C    | 2.02 | 0.85 | 1.87 | 0.81 | 2.17 | 0.92 |
| iYOL010W    | #N/A | #N/A | #N/A | #N/A | #N/A | #N/A |
| iYOL011W    | 1.28 | 0.57 | 1.30 | 0.54 | 1.39 | 0.63 |
| iYOL012C    | 0.64 | 0.23 | 1.24 | 0.52 | 0.58 | 0.18 |
| iYOL013W-A  | #N/A | #N/A | #N/A | #N/A | #N/A | #N/A |
| iYOL014W    | 2.02 | 0.82 | 2.27 | 0.90 | 1.48 | 0.68 |
| iYOL015W    | 0.76 | 0.31 | 0.82 | 0.28 | 0.68 | 0.24 |
| iYOL016C    | 1.78 | 0.78 | 1.32 | 0.64 | 1.43 | 0.69 |
| iYOL017W    | 0.60 | 0.21 | 0.56 | 0.17 | 0.58 | 0.20 |
| iYOL018C    | 1.89 | 0.83 | 1.61 | 0.73 | 1.91 | 0.80 |
| iYOL019W    | 0.49 | 0.15 | 0.41 | 0.05 | 0.47 | 0.12 |
| iYOL020W    | #N/A | #N/A | #N/A | #N/A | #N/A | #N/A |
| iYOL021C    | 0.35 | 0.07 | 0.51 | 0.13 | 0.39 | 0.08 |
| iYOL022C    | 1.13 | 0.50 | 1.34 | 0.56 | 1.26 | 0.61 |
| iYOL023W    | #N/A | #N/A | #N/A | #N/A | #N/A | #N/A |
| iYOL024W    | 1.67 | 0.73 | 2.76 | 0.96 | 2.05 | 0.89 |
| iYOL025W    | 0.70 | 0.25 | 0.88 | 0.33 | #N/A | #N/A |
| iYOL026C    | 1.51 | 0.68 | 0.94 | 0.37 | 1.25 | 0.54 |
| iYOL027C    | 3.03 | 0.98 | 1.73 | 0.74 | 1.70 | 0.75 |
| iYOL028C    | 0.58 | 0.20 | #N/A | #N/A | 0.86 | 0.39 |
| iYOL029C    | 0.30 | 0.04 | #N/A | #N/A | #N/A | #N/A |
| iYOL030W    | #N/A | #N/A | #N/A | #N/A | #N/A | #N/A |
| iYOL031C    | 1.10 | 0.48 | 1.09 | 0.42 | 1.11 | 0.46 |
| iYOL032W    | #N/A | #N/A | #N/A | #N/A | #N/A | #N/A |
| iYOL033W    | 1.80 | 0.79 | 1.40 | 0.59 | 1.52 | 0.65 |
| iYOL034W    | #N/A | #N/A | #N/A | #N/A | #N/A | #N/A |
| iYOL035C    | 0.83 | 0.34 | 1.03 | 0.39 | 0.86 | 0.37 |
| iYOL038W    | 1.37 | 0.59 | 0.90 | 0.39 | 1.07 | 0.52 |
| iYOL040C    | #N/A | #N/A | #N/A | #N/A | 0.08 | 0.00 |
| iYOL041C    | 0.79 | 0.30 | #N/A | #N/A | 0.82 | 0.37 |
| iYOL042W    | #N/A | #N/A | #N/A | #N/A | #N/A | #N/A |
| iYOL043C    | 1.86 | 0.81 | 1.96 | 0.89 | 1.70 | 0.77 |
| iYOL044W    | #N/A | #N/A | #N/A | #N/A | #N/A | #N/A |
| iYOL045W    | 1.12 | 0.49 | 1.83 | 0.86 | 1.24 | 0.61 |
| iYOL047C    | 1.32 | 0.57 | 1.20 | 0.57 | 1.18 | 0.54 |
| iYOL049W    | #N/A | #N/A | #N/A | #N/A | #N/A | #N/A |

|            |      |      |      |      |      |      |
|------------|------|------|------|------|------|------|
| iYOL050C   | 1.31 | 0.56 | 1.28 | 0.53 | 1.36 | 0.66 |
| iYOL052C   | 1.07 | 0.44 | 1.24 | 0.51 | #N/A | #N/A |
| iYOL053C-A | 1.11 | 0.49 | 1.41 | 0.68 | #N/A | #N/A |
| iYOL053W   | 1.51 | 0.68 | 1.43 | 0.63 | 1.19 | 0.57 |
| iYOL054W   | 0.80 | 0.33 | 0.85 | 0.36 | 0.86 | 0.37 |
| iYOL055C   | 1.59 | 0.71 | 1.70 | 0.82 | 2.07 | 0.88 |
| iYOL056W   | #N/A | #N/A | #N/A | #N/A | #N/A | #N/A |
| iYOL057W   | 1.69 | 0.75 | 1.93 | 0.82 | 1.79 | 0.82 |
| iYOL058W   | 1.95 | 0.80 | 1.62 | 0.74 | 1.98 | 0.84 |
| iYOL059W   | 0.93 | 0.39 | 1.10 | 0.48 | 0.69 | 0.27 |
| iYOL060C   | 0.77 | 0.31 | 1.39 | 0.59 | 0.46 | 0.12 |
| iYOL061W   | 0.40 | 0.10 | #N/A | #N/A | 0.37 | 0.07 |
| iYOL062C   | 3.03 | 0.98 | 2.25 | 0.94 | 3.11 | 0.99 |
| iYOL063C   | 1.50 | 0.67 | #N/A | #N/A | 1.31 | 0.64 |
| iYOL064C   | 0.91 | 0.36 | #N/A | #N/A | 1.23 | 0.52 |
| iYOL065C   | 2.51 | 0.94 | 2.35 | 0.91 | 2.31 | 0.89 |
| iYOL066C   | 1.50 | 0.67 | 2.29 | 0.95 | 2.07 | 0.90 |
| iYOL067C   | 1.32 | 0.59 | 1.58 | 0.68 | 1.60 | 0.76 |
| iYOL068C   | 1.00 | 0.44 | 1.56 | 0.67 | 1.13 | 0.55 |
| iYOL069W   | #N/A | #N/A | #N/A | #N/A | #N/A | #N/A |
| iYOL070C   | #N/A | #N/A | #N/A | #N/A | #N/A | #N/A |
| iYOL071W   | #N/A | #N/A | #N/A | #N/A | #N/A | #N/A |
| iYOL072W   | 2.04 | 0.85 | 1.97 | 0.84 | 2.31 | 0.94 |
| iYOL073C   | 3.80 | 0.99 | 2.72 | 0.96 | 2.99 | 0.98 |
| iYOL075C   | 2.16 | 0.86 | 2.39 | 0.92 | 2.64 | 0.96 |
| iYOL076W   | #N/A | #N/A | #N/A | #N/A | #N/A | #N/A |
| iYOL077C   | 1.54 | 0.70 | 1.59 | 0.78 | 2.18 | 0.89 |
| iYOL078W   | 1.60 | 0.69 | 1.58 | 0.68 | 1.74 | 0.74 |
| iYOL079W   | 2.47 | 0.91 | 3.08 | 0.98 | 2.52 | 0.96 |
| iYOL081W   | 0.50 | 0.15 | 0.66 | 0.17 | 0.59 | 0.19 |
| iYOL082W   | 1.62 | 0.70 | 1.61 | 0.69 | 1.35 | 0.65 |
| iYOL083W-0 | 2.35 | 0.89 | #N/A | #N/A | 1.65 | 0.78 |
| iYOL083W-1 | 0.82 | 0.33 | 1.19 | 0.57 | 0.67 | 0.25 |
| iYOL084W   | 3.00 | 0.98 | 2.82 | 0.97 | 2.30 | 0.89 |
| iYOL085C   | 2.15 | 0.85 | 2.50 | 0.93 | 2.50 | 0.96 |
| iYOL086C   | 0.63 | 0.22 | 0.95 | 0.42 | 0.48 | 0.14 |
| iYOL087C   | 1.75 | 0.74 | 1.55 | 0.70 | 1.78 | 0.79 |
| iYOL089C   | 2.19 | 0.90 | 1.32 | 0.55 | #N/A | #N/A |
| iYOL090W   | #N/A | #N/A | #N/A | #N/A | #N/A | #N/A |
| iYOL091W   | #N/A | #N/A | 2.10 | 0.92 | 2.51 | 0.95 |
| iYOL092W   | #N/A | #N/A | #N/A | #N/A | #N/A | #N/A |
| iYOL093W   | 1.29 | 0.57 | 1.15 | 0.55 | 1.29 | 0.59 |
| iYOL094C   | 1.16 | 0.51 | 1.35 | 0.58 | 1.49 | 0.68 |
| iYOL095C   | 1.09 | 0.46 | 1.15 | 0.49 | #N/A | #N/A |
| iYOL096C   | 2.60 | 0.95 | 2.63 | 0.97 | #N/A | #N/A |
| iYOL097C   | 1.08 | 0.47 | #N/A | #N/A | 1.64 | 0.72 |
| iYOL098C   | 1.30 | 0.55 | 0.99 | 0.45 | 1.18 | 0.51 |
| iYOL099C   | #N/A | #N/A | #N/A | #N/A | #N/A | #N/A |
| iYOL101C   | 1.33 | 0.60 | 1.50 | 0.64 | #N/A | #N/A |
| iYOL102C   | 1.43 | 0.65 | 1.40 | 0.59 | 1.13 | 0.55 |
| iYOL103W   | #N/A | #N/A | #N/A | #N/A | #N/A | #N/A |



|            |      |      |      |      |      |      |
|------------|------|------|------|------|------|------|
| iYOL104C   | 0.92 | 0.39 | 1.14 | 0.48 | 1.04 | 0.47 |
| iYOL105C   | 0.96 | 0.42 | 1.17 | 0.47 | 1.03 | 0.49 |
| iYOL107W   | 0.32 | 0.06 | 0.66 | 0.17 | 0.36 | 0.06 |
| iYOL108C   | 1.60 | 0.71 | 1.48 | 0.67 | 1.65 | 0.75 |
| iYOL110W   | 0.07 | 0.00 | #N/A | #N/A | 0.06 | 0.00 |
| iYOL111C   | #N/A | #N/A | 1.42 | 0.70 | 0.90 | 0.36 |
| iYOL112W   | #N/A | #N/A | 0.45 | 0.10 | #N/A | #N/A |
| iYOL113W   | 0.93 | 0.41 | 0.80 | 0.29 | 1.42 | 0.65 |
| iYOL114C   | 1.95 | 0.83 | 1.48 | 0.63 | 1.75 | 0.79 |
| iYOL115W   | #N/A | #N/A | #N/A | #N/A | #N/A | #N/A |
| iYOL116W   | 1.74 | 0.76 | 1.31 | 0.56 | 1.49 | 0.64 |
| iYOL117W   | 2.71 | 0.94 | #N/A | #N/A | 2.98 | 0.98 |
| iYOL118C   | 1.50 | 0.66 | 1.31 | 0.64 | 1.50 | 0.64 |
| iYOL119C   | 1.09 | 0.50 | 1.20 | 0.51 | 1.01 | 0.41 |
| iYOL120C   | 0.39 | 0.09 | 0.21 | 0.00 | 0.28 | 0.03 |
| iYOL121C   | 0.17 | 0.01 | 0.28 | 0.01 | 0.24 | 0.02 |
| iYOL122C   | 0.70 | 0.28 | 2.30 | 0.91 | 0.94 | 0.38 |
| iYOL123W   | #N/A | #N/A | #N/A | #N/A | #N/A | #N/A |
| iYOL124C   | 0.70 | 0.28 | 1.14 | 0.48 | 0.62 | 0.23 |
| iYOL125W   | #N/A | #N/A | #N/A | #N/A | #N/A | #N/A |
| iYOL126C   | 0.79 | 0.30 | 1.31 | 0.62 | 1.18 | 0.53 |
| iYOL127W   | 0.44 | 0.12 | 0.55 | 0.13 | 0.56 | 0.19 |
| iYOL128C   | 0.47 | 0.13 | #N/A | #N/A | 0.64 | 0.21 |
| iYOL129W   | 0.96 | 0.42 | 1.02 | 0.41 | 0.98 | 0.44 |
| iYOL130W   | 1.32 | 0.57 | 1.41 | 0.69 | 1.20 | 0.51 |
| iYOL131W   | 1.15 | 0.48 | 1.85 | 0.80 | 1.21 | 0.53 |
| iYOL132W   | 1.16 | 0.50 | 1.61 | 0.71 | 1.24 | 0.56 |
| iYOL133W   | 1.20 | 0.51 | 1.07 | 0.50 | 1.13 | 0.47 |
| iYOL135C   | 2.48 | 0.94 | 2.86 | 0.99 | 2.23 | 0.88 |
| iYOL136C   | 0.48 | 0.13 | 0.52 | 0.14 | 0.43 | 0.11 |
| iYOL137W   | 0.30 | 0.05 | 0.36 | 0.05 | 0.32 | 0.04 |
| iYOL138C   | 1.84 | 0.81 | 1.36 | 0.59 | 1.52 | 0.67 |
| iYOL139C   | 1.19 | 0.51 | 1.89 | 0.81 | #N/A | #N/A |
| iYOL140W   | 0.44 | 0.12 | #N/A | #N/A | #N/A | #N/A |
| iYOL141W   | 0.32 | 0.05 | #N/A | #N/A | #N/A | #N/A |
| iYOL142W   | 1.20 | 0.54 | #N/A | #N/A | 1.40 | 0.67 |
| iYOL143C   | 2.67 | 0.96 | 2.50 | 0.93 | 3.05 | 0.97 |
| iYOL145C   | 2.68 | 0.96 | 1.83 | 0.78 | 2.41 | 0.93 |
| iYOL146W   | #N/A | #N/A | #N/A | #N/A | #N/A | #N/A |
| iYOL147C   | #N/A | #N/A | #N/A | #N/A | #N/A | #N/A |
| iYOL148C   | 2.45 | 0.91 | 2.04 | 0.86 | 2.47 | 0.93 |
| iYOL149W   | #N/A | #N/A | #N/A | #N/A | #N/A | #N/A |
| iYOL150C   | 2.80 | 0.97 | 3.04 | 0.98 | 2.46 | 0.92 |
| iYOL152W   | 1.34 | 0.60 | 1.16 | 0.47 | 1.16 | 0.57 |
| iYOL153C-0 | 1.69 | 0.75 | 1.60 | 0.72 | 1.62 | 0.71 |
| iYOL153C-1 | 1.80 | 0.79 | 1.73 | 0.83 | 1.59 | 0.76 |
| iYOL154W   | 1.31 | 0.60 | #N/A | #N/A | #N/A | #N/A |
| iYOL155C-0 | 0.40 | 0.10 | 0.47 | 0.11 | 0.48 | 0.14 |
| iYOL155C-1 | 1.50 | 0.67 | 1.53 | 0.75 | 1.27 | 0.61 |
| iYOL156W-0 | 1.06 | 0.47 | 1.22 | 0.59 | 1.19 | 0.56 |
| iYOL156W-1 | 0.22 | 0.02 | 0.28 | 0.02 | 0.34 | 0.05 |



|                |      |      |      |      |      |      |
|----------------|------|------|------|------|------|------|
| iYOL157C       | 1.86 | 0.80 | 1.79 | 0.77 | 1.65 | 0.78 |
| iYOL158C       | 1.15 | 0.50 | 1.56 | 0.67 | 1.28 | 0.59 |
| iYOL159C       | 3.05 | 0.97 | 2.43 | 0.92 | 2.50 | 0.92 |
| iYOL160W-0     | 2.11 | 0.88 | 2.24 | 0.90 | 2.10 | 0.87 |
| iYOL160W-1     | 2.29 | 0.89 | 1.93 | 0.82 | 2.00 | 0.87 |
| iYOL161C-0     | 0.71 | 0.27 | 1.23 | 0.52 | 0.72 | 0.25 |
| iYOL161C-1     | 1.25 | 0.55 | 2.44 | 0.96 | 1.34 | 0.60 |
| iYOL162W       | 0.38 | 0.08 | #N/A | #N/A | 0.46 | 0.13 |
| iYOL164W       | 1.95 | 0.83 | 2.28 | 0.91 | 1.38 | 0.62 |
| iYOL165C       | 1.00 | 0.45 | 0.80 | 0.25 | 0.82 | 0.36 |
| iYOL166C       | 0.25 | 0.03 | #N/A | #N/A | 0.30 | 0.04 |
| iYOLCdelta1    | 1.19 | 0.50 | 0.85 | 0.32 | 0.82 | 0.36 |
| iYOLCdelta2    | 1.60 | 0.68 | 2.10 | 0.87 | 1.27 | 0.58 |
| iYOLCdelta3    | 0.54 | 0.17 | #N/A | #N/A | 0.73 | 0.28 |
| iYOLCdelta7    | 0.76 | 0.31 | #N/A | #N/A | #N/A | #N/A |
| iYOLCdelta9    | #N/A | #N/A | #N/A | #N/A | 0.47 | 0.13 |
| iYOLWdelta10-1 | 2.28 | 0.92 | 2.16 | 0.88 | 1.51 | 0.70 |
| iYOLWdelta5    | 1.25 | 0.57 | 1.43 | 0.61 | 1.32 | 0.60 |
| iYOLWdelta6    | 1.78 | 0.75 | #N/A | #N/A | 1.51 | 0.65 |
| iYOLWsigma2    | 1.29 | 0.57 | 2.01 | 0.86 | 1.46 | 0.70 |
| iYOLWtau1-0    | 1.55 | 0.70 | 1.32 | 0.55 | 1.34 | 0.57 |
| iYOR001W       | 0.97 | 0.42 | 1.02 | 0.47 | 0.94 | 0.41 |
| iYOR002W       | 1.07 | 0.48 | #N/A | #N/A | 0.93 | 0.41 |
| iYOR003W       | 1.52 | 0.65 | 1.79 | 0.85 | 2.32 | 0.92 |
| iYOR004W       | 0.65 | 0.25 | 0.49 | 0.12 | 0.69 | 0.26 |
| iYOR005C       | 0.91 | 0.38 | 1.74 | 0.76 | 0.87 | 0.40 |
| iYOR006C       | 1.38 | 0.62 | 1.28 | 0.56 | 1.19 | 0.55 |
| iYOR007C       | 0.84 | 0.34 | 0.62 | 0.19 | 0.57 | 0.17 |
| iYOR008C       | 1.05 | 0.47 | 1.00 | 0.37 | 0.67 | 0.27 |
| iYOR008C-A     | 1.13 | 0.50 | 1.40 | 0.65 | 0.97 | 0.39 |
| iYOR009W       | 0.73 | 0.29 | #N/A | #N/A | 0.65 | 0.25 |
| iYOR010C-1     | #N/A | #N/A | 2.79 | 0.97 | 1.74 | 0.80 |
| iYOR011W       | #N/A | #N/A | #N/A | #N/A | #N/A | #N/A |
| iYOR013W       | 1.77 | 0.78 | 1.56 | 0.68 | 1.38 | 0.59 |
| iYOR015W       | 0.54 | 0.18 | #N/A | #N/A | 0.91 | 0.35 |
| iYOR016C       | 1.99 | 0.82 | 1.32 | 0.64 | 2.19 | 0.90 |
| iYOR017W       | 1.38 | 0.59 | 0.88 | 0.38 | #N/A | #N/A |
| iYOR018W       | 1.49 | 0.67 | 1.40 | 0.67 | 1.43 | 0.65 |
| iYOR019W       | 0.88 | 0.38 | 0.87 | 0.33 | 0.76 | 0.32 |
| iYOR020C-0     | 1.84 | 0.80 | 2.19 | 0.89 | 1.67 | 0.73 |
| iYOR020C-1     | 1.42 | 0.61 | #N/A | #N/A | 1.11 | 0.51 |
| iYOR021C       | 2.03 | 0.86 | 1.44 | 0.66 | 2.49 | 0.96 |
| iYOR022C       | #N/A | #N/A | #N/A | #N/A | #N/A | #N/A |
| iYOR023C       | 0.97 | 0.42 | 0.88 | 0.38 | 0.99 | 0.44 |
| iYOR025W       | 1.46 | 0.65 | 0.85 | 0.32 | 1.20 | 0.51 |
| iYOR026W       | 0.96 | 0.41 | 1.30 | 0.54 | 0.87 | 0.38 |
| iYOR027W       | 0.32 | 0.05 | 0.36 | 0.05 | 0.29 | 0.03 |
| iYOR028C       | #N/A | #N/A | 1.37 | 0.67 | 0.84 | 0.38 |
| iYOR029W-0     | 1.10 | 0.48 | 0.95 | 0.36 | 0.74 | 0.27 |
| iYOR029W-1     | 2.16 | 0.88 | 1.74 | 0.79 | 1.71 | 0.80 |
| iYOR030W       | 0.63 | 0.22 | 0.67 | 0.18 | 0.73 | 0.31 |

|            |      |      |      |      |      |      |
|------------|------|------|------|------|------|------|
| iYOR031W   | 1.47 | 0.66 | 1.19 | 0.51 | 1.55 | 0.74 |
| iYOR032C   | 0.44 | 0.11 | 0.64 | 0.16 | #N/A | #N/A |
| iYOR033C   | 1.26 | 0.55 | 1.24 | 0.59 | 1.64 | 0.77 |
| iYOR034C   | 1.30 | 0.59 | 0.95 | 0.41 | 0.76 | 0.32 |
| iYOR035C   | 2.56 | 0.93 | 1.72 | 0.81 | 2.38 | 0.91 |
| iYOR036W   | 1.76 | 0.77 | 1.31 | 0.56 | 1.69 | 0.76 |
| iYOR037W   | #N/A | #N/A | #N/A | #N/A | #N/A | #N/A |
| iYOR038C   | 1.64 | 0.74 | 1.39 | 0.61 | 1.36 | 0.58 |
| iYOR039W   | #N/A | #N/A | 1.17 | 0.47 | 0.95 | 0.45 |
| iYOR040W   | 1.00 | 0.44 | 0.99 | 0.42 | 0.95 | 0.38 |
| iYOR042W   | #N/A | #N/A | 0.65 | 0.22 | 0.45 | 0.12 |
| iYOR043W   | 1.13 | 0.48 | 0.94 | 0.38 | 1.09 | 0.45 |
| iYOR044W   | 1.60 | 0.73 | 1.08 | 0.43 | 1.70 | 0.77 |
| iYOR045W   | 0.55 | 0.18 | 0.51 | 0.13 | 0.50 | 0.15 |
| iYOR046C   | 1.06 | 0.46 | 0.92 | 0.38 | 0.80 | 0.31 |
| iYOR047C   | 0.59 | 0.20 | 0.90 | 0.34 | 0.53 | 0.16 |
| iYOR048C   | #N/A | #N/A | 1.53 | 0.67 | 2.00 | 0.86 |
| iYOR049C   | 0.26 | 0.03 | 0.46 | 0.10 | 0.36 | 0.06 |
| iYOR050C   | 0.25 | 0.03 | 0.21 | 0.01 | 0.36 | 0.07 |
| iYOR051C   | #N/A | #N/A | 0.75 | 0.26 | 0.41 | 0.09 |
| iYOR052C   | 1.69 | 0.74 | 1.46 | 0.67 | 1.08 | 0.44 |
| iYOR055W   | 1.03 | 0.46 | 0.95 | 0.34 | 0.91 | 0.36 |
| iYOR056C   | 1.31 | 0.58 | 1.38 | 0.58 | 1.88 | 0.79 |
| iYOR057W   | 0.34 | 0.06 | 0.39 | 0.06 | #N/A | #N/A |
| iYOR058C-1 | 2.10 | 0.87 | 2.63 | 0.95 | 2.39 | 0.93 |
| iYOR059C   | 1.15 | 0.52 | 0.84 | 0.29 | 0.78 | 0.34 |
| iYOR060C   | 1.43 | 0.62 | 1.31 | 0.60 | 1.05 | 0.43 |
| iYOR064C   | 0.86 | 0.33 | 0.64 | 0.22 | 0.73 | 0.31 |
| iYOR066W   | 0.56 | 0.18 | 0.51 | 0.13 | 0.52 | 0.17 |
| iYOR068C   | 0.49 | 0.14 | 0.54 | 0.11 | 0.52 | 0.14 |
| iYOR069W   | #N/A | #N/A | #N/A | #N/A | #N/A | #N/A |
| iYOR070C-0 | 1.91 | 0.83 | 1.89 | 0.88 | 1.84 | 0.84 |
| iYOR070C-1 | 0.72 | 0.29 | 0.76 | 0.30 | 1.02 | 0.41 |
| iYOR071C   | #N/A | #N/A | #N/A | #N/A | #N/A | #N/A |
| iYOR072W-1 | 1.90 | 0.82 | 3.02 | 0.98 | 2.23 | 0.91 |
| iYOR073W   | #N/A | #N/A | 0.78 | 0.27 | #N/A | #N/A |
| iYOR074C   | #N/A | #N/A | 2.11 | 0.89 | 2.27 | 0.93 |
| iYOR075W   | #N/A | #N/A | #N/A | #N/A | #N/A | #N/A |
| iYOR076C   | 1.34 | 0.60 | 1.65 | 0.72 | 1.67 | 0.75 |
| iYOR077W   | 0.70 | 0.27 | 0.57 | 0.13 | 0.87 | 0.38 |
| iYOR078W   | #N/A | #N/A | #N/A | #N/A | #N/A | #N/A |
| iYOR079C   | #N/A | #N/A | #N/A | #N/A | 1.76 | 0.79 |
| iYOR081C   | 0.84 | 0.35 | 1.03 | 0.46 | #N/A | #N/A |
| iYOR084W   | 1.79 | 0.75 | 1.88 | 0.80 | 2.05 | 0.85 |
| iYOR085W   | #N/A | #N/A | #N/A | #N/A | #N/A | #N/A |
| iYOR086C   | 1.95 | 0.80 | 1.57 | 0.73 | 1.75 | 0.74 |
| iYOR088W   | 0.51 | 0.16 | 0.65 | 0.20 | 0.49 | 0.14 |
| iYOR089C   | #N/A | #N/A | 1.13 | 0.53 | 0.97 | 0.46 |
| iYOR090C   | 1.44 | 0.61 | 1.68 | 0.72 | 1.32 | 0.62 |
| iYOR094W   | 0.56 | 0.19 | #N/A | #N/A | 0.63 | 0.24 |
| iYOR095C   | 0.63 | 0.22 | 0.85 | 0.32 | 0.60 | 0.21 |

|            |      |      |      |      |      |      |
|------------|------|------|------|------|------|------|
| iYOR096W   | #N/A | #N/A | #N/A | #N/A | #N/A | #N/A |
| iYOR097C   | 1.41 | 0.65 | 1.01 | 0.39 | 1.30 | 0.55 |
| iYOR098C   | 0.97 | 0.40 | 0.83 | 0.27 | 0.83 | 0.36 |
| iYOR100C   | 1.08 | 0.45 | 1.22 | 0.57 | 0.97 | 0.39 |
| iYOR101W   | 0.51 | 0.16 | 0.43 | 0.08 | 0.62 | 0.23 |
| iYOR103C   | 1.58 | 0.67 | 1.76 | 0.80 | 1.35 | 0.61 |
| iYOR108W   | 1.05 | 0.46 | 1.19 | 0.57 | 0.88 | 0.41 |
| iYOR110W   | #N/A | #N/A | 1.55 | 0.76 | 1.75 | 0.81 |
| iYOR112W   | 1.45 | 0.65 | 1.01 | 0.41 | #N/A | #N/A |
| iYOR114W   | #N/A | #N/A | #N/A | #N/A | #N/A | #N/A |
| iYOR116C   | 1.48 | 0.66 | 1.34 | 0.65 | 1.77 | 0.75 |
| iYOR117W   | 1.21 | 0.52 | 1.25 | 0.53 | 1.31 | 0.56 |
| iYOR118W   | #N/A | #N/A | #N/A | #N/A | #N/A | #N/A |
| iYOR119C   | 1.16 | 0.50 | 1.42 | 0.60 | 1.12 | 0.50 |
| iYOR121C   | 0.31 | 0.05 | #N/A | #N/A | 0.62 | 0.20 |
| iYOR123C   | 1.79 | 0.78 | 1.88 | 0.87 | 1.91 | 0.84 |
| iYOR125C   | #N/A | #N/A | #N/A | #N/A | #N/A | #N/A |
| iYOR126C   | 1.18 | 0.51 | 1.33 | 0.56 | 1.55 | 0.71 |
| iYOR127W   | #N/A | #N/A | #N/A | #N/A | #N/A | #N/A |
| iYOR128C   | 0.80 | 0.31 | 0.81 | 0.26 | 0.78 | 0.34 |
| iYOR129C   | 2.74 | 0.96 | 2.36 | 0.96 | 2.50 | 0.95 |
| iYOR130C   | 2.36 | 0.90 | 2.24 | 0.90 | 2.17 | 0.90 |
| iYOR131C   | 1.94 | 0.81 | 1.80 | 0.78 | 1.81 | 0.79 |
| iYOR132W   | 0.43 | 0.11 | 0.95 | 0.37 | 0.74 | 0.27 |
| iYOR133W   | 1.25 | 0.57 | 1.65 | 0.77 | 1.07 | 0.48 |
| iYOR134W   | 1.52 | 0.68 | 2.05 | 0.86 | #N/A | #N/A |
| iYOR136W   | 0.40 | 0.10 | #N/A | #N/A | #N/A | #N/A |
| iYOR137C   | 0.77 | 0.31 | 0.63 | 0.18 | 0.84 | 0.38 |
| iYOR138C   | 1.09 | 0.50 | 1.00 | 0.42 | 1.15 | 0.53 |
| iYOR140W   | 0.52 | 0.16 | 0.48 | 0.11 | 0.51 | 0.16 |
| iYOR141C   | 1.62 | 0.69 | 1.25 | 0.51 | 1.56 | 0.68 |
| iYOR142W   | 0.83 | 0.32 | #N/A | #N/A | #N/A | #N/A |
| iYOR143C   | 1.46 | 0.65 | 2.03 | 0.84 | 1.87 | 0.78 |
| iYOR144C   | 1.38 | 0.59 | 1.12 | 0.44 | 1.19 | 0.50 |
| iYOR146W   | 0.62 | 0.23 | 0.90 | 0.32 | 0.78 | 0.33 |
| iYOR147W   | #N/A | #N/A | #N/A | #N/A | #N/A | #N/A |
| iYOR148C   | 2.63 | 0.95 | 2.14 | 0.87 | 2.11 | 0.90 |
| iYOR149C   | 2.65 | 0.95 | 2.47 | 0.96 | 3.14 | 0.99 |
| iYOR150W   | #N/A | #N/A | #N/A | #N/A | 0.41 | 0.09 |
| iYOR151C   | 1.40 | 0.64 | #N/A | #N/A | 1.28 | 0.62 |
| iYOR152C-0 | 0.93 | 0.38 | 1.34 | 0.58 | 0.84 | 0.35 |
| iYOR152C-1 | 0.38 | 0.09 | 0.42 | 0.08 | 0.28 | 0.03 |
| iYOR153W   | #N/A | #N/A | #N/A | #N/A | #N/A | #N/A |
| iYOR154W   | #N/A | #N/A | #N/A | #N/A | #N/A | #N/A |
| iYOR155C   | 1.37 | 0.61 | 1.76 | 0.79 | 1.28 | 0.59 |
| iYOR156C   | 1.38 | 0.62 | 1.25 | 0.51 | #N/A | #N/A |
| iYOR157C   | 1.65 | 0.70 | 1.28 | 0.59 | 1.38 | 0.63 |
| iYOR158W   | 0.88 | 0.37 | #N/A | #N/A | 1.00 | 0.45 |
| iYOR159C   | 2.26 | 0.91 | 2.71 | 0.96 | 1.67 | 0.79 |
| iYOR160W   | #N/A | #N/A | #N/A | #N/A | #N/A | #N/A |
| iYOR161C   | 0.44 | 0.11 | 0.51 | 0.13 | 0.43 | 0.11 |

|            |      |      |      |      |      |      |
|------------|------|------|------|------|------|------|
| iYOR162C   | 2.24 | 0.90 | 1.51 | 0.74 | 1.81 | 0.79 |
| iYOR163W   | 0.61 | 0.21 | #N/A | #N/A | #N/A | #N/A |
| iYOR164C   | 2.44 | 0.94 | 1.77 | 0.81 | 2.00 | 0.86 |
| iYOR165W   | #N/A | #N/A | #N/A | #N/A | #N/A | #N/A |
| iYOR166C   | 0.64 | 0.24 | 0.98 | 0.39 | 0.73 | 0.26 |
| iYOR167C   | 0.81 | 0.31 | 0.65 | 0.20 | 0.79 | 0.33 |
| iYOR171C   | 2.76 | 0.97 | 2.27 | 0.91 | 2.41 | 0.94 |
| iYOR172W   | 0.85 | 0.36 | 1.09 | 0.51 | 0.81 | 0.31 |
| iYOR173W   | 1.88 | 0.78 | 1.62 | 0.71 | 2.27 | 0.93 |
| iYOR174W   | #N/A | #N/A | #N/A | #N/A | #N/A | #N/A |
| iYOR175C   | 1.31 | 0.58 | 1.70 | 0.75 | 1.48 | 0.67 |
| iYOR176W   | #N/A | #N/A | 0.48 | 0.11 | #N/A | #N/A |
| iYOR178C-0 | 0.78 | 0.31 | 0.78 | 0.24 | 0.73 | 0.30 |
| iYOR178C-1 | 0.69 | 0.25 | 0.60 | 0.16 | 0.55 | 0.19 |
| iYOR179C-0 | 2.76 | 0.97 | 2.79 | 0.97 | 2.20 | 0.91 |
| iYOR180C   | 1.75 | 0.77 | 1.44 | 0.69 | 1.38 | 0.67 |
| iYOR181W   | #N/A | #N/A | 0.40 | 0.07 | 0.55 | 0.19 |
| iYOR182C   | #N/A | #N/A | #N/A | #N/A | #N/A | #N/A |
| iYOR183W   | #N/A | #N/A | #N/A | #N/A | #N/A | #N/A |
| iYOR184W   | 0.56 | 0.19 | 0.72 | 0.20 | 0.61 | 0.23 |
| iYOR185C   | 2.35 | 0.92 | 2.22 | 0.89 | 1.82 | 0.81 |
| iYOR186W   | 1.13 | 0.50 | 0.77 | 0.27 | 1.06 | 0.47 |
| iYOR187W   | 0.82 | 0.34 | 0.89 | 0.39 | 1.07 | 0.48 |
| iYOR188W   | 1.31 | 0.58 | 1.40 | 0.61 | 1.68 | 0.76 |
| iYOR189W   | 1.52 | 0.66 | 1.81 | 0.82 | 1.88 | 0.83 |
| iYOR190W   | 1.79 | 0.75 | 1.00 | 0.41 | 1.69 | 0.73 |
| iYOR192C-0 | 2.08 | 0.88 | 1.62 | 0.70 | 1.91 | 0.86 |
| iYOR192C-1 | 1.10 | 0.48 | 1.15 | 0.48 | 1.11 | 0.54 |
| iYOR193W   | #N/A | #N/A | #N/A | #N/A | #N/A | #N/A |
| iYOR194C   | 1.61 | 0.71 | 1.47 | 0.64 | 1.59 | 0.72 |
| iYOR195W   | 0.35 | 0.07 | #N/A | #N/A | 0.64 | 0.21 |
| iYOR196C   | 2.83 | 0.97 | #N/A | #N/A | 2.40 | 0.94 |
| iYOR197W   | #N/A | #N/A | #N/A | #N/A | #N/A | #N/A |
| iYOR198C   | 0.85 | 0.33 | 0.91 | 0.32 | 0.99 | 0.44 |
| iYOR201C   | #N/A | #N/A | 1.47 | 0.63 | 0.86 | 0.34 |
| iYOR204W   | 0.31 | 0.05 | 0.38 | 0.06 | 0.26 | 0.02 |
| iYOR205C   | 1.65 | 0.72 | 1.48 | 0.65 | 1.87 | 0.82 |
| iYOR206W   | #N/A | #N/A | #N/A | #N/A | #N/A | #N/A |
| iYOR207C   | 2.72 | 0.96 | 1.90 | 0.88 | 2.63 | 0.97 |
| iYOR208W   | #N/A | #N/A | #N/A | #N/A | #N/A | #N/A |
| iYOR209C   | 1.40 | 0.64 | 1.63 | 0.79 | 1.46 | 0.62 |
| iYOR210W   | #N/A | #N/A | #N/A | #N/A | 1.01 | 0.48 |
| iYOR211C   | 0.65 | 0.24 | 1.14 | 0.48 | 0.52 | 0.17 |
| iYOR212W   | 0.32 | 0.05 | 0.43 | 0.08 | 0.33 | 0.05 |
| iYOR213C   | 2.22 | 0.90 | 1.85 | 0.84 | 2.16 | 0.87 |
| iYOR214C   | 0.66 | 0.25 | 0.68 | 0.22 | 0.50 | 0.15 |
| iYOR215C   | 0.95 | 0.41 | 0.90 | 0.37 | 1.09 | 0.45 |
| iYOR216C   | 2.11 | 0.88 | 2.20 | 0.94 | 1.85 | 0.82 |
| iYOR218C   | 0.31 | 0.05 | 0.24 | 0.01 | 0.28 | 0.03 |
| iYOR219C   | 1.99 | 0.85 | 1.40 | 0.61 | 1.46 | 0.71 |
| iYOR220W   | 0.31 | 0.05 | 0.46 | 0.11 | 0.41 | 0.09 |

|          |      |      |      |      |      |      |
|----------|------|------|------|------|------|------|
| iYOR221C | 1.01 | 0.42 | 0.94 | 0.34 | 0.68 | 0.27 |
| iYOR222W | 0.90 | 0.39 | 1.33 | 0.65 | #N/A | #N/A |
| iYOR223W | #N/A | #N/A | #N/A | #N/A | 0.64 | 0.21 |
| iYOR224C | 1.73 | 0.76 | 1.63 | 0.72 | 1.63 | 0.74 |
| iYOR226C | 1.24 | 0.53 | 1.23 | 0.58 | 1.23 | 0.56 |
| iYOR227W | #N/A | #N/A | #N/A | #N/A | #N/A | #N/A |
| iYOR228C | 1.87 | 0.82 | 1.82 | 0.85 | 1.93 | 0.85 |
| iYOR229W | #N/A | #N/A | 0.40 | 0.06 | 0.36 | 0.06 |
| iYOR230W | 2.46 | 0.91 | 1.81 | 0.78 | 1.99 | 0.86 |
| iYOR231W | 0.89 | 0.37 | 0.79 | 0.28 | 1.50 | 0.64 |
| iYOR232W | 1.02 | 0.46 | 0.92 | 0.36 | 1.30 | 0.56 |
| iYOR233W | #N/A | #N/A | #N/A | #N/A | #N/A | #N/A |
| iYOR234C | 0.09 | 0.00 | #N/A | #N/A | 0.07 | 0.00 |
| iYOR235W | 0.62 | 0.21 | 0.78 | 0.27 | 0.60 | 0.22 |
| iYOR236W | 3.14 | 0.97 | 2.43 | 0.96 | 2.18 | 0.90 |
| iYOR237W | 1.80 | 0.80 | 2.03 | 0.91 | 2.00 | 0.82 |
| iYOR238W | 1.39 | 0.60 | 1.70 | 0.73 | 1.21 | 0.59 |
| iYOR240W | 1.20 | 0.55 | 0.75 | 0.24 | 1.19 | 0.54 |
| iYOR241W | #N/A | #N/A | #N/A | #N/A | #N/A | #N/A |
| iYOR242C | 0.59 | 0.21 | 0.64 | 0.20 | 0.51 | 0.16 |
| iYOR243C | 2.42 | 0.91 | 1.87 | 0.80 | 2.15 | 0.90 |
| iYOR244W | 0.42 | 0.11 | #N/A | #N/A | #N/A | #N/A |
| iYOR245C | 2.06 | 0.85 | 1.57 | 0.69 | 1.87 | 0.84 |
| iYOR246C | 0.99 | 0.43 | 0.96 | 0.38 | 0.63 | 0.20 |
| iYOR248W | 0.43 | 0.11 | #N/A | #N/A | #N/A | #N/A |
| iYOR249C | 1.26 | 0.55 | 1.32 | 0.56 | 1.09 | 0.49 |
| iYOR250C | 1.92 | 0.84 | 2.24 | 0.90 | 2.00 | 0.86 |
| iYOR252W | 1.70 | 0.75 | #N/A | #N/A | 1.21 | 0.51 |
| iYOR253W | #N/A | #N/A | #N/A | #N/A | #N/A | #N/A |
| iYOR254C | 1.82 | 0.81 | 1.78 | 0.76 | 2.15 | 0.87 |
| iYOR255W | #N/A | #N/A | #N/A | #N/A | #N/A | #N/A |
| iYOR256C | 1.72 | 0.76 | 1.64 | 0.71 | 1.76 | 0.76 |
| iYOR257W | 1.17 | 0.53 | 1.85 | 0.79 | #N/A | #N/A |
| iYOR260W | #N/A | #N/A | #N/A | #N/A | #N/A | #N/A |
| iYOR261C | 1.66 | 0.74 | 1.78 | 0.76 | 1.69 | 0.79 |
| iYOR262W | 1.94 | 0.84 | 2.08 | 0.89 | 1.95 | 0.85 |
| iYOR264W | 1.85 | 0.81 | 1.84 | 0.79 | 2.60 | 0.97 |
| iYOR265W | 2.87 | 0.97 | 1.97 | 0.83 | 2.59 | 0.97 |
| iYOR266W | #N/A | #N/A | #N/A | #N/A | #N/A | #N/A |
| iYOR267C | 1.43 | 0.61 | 1.43 | 0.61 | 1.14 | 0.52 |
| iYOR268C | 1.06 | 0.44 | 0.67 | 0.17 | 0.73 | 0.31 |
| iYOR269W | #N/A | #N/A | #N/A | #N/A | #N/A | #N/A |
| iYOR270C | 1.30 | 0.59 | 1.21 | 0.56 | 1.04 | 0.45 |
| iYOR271C | 0.41 | 0.11 | 0.93 | 0.36 | 0.37 | 0.06 |
| iYOR272W | 0.32 | 0.06 | 0.51 | 0.13 | 0.46 | 0.12 |
| iYOR273C | #N/A | #N/A | 1.16 | 0.49 | 0.72 | 0.30 |
| iYOR274W | 0.43 | 0.12 | 0.40 | 0.06 | #N/A | #N/A |
| iYOR275C | 1.23 | 0.54 | 1.32 | 0.65 | 1.01 | 0.45 |
| iYOR277C | 0.55 | 0.18 | 0.84 | 0.35 | 0.55 | 0.18 |
| iYOR279C | 1.93 | 0.83 | 1.62 | 0.71 | 1.93 | 0.82 |
| iYOR280C | 1.26 | 0.53 | 1.26 | 0.53 | 1.12 | 0.52 |

|            |      |      |      |      |      |      |
|------------|------|------|------|------|------|------|
| iYOR282W   | 1.87 | 0.81 | 1.98 | 0.90 | #N/A | #N/A |
| iYOR283W   | 1.74 | 0.73 | 1.72 | 0.75 | 1.52 | 0.73 |
| iYOR284W   | 2.32 | 0.92 | 1.47 | 0.68 | #N/A | #N/A |
| iYOR286W   | 1.10 | 0.49 | 0.93 | 0.41 | 1.06 | 0.48 |
| iYOR287C   | 1.92 | 0.83 | 1.38 | 0.60 | 1.66 | 0.75 |
| iYOR288C   | 2.20 | 0.87 | #N/A | #N/A | 2.10 | 0.88 |
| iYOR289W   | #N/A | #N/A | #N/A | #N/A | #N/A | #N/A |
| iYOR290C   | 1.81 | 0.79 | 1.47 | 0.72 | 1.77 | 0.76 |
| iYOR291W   | #N/A | #N/A | #N/A | #N/A | #N/A | #N/A |
| iYOR292C   | 0.45 | 0.13 | 0.54 | 0.15 | 0.53 | 0.15 |
| iYOR293W   | 1.22 | 0.55 | 1.59 | 0.78 | 1.39 | 0.64 |
| iYOR294W   | 1.01 | 0.42 | 1.39 | 0.59 | 1.01 | 0.45 |
| iYOR295W   | 1.09 | 0.49 | 1.47 | 0.73 | 1.24 | 0.58 |
| iYOR297C   | 1.75 | 0.74 | 1.84 | 0.82 | 1.85 | 0.81 |
| iYOR298C-A | 0.75 | 0.30 | 0.87 | 0.37 | 0.54 | 0.18 |
| iYOR298W   | #N/A | #N/A | #N/A | #N/A | #N/A | #N/A |
| iYOR300W   | 0.98 | 0.43 | #N/A | #N/A | #N/A | #N/A |
| iYOR301W   | 0.39 | 0.09 | 0.63 | 0.17 | 0.45 | 0.12 |
| iYOR303W   | 1.49 | 0.68 | 1.36 | 0.67 | 1.64 | 0.74 |
| iYOR304C-A | 1.92 | 0.84 | 1.96 | 0.82 | 1.72 | 0.80 |
| iYOR304W   | 0.83 | 0.34 | 0.80 | 0.25 | 0.87 | 0.34 |
| iYOR305W   | #N/A | #N/A | #N/A | #N/A | #N/A | #N/A |
| iYOR306C   | 0.39 | 0.08 | #N/A | #N/A | #N/A | #N/A |
| iYOR307C   | 0.87 | 0.37 | 1.20 | 0.53 | 0.94 | 0.42 |
| iYOR310C   | 1.14 | 0.50 | 1.36 | 0.57 | 1.36 | 0.66 |
| iYOR311C   | 1.14 | 0.49 | 1.13 | 0.47 | 1.01 | 0.45 |
| iYOR312C   | 0.26 | 0.03 | 0.45 | 0.06 | 0.32 | 0.04 |
| iYOR313C   | #N/A | #N/A | #N/A | #N/A | #N/A | #N/A |
| iYOR314W   | 0.53 | 0.17 | 0.73 | 0.27 | 0.53 | 0.15 |
| iYOR315W   | #N/A | #N/A | 0.74 | 0.25 | 0.62 | 0.23 |
| iYOR316C-0 | 1.16 | 0.49 | 1.30 | 0.63 | 1.33 | 0.63 |
| iYOR316C-1 | 0.36 | 0.07 | 0.43 | 0.06 | 0.30 | 0.04 |
| iYOR317W   | 0.63 | 0.23 | 0.73 | 0.25 | 0.62 | 0.20 |
| iYOR318C   | 1.81 | 0.79 | 1.85 | 0.80 | 1.55 | 0.67 |
| iYOR320C   | 1.64 | 0.72 | #N/A | #N/A | 1.52 | 0.69 |
| iYOR321W   | 0.41 | 0.11 | 0.43 | 0.09 | 0.49 | 0.15 |
| iYOR322C   | 1.43 | 0.64 | 1.64 | 0.72 | 1.37 | 0.63 |
| iYOR323C   | 1.74 | 0.73 | 1.24 | 0.53 | 1.48 | 0.65 |
| iYOR325W   | 1.05 | 0.45 | 1.27 | 0.60 | 1.22 | 0.59 |
| iYOR326W   | 1.39 | 0.60 | 1.03 | 0.42 | 1.23 | 0.55 |
| iYOR327C   | 1.05 | 0.47 | 0.93 | 0.33 | 1.01 | 0.45 |
| iYOR328W   | 0.58 | 0.20 | #N/A | #N/A | #N/A | #N/A |
| iYOR329C   | 1.27 | 0.58 | 1.27 | 0.54 | 1.77 | 0.75 |
| iYOR330C   | 3.32 | 0.98 | 2.62 | 0.97 | 2.29 | 0.93 |
| iYOR332W   | 1.42 | 0.65 | 2.18 | 0.88 | #N/A | #N/A |
| iYOR334W   | #N/A | #N/A | #N/A | #N/A | #N/A | #N/A |
| iYOR335C   | 1.96 | 0.85 | 2.21 | 0.92 | 2.10 | 0.88 |
| iYOR336W   | 1.28 | 0.54 | 2.34 | 0.91 | 1.53 | 0.72 |
| iYOR337W   | 0.63 | 0.23 | 0.83 | 0.35 | 0.77 | 0.32 |
| iYOR338W   | 2.49 | 0.95 | 2.01 | 0.87 | 1.95 | 0.87 |
| iYOR339C   | 1.14 | 0.48 | 0.79 | 0.27 | 1.04 | 0.48 |

|              |      |      |      |      |      |      |
|--------------|------|------|------|------|------|------|
| iYOR340C     | 0.80 | 0.32 | 1.09 | 0.51 | 1.04 | 0.47 |
| iYOR341W     | 0.53 | 0.16 | 0.56 | 0.16 | 0.50 | 0.14 |
| iYOR342C     | 0.24 | 0.02 | 0.44 | 0.09 | 0.33 | 0.05 |
| iYOR343C     | 1.10 | 0.50 | #N/A | #N/A | 1.01 | 0.44 |
| iYOR344C-1   | 0.54 | 0.18 | 1.56 | 0.70 | 0.78 | 0.33 |
| iYOR346W     | #N/A | #N/A | #N/A | #N/A | #N/A | #N/A |
| iYOR347C     | 1.35 | 0.58 | 2.00 | 0.85 | 1.34 | 0.65 |
| iYOR348C     | 0.49 | 0.14 | 0.68 | 0.22 | 0.42 | 0.09 |
| iYOR350C     | 1.82 | 0.76 | #N/A | #N/A | 1.90 | 0.83 |
| iYOR351C     | 1.26 | 0.55 | 0.98 | 0.36 | 1.10 | 0.50 |
| iYOR353C     | 2.53 | 0.94 | 2.38 | 0.96 | 1.70 | 0.77 |
| iYOR354C-0   | 0.60 | 0.22 | 1.13 | 0.47 | 0.63 | 0.20 |
| iYOR354C-1   | 0.42 | 0.10 | 0.51 | 0.11 | 0.44 | 0.10 |
| iYOR355W     | 0.65 | 0.22 | #N/A | #N/A | 0.65 | 0.25 |
| iYOR356W     | #N/A | #N/A | #N/A | #N/A | #N/A | #N/A |
| iYOR357C     | 2.84 | 0.97 | 2.43 | 0.93 | 2.85 | 0.97 |
| iYOR358W     | 0.70 | 0.25 | 0.84 | 0.31 | 1.02 | 0.41 |
| iYOR359W     | #N/A | #N/A | #N/A | #N/A | #N/A | #N/A |
| iYOR360C     | 0.46 | 0.14 | 0.65 | 0.21 | 0.70 | 0.28 |
| iYOR361C     | 0.70 | 0.25 | 0.58 | 0.18 | 0.72 | 0.29 |
| iYOR363C     | 1.38 | 0.63 | 1.32 | 0.56 | 1.46 | 0.63 |
| iYOR366W     | 1.05 | 0.44 | 0.73 | 0.27 | 0.83 | 0.36 |
| iYOR367W     | 1.09 | 0.46 | 0.95 | 0.39 | 1.01 | 0.45 |
| iYOR369C     | 0.13 | 0.00 | 0.30 | 0.02 | 0.19 | 0.01 |
| iYOR370C     | 0.67 | 0.23 | 0.75 | 0.22 | 0.75 | 0.31 |
| iYOR371C     | #N/A | #N/A | 0.95 | 0.42 | 1.23 | 0.56 |
| iYOR372C     | 2.02 | 0.86 | 1.45 | 0.62 | 1.97 | 0.85 |
| iYOR373W     | 1.86 | 0.82 | 1.35 | 0.67 | 1.69 | 0.72 |
| iYOR374W     | #N/A | #N/A | #N/A | #N/A | #N/A | #N/A |
| iYOR375C     | #N/A | #N/A | #N/A | #N/A | 0.57 | 0.20 |
| iYOR376W-0   | 1.90 | 0.79 | 1.83 | 0.78 | 1.77 | 0.75 |
| iYOR376W-1   | 0.86 | 0.35 | 0.39 | 0.04 | 0.75 | 0.31 |
| iYOR377W-0   | 0.83 | 0.35 | 0.85 | 0.28 | 0.75 | 0.32 |
| iYOR377W-1   | 1.00 | 0.44 | 0.47 | 0.11 | 0.99 | 0.44 |
| iYOR380W-0   | 1.37 | 0.61 | 1.18 | 0.54 | 1.35 | 0.58 |
| iYOR380W-1   | 1.80 | 0.77 | 1.10 | 0.50 | 1.44 | 0.70 |
| iYOR381W-0   | #N/A | #N/A | 1.36 | 0.67 | 1.39 | 0.64 |
| iYOR381W-1   | 2.42 | 0.93 | 2.01 | 0.85 | 1.84 | 0.81 |
| iYOR382W     | 1.56 | 0.68 | 1.93 | 0.82 | 1.84 | 0.81 |
| iYOR383C     | 0.52 | 0.17 | 0.45 | 0.07 | 0.56 | 0.19 |
| iYOR384W     | 1.26 | 0.57 | 1.39 | 0.59 | 1.36 | 0.62 |
| iYOR385W     | 1.22 | 0.52 | 1.05 | 0.48 | 1.02 | 0.49 |
| iYOR386W     | 0.51 | 0.15 | 0.40 | 0.04 | 1.14 | 0.47 |
| iYOR387C-0   | 1.56 | 0.70 | 1.20 | 0.49 | 1.62 | 0.73 |
| iYOR387C-1   | 1.61 | 0.73 | 2.13 | 0.88 | 1.41 | 0.61 |
| iYOR388C     | 1.38 | 0.62 | 1.55 | 0.76 | 1.69 | 0.72 |
| iYOR390W     | 1.81 | 0.79 | 1.62 | 0.71 | 1.56 | 0.71 |
| iYOR392W     | 2.80 | 0.97 | 2.22 | 0.93 | 2.29 | 0.93 |
| iYOR393W     | 0.81 | 0.34 | 0.92 | 0.36 | 0.81 | 0.35 |
| iYORCdelta11 | #N/A | #N/A | #N/A | #N/A | #N/A | #N/A |
| iYORCdelta25 | #N/A | #N/A | #N/A | #N/A | #N/A | #N/A |



|              |      |      |      |      |      |      |
|--------------|------|------|------|------|------|------|
| iYORWdelta14 | 0.90 | 0.39 | 1.05 | 0.44 | 0.85 | 0.39 |
| iYORWdelta16 | 2.04 | 0.86 | 2.54 | 0.95 | 1.75 | 0.79 |
| iYORWdelta17 | 2.16 | 0.86 | 2.27 | 0.93 | 2.88 | 0.96 |
| iYORWdelta22 | 1.57 | 0.71 | 2.04 | 0.85 | #N/A | #N/A |
| iYORWdelta24 | #N/A | #N/A | #N/A | #N/A | #N/A | #N/A |
| iYORWsigma3  | #N/A | #N/A | #N/A | #N/A | #N/A | #N/A |
| iYORWtau3    | #N/A | #N/A | #N/A | #N/A | #N/A | #N/A |
| iYPL001W     | #N/A | #N/A | #N/A | #N/A | #N/A | #N/A |
| iYPL002C     | 2.54 | 0.95 | 2.07 | 0.85 | #N/A | #N/A |
| iYPL003W     | 1.06 | 0.44 | 0.77 | 0.30 | 0.88 | 0.34 |
| iYPL004C     | 0.66 | 0.25 | 0.75 | 0.28 | 0.70 | 0.28 |
| iYPL005W     | 0.41 | 0.10 | 0.55 | 0.11 | 0.50 | 0.16 |
| iYPL006W     | 1.56 | 0.70 | 1.78 | 0.76 | 1.89 | 0.86 |
| iYPL007C     | 2.67 | 0.94 | 2.09 | 0.87 | 2.31 | 0.89 |
| iYPL008W     | #N/A | #N/A | #N/A | #N/A | #N/A | #N/A |
| iYPL009C     | 1.29 | 0.55 | 0.99 | 0.40 | 1.32 | 0.61 |
| iYPL010W     | 0.59 | 0.21 | 0.74 | 0.28 | 0.67 | 0.26 |
| iYPL011C     | 1.74 | 0.78 | 2.01 | 0.85 | #N/A | #N/A |
| iYPL012W     | #N/A | #N/A | #N/A | #N/A | #N/A | #N/A |
| iYPL013C     | 1.37 | 0.61 | 1.36 | 0.67 | 1.39 | 0.68 |
| iYPL014W     | 0.82 | 0.34 | 0.60 | 0.17 | #N/A | #N/A |
| iYPL015C     | 0.74 | 0.30 | 0.81 | 0.28 | 0.59 | 0.21 |
| iYPL016W     | 1.03 | 0.43 | 1.03 | 0.39 | 0.96 | 0.43 |
| iYPL019C     | 0.42 | 0.11 | 2.08 | 0.86 | 0.52 | 0.17 |
| iYPL020C     | 1.27 | 0.58 | 1.35 | 0.66 | 0.86 | 0.38 |
| iYPL021W     | 2.37 | 0.92 | 1.73 | 0.74 | 0.94 | 0.44 |
| iYPL023C     | 1.52 | 0.68 | 1.33 | 0.60 | 1.67 | 0.75 |
| iYPL024W     | 0.56 | 0.19 | 0.57 | 0.17 | #N/A | #N/A |
| iYPL025C     | 0.89 | 0.35 | 1.87 | 0.79 | 0.95 | 0.42 |
| iYPL026C     | #N/A | #N/A | #N/A | #N/A | 0.24 | 0.02 |
| iYPL027W     | 0.54 | 0.18 | 0.68 | 0.24 | #N/A | #N/A |
| iYPL028W     | 1.31 | 0.59 | 1.56 | 0.67 | 0.68 | 0.28 |
| iYPL029W     | 1.50 | 0.67 | 2.03 | 0.87 | 1.54 | 0.72 |
| iYPL030W     | 1.19 | 0.52 | 1.50 | 0.66 | #N/A | #N/A |
| iYPL031C     | 3.58 | 0.99 | 3.21 | 0.99 | 2.79 | 0.96 |
| iYPL038W     | #N/A | #N/A | #N/A | #N/A | #N/A | #N/A |
| iYPL039W     | 1.90 | 0.81 | 1.87 | 0.80 | 2.10 | 0.90 |
| iYPL040C     | 2.77 | 0.95 | 3.14 | 0.98 | 2.73 | 0.97 |
| iYPL041C     | 1.44 | 0.63 | 1.37 | 0.58 | 1.11 | 0.46 |
| iYPL042C     | 0.86 | 0.34 | 0.82 | 0.30 | 0.68 | 0.27 |
| iYPL045W     | 1.02 | 0.46 | 1.21 | 0.58 | #N/A | #N/A |
| iYPL046C     | 2.37 | 0.92 | 1.63 | 0.73 | 1.93 | 0.84 |
| iYPL047W     | 1.01 | 0.44 | 1.58 | 0.69 | #N/A | #N/A |
| iYPL048W     | 1.47 | 0.67 | 1.18 | 0.57 | 1.30 | 0.59 |
| iYPL049C     | 0.44 | 0.12 | 0.81 | 0.29 | 0.43 | 0.09 |
| iYPL050C     | 0.65 | 0.24 | 0.78 | 0.27 | 0.70 | 0.25 |
| iYPL051W     | #N/A | #N/A | #N/A | #N/A | #N/A | #N/A |
| iYPL052W     | 3.44 | 0.99 | 1.68 | 0.76 | 2.38 | 0.92 |
| iYPL053C     | 1.93 | 0.80 | 1.93 | 0.86 | 2.36 | 0.94 |
| iYPL054W     | 1.75 | 0.74 | 1.33 | 0.64 | 1.57 | 0.67 |
| iYPL056C     | 0.27 | 0.03 | 0.44 | 0.09 | 0.26 | 0.02 |



|            |      |      |      |      |      |      |
|------------|------|------|------|------|------|------|
| iYPL057C   | 0.35 | 0.07 | 0.44 | 0.08 | 0.32 | 0.04 |
| iYPL058C-0 | 0.33 | 0.06 | 0.45 | 0.10 | 0.32 | 0.04 |
| iYPL058C-1 | #N/A | #N/A | 0.57 | 0.16 | 0.51 | 0.16 |
| iYPL060W   | #N/A | #N/A | #N/A | #N/A | 0.63 | 0.20 |
| iYPL061W   | 1.48 | 0.66 | 1.74 | 0.83 | 1.65 | 0.70 |
| iYPL062W   | 0.55 | 0.18 | 0.38 | 0.06 | 0.60 | 0.21 |
| iYPL063W   | 0.67 | 0.26 | 0.68 | 0.21 | 0.51 | 0.16 |
| iYPL064C   | 1.34 | 0.60 | 1.83 | 0.78 | #N/A | #N/A |
| iYPL066W   | 1.48 | 0.67 | 2.00 | 0.85 | 1.62 | 0.77 |
| iYPL067C   | 0.68 | 0.25 | 0.93 | 0.34 | 0.55 | 0.19 |
| iYPL068C   | #N/A | #N/A | 1.18 | 0.54 | 0.87 | 0.33 |
| iYPL069C   | 0.92 | 0.39 | 0.97 | 0.36 | 1.26 | 0.58 |
| iYPL070W   | 0.69 | 0.26 | 0.62 | 0.19 | #N/A | #N/A |
| iYPL071C   | 1.69 | 0.73 | 1.20 | 0.58 | 1.80 | 0.83 |
| iYPL075W   | 0.83 | 0.32 | 0.73 | 0.25 | 0.92 | 0.39 |
| iYPL076W-0 | 0.87 | 0.36 | 1.19 | 0.52 | 0.69 | 0.25 |
| iYPL076W-1 | 0.37 | 0.08 | 0.44 | 0.09 | 0.34 | 0.05 |
| iYPL077C   | 1.94 | 0.80 | 1.71 | 0.73 | 1.65 | 0.70 |
| iYPL079W   | 0.33 | 0.06 | 0.45 | 0.10 | 0.43 | 0.10 |
| iYPL080C   | #N/A | #N/A | #N/A | #N/A | #N/A | #N/A |
| iYPL081W   | #N/A | #N/A | #N/A | #N/A | #N/A | #N/A |
| iYPL082C   | 0.31 | 0.05 | 0.43 | 0.09 | 0.31 | 0.03 |
| iYPL083C   | 1.09 | 0.45 | 0.98 | 0.44 | 1.29 | 0.59 |
| iYPL084W   | #N/A | #N/A | #N/A | #N/A | #N/A | #N/A |
| iYPL085W   | 1.39 | 0.63 | 0.99 | 0.40 | 1.44 | 0.66 |
| iYPL086C   | 2.06 | 0.87 | 2.08 | 0.91 | 1.62 | 0.74 |
| iYPL087W   | 0.76 | 0.31 | #N/A | #N/A | 0.64 | 0.25 |
| iYPL088W   | 2.74 | 0.97 | 2.26 | 0.90 | 2.48 | 0.96 |
| iYPL091W   | 0.57 | 0.20 | 0.65 | 0.23 | 0.73 | 0.26 |
| iYPL092W   | 1.13 | 0.51 | 1.07 | 0.47 | 1.39 | 0.60 |
| iYPL093W   | #N/A | #N/A | 1.65 | 0.71 | 0.86 | 0.39 |
| iYPL094C   | 1.68 | 0.71 | 1.37 | 0.62 | 1.24 | 0.52 |
| iYPL095C   | 0.79 | 0.31 | 0.80 | 0.32 | 1.02 | 0.49 |
| iYPL097W   | 2.04 | 0.87 | 2.16 | 0.88 | 1.93 | 0.84 |
| iYPL098C   | 2.03 | 0.85 | 1.71 | 0.81 | 2.07 | 0.87 |
| iYPL099C   | 1.65 | 0.70 | 2.20 | 0.89 | 1.55 | 0.66 |
| iYPL101W   | 1.48 | 0.67 | 2.24 | 0.89 | 1.68 | 0.79 |
| iYPL103C   | 2.15 | 0.86 | 2.32 | 0.95 | 1.60 | 0.76 |
| iYPL104W   | #N/A | #N/A | #N/A | #N/A | #N/A | #N/A |
| iYPL105C   | 1.55 | 0.66 | 2.58 | 0.95 | 1.65 | 0.74 |
| iYPL106C   | 0.54 | 0.18 | 0.75 | 0.29 | 0.77 | 0.32 |
| iYPL107W   | 0.45 | 0.12 | #N/A | #N/A | 0.56 | 0.19 |
| iYPL109C   | 1.29 | 0.57 | 1.17 | 0.54 | 1.49 | 0.69 |
| iYPL110C   | 1.06 | 0.44 | 1.62 | 0.69 | 1.29 | 0.59 |
| iYPL111W   | #N/A | #N/A | #N/A | #N/A | #N/A | #N/A |
| iYPL112C   | 0.65 | 0.23 | #N/A | #N/A | 0.81 | 0.31 |
| iYPL115C   | 1.47 | 0.67 | 1.84 | 0.79 | 2.05 | 0.86 |
| iYPL116W   | #N/A | #N/A | #N/A | #N/A | 0.33 | 0.04 |
| iYPL118W   | #N/A | #N/A | #N/A | #N/A | #N/A | #N/A |
| iYPL119C   | 2.69 | 0.96 | 1.88 | 0.83 | 2.88 | 0.96 |
| iYPL120W   | 1.01 | 0.43 | #N/A | #N/A | 0.84 | 0.35 |

|          |      |      |      |      |      |      |
|----------|------|------|------|------|------|------|
| iYPL121C | 1.21 | 0.55 | 0.87 | 0.29 | 1.48 | 0.63 |
| iYPL122C | 2.13 | 0.88 | 2.18 | 0.89 | 1.76 | 0.81 |
| iYPL123C | 3.26 | 0.99 | #N/A | #N/A | 1.76 | 0.75 |
| iYPL124W | #N/A | #N/A | #N/A | #N/A | #N/A | #N/A |
| iYPL125W | 1.33 | 0.59 | 1.74 | 0.75 | 1.87 | 0.85 |
| iYPL126W | 1.42 | 0.65 | 0.92 | 0.39 | 1.36 | 0.60 |
| iYPL127C | 0.58 | 0.20 | 0.77 | 0.24 | 0.56 | 0.17 |
| iYPL128C | 1.53 | 0.65 | 1.48 | 0.63 | 1.65 | 0.70 |
| iYPL129W | 0.36 | 0.07 | 0.45 | 0.10 | #N/A | #N/A |
| iYPL131W | 0.67 | 0.25 | 1.04 | 0.46 | 0.54 | 0.16 |
| iYPL132W | 0.38 | 0.08 | 0.38 | 0.06 | 0.53 | 0.17 |
| iYPL133C | 1.06 | 0.46 | 1.21 | 0.58 | 1.14 | 0.52 |
| iYPL134C | 0.93 | 0.41 | 1.18 | 0.48 | 1.11 | 0.51 |
| iYPL135W | 0.42 | 0.11 | 0.60 | 0.16 | 0.42 | 0.10 |
| iYPL136W | 0.68 | 0.26 | 1.08 | 0.51 | 0.65 | 0.25 |
| iYPL138C | 1.31 | 0.60 | 2.30 | 0.92 | 1.14 | 0.56 |
| iYPL139C | 1.38 | 0.62 | 1.17 | 0.49 | 1.52 | 0.65 |
| iYPL140C | 2.05 | 0.86 | 1.82 | 0.85 | 1.97 | 0.88 |
| iYPL141C | #N/A | #N/A | 1.05 | 0.43 | #N/A | #N/A |
| iYPL142C | #N/A | #N/A | #N/A | #N/A | #N/A | #N/A |
| iYPL145C | 0.61 | 0.22 | 1.28 | 0.54 | 0.53 | 0.17 |
| iYPL146C | 0.91 | 0.38 | 0.66 | 0.22 | 0.87 | 0.37 |
| iYPL147W | 0.52 | 0.17 | #N/A | #N/A | 0.66 | 0.26 |
| iYPL148C | 2.31 | 0.92 | #N/A | #N/A | #N/A | #N/A |
| iYPL149W | #N/A | #N/A | #N/A | #N/A | #N/A | #N/A |
| iYPL150W | 1.46 | 0.64 | 0.68 | 0.22 | 1.48 | 0.65 |
| iYPL151C | 2.78 | 0.97 | 2.18 | 0.89 | 2.30 | 0.92 |
| iYPL152W | #N/A | #N/A | #N/A | #N/A | #N/A | #N/A |
| iYPL153C | 1.97 | 0.84 | #N/A | #N/A | 1.36 | 0.58 |
| iYPL154C | 1.08 | 0.48 | #N/A | #N/A | 1.18 | 0.56 |
| iYPL155C | 1.75 | 0.74 | 1.23 | 0.52 | 1.21 | 0.55 |
| iYPL156C | 0.63 | 0.22 | 0.80 | 0.30 | 0.53 | 0.17 |
| iYPL157W | 0.73 | 0.29 | 0.54 | 0.15 | 0.83 | 0.36 |
| iYPL158C | 2.34 | 0.89 | 2.18 | 0.88 | 1.85 | 0.82 |
| iYPL159C | 1.98 | 0.82 | 0.92 | 0.41 | 1.51 | 0.69 |
| iYPL160W | 0.43 | 0.11 | 0.42 | 0.07 | 0.44 | 0.11 |
| iYPL161C | 2.01 | 0.86 | 2.05 | 0.85 | #N/A | #N/A |
| iYPL162C | 1.42 | 0.64 | 1.35 | 0.66 | 1.16 | 0.53 |
| iYPL163C | 0.66 | 0.25 | 0.85 | 0.31 | 0.66 | 0.26 |
| iYPL164C | 1.84 | 0.80 | 1.68 | 0.72 | 1.48 | 0.67 |
| iYPL165C | 1.36 | 0.62 | 1.07 | 0.50 | #N/A | #N/A |
| iYPL167C | 2.00 | 0.85 | #N/A | #N/A | 2.01 | 0.88 |
| iYPL168W | #N/A | #N/A | #N/A | #N/A | #N/A | #N/A |
| iYPL169C | 0.85 | 0.33 | 1.33 | 0.56 | 1.39 | 0.68 |
| iYPL170W | 0.75 | 0.28 | 0.50 | 0.12 | 0.86 | 0.33 |
| iYPL171C | 1.09 | 0.50 | 1.03 | 0.48 | 0.85 | 0.32 |
| iYPL172C | 1.99 | 0.81 | 1.51 | 0.72 | 1.39 | 0.63 |
| iYPL173W | 0.39 | 0.10 | #N/A | #N/A | 0.40 | 0.07 |
| iYPL174C | 2.11 | 0.87 | 1.28 | 0.55 | 2.08 | 0.88 |
| iYPL175W | #N/A | #N/A | #N/A | #N/A | #N/A | #N/A |
| iYPL176C | 1.73 | 0.76 | 2.02 | 0.84 | #N/A | #N/A |

|            |      |      |      |      |      |      |
|------------|------|------|------|------|------|------|
| iYPL177C-0 | 0.13 | 0.01 | 0.17 | 0.00 | 0.17 | 0.00 |
| iYPL178W   | #N/A | #N/A | #N/A | #N/A | #N/A | #N/A |
| iYPL179W   | 0.43 | 0.11 | #N/A | #N/A | 0.36 | 0.06 |
| iYPL180W   | #N/A | #N/A | 0.74 | 0.25 | 0.89 | 0.35 |
| iYPL183C   | 0.79 | 0.30 | 1.10 | 0.46 | 0.80 | 0.34 |
| iYPL183W-A | 0.88 | 0.37 | #N/A | #N/A | 1.10 | 0.50 |
| iYPL184C   | 1.42 | 0.61 | #N/A | #N/A | 0.91 | 0.42 |
| iYPL185W   | 1.55 | 0.66 | 1.27 | 0.61 | 1.31 | 0.59 |
| iYPL187W   | 2.09 | 0.86 | 1.25 | 0.56 | 1.79 | 0.82 |
| iYPL188W   | 1.06 | 0.45 | #N/A | #N/A | #N/A | #N/A |
| iYPL190C   | 0.96 | 0.40 | 0.92 | 0.35 | 1.00 | 0.45 |
| iYPL191C   | 0.68 | 0.26 | 0.60 | 0.14 | #N/A | #N/A |
| iYPL192C   | 1.64 | 0.72 | 1.91 | 0.88 | 2.00 | 0.86 |
| iYPL193W   | #N/A | #N/A | #N/A | #N/A | #N/A | #N/A |
| iYPL194W   | #N/A | #N/A | 1.05 | 0.43 | 1.31 | 0.64 |
| iYPL195W   | 2.13 | 0.89 | 1.76 | 0.84 | 2.76 | 0.98 |
| iYPL196W   | 1.30 | 0.59 | 1.65 | 0.73 | 1.65 | 0.75 |
| iYPL197C   | 1.27 | 0.56 | 1.61 | 0.71 | #N/A | #N/A |
| iYPL199C   | 0.78 | 0.30 | 0.78 | 0.27 | 0.43 | 0.09 |
| iYPL200W   | #N/A | #N/A | #N/A | #N/A | #N/A | #N/A |
| iYPL201C   | 0.48 | 0.15 | 0.46 | 0.10 | 0.47 | 0.14 |
| iYPL202C   | 0.79 | 0.33 | 1.01 | 0.45 | 0.72 | 0.29 |
| iYPL203W   | 0.36 | 0.07 | #N/A | #N/A | 0.48 | 0.12 |
| iYPL204W   | 1.26 | 0.53 | 0.85 | 0.32 | 0.99 | 0.44 |
| iYPL206C   | 1.79 | 0.75 | 2.42 | 0.93 | 1.75 | 0.75 |
| iYPL207W   | #N/A | #N/A | #N/A | #N/A | #N/A | #N/A |
| iYPL208W   | 1.48 | 0.65 | 1.62 | 0.79 | 1.47 | 0.63 |
| iYPL209C   | 2.30 | 0.91 | 1.57 | 0.67 | 1.96 | 0.85 |
| iYPL210C   | 1.61 | 0.68 | 1.79 | 0.82 | 1.96 | 0.86 |
| iYPL211W   | 0.82 | 0.35 | 0.45 | 0.08 | 0.74 | 0.30 |
| iYPL212C   | #N/A | #N/A | #N/A | #N/A | 1.80 | 0.76 |
| iYPL213W   | 0.43 | 0.12 | #N/A | #N/A | #N/A | #N/A |
| iYPL214C   | #N/A | #N/A | 2.20 | 0.93 | 2.17 | 0.89 |
| iYPL215W   | #N/A | #N/A | #N/A | #N/A | #N/A | #N/A |
| iYPL216W   | 1.93 | 0.84 | 1.59 | 0.77 | 1.85 | 0.82 |
| iYPL217C   | 1.28 | 0.55 | 1.36 | 0.59 | 1.64 | 0.70 |
| iYPL218W   | #N/A | #N/A | #N/A | #N/A | #N/A | #N/A |
| iYPL219W   | 1.58 | 0.72 | 1.48 | 0.65 | #N/A | #N/A |
| iYPL220W   | 0.84 | 0.36 | 0.69 | 0.22 | 1.14 | 0.52 |
| iYPL221W   | 0.32 | 0.06 | #N/A | #N/A | 0.34 | 0.05 |
| iYPL222W   | 0.47 | 0.13 | 0.87 | 0.37 | 0.47 | 0.13 |
| iYPL224C   | 3.19 | 0.99 | 2.32 | 0.91 | 2.87 | 0.97 |
| iYPL225W   | 0.93 | 0.40 | #N/A | #N/A | #N/A | #N/A |
| iYPL226W   | 1.58 | 0.72 | #N/A | #N/A | 1.55 | 0.70 |
| iYPL227C   | 1.12 | 0.51 | 1.48 | 0.69 | 1.24 | 0.57 |
| iYPL228W   | #N/A | #N/A | #N/A | #N/A | #N/A | #N/A |
| iYPL229W   | 1.68 | 0.75 | 1.37 | 0.66 | 1.62 | 0.75 |
| iYPL230W   | 2.39 | 0.90 | 1.66 | 0.73 | 2.36 | 0.90 |
| iYPL231W   | 0.87 | 0.37 | 0.86 | 0.29 | #N/A | #N/A |
| iYPL232W   | 0.52 | 0.16 | 0.46 | 0.10 | 0.42 | 0.10 |
| iYPL233W   | 0.51 | 0.16 | 0.86 | 0.33 | 0.40 | 0.09 |

|             |      |      |      |      |      |      |
|-------------|------|------|------|------|------|------|
| iYPL234C    | #N/A | #N/A | 2.02 | 0.85 | #N/A | #N/A |
| iYPL235W    | 1.36 | 0.61 | 1.43 | 0.61 | 1.36 | 0.62 |
| iYPL236C    | #N/A | #N/A | 1.18 | 0.49 | 1.69 | 0.79 |
| iYPL237W    | 0.55 | 0.18 | #N/A | #N/A | 0.82 | 0.36 |
| iYPL239W    | 1.07 | 0.45 | 1.30 | 0.63 | 1.04 | 0.47 |
| iYPL241C    | 1.49 | 0.68 | 1.27 | 0.57 | #N/A | #N/A |
| iYPL242C    | 1.05 | 0.45 | 1.48 | 0.73 | 0.71 | 0.29 |
| iYPL243W    | #N/A | #N/A | 0.29 | 0.03 | 0.36 | 0.06 |
| iYPL244C    | 3.13 | 0.98 | 2.37 | 0.95 | 2.74 | 0.98 |
| iYPL245W    | #N/A | #N/A | #N/A | #N/A | #N/A | #N/A |
| iYPL246C    | 1.71 | 0.76 | 1.70 | 0.74 | 1.76 | 0.79 |
| iYPL247C    | 2.17 | 0.89 | 1.81 | 0.83 | 1.86 | 0.81 |
| iYPL248C    | 1.39 | 0.63 | 1.13 | 0.50 | 1.14 | 0.52 |
| iYPL249C    | 1.22 | 0.55 | 1.26 | 0.60 | 1.49 | 0.64 |
| iYPL249C-A  | 0.45 | 0.12 | 0.66 | 0.23 | 0.45 | 0.12 |
| iYPL251W    | 0.97 | 0.42 | 1.96 | 0.82 | 0.76 | 0.33 |
| iYPL253C    | 1.43 | 0.61 | 1.31 | 0.57 | 1.32 | 0.61 |
| iYPL254W    | #N/A | #N/A | #N/A | #N/A | #N/A | #N/A |
| iYPL255W    | 1.55 | 0.66 | 1.28 | 0.59 | 1.60 | 0.68 |
| iYPL256C    | 0.87 | 0.37 | 1.29 | 0.57 | 0.98 | 0.47 |
| iYPL257W    | 1.30 | 0.58 | 1.42 | 0.62 | 1.27 | 0.54 |
| iYPL258C    | 0.93 | 0.40 | 1.15 | 0.46 | 1.14 | 0.47 |
| iYPL259C    | 1.41 | 0.61 | 1.12 | 0.44 | 1.42 | 0.61 |
| iYPL260W    | 0.40 | 0.10 | #N/A | #N/A | 0.37 | 0.06 |
| iYPL262W    | 1.19 | 0.50 | #N/A | #N/A | 1.63 | 0.73 |
| iYPL263C    | 1.85 | 0.82 | 2.44 | 0.96 | 2.11 | 0.85 |
| iYPL264C    | 1.37 | 0.60 | 1.39 | 0.69 | 1.31 | 0.60 |
| iYPL265W    | 0.69 | 0.27 | 1.48 | 0.65 | 0.65 | 0.25 |
| iYPL266W    | 0.28 | 0.04 | 0.40 | 0.06 | 0.26 | 0.02 |
| iYPL267W    | 2.05 | 0.86 | 1.69 | 0.73 | 2.07 | 0.90 |
| iYPL268W    | 0.91 | 0.39 | 1.04 | 0.41 | 1.00 | 0.45 |
| iYPL269W    | 1.70 | 0.74 | 1.76 | 0.77 | 1.57 | 0.72 |
| iYPL270W    | 1.88 | 0.81 | 1.61 | 0.69 | 1.84 | 0.84 |
| iYPL271W    | 2.43 | 0.91 | #N/A | #N/A | 1.74 | 0.78 |
| iYPL273W    | 1.76 | 0.77 | 2.25 | 0.94 | 2.09 | 0.90 |
| iYPL274W    | 0.55 | 0.17 | 1.39 | 0.59 | #N/A | #N/A |
| iYPL275W-1  | 0.67 | 0.26 | 0.85 | 0.35 | 0.57 | 0.18 |
| iYPL275W-2  | 0.92 | 0.40 | 0.73 | 0.25 | 1.15 | 0.48 |
| iYPL277C    | 1.55 | 0.70 | 1.37 | 0.68 | 1.39 | 0.60 |
| iYPL279C    | 3.00 | 0.98 | 1.96 | 0.85 | 2.63 | 0.96 |
| iYPL280W    | 1.69 | 0.76 | 1.53 | 0.67 | 1.40 | 0.64 |
| iYPL281C    | 2.68 | 0.96 | 2.32 | 0.93 | 2.37 | 0.93 |
| iYPL282C    | 0.74 | 0.30 | 0.89 | 0.36 | 0.79 | 0.34 |
| iYPL283C-0  | 0.47 | 0.14 | 0.51 | 0.13 | 0.51 | 0.16 |
| iYPL283C-1  | 0.47 | 0.14 | 0.44 | 0.09 | 0.48 | 0.14 |
| iYPLCdelta1 | 0.97 | 0.42 | 0.82 | 0.29 | 0.62 | 0.23 |
| iYPLCtau2   | 1.74 | 0.76 | 1.52 | 0.66 | #N/A | #N/A |
| iYPLWdelta6 | 2.50 | 0.92 | 2.04 | 0.86 | 2.05 | 0.89 |
| iYPLWdelta7 | 1.83 | 0.81 | 2.41 | 0.92 | 1.87 | 0.82 |
| iYPLWdelta8 | #N/A | #N/A | #N/A | #N/A | #N/A | #N/A |
| iYPR001W    | 2.09 | 0.87 | 1.48 | 0.64 | #N/A | #N/A |

|            |      |      |      |      |      |      |
|------------|------|------|------|------|------|------|
| iYPR002W   | 1.20 | 0.51 | #N/A | #N/A | 1.86 | 0.78 |
| iYPR003C   | 1.33 | 0.59 | #N/A | #N/A | #N/A | #N/A |
| iYPR004C   | 1.52 | 0.69 | 1.15 | 0.48 | 1.41 | 0.61 |
| iYPR005C   | 1.41 | 0.64 | 1.35 | 0.57 | 1.28 | 0.59 |
| iYPR006C   | 1.65 | 0.73 | 1.37 | 0.60 | 1.61 | 0.74 |
| iYPR007C   | 1.13 | 0.50 | 1.14 | 0.48 | 1.03 | 0.50 |
| iYPR009W   | #N/A | #N/A | #N/A | #N/A | #N/A | #N/A |
| iYPR011C   | 1.78 | 0.78 | 1.63 | 0.71 | 2.14 | 0.89 |
| iYPR013C-0 | 0.92 | 0.39 | 0.87 | 0.37 | 1.13 | 0.48 |
| iYPR013C-1 | 0.83 | 0.35 | 0.86 | 0.29 | #N/A | #N/A |
| iYPR017C   | 2.49 | 0.94 | 1.90 | 0.81 | 2.42 | 0.95 |
| iYPR018W   | 1.32 | 0.57 | 1.39 | 0.59 | #N/A | #N/A |
| iYPR019W   | 0.83 | 0.34 | #N/A | #N/A | 0.75 | 0.32 |
| iYPR021C   | #N/A | #N/A | 0.72 | 0.24 | #N/A | #N/A |
| iYPR023C   | 2.02 | 0.85 | 1.28 | 0.53 | 1.86 | 0.82 |
| iYPR028W   | 0.35 | 0.07 | 0.42 | 0.08 | 0.38 | 0.06 |
| iYPR029C   | 1.39 | 0.60 | #N/A | #N/A | 1.41 | 0.68 |
| iYPR030W   | 1.18 | 0.52 | 1.56 | 0.67 | #N/A | #N/A |
| iYPR031W   | 1.00 | 0.45 | #N/A | #N/A | 0.94 | 0.38 |
| iYPR032W   | #N/A | #N/A | #N/A | #N/A | #N/A | #N/A |
| iYPR033C   | 1.59 | 0.70 | 1.67 | 0.73 | 1.34 | 0.63 |
| iYPR040W   | 1.45 | 0.65 | 1.39 | 0.59 | 1.48 | 0.69 |
| iYPR042C   | 1.04 | 0.45 | 0.85 | 0.34 | 1.03 | 0.50 |
| iYPR045C   | 1.82 | 0.81 | 2.74 | 0.96 | #N/A | #N/A |
| iYPR046W   | #N/A | #N/A | #N/A | #N/A | #N/A | #N/A |
| iYPR047W   | 2.45 | 0.94 | 2.20 | 0.88 | 2.32 | 0.92 |
| iYPR048W   | #N/A | #N/A | #N/A | #N/A | #N/A | #N/A |
| iYPR049C   | 1.76 | 0.78 | 1.48 | 0.73 | 1.77 | 0.76 |
| iYPR054W   | 1.54 | 0.69 | #N/A | #N/A | 2.12 | 0.85 |
| iYPR055W   | 1.17 | 0.49 | #N/A | #N/A | 1.49 | 0.68 |
| iYPR056W   | 0.89 | 0.37 | 0.79 | 0.32 | 0.73 | 0.29 |
| iYPR057W   | 1.54 | 0.70 | #N/A | #N/A | 2.28 | 0.93 |
| iYPR059C   | #N/A | #N/A | #N/A | #N/A | #N/A | #N/A |
| iYPR061C   | 3.03 | 0.98 | 3.28 | 0.99 | #N/A | #N/A |
| iYPR062W   | 1.40 | 0.64 | 1.11 | 0.52 | 1.30 | 0.60 |
| iYPR063C   | 1.90 | 0.83 | 2.69 | 0.96 | 1.60 | 0.68 |
| iYPR064W   | 0.81 | 0.34 | 0.62 | 0.20 | 0.58 | 0.18 |
| iYPR065W   | #N/A | #N/A | #N/A | #N/A | 1.62 | 0.69 |
| iYPR066W   | 2.97 | 0.98 | 2.60 | 0.97 | 3.02 | 0.97 |
| iYPR067W   | 0.79 | 0.32 | 1.05 | 0.41 | 1.25 | 0.58 |
| iYPR068C   | #N/A | #N/A | #N/A | #N/A | #N/A | #N/A |
| iYPR069C   | 0.76 | 0.31 | 1.70 | 0.82 | 0.66 | 0.22 |
| iYPR070W   | 0.85 | 0.33 | 1.00 | 0.44 | 0.88 | 0.41 |
| iYPR072W   | #N/A | #N/A | #N/A | #N/A | #N/A | #N/A |
| iYPR073C   | 0.96 | 0.42 | 1.27 | 0.62 | #N/A | #N/A |
| iYPR074C   | 0.48 | 0.13 | #N/A | #N/A | 0.40 | 0.09 |
| iYPR076W   | 2.26 | 0.91 | 2.00 | 0.83 | 1.52 | 0.73 |
| iYPR079W   | 0.29 | 0.04 | 0.55 | 0.12 | 0.28 | 0.03 |
| iYPR080W   | #N/A | #N/A | #N/A | #N/A | #N/A | #N/A |
| iYPR081C   | #N/A | #N/A | 1.35 | 0.58 | 1.90 | 0.80 |
| iYPR082C   | 2.03 | 0.85 | 2.74 | 0.96 | 2.98 | 0.98 |

|            |      |      |      |      |      |      |
|------------|------|------|------|------|------|------|
| iYPR083W   | 2.09 | 0.87 | 2.04 | 0.91 | 2.09 | 0.86 |
| iYPR084W   | #N/A | #N/A | #N/A | #N/A | #N/A | #N/A |
| iYPR085C   | 4.50 | 1.00 | 2.44 | 0.95 | 3.30 | 0.99 |
| iYPR086W   | #N/A | #N/A | #N/A | #N/A | #N/A | #N/A |
| iYPR088C   | 3.08 | 0.98 | 2.61 | 0.95 | 3.59 | 1.00 |
| iYPR090W   | #N/A | #N/A | #N/A | #N/A | #N/A | #N/A |
| iYPR093C   | 0.84 | 0.33 | 1.53 | 0.75 | #N/A | #N/A |
| iYPR094W   | #N/A | #N/A | #N/A | #N/A | #N/A | #N/A |
| iYPR095C   | #N/A | #N/A | 1.08 | 0.51 | #N/A | #N/A |
| iYPR096C   | 1.69 | 0.75 | 1.72 | 0.75 | 2.02 | 0.86 |
| iYPR098C   | 2.19 | 0.89 | 1.83 | 0.83 | 1.52 | 0.73 |
| iYPR100W   | 1.21 | 0.55 | #N/A | #N/A | 1.26 | 0.53 |
| iYPR101W   | 0.53 | 0.17 | #N/A | #N/A | #N/A | #N/A |
| iYPR103W   | 0.28 | 0.04 | #N/A | #N/A | 0.45 | 0.11 |
| iYPR104C   | 1.51 | 0.65 | 1.78 | 0.76 | 1.58 | 0.67 |
| iYPR105C   | 1.82 | 0.81 | 2.89 | 0.97 | 1.74 | 0.80 |
| iYPR107C   | 1.30 | 0.58 | 1.01 | 0.46 | 1.14 | 0.52 |
| iYPR108W   | 0.49 | 0.14 | 0.73 | 0.21 | 0.50 | 0.13 |
| iYPR109W   | #N/A | #N/A | #N/A | #N/A | #N/A | #N/A |
| iYPR110C   | 1.68 | 0.71 | 1.68 | 0.74 | 1.71 | 0.73 |
| iYPR111W   | #N/A | #N/A | #N/A | #N/A | #N/A | #N/A |
| iYPR112C   | 0.80 | 0.33 | 0.84 | 0.35 | 0.83 | 0.36 |
| iYPR113W   | 0.77 | 0.31 | 1.20 | 0.52 | 0.67 | 0.27 |
| iYPR114W   | 1.12 | 0.50 | 1.02 | 0.44 | 1.10 | 0.48 |
| iYPR115W   | 0.90 | 0.39 | 0.98 | 0.45 | 0.80 | 0.35 |
| iYPR116W   | 1.34 | 0.61 | 1.59 | 0.76 | #N/A | #N/A |
| iYPR117W   | 1.09 | 0.46 | 1.08 | 0.46 | 1.67 | 0.71 |
| iYPR118W   | #N/A | #N/A | #N/A | #N/A | #N/A | #N/A |
| iYPR120C   | 0.66 | 0.24 | 0.86 | 0.32 | 0.33 | 0.05 |
| iYPR122W   | 0.58 | 0.20 | 1.00 | 0.45 | 0.78 | 0.29 |
| iYPR124W   | 0.93 | 0.38 | 0.97 | 0.44 | 0.98 | 0.42 |
| iYPR126C   | 0.88 | 0.38 | 0.89 | 0.38 | 1.04 | 0.50 |
| iYPR127W   | #N/A | #N/A | #N/A | #N/A | #N/A | #N/A |
| iYPR128C   | 2.75 | 0.97 | 2.68 | 0.97 | 2.74 | 0.96 |
| iYPR130C   | 0.43 | 0.11 | #N/A | #N/A | #N/A | #N/A |
| iYPR131C   | 0.25 | 0.02 | #N/A | #N/A | 0.19 | 0.01 |
| iYPR132W   | #N/A | #N/A | 1.03 | 0.39 | #N/A | #N/A |
| iYPR133C   | 1.70 | 0.72 | 1.45 | 0.72 | 1.43 | 0.68 |
| iYPR133W-A | 1.63 | 0.74 | 2.00 | 0.89 | #N/A | #N/A |
| iYPR134W   | 1.60 | 0.68 | 1.97 | 0.83 | 1.74 | 0.75 |
| iYPR135W   | 0.96 | 0.42 | 1.36 | 0.59 | 1.08 | 0.53 |
| iYPR139C   | 1.72 | 0.73 | 1.79 | 0.78 | 1.12 | 0.51 |
| iYPR140W   | #N/A | #N/A | #N/A | #N/A | #N/A | #N/A |
| iYPR141C   | 2.23 | 0.91 | #N/A | #N/A | #N/A | #N/A |
| iYPR144C   | 0.79 | 0.32 | #N/A | #N/A | 0.86 | 0.38 |
| iYPR147C   | 1.75 | 0.77 | 1.52 | 0.65 | 2.01 | 0.89 |
| iYPR148C-0 | 0.57 | 0.19 | 0.65 | 0.23 | 0.63 | 0.24 |
| iYPR149W   | 0.64 | 0.24 | #N/A | #N/A | 0.59 | 0.21 |
| iYPR151C   | 1.00 | 0.41 | 0.92 | 0.33 | 0.80 | 0.35 |
| iYPR153W   | 2.06 | 0.86 | 1.89 | 0.81 | 2.03 | 0.89 |
| iYPR154W   | 0.63 | 0.21 | 0.42 | 0.07 | 0.67 | 0.25 |

|              |      |      |      |      |      |      |
|--------------|------|------|------|------|------|------|
| iYPR155C     | 1.39 | 0.63 | 1.32 | 0.56 | 1.05 | 0.43 |
| iYPR156C     | 0.52 | 0.17 | 0.66 | 0.21 | #N/A | #N/A |
| iYPR157W     | 1.25 | 0.57 | 1.18 | 0.50 | #N/A | #N/A |
| iYPR158W     | 1.10 | 0.46 | 0.80 | 0.33 | #N/A | #N/A |
| iYPR159W     | 0.30 | 0.05 | 0.74 | 0.22 | 0.43 | 0.09 |
| iYPR160W     | 0.84 | 0.33 | 0.71 | 0.26 | 0.93 | 0.37 |
| iYPR161C     | 1.28 | 0.56 | 1.21 | 0.52 | 1.29 | 0.59 |
| iYPR162C     | #N/A | #N/A | #N/A | #N/A | #N/A | #N/A |
| iYPR163C     | 2.96 | 0.98 | 2.61 | 0.97 | 3.07 | 0.98 |
| iYPR164W     | 1.87 | 0.79 | 1.30 | 0.61 | 1.61 | 0.73 |
| iYPR165W     | 0.55 | 0.18 | 0.51 | 0.09 | 0.52 | 0.17 |
| iYPR166C     | 2.13 | 0.86 | 1.98 | 0.89 | 2.36 | 0.93 |
| iYPR167C     | 2.62 | 0.96 | 3.41 | 0.99 | 2.34 | 0.90 |
| iYPR168W     | #N/A | #N/A | #N/A | #N/A | #N/A | #N/A |
| iYPR169W     | #N/A | #N/A | #N/A | #N/A | #N/A | #N/A |
| iYPR170C     | 1.78 | 0.75 | 1.62 | 0.70 | #N/A | #N/A |
| iYPR171W     | 1.80 | 0.80 | 0.99 | 0.40 | 0.99 | 0.44 |
| iYPR172W     | #N/A | #N/A | #N/A | #N/A | #N/A | #N/A |
| iYPR173C     | 2.19 | 0.89 | 2.22 | 0.89 | 1.90 | 0.86 |
| iYPR174C     | 2.26 | 0.89 | 1.98 | 0.85 | 2.08 | 0.88 |
| iYPR176C     | 2.65 | 0.96 | 1.76 | 0.84 | 2.85 | 0.98 |
| iYPR178W     | #N/A | #N/A | #N/A | #N/A | #N/A | #N/A |
| iYPR179C     | 1.26 | 0.53 | 1.26 | 0.54 | #N/A | #N/A |
| iYPR180W     | 0.34 | 0.06 | 0.38 | 0.06 | 0.45 | 0.10 |
| iYPR181C     | 1.27 | 0.54 | 1.71 | 0.76 | 1.50 | 0.68 |
| iYPR182W     | 1.68 | 0.71 | 2.34 | 0.92 | 1.73 | 0.73 |
| iYPR183W     | 0.93 | 0.39 | 0.86 | 0.29 | #N/A | #N/A |
| iYPR184W     | 2.26 | 0.91 | 2.10 | 0.86 | 2.34 | 0.92 |
| iYPR185W     | #N/A | #N/A | #N/A | #N/A | #N/A | #N/A |
| iYPR186C     | #N/A | #N/A | #N/A | #N/A | 1.98 | 0.86 |
| iYPR187W     | #N/A | #N/A | #N/A | #N/A | #N/A | #N/A |
| iYPR188C     | #N/A | #N/A | #N/A | #N/A | 1.75 | 0.74 |
| iYPR189W     | #N/A | #N/A | #N/A | #N/A | #N/A | #N/A |
| iYPR190C     | 1.72 | 0.75 | 1.16 | 0.55 | 1.66 | 0.75 |
| iYPR192W     | #N/A | #N/A | #N/A | #N/A | #N/A | #N/A |
| iYPR193C     | 1.60 | 0.71 | #N/A | #N/A | #N/A | #N/A |
| iYPR195C-0   | 0.85 | 0.33 | 1.84 | 0.82 | 0.60 | 0.19 |
| iYPR195C-1   | 0.75 | 0.30 | 1.36 | 0.67 | #N/A | #N/A |
| iYPR196W     | #N/A | #N/A | #N/A | #N/A | 0.71 | 0.25 |
| iYPR198W-1   | 1.82 | 0.77 | 1.72 | 0.75 | 2.00 | 0.88 |
| iYPR199C     | #N/A | #N/A | #N/A | #N/A | 1.20 | 0.53 |
| iYPR200C     | 0.69 | 0.27 | #N/A | #N/A | #N/A | #N/A |
| iYPR201W-0   | 0.72 | 0.29 | #N/A | #N/A | 1.10 | 0.48 |
| iYPR201W-1   | 0.56 | 0.19 | 0.56 | 0.15 | 0.58 | 0.20 |
| iYPR203W     | 1.27 | 0.54 | 0.81 | 0.29 | 1.17 | 0.52 |
| iYPRCdelta13 | 0.85 | 0.35 | #N/A | #N/A | #N/A | #N/A |
| iYPRCdelta19 | #N/A | #N/A | #N/A | #N/A | #N/A | #N/A |
| iYPRCdelta22 | 0.74 | 0.29 | #N/A | #N/A | #N/A | #N/A |
| iYPRCtau3    | 2.41 | 0.91 | 2.23 | 0.90 | #N/A | #N/A |
| iYPRWdelta14 | 1.47 | 0.63 | #N/A | #N/A | 2.06 | 0.89 |
| iYPRWdelta16 | 0.60 | 0.21 | 0.73 | 0.25 | 0.94 | 0.42 |



|                  |      |      |      |      |      |      |
|------------------|------|------|------|------|------|------|
| iYPRWsigma4      | 1.57 | 0.70 | #N/A | #N/A | 2.07 | 0.84 |
| iYPRWtau4        | #N/A | #N/A | #N/A | #N/A | 2.37 | 0.91 |
| KAR3prom22       | #N/A | #N/A | #N/A | #N/A | 1.56 | 0.75 |
| KGD2prom         | 1.76 | 0.77 | 1.53 | 0.67 | 1.93 | 0.80 |
| LSR1             | 0.39 | 0.09 | 0.60 | 0.14 | 0.38 | 0.07 |
| MET16-r2         | #N/A | #N/A | #N/A | #N/A | #N/A | #N/A |
| MUC1prom3        | 0.24 | 0.02 | #N/A | #N/A | #N/A | #N/A |
| MUC1prom4        | 0.23 | 0.02 | 0.48 | 0.12 | 0.32 | 0.04 |
| no primers contr | #N/A | #N/A | #N/A | #N/A | #N/A | #N/A |
| PCK1prom         | #N/A | #N/A | 1.40 | 0.60 | 1.56 | 0.71 |
| POLI35Supstr     | 0.49 | 0.15 | 0.59 | 0.17 | 0.54 | 0.18 |
| POLI35Supstr2    | 0.61 | 0.22 | 0.99 | 0.40 | 0.78 | 0.33 |
| POP5             | 2.26 | 0.89 | 1.63 | 0.71 | 2.32 | 0.92 |
| PYK1prom         | 0.20 | 0.01 | 0.46 | 0.07 | #N/A | #N/A |
| Q0005            | #N/A | #N/A | #N/A | #N/A | 0.64 | 0.21 |
| Q0010            | #N/A | #N/A | #N/A | #N/A | #N/A | #N/A |
| Q0015            | 0.50 | 0.14 | 0.43 | 0.06 | 0.52 | 0.16 |
| Q0020            | #N/A | #N/A | #N/A | #N/A | #N/A | #N/A |
| Q0025            | 0.47 | 0.13 | 0.49 | 0.10 | 0.52 | 0.17 |
| Q0030            | #N/A | #N/A | #N/A | #N/A | #N/A | #N/A |
| Q0035            | #N/A | #N/A | #N/A | #N/A | #N/A | #N/A |
| Q0040            | #N/A | #N/A | #N/A | #N/A | #N/A | #N/A |
| Q0050            | #N/A | #N/A | #N/A | #N/A | #N/A | #N/A |
| RDN18-1          | 0.85 | 0.33 | 0.71 | 0.23 | 0.89 | 0.36 |
| RDN18-1A         | 0.87 | 0.36 | 0.66 | 0.20 | 0.90 | 0.35 |
| RDN18-1B         | 0.98 | 0.43 | 1.04 | 0.43 | 1.02 | 0.45 |
| RDN25-1          | 0.81 | 0.31 | #N/A | #N/A | 0.70 | 0.28 |
| RDN25-1A         | 0.50 | 0.15 | 0.53 | 0.10 | 0.45 | 0.11 |
| RDN25-1B         | #N/A | #N/A | 0.42 | 0.08 | 0.61 | 0.21 |
| RDN25-1C         | 1.21 | 0.52 | 0.98 | 0.39 | 1.04 | 0.44 |
| RDN37-1          | 0.63 | 0.22 | 0.53 | 0.10 | 0.57 | 0.19 |
| RDN37-1A         | 0.79 | 0.32 | 0.56 | 0.16 | 0.65 | 0.25 |
| RDN37-1B         | 0.62 | 0.22 | 0.55 | 0.11 | #N/A | #N/A |
| RDN37-1C         | 0.72 | 0.28 | 1.14 | 0.48 | 0.90 | 0.37 |
| RDN5-1           | 0.42 | 0.11 | 0.57 | 0.16 | 0.44 | 0.10 |
| RDN58-1          | 0.65 | 0.23 | 0.52 | 0.10 | 0.62 | 0.20 |
| RPA190           | #N/A | #N/A | #N/A | #N/A | #N/A | #N/A |
| RPL28            | 0.36 | 0.08 | #N/A | #N/A | #N/A | #N/A |
| RPL28prom        | 0.78 | 0.32 | 0.81 | 0.29 | 0.74 | 0.31 |
| RPL30prom        | #N/A | #N/A | #N/A | #N/A | #N/A | #N/A |
| RPL38orf         | #N/A | #N/A | #N/A | #N/A | #N/A | #N/A |
| RPL38prom        | 1.73 | 0.76 | 2.19 | 0.91 | 1.59 | 0.68 |
| RPP1Aorf         | 0.35 | 0.07 | #N/A | #N/A | 0.44 | 0.11 |
| RPP1Aprom        | 0.84 | 0.36 | #N/A | #N/A | 0.85 | 0.32 |
| RPR1             | #N/A | #N/A | #N/A | #N/A | #N/A | #N/A |
| RPR1orf          | #N/A | #N/A | #N/A | #N/A | #N/A | #N/A |
| RPS5-1           | 0.25 | 0.03 | #N/A | #N/A | 0.22 | 0.01 |
| RPS5-2           | #N/A | #N/A | #N/A | #N/A | #N/A | #N/A |
| SCR1             | 1.65 | 0.73 | 1.99 | 0.83 | 1.74 | 0.78 |
| SCR1-2           | 1.64 | 0.74 | 1.65 | 0.80 | 2.07 | 0.84 |
| SCR1-3           | 0.85 | 0.35 | 0.39 | 0.06 | 0.90 | 0.35 |



|            |      |      |      |      |      |      |
|------------|------|------|------|------|------|------|
| SEC23prom  | 1.31 | 0.56 | 1.38 | 0.60 | 1.11 | 0.51 |
| SFT1prom   | 0.60 | 0.21 | #N/A | #N/A | 0.92 | 0.36 |
| SIC1prom   | 2.09 | 0.88 | 1.63 | 0.71 | 1.87 | 0.79 |
| SIC1prom2  | 2.01 | 0.86 | #N/A | #N/A | #N/A | #N/A |
| snR128     | #N/A | #N/A | #N/A | #N/A | #N/A | #N/A |
| SNR13      | #N/A | #N/A | #N/A | #N/A | #N/A | #N/A |
| snR14      | 1.36 | 0.62 | 1.33 | 0.56 | 0.98 | 0.44 |
| SNR189     | #N/A | #N/A | #N/A | #N/A | 0.34 | 0.05 |
| SNR190     | #N/A | #N/A | #N/A | #N/A | 0.27 | 0.02 |
| snR3       | 0.41 | 0.10 | 0.53 | 0.15 | 0.32 | 0.04 |
| SNR33      | 0.40 | 0.10 | #N/A | #N/A | 0.53 | 0.17 |
| SNR34      | 0.41 | 0.10 | 0.79 | 0.25 | 0.62 | 0.22 |
| snR37      | #N/A | #N/A | #N/A | #N/A | 0.65 | 0.25 |
| SNR4       | 0.45 | 0.12 | 0.60 | 0.17 | 0.49 | 0.15 |
| SNR42      | #N/A | #N/A | #N/A | #N/A | #N/A | #N/A |
| SNR43      | 0.74 | 0.30 | 1.59 | 0.68 | 0.74 | 0.26 |
| SNR44      | 0.30 | 0.04 | 0.44 | 0.09 | 0.28 | 0.03 |
| SNR45      | 0.32 | 0.06 | 0.41 | 0.05 | 0.34 | 0.05 |
| SNR46      | #N/A | #N/A | #N/A | #N/A | #N/A | #N/A |
| SNR47      | #N/A | #N/A | #N/A | #N/A | #N/A | #N/A |
| SNR48      | #N/A | #N/A | #N/A | #N/A | #N/A | #N/A |
| SNR50      | #N/A | #N/A | 0.61 | 0.18 | 0.97 | 0.43 |
| SNR51      | #N/A | #N/A | #N/A | #N/A | #N/A | #N/A |
| SNR52      | #N/A | #N/A | #N/A | #N/A | #N/A | #N/A |
| SNR53      | #N/A | #N/A | #N/A | #N/A | #N/A | #N/A |
| SNR54      | #N/A | #N/A | #N/A | #N/A | #N/A | #N/A |
| SNR55      | #N/A | #N/A | #N/A | #N/A | #N/A | #N/A |
| SNR56      | #N/A | #N/A | #N/A | #N/A | #N/A | #N/A |
| SNR57      | #N/A | #N/A | #N/A | #N/A | #N/A | #N/A |
| SNR58      | #N/A | #N/A | #N/A | #N/A | #N/A | #N/A |
| SNR59      | #N/A | #N/A | #N/A | #N/A | #N/A | #N/A |
| SNR6       | 1.19 | 0.50 | 1.40 | 0.69 | 0.88 | 0.39 |
| SNR60      | #N/A | #N/A | #N/A | #N/A | #N/A | #N/A |
| SNR61      | #N/A | #N/A | #N/A | #N/A | #N/A | #N/A |
| SNR62      | #N/A | #N/A | #N/A | #N/A | #N/A | #N/A |
| SNR6-2     | 0.99 | 0.43 | 1.05 | 0.49 | 1.14 | 0.52 |
| SNR63      | 0.82 | 0.35 | 0.59 | 0.17 | #N/A | #N/A |
| SNR6-3     | 1.05 | 0.46 | 1.33 | 0.59 | 0.85 | 0.39 |
| SNR64      | 1.26 | 0.57 | 1.29 | 0.55 | 1.16 | 0.55 |
| SNR65      | #N/A | #N/A | #N/A | #N/A | #N/A | #N/A |
| SNR66      | 1.89 | 0.81 | 1.38 | 0.58 | 0.99 | 0.44 |
| SNR68      | #N/A | #N/A | #N/A | #N/A | #N/A | #N/A |
| SNR69      | 1.01 | 0.44 | #N/A | #N/A | #N/A | #N/A |
| SNR6Bbox   | 0.61 | 0.22 | 1.68 | 0.72 | 0.44 | 0.10 |
| SNR6Bdown  | 0.50 | 0.15 | 0.59 | 0.14 | 0.45 | 0.12 |
| SNR70      | 0.57 | 0.19 | 0.36 | 0.05 | 0.63 | 0.24 |
| SNR71      | #N/A | #N/A | #N/A | #N/A | #N/A | #N/A |
| SNR7-L     | 0.45 | 0.13 | #N/A | #N/A | #N/A | #N/A |
| SNR7-S     | 0.36 | 0.07 | 0.56 | 0.16 | 0.40 | 0.09 |
| SNR8       | 0.55 | 0.18 | 0.73 | 0.21 | 0.45 | 0.11 |
| SPO11prom3 | #N/A | #N/A | #N/A | #N/A | #N/A | #N/A |

|           |      |      |      |      |      |      |
|-----------|------|------|------|------|------|------|
| SPS2prom  | 1.27 | 0.57 | #N/A | #N/A | 0.95 | 0.45 |
| SRB2prom  | 2.75 | 0.97 | 1.84 | 0.86 | 2.44 | 0.91 |
| SRM1      | 0.78 | 0.32 | 0.74 | 0.29 | #N/A | #N/A |
| SSB1      | #N/A | #N/A | #N/A | #N/A | #N/A | #N/A |
| SSY5      | 0.32 | 0.05 | 0.35 | 0.04 | 0.27 | 0.02 |
| tA(AGC)P  | 0.64 | 0.24 | 0.59 | 0.13 | 0.61 | 0.23 |
| tA(UGC)O  | 0.60 | 0.21 | 0.64 | 0.17 | 0.53 | 0.15 |
| tC(GCA)P2 | 0.47 | 0.13 | 0.89 | 0.31 | 0.53 | 0.17 |
| tD(GUC)O  | 0.77 | 0.30 | 0.80 | 0.32 | 0.64 | 0.24 |
| tD(guc)o1 | 0.78 | 0.32 | 0.73 | 0.27 | 0.68 | 0.25 |
| tD(guc)o2 | #N/A | #N/A | #N/A | #N/A | 0.74 | 0.30 |
| tE(UUC)C  | 0.72 | 0.27 | #N/A | #N/A | 0.65 | 0.25 |
| tE(UUC)P  | 0.71 | 0.26 | 0.96 | 0.38 | 0.71 | 0.29 |
| TEL15R-1  | 0.38 | 0.08 | 0.36 | 0.05 | 0.44 | 0.10 |
| TEL15R-2  | 0.54 | 0.17 | 0.53 | 0.14 | 0.57 | 0.19 |
| TEL15R-4  | 1.06 | 0.46 | 0.84 | 0.30 | 0.97 | 0.43 |
| TEL15R-5  | 0.33 | 0.05 | 0.31 | 0.02 | 0.30 | 0.03 |
| TEL15R-6  | 0.39 | 0.08 | 0.38 | 0.06 | 0.40 | 0.09 |
| TEL1R     | 0.40 | 0.09 | 0.36 | 0.03 | 0.41 | 0.09 |
| TEL6R     | 0.49 | 0.14 | 0.46 | 0.10 | 0.51 | 0.15 |
| TEL9L     | 0.36 | 0.08 | 0.37 | 0.05 | 0.36 | 0.06 |
| tG(CCC)D  | 0.69 | 0.25 | #N/A | #N/A | #N/A | #N/A |
| tG(GCC)P2 | 0.75 | 0.28 | 0.73 | 0.27 | 0.75 | 0.30 |
| tG(UCC)O  | 0.61 | 0.21 | 0.62 | 0.20 | 0.67 | 0.27 |
| tH(GUG)M  | 0.91 | 0.37 | 1.28 | 0.55 | 1.14 | 0.48 |
| tl(AAU)P2 | 0.50 | 0.15 | 0.64 | 0.22 | 0.68 | 0.27 |
| tl(auu)b  | 0.51 | 0.16 | 0.61 | 0.20 | 0.71 | 0.25 |
| tK(CUU)P  | 0.61 | 0.22 | 0.78 | 0.24 | 0.65 | 0.25 |
| tK(guu)G1 | 0.83 | 0.34 | 0.63 | 0.19 | 0.73 | 0.26 |
| tL(GAG)G  | #N/A | #N/A | #N/A | #N/A | #N/A | #N/A |
| tL(UAA)N  | 0.71 | 0.28 | 0.61 | 0.20 | 0.67 | 0.23 |
| TLCprom   | 1.90 | 0.83 | 1.75 | 0.80 | 1.54 | 0.66 |
| tM(CAU)O2 | 0.56 | 0.19 | 0.70 | 0.23 | 0.52 | 0.17 |
| tM(CAU)P  | 0.40 | 0.09 | #N/A | #N/A | #N/A | #N/A |
| tN(GUU)P  | 0.65 | 0.25 | 0.83 | 0.33 | 0.70 | 0.28 |
| tP(AGG)C  | 0.37 | 0.08 | #N/A | #N/A | 0.34 | 0.05 |
| TPS3prom  | 2.22 | 0.90 | 1.71 | 0.75 | 1.77 | 0.82 |
| tQ(UUG)L  | 0.68 | 0.26 | 1.02 | 0.47 | 0.62 | 0.20 |
| tR(acg)J  | 0.45 | 0.12 | #N/A | #N/A | #N/A | #N/A |
| tR(ACG)O  | 0.56 | 0.19 | 0.71 | 0.26 | #N/A | #N/A |
| tR(CCG)L  | #N/A | #N/A | #N/A | #N/A | #N/A | #N/A |
| tR(ucu)B  | 0.71 | 0.26 | 0.68 | 0.23 | 0.62 | 0.23 |
| tR(UCU)M2 | 0.70 | 0.25 | 0.56 | 0.13 | 0.62 | 0.23 |
| tS(AGA)M  | 0.62 | 0.21 | #N/A | #N/A | 0.60 | 0.22 |
| tS(UGA)P  | 0.58 | 0.20 | 0.82 | 0.30 | 0.78 | 0.33 |
| tT(AGU)O2 | 0.64 | 0.24 | 0.62 | 0.17 | 0.63 | 0.20 |
| tT(CGU)K  | #N/A | #N/A | #N/A | #N/A | #N/A | #N/A |
| tT(UGU)P  | 0.53 | 0.17 | #N/A | #N/A | #N/A | #N/A |
| tV(AAC)M3 | 0.61 | 0.22 | 0.61 | 0.18 | 0.68 | 0.26 |
| tV(CAC)D  | 0.45 | 0.13 | #N/A | #N/A | 0.71 | 0.29 |
| tV(UAC)B  | #N/A | #N/A | #N/A | #N/A | #N/A | #N/A |

|               |      |      |      |      |      |      |
|---------------|------|------|------|------|------|------|
| YALCdelta2    | 1.16 | 0.51 | #N/A | #N/A | 1.53 | 0.65 |
| YARCdelta3    | #N/A | #N/A | 1.74 | 0.76 | 0.99 | 0.46 |
| YARCdelta8    | 1.28 | 0.55 | 1.26 | 0.57 | 1.94 | 0.81 |
| YBLCdelta7    | 0.68 | 0.24 | 1.58 | 0.77 | 0.86 | 0.33 |
| YBLCdelta7up  | 1.14 | 0.51 | #N/A | #N/A | 1.10 | 0.50 |
| YBLCsigma1    | 0.83 | 0.33 | 0.95 | 0.41 | 0.80 | 0.35 |
| YBLCsigma1dov | #N/A | #N/A | 1.53 | 0.66 | 1.56 | 0.68 |
| YBLWdelta10   | 0.90 | 0.38 | 1.10 | 0.43 | 0.99 | 0.46 |
| YBLWdelta6    | 1.78 | 0.78 | 1.49 | 0.64 | 1.31 | 0.56 |
| YBLWdelta8    | #N/A | #N/A | #N/A | #N/A | #N/A | #N/A |
| YBLWtau1      | 1.43 | 0.63 | 1.46 | 0.64 | 1.47 | 0.66 |
| YBLWty2-1A    | 1.38 | 0.62 | 1.10 | 0.43 | 1.69 | 0.73 |
| YBR028C       | #N/A | #N/A | 0.56 | 0.16 | 0.50 | 0.15 |
| YBR084W       | 0.24 | 0.02 | 0.30 | 0.02 | 0.35 | 0.06 |
| YBRCdelta11   | 1.90 | 0.79 | 2.03 | 0.84 | 1.14 | 0.56 |
| YBRCdelta18   | #N/A | #N/A | #N/A | #N/A | #N/A | #N/A |
| YBRCdelta19   | 1.08 | 0.47 | 0.89 | 0.38 | 1.22 | 0.56 |
| YBRWdelta16   | 1.53 | 0.69 | 2.59 | 0.97 | 1.65 | 0.75 |
| YBRWdelta17   | 1.33 | 0.57 | #N/A | #N/A | #N/A | #N/A |
| YCL001W-A     | 0.71 | 0.28 | #N/A | #N/A | #N/A | #N/A |
| YCL026C-A     | 2.60 | 0.96 | 3.27 | 0.99 | 2.41 | 0.91 |
| YCLCdelta1    | #N/A | #N/A | #N/A | #N/A | #N/A | #N/A |
| YCLWomega1    | 0.39 | 0.09 | 0.50 | 0.12 | 0.50 | 0.13 |
| YCLWty5-1A    | 0.25 | 0.03 | 0.31 | 0.03 | #N/A | #N/A |
| YCLWty5-1B    | 0.21 | 0.02 | 0.26 | 0.01 | 0.25 | 0.02 |
| YCLWty5-1C    | 0.24 | 0.02 | #N/A | #N/A | 0.22 | 0.01 |
| YCR020W-B     | 1.87 | 0.82 | 1.98 | 0.85 | #N/A | #N/A |
| YCR073W-A     | 1.76 | 0.74 | 1.44 | 0.71 | 1.67 | 0.78 |
| YCR097W-A     | 0.83 | 0.35 | 0.57 | 0.13 | 0.75 | 0.31 |
| YCR102W-A     | #N/A | #N/A | 0.59 | 0.18 | #N/A | #N/A |
| YCRCdelta14   | #N/A | #N/A | #N/A | #N/A | #N/A | #N/A |
| YCRCdelta6    | 1.09 | 0.49 | 1.20 | 0.48 | 1.02 | 0.48 |
| YCRWdelta11   | 1.06 | 0.48 | 1.43 | 0.61 | 1.34 | 0.61 |
| YCRWomega3    | 0.65 | 0.24 | 0.70 | 0.23 | 0.75 | 0.32 |
| YDL130W-A     | 4.04 | 1.00 | 2.07 | 0.86 | 2.28 | 0.92 |
| YDL133C-A     | #N/A | #N/A | #N/A | #N/A | #N/A | #N/A |
| YDL233W       | 1.63 | 0.74 | 1.51 | 0.65 | 2.28 | 0.88 |
| YDL234C       | #N/A | #N/A | #N/A | #N/A | #N/A | #N/A |
| YDR034W-B     | 2.05 | 0.86 | 3.09 | 0.98 | 2.33 | 0.93 |
| YDR170W-A     | 0.96 | 0.39 | 0.89 | 0.34 | #N/A | #N/A |
| YDR525W-A     | 0.26 | 0.03 | 0.49 | 0.11 | 0.29 | 0.03 |
| YDRCdelta9    | 1.18 | 0.53 | 1.87 | 0.80 | 2.12 | 0.85 |
| YDRCTy1-2B    | 0.28 | 0.04 | 0.27 | 0.01 | #N/A | #N/A |
| YDRCTy1-2D    | 1.17 | 0.50 | 1.08 | 0.45 | 1.39 | 0.63 |
| YDRWdelta10   | #N/A | #N/A | #N/A | #N/A | #N/A | #N/A |
| YDRWdelta23   | 1.00 | 0.41 | 1.20 | 0.51 | 1.06 | 0.47 |
| YDRWdelta30   | 1.17 | 0.52 | #N/A | #N/A | 1.35 | 0.57 |
| YDRWdelta7    | 0.69 | 0.27 | 1.06 | 0.44 | 0.94 | 0.44 |
| YDRWsigma4    | #N/A | #N/A | #N/A | #N/A | #N/A | #N/A |
| YE019C        | 1.38 | 0.62 | 2.14 | 0.93 | 1.64 | 0.74 |
| YELCdelta3    | 1.67 | 0.75 | 2.09 | 0.88 | 1.19 | 0.58 |

|             |      |      |      |      |      |      |
|-------------|------|------|------|------|------|------|
| YELCdelta4  | 1.04 | 0.43 | 1.24 | 0.53 | 1.06 | 0.48 |
| YELCtau1    | 2.01 | 0.86 | 1.74 | 0.83 | 1.91 | 0.85 |
| YER039C-A   | 1.87 | 0.78 | 2.04 | 0.85 | 1.77 | 0.81 |
| YER048W-A   | 1.05 | 0.47 | 1.24 | 0.52 | 0.90 | 0.39 |
| YER091C-A   | 0.36 | 0.07 | 0.37 | 0.05 | 0.38 | 0.07 |
| YER136W     | 0.32 | 0.06 | 0.49 | 0.12 | 0.37 | 0.07 |
| YER138W-A   | 0.52 | 0.16 | 0.60 | 0.17 | 0.60 | 0.22 |
| YERCdelta10 | 2.00 | 0.85 | 1.86 | 0.87 | 1.64 | 0.74 |
| YERCdelta26 | 1.31 | 0.56 | #N/A | #N/A | #N/A | #N/A |
| YERCdelta8  | #N/A | #N/A | #N/A | #N/A | #N/A | #N/A |
| YERComega1  | 0.94 | 0.40 | 1.98 | 0.83 | #N/A | #N/A |
| YERCtau3    | 0.57 | 0.20 | #N/A | #N/A | 0.99 | 0.40 |
| YERWdelta12 | 2.14 | 0.86 | 1.60 | 0.69 | 1.81 | 0.79 |
| YERWdelta13 | 1.34 | 0.59 | 1.45 | 0.63 | 1.27 | 0.58 |
| YERWdelta17 | 1.02 | 0.42 | 0.96 | 0.43 | 0.92 | 0.40 |
| YERWdelta21 | 0.26 | 0.03 | #N/A | #N/A | 0.30 | 0.03 |
| YERWdelta25 | 1.59 | 0.67 | 1.09 | 0.46 | 0.99 | 0.44 |
| YERWdelta9  | 0.95 | 0.38 | #N/A | #N/A | 1.56 | 0.71 |
| YERWomega2  | 0.80 | 0.31 | 0.74 | 0.29 | #N/A | #N/A |
| YFLCdelta6  | 1.22 | 0.52 | 1.62 | 0.71 | 0.93 | 0.41 |
| YFLWdelta1  | #N/A | #N/A | 2.19 | 0.88 | 2.49 | 0.92 |
| YFLWtau1    | 1.17 | 0.52 | 1.91 | 0.81 | 1.54 | 0.70 |
| YFR032C-A   | 0.21 | 0.02 | 0.43 | 0.08 | 0.40 | 0.09 |
| YFRCdelta9  | 1.03 | 0.45 | #N/A | #N/A | 1.12 | 0.52 |
| YFRWdelta10 | 2.65 | 0.95 | 1.68 | 0.74 | #N/A | #N/A |
| YFRWdelta7  | 0.76 | 0.28 | 1.42 | 0.62 | #N/A | #N/A |
| YGL197W     | 0.74 | 0.29 | 0.89 | 0.34 | 0.61 | 0.19 |
| YGLCdelta5  | 1.20 | 0.51 | 1.42 | 0.62 | 1.52 | 0.69 |
| YGLCtau3    | 1.76 | 0.78 | 1.80 | 0.78 | 1.61 | 0.68 |
| YGLWdelta10 | 0.93 | 0.40 | #N/A | #N/A | 0.97 | 0.43 |
| YGLWdelta4  | #N/A | #N/A | #N/A | #N/A | #N/A | #N/A |
| YGLWdelta6  | 0.55 | 0.18 | 1.10 | 0.43 | 0.53 | 0.18 |
| YGLWtau2    | #N/A | #N/A | #N/A | #N/A | 0.63 | 0.24 |
| YGRCdelta12 | #N/A | #N/A | #N/A | #N/A | #N/A | #N/A |
| YGRCdelta20 | 1.76 | 0.74 | 2.27 | 0.90 | 1.78 | 0.82 |
| YGRCTy1-2A  | 0.32 | 0.06 | 0.39 | 0.06 | 0.34 | 0.05 |
| YGRCTy1-2C  | 0.34 | 0.07 | 0.34 | 0.04 | 0.38 | 0.07 |
| YGRCTy1-2D  | 1.09 | 0.48 | 1.10 | 0.46 | 1.34 | 0.61 |
| YGRWdelta19 | #N/A | #N/A | #N/A | #N/A | #N/A | #N/A |
| YGRWdelta26 | 1.11 | 0.50 | 0.98 | 0.39 | 1.35 | 0.61 |
| YHLComega1  | #N/A | #N/A | #N/A | #N/A | #N/A | #N/A |
| YHLCsigma1  | 0.81 | 0.33 | 0.88 | 0.30 | 0.94 | 0.44 |
| YHLWdelta2  | #N/A | #N/A | 1.53 | 0.66 | #N/A | #N/A |
| YHRCdelta11 | 2.38 | 0.92 | #N/A | #N/A | #N/A | #N/A |
| YHRCdelta12 | #N/A | #N/A | #N/A | #N/A | #N/A | #N/A |
| YHRCdelta4  | 1.62 | 0.72 | 1.89 | 0.88 | 1.38 | 0.67 |
| YHRCdelta5  | #N/A | #N/A | #N/A | #N/A | #N/A | #N/A |
| YHRCdelta6  | #N/A | #N/A | #N/A | #N/A | #N/A | #N/A |
| YHRCdelta8  | 0.58 | 0.20 | #N/A | #N/A | #N/A | #N/A |
| YHRCtau4    | 1.42 | 0.61 | 1.41 | 0.70 | 1.03 | 0.42 |
| YHRCTy1-1A  | 0.37 | 0.08 | 0.56 | 0.12 | 0.44 | 0.11 |

|             |      |      |      |      |      |      |
|-------------|------|------|------|------|------|------|
| YHRCTy1-1B  | 0.31 | 0.05 | 0.36 | 0.03 | 0.34 | 0.05 |
| YHRCTy1-1D  | 1.21 | 0.53 | 1.16 | 0.49 | 1.44 | 0.66 |
| YHRWdelta9  | 1.28 | 0.58 | 2.36 | 0.91 | #N/A | #N/A |
| YHRWtau3    | 1.17 | 0.53 | 1.45 | 0.63 | 1.07 | 0.49 |
| YILCdelta2  | 0.98 | 0.42 | #N/A | #N/A | 0.99 | 0.45 |
| YILCdelta3  | 0.82 | 0.35 | 1.14 | 0.46 | 0.86 | 0.39 |
| YILCdelta5  | #N/A | #N/A | #N/A | #N/A | #N/A | #N/A |
| YILWTy3-1A  | 0.67 | 0.24 | 0.55 | 0.14 | 0.76 | 0.30 |
| YILWTy3-1B  | 2.20 | 0.88 | 1.45 | 0.62 | 1.94 | 0.85 |
| YILWTy3-1C  | 0.51 | 0.16 | 0.40 | 0.05 | 0.50 | 0.15 |
| YILWTy3-1D  | 0.42 | 0.11 | 0.38 | 0.04 | 0.41 | 0.10 |
| YIR020W-B   | 0.28 | 0.04 | 0.36 | 0.03 | 0.42 | 0.10 |
| YIRCdelta6  | 1.84 | 0.81 | 2.33 | 0.91 | 1.79 | 0.82 |
| YJL163C     | 1.99 | 0.85 | #N/A | #N/A | 1.44 | 0.66 |
| YJLCdelta6  | #N/A | #N/A | #N/A | #N/A | #N/A | #N/A |
| YJLCdelta7  | 2.25 | 0.91 | 3.99 | 1.00 | 2.05 | 0.89 |
| YJLWdelta10 | 0.93 | 0.40 | 0.73 | 0.28 | 0.81 | 0.35 |
| YJLWdelta15 | 0.44 | 0.12 | #N/A | #N/A | 0.22 | 0.01 |
| YJLWdelta16 | 1.47 | 0.67 | #N/A | #N/A | 1.21 | 0.56 |
| YJLWdelta8  | #N/A | #N/A | #N/A | #N/A | #N/A | #N/A |
| YJLWdelta9  | #N/A | #N/A | #N/A | #N/A | #N/A | #N/A |
| YJLWtau4    | 0.90 | 0.38 | #N/A | #N/A | #N/A | #N/A |
| YJRWdelta14 | #N/A | #N/A | #N/A | #N/A | #N/A | #N/A |
| YJRWdelta20 | 1.29 | 0.59 | 0.98 | 0.39 | #N/A | #N/A |
| YJRWtau3    | #N/A | #N/A | #N/A | #N/A | #N/A | #N/A |
| YKL033W-A   | 1.60 | 0.72 | #N/A | #N/A | #N/A | #N/A |
| YKL053C-A   | 1.13 | 0.50 | 0.68 | 0.19 | 1.20 | 0.55 |
| YKL162C-A   | #N/A | #N/A | #N/A | #N/A | #N/A | #N/A |
| YKLCdelta2  | 0.49 | 0.15 | 1.21 | 0.50 | 0.90 | 0.35 |
| YKLCdelta4  | 1.64 | 0.74 | 1.33 | 0.57 | 0.97 | 0.46 |
| YKLCdelta6  | 1.79 | 0.80 | 1.78 | 0.76 | 1.53 | 0.70 |
| YKLWdelta1  | 1.01 | 0.45 | 1.54 | 0.66 | 1.06 | 0.48 |
| YKRCdelta11 | 1.24 | 0.56 | 1.60 | 0.69 | #N/A | #N/A |
| YKRCdelta9  | #N/A | #N/A | #N/A | #N/A | #N/A | #N/A |
| YKRWdelta10 | #N/A | #N/A | 1.56 | 0.76 | 1.42 | 0.69 |
| YLL018C-A   | 0.79 | 0.32 | 0.87 | 0.35 | 0.60 | 0.22 |
| YLR107W     | 0.74 | 0.30 | #N/A | #N/A | 0.82 | 0.35 |
| YLR262C-A   | 1.33 | 0.59 | 1.49 | 0.72 | 1.19 | 0.54 |
| YLR438C-A   | 2.21 | 0.90 | 2.15 | 0.93 | 1.79 | 0.80 |
| YLRCdelta16 | #N/A | #N/A | #N/A | #N/A | #N/A | #N/A |
| YLRCdelta24 | 0.88 | 0.37 | 0.82 | 0.34 | 0.75 | 0.31 |
| YLRCdelta27 | #N/A | #N/A | #N/A | #N/A | #N/A | #N/A |
| YLRCtau1    | 0.63 | 0.23 | #N/A | #N/A | 0.55 | 0.17 |
| YLRWdelta12 | 0.60 | 0.21 | 1.83 | 0.78 | 0.89 | 0.41 |
| YLRWdelta15 | 0.86 | 0.36 | 1.71 | 0.73 | 0.94 | 0.44 |
| YLRWdelta17 | #N/A | #N/A | #N/A | #N/A | #N/A | #N/A |
| YML081C-A   | 1.82 | 0.76 | 1.21 | 0.49 | 2.04 | 0.89 |
| YMLCdelta1  | 1.39 | 0.60 | 1.36 | 0.59 | 1.84 | 0.78 |
| YMR046W-A   | #N/A | #N/A | #N/A | #N/A | #N/A | #N/A |
| YMR158C-B   | #N/A | #N/A | #N/A | #N/A | #N/A | #N/A |
| YMR194C-A   | 0.22 | 0.02 | 0.54 | 0.14 | 0.27 | 0.03 |

|             |      |      |      |      |      |      |
|-------------|------|------|------|------|------|------|
| YMRCdelta11 | 2.27 | 0.91 | #N/A | #N/A | 2.01 | 0.89 |
| YMRCdelta14 | 2.16 | 0.89 | 3.11 | 0.98 | 2.23 | 0.91 |
| YMRCtau1    | 1.60 | 0.68 | 2.22 | 0.90 | 1.30 | 0.55 |
| YMRWdelta15 | 1.65 | 0.72 | 2.39 | 0.92 | 1.19 | 0.50 |
| YMRWdelta16 | 0.83 | 0.35 | 0.72 | 0.20 | 0.72 | 0.26 |
| YMRWdelta20 | 2.47 | 0.91 | 3.11 | 0.99 | 2.08 | 0.90 |
| YMRWdelta21 | #N/A | #N/A | 1.40 | 0.69 | #N/A | #N/A |
| YNLWsigma2  | 0.72 | 0.28 | 1.66 | 0.80 | 0.99 | 0.40 |
| YNR032C-A   | 1.82 | 0.76 | 2.08 | 0.87 | 2.00 | 0.88 |
| YNRCdelta9  | #N/A | #N/A | 1.91 | 0.88 | 2.15 | 0.86 |
| YOL013W-A   | 1.07 | 0.45 | #N/A | #N/A | 1.20 | 0.58 |
| YOLCdelta2  | #N/A | #N/A | #N/A | #N/A | 2.08 | 0.88 |
| YOLCdelta8  | 0.98 | 0.43 | 1.49 | 0.64 | 1.35 | 0.58 |
| YOLCdelta9  | #N/A | #N/A | #N/A | #N/A | #N/A | #N/A |
| YOLWdelta6  | #N/A | #N/A | #N/A | #N/A | #N/A | #N/A |
| YOLWtau1    | #N/A | #N/A | 1.38 | 0.68 | #N/A | #N/A |
| YOR129C     | #N/A | #N/A | #N/A | #N/A | #N/A | #N/A |
| YOR235W     | 0.27 | 0.03 | 0.33 | 0.04 | 0.28 | 0.03 |
| YOR298C-A   | 0.47 | 0.14 | 0.41 | 0.07 | 0.31 | 0.04 |
| YORCdelta11 | 1.13 | 0.48 | 1.48 | 0.64 | 1.36 | 0.58 |
| YORCdelta15 | 1.01 | 0.43 | 1.75 | 0.76 | #N/A | #N/A |
| YORWdelta12 | #N/A | #N/A | #N/A | #N/A | #N/A | #N/A |
| YORWdelta16 | #N/A | #N/A | #N/A | #N/A | 1.74 | 0.74 |
| YORWdelta19 | #N/A | #N/A | #N/A | #N/A | #N/A | #N/A |
| YORWdelta22 | #N/A | #N/A | #N/A | #N/A | #N/A | #N/A |
| YPL144W     | 1.21 | 0.52 | 1.55 | 0.68 | 1.11 | 0.54 |
| YPL183W-A   | 1.35 | 0.58 | 1.17 | 0.47 | 1.42 | 0.65 |
| YPLCdelta1  | 1.08 | 0.49 | #N/A | #N/A | 0.76 | 0.32 |
| YPLCdelta10 | 0.87 | 0.36 | 2.04 | 0.85 | #N/A | #N/A |
| YPLCtau1    | 1.49 | 0.64 | 1.47 | 0.64 | 1.49 | 0.68 |
| YPLCTy4-1A  | 0.77 | 0.30 | 0.76 | 0.29 | 0.79 | 0.34 |
| YPLCTy4-1B  | 0.36 | 0.07 | 0.38 | 0.04 | 0.51 | 0.14 |
| YPLCTy4-1C  | #N/A | #N/A | 0.36 | 0.05 | #N/A | #N/A |
| YPLCTy4-1D  | #N/A | #N/A | 0.47 | 0.09 | 0.90 | 0.39 |
| YPLCTy4-1E  | 1.49 | 0.68 | 1.14 | 0.50 | 1.69 | 0.73 |
| YPLWdelta11 | #N/A | #N/A | #N/A | #N/A | #N/A | #N/A |
| YPLWdelta7  | 1.21 | 0.51 | #N/A | #N/A | 1.59 | 0.70 |
| YPLWdelta9  | #N/A | #N/A | #N/A | #N/A | #N/A | #N/A |
| YPR029C     | #N/A | #N/A | #N/A | #N/A | #N/A | #N/A |
| YPR133W-A   | 1.70 | 0.76 | #N/A | #N/A | 1.49 | 0.68 |
| YPRCdelta13 | 0.77 | 0.30 | 0.96 | 0.38 | 0.89 | 0.39 |
| YPRCdelta15 | #N/A | #N/A | #N/A | #N/A | #N/A | #N/A |
| YPRCdelta22 | 0.77 | 0.32 | #N/A | #N/A | #N/A | #N/A |
| YPRCtau3    | 2.16 | 0.88 | #N/A | #N/A | 1.71 | 0.78 |
| YPRWdelta14 | #N/A | #N/A | #N/A | #N/A | #N/A | #N/A |
| YPRWdelta16 | #N/A | #N/A | #N/A | #N/A | #N/A | #N/A |
| YPRWtau4    | 0.81 | 0.33 | #N/A | #N/A | #N/A | #N/A |
| YPT10cod    | 1.36 | 0.62 | 1.04 | 0.42 | 1.31 | 0.60 |
| ZRT1        | 1.13 | 0.50 | 0.95 | 0.42 | 0.84 | 0.36 |
| ZWF1prom    | 1.02 | 0.42 | 0.71 | 0.23 | 0.54 | 0.18 |

Htz1, *bdf1* Δ Htz1, *bdf1* Δ Htz1, *bdf2* Δ Htz1, *bdf2* Δ CHIP (percentile rank, MPR) - Intergenic

|      |      |      |      |
|------|------|------|------|
| 0.48 | 0.14 | 0.72 | 0.29 |
| 0.60 | 0.21 | 0.68 | 0.27 |
| 0.34 | 0.06 | 0.29 | 0.04 |
| 0.25 | 0.02 | 0.24 | 0.02 |
| #N/A | #N/A | #N/A | #N/A |
| #N/A | #N/A | #N/A | #N/A |
| #N/A | #N/A | #N/A | #N/A |
| #N/A | #N/A | #N/A | #N/A |
| #N/A | #N/A | #N/A | #N/A |
| #N/A | #N/A | #N/A | #N/A |
| #N/A | #N/A | #N/A | #N/A |
| #N/A | #N/A | #N/A | #N/A |
| #N/A | #N/A | #N/A | #N/A |
| #N/A | #N/A | #N/A | #N/A |
| #N/A | #N/A | #N/A | #N/A |
| #N/A | #N/A | #N/A | #N/A |
| #N/A | #N/A | #N/A | #N/A |
| #N/A | #N/A | #N/A | #N/A |
| #N/A | #N/A | #N/A | #N/A |
| #N/A | #N/A | #N/A | #N/A |
| #N/A | #N/A | #N/A | #N/A |
| 1.23 | 0.53 | 1.19 | 0.54 |
| #N/A | #N/A | #N/A | #N/A |
| 0.76 | 0.30 | 0.77 | 0.33 |
| 0.72 | 0.31 | 0.79 | 0.33 |
| #N/A | #N/A | 0.63 | 0.23 |
| #N/A | #N/A | 0.71 | 0.29 |
| #N/A | #N/A | 1.10 | 0.49 |
| #N/A | #N/A | #N/A | #N/A |
| 0.41 | 0.09 | 0.38 | 0.08 |
| 1.39 | 0.64 | 1.51 | 0.69 |
| #N/A | #N/A | #N/A | #N/A |
| 0.74 | 0.29 | 0.75 | 0.31 |
| #N/A | #N/A | #N/A | #N/A |
| 1.41 | 0.61 | 1.52 | 0.66 |
| 0.46 | 0.13 | 0.42 | 0.12 |
| 0.53 | 0.17 | 0.51 | 0.17 |
| #N/A | #N/A | #N/A | #N/A |
| 1.34 | 0.58 | 1.08 | 0.48 |
| #N/A | #N/A | #N/A | #N/A |
| #N/A | #N/A | #N/A | #N/A |
| #N/A | #N/A | #N/A | #N/A |
| #N/A | #N/A | #N/A | #N/A |
| #N/A | #N/A | #N/A | #N/A |
| 0.84 | 0.35 | 1.08 | 0.48 |
| 1.49 | 0.68 | 1.85 | 0.82 |
| 2.59 | 0.94 | 1.96 | 0.85 |
| 0.94 | 0.43 | 1.01 | 0.45 |
| #N/A | #N/A | 1.70 | 0.76 |
| #N/A | #N/A | #N/A | #N/A |
| 0.86 | 0.36 | #N/A | #N/A |

|      |      |      |      |
|------|------|------|------|
| 2.07 | 0.85 | 1.44 | 0.66 |
| 0.35 | 0.07 | 0.27 | 0.03 |
| 0.34 | 0.06 | 0.32 | 0.06 |
| 0.22 | 0.01 | 0.21 | 0.01 |
| 1.53 | 0.70 | 1.35 | 0.62 |
| #N/A | #N/A | #N/A | #N/A |
| #N/A | #N/A | #N/A | #N/A |
| #N/A | #N/A | #N/A | #N/A |
| #N/A | #N/A | 1.65 | 0.62 |
| 1.34 | 0.58 | 1.26 | 0.47 |
| 0.49 | 0.15 | 0.42 | 0.10 |
| #N/A | #N/A | 0.34 | 0.07 |
| 1.93 | 0.79 | #N/A | #N/A |
| 1.87 | 0.79 | 1.16 | 0.48 |
| 0.90 | 0.37 | 0.93 | 0.34 |
| 0.52 | 0.17 | 0.44 | 0.13 |
| #N/A | #N/A | 0.78 | 0.33 |
| 0.48 | 0.14 | 0.64 | 0.20 |
| 1.00 | 0.46 | #N/A | #N/A |
| 1.73 | 0.73 | 2.12 | 0.89 |
| 1.01 | 0.43 | 1.42 | 0.64 |
| 1.06 | 0.48 | #N/A | #N/A |
| 0.34 | 0.05 | 0.59 | 0.22 |
| 0.87 | 0.36 | 0.59 | 0.22 |
| 1.69 | 0.77 | #N/A | #N/A |
| #N/A | #N/A | #N/A | #N/A |
| 1.35 | 0.58 | 0.57 | 0.21 |
| 0.95 | 0.40 | 0.79 | 0.34 |
| #N/A | #N/A | 0.48 | 0.15 |
| 0.67 | 0.27 | 1.21 | 0.55 |
| 0.59 | 0.23 | 0.65 | 0.21 |
| 0.61 | 0.22 | 1.19 | 0.54 |
| 0.42 | 0.11 | 0.40 | 0.10 |
| 0.33 | 0.06 | 0.32 | 0.06 |
| 0.32 | 0.05 | 0.26 | 0.03 |
| 0.21 | 0.01 | #N/A | #N/A |
| #N/A | #N/A | #N/A | #N/A |
| 0.42 | 0.11 | 0.18 | 0.01 |
| 0.33 | 0.05 | 0.28 | 0.04 |
| 0.31 | 0.04 | 0.34 | 0.06 |
| 0.51 | 0.16 | 0.60 | 0.21 |
| 0.28 | 0.03 | 0.35 | 0.07 |
| #N/A | #N/A | 0.47 | 0.14 |
| 0.31 | 0.04 | 0.25 | 0.02 |
| #N/A | #N/A | 0.28 | 0.04 |
| 0.54 | 0.18 | 0.59 | 0.18 |
| #N/A | #N/A | 0.61 | 0.23 |
| #N/A | #N/A | 0.39 | 0.10 |
| 0.35 | 0.07 | 0.35 | 0.08 |
| 0.23 | 0.01 | 0.29 | 0.04 |
| #N/A | #N/A | 0.21 | 0.01 |



|      |      |      |      |
|------|------|------|------|
| 1.57 | 0.68 | #N/A | #N/A |
| 0.45 | 0.12 | 0.46 | 0.14 |
| 0.55 | 0.18 | 0.54 | 0.18 |
| 0.33 | 0.06 | 0.30 | 0.05 |
| 0.74 | 0.32 | 0.77 | 0.32 |
| #N/A | #N/A | 0.79 | 0.33 |
| 1.28 | 0.55 | 1.22 | 0.55 |
| 1.07 | 0.46 | 1.15 | 0.52 |
| #N/A | #N/A | #N/A | #N/A |
| #N/A | #N/A | 0.84 | 0.29 |
| #N/A | #N/A | #N/A | #N/A |
| 1.88 | 0.79 | 1.50 | 0.68 |
| 1.04 | 0.44 | 0.88 | 0.38 |
| #N/A | #N/A | #N/A | #N/A |
| 0.45 | 0.12 | 0.46 | 0.14 |
| 1.10 | 0.48 | 1.21 | 0.55 |
| 0.62 | 0.25 | 0.62 | 0.24 |
| 1.22 | 0.52 | 1.38 | 0.63 |
| 0.50 | 0.15 | 0.59 | 0.21 |
| #N/A | #N/A | #N/A | #N/A |
| 0.72 | 0.28 | 0.67 | 0.27 |
| 0.25 | 0.02 | 0.21 | 0.01 |
| 1.09 | 0.46 | 1.12 | 0.49 |
| #N/A | #N/A | #N/A | #N/A |
| 0.42 | 0.10 | 0.29 | 0.04 |
| #N/A | #N/A | #N/A | #N/A |
| 0.82 | 0.33 | 0.79 | 0.29 |
| #N/A | #N/A | #N/A | #N/A |
| #N/A | #N/A | #N/A | #N/A |
| #N/A | #N/A | #N/A | #N/A |
| 1.57 | 0.69 | 1.46 | 0.66 |
| 0.37 | 0.06 | 0.34 | 0.07 |
| 0.79 | 0.35 | 0.58 | 0.21 |
| 1.23 | 0.52 | 0.76 | 0.31 |
| #N/A | #N/A | #N/A | #N/A |
| #N/A | #N/A | 0.72 | 0.29 |
| #N/A | #N/A | 0.66 | 0.21 |
| 1.35 | 0.63 | 1.18 | 0.48 |
| 0.55 | 0.19 | 0.45 | 0.13 |
| 1.82 | 0.80 | #N/A | #N/A |
| #N/A | #N/A | #N/A | #N/A |
| 1.30 | 0.61 | 1.45 | 0.60 |
| #N/A | #N/A | 1.83 | 0.73 |
| 0.81 | 0.33 | 0.83 | 0.35 |
| #N/A | #N/A | #N/A | #N/A |
| 1.06 | 0.45 | 1.57 | 0.61 |
| 2.03 | 0.87 | #N/A | #N/A |
| 0.49 | 0.15 | 0.45 | 0.13 |
| 1.05 | 0.45 | 1.78 | 0.72 |
| 0.83 | 0.34 | 0.68 | 0.27 |
| 0.90 | 0.37 | 1.14 | 0.51 |

|      |      |      |      |
|------|------|------|------|
| 2.17 | 0.88 | 2.30 | 0.92 |
| #N/A | #N/A | #N/A | #N/A |
| 0.42 | 0.11 | 0.40 | 0.10 |
| 0.44 | 0.12 | 0.42 | 0.10 |
| 0.67 | 0.28 | 0.53 | 0.15 |
| #N/A | #N/A | #N/A | #N/A |
| #N/A | #N/A | #N/A | #N/A |
| 0.68 | 0.26 | 0.59 | 0.22 |
| #N/A | #N/A | 0.65 | 0.25 |
| 0.82 | 0.33 | 0.71 | 0.27 |
| 0.70 | 0.28 | 0.92 | 0.33 |
| 0.84 | 0.37 | 1.17 | 0.52 |
| #N/A | #N/A | #N/A | #N/A |
| 0.79 | 0.33 | 0.72 | 0.24 |
| #N/A | #N/A | #N/A | #N/A |
| 1.44 | 0.63 | 1.32 | 0.60 |
| 0.78 | 0.34 | 0.87 | 0.38 |
| 0.47 | 0.13 | 0.56 | 0.20 |
| #N/A | #N/A | 0.89 | 0.31 |
| #N/A | #N/A | #N/A | #N/A |
| 0.34 | 0.06 | #N/A | #N/A |
| 0.56 | 0.19 | 0.54 | 0.16 |
| 0.57 | 0.20 | 1.57 | 0.71 |
| 1.50 | 0.64 | 1.68 | 0.76 |
| 0.81 | 0.36 | 0.88 | 0.38 |
| 1.84 | 0.82 | 2.25 | 0.89 |
| #N/A | #N/A | #N/A | #N/A |
| 1.09 | 0.46 | 1.27 | 0.57 |
| 0.97 | 0.45 | 0.79 | 0.33 |
| 1.19 | 0.52 | 1.87 | 0.82 |
| #N/A | #N/A | #N/A | #N/A |
| 1.42 | 0.61 | 0.95 | 0.35 |
| #N/A | #N/A | #N/A | #N/A |
| 2.09 | 0.88 | 2.11 | 0.89 |
| 0.99 | 0.46 | 1.28 | 0.58 |
| 0.83 | 0.34 | #N/A | #N/A |
| 0.64 | 0.25 | 0.41 | 0.09 |
| #N/A | #N/A | #N/A | #N/A |
| 0.41 | 0.10 | 0.50 | 0.16 |
| 0.66 | 0.27 | 0.82 | 0.35 |
| 0.62 | 0.24 | 0.39 | 0.09 |
| 0.30 | 0.03 | 0.33 | 0.06 |
| #N/A | #N/A | #N/A | #N/A |
| 0.54 | 0.18 | 0.82 | 0.32 |
| 2.67 | 0.94 | 2.49 | 0.92 |
| 1.86 | 0.79 | 0.84 | 0.36 |
| 0.55 | 0.18 | 0.61 | 0.23 |
| 1.55 | 0.70 | 1.98 | 0.85 |
| 1.02 | 0.46 | 0.81 | 0.35 |
| #N/A | #N/A | #N/A | #N/A |
| #N/A | #N/A | #N/A | #N/A |

|      |      |      |      |
|------|------|------|------|
| 0.71 | 0.29 | 0.71 | 0.28 |
| 0.91 | 0.41 | 1.52 | 0.64 |
| #N/A | #N/A | #N/A | #N/A |
| 0.91 | 0.38 | 1.38 | 0.60 |
| #N/A | #N/A | 0.96 | 0.42 |
| 1.19 | 0.51 | #N/A | #N/A |
| #N/A | #N/A | 0.58 | 0.21 |
| 0.75 | 0.30 | 1.17 | 0.52 |
| 1.38 | 0.59 | 1.71 | 0.77 |
| 1.08 | 0.46 | 1.01 | 0.45 |
| 0.60 | 0.23 | 0.57 | 0.20 |
| #N/A | #N/A | #N/A | #N/A |
| #N/A | #N/A | #N/A | #N/A |
| 1.80 | 0.77 | 2.63 | 0.93 |
| #N/A | #N/A | #N/A | #N/A |
| 1.09 | 0.47 | 1.23 | 0.56 |
| #N/A | #N/A | #N/A | #N/A |
| #N/A | #N/A | #N/A | #N/A |
| #N/A | #N/A | 0.53 | 0.16 |
| 0.83 | 0.34 | 1.00 | 0.44 |
| 1.78 | 0.78 | 1.85 | 0.81 |
| 0.35 | 0.06 | #N/A | #N/A |
| #N/A | #N/A | #N/A | #N/A |
| #N/A | #N/A | #N/A | #N/A |
| 0.52 | 0.17 | 0.40 | 0.11 |
| 1.08 | 0.47 | 0.74 | 0.29 |
| #N/A | #N/A | #N/A | #N/A |
| 1.04 | 0.46 | 0.62 | 0.20 |
| 1.56 | 0.71 | 1.47 | 0.67 |
| #N/A | #N/A | #N/A | #N/A |
| 0.76 | 0.30 | 0.53 | 0.18 |
| #N/A | #N/A | #N/A | #N/A |
| #N/A | #N/A | 0.56 | 0.20 |
| 1.94 | 0.80 | 1.44 | 0.56 |
| 0.44 | 0.11 | 0.57 | 0.20 |
| #N/A | #N/A | #N/A | #N/A |
| #N/A | #N/A | #N/A | #N/A |
| #N/A | #N/A | #N/A | #N/A |
| 1.30 | 0.60 | 1.81 | 0.75 |
| 0.87 | 0.36 | 1.47 | 0.56 |
| 1.68 | 0.75 | 2.49 | 0.95 |
| #N/A | #N/A | #N/A | #N/A |
| 0.97 | 0.43 | 0.91 | 0.33 |
| #N/A | #N/A | 1.99 | 0.78 |
| #N/A | #N/A | #N/A | #N/A |
| #N/A | #N/A | #N/A | #N/A |
| 1.76 | 0.79 | 2.81 | 0.95 |
| #N/A | #N/A | #N/A | #N/A |
| 0.56 | 0.19 | 0.27 | 0.03 |
| 1.28 | 0.55 | 1.12 | 0.50 |
| 1.89 | 0.78 | 1.97 | 0.85 |

|      |      |      |      |
|------|------|------|------|
| #N/A | #N/A | #N/A | #N/A |
| #N/A | #N/A | #N/A | #N/A |
| 0.89 | 0.37 | 0.82 | 0.30 |
| #N/A | #N/A | 0.44 | 0.13 |
| 0.83 | 0.34 | 0.55 | 0.20 |
| 0.55 | 0.18 | 0.78 | 0.33 |
| 1.18 | 0.56 | 0.87 | 0.37 |
| 1.44 | 0.62 | 1.17 | 0.51 |
| 1.33 | 0.57 | 1.26 | 0.52 |
| 0.50 | 0.15 | #N/A | #N/A |
| 0.96 | 0.44 | #N/A | #N/A |
| #N/A | #N/A | #N/A | #N/A |
| #N/A | #N/A | 0.29 | 0.04 |
| 0.61 | 0.22 | 0.55 | 0.18 |
| 0.66 | 0.25 | 0.33 | 0.06 |
| 1.07 | 0.45 | 0.66 | 0.25 |
| 0.97 | 0.45 | 1.07 | 0.39 |
| #N/A | #N/A | #N/A | #N/A |
| #N/A | #N/A | #N/A | #N/A |
| #N/A | #N/A | #N/A | #N/A |
| #N/A | #N/A | #N/A | #N/A |
| 0.53 | 0.16 | 0.33 | 0.06 |
| 0.48 | 0.15 | 0.47 | 0.14 |
| 0.59 | 0.20 | 0.39 | 0.09 |
| #N/A | #N/A | #N/A | #N/A |
| 0.99 | 0.41 | 1.21 | 0.55 |
| 0.63 | 0.24 | 0.61 | 0.20 |
| #N/A | #N/A | #N/A | #N/A |
| #N/A | #N/A | #N/A | #N/A |
| 1.24 | 0.54 | 1.40 | 0.53 |
| 1.00 | 0.42 | 1.28 | 0.48 |
| 0.74 | 0.29 | 0.85 | 0.30 |
| 0.28 | 0.04 | 0.36 | 0.08 |
| 0.84 | 0.37 | 0.55 | 0.19 |
| #N/A | #N/A | #N/A | #N/A |
| #N/A | #N/A | #N/A | #N/A |
| #N/A | #N/A | #N/A | #N/A |
| 1.62 | 0.70 | 1.41 | 0.64 |
| #N/A | #N/A | #N/A | #N/A |
| 0.83 | 0.34 | 0.78 | 0.33 |
| 1.00 | 0.47 | 1.11 | 0.50 |
| 0.62 | 0.22 | #N/A | #N/A |
| 1.80 | 0.77 | 1.79 | 0.79 |
| 0.71 | 0.27 | 0.59 | 0.22 |
| 1.49 | 0.69 | 1.66 | 0.73 |
| #N/A | #N/A | #N/A | #N/A |
| 1.89 | 0.83 | 1.45 | 0.66 |
| 0.87 | 0.37 | 0.89 | 0.31 |
| #N/A | #N/A | #N/A | #N/A |
| 0.93 | 0.42 | 0.99 | 0.38 |
| 2.15 | 0.86 | 1.65 | 0.75 |

|      |      |      |      |
|------|------|------|------|
| 1.10 | 0.47 | #N/A | #N/A |
| 1.03 | 0.44 | 0.79 | 0.34 |
| 0.82 | 0.37 | 1.64 | 0.62 |
| 0.58 | 0.20 | 0.74 | 0.25 |
| 0.82 | 0.36 | 0.72 | 0.27 |
| #N/A | #N/A | 1.45 | 0.55 |
| #N/A | #N/A | 0.34 | 0.07 |
| #N/A | #N/A | #N/A | #N/A |
| 0.53 | 0.17 | 0.30 | 0.05 |
| #N/A | #N/A | #N/A | #N/A |
| #N/A | #N/A | #N/A | #N/A |
| 0.95 | 0.40 | 0.79 | 0.33 |
| 0.98 | 0.41 | 1.08 | 0.42 |
| 0.85 | 0.35 | 1.08 | 0.48 |
| #N/A | #N/A | 0.65 | 0.24 |
| 0.45 | 0.12 | #N/A | #N/A |
| #N/A | #N/A | #N/A | #N/A |
| 1.88 | 0.79 | #N/A | #N/A |
| 0.72 | 0.31 | 1.08 | 0.44 |
| #N/A | #N/A | #N/A | #N/A |
| 0.41 | 0.09 | 0.37 | 0.09 |
| 0.94 | 0.39 | #N/A | #N/A |
| #N/A | #N/A | #N/A | #N/A |
| #N/A | #N/A | #N/A | #N/A |
| 1.16 | 0.54 | 1.17 | 0.53 |
| 1.63 | 0.73 | 1.52 | 0.69 |
| #N/A | #N/A | #N/A | #N/A |
| 0.85 | 0.35 | 0.67 | 0.26 |
| 1.18 | 0.56 | #N/A | #N/A |
| 1.25 | 0.56 | 1.49 | 0.67 |
| 0.70 | 0.27 | 0.69 | 0.28 |
| 0.34 | 0.06 | 0.33 | 0.06 |
| 0.79 | 0.31 | #N/A | #N/A |
| 0.41 | 0.10 | 0.48 | 0.15 |
| 0.34 | 0.05 | 0.63 | 0.24 |
| #N/A | #N/A | #N/A | #N/A |
| #N/A | #N/A | #N/A | #N/A |
| #N/A | #N/A | #N/A | #N/A |
| 1.18 | 0.50 | 1.40 | 0.64 |
| 0.89 | 0.40 | 1.35 | 0.61 |
| 0.72 | 0.29 | 0.76 | 0.28 |
| 1.55 | 0.66 | 1.59 | 0.66 |
| #N/A | #N/A | #N/A | #N/A |
| #N/A | #N/A | 1.61 | 0.73 |
| 0.42 | 0.10 | 0.66 | 0.25 |
| 1.30 | 0.56 | 1.41 | 0.54 |
| #N/A | #N/A | #N/A | #N/A |
| 0.89 | 0.37 | 0.95 | 0.41 |
| 1.07 | 0.50 | 0.82 | 0.32 |
| #N/A | #N/A | 0.46 | 0.14 |
| #N/A | #N/A | #N/A | #N/A |

|      |      |      |      |
|------|------|------|------|
| 0.50 | 0.15 | 0.33 | 0.07 |
| 1.57 | 0.67 | 1.14 | 0.47 |
| 1.24 | 0.57 | 1.33 | 0.55 |
| 0.48 | 0.14 | 0.41 | 0.11 |
| #N/A | #N/A | 0.45 | 0.12 |
| #N/A | #N/A | 0.87 | 0.30 |
| #N/A | #N/A | #N/A | #N/A |
| 0.86 | 0.39 | 1.18 | 0.53 |
| 0.30 | 0.03 | 0.37 | 0.08 |
| #N/A | #N/A | #N/A | #N/A |
| 0.97 | 0.41 | 0.87 | 0.35 |
| #N/A | #N/A | #N/A | #N/A |
| 0.70 | 0.27 | 0.60 | 0.22 |
| 1.44 | 0.66 | 1.68 | 0.73 |
| 1.24 | 0.53 | 1.45 | 0.58 |
| #N/A | #N/A | 1.28 | 0.48 |
| 0.78 | 0.31 | 1.21 | 0.53 |
| 0.51 | 0.16 | 0.51 | 0.15 |
| 0.74 | 0.29 | 1.02 | 0.45 |
| 0.88 | 0.36 | 0.89 | 0.37 |
| 0.91 | 0.41 | 3.81 | 1.00 |
| 1.92 | 0.81 | 1.76 | 0.78 |
| #N/A | #N/A | #N/A | #N/A |
| 0.66 | 0.25 | 0.48 | 0.15 |
| 0.55 | 0.18 | 0.34 | 0.06 |
| 1.05 | 0.44 | #N/A | #N/A |
| 0.73 | 0.29 | 0.42 | 0.11 |
| 0.72 | 0.28 | 0.85 | 0.29 |
| #N/A | #N/A | #N/A | #N/A |
| 0.92 | 0.38 | 0.72 | 0.29 |
| 0.34 | 0.06 | 0.38 | 0.10 |
| 2.23 | 0.89 | 2.80 | 0.96 |
| 0.65 | 0.24 | 0.81 | 0.34 |
| 1.65 | 0.70 | 1.82 | 0.79 |
| 1.98 | 0.81 | 1.96 | 0.85 |
| 0.78 | 0.34 | 1.07 | 0.47 |
| 0.73 | 0.28 | 0.71 | 0.29 |
| 2.06 | 0.86 | 1.96 | 0.85 |
| 0.75 | 0.30 | 0.70 | 0.26 |
| #N/A | #N/A | #N/A | #N/A |
| 2.15 | 0.88 | 1.84 | 0.75 |
| 2.08 | 0.86 | 2.05 | 0.85 |
| 0.41 | 0.09 | 0.64 | 0.23 |
| 3.26 | 0.98 | 3.53 | 0.99 |
| 1.87 | 0.79 | 1.66 | 0.75 |
| 0.75 | 0.30 | 0.59 | 0.22 |
| 1.31 | 0.57 | 1.40 | 0.53 |
| 1.75 | 0.78 | 1.52 | 0.69 |
| 2.01 | 0.83 | 1.74 | 0.78 |
| #N/A | #N/A | #N/A | #N/A |
| #N/A | #N/A | 1.40 | 0.64 |

|      |      |      |      |
|------|------|------|------|
| 1.46 | 0.67 | 1.53 | 0.65 |
| #N/A | #N/A | #N/A | #N/A |
| 4.20 | 1.00 | 4.70 | 1.00 |
| 1.68 | 0.73 | 1.67 | 0.73 |
| #N/A | #N/A | #N/A | #N/A |
| 1.89 | 0.80 | 1.45 | 0.66 |
| #N/A | #N/A | #N/A | #N/A |
| 3.00 | 0.97 | 2.65 | 0.93 |
| 0.81 | 0.36 | 1.14 | 0.42 |
| 1.21 | 0.54 | 1.19 | 0.54 |
| 0.85 | 0.37 | 0.67 | 0.26 |
| 0.16 | 0.01 | 0.11 | 0.00 |
| 0.42 | 0.10 | 0.45 | 0.13 |
| 0.29 | 0.03 | 0.34 | 0.07 |
| 1.67 | 0.72 | 2.01 | 0.85 |
| #N/A | #N/A | 1.54 | 0.70 |
| 0.49 | 0.15 | #N/A | #N/A |
| #N/A | #N/A | 0.62 | 0.23 |
| 1.90 | 0.78 | 1.42 | 0.65 |
| 2.55 | 0.93 | 2.29 | 0.90 |
| 1.18 | 0.51 | 1.58 | 0.72 |
| 1.55 | 0.68 | 1.75 | 0.78 |
| #N/A | #N/A | #N/A | #N/A |
| 0.83 | 0.34 | 0.95 | 0.42 |
| 1.35 | 0.58 | 1.00 | 0.37 |
| 1.22 | 0.53 | 1.15 | 0.52 |
| 1.30 | 0.57 | 1.28 | 0.57 |
| 1.81 | 0.81 | 1.81 | 0.77 |
| 1.98 | 0.81 | 2.94 | 0.98 |
| 2.02 | 0.84 | 1.59 | 0.72 |
| 1.10 | 0.47 | 1.31 | 0.52 |
| 1.84 | 0.78 | 1.74 | 0.75 |
| 0.71 | 0.27 | 0.70 | 0.27 |
| 1.34 | 0.59 | 1.61 | 0.68 |
| 0.81 | 0.34 | 0.76 | 0.32 |
| 0.65 | 0.24 | #N/A | #N/A |
| 0.87 | 0.37 | 1.00 | 0.44 |
| 1.42 | 0.62 | 1.84 | 0.74 |
| 0.81 | 0.34 | 1.61 | 0.70 |
| 1.14 | 0.49 | 1.36 | 0.62 |
| 0.77 | 0.31 | 1.40 | 0.56 |
| 0.92 | 0.39 | 1.06 | 0.46 |
| #N/A | #N/A | 2.18 | 0.84 |
| 2.03 | 0.83 | 2.93 | 0.98 |
| 0.55 | 0.18 | 0.65 | 0.26 |
| 0.69 | 0.29 | 0.76 | 0.31 |
| 0.48 | 0.14 | 0.33 | 0.06 |
| 0.66 | 0.25 | 0.91 | 0.40 |
| 0.90 | 0.37 | 1.90 | 0.82 |
| 1.91 | 0.84 | 2.29 | 0.89 |
| 0.39 | 0.09 | 0.60 | 0.18 |

|      |      |      |      |
|------|------|------|------|
| 0.20 | 0.01 | 0.36 | 0.08 |
| 1.97 | 0.85 | 2.29 | 0.88 |
| 1.09 | 0.47 | 1.24 | 0.53 |
| 0.56 | 0.19 | 0.40 | 0.11 |
| #N/A | #N/A | 2.13 | 0.79 |
| #N/A | #N/A | #N/A | #N/A |
| 2.49 | 0.93 | 2.52 | 0.95 |
| 0.94 | 0.43 | 1.02 | 0.45 |
| 1.28 | 0.55 | 0.73 | 0.30 |
| 0.59 | 0.22 | 0.44 | 0.12 |
| 1.73 | 0.78 | 1.97 | 0.85 |
| 2.34 | 0.89 | 2.17 | 0.80 |
| 1.35 | 0.58 | 1.44 | 0.60 |
| 2.40 | 0.90 | 2.13 | 0.89 |
| 2.01 | 0.83 | 2.45 | 0.88 |
| 1.53 | 0.67 | 1.48 | 0.64 |
| 0.48 | 0.15 | #N/A | #N/A |
| 0.29 | 0.04 | 0.40 | 0.09 |
| 0.60 | 0.21 | 0.89 | 0.38 |
| 0.85 | 0.36 | #N/A | #N/A |
| 1.00 | 0.43 | 1.04 | 0.38 |
| 0.93 | 0.39 | 0.67 | 0.26 |
| 0.99 | 0.44 | 0.63 | 0.22 |
| 0.95 | 0.44 | 1.81 | 0.68 |
| 0.89 | 0.36 | 1.93 | 0.79 |
| 0.96 | 0.41 | 0.97 | 0.42 |
| 0.45 | 0.12 | 0.56 | 0.19 |
| 0.75 | 0.30 | 0.90 | 0.39 |
| #N/A | #N/A | 0.84 | 0.35 |
| 0.59 | 0.23 | 0.64 | 0.25 |
| 1.55 | 0.67 | 1.83 | 0.72 |
| 1.13 | 0.53 | #N/A | #N/A |
| 1.74 | 0.73 | 1.70 | 0.76 |
| 2.12 | 0.87 | 2.46 | 0.91 |
| #N/A | #N/A | #N/A | #N/A |
| 0.98 | 0.43 | 1.36 | 0.60 |
| 0.84 | 0.36 | 1.50 | 0.67 |
| 1.35 | 0.59 | 1.89 | 0.80 |
| 1.29 | 0.60 | 1.38 | 0.63 |
| 0.55 | 0.18 | 0.49 | 0.15 |
| 1.68 | 0.73 | 1.66 | 0.74 |
| 1.00 | 0.42 | 0.88 | 0.34 |
| #N/A | #N/A | 0.76 | 0.31 |
| 1.21 | 0.52 | 1.27 | 0.47 |
| 0.76 | 0.33 | #N/A | #N/A |
| 0.42 | 0.10 | 0.41 | 0.11 |
| #N/A | #N/A | #N/A | #N/A |
| 1.05 | 0.44 | 0.72 | 0.29 |
| 1.52 | 0.66 | 1.06 | 0.46 |
| 1.16 | 0.54 | 1.00 | 0.40 |
| 0.45 | 0.13 | 0.47 | 0.14 |



|      |      |      |      |
|------|------|------|------|
| 2.00 | 0.83 | 2.06 | 0.87 |
| 1.96 | 0.85 | 1.93 | 0.77 |
| 0.59 | 0.22 | 0.45 | 0.14 |
| 1.11 | 0.51 | 1.19 | 0.53 |
| 2.45 | 0.91 | 2.05 | 0.85 |
| 1.16 | 0.50 | 2.11 | 0.84 |
| 0.93 | 0.40 | 0.93 | 0.41 |
| 1.45 | 0.63 | 1.43 | 0.64 |
| 1.75 | 0.75 | 1.82 | 0.76 |
| #N/A | #N/A | #N/A | #N/A |
| 1.75 | 0.75 | 1.43 | 0.65 |
| 0.90 | 0.39 | 1.15 | 0.51 |
| 0.97 | 0.45 | 0.59 | 0.22 |
| 0.27 | 0.02 | 0.29 | 0.04 |
| 1.25 | 0.53 | 1.11 | 0.49 |
| 1.62 | 0.69 | 1.31 | 0.56 |
| 1.32 | 0.59 | 1.22 | 0.55 |
| 0.28 | 0.02 | 0.20 | 0.01 |
| 1.35 | 0.59 | 0.99 | 0.43 |
| 0.86 | 0.38 | 1.20 | 0.45 |
| 0.72 | 0.28 | 0.40 | 0.11 |
| #N/A | #N/A | 0.40 | 0.11 |
| 1.53 | 0.66 | 1.08 | 0.48 |
| 1.26 | 0.54 | 1.01 | 0.45 |
| 1.86 | 0.82 | 2.24 | 0.91 |
| 1.23 | 0.58 | 0.90 | 0.36 |
| 1.66 | 0.71 | 1.87 | 0.71 |
| #N/A | #N/A | #N/A | #N/A |
| 1.29 | 0.57 | 1.28 | 0.58 |
| 1.65 | 0.75 | 1.33 | 0.61 |
| #N/A | #N/A | 1.55 | 0.71 |
| #N/A | #N/A | #N/A | #N/A |
| 0.56 | 0.21 | 0.57 | 0.20 |
| 0.94 | 0.42 | 1.80 | 0.73 |
| 1.80 | 0.77 | 1.90 | 0.83 |
| 0.57 | 0.21 | 0.81 | 0.29 |
| 0.38 | 0.07 | 0.40 | 0.10 |
| 2.02 | 0.82 | 1.63 | 0.69 |
| 0.71 | 0.30 | 0.60 | 0.22 |
| 1.04 | 0.49 | 0.64 | 0.23 |
| 2.66 | 0.95 | 2.27 | 0.91 |
| 1.38 | 0.60 | 1.25 | 0.57 |
| 0.39 | 0.08 | #N/A | #N/A |
| 2.32 | 0.90 | 1.43 | 0.60 |
| 0.26 | 0.02 | 0.36 | 0.08 |
| 1.99 | 0.83 | 1.54 | 0.70 |
| #N/A | #N/A | #N/A | #N/A |
| 1.51 | 0.65 | #N/A | #N/A |
| 1.09 | 0.48 | 1.26 | 0.54 |
| 2.44 | 0.94 | 2.20 | 0.90 |
| #N/A | #N/A | #N/A | #N/A |

|      |      |      |      |
|------|------|------|------|
| 2.15 | 0.88 | 1.99 | 0.74 |
| #N/A | #N/A | #N/A | #N/A |
| 0.66 | 0.25 | 0.85 | 0.36 |
| #N/A | #N/A | 0.36 | 0.08 |
| 1.53 | 0.66 | 1.31 | 0.49 |
| #N/A | #N/A | 1.01 | 0.45 |
| 0.77 | 0.32 | 0.86 | 0.36 |
| 0.77 | 0.31 | 0.67 | 0.27 |
| 0.33 | 0.06 | 0.31 | 0.05 |
| #N/A | #N/A | #N/A | #N/A |
| #N/A | #N/A | #N/A | #N/A |
| 0.51 | 0.16 | 0.65 | 0.25 |
| 2.22 | 0.88 | 2.18 | 0.80 |
| #N/A | #N/A | #N/A | #N/A |
| 3.75 | 0.99 | 3.06 | 0.98 |
| 1.91 | 0.79 | 1.66 | 0.75 |
| #N/A | #N/A | #N/A | #N/A |
| 1.16 | 0.50 | 0.88 | 0.38 |
| 0.39 | 0.08 | 0.30 | 0.04 |
| 1.38 | 0.63 | 1.11 | 0.45 |
| 2.33 | 0.90 | 2.41 | 0.86 |
| 1.01 | 0.43 | #N/A | #N/A |
| #N/A | #N/A | #N/A | #N/A |
| 0.52 | 0.16 | 0.40 | 0.09 |
| #N/A | #N/A | 0.36 | 0.08 |
| #N/A | #N/A | #N/A | #N/A |
| 1.69 | 0.72 | 1.54 | 0.70 |
| 0.48 | 0.14 | 0.95 | 0.40 |
| 1.15 | 0.52 | 1.22 | 0.54 |
| #N/A | #N/A | #N/A | #N/A |
| 2.05 | 0.85 | 1.87 | 0.76 |
| 1.39 | 0.64 | 1.55 | 0.70 |
| 2.09 | 0.84 | 2.03 | 0.85 |
| 0.44 | 0.12 | 0.56 | 0.18 |
| #N/A | #N/A | 1.11 | 0.41 |
| 0.53 | 0.17 | 0.34 | 0.07 |
| 0.61 | 0.23 | 0.69 | 0.27 |
| 0.53 | 0.18 | 0.53 | 0.16 |
| #N/A | #N/A | #N/A | #N/A |
| 1.20 | 0.52 | 1.71 | 0.77 |
| 0.84 | 0.34 | #N/A | #N/A |
| #N/A | #N/A | #N/A | #N/A |
| 0.90 | 0.37 | 1.02 | 0.44 |
| 0.57 | 0.20 | 0.77 | 0.32 |
| 1.76 | 0.74 | #N/A | #N/A |
| #N/A | #N/A | #N/A | #N/A |
| 2.63 | 0.96 | 2.93 | 0.97 |
| 1.43 | 0.66 | 2.06 | 0.81 |
| 0.69 | 0.29 | 0.76 | 0.30 |
| 0.72 | 0.31 | 0.49 | 0.14 |
| 0.79 | 0.32 | 0.93 | 0.41 |

|      |      |      |      |
|------|------|------|------|
| 1.22 | 0.53 | 0.87 | 0.31 |
| 0.36 | 0.06 | 0.29 | 0.04 |
| 0.39 | 0.07 | 0.41 | 0.11 |
| 1.61 | 0.69 | 1.74 | 0.74 |
| 1.36 | 0.59 | 1.56 | 0.71 |
| 0.71 | 0.27 | 0.78 | 0.28 |
| 1.29 | 0.60 | 1.65 | 0.75 |
| 0.95 | 0.40 | 0.89 | 0.37 |
| 2.19 | 0.87 | 1.65 | 0.75 |
| 2.19 | 0.88 | 2.19 | 0.90 |
| 0.55 | 0.18 | 0.42 | 0.12 |
| 0.64 | 0.23 | 0.69 | 0.27 |
| 1.89 | 0.80 | 1.85 | 0.81 |
| #N/A | #N/A | #N/A | #N/A |
| 0.43 | 0.11 | 0.77 | 0.27 |
| 1.51 | 0.66 | 1.34 | 0.54 |
| #N/A | #N/A | #N/A | #N/A |
| 1.49 | 0.65 | 1.38 | 0.63 |
| 2.61 | 0.96 | 2.41 | 0.86 |
| #N/A | #N/A | #N/A | #N/A |
| 1.12 | 0.48 | 1.32 | 0.60 |
| 0.47 | 0.14 | 0.50 | 0.17 |
| 1.12 | 0.48 | #N/A | #N/A |
| 1.73 | 0.73 | 1.99 | 0.85 |
| 2.79 | 0.95 | 1.79 | 0.80 |
| 1.23 | 0.53 | 1.51 | 0.65 |
| 1.01 | 0.47 | 1.43 | 0.64 |
| 0.66 | 0.25 | 1.12 | 0.50 |
| 1.30 | 0.56 | 1.63 | 0.62 |
| 1.69 | 0.76 | 1.46 | 0.66 |
| 1.46 | 0.64 | 1.27 | 0.56 |
| 1.95 | 0.82 | 1.50 | 0.68 |
| 1.05 | 0.47 | 0.73 | 0.29 |
| 1.08 | 0.46 | 1.29 | 0.59 |
| 0.30 | 0.03 | 0.33 | 0.06 |
| 0.31 | 0.05 | 0.28 | 0.03 |
| 1.47 | 0.64 | 1.18 | 0.53 |
| 2.03 | 0.84 | 2.65 | 0.90 |
| 1.27 | 0.59 | 1.55 | 0.71 |
| 1.13 | 0.53 | 1.35 | 0.59 |
| 1.14 | 0.49 | 1.02 | 0.45 |
| 0.66 | 0.25 | 1.99 | 0.78 |
| 1.18 | 0.51 | 1.74 | 0.70 |
| 0.99 | 0.44 | 0.94 | 0.41 |
| 1.89 | 0.80 | 2.23 | 0.91 |
| 1.08 | 0.47 | 1.40 | 0.64 |
| 1.01 | 0.45 | 1.19 | 0.44 |
| 0.45 | 0.13 | 0.40 | 0.10 |
| 1.21 | 0.53 | 1.21 | 0.47 |
| 0.71 | 0.27 | 0.60 | 0.18 |
| 2.90 | 0.96 | 2.03 | 0.87 |

|      |      |      |      |
|------|------|------|------|
| 0.76 | 0.33 | 0.58 | 0.21 |
| #N/A | #N/A | 0.42 | 0.10 |
| 0.12 | 0.00 | 0.30 | 0.04 |
| 0.22 | 0.01 | 0.29 | 0.04 |
| 0.82 | 0.33 | 0.74 | 0.30 |
| 0.82 | 0.34 | 1.35 | 0.62 |
| 1.64 | 0.74 | 2.44 | 0.94 |
| 1.32 | 0.57 | 1.23 | 0.55 |
| 0.27 | 0.02 | 0.28 | 0.04 |
| 0.96 | 0.44 | 1.00 | 0.41 |
| 0.81 | 0.33 | 0.89 | 0.32 |
| 0.32 | 0.05 | 0.19 | 0.01 |
| 0.24 | 0.02 | 0.26 | 0.03 |
| 1.48 | 0.68 | 1.21 | 0.54 |
| 1.92 | 0.81 | 1.65 | 0.75 |
| 0.78 | 0.34 | 0.85 | 0.36 |
| 0.82 | 0.37 | 0.85 | 0.37 |
| 0.83 | 0.37 | 0.50 | 0.16 |
| 1.02 | 0.47 | 0.67 | 0.26 |
| 0.58 | 0.20 | 0.66 | 0.21 |
| #N/A | #N/A | #N/A | #N/A |
| 1.14 | 0.54 | 1.84 | 0.81 |
| 0.86 | 0.36 | 1.20 | 0.44 |
| 0.69 | 0.29 | 1.07 | 0.41 |
| 1.12 | 0.48 | 1.03 | 0.42 |
| #N/A | #N/A | #N/A | #N/A |
| 1.17 | 0.54 | 1.07 | 0.44 |
| 1.41 | 0.66 | 1.19 | 0.54 |
| 2.26 | 0.89 | 2.41 | 0.89 |
| 0.94 | 0.43 | 0.81 | 0.34 |
| #N/A | #N/A | #N/A | #N/A |
| 2.04 | 0.83 | 1.55 | 0.70 |
| #N/A | #N/A | #N/A | #N/A |
| 1.19 | 0.55 | 1.40 | 0.53 |
| 0.32 | 0.04 | #N/A | #N/A |
| 1.11 | 0.52 | 0.84 | 0.32 |
| 2.17 | 0.87 | 1.48 | 0.67 |
| 1.90 | 0.78 | 1.52 | 0.58 |
| 0.42 | 0.10 | 0.41 | 0.11 |
| 0.32 | 0.05 | 0.41 | 0.11 |
| 0.51 | 0.15 | 0.45 | 0.14 |
| 2.30 | 0.89 | 2.36 | 0.87 |
| 1.39 | 0.64 | 1.74 | 0.78 |
| 0.56 | 0.19 | 0.54 | 0.16 |
| #N/A | #N/A | #N/A | #N/A |
| 1.27 | 0.59 | 1.40 | 0.53 |
| 1.35 | 0.63 | 1.17 | 0.43 |
| #N/A | #N/A | #N/A | #N/A |
| 0.86 | 0.39 | 0.99 | 0.36 |
| 1.75 | 0.78 | 1.20 | 0.45 |
| 2.91 | 0.98 | 2.25 | 0.91 |

|      |      |      |      |
|------|------|------|------|
| 0.55 | 0.18 | 0.34 | 0.07 |
| 0.79 | 0.33 | 0.95 | 0.36 |
| 1.62 | 0.70 | 1.85 | 0.73 |
| 1.64 | 0.70 | 2.14 | 0.89 |
| 1.60 | 0.70 | 2.08 | 0.87 |
| 1.40 | 0.61 | 1.61 | 0.73 |
| 0.44 | 0.11 | 0.34 | 0.07 |
| #N/A | #N/A | 2.16 | 0.89 |
| 1.26 | 0.55 | 1.48 | 0.67 |
| 0.51 | 0.15 | 0.65 | 0.21 |
| 1.09 | 0.51 | 1.40 | 0.64 |
| #N/A | #N/A | #N/A | #N/A |
| 1.08 | 0.49 | 1.64 | 0.70 |
| #N/A | #N/A | 1.97 | 0.77 |
| #N/A | #N/A | #N/A | #N/A |
| 1.47 | 0.64 | 1.80 | 0.77 |
| 1.93 | 0.79 | #N/A | #N/A |
| 2.42 | 0.91 | 1.83 | 0.80 |
| 1.18 | 0.56 | 1.64 | 0.65 |
| 1.21 | 0.52 | 1.62 | 0.63 |
| 1.09 | 0.51 | 1.55 | 0.71 |
| #N/A | #N/A | 0.72 | 0.25 |
| 0.85 | 0.38 | 1.42 | 0.64 |
| 0.94 | 0.40 | #N/A | #N/A |
| 1.01 | 0.46 | 0.93 | 0.41 |
| 0.57 | 0.20 | #N/A | #N/A |
| 1.56 | 0.69 | 1.83 | 0.69 |
| #N/A | #N/A | 0.37 | 0.09 |
| 0.80 | 0.33 | 0.65 | 0.26 |
| 0.38 | 0.08 | 0.32 | 0.06 |
| 0.19 | 0.01 | 0.18 | 0.01 |
| #N/A | #N/A | 2.16 | 0.88 |
| 1.05 | 0.46 | 1.02 | 0.45 |
| 1.09 | 0.47 | 1.15 | 0.43 |
| #N/A | #N/A | 0.41 | 0.11 |
| 0.83 | 0.37 | 0.54 | 0.18 |
| 1.90 | 0.78 | 1.72 | 0.70 |
| 0.36 | 0.06 | 0.54 | 0.18 |
| 2.07 | 0.85 | 1.93 | 0.81 |
| #N/A | #N/A | #N/A | #N/A |
| 2.04 | 0.84 | 1.77 | 0.79 |
| 1.98 | 0.83 | 1.49 | 0.68 |
| 0.51 | 0.16 | 0.34 | 0.07 |
| 0.85 | 0.35 | 1.11 | 0.48 |
| 1.35 | 0.60 | 2.00 | 0.76 |
| #N/A | #N/A | #N/A | #N/A |
| 1.33 | 0.62 | 1.16 | 0.52 |
| 1.80 | 0.77 | 2.16 | 0.89 |
| 1.52 | 0.66 | #N/A | #N/A |
| #N/A | #N/A | #N/A | #N/A |
| #N/A | #N/A | #N/A | #N/A |

|      |      |      |      |
|------|------|------|------|
| 3.48 | 0.99 | 1.89 | 0.83 |
| #N/A | #N/A | #N/A | #N/A |
| 0.87 | 0.35 | 1.08 | 0.47 |
| 1.03 | 0.44 | 1.24 | 0.55 |
| 1.11 | 0.47 | 1.41 | 0.64 |
| #N/A | #N/A | #N/A | #N/A |
| 2.74 | 0.97 | 3.38 | 0.98 |
| 0.79 | 0.32 | 0.69 | 0.27 |
| 0.55 | 0.19 | 0.44 | 0.13 |
| 1.20 | 0.52 | 0.90 | 0.37 |
| 0.73 | 0.29 | 0.71 | 0.29 |
| 1.08 | 0.46 | 1.14 | 0.51 |
| 0.62 | 0.22 | 0.48 | 0.15 |
| 1.06 | 0.45 | 1.27 | 0.57 |
| 0.47 | 0.14 | 0.67 | 0.26 |
| 0.58 | 0.22 | #N/A | #N/A |
| 0.29 | 0.03 | 0.21 | 0.01 |
| 0.95 | 0.40 | 0.50 | 0.16 |
| 1.75 | 0.79 | 1.46 | 0.67 |
| 0.95 | 0.42 | 0.75 | 0.31 |
| 1.57 | 0.71 | 1.73 | 0.69 |
| 0.41 | 0.10 | 0.60 | 0.20 |
| 0.50 | 0.16 | 0.73 | 0.25 |
| 2.12 | 0.86 | 2.12 | 0.89 |
| #N/A | #N/A | 0.84 | 0.35 |
| #N/A | #N/A | 0.39 | 0.08 |
| 1.20 | 0.52 | 1.54 | 0.70 |
| 1.01 | 0.47 | 0.43 | 0.13 |
| #N/A | #N/A | #N/A | #N/A |
| 1.66 | 0.71 | 1.68 | 0.73 |
| 0.94 | 0.39 | #N/A | #N/A |
| 1.12 | 0.53 | 1.55 | 0.60 |
| 1.87 | 0.79 | 1.75 | 0.74 |
| 0.36 | 0.07 | 0.38 | 0.08 |
| 1.74 | 0.78 | 1.83 | 0.81 |
| 0.48 | 0.15 | 0.58 | 0.21 |
| #N/A | #N/A | #N/A | #N/A |
| 1.40 | 0.60 | 1.31 | 0.60 |
| 1.24 | 0.53 | 1.07 | 0.47 |
| 1.12 | 0.53 | 0.71 | 0.29 |
| 2.18 | 0.87 | 2.10 | 0.88 |
| #N/A | #N/A | #N/A | #N/A |
| 2.70 | 0.96 | 2.55 | 0.95 |
| 0.85 | 0.35 | 1.01 | 0.45 |
| 1.64 | 0.74 | 1.59 | 0.72 |
| 2.03 | 0.84 | 2.12 | 0.82 |
| 2.21 | 0.88 | 2.38 | 0.90 |
| 0.31 | 0.04 | 0.25 | 0.03 |
| 2.57 | 0.94 | 2.15 | 0.82 |
| 0.30 | 0.04 | 0.35 | 0.07 |
| 1.28 | 0.57 | 1.08 | 0.40 |

|      |      |      |      |
|------|------|------|------|
| 3.47 | 0.99 | 3.20 | 0.99 |
| 1.31 | 0.56 | 1.73 | 0.75 |
| 2.25 | 0.88 | 1.67 | 0.76 |
| #N/A | #N/A | #N/A | #N/A |
| 1.68 | 0.76 | 1.61 | 0.73 |
| #N/A | #N/A | #N/A | #N/A |
| #N/A | #N/A | #N/A | #N/A |
| 2.12 | 0.85 | 1.63 | 0.74 |
| 1.97 | 0.81 | 1.84 | 0.78 |
| 1.68 | 0.73 | 1.71 | 0.77 |
| 2.64 | 0.95 | 3.35 | 0.97 |
| 1.94 | 0.80 | 2.08 | 0.83 |
| 1.92 | 0.79 | 1.98 | 0.82 |
| #N/A | #N/A | #N/A | #N/A |
| 3.14 | 0.98 | 3.69 | 0.98 |
| 1.44 | 0.67 | 1.86 | 0.80 |
| 2.04 | 0.87 | 1.94 | 0.73 |
| 2.45 | 0.92 | 2.08 | 0.88 |
| #N/A | #N/A | #N/A | #N/A |
| 3.06 | 0.99 | 3.53 | 0.99 |
| 1.89 | 0.83 | 1.79 | 0.78 |
| 1.90 | 0.82 | 2.12 | 0.88 |
| 1.79 | 0.77 | 1.43 | 0.60 |
| 1.84 | 0.77 | 2.33 | 0.84 |
| 1.15 | 0.50 | 1.45 | 0.60 |
| #N/A | #N/A | #N/A | #N/A |
| 3.11 | 0.98 | 3.89 | 1.00 |
| 0.42 | 0.11 | 0.43 | 0.11 |
| 1.02 | 0.47 | #N/A | #N/A |
| 1.57 | 0.71 | 2.20 | 0.84 |
| #N/A | #N/A | #N/A | #N/A |
| 1.62 | 0.71 | 1.61 | 0.73 |
| 1.37 | 0.59 | 1.33 | 0.61 |
| 1.64 | 0.72 | #N/A | #N/A |
| 0.36 | 0.06 | 0.24 | 0.02 |
| #N/A | #N/A | #N/A | #N/A |
| 1.93 | 0.79 | 1.78 | 0.79 |
| #N/A | #N/A | 0.55 | 0.16 |
| 1.26 | 0.56 | 1.64 | 0.65 |
| 1.82 | 0.78 | 1.82 | 0.81 |
| #N/A | #N/A | 1.41 | 0.54 |
| 1.08 | 0.46 | 0.86 | 0.37 |
| #N/A | #N/A | #N/A | #N/A |
| 1.96 | 0.83 | 2.24 | 0.82 |
| 1.05 | 0.45 | 0.96 | 0.42 |
| 0.40 | 0.09 | #N/A | #N/A |
| 2.14 | 0.88 | 2.28 | 0.87 |
| 2.30 | 0.90 | 1.95 | 0.76 |
| 1.98 | 0.83 | 2.69 | 0.92 |
| 1.81 | 0.77 | 1.12 | 0.44 |
| #N/A | #N/A | 1.85 | 0.82 |

|      |      |      |      |
|------|------|------|------|
| 0.85 | 0.35 | 0.68 | 0.27 |
| 1.94 | 0.81 | 1.89 | 0.71 |
| 2.01 | 0.83 | 2.35 | 0.92 |
| 1.08 | 0.50 | 1.55 | 0.70 |
| 1.57 | 0.70 | 1.95 | 0.84 |
| 0.91 | 0.38 | 1.21 | 0.53 |
| 2.04 | 0.84 | #N/A | #N/A |
| #N/A | #N/A | #N/A | #N/A |
| 0.95 | 0.44 | 0.65 | 0.25 |
| 0.68 | 0.26 | 0.95 | 0.41 |
| 1.35 | 0.58 | 2.00 | 0.83 |
| 0.63 | 0.23 | 1.37 | 0.51 |
| #N/A | #N/A | #N/A | #N/A |
| #N/A | #N/A | 1.22 | 0.55 |
| 0.90 | 0.38 | 0.89 | 0.31 |
| 1.23 | 0.58 | 1.38 | 0.54 |
| 0.36 | 0.07 | #N/A | #N/A |
| 1.31 | 0.56 | 1.41 | 0.62 |
| #N/A | #N/A | #N/A | #N/A |
| 1.52 | 0.70 | 1.62 | 0.74 |
| 2.64 | 0.95 | 1.64 | 0.74 |
| 1.30 | 0.57 | 1.38 | 0.63 |
| 1.75 | 0.75 | 1.97 | 0.85 |
| 1.11 | 0.52 | 1.55 | 0.67 |
| #N/A | #N/A | #N/A | #N/A |
| 2.43 | 0.91 | 2.81 | 0.97 |
| 1.53 | 0.70 | #N/A | #N/A |
| 0.69 | 0.26 | 0.93 | 0.40 |
| 0.71 | 0.30 | 0.92 | 0.40 |
| 0.29 | 0.03 | 0.50 | 0.14 |
| 1.85 | 0.82 | 2.83 | 0.97 |
| 1.52 | 0.66 | 1.10 | 0.49 |
| 1.93 | 0.81 | 1.64 | 0.71 |
| 0.75 | 0.30 | 0.67 | 0.24 |
| 1.49 | 0.68 | 1.29 | 0.58 |
| #N/A | #N/A | #N/A | #N/A |
| 2.06 | 0.88 | 2.08 | 0.87 |
| 2.59 | 0.94 | 2.53 | 0.93 |
| 0.74 | 0.29 | 0.87 | 0.38 |
| 1.59 | 0.71 | 1.29 | 0.59 |
| 0.62 | 0.22 | 0.63 | 0.24 |
| 1.50 | 0.67 | 1.68 | 0.76 |
| 1.85 | 0.78 | 1.71 | 0.77 |
| 1.56 | 0.71 | 1.24 | 0.52 |
| 1.11 | 0.52 | #N/A | #N/A |
| #N/A | #N/A | #N/A | #N/A |
| 1.34 | 0.60 | 2.57 | 0.92 |
| 2.39 | 0.90 | 2.04 | 0.87 |
| #N/A | #N/A | #N/A | #N/A |
| 2.14 | 0.88 | 2.17 | 0.90 |
| #N/A | #N/A | #N/A | #N/A |



|      |      |      |      |
|------|------|------|------|
| 0.45 | 0.12 | 0.30 | 0.05 |
| 1.10 | 0.52 | 0.95 | 0.35 |
| 1.88 | 0.80 | 1.38 | 0.60 |
| #N/A | #N/A | #N/A | #N/A |
| 2.00 | 0.82 | 2.54 | 0.89 |
| 0.87 | 0.38 | 1.02 | 0.45 |
| 0.29 | 0.03 | 0.43 | 0.12 |
| 1.07 | 0.50 | 0.99 | 0.37 |
| 0.43 | 0.11 | 0.39 | 0.09 |
| 0.30 | 0.04 | 0.32 | 0.06 |
| #N/A | #N/A | #N/A | #N/A |
| 0.92 | 0.38 | 0.79 | 0.32 |
| 0.57 | 0.21 | 0.61 | 0.19 |
| 0.49 | 0.15 | 0.58 | 0.21 |
| 0.35 | 0.06 | 0.26 | 0.03 |
| 0.26 | 0.02 | 0.21 | 0.01 |
| 1.35 | 0.58 | 1.70 | 0.64 |
| #N/A | #N/A | #N/A | #N/A |
| 0.25 | 0.02 | 0.27 | 0.03 |
| 0.33 | 0.05 | 0.28 | 0.04 |
| 1.38 | 0.60 | 1.63 | 0.73 |
| 1.44 | 0.62 | 1.86 | 0.82 |
| #N/A | #N/A | 0.71 | 0.28 |
| 1.17 | 0.50 | 1.36 | 0.62 |
| 0.92 | 0.38 | 0.36 | 0.08 |
| 0.51 | 0.16 | 0.37 | 0.08 |
| 1.07 | 0.46 | 1.36 | 0.51 |
| 0.48 | 0.14 | 0.26 | 0.03 |
| 1.54 | 0.67 | 1.22 | 0.55 |
| 0.63 | 0.23 | 0.60 | 0.22 |
| 0.28 | 0.03 | 0.18 | 0.01 |
| 1.28 | 0.55 | 0.64 | 0.25 |
| #N/A | #N/A | #N/A | #N/A |
| 0.35 | 0.07 | 0.45 | 0.12 |
| 2.57 | 0.93 | 1.98 | 0.82 |
| 1.92 | 0.79 | 2.05 | 0.78 |
| #N/A | #N/A | #N/A | #N/A |
| 1.74 | 0.73 | 1.63 | 0.73 |
| 2.39 | 0.91 | 2.22 | 0.91 |
| 0.98 | 0.43 | 0.96 | 0.35 |
| 1.22 | 0.53 | 1.32 | 0.55 |
| 0.82 | 0.36 | 0.85 | 0.36 |
| 1.61 | 0.69 | 1.19 | 0.54 |
| 0.38 | 0.08 | 0.35 | 0.08 |
| 0.25 | 0.03 | 0.30 | 0.04 |
| 0.66 | 0.25 | 0.69 | 0.27 |
| 1.17 | 0.53 | #N/A | #N/A |
| 1.34 | 0.63 | 1.24 | 0.56 |
| 2.46 | 0.93 | 2.06 | 0.79 |
| 0.95 | 0.40 | 0.98 | 0.43 |
| 0.76 | 0.32 | 1.05 | 0.47 |

|      |      |      |      |
|------|------|------|------|
| 0.44 | 0.12 | 0.41 | 0.11 |
| 1.31 | 0.60 | 1.18 | 0.44 |
| 0.65 | 0.24 | 0.52 | 0.15 |
| #N/A | #N/A | #N/A | #N/A |
| 2.17 | 0.87 | 1.70 | 0.76 |
| #N/A | #N/A | #N/A | #N/A |
| 0.40 | 0.10 | 0.32 | 0.06 |
| 0.85 | 0.35 | 0.79 | 0.31 |
| #N/A | #N/A | #N/A | #N/A |
| 2.38 | 0.90 | 1.86 | 0.70 |
| 2.43 | 0.92 | 3.06 | 0.94 |
| 2.51 | 0.94 | 2.44 | 0.92 |
| 1.37 | 0.59 | 1.28 | 0.58 |
| 2.17 | 0.90 | 2.53 | 0.89 |
| 2.63 | 0.96 | 2.25 | 0.91 |
| 2.49 | 0.95 | 2.36 | 0.88 |
| 2.54 | 0.92 | #N/A | #N/A |
| 1.81 | 0.77 | 1.47 | 0.64 |
| #N/A | #N/A | #N/A | #N/A |
| 1.07 | 0.47 | 0.94 | 0.38 |
| 2.86 | 0.96 | 2.53 | 0.95 |
| 1.85 | 0.79 | 2.30 | 0.83 |
| 0.96 | 0.44 | 0.76 | 0.31 |
| 0.60 | 0.21 | 0.52 | 0.18 |
| 0.54 | 0.18 | 0.27 | 0.03 |
| 0.97 | 0.44 | 0.89 | 0.34 |
| #N/A | #N/A | 0.25 | 0.03 |
| 1.46 | 0.67 | 1.46 | 0.58 |
| 2.32 | 0.89 | 2.17 | 0.90 |
| 0.95 | 0.41 | 0.81 | 0.31 |
| 2.02 | 0.82 | 2.58 | 0.90 |
| 2.69 | 0.95 | 2.14 | 0.89 |
| 3.49 | 0.99 | 3.24 | 0.99 |
| #N/A | #N/A | #N/A | #N/A |
| 1.83 | 0.81 | 2.81 | 0.95 |
| #N/A | #N/A | #N/A | #N/A |
| 4.40 | 1.00 | 3.87 | 0.99 |
| 1.85 | 0.77 | 1.53 | 0.70 |
| 1.90 | 0.80 | 1.88 | 0.83 |
| 1.44 | 0.62 | 1.72 | 0.77 |
| 0.48 | 0.15 | 0.39 | 0.10 |
| 1.48 | 0.64 | 1.29 | 0.58 |
| 2.81 | 0.96 | 2.11 | 0.88 |
| 2.26 | 0.92 | 2.49 | 0.95 |
| 1.34 | 0.58 | 0.95 | 0.42 |
| 1.49 | 0.65 | 2.12 | 0.81 |
| #N/A | #N/A | #N/A | #N/A |
| 1.24 | 0.53 | 1.26 | 0.57 |
| 1.40 | 0.60 | 1.12 | 0.50 |
| 0.30 | 0.04 | 0.33 | 0.06 |
| 1.29 | 0.59 | 1.49 | 0.67 |

|      |      |      |      |
|------|------|------|------|
| 0.55 | 0.19 | 0.70 | 0.23 |
| 0.57 | 0.20 | 0.66 | 0.21 |
| 0.85 | 0.35 | 0.83 | 0.32 |
| 0.80 | 0.35 | 1.90 | 0.83 |
| 0.38 | 0.08 | 0.64 | 0.25 |
| 0.89 | 0.39 | 2.36 | 0.91 |
| 0.82 | 0.34 | 1.60 | 0.72 |
| 0.57 | 0.20 | 0.79 | 0.33 |
| 0.63 | 0.23 | 0.69 | 0.26 |
| 0.53 | 0.18 | 0.77 | 0.32 |
| 0.40 | 0.09 | 3.43 | 0.99 |
| 0.29 | 0.03 | 0.37 | 0.09 |
| 0.21 | 0.01 | 0.62 | 0.23 |
| 1.20 | 0.51 | 1.13 | 0.51 |
| 1.10 | 0.52 | 1.14 | 0.51 |
| 1.02 | 0.44 | 0.98 | 0.42 |
| 2.39 | 0.93 | 2.33 | 0.93 |
| 0.71 | 0.27 | 0.84 | 0.34 |
| 0.88 | 0.39 | 0.87 | 0.35 |
| #N/A | #N/A | #N/A | #N/A |
| 0.53 | 0.18 | 0.46 | 0.14 |
| 0.69 | 0.28 | 0.73 | 0.28 |
| #N/A | #N/A | #N/A | #N/A |
| 0.49 | 0.14 | 0.54 | 0.19 |
| 0.79 | 0.35 | #N/A | #N/A |
| 1.00 | 0.43 | 1.00 | 0.44 |
| 0.63 | 0.23 | 0.57 | 0.17 |
| 1.20 | 0.56 | 1.34 | 0.61 |
| 1.07 | 0.46 | 1.51 | 0.60 |
| 0.28 | 0.03 | 0.34 | 0.07 |
| 0.78 | 0.32 | 0.77 | 0.32 |
| #N/A | #N/A | 0.59 | 0.21 |
| 1.24 | 0.54 | 1.27 | 0.55 |
| 1.96 | 0.80 | 2.30 | 0.87 |
| 1.04 | 0.44 | 1.29 | 0.52 |
| 2.31 | 0.90 | 2.38 | 0.91 |
| 1.42 | 0.62 | 1.33 | 0.53 |
| 0.38 | 0.07 | #N/A | #N/A |
| 2.20 | 0.87 | 2.48 | 0.94 |
| 0.95 | 0.39 | 0.99 | 0.43 |
| #N/A | #N/A | #N/A | #N/A |
| 1.01 | 0.43 | 1.41 | 0.63 |
| 0.92 | 0.42 | 0.87 | 0.37 |
| 2.62 | 0.96 | 2.73 | 0.92 |
| 1.67 | 0.72 | 1.30 | 0.59 |
| 2.06 | 0.87 | 1.58 | 0.70 |
| #N/A | #N/A | #N/A | #N/A |
| 1.77 | 0.76 | 1.83 | 0.80 |
| 2.09 | 0.84 | 1.77 | 0.79 |
| 2.28 | 0.92 | 2.19 | 0.81 |
| 1.47 | 0.64 | 1.23 | 0.56 |

|      |      |      |      |
|------|------|------|------|
| 1.26 | 0.58 | 1.28 | 0.54 |
| 0.71 | 0.27 | 0.98 | 0.43 |
| 0.82 | 0.33 | 0.55 | 0.17 |
| 1.68 | 0.76 | 2.10 | 0.88 |
| 1.22 | 0.54 | 1.29 | 0.48 |
| #N/A | #N/A | #N/A | #N/A |
| 1.54 | 0.66 | 1.33 | 0.61 |
| 1.89 | 0.78 | 1.84 | 0.80 |
| #N/A | #N/A | 0.72 | 0.28 |
| 0.84 | 0.34 | 1.08 | 0.48 |
| 0.39 | 0.08 | #N/A | #N/A |
| 0.51 | 0.16 | 0.59 | 0.18 |
| #N/A | #N/A | #N/A | #N/A |
| 1.76 | 0.76 | 1.38 | 0.63 |
| 1.29 | 0.56 | 1.26 | 0.52 |
| 1.78 | 0.76 | 1.67 | 0.68 |
| 0.76 | 0.30 | 0.70 | 0.28 |
| 1.09 | 0.46 | 1.76 | 0.73 |
| #N/A | #N/A | #N/A | #N/A |
| 2.50 | 0.95 | 2.30 | 0.92 |
| 0.93 | 0.39 | 0.83 | 0.30 |
| 2.57 | 0.93 | 2.61 | 0.94 |
| #N/A | #N/A | #N/A | #N/A |
| 0.60 | 0.21 | 0.38 | 0.09 |
| 0.77 | 0.33 | 0.62 | 0.24 |
| #N/A | #N/A | #N/A | #N/A |
| 1.64 | 0.71 | 1.63 | 0.73 |
| #N/A | #N/A | #N/A | #N/A |
| 1.36 | 0.60 | 1.73 | 0.72 |
| 1.11 | 0.48 | 1.18 | 0.51 |
| #N/A | #N/A | #N/A | #N/A |
| #N/A | #N/A | #N/A | #N/A |
| #N/A | #N/A | #N/A | #N/A |
| 1.78 | 0.75 | 1.80 | 0.77 |
| #N/A | #N/A | #N/A | #N/A |
| 0.59 | 0.22 | 0.36 | 0.08 |
| 1.84 | 0.78 | 1.69 | 0.77 |
| 1.82 | 0.81 | 2.30 | 0.90 |
| 2.55 | 0.94 | 3.34 | 0.97 |
| 1.71 | 0.77 | 1.79 | 0.76 |
| 0.92 | 0.39 | 0.89 | 0.39 |
| #N/A | #N/A | 0.36 | 0.08 |
| 0.19 | 0.01 | 0.19 | 0.01 |
| 0.26 | 0.02 | 0.29 | 0.04 |
| 1.64 | 0.70 | 1.25 | 0.50 |
| 1.46 | 0.63 | 1.81 | 0.75 |
| 3.57 | 0.99 | 3.84 | 0.99 |
| #N/A | #N/A | #N/A | #N/A |
| #N/A | #N/A | #N/A | #N/A |
| 2.31 | 0.89 | 2.15 | 0.88 |
| 1.56 | 0.71 | 1.79 | 0.68 |

|      |      |      |      |
|------|------|------|------|
| 0.81 | 0.33 | 0.62 | 0.24 |
| 2.15 | 0.90 | 2.37 | 0.85 |
| #N/A | #N/A | #N/A | #N/A |
| 1.00 | 0.47 | 0.96 | 0.41 |
| 1.27 | 0.55 | 1.85 | 0.70 |
| 0.46 | 0.14 | 0.48 | 0.15 |
| #N/A | #N/A | 1.50 | 0.68 |
| 1.12 | 0.48 | 0.90 | 0.38 |
| #N/A | #N/A | #N/A | #N/A |
| 2.75 | 0.95 | 2.55 | 0.88 |
| #N/A | #N/A | 1.01 | 0.44 |
| 2.65 | 0.96 | 2.95 | 0.98 |
| #N/A | #N/A | 0.57 | 0.20 |
| 1.98 | 0.83 | 1.86 | 0.70 |
| 1.45 | 0.63 | 1.32 | 0.53 |
| 1.17 | 0.51 | 0.95 | 0.41 |
| 1.62 | 0.70 | 1.63 | 0.74 |
| #N/A | #N/A | #N/A | #N/A |
| 1.98 | 0.86 | 1.84 | 0.81 |
| #N/A | #N/A | #N/A | #N/A |
| 1.67 | 0.72 | 1.61 | 0.73 |
| #N/A | #N/A | #N/A | #N/A |
| 1.85 | 0.77 | 1.47 | 0.67 |
| 1.51 | 0.65 | 1.59 | 0.72 |
| 0.92 | 0.42 | 1.12 | 0.50 |
| 2.76 | 0.96 | 2.58 | 0.92 |
| #N/A | #N/A | #N/A | #N/A |
| 0.72 | 0.28 | 1.18 | 0.48 |
| 1.22 | 0.53 | 1.11 | 0.50 |
| 0.56 | 0.20 | 0.79 | 0.33 |
| 0.71 | 0.27 | 0.95 | 0.41 |
| 1.06 | 0.45 | 1.10 | 0.49 |
| 0.58 | 0.20 | 0.48 | 0.15 |
| 0.96 | 0.41 | 1.09 | 0.40 |
| 1.12 | 0.48 | 1.16 | 0.52 |
| 0.63 | 0.23 | 0.67 | 0.24 |
| 1.52 | 0.69 | 2.10 | 0.84 |
| 0.66 | 0.26 | 0.57 | 0.20 |
| 1.00 | 0.43 | 1.51 | 0.63 |
| 0.72 | 0.28 | 1.18 | 0.53 |
| 0.65 | 0.24 | 0.92 | 0.33 |
| 0.51 | 0.16 | 0.42 | 0.12 |
| 0.39 | 0.08 | 0.24 | 0.02 |
| 1.11 | 0.47 | 0.97 | 0.36 |
| 1.07 | 0.46 | 0.81 | 0.35 |
| 0.98 | 0.42 | 0.60 | 0.22 |
| 0.25 | 0.02 | 0.21 | 0.01 |
| 2.06 | 0.83 | 1.35 | 0.62 |
| 0.39 | 0.08 | 0.49 | 0.14 |
| 2.31 | 0.91 | 2.01 | 0.86 |
| 2.72 | 0.96 | 2.24 | 0.86 |

|      |      |      |      |
|------|------|------|------|
| 0.39 | 0.09 | 0.30 | 0.04 |
| 0.95 | 0.39 | 0.63 | 0.21 |
| 1.77 | 0.76 | 1.42 | 0.59 |
| #N/A | #N/A | #N/A | #N/A |
| 1.84 | 0.78 | 1.83 | 0.69 |
| 1.35 | 0.63 | 2.13 | 0.88 |
| #N/A | #N/A | #N/A | #N/A |
| 0.29 | 0.03 | #N/A | #N/A |
| 1.25 | 0.53 | 1.00 | 0.37 |
| 0.66 | 0.25 | 0.66 | 0.26 |
| 2.28 | 0.88 | 1.93 | 0.80 |
| #N/A | #N/A | 0.45 | 0.12 |
| 1.62 | 0.74 | #N/A | #N/A |
| 1.76 | 0.74 | 1.42 | 0.65 |
| #N/A | #N/A | #N/A | #N/A |
| 1.24 | 0.58 | 1.88 | 0.82 |
| 0.74 | 0.29 | 1.11 | 0.41 |
| 1.56 | 0.68 | 1.45 | 0.66 |
| #N/A | #N/A | #N/A | #N/A |
| 1.97 | 0.85 | 1.85 | 0.79 |
| 0.45 | 0.12 | 0.33 | 0.06 |
| 2.09 | 0.84 | 1.84 | 0.81 |
| #N/A | #N/A | #N/A | #N/A |
| 1.52 | 0.65 | 1.84 | 0.70 |
| 1.65 | 0.75 | 2.32 | 0.91 |
| 0.65 | 0.24 | 1.03 | 0.39 |
| 0.59 | 0.20 | 1.02 | 0.45 |
| #N/A | #N/A | 1.62 | 0.68 |
| 0.39 | 0.09 | 0.58 | 0.21 |
| 0.32 | 0.04 | 0.33 | 0.06 |
| 0.31 | 0.04 | 0.33 | 0.06 |
| 2.67 | 0.95 | 2.29 | 0.92 |
| 1.26 | 0.55 | 1.31 | 0.54 |
| #N/A | #N/A | #N/A | #N/A |
| 2.76 | 0.96 | 2.07 | 0.87 |
| 0.26 | 0.02 | 0.32 | 0.06 |
| 0.46 | 0.13 | 0.51 | 0.17 |
| 1.14 | 0.52 | 1.01 | 0.45 |
| 0.96 | 0.41 | 1.17 | 0.53 |
| 1.68 | 0.73 | 1.83 | 0.81 |
| 1.76 | 0.78 | 1.89 | 0.83 |
| 1.10 | 0.52 | #N/A | #N/A |
| 1.63 | 0.71 | 1.21 | 0.51 |
| 1.37 | 0.64 | 1.90 | 0.72 |
| 0.60 | 0.21 | #N/A | #N/A |
| 2.44 | 0.92 | 2.01 | 0.81 |
| 3.34 | 0.99 | 3.46 | 0.99 |
| #N/A | #N/A | 0.54 | 0.18 |
| 1.60 | 0.71 | 1.74 | 0.78 |
| #N/A | #N/A | #N/A | #N/A |
| 1.26 | 0.55 | 1.64 | 0.64 |

|      |      |      |      |
|------|------|------|------|
| #N/A | #N/A | 1.34 | 0.53 |
| 1.93 | 0.84 | 2.02 | 0.85 |
| 0.87 | 0.39 | 0.81 | 0.28 |
| 1.33 | 0.58 | 1.40 | 0.54 |
| 0.70 | 0.27 | 0.77 | 0.31 |
| 0.67 | 0.26 | 1.06 | 0.39 |
| #N/A | #N/A | #N/A | #N/A |
| 3.10 | 0.99 | 3.23 | 0.97 |
| 0.48 | 0.14 | 0.56 | 0.20 |
| 3.00 | 0.97 | 2.40 | 0.93 |
| #N/A | #N/A | 1.00 | 0.37 |
| 1.35 | 0.59 | 1.63 | 0.72 |
| 0.51 | 0.16 | 0.75 | 0.27 |
| 2.99 | 0.97 | 3.29 | 0.99 |
| 3.85 | 1.00 | 4.22 | 0.99 |
| 1.60 | 0.68 | 1.47 | 0.67 |
| 1.10 | 0.47 | 2.11 | 0.78 |
| 1.22 | 0.52 | 0.96 | 0.42 |
| 0.29 | 0.04 | 0.33 | 0.06 |
| 3.42 | 0.99 | 3.22 | 0.96 |
| 0.99 | 0.45 | 0.89 | 0.39 |
| 1.65 | 0.71 | 1.49 | 0.68 |
| 0.90 | 0.37 | 0.91 | 0.37 |
| 1.15 | 0.50 | 0.88 | 0.38 |
| 0.36 | 0.06 | 0.33 | 0.06 |
| 2.58 | 0.96 | 2.68 | 0.93 |
| 2.05 | 0.85 | #N/A | #N/A |
| 1.80 | 0.77 | 1.37 | 0.62 |
| 1.99 | 0.81 | 2.13 | 0.88 |
| 1.88 | 0.83 | 1.95 | 0.75 |
| #N/A | #N/A | #N/A | #N/A |
| 2.20 | 0.91 | 1.81 | 0.80 |
| #N/A | #N/A | #N/A | #N/A |
| 0.26 | 0.02 | 0.30 | 0.05 |
| 0.27 | 0.02 | 0.26 | 0.03 |
| 1.60 | 0.73 | 2.88 | 0.98 |
| 2.42 | 0.93 | 3.17 | 0.95 |
| 1.72 | 0.73 | 1.67 | 0.72 |
| 1.40 | 0.61 | 1.38 | 0.63 |
| 1.66 | 0.73 | 2.53 | 0.93 |
| 0.58 | 0.22 | 0.79 | 0.28 |
| 1.95 | 0.80 | 3.11 | 0.98 |
| 1.23 | 0.53 | 1.47 | 0.61 |
| 0.72 | 0.31 | 1.87 | 0.82 |
| 2.12 | 0.89 | 2.76 | 0.97 |
| 0.49 | 0.14 | 0.50 | 0.14 |
| 1.15 | 0.49 | 0.97 | 0.41 |
| 1.57 | 0.72 | 1.42 | 0.60 |
| 1.12 | 0.52 | 0.77 | 0.31 |
| #N/A | #N/A | #N/A | #N/A |
| 0.68 | 0.26 | 0.96 | 0.36 |

|      |      |      |      |
|------|------|------|------|
| 0.84 | 0.34 | 0.74 | 0.30 |
| 1.12 | 0.48 | 0.90 | 0.32 |
| #N/A | #N/A | #N/A | #N/A |
| 0.68 | 0.26 | 1.07 | 0.40 |
| 1.15 | 0.53 | 1.33 | 0.61 |
| 1.36 | 0.62 | 1.92 | 0.84 |
| 0.40 | 0.08 | 0.42 | 0.11 |
| 0.99 | 0.43 | 0.94 | 0.41 |
| #N/A | #N/A | 0.76 | 0.30 |
| 1.35 | 0.58 | 1.77 | 0.77 |
| 0.93 | 0.39 | 0.91 | 0.32 |
| 2.06 | 0.85 | 2.36 | 0.88 |
| 0.78 | 0.31 | 1.08 | 0.48 |
| 0.66 | 0.25 | 0.78 | 0.33 |
| 0.80 | 0.32 | 0.97 | 0.42 |
| 2.30 | 0.89 | 2.62 | 0.91 |
| #N/A | #N/A | #N/A | #N/A |
| 0.57 | 0.20 | 0.77 | 0.26 |
| #N/A | #N/A | #N/A | #N/A |
| 0.32 | 0.05 | 0.32 | 0.05 |
| 1.71 | 0.72 | 1.48 | 0.67 |
| 1.17 | 0.50 | 1.18 | 0.49 |
| #N/A | #N/A | #N/A | #N/A |
| 2.77 | 0.95 | 1.59 | 0.72 |
| 2.38 | 0.91 | 3.60 | 0.99 |
| 1.01 | 0.45 | #N/A | #N/A |
| 1.35 | 0.61 | 1.52 | 0.64 |
| 0.38 | 0.08 | 0.45 | 0.14 |
| 0.27 | 0.03 | 0.34 | 0.06 |
| 1.63 | 0.70 | 1.62 | 0.61 |
| 0.74 | 0.29 | #N/A | #N/A |
| 1.97 | 0.83 | 2.07 | 0.87 |
| 0.38 | 0.08 | 0.42 | 0.12 |
| 1.83 | 0.77 | 1.94 | 0.77 |
| 0.48 | 0.14 | 0.43 | 0.12 |
| 1.50 | 0.64 | 1.42 | 0.64 |
| 1.16 | 0.54 | 1.49 | 0.60 |
| 0.57 | 0.20 | 0.68 | 0.27 |
| 0.47 | 0.14 | 0.50 | 0.16 |
| 0.50 | 0.15 | 0.70 | 0.26 |
| 1.24 | 0.54 | 1.47 | 0.67 |
| 0.71 | 0.27 | 0.65 | 0.22 |
| 1.26 | 0.58 | 1.22 | 0.55 |
| 0.79 | 0.32 | 0.63 | 0.24 |
| 0.63 | 0.23 | 0.60 | 0.18 |
| 0.50 | 0.15 | 0.47 | 0.13 |
| 1.38 | 0.60 | 1.03 | 0.41 |
| 0.98 | 0.42 | 0.98 | 0.43 |
| 1.21 | 0.53 | 1.07 | 0.47 |
| #N/A | #N/A | #N/A | #N/A |
| 2.52 | 0.92 | 2.27 | 0.92 |



|      |      |      |      |
|------|------|------|------|
| #N/A | #N/A | #N/A | #N/A |
| 0.81 | 0.33 | 0.92 | 0.33 |
| 0.53 | 0.17 | 0.53 | 0.18 |
| 0.97 | 0.40 | 0.91 | 0.39 |
| 0.90 | 0.38 | 0.80 | 0.33 |
| 0.38 | 0.08 | #N/A | #N/A |
| #N/A | #N/A | 0.50 | 0.14 |
| #N/A | #N/A | 0.67 | 0.22 |
| 1.33 | 0.62 | 1.28 | 0.58 |
| 1.46 | 0.63 | 1.57 | 0.59 |
| 0.36 | 0.07 | 0.36 | 0.08 |
| 2.53 | 0.92 | 2.54 | 0.91 |
| 0.72 | 0.28 | 1.20 | 0.45 |
| 0.80 | 0.33 | 0.92 | 0.35 |
| 0.76 | 0.30 | #N/A | #N/A |
| 1.33 | 0.57 | 1.33 | 0.61 |
| 1.34 | 0.63 | 0.77 | 0.32 |
| 0.22 | 0.01 | 0.19 | 0.01 |
| 0.43 | 0.10 | 0.49 | 0.16 |
| 1.67 | 0.75 | 1.79 | 0.79 |
| 2.75 | 0.96 | 2.49 | 0.94 |
| 0.41 | 0.10 | 0.42 | 0.12 |
| 2.08 | 0.86 | 1.94 | 0.84 |
| #N/A | #N/A | 0.88 | 0.36 |
| #N/A | #N/A | #N/A | #N/A |
| 2.04 | 0.84 | 2.39 | 0.93 |
| 1.21 | 0.55 | 1.32 | 0.60 |
| 1.04 | 0.46 | 1.24 | 0.47 |
| 3.17 | 0.99 | 2.36 | 0.93 |
| 1.21 | 0.52 | 1.08 | 0.44 |
| 0.45 | 0.13 | 0.58 | 0.18 |
| 1.24 | 0.58 | 1.01 | 0.45 |
| 2.12 | 0.86 | 1.39 | 0.63 |
| 0.76 | 0.30 | 0.82 | 0.31 |
| #N/A | #N/A | 1.18 | 0.53 |
| #N/A | #N/A | #N/A | #N/A |
| 1.46 | 0.67 | 1.29 | 0.49 |
| 1.13 | 0.48 | 0.82 | 0.28 |
| 0.64 | 0.24 | 0.53 | 0.15 |
| #N/A | #N/A | 0.50 | 0.16 |
| 0.45 | 0.12 | 0.58 | 0.21 |
| 1.03 | 0.43 | 1.29 | 0.55 |
| 1.95 | 0.82 | 1.25 | 0.56 |
| 2.81 | 0.96 | 2.99 | 0.98 |
| 1.05 | 0.45 | 0.92 | 0.40 |
| 2.48 | 0.92 | 3.36 | 0.98 |
| 3.13 | 0.99 | 2.93 | 0.95 |
| 0.76 | 0.30 | 1.08 | 0.45 |
| 1.62 | 0.73 | 1.15 | 0.46 |
| 2.77 | 0.97 | 2.27 | 0.87 |
| #N/A | #N/A | #N/A | #N/A |

|      |      |      |      |
|------|------|------|------|
| 1.92 | 0.83 | 1.74 | 0.66 |
| 2.12 | 0.88 | 2.24 | 0.82 |
| 1.34 | 0.58 | 1.07 | 0.47 |
| 1.10 | 0.52 | 1.60 | 0.71 |
| 2.18 | 0.86 | 2.22 | 0.90 |
| 1.56 | 0.71 | 2.11 | 0.80 |
| 0.49 | 0.15 | 0.26 | 0.03 |
| 1.23 | 0.54 | 1.37 | 0.62 |
| 0.57 | 0.21 | 0.42 | 0.12 |
| 1.45 | 0.63 | 2.03 | 0.87 |
| 2.52 | 0.93 | 1.51 | 0.69 |
| #N/A | #N/A | #N/A | #N/A |
| 0.37 | 0.07 | 0.35 | 0.08 |
| 0.79 | 0.33 | 0.65 | 0.26 |
| 2.26 | 0.88 | 2.05 | 0.80 |
| 2.56 | 0.93 | 2.54 | 0.95 |
| 0.23 | 0.02 | 0.25 | 0.03 |
| 1.67 | 0.72 | 2.33 | 0.92 |
| 1.42 | 0.61 | 1.94 | 0.82 |
| 0.73 | 0.29 | 0.71 | 0.24 |
| 2.35 | 0.91 | 2.32 | 0.90 |
| #N/A | #N/A | #N/A | #N/A |
| 1.69 | 0.72 | 1.34 | 0.61 |
| 1.11 | 0.51 | 1.16 | 0.52 |
| 1.74 | 0.75 | 1.79 | 0.72 |
| 2.58 | 0.94 | 1.82 | 0.75 |
| #N/A | #N/A | #N/A | #N/A |
| 0.88 | 0.36 | 0.83 | 0.29 |
| #N/A | #N/A | #N/A | #N/A |
| 1.58 | 0.68 | 1.75 | 0.76 |
| 0.67 | 0.28 | 0.63 | 0.23 |
| 1.07 | 0.46 | 0.86 | 0.31 |
| #N/A | #N/A | #N/A | #N/A |
| 0.35 | 0.07 | 0.33 | 0.06 |
| 0.37 | 0.08 | 0.31 | 0.05 |
| 1.72 | 0.74 | 1.57 | 0.62 |
| 1.38 | 0.59 | 1.28 | 0.57 |
| 0.93 | 0.39 | 1.28 | 0.58 |
| 0.54 | 0.17 | 0.73 | 0.27 |
| 2.37 | 0.92 | 2.05 | 0.87 |
| #N/A | #N/A | 0.67 | 0.25 |
| 2.94 | 0.98 | 2.52 | 0.95 |
| #N/A | #N/A | #N/A | #N/A |
| 2.32 | 0.92 | 2.88 | 0.98 |
| 1.45 | 0.63 | 1.45 | 0.66 |
| 1.30 | 0.57 | 1.23 | 0.56 |
| 1.33 | 0.62 | 2.19 | 0.90 |
| 1.12 | 0.48 | 0.93 | 0.34 |
| 0.38 | 0.09 | 0.30 | 0.05 |
| 1.74 | 0.75 | 1.25 | 0.47 |
| #N/A | #N/A | #N/A | #N/A |

|      |      |      |      |
|------|------|------|------|
| 0.60 | 0.21 | 0.84 | 0.35 |
| 0.35 | 0.07 | 0.47 | 0.13 |
| 1.63 | 0.74 | 1.44 | 0.55 |
| 1.42 | 0.63 | #N/A | #N/A |
| 1.54 | 0.71 | #N/A | #N/A |
| #N/A | #N/A | 1.04 | 0.46 |
| 1.31 | 0.61 | 1.29 | 0.59 |
| 1.66 | 0.73 | 1.87 | 0.77 |
| #N/A | #N/A | #N/A | #N/A |
| 2.27 | 0.89 | 2.11 | 0.88 |
| 1.58 | 0.70 | 1.30 | 0.54 |
| 0.74 | 0.29 | 1.08 | 0.44 |
| 1.58 | 0.68 | 1.67 | 0.70 |
| 0.86 | 0.39 | 1.31 | 0.60 |
| 0.64 | 0.24 | 0.54 | 0.19 |
| 1.99 | 0.83 | 1.38 | 0.55 |
| #N/A | #N/A | #N/A | #N/A |
| 1.84 | 0.77 | 1.58 | 0.71 |
| #N/A | #N/A | #N/A | #N/A |
| 1.09 | 0.49 | 1.40 | 0.64 |
| #N/A | #N/A | #N/A | #N/A |
| 1.84 | 0.82 | 2.10 | 0.77 |
| 0.32 | 0.05 | 0.52 | 0.16 |
| #N/A | #N/A | #N/A | #N/A |
| 2.40 | 0.91 | 2.46 | 0.90 |
| #N/A | #N/A | #N/A | #N/A |
| 1.68 | 0.76 | 2.44 | 0.86 |
| 2.58 | 0.95 | 2.47 | 0.94 |
| 1.97 | 0.82 | 1.52 | 0.69 |
| #N/A | #N/A | #N/A | #N/A |
| 1.88 | 0.80 | 1.69 | 0.68 |
| 1.12 | 0.52 | 0.82 | 0.35 |
| 1.16 | 0.55 | 1.03 | 0.46 |
| 1.43 | 0.62 | 1.19 | 0.50 |
| 1.18 | 0.52 | 0.97 | 0.43 |
| 0.34 | 0.06 | 0.54 | 0.19 |
| 0.68 | 0.26 | 0.59 | 0.22 |
| 0.29 | 0.03 | 0.44 | 0.11 |
| 2.44 | 0.93 | 1.89 | 0.73 |
| 0.60 | 0.21 | 0.55 | 0.19 |
| 1.00 | 0.43 | 1.07 | 0.47 |
| 0.62 | 0.23 | 0.56 | 0.19 |
| 1.31 | 0.56 | 1.65 | 0.63 |
| 1.05 | 0.48 | 1.15 | 0.52 |
| 0.55 | 0.18 | 0.52 | 0.16 |
| 0.57 | 0.19 | 0.51 | 0.17 |
| #N/A | #N/A | 0.89 | 0.38 |
| #N/A | #N/A | #N/A | #N/A |
| 1.96 | 0.85 | 1.85 | 0.82 |
| #N/A | #N/A | #N/A | #N/A |
| 0.96 | 0.43 | 0.96 | 0.42 |

|      |      |      |      |
|------|------|------|------|
| #N/A | #N/A | 0.30 | 0.04 |
| 0.58 | 0.20 | 0.46 | 0.14 |
| 1.20 | 0.54 | 1.24 | 0.56 |
| #N/A | #N/A | 0.62 | 0.23 |
| 2.61 | 0.94 | 2.56 | 0.95 |
| 0.44 | 0.12 | 0.52 | 0.18 |
| 1.58 | 0.72 | #N/A | #N/A |
| 1.77 | 0.76 | #N/A | #N/A |
| #N/A | #N/A | #N/A | #N/A |
| 1.29 | 0.61 | 1.23 | 0.56 |
| 0.92 | 0.42 | 0.47 | 0.15 |
| 1.33 | 0.57 | 1.27 | 0.50 |
| 0.83 | 0.37 | 0.86 | 0.37 |
| 0.43 | 0.11 | 0.54 | 0.18 |
| 1.18 | 0.51 | 1.44 | 0.66 |
| 1.90 | 0.78 | 1.68 | 0.72 |
| 1.22 | 0.53 | 1.05 | 0.38 |
| 0.80 | 0.33 | 0.83 | 0.31 |
| 1.97 | 0.82 | 2.12 | 0.85 |
| #N/A | #N/A | #N/A | #N/A |
| 1.64 | 0.73 | 1.44 | 0.62 |
| 0.29 | 0.04 | 0.34 | 0.07 |
| 0.87 | 0.39 | 0.77 | 0.28 |
| 0.88 | 0.40 | 1.97 | 0.78 |
| 0.43 | 0.11 | 0.59 | 0.18 |
| 1.32 | 0.62 | 2.02 | 0.86 |
| 1.54 | 0.66 | 1.92 | 0.81 |
| 1.57 | 0.68 | 1.81 | 0.68 |
| 0.50 | 0.15 | 0.46 | 0.14 |
| 0.62 | 0.22 | 0.42 | 0.12 |
| 1.89 | 0.83 | 1.58 | 0.72 |
| #N/A | #N/A | #N/A | #N/A |
| #N/A | #N/A | 1.97 | 0.84 |
| 0.96 | 0.40 | 0.76 | 0.32 |
| #N/A | #N/A | #N/A | #N/A |
| 1.18 | 0.50 | 1.18 | 0.50 |
| 0.77 | 0.32 | 0.74 | 0.30 |
| 0.56 | 0.19 | 0.49 | 0.14 |
| 0.36 | 0.07 | 0.30 | 0.05 |
| 0.30 | 0.04 | 0.57 | 0.21 |
| 0.54 | 0.18 | 0.82 | 0.32 |
| 2.28 | 0.89 | 1.55 | 0.71 |
| 0.67 | 0.26 | 0.60 | 0.19 |
| #N/A | #N/A | 1.15 | 0.51 |
| 1.06 | 0.45 | 1.36 | 0.59 |
| 2.75 | 0.96 | 2.58 | 0.95 |
| 1.71 | 0.72 | 1.35 | 0.62 |
| 1.01 | 0.43 | 0.99 | 0.36 |
| 2.54 | 0.94 | 2.44 | 0.93 |
| 1.90 | 0.83 | 1.72 | 0.77 |
| 0.30 | 0.04 | 0.38 | 0.09 |

|      |      |      |      |
|------|------|------|------|
| #N/A | #N/A | #N/A | #N/A |
| 0.72 | 0.31 | #N/A | #N/A |
| 1.24 | 0.54 | 1.40 | 0.61 |
| 1.49 | 0.68 | 1.52 | 0.58 |
| 0.90 | 0.38 | 0.66 | 0.25 |
| 0.59 | 0.21 | 0.52 | 0.17 |
| 1.71 | 0.76 | 2.68 | 0.92 |
| 0.25 | 0.03 | #N/A | #N/A |
| 3.57 | 0.99 | 3.08 | 0.98 |
| #N/A | #N/A | 1.36 | 0.62 |
| #N/A | #N/A | 0.42 | 0.12 |
| 1.51 | 0.65 | 1.71 | 0.77 |
| 1.31 | 0.56 | 1.34 | 0.61 |
| 1.54 | 0.68 | 1.15 | 0.52 |
| 1.20 | 0.57 | 1.42 | 0.64 |
| #N/A | #N/A | #N/A | #N/A |
| 1.00 | 0.46 | 0.79 | 0.27 |
| 0.52 | 0.16 | 0.28 | 0.04 |
| 1.89 | 0.83 | 1.42 | 0.65 |
| 2.18 | 0.87 | 1.55 | 0.71 |
| 1.47 | 0.63 | 1.24 | 0.56 |
| 1.75 | 0.74 | 2.20 | 0.82 |
| 2.43 | 0.91 | 2.14 | 0.89 |
| 0.35 | 0.06 | 0.44 | 0.13 |
| 1.25 | 0.59 | 1.36 | 0.57 |
| #N/A | #N/A | #N/A | #N/A |
| 1.74 | 0.75 | 2.19 | 0.82 |
| 0.99 | 0.46 | 0.67 | 0.27 |
| 1.46 | 0.67 | 2.02 | 0.77 |
| 2.00 | 0.83 | 1.71 | 0.77 |
| 2.53 | 0.93 | 1.40 | 0.60 |
| 0.86 | 0.38 | 0.67 | 0.24 |
| 2.11 | 0.89 | 2.29 | 0.91 |
| 2.04 | 0.87 | 2.04 | 0.85 |
| 2.24 | 0.91 | 2.37 | 0.87 |
| 1.26 | 0.56 | 1.31 | 0.60 |
| 0.33 | 0.05 | 0.15 | 0.01 |
| 1.13 | 0.49 | 1.09 | 0.48 |
| 0.89 | 0.37 | 1.18 | 0.53 |
| 1.92 | 0.81 | 2.17 | 0.90 |
| #N/A | #N/A | #N/A | #N/A |
| 1.70 | 0.77 | 2.13 | 0.79 |
| 1.02 | 0.47 | 1.13 | 0.43 |
| 1.41 | 0.62 | 1.99 | 0.85 |
| 0.36 | 0.07 | 0.84 | 0.36 |
| 0.98 | 0.42 | 1.28 | 0.55 |
| 0.58 | 0.22 | 1.22 | 0.51 |
| 0.54 | 0.18 | 1.22 | 0.45 |
| 0.82 | 0.33 | #N/A | #N/A |
| 0.43 | 0.11 | 0.38 | 0.08 |
| 2.19 | 0.87 | 1.99 | 0.74 |

|      |      |      |      |
|------|------|------|------|
| 0.26 | 0.02 | 0.28 | 0.04 |
| 1.35 | 0.58 | 1.28 | 0.48 |
| 1.84 | 0.78 | 2.16 | 0.83 |
| 1.95 | 0.85 | 1.90 | 0.82 |
| 1.07 | 0.50 | 1.14 | 0.50 |
| 0.86 | 0.36 | 1.01 | 0.45 |
| 1.33 | 0.57 | 1.53 | 0.60 |
| 1.91 | 0.79 | 1.68 | 0.66 |
| 0.47 | 0.14 | 0.56 | 0.20 |
| 0.37 | 0.06 | 0.29 | 0.04 |
| 1.31 | 0.57 | 1.10 | 0.49 |
| 1.61 | 0.69 | #N/A | #N/A |
| 1.86 | 0.82 | 1.76 | 0.79 |
| 0.28 | 0.03 | 0.27 | 0.03 |
| 0.44 | 0.11 | 0.54 | 0.18 |
| 1.81 | 0.76 | 1.15 | 0.52 |
| 2.52 | 0.93 | 1.87 | 0.81 |
| 2.47 | 0.94 | 1.39 | 0.59 |
| 0.63 | 0.23 | 0.64 | 0.24 |
| #N/A | #N/A | #N/A | #N/A |
| 1.93 | 0.79 | 1.58 | 0.63 |
| #N/A | #N/A | #N/A | #N/A |
| 1.60 | 0.69 | 1.75 | 0.70 |
| #N/A | #N/A | #N/A | #N/A |
| 1.72 | 0.74 | 1.65 | 0.75 |
| 1.21 | 0.55 | 2.40 | 0.86 |
| 1.06 | 0.45 | 0.78 | 0.32 |
| #N/A | #N/A | 1.08 | 0.48 |
| 1.76 | 0.77 | 1.65 | 0.74 |
| 1.15 | 0.50 | 1.27 | 0.52 |
| 0.54 | 0.18 | 0.65 | 0.21 |
| #N/A | #N/A | #N/A | #N/A |
| 1.35 | 0.63 | 0.92 | 0.40 |
| 0.29 | 0.03 | 0.21 | 0.01 |
| 0.59 | 0.23 | 0.74 | 0.25 |
| #N/A | #N/A | 0.34 | 0.07 |
| 1.67 | 0.72 | 1.43 | 0.65 |
| 0.59 | 0.23 | 0.50 | 0.16 |
| 0.22 | 0.01 | 0.31 | 0.05 |
| 1.33 | 0.61 | 1.23 | 0.56 |
| 1.71 | 0.77 | 2.13 | 0.88 |
| 1.27 | 0.54 | 1.25 | 0.57 |
| 1.29 | 0.58 | 1.31 | 0.60 |
| 0.98 | 0.44 | 0.88 | 0.38 |
| #N/A | #N/A | #N/A | #N/A |
| 2.00 | 0.83 | 1.39 | 0.59 |
| 0.64 | 0.24 | 0.64 | 0.24 |
| 0.73 | 0.29 | 1.18 | 0.47 |
| #N/A | #N/A | 1.04 | 0.38 |
| 1.54 | 0.71 | 1.16 | 0.52 |
| 0.98 | 0.45 | 1.13 | 0.42 |

|      |      |      |      |
|------|------|------|------|
| 2.09 | 0.87 | 2.53 | 0.88 |
| 1.10 | 0.49 | 1.04 | 0.41 |
| #N/A | #N/A | #N/A | #N/A |
| 2.48 | 0.91 | 2.20 | 0.90 |
| 1.10 | 0.47 | 1.12 | 0.50 |
| 0.79 | 0.35 | #N/A | #N/A |
| #N/A | #N/A | 1.68 | 0.76 |
| 3.22 | 0.98 | 3.09 | 0.98 |
| 0.84 | 0.34 | 0.63 | 0.24 |
| 1.43 | 0.62 | 1.85 | 0.81 |
| 1.84 | 0.79 | 1.30 | 0.55 |
| 0.50 | 0.15 | #N/A | #N/A |
| 0.74 | 0.32 | 0.89 | 0.39 |
| #N/A | #N/A | 0.32 | 0.05 |
| 1.15 | 0.49 | 1.21 | 0.45 |
| 0.39 | 0.08 | 0.33 | 0.06 |
| 2.36 | 0.93 | #N/A | #N/A |
| 2.26 | 0.88 | 1.40 | 0.53 |
| 2.53 | 0.95 | 2.45 | 0.94 |
| 1.92 | 0.81 | 1.77 | 0.68 |
| #N/A | #N/A | #N/A | #N/A |
| 1.99 | 0.84 | 1.42 | 0.56 |
| #N/A | #N/A | #N/A | #N/A |
| 0.52 | 0.17 | 0.60 | 0.21 |
| #N/A | #N/A | #N/A | #N/A |
| 3.03 | 0.98 | 2.34 | 0.91 |
| 1.35 | 0.58 | 1.61 | 0.70 |
| 1.62 | 0.74 | 1.10 | 0.49 |
| #N/A | #N/A | 1.34 | 0.50 |
| 1.16 | 0.50 | 1.31 | 0.49 |
| 0.52 | 0.17 | 0.47 | 0.14 |
| 0.34 | 0.05 | 0.23 | 0.02 |
| 1.69 | 0.73 | 1.46 | 0.56 |
| 0.52 | 0.16 | 0.44 | 0.13 |
| #N/A | #N/A | #N/A | #N/A |
| 0.93 | 0.42 | 0.88 | 0.35 |
| 0.55 | 0.18 | 0.51 | 0.14 |
| #N/A | #N/A | #N/A | #N/A |
| 2.19 | 0.91 | 3.00 | 0.98 |
| 2.23 | 0.88 | 2.15 | 0.89 |
| 1.30 | 0.56 | 1.32 | 0.56 |
| 1.46 | 0.63 | #N/A | #N/A |
| 1.79 | 0.77 | 1.59 | 0.70 |
| #N/A | #N/A | #N/A | #N/A |
| #N/A | #N/A | #N/A | #N/A |
| 4.25 | 1.00 | 3.26 | 0.99 |
| 0.39 | 0.09 | 0.40 | 0.10 |
| 1.46 | 0.67 | 1.30 | 0.59 |
| #N/A | #N/A | #N/A | #N/A |
| 0.55 | 0.20 | 0.64 | 0.24 |
| #N/A | #N/A | 0.42 | 0.12 |

|      |      |      |      |
|------|------|------|------|
| #N/A | #N/A | #N/A | #N/A |
| 1.70 | 0.75 | 1.68 | 0.76 |
| 0.44 | 0.12 | 0.36 | 0.08 |
| 0.60 | 0.22 | 0.55 | 0.20 |
| 1.31 | 0.56 | 1.31 | 0.51 |
| 1.70 | 0.72 | 1.66 | 0.73 |
| 1.54 | 0.70 | 1.39 | 0.56 |
| 2.24 | 0.88 | 2.03 | 0.82 |
| 0.60 | 0.23 | 0.97 | 0.43 |
| 1.27 | 0.55 | 0.91 | 0.40 |
| 1.11 | 0.48 | 1.10 | 0.45 |
| #N/A | #N/A | #N/A | #N/A |
| #N/A | #N/A | #N/A | #N/A |
| 1.95 | 0.80 | 2.05 | 0.86 |
| 0.86 | 0.39 | 1.50 | 0.68 |
| #N/A | #N/A | 0.41 | 0.11 |
| 2.17 | 0.87 | 1.80 | 0.80 |
| #N/A | #N/A | #N/A | #N/A |
| 1.89 | 0.78 | 1.97 | 0.83 |
| 1.83 | 0.76 | 2.24 | 0.82 |
| 2.70 | 0.95 | 2.82 | 0.92 |
| 0.29 | 0.04 | 0.39 | 0.10 |
| #N/A | #N/A | 0.72 | 0.30 |
| 1.17 | 0.51 | 0.87 | 0.37 |
| 0.77 | 0.31 | 1.18 | 0.53 |
| 2.24 | 0.88 | 1.80 | 0.70 |
| #N/A | #N/A | #N/A | #N/A |
| 0.50 | 0.15 | 0.33 | 0.06 |
| 0.53 | 0.18 | 0.77 | 0.32 |
| 1.86 | 0.79 | 1.62 | 0.71 |
| 0.95 | 0.41 | 1.02 | 0.45 |
| 1.22 | 0.53 | 0.95 | 0.41 |
| 0.63 | 0.23 | 0.61 | 0.19 |
| 0.40 | 0.08 | 0.36 | 0.08 |
| 1.07 | 0.49 | 1.25 | 0.47 |
| #N/A | #N/A | #N/A | #N/A |
| #N/A | #N/A | #N/A | #N/A |
| 1.38 | 0.59 | 1.25 | 0.50 |
| #N/A | #N/A | #N/A | #N/A |
| 2.55 | 0.94 | 2.34 | 0.91 |
| 1.51 | 0.65 | 1.34 | 0.52 |
| 2.29 | 0.89 | 1.64 | 0.74 |
| 3.16 | 0.98 | 2.62 | 0.96 |
| 0.96 | 0.40 | #N/A | #N/A |
| 0.66 | 0.26 | 0.49 | 0.16 |
| 0.35 | 0.06 | 0.56 | 0.18 |
| 0.13 | 0.00 | 0.11 | 0.00 |
| 0.37 | 0.08 | 0.35 | 0.07 |
| 1.45 | 0.67 | 1.57 | 0.66 |
| 1.14 | 0.54 | 1.20 | 0.54 |
| #N/A | #N/A | #N/A | #N/A |



|      |      |      |      |
|------|------|------|------|
| 0.77 | 0.33 | 1.58 | 0.68 |
| 1.39 | 0.60 | 1.51 | 0.67 |
| #N/A | #N/A | #N/A | #N/A |
| 1.37 | 0.61 | 1.70 | 0.77 |
| 1.12 | 0.48 | 1.12 | 0.41 |
| 0.63 | 0.23 | 0.82 | 0.32 |
| 0.71 | 0.30 | 0.58 | 0.20 |
| 0.95 | 0.44 | 0.80 | 0.34 |
| 1.35 | 0.58 | 1.47 | 0.66 |
| 0.85 | 0.35 | 1.30 | 0.58 |
| 0.97 | 0.41 | 1.67 | 0.68 |
| 1.44 | 0.65 | 2.79 | 0.97 |
| 1.33 | 0.58 | 2.56 | 0.95 |
| 0.79 | 0.32 | 1.28 | 0.58 |
| 0.46 | 0.12 | 0.36 | 0.08 |
| 0.46 | 0.13 | 0.31 | 0.05 |
| 0.56 | 0.19 | #N/A | #N/A |
| 0.53 | 0.18 | 0.52 | 0.17 |
| #N/A | #N/A | #N/A | #N/A |
| #N/A | #N/A | #N/A | #N/A |
| 1.03 | 0.44 | 1.89 | 0.83 |
| 0.99 | 0.42 | 1.39 | 0.55 |
| #N/A | #N/A | #N/A | #N/A |
| #N/A | #N/A | #N/A | #N/A |
| #N/A | #N/A | #N/A | #N/A |
| 0.86 | 0.35 | 1.47 | 0.56 |
| 1.01 | 0.43 | 1.11 | 0.50 |
| 1.11 | 0.47 | 1.18 | 0.50 |
| 1.08 | 0.46 | #N/A | #N/A |
| 0.87 | 0.39 | 0.80 | 0.34 |
| #N/A | #N/A | 2.68 | 0.96 |
| #N/A | #N/A | 1.04 | 0.46 |
| 1.74 | 0.78 | 2.24 | 0.87 |
| #N/A | #N/A | #N/A | #N/A |
| 1.97 | 0.82 | 1.43 | 0.65 |
| 1.82 | 0.76 | 1.71 | 0.67 |
| 0.48 | 0.14 | 0.53 | 0.18 |
| 0.58 | 0.22 | 0.59 | 0.22 |
| 0.20 | 0.01 | 0.14 | 0.00 |
| 0.40 | 0.09 | 0.44 | 0.13 |
| 1.83 | 0.78 | 3.14 | 0.98 |
| #N/A | #N/A | #N/A | #N/A |
| 1.24 | 0.58 | 1.62 | 0.71 |
| 0.51 | 0.16 | 0.46 | 0.12 |
| #N/A | #N/A | #N/A | #N/A |
| 2.50 | 0.93 | 1.92 | 0.83 |
| 0.82 | 0.34 | 0.59 | 0.20 |
| 0.39 | 0.09 | 0.50 | 0.16 |
| 0.40 | 0.09 | 0.32 | 0.05 |
| 2.43 | 0.92 | 2.27 | 0.92 |
| 1.76 | 0.79 | #N/A | #N/A |

|      |      |      |      |
|------|------|------|------|
| 1.44 | 0.66 | 1.01 | 0.45 |
| 0.78 | 0.34 | 0.86 | 0.30 |
| 1.60 | 0.70 | 1.80 | 0.80 |
| 0.25 | 0.02 | 0.34 | 0.07 |
| 1.55 | 0.67 | 2.30 | 0.88 |
| 0.25 | 0.02 | 0.38 | 0.09 |
| 0.63 | 0.25 | 0.59 | 0.21 |
| 1.55 | 0.67 | 1.85 | 0.75 |
| 1.67 | 0.76 | 1.78 | 0.74 |
| 0.72 | 0.28 | 0.51 | 0.17 |
| 1.05 | 0.49 | 1.36 | 0.58 |
| 1.64 | 0.71 | 1.85 | 0.77 |
| 0.24 | 0.02 | 0.26 | 0.03 |
| 1.07 | 0.46 | 1.16 | 0.52 |
| 0.39 | 0.08 | #N/A | #N/A |
| 1.87 | 0.80 | 2.13 | 0.89 |
| #N/A | #N/A | #N/A | #N/A |
| 0.72 | 0.28 | 0.84 | 0.36 |
| 2.14 | 0.87 | 2.07 | 0.87 |
| 1.05 | 0.44 | 0.86 | 0.32 |
| 2.18 | 0.87 | 1.95 | 0.79 |
| 0.26 | 0.03 | 0.29 | 0.04 |
| 0.56 | 0.21 | 0.52 | 0.17 |
| #N/A | #N/A | #N/A | #N/A |
| 0.62 | 0.25 | 0.83 | 0.34 |
| 1.36 | 0.61 | 1.34 | 0.53 |
| 1.01 | 0.47 | 0.75 | 0.31 |
| 2.33 | 0.89 | 2.08 | 0.87 |
| 2.85 | 0.97 | 1.94 | 0.84 |
| 0.43 | 0.11 | 0.36 | 0.08 |
| 1.17 | 0.51 | 1.00 | 0.44 |
| #N/A | #N/A | #N/A | #N/A |
| 1.51 | 0.67 | 1.99 | 0.74 |
| #N/A | #N/A | #N/A | #N/A |
| 0.62 | 0.22 | 0.61 | 0.23 |
| 0.93 | 0.39 | 0.92 | 0.36 |
| 1.62 | 0.73 | 1.72 | 0.65 |
| 0.48 | 0.14 | 0.25 | 0.02 |
| 1.78 | 0.75 | 2.09 | 0.88 |
| 0.80 | 0.32 | 0.78 | 0.32 |
| 0.53 | 0.17 | 0.65 | 0.25 |
| 0.64 | 0.26 | 1.03 | 0.41 |
| 0.69 | 0.27 | 1.19 | 0.54 |
| 1.43 | 0.66 | 1.74 | 0.78 |
| 0.99 | 0.46 | 1.73 | 0.69 |
| 0.94 | 0.39 | 1.79 | 0.78 |
| 1.95 | 0.81 | 2.07 | 0.87 |
| 0.70 | 0.29 | 0.62 | 0.19 |
| 0.75 | 0.32 | 0.91 | 0.34 |
| 0.74 | 0.30 | 0.74 | 0.27 |
| 1.38 | 0.60 | 1.20 | 0.53 |

|      |      |      |      |
|------|------|------|------|
| 0.95 | 0.39 | 1.05 | 0.46 |
| #N/A | #N/A | #N/A | #N/A |
| 1.03 | 0.44 | 1.22 | 0.54 |
| 0.83 | 0.35 | 1.21 | 0.54 |
| 0.59 | 0.20 | 0.60 | 0.21 |
| #N/A | #N/A | #N/A | #N/A |
| 2.49 | 0.92 | 2.43 | 0.94 |
| 1.10 | 0.47 | 1.20 | 0.48 |
| 2.08 | 0.88 | 1.56 | 0.71 |
| #N/A | #N/A | 0.97 | 0.43 |
| 1.01 | 0.43 | 0.99 | 0.44 |
| 0.64 | 0.25 | 0.60 | 0.22 |
| 2.02 | 0.82 | 1.53 | 0.64 |
| #N/A | #N/A | #N/A | #N/A |
| 1.70 | 0.73 | 2.15 | 0.89 |
| 1.75 | 0.75 | 1.04 | 0.44 |
| 0.71 | 0.27 | 1.46 | 0.63 |
| 1.67 | 0.72 | 1.62 | 0.74 |
| #N/A | #N/A | 1.48 | 0.67 |
| 1.77 | 0.74 | 1.69 | 0.66 |
| 1.28 | 0.60 | 1.48 | 0.65 |
| #N/A | #N/A | 0.32 | 0.06 |
| 0.82 | 0.33 | 1.61 | 0.73 |
| 1.79 | 0.80 | 1.28 | 0.56 |
| 1.93 | 0.79 | 1.61 | 0.64 |
| 0.65 | 0.24 | 0.94 | 0.41 |
| #N/A | #N/A | 0.83 | 0.36 |
| 1.46 | 0.64 | 1.54 | 0.59 |
| #N/A | #N/A | 1.50 | 0.68 |
| 1.81 | 0.76 | 1.63 | 0.74 |
| 0.49 | 0.14 | 0.39 | 0.10 |
| 1.05 | 0.49 | 1.05 | 0.39 |
| 1.99 | 0.83 | #N/A | #N/A |
| 0.89 | 0.40 | 0.50 | 0.16 |
| #N/A | #N/A | #N/A | #N/A |
| 0.61 | 0.22 | 0.59 | 0.22 |
| 2.68 | 0.95 | #N/A | #N/A |
| 0.23 | 0.02 | 0.35 | 0.07 |
| #N/A | #N/A | 1.12 | 0.45 |
| 0.40 | 0.09 | 0.48 | 0.15 |
| 0.59 | 0.22 | 0.54 | 0.19 |
| 0.43 | 0.10 | 0.26 | 0.03 |
| #N/A | #N/A | #N/A | #N/A |
| 2.44 | 0.93 | 2.55 | 0.91 |
| 0.90 | 0.41 | 0.70 | 0.28 |
| 1.55 | 0.71 | 1.23 | 0.55 |
| 0.46 | 0.12 | 0.69 | 0.27 |
| 1.21 | 0.57 | 1.01 | 0.45 |
| 1.43 | 0.62 | 1.16 | 0.46 |
| 0.60 | 0.23 | 0.78 | 0.32 |
| 0.89 | 0.40 | 0.69 | 0.27 |

|      |      |      |      |
|------|------|------|------|
| 1.13 | 0.48 | 1.13 | 0.47 |
| #N/A | #N/A | #N/A | #N/A |
| 1.88 | 0.83 | 1.08 | 0.48 |
| 1.47 | 0.64 | 1.13 | 0.50 |
| 0.91 | 0.41 | 0.97 | 0.43 |
| 0.49 | 0.15 | 0.44 | 0.11 |
| #N/A | #N/A | #N/A | #N/A |
| 0.49 | 0.15 | #N/A | #N/A |
| #N/A | #N/A | 1.38 | 0.63 |
| 0.83 | 0.36 | 0.99 | 0.38 |
| 0.56 | 0.20 | 0.79 | 0.33 |
| 0.62 | 0.22 | 1.11 | 0.47 |
| 0.41 | 0.09 | 0.42 | 0.10 |
| #N/A | #N/A | 0.23 | 0.02 |
| 0.36 | 0.06 | 0.34 | 0.07 |
| 2.53 | 0.93 | 2.70 | 0.91 |
| 2.06 | 0.84 | 1.69 | 0.66 |
| 1.29 | 0.55 | 1.16 | 0.52 |
| 0.46 | 0.13 | 0.39 | 0.09 |
| #N/A | #N/A | #N/A | #N/A |
| #N/A | #N/A | 0.75 | 0.31 |
| 0.70 | 0.30 | 0.64 | 0.25 |
| 0.27 | 0.03 | 0.36 | 0.08 |
| 1.74 | 0.75 | 2.25 | 0.87 |
| 1.75 | 0.77 | 1.84 | 0.76 |
| 0.87 | 0.36 | 0.46 | 0.14 |
| 1.66 | 0.72 | 1.59 | 0.72 |
| 1.21 | 0.52 | 1.60 | 0.73 |
| 0.96 | 0.41 | 0.92 | 0.39 |
| 0.39 | 0.08 | 0.29 | 0.04 |
| 0.20 | 0.01 | 0.30 | 0.05 |
| 1.05 | 0.49 | 1.04 | 0.46 |
| 0.62 | 0.24 | 0.46 | 0.14 |
| 1.72 | 0.77 | 1.76 | 0.79 |
| 1.83 | 0.77 | 1.41 | 0.64 |
| 1.87 | 0.82 | 1.59 | 0.72 |
| 1.29 | 0.55 | 1.29 | 0.58 |
| #N/A | #N/A | #N/A | #N/A |
| 1.63 | 0.70 | #N/A | #N/A |
| 1.96 | 0.80 | 2.12 | 0.88 |
| 3.57 | 0.99 | 3.22 | 0.99 |
| 1.37 | 0.62 | 1.39 | 0.63 |
| 2.00 | 0.83 | 1.77 | 0.78 |
| 1.67 | 0.72 | 1.50 | 0.57 |
| 0.48 | 0.14 | 0.42 | 0.10 |
| 1.43 | 0.62 | 1.60 | 0.69 |
| #N/A | #N/A | #N/A | #N/A |
| 0.79 | 0.32 | 0.71 | 0.24 |
| 1.01 | 0.44 | 0.70 | 0.23 |
| 1.56 | 0.67 | 1.74 | 0.78 |
| 3.12 | 0.99 | 3.08 | 0.98 |

|      |      |      |      |
|------|------|------|------|
| 0.92 | 0.42 | 1.22 | 0.55 |
| 1.22 | 0.55 | 1.39 | 0.64 |
| 0.45 | 0.12 | #N/A | #N/A |
| 1.28 | 0.60 | 1.42 | 0.65 |
| 0.38 | 0.07 | 0.48 | 0.14 |
| 2.51 | 0.95 | 2.85 | 0.96 |
| #N/A | #N/A | 0.45 | 0.12 |
| 0.88 | 0.40 | 0.88 | 0.38 |
| 2.04 | 0.87 | 1.36 | 0.51 |
| 2.36 | 0.93 | 1.84 | 0.81 |
| 0.58 | 0.20 | 0.59 | 0.19 |
| 2.07 | 0.85 | 2.29 | 0.89 |
| 0.88 | 0.36 | 1.18 | 0.51 |
| 1.72 | 0.73 | 1.28 | 0.53 |
| 0.58 | 0.20 | 0.52 | 0.18 |
| 0.79 | 0.32 | 0.68 | 0.27 |
| #N/A | #N/A | #N/A | #N/A |
| 1.34 | 0.60 | 1.45 | 0.57 |
| 1.21 | 0.57 | 1.34 | 0.50 |
| 1.61 | 0.69 | 1.85 | 0.70 |
| 0.85 | 0.38 | 0.94 | 0.37 |
| 0.31 | 0.04 | 0.42 | 0.10 |
| 1.60 | 0.73 | 1.76 | 0.78 |
| 1.38 | 0.60 | 1.88 | 0.83 |
| #N/A | #N/A | #N/A | #N/A |
| 2.22 | 0.91 | 1.64 | 0.75 |
| 0.65 | 0.24 | 0.73 | 0.25 |
| 1.78 | 0.76 | 1.45 | 0.66 |
| 0.61 | 0.22 | 0.54 | 0.19 |
| 1.89 | 0.80 | 1.37 | 0.60 |
| 1.66 | 0.75 | 2.08 | 0.87 |
| 2.13 | 0.88 | 2.14 | 0.85 |
| 0.34 | 0.05 | #N/A | #N/A |
| 0.64 | 0.24 | 0.49 | 0.16 |
| 0.51 | 0.17 | 0.46 | 0.14 |
| 1.40 | 0.61 | 1.05 | 0.47 |
| 1.44 | 0.65 | #N/A | #N/A |
| 0.87 | 0.39 | 0.73 | 0.30 |
| #N/A | #N/A | 0.72 | 0.26 |
| 0.54 | 0.19 | 0.59 | 0.21 |
| 1.44 | 0.66 | 1.54 | 0.69 |
| 1.17 | 0.51 | 1.35 | 0.62 |
| 1.98 | 0.81 | 2.14 | 0.89 |
| 0.34 | 0.06 | 0.34 | 0.07 |
| 0.92 | 0.42 | 1.00 | 0.44 |
| 0.72 | 0.28 | 0.60 | 0.22 |
| #N/A | #N/A | #N/A | #N/A |
| 2.28 | 0.91 | 2.29 | 0.84 |
| #N/A | #N/A | #N/A | #N/A |
| 1.21 | 0.53 | 1.68 | 0.72 |
| 0.80 | 0.32 | 1.18 | 0.53 |

|      |      |      |      |
|------|------|------|------|
| 1.72 | 0.73 | 1.42 | 0.60 |
| 2.19 | 0.91 | 1.75 | 0.73 |
| #N/A | #N/A | #N/A | #N/A |
| 1.08 | 0.49 | 0.76 | 0.28 |
| 2.96 | 0.98 | 2.73 | 0.95 |
| #N/A | #N/A | #N/A | #N/A |
| 0.37 | 0.07 | 0.68 | 0.27 |
| 0.33 | 0.05 | 0.36 | 0.08 |
| 2.49 | 0.93 | 2.20 | 0.90 |
| 1.49 | 0.64 | 1.76 | 0.69 |
| 1.00 | 0.42 | 1.01 | 0.45 |
| 0.60 | 0.22 | 0.62 | 0.23 |
| 0.67 | 0.25 | 0.58 | 0.21 |
| 1.05 | 0.49 | 0.92 | 0.34 |
| 0.96 | 0.40 | 0.57 | 0.21 |
| #N/A | #N/A | #N/A | #N/A |
| 1.35 | 0.58 | 1.26 | 0.47 |
| #N/A | #N/A | 1.51 | 0.69 |
| 2.19 | 0.86 | 1.68 | 0.71 |
| #N/A | #N/A | #N/A | #N/A |
| #N/A | #N/A | 2.23 | 0.89 |
| #N/A | #N/A | #N/A | #N/A |
| 1.15 | 0.50 | 1.29 | 0.58 |
| #N/A | #N/A | 1.33 | 0.61 |
| 0.18 | 0.01 | 0.14 | 0.00 |
| 0.86 | 0.35 | 0.41 | 0.12 |
| 0.33 | 0.05 | 0.50 | 0.17 |
| #N/A | #N/A | #N/A | #N/A |
| 0.84 | 0.37 | 0.79 | 0.33 |
| 0.81 | 0.34 | 0.93 | 0.40 |
| #N/A | #N/A | #N/A | #N/A |
| 0.88 | 0.37 | 0.81 | 0.30 |
| 0.40 | 0.08 | 0.42 | 0.12 |
| 1.95 | 0.80 | 2.04 | 0.82 |
| 1.73 | 0.74 | 2.52 | 0.94 |
| 2.00 | 0.82 | 2.53 | 0.90 |
| 0.84 | 0.35 | 1.99 | 0.77 |
| 0.61 | 0.22 | 1.14 | 0.51 |
| 1.22 | 0.53 | 1.54 | 0.70 |
| 0.75 | 0.32 | #N/A | #N/A |
| 0.76 | 0.33 | 0.68 | 0.25 |
| 1.90 | 0.78 | 2.27 | 0.82 |
| #N/A | #N/A | #N/A | #N/A |
| 0.79 | 0.32 | 1.18 | 0.53 |
| 0.82 | 0.33 | 1.56 | 0.67 |
| 2.45 | 0.92 | 1.40 | 0.62 |
| #N/A | #N/A | #N/A | #N/A |
| 0.53 | 0.17 | 0.42 | 0.12 |
| 0.91 | 0.38 | 0.58 | 0.17 |
| 1.56 | 0.67 | 1.69 | 0.69 |
| #N/A | #N/A | #N/A | #N/A |

|      |      |      |      |
|------|------|------|------|
| 0.29 | 0.03 | 0.25 | 0.02 |
| 0.40 | 0.08 | 0.30 | 0.05 |
| 1.39 | 0.60 | 1.05 | 0.46 |
| 1.35 | 0.58 | 1.74 | 0.78 |
| 1.25 | 0.54 | 1.38 | 0.63 |
| #N/A | #N/A | #N/A | #N/A |
| 0.52 | 0.17 | 0.38 | 0.09 |
| 2.37 | 0.90 | #N/A | #N/A |
| 0.92 | 0.40 | 0.76 | 0.32 |
| #N/A | #N/A | #N/A | #N/A |
| 1.43 | 0.64 | #N/A | #N/A |
| 2.54 | 0.94 | 2.01 | 0.84 |
| #N/A | #N/A | #N/A | #N/A |
| 1.46 | 0.63 | 1.65 | 0.70 |
| 2.43 | 0.92 | 2.58 | 0.92 |
| 2.30 | 0.88 | 1.86 | 0.82 |
| 0.72 | 0.28 | 0.85 | 0.36 |
| 2.33 | 0.90 | 3.02 | 0.98 |
| 0.70 | 0.29 | 0.73 | 0.25 |
| 0.91 | 0.38 | 1.38 | 0.58 |
| 0.34 | 0.06 | 0.30 | 0.05 |
| 1.67 | 0.72 | 1.13 | 0.51 |
| 2.47 | 0.91 | 2.09 | 0.82 |
| 1.14 | 0.53 | 2.77 | 0.95 |
| 1.91 | 0.83 | 3.15 | 0.96 |
| 1.43 | 0.62 | 2.12 | 0.86 |
| #N/A | #N/A | #N/A | #N/A |
| 0.73 | 0.29 | 0.44 | 0.13 |
| 0.86 | 0.36 | 0.92 | 0.40 |
| 0.31 | 0.04 | 0.32 | 0.05 |
| 1.66 | 0.72 | 0.76 | 0.32 |
| 1.59 | 0.68 | 1.48 | 0.67 |
| 1.97 | 0.85 | #N/A | #N/A |
| #N/A | #N/A | #N/A | #N/A |
| 0.74 | 0.29 | 0.66 | 0.24 |
| 0.91 | 0.41 | 0.89 | 0.35 |
| #N/A | #N/A | #N/A | #N/A |
| 1.23 | 0.54 | 1.31 | 0.60 |
| #N/A | #N/A | #N/A | #N/A |
| 2.32 | 0.89 | 1.79 | 0.78 |
| 0.28 | 0.03 | 0.22 | 0.02 |
| #N/A | #N/A | 0.57 | 0.18 |
| 1.01 | 0.43 | #N/A | #N/A |
| 1.70 | 0.73 | 1.62 | 0.71 |
| #N/A | #N/A | 1.09 | 0.44 |
| 1.63 | 0.73 | 0.90 | 0.39 |
| 0.43 | 0.11 | 0.61 | 0.22 |
| 1.76 | 0.74 | 1.34 | 0.59 |
| 2.30 | 0.92 | 2.40 | 0.91 |
| #N/A | #N/A | #N/A | #N/A |
| 1.66 | 0.72 | 1.99 | 0.83 |

|      |      |      |      |
|------|------|------|------|
| 0.71 | 0.30 | 0.81 | 0.32 |
| 1.28 | 0.56 | 1.09 | 0.46 |
| 1.33 | 0.59 | 2.58 | 0.93 |
| 0.89 | 0.37 | 1.38 | 0.63 |
| 1.73 | 0.74 | 3.18 | 0.97 |
| #N/A | #N/A | 2.58 | 0.92 |
| 1.01 | 0.44 | 0.88 | 0.33 |
| #N/A | #N/A | 0.53 | 0.18 |
| 0.72 | 0.28 | 0.65 | 0.24 |
| 1.85 | 0.78 | 1.94 | 0.84 |
| 1.40 | 0.61 | 2.39 | 0.94 |
| 2.43 | 0.94 | 3.70 | 0.99 |
| 1.95 | 0.84 | 3.24 | 0.98 |
| #N/A | #N/A | #N/A | #N/A |
| 1.22 | 0.52 | 1.26 | 0.55 |
| 1.35 | 0.58 | 1.34 | 0.55 |
| #N/A | #N/A | 0.59 | 0.21 |
| 1.13 | 0.49 | 1.06 | 0.46 |
| 0.28 | 0.03 | #N/A | #N/A |
| 0.28 | 0.03 | 0.25 | 0.03 |
| 0.60 | 0.21 | 0.81 | 0.35 |
| 0.82 | 0.33 | 1.40 | 0.64 |
| #N/A | #N/A | #N/A | #N/A |
| 2.00 | 0.86 | 1.88 | 0.83 |
| #N/A | #N/A | #N/A | #N/A |
| 1.44 | 0.66 | #N/A | #N/A |
| #N/A | #N/A | #N/A | #N/A |
| 0.57 | 0.21 | 0.62 | 0.23 |
| #N/A | #N/A | #N/A | #N/A |
| 1.97 | 0.81 | 1.59 | 0.65 |
| 0.78 | 0.32 | 0.91 | 0.40 |
| 0.84 | 0.35 | 0.72 | 0.29 |
| #N/A | #N/A | #N/A | #N/A |
| 0.96 | 0.41 | 1.05 | 0.38 |
| 2.69 | 0.95 | 2.66 | 0.96 |
| 0.62 | 0.22 | #N/A | #N/A |
| 1.82 | 0.81 | 2.13 | 0.84 |
| 0.94 | 0.42 | 1.04 | 0.42 |
| #N/A | #N/A | #N/A | #N/A |
| 0.91 | 0.38 | #N/A | #N/A |
| 2.50 | 0.93 | 2.05 | 0.86 |
| #N/A | #N/A | #N/A | #N/A |
| 2.07 | 0.84 | 2.12 | 0.89 |
| 1.54 | 0.67 | 1.86 | 0.78 |
| 0.78 | 0.34 | 0.72 | 0.29 |
| #N/A | #N/A | 0.77 | 0.29 |
| 1.74 | 0.78 | 2.64 | 0.96 |
| #N/A | #N/A | #N/A | #N/A |
| 0.94 | 0.40 | 1.07 | 0.39 |
| #N/A | #N/A | #N/A | #N/A |
| 1.68 | 0.72 | 1.22 | 0.55 |



|      |      |      |      |
|------|------|------|------|
| #N/A | #N/A | #N/A | #N/A |
| 0.85 | 0.35 | 0.69 | 0.27 |
| 0.43 | 0.10 | 0.36 | 0.07 |
| 0.67 | 0.27 | 0.55 | 0.19 |
| 0.45 | 0.12 | 0.32 | 0.06 |
| 0.41 | 0.10 | 0.29 | 0.04 |
| 1.19 | 0.52 | 0.44 | 0.13 |
| 0.96 | 0.40 | #N/A | #N/A |
| 0.87 | 0.39 | 1.23 | 0.46 |
| 3.04 | 0.98 | 2.08 | 0.87 |
| 0.30 | 0.03 | 0.28 | 0.04 |
| 1.27 | 0.58 | 1.21 | 0.48 |
| #N/A | #N/A | #N/A | #N/A |
| 2.68 | 0.96 | 2.64 | 0.90 |
| #N/A | #N/A | #N/A | #N/A |
| 1.66 | 0.74 | 1.90 | 0.83 |
| #N/A | #N/A | #N/A | #N/A |
| #N/A | #N/A | #N/A | #N/A |
| 1.80 | 0.80 | 2.18 | 0.87 |
| 1.61 | 0.73 | 1.68 | 0.70 |
| #N/A | #N/A | #N/A | #N/A |
| 1.11 | 0.52 | 1.06 | 0.46 |
| 3.05 | 0.98 | 3.15 | 0.99 |
| #N/A | #N/A | #N/A | #N/A |
| 0.76 | 0.30 | 1.37 | 0.63 |
| 0.73 | 0.29 | 1.45 | 0.56 |
| 0.56 | 0.20 | 1.30 | 0.53 |
| #N/A | #N/A | 2.24 | 0.91 |
| 1.44 | 0.63 | 1.99 | 0.85 |
| 1.52 | 0.70 | 1.58 | 0.60 |
| 0.51 | 0.16 | 1.27 | 0.57 |
| 0.49 | 0.14 | 1.00 | 0.44 |
| #N/A | #N/A | #N/A | #N/A |
| 1.48 | 0.64 | 1.38 | 0.63 |
| 2.81 | 0.97 | 2.74 | 0.92 |
| 1.09 | 0.47 | 1.47 | 0.60 |
| 0.57 | 0.19 | 0.73 | 0.30 |
| 0.63 | 0.23 | 0.65 | 0.24 |
| 1.96 | 0.85 | 1.87 | 0.75 |
| 1.42 | 0.61 | 1.54 | 0.67 |
| 1.75 | 0.74 | #N/A | #N/A |
| #N/A | #N/A | #N/A | #N/A |
| 0.34 | 0.06 | 0.30 | 0.05 |
| 1.13 | 0.48 | 1.06 | 0.43 |
| 0.18 | 0.01 | 0.10 | 0.00 |
| 0.74 | 0.29 | 0.64 | 0.20 |
| 0.51 | 0.15 | 0.54 | 0.19 |
| 1.74 | 0.73 | 2.00 | 0.85 |
| 0.42 | 0.10 | 0.52 | 0.15 |
| 0.98 | 0.41 | 1.02 | 0.45 |
| #N/A | #N/A | #N/A | #N/A |

|      |      |      |      |
|------|------|------|------|
| 1.07 | 0.46 | 0.74 | 0.28 |
| #N/A | #N/A | #N/A | #N/A |
| 1.74 | 0.73 | 1.79 | 0.70 |
| 3.32 | 0.99 | 2.92 | 0.98 |
| #N/A | #N/A | #N/A | #N/A |
| 2.51 | 0.95 | 2.14 | 0.88 |
| #N/A | #N/A | #N/A | #N/A |
| 0.58 | 0.22 | 0.73 | 0.25 |
| 5.16 | 1.00 | 4.02 | 0.99 |
| #N/A | #N/A | #N/A | #N/A |
| 1.37 | 0.59 | 1.19 | 0.54 |
| 1.15 | 0.49 | 1.36 | 0.61 |
| 1.64 | 0.70 | 1.48 | 0.62 |
| 0.62 | 0.22 | #N/A | #N/A |
| 0.70 | 0.27 | 0.71 | 0.28 |
| 0.29 | 0.03 | 0.22 | 0.01 |
| 1.16 | 0.52 | 1.26 | 0.53 |
| #N/A | #N/A | #N/A | #N/A |
| 1.06 | 0.48 | 1.61 | 0.68 |
| 0.79 | 0.32 | 1.46 | 0.59 |
| 0.51 | 0.15 | 0.67 | 0.26 |
| #N/A | #N/A | #N/A | #N/A |
| 0.66 | 0.25 | 0.57 | 0.20 |
| 0.74 | 0.29 | 0.39 | 0.10 |
| 0.50 | 0.15 | 0.34 | 0.06 |
| 1.75 | 0.78 | 1.98 | 0.85 |
| 1.74 | 0.75 | 2.75 | 0.93 |
| 0.76 | 0.30 | #N/A | #N/A |
| 1.33 | 0.58 | 1.71 | 0.77 |
| 1.91 | 0.80 | 2.05 | 0.87 |
| 0.40 | 0.09 | 0.50 | 0.17 |
| 0.65 | 0.24 | 0.85 | 0.36 |
| 0.59 | 0.20 | 0.64 | 0.25 |
| 1.29 | 0.55 | #N/A | #N/A |
| 1.09 | 0.51 | 0.79 | 0.33 |
| 0.59 | 0.21 | 0.49 | 0.15 |
| 1.91 | 0.84 | 2.62 | 0.90 |
| #N/A | #N/A | 1.32 | 0.49 |
| #N/A | #N/A | 0.43 | 0.12 |
| 0.48 | 0.14 | 0.52 | 0.17 |
| 0.54 | 0.19 | 0.53 | 0.16 |
| 0.70 | 0.27 | #N/A | #N/A |
| 0.56 | 0.20 | 0.61 | 0.23 |
| 1.63 | 0.71 | 2.11 | 0.89 |
| 1.96 | 0.85 | 1.96 | 0.73 |
| 2.15 | 0.87 | 2.22 | 0.88 |
| #N/A | #N/A | #N/A | #N/A |
| 2.34 | 0.93 | 2.46 | 0.94 |
| 1.64 | 0.70 | 1.51 | 0.63 |
| #N/A | #N/A | #N/A | #N/A |
| 2.42 | 0.91 | 1.86 | 0.82 |

|      |      |      |      |
|------|------|------|------|
| 1.08 | 0.51 | 1.19 | 0.45 |
| 3.11 | 0.98 | 3.10 | 0.98 |
| 0.65 | 0.24 | 0.67 | 0.26 |
| 0.66 | 0.25 | 0.52 | 0.18 |
| 1.58 | 0.72 | 1.85 | 0.70 |
| 0.80 | 0.35 | 1.10 | 0.41 |
| 0.62 | 0.22 | 0.69 | 0.28 |
| 1.03 | 0.44 | 0.92 | 0.39 |
| #N/A | #N/A | #N/A | #N/A |
| 1.47 | 0.64 | 1.67 | 0.75 |
| 2.19 | 0.91 | 2.14 | 0.88 |
| 1.13 | 0.53 | 1.36 | 0.59 |
| 1.74 | 0.77 | 1.33 | 0.58 |
| 1.87 | 0.79 | 1.70 | 0.76 |
| #N/A | #N/A | #N/A | #N/A |
| 2.35 | 0.89 | 2.07 | 0.87 |
| 1.01 | 0.47 | 0.82 | 0.33 |
| 1.46 | 0.64 | 1.43 | 0.65 |
| 0.46 | 0.13 | 0.52 | 0.18 |
| #N/A | #N/A | #N/A | #N/A |
| 1.59 | 0.69 | #N/A | #N/A |
| 1.66 | 0.75 | 1.88 | 0.71 |
| 1.74 | 0.73 | 1.54 | 0.63 |
| 0.61 | 0.24 | 1.10 | 0.49 |
| 0.47 | 0.13 | 0.44 | 0.13 |
| 0.64 | 0.25 | 0.68 | 0.27 |
| 0.45 | 0.12 | 0.67 | 0.26 |
| 0.68 | 0.27 | 0.38 | 0.09 |
| 0.93 | 0.39 | 0.92 | 0.39 |
| 2.58 | 0.93 | 2.09 | 0.88 |
| 1.81 | 0.76 | #N/A | #N/A |
| 0.37 | 0.06 | 0.61 | 0.19 |
| 1.20 | 0.57 | 1.22 | 0.51 |
| #N/A | #N/A | #N/A | #N/A |
| 1.06 | 0.45 | 1.24 | 0.53 |
| 3.23 | 0.98 | 2.69 | 0.96 |
| 1.34 | 0.58 | 1.42 | 0.65 |
| #N/A | #N/A | #N/A | #N/A |
| #N/A | #N/A | #N/A | #N/A |
| 2.80 | 0.97 | 2.76 | 0.93 |
| 1.40 | 0.61 | 1.87 | 0.71 |
| 1.65 | 0.71 | 2.01 | 0.86 |
| 1.44 | 0.62 | 1.35 | 0.62 |
| 1.10 | 0.47 | 1.26 | 0.57 |
| #N/A | #N/A | #N/A | #N/A |
| 1.67 | 0.76 | 2.17 | 0.80 |
| 2.64 | 0.95 | 2.47 | 0.90 |
| 1.06 | 0.47 | 1.32 | 0.60 |
| 0.87 | 0.36 | 1.10 | 0.49 |
| 0.35 | 0.06 | 0.48 | 0.15 |
| 0.82 | 0.33 | 0.80 | 0.34 |

|      |      |      |      |
|------|------|------|------|
| 0.70 | 0.27 | 0.50 | 0.15 |
| 0.99 | 0.41 | #N/A | #N/A |
| 2.40 | 0.91 | 2.92 | 0.95 |
| #N/A | #N/A | #N/A | #N/A |
| #N/A | #N/A | #N/A | #N/A |
| #N/A | #N/A | #N/A | #N/A |
| #N/A | #N/A | #N/A | #N/A |
| 1.00 | 0.42 | 1.13 | 0.46 |
| 0.58 | 0.20 | 0.70 | 0.28 |
| 0.76 | 0.32 | 0.89 | 0.38 |
| #N/A | #N/A | #N/A | #N/A |
| 1.85 | 0.79 | 1.43 | 0.65 |
| 0.41 | 0.10 | #N/A | #N/A |
| 1.74 | 0.75 | 1.60 | 0.70 |
| #N/A | #N/A | #N/A | #N/A |
| 2.34 | 0.91 | 2.40 | 0.87 |
| 1.48 | 0.68 | 1.57 | 0.70 |
| 2.04 | 0.84 | 1.61 | 0.73 |
| #N/A | #N/A | #N/A | #N/A |
| 2.21 | 0.89 | 2.49 | 0.95 |
| 0.38 | 0.07 | 0.29 | 0.04 |
| #N/A | #N/A | #N/A | #N/A |
| #N/A | #N/A | #N/A | #N/A |
| 2.28 | 0.88 | 1.77 | 0.77 |
| 2.89 | 0.96 | 2.36 | 0.92 |
| 1.73 | 0.75 | 1.45 | 0.66 |
| 1.40 | 0.65 | 1.54 | 0.69 |
| 0.96 | 0.41 | 0.57 | 0.20 |
| 1.20 | 0.52 | 1.14 | 0.49 |
| 2.45 | 0.94 | 2.53 | 0.95 |
| #N/A | #N/A | #N/A | #N/A |
| 1.80 | 0.79 | 1.78 | 0.73 |
| 1.04 | 0.45 | 0.80 | 0.34 |
| 1.20 | 0.51 | 1.48 | 0.67 |
| 1.58 | 0.68 | 1.47 | 0.63 |
| #N/A | #N/A | #N/A | #N/A |
| 1.00 | 0.42 | 0.68 | 0.27 |
| #N/A | #N/A | #N/A | #N/A |
| 1.84 | 0.77 | 1.79 | 0.80 |
| #N/A | #N/A | #N/A | #N/A |
| 2.53 | 0.93 | 2.44 | 0.94 |
| 0.47 | 0.13 | 0.42 | 0.11 |
| 0.39 | 0.09 | 0.35 | 0.08 |
| 0.60 | 0.21 | 0.74 | 0.31 |
| 2.03 | 0.84 | 2.27 | 0.90 |
| 2.47 | 0.92 | 2.61 | 0.94 |
| 1.58 | 0.68 | 1.24 | 0.56 |
| 1.69 | 0.76 | 1.70 | 0.67 |
| 0.48 | 0.14 | 0.60 | 0.22 |
| #N/A | #N/A | #N/A | #N/A |
| 0.26 | 0.03 | 0.25 | 0.03 |

|      |      |      |      |
|------|------|------|------|
| 0.64 | 0.24 | 0.62 | 0.23 |
| 1.03 | 0.43 | 1.20 | 0.54 |
| 1.56 | 0.71 | 2.10 | 0.88 |
| 1.01 | 0.42 | 1.21 | 0.54 |
| 2.54 | 0.93 | 2.46 | 0.92 |
| 0.78 | 0.31 | 0.66 | 0.26 |
| 1.24 | 0.58 | 1.27 | 0.57 |
| 2.06 | 0.85 | 1.52 | 0.69 |
| 1.12 | 0.52 | 1.30 | 0.59 |
| 0.28 | 0.03 | #N/A | #N/A |
| 2.01 | 0.87 | 1.82 | 0.73 |
| 0.96 | 0.40 | 0.94 | 0.41 |
| 2.79 | 0.97 | 1.95 | 0.84 |
| 0.24 | 0.01 | 0.29 | 0.04 |
| 1.51 | 0.65 | 1.55 | 0.65 |
| 0.49 | 0.15 | 0.49 | 0.14 |
| #N/A | #N/A | #N/A | #N/A |
| 0.93 | 0.41 | 0.73 | 0.26 |
| 2.00 | 0.83 | 1.84 | 0.72 |
| 1.60 | 0.69 | #N/A | #N/A |
| #N/A | #N/A | #N/A | #N/A |
| 1.90 | 0.82 | 2.18 | 0.89 |
| 1.09 | 0.46 | 1.36 | 0.62 |
| 1.51 | 0.69 | 1.13 | 0.51 |
| #N/A | #N/A | #N/A | #N/A |
| #N/A | #N/A | #N/A | #N/A |
| #N/A | #N/A | #N/A | #N/A |
| #N/A | #N/A | #N/A | #N/A |
| 1.51 | 0.67 | 1.59 | 0.60 |
| 1.60 | 0.73 | 2.04 | 0.86 |
| #N/A | #N/A | #N/A | #N/A |
| #N/A | #N/A | #N/A | #N/A |
| #N/A | #N/A | #N/A | #N/A |
| 1.79 | 0.76 | 1.26 | 0.52 |
| 2.67 | 0.96 | 1.92 | 0.82 |
| 2.60 | 0.96 | 2.36 | 0.93 |
| #N/A | #N/A | #N/A | #N/A |
| #N/A | #N/A | #N/A | #N/A |
| #N/A | #N/A | #N/A | #N/A |
| #N/A | #N/A | #N/A | #N/A |
| #N/A | #N/A | #N/A | #N/A |
| 1.77 | 0.75 | 1.41 | 0.57 |
| #N/A | #N/A | #N/A | #N/A |
| #N/A | #N/A | #N/A | #N/A |
| #N/A | #N/A | 1.79 | 0.79 |
| 1.63 | 0.70 | 2.09 | 0.79 |
| 1.03 | 0.48 | 1.62 | 0.61 |
| 0.90 | 0.38 | 1.09 | 0.45 |
| 2.44 | 0.91 | 2.07 | 0.88 |
| #N/A | #N/A | #N/A | #N/A |
| 0.60 | 0.23 | 0.42 | 0.10 |

|      |      |      |      |
|------|------|------|------|
| 1.71 | 0.72 | 1.68 | 0.63 |
| 1.00 | 0.42 | 1.38 | 0.60 |
| 1.09 | 0.48 | 1.59 | 0.61 |
| 1.58 | 0.68 | 1.41 | 0.62 |
| 1.46 | 0.65 | 1.17 | 0.44 |
| 2.21 | 0.88 | 1.67 | 0.75 |
| 0.78 | 0.34 | 1.55 | 0.70 |
| 1.04 | 0.45 | 1.31 | 0.59 |
| 1.57 | 0.71 | 1.67 | 0.75 |
| 0.76 | 0.32 | 1.69 | 0.71 |
| 0.61 | 0.22 | 0.71 | 0.27 |
| 0.64 | 0.25 | 0.70 | 0.28 |
| 0.27 | 0.02 | 0.66 | 0.21 |
| 1.14 | 0.50 | 1.68 | 0.76 |
| 0.75 | 0.30 | 0.70 | 0.28 |
| #N/A | #N/A | #N/A | #N/A |
| #N/A | #N/A | #N/A | #N/A |
| 1.76 | 0.77 | 1.66 | 0.75 |
| 0.26 | 0.02 | 0.28 | 0.03 |
| #N/A | #N/A | #N/A | #N/A |
| 1.44 | 0.63 | 1.21 | 0.55 |
| 1.25 | 0.59 | 2.42 | 0.93 |
| 1.30 | 0.60 | 1.25 | 0.57 |
| 0.43 | 0.11 | 0.56 | 0.17 |
| 1.64 | 0.70 | 1.99 | 0.79 |
| 1.85 | 0.77 | 1.72 | 0.73 |
| #N/A | #N/A | #N/A | #N/A |
| 0.72 | 0.28 | 0.92 | 0.40 |
| 1.94 | 0.82 | 1.99 | 0.84 |
| 2.31 | 0.90 | 2.66 | 0.96 |
| 1.92 | 0.84 | 1.48 | 0.67 |
| 0.38 | 0.08 | 0.34 | 0.07 |
| 0.54 | 0.18 | 0.53 | 0.18 |
| 1.67 | 0.75 | 2.10 | 0.78 |
| 1.25 | 0.57 | 1.01 | 0.40 |
| 1.02 | 0.44 | 1.08 | 0.48 |
| 0.89 | 0.36 | 1.12 | 0.48 |
| 1.38 | 0.60 | 1.24 | 0.55 |
| 1.01 | 0.43 | 1.35 | 0.57 |
| 0.55 | 0.18 | 0.74 | 0.30 |
| 0.41 | 0.10 | 0.56 | 0.20 |
| 0.36 | 0.07 | 0.27 | 0.03 |
| 1.55 | 0.67 | 1.58 | 0.72 |
| 0.67 | 0.25 | 1.05 | 0.38 |
| 0.89 | 0.37 | 0.96 | 0.36 |
| 0.78 | 0.34 | 0.96 | 0.42 |
| 0.42 | 0.10 | 0.33 | 0.06 |
| 0.24 | 0.01 | #N/A | #N/A |
| 0.54 | 0.18 | 0.40 | 0.10 |
| 0.40 | 0.09 | 0.33 | 0.06 |
| 1.45 | 0.65 | 1.46 | 0.56 |

|      |      |      |      |
|------|------|------|------|
| 1.11 | 0.52 | 0.95 | 0.37 |
| 0.62 | 0.22 | 0.67 | 0.27 |
| #N/A | #N/A | #N/A | #N/A |
| 0.47 | 0.14 | 0.40 | 0.10 |
| 2.70 | 0.96 | 2.70 | 0.96 |
| 0.80 | 0.32 | 0.81 | 0.30 |
| 1.42 | 0.62 | 1.90 | 0.72 |
| #N/A | #N/A | #N/A | #N/A |
| 0.98 | 0.41 | 0.95 | 0.40 |
| 1.25 | 0.55 | 1.12 | 0.48 |
| 1.37 | 0.64 | #N/A | #N/A |
| 0.27 | 0.03 | 0.32 | 0.05 |
| 0.44 | 0.11 | 0.98 | 0.40 |
| #N/A | #N/A | #N/A | #N/A |
| 1.47 | 0.63 | 1.36 | 0.57 |
| 0.23 | 0.01 | #N/A | #N/A |
| 1.04 | 0.45 | 1.07 | 0.46 |
| 0.34 | 0.05 | 0.56 | 0.20 |
| 2.08 | 0.85 | 2.37 | 0.86 |
| 1.47 | 0.63 | 1.11 | 0.50 |
| 0.29 | 0.03 | 0.43 | 0.13 |
| #N/A | #N/A | #N/A | #N/A |
| 1.15 | 0.50 | 0.72 | 0.24 |
| 1.06 | 0.45 | 1.66 | 0.67 |
| #N/A | #N/A | #N/A | #N/A |
| 1.77 | 0.79 | 2.06 | 0.82 |
| 1.87 | 0.79 | 2.44 | 0.91 |
| 0.51 | 0.15 | #N/A | #N/A |
| 0.91 | 0.41 | 0.94 | 0.40 |
| #N/A | #N/A | #N/A | #N/A |
| 2.38 | 0.91 | #N/A | #N/A |
| #N/A | #N/A | #N/A | #N/A |
| 1.92 | 0.81 | 1.73 | 0.77 |
| #N/A | #N/A | #N/A | #N/A |
| 1.59 | 0.72 | 1.64 | 0.74 |
| 0.65 | 0.25 | 0.57 | 0.20 |
| #N/A | #N/A | 1.87 | 0.82 |
| 0.47 | 0.14 | #N/A | #N/A |
| #N/A | #N/A | 1.57 | 0.60 |
| #N/A | #N/A | #N/A | #N/A |
| #N/A | #N/A | 1.38 | 0.59 |
| 0.28 | 0.03 | 0.26 | 0.03 |
| 0.34 | 0.06 | 0.43 | 0.12 |
| 1.71 | 0.72 | 2.30 | 0.91 |
| 1.01 | 0.43 | 1.51 | 0.69 |
| 1.98 | 0.81 | 2.36 | 0.86 |
| 0.94 | 0.39 | 0.93 | 0.40 |
| 0.71 | 0.30 | 0.64 | 0.24 |
| 0.93 | 0.42 | 1.09 | 0.48 |
| 0.99 | 0.42 | 0.90 | 0.32 |
| 1.13 | 0.48 | 1.21 | 0.55 |

|      |      |      |      |
|------|------|------|------|
| #N/A | #N/A | #N/A | #N/A |
| 1.80 | 0.76 | 1.40 | 0.64 |
| 0.63 | 0.23 | 0.66 | 0.21 |
| 0.40 | 0.10 | 0.62 | 0.20 |
| 2.16 | 0.87 | 2.22 | 0.86 |
| 1.48 | 0.68 | 1.78 | 0.73 |
| #N/A | #N/A | #N/A | #N/A |
| 0.73 | 0.28 | 0.90 | 0.34 |
| 1.49 | 0.67 | 1.94 | 0.79 |
| #N/A | #N/A | #N/A | #N/A |
| #N/A | #N/A | 2.16 | 0.90 |
| #N/A | #N/A | #N/A | #N/A |
| 0.97 | 0.41 | 0.93 | 0.41 |
| 0.54 | 0.19 | 0.42 | 0.10 |
| 0.58 | 0.20 | 0.54 | 0.16 |
| 1.42 | 0.62 | 1.65 | 0.75 |
| 1.53 | 0.70 | 1.26 | 0.57 |
| 1.18 | 0.51 | 2.22 | 0.81 |
| 2.36 | 0.90 | 1.82 | 0.80 |
| 1.23 | 0.58 | 1.04 | 0.46 |
| #N/A | #N/A | #N/A | #N/A |
| 0.33 | 0.05 | 0.27 | 0.03 |
| 0.40 | 0.08 | 0.31 | 0.05 |
| 1.97 | 0.81 | 1.65 | 0.75 |
| 0.85 | 0.38 | 0.99 | 0.43 |
| 1.30 | 0.57 | 1.23 | 0.55 |
| 1.13 | 0.49 | 1.47 | 0.59 |
| 0.47 | 0.13 | 0.49 | 0.16 |
| 1.57 | 0.69 | 1.50 | 0.62 |
| 1.77 | 0.76 | 1.29 | 0.58 |
| 1.07 | 0.45 | 1.55 | 0.59 |
| 1.03 | 0.44 | #N/A | #N/A |
| 0.22 | 0.02 | 0.26 | 0.03 |
| #N/A | #N/A | 2.14 | 0.88 |
| 0.61 | 0.24 | 0.66 | 0.26 |
| 1.64 | 0.70 | 2.17 | 0.84 |
| 0.73 | 0.29 | 0.81 | 0.34 |
| 1.97 | 0.85 | 1.93 | 0.83 |
| 1.89 | 0.80 | 1.95 | 0.82 |
| 1.86 | 0.78 | 1.90 | 0.83 |
| 0.82 | 0.37 | 0.98 | 0.43 |
| 0.58 | 0.22 | 0.91 | 0.36 |
| #N/A | #N/A | #N/A | #N/A |
| 0.82 | 0.33 | 0.93 | 0.41 |
| 1.81 | 0.77 | 1.76 | 0.78 |
| 0.51 | 0.16 | 0.57 | 0.21 |
| 0.54 | 0.19 | 0.64 | 0.24 |
| 4.48 | 1.00 | 4.31 | 1.00 |
| 0.72 | 0.28 | 0.76 | 0.31 |
| 0.57 | 0.19 | 0.45 | 0.14 |
| 1.81 | 0.77 | 1.39 | 0.63 |



|      |      |      |      |
|------|------|------|------|
| #N/A | #N/A | 0.35 | 0.07 |
| 2.22 | 0.87 | 1.53 | 0.69 |
| #N/A | #N/A | 2.82 | 0.97 |
| 0.65 | 0.26 | 0.62 | 0.20 |
| 1.42 | 0.62 | 1.62 | 0.74 |
| 0.24 | 0.02 | 0.44 | 0.11 |
| #N/A | #N/A | #N/A | #N/A |
| 2.45 | 0.93 | 1.85 | 0.79 |
| 1.29 | 0.56 | 1.25 | 0.56 |
| 0.52 | 0.17 | 0.56 | 0.19 |
| 0.71 | 0.27 | 1.03 | 0.45 |
| 1.42 | 0.62 | 1.07 | 0.47 |
| 1.66 | 0.75 | 1.47 | 0.64 |
| 1.63 | 0.74 | 1.77 | 0.77 |
| #N/A | #N/A | 0.55 | 0.20 |
| #N/A | #N/A | #N/A | #N/A |
| 0.56 | 0.19 | 0.71 | 0.28 |
| 0.87 | 0.36 | 0.73 | 0.29 |
| 1.19 | 0.52 | 1.59 | 0.72 |
| 1.24 | 0.54 | 1.39 | 0.64 |
| 0.46 | 0.13 | 0.54 | 0.19 |
| 1.46 | 0.63 | 1.72 | 0.65 |
| 0.91 | 0.38 | 0.49 | 0.16 |
| 1.36 | 0.60 | 1.03 | 0.45 |
| 1.18 | 0.51 | 1.05 | 0.47 |
| 1.73 | 0.78 | 1.65 | 0.75 |
| 0.47 | 0.13 | 0.43 | 0.12 |
| 0.44 | 0.12 | 0.64 | 0.21 |
| 0.96 | 0.41 | 1.77 | 0.67 |
| 1.12 | 0.48 | 1.25 | 0.56 |
| 2.92 | 0.97 | 2.39 | 0.93 |
| #N/A | #N/A | #N/A | #N/A |
| 2.01 | 0.84 | 1.99 | 0.74 |
| 1.97 | 0.80 | 2.14 | 0.89 |
| 0.91 | 0.41 | 0.88 | 0.37 |
| 0.31 | 0.05 | 0.42 | 0.11 |
| 0.17 | 0.00 | 0.15 | 0.01 |
| 2.08 | 0.84 | #N/A | #N/A |
| 1.53 | 0.66 | 1.31 | 0.56 |
| #N/A | #N/A | #N/A | #N/A |
| 2.63 | 0.94 | 1.73 | 0.78 |
| 1.06 | 0.50 | 1.35 | 0.51 |
| 1.67 | 0.72 | 1.03 | 0.38 |
| #N/A | #N/A | #N/A | #N/A |
| 1.86 | 0.80 | 2.13 | 0.89 |
| 1.01 | 0.47 | 0.94 | 0.40 |
| 0.91 | 0.38 | 0.71 | 0.29 |
| 0.94 | 0.40 | 0.86 | 0.36 |
| 1.12 | 0.48 | 1.64 | 0.74 |
| #N/A | #N/A | #N/A | #N/A |
| 1.31 | 0.61 | 1.58 | 0.72 |

|      |      |      |      |
|------|------|------|------|
| #N/A | #N/A | #N/A | #N/A |
| 0.89 | 0.40 | 1.40 | 0.63 |
| 1.41 | 0.64 | 1.38 | 0.58 |
| 0.70 | 0.29 | 0.85 | 0.36 |
| #N/A | #N/A | #N/A | #N/A |
| 0.71 | 0.27 | 0.61 | 0.21 |
| 2.10 | 0.88 | 1.83 | 0.80 |
| #N/A | #N/A | #N/A | #N/A |
| 2.63 | 0.95 | 2.26 | 0.91 |
| #N/A | #N/A | #N/A | #N/A |
| #N/A | #N/A | #N/A | #N/A |
| 2.06 | 0.85 | 1.93 | 0.84 |
| 0.79 | 0.32 | 1.43 | 0.55 |
| #N/A | #N/A | #N/A | #N/A |
| 1.42 | 0.65 | 1.39 | 0.57 |
| 2.15 | 0.89 | 2.84 | 0.97 |
| 2.43 | 0.91 | 2.00 | 0.77 |
| #N/A | #N/A | #N/A | #N/A |
| 0.93 | 0.39 | 0.97 | 0.43 |
| 0.80 | 0.32 | #N/A | #N/A |
| 2.56 | 0.94 | 2.04 | 0.86 |
| 0.53 | 0.17 | 0.59 | 0.18 |
| #N/A | #N/A | #N/A | #N/A |
| 2.29 | 0.90 | 2.99 | 0.98 |
| 1.45 | 0.62 | 2.11 | 0.88 |
| 1.49 | 0.69 | 1.38 | 0.63 |
| 2.27 | 0.89 | 2.04 | 0.76 |
| 1.86 | 0.79 | 1.12 | 0.44 |
| #N/A | #N/A | #N/A | #N/A |
| 0.99 | 0.46 | 1.26 | 0.57 |
| 2.45 | 0.91 | 1.92 | 0.80 |
| 2.75 | 0.97 | 3.80 | 1.00 |
| 1.06 | 0.45 | 1.53 | 0.69 |
| 0.74 | 0.32 | 0.84 | 0.31 |
| 1.29 | 0.55 | 1.53 | 0.70 |
| 1.76 | 0.75 | 2.08 | 0.77 |
| 1.34 | 0.58 | 1.52 | 0.65 |
| 2.02 | 0.82 | 2.23 | 0.91 |
| 2.01 | 0.87 | 1.83 | 0.81 |
| 0.31 | 0.05 | 0.44 | 0.11 |
| 1.14 | 0.54 | 1.23 | 0.47 |
| 1.03 | 0.43 | 1.00 | 0.44 |
| #N/A | #N/A | 0.87 | 0.37 |
| 1.66 | 0.75 | 1.61 | 0.73 |
| 0.69 | 0.29 | 0.74 | 0.30 |
| 1.41 | 0.61 | 1.25 | 0.50 |
| #N/A | #N/A | #N/A | #N/A |
| #N/A | #N/A | 1.53 | 0.69 |
| 3.22 | 0.98 | 2.23 | 0.91 |
| 0.71 | 0.27 | 0.76 | 0.32 |
| 2.59 | 0.94 | #N/A | #N/A |

|      |      |      |      |
|------|------|------|------|
| #N/A | #N/A | #N/A | #N/A |
| 1.57 | 0.67 | 1.60 | 0.72 |
| 1.55 | 0.71 | 1.97 | 0.84 |
| 1.16 | 0.54 | 1.13 | 0.45 |
| 0.53 | 0.17 | 0.34 | 0.07 |
| 2.02 | 0.84 | 2.52 | 0.88 |
| 0.48 | 0.14 | 0.48 | 0.14 |
| #N/A | #N/A | #N/A | #N/A |
| #N/A | #N/A | #N/A | #N/A |
| 2.19 | 0.91 | 1.85 | 0.82 |
| 2.38 | 0.90 | 2.42 | 0.94 |
| #N/A | #N/A | #N/A | #N/A |
| 0.27 | 0.02 | 0.32 | 0.06 |
| 1.46 | 0.67 | 1.17 | 0.48 |
| 0.32 | 0.05 | 0.41 | 0.11 |
| #N/A | #N/A | #N/A | #N/A |
| 0.99 | 0.43 | 1.12 | 0.50 |
| 1.03 | 0.48 | 1.22 | 0.55 |
| 2.26 | 0.92 | 1.32 | 0.60 |
| 2.06 | 0.88 | 2.43 | 0.92 |
| 1.35 | 0.60 | 2.63 | 0.93 |
| 1.89 | 0.83 | 2.86 | 0.96 |
| 1.00 | 0.43 | 1.29 | 0.58 |
| 1.73 | 0.78 | 2.29 | 0.91 |
| 1.90 | 0.80 | 3.01 | 0.98 |
| #N/A | #N/A | #N/A | #N/A |
| 1.18 | 0.51 | 1.49 | 0.64 |
| 0.94 | 0.39 | 1.21 | 0.55 |
| 2.10 | 0.85 | 2.11 | 0.87 |
| 1.00 | 0.42 | 1.59 | 0.72 |
| #N/A | #N/A | #N/A | #N/A |
| 2.44 | 0.91 | 1.91 | 0.81 |
| #N/A | #N/A | 0.96 | 0.42 |
| 0.63 | 0.23 | 0.58 | 0.21 |
| #N/A | #N/A | #N/A | #N/A |
| #N/A | #N/A | #N/A | #N/A |
| 0.95 | 0.40 | 1.01 | 0.41 |
| 0.50 | 0.15 | 0.55 | 0.16 |
| 0.73 | 0.28 | 0.61 | 0.22 |
| #N/A | #N/A | #N/A | #N/A |
| 1.82 | 0.76 | 1.58 | 0.69 |
| 0.83 | 0.34 | 1.22 | 0.52 |
| 0.54 | 0.17 | 0.47 | 0.15 |
| 0.53 | 0.17 | 0.65 | 0.25 |
| 1.18 | 0.51 | 1.38 | 0.63 |
| #N/A | #N/A | #N/A | #N/A |
| 0.90 | 0.37 | 1.05 | 0.39 |
| 1.03 | 0.48 | 0.95 | 0.36 |
| #N/A | #N/A | #N/A | #N/A |
| 1.93 | 0.81 | 1.65 | 0.70 |
| 1.34 | 0.61 | 1.04 | 0.46 |

|      |      |      |      |
|------|------|------|------|
| #N/A | #N/A | #N/A | #N/A |
| 1.71 | 0.74 | 1.61 | 0.72 |
| #N/A | #N/A | #N/A | #N/A |
| #N/A | #N/A | #N/A | #N/A |
| 0.88 | 0.38 | 1.12 | 0.50 |
| #N/A | #N/A | #N/A | #N/A |
| 2.07 | 0.88 | 2.22 | 0.91 |
| 1.43 | 0.64 | #N/A | #N/A |
| 0.63 | 0.23 | 0.82 | 0.28 |
| #N/A | #N/A | 1.12 | 0.43 |
| 1.89 | 0.83 | 1.06 | 0.39 |
| 0.65 | 0.24 | 1.33 | 0.61 |
| 0.79 | 0.33 | 0.70 | 0.28 |
| 1.12 | 0.53 | 1.06 | 0.39 |
| 0.44 | 0.12 | 0.41 | 0.09 |
| 0.87 | 0.37 | 0.90 | 0.39 |
| 0.53 | 0.17 | 0.29 | 0.04 |
| #N/A | #N/A | #N/A | #N/A |
| 1.54 | 0.66 | 1.49 | 0.68 |
| 2.15 | 0.89 | 2.17 | 0.89 |
| 0.41 | 0.09 | 0.37 | 0.08 |
| 0.76 | 0.30 | 0.76 | 0.31 |
| #N/A | #N/A | #N/A | #N/A |
| 1.76 | 0.77 | 1.71 | 0.77 |
| #N/A | #N/A | 2.13 | 0.89 |
| #N/A | #N/A | #N/A | #N/A |
| 2.02 | 0.86 | 1.89 | 0.83 |
| 0.70 | 0.29 | 0.96 | 0.42 |
| 1.38 | 0.60 | 1.38 | 0.59 |
| #N/A | #N/A | #N/A | #N/A |
| 0.53 | 0.17 | 0.79 | 0.33 |
| 1.60 | 0.68 | 2.50 | 0.94 |
| #N/A | #N/A | 0.96 | 0.42 |
| 1.53 | 0.65 | 1.41 | 0.64 |
| 3.34 | 0.99 | 3.93 | 1.00 |
| 0.48 | 0.14 | 0.42 | 0.12 |
| 0.64 | 0.23 | 0.53 | 0.18 |
| 0.68 | 0.26 | 0.60 | 0.20 |
| 0.67 | 0.25 | #N/A | #N/A |
| #N/A | #N/A | #N/A | #N/A |
| #N/A | #N/A | #N/A | #N/A |
| 1.03 | 0.48 | 1.22 | 0.46 |
| #N/A | #N/A | #N/A | #N/A |
| 0.76 | 0.30 | 0.87 | 0.37 |
| 0.96 | 0.40 | 1.34 | 0.50 |
| 0.43 | 0.11 | 0.35 | 0.07 |
| 0.64 | 0.26 | 0.65 | 0.25 |
| 0.72 | 0.28 | 0.68 | 0.23 |
| 1.83 | 0.81 | 1.66 | 0.71 |
| 0.82 | 0.36 | 0.61 | 0.23 |
| 2.19 | 0.88 | 1.58 | 0.60 |

|      |      |      |      |
|------|------|------|------|
| 0.68 | 0.26 | 1.21 | 0.45 |
| 1.62 | 0.69 | 1.76 | 0.78 |
| #N/A | #N/A | 0.37 | 0.09 |
| 0.96 | 0.40 | 0.87 | 0.35 |
| 1.79 | 0.77 | 1.23 | 0.55 |
| #N/A | #N/A | 0.40 | 0.10 |
| 0.37 | 0.07 | 0.27 | 0.03 |
| #N/A | #N/A | #N/A | #N/A |
| 2.04 | 0.84 | 2.05 | 0.86 |
| 1.91 | 0.81 | 2.29 | 0.92 |
| #N/A | #N/A | #N/A | #N/A |
| 1.08 | 0.46 | #N/A | #N/A |
| #N/A | #N/A | #N/A | #N/A |
| 0.72 | 0.28 | 0.93 | 0.39 |
| #N/A | #N/A | 0.32 | 0.06 |
| #N/A | #N/A | #N/A | #N/A |
| #N/A | #N/A | 2.33 | 0.92 |
| #N/A | #N/A | #N/A | #N/A |
| #N/A | #N/A | #N/A | #N/A |
| #N/A | #N/A | #N/A | #N/A |
| 2.55 | 0.94 | 2.32 | 0.92 |
| #N/A | #N/A | 0.99 | 0.43 |
| 3.54 | 0.99 | 3.15 | 0.96 |
| 0.54 | 0.18 | 0.80 | 0.29 |
| 2.00 | 0.83 | 2.35 | 0.93 |
| #N/A | #N/A | #N/A | #N/A |
| 2.47 | 0.91 | 1.38 | 0.63 |
| 1.31 | 0.58 | 1.09 | 0.43 |
| 0.99 | 0.46 | #N/A | #N/A |
| 1.07 | 0.46 | 0.75 | 0.30 |
| 3.42 | 0.99 | 3.41 | 0.99 |
| 1.81 | 0.76 | 2.24 | 0.91 |
| 3.58 | 0.99 | 3.70 | 1.00 |
| 2.28 | 0.92 | 2.77 | 0.97 |
| 2.22 | 0.88 | 2.18 | 0.90 |
| 1.95 | 0.82 | #N/A | #N/A |
| #N/A | #N/A | 0.91 | 0.33 |
| 1.02 | 0.44 | 0.81 | 0.34 |
| 1.96 | 0.85 | 1.64 | 0.75 |
| 1.00 | 0.43 | 1.08 | 0.48 |
| 1.28 | 0.56 | 0.89 | 0.36 |
| 2.28 | 0.90 | 2.25 | 0.91 |
| 0.92 | 0.42 | 1.30 | 0.59 |
| 1.20 | 0.55 | 1.30 | 0.53 |
| #N/A | #N/A | #N/A | #N/A |
| 1.91 | 0.80 | #N/A | #N/A |
| 0.33 | 0.06 | 0.26 | 0.03 |
| #N/A | #N/A | #N/A | #N/A |
| 2.00 | 0.83 | 1.63 | 0.69 |
| #N/A | #N/A | #N/A | #N/A |
| 0.37 | 0.07 | 0.33 | 0.06 |

|      |      |      |      |
|------|------|------|------|
| 2.01 | 0.82 | 2.00 | 0.85 |
| #N/A | #N/A | #N/A | #N/A |
| 1.57 | 0.68 | 1.77 | 0.79 |
| 1.76 | 0.77 | 1.31 | 0.59 |
| 0.48 | 0.13 | 0.43 | 0.12 |
| 1.22 | 0.55 | 1.25 | 0.53 |
| 1.78 | 0.76 | 1.68 | 0.75 |
| 2.00 | 0.86 | 2.51 | 0.87 |
| #N/A | #N/A | #N/A | #N/A |
| 0.98 | 0.41 | 0.95 | 0.42 |
| #N/A | #N/A | #N/A | #N/A |
| 0.68 | 0.26 | 0.98 | 0.43 |
| 0.70 | 0.29 | 0.74 | 0.30 |
| 1.03 | 0.44 | 0.76 | 0.30 |
| #N/A | #N/A | #N/A | #N/A |
| 2.75 | 0.95 | 2.47 | 0.94 |
| 2.98 | 0.97 | 2.96 | 0.96 |
| 1.15 | 0.51 | 0.80 | 0.34 |
| 1.19 | 0.51 | 0.84 | 0.36 |
| 1.67 | 0.73 | 1.83 | 0.78 |
| 1.81 | 0.80 | 2.06 | 0.84 |
| 0.52 | 0.17 | 0.44 | 0.13 |
| 2.16 | 0.90 | 2.04 | 0.76 |
| #N/A | #N/A | #N/A | #N/A |
| #N/A | #N/A | #N/A | #N/A |
| 2.02 | 0.87 | #N/A | #N/A |
| #N/A | #N/A | #N/A | #N/A |
| 2.05 | 0.84 | 2.18 | 0.87 |
| #N/A | #N/A | #N/A | #N/A |
| #N/A | #N/A | #N/A | #N/A |
| 2.37 | 0.90 | #N/A | #N/A |
| 2.53 | 0.93 | 2.32 | 0.93 |
| 4.13 | 1.00 | 3.10 | 0.98 |
| 1.64 | 0.71 | 2.10 | 0.82 |
| 1.51 | 0.69 | 1.46 | 0.66 |
| 1.38 | 0.60 | 1.78 | 0.67 |
| 1.29 | 0.56 | 1.45 | 0.66 |
| 0.44 | 0.12 | 0.25 | 0.02 |
| #N/A | #N/A | #N/A | #N/A |
| 4.14 | 1.00 | 3.17 | 0.98 |
| #N/A | #N/A | 0.95 | 0.42 |
| #N/A | #N/A | #N/A | #N/A |
| 1.78 | 0.76 | #N/A | #N/A |
| 0.51 | 0.16 | 0.39 | 0.10 |
| #N/A | #N/A | #N/A | #N/A |
| 1.65 | 0.71 | 1.93 | 0.82 |
| 0.55 | 0.19 | #N/A | #N/A |
| 1.78 | 0.76 | #N/A | #N/A |
| 1.17 | 0.55 | #N/A | #N/A |
| 2.60 | 0.96 | 2.36 | 0.84 |
| 0.50 | 0.15 | 0.68 | 0.26 |

|      |      |      |      |
|------|------|------|------|
| 0.89 | 0.40 | 1.34 | 0.61 |
| #N/A | #N/A | #N/A | #N/A |
| 1.49 | 0.64 | 1.78 | 0.68 |
| #N/A | #N/A | 0.48 | 0.15 |
| 1.66 | 0.72 | 1.45 | 0.66 |
| 0.65 | 0.24 | 0.78 | 0.30 |
| 1.46 | 0.63 | 1.91 | 0.84 |
| #N/A | #N/A | #N/A | #N/A |
| 2.62 | 0.96 | 2.35 | 0.92 |
| #N/A | #N/A | 0.41 | 0.12 |
| 0.45 | 0.13 | 0.50 | 0.16 |
| 1.46 | 0.63 | 1.32 | 0.57 |
| 0.46 | 0.13 | 0.55 | 0.19 |
| 1.63 | 0.74 | 1.59 | 0.69 |
| 1.92 | 0.84 | 1.74 | 0.72 |
| 1.62 | 0.69 | 1.52 | 0.69 |
| 1.77 | 0.76 | 1.38 | 0.63 |
| 1.89 | 0.80 | 1.57 | 0.67 |
| 1.87 | 0.83 | 1.73 | 0.78 |
| 1.23 | 0.55 | 1.60 | 0.72 |
| 2.43 | 0.94 | 2.24 | 0.87 |
| #N/A | #N/A | #N/A | #N/A |
| 0.97 | 0.41 | #N/A | #N/A |
| 1.37 | 0.59 | 1.46 | 0.61 |
| 0.84 | 0.38 | 0.89 | 0.32 |
| #N/A | #N/A | #N/A | #N/A |
| 1.65 | 0.75 | 1.53 | 0.70 |
| 1.44 | 0.63 | 1.09 | 0.49 |
| 0.72 | 0.28 | #N/A | #N/A |
| #N/A | #N/A | #N/A | #N/A |
| 0.49 | 0.14 | 0.42 | 0.12 |
| 2.14 | 0.85 | 2.35 | 0.93 |
| #N/A | #N/A | #N/A | #N/A |
| 2.34 | 0.90 | 2.10 | 0.88 |
| 1.10 | 0.47 | 1.09 | 0.49 |
| 3.00 | 0.97 | #N/A | #N/A |
| 1.54 | 0.70 | 1.33 | 0.61 |
| 2.33 | 0.93 | 1.93 | 0.84 |
| 2.49 | 0.92 | 1.69 | 0.71 |
| #N/A | #N/A | #N/A | #N/A |
| #N/A | #N/A | #N/A | #N/A |
| 1.56 | 0.71 | 2.04 | 0.77 |
| 1.49 | 0.67 | 1.34 | 0.59 |
| #N/A | #N/A | #N/A | #N/A |
| 0.73 | 0.30 | 0.88 | 0.38 |
| 0.47 | 0.14 | 0.54 | 0.19 |
| 1.79 | 0.77 | 1.35 | 0.62 |
| 0.79 | 0.32 | 0.90 | 0.39 |
| 2.03 | 0.84 | 1.71 | 0.72 |
| 1.26 | 0.54 | 1.73 | 0.66 |
| 0.73 | 0.28 | 1.38 | 0.63 |

|      |      |      |      |
|------|------|------|------|
| 1.53 | 0.65 | 2.04 | 0.85 |
| 1.48 | 0.64 | 2.31 | 0.90 |
| 0.92 | 0.38 | 0.90 | 0.33 |
| #N/A | #N/A | 2.10 | 0.88 |
| 0.74 | 0.32 | 0.80 | 0.34 |
| 0.73 | 0.28 | 0.89 | 0.38 |
| 0.74 | 0.29 | 0.89 | 0.37 |
| 1.04 | 0.44 | 0.84 | 0.35 |
| 0.62 | 0.24 | 0.69 | 0.28 |
| #N/A | #N/A | 1.37 | 0.62 |
| 2.21 | 0.87 | 2.07 | 0.87 |
| 0.57 | 0.20 | 0.36 | 0.08 |
| 0.54 | 0.17 | 0.54 | 0.16 |
| 0.30 | 0.04 | 0.27 | 0.03 |
| 0.44 | 0.12 | 0.37 | 0.08 |
| #N/A | #N/A | #N/A | #N/A |
| 1.93 | 0.79 | 2.31 | 0.92 |
| 1.54 | 0.71 | 1.75 | 0.78 |
| 0.98 | 0.42 | 1.31 | 0.60 |
| 1.08 | 0.46 | #N/A | #N/A |
| 0.85 | 0.36 | 1.44 | 0.65 |
| 1.31 | 0.57 | 1.91 | 0.78 |
| 1.41 | 0.61 | 1.79 | 0.72 |
| 1.40 | 0.61 | 1.76 | 0.75 |
| 1.42 | 0.62 | 1.95 | 0.73 |
| 1.32 | 0.57 | 1.65 | 0.69 |
| #N/A | #N/A | #N/A | #N/A |
| 1.31 | 0.61 | 0.91 | 0.39 |
| 1.24 | 0.58 | #N/A | #N/A |
| 0.76 | 0.30 | 1.57 | 0.63 |
| 1.08 | 0.46 | 1.03 | 0.45 |
| 1.04 | 0.48 | 0.75 | 0.31 |
| 1.36 | 0.63 | 1.07 | 0.39 |
| 1.85 | 0.82 | 1.97 | 0.85 |
| #N/A | #N/A | #N/A | #N/A |
| 1.32 | 0.57 | 1.16 | 0.47 |
| 3.10 | 0.97 | 3.51 | 0.99 |
| 0.93 | 0.39 | #N/A | #N/A |
| 1.00 | 0.43 | 0.65 | 0.25 |
| 1.45 | 0.66 | 1.57 | 0.71 |
| 1.01 | 0.47 | 0.99 | 0.42 |
| #N/A | #N/A | #N/A | #N/A |
| 0.86 | 0.36 | 0.92 | 0.40 |
| 0.41 | 0.10 | 0.38 | 0.08 |
| 0.30 | 0.03 | 0.24 | 0.02 |
| 0.77 | 0.31 | 1.75 | 0.78 |
| #N/A | #N/A | 0.42 | 0.10 |
| 1.03 | 0.47 | 0.86 | 0.31 |
| 2.97 | 0.98 | 2.58 | 0.95 |
| 0.31 | 0.04 | 0.38 | 0.09 |
| 3.22 | 0.99 | 2.64 | 0.95 |



|      |      |      |      |
|------|------|------|------|
| #N/A | #N/A | 0.50 | 0.16 |
| 0.77 | 0.33 | 0.71 | 0.28 |
| 1.92 | 0.84 | 1.48 | 0.67 |
| 0.96 | 0.40 | 1.06 | 0.47 |
| 2.26 | 0.90 | 1.75 | 0.66 |
| 2.02 | 0.82 | 1.94 | 0.81 |
| 0.58 | 0.20 | 0.64 | 0.25 |
| 1.59 | 0.72 | 1.62 | 0.74 |
| #N/A | #N/A | #N/A | #N/A |
| 1.33 | 0.60 | 1.52 | 0.58 |
| 1.31 | 0.60 | 1.09 | 0.41 |
| 1.98 | 0.85 | 1.93 | 0.81 |
| 1.88 | 0.80 | 1.97 | 0.77 |
| 0.14 | 0.00 | 0.19 | 0.01 |
| 1.75 | 0.75 | #N/A | #N/A |
| 2.34 | 0.89 | 2.40 | 0.94 |
| #N/A | #N/A | #N/A | #N/A |
| #N/A | #N/A | 1.14 | 0.42 |
| 2.51 | 0.92 | 2.39 | 0.94 |
| 2.24 | 0.89 | 2.30 | 0.92 |
| #N/A | #N/A | #N/A | #N/A |
| 1.13 | 0.50 | 1.73 | 0.73 |
| 1.80 | 0.80 | 1.67 | 0.72 |
| #N/A | #N/A | #N/A | #N/A |
| 1.83 | 0.78 | #N/A | #N/A |
| 1.53 | 0.67 | 1.65 | 0.69 |
| 0.87 | 0.36 | 0.44 | 0.13 |
| 0.23 | 0.01 | 0.22 | 0.02 |
| #N/A | #N/A | #N/A | #N/A |
| 0.56 | 0.19 | #N/A | #N/A |
| 0.65 | 0.24 | 0.76 | 0.31 |
| #N/A | #N/A | #N/A | #N/A |
| 2.60 | 0.93 | 2.31 | 0.92 |
| 2.09 | 0.84 | 2.22 | 0.89 |
| 1.78 | 0.75 | 1.72 | 0.65 |
| #N/A | #N/A | 1.50 | 0.68 |
| 2.05 | 0.86 | 2.34 | 0.93 |
| 2.07 | 0.85 | 2.48 | 0.94 |
| 2.36 | 0.91 | 2.37 | 0.93 |
| #N/A | #N/A | #N/A | #N/A |
| 0.26 | 0.02 | #N/A | #N/A |
| 0.72 | 0.31 | 0.82 | 0.33 |
| 1.31 | 0.56 | 0.77 | 0.30 |
| 0.47 | 0.13 | 0.43 | 0.11 |
| 0.86 | 0.36 | 1.15 | 0.51 |
| 0.84 | 0.36 | 0.79 | 0.33 |
| 1.12 | 0.52 | 1.06 | 0.47 |
| 0.30 | 0.04 | 0.25 | 0.02 |
| 1.47 | 0.68 | 2.00 | 0.83 |
| #N/A | #N/A | #N/A | #N/A |
| 2.65 | 0.95 | 2.08 | 0.87 |

|      |      |      |      |
|------|------|------|------|
| 2.41 | 0.94 | 1.98 | 0.84 |
| 1.41 | 0.65 | #N/A | #N/A |
| #N/A | #N/A | #N/A | #N/A |
| 1.93 | 0.80 | 1.82 | 0.80 |
| 1.77 | 0.76 | 1.85 | 0.70 |
| 0.59 | 0.21 | 0.72 | 0.27 |
| 3.17 | 0.98 | 3.07 | 0.98 |
| #N/A | #N/A | #N/A | #N/A |
| 2.92 | 0.97 | 2.53 | 0.95 |
| 0.94 | 0.39 | #N/A | #N/A |
| #N/A | #N/A | #N/A | #N/A |
| 2.43 | 0.91 | 1.78 | 0.79 |
| 0.29 | 0.03 | #N/A | #N/A |
| 3.06 | 0.98 | 3.13 | 0.99 |
| #N/A | #N/A | #N/A | #N/A |
| 0.39 | 0.09 | 0.42 | 0.10 |
| 0.46 | 0.13 | 1.08 | 0.43 |
| #N/A | #N/A | 0.32 | 0.06 |
| 1.46 | 0.64 | 1.43 | 0.65 |
| 1.35 | 0.62 | 1.03 | 0.42 |
| 2.78 | 0.95 | 1.36 | 0.62 |
| 1.16 | 0.50 | 1.18 | 0.53 |
| 0.41 | 0.09 | #N/A | #N/A |
| 0.76 | 0.33 | 0.90 | 0.34 |
| #N/A | #N/A | #N/A | #N/A |
| 1.54 | 0.70 | 1.83 | 0.75 |
| 0.59 | 0.20 | 0.80 | 0.34 |
| 1.70 | 0.72 | 2.04 | 0.82 |
| 1.46 | 0.63 | 1.61 | 0.64 |
| 3.51 | 0.99 | #N/A | #N/A |
| #N/A | #N/A | #N/A | #N/A |
| 0.71 | 0.30 | 0.55 | 0.18 |
| #N/A | #N/A | #N/A | #N/A |
| 0.25 | 0.02 | 0.26 | 0.03 |
| 0.44 | 0.12 | 0.47 | 0.15 |
| 1.00 | 0.43 | 0.54 | 0.19 |
| 1.10 | 0.47 | 1.17 | 0.50 |
| 0.50 | 0.16 | 0.39 | 0.10 |
| 0.63 | 0.23 | 0.58 | 0.18 |
| 0.94 | 0.43 | 1.24 | 0.56 |
| 1.17 | 0.51 | 1.22 | 0.53 |
| 2.47 | 0.93 | 2.43 | 0.94 |
| #N/A | #N/A | #N/A | #N/A |
| 3.11 | 0.98 | 2.93 | 0.97 |
| 1.90 | 0.81 | 1.85 | 0.79 |
| 1.36 | 0.59 | 1.60 | 0.68 |
| 0.24 | 0.02 | 0.26 | 0.03 |
| #N/A | #N/A | #N/A | #N/A |
| 0.89 | 0.40 | 0.86 | 0.30 |
| 0.42 | 0.10 | 0.53 | 0.17 |
| 1.47 | 0.68 | 2.25 | 0.86 |

|      |      |      |      |
|------|------|------|------|
| #N/A | #N/A | 0.95 | 0.35 |
| 1.21 | 0.52 | 1.12 | 0.45 |
| 0.51 | 0.16 | #N/A | #N/A |
| 1.03 | 0.44 | #N/A | #N/A |
| 2.41 | 0.90 | 2.49 | 0.94 |
| 0.33 | 0.06 | 0.42 | 0.11 |
| 2.01 | 0.86 | 1.82 | 0.73 |
| 1.22 | 0.54 | 1.36 | 0.54 |
| 1.65 | 0.75 | 1.62 | 0.73 |
| #N/A | #N/A | #N/A | #N/A |
| 0.92 | 0.39 | 0.76 | 0.32 |
| 1.42 | 0.61 | 1.02 | 0.45 |
| 2.65 | 0.95 | 1.92 | 0.76 |
| #N/A | #N/A | #N/A | #N/A |
| 2.19 | 0.87 | 1.85 | 0.82 |
| 2.64 | 0.95 | 3.30 | 0.99 |
| 1.87 | 0.80 | #N/A | #N/A |
| 0.37 | 0.07 | 0.42 | 0.12 |
| 3.19 | 0.98 | 2.49 | 0.94 |
| 0.84 | 0.34 | 0.77 | 0.32 |
| 1.18 | 0.50 | 1.12 | 0.50 |
| 1.57 | 0.68 | 1.23 | 0.56 |
| 1.69 | 0.76 | 1.28 | 0.58 |
| #N/A | #N/A | #N/A | #N/A |
| 1.95 | 0.82 | 1.90 | 0.79 |
| 1.29 | 0.60 | 1.37 | 0.61 |
| 1.77 | 0.74 | 1.30 | 0.59 |
| 1.59 | 0.70 | 1.50 | 0.68 |
| 0.43 | 0.10 | 0.36 | 0.08 |
| 0.47 | 0.14 | 0.82 | 0.31 |
| 0.71 | 0.30 | 0.89 | 0.38 |
| 0.43 | 0.11 | 0.26 | 0.03 |
| 1.04 | 0.48 | 1.83 | 0.78 |
| 2.39 | 0.93 | 1.57 | 0.71 |
| 0.55 | 0.19 | 1.04 | 0.46 |
| 1.05 | 0.45 | 2.37 | 0.85 |
| 0.51 | 0.16 | 0.32 | 0.05 |
| #N/A | #N/A | #N/A | #N/A |
| 0.54 | 0.18 | 0.50 | 0.16 |
| 1.77 | 0.78 | 1.85 | 0.77 |
| 1.11 | 0.48 | 0.92 | 0.36 |
| #N/A | #N/A | 0.83 | 0.36 |
| 1.41 | 0.65 | 1.34 | 0.61 |
| 1.97 | 0.80 | 2.12 | 0.88 |
| #N/A | #N/A | #N/A | #N/A |
| 1.67 | 0.71 | 1.35 | 0.62 |
| #N/A | #N/A | #N/A | #N/A |
| 1.42 | 0.62 | 1.36 | 0.62 |
| #N/A | #N/A | #N/A | #N/A |
| 2.28 | 0.89 | 1.81 | 0.68 |
| #N/A | #N/A | #N/A | #N/A |

|      |      |      |      |
|------|------|------|------|
| 2.84 | 0.96 | 2.65 | 0.94 |
| #N/A | #N/A | #N/A | #N/A |
| 1.78 | 0.77 | 1.90 | 0.76 |
| 1.07 | 0.45 | 1.08 | 0.44 |
| 0.45 | 0.12 | 0.45 | 0.13 |
| 1.06 | 0.48 | 0.86 | 0.30 |
| 1.07 | 0.50 | 0.64 | 0.24 |
| 0.70 | 0.29 | 0.58 | 0.18 |
| 0.65 | 0.24 | 0.59 | 0.21 |
| 0.38 | 0.07 | 0.33 | 0.06 |
| 0.44 | 0.11 | 0.48 | 0.15 |
| 1.42 | 0.66 | 1.21 | 0.55 |
| 3.93 | 1.00 | 2.69 | 0.96 |
| #N/A | #N/A | #N/A | #N/A |
| 0.50 | 0.15 | #N/A | #N/A |
| 1.78 | 0.80 | 2.13 | 0.88 |
| 0.54 | 0.18 | 0.46 | 0.14 |
| 3.44 | 0.99 | 3.71 | 1.00 |
| 1.79 | 0.77 | 1.30 | 0.58 |
| 2.34 | 0.90 | 3.02 | 0.95 |
| 1.72 | 0.78 | #N/A | #N/A |
| 0.84 | 0.34 | 1.78 | 0.70 |
| #N/A | #N/A | 1.91 | 0.84 |
| 2.75 | 0.96 | 2.29 | 0.90 |
| #N/A | #N/A | #N/A | #N/A |
| 1.04 | 0.46 | 1.48 | 0.56 |
| 1.20 | 0.51 | 1.86 | 0.79 |
| 2.25 | 0.91 | 3.26 | 0.99 |
| 0.69 | 0.26 | 0.92 | 0.40 |
| 2.56 | 0.94 | 4.57 | 1.00 |
| 1.78 | 0.75 | 3.79 | 0.99 |
| 0.76 | 0.30 | 1.91 | 0.83 |
| 0.61 | 0.22 | 0.71 | 0.28 |
| 0.49 | 0.14 | 0.89 | 0.33 |
| 0.59 | 0.22 | 1.66 | 0.63 |
| 0.72 | 0.28 | 1.07 | 0.39 |
| 0.67 | 0.26 | 1.06 | 0.46 |
| #N/A | #N/A | 0.59 | 0.21 |
| 2.11 | 0.86 | 1.73 | 0.77 |
| #N/A | #N/A | #N/A | #N/A |
| 1.85 | 0.82 | 1.64 | 0.74 |
| 0.41 | 0.09 | 0.44 | 0.13 |
| 0.76 | 0.33 | 0.82 | 0.28 |
| 1.62 | 0.69 | 1.19 | 0.54 |
| #N/A | #N/A | #N/A | #N/A |
| 1.27 | 0.60 | 1.45 | 0.61 |
| 0.71 | 0.30 | 0.79 | 0.27 |
| 0.59 | 0.21 | 0.61 | 0.23 |
| #N/A | #N/A | 0.35 | 0.08 |
| 0.49 | 0.15 | 0.52 | 0.18 |
| 1.02 | 0.45 | 1.36 | 0.60 |

|      |      |      |      |
|------|------|------|------|
| 1.75 | 0.77 | 1.94 | 0.84 |
| 1.47 | 0.65 | 1.79 | 0.79 |
| #N/A | #N/A | #N/A | #N/A |
| 0.61 | 0.22 | 0.54 | 0.19 |
| #N/A | #N/A | 1.51 | 0.57 |
| 1.17 | 0.55 | 1.30 | 0.59 |
| 0.84 | 0.34 | 0.51 | 0.15 |
| 0.95 | 0.40 | 1.06 | 0.47 |
| #N/A | #N/A | #N/A | #N/A |
| 1.70 | 0.73 | 1.63 | 0.71 |
| #N/A | #N/A | #N/A | #N/A |
| 1.24 | 0.54 | 1.11 | 0.49 |
| 1.22 | 0.53 | 1.47 | 0.62 |
| #N/A | #N/A | #N/A | #N/A |
| 1.25 | 0.53 | #N/A | #N/A |
| 1.99 | 0.83 | 2.59 | 0.94 |
| 1.37 | 0.60 | 1.24 | 0.55 |
| 1.21 | 0.52 | 1.32 | 0.57 |
| 1.40 | 0.61 | 1.20 | 0.54 |
| 0.33 | 0.05 | 0.46 | 0.14 |
| 1.74 | 0.78 | 2.31 | 0.92 |
| 0.76 | 0.30 | 1.06 | 0.45 |
| #N/A | #N/A | #N/A | #N/A |
| 1.54 | 0.68 | 1.39 | 0.63 |
| 0.69 | 0.26 | 0.89 | 0.38 |
| 1.30 | 0.61 | 1.27 | 0.57 |
| 1.55 | 0.67 | 1.29 | 0.59 |
| 2.46 | 0.91 | #N/A | #N/A |
| 2.16 | 0.88 | 2.05 | 0.87 |
| 1.70 | 0.77 | 1.12 | 0.50 |
| 1.95 | 0.82 | 1.75 | 0.79 |
| #N/A | #N/A | #N/A | #N/A |
| 1.06 | 0.50 | 1.10 | 0.44 |
| #N/A | #N/A | #N/A | #N/A |
| 3.08 | 0.98 | 2.63 | 0.96 |
| 2.10 | 0.86 | 2.47 | 0.94 |
| 1.85 | 0.78 | 1.89 | 0.76 |
| 1.63 | 0.74 | 2.07 | 0.83 |
| 2.08 | 0.88 | 1.89 | 0.83 |
| 1.13 | 0.49 | #N/A | #N/A |
| #N/A | #N/A | #N/A | #N/A |
| 2.58 | 0.93 | 2.59 | 0.92 |
| 0.56 | 0.19 | 0.63 | 0.24 |
| 2.58 | 0.93 | 2.30 | 0.91 |
| #N/A | #N/A | #N/A | #N/A |
| 1.89 | 0.82 | 2.46 | 0.87 |
| 0.48 | 0.14 | 0.28 | 0.04 |
| 0.65 | 0.24 | 0.74 | 0.30 |
| 0.91 | 0.39 | 1.10 | 0.49 |
| #N/A | #N/A | 1.18 | 0.53 |
| 0.41 | 0.10 | 0.35 | 0.07 |

|      |      |      |      |
|------|------|------|------|
| 0.76 | 0.30 | 0.68 | 0.27 |
| 2.33 | 0.90 | 2.40 | 0.93 |
| #N/A | #N/A | #N/A | #N/A |
| #N/A | #N/A | #N/A | #N/A |
| 0.96 | 0.44 | 0.80 | 0.34 |
| 0.93 | 0.39 | 0.72 | 0.29 |
| 1.54 | 0.66 | 1.14 | 0.51 |
| 0.54 | 0.17 | 0.71 | 0.29 |
| 4.47 | 1.00 | 3.34 | 0.99 |
| 1.16 | 0.54 | 1.03 | 0.46 |
| #N/A | #N/A | #N/A | #N/A |
| 1.32 | 0.57 | 1.74 | 0.66 |
| 1.54 | 0.68 | 2.04 | 0.86 |
| 1.44 | 0.63 | 1.27 | 0.57 |
| 1.73 | 0.74 | 1.28 | 0.58 |
| 1.43 | 0.62 | 1.27 | 0.53 |
| 0.34 | 0.05 | 0.36 | 0.08 |
| 1.70 | 0.75 | 2.40 | 0.87 |
| 0.72 | 0.30 | 0.78 | 0.31 |
| 1.58 | 0.70 | 1.61 | 0.73 |
| 0.82 | 0.37 | 0.69 | 0.25 |
| 1.12 | 0.53 | 1.55 | 0.71 |
| 1.58 | 0.69 | 1.28 | 0.57 |
| 1.10 | 0.52 | 0.93 | 0.40 |
| #N/A | #N/A | #N/A | #N/A |
| 1.71 | 0.72 | 1.14 | 0.51 |
| #N/A | #N/A | #N/A | #N/A |
| 0.45 | 0.13 | 0.67 | 0.24 |
| 0.67 | 0.28 | 0.81 | 0.35 |
| #N/A | #N/A | 1.31 | 0.59 |
| 0.99 | 0.42 | 1.29 | 0.54 |
| 1.50 | 0.65 | 1.82 | 0.80 |
| 1.13 | 0.48 | 1.59 | 0.60 |
| 2.11 | 0.89 | 2.14 | 0.89 |
| 1.25 | 0.54 | 1.11 | 0.47 |
| 1.13 | 0.53 | 1.05 | 0.47 |
| #N/A | #N/A | #N/A | #N/A |
| 1.93 | 0.84 | 2.14 | 0.82 |
| 1.46 | 0.65 | 1.32 | 0.60 |
| 1.37 | 0.59 | 1.61 | 0.63 |
| 0.94 | 0.43 | 1.07 | 0.47 |
| #N/A | #N/A | 0.81 | 0.28 |
| 1.57 | 0.68 | 1.33 | 0.61 |
| #N/A | #N/A | #N/A | #N/A |
| 1.05 | 0.45 | 0.91 | 0.40 |
| 0.32 | 0.04 | 0.32 | 0.06 |
| 0.78 | 0.31 | 0.88 | 0.31 |
| 0.84 | 0.38 | 0.88 | 0.38 |
| 1.06 | 0.45 | 0.89 | 0.39 |
| 0.70 | 0.27 | 1.06 | 0.39 |
| #N/A | #N/A | #N/A | #N/A |

|      |      |      |      |
|------|------|------|------|
| 1.12 | 0.52 | 1.19 | 0.45 |
| #N/A | #N/A | 1.01 | 0.44 |
| #N/A | #N/A | 2.87 | 0.94 |
| 0.72 | 0.30 | 0.84 | 0.34 |
| 1.45 | 0.63 | 1.33 | 0.60 |
| 3.05 | 0.98 | 2.65 | 0.93 |
| 0.45 | 0.12 | 0.40 | 0.11 |
| #N/A | #N/A | #N/A | #N/A |
| 1.17 | 0.51 | 0.84 | 0.29 |
| 0.45 | 0.12 | #N/A | #N/A |
| 1.30 | 0.56 | 1.21 | 0.55 |
| 1.10 | 0.47 | 0.93 | 0.41 |
| #N/A | #N/A | #N/A | #N/A |
| 0.60 | 0.21 | 0.42 | 0.10 |
| 0.44 | 0.12 | 0.51 | 0.17 |
| 0.52 | 0.16 | 0.58 | 0.17 |
| 1.27 | 0.54 | 2.62 | 0.95 |
| 0.82 | 0.33 | 1.25 | 0.57 |
| 1.89 | 0.80 | 2.04 | 0.86 |
| 1.45 | 0.62 | 1.36 | 0.56 |
| 1.48 | 0.64 | 1.44 | 0.65 |
| 1.67 | 0.72 | 2.19 | 0.90 |
| #N/A | #N/A | #N/A | #N/A |
| 0.64 | 0.23 | 0.97 | 0.36 |
| 2.57 | 0.94 | 2.01 | 0.86 |
| 0.61 | 0.24 | #N/A | #N/A |
| #N/A | #N/A | #N/A | #N/A |
| #N/A | #N/A | #N/A | #N/A |
| 2.54 | 0.92 | 2.82 | 0.94 |
| #N/A | #N/A | 1.07 | 0.48 |
| 2.92 | 0.97 | 1.96 | 0.85 |
| 0.34 | 0.06 | #N/A | #N/A |
| 0.48 | 0.14 | 0.49 | 0.15 |
| #N/A | #N/A | 0.98 | 0.43 |
| #N/A | #N/A | #N/A | #N/A |
| #N/A | #N/A | #N/A | #N/A |
| #N/A | #N/A | #N/A | #N/A |
| 3.12 | 0.98 | #N/A | #N/A |
| #N/A | #N/A | 2.16 | 0.90 |
| 0.45 | 0.12 | 1.02 | 0.38 |
| 1.18 | 0.55 | 0.95 | 0.42 |
| #N/A | #N/A | #N/A | #N/A |
| #N/A | #N/A | #N/A | #N/A |
| #N/A | #N/A | #N/A | #N/A |
| 0.42 | 0.10 | 0.43 | 0.10 |
| #N/A | #N/A | #N/A | #N/A |
| 3.03 | 0.98 | 2.54 | 0.95 |
| 0.65 | 0.24 | 0.67 | 0.22 |
| #N/A | #N/A | #N/A | #N/A |
| 2.48 | 0.92 | 2.10 | 0.88 |
| 3.24 | 0.98 | 3.32 | 0.99 |

|      |      |      |      |
|------|------|------|------|
| 1.01 | 0.47 | 1.14 | 0.51 |
| #N/A | #N/A | #N/A | #N/A |
| 1.28 | 0.55 | 1.81 | 0.68 |
| 1.82 | 0.78 | 1.38 | 0.63 |
| #N/A | #N/A | 1.99 | 0.81 |
| 2.20 | 0.88 | 2.20 | 0.81 |
| 1.52 | 0.66 | 2.27 | 0.91 |
| #N/A | #N/A | 1.57 | 0.60 |
| #N/A | #N/A | #N/A | #N/A |
| #N/A | #N/A | #N/A | #N/A |
| 0.77 | 0.32 | 0.85 | 0.37 |
| 1.09 | 0.49 | 0.77 | 0.28 |
| 1.27 | 0.55 | 1.39 | 0.61 |
| 0.87 | 0.39 | 1.00 | 0.41 |
| #N/A | #N/A | #N/A | #N/A |
| 1.28 | 0.57 | 0.66 | 0.25 |
| 0.70 | 0.27 | 0.94 | 0.34 |
| 1.69 | 0.73 | 1.72 | 0.77 |
| 1.04 | 0.49 | 1.56 | 0.71 |
| 0.98 | 0.42 | 1.66 | 0.70 |
| 1.99 | 0.83 | 1.63 | 0.69 |
| 0.57 | 0.20 | 0.79 | 0.33 |
| 0.52 | 0.16 | 0.30 | 0.05 |
| 0.80 | 0.34 | 0.78 | 0.33 |
| 0.49 | 0.15 | 0.68 | 0.27 |
| 1.78 | 0.79 | 1.82 | 0.80 |
| 1.04 | 0.47 | 1.75 | 0.79 |
| 2.02 | 0.84 | 2.58 | 0.95 |
| #N/A | #N/A | 0.52 | 0.16 |
| #N/A | #N/A | #N/A | #N/A |
| 1.52 | 0.65 | 1.71 | 0.69 |
| 1.65 | 0.75 | 1.80 | 0.80 |
| #N/A | #N/A | #N/A | #N/A |
| #N/A | #N/A | #N/A | #N/A |
| 0.56 | 0.19 | 0.44 | 0.13 |
| 0.96 | 0.44 | 0.93 | 0.35 |
| 1.65 | 0.75 | 1.71 | 0.68 |
| #N/A | #N/A | 0.93 | 0.39 |
| #N/A | #N/A | 1.23 | 0.55 |
| 0.85 | 0.35 | 0.78 | 0.33 |
| #N/A | #N/A | #N/A | #N/A |
| 1.12 | 0.53 | 0.69 | 0.27 |
| #N/A | #N/A | 2.38 | 0.90 |
| 1.09 | 0.48 | 1.13 | 0.49 |
| 2.19 | 0.88 | 2.05 | 0.86 |
| 1.80 | 0.78 | 1.71 | 0.76 |
| #N/A | #N/A | #N/A | #N/A |
| 0.70 | 0.27 | 0.77 | 0.32 |
| #N/A | #N/A | #N/A | #N/A |
| 0.76 | 0.30 | #N/A | #N/A |
| #N/A | #N/A | #N/A | #N/A |



|      |      |      |      |
|------|------|------|------|
| 1.06 | 0.49 | 1.08 | 0.48 |
| 1.76 | 0.74 | #N/A | #N/A |
| 2.31 | 0.89 | 1.85 | 0.81 |
| #N/A | #N/A | 1.10 | 0.49 |
| #N/A | #N/A | 0.84 | 0.36 |
| 2.15 | 0.86 | 1.78 | 0.75 |
| #N/A | #N/A | #N/A | #N/A |
| #N/A | #N/A | #N/A | #N/A |
| #N/A | #N/A | #N/A | #N/A |
| 3.25 | 0.98 | 2.85 | 0.97 |
| 1.79 | 0.80 | #N/A | #N/A |
| #N/A | #N/A | #N/A | #N/A |
| 1.79 | 0.76 | #N/A | #N/A |
| #N/A | #N/A | #N/A | #N/A |
| 1.40 | 0.65 | 1.63 | 0.74 |
| 1.20 | 0.55 | 1.23 | 0.53 |
| 1.52 | 0.66 | 1.24 | 0.56 |
| 0.48 | 0.14 | 0.51 | 0.16 |
| 0.52 | 0.17 | 0.95 | 0.35 |
| 1.49 | 0.66 | #N/A | #N/A |
| 1.95 | 0.82 | 1.76 | 0.78 |
| 1.85 | 0.82 | 1.52 | 0.69 |
| #N/A | #N/A | #N/A | #N/A |
| 1.32 | 0.57 | 1.36 | 0.56 |
| #N/A | #N/A | 0.56 | 0.17 |
| 1.32 | 0.58 | 1.24 | 0.56 |
| 2.02 | 0.84 | 1.80 | 0.80 |
| 1.25 | 0.55 | 1.47 | 0.64 |
| 0.57 | 0.21 | 0.64 | 0.21 |
| 0.48 | 0.14 | 0.46 | 0.14 |
| #N/A | #N/A | #N/A | #N/A |
| 2.91 | 0.97 | 2.13 | 0.88 |
| 2.07 | 0.85 | 1.92 | 0.77 |
| 0.23 | 0.01 | 0.30 | 0.05 |
| 1.84 | 0.78 | 2.11 | 0.89 |
| #N/A | #N/A | #N/A | #N/A |
| 3.11 | 0.98 | 2.16 | 0.90 |
| #N/A | #N/A | #N/A | #N/A |
| #N/A | #N/A | 0.85 | 0.36 |
| 0.84 | 0.37 | 0.97 | 0.39 |
| 1.93 | 0.81 | 1.92 | 0.84 |
| 1.40 | 0.60 | 1.55 | 0.65 |
| 1.98 | 0.86 | 1.60 | 0.61 |
| #N/A | #N/A | #N/A | #N/A |
| 1.42 | 0.62 | 1.32 | 0.52 |
| 1.79 | 0.75 | 1.50 | 0.68 |
| 2.16 | 0.87 | 2.14 | 0.83 |
| 2.27 | 0.89 | 2.40 | 0.93 |
| #N/A | #N/A | #N/A | #N/A |
| #N/A | #N/A | #N/A | #N/A |
| 2.40 | 0.91 | 2.31 | 0.92 |

|      |      |      |      |
|------|------|------|------|
| 0.22 | 0.01 | 0.27 | 0.03 |
| 0.58 | 0.20 | 0.51 | 0.17 |
| 0.61 | 0.22 | 0.80 | 0.33 |
| 0.41 | 0.10 | 0.50 | 0.14 |
| 2.16 | 0.86 | 2.07 | 0.87 |
| 1.02 | 0.44 | 1.27 | 0.58 |
| 0.99 | 0.45 | 0.77 | 0.33 |
| 2.35 | 0.89 | 2.64 | 0.96 |
| 2.27 | 0.89 | 2.83 | 0.97 |
| #N/A | #N/A | #N/A | #N/A |
| 2.07 | 0.86 | 2.57 | 0.95 |
| #N/A | #N/A | #N/A | #N/A |
| 1.84 | 0.78 | 1.89 | 0.82 |
| 0.71 | 0.27 | #N/A | #N/A |
| 2.04 | 0.84 | 1.81 | 0.78 |
| #N/A | #N/A | 0.34 | 0.06 |
| 1.15 | 0.53 | 0.89 | 0.38 |
| 1.13 | 0.49 | 1.64 | 0.66 |
| 0.43 | 0.12 | 0.39 | 0.09 |
| 1.24 | 0.54 | 1.02 | 0.45 |
| #N/A | #N/A | #N/A | #N/A |
| 2.13 | 0.87 | 1.84 | 0.81 |
| #N/A | #N/A | 0.37 | 0.08 |
| 2.09 | 0.85 | 2.07 | 0.87 |
| 1.73 | 0.74 | 1.84 | 0.81 |
| 0.95 | 0.40 | 0.98 | 0.36 |
| 3.43 | 0.99 | 3.02 | 0.98 |
| 2.54 | 0.95 | 2.40 | 0.93 |
| #N/A | #N/A | #N/A | #N/A |
| #N/A | #N/A | #N/A | #N/A |
| 1.18 | 0.51 | 1.51 | 0.59 |
| 0.44 | 0.12 | #N/A | #N/A |
| #N/A | #N/A | #N/A | #N/A |
| 0.28 | 0.03 | 0.20 | 0.01 |
| #N/A | #N/A | #N/A | #N/A |
| 1.39 | 0.61 | 0.91 | 0.39 |
| 1.92 | 0.83 | 1.70 | 0.75 |
| 0.97 | 0.41 | 1.16 | 0.44 |
| 0.53 | 0.17 | 0.39 | 0.10 |
| 1.70 | 0.73 | 1.35 | 0.61 |
| 2.61 | 0.94 | 2.43 | 0.94 |
| 1.09 | 0.51 | 1.54 | 0.58 |
| 2.25 | 0.88 | 1.83 | 0.69 |
| #N/A | #N/A | #N/A | #N/A |
| #N/A | #N/A | #N/A | #N/A |
| 2.11 | 0.86 | 2.42 | 0.94 |
| #N/A | #N/A | #N/A | #N/A |
| 0.86 | 0.36 | 0.89 | 0.34 |
| #N/A | #N/A | #N/A | #N/A |
| 1.15 | 0.50 | 0.90 | 0.39 |
| 2.74 | 0.97 | 1.89 | 0.83 |

|      |      |      |      |
|------|------|------|------|
| #N/A | #N/A | #N/A | #N/A |
| #N/A | #N/A | #N/A | #N/A |
| #N/A | #N/A | 1.85 | 0.81 |
| 0.40 | 0.08 | 0.59 | 0.18 |
| 0.34 | 0.05 | 0.22 | 0.01 |
| #N/A | #N/A | #N/A | #N/A |
| 0.66 | 0.25 | 0.44 | 0.11 |
| 0.55 | 0.19 | 0.82 | 0.34 |
| 1.09 | 0.47 | 2.09 | 0.81 |
| 0.95 | 0.44 | 2.33 | 0.92 |
| 1.24 | 0.58 | 1.00 | 0.44 |
| 2.67 | 0.95 | 3.70 | 0.99 |
| 1.41 | 0.63 | 1.18 | 0.44 |
| 1.85 | 0.78 | 1.54 | 0.70 |
| 1.37 | 0.59 | 1.66 | 0.75 |
| 2.35 | 0.91 | 2.51 | 0.95 |
| 1.65 | 0.71 | 0.96 | 0.42 |
| #N/A | #N/A | #N/A | #N/A |
| 2.26 | 0.89 | 3.57 | 0.99 |
| 0.61 | 0.22 | 0.97 | 0.38 |
| 0.60 | 0.21 | 0.66 | 0.26 |
| 0.73 | 0.31 | 1.94 | 0.84 |
| 1.28 | 0.56 | 1.48 | 0.59 |
| 2.12 | 0.86 | 2.63 | 0.96 |
| 1.23 | 0.52 | 0.98 | 0.40 |
| 0.45 | 0.12 | 0.46 | 0.13 |
| 0.63 | 0.23 | 0.57 | 0.17 |
| 1.12 | 0.48 | 1.68 | 0.74 |
| 0.71 | 0.27 | #N/A | #N/A |
| 1.44 | 0.62 | 2.24 | 0.84 |
| 1.26 | 0.59 | 1.29 | 0.48 |
| #N/A | #N/A | #N/A | #N/A |
| 1.84 | 0.78 | 1.82 | 0.75 |
| 0.57 | 0.20 | 0.60 | 0.22 |
| 2.32 | 0.91 | #N/A | #N/A |
| 0.50 | 0.16 | 0.29 | 0.04 |
| 0.34 | 0.06 | 0.41 | 0.12 |
| #N/A | #N/A | #N/A | #N/A |
| 0.44 | 0.11 | 0.34 | 0.06 |
| 0.51 | 0.16 | 0.61 | 0.19 |
| 1.85 | 0.82 | 2.41 | 0.88 |
| #N/A | #N/A | #N/A | #N/A |
| #N/A | #N/A | #N/A | #N/A |
| #N/A | #N/A | 2.70 | 0.96 |
| 1.96 | 0.81 | 1.92 | 0.83 |
| #N/A | #N/A | #N/A | #N/A |
| 1.13 | 0.49 | 1.38 | 0.59 |
| #N/A | #N/A | 1.16 | 0.51 |
| #N/A | #N/A | #N/A | #N/A |
| 3.54 | 0.99 | 3.72 | 0.99 |
| #N/A | #N/A | 2.87 | 0.97 |

|      |      |      |      |
|------|------|------|------|
| #N/A | #N/A | #N/A | #N/A |
| #N/A | #N/A | #N/A | #N/A |
| 0.35 | 0.06 | 0.30 | 0.04 |
| 1.69 | 0.72 | 1.93 | 0.77 |
| #N/A | #N/A | #N/A | #N/A |
| 0.88 | 0.36 | 1.35 | 0.60 |
| 1.28 | 0.60 | 1.25 | 0.56 |
| 1.02 | 0.44 | 0.73 | 0.30 |
| 0.93 | 0.41 | 0.61 | 0.23 |
| 0.37 | 0.07 | 0.36 | 0.07 |
| 1.72 | 0.75 | 2.00 | 0.86 |
| 0.99 | 0.45 | 1.04 | 0.41 |
| 1.54 | 0.67 | 1.50 | 0.68 |
| 1.24 | 0.56 | 1.71 | 0.68 |
| 0.72 | 0.28 | 0.73 | 0.28 |
| 0.85 | 0.38 | 1.21 | 0.48 |
| 1.70 | 0.72 | 1.53 | 0.69 |
| #N/A | #N/A | #N/A | #N/A |
| 1.21 | 0.53 | 1.51 | 0.68 |
| 1.55 | 0.66 | 1.18 | 0.53 |
| #N/A | #N/A | #N/A | #N/A |
| 0.45 | 0.13 | 0.24 | 0.02 |
| 2.11 | 0.86 | 1.95 | 0.79 |
| 0.58 | 0.22 | 0.39 | 0.10 |
| 1.96 | 0.83 | 2.46 | 0.94 |
| 1.20 | 0.52 | 1.09 | 0.42 |
| 0.95 | 0.43 | 0.68 | 0.27 |
| 0.74 | 0.30 | 0.72 | 0.30 |
| 0.80 | 0.35 | 0.77 | 0.32 |
| 0.90 | 0.38 | 1.18 | 0.53 |
| 0.56 | 0.19 | 0.84 | 0.29 |
| 0.52 | 0.16 | 0.80 | 0.31 |
| 0.60 | 0.23 | 0.57 | 0.17 |
| 1.39 | 0.60 | 1.16 | 0.52 |
| #N/A | #N/A | #N/A | #N/A |
| 2.17 | 0.90 | #N/A | #N/A |
| 0.40 | 0.10 | 0.27 | 0.03 |
| #N/A | #N/A | #N/A | #N/A |
| 0.97 | 0.45 | 1.23 | 0.56 |
| 0.65 | 0.26 | 0.76 | 0.31 |
| 0.29 | 0.03 | 0.51 | 0.15 |
| 0.84 | 0.34 | 0.91 | 0.35 |
| 2.20 | 0.88 | 1.81 | 0.72 |
| 1.01 | 0.47 | 1.47 | 0.67 |
| 0.81 | 0.36 | 0.44 | 0.11 |
| 1.01 | 0.44 | 1.00 | 0.42 |
| 1.27 | 0.58 | 1.37 | 0.52 |
| 0.30 | 0.03 | 0.36 | 0.08 |
| 0.39 | 0.09 | 0.62 | 0.23 |
| 2.55 | 0.95 | 2.41 | 0.93 |
| 2.34 | 0.89 | 2.23 | 0.89 |

|      |      |      |      |
|------|------|------|------|
| 1.80 | 0.75 | 2.23 | 0.87 |
| #N/A | #N/A | #N/A | #N/A |
| 1.69 | 0.72 | 1.69 | 0.76 |
| 1.85 | 0.78 | 1.88 | 0.82 |
| 1.29 | 0.56 | 0.96 | 0.37 |
| 1.92 | 0.79 | 1.27 | 0.55 |
| #N/A | #N/A | #N/A | #N/A |
| 0.57 | 0.20 | 0.79 | 0.33 |
| 0.99 | 0.42 | 1.11 | 0.49 |
| 1.86 | 0.82 | 1.55 | 0.65 |
| 0.53 | 0.17 | 0.41 | 0.11 |
| 2.43 | 0.92 | 1.64 | 0.75 |
| 2.05 | 0.84 | 1.65 | 0.67 |
| 1.23 | 0.58 | 1.42 | 0.61 |
| 2.03 | 0.84 | 2.04 | 0.87 |
| 0.68 | 0.26 | 1.21 | 0.55 |
| 1.01 | 0.42 | 0.65 | 0.24 |
| 1.35 | 0.61 | 1.25 | 0.54 |
| 1.00 | 0.44 | 1.60 | 0.68 |
| 0.20 | 0.01 | 0.24 | 0.02 |
| 0.40 | 0.10 | 0.49 | 0.16 |
| 0.23 | 0.01 | 0.30 | 0.05 |
| 0.44 | 0.11 | 0.66 | 0.21 |
| 2.39 | 0.91 | 2.39 | 0.93 |
| 1.32 | 0.57 | 1.16 | 0.51 |
| 0.30 | 0.05 | 0.23 | 0.02 |
| 1.24 | 0.55 | 1.55 | 0.71 |
| 0.80 | 0.32 | 0.87 | 0.38 |
| 1.04 | 0.44 | 0.71 | 0.29 |
| 1.32 | 0.57 | 1.49 | 0.57 |
| #N/A | #N/A | 0.42 | 0.11 |
| 2.55 | 0.95 | 2.51 | 0.91 |
| 0.60 | 0.23 | 0.80 | 0.34 |
| 0.97 | 0.41 | 1.04 | 0.44 |
| 0.47 | 0.13 | 0.59 | 0.22 |
| 0.18 | 0.00 | 0.32 | 0.06 |
| #N/A | #N/A | #N/A | #N/A |
| 1.45 | 0.62 | 0.85 | 0.36 |
| 1.82 | 0.80 | 1.94 | 0.84 |
| #N/A | #N/A | #N/A | #N/A |
| 0.35 | 0.07 | 0.45 | 0.14 |
| 0.52 | 0.17 | 0.46 | 0.14 |
| 1.03 | 0.43 | 0.43 | 0.12 |
| 1.11 | 0.49 | 1.33 | 0.61 |
| 1.04 | 0.48 | 0.72 | 0.29 |
| 1.33 | 0.57 | 1.23 | 0.56 |
| 1.11 | 0.48 | 1.33 | 0.57 |
| 1.51 | 0.69 | 1.12 | 0.50 |
| 2.26 | 0.92 | 2.31 | 0.92 |
| 1.88 | 0.83 | 1.79 | 0.79 |
| 1.62 | 0.69 | 1.53 | 0.60 |

|      |      |      |      |
|------|------|------|------|
| 2.34 | 0.89 | 2.01 | 0.86 |
| #N/A | #N/A | #N/A | #N/A |
| 1.21 | 0.57 | 1.31 | 0.52 |
| 1.71 | 0.75 | 1.74 | 0.73 |
| 1.03 | 0.48 | 0.79 | 0.34 |
| 1.26 | 0.55 | 1.44 | 0.66 |
| 0.91 | 0.38 | 1.26 | 0.48 |
| 0.83 | 0.34 | 0.87 | 0.36 |
| 2.99 | 0.98 | 2.14 | 0.89 |
| #N/A | #N/A | #N/A | #N/A |
| 1.28 | 0.55 | 1.01 | 0.37 |
| #N/A | #N/A | 2.05 | 0.86 |
| 1.37 | 0.60 | 1.64 | 0.74 |
| #N/A | #N/A | #N/A | #N/A |
| 1.17 | 0.53 | 1.72 | 0.78 |
| #N/A | #N/A | 0.28 | 0.04 |
| #N/A | #N/A | #N/A | #N/A |
| 3.04 | 0.97 | 1.71 | 0.77 |
| #N/A | #N/A | #N/A | #N/A |
| 0.43 | 0.11 | 0.51 | 0.15 |
| 1.79 | 0.80 | 1.86 | 0.77 |
| #N/A | #N/A | #N/A | #N/A |
| #N/A | #N/A | 1.10 | 0.49 |
| 1.36 | 0.59 | 1.18 | 0.49 |
| 1.92 | 0.80 | 1.70 | 0.69 |
| 2.39 | 0.90 | 3.13 | 0.97 |
| 0.88 | 0.37 | 0.85 | 0.36 |
| #N/A | #N/A | 1.84 | 0.79 |
| 0.68 | 0.26 | 1.20 | 0.45 |
| 0.69 | 0.26 | 0.80 | 0.34 |
| 0.74 | 0.32 | 1.11 | 0.50 |
| #N/A | #N/A | 1.47 | 0.64 |
| 2.72 | 0.95 | 2.61 | 0.94 |
| 2.21 | 0.88 | #N/A | #N/A |
| #N/A | #N/A | #N/A | #N/A |
| 1.43 | 0.66 | 1.68 | 0.64 |
| #N/A | #N/A | 1.22 | 0.55 |
| #N/A | #N/A | #N/A | #N/A |
| 1.58 | 0.72 | 1.78 | 0.79 |
| #N/A | #N/A | #N/A | #N/A |
| 2.44 | 0.92 | 2.05 | 0.82 |
| 2.57 | 0.94 | 2.31 | 0.92 |
| #N/A | #N/A | 3.26 | 0.99 |
| 0.61 | 0.22 | #N/A | #N/A |
| 0.26 | 0.02 | 0.20 | 0.01 |
| 0.76 | 0.30 | 0.76 | 0.32 |
| 0.16 | 0.00 | 0.17 | 0.01 |
| 0.79 | 0.32 | 0.60 | 0.21 |
| #N/A | #N/A | 0.78 | 0.32 |
| 1.13 | 0.52 | 1.05 | 0.46 |
| 1.56 | 0.68 | 1.90 | 0.76 |

|      |      |      |      |
|------|------|------|------|
| 1.93 | 0.83 | 1.52 | 0.58 |
| 0.41 | 0.09 | 0.42 | 0.10 |
| 0.65 | 0.24 | 0.51 | 0.16 |
| 0.78 | 0.34 | 0.91 | 0.39 |
| 3.94 | 1.00 | 3.30 | 0.96 |
| 1.74 | 0.73 | 1.58 | 0.72 |
| 2.26 | 0.89 | 1.80 | 0.68 |
| #N/A | #N/A | #N/A | #N/A |
| #N/A | #N/A | 1.93 | 0.80 |
| 1.80 | 0.76 | 2.05 | 0.87 |
| 0.93 | 0.42 | 0.79 | 0.33 |
| 0.49 | 0.14 | 0.51 | 0.17 |
| 0.37 | 0.08 | 0.43 | 0.11 |
| 1.26 | 0.54 | 1.28 | 0.58 |
| 0.36 | 0.07 | 0.37 | 0.09 |
| 1.66 | 0.71 | 1.61 | 0.69 |
| 2.01 | 0.87 | 2.06 | 0.87 |
| #N/A | #N/A | 0.52 | 0.17 |
| 2.22 | 0.88 | 2.04 | 0.81 |
| 0.52 | 0.16 | 0.42 | 0.12 |
| #N/A | #N/A | #N/A | #N/A |
| #N/A | #N/A | 1.28 | 0.50 |
| #N/A | #N/A | #N/A | #N/A |
| 1.74 | 0.75 | 1.60 | 0.69 |
| 1.26 | 0.55 | 1.54 | 0.59 |
| 2.21 | 0.91 | 1.70 | 0.64 |
| #N/A | #N/A | 0.35 | 0.07 |
| #N/A | #N/A | 1.84 | 0.73 |
| 1.62 | 0.70 | 1.87 | 0.82 |
| 1.19 | 0.52 | 1.04 | 0.42 |
| 1.26 | 0.54 | 0.48 | 0.14 |
| 0.69 | 0.26 | 0.94 | 0.40 |
| 1.44 | 0.63 | 1.06 | 0.47 |
| 1.70 | 0.72 | 1.52 | 0.69 |
| 0.84 | 0.38 | 1.17 | 0.53 |
| 1.90 | 0.78 | 2.31 | 0.92 |
| 0.86 | 0.36 | 1.19 | 0.54 |
| 1.83 | 0.78 | 2.15 | 0.83 |
| #N/A | #N/A | #N/A | #N/A |
| 0.56 | 0.19 | #N/A | #N/A |
| 0.42 | 0.10 | 0.30 | 0.05 |
| #N/A | #N/A | #N/A | #N/A |
| 0.72 | 0.29 | 0.74 | 0.30 |
| 0.98 | 0.41 | 1.29 | 0.57 |
| 1.03 | 0.45 | 1.64 | 0.62 |
| #N/A | #N/A | #N/A | #N/A |
| 1.06 | 0.45 | 1.57 | 0.71 |
| 1.27 | 0.55 | 1.87 | 0.81 |
| 2.29 | 0.89 | 2.06 | 0.87 |
| 0.93 | 0.39 | 0.79 | 0.27 |
| #N/A | #N/A | #N/A | #N/A |

|      |      |      |      |
|------|------|------|------|
| 1.60 | 0.69 | 1.29 | 0.55 |
| 0.56 | 0.19 | 0.66 | 0.26 |
| #N/A | #N/A | 3.04 | 0.97 |
| 1.92 | 0.83 | 1.65 | 0.75 |
| #N/A | #N/A | #N/A | #N/A |
| 1.28 | 0.56 | 1.40 | 0.64 |
| 1.70 | 0.77 | 1.28 | 0.58 |
| 2.15 | 0.90 | 2.41 | 0.89 |
| 1.07 | 0.45 | 1.20 | 0.54 |
| 1.53 | 0.70 | 1.57 | 0.71 |
| #N/A | #N/A | 0.84 | 0.30 |
| 0.29 | 0.03 | 0.48 | 0.15 |
| #N/A | #N/A | 1.19 | 0.53 |
| 1.52 | 0.70 | #N/A | #N/A |
| 2.75 | 0.95 | 2.67 | 0.90 |
| 1.87 | 0.78 | 1.62 | 0.74 |
| #N/A | #N/A | #N/A | #N/A |
| 1.97 | 0.81 | 2.23 | 0.88 |
| #N/A | #N/A | #N/A | #N/A |
| 3.06 | 0.98 | 2.52 | 0.95 |
| 0.71 | 0.27 | 0.68 | 0.22 |
| 2.66 | 0.96 | 2.60 | 0.96 |
| 1.57 | 0.67 | 1.53 | 0.65 |
| 2.11 | 0.87 | 1.70 | 0.77 |
| #N/A | #N/A | #N/A | #N/A |
| 2.97 | 0.97 | 2.50 | 0.89 |
| #N/A | #N/A | 1.58 | 0.67 |
| 0.52 | 0.17 | 0.57 | 0.20 |
| 2.62 | 0.95 | 2.09 | 0.88 |
| 1.11 | 0.48 | 1.66 | 0.71 |
| #N/A | #N/A | #N/A | #N/A |
| 0.72 | 0.28 | 0.73 | 0.30 |
| #N/A | #N/A | #N/A | #N/A |
| #N/A | #N/A | #N/A | #N/A |
| 1.66 | 0.75 | 1.53 | 0.70 |
| #N/A | #N/A | 0.69 | 0.28 |
| #N/A | #N/A | 1.86 | 0.82 |
| 1.95 | 0.80 | 1.74 | 0.67 |
| 2.51 | 0.92 | 2.79 | 0.95 |
| 2.28 | 0.89 | 2.42 | 0.91 |
| 2.04 | 0.84 | 2.03 | 0.84 |
| 0.34 | 0.06 | 0.38 | 0.09 |
| 1.65 | 0.71 | 1.19 | 0.54 |
| 0.38 | 0.09 | 0.65 | 0.22 |
| 2.09 | 0.84 | 2.09 | 0.84 |
| 1.50 | 0.65 | 1.19 | 0.53 |
| 0.60 | 0.21 | 0.86 | 0.30 |
| 1.00 | 0.42 | 1.20 | 0.51 |
| 1.13 | 0.49 | 1.28 | 0.52 |
| #N/A | #N/A | 0.80 | 0.34 |
| 2.46 | 0.94 | 2.03 | 0.86 |



|      |      |      |      |
|------|------|------|------|
| #N/A | #N/A | #N/A | #N/A |
| 0.36 | 0.07 | 0.34 | 0.07 |
| 1.82 | 0.81 | #N/A | #N/A |
| #N/A | #N/A | #N/A | #N/A |
| 3.36 | 0.99 | #N/A | #N/A |
| 2.50 | 0.95 | 2.81 | 0.96 |
| 0.55 | 0.18 | #N/A | #N/A |
| 2.59 | 0.93 | 1.95 | 0.85 |
| 1.25 | 0.53 | 0.91 | 0.40 |
| 0.49 | 0.14 | 0.33 | 0.06 |
| 1.05 | 0.45 | 0.92 | 0.41 |
| #N/A | #N/A | #N/A | #N/A |
| 1.38 | 0.64 | 1.17 | 0.52 |
| #N/A | #N/A | #N/A | #N/A |
| 0.80 | 0.34 | 0.82 | 0.34 |
| 1.50 | 0.69 | 1.70 | 0.77 |
| 1.25 | 0.59 | #N/A | #N/A |
| 1.98 | 0.81 | 1.91 | 0.83 |
| #N/A | #N/A | #N/A | #N/A |
| 0.98 | 0.41 | 0.76 | 0.32 |
| #N/A | #N/A | #N/A | #N/A |
| 2.59 | 0.96 | 2.22 | 0.86 |
| #N/A | #N/A | #N/A | #N/A |
| #N/A | #N/A | 1.52 | 0.58 |
| 2.41 | 0.91 | 2.22 | 0.86 |
| 3.68 | 0.99 | 3.40 | 0.99 |
| #N/A | #N/A | 0.45 | 0.14 |
| 1.58 | 0.68 | 1.81 | 0.68 |
| #N/A | #N/A | #N/A | #N/A |
| 1.01 | 0.47 | 0.98 | 0.44 |
| 0.79 | 0.32 | 1.20 | 0.54 |
| 0.57 | 0.19 | 0.51 | 0.17 |
| 0.11 | 0.00 | 0.13 | 0.00 |
| 0.33 | 0.05 | 0.27 | 0.03 |
| 0.98 | 0.41 | 0.84 | 0.36 |
| 1.58 | 0.68 | 1.47 | 0.67 |
| 1.76 | 0.75 | 1.45 | 0.66 |
| #N/A | #N/A | #N/A | #N/A |
| 2.59 | 0.94 | 2.47 | 0.92 |
| 0.40 | 0.09 | 0.48 | 0.16 |
| 2.14 | 0.85 | 2.00 | 0.86 |
| 1.33 | 0.57 | 1.31 | 0.60 |
| 0.48 | 0.14 | 0.48 | 0.14 |
| 0.72 | 0.28 | 0.50 | 0.17 |
| 1.57 | 0.68 | #N/A | #N/A |
| 0.58 | 0.20 | 0.42 | 0.11 |
| 0.46 | 0.13 | 0.26 | 0.03 |
| #N/A | #N/A | #N/A | #N/A |
| 1.49 | 0.64 | 1.65 | 0.75 |
| 0.70 | 0.27 | 1.02 | 0.45 |
| 0.33 | 0.05 | 0.30 | 0.05 |

|      |      |      |      |
|------|------|------|------|
| 0.20 | 0.01 | 0.25 | 0.02 |
| #N/A | #N/A | 1.89 | 0.82 |
| 0.58 | 0.22 | 0.43 | 0.13 |
| #N/A | #N/A | #N/A | #N/A |
| #N/A | #N/A | 1.00 | 0.37 |
| #N/A | #N/A | #N/A | #N/A |
| 1.54 | 0.66 | 1.47 | 0.67 |
| #N/A | #N/A | #N/A | #N/A |
| 1.93 | 0.81 | 1.85 | 0.81 |
| 1.35 | 0.58 | 1.18 | 0.44 |
| #N/A | #N/A | #N/A | #N/A |
| #N/A | #N/A | 1.77 | 0.67 |
| #N/A | #N/A | #N/A | #N/A |
| 2.50 | 0.92 | 2.35 | 0.93 |
| 1.75 | 0.74 | 1.63 | 0.73 |
| 0.33 | 0.05 | 0.39 | 0.10 |
| #N/A | #N/A | 3.21 | 0.96 |
| 0.56 | 0.19 | 0.77 | 0.32 |
| 1.63 | 0.74 | 1.67 | 0.70 |
| 1.58 | 0.71 | 1.24 | 0.56 |
| 0.62 | 0.22 | 0.52 | 0.18 |
| 2.06 | 0.83 | 2.22 | 0.91 |
| #N/A | #N/A | #N/A | #N/A |
| 0.32 | 0.05 | 0.33 | 0.06 |
| #N/A | #N/A | #N/A | #N/A |
| #N/A | #N/A | #N/A | #N/A |
| 0.68 | 0.26 | 0.60 | 0.19 |
| #N/A | #N/A | 0.89 | 0.38 |
| #N/A | #N/A | 1.01 | 0.37 |
| 0.70 | 0.27 | 1.26 | 0.47 |
| #N/A | #N/A | 0.89 | 0.31 |
| 1.41 | 0.61 | 0.86 | 0.37 |
| 1.75 | 0.74 | 1.44 | 0.57 |
| 1.75 | 0.78 | 1.60 | 0.72 |
| 0.36 | 0.06 | 0.50 | 0.16 |
| #N/A | #N/A | #N/A | #N/A |
| #N/A | #N/A | #N/A | #N/A |
| 2.24 | 0.88 | 2.74 | 0.95 |
| 0.79 | 0.32 | 0.77 | 0.26 |
| 1.26 | 0.55 | 1.37 | 0.63 |
| 0.85 | 0.37 | 1.03 | 0.46 |
| 0.49 | 0.15 | 0.76 | 0.26 |
| #N/A | #N/A | #N/A | #N/A |
| 1.46 | 0.64 | 1.69 | 0.77 |
| #N/A | #N/A | 0.64 | 0.25 |
| 1.87 | 0.77 | 2.24 | 0.88 |
| #N/A | #N/A | #N/A | #N/A |
| 3.17 | 0.99 | #N/A | #N/A |
| 1.12 | 0.48 | 1.18 | 0.53 |
| 0.86 | 0.35 | 0.70 | 0.28 |
| 1.97 | 0.85 | 1.60 | 0.73 |

|      |      |      |      |
|------|------|------|------|
| 1.02 | 0.44 | 0.65 | 0.23 |
| 2.06 | 0.87 | 2.84 | 0.95 |
| 1.90 | 0.80 | 2.34 | 0.90 |
| 0.80 | 0.33 | 0.94 | 0.40 |
| 1.74 | 0.77 | 2.31 | 0.85 |
| 2.01 | 0.87 | 2.47 | 0.93 |
| 1.16 | 0.52 | 1.20 | 0.50 |
| 0.92 | 0.38 | 1.37 | 0.53 |
| 2.07 | 0.85 | 2.42 | 0.94 |
| 2.31 | 0.89 | 2.69 | 0.91 |
| 0.68 | 0.28 | 0.95 | 0.38 |
| 0.45 | 0.12 | 0.31 | 0.05 |
| 0.60 | 0.22 | 0.70 | 0.25 |
| 0.47 | 0.14 | 0.34 | 0.07 |
| 0.60 | 0.22 | 0.67 | 0.24 |
| 0.44 | 0.12 | 0.36 | 0.08 |
| #N/A | #N/A | 0.71 | 0.29 |
| 1.14 | 0.49 | 1.17 | 0.53 |
| #N/A | #N/A | 1.77 | 0.79 |
| 2.36 | 0.93 | 2.19 | 0.88 |
| #N/A | #N/A | #N/A | #N/A |
| 1.80 | 0.79 | 1.82 | 0.81 |
| 0.56 | 0.19 | 0.53 | 0.19 |
| 1.50 | 0.65 | 1.42 | 0.65 |
| #N/A | #N/A | #N/A | #N/A |
| #N/A | #N/A | 1.09 | 0.49 |
| 1.04 | 0.44 | 0.97 | 0.43 |
| #N/A | #N/A | 1.69 | 0.76 |
| 2.83 | 0.96 | 2.39 | 0.93 |
| #N/A | #N/A | #N/A | #N/A |
| 1.66 | 0.72 | 1.45 | 0.66 |
| 0.38 | 0.07 | 0.39 | 0.09 |
| 1.96 | 0.82 | 1.95 | 0.77 |
| 0.65 | 0.26 | 0.80 | 0.34 |
| 0.59 | 0.21 | 0.87 | 0.36 |
| #N/A | #N/A | #N/A | #N/A |
| 1.22 | 0.57 | 1.49 | 0.56 |
| 0.66 | 0.25 | 0.60 | 0.19 |
| 0.66 | 0.27 | 0.76 | 0.31 |
| 1.28 | 0.59 | 1.81 | 0.80 |
| #N/A | #N/A | 0.84 | 0.36 |
| 1.88 | 0.78 | 1.72 | 0.77 |
| 2.50 | 0.92 | #N/A | #N/A |
| #N/A | #N/A | #N/A | #N/A |
| 1.57 | 0.72 | 0.95 | 0.41 |
| 1.41 | 0.61 | 1.52 | 0.69 |
| 0.62 | 0.23 | 0.45 | 0.14 |
| 1.69 | 0.72 | 1.23 | 0.56 |
| 1.81 | 0.78 | 1.84 | 0.81 |
| 1.63 | 0.74 | 1.67 | 0.73 |
| 1.82 | 0.77 | 1.89 | 0.83 |

|      |      |      |      |
|------|------|------|------|
| 1.21 | 0.56 | 1.26 | 0.49 |
| 2.67 | 0.94 | 2.56 | 0.95 |
| #N/A | #N/A | #N/A | #N/A |
| 1.52 | 0.69 | 1.20 | 0.50 |
| #N/A | #N/A | #N/A | #N/A |
| 1.36 | 0.59 | 0.93 | 0.40 |
| 0.66 | 0.27 | 0.58 | 0.17 |
| 0.41 | 0.09 | 0.34 | 0.07 |
| #N/A | #N/A | #N/A | #N/A |
| 2.49 | 0.92 | 2.23 | 0.83 |
| 1.21 | 0.51 | 1.78 | 0.79 |
| 1.97 | 0.81 | 1.88 | 0.75 |
| #N/A | #N/A | #N/A | #N/A |
| 2.02 | 0.82 | 1.79 | 0.70 |
| 0.96 | 0.41 | 0.81 | 0.34 |
| 0.67 | 0.25 | 0.68 | 0.25 |
| 1.60 | 0.68 | 1.60 | 0.72 |
| #N/A | #N/A | #N/A | #N/A |
| 0.63 | 0.23 | 0.31 | 0.05 |
| 2.68 | 0.95 | 1.69 | 0.76 |
| #N/A | #N/A | #N/A | #N/A |
| #N/A | #N/A | 0.81 | 0.28 |
| #N/A | #N/A | #N/A | #N/A |
| #N/A | #N/A | 2.62 | 0.94 |
| #N/A | #N/A | #N/A | #N/A |
| 2.94 | 0.98 | 3.18 | 0.97 |
| #N/A | #N/A | #N/A | #N/A |
| #N/A | #N/A | #N/A | #N/A |
| 0.58 | 0.20 | 0.87 | 0.37 |
| #N/A | #N/A | 2.85 | 0.97 |
| #N/A | #N/A | #N/A | #N/A |
| 1.84 | 0.77 | 1.80 | 0.68 |
| #N/A | #N/A | 0.85 | 0.36 |
| #N/A | #N/A | #N/A | #N/A |
| #N/A | #N/A | #N/A | #N/A |
| 1.65 | 0.75 | 1.98 | 0.85 |
| #N/A | #N/A | #N/A | #N/A |
| 2.42 | 0.91 | 1.98 | 0.85 |
| 0.82 | 0.36 | 1.10 | 0.49 |
| 1.24 | 0.53 | 0.81 | 0.34 |
| 1.18 | 0.56 | 1.24 | 0.56 |
| 0.74 | 0.29 | 0.80 | 0.34 |
| 2.64 | 0.95 | 2.22 | 0.87 |
| 0.29 | 0.03 | 0.31 | 0.05 |
| 2.50 | 0.92 | 2.25 | 0.91 |
| 0.32 | 0.04 | 0.26 | 0.03 |
| 2.34 | 0.93 | 1.66 | 0.70 |
| 1.48 | 0.64 | #N/A | #N/A |
| 2.22 | 0.87 | 1.31 | 0.59 |
| 0.87 | 0.39 | 0.75 | 0.26 |
| 1.06 | 0.45 | 0.96 | 0.38 |

|      |      |      |      |
|------|------|------|------|
| 0.97 | 0.41 | 0.63 | 0.22 |
| 2.88 | 0.97 | 2.36 | 0.84 |
| #N/A | #N/A | #N/A | #N/A |
| 2.27 | 0.90 | 2.25 | 0.91 |
| 1.63 | 0.70 | 1.30 | 0.59 |
| 1.26 | 0.54 | 1.09 | 0.49 |
| 1.91 | 0.84 | 2.02 | 0.75 |
| 1.56 | 0.68 | 1.62 | 0.73 |
| #N/A | #N/A | #N/A | #N/A |
| 1.07 | 0.50 | 0.86 | 0.36 |
| 1.91 | 0.84 | 2.66 | 0.90 |
| 0.59 | 0.21 | 1.02 | 0.44 |
| 0.80 | 0.35 | 0.38 | 0.08 |
| #N/A | #N/A | #N/A | #N/A |
| #N/A | #N/A | 0.16 | 0.00 |
| #N/A | #N/A | #N/A | #N/A |
| 0.58 | 0.20 | 0.47 | 0.15 |
| 1.39 | 0.64 | 1.49 | 0.63 |
| 2.52 | 0.94 | 1.64 | 0.74 |
| 0.57 | 0.21 | 0.46 | 0.12 |
| 0.32 | 0.05 | 0.38 | 0.10 |
| 2.32 | 0.92 | 2.47 | 0.94 |
| 2.41 | 0.91 | 2.66 | 0.94 |
| 0.62 | 0.22 | 0.58 | 0.21 |
| 2.22 | 0.88 | 1.76 | 0.79 |
| 1.44 | 0.62 | 1.08 | 0.48 |
| 1.09 | 0.50 | 1.35 | 0.61 |
| 0.88 | 0.39 | 0.91 | 0.39 |
| 0.85 | 0.38 | 0.79 | 0.31 |
| 1.92 | 0.84 | 1.71 | 0.65 |
| #N/A | #N/A | 2.42 | 0.86 |
| 1.97 | 0.83 | 1.72 | 0.77 |
| #N/A | #N/A | 0.35 | 0.08 |
| 1.01 | 0.43 | 0.67 | 0.27 |
| 0.88 | 0.37 | 0.82 | 0.35 |
| 1.62 | 0.70 | 1.86 | 0.82 |
| 0.94 | 0.43 | 1.10 | 0.49 |
| 1.62 | 0.73 | 1.91 | 0.83 |
| 2.44 | 0.91 | 1.77 | 0.77 |
| 2.98 | 0.97 | 2.81 | 0.97 |
| 1.39 | 0.65 | 1.33 | 0.60 |
| 0.51 | 0.16 | #N/A | #N/A |
| 1.30 | 0.56 | 1.70 | 0.64 |
| 0.68 | 0.27 | 0.99 | 0.37 |
| 0.54 | 0.17 | 0.41 | 0.12 |
| #N/A | #N/A | #N/A | #N/A |
| 3.06 | 0.98 | 2.11 | 0.83 |
| 2.50 | 0.95 | 3.55 | 0.99 |
| #N/A | #N/A | #N/A | #N/A |
| 0.61 | 0.22 | 0.57 | 0.21 |
| 0.74 | 0.29 | 0.78 | 0.32 |

|      |      |      |      |
|------|------|------|------|
| 1.10 | 0.47 | 1.18 | 0.53 |
| 0.85 | 0.35 | #N/A | #N/A |
| 1.32 | 0.57 | 0.87 | 0.34 |
| 1.55 | 0.67 | 1.23 | 0.53 |
| 1.55 | 0.67 | #N/A | #N/A |
| 1.39 | 0.61 | 1.06 | 0.46 |
| 0.50 | 0.15 | 0.52 | 0.17 |
| 1.47 | 0.65 | 1.17 | 0.52 |
| 0.51 | 0.16 | 0.45 | 0.13 |
| 1.44 | 0.63 | 1.17 | 0.51 |
| 0.44 | 0.12 | 0.41 | 0.11 |
| 0.41 | 0.10 | 0.39 | 0.10 |
| 0.36 | 0.06 | 0.40 | 0.11 |
| 0.79 | 0.34 | 0.89 | 0.34 |
| 2.10 | 0.86 | #N/A | #N/A |
| #N/A | #N/A | #N/A | #N/A |
| 0.99 | 0.46 | 1.39 | 0.53 |
| #N/A | #N/A | #N/A | #N/A |
| #N/A | #N/A | #N/A | #N/A |
| 1.59 | 0.69 | 1.58 | 0.72 |
| 2.04 | 0.84 | 1.87 | 0.82 |
| 2.65 | 0.94 | 2.07 | 0.82 |
| #N/A | #N/A | #N/A | #N/A |
| #N/A | #N/A | #N/A | #N/A |
| 2.24 | 0.91 | 2.17 | 0.90 |
| #N/A | #N/A | #N/A | #N/A |
| 0.82 | 0.34 | 0.94 | 0.40 |
| 0.73 | 0.30 | 0.61 | 0.19 |
| 0.33 | 0.05 | 0.28 | 0.04 |
| #N/A | #N/A | 1.75 | 0.78 |
| #N/A | #N/A | #N/A | #N/A |
| #N/A | #N/A | #N/A | #N/A |
| #N/A | #N/A | #N/A | #N/A |
| 1.53 | 0.66 | 1.25 | 0.56 |
| #N/A | #N/A | 1.00 | 0.44 |
| 0.45 | 0.12 | 0.33 | 0.06 |
| 0.52 | 0.16 | 0.50 | 0.16 |
| 1.57 | 0.72 | 1.51 | 0.69 |
| 1.57 | 0.69 | #N/A | #N/A |
| 1.71 | 0.74 | 1.39 | 0.63 |
| 0.98 | 0.42 | 0.78 | 0.29 |
| 3.06 | 0.98 | 3.81 | 0.99 |
| #N/A | #N/A | #N/A | #N/A |
| 2.60 | 0.94 | 2.63 | 0.94 |
| 2.04 | 0.84 | 1.32 | 0.57 |
| #N/A | #N/A | 0.78 | 0.33 |
| 2.66 | 0.94 | 1.75 | 0.78 |
| 1.23 | 0.54 | 1.59 | 0.66 |
| 1.46 | 0.67 | 1.60 | 0.65 |
| 1.81 | 0.78 | 1.29 | 0.59 |
| #N/A | #N/A | #N/A | #N/A |

|      |      |      |      |
|------|------|------|------|
| 1.51 | 0.66 | 1.65 | 0.64 |
| #N/A | #N/A | 1.75 | 0.70 |
| 2.36 | 0.91 | 2.23 | 0.89 |
| 0.74 | 0.29 | 0.75 | 0.26 |
| 0.45 | 0.12 | 0.48 | 0.15 |
| #N/A | #N/A | 1.18 | 0.53 |
| #N/A | #N/A | #N/A | #N/A |
| 1.19 | 0.56 | 0.61 | 0.23 |
| 0.93 | 0.39 | 0.95 | 0.34 |
| 1.44 | 0.63 | 0.81 | 0.34 |
| 1.34 | 0.63 | 1.21 | 0.46 |
| #N/A | #N/A | 1.80 | 0.80 |
| 1.05 | 0.45 | 1.11 | 0.50 |
| 3.05 | 0.97 | 3.30 | 0.99 |
| #N/A | #N/A | 0.87 | 0.38 |
| 1.56 | 0.71 | 1.68 | 0.76 |
| 0.34 | 0.06 | 0.44 | 0.13 |
| 2.05 | 0.87 | 2.84 | 0.93 |
| 1.13 | 0.53 | 1.59 | 0.69 |
| #N/A | #N/A | #N/A | #N/A |
| #N/A | #N/A | #N/A | #N/A |
| #N/A | #N/A | #N/A | #N/A |
| #N/A | #N/A | 1.32 | 0.60 |
| 0.28 | 0.03 | 0.49 | 0.14 |
| 1.93 | 0.79 | 1.68 | 0.76 |
| 0.29 | 0.03 | 0.25 | 0.03 |
| #N/A | #N/A | #N/A | #N/A |
| 0.88 | 0.36 | 1.03 | 0.46 |
| 1.42 | 0.63 | 1.60 | 0.60 |
| #N/A | #N/A | #N/A | #N/A |
| 1.95 | 0.85 | 1.79 | 0.79 |
| 0.34 | 0.06 | 0.32 | 0.05 |
| 1.32 | 0.60 | 1.64 | 0.71 |
| 0.60 | 0.23 | 0.85 | 0.35 |
| 0.45 | 0.13 | #N/A | #N/A |
| 0.58 | 0.20 | 0.30 | 0.04 |
| 2.14 | 0.87 | #N/A | #N/A |
| 1.08 | 0.47 | 1.17 | 0.48 |
| 1.56 | 0.67 | #N/A | #N/A |
| 1.58 | 0.72 | #N/A | #N/A |
| 1.11 | 0.51 | 1.12 | 0.47 |
| 2.09 | 0.88 | 2.13 | 0.89 |
| 1.42 | 0.61 | 1.35 | 0.53 |
| #N/A | #N/A | #N/A | #N/A |
| 1.28 | 0.60 | 1.50 | 0.68 |
| 1.92 | 0.81 | 1.84 | 0.81 |
| #N/A | #N/A | #N/A | #N/A |
| 2.24 | 0.91 | 1.66 | 0.75 |
| 1.58 | 0.69 | 1.73 | 0.78 |
| 0.58 | 0.22 | 0.41 | 0.11 |
| #N/A | #N/A | #N/A | #N/A |

|      |      |      |      |
|------|------|------|------|
| #N/A | #N/A | #N/A | #N/A |
| 2.07 | 0.84 | 2.52 | 0.94 |
| 0.61 | 0.22 | 1.03 | 0.45 |
| #N/A | #N/A | 0.65 | 0.25 |
| 0.61 | 0.24 | 0.62 | 0.23 |
| 0.77 | 0.33 | 0.80 | 0.34 |
| 2.31 | 0.89 | 2.77 | 0.97 |
| #N/A | #N/A | #N/A | #N/A |
| #N/A | #N/A | #N/A | #N/A |
| 1.80 | 0.80 | 1.97 | 0.82 |
| 1.39 | 0.65 | 0.97 | 0.41 |
| 0.41 | 0.09 | 0.67 | 0.22 |
| 0.76 | 0.30 | 0.98 | 0.43 |
| 0.45 | 0.12 | 0.84 | 0.30 |
| 0.59 | 0.23 | 0.79 | 0.33 |
| 0.23 | 0.01 | 0.20 | 0.01 |
| 0.22 | 0.01 | #N/A | #N/A |
| #N/A | #N/A | #N/A | #N/A |
| #N/A | #N/A | #N/A | #N/A |
| 0.49 | 0.15 | 0.33 | 0.06 |
| 1.73 | 0.73 | 2.07 | 0.87 |
| 1.73 | 0.74 | 1.77 | 0.69 |
| 1.87 | 0.77 | 1.75 | 0.67 |
| 2.26 | 0.89 | 2.44 | 0.92 |
| 1.20 | 0.51 | 2.10 | 0.86 |
| 0.35 | 0.06 | 0.45 | 0.12 |
| #N/A | #N/A | #N/A | #N/A |
| 1.27 | 0.57 | 1.27 | 0.50 |
| 1.26 | 0.59 | 1.81 | 0.77 |
| #N/A | #N/A | #N/A | #N/A |
| 2.23 | 0.88 | 1.68 | 0.65 |
| #N/A | #N/A | #N/A | #N/A |
| 3.02 | 0.97 | #N/A | #N/A |
| #N/A | #N/A | 0.39 | 0.10 |
| 0.60 | 0.21 | 0.33 | 0.07 |
| 1.80 | 0.76 | 1.65 | 0.68 |
| 0.90 | 0.41 | 1.14 | 0.51 |
| 0.74 | 0.29 | 1.44 | 0.61 |
| 0.46 | 0.13 | 0.72 | 0.28 |
| 1.37 | 0.59 | 1.29 | 0.58 |
| #N/A | #N/A | 0.34 | 0.07 |
| #N/A | #N/A | 1.58 | 0.72 |
| #N/A | #N/A | 0.34 | 0.07 |
| #N/A | #N/A | #N/A | #N/A |
| 1.29 | 0.56 | 1.35 | 0.60 |
| 1.00 | 0.42 | 1.08 | 0.42 |
| 0.61 | 0.24 | 0.71 | 0.23 |
| 0.35 | 0.06 | 0.34 | 0.07 |
| #N/A | #N/A | #N/A | #N/A |
| 0.81 | 0.33 | 0.81 | 0.34 |
| 1.03 | 0.44 | 0.99 | 0.40 |



|      |      |      |      |
|------|------|------|------|
| 0.98 | 0.43 | 0.76 | 0.29 |
| #N/A | #N/A | #N/A | #N/A |
| 1.83 | 0.81 | 1.88 | 0.71 |
| 1.14 | 0.50 | 1.24 | 0.54 |
| #N/A | #N/A | #N/A | #N/A |
| 0.85 | 0.35 | 0.96 | 0.42 |
| 1.28 | 0.60 | 1.48 | 0.67 |
| 1.33 | 0.58 | 1.24 | 0.55 |
| 2.01 | 0.83 | 2.81 | 0.94 |
| 0.27 | 0.02 | 0.46 | 0.12 |
| 1.85 | 0.79 | 2.28 | 0.90 |
| 0.61 | 0.22 | 0.56 | 0.17 |
| #N/A | #N/A | #N/A | #N/A |
| #N/A | #N/A | #N/A | #N/A |
| 2.26 | 0.88 | 1.89 | 0.72 |
| 0.36 | 0.07 | #N/A | #N/A |
| 2.98 | 0.97 | 2.12 | 0.78 |
| #N/A | #N/A | #N/A | #N/A |
| #N/A | #N/A | #N/A | #N/A |
| 1.16 | 0.50 | 1.55 | 0.70 |
| 2.46 | 0.91 | 1.54 | 0.66 |
| 1.73 | 0.78 | 1.94 | 0.83 |
| #N/A | #N/A | #N/A | #N/A |
| 2.50 | 0.95 | 2.47 | 0.87 |
| #N/A | #N/A | #N/A | #N/A |
| #N/A | #N/A | 1.13 | 0.50 |
| 2.90 | 0.97 | 3.61 | 0.98 |
| #N/A | #N/A | #N/A | #N/A |
| 0.48 | 0.14 | 0.42 | 0.11 |
| 0.68 | 0.26 | 0.52 | 0.18 |
| 1.87 | 0.82 | 1.45 | 0.66 |
| 0.81 | 0.33 | 0.94 | 0.37 |
| #N/A | #N/A | #N/A | #N/A |
| 2.03 | 0.82 | 2.14 | 0.89 |
| 0.75 | 0.32 | 1.14 | 0.51 |
| #N/A | #N/A | #N/A | #N/A |
| #N/A | #N/A | #N/A | #N/A |
| 1.32 | 0.62 | 1.00 | 0.43 |
| 0.93 | 0.39 | #N/A | #N/A |
| 0.20 | 0.01 | #N/A | #N/A |
| #N/A | #N/A | #N/A | #N/A |
| #N/A | #N/A | #N/A | #N/A |
| 0.76 | 0.33 | 0.61 | 0.23 |
| #N/A | #N/A | 0.95 | 0.41 |
| #N/A | #N/A | #N/A | #N/A |
| 0.73 | 0.29 | 0.66 | 0.24 |
| #N/A | #N/A | #N/A | #N/A |
| #N/A | #N/A | 2.42 | 0.86 |
| #N/A | #N/A | 1.75 | 0.67 |
| 0.88 | 0.37 | 0.89 | 0.39 |
| 0.56 | 0.19 | 0.53 | 0.16 |

|      |      |      |      |
|------|------|------|------|
| #N/A | #N/A | #N/A | #N/A |
| #N/A | #N/A | #N/A | #N/A |
| 1.63 | 0.70 | 1.47 | 0.67 |
| #N/A | #N/A | #N/A | #N/A |
| 1.67 | 0.71 | 1.79 | 0.79 |
| #N/A | #N/A | #N/A | #N/A |
| #N/A | #N/A | #N/A | #N/A |
| 1.70 | 0.76 | 2.47 | 0.94 |
| 0.50 | 0.15 | 0.64 | 0.24 |
| 2.76 | 0.96 | 2.81 | 0.92 |
| 0.95 | 0.44 | 1.08 | 0.48 |
| 2.48 | 0.92 | 1.78 | 0.79 |
| 2.00 | 0.82 | #N/A | #N/A |
| #N/A | #N/A | 0.87 | 0.35 |
| 1.25 | 0.54 | 1.10 | 0.49 |
| #N/A | #N/A | #N/A | #N/A |
| 0.54 | 0.17 | 0.94 | 0.34 |
| 0.81 | 0.33 | #N/A | #N/A |
| 0.54 | 0.17 | 0.53 | 0.15 |
| 2.30 | 0.89 | 1.97 | 0.85 |
| #N/A | #N/A | #N/A | #N/A |
| #N/A | #N/A | #N/A | #N/A |
| 0.68 | 0.28 | #N/A | #N/A |
| 0.26 | 0.02 | 0.32 | 0.06 |
| 1.70 | 0.75 | 2.04 | 0.83 |
| #N/A | #N/A | #N/A | #N/A |
| 1.39 | 0.60 | 1.49 | 0.68 |
| #N/A | #N/A | 0.65 | 0.24 |
| 0.72 | 0.28 | 0.63 | 0.20 |
| 2.10 | 0.89 | 1.64 | 0.67 |
| 1.99 | 0.86 | 2.01 | 0.78 |
| #N/A | #N/A | 0.34 | 0.07 |
| 1.16 | 0.50 | 0.72 | 0.29 |
| 1.48 | 0.64 | 1.37 | 0.62 |
| #N/A | #N/A | #N/A | #N/A |
| 1.06 | 0.49 | 0.95 | 0.42 |
| 0.70 | 0.27 | #N/A | #N/A |
| 1.82 | 0.81 | 1.99 | 0.80 |
| 0.66 | 0.25 | 0.76 | 0.32 |
| 0.56 | 0.19 | 0.33 | 0.07 |
| 0.59 | 0.22 | 0.51 | 0.17 |
| 0.48 | 0.13 | 0.48 | 0.14 |
| #N/A | #N/A | #N/A | #N/A |
| #N/A | #N/A | #N/A | #N/A |
| #N/A | #N/A | #N/A | #N/A |
| #N/A | #N/A | 1.19 | 0.54 |
| 1.54 | 0.67 | 1.75 | 0.78 |
| #N/A | #N/A | #N/A | #N/A |
| 0.47 | 0.13 | 0.50 | 0.16 |
| 1.39 | 0.63 | 1.72 | 0.65 |
| #N/A | #N/A | 3.41 | 0.99 |

|      |      |      |      |
|------|------|------|------|
| #N/A | #N/A | #N/A | #N/A |
| #N/A | #N/A | #N/A | #N/A |
| #N/A | #N/A | #N/A | #N/A |
| 0.60 | 0.21 | 0.43 | 0.12 |
| 0.57 | 0.19 | 0.96 | 0.35 |
| #N/A | #N/A | #N/A | #N/A |
| 1.12 | 0.48 | 1.15 | 0.51 |
| 0.76 | 0.30 | 0.94 | 0.41 |
| 0.70 | 0.27 | 0.76 | 0.26 |
| 0.74 | 0.29 | 0.78 | 0.32 |
| #N/A | #N/A | #N/A | #N/A |
| 2.08 | 0.87 | 1.97 | 0.85 |
| 0.51 | 0.16 | 0.39 | 0.10 |
| 2.43 | 0.92 | 2.75 | 0.91 |
| #N/A | #N/A | #N/A | #N/A |
| 0.60 | 0.23 | 0.78 | 0.28 |
| #N/A | #N/A | 0.35 | 0.07 |
| 0.57 | 0.21 | 0.46 | 0.14 |
| 3.02 | 0.97 | 1.95 | 0.84 |
| 1.35 | 0.61 | 1.46 | 0.66 |
| 1.79 | 0.80 | 1.85 | 0.76 |
| 0.64 | 0.23 | 0.45 | 0.14 |
| 1.53 | 0.68 | 1.99 | 0.74 |
| 2.11 | 0.87 | 3.01 | 0.94 |
| 0.83 | 0.37 | 1.47 | 0.58 |
| 1.05 | 0.48 | 1.23 | 0.55 |
| #N/A | #N/A | #N/A | #N/A |
| #N/A | #N/A | 1.45 | 0.66 |
| 1.85 | 0.81 | 1.79 | 0.80 |
| 0.43 | 0.11 | 0.60 | 0.22 |
| 1.46 | 0.64 | 1.57 | 0.60 |
| #N/A | #N/A | #N/A | #N/A |
| 0.86 | 0.35 | 0.82 | 0.30 |
| 0.15 | 0.00 | 0.34 | 0.07 |
| #N/A | #N/A | 0.85 | 0.36 |
| #N/A | #N/A | 0.52 | 0.17 |
| 0.76 | 0.30 | 0.96 | 0.42 |
| 1.37 | 0.60 | 1.66 | 0.65 |
| 1.30 | 0.58 | 1.59 | 0.72 |
| #N/A | #N/A | 0.29 | 0.04 |
| #N/A | #N/A | #N/A | #N/A |
| 0.63 | 0.23 | 0.60 | 0.19 |
| #N/A | #N/A | #N/A | #N/A |
| 2.56 | 0.93 | 2.14 | 0.89 |
| 1.34 | 0.62 | 1.42 | 0.65 |
| #N/A | #N/A | #N/A | #N/A |
| 2.76 | 0.96 | 1.81 | 0.72 |
| 0.56 | 0.19 | 0.67 | 0.27 |
| 1.97 | 0.83 | 1.43 | 0.65 |
| #N/A | #N/A | #N/A | #N/A |
| 1.53 | 0.70 | 1.70 | 0.76 |

|      |      |      |      |
|------|------|------|------|
| #N/A | #N/A | #N/A | #N/A |
| 2.19 | 0.88 | 1.35 | 0.62 |
| 1.04 | 0.46 | 1.46 | 0.63 |
| 0.72 | 0.28 | 0.70 | 0.28 |
| 1.38 | 0.60 | 1.69 | 0.64 |
| #N/A | #N/A | #N/A | #N/A |
| #N/A | #N/A | #N/A | #N/A |
| 0.77 | 0.31 | 0.41 | 0.11 |
| #N/A | #N/A | #N/A | #N/A |
| 1.98 | 0.83 | 2.89 | 0.93 |
| 2.09 | 0.84 | 2.63 | 0.91 |
| #N/A | #N/A | #N/A | #N/A |
| 0.27 | 0.02 | 0.21 | 0.01 |
| 0.38 | 0.09 | 0.31 | 0.05 |
| 2.47 | 0.94 | 2.50 | 0.89 |
| #N/A | #N/A | 3.07 | 0.99 |
| #N/A | #N/A | #N/A | #N/A |
| 0.91 | 0.38 | 0.75 | 0.31 |
| 2.08 | 0.84 | 1.52 | 0.69 |
| #N/A | #N/A | #N/A | #N/A |
| #N/A | #N/A | 0.62 | 0.23 |
| 1.04 | 0.46 | 1.03 | 0.45 |
| 0.63 | 0.23 | #N/A | #N/A |
| 0.90 | 0.37 | #N/A | #N/A |
| 1.21 | 0.57 | 0.86 | 0.33 |
| #N/A | #N/A | 0.69 | 0.23 |
| 1.45 | 0.63 | 1.40 | 0.53 |
| #N/A | #N/A | #N/A | #N/A |
| #N/A | #N/A | #N/A | #N/A |
| 1.71 | 0.77 | 2.20 | 0.90 |
| 2.69 | 0.97 | 3.09 | 0.99 |
| #N/A | #N/A | 1.25 | 0.57 |
| 2.43 | 0.94 | 1.83 | 0.81 |
| 2.57 | 0.94 | 2.10 | 0.88 |
| 1.35 | 0.60 | 1.35 | 0.57 |
| 1.74 | 0.75 | #N/A | #N/A |
| #N/A | #N/A | #N/A | #N/A |
| 0.54 | 0.18 | 0.48 | 0.15 |
| 0.38 | 0.08 | 0.31 | 0.05 |
| 2.37 | 0.90 | 2.10 | 0.87 |
| 1.47 | 0.63 | 1.95 | 0.85 |
| 1.91 | 0.81 | #N/A | #N/A |
| #N/A | #N/A | 1.04 | 0.42 |
| 1.92 | 0.79 | 1.58 | 0.72 |
| #N/A | #N/A | #N/A | #N/A |
| 0.80 | 0.32 | 0.74 | 0.31 |
| 1.24 | 0.58 | 1.09 | 0.49 |
| 1.78 | 0.76 | 1.52 | 0.65 |
| #N/A | #N/A | 3.02 | 0.94 |
| 0.35 | 0.07 | 0.35 | 0.07 |
| #N/A | #N/A | #N/A | #N/A |

|      |      |      |      |
|------|------|------|------|
| #N/A | #N/A | #N/A | #N/A |
| 1.51 | 0.69 | 1.81 | 0.78 |
| #N/A | #N/A | #N/A | #N/A |
| 0.88 | 0.39 | 1.00 | 0.37 |
| 2.75 | 0.96 | 2.37 | 0.85 |
| 1.88 | 0.83 | 1.89 | 0.78 |
| #N/A | #N/A | #N/A | #N/A |
| 0.69 | 0.26 | 0.75 | 0.30 |
| 1.32 | 0.60 | 1.39 | 0.61 |
| 1.16 | 0.52 | 1.92 | 0.82 |
| 0.72 | 0.29 | 0.91 | 0.39 |
| 0.33 | 0.05 | 0.35 | 0.07 |
| 0.63 | 0.23 | 0.51 | 0.16 |
| #N/A | #N/A | 0.25 | 0.02 |
| 1.40 | 0.61 | 1.18 | 0.53 |
| 0.70 | 0.27 | 1.08 | 0.40 |
| 0.69 | 0.29 | 0.74 | 0.26 |
| 1.53 | 0.67 | 1.83 | 0.79 |
| 2.53 | 0.92 | 2.75 | 0.97 |
| #N/A | #N/A | #N/A | #N/A |
| 1.55 | 0.68 | 2.52 | 0.95 |
| 0.72 | 0.28 | 0.68 | 0.22 |
| 1.67 | 0.72 | 2.36 | 0.93 |
| #N/A | #N/A | #N/A | #N/A |
| #N/A | #N/A | #N/A | #N/A |
| #N/A | #N/A | 0.90 | 0.36 |
| 0.85 | 0.36 | 0.74 | 0.25 |
| 1.15 | 0.54 | 1.26 | 0.57 |
| #N/A | #N/A | 1.55 | 0.70 |
| 2.20 | 0.88 | #N/A | #N/A |
| #N/A | #N/A | 0.47 | 0.14 |
| 0.81 | 0.36 | 1.05 | 0.45 |
| 0.42 | 0.11 | 0.42 | 0.10 |
| 1.11 | 0.52 | 1.34 | 0.60 |
| 1.66 | 0.71 | 1.18 | 0.53 |
| 0.65 | 0.27 | 0.48 | 0.15 |
| 0.59 | 0.21 | 0.59 | 0.21 |
| 0.64 | 0.26 | 1.47 | 0.56 |
| #N/A | #N/A | #N/A | #N/A |
| #N/A | #N/A | 0.54 | 0.19 |
| 0.71 | 0.27 | 0.62 | 0.19 |
| 0.79 | 0.32 | 0.74 | 0.31 |
| 0.72 | 0.28 | 0.70 | 0.28 |
| 0.66 | 0.25 | 0.55 | 0.16 |
| 0.93 | 0.40 | 1.09 | 0.48 |
| 1.97 | 0.83 | 3.00 | 0.98 |
| 1.28 | 0.55 | 1.34 | 0.61 |
| 0.50 | 0.16 | 0.37 | 0.08 |
| 2.69 | 0.97 | 2.36 | 0.93 |
| 0.88 | 0.36 | 0.70 | 0.25 |
| #N/A | #N/A | #N/A | #N/A |

|      |      |      |      |
|------|------|------|------|
| 1.24 | 0.54 | #N/A | #N/A |
| 1.46 | 0.66 | 1.58 | 0.63 |
| #N/A | #N/A | 1.23 | 0.56 |
| #N/A | #N/A | #N/A | #N/A |
| 2.19 | 0.89 | 2.70 | 0.94 |
| #N/A | #N/A | #N/A | #N/A |
| 0.51 | 0.16 | 0.55 | 0.16 |
| 1.90 | 0.78 | 1.52 | 0.69 |
| #N/A | #N/A | 0.56 | 0.20 |
| 2.02 | 0.84 | 2.32 | 0.90 |
| 0.64 | 0.23 | 0.67 | 0.25 |
| #N/A | #N/A | 0.75 | 0.25 |
| #N/A | #N/A | 2.61 | 0.95 |
| #N/A | #N/A | #N/A | #N/A |
| #N/A | #N/A | 0.96 | 0.40 |
| 0.34 | 0.06 | 0.40 | 0.10 |
| 0.71 | 0.27 | 0.69 | 0.27 |
| 0.28 | 0.03 | 0.32 | 0.05 |
| 0.77 | 0.31 | 0.62 | 0.19 |
| 2.30 | 0.90 | 2.60 | 0.91 |
| 0.44 | 0.12 | 0.52 | 0.18 |
| 1.86 | 0.79 | #N/A | #N/A |
| 1.24 | 0.53 | 1.50 | 0.63 |
| 0.83 | 0.34 | #N/A | #N/A |
| #N/A | #N/A | #N/A | #N/A |
| 1.68 | 0.76 | 1.58 | 0.72 |
| #N/A | #N/A | #N/A | #N/A |
| #N/A | #N/A | #N/A | #N/A |
| 1.14 | 0.49 | 1.49 | 0.68 |
| 3.39 | 0.99 | 2.91 | 0.98 |
| #N/A | #N/A | 0.88 | 0.38 |
| 3.23 | 0.98 | 2.56 | 0.95 |
| #N/A | #N/A | 1.23 | 0.47 |
| 1.13 | 0.53 | 0.57 | 0.18 |
| 2.72 | 0.95 | 2.15 | 0.89 |
| #N/A | #N/A | #N/A | #N/A |
| #N/A | #N/A | 1.86 | 0.80 |
| 0.93 | 0.41 | 1.15 | 0.51 |
| 0.25 | 0.01 | 0.24 | 0.02 |
| #N/A | #N/A | #N/A | #N/A |
| 1.09 | 0.47 | 1.14 | 0.50 |
| 0.44 | 0.12 | 0.45 | 0.14 |
| #N/A | #N/A | 2.08 | 0.88 |
| 1.28 | 0.56 | 1.36 | 0.60 |
| 0.60 | 0.21 | 0.83 | 0.34 |
| 1.54 | 0.66 | 1.56 | 0.59 |
| 1.89 | 0.81 | 1.85 | 0.82 |
| 2.12 | 0.85 | 2.34 | 0.92 |
| 0.55 | 0.18 | 0.61 | 0.23 |
| 1.65 | 0.74 | 1.88 | 0.73 |
| 1.11 | 0.47 | 1.11 | 0.41 |

|      |      |      |      |
|------|------|------|------|
| 0.99 | 0.42 | 1.24 | 0.54 |
| 0.76 | 0.30 | 0.53 | 0.18 |
| #N/A | #N/A | 1.19 | 0.54 |
| #N/A | #N/A | #N/A | #N/A |
| 0.78 | 0.31 | 0.66 | 0.21 |
| 0.92 | 0.38 | 0.90 | 0.39 |
| 1.31 | 0.56 | 1.06 | 0.47 |
| 1.16 | 0.50 | 0.93 | 0.41 |
| #N/A | #N/A | #N/A | #N/A |
| 1.37 | 0.60 | 1.82 | 0.72 |
| 1.98 | 0.81 | 1.68 | 0.76 |
| #N/A | #N/A | 1.54 | 0.70 |
| 0.88 | 0.40 | 0.57 | 0.18 |
| 0.29 | 0.03 | 0.36 | 0.08 |
| 1.38 | 0.60 | #N/A | #N/A |
| 2.09 | 0.87 | 2.46 | 0.94 |
| 1.16 | 0.53 | 1.45 | 0.66 |
| 0.62 | 0.24 | 0.70 | 0.23 |
| 0.46 | 0.13 | 0.41 | 0.11 |
| 0.53 | 0.18 | 0.57 | 0.20 |
| 0.86 | 0.35 | 0.90 | 0.38 |
| 1.36 | 0.59 | 1.79 | 0.80 |
| 1.18 | 0.56 | 1.39 | 0.62 |
| 1.55 | 0.67 | 1.42 | 0.64 |
| 0.84 | 0.38 | 0.63 | 0.22 |
| 0.88 | 0.36 | 0.77 | 0.32 |
| #N/A | #N/A | #N/A | #N/A |
| 1.24 | 0.56 | 1.24 | 0.55 |
| 3.10 | 0.99 | 2.67 | 0.96 |
| 2.99 | 0.98 | 2.96 | 0.98 |
| #N/A | #N/A | #N/A | #N/A |
| 2.61 | 0.96 | 2.52 | 0.95 |
| #N/A | #N/A | #N/A | #N/A |
| 0.39 | 0.08 | 0.58 | 0.19 |
| 3.01 | 0.98 | 2.90 | 0.96 |
| 0.62 | 0.24 | 0.78 | 0.33 |
| #N/A | #N/A | 0.32 | 0.06 |
| #N/A | #N/A | 0.90 | 0.39 |
| 1.93 | 0.81 | 2.88 | 0.94 |
| 1.38 | 0.60 | 1.32 | 0.55 |
| 1.66 | 0.75 | 1.69 | 0.77 |
| #N/A | #N/A | #N/A | #N/A |
| 1.64 | 0.74 | 2.02 | 0.86 |
| 1.65 | 0.73 | 2.19 | 0.84 |
| 3.02 | 0.98 | #N/A | #N/A |
| 1.24 | 0.58 | 1.01 | 0.45 |
| #N/A | #N/A | 0.46 | 0.14 |
| 1.91 | 0.81 | 1.95 | 0.77 |
| 0.64 | 0.23 | #N/A | #N/A |
| #N/A | #N/A | #N/A | #N/A |
| 0.56 | 0.19 | 0.53 | 0.18 |

|      |      |      |      |
|------|------|------|------|
| 0.25 | 0.02 | 0.23 | 0.02 |
| #N/A | #N/A | #N/A | #N/A |
| 2.71 | 0.96 | 2.90 | 0.98 |
| 1.95 | 0.81 | 2.21 | 0.86 |
| #N/A | #N/A | 0.37 | 0.08 |
| #N/A | #N/A | #N/A | #N/A |
| 0.28 | 0.04 | 0.21 | 0.01 |
| 0.84 | 0.34 | 0.90 | 0.39 |
| 0.25 | 0.02 | 0.42 | 0.12 |
| 0.87 | 0.36 | 0.97 | 0.37 |
| 1.18 | 0.51 | 1.44 | 0.55 |
| 1.73 | 0.75 | 1.38 | 0.59 |
| 1.08 | 0.46 | 0.78 | 0.33 |
| #N/A | #N/A | 1.43 | 0.65 |
| 2.13 | 0.89 | 2.63 | 0.94 |
| #N/A | #N/A | 0.30 | 0.05 |
| 2.52 | 0.93 | 2.01 | 0.75 |
| #N/A | #N/A | #N/A | #N/A |
| 2.22 | 0.91 | 2.38 | 0.92 |
| 2.78 | 0.97 | 2.47 | 0.87 |
| 0.60 | 0.21 | 0.58 | 0.17 |
| #N/A | #N/A | #N/A | #N/A |
| 2.19 | 0.87 | 2.17 | 0.86 |
| 1.37 | 0.60 | 1.17 | 0.53 |
| 0.61 | 0.24 | 0.42 | 0.12 |
| #N/A | #N/A | 2.58 | 0.95 |
| 0.99 | 0.44 | 1.49 | 0.68 |
| 1.94 | 0.80 | 1.75 | 0.68 |
| 0.39 | 0.09 | #N/A | #N/A |
| #N/A | #N/A | 2.05 | 0.87 |
| 1.72 | 0.77 | 2.40 | 0.92 |
| 1.49 | 0.64 | 1.87 | 0.79 |
| 0.77 | 0.31 | 0.93 | 0.37 |
| 0.83 | 0.36 | 0.65 | 0.22 |
| 1.05 | 0.45 | 1.37 | 0.51 |
| 1.68 | 0.71 | #N/A | #N/A |
| 2.51 | 0.94 | 2.99 | 0.98 |
| 2.27 | 0.92 | 2.19 | 0.90 |
| 2.58 | 0.94 | 1.79 | 0.78 |
| 2.10 | 0.86 | 1.70 | 0.76 |
| #N/A | #N/A | #N/A | #N/A |
| 0.78 | 0.31 | 0.80 | 0.34 |
| 0.93 | 0.39 | 0.78 | 0.33 |
| 0.71 | 0.27 | 0.67 | 0.26 |
| 0.38 | 0.08 | 0.42 | 0.10 |
| 2.27 | 0.89 | 1.97 | 0.83 |
| 0.59 | 0.20 | 0.29 | 0.04 |
| #N/A | #N/A | #N/A | #N/A |
| 1.03 | 0.44 | 0.91 | 0.36 |
| 1.15 | 0.51 | 0.94 | 0.35 |
| #N/A | #N/A | 0.30 | 0.05 |



|      |      |      |      |
|------|------|------|------|
| 1.92 | 0.84 | 1.87 | 0.82 |
| 1.97 | 0.82 | 1.52 | 0.61 |
| 1.55 | 0.67 | 1.44 | 0.62 |
| 0.58 | 0.20 | 0.46 | 0.14 |
| 0.26 | 0.02 | 0.16 | 0.00 |
| #N/A | #N/A | 0.41 | 0.10 |
| #N/A | #N/A | 1.13 | 0.43 |
| #N/A | #N/A | #N/A | #N/A |
| 1.66 | 0.74 | 1.91 | 0.75 |
| 0.46 | 0.13 | 0.40 | 0.11 |
| 1.62 | 0.69 | 1.46 | 0.61 |
| 0.35 | 0.06 | #N/A | #N/A |
| 1.79 | 0.76 | 1.27 | 0.58 |
| #N/A | #N/A | 2.07 | 0.87 |
| 0.41 | 0.10 | 0.33 | 0.06 |
| 1.20 | 0.52 | 0.95 | 0.40 |
| 1.15 | 0.54 | 1.36 | 0.51 |
| 0.98 | 0.41 | 2.44 | 0.91 |
| 3.29 | 0.98 | 3.83 | 1.00 |
| #N/A | #N/A | #N/A | #N/A |
| #N/A | #N/A | 1.60 | 0.61 |
| #N/A | #N/A | 1.11 | 0.49 |
| #N/A | #N/A | 0.23 | 0.02 |
| 1.68 | 0.76 | 1.58 | 0.72 |
| 1.75 | 0.75 | 1.52 | 0.65 |
| 2.19 | 0.91 | 1.55 | 0.70 |
| 0.46 | 0.13 | 0.37 | 0.09 |
| #N/A | #N/A | 1.27 | 0.57 |
| #N/A | #N/A | #N/A | #N/A |
| 2.07 | 0.88 | 1.56 | 0.65 |
| 0.96 | 0.41 | 1.05 | 0.40 |
| 0.25 | 0.01 | 0.46 | 0.13 |
| 1.99 | 0.81 | 2.30 | 0.90 |
| 2.45 | 0.91 | 1.98 | 0.80 |
| 0.38 | 0.07 | #N/A | #N/A |
| 1.79 | 0.80 | #N/A | #N/A |
| #N/A | #N/A | 1.56 | 0.71 |
| 1.14 | 0.49 | 1.05 | 0.46 |
| 2.45 | 0.91 | #N/A | #N/A |
| 0.38 | 0.08 | #N/A | #N/A |
| 0.74 | 0.32 | 0.65 | 0.25 |
| 0.68 | 0.27 | 0.46 | 0.14 |
| 2.19 | 0.87 | 1.64 | 0.62 |
| #N/A | #N/A | #N/A | #N/A |
| #N/A | #N/A | #N/A | #N/A |
| 2.54 | 0.93 | #N/A | #N/A |
| 1.95 | 0.80 | 1.84 | 0.80 |
| 1.99 | 0.81 | 2.37 | 0.90 |
| 1.19 | 0.51 | 1.10 | 0.49 |
| 1.75 | 0.74 | 1.46 | 0.66 |
| 1.33 | 0.62 | 1.43 | 0.60 |

|      |      |      |      |
|------|------|------|------|
| #N/A | #N/A | 0.53 | 0.18 |
| 0.33 | 0.05 | 0.20 | 0.01 |
| 0.81 | 0.35 | 0.75 | 0.30 |
| 1.91 | 0.79 | 0.91 | 0.37 |
| 0.95 | 0.41 | 0.76 | 0.31 |
| #N/A | #N/A | 0.52 | 0.18 |
| 1.41 | 0.61 | 0.89 | 0.38 |
| 0.72 | 0.30 | 0.91 | 0.39 |
| 0.40 | 0.09 | 0.47 | 0.15 |
| 0.63 | 0.23 | 0.97 | 0.43 |
| 1.12 | 0.48 | 1.60 | 0.73 |
| #N/A | #N/A | #N/A | #N/A |
| 0.38 | 0.08 | 0.74 | 0.30 |
| 0.69 | 0.29 | 0.66 | 0.26 |
| #N/A | #N/A | 1.85 | 0.78 |
| 1.49 | 0.68 | 1.51 | 0.68 |
| 1.80 | 0.77 | 1.56 | 0.69 |
| 1.37 | 0.59 | 1.06 | 0.47 |
| 1.62 | 0.70 | 2.10 | 0.88 |
| #N/A | #N/A | 1.44 | 0.66 |
| 1.97 | 0.82 | 2.17 | 0.90 |
| #N/A | #N/A | #N/A | #N/A |
| 1.20 | 0.54 | 0.76 | 0.31 |
| 1.63 | 0.70 | 1.53 | 0.67 |
| 0.41 | 0.10 | 0.39 | 0.10 |
| 1.51 | 0.69 | 1.58 | 0.72 |
| #N/A | #N/A | #N/A | #N/A |
| 1.87 | 0.78 | 1.88 | 0.71 |
| 0.99 | 0.42 | 0.92 | 0.40 |
| 0.83 | 0.34 | 0.63 | 0.23 |
| 1.96 | 0.85 | 1.50 | 0.68 |
| 0.89 | 0.36 | #N/A | #N/A |
| 1.83 | 0.76 | 2.25 | 0.91 |
| #N/A | #N/A | 1.80 | 0.71 |
| 1.21 | 0.51 | 0.91 | 0.40 |
| #N/A | #N/A | #N/A | #N/A |
| #N/A | #N/A | 0.37 | 0.09 |
| #N/A | #N/A | 1.12 | 0.49 |
| 2.35 | 0.90 | 3.45 | 0.97 |
| 3.25 | 0.99 | 3.39 | 0.99 |
| #N/A | #N/A | #N/A | #N/A |
| 2.01 | 0.82 | 2.69 | 0.96 |
| #N/A | #N/A | #N/A | #N/A |
| 1.83 | 0.79 | 1.53 | 0.63 |
| 1.93 | 0.81 | 1.80 | 0.70 |
| 0.46 | 0.12 | 0.30 | 0.04 |
| 0.63 | 0.23 | 0.39 | 0.09 |
| 2.07 | 0.87 | 2.32 | 0.90 |
| #N/A | #N/A | #N/A | #N/A |
| 1.74 | 0.73 | 1.99 | 0.86 |
| #N/A | #N/A | #N/A | #N/A |

|      |      |      |      |
|------|------|------|------|
| 0.83 | 0.34 | 0.84 | 0.32 |
| 1.95 | 0.82 | 1.86 | 0.82 |
| #N/A | #N/A | #N/A | #N/A |
| #N/A | #N/A | #N/A | #N/A |
| 1.74 | 0.75 | 1.40 | 0.64 |
| #N/A | #N/A | 1.25 | 0.56 |
| 1.86 | 0.82 | 2.03 | 0.86 |
| 1.63 | 0.70 | 1.75 | 0.78 |
| #N/A | #N/A | #N/A | #N/A |
| 0.98 | 0.41 | 0.70 | 0.27 |
| 0.41 | 0.10 | 0.40 | 0.09 |
| #N/A | #N/A | #N/A | #N/A |
| 1.10 | 0.50 | 0.94 | 0.41 |
| 1.02 | 0.43 | 0.89 | 0.39 |
| 2.12 | 0.87 | 2.58 | 0.92 |
| 1.82 | 0.81 | 1.79 | 0.74 |
| #N/A | #N/A | #N/A | #N/A |
| 1.76 | 0.77 | 1.42 | 0.65 |
| #N/A | #N/A | 1.05 | 0.47 |
| 1.83 | 0.78 | 1.86 | 0.82 |
| 1.42 | 0.61 | #N/A | #N/A |
| 1.35 | 0.59 | 1.63 | 0.74 |
| 1.09 | 0.46 | 1.14 | 0.51 |
| #N/A | #N/A | 0.43 | 0.12 |
| #N/A | #N/A | 0.57 | 0.20 |
| 1.21 | 0.57 | 1.34 | 0.60 |
| 0.92 | 0.42 | 1.44 | 0.64 |
| 1.79 | 0.75 | 2.41 | 0.93 |
| 0.52 | 0.16 | 0.71 | 0.26 |
| 0.63 | 0.23 | 0.69 | 0.27 |
| 0.73 | 0.28 | 0.35 | 0.07 |
| #N/A | #N/A | #N/A | #N/A |
| #N/A | #N/A | #N/A | #N/A |
| 0.91 | 0.41 | 1.68 | 0.65 |
| #N/A | #N/A | 0.89 | 0.37 |
| 2.02 | 0.84 | 2.24 | 0.86 |
| 0.96 | 0.44 | 1.23 | 0.48 |
| 0.88 | 0.37 | 0.75 | 0.31 |
| 0.41 | 0.10 | 0.64 | 0.23 |
| #N/A | #N/A | 0.41 | 0.11 |
| #N/A | #N/A | #N/A | #N/A |
| #N/A | #N/A | #N/A | #N/A |
| #N/A | #N/A | 1.27 | 0.48 |
| 1.09 | 0.49 | 1.12 | 0.50 |
| 0.59 | 0.20 | 0.58 | 0.21 |
| 1.95 | 0.82 | 1.38 | 0.63 |
| 0.28 | 0.03 | #N/A | #N/A |
| #N/A | #N/A | 1.51 | 0.69 |
| 0.88 | 0.37 | 1.03 | 0.46 |
| #N/A | #N/A | 0.82 | 0.35 |
| 2.76 | 0.97 | 2.14 | 0.82 |

|      |      |      |      |
|------|------|------|------|
| #N/A | #N/A | #N/A | #N/A |
| 0.80 | 0.35 | 0.89 | 0.38 |
| 0.97 | 0.41 | 1.00 | 0.41 |
| 0.54 | 0.17 | 0.43 | 0.12 |
| 0.94 | 0.39 | 0.66 | 0.23 |
| #N/A | #N/A | 1.92 | 0.77 |
| 0.33 | 0.05 | 0.31 | 0.05 |
| 1.90 | 0.80 | 1.45 | 0.66 |
| 1.68 | 0.73 | 1.68 | 0.75 |
| 1.88 | 0.83 | 1.73 | 0.76 |
| 0.52 | 0.17 | 0.55 | 0.16 |
| 0.29 | 0.03 | 0.30 | 0.05 |
| 1.64 | 0.70 | 1.80 | 0.77 |
| 2.47 | 0.94 | 2.66 | 0.96 |
| #N/A | #N/A | #N/A | #N/A |
| 0.35 | 0.07 | 0.26 | 0.03 |
| 0.42 | 0.11 | 0.55 | 0.19 |
| 1.86 | 0.79 | #N/A | #N/A |
| 0.91 | 0.40 | 0.70 | 0.25 |
| 1.17 | 0.55 | 1.22 | 0.55 |
| #N/A | #N/A | #N/A | #N/A |
| 0.63 | 0.23 | 0.64 | 0.20 |
| #N/A | #N/A | 0.45 | 0.13 |
| 0.97 | 0.45 | #N/A | #N/A |
| 1.84 | 0.78 | 1.77 | 0.79 |
| 1.58 | 0.68 | 1.60 | 0.72 |
| 0.53 | 0.18 | 0.78 | 0.28 |
| 0.92 | 0.38 | 1.18 | 0.44 |
| 1.62 | 0.69 | 1.22 | 0.55 |
| 1.72 | 0.77 | 1.84 | 0.81 |
| 2.78 | 0.97 | 2.61 | 0.96 |
| #N/A | #N/A | #N/A | #N/A |
| #N/A | #N/A | 2.47 | 0.93 |
| #N/A | #N/A | 0.91 | 0.35 |
| #N/A | #N/A | #N/A | #N/A |
| #N/A | #N/A | 1.00 | 0.44 |
| 1.29 | 0.55 | #N/A | #N/A |
| 1.11 | 0.48 | 0.81 | 0.30 |
| 0.45 | 0.12 | 0.53 | 0.18 |
| #N/A | #N/A | #N/A | #N/A |
| 1.95 | 0.85 | 1.90 | 0.83 |
| 1.58 | 0.68 | 2.01 | 0.83 |
| #N/A | #N/A | #N/A | #N/A |
| 3.40 | 0.99 | 2.86 | 0.97 |
| 1.09 | 0.48 | 1.02 | 0.45 |
| 0.27 | 0.02 | #N/A | #N/A |
| 0.25 | 0.03 | 0.19 | 0.01 |
| 0.48 | 0.14 | 0.31 | 0.05 |
| 0.61 | 0.21 | 0.51 | 0.17 |
| 0.49 | 0.14 | 0.38 | 0.08 |
| #N/A | #N/A | 0.73 | 0.30 |

|      |      |      |      |
|------|------|------|------|
| 1.39 | 0.63 | 1.08 | 0.48 |
| 1.70 | 0.73 | 1.46 | 0.67 |
| #N/A | #N/A | 1.50 | 0.68 |
| 1.29 | 0.55 | 1.39 | 0.63 |
| #N/A | #N/A | #N/A | #N/A |
| 2.15 | 0.87 | 2.36 | 0.93 |
| 1.99 | 0.86 | 2.02 | 0.82 |
| 1.46 | 0.63 | 1.35 | 0.62 |
| 0.78 | 0.31 | 0.76 | 0.31 |
| 1.42 | 0.66 | 1.21 | 0.55 |
| 1.54 | 0.71 | 1.17 | 0.53 |
| 0.51 | 0.15 | 0.51 | 0.17 |
| 0.79 | 0.34 | 0.84 | 0.31 |
| #N/A | #N/A | 2.23 | 0.89 |
| 2.73 | 0.97 | 2.82 | 0.95 |
| 1.19 | 0.55 | 1.43 | 0.65 |
| 1.79 | 0.78 | 1.55 | 0.70 |
| 1.93 | 0.81 | 1.64 | 0.74 |
| #N/A | #N/A | 2.94 | 0.97 |
| 0.70 | 0.26 | 0.89 | 0.39 |
| 2.10 | 0.84 | 2.12 | 0.78 |
| 0.41 | 0.10 | 0.29 | 0.04 |
| 1.03 | 0.44 | 1.08 | 0.48 |
| 0.34 | 0.06 | 0.35 | 0.08 |
| 1.16 | 0.50 | 1.24 | 0.56 |
| 0.55 | 0.19 | 0.71 | 0.27 |
| 1.46 | 0.65 | 1.42 | 0.54 |
| 1.92 | 0.79 | 2.26 | 0.92 |
| #N/A | #N/A | 0.80 | 0.27 |
| 1.48 | 0.64 | 0.79 | 0.33 |
| #N/A | #N/A | 1.79 | 0.80 |
| 0.54 | 0.17 | 0.40 | 0.09 |
| 1.84 | 0.78 | 2.05 | 0.76 |
| 0.94 | 0.43 | 1.50 | 0.57 |
| 0.65 | 0.24 | 0.95 | 0.38 |
| 1.07 | 0.45 | 1.23 | 0.56 |
| 2.10 | 0.86 | 2.37 | 0.92 |
| 0.38 | 0.09 | #N/A | #N/A |
| 3.32 | 0.99 | 3.19 | 0.99 |
| 1.52 | 0.66 | 1.95 | 0.84 |
| #N/A | #N/A | #N/A | #N/A |
| 1.97 | 0.84 | 1.62 | 0.73 |
| #N/A | #N/A | #N/A | #N/A |
| 0.78 | 0.31 | #N/A | #N/A |
| 0.97 | 0.45 | 0.90 | 0.39 |
| 2.01 | 0.86 | 1.94 | 0.77 |
| 0.46 | 0.13 | 0.58 | 0.21 |
| 2.15 | 0.90 | 1.45 | 0.66 |
| 2.41 | 0.93 | 2.46 | 0.94 |
| 1.01 | 0.42 | 1.25 | 0.55 |
| 1.66 | 0.75 | 1.58 | 0.72 |

|      |      |      |      |
|------|------|------|------|
| #N/A | #N/A | #N/A | #N/A |
| 1.39 | 0.60 | 1.95 | 0.85 |
| 1.63 | 0.70 | 1.44 | 0.60 |
| 1.14 | 0.49 | 1.30 | 0.52 |
| 1.78 | 0.75 | 1.30 | 0.59 |
| 0.83 | 0.34 | 0.78 | 0.27 |
| 2.03 | 0.83 | 2.17 | 0.80 |
| #N/A | #N/A | 0.31 | 0.05 |
| 1.84 | 0.81 | 1.83 | 0.80 |
| 0.53 | 0.17 | 0.46 | 0.14 |
| #N/A | #N/A | 1.55 | 0.70 |
| 0.93 | 0.42 | 1.07 | 0.47 |
| 0.75 | 0.32 | 0.65 | 0.25 |
| 0.98 | 0.45 | 0.96 | 0.42 |
| 0.77 | 0.33 | 0.81 | 0.35 |
| 0.89 | 0.39 | 0.79 | 0.33 |
| 1.09 | 0.46 | 1.31 | 0.60 |
| 1.79 | 0.80 | 2.28 | 0.90 |
| 1.03 | 0.44 | 1.00 | 0.44 |
| 2.51 | 0.93 | 2.46 | 0.93 |
| 0.43 | 0.11 | 0.61 | 0.23 |
| 1.73 | 0.77 | 2.18 | 0.83 |
| #N/A | #N/A | 0.79 | 0.32 |
| 0.51 | 0.16 | 0.34 | 0.07 |
| 1.27 | 0.55 | 1.29 | 0.58 |
| #N/A | #N/A | #N/A | #N/A |
| 0.97 | 0.44 | 1.06 | 0.41 |
| 2.63 | 0.96 | 2.74 | 0.94 |
| 0.50 | 0.15 | 1.23 | 0.46 |
| 0.59 | 0.21 | 0.65 | 0.25 |
| 0.48 | 0.14 | 0.54 | 0.19 |
| 1.26 | 0.55 | 1.02 | 0.45 |
| #N/A | #N/A | 2.18 | 0.90 |
| 0.52 | 0.16 | #N/A | #N/A |
| 1.96 | 0.82 | 1.63 | 0.62 |
| 1.05 | 0.48 | 1.19 | 0.54 |
| 1.41 | 0.61 | 1.47 | 0.56 |
| 0.94 | 0.39 | 1.17 | 0.53 |
| 1.39 | 0.60 | 1.30 | 0.59 |
| 2.34 | 0.90 | 2.12 | 0.88 |
| 1.40 | 0.63 | 1.35 | 0.62 |
| 1.01 | 0.43 | 0.99 | 0.38 |
| #N/A | #N/A | 0.36 | 0.08 |
| 0.75 | 0.30 | #N/A | #N/A |
| #N/A | #N/A | #N/A | #N/A |
| #N/A | #N/A | 4.00 | 1.00 |
| 1.75 | 0.74 | 1.73 | 0.78 |
| #N/A | #N/A | #N/A | #N/A |
| 0.59 | 0.22 | 0.52 | 0.15 |
| 0.69 | 0.26 | 0.45 | 0.13 |
| 1.55 | 0.67 | 1.58 | 0.70 |

|      |      |      |      |
|------|------|------|------|
| 0.72 | 0.28 | 0.65 | 0.25 |
| 0.34 | 0.05 | #N/A | #N/A |
| 1.49 | 0.64 | 1.15 | 0.52 |
| 0.96 | 0.44 | 1.26 | 0.57 |
| 1.41 | 0.65 | 2.00 | 0.86 |
| 0.55 | 0.19 | 1.94 | 0.83 |
| 0.42 | 0.11 | 0.89 | 0.39 |
| 1.36 | 0.61 | 1.50 | 0.62 |
| 0.32 | 0.04 | 0.42 | 0.11 |
| 1.18 | 0.56 | 1.11 | 0.46 |
| 1.44 | 0.62 | #N/A | #N/A |
| #N/A | #N/A | #N/A | #N/A |
| 0.90 | 0.37 | 1.01 | 0.43 |
| #N/A | #N/A | #N/A | #N/A |
| 1.68 | 0.71 | #N/A | #N/A |
| #N/A | #N/A | 0.65 | 0.25 |
| 1.28 | 0.55 | 1.05 | 0.42 |
| 1.26 | 0.55 | 1.17 | 0.48 |
| #N/A | #N/A | 0.85 | 0.30 |
| 2.78 | 0.96 | 2.54 | 0.95 |
| 0.73 | 0.31 | 0.70 | 0.26 |
| 1.60 | 0.69 | 2.08 | 0.83 |
| 1.50 | 0.68 | 1.90 | 0.83 |
| 1.91 | 0.80 | 1.48 | 0.57 |
| 1.08 | 0.51 | 1.08 | 0.48 |
| 2.08 | 0.84 | 2.41 | 0.88 |
| #N/A | #N/A | #N/A | #N/A |
| 1.02 | 0.46 | 0.82 | 0.35 |
| #N/A | #N/A | #N/A | #N/A |
| 3.00 | 0.97 | 2.13 | 0.89 |
| 2.01 | 0.86 | 1.97 | 0.85 |
| 1.03 | 0.48 | 0.99 | 0.36 |
| #N/A | #N/A | 1.09 | 0.48 |
| 1.40 | 0.65 | 1.82 | 0.70 |
| 0.68 | 0.28 | 0.84 | 0.33 |
| 0.36 | 0.07 | 0.37 | 0.09 |
| 0.56 | 0.20 | 0.64 | 0.25 |
| 1.62 | 0.69 | 1.62 | 0.69 |
| 0.97 | 0.41 | 1.15 | 0.52 |
| 1.23 | 0.58 | 1.24 | 0.56 |
| 1.58 | 0.68 | #N/A | #N/A |
| 0.98 | 0.42 | 0.79 | 0.33 |
| 1.11 | 0.47 | 0.98 | 0.43 |
| 2.84 | 0.98 | 3.12 | 0.98 |
| 0.50 | 0.15 | 0.62 | 0.22 |
| 0.34 | 0.06 | 0.42 | 0.11 |
| 1.71 | 0.73 | #N/A | #N/A |
| 1.00 | 0.45 | 0.69 | 0.28 |
| 0.68 | 0.28 | 0.91 | 0.32 |
| 1.52 | 0.66 | 1.41 | 0.64 |
| 2.40 | 0.90 | #N/A | #N/A |

|      |      |      |      |
|------|------|------|------|
| #N/A | #N/A | 1.11 | 0.42 |
| #N/A | #N/A | #N/A | #N/A |
| #N/A | #N/A | #N/A | #N/A |
| 1.39 | 0.60 | 1.65 | 0.75 |
| 1.37 | 0.64 | 1.35 | 0.54 |
| #N/A | #N/A | #N/A | #N/A |
| 1.76 | 0.79 | #N/A | #N/A |
| 2.35 | 0.89 | #N/A | #N/A |
| 0.76 | 0.30 | 0.76 | 0.26 |
| #N/A | #N/A | #N/A | #N/A |
| 0.71 | 0.28 | 0.92 | 0.33 |
| #N/A | #N/A | 1.27 | 0.58 |
| 3.30 | 0.99 | 3.08 | 0.98 |
| #N/A | #N/A | 1.70 | 0.77 |
| 1.96 | 0.80 | 1.41 | 0.64 |
| 0.54 | 0.17 | 0.58 | 0.18 |
| #N/A | #N/A | 0.91 | 0.40 |
| 0.97 | 0.45 | 0.80 | 0.33 |
| 1.65 | 0.74 | #N/A | #N/A |
| 1.34 | 0.58 | #N/A | #N/A |
| #N/A | #N/A | #N/A | #N/A |
| #N/A | #N/A | 2.64 | 0.95 |
| #N/A | #N/A | #N/A | #N/A |
| 1.18 | 0.50 | 1.17 | 0.51 |
| 1.54 | 0.70 | 1.58 | 0.63 |
| 0.93 | 0.39 | 0.96 | 0.35 |
| 0.55 | 0.18 | 0.51 | 0.17 |
| 0.80 | 0.35 | 0.85 | 0.37 |
| 1.59 | 0.72 | 1.18 | 0.43 |
| 2.35 | 0.89 | 2.19 | 0.89 |
| #N/A | #N/A | #N/A | #N/A |
| 1.18 | 0.51 | 1.30 | 0.59 |
| 1.05 | 0.48 | 0.84 | 0.36 |
| 0.59 | 0.21 | 0.62 | 0.19 |
| 1.39 | 0.60 | 1.50 | 0.68 |
| 0.98 | 0.41 | 1.13 | 0.47 |
| #N/A | #N/A | 1.58 | 0.72 |
| #N/A | #N/A | #N/A | #N/A |
| 1.67 | 0.72 | 1.66 | 0.63 |
| 1.58 | 0.70 | 1.89 | 0.82 |
| 0.38 | 0.08 | #N/A | #N/A |
| 2.52 | 0.93 | 3.09 | 0.95 |
| #N/A | #N/A | #N/A | #N/A |
| 0.91 | 0.41 | 1.02 | 0.38 |
| 2.67 | 0.95 | #N/A | #N/A |
| 0.16 | 0.00 | 0.28 | 0.04 |
| #N/A | #N/A | #N/A | #N/A |
| 1.64 | 0.74 | 2.12 | 0.85 |
| #N/A | #N/A | #N/A | #N/A |
| 2.50 | 0.94 | 2.00 | 0.86 |
| #N/A | #N/A | #N/A | #N/A |



|      |      |      |      |
|------|------|------|------|
| 0.36 | 0.07 | 0.51 | 0.15 |
| 1.51 | 0.65 | 1.61 | 0.65 |
| #N/A | #N/A | #N/A | #N/A |
| 1.93 | 0.79 | #N/A | #N/A |
| #N/A | #N/A | #N/A | #N/A |
| 2.20 | 0.88 | 2.01 | 0.79 |
| #N/A | #N/A | #N/A | #N/A |
| 1.67 | 0.74 | #N/A | #N/A |
| #N/A | #N/A | #N/A | #N/A |
| 1.81 | 0.77 | 2.27 | 0.90 |
| 2.49 | 0.93 | 2.23 | 0.91 |
| #N/A | #N/A | #N/A | #N/A |
| #N/A | #N/A | 2.26 | 0.92 |
| 1.60 | 0.73 | #N/A | #N/A |
| #N/A | #N/A | #N/A | #N/A |
| 1.58 | 0.72 | 1.53 | 0.62 |
| 1.74 | 0.73 | 1.46 | 0.66 |
| 3.43 | 0.99 | 2.42 | 0.86 |
| 1.15 | 0.49 | 1.46 | 0.66 |
| 1.27 | 0.54 | 1.71 | 0.68 |
| 2.39 | 0.93 | 3.49 | 0.98 |
| 2.10 | 0.84 | 3.18 | 0.98 |
| #N/A | #N/A | #N/A | #N/A |
| 1.28 | 0.56 | #N/A | #N/A |
| 0.68 | 0.26 | 0.64 | 0.21 |
| 0.50 | 0.16 | 0.33 | 0.06 |
| 0.49 | 0.15 | 0.45 | 0.12 |
| 0.29 | 0.03 | 0.25 | 0.02 |
| #N/A | #N/A | 0.94 | 0.41 |
| #N/A | #N/A | 1.10 | 0.49 |
| #N/A | #N/A | #N/A | #N/A |
| 2.82 | 0.97 | 2.91 | 0.98 |
| 0.93 | 0.42 | 1.00 | 0.37 |
| 1.19 | 0.53 | 1.13 | 0.51 |
| 2.87 | 0.98 | 3.57 | 0.99 |
| 0.88 | 0.37 | 1.31 | 0.55 |
| 0.54 | 0.18 | #N/A | #N/A |
| 2.50 | 0.92 | 1.99 | 0.86 |
| 1.46 | 0.63 | 0.85 | 0.32 |
| 1.54 | 0.67 | 1.65 | 0.72 |
| #N/A | #N/A | #N/A | #N/A |
| 2.76 | 0.95 | 2.76 | 0.96 |
| #N/A | #N/A | #N/A | #N/A |
| #N/A | #N/A | 0.42 | 0.11 |
| 2.02 | 0.84 | 2.47 | 0.93 |
| #N/A | #N/A | #N/A | #N/A |
| 0.66 | 0.25 | 0.45 | 0.13 |
| 0.72 | 0.28 | 0.53 | 0.19 |
| 0.66 | 0.25 | 0.40 | 0.10 |
| #N/A | #N/A | #N/A | #N/A |
| #N/A | #N/A | 2.85 | 0.97 |

|      |      |      |      |
|------|------|------|------|
| 0.80 | 0.32 | 0.87 | 0.38 |
| 2.45 | 0.93 | 1.92 | 0.76 |
| 1.93 | 0.81 | 1.62 | 0.70 |
| 0.73 | 0.29 | 0.40 | 0.10 |
| 3.18 | 0.98 | 2.93 | 0.98 |
| 0.46 | 0.13 | 0.81 | 0.30 |
| #N/A | #N/A | #N/A | #N/A |
| 1.55 | 0.67 | 1.93 | 0.81 |
| 0.41 | 0.10 | #N/A | #N/A |
| 2.70 | 0.97 | 3.26 | 0.96 |
| 2.04 | 0.83 | 1.98 | 0.85 |
| #N/A | #N/A | #N/A | #N/A |
| 1.48 | 0.68 | 1.23 | 0.46 |
| 1.51 | 0.66 | 1.96 | 0.83 |
| 1.02 | 0.43 | 1.59 | 0.64 |
| 2.38 | 0.91 | 2.79 | 0.94 |
| 2.47 | 0.94 | 3.04 | 0.96 |
| #N/A | #N/A | #N/A | #N/A |
| 2.02 | 0.84 | 2.29 | 0.92 |
| #N/A | #N/A | #N/A | #N/A |
| 1.92 | 0.79 | 1.76 | 0.72 |
| 1.36 | 0.59 | 1.55 | 0.68 |
| #N/A | #N/A | #N/A | #N/A |
| 2.77 | 0.97 | 2.22 | 0.84 |
| 2.14 | 0.87 | 2.07 | 0.87 |
| 1.25 | 0.54 | 1.11 | 0.49 |
| 0.80 | 0.35 | 0.74 | 0.30 |
| 1.99 | 0.81 | 1.77 | 0.79 |
| 0.77 | 0.34 | 0.86 | 0.36 |
| 0.77 | 0.32 | 0.72 | 0.29 |
| 0.92 | 0.41 | 1.07 | 0.47 |
| 1.02 | 0.47 | 0.94 | 0.34 |
| 1.25 | 0.56 | 1.24 | 0.56 |
| 0.77 | 0.31 | 0.58 | 0.21 |
| 1.13 | 0.53 | 1.53 | 0.66 |
| 2.94 | 0.98 | 2.93 | 0.98 |
| 2.57 | 0.96 | 2.51 | 0.95 |
| 1.78 | 0.80 | 1.30 | 0.59 |
| #N/A | #N/A | 1.47 | 0.67 |
| 1.72 | 0.75 | #N/A | #N/A |
| 0.36 | 0.06 | 0.34 | 0.07 |
| 1.84 | 0.77 | 2.11 | 0.89 |
| 0.47 | 0.13 | 0.44 | 0.11 |
| 0.99 | 0.44 | 0.67 | 0.24 |
| 1.62 | 0.71 | 1.98 | 0.74 |
| 1.75 | 0.74 | 1.47 | 0.67 |
| #N/A | #N/A | #N/A | #N/A |
| 1.64 | 0.71 | 1.53 | 0.70 |
| 2.67 | 0.94 | 3.19 | 0.96 |
| 0.82 | 0.35 | 0.63 | 0.24 |
| 3.48 | 0.99 | 4.31 | 1.00 |

|      |      |      |      |
|------|------|------|------|
| 0.53 | 0.17 | 1.00 | 0.37 |
| 0.60 | 0.21 | 1.59 | 0.71 |
| 0.66 | 0.25 | 0.72 | 0.28 |
| 0.44 | 0.11 | 0.31 | 0.05 |
| 1.60 | 0.69 | 1.95 | 0.84 |
| 1.60 | 0.69 | 1.70 | 0.71 |
| 0.79 | 0.34 | 0.92 | 0.40 |
| #N/A | #N/A | #N/A | #N/A |
| 1.17 | 0.53 | 1.12 | 0.50 |
| 2.07 | 0.88 | 2.12 | 0.89 |
| #N/A | #N/A | 0.56 | 0.17 |
| 2.12 | 0.86 | 1.43 | 0.65 |
| 1.01 | 0.43 | 0.95 | 0.35 |
| 1.02 | 0.47 | 0.96 | 0.42 |
| 0.58 | 0.20 | 1.19 | 0.44 |
| 1.79 | 0.80 | 2.03 | 0.86 |
| #N/A | #N/A | #N/A | #N/A |
| 2.04 | 0.83 | 1.84 | 0.81 |
| 0.99 | 0.46 | 0.83 | 0.29 |
| #N/A | #N/A | 0.72 | 0.29 |
| 1.07 | 0.45 | 1.87 | 0.82 |
| 0.86 | 0.38 | 0.94 | 0.40 |
| 1.30 | 0.56 | 1.99 | 0.76 |
| #N/A | #N/A | 0.66 | 0.21 |
| 1.86 | 0.82 | 1.82 | 0.80 |
| 0.40 | 0.08 | 0.40 | 0.09 |
| #N/A | #N/A | #N/A | #N/A |
| 0.41 | 0.09 | 0.33 | 0.06 |
| 1.60 | 0.71 | 1.54 | 0.65 |
| #N/A | #N/A | #N/A | #N/A |
| 2.21 | 0.88 | 2.14 | 0.89 |
| 0.94 | 0.40 | 0.61 | 0.23 |
| 1.71 | 0.73 | 1.48 | 0.56 |
| 2.02 | 0.85 | 2.35 | 0.91 |
| 0.99 | 0.42 | 0.83 | 0.29 |
| #N/A | #N/A | 0.30 | 0.05 |
| #N/A | #N/A | #N/A | #N/A |
| 1.51 | 0.68 | 1.21 | 0.55 |
| #N/A | #N/A | #N/A | #N/A |
| 1.37 | 0.60 | 1.35 | 0.62 |
| #N/A | #N/A | #N/A | #N/A |
| #N/A | #N/A | 0.97 | 0.41 |
| 1.31 | 0.61 | 1.15 | 0.50 |
| 0.11 | 0.00 | 0.13 | 0.00 |
| 0.78 | 0.34 | 0.99 | 0.44 |
| #N/A | #N/A | #N/A | #N/A |
| 2.07 | 0.88 | 1.95 | 0.77 |
| #N/A | #N/A | #N/A | #N/A |
| 1.91 | 0.83 | 1.77 | 0.76 |
| 1.24 | 0.57 | 1.22 | 0.46 |
| #N/A | #N/A | #N/A | #N/A |

|      |      |      |      |
|------|------|------|------|
| 1.41 | 0.64 | 1.37 | 0.62 |
| 1.77 | 0.75 | 1.21 | 0.54 |
| 0.58 | 0.22 | 0.87 | 0.37 |
| 0.76 | 0.33 | 1.17 | 0.51 |
| 1.02 | 0.47 | 0.91 | 0.38 |
| 1.73 | 0.76 | 2.35 | 0.92 |
| #N/A | #N/A | #N/A | #N/A |
| 2.31 | 0.90 | 1.79 | 0.78 |
| 2.41 | 0.91 | 2.04 | 0.87 |
| 1.09 | 0.47 | 0.83 | 0.35 |
| 1.28 | 0.56 | 0.83 | 0.29 |
| 0.37 | 0.08 | 0.26 | 0.03 |
| 3.37 | 0.99 | 2.75 | 0.97 |
| 1.60 | 0.69 | 1.55 | 0.70 |
| #N/A | #N/A | 0.88 | 0.38 |
| 2.85 | 0.96 | 2.44 | 0.94 |
| #N/A | #N/A | #N/A | #N/A |
| 1.60 | 0.69 | 1.15 | 0.52 |
| 2.12 | 0.86 | 1.07 | 0.48 |
| #N/A | #N/A | #N/A | #N/A |
| #N/A | #N/A | #N/A | #N/A |
| #N/A | #N/A | #N/A | #N/A |
| 1.54 | 0.71 | 1.91 | 0.84 |
| #N/A | #N/A | 3.74 | 0.98 |
| 2.27 | 0.92 | 2.36 | 0.90 |
| #N/A | #N/A | #N/A | #N/A |
| 2.85 | 0.98 | 2.40 | 0.91 |
| 1.58 | 0.70 | 1.94 | 0.74 |
| 2.39 | 0.91 | 2.06 | 0.87 |
| 0.50 | 0.16 | 0.57 | 0.17 |
| 1.72 | 0.74 | 1.35 | 0.61 |
| #N/A | #N/A | 2.13 | 0.89 |
| #N/A | #N/A | 0.92 | 0.34 |
| 1.47 | 0.63 | 2.33 | 0.90 |
| 1.07 | 0.45 | 1.99 | 0.85 |
| 0.63 | 0.23 | 0.61 | 0.22 |
| 2.00 | 0.82 | 1.34 | 0.52 |
| 1.35 | 0.63 | 1.68 | 0.76 |
| #N/A | #N/A | #N/A | #N/A |
| #N/A | #N/A | #N/A | #N/A |
| #N/A | #N/A | #N/A | #N/A |
| 1.85 | 0.82 | 1.58 | 0.66 |
| 2.09 | 0.84 | 1.79 | 0.73 |
| #N/A | #N/A | 1.51 | 0.63 |
| 3.81 | 0.99 | 2.96 | 0.98 |
| 2.06 | 0.88 | 1.68 | 0.64 |
| 1.56 | 0.67 | 1.78 | 0.74 |
| #N/A | #N/A | #N/A | #N/A |
| 1.77 | 0.75 | 1.46 | 0.66 |
| 2.06 | 0.83 | 1.54 | 0.70 |
| #N/A | #N/A | #N/A | #N/A |

|      |      |      |      |
|------|------|------|------|
| #N/A | #N/A | 0.93 | 0.38 |
| 1.20 | 0.51 | 0.94 | 0.41 |
| 0.46 | 0.13 | #N/A | #N/A |
| 1.45 | 0.63 | 1.86 | 0.82 |
| 0.14 | 0.00 | #N/A | #N/A |
| 1.27 | 0.59 | 0.84 | 0.36 |
| #N/A | #N/A | #N/A | #N/A |
| 0.86 | 0.37 | 1.30 | 0.59 |
| 1.48 | 0.64 | 1.66 | 0.75 |
| #N/A | #N/A | #N/A | #N/A |
| 1.51 | 0.65 | 1.55 | 0.70 |
| 2.49 | 0.92 | 2.23 | 0.91 |
| 1.65 | 0.72 | 1.54 | 0.70 |
| 1.38 | 0.60 | 1.00 | 0.44 |
| 0.31 | 0.04 | 0.31 | 0.05 |
| 0.22 | 0.01 | 0.26 | 0.03 |
| 0.88 | 0.40 | 0.78 | 0.30 |
| #N/A | #N/A | #N/A | #N/A |
| 0.91 | 0.41 | 0.66 | 0.26 |
| #N/A | #N/A | #N/A | #N/A |
| 1.38 | 0.64 | 1.32 | 0.60 |
| 0.41 | 0.10 | 0.46 | 0.13 |
| 0.99 | 0.42 | 0.80 | 0.30 |
| 1.24 | 0.58 | 1.38 | 0.63 |
| 1.29 | 0.60 | 1.38 | 0.52 |
| 1.26 | 0.57 | 1.32 | 0.60 |
| 1.03 | 0.44 | 1.06 | 0.47 |
| 0.68 | 0.26 | 1.10 | 0.44 |
| 2.34 | 0.89 | 2.08 | 0.77 |
| 0.55 | 0.19 | 0.48 | 0.13 |
| 0.34 | 0.05 | 0.34 | 0.06 |
| 1.99 | 0.86 | 1.62 | 0.74 |
| 1.67 | 0.72 | 1.38 | 0.63 |
| #N/A | #N/A | 0.32 | 0.05 |
| 0.60 | 0.21 | 0.44 | 0.12 |
| 1.69 | 0.73 | #N/A | #N/A |
| 3.85 | 1.00 | 3.04 | 0.98 |
| 2.36 | 0.90 | 2.22 | 0.91 |
| #N/A | #N/A | #N/A | #N/A |
| #N/A | #N/A | #N/A | #N/A |
| 2.19 | 0.86 | 2.29 | 0.87 |
| #N/A | #N/A | #N/A | #N/A |
| #N/A | #N/A | 2.71 | 0.96 |
| 1.34 | 0.58 | 1.43 | 0.65 |
| 1.20 | 0.53 | 1.49 | 0.67 |
| 1.63 | 0.74 | 2.01 | 0.76 |
| 1.00 | 0.44 | 1.14 | 0.42 |
| 0.44 | 0.11 | 0.36 | 0.08 |
| 1.31 | 0.61 | 1.45 | 0.57 |
| 0.79 | 0.34 | 1.09 | 0.48 |
| 0.40 | 0.08 | 0.23 | 0.02 |

|      |      |      |      |
|------|------|------|------|
| 0.87 | 0.36 | 1.52 | 0.69 |
| 1.46 | 0.67 | 1.06 | 0.47 |
| 1.62 | 0.74 | 2.62 | 0.94 |
| 1.79 | 0.76 | 2.01 | 0.86 |
| 1.08 | 0.51 | 2.12 | 0.89 |
| 0.51 | 0.16 | 0.54 | 0.19 |
| 0.69 | 0.26 | 1.17 | 0.52 |
| 0.51 | 0.16 | 0.36 | 0.08 |
| 0.81 | 0.34 | 1.79 | 0.76 |
| 0.41 | 0.09 | 0.82 | 0.29 |
| 0.32 | 0.05 | 0.24 | 0.02 |
| 0.31 | 0.05 | 0.94 | 0.41 |
| 0.77 | 0.33 | 1.43 | 0.59 |
| #N/A | #N/A | 0.66 | 0.26 |
| #N/A | #N/A | 1.13 | 0.46 |
| 0.34 | 0.05 | #N/A | #N/A |
| 1.57 | 0.68 | 2.90 | 0.95 |
| 1.64 | 0.70 | 1.34 | 0.55 |
| 1.75 | 0.73 | 2.94 | 0.98 |
| 0.64 | 0.25 | 1.24 | 0.53 |
| 0.68 | 0.26 | 1.52 | 0.69 |
| 1.17 | 0.55 | 1.31 | 0.60 |
| 1.00 | 0.43 | 0.96 | 0.43 |
| 2.13 | 0.89 | 2.44 | 0.86 |
| 0.57 | 0.21 | 0.54 | 0.16 |
| 1.14 | 0.54 | #N/A | #N/A |
| 1.68 | 0.76 | 1.67 | 0.63 |
| 0.73 | 0.29 | 0.73 | 0.29 |
| 1.03 | 0.48 | 0.94 | 0.41 |
| 1.63 | 0.70 | 1.31 | 0.58 |
| 0.53 | 0.18 | 0.82 | 0.35 |
| 2.12 | 0.89 | #N/A | #N/A |
| #N/A | #N/A | #N/A | #N/A |
| 1.86 | 0.79 | 1.54 | 0.70 |
| 0.75 | 0.30 | 0.77 | 0.31 |
| 2.31 | 0.90 | 2.15 | 0.79 |
| 1.29 | 0.56 | 1.18 | 0.53 |
| 0.95 | 0.44 | 1.63 | 0.74 |
| 1.02 | 0.47 | #N/A | #N/A |
| 1.59 | 0.69 | 1.51 | 0.69 |
| 0.91 | 0.38 | 1.39 | 0.53 |
| #N/A | #N/A | 2.57 | 0.91 |
| #N/A | #N/A | #N/A | #N/A |
| 0.85 | 0.35 | 1.05 | 0.46 |
| 1.33 | 0.57 | 1.10 | 0.43 |
| 0.92 | 0.38 | 0.92 | 0.35 |
| 0.29 | 0.03 | 0.24 | 0.02 |
| 0.70 | 0.27 | 0.72 | 0.29 |
| 0.37 | 0.08 | #N/A | #N/A |
| 1.61 | 0.69 | 1.89 | 0.83 |
| 0.50 | 0.15 | 0.61 | 0.23 |

|      |      |      |      |
|------|------|------|------|
| 0.55 | 0.19 | 1.42 | 0.58 |
| #N/A | #N/A | 0.40 | 0.11 |
| 1.28 | 0.55 | 1.26 | 0.53 |
| 1.26 | 0.56 | 0.98 | 0.36 |
| 2.11 | 0.87 | 2.02 | 0.86 |
| 1.66 | 0.72 | 1.40 | 0.61 |
| #N/A | #N/A | #N/A | #N/A |
| 1.32 | 0.58 | 1.39 | 0.59 |
| 0.54 | 0.18 | 1.06 | 0.47 |
| 1.26 | 0.55 | 0.94 | 0.41 |
| #N/A | #N/A | 0.26 | 0.03 |
| 1.35 | 0.63 | 1.24 | 0.54 |
| 1.60 | 0.73 | #N/A | #N/A |
| #N/A | #N/A | 0.57 | 0.20 |
| 1.45 | 0.63 | 0.85 | 0.37 |
| 0.93 | 0.40 | 0.79 | 0.27 |
| 2.36 | 0.93 | 2.01 | 0.75 |
| 0.39 | 0.08 | 0.29 | 0.04 |
| 0.38 | 0.08 | #N/A | #N/A |
| #N/A | #N/A | 0.48 | 0.15 |
| 1.46 | 0.66 | 1.20 | 0.54 |
| 1.29 | 0.56 | 1.41 | 0.56 |
| 1.96 | 0.82 | 1.54 | 0.70 |
| #N/A | #N/A | 0.28 | 0.04 |
| 0.94 | 0.43 | 2.39 | 0.92 |
| 1.50 | 0.69 | 1.09 | 0.42 |
| 1.44 | 0.63 | 1.42 | 0.65 |
| 0.91 | 0.38 | 1.03 | 0.38 |
| 0.37 | 0.08 | 0.42 | 0.11 |
| 0.47 | 0.13 | 0.48 | 0.15 |
| #N/A | #N/A | #N/A | #N/A |
| 1.83 | 0.78 | 1.98 | 0.79 |
| 0.76 | 0.33 | 0.85 | 0.32 |
| #N/A | #N/A | #N/A | #N/A |
| 1.32 | 0.58 | 2.23 | 0.85 |
| #N/A | #N/A | #N/A | #N/A |
| 2.30 | 0.89 | 1.70 | 0.77 |
| #N/A | #N/A | #N/A | #N/A |
| 1.54 | 0.67 | 2.03 | 0.75 |
| 0.79 | 0.31 | 0.76 | 0.30 |
| #N/A | #N/A | #N/A | #N/A |
| #N/A | #N/A | 1.93 | 0.84 |
| 0.60 | 0.21 | 0.72 | 0.24 |
| 1.79 | 0.79 | 2.02 | 0.86 |
| #N/A | #N/A | #N/A | #N/A |
| 1.77 | 0.79 | 1.46 | 0.66 |
| #N/A | #N/A | #N/A | #N/A |
| 1.07 | 0.46 | 1.19 | 0.51 |
| 2.14 | 0.85 | 2.18 | 0.85 |
| #N/A | #N/A | #N/A | #N/A |
| 0.81 | 0.33 | 0.71 | 0.29 |

|      |      |      |      |
|------|------|------|------|
| #N/A | #N/A | #N/A | #N/A |
| 1.14 | 0.53 | 1.00 | 0.44 |
| 1.33 | 0.58 | 0.96 | 0.42 |
| 1.19 | 0.51 | 0.99 | 0.40 |
| #N/A | #N/A | #N/A | #N/A |
| 1.49 | 0.64 | 1.89 | 0.71 |
| 1.18 | 0.51 | 1.12 | 0.50 |
| 1.31 | 0.61 | 1.84 | 0.69 |
| 1.87 | 0.81 | 1.21 | 0.54 |
| #N/A | #N/A | #N/A | #N/A |
| 2.34 | 0.90 | 1.48 | 0.67 |
| 1.22 | 0.57 | 0.98 | 0.43 |
| #N/A | #N/A | #N/A | #N/A |
| 1.42 | 0.62 | 1.29 | 0.58 |
| 0.51 | 0.16 | #N/A | #N/A |
| 2.01 | 0.86 | 1.81 | 0.75 |
| #N/A | #N/A | #N/A | #N/A |
| 1.47 | 0.64 | 1.16 | 0.43 |
| #N/A | #N/A | #N/A | #N/A |
| 0.99 | 0.42 | 0.85 | 0.31 |
| 3.05 | 0.98 | 3.10 | 0.97 |
| 2.09 | 0.84 | 2.21 | 0.90 |
| 1.72 | 0.78 | 2.37 | 0.85 |
| 1.12 | 0.47 | 0.97 | 0.40 |
| 0.81 | 0.33 | 1.28 | 0.58 |
| 0.71 | 0.30 | 1.25 | 0.51 |
| 0.31 | 0.04 | #N/A | #N/A |
| 0.72 | 0.30 | 0.87 | 0.33 |
| 1.24 | 0.53 | 1.20 | 0.54 |
| 0.41 | 0.10 | 0.43 | 0.12 |
| 1.55 | 0.71 | 1.47 | 0.67 |
| #N/A | #N/A | 1.19 | 0.54 |
| 2.41 | 0.91 | 1.92 | 0.83 |
| 1.22 | 0.53 | 1.50 | 0.68 |
| #N/A | #N/A | 0.75 | 0.29 |
| #N/A | #N/A | #N/A | #N/A |
| 2.65 | 0.94 | #N/A | #N/A |
| 2.76 | 0.96 | 3.05 | 0.97 |
| #N/A | #N/A | #N/A | #N/A |
| #N/A | #N/A | 1.68 | 0.65 |
| #N/A | #N/A | 0.71 | 0.29 |
| #N/A | #N/A | 0.24 | 0.02 |
| #N/A | #N/A | #N/A | #N/A |
| #N/A | #N/A | #N/A | #N/A |
| 1.67 | 0.72 | 1.42 | 0.56 |
| 1.27 | 0.55 | 1.12 | 0.48 |
| 1.40 | 0.61 | 1.05 | 0.46 |
| 0.94 | 0.41 | 1.00 | 0.43 |
| 1.72 | 0.78 | 2.93 | 0.98 |
| #N/A | #N/A | #N/A | #N/A |
| 0.56 | 0.20 | 0.56 | 0.20 |



|      |      |      |      |
|------|------|------|------|
| 1.74 | 0.73 | 1.71 | 0.77 |
| #N/A | #N/A | #N/A | #N/A |
| 2.21 | 0.91 | 1.61 | 0.73 |
| #N/A | #N/A | #N/A | #N/A |
| 1.11 | 0.48 | 0.77 | 0.31 |
| 0.92 | 0.38 | 1.01 | 0.43 |
| 2.41 | 0.92 | 2.57 | 0.91 |
| 0.59 | 0.21 | 0.80 | 0.34 |
| 1.25 | 0.53 | 1.95 | 0.83 |
| #N/A | #N/A | #N/A | #N/A |
| 1.63 | 0.71 | 1.53 | 0.70 |
| #N/A | #N/A | 0.59 | 0.21 |
| 0.46 | 0.13 | 0.71 | 0.29 |
| 0.57 | 0.21 | 0.76 | 0.32 |
| #N/A | #N/A | 2.46 | 0.94 |
| 1.82 | 0.76 | 1.75 | 0.73 |
| 0.37 | 0.07 | #N/A | #N/A |
| #N/A | #N/A | #N/A | #N/A |
| #N/A | #N/A | #N/A | #N/A |
| 0.88 | 0.37 | #N/A | #N/A |
| #N/A | #N/A | 1.98 | 0.80 |
| 0.79 | 0.34 | 0.96 | 0.35 |
| #N/A | #N/A | 0.76 | 0.32 |
| 1.55 | 0.71 | 1.69 | 0.64 |
| 2.14 | 0.85 | 1.85 | 0.78 |
| 1.86 | 0.79 | 1.69 | 0.67 |
| 1.89 | 0.81 | 2.08 | 0.86 |
| 1.17 | 0.51 | 1.16 | 0.44 |
| #N/A | #N/A | #N/A | #N/A |
| 2.03 | 0.82 | 1.91 | 0.83 |
| #N/A | #N/A | 0.33 | 0.06 |
| #N/A | #N/A | 3.00 | 0.98 |
| #N/A | #N/A | #N/A | #N/A |
| 0.95 | 0.40 | 1.23 | 0.46 |
| 1.40 | 0.61 | 1.21 | 0.51 |
| #N/A | #N/A | 0.27 | 0.03 |
| 1.89 | 0.83 | 1.63 | 0.74 |
| #N/A | #N/A | 0.27 | 0.03 |
| 3.44 | 0.99 | 2.80 | 0.93 |
| #N/A | #N/A | #N/A | #N/A |
| 2.28 | 0.89 | 1.60 | 0.73 |
| #N/A | #N/A | #N/A | #N/A |
| 0.75 | 0.32 | 0.59 | 0.22 |
| 0.50 | 0.15 | 0.39 | 0.10 |
| 2.31 | 0.89 | 2.30 | 0.84 |
| 0.67 | 0.26 | 0.54 | 0.19 |
| 0.99 | 0.41 | 0.94 | 0.36 |
| 1.95 | 0.81 | 2.32 | 0.90 |
| #N/A | #N/A | 0.25 | 0.03 |
| 1.43 | 0.62 | 1.60 | 0.71 |
| 0.59 | 0.23 | 0.39 | 0.10 |

|      |      |      |      |
|------|------|------|------|
| 1.06 | 0.50 | 0.96 | 0.42 |
| #N/A | #N/A | 0.92 | 0.38 |
| #N/A | #N/A | #N/A | #N/A |
| 2.17 | 0.86 | 2.25 | 0.91 |
| 2.01 | 0.83 | 1.04 | 0.44 |
| #N/A | #N/A | #N/A | #N/A |
| 1.65 | 0.70 | 1.83 | 0.81 |
| #N/A | #N/A | 0.51 | 0.14 |
| 2.00 | 0.81 | 2.07 | 0.86 |
| 1.65 | 0.73 | 1.11 | 0.49 |
| #N/A | #N/A | 1.07 | 0.47 |
| #N/A | #N/A | #N/A | #N/A |
| 0.12 | 0.00 | 0.06 | 0.00 |
| 0.60 | 0.21 | 0.79 | 0.33 |
| 2.00 | 0.86 | #N/A | #N/A |
| 1.24 | 0.54 | 1.13 | 0.42 |
| #N/A | #N/A | 1.57 | 0.71 |
| 1.31 | 0.59 | #N/A | #N/A |
| #N/A | #N/A | #N/A | #N/A |
| 0.58 | 0.20 | 0.69 | 0.27 |
| 2.11 | 0.86 | 2.18 | 0.83 |
| #N/A | #N/A | #N/A | #N/A |
| 1.68 | 0.74 | 1.99 | 0.82 |
| 1.05 | 0.45 | 0.81 | 0.29 |
| 0.42 | 0.10 | 0.35 | 0.08 |
| 1.95 | 0.82 | 1.36 | 0.62 |
| 2.14 | 0.87 | 2.09 | 0.87 |
| #N/A | #N/A | 1.61 | 0.73 |
| #N/A | #N/A | #N/A | #N/A |
| 2.09 | 0.85 | 1.66 | 0.63 |
| #N/A | #N/A | #N/A | #N/A |
| 2.38 | 0.90 | 2.19 | 0.90 |
| 1.39 | 0.65 | 1.94 | 0.73 |
| #N/A | #N/A | #N/A | #N/A |
| 1.65 | 0.71 | 1.81 | 0.80 |
| 2.28 | 0.90 | 1.90 | 0.74 |
| 1.81 | 0.77 | 2.15 | 0.79 |
| 2.28 | 0.88 | 2.58 | 0.95 |
| #N/A | #N/A | #N/A | #N/A |
| 0.92 | 0.42 | 1.37 | 0.52 |
| 1.16 | 0.50 | 0.98 | 0.43 |
| #N/A | #N/A | #N/A | #N/A |
| 1.82 | 0.76 | 1.20 | 0.51 |
| 0.63 | 0.23 | #N/A | #N/A |
| #N/A | #N/A | 0.35 | 0.08 |
| 0.89 | 0.38 | 0.89 | 0.32 |
| 0.40 | 0.08 | #N/A | #N/A |
| 1.35 | 0.59 | 1.63 | 0.69 |
| 0.67 | 0.25 | 0.84 | 0.36 |
| 2.00 | 0.83 | 2.38 | 0.93 |
| #N/A | #N/A | 1.45 | 0.66 |

|      |      |      |      |
|------|------|------|------|
| 1.97 | 0.82 | 2.20 | 0.81 |
| 1.98 | 0.84 | 1.64 | 0.75 |
| 1.48 | 0.68 | 2.55 | 0.92 |
| 0.47 | 0.14 | 0.75 | 0.31 |
| 1.60 | 0.69 | 1.73 | 0.76 |
| 1.15 | 0.54 | 1.50 | 0.68 |
| #N/A | #N/A | #N/A | #N/A |
| 1.42 | 0.65 | 1.63 | 0.62 |
| #N/A | #N/A | #N/A | #N/A |
| 0.45 | 0.12 | 0.54 | 0.18 |
| 1.41 | 0.61 | 1.55 | 0.62 |
| 1.28 | 0.56 | 1.10 | 0.46 |
| 1.72 | 0.73 | 1.47 | 0.58 |
| 2.61 | 0.93 | 1.96 | 0.85 |
| 0.79 | 0.32 | 0.60 | 0.22 |
| #N/A | #N/A | 0.44 | 0.11 |
| 1.29 | 0.56 | #N/A | #N/A |
| 0.70 | 0.27 | 0.48 | 0.13 |
| 1.31 | 0.61 | #N/A | #N/A |
| 2.52 | 0.94 | 2.23 | 0.83 |
| 0.88 | 0.37 | 0.81 | 0.35 |
| #N/A | #N/A | #N/A | #N/A |
| #N/A | #N/A | 0.54 | 0.19 |
| 1.13 | 0.49 | 0.97 | 0.42 |
| 1.14 | 0.54 | 1.32 | 0.56 |
| 1.15 | 0.49 | 1.47 | 0.67 |
| 0.22 | 0.01 | 0.22 | 0.02 |
| #N/A | #N/A | #N/A | #N/A |
| 0.69 | 0.26 | 0.62 | 0.23 |
| #N/A | #N/A | #N/A | #N/A |
| 1.45 | 0.65 | 1.17 | 0.52 |
| 0.43 | 0.11 | 0.27 | 0.03 |
| 0.42 | 0.11 | #N/A | #N/A |
| 2.65 | 0.95 | 2.02 | 0.84 |
| 1.50 | 0.64 | 1.54 | 0.70 |
| 0.32 | 0.04 | 0.35 | 0.07 |
| 2.38 | 0.90 | 1.58 | 0.72 |
| 2.47 | 0.91 | 1.99 | 0.85 |
| 1.13 | 0.49 | 1.09 | 0.48 |
| 1.14 | 0.54 | 0.97 | 0.40 |
| 1.00 | 0.45 | 1.07 | 0.48 |
| 0.56 | 0.19 | 0.57 | 0.21 |
| 2.26 | 0.88 | 1.23 | 0.46 |
| 3.29 | 0.99 | 2.59 | 0.94 |
| 1.65 | 0.75 | 2.08 | 0.84 |
| #N/A | #N/A | #N/A | #N/A |
| 1.97 | 0.81 | 2.35 | 0.92 |
| 2.37 | 0.93 | 1.98 | 0.85 |
| 0.34 | 0.05 | 0.50 | 0.16 |
| 1.84 | 0.81 | 2.68 | 0.96 |
| 0.69 | 0.26 | 1.09 | 0.48 |

|      |      |      |      |
|------|------|------|------|
| 1.21 | 0.52 | 0.95 | 0.42 |
| 0.41 | 0.09 | 0.44 | 0.13 |
| 0.29 | 0.04 | 0.45 | 0.12 |
| 0.84 | 0.34 | 1.01 | 0.42 |
| 0.99 | 0.42 | #N/A | #N/A |
| #N/A | #N/A | #N/A | #N/A |
| 0.87 | 0.36 | 1.25 | 0.57 |
| 0.39 | 0.09 | 0.38 | 0.09 |
| 2.17 | 0.87 | 1.60 | 0.73 |
| 1.55 | 0.68 | 1.44 | 0.55 |
| 2.17 | 0.87 | 2.12 | 0.89 |
| 0.83 | 0.34 | 0.68 | 0.27 |
| 0.38 | 0.08 | 0.32 | 0.06 |
| 0.51 | 0.16 | 0.56 | 0.18 |
| #N/A | #N/A | #N/A | #N/A |
| 2.98 | 0.97 | 2.94 | 0.97 |
| 1.06 | 0.45 | 1.06 | 0.47 |
| #N/A | #N/A | #N/A | #N/A |
| 0.58 | 0.20 | 0.78 | 0.30 |
| 0.74 | 0.29 | 0.63 | 0.24 |
| 1.19 | 0.55 | 1.42 | 0.54 |
| 0.82 | 0.35 | 0.96 | 0.35 |
| 1.11 | 0.48 | 1.10 | 0.49 |
| 0.32 | 0.04 | 0.27 | 0.03 |
| 1.12 | 0.48 | 0.72 | 0.29 |
| 1.16 | 0.50 | 1.27 | 0.57 |
| 2.12 | 0.86 | 1.74 | 0.75 |
| 1.15 | 0.54 | 1.32 | 0.60 |
| #N/A | #N/A | #N/A | #N/A |
| #N/A | #N/A | #N/A | #N/A |
| 1.47 | 0.64 | 1.99 | 0.84 |
| 0.73 | 0.28 | 0.56 | 0.20 |
| 0.91 | 0.38 | 0.97 | 0.42 |
| 1.19 | 0.55 | 1.55 | 0.68 |
| 1.19 | 0.56 | 1.34 | 0.61 |
| 1.24 | 0.54 | 1.54 | 0.68 |
| 1.12 | 0.48 | 1.13 | 0.48 |
| 1.51 | 0.67 | #N/A | #N/A |
| #N/A | #N/A | 1.29 | 0.57 |
| 0.56 | 0.18 | 0.25 | 0.02 |
| 1.35 | 0.59 | 1.65 | 0.66 |
| 1.12 | 0.48 | 1.19 | 0.53 |
| #N/A | #N/A | 0.48 | 0.15 |
| 1.40 | 0.65 | 1.57 | 0.68 |
| 1.31 | 0.62 | 1.17 | 0.52 |
| 1.38 | 0.63 | 1.64 | 0.69 |
| 0.92 | 0.38 | 1.51 | 0.69 |
| 1.75 | 0.75 | 2.61 | 0.96 |
| 0.56 | 0.20 | 0.63 | 0.22 |
| #N/A | #N/A | #N/A | #N/A |
| #N/A | #N/A | #N/A | #N/A |

|      |      |      |      |
|------|------|------|------|
| 0.79 | 0.33 | #N/A | #N/A |
| 1.24 | 0.54 | 2.57 | 0.95 |
| 1.58 | 0.68 | 2.11 | 0.88 |
| 1.46 | 0.66 | 1.29 | 0.58 |
| #N/A | #N/A | #N/A | #N/A |
| #N/A | #N/A | #N/A | #N/A |
| #N/A | #N/A | #N/A | #N/A |
| #N/A | #N/A | #N/A | #N/A |
| 1.80 | 0.77 | 2.22 | 0.91 |
| 0.42 | 0.10 | 0.74 | 0.30 |
| 0.49 | 0.15 | #N/A | #N/A |
| 0.40 | 0.08 | 0.39 | 0.10 |
| 1.92 | 0.79 | 1.49 | 0.61 |
| 2.22 | 0.90 | 2.98 | 0.95 |
| #N/A | #N/A | #N/A | #N/A |
| 1.29 | 0.60 | 1.31 | 0.60 |
| #N/A | #N/A | #N/A | #N/A |
| 1.93 | 0.82 | 2.50 | 0.87 |
| #N/A | #N/A | #N/A | #N/A |
| 1.67 | 0.72 | 1.48 | 0.67 |
| 0.55 | 0.18 | 0.62 | 0.23 |
| 0.45 | 0.12 | 0.77 | 0.28 |
| 0.69 | 0.26 | 0.80 | 0.34 |
| 0.69 | 0.26 | 0.61 | 0.23 |
| 1.56 | 0.67 | 1.44 | 0.58 |
| 1.80 | 0.77 | 2.04 | 0.87 |
| 1.65 | 0.72 | 1.56 | 0.68 |
| 0.65 | 0.25 | #N/A | #N/A |
| 0.79 | 0.32 | 0.91 | 0.34 |
| #N/A | #N/A | #N/A | #N/A |
| 0.44 | 0.12 | 0.56 | 0.18 |
| 0.88 | 0.39 | 1.03 | 0.45 |
| 1.69 | 0.72 | #N/A | #N/A |
| 1.80 | 0.75 | 1.31 | 0.60 |
| 3.89 | 1.00 | 3.48 | 0.99 |
| #N/A | #N/A | #N/A | #N/A |
| 1.86 | 0.80 | 2.22 | 0.85 |
| 3.26 | 0.98 | 2.98 | 0.98 |
| 1.15 | 0.54 | 1.43 | 0.65 |
| 0.95 | 0.40 | 0.71 | 0.29 |
| 1.64 | 0.71 | 1.17 | 0.52 |
| 1.94 | 0.84 | 2.17 | 0.82 |
| 0.87 | 0.36 | 1.25 | 0.57 |
| 1.62 | 0.70 | 1.41 | 0.62 |
| 0.95 | 0.43 | 0.78 | 0.33 |
| 0.80 | 0.35 | #N/A | #N/A |
| #N/A | #N/A | #N/A | #N/A |
| 2.50 | 0.92 | 2.56 | 0.95 |
| 1.96 | 0.80 | 2.08 | 0.84 |
| 1.57 | 0.72 | 1.65 | 0.68 |
| 0.34 | 0.05 | 0.27 | 0.03 |

|      |      |      |      |
|------|------|------|------|
| 0.41 | 0.09 | 0.32 | 0.06 |
| 0.44 | 0.11 | 0.43 | 0.12 |
| 0.53 | 0.17 | 0.39 | 0.09 |
| #N/A | #N/A | #N/A | #N/A |
| 1.06 | 0.49 | 1.38 | 0.54 |
| 0.40 | 0.09 | 0.35 | 0.08 |
| 0.58 | 0.22 | 0.58 | 0.21 |
| 2.39 | 0.90 | 1.68 | 0.76 |
| 1.67 | 0.76 | 1.55 | 0.66 |
| 0.75 | 0.32 | 0.66 | 0.21 |
| 0.95 | 0.44 | #N/A | #N/A |
| 1.83 | 0.81 | 1.67 | 0.66 |
| #N/A | #N/A | #N/A | #N/A |
| 1.46 | 0.67 | 1.42 | 0.65 |
| 1.05 | 0.49 | 0.84 | 0.34 |
| 1.36 | 0.59 | 0.94 | 0.39 |
| 0.57 | 0.19 | 0.34 | 0.06 |
| 1.97 | 0.82 | 1.88 | 0.82 |
| 0.27 | 0.03 | 0.28 | 0.04 |
| 0.37 | 0.07 | #N/A | #N/A |
| #N/A | #N/A | #N/A | #N/A |
| 0.50 | 0.15 | 0.45 | 0.14 |
| 0.83 | 0.37 | 1.10 | 0.46 |
| #N/A | #N/A | #N/A | #N/A |
| 1.20 | 0.57 | 1.49 | 0.67 |
| 2.28 | 0.88 | 1.70 | 0.76 |
| 0.50 | 0.15 | 0.50 | 0.16 |
| 1.59 | 0.69 | 1.82 | 0.80 |
| 0.39 | 0.08 | 0.51 | 0.17 |
| 1.32 | 0.62 | 1.44 | 0.65 |
| 1.31 | 0.57 | #N/A | #N/A |
| 1.45 | 0.64 | 1.52 | 0.58 |
| 0.75 | 0.29 | 0.82 | 0.35 |
| 2.32 | 0.92 | 2.32 | 0.92 |
| 1.99 | 0.85 | 2.08 | 0.87 |
| #N/A | #N/A | 1.62 | 0.61 |
| 1.82 | 0.76 | #N/A | #N/A |
| 1.75 | 0.75 | 2.37 | 0.92 |
| #N/A | #N/A | #N/A | #N/A |
| 1.64 | 0.71 | 1.38 | 0.63 |
| 1.19 | 0.51 | 0.86 | 0.36 |
| 0.38 | 0.07 | 0.53 | 0.18 |
| 1.28 | 0.59 | 1.86 | 0.75 |
| 1.05 | 0.44 | 1.05 | 0.39 |
| #N/A | #N/A | #N/A | #N/A |
| 0.61 | 0.21 | 0.76 | 0.32 |
| 1.82 | 0.76 | 1.95 | 0.73 |
| 0.25 | 0.02 | 0.27 | 0.03 |
| #N/A | #N/A | #N/A | #N/A |
| 2.55 | 0.94 | 3.17 | 0.99 |
| 0.43 | 0.11 | 0.88 | 0.37 |

|      |      |      |      |
|------|------|------|------|
| 1.07 | 0.45 | 1.33 | 0.61 |
| 2.49 | 0.93 | 2.17 | 0.90 |
| 2.30 | 0.89 | 2.14 | 0.89 |
| #N/A | #N/A | #N/A | #N/A |
| 2.40 | 0.90 | 1.65 | 0.62 |
| 1.64 | 0.70 | 1.32 | 0.60 |
| 1.12 | 0.49 | 0.75 | 0.31 |
| 1.11 | 0.49 | 1.37 | 0.61 |
| 0.36 | 0.06 | #N/A | #N/A |
| 0.68 | 0.26 | 0.58 | 0.17 |
| 0.42 | 0.10 | 0.46 | 0.14 |
| 1.17 | 0.51 | 1.18 | 0.53 |
| 1.53 | 0.65 | 1.09 | 0.49 |
| 0.45 | 0.12 | 0.40 | 0.10 |
| #N/A | #N/A | 0.48 | 0.15 |
| 1.11 | 0.48 | 1.48 | 0.65 |
| 1.45 | 0.63 | 1.19 | 0.54 |
| 2.30 | 0.90 | 2.56 | 0.89 |
| 0.82 | 0.35 | 0.81 | 0.35 |
| #N/A | #N/A | #N/A | #N/A |
| 0.91 | 0.38 | 0.75 | 0.30 |
| 1.31 | 0.56 | #N/A | #N/A |
| #N/A | #N/A | 0.47 | 0.13 |
| 1.58 | 0.68 | 1.93 | 0.84 |
| #N/A | #N/A | #N/A | #N/A |
| 1.10 | 0.47 | 1.12 | 0.50 |
| 2.92 | 0.97 | 3.15 | 0.98 |
| #N/A | #N/A | #N/A | #N/A |
| 1.59 | 0.69 | 1.54 | 0.70 |
| #N/A | #N/A | 0.89 | 0.32 |
| 1.21 | 0.53 | 1.54 | 0.59 |
| #N/A | #N/A | 0.61 | 0.23 |
| 0.78 | 0.31 | 0.92 | 0.40 |
| 2.36 | 0.90 | 2.65 | 0.96 |
| 1.78 | 0.80 | 1.92 | 0.84 |
| 0.52 | 0.16 | 0.41 | 0.11 |
| 1.92 | 0.84 | 2.16 | 0.84 |
| 1.65 | 0.71 | 1.84 | 0.69 |
| 0.72 | 0.31 | 0.64 | 0.24 |
| 1.46 | 0.64 | 1.81 | 0.76 |
| #N/A | #N/A | 1.12 | 0.50 |
| #N/A | #N/A | 2.10 | 0.86 |
| #N/A | #N/A | #N/A | #N/A |
| 1.41 | 0.66 | 1.66 | 0.75 |
| 0.53 | 0.17 | 0.67 | 0.27 |
| 0.99 | 0.42 | 1.27 | 0.50 |
| 1.21 | 0.57 | 1.27 | 0.58 |
| 0.53 | 0.17 | #N/A | #N/A |
| 2.14 | 0.85 | 2.20 | 0.90 |
| #N/A | #N/A | #N/A | #N/A |
| 1.69 | 0.76 | 2.70 | 0.96 |

|      |      |      |      |
|------|------|------|------|
| 0.14 | 0.00 | 0.16 | 0.00 |
| #N/A | #N/A | #N/A | #N/A |
| 0.52 | 0.17 | 0.38 | 0.09 |
| 1.06 | 0.45 | 1.11 | 0.41 |
| 1.04 | 0.48 | 0.88 | 0.38 |
| #N/A | #N/A | #N/A | #N/A |
| 1.48 | 0.64 | 1.41 | 0.60 |
| 1.05 | 0.44 | 1.28 | 0.58 |
| 0.78 | 0.31 | 1.45 | 0.66 |
| 0.99 | 0.45 | 1.20 | 0.48 |
| 0.93 | 0.42 | 1.08 | 0.45 |
| 0.58 | 0.20 | 0.50 | 0.17 |
| 2.18 | 0.86 | #N/A | #N/A |
| #N/A | #N/A | #N/A | #N/A |
| 1.38 | 0.60 | 1.21 | 0.49 |
| 2.86 | 0.98 | 2.31 | 0.88 |
| 2.13 | 0.85 | 1.84 | 0.81 |
| 0.75 | 0.31 | 1.10 | 0.41 |
| 0.91 | 0.41 | 0.62 | 0.24 |
| #N/A | #N/A | #N/A | #N/A |
| 0.52 | 0.17 | 0.44 | 0.13 |
| 0.84 | 0.34 | 0.84 | 0.35 |
| 0.49 | 0.14 | 0.41 | 0.12 |
| 0.90 | 0.37 | 0.94 | 0.36 |
| 2.49 | 0.93 | 2.10 | 0.82 |
| #N/A | #N/A | #N/A | #N/A |
| 1.69 | 0.72 | 1.53 | 0.69 |
| 1.88 | 0.79 | 2.12 | 0.88 |
| 1.60 | 0.72 | 2.30 | 0.83 |
| 0.85 | 0.38 | 0.67 | 0.26 |
| 2.59 | 0.93 | 2.21 | 0.89 |
| #N/A | #N/A | #N/A | #N/A |
| 2.19 | 0.88 | 2.45 | 0.86 |
| #N/A | #N/A | #N/A | #N/A |
| 2.30 | 0.92 | 1.64 | 0.74 |
| 1.59 | 0.69 | 1.49 | 0.68 |
| #N/A | #N/A | #N/A | #N/A |
| 1.88 | 0.78 | 1.34 | 0.56 |
| 1.05 | 0.47 | 0.97 | 0.38 |
| 0.53 | 0.18 | 0.56 | 0.17 |
| 0.47 | 0.13 | 0.37 | 0.09 |
| 2.83 | 0.96 | 3.02 | 0.97 |
| 0.43 | 0.10 | #N/A | #N/A |
| 1.71 | 0.77 | 1.94 | 0.78 |
| 1.73 | 0.78 | 2.00 | 0.81 |
| #N/A | #N/A | #N/A | #N/A |
| 1.65 | 0.70 | 1.63 | 0.74 |
| 2.11 | 0.87 | 2.25 | 0.89 |
| 0.52 | 0.17 | 0.93 | 0.40 |
| 0.62 | 0.22 | 0.47 | 0.15 |
| 0.55 | 0.19 | 0.56 | 0.17 |



|      |      |      |      |
|------|------|------|------|
| 1.54 | 0.67 | 1.33 | 0.61 |
| 1.62 | 0.73 | 1.86 | 0.76 |
| 2.21 | 0.87 | 2.85 | 0.96 |
| 0.56 | 0.19 | 0.63 | 0.24 |
| 1.60 | 0.70 | 1.52 | 0.65 |
| 1.10 | 0.51 | 1.50 | 0.66 |
| 1.08 | 0.51 | 1.20 | 0.54 |
| #N/A | #N/A | #N/A | #N/A |
| 3.31 | 0.99 | 2.97 | 0.96 |
| #N/A | #N/A | #N/A | #N/A |
| 2.20 | 0.91 | 2.12 | 0.85 |
| #N/A | #N/A | 1.96 | 0.79 |
| 1.08 | 0.47 | 1.05 | 0.46 |
| 1.30 | 0.59 | 1.40 | 0.63 |
| 0.54 | 0.18 | 0.45 | 0.13 |
| 1.11 | 0.48 | 0.99 | 0.43 |
| 1.95 | 0.81 | 1.42 | 0.64 |
| #N/A | #N/A | #N/A | #N/A |
| 1.47 | 0.67 | 1.57 | 0.70 |
| 1.12 | 0.48 | 0.95 | 0.42 |
| 1.04 | 0.46 | 1.27 | 0.52 |
| 1.39 | 0.60 | 1.34 | 0.61 |
| 1.17 | 0.51 | 1.60 | 0.69 |
| #N/A | #N/A | 0.30 | 0.04 |
| 1.99 | 0.86 | 1.25 | 0.57 |
| 2.32 | 0.90 | 2.32 | 0.89 |
| 1.58 | 0.69 | 1.62 | 0.62 |
| 0.64 | 0.24 | 0.78 | 0.33 |
| 0.28 | 0.02 | 0.24 | 0.02 |
| 2.42 | 0.92 | 2.06 | 0.87 |
| 1.54 | 0.66 | 0.75 | 0.31 |
| 1.72 | 0.74 | 1.71 | 0.74 |
| 2.38 | 0.93 | 1.85 | 0.79 |
| 1.06 | 0.50 | 2.00 | 0.86 |
| 1.85 | 0.79 | 1.30 | 0.52 |
| #N/A | #N/A | 0.80 | 0.27 |
| 0.83 | 0.34 | 0.75 | 0.31 |
| 1.18 | 0.50 | 0.99 | 0.44 |
| 1.22 | 0.53 | 1.44 | 0.65 |
| #N/A | #N/A | 2.99 | 0.96 |
| 0.87 | 0.36 | 1.48 | 0.59 |
| 1.84 | 0.77 | 2.50 | 0.95 |
| 0.56 | 0.19 | 0.65 | 0.22 |
| 0.56 | 0.20 | 0.43 | 0.13 |
| 0.60 | 0.21 | 0.32 | 0.06 |
| 1.07 | 0.45 | 0.83 | 0.36 |
| #N/A | #N/A | 1.88 | 0.77 |
| 2.56 | 0.94 | 3.14 | 0.95 |
| 1.14 | 0.49 | 2.20 | 0.90 |
| #N/A | #N/A | 1.85 | 0.70 |
| 1.83 | 0.81 | 2.07 | 0.82 |

|      |      |      |      |
|------|------|------|------|
| 1.07 | 0.46 | 1.97 | 0.84 |
| #N/A | #N/A | #N/A | #N/A |
| 1.32 | 0.57 | 1.35 | 0.59 |
| 1.17 | 0.51 | 1.37 | 0.57 |
| 1.46 | 0.63 | 1.61 | 0.67 |
| 0.40 | 0.09 | 0.96 | 0.42 |
| #N/A | #N/A | #N/A | #N/A |
| 2.19 | 0.86 | 2.16 | 0.89 |
| 1.25 | 0.53 | 1.07 | 0.47 |
| 1.10 | 0.47 | 0.93 | 0.41 |
| 2.84 | 0.96 | 2.41 | 0.85 |
| 1.51 | 0.66 | 1.68 | 0.71 |
| 0.55 | 0.20 | 0.96 | 0.39 |
| 1.25 | 0.54 | 0.85 | 0.36 |
| 1.84 | 0.78 | 2.01 | 0.80 |
| 0.39 | 0.09 | 0.36 | 0.08 |
| 1.96 | 0.85 | 1.65 | 0.70 |
| 2.15 | 0.86 | 1.89 | 0.83 |
| #N/A | #N/A | 1.61 | 0.66 |
| #N/A | #N/A | #N/A | #N/A |
| 2.28 | 0.89 | 1.95 | 0.77 |
| 1.83 | 0.81 | 1.32 | 0.60 |
| 1.19 | 0.52 | 0.95 | 0.41 |
| 2.92 | 0.96 | 2.52 | 0.95 |
| #N/A | #N/A | #N/A | #N/A |
| 2.33 | 0.90 | #N/A | #N/A |
| #N/A | #N/A | #N/A | #N/A |
| 1.24 | 0.53 | 1.70 | 0.76 |
| 2.01 | 0.83 | 2.43 | 0.94 |
| 1.81 | 0.76 | 1.17 | 0.53 |
| 0.97 | 0.45 | 1.01 | 0.43 |
| #N/A | #N/A | 2.14 | 0.87 |
| 0.45 | 0.13 | #N/A | #N/A |
| 3.30 | 0.99 | 3.26 | 0.99 |
| 1.39 | 0.65 | 1.44 | 0.55 |
| 1.64 | 0.70 | 1.69 | 0.76 |
| 0.39 | 0.08 | 0.57 | 0.17 |
| 1.48 | 0.64 | 1.56 | 0.67 |
| 3.50 | 0.99 | 2.84 | 0.97 |
| #N/A | #N/A | #N/A | #N/A |
| #N/A | #N/A | #N/A | #N/A |
| 1.25 | 0.54 | 1.29 | 0.53 |
| 0.79 | 0.32 | 0.86 | 0.35 |
| #N/A | #N/A | #N/A | #N/A |
| 1.34 | 0.63 | 1.11 | 0.49 |
| 0.82 | 0.33 | #N/A | #N/A |
| 1.72 | 0.74 | 2.06 | 0.87 |
| 0.30 | 0.03 | 0.37 | 0.08 |
| #N/A | #N/A | #N/A | #N/A |
| 2.57 | 0.93 | 1.91 | 0.75 |
| 2.50 | 0.92 | 2.40 | 0.88 |

|      |      |      |      |
|------|------|------|------|
| 2.37 | 0.90 | 1.97 | 0.85 |
| #N/A | #N/A | #N/A | #N/A |
| 3.16 | 0.99 | 2.72 | 0.97 |
| #N/A | #N/A | #N/A | #N/A |
| 3.29 | 0.98 | 3.23 | 0.99 |
| #N/A | #N/A | #N/A | #N/A |
| 1.79 | 0.80 | 1.91 | 0.77 |
| #N/A | #N/A | #N/A | #N/A |
| 1.94 | 0.80 | 1.36 | 0.62 |
| 1.83 | 0.81 | 1.90 | 0.75 |
| 1.44 | 0.63 | 1.91 | 0.81 |
| 2.14 | 0.85 | 1.41 | 0.53 |
| #N/A | #N/A | #N/A | #N/A |
| #N/A | #N/A | 0.24 | 0.02 |
| #N/A | #N/A | 1.45 | 0.66 |
| 2.76 | 0.96 | 1.83 | 0.81 |
| 1.29 | 0.56 | 1.30 | 0.58 |
| 0.76 | 0.30 | 0.61 | 0.22 |
| #N/A | #N/A | #N/A | #N/A |
| 2.25 | 0.89 | 1.86 | 0.82 |
| #N/A | #N/A | #N/A | #N/A |
| 0.97 | 0.43 | 1.07 | 0.45 |
| 1.00 | 0.42 | 0.97 | 0.42 |
| 1.08 | 0.46 | 1.04 | 0.44 |
| 0.92 | 0.41 | 0.92 | 0.38 |
| 1.26 | 0.55 | 1.31 | 0.59 |
| 1.91 | 0.81 | 1.52 | 0.65 |
| #N/A | #N/A | #N/A | #N/A |
| 0.82 | 0.36 | 0.77 | 0.30 |
| 0.68 | 0.26 | 0.71 | 0.29 |
| 1.21 | 0.52 | 1.40 | 0.55 |
| 1.15 | 0.49 | 0.92 | 0.35 |
| #N/A | #N/A | #N/A | #N/A |
| 3.35 | 0.99 | 2.74 | 0.96 |
| 0.49 | 0.15 | #N/A | #N/A |
| 0.30 | 0.04 | 0.27 | 0.03 |
| #N/A | #N/A | #N/A | #N/A |
| 1.73 | 0.74 | 1.57 | 0.71 |
| 1.39 | 0.60 | 1.76 | 0.78 |
| 1.42 | 0.61 | 1.81 | 0.80 |
| 1.52 | 0.69 | 1.47 | 0.66 |
| 1.90 | 0.80 | 1.22 | 0.52 |
| #N/A | #N/A | #N/A | #N/A |
| #N/A | #N/A | 1.97 | 0.73 |
| 1.18 | 0.56 | 0.90 | 0.39 |
| 1.29 | 0.60 | 1.71 | 0.77 |
| 0.49 | 0.14 | 0.61 | 0.23 |
| #N/A | #N/A | 0.78 | 0.26 |
| 0.93 | 0.39 | 1.05 | 0.47 |
| 1.78 | 0.75 | 1.85 | 0.81 |
| #N/A | #N/A | 0.58 | 0.21 |

|      |      |      |      |
|------|------|------|------|
| 0.99 | 0.42 | 1.44 | 0.66 |
| #N/A | #N/A | 0.58 | 0.20 |
| 0.82 | 0.35 | 0.94 | 0.38 |
| 0.95 | 0.44 | #N/A | #N/A |
| #N/A | #N/A | #N/A | #N/A |
| 0.36 | 0.07 | 0.79 | 0.27 |
| 2.01 | 0.84 | 1.33 | 0.61 |
| #N/A | #N/A | 0.81 | 0.28 |
| 3.59 | 0.99 | 3.24 | 0.97 |
| #N/A | #N/A | 1.35 | 0.62 |
| 0.39 | 0.08 | 0.36 | 0.09 |
| 2.91 | 0.97 | 2.30 | 0.87 |
| 2.85 | 0.97 | 2.20 | 0.89 |
| #N/A | #N/A | #N/A | #N/A |
| #N/A | #N/A | #N/A | #N/A |
| 1.63 | 0.71 | 1.81 | 0.79 |
| 1.07 | 0.47 | 1.25 | 0.57 |
| #N/A | #N/A | #N/A | #N/A |
| 2.42 | 0.91 | 2.12 | 0.88 |
| 2.35 | 0.91 | 2.17 | 0.88 |
| #N/A | #N/A | 2.69 | 0.96 |
| #N/A | #N/A | #N/A | #N/A |
| #N/A | #N/A | #N/A | #N/A |
| #N/A | #N/A | 0.23 | 0.02 |
| 1.78 | 0.78 | 1.75 | 0.72 |
| 1.52 | 0.65 | 1.76 | 0.78 |
| 0.61 | 0.23 | 0.82 | 0.34 |
| 2.08 | 0.87 | 2.39 | 0.88 |
| #N/A | #N/A | #N/A | #N/A |
| #N/A | #N/A | #N/A | #N/A |
| #N/A | #N/A | #N/A | #N/A |
| 2.65 | 0.95 | #N/A | #N/A |
| #N/A | #N/A | #N/A | #N/A |
| 1.32 | 0.57 | #N/A | #N/A |
| #N/A | #N/A | #N/A | #N/A |
| 1.67 | 0.72 | 1.61 | 0.73 |
| #N/A | #N/A | 0.91 | 0.40 |
| #N/A | #N/A | 1.01 | 0.45 |
| #N/A | #N/A | #N/A | #N/A |
| #N/A | #N/A | 1.81 | 0.72 |
| #N/A | #N/A | #N/A | #N/A |
| #N/A | #N/A | 1.27 | 0.52 |
| 0.65 | 0.26 | 0.76 | 0.32 |
| 0.63 | 0.23 | 0.48 | 0.15 |
| 1.17 | 0.52 | #N/A | #N/A |
| #N/A | #N/A | 0.59 | 0.22 |
| #N/A | #N/A | #N/A | #N/A |
| 0.61 | 0.24 | #N/A | #N/A |
| #N/A | #N/A | 2.43 | 0.94 |
| 1.25 | 0.59 | 1.70 | 0.76 |
| 0.97 | 0.41 | #N/A | #N/A |

|      |      |      |      |
|------|------|------|------|
| #N/A | #N/A | 1.86 | 0.82 |
| 2.16 | 0.90 | 2.63 | 0.96 |
| #N/A | #N/A | #N/A | #N/A |
| 1.47 | 0.64 | 1.61 | 0.69 |
| 0.31 | 0.04 | 0.37 | 0.09 |
| #N/A | #N/A | #N/A | #N/A |
| 0.33 | 0.06 | 0.32 | 0.05 |
| 0.33 | 0.05 | 0.33 | 0.06 |
| #N/A | #N/A | #N/A | #N/A |
| 1.69 | 0.73 | 1.63 | 0.74 |
| 0.48 | 0.14 | 0.42 | 0.12 |
| 0.56 | 0.19 | 0.70 | 0.28 |
| 1.40 | 0.61 | 1.73 | 0.65 |
| #N/A | #N/A | 0.19 | 0.01 |
| 0.55 | 0.19 | #N/A | #N/A |
| #N/A | #N/A | #N/A | #N/A |
| 0.43 | 0.11 | 0.41 | 0.11 |
| #N/A | #N/A | #N/A | #N/A |
| 0.51 | 0.16 | 0.37 | 0.09 |
| #N/A | #N/A | #N/A | #N/A |
| #N/A | #N/A | #N/A | #N/A |
| #N/A | #N/A | #N/A | #N/A |
| #N/A | #N/A | #N/A | #N/A |
| 0.46 | 0.13 | 0.75 | 0.31 |
| 0.47 | 0.13 | 0.69 | 0.28 |
| 0.52 | 0.16 | 0.89 | 0.37 |
| 0.44 | 0.11 | 0.59 | 0.22 |
| 0.38 | 0.07 | 0.40 | 0.10 |
| 0.40 | 0.08 | 0.56 | 0.20 |
| 0.61 | 0.22 | 1.06 | 0.47 |
| 0.41 | 0.09 | 0.51 | 0.17 |
| 0.44 | 0.11 | 0.64 | 0.25 |
| 0.41 | 0.09 | 0.53 | 0.18 |
| 0.50 | 0.15 | 0.76 | 0.32 |
| 0.40 | 0.09 | 0.39 | 0.10 |
| 0.43 | 0.11 | 0.50 | 0.16 |
| #N/A | #N/A | #N/A | #N/A |
| 0.34 | 0.05 | #N/A | #N/A |
| 0.68 | 0.28 | #N/A | #N/A |
| #N/A | #N/A | #N/A | #N/A |
| #N/A | #N/A | #N/A | #N/A |
| 1.92 | 0.79 | 1.78 | 0.79 |
| #N/A | #N/A | 0.33 | 0.06 |
| 1.13 | 0.48 | 1.15 | 0.52 |
| 1.25 | 0.53 | 1.07 | 0.41 |
| #N/A | #N/A | #N/A | #N/A |
| 0.21 | 0.01 | 0.12 | 0.00 |
| #N/A | #N/A | #N/A | #N/A |
| 1.04 | 0.44 | 1.52 | 0.69 |
| 1.18 | 0.51 | 2.11 | 0.81 |
| 0.56 | 0.19 | 0.70 | 0.25 |

|      |      |      |      |
|------|------|------|------|
| 1.25 | 0.54 | 1.35 | 0.51 |
| 1.29 | 0.60 | #N/A | #N/A |
| 1.68 | 0.76 | 1.58 | 0.71 |
| #N/A | #N/A | #N/A | #N/A |
| #N/A | #N/A | #N/A | #N/A |
| #N/A | #N/A | #N/A | #N/A |
| 1.30 | 0.61 | 1.66 | 0.75 |
| #N/A | #N/A | 0.49 | 0.15 |
| 0.41 | 0.10 | 0.51 | 0.17 |
| 0.31 | 0.05 | 0.33 | 0.06 |
| 0.53 | 0.17 | #N/A | #N/A |
| 0.53 | 0.18 | 0.70 | 0.23 |
| #N/A | #N/A | #N/A | #N/A |
| 0.67 | 0.25 | 0.51 | 0.17 |
| 0.81 | 0.36 | 0.67 | 0.27 |
| 0.94 | 0.40 | 1.18 | 0.50 |
| 0.28 | 0.03 | 0.24 | 0.02 |
| 0.33 | 0.04 | #N/A | #N/A |
| 0.61 | 0.22 | 0.47 | 0.14 |
| #N/A | #N/A | #N/A | #N/A |
| #N/A | #N/A | #N/A | #N/A |
| #N/A | #N/A | #N/A | #N/A |
| #N/A | #N/A | #N/A | #N/A |
| #N/A | #N/A | #N/A | #N/A |
| #N/A | #N/A | #N/A | #N/A |
| #N/A | #N/A | #N/A | #N/A |
| #N/A | #N/A | #N/A | #N/A |
| #N/A | #N/A | #N/A | #N/A |
| #N/A | #N/A | #N/A | #N/A |
| #N/A | #N/A | #N/A | #N/A |
| 0.95 | 0.43 | 0.87 | 0.38 |
| #N/A | #N/A | #N/A | #N/A |
| #N/A | #N/A | #N/A | #N/A |
| #N/A | #N/A | #N/A | #N/A |
| 0.64 | 0.25 | 0.34 | 0.07 |
| 0.85 | 0.38 | #N/A | #N/A |
| #N/A | #N/A | 1.14 | 0.44 |
| #N/A | #N/A | #N/A | #N/A |
| #N/A | #N/A | 0.96 | 0.42 |
| 0.76 | 0.33 | #N/A | #N/A |
| #N/A | #N/A | 1.90 | 0.83 |
| #N/A | #N/A | 0.41 | 0.11 |
| #N/A | #N/A | 0.35 | 0.07 |
| 0.58 | 0.20 | 0.47 | 0.13 |
| #N/A | #N/A | #N/A | #N/A |
| 0.58 | 0.20 | 0.75 | 0.26 |
| 0.55 | 0.18 | 0.56 | 0.20 |
| 0.94 | 0.39 | 0.73 | 0.27 |
| #N/A | #N/A | #N/A | #N/A |

|      |      |      |      |
|------|------|------|------|
| #N/A | #N/A | #N/A | #N/A |
| #N/A | #N/A | 3.73 | 0.99 |
| 0.82 | 0.36 | 0.61 | 0.19 |
| #N/A | #N/A | #N/A | #N/A |
| 0.32 | 0.05 | 0.27 | 0.03 |
| 0.56 | 0.20 | 0.52 | 0.15 |
| #N/A | #N/A | 0.57 | 0.17 |
| 0.60 | 0.22 | 0.53 | 0.18 |
| 0.72 | 0.28 | 0.76 | 0.32 |
| 0.65 | 0.25 | 0.75 | 0.31 |
| #N/A | #N/A | 0.72 | 0.24 |
| 0.85 | 0.37 | #N/A | #N/A |
| 0.85 | 0.35 | #N/A | #N/A |
| 0.53 | 0.18 | 0.33 | 0.06 |
| 0.53 | 0.17 | 0.50 | 0.16 |
| 0.95 | 0.42 | 0.98 | 0.38 |
| 0.31 | 0.04 | 0.25 | 0.03 |
| 0.43 | 0.11 | 0.35 | 0.07 |
| 0.44 | 0.12 | 0.31 | 0.05 |
| 0.50 | 0.16 | 0.41 | 0.11 |
| 0.41 | 0.10 | 0.33 | 0.07 |
| #N/A | #N/A | 0.79 | 0.33 |
| 0.74 | 0.29 | #N/A | #N/A |
| 0.61 | 0.22 | 0.63 | 0.20 |
| 0.74 | 0.29 | 0.84 | 0.36 |
| 0.60 | 0.21 | 0.52 | 0.18 |
| 0.66 | 0.24 | 0.57 | 0.20 |
| 0.65 | 0.26 | 0.66 | 0.26 |
| 0.60 | 0.23 | 0.60 | 0.21 |
| 0.25 | 0.03 | #N/A | #N/A |
| 0.66 | 0.25 | 0.74 | 0.27 |
| 1.34 | 0.57 | 1.35 | 0.61 |
| 0.64 | 0.24 | 0.40 | 0.10 |
| 0.44 | 0.12 | 0.58 | 0.18 |
| 0.68 | 0.26 | 0.77 | 0.31 |
| 0.56 | 0.19 | 0.35 | 0.07 |
| 1.65 | 0.71 | 1.58 | 0.71 |
| 0.99 | 0.42 | 0.66 | 0.23 |
| 0.41 | 0.09 | 0.39 | 0.10 |
| 0.58 | 0.20 | 0.36 | 0.08 |
| #N/A | #N/A | #N/A | #N/A |
| 0.50 | 0.15 | 0.61 | 0.23 |
| 0.48 | 0.15 | 0.54 | 0.18 |
| 0.68 | 0.27 | 0.58 | 0.20 |
| 0.57 | 0.21 | 0.71 | 0.27 |
| 0.56 | 0.21 | 0.54 | 0.19 |
| #N/A | #N/A | #N/A | #N/A |
| 0.56 | 0.19 | 0.61 | 0.23 |
| 0.66 | 0.25 | 0.69 | 0.28 |
| 0.66 | 0.25 | 0.61 | 0.19 |
| #N/A | #N/A | #N/A | #N/A |

|      |      |      |      |
|------|------|------|------|
| 1.02 | 0.43 | #N/A | #N/A |
| 1.28 | 0.57 | 0.98 | 0.43 |
| #N/A | #N/A | 1.29 | 0.48 |
| #N/A | #N/A | 0.91 | 0.33 |
| 0.73 | 0.28 | 1.32 | 0.60 |
| 0.77 | 0.31 | 0.81 | 0.27 |
| 1.46 | 0.63 | #N/A | #N/A |
| 0.87 | 0.36 | 0.87 | 0.36 |
| 0.96 | 0.40 | #N/A | #N/A |
| #N/A | #N/A | #N/A | #N/A |
| 1.02 | 0.48 | 1.26 | 0.55 |
| 1.42 | 0.61 | 1.29 | 0.58 |
| 0.73 | 0.31 | 0.37 | 0.08 |
| 0.41 | 0.10 | 0.31 | 0.05 |
| 0.93 | 0.42 | 1.68 | 0.68 |
| #N/A | #N/A | #N/A | #N/A |
| 0.81 | 0.33 | 0.98 | 0.44 |
| #N/A | #N/A | 1.88 | 0.72 |
| 1.07 | 0.46 | 1.75 | 0.73 |
| 0.72 | 0.31 | 0.86 | 0.33 |
| 1.93 | 0.84 | #N/A | #N/A |
| #N/A | #N/A | #N/A | #N/A |
| 0.46 | 0.13 | 0.39 | 0.10 |
| 0.26 | 0.02 | 0.23 | 0.02 |
| 0.25 | 0.02 | 0.19 | 0.01 |
| 0.30 | 0.04 | 0.22 | 0.01 |
| 1.71 | 0.72 | 1.66 | 0.72 |
| 1.83 | 0.78 | 1.80 | 0.77 |
| 0.94 | 0.40 | 1.15 | 0.45 |
| 0.37 | 0.07 | 1.05 | 0.38 |
| #N/A | #N/A | #N/A | #N/A |
| 0.98 | 0.41 | 1.00 | 0.43 |
| 1.34 | 0.58 | 1.38 | 0.63 |
| 0.31 | 0.04 | 0.60 | 0.22 |
| 2.55 | 0.95 | 2.14 | 0.89 |
| #N/A | #N/A | #N/A | #N/A |
| 1.37 | 0.64 | 1.81 | 0.80 |
| #N/A | #N/A | #N/A | #N/A |
| 2.89 | 0.97 | 2.27 | 0.91 |
| 1.28 | 0.56 | 0.98 | 0.43 |
| #N/A | #N/A | #N/A | #N/A |
| 1.05 | 0.49 | 1.25 | 0.54 |
| 0.29 | 0.04 | 0.24 | 0.02 |
| 1.48 | 0.64 | #N/A | #N/A |
| #N/A | #N/A | #N/A | #N/A |
| 0.89 | 0.37 | 0.95 | 0.37 |
| 1.62 | 0.70 | 1.38 | 0.56 |
| 0.71 | 0.27 | #N/A | #N/A |
| #N/A | #N/A | #N/A | #N/A |
| 1.84 | 0.81 | 1.62 | 0.73 |
| 2.11 | 0.86 | 1.60 | 0.61 |



|      |      |      |      |
|------|------|------|------|
| 0.85 | 0.35 | 1.02 | 0.42 |
| 1.48 | 0.68 | 2.09 | 0.83 |
| 1.95 | 0.80 | 1.69 | 0.75 |
| 1.23 | 0.58 | 0.90 | 0.39 |
| 0.67 | 0.25 | 0.42 | 0.12 |
| 0.24 | 0.02 | 0.27 | 0.03 |
| 0.60 | 0.21 | 0.51 | 0.17 |
| 1.83 | 0.78 | 1.56 | 0.71 |
| #N/A | #N/A | 1.13 | 0.44 |
| #N/A | #N/A | #N/A | #N/A |
| 0.60 | 0.24 | 1.26 | 0.47 |
| 0.64 | 0.24 | 0.58 | 0.21 |
| 1.72 | 0.76 | 1.98 | 0.77 |
| 1.05 | 0.45 | 1.23 | 0.55 |
| 0.88 | 0.39 | 1.03 | 0.38 |
| 0.26 | 0.02 | 0.21 | 0.01 |
| 0.51 | 0.17 | 0.55 | 0.19 |
| #N/A | #N/A | 1.17 | 0.52 |
| #N/A | #N/A | 0.52 | 0.18 |
| 0.71 | 0.30 | 1.50 | 0.67 |
| 0.68 | 0.28 | 2.46 | 0.94 |
| #N/A | #N/A | 2.19 | 0.86 |
| 0.36 | 0.07 | 0.30 | 0.05 |
| 0.91 | 0.38 | 1.14 | 0.42 |
| 2.34 | 0.91 | 2.24 | 0.91 |
| 0.68 | 0.28 | 0.80 | 0.34 |
| 1.20 | 0.52 | 0.53 | 0.19 |
| 0.82 | 0.33 | 1.33 | 0.61 |
| 0.81 | 0.35 | 1.76 | 0.75 |
| 0.89 | 0.40 | 0.80 | 0.34 |
| #N/A | #N/A | #N/A | #N/A |
| 0.59 | 0.20 | 0.66 | 0.26 |
| 0.46 | 0.13 | 0.53 | 0.15 |
| #N/A | #N/A | #N/A | #N/A |
| 1.93 | 0.81 | #N/A | #N/A |
| 0.32 | 0.05 | 0.26 | 0.03 |
| 0.40 | 0.08 | 0.29 | 0.04 |
| 1.52 | 0.67 | 1.14 | 0.51 |
| #N/A | #N/A | #N/A | #N/A |
| 1.54 | 0.67 | 1.60 | 0.65 |
| #N/A | #N/A | #N/A | #N/A |
| #N/A | #N/A | 0.89 | 0.39 |
| #N/A | #N/A | 0.69 | 0.28 |
| #N/A | #N/A | #N/A | #N/A |
| #N/A | #N/A | #N/A | #N/A |
| 1.01 | 0.43 | 1.36 | 0.59 |
| #N/A | #N/A | #N/A | #N/A |
| #N/A | #N/A | #N/A | #N/A |
| #N/A | #N/A | #N/A | #N/A |
| 1.00 | 0.42 | 1.63 | 0.66 |
| 0.41 | 0.09 | 0.34 | 0.07 |

|      |      |      |      |
|------|------|------|------|
| #N/A | #N/A | 0.25 | 0.03 |
| 1.50 | 0.64 | 1.22 | 0.55 |
| 0.70 | 0.27 | 1.26 | 0.54 |
| 1.62 | 0.69 | 1.66 | 0.63 |
| 0.92 | 0.40 | 0.96 | 0.41 |
| 0.58 | 0.20 | 0.63 | 0.24 |
| #N/A | #N/A | #N/A | #N/A |
| 0.50 | 0.16 | 0.50 | 0.16 |
| 1.98 | 0.83 | 1.87 | 0.82 |
| 0.36 | 0.08 | 0.40 | 0.10 |
| 0.38 | 0.07 | 0.33 | 0.06 |
| 0.34 | 0.06 | 0.37 | 0.08 |
| 1.08 | 0.50 | 2.05 | 0.81 |
| #N/A | #N/A | 1.30 | 0.59 |
| #N/A | #N/A | #N/A | #N/A |
| 1.16 | 0.50 | 2.47 | 0.87 |
| 0.78 | 0.34 | 0.93 | 0.40 |
| 0.48 | 0.14 | 0.45 | 0.13 |
| 0.89 | 0.37 | #N/A | #N/A |
| #N/A | #N/A | #N/A | #N/A |
| #N/A | #N/A | #N/A | #N/A |
| 0.80 | 0.34 | 0.92 | 0.33 |
| #N/A | #N/A | #N/A | #N/A |
| 0.90 | 0.38 | 1.60 | 0.61 |
| #N/A | #N/A | #N/A | #N/A |
| #N/A | #N/A | 1.51 | 0.63 |
| 1.22 | 0.53 | 2.08 | 0.77 |
| #N/A | #N/A | #N/A | #N/A |
| 0.66 | 0.27 | 0.68 | 0.22 |
| 0.97 | 0.45 | 1.17 | 0.53 |
| 1.34 | 0.58 | 1.79 | 0.79 |
| #N/A | #N/A | 1.30 | 0.59 |
| 1.14 | 0.49 | 1.29 | 0.59 |
| #N/A | #N/A | #N/A | #N/A |
| 1.26 | 0.55 | 2.20 | 0.81 |
| 0.65 | 0.24 | 0.87 | 0.37 |
| #N/A | #N/A | 0.74 | 0.30 |
| 1.32 | 0.57 | 1.54 | 0.70 |
| 2.19 | 0.86 | 1.87 | 0.81 |
| #N/A | #N/A | #N/A | #N/A |
| #N/A | #N/A | 0.89 | 0.39 |
| #N/A | #N/A | #N/A | #N/A |
| 0.37 | 0.07 | 0.64 | 0.20 |
| 0.27 | 0.03 | 0.81 | 0.35 |
| 0.95 | 0.40 | 1.42 | 0.59 |
| 0.47 | 0.14 | #N/A | #N/A |
| 1.44 | 0.62 | 2.15 | 0.89 |
| 0.90 | 0.37 | 1.18 | 0.52 |
| #N/A | #N/A | #N/A | #N/A |
| #N/A | #N/A | #N/A | #N/A |
| 0.35 | 0.06 | 0.21 | 0.01 |

|      |      |      |      |
|------|------|------|------|
| 1.31 | 0.61 | 1.33 | 0.61 |
| 1.10 | 0.47 | 1.97 | 0.84 |
| #N/A | #N/A | 1.46 | 0.64 |
| 1.01 | 0.43 | #N/A | #N/A |
| 0.99 | 0.42 | 0.52 | 0.17 |
| #N/A | #N/A | 3.49 | 0.99 |
| 1.42 | 0.61 | #N/A | #N/A |
| #N/A | #N/A | 0.85 | 0.37 |
| 1.64 | 0.73 | 1.89 | 0.82 |
| 1.60 | 0.73 | 2.10 | 0.88 |
| 1.38 | 0.64 | 1.25 | 0.56 |
| #N/A | #N/A | 2.56 | 0.88 |
| #N/A | #N/A | #N/A | #N/A |
| #N/A | #N/A | 0.43 | 0.12 |
| #N/A | #N/A | #N/A | #N/A |
| #N/A | #N/A | #N/A | #N/A |
| #N/A | #N/A | #N/A | #N/A |
| 0.23 | 0.01 | 0.30 | 0.04 |
| 0.44 | 0.11 | 0.43 | 0.12 |
| #N/A | #N/A | 1.29 | 0.58 |
| 1.00 | 0.42 | 1.13 | 0.48 |
| #N/A | #N/A | #N/A | #N/A |
| #N/A | #N/A | 1.44 | 0.58 |
| #N/A | #N/A | #N/A | #N/A |
| #N/A | #N/A | #N/A | #N/A |
| 1.22 | 0.53 | 1.32 | 0.60 |
| 1.51 | 0.66 | 1.44 | 0.55 |
| 1.29 | 0.56 | 1.01 | 0.37 |
| #N/A | #N/A | 0.92 | 0.41 |
| 1.03 | 0.46 | 1.23 | 0.56 |
| 0.71 | 0.29 | 0.68 | 0.27 |
| 0.59 | 0.20 | 0.28 | 0.04 |
| 0.72 | 0.29 | 0.29 | 0.04 |
| 0.96 | 0.43 | 0.45 | 0.12 |
| 1.40 | 0.61 | 1.41 | 0.61 |
| #N/A | #N/A | #N/A | #N/A |
| 1.30 | 0.56 | 1.39 | 0.63 |
| #N/A | #N/A | #N/A | #N/A |
| #N/A | #N/A | #N/A | #N/A |
| 1.56 | 0.68 | 2.17 | 0.90 |
| #N/A | #N/A | 0.76 | 0.26 |
| #N/A | #N/A | #N/A | #N/A |
| 0.70 | 0.29 | 0.92 | 0.37 |
| 0.83 | 0.34 | 2.14 | 0.89 |
| #N/A | #N/A | #N/A | #N/A |
| #N/A | #N/A | #N/A | #N/A |
| 0.75 | 0.29 | 1.04 | 0.46 |
| 1.21 | 0.53 | 1.39 | 0.63 |
| 1.34 | 0.58 | 1.14 | 0.48 |
| 0.45 | 0.12 | 0.67 | 0.26 |

| UniGeneID | Name  | Other Names     | Promoter     | Change in gene expression | No HS: HA-Htz1 |
|-----------|-------|-----------------|--------------|---------------------------|----------------|
| YAL001C   | TFC3  | FUN24 TSV115    | iYAL001C     | #N/A                      | 1.48           |
| YAL002W   | VPS8  | FUN15 VPT8      | iYAL003W     | #N/A                      | 1.07           |
| YAL003W   | EFB1  | EF-1 beta TEF5  | iYAL004W     | -0.59                     | 0.38           |
| YAL004W   | 0     | #N/A            | iP(UGG)A     | #N/A                      | #N/A           |
| YAL005C   | SSA1  | YG100           | iYAL004W     | 1.08                      | 0.38           |
| YAL007C   | ERP2  |                 | 0 iYAL007C   | -0.33                     | 2.15           |
| YAL008W   | FUN14 |                 | 0 iYAL009W   | 1.92                      | 1.50           |
| YAL009W   | SPO7  |                 | 0 iYAL010C   | 0.12                      | 2.07           |
| YAL010C   | MDM10 | FUN37           | iYAL010C     | -0.27                     | 2.07           |
| YAL011W   | 0     | SWC1            | iYAL012W     | -0.66                     | #N/A           |
| YAL012W   | CYS3  | CY11 FUN35 STR1 | iYAL013W     | 0.13                      | 0.73           |
| YAL013W   | DEP1  | FUN54           | iYAL014C     | #N/A                      | 2.28           |
| YAL014C   | UIP2  | SLT2 UIP2       | iYAL014C     | -0.30                     | 2.28           |
| YAL015C   | NTG1  | FUN33 SCR1      | iYAL015C     | 1.26                      | 0.69           |
| YAL016W   | TPD3  | FUN32           | iYAL017W     | 0.28                      | 2.36           |
| YAL018C   | 0     | #N/A            | iYAL018C     | #N/A                      | 2.45           |
| YAL019W   | FUN30 |                 | 0 iYAL020C   | #N/A                      | 2.94           |
| YAL020C   | ATS1  | FUN28 KTI13     | iYAL020C     | 0.10                      | 2.94           |
| YAL023C   | PMT2  | FUN25           | iYAL023C     | #N/A                      | 1.59           |
| YAL025C   | MAK16 |                 | 0 iYAL025C   | -1.81                     | 1.68           |
| YAL027W   | 0     | #N/A            | iYAL028W     | #N/A                      | #N/A           |
| YAL030W   | SNC1  |                 | 0 iYAL031C   | 1.43                      | 3.67           |
| YAL031C   | FUN21 |                 | 0 iYAL031C   | #N/A                      | 3.67           |
| YAL032C   | PRP45 | FUN20           | iYAL032C     | #N/A                      | 2.87           |
| YAL033W   | POP5  | FUN53           | iYAL034C     | -1.54                     | 1.89           |
| YAL034C   | FUN19 |                 | 0 iYAL034C   | #N/A                      | 1.89           |
| YAL034W-A | MTW1  | DSN3 NSL2       | iYAL036C     | #N/A                      | 2.85           |
| YAL035C-A | #N/A  | #N/A            | iYAL034W-    | #N/A                      | 0.19           |
| YAL037W   | 0     | #N/A            | iYAL038W     | #N/A                      | 0.96           |
| YAL039C   | CYC3  |                 | 0 iYAL039C-0 | #N/A                      | 0.58           |
| YAL040C   | CLN3  | DAF1 FUN10 WHI1 | iYAL040C     | -0.62                     | 0.38           |
| YAL041W   | CDC24 | CLS4            | iYAL042W     | #N/A                      | 3.47           |
| YAL042W   | ERV46 | FUN9            | iYAL043C     | -0.34                     | 1.77           |
| YAL043C   | PTA1  | FUN39           | iYAL043C     | #N/A                      | 1.77           |
| YAL043C-A | #N/A  | #N/A            | iYAL042W     | -0.51                     | 3.47           |
| YAL044C   | GCV3  |                 | 0 iYAL044C   | 1.37                      | #N/A           |
| YAL045C   | 0     | #N/A            | iYAL045C     | #N/A                      | 1.00           |
| YAL046C   | 0     | #N/A            | iYAL046C     | 0.08                      | #N/A           |
| YAL047C   | SPC72 | LDB4            | iYAL047C     | #N/A                      | 1.26           |
| YAL048C   | 0     |                 | 0 iYAL048C   | #N/A                      | #N/A           |
| YAL049C   | 0     | #N/A            | iYAL049C     | 0.54                      | #N/A           |
| YAL051W   | OAF1  | YAF1            | iYAL053W     | #N/A                      | 1.28           |
| YAL054C   | ACS1  | FUN44           | iYAL054C     | #N/A                      | 0.87           |
| YAL055W   | PEX22 | YAF5            | iYAL056W     | 1.34                      | 1.33           |
| YAL058C-A | #N/A  | #N/A            | iYAL058C-A   | -0.27                     | 1.90           |
| YAL058W   | CNE1  | FUN48           | iYAL059W     | -0.37                     | 1.50           |
| YAL059W   | ECM1  |                 | 0 iYAL060W   | -3.19                     | 0.47           |
| YAL060W   | BDH1  |                 | 0 iYAL061W   | 2.56                      | 1.06           |
| YAL061W   | 0     | #N/A            | iYAL062W     | 2.19                      | 1.43           |
| YAL062W   | GDH3  | FUN51           | iYAL063C-2   | 0.21                      | #N/A           |

|           |       |                |      |              |       |      |
|-----------|-------|----------------|------|--------------|-------|------|
| YAL063C   | FLO9  |                | 0    | iYAL063C-0   | #N/A  | 0.77 |
| YAL064W   |       | 0              | #N/A | iYAL064C-A   | #N/A  | 1.21 |
| YAL065C   |       | 0              | #N/A | iYAL064C-A   | #N/A  | 1.48 |
| YAL065C-A | #N/A  |                | #N/A | #N/A         | #N/A  | #N/A |
| YAL066W   |       | 0              | #N/A | #N/A         | #N/A  | #N/A |
| YAL067C   | SEO1  |                |      | 0 iYAL064C-A | #N/A  | 1.48 |
| YAL068C   |       | 0              | #N/A | iYAL064C-A   | #N/A  | 1.48 |
| YAL069W   |       | 0              | #N/A | #N/A         | #N/A  | #N/A |
| YAR002AC  | #N/A  |                | #N/A | #N/A         | #N/A  | #N/A |
| YAR002W   | NUP60 |                |      | 0 iCEN1      | #N/A  | 1.24 |
| YAR003W   | SWD1  | CPS50 SAF49    |      | iYAR002C-A   | -0.27 | 2.19 |
| YAR007C   | RFA1  | BUF2 FUN3 RPA1 |      | iYAR007C     | 0.15  | 2.54 |
| YAR008W   | SEN34 | FUN4           |      | iYAR007C     | -2.04 | 2.54 |
| YAR010C   | #N/A  |                | #N/A | iYARCdelta   | 0.83  | #N/A |
| YAR015W   | ADE1  |                |      | 0 iYAR014C   | #N/A  | 3.47 |
| YAR020C   | PAU7  |                |      | 0 iYAR020C-C | #N/A  | 0.89 |
| YAR023C   |       | 0              | #N/A | iYAR023C     | #N/A  | 1.89 |
| YAR027W   | UIP3  |                |      | 0 iYARWdelta | 2.30  | 1.50 |
| YAR028W   |       | 0              | #N/A | iYAR027W     | #N/A  | 2.09 |
| YAR029W   |       | 0              | #N/A | iYAR028W     | #N/A  | 1.58 |
| YAR030C   |       | 0              | #N/A | iYAR031W     | #N/A  | 1.99 |
| YAR031W   | PRM9  |                |      | 0 iYAR028W   | -0.43 | 1.58 |
| YAR033W   |       | 0              |      | 0 iYAR031W   | #N/A  | 1.99 |
| YAR035W   | YAT1  |                |      | 0 iYARWdelta | #N/A  | 0.58 |
| YAR037W   | #N/A  |                | #N/A | #N/A         | #N/A  | #N/A |
| YAR040C   | #N/A  |                | #N/A | #N/A         | #N/A  | #N/A |
| YAR042W   | SWH1  | OSH1           |      | iYAR035W     | #N/A  | 1.37 |
| YAR043C   | #N/A  |                | #N/A | #N/A         | #N/A  | #N/A |
| YAR044W   | OSH1  |                |      | 0 iYAR042W   | 0.37  | 0.63 |
| YAR047C   |       | 0              | #N/A | iYAR047C-C   | #N/A  | 1.09 |
| YAR052C   | #N/A  |                | #N/A | #N/A         | #N/A  | #N/A |
| YAR053W   |       | 0              | #N/A | iYAR050W     | -0.06 | #N/A |
| YAR060C   |       | 0              | #N/A | iYAR060C     | #N/A  | 1.03 |
| YAR061W   |       | 0              | #N/A | iYAR060C     | #N/A  | 1.03 |
| YAR062W   |       | 0              | #N/A | iYAR061W     | #N/A  | 0.61 |
| YAR064W   |       | 0              | #N/A | iYAR062W     | #N/A  | 0.78 |
| YAR066W   |       | 0              | #N/A | iYAR064W     | #N/A  | 0.88 |
| YAR068W   |       | 0              | #N/A | iYAR066W     | #N/A  | 0.68 |
| YAR069C   |       | 0              | #N/A | iYAR069C     | #N/A  | 1.72 |
| YAR070C   |       | 0              | #N/A | iYAR070C     | #N/A  | 1.94 |
| YAR071W   | PHO11 |                |      | 0 iYAR070C   | #N/A  | 1.94 |
| YAR073W   | IMD1  |                |      | 0 iYAR071W   | -1.30 | 2.47 |
| YAR074C   | #N/A  |                | #N/A | #N/A         | -1.44 | #N/A |
| YAR075W   |       | 0              | #N/A | iYAR071W     | -1.54 | 2.47 |
| YBL001C   | ECM15 |                |      | 0 iYBL001C   | #N/A  | 0.96 |
| YBL002W   | HTB2  |                |      | 0 iYBL003C   | -1.21 | 0.30 |
| YBL003C   | HTA2  | H2A2           |      | iYBL003C     | -0.83 | 0.30 |
| YBL004W   | UTP20 |                |      | 0 itS(AGA)B  | #N/A  | 1.56 |
| YBL005W-A | #N/A  |                | #N/A | iYBL005W     | 0.59  | 0.56 |
| YBL006C   |       | 0              |      | 0 iYBL006C   | #N/A  | 1.62 |
| YBL007C   | SLA1  |                |      | 0 iYBL007C   | 0.29  | 1.49 |

|         |        |                |            |       |      |
|---------|--------|----------------|------------|-------|------|
| YBL010C | 0      | #N/A           | iYBL010C   | #N/A  | 2.67 |
| YBL011W | SCT1   | GAT2           | iYBL013W   | -1.00 | 0.90 |
| YBL013W | FMT1   |                | 0 iYBL014C | #N/A  | 2.64 |
| YBL014C | RRN6   |                | 0 iYBL014C | #N/A  | 2.64 |
| YBL015W | ACH1   |                | 0 iYBL016W | 0.39  | 1.31 |
| YBL016W | FUS3   | DAC2           | iYBL017C   | #N/A  | 0.98 |
| YBL017C | PEP1   | VPS10 VPT1     | iYBL017C   | #N/A  | 0.98 |
| YBL018C | POP8   |                | 0 iYBL018C | #N/A  | 1.93 |
| YBL019W | APN2   | ETH1           | iYBL020W   | #N/A  | #N/A |
| YBL020W | RFT1   |                | 0 iYBL021C | -0.87 | #N/A |
| YBL021C | HAP3   |                | 0 iYBL021C | #N/A  | #N/A |
| YBL022C | PIM1   | LON1 Lon       | iYBL022C   | 0.77  | 1.31 |
| YBL023C | MCM2   |                | 0 iYBL023C | 0.15  | 0.79 |
| YBL024W | NCL1   | TRM4           | iYBL025W   | #N/A  | 1.20 |
| YBL025W | RRN10  |                | 0 iYBL026W | #N/A  | 1.60 |
| YBL028C | 0      | #N/A           | iYBL028C   | #N/A  | 0.25 |
| YBL029W | 0      | #N/A           | iYBL030C-1 | #N/A  | 0.31 |
| YBL030C | PET9   | AAC2 ANC2 OP1  | iYBL030C-0 | 0.59  | 0.74 |
| YBL031W | SHE1   |                | 0 iYBL032W | #N/A  | 1.41 |
| YBL032W | HEK2   | KHD1           | iYBL033C   | -1.69 | 1.99 |
| YBL033C | RIB1   |                | 0 iYBL033C | 0.58  | 1.99 |
| YBL036C | 0      | #N/A           | iYBL036C   | -0.19 | 2.09 |
| YBL038W | MRPL16 |                | 0 iYBL039C | #N/A  | #N/A |
| YBL039C | URA7   |                | 0 iYBL039C | -3.42 | #N/A |
| YBL040C | ERD2   |                | 0 iYBL040C | 0.93  | 1.61 |
| YBL041W | PRE7   | PRS3           | iYBL042C   | 0.92  | 0.55 |
| YBL042C | FUI1   |                | 0 iYBL042C | -1.42 | 0.55 |
| YBL043W | ECM13  |                | 0 iYBL044W | #N/A  | 1.64 |
| YBL044W | 0      | #N/A           | iYBL045C   | #N/A  | 0.93 |
| YBL046W | 0      | #N/A           | iYBL047C   | -1.89 | 2.53 |
| YBL048W | 0      | #N/A           | iYBL050W   | 3.59  | 0.88 |
| YBL049W | 0      |                | 0 iYBL050W | #N/A  | 0.88 |
| YBL050W | SEC17  |                | 0 iYBL051C | 0.46  | 3.14 |
| YBL051C | PIN4   | MDT1           | iYBL051C   | -0.11 | 3.14 |
| YBL053W | 0      | #N/A           | iYBL054W   | #N/A  | #N/A |
| YBL054W | 0      | #N/A           | iYBL055C   | #N/A  | 1.79 |
| YBL055C | 0      | #N/A           | iYBL055C   | -0.50 | 1.79 |
| YBL056W | PTC3   |                | 0 iYBL057C | -0.10 | 2.18 |
| YBL057C | 0      |                | 0 iYBL057C | #N/A  | 2.18 |
| YBL058W | SHP1   |                | 0 iYBL059W | 0.45  | 1.06 |
| YBL059W | 0      | #N/A           | iYBL060W   | -0.02 | 1.46 |
| YBL060W | 0      | #N/A           | iYBL061C   | -0.40 | 1.32 |
| YBL061C | SKT5   | CAL2 CHS4 CSD4 | iYBL061C   | #N/A  | 1.32 |
| YBL062W | 0      | #N/A           | iYBL063W   | 0.98  | #N/A |
| YBL063W | KIP1   | CIN9           | iYBL064C   | #N/A  | 2.01 |
| YBL064C | 0      | mTPx           | iYBL064C   | 2.08  | 2.01 |
| YBL065W | 0      | #N/A           | iYBL067C   | #N/A  | 0.86 |
| YBL067C | UBP13  |                | 0 iYBL067C | #N/A  | 0.86 |
| YBL068W | PRS4   |                | 0 iYBL069W | -0.45 | 1.71 |
| YBL069W | AST1   |                | 0 iYBL071C | -0.62 | #N/A |
| YBL070C | 0      | #N/A           | iYBL069W   | #N/A  | 1.71 |

|           |        |                |             |       |      |
|-----------|--------|----------------|-------------|-------|------|
| YBL071C   | 0      | #N/A           | iYBL071C    | #N/A  | #N/A |
| YBL072C   | RPS8A  |                | 0 iYBL072C  | -1.60 | 0.87 |
| YBL073W   | 0      | #N/A           | iYBL075C    | #N/A  | 0.38 |
| YBL074C   | AAR2   |                | 0 iYBL073W  | #N/A  | 0.42 |
| YBL075C   | SSA3   | HSP70          | iYBL075C    | 4.20  | 0.38 |
| YBL077W   | 0      | #N/A           | iYBL078C    | -1.14 | #N/A |
| YBL078C   | AUT7   | APG8 AUT7 CVT5 | iYBL078C    | 3.23  | #N/A |
| YBL080C   | PET112 |                | 0 iYBL080C  | 0.43  | 1.97 |
| YBL081W   | 0      | #N/A           | iYBL082C    | -1.03 | 2.42 |
| YBL082C   | RHK1   | ALG3           | iYBL082C    | -1.71 | 2.42 |
| YBL083C   | 0      | #N/A           | iYBL082C    | -1.37 | 2.42 |
| YBL086C   | 0      | #N/A           | iYBL086C    | -1.46 | 0.97 |
| YBL087C   | RPL23A |                | 0 iYBL087C  | -1.53 | 0.42 |
| YBL088C   | TEL1   |                | 0 iYBL088C  | #N/A  | 1.12 |
| YBL089W   | 0      |                | 0 iYBL090W  | #N/A  | #N/A |
| YBL090W   | MRP21  | MRP50          | iYBL091C    | #N/A  | 1.36 |
| YBL091C   | MAP2   |                | 0 iYBL091C  | -0.02 | 1.36 |
| YBL092W   | RPL32  |                | 0 iYBL093C  | #N/A  | 0.51 |
| YBL093C   | ROX3   | NUT3 SSN7      | iYBL093C    | #N/A  | 0.51 |
| YBL094C   | 0      | #N/A           | iYBL094C    | 0.51  | 0.55 |
| YBL095W   | 0      | #N/A           | iYBL097W    | 0.47  | #N/A |
| YBL096C   | 0      | #N/A           | iYBL094C    | 0.06  | 0.55 |
| YBL097W   | BRN1   |                | 0 iYBL098W  | #N/A  | 2.42 |
| YBL098W   | BNA4   |                | 0 iYBL099W  | -0.85 | 0.68 |
| YBL099W   | ATP1   |                | 0 itF(GAA)B | 0.42  | 0.62 |
| YBL100C   | 0      | #N/A           | iYBL099W    | #N/A  | 0.68 |
| YBL101C   | ECM21  |                | 0 iYBL101C  | 0.47  | 1.14 |
| YBL101W-A | #N/A   | #N/A           | iYBL101C    | 0.56  | 1.14 |
| YBL102W   | SFT2   |                | 0 iYBL103C  | 0.85  | 1.86 |
| YBL103C   | RTG3   |                | 0 iYBL103C  | #N/A  | 1.86 |
| YBL107C   | 0      | #N/A           | iYBL107C    | #N/A  | #N/A |
| YBL109W   | 0      | #N/A           | iYBL111C    | -0.33 | 0.56 |
| YBL111C   | 0      | #N/A           | iYBL111C    | 0.04  | 0.56 |
| YBL112C   | 0      | #N/A           | iYBL111C    | #N/A  | 0.56 |
| YBL113C   | 0      | #N/A           | iYBL111C    | -0.13 | 0.56 |
| YBLO05W   | #N/A   | #N/A           | #N/A        | -0.90 | #N/A |
| YBR001C   | NTH2   |                | 0 iYBR001C  | 2.65  | 0.71 |
| YBR002C   | RER2   |                | 0 iYBR002C  | -0.49 | 3.05 |
| YBR003W   | COQ1   |                | 0 iYBR002C  | 0.75  | 3.05 |
| YBR004C   | 0      |                | 0 iYBR004C  | 0.03  | 1.82 |
| YBR005W   | 0      |                | 0 iYBR004C  | 0.36  | 1.82 |
| YBR006W   | UGA2   | UGA5           | iYBR005W    | #N/A  | 1.43 |
| YBR009C   | HHF1   |                | 0 iYBR009C  | -0.48 | 0.40 |
| YBR010W   | HHT1   | BUR5 SIN2      | iYBR009C    | #N/A  | 0.40 |
| YBR011C   | IPP1   | PPA1           | iYBR011C    | -0.20 | 1.35 |
| YBR012C   | 0      | #N/A           | iYBR013C    | #N/A  | #N/A |
| YBR012W-A | #N/A   | #N/A           | iYBRCdelta  | 0.53  | #N/A |
| YBR013C   | 0      | #N/A           | iYBR013C    | #N/A  | #N/A |
| YBR014C   | 0      | #N/A           | iYBR014C    | 0.41  | 0.97 |
| YBR016W   | 0      | #N/A           | iYBR015C    | -0.02 | 1.46 |
| YBR018C   | GAL7   |                | 0 iYBR018C  | -0.11 | 1.74 |

|           |        |                |      |            |       |      |
|-----------|--------|----------------|------|------------|-------|------|
| YBR019C   | GAL10  |                | 0    | iYBR019C   | #N/A  | 1.42 |
| YBR020W   | GAL1   |                | 0    | iYBR019C   | #N/A  | 1.42 |
| YBR022W   |        | 0              | #N/A | iYBR021W   | #N/A  | 1.54 |
| YBR024W   | SCO2   |                | 0    | iYBR023C   | 0.07  | #N/A |
| YBR025C   |        | 0              | #N/A | iYBR025C   | -0.32 | 1.37 |
| YBR026C   | MRF1'  | MRF1 MRF1'     |      | iYBR027C   | 2.13  | #N/A |
| YBR028C   |        | 0              | #N/A | iYBR028C   | #N/A  | 1.05 |
| YBR029C   | CDS1   | CDG1           |      | iYBR029C   | 0.14  | 2.34 |
| YBR030W   |        | 0              | #N/A | iYBR029C   | #N/A  | 2.34 |
| YBR031W   | RPL4A  |                | 0    | iYBR030W   | -1.53 | #N/A |
| YBR032W   |        | 0              | #N/A | iYBR031W   | #N/A  | #N/A |
| YBR033W   | EDS1   |                | 0    | iYBR032W   | -1.44 | 1.05 |
| YBR034C   | HMT1   | HCP1 ODP1 RMT1 |      | iYBR034C   | -0.40 | 1.28 |
| YBR035C   | PDX3   |                | 0    | iYBR035C   | 1.10  | 1.66 |
| YBR036C   | CSG2   | CLS2           |      | iYBR036C   | 0.38  | 2.80 |
| YBR037C   | SCO1   | PET161         |      | iYBR037C   | 0.38  | 1.29 |
| YBR039W   | ATP3   |                | 0    | iYBR038W   | -0.05 | 1.21 |
| YBR040W   | FIG1   |                | 0    | iYBR039W   | #N/A  | 0.68 |
| YBR044C   | TCM62  |                | 0    | iYBR044C   | -0.03 | 1.60 |
| YBR045C   | GIP1   |                | 0    | iYBR045C   | #N/A  | 0.67 |
| YBR047W   |        | 0              |      | iYBR046C   | #N/A  | 0.97 |
| YBR050C   | REG2   |                | 0    | iYBR051W   | #N/A  | 1.88 |
| YBR051W   |        | 0              | #N/A | iYBR049C   | #N/A  | 1.60 |
| YBR053C   |        | 0              | #N/A | iYBR053C-C | 2.18  | 1.05 |
| YBR054W   | YRO2   |                | 0    | iYBR053C-1 | 2.98  | 1.24 |
| YBR057C   | MUM2   | SPOT8          |      | iYBR057C   | -0.60 | 1.01 |
| YBR060C   | ORC2   | RRR1 SIR5      |      | iYBR060C-C | -1.26 | 1.27 |
| YBR061C   | TRM7   |                | 0    | iYBR061C   | -2.19 | #N/A |
| YBR062C   |        | 0              | #N/A | iYBR062C   | 1.63  | 1.33 |
| YBR063C   |        | 0              | #N/A | iYBR064W   | #N/A  | 0.72 |
| YBR064W   |        | 0              | #N/A | iYBR062C   | #N/A  | 1.33 |
| YBR065C   | ECM2   | SLT11          |      | iYBR065C   | -0.40 | 1.86 |
| YBR066C   | NRG2   |                | 0    | iYBR066C   | -1.30 | 0.48 |
| YBR067C   | TIP1   |                | 0    | iYBR067C   | #N/A  | 0.41 |
| YBR068C   | BAP2   |                | 0    | iYBR068C   | 0.45  | 0.18 |
| YBR069C   | TAT1   | VAP1           |      | iYBR069C   | -1.16 | 0.31 |
| YBR070C   |        | 0              | #N/A | iYBR070C   | -0.02 | 0.83 |
| YBR071W   |        | 0              | #N/A | iYBR070C   | #N/A  | 0.83 |
| YBR072W   | HSP26  |                | 0    | iYBR071W   | 6.09  | 1.11 |
| YBR074W   |        | 0              | #N/A | iYBR073W   | #N/A  | #N/A |
| YBR075W   |        | 0              | #N/A | iYBR074W   | -0.28 | #N/A |
| YBR076W   | ECM8   |                | 0    | iYBR075W   | -0.55 | 0.92 |
| YBR077C   |        | 0              | #N/A | iYBR077C   | #N/A  | 0.32 |
| YBR082C   | UBC4   |                | 0    | iYBR082C-C | 1.14  | 0.55 |
| YBR083W   | TEC1   | ROC1           |      | iYBR082C-1 | 0.19  | 0.36 |
| YBR084C-A | RPL19A |                | 0    | iYBR084C-A | -1.33 | 0.57 |
| YBR085W   | AAC3   | ANC3           |      | iYBR084C-A | -0.61 | 0.57 |
| YBR087W   | RFC5   |                | 0    | iYBR086C   | -0.83 | 0.95 |
| YBR088C   | POL30  | PCNA           |      | iYBR089W   | -1.95 | 1.01 |
| YBR089W   |        | 0              | #N/A | iYBR087W   | -3.04 | #N/A |
| YBR090C   |        | 0              | #N/A | iYBR090C   | #N/A  | 0.88 |



|           |        |                    |      |            |            |
|-----------|--------|--------------------|------|------------|------------|
| YBR090C-A | #N/A   | #N/A               | #N/A | #N/A       | #N/A       |
| YBR091C   | MRS5   | TIM12              |      | iYBR091C   | -0.34 2.40 |
| YBR092C   | PHO3   |                    |      | 0 iYBR092C | -2.36 0.67 |
| YBR093C   | PHO5   |                    |      | 0 iYBR093C | #N/A #N/A  |
| YBR095C   | 0      |                    |      | 0 iYBR095C | #N/A 1.66  |
| YBR096W   | 0      | #N/A               |      | iYBR095C   | 1.09 1.66  |
| YBR098W   | MMS4   | SLX2               |      | iYBR097W   | #N/A #N/A  |
| YBR099C   | 0      | #N/A               |      | iYBR100W   | #N/A 0.53  |
| YBR100W   | 0      | #N/A               |      | iYBR097W   | #N/A #N/A  |
| YBR101C   | 0      |                    |      | 0 iYBR101C | #N/A 1.52  |
| YBR103W   | SIF2   | EMB1               |      | iYBR102C   | #N/A 1.83  |
| YBR104W   | YMC2   |                    |      | 0 iYBR103W | -0.94 1.73 |
| YBR105C   | VID24  | GID4               |      | iYBR105C   | 1.47 0.26  |
| YBR106W   | PHO88  |                    |      | 0 iYBR105C | -0.14 0.26 |
| YBR107C   | IML3   | MCM19              |      | iYBR107C   | -0.18 #N/A |
| YBR108W   | 0      | #N/A               |      | iYBR107C   | #N/A #N/A  |
| YBR109C   | CMD1   |                    |      | 0 iYBR109C | 0.64 1.75  |
| YBR110W   | ALG1   |                    |      | 0 iYBR109C | -0.58 1.75 |
| YBR111C   | YSA1   | RMA2               |      | iYBR111C   | 1.35 #N/A  |
| YBR112C   | CYC8   | CRT8 SSN6          |      | iYBR113W   | -0.46 0.50 |
| YBR113W   | 0      | #N/A               |      | iYBR111C   | #N/A #N/A  |
| YBR116C   | 0      | #N/A               |      | iYBR117C   | 5.94 1.42  |
| YBR117C   | TKL2   |                    |      | 0 iYBR117C | 4.44 1.42  |
| YBR118W   | TEF2   | EF-1 alpha         |      | iYBR117C   | -0.71 1.42 |
| YBR119W   | MUD1   |                    |      | 0 iYBR118W | #N/A #N/A  |
| YBR120C   | CBP6   |                    |      | 0 iYBR120C | #N/A 1.12  |
| YBR122C   | MRPL36 |                    |      | 0 iYBR122C | -0.19 1.91 |
| YBR123C   | TFC1   |                    |      | 0 iYBR124W | -0.71 0.62 |
| YBR124W   | 0      | #N/A               |      | iYBR122C   | #N/A 1.91  |
| YBR125C   | PTC4   | GCT1               |      | iYBR125C   | 0.17 #N/A  |
| YBR126C   | TPS1   | BYP1 CIF1 FDP1 GGC |      | iYBR126C   | 2.24 #N/A  |
| YBR127C   | VMA2   | ATPSV VAT2         |      | iYBR127C   | -0.29 1.95 |
| YBR128C   | APG14  | APG14 CVT12        |      | iYBR128C   | #N/A 1.68  |
| YBR129C   | OPY1   |                    |      | 0 iYBR129C | #N/A 2.23  |
| YBR130C   | SHE3   |                    |      | 0 iYBR130C | #N/A 1.90  |
| YBR131W   | CCZ1   | CVT16              |      | iYBR130C   | #N/A 1.90  |
| YBR132C   | AGP2   |                    |      | 0 iYBR132C | 3.71 0.60  |
| YBR133C   | HSL7   |                    |      | 0 iYBR134W | #N/A 2.68  |
| YBR135W   | CKS1   |                    |      | 0 iYBR134W | -0.95 2.68 |
| YBR136W   | MEC1   | ESR1 SAD3          |      | iYBR135W   | #N/A #N/A  |
| YBR137W   | 0      | #N/A               |      | iYBR136W   | 1.88 1.47  |
| YBR139W   | 0      | #N/A               |      | iYBR138C   | 2.44 0.89  |
| YBR141C   | 0      | #N/A               |      | iYBR141C   | #N/A 1.49  |
| YBR144C   | 0      | #N/A               |      | iYBR144C   | #N/A #N/A  |
| YBR145W   | ADH5   |                    |      | 0 iYBR144C | 0.88 #N/A  |
| YBR146W   | MRPS9  |                    |      | 0 iYBR145W | 0.06 2.15  |
| YBR148W   | YSW1   |                    |      | 0 iYBR147W | #N/A #N/A  |
| YBR149W   | ARA1   |                    |      | 0 iYBR148W | 1.85 1.19  |
| YBR150C   | TBS1   |                    |      | 0 iYBR150C | #N/A #N/A  |
| YBR151W   | APD1   |                    |      | 0 iYBR150C | 0.61 #N/A  |
| YBR152W   | SPP381 |                    |      | 0 iYBR151W | #N/A 0.95  |

|           |        |                  |   |            |       |      |
|-----------|--------|------------------|---|------------|-------|------|
| YBR153W   | RIB7   |                  | 0 | iYBR152W   | 0.46  | 0.70 |
| YBR154C   | RPB5   |                  | 0 | iYBR154C   | -0.57 | 1.38 |
| YBR155W   | CNS1   |                  | 0 | iYBR154C   | #N/A  | 1.38 |
| YBR157C   | ICS2   |                  | 0 | iYBR157C-1 | #N/A  | 0.55 |
| YBR158W   | CST13  | CST13 ICS4       |   | iYBR157C-1 | 0.02  | 0.27 |
| YBR159W   | 0      | #N/A             |   | iYBR158W   | -0.02 | 1.94 |
| YBR160W   | CDC28  | CDK1 HSL5 SRM5   |   | iYBR159W   | 0.37  | 1.71 |
| YBR161W   | 0      |                  | 0 | iYBR160W   | 0.34  | 1.03 |
| YBR162C   | TOS1   |                  | 0 | iYBR162C   | -0.49 | 0.55 |
| YBR162W-A | YSY6   |                  | 0 | iYBR162C   | -0.06 | 0.55 |
| YBR164C   | ARL1   | DLP2             |   | iYBR164C   | 0.14  | 1.73 |
| YBR165W   | UBS1   |                  | 0 | iYBR164C   | -0.64 | 1.73 |
| YBR166C   | TYR1   |                  | 0 | iYBR166C   | 0.22  | 1.67 |
| YBR167C   | POP7   | RPP2             |   | iYBR167C   | 0.35  | 1.29 |
| YBR168W   | 0      |                  | 0 | iYBR167C   | -0.12 | 1.29 |
| YBR169C   | SSE2   |                  | 0 | iYBR169C   | 3.32  | 1.06 |
| YBR170C   | NPL4   | HRD4             |   | iYBR170C   | #N/A  | 1.89 |
| YBR171W   | SEC66  | HSS1 SEC71       |   | iYBR170C   | #N/A  | 1.89 |
| YBR172C   | SMY2   |                  | 0 | iYBR172C   | 0.19  | 1.32 |
| YBR173C   | UMP1   |                  | 0 | iYBR173C   | 0.25  | 2.19 |
| YBR174C   | 0      | #N/A             |   | iYBR175W   | #N/A  | 0.89 |
| YBR175W   | SWD3   | CPS30 SAF35      |   | iYBR173C   | 0.14  | 2.19 |
| YBR176W   | ECM31  |                  | 0 | iYBR175W   | -0.26 | 0.89 |
| YBR177C   | EHT1   |                  | 0 | iYBR178W   | 0.69  | #N/A |
| YBR178W   | 0      | #N/A             |   | iYBR176W   | #N/A  | #N/A |
| YBR180W   | DTR1   |                  | 0 | iYBR179C   | #N/A  | 1.93 |
| YBR181C   | RPS6B  | LPG18 RPS101 RPS |   | iYBR181C   | -1.67 | 0.69 |
| YBR182C   | SMP1   |                  | 0 | iYBR182C   | #N/A  | 1.00 |
| YBR183W   | YPC1   |                  | 0 | iYBR182C   | 2.20  | 1.00 |
| YBR184W   | 0      | #N/A             |   | iYBR183W   | #N/A  | 0.97 |
| YBR185C   | MBA1   |                  | 0 | iYBR185C   | 0.57  | 2.36 |
| YBR187W   | 0      | #N/A             |   | iYBR186W   | -0.46 | 0.65 |
| YBR188C   | NTC20  |                  | 0 | iYBR188C   | #N/A  | 1.17 |
| YBR189W   | RPS9B  | RPS13A SUP46     |   | iYBR188C   | -1.74 | 1.17 |
| YBR190W   | 0      | #N/A             |   | iYBR189W   | #N/A  | 0.56 |
| YBR191W   | RPL21A | URP1             |   | iYBR189W   | -1.34 | 0.56 |
| YBR192W   | RIM2   |                  | 0 | iYBR191W   | #N/A  | 1.16 |
| YBR193C   | MED8   |                  | 0 | iYBR193C   | 0.20  | 1.08 |
| YBR194W   | 0      |                  | 0 | iYBR193C   | #N/A  | 1.08 |
| YBR195C   | MSI1   | CAC3             |   | iYBR195C   | -0.03 | 0.56 |
| YBR196C   | PGI1   | CDC30            |   | iYBR196C   | -0.42 | 0.26 |
| YBR197C   | 0      | #N/A             |   | iYBR197C   | -0.81 | 0.65 |
| YBR199W   | KTR4   |                  | 0 | iYBR198C   | 0.56  | #N/A |
| YBR200W   | BEM1   | SRO1             |   | iYBR199W   | #N/A  | 1.02 |
| YBR201W   | DER1   |                  | 0 | iYBR200W   | 0.79  | 1.47 |
| YBR202W   | CDC47  | MCM7             |   | iYBR201W-  | -1.92 | #N/A |
| YBR204C   | 0      | #N/A             |   | iYBR204C   | 1.07  | 1.99 |
| YBR205W   | KTR3   |                  | 0 | iYBR204C   | -1.08 | 1.99 |
| YBR206W   | 0      | #N/A             |   | iYBR204C   | -0.93 | 1.99 |
| YBR209W   | 0      | #N/A             |   | iYBR208C   | #N/A  | 1.46 |
| YBR210W   | 0      |                  | 0 | itE(UUC)B  | 0.12  | 1.80 |

|         |        |            |            |       |      |
|---------|--------|------------|------------|-------|------|
| YBR211C | AME1   | ARP100     | iYBR211C   | -1.22 | 1.70 |
| YBR213W | MET8   |            | 0 iYBR212W | -0.48 | #N/A |
| YBR214W | SDS24  |            | 0 iYBR213W | 0.91  | 2.01 |
| YBR215W | HPC2   |            | 0 iYBR214W | #N/A  | #N/A |
| YBR216C | 0      |            | 0 iYBR216C | #N/A  | 1.49 |
| YBR217W | APG12  | APG12      | iYBR216C   | #N/A  | 1.49 |
| YBR219C | 0      | #N/A       | iYBR220C   | -1.29 | 1.53 |
| YBR220C | 0      | #N/A       | iYBR220C   | #N/A  | 1.53 |
| YBR221C | PDB1   |            | 0 iYBR221C | -0.13 | 1.12 |
| YBR222C | FAT2   | FAT2       | iYBR222C   | 0.33  | 1.07 |
| YBR223C | TDP1   |            | 0 iYBR227C | #N/A  | 1.33 |
| YBR225W | 0      | #N/A       | iYBR222C   | #N/A  | 1.07 |
| YBR226C | 0      | #N/A       | iYBR227C   | #N/A  | 1.33 |
| YBR228W | SLX1   |            | 0 iYBR227C | -0.14 | 1.33 |
| YBR229C | ROT2   | GLS2       | iYBR229C   | -0.13 | 3.43 |
| YBR230C | 0      | #N/A       | iYBR230C   | 2.56  | 0.84 |
| YBR231C | AOR1   | AOR1       | iYBR231C   | 0.40  | 1.47 |
| YBR232C | 0      | #N/A       | iYBR233W   | #N/A  | 2.44 |
| YBR233W | PBP2   | HEK1       | iYBR231C   | #N/A  | 1.47 |
| YBR234C | ARC40  |            | 0 iYBR234C | 0.42  | 1.97 |
| YBR236C | ABD1   |            | 0 iYBR236C | #N/A  | #N/A |
| YBR238C | 0      | #N/A       | iYBR238C   | #N/A  | 0.96 |
| YBR240C | THI2   | PHO6       | iYBR240C   | #N/A  | 1.65 |
| YBR241C | 0      | #N/A       | iYBR241C   | 1.08  | 1.83 |
| YBR242W | 0      | #N/A       | iYBR241C   | #N/A  | 1.83 |
| YBR243C | ALG7   | TUR1       | iYBR243C   | -0.25 | 1.82 |
| YBR244W | GPX2   | AMI1       | iYBR243C   | -1.42 | 1.82 |
| YBR246W | 0      | #N/A       | iYBR244W   | 0.10  | #N/A |
| YBR247C | ENP1   | MEG1       | iYBR247C   | -2.90 | 1.63 |
| YBR248C | HIS7   |            | 0 iYBR248C | 0.02  | #N/A |
| YBR249C | ARO4   |            | 0 iYBR249C | -1.45 | 1.27 |
| YBR250W | 0      | #N/A       | iYBR249C   | #N/A  | 1.27 |
| YBR251W | MRPS5  |            | 0 iYBR250W | 1.11  | 2.29 |
| YBR252W | DUT1   |            | 0 iYBR251W | #N/A  | 1.09 |
| YBR253W | SRB6   |            | 0 iYBR252W | #N/A  | 1.42 |
| YBR254C | TRS20  |            | 0 iYBR254C | #N/A  | 2.15 |
| YBR255W | 0      | #N/A       | iYBR254C   | 1.11  | 2.15 |
| YBR256C | RIB5   |            | 0 iYBR256C | 1.45  | #N/A |
| YBR257W | POP4   |            | 0 iYBR256C | #N/A  | #N/A |
| YBR258C | SHG1   | CPS15      | iYBR258C   | #N/A  | #N/A |
| YBR259W | 0      | #N/A       | iYBR258C   | #N/A  | #N/A |
| YBR260C | RGD1   |            | 0 iYBR260C | #N/A  | 2.71 |
| YBR261C | 0      | #N/A       | iYBR261C   | -0.67 | 1.58 |
| YBR262C | 0      |            | 0 iYBR264C | 0.77  | 1.67 |
| YBR263W | SHM1   | SHMT1 TMP3 | iYBR261C   | -1.17 | 1.58 |
| YBR264C | YPT10  |            | 0 iYBR264C | 0.67  | 1.67 |
| YBR265W | TSC10  |            | 0 iYBR264C | -0.95 | 1.67 |
| YBR266C | 0      | #N/A       | iYBR267W   | #N/A  | 1.78 |
| YBR267W | 0      |            | 0 iYBR265W | -1.43 | #N/A |
| YBR268W | MRPL37 |            | 0 iYBR267W | 0.08  | 1.78 |
| YBR269C | 0      |            | 0 iYBR269C | #N/A  | #N/A |

|         |                      |      |              |       |      |
|---------|----------------------|------|--------------|-------|------|
| YBR270C | 0                    | #N/A | iYBR270C     | #N/A  | 3.07 |
| YBR271W | 0                    | #N/A | iYBR270C     | -1.93 | 3.07 |
| YBR272C | HSM3                 |      | 0 iYBR272C   | 0.76  | #N/A |
| YBR273C | 0                    |      | 0 iYBR273C   | 0.64  | #N/A |
| YBR274W | CHK1                 |      | 0 iYBR273C   | 0.58  | #N/A |
| YBR275C | RIF1                 |      | 0 iYBR275C   | #N/A  | 1.40 |
| YBR276C | PPS1                 |      | 0 iYBR276C   | #N/A  | 1.59 |
| YBR277C | 0                    | #N/A | iYBR278W     | #N/A  | 1.79 |
| YBR278W | DPB3                 |      | 0 iYBR276C   | #N/A  | 1.59 |
| YBR279W | PAF1                 |      | 0 iYBR278W   | 1.04  | 1.79 |
| YBR280C | 0                    | #N/A | iYBR280C     | 3.31  | #N/A |
| YBR281C | 0                    | #N/A | iYBR281C     | #N/A  | 1.47 |
| YBR282W | MRPL27               |      | 0 iYBR281C   | #N/A  | 1.47 |
| YBR283C | SSH1                 |      | 0 iYBR283C   | -0.31 | 1.69 |
| YBR284W | 0                    | #N/A | iYBR283C     | #N/A  | 1.69 |
| YBR285W | 0                    | #N/A | iYBR284W     | 9.43  | 0.99 |
| YBR286W | APE3 APY1            |      | iYBR285W     | 0.66  | #N/A |
| YBR287W | 0                    |      | 0 iYBR286W   | 1.57  | 1.38 |
| YBR288C | APM3 YKS6            |      | iYBR288C     | -0.04 | 1.53 |
| YBR289W | SNF5 HAF4 SWI10 TYE4 |      | iYBR288C     | #N/A  | 1.53 |
| YBR290W | BSD2                 |      | 0 iYBR289W   | 1.31  | 1.01 |
| YBR291C | CTP1                 |      | 0 iYBR291C   | -0.32 | 1.09 |
| YBR292C | 0                    | #N/A | iYBR292C-0   | #N/A  | 1.52 |
| YBR293W | 0                    | #N/A | iYBR292C-1   | 0.06  | 2.20 |
| YBR294W | SUL1 SFP2            |      | iYBR293W     | #N/A  | 1.00 |
| YBR295W | PCA1 CAD2 PAY2       |      | iYBR294W     | #N/A  | 1.25 |
| YBR296C | PHO89 ITN1           |      | iYBR296C-0   | #N/A  | 1.22 |
| YBR297W | MAL33 MAL3R          |      | iYBR296C-1   | #N/A  | 1.80 |
| YBR298C | MAL31 MAL3T          |      | iYBR298C     | 0.05  | 2.29 |
| YBR299W | MAL32 MAL3S          |      | iYBR298C     | #N/A  | 2.29 |
| YBR300C | 0                    | #N/A | iYBR301W     | #N/A  | 1.68 |
| YBR301W | DAN3                 |      | 0 iYBR299W   | #N/A  | 1.42 |
| YBR302C | COS2                 |      | 0 #N/A       | #N/A  | #N/A |
| YCL001W | RER1                 |      | 0 iYCL011C   | #N/A  | 2.08 |
| YCL002C | 0                    | #N/A | iYCRCdelta   | #N/A  | 0.74 |
| YCL003W | #N/A                 | #N/A | #N/A         | #N/A  | #N/A |
| YCL004W | PGS1 PEL1            |      | iYCL011C     | #N/A  | 2.08 |
| YCL005W | 0                    | #N/A | iYCL011C     | 0.40  | 2.08 |
| YCL006C | #N/A                 | #N/A | iYCRCdelta   | #N/A  | 0.74 |
| YCL007C | CWH36                | #N/A | iYCRCdelta   | #N/A  | 0.74 |
| YCL008C | STP22 VPS23          |      | iYCRCdelta   | #N/A  | 0.74 |
| YCL009C | ILV6                 |      | 0 iYCRCdelta | -0.48 | 0.74 |
| YCL010C | SGF29                |      | 0 iYCRCdelta | #N/A  | 0.74 |
| YCL011C | GBP2 RLF6            |      | iYCL011C     | -0.45 | 2.08 |
| YCL012W | #N/A                 | #N/A | iYCLWdelta   | #N/A  | #N/A |
| YCL013W | #N/A                 | #N/A | #N/A         | #N/A  | #N/A |
| YCL014W | BUD3                 |      | 0 iYCLWdelta | #N/A  | #N/A |
| YCL016C | DCC1                 |      | 0 iYCL011C   | #N/A  | 2.08 |
| YCL017C | NFS1 SPL1            |      | iYCL011C     | -0.33 | 2.08 |
| YCL018W | LEU2                 |      | 0 iYCLWdelta | -0.82 | #N/A |
| YCL019W | #N/A                 | #N/A | iYCL022C     | #N/A  | #N/A |

|         |                        |            |             |       |      |
|---------|------------------------|------------|-------------|-------|------|
| YCL020W | #N/A                   | #N/A       | iYCL022C    | 0.60  | #N/A |
| YCL021W | #N/A                   | #N/A       | #N/A        | #N/A  | #N/A |
| YCL022C | 0                      | #N/A       | iYCL022C    | #N/A  | #N/A |
| YCL023C | 0                      | #N/A       | iYCL022C    | #N/A  | #N/A |
| YCL024W | KCC4                   |            | 0 iYCL025C  | #N/A  | 0.44 |
| YCL025C | AGP1                   | YCC5       | iYCL025C    | -0.10 | 0.44 |
| YCL026C | #N/A                   | #N/A       | #N/A        | #N/A  | #N/A |
| YCL027W | FUS1                   |            | 0 iYCL028W  | #N/A  | 1.23 |
| YCL028W | RNQ1                   | [PIN(+)]   | iYCL029C    | #N/A  | 1.65 |
| YCL029C | BIK1                   | ARM5 PAC14 | iYCL029C    | #N/A  | 1.65 |
| YCL030C | HIS4                   |            | 0 iYCL030C  | -0.67 | 0.52 |
| YCL031C | RRP7                   |            | 0 iYCL031C  | #N/A  | 1.71 |
| YCL032W | STE50                  |            | 0 iYCL033C  | #N/A  | #N/A |
| YCL033C | 0                      | #N/A       | iYCL033C    | 0.79  | #N/A |
| YCL034W | LSB5                   |            | 0 iYCL035C  | -0.16 | 2.40 |
| YCL035C | GRX1                   |            | 0 iYCL035C  | 1.81  | 2.40 |
| YCL036W | GFD2                   |            | 0 iYCL037C  | -2.04 | 0.99 |
| YCL037C | SRO9                   |            | 0 iYCL037C  | -0.86 | 0.99 |
| YCL038C | AUT4                   | AUT4       | iYCL038C    | 1.12  | 0.77 |
| YCL039W | 0                      | MOH2       | iYCL040W    | #N/A  | 3.92 |
| YCL040W | GLK1                   | HOR3       | iYCL044C    | 3.51  | 1.46 |
| YCL041C | 0                      | #N/A       | iYCL040W    | #N/A  | 3.92 |
| YCL042W | 0                      | #N/A       | iYCL044C    | #N/A  | 1.46 |
| YCL043C | PDI1                   | MFP1 TRG1  | iYCL040W    | 0.76  | 3.92 |
| YCL044C | 0                      | #N/A       | iYCL044C    | 0.60  | 1.46 |
| YCL045C | 0                      | #N/A       | iYCL046W    | -0.33 | 1.42 |
| YCL046W | 0                      | #N/A       | iYCL047C    | #N/A  | 0.90 |
| YCL047C | 0                      | #N/A       | iYCL047C    | #N/A  | 0.90 |
| YCL048W | 0                      | #N/A       | iYCL049C    | #N/A  | 1.48 |
| YCL049C | 0                      | #N/A       | iYCL049C    | 0.52  | 1.48 |
| YCL050C | APA1                   | DTP1       | iYCL050C    | 0.45  | 2.39 |
| YCL051W | LRE1                   |            | 0 iYCL052C  | #N/A  | 2.22 |
| YCL052C | PBN1                   |            | 0 iYCL052C  | 0.18  | 2.22 |
| YCL053C | #N/A                   | #N/A       | #N/A        | -1.84 | #N/A |
| YCL054W | SPB1                   |            | 0 iYCL055W- | -1.88 | 1.49 |
| YCL055W | KAR4                   |            | 0 iYCL056C  | #N/A  | 1.70 |
| YCL056C | 0                      | #N/A       | iYCL056C    | 0.84  | 1.70 |
| YCL057W | PRD1                   |            | 0 iYCL058C  | 0.65  | #N/A |
| YCL058C | FYV5                   |            | 0 iYCL058C  | #N/A  | #N/A |
| YCL059C | KRR1                   |            | 0 iYCL059C  | #N/A  | 2.55 |
| YCL060C | #N/A                   | #N/A       | #N/A        | #N/A  | #N/A |
| YCL061C | MRC1                   |            | 0 iYCL061C  | 2.03  | 1.12 |
| YCL062W | #N/A                   | #N/A       | #N/A        | #N/A  | #N/A |
| YCL063W | 0                      |            | 0 iYCL064C  | #N/A  | 1.48 |
| YCL064C | CHA1                   |            | 0 iYCL064C  | 2.59  | 1.48 |
| YCL065W | 0                      | #N/A       | iYCL067C    | 0.49  | #N/A |
| YCL066W | HMLALP ALPHA1 MATALPHA |            | iYCL067C    | 0.39  | #N/A |
| YCL067C | HMLALP ALPHA2 MATALPHA |            | iYCL067C    | #N/A  | #N/A |
| YCL068C | 0                      | #N/A       | iYCL068C    | #N/A  | 0.76 |
| YCL069W | 0                      | #N/A       | iYCL073C    | #N/A  | 0.60 |
| YCL073C | 0                      | #N/A       | iYCL073C    | -0.95 | 0.60 |

|           |        |                  |              |       |      |
|-----------|--------|------------------|--------------|-------|------|
| YCL074W   | #N/A   | #N/A             | iYCL075W     | #N/A  | 0.27 |
| YCL075W   | #N/A   | #N/A             | #N/A         | #N/A  | #N/A |
| YCL076W   | 0      | #N/A             | #N/A         | #N/A  | #N/A |
| YCLX01W   | #N/A   | #N/A             | #N/A         | #N/A  | #N/A |
| YCLX02C   | #N/A   | #N/A             | #N/A         | #N/A  | #N/A |
| YCLX03C   | #N/A   | #N/A             | #N/A         | #N/A  | #N/A |
| YCLX04W   | #N/A   | #N/A             | #N/A         | #N/A  | #N/A |
| YCLX05C   | #N/A   | #N/A             | #N/A         | -0.75 | #N/A |
| YCLX06C   | #N/A   | #N/A             | #N/A         | #N/A  | #N/A |
| YCLX07W   | #N/A   | #N/A             | #N/A         | #N/A  | #N/A |
| YCLX08C   | #N/A   | #N/A             | #N/A         | #N/A  | #N/A |
| YCLX09W   | #N/A   | #N/A             | #N/A         | -0.37 | #N/A |
| YCLX10C   | #N/A   | #N/A             | #N/A         | #N/A  | #N/A |
| YCLX11W   | #N/A   | #N/A             | #N/A         | -0.40 | #N/A |
| YCLX12W   | #N/A   | #N/A             | #N/A         | #N/A  | #N/A |
| YCR001W   | 0      | #N/A             | iYCL011C     | #N/A  | 2.08 |
| YCR002C   | CDC10  |                  | 0 iYCRCdelta | 0.15  | 0.74 |
| YCR003W   | MRPL32 |                  | 0 iYCL011C   | 1.24  | 2.08 |
| YCR004C   | YCP4   |                  | 0 iYCRCdelta | 0.97  | 0.74 |
| YCR005C   | CIT2   |                  | 0 iYCRCdelta | 2.81  | 0.74 |
| YCR006C   | 0      | #N/A             | iYCRCdelta   | #N/A  | 0.74 |
| YCR007C   | 0      | #N/A             | itG(GCC)C    | -0.03 | #N/A |
| YCR008W   | SAT4   | HAL4             | iYCRCdelta   | #N/A  | 0.74 |
| YCR009C   | RVS161 | END6 FUS7 SPE161 | itG(GCC)C    | 0.45  | #N/A |
| YCR010C   | ADY2   | ATO1             | itG(GCC)C    | #N/A  | #N/A |
| YCR011C   | ADP1   |                  | 0 itG(GCC)C  | 0.77  | #N/A |
| YCR012W   | PGK1   |                  | 0 iYCRCdelta | 0.63  | 0.74 |
| YCR013C   | 0      | #N/A             | itG(GCC)C    | 0.73  | #N/A |
| YCR014C   | POL4   | POLX             | itG(GCC)C    | #N/A  | #N/A |
| YCR015C   | 0      | #N/A             | itG(GCC)C    | -0.20 | #N/A |
| YCR016W   | 0      | #N/A             | itG(GCC)C    | #N/A  | #N/A |
| YCR017C   | CWH43  |                  | 0 iYCR017C   | -0.43 | 1.96 |
| YCR018C   | SRD1   |                  | 0 iYCR018C   | #N/A  | #N/A |
| YCR019W   | MAK32  |                  | 0 iYCR018C-/ | #N/A  | 1.50 |
| YCR020C   | PET18  | HIT2             | iYCR020C     | #N/A  | 1.54 |
| YCR020C-A | MAK31  | LSM9 SMX1        | iYCR020C-/   | #N/A  | 3.52 |
| YCR021C   | HSP30  | YRO1             | iYCR021C     | 1.29  | 1.45 |
| YCR022C   | 0      | #N/A             | iYCR022C     | -0.68 | 0.97 |
| YCR023C   | 0      | #N/A             | iYCR023C     | -0.07 | 1.43 |
| YCR024C   | 0      | #N/A             | iYCR024C     | -0.86 | 0.40 |
| YCR024C-A | PMP1   |                  | 0 iYCR024C-/ | -1.49 | 0.38 |
| YCR025C   | 0      | #N/A             | iYCR025C     | 2.01  | #N/A |
| YCR026C   | 0      | #N/A             | iYCR026C     | -0.20 | 1.02 |
| YCR027C   | RHB1   |                  | 0 iYCR027C   | -0.55 | 1.46 |
| YCR028C   | FEN2   |                  | 0 iYCR028C   | -0.65 | 2.19 |
| YCR029C   | #N/A   | #N/A             | #N/A         | 0.86  | #N/A |
| YCR029C-A | #N/A   | #N/A             | #N/A         | 0.21  | #N/A |
| YCR030C   | SYP1   |                  | 0 iYCR030C   | -1.24 | 1.04 |
| YCR031C   | RPS14A | CRY1 RPL59       | iYCR031C     | -1.12 | 0.41 |
| YCR032W   | BPH1   |                  | 0 iSNR189    | -0.83 | 1.40 |
| YCR033W   | SNT1   |                  | 0 iYCR032W   | -0.99 | 1.48 |



|         |                        |                    |            |       |      |
|---------|------------------------|--------------------|------------|-------|------|
| YCR034W | FEN1                   | ELO2 GNS1 VBM2     | iYCR033W   | -1.11 | 0.96 |
| YCR035C | RRP43                  |                    | 0 iYCR035C | 0.75  | 2.55 |
| YCR036W | RBK1                   |                    | 0 iYCR035C | 1.18  | 2.55 |
| YCR037C | PHO87                  |                    | 0 iYCR037C | #N/A  | 0.80 |
| YCR038C | BUD5                   |                    | 0 iYCR038C | #N/A  | 0.82 |
| YCR039C | MATALP ALPHA2 HMLALPHA |                    | iYCR039C   | 0.87  | #N/A |
| YCR040W | MATALP ALPHA1 HMLALPHA |                    | iYCR039C   | 0.23  | #N/A |
| YCR041W | 0                      | #N/A               | iYCR039C   | #N/A  | #N/A |
| YCR042C | TAF2                   | TAF150 TSM1 TafII1 | iYCR042C   | 0.05  | 1.29 |
| YCR043C | 0                      | #N/A               | iYCR043C   | #N/A  | #N/A |
| YCR044C | PER1                   | COS16              | iYCR044C   | -0.25 | 2.19 |
| YCR045C | 0                      | #N/A               | iYCR045C   | -0.13 | #N/A |
| YCR046C | IMG1                   |                    | 0 iYCR046C | 0.19  | 2.34 |
| YCR047C | BUD23                  |                    | 0 iYCR047C | -1.67 | 2.37 |
| YCR048W | ARE1                   | SAT2               | iYCR047C   | -0.70 | 2.37 |
| YCR049C | 0                      | #N/A               | iYCR050C   | -0.06 | 1.80 |
| YCR050C | 0                      | #N/A               | iYCR050C   | -0.59 | 1.80 |
| YCR051W | 0                      | #N/A               | iYCR050C   | -1.45 | 1.80 |
| YCR052W | RSC6                   |                    | 0 iYCR051W | #N/A  | 2.18 |
| YCR053W | THR4                   |                    | 0 iYCR052W | -0.76 | 2.09 |
| YCR054C | CTR86                  |                    | 0 iYCR054C | #N/A  | 1.00 |
| YCR055C | #N/A                   | #N/A               | #N/A       | -2.07 | #N/A |
| YCR056W | #N/A                   | #N/A               | #N/A       | -0.12 | #N/A |
| YCR057C | PWP2                   | UTP1               | iYCR057C   | #N/A  | 2.35 |
| YCR058C | #N/A                   | #N/A               | #N/A       | #N/A  | #N/A |
| YCR059C | YIH1                   |                    | 0 iYCR059C | -2.16 | 2.05 |
| YCR060W | 0                      |                    | 0 iYCR059C | #N/A  | 2.05 |
| YCR061W | 0                      | #N/A               | iYCR060W   | 1.13  | 0.59 |
| YCR062W | #N/A                   | #N/A               | iYCR060W   | 1.74  | 0.59 |
| YCR063W | BUD31                  | CWC14              | iYCR062W   | #N/A  | #N/A |
| YCR064C | 0                      | #N/A               | iYCR063W   | #N/A  | 0.36 |
| YCR065W | HCM1                   |                    | 0 iYCR063W | #N/A  | 0.36 |
| YCR066W | RAD18                  |                    | 0 iYCR065W | -1.29 | 1.18 |
| YCR067C | SED4                   |                    | 0 iYCR067C | 0.10  | 1.58 |
| YCR068W | CVT17                  | AUT5 CVT17         | iYCR067C   | #N/A  | 1.58 |
| YCR069W | CPR4                   | CYP4 SCC3          | iYCR068W   | -0.31 | 3.14 |
| YCR070W | #N/A                   | #N/A               | #N/A       | 0.31  | #N/A |
| YCR071C | IMG2                   |                    | 0 iYCR071C | 0.31  | 2.82 |
| YCR072C | 0                      | #N/A               | iYCR072C   | -2.01 | 1.97 |
| YCR073C | SSK22                  |                    | 0 iYCR073C | -0.35 | 3.37 |
| YCR074C | #N/A                   | #N/A               | #N/A       | -0.02 | #N/A |
| YCR075C | ERS1                   |                    | 0 iYCR075C | 0.11  | 2.32 |
| YCR076C | 0                      | #N/A               | iYCR076C   | 0.60  | #N/A |
| YCR077C | PAT1                   | MRT1               | iYCR077C   | -1.24 | 4.11 |
| YCR079W | 0                      | #N/A               | iYCR077C   | 0.09  | 4.11 |
| YCR080W | #N/A                   | #N/A               | #N/A       | #N/A  | #N/A |
| YCR081W | SRB8                   | GIG1 NUT6 SSN5     | iYCR079W   | #N/A  | 1.19 |
| YCR082W | 0                      |                    | 0 iYCR081W | #N/A  | #N/A |
| YCR083W | TRX3                   |                    | 0 iYCR082W | #N/A  | 2.00 |
| YCR084C | TUP1                   | AAR1 AER2 AMM1 C   | iYCR084C   | #N/A  | 1.51 |
| YCR085W | 0                      | #N/A               | iYCR084C   | #N/A  | 1.51 |

|          |       |                 |   |            |       |      |
|----------|-------|-----------------|---|------------|-------|------|
| YCR086W  | CSM1  |                 | 0 | iYCR085W   | #N/A  | 1.94 |
| YCR087W  | 0     | #N/A            |   | iYCR085W   | -1.80 | 1.94 |
| YCR088W  | ABP1  |                 | 0 | iYCR087C-  | 0.28  | 2.18 |
| YCR089W  | FIG2  |                 | 0 | iYCR088W   | -3.24 | 1.20 |
| YCR090C  | 0     | #N/A            |   | iYCR090C-  | #N/A  | #N/A |
| YCR091W  | KIN82 |                 | 0 | iYCR090C-  | #N/A  | 1.58 |
| YCR092C  | MSH3  |                 | 0 | iYCR092C   | -0.49 | 1.80 |
| YCR093W  | CDC39 | NOT1 ROS1 SMD6  |   | iYCR092C   | -0.07 | 1.80 |
| YCR094W  | CDC50 |                 | 0 | iYCR093W   | -0.34 | 1.76 |
| YCR095C  | 0     | #N/A            |   | iYCR095C-  | -0.23 | 1.63 |
| YCR096C  | HMRA2 | A2 MATA2        |   | iYCR096C   | 1.36  | 0.49 |
| YCR097WA | #N/A  | #N/A            |   | #N/A       | #N/A  | #N/A |
| YCR097WB | #N/A  | #N/A            |   | #N/A       | #N/A  | #N/A |
| YCR098C  | GIT1  |                 | 0 | iYCR098C-  | 0.64  | 2.43 |
| YCR099C  | 0     | #N/A            |   | iYCR100C   | #N/A  | 0.73 |
| YCR100C  | 0     | #N/A            |   | iYCR100C   | #N/A  | 0.73 |
| YCR101C  | 0     | #N/A            |   | iYCR101C   | #N/A  | 1.86 |
| YCR102C  | 0     | #N/A            |   | iYCR102C   | #N/A  | 1.41 |
| YCR103C  | #N/A  | #N/A            |   | iYCR103C   | #N/A  | 0.77 |
| YCR104W  | PAU3  |                 | 0 | iYCR103C   | -0.43 | 0.77 |
| YCR105W  | 0     | ADHVII          |   | iYCR104W   | 0.01  | 0.67 |
| YCR106W  | RDS1  |                 | 0 | iYCR105W   | -1.17 | #N/A |
| YCR107W  | AAD3  |                 | 0 | iYCR106W   | -0.60 | 0.52 |
| YCRX01W  | #N/A  | #N/A            |   | #N/A       | #N/A  | #N/A |
| YCRX02C  | #N/A  | #N/A            |   | #N/A       | 1.03  | #N/A |
| YCRX03C  | #N/A  | #N/A            |   | #N/A       | #N/A  | #N/A |
| YCRX04W  | #N/A  | #N/A            |   | #N/A       | -0.51 | #N/A |
| YCRX05W  | #N/A  | #N/A            |   | #N/A       | #N/A  | #N/A |
| YCRX06W  | #N/A  | #N/A            |   | #N/A       | #N/A  | #N/A |
| YCRX07W  | #N/A  | #N/A            |   | #N/A       | -2.60 | #N/A |
| YCRX08W  | #N/A  | #N/A            |   | #N/A       | -1.83 | #N/A |
| YCRX09C  | #N/A  | #N/A            |   | #N/A       | #N/A  | #N/A |
| YCRX10W  | #N/A  | #N/A            |   | #N/A       | #N/A  | #N/A |
| YCRX11W  | #N/A  | #N/A            |   | #N/A       | #N/A  | #N/A |
| YCRX12W  | #N/A  | #N/A            |   | #N/A       | #N/A  | #N/A |
| YCRX13W  | #N/A  | #N/A            |   | #N/A       | 0.15  | #N/A |
| YCRX14W  | #N/A  | #N/A            |   | #N/A       | #N/A  | #N/A |
| YCRX15W  | #N/A  | #N/A            |   | #N/A       | #N/A  | #N/A |
| YCRX16C  | #N/A  | #N/A            |   | #N/A       | -1.81 | #N/A |
| YCRX17W  | #N/A  | #N/A            |   | #N/A       | 0.36  | #N/A |
| YCRX18C  | #N/A  | #N/A            |   | #N/A       | #N/A  | #N/A |
| YCRX19W  | #N/A  | #N/A            |   | #N/A       | #N/A  | #N/A |
| YCRX20C  | #N/A  | #N/A            |   | #N/A       | #N/A  | #N/A |
| YCRX21C  | #N/A  | #N/A            |   | #N/A       | 0.01  | #N/A |
| YDL001W  | 0     |                 | 0 | iYDL002C   | -0.11 | 0.92 |
| YDL002C  | NHP10 | HMO2            |   | iYDL002C   | 0.09  | 0.92 |
| YDL003W  | MCD1  | PDS3 RHC21 SCC1 |   | iYDL004W   | -2.60 | 1.15 |
| YDL004W  | ATP16 |                 | 0 | iYDL005C   | 0.47  | 1.76 |
| YDL005C  | MED2  |                 | 0 | iYDL005C   | -1.15 | 1.76 |
| YDL006W  | PTC1  | CWH47 KCS2 TPD1 |   | iYDL007W   | 0.49  | 0.90 |
| YDL007W  | RPT2  | YHS4 YTA5       |   | itS(AGA)D1 | 1.14  | 1.21 |



|         |       |                           |       |            |            |      |      |
|---------|-------|---------------------------|-------|------------|------------|------|------|
| YDL008W | APC11 |                           | 0     | iYDL009C   | 0.02       | 0.95 |      |
| YDL009C |       | 0                         | #N/A  | iYDL009C   | 1.53       | 0.95 |      |
| YDL010W |       | 0                         | #N/A  | iYDL012C   | 1.17       | 2.03 |      |
| YDL011C |       | 0                         | #N/A  | iYDL009C   | -0.97      | 0.95 |      |
| YDL012C |       | 0                         | #N/A  | iYDL012C   | -0.40      | 2.03 |      |
| YDL013W | HEX3  | SLX5                      |       | iYDL014W   | 0.03       | 1.71 |      |
| YDL014W | NOP1  | LOT3                      |       | iYDL015C   | -2.22      | 1.04 |      |
| YDL015C | TSC13 |                           | 0     | iYDL015C   | 0.39       | 1.04 |      |
| YDL016C |       | 0                         | #N/A  | iYDL016C   | 0.24       | 0.54 |      |
| YDL017W | CDC7  | LSD6 SAS1                 |       | iYDL018C   | 0.37       | 2.02 |      |
| YDL018C | ERP3  |                           | 0     | iYDL018C   | 0.20       | 2.02 |      |
| YDL019C | OSH2  |                           | 0     | iYDL019C   | -0.16      | #N/A |      |
| YDL020C | RPN4  | SON1 UFD5                 |       | iYDL020C   | #N/A       | 1.37 |      |
| YDL021W | GPM2  |                           | 0     | iYDL022W   | 1.43       | 0.81 |      |
| YDL022W | GPD1  | DAR1 HOR1 OSG1 CitA(AGC)D |       |            | 1.64       | 0.49 |      |
| YDL023C |       | 0                         | 0     | iYDL022W   | #N/A       | 0.81 |      |
| YDL024C | DIA3  |                           | 0     | iYDL024C   | 1.57       | 0.97 |      |
| YDL025C |       | 0                         | #N/A  | iYDL025C   | 0.96       | 2.00 |      |
| YDL026W |       | 0                         | #N/A  | iYDL028C   | #N/A       | 2.32 |      |
| YDL027C |       | 0                         | #N/A  | iYDL026W   | 1.23       | 1.42 |      |
| YDL028C | MPS1  | RPK1                      |       | iYDL028C   | -0.55      | 2.32 |      |
| YDL029W | ARP2  | ACT2                      |       | iYDL030W   | 0.55       | 1.65 |      |
| YDL030W | PRP9  |                           | 0     | iYDL031W   | -0.74      | 1.71 |      |
| YDL031W | DBP10 |                           | 0     | iYDL032W   | -3.03      | #N/A |      |
| YDL032W |       | 0                         | #N/A  | iYDL034W   | #N/A       | 1.11 |      |
| YDL033C |       | 0                         |       | 0          | iYDL032W   | #N/A | #N/A |
| YDL034W |       | 0                         | #N/A  | iYDL036C   | #N/A       | 1.15 |      |
| YDL035C | GPR1  |                           | 0     | iYDL034W   | #N/A       | 1.11 |      |
| YDL036C |       | 0                         | #N/A  | iYDL036C   | -0.26      | 1.15 |      |
| YDL037C |       | 0                         |       | 0          | iYDL037C-C | #N/A | 1.22 |
| YDL038C |       | 0                         | #N/A  | iYDL038C   | #N/A       | #N/A |      |
| YDL039C | PRM7  |                           | 0     | iYDL038C   | #N/A       | #N/A |      |
| YDL040C | NAT1  | AAA1                      |       | iYDL040C   | -0.54      | 1.95 |      |
| YDL041W | KRE26 |                           | #N/A  | iYDL043C   | #N/A       | #N/A |      |
| YDL042C | SIR2  |                           | 38047 | iYDL041W   | -0.80      | #N/A |      |
| YDL043C | PRP11 | RNA11                     |       | iYDL043C   | #N/A       | #N/A |      |
| YDL044C | MTF2  | NAM1                      |       | iYDL044C   | -0.01      | 1.21 |      |
| YDL045C | FAD1  |                           | 0     | iYDL045C   | 1.02       | 1.86 |      |
| YDL046W |       | 0                         |       | 0          | iYDL047W   | 1.15 | #N/A |
| YDL047W | SIT4  | LGN4                      |       | iYDL048C-1 | -0.26      | 0.48 |      |
| YDL048C | STP4  |                           | 0     | iYDL048C-C | 0.15       | 0.81 |      |
| YDL049C | KNH1  |                           | 0     | iYDL049C   | #N/A       | #N/A |      |
| YDL050C |       | 0                         | #N/A  | iYDL050C   | -1.88      | #N/A |      |
| YDL051W | LHP1  | LAH1 YLA1                 |       | iYDL052C   | -2.02      | 1.49 |      |
| YDL052C | SLC1  |                           | 0     | iYDL052C   | 0.50       | 1.49 |      |
| YDL053C |       | 0                         |       | 0          | iYDL053C   | 0.63 | 1.17 |
| YDL054C | MCH1  |                           | 0     | iYDL054C   | 1.15       | #N/A |      |
| YDL055C | PSA1  | MPG1 SRB1 VIG9            |       | iYDL055C-C | -0.56      | 0.73 |      |
| YDL056W | MBP1  |                           | 0     | iYDL057W   | #N/A       | 2.29 |      |
| YDL057W |       | 0                         | #N/A  | iYDL058W   | 0.83       | 0.84 |      |
| YDL058W | USO1  | INT1                      |       | iYDL059C   | #N/A       | 2.22 |      |

|         |        |                  |   |          |       |      |
|---------|--------|------------------|---|----------|-------|------|
| YDL059C | RAD59  |                  | 0 | iYDL059C | 0.96  | 2.22 |
| YDL060W | TSR1   |                  | 0 | iYDL061C | -3.70 | 0.46 |
| YDL061C | RPS29B | YS29B            |   | iYDL061C | -1.00 | 0.46 |
| YDL062W | 0      | #N/A             |   | iYDL064W | #N/A  | #N/A |
| YDL063C | 0      | #N/A             |   | iYDL062W | -4.12 | 0.80 |
| YDL064W | UBC9   |                  | 0 | iYDL065C | -0.71 | 2.03 |
| YDL065C | PEX19  | PAS12            |   | iYDL065C | 0.77  | 2.03 |
| YDL066W | IDP1   |                  | 0 | iYDL067C | 0.46  | 1.77 |
| YDL067C | COX9   |                  | 0 | iYDL067C | 0.63  | 1.77 |
| YDL068W | 0      | #N/A             |   | iYDL070W | #N/A  | #N/A |
| YDL069C | CBS1   |                  | 0 | iYDL068W | #N/A  | 1.38 |
| YDL070W | BDF2   |                  | 0 | iYDL072C | 0.45  | #N/A |
| YDL071C | 0      | #N/A             |   | iYDL070W | #N/A  | #N/A |
| YDL072C | 0      |                  | 0 | iYDL072C | 1.28  | #N/A |
| YDL073W | 0      | #N/A             |   | iYDL074C | -0.28 | 2.36 |
| YDL074C | BRE1   |                  | 0 | iYDL074C | -0.59 | 2.36 |
| YDL075W | RPL31A | RPL34            |   | iYDL076C | -1.27 | 0.37 |
| YDL076C | 0      |                  | 0 | iYDL076C | 0.22  | 0.37 |
| YDL077C | VAM6   | CVT4 VPL18 VPL22 |   | iYDL077C | #N/A  | 1.58 |
| YDL078C | MDH3   |                  | 0 | iYDL078C | 0.19  | 1.53 |
| YDL079C | MRK1   |                  | 0 | iYDL079C | 0.39  | 3.19 |
| YDL080C | THI3   | KID1             |   | iYDL080C | 0.03  | 1.35 |
| YDL081C | RPP1A  | RPLA1            |   | iYDL081C | -1.16 | 1.01 |
| YDL082W | RPL13A |                  | 0 | iYDL083C | -1.55 | 0.21 |
| YDL083C | RPS16B |                  | 0 | iYDL083C | -1.75 | 0.21 |
| YDL084W | SUB2   |                  | 0 | iYDL085W | -0.58 | 1.66 |
| YDL085W | NDE2   | NDH2             |   | iYDL086W | 2.89  | 1.81 |
| YDL086W | 0      | #N/A             |   | iYDL087C | 0.57  | 2.81 |
| YDL087C | LUC7   | EPE1 EXM2        |   | iYDL087C | #N/A  | 2.81 |
| YDL088C | ASM4   | NUP59            |   | iYDL088C | 0.14  | #N/A |
| YDL089W | 0      | #N/A             |   | iYDL090C | 0.01  | 1.55 |
| YDL090C | RAM1   | DPR1 FUS8 SCG2 S |   | iYDL090C | -0.35 | 1.55 |
| YDL091C | 0      |                  | 0 | iYDL091C | 0.30  | 1.82 |
| YDL092W | SRP14  |                  | 0 | iYDL093W | #N/A  | 2.58 |
| YDL093W | PMT5   |                  | 0 | iYDL095W | -0.50 | #N/A |
| YDL094C | 0      | #N/A             |   | iYDL093W | 0.23  | 2.58 |
| YDL095W | PMT1   |                  | 0 | iYDL097C | -0.36 | 1.38 |
| YDL096C | 0      | #N/A             |   | iYDL095W | #N/A  | #N/A |
| YDL097C | RPN6   | NAS4             |   | iYDL097C | 0.80  | 1.38 |
| YDL098C | SNU23  |                  | 0 | iYDL098C | 0.02  | 1.28 |
| YDL099W | 0      | #N/A             |   | iYDL100C | 0.94  | #N/A |
| YDL100C | ARR4   |                  | 0 | iYDL100C | 0.35  | #N/A |
| YDL101C | DUN1   |                  | 0 | iYDL101C | -1.22 | #N/A |
| YDL102W | CDC2   | HPR6 POL3 TEX1   |   | iYDL103C | -1.35 | 1.74 |
| YDL103C | QRI1   | UAP1             |   | iYDL103C | #N/A  | 1.74 |
| YDL104C | QRI7   |                  | 0 | iYDL104C | #N/A  | #N/A |
| YDL105W | QRI2   |                  | 0 | iYDL106C | #N/A  | 3.14 |
| YDL106C | PHO2   | BAS2 GRF10       |   | iYDL106C | -0.60 | 3.14 |
| YDL107W | MSS2   |                  | 0 | iYDL108W | #N/A  | 1.01 |
| YDL108W | KIN28  |                  | 0 | iYDL109C | 0.19  | 1.13 |
| YDL109C | 0      | #N/A             |   | iYDL109C | #N/A  | 1.13 |

|           |        |                  |            |       |      |
|-----------|--------|------------------|------------|-------|------|
| YDL110C   | 0      | #N/A             | iYDL110C   | 2.36  | 1.02 |
| YDL111C   | RRP42  |                  | 0 iYDL111C | #N/A  | 1.64 |
| YDL112W   | TRM3   |                  | 0 iYDL113C | #N/A  | #N/A |
| YDL113C   | CVT20  | CVT20 SNX42      | iYDL113C   | #N/A  | #N/A |
| YDL114W   | 0      | #N/A             | iYDL115C   | #N/A  | 1.72 |
| YDL115C   | IWR1   |                  | 0 iYDL115C | 1.02  | 1.72 |
| YDL116W   | NUP84  |                  | 0 iYDL117W | -0.95 | 1.93 |
| YDL117W   | CYK3   |                  | 0 iYDL118W | -0.15 | 1.31 |
| YDL118W   | 0      | #N/A             | iYDL120W   | 0.25  | 1.34 |
| YDL119C   | 0      | #N/A             | iYDL118W   | -0.27 | 1.31 |
| YDL120W   | YFH1   |                  | 0 iYDL121C | #N/A  | 3.18 |
| YDL121C   | 0      | #N/A             | iYDL121C   | -4.03 | 3.18 |
| YDL122W   | UBP1   |                  | 0 iYDL123W | #N/A  | 1.01 |
| YDL123W   | SNA4   |                  | 0 iYDL124W | 0.92  | 2.31 |
| YDL124W   | 0      | #N/A             | iYDL125C   | 2.05  | 0.78 |
| YDL125C   | HNT1   |                  | 0 iYDL125C | 0.25  | 0.78 |
| YDL126C   | CDC48  |                  | 0 iYDL126C | 0.64  | 1.07 |
| YDL127W   | PCL2   | CLN4             | iYDL128W   | -0.13 | 0.61 |
| YDL128W   | VCX1   | HUM1 MNR1        | iYDL129W   | 0.10  | 0.80 |
| YDL129W   | 0      | #N/A             | iYDL130W   | #N/A  | 1.57 |
| YDL130W   | RPP1B  | RPL44' RPLA3     | iYDL130W-  | -1.22 | #N/A |
| YDL131W   | LYS21  |                  | 0 iYDL132W | -0.53 | #N/A |
| YDL132W   | CDC53  |                  | 0 iYDL133W | #N/A  | 1.79 |
| YDL133W   | 0      | #N/A             | iYDL133C-A | -0.45 | 0.78 |
| YDL134C   | PPH21  | PPH1             | iYDL134C   | -0.07 | 1.03 |
| YDL134C-A | #N/A   | #N/A             | #N/A       | 0.16  | #N/A |
| YDL135C   | RDI1   |                  | 0 iYDL135C | #N/A  | #N/A |
| YDL136W   | RPL35B | SOS2             | iYDL137W   | -0.83 | 0.29 |
| YDL137W   | ARF2   |                  | 0 iYDL138W | 0.49  | 1.11 |
| YDL138W   | RGT2   |                  | 0 iYDL139C | 0.26  | 0.76 |
| YDL139C   | SCM3   |                  | 0 iYDL139C | #N/A  | 0.76 |
| YDL140C   | RPO21  | RPB1 RPB220 SUA8 | iYDL140C   | #N/A  | 1.20 |
| YDL141W   | BPL1   | ACC2             | iYDL142C   | -0.84 | 1.95 |
| YDL142C   | CRD1   | CLS1             | iYDL142C   | 0.44  | 1.95 |
| YDL143W   | CCT4   | TCP4             | iYDL144C   | -0.25 | 2.77 |
| YDL144C   | 0      | #N/A             | iYDL144C   | 0.51  | 2.77 |
| YDL145C   | COP1   | RET1 SEC33       | iYDL145C   | -0.53 | 3.13 |
| YDL146W   | 0      | #N/A             | iYDL147W   | 0.59  | 1.01 |
| YDL147W   | RPN5   | NAS5             | iYDL148C   | 1.21  | 1.84 |
| YDL148C   | NOP14  | UTP2             | iYDL148C   | #N/A  | 1.84 |
| YDL149W   | APG9   | APG9 AUT9 CVT7   | iYDL150W   | 0.74  | 1.62 |
| YDL150W   | RPC53  | RPC4             | iYDL152W   | -1.24 | 1.16 |
| YDL151C   | FYV3   |                  | 0 iYDL150W | -1.40 | 1.62 |
| YDL152W   | 0      | #N/A             | iYDL154W   | #N/A  | #N/A |
| YDL153C   | SAS10  | UTP3             | iYDL152W   | -2.52 | 1.16 |
| YDL154W   | MSH5   |                  | 0 iYDL155W | #N/A  | 0.44 |
| YDL155W   | CLB3   |                  | 0 iYDL156W | -0.79 | 1.11 |
| YDL156W   | 0      | #N/A             | iYDL157C   | -2.52 | #N/A |
| YDL157C   | 0      | #N/A             | iYDL157C   | -0.58 | #N/A |
| YDL158C   | 0      | #N/A             | iYDL157C   | -1.45 | #N/A |
| YDL159W   | STE7   |                  | 0 iYDL160C | #N/A  | 0.74 |

|         |        |            |      |              |       |      |
|---------|--------|------------|------|--------------|-------|------|
| YDL160C | DHH1   |            | 0    | iYDL160C     | -0.25 | 0.74 |
| YDL161W | ENT1   |            |      | 0 iYDL163W   | 0.31  | #N/A |
| YDL162C |        | 0          | #N/A | iYDL161W     | #N/A  | #N/A |
| YDL163W |        | 0          | #N/A | iYDL165W     | #N/A  | 0.81 |
| YDL164C | CDC9   | MMS8       |      | iYDL163W     | -0.53 | #N/A |
| YDL165W | CDC36  | DNA19 NOT2 |      | iYDL166C     | -0.82 | 1.11 |
| YDL166C | FAP7   |            |      | 0 iYDL166C   | -0.58 | 1.11 |
| YDL167C | NRP1   |            |      | 0 iYDL167C   | #N/A  | 1.89 |
| YDL168W | SFA1   | ADH5       |      | iYDL169C     | 0.31  | 1.45 |
| YDL169C | UGX2   |            |      | 0 iYDL169C   | 1.52  | 1.45 |
| YDL170W | UGA3   |            |      | 0 iYDL171C   | #N/A  | 1.42 |
| YDL171C | GLT1   |            |      | 0 iYDL171C   | #N/A  | 1.42 |
| YDL172C |        | 0          | #N/A | iYDL172C     | 0.50  | #N/A |
| YDL173W |        | 0          | #N/A | iYDL174C     | #N/A  | #N/A |
| YDL174C | DLD1   |            |      | 0 iYDL174C   | 1.48  | #N/A |
| YDL175C | AIR2   |            |      | 0 iYDL175C   | #N/A  | #N/A |
| YDL176W |        | 0          | #N/A | iYDL177C     | -0.42 | #N/A |
| YDL177C |        | 0          | #N/A | iYDL177C     | -0.26 | #N/A |
| YDL178W | DLD2   | AIP2       |      | iYDL179W     | 0.08  | 1.31 |
| YDL179W | PCL9   |            |      | 0 iYDL180W   | -0.96 | 1.91 |
| YDL180W |        | 0          | #N/A | iYDL181W     | 1.17  | 0.91 |
| YDL181W | INH1   |            |      | 0 iYDL182W   | 1.87  | 0.92 |
| YDL182W | LYS20  |            |      | 0 iYDL183C-1 | -0.73 | 0.51 |
| YDL183C |        | 0          | #N/A | iYDL183C-0   | #N/A  | 1.50 |
| YDL184C | RPL41A | RPL47A     |      | iYDL184C     | #N/A  | 0.30 |
| YDL185W | TFP1   | CLS8 VMA1  |      | iYDL186W     | 0.09  | 2.80 |
| YDL186W |        | 0          | #N/A | iYDL188C     | #N/A  | 2.17 |
| YDL187C |        | 0          | #N/A | iYDL186W     | #N/A  | 2.80 |
| YDL188C | PPH22  | PPH2       |      | iYDL188C     | 0.02  | 2.17 |
| YDL189W |        | 0          |      | 0 iYDL190C   | -1.30 | 3.17 |
| YDL190C | UFD2   |            |      | 0 iYDL190C   | 0.04  | 3.17 |
| YDL191W | RPL35A | SOS1       |      | iYDL192W     | -0.85 | 0.38 |
| YDL192W | ARF1   |            |      | 0 iYDL193W   | -0.44 | 0.89 |
| YDL193W |        | 0          | #N/A | iYDL194W     | 0.92  | 1.26 |
| YDL194W | SNF3   |            |      | 0 iYDL195W   | -0.34 | 2.04 |
| YDL195W | SEC31  | WEB1       |      | iYDL196W     | #N/A  | 2.89 |
| YDL196W |        | 0          | #N/A | iYDL197C     | #N/A  | 1.22 |
| YDL197C | ASF2   |            |      | 0 iYDL197C   | -0.08 | 1.22 |
| YDL198C | YHM1   | YHM1       |      | iYDL198C     | 0.66  | 1.24 |
| YDL199C |        | 0          | #N/A | iYDL199C     | 0.67  | 2.22 |
| YDL200C | MGT1   | MGMT       |      | iYDL200C     | 0.54  | 1.17 |
| YDL201W | TRM8   |            |      | 0 iYDL202W   | -1.00 | 1.78 |
| YDL202W | MRPL11 |            |      | 0 iYDL203C   | -0.15 | 3.51 |
| YDL203C |        | 0          | #N/A | iYDL203C     | -0.31 | 3.51 |
| YDL204W |        | 0          |      | 0 iYDL205C   | 3.25  | 1.85 |
| YDL205C | HEM3   |            |      | 0 iYDL205C   | -0.62 | 1.85 |
| YDL206W |        | 0          | #N/A | iYDL207W     | 0.93  | 1.55 |
| YDL207W | GLE1   | BRR3 RSS1  |      | iYDL208W     | -0.51 | 1.55 |
| YDL208W | NHP2   |            |      | 0 iYDL209C   | -1.74 | 2.35 |
| YDL209C | CWC2   | NTC40      |      | iYDL209C     | -1.16 | 2.35 |
| YDL210W | UGA4   |            |      | 0 itG(GCC)D1 | #N/A  | 1.62 |

|         |       |                 |              |       |      |
|---------|-------|-----------------|--------------|-------|------|
| YDL211C | 0     | #N/A            | iYDL211C-0   | -0.62 | 1.27 |
| YDL212W | SHR3  | APF1            | iYDL213C     | -0.50 | 2.20 |
| YDL213C | FYV14 |                 | 0 iYDL213C   | -1.91 | 2.20 |
| YDL214C | PRR2  |                 | 0 iYDL214C   | 0.36  | 0.47 |
| YDL215C | GDH2  | GDH-B GDHB      | iYDL215C     | 0.67  | 2.61 |
| YDL216C | RRI1  | CSN5 JAB1       | iYDL216C     | #N/A  | 1.27 |
| YDL217C | TIM22 |                 | 0 iYDL217C   | -0.57 | 1.55 |
| YDL218W | 0     | #N/A            | iYDL219W     | #N/A  | 2.93 |
| YDL219W | DTD1  |                 | 0 iYDL220C   | 0.19  | #N/A |
| YDL220C | CDC13 | EST4            | iYDL220C     | -0.25 | #N/A |
| YDL221W | 0     | #N/A            | iYDL222C     | 0.45  | 1.63 |
| YDL222C | 0     |                 | 0 iYDL222C   | 5.70  | 1.63 |
| YDL223C | HBT1  |                 | 0 iYDL223C   | 0.59  | 1.13 |
| YDL224C | WHI4  |                 | 0 iYDL224C   | -0.88 | 1.18 |
| YDL225W | SHS1  | 38237           | iYDL226C     | -0.85 | 4.01 |
| YDL226C | GCS1  |                 | 0 iYDL226C   | -1.03 | 4.01 |
| YDL227C | HO    |                 | 0 iYDL227C-0 | -3.16 | 0.87 |
| YDL228C | 0     | #N/A            | iYDL228C     | -2.90 | 0.83 |
| YDL229W | SSB1  | YG101           | iYDL230W     | -2.78 | #N/A |
| YDL230W | PTP1  |                 | 0 iYDL231C   | #N/A  | 2.45 |
| YDL231C | BRE4  |                 | 0 iYDL231C   | -1.48 | 2.45 |
| YDL232W | OST4  |                 | 0 iYDL233W   | #N/A  | 1.70 |
| YDL233W | 0     | #N/A            | iYDL234C     | 0.44  | 2.01 |
| YDL234C | GYP7  |                 | 0 iYDL234C   | 1.66  | 2.01 |
| YDL235C | YPD1  |                 | 0 iYDL235C   | 0.35  | 1.50 |
| YDL236W | PHO13 |                 | 0 iYDL237W   | -0.34 | #N/A |
| YDL237W | 0     | #N/A            | iYDL238C     | 0.69  | 2.62 |
| YDL238C | 0     |                 | 0 iYDL238C   | 1.60  | 2.62 |
| YDL239C | ADY3  |                 | 0 iYDL239C   | #N/A  | #N/A |
| YDL240W | LRG1  |                 | 0 iYDL241W-  | -1.05 | 2.37 |
| YDL241W | 0     | #N/A            | iYDL242W     | -1.19 | 1.02 |
| YDL242W | 0     | #N/A            | iYDL243C     | #N/A  | 1.34 |
| YDL243C | AAD4  |                 | 0 iYDL243C   | 0.64  | 1.34 |
| YDL244W | THI13 |                 | 0 iYDL245C-1 | 0.34  | 2.05 |
| YDL245C | HXT15 |                 | 0 iYDL245C-0 | -3.54 | 0.84 |
| YDL246C | 0     |                 | 0 iYDL246C-0 | #N/A  | 1.39 |
| YDL247W | 0     |                 | 0 iYDL248W-  | 0.39  | 1.32 |
| YDL248W | COS7  |                 | 0 #N/A       | 0.94  | #N/A |
| YDR001C | NTH1  |                 | 0 iYDR001C   | 2.84  | 1.04 |
| YDR002W | YRB1  | CST20 HTN1 SFO1 | iYDR001C     | #N/A  | 1.04 |
| YDR003W | 0     |                 | 0 iYDR002W   | 0.83  | 0.69 |
| YDR004W | RAD57 |                 | 0 iYDR003W   | 0.50  | 1.01 |
| YDR005C | MAF1  |                 | 0 iYDR005C   | -0.07 | 1.31 |
| YDR006C | SOK1  |                 | 0 iYDR006C   | 0.06  | 1.30 |
| YDR007W | TRP1  |                 | 0 iYDR006C   | 0.52  | 1.30 |
| YDR008C | 0     | #N/A            | iYDR008C     | 0.45  | 1.29 |
| YDR009W | GAL3  |                 | 0 iYDR008C   | #N/A  | 1.29 |
| YDR010C | 0     | #N/A            | iYDR010C     | #N/A  | 0.50 |
| YDR011W | SNQ2  |                 | 0 iYDR010C   | 0.87  | 0.50 |
| YDR012W | RPL4B |                 | 0 iYDR011W   | -1.44 | 0.94 |
| YDR013W | 0     | CDC101          | iYDR012W     | 0.12  | #N/A |

|         |        |                  |      |              |       |      |
|---------|--------|------------------|------|--------------|-------|------|
| YDR014W | RAD61  |                  | 0    | iYDR013W     | #N/A  | #N/A |
| YDR015C |        | 0                | #N/A | iYDR015C     | #N/A  | #N/A |
| YDR016C | DAD1   |                  |      | 0 iYDR016C   | #N/A  | 2.95 |
| YDR017C | KCS1   |                  |      | 0 iYDR017C   | -0.68 | #N/A |
| YDR018C |        | 0                | #N/A | iYDR018C     | 1.16  | 1.04 |
| YDR019C | GCV1   | GSD1             |      | iYDR019C     | 2.39  | 0.88 |
| YDR020C |        | 0                | #N/A | iYDR020C     | #N/A  | 1.51 |
| YDR021W | FAL1   |                  |      | 0 iYDR020C   | -1.74 | 1.51 |
| YDR022C | CIS1   |                  |      | 0 iYDR022C   | #N/A  | 0.92 |
| YDR023W | SES1   | SerRS            |      | itV(UAC)D    | -1.10 | 0.54 |
| YDR024W | FYV1   |                  |      | 0 iYDR023W   | -1.67 | #N/A |
| YDR025W | RPS11A |                  |      | 0 iYDR023W   | -1.61 | #N/A |
| YDR026C |        | 0                | #N/A | iYDR026C     | -0.60 | 2.14 |
| YDR027C | LUV1   | CGP1 LUV1 TCS3   |      | iYDR027C     | 0.19  | 1.40 |
| YDR028C | REG1   | HEX2 PZF240 SPP4 |      | iYDR028C     | #N/A  | #N/A |
| YDR029W |        | 0                | #N/A | iYDR028C     | #N/A  | #N/A |
| YDR030C | RAD28  |                  |      | 0 iYDR030C   | -0.73 | 3.19 |
| YDR031W |        | 0                | #N/A | iYDR030C     | #N/A  | 3.19 |
| YDR032C | PST2   |                  |      | 0 iYDR032C-0 | 2.23  | 1.44 |
| YDR033W | MRH1   |                  |      | 0 iYDR032C-2 | -0.67 | 0.62 |
| YDR034C | LYS14  |                  |      | 0 iYDR034C   | -0.96 | 1.79 |
| YDR035W | ARO3   |                  |      | 0 iYDR034W-  | #N/A  | 1.90 |
| YDR036C |        | 0                | MRP5 | iYDR036C     | -1.14 | 1.65 |
| YDR037W | KRS1   | GCD5             |      | iYDR036C     | -0.95 | 1.65 |
| YDR038C | ENA5   |                  |      | 0 iYDR038C   | 1.82  | 1.39 |
| YDR039C | ENA2   |                  |      | 0 iYDR039C   | 1.88  | #N/A |
| YDR040C | ENA1   | HOR6 PMR2        |      | iYDR040C     | 1.68  | 1.01 |
| YDR041W | RSM10  |                  |      | 0 iYDR040C   | 0.52  | 1.01 |
| YDR042C |        | 0                | #N/A | iYDR042C     | #N/A  | 0.46 |
| YDR043C | NRG1   |                  |      | 0 iYDR043C-0 | #N/A  | 0.70 |
| YDR044W | HEM13  |                  |      | 0 iYDR043C-2 | -0.59 | 1.71 |
| YDR045C | RPC11  |                  |      | 0 iYDR045C   | #N/A  | 1.30 |
| YDR046C | BAP3   | PAP1             |      | iYDR046C     | -0.18 | #N/A |
| YDR047W | HEM12  | HEM6             |      | iYDR046C     | -0.13 | #N/A |
| YDR048C |        | 0                | #N/A | iYDR049W     | -2.40 | #N/A |
| YDR049W |        | 0                | #N/A | iYDR047W     | -0.84 | #N/A |
| YDR050C | TPI1   |                  |      | 0 iYDR050C   | 0.25  | 0.46 |
| YDR051C |        | 0                | #N/A | iYDR051C     | 0.08  | 1.16 |
| YDR052C | DBF4   | LSD7             |      | iYDR053W     | #N/A  | 0.95 |
| YDR053W |        | 0                | #N/A | iYDR051C     | #N/A  | 1.16 |
| YDR054C | CDC34  | DNA6 UBC3        |      | iYDR054C     | 0.74  | 0.93 |
| YDR055W | PST1   |                  |      | 0 iYDR054C   | 1.87  | 0.93 |
| YDR056C |        | 0                | #N/A | iYDR056C     | #N/A  | 1.91 |
| YDR057W |        | 0                |      | 0 iYDR056C   | 0.35  | 1.91 |
| YDR058C | TGL2   |                  |      | 0 iYDR058C   | 2.09  | 0.74 |
| YDR059C | UBC5   |                  |      | 0 iYDR059C   | 2.38  | #N/A |
| YDR060W | MAK21  | NOC1             |      | iYDR059C     | -4.40 | #N/A |
| YDR061W |        | 0                | #N/A | iYDR060W     | 0.31  | 0.46 |
| YDR062W | LCB2   | SCS1 TSC1        |      | iYDR061W     | -0.53 | 1.38 |
| YDR063W |        | 0                | #N/A | iYDR062W     | 0.66  | 0.83 |
| YDR064W | RPS13  | RPS13B RPS13C    |      | iYDR063W     | -1.43 | 0.32 |



|         |        |                   |            |       |      |
|---------|--------|-------------------|------------|-------|------|
| YDR065W | 0      | #N/A              | iYDR064W   | #N/A  | #N/A |
| YDR066C | 0      | #N/A              | iYDR066C   | -0.39 | 1.20 |
| YDR067C | 0      | #N/A              | iYDR067C   | #N/A  | 2.64 |
| YDR068W | DOS2   |                   | 0 iYDR067C | #N/A  | 2.64 |
| YDR069C | DOA4   | DOS1 MUT4 NPI2 S  | iYDR069C   | 0.32  | 2.54 |
| YDR070C | 0      |                   | 0 iYDR070C | #N/A  | 1.23 |
| YDR071C | 0      |                   | 0 iYDR071C | 0.25  | 0.78 |
| YDR072C | IPT1   | SYR4              | iYDR072C   | -0.60 | #N/A |
| YDR073W | SNF11  |                   | 0 iYDR072C | -1.31 | #N/A |
| YDR074W | TPS2   | HOG2 PFK3         | iYDR073W   | 1.56  | 1.19 |
| YDR075W | PPH3   |                   | 0 iYDR074W | #N/A  | 2.05 |
| YDR076W | RAD55  |                   | 0 iYDR075W | 1.66  | #N/A |
| YDR077W | SED1   |                   | 0 iYDR076W | 2.39  | 0.23 |
| YDR078C | SHU2   |                   | 0 iYDR078C | #N/A  | 1.69 |
| YDR079W | PET100 |                   | 0 iYDR078C | -0.56 | 1.69 |
| YDR080W | VPS41  | CVT8 FET2 SVL2 VA | iYDR079W   | #N/A  | 1.76 |
| YDR081C | PDC2   |                   | 0 iYDR081C | -2.53 | 2.58 |
| YDR082W | STN1   |                   | 0 iYDR081C | #N/A  | 2.58 |
| YDR083W | RRP8   |                   | 0 iYDR082W | #N/A  | #N/A |
| YDR084C | 0      |                   | 0 iYDR084C | 0.77  | 2.26 |
| YDR085C | AFR1   |                   | 0 iYDR085C | 1.45  | 0.91 |
| YDR086C | SSS1   |                   | 0 iYDR086C | #N/A  | 0.93 |
| YDR087C | RRP1   |                   | 0 iYDR087C | -1.89 | 1.46 |
| YDR088C | SLU7   | SLT17             | iYDR088C   | -0.20 | 1.34 |
| YDR089W | 0      | #N/A              | itR(ACG)D- | 0.05  | 0.72 |
| YDR090C | 0      | #N/A              | iYDR090C   | 0.13  | 1.11 |
| YDR091C | RLI1   |                   | 0 iYDR091C | -1.74 | 1.53 |
| YDR092W | UBC13  |                   | 0 iYDR091C | -0.30 | 1.53 |
| YDR093W | DNF2   |                   | 0 iYDR092W | -0.37 | 0.75 |
| YDR094W | 0      | #N/A              | iYDR092W   | #N/A  | 0.75 |
| YDR095C | 0      | #N/A              | iYDR095C   | #N/A  | 0.98 |
| YDR096W | GIS1   |                   | 0 iYDR095C | #N/A  | 0.98 |
| YDR097C | MSH6   | PMS3              | iYDR097C   | -3.14 | 1.31 |
| YDR098C | GRX3   |                   | 0 iYDR098C | -0.02 | #N/A |
| YDR099W | BMH2   | SCD3              | iYDR099W   | 0.58  | #N/A |
| YDR100W | 0      |                   | 0 iYDR099W | 1.62  | 0.74 |
| YDR101C | ARX1   |                   | 0 iYDR101C | -2.62 | 0.90 |
| YDR102C | 0      | #N/A              | iYDR102C   | #N/A  | 1.08 |
| YDR103W | STE5   | HMD3 NUL3         | iYDR102C   | 0.04  | 1.08 |
| YDR104C | SPO71  |                   | 0 iYDR104C | #N/A  | 1.43 |
| YDR105C | 0      |                   | 0 iYDR105C | 0.71  | 2.81 |
| YDR106W | ARP10  |                   | 0 iYDR105C | #N/A  | 2.81 |
| YDR107C | 0      | #N/A              | iYDR107C   | 0.55  | 3.21 |
| YDR108W | GSG1   | TRS85             | iYDR107C   | #N/A  | 3.21 |
| YDR109C | 0      | #N/A              | iYDR109C   | 0.00  | 2.11 |
| YDR110W | FOB1   | HRM1              | iYDR109C   | #N/A  | 2.11 |
| YDR111C | 0      |                   | 0 iYDR112W | #N/A  | 1.28 |
| YDR112W | 0      | #N/A              | iYDR110W   | #N/A  | 0.77 |
| YDR113C | PDS1   |                   | 0 iYDR113C | -1.57 | 1.75 |
| YDR114C | 0      | #N/A              | iYDR115W   | #N/A  | #N/A |
| YDR115W | 0      | #N/A              | iYDR113C   | #N/A  | 1.75 |

|         |       |                    |   |          |       |      |
|---------|-------|--------------------|---|----------|-------|------|
| YDR116C | 0     |                    | 0 | iYDR116C | 0.54  | 1.36 |
| YDR117C | 0     | #N/A               |   | iYDR117C | -0.90 | 2.17 |
| YDR118W | APC4  |                    | 0 | iYDR117C | #N/A  | 2.17 |
| YDR119W | 0     | #N/A               |   | iYDR118W | -0.25 | 1.03 |
| YDR120C | TRM1  |                    | 0 | iYDR120C | -2.60 | 2.29 |
| YDR121W | DPB4  |                    | 0 | iYDR120C | -1.00 | 2.29 |
| YDR122W | KIN1  |                    | 0 | iYDR121W | #N/A  | 2.12 |
| YDR123C | INO2  | DIE1 SCS1          |   | iYDR123C | #N/A  | 0.94 |
| YDR124W | 0     | #N/A               |   | iYDR123C | 0.74  | 0.94 |
| YDR125C | ECM18 |                    | 0 | iYDR125C | #N/A  | 1.45 |
| YDR126W | PSL10 | PSL10              |   | iYDR125C | #N/A  | 1.45 |
| YDR127W | ARO1  |                    | 0 | iYDR126W | 0.10  | #N/A |
| YDR128W | 0     | #N/A               |   | iYDR127W | #N/A  | #N/A |
| YDR129C | SAC6  | ABP67              |   | iYDR129C | 1.11  | 1.31 |
| YDR130C | FIN1  |                    | 0 | iYDR130C | -3.63 | 3.32 |
| YDR131C | 0     | #N/A               |   | iYDR131C | #N/A  | 1.32 |
| YDR132C | 0     | #N/A               |   | iYDR132C | -0.98 | #N/A |
| YDR133C | 0     | #N/A               |   | iYDR134C | 0.71  | 0.27 |
| YDR134C | 0     | #N/A               |   | iYDR134C | 0.50  | 0.27 |
| YDR135C | YCF1  |                    | 0 | iYDR135C | -0.41 | 2.95 |
| YDR136C | VPS61 |                    | 0 | iYDR137W | #N/A  | 1.39 |
| YDR137W | RGP1  |                    | 0 | iYDR135C | #N/A  | 2.95 |
| YDR138W | HPR1  |                    | 0 | iYDR137W | #N/A  | 1.39 |
| YDR139C | RUB1  |                    | 0 | iYDR139C | #N/A  | 1.90 |
| YDR140W | FYV9  | #N/A               |   | iYDR139C | 0.17  | 1.90 |
| YDR141C | DOP1  |                    | 0 | iYDR141C | #N/A  | 1.67 |
| YDR142C | PEX7  | PAS7 PEB1          |   | iYDR142C | -0.45 | 1.06 |
| YDR143C | SAN1  |                    | 0 | iYDR143C | -0.40 | 1.58 |
| YDR144C | MKC7  | YPS2               |   | iYDR144C | #N/A  | 2.00 |
| YDR145W | TAF12 | TAF61 TAF68 Taf116 |   | iYDR144C | 0.00  | 2.00 |
| YDR146C | SWI5  |                    | 0 | iYDR146C | -1.39 | 0.97 |
| YDR147W | EKI1  |                    | 0 | iYDR146C | #N/A  | 0.97 |
| YDR148C | KGD2  |                    | 0 | iYDR148C | 0.54  | 2.26 |
| YDR149C | 0     | #N/A               |   | iYDR150W | #N/A  | 0.70 |
| YDR150W | NUM1  | PAC12              |   | iYDR148C | #N/A  | 2.26 |
| YDR151C | CTH1  |                    | 0 | iYDR151C | -0.13 | 1.19 |
| YDR152W | 0     |                    | 0 | iYDR151C | #N/A  | 1.19 |
| YDR153C | 0     |                    | 0 | iYDR153C | -0.24 | 0.38 |
| YDR154C | 0     | #N/A               |   | iYDR155C | 0.77  | 0.42 |
| YDR155C | CPR1  | CPH1 CYP1          |   | iYDR155C | 0.65  | 0.42 |
| YDR156W | RPA14 |                    | 0 | iYDR155C | -1.52 | 0.42 |
| YDR157W | 0     | #N/A               |   | iYDR155C | #N/A  | 0.42 |
| YDR158W | HOM2  |                    | 0 | iYDR155C | -0.35 | 0.42 |
| YDR159W | SAC3  | LEP1               |   | iYDR158W | #N/A  | 1.83 |
| YDR160W | SSY1  | SHR10              |   | iYDR159W | -0.56 | #N/A |
| YDR161W | TCI1  | #N/A               |   | iYDR160W | -2.07 | 1.08 |
| YDR162C | NBP2  |                    | 0 | iYDR162C | -1.21 | 1.71 |
| YDR163W | CWC15 |                    | 0 | iYDR162C | -0.79 | 1.71 |
| YDR164C | SEC1  |                    | 0 | iYDR164C | -0.87 | 2.43 |
| YDR165W | TRM82 |                    | 0 | iYDR164C | -1.67 | 2.43 |
| YDR166C | SEC5  |                    | 0 | iYDR166C | #N/A  | 2.85 |



|           |        |                     |             |       |      |
|-----------|--------|---------------------|-------------|-------|------|
| YDR167W   | TAF10  | TAF23 TAF25 TafII25 | iYDR166C    | -0.25 | 2.85 |
| YDR168W   | CDC37  | SMO1                | iYDR167W    | 0.68  | 1.58 |
| YDR169C   | STB3   |                     | 0 iYDR169C- | -0.55 | 1.84 |
| YDR170C   | SEC7   |                     | 0 iYDR170C  | -1.14 | 0.91 |
| YDR171W   | HSP42  |                     | 0 iYDR170W- | 3.05  | #N/A |
| YDR172W   | SUP35  | GST1 PNM2 SAL3 Sti  | iYDR171W    | -0.64 | 1.12 |
| YDR173C   | ARG82  | ARGR3 IPK2          | iYDR173C    | 0.71  | 0.79 |
| YDR174W   | HMO1   | HSM2                | iYDR173C    | #N/A  | 0.79 |
| YDR175C   | RSM24  |                     | 0 iYDR175C  | 0.12  | 1.68 |
| YDR176W   | NGG1   | ADA3 SWI7           | iYDR175C    | -0.83 | 1.68 |
| YDR177W   | UBC1   |                     | 0 iYDR176W  | 0.33  | 1.90 |
| YDR178W   | SDH4   | ACN18               | iYDR177W    | 2.34  | 2.18 |
| YDR179C   | 0      |                     | 0 iYDR179C  | #N/A  | 1.46 |
| YDR179W-A | 0      | #N/A                | iYDR179C    | #N/A  | 1.46 |
| YDR180W   | SCC2   |                     | 0 iYDR179W- | #N/A  | 2.06 |
| YDR181C   | SAS4   |                     | 0 iYDR181C  | #N/A  | 1.77 |
| YDR182W   | CDC1   | DSC1 DSR1 ESP2      | iYDR181C    | 0.14  | 1.77 |
| YDR183W   | PLP1   |                     | 0 iYDR182W  | #N/A  | 1.09 |
| YDR184C   | ATC1   | LIC4                | iYDR184C    | -2.22 | #N/A |
| YDR185C   | 0      | #N/A                | iYDR185C    | -0.56 | 0.98 |
| YDR186C   | 0      | #N/A                | iYDR186C    | 0.28  | 0.58 |
| YDR187C   | 0      | #N/A                | iYDR188W    | -0.91 | 1.00 |
| YDR188W   | CCT6   | HTR3 TCP20 TCP6     | iYDR186C    | -0.18 | 0.58 |
| YDR189W   | SLY1   |                     | 0 iYDR188W  | -0.58 | 1.00 |
| YDR190C   | RVB1   | TIH1 TIP49A         | iYDR190C    | -0.59 | 1.42 |
| YDR191W   | HST4   |                     | 0 iYDR190C  | -0.94 | 1.42 |
| YDR192C   | NUP42  | RIP1 UIP1           | iYDR193W    | -0.21 | 1.25 |
| YDR193W   | 0      | #N/A                | iYDR191W    | #N/A  | #N/A |
| YDR194C   | MSS116 |                     | 0 iYDR194C  | -0.24 | #N/A |
| YDR195W   | REF2   |                     | 0 iYDR194C  | -0.92 | #N/A |
| YDR196C   | 0      | #N/A                | iYDR196C    | #N/A  | #N/A |
| YDR197W   | CBS2   | CBP7                | iYDR196C    | #N/A  | #N/A |
| YDR198C   | 0      | #N/A                | iYDR198C    | -1.06 | #N/A |
| YDR199W   | 0      | #N/A                | iYDR198C    | #N/A  | #N/A |
| YDR200C   | VPS64  | FAR9                | iYDR200C    | 0.25  | 2.46 |
| YDR201W   | SPC19  |                     | 0 iYDR200C  | -0.07 | 2.46 |
| YDR202C   | RAV2   |                     | 0 iYDR203W  | 0.86  | #N/A |
| YDR203W   | 0      | #N/A                | iYDR201W    | #N/A  | #N/A |
| YDR204W   | COQ4   |                     | 0 iYDR203W  | 1.01  | #N/A |
| YDR205W   | MSC2   |                     | 0 iYDR204W  | 0.01  | 2.40 |
| YDR206W   | EBS1   |                     | 0 iYDR205W  | -1.60 | 2.04 |
| YDR207C   | UME6   | CAR80 NIM2 RIM16    | iYDR207C    | #N/A  | 1.91 |
| YDR208W   | MSS4   |                     | 0 iYDR207C  | 0.21  | 1.91 |
| YDR209C   | 0      | #N/A                | iYDR210W    | #N/A  | #N/A |
| YDR210W   | 0      | #N/A                | iYDR208W    | #N/A  | #N/A |
| YDR211W   | GCD6   |                     | 0 itI(UAU)D | -0.62 | 1.30 |
| YDR212W   | TCP1   | CCT1                | iYDR211W    | -0.17 | 1.49 |
| YDR213W   | UPC2   | MOX4                | iYDR212W    | -0.07 | 1.25 |
| YDR214W   | AHA1   |                     | 0 iYDR213W  | 2.26  | 0.76 |
| YDR215C   | 0      | #N/A                | iYDR215C    | -1.34 | 0.92 |
| YDR216W   | ADR1   |                     | 0 iYDR215C  | 1.24  | 0.92 |

|         |       |                 |   |            |       |      |
|---------|-------|-----------------|---|------------|-------|------|
| YDR217C | RAD9  |                 | 0 | iYDR217C   | -2.14 | 1.76 |
| YDR218C | SPR28 |                 | 0 | iYDR218C   | #N/A  | 0.67 |
| YDR219C | 0     | #N/A            |   | iYDR219C   | -1.23 | 1.28 |
| YDR220C | 0     | #N/A            |   | iYDR221W   | #N/A  | 0.58 |
| YDR221W | 0     | #N/A            |   | iYDR219C   | -0.33 | 1.28 |
| YDR222W | 0     | #N/A            |   | iYDR221W   | -0.79 | 0.58 |
| YDR223W | 0     | #N/A            |   | iYDR222W   | #N/A  | 1.35 |
| YDR224C | HTB1  | SPT12           |   | iYDR224C   | -0.95 | 0.54 |
| YDR225W | HTA1  | H2A1 SPT11      |   | iYDR224C   | -0.78 | 0.54 |
| YDR226W | ADK1  | AKY1 AKY2       |   | iYDR225W   | -0.52 | 0.56 |
| YDR227W | SIR4  | ASD1 STE9 UTH2  |   | iYDR226W   | -0.73 | 1.00 |
| YDR228C | PCF11 |                 | 0 | iYDR228C   | 0.05  | 2.10 |
| YDR229W | 0     |                 | 0 | iYDR228C   | 0.09  | 2.10 |
| YDR230W | 0     | #N/A            |   | iYDR229W   | #N/A  | #N/A |
| YDR231C | COX20 |                 | 0 | iYDR231C   | #N/A  | 1.20 |
| YDR232W | HEM1  | CYD1            |   | iYDR231C   | -0.40 | 1.20 |
| YDR233C | 0     |                 | 0 | iYDR233C   | -0.31 | 0.45 |
| YDR234W | LYS4  | LYS3            |   | iYDR233C   | #N/A  | 0.45 |
| YDR235W | PRP42 | MUD16 SNU65     |   | iYDR234W   | 0.53  | 1.64 |
| YDR236C | FMN1  |                 | 0 | iYDR236C   | 0.69  | 2.73 |
| YDR237W | MRPL7 | YmL5/7          |   | iYDR236C   | 0.17  | 2.73 |
| YDR238C | SEC26 |                 | 0 | iYDR238C   | -0.04 | 1.80 |
| YDR239C | 0     | #N/A            |   | iYDR239C   | -0.63 | 1.49 |
| YDR240C | SNU56 | MUD10           |   | YDRWdelta  | -1.86 | #N/A |
| YDR241W | BUD26 |                 | 0 | iYDR239C   | -2.90 | 1.49 |
| YDR242W | AMD2  |                 | 0 | itY(GUA)D  | #N/A  | 0.92 |
| YDR243C | PRP28 |                 | 0 | iYDR243C   | #N/A  | 1.67 |
| YDR244W | PEX5  | PAS10           |   | iYDR243C   | #N/A  | 1.67 |
| YDR245W | MNN10 | BED1 REC41 SLC2 |   | iYDR244W   | -0.53 | 1.62 |
| YDR246W | TRS23 |                 | 0 | iYDR245W   | 0.51  | 1.00 |
| YDR247W | 0     |                 | 0 | iYDR246W   | #N/A  | 1.19 |
| YDR248C | 0     | #N/A            |   | iYDR248C   | #N/A  | #N/A |
| YDR249C | 0     | #N/A            |   | iYDR249C   | -0.84 | 1.47 |
| YDR250C | 0     | #N/A            |   | iYDR250C   | #N/A  | 1.22 |
| YDR251W | PAM1  |                 | 0 | iYDR250C   | -0.40 | 1.22 |
| YDR252W | BTT1  |                 | 0 | iYDR251W   | #N/A  | #N/A |
| YDR253C | MET32 |                 | 0 | iYDR253C   | #N/A  | 1.79 |
| YDR254W | CHL4  | CTF17 MCM17     |   | iYDR253C   | 0.83  | 1.79 |
| YDR255C | 0     | GID2            |   | iYDR255C   | 0.04  | 1.45 |
| YDR256C | CTA1  |                 | 0 | iYDR256C   | #N/A  | 0.31 |
| YDR257C | RMS1  | RMS1            |   | iYDR257C   | -0.50 | 1.04 |
| YDR258C | HSP78 |                 | 0 | iYDR258C   | 3.43  | 1.20 |
| YDR259C | YAP6  | HAL7            |   | iYDR259C   | #N/A  | 0.40 |
| YDR260C | SWM1  |                 | 0 | iYDR260C   | -0.10 | 1.51 |
| YDR261C | EXG2  |                 | 0 | iYDR261C-C | 0.79  | 1.56 |
| YDR262W | 0     | #N/A            |   | itG(GCC)D2 | #N/A  | 1.00 |
| YDR263C | DIN7  | DIN3            |   | iYDR263C   | -1.50 | 0.55 |
| YDR264C | AKR1  |                 | 0 | iYDR264C   | 0.14  | 2.23 |
| YDR265W | PEX10 | PAS4            |   | iYDR264C   | -0.38 | 2.23 |
| YDR266C | 0     | #N/A            |   | iYDR266C   | -0.32 | #N/A |
| YDR267C | 0     | #N/A            |   | iYDR267C   | -0.33 | 1.64 |

|         |        |                    |   |            |       |      |
|---------|--------|--------------------|---|------------|-------|------|
| YDR268W | MSW1   |                    | 0 | iYDR267C   | -0.50 | 1.64 |
| YDR269C | 0      | #N/A               |   | iYDR271C   | #N/A  | #N/A |
| YDR270W | CCC2   |                    | 0 | iYDR268W   | 0.03  | 0.56 |
| YDR271C | 0      | #N/A               |   | iYDR271C   | -0.10 | #N/A |
| YDR272W | GLO2   |                    | 0 | iYDR271C   | 1.46  | #N/A |
| YDR273W | DON1   |                    | 0 | iYDR272W   | 0.41  | 0.84 |
| YDR274C | 0      | #N/A               |   | iYDR274C   | 1.81  | 0.48 |
| YDR275W | 0      |                    | 0 | iYDR274C   | -0.23 | 0.48 |
| YDR276C | PMP3   | SNA1               |   | iYDR276C   | 1.19  | 0.41 |
| YDR277C | MTH1   | BPC1 DGT1 HTR1     |   | iYDR277C   | #N/A  | 0.64 |
| YDR278C | 0      | #N/A               |   | itE(CUC)D- | #N/A  | 1.14 |
| YDR279W | 0      | Rnh2B              |   | itE(CUC)D- | -2.04 | 1.59 |
| YDR280W | RRP45  |                    | 0 | iYDR279W   | -0.70 | 1.93 |
| YDR281C | PHM6   |                    | 0 | iYDR281C   | #N/A  | 1.08 |
| YDR282C | 0      | #N/A               |   | iYDR282C   | 1.08  | 1.35 |
| YDR283C | GCN2   | AAS1               |   | iYDR283C   | #N/A  | 1.97 |
| YDR284C | DPP1   | ZRG1               |   | iYDR284C   | 0.21  | 1.36 |
| YDR285W | ZIP1   |                    | 0 | iYDR284C   | #N/A  | 1.36 |
| YDR286C | 0      | #N/A               |   | iYDR286C   | #N/A  | 2.67 |
| YDR287W | 0      | #N/A               |   | iYDR286C   | 1.05  | 2.67 |
| YDR288W | 0      |                    | 0 | iYDR287W   | 0.68  | 1.62 |
| YDR289C | RTT103 |                    | 0 | iYDR291W   | 0.81  | #N/A |
| YDR290W | 0      | #N/A               |   | iYDR288W   | #N/A  | 0.58 |
| YDR291W | 0      | #N/A               |   | iYDR288W   | 0.10  | 0.58 |
| YDR292C | SRP101 |                    | 0 | iYDR292C   | -0.38 | #N/A |
| YDR293C | SSD1   | CLA1 MCS1 RLT1 SFi |   | iYDR293C   | 0.27  | #N/A |
| YDR294C | DPL1   | BST1               |   | iYDR294C   | 0.70  | 1.08 |
| YDR295C | PLO2   | PLO2               |   | iYDR295C   | 0.27  | 1.55 |
| YDR296W | MHR1   | XTC1               |   | iYDR295C   | -0.05 | 1.55 |
| YDR297W | SUR2   | SYR2               |   | iYDR296W   | #N/A  | 0.71 |
| YDR298C | ATP5   | OSC1               |   | iYDR298C   | -0.19 | 1.77 |
| YDR299W | BFR2   |                    | 0 | iYDR298C   | -1.89 | 1.77 |
| YDR300C | PRO1   |                    | 0 | iYDR300C   | #N/A  | 3.23 |
| YDR301W | CFT1   | YHH1               |   | iYDR300C   | -0.31 | 3.23 |
| YDR302W | GPI11  |                    | 0 | iYDR301W   | 0.82  | 1.66 |
| YDR303C | RSC3   |                    | 0 | iYDR303C   | -0.56 | 2.38 |
| YDR304C | CPR5   | CYP5               |   | iYDR304C   | 1.02  | 1.11 |
| YDR305C | HNT2   | APH1               |   | iYDR305C   | #N/A  | #N/A |
| YDR306C | 0      | #N/A               |   | iYDR306C   | 0.70  | 1.65 |
| YDR307W | 0      | #N/A               |   | itV(CAC)D  | #N/A  | #N/A |
| YDR308C | SRB7   |                    | 0 | iYDR308C   | #N/A  | 0.84 |
| YDR309C | GIC2   |                    | 0 | iYDR309C   | #N/A  | 0.32 |
| YDR310C | SUM1   |                    | 0 | iYDR310C   | -0.42 | 1.42 |
| YDR311W | TFB1   |                    | 0 | iYDR310C   | -0.24 | 1.42 |
| YDR312W | SSF2   |                    | 0 | iYDR311W   | #N/A  | 1.89 |
| YDR313C | PIB1   |                    | 0 | iYDR313C   | 0.46  | 1.49 |
| YDR314C | 0      | #N/A               |   | iYDR314C   | #N/A  | 1.50 |
| YDR315C | IPK1   | GSL1               |   | iYDR315C   | #N/A  | #N/A |
| YDR316W | 0      |                    | 0 | iYDR315C   | 1.04  | #N/A |
| YDR317W | 0      | #N/A               |   | iYDRWdelta | -0.16 | 0.51 |
| YDR318W | MCM21  | CTF5               |   | iYDR317W   | -0.32 | 1.50 |

|         |        |                  |              |       |      |
|---------|--------|------------------|--------------|-------|------|
| YDR319C | 0      | #N/A             | iYDR319C     | 1.01  | #N/A |
| YDR320C | SWA2   | AUX1 BUD24       | iYDR320C     | 0.12  | 2.17 |
| YDR321W | ASP1   |                  | 0 iYDR320C   | #N/A  | 2.17 |
| YDR322W | MRPL35 | YmL35            | iYDR321W     | 0.46  | 1.08 |
| YDR323C | PEP7   | VAC1 VPL21 VPS19 | iYDR323C     | #N/A  | 1.33 |
| YDR324C | UTP4   |                  | 0 iYDR324C   | -1.69 | 1.31 |
| YDR325W | YCG1   | TIE1 YCS5        | iYDR324C     | -1.31 | 1.31 |
| YDR326C | 0      | #N/A             | iYDR326C     | -0.77 | 3.07 |
| YDR327W | 0      | #N/A             | iYDR326C     | 0.62  | 3.07 |
| YDR328C | SKP1   | CBF3D MGO1       | iYDR328C     | 0.49  | 2.26 |
| YDR329C | PEX3   | PAS3             | iYDR329C     | 0.39  | #N/A |
| YDR330W | 0      |                  | 0 iYDR329C   | 0.63  | #N/A |
| YDR331W | GPI8   |                  | 0 iYDR330W   | #N/A  | 1.38 |
| YDR332W | 0      | #N/A             | iYDR331W     | -1.64 | #N/A |
| YDR333C | 0      | #N/A             | iYDR333C     | -2.73 | #N/A |
| YDR334W | SWR1   |                  | 0 iYDR333C   | #N/A  | #N/A |
| YDR335W | MSN5   | KAP142 STE21     | iYDR334W     | #N/A  | #N/A |
| YDR336W | 0      | #N/A             | iYDR335W     | -0.90 | 1.32 |
| YDR337W | MRPS28 |                  | 0 iYDR336W   | 0.74  | 2.12 |
| YDR338C | 0      | #N/A             | iYDR338C     | -0.17 | 1.79 |
| YDR339C | 0      | #N/A             | iYDR339C     | -0.84 | 0.98 |
| YDR340W | 0      | #N/A             | iYDR339C     | #N/A  | 0.98 |
| YDR341C | 0      | #N/A             | iYDR341C     | -1.29 | 2.08 |
| YDR342C | HXT7   |                  | 0 iYDR342C-0 | -0.79 | 0.49 |
| YDR343C | HXT6   |                  | 0 iYDR343C   | -0.72 | 0.98 |
| YDR344C | 0      | #N/A             | iYDR344C     | #N/A  | #N/A |
| YDR345C | HXT3   |                  | 0 iYDR345C-0 | -1.96 | 0.42 |
| YDR346C | SGI1   |                  | 0 iYDR346C   | -0.87 | 2.09 |
| YDR347W | MRP1   |                  | 0 iYDR346C   | 0.20  | 2.09 |
| YDR348C | 0      | #N/A             | iYDR348C     | -0.35 | 1.20 |
| YDR349C | YPS7   |                  | 0 iYDR349C   | -0.35 | 2.07 |
| YDR350C | TCM10  | ATP22            | iYDR350C     | 0.04  | 2.27 |
| YDR351W | SBE2   |                  | 0 iYDR350C   | 0.57  | 2.27 |
| YDR352W | 0      | #N/A             | iYDR351W     | -0.60 | 1.00 |
| YDR353W | TRR1   |                  | 0 iYDR352W   | 0.07  | 1.17 |
| YDR354W | TRP4   |                  | 0 iYDR353W   | 0.11  | 1.29 |
| YDR355C | 0      | #N/A             | iYDR356W     | #N/A  | 0.65 |
| YDR356W | SPC110 | NUF1 XCM1        | iYDR354W     | #N/A  | #N/A |
| YDR357C | 0      | #N/A             | iYDR357C     | #N/A  | #N/A |
| YDR358W | GGA1   |                  | 0 iYDR357C   | 0.32  | #N/A |
| YDR359C | VID21  | EAF1             | iYDR360W     | -0.30 | 0.94 |
| YDR360W | 0      | #N/A             | iYDR358W     | #N/A  | 0.45 |
| YDR361C | BCP1   |                  | 0 iYDR361C   | -4.71 | 1.08 |
| YDR362C | TFC6   |                  | 0 iYDR362C   | -0.67 | 1.93 |
| YDR363W | ESC2   |                  | 0 iYDR362C   | -0.82 | 1.93 |
| YDR364C | CDC40  | PRP17 SLT15 SLU4 | iYDR364C     | #N/A  | 1.25 |
| YDR365C | 0      |                  | 0 iYDR365C   | -3.08 | 2.49 |
| YDR366C | 0      | #N/A             | iYDR367W     | 0.36  | 1.67 |
| YDR367W | 0      | #N/A             | iYDR365C     | -2.63 | 2.49 |
| YDR368W | YPR1   |                  | 0 iYDR367W   | 0.51  | 1.67 |
| YDR369C | XRS2   |                  | 0 iYDR369C   | 0.02  | #N/A |

|         |        |            |              |       |      |
|---------|--------|------------|--------------|-------|------|
| YDR370C | 0      | #N/A       | iYDR370C     | -0.81 | 1.84 |
| YDR371W | CTS2   |            | 0 iYDR370C   | 0.85  | 1.84 |
| YDR372C | VPS74  | API1       | iYDR372C     | -0.18 | 2.10 |
| YDR373W | FRQ1   |            | 0 iYDR372C   | 1.28  | 2.10 |
| YDR374C | 0      | #N/A       | iYDR374C     | #N/A  | 2.00 |
| YDR375C | BCS1   |            | 0 iYDR375C   | -0.10 | 1.82 |
| YDR376W | ARH1   |            | 0 iYDR375C   | 0.31  | 1.82 |
| YDR377W | ATP17  |            | 0 iYDR376W   | 0.14  | 1.03 |
| YDR378C | LSM6   |            | 0 iYDR378C   | #N/A  | 1.79 |
| YDR379W | RGA2   |            | 0 iYDR378C   | #N/A  | 1.79 |
| YDR380W | ARO10  |            | 0 iYDR379W   | 2.50  | 1.11 |
| YDR381W | YRA1   | SHE11      | iYDR380W     | -1.24 | 0.66 |
| YDR382W | RPP2B  | RPL45 YPA1 | iYDR381W     | -1.69 | #N/A |
| YDR383C | NKP1   |            | 0 iYDR383C   | #N/A  | 0.87 |
| YDR384C | 0      |            | 0 iYDR384C   | 0.02  | 0.21 |
| YDR385W | EFT2   |            | 0 iYDR384C   | -2.01 | 0.21 |
| YDR386W | MUS81  | SLX3       | iYDR385W     | -1.05 | 0.65 |
| YDR387C | 0      | #N/A       | iYDR387C     | 0.56  | 1.55 |
| YDR388W | RVS167 |            | 0 iYDR387C   | 0.24  | 1.55 |
| YDR389W | SAC7   |            | 0 iYDR388W   | #N/A  | 0.64 |
| YDR390C | UBA2   | UAL1       | iYDR390C     | -1.13 | 1.95 |
| YDR391C | 0      | #N/A       | iYDR391C     | #N/A  | 2.23 |
| YDR392W | SPT3   |            | 0 iYDR391C   | 0.55  | 2.23 |
| YDR393W | SHE9   | MDM33      | iYDR392W     | #N/A  | 1.57 |
| YDR394W | RPT3   | YNT1 YTA2  | iYDR393W     | 0.35  | 1.80 |
| YDR395W | SXM1   | KAP108     | iYDR394W     | -1.69 | 1.16 |
| YDR396W | 0      | #N/A       | iYDR395W     | -0.17 | #N/A |
| YDR397C | NCB2   | YDR1       | iYDR397C     | #N/A  | 1.27 |
| YDR398W | UTP5   |            | 0 iYDR397C   | -1.96 | 1.27 |
| YDR399W | HPT1   | BRA6       | iYDR398W     | #N/A  | 0.37 |
| YDR400W | URH1   |            | 0 iYDR399W   | -0.46 | 0.82 |
| YDR401W | 0      | #N/A       | iYDR400W     | #N/A  | #N/A |
| YDR402C | DIT2   | CYP56      | iYDR402C     | #N/A  | 0.98 |
| YDR403W | DIT1   |            | 0 iYDR402C   | #N/A  | 0.98 |
| YDR404C | RPB7   |            | 0 iYDR404C   | 0.06  | 2.51 |
| YDR405W | MRP20  | MRPL41     | iYDR404C     | #N/A  | 2.51 |
| YDR406W | PDR15  |            | 0 iYDR405W   | 1.18  | 0.94 |
| YDR407C | TRS120 |            | 0 iYDR407C   | -0.52 | 2.12 |
| YDR408C | ADE8   |            | 0 iYDR408C   | #N/A  | 1.42 |
| YDR409W | SIZ1   | ULL1       | iYDR408C     | -1.42 | 1.42 |
| YDR410C | STE14  |            | 0 iYDR410C   | #N/A  | 1.89 |
| YDR411C | 0      |            | 0 iYDR411C   | 0.53  | 2.85 |
| YDR412W | 0      | #N/A       | iYDR411C     | -2.74 | 2.85 |
| YDR413C | 0      | #N/A       | iYDR413C     | #N/A  | 0.79 |
| YDR414C | ERD1   | LDB2       | iYDR414C     | #N/A  | 1.46 |
| YDR415C | 0      | #N/A       | iYDR415C     | 0.58  | #N/A |
| YDR416W | SYF1   | NTC90      | iYDR415C     | -0.95 | #N/A |
| YDR417C | 0      | #N/A       | iYDR418W     | -1.41 | 0.76 |
| YDR418W | RPL12B |            | 0 iYDR416W   | -1.44 | 0.38 |
| YDR419W | RAD30  | DBH1       | iYDR418W     | #N/A  | 0.76 |
| YDR420W | HKR1   |            | 0 itS(AGA)D3 | #N/A  | 0.33 |

|         |        |                   |      |              |       |      |
|---------|--------|-------------------|------|--------------|-------|------|
| YDR421W | ARO80  |                   | 0    | iYDR420W     | 0.33  | 1.25 |
| YDR422C | SIP1   |                   | 0    | iYDR422C     | -0.61 | 1.56 |
| YDR423C | CAD1   | YAP2              |      | iYDR423C     | 0.44  | #N/A |
| YDR424C | DYN2   | SLC1              |      | iYDR424C     | #N/A  | #N/A |
| YDR425W |        | 0                 |      | 0 iYDR424C   | #N/A  | #N/A |
| YDR426C |        | 0                 | #N/A | iYDR426C     | #N/A  | 1.99 |
| YDR427W | RPN9   |                   |      | 0 iYDR426C   | 0.45  | 1.99 |
| YDR428C |        | 0                 | #N/A | iYDR428C     | -0.24 | #N/A |
| YDR429C | TIF35  |                   |      | 0 iYDR429C   | -0.44 | 1.33 |
| YDR430C | CYM1   |                   |      | 0 iYDR431W   | #N/A  | #N/A |
| YDR431W |        | 0                 | #N/A | iYDR429C     | #N/A  | 1.33 |
| YDR432W | NPL3   | MTR13 MTS1 NAB1   |      | iYDR431W     | 0.70  | #N/A |
| YDR433W | KRE22  |                   | #N/A | iYDR431W     | 0.78  | #N/A |
| YDR434W | GPI17  |                   |      | 0 iYDR433W   | 0.07  | 0.63 |
| YDR435C | PPM1   |                   |      | 0 iYDR435C   | 0.71  | 2.16 |
| YDR436W | PPZ2   |                   |      | 0 iYDR435C   | 1.03  | 2.16 |
| YDR437W |        | 0                 | #N/A | iYDR436W     | #N/A  | 1.24 |
| YDR438W |        | 0                 | #N/A | iYDR437W     | 0.63  | 1.08 |
| YDR439W | LRS4   |                   |      | 0 iYDR438W   | -1.26 | #N/A |
| YDR440W | DOT1   | PCH1              |      | iYDR439W-    | -0.67 | 1.12 |
| YDR441C | APT2   |                   |      | 0 iYDR441C   | -0.78 | 0.41 |
| YDR442W |        | 0                 | #N/A | iYDR441C     | 0.60  | 0.41 |
| YDR443C | SSN2   | NUT8 RYE3 SCA1 SI |      | iYDR443C     | #N/A  | 1.50 |
| YDR444W |        | 0                 | #N/A | iYDR443C     | -2.16 | 1.50 |
| YDR445C |        | 0                 | #N/A | itK(CUU)D2   | -1.15 | #N/A |
| YDR446W | ECM11  |                   |      | 0 iYDRWdelta | #N/A  | 1.93 |
| YDR447C | RPS17B | RP51B RPL51B      |      | iYDR447C     | -1.41 | 0.49 |
| YDR448W | ADA2   | SWI8              |      | iYDR447C     | -2.25 | 0.49 |
| YDR449C | UTP6   |                   |      | 0 iYDR449C   | -3.32 | 0.84 |
| YDR450W | RPS18A |                   |      | 0 iYDR449C   | -1.37 | 0.84 |
| YDR451C | YHP1   |                   |      | 0 iYDR451C   | #N/A  | #N/A |
| YDR452W | PPN1   | PHM5              |      | iYDR451C     | -0.40 | #N/A |
| YDR453C | TSA2   | cTPxII            |      | iYDR453C     | 0.55  | 2.35 |
| YDR454C | GUK1   | PUR5              |      | iYDR454C     | #N/A  | 1.78 |
| YDR455C |        | 0                 | #N/A | iYDR456W     | #N/A  | 1.27 |
| YDR456W | NHX1   | NHA2 VPS44        |      | iYDR454C     | #N/A  | 1.78 |
| YDR457W | TOM1   |                   |      | 0 iYDR456W   | 0.12  | 1.27 |
| YDR458C |        | 0                 | #N/A | iYDR458C     | -0.13 | #N/A |
| YDR459C |        | 0                 | #N/A | iYDR459C     | -0.75 | 1.79 |
| YDR460W | TFB3   | RIG2              |      | iYDR459C     | 0.32  | 1.79 |
| YDR461W | MFA1   |                   |      | 0 iYDR460W   | #N/A  | #N/A |
| YDR462W | MRPL28 |                   |      | 0 iYDR461W   | 0.68  | #N/A |
| YDR463W | STP1   | BAP1 SSY2         |      | iYDR462W     | -0.21 | #N/A |
| YDR464W | SPP41  |                   |      | 0 iYDR463W   | #N/A  | #N/A |
| YDR465C | RMT2   |                   |      | 0 iYDR465C   | -3.47 | #N/A |
| YDR466W |        | 0                 |      | 0 iYDR465C   | #N/A  | #N/A |
| YDR467C |        | 0                 | #N/A | iYDR467C     | #N/A  | #N/A |
| YDR468C | TLG1   |                   |      | 0 iYDR468C   | 0.99  | #N/A |
| YDR469W | SDC1   | CPS25 SAF19       |      | iYDR468C     | #N/A  | #N/A |
| YDR470C | UGO1   |                   |      | 0 iYDR470C   | #N/A  | 0.53 |
| YDR471W | RPL27B |                   |      | 0 iYDR470C   | -0.97 | 0.53 |



|         |        |                   |   |            |       |      |
|---------|--------|-------------------|---|------------|-------|------|
| YDR472W | TRS31  |                   | 0 | iSNR13     | -0.53 | 1.08 |
| YDR473C | PRP3   | RNA3              |   | iYDR473C-C | 0.12  | 1.67 |
| YDR474C | 0      | #N/A              |   | iYDR474C   | 1.07  | 0.76 |
| YDR475C | JIP4   |                   | 0 | iYDR475C   | #N/A  | 1.17 |
| YDR476C | 0      | #N/A              |   | iYDR476C   | -0.35 | 1.89 |
| YDR477W | SNF1   | CAT1 CCR1 GLC2 H. |   | iYDR476C   | -0.27 | 1.89 |
| YDR478W | SNM1   |                   | 0 | iYDR477W   | #N/A  | 1.27 |
| YDR479C | 0      |                   | 0 | iYDR479C   | 0.61  | 2.03 |
| YDR480W | DIG2   | RST2              |   | iYDR479C   | #N/A  | 2.03 |
| YDR481C | PHO8   |                   | 0 | iYDR481C   | 0.57  | 1.23 |
| YDR482C | CWC21  |                   | 0 | iYDR482C   | #N/A  | 1.08 |
| YDR483W | KRE2   | MNT1              |   | iYDR482C   | 0.06  | 1.08 |
| YDR484W | SAC2   | SAC2              |   | iYDR483W   | -1.05 | #N/A |
| YDR485C | VPS72  | SWC2              |   | iYDR485C   | -1.91 | #N/A |
| YDR486C | VPS60  | CHM5 MOS10        |   | iYDR486C   | 0.70  | 0.87 |
| YDR487C | RIB3   |                   | 0 | iYDR487C   | #N/A  | #N/A |
| YDR488C | PAC11  |                   | 0 | iYDR488C   | -1.68 | 2.10 |
| YDR489W | 0      | CDC105            |   | iYDR488C   | #N/A  | 2.10 |
| YDR490C | PKH1   |                   | 0 | iYDR490C   | -0.57 | 2.84 |
| YDR491C | 0      | #N/A              |   | iYDR492W   | #N/A  | 2.14 |
| YDR492W | 0      |                   | 0 | iYDR490C   | -1.71 | 2.84 |
| YDR493W | 0      |                   | 0 | iYDR492W   | 0.63  | 2.14 |
| YDR494W | RSM28  |                   | 0 | iYDR493W   | 0.25  | 2.23 |
| YDR495C | VPS3   | PEP6 VPL3 VPT17   |   | iYDR495C   | -0.85 | 0.81 |
| YDR496C | PUF6   |                   | 0 | iYDR496C   | -2.23 | 1.03 |
| YDR497C | ITR1   |                   | 0 | iYDR497C   | 0.66  | 1.05 |
| YDR498C | SEC20  |                   | 0 | iYDR498C   | 0.00  | 1.59 |
| YDR499W | LCD1   | DDC2 PIE1         |   | iYDR498C   | #N/A  | 1.59 |
| YDR500C | RPL37B |                   | 0 | iYDR500C   | -1.47 | 0.38 |
| YDR501W | PLM2   |                   | 0 | iYDR500C   | -0.74 | 0.38 |
| YDR502C | SAM2   | ETH2              |   | iYDR502C   | -0.23 | #N/A |
| YDR503C | LPP1   |                   | 0 | iYDR503C   | 1.23  | 1.85 |
| YDR504C | 0      |                   | 0 | iYDR505C   | 1.43  | 1.21 |
| YDR505C | PSP1   | GIN5              |   | iYDR505C   | 0.59  | 1.21 |
| YDR506C | 0      | #N/A              |   | iYDR506C   | #N/A  | 1.55 |
| YDR507C | GIN4   | ERC47             |   | iYDR507C   | #N/A  | 0.52 |
| YDR508C | GNP1   |                   | 0 | iYDR509W   | 1.16  | 0.44 |
| YDR509W | 0      | #N/A              |   | iYDR507C   | #N/A  | 0.52 |
| YDR510W | SMT3   |                   | 0 | iYDR509W   | -0.05 | 0.44 |
| YDR511W | ACN9   |                   | 0 | iYDR510W   | #N/A  | 1.17 |
| YDR512C | 0      |                   | 0 | iYDR513W   | #N/A  | #N/A |
| YDR513W | TTR1   | GRX2              |   | iYDR511W   | #N/A  | #N/A |
| YDR514C | 0      | #N/A              |   | iYDR514C   | #N/A  | 1.21 |
| YDR515W | SLF1   | SRO99             |   | iYDR514C   | #N/A  | 1.21 |
| YDR516C | 0      |                   | 0 | iYDR516C   | 1.31  | 2.36 |
| YDR517W | GRH1   |                   | 0 | iYDR516C   | -0.07 | 2.36 |
| YDR518W | EUG1   |                   | 0 | iYDR517W   | 0.15  | #N/A |
| YDR519W | FPR2   | FKB2              |   | iYDR518W   | 0.32  | 1.30 |
| YDR520C | 0      | #N/A              |   | iYDR521W   | -0.50 | 2.58 |
| YDR521W | 0      | #N/A              |   | iYDR519W   | #N/A  | #N/A |
| YDR522C | SPS2   |                   | 0 | iYDR522C   | #N/A  | #N/A |

|           |        |                |      |              |       |      |
|-----------|--------|----------------|------|--------------|-------|------|
| YDR523C   | SPS1   |                | 0    | iYDR523C     | #N/A  | 0.49 |
| YDR524C   | AGE1   | SAT1           |      | iYDR524C     | -0.41 | 0.49 |
| YDR525W   | API2   |                | 0    | iYDR524C     | #N/A  | 0.49 |
| YDR526C   |        | 0              | #N/A | iYDR527W-    | -2.76 | 1.28 |
| YDR527W   |        | 0              |      | 0 iYDR525W-  | #N/A  | 0.32 |
| YDR528W   | HLR1   |                | 0    | iYDR527W-    | #N/A  | 1.33 |
| YDR529C   | QCR7   | COR4 CRO1 UCR7 |      | iYDR529C     | #N/A  | 1.68 |
| YDR530C   | APA2   |                | 0    | iYDR530C     | 1.55  | 1.42 |
| YDR531W   |        | 0              | #N/A | iYDR530C     | 0.61  | 1.42 |
| YDR532C   | KRE28  |                | #N/A | iYDR532C     | #N/A  | 1.22 |
| YDR533C   |        | 0              |      | 0 iYDR533C   | 2.70  | 0.88 |
| YDR534C   | FIT1   |                | 0    | iYDR534C-C   | -2.67 | 0.85 |
| YDR535C   |        | 0              | #N/A | iYDR535C     | #N/A  | 0.94 |
| YDR536W   | STL1   |                | 0    | iYDR535C     | #N/A  | 0.94 |
| YDR537C   |        | 0              | #N/A | iYDR538W     | -1.46 | 0.87 |
| YDR538W   | PAD1   | POF1           |      | iYDR536W     | -1.55 | 1.34 |
| YDR539W   |        | 0              | #N/A | iYDR538W     | #N/A  | 0.87 |
| YDR540C   |        | 0              | #N/A | iYDR540C     | 2.41  | 1.72 |
| YDR541C   |        | 0              | #N/A | iYDR541C-C   | -0.13 | #N/A |
| YDR542W   |        | 0              | #N/A | iYDR541C-1   | -0.44 | 0.82 |
| YDR543C   |        | 0              | #N/A | iYDR543C     | #N/A  | 0.35 |
| YDR544C   |        | 0              | #N/A | iYDR544C     | #N/A  | 0.61 |
| YDR545W   | YRF1-1 | YRF1           |      | iYDR544C     | -0.04 | 0.61 |
| YEL001C   |        | 0              | #N/A | iYEL001C     | #N/A  | 1.78 |
| YEL002C   | WBP1   |                | 0    | iYEL002C     | -0.11 | #N/A |
| YEL003W   | GIM4   | PFD2           |      | iYEL004W     | -0.46 | 1.72 |
| YEL004W   | YEA4   |                | 0    | iYEL005C     | 0.39  | 1.59 |
| YEL005C   | VAB2   | VAB31          |      | iYEL005C     | 0.17  | 1.59 |
| YEL006W   |        | 0              | #N/A | iYEL007W     | #N/A  | 0.57 |
| YEL007W   | TOS9   |                | #N/A | iYEL008W     | -0.01 | 0.14 |
| YEL008W   |        | 0              | #N/A | iYEL009C     | #N/A  | 0.35 |
| YEL009C   | GCN4   | AAS3 ARG9      |      | iYEL009C     | -0.34 | 0.35 |
| YEL010W   |        | 0              | #N/A | iYELCdelta4  | #N/A  | 0.74 |
| YEL011W   | GLC3   | GHA1           |      | iYEL012W     | 2.81  | 1.37 |
| YEL012W   | UBC8   | GID3           |      | itQ(UUG)E2   | 2.19  | 1.56 |
| YEL013W   | VAC8   | YEB3           |      | iYEL014C     | 0.22  | #N/A |
| YEL014C   |        | 0              | #N/A | iYEL014C     | #N/A  | #N/A |
| YEL015W   |        | 0              | DCP3 | iYEL016C     | -0.45 | 2.12 |
| YEL016C   |        | 0              | #N/A | iYEL016C     | #N/A  | 2.12 |
| YEL017C-A | PMP2   |                | 0    | iYEL017C-A   | #N/A  | 0.69 |
| YEL017W   |        | 0              |      | 0 iYEL017C-A | -0.09 | 0.69 |
| YEL018W   | EAF5   |                | 0    | iYEL019C     | #N/A  | 1.57 |
| YEL019C   | MMS21  |                | 0    | iYEL019C     | #N/A  | 1.57 |
| YEL020C   |        | 0              | #N/A | iYEL020C     | 0.54  | #N/A |
| YEL021W   | URA3   |                | 0    | iYEL022W     | 1.06  | 0.74 |
| YEL022W   | GEA2   |                | 0    | iYEL023C     | #N/A  | 1.64 |
| YEL023C   |        | 0              | #N/A | iYEL023C     | #N/A  | 1.64 |
| YEL024W   | RIP1   |                | 0    | iYEL025C     | 1.00  | 1.41 |
| YEL025C   | SRI1   |                | #N/A | iYEL025C     | #N/A  | 1.41 |
| YEL026W   | SNU13  |                | 0    | iYEL027W     | -1.47 | #N/A |
| YEL027W   | CUP5   | CLS7 GEF2 VMA3 |      | itM(CAU)E    | 0.08  | 0.60 |



|           |        |                |              |       |      |
|-----------|--------|----------------|--------------|-------|------|
| YEL028W   | 0      | #N/A           | iYEL029C     | -1.60 | 1.43 |
| YEL029C   | BUD16  |                | 0 iYEL029C   | -0.41 | 1.43 |
| YEL030W   | ECM10  | SSC3           | iYEL031W     | #N/A  | 1.14 |
| YEL031W   | SPF1   | COD1 PER9 PIO1 | iYEL032W     | #N/A  | 2.18 |
| YEL032W   | MCM3   |                | 0 itS(AGA)E  | #N/A  | 0.66 |
| YEL033W   | 0      | #N/A           | iYEL035C     | -0.06 | 0.27 |
| YEL034W   | HYP2   | TIF51A         | iYEL035C     | 0.08  | 0.27 |
| YEL035C   | UTR5   |                | 0 iYEL035C   | #N/A  | 0.27 |
| YEL036C   | ANP1   | GEM3 MNN8      | iYEL036C     | -0.18 | #N/A |
| YEL037C   | RAD23  |                | 0 iYEL037C   | 0.26  | 1.10 |
| YEL038W   | UTR4   |                | 0 iYEL039C   | 0.63  | 2.17 |
| YEL039C   | CYC7   |                | 0 iYEL039C   | 3.56  | 2.17 |
| YEL040W   | UTR2   | CRH2           | iYEL041W     | -1.02 | 0.82 |
| YEL041W   | 0      | #N/A           | iYEL042W     | #N/A  | 1.10 |
| YEL042W   | GDA1   | GDPase         | iYEL043W     | -1.50 | #N/A |
| YEL043W   | 0      | #N/A           | iYEL044W     | #N/A  | 1.86 |
| YEL044W   | IES6   |                | 0 iYEL045C   | #N/A  | 0.16 |
| YEL045C   | 0      | #N/A           | iYEL045C     | #N/A  | 0.16 |
| YEL046C   | GLY1   |                | 0 iYEL045C   | -0.85 | 0.16 |
| YEL047C   | 0      | #N/A           | iYEL047C     | 0.50  | 0.77 |
| YEL048C   | 0      | #N/A           | iYEL048C     | #N/A  | 0.58 |
| YEL049W   | PAU2   |                | 0 iYELWdelta | 0.17  | 0.93 |
| YEL050C   | RML2   |                | 0 iYEL050C   | 0.30  | 1.35 |
| YEL051W   | VMA8   |                | 0 iYEL052W   | -0.13 | #N/A |
| YEL052W   | AFG1   |                | 0 iYEL053C   | 0.15  | 1.74 |
| YEL053C   | MAK10  |                | 0 iYEL053C   | -1.94 | 1.74 |
| YEL054C   | RPL12A |                | 0 iYEL054C   | -1.45 | 0.36 |
| YEL055C   | POL5   |                | 0 iYEL055C   | -0.88 | 1.09 |
| YEL056W   | HAT2   |                | 0 iYEL057C   | -0.27 | 1.26 |
| YEL057C   | 0      | #N/A           | iYEL057C     | #N/A  | 1.26 |
| YEL058W   | PCM1   | AGM1           | iYEL059W     | 0.23  | 0.43 |
| YEL059C-A | SOM1   |                | 0 iYEL059W   | #N/A  | 0.43 |
| YEL059W   | 0      | #N/A           | iYEL060C     | #N/A  | 1.22 |
| YEL060C   | PRB1   | CVT1 yscB      | iYEL060C     | 2.16  | 1.22 |
| YEL061C   | CIN8   | KSL2 SDS15     | iYEL061C     | #N/A  | #N/A |
| YEL062W   | NPR2   |                | 0 iYEL063C   | -0.44 | 1.75 |
| YEL063C   | CAN1   |                | 0 iYEL063C   | 0.01  | 1.75 |
| YEL064C   | 0      |                | 0 iYEL064C   | -0.83 | #N/A |
| YEL065W   | SIT1   | ARN3           | iYEL066W     | -1.72 | #N/A |
| YEL066W   | HPA3   |                | 0 iYEL068C   | 0.31  | #N/A |
| YEL067C   | 0      | #N/A           | iYEL066W     | #N/A  | #N/A |
| YEL068C   | 0      | #N/A           | iYEL068C     | #N/A  | #N/A |
| YEL069C   | HXT13  |                | 0 iYEL069C-0 | #N/A  | #N/A |
| YEL070W   | 0      | #N/A           | iYEL071W-    | 1.60  | #N/A |
| YEL071W   | DLD3   |                | 0 iYEL072W-  | 1.56  | #N/A |
| YEL072W   | 0      |                | 0 iYEL073C-4 | #N/A  | 1.39 |
| YEL073C   | 0      | #N/A           | iYEL073C-0   | -0.73 | 1.00 |
| YEL074W   | 0      | #N/A           | iYEL075C     | #N/A  | 0.91 |
| YEL075C   | 0      | #N/A           | iYEL075C     | -0.34 | 0.91 |
| YEL076C   | 0      | #N/A           | iYEL075C     | #N/A  | 0.91 |
| YEL076C-A | 0      | #N/A           | iYEL075C     | -1.09 | 0.91 |

|           |       |          |              |       |      |
|-----------|-------|----------|--------------|-------|------|
| YEL076W-C | #N/A  | #N/A     | iYEL077C     | #N/A  | 0.88 |
| YEL077C   | 0     | #N/A     | iYEL077C     | -0.01 | 0.88 |
| YER001W   | MNN1  |          | 0 iCEN5      | -2.04 | 0.61 |
| YER002W   | NOP16 |          | 0 iYER001W   | -2.20 | #N/A |
| YER003C   | PMI40 | PMI      | iYER003C     | -0.41 | 2.02 |
| YER004W   | 0     |          | 0 iYER003C   | 0.87  | 2.02 |
| YER005W   | YND1  | YEJ5     | iYER004W     | 0.04  | 1.41 |
| YER006W   | NUG1  |          | 0 iYER005W   | -3.37 | #N/A |
| YER007C-A | 0     | #N/A     | iYER007C-A   | -0.58 | 1.14 |
| YER007W   | PAC2  |          | 0 iYER006W   | #N/A  | #N/A |
| YER008C   | SEC3  | PSL1     | iYER008C     | #N/A  | 2.20 |
| YER009W   | NTF2  |          | 0 iYER008C   | #N/A  | 2.20 |
| YER010C   | 0     | #N/A     | iYER010C-C   | 0.73  | 1.49 |
| YER011W   | TIR1  | SRP1     | iYER010C-1   | -0.32 | 0.93 |
| YER012W   | PRE1  |          | 0 itE(UUC)E1 | 0.92  | 1.25 |
| YER013W   | PRP22 |          | 0 iYER012W   | -0.20 | 2.54 |
| YER014W   | HEM14 |          | 0 iYER013W   | #N/A  | #N/A |
| YER015W   | FAA2  | FAM1     | iYER014W     | 0.65  | 1.96 |
| YER016W   | BIM1  | EB1 YEB1 | iYER015W     | -0.14 | 1.48 |
| YER017C   | AFG3  | YTA10    | iYER017C     | #N/A  | 1.37 |
| YER018C   | SPC25 |          | 0 iYER018C   | 0.03  | 2.15 |
| YER019C-A | SBH2  | SEB2     | iYER019C-A   | 0.07  | 1.46 |
| YER019W   | ISC1  |          | 0 iYER018C   | -0.60 | 2.15 |
| YER020W   | GPA2  | SSP101   | iYER019C-A   | 0.68  | 1.46 |
| YER021W   | RPN3  | SUN2     | iYER020W     | 0.58  | 1.26 |
| YER022W   | SRB4  |          | 0 iYER021W   | #N/A  | 1.63 |
| YER023W   | PRO3  | ORE2     | iYER022W     | -0.04 | 2.40 |
| YER024W   | YAT2  |          | 0 iYER023W   | #N/A  | #N/A |
| YER025W   | GCD11 | SUI4     | iYER024W     | -1.42 | #N/A |
| YER026C   | CHO1  | PSS1     | iYER026C     | 0.89  | 1.06 |
| YER027C   | GAL83 | SPM1     | iYER027C     | 0.23  | 1.94 |
| YER028C   | 0     |          | 0 iYER028C   | #N/A  | 0.56 |
| YER029C   | SMB1  | Sm B     | iYER029C     | -0.72 | #N/A |
| YER030W   | 0     | #N/A     | iYER029C     | -1.75 | #N/A |
| YER031C   | YPT31 | YPT8     | iYER031C     | -0.33 | #N/A |
| YER032W   | FIR1  | PIP1     | iYER031C     | #N/A  | #N/A |
| YER033C   | ZRG8  |          | 0 iYER033C   | 0.23  | 1.06 |
| YER034W   | 0     | #N/A     | iYER033C     | #N/A  | 1.06 |
| YER035W   | EDC2  |          | 0 iYER034W   | 1.10  | 0.46 |
| YER036C   | KRE30 | #N/A     | iYER036C     | -1.28 | 0.44 |
| YER037W   | PHM8  |          | 0 iYER036C   | 1.66  | 0.44 |
| YER038C   | KRE29 |          | 0 iYER038C   | #N/A  | #N/A |
| YER039C   | HVG1  | YEM9     | iYER039C-A   | 1.23  | 2.64 |
| YER040W   | GLN3  |          | 0 iYER039C-A | -0.43 | 2.64 |
| YER041W   | YEN1  |          | 0 iYER040W   | #N/A  | #N/A |
| YER042W   | MXR1  | MSRA     | iYER041W     | 0.60  | 0.90 |
| YER043C   | SAH1  |          | 0 iYER043C   | -1.34 | 0.70 |
| YER044C   | ERG28 | BUD18    | iYER044C     | 0.77  | 0.59 |
| YER044C-A | MEI4  |          | 0 iYER044C-A | #N/A  | 0.92 |
| YER045C   | ACA1  |          | 0 iYER045C-C | #N/A  | 0.64 |
| YER046W   | SPO73 |          | 0 iYER045C-1 | #N/A  | 0.78 |

|           |        |                 |      |              |       |      |
|-----------|--------|-----------------|------|--------------|-------|------|
| YER047C   | SAP1   |                 | 0    | iYER047C     | -0.17 | 1.96 |
| YER048C   | CAJ1   |                 | 0    | iYER048C     | 0.71  | 1.35 |
| YER049W   |        | 0               | #N/A | iYER048W-    | #N/A  | 1.26 |
| YER050C   | RSM18  |                 | 0    | iYER050C     | #N/A  | #N/A |
| YER051W   |        | 0               | #N/A | iYER050C     | #N/A  | #N/A |
| YER052C   | HOM3   | BOR1 SIL4       |      | iYER052C     | 0.70  | 1.46 |
| YER053C   |        | 0               |      | 0 iYER053C-C | 1.78  | 0.70 |
| YER054C   | GIP2   |                 | 0    | iYER054C     | 3.29  | 1.11 |
| YER055C   | HIS1   |                 | 0    | iYER055C     | -0.71 | 0.47 |
| YER056C   | FCY2   | BRA7            |      | iYER056C     | -0.57 | 0.21 |
| YER056C-A | RPL34A |                 | 0    | iYER056C-A   | -1.46 | 0.41 |
| YER057C   | HMF1   | HIG1            |      | iYER057C     | #N/A  | 2.00 |
| YER058W   | PET117 |                 | 0    | iYER057C     | 1.92  | 2.00 |
| YER059W   | PCL6   |                 | 0    | iYER058W     | -0.08 | 1.64 |
| YER060W   | FCY21  |                 | 0    | iYER059W     | -0.36 | 1.56 |
| YER060W-A | FCY22  |                 | 0    | iYER060W     | -0.24 | 0.47 |
| YER061C   | CEM1   |                 | 0    | iYER061C     | #N/A  | 0.86 |
| YER062C   | HOR2   | GPP2            |      | iYER062C     | 2.51  | 0.74 |
| YER063W   | THO1   |                 | 0    | iYER062C     | 0.22  | 0.74 |
| YER064C   |        | 0               | #N/A | iYER064C     | #N/A  | #N/A |
| YER065C   | ICL1   |                 | 0    | iYER065C     | -0.08 | #N/A |
| YER066C-A |        | 0               | #N/A | iYER067W     | #N/A  | 1.71 |
| YER066W   |        | 0               | #N/A | itS(UGA)E-   | 0.30  | 0.75 |
| YER067W   |        | 0               | #N/A | iYER066W     | 2.87  | 1.83 |
| YER068W   | MOT2   | NOT4 SIG1       |      | iYER067W     | #N/A  | 1.71 |
| YER069W   | ARG5,6 |                 | 0    | iYER068W     | 0.15  | 0.28 |
| YER070W   | RNR1   | CRT7 RIR1 SDS12 |      | iYER069W     | -2.53 | 1.38 |
| YER071C   |        | 0               | #N/A | iYER071C     | #N/A  | 1.10 |
| YER072W   | VTC1   | NRF1 PHM4       |      | iYER071C     | -0.08 | 1.10 |
| YER073W   | ALD5   |                 | 0    | iYER072W     | -1.10 | 0.25 |
| YER074W   | RPS24A | RPS24EA         |      | iYER073W     | -1.20 | 0.24 |
| YER075C   | PTP3   |                 | 0    | iYER075C     | -1.12 | 0.48 |
| YER076C   |        | 0               | #N/A | iYER076C     | 0.63  | 1.33 |
| YER077C   |        | 0               | #N/A | iYER077C     | #N/A  | #N/A |
| YER078C   |        | 0               | #N/A | iYER078C     | 0.15  | 1.90 |
| YER079W   |        | 0               | #N/A | iYER078C     | 0.75  | 1.90 |
| YER080W   |        | 0               |      | 0 iYER079W   | 0.36  | 1.33 |
| YER081W   | SER3   |                 | 0    | iYER080W     | #N/A  | #N/A |
| YER082C   | UTP7   | KRE31           |      | iYER082C     | -1.26 | #N/A |
| YER083C   |        | 0               |      | 0 iYER084W   | -0.07 | 1.50 |
| YER084W   |        | 0               | #N/A | iYER082C     | #N/A  | #N/A |
| YER085C   |        | 0               | #N/A | iYER085C     | #N/A  | 2.48 |
| YER086W   | ILV1   | ISO1            |      | iYER085C     | -1.40 | 2.48 |
| YER087C-A | #N/A   | #N/A            |      | iYER087C-A   | #N/A  | 1.74 |
| YER087W   |        | 0               | #N/A | iYER086W     | 1.04  | 0.73 |
| YER088C   | DOT6   |                 | 0    | iYER088C     | 0.05  | 0.57 |
| YER089C   | PTC2   |                 | 0    | iYER089C     | -0.33 | 1.62 |
| YER090W   | TRP2   |                 | 0    | iYER089C     | 0.27  | 1.62 |
| YER091C   | MET6   |                 | 0    | iYER091C     | 0.89  | #N/A |
| YER092W   | IES5   |                 | 0    | iYER091C-A   | #N/A  | 0.92 |
| YER093C   |        | 0               | AVO3 | iYER093C     | 0.06  | 2.72 |

|           |        |                    |              |       |      |
|-----------|--------|--------------------|--------------|-------|------|
| YER093C-A | 0      | #N/A               | iYER093C-A   | #N/A  | 1.13 |
| YER094C   | PUP3   | SCS32              | iYER094C     | 0.35  | 1.59 |
| YER095W   | RAD51  | MUT5               | iYER094C     | 1.04  | 1.59 |
| YER096W   | SHC1   |                    | 0 iYER095W   | 1.48  | 0.65 |
| YER097W   | 0      | #N/A               | itE(UUC)E2   | #N/A  | 0.66 |
| YER098W   | UBP9   |                    | 0 itE(UUC)E2 | 0.52  | 0.66 |
| YER099C   | PRS2   |                    | 0 iYER099C   | -0.21 | 2.61 |
| YER100W   | UBC6   | DOA2               | iYER099C     | 0.14  | 2.61 |
| YER101C   | AST2   |                    | 0 iYER101C   | 0.11  | 0.85 |
| YER102W   | RPS8B  |                    | 0 iYER101C   | -1.50 | 0.85 |
| YER103W   | SSA4   |                    | 0 iYER102W   | 5.21  | 1.62 |
| YER104W   | RTT105 |                    | 0 iYER103W   | -2.32 | 1.92 |
| YER105C   | NUP157 |                    | 0 iYER105C   | -1.00 | 0.63 |
| YER106W   | MAM1   |                    | 0 iYER105C   | #N/A  | 0.63 |
| YER107C   | GLE2   | RAE1               | iYER107C     | -0.57 | 1.27 |
| YER108C   | #N/A   | #N/A               | #N/A         | -4.09 | #N/A |
| YER109C   | FLO8   | PHD5               | iYER108C     | 0.55  | 0.78 |
| YER110C   | KAP123 | YRB4               | iYER110C     | #N/A  | #N/A |
| YER111C   | SWI4   | ART1               | iYER111C     | #N/A  | 0.68 |
| YER112W   | LSM4   | SDB23 USS1         | iYER111C     | #N/A  | 0.68 |
| YER113C   | 0      | #N/A               | iYER113C     | 0.01  | #N/A |
| YER114C   | BOI2   | BEB1               | iYER114C     | -1.15 | 1.35 |
| YER115C   | SPR6   |                    | 0 iYER115C   | #N/A  | 1.68 |
| YER116C   | SLX8   |                    | 0 iYER116C   | #N/A  | 0.91 |
| YER117W   | RPL23B |                    | 0 iYER116C   | -1.31 | 0.91 |
| YER118C   | SHO1   | SSU81              | iYER118C     | -0.63 | 1.55 |
| YER119C   | 0      |                    | 0 iYER120W   | 1.54  | 1.41 |
| YER119C-A | 0      | #N/A               | iYER120W     | #N/A  | 1.41 |
| YER120W   | SCS2   |                    | 0 iYER118C   | -0.24 | 1.55 |
| YER121W   | 0      | #N/A               | iYER120W     | #N/A  | 1.41 |
| YER122C   | GLO3   |                    | 0 iYER122C   | 0.48  | 2.31 |
| YER123W   | YCK3   | CKI3               | iYER122C     | -0.38 | 2.31 |
| YER124C   | DSE1   |                    | 0 iYER124C   | -0.32 | 1.94 |
| YER125W   | RSP5   | MDP1 MUT2 NPI1 SI  | iYER124C     | -0.20 | 1.94 |
| YER126C   | NSA2   |                    | 0 iYER126C   | #N/A  | 1.43 |
| YER127W   | LCP5   |                    | 0 iYER126C   | -1.27 | 1.43 |
| YER128W   | 0      | #N/A               | iYER127W     | #N/A  | #N/A |
| YER129W   | PAK1   |                    | 0 iYER128W   | #N/A  | 2.02 |
| YER130C   | 0      | #N/A               | iYER130C     | 0.38  | 0.51 |
| YER131W   | RPS26B |                    | 0 iYER130C   | -1.74 | 0.51 |
| YER132C   | PMD1   |                    | 0 iYER132C   | #N/A  | 0.92 |
| YER133W   | GLC7   | CID1 DIS2 DIS2S1 P | iYERdelta    | 0.66  | 1.92 |
| YER134C   | 0      | #N/A               | iYER134C     | 0.12  | 1.34 |
| YER135C   | 0      | #N/A               | iYER135C     | #N/A  | 0.96 |
| YER136W   | GDI1   | SEC19              | itV(AAC)E1   | 0.28  | 0.68 |
| YER137C   | 0      | #N/A               | iSCR1        | #N/A  | 1.05 |
| YER138C   | #N/A   | #N/A               | YERWdelta    | 0.33  | 0.37 |
| YER139C   | 0      | #N/A               | iYER139C     | #N/A  | 1.42 |
| YER140W   | 0      | #N/A               | iYER139C     | -0.68 | 1.42 |
| YER141W   | COX15  |                    | 0 iYER140W   | 0.65  | 1.45 |
| YER142C   | MAG1   | MMS5               | iYER142C     | 1.62  | 1.52 |

|         |        |                  |                |       |      |
|---------|--------|------------------|----------------|-------|------|
| YER143W | DDI1   | VSM1             | iYER142C       | 1.30  | 1.52 |
| YER144C | UBP5   |                  | 0 iYER144C     | #N/A  | 1.12 |
| YER145C | FTR1   |                  | 0 iYER145C     | -2.55 | 0.48 |
| YER146W | LSM5   |                  | 0 iYER145C     | -0.49 | 0.48 |
| YER147C | SCC4   |                  | 0 iYER147C     | -0.86 | 2.13 |
| YER148W | SPT15  | BTF1 TBP TBP1    | iYER147C       | -0.15 | 2.13 |
| YER149C | PEA2   | DFG9 PPF2        | iYER149C       | -1.50 | 1.52 |
| YER150W | SPI1   |                  | 0 iYER149C     | 2.94  | 1.52 |
| YER151C | UBP3   |                  | 0 iYER151C     | 0.41  | 1.57 |
| YER152C | 0      | #N/A             | iYER153C       | 0.11  | 2.00 |
| YER153C | PET122 |                  | 0 iYER153C     | #N/A  | 2.00 |
| YER154W | OXA1   | PET1402          | iYER153C       | -0.39 | 2.00 |
| YER155C | BEM2   | IPL2 SUP9 TSL1   | iYER155C       | 0.09  | 0.67 |
| YER156C | 0      | #N/A             | iYER156C       | -1.53 | 1.97 |
| YER157W | SEC34  | GRD20 SEC34      | iYER156C       | -0.56 | 1.97 |
| YER158C | 0      | #N/A             | iYER158C       | 0.09  | 1.05 |
| YER159C | BUR6   | NCB1             | iYER159C       | 0.74  | 0.38 |
| YER160C | #N/A   | #N/A             | iYERCdelta     | 0.18  | 0.71 |
| YER161C | SPT2   | EXA1 SIN1        | iYER161C       | 0.33  | 2.05 |
| YER162C | RAD4   |                  | 0 iYER162C     | 0.38  | 1.95 |
| YER163C | 0      | #N/A             | iYER163C-C     | 1.78  | 1.24 |
| YER164W | CHD1   |                  | 0 iYER163C-1   | -1.56 | 0.75 |
| YER165W | PAB1   |                  | 0 iYER164W     | -2.07 | 0.50 |
| YER166W | DNF1   |                  | 0 iYER165W     | #N/A  | 1.05 |
| YER167W | BCK2   | CTR7             | iYER166W       | #N/A  | 0.76 |
| YER168C | CCA1   | TNT1             | iYER168C       | -0.59 | 1.09 |
| YER169W | RPH1   |                  | 0 iYER168C     | #N/A  | 1.09 |
| YER170W | ADK2   | AKY3 PAK3        | iYER169W       | -0.64 | #N/A |
| YER171W | RAD3   | REM1             | iYER170W       | -0.84 | 2.65 |
| YER172C | BRR2   | PRP44 RSS1 SLT22 | iYER172C       | -0.29 | 2.45 |
| YER173W | RAD24  | RS1              | iYER172C       | #N/A  | 2.45 |
| YER174C | GRX4   |                  | 0 iYER174C     | -0.33 | 0.92 |
| YER175C | TMT1   | TAM1             | iYER175C       | #N/A  | 1.54 |
| YER176W | ECM32  | HEL1 MTT1        | iYER175C       | 0.43  | 1.54 |
| YER177W | BMH1   |                  | 38083 iYER176W | 0.55  | 0.22 |
| YER178W | PDA1   |                  | 0 iYER177W     | 0.04  | 0.82 |
| YER179W | DMC1   | ISC2             | iYER178W       | 1.46  | 0.69 |
| YER180C | ISC10  |                  | 0 iYER180C     | -0.31 | 1.26 |
| YER181C | 0      | #N/A             | iYER181C       | #N/A  | 1.13 |
| YER182W | 0      |                  | 0 iYERCdelta   | 0.28  | 1.37 |
| YER183C | FAU1   |                  | 0 iYER183C-C   | #N/A  | 1.07 |
| YER184C | 0      | #N/A             | iYER184C       | #N/A  | 2.20 |
| YER185W | 0      | #N/A             | iYER184C       | #N/A  | 2.20 |
| YER186C | 0      | #N/A             | iYER186C       | -0.74 | 2.38 |
| YER187W | 0      | #N/A             | iYERComeg      | -0.17 | 1.12 |
| YER188W | 0      | #N/A             | iYER187W       | -1.05 | 1.52 |
| YER189W | 0      | #N/A             | iYERWome       | -0.15 | #N/A |
| YER190W | YRF1-2 | YRF1             | iYERWome       | -0.20 | #N/A |
| YFL001W | DEG1   | PUS3             | iYFL002C       | #N/A  | 2.14 |
| YFL002C | SPB4   |                  | 0 iYFL002C     | -1.50 | 2.14 |
| YFL003C | MSH4   |                  | 0 iYFL003C     | #N/A  | 0.67 |

|           |       |                 |              |       |      |
|-----------|-------|-----------------|--------------|-------|------|
| YFL004W   | VTC2  | PHM1            | iYFL005W     | -1.03 | 1.39 |
| YFL005W   | SEC4  | SRO6            | iYFL006W     | 0.18  | 2.01 |
| YFL006W   | 0     | #N/A            | iYFL007W     | 0.21  | #N/A |
| YFL007W   | BLM3  |                 | 0 iYFL008W   | #N/A  | 1.65 |
| YFL008W   | SMC1  | CHL10           | iYFL009W     | -1.05 | 2.26 |
| YFL009W   | CDC4  |                 | 0 iYFL010C   | 0.11  | 2.31 |
| YFL010C   | WWM1  |                 | 0 iYFL010C   | 0.80  | 2.31 |
| YFL011W   | HXT10 |                 | 0 iYFL012W   | #N/A  | #N/A |
| YFL011W-A | #N/A  | #N/A            | #N/A         | 0.78  | #N/A |
| YFL012W   | 0     | #N/A            | iYFL013W-A   | #N/A  | 3.23 |
| YFL013C   | IES1  |                 | 0 iYFL013W-A | -1.01 | 3.23 |
| YFL013W-A | #N/A  | #N/A            | iYFL014W     | #N/A  | 0.67 |
| YFL014W   | HSP12 | GLP1 HOR5       | iYFL015C     | 8.29  | 0.82 |
| YFL015C   | 0     | #N/A            | iYFL015C     | #N/A  | 0.82 |
| YFL016C   | MDJ1  |                 | 0 iYFL016C   | 1.37  | 0.43 |
| YFL017C   | GNA1  | PAT1            | iYFL017C     | -0.30 | 0.30 |
| YFL018C   | LPD1  | HPD1            | iYFL018C     | 0.67  | 1.12 |
| YFL018W-A | #N/A  | #N/A            | #N/A         | -0.53 | #N/A |
| YFL019C   | 0     | #N/A            | YFLWdelta    | #N/A  | 1.25 |
| YFL020C   | PAU5  |                 | 0 iYFL020C   | #N/A  | 1.95 |
| YFL021W   | GAT1  | MEP80 NIL1      | iYFL022C     | -0.41 | #N/A |
| YFL022C   | FRS2  |                 | 0 iYFL022C   | #N/A  | #N/A |
| YFL023W   | FYV11 |                 | 0 iYFL024C   | -2.41 | 0.54 |
| YFL024C   | EPL1  |                 | 0 iYFL024C   | -0.11 | 0.54 |
| YFL025C   | BST1  |                 | 0 iYFL025C   | 0.12  | 0.88 |
| YFL026W   | STE2  |                 | 0 iYFL027C   | #N/A  | 3.10 |
| YFL027C   | GYP8  |                 | 0 iYFL027C   | #N/A  | 3.10 |
| YFL028C   | CAF16 |                 | 0 iYFL028C   | #N/A  | 1.80 |
| YFL029C   | CAK1  | CIV1            | iYFL029C     | 0.86  | 2.10 |
| YFL030W   | 0     |                 | 0 iYFL031W   | 1.44  | #N/A |
| YFL031W   | HAC1  | ERN4 IRE15      | iYFL033C     | 0.23  | 0.77 |
| YFL032W   | 0     | #N/A            | iYFL033C     | #N/A  | 0.77 |
| YFL033C   | RIM15 | TAK1            | iYFL033C     | 0.71  | 0.77 |
| YFL034W   | 0     | #N/A            | iYFL034C-A   | -0.23 | 1.03 |
| YFL035C   | #N/A  | #N/A            | #N/A         | #N/A  | #N/A |
| YFL035C-A | #N/A  | #N/A            | #N/A         | 0.17  | #N/A |
| YFL035C-B | #N/A  | #N/A            | #N/A         | 0.02  | #N/A |
| YFL036W   | RPO41 |                 | 0 iYFL037W   | 0.57  | #N/A |
| YFL037W   | TUB2  | ARM10 SHE8      | iYFL038C     | -0.63 | 2.65 |
| YFL038C   | YPT1  | YP2             | iYFL038C     | 0.32  | 2.65 |
| YFL039C   | ACT1  | ABY1 END7 actin | iYFL039C     | 0.03  | 0.29 |
| YFL040W   | 0     | #N/A            | iYFL041W     | #N/A  | #N/A |
| YFL041W   | FET5  |                 | 0 iYFL042C   | -0.71 | 1.69 |
| YFL042C   | 0     | #N/A            | iYFL042C     | 1.31  | 1.69 |
| YFL043C   | #N/A  | #N/A            | iYFL042C     | 1.17  | 1.69 |
| YFL044C   | 0     |                 | 0 iYFL044C   | 1.23  | #N/A |
| YFL045C   | SEC53 | ALG4            | iYFL045C     | -0.78 | 1.01 |
| YFL046W   | 0     |                 | 0 iYFL047W   | 0.80  | 1.06 |
| YFL047W   | RGD2  |                 | 0 iYFL048C   | #N/A  | 2.83 |
| YFL048C   | EMP47 |                 | 0 iYFL048C   | #N/A  | 2.83 |
| YFL049W   | 0     | #N/A            | iYFL050C     | #N/A  | 1.99 |



|           |       |                  |      |              |       |      |
|-----------|-------|------------------|------|--------------|-------|------|
| YFL050C   | ALR2  |                  | 0    | iYFL050C     | -0.14 | 1.99 |
| YFL051C   |       | 0                | #N/A | iYFL051C-0   | 1.50  | 0.86 |
| YFL052W   |       | 0                | #N/A | iYFL053W-    | #N/A  | 2.08 |
| YFL053W   | DAK2  |                  | 0    | iYFL054C     | 1.68  | 2.16 |
| YFL054C   |       | 0                | #N/A | iYFL054C     | 1.36  | 2.16 |
| YFL055W   | AGP3  |                  | 0    | iYFL056C-1   | 0.23  | 1.86 |
| YFL056C   | AAD6  |                  | 0    | iYFL056C-0   | -1.15 | 0.98 |
| YFL057C   |       | 0                |      | 0 iYFL056C-0 | 0.36  | 0.98 |
| YFL058W   | THI5  |                  | 0    | iYFL059W     | #N/A  | 2.53 |
| YFL059W   | SNZ3  |                  | 0    | iYFL060C     | 0.37  | 2.01 |
| YFL060C   | SNO3  |                  | 0    | iYFL060C     | #N/A  | 2.01 |
| YFL061W   |       | 0                | #N/A | iYFL062W-    | 1.18  | 1.86 |
| YFL062W   | COS4  |                  | 0    | iYFL063W     | 1.13  | 0.86 |
| YFL063W   |       | 0                | #N/A | iYFL064C     | -0.58 | #N/A |
| YFL064C   |       | 0                | #N/A | iYFL064C     | #N/A  | #N/A |
| YFL065C   |       | 0                | #N/A | iYFL064C     | #N/A  | #N/A |
| YFL066C   |       | 0                | #N/A | iYFL066C     | 0.38  | 1.38 |
| YFL067W   |       | 0                | #N/A | iYFL068W     | -0.29 | 0.43 |
| YFL068W   |       | 0                | #N/A | #N/A         | -0.11 | #N/A |
| YFL-TYA   | #N/A  | #N/A             | #N/A | #N/A         | 0.65  | #N/A |
| YFL-TYB   | #N/A  | #N/A             | #N/A | #N/A         | #N/A  | #N/A |
| YFR001W   | LOC1  |                  | 0    | iCEN6        | #N/A  | 1.11 |
| YFR002W   | NIC96 |                  | 0    | iYFR001W     | 0.20  | 1.69 |
| YFR003C   |       | 0                |      | 0 iYFR003C   | #N/A  | #N/A |
| YFR004W   | RPN11 | MPR1             |      | iYFR003C     | 0.98  | #N/A |
| YFR005C   | SAD1  |                  | 0    | iYFR005C     | -1.11 | 0.60 |
| YFR006W   |       | 0                | #N/A | iYFR005C     | 0.39  | 0.60 |
| YFR007W   |       | 0                | #N/A | iYFRWdelta   | #N/A  | 1.20 |
| YFR008W   |       | 0                |      | 0 iYFR007W   | #N/A  | 1.65 |
| YFR009W   | GCN20 |                  | 0    | itG(GCC)F1   | -0.45 | #N/A |
| YFR010W   | UBP6  |                  | 0    | iYFR009W     | 0.60  | 0.78 |
| YFR011C   |       | 0                | #N/A | iYFR011C     | -0.64 | 0.80 |
| YFR012W   |       | 0                | #N/A | itY(GUA)F1   | #N/A  | #N/A |
| YFR013W   | IOC3  |                  | 0    | iYFR012W     | -1.48 | 1.87 |
| YFR014C   | CMK1  |                  | 0    | iYFR014C     | 0.63  | 1.61 |
| YFR015C   | GSY1  |                  | 0    | iYFR015C     | 0.75  | 1.09 |
| YFR016C   |       | 0                | #N/A | iYFR016C     | 0.42  | #N/A |
| YFR017C   |       | 0                | #N/A | iYFR017C     | #N/A  | 1.40 |
| YFR018C   |       | 0                | #N/A | iYFR018C     | -3.30 | 1.69 |
| YFR019W   | FAB1  | SVL7             |      | iYFR018C     | 0.61  | 1.69 |
| YFR020W   |       | 0                | #N/A | iYFRCdelta   | 0.60  | 1.52 |
| YFR021W   | AUT10 | AUT10 CVT18 NMR1 |      | iYFR020W     | -0.08 | 2.11 |
| YFR022W   |       | 0                | #N/A | iYFR021W     | -1.71 | 2.18 |
| YFR023W   | PES4  |                  | 0    | iYFR022W     | #N/A  | 0.58 |
| YFR024C   |       | 0                | #N/A | iYFR024C-A   | 0.51  | #N/A |
| YFR024C-A | LSB3  | YFR024C          |      | iYFR024C-A   | 0.60  | #N/A |
| YFR025C   | HIS2  |                  | 0    | iYFR025C     | 0.42  | #N/A |
| YFR026C   |       | 0                | #N/A | iYFR026C     | #N/A  | 1.36 |
| YFR027W   | ECO1  | CTF7             |      | iYFRWdelta   | -0.44 | 2.32 |
| YFR028C   | CDC14 | OAF3             |      | iYFR028C     | -1.25 | #N/A |
| YFR029W   | PTR3  | SSY3             |      | itY(GUA)F2   | -0.74 | 1.73 |

|           |        |                  |   |            |       |      |
|-----------|--------|------------------|---|------------|-------|------|
| YFR030W   | MET10  |                  | 0 | iYFR029W   | 0.29  | 1.69 |
| YFR031C   | SMC2   |                  | 0 | iYFR031C   | 0.03  | 0.88 |
| YFR031C-A | RPL2A  | RPL5B            |   | iYFR031C-A | -1.66 | 0.27 |
| YFR032C   | 0      | #N/A             |   | iYFR032C   | #N/A  | 0.70 |
| YFR033C   | QCR6   | COR3 UCR6        |   | iYFR033C   | 0.37  | 0.43 |
| YFR034C   | PHO4   |                  | 0 | iYFR034C   | #N/A  | 0.62 |
| YFR035C   | 0      | #N/A             |   | iYFR035C   | -0.71 | 0.51 |
| YFR036W   | CDC26  | HIT3 SCD26       |   | iYFR036W   | #N/A  | #N/A |
| YFR037C   | RSC8   | SWH3             |   | iYFR037C   | -0.29 | #N/A |
| YFR038W   | 0      | #N/A             |   | iYFR038W   | -1.32 | #N/A |
| YFR039C   | 0      | #N/A             |   | iYFR039C   | -0.32 | 1.85 |
| YFR040W   | SAP155 |                  | 0 | iYFR040W   | 0.33  | 1.85 |
| YFR041C   | 0      |                  | 0 | iYFR041C   | 0.60  | #N/A |
| YFR042W   | 0      | #N/A             |   | iYFR042W   | #N/A  | #N/A |
| YFR043C   | 0      | #N/A             |   | iYFR043C   | #N/A  | #N/A |
| YFR044C   | 0      | #N/A             |   | iYFR044C   | 0.48  | 2.01 |
| YFR045W   | 0      | #N/A             |   | iYFR045W   | 0.90  | 2.01 |
| YFR046C   | 0      |                  | 0 | iYFR046C   | -0.35 | #N/A |
| YFR047C   | BNA6   | QPT1             |   | iYFR047C   | 0.72  | 1.71 |
| YFR048W   | 0      |                  | 0 | iYFR048W   | #N/A  | 1.71 |
| YFR049W   | YMR31  |                  | 0 | iYFR049W   | #N/A  | 1.92 |
| YFR050C   | PRE4   |                  | 0 | iYFR050C   | 0.48  | #N/A |
| YFR051C   | RET2   |                  | 0 | iYFR051C   | -0.33 | 3.29 |
| YFR052W   | RPN12  | NIN1             |   | iYFR052W   | 1.45  | 3.29 |
| YFR053C   | HXK1   |                  | 0 | iYFR053C   | 3.81  | 1.99 |
| YFR054C   | 0      | #N/A             |   | iYFR054C   | #N/A  | 1.64 |
| YFR055W   | 0      | #N/A             |   | iYFR055W   | 0.01  | 1.11 |
| YFR056C   | 0      | #N/A             |   | iYFR056C   | #N/A  | 0.77 |
| YFR057W   | 0      | #N/A             |   | iYFR057W   | #N/A  | #N/A |
| YGL001C   | ERG26  |                  | 0 | iYGL001C   | -0.06 | 0.75 |
| YGL002W   | ERP6   |                  | 0 | iYGL002W   | 0.36  | 1.59 |
| YGL003C   | CDH1   | HCT1             |   | iYGL003C   | -0.12 | 1.59 |
| YGL004C   | 0      |                  | 0 | iYGL004C   | #N/A  | 1.11 |
| YGL005C   | COD5   | COD5             |   | iYGL005C   | -0.12 | 1.08 |
| YGL006W   | PMC1   |                  | 0 | iYGL006W   | 0.93  | 0.99 |
| YGL007W   | 0      | #N/A             |   | iYGL007W   | #N/A  | 0.13 |
| YGL008C   | PMA1   |                  | 0 | iYGL008C   | -0.91 | 0.13 |
| YGL009C   | LEU1   |                  | 0 | iYGL009C   | -1.84 | 0.54 |
| YGL010W   | 0      | #N/A             |   | iYGL010W   | 1.88  | #N/A |
| YGL011C   | SCL1   | PRC2             |   | iYGL011C   | 0.90  | #N/A |
| YGL012W   | ERG4   |                  | 0 | iYGL012W   | -0.55 | #N/A |
| YGL013C   | PDR1   | AMY1 ANT1 BOR2 C |   | iYGL013C   | -0.17 | #N/A |
| YGL014W   | PUF4   | YGL023           |   | iYGL014W   | #N/A  | 0.86 |
| YGL015C   | 0      | #N/A             |   | iYGL015C   | #N/A  | 0.86 |
| YGL016W   | KAP122 | PDR6             |   | iYGL016W   | -1.58 | 2.12 |
| YGL017W   | ATE1   |                  | 0 | iYGL017W   | 0.07  | 2.67 |
| YGL018C   | JAC1   |                  | 0 | iYGL018C   | #N/A  | 2.67 |
| YGL019W   | CKB1   |                  | 0 | iYGL019W   | 0.16  | 1.93 |
| YGL020C   | 0      |                  | 0 | iYGL020C   | -0.29 | 1.93 |
| YGL021W   | ALK1   |                  | 0 | iYGL021W   | -0.01 | 0.56 |
| YGL022W   | STT3   |                  | 0 | iYGL022W   | -0.49 | 4.07 |



|         |         |                       |   |            |       |      |
|---------|---------|-----------------------|---|------------|-------|------|
| YGL023C | PIB2    |                       | 0 | iYGL023C   | -0.39 | 4.07 |
| YGL024W |         | 0                     |   | iYGL026C   | #N/A  | 1.43 |
| YGL025C | PGD1    | HRS1 MED3             |   | iYGL024W   | -0.66 | #N/A |
| YGL026C | TRP5    |                       | 0 | iYGL026C   | -0.03 | 1.43 |
| YGL027C | CWH41   | GLS1                  |   | iYGL027C   | -0.02 | #N/A |
| YGL028C | SCW11   |                       | 0 | iYGL028C   | 0.17  | 1.54 |
| YGL029W | CGR1    |                       | 0 | iYGL030W   | #N/A  | 0.66 |
| YGL030W | RPL30   |                       | 0 | iYGL031C   | -1.52 | 0.30 |
| YGL031C | RPL24A  | RPL30A                |   | iYGL031C   | #N/A  | 0.30 |
| YGL032C | AGA2    |                       | 0 | iYGL032C   | #N/A  | 0.72 |
| YGL033W | HOP2    |                       | 0 | iYGL034C-1 | #N/A  | 1.23 |
| YGL034C |         | 0 #N/A                |   | iYGL034C-C | #N/A  | 1.61 |
| YGL035C | MIG1    | CAT4 SSN1 TDS22       |   | iYGL035C   | #N/A  | 0.67 |
| YGL036W |         | 0 #N/A                |   | iYGL037C   | 0.23  | #N/A |
| YGL037C | PNC1    |                       | 0 | iYGL037C   | 2.81  | #N/A |
| YGL038C | OCH1    | LDB12 NGD29           |   | iYGL038C   | -0.46 | 0.84 |
| YGL039W |         | 0 #N/A                |   | itL(CAA)G2 | -0.71 | 1.08 |
| YGL040C | HEM2    | SLU1                  |   | iYGL040C-C | 0.28  | 1.11 |
| YGL041C |         | 0 #N/A                |   | iYGL041C   | #N/A  | #N/A |
| YGL042C |         | 0 #N/A                |   | iYGL042C   | #N/A  | 1.34 |
| YGL043W | DST1    | P37 PPR2 S-III SII TF |   | iYGL044C   | #N/A  | 2.26 |
| YGL044C | RNA15   |                       | 0 | iYGL044C   | #N/A  | 2.26 |
| YGL045W |         | 0 PAL3                |   | iYGL046W   | 1.03  | 0.99 |
| YGL046W |         | 0 #N/A                |   | iYGLWdelta | #N/A  | 1.66 |
| YGL047W |         | 0 #N/A                |   | iYGL048C   | 1.82  | 1.21 |
| YGL048C | RPT6    | CIM3 CRL3 SCB68 Si    |   | iYGL048C   | 0.81  | 1.21 |
| YGL049C | TIF4632 |                       | 0 | iYGL049C   | -0.19 | 1.05 |
| YGL050W |         | 0 #N/A                |   | itR(UCU)G1 | -0.15 | 1.61 |
| YGL051W |         | 0                     |   | iYGL053W   | -0.56 | 1.02 |
| YGL052W |         | 0 #N/A                |   | iYGL053W   | -0.92 | 1.02 |
| YGL053W | PRM8    |                       | 0 | iYGLWdelta | 0.50  | 1.62 |
| YGL054C | ERV14   |                       | 0 | iYGL054C   | 0.45  | #N/A |
| YGL055W | OLE1    | MDM2                  |   | iYGL056C   | -2.45 | 0.45 |
| YGL056C | SDS23   |                       | 0 | iYGL056C   | -0.06 | 0.45 |
| YGL057C |         | 0 #N/A                |   | iYGL057C   | -0.33 | 0.49 |
| YGL058W | RAD6    | UBC2                  |   | iYGL059W   | #N/A  | 2.26 |
| YGL059W |         | 0 #N/A                |   | iYGL060W   | #N/A  | 1.89 |
| YGL060W |         | 0                     |   | iYGL061C   | -1.40 | 1.74 |
| YGL061C | DUO1    |                       | 0 | iYGL061C   | -0.61 | 1.74 |
| YGL061L | #N/A    | #N/A                  |   | #N/A       | -0.81 | #N/A |
| YGL062W | PYC1    |                       | 0 | iYGL063W   | 2.92  | #N/A |
| YGL063W | PUS2    |                       | 0 | iYGL064C   | -1.80 | 2.01 |
| YGL064C | MRH4    |                       | 0 | iYGL064C   | #N/A  | 2.01 |
| YGL065C | ALG2    |                       | 0 | iYGL065C   | 0.27  | 1.44 |
| YGL066W | SGF73   |                       | 0 | iYGL067W   | #N/A  | 2.61 |
| YGL067W | NPY1    |                       | 0 | iYGL068W   | -0.11 | 1.56 |
| YGL068W |         | 0                     |   | iYGL070C   | 0.53  | 2.89 |
| YGL069C |         | 0                     |   | iYGL068W   | 0.24  | 1.56 |
| YGL070C | RPB9    | SHI1 SSU73            |   | iYGL070C   | -0.97 | 2.89 |
| YGL071W | RCS1    | AFT1                  |   | iYGL072C   | -1.97 | 0.43 |
| YGL072C |         | 0 #N/A                |   | iYGL072C   | 0.27  | 0.43 |

|         |         |                  |             |       |      |
|---------|---------|------------------|-------------|-------|------|
| YGL073W | HSF1    | EXA3 MAS3        | iYGL075C    | -0.07 | 1.54 |
| YGL074C | 0       | #N/A             | iYGL072C    | #N/A  | 0.43 |
| YGL075C | MPS2    | MMC1             | iYGL075C    | #N/A  | 1.54 |
| YGL076C | RPL7A   |                  | 0 iYGL076C  | -1.99 | 1.03 |
| YGL077C | HNM1    |                  | 0 iYGL077C  | -0.14 | 1.17 |
| YGL078C | DBP3    |                  | 0 iYGL078C  | -2.17 | 0.84 |
| YGL079W | 0       | #N/A             | iYGL080W    | -0.32 | 1.74 |
| YGL080W | 0       |                  | 0 iYGL081W  | #N/A  | 1.56 |
| YGL081W | 0       | #N/A             | iYGL082W    | #N/A  | 1.05 |
| YGL082W | 0       | #N/A             | iYGL083W    | #N/A  | 1.56 |
| YGL083W | SCY1    |                  | 0 iYGL084C  | 0.39  | 1.66 |
| YGL084C | GUP1    |                  | 0 iYGL084C  | 0.45  | 1.66 |
| YGL085W | 0       | #N/A             | iYGL086W    | #N/A  | #N/A |
| YGL086W | MAD1    |                  | 0 iYGL087C  | 0.18  | 1.94 |
| YGL087C | MMS2    |                  | 0 iYGL087C  | -0.51 | 1.94 |
| YGL088W | 0       | #N/A             | iYGL089C    | #N/A  | 0.52 |
| YGL089C | MF(ALP) |                  | 0 iYGL089C  | -2.73 | 0.52 |
| YGL090W | LIF1    |                  | 0 iYGL091C  | #N/A  | #N/A |
| YGL091C | NBP35   |                  | 0 iYGL091C  | 0.92  | #N/A |
| YGL092W | NUP145  | RAT10            | iYGL093W    | 0.54  | 1.86 |
| YGL093W | SPC105  |                  | 0 iYGL094C  | 1.11  | 2.24 |
| YGL094C | PAN2    |                  | 0 iYGL094C  | #N/A  | 2.24 |
| YGL095C | VPS45   | STT10 VPL28      | iYGL095C    | #N/A  | 1.39 |
| YGL096W | TOS8    |                  | 0 iYGL097W- | #N/A  | 0.46 |
| YGL097W | SRM1    | MTR1 PRP20       | iYGLCtau3   | -0.81 | #N/A |
| YGL098W | 0       | SLT1             | iYGL099W    | 0.25  | 0.67 |
| YGL099W | LSG1    | KRE35            | iYGL100W    | -1.83 | 1.37 |
| YGL100W | SEH1    |                  | 0 iYGL101W  | -0.09 | 1.45 |
| YGL101W | 0       | #N/A             | iYGL102C    | -0.46 | 0.55 |
| YGL102C | 0       | #N/A             | iYGL102C    | -1.00 | 0.55 |
| YGL103W | RPL28   | CYH2             | iYGL104C    | -0.48 | 0.87 |
| YGL104C | VPS73   |                  | 0 iYGL104C  | #N/A  | 0.87 |
| YGL105W | ARC1    |                  | 0 iYGL106W  | -0.29 | 1.36 |
| YGL106W | MLC1    |                  | 0 iYGL107C  | 0.27  | 2.39 |
| YGL107C | 0       |                  | 0 iYGL107C  | -0.55 | 2.39 |
| YGL108C | 0       | #N/A             | iYGL108C    | #N/A  | #N/A |
| YGL109W | 0       | #N/A             | iYGL110C    | #N/A  | #N/A |
| YGL110C | 0       |                  | 0 iYGL110C  | 0.03  | #N/A |
| YGL111W | NSA1    |                  | 0 iYGL112C  | -1.09 | #N/A |
| YGL112C | TAF6    | TAF60 TafII60    | iYGL112C    | -0.36 | #N/A |
| YGL113W | SLD3    |                  | 0 iYGL114W  | #N/A  | 1.55 |
| YGL114W | 0       | #N/A             | iYGL115W    | 0.49  | 1.40 |
| YGL115W | SNF4    | CAT3 SCI1        | iYGL116W    | 0.43  | 1.21 |
| YGL116W | CDC20   | PAC5             | iYGL117W    | -0.83 | 1.34 |
| YGL117W | 0       | #N/A             | iYGL118C    | 2.55  | #N/A |
| YGL118C | 0       | #N/A             | iYGL118C    | #N/A  | #N/A |
| YGL119W | ABC1    | COQ8             | iYGL120C    | #N/A  | 1.89 |
| YGL120C | PRP43   | JA1              | iYGL120C    | #N/A  | 1.89 |
| YGL121C | 0       |                  | 0 iYGL121C  | #N/A  | 1.20 |
| YGL122C | NAB2    |                  | 0 iYGL122C  | #N/A  | 1.19 |
| YGL123W | RPS2    | RPS4 SUP138 SUP3 | iYGL124C    | -1.86 | 0.68 |

|         |       |                   |   |            |       |      |
|---------|-------|-------------------|---|------------|-------|------|
| YGL124C | MON1  |                   | 0 | iYGL124C   | -0.18 | 0.68 |
| YGL125W | MET13 | MET11 MRPL45      |   | iYGL126W   | 0.18  | 0.49 |
| YGL126W | SCS3  |                   | 0 | iYGL127C   | 0.22  | 2.18 |
| YGL127C | SOH1  |                   | 0 | iYGL127C   | 0.54  | 2.18 |
| YGL128C | CWC23 |                   | 0 | iYGL127C   | -2.97 | 2.18 |
| YGL129C | RSM23 |                   | 0 | iYGL129C   | 0.85  | #N/A |
| YGL130W | CEG1  |                   | 0 | iYGL131C   | 0.38  | #N/A |
| YGL131C | SNT2  |                   | 0 | iYGL131C   | #N/A  | #N/A |
| YGL132W | 0     | #N/A              |   | iYGL133W   | #N/A  | #N/A |
| YGL133W | ITC1  |                   | 0 | iYGL134W   | 0.85  | #N/A |
| YGL134W | PCL10 |                   | 0 | iYGL135W   | #N/A  | 1.07 |
| YGL135W | RPL1B | SSM2              |   | iYGL136C   | -1.46 | 0.86 |
| YGL136C | MRM2  |                   | 0 | iYGL136C   | 0.54  | 0.86 |
| YGL137W | SEC27 |                   | 0 | iYGL138C   | -0.22 | 1.47 |
| YGL138C | 0     | #N/A              |   | iYGL138C   | #N/A  | 1.47 |
| YGL139W | 0     | #N/A              |   | iYGL140C   | -1.26 | 1.53 |
| YGL140C | 0     | #N/A              |   | iYGL140C   | 0.05  | 1.53 |
| YGL141W | HUL5  |                   | 0 | iYGL142C   | 0.33  | #N/A |
| YGL142C | GPI10 |                   | 0 | iYGL142C   | -0.06 | #N/A |
| YGL143C | MRF1  |                   | 0 | iYGL143C   | 0.32  | 1.15 |
| YGL144C | 0     |                   | 0 | iYGL144C   | #N/A  | 1.93 |
| YGL145W | TIP20 | TIP1              |   | iYGL146C   | -1.21 | 1.96 |
| YGL146C | 0     | #N/A              |   | iYGL146C   | 0.94  | 1.96 |
| YGL147C | RPL9A |                   | 0 | iYGL147C   | -1.96 | 0.36 |
| YGL148W | ARO2  |                   | 0 | iYGL149W   | -1.61 | #N/A |
| YGL149W | 0     | #N/A              |   | iYGL151W   | #N/A  | #N/A |
| YGL150C | INO80 |                   | 0 | iYGL149W   | -0.61 | #N/A |
| YGL151W | NUT1  |                   | 0 | iYGL152C   | #N/A  | #N/A |
| YGL152C | 0     | #N/A              |   | iYGL152C   | #N/A  | #N/A |
| YGL153W | PEX14 |                   | 0 | iYGL154C   | 0.50  | #N/A |
| YGL154C | LYS5  |                   | 0 | iYGL154C   | #N/A  | #N/A |
| YGL155W | CDC43 | CAL1              |   | iYGL156W   | -0.54 | 2.30 |
| YGL156W | AMS1  |                   | 0 | iYGL157W   | 2.28  | 1.15 |
| YGL157W | 0     | #N/A              |   | iYGL158W   | 1.22  | 1.55 |
| YGL158W | RCK1  |                   | 0 | itL(CAA)G1 | 0.76  | #N/A |
| YGL159W | 0     | #N/A              |   | iYGL160W   | -0.17 | #N/A |
| YGL160W | 0     | #N/A              |   | iYGL161C   | 0.44  | 2.58 |
| YGL161C | 0     |                   | 0 | iYGL161C   | 0.84  | 2.58 |
| YGL162W | SUT1  |                   | 0 | iYGL163C-1 | 0.10  | 0.45 |
| YGL163C | RAD54 | XRS1              |   | iYGL163C-C | 1.21  | 1.43 |
| YGL164C | 0     |                   | 0 | iYGL164C   | -0.60 | 1.12 |
| YGL165C | 0     | #N/A              |   | iYGL164C   | 0.46  | 1.12 |
| YGL166W | CUP2  | ACE1              |   | iYGL167C   | -0.40 | 1.77 |
| YGL167C | PMR1  | BSD1 LDB1         |   | iYGL167C   | -0.13 | 1.77 |
| YGL168W | 0     |                   | 0 | iYGL169W   | -0.17 | #N/A |
| YGL169W | SUA5  |                   | 0 | itK(CUU)G2 | -1.42 | #N/A |
| YGL170C | SPO74 |                   | 0 | iYGL170C   | #N/A  | 0.94 |
| YGL171W | ROK1  |                   | 0 | iYGL172W   | -3.35 | 1.78 |
| YGL172W | NUP49 | NSP49             |   | iYGL173C   | -0.46 | #N/A |
| YGL173C | KEM1  | DST2 RAR5 SEP1 SH |   | iYGL173C   | -0.25 | #N/A |
| YGL174W | BUD13 | CWC26             |   | iYGL175C   | -0.54 | 1.84 |

|         |        |                 |              |       |      |
|---------|--------|-----------------|--------------|-------|------|
| YGL175C | SAE2   | COM1            | iYGL175C     | #N/A  | 1.84 |
| YGL176C | 0      | #N/A            | iYGL176C     | -0.95 | #N/A |
| YGL177W | 0      | #N/A            | iYGL179C-1   | #N/A  | #N/A |
| YGL178W | MPT5   | HTR1 PUF5 UTH4  | iYGL177W-    | #N/A  | 0.50 |
| YGL179C | TOS3   |                 | 0 iYGL179C-C | 0.00  | #N/A |
| YGL180W | APG1   | APG1 AUT3 CVT10 | iYGL181W     | #N/A  | 1.81 |
| YGL181W | GTS1   | FHT1            | iYGL182C     | 0.12  | 2.14 |
| YGL182C | 0      | #N/A            | iYGL182C     | #N/A  | 2.14 |
| YGL183C | MND1   |                 | 0 iYGL183C   | #N/A  | #N/A |
| YGL184C | STR3   |                 | 0 iYGL184C   | 2.27  | #N/A |
| YGL185C | 0      | #N/A            | iYGL185C     | 0.86  | #N/A |
| YGL186C | 0      |                 | 0 iYGL186C   | 0.83  | 2.28 |
| YGL187C | COX4   |                 | 0 iYGL187C   | 0.40  | 0.70 |
| YGL188C | 0      | #N/A            | iYGL188C     | #N/A  | #N/A |
| YGL189C | RPS26A | RPS26           | iYGL189C     | -0.99 | 0.29 |
| YGL190C | CDC55  |                 | 0 iYGL190C   | 0.14  | 0.56 |
| YGL191W | COX13  |                 | 0 iYGL192W   | 1.14  | 0.97 |
| YGL192W | IME4   | SPO8            | iYGL194C     | -0.82 | #N/A |
| YGL193C | 0      | #N/A            | iYGL192W     | -0.07 | 0.97 |
| YGL194C | HOS2   | RTL1            | iYGL194C     | #N/A  | #N/A |
| YGL195W | GCN1   |                 | 0 iYGL196W   | -0.88 | 2.83 |
| YGL196W | 0      | #N/A            | iYGL197W     | #N/A  | 1.06 |
| YGL197W | MDS3   |                 | 0 iYGL198W   | 0.19  | 1.46 |
| YGL198W | 0      |                 | 0 iYGL200C   | 0.63  | 2.05 |
| YGL199C | 0      | #N/A            | iYGL198W     | 0.37  | 1.46 |
| YGL200C | EMP24  | BST2            | iYGL200C     | -0.04 | 2.05 |
| YGL201C | MCM6   |                 | 0 iYGL201C   | -0.25 | 1.42 |
| YGL202W | ARO8   |                 | 0 itK(UUU)G1 | -0.28 | 0.77 |
| YGL203C | KEX1   |                 | 0 iYGL203C   | 0.20  | 1.69 |
| YGL204C | 0      | #N/A            | iYGL204C     | #N/A  | 0.95 |
| YGL205W | POX1   | FOX1            | iYGL206C     | -0.17 | 1.87 |
| YGL206C | CHC1   | SWA5            | iYGL206C     | 0.35  | 1.87 |
| YGL207W | SPT16  | CDC68 SSF1      | iYGL208W     | 0.33  | #N/A |
| YGL208W | SIP2   | SPM2            | iYGL209W     | 0.30  | 1.16 |
| YGL209W | MIG2   | MLZ1            | iYGL210W     | -0.99 | 0.40 |
| YGL210W | YPT32  |                 | 0 iYGL211W   | #N/A  | #N/A |
| YGL211W | 0      |                 | 0 iYGL212W   | -0.81 | #N/A |
| YGL212W | VAM7   | VPS43           | iYGL213C     | -2.41 | #N/A |
| YGL213C | SKI8   | REC103          | iYGL213C     | -0.56 | #N/A |
| YGL214W | 0      | #N/A            | iYGL215W     | -0.37 | #N/A |
| YGL215W | CLG1   |                 | 0 iYGL216W   | -0.48 | 1.04 |
| YGL216W | KIP3   |                 | 0 iYGL218W   | -1.22 | 1.72 |
| YGL217C | 0      | #N/A            | iYGL216W     | #N/A  | 1.04 |
| YGL218W | 0      |                 | 0 iYGL220W   | #N/A  | #N/A |
| YGL219C | MMM2   | MMM2            | iYGL218W     | -0.46 | 1.72 |
| YGL220W | 0      | #N/A            | iYGL221C     | 0.55  | #N/A |
| YGL221C | NIF3   |                 | 0 iYGL221C   | 0.77  | #N/A |
| YGL222C | EDC1   |                 | 0 iYGL222C   | #N/A  | 1.87 |
| YGL223C | COD3   | COD3 LDB11      | iYGL223C     | -0.75 | #N/A |
| YGL224C | SDT1   | SSM1            | iYGL224C     | 0.24  | 1.09 |
| YGL225W | VRG4   | GOG5 LDB3 VAN2  | itV(AAC)G3   | -0.67 | #N/A |

|         |        |                  |             |       |      |
|---------|--------|------------------|-------------|-------|------|
| YGL226W | 0      | #N/A             | iYGL226C-   | #N/A  | #N/A |
| YGL227W | VID30  | GID1             | iYGL228W    | 1.76  | #N/A |
| YGL228W | SHE10  |                  | 0 iYGL229C  | 0.09  | 2.40 |
| YGL229C | SAP4   |                  | 0 iYGL229C  | 0.30  | 2.40 |
| YGL230C | 0      | #N/A             | iYGL230C    | #N/A  | #N/A |
| YGL231C | 0      | #N/A             | iYGL231C    | -0.20 | #N/A |
| YGL232W | 0      |                  | 0 iYGL233W  | 0.16  | #N/A |
| YGL233W | SEC15  |                  | 0 iYGL234W  | 0.05  | 0.75 |
| YGL234W | ADE5,7 |                  | 0 iYGL235W  | -1.61 | 2.04 |
| YGL235W | 0      | #N/A             | iYGL237C    | #N/A  | 1.69 |
| YGL236C | MTO1   | IPS1             | iYGL235W    | -0.93 | 2.04 |
| YGL237C | HAP2   |                  | 0 iYGL237C  | -0.88 | 1.69 |
| YGL238W | CSE1   | KAP109           | iYGL240W    | -0.11 | #N/A |
| YGL239C | 0      | #N/A             | iYGL238W    | #N/A  | #N/A |
| YGL240W | DOC1   | APC10            | iYGL242C    | #N/A  | #N/A |
| YGL241W | KAP114 |                  | 0 iYGL242C  | -0.24 | #N/A |
| YGL242C | 0      | #N/A             | iYGL242C    | 1.32  | #N/A |
| YGL243W | TAD1   |                  | 0 iYGL244W  | -0.06 | #N/A |
| YGL244W | RTF1   | CSL3             | iYGL245W    | 0.08  | 1.53 |
| YGL245W | 0      |                  | 0 iYGL246C  | -0.39 | #N/A |
| YGL246C | RAI1   |                  | 0 iYGL246C  | -0.21 | #N/A |
| YGL247W | BRR6   |                  | 0 iYGL248W  | 0.37  | #N/A |
| YGL248W | PDE1   |                  | 0 iYGL249W  | 2.00  | 1.38 |
| YGL249W | ZIP2   |                  | 0 iYGL250W  | #N/A  | 1.57 |
| YGL250W | 0      | #N/A             | iYGL251C    | 0.42  | 1.19 |
| YGL251C | HFM1   | MER3             | iYGL251C    | -0.77 | 1.19 |
| YGL252C | RTG2   |                  | 0 iYGL252C  | 0.10  | 2.26 |
| YGL253W | HXK2   | HEX1 HKB SCI2    | iYGL254W    | -1.30 | 0.36 |
| YGL254W | FZF1   | NRC299 RSU1 SUL1 | iYGL255W    | #N/A  | #N/A |
| YGL255W | ZRT1   |                  | 0 iYGL256W- | -0.20 | 0.87 |
| YGL256W | ADH4   | NRC465 ZRG5      | iYGL257C    | -0.64 | 1.41 |
| YGL257C | MNT2   |                  | 0 iYGL257C  | -0.68 | 1.41 |
| YGL258W | 0      | #N/A             | iYGL259W-   | 2.05  | 1.54 |
| YGL259W | YPS5   |                  | 0 iYGL260W  | #N/A  | 1.17 |
| YGL260W | 0      | #N/A             | iYGL261C    | #N/A  | 0.86 |
| YGL261C | 0      | #N/A             | iYGL261C    | -0.86 | 0.86 |
| YGL262W | 0      | #N/A             | iYGL263W    | #N/A  | #N/A |
| YGL263W | COS12  |                  | 0 iYGLWome  | #N/A  | #N/A |
| YGR001C | 0      | #N/A             | iYGR001C    | -0.54 | 1.24 |
| YGR002C | 0      | EAF2 GOD1        | iYGR002C    | #N/A  | 2.12 |
| YGR003W | 0      | CULB CULLIN B    | iYGR002C    | -0.77 | 2.12 |
| YGR004W | 0      |                  | 0 iYGR003W  | #N/A  | 1.09 |
| YGR005C | TFG2   |                  | 0 iYGR005C  | 0.19  | 1.79 |
| YGR006W | PRP18  |                  | 0 iYGR005C  | #N/A  | 1.79 |
| YGR007W | MUQ1   | ECT1             | iYGR006W    | 0.00  | 2.13 |
| YGR008C | STF2   |                  | 0 iYGR008C  | 1.89  | 1.19 |
| YGR009C | SEC9   | HSS7             | iYGR009C    | 0.18  | 1.55 |
| YGR010W | NMA2   |                  | 0 iYGR009C  | 0.29  | 1.55 |
| YGR011W | 0      | #N/A             | iYGR009C    | #N/A  | 1.55 |
| YGR012W | 0      | #N/A             | iYGR011W    | 0.30  | 2.10 |
| YGR013W | SNU71  |                  | 0 iYGR012W  | -0.33 | 1.35 |

|         |        |        |      |            |       |      |
|---------|--------|--------|------|------------|-------|------|
| YGR014W | MSB2   |        | 0    | iYGR013W   | -0.07 | 0.48 |
| YGR015C |        | 0      | #N/A | iYGR015C   | #N/A  | 1.40 |
| YGR016W |        | 0      | #N/A | iYGR015C   | 0.65  | 1.40 |
| YGR017W |        | 0      | #N/A | iYGR016W   | 0.37  | 1.53 |
| YGR018C |        | 0      | #N/A | iYGR018C   | 0.51  | 1.09 |
| YGR019W | UGA1   |        |      | 0 iYGR018C | #N/A  | 1.09 |
| YGR020C | VMA7   |        |      | 0 iYGR020C | #N/A  | 1.38 |
| YGR021W |        | 0      | #N/A | iYGR020C   | 1.41  | 1.38 |
| YGR022C |        | 0      | #N/A | iYGR023W   | #N/A  | 0.80 |
| YGR023W | MTL1   |        |      | 0 iYGR021W | 1.22  | 1.69 |
| YGR024C |        | 0      |      | 0 iYGR026W | -0.03 | 0.56 |
| YGR025W |        | 0      | #N/A | itD(GUC)G1 | #N/A  | 0.22 |
| YGR026W |        | 0      | #N/A | itD(GUC)G1 | 0.67  | 0.22 |
| YGR027C | RPS25A | RPS31A |      | iYGR027C   | -0.76 | 0.33 |
| YGR028W | MSP1   | YTA4   |      | itE(UUC)G3 | 1.16  | 2.46 |
| YGR029W | ERV1   |        |      | 0 iYGR028W | #N/A  | 1.83 |
| YGR030C | POP6   |        |      | 0 iYGR030C | -1.86 | #N/A |
| YGR031W |        | 0      | #N/A | iYGR030C   | -0.06 | #N/A |
| YGR032W | GSC2   | FKS2   |      | iYGR031W   | 1.71  | 0.98 |
| YGR033C |        | 0      |      | 0 iYGR033C | -0.01 | 0.37 |
| YGR034W | RPL26B |        |      | 0 iYGR033C | -1.49 | 0.37 |
| YGR035C |        | 0      | #N/A | iYGR035C   | #N/A  | 0.36 |
| YGR036C | CAX4   | CWH8   |      | iYGR036C   | #N/A  | 1.61 |
| YGR037C | ACB1   |        |      | 0 iYGR037C | -0.51 | 1.20 |
| YGR038W | ORM1   |        |      | 0 iYGR037C | 0.80  | 1.20 |
| YGR039W |        | 0      | #N/A | iYGR039W   | #N/A  | #N/A |
| YGR040W | KSS1   |        |      | 0 iYGR039W | -0.32 | #N/A |
| YGR041W | BUD9   |        |      | 0 iYGR040W | -0.28 | 0.39 |
| YGR042W |        | 0      | #N/A | iYGR041W   | -0.34 | 2.43 |
| YGR043C |        | 0      | #N/A | iYGR043C-  | 5.00  | #N/A |
| YGR044C | RME1   | CSP1   |      | iYGR045C   | 1.16  | 1.61 |
| YGR045C |        | 0      | #N/A | iYGR045C   | #N/A  | 1.61 |
| YGR046W |        | 0      | #N/A | iYGR045C   | -0.82 | 1.61 |
| YGR047C | TFC4   | PCF1   |      | iYGR047C   | -0.45 | 1.10 |
| YGR048W | UFD1   |        |      | 0 iYGR047C | 0.78  | 1.10 |
| YGR049W | SCM4   |        |      | 0 iYGR048W | #N/A  | 0.83 |
| YGR050C |        | 0      | #N/A | iYGR050C   | #N/A  | 0.60 |
| YGR051C |        | 0      | #N/A | iYGR051C   | #N/A  | 1.34 |
| YGR052W |        | 0      |      | 0 iYGR051C | #N/A  | 1.34 |
| YGR053C |        | 0      | #N/A | iYGR053C   | #N/A  | 1.82 |
| YGR054W |        | 0      | #N/A | iYGR053C   | #N/A  | 1.82 |
| YGR055W | MUP1   |        |      | 0 iYGR054W | 0.44  | 0.25 |
| YGR056W | RSC1   |        |      | 0 iYGR055W | -1.04 | 0.85 |
| YGR057C | LST7   |        |      | 0 iYGR057C | #N/A  | 1.68 |
| YGR058W |        | 0      | #N/A | iYGR057C   | -0.09 | 1.68 |
| YGR059W | SPR3   |        |      | 0 iYGR058W | #N/A  | 1.42 |
| YGR060W | ERG25  |        |      | 0 iSNR48   | -0.29 | 0.18 |
| YGR061C | ADE6   |        |      | 0 iYGR061C | #N/A  | 0.88 |
| YGR062C | COX18  | OXA2   |      | iYGR062C   | 0.36  | 1.23 |
| YGR063C | SPT4   |        |      | 0 iYGR064W | 0.23  | #N/A |
| YGR064W |        | 0      | #N/A | iYGR062C   | 0.19  | 1.23 |



|         |        |                |      |            |       |      |
|---------|--------|----------------|------|------------|-------|------|
| YGR065C | VHT1   |                | 0    | iYGR065C   | #N/A  | 2.07 |
| YGR066C |        | 0              | #N/A | iYGR066C   | 2.84  | 2.13 |
| YGR067C |        | 0              | #N/A | iYGR067C   | #N/A  | 0.61 |
| YGR068C |        | 0              | #N/A | iYGR069W   | -1.12 | 1.03 |
| YGR069W |        | 0              | #N/A | iYGR067C   | #N/A  | 0.61 |
| YGR070W | ROM1   | SKC1           |      | iYGR069W   | #N/A  | 1.03 |
| YGR071C |        | 0              | #N/A | iYGR071C   | #N/A  | 1.50 |
| YGR072W | UPF3   | SUA6           |      | iYGR071C   | 0.57  | 1.50 |
| YGR073C |        | 0              | #N/A | iYGR075C   | 0.08  | 1.34 |
| YGR074W | SMD1   | SPP92 Sm D1    |      | iYGR072W   | 0.24  | #N/A |
| YGR075C | PRP38  |                | 0    | iYGR075C   | -0.80 | 1.34 |
| YGR076C | MRPL25 | YMR26          |      | iYGR076C   | #N/A  | #N/A |
| YGR077C | PEX8   | PAS6           |      | iYGR077C   | 0.22  | 1.43 |
| YGR078C | PAC10  | GIM2 PFD3 RKS2 |      | iYGR078C   | 0.17  | #N/A |
| YGR079W |        | 0              | #N/A | iYGR078C   | -1.11 | #N/A |
| YGR080W | TWF1   |                | 0    | iYGR079W   | 0.69  | #N/A |
| YGR081C |        | 0              |      | iYGR081C   | -0.56 | 1.71 |
| YGR082W | TOM20  | MAS20 MOM19    |      | iYGR081C   | -0.03 | 1.71 |
| YGR083C | GCD2   | GCD12          |      | iYGR083C   | -0.55 | 1.17 |
| YGR084C | MRP13  |                | 0    | iYGR084C   | -0.10 | #N/A |
| YGR085C | RPL11B |                | 0    | iYGR085C   | #N/A  | 0.35 |
| YGR086C |        | 0              |      | iYGR086C   | 1.07  | 0.38 |
| YGR087C | PDC6   |                | 0    | iYGR087C-  | #N/A  | 1.62 |
| YGR088W | CTT1   |                | 0    | iYGR087C-  | 5.94  | 1.41 |
| YGR089W |        | 0              |      | iYGR088W   | #N/A  | 2.14 |
| YGR090W |        | 0              |      | itT(UGU)G1 | #N/A  | 0.56 |
| YGR091W | PRP31  |                | 0    | iYGR090W   | #N/A  | 0.90 |
| YGR092W | DBF2   |                | 0    | iYGR091W   | 0.31  | 0.67 |
| YGR093W |        | 0              | #N/A | iYGR092W   | #N/A  | 1.09 |
| YGR094W | VAS1   |                | 0    | iYGR093W   | #N/A  | #N/A |
| YGR095C | RRP46  |                | 0    | iYGR095C   | #N/A  | #N/A |
| YGR096W |        | 0              |      | iYGR095C   | #N/A  | #N/A |
| YGR097W | ASK10  |                | 0    | iYGR096W   | #N/A  | 0.48 |
| YGR098C | ESP1   |                | 0    | iYGR098C   | #N/A  | 2.24 |
| YGR099W | TEL2   |                | 0    | iYGR098C   | #N/A  | 2.24 |
| YGR100W | MDR1   | GYP2 MIC1      |      | iYGR099W   | 0.19  | 1.87 |
| YGR101W | PCP1   | MDM37 RBD1     |      | iYGR100W   | 1.24  | #N/A |
| YGR102C |        | 0              | #N/A | iYGR102C   | 0.64  | 1.87 |
| YGR103W | NOP7   | YPH1           |      | iYGR102C   | -3.60 | 1.87 |
| YGR104C | SRB5   |                | 0    | iYGR104C   | #N/A  | 1.65 |
| YGR105W | VMA21  |                | 0    | iYGR104C   | -0.39 | 1.65 |
| YGR106C |        | 0              | #N/A | iYGR106C   | -0.09 | 1.04 |
| YGR107W |        | 0              | #N/A | iYGRWdelta | #N/A  | 1.07 |
| YGR108W | CLB1   | SCB1           |      | iYGR107W   | -0.88 | #N/A |
| YGR109C | CLB6   |                | 0    | iYGR109C   | #N/A  | 1.06 |
| YGR110W |        | 0              | #N/A | iYGR109C   | 1.50  | 1.70 |
| YGR111W |        | 0              | #N/A | iYGR110W   | 1.26  | 1.44 |
| YGR112W | SHY1   |                | 0    | iYGR111W   | #N/A  | 1.53 |
| YGR113W | DAM1   |                | 0    | iYGR112W   | -1.37 | 2.39 |
| YGR114C |        | 0              | #N/A | iYGR116W   | #N/A  | #N/A |
| YGR115C |        | 0              | #N/A | iYGR116W   | #N/A  | #N/A |

|         |         |                   |              |       |      |
|---------|---------|-------------------|--------------|-------|------|
| YGR116W | SPT6    | CRE2 SSN20        | iYGR113W     | -0.91 | 1.13 |
| YGR117C | 0       | #N/A              | iYGR117C     | -0.54 | 0.27 |
| YGR118W | RPS23A  |                   | 0 iYGR117C   | -0.97 | 0.27 |
| YGR119C | NUP57   |                   | 0 iYGR119C   | -0.82 | 1.87 |
| YGR120C | SEC35   | SEC35             | iYGR120C     | -0.45 | #N/A |
| YGR121C | MEP1    | AMT1              | iYGR121C     | 1.33  | 1.27 |
| YGR122W | 0       | #N/A              | iYGR121C     | #N/A  | 1.27 |
| YGR123C | PPT1    |                   | 0 iYGR123C   | #N/A  | 1.33 |
| YGR124W | ASN2    |                   | 0 itI(AAU)G  | -0.64 | 1.04 |
| YGR125W | 0       | #N/A              | iYGR124W     | 0.29  | 1.27 |
| YGR126W | 0       | #N/A              | iYGR125W     | #N/A  | 1.31 |
| YGR127W | 0       | #N/A              | iYGR126W     | 0.37  | #N/A |
| YGR128C | UTP8    |                   | 0 iYGR128C   | -2.20 | 1.38 |
| YGR129W | SYF2    | NTC31             | iYGR128C     | -1.00 | 1.38 |
| YGR130C | 0       | #N/A              | iYGR130C     | 0.38  | 2.06 |
| YGR131W | 0       | #N/A              | iYGR130C     | 1.12  | 2.06 |
| YGR132C | PHB1    |                   | 0 iYGR132C   | 0.61  | 1.97 |
| YGR133W | PEX4    | PAS2 UBC10        | iYGR132C     | #N/A  | 1.97 |
| YGR134W | CAF130  |                   | 0 iYGR133W   | -0.63 | 2.03 |
| YGR135W | PRE9    |                   | 0 iYGR134W   | 0.45  | 1.54 |
| YGR136W | LSB1    |                   | 0 iYGR135W   | 1.53  | 0.66 |
| YGR137W | 0       | #N/A              | iYGR135W     | 1.48  | 0.66 |
| YGR138C | TPO2    |                   | 0 iYGR138C   | 0.28  | #N/A |
| YGR139W | 0       | #N/A              | iYGR138C     | #N/A  | #N/A |
| YGR140W | CBF2    | CBF3A CEP2 CSL5 C | iYGR139W     | #N/A  | 1.07 |
| YGR141W | VPS62   |                   | 0 iYGR140W   | -0.53 | 1.86 |
| YGR142W | BTN2    |                   | 0 iYGR141W   | 1.85  | 0.56 |
| YGR143W | SKN1    |                   | 0 itA(AGC)G  | -0.02 | 0.76 |
| YGR144W | THI4    | ESP35 MOL1        | itG(UCC)G    | 1.02  | 1.22 |
| YGR145W | 0       |                   | 0 iYGR144W   | -3.92 | 2.28 |
| YGR146C | 0       | #N/A              | iYGR146C     | 0.54  | 0.52 |
| YGR147C | NAT2    |                   | 0 iYGR147C   | -0.40 | 3.38 |
| YGR148C | RPL24B  | RPL30B            | iYGR148C     | -1.05 | #N/A |
| YGR149W | 0       | #N/A              | iYGR148C     | 1.81  | #N/A |
| YGR150C | 0       | #N/A              | iYGR150C     | 0.13  | 1.97 |
| YGR151C | 0       | #N/A              | iYGR152C     | -1.63 | 1.81 |
| YGR152C | RSR1    | BUD1              | iYGR152C     | -0.53 | 1.81 |
| YGR153W | TOS10   | #N/A              | iYGR152C     | 1.04  | 1.81 |
| YGR154C | 0       | #N/A              | iYGR154C     | #N/A  | 0.62 |
| YGR155W | CYS4    | NHS5 STR4 VMA41   | iYGR154C     | -0.24 | 0.62 |
| YGR156W | PTI1    |                   | 0 iYGR155W   | 0.33  | 1.63 |
| YGR157W | CHO2    | PEM1              | iYGR156W     | -0.12 | #N/A |
| YGR158C | MTR3    |                   | 0 iYGR158C   | -0.73 | 1.61 |
| YGR159C | NSR1    | SHE5              | iYGR160W     | -2.02 | 1.04 |
| YGR160W | FYV13   | #N/A              | iYGR158C     | #N/A  | 1.61 |
| YGR161C | 0       |                   | 0 iYGR161C-0 | 0.83  | 0.47 |
| YGR162W | TIF4631 |                   | 0 itV(AAC)G2 | -1.62 | 0.34 |
| YGR163W | GTR2    |                   | 0 iYGR162W   | 0.30  | 1.44 |
| YGR164W | 0       | #N/A              | iYGR162W     | #N/A  | 1.44 |
| YGR165W | 0       |                   | 0 itR(UCU)G2 | #N/A  | 1.14 |
| YGR166W | KRE11   | TRS65             | iYGR165W     | 0.43  | 1.63 |



|         |       |                  |              |       |      |
|---------|-------|------------------|--------------|-------|------|
| YGR167W | CLC1  | SCD4             | iYGR166W     | 1.05  | 2.33 |
| YGR168C | 0     | #N/A             | iYGR168C     | -0.02 | #N/A |
| YGR169C | PUS6  |                  | 0 iYGR169C   | #N/A  | 0.77 |
| YGR170W | PSD2  |                  | 0 iYGR169C   | -0.38 | 0.77 |
| YGR171C | MSM1  |                  | 0 iYGR171C   | #N/A  | #N/A |
| YGR172C | YIP1  |                  | 0 iYGR172C   | -0.13 | 1.20 |
| YGR173W | 0     | GIR1             | iYGR172C     | -1.04 | 1.20 |
| YGR174C | CBP4  |                  | 0 iYGR174C   | 1.29  | 1.83 |
| YGR175C | ERG1  |                  | 0 iYGR175C   | -0.48 | 0.36 |
| YGR176W | 0     | #N/A             | iYGR175C     | -2.23 | 0.36 |
| YGR177C | ATF2  |                  | 0 iYGR177C   | -2.74 | 0.85 |
| YGR178C | PBP1  | MRS16            | iYGR178C     | 0.09  | 1.18 |
| YGR179C | OKP1  |                  | 0 iYGR179C   | -1.18 | 2.77 |
| YGR180C | RNR4  | CRT3             | iYGR180C     | -0.45 | 0.41 |
| YGR181W | TIM13 |                  | 0 itL(CAA)G3 | #N/A  | 1.95 |
| YGR182C | 0     | #N/A             | iYGR182C     | #N/A  | 0.95 |
| YGR183C | QCR9  | UCR9             | iYGR183C     | 0.47  | 1.38 |
| YGR184C | UBR1  | PTR1             | iYGR184C     | 0.07  | 1.43 |
| YGR185C | TYS1  | TTS1 TYRRS       | iYGR185C     | -0.50 | 2.33 |
| YGR186W | TFG1  | RAP74 SSU71      | iYGR185C     | 0.60  | 2.33 |
| YGR187C | HGH1  |                  | 0 iYGR187C   | -1.45 | 1.56 |
| YGR188C | BUB1  |                  | 0 iYGR188C   | #N/A  | 2.19 |
| YGR189C | CRH1  |                  | 0 iYGR189C   | 0.58  | 0.67 |
| YGR190C | 0     | #N/A             | iYGR191W     | #N/A  | 0.54 |
| YGR191W | HIP1  |                  | 0 itW(CCA)G2 | -0.53 | 1.03 |
| YGR192C | TDH3  | GLD1 HSP35 HSP36 | iYGR192C     | 0.48  | 0.16 |
| YGR193C | PDX1  |                  | 0 iYGR193C   | -0.02 | #N/A |
| YGR194C | XKS1  |                  | 0 iYGR194C   | 1.54  | 1.29 |
| YGR195W | SKI6  | ECM20 RRP41      | iYGR194C     | -0.25 | 1.29 |
| YGR196C | FYV8  |                  | 0 iYGR196C   | -0.39 | 2.16 |
| YGR197C | SNG1  |                  | 0 iYGR197C   | #N/A  | 1.55 |
| YGR198W | 0     | #N/A             | iYGR197C     | -0.17 | 1.55 |
| YGR199W | PMT6  |                  | 0 iYGR198W   | 0.47  | #N/A |
| YGR200C | ELP2  | TOT2             | iYGR200C     | #N/A  | 1.66 |
| YGR201C | 0     | #N/A             | iYGR201C     | -0.44 | #N/A |
| YGR202C | PCT1  | BSR2 CCT1        | iYGR202C     | 0.07  | 0.58 |
| YGR203W | 0     | #N/A             | iYGR202C     | 0.73  | 0.58 |
| YGR204W | ADE3  |                  | 0 iYGR203W   | 0.01  | #N/A |
| YGR205W | 0     | #N/A             | iYGR204W     | 1.83  | #N/A |
| YGR206W | 0     | #N/A             | iYGR205W     | #N/A  | #N/A |
| YGR207C | 0     | #N/A             | iYGR207C     | 1.16  | 0.97 |
| YGR208W | SER2  |                  | 0 iYGR207C   | -0.27 | 0.97 |
| YGR209C | TRX2  | LMA1             | iYGR209C     | 1.06  | 1.01 |
| YGR210C | 0     | #N/A             | iYGR210C     | -0.91 | 1.30 |
| YGR211W | ZPR1  |                  | 0 iYGR210C   | -1.67 | 1.30 |
| YGR212W | 0     | #N/A             | iYGR211W     | 2.81  | 0.61 |
| YGR213C | RTA1  |                  | 0 iYGR213C   | 1.36  | 0.47 |
| YGR214W | RPS0A | NAB1 NAB1A YST1  | iYGR213C     | -1.78 | 0.47 |
| YGR215W | RSM27 |                  | 0 iYGR214W   | 0.13  | 2.86 |
| YGR216C | GPI1  |                  | 0 iYGR216C   | -0.11 | 2.37 |
| YGR217W | CCH1  |                  | 0 iYGR216C   | #N/A  | 2.37 |

|         |         |             |              |       |      |
|---------|---------|-------------|--------------|-------|------|
| YGR218W | CRM1    | KAP124 XPO1 | iYGRWdelta   | -0.15 | 1.45 |
| YGR219W | 0       | #N/A        | iYGR218W     | 0.59  | #N/A |
| YGR220C | MRPL9   |             | 0 iYGR220C   | 0.37  | 2.04 |
| YGR221C | TOS2    |             | 0 iYGR221C   | 0.18  | 0.97 |
| YGR222W | PET54   |             | 0 iSNR7-S    | 0.77  | 1.84 |
| YGR223C | 0       |             | 0 iYGR223C   | 0.66  | 1.23 |
| YGR224W | AZR1    |             | 0 iYGR223C   | -0.55 | 1.23 |
| YGR225W | AMA1    | SPO70       | iYGR224W     | #N/A  | 2.42 |
| YGR226C | 0       | #N/A        | iYGR226C     | 0.72  | 1.95 |
| YGR227W | DIE2    | ALG10       | iYGR226C     | 0.33  | 1.95 |
| YGR228W | 0       | #N/A        | iYGR227W     | -0.96 | #N/A |
| YGR229C | SMI1    | KNR4        | iYGR229C     | -0.88 | 1.16 |
| YGR230W | BNS1    |             | 0 iYGR229C   | #N/A  | 1.16 |
| YGR231C | PHB2    |             | 0 iYGR231C   | 0.52  | 2.45 |
| YGR232W | NAS6    |             | 0 iYGR231C   | 0.84  | 2.45 |
| YGR233C | PHO81   |             | 0 iYGR233C-  | #N/A  | 0.65 |
| YGR234W | YHB1    | YHB4        | iYGR233C-    | -3.38 | #N/A |
| YGR235C | 0       | #N/A        | iYGR235C     | 0.51  | 2.30 |
| YGR236C | SPG1    |             | 0 iYGR236C   | #N/A  | 1.51 |
| YGR237C | 0       | #N/A        | iYGR237C     | 0.60  | 1.91 |
| YGR238C | KEL2    |             | 0 iYGR238C   | #N/A  | 1.63 |
| YGR239C | PEX21   |             | 0 iYGR239C   | 1.02  | 1.35 |
| YGR240C | PFK1    |             | 0 iYGR240C   | -0.87 | #N/A |
| YGR241C | YAP1802 |             | 0 iYGR242W   | -0.66 | #N/A |
| YGR242W | 0       | #N/A        | iYGR240C     | #N/A  | #N/A |
| YGR243W | 0       |             | 0 iYGR242W   | 2.67  | #N/A |
| YGR244C | LSC2    |             | 0 iYGR244C   | 1.60  | 0.96 |
| YGR245C | SDA1    |             | 0 iYGR245C   | -3.31 | 1.99 |
| YGR246C | BRF1    | PCF4 TDS4   | iYGR246C     | -0.34 | 2.22 |
| YGR247W | CPD1    |             | 0 iYGR246C   | #N/A  | 2.22 |
| YGR248W | SOL4    |             | 0 iYGR247W   | 5.46  | 1.46 |
| YGR249W | MGA1    |             | 0 iYGR248W   | 1.18  | 0.91 |
| YGR250C | 0       | #N/A        | iYGR250C-    | 1.09  | 1.74 |
| YGR251W | 0       | #N/A        | iYGR250C-    | #N/A  | 1.98 |
| YGR252W | GCN5    | ADA4 SWI9   | iYGR251W     | -0.48 | 1.86 |
| YGR253C | PUP2    | DOA5        | iYGR253C-    | 1.21  | #N/A |
| YGR254W | ENO1    | HSP48       | iYGR253C-    | 0.39  | #N/A |
| YGR255C | COQ6    |             | 0 iYGR255C   | 0.97  | 1.02 |
| YGR256W | GND2    |             | 0 itT(UGU)G2 | 4.04  | 1.33 |
| YGR257C | 0       |             | 0 iYGR257C   | -0.18 | 1.68 |
| YGR258C | RAD2    |             | 0 iYGR258C-  | 1.23  | 0.84 |
| YGR259C | 0       | #N/A        | iYGR260W     | #N/A  | 0.44 |
| YGR260W | TNA1    |             | 0 iYGR258C-  | 0.11  | 1.01 |
| YGR261C | APL6    | YKS5        | iYGR261C     | -0.37 | #N/A |
| YGR262C | BUD32   | LDB14       | iYGR262C     | -0.11 | 3.56 |
| YGR263C | 0       | #N/A        | iYGR263C     | -0.72 | 1.13 |
| YGR264C | MES1    | MES MetRS   | iYGR265W     | -1.15 | 2.05 |
| YGR265W | 0       | #N/A        | iYGR263C     | #N/A  | 1.13 |
| YGR266W | 0       | #N/A        | iYGR265W     | 0.64  | 2.05 |
| YGR267C | FOL2    |             | 0 iYGR267C   | 0.56  | 1.58 |
| YGR268C | 0       |             | 0 iYGR269W   | 0.81  | 1.66 |

|         |        |                    |             |       |      |
|---------|--------|--------------------|-------------|-------|------|
| YGR269W | 0      | #N/A               | iYGR267C    | #N/A  | 1.58 |
| YGR270W | YTA7   |                    | 0 iYGR269W  | 0.31  | 1.66 |
| YGR271W | SLH1   |                    | 0 iYGR270W  | -0.05 | 1.34 |
| YGR272C | 0      | #N/A               | iYGR272C    | #N/A  | #N/A |
| YGR273C | 0      | #N/A               | iYGR273C    | #N/A  | 0.52 |
| YGR274C | TAF1   | TAF130 TAF145 Taf1 | iYGR274C    | -0.37 | #N/A |
| YGR275W | RTT102 |                    | 0 iYGR274C  | -0.10 | #N/A |
| YGR276C | RNH70  | REX1               | iYGR276C    | -0.38 | 1.51 |
| YGR277C | 0      | #N/A               | iYGR277C    | 0.42  | 2.17 |
| YGR278W | CWC22  |                    | 0 iYGR277C  | -1.29 | 2.17 |
| YGR279C | SCW4   |                    | 0 iYGR279C  | 0.09  | 0.40 |
| YGR280C | PXR1   | GNO1               | iYGR280C    | -2.19 | 1.32 |
| YGR281W | YOR1   | YRS1               | iYGR280C    | 0.91  | 1.32 |
| YGR282C | BGL2   |                    | 0 iYGR282C  | 0.66  | #N/A |
| YGR283C | 0      | #N/A               | iYGR283C    | -0.07 | 1.00 |
| YGR284C | ERV29  |                    | 0 iYGR284C  | 0.89  | 4.05 |
| YGR285C | ZUO1   |                    | 0 iYGR285C  | -1.07 | 1.26 |
| YGR286C | BIO2   |                    | 0 iYGR286C- | 0.24  | 2.77 |
| YGR287C | 0      | #N/A               | iYGR287C    | 1.21  | 1.89 |
| YGR288W | MAL13  |                    | 0 iYGR287C  | -0.12 | 1.89 |
| YGR289C | MAL11  | AGT1               | iYGR290W    | 0.54  | 3.33 |
| YGR290W | 0      | #N/A               | iYGR288W-   | #N/A  | 1.82 |
| YGR291C | 0      | #N/A               | iYGR291C    | #N/A  | #N/A |
| YGR292W | MAL12  |                    | 0 iYGR291C  | 0.97  | #N/A |
| YGR293C | 0      | #N/A               | iYGR294W    | #N/A  | 1.74 |
| YGR294W | 0      | #N/A               | iYGR292W-   | -0.29 | 1.13 |
| YGR295C | COS6   |                    | 0 iYGR295C- | 0.97  | #N/A |
| YGR296W | YRF1-3 | YRF1               | iYGR295C-   | -0.11 | #N/A |
| YHL001W | RPL14B |                    | 0 iYHL002W  | -1.21 | 0.71 |
| YHL002W | HSE1   |                    | 0 iYHL003C  | 0.52  | 1.34 |
| YHL003C | LAG1   |                    | 0 iYHL003C  | 0.06  | 1.34 |
| YHL004W | MRP4   |                    | 0 iYHL007C  | 0.03  | 1.02 |
| YHL005C | 0      | #N/A               | iYHL004W    | #N/A  | #N/A |
| YHL006C | SHU1   |                    | 0 iYHL004W  | #N/A  | #N/A |
| YHL007C | STE20  |                    | 0 iYHL007C  | 0.17  | 1.02 |
| YHL008C | 0      | #N/A               | iYHL008C    | 0.05  | 0.86 |
| YHL009C | YAP3   |                    | 0 iYHL009C  | #N/A  | #N/A |
| YHL010C | 0      | #N/A               | iYHL010C    | -0.77 | 1.33 |
| YHL011C | PRS3   |                    | 0 iYHL011C  | -0.71 | 1.05 |
| YHL012W | 0      | #N/A               | iYHL013C    | #N/A  | 0.89 |
| YHL013C | 0      | #N/A               | iYHL013C    | #N/A  | 0.89 |
| YHL014C | YLF2   | YLF1               | iYHL014C    | -3.01 | #N/A |
| YHL015W | RPS20  | URP2               | iYHL016C    | -1.46 | 1.23 |
| YHL016C | DUR3   |                    | 0 iYHL016C  | -0.06 | 1.23 |
| YHL017W | 0      | #N/A               | iYHL018W    | -0.23 | #N/A |
| YHL018W | 0      | #N/A               | iYHL019C    | #N/A  | 1.68 |
| YHL019C | APM2   |                    | 0 iYHL019C  | 0.83  | 1.68 |
| YHL020C | OPI1   |                    | 0 iYHL020C  | -0.44 | 1.75 |
| YHL021C | 0      |                    | 0 iYHL021C  | 3.54  | 0.90 |
| YHL022C | SPO11  |                    | 0 iYHL022C  | #N/A  | #N/A |
| YHL023C | 0      |                    | 0 iYHL023C  | -0.79 | 1.28 |

|           |        |                 |   |              |       |      |
|-----------|--------|-----------------|---|--------------|-------|------|
| YHL024W   | RIM4   |                 | 0 | iYHL025W     | 1.56  | 0.71 |
| YHL025W   | SNF6   |                 |   | 0 iYHL026C   | #N/A  | 0.97 |
| YHL026C   | 0      | #N/A            |   | iYHL026C     | -1.82 | 0.97 |
| YHL027W   | RIM101 | RIM1            |   | iYHL028W     | 0.35  | 1.10 |
| YHL028W   | WSC4   | YHC8            |   | iYHL029C     | -1.97 | 0.47 |
| YHL029C   | 0      | #N/A            |   | iYHL029C     | -0.14 | 0.47 |
| YHL030W   | ECM29  |                 |   | 0 iYHL031C   | 0.91  | 1.59 |
| YHL031C   | GOS1   |                 |   | 0 iYHL031C   | 0.68  | 1.59 |
| YHL032C   | GUT1   |                 |   | 0 iYHL032C   | 0.52  | 2.13 |
| YHL033C   | RPL8A  | MAK7            |   | iYHL033C     | -1.99 | #N/A |
| YHL034C   | SBP1   | SSB1 SSBR1      |   | iYHL034C     | 0.47  | #N/A |
| YHL035C   | 0      |                 |   | 0 iYHL035C   | 0.07  | 0.71 |
| YHL036W   | MUP3   |                 |   | 0 iYHL037C   | 0.52  | 1.73 |
| YHL037C   | 0      | #N/A            |   | iYHL037C     | #N/A  | 1.73 |
| YHL038C   | CBP2   |                 |   | 0 iYHL038C   | -1.99 | 1.89 |
| YHL039W   | 0      | #N/A            |   | iYHL040C     | -1.60 | 1.59 |
| YHL040C   | ARN1   |                 |   | 0 iYHL040C   | -1.32 | 1.59 |
| YHL041W   | 0      | #N/A            |   | iYHL042W     | #N/A  | 1.17 |
| YHL042W   | 0      | #N/A            |   | iYHL043W     | #N/A  | #N/A |
| YHL043W   | ECM34  |                 |   | 0 iYHL044W   | -0.33 | 0.81 |
| YHL044W   | 0      | #N/A            |   | iYHL045W     | 0.97  | 1.73 |
| YHL045W   | 0      | #N/A            |   | iYHL046C     | #N/A  | #N/A |
| YHL046C   | 0      | #N/A            |   | iYHL046C     | #N/A  | #N/A |
| YHL047C   | ARN2   | TAF1            |   | iYHL047C-0   | -1.49 | 1.17 |
| YHL048W   | COS8   |                 |   | 0 iYHL049C-1 | 1.20  | 0.77 |
| YHL049C   | 0      | #N/A            |   | iYHL049C-0   | -0.37 | 0.57 |
| YHL050C   | 0      | #N/A            |   | iYHL050C     | -0.02 | #N/A |
| YHR001W   | OSH7   |                 |   | 0 iCEN8      | 0.48  | 1.49 |
| YHR001W-A | QCR10  |                 |   | 0 iYHR001W   | 0.51  | 1.06 |
| YHR002W   | LEU5   |                 |   | 0 iYHR001W-  | #N/A  | #N/A |
| YHR003C   | 0      | #N/A            |   | iYHR003C     | -0.41 | 1.02 |
| YHR004C   | NEM1   |                 |   | 0 iYHR004C   | #N/A  | 0.75 |
| YHR005C   | GPA1   | CDC70 DAC1 SCG1 |   | iYHR005C     | 0.36  | 0.39 |
| YHR006W   | STP2   |                 |   | 0 iYHRCdelta | -0.33 | 1.33 |
| YHR007C   | ERG11  | CYP51           |   | iYHR007C     | -0.92 | #N/A |
| YHR008C   | SOD2   |                 |   | 0 iYHR008C   | #N/A  | 0.74 |
| YHR009C   | 0      | #N/A            |   | iYHR009C     | 0.22  | #N/A |
| YHR010W   | RPL27A | RPL27           |   | iYHR009C     | -1.22 | #N/A |
| YHR011W   | DIA4   |                 |   | 0 iYHR010W   | 0.04  | #N/A |
| YHR012W   | VPS29  | PEP11           |   | iYHR011W     | 0.56  | #N/A |
| YHR013C   | ARD1   |                 |   | 0 iYHR013C   | -1.12 | 1.64 |
| YHR014W   | SPO13  |                 |   | 0 iYHR013C   | #N/A  | 1.64 |
| YHR015W   | MIP6   |                 |   | 0 itQ(UUG)H  | 0.23  | #N/A |
| YHR016C   | YSC84  | LSB4            |   | iYHR016C     | 0.91  | 1.97 |
| YHR017W   | YSC83  |                 |   | 0 iYHR016C   | -0.05 | 1.97 |
| YHR018C   | ARG4   |                 |   | 0 iYHR018C   | 2.20  | 0.81 |
| YHR019C   | DED81  |                 |   | 0 iYHR019C   | -1.25 | 1.48 |
| YHR020W   | 0      | #N/A            |   | iYHR019C     | -1.93 | 1.48 |
| YHR021C   | RPS27B |                 |   | 0 iYHR021C   | -1.42 | 0.23 |
| YHR022C   | 0      | #N/A            |   | iYHR022C     | 2.08  | #N/A |
| YHR023W   | MYO1   |                 |   | 0 iYHR022C   | #N/A  | #N/A |

|           |        |                |              |       |      |
|-----------|--------|----------------|--------------|-------|------|
| YHR024C   | MAS2   | MIF2           | iYHR024C     | 0.25  | 1.86 |
| YHR025W   | THR1   |                | 0 iYHR024C   | -0.77 | 1.86 |
| YHR026W   | PPA1   | VMA16          | iYHR025W     | -0.41 | 2.17 |
| YHR027C   | RPN1   | HRD2 NAS1      | iYHR027C     | 0.43  | #N/A |
| YHR028C   | DAP2   | DPP2           | iYHR028C     | 0.71  | #N/A |
| YHR029C   | 0      | #N/A           | iYHR029C     | #N/A  | 0.69 |
| YHR030C   | SLT2   | BYC2 MPK1 SLK2 | iYHR030C     | 1.21  | #N/A |
| YHR031C   | RRM3   | RTT104         | iYHR031C     | -0.99 | #N/A |
| YHR032W   | 0      | #N/A           | iYHR031C     | #N/A  | #N/A |
| YHR033W   | 0      | #N/A           | iYHR032W     | 1.01  | 0.30 |
| YHR034C   | 0      |                | 0 iYHR034C   | 1.01  | #N/A |
| YHR035W   | 0      | #N/A           | iYHR034C     | #N/A  | #N/A |
| YHR036W   | 0      | #N/A           | iYHR035W     | -1.95 | #N/A |
| YHR037W   | PUT2   |                | 0 iYHR036W   | 0.72  | #N/A |
| YHR038W   | FIL1   | FIL1 KIM4      | iYHR037W     | -0.25 | #N/A |
| YHR039BC  | #N/A   | #N/A           | #N/A         | #N/A  | #N/A |
| YHR039C   | MSC7   |                | 0 iYHR039C   | -0.38 | #N/A |
| YHR040W   | 0      |                | 0 iYHR039C-E | -1.73 | 2.81 |
| YHR041C   | SRB2   | HRS2           | iYHR041C     | -0.63 | 2.65 |
| YHR042W   | NCP1   | CPR1           | iYHR041C     | -1.20 | 2.65 |
| YHR043C   | DOG2   |                | 0 iYHR043C   | 1.80  | 1.82 |
| YHR044C   | DOG1   |                | 0 iYHR044C   | 1.79  | #N/A |
| YHR045W   | 0      | #N/A           | iYHR044C     | -0.06 | #N/A |
| YHR046C   | INM1   |                | 0 iYHR046C   | 0.56  | 1.30 |
| YHR047C   | AAP1'  | AAP1           | iYHR047C-0   | -0.07 | #N/A |
| YHR048W   | 0      | #N/A           | iYHR047C-2   | -0.53 | #N/A |
| YHR049C-A | 0      | #N/A           | iYHR049C-7   | 0.93  | #N/A |
| YHR049W   | FSH1   |                | 0 iYHR048W   | 0.43  | 1.39 |
| YHR050W   | SMF2   |                | 0 iYHR049C-7 | 0.46  | #N/A |
| YHR051W   | COX6   |                | 0 iYHR050W   | 1.10  | 1.22 |
| YHR052W   | CIC1   | NSA3           | iYHR051W     | -1.72 | #N/A |
| YHR053C   | CUP1-1 | CUP1           | iYHR053C     | #N/A  | 2.68 |
| YHR054C   | 0      | #N/A           | iYHR054C     | -0.45 | 1.20 |
| YHR055C   | CUP1-2 | CUP1           | iYHR055C     | 0.53  | 2.45 |
| YHR056C   | RSC30  |                | 0 iYHR056C   | -0.67 | 2.74 |
| YHR057C   | CPR2   | CYP2           | iYHR057C     | 0.81  | #N/A |
| YHR058C   | MED6   |                | 0 iYHR058C   | -1.60 | 1.71 |
| YHR059W   | FYV4   |                | 0 iYHR058C   | #N/A  | 1.71 |
| YHR060W   | VMA22  | CEV1 VPH6      | iYHR059W     | 0.79  | 1.45 |
| YHR061C   | GIC1   |                | 0 iYHR061C   | 0.79  | 1.07 |
| YHR062C   | RPP1   |                | 0 iYHR062C   | -1.80 | 2.79 |
| YHR063C   | PAN5   |                | 0 iYHR063C   | -0.26 | 0.84 |
| YHR064C   | SSZ1   | PDR13          | iYHR064C     | -1.49 | 0.81 |
| YHR065C   | RRP3   |                | 0 iYHR065C   | -0.63 | 1.70 |
| YHR066W   | SSF1   |                | 0 iYHR065C   | -2.36 | 1.70 |
| YHR067W   | 0      | HTD2           | iYHR066W     | #N/A  | #N/A |
| YHR068W   | DYS1   |                | 0 iYHR067W   | -1.31 | 1.04 |
| YHR069C   | RRP4   |                | 0 iYHR069C   | -0.78 | #N/A |
| YHR070W   | TRM5   |                | 0 iYHR069C   | #N/A  | #N/A |
| YHR071W   | PCL5   |                | 0 iYHR070W   | 1.74  | 0.38 |
| YHR072W   | ERG7   |                | 0 itF(GAA)H1 | -0.74 | #N/A |

|          |       |                |   |          |       |      |
|----------|-------|----------------|---|----------|-------|------|
| YHR073W  | OSH3  |                | 0 | iYHR072W | #N/A  | #N/A |
| YHR074W  | QNS1  |                | 0 | iYHR073W | -0.22 | 1.87 |
| YHR075C  | PPE1  | MRPS2          |   | iYHR075C | 0.66  | #N/A |
| YHR076W  | 0     |                | 0 | iYHR075C | #N/A  | #N/A |
| YHR077C  | NMD2  | IFS1 SUA1 UPF2 |   | iYHR077C | -0.27 | 2.22 |
| YHR078W  | 0     | #N/A           |   | iYHR077C | #N/A  | 2.22 |
| YHR079BC | #N/A  | #N/A           |   | #N/A     | -1.23 | #N/A |
| YHR079C  | IRE1  | ERN1           |   | iYHR079C | -0.85 | #N/A |
| YHR080C  | 0     | #N/A           |   | iYHR080C | 0.50  | 1.97 |
| YHR081W  | 0     | YC1D           |   | iYHR080C | -3.70 | 1.97 |
| YHR082C  | KSP1  |                | 0 | iYHR082C | #N/A  | #N/A |
| YHR083W  | 0     | FMP20          |   | iYHR082C | -0.40 | #N/A |
| YHR084W  | STE12 |                | 0 | iYHR083W | -1.19 | 1.56 |
| YHR085W  | 0     |                | 0 | iYHR084W | #N/A  | #N/A |
| YHR086W  | NAM8  | MRE2 MUD15     |   | iYHR085W | -0.21 | 2.30 |
| YHR087W  | 0     | #N/A           |   | iYHR086W | 4.54  | #N/A |
| YHR088W  | RPF1  |                | 0 | iYHR087W | -2.76 | 2.15 |
| YHR089C  | GAR1  |                | 0 | iYHR089C | -1.34 | 1.41 |
| YHR090C  | YNG2  | EAF4 NBN1      |   | iYHR090C | -0.72 | #N/A |
| YHR091C  | MSR1  |                | 0 | iYHR091C | 0.15  | #N/A |
| YHR092C  | HXT4  | LGT1 RAG1      |   | iYHR092C | -0.88 | #N/A |
| YHR093W  | AHT1  |                | 0 | iYHR092C | #N/A  | #N/A |
| YHR094C  | HXT1  | HOR4           |   | iYHR094C | -1.19 | 0.88 |
| YHR095W  | 0     | #N/A           |   | iYHR094C | #N/A  | 0.88 |
| YHR096C  | HXT5  |                | 0 | iYHR096C | 2.44  | #N/A |
| YHR097C  | 0     | #N/A           |   | iYHR097C | #N/A  | 0.82 |
| YHR098C  | SFB3  | LST1           |   | iYHR098C | -0.31 | #N/A |
| YHR099W  | TRA1  |                | 0 | iYHR098C | #N/A  | #N/A |
| YHR100C  | 0     | #N/A           |   | iYHR100C | -0.71 | 2.37 |
| YHR101C  | BIG1  |                | 0 | iYHR101C | #N/A  | 2.75 |
| YHR102W  | KIC1  | NRK1           |   | iYHR101C | 0.43  | 2.75 |
| YHR103W  | SBE22 |                | 0 | iYHR102W | -0.09 | 0.87 |
| YHR104W  | GRE3  |                | 0 | iYHR103W | 2.69  | #N/A |
| YHR105W  | 0     |                | 0 | iYHR104W | #N/A  | #N/A |
| YHR106W  | TRR2  |                | 0 | iYHR105W | 1.09  | 1.57 |
| YHR107C  | CDC12 | CLA10 PSL7     |   | iYHR107C | -0.21 | 1.98 |
| YHR108W  | GGA2  |                | 0 | iYHR107C | -0.39 | 1.98 |
| YHR109W  | CTM1  |                | 0 | iYHR108W | 0.31  | #N/A |
| YHR110W  | ERP5  |                | 0 | iYHR109W | 0.29  | #N/A |
| YHR111W  | 0     | YHR1           |   | iYHR110W | -0.52 | 2.17 |
| YHR112C  | 0     | #N/A           |   | iYHR112C | 0.46  | 2.01 |
| YHR113W  | 0     | #N/A           |   | iYHR112C | 0.71  | 2.01 |
| YHR114W  | BZZ1  | LSB7           |   | iYHR113W | 0.44  | #N/A |
| YHR115C  | 0     |                | 0 | iYHR115C | 0.30  | 3.00 |
| YHR116W  | 0     |                | 0 | iYHR115C | #N/A  | 3.00 |
| YHR117W  | TOM71 | TOM72          |   | iYHR116W | #N/A  | 2.24 |
| YHR118C  | ORC6  |                | 0 | iYHR118C | #N/A  | 3.49 |
| YHR119W  | SET1  | YTX1           |   | iYHR118C | -0.83 | 3.49 |
| YHR120W  | MSH1  |                | 0 | iYHR119W | -0.82 | 2.12 |
| YHR121W  | 0     |                | 0 | iYHR120W | 0.34  | 1.50 |
| YHR122W  | 0     | #N/A           |   | iYHR121W | -0.12 | 1.47 |



|           |         |                 |   |              |       |      |
|-----------|---------|-----------------|---|--------------|-------|------|
| YHR123W   | EPT1    |                 | 0 | iYHR122W     | 0.32  | 1.44 |
| YHR124W   | NDT80   |                 |   | 0 iYHR123W   | -0.13 | 0.52 |
| YHR125W   | 0       | #N/A            |   | itF(GAA)H2   | #N/A  | #N/A |
| YHR126C   | 0       | #N/A            |   | iYHR126C     | #N/A  | #N/A |
| YHR127W   | 0       | #N/A            |   | iYHR126C     | -1.76 | #N/A |
| YHR128W   | FUR1    |                 |   | 0 iYHR127W   | -1.12 | #N/A |
| YHR129C   | ARP1    | ACT5            |   | iYHR129C     | -0.46 | #N/A |
| YHR130C   | 0       | #N/A            |   | iYHR131C     | 0.49  | 3.38 |
| YHR131C   | 0       | #N/A            |   | iYHR131C     | #N/A  | 3.38 |
| YHR132C   | ECM14   |                 |   | 0 iYHR132C   | 0.40  | #N/A |
| YHR133C   | 0       |                 |   | 0 iYHR133C   | #N/A  | #N/A |
| YHR134W   | WSS1    |                 |   | 0 iYHR133C   | 0.15  | #N/A |
| YHR135C   | YCK1    | CKI2            |   | iYHR135C     | 0.56  | 2.73 |
| YHR136C   | SPL2    |                 |   | 0 iYHR136C   | #N/A  | 1.07 |
| YHR137W   | ARO9    |                 |   | 0 iYHR136C   | 2.88  | 1.07 |
| YHR138C   | 0       | #N/A            |   | iYHR138C     | 3.41  | #N/A |
| YHR139C   | SPS100  |                 |   | 0 iYHR139C   | 1.54  | 1.57 |
| YHR139C-A | 0       | #N/A            |   | iYHR139C-A   | #N/A  | #N/A |
| YHR140W   | 0       | #N/A            |   | iYHR139C-A   | 2.93  | #N/A |
| YHR141C   | RPL42B  | MAK18           |   | iYHR141C     | -0.74 | #N/A |
| YHR142W   | CHS7    |                 |   | 0 iYHR141C   | 0.88  | #N/A |
| YHR143W   | DSE2    |                 |   | 0 iYHR142W   | -0.58 | 1.73 |
| YHR143W-A | RPC10   | RPB12           |   | iYHR143W     | #N/A  | #N/A |
| YHR144C   | DCD1    |                 |   | 0 iYHR144C   | #N/A  | 0.78 |
| YHR145C   | 0       | #N/A            |   | iYHRCdelta   | #N/A  | #N/A |
| YHR146W   | CRP1    |                 |   | 0 iYHRCdelta | -0.04 | 1.72 |
| YHR147C   | MRPL6   |                 |   | 0 iYHR147C   | 0.54  | 2.85 |
| YHR148W   | IMP3    |                 |   | 0 iYHR147C   | -1.88 | 2.85 |
| YHR149C   | 0       |                 |   | 0 iYHR149C   | -3.00 | 1.32 |
| YHR150W   | 0       |                 |   | 0 iYHR149C   | -1.14 | 1.32 |
| YHR151C   | 0       | #N/A            |   | iYHR151C     | 0.26  | 1.97 |
| YHR152W   | SPO12   |                 |   | 0 iYHR151C   | -0.20 | 1.97 |
| YHR153C   | SPO16   |                 |   | 0 iYHR153C   | #N/A  | 1.65 |
| YHR154W   | RTT107  | ESC4            |   | iYHR153C     | -1.46 | 1.65 |
| YHR155W   | 0       | #N/A            |   | iYHR154W     | -0.03 | #N/A |
| YHR156C   | LIN1    |                 |   | 0 iYHR156C   | -0.75 | 1.44 |
| YHR157W   | REC104  |                 |   | 0 iYHR156C   | #N/A  | 1.44 |
| YHR158C   | KEL1    |                 |   | 0 iYHR158C   | -0.54 | 2.57 |
| YHR159W   | 0       | #N/A            |   | iYHR158C     | 1.37  | 2.57 |
| YHR160C   | PEX18   |                 |   | 0 iYHR160C   | 0.52  | 0.54 |
| YHR161C   | YAP1801 |                 |   | 0 iYHR161C   | 0.40  | #N/A |
| YHR162W   | 0       | #N/A            |   | iYHR161C     | 0.70  | #N/A |
| YHR163W   | SOL3    |                 |   | 0 iYHR162W   | 0.25  | 1.97 |
| YHR164C   | DNA2    | WEB2            |   | iYHR164C     | 0.58  | 1.30 |
| YHR165C   | PRP8    | DBF3 DNA39 RNA8 |   | iYHR165C     | #N/A  | 2.37 |
| YHR166C   | CDC23   |                 |   | 0 iYHR166C   | -0.06 | 2.56 |
| YHR167W   | THP2    |                 |   | 0 iYHR166C   | -1.22 | 2.56 |
| YHR168W   | 0       |                 |   | 0 iYHR167W   | -1.28 | 1.40 |
| YHR169W   | DBP8    |                 |   | 0 iYHR168W   | -2.51 | 1.50 |
| YHR170W   | NMD3    | SRC5            |   | iYHR169W     | -2.88 | #N/A |
| YHR171W   | APG7    | APG7 CVT2       |   | iYHR170W     | 0.61  | 1.13 |

|           |       |                   |   |            |       |      |
|-----------|-------|-------------------|---|------------|-------|------|
| YHR172W   | SPC97 |                   | 0 | iYHR171W   | #N/A  | 2.00 |
| YHR173C   | 0     | #N/A              |   | iYHR173C   | -1.32 | #N/A |
| YHR174W   | ENO2  |                   | 0 | iYHR173C   | 0.25  | #N/A |
| YHR175W   | CTR2  |                   | 0 | iYHR174W   | -0.31 | 0.90 |
| YHR176W   | 0     | FMO               |   | iYHR175W   | -0.54 | #N/A |
| YHR177W   | 0     | #N/A              |   | iYHR176W   | 0.18  | #N/A |
| YHR178W   | STB5  |                   | 0 | iYHR177W   | -0.54 | 0.76 |
| YHR179W   | OYE2  | Old Yellow Enzyme |   | iYHR178W   | -0.39 | 0.99 |
| YHR180W   | 0     | #N/A              |   | iYHRCdelta | #N/A  | 1.79 |
| YHR181W   | 0     |                   | 0 | itT(UGU)H  | 0.65  | 0.27 |
| YHR182W   | 0     | #N/A              |   | iYHR181W   | -0.16 | #N/A |
| YHR183W   | GND1  |                   | 0 | iYHR182W   | -0.12 | 0.98 |
| YHR184W   | SSP1  | SPO3              |   | iYHR183W   | #N/A  | 0.60 |
| YHR185C   | PFS1  | ADY1              |   | iYHR185C   | #N/A  | 0.59 |
| YHR186C   | COG1  |                   | 0 | iYHR186C   | -0.92 | 2.07 |
| YHR187W   | IKI1  | ELP5 HAP2 TOT5    |   | iYHR186C   | #N/A  | 2.07 |
| YHR188C   | GPI16 |                   | 0 | iYHR188C   | -0.15 | 1.86 |
| YHR189W   | 0     | PTH               |   | iYHR188C   | #N/A  | 1.86 |
| YHR190W   | ERG9  |                   | 0 | iYHR189W   | 0.19  | 1.10 |
| YHR191C   | CTF8  |                   | 0 | iYHR191C   | #N/A  | #N/A |
| YHR192W   | 0     | #N/A              |   | iYHR191C   | -0.45 | #N/A |
| YHR193C   | EGD2  |                   | 0 | iYHR193C   | -0.62 | 1.86 |
| YHR194W   | 0     |                   | 0 | iYHR193C   | 0.51  | 1.86 |
| YHR195W   | NVJ1  | VAB36             |   | iYHR194W   | -0.16 | 1.82 |
| YHR196W   | UTP9  |                   | 0 | iYHR195W   | -1.03 | 3.00 |
| YHR197W   | 0     |                   | 0 | iYHR196W   | -4.65 | #N/A |
| YHR198C   | 0     |                   | 0 | iYHR198C   | 0.89  | #N/A |
| YHR199C   | 0     |                   | 0 | iYHR199C   | 0.38  | 1.35 |
| YHR200W   | RPN10 | MCB1 SUN1         |   | iYHR199C   | 0.17  | 1.35 |
| YHR201C   | PPX1  |                   | 0 | iYHR201C   | 0.12  | #N/A |
| YHR202W   | 0     | #N/A              |   | iYHR201C   | -0.69 | #N/A |
| YHR203C   | RPS4B |                   | 0 | iYHR203C   | -1.77 | 0.50 |
| YHR204W   | MNL1  | HTM1              |   | iYHR203C   | -0.62 | 0.50 |
| YHR205W   | SCH9  | KOM1              |   | iYHR204W   | -0.32 | 1.62 |
| YHR206W   | SKN7  | BRY1 POS9         |   | iYHR205W   | -1.85 | 1.23 |
| YHR207C   | SET5  |                   | 0 | iYHR207C   | 0.26  | 1.37 |
| YHR208W   | BAT1  | ECA39 TWT1        |   | iYHR207C   | -1.14 | 1.37 |
| YHR209W   | 0     | #N/A              |   | iYHR208W   | 2.44  | 1.06 |
| YHR210C   | 0     | #N/A              |   | iYHR210C-C | #N/A  | 2.80 |
| YHR211W   | FLO5  |                   | 0 | iYHR210C-C | -1.26 | 2.80 |
| YHR212C   | 0     | #N/A              |   | iYHR213W-  | #N/A  | 0.90 |
| YHR213W   | 0     | #N/A              |   | iYHRCdelta | -0.92 | 1.42 |
| YHR214C-B | #N/A  | #N/A              |   | iYHRCdelta | 0.43  | 1.39 |
| YHR214W   | 0     | #N/A              |   | iYHR213W-  | 0.23  | 0.90 |
| YHR214W-A | 0     | #N/A              |   | iYHR213W-  | -0.13 | 0.90 |
| YHR215W   | PHO12 | PHO10             |   | iYHRCdelta | -1.15 | 1.39 |
| YHR216W   | IMD2  | PUR5              |   | iYHRCdelta | -1.68 | 1.39 |
| YHR217C   | 0     | #N/A              |   | #N/A       | -0.26 | #N/A |
| YHR218W   | 0     | #N/A              |   | iYHRCdelta | -0.10 | 1.39 |
| YHR219W   | 0     | #N/A              |   | iYHRCdelta | -0.20 | 1.39 |
| YIL001W   | 0     | #N/A              |   | iYIL002C   | -0.05 | 1.44 |



|           |       |                  |               |       |      |
|-----------|-------|------------------|---------------|-------|------|
| YIL002C   | INP51 | SJL1             | iYIL002C      | 0.46  | 1.44 |
| YIL003W   | DRE3  | DRE3             | iYIL004C      | -0.95 | 1.92 |
| YIL004C   | BET1  | SLY12            | iYIL004C      | -1.30 | 1.92 |
| YIL005W   | EPS1  |                  | 0 iYIL006W    | -0.86 | 1.38 |
| YIL006W   | 0     | #N/A             | iYIL007C      | #N/A  | 2.32 |
| YIL007C   | 0     |                  | 0 iYIL007C    | #N/A  | 2.32 |
| YIL008W   | URM1  |                  | 0 iYIL009W    | #N/A  | #N/A |
| YIL009W   | FAA3  |                  | 0 iYILCdelta5 | -0.27 | 0.68 |
| YIL010W   | DOT5  | nTPx             | iYIL011W      | 0.91  | 0.87 |
| YIL011W   | TIR3  | YIB1             | iYIL012W      | -1.89 | 0.81 |
| YIL012W   | 0     | #N/A             | iYIL013C      | #N/A  | 0.50 |
| YIL013C   | PDR11 |                  | 0 iYIL013C    | #N/A  | 0.50 |
| YIL014W   | MNT3  |                  | 0 itT(AGU)I2  | -0.04 | #N/A |
| YIL015C-A | #N/A  | #N/A             | iYIL015C-A    | #N/A  | 1.04 |
| YIL015W   | BAR1  | SST1             | iYIL016W      | #N/A  | 1.12 |
| YIL016W   | SNL1  |                  | 0 iYIL017C    | -1.55 | 3.06 |
| YIL017W   | #N/A  | #N/A             | #N/A          | 0.66  | #N/A |
| YIL018W   | RPL2B | LOT2 RPL5A       | iYIL019W      | -1.29 | 0.36 |
| YIL019W   | 0     |                  | 0 iYIL020C    | -3.40 | 2.14 |
| YIL020C   | HIS6  |                  | 0 iYIL020C    | -0.91 | 2.14 |
| YIL021W   | RPB3  |                  | 0 iYIL022W    | -0.10 | 1.05 |
| YIL022W   | TIM44 | ISP45 MIM44 MPI1 | iYIL023C      | 0.12  | #N/A |
| YIL023C   | 0     | #N/A             | iYIL023C      | 1.00  | #N/A |
| YIL024C   | 0     | #N/A             | iYIL024C      | -0.39 | 0.95 |
| YIL025C   | 0     | #N/A             | iYIL024C      | #N/A  | 0.95 |
| YIL026C   | IRR1  | SCC3             | iYIL026C      | -1.88 | 1.34 |
| YIL027C   | KRE27 |                  | 0 iYIL027C    | #N/A  | 1.84 |
| YIL028W   | 0     | #N/A             | iYIL029C      | -2.12 | #N/A |
| YIL029C   | 0     | #N/A             | iYIL029C      | #N/A  | #N/A |
| YIL030C   | SSM4  | DOA10            | iYIL030C      | -0.02 | 2.43 |
| YIL031W   | ULP2  | SMT4             | iYIL032C      | #N/A  | 1.90 |
| YIL032C   | 0     | #N/A             | iYIL032C      | #N/A  | 1.90 |
| YIL033C   | BCY1  | SRA1             | iYIL033C      | 1.14  | 0.99 |
| YIL034C   | CAP2  |                  | 0 iYIL034C    | 0.54  | 1.94 |
| YIL035C   | CKA1  |                  | 0 iYIL035C    | 0.25  | 2.01 |
| YIL036W   | CST6  | ACA2 SHF1        | iYIL037C      | -0.15 | 1.39 |
| YIL037C   | PRM2  |                  | 0 iYIL037C    | -1.93 | 1.39 |
| YIL038C   | NOT3  |                  | 0 iYIL038C    | -0.35 | 2.45 |
| YIL039W   | 0     | #N/A             | iYIL040W      | -0.63 | #N/A |
| YIL040W   | 0     |                  | 0 iYIL041W    | #N/A  | #N/A |
| YIL041W   | 0     |                  | 0 iYIL042C    | 0.03  | 3.42 |
| YIL042C   | 0     | #N/A             | iYIL042C      | -0.10 | 3.42 |
| YIL043C   | CBR1  | CBR5             | iYIL043C      | -0.89 | #N/A |
| YIL044C   | AGE2  | SAT2             | iYIL044C      | -0.43 | 2.32 |
| YIL045W   | PIG2  |                  | 0 iYIL046W    | -0.41 | 1.47 |
| YIL046W   | MET30 | ZRG11            | iYIL047C      | -0.39 | 1.52 |
| YIL047C   | SYG1  |                  | 0 iYIL047C    | -1.03 | 1.52 |
| YIL048W   | NEO1  |                  | 0 iYIL049W    | 0.44  | 1.80 |
| YIL049W   | DFG10 |                  | 0 iYIL050W    | 0.40  | 0.95 |
| YIL050W   | PCL7  |                  | 0 iYIL051C    | 0.54  | 0.79 |
| YIL051C   | MMF1  | IBM1             | iYIL051C      | 1.25  | 0.79 |

|           |        |             |   |            |       |      |
|-----------|--------|-------------|---|------------|-------|------|
| YIL052C   | RPL34B |             | 0 | iYIL052C   | -1.59 | 0.31 |
| YIL053W   | RHR2   | GPP1        |   | iYIL054W   | -0.27 | 0.27 |
| YIL054W   | FYV2   | #N/A        |   | iYIL055C   | #N/A  | 0.95 |
| YIL055C   | 0      | #N/A        |   | iYIL055C   | 1.20  | 0.95 |
| YIL056W   | 0      | #N/A        |   | itS(UGA)I  | -0.01 | 0.33 |
| YIL057C   | 0      | #N/A        |   | iYIL057C   | -0.21 | #N/A |
| YIL058W   | 0      | #N/A        |   | iYIL061C   | #N/A  | #N/A |
| YIL059C   | 0      | #N/A        |   | iYIL058W   | -0.16 | 1.68 |
| YIL060W   | 0      | #N/A        |   | iYIL061C   | 0.47  | #N/A |
| YIL061C   | SNP1   |             | 0 | iYIL061C   | #N/A  | #N/A |
| YIL062C   | ARC15  |             | 0 | iYIL062C   | 1.69  | 1.92 |
| YIL063C   | YRB2   |             | 0 | iYIL063C   | 0.50  | #N/A |
| YIL064W   | 0      | #N/A        |   | iYIL065C   | -1.78 | 2.85 |
| YIL065C   | FIS1   | MDV2        |   | iYIL065C   | 1.39  | 2.85 |
| YIL066C   | RNR3   | DIN1 RIR3   |   | iYIL066C   | -1.09 | 1.60 |
| YIL067C   | 0      | #N/A        |   | iYIL067C   | 0.55  | 1.62 |
| YIL068C   | SEC6   |             | 0 | iYIL068C   | 0.58  | 1.41 |
| YIL069C   | RPS24B | RPS24EB     |   | iYIL069C   | -1.25 | 0.24 |
| YIL070C   | MAM33  |             | 0 | iYIL070C   | 0.65  | 0.81 |
| YIL071W   | #N/A   | #N/A        |   | #N/A       | #N/A  | #N/A |
| YIL072W   | HOP1   |             | 0 | iYIL073C   | 0.09  | #N/A |
| YIL073C   | SPO22  |             | 0 | iYIL073C   | #N/A  | #N/A |
| YIL074C   | SER33  |             | 0 | iYIL074C   | 0.09  | 1.18 |
| YIL075C   | RPN2   | SEN3        |   | iYIL075C   | 0.57  | 1.29 |
| YIL076W   | SEC28  | ANU2        |   | iYIL077C   | 0.64  | 2.02 |
| YIL077C   | 0      | #N/A        |   | iYIL077C   | -0.02 | 2.02 |
| YIL078W   | THS1   |             | 0 | iYIL079C   | -1.26 | 1.93 |
| YIL079C   | AIR1   |             | 0 | iYIL079C   | #N/A  | 1.93 |
| YIL080W   | #N/A   | #N/A        |   | YILWTy3-10 | #N/A  | 0.58 |
| YIL082W   | 0      | #N/A        |   | iYIL083C   | -0.03 | 1.72 |
| YIL082W-A | 0      | #N/A        |   | YILWTy3-10 | #N/A  | 0.58 |
| YIL083C   | 0      | #N/A        |   | iYIL083C   | -0.21 | 1.72 |
| YIL084C   | SDS3   |             | 0 | iYIL084C   | -1.38 | #N/A |
| YIL085C   | KTR7   |             | 0 | iYIL085C   | -0.32 | #N/A |
| YIL086C   | 0      | #N/A        |   | iYIL085C   | #N/A  | #N/A |
| YIL087C   | 0      | #N/A        |   | iYIL085C   | 1.96  | #N/A |
| YIL088C   | 0      |             | 0 | iYIL088C   | 0.52  | 1.87 |
| YIL089W   | 0      | #N/A        |   | iYIL090W   | 0.21  | 0.67 |
| YIL090W   | 0      | #N/A        |   | iYIL091C   | -0.33 | 3.07 |
| YIL091C   | 0      | #N/A        |   | iYIL091C   | -1.88 | 3.07 |
| YIL092W   | 0      | #N/A        |   | iYIL093C   | -3.24 | 2.35 |
| YIL093C   | RSM25  |             | 0 | iYIL093C   | 0.28  | 2.35 |
| YIL094C   | LYS12  | LYS10 LYS11 |   | iYIL094C   | -0.16 | 0.90 |
| YIL095W   | PRK1   | PAK1        |   | itI(AAU)I1 | 0.96  | 1.63 |
| YIL096C   | 0      | #N/A        |   | iYIL096C   | #N/A  | 1.37 |
| YIL097W   | FYV10  | GID9        |   | iYIL098C   | 0.47  | 2.68 |
| YIL098C   | FMC1   |             | 0 | iYIL098C   | 0.91  | 2.68 |
| YIL099W   | SGA1   |             | 0 | iYIL100W   | #N/A  | 0.95 |
| YIL100W   | 0      | #N/A        |   | iYIL101C   | #N/A  | 1.86 |
| YIL101C   | XBP1   |             | 0 | iYIL101C   | 1.27  | 1.86 |
| YIL102C   | 0      | #N/A        |   | iYIL102C   | -0.21 | 0.59 |

|         |        |                  |              |       |      |
|---------|--------|------------------|--------------|-------|------|
| YIL103W | 0      | #N/A             | iYIL104C     | -0.91 | 1.15 |
| YIL104C | SHQ1   |                  | 0 iYIL104C   | 0.94  | 1.15 |
| YIL105C | 0 LIT2 |                  | iYIL105C     | #N/A  | 2.02 |
| YIL106W | MOB1   |                  | 0 iYIL107C   | -0.47 | 1.10 |
| YIL107C | PFK26  | PFK-2            | iYIL107C     | 1.50  | 1.10 |
| YIL108W | 0      | #N/A             | iYIL109C     | 1.21  | #N/A |
| YIL109C | SEC24  | ANU1             | iYIL109C     | 0.00  | #N/A |
| YIL110W | 0      | #N/A             | iYIL111W     | -1.44 | 2.10 |
| YIL111W | COX5B  |                  | 0 iYIL112W   | 0.12  | 1.05 |
| YIL112W | 0      |                  | 0 iYIL113W   | #N/A  | 2.07 |
| YIL113W | 0      |                  | 0 iYIL114C   | 3.06  | 1.45 |
| YIL114C | POR2   | YVDAC2           | iYIL114C     | -0.30 | 1.45 |
| YIL115C | NUP159 | NUP158 RAT7      | iYIL115C     | -0.49 | 2.80 |
| YIL116W | HIS5   |                  | 0 iYIL117C   | 0.72  | 0.50 |
| YIL117C | PRM5   |                  | 0 iYIL117C   | 1.49  | 0.50 |
| YIL118W | RHO3   |                  | 0 iYIL119C-1 | -0.51 | #N/A |
| YIL119C | RPI1   |                  | 0 iYIL119C-0 | #N/A  | 0.30 |
| YIL120W | QDR1   |                  | 0 iYIL121W   | -0.38 | 0.69 |
| YIL121W | 0      |                  | 0 iYIL122W   | -1.07 | 0.84 |
| YIL122W | POG1   |                  | 0 iYIL123W   | #N/A  | 0.37 |
| YIL123W | SIM1   |                  | 0 iYIL124W   | -0.05 | 0.81 |
| YIL124W | AYR1   |                  | 0 iYIL125W   | 1.68  | 1.86 |
| YIL125W | KGD1   | OGD1             | iYIL126W     | 0.35  | 1.92 |
| YIL126W | STH1   | NPS1             | iYIL127C     | 0.05  | 2.52 |
| YIL127C | 0      | #N/A             | iYIL127C     | -2.23 | 2.52 |
| YIL128W | MET18  | MMS19            | iYIL129C     | -0.52 | 2.76 |
| YIL129C | TAO3   | PAG1             | iYIL129C     | -3.65 | 2.76 |
| YIL130W | GIN1   | #N/A             | iYIL131C     | #N/A  | 2.02 |
| YIL131C | FKH1   |                  | 0 iYIL131C   | #N/A  | 2.02 |
| YIL132C | CSM2   |                  | 0 iYIL132C   | #N/A  | 1.05 |
| YIL133C | RPL16A | RPL13            | iYIL133C     | -1.01 | 0.24 |
| YIL134W | FLX1   |                  | 0 iSNR68     | -0.09 | 1.50 |
| YIL135C | 0      |                  | 0 iYIL135C   | -0.85 | 0.56 |
| YIL136W | OM45   |                  | 0 iYIL137C   | 3.26  | 2.21 |
| YIL137C | 0      | #N/A             | iYIL137C     | -0.03 | 2.21 |
| YIL138C | TPM2   | tropomyosin      | iYIL138C     | #N/A  | #N/A |
| YIL139C | REV7   |                  | 0 iYIL139C   | -0.06 | 1.16 |
| YIL140W | AXL2   | BUD10 SRO4       | iYIL142W     | 0.19  | 0.65 |
| YIL141W | 0      | #N/A             | iYIL142W     | #N/A  | 0.65 |
| YIL142W | CCT2   | BIN3 TCP2        | iYIL143C     | -0.34 | 2.84 |
| YIL143C | SSL2   | LOM3 RAD25       | iYIL143C     | 0.12  | 2.84 |
| YIL144W | TID3   | HEC1 NDC80       | iYIL145C     | -0.46 | #N/A |
| YIL145C | PAN6   |                  | 0 iYIL145C   | -0.38 | #N/A |
| YIL146C | ECM37  |                  | 0 iYIL146C   | -0.18 | 1.35 |
| YIL147C | SLN1   | YPD2             | iYIL147C     | -1.39 | 1.52 |
| YIL148W | RPL40A | CEP52A UB11 UBI1 | iYIL149C     | -1.30 | 0.99 |
| YIL149C | MLP2   |                  | 0 iYIL149C   | -0.05 | 0.99 |
| YIL150C | DNA43  | DNA43            | iYIL150C     | #N/A  | #N/A |
| YIL151C | 0      | #N/A             | iYIL151C     | #N/A  | 2.43 |
| YIL152W | 0      | #N/A             | iYIL153W     | -0.75 | 1.47 |
| YIL153W | RRD1   | YPA1             | iYIL154C     | 0.02  | 2.83 |

|         |       |                |              |       |      |
|---------|-------|----------------|--------------|-------|------|
| YIL154C | IMP2' | IMP2           | iYIL154C     | 0.32  | 2.83 |
| YIL155C | GUT2  |                | 0 iYIL155C   | 2.30  | #N/A |
| YIL156W | UBP7  |                | 0 iYIL157C   | -0.34 | 3.04 |
| YIL157C | 0     |                | 0 iYIL157C   | #N/A  | 3.04 |
| YIL158W | 0     | #N/A           | iYIL159W     | -0.34 | 1.00 |
| YIL159W | BNR1  |                | 0 iYIL160C   | #N/A  | 1.29 |
| YIL160C | POT1  | FOX3 POX3      | iYIL160C     | 1.86  | 1.29 |
| YIL161W | 0     | #N/A           | iYIL162W     | -0.11 | 1.44 |
| YIL162W | SUC2  |                | 0 iYIL163C   | 1.15  | #N/A |
| YIL163C | 0     | #N/A           | iYIL163C     | #N/A  | #N/A |
| YIL164C | NIT1  |                | 0 iYIL164C-0 | 0.11  | 1.62 |
| YIL165C | 0     | #N/A           | iYIL164C-0   | 0.73  | 1.62 |
| YIL166C | 0     | #N/A           | iYIL166C     | #N/A  | #N/A |
| YIL167W | 0     |                | 0 iYIL169C-1 | 0.53  | 0.81 |
| YIL168W | SDL1  | #N/A           | iYIL169C-1   | #N/A  | 0.81 |
| YIL169C | 0     | #N/A           | iYIL169C-0   | 0.16  | 0.51 |
| YIL170W | HXT12 |                | 0 iYIL172C   | 0.92  | 1.55 |
| YIL171W | HXT12 | #N/A           | iYIL172C     | #N/A  | 1.55 |
| YIL172C | 0     | #N/A           | iYIL172C     | #N/A  | 1.55 |
| YIL173W | VTH1  |                | 0 iYIL174W-1 | #N/A  | 1.93 |
| YIL174W | 0     | #N/A           | iYIL177C-1   | #N/A  | 0.42 |
| YIL175W | 0     | #N/A           | iYIL177C-1   | #N/A  | 0.42 |
| YIL176C | 0     | #N/A           | iYIL174W-0   | -0.37 | 0.94 |
| YIL177C | 0     | #N/A           | iYIL177C-0   | 0.07  | #N/A |
| YIR001C | SGN1  | RBP1 RBP29     | iYIR001C     | #N/A  | 1.16 |
| YIR002C | MPH1  |                | 0 iYIR002C   | 0.49  | 1.74 |
| YIR003W | 0     | #N/A           | iYIR002C     | 0.55  | 1.74 |
| YIR004W | DJP1  | ICS1 PAS22     | iYIR003W     | -0.05 | #N/A |
| YIR005W | IST3  | SNU17          | iYIR004W     | #N/A  | #N/A |
| YIR006C | PAN1  | DIM2 MDP3 MIP3 | iYIR006C     | -0.19 | 1.49 |
| YIR007W | 0     | #N/A           | itE(UUC)I    | #N/A  | #N/A |
| YIR008C | PRI1  |                | 0 iYIR008C   | -0.29 | 2.23 |
| YIR009W | MSL1  | YIB9w          | iYIR008C     | #N/A  | 2.23 |
| YIR010W | DSN1  |                | 0 iYIR009W   | -1.08 | #N/A |
| YIR011C | STS1  | DBF8 SSM5      | iYIR011C     | 0.31  | 3.14 |
| YIR012W | SQT1  |                | 0 iYIR011C   | -0.90 | 3.14 |
| YIR013C | GAT4  |                | 0 iYIR013C   | #N/A  | 1.30 |
| YIR014W | 0     | #N/A           | iYIR013C     | #N/A  | 1.30 |
| YIR015W | RPR2  |                | 0 iYIR014W   | #N/A  | 0.91 |
| YIR016W | 0     | #N/A           | iYIR015W     | 0.38  | #N/A |
| YIR017C | MET28 |                | 0 iYIR017C   | 1.23  | 0.73 |
| YIR018W | YAP5  |                | 0 iYIR017C   | #N/A  | 0.73 |
| YIR019C | MUC1  | FLO11 STA4     | iYIR019C     | #N/A  | #N/A |
| YIR020C | 0     | #N/A           | iYIR020C     | #N/A  | 0.40 |
| YIR021W | MRS1  | PET157         | iYIR020W-E   | -0.14 | 1.93 |
| YIR022W | SEC11 |                | 0 iYIR021W   | 0.25  | 2.65 |
| YIR023W | DAL81 | UGA35          | iYIR022W     | -0.81 | 2.77 |
| YIR024C | GIF1  | #N/A           | iYIR024C     | #N/A  | 1.81 |
| YIR025W | MND2  |                | 0 iYIR024C   | 0.02  | 1.81 |
| YIR026C | YVH1  |                | 0 iYIR026C   | -3.53 | 2.84 |
| YIR027C | DAL1  |                | 0 iYIR027C   | #N/A  | 1.20 |

|         |        |                            |   |            |       |      |
|---------|--------|----------------------------|---|------------|-------|------|
| YIR028W | DAL4   |                            | 0 | iYIR027C   | 2.13  | 1.20 |
| YIR029W | DAL2   | ALC1                       |   | iYIR028W   | 0.43  | #N/A |
| YIR030C | DCG1   |                            | 0 | iYIR030C   | #N/A  | 0.86 |
| YIR031C | DAL7   | MLS2 MSL2                  |   | iYIR031C   | -0.64 | 2.26 |
| YIR032C | DAL3   |                            | 0 | iYIR032C   | #N/A  | 3.52 |
| YIR033W | MGA2   |                            | 0 | iYIR032C   | -1.10 | 3.52 |
| YIR034C | LYS1   |                            | 0 | iYIR034C   | 1.46  | #N/A |
| YIR035C |        | 0 #N/A                     |   | iYIR035C   | -0.47 | 1.88 |
| YIR036C |        | 0 #N/A                     |   | iYIR036C   | 0.86  | 3.51 |
| YIR037W | HYR1   | GPX3 ORP1                  |   | iYIR036C   | 0.90  | 3.51 |
| YIR038C | GTT1   |                            | 0 | iYIR038C-0 | 2.09  | 3.12 |
| YIR039C | YPS6   |                            | 0 | iYIR039C   | 2.97  | 1.28 |
| YIR040C |        | 0 #N/A                     |   | iYIR040C   | #N/A  | #N/A |
| YIR041W |        | 0 #N/A                     |   | iYIR040C   | 0.57  | #N/A |
| YIR042C |        | 0 #N/A                     |   | iYIR042C   | #N/A  | 2.13 |
| YIR043C |        | 0 #N/A                     |   | iYIR043C   | 1.25  | 1.58 |
| YIR044C |        | 0 #N/A                     |   | #N/A       | #N/A  | #N/A |
| YJL001W | PRE3   | CRL21                      |   | iYJL002C   | 1.12  | 1.71 |
| YJL002C | OST1   | NLT1                       |   | iYJL002C   | -0.58 | 1.71 |
| YJL003W |        | 0                          | 0 | iYJL004C   | 0.79  | 1.80 |
| YJL004C | SYS1   |                            | 0 | iYJL004C   | 0.61  | 1.80 |
| YJL005W | CYR1   | CDC35 FIL1 HSR1 SitL(UAA)J |   |            | 1.17  | 1.27 |
| YJL006C | CTK2   |                            | 0 | iYJL006C   | #N/A  | 0.60 |
| YJL007C |        | 0 #N/A                     |   | itM(CAU)J2 | #N/A  | #N/A |
| YJL008C | CCT8   |                            | 0 | iYJL008C   | -0.75 | 1.80 |
| YJL009W |        | 0 #N/A                     |   | iYJL010C   | -0.73 | #N/A |
| YJL010C |        | 0 #N/A                     |   | iYJL010C   | -2.36 | #N/A |
| YJL011C |        | 0                          | 0 | iYJL011C   | -1.89 | 2.41 |
| YJL012C | VTC4   | PHM3                       |   | iYJL012C   | -0.73 | 1.26 |
| YJL013C | MAD3   |                            | 0 | iYJL013C   | -0.61 | 0.85 |
| YJL014W | CCT3   | BIN2 TCP3                  |   | iYJL017W   | -0.81 | #N/A |
| YJL015C |        | 0 #N/A                     |   | iYJL014W   | 1.98  | 0.67 |
| YJL016W |        | 0 #N/A                     |   | iYJL017W   | 1.84  | #N/A |
| YJL017W |        | 0 #N/A                     |   | iYJL018W   | 1.40  | 1.90 |
| YJL018W |        | 0 #N/A                     |   | iYJL020C   | #N/A  | 2.46 |
| YJL019W |        | 0 NEP98                    |   | iYJL020C   | -2.15 | 2.46 |
| YJL020C | BBC1   | MTI1                       |   | iYJL020C   | 1.07  | 2.46 |
| YJL021C | #N/A   | #N/A                       |   | iYJL020C   | 1.34  | 2.46 |
| YJL022W |        | 0 #N/A                     |   | itG(GCC)J1 | #N/A  | 0.95 |
| YJL023C | PET130 |                            | 0 | iYJL022W   | #N/A  | 1.57 |
| YJL024C | APS3   | YKS7                       |   | iYJL024C   | 0.06  | #N/A |
| YJL025W | RRN7   |                            | 0 | iYJL026W   | -0.82 | #N/A |
| YJL026W | RNR2   | CRT6                       |   | iYJL027C   | -0.16 | 2.14 |
| YJL027C |        | 0 #N/A                     |   | iYJL027C   | #N/A  | 2.14 |
| YJL028W |        | 0 #N/A                     |   | itM(CAU)J1 | #N/A  | 1.06 |
| YJL029C | VPS53  |                            | 0 | iYJL029C   | #N/A  | 1.52 |
| YJL030W | MAD2   |                            | 0 | iYJL031C   | 0.96  | 2.81 |
| YJL031C | BET4   |                            | 0 | iYJL031C   | 0.85  | 2.81 |
| YJL032W |        | 0 #N/A                     |   | iYJL033W   | 0.15  | #N/A |
| YJL033W | HCA4   | DBP4 ECM24                 |   | iYJL034W   | -4.95 | 1.26 |
| YJL034W | KAR2   | BIP GRP78                  |   | iYJL035C   | 1.32  | 1.33 |

|         |        |                  |        |            |       |      |
|---------|--------|------------------|--------|------------|-------|------|
| YJL035C | TAD2   |                  | 0      | iYJL035C   | #N/A  | 1.33 |
| YJL036W | SNX4   | ATG24 CVT13      |        | itV(AAC)J  | #N/A  | 1.27 |
| YJL037W |        | 0                | #N/A   | iYJL038C   | #N/A  | 1.36 |
| YJL038C |        | 0                | #N/A   | iYJL038C   | -2.65 | 1.36 |
| YJL039C | NUP192 |                  |        | 0 iYJL039C | -0.76 | 1.55 |
| YJL041W | NSP1   |                  |        | 0 iYJL042W | -0.81 | #N/A |
| YJL042W | MHP1   |                  |        | 0 iYJL043W | 0.45  | #N/A |
| YJL043W |        | 0                | #N/A   | iYJL044C   | #N/A  | 1.43 |
| YJL044C | GYP6   |                  |        | 0 iYJL044C | -0.03 | 1.43 |
| YJL045W |        | 0                | #N/A   | itD(GUC)J2 | 3.76  | 0.89 |
| YJL046W |        | 0                | #N/A   | iYJL047C   | 0.60  | 1.45 |
| YJL047C | RTT101 | CUL8 CULC CULLIN |        | iYJL047C   | 0.08  | 1.45 |
| YJL048C |        | 0                |        | 0 iYJL048C | 1.05  | 1.02 |
| YJL049W |        | 0                | #N/A   | iYJL050W   | -0.15 | 1.84 |
| YJL050W | MTR4   | DOB1             |        | iYJL051W   | -3.16 | #N/A |
| YJL051W |        | 0                | #N/A   | iYJL052W   | #N/A  | 0.99 |
| YJL052W | TDH1   | GLD3             |        | iYJL053W   | 0.54  | 1.50 |
| YJL053W | PEP8   | GRD6 VPS26 VPT4  |        | iYJL054W   | 1.10  | 0.69 |
| YJL054W | TIM54  |                  |        | 0 iYJL055W | -0.97 | #N/A |
| YJL055W |        | 0                | #N/A   | iYJL056C   | 1.07  | 2.49 |
| YJL056C | ZAP1   | ZRG10            |        | iYJL056C   | #N/A  | 2.49 |
| YJL057C | IKS1   |                  | #N/A   | iYJL057C   | #N/A  | 1.64 |
| YJL058C |        | 0                |        | 0 iYJL058C | -0.40 | 1.01 |
| YJL059W | YHC3   | BTN1             |        | iYJL060W   | 1.32  | #N/A |
| YJL060W | BNA3   |                  |        | 0 iYJL061W | 0.94  | 1.22 |
| YJL061W | NUP82  | HRB187           |        | iYJL062W   | -0.32 | #N/A |
| YJL062W | LAS21  | GPI7             |        | iYJL063C   | -0.27 | 3.67 |
| YJL063C | MRPL8  | HRD238           |        | iYJL063C   | -0.17 | 3.67 |
| YJL064W |        | 0                | #N/A   | iYJL066C   | #N/A  | 1.54 |
| YJL065C |        | 0                |        | 0 iYJL064W | 0.12  | 2.28 |
| YJL066C | MPM1   |                  |        | 0 iYJL066C | 1.82  | 1.54 |
| YJL067W |        | 0                | #N/A   | iYJL068C   | 1.93  | 1.88 |
| YJL068C |        | 0                | #N/A   | iYJL068C   | 1.38  | 1.88 |
| YJL069C | UTP18  |                  |        | 0 iYJL069C | -1.72 | #N/A |
| YJL070C |        | 0                | #N/A   | iYJL070C   | 1.50  | #N/A |
| YJL071W | ARG2   | HRB574           |        | iYJL072C   | 0.13  | #N/A |
| YJL072C |        | 0                | CDC102 | iYJL072C   | #N/A  | #N/A |
| YJL073W | JEM1   | KAR8             |        | iYJL074C   | 0.44  | 1.79 |
| YJL074C | SMC3   |                  |        | 0 iYJL074C | #N/A  | 1.79 |
| YJL075C |        | 0                |        | 0 iYJL075C | -0.58 | #N/A |
| YJL076W | NET1   | CFI1 ESC5        |        | iYJL077C   | -0.90 | 2.17 |
| YJL077C | ICS3   |                  |        | 0 iYJL077C | #N/A  | 2.17 |
| YJL078C | PRY3   |                  |        | 0 iYJL078C | #N/A  | 0.46 |
| YJL079C | PRY1   |                  |        | 0 iYJL079C | 0.09  | 0.69 |
| YJL080C | SCP160 |                  |        | 0 iYJL080C | -1.02 | 1.19 |
| YJL081C | ARP4   | ACT3             |        | iYJL081C   | -0.63 | 2.14 |
| YJL082W | IML2   |                  |        | 0 iYJL083W | 1.55  | 0.78 |
| YJL083W |        | 0                | #N/A   | iYJL084C   | -0.68 | 1.88 |
| YJL084C |        | 0                | #N/A   | iYJL084C   | #N/A  | 1.88 |
| YJL085W | EXO70  |                  |        | 0 iYJL088W | 0.37  | #N/A |
| YJL086C |        | 0                | #N/A   | iYJL085W   | #N/A  | #N/A |

|         |        |                   |              |       |      |
|---------|--------|-------------------|--------------|-------|------|
| YJL087C | TRL1   | LIG1 RLG1         | iYJL085W     | -1.32 | #N/A |
| YJL088W | ARG3   |                   | 0 iYJL089W   | #N/A  | 0.45 |
| YJL089W | SIP4   |                   | 0 iYJL090C   | #N/A  | #N/A |
| YJL090C | DPB11  |                   | 0 iYJL090C   | #N/A  | #N/A |
| YJL091C | 0      |                   | 0 iYJL091C   | 1.33  | 1.58 |
| YJL092W | HPR5   | RADH RADH1 SRS2   | iYJL093C     | -0.99 | 3.95 |
| YJL093C | TOK1   | DUK1 YKC1 YORK Y  | iYJL093C     | 0.00  | 3.95 |
| YJL094C | KHA1   |                   | 0 iYJL094C   | 0.42  | 1.22 |
| YJL095W | BCK1   | LAS3 SAP3 SLK1 SS | iYJL096W     | -2.14 | 1.53 |
| YJL096W | MRPL49 |                   | 0 iYJL098W   | 0.55  | #N/A |
| YJL097W | 0      | #N/A              | iYJL098W     | -0.01 | #N/A |
| YJL098W | SAP185 |                   | 0 iYJL099W   | -1.58 | 1.02 |
| YJL099W | CHS6   | CSD3              | iYJL100W     | 0.56  | #N/A |
| YJL100W | LSB6   |                   | 0 iYJL101C   | 0.21  | 1.07 |
| YJL101C | GSH1   |                   | 0 iYJL101C   | -0.92 | 1.07 |
| YJL102W | MEF2   |                   | 0 iYJL103C   | 0.03  | 2.03 |
| YJL103C | 0      | #N/A              | iYJL103C     | 0.46  | 2.03 |
| YJL104W | MIA1   | MIA1 TIM16        | iYJL105W     | -0.04 | #N/A |
| YJL105W | SET4   |                   | 0 iYJL106W-1 | -0.62 | 0.55 |
| YJL106W | IME2   | SME1              | iYJL107C     | #N/A  | 1.02 |
| YJL107C | 0      | #N/A              | iYJL107C     | #N/A  | 1.02 |
| YJL108C | PRM10  |                   | 0 iYJL107C   | 1.08  | 1.02 |
| YJL109C | UTP10  |                   | 0 iYJL109C   | -2.37 | #N/A |
| YJL110C | GZF3   | DEH1 NIL2         | iYJL110C     | -0.67 | 1.10 |
| YJL111W | CCT7   | TCP7              | iYJL112W     | -0.87 | #N/A |
| YJL112W | MDV1   | FIS2 GAG3         | itD(GUC)J1   | -0.13 | 1.44 |
| YJL113W | #N/A   | #N/A              | iYJL115W     | #N/A  | #N/A |
| YJL114W | #N/A   | #N/A              | iYJL115W     | #N/A  | #N/A |
| YJL115W | ASF1   |                   | 0 iYJL116C   | -0.33 | 0.88 |
| YJL116C | NCA3   |                   | 0 iYJL116C   | 1.40  | 0.88 |
| YJL117W | PHO86  |                   | 0 iYJL118W   | 0.12  | 1.66 |
| YJL118W | 0      | #N/A              | iYJL120W     | -0.57 | 1.90 |
| YJL119C | 0      | #N/A              | iYJL118W     | -0.78 | 1.66 |
| YJL120W | 0      | #N/A              | iYJL122W     | -2.82 | 1.38 |
| YJL121C | RPE1   | EPI1 POS18        | iYJL120W     | -1.23 | 1.90 |
| YJL122W | 0      | #N/A              | iYJL123C     | -1.65 | 1.67 |
| YJL123C | 0      | #N/A              | iYJL123C     | 0.83  | 1.67 |
| YJL124C | LSM1   | SPB8              | iYJL124C     | -0.22 | 1.40 |
| YJL125C | GCD14  |                   | 0 iYJL125C   | -1.33 | 1.22 |
| YJL126W | NIT2   |                   | 0 iYJL127C   | 0.31  | 1.08 |
| YJL127C | SPT10  | CRE1 SUD1         | iYJL127C     | -0.63 | 1.08 |
| YJL128C | PBS2   | HOG4 SFS4 SSK4    | iYJL128C-0   | 0.01  | 1.41 |
| YJL129C | TRK1   |                   | 0 iYJL129C   | -0.06 | 1.04 |
| YJL130C | URA2   |                   | 0 iYJL130C   | -1.10 | 0.64 |
| YJL131C | 0      | #N/A              | iYJL131C     | 0.83  | 1.06 |
| YJL132W | 0      | #N/A              | iYJL133W     | 1.80  | 1.14 |
| YJL133W | MRS3   |                   | 0 iYJL134W   | 0.17  | 0.32 |
| YJL134W | LCB3   | LBP1 YSR2         | iYJL136C     | 0.17  | 0.52 |
| YJL135W | 0      | #N/A              | iYJL136C     | #N/A  | 0.52 |
| YJL136C | RPS21B |                   | 0 iYJL136C   | #N/A  | 0.52 |
| YJL137C | GLG2   |                   | 0 iYJL137C   | 0.54  | 0.99 |



|         |        |                 |       |            |       |      |
|---------|--------|-----------------|-------|------------|-------|------|
| YJL138C | TIF2   |                 | 0     | iYJL138C   | -1.46 | 1.26 |
| YJL139C | YUR1   |                 | 0     | iYJL139C   | 0.22  | 0.72 |
| YJL140W | RPB4   | CTF15           |       | iYJL141C   | 0.49  | 1.57 |
| YJL141C | YAK1   |                 | 0     | iYJL141C   | 0.47  | 1.57 |
| YJL142C |        | 0 #N/A          |       | iYJL141C   | 0.74  | 1.57 |
| YJL143W | TIM17  | MIM17 MPI2 SMS1 |       | iYJL144W   | 0.10  | 2.33 |
| YJL144W |        | 0 #N/A          |       | iYJL145W   | 2.29  | 0.85 |
| YJL145W | SFH5   |                 | 0     | iYJL146W   | #N/A  | 1.05 |
| YJL146W | IDS2   |                 | 0     | iYJL147C   | 0.34  | 2.12 |
| YJL147C |        | 0 #N/A          |       | iYJL147C   | -0.87 | 2.12 |
| YJL148W | RPA34  |                 | 0     | iSNR190    | -2.05 | 0.59 |
| YJL149W |        | 0 #N/A          |       | iYJL151C   | -0.65 | 0.83 |
| YJL150W |        | 0 #N/A          |       | iYJL151C   | #N/A  | 0.83 |
| YJL151C | SNA3   |                 | 0     | iYJL151C   | 0.84  | 0.83 |
| YJL152W |        | 0 #N/A          |       | iYJL153C   | 0.99  | 0.50 |
| YJL153C | INO1   |                 | 38078 | iYJL153C   | #N/A  | 0.50 |
| YJL154C | VPS35  | GRD9 VPT7       |       | iYJL154C   | 0.34  | 1.52 |
| YJL155C | FBP26  | FBPase-2        |       | iYJL155C   | 1.11  | 0.76 |
| YJL156C | SSY5   |                 | 0     | iYJL156C   | 0.26  | #N/A |
| YJL157C | FAR1   |                 | 0     | iYJL157C   | -0.41 | 0.65 |
| YJL158C | CIS3   | CCW11 CCW5 PIR4 |       | iYJL158C   | 0.34  | 0.52 |
| YJL159W | HSP150 | CCW7 ORE1 PIR2  |       | iYJL160C-1 | 1.38  | 0.94 |
| YJL160C |        | 0 #N/A          |       | iYJL160C-0 | #N/A  | 1.43 |
| YJL161W |        | 0               | 0     | itE(UUC)J  | 2.79  | 1.83 |
| YJL162C |        | 0               | 0     | iYJL162C   | #N/A  | #N/A |
| YJL163C |        | 0 #N/A          |       | iYJL163C   | 1.07  | 1.36 |
| YJL164C | TPK1   | PKA1 SRA3       |       | iYJL164C   | #N/A  | 1.80 |
| YJL165C | HAL5   |                 | 0     | iYJL165C   | 0.77  | 1.65 |
| YJL166W | QCR8   | COR5            |       | iYJL167W   | 1.43  | 0.91 |
| YJL167W | ERG20  | BOT3 FDS1 FPP1  |       | iYJL168C   | -0.17 | 2.16 |
| YJL168C | SET2   | EZL1            |       | iYJL168C   | -0.57 | 2.16 |
| YJL169W |        | 0 #N/A          |       | iYJL170C   | #N/A  | 0.96 |
| YJL170C | ASG7   |                 | 0     | iYJL170C   | #N/A  | 0.96 |
| YJL171C |        | 0 #N/A          |       | iYJL171C   | 0.90  | #N/A |
| YJL172W | CPS1   |                 | 0     | iYJL173C   | 1.18  | 2.38 |
| YJL173C | RFA3   |                 | 0     | iYJL173C   | -2.51 | 2.38 |
| YJL174W | KRE9   |                 | 0     | iYJL175W   | 0.91  | 3.00 |
| YJL175W |        | 0 #N/A          |       | iYJL177W   | #N/A  | #N/A |
| YJL176C | SWI3   | TYE2            |       | iYJL175W   | -0.93 | 3.00 |
| YJL177W | RPL17B |                 | 0     | iYJL178C   | -1.79 | 0.46 |
| YJL178C |        | 0 ETF1          |       | iYJL178C   | -0.06 | 0.46 |
| YJL179W | PFD1   | GIM6            |       | iYJL180C   | #N/A  | #N/A |
| YJL180C | ATP12  |                 | 0     | iYJL180C   | -0.45 | #N/A |
| YJL181W |        | 0 #N/A          |       | iYJL183W   | -1.50 | #N/A |
| YJL182C |        | 0 #N/A          |       | iYJL181W   | #N/A  | #N/A |
| YJL183W | MNN11  |                 | 0     | iYJL184W   | -0.59 | 2.84 |
| YJL184W |        | 0 LDB6          |       | iYJL185C   | #N/A  | 1.92 |
| YJL185C |        | 0 #N/A          |       | iYJL185C   | -1.00 | 1.92 |
| YJL186W | MNN5   |                 | 0     | iYJL187C   | 0.18  | 0.93 |
| YJL187C | SWE1   | WEE1            |       | iYJL187C   | -0.10 | 0.93 |
| YJL188C | BUD19  |                 | 0     | iYJL188C   | -1.98 | #N/A |



|           |        |                 |              |       |      |
|-----------|--------|-----------------|--------------|-------|------|
| YJL189W   | RPL39  | PUB2 RPL46 SPB2 | iYJL190C     | #N/A  | 0.16 |
| YJL190C   | RPS22A | RPS24           | iYJL190C     | -1.73 | 0.16 |
| YJL191W   | RPS14B | CRY2            | iYJL192C     | -1.13 | #N/A |
| YJL192C   | 0      |                 | 0 iYJL192C   | 0.04  | #N/A |
| YJL193W   | 0      | #N/A            | iYJL194W     | 0.00  | 2.02 |
| YJL194W   | CDC6   |                 | 0 iYJL196C   | -1.24 | 0.69 |
| YJL195C   | 0      | #N/A            | iYJL194W     | #N/A  | 2.02 |
| YJL196C   | ELO1   |                 | 0 iYJL196C   | 0.47  | 0.69 |
| YJL197W   | UBP12  |                 | 0 iYJL198W   | -0.10 | 1.71 |
| YJL198W   | PHO90  |                 | 0 iYJL199C   | -1.02 | 2.75 |
| YJL199C   | 0      |                 | 0 iYJL199C   | 1.51  | 2.75 |
| YJL200C   | 0      | #N/A            | iYJL200C     | -0.47 | 0.53 |
| YJL201W   | ECM25  |                 | 0 iYJL202C   | -0.81 | 2.27 |
| YJL202C   | 0      | #N/A            | iYJL202C     | #N/A  | 2.27 |
| YJL203W   | PRP21  | SPP91           | iYJL204C     | -1.67 | 1.84 |
| YJL204C   | RCY1   |                 | 0 iYJL204C   | 0.81  | 1.84 |
| YJL206C   | 0      | #N/A            | iYJL206C     | -0.22 | 1.76 |
| YJL206C-A | #N/A   | #N/A            | #N/A         | -0.69 | #N/A |
| YJL207C   | 0      | #N/A            | iYJL207C     | #N/A  | 1.52 |
| YJL208C   | NUC1   |                 | 0 iYJL208C   | -1.61 | #N/A |
| YJL209W   | CBP1   |                 | 0 iYJL210W   | -1.11 | #N/A |
| YJL210W   | PEX2   | CRT1 PAS5       | iYJL212C     | 0.40  | 0.93 |
| YJL211C   | 0      | #N/A            | iYJL210W     | 0.32  | #N/A |
| YJL212C   | OPT1   | GSH11 HGT1      | iYJL212C     | -1.23 | 0.93 |
| YJL213W   | 0      | #N/A            | iYJL214W-2   | 1.74  | #N/A |
| YJL214W   | HXT8   |                 | 0 iYJL215C   | #N/A  | #N/A |
| YJL215C   | 0      | #N/A            | iYJL215C     | #N/A  | #N/A |
| YJL216C   | 0      | #N/A            | iYJL216C     | #N/A  | 0.88 |
| YJL217W   | 0      | #N/A            | iYJL218W     | 2.26  | 1.96 |
| YJL218W   | 0      | #N/A            | iYJL219W     | 0.26  | 1.34 |
| YJL219W   | HXT9   |                 | 0 iYJL220W   | 0.38  | 1.59 |
| YJL220W   | 0      | #N/A            | iYJL222W     | #N/A  | 1.34 |
| YJL221C   | FSP2   |                 | 0 iYJL220W   | -0.73 | 1.59 |
| YJL222W   | VTH2   |                 | 0 iYJL223C-1 | 0.01  | #N/A |
| YJL223C   | PAU1   |                 | 0 iYJL223C-0 | -0.30 | 0.80 |
| YJL225C   | 0      | #N/A            | iYJL225C-0   | -0.04 | #N/A |
| YJR001W   | 0      |                 | 0 iCEN10     | 0.22  | 0.90 |
| YJR002W   | MPP10  |                 | 0 iYJR001W   | -2.16 | #N/A |
| YJR003C   | 0      | #N/A            | iYJR003C     | -1.27 | 0.68 |
| YJR004C   | SAG1   | AG(ALPHA)1      | iYJR004C     | -1.71 | 1.12 |
| YJR005W   | APL1   | YAP80           | iYJR004C     | -0.32 | 1.12 |
| YJR006W   | HYS2   | HUS2 POL31 SDP5 | iYJR005W     | -0.26 | 0.81 |
| YJR007W   | SUI2   |                 | 0 iYJR006W   | -0.71 | 1.40 |
| YJR008W   | 0      | #N/A            | iYJR007W     | 2.31  | 0.98 |
| YJR009C   | TDH2   | GLD2            | iYJR009C-0   | 0.41  | 0.48 |
| YJR010C-A | SPC1   |                 | 0 iYJR010C-A | -0.80 | 1.80 |
| YJR010W   | MET3   |                 | 0 iYJR009C-1 | 1.02  | #N/A |
| YJR011C   | 0      | #N/A            | iYJR011C     | #N/A  | 1.72 |
| YJR012C   | 0      | #N/A            | iYJR012C     | -0.58 | 1.50 |
| YJR013W   | 0      |                 | 0 iYJR012C   | 0.06  | 1.50 |
| YJR014W   | 0      | #N/A            | iYJR013W     | 0.14  | #N/A |

|         |        |              |              |       |      |
|---------|--------|--------------|--------------|-------|------|
| YJR015W | 0      | #N/A         | iYJR014W     | -0.26 | 0.54 |
| YJR016C | ILV3   |              | 0 iYJR016C   | -1.72 | #N/A |
| YJR017C | ESS1   | PIN1 PTF1    | iYJR018W     | -0.34 | #N/A |
| YJR018W | 0      | #N/A         | iYJR016C     | -1.98 | #N/A |
| YJR019C | TES1   | PTE1         | iYJR020W     | 0.37  | 1.05 |
| YJR020W | 0      | #N/A         | iYJR018W     | 0.85  | #N/A |
| YJR021C | REC107 | MER2         | iYJR021C     | -0.17 | 1.80 |
| YJR022W | LSM8   |              | 0 iYJR021C   | #N/A  | 1.80 |
| YJR023C | 0      | #N/A         | iYJR024C     | #N/A  | 1.25 |
| YJR024C | 0      | #N/A         | iYJR024C     | -0.41 | 1.25 |
| YJR025C | BNA1   | HAD1         | iYJR025C     | 1.18  | 0.98 |
| YJR026W | #N/A   | #N/A         | iYJR025C     | 0.53  | 0.98 |
| YJR027W | #N/A   | #N/A         | iYJR025C     | 0.21  | 0.98 |
| YJR028W | #N/A   | #N/A         | iYJR025C     | 0.50  | 0.98 |
| YJR029W | #N/A   | #N/A         | iYJR025C     | 0.26  | 0.98 |
| YJR030C | 0      | #N/A         | iYJR030C     | -0.80 | 0.70 |
| YJR031C | GEA1   |              | 0 iYJR031C   | -1.61 | 2.42 |
| YJR032W | CPR7   |              | 0 iYJR031C   | -0.59 | 2.42 |
| YJR033C | RAV1   |              | 0 iYJR033C   | #N/A  | #N/A |
| YJR034W | PET191 |              | 0 iYJR033C   | #N/A  | #N/A |
| YJR035W | RAD26  |              | 0 iYJR034W   | #N/A  | #N/A |
| YJR036C | HUL4   |              | 0 iYJR037W   | 1.32  | 3.34 |
| YJR037W | 0      | #N/A         | iYJR035W     | #N/A  | #N/A |
| YJR038C | 0      | #N/A         | iYJR039W     | #N/A  | 1.81 |
| YJR039W | 0      | #N/A         | iYJR037W     | 0.00  | 3.34 |
| YJR040W | GEF1   | CLC          | iYJR039W     | 0.32  | 1.81 |
| YJR041C | 0      |              | 0 iYJR041C   | -2.95 | #N/A |
| YJR042W | NUP85  | RAT9         | iYJR041C     | #N/A  | #N/A |
| YJR043C | POL32  |              | 0 iYJR043C   | #N/A  | 1.88 |
| YJR044C | VPS55  |              | 0 iYJR044C   | 1.03  | 1.25 |
| YJR045C | SSC1   | ENS1 mtHSP70 | iYJR045C     | 0.72  | 1.28 |
| YJR046W | TAH11  | CDT1 SID2    | iYJR045C     | -0.01 | 1.28 |
| YJR047C | ANB1   | HYP1 TIF51B  | iYJR047C     | #N/A  | 0.51 |
| YJR048W | CYC1   |              | 0 iYJR047C   | #N/A  | 0.51 |
| YJR049C | UTR1   |              | 0 iYJR049C   | 0.36  | 2.01 |
| YJR050W | ISY1   | NTC30 UTR3   | iYJR049C     | 0.06  | 2.01 |
| YJR051W | OSM1   |              | 0 iYJR050W   | 0.48  | 1.52 |
| YJR052W | RAD7   |              | 0 itG(GCC)J2 | 1.09  | 0.63 |
| YJR053W | BFA1   | IBD1         | iYJR052W     | #N/A  | #N/A |
| YJR054W | 0      | #N/A         | iYJR053W     | -0.03 | 1.22 |
| YJR055W | HIT1   |              | 0 itR(CCU)J  | #N/A  | 1.23 |
| YJR056C | 0      | #N/A         | iYJR056C     | -0.66 | 1.65 |
| YJR057W | CDC8   |              | 0 iYJRWdelta | -0.01 | 1.30 |
| YJR058C | APS2   | YAP17        | iYJR058C     | 0.44  | 1.85 |
| YJR059W | PTK2   | STK2         | iYJR058C     | 0.54  | 1.85 |
| YJR060W | CBF1   | CEP1 CPF1    | iYJR059W     | #N/A  | 0.82 |
| YJR061W | 0      | #N/A         | iYJR060W     | 0.95  | 1.01 |
| YJR062C | NTA1   | DEA1         | iYJR062C     | -2.35 | 2.51 |
| YJR063W | RPA12  | RRN4         | iYJR062C     | #N/A  | 2.51 |
| YJR064W | CCT5   | TCP5         | iYJR063W     | -0.42 | 2.21 |
| YJR065C | ARP3   | ACT4         | iYJR065C     | 0.63  | 2.90 |

|           |        |                 |              |       |      |
|-----------|--------|-----------------|--------------|-------|------|
| YJR066W   | TOR1   | DRR1            | iYJR065C     | #N/A  | 2.90 |
| YJR067C   | YAE1   |                 | 0 iYJR067C   | -0.37 | 1.78 |
| YJR068W   | RFC2   |                 | 0 iYJR067C   | -0.30 | 1.78 |
| YJR069C   | HAM1   |                 | 0 iYJR069C   | -0.62 | 0.76 |
| YJR070C   |        | 0               | 0 iYJR071W   | -2.12 | 0.75 |
| YJR071W   |        | 0 #N/A          | iYJR069C     | #N/A  | 0.76 |
| YJR072C   |        | 0 #N/A          | iYJR072C     | -0.73 | 1.57 |
| YJR073C   | OPI3   | PEM2            | iYJR073C     | 1.81  | 1.69 |
| YJR074W   | MOG1   |                 | 0 iYJR073C   | #N/A  | 1.69 |
| YJR075W   | HOC1   |                 | 0 iYJR074W   | -0.23 | 1.80 |
| YJR076C   | CDC11  | PSL9            | iYJR076C     | -0.24 | #N/A |
| YJR077C   | MIR1   |                 | 0 iYJR077C   | 0.07  | 1.02 |
| YJR078W   | BNA2   |                 | 0 iYJR077C   | 0.38  | 1.02 |
| YJR079W   |        | 0 #N/A          | iYJR077C     | 0.63  | 1.02 |
| YJR080C   |        | 0               | 0 iYJR080C   | 0.53  | 2.00 |
| YJR082C   | EAF6   |                 | 0 iYJR082C   | -0.39 | 1.99 |
| YJR083C   |        | 0               | 0 iYJR083C   | -0.49 | 1.30 |
| YJR084W   |        | 0               | 0 iYJR083C   | 0.22  | 1.30 |
| YJR085C   |        | 0 #N/A          | iYJR085C     | 1.69  | #N/A |
| YJR086W   | STE18  |                 | 0 iYJR085C   | 0.77  | #N/A |
| YJR087W   |        | 0 #N/A          | iYJR085C     | #N/A  | #N/A |
| YJR088C   |        | 0 #N/A          | iYJR088C     | 0.85  | 2.62 |
| YJR089W   | BIR1   |                 | 0 iYJR088C   | -1.34 | 2.62 |
| YJR090C   | GRR1   | CAT80 COT2 SSU2 | iYJR090C     | 0.36  | 0.79 |
| YJR091C   | JSN1   | PUF1            | iYJR091C     | 0.40  | 0.98 |
| YJR092W   | BUD4   |                 | 0 iYJR091C   | -0.65 | 0.98 |
| YJR093C   | FIP1   |                 | 0 iYJR093C   | -0.15 | 2.32 |
| YJR094C   | IME1   |                 | 0 iYJR094C-0 | #N/A  | 0.98 |
| YJR094W-A | RPL43B |                 | 0 iYJR094C-1 | 0.50  | #N/A |
| YJR095W   | SFC1   | ACR1            | iYJR094W-1   | #N/A  | 0.69 |
| YJR096W   |        | 0 #N/A          | iYJR095W     | 1.86  | 1.78 |
| YJR097W   |        | 0               | 0 iYJR096W   | -1.77 | 2.28 |
| YJR098C   |        | 0 #N/A          | iYJR098C     | #N/A  | 2.09 |
| YJR099W   | YUH1   |                 | 0 iYJR098C   | 0.66  | 2.09 |
| YJR100C   |        | 0 #N/A          | iYJR100C     | 0.82  | 1.14 |
| YJR101W   | RSM26  |                 | 0 itL(UAG)J  | 0.15  | 1.09 |
| YJR102C   | VPS25  | VPT25           | iYJR102C     | -0.49 | #N/A |
| YJR103W   | URA8   |                 | 0 iYJR102C   | 0.82  | #N/A |
| YJR104C   | SOD1   | CRS4            | iYJR104C     | 0.82  | 0.70 |
| YJR105W   | ADO1   |                 | 0 iYJR104C   | -0.52 | 0.70 |
| YJR106W   | ECM27  |                 | 0 iYJR105W   | -0.09 | 1.40 |
| YJR107W   |        | 0 #N/A          | iYJR106W     | 1.07  | 0.56 |
| YJR108W   | ABM1   |                 | 0 iYJR107W   | #N/A  | 1.58 |
| YJR109C   | CPA2   |                 | 0 iYJR109C   | 1.09  | 2.12 |
| YJR110W   |        | 0               | 0 iYJR109C   | -0.28 | 2.12 |
| YJR111C   |        | 0 #N/A          | iYJR111C     | 0.30  | 1.56 |
| YJR112W   | NNF1   |                 | 0 iYJR111C   | -1.36 | 1.56 |
| YJR113C   | RSM7   |                 | 0 iYJR114W   | 0.17  | 1.03 |
| YJR114W   |        | 0               | 0 iYJR112W   | -0.34 | 2.45 |
| YJR115W   |        | 0 #N/A          | iYJR114W     | #N/A  | 1.03 |
| YJR116W   |        | 0 #N/A          | iYJR115W     | 0.19  | 2.10 |

|         |        |                |              |       |      |
|---------|--------|----------------|--------------|-------|------|
| YJR117W | STE24  | AFC1 PIO2      | iYJR116W     | 0.85  | 1.67 |
| YJR118C | ILM1   |                | 0 iYJR118C   | -0.08 | #N/A |
| YJR119C | 0      | #N/A           | iYJR119C     | -0.04 | 1.53 |
| YJR120W | 0      | #N/A           | iYJR119C     | #N/A  | 1.53 |
| YJR121W | ATP2   |                | 0 iYJR120W   | 0.14  | 0.41 |
| YJR122W | CAF17  |                | 0 iYJR121W   | 0.23  | #N/A |
| YJR123W | RPS5   |                | 0 iYJR122W   | -1.22 | 0.27 |
| YJR124C | 0      | #N/A           | iYJR124C     | -0.88 | #N/A |
| YJR125C | ENT3   |                | 0 iYJR125C   | 1.08  | 2.13 |
| YJR126C | VPS70  |                | 0 iYJR126C   | -0.17 | #N/A |
| YJR127C | ZMS1   |                | 0 iYJR128W   | 0.53  | 0.44 |
| YJR128W | 0      | #N/A           | iYJR126C     | #N/A  | #N/A |
| YJR129C | 0      | #N/A           | iYJR129C     | -1.39 | 1.35 |
| YJR130C | STR2   |                | 0 iYJR130C   | 0.97  | 1.75 |
| YJR131W | MNS1   |                | 0 iYJR130C   | 0.55  | 1.75 |
| YJR132W | NMD5   | KAP119         | iYJR131W     | -1.60 | 1.77 |
| YJR133W | XPT1   |                | 0 iYJR132W   | 0.35  | 1.32 |
| YJR134C | SGM1   |                | 0 iYJR134C   | -0.14 | #N/A |
| YJR135C | MCM22  |                | 0 iYJR135C   | #N/A  | 2.19 |
| YJR136C | 0      | #N/A           | iYJR136C     | -0.48 | #N/A |
| YJR137C | ECM17  | MET5           | iYJR137C     | 0.50  | 1.03 |
| YJR138W | IML1   |                | 0 iYJR137C   | #N/A  | 1.03 |
| YJR139C | HOM6   |                | 0 iYJR139C   | 0.38  | 1.01 |
| YJR140C | HIR3   | HPC1           | iYJR140C     | -1.31 | #N/A |
| YJR141W | 0      | #N/A           | iYJR140C     | #N/A  | #N/A |
| YJR142W | 0      | #N/A           | iYJR141W     | 1.02  | #N/A |
| YJR143C | PMT4   |                | 0 iYJR143C   | -0.99 | 2.04 |
| YJR144W | MGM101 | MGM9           | iYJR143C     | -0.24 | 2.04 |
| YJR145C | RPS4A  |                | 0 iYJR145C   | -1.73 | #N/A |
| YJR146W | 0      | #N/A           | iYJR145C     | 1.77  | #N/A |
| YJR147W | HMS2   |                | 0 iYJR145C   | 0.19  | #N/A |
| YJR148W | BAT2   | ECA40 TWT2     | iYJR147W     | 1.02  | #N/A |
| YJR149W | 0      | #N/A           | iYJR148W     | 1.17  | 0.57 |
| YJR150C | DAN1   | CCW13          | iYJR150C-0   | #N/A  | 1.51 |
| YJR151C | DAN4   |                | 0 iYJR151C-0 | -0.24 | 1.30 |
| YJR152W | DAL5   | UREP1          | iYJR151C-2   | 0.16  | 1.16 |
| YJR153W | PGU1   | PGL1 PSM1      | iYJR152W     | 0.68  | 1.52 |
| YJR154W | 0      | #N/A           | iYJR153W-    | #N/A  | 2.10 |
| YJR155W | AAD10  |                | 0 iYJR154W   | 0.78  | 0.93 |
| YJR156C | THI11  |                | 0 iYJR156C   | #N/A  | 2.51 |
| YJR157W | 0      | #N/A           | iYJR156C     | #N/A  | 2.51 |
| YJR158W | HXT16  |                | 0 iYJR157W-  | #N/A  | 0.73 |
| YJR159W | SOR1   | SDH1           | iYJR158W-    | 1.13  | 1.46 |
| YJR160C | 0      |                | 0 iYJR160C-0 | 0.81  | 1.31 |
| YJR161C | COS5   |                | 0 iYJR161C   | 0.92  | 0.78 |
| YJR162C | 0      | #N/A           | #N/A         | -0.87 | #N/A |
| YKL001C | MET14  |                | 0 iYKL001C   | 0.68  | 1.22 |
| YKL002W | DID4   | CHM2 GRD7 REN1 | iYKL003C     | 0.14  | 1.88 |
| YKL003C | MRP17  |                | 0 iYKL003C   | 0.47  | 1.88 |
| YKL004W | AUR1   |                | 0 iYKL005C   | -1.38 | 2.36 |
| YKL005C | 0      |                | 0 iYKL005C   | 0.06  | 2.36 |

|           |        |             |   |            |            |       |      |
|-----------|--------|-------------|---|------------|------------|-------|------|
| YKL006C-A | SFT1   |             | 0 | iYKL006C-A | -0.94      | 0.34  |      |
| YKL006W   | RPL14A |             | 0 | iYKL006C-A | -1.01      | 0.34  |      |
| YKL007W   | CAP1   |             | 0 | iYKL008C   | 0.88       | 0.50  |      |
| YKL008C   | LAC1   | DGT1        |   | iYKL008C   | -0.01      | 0.50  |      |
| YKL009W   | MRT4   |             | 0 | iYKL010C   | -2.07      | 1.64  |      |
| YKL010C   | UFD4   |             | 0 | iYKL010C   | 0.86       | 1.64  |      |
| YKL011C   | CCE1   | MGT1        |   | iYKL011C   | 0.13       | #N/A  |      |
| YKL012W   | PRP40  |             | 0 | iYKL013C   | -0.22      | 2.32  |      |
| YKL013C   | ARC19  |             | 0 | iYKL013C   | 1.02       | 2.32  |      |
| YKL014C   |        |             | 0 | iYKL014C   | #N/A       | 1.20  |      |
| YKL015W   | PUT3   |             | 0 | iYKL016C   | 0.25       | 1.62  |      |
| YKL016C   | ATP7   |             | 0 | iYKL016C   | 0.24       | 1.62  |      |
| YKL017C   | HCS1   | DIP1        |   | iYKL017C   | -0.55      | #N/A  |      |
| YKL018W   | SWD2   | CPS35 SAF37 |   | iYKL019W   | #N/A       | 3.04  |      |
| YKL019W   | RAM2   |             | 0 | iYKL020C   | -0.65      | 2.75  |      |
| YKL020C   | SPT23  |             | 0 | iYKL020C   | 0.02       | 2.75  |      |
| YKL021C   | MAK11  |             | 0 | iYKL021C   | -1.48      | #N/A  |      |
| YKL022C   | CDC16  |             | 0 | iYKL022C   | -0.03      | #N/A  |      |
| YKL023W   |        |             | 0 | #N/A       | iYKL024C   | #N/A  | 2.13 |
| YKL024C   | URA6   | SOC8        |   | iYKL024C   | -0.82      | 2.13  |      |
| YKL025C   | PAN3   | ECM35       |   | iYKL025C   | -0.04      | #N/A  |      |
| YKL026C   | GPX1   |             | 0 | iYKL026C   | 2.44       | 1.25  |      |
| YKL027W   |        |             | 0 | #N/A       | iYKL028W   | 0.11  | 0.90 |
| YKL028W   | TFA1   |             | 0 | iYKL029C   | -0.21      | 0.73  |      |
| YKL029C   | MAE1   |             | 0 | iYKL029C   | -2.17      | 0.73  |      |
| YKL030W   |        |             | 0 | #N/A       | iYKL032C   | -1.87 | 0.40 |
| YKL031W   |        |             | 0 | #N/A       | iYKL032C   | 0.98  | 0.40 |
| YKL032C   | IXR1   | ORD1        |   | iYKL032C   | 0.00       | 0.40  |      |
| YKL033W   |        |             | 0 | iYKL033W-  | -1.06      | 1.36  |      |
| YKL034W   | TUL1   |             | 0 | iYKL035W   | 1.04       | 1.54  |      |
| YKL035W   | UGP1   |             | 0 | iYKL038W   | 2.17       | 0.98  |      |
| YKL036C   |        |             | 0 | #N/A       | iYKL035W   | #N/A  | 1.54 |
| YKL037W   |        |             | 0 | #N/A       | iYKL038W   | -0.36 | 0.98 |
| YKL038W   | RGT1   |             | 0 | iSNR69     | 0.21       | 1.22  |      |
| YKL039W   | PTM1   |             | 0 | iYKL040C   | 0.43       | 1.50  |      |
| YKL040C   | NFU1   | NUB1        |   | iYKL040C   | 0.12       | 1.50  |      |
| YKL041W   | VPS24  | DID3        |   | iYKL042W   | #N/A       | 1.56  |      |
| YKL042W   | SPC42  |             | 0 | iYKL043W   | #N/A       | 0.96  |      |
| YKL043W   | PHD1   |             | 0 | iYKL044W   | -1.04      | #N/A  |      |
| YKL044W   |        |             | 0 | #N/A       | iYKL045W   | #N/A  | 0.30 |
| YKL045W   | PRI2   |             | 0 | iYKL046C   | -0.97      | 2.52  |      |
| YKL046C   |        |             | 0 | iYKL046C   | -0.59      | 2.52  |      |
| YKL047W   |        |             | 0 | #N/A       | iYKL048C   | -0.31 | 2.29 |
| YKL048C   | ELM1   | LDB9        |   | iYKL048C   | -0.42      | 2.29  |      |
| YKL049C   | CSE4   | CSL2        |   | iYKL049C   | 0.07       | 1.57  |      |
| YKL050C   |        |             | 0 | #N/A       | iYKL050C   | #N/A  | 0.73 |
| YKL051W   |        |             | 0 | iYKL052C   | 0.75       | 0.52  |      |
| YKL052C   | ASK1   |             | 0 | iYKL052C   | -0.03      | 0.52  |      |
| YKL053W   |        |             | 0 | #N/A       | iYKL053C-A | -0.16 | 0.92 |
| YKL054C   | VID31  | VID31       |   | iYKL054C   | 0.27       | 0.91  |      |
| YKL055C   | OAR1   |             | 0 | iYKL055C   | #N/A       | 0.63  |      |

|           |        |               |              |       |      |
|-----------|--------|---------------|--------------|-------|------|
| YKL056C   | 0      | #N/A          | iYKL056C     | -0.50 | #N/A |
| YKL057C   | NUP120 | RAT2          | iYKL057C     | -0.23 | 1.41 |
| YKL058W   | TOA2   |               | 0 iYKL059C   | -0.03 | 2.25 |
| YKL059C   | MPE1   |               | 0 iYKL059C   | -0.73 | 2.25 |
| YKL060C   | FBA1   | LOT1          | iYKL060C     | -0.19 | 0.28 |
| YKL061W   | 0      | #N/A          | iYKL062W     | #N/A  | #N/A |
| YKL062W   | MSN4   |               | 0 iYKL063C-1 | -0.96 | 0.63 |
| YKL063C   | 0      | #N/A          | iYKL063C-0   | 0.12  | 0.97 |
| YKL064W   | MNR2   |               | 0 iYKL065C   | 0.68  | 1.89 |
| YKL065C   | YET1   |               | 0 iYKL065C   | 1.40  | 1.89 |
| YKL066W   | 0      | #N/A          | iYKLWdelta   | 1.23  | 1.77 |
| YKL067W   | YNK1   | NDK1          | iYKLWdelta   | 1.34  | 1.77 |
| YKL068W   | NUP100 | NSP100        | itV(AAC)K1-  | #N/A  | #N/A |
| YKL069W   | 0      | #N/A          | iYKL070W     | 0.37  | 1.06 |
| YKL070W   | 0      | #N/A          | iYKL071W     | 0.23  | 0.42 |
| YKL071W   | 0      | #N/A          | itW(CCA)K-   | -0.80 | 0.73 |
| YKL072W   | STB6   |               | 0 iYKL073W   | -2.16 | 2.22 |
| YKL073W   | LHS1   | CER1 SSI1     | iYKL074C     | -0.20 | 2.44 |
| YKL074C   | MUD2   |               | 0 iYKL074C   | 0.17  | 2.44 |
| YKL075C   | 0      | #N/A          | iYKL075C     | 0.11  | 1.95 |
| YKL076C   | 0      |               | 0 iYKL075C   | 0.34  | 1.95 |
| YKL077W   | 0      | #N/A          | iYKL078W     | -0.03 | 1.43 |
| YKL078W   | DHR2   |               | 0 iYKL079W   | #N/A  | 1.90 |
| YKL079W   | SMY1   |               | 0 iYKL080W   | #N/A  | #N/A |
| YKL080W   | VMA5   | CSL5 VAT3     | iYKL081W     | -0.29 | 1.05 |
| YKL081W   | TEF4   | EFC1          | iYKL082C     | -0.95 | 0.77 |
| YKL082C   | 0      |               | 0 iYKL082C   | -1.13 | 0.77 |
| YKL083W   | 0      | #N/A          | iYKL084W     | #N/A  | #N/A |
| YKL084W   | 0      | #N/A          | iYKL085W     | #N/A  | 0.65 |
| YKL085W   | MDH1   |               | 0 iYKL086W   | 1.26  | 0.96 |
| YKL086W   | 0      |               | 0 iYKL087C   | #N/A  | 2.21 |
| YKL087C   | CYT2   |               | 0 iYKL087C   | 0.84  | 2.21 |
| YKL088W   | 0      | #N/A          | iYKL089W     | 0.37  | 2.07 |
| YKL089W   | MIF2   |               | 0 iYKL090W   | -0.34 | 0.99 |
| YKL090W   | 0      |               | 0 iYKL091C   | -1.65 | 1.22 |
| YKL091C   | 0      | #N/A          | iYKL091C     | 2.41  | 1.22 |
| YKL092C   | BUD2   | CLA2 ERC25    | iYKL092C     | #N/A  | #N/A |
| YKL093W   | MBR1   |               | 0 iYKL094W   | 0.29  | 0.73 |
| YKL094W   | YJU3   |               | 0 iYKL095W   | 0.94  | 1.19 |
| YKL095W   | YJU2   | CWC16         | iYKL096W     | #N/A  | 1.60 |
| YKL096W   | CWP1   | YJU1          | iYKL097W-    | 2.49  | 0.24 |
| YKL097C   | 0      | #N/A          | iYKL097C     | #N/A  | 0.25 |
| YKL097W-A | #N/A   | #N/A          | #N/A         | #N/A  | #N/A |
| YKL098W   | 0      | #N/A          | iYKL099C     | 0.08  | 2.37 |
| YKL099C   | UTP11  |               | 0 iYKL099C   | #N/A  | 2.37 |
| YKL100C   | 0      | #N/A          | iYKL100C     | 1.21  | 1.09 |
| YKL101W   | HSL1   | NIK1          | iYKL102C     | -0.28 | 1.81 |
| YKL102C   | 0      | #N/A          | iYKL102C     | 1.27  | 1.81 |
| YKL103C   | LAP4   | APE1 API YSC1 | iYKL103C     | 2.79  | 0.80 |
| YKL104C   | GFA1   |               | 0 iYKL104C   | 0.76  | 0.61 |
| YKL105C   | 0      | #N/A          | iYKL105C     | -1.58 | 1.51 |



|         |        |                    |      |             |          |       |      |
|---------|--------|--------------------|------|-------------|----------|-------|------|
| YKL106W | AAT1   |                    | 0    | iYKL107W    | -0.33    | #N/A  |      |
| YKL107W |        | 0                  | #N/A | iYKL108W    | #N/A     | 0.63  |      |
| YKL108W | SLD2   | DRC1               |      | iYKL109W    | -2.20    | 1.02  |      |
| YKL109W | HAP4   |                    | 0    | iYKL110C-1  | 0.62     | 0.25  |      |
| YKL110C | KTI12  | TOT4               |      | iYKL110C-0  | -0.92    | 0.55  |      |
| YKL111C |        | 0                  | #N/A | iYKL111C    | 0.01     | #N/A  |      |
| YKL112W | ABF1   | BAF1 OBF1 REB2 SEI |      | iYKL113C    | -0.27    | 0.86  |      |
| YKL113C | RAD27  | ERC11 RTH1         |      | iYKL113C    | -1.98    | 0.86  |      |
| YKL114C | APN1   |                    | 0    | iYKL114C    | -0.15    | 1.36  |      |
| YKL115C |        | 0                  | #N/A | iYKL115C    | #N/A     | #N/A  |      |
| YKL116C | PRR1   |                    | 0    | iYKL115C    | -0.64    | #N/A  |      |
| YKL117W | SBA1   |                    | 0    | itA(AGC)K1  | 0.92     | #N/A  |      |
| YKL118W |        | 0                  | #N/A | iYKL120W    | #N/A     | 0.56  |      |
| YKL119C | VPH2   | CLS10 VMA12        |      | iYKLCdelta4 | 0.60     | 0.78  |      |
| YKL120W | OAC1   |                    | 0    | iYKL121W    | -0.77    | 0.42  |      |
| YKL121W |        | 0                  | #N/A | iYKL122C    | 0.34     | #N/A  |      |
| YKL122C | SRP21  |                    | 0    | iYKL122C    | -1.23    | #N/A  |      |
| YKL123W |        | 0                  | #N/A | iYKL125W    | 0.78     | 1.40  |      |
| YKL124W | SSH4   | MLF4               |      | iYKL125W    | #N/A     | 1.40  |      |
| YKL125W | RRN3   |                    | 0    | iYKL126W    | -0.50    | 1.12  |      |
| YKL126W | YPK1   | SLI2               |      | iYKL127W    | 0.33     | 1.55  |      |
| YKL127W | PGM1   |                    | 0    | itK(CUU)K   | -1.02    | #N/A  |      |
| YKL128C | PMU1   |                    | 0    | iYKL128C    | -0.05    | 1.03  |      |
| YKL129C | MYO3   |                    | 0    | iYKL129C    | 1.23     | #N/A  |      |
| YKL130C | SHE2   |                    | 0    | iYKL130C    | -0.24    | 1.25  |      |
| YKL131W |        | 0                  | #N/A | iYKL133C    | #N/A     | 1.72  |      |
| YKL132C | RMA1   |                    | 0    | iYKL131W    | #N/A     | 1.81  |      |
| YKL133C |        | 0                  | #N/A | iYKL133C    | 1.77     | 1.72  |      |
| YKL134C |        | 37530              |      | 0           | iYKL134C | -0.15 | 2.22 |
| YKL135C | APL2   |                    | 0    | iYKL135C    | 0.18     | 2.06  |      |
| YKL136W |        | 0                  | #N/A | iYKL137W    | 0.24     | #N/A  |      |
| YKL137W |        | 0                  | #N/A | iYKL138C    | #N/A     | #N/A  |      |
| YKL138C | MRPL31 |                    | 0    | iYKL138C    | #N/A     | #N/A  |      |
| YKL139W | CTK1   |                    | 0    | iYKL140W    | 0.19     | 1.40  |      |
| YKL140W | TGL1   | YKL5               |      | iYKL141W    | #N/A     | 1.28  |      |
| YKL141W | SDH3   | CYB3 YKL4          |      | iYKL142W    | 1.32     | 1.80  |      |
| YKL142W | MRP8   | YKL3               |      | iYKL143W    | 1.81     | 0.67  |      |
| YKL143W | LTV1   | YKL2               |      | iYKL144C    | -4.14    | 3.65  |      |
| YKL144C | RPC25  | YKL1               |      | iYKL144C    | -1.32    | 3.65  |      |
| YKL145W | RPT1   | CIM5 YTA3          |      | iYKL146W    | 0.51     | 1.05  |      |
| YKL146W |        | 0                  |      | 0           | iYKL148C | 0.13  | 1.29 |
| YKL147C |        | 0                  | #N/A | iYKL146W    | #N/A     | 1.05  |      |
| YKL148C | SDH1   |                    | 0    | iYKL148C    | 1.12     | 1.29  |      |
| YKL149C | DBR1   | PRP26              |      | iYKL149C    | -1.78    | 0.97  |      |
| YKL150W | MCR1   |                    | 0    | iYKL151C    | 1.60     | 1.61  |      |
| YKL151C |        | 0                  | #N/A | iYKL151C    | 2.99     | 1.61  |      |
| YKL152C | GPM1   |                    | 0    | iYKL152C    | -0.11    | 0.31  |      |
| YKL153W |        | 0                  | #N/A | iYKLWdelta  | 0.15     | 1.38  |      |
| YKL154W | SRP102 |                    | 0    | iYKL155C    | #N/A     | 3.07  |      |
| YKL155C | RSM22  |                    | 0    | iYKL155C    | 0.41     | 3.07  |      |
| YKL156W | RPS27A |                    | 0    | iYKL157W    | -0.77    | 0.60  |      |

|         |        |                   |              |       |      |
|---------|--------|-------------------|--------------|-------|------|
| YKL157W | APE2   | LAP1              | iYKL158W     | 0.34  | 1.77 |
| YKL158W | #N/A   | #N/A              | #N/A         | #N/A  | #N/A |
| YKL159C | RCN1   |                   | 0 iYKL159C   | -0.09 | 2.54 |
| YKL160W | 0      |                   | 0 iYKL161C-1 | -0.01 | #N/A |
| YKL161C | 0      | #N/A              | iYKL161C-0   | 0.16  | 0.98 |
| YKL162C | 0      | #N/A              | iYKL162C     | #N/A  | 1.59 |
| YKL163W | PIR3   | CCW8              | iYKL164C-1   | 2.65  | 0.77 |
| YKL164C | PIR1   | CCW6              | iYKL164C-0   | 0.30  | 0.79 |
| YKL165C | MCD4   | FSR2 SSU21 ZRG16  | iYKL165C     | 0.16  | 1.23 |
| YKL166C | TPK3   |                   | 0 iYKL166C-0 | -0.85 | #N/A |
| YKL167C | MRP49  |                   | 0 iYKL167C   | 0.45  | 2.91 |
| YKL168C | KKQ8   |                   | 0 iYKL168C   | 0.63  | #N/A |
| YKL169C | 0      | #N/A              | iYKL169C     | #N/A  | #N/A |
| YKL170W | MRPL38 | MRPL34            | iYKL171W     | #N/A  | 2.43 |
| YKL171W | 0      | #N/A              | iYKL172W     | -0.37 | 1.76 |
| YKL172W | EBP2   |                   | 0 iYKL173W   | -1.80 | #N/A |
| YKL173W | SNU114 | GIN10             | iYKL174C     | 0.13  | 1.87 |
| YKL174C | 0      | #N/A              | iYKL174C     | 0.19  | 1.87 |
| YKL175W | ZRT3   |                   | 0 iYKL176C   | -0.06 | 1.92 |
| YKL176C | LST4   |                   | 0 iYKL176C   | -0.85 | 1.92 |
| YKL177W | 0      | #N/A              | iYKL179C     | #N/A  | 1.86 |
| YKL178C | STE3   | DAF2              | iYKL177W     | -1.71 | 0.99 |
| YKL179C | COY1   |                   | 0 iYKL179C   | 0.33  | 1.86 |
| YKL180W | RPL17A | RPL17             | iYKL181W     | -1.57 | #N/A |
| YKL181W | PRS1   | PRP1              | iYKL182W     | -1.00 | 0.86 |
| YKL182W | FAS1   |                   | 0 iYKL183W   | #N/A  | 0.15 |
| YKL183W | LOT5   |                   | 0 iYKL184W   | #N/A  | 0.73 |
| YKL184W | SPE1   | ORD1 SPE10        | iYKL185W     | -0.50 | 0.59 |
| YKL185W | ASH1   |                   | 0 iYKL186C   | -0.47 | 1.30 |
| YKL186C | MTR2   |                   | 0 iYKL186C   | 1.96  | 1.30 |
| YKL187C | 0      | #N/A              | iYKL187C     | 3.03  | 1.56 |
| YKL188C | PXA2   | PAT1              | iYKL188C     | 0.59  | 1.65 |
| YKL189W | HYM1   |                   | 0 itL(UAA)K  | 0.44  | 1.21 |
| YKL190W | CNB1   | CRV1 YCN2         | iYKL191W     | 0.49  | 1.04 |
| YKL191W | DPH2   |                   | 0 iYKL192C   | -2.53 | 2.91 |
| YKL192C | ACP1   |                   | 0 iYKL192C   | 0.77  | 2.91 |
| YKL193C | SDS22  | EGP1              | iYKL193C     | -0.46 | 1.53 |
| YKL194C | MST1   |                   | 0 iYKL194C   | #N/A  | 2.39 |
| YKL195W | 0      |                   | 0 iYKL196C   | 1.16  | 2.60 |
| YKL196C | YKT6   |                   | 0 iYKL196C   | 0.59  | 2.60 |
| YKL197C | PEX1   | PAS1              | iYKL197C     | 0.54  | 1.35 |
| YKL198C | PTK1   | KKT8 POT1 STK1 YK | iYKL198C     | 0.91  | 0.85 |
| YKL199C | YKT9   |                   | 0 iYKL198C   | -0.77 | 0.85 |
| YKL200C | #N/A   | #N/A              | #N/A         | -4.54 | #N/A |
| YKL201C | MNN4   |                   | 0 iYKL201C   | 0.44  | 0.68 |
| YKL202W | 0      | #N/A              | iYKL203C     | 0.85  | 1.63 |
| YKL203C | TOR2   | DRR2              | iYKL203C     | 0.24  | 1.63 |
| YKL204W | EAP1   |                   | 0 iYKL205W   | -0.62 | 1.80 |
| YKL205W | LOS1   |                   | 0 iYKL206C   | -0.45 | 1.91 |
| YKL206C | 0      | #N/A              | iYKL206C     | 0.68  | 1.91 |
| YKL207W | 0      | #N/A              | iYKL208W     | -0.08 | 2.04 |



|         |        |                 |   |             |       |      |
|---------|--------|-----------------|---|-------------|-------|------|
| YKL208W | CBT1   |                 | 0 | itT(CGU)K   | -0.13 | 0.91 |
| YKL209C | STE6   |                 | 0 | iYKL209C    | #N/A  | 0.64 |
| YKL210W | UBA1   |                 | 0 | iSNR64      | 0.46  | 1.39 |
| YKL211C | TRP3   |                 | 0 | iYKL211C    | 0.20  | 1.04 |
| YKL212W | SAC1   | RSD1            |   | iYKL213C    | -0.20 | 1.78 |
| YKL213C | DOA1   | UFD3 ZZZ4       |   | iYKL213C    | 0.72  | 1.78 |
| YKL214C | YRA2   |                 | 0 | iYKL214C    | #N/A  | 1.47 |
| YKL215C |        | 0 #N/A          |   | iYKL215C    | #N/A  | 1.51 |
| YKL216W | URA1   |                 | 0 | iYKL217W    | -2.45 | 1.27 |
| YKL217W | JEN1   |                 | 0 | iYKL218C-2  | 3.58  | 0.57 |
| YKL218C | SRY1   |                 | 0 | iYKL218C-0  | 1.32  | 1.53 |
| YKL219W | COS9   |                 | 0 | iYKL220C-2  | 1.23  | 1.14 |
| YKL220C | FRE2   |                 | 0 | iYKL220C-0  | #N/A  | 1.48 |
| YKL221W | MCH2   |                 | 0 | iYKL222C    | 1.64  | 1.43 |
| YKL222C |        | 0 #N/A          |   | iYKL222C    | -0.88 | 1.43 |
| YKL223W |        | 0 #N/A          |   | iYKL224C    | #N/A  | #N/A |
| YKL224C |        | 0 #N/A          |   | iYKL224C    | -0.13 | #N/A |
| YKL225W |        | 0 #N/A          |   | #N/A        | -2.73 | #N/A |
| YKR001C | VPS1   | GRD1 LAM1 SPO15 |   | iYKR001C    | 0.03  | 2.16 |
| YKR002W | PAP1   |                 | 0 | iYKR001C    | -0.26 | 2.16 |
| YKR003W | OSH6   |                 | 0 | iYKR002W    | 0.95  | 0.82 |
| YKR004C | ECM9   |                 | 0 | iYKR004C    | -0.19 | 1.11 |
| YKR005C |        | 0 #N/A          |   | iYKR005C    | -0.48 | 0.91 |
| YKR006C | MRPL13 | YK105           |   | iYKR006C    | 0.52  | 3.13 |
| YKR007W |        | 0               |   | 0 iYKR006C  | -0.56 | 3.13 |
| YKR008W | RSC4   |                 | 0 | iYKR007W    | -0.10 | #N/A |
| YKR009C | FOX2   | POX2            |   | iYKR009C    | 0.77  | 0.96 |
| YKR010C | TOF2   |                 | 0 | iYKR010C    | -1.77 | 1.72 |
| YKR011C | TOS5   | #N/A            |   | iYKR011C    | 1.96  | 1.76 |
| YKR012C |        | 0 #N/A          |   | iYKR013W    | 1.31  | 0.88 |
| YKR013W | PRY2   |                 | 0 | iYKR011C    | 0.04  | 1.76 |
| YKR014C | YPT52  |                 | 0 | iYKR014C    | 0.90  | 2.13 |
| YKR015C |        | 0 #N/A          |   | iYKR015C    | #N/A  | 0.82 |
| YKR016W |        | 0               |   | 0 iYKR015C  | 0.63  | 0.82 |
| YKR017C |        | 0 #N/A          |   | iYKR017C    | -0.09 | 1.70 |
| YKR018C |        | 0 #N/A          |   | iYKR018C    | 0.44  | 1.80 |
| YKR019C | IRS4   |                 | 0 | iYKR019C    | -1.11 | 2.20 |
| YKR020W | VPS67  | API3 VPS67 WHI6 |   | iYKR019C    | #N/A  | 2.20 |
| YKR021W |        | 0 #N/A          |   | iYKR020W    | #N/A  | 1.58 |
| YKR022C |        | 0 #N/A          |   | iYKR022C    | -0.30 | 1.93 |
| YKR023W |        | 0 #N/A          |   | iYKR022C    | 0.45  | 1.93 |
| YKR024C | DBP7   |                 | 0 | iYKR024C    | -1.73 | #N/A |
| YKR025W | RPC37  |                 | 0 | iYKR024C    | -0.93 | #N/A |
| YKR026C | GCN3   | AAS2            |   | iYKR026C    | -0.74 | 2.77 |
| YKR027W |        | 0               |   | 0 itR(ACG)K | -0.65 | 1.27 |
| YKR028W | SAP190 |                 | 0 | iYKR027W    | -0.40 | 1.66 |
| YKR029C | SET3   |                 | 0 | iYKR029C    | -1.69 | 1.40 |
| YKR030W |        | 0 MSG1          |   | iYKR029C    | 0.29  | 1.40 |
| YKR031C | SPO14  | PLD1            |   | iYKR031C    | #N/A  | 2.96 |
| YKR032W |        | 0 #N/A          |   | iYKR031C    | #N/A  | 2.96 |
| YKR033C |        | 0 #N/A          |   | iYKR034W    | #N/A  | 1.63 |

|         |        |                |              |       |      |
|---------|--------|----------------|--------------|-------|------|
| YKR034W | DAL80  | UGA43          | iYKR031C     | #N/A  | 2.96 |
| YKR035C | 0      | #N/A           | iYKR035W-    | 0.70  | 0.87 |
| YKR036C | CAF4   |                | 0 iYKR036C   | -0.18 | 2.81 |
| YKR037C | SPC34  |                | 0 iYKR037C   | #N/A  | #N/A |
| YKR038C | 0      |                | 0 iYKR038C   | -0.33 | #N/A |
| YKR039W | GAP1   |                | 0 iYKRCdelta | 1.20  | 1.85 |
| YKR040C | 0      | #N/A           | iYKR041W     | #N/A  | 0.18 |
| YKR041W | 0      | #N/A           | iYKRCdelta   | #N/A  | 0.55 |
| YKR042W | UTH1   |                | 0 iYKR041W   | 0.60  | 0.18 |
| YKR043C | 0      | #N/A           | iYKR043C     | -1.31 | #N/A |
| YKR044W | UIP5   |                | 0 iYKR043C   | -0.39 | #N/A |
| YKR045C | 0      | #N/A           | iYKR045C     | -2.08 | 1.55 |
| YKR046C | 0      |                | 0 iYKR046C   | 1.44  | 1.64 |
| YKR047W | 0      | #N/A           | iYKR046C     | 0.26  | 1.64 |
| YKR048C | NAP1   |                | 0 iYKR048C   | 0.18  | 2.91 |
| YKR049C | 0      |                | 0 iYKR049C   | #N/A  | 2.42 |
| YKR050W | TRK2   | RPD2           | iYKR049C     | -1.05 | 2.42 |
| YKR051W | 0      | #N/A           | iYKR050W     | 0.25  | 1.45 |
| YKR052C | MRS4   |                | 0 iYKR052C   | -1.37 | 1.06 |
| YKR053C | YSR3   | LBP2           | iYKR053C     | #N/A  | 0.73 |
| YKR054C | DYN1   | DHC1 PAC6      | iYKR054C     | #N/A  | 2.94 |
| YKR055W | RHO4   |                | 0 iYKR054C   | #N/A  | 2.94 |
| YKR056W | TRM2   | NUC2 NUD1 RNC1 | iYKR055W     | -2.16 | 0.84 |
| YKR057W | RPS21A | RPS25          | iYKR056W     | -1.30 | 0.45 |
| YKR058W | GLG1   |                | 0 iYKR057W   | -0.19 | #N/A |
| YKR059W | TIF1   |                | 0 iYKR058W   | -1.72 | #N/A |
| YKR060W | 0      |                | 0 iYKR059W   | -1.57 | 1.38 |
| YKR061W | KTR2   |                | 0 iYKR060W   | 1.28  | 1.41 |
| YKR062W | TFA2   |                | 0 iSNR42     | 0.41  | 1.61 |
| YKR063C | LAS1   |                | 0 iYKR063C   | -0.22 | 2.04 |
| YKR064W | 0      | #N/A           | iYKR063C     | 0.34  | 2.04 |
| YKR065C | 0      |                | 0 iYKR065C   | 0.36  | 3.19 |
| YKR066C | CCP1   |                | 0 iYKR066C   | 1.09  | 2.54 |
| YKR067W | GPT2   | GAT1           | iYKR066C     | 2.20  | 2.54 |
| YKR068C | BET3   |                | 0 iYKR068C   | 0.41  | 1.63 |
| YKR069W | MET1   | MET20          | iYKR068C     | #N/A  | 1.63 |
| YKR070W | 0      | #N/A           | iYKR069W     | 0.41  | 1.23 |
| YKR071C | DRE2   |                | 0 iYKR071C   | -0.36 | 0.88 |
| YKR072C | SIS2   | HAL3           | iYKR072C     | 0.17  | #N/A |
| YKR073C | 0      | #N/A           | iYKR073C     | #N/A  | 1.45 |
| YKR074W | 0      | #N/A           | itK(UUU)K    | -0.59 | 1.91 |
| YKR075C | 0      | #N/A           | iYKR075C-C   | -3.10 | 0.55 |
| YKR076W | ECM4   |                | 0 iYKR075C-1 | 2.36  | 1.69 |
| YKR077W | 0      | #N/A           | iYKR076W     | -1.10 | 1.56 |
| YKR078W | 0      | #N/A           | iYKR077W     | -1.06 | 2.25 |
| YKR079C | 0      |                | 0 iYKR079C   | -0.96 | 1.36 |
| YKR080W | MTD1   |                | 0 iYKR079C   | 0.62  | 1.36 |
| YKR081C | RPF2   |                | 0 iYKR081C   | -2.22 | 3.20 |
| YKR082W | NUP133 | RAT3           | iYKR081C     | -0.55 | 3.20 |
| YKR083C | DAD2   | HSK1           | iYKR083C     | -0.66 | #N/A |
| YKR084C | HBS1   |                | 0 iYKR084C   | -0.18 | #N/A |

|         |        |                  |   |            |       |      |
|---------|--------|------------------|---|------------|-------|------|
| YKR085C | MRPL20 |                  | 0 | iYKR085C   | #N/A  | 2.17 |
| YKR086W | PRP16  |                  | 0 | iYKR085C   | #N/A  | 2.17 |
| YKR087C | 0      |                  | 0 | iYKR087C   | 0.30  | 1.84 |
| YKR088C | 0      |                  | 0 | iYKR088C   | 0.17  | #N/A |
| YKR089C | 0      |                  | 0 | iYKR089C   | -0.04 | 0.94 |
| YKR090W | PXL1   |                  | 0 | iYKR089C   | 0.62  | 0.94 |
| YKR091W | SRL3   |                  | 0 | iYKR090W   | 2.66  | 1.03 |
| YKR092C | SRP40  |                  | 0 | iYKR092C-C | -1.58 | 0.36 |
| YKR093W | PTR2   |                  | 0 | iYKR092C-1 | -0.18 | 0.16 |
| YKR094C | RPL40B | CEP52B UB12 UBI2 |   | iYKR094C   | -1.49 | 1.08 |
| YKR095W | MLP1   | MPL1             |   | iYKR094C   | #N/A  | 1.08 |
| YKR096W | 0      | #N/A             |   | iYKR095W   | 0.32  | 1.38 |
| YKR097W | PCK1   | JPM2 PPC1        |   | iYKR096W   | #N/A  | 1.45 |
| YKR098C | UBP11  |                  | 0 | iYKR098C   | 0.12  | 2.68 |
| YKR099W | BAS1   |                  | 0 | iYKR098C   | -0.68 | 2.68 |
| YKR100C | 0      |                  | 0 | iYKR100C   | #N/A  | 2.82 |
| YKR101W | SIR1   |                  | 0 | iYKR100C   | #N/A  | 2.82 |
| YKR102W | FLO10  |                  | 0 | iYKR101W-  | #N/A  | 0.70 |
| YKR103W | 0      |                  | 0 | iYKR102W-  | 0.29  | 0.53 |
| YKR104W | 0      | #N/A             |   | iYKR103W   | -0.14 | #N/A |
| YKR105C | 0      | #N/A             |   | iYKR105C   | #N/A  | 0.91 |
| YKR106W | 0      | #N/A             |   | iYKR105C   | #N/A  | 0.91 |
| YLL001W | DNM1   |                  | 0 | iYLL002W   | #N/A  | 1.44 |
| YLL002W | RTT109 | KIM2 REM50       |   | iYLL003W   | -1.03 | #N/A |
| YLL003W | SFI1   |                  | 0 | iYLL004W   | #N/A  | 1.93 |
| YLL004W | ORC3   |                  | 0 | iYLL005C   | -0.86 | 1.73 |
| YLL005C | SPO75  |                  | 0 | iYLL005C   | 0.69  | 1.73 |
| YLL006W | MMM1   | YME6             |   | iYLL007C   | 0.96  | 1.02 |
| YLL007C | 0      | #N/A             |   | iYLL007C   | #N/A  | 1.02 |
| YLL008W | DRS1   |                  | 0 | iYLL009C   | #N/A  | 1.75 |
| YLL009C | COX17  |                  | 0 | iYLL009C   | #N/A  | 1.75 |
| YLL010C | PSR1   |                  | 0 | iYLL010C   | -0.17 | 2.27 |
| YLL011W | SOF1   |                  | 0 | iYLL012W   | -1.29 | 2.47 |
| YLL012W | 0      | #N/A             |   | iYLL013C   | 0.31  | #N/A |
| YLL013C | PUF3   |                  | 0 | iYLL013C   | #N/A  | #N/A |
| YLL014W | 0      | #N/A             |   | iYLL015W   | 0.23  | #N/A |
| YLL015W | BPT1   |                  | 0 | iYLL016W   | 0.24  | 1.36 |
| YLL016W | SDC25  |                  | 0 | iYLL017W   | -1.21 | 0.69 |
| YLL017W | SDC25  | #N/A             |   | iYLL018C   | -0.92 | 2.26 |
| YLL018C | DPS1   | AspRS            |   | iYLL018C   | -0.60 | 2.26 |
| YLL019C | KNS1   | L124             |   | iYLL019C   | 0.75  | 0.50 |
| YLL020C | 0      | #N/A             |   | iYLL019C   | 1.55  | 0.50 |
| YLL021W | SPA2   | FUS6 PEA1        |   | iYLL022C   | -0.75 | #N/A |
| YLL022C | HIF1   |                  | 0 | iYLL022C   | -1.54 | #N/A |
| YLL023C | 0      | #N/A             |   | iYLL023C   | 1.59  | #N/A |
| YLL024C | SSA2   |                  | 0 | iYLL024C   | 0.73  | 0.48 |
| YLL025W | 0      | #N/A             |   | itP(UGG)L- | #N/A  | #N/A |
| YLL026W | HSP104 |                  | 0 | iYLL027W   | 3.61  | 1.30 |
| YLL027W | ISA1   |                  | 0 | iYLL028W   | 1.06  | 0.91 |
| YLL028W | TPO1   |                  | 0 | iYLL029W   | 1.41  | #N/A |
| YLL029W | 0      | #N/A             |   | iYLL030C   | #N/A  | 0.89 |

|         |       |            |            |       |      |
|---------|-------|------------|------------|-------|------|
| YLL030C | 0     | #N/A       | iYLL030C   | #N/A  | 0.89 |
| YLL031C | GPI13 | MPC1       | iYLL031C   | -0.44 | 1.78 |
| YLL032C | 0     | #N/A       | iYLL032C   | -0.58 | 1.39 |
| YLL033W | 0     | #N/A       | iYLL034C   | #N/A  | 3.54 |
| YLL034C | 0     |            | 0 iYLL034C | -2.33 | 3.54 |
| YLL035W | GRC3  |            | 0 iYLL036C | -2.25 | #N/A |
| YLL036C | PRP19 | PSO4       | iYLL036C   | -0.37 | #N/A |
| YLL037W | 0     | #N/A       | iYLL039C   | -0.24 | 1.05 |
| YLL038C | ENT4  |            | 0 iYLL036C | #N/A  | #N/A |
| YLL039C | UBI4  | SCD2 UB14  | iYLL039C   | 3.75  | 1.05 |
| YLL040C | VPS13 | SOI1 VPT2  | iYLL040C   | #N/A  | 1.84 |
| YLL041C | SDH2  | ACN17      | iYLL041C   | 1.21  | 1.23 |
| YLL042C | APG10 | APG10      | iYLL042C   | #N/A  | 0.98 |
| YLL043W | FPS1  |            | 0 iYLL044W | 0.26  | 1.65 |
| YLL044W | 0     | #N/A       | iYLL046C   | -1.96 | 0.58 |
| YLL045C | RPL8B | KRB1 SCL41 | iYLL044W   | -2.01 | 1.65 |
| YLL046C | RNP1  |            | 0 iYLL046C | -2.40 | 0.58 |
| YLL047W | 0     | #N/A       | iYLL048C   | #N/A  | 2.27 |
| YLL048C | YBT1  | BAT1       | iYLL048C   | -0.35 | 2.27 |
| YLL049W | 0     | #N/A       | iYLL050C   | -0.46 | #N/A |
| YLL050C | COF1  |            | 0 iYLL050C | 0.48  | #N/A |
| YLL051C | FRE6  |            | 0 iYLL051C | -1.17 | 1.04 |
| YLL052C | AQY2  |            | 0 iYLL052C | 0.27  | 0.51 |
| YLL053C | 0     | #N/A       | iYLL052C   | 0.30  | 0.51 |
| YLL054C | 0     | #N/A       | iYLL054C   | #N/A  | 1.61 |
| YLL055W | 0     | #N/A       | iYLL056C-1 | 0.16  | 2.06 |
| YLL056C | 0     | #N/A       | iYLL056C-0 | -0.09 | 1.46 |
| YLL057C | 0     |            | 0 iYLL057C | -1.44 | 1.03 |
| YLL058W | 0     | #N/A       | iYLL059C   | 0.51  | 2.07 |
| YLL059C | 0     | #N/A       | iYLL059C   | #N/A  | 2.07 |
| YLL060C | GTT2  |            | 0 iYLL060C | #N/A  | 1.25 |
| YLL061W | MMP1  |            | 0 iYLL062C | 0.16  | 1.10 |
| YLL062C | MHT1  |            | 0 iYLL062C | 0.69  | 1.10 |
| YLL063C | AYT1  |            | 0 iYLL063C | #N/A  | 2.02 |
| YLL064C | 0     | #N/A       | iYLL064C   | -0.39 | 0.98 |
| YLL065W | 0     | #N/A       | iYLL066C-1 | #N/A  | 0.30 |
| YLL066C | 0     | #N/A       | iYLL066C-0 | -0.14 | 0.79 |
| YLL067C | 0     | #N/A       | iYLL067C-0 | -0.21 | 0.80 |
| YLR001C | 0     | #N/A       | iYLR001C   | 0.64  | 0.87 |
| YLR002C | NOC3  |            | 0 iYLR002C | -2.76 | #N/A |
| YLR003C | 0     | #N/A       | iYLR003C   | -2.13 | 1.18 |
| YLR004C | 0     | #N/A       | iYLR004C   | -0.65 | 2.08 |
| YLR005W | SSL1  |            | 0 iYLR004C | 0.01  | 2.08 |
| YLR006C | SSK1  |            | 0 iYLR006C | -0.66 | 2.52 |
| YLR007W | NSE1  |            | 0 iYLR006C | -0.24 | 2.52 |
| YLR008C | 0     | TIM14      | iYLR008C   | -0.19 | 1.60 |
| YLR009W | RLP24 |            | 0 iYLR008C | -1.66 | 1.60 |
| YLR010C | TEN1  |            | 0 iYLR010C | #N/A  | #N/A |
| YLR011W | LOT6  |            | 0 iYLR011C | #N/A  | 2.19 |
| YLR012C | 0     | #N/A       | iYLR012C   | #N/A  | #N/A |
| YLR013W | GAT3  |            | 0 iYLR012C | #N/A  | #N/A |

|         |        |            |   |          |            |          |      |      |
|---------|--------|------------|---|----------|------------|----------|------|------|
| YLR014C | PPR1   |            | 0 | iYLR014C | -1.22      | #N/A     |      |      |
| YLR015W | BRE2   | CPS60      |   | iYLR014C | -0.80      | #N/A     |      |      |
| YLR016C |        |            | 0 | #N/A     | 0.24       | 2.19     |      |      |
| YLR017W | MEU1   |            |   | 0        | iYLR016C   | #N/A     | 2.19 |      |
| YLR018C | POM34  |            |   | 0        | iYLR018C   | -0.66    | 1.81 |      |
| YLR019W | PSR2   |            |   | 0        | iYLR018C   | -0.30    | 1.81 |      |
| YLR020C |        |            | 0 | #N/A     | iYLR020C   | #N/A     | 1.81 |      |
| YLR021W |        |            | 0 | #N/A     | iYLR020C   | 0.30     | 1.81 |      |
| YLR022C |        |            | 0 | #N/A     | iYLR022C   | -0.12    | 0.71 |      |
| YLR023C |        |            | 0 |          | 0          | iYLR023C | 0.14 | 0.80 |
| YLR024C | UBR2   |            |   | 0        | iYLR024C   | #N/A     | #N/A |      |
| YLR025W | SNF7   | DID1 VPS32 |   |          | iYLR024C   | 1.53     | #N/A |      |
| YLR026C | SED5   |            |   | 0        | iYLR026C   | 0.16     | 1.66 |      |
| YLR027C | AAT2   | ASP5       |   |          | iYLR027C   | 0.03     | 0.68 |      |
| YLR028C | ADE16  |            |   | 0        | iYLR028C   | 0.55     | #N/A |      |
| YLR029C | RPL15A | RPL10A     |   |          | iYLR029C   | -1.21    | 1.44 |      |
| YLR030W |        |            | 0 | #N/A     | iYLR029C   | -1.30    | 1.44 |      |
| YLR031W |        |            | 0 | #N/A     | iYLR030W   | 1.17     | #N/A |      |
| YLR032W | RAD5   | REV2 SNM2  |   |          | iYLR031W   | -1.12    | 2.18 |      |
| YLR033W | RSC58  |            |   | 0        | iYLR032W   | #N/A     | 1.24 |      |
| YLR034C | SMF3   |            |   | 0        | iYLR034C   | 0.12     | 1.03 |      |
| YLR035C | MLH2   |            |   | 0        | iYLR035C   | -0.85    | 1.74 |      |
| YLR036C |        |            | 0 | #N/A     | iYLR036C   | #N/A     | 1.58 |      |
| YLR037C | DAN2   |            |   | 0        | iYLR037C-C | 0.08     | 1.39 |      |
| YLR038C | COX12  |            |   | 0        | iYLR038C   | #N/A     | 1.26 |      |
| YLR039C | RIC1   |            |   | 0        | iYLR039C   | -0.39    | 0.82 |      |
| YLR040C |        |            | 0 | #N/A     | iYLR041W   | 0.11     | #N/A |      |
| YLR041W |        |            | 0 | #N/A     | iYLR039C   | -0.95    | 0.82 |      |
| YLR042C |        |            | 0 | #N/A     | iYLR042C   | #N/A     | #N/A |      |
| YLR043C | TRX1   | LMA1       |   |          | iYLR043C   | -0.35    | #N/A |      |
| YLR044C | PDC1   |            |   | 0        | iYLR044C   | -0.68    | 0.27 |      |
| YLR045C | STU2   |            |   | 0        | iYLR045C   | -0.48    | 1.26 |      |
| YLR046C |        |            | 0 | #N/A     | iYLR046C   | 0.50     | #N/A |      |
| YLR047C |        |            | 0 | #N/A     | iYLR047C   | #N/A     | 0.39 |      |
| YLR048W | RPS0B  | NAB1B YST2 |   |          | iYLR047C   | -1.79    | 0.39 |      |
| YLR049C |        |            | 0 | #N/A     | iYLR049C   | -0.04    | #N/A |      |
| YLR050C |        |            | 0 | #N/A     | iYLR050C   | 0.60     | 1.49 |      |
| YLR051C |        |            | 0 | #N/A     | iYLR051C   | -0.64    | 1.78 |      |
| YLR052W | IES3   |            |   | 0        | iYLR051C   | #N/A     | 1.78 |      |
| YLR053C |        |            | 0 | #N/A     | iYLR053C   | 0.00     | 2.12 |      |
| YLR054C |        |            | 0 |          | 0          | iYLR054C | #N/A | 0.74 |
| YLR055C | SPT8   |            |   | 0        | iYLR055C   | -0.42    | 0.78 |      |
| YLR056W | ERG3   | PSO6 SYR1  |   |          | iYLR055C   | -1.70    | 0.78 |      |
| YLR057W |        |            | 0 | #N/A     | iYLR056W   | -0.06    | #N/A |      |
| YLR058C | SHM2   | SHMT2      |   |          | iYLR058C   | 0.64     | 0.65 |      |
| YLR059C | REX2   | YNT20      |   |          | iYLR059C   | -0.02    | 2.02 |      |
| YLR060W | FRS1   |            |   | 0        | iYLR059C   | -0.77    | 2.02 |      |
| YLR061W | RPL22A |            |   | 0        | iYLR060W   | -1.54    | #N/A |      |
| YLR062C | BUD28  |            |   | 0        | iYLR062C   | -1.42    | #N/A |      |
| YLR063W |        |            | 0 | #N/A     | iYLR062C   | #N/A     | #N/A |      |
| YLR064W |        |            | 0 | #N/A     | iYLR063W   | 1.46     | #N/A |      |

|         |        |           |            |       |      |
|---------|--------|-----------|------------|-------|------|
| YLR065C | 0      | #N/A      | iYLR065C   | -0.36 | #N/A |
| YLR066W | SPC3   |           | 0 iYLR065C | #N/A  | #N/A |
| YLR067C | PET309 |           | 0 iYLR067C | #N/A  | 2.72 |
| YLR068W | FYV7   |           | 0 iYLR067C | #N/A  | 2.72 |
| YLR069C | MEF1   |           | 0 iYLR069C | 1.18  | #N/A |
| YLR070C | XYL2   |           | 0 iYLR070C | #N/A  | #N/A |
| YLR071C | RGR1   |           | 0 iYLR071C | -0.62 | 2.49 |
| YLR072W | 0      | #N/A      | iYLR071C   | 0.20  | 2.49 |
| YLR073C | 0      | #N/A      | iYLR073C   | -1.75 | 1.17 |
| YLR074C | BUD20  |           | 0 iYLR074C | -1.38 | 0.42 |
| YLR075W | RPL10  | GRC5 QSR1 | iYLR074C   | -1.08 | 0.42 |
| YLR076C | 0      | #N/A      | iYLR076C   | -1.24 | #N/A |
| YLR077W | 0      |           | 0 iYLR076C | 0.03  | #N/A |
| YLR078C | BOS1   | SEC32     | iYLR078C   | 0.41  | 1.85 |
| YLR079W | SIC1   | SDB25     | iYLR078C   | 0.49  | 1.85 |
| YLR080W | EMP46  |           | 0 iYLR079W | 2.55  | #N/A |
| YLR081W | GAL2   |           | 0 iYLR080W | #N/A  | 1.70 |
| YLR082C | SRL2   |           | 0 iYLR082C | -0.53 | 0.88 |
| YLR083C | EMP70  |           | 0 iYLR083C | -1.45 | 1.60 |
| YLR084C | RAX2   |           | 0 iYLR084C | #N/A  | 0.55 |
| YLR085C | ARP6   |           | 0 iYLR085C | -0.44 | 2.37 |
| YLR086W | SMC4   |           | 0 iYLR085C | -0.42 | 2.37 |
| YLR087C | CSF1   |           | 0 iYLR087C | #N/A  | 2.64 |
| YLR088W | GAA1   | END2      | iYLR087C   | -0.15 | 2.64 |
| YLR089C | 0      |           | 0 iYLR089C | 0.93  | 1.56 |
| YLR090W | XDJ1   |           | 0 iYLR089C | 0.19  | 1.56 |
| YLR091W | 0      | #N/A      | iYLR090W   | -0.05 | #N/A |
| YLR092W | SUL2   |           | 0 iYLR091W | 0.40  | 1.49 |
| YLR093C | NYV1   | MAM2      | iYLR093C   | 0.97  | 0.73 |
| YLR094C | GIS3   |           | 0 iYLR094C | -0.60 | 0.86 |
| YLR095C | IOC2   |           | 0 iYLR095C | -0.15 | 3.44 |
| YLR096W | KIN2   |           | 0 iYLR095C | -0.89 | 3.44 |
| YLR097C | 0      |           | 0 iYLR097C | 0.56  | 2.21 |
| YLR098C | CHA4   | SIL2 SIL3 | iYLR098C   | -0.26 | 1.46 |
| YLR099C | ICT1   |           | 0 iYLR099C | -0.28 | 0.93 |
| YLR100W | ERG27  |           | 0 iYLR099C | -0.33 | 0.93 |
| YLR101C | 0      | #N/A      | iYLR102C   | -0.23 | #N/A |
| YLR102C | APC9   |           | 0 iYLR102C | 1.31  | #N/A |
| YLR103C | CDC45  | SLD4      | iYLR103C   | -1.40 | 1.61 |
| YLR104W | 0      | #N/A      | iYLR103C   | 0.64  | 1.61 |
| YLR105C | SEN2   |           | 0 iYLR105C | -0.62 | 0.75 |
| YLR106C | MDN1   | REA1      | iYLR106C   | -2.75 | 1.94 |
| YLR107W | REX3   |           | 0 iYLR106C | 0.05  | 1.94 |
| YLR108C | 0      | #N/A      | iYLR108C   | -1.33 | 0.40 |
| YLR109W | AHP1   | cTPxIII   | iYLR108C   | 1.07  | 0.40 |
| YLR110C | CCW12  |           | 0 iYLR110C | -0.35 | 0.13 |
| YLR111W | 0      | #N/A      | iYLR110C   | #N/A  | 0.13 |
| YLR112W | 0      | #N/A      | iYLR111W   | 1.06  | #N/A |
| YLR113W | HOG1   | SSK3      | iYLR112W   | -0.39 | 0.36 |
| YLR114C | 0      | #N/A      | iYLR114C   | -0.38 | 1.93 |
| YLR115W | CFT2   | YDH1      | iYLR114C   | #N/A  | 1.93 |



|         |        |                  |            |       |      |
|---------|--------|------------------|------------|-------|------|
| YLR116W | MSL5   | BBP              | iYLR115W   | -1.57 | 0.57 |
| YLR117C | CLF1   | NTC77 SYF3       | iYLR117C   | -0.89 | 2.08 |
| YLR118C | 0      | #N/A             | iYLR118C   | 0.98  | 2.11 |
| YLR119W | SRN2   | SRN10 VPS37      | iYLR118C   | 0.04  | 2.11 |
| YLR120C | YPS1   | YAP3             | iYLR120C   | 0.97  | 1.28 |
| YLR121C | YPS3   | YPS4             | iYLR121C   | 1.51  | 1.05 |
| YLR122C | 0      | #N/A             | iYLR123C   | #N/A  | #N/A |
| YLR123C | 0      | #N/A             | iYLR123C   | #N/A  | #N/A |
| YLR124W | 0      | #N/A             | iYLR123C   | #N/A  | #N/A |
| YLR125W | 0      | #N/A             | iYLR124W-  | #N/A  | #N/A |
| YLR126C | 0      | #N/A             | iYLR126C   | 0.05  | 1.60 |
| YLR127C | APC2   | RSI1             | iYLR127C   | -1.43 | 1.40 |
| YLR128W | 0      |                  | 0 iYLR127C | #N/A  | 1.40 |
| YLR129W | DIP2   | UTP12            | iYLR128W   | -1.21 | #N/A |
| YLR130C | ZRT2   |                  | 0 iYLR130C | -0.35 | 0.83 |
| YLR131C | ACE2   |                  | 0 iYLR131C | -0.75 | 1.01 |
| YLR132C | 0      | #N/A             | iYLR132C   | 1.12  | 2.11 |
| YLR133W | CKI1   |                  | 0 iYLR132C | 0.77  | 2.11 |
| YLR134W | PDC5   |                  | 0 iYLR133W | -0.87 | 1.41 |
| YLR135W | SLX4   |                  | 0 iYLR134W | 0.02  | 1.19 |
| YLR136C | TIS11  | CTH2             | iYLR136C   | #N/A  | 2.05 |
| YLR137W | 0      | #N/A             | iYLR136C   | 0.38  | 2.05 |
| YLR138W | NHA1   |                  | 0 iYLR137W | 0.21  | #N/A |
| YLR139C | SLS1   |                  | 0 iYLR141W | -0.82 | 0.77 |
| YLR140W | 0      | #N/A             | iYLR138W   | 0.13  | 0.52 |
| YLR141W | RRN5   |                  | 0 iYLR138W | #N/A  | 0.52 |
| YLR142W | PUT1   |                  | 0 iYLR141W | 1.15  | 0.77 |
| YLR143W | 0      | #N/A             | itD(GUC)L1 | -0.36 | #N/A |
| YLR144C | ACF2   | ENG2             | iYLR144C   | #N/A  | #N/A |
| YLR145W | 0      | #N/A             | iYLR144C   | 0.34  | #N/A |
| YLR146C | SPE4   |                  | 0 iYLR146C | -1.46 | 3.19 |
| YLR147C | SMD3   | SLT16 Sm D3      | iYLR147C   | -1.05 | #N/A |
| YLR148W | PEP3   | VAM8 VPS18 VPT18 | iYLR147C   | -0.99 | #N/A |
| YLR149C | 0      | #N/A             | iYLR149C   | 1.08  | 0.71 |
| YLR150W | STM1   | MPT4             | iYLR149C   | -1.50 | 0.71 |
| YLR151C | PCD1   |                  | 0 iYLR151C | 1.69  | #N/A |
| YLR152C | 0      | #N/A             | iYLR152C   | 2.14  | 1.31 |
| YLR153C | ACS2   |                  | 0 iYLR153C | -0.34 | 0.49 |
| YLR154C | 0      | Rnh2C            | iYLRWdelta | #N/A  | 0.47 |
| YLR155C | ASP3-1 | ASP3             | iYLR155C-0 | #N/A  | #N/A |
| YLR156W | 0      | #N/A             | iYLR155C-0 | #N/A  | #N/A |
| YLR157C | ASP3-2 | ASP3             | iYLR157C-0 | #N/A  | #N/A |
| YLR158C | ASP3-3 | ASP3             | iYLR158C-0 | #N/A  | #N/A |
| YLR159W | 0      | #N/A             | iYLR158C-1 | #N/A  | #N/A |
| YLR160C | ASP3-4 | ASP3             | iYLR160C-0 | #N/A  | #N/A |
| YLR161W | 0      | #N/A             | iYLR160C-1 | #N/A  | #N/A |
| YLR162W | 0      | #N/A             | iYLR160C-1 | 0.87  | #N/A |
| YLR163C | MAS1   | MIF1             | iYLR163C   | 0.40  | 2.37 |
| YLR164W | 0      | #N/A             | iYLR163C   | 0.65  | 2.37 |
| YLR165C | PUS5   |                  | 0 iYLR165C | 0.35  | 1.11 |
| YLR166C | SEC10  |                  | 0 iYLR166C | 0.20  | #N/A |

|         |        |            |            |       |      |
|---------|--------|------------|------------|-------|------|
| YLR167W | RPS31  | RPS37 UBI3 | iYLR166C   | -1.75 | #N/A |
| YLR168C | 0      | #N/A       | iYLR168C   | 1.28  | #N/A |
| YLR169W | 0      | #N/A       | iYLR168C   | #N/A  | #N/A |
| YLR170C | APS1   | YAP19      | iYLR171W   | #N/A  | 1.70 |
| YLR171W | 0      | #N/A       | iYLR168C   | -1.76 | #N/A |
| YLR172C | DPH5   |            | 0 iYLR172C | -1.17 | 2.11 |
| YLR173W | 0      | #N/A       | iYLR172C   | -0.52 | 2.11 |
| YLR174W | IDP2   |            | 0 iYLR173W | 2.08  | 2.57 |
| YLR175W | CBF5   |            | 0 iYLR174W | -1.97 | #N/A |
| YLR176C | RFX1   | CRT1       | iYLR176C   | 0.26  | 2.72 |
| YLR177W | 0      | #N/A       | iYLR176C   | #N/A  | 2.72 |
| YLR178C | TFS1   | DKA1       | iYLR178C   | 3.36  | 1.63 |
| YLR179C | 0      | #N/A       | iYLR179C   | -0.04 | 0.50 |
| YLR180W | SAM1   | ETH10      | iYLR179C   | -1.08 | 0.50 |
| YLR181C | VTA1   |            | 0 iYLR181C | -0.11 | 1.64 |
| YLR182W | SWI6   | PSL8 SDS11 | iYLR181C   | -0.04 | 1.64 |
| YLR183C | TOS4   |            | 0 iYLR183C | -1.88 | #N/A |
| YLR184W | 0      | #N/A       | iYLR183C   | #N/A  | #N/A |
| YLR185W | RPL37A |            | 0 iYLR184W | -1.44 | #N/A |
| YLR186W | EMG1   | NEP1       | iYLR185W   | -1.16 | #N/A |
| YLR187W | 0      |            | 0 iYLR186W | -0.63 | 1.65 |
| YLR188W | MDL1   |            | 0 iYLR187W | -0.66 | 1.29 |
| YLR189C | UGT51  | UGT51      | iYLR189C   | 0.35  | #N/A |
| YLR190W | 0      |            | 0 iYLR189C | -1.26 | #N/A |
| YLR191W | PEX13  | PAS20      | iYLR190W   | 0.57  | #N/A |
| YLR192C | HCR1   |            | 0 iYLR192C | -0.19 | #N/A |
| YLR193C | 0      | #N/A       | iYLR193C   | #N/A  | #N/A |
| YLR194C | 0      | #N/A       | iYLR194C   | 1.06  | 1.31 |
| YLR195C | NMT1   | CDC72      | iYLR195C   | 0.08  | #N/A |
| YLR196W | PWP1   |            | 0 iYLR195C | -2.79 | #N/A |
| YLR197W | SIK1   | NOP56      | iYLR196W   | -2.57 | 1.39 |
| YLR198C | 0      | #N/A       | iYLR198C   | -2.92 | #N/A |
| YLR199C | 0      | #N/A       | iYLR199C   | 1.36  | 2.13 |
| YLR200W | YKE2   | GIM1 PFD6  | iYLR199C   | #N/A  | 2.13 |
| YLR201C | 0      |            | 0 iYLR203C | 0.99  | 4.21 |
| YLR202C | 0      | #N/A       | iYLR203C   | #N/A  | 4.21 |
| YLR203C | MSS51  |            | 0 iYLR203C | 0.17  | 4.21 |
| YLR204W | QRI5   |            | 0 iYLR203C | 0.05  | 4.21 |
| YLR205C | HMX1   |            | 0 iYLR205C | 1.27  | 1.74 |
| YLR206W | ENT2   |            | 0 iYLR205C | #N/A  | 1.74 |
| YLR207W | HRD3   |            | 0 iYLR206W | 0.58  | #N/A |
| YLR208W | SEC13  | ANU3       | iYLR207W   | 0.08  | 1.88 |
| YLR209C | PNP1   |            | 0 iYLR209C | 0.22  | 2.12 |
| YLR210W | CLB4   |            | 0 iYLR209C | -1.78 | 2.12 |
| YLR211C | 0      | #N/A       | iYLR211C   | #N/A  | 1.20 |
| YLR212C | TUB4   |            | 0 iYLR212C | -1.13 | 1.49 |
| YLR213C | CRR1   |            | 0 iYLR213C | -0.84 | 1.15 |
| YLR214W | FRE1   |            | 0 iYLR213C | -1.34 | 1.15 |
| YLR215C | CDC123 |            | 0 iYLR215C | -0.55 | 1.57 |
| YLR216C | CPR6   |            | 0 iYLR217W | 2.49  | 1.88 |
| YLR217W | 0      | #N/A       | iYLR215C   | 2.27  | 1.57 |



|         |        |                  |              |       |      |
|---------|--------|------------------|--------------|-------|------|
| YLR218C | 0      | #N/A             | iYLR218C     | 1.17  | 2.92 |
| YLR219W | MSC3   |                  | 0 iYLR218C   | #N/A  | 2.92 |
| YLR220W | CCC1   |                  | 0 iYLR219W   | 1.38  | 0.74 |
| YLR221C | RSA3   |                  | 0 iYLR221C   | -2.31 | 1.02 |
| YLR222C | UTP13  |                  | 0 iYLR222C   | -1.87 | #N/A |
| YLR223C | IFH1   |                  | 0 iYLR223C   | 0.04  | #N/A |
| YLR224W | 0      | #N/A             | iYLR223C     | #N/A  | #N/A |
| YLR225C | 0      | #N/A             | iYLR225C     | 1.13  | #N/A |
| YLR226W | BUR2   | CST4             | iYLR225C     | -0.69 | #N/A |
| YLR227C | ADY4   |                  | 0 iYLR227C   | -0.14 | 1.21 |
| YLR228C | ECM22  |                  | 0 iYLR228C-0 | #N/A  | 0.99 |
| YLR229C | CDC42  |                  | 0 iYLR230W   | -0.61 | 1.57 |
| YLR230W | 0      | #N/A             | iYLR228C-1   | -0.67 | 0.70 |
| YLR231C | BNA5   |                  | 0 iYLR232W   | 0.20  | 0.95 |
| YLR232W | 0      | #N/A             | iti(UAU)L    | #N/A  | 2.45 |
| YLR233C | EST1   |                  | 0 iYLR233C   | -1.75 | 3.80 |
| YLR234W | TOP3   | EDR1             | iYLR233C     | #N/A  | 3.80 |
| YLR235C | 0      | #N/A             | iYLR236C     | #N/A  | #N/A |
| YLR236C | 0      | #N/A             | iYLR236C     | -1.78 | #N/A |
| YLR237W | THI7   | THI10            | iYLR236C     | -1.30 | #N/A |
| YLR238W | 0      |                  | 0 iYLR237W   | -0.95 | 1.71 |
| YLR239C | LIP2   |                  | 0 iYLR239C   | 0.33  | 2.04 |
| YLR240W | VPS34  | END12 PEP15 VPL7 | iYLR239C     | 0.29  | 2.04 |
| YLR241W | 0      | #N/A             | iYLR240W     | 1.32  | 1.97 |
| YLR242C | ARV1   |                  | 0 iYLR242C   | #N/A  | #N/A |
| YLR243W | 0      | #N/A             | iYLR242C     | -0.68 | #N/A |
| YLR244C | MAP1   |                  | 0 iYLR244C   | -0.62 | #N/A |
| YLR245C | CDD1   |                  | 0 iYLR245C   | 0.19  | 1.32 |
| YLR246W | ERF2   |                  | 0 iYLR245C   | -0.32 | 1.32 |
| YLR247C | 0      | #N/A             | iYLR247C     | 0.41  | 2.04 |
| YLR248W | RCK2   | CLK1 CMK3        | iYLR247C     | 0.61  | 2.04 |
| YLR249W | YEF3   | EF-3 TEF3        | iYLR248W     | -2.01 | 0.34 |
| YLR250W | SSP120 |                  | 0 iYLR249W   | 1.34  | 1.04 |
| YLR251W | SYM1   |                  | 0 iYLR250W   | 2.89  | 0.94 |
| YLR252W | 0      | #N/A             | iYLR250W     | 3.80  | 0.94 |
| YLR253W | 0      | #N/A             | iYLR252W     | -0.04 | 1.69 |
| YLR254C | 0      | #N/A             | iYLR254C     | 0.02  | 1.94 |
| YLR255C | 0      | #N/A             | iYLR255C     | #N/A  | 0.37 |
| YLR256W | HAP1   | CYP1             | iYLR255C     | -0.02 | 0.37 |
| YLR257W | 0      | #N/A             | iYLRWdelta   | 0.67  | 0.62 |
| YLR258W | GSY2   |                  | 0 iYLR257W   | 2.17  | 1.76 |
| YLR259C | HSP60  | CPN60 MIF4       | iYLR259C     | 1.52  | #N/A |
| YLR260W | LCB5   |                  | 0 iYLR259C   | 0.31  | #N/A |
| YLR261C | VPS63  |                  | 0 iYLR262C   | 0.16  | 1.27 |
| YLR262C | YPT6   |                  | 0 iYLR262C   | -0.15 | 1.27 |
| YLR263W | RED1   |                  | 0 iYLR262C-A | #N/A  | 0.84 |
| YLR264W | RPS28B | RPS33B           | iYLR263W     | #N/A  | 0.91 |
| YLR265C | NEJ1   | LIF2             | iYLR265C     | -0.54 | 2.02 |
| YLR266C | 0      |                  | 0 iYLR266C   | 0.18  | 1.53 |
| YLR267W | BOP2   |                  | 0 iYLR266C   | 0.21  | 1.53 |
| YLR268W | SEC22  | SLY2 TSL26       | iYLR267W     | -0.17 | #N/A |

|           |        |             |              |       |      |
|-----------|--------|-------------|--------------|-------|------|
| YLR269C   | 0      | #N/A        | iYLR270W     | -1.20 | 1.07 |
| YLR270W   | 0      | DcpS        | iYLR267W     | 2.31  | #N/A |
| YLR271W   | 0      | #N/A        | iYLR270W     | 0.17  | 1.07 |
| YLR272C   | YCS4   | LOC7        | iYLR272C     | #N/A  | #N/A |
| YLR273C   | PIG1   |             | 0 iYLR273C   | -0.76 | 1.66 |
| YLR274W   | CDC46  | BOB1 MCM5   | iYLR273C     | -0.16 | 1.66 |
| YLR275W   | SMD2   | Sm D2       | iYLR274W     | -0.95 | 1.74 |
| YLR276C   | DBP9   |             | 0 iYLR276C   | #N/A  | 1.89 |
| YLR277C   | YSH1   | BRR5        | iYLR277C     | -0.18 | 1.24 |
| YLR278C   | 0      | #N/A        | iYLR278C     | #N/A  | 0.38 |
| YLR279W   | 0      | #N/A        | iYLR278C     | #N/A  | 0.38 |
| YLR280C   | 0      | #N/A        | iYLR281C     | #N/A  | #N/A |
| YLR281C   | 0      | #N/A        | iYLR281C     | #N/A  | #N/A |
| YLR282C   | 0      | #N/A        | iYLR283W     | #N/A  | #N/A |
| YLR283W   | 0      | #N/A        | iYLR281C     | -0.08 | #N/A |
| YLR284C   | ECI1   |             | 0 iYLR284C   | 0.99  | 2.25 |
| YLR285W   | 0      |             | 0 iYLR284C   | -0.30 | 2.25 |
| YLR286C   | CTS1   |             | 0 iYLR286C   | 0.08  | 0.68 |
| YLR287C   | 0      | #N/A        | iYLR287C     | 0.05  | 0.70 |
| YLR287C-A | RPS30A |             | 0 iYLR287C-A | -1.91 | 0.73 |
| YLR288C   | MEC3   | PIP3        | iYLR288C     | -0.28 | 2.06 |
| YLR289W   | GUF1   |             | 0 iYLR288C   | 0.23  | 2.06 |
| YLR290C   | 0      | #N/A        | iYLR290C     | 0.83  | #N/A |
| YLR291C   | GCD7   |             | 0 iYLR291C   | -0.39 | 1.55 |
| YLR292C   | SEC72  | SEC67 SIM2  | iYLR292C     | 0.10  | 1.72 |
| YLR293C   | GSP1   | CNR1 CST17  | iYLR293C     | -0.83 | 0.46 |
| YLR294C   | 0      | #N/A        | iYLR295C     | 0.09  | 1.17 |
| YLR295C   | ATP14  |             | 0 iYLR295C   | -0.10 | 1.17 |
| YLR296W   | 0      | #N/A        | iYLR295C     | #N/A  | 1.17 |
| YLR297W   | 0      | #N/A        | iYLR296W     | 1.28  | 0.70 |
| YLR298C   | YHC1   |             | 0 iYLR298C   | 1.00  | 0.30 |
| YLR299W   | ECM38  | CIS2        | iYLR298C     | 0.54  | 0.30 |
| YLR300W   | EXG1   | BGL1        | iYLR299W     | 0.01  | 0.30 |
| YLR301W   | 0      | #N/A        | iYLR300W     | 0.49  | #N/A |
| YLR302C   | 0      | #N/A        | iYLR303W     | #N/A  | 1.03 |
| YLR303W   | MET17  | MET15 MET25 | iYLRdelta    | 0.77  | #N/A |
| YLR304C   | ACO1   | GLU1        | iYLR304C     | 1.39  | 0.53 |
| YLR305C   | STT4   | BLM1        | iYLR305C     | -0.60 | 1.98 |
| YLR306W   | UBC12  |             | 0 iYLR305C   | #N/A  | 1.98 |
| YLR307W   | CDA1   |             | 0 iYLR306W   | #N/A  | #N/A |
| YLR308W   | CDA2   |             | 0 iYLR307W   | #N/A  | #N/A |
| YLR309C   | IMH1   | SYS3        | iYLR309C     | 0.28  | 1.85 |
| YLR310C   | CDC25  | CDC25' CTN1 | iYLR310C     | -0.73 | #N/A |
| YLR311C   | 0      | #N/A        | iYLR312C     | #N/A  | 1.68 |
| YLR312C   | 0      | #N/A        | iYLR312C     | 2.13  | 1.68 |
| YLR313C   | SPH1   |             | 0 iYLR313C   | #N/A  | #N/A |
| YLR314C   | CDC3   |             | 0 iYLR314C   | 0.41  | 1.44 |
| YLR315W   | NKP2   |             | 0 iYLR314C   | #N/A  | 1.44 |
| YLR316C   | TAD3   |             | 0 iYLR317W   | -0.14 | 1.41 |
| YLR317W   | KRE34  | #N/A        | iYLR314C     | -0.09 | 1.44 |
| YLR318W   | EST2   | TERT        | iYLR317W     | 0.22  | 1.41 |

|         |        |                 |             |       |      |
|---------|--------|-----------------|-------------|-------|------|
| YLR319C | BUD6   | AIP3            | iYLR319C    | #N/A  | 1.30 |
| YLR320W | MMS22  | SLM2            | iYLR319C    | -0.17 | 1.30 |
| YLR321C | SFH1   |                 | 0 iYLR322W  | -0.92 | 2.83 |
| YLR322W | VPS65  |                 | 0 iYLR320W  | #N/A  | #N/A |
| YLR323C | CWC24  |                 | 0 iYLR323C  | 0.06  | #N/A |
| YLR324W | 0      |                 | 0 iYLR323C  | 1.21  | #N/A |
| YLR325C | RPL38  |                 | 0 iYLR325C  | -1.13 | 1.07 |
| YLR326W | 0      | #N/A            | iYLR325C    | 0.55  | 1.07 |
| YLR327C | 0      | #N/A            | iYLR327C    | 3.93  | 1.05 |
| YLR328W | NMA1   |                 | 0 itS(GCU)L | -0.18 | 0.46 |
| YLR329W | REC102 |                 | 0 iYLR328W  | -0.14 | 0.84 |
| YLR330W | CHS5   | CAL3            | iYLR329W    | -0.08 | 1.70 |
| YLR331C | JIP3   |                 | 0 iYLR332W- | -0.54 | #N/A |
| YLR332W | MID2   | KAI1            | iYLR330W    | 0.63  | 0.35 |
| YLR333C | RPS25B |                 | 0 iYLR333C  | -1.08 | 0.35 |
| YLR334C | 0      | #N/A            | iYLRWdelta  | -2.00 | #N/A |
| YLR335W | NUP2   |                 | 0 itE(UUC)L | -0.46 | #N/A |
| YLR336C | SGD1   |                 | 0 iYLR336C  | -0.88 | 1.34 |
| YLR337W | #N/A   | #N/A            | #N/A        | 0.83  | #N/A |
| YLR338W | KRE21  | #N/A            | iYLR336C    | #N/A  | 1.34 |
| YLR339C | 0      | #N/A            | iYLR340W    | -1.35 | 0.60 |
| YLR340W | RPP0   | RPL10E          | iYLR338W    | -1.27 | 0.93 |
| YLR341W | SPO77  |                 | 0 iYLR340W  | #N/A  | 0.60 |
| YLR342W | FKS1   | CND1 CWH53 ETG1 | iYLR341W    | -0.21 | #N/A |
| YLR343W | 0      |                 | 0 iYLR342W  | 0.12  | 0.36 |
| YLR344W | RPL26A |                 | 0 itR(CCG)L | -1.17 | 0.31 |
| YLR345W | 0      | #N/A            | iYLR344W    | 1.43  | #N/A |
| YLR346C | 0      | #N/A            | iYLR346C    | #N/A  | #N/A |
| YLR347C | KAP95  | RSL1            | iYLR347C    | 0.45  | 0.95 |
| YLR348C | DIC1   |                 | 0 iYLR349W  | 0.78  | 0.67 |
| YLR349W | 0      | #N/A            | iYLR347C    | 0.48  | 0.95 |
| YLR350W | ORM2   |                 | 0 iYLR349W  | 0.89  | 0.67 |
| YLR351C | NIT3   |                 | 0 iYLR351C  | -0.31 | 2.01 |
| YLR352W | 0      | #N/A            | iYLR351C    | 0.26  | 2.01 |
| YLR353W | BUD8   |                 | 0 iYLR352W  | 0.07  | 1.39 |
| YLR354C | TAL1   |                 | 0 iYLR354C  | 0.38  | #N/A |
| YLR355C | ILV5   |                 | 0 iYLR355C  | -0.80 | 0.76 |
| YLR356W | 0      | #N/A            | iYLR355C    | 1.95  | 0.76 |
| YLR357W | RSC2   |                 | 0 iYLR356W  | -1.36 | 1.87 |
| YLR358C | 0      | #N/A            | iYLR358C    | -0.47 | 1.19 |
| YLR359W | ADE13  | BRA1 BRA8       | iYLR358C    | -1.76 | 1.19 |
| YLR360W | VPS38  | VPL17           | iYLR359W    | 0.93  | #N/A |
| YLR361C | 0      |                 | 0 iYLR361C  | 0.72  | #N/A |
| YLR362W | STE11  |                 | 0 iYLR361C  | 0.57  | #N/A |
| YLR363C | NMD4   |                 | 0 iYLR363C  | -0.53 | 1.56 |
| YLR364W | 0      | #N/A            | iYLR363C    | #N/A  | 1.56 |
| YLR365W | 0      | #N/A            | iYLR364W    | #N/A  | #N/A |
| YLR366W | 0      | #N/A            | iYLR364W    | #N/A  | #N/A |
| YLR367W | RPS22B |                 | 0 iYLR366W  | -0.99 | 0.55 |
| YLR368W | FLM1   |                 | 0 iSNR44    | 0.37  | 0.55 |
| YLR369W | SSQ1   | SSC2            | iYLR368W    | 0.44  | #N/A |

|         |        |                    |   |            |       |      |
|---------|--------|--------------------|---|------------|-------|------|
| YLR370C | ARC18  |                    | 0 | iYLR370C   | 1.22  | 2.22 |
| YLR371W | ROM2   |                    | 0 | iYLR370C   | 0.37  | 2.22 |
| YLR372W | SUR4   | APA1 ELO3 SRE1 VEI | 0 | iYLR371W   | -0.80 | #N/A |
| YLR373C | VID22  |                    | 0 | iYLR373C   | -0.51 | #N/A |
| YLR374C | 0      | #N/A               |   | iYLR375W   | #N/A  | #N/A |
| YLR375W | STP3   |                    | 0 | iYLR373C   | 0.07  | #N/A |
| YLR376C | 0      |                    | 0 | iYLR376C   | 0.33  | #N/A |
| YLR377C | FBP1   | ACN8 FBPase        |   | iYLR377C   | #N/A  | 1.55 |
| YLR378C | SEC61  |                    | 0 | iYLR379W   | -0.21 | 1.26 |
| YLR379W | 0      | #N/A               |   | itK(UUU)L  | -0.58 | #N/A |
| YLR380W | CSR1   | SFH2               |   | iYLR379W   | -0.49 | 1.26 |
| YLR381W | CTF3   | CHL3               |   | iYLR380W   | #N/A  | 1.74 |
| YLR382C | NAM2   | MSL1               |   | iYLR382C   | -0.27 | 2.16 |
| YLR383W | RHC18  | SMC6               |   | iYLR382C   | -0.26 | 2.16 |
| YLR384C | IKI3   | ELP1 TOT1          |   | iYLR384C   | -1.04 | 1.40 |
| YLR385C | 0      | AWS1               |   | iYLR385C   | #N/A  | 2.89 |
| YLR386W | VAC14  |                    | 0 | iYLR385C   | -1.75 | 2.89 |
| YLR387C | 0      |                    | 0 | iYLR387C   | 0.54  | 0.49 |
| YLR388W | RPS29A |                    | 0 | iYLR387C   | #N/A  | 0.49 |
| YLR389C | STE23  |                    | 0 | iYLR389C   | -1.00 | 1.07 |
| YLR390W | ECM19  |                    | 0 | iYLR389C   | #N/A  | 1.07 |
| YLR391W | #N/A   | #N/A               |   | #N/A       | 0.12  | #N/A |
| YLR392C | 0      | #N/A               |   | iYLR392C   | #N/A  | 1.95 |
| YLR393W | ATP10  |                    | 0 | iYLR392C   | #N/A  | 1.95 |
| YLR394W | CST9   | ZIP3               |   | iYLR392C   | -0.03 | 1.95 |
| YLR395C | COX8   |                    | 0 | iYLR395C   | 0.51  | #N/A |
| YLR396C | VPS33  | CLS14 MET27 PEP1   | 0 | iYLR396C   | 0.25  | #N/A |
| YLR397C | AFG2   | DRG1               |   | iYLR397C   | -1.34 | 0.99 |
| YLR398C | SKI2   |                    | 0 | iYLR398C   | 0.04  | #N/A |
| YLR399C | BDF1   |                    | 0 | iYLR399C   | 0.10  | 0.39 |
| YLR400W | 0      | #N/A               |   | iYLR399C   | -1.52 | 0.39 |
| YLR401C | 0      |                    | 0 | iYLR401C   | -1.94 | #N/A |
| YLR402W | 0      | #N/A               |   | iYLR401C   | #N/A  | #N/A |
| YLR403W | SFP1   |                    | 0 | iYLR402W   | -0.60 | 0.85 |
| YLR404W | 0      | #N/A               |   | iYLR403W   | 0.12  | #N/A |
| YLR405W | 0      |                    | 0 | iYLR404W   | -0.42 | #N/A |
| YLR406C | RPL31B |                    | 0 | iYLR406C   | -0.96 | 0.55 |
| YLR407W | 0      | #N/A               |   | iYLR406C   | #N/A  | 0.55 |
| YLR408C | 0      | #N/A               |   | iYLR408C   | #N/A  | 1.72 |
| YLR409C | UTP21  |                    | 0 | iYLR409C   | -1.96 | #N/A |
| YLR410W | VIP1   |                    | 0 | iYLR409C   | -0.09 | #N/A |
| YLR411W | CTR3   |                    | 0 | iYLRWdelta | 0.90  | 1.42 |
| YLR412W | 0      | #N/A               |   | iYLR411W   | -0.45 | #N/A |
| YLR413W | 0      | #N/A               |   | iYLR412W-  | -2.74 | #N/A |
| YLR414C | 0      | #N/A               |   | iYLR414C   | 1.10  | #N/A |
| YLR415C | 0      | #N/A               |   | iYLR416C   | #N/A  | 1.44 |
| YLR416C | 0      | #N/A               |   | iYLR416C   | #N/A  | 1.44 |
| YLR417W | VPS36  | GRD12 VAC3 VPL11   | 0 | iYLR416C   | #N/A  | 1.44 |
| YLR418C | CDC73  |                    | 0 | iYLR418C   | -0.05 | 1.85 |
| YLR419W | 0      | #N/A               |   | iYLR418C   | #N/A  | 1.85 |
| YLR420W | URA4   |                    | 0 | iYLRCDelta | -0.93 | #N/A |

|         |        |                |   |             |       |      |
|---------|--------|----------------|---|-------------|-------|------|
| YLR421C | RPN13  |                | 0 | iYLR421C    | 1.02  | #N/A |
| YLR422W | 0      | #N/A           |   | iYLR421C    | #N/A  | #N/A |
| YLR423C | APG17  | APG17          |   | iYLR423C    | 0.39  | 2.17 |
| YLR424W | 0      |                | 0 | iYLR423C    | -0.39 | 2.17 |
| YLR425W | TUS1   | SOP10          |   | iYLRcdelta2 | 0.50  | 1.57 |
| YLR426W | 0      | #N/A           |   | iYLR425W    | 0.17  | 2.00 |
| YLR427W | 0      |                | 0 | iYLR426W    | -0.76 | 2.54 |
| YLR428C | 0      | #N/A           |   | iYLR429W    | #N/A  | #N/A |
| YLR429W | CRN1   |                | 0 | iYLR427W    | -0.26 | 1.12 |
| YLR430W | SEN1   | CIK3 NRD2      |   | iYLR429W    | 0.65  | #N/A |
| YLR431C | 0      | CVT23          |   | iYLR431C    | #N/A  | 0.79 |
| YLR432W | IMD3   |                | 0 | iYLR431C    | -1.47 | 0.79 |
| YLR433C | CNA1   | CMP1           |   | iYLR435W    | -0.63 | 0.51 |
| YLR434C | 0      | #N/A           |   | iYLR435W    | #N/A  | 0.51 |
| YLR435W | 0      |                | 0 | iYLR432W    | -1.50 | #N/A |
| YLR436C | ECM30  |                | 0 | iYLR436C    | 0.38  | 0.90 |
| YLR437C | 0      | #N/A           |   | iYLR437C    | 0.25  | 0.41 |
| YLR438W | CAR2   |                | 0 | iYLR437C    | 0.85  | 0.41 |
| YLR439W | MRPL4  |                | 0 | iYLR438C-A  | 0.15  | 2.05 |
| YLR440C | 0      |                | 0 | iYLR440C    | 0.01  | 0.78 |
| YLR441C | RPS1A  | RP10A          |   | iYLR441C    | -1.83 | 0.42 |
| YLR442C | SIR3   | CMT1 MAR2 STE8 |   | iYLR442C    | 0.27  | 1.70 |
| YLR443W | ECM7   | ZRG15          |   | iYLR442C    | 0.19  | 1.70 |
| YLR444C | 0      | #N/A           |   | iYLR444C    | 0.55  | #N/A |
| YLR445W | 0      | #N/A           |   | iYLR444C    | #N/A  | #N/A |
| YLR446W | 0      | #N/A           |   | iYLR445W    | -0.11 | 1.41 |
| YLR447C | VMA6   |                | 0 | iYLR447C    | -0.73 | 0.73 |
| YLR448W | RPL6B  |                | 0 | iYLR447C    | -1.23 | 0.73 |
| YLR449W | FPR4   |                | 0 | iYLR448W    | -1.47 | #N/A |
| YLR450W | HMG2   |                | 0 | iYLR449W    | -0.17 | 2.23 |
| YLR451W | LEU3   |                | 0 | iYLR450W    | -1.63 | 1.92 |
| YLR452C | SST2   |                | 0 | iYLR452C    | -0.11 | 0.93 |
| YLR453C | RIF2   |                | 0 | iYLR453C    | #N/A  | 1.37 |
| YLR454W | 0      |                | 0 | iYLR453C    | 0.92  | 1.37 |
| YLR455W | 0      | #N/A           |   | iYLRcdelta2 | 0.14  | #N/A |
| YLR456W | 0      | #N/A           |   | iYLR455W    | #N/A  | 0.88 |
| YLR457C | NBP1   |                | 0 | iYLR458W    | -0.11 | 1.61 |
| YLR458W | 0      | #N/A           |   | iYLR456W    | #N/A  | #N/A |
| YLR459W | CDC91  |                | 0 | iYLR458W    | #N/A  | 1.61 |
| YLR460C | 0      | #N/A           |   | iYLR460C-C  | -2.95 | #N/A |
| YLR461W | PAU4   |                | 0 | iYLR460C-1  | -0.75 | 0.80 |
| YLR462W | 0      | #N/A           |   | iYLR461W-   | -0.47 | 0.61 |
| YLR463C | 0      | #N/A           |   | iYLR466W    | -0.64 | 0.45 |
| YLR464W | 0      | #N/A           |   | iYLR461W-   | -1.39 | 0.61 |
| YLR465C | 0      |                | 0 | iYLR466W    | #N/A  | 0.45 |
| YLR466W | YRF1-4 | YRF1           |   | iYLR461W-   | -0.04 | 0.61 |
| YLR467W | YRF1-5 | YRF1           |   | iYLR466W    | #N/A  | 0.45 |
| YML001W | YPT7   | AST4 VAM4      |   | iYML002W    | 0.23  | 1.79 |
| YML002W | 0      | #N/A           |   | iYML003W    | 0.72  | 0.66 |
| YML003W | 0      | #N/A           |   | iYML004C    | #N/A  | 1.93 |
| YML004C | GLO1   |                | 0 | iYML004C    | 2.05  | 1.93 |

|           |        |                  |      |                        |       |      |
|-----------|--------|------------------|------|------------------------|-------|------|
| YML005W   |        | 0                | 0    | itS(AGA)M              | 0.41  | 1.42 |
| YML006C   | GIS4   |                  | 0    | iYML006C               | -0.79 | 0.65 |
| YML007W   | YAP1   | PAR1 SNQ3        |      | iYML008C               | 0.32  | 0.60 |
| YML008C   | ERG6   | ISE1 LIS1 SED6   |      | iYML008C               | -0.16 | 0.60 |
| YML009C   | MRPL39 |                  | 0    | iYML009C               | 0.33  | 1.81 |
| YML010W   | SPT5   |                  | 0    | iYML011C               | -0.35 | 2.79 |
| YML010W-A | #N/A   | #N/A             |      | iYML011C               | -0.31 | 2.79 |
| YML010W-B | #N/A   | #N/A             |      | #N/A                   | -0.20 | #N/A |
| YML011C   |        | 0                | #N/A | iYML011C               | #N/A  | 2.79 |
| YML012W   | ERV25  |                  | 0    | iYML013C- <del>A</del> | 0.46  | #N/A |
| YML013C-A | #N/A   | #N/A             |      | iYML013C- <del>A</del> | -0.47 | #N/A |
| YML013W   | SEL1   |                  | 0    | iYML014W               | -0.95 | 1.73 |
| YML014W   |        | 0                |      | iYML015C               | -1.52 | 2.36 |
| YML015C   | TAF11  | TAF40 TafII40    |      | iYML015C               | 0.83  | 2.36 |
| YML016C   | PPZ1   |                  | 0    | iYML016C               | 0.91  | 1.08 |
| YML017W   | PSP2   | MRS15            |      | iYML018C               | #N/A  | 1.45 |
| YML018C   |        | 0                | #N/A | iYML018C               | -0.75 | 1.45 |
| YML019W   | OST6   |                  | 0    | iYML020W               | -0.60 | 1.40 |
| YML020W   |        | 0                | #N/A | iYML021C               | -0.04 | 1.90 |
| YML021C   | UNG1   |                  | 0    | iYML021C               | -0.50 | 1.90 |
| YML022W   | APT1   |                  | 0    | iYML023C               | -0.99 | 1.33 |
| YML023C   |        | 0                | #N/A | iYML023C               | -0.37 | 1.33 |
| YML024W   | RPS17A | RP51A RPL51A     |      | iYML025C               | -1.34 | 0.68 |
| YML025C   |        | 0                |      | iYML025C               | 0.78  | 0.68 |
| YML026C   | RPS18B |                  | 0    | iYML026C               | -1.65 | 0.29 |
| YML027W   | YOX1   |                  | 0    | iYML028W               | 0.59  | 0.65 |
| YML028W   | TSA1   | TPX1 ZRG14 cTPxl |      | iYML029W               | 0.73  | 0.96 |
| YML029W   | USA1   |                  | 0    | iYML030W               | 0.00  | 1.39 |
| YML030W   |        | 0                | #N/A | iYML031W               | 0.75  | 2.01 |
| YML031W   | NDC1   |                  | 0    | iYML033W               | -0.78 | 0.34 |
| YML032C   | RAD52  |                  | 0    | iYML031W               | 0.09  | 2.01 |
| YML032C-A | #N/A   | #N/A             |      | #N/A                   | #N/A  | #N/A |
| YML033W   | #N/A   | #N/A             |      | #N/A                   | #N/A  | #N/A |
| YML034W   | SRC1   |                  | 0    | iYML034W               | -0.57 | #N/A |
| YML035C   | AMD1   | AMD3             |      | iYML035C               | -0.07 | 0.71 |
| YML035C-A | #N/A   | #N/A             |      | iYML034W               | #N/A  | #N/A |
| YML036W   |        | 0                | #N/A | iYML037C               | -0.62 | 1.71 |
| YML037C   |        | 0                | #N/A | iYML037C               | #N/A  | 1.71 |
| YML038C   | YMD8   |                  | 0    | iYML038C               | -0.64 | #N/A |
| YML039W   | #N/A   | #N/A             |      | itP(UGG)M              | 0.28  | #N/A |
| YML040W   | #N/A   | #N/A             |      | itP(UGG)M              | 0.48  | #N/A |
| YML041C   | VPS71  | SWC6             |      | iYML041C               | #N/A  | 1.71 |
| YML042W   | CAT2   | YCAT             |      | iYML043C               | 2.14  | 1.28 |
| YML043C   | RRN11  |                  | 0    | iYML043C               | -0.78 | 1.28 |
| YML045W   | #N/A   | #N/A             |      | itG(GCC)M              | 0.47  | #N/A |
| YML046W   | PRP39  |                  | 0    | iYML047C               | -1.05 | 1.17 |
| YML047C   | PRM6   |                  | 0    | iYML047C               | #N/A  | 1.17 |
| YML048W   | GSF2   | ECM6             |      | iYML049C               | 0.13  | 1.72 |
| YML048W-A | #N/A   | #N/A             |      | iYML048W               | #N/A  | 0.78 |
| YML049C   | RSE1   |                  | 0    | iYML049C               | 0.48  | 1.72 |
| YML050W   |        | 0                | #N/A | iYML051W               | -0.01 | 1.01 |



|           |       |                     |      |              |       |      |
|-----------|-------|---------------------|------|--------------|-------|------|
| YML051W   | GAL80 |                     | 0    | iYML052W     | -0.33 | 1.11 |
| YML052W   | SUR7  |                     |      | 0 iYML053C   | -0.44 | 0.56 |
| YML053C   |       | 0                   | #N/A | iYML053C     | -0.70 | 0.56 |
| YML054C   | CYB2  |                     |      | 0 iYML054C   | 4.52  | 0.82 |
| YML055W   | SPC2  | SPY1                |      | iSNR54       | 0.67  | 0.63 |
| YML056C   | IMD4  |                     |      | 0 iSNR54     | -1.61 | 0.63 |
| YML057W   | CMP2  | CNA2                |      | iYML058W     | 0.93  | 1.09 |
| YML058C-A | #N/A  |                     | #N/A | iYML057W     | 0.75  | #N/A |
| YML058W   | SML1  |                     |      | 0 iYML059C   | 0.56  | #N/A |
| YML059C   |       | 0                   | #N/A | iYML059C     | 0.81  | #N/A |
| YML060W   | OGG1  |                     |      | 0 iYML061C   | -3.88 | 1.64 |
| YML061C   | PIF1  | TST1                |      | iYML061C     | -0.74 | 1.64 |
| YML062C   | MFT1  | MFT52               |      | iYML062C     | 0.60  | 1.74 |
| YML063W   | RPS1B | PLC2 RP10B          |      | iYML064C     | -1.78 | 0.31 |
| YML064C   | TEM1  |                     |      | 0 iYML064C   | -0.15 | 0.31 |
| YML065W   | ORC1  |                     |      | 0 iYML066C   | -0.61 | 2.27 |
| YML066C   | SMA2  |                     |      | 0 iYML066C   | #N/A  | 2.27 |
| YML067C   | ERV41 |                     |      | 0 iYML067C   | 0.65  | #N/A |
| YML068W   |       | 0                   |      | 0 iYML069W   | #N/A  | #N/A |
| YML069W   | POB3  |                     |      | 0 iYML070W   | 0.15  | 2.81 |
| YML070W   | DAK1  |                     |      | 0 iYMLCdelta | 1.89  | 2.20 |
| YML071C   | DOR1  | DOR1                |      | iYML071C     | -0.02 | #N/A |
| YML072C   |       | 0                   |      | 0 iYML072C   | 0.22  | 0.68 |
| YML073C   | RPL6A | YL16A               |      | iYML073C     | -1.61 | #N/A |
| YML074C   | FPR3  | NPI46               |      | iYML074C-C   | -0.11 | 1.20 |
| YML075C   | HMG1  |                     |      | 0 iYML075C   | -0.15 | 0.65 |
| YML076C   | WAR1  |                     |      | 0 iYML076C   | -0.12 | #N/A |
| YML077W   | BET5  |                     |      | 0 iYML078W   | #N/A  | 1.46 |
| YML078W   | CPR3  | CYP3                |      | iYML079W     | 0.52  | #N/A |
| YML079W   |       | 0                   | #N/A | iYML080W     | 0.65  | 1.15 |
| YML080W   | DUS1  |                     |      | 0 iYML081W   | -1.61 | 3.23 |
| YML081W   |       | 0                   | #N/A | iYML081C-A   | -0.58 | 2.50 |
| YML082W   |       | 0                   | #N/A | iYML083C     | -1.20 | 1.78 |
| YML083C   |       | 0                   | #N/A | iYML083C     | -0.36 | 1.78 |
| YML084W   |       | 0                   | #N/A | iYML085C     | #N/A  | 2.97 |
| YML085C   | TUB1  |                     |      | 0 iYML085C   | -0.23 | 2.97 |
| YML086C   | ALO1  |                     |      | 0 iYML086C   | #N/A  | 1.36 |
| YML087C   |       | 0                   | #N/A | iYML087C     | #N/A  | 1.23 |
| YML088W   | UFO1  |                     |      | 0 iYML089C   | 0.46  | 0.58 |
| YML089C   |       | 0                   | #N/A | iYML089C     | #N/A  | 0.58 |
| YML090W   |       | 0                   | #N/A | iYML092C     | #N/A  | #N/A |
| YML091C   | RPM2  |                     |      | 0 iYML089C   | -0.31 | 0.58 |
| YML092C   | PRE8  |                     |      | 0 iYML092C   | 0.78  | #N/A |
| YML093W   | UTP14 |                     |      | 0 iYML094W   | -1.55 | #N/A |
| YML094W   | GIM5  | PFD5                |      | iYML095C     | #N/A  | 1.46 |
| YML095C   | RAD10 |                     |      | 0 iYML095C   | -2.19 | 1.46 |
| YML095C-A | #N/A  |                     | #N/A | iYML094W     | #N/A  | #N/A |
| YML096W   |       | 0                   | #N/A | iYML097C     | -0.93 | 1.70 |
| YML097C   | VPS9  | VPL31 VPT9          |      | iYML097C     | -0.20 | 1.70 |
| YML098W   | TAF13 | FUN81 TAF19 TafII19 |      | iYML099C     | #N/A  | 1.33 |
| YML099C   | ARG81 | ARGR2               |      | iYML099C     | -0.48 | 1.33 |

|           |        |                   |   |            |       |      |
|-----------|--------|-------------------|---|------------|-------|------|
| YML100W   | TSL1   |                   | 0 | iYML101C   | 3.12  | 1.18 |
| YML100W-A | #N/A   | #N/A              |   | iYML100W   | #N/A  | #N/A |
| YML101C   | 0      |                   | 0 | iYML101C   | 0.16  | 1.18 |
| YML102C-A | #N/A   | #N/A              |   | iYML101C   | -0.86 | 1.18 |
| YML102W   | CAC2   |                   | 0 | iYML103C   | -0.61 | 0.96 |
| YML103C   | NUP188 |                   | 0 | iYML103C   | -0.99 | 0.96 |
| YML104C   | MDM1   |                   | 0 | iYML104C   | -0.29 | 2.05 |
| YML105C   | SEC65  |                   | 0 | iYML105C   | -0.37 | #N/A |
| YML106W   | URA5   | PYR5              |   | iYML107C   | -1.57 | #N/A |
| YML107C   | 0      | #N/A              |   | iYML107C   | 0.13  | #N/A |
| YML108W   | 0      | #N/A              |   | iYML109W   | #N/A  | #N/A |
| YML109W   | ZDS2   | CES4              |   | iYML110C   | -1.17 | 1.41 |
| YML110C   | COQ5   | DBI56             |   | iYML110C   | 1.24  | 1.41 |
| YML111W   | BUL2   |                   | 0 | iYML112W   | 0.45  | 0.93 |
| YML112W   | CTK3   |                   | 0 | iYML113W   | -0.26 | #N/A |
| YML113W   | DAT1   |                   | 0 | iYML114C   | -1.11 | 1.92 |
| YML114C   | TAF8   | TAF65 TafII65     |   | iYML114C   | -0.14 | 1.92 |
| YML115C   | VAN1   | LDB13 VRG7 VRG8   |   | iYML115C   | 0.28  | 1.70 |
| YML116W   | ATR1   | SNQ1              |   | iYML117W-  | -0.32 | 0.58 |
| YML117W   | 0      |                   | 0 | iYML118W   | 0.82  | 2.10 |
| YML117W-A | #N/A   | #N/A              |   | iYML118W   | 1.27  | 2.10 |
| YML118W   | NGL3   |                   | 0 | iYML119W   | 2.63  | 1.24 |
| YML119W   | 0      | #N/A              |   | iYML120C   | -0.40 | 1.15 |
| YML120C   | NDI1   |                   | 0 | iYML120C   | 0.97  | 1.15 |
| YML121W   | GTR1   |                   | 0 | iYML122C   | 0.51  | 0.84 |
| YML122C   | 0      | #N/A              |   | iYML122C   | #N/A  | 0.84 |
| YML123C   | PHO84  |                   | 0 | iYML123C   | -1.21 | 0.78 |
| YML124C   | TUB3   |                   | 0 | iYML124C   | -0.42 | 1.82 |
| YML125C   | 0      | #N/A              |   | iYML125C   | -0.41 | 1.43 |
| YML126C   | ERG13  | HMGS              |   | iYML126C   | -0.57 | 0.73 |
| YML127W   | RSC9   |                   | 0 | iYML128C   | -0.04 | 2.34 |
| YML128C   | MSC1   |                   | 0 | iYML128C   | 4.28  | 2.34 |
| YML129C   | COX14  |                   | 0 | iYML129C   | #N/A  | #N/A |
| YML130C   | ERO1   |                   | 0 | iYML130C   | 1.37  | #N/A |
| YML131W   | 0      | #N/A              |   | iYML132W-  | 0.96  | 1.60 |
| YML132W   | COS3   |                   | 0 | iYML133C-1 | 1.15  | #N/A |
| YML133C   | 0      | #N/A              |   | iYML133C-C | -0.10 | 0.66 |
| YMR001C   | CDC5   | MSD2 PKX2         |   | iYMR001C   | #N/A  | 0.69 |
| YMR002W   | 0      | #N/A              |   | iYMR001C   | 0.58  | 0.69 |
| YMR003W   | 0      | #N/A              |   | iYMR002W   | #N/A  | 1.59 |
| YMR004W   | MVP1   |                   | 0 | iYMR003W   | -0.04 | #N/A |
| YMR005W   | TAF4   | MPT1 TAF48 TSG2 T |   | iYMR004W   | 0.03  | 2.60 |
| YMR006C   | PLB2   |                   | 0 | iYMR006C   | -2.36 | 1.39 |
| YMR007W   | 0      | #N/A              |   | iYMR006C   | 1.50  | 1.39 |
| YMR008C   | PLB1   |                   | 0 | iYMR008C   | 1.41  | 1.48 |
| YMR009W   | 0      | #N/A              |   | iYMR008C   | 1.00  | 1.48 |
| YMR010W   | 0      | #N/A              |   | iYMR009W   | 0.12  | 1.24 |
| YMR011W   | HXT2   |                   | 0 | iYMR010W-  | 0.05  | 0.48 |
| YMR012W   | CLU1   | TIF31             |   | itE(UUC)M  | -0.59 | #N/A |
| YMR013C   | SEC59  |                   | 0 | iYMR013C-  | 0.10  | 0.49 |
| YMR014W   | BUD22  |                   | 0 | iYMR013C-  | -1.04 | 0.70 |



|           |        |               |   |              |       |      |
|-----------|--------|---------------|---|--------------|-------|------|
| YMR015C   | ERG5   |               | 0 | iYMR015C     | 0.21  | 0.73 |
| YMR016C   | SOK2   |               |   | 0 iYMR016C-  | 0.05  | 0.30 |
| YMR017W   | SPO20  | DBI9          |   | iYMR016C-    | #N/A  | #N/A |
| YMR018W   | 0      | #N/A          |   | iYMR017W     | #N/A  | 0.83 |
| YMR019W   | STB4   |               |   | 0 iYMR018W   | #N/A  | 2.46 |
| YMR020W   | FMS1   |               |   | 0 iYMR019W   | 1.22  | 1.37 |
| YMR021C   | MAC1   | CUA1          |   | iYMR021C     | 0.92  | 2.77 |
| YMR022W   | QRI8   | UBC7          |   | iYMR021C     | 0.86  | 2.77 |
| YMR023C   | MSS1   | PET53         |   | iYMR023C     | #N/A  | 0.67 |
| YMR024W   | MRPL3  |               |   | 0 itA(AGC)M1 | 0.74  | 2.23 |
| YMR025W   | 0      |               |   | 0 iYMR024W   | #N/A  | #N/A |
| YMR026C   | PEX12  | PAS11         |   | iYMR026C     | -1.02 | 1.59 |
| YMR027W   | HRT2   | #N/A          |   | iYMR026C     | 0.58  | 1.59 |
| YMR028W   | TAP42  |               |   | 0 iYMR027W   | 0.59  | 1.18 |
| YMR029C   | 0      |               |   | 0 iYMR029C   | #N/A  | 2.05 |
| YMR030W   | 0      |               |   | 0 iYMR029C   | #N/A  | 2.05 |
| YMR031C   | 0      | #N/A          |   | iYMR031W-    | 1.23  | 0.59 |
| YMR031W-A | 0      | #N/A          |   | iYMR030W     | #N/A  | #N/A |
| YMR032W   | HOF1   | CYK2          |   | iYMR031W-    | #N/A  | 0.59 |
| YMR033W   | ARP9   | SWP59         |   | iYMR032W     | -0.46 | #N/A |
| YMR034C   | 0      | #N/A          |   | iYMR034C     | 0.36  | 1.79 |
| YMR035W   | IMP2   |               |   | 0 iYMR034C   | 0.49  | 1.79 |
| YMR036C   | MIH1   |               |   | 0 iYMR036C   | -0.21 | #N/A |
| YMR037C   | MSN2   |               |   | 0 iYMR037C   | 0.18  | #N/A |
| YMR038C   | LYS7   | CCS           |   | iYMR038C     | 0.10  | 0.68 |
| YMR039C   | SUB1   | TSP1          |   | iYMR039C     | #N/A  | 2.11 |
| YMR040W   | 0      |               |   | 0 iYMR039C   | 2.11  | 2.11 |
| YMR041C   | 0      | #N/A          |   | iYMR041C     | 1.13  | 0.71 |
| YMR042W   | ARG80  | ARGR1         |   | itF(GAA)M    | #N/A  | 0.61 |
| YMR043W   | MCM1   | FUN80         |   | iYMR042W     | -0.26 | 0.32 |
| YMR044W   | IOC4   |               |   | 0 iYMR043W   | -0.08 | 0.61 |
| YMR045C   | #N/A   | #N/A          |   | iYMR046W-    | 0.27  | 0.80 |
| YMR046C   | #N/A   | #N/A          |   | iYMR046W-    | 0.54  | 0.80 |
| YMR047C   | NUP116 | NSP116        |   | iYMR047C     | -0.10 | 2.85 |
| YMR048W   | CSM3   |               |   | 0 iYMR047C   | #N/A  | 2.85 |
| YMR049C   | ERB1   |               |   | 0 iYMR049C-  | -2.22 | #N/A |
| YMR050C   | #N/A   | #N/A          |   | iYMRCdelta   | 0.31  | #N/A |
| YMR051C   | #N/A   | #N/A          |   | iYMRCdelta   | 0.47  | #N/A |
| YMR052C-A | 0      | #N/A          |   | iYMR053C     | 1.57  | 1.34 |
| YMR052W   | FAR3   |               |   | 0 itW(CCA)M  | 2.08  | 1.26 |
| YMR053C   | STB2   |               |   | 0 iYMR053C   | 0.79  | 1.34 |
| YMR054W   | STV1   |               |   | 0 iYMR053C   | 0.16  | 1.34 |
| YMR055C   | BUB2   | PAC7          |   | iYMR055C     | -0.09 | 1.33 |
| YMR056C   | AAC1   |               |   | 0 iYMR056C   | 1.72  | #N/A |
| YMR057C   | 0      | #N/A          |   | iYMR057C     | #N/A  | #N/A |
| YMR058W   | FET3   |               |   | 0 iYMR057C   | -3.38 | #N/A |
| YMR059W   | SEN15  |               |   | 0 iYMR058W   | #N/A  | 1.31 |
| YMR060C   | TOM37  | MAS37 PET3027 |   | iYMR060C     | 0.35  | 4.02 |
| YMR061W   | RNA14  |               |   | 0 iYMR060C   | -0.73 | 4.02 |
| YMR062C   | ECM40  | ARG7          |   | iYMR062C     | 0.94  | 2.69 |
| YMR063W   | RIM9   |               |   | 0 iYMR062C   | #N/A  | 2.69 |

|           |       |                |              |       |      |
|-----------|-------|----------------|--------------|-------|------|
| YMR064W   | AEP1  | NCA1           | iYMR063W     | -0.33 | 1.55 |
| YMR065W   | KAR5  | FIG3           | iYMR064W     | -0.40 | 1.31 |
| YMR066W   | SOV1  |                | 0 iYMR065W   | #N/A  | 1.93 |
| YMR067C   | 0     |                | 0 iYMR067C   | 0.51  | 1.69 |
| YMR068W   | AVO2  |                | 0 iYMR067C   | 0.60  | 1.69 |
| YMR069W   | 0     |                | 0 iYMR068W   | #N/A  | 1.19 |
| YMR070W   | MOT3  | ROX7           | iYMR069W     | -0.12 | 0.22 |
| YMR071C   | 0     |                | 0 iYMR071C   | 0.74  | 1.12 |
| YMR072W   | ABF2  |                | 0 iYMR071C   | 0.15  | 1.12 |
| YMR073C   | 0     | #N/A           | iYMR073C     | 0.01  | 1.58 |
| YMR074C   | 0     | #N/A           | iYMR074C     | 0.44  | 1.17 |
| YMR075C-A | 0     | #N/A           | iYMR075C-    | -2.36 | 0.65 |
| YMR075W   | 0     |                | 0 iYMR074C   | #N/A  | 1.17 |
| YMR076C   | PDS5  |                | 0 iYMR076C   | -1.85 | 1.26 |
| YMR077C   | VPS20 | CHM6           | iYMR077C     | #N/A  | 1.86 |
| YMR078C   | CTF18 | CHL12          | iYMR078C     | -0.89 | 2.07 |
| YMR079W   | SEC14 | PIT1           | iYMR078C     | -0.50 | 2.07 |
| YMR080C   | NAM7  | IFS2 MOF4 UPF1 | iYMR080C     | -0.73 | 2.06 |
| YMR081C   | ISF1  | MBR3           | iYMR081C     | 0.71  | 0.96 |
| YMR082C   | 0     | #N/A           | iYMR082C-    | #N/A  | 1.32 |
| YMR083W   | ADH3  |                | 0 iYMR082C-  | 0.06  | 0.63 |
| YMR084W   | 0     | #N/A           | iYMR083W     | #N/A  | 1.71 |
| YMR085W   | 0     | #N/A           | iYMR084W     | 0.16  | #N/A |
| YMR086C-A | 0     | #N/A           | iYMR086C-    | #N/A  | 0.99 |
| YMR086W   | 0     | #N/A           | iYMR085W     | 0.77  | 0.89 |
| YMR087W   | 0     | #N/A           | iYMR086C-    | 1.57  | 0.99 |
| YMR088C   | 0     | #N/A           | iYMR088C     | 0.05  | 1.34 |
| YMR089C   | YTA12 | RCA1           | iYMR089C     | 0.23  | 1.41 |
| YMR090W   | 0     | #N/A           | iYMR089C     | 2.71  | 1.41 |
| YMR091C   | NPL6  |                | 0 iYMR091C   | -0.21 | 1.33 |
| YMR092C   | AIP1  |                | 0 iYMR092C   | 0.82  | 1.75 |
| YMR093W   | UTP15 |                | 0 iYMR092C   | -0.95 | 1.75 |
| YMR094W   | CTF13 | CBF3C          | iYMR093W     | 1.26  | 1.48 |
| YMR095C   | SNO1  |                | 0 iYMR095C   | 2.25  | 0.67 |
| YMR096W   | SNZ1  |                | 0 iYMR095C   | 1.04  | 0.67 |
| YMR097C   | 0     |                | 0 iYMR097C   | 0.38  | #N/A |
| YMR098C   | 0     | #N/A           | iYMR098C     | 1.59  | 1.55 |
| YMR099C   | 0     | #N/A           | iYMR099C     | 0.57  | 1.41 |
| YMR100W   | MUB1  |                | 0 iYMR099C   | #N/A  | 1.41 |
| YMR101C   | SRT1  |                | 0 iYMR101C   | -1.21 | 0.50 |
| YMR102C   | 0     | #N/A           | iYMR102C     | 0.07  | 0.58 |
| YMR103C   | 0     | #N/A           | iYMR103C     | #N/A  | 0.67 |
| YMR104C   | YPK2  | YKR2           | iYMR104C     | #N/A  | 1.45 |
| YMR105C   | PGM2  | GAL5           | iYMR105C     | 3.83  | 1.87 |
| YMR106C   | YKU80 | HDF2           | iYMR106C     | 0.25  | 1.19 |
| YMR107W   | 0     |                | 0 iYMRWdelta | #N/A  | 1.90 |
| YMR108W   | ILV2  | SMR1 THI1      | iYMR107W     | -0.75 | 0.43 |
| YMR109W   | MYO5  |                | 0 iYMR108W   | -0.42 | 1.50 |
| YMR110C   | 0     | #N/A           | iYMR110C     | 1.95  | 1.11 |
| YMR111C   | 0     | #N/A           | iYMR111C     | -0.35 | 1.52 |
| YMR112C   | MED11 |                | 0 iYMR112C   | #N/A  | 2.04 |

|           |        |                  |      |           |       |      |
|-----------|--------|------------------|------|-----------|-------|------|
| YMR113W   | FOL3   |                  | 0    | iYMR112C  | -0.12 | 2.04 |
| YMR114C   |        | 0                | #N/A | iYMR114C  | 1.05  | 2.84 |
| YMR115W   |        | 0                |      | iYMR114C  | 0.45  | 2.84 |
| YMR116C   | ASC1   | CPC2             |      | iYMR116C  | -1.63 | 0.62 |
| YMR117C   | SPC24  |                  | 0    | iYMR117C  | #N/A  | 2.27 |
| YMR118C   |        | 0                | #N/A | iYMR118C  | 0.88  | 0.90 |
| YMR119W   | ASI1   |                  | 0    | itL(CAA)M | 1.07  | 0.80 |
| YMR119W-A |        | 0                | #N/A | itL(CAA)M | 1.09  | 0.80 |
| YMR120C   | ADE17  |                  | 0    | iYMR120C  | -0.30 | 1.08 |
| YMR121C   | RPL15B |                  | 0    | iYMR121C  | -1.06 | #N/A |
| YMR122C   |        | 0                | #N/A | iYMR122C- | #N/A  | #N/A |
| YMR123W   | PKR1   |                  | 0    | iYMR122C- | #N/A  | 2.15 |
| YMR124W   |        | 0                | #N/A | iYMR123W  | 0.88  | 0.97 |
| YMR125W   | STO1   | CBC1 CBP80 GCR3  |      | iYMR124W  | -0.57 | 1.79 |
| YMR126C   |        | 0                |      | iYMR126C  | -0.84 | 1.62 |
| YMR127C   | SAS2   |                  | 0    | iYMR127C  | -2.02 | 1.72 |
| YMR128W   | ECM16  | DHR1             |      | iYMR127C  | -3.60 | 1.72 |
| YMR129W   | POM152 |                  | 0    | iYMR128W  | -0.63 | 2.91 |
| YMR130W   |        | 0                | #N/A | iYMR129W  | -0.24 | 1.40 |
| YMR131C   | RRB1   |                  | 0    | iYMR131C  | -2.32 | 1.61 |
| YMR132C   |        | 0                |      | iYMR132C  | #N/A  | #N/A |
| YMR133W   | REC114 |                  | 0    | iYMR132C  | 2.16  | #N/A |
| YMR134W   |        | 0                | #N/A | iYMR133W  | 0.35  | 0.83 |
| YMR135C   |        | 0                | DCR1 | iYMR135W- | #N/A  | 0.43 |
| YMR135W-A |        | 0                | #N/A | iYMR134W  | -1.13 | 0.73 |
| YMR136W   | GAT2   |                  | 0    | iYMR135W- | #N/A  | 0.43 |
| YMR137C   | PSO2   | SNM1             |      | iYMR137C  | #N/A  | 1.72 |
| YMR138W   | CIN4   | GTP1 UGX1        |      | iYMR137C  | -1.03 | 1.72 |
| YMR139W   | RIM11  | GSK3 MDS1        |      | iYMR138W  | #N/A  | 2.73 |
| YMR140W   |        | 0                |      | iYMR139W  | #N/A  | #N/A |
| YMR141C   |        | 0                | #N/A | iYMR141C  | 0.95  | #N/A |
| YMR142C   | RPL13B |                  | 0    | iYMR142C  | -1.55 | 0.27 |
| YMR143W   | RPS16A |                  | 0    | iYMR142C  | -1.29 | 0.27 |
| YMR144W   |        | 0                | #N/A | iYMR143W  | -1.35 | 1.26 |
| YMR145C   | NDE1   | NDH1             |      | iYMR145C  | 0.21  | 0.29 |
| YMR146C   | TIF34  |                  | 0    | iYMR146C  | -1.11 | 0.75 |
| YMR147W   |        | 0                | #N/A | iYMR146C  | #N/A  | 0.75 |
| YMR148W   |        | 0                | #N/A | iYMR147W  | 1.26  | 1.12 |
| YMR149W   | SWP1   |                  | 0    | iYMR148W  | -0.16 | 1.22 |
| YMR150C   | IMP1   | PET-TS2858       |      | iYMR151W  | 0.74  | 1.15 |
| YMR151W   | YIM2   |                  | 0    | iYMR149W  | #N/A  | 0.98 |
| YMR152W   | YIM1   |                  | 0    | iYMR151W  | 1.19  | 1.15 |
| YMR153C-A |        | 0                | #N/A | iYMR153C- | -0.38 | 0.59 |
| YMR153W   | NUP53  |                  | 0    | iYMR152W  | 0.64  | #N/A |
| YMR154C   | RIM13  | CPL1             |      | iYMR154C  | -1.42 | 0.75 |
| YMR155W   |        | 0                | #N/A | iYMR154C  | 0.50  | 0.75 |
| YMR156C   | TPP1   |                  | 0    | iYMR156C  | 0.26  | 1.34 |
| YMR157C   |        | 0                |      | iYMR157C  | 0.39  | 3.18 |
| YMR158W   |        | 0                |      | iYMR157C  | 0.74  | 3.18 |
| YMR158W-A |        | 0                | #N/A | iYMR158C- | #N/A  | 0.85 |
| YMR159C   | APG16  | APG16 CVT11 SAP1 |      | iYMR159C  | #N/A  | 1.76 |

|           |        |                 |      |             |       |      |
|-----------|--------|-----------------|------|-------------|-------|------|
| YMR160W   |        | 0               | #N/A | iYMR159C    | 0.43  | 1.76 |
| YMR161W   | HLJ1   |                 |      | 0 iYMR160W  | -0.14 | 1.71 |
| YMR162C   | DNF3   |                 |      | 0 iYMR162C  | 0.29  | 2.38 |
| YMR163C   |        | 0               | #N/A | iYMR163C    | -0.94 | #N/A |
| YMR164C   | MSS11  |                 |      | 0 iYMR164C  | #N/A  | #N/A |
| YMR165C   | SMP2   |                 |      | 0 iYMR165C  | 0.27  | #N/A |
| YMR166C   |        | 0               | #N/A | iYMR166C    | 0.04  | 1.63 |
| YMR167W   | MLH1   | PMS2            |      | iYMR166C    | 0.00  | 1.63 |
| YMR168C   | CEP3   | CBF3 CBF3B CSL1 |      | iYMR168C    | #N/A  | 1.68 |
| YMR169C   | ALD3   |                 |      | 0 iYMR169C  | 4.65  | 2.08 |
| YMR170C   | ALD2   |                 |      | 0 iYMR170C  | 3.74  | 1.63 |
| YMR171C   |        | 0               | #N/A | iYMR171C    | #N/A  | 0.78 |
| YMR172C-A |        | 0               | #N/A | iYMR172C-   | -0.24 | 0.85 |
| YMR172W   | HOT1   |                 |      | 0 iYMR171C  | -1.50 | 0.78 |
| YMR173W   | DDR48  | FSP             |      | iYMR172C-   | 2.59  | 0.85 |
| YMR173W-A |        | 0               | #N/A | iYMR172C-   | 2.56  | 0.85 |
| YMR174C   | PAI3   |                 |      | 0 iYMR174C  | 2.76  | 1.73 |
| YMR175W   | SIP18  |                 |      | 0 iYMR174C  | #N/A  | 1.73 |
| YMR176W   | ECM5   |                 |      | 0 iYMR175W  | #N/A  | 2.05 |
| YMR177W   | MMT1   |                 |      | 0 iYMR176W  | -0.94 | 1.43 |
| YMR178W   |        | 0               | #N/A | iYMR177W    | 0.13  | 1.85 |
| YMR179W   | SPT21  |                 |      | 0 iYMR178W  | -2.68 | 1.35 |
| YMR180C   | CTL1   | CTH1            |      | iYMR180C    | 0.94  | 0.99 |
| YMR181C   |        | 0               | #N/A | iYMR181C    | #N/A  | 0.62 |
| YMR182C   | RGM1   |                 |      | 0 iYMR182C- | 0.49  | 0.58 |
| YMR183C   | SSO2   |                 |      | 0 iYMR183C  | -0.66 | 2.35 |
| YMR184W   |        | 0               | #N/A | iYMR183C    | 1.64  | 2.35 |
| YMR185W   |        | 0               | #N/A | iYMR184W    | -2.01 | #N/A |
| YMR186W   | HSC82  |                 |      | 0 iYMR185W  | 0.92  | #N/A |
| YMR187C   |        | 0               | #N/A | iYMR187C    | -1.05 | 0.98 |
| YMR188C   |        | 0               |      | 0 iYMR188C  | 0.73  | 1.43 |
| YMR189W   | GCV2   | GSD2            |      | iYMR188C    | 1.99  | 1.43 |
| YMR190C   | SGS1   |                 |      | 0 iYMR190C  | -0.61 | 3.00 |
| YMR191W   |        | 0               |      | 0 iYMR190C  | 1.27  | 3.00 |
| YMR192W   |        | 0               |      | 0 iYMR191W  | 0.46  | 1.86 |
| YMR193C-A |        | 0               | #N/A | iYMR194W    | #N/A  | 0.57 |
| YMR193W   | MRPL24 | MRPL14          |      | iYMR192W    | 1.08  | 1.04 |
| YMR194W   | RPL36A | RPL39B          |      | iYMR193W    | -1.32 | 0.51 |
| YMR195W   | ICY1   |                 |      | 0 iYMR194C- | 0.98  | 0.21 |
| YMR196W   |        | 0               | #N/A | iYMR195W    | #N/A  | 1.29 |
| YMR197C   | VTI1   |                 |      | 0 iYMR197C  | 1.86  | 2.23 |
| YMR198W   | CIK1   |                 |      | 0 iYMR197C  | -1.93 | 2.23 |
| YMR199W   | CLN1   |                 |      | 0 iYMR198W  | -2.17 | 0.42 |
| YMR200W   | ROT1   |                 |      | 0 iYMR199W  | 0.58  | 1.47 |
| YMR201C   | RAD14  |                 |      | 0 iYMR201C  | 0.82  | 0.86 |
| YMR202W   | ERG2   | END11           |      | iYMR201C    | -0.75 | 0.86 |
| YMR203W   | TOM40  | ISP42 MOM38     |      | iYMR202W    | 0.09  | 2.42 |
| YMR204C   |        | 0               | #N/A | iYMR204C    | #N/A  | 1.75 |
| YMR205C   | PFK2   |                 |      | 0 iYMR205C  | -0.09 | 1.30 |
| YMR206W   |        | 0               | #N/A | iYMR205C    | 1.25  | 1.30 |
| YMR207C   | HFA1   |                 |      | 0 iYMR207C  | #N/A  | 2.42 |

|           |        |                    |              |       |      |
|-----------|--------|--------------------|--------------|-------|------|
| YMR208W   | ERG12  | RAR1               | iYMR207C     | 0.03  | 2.42 |
| YMR209C   | 0      | #N/A               | iYMR209C     | -0.23 | 1.12 |
| YMR210W   | 0      | #N/A               | iYMR209C     | 0.58  | 1.12 |
| YMR211W   | DML1   |                    | 0 iYMR210W   | -0.44 | #N/A |
| YMR212C   | EFR3   |                    | 0 iYMR212C   | #N/A  | 2.16 |
| YMR213W   | CEF1   |                    | 0 iYMR212C   | 0.69  | 2.16 |
| YMR214W   | SCJ1   |                    | 0 iYMR213W   | 0.93  | 1.65 |
| YMR215W   | GAS3   |                    | 0 iYMR214W   | -1.25 | 1.13 |
| YMR216C   | SKY1   |                    | 0 iYMR216C   | 0.00  | 0.98 |
| YMR217W   | GUA1   |                    | 0 iYMR216C   | -2.62 | 0.98 |
| YMR218C   | TRS130 |                    | 0 iYMR218C   | -0.36 | 1.90 |
| YMR219W   | ESC1   |                    | 0 iYMR218C   | -1.77 | 1.90 |
| YMR220W   | ERG8   |                    | 0 iYMR219W   | 0.45  | 1.01 |
| YMR221C   | 0      |                    | 0 iYMR221C   | -0.55 | 1.18 |
| YMR222C   | FSH2   |                    | 0 iYMR222C   | #N/A  | 1.44 |
| YMR223W   | UBP8   |                    | 0 iYMR222C   | -0.64 | 1.44 |
| YMR224C   | MRE11  | NGS1 RAD58 XRS4    | iYMR224C     | -1.27 | 1.75 |
| YMR225C   | MRPL44 | YMR44              | iYMR225C     | #N/A  | 1.40 |
| YMR226C   | 0      | #N/A               | iYMR226C     | 0.83  | 1.24 |
| YMR227C   | TAF7   | TAF67 TafII67      | iYMR227C     | -0.32 | #N/A |
| YMR228W   | MTF1   |                    | 0 iYMR227C   | -0.15 | #N/A |
| YMR229C   | RRP5   |                    | 0 iYMR229C   | -2.52 | #N/A |
| YMR230W   | RPS10B |                    | 0 iYMR229C   | #N/A  | #N/A |
| YMR231W   | PEP5   | END1 VAM1 VPL9 Vli | iYMR230W     | 0.02  | 0.68 |
| YMR232W   | FUS2   |                    | 0 iYMR231W   | #N/A  | 0.77 |
| YMR233W   | TRI1   | #N/A               | iYMR232W     | #N/A  | 1.36 |
| YMR234W   | RNH1   |                    | 0 iYMR233W   | -0.24 | 1.70 |
| YMR235C   | RNA1   |                    | 0 iYMR235C   | -0.55 | 2.65 |
| YMR236W   | TAF9   | TAF17 TafII17      | iYMR235C     | 0.04  | 2.65 |
| YMR237W   | 0      |                    | 0 iYMR236W   | 0.61  | 2.53 |
| YMR238W   | DFG5   |                    | 0 iYMR237W   | 0.51  | 2.16 |
| YMR239C   | RNT1   |                    | 0 iYMR239C   | -2.45 | 1.83 |
| YMR240C   | CUS1   |                    | 0 iYMR240C   | #N/A  | 1.37 |
| YMR241W   | YHM2   |                    | 0 iYMR240C   | -0.41 | 1.37 |
| YMR242C   | RPL20A | RPL18A2            | iYMR242C     | -1.77 | 0.31 |
| YMR243C   | ZRC1   | OSR1               | iYMR243C     | -1.31 | 0.83 |
| YMR244C-A | 0      | #N/A               | iYMR245W     | 0.82  | 0.58 |
| YMR244W   | 0      | #N/A               | iYMR243C     | #N/A  | 0.83 |
| YMR245W   | 0      | #N/A               | iYMR244W     | #N/A  | 0.71 |
| YMR246W   | FAA4   |                    | 0 iYMR245W   | -2.78 | 0.58 |
| YMR247C   | 0      | #N/A               | iYMR247C     | #N/A  | 1.21 |
| YMR250W   | GAD1   |                    | 0 iYMRWdelta | 3.83  | #N/A |
| YMR251W   | 0      | #N/A               | iYMR250W     | #N/A  | 0.89 |
| YMR251W-A | HOR7   |                    | 0 iYMR251W   | 2.78  | 0.85 |
| YMR252C   | 0      | #N/A               | iYMR252C     | 0.48  | #N/A |
| YMR253C   | 0      | #N/A               | iYMR253C     | 0.95  | 1.57 |
| YMR254C   | 0      | #N/A               | iYMR254C     | #N/A  | #N/A |
| YMR255W   | GFD1   |                    | 0 iYMR254C   | 0.42  | #N/A |
| YMR256C   | COX7   |                    | 0 iYMR256C   | #N/A  | #N/A |
| YMR257C   | PET111 |                    | 0 iYMR257C   | #N/A  | 2.17 |
| YMR258C   | 0      | #N/A               | iYMR258C     | 1.23  | 1.78 |

|           |        |                  |             |       |      |
|-----------|--------|------------------|-------------|-------|------|
| YMR259C   | 0      | #N/A             | iYMR259C    | #N/A  | 1.86 |
| YMR260C   | TIF11  |                  | 0 iYMR260C  | -0.48 | 1.08 |
| YMR261C   | TPS3   |                  | 0 iYMR261C  | 1.00  | #N/A |
| YMR262W   | 0      | #N/A             | iYMR261C    | 0.68  | #N/A |
| YMR263W   | SAP30  |                  | 0 iYMR262W  | -1.12 | #N/A |
| YMR264W   | CUE1   |                  | 0 iYMR263W  | 0.53  | 2.12 |
| YMR265C   | 0      | #N/A             | iYMR265C    | -1.85 | 1.09 |
| YMR266W   | RSN1   |                  | 0 iYMR265C  | #N/A  | 1.09 |
| YMR267W   | PPA2   | IPP2             | iYMR266W    | 0.46  | 1.53 |
| YMR268C   | PRP24  |                  | 0 iYMR268C  | -0.64 | 1.42 |
| YMR269W   | 0      | #N/A             | iYMR268C    | #N/A  | 1.42 |
| YMR270C   | RRN9   |                  | 0 iYMR270C  | #N/A  | 1.69 |
| YMR271C   | URA10  |                  | 0 iYMR271C  | #N/A  | 1.24 |
| YMR272C   | SCS7   | FAH1             | iYMR272C    | 0.13  | 0.93 |
| YMR273C   | ZDS1   | CES1 CKM1 NRC1 C | iYMR273C    | 0.41  | 1.35 |
| YMR274C   | RCE1   |                  | 0 iYMR274C  | -0.48 | #N/A |
| YMR275C   | BUL1   | DAG1 RDS1 SMM2   | iYMR275C    | #N/A  | 2.49 |
| YMR276W   | DSK2   |                  | 0 iYMR275C  | 0.28  | 2.49 |
| YMR277W   | FCP1   |                  | 0 iYMR276W  | -0.03 | #N/A |
| YMR278W   | 0      | #N/A             | iYMR277W    | 0.63  | 1.25 |
| YMR279C   | 0      | #N/A             | iYMR279C    | 0.91  | 0.38 |
| YMR280C   | CAT8   | DIL1 MSP8        | iYMR280C    | #N/A  | 1.43 |
| YMR281W   | GPI12  |                  | 0 iYMR280C  | 0.40  | 1.43 |
| YMR282C   | AEP2   | ATP13            | iYMR282C    | -0.44 | 2.88 |
| YMR283C   | RIT1   |                  | 0 iYMR283C  | #N/A  | 2.57 |
| YMR284W   | YKU70  | HDF1 NES24       | itY(GUA)M2  | #N/A  | 1.09 |
| YMR285C   | NGL2   |                  | 0 iYMR285C  | -0.57 | 3.48 |
| YMR286W   | MRPL33 |                  | 0 iYMR285C  | #N/A  | 3.48 |
| YMR287C   | MSU1   | DSS1             | iYMR287C    | -0.71 | 1.90 |
| YMR288W   | HSH155 |                  | 0 iYMR287C  | -0.91 | 1.90 |
| YMR289W   | 0      |                  | 0 iYMR288W  | #N/A  | 1.35 |
| YMR290C   | HAS1   |                  | 0 iYMR290W- | -1.82 | 0.39 |
| YMR290W-A | 0      | #N/A             | iYMR289W    | #N/A  | 0.58 |
| YMR291W   | 0      | #N/A             | iYMR290W-   | 1.72  | 0.39 |
| YMR292W   | GOT1   |                  | 0 iYMR291W  | -0.42 | 2.34 |
| YMR293C   | 0      | #N/A             | iYMR293C    | -1.17 | 1.23 |
| YMR294W   | JNM1   | INS1 PAC3        | iYMR293C    | 0.35  | 1.23 |
| YMR294W-A | 0      | #N/A             | iYMR294W    | #N/A  | #N/A |
| YMR295C   | 0      | #N/A             | iYMR295C    | 0.18  | #N/A |
| YMR296C   | LCB1   | END8 TSC2        | iYMR296C    | -0.66 | 1.16 |
| YMR297W   | PRC1   | LBC1             | iYMR296C    | 1.23  | 1.16 |
| YMR298W   | 0      | #N/A             | iYMR297W    | #N/A  | 1.92 |
| YMR299C   | 0      |                  | 0 iYMR299C  | 0.46  | #N/A |
| YMR300C   | ADE4   |                  | 0 iYMR300C  | -0.23 | 1.24 |
| YMR301C   | ATM1   |                  | 0 iYMR301C  | -2.99 | 1.30 |
| YMR302C   | PRP12  | RNA12 YME2       | iYMR302C    | -0.25 | 2.80 |
| YMR303C   | ADH2   | ADR2             | iYMR303C    | -0.05 | 2.26 |
| YMR304C-A | 0      | #N/A             | iYMR305C    | -0.65 | 0.75 |
| YMR304W   | UBP15  |                  | 0 iYMR303C  | -0.66 | 2.26 |
| YMR305C   | SCW10  |                  | 0 iYMR305C  | -1.17 | 0.75 |
| YMR306C-A | 0      | #N/A             | iYMR306C-   | #N/A  | 0.47 |



|           |       |                    |   |            |       |      |
|-----------|-------|--------------------|---|------------|-------|------|
| YMR306W   | FKS3  |                    | 0 | iYMR305C   | #N/A  | 0.75 |
| YMR308C   | PSE1  | KAP121             |   | iYMR308C   | -0.80 | 1.23 |
| YMR309C   | NIP1  |                    | 0 | iYMR309C   | #N/A  | 1.07 |
| YMR310C   |       | 0 #N/A             |   | iYMR310C   | #N/A  | 2.88 |
| YMR311C   | GLC8  |                    | 0 | iYMR311C   | 1.14  | 1.60 |
| YMR312W   | ELP6  | HAP3 TOT6          |   | iYMR311C   | -1.30 | 1.60 |
| YMR313C   |       | 0                  | 0 | iYMR313C   | #N/A  | 2.48 |
| YMR314W   | PRE5  |                    | 0 | iYMR313C   | 0.52  | 2.48 |
| YMR315W   |       | 0 #N/A             |   | iYMR314W   | 2.51  | 1.03 |
| YMR316C-A |       | 0 #N/A             |   | iYMR316C-  | 2.08  | 1.05 |
| YMR316C-B |       | 0 #N/A             |   | iYMR317W   | 0.74  | 1.39 |
| YMR316W   | DIA1  |                    | 0 | iYMR315W   | 1.67  | 1.71 |
| YMR317W   |       | 0 #N/A             |   | iYMR316C-  | #N/A  | 1.05 |
| YMR318C   | ADH6  | ADHVI              |   | iYMR318C   | -0.13 | 1.07 |
| YMR319C   | FET4  |                    | 0 | iYMR319C-  | -1.73 | 0.68 |
| YMR320W   |       | 0 #N/A             |   | iYMR319C-  | #N/A  | 0.58 |
| YMR321C   |       | 0 #N/A             |   | iYMR321C   | -1.03 | 1.19 |
| YMR322C   |       | 0 HSP34            |   | iYMR322C   | #N/A  | 1.66 |
| YMR323W   |       | 0 #N/A             |   | iYMR322C   | #N/A  | 1.66 |
| YMR324C   |       | 0 #N/A             |   | iYMR324C   | #N/A  | 0.76 |
| YMR325W   |       | 0 #N/A             |   | iYMR324C   | -0.22 | 0.76 |
| YMR326C   |       | 0 #N/A             |   | #N/A       | #N/A  | #N/A |
| YNL001W   | DOM34 |                    | 0 | iYNL002C   | -1.03 | 0.97 |
| YNL002C   | RLP7  | RPL7               |   | iYNL002C   | -1.83 | 0.97 |
| YNL003C   | PET8  | SAM5               |   | iYNL003C   | #N/A  | 0.84 |
| YNL004W   | HRB1  | TOM34              |   | iYNL005C   | 0.35  | 1.47 |
| YNL005C   | MRP7  | MRPL2              |   | iYNL005C   | 0.28  | 1.47 |
| YNL006W   | LST8  |                    | 0 | iYNL007C   | 0.46  | 1.42 |
| YNL007C   | SIS1  |                    | 0 | iYNL007C   | 1.12  | 1.42 |
| YNL008C   | ASI3  |                    | 0 | iYNL008C   | 0.86  | #N/A |
| YNL009W   | IDP3  |                    | 0 | iYNL010W   | #N/A  | #N/A |
| YNL010W   |       | 0 #N/A             |   | iYNL011C   | -0.66 | 1.66 |
| YNL011C   |       | 0 #N/A             |   | iYNL011C   | 0.77  | 1.66 |
| YNL012W   | SPO1  |                    | 0 | iYNL013C   | #N/A  | 0.71 |
| YNL013C   |       | 0 #N/A             |   | iYNL013C   | 1.58  | 0.71 |
| YNL014W   | HEF3  | EF-3 ZRG7          |   | iYNL015W   | -0.32 | #N/A |
| YNL015W   | PBI2  | I2B IB2 LMA1       |   | iYNL016W   | 2.73  | 0.82 |
| YNL016W   | PUB1  | RNP1               |   | itl(AAU)N2 | -0.67 | 0.65 |
| YNL017C   |       | 0 #N/A             |   | itl(AAU)N2 | #N/A  | 0.65 |
| YNL018C   |       | 0 #N/A             |   | iYNL018C   | #N/A  | 0.52 |
| YNL019C   |       | 0 #N/A             |   | iYNL019C   | 0.18  | 0.64 |
| YNL020C   | ARK1  |                    | 0 | iYNL020C   | 0.22  | 1.72 |
| YNL021W   | HDA1  |                    | 0 | iYNL022C   | 0.04  | 1.33 |
| YNL022C   |       | 0 #N/A             |   | iYNL022C   | -2.07 | 1.33 |
| YNL023C   | FAP1  |                    | 0 | iYNL023C   | #N/A  | 1.40 |
| YNL024C   |       | 0 #N/A             |   | iYNL024C   | -1.36 | #N/A |
| YNL025C   | SSN8  | GIG3 NUT9 RYE2 SFI |   | iYNL025C   | #N/A  | 0.64 |
| YNL026W   |       | 0 OMP85 TOB55      |   | iYNL027W   | 0.73  | 1.86 |
| YNL027W   | CRZ1  | HAL8 TCN1          |   | iYNL028W   | 0.23  | 2.72 |
| YNL028W   |       | 0 #N/A             |   | iYNL030W   | #N/A  | #N/A |
| YNL029C   | KTR5  |                    | 0 | iYNL028W   | -0.35 | 2.72 |

|         |        |             |   |            |       |      |
|---------|--------|-------------|---|------------|-------|------|
| YNL030W | HHF2   |             | 0 | iYNL031C   | -0.31 | 0.48 |
| YNL031C | HHT2   |             | 0 | iYNL031C   | -0.06 | 0.48 |
| YNL032W | SIW14  |             | 0 | iYNL033W   | 0.14  | 1.37 |
| YNL033W | 0      | #N/A        |   | iYNL034W   | 0.84  | 0.62 |
| YNL034W | 0      | #N/A        |   | itI(AAU)N1 | #N/A  | 0.53 |
| YNL035C | 0      | #N/A        |   | iYNL035C   | -0.68 | 1.05 |
| YNL036W | NCE103 | NCE3        |   | iYNL037C   | 2.94  | 0.66 |
| YNL037C | IDH1   |             | 0 | iYNL037C   | 1.47  | 0.66 |
| YNL038W | GPI15  |             | 0 | iYNL039W   | -0.38 | #N/A |
| YNL039W | BDP1   | TFC5        |   | iYNL040W   | #N/A  | 1.97 |
| YNL040W | 0      | #N/A        |   | iYNL041C   | 0.45  | 1.53 |
| YNL041C | COD2   | COD2        |   | iYNL041C   | -0.89 | 1.53 |
| YNL042W | BOP3   |             | 0 | itP(UGG)N1 | 0.00  | 0.88 |
| YNL043C | 0      | #N/A        |   | iYNL043C   | 0.16  | 1.38 |
| YNL044W | YIP3   |             | 0 | iYNL045W   | 0.13  | 1.87 |
| YNL045W | 0      | #N/A        |   | iYNL046W   | 1.48  | 1.50 |
| YNL046W | 0      | #N/A        |   | iYNL047C   | -0.21 | 2.30 |
| YNL047C | 0      | LIT1        |   | iYNL047C   | -1.57 | 2.30 |
| YNL048W | ALG11  |             | 0 | iYNL049C   | -0.23 | 2.40 |
| YNL049C | SFB2   |             | 0 | iYNL049C   | -0.70 | 2.40 |
| YNL050C | 0      | #N/A        |   | iYNL050C   | -0.68 | #N/A |
| YNL051W | COD4   | API4 COD4   |   | iYNL052W   | -0.27 | 1.41 |
| YNL052W | COX5A  |             | 0 | iYNL053W   | 0.46  | 1.39 |
| YNL053W | MSG5   |             | 0 | iYNL054W   | -0.23 | #N/A |
| YNL054W | VAC7   |             | 0 | iYNLWdelta | 0.58  | 2.89 |
| YNL055C | POR1   | OMP2 YVDAC1 |   | iYNL055C   | 1.79  | 0.86 |
| YNL056W | 0      | #N/A        |   | iYNL057W   | 0.52  | 1.04 |
| YNL057W | 0      | #N/A        |   | iYNL059C   | #N/A  | 1.91 |
| YNL058C | 0      | #N/A        |   | iYNL057W   | 0.88  | 1.04 |
| YNL059C | ARP5   |             | 0 | iYNL059C   | -0.19 | 1.91 |
| YNL061W | NOP2   | YNA1        |   | iYNL062C   | -2.50 | 2.28 |
| YNL062C | GCD10  |             | 0 | iYNL062C   | -1.51 | 2.28 |
| YNL063W | 0      | #N/A        |   | iYNL064C   | -0.14 | 1.12 |
| YNL064C | YDJ1   | HSP40 MAS5  |   | iYNL064C   | 0.89  | 1.12 |
| YNL065W | AQR1   |             | 0 | iYNL066W   | -0.91 | 0.29 |
| YNL066W | SUN4   | SCW3        |   | iYNL067W   | -0.44 | 0.32 |
| YNL067W | RPL9B  |             | 0 | iYNL068C   | -1.10 | 0.44 |
| YNL068C | FKH2   |             | 0 | iYNL068C   | -1.71 | 0.44 |
| YNL069C | RPL16B | RP23        |   | iYNL069C   | -1.64 | 0.45 |
| YNL070W | TOM7   | MOM7 YOK22  |   | iYNL071W   | #N/A  | #N/A |
| YNL071W | LAT1   | ODP2 PDA2   |   | iYNL072W   | 0.06  | 1.65 |
| YNL072W | RNH35  | RNH35 Rnh2A |   | iYNL073W   | 1.26  | 1.74 |
| YNL073W | MSK1   |             | 0 | iYNL074C   | 0.12  | 1.31 |
| YNL074C | MLF3   | YMK1        |   | iYNL074C   | 0.90  | 1.31 |
| YNL075W | IMP4   |             | 0 | iYNL076W   | #N/A  | 2.05 |
| YNL076W | MKS1   | LYS80       |   | iYNL077W   | #N/A  | 2.44 |
| YNL077W | 0      |             | 0 | iYNL078W   | 1.10  | 1.31 |
| YNL078W | NIS1   | JIP1        |   | iYNL079C   | -0.07 | 0.87 |
| YNL079C | TPM1   | tropomyosin |   | iYNL079C   | 0.54  | 0.87 |
| YNL080C | 0      | #N/A        |   | iYNL080C   | #N/A  | 1.16 |
| YNL081C | 0      |             | 0 | iYNL081C   | 0.55  | 3.21 |



|         |       |                  |      |             |       |      |
|---------|-------|------------------|------|-------------|-------|------|
| YNL082W | PMS1  |                  | 0    | iYNL083W    | -0.49 | 0.74 |
| YNL083W |       | 0                | #N/A | iYNL084C    | -0.03 | 2.23 |
| YNL084C | END3  |                  |      | 0 iYNL084C  | #N/A  | 2.23 |
| YNL085W | MKT1  |                  |      | 0 iYNL086W  | -0.44 | 2.86 |
| YNL086W |       | 0                | #N/A | iYNL087W    | #N/A  | #N/A |
| YNL087W |       | 0                |      | 0 iYNL088W  | -1.95 | #N/A |
| YNL088W | TOP2  | TOR3 TRF3        |      | iYNL089C    | -0.95 | 1.42 |
| YNL089C |       | 0                | #N/A | iYNL089C    | -0.20 | 1.42 |
| YNL090W | RHO2  |                  |      | 0 iYNL091W  | -0.47 | 1.84 |
| YNL091W | NST1  |                  |      | 0 iYNL092W  | -0.11 | 2.16 |
| YNL092W |       | 0                | #N/A | iYNL093W    | 1.88  | 2.77 |
| YNL093W | YPT53 |                  |      | 0 iYNL094W  | #N/A  | 0.95 |
| YNL094W | APP1  |                  |      | 0 iYNL095C  | 0.05  | 2.02 |
| YNL095C |       | 0                | #N/A | iYNL095C    | -0.86 | 2.02 |
| YNL096C | RPS7B |                  |      | 0 iYNL096C  | -0.89 | 0.32 |
| YNL097C | PHO23 |                  |      | 0 iYNL097C  | 0.60  | 1.20 |
| YNL098C | RAS2  | CTN5 CYR3 GLC5 T |      | iYNL098C    | 0.52  | 0.54 |
| YNL099C | OCA1  |                  |      | 0 iYNL099C  | 0.24  | 1.55 |
| YNL100W |       | 0                | #N/A | iYNL101W    | 1.06  | 1.55 |
| YNL101W |       | 0                |      | 0 iYNL102W  | -0.11 | 1.93 |
| YNL102W | POL1  | CDC17 CRT5 HPR3  |      | iYNL103W    | -0.50 | #N/A |
| YNL103W | MET4  |                  |      | 0 iYNL104C  | 0.32  | 0.99 |
| YNL104C | LEU4  |                  |      | 0 iYNL104C  | 0.36  | 0.99 |
| YNL105W |       | 0                | #N/A | iYNL107W    | #N/A  | 0.64 |
| YNL106C | INP52 | SJL2             |      | iYNL105W    | 0.28  | 2.07 |
| YNL107W | YAF9  |                  |      | 0 iYNL108C  | 0.13  | 2.05 |
| YNL108C |       | 0                | #N/A | iYNL108C    | -0.18 | 2.05 |
| YNL109W |       | 0                | #N/A | iYNL110C    | -0.14 | #N/A |
| YNL110C | NOP15 |                  |      | 0 iYNL110C  | #N/A  | #N/A |
| YNL111C | CYB5  |                  |      | 0 iYNL111C  | 0.36  | 0.86 |
| YNL112W | DBP2  |                  |      | 0 iYNL113W  | -4.72 | 1.24 |
| YNL113W | RPC19 |                  |      | 0 iYNL115C  | -0.73 | 2.07 |
| YNL114C |       | 0                | #N/A | iYNL113W    | #N/A  | 1.24 |
| YNL115C |       | 0                | #N/A | iYNL115C    | 1.96  | 2.07 |
| YNL116W |       | 0                |      | 0 iYNL117W  | -0.12 | 3.79 |
| YNL117W | MLS1  |                  |      | 0 iYNL118C  | 1.06  | 2.05 |
| YNL118C | DCP2  | PSU1             |      | iYNL118C    | -0.09 | 2.05 |
| YNL119W |       | 0                |      | 0 iYNL121C  | -0.52 | 2.12 |
| YNL120C |       | 0                | #N/A | iYNL119W    | #N/A  | #N/A |
| YNL121C | TOM70 | MAS70 MOM72 OMF  |      | iYNL121C    | -0.17 | 2.12 |
| YNL122C |       | 0                | #N/A | iYNL122C    | #N/A  | #N/A |
| YNL123W |       | 0                | #N/A | iYNL124W    | -0.40 | 0.86 |
| YNL124W | NAF1  |                  |      | 0 iYNL125C  | -3.13 | 2.01 |
| YNL125C | ESBP6 | MCH3             |      | iYNL125C    | 1.68  | 2.01 |
| YNL126W | SPC98 |                  |      | 0 iYNL127W  | -2.05 | 1.57 |
| YNL127W |       | 0                |      | 0 iYNL128W  | 0.42  | 1.61 |
| YNL128W | TEP1  |                  |      | 0 iYNL129W  | #N/A  | #N/A |
| YNL129W |       | 0                |      | 0 iYNL130C  | 0.43  | 1.56 |
| YNL130C | CPT1  |                  |      | 0 iYNL130C  | 0.77  | 1.56 |
| YNL131W | TOM22 | MAS17 MAS22 MOM  |      | iYNL132W    | 0.01  | 2.15 |
| YNL132W | KRE33 |                  |      | 0 itF(GAA)N | -2.58 | 2.21 |

|         |        |                 |   |            |       |      |
|---------|--------|-----------------|---|------------|-------|------|
| YNL133C | FYV6   |                 | 0 | iYNL133C   | 0.33  | 2.01 |
| YNL134C | 0      | #N/A            |   | iYNL134C   | 1.23  | 1.31 |
| YNL135C | FPR1   | FKB1 RBP1       |   | iYNL135C   | 0.20  | 1.37 |
| YNL136W | 0      |                 | 0 | iYNL137C   | -0.66 | 2.09 |
| YNL137C | NAM9   | MNA6            |   | iYNL137C   | -0.03 | 2.09 |
| YNL138W | SRV2   | CAP             |   | iYNL139C   | 0.35  | 2.17 |
| YNL139C | RLR1   | LDB5 THO2 ZRG13 |   | iYNL139C   | #N/A  | 2.17 |
| YNL140C | 0      | #N/A            |   | iYNL139C   | -0.28 | 2.17 |
| YNL141W | AAH1   |                 | 0 | iYNL142W   | -1.78 | 1.69 |
| YNL142W | MEP2   |                 | 0 | iYNL143C   | 0.51  | 1.21 |
| YNL143C | 0      | #N/A            |   | iYNL143C   | #N/A  | 1.21 |
| YNL144C | 0      | #N/A            |   | iYNL144C-C | #N/A  | 0.73 |
| YNL145W | MFA2   |                 | 0 | iYNL146W   | #N/A  | 1.13 |
| YNL146W | 0      | #N/A            |   | iYNL147W   | #N/A  | 2.42 |
| YNL147W | LSM7   |                 | 0 | iYNL148C   | 0.34  | 2.29 |
| YNL148C | ALF1   |                 | 0 | iYNL148C   | -2.03 | 2.29 |
| YNL149C | 0      | #N/A            |   | iYNL149C   | -0.02 | 1.09 |
| YNL150W | 0      | #N/A            |   | iYNL151C   | 0.03  | 2.70 |
| YNL151C | RPC31  | ACP2 RPC8       |   | iYNL151C   | -1.54 | 2.70 |
| YNL152W | 0      | #N/A            |   | iYNL153C   | #N/A  | 2.28 |
| YNL153C | GIM3   | PFD4            |   | iYNL153C   | -0.33 | 2.28 |
| YNL154C | YCK2   |                 | 0 | iYNL154C   | -0.31 | 0.87 |
| YNL155W | 0      | #N/A            |   | iYNL156C   | 1.56  | 1.45 |
| YNL156C | 0      |                 | 0 | iYNL156C   | 1.08  | 1.45 |
| YNL157W | 0      | #N/A            |   | iYNL158W   | 0.31  | 1.58 |
| YNL158W | 0      | #N/A            |   | iYNL159C   | 0.47  | 3.01 |
| YNL159C | ASI2   |                 | 0 | iYNL159C   | 0.99  | 3.01 |
| YNL160W | YGP1   |                 | 0 | iYNL161W-  | 3.42  | 0.75 |
| YNL161W | CBK1   |                 | 0 | iYNL162W   | 0.38  | 1.80 |
| YNL162W | RPL42A |                 | 0 | iYNL163C   | #N/A  | #N/A |
| YNL163C | RIA1   | EFL1            |   | iYNL163C   | -0.68 | #N/A |
| YNL164C | IBD2   |                 | 0 | iYNL164C   | -0.55 | 3.31 |
| YNL165W | 0      | #N/A            |   | iYNL166C   | #N/A  | 1.77 |
| YNL166C | BNI5   |                 | 0 | iYNL166C   | -0.87 | 1.77 |
| YNL167C | SKO1   | ACR1            |   | iYNL167C   | 0.16  | 1.67 |
| YNL168C | 0      |                 | 0 | iYNL168C   | 0.45  | 1.61 |
| YNL169C | PSD1   |                 | 0 | iYNL169C   | -0.01 | 1.29 |
| YNL170W | 0      | #N/A            |   | iYNL173C   | 0.05  | 1.57 |
| YNL171C | 0      | #N/A            |   | iYNL169C   | 0.34  | 1.29 |
| YNL172W | APC1   |                 | 0 | iYNL173C   | -0.39 | 1.57 |
| YNL173C | MDG1   |                 | 0 | iYNL173C   | #N/A  | 1.57 |
| YNL174W | 0      | #N/A            |   | iYNL176C   | -6.75 | 1.40 |
| YNL175C | NOP13  |                 | 0 | iYNL174W   | -2.93 | 1.31 |
| YNL176C | 0      | #N/A            |   | iYNL176C   | 0.12  | 1.40 |
| YNL177C | 0      |                 | 0 | iYNL177C   | 0.47  | 1.16 |
| YNL178W | RPS3   | SUF14           |   | iYNL179C-1 | -1.90 | 0.56 |
| YNL179C | 0      |                 | 0 | iYNL179C-C | #N/A  | #N/A |
| YNL180C | RHO5   |                 | 0 | iYNL179C-C | #N/A  | #N/A |
| YNL181W | 0      | #N/A            |   | iYNL182C   | 0.01  | 2.77 |
| YNL182C | 0      |                 | 0 | iYNL182C   | -2.23 | 2.77 |
| YNL183C | NPR1   |                 | 0 | iYNL183C   | -0.67 | 1.81 |

|         |        |                |            |       |      |
|---------|--------|----------------|------------|-------|------|
| YNL184C | 0      | #N/A           | iYNL184C   | #N/A  | #N/A |
| YNL185C | MRPL19 |                | 0 iYNL184C | 1.17  | #N/A |
| YNL186W | UBP10  | DOT4           | iYNL187W   | -0.93 | 0.52 |
| YNL187W | 0      | #N/A           | iYNL188W   | 0.17  | 1.82 |
| YNL188W | KAR1   |                | 0 iYNL189W | -0.24 | 0.69 |
| YNL189W | SRP1   | KAP60 SCM1     | iYNL190W   | -0.02 | #N/A |
| YNL190W | 0      | #N/A           | iYNL191W   | 0.06  | 0.37 |
| YNL191W | 0      | #N/A           | iYNL192W   | 0.18  | 1.01 |
| YNL192W | CHS1   | USA4           | iYNL193W   | 0.59  | #N/A |
| YNL193W | 0      | #N/A           | iYNL194C   | 0.66  | 1.87 |
| YNL194C | 0      | #N/A           | iYNL194C   | 4.57  | 1.87 |
| YNL195C | 0      | #N/A           | iYNL195C   | 3.90  | 1.43 |
| YNL196C | SLZ1   | #N/A           | iYNL196C   | 0.65  | 1.04 |
| YNL197C | WHI3   |                | 0 iYNL197C | -0.78 | 1.85 |
| YNL198C | 0      | #N/A           | iYNL198C   | #N/A  | 0.53 |
| YNL199C | GCR2   |                | 0 iYNL198C | -0.40 | 0.53 |
| YNL200C | 0      | #N/A           | iYNL200C   | 2.39  | 1.45 |
| YNL201C | 0      |                | 0 iYNL201C | -0.50 | 1.07 |
| YNL202W | SPS19  | SPX19          | iYNL204C   | #N/A  | 0.71 |
| YNL203C | 0      | #N/A           | iYNL202W   | 4.17  | #N/A |
| YNL204C | SPS18  | SPX18          | iYNL204C   | -1.56 | 0.71 |
| YNL205C | 0      | #N/A           | iYNL204C   | #N/A  | 0.71 |
| YNL206C | RTT106 |                | 0 iYNL204C | -0.68 | 0.71 |
| YNL207W | RIO2   |                | 0 iYNL208W | -1.08 | #N/A |
| YNL208W | 0      | #N/A           | iYNL209W   | 1.74  | 0.78 |
| YNL209W | SSB2   |                | 0 iYNL210W | -2.14 | 1.22 |
| YNL210W | MER1   |                | 0 iYNL211C | #N/A  | 0.81 |
| YNL211C | 0      | #N/A           | iYNL211C   | #N/A  | 0.81 |
| YNL212W | VID27  |                | 0 iYNL213C | #N/A  | 3.02 |
| YNL213C | 0      | #N/A           | iYNL213C   | -0.75 | 3.02 |
| YNL214W | PEX17  | PAS9           | iYNL215W   | -0.31 | 1.67 |
| YNL215W | IES2   |                | 0 iYNL216W | 1.00  | 1.55 |
| YNL216W | RAP1   | GRF1 TBA1 TUF1 | iYNL217W   | -0.80 | #N/A |
| YNL217W | 0      | #N/A           | iYNL218W   | -1.33 | #N/A |
| YNL218W | MGS1   |                | 0 iYNL219C | #N/A  | 1.79 |
| YNL219C | ALG9   |                | 0 iYNL219C | -0.52 | 1.79 |
| YNL220W | ADE12  | BRA9           | iYNL221C   | -1.20 | 0.83 |
| YNL221C | POP1   |                | 0 iYNL221C | -0.77 | 0.83 |
| YNL222W | SSU72  |                | 0 iYNL223W | -0.20 | 1.95 |
| YNL223W | AUT2   | APG4 AUT2      | iYNL224C   | 0.79  | 2.09 |
| YNL224C | 0      | #N/A           | iYNL224C   | 0.54  | 2.09 |
| YNL225C | CNM67  |                | 0 iYNL225C | 0.02  | #N/A |
| YNL226W | 0      | #N/A           | iYNL229C   | #N/A  | 1.80 |
| YNL227C | 0      |                | 0 iYNL226W | -0.22 | 0.70 |
| YNL228W | 0      | #N/A           | iYNL229C   | -0.94 | 1.80 |
| YNL229C | URE2   | [URE3]         | iYNL229C   | 0.32  | 1.80 |
| YNL230C | ELA1   |                | 0 iYNL230C | #N/A  | 1.06 |
| YNL231C | PDR16  | SFH3           | iYNL231C   | 0.10  | 0.43 |
| YNL232W | CSL4   | SKI4           | iYNL233W   | -0.40 | 1.42 |
| YNL233W | BNI4   |                | 0 iYNL234W | -0.54 | 1.21 |
| YNL234W | 0      | #N/A           | iYNL235C   | #N/A  | 2.95 |

|         |        |   |                    |            |       |      |
|---------|--------|---|--------------------|------------|-------|------|
| YNL235C |        | 0 | #N/A               | iYNL235C   | 0.00  | 2.95 |
| YNL236W | SIN4   |   | BEL2 GAL22 RYE1 Si | iYNL237W   | -0.18 | 1.38 |
| YNL237W | YTP1   |   |                    | 0 iYNL238W | 2.37  | 0.76 |
| YNL238W | KEX2   |   | QDS1 SRB1 VMA45    | iYNL239W   | -0.39 | 1.70 |
| YNL239W | LAP3   |   | BLH1 GAL6 YCP1     | iYNL240C   | 0.67  | 2.68 |
| YNL240C | NAR1   |   |                    | 0 iYNL240C | -1.64 | 2.68 |
| YNL241C | ZWF1   |   | MET19 POS10        | iYNL241C   | 0.95  | 0.63 |
| YNL242W | APG2   |   | APG2 AUT8 SPO72    | iYNL243W   | 0.89  | 2.03 |
| YNL243W | SLA2   |   | END4 MOP2          | iYNL244C   | -0.76 | 0.85 |
| YNL244C | SUI1   |   | MOF2 RFR1          | iYNL244C   | -0.29 | 0.85 |
| YNL245C | CWC25  |   |                    | 0 iYNL245C | 0.03  | 0.75 |
| YNL246W | VPS75  |   |                    | 0 iYNL247W | -0.13 | 1.51 |
| YNL247W |        | 0 | #N/A               | iYNL248C   | -1.84 | 1.98 |
| YNL248C | RPA49  |   |                    | 0 iYNL248C | #N/A  | 1.98 |
| YNL249C | MPA43  |   |                    | 0 iYNL249C | -1.20 | 1.16 |
| YNL250W | RAD50  |   |                    | 0 iYNL251C | 0.21  | 1.56 |
| YNL251C | NRD1   |   |                    | 0 iYNL251C | -0.62 | 1.56 |
| YNL252C | MRPL17 |   | MRPL30             | iYNL252C   | 0.97  | #N/A |
| YNL253W |        | 0 |                    | 0 iYNL254C | -0.97 | 1.16 |
| YNL254C |        | 0 | #N/A               | iYNL254C   | -1.38 | 1.16 |
| YNL255C | GIS2   |   |                    | 0 iYNL255C | -0.87 | 1.38 |
| YNL256W | FOL1   |   |                    | 0 iYNL257C | #N/A  | 2.19 |
| YNL257C | SIP3   |   |                    | 0 iYNL257C | -0.30 | 2.19 |
| YNL258C | DSL1   |   |                    | 0 iYNL258C | -0.30 | 2.82 |
| YNL259C | ATX1   |   |                    | 0 iYNL259C | -0.29 | 0.85 |
| YNL260C |        | 0 | #N/A               | iYNL260C   | -0.55 | 0.49 |
| YNL261W | ORC5   |   |                    | 0 iYNL262W | 0.25  | 0.83 |
| YNL262W | POL2   |   | DUN2               | iYNL263C   | -1.22 | 3.27 |
| YNL263C | YIF1   |   |                    | 0 iYNL263C | 0.22  | 3.27 |
| YNL264C | PDR17  |   | ISS1 SFH4          | iYNL264C   | -0.02 | 1.71 |
| YNL265C | IST1   |   |                    | 0 iYNL265C | 0.71  | 1.33 |
| YNL266W |        | 0 | #N/A               | iYNL267W   | -0.21 | 0.79 |
| YNL267W | PIK1   |   | PIK120 PIK41       | iYNL268W   | 0.38  | 1.21 |
| YNL268W | LYP1   |   |                    | 0 iYNL269W | 0.04  | 0.56 |
| YNL269W |        | 0 |                    | 0 iYNL271C | #N/A  | 2.16 |
| YNL270C | ALP1   |   | APL1               | iYNL269W   | 0.26  | 0.56 |
| YNL271C | BNI1   |   | PPF3 SHE5          | iYNL271C   | #N/A  | 2.16 |
| YNL272C | SEC2   |   |                    | 0 iYNL272C | -0.38 | 1.35 |
| YNL273W | TOF1   |   |                    | 0 iYNL274C | -0.62 | 3.06 |
| YNL274C |        | 0 | #N/A               | iYNL274C   | 3.73  | 3.06 |
| YNL275W |        | 0 | #N/A               | iYNL276C   | -0.22 | #N/A |
| YNL276C |        | 0 | #N/A               | iYNL276C   | 4.05  | #N/A |
| YNL277W | MET2   |   |                    | 0 iYNL278W | 1.06  | 0.74 |
| YNL278W | CAF120 |   |                    | 0 iYNL279W | -1.21 | 2.29 |
| YNL279W | PRM1   |   |                    | 0 iYNL280C | 0.17  | 0.79 |
| YNL280C | ERG24  |   |                    | 0 iYNL280C | -0.20 | 0.79 |
| YNL281W | HCH1   |   |                    | 0 iYNL282W | 1.39  | 0.84 |
| YNL282W | POP3   |   |                    | 0 iYNL283C | -2.21 | 0.75 |
| YNL283C | WSC2   |   | STA3               | iYNL283C   | -0.17 | 0.75 |
| YNL284C | MRPL10 |   | MRPL18             | iYNL284C   | -0.01 | 1.82 |
| YNL285W |        | 0 | #N/A               | itG(UCC)N  | #N/A  | 0.68 |

|         |        |                  |   |           |       |      |
|---------|--------|------------------|---|-----------|-------|------|
| YNL286W | CUS2   |                  | 0 | iYNL287W  | 0.37  | 1.04 |
| YNL287W | SEC21  |                  | 0 | iYNL288W  | -0.51 | 1.34 |
| YNL288W | CAF40  |                  | 0 | iYNL289W- | 0.09  | 1.62 |
| YNL289W | PCL1   | HCS26            |   | iYNL290W  | 0.11  | 1.03 |
| YNL290W | RFC3   |                  | 0 | iYNL291C  | -0.28 | #N/A |
| YNL291C | MID1   |                  | 0 | iYNL291C  | -0.73 | #N/A |
| YNL292W | PUS4   |                  | 0 | iYNL293W  | -0.56 | 1.28 |
| YNL293W | MSB3   | GYP3             |   | iYNL294C  | -0.02 | 1.99 |
| YNL294C | RIM21  | PAL2             |   | iYNL294C  | 0.90  | 1.99 |
| YNL295W | 0      | #N/A             |   | iYNL296W  | 0.16  | 2.53 |
| YNL296W | KRE25  | #N/A             |   | iYNL298W  | #N/A  | #N/A |
| YNL297C | MON2   | YSL2             |   | iYNL296W  | -0.09 | 2.53 |
| YNL298W | CLA4   | ERC10            |   | iYNL299W  | 0.15  | 0.83 |
| YNL299W | TRF5   |                  | 0 | iYNL300W  | #N/A  | 1.87 |
| YNL300W | TOS6   | #N/A             |   | iYNL301C  | -0.58 | #N/A |
| YNL301C | RPL18B | RP28B            |   | iYNL301C  | -1.49 | #N/A |
| YNL302C | RPS19B | RP55B            |   | iYNL302C  | -1.36 | 0.23 |
| YNL303W | 0      | #N/A             |   | iYNL305C  | -1.06 | 2.40 |
| YNL304W | YPT11  |                  | 0 | iYNL305C  | 0.28  | 2.40 |
| YNL305C | 0      | #N/A             |   | iYNL305C  | 2.40  | 2.40 |
| YNL306W | MRPS18 |                  | 0 | iYNL307C  | 0.84  | 2.74 |
| YNL307C | MCK1   | YPK1             |   | iYNL307C  | -0.25 | 2.74 |
| YNL308C | KRI1   |                  | 0 | iYNL308C  | -1.37 | #N/A |
| YNL309W | STB1   |                  | 0 | iYNL311C  | #N/A  | 1.50 |
| YNL310C | 0      |                  | 0 | iYNL309W  | 0.17  | 0.52 |
| YNL311C | 0      | #N/A             |   | iYNL311C  | -0.77 | 1.50 |
| YNL312W | RFA2   | BUF1 RPA2        |   | iYNL313C  | 0.34  | #N/A |
| YNL313C | 0      | #N/A             |   | iYNL313C  | -1.28 | #N/A |
| YNL314W | DAL82  |                  | 0 | iYNL315C  | -0.29 | #N/A |
| YNL315C | ATP11  |                  | 0 | iYNL315C  | 0.20  | #N/A |
| YNL316C | PHA2   |                  | 0 | iYNL316C  | 0.00  | #N/A |
| YNL317W | PFS2   |                  | 0 | iYNL318C  | -0.81 | 1.32 |
| YNL318C | HXT14  |                  | 0 | iYNL318C  | #N/A  | 1.32 |
| YNL318L | #N/A   | #N/A             |   | #N/A      | #N/A  | #N/A |
| YNL319W | 0      | #N/A             |   | iYNL320W  | #N/A  | #N/A |
| YNL320W | 0      | #N/A             |   | iYNL321W  | 0.65  | 1.82 |
| YNL321W | 0      | #N/A             |   | iYNL322C  | 0.48  | 2.16 |
| YNL322C | KRE1   |                  | 0 | iYNL322C  | 0.97  | 2.16 |
| YNL323W | LEM3   | BRE3 ROS3        |   | iYNL324W  | 0.04  | 2.49 |
| YNL324W | 0      | #N/A             |   | iYNL326C  | #N/A  | 1.02 |
| YNL325C | FIG4   |                  | 0 | iYNL324W  | -0.28 | 2.49 |
| YNL326C | 0      | #N/A             |   | iYNL326C  | 0.53  | 1.02 |
| YNL327W | EGT2   |                  | 0 | iYNL328C  | 0.03  | 1.08 |
| YNL328C | MDJ2   |                  | 0 | iYNL328C  | #N/A  | 1.08 |
| YNL329C | PEX6   | PAS8             |   | iYNL329C  | -0.07 | 1.62 |
| YNL330C | RPD3   | MOF6 REC3 SDI2 S |   | iYNL330C  | 0.20  | 3.30 |
| YNL331C | AAD14  |                  | 0 | iYNL331C  | 0.29  | 1.42 |
| YNL332W | THI12  |                  | 0 | iYNL333W  | 0.98  | 2.67 |
| YNL333W | SNZ2   |                  | 0 | iYNL334C  | 0.42  | 2.13 |
| YNL334C | SNO2   |                  | 0 | iYNL334C  | 0.03  | 2.13 |
| YNL335W | 0      | #N/A             |   | iYNL336W- | 1.71  | 1.79 |

|         |        |                  |      |            |       |      |
|---------|--------|------------------|------|------------|-------|------|
| YNL336W | COS1   |                  | 0    | iYNL337W   | 1.10  | 0.87 |
| YNL337W |        | 0                | #N/A | iYNL338W   | #N/A  | 0.33 |
| YNL338W |        | 0                | #N/A | iYNL339C   | #N/A  | 0.45 |
| YNL339C | YRF1-6 | YRF1             |      | iYNL339C   | -0.05 | 0.45 |
| YNR001C | CIT1   | CS1 LYS6         |      | iYNR001C   | 2.12  | 0.95 |
| YNR002C | FUN34  | ATO2             |      | iYNR002C   | 4.17  | 0.80 |
| YNR003C | RPC34  |                  | 0    | iYNR003C   | -4.88 | 2.05 |
| YNR004W |        | 0                | #N/A | iYNR003C   | #N/A  | 2.05 |
| YNR005C |        | 0                | #N/A | iYNR006W   | #N/A  | 0.57 |
| YNR006W | VPS27  | DID7 GRD11 SSV17 |      | iYNR004W   | 0.45  | 1.40 |
| YNR007C | AUT1   | APG3 AUT1        |      | iYNR007C   | 0.88  | 1.70 |
| YNR008W | LRO1   |                  | 0    | iYNR007C   | 0.53  | 1.70 |
| YNR009W |        | 0                | #N/A | iYNR008W   | #N/A  | 0.74 |
| YNR010W | CSE2   | MED9             |      | iYNR009W   | -0.97 | 1.36 |
| YNR011C | PRP2   | RNA2             |      | iYNR011C   | 0.04  | 1.87 |
| YNR012W | URK1   |                  | 0    | iYNR011C   | #N/A  | 1.87 |
| YNR013C | PHO91  |                  | 0    | iYNR013C   | 0.27  | 0.47 |
| YNR014W |        | 0                | #N/A | iYNR013C   | -0.90 | 0.47 |
| YNR015W | SMM1   | DUS2             |      | iYNR014W   | -1.43 | 2.28 |
| YNR016C | ACC1   | ABP2 FAS3 MTR7   |      | iYNR016C-0 | -0.89 | 0.36 |
| YNR017W | MAS6   | MIM23 MPI3 TIM23 |      | iYNR016C-1 | -0.44 | 0.37 |
| YNR018W |        | 0                | #N/A | iYNR017W   | -0.71 | 0.31 |
| YNR019W | ARE2   | SAT1             |      | iYNR018W   | 1.49  | #N/A |
| YNR020C |        | 0                | #N/A | iYNR020C   | 0.01  | 1.57 |
| YNR021W |        | 0                | #N/A | iYNR020C   | -0.49 | 1.57 |
| YNR022C |        | 0                |      | iYNR022C   | -0.81 | 3.06 |
| YNR023W | SNF12  | SWP73            |      | iYNR022C   | #N/A  | 3.06 |
| YNR024W |        | 0                | #N/A | iYNR023W   | -0.68 | 1.74 |
| YNR025C |        | 0                | #N/A | iYNR025C   | 0.31  | 0.71 |
| YNR026C | SEC12  | SED2             |      | iYNR026C   | #N/A  | 2.25 |
| YNR027W | BUD17  |                  | 0    | iYNR026C   | -0.06 | 2.25 |
| YNR028W | CPR8   |                  | 0    | iYNR027W   | 0.18  | 0.56 |
| YNR029C |        | 0                | #N/A | iYNR029C   | -0.49 | 2.28 |
| YNR030W | ECM39  | ALG12            |      | iYNR029C   | 0.46  | 2.28 |
| YNR031C | SSK2   |                  | 0    | iYNR031C   | -0.10 | 3.16 |
| YNR032W | PPG1   |                  | 0    | iYNR031C   | 0.26  | 3.16 |
| YNR033W | ABZ1   |                  | 0    | iYNR032C-7 | 0.48  | 1.99 |
| YNR034W | SOL1   |                  | 0    | iYNR033W   | 1.47  | 1.99 |
| YNR035C | ARC35  | END9             |      | iYNR035C   | 0.85  | #N/A |
| YNR036C |        | 0                | #N/A | iYNR036C   | 0.92  | 2.39 |
| YNR037C | RSM19  |                  | 0    | iYNR037C   | #N/A  | 2.96 |
| YNR038W | DBP6   |                  | 0    | iYNR037C   | -2.83 | 2.96 |
| YNR039C | ZRG17  |                  | 0    | iYNR039C   | #N/A  | 2.38 |
| YNR040W |        | 0                | #N/A | iYNR039C   | 0.20  | 2.38 |
| YNR041C | COQ2   |                  | 0    | iYNR042W   | 0.70  | 1.35 |
| YNR042W |        | 0                | #N/A | iYNR040W   | 0.52  | 0.47 |
| YNR043W | MVD1   | ERG19            |      | iYNR042W   | -0.59 | 1.35 |
| YNR044W | AGA1   |                  | 0    | iYNR043W   | -0.51 | 1.12 |
| YNR045W | PET494 |                  | 0    | iYNR044W   | -0.53 | #N/A |
| YNR046W |        | 0                | #N/A | iYNR045W   | -1.15 | 2.17 |
| YNR047W |        | 0                | #N/A | iYNR046W   | #N/A  | 2.82 |



|         |       |                   |              |       |      |
|---------|-------|-------------------|--------------|-------|------|
| YNR048W | 0     | #N/A              | iYNR047W     | -0.25 | 1.32 |
| YNR049C | MSO1  |                   | 0 iYNR049C   | #N/A  | 1.24 |
| YNR050C | LYS9  | LYS13             | iYNR050C     | -0.63 | 0.68 |
| YNR051C | BRE5  |                   | 0 iYNR051C   | -0.23 | 1.22 |
| YNR052C | POP2  | CAF1              | iYNR052C     | -0.40 | #N/A |
| YNR053C | NOG2  |                   | 0 iYNR053C   | -1.27 | 0.69 |
| YNR054C | 0     | #N/A              | iYNR054C-0   | -1.56 | 1.36 |
| YNR055C | HOL1  |                   | 0 iYNR055C   | 0.46  | 1.69 |
| YNR056C | BIO5  |                   | 0 iYNR057C   | 0.31  | 2.32 |
| YNR057C | BIO4  |                   | 0 iYNR057C   | 0.60  | 2.32 |
| YNR058W | BIO3  |                   | 0 iYNR057C   | 0.64  | 2.32 |
| YNR059W | MNT4  |                   | 0 iYNR058W   | -0.24 | 2.00 |
| YNR060W | FRE4  |                   | 0 iYNR059W   | -1.39 | 0.76 |
| YNR061C | 0     | #N/A              | iYNR061C     | 0.09  | 1.37 |
| YNR062C | 0     | #N/A              | iYNR062C-0   | #N/A  | 0.58 |
| YNR063W | 0     | #N/A              | iYNR062C-7   | #N/A  | 1.80 |
| YNR064C | 0     | #N/A              | iYNR064C     | 0.53  | 0.67 |
| YNR065C | YSN1  |                   | 0 iYNR066C   | 0.42  | 1.82 |
| YNR066C | 0     | #N/A              | iYNR066C     | #N/A  | 1.82 |
| YNR067C | DSE4  | ENG1              | iYNR067C     | 0.54  | 1.84 |
| YNR068C | 0     | #N/A              | iYNR068C     | 2.03  | #N/A |
| YNR069C | 0     |                   | 0 iYNR069C-0 | #N/A  | 1.58 |
| YNR070W | PDR18 | #N/A              | iYNR069C-7   | #N/A  | #N/A |
| YNR071C | 0     | #N/A              | iYNR071C     | #N/A  | 0.49 |
| YNR072W | HXT17 |                   | 0 iYNR071C   | #N/A  | 0.49 |
| YNR073C | 0     | #N/A              | iYNR073C     | 1.85  | #N/A |
| YNR074C | 0     | #N/A              | iYNR074C     | -0.17 | 1.74 |
| YNR075W | COS10 |                   | 0 iYNR074C   | #N/A  | 1.74 |
| YNR076W | PAU6  |                   | 0 iYNR075W   | -0.16 | 0.78 |
| YNR077C | 0     | #N/A              | #N/A         | #N/A  | #N/A |
| YOL001W | PHO80 | AGS3 TUP7 VAC5    | iYOL002C     | -0.14 | 1.26 |
| YOL002C | 0     |                   | 0 iYOL002C   | -0.03 | 1.26 |
| YOL003C | 0     | #N/A              | iYOL003C     | 0.14  | 1.70 |
| YOL004W | SIN3  | CPE1 GAM2 RPD1 Si | iYOL005C     | 0.64  | 1.53 |
| YOL005C | RPB11 |                   | 0 iYOL005C   | -0.50 | 1.53 |
| YOL006C | TOP1  | MAK1 MAK17        | iYOL006C     | #N/A  | 0.64 |
| YOL007C | 0     | #N/A              | iYOL007C     | -0.28 | 0.83 |
| YOL008W | 0     | #N/A              | iYOL009C     | 0.19  | 1.74 |
| YOL009C | MDM12 |                   | 0 iYOL009C   | 0.80  | 1.74 |
| YOL010W | RCL1  |                   | 0 iYOL011W   | -1.14 | 2.05 |
| YOL011W | PLB3  |                   | 0 iYOL012C   | -0.33 | 0.83 |
| YOL012C | HTZ1  | H2A.F/Z H2AZ HTA3 | iYOL012C     | -0.89 | 0.83 |
| YOL013C | HRD1  | DER3              | iYOL013C     | 0.44  | #N/A |
| YOL014W | 0     | #N/A              | iYOL015W     | -1.55 | 0.81 |
| YOL015W | 0     | #N/A              | iYOL016C     | #N/A  | 1.57 |
| YOL016C | CMK2  |                   | 0 iYOL016C   | 1.32  | 1.57 |
| YOL017W | ESC8  |                   | 0 iYOL018C   | -1.41 | 2.06 |
| YOL018C | TLG2  |                   | 0 iYOL018C   | -0.16 | 2.06 |
| YOL019W | TOS7  | #N/A              | itY(GUA)O    | -0.81 | 0.69 |
| YOL020W | TAT2  | LTG3 SAB2 SCM2 T  | iYOL021C     | -0.20 | 0.42 |
| YOL021C | DIS3  | RRP44             | iYOL021C     | -0.98 | 0.42 |

|           |       |                   |              |       |      |
|-----------|-------|-------------------|--------------|-------|------|
| YOL022C   | 0     | #N/A              | iYOL022C     | -1.58 | 1.32 |
| YOL023W   | IFM1  |                   | 0 iYOL024W   | 0.47  | 2.09 |
| YOL024W   | 0     | #N/A              | iYOL025W     | #N/A  | 0.47 |
| YOL025W   | LAG2  | ECM36             | itS(GCU)O    | 0.43  | 1.17 |
| YOL026C   | 0     |                   | 0 iYOL026C   | -0.17 | 1.34 |
| YOL027C   | 0     |                   | 0 iYOL027C   | -0.07 | 2.36 |
| YOL028C   | YAP7  |                   | 0 iYOL028C   | #N/A  | 0.88 |
| YOL029C   | 0     | #N/A              | iYOL029C     | #N/A  | 0.38 |
| YOL030W   | GAS5  |                   | 0 iYOL031C   | 0.33  | 1.26 |
| YOL031C   | 0     | SLS1              | iYOL031C     | 0.75  | 1.26 |
| YOL032W   | 0     | #N/A              | iYOL033W     | 1.90  | 1.03 |
| YOL033W   | MSE1  |                   | 0 iYOL034W   | 0.27  | #N/A |
| YOL034W   | SMC5  |                   | 0 iSNR50     | -0.95 | #N/A |
| YOL035C   | 0     | #N/A              | iYOL035C     | 0.94  | 0.78 |
| YOL036W   | 0     | #N/A              | iYOL038W     | 0.56  | 0.90 |
| YOL037C   | 0     | #N/A              | iYOL035C     | #N/A  | 0.78 |
| YOL038W   | PRE6  |                   | 0 iYOL039W   | 0.87  | #N/A |
| YOL039W   | RPP2A | RPL44 RPLA2       | iYOL040C     | -1.10 | 0.15 |
| YOL040C   | RPS15 | RPS21             | iYOL040C     | -1.25 | 0.15 |
| YOL041C   | NOP12 |                   | 0 iYOL041C   | -1.18 | 1.02 |
| YOL042W   | NGL1  |                   | 0 iYOL043C   | -0.53 | 1.37 |
| YOL043C   | NTG2  | SCR2              | iYOL043C     | 0.56  | 1.37 |
| YOL044W   | PEX15 | PAS21             | iYOL045W     | 0.09  | 2.09 |
| YOL045W   | 0     |                   | 0 iYOL047C   | #N/A  | 1.32 |
| YOL046C   | 0     | #N/A              | iYOL045W     | #N/A  | 2.09 |
| YOL047C   | 0     | #N/A              | iYOL047C     | #N/A  | 1.32 |
| YOL048C   | 0     | #N/A              | iYOL048C     | 0.59  | #N/A |
| YOL049W   | GSH2  |                   | 0 iYOL050C   | 0.20  | 1.97 |
| YOL050C   | 0     | #N/A              | iYOL050C     | 0.05  | 1.97 |
| YOL051W   | GAL11 | ABE1 RAR3 SDS4 SI | iYOL052C     | 0.36  | 1.39 |
| YOL052C   | SPE2  |                   | 0 iYOL052C   | 0.08  | 1.39 |
| YOL053C-A | #N/A  | #N/A              | #N/A         | 6.77  | #N/A |
| YOL053W   | 0     | #N/A              | iYOL054W     | 1.03  | 0.74 |
| YOL054W   | 0     |                   | 0 itN(GUU)O1 | -0.31 | #N/A |
| YOL055C   | THI20 |                   | 0 iYOL055C   | 1.24  | 1.23 |
| YOL056W   | GPM3  |                   | 0 iYOL057W   | -0.32 | 1.74 |
| YOL057W   | 0     | #N/A              | iYOL058W     | -0.05 | 1.62 |
| YOL058W   | ARG1  | ARG10             | iYOL059W     | 1.06  | 0.75 |
| YOL059W   | GPD2  | GPD3              | iYOL060C     | -0.78 | 0.71 |
| YOL060C   | MAM3  |                   | 0 iYOL060C   | 0.36  | 0.71 |
| YOL061W   | PRS5  |                   | 0 iYOL062C   | -1.44 | 3.43 |
| YOL062C   | APM4  | AMP1              | iYOL062C     | -0.23 | 3.43 |
| YOL063C   | 0     |                   | 0 iYOL063C   | 0.01  | 2.60 |
| YOL064C   | MET22 | HAL2              | iYOL064C     | 0.48  | #N/A |
| YOL065C   | INP54 |                   | 0 iYOL065C   | -0.01 | 2.61 |
| YOL066C   | RIB2  |                   | 0 iYOL066C   | 0.27  | 2.37 |
| YOL067C   | RTG1  |                   | 0 iYOL067C   | #N/A  | 1.04 |
| YOL068C   | HST1  |                   | 0 iYOL068C   | 0.23  | 1.89 |
| YOL069W   | NUF2  |                   | 0 iYOL070C   | -1.26 | #N/A |
| YOL070C   | 0     | #N/A              | iYOL070C     | -0.12 | #N/A |
| YOL071W   | 0     |                   | 0 iYOL072W   | #N/A  | #N/A |



|         |        |                  |       |            |       |      |
|---------|--------|------------------|-------|------------|-------|------|
| YOL072W | THP1   | BUD29            |       | iYOL073C   | #N/A  | 3.84 |
| YOL073C |        | 0                | #N/A  | iYOL073C   | 0.69  | 3.84 |
| YOL075C |        | 0                | #N/A  | iYOL075C   | 0.47  | 2.60 |
| YOL076W | MDM20  |                  | 38322 | iYOL077C   | -0.99 | 2.86 |
| YOL077C | BRX1   |                  |       | 0 iYOL077C | -2.81 | 2.86 |
| YOL078W | AVO1   |                  |       | 0 iYOL079W | #N/A  | 1.80 |
| YOL079W |        | 0                | #N/A  | iYOL081W   | #N/A  | 0.57 |
| YOL080C | REX4   |                  |       | 0 iYOL079W | -3.54 | 1.80 |
| YOL081W | IRA2   | CCS1 GLC4        |       | iYOL082W   | #N/A  | 1.70 |
| YOL082W | CVT19  | CVT19            |       | iYOL083W-  | #N/A  | 1.38 |
| YOL083W |        | 0                | #N/A  | iYOL084W   | 2.23  | 1.56 |
| YOL084W | PHM7   |                  |       | 0 iYOL085C | 3.97  | 1.32 |
| YOL085C |        | 0                | #N/A  | iYOL085C   | #N/A  | 1.32 |
| YOL086C | ADH1   | ADC1             |       | iYOL086C   | 0.19  | 0.52 |
| YOL087C |        | 0                | #N/A  | iYOL087C   | 1.20  | 1.76 |
| YOL088C | MPD2   |                  |       | 0 iYOL088C | #N/A  | #N/A |
| YOL089C | HAL9   |                  |       | 0 iYOL089C | -0.05 | 1.65 |
| YOL090W | MSH2   | PMS5             |       | iYOL091W   | 0.57  | #N/A |
| YOL091W | SPO21  | MPC70            |       | iYOL092W   | #N/A  | #N/A |
| YOL092W |        | 0                | #N/A  | iYOL093W   | -0.86 | 1.68 |
| YOL093W |        | 0                |       | 0 iYOL094C | -0.47 | 1.51 |
| YOL094C | RFC4   |                  |       | 0 iYOL094C | -0.03 | 1.51 |
| YOL095C | HMI1   |                  |       | 0 iYOL095C | -0.53 | 1.54 |
| YOL096C | COQ3   |                  |       | 0 iYOL096C | 1.14  | 3.61 |
| YOL097C | WRS1   | HRE342           |       | iYOL097C   | -0.86 | 1.68 |
| YOL098C |        | 0                | #N/A  | iYOL098C   | -0.04 | 1.70 |
| YOL099C |        | 0                | #N/A  | iYOL099C   | 0.02  | 0.44 |
| YOL100W | PKH2   |                  |       | 0 iYOL101C | 0.14  | 1.40 |
| YOL101C |        | 0                |       | 0 iYOL101C | -2.06 | 1.40 |
| YOL102C | TPT1   |                  |       | 0 iYOL102C | #N/A  | 1.18 |
| YOL103W | ITR2   | HRB612           |       | iYOLWdelta | -0.90 | #N/A |
| YOL104C | NDJ1   | TAM1             |       | iYOL104C   | #N/A  | #N/A |
| YOL105C | WSC3   |                  |       | 0 iYOL105C | 0.60  | 1.07 |
| YOL106W |        | 0                | #N/A  | iYOL107W   | 0.07  | 0.54 |
| YOL107W |        | 0                | #N/A  | iYOL108C   | 1.46  | 1.47 |
| YOL108C | INO4   |                  |       | 0 iYOL108C | 0.43  | 1.47 |
| YOL109W |        | 0                |       | 0 iYOL110W | #N/A  | 0.12 |
| YOL110W | SHR5   | ERF4             |       | iYOL111C   | 0.61  | 0.96 |
| YOL111C |        | 0                | #N/A  | iYOL111C   | 0.56  | 0.96 |
| YOL112W | MSB4   |                  |       | 0 iYOL113W | 0.06  | 1.54 |
| YOL113W | SKM1   |                  |       | 0 iYOL114C | 0.33  | 1.49 |
| YOL114C |        | 0                | #N/A  | iYOL114C   | #N/A  | 1.49 |
| YOL115W | TRF4   |                  |       | 0 iYOL116W | -0.58 | 2.00 |
| YOL116W | MSN1   | FUP1 HRB382 MSS1 |       | iYOL117W   | 0.12  | 1.90 |
| YOL117W |        | 0 CSN10          |       | iYOL118C   | 1.28  | 1.30 |
| YOL118C |        | 0                | #N/A  | iYOL118C   | #N/A  | 1.30 |
| YOL119C | MCH4   |                  |       | 0 iYOL119C | 1.64  | #N/A |
| YOL120C | RPL18A | RP28A            |       | iYOL120C   | -1.56 | 0.40 |
| YOL121C | RPS19A |                  |       | 0 iYOL121C | -1.27 | 0.26 |
| YOL122C | SMF1   | SBS1             |       | iYOL122C   | 1.12  | 1.07 |
| YOL123W | HRP1   | NAB4 NAB5        |       | iYOL124C   | -0.86 | 0.56 |

|         |       |                |              |       |      |
|---------|-------|----------------|--------------|-------|------|
| YOL124C | 0     | #N/A           | iYOL124C     | -2.78 | 0.56 |
| YOL125W | 0     | #N/A           | iYOL126C     | -1.32 | 1.12 |
| YOL126C | MDH2  |                | 0 iYOL126C   | 0.10  | 1.12 |
| YOL127W | RPL25 |                | 0 iYOL128C   | -1.59 | 0.62 |
| YOL128C | 0     |                | 0 iYOL128C   | #N/A  | 0.62 |
| YOL129W | VPS68 |                | 0 iYOL130W   | 1.31  | 1.31 |
| YOL130W | ALR1  | SWC3           | iYOL131W     | -1.10 | 1.53 |
| YOL131W | 0     | #N/A           | iYOL132W     | #N/A  | 0.89 |
| YOL132W | GAS4  |                | 0 iYOL133W   | #N/A  | 0.86 |
| YOL133W | HRT1  | HRT2 RBX1 ROC1 | iYOL135C     | 0.45  | 2.67 |
| YOL134C | 0     | #N/A           | iYOL133W     | 0.88  | 0.86 |
| YOL135C | MED7  |                | 0 iYOL135C   | 0.02  | 2.67 |
| YOL136C | PFK27 | PFK-2          | iYOL136C     | 0.36  | 0.57 |
| YOL137W | 0     |                | 0 iYOL138C   | 0.23  | 1.93 |
| YOL138C | 0     | #N/A           | iYOL138C     | -1.18 | 1.93 |
| YOL139C | CDC33 | TIF45 eIF-4E   | iYOL139C     | -0.69 | 1.12 |
| YOL140W | ARG8  |                | 0 iYOL141W   | -1.00 | 0.48 |
| YOL141W | PPM2  |                | 0 iYOL142W   | #N/A  | 1.16 |
| YOL142W | RRP40 |                | 0 iYOL143C   | -0.97 | 3.08 |
| YOL143C | RIB4  |                | 0 iYOL143C   | 0.26  | 3.08 |
| YOL144W | NOP8  |                | 0 iYOL145C   | -0.98 | 2.51 |
| YOL145C | CTR9  | CDP1           | iYOL145C     | -0.01 | 2.51 |
| YOL146W | 0     |                | 0 iYOL147C   | #N/A  | #N/A |
| YOL147C | PEX11 | PMP24 PMP27    | iYOL147C     | 0.43  | #N/A |
| YOL148C | SPT20 | ADA5           | iYOL148C     | -0.74 | 2.43 |
| YOL149W | DCP1  |                | 0 iYOL150C   | -0.33 | 4.11 |
| YOL150C | 0     | #N/A           | iYOL150C     | 0.84  | 4.11 |
| YOL151W | GRE2  |                | 0 iYOL152W   | 0.72  | 1.18 |
| YOL152W | FRE7  |                | 0 iYOL153C-1 | #N/A  | 1.79 |
| YOL153C | 0     | #N/A           | iYOL153C-C   | 2.15  | 1.50 |
| YOL154W | 0     |                | 0 iYOL155C-1 | 0.03  | 1.33 |
| YOL155C | 0     | #N/A           | iYOL155C-C   | 0.77  | 0.48 |
| YOL156W | HXT11 | LGT3           | iYOL157C     | 0.78  | 1.47 |
| YOL157C | 0     | #N/A           | iYOL157C     | -0.94 | 1.47 |
| YOL158C | ENB1  | ARN4           | iYOL158C     | -1.17 | 1.25 |
| YOL159C | 0     | #N/A           | iYOL159C     | 1.32  | 1.83 |
| YOL160W | 0     | #N/A           | iYOL161C-1   | #N/A  | 1.11 |
| YOL161C | 0     | #N/A           | iYOL161C-C   | -0.14 | 0.68 |
| YOL162W | 0     | #N/A           | iYOL164W     | #N/A  | 1.34 |
| YOL163W | 0     | #N/A           | iYOL164W     | #N/A  | 1.34 |
| YOL164W | 0     | #N/A           | iYOLWtau1    | -0.56 | #N/A |
| YOL165C | AAD15 |                | 0 iYOL165C   | -0.05 | 1.35 |
| YOL166C | 0     | #N/A           | iYOL166C     | #N/A  | 0.82 |
| YOR001W | RRP6  |                | 0 iCEN15     | -1.55 | #N/A |
| YOR002W | ALG6  |                | 0 iYOR001W   | 0.08  | 1.24 |
| YOR003W | YSP3  |                | 0 iYOR002W   | 1.54  | 0.75 |
| YOR004W | 0     | #N/A           | iYOR003W     | -2.57 | 2.00 |
| YOR005C | DNL4  | LIG4           | iYOR005C     | -0.03 | 0.86 |
| YOR006C | 0     | #N/A           | iYOR006C     | -0.35 | 1.32 |
| YOR007C | SGT2  |                | 0 iYOR007C   | 1.06  | 0.74 |
| YOR008C | SLG1  | HCS77 WSC1     | iYOR008C     | 0.21  | 1.26 |

|         |        |                 |      |            |          |       |      |
|---------|--------|-----------------|------|------------|----------|-------|------|
| YOR009W | TIR4   |                 | 0    | iYOR008C-  | -1.09    | 0.78  |      |
| YOR010C | TIR2   | SRP2            |      | iYOR010C-  | -1.00    | #N/A  |      |
| YOR011W | AUS1   |                 | 0    | iYOR010C-  | -1.02    | 1.92  |      |
| YOR012W |        | 0               | #N/A | iYOLWdelta | #N/A     | 1.67  |      |
| YOR013W |        | 0               | #N/A | iYOLWdelta | 0.16     | 1.67  |      |
| YOR014W | RTS1   | SCS1            |      | iYOR013W   | 0.18     | 2.53  |      |
| YOR015W |        | 0               | #N/A | iYOR013W   | 0.42     | 2.53  |      |
| YOR016C | ERP4   |                 | 0    | iYOR016C   | 0.03     | 1.87  |      |
| YOR017W | PET127 |                 | 0    | iYOR016C   | -0.30    | 1.87  |      |
| YOR018W | ROD1   |                 | 0    | iYOR017W   | -0.02    | 1.21  |      |
| YOR019W |        | 0               | #N/A | iYOR018W   | 0.99     | 1.29  |      |
| YOR020C | HSP10  | CPN10           |      | iYOR020C-  | 2.20     | 1.42  |      |
| YOR021C |        | 0               | #N/A | iYOR021C   | #N/A     | #N/A  |      |
| YOR022C |        | 0               | #N/A | iYOR022C   | 0.29     | #N/A  |      |
| YOR023C | AHC1   |                 | 0    | iYOR023C   | 0.26     | 1.41  |      |
| YOR024W |        | 0               | #N/A | iYOR023C   | #N/A     | 1.41  |      |
| YOR025W | HST3   |                 | 0    | iYOR023C   | -1.05    | 1.41  |      |
| YOR026W | BUB3   |                 | 0    | iYOR025W   | #N/A     | 1.15  |      |
| YOR027W | STI1   |                 | 0    | iYOR026W   | 1.70     | 0.74  |      |
| YOR028C | CIN5   | HAL6 YAP4       |      | iYOR028C   | 0.15     | #N/A  |      |
| YOR029W |        | 0               | #N/A | iYOR028C   | #N/A     | #N/A  |      |
| YOR030W | DFG16  | ECM41 ZRG11     |      | iYOR029W-  | -0.14    | 1.72  |      |
| YOR031W | CRS5   |                 | 0    | iYOR030W   | 0.13     | 0.63  |      |
| YOR032C | HMS1   |                 | 0    | iYOR032C   | 0.69     | 0.47  |      |
| YOR033C | EXO1   | DHS1            |      | iYOR033C   | -0.26    | 1.39  |      |
| YOR034C | AKR2   |                 | 0    | iYOR034C   | -0.25    | 0.90  |      |
| YOR035C | SHE4   | DIM1            |      | iYOR035C   | 0.33     | 2.35  |      |
| YOR036W | PEP12  | VPL6 VPS6 VPT13 |      | iYOR035C   | #N/A     | 2.35  |      |
| YOR037W | CYC2   |                 | 0    | iYOR036W   | #N/A     | 1.30  |      |
| YOR038C | HIR2   | SPT1            |      | iYOR038C   | -0.48    | 1.77  |      |
| YOR039W | CKB2   |                 | 0    | iYOR038C   | -0.30    | 1.77  |      |
| YOR040W | GLO4   |                 | 0    | iYOR039W   | #N/A     | 0.84  |      |
| YOR041C |        | 0               |      | 0          | iYOR042W | #N/A  | 0.55 |
| YOR042W |        | 0               |      | 0          | iYOR040W | 0.38  | 1.07 |
| YOR043W | WHI2   |                 | 0    | iSNR62     | -0.34    | 0.83  |      |
| YOR044W |        | 0               | #N/A | iYOR043W   | 0.85     | 1.17  |      |
| YOR045W | TOM6   | ISP6 MOM8B      |      | iYOR044W   | -0.63    | 1.54  |      |
| YOR046C | DBP5   | RAT8            |      | iYOR046C   | -0.50    | 0.80  |      |
| YOR047C | STD1   | MSN3 SFS3       |      | iYOR047C   | -0.78    | 0.71  |      |
| YOR048C | RAT1   | HKE1 TAP1 XRN2  |      | iYOR048C   | -1.55    | 1.69  |      |
| YOR049C |        | 0               |      | 0          | iYOR049C | -1.46 | 0.36 |
| YOR050C |        | 0               | #N/A | iYOR050C   | -1.51    | 0.38  |      |
| YOR051C |        | 0               | #N/A | iYOR051C   | -1.12    | 0.58  |      |
| YOR052C |        | 0               | #N/A | iYOR052C   | 2.50     | 1.19  |      |
| YOR053W |        | 0               | #N/A | iYOR052C   | 1.19     | 1.19  |      |
| YOR054C |        | 0               |      | 0          | iYOR055W | 1.08  | 1.07 |
| YOR055W |        | 0               | #N/A | iYOR052C   | #N/A     | 1.19  |      |
| YOR056C | NOB1   | YOR29-07        |      | iYOR056C   | -1.92    | 1.46  |      |
| YOR057W | SGT1   | YOR29-08        |      | iYOR056C   | 0.00     | 1.46  |      |
| YOR058C | ASE1   | YOR29-09        |      | iYOR058C-  | -1.29    | #N/A  |      |
| YOR059C |        | 0               | #N/A | iYOR059C   | 0.49     | 1.01  |      |

|         |       |                   |              |       |      |
|---------|-------|-------------------|--------------|-------|------|
| YOR060C | 0     | #N/A              | iYOR060C     | #N/A  | 1.29 |
| YOR061W | CKA2  | YOR29-12          | iYOR060C     | -0.43 | 1.29 |
| YOR062C | 0     | #N/A              | iYOR062C     | 0.63  | #N/A |
| YOR063W | RPL3  | MAK8 TCM1 YOR29-  | iYOR062C     | -1.23 | #N/A |
| YOR064C | YNG1  | YOR29-15          | iYOR064C     | -0.20 | 0.93 |
| YOR065W | CYT1  | CTC1 YOR29-16     | iYOR064C     | 1.01  | 0.93 |
| YOR066W | 0     | #N/A              | iYOR065W     | -1.58 | #N/A |
| YOR067C | ALG8  | YOR29-18          | iYOR067C     | -0.10 | #N/A |
| YOR068C | 0     | YOR29-19          | iYOR068C     | #N/A  | 0.70 |
| YOR069W | VPS5  | GRD2 PEP10 VPT5   | iYOR068C     | 0.62  | 0.70 |
| YOR070C | GYP1  | YOR29-21          | iYOR070C-0   | -0.79 | 1.86 |
| YOR071C | 0     | #N/A              | iYOR071C     | -0.21 | #N/A |
| YOR072W | 0     | #N/A              | iYOR071C     | #N/A  | #N/A |
| YOR073W | 0     |                   | 0 itP(UGG)O2 | -2.05 | 2.68 |
| YOR074C | CDC21 | CRT9 TMP1 YOR29-  | iYOR074C     | -0.53 | 1.89 |
| YOR075W | UFE1  | YOR29-26          | iYOR074C     | -0.06 | 1.89 |
| YOR076C | SKI7  | YOR29-27          | iYOR076C     | #N/A  | 1.98 |
| YOR077W | RTS2  | YOR29-28          | iYOR076C     | -1.56 | 1.98 |
| YOR078W | BUD21 | UTP16 YOR29-29    | iYOR077W     | -0.22 | 1.23 |
| YOR079C | ATX2  | YOR29-30          | iYOR079C     | 0.17  | 1.13 |
| YOR080W | DIA2  | YOR29-31          | iYOR079C     | -1.22 | 1.13 |
| YOR081C | 0     |                   | 0 iYOR081C   | 0.28  | 0.95 |
| YOR082C | 0     | #N/A              | iYOR083W     | #N/A  | #N/A |
| YOR083W | WHI5  |                   | 0 iYOR081C   | #N/A  | 0.95 |
| YOR084W | 0     | #N/A              | iYOR083W     | -0.01 | #N/A |
| YOR085W | OST3  |                   | 0 iYOR084W   | 0.09  | 2.77 |
| YOR086C | 0     |                   | 0 iYOR086C   | 0.78  | 1.85 |
| YOR087W | YVC1  |                   | 0 itN(GUU)O2 | -1.82 | #N/A |
| YOR088W | 0     | #N/A              | itN(GUU)O2   | 0.35  | #N/A |
| YOR089C | VPS21 | VPS12 VPT12 YPT2- | iYOR089C     | 1.01  | 1.48 |
| YOR090C | PTC5  |                   | 0 iYOR090C   | 0.45  | 1.89 |
| YOR091W | 0     | #N/A              | iYOR090C     | -1.28 | 1.89 |
| YOR092W | ECM3  | YOR3165W          | iYOR091W     | 0.65  | #N/A |
| YOR093C | 0     | #N/A              | iYOR093C     | -0.09 | #N/A |
| YOR094W | ARF3  | ARL2              | iYOR093C     | 0.01  | #N/A |
| YOR095C | RKI1  |                   | 0 iYOR095C   | -2.41 | 0.72 |
| YOR096W | RPS7A | RPS30             | iYOR095C     | -1.45 | 0.72 |
| YOR097C | 0     | #N/A              | iYOR097C     | 1.30  | 1.32 |
| YOR098C | NUP1  |                   | 0 iYOR098C   | -0.51 | 1.38 |
| YOR099W | KTR1  |                   | 0 iYOR098C   | -0.29 | 1.38 |
| YOR100C | CRC1  |                   | 0 iYOR100C   | 4.22  | 0.78 |
| YOR101W | RAS1  |                   | 0 iYOR100C   | -1.37 | 0.78 |
| YOR102W | 0     | #N/A              | iYOR101W     | 0.63  | #N/A |
| YOR103C | OST2  |                   | 0 iYOR103C   | 0.61  | 1.26 |
| YOR104W | PIN2  |                   | 0 iYOR103C   | 0.47  | 1.26 |
| YOR105W | 0     | #N/A              | iYOR103C     | -0.40 | 1.26 |
| YOR106W | VAM3  | PTH1              | iYOR105W     | -1.14 | #N/A |
| YOR107W | RGS2  |                   | 0 iYOR106W   | -1.71 | #N/A |
| YOR108W | 0     |                   | 0 iYOR107W   | -1.01 | #N/A |
| YOR109W | INP53 | SJL3 SOP2         | iYOR108W     | 0.13  | 1.34 |
| YOR110W | TFC7  |                   | 0 iYOR109W   | 0.39  | #N/A |

|         |        |                   |            |       |      |
|---------|--------|-------------------|------------|-------|------|
| YOR111W | 0      | #N/A              | iYOR110W   | 0.56  | 1.22 |
| YOR112W | 0      | #N/A              | iYOR111W   | #N/A  | #N/A |
| YOR113W | AZF1   |                   | 0 iYOR112W | 0.15  | 1.64 |
| YOR114W | 0      | #N/A              | iYOR113W   | #N/A  | #N/A |
| YOR115C | TRS33  |                   | 0 iYOR115C | 0.08  | #N/A |
| YOR116C | RPO31  | RPC1 RPC160       | iYOR116C   | -0.73 | 2.06 |
| YOR117W | RPT5   | YTA1              | iYOR116C   | 0.57  | 2.06 |
| YOR118W | 0      | #N/A              | iYOR117W   | -0.57 | 1.53 |
| YOR119C | RIO1   | RRP10             | iYOR119C   | -1.02 | 1.37 |
| YOR120W | GCY1   | GCY               | iYOR119C   | 3.20  | 1.37 |
| YOR121C | 0      | #N/A              | iYOR121C   | 3.46  | #N/A |
| YOR122C | PFY1   | PRF1              | iYOR122C   | 0.41  | #N/A |
| YOR123C | LEO1   |                   | 0 iYOR123C | -0.01 | 2.54 |
| YOR124C | UBP2   |                   | 0 iYOR124C | #N/A  | #N/A |
| YOR125C | CAT5   | COQ7              | iYOR125C   | 0.73  | #N/A |
| YOR126C | IAH1   |                   | 0 iYOR126C | 0.28  | 1.35 |
| YOR127W | RGA1   | DBM1 THE1         | iYOR126C   | 0.15  | 1.35 |
| YOR128C | ADE2   |                   | 0 iYOR128C | 0.01  | 0.88 |
| YOR129C | 0      | #N/A              | iYOR129C   | -0.93 | 2.00 |
| YOR130C | ORT1   | ARG11             | iYOR130C   | 0.98  | 2.43 |
| YOR131C | 0      | #N/A              | iYOR131C   | 0.53  | 2.02 |
| YOR132W | VPS17  | PEP21             | iYOR131C   | #N/A  | 2.02 |
| YOR133W | EFT1   |                   | 0 iYOR132W | -1.43 | 1.26 |
| YOR134W | BAG7   |                   | 0 iYOR133W | 1.51  | 0.75 |
| YOR135C | 0      | #N/A              | iYOR136W   | #N/A  | 0.63 |
| YOR136W | IDH2   |                   | 0 iYOR134W | 1.51  | 2.14 |
| YOR137C | SIA1   |                   | 0 iYOR137C | 1.28  | 1.17 |
| YOR138C | 0      |                   | 0 iYOR138C | -0.23 | 1.47 |
| YOR139C | 0      | #N/A              | iYOR140W   | #N/A  | 0.60 |
| YOR140W | SFL1   |                   | 0 iYOR138C | 0.23  | 1.47 |
| YOR141C | ARP8   |                   | 0 iYOR141C | -0.28 | 2.04 |
| YOR142W | LSC1   |                   | 0 iYOR141C | 0.68  | 2.04 |
| YOR143C | THI80  |                   | 0 iYOR143C | -0.55 | 1.74 |
| YOR144C | ELG1   | RTT110            | iYOR144C   | -1.55 | 1.41 |
| YOR145C | 0      | RRP20             | iYOR146W   | -1.59 | #N/A |
| YOR146W | 0      | #N/A              | iYOR144C   | #N/A  | 1.41 |
| YOR147W | 0      |                   | 0 iYOR146W | -0.50 | #N/A |
| YOR148C | SPP2   |                   | 0 iYOR148C | 0.22  | 2.59 |
| YOR149C | SMP3   | LAS2 SAP2         | iYOR149C   | -0.91 | 2.72 |
| YOR150W | MRPL23 |                   | 0 iYOR149C | 0.55  | 2.72 |
| YOR151C | RPB2   | RPB150 RPO22 SIT2 | iYOR151C   | 0.09  | 1.63 |
| YOR152C | 0      | #N/A              | iYOR152C-  | 0.63  | 0.86 |
| YOR153W | PDR5   | LEM1 STS1 YDR1    | iYOR152C-  | 0.26  | 0.25 |
| YOR154W | 0      | #N/A              | iYOR153W   | -1.63 | #N/A |
| YOR155C | 0      |                   | 0 iYOR155C | 0.95  | 1.62 |
| YOR156C | NFI1   | SIZ2              | iYOR156C   | 0.82  | 1.11 |
| YOR157C | PUP1   |                   | 0 iYOR157C | 0.84  | 1.41 |
| YOR158W | PET123 |                   | 0 iYOR157C | 0.29  | 1.41 |
| YOR159C | SME1   | Sm E              | iYOR159C   | -0.50 | 2.49 |
| YOR160W | MTR10  | KAP111            | iYOR159C   | #N/A  | 2.49 |
| YOR161C | 0      |                   | 0 iYOR161C | 2.93  | 0.46 |

|         |        |                  |      |              |       |      |
|---------|--------|------------------|------|--------------|-------|------|
| YOR162C | YRR1   |                  | 0    | iYOR162C     | 0.27  | 1.80 |
| YOR163W | DDP1   |                  |      | 0 iYOR162C   | 0.38  | 1.80 |
| YOR164C |        | 0                | #N/A | iYOR164C     | 0.03  | 1.87 |
| YOR165W |        | 0                |      | 0 iYOR164C   | -0.59 | 1.87 |
| YOR166C |        | 0                | #N/A | iYOR166C     | #N/A  | 1.14 |
| YOR167C | RPS28A | RPS33A           |      | iYOR167C     | -1.10 | 1.00 |
| YOR168W | GLN4   |                  |      | 0 iYOR167C   | -1.22 | 1.00 |
| YOR169C |        | 0                | #N/A | iYOR171C     | -0.88 | 2.31 |
| YOR170W |        | 0                | #N/A | iYOR167C     | #N/A  | 1.00 |
| YOR171C | LCB4   |                  |      | 0 iYOR171C   | -0.05 | 2.31 |
| YOR172W |        | 0                |      | 0 iYOR171C   | -0.25 | 2.31 |
| YOR173W |        | 0                |      | 0 iYOR172W   | 4.06  | 0.82 |
| YOR174W | MED4   |                  |      | 0 iYOR173W   | -0.49 | 2.28 |
| YOR175C |        | 0                | #N/A | iYOR175C     | -0.55 | 1.86 |
| YOR176W | HEM15  |                  |      | 0 iYOR175C   | 0.19  | 1.86 |
| YOR177C | MPC54  |                  |      | 0 iYOR177C   | #N/A  | #N/A |
| YOR178C | GAC1   |                  |      | 0 iYOR178C-  | -1.45 | 0.74 |
| YOR179C |        | 0                |      | 0 iYOR179C-  | 0.26  | 2.01 |
| YOR180C | DCI1   | ECI2             |      | iYOR180C     | -0.04 | 1.82 |
| YOR181W | LAS17  | BEE1             |      | iYOR180C     | 0.76  | 1.82 |
| YOR182C | RPS30B |                  |      | 0 iYOR182C   | -0.31 | #N/A |
| YOR183W | FYV12  |                  |      | 0 iYOR182C   | #N/A  | #N/A |
| YOR184W | SER1   | ADE9             |      | iYOR183W     | -0.34 | #N/A |
| YOR185C | GSP2   | CNR2             |      | iYOR185C     | 2.82  | 2.43 |
| YOR186W |        | 0                | #N/A | iYOR185C     | #N/A  | 2.43 |
| YOR187W | TUF1   |                  |      | 0 iYOR186W   | 0.22  | 0.79 |
| YOR188W | MSB1   |                  |      | 0 iYOR187W   | -1.82 | 1.13 |
| YOR189W | IES4   |                  |      | 0 iYOR188W   | #N/A  | 1.27 |
| YOR190W | SPR1   | SSG1             |      | iYOR189W     | 0.20  | 1.42 |
| YOR191W | RIS1   | DIS1             |      | iYOR190W     | #N/A  | 1.65 |
| YOR192C |        | 0                | #N/A | iYOR192C-    | -0.77 | 1.86 |
| YOR193W |        | 0                |      | 0 itM(CAU)O1 | 0.58  | #N/A |
| YOR194C | TOA1   |                  |      | 0 iYOR194C   | 0.10  | 3.51 |
| YOR195W | SLK19  |                  |      | 0 iYOR194C   | #N/A  | 3.51 |
| YOR196C | LIP5   |                  |      | 0 iYOR196C   | -0.31 | 3.59 |
| YOR197W | MCA1   | YCA1             |      | iYOR196C     | -0.14 | 3.59 |
| YOR198C | BFR1   |                  |      | 0 iYOR198C   | -0.07 | 0.79 |
| YOR199W |        | 0                | #N/A | iYOR198C     | -0.25 | 0.79 |
| YOR200W |        | 0                | #N/A | iYOR198C     | 0.20  | 0.79 |
| YOR201C | PET56  |                  |      | 0 iYOR201C   | 0.26  | 1.21 |
| YOR202W | HIS3   | HIS10            |      | iYOR201C     | 0.16  | 1.21 |
| YOR203W |        | 0                | #N/A | iYOR201C     | 0.18  | 1.21 |
| YOR204W | DED1   | SPP81            |      | iYOR201C     | -0.35 | 1.21 |
| YOR205C |        | 0                |      | 0 iYOR205C   | -0.12 | 1.91 |
| YOR206W | NOC2   |                  |      | 0 iYOR205C   | -2.78 | 1.91 |
| YOR207C | RET1   | PDS2 RPC128 RPC2 |      | iYOR207C     | -0.81 | 2.79 |
| YOR208W | PTP2   |                  |      | 0 iYOR207C   | 0.63  | 2.79 |
| YOR209C | NPT1   |                  |      | 0 iYOR209C   | -0.34 | 1.51 |
| YOR210W | RPB10  |                  |      | 0 iYOR209C   | #N/A  | 1.51 |
| YOR211C | MGM1   | MNA1             |      | iYOR211C     | -0.47 | 0.88 |
| YOR212W | STE4   | HMD2             |      | iYOR211C     | -0.27 | 0.88 |



|         |        |                 |      |            |       |      |
|---------|--------|-----------------|------|------------|-------|------|
| YOR213C | SAS5   |                 | 0    | iYOR213C   | -0.63 | 1.97 |
| YOR214C |        | 0               | #N/A | iYOR214C   | #N/A  | #N/A |
| YOR215C |        | 0               | #N/A | iYOR215C   | 1.49  | 0.95 |
| YOR216C | RUD3   | GRP1            |      | iYOR216C   | -0.04 | 2.42 |
| YOR217W | RFC1   | CDC44           |      | iYOR216C   | -0.61 | 2.42 |
| YOR218C |        | 0               | #N/A | iYOR218C   | -0.54 | 0.48 |
| YOR219C | STE13  | YCI1            |      | iYOR219C   | 0.25  | #N/A |
| YOR220W |        | 0               | #N/A | iYOR219C   | 1.84  | #N/A |
| YOR221C | MCT1   |                 |      | 0 iYOR221C | 1.17  | 0.99 |
| YOR222W | ODC2   |                 |      | 0 iYOR221C | -0.56 | 0.99 |
| YOR223W |        | 0               | #N/A | iYOR222W   | 0.92  | 1.13 |
| YOR224C | RPB8   |                 |      | 0 iYOR224C | -0.83 | 2.67 |
| YOR225W |        | 0               | #N/A | iYOR224C   | -1.17 | 2.67 |
| YOR226C | ISU2   | NUA2            |      | iYOR226C   | -1.41 | 1.23 |
| YOR227W |        | 0               | #N/A | iYOR226C   | 0.95  | 1.23 |
| YOR228C |        | 0               | #N/A | iYOR228C   | 1.37  | 2.01 |
| YOR229W | WTM2   |                 |      | 0 iYOR228C | -0.47 | 2.01 |
| YOR230W | WTM1   |                 |      | 0 iYOR229W | 0.49  | 0.55 |
| YOR231W | MKK1   | SSP32           |      | iYOR230W   | 0.05  | 2.34 |
| YOR232W | MGE1   | YGE1            |      | iYOR231W   | -0.28 | 1.83 |
| YOR233W | KIN4   | KIN3 KIN31      |      | iYOR232W   | #N/A  | 1.16 |
| YOR234C | RPL33B | RPL37B          |      | iYOR234C   | -1.38 | 0.21 |
| YOR235W |        | 0               | #N/A | iYOR234C   | #N/A  | 0.21 |
| YOR236W | DFR1   |                 |      | 0 iYOR235W | -1.75 | 0.52 |
| YOR237W | HES1   | OSH5            |      | iYOR236W   | #N/A  | 2.63 |
| YOR238W |        | 0               | #N/A | iYOR237W   | 0.37  | 1.48 |
| YOR239W | ABP140 |                 |      | 0 iYOR238W | #N/A  | 1.32 |
| YOR240W | #N/A   |                 | #N/A | iYOR238W   | -0.35 | 1.32 |
| YOR241W | MET7   | MET23           |      | iYOR240W   | -0.03 | 1.08 |
| YOR242C | SSP2   |                 |      | 0 iYOR242C | -0.46 | 0.58 |
| YOR243C |        | 0               |      | 0 iYOR243C | -1.85 | 2.48 |
| YOR244W | ESA1   | TAS1            |      | iYOR243C   | 0.03  | 2.48 |
| YOR245C | DGA1   |                 |      | 0 iYOR245C | 1.05  | 1.46 |
| YOR246C |        | 0               | #N/A | iYOR246C   | -0.89 | 0.87 |
| YOR247W | SRL1   |                 |      | 0 iYOR246C | -0.38 | 0.87 |
| YOR248W | TOS11  |                 | #N/A | iYOR246C   | -0.33 | 0.87 |
| YOR249C | APC5   | RMC1            |      | iYOR249C   | 0.32  | 1.26 |
| YOR250C | CLP1   |                 |      | 0 iYOR250C | 0.14  | 2.19 |
| YOR251C |        | 0               | #N/A | iYOR251C   | -0.80 | #N/A |
| YOR252W |        | 0               | #N/A | iYOR251C   | #N/A  | #N/A |
| YOR253W | ARD2   | ARD2 ROG2       |      | iYOR252W   | -0.11 | #N/A |
| YOR254C | SEC63  | PTL1            |      | iYOR254C   | -0.31 | 1.71 |
| YOR255W |        | 0               |      | 0 iYOR254C | #N/A  | 1.71 |
| YOR256C |        | 0               | #N/A | iYOR256C   | 0.72  | 1.43 |
| YOR257W | CDC31  | DSK1            |      | iYOR256C   | 0.91  | 1.43 |
| YOR258W | HNT3   |                 |      | 0 iYOR257W | 0.15  | 1.07 |
| YOR259C | RPT4   | CRL13 PCS1 SUG2 |      | iYOR259C   | 0.82  | #N/A |
| YOR260W | GCD1   | TRA3            |      | iYOR259C   | -0.28 | #N/A |
| YOR261C | RPN8   |                 |      | 0 iYOR261C | 0.72  | 2.03 |
| YOR262W |        | 0               | #N/A | iYOR261C   | -0.64 | 2.03 |
| YOR263C |        | 0               | #N/A | iYOR264W   | #N/A  | 1.95 |

|           |        |                  |      |            |       |      |
|-----------|--------|------------------|------|------------|-------|------|
| YOR264W   | DSE3   |                  | 0    | iYOR262W   | 0.07  | 1.43 |
| YOR265W   | RBL2   |                  | 0    | iYOR264W   | 0.83  | 1.95 |
| YOR266W   | PNT1   |                  | 0    | iYOR265W   | -1.46 | 1.69 |
| YOR267C   |        | 0                | 0    | iYOR267C   | 0.96  | 1.01 |
| YOR268C   |        | 0                | #N/A | iYOR268C   | #N/A  | 1.47 |
| YOR269W   | PAC1   |                  | 0    | iYOR268C   | -0.12 | 1.47 |
| YOR270C   | VPH1   |                  | 0    | iYOR270C   | -0.01 | 1.24 |
| YOR271C   |        | 0                | #N/A | iYOR271C   | -1.82 | 0.55 |
| YOR272W   | YTM1   |                  | 0    | iSNR8      | -3.19 | 1.51 |
| YOR273C   | TPO4   |                  | 0    | iYOR273C   | 1.57  | 0.77 |
| YOR274W   | MOD5   |                  | 0    | iYOR273C   | -0.18 | 0.77 |
| YOR275C   | RIM20  |                  | 0    | iYOR275C   | -0.53 | 1.79 |
| YOR276W   | CAF20  | CAF2 CAP20       |      | iYOR275C   | -0.97 | 1.79 |
| YOR277C   |        | 0                | #N/A | iYOR277C   | -0.91 | 0.64 |
| YOR278W   | HEM4   | SLU2             |      | iYOR277C   | -0.28 | 0.64 |
| YOR279C   | RFM1   |                  | 0    | iYOR279C   | -0.06 | 1.73 |
| YOR280C   | FSH3   |                  | 0    | iYOR280C   | 0.09  | 1.04 |
| YOR281C   | PLP2   |                  | 0    | iYOR282W   | 0.04  | 1.30 |
| YOR282W   |        | 0                | #N/A | iYOR280C   | #N/A  | 1.04 |
| YOR283W   |        | 0                | #N/A | iYOR282W   | -0.03 | 1.30 |
| YOR284W   |        | 0                |      | iYOR283W   | #N/A  | 1.70 |
| YOR285W   |        | 0                | #N/A | iYOR284W   | 2.00  | 2.65 |
| YOR286W   |        | 0                |      | iYOR285W   | 0.63  | #N/A |
| YOR287C   |        | 0                | #N/A | iYOR287C   | #N/A  | 1.46 |
| YOR288C   | MPD1   |                  | 0    | iYOR288C   | 1.53  | 1.90 |
| YOR289W   |        | 0                | #N/A | iYOR288C   | 2.58  | 1.90 |
| YOR290C   | SNF2   | GAM1 HAF1 SW12 T |      | iYOR290C   | -0.22 | 2.12 |
| YOR291W   |        | 0                | #N/A | iYOR290C   | 0.53  | 2.12 |
| YOR292C   |        | 0                | #N/A | iYOR292C   | 1.42  | 0.54 |
| YOR293W   | RPS10A |                  | 0    | iYOR292C   | -1.37 | 0.54 |
| YOR294W   | RRS1   |                  | 0    | iYOR293W   | -2.03 | 1.24 |
| YOR295W   | UAF30  |                  | 0    | iYOR294W   | #N/A  | 0.95 |
| YOR296W   |        | 0                | #N/A | iYOR295W   | 0.17  | 1.39 |
| YOR297C   | TIM18  |                  | 0    | iYOR297C   | 0.41  | 1.36 |
| YOR298W   |        | 0                | #N/A | iYOR297C   | -0.84 | 1.36 |
| YOR299W   | BUD7   |                  | 0    | iYOR298C-7 | 0.13  | 0.52 |
| YOR300W   |        | 0                | #N/A | iYOR298C-7 | #N/A  | 0.52 |
| YOR301W   | RAX1   |                  | 0    | iYOR300W   | 0.82  | 1.19 |
| YOR302W   |        | 0                | #N/A | iYOR301W   | #N/A  | 0.49 |
| YOR303W   | CPA1   |                  | 0    | iYOR301W   | 0.46  | 0.49 |
| YOR304C-A |        | 0                | #N/A | iYOR304C-7 | #N/A  | 1.80 |
| YOR304W   | ISW2   |                  | 0    | iYOR303W   | 0.00  | 1.17 |
| YOR305W   |        | 0                | #N/A | iYOR304C-7 | 0.18  | 1.80 |
| YOR306C   | MCH5   |                  | 0    | iYOR306C   | 0.17  | 0.49 |
| YOR307C   | SLY41  |                  | 0    | iYOR307C   | 0.65  | 1.13 |
| YOR308C   | SNU66  |                  | 0    | iYOR308C   | -0.42 | #N/A |
| YOR309C   |        | 0                | #N/A | iYOR310C   | -1.48 | 1.28 |
| YOR310C   | NOP58  | NOP5             |      | iYOR310C   | -1.86 | 1.28 |
| YOR311C   | HSD1   |                  | 0    | iYOR311C   | 0.29  | 1.21 |
| YOR312C   | RPL20B | RPL18A1          |      | iYOR312C   | -1.68 | 0.32 |
| YOR313C   | SPS4   |                  | 0    | iYOR313C   | #N/A  | #N/A |



|         |        |             |              |       |      |
|---------|--------|-------------|--------------|-------|------|
| YOR314W | 0      | #N/A        | iYOR313C     | #N/A  | #N/A |
| YOR315W | 0      | #N/A        | iYOR314W     | -2.76 | 0.63 |
| YOR316C | COT1   |             | 0 iYOR316C-  | -0.36 | 1.28 |
| YOR317W | FAA1   |             | 0 iYOR316C-  | 1.78  | 0.30 |
| YOR318C | 0      | #N/A        | iYOR318C     | #N/A  | 2.07 |
| YOR319W | HSH49  |             | 0 iYOR318C   | -0.45 | 2.07 |
| YOR320C | 0      |             | 0 iYOR320C   | -0.39 | 1.95 |
| YOR321W | PMT3   |             | 0 iYOR320C   | -0.03 | 1.95 |
| YOR322C | 0      | #N/A        | iYOR322C     | -0.26 | 2.10 |
| YOR323C | PRO2   |             | 0 iYOR323C   | -0.15 | 2.13 |
| YOR324C | 0      |             | 0 iYOR325W   | #N/A  | 1.64 |
| YOR325W | 0      | #N/A        | iYOR323C     | #N/A  | 2.13 |
| YOR326W | MYO2   | CDC66       | iYOR325W     | -0.55 | 1.64 |
| YOR327C | SNC2   |             | 0 iYOR327C   | 0.90  | 1.02 |
| YOR328W | PDR10  |             | 0 iYOR327C   | 0.54  | 1.02 |
| YOR329C | SCD5   | FTB1        | iYOR329C     | 0.60  | 1.70 |
| YOR330C | MIP1   |             | 0 iYOR330C   | -0.24 | 2.48 |
| YOR331C | 0      | #N/A        | iYOR332W     | 0.35  | 1.71 |
| YOR332W | VMA4   |             | 0 iYOR330C   | 0.10  | 2.48 |
| YOR333C | 0      | #N/A        | iYOR334W     | #N/A  | #N/A |
| YOR334W | MRS2   |             | 0 iYOR332W   | 0.09  | 1.71 |
| YOR335C | ALA1   | CDC64       | iYOR335C     | -1.53 | 1.90 |
| YOR336W | KRE5   |             | 0 iYOR335C   | -0.01 | 1.90 |
| YOR337W | TEA1   |             | 0 iYOR336W   | 0.15  | 1.39 |
| YOR338W | 0      | #N/A        | iYOR337W     | 0.98  | 0.63 |
| YOR339C | UBC11  |             | 0 iYOR339C   | #N/A  | 0.82 |
| YOR340C | RPA43  |             | 0 iYOR340C   | -2.06 | 0.96 |
| YOR341W | RPA190 | RRN1        | iYOR340C     | -2.05 | 0.96 |
| YOR342C | 0      | #N/A        | iYOR342C     | -1.05 | 0.30 |
| YOR343C | 0      | #N/A        | iYOR343C     | #N/A  | 0.87 |
| YOR344C | TYE7   | SGC1        | iYOR344C-    | 0.02  | #N/A |
| YOR345C | 0      | #N/A        | iYOR346W     | #N/A  | #N/A |
| YOR346W | REV1   |             | 0 itP(UGG)O3 | 1.91  | #N/A |
| YOR347C | PYK2   |             | 0 iYOR347C   | 2.80  | 1.14 |
| YOR348C | PUT4   |             | 0 iYOR348C   | 2.74  | 0.54 |
| YOR349W | CIN1   |             | 0 iYOR348C   | 0.15  | 0.54 |
| YOR350C | MNE1   |             | 0 iYOR350C   | 0.17  | 1.69 |
| YOR351C | MEK1   | MRE4        | iYOR351C     | #N/A  | 1.30 |
| YOR352W | 0      | #N/A        | iYOR351C     | 0.98  | 1.30 |
| YOR353C | 0      |             | 0 iYOR353C   | -0.11 | 1.76 |
| YOR354C | MSC6   |             | 0 iYOR354C-  | 0.02  | 0.75 |
| YOR355W | GDS1   |             | 0 iYOR354C-  | -0.26 | 0.53 |
| YOR356W | 0      | #N/A        | iYOR355W     | 1.17  | 0.68 |
| YOR357C | GRD19  | SNX3        | iYOR357C     | #N/A  | 2.48 |
| YOR358W | HAP5   |             | 0 iYOR357C   | 0.71  | 2.48 |
| YOR359W | VTS1   |             | 0 iYOR358W   | -1.15 | 0.92 |
| YOR360C | PDE2   | SRA5        | iYOR360C     | 0.07  | 0.96 |
| YOR361C | PRT1   | CDC63 DNA26 | iYOR361C     | -1.21 | 0.83 |
| YOR362C | PRE10  |             | 0 iYOR362C   | 0.52  | #N/A |
| YOR363C | PIP2   | OAF2        | iYOR363C     | 0.29  | 1.18 |
| YOR364W | 0      | #N/A        | iYOR363C     | #N/A  | 1.18 |

|         |       |                 |             |       |      |
|---------|-------|-----------------|-------------|-------|------|
| YOR365C | 0     | #N/A            | iYOR366W    | -0.14 | 1.00 |
| YOR366W | 0     | #N/A            | iYOR363C    | #N/A  | 1.18 |
| YOR367W | SCP1  |                 | 0 iYOR366W  | 0.38  | 1.00 |
| YOR368W | RAD17 |                 | 0 iYOR367W  | -0.39 | 0.95 |
| YOR369C | RPS12 |                 | 0 iYOR369C  | -1.41 | 0.40 |
| YOR370C | MRS6  | MSI4            | iYOR370C    | 0.25  | 1.05 |
| YOR371C | KRH2  | KRH2            | iYOR371C    | 0.13  | 1.71 |
| YOR372C | NDD1  |                 | 0 iYOR372C  | -0.48 | 2.72 |
| YOR373W | NUD1  |                 | 0 iYOR372C  | 1.21  | 2.72 |
| YOR374W | ALD4  | ALD7            | iYOR373W    | 3.67  | 1.45 |
| YOR375C | GDH1  | GDH-A GDHA URE1 | iYOR375C    | -1.51 | #N/A |
| YOR376W | 0     | #N/A            | iYOR375C    | #N/A  | #N/A |
| YOR377W | ATF1  |                 | 0 iYOR376W- | -0.35 | 1.06 |
| YOR378W | 0     | #N/A            | iYOR377W-   | 0.06  | 0.85 |
| YOR379C | 0     | #N/A            | iYOR379C    | 0.99  | #N/A |
| YOR380W | RDR1  |                 | 0 iYOR379C  | -0.33 | #N/A |
| YOR381W | FRE3  |                 | 0 iYOR380W- | -0.22 | 1.15 |
| YOR382W | FIT2  |                 | 0 iYOR381W- | 0.97  | 1.99 |
| YOR383C | FIT3  |                 | 0 iYOR383C  | 0.25  | 0.61 |
| YOR384W | FRE5  |                 | 0 iYOR383C  | #N/A  | 0.61 |
| YOR385W | 0     | #N/A            | iYOR384W    | 0.54  | 1.36 |
| YOR386W | PHR1  |                 | 0 iYOR385W  | 2.04  | 1.15 |
| YOR387C | 0     | #N/A            | iYOR387C-   | #N/A  | 1.31 |
| YOR388C | FDH1  |                 | 0 iYOR388C  | 0.17  | 1.16 |
| YOR389W | 0     | #N/A            | iYOR388C    | -0.40 | 1.16 |
| YOR390W | 0     | #N/A            | iYOR389W    | -0.47 | #N/A |
| YOR391C | 0     |                 | 0 iYOR392W  | 2.27  | 1.61 |
| YOR392W | 0     | #N/A            | iYOR390W    | #N/A  | 1.21 |
| YOR393W | ERR1  |                 | 0 iYOR392W  | #N/A  | 1.61 |
| YOR394W | 0     | #N/A            | iYOR393W    | 0.42  | 0.85 |
| YPL001W | HAT1  |                 | 0 iYPL002C  | -0.04 | 2.19 |
| YPL002C | SNF8  | VPS22           | iYPL002C    | 0.78  | 2.19 |
| YPL003W | ULA1  | ENR2            | iYPL004C    | 1.31  | 0.92 |
| YPL004C | 0     |                 | 0 iYPL004C  | 1.21  | 0.92 |
| YPL005W | 0     |                 | 0 iYPL006W  | 0.04  | 1.46 |
| YPL006W | NCR1  |                 | 0 iYPL007C  | 1.15  | 2.47 |
| YPL007C | TFC8  |                 | 0 iYPL007C  | #N/A  | 2.47 |
| YPL008W | CHL1  | CTF1 LPA9       | iYPL009C    | -0.35 | 1.72 |
| YPL009C | 0     | #N/A            | iYPL009C    | 0.60  | 1.72 |
| YPL010W | RET3  |                 | 0 iYPL011C  | 0.11  | 2.90 |
| YPL011C | TAF3  | TAF47 TafII47   | iYPL011C    | -0.44 | 2.90 |
| YPL012W | RRP12 |                 | 0 iYPL013C  | #N/A  | 1.40 |
| YPL013C | 0     |                 | 0 iYPL013C  | 0.56  | 1.40 |
| YPL014W | 0     | #N/A            | iYPL015C    | 0.24  | 1.07 |
| YPL015C | HST2  |                 | 0 iYPL015C  | 0.17  | 1.07 |
| YPL016W | SWI1  | ADR6 GAM3 LPA1  | iYPL017C    | #N/A  | #N/A |
| YPL017C | 0     | #N/A            | iYPL017C    | 0.44  | #N/A |
| YPL018W | CTF19 | MCM18           | iYPL019C    | 4.23  | 1.57 |
| YPL019C | VTC3  | PHM2            | iYPL019C    | -0.46 | 1.57 |
| YPL020C | ULP1  |                 | 0 iYPL020C  | 0.43  | 1.83 |
| YPL021W | ECM23 | SRD2            | iYPL022W    | #N/A  | #N/A |

|         |       |                    |              |       |      |
|---------|-------|--------------------|--------------|-------|------|
| YPL022W | RAD1  | LPB9               | iYPL023C     | 0.09  | 1.67 |
| YPL023C | MET12 |                    | 0 iYPL023C   | -0.47 | 1.67 |
| YPL024W | NCE4  |                    | 0 iYPL025C   | 0.74  | 0.92 |
| YPL025C | 0     | #N/A               | iYPL025C     | #N/A  | 0.92 |
| YPL026C | SKS1  | SHA3               | iYPL026C     | -0.31 | 0.28 |
| YPL027W | SMA1  |                    | 0 iYPL028W   | #N/A  | 1.01 |
| YPL028W | ERG10 | LPB3 TSM0115       | iYPL029W     | 0.63  | 1.66 |
| YPL029W | SUV3  | LPB2               | iYPL030W     | -0.38 | 1.81 |
| YPL030W | 0     | #N/A               | iYPL031C     | -1.06 | 2.72 |
| YPL031C | PHO85 | LDB15              | iYPL031C     | 0.08  | 2.72 |
| YPL032C | SVL3  |                    | 0 iYPL032C   | -0.39 | #N/A |
| YPL033C | 0     | #N/A               | iYPL033C     | #N/A  | #N/A |
| YPL034W | 0     | #N/A               | iYPL036W     | 1.02  | #N/A |
| YPL035C | 0     | #N/A               | iYPL033C     | #N/A  | #N/A |
| YPL036W | PMA2  |                    | 0 iYPL037C   | -1.35 | #N/A |
| YPL037C | EGD1  |                    | 0 iYPL037C   | -0.79 | #N/A |
| YPL038W | MET31 |                    | 0 iYPL039W   | -0.23 | 1.77 |
| YPL039W | 0     | #N/A               | iYPL040C     | -0.66 | 2.38 |
| YPL040C | ISM1  |                    | 0 iYPL040C   | -0.94 | 2.38 |
| YPL041C | 0     | #N/A               | iYPL041C     | 0.68  | 1.67 |
| YPL042C | SSN3  | GIG2 NUT7 RYE5 SFI | iYPL042C     | -0.09 | 0.79 |
| YPL043W | NOP4  | NOP77              | iYPL045W     | -2.27 | #N/A |
| YPL044C | 0     | #N/A               | iYPL043W     | #N/A  | #N/A |
| YPL045W | VPS16 | SVL6 VAM9 VPT16    | iYPL046C     | -0.01 | 1.91 |
| YPL046C | ELC1  |                    | 0 iYPL046C   | 0.94  | 1.91 |
| YPL047W | 0     |                    | 0 iYPL048W   | -1.51 | 1.38 |
| YPL048W | CAM1  | EF-1 gamma TEF3    | iYPL049C     | 0.08  | 0.46 |
| YPL049C | DIG1  | RST1               | iYPL049C     | -0.36 | 0.46 |
| YPL050C | MNN9  |                    | 0 iYPL050C   | -0.27 | 0.75 |
| YPL051W | ARL3  |                    | 0 iYPL052W   | -0.05 | 2.34 |
| YPL052W | 0     | #N/A               | iYPL053C     | 0.91  | 2.27 |
| YPL053C | KTR6  | MNN6               | iYPL053C     | 0.31  | 2.27 |
| YPL054W | LEE1  |                    | 0 iYPL055C   | 1.34  | #N/A |
| YPL055C | LGE1  |                    | 0 iYPL055C   | 0.74  | #N/A |
| YPL056C | 0     | #N/A               | iYPL056C     | 0.32  | 0.28 |
| YPL057C | SUR1  | BCL21 CSG1 LPE15   | iYPL057C     | 0.47  | 0.32 |
| YPL058C | PDR12 |                    | 0 iYPL058C-0 | 0.26  | 0.31 |
| YPL059W | GRX5  |                    | 0 iYPLCtau2  | 0.73  | 1.35 |
| YPL060W | LPE10 |                    | 0 iYPL061W   | 0.30  | 1.26 |
| YPL061W | ALD6  |                    | 0 iYPL062W   | 0.87  | 0.29 |
| YPL062W | 0     | #N/A               | iYPL063W     | #N/A  | 0.49 |
| YPL063W | 0     |                    | 0 iYPL064C   | -0.62 | 1.41 |
| YPL064C | CWC27 |                    | 0 iYPL064C   | #N/A  | 1.41 |
| YPL065W | VPS28 | VPT28              | iYPL066W     | #N/A  | 1.62 |
| YPL066W | 0     | #N/A               | iYPL067C     | -0.05 | 0.63 |
| YPL067C | 0     | #N/A               | iYPL067C     | 0.76  | 0.63 |
| YPL068C | 0     | #N/A               | iYPL068C     | #N/A  | #N/A |
| YPL069C | BTS1  |                    | 0 iYPL069C   | #N/A  | 1.22 |
| YPL070W | 0     |                    | 0 iYPL071C   | 0.36  | 1.18 |
| YPL071C | 0     | #N/A               | iYPL071C     | #N/A  | 1.18 |
| YPL072W | UBP16 |                    | 0 iYPL074W   | -0.99 | #N/A |

|         |        |                    |            |       |      |
|---------|--------|--------------------|------------|-------|------|
| YPL073C | 0      | #N/A               | iYPL071C   | #N/A  | 1.18 |
| YPL074W | YTA6   |                    | 0 iYPL075W | 0.03  | 0.89 |
| YPL075W | GCR1   | LPF10              | iYPL076W   | 0.30  | 0.49 |
| YPL076W | GPI2   | GCR4               | iYPL077C   | 0.58  | 2.13 |
| YPL077C | 0      | #N/A               | iYPL077C   | #N/A  | 2.13 |
| YPL078C | ATP4   | LPF7               | iYPL078C   | 0.37  | #N/A |
| YPL079W | RPL21B |                    | 0 iYPL080C | -1.72 | 0.52 |
| YPL080C | 0      | #N/A               | iYPL080C   | #N/A  | 0.52 |
| YPL081W | RPS9A  |                    | 0 iYPL082C | -0.76 | 0.43 |
| YPL082C | MOT1   | BTAF1 BUR3 LPF4    | iYPL082C   | -0.44 | 0.43 |
| YPL083C | SEN54  |                    | 0 iYPL083C | -0.42 | 1.35 |
| YPL084W | BRO1   | ASI6 LPF2 NPI3 VPS | iYPL085W   | 0.06  | 1.44 |
| YPL085W | SEC16  | LPF1               | iYPL086C   | -0.65 | 1.67 |
| YPL086C | ELP3   | HPA1 TOT3          | iYPL086C   | -1.78 | 1.67 |
| YPL087W | YDC1   |                    | 0 iYPL088W | 2.03  | 1.86 |
| YPL088W | 0      | #N/A               | iYPL089C   | 2.32  | #N/A |
| YPL089C | RLM1   |                    | 0 iYPL089C | 0.24  | #N/A |
| YPL090C | RPS6A  |                    | 0 iYPL090C | -1.78 | #N/A |
| YPL091W | GLR1   | LPG17              | iYPL092W   | 0.42  | #N/A |
| YPL092W | SSU1   | LPG16              | iYPL093W   | 1.56  | 0.96 |
| YPL093W | NOG1   |                    | 0 iYPL094C | -1.89 | 1.46 |
| YPL094C | SEC62  | LPG14              | iYPL094C   | -0.23 | 1.46 |
| YPL095C | 0      | #N/A               | iYPL095C   | 0.47  | 0.77 |
| YPL096W | PNG1   |                    | 0 iYPL097W | 0.68  | 2.04 |
| YPL097W | MSY1   |                    | 0 iYPL098C | 0.81  | 1.46 |
| YPL098C | 0      | #N/A               | iYPL098C   | 0.48  | 1.46 |
| YPL099C | 0      |                    | 0 iYPL099C | 0.47  | 1.11 |
| YPL100W | MAI1   | HSV1 MAI1          | iYPL101W   | 0.79  | 2.34 |
| YPL101W | ELP4   | HAP1 TOT7          | iYPL103C   | -1.72 | 1.94 |
| YPL102C | KRE24  | #N/A               | iYPL101W   | #N/A  | 2.34 |
| YPL103C | 0      |                    | 0 iYPL103C | 0.32  | 1.94 |
| YPL104W | MSD1   | LPG5               | iYPL105C   | 0.68  | 1.65 |
| YPL105C | 0      | #N/A               | iYPL105C   | -0.66 | 1.65 |
| YPL106C | SSE1   | LPG3 MSI3          | iYPL106C   | 0.97  | 0.94 |
| YPL106W | #N/A   | #N/A               | #N/A       | #N/A  | #N/A |
| YPL107W | 0      | #N/A               | iYPL109C   | 0.63  | 1.38 |
| YPL108W | 0      | #N/A               | iYPL109C   | -0.81 | 1.38 |
| YPL109C | 0      | #N/A               | iYPL109C   | #N/A  | 1.38 |
| YPL110C | 0      | #N/A               | iYPL110C   | 1.46  | 1.04 |
| YPL111W | CAR1   | LPH15              | itM(CAU)P  | 0.30  | 0.34 |
| YPL112C | 0      |                    | 0 iYPL112C | -0.12 | 0.94 |
| YPL113C | 0      | #N/A               | iYPL113C   | 1.08  | #N/A |
| YPL114W | 0      | #N/A               | iYPL115C   | 1.60  | 2.24 |
| YPL115C | BEM3   |                    | 0 iYPL115C | 0.25  | 2.24 |
| YPL116W | HOS3   |                    | 0 iYPL117C | #N/A  | #N/A |
| YPL117C | IDI1   | BOT2 LPH10         | iYPL117C   | 0.18  | #N/A |
| YPL118W | MRP51  |                    | 0 iYPL119C | 0.54  | 2.51 |
| YPL119C | DBP1   | LPH8               | iYPL119C   | 0.15  | 2.51 |
| YPL120W | VPS30  | APG6 ATG6 VPT30    | iYPL121C   | 0.40  | 1.54 |
| YPL121C | MEI5   | LPH6               | iYPL121C   | #N/A  | 1.54 |
| YPL122C | TFB2   |                    | 0 iYPL122C | -0.86 | 2.60 |

|         |        |                      |   |          |       |      |
|---------|--------|----------------------|---|----------|-------|------|
| YPL123C | RNY1   |                      | 0 | iYPL123C | 3.13  | 2.67 |
| YPL124W | SPC29  | LPH3 NIP29           |   | iYPL125W | 0.20  | 1.37 |
| YPL125W | KAP120 |                      | 0 | iYPL126W | -0.35 | 1.80 |
| YPL126W | NAN1   | UTP17                |   | iYPL127C | -3.26 | 0.71 |
| YPL127C | HHO1   |                      | 0 | iYPL127C | -0.06 | 0.71 |
| YPL128C | TBF1   | LPI16                |   | iYPL128C | -0.77 | 1.54 |
| YPL129W | TAF14  | ANC1 SWP29 TAF3C     |   | iYPL130W | 0.21  | #N/A |
| YPL130W | SPO19  |                      | 0 | iYPL131W | #N/A  | #N/A |
| YPL131W | RPL5   | LPI14 RPL1           |   | iYPL132W | -1.48 | 0.46 |
| YPL132W | COX11  | LPI13 PSO7           |   | iYPL133C | -0.15 | 1.27 |
| YPL133C | RDS2   |                      | 0 | iYPL133C | -0.32 | 1.27 |
| YPL134C | ODC1   |                      | 0 | iYPL134C | 1.18  | 0.95 |
| YPL135W | ISU1   | NUA1                 |   | iYPL136W | 1.56  | 0.51 |
| YPL136W | 0      | #N/A                 |   | iYPL138C | #N/A  | 1.78 |
| YPL137C | 0      | #N/A                 |   | iYPL136W | -0.03 | 0.51 |
| YPL138C | SPP1   | CPS40 SAF41          |   | iYPL138C | -0.25 | 1.78 |
| YPL139C | UME1   | WTM3                 |   | iYPL139C | 0.10  | 1.38 |
| YPL140C | MKK2   | LPI6 SSP33           |   | iYPL140C | -0.32 | 2.24 |
| YPL141C | 0      | #N/A                 |   | iYPL141C | #N/A  | 0.76 |
| YPL142C | 0      | #N/A                 |   | iYPL142C | -1.44 | #N/A |
| YPL143W | RPL33A | RPL37A               |   | iYPL144W | -1.53 | #N/A |
| YPL144W | 0      | #N/A                 |   | iYPL145C | 0.28  | 0.82 |
| YPL145C | KES1   | LPI3 OSH4            |   | iYPL145C | -0.30 | 0.82 |
| YPL146C | 0      | #N/A                 |   | iYPL146C | -1.42 | 0.93 |
| YPL147W | PXA1   | LPI1 PAL1 PAT2 SSP   |   | iYPL148C | 1.94  | 1.52 |
| YPL148C | PPT2   |                      | 0 | iYPL148C | #N/A  | 1.52 |
| YPL149W | APG5   | APG5                 |   | iYPL150W | -0.24 | 1.49 |
| YPL150W | 0      | #N/A                 |   | iYPL151C | 1.24  | 3.16 |
| YPL151C | PRP46  | NTC50                |   | iYPL151C | 0.01  | 3.16 |
| YPL152W | RRD2   | YPA2                 |   | iYPL153C | 0.94  | 1.39 |
| YPL153C | RAD53  | LSD1 MEC2 SPK1       |   | iYPL153C | -1.11 | 1.39 |
| YPL154C | PEP4   | PHO9 PRA1 yscA       |   | iYPL154C | 1.48  | 1.11 |
| YPL155C | KIP2   |                      | 0 | iYPL155C | -0.67 | 1.85 |
| YPL156C | PRM4   |                      | 0 | iYPL156C | #N/A  | 0.53 |
| YPL157W | 0      |                      | 0 | iYPL158C | -0.83 | 1.95 |
| YPL158C | 0      | #N/A                 |   | iYPL158C | 0.27  | 1.95 |
| YPL159C | 0      |                      | 0 | iYPL159C | #N/A  | 1.99 |
| YPL160W | CDC60  | LeuRS                |   | iYPL161C | -1.60 | 1.70 |
| YPL161C | BEM4   | ROM7                 |   | iYPL161C | #N/A  | 1.70 |
| YPL162C | 0      | #N/A                 |   | iYPL162C | -0.03 | 1.91 |
| YPL163C | SVS1   |                      | 0 | iYPL163C | -0.93 | 0.67 |
| YPL164C | MLH3   |                      | 0 | iYPL164C | 0.02  | 1.78 |
| YPL165C | SET6   |                      | 0 | iYPL165C | 1.94  | 2.03 |
| YPL166W | 0      | #N/A                 |   | iYPL167C | #N/A  | 2.59 |
| YPL167C | REV3   | PSO1                 |   | iYPL167C | #N/A  | 2.59 |
| YPL168W | 0      | #N/A                 |   | iYPL169C | #N/A  | 1.18 |
| YPL169C | MEX67  |                      | 0 | iYPL169C | -0.04 | 1.18 |
| YPL170W | 0      |                      | 0 | iYPL171C | 1.21  | 1.20 |
| YPL171C | OYE3   | Old Yellow Enzyme Zi |   | iYPL171C | -0.02 | 1.20 |
| YPL172C | COX10  |                      | 0 | iYPL172C | -0.28 | 1.33 |
| YPL173W | MRPL40 |                      | 0 | iYPL174C | 0.63  | 1.98 |

|         |         |                  |              |       |      |
|---------|---------|------------------|--------------|-------|------|
| YPL174C | NIP100  | PAC13            | iYPL174C     | -1.16 | 1.98 |
| YPL175W | SPT14   | CWH6 GPI3        | iYPL176C     | -0.39 | 2.21 |
| YPL176C | 0       | #N/A             | iYPL176C     | 0.71  | 2.21 |
| YPL177C | CUP9    |                  | 0 iYPL177C-0 | -0.28 | 0.18 |
| YPL178W | CBC2    | CBP20 MUD13 SAE1 | iYPLWdelta   | -0.31 | 1.11 |
| YPL179W | PPQ1    | SAL6             | iYPL180W     | 0.40  | 1.68 |
| YPL180W | 0       |                  | 0 iYPL181W   | -0.64 | #N/A |
| YPL181W | 0       | RXT1             | iYPL183C     | 0.01  | 0.93 |
| YPL182C | 0       | #N/A             | iYPL181W     | #N/A  | #N/A |
| YPL183C | 0       | #N/A             | iYPL183C     | -1.53 | 0.93 |
| YPL184C | 0       | #N/A             | iYPL184C     | 0.08  | 1.39 |
| YPL185W | 0       | #N/A             | iYPL187W     | #N/A  | 0.92 |
| YPL186C | UIP4    |                  | 0 iYPL185W   | 3.59  | 0.93 |
| YPL187W | MF(ALP) |                  | 0 iYPL188W   | -1.05 | 0.84 |
| YPL188W | POS5    |                  | 0 iYPL189W   | 0.12  | #N/A |
| YPL189W | GUP2    |                  | 0 iYPL190C   | 0.50  | 0.98 |
| YPL190C | NAB3    | HMD1             | iYPL190C     | 0.13  | 0.98 |
| YPL191C | 0       | #N/A             | iYPL191C     | 0.71  | 0.61 |
| YPL192C | PRM3    |                  | 0 iYPL192C   | 0.00  | 1.82 |
| YPL193W | RSA1    |                  | 0 iYPL194W   | -1.03 | #N/A |
| YPL194W | DDC1    |                  | 0 iYPL195W   | -1.22 | 2.04 |
| YPL195W | APL5    | YKS4             | iYPL196W     | 0.43  | 1.68 |
| YPL196W | OXR1    |                  | 0 iYPL197C   | 1.47  | 1.21 |
| YPL197C | 0       | #N/A             | iYPL197C     | -1.59 | 1.21 |
| YPL198W | RPL7B   |                  | 0 iSNR59     | -1.62 | #N/A |
| YPL199C | 0       | #N/A             | iYPL199C     | -0.51 | 1.09 |
| YPL200W | CSM4    |                  | 0 iYPL201C   | #N/A  | 0.44 |
| YPL201C | 0       | #N/A             | iYPL201C     | #N/A  | 0.44 |
| YPL202C | AFT2    |                  | 0 iYPL202C   | 0.58  | 0.77 |
| YPL203W | TPK2    | PKA2 PKA3 YKR1   | iYPL204W     | 0.84  | 1.68 |
| YPL204W | HRR25   |                  | 0 iYPL206C   | -0.23 | 1.53 |
| YPL205C | 0       | #N/A             | iYPL204W     | #N/A  | 1.68 |
| YPL206C | 0       | #N/A             | iYPL206C     | 0.97  | 1.53 |
| YPL207W | 0       | #N/A             | iYPL208W     | -1.44 | 1.35 |
| YPL208W | 0       | #N/A             | iYPL209C     | -0.55 | 1.65 |
| YPL209C | IPL1    | PAC15            | iYPL209C     | #N/A  | 1.65 |
| YPL210C | SRP72   |                  | 0 iYPL210C   | -0.21 | 1.42 |
| YPL211W | NIP7    |                  | 0 iYPL212C   | -2.38 | 1.77 |
| YPL212C | PUS1    |                  | 0 iYPL212C   | -0.93 | 1.77 |
| YPL213W | LEA1    |                  | 0 iYPL214C   | 0.34  | 2.55 |
| YPL214C | THI6    |                  | 0 iYPL214C   | 0.35  | 2.55 |
| YPL215W | CBP3    |                  | 0 iYPL216W   | 0.29  | 2.19 |
| YPL216W | 0       | #N/A             | iYPL217C     | #N/A  | 1.68 |
| YPL217C | BMS1    |                  | 0 iYPL217C   | -1.78 | 1.68 |
| YPL218W | SAR1    |                  | 0 iYPL219W   | 0.09  | 1.77 |
| YPL219W | PCL8    |                  | 0 iYPL220W   | -1.13 | 1.12 |
| YPL220W | RPL1A   | SSM1             | iYPL221W     | -1.55 | 0.42 |
| YPL221W | BOP1    |                  | 0 iYPL222W   | 0.19  | 0.41 |
| YPL222W | 0       |                  | 0 iYPL223C   | #N/A  | #N/A |
| YPL223C | GRE1    |                  | 0 iYPL223C   | #N/A  | #N/A |
| YPL224C | MMT2    | MFT2             | iYPL224C     | 0.43  | 2.52 |



|         |       |             |              |       |      |
|---------|-------|-------------|--------------|-------|------|
| YPL225W | 0     | #N/A        | iYPL226W     | 0.93  | 1.74 |
| YPL226W | NEW1  |             | 0 iYPL227C   | -1.48 | 1.72 |
| YPL227C | ALG5  |             | 0 iYPL227C   | -0.55 | 1.72 |
| YPL228W | CET1  | CES5        | iYPL229W     | -0.70 | 1.96 |
| YPL229W | 0     | #N/A        | iYPL230W     | 0.74  | 2.22 |
| YPL230W | 0     | #N/A        | iYPL231W     | 1.42  | 0.85 |
| YPL231W | FAS2  |             | 0 iYPL232W   | #N/A  | 0.45 |
| YPL232W | SSO1  |             | 0 iYPL233W   | 0.59  | 0.58 |
| YPL233W | NSL1  |             | 0 iYPL234C   | -0.24 | 1.24 |
| YPL234C | TFP3  | CLS9 VMA11  | iYPL234C     | 0.01  | 1.24 |
| YPL235W | RVB2  | TIH2 TIP49B | iYPL236C     | -0.30 | 2.33 |
| YPL236C | 0     | #N/A        | iYPL236C     | 0.15  | 2.33 |
| YPL237W | SUI3  |             | 0 iYPL239W   | -0.92 | 1.02 |
| YPL238C | 0     | #N/A        | iYPL237W     | -0.80 | 0.97 |
| YPL239W | YAR1  |             | 0 iYPL240C   | #N/A  | #N/A |
| YPL240C | HSP82 | HSP83 HSP90 | iYPL240C     | 2.86  | #N/A |
| YPL241C | CIN2  |             | 0 iYPL241C   | #N/A  | 1.59 |
| YPL242C | IQG1  | CYK1        | iYPL242C     | 0.06  | 1.34 |
| YPL243W | SRP68 |             | 0 iYPL244C   | -0.13 | 3.05 |
| YPL244C | HUT1  |             | 0 iYPL244C   | -0.11 | 3.05 |
| YPL245W | 0     | #N/A        | iYPL246C     | -1.07 | 1.74 |
| YPL246C | 0     |             | 0 iYPL246C   | 0.12  | 1.74 |
| YPL247C | 0     | #N/A        | iYPL247C     | 0.77  | 1.60 |
| YPL248C | GAL4  | GAL81       | iYPL248C     | 0.21  | 1.17 |
| YPL249C | GYP5  |             | 0 iYPL249C   | 0.98  | 1.28 |
| YPL250C | ICY2  |             | 0 iYPL250C   | 1.65  | #N/A |
| YPL251W | 0     | #N/A        | iYPL253C     | 0.65  | 1.59 |
| YPL252C | YAH1  |             | 0 iYPL251W   | -0.46 | 0.80 |
| YPL253C | VIK1  |             | 0 iYPL253C   | 0.52  | 1.59 |
| YPL254W | HFI1  | ADA1 SUP110 | iYPL255W     | -0.56 | 2.81 |
| YPL255W | BBP1  |             | 0 iYPL256C   | -1.22 | 1.01 |
| YPL256C | CLN2  |             | 0 iYPL256C   | -1.03 | 1.01 |
| YPL257W | 0     | #N/A        | iYPLWdelta   | 0.27  | 2.19 |
| YPL258C | THI21 |             | 0 iYPL258C   | -0.88 | 1.08 |
| YPL259C | APM1  | YAP54       | iYPL259C     | -0.31 | 1.40 |
| YPL260W | 0     | #N/A        | iYPL262W     | 0.91  | 1.22 |
| YPL261C | 0     | #N/A        | iYPL260W     | #N/A  | 0.53 |
| YPL262W | FUM1  |             | 0 iYPL263C   | 0.81  | 1.65 |
| YPL263C | KEL3  |             | 0 iYPL263C   | -1.34 | 1.65 |
| YPL264C | 0     | #N/A        | iYPL264C     | 2.73  | 1.14 |
| YPL265W | DIP5  |             | 0 iYPL266W   | 1.72  | 0.37 |
| YPL266W | DIM1  | CDH1        | iYPL267W     | -2.16 | 2.75 |
| YPL267W | 0     | #N/A        | iYPL268W     | #N/A  | 0.90 |
| YPL268W | PLC1  |             | 0 iYPL269W   | -0.21 | 1.60 |
| YPL269W | KAR9  |             | 0 iYPL270W   | -0.51 | 2.78 |
| YPL270W | MDL2  |             | 0 iYPL271W   | -0.02 | 1.68 |
| YPL271W | ATP15 | ATPEPSILON  | iYPL272C-1   | 0.82  | #N/A |
| YPL272C | 0     | #N/A        | iYPL272C-0   | -1.47 | #N/A |
| YPL273W | SAM4  |             | 0 iYPL274W   | -1.06 | 0.84 |
| YPL274W | SAM3  |             | 0 iYPL275W-5 | 0.03  | 0.78 |
| YPL275W | FDH2  |             | 0 iYPL277C   | #N/A  | 1.06 |

|         |        |                |              |       |      |
|---------|--------|----------------|--------------|-------|------|
| YPL276W | FDH2   | #N/A           | iYPL277C     | #N/A  | 1.06 |
| YPL277C | 0      | #N/A           | iYPL277C     | -0.94 | 1.06 |
| YPL278C | 0      | #N/A           | iYPL277C     | -0.93 | 1.06 |
| YPL279C | 0      | #N/A           | iYPL279C     | -0.46 | 2.93 |
| YPL280W | 0      |                | 0 iYPL281C   | 2.51  | 1.53 |
| YPL281C | ERR2   |                | 0 iYPL281C   | 2.74  | 1.53 |
| YPL282C | 0      | #N/A           | iYPL282C     | 0.03  | 0.85 |
| YPL283C | YRF1-7 | YRF1           | iYPL283C-0   | -0.14 | 0.48 |
| YPR001W | CIT3   |                | 0 iCEN16     | 1.04  | 1.75 |
| YPR002W | PDH1   |                | 0 iYPR001W   | 2.87  | 1.16 |
| YPR003C | 0      | #N/A           | iYPR003C     | 1.02  | 1.75 |
| YPR004C | 0      | #N/A           | iYPR004C     | 0.03  | 1.86 |
| YPR005C | HAL1   |                | 0 iYPR005C   | -0.43 | #N/A |
| YPR006C | ICL2   |                | 0 iYPR006C   | 1.38  | 1.04 |
| YPR007C | SPO69  | SPO69          | iYPR007C     | #N/A  | 0.88 |
| YPR008W | HAA1   |                | 0 itG(GCC)P1 | 0.38  | #N/A |
| YPR009W | SUT2   |                | 0 iYPR008W   | -0.38 | #N/A |
| YPR010C | RPA135 | RPA2 RRN2 SRP3 | iYPR010C     | -2.25 | #N/A |
| YPR011C | 0      | #N/A           | iYPR011C     | 0.17  | 1.71 |
| YPR012W | 0      | #N/A           | iYPR011C     | #N/A  | 1.71 |
| YPR013C | 0      | #N/A           | iYPR013C-C   | 0.40  | 0.86 |
| YPR014C | 0      | #N/A           | iYPR014C-C   | #N/A  | #N/A |
| YPR015C | 0      | #N/A           | iYPR015C     | #N/A  | #N/A |
| YPR016C | TIF6   | CDC95          | iYPR016C     | -0.78 | #N/A |
| YPR017C | DSS4   |                | 0 iYPR017C   | -1.26 | 1.99 |
| YPR018W | RLF2   | CAC1           | iYPR017C     | -0.55 | 1.99 |
| YPR019W | CDC54  | HCD21 MCM4     | iYPR018W     | -0.21 | 1.58 |
| YPR020W | ATP20  |                | 0 iYPR019W   | #N/A  | 0.88 |
| YPR021C | 0      |                | 0 iYPR021C   | 0.31  | 0.82 |
| YPR022C | 0      | #N/A           | iYPR022C     | 0.06  | #N/A |
| YPR023C | EAF3   |                | 0 iYPR023C   | -0.04 | 2.76 |
| YPR024W | YME1   | OSD1 YTA11     | iYPR023C     | 0.65  | 2.76 |
| YPR025C | CCL1   |                | 0 iYPR025C   | -0.10 | #N/A |
| YPR026W | ATH1   |                | 0 iYPR025C   | 2.36  | #N/A |
| YPR027C | 0      | #N/A           | iYPR027C     | -0.13 | #N/A |
| YPR028W | YOP1   | YIP2           | itF(GAA)P2   | 1.16  | #N/A |
| YPR029C | APL4   |                | 0 iYPR029C   | -0.14 | 1.40 |
| YPR030W | CSR2   | MRG19          | iYPR029C     | 0.37  | 1.40 |
| YPR031W | 0      |                | 0 iYPR030W   | -0.81 | 1.62 |
| YPR032W | SRO7   | SNI1 SOP1      | iYPR031W     | -0.10 | #N/A |
| YPR033C | HTS1   | TSM4572        | iYPR033C     | -0.79 | 1.92 |
| YPR034W | ARP7   | SWP61          | iYPR033C     | -0.42 | 1.92 |
| YPR035W | GLN1   |                | 0 iYPR034W   | 0.26  | #N/A |
| YPR036W | VMA13  | CLS11          | iYPR035W     | -0.51 | #N/A |
| YPR037C | ERV2   |                | 0 iYPR040W   | -0.99 | 1.89 |
| YPR038W | 0      | #N/A           | iYPR036W     | -0.99 | #N/A |
| YPR039W | 0      | #N/A           | iYPR036W     | #N/A  | #N/A |
| YPR040W | SDF1   |                | 0 iYPR036W   | -0.14 | #N/A |
| YPR041W | TIF5   |                | 0 iYPR040W   | -0.83 | 1.89 |
| YPR042C | PUF2   |                | 0 iYPR042C   | #N/A  | 2.03 |
| YPR043W | RPL43A |                | 0 iYPR042C   | -1.56 | 2.03 |



|         |       |                |             |       |      |
|---------|-------|----------------|-------------|-------|------|
| YPR044C | 0     | #N/A           | iYPR044C    | -1.39 | #N/A |
| YPR045C | 0     | #N/A           | iYPR045C    | #N/A  | 3.04 |
| YPR046W | MCM16 |                | 0 iYPR045C  | -0.11 | 3.04 |
| YPR047W | MSF1  |                | 0 iYPR046W  | 1.43  | #N/A |
| YPR048W | TAH18 |                | 0 iYPR047W  | -0.73 | #N/A |
| YPR049C | CVT9  | CVT9           | iYPR049C    | 0.57  | #N/A |
| YPR050C | 0     | #N/A           | iYPR051W    | -0.64 | #N/A |
| YPR051W | MAK3  |                | 0 iYPR049C  | -0.37 | #N/A |
| YPR052C | NHP6A |                | 0 iYPR054W  | -0.20 | 1.88 |
| YPR053C | 0     | #N/A           | iYPR054W    | 0.15  | 1.88 |
| YPR054W | SMK1  |                | 0 iYPR051W  | -0.44 | #N/A |
| YPR055W | SEC8  |                | 0 iYPR054W  | #N/A  | 1.88 |
| YPR056W | TFB4  |                | 0 iYPR055W  | -0.77 | 1.11 |
| YPR057W | BRR1  |                | 0 iYPR056W  | -0.06 | 1.09 |
| YPR058W | YMC1  |                | 0 iYPR057W  | -1.16 | #N/A |
| YPR059C | 0     | #N/A           | iYPR059C    | -0.99 | 0.66 |
| YPR060C | ARO7  | HGS1 OSM2 TYR7 | iYPR060C    | #N/A  | #N/A |
| YPR061C | 0     |                | 0 iYPR061C  | -0.28 | 2.82 |
| YPR062W | FCY1  |                | 0 iYPR061C  | -0.32 | 2.82 |
| YPR063C | 0     | #N/A           | iYPR063C    | 0.10  | 1.21 |
| YPR064W | 0     | #N/A           | iYPR063C    | #N/A  | 1.21 |
| YPR065W | ROX1  | REO1           | iYPR064W    | -0.11 | 0.44 |
| YPR066W | UBA3  |                | 0 iYPR065W  | -0.42 | 0.98 |
| YPR067W | ISA2  |                | 0 iYPR066W  | 0.50  | 2.28 |
| YPR068C | HOS1  |                | 0 iYPR068C  | 0.30  | #N/A |
| YPR069C | SPE3  |                | 0 iYPR069C  | -0.40 | 0.96 |
| YPR070W | MED1  |                | 0 iYPR069C  | #N/A  | 0.96 |
| YPR071W | 0     | #N/A           | iYPR070W    | 0.42  | 0.77 |
| YPR072W | NOT5  |                | 0 itS(UGA)P | 0.29  | 1.09 |
| YPR073C | LTP1  |                | 0 iYPR073C  | 0.60  | 1.16 |
| YPR074C | TKL1  |                | 0 iYPR074C  | -0.68 | 0.35 |
| YPR075C | OPY2  |                | 0 iYPR076W  | 0.79  | 2.46 |
| YPR076W | 0     | #N/A           | iYPR074C    | 0.79  | 0.35 |
| YPR077C | 0     | #N/A           | iYPR078C    | #N/A  | #N/A |
| YPR078C | 0     | #N/A           | iYPR078C    | 2.49  | #N/A |
| YPR079W | MRL1  |                | 0 iYPR078C  | 0.95  | #N/A |
| YPR080W | TEF1  | EF-1 alpha     | iYPR079W    | -0.77 | 0.42 |
| YPR081C | 0     |                | 0 iYPR081C  | 1.37  | 1.60 |
| YPR082C | DIB1  | SNU16          | iYPR082C    | -0.06 | 2.11 |
| YPR083W | 0     |                | 0 iYPR082C  | -1.36 | 2.11 |
| YPR084W | 0     | #N/A           | iYPR083W    | -0.42 | 3.04 |
| YPR085C | 0     | #N/A           | iYPR085C    | 0.00  | 2.85 |
| YPR086W | SUA7  | SOH4           | iYPR085C    | -0.17 | 2.85 |
| YPR087W | VPS69 |                | 0 iYPR086W  | 0.00  | #N/A |
| YPR088C | SRP54 | SRH1           | iYPR088C    | -0.20 | 3.85 |
| YPR089W | 0     | #N/A           | iYPR088C    | #N/A  | 3.85 |
| YPR090W | 0     | #N/A           | iYPR088C    | 0.01  | 3.85 |
| YPR091C | 0     | #N/A           | iSNR51      | #N/A  | 0.33 |
| YPR092W | 0     | #N/A           | iYPR090W    | 1.69  | #N/A |
| YPR093C | 0     | #N/A           | iYPR093C    | 0.43  | 1.23 |
| YPR094W | RDS3  |                | 0 iYPR093C  | #N/A  | 1.23 |

|         |        |                |      |              |       |      |
|---------|--------|----------------|------|--------------|-------|------|
| YPR095C | SYT1   |                | 0    | iYPR095C     | #N/A  | 1.56 |
| YPR096C |        | 0              | #N/A | iYPR096C     | #N/A  | #N/A |
| YPR097W |        | 0              | #N/A | iYPR096C     | 0.01  | #N/A |
| YPR098C |        | 0              | #N/A | iYPR098C     | 1.70  | #N/A |
| YPR099C |        | 0              | #N/A | iYPR100W     | 0.82  | 1.08 |
| YPR100W |        | 0              |      | 0 iYPR098C   | 0.86  | #N/A |
| YPR101W | SNT309 |                |      | 0 iYPR100W   | #N/A  | 1.08 |
| YPR102C | RPL11A |                |      | 0 iYPR102C   | -1.31 | #N/A |
| YPR103W | PRE2   | DOA3 PRG1 SRR2 |      | iYPR102C     | 0.86  | #N/A |
| YPR104C | FHL1   |                |      | 0 iYPR104C   | #N/A  | 1.62 |
| YPR105C | COD1   | COD1 SEC38     |      | iYPR105C     | 0.03  | 1.89 |
| YPR106W | ISR1   |                |      | 0 iYPR105C   | -0.41 | 1.89 |
| YPR107C | YTH1   |                |      | 0 iYPR107C   | 0.45  | 1.76 |
| YPR108W | RPN7   |                |      | 0 iYPR107C   | 1.12  | 1.76 |
| YPR109W |        | 0              | #N/A | itT(UGU)P    | 0.61  | 1.12 |
| YPR110C | RPC40  | RPC5           |      | iYPR110C     | -1.51 | 1.52 |
| YPR111W | DBF20  |                |      | 0 iYPR110C   | 0.33  | 1.52 |
| YPR112C | MRD1   |                |      | 0 iYPR112C   | -2.29 | 1.06 |
| YPR113W | PIS1   |                |      | 0 iYPR112C   | 0.14  | 1.06 |
| YPR114W |        | 0              | #N/A | iYPR113W     | 0.18  | #N/A |
| YPR115W |        | 0              | #N/A | iYPR114W     | 0.14  | 1.08 |
| YPR116W |        | 0              | #N/A | iYPR115W     | #N/A  | 0.90 |
| YPR117W |        | 0              | #N/A | iYPR116W     | #N/A  | 1.63 |
| YPR118W |        | 0              | #N/A | iYPR117W     | -1.44 | 1.49 |
| YPR119W | CLB2   |                |      | 0 iYPRWsigm  | -1.36 | #N/A |
| YPR120C | CLB5   |                |      | 0 iYPR120C   | -2.61 | 0.57 |
| YPR121W | THI22  |                |      | 0 iYPRWdelta | 0.27  | 0.68 |
| YPR122W | AXL1   | FUS5 STE22     |      | iYPR121W-    | #N/A  | #N/A |
| YPR123C |        | 0              | #N/A | iYPR124W     | 0.62  | 1.30 |
| YPR124W | CTR1   |                |      | 0 iYPR122W   | #N/A  | 0.75 |
| YPR125W |        | 0              | #N/A | iYPR124W     | -0.28 | 1.30 |
| YPR126C |        | 0              | #N/A | iYPR126C     | 0.02  | 0.88 |
| YPR127W |        | 0              | #N/A | iYPR126C     | 0.20  | 0.88 |
| YPR128C | ANT1   |                |      | 0 iYPR128C   | -0.15 | 2.68 |
| YPR129W | SCD6   |                |      | 0 iYPR128C   | -0.12 | 2.68 |
| YPR130C |        | 0              | #N/A | iYPR130C     | -0.04 | 0.52 |
| YPR131C | NAT3   |                |      | 0 iYPR131C   | -0.01 | 0.23 |
| YPR132W | RPS23B |                |      | 0 iYPR131C   | -0.86 | 0.23 |
| YPR133C | IWS1   | SPN1           |      | iYPR133C     | -0.18 | 1.62 |
| YPR134W | MSS18  |                |      | 0 iYPR133W-  | #N/A  | 1.40 |
| YPR135W | CTF4   | CHL15 POB1     |      | iYPR134W     | #N/A  | 1.40 |
| YPR136C | FYV15  | #N/A           |      | iYPR137W     | #N/A  | #N/A |
| YPR137W | RRP9   |                |      | 0 iYPR135W   | -0.83 | 1.45 |
| YPR138C | MEP3   |                |      | 0 iYPR138C   | 0.20  | #N/A |
| YPR139C | VPS66  |                |      | 0 iYPR139C   | -0.13 | 1.51 |
| YPR140W |        | 0              |      | 0 iYPR139C   | 0.74  | 1.51 |
| YPR141C | KAR3   | OSR11          |      | iYPR141C     | -0.59 | 1.88 |
| YPR142C |        | 0              | #N/A | iYPR143W     | -1.51 | #N/A |
| YPR143W |        | 0              | #N/A | iYPR141C     | -1.20 | 1.88 |
| YPR144C | UTP19  | UTP19          |      | iYPR144C     | -1.71 | 1.19 |
| YPR145W | ASN1   |                |      | 0 iSNR45     | -0.71 | #N/A |

|         |        |                   |              |       |      |
|---------|--------|-------------------|--------------|-------|------|
| YPR146C | 0      | #N/A              | iYPR147C     | 0.40  | 1.89 |
| YPR147C | 0      | #N/A              | iYPR147C     | 0.12  | 1.89 |
| YPR148C | 0      | #N/A              | iYPR148C-C   | 0.97  | 0.56 |
| YPR149W | NCE102 | NCE2              | iYPR148C-1   | 1.73  | #N/A |
| YPR150W | 0      | #N/A              | iYPR149W     | 3.50  | 0.76 |
| YPR151C | 0      |                   | 0 iYPR151C   | 3.62  | 1.03 |
| YPR152C | 0      | #N/A              | iYPR152C     | #N/A  | #N/A |
| YPR153W | 0      | #N/A              | iYPR152C     | #N/A  | #N/A |
| YPR154W | PIN3   | LSB2              | iYPR153W     | 1.47  | 2.87 |
| YPR155C | NCA2   |                   | 0 iYPR155C   | 0.48  | 0.95 |
| YPR156C | TPO3   |                   | 0 iYPR156C   | 0.27  | 0.56 |
| YPR157W | 0      | #N/A              | iYPR156C     | 0.84  | 0.56 |
| YPR158W | 0      | #N/A              | iYPR157W     | 1.13  | 0.62 |
| YPR159W | KRE6   | CWH48             | itA(AGC)P    | 0.43  | 0.47 |
| YPR160W | GPH1   |                   | 0 itG(GCC)P2 | 3.74  | 1.18 |
| YPR161C | SGV1   | BUR1              | iYPR161C     | 0.24  | 1.71 |
| YPR162C | ORC4   |                   | 0 iYPR162C   | #N/A  | #N/A |
| YPR163C | TIF3   | RBL3 STM1         | iYPR163C     | -1.46 | 2.96 |
| YPR164W | MMS1   | RTT108 SLM6       | iYPR163C     | -0.90 | 2.96 |
| YPR165W | RHO1   |                   | 0 iYPR164W   | 0.57  | 1.88 |
| YPR166C | MRP2   |                   | 0 iYPR166C   | 0.58  | 1.71 |
| YPR167C | MET16  |                   | 0 iYPR167C   | 1.05  | 1.81 |
| YPR168W | NUT2   | MED10             | iYPR167C     | #N/A  | 1.81 |
| YPR169W | JIP5   |                   | 0 iYPR168W   | -0.63 | #N/A |
| YPR170C | 0      | #N/A              | iYPR170C     | -0.16 | 1.65 |
| YPR171W | 0      |                   | 0 iYPR170C   | #N/A  | 1.65 |
| YPR172W | 0      | #N/A              | iYPR171W     | 1.17  | 1.46 |
| YPR173C | VPS4   | CSC1 DID6 END13 G | iYPR173C     | 0.05  | 2.13 |
| YPR174C | 0      | #N/A              | iYPR174C     | -0.59 | 1.79 |
| YPR175W | DPB2   |                   | 0 iYPR174C   | -0.38 | 1.79 |
| YPR176C | BET2   |                   | 0 iYPR176C   | 0.20  | 2.35 |
| YPR177C | 0      | #N/A              | iYPR178W     | #N/A  | #N/A |
| YPR178W | PRP4   | RNA4              | iYPR176C     | 0.71  | 2.35 |
| YPR179C | PLO1   | PLO1              | iYPR179C     | -0.23 | 1.62 |
| YPR180W | AOS1   |                   | 0 iYPR179C   | 0.52  | 1.62 |
| YPR181C | SEC23  |                   | 0 iYPR181C   | 0.18  | 1.63 |
| YPR182W | SMX3   | Sm F              | iYPR181C     | -0.62 | 1.63 |
| YPR183W | DPM1   | SED3              | iYPR182W     | -0.09 | 1.48 |
| YPR184W | GDB1   |                   | 0 iYPR183W   | 2.82  | 0.76 |
| YPR185W | APG13  | APG13             | iYPR184W     | #N/A  | 3.16 |
| YPR186C | PZF1   | TFC2              | iYPR186C     | #N/A  | 2.34 |
| YPR187W | RPO26  | RPB6              | iYPR186C     | -0.99 | 2.34 |
| YPR188C | MLC2   |                   | 0 iYPR188C   | 0.53  | 1.74 |
| YPR189W | SKI3   | SKI5              | iYPR188C     | 0.50  | 1.74 |
| YPR190C | RPC82  | RPC3              | iYPR190C     | -2.29 | 1.59 |
| YPR191W | QCR2   | COR2 UCR2         | iYPR190C     | 0.94  | 1.59 |
| YPR192W | AQY1   |                   | 0 iYPR191W   | 1.49  | #N/A |
| YPR193C | HPA2   |                   | 0 iYPR193C   | 2.74  | 1.49 |
| YPR194C | OPT2   |                   | 0 iYPR194C   | 0.15  | #N/A |
| YPR195C | 0      | #N/A              | iYPR195C-C   | #N/A  | 0.41 |
| YPR196W | 0      | #N/A              | iYPR195C-2   | #N/A  | #N/A |

|                |      |           |           |       |      |
|----------------|------|-----------|-----------|-------|------|
| <b>YPR197C</b> | 0    | #N/A      | iYPR198W- | #N/A  | #N/A |
| <b>YPR198W</b> | SGE1 | NOR1      | iYPRWtau4 | -0.04 | 1.54 |
| <b>YPR199C</b> | ARR1 | ACR1 YAP8 | iYPR199C  | 0.63  | #N/A |
| <b>YPR200C</b> | ARR2 | ACR2      | iYPR200C  | #N/A  | #N/A |
| <b>YPR201W</b> | ARR3 | ACR3      | iYPR200C  | #N/A  | #N/A |
| <b>YPR202W</b> | 0    | #N/A      | iYPR201W- | -0.34 | 0.59 |
| <b>YPR203W</b> | 0    | #N/A      | iYPR201W- | -0.87 | 0.59 |
| <b>YPR204W</b> | 0    | #N/A      | iYPR203W  | -0.04 | 1.35 |

| No HS: HA-Htz1 | HS 30 min: HA-Htz1 | HS 30 min: HA-Htz1 | Recovery 30 min: HA-Htz1 |
|----------------|--------------------|--------------------|--------------------------|
| 0.66           | #N/A               | #N/A               | 0.95                     |
| 0.47           | 1.63               | 0.71               | 1.03                     |
| 0.06           | 0.25               | 0.02               | 0.65                     |
| #N/A           | #N/A               | #N/A               | #N/A                     |
| 0.06           | 0.25               | 0.02               | 0.65                     |
| 0.88           | 1.88               | 0.81               | 2.04                     |
| 0.67           | 1.72               | 0.76               | 1.30                     |
| 0.87           | #N/A               | #N/A               | 1.94                     |
| 0.87           | #N/A               | #N/A               | 1.94                     |
| #N/A           | #N/A               | #N/A               | #N/A                     |
| 0.27           | 0.70               | 0.25               | 0.69                     |
| 0.91           | 2.22               | 0.89               | 2.27                     |
| 0.91           | 2.22               | 0.89               | 2.27                     |
| 0.25           | 0.86               | 0.34               | 0.76                     |
| 0.92           | #N/A               | #N/A               | 2.14                     |
| 0.94           | 1.98               | 0.83               | 2.95                     |
| 0.97           | 3.30               | 0.98               | 2.35                     |
| 0.97           | 3.30               | 0.98               | 2.35                     |
| 0.71           | 1.34               | 0.60               | 1.18                     |
| 0.75           | 2.04               | 0.81               | #N/A                     |
| #N/A           | #N/A               | #N/A               | #N/A                     |
| 0.99           | 4.23               | 0.99               | 4.05                     |
| 0.99           | 4.23               | 0.99               | 4.05                     |
| 0.97           | 1.94               | 0.82               | 2.10                     |
| 0.81           | 1.66               | 0.73               | 1.49                     |
| 0.81           | 1.66               | 0.73               | 1.49                     |
| 0.97           | 3.27               | 0.97               | 2.32                     |
| 0.01           | #N/A               | #N/A               | #N/A                     |
| 0.41           | 1.36               | 0.61               | 0.90                     |
| 0.17           | 0.49               | 0.13               | 0.61                     |
| 0.05           | 0.50               | 0.13               | 0.38                     |
| 0.99           | 3.02               | 0.94               | 2.96                     |
| 0.78           | #N/A               | #N/A               | 2.55                     |
| 0.78           | #N/A               | #N/A               | 2.55                     |
| 0.99           | 3.02               | 0.94               | 2.96                     |
| #N/A           | #N/A               | #N/A               | #N/A                     |
| 0.42           | 0.37               | 0.06               | 0.32                     |
| #N/A           | 0.95               | 0.39               | #N/A                     |
| 0.56           | 0.53               | 0.15               | #N/A                     |
| #N/A           | #N/A               | #N/A               | #N/A                     |
| #N/A           | 1.39               | 0.62               | 1.76                     |
| 0.57           | #N/A               | #N/A               | 0.89                     |
| 0.36           | 0.65               | 0.21               | 1.15                     |
| 0.59           | 1.07               | 0.46               | 1.37                     |
| 0.82           | 1.85               | 0.78               | 2.49                     |
| 0.66           | 2.25               | 0.85               | 1.17                     |
| 0.16           | 1.38               | 0.61               | #N/A                     |
| 0.45           | 0.63               | 0.21               | 1.00                     |
| 0.63           | 0.59               | 0.18               | 1.35                     |
| #N/A           | #N/A               | #N/A               | #N/A                     |

|      |      |      |      |
|------|------|------|------|
| 0.29 | 1.07 | 0.46 | 0.84 |
| 0.54 | 1.01 | 0.43 | 0.97 |
| 0.67 | 1.71 | 0.76 | 1.56 |
| #N/A | #N/A | #N/A | #N/A |
| #N/A | #N/A | #N/A | #N/A |
| 0.67 | 1.71 | 0.76 | 1.56 |
| 0.67 | 1.71 | 0.76 | 1.56 |
| #N/A | #N/A | #N/A | #N/A |
| #N/A | #N/A | #N/A | #N/A |
| 0.54 | 1.18 | 0.52 | 1.62 |
| 0.89 | 2.71 | 0.95 | 2.03 |
| 0.94 | 3.10 | 0.98 | 2.10 |
| 0.94 | 3.10 | 0.98 | 2.10 |
| #N/A | #N/A | #N/A | #N/A |
| 0.99 | 2.63 | 0.95 | 2.48 |
| 0.37 | 0.81 | 0.32 | 0.77 |
| 0.82 | 1.69 | 0.75 | 1.57 |
| 0.68 | 1.46 | 0.65 | 1.46 |
| 0.88 | 1.74 | 0.76 | 1.76 |
| 0.71 | 2.59 | 0.94 | 1.36 |
| 0.84 | 2.05 | 0.85 | 1.41 |
| 0.71 | 2.59 | 0.94 | 1.36 |
| 0.84 | 2.05 | 0.85 | 1.41 |
| 0.18 | 0.55 | 0.16 | 0.67 |
| #N/A | #N/A | #N/A | #N/A |
| #N/A | #N/A | #N/A | #N/A |
| 0.61 | 1.24 | 0.55 | 0.98 |
| #N/A | #N/A | #N/A | #N/A |
| 0.20 | #N/A | #N/A | 0.54 |
| 0.47 | 1.17 | 0.51 | 1.09 |
| #N/A | #N/A | #N/A | #N/A |
| #N/A | 1.18 | 0.51 | 0.59 |
| 0.44 | 1.06 | 0.46 | 0.99 |
| 0.44 | 1.06 | 0.46 | 0.99 |
| 0.19 | 0.49 | 0.12 | 0.45 |
| 0.30 | 0.88 | 0.36 | 0.77 |
| 0.36 | 1.06 | 0.46 | 0.75 |
| 0.24 | 0.82 | 0.32 | 0.62 |
| 0.76 | 1.34 | 0.60 | 1.50 |
| 0.83 | 2.18 | 0.88 | 2.21 |
| 0.83 | 2.18 | 0.88 | 2.21 |
| 0.93 | 2.16 | 0.88 | 2.06 |
| #N/A | #N/A | #N/A | #N/A |
| 0.93 | 2.16 | 0.88 | 2.06 |
| 0.41 | 0.90 | 0.37 | 0.82 |
| 0.03 | 0.45 | 0.10 | 0.31 |
| 0.03 | 0.45 | 0.10 | 0.31 |
| 0.69 | 2.74 | 0.96 | 1.25 |
| 0.16 | 0.68 | 0.23 | 0.65 |
| 0.71 | 1.56 | 0.67 | 1.89 |
| 0.67 | 1.30 | 0.58 | 1.78 |

|      |      |      |      |
|------|------|------|------|
| 0.89 | 2.05 | 0.85 | 2.28 |
| 0.36 | 1.07 | 0.44 | 0.74 |
| 0.94 | 2.50 | 0.91 | 2.33 |
| 0.94 | 2.50 | 0.91 | 2.33 |
| 0.59 | 1.19 | 0.53 | 1.40 |
| 0.42 | 1.03 | 0.44 | 1.18 |
| 0.42 | 1.03 | 0.44 | 1.18 |
| 0.83 | 1.83 | 0.79 | 1.60 |
| #N/A | #N/A | #N/A | #N/A |
| #N/A | #N/A | #N/A | #N/A |
| #N/A | #N/A | #N/A | #N/A |
| 0.59 | 1.55 | 0.68 | 1.65 |
| 0.31 | 1.23 | 0.55 | 1.16 |
| 0.53 | 1.15 | 0.51 | 0.99 |
| 0.70 | 1.44 | 0.65 | 1.60 |
| 0.02 | 0.42 | 0.09 | 0.14 |
| 0.03 | 0.68 | 0.24 | 0.57 |
| 0.28 | 0.74 | 0.27 | 0.88 |
| 0.63 | 2.09 | 0.85 | #N/A |
| 0.85 | 1.55 | 0.69 | 1.98 |
| 0.85 | 1.55 | 0.69 | 1.98 |
| 0.86 | 1.94 | 0.83 | 1.45 |
| #N/A | 2.07 | 0.86 | 1.22 |
| #N/A | 2.07 | 0.86 | 1.22 |
| 0.71 | 1.80 | 0.78 | 1.77 |
| 0.15 | 0.65 | 0.22 | 0.37 |
| 0.15 | 0.65 | 0.22 | 0.37 |
| 0.73 | 1.71 | 0.75 | 1.77 |
| 0.39 | 0.89 | 0.35 | 1.12 |
| 0.94 | 2.06 | 0.85 | 2.14 |
| 0.36 | 1.13 | 0.49 | 1.22 |
| 0.36 | 1.13 | 0.49 | 1.22 |
| 0.98 | 3.35 | 0.99 | 3.79 |
| 0.98 | 3.35 | 0.99 | 3.79 |
| #N/A | #N/A | #N/A | #N/A |
| 0.77 | 1.31 | 0.59 | 0.70 |
| 0.77 | 1.31 | 0.59 | 0.70 |
| 0.88 | #N/A | #N/A | 1.97 |
| 0.88 | #N/A | #N/A | 1.97 |
| 0.45 | #N/A | #N/A | #N/A |
| 0.65 | 1.87 | 0.80 | 1.50 |
| 0.59 | #N/A | #N/A | 1.18 |
| 0.59 | #N/A | #N/A | 1.18 |
| #N/A | #N/A | #N/A | #N/A |
| 0.86 | 1.43 | 0.64 | 2.14 |
| 0.86 | 1.43 | 0.64 | 2.14 |
| 0.35 | 1.04 | 0.45 | 0.65 |
| 0.35 | 1.04 | 0.45 | 0.65 |
| 0.76 | 1.89 | 0.81 | 1.22 |
| #N/A | #N/A | #N/A | #N/A |
| 0.76 | 1.89 | 0.81 | 1.22 |

|      |      |      |      |
|------|------|------|------|
| #N/A | #N/A | #N/A | #N/A |
| 0.35 | 1.40 | 0.63 | 0.66 |
| 0.06 | 0.40 | 0.07 | 0.41 |
| 0.07 | 0.82 | 0.32 | 0.58 |
| 0.06 | 0.40 | 0.07 | 0.41 |
| #N/A | #N/A | #N/A | #N/A |
| #N/A | #N/A | #N/A | #N/A |
| 0.84 | 2.15 | 0.87 | 2.05 |
| 0.93 | 3.71 | 0.99 | 1.57 |
| 0.93 | 3.71 | 0.99 | 1.57 |
| 0.93 | 3.71 | 0.99 | 1.57 |
| 0.41 | 0.86 | 0.34 | 1.00 |
| 0.08 | 0.43 | 0.08 | 0.48 |
| 0.48 | #N/A | #N/A | 1.12 |
| #N/A | #N/A | #N/A | #N/A |
| 0.61 | 1.32 | 0.57 | #N/A |
| 0.61 | 1.32 | 0.57 | #N/A |
| 0.13 | 0.64 | 0.21 | 0.41 |
| 0.13 | 0.64 | 0.21 | 0.41 |
| 0.16 | 0.78 | 0.29 | 0.53 |
| #N/A | #N/A | #N/A | #N/A |
| 0.16 | 0.78 | 0.29 | 0.53 |
| 0.66 | 1.02 | 0.43 | #N/A |
| 0.24 | 0.65 | 0.22 | 0.81 |
| 0.21 | 0.64 | 0.21 | 0.62 |
| 0.24 | 0.65 | 0.22 | 0.81 |
| 0.50 | 0.84 | 0.33 | 1.18 |
| 0.50 | 0.84 | 0.33 | 1.18 |
| 0.80 | 1.88 | 0.81 | 2.10 |
| 0.80 | 1.88 | 0.81 | 2.10 |
| #N/A | #N/A | #N/A | #N/A |
| 0.17 | 0.79 | 0.30 | 0.63 |
| 0.17 | 0.79 | 0.30 | 0.63 |
| 0.17 | 0.79 | 0.30 | 0.63 |
| 0.17 | 0.79 | 0.30 | 0.63 |
| #N/A | #N/A | #N/A | #N/A |
| 0.26 | 0.55 | 0.16 | 0.52 |
| 0.97 | 1.86 | 0.78 | 2.88 |
| 0.97 | 1.86 | 0.78 | 2.88 |
| 0.80 | 1.23 | 0.54 | #N/A |
| 0.80 | 1.23 | 0.54 | #N/A |
| 0.64 | 1.41 | 0.64 | 1.16 |
| 0.07 | 0.47 | 0.11 | 0.42 |
| 0.07 | 0.47 | 0.11 | 0.42 |
| 0.60 | 1.11 | 0.48 | 1.46 |
| #N/A | #N/A | #N/A | #N/A |
| #N/A | #N/A | #N/A | #N/A |
| #N/A | #N/A | #N/A | #N/A |
| 0.40 | 0.87 | 0.35 | 0.70 |
| 0.66 | 1.12 | 0.49 | 1.38 |
| 0.74 | 1.97 | 0.83 | 1.59 |



|      |      |      |      |
|------|------|------|------|
| 0.63 | 1.07 | 0.46 | 1.35 |
| 0.63 | 1.07 | 0.46 | 1.35 |
| 0.69 | 1.88 | 0.81 | 1.48 |
| #N/A | #N/A | #N/A | #N/A |
| 0.61 | 1.02 | 0.43 | 1.09 |
| #N/A | #N/A | #N/A | #N/A |
| 0.45 | 1.06 | 0.46 | 0.99 |
| 0.92 | 2.30 | 0.90 | 1.48 |
| 0.92 | 2.30 | 0.90 | 1.48 |
| #N/A | #N/A | #N/A | #N/A |
| #N/A | #N/A | #N/A | #N/A |
| 0.45 | 1.54 | 0.69 | #N/A |
| 0.57 | 1.98 | 0.83 | 0.90 |
| 0.74 | 1.62 | 0.72 | 1.69 |
| 0.96 | 2.30 | 0.91 | 2.02 |
| 0.57 | 1.41 | 0.63 | 1.46 |
| 0.53 | 1.43 | 0.63 | 1.48 |
| 0.24 | 0.76 | 0.28 | 0.95 |
| 0.72 | 1.35 | 0.60 | 1.34 |
| 0.22 | 0.65 | 0.22 | #N/A |
| 0.41 | 1.51 | 0.63 | 0.97 |
| 0.82 | 1.27 | 0.57 | 1.97 |
| 0.71 | 1.30 | 0.58 | 1.47 |
| 0.45 | 0.80 | 0.30 | 1.07 |
| 0.55 | 0.91 | 0.37 | 1.61 |
| 0.43 | 1.09 | 0.48 | 1.16 |
| 0.56 | 1.48 | 0.66 | 1.01 |
| #N/A | #N/A | #N/A | #N/A |
| 0.59 | 1.42 | 0.64 | 1.39 |
| 0.26 | 0.96 | 0.40 | 0.83 |
| 0.59 | 1.42 | 0.64 | 1.39 |
| 0.81 | 2.08 | 0.86 | 1.78 |
| 0.11 | 0.53 | 0.15 | 0.72 |
| 0.07 | 0.51 | 0.13 | 0.32 |
| 0.01 | #N/A | #N/A | 0.14 |
| 0.03 | 0.39 | 0.08 | 0.40 |
| 0.33 | 0.80 | 0.30 | 0.82 |
| 0.33 | 0.80 | 0.30 | 0.82 |
| 0.49 | 0.78 | 0.30 | 1.01 |
| #N/A | 1.23 | 0.54 | 0.86 |
| #N/A | 0.47 | 0.11 | #N/A |
| 0.39 | 1.25 | 0.56 | 0.91 |
| 0.03 | 0.39 | 0.06 | 0.26 |
| 0.16 | 0.56 | 0.17 | 0.91 |
| 0.05 | 0.25 | 0.02 | 0.47 |
| 0.17 | 0.75 | 0.28 | 0.48 |
| 0.17 | 0.75 | 0.28 | 0.48 |
| 0.40 | 1.31 | 0.58 | 1.08 |
| 0.43 | 1.16 | 0.50 | 1.13 |
| #N/A | #N/A | #N/A | #N/A |
| 0.35 | #N/A | #N/A | #N/A |

|      |      |      |      |
|------|------|------|------|
| #N/A | #N/A | #N/A | #N/A |
| 0.93 | #N/A | #N/A | #N/A |
| 0.23 | 1.01 | 0.42 | 0.85 |
| #N/A | #N/A | #N/A | #N/A |
| 0.70 | 2.01 | 0.82 | #N/A |
| 0.70 | 2.01 | 0.82 | #N/A |
| #N/A | #N/A | #N/A | #N/A |
| 0.15 | 0.37 | 0.06 | #N/A |
| #N/A | #N/A | #N/A | #N/A |
| 0.68 | 1.26 | 0.56 | 1.46 |
| 0.80 | 2.05 | 0.85 | 1.86 |
| 0.77 | 1.96 | 0.83 | 2.12 |
| 0.02 | 0.34 | 0.05 | #N/A |
| 0.02 | 0.34 | 0.05 | #N/A |
| #N/A | #N/A | #N/A | #N/A |
| #N/A | #N/A | #N/A | #N/A |
| 0.77 | 1.75 | 0.77 | 1.64 |
| 0.77 | 1.75 | 0.77 | 1.64 |
| #N/A | #N/A | #N/A | #N/A |
| 0.12 | 0.44 | 0.09 | 0.48 |
| #N/A | #N/A | #N/A | #N/A |
| 0.64 | 1.07 | 0.45 | 1.24 |
| 0.64 | 1.07 | 0.45 | 1.24 |
| 0.64 | 1.07 | 0.45 | 1.24 |
| #N/A | #N/A | #N/A | #N/A |
| 0.49 | 1.14 | 0.49 | 1.32 |
| 0.83 | 2.31 | 0.90 | 2.78 |
| 0.20 | 0.63 | 0.21 | 0.67 |
| 0.83 | 2.31 | 0.90 | 2.78 |
| #N/A | #N/A | #N/A | #N/A |
| #N/A | 0.66 | 0.22 | #N/A |
| 0.84 | 1.60 | 0.71 | 1.98 |
| 0.75 | 0.91 | 0.37 | #N/A |
| 0.89 | 1.72 | 0.76 | 2.83 |
| 0.83 | 1.80 | 0.79 | 2.42 |
| 0.83 | 1.80 | 0.79 | 2.42 |
| 0.19 | 0.42 | 0.08 | 0.51 |
| 0.91 | 2.54 | 0.86 | #N/A |
| 0.91 | 2.54 | 0.86 | #N/A |
| #N/A | #N/A | #N/A | #N/A |
| 0.65 | 1.51 | 0.68 | 1.23 |
| 0.37 | 1.05 | 0.44 | 1.23 |
| 0.67 | #N/A | #N/A | 1.15 |
| #N/A | 1.27 | 0.56 | #N/A |
| #N/A | 1.27 | 0.56 | #N/A |
| 0.89 | 1.66 | 0.73 | 2.45 |
| #N/A | 0.77 | 0.29 | 1.43 |
| 0.53 | 0.86 | 0.34 | 1.25 |
| #N/A | 1.12 | 0.49 | 1.32 |
| #N/A | 1.12 | 0.49 | 1.32 |
| 0.40 | 0.92 | 0.37 | 1.02 |

|      |      |      |      |
|------|------|------|------|
| 0.25 | 1.11 | 0.48 | #N/A |
| 0.62 | 2.04 | 0.85 | 1.02 |
| 0.62 | 2.04 | 0.85 | 1.02 |
| 0.16 | 0.28 | 0.02 | 0.57 |
| 0.02 | 0.23 | 0.02 | 0.39 |
| 0.83 | 2.22 | 0.89 | 2.46 |
| 0.76 | #N/A | #N/A | 1.03 |
| 0.44 | 1.08 | 0.47 | 1.45 |
| 0.15 | 0.73 | 0.26 | 0.54 |
| 0.15 | 0.73 | 0.26 | 0.54 |
| 0.77 | 1.79 | 0.78 | 1.52 |
| 0.77 | 1.79 | 0.78 | 1.52 |
| 0.72 | 1.63 | 0.71 | 1.16 |
| 0.57 | 1.69 | 0.74 | 1.73 |
| 0.57 | 1.69 | 0.74 | 1.73 |
| 0.46 | 0.59 | 0.18 | 1.20 |
| 0.79 | 2.45 | 0.93 | 1.56 |
| 0.79 | 2.45 | 0.93 | 1.56 |
| 0.58 | 1.50 | 0.63 | #N/A |
| 0.90 | 1.85 | 0.79 | 2.57 |
| 0.35 | 1.75 | 0.75 | 1.68 |
| 0.90 | 1.85 | 0.79 | 2.57 |
| 0.35 | 1.75 | 0.75 | 1.68 |
| #N/A | #N/A | #N/A | #N/A |
| #N/A | #N/A | #N/A | #N/A |
| 0.82 | 1.84 | 0.80 | 1.47 |
| 0.25 | 0.84 | 0.33 | 0.83 |
| 0.42 | 0.78 | 0.29 | 1.03 |
| 0.42 | 0.78 | 0.29 | 1.03 |
| 0.41 | 1.05 | 0.45 | 1.01 |
| 0.92 | 2.58 | 0.94 | 2.58 |
| 0.22 | 1.32 | 0.59 | 0.61 |
| 0.52 | 1.48 | 0.66 | 1.41 |
| 0.52 | 1.48 | 0.66 | 1.41 |
| 0.16 | 0.57 | 0.17 | 0.53 |
| 0.16 | 0.57 | 0.17 | 0.53 |
| 0.50 | 1.55 | 0.69 | 1.66 |
| 0.47 | 1.25 | 0.55 | 0.95 |
| 0.47 | 1.25 | 0.55 | 0.95 |
| 0.18 | #N/A | #N/A | #N/A |
| 0.02 | 0.29 | 0.03 | 0.24 |
| 0.23 | 0.71 | 0.25 | #N/A |
| #N/A | #N/A | #N/A | 1.99 |
| 0.44 | 1.03 | 0.44 | 0.95 |
| 0.66 | 1.27 | 0.56 | 1.95 |
| #N/A | #N/A | #N/A | #N/A |
| 0.84 | 2.05 | 0.85 | 1.79 |
| 0.84 | 2.05 | 0.85 | 1.79 |
| 0.84 | 2.05 | 0.85 | 1.79 |
| 0.66 | 1.32 | 0.59 | 1.34 |
| 0.79 | 1.50 | 0.67 | 2.08 |

|      |      |      |      |
|------|------|------|------|
| 0.76 | 1.70 | 0.75 | 2.19 |
| #N/A | #N/A | #N/A | 1.02 |
| 0.85 | 0.85 | 0.33 | 1.81 |
| #N/A | 1.81 | 0.79 | 2.10 |
| 0.67 | 1.93 | 0.82 | 1.94 |
| 0.67 | 1.93 | 0.82 | 1.94 |
| 0.67 | 1.46 | 0.66 | 1.60 |
| 0.67 | 1.46 | 0.66 | 1.60 |
| 0.49 | 1.33 | 0.58 | 1.60 |
| 0.45 | 0.70 | 0.25 | 0.70 |
| 0.59 | 1.67 | 0.74 | 1.51 |
| 0.45 | 0.70 | 0.25 | 0.70 |
| 0.59 | 1.67 | 0.74 | 1.51 |
| 0.59 | 1.67 | 0.74 | 1.51 |
| 0.99 | #N/A | #N/A | 2.33 |
| 0.34 | 0.62 | 0.20 | 1.02 |
| 0.66 | 1.75 | 0.75 | 1.72 |
| 0.93 | 2.56 | 0.94 | 2.32 |
| 0.66 | 1.75 | 0.75 | 1.72 |
| 0.84 | 2.46 | 0.92 | 1.71 |
| #N/A | #N/A | #N/A | #N/A |
| 0.41 | 1.38 | 0.58 | 0.51 |
| 0.73 | 1.20 | 0.53 | #N/A |
| 0.80 | 1.42 | 0.64 | 1.09 |
| 0.80 | 1.42 | 0.64 | 1.09 |
| 0.80 | 1.74 | 0.76 | 1.41 |
| 0.80 | 1.74 | 0.76 | 1.41 |
| #N/A | #N/A | #N/A | #N/A |
| 0.73 | 2.25 | 0.90 | 1.38 |
| #N/A | #N/A | #N/A | 1.00 |
| 0.57 | 1.18 | 0.52 | 1.14 |
| 0.57 | 1.18 | 0.52 | 1.14 |
| 0.91 | 2.78 | 0.96 | 2.16 |
| 0.46 | 1.28 | 0.57 | #N/A |
| 0.64 | 1.83 | 0.79 | 1.73 |
| 0.84 | 3.12 | 0.96 | 2.95 |
| 0.84 | 3.12 | 0.96 | 2.95 |
| #N/A | 1.36 | 0.61 | 1.47 |
| #N/A | 1.36 | 0.61 | 1.47 |
| #N/A | #N/A | #N/A | #N/A |
| #N/A | #N/A | #N/A | #N/A |
| 0.96 | 2.61 | 0.94 | 3.00 |
| 0.70 | 2.03 | 0.85 | #N/A |
| 0.75 | 1.81 | 0.79 | #N/A |
| 0.70 | 2.03 | 0.85 | #N/A |
| 0.75 | 1.81 | 0.79 | #N/A |
| 0.75 | 1.81 | 0.79 | #N/A |
| 0.78 | 1.38 | 0.61 | 0.79 |
| #N/A | 1.51 | 0.68 | #N/A |
| 0.78 | 1.38 | 0.61 | 0.79 |
| #N/A | 0.80 | 0.30 | #N/A |

|      |      |      |      |
|------|------|------|------|
| 0.98 | 2.77 | 0.96 | 2.24 |
| 0.98 | 2.77 | 0.96 | 2.24 |
| #N/A | #N/A | #N/A | #N/A |
| #N/A | 2.10 | 0.87 | 1.19 |
| #N/A | 2.10 | 0.87 | 1.19 |
| 0.63 | 1.35 | 0.60 | 1.28 |
| 0.70 | 1.90 | 0.82 | 1.56 |
| 0.79 | 1.90 | 0.78 | 2.09 |
| 0.70 | 1.90 | 0.82 | 1.56 |
| 0.79 | 1.90 | 0.78 | 2.09 |
| #N/A | #N/A | #N/A | #N/A |
| 0.66 | 1.75 | 0.76 | 1.63 |
| 0.66 | 1.75 | 0.76 | 1.63 |
| 0.75 | 1.34 | 0.60 | 1.97 |
| 0.75 | 1.34 | 0.60 | 1.97 |
| 0.42 | 0.97 | 0.40 | 0.94 |
| #N/A | #N/A | #N/A | #N/A |
| 0.61 | 0.75 | 0.27 | #N/A |
| 0.68 | 2.25 | 0.87 | 3.45 |
| 0.68 | 2.25 | 0.87 | 3.45 |
| 0.43 | 0.90 | 0.37 | 0.94 |
| 0.48 | #N/A | #N/A | #N/A |
| 0.68 | 1.81 | 0.79 | 1.37 |
| 0.90 | 2.21 | 0.89 | 1.88 |
| 0.43 | 1.01 | 0.43 | 1.06 |
| 0.56 | 1.22 | 0.54 | 0.99 |
| 0.54 | 1.16 | 0.51 | 1.56 |
| 0.79 | 1.25 | 0.56 | 1.59 |
| 0.91 | 1.49 | 0.67 | 2.37 |
| 0.91 | 1.49 | 0.67 | 2.37 |
| 0.75 | 2.17 | 0.88 | 1.86 |
| 0.64 | 1.64 | 0.73 | 1.26 |
| #N/A | #N/A | #N/A | #N/A |
| 0.87 | 1.66 | 0.69 | 1.54 |
| 0.27 | 1.14 | 0.50 | 0.78 |
| #N/A | #N/A | #N/A | #N/A |
| 0.87 | 1.66 | 0.69 | 1.54 |
| 0.87 | 1.66 | 0.69 | 1.54 |
| 0.27 | 1.14 | 0.50 | 0.78 |
| 0.27 | 1.14 | 0.50 | 0.78 |
| 0.27 | 1.14 | 0.50 | 0.78 |
| 0.27 | 1.14 | 0.50 | 0.78 |
| 0.27 | 1.14 | 0.50 | 0.78 |
| 0.87 | 1.66 | 0.69 | 1.54 |
| #N/A | #N/A | #N/A | #N/A |
| #N/A | #N/A | #N/A | #N/A |
| #N/A | #N/A | #N/A | #N/A |
| 0.87 | 1.66 | 0.69 | 1.54 |
| 0.87 | 1.66 | 0.69 | 1.54 |
| #N/A | #N/A | #N/A | #N/A |
| #N/A | #N/A | #N/A | 0.78 |

|      |      |      |      |
|------|------|------|------|
| #N/A | #N/A | #N/A | 0.78 |
| #N/A | #N/A | #N/A | #N/A |
| #N/A | #N/A | #N/A | 0.78 |
| #N/A | #N/A | #N/A | 0.78 |
| 0.09 | 0.42 | 0.08 | 0.43 |
| 0.09 | 0.42 | 0.08 | 0.43 |
| #N/A | #N/A | #N/A | #N/A |
| 0.54 | 1.14 | 0.50 | 1.34 |
| 0.74 | 1.71 | 0.75 | 1.53 |
| 0.74 | 1.71 | 0.75 | 1.53 |
| 0.14 | 1.06 | 0.46 | 0.80 |
| 0.76 | 2.24 | 0.89 | 1.56 |
| #N/A | 1.92 | 0.82 | 1.75 |
| #N/A | 1.92 | 0.82 | 1.75 |
| 0.93 | 1.56 | 0.70 | 2.78 |
| 0.93 | 1.56 | 0.70 | 2.78 |
| 0.42 | 1.63 | 0.73 | 0.73 |
| 0.42 | 1.63 | 0.73 | 0.73 |
| 0.29 | 0.71 | 0.25 | 0.62 |
| 0.99 | 1.85 | 0.80 | 4.60 |
| 0.65 | 1.26 | 0.56 | 2.15 |
| 0.99 | 1.85 | 0.80 | 4.60 |
| 0.65 | 1.26 | 0.56 | 2.15 |
| 0.99 | 1.85 | 0.80 | 4.60 |
| 0.65 | 1.26 | 0.56 | 2.15 |
| 0.64 | #N/A | #N/A | #N/A |
| 0.37 | 1.39 | 0.63 | #N/A |
| 0.37 | 1.39 | 0.63 | #N/A |
| 0.66 | 1.52 | 0.68 | 1.78 |
| 0.66 | 1.52 | 0.68 | 1.78 |
| 0.91 | 1.58 | 0.71 | 2.88 |
| 0.90 | 1.81 | 0.79 | 2.08 |
| 0.90 | 1.81 | 0.79 | 2.08 |
| #N/A | #N/A | #N/A | #N/A |
| 0.67 | 1.54 | 0.69 | 1.54 |
| 0.75 | 1.61 | 0.72 | 1.88 |
| 0.75 | 1.61 | 0.72 | 1.88 |
| #N/A | #N/A | #N/A | #N/A |
| #N/A | #N/A | #N/A | #N/A |
| 0.93 | 1.77 | 0.61 | 2.30 |
| #N/A | #N/A | #N/A | #N/A |
| 0.49 | 1.26 | 0.56 | 1.03 |
| #N/A | #N/A | #N/A | #N/A |
| 0.66 | 1.66 | 0.73 | 1.21 |
| 0.66 | 1.66 | 0.73 | 1.21 |
| #N/A | #N/A | #N/A | #N/A |
| #N/A | #N/A | #N/A | #N/A |
| #N/A | #N/A | #N/A | #N/A |
| 0.29 | 0.84 | 0.33 | 0.74 |
| 0.19 | 0.77 | 0.29 | 0.67 |
| 0.19 | 0.77 | 0.29 | 0.67 |

|      |      |      |      |
|------|------|------|------|
| 0.02 | 0.27 | 0.02 | 0.28 |
| #N/A | #N/A | #N/A | #N/A |
| #N/A | #N/A | #N/A | #N/A |
| #N/A | #N/A | #N/A | #N/A |
| #N/A | #N/A | #N/A | #N/A |
| #N/A | #N/A | #N/A | #N/A |
| #N/A | #N/A | #N/A | #N/A |
| #N/A | #N/A | #N/A | #N/A |
| #N/A | #N/A | #N/A | #N/A |
| #N/A | #N/A | #N/A | #N/A |
| #N/A | #N/A | #N/A | #N/A |
| #N/A | #N/A | #N/A | #N/A |
| #N/A | #N/A | #N/A | #N/A |
| #N/A | #N/A | #N/A | #N/A |
| 0.87 | 1.66 | 0.69 | 1.54 |
| 0.27 | 1.14 | 0.50 | 0.78 |
| 0.87 | 1.66 | 0.69 | 1.54 |
| 0.27 | 1.14 | 0.50 | 0.78 |
| 0.27 | 1.14 | 0.50 | 0.78 |
| 0.27 | 1.14 | 0.50 | 0.78 |
| #N/A | #N/A | #N/A | #N/A |
| 0.27 | 1.14 | 0.50 | 0.78 |
| #N/A | #N/A | #N/A | #N/A |
| #N/A | #N/A | #N/A | #N/A |
| #N/A | #N/A | #N/A | #N/A |
| 0.27 | 1.14 | 0.50 | 0.78 |
| #N/A | #N/A | #N/A | #N/A |
| #N/A | #N/A | #N/A | #N/A |
| #N/A | #N/A | #N/A | #N/A |
| #N/A | #N/A | #N/A | #N/A |
| 0.83 | 1.59 | 0.71 | 1.69 |
| #N/A | #N/A | #N/A | #N/A |
| 0.68 | 1.86 | 0.80 | 1.37 |
| 0.69 | 2.03 | 0.85 | #N/A |
| 0.98 | 2.93 | 0.90 | 1.80 |
| 0.65 | 1.46 | 0.65 | #N/A |
| 0.41 | 1.03 | 0.44 | 1.73 |
| 0.64 | 1.22 | 0.54 | 1.51 |
| 0.07 | 0.53 | 0.15 | 0.46 |
| 0.06 | 0.43 | 0.09 | 0.35 |
| #N/A | #N/A | #N/A | #N/A |
| 0.43 | 1.03 | 0.44 | 0.84 |
| 0.65 | 1.39 | 0.62 | 1.16 |
| 0.89 | 2.20 | 0.80 | 2.66 |
| #N/A | #N/A | #N/A | #N/A |
| #N/A | #N/A | #N/A | #N/A |
| 0.45 | 0.90 | 0.36 | 0.88 |
| 0.07 | 0.38 | 0.07 | 0.35 |
| 0.63 | 1.71 | 0.75 | 1.69 |
| 0.66 | 1.85 | 0.80 | 1.44 |

|      |      |      |      |
|------|------|------|------|
| 0.40 | 1.18 | 0.52 | 0.72 |
| 0.94 | 1.10 | 0.48 | 2.07 |
| 0.94 | 1.10 | 0.48 | 2.07 |
| 0.31 | 1.12 | 0.49 | 0.96 |
| 0.32 | 0.93 | 0.38 | 0.76 |
| #N/A | #N/A | #N/A | #N/A |
| #N/A | #N/A | #N/A | #N/A |
| #N/A | #N/A | #N/A | #N/A |
| 0.57 | 1.53 | 0.68 | 1.37 |
| #N/A | 4.37 | 0.96 | 2.25 |
| 0.90 | 2.81 | 0.95 | 1.76 |
| #N/A | 1.25 | 0.55 | 1.31 |
| 0.90 | 2.59 | 0.94 | 1.43 |
| 0.91 | 2.87 | 0.97 | 2.00 |
| 0.91 | 2.87 | 0.97 | 2.00 |
| 0.79 | 2.70 | 0.93 | 1.98 |
| 0.79 | 2.70 | 0.93 | 1.98 |
| 0.79 | 2.70 | 0.93 | 1.98 |
| 0.88 | 2.48 | 0.93 | 1.22 |
| 0.87 | 2.03 | 0.85 | 1.15 |
| 0.43 | 2.00 | 0.84 | 0.67 |
| #N/A | #N/A | #N/A | #N/A |
| #N/A | #N/A | #N/A | #N/A |
| 0.91 | 3.39 | 0.98 | #N/A |
| #N/A | #N/A | #N/A | #N/A |
| 0.87 | #N/A | #N/A | 1.39 |
| 0.87 | #N/A | #N/A | 1.39 |
| 0.18 | 0.51 | 0.14 | 0.46 |
| 0.18 | 0.51 | 0.14 | 0.46 |
| #N/A | 0.64 | 0.21 | 0.73 |
| 0.05 | 0.62 | 0.20 | 0.25 |
| 0.05 | 0.62 | 0.20 | 0.25 |
| 0.52 | 1.33 | 0.60 | 1.10 |
| 0.71 | 1.65 | 0.73 | 1.55 |
| 0.71 | 1.65 | 0.73 | 1.55 |
| 0.97 | 2.19 | 0.88 | 2.51 |
| #N/A | #N/A | #N/A | #N/A |
| 0.95 | 2.91 | 0.96 | #N/A |
| 0.84 | 3.52 | 0.99 | 1.45 |
| 0.99 | 3.22 | 0.98 | 3.07 |
| #N/A | #N/A | #N/A | #N/A |
| 0.92 | 2.39 | 0.92 | 3.03 |
| #N/A | #N/A | #N/A | #N/A |
| 1.00 | 2.30 | 0.89 | 3.66 |
| 1.00 | 2.30 | 0.89 | 3.66 |
| #N/A | #N/A | #N/A | #N/A |
| 0.51 | 1.15 | 0.50 | 0.76 |
| #N/A | #N/A | #N/A | #N/A |
| 0.84 | #N/A | #N/A | 2.47 |
| 0.68 | 1.69 | 0.75 | 1.59 |
| 0.68 | 1.69 | 0.75 | 1.59 |



|      |      |      |      |
|------|------|------|------|
| 0.81 | 1.82 | 0.79 | 1.54 |
| 0.81 | 1.82 | 0.79 | 1.54 |
| 0.89 | 2.31 | 0.91 | 1.73 |
| 0.53 | 1.38 | 0.62 | 1.23 |
| #N/A | #N/A | #N/A | #N/A |
| 0.71 | 1.75 | 0.76 | 1.50 |
| 0.79 | 1.40 | 0.63 | 1.98 |
| 0.79 | 1.40 | 0.63 | 1.98 |
| 0.74 | 1.95 | 0.83 | 1.74 |
| 0.73 | 1.74 | 0.77 | 1.52 |
| 0.12 | 0.50 | 0.13 | 0.59 |
| #N/A | #N/A | #N/A | #N/A |
| #N/A | #N/A | #N/A | #N/A |
| 0.93 | 1.53 | 0.69 | 3.10 |
| 0.26 | #N/A | #N/A | #N/A |
| 0.26 | #N/A | #N/A | #N/A |
| 0.82 | 1.94 | 0.83 | 2.13 |
| 0.64 | 1.59 | 0.71 | 1.50 |
| 0.30 | 1.01 | 0.43 | 0.79 |
| 0.30 | 1.01 | 0.43 | 0.79 |
| 0.23 | 1.10 | 0.48 | 0.69 |
| #N/A | 1.53 | 0.68 | #N/A |
| 0.14 | #N/A | #N/A | 0.54 |
| #N/A | #N/A | #N/A | #N/A |
| #N/A | #N/A | #N/A | #N/A |
| #N/A | #N/A | #N/A | #N/A |
| #N/A | #N/A | #N/A | #N/A |
| #N/A | #N/A | #N/A | #N/A |
| #N/A | #N/A | #N/A | #N/A |
| #N/A | #N/A | #N/A | #N/A |
| #N/A | #N/A | #N/A | #N/A |
| #N/A | #N/A | #N/A | #N/A |
| #N/A | #N/A | #N/A | #N/A |
| #N/A | #N/A | #N/A | #N/A |
| #N/A | #N/A | #N/A | #N/A |
| #N/A | #N/A | #N/A | #N/A |
| #N/A | #N/A | #N/A | #N/A |
| #N/A | #N/A | #N/A | #N/A |
| #N/A | #N/A | #N/A | #N/A |
| #N/A | #N/A | #N/A | #N/A |
| #N/A | #N/A | #N/A | #N/A |
| #N/A | #N/A | #N/A | #N/A |
| #N/A | #N/A | #N/A | #N/A |
| #N/A | #N/A | #N/A | #N/A |
| 0.38 | 1.14 | 0.49 | 0.93 |
| 0.38 | 1.14 | 0.49 | 0.93 |
| 0.51 | 1.07 | 0.46 | 0.95 |
| 0.78 | 1.78 | 0.78 | 1.93 |
| 0.78 | 1.78 | 0.78 | 1.93 |
| 0.37 | 0.74 | 0.27 | 0.78 |
| 0.54 | 0.78 | 0.29 | 1.34 |

|      |      |      |      |
|------|------|------|------|
| 0.40 | #N/A | #N/A | #N/A |
| 0.40 | #N/A | #N/A | #N/A |
| 0.86 | 1.54 | 0.69 | 1.66 |
| 0.40 | #N/A | #N/A | #N/A |
| 0.86 | 1.54 | 0.69 | 1.66 |
| 0.75 | 2.34 | 0.91 | 1.62 |
| 0.45 | 2.07 | 0.86 | 0.89 |
| 0.45 | 2.07 | 0.86 | 0.89 |
| 0.15 | 0.50 | 0.14 | 0.34 |
| 0.86 | 2.24 | 0.89 | 1.87 |
| 0.86 | 2.24 | 0.89 | 1.87 |
| #N/A | #N/A | #N/A | #N/A |
| 0.61 | 0.92 | 0.37 | 1.94 |
| 0.32 | 0.83 | 0.33 | 1.59 |
| 0.12 | 0.24 | 0.02 | 0.51 |
| 0.32 | 0.83 | 0.33 | 1.59 |
| 0.41 | 1.19 | 0.53 | 1.08 |
| 0.85 | 1.55 | 0.69 | 2.49 |
| 0.91 | 2.19 | 0.89 | 2.02 |
| 0.63 | 0.91 | 0.37 | 1.99 |
| 0.91 | 2.19 | 0.89 | 2.02 |
| 0.72 | 1.98 | 0.84 | 1.54 |
| 0.75 | 2.17 | 0.87 | 1.77 |
| #N/A | 1.41 | 0.63 | #N/A |
| 0.49 | 1.04 | 0.45 | 1.05 |
| #N/A | 1.41 | 0.63 | #N/A |
| 0.50 | 0.96 | 0.40 | 0.99 |
| 0.49 | 1.04 | 0.45 | 1.05 |
| 0.50 | 0.96 | 0.40 | 0.99 |
| 0.54 | 1.18 | 0.52 | 0.69 |
| #N/A | #N/A | #N/A | #N/A |
| #N/A | #N/A | #N/A | #N/A |
| 0.84 | 1.99 | 0.84 | #N/A |
| #N/A | #N/A | #N/A | #N/A |
| #N/A | 1.00 | 0.42 | 0.92 |
| #N/A | #N/A | #N/A | #N/A |
| 0.53 | 1.45 | 0.65 | 1.10 |
| 0.77 | 2.10 | 0.87 | 1.60 |
| #N/A | #N/A | #N/A | #N/A |
| 0.11 | 0.67 | 0.23 | 0.50 |
| 0.32 | 0.52 | 0.14 | 0.56 |
| #N/A | #N/A | #N/A | #N/A |
| #N/A | #N/A | #N/A | #N/A |
| 0.67 | 1.56 | 0.70 | #N/A |
| 0.67 | 1.56 | 0.70 | #N/A |
| 0.51 | 1.17 | 0.52 | 2.10 |
| #N/A | 1.22 | 0.54 | #N/A |
| 0.27 | 0.56 | 0.17 | 0.43 |
| 0.92 | 2.32 | 0.90 | 2.00 |
| 0.34 | 0.91 | 0.37 | 0.85 |
| 0.90 | 2.41 | 0.92 | 1.74 |

|      |      |      |      |
|------|------|------|------|
| 0.90 | 2.41 | 0.92 | 1.74 |
| 0.10 | 0.99 | 0.41 | 0.45 |
| 0.10 | 0.99 | 0.41 | 0.45 |
| #N/A | #N/A | #N/A | #N/A |
| 0.31 | 1.17 | 0.51 | #N/A |
| 0.86 | 1.80 | 0.75 | #N/A |
| 0.86 | 1.80 | 0.75 | #N/A |
| 0.78 | 1.59 | 0.71 | 1.54 |
| 0.78 | 1.59 | 0.71 | 1.54 |
| #N/A | #N/A | #N/A | #N/A |
| 0.61 | 1.11 | 0.48 | 1.21 |
| #N/A | #N/A | #N/A | #N/A |
| #N/A | #N/A | #N/A | #N/A |
| #N/A | #N/A | #N/A | #N/A |
| 0.92 | 2.80 | 0.96 | 2.06 |
| 0.92 | 2.80 | 0.96 | 2.06 |
| 0.05 | 0.53 | 0.15 | 0.49 |
| 0.05 | 0.53 | 0.15 | 0.49 |
| 0.71 | 1.43 | 0.64 | 1.50 |
| 0.69 | 1.54 | 0.68 | 2.01 |
| 0.99 | 1.36 | 0.60 | 3.02 |
| 0.60 | 1.62 | 0.72 | 1.70 |
| 0.44 | 1.29 | 0.57 | 0.79 |
| 0.01 | 0.26 | 0.02 | 0.19 |
| 0.01 | 0.26 | 0.02 | 0.19 |
| 0.73 | 1.54 | 0.69 | 2.28 |
| 0.80 | 1.35 | 0.61 | 2.10 |
| 0.95 | 3.17 | 0.98 | 3.52 |
| 0.95 | 3.17 | 0.98 | 3.52 |
| #N/A | #N/A | #N/A | #N/A |
| 0.70 | 1.81 | 0.79 | 1.72 |
| 0.70 | 1.81 | 0.79 | 1.72 |
| 0.80 | 2.10 | 0.84 | 1.35 |
| 0.95 | 2.50 | 0.93 | 2.07 |
| #N/A | #N/A | #N/A | #N/A |
| 0.95 | 2.50 | 0.93 | 2.07 |
| 0.62 | 1.00 | 0.42 | 1.40 |
| #N/A | #N/A | #N/A | #N/A |
| 0.62 | 1.00 | 0.42 | 1.40 |
| 0.57 | 1.41 | 0.62 | 1.13 |
| #N/A | #N/A | #N/A | #N/A |
| #N/A | #N/A | #N/A | #N/A |
| #N/A | #N/A | #N/A | #N/A |
| 0.77 | 1.92 | 0.82 | 1.37 |
| 0.77 | 1.92 | 0.82 | 1.37 |
| #N/A | #N/A | #N/A | #N/A |
| 0.97 | 3.12 | 0.97 | 2.89 |
| 0.97 | 3.12 | 0.97 | 2.89 |
| 0.43 | #N/A | #N/A | 1.68 |
| 0.50 | 1.26 | 0.56 | 0.94 |
| 0.50 | 1.26 | 0.56 | 0.94 |

|      |      |      |      |
|------|------|------|------|
| 0.44 | 0.99 | 0.42 | 0.75 |
| 0.74 | 1.33 | 0.60 | 1.73 |
| #N/A | 2.34 | 0.91 | #N/A |
| #N/A | 2.34 | 0.91 | #N/A |
| 0.76 | 2.01 | 0.84 | 2.00 |
| 0.76 | 2.01 | 0.84 | 2.00 |
| 0.83 | 2.41 | 0.83 | 1.48 |
| 0.58 | 1.47 | 0.66 | 1.38 |
| 0.58 | 0.74 | 0.27 | 0.82 |
| 0.58 | 1.47 | 0.66 | 1.38 |
| 0.93 | 3.05 | 0.96 | 2.76 |
| 0.93 | 3.05 | 0.96 | 2.76 |
| 0.43 | 1.11 | 0.48 | 1.08 |
| 0.91 | 3.12 | 0.65 | 3.08 |
| 0.30 | 0.40 | 0.08 | 0.97 |
| 0.30 | 0.40 | 0.08 | 0.97 |
| 0.46 | 0.59 | 0.19 | 1.81 |
| 0.20 | 0.47 | 0.11 | 0.57 |
| 0.31 | 0.89 | 0.36 | 1.08 |
| 0.71 | 1.07 | 0.46 | 0.86 |
| #N/A | #N/A | #N/A | #N/A |
| #N/A | #N/A | #N/A | #N/A |
| 0.79 | #N/A | #N/A | 1.99 |
| 0.30 | 0.78 | 0.29 | 0.72 |
| 0.44 | 0.95 | 0.39 | 1.52 |
| #N/A | #N/A | #N/A | #N/A |
| #N/A | 0.96 | 0.40 | 1.12 |
| 0.03 | 0.39 | 0.07 | 0.22 |
| 0.49 | 0.86 | 0.34 | 1.04 |
| 0.29 | 0.62 | 0.20 | 0.76 |
| 0.29 | 0.62 | 0.20 | 0.76 |
| 0.53 | 1.14 | 0.50 | 1.10 |
| 0.84 | 2.19 | 0.89 | 2.09 |
| 0.84 | 2.19 | 0.89 | 2.09 |
| 0.96 | 2.33 | 0.90 | 2.41 |
| 0.96 | 2.33 | 0.90 | 2.41 |
| 0.97 | 2.49 | 0.93 | 2.90 |
| 0.43 | 0.79 | 0.30 | 1.01 |
| 0.80 | 2.10 | 0.86 | 1.97 |
| 0.80 | 2.10 | 0.86 | 1.97 |
| 0.72 | 1.90 | 0.81 | 1.64 |
| 0.50 | 1.57 | 0.69 | #N/A |
| 0.72 | 1.90 | 0.81 | 1.64 |
| #N/A | #N/A | #N/A | #N/A |
| 0.50 | 1.57 | 0.69 | #N/A |
| 0.09 | 0.46 | 0.11 | 0.55 |
| 0.49 | 1.27 | 0.56 | 0.89 |
| #N/A | #N/A | #N/A | #N/A |
| #N/A | #N/A | #N/A | #N/A |
| #N/A | #N/A | #N/A | #N/A |
| 0.28 | 0.75 | 0.28 | 0.63 |

|      |      |      |      |
|------|------|------|------|
| 0.28 | 0.75 | 0.28 | 0.63 |
| #N/A | 1.25 | 0.55 | #N/A |
| #N/A | #N/A | #N/A | #N/A |
| 0.31 | 0.71 | 0.25 | 0.55 |
| #N/A | 1.25 | 0.55 | #N/A |
| 0.49 | 2.00 | 0.84 | 1.60 |
| 0.49 | 2.00 | 0.84 | 1.60 |
| 0.82 | 2.66 | 0.95 | #N/A |
| 0.65 | 1.45 | 0.65 | 1.56 |
| 0.65 | 1.45 | 0.65 | 1.56 |
| 0.64 | 1.61 | 0.71 | 1.44 |
| 0.64 | 1.61 | 0.71 | 1.44 |
| #N/A | #N/A | #N/A | #N/A |
| #N/A | #N/A | #N/A | #N/A |
| #N/A | #N/A | #N/A | #N/A |
| #N/A | 2.20 | 0.87 | 1.74 |
| #N/A | 1.98 | 0.81 | 1.92 |
| #N/A | 1.98 | 0.81 | 1.92 |
| 0.58 | 1.75 | 0.75 | 2.01 |
| 0.82 | 1.98 | 0.84 | #N/A |
| 0.38 | 1.06 | 0.46 | 1.04 |
| 0.39 | 1.04 | 0.45 | 1.70 |
| 0.13 | 0.54 | 0.16 | 0.67 |
| 0.67 | 1.41 | 0.63 | 1.51 |
| 0.03 | #N/A | #N/A | 0.36 |
| 0.97 | 2.53 | 0.94 | 2.93 |
| 0.85 | 1.68 | 0.73 | 2.02 |
| 0.97 | 2.53 | 0.94 | 2.93 |
| 0.85 | 1.68 | 0.73 | 2.02 |
| 0.97 | #N/A | #N/A | #N/A |
| 0.97 | #N/A | #N/A | #N/A |
| 0.06 | 0.59 | 0.18 | 0.43 |
| 0.36 | 1.01 | 0.42 | 0.59 |
| 0.56 | #N/A | #N/A | 0.91 |
| 0.86 | 2.05 | 0.86 | 2.33 |
| 0.97 | 2.14 | 0.87 | 3.29 |
| 0.54 | 1.07 | 0.45 | 1.31 |
| 0.54 | 1.07 | 0.45 | 1.31 |
| 0.55 | 0.90 | 0.36 | 1.18 |
| 0.90 | 2.61 | 0.92 | 2.46 |
| 0.51 | 1.07 | 0.46 | 0.70 |
| 0.77 | 2.30 | 0.90 | 1.14 |
| 0.99 | 3.36 | 0.99 | 3.09 |
| 0.99 | 3.36 | 0.99 | 3.09 |
| 0.81 | 2.27 | 0.90 | 2.00 |
| 0.81 | 2.27 | 0.90 | 2.00 |
| 0.70 | #N/A | #N/A | #N/A |
| 0.70 | 2.00 | 0.84 | 2.21 |
| 0.92 | 4.52 | 0.98 | 1.65 |
| 0.92 | 4.52 | 0.98 | 1.65 |
| 0.73 | 1.81 | 0.78 | 1.84 |

|      |      |      |      |
|------|------|------|------|
| 0.57 | 1.37 | 0.62 | 1.00 |
| 0.90 | 2.57 | 0.94 | 1.74 |
| 0.90 | 2.57 | 0.94 | 1.74 |
| 0.10 | 0.64 | 0.22 | 0.54 |
| 0.95 | #N/A | #N/A | 1.79 |
| 0.56 | #N/A | #N/A | #N/A |
| 0.70 | 1.96 | 0.83 | 1.94 |
| 0.97 | 3.28 | 0.98 | 2.23 |
| #N/A | 3.03 | 0.98 | 3.26 |
| #N/A | 3.03 | 0.98 | 3.26 |
| 0.73 | 0.96 | 0.40 | 0.76 |
| 0.73 | 0.96 | 0.40 | 0.76 |
| 0.49 | #N/A | #N/A | 1.14 |
| 0.52 | 1.14 | 0.50 | 1.79 |
| 1.00 | 4.08 | 0.99 | 2.39 |
| 1.00 | 4.08 | 0.99 | 2.39 |
| 0.36 | 1.11 | 0.48 | 1.06 |
| 0.33 | 1.00 | 0.42 | 1.00 |
| #N/A | 0.53 | 0.15 | #N/A |
| 0.93 | #N/A | #N/A | 2.64 |
| 0.93 | #N/A | #N/A | 2.64 |
| 0.76 | 1.32 | 0.59 | 1.59 |
| 0.85 | #N/A | #N/A | 1.87 |
| 0.85 | #N/A | #N/A | 1.87 |
| 0.68 | #N/A | #N/A | #N/A |
| #N/A | 1.88 | 0.81 | 2.59 |
| 0.95 | #N/A | #N/A | #N/A |
| 0.95 | #N/A | #N/A | #N/A |
| #N/A | #N/A | #N/A | #N/A |
| 0.92 | 2.95 | 0.97 | 2.80 |
| 0.44 | 1.10 | 0.48 | 0.99 |
| 0.60 | 1.27 | 0.56 | 0.93 |
| 0.60 | 1.27 | 0.56 | 0.93 |
| 0.86 | 2.18 | 0.88 | 2.60 |
| 0.34 | 0.97 | 0.40 | 0.68 |
| 0.62 | 2.17 | 0.88 | 1.15 |
| 0.59 | 1.01 | 0.43 | 1.16 |
| #N/A | #N/A | #N/A | #N/A |
| 0.45 | 0.45 | 0.10 | 0.79 |
| 0.45 | 0.45 | 0.10 | 0.79 |
| 0.24 | #N/A | #N/A | 0.65 |
| 0.43 | 0.85 | 0.34 | 0.94 |
| 0.59 | 1.12 | 0.49 | 0.89 |
| 0.58 | 1.36 | 0.61 | 1.15 |
| 0.58 | 1.36 | 0.61 | 1.15 |
| 0.57 | 1.18 | 0.52 | 1.57 |
| 0.57 | 1.18 | 0.52 | 1.57 |
| 0.12 | 0.37 | 0.06 | 0.56 |
| 0.12 | 0.37 | 0.06 | 0.56 |
| 0.39 | 1.18 | 0.52 | 0.89 |
| #N/A | 0.51 | 0.13 | #N/A |

|      |      |      |      |
|------|------|------|------|
| #N/A | #N/A | #N/A | 1.53 |
| #N/A | #N/A | #N/A | #N/A |
| 0.97 | 2.26 | 0.90 | 2.75 |
| #N/A | 1.45 | 0.64 | 1.47 |
| 0.45 | 1.25 | 0.55 | 1.58 |
| 0.36 | 1.02 | 0.44 | 1.01 |
| 0.68 | 1.79 | 0.77 | #N/A |
| 0.68 | 1.79 | 0.77 | #N/A |
| 0.36 | 1.30 | 0.56 | #N/A |
| 0.15 | 0.66 | 0.22 | 0.57 |
| #N/A | #N/A | #N/A | #N/A |
| #N/A | #N/A | #N/A | #N/A |
| 0.88 | 1.67 | 0.74 | 2.38 |
| 0.63 | 1.25 | 0.56 | 1.33 |
| #N/A | #N/A | #N/A | #N/A |
| #N/A | #N/A | #N/A | #N/A |
| 0.97 | 3.21 | 0.98 | 2.97 |
| 0.97 | 3.21 | 0.98 | 2.97 |
| 0.65 | 0.97 | 0.40 | 1.71 |
| 0.20 | 0.59 | 0.18 | 0.86 |
| 0.78 | 1.65 | 0.73 | 1.73 |
| 0.83 | 1.12 | 0.49 | 1.64 |
| 0.73 | 1.59 | 0.71 | 1.73 |
| 0.73 | 1.59 | 0.71 | 1.73 |
| 0.62 | 1.71 | 0.75 | 1.24 |
| #N/A | #N/A | #N/A | #N/A |
| 0.43 | 0.30 | 0.03 | 0.87 |
| 0.43 | 0.30 | 0.03 | 0.87 |
| 0.10 | 0.69 | 0.24 | 0.57 |
| 0.25 | 0.43 | 0.09 | 0.75 |
| 0.76 | 2.27 | 0.89 | 1.42 |
| 0.58 | 1.56 | 0.70 | 1.16 |
| #N/A | #N/A | #N/A | #N/A |
| #N/A | #N/A | #N/A | #N/A |
| #N/A | 0.56 | 0.16 | 0.46 |
| #N/A | #N/A | #N/A | #N/A |
| 0.10 | 0.70 | 0.25 | 0.53 |
| 0.51 | 1.35 | 0.60 | 0.96 |
| 0.40 | 1.12 | 0.49 | 0.89 |
| 0.51 | 1.35 | 0.60 | 0.96 |
| 0.39 | 0.66 | 0.23 | 0.83 |
| 0.39 | 0.66 | 0.23 | 0.83 |
| 0.83 | 1.83 | 0.79 | 1.08 |
| 0.83 | 1.83 | 0.79 | 1.08 |
| 0.28 | 0.66 | 0.22 | #N/A |
| #N/A | #N/A | #N/A | #N/A |
| #N/A | #N/A | #N/A | #N/A |
| 0.10 | 0.70 | 0.25 | 0.39 |
| 0.62 | 1.36 | 0.58 | 0.85 |
| 0.33 | 1.06 | 0.46 | 0.94 |
| 0.04 | 0.60 | 0.19 | #N/A |

|      |      |      |      |
|------|------|------|------|
| #N/A | #N/A | #N/A | #N/A |
| 0.53 | 1.14 | 0.48 | 1.56 |
| 0.82 | #N/A | #N/A | #N/A |
| 0.82 | #N/A | #N/A | #N/A |
| 0.94 | 1.71 | 0.75 | 2.20 |
| 0.54 | 1.10 | 0.46 | 1.29 |
| 0.30 | #N/A | #N/A | #N/A |
| #N/A | #N/A | #N/A | #N/A |
| #N/A | #N/A | #N/A | #N/A |
| 0.52 | 0.44 | 0.10 | 1.69 |
| 0.83 | 2.12 | 0.84 | 1.80 |
| #N/A | #N/A | #N/A | #N/A |
| 0.01 | 0.12 | 0.00 | 0.22 |
| 0.75 | 1.12 | 0.48 | 1.93 |
| 0.75 | 1.12 | 0.48 | 1.93 |
| 0.78 | 2.19 | 0.88 | 1.76 |
| 0.95 | 2.93 | 0.97 | 2.33 |
| 0.95 | 2.93 | 0.97 | 2.33 |
| #N/A | #N/A | #N/A | #N/A |
| 0.86 | 1.31 | 0.57 | 2.60 |
| 0.38 | 0.46 | 0.11 | 0.84 |
| 0.39 | 1.07 | 0.46 | 0.75 |
| 0.65 | 1.56 | 0.70 | 1.92 |
| 0.60 | 0.95 | 0.39 | 1.51 |
| 0.27 | 0.50 | 0.13 | 0.98 |
| 0.48 | 1.92 | 0.82 | 1.29 |
| 0.68 | 1.80 | 0.79 | 1.10 |
| 0.68 | 1.80 | 0.79 | 1.10 |
| 0.28 | 0.83 | 0.33 | 0.62 |
| 0.28 | 0.83 | 0.33 | 0.62 |
| 0.42 | 0.50 | 0.13 | 1.49 |
| 0.42 | 0.50 | 0.13 | 1.49 |
| 0.59 | 1.79 | 0.75 | 1.71 |
| #N/A | 0.79 | 0.30 | #N/A |
| #N/A | #N/A | #N/A | #N/A |
| 0.28 | 0.66 | 0.23 | 1.02 |
| 0.37 | 0.61 | 0.19 | 1.01 |
| 0.47 | 1.07 | 0.46 | 1.22 |
| 0.47 | 1.07 | 0.46 | 1.22 |
| 0.65 | 1.59 | 0.71 | 1.41 |
| 0.96 | 2.01 | 0.83 | 1.80 |
| 0.96 | 2.01 | 0.83 | 1.80 |
| 0.97 | 2.00 | 0.84 | #N/A |
| 0.97 | 2.00 | 0.84 | #N/A |
| 0.88 | 2.75 | 0.96 | 2.03 |
| 0.88 | 2.75 | 0.96 | 2.03 |
| 0.57 | 0.92 | 0.37 | 1.14 |
| 0.29 | #N/A | #N/A | #N/A |
| 0.76 | 2.38 | 0.92 | 1.58 |
| #N/A | #N/A | #N/A | #N/A |
| 0.76 | 2.38 | 0.92 | 1.58 |



|      |      |      |      |
|------|------|------|------|
| 0.61 | #N/A | #N/A | 1.23 |
| 0.80 | 2.16 | 0.82 | 1.98 |
| 0.80 | 2.16 | 0.82 | 1.98 |
| 0.44 | 0.98 | 0.41 | 0.92 |
| 0.92 | 2.03 | 0.84 | 2.53 |
| 0.92 | 2.03 | 0.84 | 2.53 |
| 0.88 | 2.02 | 0.85 | 2.29 |
| 0.39 | 1.08 | 0.47 | 0.98 |
| 0.39 | 1.08 | 0.47 | 0.98 |
| 0.63 | #N/A | #N/A | 1.31 |
| 0.63 | #N/A | #N/A | 1.31 |
| #N/A | 1.14 | 0.50 | #N/A |
| #N/A | #N/A | #N/A | #N/A |
| 0.59 | 1.05 | 0.45 | 0.93 |
| 0.95 | 2.33 | 0.91 | 2.08 |
| 0.58 | 1.93 | 0.82 | 2.47 |
| #N/A | #N/A | #N/A | #N/A |
| 0.02 | 0.22 | 0.01 | 0.34 |
| 0.02 | 0.22 | 0.01 | 0.34 |
| 0.95 | #N/A | #N/A | 1.63 |
| 0.63 | 1.72 | 0.76 | 1.68 |
| 0.95 | #N/A | #N/A | 1.63 |
| 0.63 | 1.72 | 0.76 | 1.68 |
| 0.82 | 2.70 | 0.95 | 1.51 |
| 0.82 | 2.70 | 0.95 | 1.51 |
| 0.74 | 1.55 | 0.69 | 1.60 |
| 0.46 | 1.22 | 0.54 | 1.22 |
| 0.71 | 2.04 | 0.84 | 1.92 |
| 0.85 | 2.56 | 0.94 | 2.02 |
| 0.85 | 2.56 | 0.94 | 2.02 |
| 0.41 | 1.05 | 0.45 | 0.98 |
| 0.41 | 1.05 | 0.45 | 0.98 |
| 0.91 | 1.68 | 0.75 | 2.35 |
| 0.25 | 0.72 | 0.26 | 0.75 |
| 0.91 | 1.68 | 0.75 | 2.35 |
| 0.52 | 1.09 | 0.47 | 1.45 |
| 0.52 | 1.09 | 0.47 | 1.45 |
| 0.06 | 0.44 | 0.09 | 0.49 |
| 0.08 | 0.37 | 0.06 | 0.76 |
| 0.08 | 0.37 | 0.06 | 0.76 |
| 0.08 | 0.37 | 0.06 | 0.76 |
| 0.08 | 0.37 | 0.06 | 0.76 |
| 0.08 | 0.37 | 0.06 | 0.76 |
| 0.80 | 0.94 | 0.39 | 1.88 |
| #N/A | 1.73 | 0.76 | 1.66 |
| 0.47 | 0.95 | 0.39 | #N/A |
| 0.76 | 2.04 | 0.85 | 1.61 |
| 0.76 | 2.04 | 0.85 | 1.61 |
| 0.90 | 3.28 | 0.98 | 1.43 |
| 0.90 | 3.28 | 0.98 | 1.43 |
| 0.97 | 2.80 | 0.96 | 2.86 |

|      |      |      |      |
|------|------|------|------|
| 0.97 | 2.80 | 0.96 | 2.86 |
| 0.70 | 1.62 | 0.72 | 2.01 |
| 0.80 | 1.22 | 0.54 | 2.06 |
| 0.38 | 1.15 | 0.50 | 1.49 |
| #N/A | #N/A | #N/A | #N/A |
| 0.49 | 1.16 | 0.51 | 1.56 |
| 0.30 | 0.76 | 0.28 | 0.70 |
| 0.30 | 0.76 | 0.28 | 0.70 |
| 0.75 | 2.05 | 0.85 | 1.60 |
| 0.75 | 2.05 | 0.85 | 1.60 |
| 0.82 | 1.66 | 0.74 | #N/A |
| 0.90 | 1.42 | 0.64 | 1.88 |
| 0.66 | 1.73 | 0.76 | 1.62 |
| 0.66 | 1.73 | 0.76 | 1.62 |
| 0.86 | #N/A | #N/A | 2.19 |
| 0.78 | 2.05 | 0.86 | 1.77 |
| 0.78 | 2.05 | 0.86 | 1.77 |
| 0.48 | #N/A | #N/A | 1.39 |
| #N/A | 1.86 | 0.77 | #N/A |
| 0.41 | 1.29 | 0.57 | #N/A |
| 0.18 | 0.64 | 0.21 | 0.51 |
| 0.42 | 1.33 | 0.59 | 1.08 |
| 0.18 | 0.64 | 0.21 | 0.51 |
| 0.42 | 1.33 | 0.59 | 1.08 |
| 0.64 | 2.16 | 0.88 | 1.50 |
| 0.64 | 2.16 | 0.88 | 1.50 |
| 0.55 | 1.21 | 0.54 | 1.41 |
| #N/A | #N/A | #N/A | #N/A |
| #N/A | #N/A | #N/A | #N/A |
| #N/A | #N/A | #N/A | #N/A |
| #N/A | 1.72 | 0.75 | #N/A |
| #N/A | 1.72 | 0.75 | #N/A |
| #N/A | 1.34 | 0.60 | #N/A |
| #N/A | 1.34 | 0.60 | #N/A |
| 0.92 | 2.44 | 0.92 | 5.00 |
| 0.92 | 2.44 | 0.92 | 5.00 |
| #N/A | 1.44 | 0.65 | 2.28 |
| #N/A | #N/A | #N/A | #N/A |
| #N/A | 1.44 | 0.65 | 2.28 |
| 0.93 | #N/A | #N/A | 2.31 |
| 0.84 | 1.71 | 0.75 | #N/A |
| 0.83 | 1.52 | 0.68 | 1.63 |
| 0.83 | 1.52 | 0.68 | 1.63 |
| #N/A | 0.92 | 0.37 | #N/A |
| #N/A | #N/A | #N/A | #N/A |
| 0.58 | 1.49 | 0.66 | 0.85 |
| 0.66 | 4.06 | 0.99 | 1.59 |
| 0.56 | 1.62 | 0.72 | 1.37 |
| 0.29 | #N/A | #N/A | 1.92 |
| 0.37 | 0.64 | 0.21 | 1.04 |
| 0.37 | 0.64 | 0.21 | 1.04 |

|      |      |      |      |
|------|------|------|------|
| 0.78 | #N/A | #N/A | 1.81 |
| 0.24 | 0.79 | 0.30 | 0.62 |
| 0.56 | 1.58 | 0.71 | 1.66 |
| 0.18 | 0.70 | 0.25 | 0.58 |
| 0.56 | 1.58 | 0.71 | 1.66 |
| 0.18 | 0.70 | 0.25 | 0.58 |
| 0.60 | 1.33 | 0.59 | 1.77 |
| 0.15 | 0.84 | 0.33 | 0.32 |
| 0.15 | 0.84 | 0.33 | 0.32 |
| 0.16 | 0.63 | 0.21 | 0.52 |
| 0.43 | 1.37 | 0.62 | 1.33 |
| 0.88 | 1.92 | 0.82 | 1.96 |
| 0.88 | 1.92 | 0.82 | 1.96 |
| #N/A | #N/A | #N/A | #N/A |
| 0.53 | 1.38 | 0.61 | 1.03 |
| 0.53 | 1.38 | 0.61 | 1.03 |
| 0.09 | 0.75 | 0.28 | 0.38 |
| 0.09 | 0.75 | 0.28 | 0.38 |
| 0.73 | 1.41 | 0.63 | 2.01 |
| 0.96 | 2.46 | 0.93 | 2.39 |
| 0.96 | 2.46 | 0.93 | 2.39 |
| 0.74 | 1.70 | 0.73 | 1.29 |
| 0.65 | 2.59 | 0.94 | 1.65 |
| #N/A | #N/A | #N/A | #N/A |
| 0.65 | 2.59 | 0.94 | 1.65 |
| 0.39 | 0.76 | 0.29 | 0.78 |
| 0.74 | 1.38 | 0.62 | #N/A |
| 0.74 | 1.38 | 0.62 | #N/A |
| 0.59 | 1.43 | 0.64 | 0.54 |
| 0.42 | 1.84 | 0.79 | 1.28 |
| 0.53 | 0.51 | 0.14 | 1.03 |
| #N/A | #N/A | #N/A | 0.80 |
| 0.66 | 1.57 | 0.70 | 1.70 |
| 0.54 | #N/A | #N/A | #N/A |
| 0.54 | #N/A | #N/A | #N/A |
| #N/A | #N/A | #N/A | #N/A |
| 0.79 | 1.72 | 0.75 | 2.00 |
| 0.79 | 1.72 | 0.75 | 2.00 |
| 0.65 | 1.38 | 0.62 | 1.34 |
| 0.03 | 0.49 | 0.12 | 0.44 |
| 0.44 | #N/A | #N/A | 1.19 |
| 0.53 | 0.43 | 0.10 | 1.74 |
| 0.07 | 0.25 | 0.02 | 0.42 |
| 0.68 | 0.76 | 0.29 | 1.85 |
| 0.70 | 1.04 | 0.44 | 1.56 |
| 0.43 | 1.01 | 0.43 | 1.33 |
| 0.15 | #N/A | #N/A | 0.61 |
| 0.90 | 2.20 | 0.89 | 1.82 |
| 0.90 | 2.20 | 0.89 | 1.82 |
| #N/A | #N/A | #N/A | #N/A |
| 0.73 | 1.66 | 0.73 | 1.63 |

|      |      |      |      |
|------|------|------|------|
| 0.73 | 1.66 | 0.73 | 1.63 |
| #N/A | #N/A | #N/A | #N/A |
| 0.16 | 1.03 | 0.44 | 1.12 |
| #N/A | #N/A | #N/A | #N/A |
| #N/A | #N/A | #N/A | #N/A |
| 0.34 | 0.89 | 0.36 | 1.05 |
| 0.12 | 0.53 | 0.15 | 0.53 |
| 0.12 | 0.53 | 0.15 | 0.53 |
| 0.07 | 0.33 | 0.04 | 0.44 |
| 0.21 | 0.46 | 0.11 | 0.60 |
| 0.49 | 1.39 | 0.62 | 1.21 |
| 0.71 | 1.93 | 0.82 | 1.44 |
| 0.82 | 2.11 | 0.86 | 2.12 |
| 0.46 | 1.28 | 0.57 | 1.29 |
| 0.60 | 1.49 | 0.67 | 1.15 |
| 0.83 | 2.34 | 0.88 | 2.00 |
| 0.61 | 1.24 | 0.55 | 1.15 |
| 0.61 | 1.24 | 0.55 | 1.15 |
| 0.96 | 2.10 | 0.86 | 2.54 |
| 0.96 | 2.10 | 0.86 | 2.54 |
| 0.72 | 1.44 | 0.64 | 1.59 |
| #N/A | #N/A | #N/A | #N/A |
| 0.18 | 0.61 | 0.20 | 0.66 |
| 0.18 | 0.61 | 0.20 | 0.66 |
| #N/A | #N/A | #N/A | 0.82 |
| #N/A | #N/A | #N/A | #N/A |
| 0.46 | 1.02 | 0.43 | 0.89 |
| 0.70 | 1.27 | 0.55 | 1.51 |
| 0.70 | 1.27 | 0.55 | 1.51 |
| 0.26 | 0.81 | 0.31 | 0.58 |
| 0.78 | 2.14 | 0.87 | 1.63 |
| 0.78 | 2.14 | 0.87 | 1.63 |
| 0.99 | 3.00 | 0.96 | 2.91 |
| 0.99 | 3.00 | 0.96 | 2.91 |
| 0.74 | 1.69 | 0.75 | 1.48 |
| 0.93 | 2.51 | 0.93 | 1.87 |
| 0.48 | 1.47 | 0.66 | 1.89 |
| #N/A | #N/A | #N/A | #N/A |
| 0.74 | 1.27 | 0.55 | 1.70 |
| #N/A | 0.72 | 0.26 | 1.01 |
| 0.34 | 1.09 | 0.47 | 0.79 |
| 0.04 | 0.48 | 0.12 | 0.32 |
| 0.64 | 1.46 | 0.65 | 1.35 |
| 0.64 | 1.46 | 0.65 | 1.35 |
| 0.82 | 2.28 | 0.90 | 1.71 |
| 0.67 | 1.07 | 0.46 | 1.69 |
| 0.68 | 1.88 | 0.80 | 1.07 |
| #N/A | #N/A | #N/A | #N/A |
| #N/A | #N/A | #N/A | #N/A |
| 0.14 | 1.60 | 0.71 | 0.87 |
| 0.68 | 1.62 | 0.72 | 1.56 |

|      |      |      |      |
|------|------|------|------|
| #N/A | 0.70 | 0.25 | #N/A |
| 0.89 | 2.35 | 0.91 | 2.21 |
| 0.89 | 2.35 | 0.91 | 2.21 |
| 0.46 | 1.25 | 0.55 | 0.69 |
| 0.58 | 2.27 | 0.90 | 1.13 |
| 0.56 | 1.72 | 0.74 | #N/A |
| 0.56 | 1.72 | 0.74 | #N/A |
| 0.98 | 2.89 | 0.96 | 2.20 |
| 0.98 | 2.89 | 0.96 | 2.20 |
| 0.89 | 2.57 | 0.94 | 3.27 |
| #N/A | #N/A | #N/A | #N/A |
| #N/A | #N/A | #N/A | #N/A |
| 0.62 | 0.74 | 0.27 | 1.68 |
| #N/A | #N/A | #N/A | #N/A |
| #N/A | 1.02 | 0.43 | 1.36 |
| #N/A | 1.02 | 0.43 | 1.36 |
| #N/A | #N/A | #N/A | #N/A |
| 0.59 | #N/A | #N/A | 0.95 |
| 0.85 | 1.63 | 0.73 | 1.54 |
| 0.77 | 1.62 | 0.71 | 1.64 |
| 0.42 | 1.53 | 0.66 | 0.72 |
| 0.42 | 1.53 | 0.66 | 0.72 |
| 0.87 | 2.16 | 0.87 | 1.94 |
| 0.12 | #N/A | #N/A | #N/A |
| 0.42 | 0.50 | 0.13 | 0.65 |
| #N/A | 1.32 | 0.59 | 1.36 |
| 0.08 | 0.48 | 0.12 | 0.37 |
| 0.87 | 1.99 | 0.83 | 1.71 |
| 0.87 | 1.99 | 0.83 | 1.71 |
| 0.52 | 1.33 | 0.60 | 1.10 |
| 0.87 | 2.45 | 0.93 | 1.77 |
| 0.90 | 1.82 | 0.79 | 1.97 |
| 0.90 | 1.82 | 0.79 | 1.97 |
| 0.42 | 1.28 | 0.57 | 0.90 |
| 0.52 | 1.20 | 0.53 | 1.21 |
| 0.55 | 1.13 | 0.50 | 1.68 |
| 0.22 | 0.78 | 0.29 | #N/A |
| #N/A | 1.12 | 0.47 | #N/A |
| #N/A | #N/A | #N/A | #N/A |
| #N/A | #N/A | #N/A | #N/A |
| 0.40 | 1.42 | 0.64 | 0.92 |
| 0.09 | #N/A | #N/A | #N/A |
| 0.46 | 1.55 | 0.69 | 1.39 |
| 0.78 | 2.23 | 0.89 | 1.99 |
| 0.78 | 2.23 | 0.89 | 1.99 |
| 0.55 | 2.42 | 0.92 | 1.05 |
| 0.94 | 4.48 | 1.00 | #N/A |
| 0.73 | 1.42 | 0.63 | #N/A |
| 0.94 | 4.48 | 1.00 | #N/A |
| 0.73 | 1.42 | 0.63 | #N/A |
| #N/A | #N/A | #N/A | #N/A |

|      |      |      |      |
|------|------|------|------|
| 0.81 | 1.87 | 0.78 | 2.75 |
| 0.81 | 1.87 | 0.78 | 2.75 |
| 0.88 | 1.99 | 0.84 | 2.63 |
| 0.88 | 1.99 | 0.84 | 2.63 |
| 0.85 | 1.69 | 0.74 | 1.98 |
| 0.80 | 1.15 | 0.50 | 1.44 |
| 0.80 | 1.15 | 0.50 | 1.44 |
| 0.44 | 0.95 | 0.39 | 0.95 |
| 0.78 | 1.73 | 0.76 | 1.54 |
| 0.78 | 1.73 | 0.76 | 1.54 |
| 0.49 | 0.61 | 0.20 | 1.40 |
| 0.23 | 0.42 | 0.08 | 0.70 |
| #N/A | #N/A | #N/A | #N/A |
| 0.36 | 1.16 | 0.51 | 0.98 |
| 0.01 | 0.20 | 0.01 | 0.18 |
| 0.01 | 0.20 | 0.01 | 0.18 |
| 0.21 | 1.02 | 0.43 | 0.79 |
| 0.70 | #N/A | #N/A | 1.85 |
| 0.70 | #N/A | #N/A | 1.85 |
| 0.22 | 0.71 | 0.25 | 0.59 |
| 0.84 | #N/A | #N/A | #N/A |
| 0.90 | 1.97 | 0.83 | 1.99 |
| 0.90 | 1.97 | 0.83 | 1.99 |
| 0.69 | 1.36 | 0.61 | #N/A |
| 0.78 | 1.15 | 0.51 | #N/A |
| 0.50 | 1.69 | 0.74 | 1.07 |
| #N/A | #N/A | #N/A | #N/A |
| 0.56 | 1.56 | 0.69 | 1.10 |
| 0.56 | 1.56 | 0.69 | 1.10 |
| 0.05 | 1.27 | 0.56 | #N/A |
| 0.32 | 1.38 | 0.62 | 0.78 |
| #N/A | #N/A | #N/A | #N/A |
| 0.42 | 1.28 | 0.57 | 0.79 |
| 0.42 | 1.28 | 0.57 | 0.79 |
| 0.94 | 2.20 | 0.89 | 2.53 |
| 0.94 | 2.20 | 0.89 | 2.53 |
| 0.40 | 0.78 | 0.30 | 1.17 |
| 0.88 | #N/A | #N/A | #N/A |
| 0.63 | 1.23 | 0.55 | 1.55 |
| 0.63 | 1.23 | 0.55 | 1.55 |
| 0.82 | 2.21 | 0.89 | 1.32 |
| 0.97 | 3.27 | 0.98 | 2.81 |
| 0.97 | 3.27 | 0.98 | 2.81 |
| 0.31 | 1.11 | 0.48 | 0.57 |
| 0.66 | 1.45 | 0.65 | 1.70 |
| #N/A | 1.63 | 0.72 | 0.98 |
| #N/A | 1.63 | 0.72 | 0.98 |
| 0.29 | 0.90 | 0.37 | 0.69 |
| 0.06 | 0.60 | 0.19 | 0.23 |
| 0.29 | 0.90 | 0.37 | 0.69 |
| 0.04 | 0.36 | 0.05 | 0.28 |

|      |      |      |      |
|------|------|------|------|
| 0.55 | #N/A | #N/A | 1.01 |
| 0.70 | #N/A | #N/A | #N/A |
| #N/A | #N/A | #N/A | #N/A |
| #N/A | 2.14 | 0.85 | 3.37 |
| #N/A | 2.14 | 0.85 | 3.37 |
| 0.85 | 1.96 | 0.78 | 2.64 |
| 0.85 | 1.96 | 0.78 | 2.64 |
| #N/A | #N/A | #N/A | #N/A |
| 0.59 | 1.96 | 0.83 | 1.90 |
| #N/A | #N/A | #N/A | #N/A |
| 0.59 | 1.96 | 0.83 | 1.90 |
| #N/A | #N/A | #N/A | #N/A |
| #N/A | #N/A | #N/A | #N/A |
| 0.21 | 0.66 | 0.22 | 0.54 |
| 0.89 | 2.30 | 0.90 | 2.59 |
| 0.89 | 2.30 | 0.90 | 2.59 |
| 0.55 | #N/A | #N/A | #N/A |
| 0.47 | 1.35 | 0.60 | 1.09 |
| #N/A | #N/A | #N/A | #N/A |
| 0.48 | 1.52 | 0.68 | 0.91 |
| 0.09 | 0.55 | 0.16 | 0.22 |
| 0.09 | 0.55 | 0.16 | 0.22 |
| 0.67 | 1.56 | 0.68 | 1.50 |
| 0.67 | 1.56 | 0.68 | 1.50 |
| #N/A | #N/A | #N/A | #N/A |
| 0.81 | 1.97 | 0.82 | 2.17 |
| 0.12 | 0.72 | 0.26 | 0.43 |
| 0.12 | 0.72 | 0.26 | 0.43 |
| 0.34 | 1.17 | 0.51 | 0.73 |
| 0.34 | 1.17 | 0.51 | 0.73 |
| #N/A | #N/A | #N/A | #N/A |
| #N/A | #N/A | #N/A | #N/A |
| 0.90 | 2.09 | 0.86 | 2.06 |
| 0.77 | 2.21 | 0.85 | 1.75 |
| 0.56 | 1.92 | 0.82 | 1.78 |
| 0.77 | 2.21 | 0.85 | 1.75 |
| 0.56 | 1.92 | 0.82 | 1.78 |
| #N/A | #N/A | #N/A | #N/A |
| 0.77 | 2.18 | 0.88 | 2.02 |
| 0.77 | 2.18 | 0.88 | 2.02 |
| #N/A | #N/A | #N/A | #N/A |
| #N/A | #N/A | #N/A | #N/A |
| #N/A | #N/A | #N/A | #N/A |
| #N/A | #N/A | #N/A | #N/A |
| #N/A | 3.37 | 0.98 | 3.28 |
| #N/A | 3.37 | 0.98 | 3.28 |
| #N/A | #N/A | #N/A | #N/A |
| #N/A | 1.45 | 0.64 | 1.32 |
| #N/A | 1.45 | 0.64 | 1.32 |
| 0.14 | 0.65 | 0.22 | 0.68 |
| 0.14 | 0.65 | 0.22 | 0.68 |

|      |      |      |      |
|------|------|------|------|
| 0.46 | 1.50 | 0.67 | 0.93 |
| 0.75 | 1.79 | 0.78 | 1.31 |
| 0.29 | 0.48 | 0.12 | 0.75 |
| 0.52 | 0.74 | 0.27 | 1.34 |
| 0.82 | 1.40 | 0.63 | 1.98 |
| 0.82 | 1.40 | 0.63 | 1.98 |
| 0.57 | #N/A | #N/A | 1.56 |
| 0.86 | 1.80 | 0.78 | 2.49 |
| 0.86 | 1.80 | 0.78 | 2.49 |
| 0.54 | 1.10 | 0.48 | 1.35 |
| 0.47 | 1.46 | 0.65 | #N/A |
| 0.47 | 1.46 | 0.65 | #N/A |
| #N/A | #N/A | #N/A | #N/A |
| #N/A | 1.52 | 0.68 | 2.07 |
| 0.36 | 1.27 | 0.56 | 0.94 |
| #N/A | #N/A | #N/A | #N/A |
| 0.86 | 2.15 | 0.87 | 1.77 |
| 0.86 | 2.15 | 0.87 | 1.77 |
| 0.97 | 2.30 | 0.86 | 2.71 |
| 0.78 | 1.78 | 0.78 | 1.79 |
| 0.97 | 2.30 | 0.86 | 2.71 |
| 0.78 | 1.78 | 0.78 | 1.79 |
| 0.90 | 2.62 | 0.93 | 2.20 |
| 0.32 | 0.81 | 0.31 | #N/A |
| 0.45 | 1.52 | 0.67 | 0.48 |
| 0.45 | 1.04 | 0.45 | 1.17 |
| 0.71 | 1.78 | 0.78 | 1.57 |
| 0.71 | 1.78 | 0.78 | 1.57 |
| 0.05 | 0.55 | 0.16 | 0.58 |
| 0.05 | 0.55 | 0.16 | 0.58 |
| #N/A | #N/A | #N/A | #N/A |
| 0.81 | 1.34 | 0.60 | #N/A |
| 0.53 | 1.14 | 0.50 | 1.05 |
| 0.53 | 1.14 | 0.50 | 1.05 |
| 0.69 | 1.02 | 0.43 | 1.67 |
| 0.13 | 0.64 | 0.22 | 0.55 |
| 0.08 | 0.42 | 0.08 | 0.49 |
| 0.13 | 0.64 | 0.22 | 0.55 |
| 0.08 | 0.42 | 0.08 | 0.49 |
| 0.51 | 0.93 | 0.38 | 0.83 |
| #N/A | #N/A | #N/A | #N/A |
| #N/A | #N/A | #N/A | #N/A |
| 0.53 | 1.11 | 0.48 | 1.12 |
| 0.53 | 1.11 | 0.48 | 1.12 |
| 0.92 | 1.28 | 0.57 | 2.76 |
| 0.92 | 1.28 | 0.57 | 2.76 |
| #N/A | 1.81 | 0.77 | 1.10 |
| 0.58 | 1.64 | 0.71 | #N/A |
| 0.94 | 2.51 | 0.93 | #N/A |
| #N/A | #N/A | #N/A | #N/A |
| #N/A | #N/A | #N/A | #N/A |



|      |      |      |      |
|------|------|------|------|
| 0.12 | 0.79 | 0.30 | 0.87 |
| 0.12 | 0.44 | 0.09 | 0.31 |
| 0.12 | 0.44 | 0.09 | 0.31 |
| 0.57 | 2.06 | 0.86 | 1.01 |
| 0.03 | 0.36 | 0.05 | 0.42 |
| 0.60 | 1.30 | 0.58 | 1.32 |
| 0.74 | 0.85 | 0.33 | 1.60 |
| 0.64 | 1.01 | 0.43 | 1.31 |
| 0.64 | 1.01 | 0.43 | 1.31 |
| 0.54 | 1.38 | 0.62 | 1.23 |
| 0.36 | 0.90 | 0.37 | 1.24 |
| 0.34 | 0.64 | 0.22 | 0.76 |
| 0.40 | 1.15 | 0.50 | 0.63 |
| 0.40 | 1.15 | 0.50 | 0.63 |
| 0.35 | 1.00 | 0.42 | 0.90 |
| 0.60 | 1.02 | 0.43 | 1.14 |
| 0.35 | 1.00 | 0.42 | 0.90 |
| 0.77 | 1.14 | 0.50 | 1.56 |
| #N/A | 1.45 | 0.65 | 1.65 |
| 0.33 | 0.85 | 0.34 | 0.61 |
| 0.05 | 0.44 | 0.10 | 0.42 |
| 0.20 | 0.83 | 0.33 | 0.68 |
| 0.20 | 0.83 | 0.33 | 0.68 |
| 0.79 | 1.39 | 0.63 | 1.70 |
| #N/A | #N/A | #N/A | #N/A |
| 0.74 | 2.03 | 0.85 | 1.90 |
| 0.68 | 1.59 | 0.71 | 1.33 |
| 0.68 | 1.59 | 0.71 | 1.33 |
| 0.16 | 0.76 | 0.28 | 0.74 |
| 0.00 | 0.16 | 0.01 | 0.17 |
| 0.04 | #N/A | #N/A | 0.24 |
| 0.04 | #N/A | #N/A | 0.24 |
| 0.28 | 1.57 | 0.70 | 0.75 |
| 0.61 | 1.36 | 0.59 | 1.37 |
| 0.69 | 1.27 | 0.56 | 1.33 |
| #N/A | #N/A | #N/A | #N/A |
| #N/A | #N/A | #N/A | #N/A |
| 0.88 | 2.31 | 0.90 | 2.11 |
| 0.88 | 2.31 | 0.90 | 2.11 |
| 0.25 | 0.69 | 0.24 | 0.56 |
| 0.25 | 0.69 | 0.24 | 0.56 |
| 0.70 | 2.74 | 0.90 | 1.62 |
| 0.70 | 2.74 | 0.90 | 1.62 |
| #N/A | #N/A | #N/A | #N/A |
| 0.28 | 0.99 | 0.39 | #N/A |
| 0.73 | 1.73 | 0.75 | 2.32 |
| 0.73 | 1.73 | 0.75 | 2.32 |
| 0.63 | 1.40 | 0.63 | 1.50 |
| 0.63 | 1.40 | 0.63 | 1.50 |
| #N/A | 1.01 | 0.43 | 0.71 |
| 0.19 | 0.72 | 0.26 | #N/A |

|      |      |      |      |
|------|------|------|------|
| 0.64 | 1.87 | 0.81 | 1.50 |
| 0.64 | 1.87 | 0.81 | 1.50 |
| 0.49 | 1.10 | 0.47 | 0.83 |
| 0.90 | 1.88 | 0.80 | 2.51 |
| 0.23 | #N/A | #N/A | 0.74 |
| 0.02 | 0.30 | 0.03 | #N/A |
| 0.02 | 0.30 | 0.03 | #N/A |
| 0.02 | 0.30 | 0.03 | #N/A |
| #N/A | #N/A | #N/A | #N/A |
| 0.48 | 1.02 | 0.43 | 1.09 |
| 0.89 | 1.99 | 0.83 | 2.30 |
| 0.89 | 1.99 | 0.83 | 2.30 |
| 0.32 | 0.71 | 0.25 | 1.02 |
| 0.48 | 2.00 | 0.84 | 0.96 |
| #N/A | 1.51 | 0.67 | #N/A |
| 0.79 | 1.29 | 0.57 | #N/A |
| 0.01 | 0.31 | 0.03 | 0.17 |
| 0.01 | 0.31 | 0.03 | 0.17 |
| 0.01 | 0.31 | 0.03 | 0.17 |
| 0.29 | 0.78 | 0.29 | 0.60 |
| 0.17 | 0.57 | 0.25 | #N/A |
| 0.39 | 1.67 | 0.74 | 1.26 |
| 0.60 | 1.64 | 0.73 | 1.46 |
| #N/A | 2.50 | 0.93 | 2.25 |
| 0.77 | 2.21 | 0.88 | 1.34 |
| 0.77 | 2.21 | 0.88 | 1.34 |
| 0.05 | 0.56 | 0.16 | 0.22 |
| 0.47 | 1.89 | 0.81 | 0.76 |
| 0.56 | 1.06 | 0.46 | 1.12 |
| 0.56 | 1.06 | 0.46 | 1.12 |
| 0.10 | 0.36 | 0.06 | 0.30 |
| 0.10 | 0.36 | 0.06 | 0.30 |
| 0.53 | 0.62 | 0.20 | #N/A |
| 0.53 | 0.62 | 0.20 | #N/A |
| #N/A | 1.33 | 0.60 | 1.32 |
| 0.78 | 1.51 | 0.68 | #N/A |
| 0.78 | 1.51 | 0.68 | #N/A |
| #N/A | #N/A | #N/A | #N/A |
| #N/A | #N/A | #N/A | #N/A |
| #N/A | 0.57 | 0.17 | 0.96 |
| #N/A | #N/A | #N/A | #N/A |
| #N/A | 0.57 | 0.17 | 0.96 |
| #N/A | #N/A | #N/A | #N/A |
| #N/A | #N/A | #N/A | #N/A |
| #N/A | #N/A | #N/A | #N/A |
| 0.62 | 1.41 | 0.63 | 1.34 |
| 0.43 | 0.95 | 0.39 | 0.94 |
| 0.38 | 1.11 | 0.48 | 1.00 |
| 0.38 | 1.11 | 0.48 | 1.00 |
| 0.38 | 1.11 | 0.48 | 1.00 |
| 0.38 | 1.11 | 0.48 | 1.00 |

|      |      |      |      |
|------|------|------|------|
| 0.36 | 1.14 | 0.50 | #N/A |
| 0.36 | 1.14 | 0.50 | #N/A |
| 0.19 | 0.93 | 0.38 | 0.49 |
| #N/A | #N/A | #N/A | #N/A |
| 0.84 | 2.19 | 0.88 | 1.92 |
| 0.84 | 2.19 | 0.88 | 1.92 |
| 0.63 | 0.92 | 0.38 | 1.01 |
| #N/A | 1.78 | 0.77 | 0.97 |
| 0.49 | 1.21 | 0.53 | 1.23 |
| #N/A | #N/A | #N/A | #N/A |
| 0.90 | 2.30 | 0.87 | #N/A |
| 0.90 | 2.30 | 0.87 | #N/A |
| 0.66 | 1.51 | 0.68 | 1.33 |
| 0.39 | 1.41 | 0.63 | 0.99 |
| 0.55 | 0.91 | 0.37 | 1.43 |
| 0.90 | #N/A | #N/A | 1.37 |
| #N/A | #N/A | #N/A | #N/A |
| 0.85 | 1.99 | 0.83 | #N/A |
| 0.66 | 1.49 | 0.67 | 1.29 |
| 0.60 | #N/A | #N/A | #N/A |
| 0.84 | 1.68 | 0.73 | 1.50 |
| 0.66 | 1.08 | 0.47 | 1.52 |
| 0.84 | 1.68 | 0.73 | 1.50 |
| 0.66 | 1.08 | 0.47 | 1.52 |
| 0.55 | 0.92 | 0.38 | 1.21 |
| 0.68 | #N/A | #N/A | #N/A |
| 0.88 | 2.13 | 0.85 | 1.77 |
| #N/A | #N/A | #N/A | #N/A |
| #N/A | 2.05 | 0.85 | 1.62 |
| 0.46 | 0.91 | 0.37 | 1.14 |
| 0.84 | 1.80 | 0.78 | 1.66 |
| 0.16 | 0.58 | 0.18 | 0.57 |
| #N/A | #N/A | #N/A | #N/A |
| #N/A | #N/A | #N/A | #N/A |
| #N/A | 3.21 | 0.98 | 2.20 |
| #N/A | 3.21 | 0.98 | 2.20 |
| 0.46 | 0.94 | 0.39 | #N/A |
| 0.46 | 0.94 | 0.39 | #N/A |
| 0.10 | 0.26 | 0.02 | 0.36 |
| 0.09 | 0.29 | 0.03 | 0.31 |
| 0.09 | 0.29 | 0.03 | 0.31 |
| #N/A | #N/A | #N/A | #N/A |
| 0.95 | 2.95 | 0.97 | 2.60 |
| 0.95 | 2.95 | 0.97 | 2.60 |
| #N/A | 1.23 | 0.54 | 0.85 |
| 0.37 | 1.24 | 0.55 | 1.31 |
| 0.25 | 0.73 | 0.26 | 0.53 |
| 0.17 | 0.63 | 0.21 | 0.58 |
| 0.38 | 0.74 | 0.27 | 0.70 |
| 0.22 | 0.41 | 0.08 | 0.41 |
| 0.30 | 0.96 | 0.40 | 0.98 |

|      |      |      |      |
|------|------|------|------|
| 0.84 | 1.48 | 0.66 | 1.32 |
| 0.60 | 1.29 | 0.58 | 1.61 |
| 0.56 | 1.18 | 0.52 | 1.05 |
| #N/A | #N/A | #N/A | #N/A |
| #N/A | #N/A | #N/A | #N/A |
| 0.65 | 0.94 | 0.39 | 1.85 |
| 0.25 | 0.56 | 0.17 | 1.15 |
| 0.48 | 0.46 | 0.11 | 1.33 |
| 0.10 | 0.49 | 0.12 | 0.50 |
| 0.01 | 0.36 | 0.05 | 0.22 |
| 0.07 | 0.39 | 0.08 | 0.52 |
| 0.84 | 1.13 | 0.44 | 1.87 |
| 0.84 | 1.13 | 0.44 | 1.87 |
| 0.73 | 1.28 | 0.57 | 2.11 |
| 0.70 | 1.48 | 0.66 | 1.57 |
| 0.11 | 0.68 | 0.24 | 0.52 |
| 0.35 | #N/A | #N/A | 0.90 |
| 0.28 | 0.80 | 0.30 | 0.86 |
| 0.28 | 0.80 | 0.30 | 0.86 |
| #N/A | #N/A | #N/A | #N/A |
| #N/A | #N/A | #N/A | #N/A |
| 0.76 | 1.35 | 0.61 | 2.41 |
| 0.28 | 0.71 | 0.26 | 0.74 |
| 0.79 | 1.47 | 0.66 | 1.81 |
| 0.76 | 1.35 | 0.61 | 2.41 |
| 0.02 | 0.53 | 0.14 | 0.60 |
| 0.62 | 1.42 | 0.64 | #N/A |
| 0.48 | 1.23 | 0.55 | 1.04 |
| 0.48 | 1.23 | 0.55 | 1.04 |
| 0.02 | #N/A | #N/A | #N/A |
| 0.02 | #N/A | #N/A | 0.36 |
| 0.11 | 0.64 | 0.22 | 0.55 |
| 0.60 | 1.23 | 0.55 | 1.60 |
| #N/A | #N/A | #N/A | #N/A |
| 0.82 | 1.66 | 0.73 | 2.44 |
| 0.82 | 1.66 | 0.73 | 2.44 |
| 0.60 | 1.20 | 0.53 | 1.59 |
| #N/A | #N/A | #N/A | #N/A |
| #N/A | #N/A | #N/A | #N/A |
| 0.68 | 1.86 | 0.80 | 1.67 |
| #N/A | #N/A | #N/A | #N/A |
| 0.92 | 2.40 | 0.91 | 2.59 |
| 0.92 | 2.40 | 0.91 | 2.59 |
| 0.75 | 1.06 | 0.41 | 1.42 |
| 0.27 | 1.18 | 0.52 | 1.17 |
| 0.17 | 0.57 | 0.17 | 0.45 |
| 0.73 | 1.47 | 0.66 | 1.82 |
| 0.73 | 1.47 | 0.66 | 1.82 |
| #N/A | #N/A | #N/A | #N/A |
| 0.39 | 0.49 | 0.12 | #N/A |
| 0.94 | 2.75 | 0.95 | 2.10 |

|      |      |      |      |
|------|------|------|------|
| 0.50 | 0.77 | 0.29 | #N/A |
| 0.71 | 0.78 | 0.30 | 1.71 |
| 0.71 | 0.78 | 0.30 | 1.71 |
| 0.22 | #N/A | #N/A | #N/A |
| 0.22 | #N/A | #N/A | 0.37 |
| 0.22 | #N/A | #N/A | 0.37 |
| 0.92 | 3.26 | 0.98 | 1.64 |
| 0.92 | 3.26 | 0.98 | 1.64 |
| 0.34 | 1.18 | 0.51 | 0.78 |
| 0.34 | 1.18 | 0.51 | 0.78 |
| 0.72 | 1.31 | 0.58 | 1.36 |
| 0.83 | 1.95 | 0.83 | 1.57 |
| 0.20 | 1.20 | 0.50 | #N/A |
| 0.20 | 1.20 | 0.50 | #N/A |
| 0.56 | 1.59 | 0.71 | 1.34 |
| #N/A | #N/A | #N/A | #N/A |
| 0.30 | 0.79 | 0.30 | 0.60 |
| #N/A | #N/A | #N/A | #N/A |
| 0.24 | 0.84 | 0.33 | 0.91 |
| 0.24 | 0.84 | 0.33 | 0.91 |
| #N/A | 1.46 | 0.64 | 1.31 |
| 0.61 | 1.52 | 0.68 | 1.31 |
| 0.75 | 1.38 | 0.62 | 1.18 |
| 0.38 | 1.14 | 0.50 | 0.72 |
| 0.38 | 1.14 | 0.50 | 0.72 |
| 0.70 | 1.57 | 0.70 | 1.49 |
| 0.63 | 1.53 | 0.69 | 1.89 |
| 0.63 | 1.53 | 0.69 | 1.89 |
| 0.70 | 1.57 | 0.70 | 1.49 |
| 0.63 | 1.53 | 0.69 | 1.89 |
| 0.92 | 2.24 | 0.89 | 2.34 |
| 0.92 | 2.24 | 0.89 | 2.34 |
| 0.84 | 2.11 | 0.87 | 2.04 |
| 0.84 | 2.11 | 0.87 | 2.04 |
| 0.64 | 2.41 | 0.92 | 1.07 |
| 0.64 | 2.41 | 0.92 | 1.07 |
| #N/A | 1.82 | 0.78 | 1.37 |
| 0.86 | 1.93 | 0.82 | 2.30 |
| 0.13 | 0.68 | 0.23 | 0.54 |
| 0.13 | 0.68 | 0.23 | 0.54 |
| 0.38 | 0.99 | 0.42 | 0.75 |
| 0.83 | 1.51 | 0.68 | 1.85 |
| 0.60 | 1.25 | 0.55 | 1.23 |
| 0.40 | #N/A | #N/A | #N/A |
| 0.24 | 0.80 | 0.31 | 0.95 |
| 0.46 | 1.39 | 0.62 | 1.66 |
| 0.05 | 0.35 | 0.05 | 0.39 |
| 0.64 | 1.70 | 0.74 | 1.98 |
| 0.64 | 1.70 | 0.74 | 1.98 |
| 0.64 | 0.88 | 0.35 | 1.16 |
| 0.68 | #N/A | #N/A | 1.52 |

|      |      |      |      |
|------|------|------|------|
| 0.68 | #N/A | #N/A | 1.52 |
| 0.48 | 1.26 | 0.56 | 0.71 |
| 0.11 | 1.04 | 0.44 | 0.68 |
| 0.11 | 1.04 | 0.44 | 0.68 |
| 0.88 | 1.94 | 0.82 | 2.42 |
| 0.88 | 1.94 | 0.82 | 2.42 |
| 0.68 | 1.39 | 0.62 | 1.30 |
| 0.68 | 1.39 | 0.62 | 1.30 |
| 0.71 | 1.74 | 0.76 | #N/A |
| 0.85 | 2.43 | 0.92 | 1.17 |
| 0.85 | 2.43 | 0.92 | 1.17 |
| 0.85 | 2.43 | 0.92 | 1.17 |
| 0.23 | 0.99 | 0.41 | 0.78 |
| 0.84 | 2.50 | 0.93 | 1.85 |
| 0.84 | 2.50 | 0.93 | 1.85 |
| 0.45 | 0.64 | 0.22 | 1.19 |
| 0.06 | 0.31 | 0.03 | 0.51 |
| 0.26 | 0.78 | 0.29 | 0.72 |
| 0.87 | 2.20 | 0.89 | 2.17 |
| 0.84 | 1.17 | 0.52 | 1.49 |
| 0.55 | 0.93 | 0.38 | 1.25 |
| 0.28 | 0.62 | 0.20 | 1.02 |
| 0.12 | #N/A | #N/A | 0.81 |
| 0.45 | 1.36 | 0.61 | 1.05 |
| 0.29 | #N/A | #N/A | 0.74 |
| 0.47 | 1.58 | 0.70 | 1.25 |
| 0.47 | 1.58 | 0.70 | 1.25 |
| #N/A | #N/A | #N/A | #N/A |
| 0.92 | 1.70 | 0.72 | #N/A |
| 0.86 | 2.41 | 0.90 | #N/A |
| 0.86 | 2.41 | 0.90 | #N/A |
| 0.38 | 1.13 | 0.49 | 1.11 |
| 0.69 | 1.60 | 0.72 | 1.49 |
| 0.69 | 1.60 | 0.72 | 1.49 |
| 0.01 | 0.14 | 0.01 | 0.34 |
| 0.33 | 0.42 | 0.08 | 0.94 |
| 0.24 | 0.67 | 0.23 | 0.53 |
| 0.56 | 1.34 | 0.60 | 1.12 |
| 0.50 | 1.03 | 0.43 | #N/A |
| 0.61 | 1.37 | 0.62 | #N/A |
| 0.46 | 1.24 | 0.55 | 1.14 |
| 0.90 | 2.17 | 0.88 | 1.73 |
| 0.90 | 2.17 | 0.88 | 1.73 |
| 0.92 | 2.57 | 0.94 | 1.82 |
| 0.48 | 1.60 | 0.72 | 1.63 |
| 0.68 | 1.44 | 0.64 | 1.52 |
| #N/A | #N/A | #N/A | #N/A |
| #N/A | #N/A | #N/A | #N/A |
| 0.76 | #N/A | #N/A | #N/A |
| 0.76 | #N/A | #N/A | #N/A |
| 0.23 | 0.89 | 0.36 | #N/A |

|      |      |      |      |
|------|------|------|------|
| 0.62 | 1.70 | 0.74 | 1.50 |
| 0.86 | 2.31 | 0.91 | 1.77 |
| #N/A | #N/A | #N/A | #N/A |
| 0.74 | 1.39 | 0.62 | 1.33 |
| 0.91 | 2.36 | 0.92 | 2.81 |
| 0.90 | 2.21 | 0.88 | 2.04 |
| 0.90 | 2.21 | 0.88 | 2.04 |
| #N/A | #N/A | #N/A | #N/A |
| #N/A | #N/A | #N/A | #N/A |
| 0.98 | 2.44 | 0.91 | #N/A |
| 0.98 | 2.44 | 0.91 | #N/A |
| 0.23 | 0.52 | 0.14 | #N/A |
| 0.33 | 0.31 | 0.04 | 0.92 |
| 0.33 | 0.31 | 0.04 | 0.92 |
| 0.09 | 0.35 | 0.05 | 0.79 |
| 0.03 | #N/A | #N/A | #N/A |
| 0.49 | 1.28 | 0.57 | 1.47 |
| #N/A | #N/A | #N/A | #N/A |
| 0.55 | 1.56 | 0.70 | 1.60 |
| 0.84 | 1.84 | 0.79 | 1.66 |
| #N/A | #N/A | #N/A | #N/A |
| #N/A | #N/A | #N/A | #N/A |
| 0.15 | 0.58 | 0.18 | 0.58 |
| 0.15 | 0.58 | 0.18 | 0.58 |
| 0.36 | 1.01 | 0.43 | 0.76 |
| 0.98 | 2.83 | 0.96 | #N/A |
| 0.98 | 2.83 | 0.96 | #N/A |
| 0.77 | #N/A | #N/A | 1.65 |
| 0.84 | 2.14 | 0.81 | #N/A |
| #N/A | #N/A | #N/A | #N/A |
| 0.29 | 0.68 | 0.23 | #N/A |
| 0.29 | 0.68 | 0.23 | #N/A |
| 0.29 | 0.68 | 0.23 | #N/A |
| 0.44 | 1.26 | 0.56 | 1.11 |
| #N/A | #N/A | #N/A | #N/A |
| #N/A | #N/A | #N/A | #N/A |
| #N/A | #N/A | #N/A | #N/A |
| #N/A | #N/A | #N/A | #N/A |
| 0.95 | 2.00 | 0.84 | 2.13 |
| 0.95 | 2.00 | 0.84 | 2.13 |
| 0.02 | 0.27 | 0.02 | 0.27 |
| #N/A | #N/A | #N/A | #N/A |
| 0.75 | 1.67 | 0.74 | 1.80 |
| 0.75 | 1.67 | 0.74 | 1.80 |
| 0.75 | 1.67 | 0.74 | 1.80 |
| #N/A | #N/A | #N/A | #N/A |
| 0.43 | 0.93 | 0.38 | 1.01 |
| 0.46 | #N/A | #N/A | 1.21 |
| 0.90 | 1.28 | 0.57 | #N/A |
| 0.90 | 1.28 | 0.57 | #N/A |
| 0.85 | 1.63 | 0.70 | 2.01 |

|      |      |      |      |
|------|------|------|------|
| 0.85 | 1.63 | 0.70 | 2.01 |
| 0.35 | 0.68 | 0.24 | 0.76 |
| 0.87 | 1.10 | 0.48 | 1.70 |
| 0.89 | 1.50 | 0.67 | 1.77 |
| 0.89 | 1.50 | 0.67 | 1.77 |
| 0.81 | 1.56 | 0.69 | 1.68 |
| 0.42 | 0.83 | 0.33 | 0.85 |
| 0.42 | 0.83 | 0.33 | 0.85 |
| 0.94 | 2.41 | 0.90 | 2.68 |
| 0.85 | 2.13 | 0.87 | 2.19 |
| 0.85 | 2.13 | 0.87 | 2.19 |
| 0.81 | 1.55 | 0.69 | 1.38 |
| 0.35 | 0.75 | 0.28 | 0.90 |
| #N/A | #N/A | #N/A | #N/A |
| #N/A | #N/A | #N/A | #N/A |
| #N/A | #N/A | #N/A | #N/A |
| 0.62 | 1.58 | 0.71 | 1.40 |
| 0.08 | 0.43 | 0.09 | 0.44 |
| #N/A | #N/A | #N/A | #N/A |
| #N/A | #N/A | #N/A | #N/A |
| #N/A | #N/A | #N/A | #N/A |
| 0.49 | 1.72 | 0.76 | #N/A |
| 0.72 | 2.76 | 0.94 | #N/A |
| #N/A | 1.33 | 0.59 | 3.37 |
| #N/A | 1.33 | 0.59 | 3.37 |
| 0.19 | 0.62 | 0.20 | 0.57 |
| 0.19 | 0.62 | 0.20 | 0.57 |
| 0.52 | 1.03 | 0.44 | 0.88 |
| 0.70 | #N/A | #N/A | #N/A |
| #N/A | #N/A | #N/A | #N/A |
| 0.30 | #N/A | #N/A | 1.06 |
| 0.32 | 2.45 | 0.77 | #N/A |
| #N/A | #N/A | #N/A | 0.43 |
| 0.82 | 2.71 | 0.96 | 1.82 |
| 0.71 | 1.23 | 0.55 | 1.38 |
| 0.48 | 1.09 | 0.47 | 0.86 |
| #N/A | #N/A | #N/A | #N/A |
| 0.63 | 0.83 | 0.32 | 0.83 |
| 0.75 | 1.66 | 0.74 | 2.03 |
| 0.75 | 1.66 | 0.74 | 2.03 |
| 0.68 | 1.45 | 0.65 | 1.28 |
| 0.86 | 2.16 | 0.87 | 1.92 |
| 0.89 | 1.64 | 0.72 | 1.98 |
| 0.18 | 0.82 | 0.31 | 0.78 |
| #N/A | 1.26 | 0.56 | 1.56 |
| #N/A | 1.26 | 0.56 | 1.56 |
| #N/A | #N/A | #N/A | #N/A |
| 0.61 | 1.27 | 0.57 | 0.98 |
| 0.91 | 2.64 | 0.95 | 1.76 |
| #N/A | #N/A | #N/A | #N/A |
| 0.76 | 1.85 | 0.80 | 1.43 |



|      |      |      |      |
|------|------|------|------|
| 0.75 | 1.47 | 0.66 | 1.51 |
| 0.36 | 0.95 | 0.38 | #N/A |
| 0.02 | #N/A | #N/A | 0.27 |
| 0.25 | 1.17 | 0.50 | 0.87 |
| 0.09 | #N/A | #N/A | #N/A |
| 0.20 | #N/A | #N/A | 0.61 |
| 0.13 | #N/A | #N/A | #N/A |
| #N/A | #N/A | #N/A | #N/A |
| #N/A | 3.99 | 0.99 | 2.58 |
| #N/A | 3.99 | 0.99 | 2.58 |
| 0.81 | 1.91 | 0.82 | 1.68 |
| 0.81 | 1.91 | 0.82 | 1.68 |
| #N/A | 1.93 | 0.82 | #N/A |
| #N/A | 1.93 | 0.82 | #N/A |
| #N/A | #N/A | #N/A | #N/A |
| 0.83 | 1.96 | 0.83 | 1.89 |
| 0.83 | 1.96 | 0.83 | 1.89 |
| #N/A | #N/A | #N/A | #N/A |
| 0.76 | 1.84 | 0.79 | 1.67 |
| 0.76 | 1.84 | 0.79 | 1.67 |
| 0.83 | 1.38 | 0.62 | 1.66 |
| #N/A | 1.61 | 0.65 | 1.90 |
| 0.99 | 2.85 | 0.97 | 3.00 |
| 0.99 | 2.85 | 0.97 | 3.00 |
| 0.85 | 0.31 | 0.04 | 1.18 |
| 0.73 | 1.17 | 0.51 | 1.17 |
| 0.49 | 1.06 | 0.46 | 0.80 |
| 0.30 | 0.91 | 0.37 | 1.11 |
| #N/A | #N/A | #N/A | #N/A |
| 0.28 | 0.68 | 0.24 | 0.69 |
| 0.71 | 2.11 | 0.86 | 2.06 |
| 0.71 | 2.11 | 0.86 | 2.06 |
| 0.49 | 1.38 | 0.62 | 1.14 |
| 0.47 | 1.87 | 0.81 | #N/A |
| 0.42 | 0.72 | 0.26 | 1.26 |
| 0.00 | 0.25 | 0.02 | 0.22 |
| 0.00 | 0.25 | 0.02 | 0.22 |
| 0.15 | 1.02 | 0.44 | 0.41 |
| #N/A | 1.21 | 0.54 | 2.73 |
| #N/A | 1.21 | 0.54 | 2.73 |
| #N/A | 1.42 | 0.64 | 1.16 |
| #N/A | 1.42 | 0.64 | 1.16 |
| 0.35 | #N/A | #N/A | 0.66 |
| 0.35 | #N/A | #N/A | 0.66 |
| 0.86 | 2.13 | 0.87 | #N/A |
| 0.95 | 2.78 | 0.96 | #N/A |
| 0.95 | 2.78 | 0.96 | #N/A |
| 0.84 | 2.33 | 0.91 | 2.37 |
| 0.84 | 2.33 | 0.91 | 2.37 |
| 0.16 | 0.68 | 0.24 | 0.93 |
| 1.00 | 3.88 | 0.99 | 4.47 |

|      |      |      |      |
|------|------|------|------|
| 1.00 | 3.88 | 0.99 | 4.47 |
| 0.64 | 1.37 | 0.61 | 1.70 |
| #N/A | #N/A | #N/A | #N/A |
| 0.64 | 1.37 | 0.61 | 1.70 |
| #N/A | 1.27 | 0.57 | #N/A |
| 0.69 | 2.33 | 0.91 | 1.70 |
| 0.22 | 0.84 | 0.33 | #N/A |
| 0.03 | 0.39 | 0.07 | 0.36 |
| 0.03 | 0.39 | 0.07 | 0.36 |
| 0.26 | 1.10 | 0.48 | 0.95 |
| 0.55 | 1.64 | 0.73 | 1.46 |
| 0.72 | 1.35 | 0.60 | 1.28 |
| 0.22 | 0.72 | 0.26 | #N/A |
| #N/A | 0.32 | 0.04 | 0.91 |
| #N/A | 0.32 | 0.04 | 0.91 |
| 0.33 | 0.88 | 0.35 | 1.20 |
| 0.47 | 1.06 | 0.46 | 1.16 |
| 0.49 | 1.41 | 0.63 | 1.06 |
| #N/A | 0.73 | 0.27 | #N/A |
| 0.60 | 1.39 | 0.62 | #N/A |
| 0.91 | 2.44 | 0.93 | 1.95 |
| 0.91 | 2.44 | 0.93 | 1.95 |
| 0.42 | 0.98 | 0.40 | 0.73 |
| 0.74 | 1.13 | 0.50 | 1.18 |
| 0.54 | #N/A | #N/A | 1.91 |
| 0.54 | #N/A | #N/A | 1.91 |
| 0.46 | 1.09 | 0.47 | 1.19 |
| 0.63 | 0.79 | 0.30 | 1.23 |
| 0.44 | 0.89 | 0.36 | #N/A |
| 0.44 | 0.89 | 0.36 | #N/A |
| 0.73 | 1.50 | 0.67 | 1.60 |
| #N/A | #N/A | #N/A | #N/A |
| 0.10 | 0.61 | 0.19 | 0.31 |
| 0.10 | 0.61 | 0.19 | 0.31 |
| 0.15 | 0.65 | 0.22 | 0.74 |
| 0.90 | 2.31 | 0.91 | 2.63 |
| 0.82 | 1.96 | 0.83 | 2.27 |
| 0.77 | 2.33 | 0.88 | 1.90 |
| 0.77 | 2.33 | 0.88 | 1.90 |
| #N/A | #N/A | #N/A | #N/A |
| #N/A | #N/A | #N/A | #N/A |
| 0.84 | 3.09 | 0.94 | 2.24 |
| 0.84 | 3.09 | 0.94 | 2.24 |
| 0.65 | #N/A | #N/A | #N/A |
| 0.94 | 1.76 | 0.76 | 1.67 |
| 0.70 | 1.43 | 0.64 | 1.16 |
| 0.97 | 3.57 | 0.99 | 3.33 |
| 0.70 | 1.43 | 0.64 | 1.16 |
| 0.97 | 3.57 | 0.99 | 3.33 |
| 0.08 | 1.21 | 0.53 | 1.00 |
| 0.08 | 1.21 | 0.53 | 1.00 |

|      |      |      |      |
|------|------|------|------|
| 0.69 | 1.48 | 0.66 | 1.54 |
| 0.08 | 1.21 | 0.53 | 1.00 |
| 0.69 | 1.48 | 0.66 | 1.54 |
| 0.44 | 1.00 | 0.42 | 0.90 |
| 0.52 | 0.72 | 0.26 | #N/A |
| 0.34 | 0.72 | 0.26 | 0.66 |
| 0.76 | #N/A | #N/A | #N/A |
| 0.70 | 1.31 | 0.58 | 1.51 |
| 0.44 | 1.01 | 0.42 | 1.47 |
| 0.70 | 1.41 | 0.63 | 1.97 |
| 0.74 | 1.92 | 0.82 | 1.79 |
| 0.74 | 1.92 | 0.82 | 1.79 |
| #N/A | #N/A | #N/A | #N/A |
| 0.82 | 2.31 | 0.89 | 2.74 |
| 0.82 | 2.31 | 0.89 | 2.74 |
| 0.14 | 0.98 | 0.41 | 0.80 |
| 0.14 | 0.98 | 0.41 | 0.80 |
| #N/A | #N/A | #N/A | #N/A |
| #N/A | #N/A | #N/A | #N/A |
| 0.81 | 2.03 | 0.85 | #N/A |
| 0.90 | 1.92 | 0.81 | 1.68 |
| 0.90 | 1.92 | 0.81 | 1.68 |
| 0.62 | 1.43 | 0.64 | 1.04 |
| 0.10 | 0.31 | 0.03 | 0.73 |
| #N/A | #N/A | #N/A | #N/A |
| 0.24 | 1.10 | 0.48 | 0.56 |
| 0.60 | 2.03 | 0.83 | 1.64 |
| 0.65 | #N/A | #N/A | 1.38 |
| 0.16 | 0.72 | 0.26 | #N/A |
| 0.16 | 0.72 | 0.26 | #N/A |
| 0.35 | 1.10 | 0.47 | 0.99 |
| 0.35 | 1.10 | 0.47 | 0.99 |
| 0.61 | 1.55 | 0.68 | #N/A |
| 0.91 | 1.92 | 0.79 | #N/A |
| 0.91 | 1.92 | 0.79 | #N/A |
| #N/A | #N/A | #N/A | #N/A |
| #N/A | #N/A | #N/A | #N/A |
| #N/A | #N/A | #N/A | #N/A |
| #N/A | 3.78 | 0.99 | 2.51 |
| #N/A | 3.78 | 0.99 | 2.51 |
| 0.68 | 1.68 | 0.75 | 1.43 |
| 0.63 | 1.58 | 0.71 | 1.34 |
| 0.54 | 1.58 | 0.71 | 1.36 |
| 0.60 | 1.17 | 0.52 | 1.35 |
| #N/A | #N/A | #N/A | #N/A |
| #N/A | #N/A | #N/A | #N/A |
| 0.82 | 2.57 | 0.94 | 1.23 |
| 0.82 | 2.57 | 0.94 | 1.23 |
| 0.53 | 1.07 | 0.46 | 1.17 |
| 0.53 | 0.73 | 0.26 | 1.44 |
| 0.24 | 0.86 | 0.34 | 0.69 |

|      |      |      |      |
|------|------|------|------|
| 0.24 | 0.86 | 0.34 | 0.69 |
| 0.12 | #N/A | #N/A | 0.57 |
| 0.89 | 1.62 | 0.72 | 2.82 |
| 0.89 | 1.62 | 0.72 | 2.82 |
| 0.89 | 1.62 | 0.72 | 2.82 |
| #N/A | #N/A | #N/A | #N/A |
| #N/A | #N/A | #N/A | #N/A |
| #N/A | #N/A | #N/A | #N/A |
| #N/A | #N/A | #N/A | #N/A |
| #N/A | #N/A | #N/A | #N/A |
| 0.44 | 0.84 | 0.33 | 0.59 |
| 0.35 | 1.03 | 0.44 | 0.93 |
| 0.35 | 1.03 | 0.44 | 0.93 |
| 0.66 | 1.55 | 0.69 | 1.49 |
| 0.66 | 1.55 | 0.69 | 1.49 |
| 0.69 | 2.57 | 0.94 | 1.54 |
| 0.69 | 2.57 | 0.94 | 1.54 |
| #N/A | #N/A | #N/A | #N/A |
| #N/A | #N/A | #N/A | #N/A |
| 0.50 | 1.15 | 0.50 | 1.28 |
| 0.82 | 1.51 | 0.67 | 1.48 |
| 0.84 | 1.64 | 0.72 | 2.01 |
| 0.84 | 1.64 | 0.72 | 2.01 |
| 0.05 | 0.59 | 0.18 | 0.25 |
| #N/A | #N/A | #N/A | #N/A |
| #N/A | #N/A | #N/A | #N/A |
| #N/A | #N/A | #N/A | #N/A |
| #N/A | #N/A | #N/A | #N/A |
| #N/A | #N/A | #N/A | #N/A |
| #N/A | #N/A | #N/A | #N/A |
| #N/A | #N/A | #N/A | #N/A |
| 0.90 | 2.36 | 0.91 | 1.75 |
| 0.50 | 1.12 | 0.49 | 1.07 |
| 0.68 | 0.97 | 0.40 | 1.21 |
| #N/A | #N/A | #N/A | #N/A |
| #N/A | 1.05 | 0.45 | 1.21 |
| 0.95 | 2.34 | 0.90 | 3.21 |
| 0.95 | 2.34 | 0.90 | 3.21 |
| 0.09 | 0.22 | 0.01 | 0.37 |
| 0.64 | 0.95 | 0.39 | 0.93 |
| 0.49 | 1.26 | 0.56 | 1.27 |
| 0.49 | 1.26 | 0.56 | 1.27 |
| 0.78 | 1.70 | 0.75 | 1.63 |
| 0.78 | 1.70 | 0.75 | 1.63 |
| #N/A | #N/A | #N/A | #N/A |
| #N/A | #N/A | #N/A | #N/A |
| 0.40 | 1.64 | 0.66 | #N/A |
| 0.79 | 2.05 | 0.85 | #N/A |
| #N/A | #N/A | #N/A | #N/A |
| #N/A | #N/A | #N/A | #N/A |
| 0.79 | 1.49 | 0.66 | #N/A |

|      |      |      |      |
|------|------|------|------|
| 0.79 | 1.49 | 0.66 | #N/A |
| #N/A | #N/A | #N/A | #N/A |
| #N/A | #N/A | #N/A | #N/A |
| 0.13 | 0.49 | 0.12 | 0.50 |
| #N/A | #N/A | #N/A | #N/A |
| 0.80 | 1.26 | 0.56 | 1.71 |
| 0.89 | 2.56 | 0.92 | 2.40 |
| 0.89 | 2.56 | 0.92 | 2.40 |
| #N/A | #N/A | #N/A | #N/A |
| #N/A | #N/A | #N/A | #N/A |
| #N/A | 1.15 | 0.50 | 1.65 |
| 0.91 | 1.66 | 0.73 | 2.02 |
| 0.25 | 0.62 | 0.20 | 0.73 |
| #N/A | #N/A | #N/A | #N/A |
| 0.03 | 0.28 | 0.03 | 0.30 |
| 0.16 | 0.61 | 0.20 | 0.64 |
| 0.41 | 0.89 | 0.36 | 1.08 |
| #N/A | 1.59 | 0.67 | #N/A |
| 0.41 | 0.89 | 0.36 | 1.08 |
| #N/A | 1.59 | 0.67 | #N/A |
| 0.97 | 3.05 | 0.98 | 3.22 |
| 0.46 | 0.83 | 0.32 | 0.92 |
| 0.65 | 1.12 | 0.48 | 1.77 |
| 0.86 | 1.93 | 0.82 | 1.95 |
| 0.65 | 1.12 | 0.48 | 1.77 |
| 0.86 | 1.93 | 0.82 | 1.95 |
| 0.63 | 1.50 | 0.67 | 1.31 |
| 0.29 | 0.97 | 0.41 | 0.57 |
| 0.75 | 1.88 | 0.79 | 1.13 |
| 0.39 | #N/A | #N/A | 0.94 |
| 0.81 | 1.49 | 0.67 | 2.06 |
| 0.81 | 1.49 | 0.67 | 2.06 |
| #N/A | #N/A | #N/A | #N/A |
| 0.51 | 1.57 | 0.70 | 1.31 |
| 0.07 | 0.43 | 0.09 | 0.38 |
| #N/A | #N/A | #N/A | #N/A |
| #N/A | #N/A | #N/A | #N/A |
| #N/A | #N/A | #N/A | #N/A |
| #N/A | #N/A | #N/A | #N/A |
| 0.45 | 1.04 | 0.45 | 0.80 |
| 0.76 | 2.25 | 0.90 | 2.20 |
| 0.45 | 1.04 | 0.45 | 0.80 |
| #N/A | #N/A | #N/A | #N/A |
| 0.76 | 2.25 | 0.90 | 2.20 |
| #N/A | #N/A | #N/A | #N/A |
| #N/A | #N/A | #N/A | #N/A |
| 0.82 | 1.57 | 0.70 | #N/A |
| #N/A | 0.93 | 0.38 | #N/A |
| 0.47 | 1.60 | 0.69 | #N/A |
| #N/A | #N/A | #N/A | #N/A |

|      |      |      |      |
|------|------|------|------|
| #N/A | #N/A | #N/A | #N/A |
| #N/A | 2.18 | 0.87 | 1.59 |
| 0.93 | 1.85 | 0.80 | 2.16 |
| 0.93 | 1.85 | 0.80 | 2.16 |
| #N/A | #N/A | #N/A | #N/A |
| #N/A | #N/A | #N/A | #N/A |
| #N/A | #N/A | #N/A | #N/A |
| 0.26 | 1.04 | 0.44 | #N/A |
| 0.87 | 2.67 | 0.95 | 1.36 |
| 0.75 | 3.19 | 0.97 | 1.80 |
| 0.87 | 2.67 | 0.95 | 1.36 |
| 0.75 | 3.19 | 0.97 | 1.80 |
| #N/A | #N/A | #N/A | #N/A |
| #N/A | #N/A | #N/A | #N/A |
| #N/A | #N/A | #N/A | #N/A |
| #N/A | #N/A | #N/A | #N/A |
| #N/A | #N/A | #N/A | #N/A |
| #N/A | #N/A | #N/A | #N/A |
| 0.65 | 1.92 | 0.82 | 1.45 |
| #N/A | #N/A | #N/A | #N/A |
| #N/A | #N/A | #N/A | #N/A |
| #N/A | 1.14 | 0.49 | #N/A |
| 0.62 | 0.74 | 0.27 | 1.34 |
| 0.69 | 1.56 | 0.69 | 1.52 |
| 0.52 | 1.86 | 0.80 | 1.52 |
| 0.52 | 1.86 | 0.80 | 1.52 |
| 0.90 | 2.11 | 0.86 | 2.11 |
| 0.05 | 0.64 | 0.22 | 0.46 |
| #N/A | 1.11 | 0.48 | #N/A |
| 0.36 | 1.44 | 0.65 | 0.90 |
| 0.63 | 1.87 | 0.80 | 1.18 |
| 0.63 | 1.87 | 0.80 | 1.18 |
| 0.69 | 1.85 | 0.80 | 1.60 |
| 0.52 | 1.24 | 0.55 | 1.23 |
| 0.35 | 0.98 | 0.40 | #N/A |
| 0.35 | 0.98 | 0.40 | #N/A |
| #N/A | #N/A | #N/A | #N/A |
| #N/A | #N/A | #N/A | #N/A |
| 0.55 | 1.79 | 0.78 | 1.12 |
| 0.85 | 2.95 | 0.94 | 1.56 |
| 0.85 | 2.95 | 0.94 | 1.56 |
| 0.48 | #N/A | #N/A | #N/A |
| 0.79 | 2.07 | 0.81 | 1.83 |
| 0.79 | 2.07 | 0.81 | 1.83 |
| 0.88 | 1.55 | 0.69 | 1.73 |
| 0.53 | 0.61 | 0.19 | 1.27 |
| 0.67 | 1.75 | 0.76 | 1.91 |
| 0.67 | 1.75 | 0.76 | 1.91 |
| 0.67 | 1.75 | 0.76 | 1.91 |
| 0.86 | 2.46 | 0.92 | #N/A |
| 0.61 | 1.35 | 0.60 | 1.47 |

|      |      |      |      |
|------|------|------|------|
| 0.11 | 0.46 | 0.10 | 0.44 |
| 0.63 | 1.74 | 0.76 | 1.39 |
| 0.63 | 1.74 | 0.76 | 1.39 |
| 0.68 | 1.38 | 0.62 | 1.54 |
| 0.48 | #N/A | #N/A | 1.41 |
| 0.48 | #N/A | #N/A | 1.41 |
| 0.62 | 1.14 | 0.50 | 1.15 |
| 0.62 | 1.14 | 0.50 | 1.15 |
| 0.31 | 0.61 | 0.20 | 0.86 |
| 0.75 | 0.52 | 0.14 | 1.34 |
| 0.16 | 0.53 | 0.15 | 1.04 |
| 0.01 | #N/A | #N/A | #N/A |
| 0.01 | #N/A | #N/A | #N/A |
| 0.04 | 0.58 | 0.18 | 0.49 |
| 0.71 | 1.49 | 0.67 | #N/A |
| 0.80 | 1.72 | 0.76 | 1.82 |
| #N/A | 1.57 | 0.70 | #N/A |
| #N/A | 1.57 | 0.70 | #N/A |
| 0.42 | 0.74 | 0.27 | 1.07 |
| 0.05 | 0.47 | 0.11 | #N/A |
| 0.05 | 0.47 | 0.11 | #N/A |
| 0.05 | 0.44 | 0.09 | 0.39 |
| 0.72 | 1.58 | 0.71 | 1.21 |
| 0.53 | 1.36 | 0.61 | 1.29 |
| 0.53 | 1.36 | 0.61 | 1.29 |
| #N/A | #N/A | #N/A | #N/A |
| #N/A | #N/A | #N/A | #N/A |
| 0.06 | 0.60 | 0.19 | 0.50 |
| 0.93 | 2.36 | 0.91 | 2.18 |
| #N/A | #N/A | #N/A | #N/A |
| 0.72 | 0.88 | 0.35 | 1.88 |
| 0.72 | 0.88 | 0.35 | 1.88 |
| 0.72 | 0.88 | 0.35 | 1.88 |
| 0.48 | 1.33 | 0.59 | 1.77 |
| 0.48 | 1.33 | 0.59 | 1.77 |
| 0.33 | 0.60 | 0.19 | #N/A |
| 0.19 | 0.17 | 0.01 | 0.59 |
| 0.60 | 1.18 | 0.52 | #N/A |
| 0.60 | 1.18 | 0.52 | #N/A |
| 0.80 | 2.01 | 0.84 | 2.16 |
| 0.80 | 2.01 | 0.84 | 2.16 |
| 0.02 | 0.28 | 0.03 | 0.31 |
| 0.34 | 0.81 | 0.31 | 1.03 |
| 0.71 | 2.48 | 0.93 | 1.40 |
| 0.71 | 2.48 | 0.93 | 1.40 |
| 0.63 | 1.55 | 0.69 | 1.03 |
| 0.01 | 0.13 | 0.01 | 0.15 |
| 0.36 | 1.34 | 0.59 | 0.87 |
| 0.55 | 0.98 | 0.41 | #N/A |
| #N/A | #N/A | #N/A | #N/A |
| 0.55 | 0.98 | 0.41 | #N/A |

|      |      |      |      |
|------|------|------|------|
| 0.87 | 2.43 | 0.92 | 2.43 |
| 0.86 | 2.11 | 0.86 | 2.16 |
| 0.19 | 1.15 | 0.51 | 0.54 |
| 0.44 | 0.71 | 0.25 | 1.52 |
| 0.19 | 1.15 | 0.51 | 0.54 |
| 0.44 | 0.71 | 0.25 | 1.52 |
| 0.67 | 1.98 | 0.82 | #N/A |
| 0.67 | 1.98 | 0.82 | #N/A |
| 0.60 | 1.96 | 0.80 | 3.13 |
| #N/A | #N/A | #N/A | #N/A |
| 0.60 | 1.96 | 0.80 | 3.13 |
| #N/A | #N/A | #N/A | #N/A |
| 0.64 | 2.33 | 0.91 | 1.43 |
| #N/A | 1.02 | 0.43 | 0.54 |
| #N/A | 1.02 | 0.43 | 0.54 |
| #N/A | #N/A | #N/A | #N/A |
| 0.75 | 2.62 | 0.90 | 1.64 |
| 0.75 | 2.62 | 0.90 | 1.64 |
| 0.51 | 1.59 | 0.71 | #N/A |
| #N/A | #N/A | #N/A | #N/A |
| 0.04 | 0.42 | 0.08 | 0.40 |
| 0.06 | 0.36 | 0.05 | 0.44 |
| 0.72 | 1.57 | 0.69 | 1.79 |
| 0.63 | 1.07 | 0.46 | 1.93 |
| 0.88 | 2.23 | 0.89 | 2.62 |
| 0.16 | 0.92 | 0.37 | 0.51 |
| 0.37 | 0.78 | 0.30 | #N/A |
| 0.24 | 0.80 | 0.30 | 0.70 |
| 0.47 | 1.18 | 0.52 | 1.36 |
| #N/A | #N/A | #N/A | #N/A |
| #N/A | 0.66 | 0.23 | 0.65 |
| #N/A | 0.66 | 0.23 | 0.65 |
| 0.11 | 0.31 | 0.04 | 0.39 |
| 0.90 | 2.69 | 0.94 | 2.14 |
| 0.90 | 2.69 | 0.94 | 2.14 |
| 0.82 | 1.70 | 0.73 | 1.41 |
| #N/A | #N/A | #N/A | #N/A |
| 0.82 | 2.38 | 0.88 | 1.67 |
| 0.82 | 2.38 | 0.88 | 1.67 |
| 0.72 | 1.65 | 0.72 | #N/A |
| 0.72 | 1.65 | 0.72 | #N/A |
| 0.45 | 1.25 | 0.55 | 1.24 |
| 0.47 | 0.83 | 0.32 | 0.98 |
| #N/A | 0.91 | 0.37 | 0.77 |
| 0.45 | 1.81 | 0.75 | 0.92 |
| 0.76 | 1.92 | 0.82 | 1.47 |
| 0.64 | 1.29 | 0.57 | 1.28 |
| 0.68 | #N/A | #N/A | 1.49 |
| 0.92 | 1.85 | 0.80 | 1.51 |
| #N/A | #N/A | #N/A | #N/A |
| #N/A | #N/A | #N/A | #N/A |



|      |      |      |      |
|------|------|------|------|
| 0.50 | 1.44 | 0.64 | 1.24 |
| 0.02 | 0.43 | 0.09 | 0.28 |
| 0.02 | 0.43 | 0.09 | 0.28 |
| 0.81 | 1.74 | 0.76 | 1.31 |
| #N/A | 0.66 | 0.25 | #N/A |
| 0.57 | 1.02 | 0.43 | 1.35 |
| 0.57 | 1.02 | 0.43 | 1.35 |
| 0.59 | 1.75 | 0.77 | 0.94 |
| 0.45 | 1.04 | 0.45 | 0.83 |
| 0.56 | 1.52 | 0.68 | 1.44 |
| 0.59 | 1.25 | 0.55 | 1.76 |
| #N/A | 1.11 | 0.48 | #N/A |
| 0.59 | #N/A | #N/A | #N/A |
| 0.59 | #N/A | #N/A | #N/A |
| 0.85 | 1.15 | 0.50 | 2.03 |
| 0.85 | 1.15 | 0.50 | 2.03 |
| 0.85 | 2.10 | 0.87 | 2.11 |
| 0.85 | 2.10 | 0.87 | 2.11 |
| 0.86 | 1.89 | 0.81 | 1.73 |
| 0.69 | 1.69 | 0.74 | 2.15 |
| 0.22 | #N/A | #N/A | #N/A |
| 0.22 | #N/A | #N/A | #N/A |
| #N/A | #N/A | #N/A | #N/A |
| #N/A | #N/A | #N/A | #N/A |
| 0.46 | 0.96 | 0.40 | 0.78 |
| 0.82 | 0.78 | 0.30 | 1.54 |
| 0.16 | 0.35 | 0.05 | 1.18 |
| 0.29 | 0.83 | 0.32 | 0.93 |
| 0.54 | 1.05 | 0.45 | 1.10 |
| 0.84 | 4.35 | 1.00 | #N/A |
| 0.14 | 0.40 | 0.07 | 0.53 |
| 0.98 | 2.54 | 0.94 | 2.09 |
| #N/A | #N/A | #N/A | #N/A |
| #N/A | #N/A | #N/A | #N/A |
| 0.84 | 2.12 | 0.84 | 1.73 |
| 0.80 | 2.00 | 0.84 | 1.43 |
| 0.80 | 2.00 | 0.84 | 1.43 |
| 0.80 | 2.00 | 0.84 | 1.43 |
| 0.20 | 0.77 | 0.29 | 0.69 |
| 0.20 | 0.77 | 0.29 | 0.69 |
| 0.73 | 1.68 | 0.75 | 1.67 |
| #N/A | 0.39 | 0.07 | 0.22 |
| 0.72 | 3.60 | 0.97 | 1.79 |
| 0.45 | 1.26 | 0.56 | 0.97 |
| 0.72 | 3.60 | 0.97 | 1.79 |
| 0.11 | 0.17 | 0.01 | 0.75 |
| 0.04 | 0.43 | 0.09 | 0.40 |
| 0.65 | #N/A | #N/A | 1.86 |
| 0.65 | #N/A | #N/A | 1.86 |
| 0.50 | 1.34 | 0.59 | 1.06 |
| 0.73 | #N/A | #N/A | 2.34 |

|      |       |      |      |
|------|-------|------|------|
| 0.90 | 1.34  | 0.59 | 1.84 |
| #N/A | #N/A  | #N/A | #N/A |
| 0.29 | 0.91  | 0.37 | 0.75 |
| 0.29 | 0.91  | 0.37 | 0.75 |
| #N/A | 1.96  | 0.79 | #N/A |
| 0.52 | 0.98  | 0.41 | 0.78 |
| 0.52 | 0.98  | 0.41 | 0.78 |
| 0.80 | 1.54  | 0.69 | 1.56 |
| 0.05 | 0.81  | 0.31 | #N/A |
| 0.05 | 0.81  | 0.31 | #N/A |
| 0.34 | 1.00  | 0.42 | 0.68 |
| 0.52 | 1.33  | 0.59 | 1.38 |
| 0.93 | 2.24  | 0.89 | 4.10 |
| 0.07 | 0.50  | 0.13 | 0.33 |
| 0.83 | 1.85  | 0.80 | 1.44 |
| 0.40 | 0.82  | 0.32 | 0.81 |
| 0.61 | 1.25  | 0.56 | 0.90 |
| 0.63 | 1.41  | 0.63 | 1.31 |
| 0.89 | 2.55  | 0.94 | 2.20 |
| 0.89 | 2.55  | 0.94 | 2.20 |
| 0.70 | 1.81  | 0.79 | 1.03 |
| 0.90 | 2.56  | 0.94 | 2.60 |
| 0.23 | 0.36  | 0.05 | #N/A |
| 0.15 | 0.53  | 0.14 | 0.62 |
| 0.44 | 1.16  | 0.51 | 0.94 |
| 0.00 | 0.11  | 0.00 | 0.45 |
| #N/A | 13.64 | 0.83 | #N/A |
| 0.57 | 1.23  | 0.55 | 1.17 |
| 0.57 | 1.23  | 0.55 | 1.17 |
| 0.83 | 3.01  | 0.96 | 2.80 |
| 0.70 | 1.34  | 0.59 | 1.65 |
| 0.70 | 1.34  | 0.59 | 1.65 |
| #N/A | 0.97  | 0.40 | #N/A |
| 0.73 | 2.07  | 0.86 | 1.05 |
| #N/A | 0.86  | 0.34 | 0.81 |
| 0.17 | 0.61  | 0.20 | 0.69 |
| 0.17 | 0.61  | 0.20 | 0.69 |
| #N/A | #N/A  | #N/A | #N/A |
| #N/A | 0.83  | 0.33 | 1.27 |
| #N/A | #N/A  | #N/A | #N/A |
| 0.38 | 1.14  | 0.50 | #N/A |
| 0.38 | 1.14  | 0.50 | #N/A |
| 0.43 | 1.63  | 0.73 | #N/A |
| 0.58 | 1.34  | 0.60 | 1.17 |
| 0.58 | 1.34  | 0.60 | 1.17 |
| 0.19 | 0.89  | 0.36 | 0.55 |
| 0.11 | 0.58  | 0.18 | #N/A |
| 0.11 | 0.58  | 0.18 | #N/A |
| 0.95 | 3.29  | 0.98 | 2.61 |
| 0.91 | 1.83  | 0.79 | 1.90 |
| 0.91 | 1.83  | 0.79 | 1.90 |

|      |      |      |      |
|------|------|------|------|
| 0.65 | 1.35 | 0.60 | 1.70 |
| #N/A | #N/A | #N/A | #N/A |
| 0.79 | #N/A | #N/A | 2.56 |
| 0.40 | 0.97 | 0.41 | 0.81 |
| 0.80 | 1.01 | 0.41 | 1.74 |
| 0.54 | 1.35 | 0.61 | 1.34 |
| 0.54 | 1.35 | 0.61 | 1.34 |
| 0.92 | 2.45 | 0.93 | 2.78 |
| 0.84 | 2.09 | 0.86 | 2.12 |
| 0.84 | 2.09 | 0.86 | 2.12 |
| #N/A | #N/A | #N/A | #N/A |
| 0.50 | 0.71 | 0.26 | 1.16 |
| 0.50 | 0.71 | 0.26 | 1.16 |
| 0.93 | 1.92 | 0.82 | 3.37 |
| 0.93 | 1.92 | 0.82 | 3.37 |
| 0.22 | 1.18 | 0.52 | 0.80 |
| #N/A | #N/A | #N/A | #N/A |
| 0.91 | 1.86 | 0.79 | #N/A |
| 0.68 | 1.17 | 0.51 | 1.16 |
| 0.83 | 1.90 | 0.76 | 1.89 |
| 0.73 | 1.54 | 0.69 | 1.52 |
| 0.60 | 1.05 | 0.45 | 1.22 |
| #N/A | #N/A | #N/A | #N/A |
| #N/A | #N/A | #N/A | #N/A |
| #N/A | #N/A | #N/A | #N/A |
| #N/A | #N/A | #N/A | #N/A |
| 0.40 | 1.41 | 0.63 | 0.64 |
| 0.85 | 2.81 | 0.96 | 1.33 |
| 0.90 | 2.63 | 0.94 | 2.71 |
| 0.90 | 2.63 | 0.94 | 2.71 |
| 0.65 | 1.28 | 0.54 | 2.05 |
| 0.38 | 0.62 | 0.20 | 1.12 |
| 0.77 | 1.33 | 0.59 | 2.03 |
| 0.85 | 2.50 | 0.93 | 1.79 |
| 0.81 | 2.12 | 0.87 | 1.38 |
| #N/A | 0.76 | 0.29 | 1.93 |
| #N/A | #N/A | #N/A | #N/A |
| 0.44 | 1.07 | 0.46 | 1.17 |
| 0.59 | 1.16 | 0.51 | 1.67 |
| 0.75 | 1.83 | 0.79 | 2.02 |
| 0.34 | 0.73 | 0.27 | 0.81 |
| 0.09 | #N/A | #N/A | #N/A |
| 0.44 | 1.12 | 0.48 | 0.88 |
| #N/A | 1.07 | 0.46 | #N/A |
| 0.98 | 2.35 | 0.89 | 2.54 |
| 0.48 | 1.32 | 0.59 | 1.49 |
| 0.87 | 2.74 | 0.96 | 2.20 |
| 0.48 | 1.32 | 0.59 | 1.49 |
| 0.87 | 2.74 | 0.96 | 2.20 |
| 0.70 | 1.32 | 0.59 | 1.47 |
| 0.74 | 1.37 | 0.62 | 1.82 |

|      |      |      |      |
|------|------|------|------|
| 0.70 | 1.32 | 0.59 | 1.47 |
| 0.74 | 1.37 | 0.62 | 1.82 |
| 0.60 | 1.91 | 0.82 | #N/A |
| #N/A | 2.40 | 0.92 | 1.02 |
| 0.14 | #N/A | #N/A | 0.54 |
| #N/A | #N/A | #N/A | #N/A |
| #N/A | #N/A | #N/A | #N/A |
| 0.68 | #N/A | #N/A | 1.85 |
| 0.88 | 2.11 | 0.86 | 2.47 |
| 0.88 | 2.11 | 0.86 | 2.47 |
| 0.07 | 0.88 | 0.35 | 0.41 |
| 0.59 | 1.44 | 0.65 | 1.21 |
| 0.59 | 1.44 | 0.65 | 1.21 |
| #N/A | #N/A | #N/A | #N/A |
| 0.43 | 1.33 | 0.59 | 0.84 |
| 0.72 | 1.04 | 0.45 | #N/A |
| 0.56 | 2.38 | 0.90 | #N/A |
| 0.96 | 2.10 | 0.87 | 2.27 |
| 0.82 | 1.49 | 0.67 | 1.81 |
| 0.82 | 1.49 | 0.67 | 1.81 |
| 0.99 | 2.12 | 0.87 | 2.61 |
| 0.80 | 2.15 | 0.88 | 2.31 |
| #N/A | #N/A | #N/A | #N/A |
| #N/A | #N/A | #N/A | #N/A |
| 0.77 | 2.16 | 0.88 | 1.84 |
| 0.49 | 1.27 | 0.57 | 0.99 |
| #N/A | #N/A | #N/A | #N/A |
| #N/A | #N/A | #N/A | #N/A |
| 0.26 | 0.82 | 0.32 | 0.77 |
| 0.60 | 1.31 | 0.58 | 1.36 |
| 0.60 | 1.31 | 0.58 | 1.36 |
| 0.44 | 1.12 | 0.48 | 0.84 |
| #N/A | #N/A | #N/A | #N/A |
| #N/A | #N/A | #N/A | #N/A |
| 0.44 | 1.12 | 0.48 | 0.84 |
| 0.35 | #N/A | #N/A | 0.84 |
| #N/A | #N/A | #N/A | #N/A |
| 0.59 | 1.50 | 0.67 | 1.51 |
| 0.45 | 1.22 | 0.54 | 0.86 |
| 0.36 | 2.39 | 0.91 | 1.21 |
| 0.36 | 2.39 | 0.91 | 1.21 |
| #N/A | #N/A | #N/A | #N/A |
| 0.55 | 0.98 | 0.41 | 1.22 |
| 0.55 | 0.98 | 0.41 | 1.22 |
| #N/A | #N/A | #N/A | #N/A |
| 0.75 | 1.43 | 0.63 | 1.82 |
| 0.75 | 1.43 | 0.63 | 1.82 |
| 0.77 | 1.09 | 0.47 | 1.00 |
| 0.37 | 0.63 | 0.21 | 0.78 |
| #N/A | #N/A | #N/A | #N/A |
| 0.57 | 1.45 | 0.65 | 1.87 |

|      |      |      |      |
|------|------|------|------|
| 0.26 | 0.31 | 0.04 | 0.69 |
| 0.41 | 1.36 | 0.61 | 0.82 |
| 0.41 | 1.36 | 0.61 | 0.82 |
| 0.48 | 1.32 | 0.58 | 1.36 |
| 0.11 | 0.91 | 0.37 | 0.88 |
| 0.11 | 0.91 | 0.37 | 0.88 |
| 0.71 | 1.45 | 0.65 | 1.64 |
| 0.71 | 1.45 | 0.65 | 1.64 |
| 0.88 | 1.46 | 0.66 | 2.71 |
| #N/A | #N/A | #N/A | #N/A |
| #N/A | #N/A | #N/A | #N/A |
| 0.25 | 1.13 | 0.50 | 0.57 |
| 0.77 | 1.16 | 0.49 | #N/A |
| 0.77 | 1.16 | 0.49 | #N/A |
| 0.82 | 2.54 | 0.93 | #N/A |
| 0.71 | 2.65 | 0.95 | 1.54 |
| 0.71 | 2.65 | 0.95 | 1.54 |
| 0.51 | 1.02 | 0.43 | 1.24 |
| #N/A | #N/A | #N/A | #N/A |
| 0.32 | 0.85 | 0.34 | 0.95 |
| 0.77 | 1.63 | 0.73 | 1.85 |
| #N/A | #N/A | #N/A | #N/A |
| #N/A | #N/A | #N/A | #N/A |
| 0.52 | 1.39 | 0.62 | 1.25 |
| 0.30 | 0.73 | 0.26 | 0.79 |
| 0.17 | 0.58 | 0.18 | 0.65 |
| #N/A | #N/A | #N/A | #N/A |
| 0.66 | 1.09 | 0.47 | 0.81 |
| 0.46 | 0.82 | 0.32 | 1.56 |
| #N/A | #N/A | #N/A | #N/A |
| 0.44 | #N/A | #N/A | #N/A |
| 0.28 | 0.98 | 0.41 | 0.95 |
| 0.07 | 0.39 | 0.06 | 0.48 |
| 0.60 | 1.07 | 0.46 | 1.19 |
| #N/A | #N/A | #N/A | #N/A |
| 0.28 | 0.62 | 0.20 | 0.90 |
| #N/A | #N/A | #N/A | #N/A |
| #N/A | #N/A | #N/A | #N/A |
| #N/A | #N/A | #N/A | #N/A |
| #N/A | 2.20 | 0.88 | 1.68 |
| 0.72 | 2.34 | 0.91 | 1.71 |
| 0.72 | 2.34 | 0.91 | 1.71 |
| #N/A | #N/A | #N/A | #N/A |
| 0.83 | 1.66 | 0.73 | 1.95 |
| 0.83 | 1.66 | 0.73 | 1.95 |
| 0.32 | 0.71 | 0.25 | 0.86 |
| 0.66 | 2.45 | 0.92 | 0.93 |
| 0.66 | 2.45 | 0.92 | 0.93 |
| 0.01 | 0.29 | 0.03 | 0.25 |
| #N/A | #N/A | #N/A | #N/A |
| #N/A | #N/A | #N/A | #N/A |

|      |      |      |      |
|------|------|------|------|
| 0.81 | 2.64 | 0.95 | 1.18 |
| 0.81 | 2.64 | 0.95 | 1.18 |
| 0.88 | 3.35 | 0.98 | 2.21 |
| #N/A | #N/A | #N/A | #N/A |
| #N/A | #N/A | #N/A | #N/A |
| 0.24 | 0.79 | 0.30 | 0.53 |
| #N/A | #N/A | #N/A | #N/A |
| #N/A | #N/A | #N/A | #N/A |
| #N/A | #N/A | #N/A | #N/A |
| 0.03 | 0.36 | 0.05 | #N/A |
| #N/A | 1.80 | 0.78 | #N/A |
| #N/A | 1.80 | 0.78 | #N/A |
| #N/A | #N/A | #N/A | #N/A |
| #N/A | #N/A | #N/A | #N/A |
| #N/A | #N/A | #N/A | #N/A |
| #N/A | #N/A | #N/A | #N/A |
| #N/A | #N/A | #N/A | #N/A |
| 0.97 | #N/A | #N/A | 2.54 |
| 0.95 | 2.63 | 0.95 | 1.86 |
| 0.95 | 2.63 | 0.95 | 1.86 |
| 0.80 | 1.33 | 0.60 | 1.42 |
| #N/A | #N/A | #N/A | #N/A |
| #N/A | #N/A | #N/A | #N/A |
| 0.58 | 1.29 | 0.57 | 1.02 |
| #N/A | #N/A | #N/A | #N/A |
| #N/A | #N/A | #N/A | #N/A |
| #N/A | 0.66 | 0.22 | #N/A |
| 0.60 | 0.96 | 0.39 | 1.44 |
| #N/A | 0.66 | 0.22 | #N/A |
| 0.54 | #N/A | #N/A | 1.30 |
| #N/A | #N/A | #N/A | #N/A |
| 0.96 | 2.69 | 0.95 | 2.61 |
| 0.52 | #N/A | #N/A | #N/A |
| 0.94 | 2.48 | 0.93 | 2.60 |
| 0.96 | 2.44 | 0.92 | 2.53 |
| #N/A | #N/A | #N/A | #N/A |
| 0.76 | 2.23 | 0.89 | #N/A |
| 0.76 | 2.23 | 0.89 | #N/A |
| 0.64 | 2.48 | 0.93 | 1.41 |
| 0.45 | 0.99 | 0.42 | #N/A |
| 0.95 | 1.52 | 0.67 | #N/A |
| 0.33 | 1.90 | 0.80 | #N/A |
| 0.32 | 1.37 | 0.60 | 0.68 |
| 0.74 | 2.71 | 0.96 | 1.82 |
| 0.74 | 2.71 | 0.96 | 1.82 |
| #N/A | #N/A | #N/A | 0.72 |
| 0.45 | 1.27 | 0.56 | #N/A |
| #N/A | #N/A | #N/A | #N/A |
| #N/A | #N/A | #N/A | #N/A |
| 0.06 | 0.36 | 0.05 | 0.30 |
| #N/A | #N/A | #N/A | #N/A |

|      |      |      |      |
|------|------|------|------|
| #N/A | #N/A | #N/A | #N/A |
| 0.82 | 1.99 | 0.83 | 1.52 |
| #N/A | #N/A | #N/A | #N/A |
| #N/A | #N/A | #N/A | #N/A |
| 0.90 | 2.24 | 0.89 | 2.22 |
| 0.90 | 2.24 | 0.89 | 2.22 |
| #N/A | #N/A | #N/A | #N/A |
| #N/A | #N/A | #N/A | #N/A |
| 0.85 | 1.25 | 0.55 | 2.11 |
| 0.85 | 1.25 | 0.55 | 2.11 |
| #N/A | #N/A | #N/A | #N/A |
| #N/A | #N/A | #N/A | #N/A |
| 0.69 | 1.38 | 0.61 | 1.81 |
| #N/A | #N/A | #N/A | #N/A |
| 0.90 | 2.20 | 0.89 | 1.80 |
| #N/A | #N/A | #N/A | #N/A |
| 0.87 | 2.54 | 0.93 | 2.62 |
| 0.62 | 1.48 | 0.64 | 0.69 |
| #N/A | #N/A | #N/A | #N/A |
| #N/A | #N/A | #N/A | #N/A |
| #N/A | 1.09 | 0.47 | #N/A |
| #N/A | 1.09 | 0.47 | #N/A |
| 0.36 | 2.26 | 0.86 | #N/A |
| 0.36 | 2.26 | 0.86 | #N/A |
| #N/A | #N/A | #N/A | #N/A |
| 0.33 | 0.63 | 0.21 | 1.22 |
| #N/A | #N/A | #N/A | #N/A |
| #N/A | #N/A | #N/A | #N/A |
| 0.92 | 1.60 | 0.69 | #N/A |
| 0.96 | 2.85 | 0.96 | 2.45 |
| 0.96 | 2.85 | 0.96 | 2.45 |
| 0.35 | 0.90 | 0.36 | 0.76 |
| #N/A | 0.57 | 0.17 | 1.41 |
| #N/A | 1.30 | 0.58 | #N/A |
| 0.69 | 1.30 | 0.58 | 1.73 |
| 0.82 | 1.76 | 0.77 | #N/A |
| 0.82 | 1.76 | 0.77 | #N/A |
| #N/A | #N/A | #N/A | #N/A |
| #N/A | #N/A | #N/A | #N/A |
| 0.89 | 1.57 | 0.70 | 1.22 |
| 0.86 | 1.78 | 0.78 | 2.31 |
| 0.86 | 1.78 | 0.78 | 2.31 |
| #N/A | #N/A | #N/A | #N/A |
| 0.96 | 2.86 | 0.95 | 3.35 |
| 0.96 | 2.86 | 0.95 | 3.35 |
| 0.89 | 1.54 | 0.68 | 2.89 |
| 0.99 | 3.78 | 0.99 | 2.53 |
| 0.99 | 3.78 | 0.99 | 2.53 |
| 0.87 | 2.48 | 0.93 | 1.21 |
| 0.67 | 1.76 | 0.76 | 1.63 |
| 0.64 | 1.99 | 0.82 | #N/A |

|      |      |      |      |
|------|------|------|------|
| 0.65 | 1.50 | 0.64 | #N/A |
| 0.14 | 0.48 | 0.12 | #N/A |
| #N/A | #N/A | #N/A | #N/A |
| #N/A | #N/A | #N/A | #N/A |
| #N/A | #N/A | #N/A | #N/A |
| #N/A | #N/A | #N/A | #N/A |
| #N/A | #N/A | #N/A | #N/A |
| 0.99 | 3.74 | 0.99 | 2.55 |
| 0.99 | 3.74 | 0.99 | 2.55 |
| #N/A | #N/A | #N/A | #N/A |
| #N/A | 0.96 | 0.40 | #N/A |
| #N/A | 0.96 | 0.40 | #N/A |
| 0.96 | 2.09 | 0.87 | 2.29 |
| 0.46 | 0.76 | 0.28 | 0.87 |
| 0.46 | 0.76 | 0.28 | 0.87 |
| #N/A | #N/A | #N/A | #N/A |
| 0.70 | 1.27 | 0.57 | 1.20 |
| #N/A | #N/A | #N/A | #N/A |
| #N/A | #N/A | #N/A | #N/A |
| #N/A | #N/A | #N/A | #N/A |
| #N/A | #N/A | #N/A | #N/A |
| 0.77 | #N/A | #N/A | 1.73 |
| #N/A | #N/A | #N/A | #N/A |
| 0.29 | 0.85 | 0.33 | 0.71 |
| #N/A | #N/A | #N/A | #N/A |
| 0.74 | 1.95 | 0.83 | 1.48 |
| 0.96 | 2.79 | 0.92 | 1.92 |
| 0.96 | 2.79 | 0.92 | 1.92 |
| 0.59 | 1.37 | 0.61 | 1.17 |
| 0.59 | 1.37 | 0.61 | 1.17 |
| 0.82 | 2.61 | 0.95 | 1.90 |
| 0.82 | 2.61 | 0.95 | 1.90 |
| 0.71 | 2.12 | 0.87 | 1.97 |
| 0.71 | 2.12 | 0.87 | 1.97 |
| #N/A | #N/A | #N/A | #N/A |
| 0.64 | 1.25 | 0.56 | 1.51 |
| 0.64 | 1.25 | 0.56 | 1.51 |
| 0.95 | 2.46 | 0.93 | 3.22 |
| 0.95 | 2.46 | 0.93 | 3.22 |
| 0.15 | 0.68 | 0.24 | 0.53 |
| #N/A | #N/A | #N/A | #N/A |
| #N/A | #N/A | #N/A | #N/A |
| 0.82 | 1.56 | 0.69 | 1.71 |
| 0.58 | 1.27 | 0.56 | 1.55 |
| 0.92 | 1.56 | 0.69 | 2.53 |
| 0.95 | #N/A | #N/A | 1.71 |
| 0.95 | #N/A | #N/A | 1.71 |
| 0.62 | 1.49 | 0.67 | #N/A |
| 0.67 | 1.70 | 0.73 | #N/A |
| #N/A | #N/A | #N/A | 1.22 |
| 0.48 | 1.53 | 0.58 | 1.02 |



|      |      |      |      |
|------|------|------|------|
| 0.86 | 2.41 | 0.92 | 2.66 |
| #N/A | #N/A | #N/A | #N/A |
| #N/A | #N/A | #N/A | #N/A |
| 0.38 | 0.75 | 0.28 | 0.74 |
| #N/A | #N/A | #N/A | #N/A |
| #N/A | #N/A | #N/A | #N/A |
| 0.29 | 0.73 | 0.27 | 0.83 |
| 0.42 | 0.94 | 0.39 | 0.77 |
| 0.79 | 1.66 | 0.73 | 1.60 |
| 0.02 | #N/A | #N/A | #N/A |
| #N/A | 1.76 | 0.77 | #N/A |
| 0.42 | 1.64 | 0.73 | 1.00 |
| 0.19 | 0.86 | 0.34 | #N/A |
| 0.18 | 0.66 | 0.23 | 0.66 |
| 0.86 | 2.38 | 0.91 | 2.73 |
| 0.86 | 2.38 | 0.91 | 2.73 |
| 0.80 | 1.38 | 0.62 | 3.00 |
| 0.80 | 1.38 | 0.62 | 3.00 |
| 0.48 | 1.08 | 0.47 | 1.55 |
| #N/A | 2.20 | 0.83 | 1.63 |
| #N/A | 2.20 | 0.83 | 1.63 |
| 0.80 | 1.93 | 0.82 | 2.07 |
| 0.80 | 1.93 | 0.82 | 2.07 |
| 0.80 | 1.58 | 0.70 | 1.90 |
| 0.97 | #N/A | #N/A | #N/A |
| #N/A | #N/A | #N/A | #N/A |
| #N/A | #N/A | #N/A | 0.90 |
| 0.60 | 1.03 | 0.44 | 1.48 |
| 0.60 | 1.03 | 0.44 | 1.48 |
| #N/A | #N/A | #N/A | #N/A |
| #N/A | #N/A | #N/A | #N/A |
| 0.12 | 0.78 | 0.29 | 0.45 |
| 0.12 | 0.78 | 0.29 | 0.45 |
| 0.72 | 1.83 | 0.79 | 1.49 |
| 0.55 | 1.52 | 0.68 | 1.09 |
| 0.61 | 1.68 | 0.75 | 1.32 |
| 0.61 | 1.68 | 0.75 | 1.32 |
| 0.46 | 0.89 | 0.36 | 0.98 |
| 0.96 | 1.07 | 0.46 | 1.87 |
| 0.96 | 1.07 | 0.46 | 1.87 |
| 0.37 | 1.01 | 0.43 | 0.84 |
| 0.64 | 1.49 | 0.67 | 1.30 |
| 0.62 | 1.39 | 0.62 | 1.29 |
| 0.37 | 1.01 | 0.43 | 0.84 |
| 0.37 | 1.01 | 0.43 | 0.84 |
| 0.62 | 1.39 | 0.62 | 1.29 |
| 0.62 | 1.39 | 0.62 | 1.29 |
| #N/A | #N/A | #N/A | #N/A |
| 0.62 | 1.39 | 0.62 | 1.29 |
| 0.62 | 1.39 | 0.62 | 1.29 |
| 0.64 | 1.58 | 0.70 | 1.31 |

|      |       |      |      |
|------|-------|------|------|
| 0.64 | 1.58  | 0.70 | 1.31 |
| 0.83 | 1.86  | 0.80 | 1.77 |
| 0.83 | 1.86  | 0.80 | 1.77 |
| 0.62 | 1.04  | 0.44 | 1.50 |
| 0.92 | 2.24  | 0.90 | 2.15 |
| 0.92 | 2.24  | 0.90 | 2.15 |
| #N/A | #N/A  | #N/A | 1.48 |
| 0.24 | 0.75  | 0.28 | 0.79 |
| 0.35 | #N/A  | #N/A | #N/A |
| 0.32 | 1.33  | 0.59 | 0.84 |
| 0.13 | 0.55  | 0.16 | 0.48 |
| 0.13 | 0.55  | 0.16 | 0.48 |
| #N/A | 1.42  | 0.64 | #N/A |
| 0.45 | #N/A  | #N/A | 0.94 |
| 0.48 | 1.07  | 0.46 | 0.74 |
| 0.98 | 2.70  | 0.95 | 2.48 |
| #N/A | #N/A  | #N/A | #N/A |
| 0.05 | 0.52  | 0.14 | 0.28 |
| 0.88 | 2.85  | 0.97 | 1.98 |
| 0.88 | 2.85  | 0.97 | 1.98 |
| 0.45 | 0.95  | 0.39 | 1.26 |
| #N/A | 1.08  | 0.47 | 1.58 |
| #N/A | 1.08  | 0.47 | 1.58 |
| 0.39 | 0.89  | 0.36 | 0.92 |
| 0.39 | 0.89  | 0.36 | 0.92 |
| 0.60 | 1.57  | 0.70 | 1.43 |
| 0.80 | 1.91  | 0.82 | 1.49 |
| #N/A | #N/A  | #N/A | #N/A |
| #N/A | #N/A  | #N/A | #N/A |
| 0.87 | #N/A  | #N/A | #N/A |
| 0.82 | 2.06  | 0.86 | 1.34 |
| 0.82 | 2.06  | 0.86 | 1.34 |
| 0.42 | 0.93  | 0.38 | 1.45 |
| 0.84 | #N/A  | #N/A | 2.16 |
| 0.85 | 2.03  | 0.85 | 1.87 |
| 0.62 | 79.71 | 0.85 | 1.59 |
| 0.62 | 79.71 | 0.85 | 1.59 |
| 0.93 | 3.43  | 0.97 | 5.92 |
| #N/A | #N/A  | #N/A | #N/A |
| #N/A | #N/A  | #N/A | #N/A |
| 0.99 | 2.90  | 0.97 | 2.50 |
| 0.99 | 2.90  | 0.97 | 2.50 |
| #N/A | #N/A  | #N/A | #N/A |
| 0.92 | 2.32  | 0.91 | #N/A |
| 0.66 | 1.47  | 0.66 | 1.42 |
| 0.68 | 1.54  | 0.69 | 1.29 |
| 0.68 | 1.54  | 0.69 | 1.29 |
| 0.80 | 1.28  | 0.57 | 1.57 |
| 0.39 | 1.97  | 0.78 | #N/A |
| 0.31 | 0.87  | 0.34 | 0.87 |
| 0.31 | 0.87  | 0.34 | 0.87 |

|      |      |      |      |
|------|------|------|------|
| 0.03 | 0.31 | 0.03 | 0.35 |
| 0.03 | 0.38 | 0.06 | 0.34 |
| 0.40 | 0.59 | 0.18 | 0.78 |
| 0.40 | 0.59 | 0.18 | 0.78 |
| 0.04 | 0.26 | 0.02 | 0.48 |
| #N/A | #N/A | #N/A | #N/A |
| #N/A | #N/A | #N/A | 2.30 |
| 0.75 | 2.14 | 0.87 | 1.56 |
| #N/A | #N/A | #N/A | 2.30 |
| #N/A | #N/A | #N/A | 2.30 |
| 0.83 | #N/A | #N/A | 1.73 |
| #N/A | #N/A | #N/A | #N/A |
| 0.97 | 2.14 | 0.88 | 1.93 |
| 0.97 | 2.14 | 0.88 | 1.93 |
| 0.72 | 1.69 | 0.74 | 1.47 |
| 0.73 | 2.53 | 0.94 | 2.17 |
| 0.63 | 2.37 | 0.91 | 2.20 |
| 0.02 | 0.45 | 0.10 | 0.31 |
| 0.32 | 0.99 | 0.42 | 0.86 |
| #N/A | #N/A | #N/A | #N/A |
| #N/A | 1.46 | 0.65 | 1.27 |
| #N/A | 1.46 | 0.65 | 1.27 |
| 0.52 | 1.01 | 0.42 | 1.14 |
| 0.57 | 1.08 | 0.47 | 1.51 |
| 0.86 | 1.19 | 0.52 | 2.03 |
| 0.86 | 1.19 | 0.52 | 2.03 |
| 0.83 | 2.71 | 0.95 | 1.97 |
| 0.83 | 2.71 | 0.95 | 1.97 |
| 0.18 | 0.51 | 0.14 | 0.55 |
| 0.76 | 1.93 | 0.82 | 1.76 |
| 0.18 | 0.51 | 0.14 | 0.55 |
| 0.76 | 1.93 | 0.82 | 1.76 |
| #N/A | #N/A | #N/A | #N/A |
| #N/A | #N/A | #N/A | #N/A |
| #N/A | #N/A | #N/A | #N/A |
| #N/A | #N/A | #N/A | #N/A |
| 0.82 | 1.86 | 0.78 | 1.96 |
| 0.23 | 0.85 | 0.33 | 0.70 |
| 0.97 | 3.97 | 0.99 | 2.88 |
| 0.97 | 3.97 | 0.99 | 2.88 |
| 0.92 | 2.73 | 0.96 | 2.02 |
| 0.92 | 2.73 | 0.96 | 2.02 |
| 0.37 | 1.08 | 0.46 | 0.96 |
| 0.72 | 1.75 | 0.76 | 1.89 |
| 0.61 | 2.28 | 0.90 | 1.27 |
| 0.95 | 2.27 | 0.90 | 2.70 |
| 0.95 | 2.27 | 0.90 | 2.70 |
| 0.40 | 0.25 | 0.02 | 0.91 |
| 0.81 | 0.68 | 0.24 | #N/A |
| 0.81 | 0.68 | 0.24 | #N/A |
| 0.18 | 0.47 | 0.11 | #N/A |

|      |      |      |      |
|------|------|------|------|
| 0.50 | 2.04 | 0.75 | #N/A |
| 0.50 | 2.04 | 0.75 | #N/A |
| 0.85 | 1.61 | 0.71 | 1.60 |
| 0.48 | 1.07 | 0.46 | 0.96 |
| 0.48 | 1.07 | 0.46 | 0.96 |
| #N/A | #N/A | #N/A | #N/A |
| #N/A | #N/A | #N/A | #N/A |
| 0.87 | 1.90 | 0.81 | 1.52 |
| 0.44 | 0.71 | 0.25 | 1.15 |
| 0.86 | 1.71 | 0.75 | 1.26 |
| 0.63 | 1.45 | 0.65 | 1.45 |
| 0.63 | 1.45 | 0.65 | 1.45 |
| 0.97 | 3.42 | 0.99 | 2.55 |
| 0.13 | 0.52 | 0.14 | 0.62 |
| 0.13 | 0.52 | 0.14 | 0.62 |
| #N/A | #N/A | #N/A | #N/A |
| 0.03 | 0.25 | 0.02 | 0.31 |
| 0.25 | 0.89 | 0.36 | 0.70 |
| 0.34 | 1.08 | 0.47 | 0.63 |
| 0.05 | 0.50 | 0.13 | 0.45 |
| 0.32 | 0.53 | 0.15 | 0.72 |
| 0.82 | 1.51 | 0.67 | 1.94 |
| 0.83 | 1.63 | 0.72 | 2.16 |
| 0.94 | 2.77 | 0.96 | 2.46 |
| 0.94 | 2.77 | 0.96 | 2.46 |
| 0.96 | 2.38 | 0.91 | 3.00 |
| 0.96 | 2.38 | 0.91 | 3.00 |
| 0.86 | 2.83 | 0.97 | 1.94 |
| 0.86 | 2.83 | 0.97 | 1.94 |
| 0.46 | 1.48 | 0.63 | 1.06 |
| 0.01 | 0.40 | 0.08 | 0.25 |
| 0.68 | 2.09 | 0.83 | #N/A |
| 0.20 | 1.02 | 0.43 | 0.92 |
| 0.90 | 1.53 | 0.68 | 2.36 |
| 0.90 | 1.53 | 0.68 | 2.36 |
| #N/A | #N/A | #N/A | #N/A |
| 0.51 | 1.12 | 0.49 | 0.95 |
| 0.21 | 0.77 | 0.29 | 0.73 |
| 0.21 | 0.77 | 0.29 | 0.73 |
| 0.97 | 3.03 | 0.97 | 2.81 |
| 0.97 | 3.03 | 0.97 | 2.81 |
| #N/A | 1.36 | 0.61 | 1.31 |
| #N/A | 1.36 | 0.61 | 1.31 |
| 0.60 | 1.81 | 0.78 | 1.39 |
| 0.68 | 1.66 | 0.73 | 1.44 |
| 0.42 | 1.28 | 0.57 | 1.42 |
| 0.42 | 1.28 | 0.57 | 1.42 |
| #N/A | #N/A | #N/A | 1.09 |
| 0.93 | 2.91 | 0.96 | 2.80 |
| 0.66 | 1.05 | 0.44 | #N/A |
| 0.96 | 1.60 | 0.71 | 2.31 |

|      |      |      |      |
|------|------|------|------|
| 0.96 | 1.60 | 0.71 | 2.31 |
| #N/A | 0.67 | 0.23 | #N/A |
| 0.98 | 2.85 | 0.95 | 2.26 |
| 0.98 | 2.85 | 0.95 | 2.26 |
| 0.42 | 1.32 | 0.58 | #N/A |
| 0.57 | 2.03 | 0.85 | 1.28 |
| 0.57 | 2.03 | 0.85 | 1.28 |
| 0.63 | 1.80 | 0.79 | 1.28 |
| #N/A | #N/A | #N/A | #N/A |
| #N/A | #N/A | #N/A | #N/A |
| 0.72 | 1.45 | 0.65 | 1.67 |
| 0.72 | 1.45 | 0.65 | 1.67 |
| #N/A | 1.73 | 0.76 | 1.39 |
| 0.32 | #N/A | #N/A | 0.94 |
| 0.32 | #N/A | #N/A | 0.94 |
| 0.13 | 0.40 | 0.07 | 0.48 |
| 0.70 | 1.04 | 0.45 | 1.29 |
| 0.70 | 1.04 | 0.45 | 1.29 |
| 0.70 | 1.04 | 0.45 | 1.29 |
| 0.83 | 2.10 | 0.86 | 1.98 |
| 0.08 | 0.44 | 0.10 | #N/A |
| 0.08 | 0.44 | 0.10 | #N/A |
| 0.40 | 1.58 | 0.71 | 1.36 |
| #N/A | #N/A | #N/A | #N/A |
| 0.51 | 1.08 | 0.46 | #N/A |
| 0.77 | 1.92 | 0.81 | 1.61 |
| 0.77 | 1.92 | 0.81 | 1.61 |
| #N/A | #N/A | #N/A | #N/A |
| #N/A | #N/A | #N/A | #N/A |
| 0.67 | 1.50 | 0.67 | 1.57 |
| #N/A | #N/A | #N/A | #N/A |
| 0.87 | 2.65 | 0.93 | 2.17 |
| 0.87 | 2.65 | 0.93 | 2.17 |
| #N/A | #N/A | #N/A | #N/A |
| 0.98 | 3.50 | 0.99 | #N/A |
| 0.98 | 3.50 | 0.99 | #N/A |
| 0.58 | 1.19 | 0.52 | 1.17 |
| 0.58 | 1.19 | 0.52 | 1.17 |
| 0.37 | 0.79 | 0.30 | #N/A |
| #N/A | 0.61 | 0.19 | 0.54 |
| 0.27 | 0.47 | 0.12 | 0.80 |
| 0.27 | 0.47 | 0.12 | 0.80 |
| #N/A | #N/A | #N/A | #N/A |
| 0.07 | 0.32 | 0.04 | 0.42 |
| 0.84 | 1.55 | 0.69 | 1.87 |
| 0.94 | 2.61 | 0.95 | 2.42 |
| 0.95 | 2.18 | 0.88 | 2.40 |
| 0.80 | 1.68 | 0.74 | 1.44 |
| 0.80 | 1.68 | 0.74 | 1.44 |
| 0.95 | 3.02 | 0.97 | 2.31 |
| 0.52 | 1.58 | 0.71 | 1.35 |

|      |      |      |      |
|------|------|------|------|
| 0.52 | 1.58 | 0.71 | 1.35 |
| #N/A | 2.08 | 0.86 | 2.20 |
| 0.35 | 0.94 | 0.39 | 1.21 |
| 0.85 | 1.51 | 0.68 | 1.47 |
| 0.99 | 2.50 | 0.91 | 2.75 |
| 0.99 | 2.50 | 0.91 | 2.75 |
| #N/A | 1.15 | 0.51 | #N/A |
| 0.80 | 0.91 | 0.37 | 1.52 |
| 0.99 | #N/A | #N/A | 2.66 |
| 0.99 | #N/A | #N/A | 2.66 |
| 0.98 | 2.47 | 0.92 | 3.28 |
| 0.57 | 1.37 | 0.61 | 1.35 |
| #N/A | #N/A | #N/A | 0.79 |
| #N/A | #N/A | #N/A | 0.79 |
| 0.88 | 2.00 | 0.83 | 1.38 |
| 0.71 | 1.28 | 0.57 | 1.62 |
| #N/A | #N/A | #N/A | #N/A |
| 0.76 | 1.47 | 0.66 | 2.19 |
| 0.76 | 1.47 | 0.66 | 2.19 |
| 0.79 | 2.02 | 0.84 | 1.73 |
| 0.79 | 2.02 | 0.84 | 1.73 |
| 0.56 | 1.14 | 0.50 | 1.84 |
| 0.19 | 1.12 | 0.49 | 0.89 |
| #N/A | #N/A | #N/A | #N/A |
| 0.79 | #N/A | #N/A | #N/A |
| #N/A | #N/A | #N/A | #N/A |
| #N/A | #N/A | #N/A | #N/A |
| 0.86 | 2.33 | 0.91 | #N/A |
| 0.56 | 1.43 | 0.64 | 1.15 |
| 0.34 | 0.88 | 0.35 | 0.94 |
| #N/A | #N/A | #N/A | 0.83 |
| 0.23 | #N/A | #N/A | #N/A |
| #N/A | #N/A | #N/A | 0.83 |
| 0.83 | 0.80 | 0.31 | 1.32 |
| 0.93 | 2.84 | 0.97 | 2.75 |
| 0.93 | 2.84 | 0.97 | 2.75 |
| 0.93 | 2.84 | 0.97 | 2.75 |
| 0.93 | 2.84 | 0.97 | 2.75 |
| 0.40 | 0.94 | 0.39 | 0.88 |
| 0.70 | 1.68 | 0.75 | 1.59 |
| #N/A | #N/A | #N/A | #N/A |
| #N/A | 0.98 | 0.40 | #N/A |
| 0.87 | 2.10 | 0.86 | 1.44 |
| 0.87 | 2.10 | 0.86 | 1.44 |
| 0.44 | 0.67 | 0.23 | 0.66 |
| 0.67 | 1.25 | 0.51 | #N/A |
| 0.88 | 1.86 | 0.80 | 1.77 |
| 0.88 | 1.86 | 0.80 | 1.77 |
| #N/A | #N/A | #N/A | #N/A |
| 0.56 | 1.53 | 0.68 | 1.26 |
| 0.59 | #N/A | #N/A | 1.66 |

|      |      |      |      |
|------|------|------|------|
| 0.59 | #N/A | #N/A | 1.66 |
| 0.56 | 1.10 | 0.48 | 1.37 |
| 0.61 | 1.94 | 0.82 | 1.66 |
| 0.61 | 1.94 | 0.82 | 1.66 |
| 0.70 | 1.85 | 0.79 | 1.38 |
| #N/A | #N/A | #N/A | #N/A |
| #N/A | #N/A | #N/A | #N/A |
| 0.64 | 0.97 | 0.40 | 1.38 |
| 0.64 | 0.97 | 0.40 | 1.38 |
| 0.36 | 0.77 | 0.29 | 0.71 |
| 0.65 | 1.47 | 0.66 | 1.45 |
| 0.65 | 1.47 | 0.66 | 1.45 |
| 0.44 | 0.85 | 0.33 | 1.03 |
| 0.77 | 2.43 | 0.93 | 1.06 |
| #N/A | #N/A | #N/A | #N/A |
| 0.42 | 0.81 | 0.31 | 0.65 |
| 0.67 | 0.84 | 0.33 | 2.10 |
| 0.24 | 1.07 | 0.45 | 0.99 |
| #N/A | 2.66 | 0.78 | #N/A |
| 0.92 | 1.75 | 0.77 | #N/A |
| 0.92 | 1.75 | 0.77 | #N/A |
| 0.69 | 1.97 | 0.84 | 1.31 |
| 0.40 | #N/A | #N/A | 1.67 |
| #N/A | #N/A | #N/A | #N/A |
| 0.54 | 1.24 | 0.55 | 1.09 |
| #N/A | #N/A | #N/A | #N/A |
| 0.99 | 2.44 | 0.93 | 3.47 |
| 0.99 | 2.44 | 0.93 | 3.47 |
| 0.69 | 1.54 | 0.66 | 1.66 |
| 0.86 | 1.82 | 0.79 | #N/A |
| 0.69 | 1.54 | 0.66 | 1.66 |
| 0.81 | #N/A | #N/A | 2.41 |
| 0.81 | #N/A | #N/A | 2.41 |
| #N/A | 2.70 | 0.95 | 1.63 |
| #N/A | #N/A | #N/A | #N/A |
| #N/A | 2.16 | 0.88 | #N/A |
| #N/A | 2.16 | 0.88 | #N/A |
| 0.78 | 1.93 | 0.82 | 2.08 |
| 0.78 | 1.93 | 0.82 | 2.08 |
| #N/A | #N/A | #N/A | #N/A |
| 0.88 | 3.24 | 0.98 | 2.04 |
| 0.88 | 3.24 | 0.98 | 2.04 |
| 0.10 | 0.53 | 0.15 | 0.44 |
| 0.24 | 0.81 | 0.31 | 0.73 |
| 0.53 | 1.17 | 0.52 | 1.30 |
| 0.87 | 2.68 | 0.94 | 2.47 |
| 0.30 | 0.65 | 0.22 | 0.92 |
| 0.82 | 1.66 | 0.74 | 1.83 |
| 0.82 | 1.66 | 0.74 | 1.83 |
| #N/A | #N/A | #N/A | #N/A |
| #N/A | 0.41 | 0.08 | #N/A |

|      |      |      |      |
|------|------|------|------|
| #N/A | 0.41 | 0.08 | #N/A |
| 0.09 | 0.29 | 0.03 | 0.92 |
| #N/A | 0.79 | 0.30 | 1.09 |
| #N/A | 0.79 | 0.30 | 1.09 |
| 0.71 | 1.51 | 0.65 | 2.39 |
| 1.00 | 4.20 | 1.00 | 4.20 |
| 1.00 | 4.20 | 1.00 | 4.20 |
| 0.54 | #N/A | #N/A | 1.29 |
| 0.67 | 1.85 | 0.80 | 1.78 |
| #N/A | #N/A | #N/A | 1.17 |
| #N/A | #N/A | #N/A | 1.17 |
| 0.44 | 1.12 | 0.49 | 0.92 |
| #N/A | #N/A | #N/A | #N/A |
| 0.47 | 1.08 | 0.47 | 1.11 |
| 0.47 | 1.08 | 0.47 | 1.11 |
| 0.86 | 2.34 | 0.90 | 2.10 |
| 0.86 | 2.34 | 0.90 | 2.10 |
| #N/A | #N/A | #N/A | #N/A |
| 0.15 | 0.77 | 0.29 | 0.61 |
| 0.44 | 0.55 | 0.16 | 0.68 |
| 0.44 | 0.55 | 0.16 | 0.68 |
| 0.44 | 0.55 | 0.16 | 0.68 |
| #N/A | 1.78 | 0.77 | 0.77 |
| 0.48 | 1.49 | 0.66 | #N/A |
| #N/A | 1.52 | 0.68 | 1.01 |
| 0.64 | 1.20 | 0.53 | 1.42 |
| #N/A | #N/A | #N/A | #N/A |
| #N/A | #N/A | #N/A | #N/A |
| 0.36 | 0.63 | 0.20 | 0.64 |
| 0.36 | 0.63 | 0.20 | 0.64 |
| 0.73 | 1.83 | 0.78 | #N/A |
| 0.83 | 1.81 | 0.78 | 0.79 |
| 0.73 | 1.83 | 0.78 | #N/A |
| 0.59 | 1.63 | 0.71 | #N/A |
| 0.83 | 1.81 | 0.78 | 0.79 |
| 0.74 | 2.88 | 0.96 | 1.07 |
| 0.74 | 2.88 | 0.96 | 1.07 |
| 0.63 | 1.40 | 0.63 | 1.51 |
| 0.53 | 1.53 | 0.68 | 1.13 |
| 0.43 | 1.99 | 0.84 | 2.09 |
| 0.43 | 1.99 | 0.84 | 2.09 |
| 0.64 | 1.01 | 0.43 | 1.54 |
| 0.45 | 1.29 | 0.57 | 1.15 |
| 0.22 | 0.83 | 0.32 | 0.53 |
| 0.44 | 1.82 | 0.79 | 1.93 |
| 0.50 | 0.66 | 0.23 | #N/A |
| 0.03 | 0.29 | 0.03 | 0.34 |
| 0.14 | 0.63 | 0.21 | 0.39 |
| 0.14 | 0.63 | 0.21 | 0.39 |
| 0.14 | 0.63 | 0.21 | 0.39 |
| 0.43 | 1.19 | 0.52 | 1.31 |



|      |      |      |      |
|------|------|------|------|
| 0.55 | 1.35 | 0.59 | 1.01 |
| 0.27 | 0.94 | 0.39 | 0.43 |
| 0.71 | 1.00 | 0.42 | 1.98 |
| 0.71 | 1.00 | 0.42 | 1.98 |
| 0.71 | 1.00 | 0.42 | 1.98 |
| 0.92 | 1.65 | 0.74 | 2.06 |
| 0.35 | 0.73 | 0.27 | 0.91 |
| 0.45 | 1.43 | 0.64 | 1.09 |
| 0.87 | 2.20 | 0.88 | 1.42 |
| 0.87 | 2.20 | 0.88 | 1.42 |
| 0.17 | 1.53 | 0.69 | 0.61 |
| 0.33 | 0.96 | 0.40 | 0.64 |
| 0.33 | 0.96 | 0.40 | 0.64 |
| 0.33 | 0.96 | 0.40 | 0.64 |
| 0.12 | 0.52 | 0.14 | 0.71 |
| 0.12 | 0.52 | 0.14 | 0.71 |
| 0.67 | 1.13 | 0.48 | 1.70 |
| 0.29 | 0.84 | 0.33 | 1.13 |
| #N/A | #N/A | #N/A | #N/A |
| 0.22 | 1.05 | 0.45 | 0.61 |
| 0.14 | 0.83 | 0.32 | 0.49 |
| 0.39 | 0.27 | 0.02 | 0.92 |
| 0.64 | 0.92 | 0.37 | 1.81 |
| 0.80 | 1.19 | 0.53 | 1.28 |
| #N/A | #N/A | #N/A | #N/A |
| 0.61 | 1.23 | 0.54 | 1.44 |
| 0.79 | 0.96 | 0.40 | 2.21 |
| 0.74 | 1.27 | 0.56 | 1.44 |
| 0.37 | 0.73 | 0.27 | 1.09 |
| 0.89 | 2.43 | 0.92 | 1.63 |
| 0.89 | 2.43 | 0.92 | 1.63 |
| 0.39 | 0.83 | 0.32 | 1.03 |
| 0.39 | 0.83 | 0.32 | 1.03 |
| #N/A | #N/A | #N/A | #N/A |
| 0.93 | 1.50 | 0.67 | 1.88 |
| 0.93 | 1.50 | 0.67 | 1.88 |
| 0.98 | 2.88 | 0.96 | 2.23 |
| #N/A | 0.51 | 0.13 | #N/A |
| 0.98 | 2.88 | 0.96 | 2.23 |
| 0.10 | 0.87 | 0.34 | 0.49 |
| 0.10 | 0.87 | 0.34 | 0.49 |
| #N/A | #N/A | #N/A | #N/A |
| #N/A | #N/A | #N/A | #N/A |
| #N/A | #N/A | #N/A | #N/A |
| #N/A | #N/A | #N/A | #N/A |
| 0.97 | 3.36 | 0.97 | 4.18 |
| 0.82 | 1.71 | 0.75 | 1.74 |
| 0.82 | 1.71 | 0.75 | 1.74 |
| 0.39 | 0.98 | 0.41 | 0.92 |
| 0.39 | 0.98 | 0.41 | 0.92 |
| #N/A | #N/A | #N/A | #N/A |

|      |      |      |      |
|------|------|------|------|
| 0.00 | 0.23 | 0.02 | 0.16 |
| 0.00 | 0.23 | 0.02 | 0.16 |
| #N/A | 0.75 | 0.28 | 0.57 |
| #N/A | 0.75 | 0.28 | 0.57 |
| 0.85 | 1.85 | 0.80 | 2.01 |
| 0.24 | 0.81 | 0.31 | 0.64 |
| 0.85 | 1.85 | 0.80 | 2.01 |
| 0.24 | 0.81 | 0.31 | 0.64 |
| 0.76 | #N/A | #N/A | 1.54 |
| 0.96 | 2.20 | 0.89 | 2.03 |
| 0.96 | 2.20 | 0.89 | 2.03 |
| 0.14 | 0.93 | 0.38 | #N/A |
| 0.89 | 2.21 | 0.85 | #N/A |
| 0.89 | 2.21 | 0.85 | #N/A |
| 0.79 | 1.66 | 0.72 | #N/A |
| 0.79 | 1.66 | 0.72 | #N/A |
| 0.78 | 1.51 | 0.68 | 2.03 |
| #N/A | #N/A | #N/A | #N/A |
| 0.69 | 1.36 | 0.61 | 1.07 |
| #N/A | #N/A | #N/A | #N/A |
| #N/A | #N/A | #N/A | #N/A |
| 0.39 | 0.86 | 0.34 | 1.39 |
| #N/A | #N/A | #N/A | #N/A |
| 0.39 | 0.86 | 0.34 | 1.39 |
| #N/A | #N/A | #N/A | #N/A |
| #N/A | #N/A | #N/A | #N/A |
| #N/A | #N/A | #N/A | #N/A |
| 0.36 | 0.99 | 0.42 | 0.86 |
| 0.84 | 1.23 | 0.54 | 1.83 |
| 0.60 | 1.73 | 0.75 | 1.91 |
| 0.71 | 1.10 | 0.48 | 1.33 |
| 0.60 | 1.26 | 0.56 | 1.10 |
| 0.71 | 1.10 | 0.48 | 1.33 |
| #N/A | #N/A | #N/A | #N/A |
| 0.32 | 1.14 | 0.50 | 0.97 |
| #N/A | #N/A | #N/A | #N/A |
| 0.35 | 0.73 | 0.26 | #N/A |
| #N/A | #N/A | #N/A | #N/A |
| 0.24 | 1.36 | 0.61 | 0.68 |
| 0.49 | 1.46 | 0.65 | 1.12 |
| 0.49 | 1.46 | 0.65 | 1.12 |
| 0.32 | 1.32 | 0.59 | 1.05 |
| 0.62 | 1.98 | 0.80 | 1.02 |
| 0.42 | 0.80 | 0.30 | 0.79 |
| 0.12 | 0.70 | 0.25 | 0.49 |
| 0.78 | 2.00 | 0.83 | 1.67 |
| #N/A | #N/A | #N/A | #N/A |
| 0.76 | 2.05 | 0.85 | 1.92 |
| 0.68 | 1.82 | 0.79 | 1.26 |
| 0.68 | 1.82 | 0.79 | 1.26 |
| #N/A | #N/A | #N/A | #N/A |

|      |       |      |      |
|------|-------|------|------|
| 0.16 | 1.32  | 0.58 | 0.60 |
| #N/A | #N/A  | #N/A | 0.38 |
| #N/A | #N/A  | #N/A | #N/A |
| #N/A | #N/A  | #N/A | 0.38 |
| 0.46 | 1.36  | 0.60 | 1.39 |
| #N/A | #N/A  | #N/A | #N/A |
| 0.77 | 1.69  | 0.74 | 1.02 |
| 0.77 | 1.69  | 0.74 | 1.02 |
| 0.55 | 16.38 | 0.82 | 1.11 |
| 0.55 | 16.38 | 0.82 | 1.11 |
| 0.42 | 0.97  | 0.40 | 1.05 |
| 0.42 | 0.97  | 0.40 | 1.05 |
| 0.42 | 0.97  | 0.40 | 1.05 |
| 0.42 | 0.97  | 0.40 | 1.05 |
| 0.42 | 0.97  | 0.40 | 1.05 |
| 0.25 | 0.95  | 0.39 | #N/A |
| 0.91 | 3.29  | 0.98 | 1.53 |
| 0.91 | 3.29  | 0.98 | 1.53 |
| #N/A | #N/A  | #N/A | #N/A |
| #N/A | #N/A  | #N/A | #N/A |
| #N/A | #N/A  | #N/A | #N/A |
| 0.99 | 2.52  | 0.93 | 3.91 |
| #N/A | #N/A  | #N/A | #N/A |
| 0.80 | 2.36  | 0.92 | 1.73 |
| 0.99 | 2.52  | 0.93 | 3.91 |
| 0.80 | 2.36  | 0.92 | 1.73 |
| #N/A | #N/A  | #N/A | #N/A |
| #N/A | #N/A  | #N/A | #N/A |
| 0.81 | 1.79  | 0.77 | #N/A |
| 0.55 | 0.90  | 0.36 | 2.11 |
| 0.57 | 1.16  | 0.51 | 1.23 |
| 0.57 | 1.16  | 0.51 | 1.23 |
| 0.13 | 0.59  | 0.18 | 0.50 |
| 0.13 | 0.59  | 0.18 | 0.50 |
| 0.83 | 2.22  | 0.89 | 1.20 |
| 0.83 | 2.22  | 0.89 | 1.20 |
| 0.68 | #N/A  | #N/A | 1.13 |
| 0.20 | 0.72  | 0.26 | 0.61 |
| #N/A | #N/A  | #N/A | #N/A |
| 0.53 | 1.02  | 0.43 | #N/A |
| 0.50 | #N/A  | #N/A | #N/A |
| 0.74 | 2.13  | 0.87 | 1.74 |
| 0.58 | 1.18  | 0.52 | 1.35 |
| 0.81 | 0.75  | 0.28 | 1.78 |
| 0.81 | 0.75  | 0.28 | 1.78 |
| 0.32 | 0.92  | 0.37 | 0.92 |
| 0.44 | 1.12  | 0.49 | 0.98 |
| 0.93 | 3.40  | 0.99 | 2.28 |
| 0.93 | 3.40  | 0.99 | 2.28 |
| 0.90 | 2.21  | 0.89 | 1.74 |
| 0.97 | 1.94  | 0.83 | 2.41 |

|      |      |      |      |
|------|------|------|------|
| 0.97 | 1.94 | 0.83 | 2.41 |
| 0.79 | 3.10 | 0.98 | 1.89 |
| 0.79 | 3.10 | 0.98 | 1.89 |
| 0.29 | 1.05 | 0.45 | 0.70 |
| 0.28 | 0.97 | 0.40 | 0.65 |
| 0.29 | 1.05 | 0.45 | 0.70 |
| 0.70 | 1.98 | 0.83 | #N/A |
| 0.74 | 1.42 | 0.64 | 1.87 |
| 0.74 | 1.42 | 0.64 | 1.87 |
| 0.77 | 1.48 | 0.66 | #N/A |
| #N/A | #N/A | #N/A | #N/A |
| 0.44 | 1.03 | 0.44 | 0.75 |
| 0.44 | 1.03 | 0.44 | 0.75 |
| 0.44 | 1.03 | 0.44 | 0.75 |
| 0.84 | 1.38 | 0.61 | 2.28 |
| 0.85 | 1.71 | 0.76 | 1.41 |
| 0.57 | 2.68 | 0.95 | 2.30 |
| 0.57 | 2.68 | 0.95 | 2.30 |
| #N/A | #N/A | #N/A | #N/A |
| #N/A | #N/A | #N/A | #N/A |
| #N/A | #N/A | #N/A | #N/A |
| 0.95 | 2.15 | 0.88 | 2.54 |
| 0.95 | 2.15 | 0.88 | 2.54 |
| 0.30 | 0.78 | 0.29 | 0.91 |
| 0.42 | 1.14 | 0.50 | 0.95 |
| 0.42 | 1.14 | 0.50 | 0.95 |
| 0.92 | 2.04 | 0.84 | 2.92 |
| 0.41 | 1.06 | 0.46 | 1.29 |
| #N/A | #N/A | #N/A | #N/A |
| 0.25 | 1.32 | 0.59 | 1.18 |
| 0.79 | 1.61 | 0.71 | 1.85 |
| 0.89 | 1.79 | 0.78 | 1.84 |
| 0.87 | 2.36 | 0.91 | 1.97 |
| 0.87 | 2.36 | 0.91 | 1.97 |
| 0.50 | 1.54 | 0.68 | 1.30 |
| 0.47 | 1.29 | 0.57 | 1.45 |
| #N/A | 1.55 | 0.69 | #N/A |
| #N/A | 1.55 | 0.69 | #N/A |
| 0.25 | 0.79 | 0.30 | #N/A |
| 0.25 | 0.79 | 0.30 | #N/A |
| 0.63 | 1.26 | 0.56 | 1.20 |
| 0.16 | 0.53 | 0.15 | 0.43 |
| 0.71 | 1.38 | 0.61 | 1.43 |
| 0.88 | 1.51 | 0.68 | 2.41 |
| 0.88 | 1.51 | 0.68 | 2.41 |
| 0.70 | 1.94 | 0.83 | 1.20 |
| 0.70 | 1.94 | 0.83 | 1.20 |
| 0.44 | 0.58 | 0.18 | 0.60 |
| 0.92 | 2.42 | 0.93 | 1.81 |
| 0.44 | 0.58 | 0.18 | 0.60 |
| 0.88 | 1.71 | 0.75 | 1.51 |

|      |      |      |      |
|------|------|------|------|
| 0.74 | 1.15 | 0.50 | 1.56 |
| #N/A | #N/A | #N/A | #N/A |
| 0.69 | #N/A | #N/A | 1.40 |
| 0.69 | #N/A | #N/A | 1.40 |
| 0.07 | 0.81 | 0.31 | #N/A |
| #N/A | #N/A | #N/A | #N/A |
| 0.02 | 0.36 | 0.06 | 0.28 |
| #N/A | 1.21 | 0.53 | 0.86 |
| 0.88 | 1.84 | 0.77 | 2.10 |
| #N/A | 1.22 | 0.53 | 1.73 |
| 0.09 | 0.64 | 0.21 | 0.48 |
| #N/A | 1.22 | 0.53 | 1.73 |
| 0.60 | 0.89 | 0.36 | 1.48 |
| 0.78 | 2.30 | 0.89 | #N/A |
| 0.78 | 2.30 | 0.89 | #N/A |
| 0.77 | 1.61 | 0.70 | 1.05 |
| 0.58 | #N/A | #N/A | #N/A |
| #N/A | #N/A | #N/A | #N/A |
| 0.89 | 2.17 | 0.87 | 2.10 |
| #N/A | #N/A | #N/A | #N/A |
| 0.44 | 0.87 | 0.35 | 0.84 |
| 0.44 | 0.87 | 0.35 | 0.84 |
| 0.42 | 1.43 | 0.64 | 0.99 |
| #N/A | 2.14 | 0.87 | #N/A |
| #N/A | 2.14 | 0.87 | #N/A |
| #N/A | #N/A | #N/A | #N/A |
| 0.86 | 2.17 | 0.76 | #N/A |
| 0.86 | 2.17 | 0.76 | #N/A |
| #N/A | 0.29 | 0.03 | 0.25 |
| #N/A | 0.29 | 0.03 | 0.25 |
| #N/A | 0.29 | 0.03 | 0.25 |
| #N/A | #N/A | #N/A | #N/A |
| 0.16 | #N/A | #N/A | #N/A |
| 0.68 | 1.58 | 0.71 | 1.46 |
| 0.58 | 1.04 | 0.45 | 1.03 |
| 0.51 | 1.19 | 0.53 | 1.26 |
| 0.68 | 1.61 | 0.71 | 1.47 |
| 0.88 | 2.04 | 0.85 | 2.17 |
| 0.39 | 1.16 | 0.51 | 0.85 |
| 0.94 | 2.37 | 0.92 | 2.84 |
| 0.94 | 2.37 | 0.92 | 2.84 |
| 0.27 | 0.96 | 0.40 | 0.58 |
| 0.66 | 2.25 | 0.89 | 1.23 |
| 0.58 | 1.03 | 0.44 | 1.11 |
| 0.30 | 0.73 | 0.27 | 0.77 |
| #N/A | #N/A | #N/A | #N/A |
| 0.54 | 1.12 | 0.49 | 0.98 |
| 0.82 | 1.75 | 0.76 | 1.81 |
| 0.82 | 1.75 | 0.76 | 1.81 |
| 0.92 | 2.41 | 0.92 | 2.16 |
| 0.92 | 2.41 | 0.92 | 2.16 |

|      |      |      |      |
|------|------|------|------|
| 0.04 | 0.69 | 0.24 | 0.31 |
| 0.04 | 0.69 | 0.24 | 0.31 |
| 0.12 | 0.42 | 0.08 | 0.37 |
| 0.12 | 0.42 | 0.08 | 0.37 |
| 0.73 | 1.96 | 0.83 | 1.29 |
| 0.73 | 1.96 | 0.83 | 1.29 |
| #N/A | #N/A | #N/A | #N/A |
| 0.91 | 2.08 | 0.86 | 2.67 |
| 0.91 | 2.08 | 0.86 | 2.67 |
| 0.52 | 2.13 | 0.86 | 1.43 |
| 0.72 | 1.31 | 0.58 | 1.34 |
| 0.72 | 1.31 | 0.58 | 1.34 |
| #N/A | #N/A | #N/A | #N/A |
| 0.97 | 3.13 | 0.98 | 3.44 |
| 0.96 | 2.06 | 0.85 | 2.06 |
| 0.96 | 2.06 | 0.85 | 2.06 |
| #N/A | #N/A | #N/A | #N/A |
| #N/A | #N/A | #N/A | #N/A |
| 0.87 | 2.04 | 0.85 | 1.74 |
| 0.87 | 2.04 | 0.85 | 1.74 |
| #N/A | #N/A | #N/A | #N/A |
| 0.55 | 0.96 | 0.40 | 0.96 |
| 0.38 | #N/A | #N/A | #N/A |
| 0.27 | 0.96 | 0.40 | 0.59 |
| 0.27 | 0.96 | 0.40 | 0.59 |
| 0.07 | 0.41 | 0.08 | 0.49 |
| 0.07 | 0.41 | 0.08 | 0.49 |
| 0.07 | 0.41 | 0.08 | 0.49 |
| 0.60 | 1.67 | 0.73 | 1.30 |
| 0.69 | 1.18 | 0.52 | 1.90 |
| 0.41 | 0.33 | 0.04 | 0.94 |
| 0.69 | 1.18 | 0.52 | 1.90 |
| 0.41 | 0.33 | 0.04 | 0.94 |
| 0.54 | 1.62 | 0.72 | 1.12 |
| 0.68 | 1.16 | 0.51 | 1.68 |
| 0.68 | 1.16 | 0.51 | 1.68 |
| 0.70 | 1.37 | 0.61 | 1.42 |
| 0.40 | 1.11 | 0.48 | 0.98 |
| #N/A | 0.50 | 0.13 | #N/A |
| 0.03 | 0.32 | 0.04 | 0.36 |
| 0.94 | 2.07 | 0.86 | 2.30 |
| 0.94 | 2.07 | 0.86 | 2.30 |
| 0.92 | 2.53 | 0.93 | #N/A |
| 0.92 | 2.53 | 0.93 | #N/A |
| 0.70 | 2.28 | 0.90 | 1.20 |
| 0.27 | 1.14 | 0.49 | 0.60 |
| 0.13 | 0.41 | 0.08 | 0.75 |
| 0.13 | 0.41 | 0.08 | 0.75 |
| 0.38 | 0.85 | 0.33 | #N/A |
| 0.35 | 0.59 | 0.18 | #N/A |
| 0.21 | 0.80 | 0.31 | 0.83 |

|      |      |      |      |
|------|------|------|------|
| #N/A | 0.86 | 0.34 | #N/A |
| 0.63 | 1.58 | 0.71 | 1.36 |
| 0.91 | 2.30 | 0.91 | 2.38 |
| 0.91 | 2.30 | 0.91 | 2.38 |
| 0.02 | 0.25 | 0.02 | 0.34 |
| #N/A | #N/A | #N/A | 0.96 |
| 0.21 | 0.46 | 0.10 | 0.58 |
| 0.41 | 0.90 | 0.36 | 0.87 |
| 0.82 | 1.15 | 0.51 | 2.03 |
| 0.82 | 1.15 | 0.51 | 2.03 |
| 0.74 | 1.76 | 0.73 | 2.57 |
| 0.74 | 1.76 | 0.73 | 2.57 |
| #N/A | #N/A | #N/A | #N/A |
| 0.46 | #N/A | #N/A | 1.09 |
| 0.08 | 0.69 | 0.24 | 0.52 |
| 0.27 | 0.94 | 0.39 | 0.65 |
| 0.90 | 2.13 | 0.87 | 1.70 |
| 0.91 | 1.90 | 0.81 | 1.60 |
| 0.91 | 1.90 | 0.81 | 1.60 |
| 0.80 | 2.72 | 0.96 | 1.58 |
| 0.80 | 2.72 | 0.96 | 1.58 |
| 0.63 | 1.60 | 0.71 | 1.28 |
| 0.81 | 1.90 | 0.81 | #N/A |
| #N/A | #N/A | #N/A | #N/A |
| 0.46 | 1.41 | 0.63 | 1.25 |
| 0.29 | 2.35 | 0.91 | 0.64 |
| 0.29 | 2.35 | 0.91 | 0.64 |
| #N/A | 1.04 | 0.42 | #N/A |
| 0.21 | 0.75 | 0.28 | 0.65 |
| 0.41 | 0.72 | 0.26 | 1.27 |
| 0.88 | 1.52 | 0.68 | 2.08 |
| 0.88 | 1.52 | 0.68 | 2.08 |
| 0.87 | 2.83 | 0.96 | #N/A |
| 0.39 | 1.43 | 0.64 | #N/A |
| 0.54 | 1.10 | 0.48 | 1.01 |
| 0.54 | 1.10 | 0.48 | 1.01 |
| #N/A | 1.86 | 0.80 | #N/A |
| 0.27 | 0.93 | 0.38 | 0.77 |
| 0.53 | #N/A | #N/A | 1.07 |
| 0.69 | 1.02 | 0.43 | 1.30 |
| 0.01 | 0.14 | 0.01 | 0.30 |
| 0.02 | 0.20 | 0.01 | 0.27 |
| #N/A | #N/A | #N/A | #N/A |
| 0.91 | 3.43 | 0.96 | 1.65 |
| 0.91 | 3.43 | 0.96 | 1.65 |
| 0.47 | 1.24 | 0.55 | 0.68 |
| 0.80 | 0.85 | 0.33 | 0.82 |
| 0.80 | 0.85 | 0.33 | 0.82 |
| 0.31 | 0.56 | 0.17 | 0.50 |
| 0.19 | 0.28 | 0.03 | 0.55 |
| 0.68 | 1.19 | 0.52 | 1.46 |

|      |      |      |      |
|------|------|------|------|
| #N/A | 2.05 | 0.85 | 1.84 |
| 0.21 | #N/A | #N/A | 0.59 |
| 0.44 | 1.71 | 0.69 | 1.53 |
| 0.02 | 0.22 | 0.01 | #N/A |
| 0.16 | 0.47 | 0.11 | 0.48 |
| #N/A | #N/A | #N/A | #N/A |
| 0.35 | 0.94 | 0.38 | 0.88 |
| 0.35 | 0.94 | 0.38 | 0.88 |
| 0.61 | #N/A | #N/A | 1.52 |
| #N/A | #N/A | #N/A | #N/A |
| #N/A | #N/A | #N/A | #N/A |
| #N/A | 0.79 | 0.30 | 2.32 |
| 0.17 | 0.40 | 0.08 | 0.53 |
| 0.30 | 0.70 | 0.25 | #N/A |
| 0.07 | 0.68 | 0.23 | 0.43 |
| #N/A | #N/A | #N/A | #N/A |
| #N/A | #N/A | #N/A | #N/A |
| 0.63 | 1.37 | 0.61 | 1.37 |
| 0.63 | 1.37 | 0.61 | 1.37 |
| 0.49 | 0.97 | 0.41 | #N/A |
| 0.70 | 1.18 | 0.52 | 1.93 |
| #N/A | 0.99 | 0.42 | 1.08 |
| 0.44 | 1.33 | 0.60 | 1.06 |
| #N/A | #N/A | #N/A | #N/A |
| 0.55 | 1.54 | 0.69 | #N/A |
| 0.72 | 1.65 | 0.73 | 3.02 |
| 0.79 | 2.24 | 0.89 | 1.97 |
| 0.72 | 1.65 | 0.73 | 3.02 |
| 0.86 | 0.94 | 0.38 | 2.70 |
| 0.87 | 1.93 | 0.83 | #N/A |
| #N/A | #N/A | #N/A | #N/A |
| #N/A | 1.03 | 0.43 | #N/A |
| #N/A | 1.03 | 0.43 | #N/A |
| 0.60 | 1.10 | 0.48 | #N/A |
| 0.57 | 1.33 | 0.59 | 1.36 |
| 0.79 | 1.08 | 0.47 | 1.55 |
| 0.23 | #N/A | #N/A | 0.71 |
| 0.98 | 2.12 | 0.81 | #N/A |
| 0.98 | 2.12 | 0.81 | #N/A |
| 0.45 | 1.34 | 0.60 | 1.81 |
| 0.58 | 0.95 | 0.39 | 1.35 |
| 0.45 | 1.34 | 0.60 | 1.81 |
| 0.58 | 0.95 | 0.39 | 1.35 |
| 0.41 | 0.66 | 0.23 | #N/A |
| 0.72 | 0.83 | 0.33 | 2.13 |
| 0.72 | 0.83 | 0.33 | 2.13 |
| 0.03 | 0.24 | 0.02 | 0.46 |
| 0.62 | 1.22 | 0.54 | 1.26 |
| 0.91 | 2.82 | 0.94 | #N/A |
| 0.91 | 2.82 | 0.94 | #N/A |
| 0.18 | 0.56 | 0.16 | 0.55 |



|      |      |      |      |
|------|------|------|------|
| 0.78 | #N/A | #N/A | 1.33 |
| #N/A | #N/A | #N/A | #N/A |
| 0.92 | 2.11 | 0.86 | 2.26 |
| #N/A | #N/A | #N/A | #N/A |
| 0.41 | 0.75 | 0.27 | 0.92 |
| 0.71 | 1.21 | 0.54 | 1.27 |
| 0.29 | 0.70 | 0.25 | 0.96 |
| 0.30 | 0.43 | 0.09 | 1.22 |
| 0.54 | #N/A | #N/A | #N/A |
| #N/A | #N/A | #N/A | #N/A |
| 0.97 | 2.17 | 0.86 | 3.03 |
| #N/A | #N/A | #N/A | #N/A |
| #N/A | #N/A | #N/A | #N/A |
| 0.89 | 1.36 | 0.60 | 2.51 |
| 0.78 | 1.97 | 0.82 | 1.98 |
| #N/A | #N/A | #N/A | #N/A |
| 0.81 | 2.10 | 0.87 | 1.72 |
| 0.81 | 2.10 | 0.87 | 1.72 |
| 0.83 | 2.31 | 0.91 | 1.71 |
| 0.83 | 2.31 | 0.91 | 1.71 |
| 0.78 | 1.95 | 0.82 | 1.70 |
| 0.42 | 1.62 | 0.71 | 1.14 |
| 0.78 | 1.95 | 0.82 | 1.70 |
| #N/A | #N/A | #N/A | #N/A |
| 0.34 | 1.14 | 0.50 | 0.52 |
| 0.00 | 0.39 | 0.07 | 0.23 |
| 0.27 | 0.67 | 0.23 | 0.64 |
| 0.18 | 1.46 | 0.65 | 0.56 |
| 0.58 | 0.88 | 0.35 | 1.28 |
| 0.58 | 0.88 | 0.35 | 1.28 |
| 0.70 | 1.00 | 0.42 | 1.32 |
| 0.73 | 1.55 | 0.67 | #N/A |
| 0.53 | 1.07 | 0.46 | 1.07 |
| 0.45 | 1.50 | 0.63 | 0.85 |
| 0.97 | 2.83 | 0.94 | 1.99 |
| 0.97 | 2.83 | 0.94 | 1.99 |
| 0.69 | 1.31 | 0.58 | 2.66 |
| 0.91 | 2.01 | 0.79 | 1.45 |
| 0.94 | #N/A | #N/A | 3.49 |
| 0.94 | #N/A | #N/A | 3.49 |
| 0.60 | 2.09 | 0.79 | #N/A |
| 0.34 | 0.76 | 0.28 | 0.94 |
| 0.34 | 0.76 | 0.28 | 0.94 |
| #N/A | #N/A | #N/A | #N/A |
| 0.23 | 0.47 | 0.11 | 0.62 |
| 0.73 | 1.80 | 0.78 | #N/A |
| 0.73 | 1.80 | 0.78 | #N/A |
| 0.79 | 1.64 | 0.72 | #N/A |
| 0.81 | #N/A | #N/A | #N/A |
| 0.81 | #N/A | #N/A | #N/A |
| 0.86 | 2.25 | 0.88 | 1.36 |

|      |      |      |      |
|------|------|------|------|
| 0.38 | #N/A | #N/A | 0.94 |
| 0.22 | 0.61 | 0.19 | #N/A |
| 0.61 | 0.94 | 0.39 | 1.73 |
| 0.45 | 0.88 | 0.35 | 0.90 |
| 0.77 | 2.15 | 0.88 | 1.42 |
| 0.77 | 2.15 | 0.88 | 1.42 |
| 0.65 | #N/A | #N/A | #N/A |
| 0.68 | 1.80 | 0.78 | 1.74 |
| 0.56 | 1.72 | 0.76 | 0.79 |
| 0.17 | 0.75 | 0.28 | 0.75 |
| 0.69 | 1.36 | 0.61 | 1.23 |
| 0.50 | 1.06 | 0.45 | 1.29 |
| 0.66 | 1.66 | 0.74 | 1.09 |
| 0.64 | 1.82 | 0.79 | 2.01 |
| 0.64 | 1.82 | 0.79 | 2.01 |
| #N/A | #N/A | #N/A | #N/A |
| #N/A | #N/A | #N/A | #N/A |
| #N/A | #N/A | #N/A | #N/A |
| 0.89 | 2.76 | 0.95 | 1.93 |
| 0.89 | 2.76 | 0.95 | 1.93 |
| 0.32 | 1.00 | 0.42 | 0.91 |
| 0.49 | 1.31 | 0.59 | 1.08 |
| 0.38 | 1.20 | 0.53 | 0.93 |
| 0.98 | 2.85 | 0.95 | 2.63 |
| 0.98 | 2.85 | 0.95 | 2.63 |
| #N/A | 2.44 | 0.92 | 2.62 |
| 0.40 | 1.31 | 0.58 | 1.12 |
| 0.75 | 2.22 | 0.88 | 1.98 |
| 0.78 | 1.35 | 0.60 | 1.31 |
| 0.36 | 1.15 | 0.50 | 0.85 |
| 0.78 | 1.35 | 0.60 | 1.31 |
| 0.88 | 1.42 | 0.63 | 2.19 |
| 0.33 | 0.89 | 0.36 | 0.86 |
| 0.33 | 0.89 | 0.36 | 0.86 |
| 0.76 | 1.28 | 0.57 | 1.53 |
| 0.79 | 2.24 | 0.89 | 1.93 |
| 0.90 | 2.32 | 0.90 | 1.87 |
| 0.90 | 2.32 | 0.90 | 1.87 |
| 0.71 | 2.12 | 0.87 | 1.67 |
| 0.78 | 2.15 | 0.86 | 2.59 |
| 0.78 | 2.15 | 0.86 | 2.59 |
| #N/A | 4.42 | 1.00 | 3.46 |
| #N/A | 4.42 | 1.00 | 3.46 |
| 0.96 | 2.93 | 0.97 | 2.51 |
| 0.56 | 1.86 | 0.79 | 1.68 |
| 0.74 | 1.57 | 0.69 | 2.03 |
| 0.63 | 1.89 | 0.80 | 1.34 |
| 0.63 | 1.89 | 0.80 | 1.34 |
| 0.97 | 2.70 | 0.95 | 2.83 |
| 0.97 | 2.70 | 0.95 | 2.83 |
| 0.73 | 1.98 | 0.81 | 1.90 |

|      |      |      |      |
|------|------|------|------|
| 0.97 | 2.70 | 0.95 | 2.83 |
| 0.35 | #N/A | #N/A | 0.77 |
| 0.95 | 2.60 | 0.95 | 2.15 |
| #N/A | #N/A | #N/A | #N/A |
| #N/A | #N/A | #N/A | #N/A |
| 0.81 | 1.44 | 0.64 | 1.79 |
| 0.01 | 0.27 | 0.02 | 0.20 |
| 0.16 | 0.36 | 0.06 | #N/A |
| 0.01 | 0.27 | 0.02 | 0.20 |
| #N/A | #N/A | #N/A | 1.39 |
| #N/A | #N/A | #N/A | 1.39 |
| 0.69 | 1.05 | 0.45 | 1.22 |
| 0.73 | 1.74 | 0.77 | #N/A |
| 0.73 | 1.74 | 0.77 | #N/A |
| 0.97 | 2.63 | 0.93 | 2.33 |
| 0.93 | 2.34 | 0.91 | 1.93 |
| 0.93 | 2.34 | 0.91 | 1.93 |
| 0.65 | 1.50 | 0.67 | 1.39 |
| 0.46 | 1.26 | 0.56 | 1.16 |
| 0.27 | 0.97 | 0.40 | 0.76 |
| 0.97 | 3.06 | 0.97 | 2.13 |
| 0.97 | 3.06 | 0.97 | 2.13 |
| 0.34 | 1.39 | 0.62 | 0.84 |
| 0.09 | 1.01 | 0.42 | 0.46 |
| #N/A | 1.02 | 0.43 | 1.49 |
| #N/A | #N/A | #N/A | 1.31 |
| 0.62 | 1.49 | 0.67 | #N/A |
| 0.63 | 1.38 | 0.61 | #N/A |
| 0.72 | 1.73 | 0.76 | 1.46 |
| 0.86 | 2.18 | 0.85 | #N/A |
| 0.86 | 2.18 | 0.85 | #N/A |
| 0.97 | 2.19 | 0.72 | #N/A |
| 0.94 | 1.94 | 0.81 | 2.82 |
| 0.94 | 1.94 | 0.81 | 2.82 |
| 0.73 | 1.89 | 0.81 | 1.49 |
| 0.73 | 1.89 | 0.81 | 1.49 |
| 0.54 | 1.16 | 0.51 | #N/A |
| 0.36 | 0.93 | 0.38 | 0.98 |
| #N/A | #N/A | #N/A | #N/A |
| 0.65 | 1.23 | 0.54 | 1.16 |
| 0.80 | #N/A | #N/A | #N/A |
| 0.16 | 0.45 | 0.10 | 0.53 |
| 0.75 | 1.40 | 0.63 | 1.34 |
| 0.70 | 1.32 | 0.59 | 0.97 |
| 0.89 | 1.45 | 0.65 | #N/A |
| 0.61 | 1.16 | 0.51 | 1.55 |
| 0.61 | 1.16 | 0.51 | 1.55 |
| 0.95 | 2.78 | 0.96 | 2.29 |
| 0.95 | 2.78 | 0.96 | 2.29 |
| #N/A | 1.05 | 0.45 | #N/A |
| #N/A | 2.25 | 0.88 | 1.65 |

|      |      |      |      |
|------|------|------|------|
| 0.89 | 2.83 | 0.96 | 3.52 |
| 0.89 | 2.83 | 0.96 | 3.52 |
| 0.80 | #N/A | #N/A | 1.80 |
| #N/A | #N/A | #N/A | #N/A |
| 0.39 | 0.87 | 0.35 | #N/A |
| 0.39 | 0.87 | 0.35 | #N/A |
| 0.45 | 0.52 | 0.14 | 0.75 |
| 0.05 | 0.57 | 0.17 | 0.37 |
| 0.00 | 0.15 | 0.01 | 0.19 |
| 0.47 | 1.26 | 0.56 | 1.29 |
| 0.47 | 1.26 | 0.56 | 1.29 |
| 0.62 | 1.31 | 0.59 | 1.15 |
| 0.65 | 1.72 | 0.76 | 1.64 |
| 0.95 | 2.42 | 0.92 | 2.20 |
| 0.95 | 2.42 | 0.92 | 2.20 |
| 0.97 | 2.45 | 0.92 | 2.29 |
| 0.97 | 2.45 | 0.92 | 2.29 |
| 0.25 | 0.91 | 0.37 | 0.61 |
| 0.14 | 0.44 | 0.09 | 0.44 |
| #N/A | #N/A | #N/A | #N/A |
| 0.38 | 0.93 | 0.38 | #N/A |
| 0.38 | 0.93 | 0.38 | #N/A |
| 0.65 | 1.73 | 0.76 | 1.44 |
| #N/A | #N/A | #N/A | #N/A |
| 0.84 | 2.34 | 0.78 | #N/A |
| 0.74 | 1.52 | 0.68 | 1.33 |
| 0.74 | 1.52 | 0.68 | 1.33 |
| 0.42 | 2.20 | 0.89 | 1.66 |
| 0.42 | 2.20 | 0.89 | 1.66 |
| 0.77 | 3.18 | 0.97 | 1.73 |
| 0.77 | 3.18 | 0.97 | 1.73 |
| 0.91 | 2.16 | 0.88 | 1.95 |
| 0.94 | 2.92 | 0.96 | #N/A |
| #N/A | #N/A | #N/A | #N/A |
| #N/A | #N/A | #N/A | #N/A |
| #N/A | 1.71 | 0.76 | 2.24 |
| 0.61 | 1.19 | 0.52 | 1.61 |
| 0.24 | 0.67 | 0.23 | 0.67 |
| 0.84 | 2.18 | 0.88 | 2.59 |
| 0.84 | 2.18 | 0.88 | 2.59 |
| 0.13 | 0.30 | 0.03 | 0.48 |
| 0.13 | 0.30 | 0.03 | 0.48 |
| #N/A | #N/A | #N/A | #N/A |
| #N/A | #N/A | #N/A | #N/A |
| #N/A | #N/A | #N/A | #N/A |
| 0.11 | 0.36 | 0.05 | 1.21 |
| #N/A | #N/A | #N/A | #N/A |
| 0.57 | 0.57 | 0.17 | 1.89 |
| 0.38 | 0.49 | 0.13 | 0.89 |
| #N/A | #N/A | #N/A | #N/A |
| 0.37 | 1.05 | 0.45 | 1.14 |

|      |      |      |      |
|------|------|------|------|
| 0.37 | 1.05 | 0.45 | 1.14 |
| 0.78 | 1.54 | 0.69 | #N/A |
| 0.62 | 2.13 | 0.86 | 1.02 |
| 0.99 | 3.56 | 0.99 | 2.57 |
| 0.99 | 3.56 | 0.99 | 2.57 |
| #N/A | 2.85 | 0.95 | 2.12 |
| #N/A | 2.85 | 0.95 | 2.12 |
| 0.45 | 0.53 | 0.15 | 1.05 |
| #N/A | 2.85 | 0.95 | 2.12 |
| 0.45 | 0.53 | 0.15 | 1.05 |
| 0.79 | 2.53 | 0.89 | 2.02 |
| 0.55 | 0.88 | 0.35 | 1.35 |
| 0.41 | 0.87 | 0.35 | 1.01 |
| 0.74 | 1.46 | 0.65 | 1.43 |
| 0.18 | 0.85 | 0.33 | 0.89 |
| 0.74 | 1.46 | 0.65 | 1.43 |
| 0.18 | 0.85 | 0.33 | 0.89 |
| 0.91 | 1.90 | 0.81 | #N/A |
| 0.91 | 1.90 | 0.81 | #N/A |
| #N/A | 2.15 | 0.87 | #N/A |
| #N/A | 2.15 | 0.87 | #N/A |
| 0.45 | 1.83 | 0.79 | 1.23 |
| 0.13 | 0.79 | 0.30 | 0.66 |
| 0.13 | 0.79 | 0.30 | 0.66 |
| 0.66 | 1.60 | 0.71 | #N/A |
| 0.87 | 1.52 | 0.67 | 2.44 |
| 0.65 | 1.82 | 0.79 | 1.78 |
| 0.45 | 0.89 | 0.36 | 1.22 |
| 0.86 | 1.74 | 0.77 | 2.43 |
| 0.86 | 1.74 | 0.77 | 2.43 |
| 0.55 | 1.28 | 0.57 | 1.21 |
| 0.48 | 1.29 | 0.57 | 1.63 |
| 0.48 | 1.29 | 0.57 | 1.63 |
| 0.85 | 2.14 | 0.87 | 1.90 |
| 0.42 | 1.50 | 0.67 | 1.02 |
| 0.03 | 0.38 | 0.06 | 0.34 |
| 0.31 | 0.93 | 0.38 | 0.79 |
| 0.32 | 0.97 | 0.40 | 0.82 |
| 0.35 | 1.43 | 0.64 | 0.81 |
| #N/A | #N/A | #N/A | #N/A |
| 0.50 | 2.16 | 0.83 | #N/A |
| 0.87 | 1.72 | 0.76 | 1.72 |
| 0.87 | 1.72 | 0.76 | 1.72 |
| 0.94 | 1.60 | 0.72 | 1.73 |
| 0.94 | 1.60 | 0.72 | 1.73 |
| 0.71 | 2.63 | 0.95 | 1.32 |
| 0.71 | 2.63 | 0.95 | 1.32 |
| #N/A | #N/A | #N/A | #N/A |
| 0.90 | 2.17 | 0.88 | 2.64 |
| #N/A | #N/A | #N/A | #N/A |
| #N/A | #N/A | #N/A | #N/A |

|      |      |      |      |
|------|------|------|------|
| #N/A | #N/A | #N/A | #N/A |
| #N/A | #N/A | #N/A | #N/A |
| 0.89 | 2.69 | 0.95 | #N/A |
| 0.89 | 2.69 | 0.95 | #N/A |
| 0.79 | 1.29 | 0.58 | 1.65 |
| 0.79 | 1.29 | 0.58 | 1.65 |
| 0.79 | 2.60 | 0.91 | 1.91 |
| 0.79 | 2.60 | 0.91 | 1.91 |
| 0.26 | 0.79 | 0.30 | 0.83 |
| 0.31 | 0.43 | 0.09 | 0.48 |
| #N/A | #N/A | #N/A | #N/A |
| #N/A | #N/A | #N/A | #N/A |
| 0.72 | 1.93 | 0.80 | 1.33 |
| 0.23 | 0.61 | 0.19 | 0.62 |
| #N/A | 0.67 | 0.23 | 0.71 |
| 0.65 | 1.55 | 0.67 | 2.34 |
| 0.65 | 1.55 | 0.67 | 2.34 |
| #N/A | 0.87 | 0.35 | #N/A |
| 0.84 | 1.14 | 0.47 | 1.64 |
| 0.55 | 1.92 | 0.80 | 1.74 |
| 0.44 | 1.54 | 0.69 | 1.28 |
| 0.74 | 1.74 | 0.76 | 1.59 |
| 0.71 | 1.58 | 0.71 | 1.58 |
| 0.62 | 1.15 | 0.50 | 1.24 |
| 0.56 | 1.07 | 0.45 | 0.88 |
| 0.32 | 1.31 | 0.57 | 1.07 |
| #N/A | #N/A | #N/A | #N/A |
| 0.32 | 1.31 | 0.57 | 1.07 |
| #N/A | #N/A | #N/A | #N/A |
| #N/A | 1.01 | 0.43 | 1.34 |
| 0.02 | 0.31 | 0.03 | 0.23 |
| 0.56 | 1.38 | 0.60 | #N/A |
| #N/A | 0.70 | 0.25 | 0.72 |
| 0.06 | 0.49 | 0.12 | 0.51 |
| 0.06 | 0.49 | 0.12 | 0.51 |
| #N/A | #N/A | #N/A | 1.08 |
| 0.67 | 1.12 | 0.49 | 1.32 |
| 0.78 | 1.60 | 0.71 | 1.24 |
| 0.78 | 1.60 | 0.71 | 1.24 |
| 0.88 | 1.01 | 0.43 | 1.34 |
| 0.28 | 1.08 | 0.46 | 0.71 |
| 0.30 | 0.89 | 0.36 | 0.68 |
| 0.30 | 0.89 | 0.36 | 0.68 |
| #N/A | 2.63 | 0.95 | 0.79 |
| 0.22 | 0.39 | 0.06 | 0.60 |
| 0.85 | 1.69 | 0.75 | 1.67 |
| 0.85 | 1.69 | 0.75 | 1.67 |
| #N/A | #N/A | #N/A | #N/A |
| #N/A | #N/A | #N/A | #N/A |
| #N/A | #N/A | #N/A | #N/A |
| #N/A | #N/A | #N/A | #N/A |

|      |      |      |      |
|------|------|------|------|
| #N/A | 3.25 | 0.98 | 1.70 |
| #N/A | 3.25 | 0.98 | 1.70 |
| 0.95 | 2.56 | 0.94 | 6.25 |
| 0.95 | 2.56 | 0.94 | 6.25 |
| #N/A | #N/A | #N/A | #N/A |
| #N/A | 0.93 | 0.38 | #N/A |
| 0.94 | 4.32 | 0.99 | #N/A |
| 0.94 | 4.32 | 0.99 | #N/A |
| 0.51 | 2.10 | 0.85 | 0.57 |
| 0.07 | 0.93 | 0.38 | 0.21 |
| 0.07 | 0.93 | 0.38 | 0.21 |
| #N/A | #N/A | #N/A | #N/A |
| #N/A | #N/A | #N/A | #N/A |
| 0.81 | 1.63 | 0.72 | #N/A |
| 0.81 | 1.63 | 0.72 | #N/A |
| #N/A | #N/A | #N/A | #N/A |
| 0.76 | 1.75 | 0.77 | 1.20 |
| 0.36 | 1.05 | 0.45 | #N/A |
| 0.66 | 2.12 | 0.86 | 1.66 |
| 0.15 | 0.84 | 0.33 | 0.54 |
| 0.92 | 3.14 | 0.98 | 1.99 |
| 0.92 | 3.14 | 0.98 | 1.99 |
| 0.95 | 2.49 | 0.93 | 2.38 |
| 0.95 | 2.49 | 0.93 | 2.38 |
| 0.70 | 0.75 | 0.28 | 1.18 |
| 0.70 | 0.75 | 0.28 | 1.18 |
| #N/A | #N/A | #N/A | #N/A |
| 0.66 | 1.83 | 0.80 | 1.32 |
| 0.27 | 0.75 | 0.27 | 0.69 |
| 0.35 | 1.00 | 0.42 | 0.79 |
| 0.99 | 3.15 | 0.98 | 3.38 |
| 0.99 | 3.15 | 0.98 | 3.38 |
| 0.88 | 2.29 | 0.90 | 2.25 |
| 0.65 | 1.88 | 0.81 | 1.30 |
| 0.39 | 0.98 | 0.41 | 0.98 |
| 0.39 | 0.98 | 0.41 | 0.98 |
| #N/A | #N/A | #N/A | #N/A |
| #N/A | #N/A | #N/A | #N/A |
| 0.72 | 1.75 | 0.77 | 1.58 |
| 0.72 | 1.75 | 0.77 | 1.58 |
| 0.28 | 1.25 | 0.55 | 0.68 |
| 0.84 | 2.84 | 0.96 | 2.03 |
| 0.84 | 2.84 | 0.96 | 2.03 |
| 0.07 | 0.38 | 0.07 | 0.82 |
| 0.07 | 0.38 | 0.07 | 0.82 |
| 0.00 | 0.12 | 0.00 | 0.12 |
| 0.00 | 0.12 | 0.00 | 0.12 |
| #N/A | #N/A | #N/A | #N/A |
| 0.05 | 0.36 | 0.06 | #N/A |
| 0.83 | 2.58 | 0.94 | 1.57 |
| 0.83 | 2.58 | 0.94 | 1.57 |

|      |      |      |      |
|------|------|------|------|
| 0.17 | 0.70 | 0.25 | 0.60 |
| 0.87 | 1.46 | 0.65 | 1.68 |
| 0.84 | #N/A | #N/A | #N/A |
| 0.84 | #N/A | #N/A | #N/A |
| 0.57 | 0.72 | 0.26 | 1.07 |
| 0.45 | 1.02 | 0.43 | 1.03 |
| #N/A | 1.87 | 0.80 | #N/A |
| #N/A | 1.87 | 0.80 | #N/A |
| #N/A | 1.87 | 0.80 | #N/A |
| #N/A | #N/A | #N/A | #N/A |
| 0.70 | 2.08 | 0.85 | 0.83 |
| 0.61 | 1.50 | 0.66 | 1.10 |
| 0.61 | 1.50 | 0.66 | 1.10 |
| #N/A | 1.31 | 0.59 | 1.96 |
| 0.33 | 1.05 | 0.45 | 0.53 |
| 0.43 | 1.10 | 0.48 | 0.87 |
| 0.83 | 1.77 | 0.78 | 2.84 |
| 0.83 | 1.77 | 0.78 | 2.84 |
| 0.63 | 1.11 | 0.48 | 0.97 |
| 0.52 | 1.51 | 0.68 | 1.48 |
| 0.87 | 1.86 | 0.80 | 2.60 |
| 0.87 | 1.86 | 0.80 | 2.60 |
| #N/A | 1.36 | 0.60 | 1.00 |
| 0.29 | 0.52 | 0.14 | 0.46 |
| 0.15 | #N/A | #N/A | 0.15 |
| 0.15 | #N/A | #N/A | 0.15 |
| 0.29 | 0.52 | 0.14 | 0.46 |
| #N/A | #N/A | #N/A | #N/A |
| #N/A | #N/A | #N/A | #N/A |
| #N/A | #N/A | #N/A | #N/A |
| 0.98 | 3.32 | 0.97 | 2.16 |
| #N/A | 2.00 | 0.83 | 1.46 |
| #N/A | 2.00 | 0.83 | 1.46 |
| 0.26 | 0.70 | 0.25 | 0.58 |
| 0.26 | 0.70 | 0.25 | 0.58 |
| #N/A | #N/A | #N/A | #N/A |
| 0.58 | 1.00 | 0.42 | 1.50 |
| 0.11 | 0.67 | 0.23 | 0.47 |
| 0.11 | 0.44 | 0.10 | 0.55 |
| #N/A | #N/A | #N/A | #N/A |
| #N/A | #N/A | #N/A | #N/A |
| #N/A | #N/A | #N/A | #N/A |
| #N/A | #N/A | #N/A | #N/A |
| #N/A | #N/A | #N/A | #N/A |
| #N/A | #N/A | #N/A | #N/A |
| #N/A | #N/A | #N/A | #N/A |
| #N/A | #N/A | #N/A | #N/A |
| 0.93 | 1.88 | 0.80 | 2.32 |
| 0.93 | 1.88 | 0.80 | 2.32 |
| 0.49 | 1.65 | 0.73 | #N/A |
| #N/A | #N/A | #N/A | #N/A |



|      |      |      |      |
|------|------|------|------|
| #N/A | #N/A | #N/A | #N/A |
| #N/A | #N/A | #N/A | #N/A |
| #N/A | #N/A | #N/A | #N/A |
| 0.76 | 1.54 | 0.68 | #N/A |
| #N/A | #N/A | #N/A | #N/A |
| 0.88 | 2.67 | 0.95 | #N/A |
| 0.88 | 2.67 | 0.95 | #N/A |
| 0.91 | 1.27 | 0.56 | 1.93 |
| #N/A | #N/A | #N/A | #N/A |
| 0.96 | 1.44 | 0.65 | 2.00 |
| 0.96 | 1.44 | 0.65 | 2.00 |
| 0.70 | 0.82 | 0.32 | 0.81 |
| 0.12 | 0.46 | 0.11 | #N/A |
| 0.12 | 0.46 | 0.11 | #N/A |
| 0.73 | 2.57 | 0.89 | 1.81 |
| 0.73 | 2.57 | 0.89 | 1.81 |
| #N/A | #N/A | #N/A | #N/A |
| #N/A | #N/A | #N/A | #N/A |
| #N/A | #N/A | #N/A | #N/A |
| #N/A | #N/A | #N/A | #N/A |
| 0.73 | 1.55 | 0.70 | 1.73 |
| 0.58 | 1.20 | 0.53 | #N/A |
| #N/A | #N/A | #N/A | #N/A |
| #N/A | #N/A | #N/A | #N/A |
| #N/A | #N/A | #N/A | #N/A |
| #N/A | #N/A | #N/A | #N/A |
| #N/A | #N/A | #N/A | #N/A |
| 0.58 | 1.14 | 0.50 | #N/A |
| #N/A | #N/A | #N/A | #N/A |
| #N/A | #N/A | #N/A | #N/A |
| 0.61 | 1.42 | 0.61 | #N/A |
| #N/A | #N/A | #N/A | #N/A |
| 0.88 | 1.44 | 0.64 | 1.89 |
| 0.88 | 1.44 | 0.64 | 1.89 |
| 1.00 | 2.06 | 0.86 | 2.97 |
| 1.00 | 2.06 | 0.86 | 2.97 |
| 1.00 | 2.06 | 0.86 | 2.97 |
| 1.00 | 2.06 | 0.86 | 2.97 |
| 0.77 | 1.22 | 0.54 | 2.23 |
| 0.77 | 1.22 | 0.54 | 2.23 |
| #N/A | #N/A | #N/A | #N/A |
| 0.79 | 1.77 | 0.75 | 1.90 |
| 0.88 | 2.35 | 0.91 | 1.28 |
| 0.88 | 2.35 | 0.91 | 1.28 |
| 0.53 | 1.68 | 0.72 | 1.24 |
| 0.66 | 1.80 | 0.77 | #N/A |
| 0.51 | 1.31 | 0.59 | 1.09 |
| 0.51 | 1.31 | 0.59 | 1.09 |
| 0.69 | #N/A | #N/A | #N/A |
| 0.82 | 0.60 | 0.19 | 1.64 |
| 0.69 | #N/A | #N/A | #N/A |

|      |      |      |      |
|------|------|------|------|
| 0.97 | 1.46 | 0.66 | 3.14 |
| 0.97 | 1.46 | 0.66 | 3.14 |
| 0.28 | 0.64 | 0.21 | 0.74 |
| 0.44 | 1.45 | 0.64 | 0.57 |
| #N/A | #N/A | #N/A | #N/A |
| #N/A | #N/A | #N/A | #N/A |
| #N/A | #N/A | #N/A | #N/A |
| #N/A | #N/A | #N/A | #N/A |
| #N/A | #N/A | #N/A | #N/A |
| 0.54 | 0.95 | 0.39 | 0.95 |
| 0.42 | 0.81 | 0.31 | 0.87 |
| 0.70 | 1.25 | 0.56 | #N/A |
| 0.25 | 0.80 | 0.30 | #N/A |
| 0.40 | 1.36 | 0.60 | 0.80 |
| 0.92 | #N/A | #N/A | #N/A |
| 0.99 | 3.43 | 0.99 | 2.01 |
| 0.99 | 3.43 | 0.99 | 2.01 |
| #N/A | #N/A | #N/A | #N/A |
| #N/A | #N/A | #N/A | #N/A |
| #N/A | #N/A | #N/A | #N/A |
| 0.72 | 1.85 | 0.78 | 1.50 |
| 0.85 | 1.56 | 0.63 | #N/A |
| 0.85 | 1.56 | 0.63 | #N/A |
| 0.85 | 1.32 | 0.59 | 1.33 |
| #N/A | #N/A | #N/A | #N/A |
| #N/A | #N/A | #N/A | #N/A |
| #N/A | #N/A | #N/A | #N/A |
| 0.59 | 1.48 | 0.65 | 0.56 |
| 0.59 | 1.48 | 0.65 | 0.56 |
| 0.85 | 1.70 | 0.75 | 2.11 |
| 0.85 | 1.70 | 0.75 | 2.11 |
| 0.04 | 0.39 | 0.07 | 0.24 |
| 0.44 | #N/A | #N/A | #N/A |
| 0.39 | 0.88 | 0.35 | 0.85 |
| 0.39 | 0.88 | 0.35 | 0.85 |
| 0.74 | 1.20 | 0.52 | 1.48 |
| 0.84 | 1.96 | 0.83 | 1.19 |
| 0.05 | 0.35 | 0.05 | 0.27 |
| 0.05 | 0.35 | 0.05 | 0.27 |
| 0.21 | 0.52 | 0.14 | 0.41 |
| 0.77 | 0.92 | 0.37 | 2.22 |
| #N/A | #N/A | #N/A | #N/A |
| #N/A | #N/A | #N/A | #N/A |
| 0.55 | #N/A | #N/A | 1.45 |
| 0.55 | #N/A | #N/A | 1.45 |
| 0.34 | 0.96 | 0.40 | 1.18 |
| 0.38 | 1.11 | 0.48 | 0.38 |
| 0.86 | 2.12 | 0.87 | 2.47 |
| 0.68 | 1.30 | 0.58 | 1.89 |
| 0.68 | 1.30 | 0.58 | 1.89 |
| #N/A | 1.93 | 0.75 | 1.81 |

|      |      |      |      |
|------|------|------|------|
| 0.46 | #N/A | #N/A | 1.17 |
| #N/A | 1.93 | 0.75 | 1.81 |
| 0.46 | #N/A | #N/A | 1.17 |
| #N/A | #N/A | #N/A | #N/A |
| 0.74 | 1.83 | 0.79 | 1.43 |
| 0.74 | 1.83 | 0.79 | 1.43 |
| 0.77 | 2.18 | 0.87 | 2.46 |
| 0.77 | 3.89 | 0.99 | #N/A |
| 0.55 | 1.86 | 0.80 | #N/A |
| 0.06 | 0.44 | 0.10 | 0.51 |
| 0.06 | 0.44 | 0.10 | 0.51 |
| #N/A | #N/A | #N/A | #N/A |
| #N/A | #N/A | #N/A | #N/A |
| #N/A | #N/A | #N/A | #N/A |
| #N/A | #N/A | #N/A | #N/A |
| 0.90 | 2.15 | 0.87 | #N/A |
| 0.90 | 2.15 | 0.87 | #N/A |
| 0.23 | 1.35 | 0.60 | #N/A |
| 0.25 | 0.96 | 0.40 | #N/A |
| 0.27 | 1.01 | 0.43 | #N/A |
| 0.82 | #N/A | #N/A | 1.03 |
| 0.82 | #N/A | #N/A | 1.03 |
| #N/A | #N/A | #N/A | #N/A |
| 0.69 | 2.13 | 0.87 | 1.39 |
| 0.73 | 1.04 | 0.44 | 1.19 |
| 0.10 | 0.75 | 0.28 | #N/A |
| 0.52 | 0.92 | 0.37 | 0.86 |
| 0.52 | 0.92 | 0.37 | 0.86 |
| 0.52 | 0.92 | 0.37 | 0.86 |
| 0.25 | 0.37 | 0.06 | 0.48 |
| 0.03 | 0.20 | 0.01 | 0.24 |
| 0.03 | 0.20 | 0.01 | 0.24 |
| 0.03 | 0.18 | 0.01 | 0.20 |
| #N/A | #N/A | #N/A | #N/A |
| 0.44 | 0.82 | 0.32 | 1.11 |
| #N/A | #N/A | #N/A | #N/A |
| 0.14 | 0.30 | 0.03 | 0.56 |
| 0.78 | #N/A | #N/A | #N/A |
| 0.78 | #N/A | #N/A | #N/A |
| #N/A | #N/A | #N/A | #N/A |
| #N/A | #N/A | #N/A | #N/A |
| 0.81 | 2.69 | 0.95 | #N/A |
| #N/A | 1.73 | 0.76 | 2.57 |
| 0.73 | 1.49 | 0.67 | 1.89 |
| 0.73 | 1.49 | 0.67 | 1.89 |
| #N/A | #N/A | #N/A | #N/A |
| 0.65 | 1.42 | 0.64 | 1.12 |
| 0.65 | 1.42 | 0.64 | 1.12 |
| 0.63 | 1.41 | 0.63 | #N/A |
| 0.65 | 1.42 | 0.64 | 1.12 |
| 0.63 | 1.41 | 0.63 | #N/A |

|      |       |      |      |
|------|-------|------|------|
| 0.58 | 3.23  | 0.96 | #N/A |
| 0.58 | 3.23  | 0.96 | #N/A |
| 0.97 | 30.72 | 1.00 | #N/A |
| #N/A | #N/A  | #N/A | #N/A |
| #N/A | 0.71  | 0.25 | 0.40 |
| #N/A | 0.71  | 0.25 | 0.40 |
| 0.47 | 1.02  | 0.43 | 1.05 |
| 0.47 | 1.02  | 0.43 | 1.05 |
| 0.46 | 0.27  | 0.02 | 1.06 |
| 0.12 | #N/A  | #N/A | #N/A |
| 0.34 | 0.61  | 0.19 | 0.93 |
| 0.74 | 1.33  | 0.59 | 1.59 |
| #N/A | #N/A  | #N/A | #N/A |
| 0.05 | 0.26  | 0.02 | #N/A |
| 0.05 | 0.43  | 0.09 | 0.37 |
| #N/A | #N/A  | #N/A | #N/A |
| #N/A | #N/A  | #N/A | #N/A |
| 0.60 | 1.01  | 0.43 | 1.08 |
| #N/A | #N/A  | #N/A | #N/A |
| 0.60 | 1.01  | 0.43 | 1.08 |
| 0.18 | 0.95  | 0.39 | #N/A |
| 0.39 | #N/A  | #N/A | 1.11 |
| 0.18 | 0.95  | 0.39 | #N/A |
| #N/A | #N/A  | #N/A | #N/A |
| 0.05 | 0.38  | 0.06 | 0.37 |
| 0.03 | 0.45  | 0.10 | 0.36 |
| #N/A | 1.33  | 0.55 | #N/A |
| #N/A | #N/A  | #N/A | #N/A |
| 0.40 | 0.70  | 0.24 | 1.04 |
| 0.23 | 0.79  | 0.30 | 0.86 |
| 0.40 | 0.70  | 0.24 | 1.04 |
| 0.23 | 0.79  | 0.30 | 0.86 |
| 0.86 | 1.73  | 0.74 | 2.10 |
| 0.86 | 1.73  | 0.74 | 2.10 |
| 0.63 | 1.50  | 0.67 | 1.65 |
| #N/A | #N/A  | #N/A | #N/A |
| 0.29 | 0.95  | 0.39 | 0.85 |
| 0.29 | 0.95  | 0.39 | 0.85 |
| 0.82 | 1.28  | 0.57 | 1.88 |
| 0.53 | 1.16  | 0.51 | #N/A |
| 0.53 | 1.16  | 0.51 | #N/A |
| #N/A | #N/A  | #N/A | #N/A |
| #N/A | 2.04  | 0.85 | 1.93 |
| #N/A | 2.04  | 0.85 | 1.93 |
| 0.70 | 1.94  | 0.83 | 1.26 |
| 0.70 | 1.94  | 0.83 | 1.26 |
| #N/A | #N/A  | #N/A | #N/A |
| #N/A | #N/A  | #N/A | #N/A |
| 0.15 | 0.95  | 0.39 | 0.37 |
| 0.15 | #N/A  | #N/A | 0.44 |
| #N/A | #N/A  | #N/A | #N/A |

|      |      |      |      |
|------|------|------|------|
| 0.90 | 1.91 | 0.81 | 2.41 |
| 0.90 | 1.91 | 0.81 | 2.41 |
| #N/A | #N/A | #N/A | #N/A |
| #N/A | 3.51 | 0.95 | 2.38 |
| #N/A | #N/A | #N/A | 0.11 |
| #N/A | 3.51 | 0.95 | 2.38 |
| #N/A | #N/A | #N/A | #N/A |
| 0.69 | 1.65 | 0.73 | 1.53 |
| 0.56 | 1.53 | 0.69 | 1.40 |
| #N/A | #N/A | #N/A | #N/A |
| 0.56 | 1.53 | 0.69 | 1.40 |
| 0.77 | 1.86 | 0.80 | #N/A |
| 0.89 | 1.88 | 0.81 | 1.74 |
| 0.89 | 1.88 | 0.81 | 1.74 |
| 0.62 | #N/A | #N/A | #N/A |
| 0.97 | 2.26 | 0.89 | 2.23 |
| 0.97 | 2.26 | 0.89 | 2.23 |
| 0.12 | 0.60 | 0.19 | 0.48 |
| 0.12 | 0.60 | 0.19 | 0.48 |
| 0.46 | 1.09 | 0.47 | 1.41 |
| 0.46 | 1.09 | 0.47 | 1.41 |
| #N/A | #N/A | #N/A | #N/A |
| 0.84 | 1.62 | 0.72 | 2.30 |
| 0.84 | 1.62 | 0.72 | 2.30 |
| 0.84 | 1.62 | 0.72 | 2.30 |
| #N/A | #N/A | #N/A | #N/A |
| #N/A | #N/A | #N/A | #N/A |
| 0.43 | 1.09 | 0.47 | 0.80 |
| #N/A | #N/A | #N/A | #N/A |
| 0.09 | 0.33 | 0.04 | 0.18 |
| 0.09 | 0.33 | 0.04 | 0.18 |
| #N/A | #N/A | #N/A | #N/A |
| #N/A | #N/A | #N/A | #N/A |
| 0.34 | 0.97 | 0.40 | 0.97 |
| #N/A | #N/A | #N/A | #N/A |
| #N/A | #N/A | #N/A | #N/A |
| 0.15 | 0.71 | 0.25 | 0.43 |
| 0.15 | 0.71 | 0.25 | 0.43 |
| 0.73 | 2.49 | 0.88 | #N/A |
| #N/A | #N/A | #N/A | #N/A |
| #N/A | #N/A | #N/A | #N/A |
| 0.64 | 1.61 | 0.72 | #N/A |
| #N/A | #N/A | #N/A | #N/A |
| #N/A | #N/A | #N/A | #N/A |
| #N/A | #N/A | #N/A | #N/A |
| 0.65 | 2.07 | 0.68 | 2.37 |
| 0.65 | 2.07 | 0.68 | 2.37 |
| 0.65 | 2.07 | 0.68 | 2.37 |
| 0.79 | #N/A | #N/A | 1.37 |
| 0.79 | #N/A | #N/A | 1.37 |
| #N/A | #N/A | #N/A | #N/A |

|      |      |      |      |
|------|------|------|------|
| #N/A | 2.79 | 0.96 | 2.61 |
| #N/A | 2.79 | 0.96 | 2.61 |
| 0.82 | 1.76 | 0.77 | #N/A |
| 0.82 | 1.76 | 0.77 | #N/A |
| 0.70 | 1.70 | 0.75 | 1.64 |
| 0.85 | 1.95 | 0.80 | #N/A |
| 0.94 | 1.77 | 0.76 | 2.88 |
| #N/A | #N/A | #N/A | #N/A |
| 0.49 | 1.10 | 0.48 | 1.15 |
| #N/A | #N/A | #N/A | #N/A |
| 0.30 | 1.38 | 0.62 | 0.60 |
| 0.30 | 1.38 | 0.62 | 0.60 |
| 0.14 | 1.23 | 0.54 | #N/A |
| 0.14 | 1.23 | 0.54 | #N/A |
| #N/A | #N/A | #N/A | #N/A |
| 0.38 | 0.50 | 0.13 | 0.80 |
| 0.08 | 0.36 | 0.05 | 0.56 |
| 0.08 | 0.36 | 0.05 | 0.56 |
| 0.86 | 2.40 | 0.92 | 1.83 |
| 0.28 | 0.65 | 0.22 | #N/A |
| 0.09 | 0.50 | 0.13 | 0.32 |
| 0.75 | 1.47 | 0.66 | 1.33 |
| 0.75 | 1.47 | 0.66 | 1.33 |
| #N/A | #N/A | #N/A | #N/A |
| #N/A | #N/A | #N/A | #N/A |
| 0.63 | 1.14 | 0.49 | 1.35 |
| 0.27 | 0.70 | 0.25 | 0.51 |
| 0.27 | 0.70 | 0.25 | 0.51 |
| #N/A | #N/A | #N/A | #N/A |
| 0.90 | 2.48 | 0.93 | 3.00 |
| 0.83 | 2.25 | 0.84 | 2.02 |
| 0.39 | 0.98 | 0.41 | 0.74 |
| 0.61 | 1.15 | 0.51 | 1.71 |
| 0.61 | 1.15 | 0.51 | 1.71 |
| #N/A | #N/A | #N/A | #N/A |
| 0.36 | 1.03 | 0.44 | 0.77 |
| 0.72 | 1.33 | 0.60 | 1.34 |
| #N/A | #N/A | #N/A | #N/A |
| 0.72 | 1.33 | 0.60 | 1.34 |
| #N/A | #N/A | #N/A | #N/A |
| 0.31 | 1.24 | 0.55 | 0.85 |
| 0.20 | 0.80 | 0.31 | 0.67 |
| 0.09 | 0.56 | 0.17 | 0.47 |
| 0.20 | 0.80 | 0.31 | 0.67 |
| 0.09 | 0.56 | 0.17 | 0.47 |
| 0.20 | 0.80 | 0.31 | 0.67 |
| 0.09 | 0.56 | 0.17 | 0.47 |
| 0.79 | 1.56 | 0.70 | 1.84 |
| 0.22 | 0.43 | 0.09 | 0.40 |
| 0.84 | 1.06 | 0.45 | 1.52 |
| 0.84 | 1.06 | 0.45 | 1.52 |

|      |      |      |      |
|------|------|------|------|
| 0.64 | 1.62 | 0.72 | 1.31 |
| 0.22 | 1.00 | 0.42 | 0.80 |
| 0.19 | 0.48 | 0.12 | 0.55 |
| 0.19 | 0.48 | 0.12 | 0.55 |
| 0.79 | 1.47 | 0.65 | 1.61 |
| 0.94 | 1.77 | 0.72 | 1.34 |
| 0.94 | 1.77 | 0.72 | 1.34 |
| #N/A | #N/A | #N/A | #N/A |
| 0.94 | 1.77 | 0.72 | 1.34 |
| #N/A | #N/A | #N/A | #N/A |
| #N/A | #N/A | #N/A | #N/A |
| 0.74 | 1.46 | 0.63 | #N/A |
| 0.92 | 3.65 | 0.98 | 1.76 |
| 0.92 | 3.65 | 0.98 | 1.76 |
| 0.46 | 1.04 | 0.44 | #N/A |
| 0.65 | 1.51 | 0.68 | 1.73 |
| 0.65 | 1.51 | 0.68 | 1.73 |
| 0.62 | 1.64 | 0.70 | 1.29 |
| 0.82 | 1.69 | 0.74 | 1.56 |
| 0.82 | 1.69 | 0.74 | 1.56 |
| 0.59 | 1.80 | 0.78 | 1.83 |
| 0.59 | 1.80 | 0.78 | 1.83 |
| 0.24 | 0.77 | 0.29 | 0.53 |
| 0.24 | 0.77 | 0.29 | 0.53 |
| 0.03 | 0.50 | 0.13 | 0.32 |
| 0.22 | 0.71 | 0.26 | 0.61 |
| 0.41 | 0.63 | 0.21 | 0.97 |
| 0.62 | 1.27 | 0.56 | 1.61 |
| 0.82 | 2.25 | 0.88 | 2.69 |
| 0.05 | 0.44 | 0.09 | #N/A |
| 0.82 | 2.25 | 0.88 | 2.69 |
| #N/A | #N/A | #N/A | #N/A |
| #N/A | #N/A | #N/A | #N/A |
| #N/A | #N/A | #N/A | #N/A |
| 0.26 | 0.93 | 0.38 | 0.78 |
| #N/A | #N/A | #N/A | #N/A |
| 0.76 | 5.17 | 0.89 | #N/A |
| 0.76 | 5.17 | 0.89 | #N/A |
| #N/A | #N/A | #N/A | #N/A |
| #N/A | #N/A | #N/A | #N/A |
| #N/A | #N/A | #N/A | #N/A |
| 0.75 | 2.06 | 0.85 | 2.26 |
| 0.57 | 1.93 | 0.82 | 1.30 |
| 0.57 | 1.93 | 0.82 | 1.30 |
| #N/A | #N/A | #N/A | #N/A |
| 0.51 | 1.95 | 0.81 | 1.67 |
| 0.51 | 1.95 | 0.81 | 1.67 |
| 0.72 | 1.36 | 0.60 | 1.90 |
| 0.30 | 0.56 | 0.17 | #N/A |
| 0.72 | 1.36 | 0.60 | 1.90 |
| 0.43 | 1.83 | 0.79 | 1.27 |

|      |      |      |      |
|------|------|------|------|
| 0.49 | 1.22 | 0.54 | 1.08 |
| 0.16 | 0.70 | 0.25 | 0.75 |
| 0.16 | 0.70 | 0.25 | 0.75 |
| 0.33 | 0.65 | 0.22 | 0.83 |
| 0.20 | 1.31 | 0.58 | 0.62 |
| 0.20 | 1.31 | 0.58 | 0.62 |
| 0.47 | 0.60 | 0.19 | 1.19 |
| #N/A | #N/A | #N/A | #N/A |
| #N/A | #N/A | #N/A | #N/A |
| #N/A | #N/A | #N/A | #N/A |
| 0.73 | #N/A | #N/A | #N/A |
| 0.73 | #N/A | #N/A | #N/A |
| 0.77 | 2.27 | 0.90 | #N/A |
| 0.03 | 0.45 | 0.10 | 0.23 |
| 0.03 | 0.45 | 0.10 | 0.23 |
| 0.91 | 2.83 | 0.96 | 2.29 |
| 0.91 | 2.83 | 0.96 | 2.29 |
| #N/A | #N/A | #N/A | #N/A |
| #N/A | #N/A | #N/A | #N/A |
| 0.96 | 2.27 | 0.87 | 1.72 |
| 0.89 | 1.87 | 0.81 | 2.03 |
| #N/A | #N/A | #N/A | #N/A |
| 0.24 | 0.74 | 0.27 | 0.86 |
| #N/A | #N/A | #N/A | #N/A |
| 0.53 | 1.28 | 0.57 | 0.81 |
| 0.22 | 0.80 | 0.30 | 0.68 |
| #N/A | #N/A | #N/A | 0.86 |
| 0.66 | 1.64 | 0.69 | #N/A |
| #N/A | #N/A | #N/A | 0.29 |
| 0.48 | 1.41 | 0.61 | 0.81 |
| 0.97 | 4.49 | 0.99 | 4.90 |
| 0.93 | 2.79 | 0.96 | 2.30 |
| 0.78 | 2.18 | 0.88 | 1.24 |
| 0.78 | 2.18 | 0.88 | 1.24 |
| 0.95 | 3.69 | 0.99 | 1.96 |
| 0.95 | 3.69 | 0.99 | 1.96 |
| 0.61 | 1.81 | 0.78 | 1.30 |
| 0.55 | 1.22 | 0.54 | 0.88 |
| 0.18 | 0.52 | 0.14 | 0.41 |
| 0.18 | 0.52 | 0.14 | 0.41 |
| #N/A | #N/A | #N/A | #N/A |
| 0.18 | 0.52 | 0.14 | 0.41 |
| #N/A | #N/A | #N/A | #N/A |
| #N/A | 2.44 | 0.90 | #N/A |
| 0.66 | 2.02 | 0.85 | 1.12 |
| 0.66 | 2.02 | 0.85 | 1.12 |
| #N/A | 2.44 | 0.90 | #N/A |
| 0.73 | 2.18 | 0.88 | 1.26 |
| 0.73 | 2.18 | 0.88 | 1.26 |
| 0.59 | 1.29 | 0.57 | 1.18 |
| 0.59 | 1.29 | 0.57 | 1.18 |



|      |      |      |      |
|------|------|------|------|
| 0.52 | 0.44 | 0.09 | 1.36 |
| #N/A | #N/A | #N/A | #N/A |
| 0.52 | 0.44 | 0.09 | 1.36 |
| 0.52 | 0.44 | 0.09 | 1.36 |
| 0.40 | 1.27 | 0.57 | 1.05 |
| 0.40 | 1.27 | 0.57 | 1.05 |
| 0.87 | 1.94 | 0.82 | 1.40 |
| #N/A | 2.07 | 0.86 | #N/A |
| #N/A | #N/A | #N/A | #N/A |
| #N/A | #N/A | #N/A | #N/A |
| #N/A | #N/A | #N/A | #N/A |
| 0.63 | 1.18 | 0.52 | 1.55 |
| 0.63 | 1.18 | 0.52 | 1.55 |
| 0.39 | #N/A | #N/A | 0.79 |
| #N/A | #N/A | #N/A | #N/A |
| 0.83 | 2.28 | 0.90 | 1.56 |
| 0.83 | 2.28 | 0.90 | 1.56 |
| 0.75 | 2.24 | 0.89 | #N/A |
| 0.18 | 0.43 | 0.09 | 1.06 |
| 0.88 | 0.90 | 0.36 | 1.92 |
| 0.88 | 0.90 | 0.36 | 1.92 |
| 0.55 | 1.50 | 0.67 | 1.12 |
| 0.51 | 0.74 | 0.27 | 1.28 |
| 0.51 | 0.74 | 0.27 | 1.28 |
| 0.34 | 0.84 | 0.33 | #N/A |
| 0.34 | 0.84 | 0.33 | #N/A |
| 0.30 | 0.75 | 0.28 | #N/A |
| 0.79 | 2.21 | 0.89 | 2.04 |
| 0.64 | 1.29 | 0.56 | #N/A |
| 0.27 | 0.92 | 0.37 | #N/A |
| 0.92 | 1.24 | 0.55 | 3.03 |
| 0.92 | 1.24 | 0.55 | 3.03 |
| #N/A | 1.63 | 0.71 | 4.30 |
| #N/A | #N/A | #N/A | #N/A |
| 0.72 | 1.68 | 0.75 | 1.61 |
| #N/A | #N/A | #N/A | #N/A |
| 0.23 | 0.84 | 0.33 | 0.77 |
| 0.24 | 0.86 | 0.34 | 0.81 |
| 0.24 | 0.86 | 0.34 | 0.81 |
| 0.70 | 1.59 | 0.70 | 1.83 |
| #N/A | 1.33 | 0.59 | #N/A |
| 0.95 | 2.52 | 0.94 | 2.46 |
| 0.61 | 1.78 | 0.76 | #N/A |
| 0.61 | 1.78 | 0.76 | #N/A |
| 0.67 | 0.77 | 0.29 | 0.96 |
| 0.67 | 0.77 | 0.29 | 0.96 |
| 0.55 | 0.80 | 0.31 | 1.04 |
| 0.11 | 0.36 | 0.05 | 0.22 |
| #N/A | 0.86 | 0.34 | #N/A |
| 0.12 | 0.71 | 0.26 | 0.56 |
| 0.25 | 0.96 | 0.40 | 0.57 |

|      |      |      |      |
|------|------|------|------|
| 0.27 | 0.88 | 0.35 | 0.76 |
| 0.03 | 0.46 | 0.11 | 0.35 |
| #N/A | #N/A | #N/A | #N/A |
| 0.33 | 1.00 | 0.42 | 0.74 |
| 0.93 | 2.77 | 0.96 | 2.83 |
| 0.61 | 1.58 | 0.71 | 1.11 |
| 0.96 | 2.33 | 0.90 | 2.16 |
| 0.96 | 2.33 | 0.90 | 2.16 |
| 0.22 | #N/A | #N/A | #N/A |
| 0.89 | 1.49 | 0.55 | 3.28 |
| #N/A | 1.30 | 0.58 | #N/A |
| 0.71 | 2.05 | 0.85 | 2.14 |
| 0.71 | 2.05 | 0.85 | 2.14 |
| 0.51 | 1.23 | 0.52 | 1.54 |
| 0.86 | 1.81 | 0.79 | 2.80 |
| 0.86 | 1.81 | 0.79 | 2.80 |
| 0.18 | 0.81 | 0.31 | 0.85 |
| #N/A | #N/A | #N/A | #N/A |
| 0.18 | 0.81 | 0.31 | 0.85 |
| #N/A | 2.25 | 0.90 | 1.91 |
| 0.79 | 1.76 | 0.77 | 1.58 |
| 0.79 | 1.76 | 0.77 | 1.58 |
| #N/A | #N/A | #N/A | #N/A |
| #N/A | #N/A | #N/A | #N/A |
| 0.23 | 0.78 | 0.30 | 0.93 |
| 0.88 | 1.94 | 0.82 | 2.24 |
| 0.88 | 1.94 | 0.82 | 2.24 |
| 0.26 | 0.80 | 0.31 | 0.55 |
| 0.20 | 0.50 | 0.13 | 0.54 |
| 0.04 | 0.41 | 0.07 | 0.36 |
| 0.20 | 1.07 | 0.46 | 0.60 |
| 0.31 | 0.70 | 0.25 | #N/A |
| 0.31 | 0.70 | 0.25 | #N/A |
| 0.97 | 3.19 | 0.98 | 2.57 |
| 0.97 | 3.19 | 0.98 | 2.57 |
| #N/A | 1.77 | 0.77 | 1.44 |
| #N/A | 0.77 | 0.29 | #N/A |
| #N/A | 0.77 | 0.29 | #N/A |
| 0.60 | 1.33 | 0.60 | 0.95 |
| 0.56 | 1.51 | 0.68 | 0.91 |
| 0.60 | 1.33 | 0.60 | 0.95 |
| 0.60 | 1.33 | 0.60 | 0.95 |
| 0.59 | 1.32 | 0.59 | #N/A |
| #N/A | 0.98 | 0.41 | 0.58 |
| #N/A | 1.10 | 0.47 | #N/A |
| #N/A | 1.10 | 0.47 | #N/A |
| 0.59 | 2.68 | 0.94 | 1.98 |
| 0.99 | 2.56 | 0.93 | 2.50 |
| 0.99 | 2.56 | 0.93 | 2.50 |
| 0.96 | 2.13 | 0.87 | 2.42 |
| 0.96 | 2.13 | 0.87 | 2.42 |

|      |      |      |      |
|------|------|------|------|
| 0.68 | 1.30 | 0.54 | 0.95 |
| 0.58 | 1.28 | 0.57 | 1.15 |
| 0.82 | 1.96 | 0.83 | 1.28 |
| 0.74 | 1.36 | 0.60 | 1.78 |
| 0.74 | 1.36 | 0.60 | 1.78 |
| 0.51 | 0.76 | 0.28 | 1.00 |
| 0.01 | 0.24 | 0.02 | 0.26 |
| 0.49 | 1.33 | 0.59 | 1.74 |
| 0.49 | 1.33 | 0.59 | 1.74 |
| 0.67 | 1.84 | 0.76 | 1.84 |
| 0.52 | 1.24 | 0.55 | 1.21 |
| 0.21 | 1.19 | 0.52 | 1.12 |
| 0.52 | 1.24 | 0.55 | 1.21 |
| 0.56 | 1.83 | 0.79 | 1.25 |
| 0.81 | 2.23 | 0.89 | 1.73 |
| 0.87 | 2.13 | 0.87 | 1.49 |
| 0.87 | 2.13 | 0.87 | 1.49 |
| 0.87 | 2.22 | 0.89 | 1.88 |
| 0.41 | 0.72 | 0.26 | 0.76 |
| 0.59 | 1.16 | 0.51 | 1.11 |
| 0.21 | 0.48 | 0.12 | 0.73 |
| 0.76 | #N/A | #N/A | 1.44 |
| #N/A | #N/A | #N/A | #N/A |
| 0.42 | 1.05 | 0.45 | 1.15 |
| 0.36 | 0.93 | 0.38 | 1.02 |
| 0.42 | 1.05 | 0.45 | 1.15 |
| 0.60 | 1.31 | 0.58 | 1.35 |
| 0.63 | 1.29 | 0.58 | 1.11 |
| 0.63 | 1.29 | 0.58 | 1.11 |
| 0.59 | 1.35 | 0.60 | #N/A |
| 0.78 | 1.87 | 0.81 | 1.38 |
| 0.78 | 1.87 | 0.81 | 1.38 |
| 0.66 | #N/A | #N/A | 1.14 |
| 0.23 | 1.01 | 0.43 | 0.67 |
| 0.23 | 1.01 | 0.43 | 0.67 |
| #N/A | 1.49 | 0.66 | 1.73 |
| 0.69 | 1.96 | 0.82 | 1.46 |
| 0.63 | 1.25 | 0.55 | 1.46 |
| 0.63 | 1.25 | 0.55 | 1.46 |
| 0.12 | 0.52 | 0.14 | 0.75 |
| 0.17 | 0.54 | 0.15 | 0.68 |
| 0.22 | 0.48 | 0.12 | 0.81 |
| 0.65 | 0.79 | 0.30 | 1.21 |
| 0.81 | 0.87 | 0.34 | 1.48 |
| 0.52 | 1.54 | 0.69 | 1.38 |
| 0.80 | 1.13 | 0.50 | 1.93 |
| 0.08 | 0.51 | 0.14 | 0.49 |
| 0.67 | 1.33 | 0.59 | 1.35 |
| 0.49 | 1.31 | 0.58 | 1.09 |
| 0.68 | 1.99 | 0.83 | 1.68 |
| 0.87 | 2.27 | 0.90 | #N/A |

|      |      |      |      |
|------|------|------|------|
| 0.87 | 2.27 | 0.90 | #N/A |
| 0.96 | 2.48 | 0.91 | 2.27 |
| 0.96 | 2.48 | 0.91 | 2.27 |
| 0.19 | 1.11 | 0.48 | #N/A |
| 0.91 | 2.69 | 0.92 | 1.90 |
| 0.37 | 0.94 | 0.39 | 0.67 |
| 0.31 | 1.03 | 0.44 | 0.94 |
| 0.31 | 1.03 | 0.44 | 0.94 |
| 0.47 | 0.94 | 0.39 | 1.24 |
| #N/A | #N/A | #N/A | #N/A |
| #N/A | #N/A | #N/A | #N/A |
| 0.89 | 1.93 | 0.81 | 2.15 |
| 0.41 | 0.98 | 0.41 | 1.11 |
| 0.79 | 1.80 | 0.78 | 1.97 |
| 0.71 | 1.67 | 0.73 | 1.45 |
| 0.73 | 1.95 | 0.80 | 1.52 |
| 0.73 | 1.95 | 0.80 | 1.52 |
| 0.96 | 3.12 | 0.97 | 1.44 |
| 0.61 | 2.42 | 0.86 | 1.59 |
| 0.72 | 2.00 | 0.82 | #N/A |
| #N/A | #N/A | #N/A | #N/A |
| #N/A | #N/A | #N/A | #N/A |
| 0.33 | #N/A | #N/A | #N/A |
| 0.08 | 0.20 | 0.01 | 0.39 |
| 0.27 | 0.55 | 0.16 | #N/A |
| 0.08 | 0.20 | 0.01 | 0.39 |
| 0.76 | 1.86 | 0.79 | #N/A |
| 0.76 | 1.86 | 0.79 | #N/A |
| 0.96 | 1.97 | 0.83 | 2.67 |
| #N/A | #N/A | #N/A | #N/A |
| #N/A | #N/A | #N/A | #N/A |
| 0.02 | 0.49 | 0.12 | 0.28 |
| 0.02 | 0.49 | 0.12 | 0.28 |
| 0.54 | 1.66 | 0.74 | 0.93 |
| 0.03 | 0.17 | 0.01 | 0.40 |
| 0.28 | 0.85 | 0.34 | 0.76 |
| 0.28 | 0.85 | 0.34 | 0.76 |
| 0.49 | 1.23 | 0.54 | 0.97 |
| 0.54 | 0.93 | 0.38 | 1.28 |
| 0.50 | 0.92 | 0.37 | 1.42 |
| 0.42 | 0.88 | 0.35 | 0.74 |
| 0.50 | 0.92 | 0.37 | 1.42 |
| 0.18 | 0.47 | 0.11 | #N/A |
| #N/A | 2.25 | 0.89 | 2.36 |
| 0.28 | 0.77 | 0.29 | 0.84 |
| 0.28 | 0.77 | 0.29 | 0.84 |
| 0.60 | 1.41 | 0.63 | 1.54 |
| 0.98 | 2.17 | 0.85 | 2.41 |
| 0.98 | 2.17 | 0.85 | 2.41 |
| 0.35 | 0.69 | 0.24 | 0.78 |
| 0.78 | 1.40 | 0.63 | 2.11 |

|      |      |      |      |
|------|------|------|------|
| 0.78 | 1.40 | 0.63 | 2.11 |
| 0.76 | #N/A | #N/A | #N/A |
| 0.93 | 2.44 | 0.88 | #N/A |
| #N/A | 1.82 | 0.76 | 1.12 |
| #N/A | #N/A | #N/A | #N/A |
| #N/A | #N/A | #N/A | #N/A |
| 0.73 | 2.11 | 0.87 | 1.26 |
| 0.73 | 2.11 | 0.87 | 1.26 |
| 0.75 | 1.57 | 0.70 | 1.45 |
| 0.86 | 1.20 | 0.52 | 2.77 |
| 0.73 | 1.28 | 0.57 | 1.34 |
| 0.30 | 0.79 | 0.30 | 0.73 |
| 0.34 | 0.86 | 0.34 | 1.51 |
| 0.30 | 0.79 | 0.30 | 0.73 |
| 0.34 | 0.86 | 0.34 | 1.51 |
| 0.34 | 0.86 | 0.34 | 1.51 |
| 0.75 | #N/A | #N/A | 1.72 |
| 0.75 | #N/A | #N/A | 1.72 |
| 0.87 | 1.62 | 0.73 | 1.72 |
| 0.64 | 1.31 | 0.58 | 0.92 |
| 0.81 | 2.56 | 0.94 | 1.70 |
| 0.60 | 1.54 | 0.68 | 1.32 |
| 0.42 | 0.79 | 0.30 | 0.99 |
| 0.20 | 0.57 | 0.17 | 0.57 |
| 0.17 | 0.55 | 0.16 | 0.52 |
| 0.92 | 1.51 | 0.66 | 2.10 |
| 0.92 | 1.51 | 0.66 | 2.10 |
| #N/A | #N/A | #N/A | #N/A |
| #N/A | #N/A | #N/A | 0.89 |
| 0.42 | 1.48 | 0.66 | 1.04 |
| 0.64 | 1.03 | 0.44 | 1.09 |
| 0.64 | 1.03 | 0.44 | 1.09 |
| 0.98 | 2.18 | 0.85 | 1.98 |
| 0.98 | 2.18 | 0.85 | 1.98 |
| 0.80 | 1.37 | 0.62 | #N/A |
| 0.18 | 0.43 | 0.09 | 0.61 |
| 0.44 | 1.40 | 0.62 | 1.14 |
| 0.13 | 0.71 | 0.25 | #N/A |
| 0.01 | 0.14 | 0.01 | 0.46 |
| 0.57 | 0.99 | 0.41 | 1.54 |
| 0.90 | 2.51 | 0.93 | 1.79 |
| 0.90 | 2.51 | 0.93 | 1.79 |
| 0.08 | 0.39 | 0.07 | 0.28 |
| 0.64 | 1.30 | 0.57 | 1.53 |
| 0.35 | 1.38 | 0.62 | 0.86 |
| 0.35 | 1.38 | 0.62 | 0.86 |
| 0.93 | 2.11 | 0.77 | 2.69 |
| 0.71 | #N/A | #N/A | #N/A |
| 0.58 | 0.88 | 0.35 | 1.67 |
| 0.58 | 0.88 | 0.35 | 1.67 |
| 0.93 | 3.30 | 0.98 | 2.85 |

|      |      |      |      |
|------|------|------|------|
| 0.93 | 3.30 | 0.98 | 2.85 |
| 0.48 | 1.34 | 0.60 | #N/A |
| 0.48 | 1.34 | 0.60 | #N/A |
| #N/A | #N/A | #N/A | #N/A |
| 0.88 | 2.53 | 0.93 | 1.17 |
| 0.88 | 2.53 | 0.93 | 1.17 |
| 0.74 | 1.35 | 0.60 | 1.12 |
| 0.50 | 2.31 | 0.90 | 1.58 |
| 0.42 | 1.46 | 0.66 | 0.70 |
| 0.42 | 1.46 | 0.66 | 0.70 |
| 0.82 | #N/A | #N/A | #N/A |
| 0.82 | #N/A | #N/A | #N/A |
| 0.43 | #N/A | #N/A | #N/A |
| 0.51 | 1.31 | 0.58 | #N/A |
| 0.65 | 0.63 | 0.20 | 1.34 |
| 0.65 | 0.63 | 0.20 | 1.34 |
| 0.77 | 1.62 | 0.72 | 1.24 |
| 0.63 | 1.23 | 0.54 | #N/A |
| 0.54 | 1.08 | 0.47 | 0.85 |
| #N/A | 2.63 | 0.94 | 2.23 |
| #N/A | 2.63 | 0.94 | 2.23 |
| #N/A | #N/A | #N/A | #N/A |
| #N/A | #N/A | #N/A | #N/A |
| 0.24 | 1.01 | 0.43 | 0.65 |
| 0.29 | 1.07 | 0.46 | 0.56 |
| 0.60 | 1.67 | 0.74 | #N/A |
| 0.75 | 1.56 | 0.70 | 1.82 |
| 0.95 | 2.15 | 0.85 | 2.58 |
| 0.95 | 2.15 | 0.85 | 2.58 |
| 0.93 | #N/A | #N/A | 2.00 |
| 0.89 | 1.58 | 0.70 | 1.65 |
| 0.74 | 1.29 | 0.56 | #N/A |
| 0.61 | 1.26 | 0.56 | 1.25 |
| 0.61 | 1.26 | 0.56 | 1.25 |
| 0.03 | 0.48 | 0.12 | 0.30 |
| 0.33 | 0.75 | 0.28 | 0.63 |
| 0.17 | 1.18 | 0.52 | 0.22 |
| 0.33 | 0.75 | 0.28 | 0.63 |
| 0.26 | 0.94 | 0.39 | 0.49 |
| 0.17 | 1.18 | 0.52 | 0.22 |
| 0.54 | 1.60 | 0.70 | 1.45 |
| #N/A | #N/A | #N/A | #N/A |
| 0.37 | 0.67 | 0.23 | 1.28 |
| 0.34 | 0.19 | 0.01 | 0.94 |
| #N/A | #N/A | #N/A | #N/A |
| 0.69 | 1.47 | 0.66 | 1.55 |
| #N/A | #N/A | #N/A | #N/A |
| #N/A | #N/A | #N/A | #N/A |
| #N/A | 0.65 | 0.22 | 0.83 |
| 0.89 | 2.19 | 0.88 | 2.56 |
| 0.78 | 1.00 | 0.42 | #N/A |

|      |      |      |      |
|------|------|------|------|
| 0.74 | 2.28 | 0.90 | 1.23 |
| 0.46 | 1.13 | 0.49 | #N/A |
| #N/A | 1.50 | 0.67 | 1.87 |
| #N/A | 1.50 | 0.67 | 1.87 |
| #N/A | 1.22 | 0.54 | 2.21 |
| 0.87 | 1.81 | 0.79 | 1.89 |
| 0.47 | 1.49 | 0.66 | 0.66 |
| 0.47 | 1.49 | 0.66 | 0.66 |
| 0.69 | 1.82 | 0.78 | 1.09 |
| 0.64 | 2.03 | 0.85 | 0.85 |
| 0.64 | 2.03 | 0.85 | 0.85 |
| 0.75 | 2.16 | 0.88 | #N/A |
| 0.55 | 1.20 | 0.53 | 1.45 |
| 0.39 | 0.78 | 0.30 | 0.60 |
| 0.60 | 1.54 | 0.68 | 1.38 |
| #N/A | #N/A | #N/A | #N/A |
| 0.94 | 1.87 | 0.81 | 2.15 |
| 0.94 | 1.87 | 0.81 | 2.15 |
| #N/A | #N/A | #N/A | #N/A |
| 0.56 | 0.95 | 0.39 | #N/A |
| 0.05 | 0.48 | 0.12 | 0.41 |
| 0.65 | 0.95 | 0.39 | 1.43 |
| 0.65 | 0.95 | 0.39 | 1.43 |
| 0.96 | 2.54 | 0.94 | #N/A |
| 0.95 | 2.58 | 0.94 | 3.14 |
| 0.47 | 0.82 | 0.32 | 1.20 |
| 0.99 | 1.70 | 0.74 | #N/A |
| 0.99 | 1.70 | 0.74 | #N/A |
| 0.83 | 2.15 | 0.88 | 2.06 |
| 0.83 | 2.15 | 0.88 | 2.06 |
| 0.60 | #N/A | #N/A | #N/A |
| 0.06 | 0.28 | 0.02 | 0.34 |
| 0.17 | 0.53 | 0.15 | 0.50 |
| 0.06 | 0.28 | 0.02 | 0.34 |
| 0.92 | 2.33 | 0.91 | 1.89 |
| 0.55 | 1.63 | 0.71 | 1.03 |
| 0.55 | 1.63 | 0.71 | 1.03 |
| #N/A | #N/A | #N/A | #N/A |
| #N/A | #N/A | #N/A | #N/A |
| 0.51 | 0.79 | 0.30 | 1.71 |
| 0.51 | 0.79 | 0.30 | 1.71 |
| 0.81 | 1.80 | 0.79 | #N/A |
| #N/A | #N/A | #N/A | #N/A |
| 0.55 | 1.23 | 0.54 | #N/A |
| 0.58 | 1.52 | 0.67 | 1.09 |
| 0.97 | 2.46 | 0.92 | 2.64 |
| 0.91 | 1.33 | 0.59 | 2.06 |
| 0.28 | 0.93 | 0.38 | 0.94 |
| 0.91 | 1.33 | 0.59 | 2.06 |
| 0.28 | 0.93 | 0.38 | 0.94 |
| 0.11 | 0.49 | 0.13 | 0.35 |

|      |      |      |      |
|------|------|------|------|
| 0.28 | 0.93 | 0.38 | 0.94 |
| 0.54 | 1.53 | 0.69 | 0.89 |
| 0.47 | 1.75 | 0.76 | 0.65 |
| 0.95 | 2.79 | 0.96 | 2.42 |
| 0.72 | 1.52 | 0.68 | 1.67 |
| 0.72 | 1.52 | 0.68 | 1.67 |
| 0.91 | 1.18 | 0.51 | 2.21 |
| 0.91 | 1.18 | 0.51 | 2.21 |
| 0.44 | 0.58 | 0.17 | 0.90 |
| 0.45 | 0.99 | 0.41 | 0.75 |
| 0.62 | 0.92 | 0.37 | #N/A |
| 0.76 | 1.37 | 0.61 | 1.47 |
| 0.45 | 0.99 | 0.41 | 0.75 |
| 0.46 | 1.09 | 0.47 | 1.10 |
| 0.24 | 0.74 | 0.27 | 0.74 |
| 0.18 | 0.63 | 0.21 | 0.51 |
| 0.52 | 1.39 | 0.62 | 0.98 |
| 0.74 | 2.05 | 0.85 | 1.80 |
| 0.74 | 2.05 | 0.85 | 1.80 |
| 0.29 | 0.94 | 0.39 | 0.92 |
| 0.29 | 0.94 | 0.39 | 0.92 |
| #N/A | #N/A | #N/A | #N/A |
| 0.41 | #N/A | #N/A | #N/A |
| 0.41 | #N/A | #N/A | #N/A |
| 0.34 | 1.00 | 0.41 | 0.54 |
| 0.67 | 1.58 | 0.71 | 1.25 |
| 0.67 | 1.58 | 0.71 | 1.25 |
| 0.63 | 0.78 | 0.30 | 1.66 |
| 0.63 | 0.78 | 0.30 | 1.66 |
| #N/A | #N/A | #N/A | 1.18 |
| #N/A | #N/A | #N/A | #N/A |
| 0.74 | 1.71 | 0.76 | 1.28 |
| 0.74 | 1.71 | 0.76 | 1.28 |
| 0.26 | 1.05 | 0.45 | 0.69 |
| 0.26 | 1.05 | 0.45 | 0.69 |
| #N/A | #N/A | #N/A | #N/A |
| 0.33 | 0.43 | 0.09 | 0.94 |
| 0.22 | 0.92 | 0.38 | #N/A |
| 0.22 | 0.92 | 0.38 | #N/A |
| 0.13 | 0.56 | 0.16 | 0.51 |
| 0.21 | 0.82 | 0.32 | 0.54 |
| 0.76 | 1.62 | 0.72 | 1.17 |
| 0.59 | 2.09 | 0.83 | 1.40 |
| 0.59 | 2.09 | 0.83 | 1.40 |
| 0.63 | 2.21 | 0.88 | 1.25 |
| #N/A | 1.66 | 0.74 | 0.89 |
| 0.21 | 0.90 | 0.36 | 0.74 |
| 0.82 | 1.72 | 0.76 | 1.77 |
| 0.96 | 2.14 | 0.87 | 2.44 |
| #N/A | #N/A | #N/A | #N/A |
| 0.96 | 2.14 | 0.87 | 2.44 |



|      |      |      |      |
|------|------|------|------|
| 0.11 | 0.45 | 0.10 | 0.40 |
| 0.11 | 0.45 | 0.10 | 0.40 |
| 0.62 | 1.45 | 0.65 | 1.22 |
| 0.20 | 0.76 | 0.28 | 0.57 |
| 0.14 | 0.61 | 0.20 | 0.50 |
| 0.45 | 1.97 | 0.83 | 1.40 |
| 0.22 | #N/A | #N/A | 0.84 |
| 0.22 | #N/A | #N/A | 0.84 |
| #N/A | #N/A | #N/A | 1.15 |
| 0.83 | 1.98 | 0.83 | 1.00 |
| 0.68 | 1.85 | 0.79 | 1.40 |
| 0.68 | 1.85 | 0.79 | 1.40 |
| 0.36 | 0.84 | 0.33 | 0.87 |
| 0.62 | 1.61 | 0.72 | 1.10 |
| 0.80 | 1.36 | 0.60 | 1.85 |
| 0.67 | 1.83 | 0.79 | 1.24 |
| 0.91 | 2.29 | 0.90 | 2.58 |
| 0.91 | 2.29 | 0.90 | 2.58 |
| 0.92 | 2.27 | 0.90 | 2.12 |
| 0.92 | 2.27 | 0.90 | 2.12 |
| #N/A | 0.85 | 0.33 | #N/A |
| 0.63 | 1.25 | 0.54 | 1.58 |
| 0.61 | 1.09 | 0.47 | 1.28 |
| #N/A | 0.75 | 0.28 | #N/A |
| 0.97 | 2.56 | 0.94 | 2.55 |
| 0.35 | 0.65 | 0.22 | 0.93 |
| 0.41 | 1.27 | 0.56 | 1.51 |
| 0.82 | 1.93 | 0.82 | 1.43 |
| 0.41 | 1.27 | 0.56 | 1.51 |
| 0.82 | 1.93 | 0.82 | 1.43 |
| 0.91 | 3.92 | 0.99 | 1.56 |
| 0.91 | 3.92 | 0.99 | 1.56 |
| 0.49 | 1.16 | 0.51 | 1.42 |
| 0.49 | 1.16 | 0.51 | 1.42 |
| 0.03 | 0.47 | 0.11 | 0.17 |
| 0.03 | 0.48 | 0.12 | #N/A |
| 0.09 | 0.59 | 0.18 | 0.46 |
| 0.09 | 0.59 | 0.18 | 0.46 |
| 0.09 | 0.79 | 0.30 | 0.42 |
| #N/A | 1.34 | 0.60 | 1.46 |
| 0.71 | 1.05 | 0.45 | 2.10 |
| 0.77 | 0.95 | 0.39 | 1.33 |
| 0.58 | 1.23 | 0.55 | 1.29 |
| 0.58 | 1.23 | 0.55 | 1.29 |
| 0.86 | 3.03 | 0.93 | 1.93 |
| 0.93 | 1.81 | 0.79 | 2.20 |
| 0.59 | 0.45 | 0.10 | 1.70 |
| 0.36 | 0.62 | 0.20 | 0.90 |
| 0.36 | 0.62 | 0.20 | 0.90 |
| 0.52 | 1.16 | 0.51 | 1.35 |
| 0.98 | 1.11 | 0.44 | 4.95 |

|      |      |      |       |
|------|------|------|-------|
| 0.28 | 0.63 | 0.21 | 0.96  |
| 0.90 | 2.25 | 0.88 | 2.57  |
| 0.90 | 2.25 | 0.88 | 2.57  |
| 0.95 | 2.03 | 0.85 | 1.74  |
| #N/A | #N/A | #N/A | #N/A  |
| #N/A | #N/A | #N/A | #N/A  |
| 0.64 | 1.44 | 0.64 | 1.09  |
| 0.64 | 1.44 | 0.64 | 1.09  |
| 0.80 | 1.73 | 0.76 | 2.36  |
| 0.89 | 1.55 | 0.69 | 1.62  |
| 0.96 | 1.70 | 0.75 | 2.46  |
| 0.40 | 1.04 | 0.44 | 0.79  |
| 0.86 | 1.75 | 0.76 | 2.07  |
| 0.86 | 1.75 | 0.76 | 2.07  |
| 0.03 | 0.54 | 0.15 | 0.28  |
| 0.53 | 1.04 | 0.45 | 1.37  |
| 0.15 | 0.23 | 0.02 | 0.89  |
| 0.70 | 1.40 | 0.63 | 1.39  |
| 0.70 | 1.62 | 0.73 | 1.79  |
| 0.82 | 2.07 | 0.83 | 2.57  |
| #N/A | #N/A | #N/A | #N/A  |
| 0.42 | 0.65 | 0.22 | 0.82  |
| 0.42 | 0.65 | 0.22 | 0.82  |
| 0.21 | 0.59 | 0.18 | 0.60  |
| 0.84 | 1.56 | 0.70 | 16.61 |
| 0.86 | 1.34 | 0.60 | #N/A  |
| 0.86 | 1.34 | 0.60 | #N/A  |
| #N/A | #N/A | #N/A | #N/A  |
| #N/A | #N/A | #N/A | #N/A  |
| 0.35 | 1.28 | 0.57 | 0.73  |
| 0.54 | 1.72 | 0.73 | 0.70  |
| 0.86 | 1.59 | 0.71 | 1.67  |
| 0.54 | 1.72 | 0.73 | 0.70  |
| 0.86 | 1.59 | 0.71 | 1.67  |
| 0.99 | 3.66 | 0.99 | 2.80  |
| 0.86 | 1.69 | 0.75 | 1.56  |
| 0.86 | 1.69 | 0.75 | 1.56  |
| 0.88 | #N/A | #N/A | #N/A  |
| #N/A | 0.36 | 0.06 | #N/A  |
| 0.88 | #N/A | #N/A | #N/A  |
| #N/A | #N/A | #N/A | #N/A  |
| 0.35 | #N/A | #N/A | 0.49  |
| 0.84 | 1.41 | 0.63 | 1.81  |
| 0.84 | 1.41 | 0.63 | 1.81  |
| 0.70 | 2.40 | 0.92 | 1.59  |
| 0.71 | 1.95 | 0.82 | 1.89  |
| #N/A | 0.77 | 0.29 | #N/A  |
| 0.70 | 1.02 | 0.43 | 1.43  |
| 0.70 | 1.02 | 0.43 | 1.43  |
| 0.89 | 2.28 | 0.90 | 1.64  |
| 0.89 | 2.61 | 0.94 | 1.37  |

|      |      |      |      |
|------|------|------|------|
| 0.84 | #N/A | #N/A | 1.77 |
| 0.59 | 1.24 | 0.55 | 1.76 |
| 0.62 | 0.97 | 0.40 | 2.63 |
| 0.87 | 1.89 | 0.81 | 2.00 |
| 0.87 | 1.89 | 0.81 | 2.00 |
| 0.89 | 2.08 | 0.86 | 1.80 |
| 0.89 | 2.08 | 0.86 | 1.80 |
| 0.89 | 2.08 | 0.86 | 1.80 |
| 0.75 | 2.02 | 0.74 | 2.90 |
| 0.54 | 1.32 | 0.59 | 1.05 |
| 0.54 | 1.32 | 0.59 | 1.05 |
| 0.27 | 0.66 | 0.23 | 0.75 |
| 0.49 | 1.00 | 0.42 | 0.89 |
| 0.93 | 1.79 | 0.78 | 2.70 |
| 0.92 | #N/A | #N/A | 2.16 |
| 0.92 | #N/A | #N/A | 2.16 |
| 0.47 | 1.07 | 0.45 | 0.99 |
| 0.96 | 3.20 | 0.98 | 2.45 |
| 0.96 | 3.20 | 0.98 | 2.45 |
| 0.88 | 1.94 | 0.81 | 2.11 |
| 0.88 | 1.94 | 0.81 | 2.11 |
| 0.36 | 0.64 | 0.21 | 0.87 |
| 0.65 | 1.03 | 0.44 | 1.58 |
| 0.65 | 1.03 | 0.44 | 1.58 |
| 0.70 | 1.43 | 0.64 | 1.40 |
| 0.98 | 2.26 | 0.90 | 2.99 |
| 0.98 | 2.26 | 0.90 | 2.99 |
| 0.28 | 0.42 | 0.08 | 0.79 |
| 0.79 | 2.10 | 0.85 | 1.28 |
| #N/A | #N/A | #N/A | #N/A |
| #N/A | #N/A | #N/A | #N/A |
| 0.99 | 2.69 | 0.95 | 1.95 |
| 0.78 | 2.06 | 0.86 | 1.72 |
| 0.78 | 2.06 | 0.86 | 1.72 |
| 0.75 | 1.39 | 0.62 | 1.85 |
| 0.72 | 1.84 | 0.79 | 1.66 |
| 0.58 | 1.54 | 0.69 | 1.15 |
| 0.70 | 1.37 | 0.61 | 1.65 |
| 0.58 | 1.54 | 0.69 | 1.15 |
| 0.70 | 1.37 | 0.61 | 1.65 |
| 0.70 | 1.37 | 0.61 | 1.65 |
| 0.63 | 1.44 | 0.65 | 1.13 |
| 0.58 | 1.51 | 0.68 | 1.43 |
| 0.63 | 1.44 | 0.65 | 1.13 |
| 0.51 | 1.22 | 0.54 | 1.10 |
| 0.16 | 0.45 | 0.10 | 0.74 |
| #N/A | #N/A | #N/A | #N/A |
| #N/A | #N/A | #N/A | #N/A |
| 0.96 | 2.41 | 0.92 | 1.74 |
| 0.96 | 2.41 | 0.92 | 1.74 |
| 0.79 | 2.01 | 0.84 | 2.56 |

|      |      |      |      |
|------|------|------|------|
| #N/A | #N/A | #N/A | #N/A |
| #N/A | #N/A | #N/A | #N/A |
| 0.14 | 0.70 | 0.25 | 0.40 |
| 0.79 | 1.78 | 0.77 | 1.64 |
| 0.25 | 0.98 | 0.41 | 0.45 |
| #N/A | #N/A | #N/A | #N/A |
| 0.05 | 0.56 | 0.17 | 0.31 |
| 0.43 | 1.29 | 0.58 | 1.17 |
| #N/A | 0.51 | 0.14 | 0.70 |
| 0.81 | 0.95 | 0.39 | 2.06 |
| 0.81 | 0.95 | 0.39 | 2.06 |
| 0.64 | 0.58 | 0.18 | 1.15 |
| 0.44 | 0.62 | 0.20 | 0.76 |
| 0.81 | 1.91 | 0.82 | 1.72 |
| 0.14 | 0.66 | 0.23 | 0.63 |
| 0.14 | 0.66 | 0.23 | 0.63 |
| 0.65 | 1.23 | 0.54 | #N/A |
| 0.46 | 1.36 | 0.61 | 1.35 |
| 0.26 | 1.45 | 0.65 | 0.85 |
| #N/A | #N/A | #N/A | #N/A |
| 0.26 | 1.45 | 0.65 | 0.85 |
| 0.26 | 1.45 | 0.65 | 0.85 |
| 0.26 | 1.45 | 0.65 | 0.85 |
| #N/A | #N/A | #N/A | #N/A |
| 0.30 | 0.67 | 0.23 | 0.65 |
| 0.54 | 1.35 | 0.60 | #N/A |
| 0.32 | 1.32 | 0.58 | #N/A |
| 0.32 | 1.32 | 0.58 | #N/A |
| 0.98 | 2.76 | 0.96 | 3.28 |
| 0.98 | 2.76 | 0.96 | 3.28 |
| 0.74 | 1.37 | 0.62 | #N/A |
| 0.68 | 1.65 | 0.73 | 1.52 |
| #N/A | 2.02 | 0.85 | 1.61 |
| #N/A | 1.25 | 0.55 | 0.81 |
| 0.79 | 2.31 | 0.91 | 1.97 |
| 0.79 | 2.31 | 0.91 | 1.97 |
| 0.33 | 1.16 | 0.50 | 0.77 |
| 0.33 | 1.16 | 0.50 | 0.77 |
| 0.84 | 2.43 | 0.91 | 3.52 |
| 0.86 | 1.74 | 0.77 | 2.25 |
| 0.86 | 1.74 | 0.77 | 2.25 |
| #N/A | 1.00 | 0.41 | #N/A |
| 0.78 | 1.77 | 0.78 | 1.24 |
| 0.25 | #N/A | #N/A | #N/A |
| 0.78 | 1.77 | 0.78 | 1.24 |
| 0.78 | 1.77 | 0.78 | 1.24 |
| 0.46 | 0.89 | 0.36 | 1.19 |
| 0.08 | 0.38 | 0.06 | 0.45 |
| 0.64 | 2.13 | 0.87 | 1.54 |
| 0.53 | 1.71 | 0.75 | 0.98 |
| 0.97 | 2.10 | 0.85 | 1.29 |

|      |      |      |      |
|------|------|------|------|
| 0.97 | 2.10 | 0.85 | 1.29 |
| 0.62 | 1.39 | 0.62 | 1.05 |
| 0.29 | 0.86 | 0.34 | 0.50 |
| 0.75 | 1.87 | 0.76 | 1.29 |
| 0.95 | 2.17 | 0.87 | 2.95 |
| 0.95 | 2.17 | 0.87 | 2.95 |
| 0.21 | 0.26 | 0.02 | 0.94 |
| 0.86 | #N/A | #N/A | 2.42 |
| 0.34 | 0.90 | 0.37 | 0.75 |
| 0.34 | 0.90 | 0.37 | 0.75 |
| 0.28 | 0.95 | 0.39 | 0.73 |
| 0.66 | 1.80 | 0.78 | 1.93 |
| 0.85 | 3.72 | 0.98 | #N/A |
| 0.85 | 3.72 | 0.98 | #N/A |
| 0.50 | 1.18 | 0.51 | #N/A |
| 0.70 | 1.45 | 0.65 | 1.70 |
| 0.70 | 1.45 | 0.65 | 1.70 |
| #N/A | #N/A | #N/A | #N/A |
| 0.51 | 1.38 | 0.62 | 0.87 |
| 0.51 | 1.38 | 0.62 | 0.87 |
| 0.62 | 1.52 | 0.68 | #N/A |
| 0.86 | 2.13 | 0.86 | 3.23 |
| 0.86 | 2.13 | 0.86 | 3.23 |
| 0.76 | 1.05 | 0.45 | #N/A |
| 0.34 | 0.92 | 0.37 | 1.02 |
| 0.13 | #N/A | #N/A | #N/A |
| 0.33 | #N/A | #N/A | #N/A |
| 0.98 | 3.49 | 0.99 | 2.57 |
| 0.98 | 3.49 | 0.99 | 2.57 |
| 0.73 | #N/A | #N/A | #N/A |
| 0.59 | 1.45 | 0.65 | 1.73 |
| 0.31 | 0.91 | 0.37 | 0.56 |
| 0.54 | 1.12 | 0.49 | 1.06 |
| 0.17 | 0.74 | 0.27 | 0.67 |
| 0.89 | 2.17 | 0.88 | 2.09 |
| 0.17 | 0.74 | 0.27 | 0.67 |
| 0.89 | 2.17 | 0.88 | 2.09 |
| 0.60 | 1.90 | 0.79 | 1.73 |
| 0.97 | 2.35 | 0.91 | 2.66 |
| 0.97 | 2.35 | 0.91 | 2.66 |
| #N/A | #N/A | #N/A | #N/A |
| #N/A | #N/A | #N/A | #N/A |
| 0.28 | 0.95 | 0.39 | 0.73 |
| 0.91 | 1.82 | 0.79 | 2.14 |
| 0.30 | 0.92 | 0.38 | 0.73 |
| 0.30 | 0.92 | 0.38 | 0.73 |
| 0.33 | 0.72 | 0.26 | 0.85 |
| 0.28 | 0.76 | 0.28 | 0.67 |
| 0.28 | 0.76 | 0.28 | 0.67 |
| 0.80 | 1.84 | 0.79 | 1.96 |
| 0.24 | 0.65 | 0.22 | 1.00 |

|      |      |      |      |
|------|------|------|------|
| 0.45 | 1.03 | 0.44 | 0.93 |
| 0.60 | 1.38 | 0.62 | 1.32 |
| 0.71 | 1.74 | 0.76 | 1.71 |
| 0.44 | 1.13 | 0.49 | 0.94 |
| #N/A | 1.88 | 0.81 | 1.54 |
| #N/A | 1.88 | 0.81 | 1.54 |
| 0.57 | 1.60 | 0.71 | 0.99 |
| 0.83 | 1.07 | 0.46 | 1.25 |
| 0.83 | 1.07 | 0.46 | 1.25 |
| 0.94 | 2.06 | 0.85 | 2.89 |
| #N/A | #N/A | #N/A | #N/A |
| 0.94 | 2.06 | 0.85 | 2.89 |
| 0.33 | 1.23 | 0.55 | 0.81 |
| 0.82 | #N/A | #N/A | 1.87 |
| #N/A | #N/A | #N/A | #N/A |
| #N/A | #N/A | #N/A | #N/A |
| 0.01 | 0.36 | 0.06 | #N/A |
| 0.93 | 2.50 | 0.93 | 2.60 |
| 0.93 | 2.50 | 0.93 | 2.60 |
| 0.93 | 2.50 | 0.93 | 2.60 |
| 0.96 | 2.00 | 0.84 | 2.44 |
| 0.96 | 2.00 | 0.84 | 2.44 |
| #N/A | #N/A | #N/A | #N/A |
| 0.67 | 1.47 | 0.66 | 1.86 |
| 0.14 | 0.60 | 0.19 | 0.47 |
| 0.67 | 1.47 | 0.66 | 1.86 |
| #N/A | 1.48 | 0.66 | #N/A |
| #N/A | 1.48 | 0.66 | #N/A |
| #N/A | 1.34 | 0.60 | #N/A |
| #N/A | 1.34 | 0.60 | #N/A |
| #N/A | #N/A | #N/A | #N/A |
| 0.59 | #N/A | #N/A | 2.00 |
| 0.59 | #N/A | #N/A | 2.00 |
| #N/A | #N/A | #N/A | #N/A |
| #N/A | #N/A | #N/A | #N/A |
| 0.80 | 2.14 | 0.88 | 2.09 |
| 0.83 | 2.44 | 0.93 | 2.10 |
| 0.83 | 2.44 | 0.93 | 2.10 |
| 0.93 | 2.30 | 0.91 | 2.39 |
| 0.44 | 1.33 | 0.49 | #N/A |
| 0.93 | 2.30 | 0.91 | 2.39 |
| 0.44 | 1.33 | 0.49 | #N/A |
| 0.47 | 1.28 | 0.57 | 1.06 |
| 0.47 | 1.28 | 0.57 | 1.06 |
| 0.72 | 2.12 | 0.84 | 1.20 |
| 0.99 | #N/A | #N/A | #N/A |
| 0.64 | 1.49 | 0.67 | #N/A |
| 0.95 | 2.66 | 0.95 | 2.61 |
| 0.89 | 2.24 | 0.90 | 2.01 |
| 0.89 | 2.24 | 0.90 | 2.01 |
| 0.79 | 1.38 | 0.62 | 1.38 |

|      |      |      |      |
|------|------|------|------|
| 0.36 | 0.78 | 0.30 | 0.93 |
| 0.04 | 0.40 | 0.07 | 0.38 |
| 0.10 | 0.60 | 0.19 | 0.50 |
| 0.10 | 0.60 | 0.19 | 0.50 |
| 0.39 | 0.36 | 0.05 | 1.00 |
| 0.31 | 0.92 | 0.38 | 0.85 |
| 0.82 | #N/A | #N/A | 2.09 |
| 0.82 | #N/A | #N/A | 2.09 |
| 0.18 | 0.53 | 0.15 | 0.66 |
| 0.63 | 1.05 | 0.45 | 1.05 |
| 0.73 | 2.31 | 0.85 | 1.80 |
| 0.73 | 2.31 | 0.85 | 1.80 |
| 0.27 | 1.11 | 0.48 | 0.62 |
| 0.61 | 1.70 | 0.75 | 1.33 |
| 0.81 | 2.24 | 0.89 | 1.58 |
| 0.81 | 2.24 | 0.89 | 1.58 |
| 0.11 | 0.27 | 0.02 | 0.38 |
| 0.11 | 0.27 | 0.02 | 0.38 |
| 0.91 | 1.45 | 0.65 | 1.92 |
| 0.05 | 0.72 | 0.26 | 0.28 |
| 0.06 | 0.78 | 0.30 | 0.28 |
| 0.03 | 0.55 | 0.16 | 0.42 |
| #N/A | #N/A | #N/A | #N/A |
| 0.71 | #N/A | #N/A | #N/A |
| 0.71 | #N/A | #N/A | #N/A |
| 0.98 | 2.82 | 0.96 | #N/A |
| 0.98 | 2.82 | 0.96 | #N/A |
| 0.77 | 1.63 | 0.72 | 1.49 |
| 0.26 | 0.72 | 0.26 | 0.48 |
| 0.91 | 2.77 | 0.95 | 2.26 |
| 0.91 | 2.77 | 0.95 | 2.26 |
| 0.16 | 0.89 | 0.36 | #N/A |
| 0.90 | 1.73 | 0.76 | 3.06 |
| 0.90 | 1.73 | 0.76 | 3.06 |
| 0.98 | 2.75 | 0.96 | 2.98 |
| 0.98 | 2.75 | 0.96 | 2.98 |
| 0.85 | 1.56 | 0.69 | 1.83 |
| 0.83 | #N/A | #N/A | 0.96 |
| #N/A | #N/A | #N/A | #N/A |
| 0.93 | 2.33 | 0.89 | 3.53 |
| 0.96 | 3.26 | 0.98 | 2.78 |
| 0.96 | 3.26 | 0.98 | 2.78 |
| 0.93 | 2.30 | 0.89 | 3.49 |
| 0.93 | 2.30 | 0.89 | 3.49 |
| 0.60 | 1.36 | 0.60 | 1.12 |
| 0.10 | #N/A | #N/A | #N/A |
| 0.60 | 1.36 | 0.60 | 1.12 |
| 0.49 | 1.58 | 0.70 | 0.90 |
| #N/A | #N/A | #N/A | #N/A |
| 0.88 | #N/A | #N/A | #N/A |
| 0.97 | 2.46 | 0.92 | 2.60 |

|      |      |      |      |
|------|------|------|------|
| 0.58 | 1.30 | 0.58 | 1.27 |
| 0.55 | 1.13 | 0.49 | 1.59 |
| 0.24 | 0.88 | 0.35 | 0.53 |
| 0.54 | 1.25 | 0.55 | 1.43 |
| #N/A | #N/A | #N/A | 1.06 |
| 0.25 | 1.24 | 0.54 | 0.53 |
| 0.61 | 1.65 | 0.73 | 1.40 |
| 0.75 | 1.26 | 0.56 | 1.90 |
| 0.92 | 2.16 | 0.86 | 2.01 |
| 0.92 | 2.16 | 0.86 | 2.01 |
| 0.92 | 2.16 | 0.86 | 2.01 |
| 0.85 | 2.03 | 0.85 | 1.88 |
| 0.29 | 1.11 | 0.48 | 1.01 |
| 0.61 | 1.37 | 0.61 | 0.99 |
| 0.18 | 0.48 | 0.12 | 0.52 |
| 0.79 | 1.72 | 0.75 | 2.19 |
| 0.23 | 0.91 | 0.37 | 0.51 |
| 0.80 | 1.40 | 0.62 | 1.75 |
| 0.80 | 1.40 | 0.62 | 1.75 |
| 0.80 | 1.40 | 0.63 | 2.00 |
| #N/A | #N/A | #N/A | #N/A |
| 0.71 | 0.94 | 0.39 | 1.52 |
| #N/A | #N/A | #N/A | #N/A |
| 0.12 | 0.62 | 0.20 | 0.57 |
| 0.12 | 0.62 | 0.20 | 0.57 |
| #N/A | 1.20 | 0.53 | #N/A |
| 0.77 | 1.86 | 0.80 | 1.39 |
| 0.77 | 1.86 | 0.80 | 1.39 |
| 0.30 | 1.09 | 0.47 | 0.82 |
| #N/A | #N/A | #N/A | #N/A |
| 0.56 | 1.31 | 0.58 | 0.87 |
| 0.56 | 1.31 | 0.58 | 0.87 |
| 0.73 | 2.18 | 0.87 | 1.50 |
| 0.69 | 1.76 | 0.77 | 1.40 |
| 0.69 | 1.76 | 0.77 | 1.40 |
| 0.21 | 0.76 | 0.28 | 0.65 |
| 0.34 | 0.85 | 0.34 | 0.67 |
| 0.77 | 1.41 | 0.63 | 0.91 |
| 0.77 | 1.41 | 0.63 | 0.91 |
| 0.86 | 2.29 | 0.90 | 1.64 |
| 0.33 | 0.60 | 0.19 | 0.67 |
| 0.33 | 0.60 | 0.19 | 0.67 |
| #N/A | #N/A | #N/A | #N/A |
| 0.32 | 1.04 | 0.45 | 0.76 |
| 0.71 | 1.52 | 0.67 | 1.68 |
| 0.71 | 1.52 | 0.67 | 1.68 |
| 0.85 | 2.05 | 0.85 | 2.24 |
| 0.85 | 2.05 | 0.85 | 2.24 |
| 0.25 | 0.83 | 0.32 | 0.76 |
| 0.08 | 0.58 | 0.18 | 0.41 |
| 0.08 | 0.58 | 0.18 | 0.41 |



|      |      |      |      |
|------|------|------|------|
| 0.59 | 1.73 | 0.76 | 1.03 |
| 0.86 | 1.86 | 0.80 | 1.31 |
| 0.11 | 0.60 | 0.19 | 0.71 |
| 0.52 | 1.14 | 0.50 | 1.35 |
| 0.60 | 0.77 | 0.29 | 1.43 |
| 0.93 | 1.75 | 0.76 | 2.03 |
| 0.36 | 1.02 | 0.43 | 0.75 |
| 0.07 | 0.44 | 0.10 | 0.41 |
| 0.56 | 1.04 | 0.44 | 1.13 |
| 0.56 | 1.04 | 0.44 | 1.13 |
| 0.44 | #N/A | #N/A | 1.49 |
| #N/A | #N/A | #N/A | #N/A |
| #N/A | 1.31 | 0.59 | 1.11 |
| 0.29 | 1.50 | 0.66 | 1.16 |
| 0.37 | 1.16 | 0.51 | 0.93 |
| 0.29 | 1.50 | 0.66 | 1.16 |
| #N/A | #N/A | #N/A | #N/A |
| 0.00 | 0.21 | 0.01 | 0.15 |
| 0.00 | 0.21 | 0.01 | 0.15 |
| 0.43 | 1.93 | 0.81 | #N/A |
| 0.61 | 1.56 | 0.69 | 1.22 |
| 0.61 | 1.56 | 0.69 | 1.22 |
| 0.82 | 2.40 | 0.88 | 2.21 |
| 0.59 | 1.04 | 0.44 | 0.99 |
| 0.82 | 2.40 | 0.88 | 2.21 |
| 0.59 | 1.04 | 0.44 | 0.99 |
| #N/A | #N/A | #N/A | #N/A |
| 0.80 | 1.95 | 0.81 | 2.19 |
| 0.80 | 1.95 | 0.81 | 2.19 |
| 0.63 | 1.79 | 0.78 | 0.87 |
| 0.63 | 1.79 | 0.78 | 0.87 |
| #N/A | #N/A | #N/A | #N/A |
| 0.28 | 1.58 | 0.70 | 1.08 |
| #N/A | 1.59 | 0.67 | 0.70 |
| 0.53 | 1.23 | 0.54 | 1.71 |
| 0.77 | 1.62 | 0.72 | 1.51 |
| 0.72 | 1.84 | 0.80 | 1.37 |
| 0.28 | 0.69 | 0.24 | 0.87 |
| 0.26 | 0.39 | 0.07 | 0.89 |
| 0.26 | 0.39 | 0.07 | 0.89 |
| 0.99 | 4.09 | 1.00 | 3.45 |
| 0.99 | 4.09 | 1.00 | 3.45 |
| 0.88 | 2.73 | 0.95 | 2.88 |
| #N/A | 1.47 | 0.61 | #N/A |
| 0.95 | 2.87 | 0.96 | 1.79 |
| 0.85 | 2.46 | 0.71 | #N/A |
| 0.45 | 1.43 | 0.64 | 0.94 |
| 0.82 | 0.92 | 0.38 | #N/A |
| #N/A | 2.10 | 0.81 | #N/A |
| #N/A | 2.10 | 0.81 | #N/A |
| #N/A | 0.99 | 0.40 | 1.35 |

|      |      |      |      |
|------|------|------|------|
| 1.00 | 2.81 | 0.96 | 2.30 |
| 1.00 | 2.81 | 0.96 | 2.30 |
| 0.94 | 2.81 | 0.96 | 2.14 |
| 0.97 | 4.01 | 1.00 | 2.20 |
| 0.97 | 4.01 | 1.00 | 2.20 |
| 0.78 | #N/A | #N/A | 0.57 |
| 0.17 | 0.99 | 0.41 | #N/A |
| 0.78 | #N/A | #N/A | 0.57 |
| 0.76 | 0.84 | 0.33 | 1.46 |
| 0.62 | 0.86 | 0.34 | 1.19 |
| 0.70 | 1.47 | 0.65 | 1.79 |
| 0.59 | 0.93 | 0.38 | 1.46 |
| 0.59 | 0.93 | 0.38 | 1.46 |
| 0.13 | 0.48 | 0.11 | 0.66 |
| 0.78 | 1.56 | 0.70 | 1.89 |
| #N/A | #N/A | #N/A | #N/A |
| 0.74 | 1.10 | 0.47 | 1.54 |
| #N/A | #N/A | #N/A | #N/A |
| #N/A | #N/A | #N/A | #N/A |
| 0.75 | 2.41 | 0.92 | 1.36 |
| 0.66 | 1.75 | 0.75 | 1.12 |
| 0.66 | 1.75 | 0.75 | 1.12 |
| 0.69 | 2.19 | 0.76 | #N/A |
| 0.99 | 2.81 | 0.92 | 2.18 |
| 0.75 | 2.12 | 0.73 | #N/A |
| 0.75 | 1.56 | 0.70 | 1.05 |
| 0.09 | 0.35 | 0.06 | #N/A |
| 0.63 | 1.51 | 0.67 | 1.11 |
| 0.63 | 1.51 | 0.67 | 1.11 |
| 0.52 | 2.21 | 0.89 | 1.00 |
| #N/A | 1.55 | 0.69 | 1.26 |
| #N/A | 0.97 | 0.41 | #N/A |
| 0.46 | 0.65 | 0.22 | 0.79 |
| 0.15 | #N/A | #N/A | #N/A |
| 0.64 | #N/A | #N/A | #N/A |
| 0.64 | #N/A | #N/A | #N/A |
| 0.00 | #N/A | #N/A | 0.09 |
| 0.41 | 1.36 | 0.61 | 1.25 |
| 0.41 | 1.36 | 0.61 | 1.25 |
| 0.69 | 1.35 | 0.60 | 2.09 |
| 0.67 | 0.87 | 0.34 | 1.55 |
| 0.67 | 0.87 | 0.34 | 1.55 |
| 0.85 | 1.68 | 0.75 | 1.49 |
| 0.83 | 2.10 | 0.85 | 2.54 |
| 0.58 | 0.94 | 0.39 | 1.07 |
| 0.58 | 0.94 | 0.39 | 1.07 |
| #N/A | 1.10 | 0.44 | #N/A |
| 0.07 | 0.39 | 0.07 | 0.22 |
| 0.02 | 0.47 | 0.11 | 0.17 |
| 0.47 | 1.30 | 0.55 | 1.37 |
| 0.16 | 0.87 | 0.35 | #N/A |

|      |      |      |      |
|------|------|------|------|
| 0.16 | 0.87 | 0.35 | #N/A |
| 0.49 | 1.64 | 0.73 | 0.81 |
| 0.49 | 1.64 | 0.73 | 0.81 |
| 0.21 | 1.43 | 0.64 | 0.49 |
| 0.21 | 1.43 | 0.64 | 0.49 |
| 0.58 | 1.36 | 0.60 | 1.41 |
| 0.69 | 1.19 | 0.52 | 1.60 |
| 0.37 | 1.06 | 0.45 | 0.77 |
| 0.35 | 0.96 | 0.40 | 0.95 |
| 0.95 | 3.21 | 0.91 | 2.83 |
| 0.35 | 0.96 | 0.40 | 0.95 |
| 0.95 | 3.21 | 0.91 | 2.83 |
| 0.17 | 0.48 | 0.12 | 0.58 |
| 0.83 | 2.27 | 0.87 | #N/A |
| 0.83 | 2.27 | 0.87 | #N/A |
| 0.49 | 1.93 | 0.79 | 1.15 |
| 0.11 | 0.79 | 0.30 | 0.37 |
| 0.50 | #N/A | #N/A | #N/A |
| 0.98 | 3.29 | 0.98 | 2.23 |
| 0.98 | 3.29 | 0.98 | 2.23 |
| 0.93 | 2.49 | 0.91 | 2.28 |
| 0.93 | 2.49 | 0.91 | 2.28 |
| #N/A | #N/A | #N/A | 0.09 |
| #N/A | #N/A | #N/A | 0.09 |
| 0.93 | 2.98 | 0.97 | 2.47 |
| 1.00 | #N/A | #N/A | #N/A |
| 1.00 | #N/A | #N/A | #N/A |
| 0.52 | 1.36 | 0.61 | 1.44 |
| 0.79 | 1.92 | 0.82 | 1.48 |
| 0.67 | 1.43 | 0.64 | 1.56 |
| 0.60 | 1.34 | 0.60 | 1.41 |
| 0.11 | 0.42 | 0.08 | 0.58 |
| 0.66 | 0.99 | 0.42 | 1.09 |
| 0.66 | 0.99 | 0.42 | 1.09 |
| 0.55 | 1.73 | 0.76 | 1.64 |
| 0.80 | 1.35 | 0.60 | 1.26 |
| 0.49 | 1.29 | 0.58 | 1.01 |
| 0.24 | 1.05 | 0.45 | 0.79 |
| 0.60 | 1.34 | 0.60 | 1.01 |
| 0.60 | 1.34 | 0.60 | 1.01 |
| #N/A | #N/A | #N/A | #N/A |
| 0.60 | 1.24 | 0.55 | 1.40 |
| 0.33 | 0.70 | 0.24 | 0.45 |
| #N/A | #N/A | #N/A | #N/A |
| 0.55 | 1.46 | 0.66 | 1.25 |
| 0.28 | 0.82 | 0.32 | 1.26 |
| 0.85 | 2.27 | 0.89 | 1.53 |
| 0.33 | 1.27 | 0.56 | 1.16 |
| 0.59 | 0.86 | 0.34 | 1.31 |
| 0.27 | 0.48 | 0.12 | 0.99 |
| 0.55 | 0.96 | 0.40 | 1.21 |

|      |      |      |      |
|------|------|------|------|
| 0.30 | 0.94 | 0.39 | 0.79 |
| #N/A | #N/A | #N/A | #N/A |
| 0.83 | 1.45 | 0.65 | 1.34 |
| 0.75 | 1.43 | 0.64 | 1.98 |
| 0.75 | 1.43 | 0.64 | 1.98 |
| 0.94 | 1.54 | 0.69 | 2.44 |
| 0.94 | 1.54 | 0.69 | 2.44 |
| 0.82 | 2.07 | 0.85 | 1.59 |
| 0.82 | 2.07 | 0.85 | 1.59 |
| 0.53 | 0.84 | 0.33 | 1.43 |
| 0.57 | 1.75 | 0.77 | 1.31 |
| 0.64 | 0.86 | 0.34 | 1.68 |
| #N/A | 3.10 | 0.96 | #N/A |
| #N/A | #N/A | #N/A | #N/A |
| 0.63 | 1.45 | 0.65 | 1.73 |
| 0.63 | 1.45 | 0.65 | 1.73 |
| 0.63 | 1.45 | 0.65 | 1.73 |
| 0.50 | 2.06 | 0.82 | 1.13 |
| 0.28 | 0.64 | 0.21 | 1.15 |
| #N/A | 0.98 | 0.41 | #N/A |
| #N/A | 0.98 | 0.41 | #N/A |
| 0.75 | 1.53 | 0.69 | 2.03 |
| 0.20 | 0.65 | 0.22 | 0.68 |
| 0.10 | 0.48 | 0.12 | 0.61 |
| 0.61 | 1.66 | 0.67 | 0.80 |
| 0.37 | 1.14 | 0.49 | 1.35 |
| 0.92 | 1.79 | 0.75 | 2.04 |
| 0.92 | 1.79 | 0.75 | 2.04 |
| 0.58 | 1.09 | 0.47 | 1.10 |
| 0.78 | 1.82 | 0.79 | 1.34 |
| 0.78 | 1.82 | 0.79 | 1.34 |
| 0.34 | 1.00 | 0.42 | 0.85 |
| 0.15 | #N/A | #N/A | 0.43 |
| 0.47 | 0.91 | 0.37 | 1.08 |
| 0.33 | 0.85 | 0.34 | 0.76 |
| 0.51 | 1.17 | 0.51 | 1.08 |
| 0.68 | 1.30 | 0.58 | 0.73 |
| 0.31 | 1.34 | 0.59 | 0.80 |
| 0.26 | 1.05 | 0.45 | 0.56 |
| 0.74 | 2.12 | 0.87 | 1.80 |
| 0.05 | 0.47 | 0.11 | 0.43 |
| 0.06 | 0.64 | 0.22 | 0.39 |
| 0.17 | #N/A | #N/A | 0.51 |
| 0.53 | 0.55 | 0.16 | 1.68 |
| 0.53 | 0.55 | 0.16 | 1.68 |
| 0.47 | #N/A | #N/A | 1.10 |
| 0.53 | 0.55 | 0.16 | 1.68 |
| 0.65 | 1.62 | 0.72 | 1.24 |
| 0.65 | 1.62 | 0.72 | 1.24 |
| #N/A | #N/A | #N/A | #N/A |
| 0.44 | 0.75 | 0.28 | #N/A |

|      |      |      |      |
|------|------|------|------|
| 0.57 | 1.34 | 0.60 | 0.98 |
| 0.57 | 1.34 | 0.60 | 0.98 |
| #N/A | #N/A | #N/A | #N/A |
| #N/A | #N/A | #N/A | #N/A |
| 0.39 | 0.85 | 0.33 | 0.80 |
| 0.39 | 0.85 | 0.33 | 0.80 |
| #N/A | #N/A | #N/A | #N/A |
| #N/A | #N/A | #N/A | #N/A |
| 0.25 | 0.65 | 0.22 | 0.63 |
| 0.25 | 0.65 | 0.22 | 0.63 |
| 0.82 | 1.89 | 0.81 | 1.78 |
| #N/A | #N/A | #N/A | #N/A |
| #N/A | #N/A | #N/A | #N/A |
| 0.95 | 2.51 | 0.92 | 1.61 |
| 0.82 | 2.12 | 0.87 | 1.66 |
| 0.82 | 2.12 | 0.87 | 1.66 |
| 0.84 | 2.16 | 0.87 | 1.92 |
| 0.84 | 2.16 | 0.87 | 1.92 |
| 0.54 | 1.23 | 0.54 | #N/A |
| 0.47 | #N/A | #N/A | #N/A |
| 0.47 | #N/A | #N/A | #N/A |
| 0.40 | 0.51 | 0.19 | #N/A |
| #N/A | #N/A | #N/A | #N/A |
| 0.40 | 0.51 | 0.19 | #N/A |
| #N/A | #N/A | #N/A | #N/A |
| 0.96 | 2.70 | 0.95 | 3.03 |
| 0.81 | 1.15 | 0.51 | 2.08 |
| #N/A | #N/A | #N/A | #N/A |
| #N/A | #N/A | #N/A | #N/A |
| 0.66 | 1.22 | 0.54 | 1.43 |
| 0.82 | 1.97 | 0.83 | 1.51 |
| 0.82 | 1.97 | 0.83 | 1.51 |
| #N/A | #N/A | #N/A | #N/A |
| #N/A | #N/A | #N/A | #N/A |
| #N/A | #N/A | #N/A | #N/A |
| 0.26 | 0.97 | 0.40 | 0.51 |
| 0.26 | 0.97 | 0.40 | 0.51 |
| 0.59 | #N/A | #N/A | 1.15 |
| 0.61 | 1.14 | 0.50 | 1.10 |
| 0.61 | 1.14 | 0.50 | 1.10 |
| 0.30 | 0.77 | 0.29 | 0.72 |
| 0.30 | 0.77 | 0.29 | 0.72 |
| #N/A | #N/A | #N/A | #N/A |
| 0.56 | 1.16 | 0.51 | 0.77 |
| 0.56 | 1.16 | 0.51 | 0.77 |
| 0.56 | 1.16 | 0.51 | 0.77 |
| #N/A | #N/A | #N/A | #N/A |
| #N/A | #N/A | #N/A | #N/A |
| #N/A | #N/A | #N/A | #N/A |
| 0.60 | 1.24 | 0.55 | 1.28 |
| #N/A | #N/A | #N/A | #N/A |

|      |      |      |      |
|------|------|------|------|
| 0.54 | 1.45 | 0.65 | 1.68 |
| #N/A | #N/A | #N/A | #N/A |
| 0.73 | 1.66 | 0.73 | 1.43 |
| #N/A | #N/A | #N/A | #N/A |
| #N/A | #N/A | #N/A | #N/A |
| 0.86 | 2.50 | 0.93 | 1.84 |
| 0.86 | 2.50 | 0.93 | 1.84 |
| 0.67 | #N/A | #N/A | 1.73 |
| 0.61 | 0.88 | 0.35 | 1.22 |
| 0.61 | 0.88 | 0.35 | 1.22 |
| #N/A | 0.47 | 0.12 | 0.57 |
| #N/A | #N/A | #N/A | #N/A |
| 0.95 | 2.60 | 0.94 | 2.45 |
| #N/A | #N/A | #N/A | #N/A |
| #N/A | #N/A | #N/A | #N/A |
| 0.60 | 1.19 | 0.52 | 1.10 |
| 0.60 | 1.19 | 0.52 | 1.10 |
| 0.37 | 0.90 | 0.36 | 0.88 |
| 0.84 | 2.53 | 0.94 | 2.23 |
| 0.93 | 2.26 | 0.90 | 2.59 |
| 0.86 | 1.52 | 0.68 | 2.11 |
| 0.86 | 1.52 | 0.68 | 2.11 |
| 0.55 | 0.96 | 0.40 | 1.09 |
| 0.29 | 0.40 | 0.07 | 0.87 |
| 0.21 | 0.51 | 0.14 | 0.50 |
| 0.86 | 0.42 | 0.10 | 1.56 |
| 0.52 | 1.10 | 0.47 | 0.86 |
| 0.66 | 1.51 | 0.68 | 1.76 |
| 0.19 | 0.42 | 0.08 | 0.35 |
| 0.66 | 1.51 | 0.68 | 1.76 |
| 0.82 | 1.96 | 0.83 | 2.08 |
| 0.82 | 1.96 | 0.83 | 2.08 |
| 0.77 | 2.30 | 0.90 | 1.55 |
| 0.63 | 2.29 | 0.90 | 1.09 |
| #N/A | 1.35 | 0.61 | 1.11 |
| 0.63 | 2.29 | 0.90 | 1.09 |
| #N/A | 1.35 | 0.61 | 1.11 |
| 0.95 | 2.75 | 0.96 | 2.66 |
| 0.96 | 3.14 | 0.98 | 2.05 |
| 0.96 | 3.14 | 0.98 | 2.05 |
| 0.73 | 1.32 | 0.59 | 1.94 |
| 0.35 | 0.74 | 0.27 | 1.18 |
| 0.02 | 0.24 | 0.02 | 0.37 |
| #N/A | 1.22 | 0.54 | #N/A |
| 0.73 | 1.68 | 0.74 | 1.34 |
| 0.48 | 1.53 | 0.68 | 1.46 |
| 0.63 | 1.39 | 0.62 | 2.33 |
| 0.63 | 1.39 | 0.62 | 2.33 |
| 0.94 | 2.54 | 0.94 | 2.24 |
| 0.94 | 2.54 | 0.94 | 2.24 |
| 0.10 | 0.44 | 0.10 | 0.51 |

|      |      |      |      |
|------|------|------|------|
| 0.79 | 1.50 | 0.67 | 1.90 |
| 0.79 | 1.50 | 0.67 | 1.90 |
| 0.81 | 3.06 | 0.98 | 1.61 |
| 0.81 | 3.06 | 0.98 | 1.61 |
| 0.50 | 1.62 | 0.72 | 0.85 |
| 0.42 | 1.23 | 0.53 | 0.42 |
| 0.42 | 1.23 | 0.53 | 0.42 |
| 0.92 | 2.24 | 0.89 | 2.66 |
| 0.42 | 1.23 | 0.53 | 0.42 |
| 0.92 | 2.24 | 0.89 | 2.66 |
| 0.92 | 2.24 | 0.89 | 2.66 |
| 0.32 | 0.84 | 0.33 | 0.60 |
| 0.90 | 1.40 | 0.63 | 1.60 |
| 0.81 | 1.52 | 0.68 | 1.52 |
| 0.81 | 1.52 | 0.68 | 1.52 |
| #N/A | #N/A | #N/A | #N/A |
| 0.28 | 0.32 | 0.04 | 0.95 |
| 0.86 | 1.75 | 0.77 | 1.61 |
| 0.80 | 1.29 | 0.57 | 1.78 |
| 0.80 | 1.29 | 0.57 | 1.78 |
| #N/A | #N/A | #N/A | #N/A |
| #N/A | #N/A | #N/A | #N/A |
| #N/A | #N/A | #N/A | #N/A |
| 0.92 | 1.48 | 0.67 | 2.68 |
| 0.92 | 1.48 | 0.67 | 2.68 |
| 0.30 | 0.91 | 0.37 | 0.80 |
| 0.49 | 1.33 | 0.60 | 1.00 |
| 0.56 | 1.45 | 0.65 | 1.58 |
| 0.64 | 1.55 | 0.68 | 1.46 |
| 0.74 | 1.66 | 0.72 | 1.32 |
| 0.81 | 1.69 | 0.75 | 2.11 |
| #N/A | #N/A | #N/A | #N/A |
| 0.99 | 3.43 | 0.99 | 2.79 |
| 0.99 | 3.43 | 0.99 | 2.79 |
| 0.99 | 3.92 | 0.94 | 2.36 |
| 0.99 | 3.92 | 0.94 | 2.36 |
| 0.31 | 1.05 | 0.45 | #N/A |
| 0.31 | 1.05 | 0.45 | #N/A |
| 0.31 | 1.05 | 0.45 | #N/A |
| 0.54 | 1.03 | 0.43 | #N/A |
| 0.54 | 1.03 | 0.43 | #N/A |
| 0.54 | 1.03 | 0.43 | #N/A |
| 0.54 | 1.03 | 0.43 | #N/A |
| 0.83 | 2.86 | 0.97 | #N/A |
| 0.83 | 2.86 | 0.97 | #N/A |
| 0.97 | 1.56 | 0.70 | 2.14 |
| 0.97 | 1.56 | 0.70 | 2.14 |
| 0.67 | 1.66 | 0.73 | 1.48 |
| 0.67 | 1.66 | 0.73 | 1.48 |
| 0.36 | 0.87 | 0.35 | 0.68 |
| 0.36 | 0.87 | 0.35 | 0.68 |

|      |      |      |      |
|------|------|------|------|
| 0.85 | 2.27 | 0.88 | 1.74 |
| #N/A | 0.56 | 0.17 | 0.74 |
| 0.40 | 0.85 | 0.34 | 1.11 |
| 0.92 | 2.63 | 0.95 | #N/A |
| 0.92 | 2.63 | 0.95 | #N/A |
| 0.11 | 0.35 | 0.06 | 0.22 |
| #N/A | 0.86 | 0.34 | 1.60 |
| #N/A | 0.86 | 0.34 | 1.60 |
| 0.42 | 0.69 | 0.24 | 0.89 |
| 0.42 | 0.69 | 0.24 | 0.89 |
| 0.50 | 1.23 | 0.54 | 0.96 |
| 0.94 | 3.65 | 0.99 | 1.92 |
| 0.94 | 3.65 | 0.99 | 1.92 |
| 0.55 | 1.58 | 0.70 | 1.67 |
| 0.55 | 1.58 | 0.70 | 1.67 |
| 0.85 | 1.91 | 0.81 | 2.87 |
| 0.85 | 1.91 | 0.81 | 2.87 |
| 0.16 | 0.43 | 0.09 | 0.42 |
| 0.92 | 1.91 | 0.82 | 2.48 |
| 0.76 | 1.49 | 0.66 | 2.62 |
| 0.51 | 1.55 | 0.70 | 1.38 |
| 0.01 | 0.23 | 0.01 | 0.22 |
| 0.01 | 0.23 | 0.01 | 0.22 |
| 0.14 | 0.85 | 0.34 | 0.50 |
| 0.95 | 3.11 | 0.98 | 2.68 |
| 0.67 | #N/A | #N/A | #N/A |
| 0.59 | 1.45 | 0.65 | 0.86 |
| 0.59 | 1.45 | 0.65 | 0.86 |
| 0.47 | 0.73 | 0.26 | 1.28 |
| 0.18 | 0.54 | 0.15 | 0.53 |
| 0.92 | 2.49 | 0.92 | 2.71 |
| 0.92 | 2.49 | 0.92 | 2.71 |
| 0.65 | 2.07 | 0.86 | 2.02 |
| 0.35 | 1.09 | 0.47 | 0.92 |
| 0.35 | 1.09 | 0.47 | 0.92 |
| 0.35 | 1.09 | 0.47 | 0.92 |
| 0.54 | 1.58 | 0.70 | #N/A |
| 0.89 | 1.83 | 0.79 | 1.50 |
| #N/A | #N/A | #N/A | #N/A |
| #N/A | #N/A | #N/A | #N/A |
| #N/A | 2.18 | 0.62 | #N/A |
| 0.76 | 2.12 | 0.86 | #N/A |
| 0.76 | 2.12 | 0.86 | #N/A |
| 0.65 | 1.49 | 0.67 | 1.67 |
| 0.65 | 1.49 | 0.67 | 1.67 |
| 0.43 | 1.41 | 0.63 | 1.17 |
| #N/A | #N/A | #N/A | #N/A |
| #N/A | #N/A | #N/A | #N/A |
| 0.86 | 1.87 | 0.80 | 1.71 |
| 0.86 | 1.87 | 0.80 | 1.71 |
| 0.84 | #N/A | #N/A | 1.85 |



|      |      |      |      |
|------|------|------|------|
| 0.63 | 2.29 | 0.90 | 1.96 |
| 0.84 | #N/A | #N/A | 1.85 |
| 0.75 | 1.81 | 0.76 | 1.63 |
| 0.43 | 0.57 | 0.17 | 0.93 |
| 0.64 | 1.74 | 0.77 | 1.01 |
| 0.64 | 1.74 | 0.77 | 1.01 |
| 0.56 | 1.82 | 0.79 | 1.34 |
| 0.16 | 0.96 | 0.40 | 0.44 |
| 0.67 | 3.03 | 0.97 | 1.44 |
| 0.30 | 0.53 | 0.15 | 0.76 |
| 0.30 | 0.53 | 0.15 | 0.76 |
| 0.79 | 2.29 | 0.86 | 1.89 |
| 0.79 | 2.29 | 0.86 | 1.89 |
| 0.21 | 0.89 | 0.36 | 0.66 |
| 0.21 | 0.89 | 0.36 | 0.66 |
| 0.77 | 1.84 | 0.80 | 1.70 |
| 0.44 | 1.16 | 0.51 | 1.01 |
| 0.58 | 1.69 | 0.75 | 1.38 |
| 0.44 | 1.16 | 0.51 | 1.01 |
| 0.58 | 1.69 | 0.75 | 1.38 |
| 0.76 | 1.82 | 0.79 | 1.72 |
| 0.95 | 1.77 | 0.78 | 1.97 |
| #N/A | #N/A | #N/A | #N/A |
| 0.66 | 1.18 | 0.52 | 0.96 |
| 0.82 | 0.74 | 0.27 | #N/A |
| 0.82 | 0.74 | 0.27 | #N/A |
| 0.88 | 1.77 | 0.76 | 1.73 |
| 0.88 | 1.77 | 0.76 | 1.73 |
| 0.15 | 0.63 | 0.21 | 0.66 |
| 0.15 | 0.63 | 0.21 | 0.66 |
| 0.55 | #N/A | #N/A | 1.07 |
| 0.40 | 1.51 | 0.68 | 0.70 |
| 0.62 | 1.34 | 0.59 | 1.18 |
| 0.61 | 1.87 | 0.81 | #N/A |
| 0.61 | 1.87 | 0.81 | #N/A |
| 0.13 | 0.52 | 0.14 | 1.12 |
| 0.13 | 0.52 | 0.14 | 1.12 |
| 0.52 | 1.28 | 0.57 | #N/A |
| 0.12 | 0.42 | 0.08 | 0.45 |
| 0.12 | 0.42 | 0.08 | 0.45 |
| 0.79 | 3.22 | 0.98 | 1.76 |
| 0.50 | 1.39 | 0.62 | 0.94 |
| 0.79 | 3.22 | 0.98 | 1.76 |
| 0.12 | 0.63 | 0.21 | 0.35 |
| 0.50 | 1.96 | 0.83 | 0.93 |
| #N/A | #N/A | #N/A | #N/A |
| 0.57 | 1.51 | 0.68 | 1.34 |
| 0.57 | 1.51 | 0.68 | 1.34 |
| 0.53 | 1.80 | 0.77 | 1.56 |
| 0.04 | 0.44 | 0.09 | 0.25 |
| #N/A | #N/A | #N/A | 0.35 |

|      |      |      |      |
|------|------|------|------|
| #N/A | #N/A | #N/A | 0.35 |
| 0.21 | 1.04 | 0.44 | 0.75 |
| 0.57 | 1.14 | 0.49 | 1.21 |
| 0.03 | 0.15 | 0.01 | 0.26 |
| 0.86 | 2.83 | 0.97 | 1.47 |
| 0.86 | 2.83 | 0.97 | 1.47 |
| 0.81 | 2.12 | 0.87 | 1.93 |
| 0.81 | 2.12 | 0.87 | 1.93 |
| 0.87 | #N/A | #N/A | 1.58 |
| 0.85 | #N/A | #N/A | 2.39 |
| 0.73 | 2.07 | 0.86 | 1.55 |
| 0.85 | #N/A | #N/A | 2.39 |
| 0.73 | 2.07 | 0.86 | 1.55 |
| 0.44 | 1.12 | 0.49 | 0.82 |
| 0.44 | 1.12 | 0.49 | 0.82 |
| 0.75 | #N/A | #N/A | #N/A |
| 0.92 | 2.78 | 0.96 | 2.41 |
| 0.75 | 1.51 | 0.68 | 1.84 |
| 0.92 | 2.78 | 0.96 | 2.41 |
| #N/A | #N/A | #N/A | #N/A |
| 0.75 | 1.51 | 0.68 | 1.84 |
| 0.83 | 2.23 | 0.89 | 1.61 |
| 0.83 | 2.23 | 0.89 | 1.61 |
| 0.62 | 1.33 | 0.59 | 1.11 |
| 0.21 | 0.47 | 0.11 | 0.45 |
| 0.33 | 1.07 | 0.46 | 0.53 |
| 0.41 | 1.38 | 0.62 | 1.08 |
| 0.41 | 1.38 | 0.62 | 1.08 |
| 0.03 | 0.43 | 0.09 | 0.20 |
| 0.36 | 0.71 | 0.25 | 1.24 |
| #N/A | #N/A | #N/A | #N/A |
| #N/A | #N/A | #N/A | #N/A |
| #N/A | #N/A | #N/A | #N/A |
| 0.50 | 0.77 | 0.29 | 1.45 |
| 0.16 | 0.35 | 0.05 | 0.43 |
| 0.16 | 0.35 | 0.05 | 0.43 |
| 0.74 | 1.65 | 0.74 | #N/A |
| 0.58 | 1.46 | 0.65 | 1.36 |
| 0.58 | 1.46 | 0.65 | 1.36 |
| 0.78 | 2.12 | 0.86 | 2.34 |
| 0.28 | 0.88 | 0.35 | 0.71 |
| 0.14 | 0.57 | 0.17 | 0.49 |
| 0.23 | 0.52 | 0.14 | 0.82 |
| 0.94 | 1.89 | 0.81 | 2.73 |
| 0.94 | 1.89 | 0.81 | 2.73 |
| 0.38 | 2.03 | 0.84 | 1.05 |
| 0.41 | 1.13 | 0.49 | 0.63 |
| 0.33 | 0.73 | 0.27 | 0.92 |
| #N/A | #N/A | #N/A | #N/A |
| 0.52 | 0.80 | 0.31 | #N/A |
| 0.52 | 0.80 | 0.31 | #N/A |

|      |      |      |      |
|------|------|------|------|
| 0.43 | 0.96 | 0.40 | 0.89 |
| 0.52 | 0.80 | 0.31 | #N/A |
| 0.43 | 0.96 | 0.40 | 0.89 |
| 0.39 | 1.44 | 0.64 | 0.66 |
| 0.07 | 0.57 | 0.17 | 0.53 |
| 0.45 | 0.88 | 0.35 | 1.28 |
| 0.76 | 1.75 | 0.77 | 1.75 |
| 0.96 | 3.21 | 0.98 | 2.40 |
| 0.96 | 3.21 | 0.98 | 2.40 |
| 0.65 | 0.35 | 0.05 | 1.45 |
| #N/A | 0.53 | 0.16 | #N/A |
| #N/A | 0.53 | 0.16 | #N/A |
| 0.46 | 0.52 | 0.14 | 1.14 |
| 0.34 | 1.47 | 0.65 | 0.80 |
| #N/A | #N/A | #N/A | #N/A |
| #N/A | #N/A | #N/A | #N/A |
| 0.51 | 1.26 | 0.56 | 1.49 |
| 0.84 | 1.98 | 0.83 | 2.01 |
| 0.19 | 0.66 | 0.22 | 0.60 |
| 0.19 | 0.66 | 0.22 | 0.60 |
| 0.61 | 1.35 | 0.60 | 1.40 |
| 0.50 | 1.21 | 0.53 | 1.14 |
| 0.58 | 1.24 | 0.55 | 1.09 |
| 0.51 | 1.81 | 0.78 | 0.99 |
| 0.51 | 1.81 | 0.78 | 0.99 |
| #N/A | #N/A | #N/A | #N/A |
| 0.72 | 2.16 | 0.88 | 1.87 |
| 0.53 | 1.23 | 0.54 | 1.08 |
| 0.72 | 2.16 | 0.88 | 1.87 |
| 0.34 | 0.83 | 0.32 | 0.76 |
| 0.89 | 5.10 | 0.97 | 1.88 |
| 0.89 | 5.10 | 0.97 | 1.88 |
| 0.38 | 0.55 | 0.16 | 0.88 |
| 0.38 | 0.55 | 0.16 | 0.88 |
| 0.65 | 1.24 | 0.55 | 1.72 |
| 0.93 | 1.84 | 0.80 | 2.58 |
| 0.93 | 1.84 | 0.80 | 2.58 |
| 0.76 | 2.07 | 0.86 | 1.22 |
| 0.76 | 2.07 | 0.86 | 1.22 |
| 0.97 | 2.62 | 0.95 | 2.18 |
| 0.97 | 2.62 | 0.95 | 2.18 |
| 0.63 | 1.84 | 0.79 | 1.42 |
| 0.63 | 1.84 | 0.79 | 1.42 |
| 0.46 | 0.68 | 0.24 | 0.93 |
| 0.46 | 0.68 | 0.24 | 0.93 |
| #N/A | #N/A | #N/A | #N/A |
| #N/A | #N/A | #N/A | #N/A |
| 0.70 | 1.68 | 0.75 | 1.21 |
| 0.70 | 1.68 | 0.75 | 1.21 |
| 0.80 | 2.29 | 0.88 | #N/A |
| #N/A | #N/A | #N/A | #N/A |

|      |      |      |      |
|------|------|------|------|
| 0.75 | 1.69 | 0.74 | 1.65 |
| 0.75 | 1.69 | 0.74 | 1.65 |
| 0.38 | 0.69 | 0.24 | 0.77 |
| 0.38 | 0.69 | 0.24 | 0.77 |
| 0.03 | 0.26 | 0.04 | #N/A |
| 0.43 | 1.36 | 0.61 | 1.21 |
| 0.74 | 1.47 | 0.65 | 1.93 |
| 0.80 | 2.28 | 0.90 | 1.43 |
| 0.96 | 3.26 | 0.98 | 2.33 |
| 0.96 | 3.26 | 0.98 | 2.33 |
| #N/A | #N/A | #N/A | #N/A |
| #N/A | #N/A | #N/A | #N/A |
| #N/A | #N/A | #N/A | #N/A |
| #N/A | #N/A | #N/A | #N/A |
| #N/A | #N/A | #N/A | #N/A |
| #N/A | #N/A | #N/A | #N/A |
| 0.77 | 1.87 | 0.81 | 1.30 |
| 0.92 | 3.05 | 0.98 | 1.78 |
| 0.92 | 3.05 | 0.98 | 1.78 |
| 0.74 | 1.64 | 0.72 | 1.25 |
| 0.30 | 1.03 | 0.44 | 0.69 |
| #N/A | 1.19 | 0.51 | 0.68 |
| #N/A | #N/A | #N/A | #N/A |
| 0.82 | 1.88 | 0.81 | 1.84 |
| 0.82 | 1.88 | 0.81 | 1.84 |
| 0.62 | 1.90 | 0.81 | 1.22 |
| 0.10 | 0.61 | 0.19 | 0.47 |
| 0.10 | 0.61 | 0.19 | 0.47 |
| 0.28 | 0.67 | 0.23 | 0.60 |
| 0.88 | 1.82 | 0.79 | #N/A |
| 0.90 | 1.69 | 0.75 | 1.25 |
| 0.90 | 1.69 | 0.75 | 1.25 |
| #N/A | #N/A | #N/A | #N/A |
| #N/A | #N/A | #N/A | #N/A |
| 0.02 | 0.22 | 0.01 | 0.20 |
| 0.04 | 0.27 | 0.02 | 0.28 |
| 0.03 | 0.43 | 0.09 | 0.33 |
| 0.61 | 1.48 | 0.67 | 1.48 |
| 0.56 | 1.12 | 0.48 | 1.44 |
| 0.03 | 0.33 | 0.04 | 1.11 |
| 0.12 | 0.66 | 0.22 | 0.74 |
| 0.61 | 2.11 | 0.86 | 1.45 |
| 0.61 | 2.11 | 0.86 | 1.45 |
| 0.72 | 1.32 | 0.59 | 1.40 |
| 0.21 | 0.75 | 0.28 | 0.87 |
| 0.21 | 0.75 | 0.28 | 0.87 |
| #N/A | 1.51 | 0.66 | #N/A |
| 0.54 | 2.24 | 0.89 | 0.76 |
| 0.52 | 1.16 | 0.50 | 1.09 |
| 0.52 | 1.16 | 0.50 | 1.09 |
| #N/A | #N/A | #N/A | #N/A |

|      |      |      |      |
|------|------|------|------|
| 0.52 | 1.16 | 0.50 | 1.09 |
| 0.37 | 0.98 | 0.41 | 0.80 |
| 0.12 | 0.68 | 0.24 | 0.59 |
| 0.86 | 2.09 | 0.86 | 2.45 |
| 0.86 | 2.09 | 0.86 | 2.45 |
| #N/A | #N/A | #N/A | #N/A |
| 0.15 | #N/A | #N/A | #N/A |
| 0.15 | #N/A | #N/A | #N/A |
| 0.08 | 0.51 | 0.13 | 0.40 |
| 0.08 | 0.51 | 0.13 | 0.40 |
| 0.60 | 1.63 | 0.72 | 1.11 |
| 0.64 | 1.49 | 0.66 | 1.36 |
| 0.75 | 1.94 | 0.82 | 2.32 |
| 0.75 | 1.94 | 0.82 | 2.32 |
| 0.81 | 0.85 | 0.33 | 1.48 |
| #N/A | #N/A | #N/A | #N/A |
| #N/A | #N/A | #N/A | #N/A |
| #N/A | #N/A | #N/A | #N/A |
| #N/A | 1.15 | 0.50 | 1.31 |
| 0.41 | 1.33 | 0.59 | #N/A |
| 0.66 | 1.74 | 0.76 | 1.08 |
| 0.66 | 1.74 | 0.76 | 1.08 |
| 0.29 | 0.94 | 0.39 | 0.89 |
| 0.87 | 2.17 | 0.87 | 1.70 |
| 0.66 | 1.67 | 0.74 | 1.74 |
| 0.66 | 1.67 | 0.74 | 1.74 |
| 0.48 | 1.70 | 0.75 | 1.33 |
| 0.87 | 2.06 | 0.77 | 0.79 |
| 0.84 | 2.37 | 0.86 | 2.04 |
| 0.87 | 2.06 | 0.77 | 0.79 |
| 0.84 | 2.37 | 0.86 | 2.04 |
| 0.74 | 1.30 | 0.58 | 1.78 |
| 0.74 | 1.30 | 0.58 | 1.78 |
| 0.39 | 0.86 | 0.34 | 0.95 |
| #N/A | #N/A | #N/A | #N/A |
| 0.62 | 1.63 | 0.73 | 1.51 |
| 0.62 | 1.63 | 0.73 | 1.51 |
| 0.62 | 1.63 | 0.73 | 1.51 |
| 0.45 | 0.96 | 0.40 | 0.74 |
| 0.04 | 0.33 | 0.04 | 0.48 |
| 0.39 | 0.89 | 0.36 | #N/A |
| #N/A | #N/A | #N/A | #N/A |
| 0.89 | 2.18 | 0.88 | 1.90 |
| 0.89 | 2.18 | 0.88 | 1.90 |
| #N/A | #N/A | #N/A | #N/A |
| #N/A | #N/A | #N/A | #N/A |
| 0.94 | 1.84 | 0.80 | 3.25 |
| 0.94 | 1.84 | 0.80 | 3.25 |
| 0.69 | 1.68 | 0.74 | 1.60 |
| 0.69 | 1.68 | 0.74 | 1.60 |
| 0.85 | 2.08 | 0.86 | #N/A |

|      |      |      |      |
|------|------|------|------|
| 0.80 | 2.59 | 0.89 | #N/A |
| 0.61 | 1.05 | 0.43 | #N/A |
| 0.77 | 2.46 | 0.91 | 1.15 |
| 0.26 | 1.22 | 0.54 | 0.52 |
| 0.26 | 1.22 | 0.54 | 0.52 |
| 0.69 | 1.90 | 0.81 | 1.40 |
| #N/A | #N/A | #N/A | #N/A |
| #N/A | 0.71 | 0.26 | #N/A |
| 0.10 | 0.63 | 0.21 | 0.43 |
| 0.57 | 1.42 | 0.64 | 1.26 |
| 0.57 | 1.42 | 0.64 | 1.26 |
| 0.39 | 1.17 | 0.51 | 0.86 |
| 0.13 | 0.27 | 0.02 | 0.94 |
| 0.78 | 1.10 | 0.47 | 1.26 |
| 0.13 | 0.27 | 0.02 | 0.94 |
| 0.78 | 1.10 | 0.47 | 1.26 |
| 0.62 | 1.37 | 0.62 | 1.11 |
| 0.90 | 2.12 | 0.87 | 2.10 |
| 0.29 | 1.33 | 0.59 | 0.74 |
| #N/A | #N/A | #N/A | #N/A |
| #N/A | #N/A | #N/A | #N/A |
| 0.32 | 1.10 | 0.48 | 0.81 |
| 0.32 | 1.10 | 0.48 | 0.81 |
| 0.39 | 1.49 | 0.67 | 0.93 |
| 0.69 | 1.92 | 0.81 | 1.84 |
| 0.69 | 1.92 | 0.81 | 1.84 |
| 0.67 | 1.87 | 0.80 | 1.65 |
| 0.98 | 2.62 | 0.94 | 2.39 |
| 0.98 | 2.62 | 0.94 | 2.39 |
| 0.62 | 1.31 | 0.59 | 1.15 |
| 0.62 | 1.31 | 0.59 | 1.15 |
| 0.49 | 0.88 | 0.35 | 1.04 |
| 0.81 | 2.06 | 0.84 | 1.32 |
| 0.14 | 0.76 | 0.28 | 0.78 |
| 0.84 | 2.29 | 0.90 | 1.46 |
| 0.84 | 2.29 | 0.90 | 1.46 |
| 0.85 | 2.11 | 0.87 | 1.79 |
| 0.76 | 2.08 | 0.86 | 1.58 |
| 0.76 | 2.08 | 0.86 | 1.58 |
| 0.82 | 1.67 | 0.74 | 1.59 |
| 0.23 | 0.88 | 0.35 | 0.70 |
| 0.75 | 2.17 | 0.86 | 1.65 |
| 0.85 | 0.86 | 0.34 | #N/A |
| 0.94 | 2.25 | 0.89 | 1.73 |
| 0.94 | 2.25 | 0.89 | 1.73 |
| 0.52 | 1.57 | 0.70 | 2.33 |
| 0.52 | 1.57 | 0.70 | 2.33 |
| 0.53 | 1.10 | 0.48 | 0.93 |
| 0.53 | 1.10 | 0.48 | 0.93 |
| 0.60 | 2.03 | 0.85 | 1.43 |
| 0.82 | 2.40 | 0.92 | 2.22 |

|      |      |      |      |
|------|------|------|------|
| 0.82 | 2.40 | 0.92 | 2.22 |
| 0.90 | 1.49 | 0.65 | 1.88 |
| 0.90 | 1.49 | 0.65 | 1.88 |
| 0.01 | 0.22 | 0.01 | 0.18 |
| 0.49 | 1.08 | 0.47 | #N/A |
| 0.75 | 1.67 | 0.74 | 0.97 |
| #N/A | #N/A | #N/A | #N/A |
| 0.39 | 1.45 | 0.65 | 0.86 |
| #N/A | #N/A | #N/A | #N/A |
| 0.39 | 1.45 | 0.65 | 0.86 |
| 0.62 | 1.37 | 0.61 | 1.29 |
| 0.38 | 0.93 | 0.38 | 0.96 |
| 0.39 | 1.09 | 0.47 | 1.01 |
| 0.33 | 0.92 | 0.38 | #N/A |
| #N/A | #N/A | #N/A | #N/A |
| 0.41 | 0.86 | 0.34 | 0.96 |
| 0.41 | 0.86 | 0.34 | 0.96 |
| 0.19 | 0.64 | 0.21 | 0.53 |
| 0.79 | #N/A | #N/A | 1.85 |
| #N/A | 1.76 | 0.71 | 0.79 |
| 0.86 | 2.65 | 0.94 | 2.18 |
| 0.75 | #N/A | #N/A | 1.54 |
| 0.53 | 1.16 | 0.50 | 1.11 |
| 0.53 | 1.16 | 0.50 | 1.11 |
| #N/A | 0.56 | 0.16 | 0.42 |
| 0.46 | 1.25 | 0.55 | 0.84 |
| 0.09 | 0.79 | 0.30 | 0.55 |
| 0.09 | 0.79 | 0.30 | 0.55 |
| 0.30 | 1.03 | 0.44 | 0.60 |
| 0.75 | 1.19 | 0.52 | 2.04 |
| 0.68 | 1.53 | 0.68 | 1.30 |
| 0.75 | 1.19 | 0.52 | 2.04 |
| 0.68 | 1.53 | 0.68 | 1.30 |
| 0.61 | 1.64 | 0.73 | 1.02 |
| 0.70 | #N/A | #N/A | 1.54 |
| 0.70 | #N/A | #N/A | 1.54 |
| 0.61 | 1.49 | 0.66 | #N/A |
| 0.77 | 1.98 | 0.81 | #N/A |
| 0.77 | 1.98 | 0.81 | #N/A |
| 0.93 | 1.91 | 0.81 | 2.41 |
| 0.93 | 1.91 | 0.81 | 2.41 |
| 0.86 | 2.03 | 0.82 | 2.21 |
| 0.75 | 2.93 | 0.97 | 1.46 |
| 0.75 | 2.93 | 0.97 | 1.46 |
| 0.78 | 1.65 | 0.73 | 1.57 |
| 0.49 | 1.57 | 0.69 | 0.94 |
| 0.08 | 0.87 | 0.34 | 0.32 |
| 0.07 | 0.43 | 0.09 | 0.31 |
| #N/A | #N/A | #N/A | #N/A |
| #N/A | #N/A | #N/A | #N/A |
| 0.93 | 2.13 | 0.87 | 2.10 |

|      |      |      |      |
|------|------|------|------|
| 0.76 | 2.10 | 0.86 | 1.72 |
| 0.76 | #N/A | #N/A | 1.58 |
| 0.76 | #N/A | #N/A | 1.58 |
| 0.84 | 1.71 | 0.75 | 1.56 |
| 0.90 | 1.64 | 0.73 | 2.12 |
| 0.34 | 0.33 | 0.04 | 0.88 |
| 0.09 | 0.70 | 0.25 | 0.46 |
| 0.17 | 0.53 | 0.15 | 0.38 |
| 0.55 | 1.33 | 0.60 | 0.97 |
| 0.55 | 1.33 | 0.60 | 0.97 |
| 0.92 | 2.14 | 0.86 | 1.62 |
| 0.92 | 2.14 | 0.86 | 1.62 |
| 0.44 | 1.22 | 0.54 | 1.03 |
| 0.39 | 0.76 | 0.28 | 0.51 |
| #N/A | #N/A | #N/A | #N/A |
| #N/A | #N/A | #N/A | #N/A |
| 0.71 | #N/A | #N/A | #N/A |
| 0.60 | #N/A | #N/A | 0.96 |
| 0.98 | 2.60 | 0.94 | 2.44 |
| 0.98 | 2.60 | 0.94 | 2.44 |
| 0.77 | 2.19 | 0.87 | 1.35 |
| 0.77 | 2.19 | 0.87 | 1.35 |
| 0.72 | 1.31 | 0.58 | 2.29 |
| 0.51 | 1.41 | 0.63 | 1.43 |
| 0.57 | 1.68 | 0.74 | 1.20 |
| #N/A | #N/A | #N/A | #N/A |
| 0.71 | 1.78 | 0.78 | 1.21 |
| 0.31 | 0.77 | 0.29 | 0.71 |
| 0.71 | 1.78 | 0.78 | 1.21 |
| 0.97 | 2.78 | 0.96 | 2.35 |
| 0.43 | 1.13 | 0.49 | 0.88 |
| 0.43 | 1.13 | 0.49 | 0.88 |
| 0.88 | 1.69 | 0.74 | 1.62 |
| 0.47 | 1.13 | 0.50 | 1.04 |
| 0.63 | 1.53 | 0.69 | 1.30 |
| 0.53 | 0.95 | 0.39 | 1.51 |
| 0.14 | 0.64 | 0.21 | 0.42 |
| 0.74 | 1.50 | 0.66 | 1.97 |
| 0.74 | 1.50 | 0.66 | 1.97 |
| 0.50 | 1.46 | 0.66 | #N/A |
| 0.05 | 0.38 | 0.06 | 0.50 |
| 0.95 | 2.75 | 0.96 | 2.17 |
| 0.37 | 1.13 | 0.49 | 1.04 |
| 0.71 | 1.34 | 0.60 | 1.60 |
| 0.96 | 2.79 | 0.92 | 2.32 |
| 0.75 | 1.01 | 0.43 | #N/A |
| #N/A | #N/A | #N/A | #N/A |
| #N/A | #N/A | #N/A | #N/A |
| 0.32 | 0.89 | 0.36 | 1.06 |
| 0.30 | 0.97 | 0.40 | 0.90 |
| 0.46 | 1.19 | 0.52 | 1.03 |



|      |      |      |      |
|------|------|------|------|
| 0.46 | 1.19 | 0.52 | 1.03 |
| 0.46 | 1.19 | 0.52 | 1.03 |
| 0.46 | 1.19 | 0.52 | 1.03 |
| 0.97 | 3.13 | 0.98 | 2.93 |
| 0.69 | 1.97 | 0.83 | 1.88 |
| 0.69 | 1.97 | 0.83 | 1.88 |
| 0.34 | 0.83 | 0.32 | 0.76 |
| 0.12 | 0.58 | 0.18 | 0.59 |
| 0.77 | 1.66 | 0.73 | #N/A |
| 0.50 | 0.82 | 0.32 | 1.18 |
| 0.62 | #N/A | #N/A | #N/A |
| 0.81 | 1.41 | 0.63 | 1.29 |
| #N/A | 0.56 | 0.17 | 0.76 |
| 0.45 | 1.14 | 0.50 | 1.29 |
| 0.36 | 0.79 | 0.30 | 0.86 |
| #N/A | #N/A | #N/A | #N/A |
| #N/A | #N/A | #N/A | #N/A |
| #N/A | #N/A | #N/A | #N/A |
| 0.76 | 2.07 | 0.86 | 1.66 |
| 0.76 | 2.07 | 0.86 | 1.66 |
| 0.35 | 0.99 | 0.42 | 0.78 |
| #N/A | #N/A | #N/A | #N/A |
| #N/A | #N/A | #N/A | #N/A |
| #N/A | #N/A | #N/A | #N/A |
| 0.85 | 2.57 | 0.94 | 2.03 |
| 0.85 | 2.57 | 0.94 | 2.03 |
| 0.71 | 2.00 | 0.84 | 1.12 |
| 0.37 | 1.56 | 0.68 | 1.21 |
| 0.33 | 1.27 | 0.56 | 0.96 |
| #N/A | #N/A | #N/A | #N/A |
| 0.96 | 2.67 | 0.95 | 2.83 |
| 0.96 | 2.67 | 0.95 | 2.83 |
| #N/A | #N/A | #N/A | #N/A |
| #N/A | #N/A | #N/A | #N/A |
| #N/A | #N/A | #N/A | #N/A |
| #N/A | #N/A | #N/A | #N/A |
| 0.63 | 1.06 | 0.45 | 1.38 |
| 0.63 | 1.06 | 0.45 | 1.38 |
| 0.73 | 1.16 | 0.51 | #N/A |
| #N/A | 1.05 | 0.44 | #N/A |
| 0.83 | 2.15 | 0.86 | 1.48 |
| 0.83 | 2.15 | 0.86 | 1.48 |
| #N/A | #N/A | #N/A | #N/A |
| #N/A | #N/A | #N/A | #N/A |
| 0.81 | 1.65 | 0.73 | 1.15 |
| #N/A | #N/A | #N/A | #N/A |
| #N/A | #N/A | #N/A | #N/A |
| #N/A | #N/A | #N/A | #N/A |
| 0.81 | 1.65 | 0.73 | 1.15 |
| 0.86 | 1.99 | 0.83 | 2.04 |
| 0.86 | 1.99 | 0.83 | 2.04 |

|      |      |      |      |
|------|------|------|------|
| #N/A | #N/A | #N/A | #N/A |
| 0.98 | 2.83 | 0.96 | 2.20 |
| 0.98 | 2.83 | 0.96 | 2.20 |
| #N/A | #N/A | #N/A | #N/A |
| #N/A | 2.04 | 0.85 | 1.59 |
| #N/A | 1.86 | 0.75 | 1.32 |
| #N/A | #N/A | #N/A | #N/A |
| #N/A | 1.86 | 0.75 | 1.32 |
| 0.81 | 1.99 | 0.83 | 2.00 |
| 0.81 | 1.99 | 0.83 | 2.00 |
| #N/A | #N/A | #N/A | #N/A |
| 0.81 | 1.99 | 0.83 | 2.00 |
| 0.47 | 1.18 | 0.51 | #N/A |
| 0.48 | 0.92 | 0.37 | 1.07 |
| #N/A | 1.96 | 0.83 | 2.25 |
| 0.23 | 0.74 | 0.27 | 0.59 |
| #N/A | #N/A | #N/A | #N/A |
| 0.94 | 3.52 | 0.97 | 2.06 |
| 0.94 | 3.52 | 0.97 | 2.06 |
| 0.53 | 1.12 | 0.49 | 1.74 |
| 0.53 | 1.12 | 0.49 | 1.74 |
| 0.09 | 0.68 | 0.24 | #N/A |
| 0.41 | 1.17 | 0.51 | 0.62 |
| 0.89 | 1.82 | 0.75 | 3.22 |
| #N/A | #N/A | #N/A | #N/A |
| 0.40 | 1.42 | 0.63 | 2.04 |
| 0.40 | 1.42 | 0.63 | 2.04 |
| 0.29 | 0.84 | 0.33 | 0.66 |
| 0.48 | 1.09 | 0.47 | 0.98 |
| 0.51 | 0.72 | 0.26 | #N/A |
| 0.05 | 0.55 | 0.16 | #N/A |
| 0.92 | 1.72 | 0.76 | 1.25 |
| 0.05 | 0.55 | 0.16 | #N/A |
| #N/A | #N/A | #N/A | #N/A |
| #N/A | #N/A | #N/A | #N/A |
| #N/A | #N/A | #N/A | #N/A |
| 0.09 | 0.40 | 0.07 | 0.47 |
| 0.71 | 1.36 | 0.61 | #N/A |
| 0.88 | 2.69 | 0.95 | 2.80 |
| 0.88 | 2.69 | 0.95 | 2.80 |
| 0.98 | 2.60 | 0.93 | 2.41 |
| 0.96 | 3.58 | 0.99 | 2.17 |
| 0.96 | 3.58 | 0.99 | 2.17 |
| #N/A | #N/A | #N/A | #N/A |
| 1.00 | 4.70 | 1.00 | 3.04 |
| 1.00 | 4.70 | 1.00 | 3.04 |
| 1.00 | 4.70 | 1.00 | 3.04 |
| 0.04 | #N/A | #N/A | #N/A |
| #N/A | #N/A | #N/A | #N/A |
| 0.53 | 1.68 | 0.74 | #N/A |
| 0.53 | 1.68 | 0.74 | #N/A |

|      |      |      |      |
|------|------|------|------|
| 0.70 | 1.50 | 0.68 | 1.63 |
| #N/A | 2.06 | 0.85 | 1.57 |
| #N/A | 2.06 | 0.85 | 1.57 |
| #N/A | 1.02 | 0.43 | 1.34 |
| 0.47 | 1.23 | 0.55 | #N/A |
| #N/A | 1.02 | 0.43 | 1.34 |
| 0.47 | 1.23 | 0.55 | #N/A |
| #N/A | #N/A | #N/A | #N/A |
| #N/A | #N/A | #N/A | #N/A |
| 0.73 | 2.30 | 0.91 | 1.62 |
| 0.82 | 1.92 | 0.82 | 1.52 |
| 0.82 | 1.92 | 0.82 | 1.52 |
| 0.78 | 1.13 | 0.49 | 1.65 |
| 0.78 | 1.13 | 0.49 | 1.65 |
| 0.49 | 1.43 | 0.63 | 0.95 |
| 0.68 | 2.08 | 0.86 | 1.32 |
| 0.68 | 2.08 | 0.86 | 1.32 |
| 0.46 | 1.26 | 0.56 | 0.91 |
| 0.46 | 1.26 | 0.56 | 0.91 |
| #N/A | 1.01 | 0.43 | 1.02 |
| 0.47 | 1.01 | 0.42 | 1.13 |
| 0.37 | 0.88 | 0.35 | 0.92 |
| 0.73 | 1.41 | 0.63 | 1.18 |
| 0.65 | 2.35 | 0.82 | 1.02 |
| #N/A | #N/A | #N/A | #N/A |
| 0.17 | 1.00 | 0.41 | 0.49 |
| 0.24 | 0.68 | 0.24 | 0.78 |
| #N/A | #N/A | #N/A | #N/A |
| 0.58 | 1.39 | 0.62 | 1.20 |
| 0.28 | 0.85 | 0.33 | 0.70 |
| 0.58 | 1.39 | 0.62 | 1.20 |
| 0.36 | 1.16 | 0.51 | 0.67 |
| 0.36 | 1.16 | 0.51 | 0.67 |
| 0.96 | 2.77 | 0.96 | 2.77 |
| 0.96 | 2.77 | 0.96 | 2.77 |
| 0.14 | #N/A | #N/A | #N/A |
| 0.01 | 0.41 | 0.08 | 0.33 |
| 0.01 | 0.41 | 0.08 | 0.33 |
| 0.72 | #N/A | #N/A | 1.93 |
| 0.62 | 1.40 | 0.62 | 1.19 |
| 0.63 | 1.40 | 0.63 | #N/A |
| #N/A | #N/A | #N/A | #N/A |
| 0.65 | 1.73 | 0.74 | 1.08 |
| #N/A | #N/A | #N/A | #N/A |
| 0.68 | 1.43 | 0.62 | 1.36 |
| 0.68 | 1.43 | 0.62 | 1.36 |
| 0.80 | 1.96 | 0.82 | #N/A |
| #N/A | #N/A | #N/A | #N/A |
| 0.80 | 1.96 | 0.82 | #N/A |
| 0.52 | 1.35 | 0.60 | 1.00 |
| #N/A | #N/A | #N/A | #N/A |

|      |      |      |      |
|------|------|------|------|
| 0.82 | 1.87 | 0.81 | 1.95 |
| 0.82 | 1.87 | 0.81 | 1.95 |
| 0.17 | 0.58 | 0.17 | 0.74 |
| #N/A | #N/A | #N/A | #N/A |
| 0.29 | 0.53 | 0.14 | 0.45 |
| 0.44 | 0.76 | 0.28 | 0.86 |
| #N/A | #N/A | #N/A | #N/A |
| #N/A | #N/A | #N/A | #N/A |
| 0.97 | 1.96 | 0.83 | 1.48 |
| 0.39 | 1.20 | 0.53 | 1.32 |
| 0.16 | 0.59 | 0.19 | 0.62 |
| 0.16 | 0.59 | 0.19 | 0.62 |
| 0.20 | 0.46 | 0.11 | 1.06 |
| 0.11 | 0.55 | 0.16 | 0.35 |
| 0.52 | 0.59 | 0.19 | 1.45 |
| 0.75 | 1.88 | 0.81 | 1.35 |
| #N/A | #N/A | #N/A | #N/A |
| 0.97 | 3.55 | 0.99 | 2.78 |
| 0.97 | 3.55 | 0.99 | 2.78 |
| 0.82 | 1.40 | 0.63 | 2.64 |
| 0.75 | 2.10 | 0.81 | 1.90 |
| 0.79 | 1.63 | 0.72 | 1.61 |
| 0.79 | 1.63 | 0.72 | 1.61 |
| #N/A | #N/A | #N/A | #N/A |
| 0.73 | 1.51 | 0.68 | 1.58 |
| 0.73 | 1.51 | 0.68 | 1.58 |
| 0.65 | 1.01 | 0.43 | 1.13 |
| 0.88 | 1.79 | 0.78 | 1.78 |
| 0.79 | 1.67 | 0.74 | 1.39 |
| 0.79 | 1.67 | 0.74 | 1.39 |
| 0.92 | 2.01 | 0.84 | 1.84 |
| #N/A | #N/A | #N/A | #N/A |
| 0.92 | 2.01 | 0.84 | 1.84 |
| 0.60 | #N/A | #N/A | #N/A |
| 0.60 | #N/A | #N/A | #N/A |
| 0.73 | 1.30 | 0.58 | 1.35 |
| 0.73 | 1.30 | 0.58 | 1.35 |
| 0.66 | 1.13 | 0.50 | 1.09 |
| 0.29 | 0.71 | 0.26 | 0.65 |
| 0.96 | 2.29 | 0.90 | 2.61 |
| 0.71 | 5.09 | 0.97 | #N/A |
| 0.71 | 5.09 | 0.97 | #N/A |
| 0.77 | 3.20 | 0.97 | #N/A |
| 0.77 | 3.20 | 0.97 | #N/A |
| 0.71 | 1.50 | 0.67 | 1.03 |
| 0.71 | 1.50 | 0.67 | 1.03 |
| #N/A | #N/A | #N/A | #N/A |
| 0.67 | 1.63 | 0.71 | 1.35 |
| #N/A | #N/A | #N/A | #N/A |
| 0.07 | 0.59 | 0.18 | #N/A |
| #N/A | #N/A | #N/A | #N/A |

|      |      |      |      |
|------|------|------|------|
| #N/A | #N/A | #N/A | #N/A |
| 0.69 | 1.94 | 0.82 | 1.06 |
| #N/A | #N/A | #N/A | #N/A |
| #N/A | #N/A | #N/A | #N/A |
| #N/A | #N/A | #N/A | #N/A |
| 0.19 | 0.69 | 0.24 | 0.66 |
| 0.19 | 0.69 | 0.24 | 0.66 |
| 0.60 | 1.68 | 0.75 | 1.44 |

Recovery 30 min: HA-Htz1    **No HS: H2A-TAP**    **No HS: H2A-TAP**    **HS 30 min: H2A-TAP**    **HS 30 min: H2A-TAP**

|      |      |      |      |      |
|------|------|------|------|------|
| 0.42 | 0.88 | 0.24 | 1.59 | 0.61 |
| 0.46 | 1.31 | 0.79 | 1.35 | 0.86 |
| 0.23 | 0.54 | 0.03 | 0.31 | 0.01 |
| #N/A | #N/A | #N/A | #N/A | #N/A |
| 0.23 | 0.54 | 0.03 | 0.31 | 0.01 |
| 0.86 | 1.01 | 0.40 | 0.99 | 0.48 |
| 0.60 | 1.39 | 0.77 | 0.99 | 0.48 |
| 0.85 | 0.90 | 0.27 | 1.16 | 0.61 |
| 0.85 | 0.90 | 0.27 | 1.16 | 0.61 |
| #N/A | #N/A | #N/A | #N/A | #N/A |
| 0.26 | 1.51 | 0.90 | 1.60 | 0.91 |
| 0.91 | 1.45 | 0.90 | 1.46 | 0.88 |
| 0.91 | 1.45 | 0.90 | 1.46 | 0.88 |
| 0.30 | 1.35 | 0.82 | 1.39 | 0.87 |
| 0.89 | 1.03 | 0.42 | 0.92 | 0.39 |
| 0.97 | 1.17 | 0.61 | 1.05 | 0.56 |
| 0.91 | 1.42 | 0.82 | 1.58 | 0.94 |
| 0.91 | 1.42 | 0.82 | 1.58 | 0.94 |
| 0.54 | 1.26 | 0.75 | 1.00 | 0.50 |
| #N/A | 0.97 | 0.36 | 0.94 | 0.42 |
| #N/A | #N/A | #N/A | #N/A | #N/A |
| 0.99 | 1.19 | 0.64 | 0.74 | 0.21 |
| 0.99 | 1.19 | 0.64 | 0.74 | 0.21 |
| 0.88 | 1.24 | 0.71 | 1.62 | 0.95 |
| 0.69 | 1.41 | 0.74 | 1.33 | 0.82 |
| 0.69 | 1.41 | 0.74 | 1.33 | 0.82 |
| 0.92 | #N/A | #N/A | 1.27 | 0.76 |
| #N/A | 0.66 | 0.11 | #N/A | #N/A |
| 0.38 | 1.44 | 0.89 | 1.10 | 0.52 |
| 0.21 | 0.83 | 0.19 | 0.80 | 0.24 |
| 0.07 | 0.82 | 0.19 | 0.76 | 0.21 |
| 0.98 | 1.30 | 0.63 | 1.09 | 0.62 |
| 0.94 | 1.06 | 0.48 | 0.98 | 0.47 |
| 0.94 | 1.06 | 0.48 | 0.98 | 0.47 |
| 0.98 | 1.30 | 0.63 | 1.09 | 0.62 |
| #N/A | 0.99 | 0.39 | #N/A | #N/A |
| 0.05 | #N/A | #N/A | #N/A | #N/A |
| #N/A | 0.85 | 0.21 | 1.02 | 0.50 |
| #N/A | 0.73 | 0.13 | 0.68 | 0.23 |
| #N/A | #N/A | #N/A | 0.72 | 0.21 |
| 0.79 | #N/A | #N/A | 0.98 | 0.46 |
| 0.38 | #N/A | #N/A | #N/A | #N/A |
| 0.53 | 0.70 | 0.10 | 0.76 | 0.32 |
| 0.62 | 1.08 | 0.50 | 1.08 | 0.60 |
| 0.74 | 1.13 | 0.56 | 1.22 | 0.71 |
| 0.54 | 1.14 | 0.58 | 1.07 | 0.55 |
| #N/A | 0.82 | 0.18 | 1.08 | 0.59 |
| 0.44 | 1.17 | 0.63 | 0.87 | 0.34 |
| 0.63 | 1.21 | 0.69 | 0.70 | 0.15 |
| #N/A | #N/A | #N/A | #N/A | #N/A |

|      |      |      |      |      |
|------|------|------|------|------|
| 0.35 | 0.94 | 0.30 | 0.96 | 0.44 |
| 0.43 | 0.74 | 0.12 | 0.60 | 0.08 |
| 0.72 | 1.25 | 0.74 | 1.11 | 0.64 |
| #N/A | #N/A | #N/A | #N/A | #N/A |
| #N/A | #N/A | #N/A | #N/A | #N/A |
| 0.72 | 1.25 | 0.74 | 1.11 | 0.64 |
| 0.72 | 1.25 | 0.74 | 1.11 | 0.64 |
| #N/A | #N/A | #N/A | #N/A | #N/A |
| #N/A | #N/A | #N/A | #N/A | #N/A |
| 0.71 | 0.80 | 0.20 | 0.79 | 0.23 |
| 0.83 | 0.98 | 0.38 | 1.46 | 0.60 |
| 0.87 | 1.14 | 0.57 | 1.09 | 0.61 |
| 0.87 | 1.14 | 0.57 | 1.09 | 0.61 |
| #N/A | #N/A | #N/A | 0.36 | 0.01 |
| 0.92 | 1.40 | 0.87 | 1.39 | 0.87 |
| 0.31 | 1.52 | 0.85 | 1.65 | 0.95 |
| 0.72 | 1.21 | 0.65 | 1.37 | 0.87 |
| 0.68 | 1.12 | 0.56 | 1.01 | 0.51 |
| 0.79 | 0.91 | 0.28 | 0.82 | 0.27 |
| 0.63 | 1.00 | 0.39 | 1.18 | 0.69 |
| 0.66 | 1.24 | 0.70 | 1.17 | 0.71 |
| 0.63 | 1.00 | 0.39 | 1.18 | 0.69 |
| 0.66 | 1.24 | 0.70 | 1.17 | 0.71 |
| 0.25 | 0.98 | 0.35 | 1.04 | 0.52 |
| #N/A | #N/A | #N/A | #N/A | #N/A |
| #N/A | #N/A | #N/A | #N/A | #N/A |
| 0.43 | 1.15 | 0.59 | 1.16 | 0.69 |
| #N/A | #N/A | #N/A | #N/A | #N/A |
| 0.16 | #N/A | #N/A | #N/A | #N/A |
| 0.49 | 1.22 | 0.66 | 1.36 | 0.86 |
| #N/A | #N/A | #N/A | #N/A | #N/A |
| 0.22 | 1.19 | 0.67 | 1.40 | 0.81 |
| 0.44 | 1.08 | 0.49 | 1.23 | 0.76 |
| 0.44 | 1.08 | 0.49 | 1.23 | 0.76 |
| 0.11 | 1.31 | 0.79 | 1.07 | 0.59 |
| 0.31 | 1.26 | 0.74 | 1.29 | 0.82 |
| 0.30 | 1.32 | 0.75 | 1.22 | 0.73 |
| 0.21 | 1.63 | 0.95 | 1.72 | 0.95 |
| 0.69 | 1.32 | 0.79 | 1.49 | 0.90 |
| 0.90 | 1.10 | 0.53 | 1.44 | 0.81 |
| 0.90 | 1.10 | 0.53 | 1.44 | 0.81 |
| 0.87 | 0.91 | 0.28 | 1.11 | 0.63 |
| #N/A | #N/A | #N/A | #N/A | #N/A |
| 0.87 | 0.91 | 0.28 | 1.11 | 0.63 |
| 0.34 | 0.91 | 0.28 | 0.91 | 0.37 |
| 0.04 | 0.48 | 0.02 | 0.82 | 0.38 |
| 0.04 | 0.48 | 0.02 | 0.82 | 0.38 |
| 0.58 | 0.94 | 0.30 | 0.98 | 0.47 |
| 0.23 | 1.03 | 0.44 | 1.00 | 0.49 |
| 0.84 | 1.40 | 0.86 | 1.48 | 0.87 |
| 0.80 | 1.27 | 0.75 | 1.28 | 0.79 |

|      |      |      |      |      |
|------|------|------|------|------|
| 0.74 | 1.22 | 0.68 | 1.18 | 0.61 |
| 0.29 | 0.94 | 0.34 | 1.12 | 0.55 |
| 0.88 | 0.98 | 0.37 | 0.86 | 0.31 |
| 0.88 | 0.98 | 0.37 | 0.86 | 0.31 |
| 0.65 | 1.55 | 0.76 | 1.15 | 0.65 |
| 0.54 | 0.85 | 0.20 | 1.10 | 0.60 |
| 0.54 | 0.85 | 0.20 | 1.10 | 0.60 |
| 0.73 | 1.09 | 0.51 | 1.33 | 0.78 |
| #N/A | 0.96 | 0.34 | 1.28 | 0.82 |
| #N/A | #N/A | #N/A | #N/A | #N/A |
| #N/A | #N/A | #N/A | #N/A | #N/A |
| 0.75 | 1.21 | 0.68 | 1.59 | 0.83 |
| 0.52 | 1.43 | 0.75 | 1.40 | 0.85 |
| 0.43 | 1.16 | 0.61 | 1.08 | 0.60 |
| 0.70 | 1.21 | 0.62 | 1.07 | 0.59 |
| 0.01 | 0.26 | 0.00 | 0.47 | 0.09 |
| 0.19 | 0.44 | 0.02 | 0.64 | 0.12 |
| 0.38 | 0.78 | 0.15 | 0.82 | 0.32 |
| #N/A | 0.98 | 0.36 | #N/A | #N/A |
| 0.85 | 0.80 | 0.19 | #N/A | #N/A |
| 0.85 | 0.80 | 0.19 | #N/A | #N/A |
| 0.68 | 1.17 | 0.60 | 0.91 | 0.37 |
| 0.57 | 0.87 | 0.22 | 0.61 | 0.08 |
| 0.57 | 0.87 | 0.22 | 0.61 | 0.08 |
| 0.80 | 1.28 | 0.76 | 1.00 | 0.49 |
| 0.07 | 0.60 | 0.05 | 0.51 | 0.07 |
| 0.07 | 0.60 | 0.05 | 0.51 | 0.07 |
| 0.72 | 0.88 | 0.30 | 0.60 | 0.09 |
| 0.51 | 0.86 | 0.23 | 0.79 | 0.24 |
| 0.88 | 1.17 | 0.55 | 0.92 | 0.39 |
| 0.55 | 1.09 | 0.51 | 0.99 | 0.47 |
| 0.55 | 1.09 | 0.51 | 0.99 | 0.47 |
| 0.99 | 1.33 | 0.78 | 1.20 | 0.74 |
| 0.99 | 1.33 | 0.78 | 1.20 | 0.74 |
| #N/A | 1.11 | 0.55 | 0.90 | 0.36 |
| 0.26 | 0.95 | 0.34 | 1.04 | 0.54 |
| 0.26 | 0.95 | 0.34 | 1.04 | 0.54 |
| 0.85 | 1.10 | 0.53 | 1.17 | 0.68 |
| 0.85 | 1.10 | 0.53 | 1.17 | 0.68 |
| #N/A | #N/A | #N/A | #N/A | #N/A |
| 0.67 | 1.14 | 0.58 | 1.34 | 0.84 |
| 0.54 | 1.06 | 0.47 | 1.13 | 0.63 |
| 0.54 | 1.06 | 0.47 | 1.13 | 0.63 |
| #N/A | #N/A | #N/A | #N/A | #N/A |
| 0.89 | 0.98 | 0.38 | 0.98 | 0.47 |
| 0.89 | 0.98 | 0.38 | 0.98 | 0.47 |
| 0.23 | 1.32 | 0.77 | 1.08 | 0.61 |
| 0.23 | 1.32 | 0.77 | 1.08 | 0.61 |
| 0.56 | 1.18 | 0.64 | 1.06 | 0.56 |
| #N/A | #N/A | #N/A | #N/A | #N/A |
| 0.56 | 1.18 | 0.64 | 1.06 | 0.56 |



|      |      |      |      |      |
|------|------|------|------|------|
| #N/A | #N/A | #N/A | #N/A | #N/A |
| 0.24 | 0.84 | 0.20 | 0.83 | 0.27 |
| 0.08 | 1.23 | 0.66 | 1.63 | 0.96 |
| 0.18 | 0.48 | 0.02 | 0.79 | 0.25 |
| 0.08 | 1.23 | 0.66 | 1.63 | 0.96 |
| #N/A | #N/A | #N/A | #N/A | #N/A |
| #N/A | #N/A | #N/A | #N/A | #N/A |
| 0.87 | 1.36 | 0.80 | 1.14 | 0.68 |
| 0.72 | 1.29 | 0.77 | 1.09 | 0.60 |
| 0.72 | 1.29 | 0.77 | 1.09 | 0.60 |
| 0.72 | 1.29 | 0.77 | 1.09 | 0.60 |
| 0.44 | 0.88 | 0.24 | 0.93 | 0.40 |
| 0.13 | 0.68 | 0.09 | 0.74 | 0.18 |
| 0.51 | 0.27 | 0.01 | #N/A | #N/A |
| #N/A | #N/A | #N/A | #N/A | #N/A |
| #N/A | 0.98 | 0.36 | 0.86 | 0.32 |
| #N/A | 0.98 | 0.36 | 0.86 | 0.32 |
| 0.09 | 0.68 | 0.08 | 0.69 | 0.15 |
| 0.09 | 0.68 | 0.08 | 0.69 | 0.15 |
| 0.16 | 1.17 | 0.64 | 1.19 | 0.73 |
| #N/A | #N/A | #N/A | #N/A | #N/A |
| 0.16 | 1.17 | 0.64 | 1.19 | 0.73 |
| #N/A | #N/A | #N/A | 1.72 | 0.95 |
| 0.33 | 0.78 | 0.15 | 0.67 | 0.15 |
| 0.21 | 0.86 | 0.22 | 0.91 | 0.37 |
| 0.33 | 0.78 | 0.15 | 0.67 | 0.15 |
| 0.54 | 1.18 | 0.64 | 1.22 | 0.76 |
| 0.54 | 1.18 | 0.64 | 1.22 | 0.76 |
| 0.88 | 1.22 | 0.67 | 1.12 | 0.65 |
| 0.88 | 1.22 | 0.67 | 1.12 | 0.65 |
| #N/A | #N/A | #N/A | #N/A | #N/A |
| 0.22 | 0.70 | 0.10 | 0.78 | 0.22 |
| 0.22 | 0.70 | 0.10 | 0.78 | 0.22 |
| 0.22 | 0.70 | 0.10 | 0.78 | 0.22 |
| 0.22 | 0.70 | 0.10 | 0.78 | 0.22 |
| #N/A | #N/A | #N/A | #N/A | #N/A |
| 0.15 | 0.81 | 0.18 | 1.01 | 0.49 |
| 0.77 | 0.91 | 0.29 | 0.86 | 0.32 |
| 0.77 | 0.91 | 0.29 | 0.86 | 0.32 |
| #N/A | 1.22 | 0.63 | 3.48 | 0.93 |
| #N/A | 1.22 | 0.63 | 3.48 | 0.93 |
| 0.53 | 1.52 | 0.87 | 1.15 | 0.65 |
| 0.09 | 0.60 | 0.05 | 0.72 | 0.17 |
| 0.09 | 0.60 | 0.05 | 0.72 | 0.17 |
| 0.68 | 1.12 | 0.54 | 1.03 | 0.53 |
| #N/A | 1.04 | 0.46 | 0.66 | 0.12 |
| #N/A | #N/A | #N/A | #N/A | #N/A |
| #N/A | 1.04 | 0.46 | 0.66 | 0.12 |
| 0.26 | 1.47 | 0.87 | 0.87 | 0.31 |
| 0.64 | 1.35 | 0.83 | 1.31 | 0.82 |
| 0.72 | 0.91 | 0.28 | 1.08 | 0.53 |

|      |      |      |      |      |
|------|------|------|------|------|
| 0.63 | 0.96 | 0.35 | 1.10 | 0.62 |
| 0.63 | 0.96 | 0.35 | 1.10 | 0.62 |
| 0.69 | 1.20 | 0.67 | 1.33 | 0.85 |
| #N/A | #N/A | #N/A | #N/A | #N/A |
| 0.49 | 1.19 | 0.65 | 0.84 | 0.28 |
| #N/A | #N/A | #N/A | #N/A | #N/A |
| 0.42 | 0.81 | 0.17 | 1.12 | 0.64 |
| 0.69 | 1.28 | 0.76 | 0.91 | 0.38 |
| 0.69 | 1.28 | 0.76 | 0.91 | 0.38 |
| #N/A | #N/A | #N/A | #N/A | #N/A |
| #N/A | #N/A | #N/A | #N/A | #N/A |
| #N/A | 0.69 | 0.09 | 0.69 | 0.17 |
| 0.37 | 0.78 | 0.15 | 0.70 | 0.21 |
| 0.77 | 0.96 | 0.33 | 1.22 | 0.70 |
| 0.87 | 1.21 | 0.67 | 1.53 | 0.79 |
| 0.68 | 0.88 | 0.25 | 0.78 | 0.22 |
| 0.67 | 1.06 | 0.47 | 1.18 | 0.71 |
| 0.42 | 0.89 | 0.25 | 0.94 | 0.42 |
| 0.62 | 1.54 | 0.93 | 1.21 | 0.76 |
| #N/A | #N/A | #N/A | 0.79 | 0.24 |
| 0.43 | 2.30 | 0.93 | 1.15 | 0.65 |
| 0.85 | 1.22 | 0.68 | 1.01 | 0.51 |
| 0.68 | 0.88 | 0.25 | 0.84 | 0.32 |
| 0.48 | 0.99 | 0.37 | 0.93 | 0.39 |
| 0.74 | 1.01 | 0.40 | 0.67 | 0.12 |
| 0.53 | 0.87 | 0.24 | 0.92 | 0.40 |
| 0.45 | 1.17 | 0.61 | 1.15 | 0.69 |
| #N/A | #N/A | #N/A | #N/A | #N/A |
| 0.65 | 1.25 | 0.73 | 1.18 | 0.72 |
| 0.35 | 1.08 | 0.50 | 1.12 | 0.63 |
| 0.65 | 1.25 | 0.73 | 1.18 | 0.72 |
| 0.80 | 0.91 | 0.27 | 0.85 | 0.30 |
| 0.27 | 0.58 | 0.05 | 0.71 | 0.15 |
| 0.04 | 0.74 | 0.12 | 0.72 | 0.16 |
| 0.01 | 0.41 | 0.01 | 0.54 | 0.06 |
| 0.09 | 0.82 | 0.36 | #N/A | #N/A |
| 0.34 | 1.16 | 0.62 | 1.06 | 0.55 |
| 0.34 | 1.16 | 0.62 | 1.06 | 0.55 |
| 0.45 | 1.40 | 0.86 | 0.89 | 0.37 |
| 0.36 | #N/A | #N/A | 0.94 | 0.41 |
| #N/A | 1.10 | 0.52 | 1.05 | 0.56 |
| 0.39 | 1.14 | 0.59 | 1.17 | 0.71 |
| 0.03 | 0.37 | 0.01 | 0.34 | 0.01 |
| 0.39 | 0.70 | 0.10 | 0.72 | 0.21 |
| 0.12 | 0.46 | 0.03 | 0.46 | 0.03 |
| 0.13 | 0.68 | 0.10 | 0.91 | 0.40 |
| 0.13 | 0.68 | 0.10 | 0.91 | 0.40 |
| 0.49 | 1.09 | 0.51 | 0.77 | 0.21 |
| 0.51 | 1.15 | 0.58 | 0.88 | 0.37 |
| #N/A | #N/A | #N/A | #N/A | #N/A |
| #N/A | 0.96 | 0.40 | #N/A | #N/A |

|      |      |      |      |      |
|------|------|------|------|------|
| #N/A | #N/A | #N/A | #N/A | #N/A |
| #N/A | 2.87 | 0.64 | #N/A | #N/A |
| 0.35 | 0.85 | 0.22 | 0.89 | 0.35 |
| #N/A | #N/A | #N/A | #N/A | #N/A |
| #N/A | 1.27 | 0.69 | #N/A | #N/A |
| #N/A | 1.27 | 0.69 | #N/A | #N/A |
| #N/A | 0.39 | 0.01 | #N/A | #N/A |
| #N/A | 1.12 | 0.52 | 0.92 | 0.40 |
| #N/A | 0.39 | 0.01 | #N/A | #N/A |
| 0.66 | #N/A | #N/A | 0.86 | 0.31 |
| 0.83 | 1.19 | 0.65 | 1.17 | 0.67 |
| 0.85 | 1.39 | 0.76 | 1.34 | 0.75 |
| #N/A | 0.61 | 0.05 | 0.44 | 0.02 |
| #N/A | 0.61 | 0.05 | 0.44 | 0.02 |
| #N/A | #N/A | #N/A | #N/A | #N/A |
| #N/A | #N/A | #N/A | #N/A | #N/A |
| 0.75 | 1.04 | 0.44 | 1.26 | 0.75 |
| 0.75 | 1.04 | 0.44 | 1.26 | 0.75 |
| #N/A | #N/A | #N/A | #N/A | #N/A |
| 0.12 | 0.70 | 0.10 | 0.76 | 0.20 |
| #N/A | #N/A | #N/A | #N/A | #N/A |
| 0.57 | 0.84 | 0.20 | 1.06 | 0.56 |
| 0.57 | 0.84 | 0.20 | 1.06 | 0.56 |
| 0.57 | 0.84 | 0.20 | 1.06 | 0.56 |
| #N/A | #N/A | #N/A | #N/A | #N/A |
| 0.61 | 1.22 | 0.70 | 1.34 | 0.85 |
| 0.93 | 1.02 | 0.42 | #N/A | #N/A |
| 0.24 | 1.27 | 0.75 | 1.56 | 0.88 |
| 0.93 | 1.02 | 0.42 | #N/A | #N/A |
| #N/A | #N/A | #N/A | #N/A | #N/A |
| #N/A | 1.07 | 0.49 | 0.81 | 0.35 |
| 0.84 | 0.90 | 0.26 | 0.98 | 0.48 |
| #N/A | 0.97 | 0.44 | 1.49 | 0.81 |
| 0.97 | 1.26 | 0.71 | 0.90 | 0.39 |
| 0.91 | 0.80 | 0.16 | 1.05 | 0.54 |
| 0.91 | 0.80 | 0.16 | 1.05 | 0.54 |
| 0.15 | 1.41 | 0.85 | 1.38 | 0.84 |
| #N/A | #N/A | #N/A | 1.57 | 0.92 |
| #N/A | #N/A | #N/A | 1.57 | 0.92 |
| #N/A | #N/A | #N/A | #N/A | #N/A |
| 0.56 | 0.98 | 0.36 | 1.10 | 0.60 |
| 0.54 | 1.44 | 0.89 | 0.97 | 0.45 |
| 0.53 | 1.05 | 0.47 | 1.15 | 0.67 |
| #N/A | #N/A | #N/A | 1.00 | 0.50 |
| #N/A | #N/A | #N/A | 1.00 | 0.50 |
| 0.91 | 1.35 | 0.83 | 1.11 | 0.64 |
| 0.66 | 0.88 | 0.25 | #N/A | #N/A |
| 0.58 | 1.01 | 0.40 | #N/A | #N/A |
| 0.61 | 0.82 | 0.20 | 0.77 | 0.23 |
| 0.61 | 0.82 | 0.20 | 0.77 | 0.23 |
| 0.46 | 0.93 | 0.37 | 1.05 | 0.54 |

|      |      |      |      |      |
|------|------|------|------|------|
| #N/A | 0.95 | 0.34 | 1.33 | 0.84 |
| 0.46 | 0.86 | 0.23 | 0.97 | 0.45 |
| 0.46 | 0.86 | 0.23 | 0.97 | 0.45 |
| 0.18 | 0.83 | 0.19 | 0.64 | 0.14 |
| 0.09 | 0.49 | 0.02 | 0.58 | 0.10 |
| 0.94 | 1.13 | 0.56 | 1.07 | 0.59 |
| 0.45 | 0.74 | 0.12 | 0.84 | 0.32 |
| 0.67 | 0.78 | 0.15 | 0.59 | 0.07 |
| 0.16 | 0.70 | 0.10 | 0.65 | 0.11 |
| 0.16 | 0.70 | 0.10 | 0.65 | 0.11 |
| 0.71 | 1.01 | 0.40 | 1.01 | 0.51 |
| 0.71 | 1.01 | 0.40 | 1.01 | 0.51 |
| 0.53 | 1.18 | 0.63 | #N/A | #N/A |
| 0.77 | 1.07 | 0.49 | 1.24 | 0.76 |
| 0.77 | 1.07 | 0.49 | 1.24 | 0.76 |
| 0.55 | 0.75 | 0.13 | 0.68 | 0.14 |
| 0.70 | 1.25 | 0.67 | 1.43 | 0.90 |
| 0.70 | 1.25 | 0.67 | 1.43 | 0.90 |
| #N/A | 1.41 | 0.87 | #N/A | #N/A |
| 0.95 | 1.37 | 0.78 | 1.17 | 0.68 |
| 0.77 | 1.41 | 0.84 | 0.83 | 0.29 |
| 0.95 | 1.37 | 0.78 | 1.17 | 0.68 |
| 0.77 | 1.41 | 0.84 | 0.83 | 0.29 |
| #N/A | #N/A | #N/A | #N/A | #N/A |
| #N/A | #N/A | #N/A | 1.08 | 0.55 |
| 0.68 | 1.03 | 0.42 | 0.90 | 0.36 |
| 0.35 | 0.71 | 0.10 | 0.56 | 0.08 |
| 0.45 | 0.85 | 0.28 | 0.96 | 0.43 |
| 0.45 | 0.85 | 0.28 | 0.96 | 0.43 |
| 0.45 | 0.56 | 0.05 | 0.79 | 0.24 |
| 0.95 | 1.34 | 0.81 | 1.39 | 0.70 |
| 0.20 | 0.89 | 0.25 | 1.15 | 0.69 |
| 0.63 | 1.32 | 0.77 | 0.72 | 0.19 |
| 0.63 | 1.32 | 0.77 | 0.72 | 0.19 |
| 0.17 | 0.92 | 0.30 | 0.91 | 0.38 |
| 0.17 | 0.92 | 0.30 | 0.91 | 0.38 |
| 0.74 | 1.39 | 0.73 | 1.25 | 0.78 |
| 0.41 | 1.22 | 0.70 | 1.26 | 0.80 |
| 0.41 | 1.22 | 0.70 | 1.26 | 0.80 |
| #N/A | 0.93 | 0.32 | 1.07 | 0.55 |
| 0.02 | 0.67 | 0.08 | 0.60 | 0.07 |
| #N/A | 1.24 | 0.72 | #N/A | #N/A |
| 0.85 | 1.26 | 0.65 | 1.03 | 0.51 |
| 0.41 | 1.07 | 0.49 | 1.16 | 0.70 |
| 0.85 | 1.28 | 0.76 | 1.06 | 0.58 |
| #N/A | #N/A | #N/A | #N/A | #N/A |
| 0.81 | 1.18 | 0.64 | 1.47 | 0.80 |
| 0.81 | 1.18 | 0.64 | 1.47 | 0.80 |
| 0.81 | 1.18 | 0.64 | 1.47 | 0.80 |
| 0.62 | 0.93 | 0.29 | 0.87 | 0.32 |
| 0.88 | 0.91 | 0.27 | 0.90 | 0.37 |

|      |      |      |      |      |
|------|------|------|------|------|
| 0.90 | 1.31 | 0.79 | 1.26 | 0.77 |
| 0.45 | 1.30 | 0.79 | 1.60 | 0.92 |
| 0.81 | 1.34 | 0.79 | 1.06 | 0.58 |
| 0.87 | 1.13 | 0.56 | 1.21 | 0.72 |
| 0.83 | 1.09 | 0.52 | 1.27 | 0.65 |
| 0.83 | 1.09 | 0.52 | 1.27 | 0.65 |
| 0.71 | 1.05 | 0.46 | 0.94 | 0.44 |
| 0.71 | 1.05 | 0.46 | 0.94 | 0.44 |
| 0.72 | 1.13 | 0.57 | 1.15 | 0.68 |
| 0.27 | 0.87 | 0.27 | 0.84 | 0.31 |
| 0.70 | 1.03 | 0.43 | 0.98 | 0.46 |
| 0.27 | 0.87 | 0.27 | 0.84 | 0.31 |
| 0.70 | 1.03 | 0.43 | 0.98 | 0.46 |
| 0.70 | 1.03 | 0.43 | 0.98 | 0.46 |
| 0.87 | 0.89 | 0.26 | 1.00 | 0.49 |
| 0.45 | 0.74 | 0.12 | 0.73 | 0.18 |
| 0.77 | 1.22 | 0.67 | 1.20 | 0.69 |
| 0.91 | 1.07 | 0.49 | 1.09 | 0.61 |
| 0.77 | 1.22 | 0.67 | 1.20 | 0.69 |
| 0.77 | 1.17 | 0.62 | 1.23 | 0.76 |
| #N/A | 0.96 | 0.33 | 0.93 | 0.40 |
| 0.15 | 0.78 | 0.15 | 0.79 | 0.23 |
| #N/A | 1.11 | 0.55 | 1.30 | 0.58 |
| 0.50 | 1.10 | 0.53 | 0.91 | 0.39 |
| 0.50 | 1.10 | 0.53 | 0.91 | 0.39 |
| 0.66 | 1.32 | 0.80 | 0.89 | 0.35 |
| 0.66 | 1.32 | 0.80 | 0.89 | 0.35 |
| #N/A | #N/A | #N/A | #N/A | #N/A |
| 0.64 | 1.39 | 0.84 | 1.32 | 0.74 |
| 0.44 | 1.14 | 0.58 | 1.07 | 0.60 |
| 0.52 | 1.24 | 0.71 | 1.16 | 0.68 |
| 0.52 | 1.24 | 0.71 | 1.16 | 0.68 |
| 0.89 | 1.17 | 0.60 | 0.89 | 0.35 |
| #N/A | 0.97 | 0.42 | 0.73 | 0.19 |
| 0.76 | 0.89 | 0.25 | 0.93 | 0.41 |
| 0.97 | 1.14 | 0.58 | 1.03 | 0.50 |
| 0.97 | 1.14 | 0.58 | 1.03 | 0.50 |
| 0.68 | 1.02 | 0.41 | 0.78 | 0.21 |
| 0.68 | 1.02 | 0.41 | 0.78 | 0.21 |
| #N/A | 1.41 | 0.87 | 0.90 | 0.35 |
| #N/A | 1.41 | 0.87 | 0.90 | 0.35 |
| 0.98 | 1.28 | 0.69 | 1.06 | 0.56 |
| #N/A | 1.22 | 0.69 | 1.47 | 0.90 |
| #N/A | 0.93 | 0.29 | 0.68 | 0.13 |
| #N/A | 1.22 | 0.69 | 1.47 | 0.90 |
| #N/A | 0.93 | 0.29 | 0.68 | 0.13 |
| #N/A | 0.93 | 0.29 | 0.68 | 0.13 |
| 0.32 | 0.82 | 0.18 | 1.08 | 0.59 |
| #N/A | 1.01 | 0.42 | 1.23 | 0.73 |
| 0.32 | 0.82 | 0.18 | 1.08 | 0.59 |
| #N/A | 0.54 | 0.03 | #N/A | #N/A |

|      |      |      |      |      |
|------|------|------|------|------|
| 0.89 | 1.16 | 0.62 | #N/A | #N/A |
| 0.89 | 1.16 | 0.62 | #N/A | #N/A |
| #N/A | 1.29 | 0.76 | #N/A | #N/A |
| 0.46 | 1.14 | 0.55 | 0.86 | 0.35 |
| 0.46 | 1.14 | 0.55 | 0.86 | 0.35 |
| 0.59 | 1.28 | 0.77 | 0.96 | 0.45 |
| 0.72 | 0.96 | 0.33 | 1.30 | 0.80 |
| 0.88 | 1.08 | 0.50 | 1.03 | 0.51 |
| 0.72 | 0.96 | 0.33 | 1.30 | 0.80 |
| 0.88 | 1.08 | 0.50 | 1.03 | 0.51 |
| #N/A | #N/A | #N/A | #N/A | #N/A |
| 0.74 | 1.36 | 0.79 | 1.16 | 0.61 |
| 0.74 | 1.36 | 0.79 | 1.16 | 0.61 |
| 0.83 | 1.08 | 0.50 | 1.01 | 0.50 |
| 0.83 | 1.08 | 0.50 | 1.01 | 0.50 |
| 0.41 | 1.31 | 0.71 | 1.34 | 0.85 |
| #N/A | #N/A | #N/A | #N/A | #N/A |
| #N/A | 1.28 | 0.76 | 1.02 | 0.51 |
| 0.91 | 1.47 | 0.78 | 1.03 | 0.51 |
| 0.91 | 1.47 | 0.78 | 1.03 | 0.51 |
| 0.41 | 0.94 | 0.30 | 0.94 | 0.42 |
| #N/A | 0.82 | 0.18 | 0.80 | 0.25 |
| 0.64 | 1.21 | 0.68 | 1.30 | 0.82 |
| 0.82 | 1.20 | 0.64 | 1.09 | 0.62 |
| 0.47 | 1.21 | 0.65 | 1.12 | 0.63 |
| 0.44 | 1.00 | 0.38 | 1.13 | 0.64 |
| 0.71 | 0.84 | 0.22 | #N/A | #N/A |
| 0.73 | 1.07 | 0.49 | 1.01 | 0.51 |
| 0.93 | 1.40 | 0.82 | 1.27 | 0.64 |
| 0.93 | 1.40 | 0.82 | 1.27 | 0.64 |
| 0.83 | 1.00 | 0.39 | 1.07 | 0.58 |
| 0.59 | 1.24 | 0.72 | 1.09 | 0.60 |
| #N/A | #N/A | #N/A | #N/A | #N/A |
| 0.71 | 1.16 | 0.62 | 1.36 | 0.84 |
| 0.31 | 0.78 | 0.15 | 0.76 | 0.20 |
| #N/A | #N/A | #N/A | #N/A | #N/A |
| 0.71 | 1.16 | 0.62 | 1.36 | 0.84 |
| 0.71 | 1.16 | 0.62 | 1.36 | 0.84 |
| 0.31 | 0.78 | 0.15 | 0.76 | 0.20 |
| 0.31 | 0.78 | 0.15 | 0.76 | 0.20 |
| 0.31 | 0.78 | 0.15 | 0.76 | 0.20 |
| 0.31 | 0.78 | 0.15 | 0.76 | 0.20 |
| 0.31 | 0.78 | 0.15 | 0.76 | 0.20 |
| 0.71 | 1.16 | 0.62 | 1.36 | 0.84 |
| #N/A | #N/A | #N/A | #N/A | #N/A |
| #N/A | #N/A | #N/A | #N/A | #N/A |
| #N/A | #N/A | #N/A | #N/A | #N/A |
| 0.71 | 1.16 | 0.62 | 1.36 | 0.84 |
| 0.71 | 1.16 | 0.62 | 1.36 | 0.84 |
| #N/A | #N/A | #N/A | #N/A | #N/A |
| 0.31 | 0.98 | 0.35 | 1.15 | 0.59 |

|      |      |      |      |      |
|------|------|------|------|------|
| 0.31 | 0.98 | 0.35 | 1.15 | 0.59 |
| #N/A | #N/A | #N/A | #N/A | #N/A |
| 0.31 | 0.98 | 0.35 | 1.15 | 0.59 |
| 0.31 | 0.98 | 0.35 | 1.15 | 0.59 |
| 0.11 | 0.52 | 0.03 | 0.55 | 0.06 |
| 0.11 | 0.52 | 0.03 | 0.55 | 0.06 |
| #N/A | #N/A | #N/A | #N/A | #N/A |
| 0.62 | 1.00 | 0.39 | 1.03 | 0.53 |
| 0.71 | 1.15 | 0.60 | 1.07 | 0.58 |
| 0.71 | 1.15 | 0.60 | 1.07 | 0.58 |
| 0.33 | 0.82 | 0.19 | 1.24 | 0.76 |
| 0.72 | 1.19 | 0.60 | 0.84 | 0.28 |
| 0.79 | #N/A | #N/A | 1.29 | 0.82 |
| 0.79 | #N/A | #N/A | 1.29 | 0.82 |
| 0.97 | 1.28 | 0.74 | 1.41 | 0.89 |
| 0.97 | 1.28 | 0.74 | 1.41 | 0.89 |
| 0.28 | 1.39 | 0.86 | 1.37 | 0.86 |
| 0.28 | 1.39 | 0.86 | 1.37 | 0.86 |
| 0.21 | 1.21 | 0.67 | 1.00 | 0.49 |
| 0.99 | 0.98 | 0.36 | #N/A | #N/A |
| 0.88 | 1.25 | 0.74 | 1.12 | 0.63 |
| 0.99 | 0.98 | 0.36 | #N/A | #N/A |
| 0.88 | 1.25 | 0.74 | 1.12 | 0.63 |
| 0.99 | 0.98 | 0.36 | #N/A | #N/A |
| 0.88 | 1.25 | 0.74 | 1.12 | 0.63 |
| #N/A | 1.09 | 0.51 | 1.03 | 0.54 |
| #N/A | 0.74 | 0.12 | 0.89 | 0.36 |
| #N/A | 0.74 | 0.12 | 0.89 | 0.36 |
| 0.80 | 1.08 | 0.50 | 1.15 | 0.69 |
| 0.80 | 1.08 | 0.50 | 1.15 | 0.69 |
| 0.96 | 1.01 | 0.42 | 0.95 | 0.43 |
| 0.88 | 1.21 | 0.66 | 1.23 | 0.76 |
| 0.88 | 1.21 | 0.66 | 1.23 | 0.76 |
| #N/A | #N/A | #N/A | #N/A | #N/A |
| 0.71 | 0.75 | 0.13 | 0.82 | 0.30 |
| 0.83 | 1.04 | 0.44 | 0.94 | 0.41 |
| 0.83 | 1.04 | 0.44 | 0.94 | 0.41 |
| #N/A | #N/A | #N/A | #N/A | #N/A |
| #N/A | #N/A | #N/A | #N/A | #N/A |
| 0.91 | 0.72 | 0.13 | 0.87 | 0.36 |
| #N/A | #N/A | #N/A | #N/A | #N/A |
| 0.46 | 1.57 | 0.94 | 1.80 | 0.95 |
| #N/A | #N/A | #N/A | #N/A | #N/A |
| 0.56 | 1.00 | 0.39 | 0.84 | 0.29 |
| 0.56 | 1.00 | 0.39 | 0.84 | 0.29 |
| #N/A | #N/A | #N/A | #N/A | #N/A |
| #N/A | #N/A | #N/A | #N/A | #N/A |
| #N/A | #N/A | #N/A | #N/A | #N/A |
| 0.29 | 1.40 | 0.85 | 1.25 | 0.76 |
| 0.25 | 1.32 | 0.78 | 1.27 | 0.80 |
| 0.25 | 1.32 | 0.78 | 1.27 | 0.80 |

|      |      |      |      |      |
|------|------|------|------|------|
| 0.03 | 1.44 | 0.89 | 1.83 | 0.91 |
| #N/A | #N/A | #N/A | #N/A | #N/A |
| #N/A | #N/A | #N/A | #N/A | #N/A |
| #N/A | #N/A | #N/A | #N/A | #N/A |
| #N/A | #N/A | #N/A | #N/A | #N/A |
| #N/A | #N/A | #N/A | #N/A | #N/A |
| #N/A | #N/A | #N/A | #N/A | #N/A |
| #N/A | #N/A | #N/A | #N/A | #N/A |
| #N/A | #N/A | #N/A | #N/A | #N/A |
| #N/A | #N/A | #N/A | #N/A | #N/A |
| #N/A | #N/A | #N/A | #N/A | #N/A |
| #N/A | #N/A | #N/A | #N/A | #N/A |
| #N/A | #N/A | #N/A | #N/A | #N/A |
| #N/A | #N/A | #N/A | #N/A | #N/A |
| 0.71 | 1.16 | 0.62 | 1.36 | 0.84 |
| 0.31 | 0.78 | 0.15 | 0.76 | 0.20 |
| 0.71 | 1.16 | 0.62 | 1.36 | 0.84 |
| 0.31 | 0.78 | 0.15 | 0.76 | 0.20 |
| 0.31 | 0.78 | 0.15 | 0.76 | 0.20 |
| 0.31 | 0.78 | 0.15 | 0.76 | 0.20 |
| #N/A | #N/A | #N/A | #N/A | #N/A |
| 0.31 | 0.78 | 0.15 | 0.76 | 0.20 |
| #N/A | #N/A | #N/A | #N/A | #N/A |
| #N/A | #N/A | #N/A | #N/A | #N/A |
| #N/A | #N/A | #N/A | #N/A | #N/A |
| 0.31 | 0.78 | 0.15 | 0.76 | 0.20 |
| #N/A | #N/A | #N/A | #N/A | #N/A |
| #N/A | #N/A | #N/A | #N/A | #N/A |
| #N/A | #N/A | #N/A | #N/A | #N/A |
| #N/A | #N/A | #N/A | #N/A | #N/A |
| 0.77 | 1.34 | 0.71 | 1.00 | 0.49 |
| #N/A | #N/A | #N/A | #N/A | #N/A |
| 0.64 | 1.35 | 0.82 | 1.18 | 0.72 |
| #N/A | 0.70 | 0.10 | 0.80 | 0.23 |
| 0.71 | 0.89 | 0.24 | 0.77 | 0.26 |
| #N/A | 1.38 | 0.71 | 1.15 | 0.69 |
| 0.77 | 1.22 | 0.68 | 0.83 | 0.29 |
| 0.68 | 1.29 | 0.72 | 0.99 | 0.49 |
| 0.11 | 0.78 | 0.14 | 0.86 | 0.32 |
| 0.06 | 0.66 | 0.08 | 0.63 | 0.09 |
| #N/A | 0.85 | 0.23 | 1.03 | 0.52 |
| 0.35 | 1.15 | 0.60 | 1.15 | 0.68 |
| 0.53 | 1.11 | 0.54 | 0.79 | 0.23 |
| 0.93 | 1.13 | 0.57 | 1.26 | 0.72 |
| #N/A | #N/A | #N/A | #N/A | #N/A |
| #N/A | #N/A | #N/A | #N/A | #N/A |
| 0.37 | 1.17 | 0.56 | 1.14 | 0.65 |
| 0.06 | 0.93 | 0.31 | 0.83 | 0.31 |
| 0.77 | 1.03 | 0.42 | 1.19 | 0.73 |
| 0.65 | 1.09 | 0.52 | 1.17 | 0.71 |



|      |      |      |      |      |
|------|------|------|------|------|
| 0.28 | 1.45 | 0.90 | 1.46 | 0.85 |
| 0.87 | 0.84 | 0.23 | 0.97 | 0.46 |
| 0.87 | 0.84 | 0.23 | 0.97 | 0.46 |
| 0.41 | 0.82 | 0.18 | 0.85 | 0.29 |
| 0.30 | 1.46 | 0.90 | 1.39 | 0.88 |
| #N/A | #N/A | #N/A | #N/A | #N/A |
| #N/A | #N/A | #N/A | #N/A | #N/A |
| #N/A | #N/A | #N/A | #N/A | #N/A |
| 0.64 | 1.30 | 0.66 | 1.00 | 0.50 |
| 0.90 | 1.43 | 0.77 | 0.70 | 0.16 |
| 0.77 | 1.21 | 0.68 | 1.35 | 0.74 |
| 0.61 | 1.25 | 0.73 | 1.18 | 0.68 |
| 0.63 | 1.40 | 0.80 | 1.22 | 0.74 |
| 0.86 | 1.35 | 0.83 | 1.27 | 0.80 |
| 0.86 | 1.35 | 0.83 | 1.27 | 0.80 |
| 0.78 | 1.60 | 0.94 | 1.97 | 0.98 |
| 0.78 | 1.60 | 0.94 | 1.97 | 0.98 |
| 0.78 | 1.60 | 0.94 | 1.97 | 0.98 |
| 0.56 | 1.38 | 0.86 | 1.33 | 0.61 |
| 0.52 | 1.47 | 0.90 | 1.44 | 0.90 |
| 0.25 | 1.32 | 0.81 | 1.04 | 0.55 |
| #N/A | #N/A | #N/A | #N/A | #N/A |
| #N/A | #N/A | #N/A | #N/A | #N/A |
| #N/A | 1.70 | 0.93 | #N/A | #N/A |
| #N/A | #N/A | #N/A | #N/A | #N/A |
| 0.64 | 1.25 | 0.74 | 0.47 | 0.05 |
| 0.64 | 1.25 | 0.74 | 0.47 | 0.05 |
| 0.12 | 1.00 | 0.39 | 0.76 | 0.19 |
| 0.12 | 1.00 | 0.39 | 0.76 | 0.19 |
| 0.28 | 1.19 | 0.65 | 1.09 | 0.58 |
| 0.02 | 0.58 | 0.04 | 0.75 | 0.24 |
| 0.02 | 0.58 | 0.04 | 0.75 | 0.24 |
| 0.50 | 1.15 | 0.60 | 1.05 | 0.57 |
| 0.72 | 0.88 | 0.24 | 0.90 | 0.36 |
| 0.72 | 0.88 | 0.24 | 0.90 | 0.36 |
| 0.94 | 1.40 | 0.86 | 1.21 | 0.70 |
| #N/A | #N/A | #N/A | #N/A | #N/A |
| #N/A | 1.36 | 0.76 | 1.25 | 0.76 |
| 0.67 | 1.27 | 0.69 | 1.56 | 0.72 |
| 0.98 | 1.24 | 0.71 | 1.24 | 0.78 |
| #N/A | #N/A | #N/A | #N/A | #N/A |
| 0.98 | 1.29 | 0.78 | 0.91 | 0.37 |
| #N/A | #N/A | #N/A | #N/A | #N/A |
| 0.99 | 1.45 | 0.78 | 1.09 | 0.62 |
| 0.99 | 1.45 | 0.78 | 1.09 | 0.62 |
| #N/A | #N/A | #N/A | #N/A | #N/A |
| 0.30 | 0.90 | 0.33 | 0.81 | 0.25 |
| #N/A | 1.14 | 0.59 | 0.69 | 0.15 |
| 0.93 | 1.19 | 0.66 | 1.12 | 0.64 |
| 0.73 | 1.03 | 0.43 | 0.98 | 0.47 |
| 0.73 | 1.03 | 0.43 | 0.98 | 0.47 |

|      |      |      |      |      |
|------|------|------|------|------|
| 0.71 | 0.57 | 0.06 | 0.85 | 0.29 |
| 0.71 | 0.57 | 0.06 | 0.85 | 0.29 |
| 0.77 | 1.68 | 0.96 | 1.27 | 0.79 |
| 0.56 | 1.02 | 0.44 | 1.18 | 0.71 |
| #N/A | #N/A | #N/A | #N/A | #N/A |
| 0.70 | 1.18 | 0.65 | 1.24 | 0.78 |
| 0.86 | 0.90 | 0.26 | 0.78 | 0.22 |
| 0.86 | 0.90 | 0.26 | 0.78 | 0.22 |
| 0.77 | 1.07 | 0.49 | 1.09 | 0.61 |
| 0.70 | 1.16 | 0.60 | 1.38 | 0.87 |
| 0.20 | 1.24 | 0.71 | 1.23 | 0.77 |
| #N/A | #N/A | #N/A | #N/A | #N/A |
| #N/A | #N/A | #N/A | #N/A | #N/A |
| 0.98 | 1.09 | 0.52 | 1.32 | 0.83 |
| #N/A | 1.21 | 0.65 | #N/A | #N/A |
| #N/A | 1.21 | 0.65 | #N/A | #N/A |
| 0.89 | 1.37 | 0.85 | 1.27 | 0.80 |
| 0.70 | 1.10 | 0.53 | 1.10 | 0.62 |
| 0.32 | 1.26 | 0.75 | 1.28 | 0.81 |
| 0.32 | 1.26 | 0.75 | 1.28 | 0.81 |
| 0.26 | 1.11 | 0.55 | 1.19 | 0.73 |
| #N/A | #N/A | #N/A | 1.02 | 0.52 |
| 0.17 | 1.40 | 0.87 | 1.47 | 0.90 |
| #N/A | #N/A | #N/A | #N/A | #N/A |
| #N/A | #N/A | #N/A | #N/A | #N/A |
| #N/A | #N/A | #N/A | #N/A | #N/A |
| #N/A | #N/A | #N/A | #N/A | #N/A |
| #N/A | #N/A | #N/A | #N/A | #N/A |
| #N/A | #N/A | #N/A | #N/A | #N/A |
| #N/A | #N/A | #N/A | #N/A | #N/A |
| #N/A | #N/A | #N/A | #N/A | #N/A |
| #N/A | #N/A | #N/A | #N/A | #N/A |
| #N/A | #N/A | #N/A | #N/A | #N/A |
| #N/A | #N/A | #N/A | #N/A | #N/A |
| #N/A | #N/A | #N/A | #N/A | #N/A |
| #N/A | #N/A | #N/A | #N/A | #N/A |
| #N/A | #N/A | #N/A | #N/A | #N/A |
| #N/A | #N/A | #N/A | #N/A | #N/A |
| #N/A | #N/A | #N/A | #N/A | #N/A |
| #N/A | #N/A | #N/A | #N/A | #N/A |
| #N/A | #N/A | #N/A | #N/A | #N/A |
| #N/A | #N/A | #N/A | #N/A | #N/A |
| #N/A | #N/A | #N/A | #N/A | #N/A |
| 0.39 | 1.00 | 0.38 | 1.02 | 0.52 |
| 0.39 | 1.00 | 0.38 | 1.02 | 0.52 |
| 0.42 | 0.98 | 0.36 | 0.91 | 0.37 |
| 0.84 | 0.95 | 0.34 | 1.07 | 0.58 |
| 0.84 | 0.95 | 0.34 | 1.07 | 0.58 |
| 0.31 | 1.13 | 0.56 | 0.89 | 0.38 |
| 0.62 | 0.67 | 0.08 | 0.58 | 0.07 |

|      |      |      |      |      |
|------|------|------|------|------|
| #N/A | 1.23 | 0.59 | 1.25 | 0.78 |
| #N/A | 1.23 | 0.59 | 1.25 | 0.78 |
| 0.75 | 1.10 | 0.53 | 0.99 | 0.48 |
| #N/A | 1.23 | 0.59 | 1.25 | 0.78 |
| 0.75 | 1.10 | 0.53 | 0.99 | 0.48 |
| 0.72 | 1.14 | 0.59 | 1.37 | 0.79 |
| 0.38 | 1.16 | 0.62 | 1.45 | 0.88 |
| 0.38 | 1.16 | 0.62 | 1.45 | 0.88 |
| 0.06 | 0.82 | 0.19 | 0.89 | 0.38 |
| 0.81 | 1.47 | 0.91 | 1.22 | 0.73 |
| 0.81 | 1.47 | 0.91 | 1.22 | 0.73 |
| #N/A | #N/A | #N/A | #N/A | #N/A |
| 0.84 | 0.83 | 0.19 | 0.95 | 0.43 |
| 0.73 | 0.79 | 0.16 | 0.67 | 0.30 |
| 0.15 | 0.58 | 0.05 | 0.48 | 0.05 |
| 0.73 | 0.79 | 0.16 | 0.67 | 0.30 |
| 0.49 | 0.89 | 0.32 | 0.82 | 0.27 |
| 0.94 | 0.96 | 0.34 | 1.33 | 0.70 |
| 0.87 | 1.01 | 0.41 | 0.84 | 0.29 |
| 0.85 | 0.78 | 0.15 | 0.62 | 0.10 |
| 0.87 | 1.01 | 0.41 | 0.84 | 0.29 |
| 0.69 | 0.84 | 0.20 | 1.03 | 0.53 |
| 0.80 | 1.07 | 0.48 | #N/A | #N/A |
| #N/A | 1.13 | 0.57 | 1.19 | 0.64 |
| 0.47 | 1.07 | 0.49 | 0.98 | 0.46 |
| #N/A | 1.13 | 0.57 | 1.19 | 0.64 |
| 0.43 | 1.31 | 0.79 | 1.23 | 0.71 |
| 0.47 | 1.07 | 0.49 | 0.98 | 0.46 |
| 0.43 | 1.31 | 0.79 | 1.23 | 0.71 |
| 0.26 | 0.90 | 0.31 | 0.76 | 0.21 |
| #N/A | #N/A | #N/A | #N/A | #N/A |
| #N/A | #N/A | #N/A | #N/A | #N/A |
| #N/A | 1.17 | 0.63 | 1.19 | 0.71 |
| #N/A | #N/A | #N/A | #N/A | #N/A |
| 0.40 | 0.92 | 0.28 | 0.81 | 0.26 |
| #N/A | #N/A | #N/A | #N/A | #N/A |
| 0.50 | 1.41 | 0.64 | 1.08 | 0.60 |
| 0.73 | 1.29 | 0.68 | 1.15 | 0.67 |
| #N/A | #N/A | #N/A | #N/A | #N/A |
| 0.14 | 0.77 | 0.15 | 0.79 | 0.27 |
| 0.18 | 0.71 | 0.10 | 0.75 | 0.20 |
| #N/A | #N/A | #N/A | #N/A | #N/A |
| #N/A | #N/A | #N/A | #N/A | #N/A |
| #N/A | 1.07 | 0.48 | 1.15 | 0.69 |
| #N/A | 1.07 | 0.48 | 1.15 | 0.69 |
| 0.77 | 1.07 | 0.48 | 0.94 | 0.41 |
| #N/A | 1.10 | 0.52 | 1.04 | 0.55 |
| 0.10 | 0.67 | 0.08 | 0.66 | 0.13 |
| 0.86 | 1.35 | 0.82 | 1.29 | 0.82 |
| 0.35 | 1.13 | 0.55 | 0.84 | 0.30 |
| 0.78 | 1.38 | 0.79 | 1.46 | 0.89 |

|      |      |      |      |      |
|------|------|------|------|------|
| 0.78 | 1.38 | 0.79 | 1.46 | 0.89 |
| 0.11 | 0.79 | 0.16 | 0.94 | 0.42 |
| 0.11 | 0.79 | 0.16 | 0.94 | 0.42 |
| #N/A | #N/A | #N/A | #N/A | #N/A |
| #N/A | 0.90 | 0.27 | 1.06 | 0.58 |
| #N/A | 0.95 | 0.33 | 0.98 | 0.47 |
| #N/A | 0.95 | 0.33 | 0.98 | 0.47 |
| 0.71 | 1.50 | 0.80 | 1.08 | 0.61 |
| 0.71 | 1.50 | 0.80 | 1.08 | 0.61 |
| #N/A | #N/A | #N/A | #N/A | #N/A |
| 0.56 | 1.22 | 0.69 | 1.22 | 0.68 |
| #N/A | #N/A | #N/A | #N/A | #N/A |
| #N/A | #N/A | #N/A | #N/A | #N/A |
| #N/A | #N/A | #N/A | #N/A | #N/A |
| 0.87 | 1.04 | 0.44 | 0.79 | 0.24 |
| 0.87 | 1.04 | 0.44 | 0.79 | 0.24 |
| 0.13 | 0.51 | 0.03 | 0.65 | 0.12 |
| 0.13 | 0.51 | 0.03 | 0.65 | 0.12 |
| 0.70 | 1.16 | 0.61 | 1.04 | 0.55 |
| 0.86 | 1.06 | 0.49 | 1.27 | 0.66 |
| 0.98 | 1.17 | 0.62 | 1.21 | 0.60 |
| 0.77 | 1.11 | 0.54 | 1.46 | 0.88 |
| 0.32 | 1.17 | 0.62 | 1.07 | 0.59 |
| 0.01 | 0.46 | 0.02 | 0.42 | 0.02 |
| 0.01 | 0.46 | 0.02 | 0.42 | 0.02 |
| 0.91 | 1.06 | 0.48 | 1.09 | 0.62 |
| 0.88 | 1.04 | 0.44 | 1.18 | 0.69 |
| 0.99 | 1.19 | 0.66 | 1.61 | 0.84 |
| 0.99 | 1.19 | 0.66 | 1.61 | 0.84 |
| #N/A | #N/A | #N/A | #N/A | #N/A |
| 0.78 | 1.15 | 0.61 | 1.05 | 0.55 |
| 0.78 | 1.15 | 0.61 | 1.05 | 0.55 |
| 0.63 | 1.20 | 0.66 | 1.40 | 0.89 |
| 0.87 | 1.22 | 0.64 | 1.06 | 0.58 |
| #N/A | #N/A | #N/A | #N/A | #N/A |
| 0.87 | 1.22 | 0.64 | 1.06 | 0.58 |
| 0.65 | 0.93 | 0.29 | 0.79 | 0.23 |
| #N/A | #N/A | #N/A | #N/A | #N/A |
| 0.65 | 0.93 | 0.29 | 0.79 | 0.23 |
| 0.51 | 0.84 | 0.22 | 0.97 | 0.46 |
| #N/A | #N/A | #N/A | #N/A | #N/A |
| #N/A | #N/A | #N/A | #N/A | #N/A |
| #N/A | 1.18 | 0.57 | 1.13 | 0.59 |
| 0.64 | 1.02 | 0.41 | 1.15 | 0.68 |
| 0.64 | 1.02 | 0.41 | 1.15 | 0.68 |
| #N/A | #N/A | #N/A | #N/A | #N/A |
| 0.97 | 0.98 | 0.36 | 1.03 | 0.54 |
| 0.97 | 0.98 | 0.36 | 1.03 | 0.54 |
| 0.73 | 3.05 | 0.61 | #N/A | #N/A |
| 0.41 | 1.17 | 0.63 | 1.00 | 0.49 |
| 0.41 | 1.17 | 0.63 | 1.00 | 0.49 |

|      |      |      |      |      |
|------|------|------|------|------|
| 0.29 | 1.24 | 0.70 | 1.49 | 0.80 |
| 0.76 | 0.97 | 0.35 | 1.01 | 0.51 |
| #N/A | 1.12 | 0.56 | 1.31 | 0.83 |
| #N/A | 1.12 | 0.56 | 1.31 | 0.83 |
| 0.85 | 1.32 | 0.81 | 1.16 | 0.70 |
| 0.85 | 1.32 | 0.81 | 1.16 | 0.70 |
| 0.68 | 0.97 | 0.35 | 0.86 | 0.32 |
| 0.64 | 1.32 | 0.81 | 1.19 | 0.74 |
| 0.34 | 1.20 | 0.67 | 1.11 | 0.61 |
| 0.64 | 1.32 | 0.81 | 1.19 | 0.74 |
| 0.80 | 0.77 | 0.15 | 1.02 | 0.52 |
| 0.80 | 0.77 | 0.15 | 1.02 | 0.52 |
| 0.49 | 1.24 | 0.71 | 1.01 | 0.50 |
| 0.97 | 1.13 | 0.58 | 0.78 | 0.22 |
| 0.43 | 0.92 | 0.34 | 0.62 | 0.11 |
| 0.43 | 0.92 | 0.34 | 0.62 | 0.11 |
| 0.79 | 1.28 | 0.74 | 1.41 | 0.89 |
| 0.19 | 0.74 | 0.12 | 0.64 | 0.10 |
| 0.49 | 0.98 | 0.35 | 1.04 | 0.55 |
| 0.36 | 1.18 | 0.65 | 0.67 | 0.20 |
| #N/A | 0.58 | 0.04 | 0.64 | 0.10 |
| #N/A | #N/A | #N/A | #N/A | #N/A |
| 0.84 | 1.17 | 0.64 | 1.21 | 0.75 |
| 0.28 | 0.47 | 0.03 | 0.53 | 0.05 |
| 0.71 | 0.97 | 0.36 | 0.84 | 0.28 |
| #N/A | #N/A | #N/A | #N/A | #N/A |
| 0.49 | 1.25 | 0.73 | 0.99 | 0.49 |
| 0.02 | 0.67 | 0.08 | 0.66 | 0.12 |
| 0.46 | 1.21 | 0.65 | 1.22 | 0.76 |
| 0.30 | 0.82 | 0.18 | 0.77 | 0.21 |
| 0.30 | 0.82 | 0.18 | 0.77 | 0.21 |
| 0.50 | 1.00 | 0.40 | 0.72 | 0.20 |
| 0.88 | 1.18 | 0.64 | 1.30 | 0.83 |
| 0.88 | 1.18 | 0.64 | 1.30 | 0.83 |
| 0.93 | 1.13 | 0.56 | 1.09 | 0.61 |
| 0.93 | 1.13 | 0.56 | 1.09 | 0.61 |
| 0.94 | 1.02 | 0.42 | 1.16 | 0.65 |
| 0.44 | 1.14 | 0.59 | 0.97 | 0.46 |
| 0.83 | 1.04 | 0.43 | 0.87 | 0.33 |
| 0.83 | 1.04 | 0.43 | 0.87 | 0.33 |
| 0.75 | 1.18 | 0.62 | 1.48 | 0.86 |
| #N/A | 1.01 | 0.40 | 1.18 | 0.66 |
| 0.75 | 1.18 | 0.62 | 1.48 | 0.86 |
| #N/A | #N/A | #N/A | #N/A | #N/A |
| #N/A | 1.01 | 0.40 | 1.18 | 0.66 |
| 0.17 | 1.34 | 0.65 | 1.13 | 0.64 |
| 0.38 | 1.30 | 0.71 | 1.02 | 0.52 |
| #N/A | #N/A | #N/A | #N/A | #N/A |
| #N/A | #N/A | #N/A | #N/A | #N/A |
| #N/A | #N/A | #N/A | #N/A | #N/A |
| 0.22 | 1.21 | 0.68 | 1.25 | 0.78 |

|      |      |      |      |      |
|------|------|------|------|------|
| 0.22 | 1.21 | 0.68 | 1.25 | 0.78 |
| #N/A | #N/A | #N/A | #N/A | #N/A |
| #N/A | #N/A | #N/A | #N/A | #N/A |
| 0.17 | 0.89 | 0.25 | 0.82 | 0.27 |
| #N/A | #N/A | #N/A | #N/A | #N/A |
| 0.73 | 0.60 | 0.05 | 1.00 | 0.49 |
| 0.73 | 0.60 | 0.05 | 1.00 | 0.49 |
| #N/A | #N/A | #N/A | 1.25 | 0.76 |
| 0.72 | 0.91 | 0.29 | 1.26 | 0.77 |
| 0.72 | 0.91 | 0.29 | 1.26 | 0.77 |
| 0.67 | 0.78 | 0.15 | 0.79 | 0.26 |
| 0.67 | 0.78 | 0.15 | 0.79 | 0.26 |
| #N/A | #N/A | #N/A | #N/A | #N/A |
| #N/A | #N/A | #N/A | #N/A | #N/A |
| #N/A | #N/A | #N/A | #N/A | #N/A |
| 0.79 | 1.23 | 0.70 | 0.96 | 0.44 |
| 0.84 | 1.16 | 0.59 | 0.93 | 0.41 |
| 0.84 | 1.16 | 0.59 | 0.93 | 0.41 |
| 0.85 | 1.17 | 0.63 | 0.97 | 0.45 |
| #N/A | 1.20 | 0.58 | 1.11 | 0.63 |
| 0.46 | 1.54 | 0.92 | 1.21 | 0.75 |
| 0.77 | 1.23 | 0.67 | 1.10 | 0.55 |
| 0.25 | 0.52 | 0.03 | 0.49 | 0.04 |
| 0.69 | 1.13 | 0.55 | 0.91 | 0.37 |
| 0.07 | 0.53 | 0.03 | 0.54 | 0.06 |
| 0.97 | 0.89 | 0.26 | 0.94 | 0.41 |
| 0.85 | 1.25 | 0.73 | 0.93 | 0.40 |
| 0.97 | 0.89 | 0.26 | 0.94 | 0.41 |
| 0.85 | 1.25 | 0.73 | 0.93 | 0.40 |
| #N/A | 1.15 | 0.57 | 1.22 | 0.63 |
| #N/A | 1.15 | 0.57 | 1.22 | 0.63 |
| 0.11 | 0.89 | 0.29 | 0.68 | 0.14 |
| 0.20 | 0.84 | 0.20 | 0.87 | 0.32 |
| 0.39 | 1.08 | 0.50 | 0.81 | 0.26 |
| 0.92 | 1.05 | 0.46 | 0.98 | 0.47 |
| 0.99 | 1.10 | 0.52 | 1.05 | 0.55 |
| 0.60 | 1.46 | 0.90 | 2.07 | 0.71 |
| 0.60 | 1.46 | 0.90 | 2.07 | 0.71 |
| 0.54 | 1.08 | 0.50 | 1.17 | 0.71 |
| 0.94 | 1.33 | 0.63 | #N/A | #N/A |
| 0.27 | 1.11 | 0.54 | 1.17 | 0.67 |
| 0.52 | 1.36 | 0.84 | 0.96 | 0.45 |
| 0.98 | 1.10 | 0.52 | 1.02 | 0.52 |
| 0.98 | 1.10 | 0.52 | 1.02 | 0.52 |
| 0.83 | 1.33 | 0.71 | 1.24 | 0.78 |
| 0.83 | 1.33 | 0.71 | 1.24 | 0.78 |
| #N/A | 1.12 | 0.54 | 0.87 | 0.32 |
| 0.89 | 0.98 | 0.35 | 1.15 | 0.70 |
| 0.76 | 0.88 | 0.24 | 0.89 | 0.35 |
| 0.76 | 0.88 | 0.24 | 0.89 | 0.35 |
| 0.81 | 0.92 | 0.28 | 0.94 | 0.42 |

|      |      |      |      |      |
|------|------|------|------|------|
| 0.45 | 1.26 | 0.74 | 0.98 | 0.47 |
| 0.79 | 1.20 | 0.67 | 1.12 | 0.66 |
| 0.79 | 1.20 | 0.67 | 1.12 | 0.66 |
| 0.17 | 0.73 | 0.12 | 0.69 | 0.14 |
| 0.80 | 1.02 | 0.42 | 0.97 | 0.45 |
| #N/A | 1.07 | 0.49 | 0.76 | 0.20 |
| 0.84 | 1.12 | 0.55 | 1.34 | 0.71 |
| 0.91 | 1.23 | 0.68 | 1.36 | 0.85 |
| 0.93 | #N/A | #N/A | 0.99 | 0.48 |
| 0.93 | #N/A | #N/A | 0.99 | 0.48 |
| 0.30 | 1.18 | 0.64 | 1.21 | 0.75 |
| 0.30 | 1.18 | 0.64 | 1.21 | 0.75 |
| 0.52 | 1.51 | 0.87 | 1.01 | 0.51 |
| 0.80 | 1.30 | 0.73 | 1.24 | 0.77 |
| 0.92 | 0.90 | 0.26 | 0.79 | 0.23 |
| 0.92 | 0.90 | 0.26 | 0.79 | 0.23 |
| 0.48 | 1.08 | 0.50 | 1.23 | 0.66 |
| 0.44 | 0.81 | 0.17 | 1.21 | 0.74 |
| #N/A | 0.97 | 0.35 | 0.83 | 0.27 |
| 0.95 | 1.01 | 0.41 | 0.88 | 0.33 |
| 0.95 | 1.01 | 0.41 | 0.88 | 0.33 |
| 0.73 | 1.09 | 0.51 | 0.91 | 0.37 |
| 0.82 | 1.12 | 0.56 | 0.93 | 0.41 |
| 0.82 | 1.12 | 0.56 | 0.93 | 0.41 |
| #N/A | 1.34 | 0.79 | 1.31 | 0.63 |
| 0.95 | 1.10 | 0.53 | 1.24 | 0.77 |
| #N/A | 1.25 | 0.73 | 1.80 | 0.97 |
| #N/A | 1.25 | 0.73 | 1.80 | 0.97 |
| #N/A | 1.57 | 0.76 | 1.40 | 0.84 |
| 0.97 | 1.21 | 0.67 | 1.34 | 0.85 |
| 0.44 | 1.07 | 0.49 | 1.03 | 0.54 |
| 0.40 | 1.18 | 0.64 | 1.31 | 0.79 |
| 0.40 | 1.18 | 0.64 | 1.31 | 0.79 |
| 0.95 | 1.20 | 0.68 | 1.24 | 0.78 |
| 0.25 | 0.86 | 0.22 | 1.08 | 0.61 |
| 0.53 | 0.90 | 0.26 | 0.88 | 0.33 |
| 0.53 | 1.14 | 0.58 | 1.21 | 0.74 |
| #N/A | #N/A | #N/A | #N/A | #N/A |
| 0.32 | 0.94 | 0.31 | 0.77 | 0.21 |
| 0.32 | 0.94 | 0.31 | 0.77 | 0.21 |
| 0.24 | 0.78 | 0.16 | 0.62 | 0.09 |
| 0.41 | 1.18 | 0.64 | 1.06 | 0.54 |
| 0.38 | 1.09 | 0.52 | 0.67 | 0.34 |
| 0.52 | 1.31 | 0.78 | 1.42 | 0.90 |
| 0.52 | 1.31 | 0.78 | 1.42 | 0.90 |
| 0.73 | 0.99 | 0.37 | 1.50 | 0.87 |
| 0.73 | 0.99 | 0.37 | 1.50 | 0.87 |
| 0.18 | 0.61 | 0.05 | 0.94 | 0.42 |
| 0.18 | 0.61 | 0.05 | 0.94 | 0.42 |
| 0.38 | 1.03 | 0.43 | 1.09 | 0.62 |
| #N/A | #N/A | #N/A | 0.59 | 0.10 |

|      |      |      |      |      |
|------|------|------|------|------|
| 0.63 | 1.39 | 0.63 | 1.29 | 0.76 |
| #N/A | #N/A | #N/A | #N/A | #N/A |
| 0.96 | 1.13 | 0.58 | 0.92 | 0.39 |
| 0.64 | 0.95 | 0.34 | 0.53 | 0.05 |
| 0.67 | #N/A | #N/A | #N/A | #N/A |
| 0.44 | 1.25 | 0.69 | 0.90 | 0.36 |
| #N/A | 1.49 | 0.91 | 0.99 | 0.48 |
| #N/A | 1.49 | 0.91 | 0.99 | 0.48 |
| #N/A | 0.78 | 0.14 | 0.94 | 0.42 |
| 0.18 | 1.23 | 0.66 | 0.73 | 0.16 |
| #N/A | #N/A | #N/A | #N/A | #N/A |
| #N/A | #N/A | #N/A | #N/A | #N/A |
| 0.91 | 1.40 | 0.87 | 0.68 | 0.14 |
| 0.61 | 1.23 | 0.70 | 1.42 | 0.87 |
| #N/A | 1.57 | 0.86 | 1.38 | 0.58 |
| #N/A | 1.57 | 0.86 | 1.38 | 0.58 |
| 0.93 | 1.35 | 0.80 | 1.15 | 0.64 |
| 0.93 | 1.35 | 0.80 | 1.15 | 0.64 |
| 0.78 | 0.96 | 0.33 | 1.06 | 0.55 |
| 0.36 | 0.87 | 0.27 | 0.56 | 0.06 |
| 0.78 | 0.97 | 0.35 | 0.98 | 0.46 |
| 0.74 | 1.03 | 0.44 | 0.94 | 0.42 |
| 0.78 | 0.80 | 0.17 | 0.74 | 0.19 |
| 0.78 | 0.80 | 0.17 | 0.74 | 0.19 |
| 0.57 | 1.08 | 0.51 | 0.97 | 0.45 |
| #N/A | #N/A | #N/A | #N/A | #N/A |
| 0.37 | 0.92 | 0.29 | 0.58 | 0.07 |
| 0.37 | 0.92 | 0.29 | 0.58 | 0.07 |
| 0.18 | 0.78 | 0.15 | 0.82 | 0.26 |
| 0.30 | 0.82 | 0.18 | 0.84 | 0.28 |
| 0.66 | 0.87 | 0.22 | 1.00 | 0.48 |
| 0.53 | 1.02 | 0.43 | 0.85 | 0.32 |
| #N/A | #N/A | #N/A | #N/A | #N/A |
| #N/A | #N/A | #N/A | #N/A | #N/A |
| 0.11 | 0.87 | 0.25 | 1.16 | 0.71 |
| #N/A | 0.81 | 0.18 | 0.79 | 0.24 |
| 0.16 | 0.73 | 0.15 | 0.66 | 0.17 |
| 0.43 | 1.19 | 0.66 | 1.35 | 0.86 |
| 0.38 | 1.31 | 0.77 | 1.09 | 0.60 |
| 0.43 | 1.19 | 0.66 | 1.35 | 0.86 |
| 0.35 | 0.90 | 0.26 | 0.73 | 0.18 |
| 0.35 | 0.90 | 0.26 | 0.73 | 0.18 |
| 0.48 | 1.03 | 0.44 | 1.14 | 0.54 |
| 0.48 | 1.03 | 0.44 | 1.14 | 0.54 |
| #N/A | 0.65 | 0.07 | 0.44 | 0.03 |
| #N/A | #N/A | #N/A | #N/A | #N/A |
| #N/A | #N/A | #N/A | #N/A | #N/A |
| 0.08 | 1.15 | 0.60 | 0.97 | 0.45 |
| 0.36 | 1.04 | 0.45 | 1.03 | 0.54 |
| 0.41 | 1.21 | 0.68 | 1.38 | 0.87 |
| #N/A | 0.53 | 0.07 | 0.48 | 0.04 |



|      |      |      |      |      |
|------|------|------|------|------|
| #N/A | 1.38 | 0.77 | 0.87 | 0.32 |
| 0.72 | 1.19 | 0.61 | 1.01 | 0.50 |
| #N/A | 1.06 | 0.48 | #N/A | #N/A |
| #N/A | 1.06 | 0.48 | #N/A | #N/A |
| 0.89 | 1.22 | 0.69 | 0.86 | 0.30 |
| 0.59 | 0.87 | 0.23 | 0.89 | 0.36 |
| #N/A | 0.80 | 0.18 | 0.86 | 0.32 |
| #N/A | #N/A | #N/A | #N/A | #N/A |
| #N/A | #N/A | #N/A | #N/A | #N/A |
| 0.77 | 1.11 | 0.54 | 0.87 | 0.33 |
| 0.81 | 1.33 | 0.77 | 1.24 | 0.78 |
| #N/A | 2.10 | 0.95 | #N/A | #N/A |
| 0.02 | 0.65 | 0.07 | 0.21 | 0.00 |
| 0.80 | 0.87 | 0.30 | 0.83 | 0.27 |
| 0.80 | 0.87 | 0.30 | 0.83 | 0.27 |
| 0.79 | 1.41 | 0.84 | 1.04 | 0.54 |
| 0.91 | 1.03 | 0.42 | 0.79 | 0.22 |
| 0.91 | 1.03 | 0.42 | 0.79 | 0.22 |
| #N/A | 0.62 | 0.11 | 0.77 | 0.21 |
| 0.90 | #N/A | #N/A | 1.12 | 0.65 |
| 0.35 | 1.10 | 0.54 | 0.70 | 0.14 |
| 0.30 | 1.01 | 0.39 | 0.97 | 0.46 |
| 0.84 | 1.01 | 0.43 | 0.96 | 0.44 |
| 0.70 | 1.05 | 0.46 | 0.93 | 0.41 |
| 0.43 | 0.84 | 0.21 | 0.96 | 0.44 |
| 0.60 | 1.18 | 0.65 | 0.88 | 0.35 |
| 0.50 | 0.84 | 0.22 | 0.81 | 0.26 |
| 0.50 | 0.84 | 0.22 | 0.81 | 0.26 |
| 0.21 | 0.89 | 0.25 | 0.77 | 0.24 |
| 0.21 | 0.89 | 0.25 | 0.77 | 0.24 |
| 0.69 | 1.20 | 0.67 | #N/A | #N/A |
| 0.69 | 1.20 | 0.67 | #N/A | #N/A |
| 0.70 | 0.96 | 0.34 | 0.70 | 0.15 |
| #N/A | #N/A | #N/A | 0.75 | 0.19 |
| #N/A | #N/A | #N/A | #N/A | #N/A |
| 0.45 | 1.08 | 0.51 | 1.13 | 0.66 |
| 0.45 | 0.90 | 0.26 | 1.11 | 0.62 |
| 0.57 | 0.89 | 0.30 | 0.98 | 0.46 |
| 0.57 | 0.89 | 0.30 | 0.98 | 0.46 |
| 0.65 | 1.26 | 0.72 | 1.01 | 0.51 |
| 0.81 | 0.94 | 0.37 | 1.28 | 0.75 |
| 0.81 | 0.94 | 0.37 | 1.28 | 0.75 |
| #N/A | 1.23 | 0.70 | 0.96 | 0.44 |
| #N/A | 1.23 | 0.70 | 0.96 | 0.44 |
| 0.85 | 1.15 | 0.61 | 1.17 | 0.71 |
| 0.85 | 1.15 | 0.61 | 1.17 | 0.71 |
| 0.52 | 1.39 | 0.84 | 0.83 | 0.28 |
| #N/A | 1.20 | 0.65 | 0.92 | 0.41 |
| 0.73 | 1.11 | 0.55 | 1.01 | 0.51 |
| #N/A | #N/A | #N/A | #N/A | #N/A |
| 0.73 | 1.11 | 0.55 | 1.01 | 0.51 |

|      |      |      |      |      |
|------|------|------|------|------|
| 0.57 | 1.36 | 0.77 | 0.79 | 0.23 |
| 0.80 | 1.37 | 0.84 | 1.16 | 0.69 |
| 0.80 | 1.37 | 0.84 | 1.16 | 0.69 |
| 0.40 | 1.05 | 0.46 | 1.11 | 0.64 |
| 0.89 | #N/A | #N/A | 0.86 | 0.31 |
| 0.89 | #N/A | #N/A | 0.86 | 0.31 |
| 0.91 | 1.32 | 0.78 | 1.08 | 0.58 |
| 0.44 | 1.12 | 0.56 | 0.97 | 0.45 |
| 0.44 | 1.12 | 0.56 | 0.97 | 0.45 |
| 0.60 | 1.18 | 0.54 | 1.00 | 0.50 |
| 0.60 | 1.18 | 0.54 | 1.00 | 0.50 |
| #N/A | 1.12 | 0.56 | 1.14 | 0.63 |
| #N/A | #N/A | #N/A | #N/A | #N/A |
| 0.40 | 0.96 | 0.39 | 1.27 | 0.78 |
| 0.88 | 1.13 | 0.57 | 1.07 | 0.56 |
| 0.94 | 1.21 | 0.66 | 0.96 | 0.45 |
| #N/A | #N/A | #N/A | #N/A | #N/A |
| 0.05 | 0.58 | 0.04 | 0.51 | 0.06 |
| 0.05 | 0.58 | 0.04 | 0.51 | 0.06 |
| 0.74 | 1.19 | 0.52 | 0.95 | 0.43 |
| 0.76 | 1.32 | 0.81 | 1.07 | 0.55 |
| 0.74 | 1.19 | 0.52 | 0.95 | 0.43 |
| 0.76 | 1.32 | 0.81 | 1.07 | 0.55 |
| 0.69 | 1.26 | 0.73 | 1.23 | 0.76 |
| 0.69 | 1.26 | 0.73 | 1.23 | 0.76 |
| 0.73 | 0.92 | 0.28 | 1.02 | 0.52 |
| 0.56 | 1.25 | 0.69 | 1.95 | 0.96 |
| 0.82 | 1.01 | 0.42 | 1.17 | 0.70 |
| 0.86 | 1.04 | 0.47 | #N/A | #N/A |
| 0.86 | 1.04 | 0.47 | #N/A | #N/A |
| 0.43 | 0.98 | 0.36 | 0.73 | 0.17 |
| 0.43 | 0.98 | 0.36 | 0.73 | 0.17 |
| 0.91 | 1.19 | 0.62 | 0.92 | 0.40 |
| 0.29 | 1.14 | 0.58 | 1.07 | 0.60 |
| 0.91 | 1.19 | 0.62 | 0.92 | 0.40 |
| 0.68 | 0.79 | 0.17 | 0.69 | 0.14 |
| 0.68 | 0.79 | 0.17 | 0.69 | 0.14 |
| 0.13 | 0.72 | 0.12 | 0.63 | 0.10 |
| 0.30 | 0.44 | 0.02 | 0.34 | 0.01 |
| 0.30 | 0.44 | 0.02 | 0.34 | 0.01 |
| 0.30 | 0.44 | 0.02 | 0.34 | 0.01 |
| 0.30 | 0.44 | 0.02 | 0.34 | 0.01 |
| 0.30 | 0.44 | 0.02 | 0.34 | 0.01 |
| 0.83 | 1.21 | 0.63 | 1.46 | 0.91 |
| 0.75 | 1.13 | 0.55 | 1.46 | 0.84 |
| #N/A | 1.00 | 0.42 | 1.03 | 0.51 |
| 0.73 | 1.17 | 0.62 | 1.44 | 0.86 |
| 0.73 | 1.17 | 0.62 | 1.44 | 0.86 |
| 0.67 | 0.90 | 0.31 | 0.95 | 0.42 |
| 0.67 | 0.90 | 0.31 | 0.95 | 0.42 |
| 0.92 | 1.36 | 0.80 | 0.99 | 0.48 |

|      |      |      |      |      |
|------|------|------|------|------|
| 0.92 | 1.36 | 0.80 | 0.99 | 0.48 |
| 0.84 | 1.41 | 0.81 | 1.39 | 0.85 |
| 0.88 | 1.21 | 0.67 | 1.47 | 0.80 |
| 0.69 | 1.12 | 0.56 | 1.22 | 0.76 |
| #N/A | #N/A | #N/A | #N/A | #N/A |
| 0.72 | 0.94 | 0.33 | 0.83 | 0.27 |
| 0.27 | 0.69 | 0.09 | 0.78 | 0.29 |
| 0.27 | 0.69 | 0.09 | 0.78 | 0.29 |
| 0.73 | 1.17 | 0.63 | 1.05 | 0.57 |
| 0.73 | 1.17 | 0.63 | 1.05 | 0.57 |
| #N/A | 0.98 | 0.38 | 0.87 | 0.33 |
| 0.80 | 1.64 | 0.96 | 1.11 | 0.64 |
| 0.73 | 1.13 | 0.57 | 1.06 | 0.57 |
| 0.73 | 1.13 | 0.57 | 1.06 | 0.57 |
| 0.89 | 1.26 | 0.68 | 0.88 | 0.33 |
| 0.80 | 1.21 | 0.69 | 1.00 | 0.49 |
| 0.80 | 1.21 | 0.69 | 1.00 | 0.49 |
| 0.65 | 1.16 | 0.58 | 1.20 | 0.69 |
| #N/A | 0.98 | 0.40 | 1.23 | 0.76 |
| #N/A | 1.23 | 0.60 | 0.89 | 0.38 |
| 0.15 | 0.72 | 0.11 | 0.96 | 0.45 |
| 0.49 | 0.95 | 0.33 | 1.42 | 0.81 |
| 0.15 | 0.72 | 0.11 | 0.96 | 0.45 |
| 0.49 | 0.95 | 0.33 | 1.42 | 0.81 |
| 0.69 | 0.86 | 0.25 | 0.77 | 0.22 |
| 0.69 | 0.86 | 0.25 | 0.77 | 0.22 |
| 0.66 | 1.06 | 0.47 | 1.05 | 0.57 |
| #N/A | #N/A | #N/A | #N/A | #N/A |
| #N/A | #N/A | #N/A | #N/A | #N/A |
| #N/A | #N/A | #N/A | #N/A | #N/A |
| #N/A | 1.57 | 0.94 | 0.84 | 0.28 |
| #N/A | 1.57 | 0.94 | 0.84 | 0.28 |
| #N/A | #N/A | #N/A | #N/A | #N/A |
| #N/A | #N/A | #N/A | #N/A | #N/A |
| 0.94 | 1.26 | 0.75 | #N/A | #N/A |
| 0.94 | 1.26 | 0.75 | #N/A | #N/A |
| 0.87 | 0.97 | 0.36 | 1.19 | 0.74 |
| #N/A | #N/A | #N/A | #N/A | #N/A |
| 0.87 | 0.97 | 0.36 | 1.19 | 0.74 |
| 0.91 | 0.96 | 0.33 | 1.19 | 0.71 |
| #N/A | 1.01 | 0.40 | 1.34 | 0.86 |
| 0.75 | 0.97 | 0.35 | 1.14 | 0.64 |
| 0.75 | 0.97 | 0.35 | 1.14 | 0.64 |
| #N/A | 1.39 | 0.79 | 1.45 | 0.85 |
| #N/A | #N/A | #N/A | #N/A | #N/A |
| 0.35 | 0.84 | 0.20 | 0.73 | 0.18 |
| 0.73 | 1.38 | 0.75 | 1.11 | 0.63 |
| 0.63 | 1.11 | 0.54 | 1.28 | 0.73 |
| 0.83 | 0.85 | 0.21 | 0.60 | 0.10 |
| 0.46 | 1.37 | 0.84 | 1.48 | 0.86 |
| 0.46 | 1.37 | 0.84 | 1.48 | 0.86 |

|      |      |      |      |      |
|------|------|------|------|------|
| 0.77 | 0.87 | 0.23 | 1.07 | 0.59 |
| 0.21 | 1.20 | 0.66 | 1.17 | 0.68 |
| 0.76 | 1.32 | 0.79 | 1.03 | 0.52 |
| 0.19 | 0.75 | 0.12 | 0.78 | 0.24 |
| 0.76 | 1.32 | 0.79 | 1.03 | 0.52 |
| 0.19 | 0.75 | 0.12 | 0.78 | 0.24 |
| 0.79 | 1.21 | 0.65 | 0.87 | 0.33 |
| 0.04 | 0.75 | 0.13 | 0.75 | 0.20 |
| 0.04 | 0.75 | 0.13 | 0.75 | 0.20 |
| 0.15 | 0.79 | 0.16 | 0.86 | 0.33 |
| 0.62 | 1.15 | 0.59 | 0.90 | 0.37 |
| 0.85 | 1.19 | 0.63 | 1.08 | 0.60 |
| 0.85 | 1.19 | 0.63 | 1.08 | 0.60 |
| #N/A | #N/A | #N/A | #N/A | #N/A |
| 0.46 | 1.18 | 0.61 | 1.01 | 0.50 |
| 0.46 | 1.18 | 0.61 | 1.01 | 0.50 |
| 0.07 | 0.60 | 0.05 | 0.60 | 0.07 |
| 0.07 | 0.60 | 0.05 | 0.60 | 0.07 |
| 0.82 | 1.21 | 0.68 | 0.77 | 0.20 |
| 0.91 | 1.08 | 0.50 | 1.54 | 0.90 |
| 0.91 | 1.08 | 0.50 | 1.54 | 0.90 |
| 0.57 | 1.22 | 0.67 | 1.07 | 0.54 |
| 0.75 | 1.27 | 0.75 | 1.33 | 0.85 |
| #N/A | #N/A | #N/A | #N/A | #N/A |
| 0.75 | 1.27 | 0.75 | 1.33 | 0.85 |
| 0.32 | 0.96 | 0.34 | 0.80 | 0.27 |
| #N/A | 1.38 | 0.69 | 0.90 | 0.40 |
| #N/A | 1.38 | 0.69 | 0.90 | 0.40 |
| 0.17 | 0.82 | 0.21 | 1.44 | 0.86 |
| 0.58 | 1.08 | 0.50 | 0.77 | 0.21 |
| 0.46 | 1.14 | 0.58 | 0.86 | 0.33 |
| 0.32 | 1.20 | 0.67 | 1.21 | 0.65 |
| 0.76 | 0.95 | 0.33 | 1.27 | 0.73 |
| #N/A | 1.08 | 0.50 | #N/A | #N/A |
| #N/A | 1.08 | 0.50 | #N/A | #N/A |
| #N/A | #N/A | #N/A | #N/A | #N/A |
| 0.84 | 0.87 | 0.24 | 0.75 | 0.20 |
| 0.84 | 0.87 | 0.24 | 0.75 | 0.20 |
| 0.62 | 1.00 | 0.38 | 1.23 | 0.72 |
| 0.12 | 1.04 | 0.46 | 1.00 | 0.50 |
| 0.55 | 1.22 | 0.69 | 1.24 | 0.57 |
| 0.79 | #N/A | #N/A | 0.57 | 0.06 |
| 0.09 | 0.50 | 0.02 | 0.58 | 0.07 |
| 0.80 | 0.98 | 0.37 | 1.31 | 0.82 |
| 0.72 | 0.93 | 0.31 | 1.14 | 0.62 |
| 0.61 | 0.66 | 0.07 | 0.64 | 0.10 |
| 0.21 | 1.25 | 0.74 | 0.94 | 0.42 |
| 0.80 | 1.16 | 0.61 | 1.09 | 0.61 |
| 0.80 | 1.16 | 0.61 | 1.09 | 0.61 |
| #N/A | #N/A | #N/A | #N/A | #N/A |
| 0.75 | 1.24 | 0.62 | 0.89 | 0.35 |

|      |      |      |      |      |
|------|------|------|------|------|
| 0.75 | 1.24 | 0.62 | 0.89 | 0.35 |
| #N/A | #N/A | #N/A | #N/A | #N/A |
| 0.51 | 0.89 | 0.25 | 1.03 | 0.54 |
| #N/A | #N/A | #N/A | #N/A | #N/A |
| #N/A | #N/A | #N/A | #N/A | #N/A |
| 0.47 | 1.16 | 0.62 | #N/A | #N/A |
| 0.15 | 0.90 | 0.27 | 0.78 | 0.22 |
| 0.15 | 0.90 | 0.27 | 0.78 | 0.22 |
| 0.10 | 0.76 | 0.15 | 0.69 | 0.21 |
| 0.21 | 0.98 | 0.38 | 0.63 | 0.10 |
| 0.56 | 0.80 | 0.16 | 1.31 | 0.84 |
| 0.67 | 1.16 | 0.58 | 1.11 | 0.62 |
| 0.89 | 1.03 | 0.42 | 0.97 | 0.47 |
| 0.60 | 1.05 | 0.46 | 0.88 | 0.33 |
| 0.53 | 1.17 | 0.58 | 1.45 | 0.82 |
| 0.79 | 1.09 | 0.51 | 0.98 | 0.47 |
| 0.52 | 1.07 | 0.49 | 0.85 | 0.30 |
| 0.52 | 1.07 | 0.49 | 0.85 | 0.30 |
| 0.92 | 1.16 | 0.62 | 0.95 | 0.43 |
| 0.92 | 1.16 | 0.62 | 0.95 | 0.43 |
| 0.73 | 1.44 | 0.87 | 1.27 | 0.78 |
| #N/A | 0.83 | 0.21 | #N/A | #N/A |
| 0.24 | 1.85 | 0.98 | 0.98 | 0.48 |
| 0.24 | 1.85 | 0.98 | 0.98 | 0.48 |
| 0.34 | 1.38 | 0.84 | 1.02 | 0.53 |
| #N/A | #N/A | #N/A | #N/A | #N/A |
| 0.38 | 1.24 | 0.69 | 0.92 | 0.38 |
| 0.70 | 1.02 | 0.41 | 0.82 | 0.30 |
| 0.70 | 1.02 | 0.41 | 0.82 | 0.30 |
| 0.19 | 0.84 | 0.21 | 0.90 | 0.37 |
| 0.72 | 1.20 | 0.65 | 1.06 | 0.58 |
| 0.72 | 1.20 | 0.65 | 1.06 | 0.58 |
| 0.97 | 0.98 | 0.36 | 1.40 | 0.84 |
| 0.97 | 0.98 | 0.36 | 1.40 | 0.84 |
| 0.69 | 0.99 | 0.37 | 1.07 | 0.58 |
| 0.83 | 1.38 | 0.81 | 1.31 | 0.69 |
| 0.79 | 0.92 | 0.29 | 1.42 | 0.84 |
| #N/A | 0.98 | 0.40 | 1.15 | 0.67 |
| 0.72 | 0.89 | 0.32 | 1.02 | 0.49 |
| 0.45 | 0.91 | 0.29 | 0.81 | 0.24 |
| 0.32 | 0.98 | 0.35 | 0.87 | 0.31 |
| 0.04 | 0.53 | 0.03 | 0.72 | 0.19 |
| 0.63 | 1.06 | 0.49 | 1.00 | 0.50 |
| 0.63 | 1.06 | 0.49 | 1.00 | 0.50 |
| 0.78 | 0.94 | 0.32 | 0.74 | 0.27 |
| 0.75 | 0.95 | 0.34 | 0.97 | 0.45 |
| 0.48 | 1.48 | 0.90 | 1.52 | 0.73 |
| #N/A | #N/A | #N/A | 1.29 | 0.63 |
| #N/A | #N/A | #N/A | 1.29 | 0.63 |
| 0.37 | 1.05 | 0.46 | 0.64 | 0.12 |
| 0.72 | 1.05 | 0.46 | 0.97 | 0.45 |

|      |      |      |      |      |
|------|------|------|------|------|
| #N/A | #N/A | #N/A | #N/A | #N/A |
| 0.88 | 1.20 | 0.67 | 1.18 | 0.71 |
| 0.88 | 1.20 | 0.67 | 1.18 | 0.71 |
| 0.29 | 0.95 | 0.32 | 0.86 | 0.31 |
| 0.51 | 1.00 | 0.43 | 1.10 | 0.60 |
| #N/A | 0.93 | 0.34 | 0.80 | 0.28 |
| #N/A | 0.93 | 0.34 | 0.80 | 0.28 |
| 0.89 | 1.13 | 0.57 | 1.41 | 0.90 |
| 0.89 | 1.13 | 0.57 | 1.41 | 0.90 |
| 0.99 | 1.23 | 0.63 | 1.19 | 0.73 |
| #N/A | 1.19 | 0.65 | 1.18 | 0.72 |
| #N/A | 1.19 | 0.65 | 1.18 | 0.72 |
| 0.77 | 1.11 | 0.54 | 1.09 | 0.62 |
| #N/A | #N/A | #N/A | #N/A | #N/A |
| 0.62 | 0.94 | 0.30 | 0.83 | 0.30 |
| 0.62 | 0.94 | 0.30 | 0.83 | 0.30 |
| #N/A | #N/A | #N/A | #N/A | #N/A |
| 0.41 | 1.23 | 0.71 | 1.41 | 0.81 |
| 0.71 | 1.30 | 0.79 | 1.04 | 0.55 |
| 0.75 | 1.93 | 0.99 | 0.86 | 0.33 |
| 0.28 | 0.83 | 0.19 | 0.86 | 0.43 |
| 0.28 | 0.83 | 0.19 | 0.86 | 0.43 |
| 0.83 | 1.24 | 0.72 | 0.95 | 0.42 |
| #N/A | 0.72 | 0.11 | 0.78 | 0.21 |
| 0.24 | 1.14 | 0.58 | #N/A | #N/A |
| 0.62 | 0.97 | 0.35 | 0.77 | 0.21 |
| 0.07 | 0.68 | 0.09 | 0.53 | 0.05 |
| 0.78 | 0.79 | 0.16 | 1.05 | 0.56 |
| 0.78 | 0.79 | 0.16 | 1.05 | 0.56 |
| 0.50 | 0.97 | 0.37 | 0.86 | 0.35 |
| 0.80 | 1.12 | 0.56 | 1.02 | 0.51 |
| 0.82 | 1.11 | 0.54 | 1.22 | 0.73 |
| 0.82 | 1.11 | 0.54 | 1.22 | 0.73 |
| 0.39 | 1.23 | 0.70 | 1.32 | 0.84 |
| 0.56 | 1.13 | 0.56 | 1.26 | 0.80 |
| 0.74 | 1.44 | 0.76 | 1.35 | 0.83 |
| #N/A | 1.37 | 0.84 | 1.18 | 0.72 |
| #N/A | 1.20 | 0.59 | 1.01 | 0.50 |
| #N/A | #N/A | #N/A | #N/A | #N/A |
| #N/A | #N/A | #N/A | #N/A | #N/A |
| 0.39 | 1.17 | 0.60 | 0.63 | 0.11 |
| #N/A | 1.26 | 0.74 | 1.17 | 0.71 |
| 0.63 | 0.96 | 0.35 | 0.62 | 0.14 |
| 0.73 | 1.07 | 0.48 | 0.92 | 0.38 |
| 0.73 | 1.07 | 0.48 | 0.92 | 0.38 |
| 0.46 | 1.24 | 0.66 | #N/A | #N/A |
| #N/A | 1.25 | 0.72 | 1.13 | 0.67 |
| #N/A | 2.92 | 0.54 | 0.72 | 0.27 |
| #N/A | 1.25 | 0.72 | 1.13 | 0.67 |
| #N/A | 2.92 | 0.54 | 0.72 | 0.27 |
| #N/A | 0.76 | 0.19 | 0.65 | 0.13 |

|      |      |      |      |      |
|------|------|------|------|------|
| 0.96 | 0.99 | 0.39 | 1.23 | 0.75 |
| 0.96 | 0.99 | 0.39 | 1.23 | 0.75 |
| 0.95 | 1.00 | 0.39 | 0.88 | 0.34 |
| 0.95 | 1.00 | 0.39 | 0.88 | 0.34 |
| 0.82 | 1.14 | 0.59 | 1.20 | 0.66 |
| 0.62 | 1.01 | 0.40 | 0.78 | 0.22 |
| 0.62 | 1.01 | 0.40 | 0.78 | 0.22 |
| 0.41 | 1.18 | 0.58 | 1.08 | 0.59 |
| 0.70 | 1.24 | 0.72 | 0.96 | 0.44 |
| 0.70 | 1.24 | 0.72 | 0.96 | 0.44 |
| 0.66 | 1.55 | 0.91 | 1.07 | 0.58 |
| 0.26 | 0.67 | 0.08 | 0.74 | 0.18 |
| #N/A | #N/A | #N/A | #N/A | #N/A |
| 0.43 | 1.15 | 0.60 | 1.16 | 0.70 |
| 0.01 | 0.40 | 0.01 | 0.47 | 0.04 |
| 0.01 | 0.40 | 0.01 | 0.47 | 0.04 |
| 0.32 | 0.98 | 0.37 | 1.04 | 0.55 |
| 0.81 | 1.04 | 0.45 | 1.14 | 0.67 |
| 0.81 | 1.04 | 0.45 | 1.14 | 0.67 |
| 0.19 | 1.30 | 0.77 | 0.84 | 0.28 |
| #N/A | 1.14 | 0.55 | 0.71 | 0.15 |
| 0.85 | 1.21 | 0.68 | 1.34 | 0.81 |
| 0.85 | 1.21 | 0.68 | 1.34 | 0.81 |
| #N/A | 1.27 | 0.60 | 1.09 | 0.61 |
| #N/A | 1.10 | 0.51 | 1.08 | 0.61 |
| 0.48 | 1.01 | 0.40 | 1.21 | 0.75 |
| #N/A | #N/A | #N/A | #N/A | #N/A |
| 0.50 | 1.12 | 0.53 | 1.03 | 0.53 |
| 0.50 | 1.12 | 0.53 | 1.03 | 0.53 |
| #N/A | 0.57 | 0.04 | 0.79 | 0.22 |
| 0.32 | 1.13 | 0.57 | 0.89 | 0.36 |
| #N/A | #N/A | #N/A | 0.87 | 0.32 |
| 0.32 | 1.10 | 0.53 | 1.10 | 0.62 |
| 0.32 | 1.10 | 0.53 | 1.10 | 0.62 |
| 0.93 | 1.04 | 0.46 | 0.92 | 0.40 |
| 0.93 | 1.04 | 0.46 | 0.92 | 0.40 |
| 0.54 | 1.17 | 0.63 | 1.32 | 0.84 |
| #N/A | 1.17 | 0.57 | #N/A | #N/A |
| 0.71 | 0.97 | 0.35 | 1.00 | 0.50 |
| 0.71 | 0.97 | 0.35 | 1.00 | 0.50 |
| 0.61 | 1.63 | 0.94 | 0.84 | 0.29 |
| 0.97 | 1.43 | 0.84 | 1.07 | 0.57 |
| 0.97 | 1.43 | 0.84 | 1.07 | 0.57 |
| 0.19 | 0.91 | 0.27 | 0.82 | 0.26 |
| 0.64 | 1.10 | 0.53 | 1.13 | 0.50 |
| 0.43 | 1.23 | 0.68 | 0.92 | 0.38 |
| 0.43 | 1.23 | 0.68 | 0.92 | 0.38 |
| 0.26 | 1.03 | 0.42 | 0.86 | 0.35 |
| 0.02 | 0.63 | 0.06 | #N/A | #N/A |
| 0.26 | 1.03 | 0.42 | 0.86 | 0.35 |
| 0.03 | #N/A | #N/A | 0.48 | 0.03 |

|      |      |      |      |      |
|------|------|------|------|------|
| 0.45 | 1.30 | 0.75 | 1.47 | 0.91 |
| #N/A | #N/A | #N/A | 1.57 | 0.93 |
| #N/A | 0.66 | 0.11 | #N/A | #N/A |
| 0.99 | 1.40 | 0.80 | 1.23 | 0.77 |
| 0.99 | 1.40 | 0.80 | 1.23 | 0.77 |
| 0.95 | 0.67 | 0.10 | 0.78 | 0.31 |
| 0.95 | 0.67 | 0.10 | 0.78 | 0.31 |
| #N/A | #N/A | #N/A | #N/A | #N/A |
| 0.83 | 1.06 | 0.48 | 0.95 | 0.43 |
| #N/A | #N/A | #N/A | #N/A | #N/A |
| 0.83 | 1.06 | 0.48 | 0.95 | 0.43 |
| #N/A | #N/A | #N/A | #N/A | #N/A |
| #N/A | #N/A | #N/A | #N/A | #N/A |
| 0.16 | 1.29 | 0.78 | 1.04 | 0.55 |
| 0.94 | 1.27 | 0.75 | 1.62 | 0.96 |
| 0.94 | 1.27 | 0.75 | 1.62 | 0.96 |
| #N/A | 1.17 | 0.63 | 1.14 | 0.66 |
| 0.49 | 1.37 | 0.81 | 1.49 | 0.90 |
| #N/A | 1.17 | 0.53 | 0.91 | 0.42 |
| 0.39 | 1.37 | 0.84 | 1.44 | 0.90 |
| 0.01 | 0.48 | 0.02 | 0.58 | 0.09 |
| 0.01 | 0.48 | 0.02 | 0.58 | 0.09 |
| 0.70 | 1.24 | 0.69 | #N/A | #N/A |
| 0.70 | 1.24 | 0.69 | #N/A | #N/A |
| #N/A | #N/A | #N/A | #N/A | #N/A |
| 0.89 | 1.02 | 0.43 | 0.92 | 0.39 |
| 0.10 | 0.66 | 0.07 | 0.86 | 0.31 |
| 0.10 | 0.66 | 0.07 | 0.86 | 0.31 |
| 0.28 | 0.91 | 0.28 | 0.92 | 0.39 |
| 0.28 | 0.91 | 0.28 | 0.92 | 0.39 |
| #N/A | #N/A | #N/A | #N/A | #N/A |
| #N/A | #N/A | #N/A | #N/A | #N/A |
| 0.88 | 1.25 | 0.72 | 1.01 | 0.50 |
| 0.77 | 0.90 | 0.26 | 1.02 | 0.53 |
| 0.80 | 1.06 | 0.48 | 0.94 | 0.43 |
| 0.77 | 0.90 | 0.26 | 1.02 | 0.53 |
| 0.80 | 1.06 | 0.48 | 0.94 | 0.43 |
| #N/A | 1.04 | 0.44 | 1.14 | 0.65 |
| 0.84 | 1.37 | 0.83 | 1.20 | 0.63 |
| 0.84 | 1.37 | 0.83 | 1.20 | 0.63 |
| #N/A | #N/A | #N/A | #N/A | #N/A |
| #N/A | #N/A | #N/A | #N/A | #N/A |
| #N/A | #N/A | #N/A | #N/A | #N/A |
| #N/A | #N/A | #N/A | #N/A | #N/A |
| 0.98 | 1.22 | 0.63 | 1.01 | 0.51 |
| 0.98 | 1.22 | 0.63 | 1.01 | 0.51 |
| #N/A | 1.26 | 0.73 | 1.76 | 0.80 |
| 0.62 | 1.16 | 0.55 | 1.02 | 0.53 |
| 0.62 | 1.16 | 0.55 | 1.02 | 0.53 |
| 0.25 | 0.61 | 0.05 | 0.63 | 0.10 |
| 0.25 | 0.61 | 0.05 | 0.63 | 0.10 |



|      |      |      |      |      |
|------|------|------|------|------|
| 0.39 | 0.96 | 0.36 | 1.28 | 0.74 |
| 0.60 | 1.41 | 0.78 | 1.48 | 0.85 |
| 0.29 | 1.35 | 0.83 | 1.46 | 0.79 |
| 0.61 | 1.09 | 0.51 | 1.05 | 0.53 |
| 0.85 | 1.12 | 0.56 | 1.13 | 0.67 |
| 0.85 | 1.12 | 0.56 | 1.13 | 0.67 |
| 0.65 | 1.19 | 0.61 | 1.00 | 0.49 |
| 0.94 | 1.14 | 0.58 | 1.29 | 0.82 |
| 0.94 | 1.14 | 0.58 | 1.29 | 0.82 |
| 0.63 | 1.33 | 0.75 | 1.20 | 0.71 |
| #N/A | 0.85 | 0.21 | 0.88 | 0.38 |
| #N/A | 0.85 | 0.21 | 0.88 | 0.38 |
| #N/A | #N/A | #N/A | #N/A | #N/A |
| 0.87 | 1.12 | 0.55 | 1.11 | 0.54 |
| 0.41 | 0.92 | 0.31 | 0.72 | 0.17 |
| #N/A | 0.70 | 0.15 | 0.43 | 0.03 |
| 0.79 | 1.28 | 0.73 | 0.86 | 0.31 |
| 0.79 | 1.28 | 0.73 | 0.86 | 0.31 |
| 0.96 | 1.04 | 0.46 | #N/A | #N/A |
| 0.76 | 1.09 | 0.51 | #N/A | #N/A |
| 0.96 | 1.04 | 0.46 | #N/A | #N/A |
| 0.76 | 1.09 | 0.51 | #N/A | #N/A |
| 0.87 | 1.19 | 0.60 | #N/A | #N/A |
| #N/A | 1.11 | 0.55 | 1.16 | 0.69 |
| 0.13 | 1.31 | 0.77 | 0.89 | 0.35 |
| 0.54 | 1.02 | 0.42 | 1.56 | 0.79 |
| 0.73 | 0.85 | 0.21 | 1.06 | 0.57 |
| 0.73 | 0.85 | 0.21 | 1.06 | 0.57 |
| 0.19 | 0.71 | 0.10 | 0.56 | 0.06 |
| 0.19 | 0.71 | 0.10 | 0.56 | 0.06 |
| #N/A | #N/A | #N/A | #N/A | #N/A |
| #N/A | 1.22 | 0.69 | 1.28 | 0.81 |
| 0.47 | 0.99 | 0.37 | 0.93 | 0.40 |
| 0.47 | 0.99 | 0.37 | 0.93 | 0.40 |
| 0.76 | 0.75 | 0.27 | 0.49 | 0.04 |
| 0.17 | 0.91 | 0.28 | 0.82 | 0.25 |
| 0.13 | 0.39 | 0.01 | 0.36 | 0.01 |
| 0.17 | 0.91 | 0.28 | 0.82 | 0.25 |
| 0.13 | 0.39 | 0.01 | 0.36 | 0.01 |
| 0.34 | 1.02 | 0.42 | 0.85 | 0.30 |
| #N/A | #N/A | #N/A | #N/A | #N/A |
| #N/A | #N/A | #N/A | #N/A | #N/A |
| 0.51 | 0.98 | 0.40 | 0.66 | 0.11 |
| 0.51 | 0.98 | 0.40 | 0.66 | 0.11 |
| 0.95 | 1.37 | 0.83 | 1.19 | 0.67 |
| 0.95 | 1.37 | 0.83 | 1.19 | 0.67 |
| 0.49 | 1.26 | 0.59 | 0.64 | 0.10 |
| #N/A | 1.13 | 0.56 | #N/A | #N/A |
| #N/A | #N/A | #N/A | 1.10 | 0.57 |
| #N/A | #N/A | #N/A | #N/A | #N/A |
| #N/A | #N/A | #N/A | 1.13 | 0.67 |

|      |      |      |      |      |
|------|------|------|------|------|
| 0.36 | 0.87 | 0.23 | 0.86 | 0.31 |
| 0.04 | 0.85 | 0.27 | 0.97 | 0.45 |
| 0.04 | 0.85 | 0.27 | 0.97 | 0.45 |
| 0.45 | 1.12 | 0.56 | 1.05 | 0.56 |
| 0.10 | 0.73 | 0.12 | 0.58 | 0.08 |
| 0.62 | 1.14 | 0.59 | 1.10 | 0.63 |
| 0.68 | 0.92 | 0.28 | 1.20 | 0.69 |
| 0.61 | 1.10 | 0.52 | 1.04 | 0.55 |
| 0.61 | 1.10 | 0.52 | 1.04 | 0.55 |
| 0.57 | 1.03 | 0.44 | 1.06 | 0.57 |
| 0.57 | 1.41 | 0.87 | 0.88 | 0.34 |
| 0.30 | 1.16 | 0.60 | 0.77 | 0.21 |
| 0.22 | 1.06 | 0.47 | 1.21 | 0.75 |
| 0.22 | 1.06 | 0.47 | 1.21 | 0.75 |
| 0.39 | 0.98 | 0.37 | 1.27 | 0.79 |
| 0.52 | 1.05 | 0.46 | #N/A | #N/A |
| 0.39 | 0.98 | 0.37 | 1.27 | 0.79 |
| 0.72 | 1.54 | 0.93 | 1.02 | 0.53 |
| 0.76 | 1.12 | 0.56 | 1.25 | 0.70 |
| 0.21 | 1.14 | 0.58 | 1.34 | 0.86 |
| 0.09 | 0.59 | 0.04 | 0.81 | 0.28 |
| 0.25 | 0.66 | 0.08 | 0.83 | 0.28 |
| 0.25 | 0.66 | 0.08 | 0.83 | 0.28 |
| 0.77 | 1.07 | 0.49 | 0.89 | 0.34 |
| #N/A | #N/A | #N/A | #N/A | #N/A |
| 0.79 | 1.11 | 0.53 | 0.87 | 0.32 |
| 0.62 | 0.80 | 0.17 | 1.10 | 0.55 |
| 0.62 | 0.80 | 0.17 | 1.10 | 0.55 |
| 0.29 | 1.14 | 0.59 | 1.04 | 0.55 |
| 0.01 | 0.28 | 0.00 | 0.28 | 0.00 |
| 0.02 | 0.59 | 0.05 | 0.53 | 0.05 |
| 0.02 | 0.59 | 0.05 | 0.53 | 0.05 |
| 0.29 | 0.97 | 0.36 | 0.84 | 0.28 |
| 0.64 | 0.99 | 0.41 | 1.65 | 0.96 |
| 0.62 | 1.13 | 0.57 | 0.90 | 0.37 |
| #N/A | 1.70 | 0.96 | 0.80 | 0.31 |
| #N/A | 1.70 | 0.96 | 0.80 | 0.31 |
| 0.89 | 1.18 | 0.64 | 0.91 | 0.39 |
| 0.89 | 1.18 | 0.64 | 0.91 | 0.39 |
| 0.18 | 0.58 | 0.04 | 0.64 | 0.14 |
| 0.18 | 0.58 | 0.04 | 0.64 | 0.14 |
| 0.75 | 1.00 | 0.40 | 1.18 | 0.69 |
| 0.75 | 1.00 | 0.40 | 1.18 | 0.69 |
| #N/A | 1.28 | 0.73 | 0.86 | 0.33 |
| #N/A | 1.00 | 0.40 | 1.11 | 0.64 |
| 0.91 | 1.03 | 0.43 | 0.76 | 0.21 |
| 0.91 | 1.03 | 0.43 | 0.76 | 0.21 |
| 0.70 | 1.00 | 0.38 | 0.93 | 0.40 |
| 0.70 | 1.00 | 0.38 | 0.93 | 0.40 |
| 0.27 | 0.86 | 0.22 | 0.98 | 0.47 |
| #N/A | 0.79 | 0.16 | 0.67 | 0.14 |

|      |      |      |      |      |
|------|------|------|------|------|
| 0.70 | 1.33 | 0.81 | 1.08 | 0.61 |
| 0.70 | 1.33 | 0.81 | 1.08 | 0.61 |
| 0.34 | 1.18 | 0.60 | 1.02 | 0.53 |
| 0.93 | 1.16 | 0.55 | 1.27 | 0.74 |
| 0.29 | 0.92 | 0.30 | 0.80 | 0.27 |
| #N/A | 0.75 | 0.13 | 0.58 | 0.08 |
| #N/A | 0.75 | 0.13 | 0.58 | 0.08 |
| #N/A | 0.75 | 0.13 | 0.58 | 0.08 |
| #N/A | #N/A | #N/A | #N/A | #N/A |
| 0.49 | 0.99 | 0.37 | 1.14 | 0.67 |
| 0.84 | 1.03 | 0.44 | 1.05 | 0.51 |
| 0.84 | 1.03 | 0.44 | 1.05 | 0.51 |
| 0.46 | 0.73 | 0.12 | 1.12 | 0.61 |
| 0.41 | 1.52 | 0.93 | 1.20 | 0.70 |
| #N/A | 1.13 | 0.57 | 1.19 | 0.64 |
| #N/A | 1.16 | 0.56 | 1.10 | 0.60 |
| 0.01 | #N/A | #N/A | 0.52 | 0.06 |
| 0.01 | #N/A | #N/A | 0.52 | 0.06 |
| 0.01 | #N/A | #N/A | 0.52 | 0.06 |
| 0.20 | 1.17 | 0.59 | 1.10 | 0.62 |
| #N/A | #N/A | #N/A | #N/A | #N/A |
| 0.58 | 1.24 | 0.68 | 1.23 | 0.77 |
| 0.68 | 0.93 | 0.32 | 1.01 | 0.51 |
| 0.89 | 1.30 | 0.71 | 0.89 | 0.34 |
| 0.62 | 1.33 | 0.79 | 1.09 | 0.61 |
| 0.62 | 1.33 | 0.79 | 1.09 | 0.61 |
| 0.02 | 0.73 | 0.18 | 0.62 | 0.11 |
| 0.30 | 0.94 | 0.30 | 0.87 | 0.34 |
| 0.51 | 1.03 | 0.42 | 0.91 | 0.37 |
| 0.51 | 1.03 | 0.42 | 0.91 | 0.37 |
| 0.04 | 0.51 | 0.04 | 0.45 | 0.03 |
| 0.04 | 0.51 | 0.04 | 0.45 | 0.03 |
| #N/A | 0.85 | 0.29 | 0.77 | 0.26 |
| #N/A | 0.85 | 0.29 | 0.77 | 0.26 |
| 0.61 | 1.06 | 0.47 | 1.01 | 0.51 |
| #N/A | 0.93 | 0.30 | 0.81 | 0.26 |
| #N/A | 0.93 | 0.30 | 0.81 | 0.26 |
| #N/A | #N/A | #N/A | #N/A | #N/A |
| #N/A | #N/A | #N/A | #N/A | #N/A |
| 0.42 | 0.91 | 0.26 | 1.05 | 0.55 |
| #N/A | #N/A | #N/A | #N/A | #N/A |
| 0.42 | 0.91 | 0.26 | 1.05 | 0.55 |
| #N/A | #N/A | #N/A | #N/A | #N/A |
| #N/A | #N/A | #N/A | #N/A | #N/A |
| #N/A | #N/A | #N/A | #N/A | #N/A |
| 0.62 | 1.19 | 0.66 | 1.06 | 0.57 |
| 0.41 | 1.39 | 0.82 | 1.24 | 0.77 |
| 0.45 | 0.90 | 0.26 | 0.94 | 0.42 |
| 0.45 | 0.90 | 0.26 | 0.94 | 0.42 |
| 0.45 | 0.90 | 0.26 | 0.94 | 0.42 |
| 0.45 | 0.90 | 0.26 | 0.94 | 0.42 |

|      |      |      |      |      |
|------|------|------|------|------|
| #N/A | 1.21 | 0.68 | 1.33 | 0.84 |
| #N/A | 1.21 | 0.68 | 1.33 | 0.84 |
| 0.14 | 0.66 | 0.08 | 0.61 | 0.09 |
| #N/A | #N/A | #N/A | #N/A | #N/A |
| 0.82 | 1.21 | 0.64 | 1.17 | 0.69 |
| 0.82 | 1.21 | 0.64 | 1.17 | 0.69 |
| 0.44 | 1.15 | 0.58 | 1.25 | 0.72 |
| 0.43 | 1.14 | 0.55 | 1.11 | 0.57 |
| 0.56 | 1.54 | 0.94 | 0.93 | 0.44 |
| #N/A | 1.81 | 0.95 | #N/A | #N/A |
| #N/A | 1.20 | 0.56 | 0.72 | 0.16 |
| #N/A | 1.20 | 0.56 | 0.72 | 0.16 |
| 0.61 | 0.91 | 0.27 | 1.24 | 0.76 |
| 0.44 | 0.51 | 0.03 | 0.74 | 0.19 |
| 0.66 | 0.74 | 0.12 | 0.77 | 0.26 |
| 0.63 | 0.83 | 0.20 | 1.25 | 0.71 |
| #N/A | 1.41 | 0.87 | 2.05 | 0.98 |
| #N/A | 1.13 | 0.57 | 1.60 | 0.95 |
| 0.59 | 1.27 | 0.67 | 1.19 | 0.70 |
| #N/A | 0.80 | 0.28 | 0.90 | 0.39 |
| 0.69 | 0.95 | 0.33 | 0.78 | 0.22 |
| 0.68 | 1.01 | 0.40 | 1.31 | 0.75 |
| 0.69 | 0.95 | 0.33 | 0.78 | 0.22 |
| 0.68 | 1.01 | 0.40 | 1.31 | 0.75 |
| 0.56 | 0.92 | 0.36 | 1.05 | 0.56 |
| #N/A | 1.72 | 0.91 | 2.33 | 0.87 |
| 0.78 | 1.45 | 0.86 | 0.96 | 0.45 |
| #N/A | 1.23 | 0.64 | #N/A | #N/A |
| 0.70 | 0.99 | 0.37 | 1.23 | 0.66 |
| 0.51 | 1.08 | 0.50 | 0.79 | 0.23 |
| 0.75 | 1.14 | 0.59 | 1.18 | 0.67 |
| 0.18 | 0.65 | 0.07 | 0.70 | 0.15 |
| #N/A | #N/A | #N/A | #N/A | #N/A |
| #N/A | #N/A | #N/A | #N/A | #N/A |
| 0.90 | 0.96 | 0.33 | 1.25 | 0.78 |
| 0.90 | 0.96 | 0.33 | 1.25 | 0.78 |
| #N/A | 0.78 | 0.15 | 0.75 | 0.22 |
| #N/A | 0.78 | 0.15 | 0.75 | 0.22 |
| 0.06 | 0.74 | 0.13 | 0.63 | 0.10 |
| 0.04 | 0.44 | 0.02 | 0.54 | 0.05 |
| 0.04 | 0.44 | 0.02 | 0.54 | 0.05 |
| #N/A | #N/A | #N/A | #N/A | #N/A |
| 0.95 | 1.42 | 0.88 | 1.54 | 0.93 |
| 0.95 | 1.42 | 0.88 | 1.54 | 0.93 |
| 0.36 | 1.32 | 0.77 | 1.04 | 0.56 |
| 0.61 | 1.11 | 0.54 | 0.96 | 0.45 |
| 0.16 | 0.82 | 0.18 | 1.08 | 0.60 |
| 0.19 | 0.76 | 0.17 | 0.72 | 0.16 |
| 0.26 | 1.21 | 0.68 | 1.07 | 0.59 |
| 0.09 | 0.74 | 0.13 | 0.63 | 0.13 |
| 0.43 | 0.79 | 0.17 | 0.75 | 0.18 |

|      |      |      |      |      |
|------|------|------|------|------|
| 0.61 | 0.99 | 0.38 | 1.01 | 0.52 |
| 0.74 | 1.21 | 0.68 | 1.55 | 0.94 |
| 0.47 | 1.24 | 0.68 | 0.83 | 0.31 |
| #N/A | #N/A | #N/A | #N/A | #N/A |
| #N/A | #N/A | #N/A | #N/A | #N/A |
| 0.82 | 1.19 | 0.64 | 0.90 | 0.37 |
| 0.53 | 0.74 | 0.12 | 0.64 | 0.11 |
| 0.62 | 1.01 | 0.40 | 1.11 | 0.64 |
| 0.15 | 0.67 | 0.08 | 0.79 | 0.22 |
| 0.02 | 0.48 | 0.02 | 0.47 | 0.03 |
| 0.15 | 0.67 | 0.10 | 0.66 | 0.18 |
| 0.83 | 1.11 | 0.53 | 1.03 | 0.52 |
| 0.83 | 1.11 | 0.53 | 1.03 | 0.52 |
| 0.88 | 1.29 | 0.77 | 1.32 | 0.71 |
| 0.71 | 1.08 | 0.50 | 1.35 | 0.84 |
| 0.16 | 1.25 | 0.68 | 1.56 | 0.90 |
| 0.39 | 0.90 | 0.26 | 0.73 | 0.23 |
| 0.36 | 0.62 | 0.06 | 0.78 | 0.23 |
| 0.36 | 0.62 | 0.06 | 0.78 | 0.23 |
| #N/A | #N/A | #N/A | #N/A | #N/A |
| #N/A | #N/A | #N/A | #N/A | #N/A |
| 0.92 | #N/A | #N/A | 0.94 | 0.42 |
| 0.29 | 1.36 | 0.84 | 1.20 | 0.74 |
| 0.81 | 1.22 | 0.69 | 1.17 | 0.72 |
| 0.92 | #N/A | #N/A | 0.94 | 0.42 |
| 0.20 | 0.94 | 0.30 | #N/A | #N/A |
| #N/A | 0.96 | 0.33 | 1.00 | 0.50 |
| 0.47 | 0.76 | 0.14 | 1.39 | 0.75 |
| 0.47 | 0.76 | 0.14 | 1.39 | 0.75 |
| #N/A | 0.51 | 0.03 | 0.64 | 0.10 |
| 0.07 | 0.87 | 0.23 | 0.80 | 0.27 |
| 0.17 | 0.91 | 0.29 | 1.04 | 0.51 |
| 0.72 | 1.20 | 0.67 | 1.12 | 0.65 |
| #N/A | #N/A | #N/A | #N/A | #N/A |
| 0.93 | 1.20 | 0.67 | 1.25 | 0.70 |
| 0.93 | 1.20 | 0.67 | 1.25 | 0.70 |
| 0.73 | 1.14 | 0.58 | 0.97 | 0.46 |
| #N/A | #N/A | #N/A | #N/A | #N/A |
| #N/A | 1.06 | 0.48 | 0.76 | 0.26 |
| 0.76 | 1.05 | 0.46 | 1.27 | 0.79 |
| #N/A | 1.06 | 0.48 | 0.76 | 0.26 |
| 0.94 | 1.46 | 0.83 | 1.28 | 0.81 |
| 0.94 | 1.46 | 0.83 | 1.28 | 0.81 |
| 0.65 | 1.00 | 0.38 | 0.90 | 0.36 |
| 0.52 | 0.90 | 0.28 | 1.09 | 0.55 |
| 0.11 | 1.05 | 0.46 | 1.06 | 0.55 |
| 0.77 | 1.33 | 0.80 | 0.90 | 0.36 |
| 0.77 | 1.33 | 0.80 | 0.90 | 0.36 |
| #N/A | 0.73 | 0.12 | #N/A | #N/A |
| #N/A | 0.40 | 0.01 | 0.44 | 0.04 |
| 0.87 | 1.47 | 0.90 | 1.28 | 0.75 |

|      |      |      |      |      |
|------|------|------|------|------|
| #N/A | 1.16 | 0.57 | 1.21 | 0.72 |
| 0.75 | 1.11 | 0.55 | 1.10 | 0.62 |
| 0.75 | 1.11 | 0.55 | 1.10 | 0.62 |
| #N/A | 1.30 | 0.77 | 1.15 | 0.68 |
| 0.06 | 0.87 | 0.30 | 0.83 | 0.28 |
| 0.06 | 0.87 | 0.30 | 0.83 | 0.28 |
| 0.74 | 1.16 | 0.59 | 1.20 | 0.70 |
| 0.74 | 1.16 | 0.59 | 1.20 | 0.70 |
| 0.31 | 0.88 | 0.23 | 1.03 | 0.53 |
| 0.31 | 0.88 | 0.23 | 1.03 | 0.53 |
| 0.63 | 1.25 | 0.73 | 1.40 | 0.74 |
| 0.72 | 1.57 | 0.92 | 1.07 | 0.57 |
| #N/A | 1.15 | 0.60 | 1.23 | 0.60 |
| #N/A | 1.15 | 0.60 | 1.23 | 0.60 |
| 0.62 | 1.11 | 0.54 | 1.01 | 0.51 |
| #N/A | #N/A | #N/A | #N/A | #N/A |
| 0.20 | 1.56 | 0.92 | 1.59 | 0.95 |
| #N/A | #N/A | #N/A | #N/A | #N/A |
| 0.39 | 0.77 | 0.15 | 0.71 | 0.15 |
| 0.39 | 0.77 | 0.15 | 0.71 | 0.15 |
| 0.61 | 1.32 | 0.81 | 1.33 | 0.84 |
| 0.61 | 1.14 | 0.57 | 1.10 | 0.62 |
| 0.54 | 1.26 | 0.73 | 1.45 | 0.91 |
| 0.28 | 0.80 | 0.18 | 1.02 | 0.50 |
| 0.28 | 0.80 | 0.18 | 1.02 | 0.50 |
| 0.68 | 1.27 | 0.73 | 0.96 | 0.45 |
| 0.84 | 1.17 | 0.61 | 1.08 | 0.59 |
| 0.84 | 1.17 | 0.61 | 1.08 | 0.59 |
| 0.68 | 1.27 | 0.73 | 0.96 | 0.45 |
| 0.84 | 1.17 | 0.61 | 1.08 | 0.59 |
| 0.92 | 1.06 | 0.48 | 1.05 | 0.56 |
| 0.92 | 1.06 | 0.48 | 1.05 | 0.56 |
| 0.87 | 0.95 | 0.32 | 0.79 | 0.23 |
| 0.87 | 0.95 | 0.32 | 0.79 | 0.23 |
| 0.48 | 1.20 | 0.65 | 1.45 | 0.85 |
| 0.48 | 1.20 | 0.65 | 1.45 | 0.85 |
| 0.61 | 1.62 | 0.96 | 1.28 | 0.81 |
| 0.89 | 1.20 | 0.62 | 1.17 | 0.71 |
| 0.17 | 0.61 | 0.06 | 0.78 | 0.22 |
| 0.17 | 0.61 | 0.06 | 0.78 | 0.22 |
| 0.30 | 0.82 | 0.19 | 0.66 | 0.12 |
| 0.81 | 0.96 | 0.35 | 0.70 | 0.14 |
| 0.57 | 1.06 | 0.48 | 0.93 | 0.41 |
| #N/A | 0.87 | 0.23 | 1.20 | 0.71 |
| 0.41 | 0.65 | 0.07 | 0.80 | 0.28 |
| 0.75 | 0.69 | 0.15 | 0.49 | 0.04 |
| 0.08 | 1.14 | 0.59 | 1.10 | 0.63 |
| 0.86 | 1.28 | 0.75 | 0.98 | 0.46 |
| 0.86 | 1.28 | 0.75 | 0.98 | 0.46 |
| 0.52 | 1.23 | 0.71 | 1.39 | 0.61 |
| 0.69 | 1.16 | 0.59 | 0.87 | 0.32 |

|      |      |      |      |      |
|------|------|------|------|------|
| 0.69 | 1.16 | 0.59 | 0.87 | 0.32 |
| 0.27 | 0.94 | 0.30 | 1.19 | 0.73 |
| 0.25 | 1.02 | 0.41 | 1.17 | 0.71 |
| 0.25 | 1.02 | 0.41 | 1.17 | 0.71 |
| 0.90 | 1.12 | 0.55 | 0.88 | 0.33 |
| 0.90 | 1.12 | 0.55 | 0.88 | 0.33 |
| 0.60 | 1.17 | 0.63 | 1.10 | 0.54 |
| 0.60 | 1.17 | 0.63 | 1.10 | 0.54 |
| #N/A | 1.23 | 0.70 | #N/A | #N/A |
| 0.54 | 1.67 | 0.94 | 0.99 | 0.47 |
| 0.54 | 1.67 | 0.94 | 0.99 | 0.47 |
| 0.54 | 1.67 | 0.94 | 0.99 | 0.47 |
| 0.31 | 0.88 | 0.27 | 1.01 | 0.50 |
| 0.80 | 1.02 | 0.44 | 1.20 | 0.72 |
| 0.80 | 1.02 | 0.44 | 1.20 | 0.72 |
| 0.55 | 0.77 | 0.14 | 0.84 | 0.32 |
| 0.15 | 0.75 | 0.13 | 0.84 | 0.32 |
| 0.28 | 1.24 | 0.72 | 1.27 | 0.79 |
| 0.89 | 1.41 | 0.88 | 1.25 | 0.79 |
| 0.68 | 1.19 | 0.60 | 1.57 | 0.95 |
| 0.57 | 1.01 | 0.40 | 0.90 | 0.36 |
| 0.46 | 1.17 | 0.64 | 1.17 | 0.71 |
| 0.33 | 0.82 | 0.19 | 0.70 | 0.15 |
| 0.47 | 1.23 | 0.71 | 1.30 | 0.56 |
| 0.29 | 1.28 | 0.76 | 0.96 | 0.44 |
| 0.58 | 0.67 | 0.08 | 0.57 | 0.06 |
| 0.58 | 0.67 | 0.08 | 0.57 | 0.06 |
| #N/A | #N/A | #N/A | #N/A | #N/A |
| #N/A | 1.77 | 0.97 | 1.15 | 0.68 |
| #N/A | 1.11 | 0.54 | 1.27 | 0.79 |
| #N/A | 1.11 | 0.54 | 1.27 | 0.79 |
| 0.50 | 1.26 | 0.74 | 0.79 | 0.23 |
| 0.69 | 1.17 | 0.63 | 1.04 | 0.55 |
| 0.69 | 1.17 | 0.63 | 1.04 | 0.55 |
| 0.06 | 0.45 | 0.02 | 0.39 | 0.02 |
| 0.41 | 0.90 | 0.28 | 0.92 | 0.39 |
| 0.17 | 1.31 | 0.79 | 1.45 | 0.72 |
| 0.51 | 1.10 | 0.53 | 1.05 | 0.54 |
| #N/A | 1.17 | 0.63 | 1.05 | 0.54 |
| #N/A | #N/A | #N/A | 1.04 | 0.52 |
| 0.52 | 1.34 | 0.83 | 1.25 | 0.76 |
| 0.78 | 1.15 | 0.59 | 1.12 | 0.61 |
| 0.78 | 1.15 | 0.59 | 1.12 | 0.61 |
| 0.81 | 1.19 | 0.66 | 1.24 | 0.78 |
| 0.75 | 1.22 | 0.70 | 1.46 | 0.90 |
| 0.69 | 1.13 | 0.58 | 1.22 | 0.67 |
| #N/A | #N/A | #N/A | #N/A | #N/A |
| #N/A | #N/A | #N/A | #N/A | #N/A |
| #N/A | 0.91 | 0.32 | 0.74 | 0.18 |
| #N/A | 0.91 | 0.32 | 0.74 | 0.18 |
| #N/A | 0.86 | 0.23 | 0.70 | 0.14 |

|      |      |      |      |      |
|------|------|------|------|------|
| 0.70 | 1.09 | 0.51 | 1.20 | 0.72 |
| 0.80 | 1.15 | 0.60 | 0.92 | 0.39 |
| #N/A | 1.35 | 0.82 | 1.54 | 0.64 |
| 0.62 | 1.49 | 0.91 | 0.95 | 0.43 |
| 0.96 | 0.94 | 0.31 | 0.75 | 0.19 |
| 0.86 | 0.79 | 0.34 | 0.36 | 0.05 |
| 0.86 | 0.79 | 0.34 | 0.36 | 0.05 |
| #N/A | #N/A | #N/A | #N/A | #N/A |
| #N/A | #N/A | #N/A | #N/A | #N/A |
| #N/A | 1.28 | 0.72 | 1.06 | 0.58 |
| #N/A | 1.28 | 0.72 | 1.06 | 0.58 |
| #N/A | 1.07 | 0.49 | 0.87 | 0.32 |
| 0.40 | 0.94 | 0.31 | 0.57 | 0.07 |
| 0.40 | 0.94 | 0.31 | 0.57 | 0.07 |
| 0.32 | 0.58 | 0.05 | 0.52 | 0.04 |
| #N/A | 1.26 | 0.74 | 1.33 | 0.74 |
| 0.67 | 1.00 | 0.38 | 1.00 | 0.49 |
| #N/A | #N/A | #N/A | #N/A | #N/A |
| 0.70 | 1.44 | 0.69 | 1.66 | 0.90 |
| 0.76 | 1.27 | 0.70 | 1.23 | 0.66 |
| #N/A | #N/A | #N/A | #N/A | #N/A |
| #N/A | #N/A | #N/A | #N/A | #N/A |
| 0.19 | 0.68 | 0.09 | 0.64 | 0.10 |
| 0.19 | 0.68 | 0.09 | 0.64 | 0.10 |
| 0.30 | 1.07 | 0.49 | 0.92 | 0.39 |
| #N/A | 0.89 | 0.40 | 0.71 | 0.15 |
| #N/A | 0.89 | 0.40 | 0.71 | 0.15 |
| 0.73 | 0.86 | 0.24 | 1.37 | 0.75 |
| #N/A | 2.08 | 0.99 | #N/A | #N/A |
| #N/A | #N/A | #N/A | #N/A | #N/A |
| #N/A | 0.81 | 0.17 | 0.64 | 0.13 |
| #N/A | 0.81 | 0.17 | 0.64 | 0.13 |
| #N/A | 0.81 | 0.17 | 0.64 | 0.13 |
| 0.50 | 1.06 | 0.47 | 1.00 | 0.50 |
| #N/A | #N/A | #N/A | #N/A | #N/A |
| #N/A | #N/A | #N/A | #N/A | #N/A |
| #N/A | #N/A | #N/A | #N/A | #N/A |
| #N/A | #N/A | #N/A | #N/A | #N/A |
| 0.89 | 0.90 | 0.26 | 1.06 | 0.58 |
| 0.89 | 0.90 | 0.26 | 1.06 | 0.58 |
| 0.03 | 0.46 | 0.02 | 0.43 | 0.02 |
| #N/A | #N/A | #N/A | 1.29 | 0.57 |
| 0.81 | 1.35 | 0.82 | 1.58 | 0.95 |
| 0.81 | 1.35 | 0.82 | 1.58 | 0.95 |
| 0.81 | 1.35 | 0.82 | 1.58 | 0.95 |
| #N/A | 2.73 | 0.99 | 2.01 | 0.96 |
| 0.45 | 0.69 | 0.09 | 0.81 | 0.34 |
| 0.56 | 1.40 | 0.81 | 1.91 | 0.73 |
| #N/A | 0.93 | 0.30 | 0.97 | 0.45 |
| #N/A | 0.93 | 0.30 | 0.97 | 0.45 |
| 0.84 | 1.22 | 0.68 | 0.93 | 0.40 |



|      |      |      |      |      |
|------|------|------|------|------|
| 0.84 | 1.22 | 0.68 | 0.93 | 0.40 |
| 0.30 | 0.93 | 0.30 | 1.00 | 0.49 |
| 0.75 | 1.12 | 0.55 | 1.29 | 0.81 |
| 0.80 | 1.07 | 0.48 | 1.14 | 0.68 |
| 0.80 | 1.07 | 0.48 | 1.14 | 0.68 |
| 0.77 | 1.22 | 0.70 | 1.08 | 0.56 |
| 0.35 | 1.47 | 0.90 | 1.17 | 0.69 |
| 0.35 | 1.47 | 0.90 | 1.17 | 0.69 |
| 0.96 | 1.31 | 0.79 | 1.16 | 0.68 |
| 0.90 | 1.09 | 0.52 | 1.29 | 0.82 |
| 0.90 | 1.09 | 0.52 | 1.29 | 0.82 |
| 0.65 | 1.21 | 0.68 | 1.31 | 0.82 |
| 0.39 | 0.85 | 0.21 | 0.93 | 0.41 |
| #N/A | #N/A | #N/A | #N/A | #N/A |
| #N/A | #N/A | #N/A | #N/A | #N/A |
| #N/A | #N/A | #N/A | #N/A | #N/A |
| 0.65 | 1.13 | 0.57 | 1.17 | 0.70 |
| 0.10 | 1.37 | 0.85 | 1.56 | 0.92 |
| #N/A | #N/A | #N/A | #N/A | #N/A |
| #N/A | #N/A | #N/A | #N/A | #N/A |
| #N/A | #N/A | #N/A | #N/A | #N/A |
| #N/A | 0.48 | 0.02 | 0.54 | 0.06 |
| #N/A | 1.04 | 0.46 | 1.14 | 0.66 |
| 0.98 | 1.31 | 0.75 | 1.30 | 0.71 |
| 0.98 | 1.31 | 0.75 | 1.30 | 0.71 |
| 0.19 | 0.66 | 0.08 | 0.59 | 0.08 |
| 0.19 | 0.66 | 0.08 | 0.59 | 0.08 |
| 0.38 | 1.40 | 0.80 | 0.99 | 0.49 |
| #N/A | 1.28 | 0.75 | 1.28 | 0.75 |
| #N/A | 0.85 | 0.21 | #N/A | #N/A |
| 0.47 | 1.50 | 0.91 | 0.84 | 0.29 |
| #N/A | 0.74 | 0.12 | #N/A | #N/A |
| 0.12 | 0.60 | 0.07 | #N/A | #N/A |
| 0.81 | 1.00 | 0.38 | 1.25 | 0.77 |
| 0.64 | 1.09 | 0.52 | 0.77 | 0.20 |
| 0.36 | 0.95 | 0.31 | 1.43 | 0.84 |
| #N/A | #N/A | #N/A | #N/A | #N/A |
| 0.34 | 1.13 | 0.57 | 0.97 | 0.46 |
| 0.85 | 1.31 | 0.76 | 1.07 | 0.56 |
| 0.85 | 1.31 | 0.76 | 1.07 | 0.56 |
| 0.58 | 1.29 | 0.75 | 1.22 | 0.76 |
| 0.84 | 1.21 | 0.68 | 1.49 | 0.92 |
| 0.80 | 1.11 | 0.54 | 1.07 | 0.58 |
| 0.32 | 0.77 | 0.14 | 0.95 | 0.43 |
| 0.69 | 1.16 | 0.62 | 1.06 | 0.56 |
| 0.69 | 1.16 | 0.62 | 1.06 | 0.56 |
| #N/A | #N/A | #N/A | #N/A | #N/A |
| 0.43 | 1.36 | 0.84 | 1.30 | 0.68 |
| 0.79 | 0.99 | 0.38 | 1.02 | 0.53 |
| #N/A | #N/A | #N/A | #N/A | #N/A |
| 0.66 | 1.06 | 0.49 | 0.92 | 0.39 |

|      |      |      |      |      |
|------|------|------|------|------|
| 0.68 | 1.16 | 0.61 | 1.19 | 0.68 |
| #N/A | 1.22 | 0.69 | 1.08 | 0.59 |
| 0.03 | 0.62 | 0.06 | 0.83 | 0.33 |
| 0.37 | 1.14 | 0.58 | 0.98 | 0.46 |
| #N/A | #N/A | #N/A | #N/A | #N/A |
| 0.21 | 0.86 | 0.22 | 0.98 | 0.46 |
| #N/A | 0.98 | 0.44 | #N/A | #N/A |
| #N/A | #N/A | #N/A | #N/A | #N/A |
| 0.95 | 1.11 | 0.54 | 1.38 | 0.86 |
| 0.95 | 1.11 | 0.54 | 1.38 | 0.86 |
| 0.76 | 1.20 | 0.67 | 1.19 | 0.72 |
| 0.76 | 1.20 | 0.67 | 1.19 | 0.72 |
| #N/A | 1.18 | 0.62 | 0.99 | 0.48 |
| #N/A | 1.18 | 0.62 | 0.99 | 0.48 |
| #N/A | #N/A | #N/A | #N/A | #N/A |
| 0.83 | 1.07 | 0.48 | 1.31 | 0.82 |
| 0.83 | 1.07 | 0.48 | 1.31 | 0.82 |
| #N/A | #N/A | #N/A | #N/A | #N/A |
| 0.76 | 1.29 | 0.77 | 1.29 | 0.80 |
| 0.76 | 1.29 | 0.77 | 1.29 | 0.80 |
| 0.74 | 1.12 | 0.56 | 0.97 | 0.45 |
| 0.82 | #N/A | #N/A | 0.99 | 0.49 |
| 0.97 | 0.77 | 0.14 | 1.09 | 0.61 |
| 0.97 | 0.77 | 0.14 | 1.09 | 0.61 |
| 0.53 | 0.97 | 0.35 | 0.45 | 0.04 |
| 0.53 | 1.32 | 0.68 | 1.41 | 0.85 |
| 0.32 | 1.15 | 0.60 | 0.87 | 0.34 |
| 0.50 | 1.38 | 0.85 | 1.28 | 0.80 |
| #N/A | #N/A | #N/A | #N/A | #N/A |
| 0.26 | 0.90 | 0.33 | 0.40 | 0.02 |
| 0.87 | 1.50 | 0.92 | 1.24 | 0.78 |
| 0.87 | 1.50 | 0.92 | 1.24 | 0.78 |
| 0.52 | 1.20 | 0.60 | 1.66 | 0.96 |
| #N/A | 0.79 | 0.17 | 1.16 | 0.64 |
| 0.58 | 0.87 | 0.23 | 0.99 | 0.49 |
| 0.02 | 0.26 | 0.00 | 0.38 | 0.01 |
| 0.02 | 0.26 | 0.00 | 0.38 | 0.01 |
| 0.09 | 0.86 | 0.25 | 0.89 | 0.34 |
| 0.96 | 0.84 | 0.20 | 0.98 | 0.47 |
| 0.96 | 0.84 | 0.20 | 0.98 | 0.47 |
| 0.53 | 0.89 | 0.25 | 0.85 | 0.32 |
| 0.53 | 0.89 | 0.25 | 0.85 | 0.32 |
| 0.24 | 1.04 | 0.44 | 1.03 | 0.54 |
| 0.24 | 1.04 | 0.44 | 1.03 | 0.54 |
| #N/A | 1.02 | 0.43 | 0.86 | 0.36 |
| #N/A | 1.11 | 0.53 | 0.98 | 0.47 |
| #N/A | 1.11 | 0.53 | 0.98 | 0.47 |
| 0.93 | 1.09 | 0.52 | 1.11 | 0.63 |
| 0.93 | 1.09 | 0.52 | 1.11 | 0.63 |
| 0.39 | 1.13 | 0.57 | 1.13 | 0.67 |
| 1.00 | 1.05 | 0.46 | 1.11 | 0.63 |

|      |      |      |      |      |
|------|------|------|------|------|
| 1.00 | 1.05 | 0.46 | 1.11 | 0.63 |
| 0.72 | 1.05 | 0.45 | 1.10 | 0.62 |
| #N/A | #N/A | #N/A | #N/A | #N/A |
| 0.72 | 1.05 | 0.45 | 1.10 | 0.62 |
| #N/A | 1.11 | 0.55 | 1.35 | 0.82 |
| 0.77 | 1.01 | 0.40 | 0.96 | 0.44 |
| #N/A | 0.77 | 0.15 | 0.96 | 0.44 |
| 0.06 | 0.63 | 0.06 | 0.76 | 0.26 |
| 0.06 | 0.63 | 0.06 | 0.76 | 0.26 |
| 0.42 | 1.02 | 0.42 | 0.93 | 0.40 |
| 0.67 | 1.00 | 0.39 | 1.38 | 0.88 |
| 0.59 | 0.96 | 0.33 | 0.85 | 0.29 |
| #N/A | 1.04 | 0.45 | 0.80 | 0.27 |
| 0.39 | 0.48 | 0.02 | #N/A | #N/A |
| 0.39 | 0.48 | 0.02 | #N/A | #N/A |
| 0.56 | 0.92 | 0.29 | 0.67 | 0.13 |
| 0.53 | 1.08 | 0.50 | 1.13 | 0.67 |
| 0.48 | 0.98 | 0.36 | 0.89 | 0.36 |
| #N/A | 1.20 | 0.65 | 0.88 | 0.33 |
| #N/A | 1.30 | 0.77 | 0.99 | 0.48 |
| 0.85 | 1.27 | 0.75 | 1.05 | 0.54 |
| 0.85 | 1.27 | 0.75 | 1.05 | 0.54 |
| 0.28 | 1.29 | 0.67 | 1.14 | 0.64 |
| 0.54 | 1.10 | 0.53 | 1.00 | 0.49 |
| 0.83 | 1.15 | 0.58 | 1.30 | 0.79 |
| 0.83 | 1.15 | 0.58 | 1.30 | 0.79 |
| 0.55 | 1.32 | 0.68 | 1.27 | 0.77 |
| 0.55 | 1.06 | 0.47 | #N/A | #N/A |
| #N/A | 1.06 | 0.47 | #N/A | #N/A |
| #N/A | 1.06 | 0.47 | #N/A | #N/A |
| 0.74 | 1.10 | 0.53 | 1.10 | 0.62 |
| #N/A | 0.80 | 0.16 | 0.63 | 0.10 |
| 0.04 | 0.56 | 0.04 | 0.61 | 0.08 |
| 0.04 | 0.56 | 0.04 | 0.61 | 0.08 |
| 0.29 | 0.75 | 0.13 | #N/A | #N/A |
| 0.95 | 1.00 | 0.39 | 1.09 | 0.61 |
| 0.91 | 1.08 | 0.50 | 0.96 | 0.45 |
| 0.82 | 1.21 | 0.67 | 1.04 | 0.54 |
| 0.82 | 1.21 | 0.67 | 1.04 | 0.54 |
| #N/A | #N/A | #N/A | #N/A | #N/A |
| #N/A | #N/A | #N/A | #N/A | #N/A |
| 0.90 | 1.24 | 0.58 | 1.03 | 0.53 |
| 0.90 | 1.24 | 0.58 | 1.03 | 0.53 |
| #N/A | 0.99 | 0.37 | 0.99 | 0.48 |
| 0.76 | 1.30 | 0.73 | 0.99 | 0.48 |
| 0.53 | 0.88 | 0.24 | 1.08 | 0.60 |
| 0.99 | 1.15 | 0.60 | 1.14 | 0.57 |
| 0.53 | 0.88 | 0.24 | 1.08 | 0.60 |
| 0.99 | 1.15 | 0.60 | 1.14 | 0.57 |
| 0.45 | 0.85 | 0.21 | 1.11 | 0.63 |
| 0.45 | 0.85 | 0.21 | 1.11 | 0.63 |

|      |      |      |      |      |
|------|------|------|------|------|
| 0.71 | 1.20 | 0.64 | 1.04 | 0.52 |
| 0.45 | 0.85 | 0.21 | 1.11 | 0.63 |
| 0.71 | 1.20 | 0.64 | 1.04 | 0.52 |
| 0.39 | 0.93 | 0.31 | 0.93 | 0.41 |
| #N/A | 1.06 | 0.48 | #N/A | #N/A |
| 0.24 | 0.94 | 0.35 | 0.99 | 0.48 |
| #N/A | 0.94 | 0.30 | 1.12 | 0.63 |
| 0.69 | 1.24 | 0.66 | 1.24 | 0.76 |
| 0.67 | 1.02 | 0.43 | 0.83 | 0.29 |
| 0.86 | 1.52 | 0.90 | 1.03 | 0.53 |
| 0.80 | 1.23 | 0.71 | 1.15 | 0.69 |
| 0.80 | 1.23 | 0.71 | 1.15 | 0.69 |
| #N/A | #N/A | #N/A | #N/A | #N/A |
| 0.87 | 0.93 | 0.29 | 0.93 | 0.41 |
| 0.87 | 0.93 | 0.29 | 0.93 | 0.41 |
| 0.33 | 1.29 | 0.76 | 1.11 | 0.65 |
| 0.33 | 1.29 | 0.76 | 1.11 | 0.65 |
| #N/A | #N/A | #N/A | #N/A | #N/A |
| #N/A | #N/A | #N/A | #N/A | #N/A |
| #N/A | 1.51 | 0.90 | 1.06 | 0.57 |
| 0.77 | 1.14 | 0.54 | 1.16 | 0.66 |
| 0.77 | 1.14 | 0.54 | 1.16 | 0.66 |
| 0.47 | 0.93 | 0.31 | 0.82 | 0.26 |
| 0.28 | 0.72 | 0.12 | 0.66 | 0.13 |
| #N/A | #N/A | #N/A | #N/A | #N/A |
| 0.18 | 1.08 | 0.50 | 0.96 | 0.44 |
| 0.73 | 0.93 | 0.35 | 0.83 | 0.31 |
| 0.64 | 1.24 | 0.72 | 1.30 | 0.57 |
| #N/A | 0.78 | 0.20 | 1.01 | 0.49 |
| #N/A | 0.78 | 0.20 | 1.01 | 0.49 |
| 0.44 | 0.75 | 0.13 | 0.80 | 0.24 |
| 0.44 | 0.75 | 0.13 | 0.80 | 0.24 |
| #N/A | 1.62 | 0.95 | 0.83 | 0.28 |
| #N/A | 1.45 | 0.90 | 1.06 | 0.58 |
| #N/A | 1.45 | 0.90 | 1.06 | 0.58 |
| #N/A | 1.23 | 0.65 | 1.91 | 0.96 |
| #N/A | #N/A | #N/A | #N/A | #N/A |
| #N/A | #N/A | #N/A | #N/A | #N/A |
| 0.89 | 1.21 | 0.69 | 1.17 | 0.69 |
| 0.89 | 1.21 | 0.69 | 1.17 | 0.69 |
| 0.67 | 1.22 | 0.66 | 0.90 | 0.36 |
| 0.62 | 1.24 | 0.59 | 1.38 | 0.86 |
| 0.63 | 0.91 | 0.28 | 1.07 | 0.56 |
| 0.63 | 1.16 | 0.60 | 0.89 | 0.34 |
| #N/A | #N/A | #N/A | #N/A | #N/A |
| #N/A | #N/A | #N/A | #N/A | #N/A |
| 0.57 | 1.25 | 0.74 | 0.98 | 0.48 |
| 0.57 | 1.25 | 0.74 | 0.98 | 0.48 |
| 0.52 | 1.29 | 0.78 | 1.04 | 0.54 |
| 0.61 | 1.01 | 0.45 | 0.92 | 0.41 |
| 0.26 | 0.67 | 0.08 | 0.74 | 0.18 |

|      |      |      |      |      |
|------|------|------|------|------|
| 0.26 | 0.67 | 0.08 | 0.74 | 0.18 |
| 0.18 | 1.05 | 0.46 | 1.18 | 0.66 |
| 0.97 | 1.32 | 0.81 | 1.24 | 0.76 |
| 0.97 | 1.32 | 0.81 | 1.24 | 0.76 |
| 0.97 | 1.32 | 0.81 | 1.24 | 0.76 |
| #N/A | #N/A | #N/A | #N/A | #N/A |
| #N/A | #N/A | #N/A | #N/A | #N/A |
| #N/A | #N/A | #N/A | #N/A | #N/A |
| #N/A | #N/A | #N/A | #N/A | #N/A |
| #N/A | 1.20 | 0.67 | 1.04 | 0.54 |
| 0.19 | 0.95 | 0.35 | 1.16 | 0.67 |
| 0.41 | 1.20 | 0.56 | 1.18 | 0.72 |
| 0.41 | 1.20 | 0.56 | 1.18 | 0.72 |
| 0.69 | 0.98 | 0.39 | 0.81 | 0.29 |
| 0.69 | 0.98 | 0.39 | 0.81 | 0.29 |
| 0.71 | 1.34 | 0.83 | 1.36 | 0.86 |
| 0.71 | 1.34 | 0.83 | 1.36 | 0.86 |
| #N/A | 1.07 | 0.48 | 1.37 | 0.64 |
| #N/A | 1.07 | 0.48 | 1.37 | 0.64 |
| 0.59 | 1.21 | 0.68 | 1.00 | 0.49 |
| 0.63 | 1.47 | 0.88 | 0.97 | 0.46 |
| 0.86 | 0.77 | 0.15 | 0.72 | 0.17 |
| 0.86 | 0.77 | 0.15 | 0.72 | 0.17 |
| 0.02 | 0.46 | 0.05 | 1.00 | 0.48 |
| #N/A | #N/A | #N/A | #N/A | #N/A |
| #N/A | #N/A | #N/A | 1.38 | 0.88 |
| #N/A | #N/A | #N/A | #N/A | #N/A |
| #N/A | #N/A | #N/A | #N/A | #N/A |
| #N/A | #N/A | #N/A | #N/A | #N/A |
| #N/A | #N/A | #N/A | #N/A | #N/A |
| #N/A | #N/A | #N/A | #N/A | #N/A |
| 0.79 | 1.24 | 0.72 | 0.95 | 0.43 |
| 0.49 | 1.24 | 0.72 | 0.90 | 0.37 |
| 0.55 | 0.79 | 0.16 | 0.72 | 0.16 |
| #N/A | #N/A | #N/A | #N/A | #N/A |
| 0.56 | 1.11 | 0.52 | 1.23 | 0.74 |
| 0.98 | 1.35 | 0.83 | 1.01 | 0.50 |
| 0.98 | 1.35 | 0.83 | 1.01 | 0.50 |
| 0.06 | 0.81 | 0.17 | 0.68 | 0.15 |
| 0.40 | 1.34 | 0.78 | 1.29 | 0.82 |
| 0.59 | 1.26 | 0.73 | 1.34 | 0.82 |
| 0.59 | 1.26 | 0.73 | 1.34 | 0.82 |
| 0.74 | 1.09 | 0.51 | 1.17 | 0.71 |
| 0.74 | 1.09 | 0.51 | 1.17 | 0.71 |
| #N/A | #N/A | #N/A | #N/A | #N/A |
| #N/A | #N/A | #N/A | #N/A | #N/A |
| #N/A | 0.90 | 0.27 | 0.84 | 0.32 |
| #N/A | 0.98 | 0.36 | 1.10 | 0.60 |
| #N/A | #N/A | #N/A | #N/A | #N/A |
| #N/A | #N/A | #N/A | #N/A | #N/A |
| #N/A | 1.21 | 0.68 | 1.03 | 0.53 |

|      |      |      |      |      |
|------|------|------|------|------|
| #N/A | 1.21 | 0.68 | 1.03 | 0.53 |
| #N/A | #N/A | #N/A | #N/A | #N/A |
| #N/A | #N/A | #N/A | #N/A | #N/A |
| 0.14 | 1.36 | 0.83 | 1.43 | 0.90 |
| #N/A | #N/A | #N/A | #N/A | #N/A |
| 0.77 | 1.24 | 0.72 | 1.02 | 0.52 |
| 0.92 | 1.12 | 0.56 | #N/A | #N/A |
| 0.92 | 1.12 | 0.56 | #N/A | #N/A |
| #N/A | #N/A | #N/A | #N/A | #N/A |
| #N/A | #N/A | #N/A | #N/A | #N/A |
| 0.76 | 0.74 | 0.12 | 0.84 | 0.30 |
| 0.86 | 0.93 | 0.29 | 0.83 | 0.31 |
| 0.28 | 1.20 | 0.66 | 1.21 | 0.74 |
| #N/A | #N/A | #N/A | #N/A | #N/A |
| 0.04 | 0.58 | 0.04 | 0.77 | 0.22 |
| 0.23 | 0.97 | 0.37 | 1.01 | 0.52 |
| 0.49 | 0.89 | 0.25 | 0.86 | 0.33 |
| #N/A | 1.09 | 0.52 | 1.96 | 0.99 |
| 0.49 | 0.89 | 0.25 | 0.86 | 0.33 |
| #N/A | 1.09 | 0.52 | 1.96 | 0.99 |
| 0.97 | 1.30 | 0.72 | 1.14 | 0.67 |
| 0.40 | 1.12 | 0.55 | 1.16 | 0.70 |
| 0.80 | 0.84 | 0.21 | 0.84 | 0.30 |
| 0.82 | #N/A | #N/A | 0.91 | 0.40 |
| 0.80 | 0.84 | 0.21 | 0.84 | 0.30 |
| 0.82 | #N/A | #N/A | 0.91 | 0.40 |
| 0.60 | 1.24 | 0.71 | 1.18 | 0.68 |
| 0.18 | 0.91 | 0.28 | 0.88 | 0.35 |
| 0.52 | 0.98 | 0.40 | 0.92 | 0.40 |
| 0.40 | 1.13 | 0.56 | 0.89 | 0.35 |
| 0.86 | 1.01 | 0.40 | 0.92 | 0.39 |
| 0.86 | 1.01 | 0.40 | 0.92 | 0.39 |
| #N/A | #N/A | #N/A | #N/A | #N/A |
| 0.61 | 1.15 | 0.60 | 1.11 | 0.62 |
| 0.07 | 0.79 | 0.16 | 0.77 | 0.21 |
| #N/A | #N/A | #N/A | #N/A | #N/A |
| #N/A | #N/A | #N/A | #N/A | #N/A |
| #N/A | #N/A | #N/A | #N/A | #N/A |
| #N/A | #N/A | #N/A | #N/A | #N/A |
| #N/A | #N/A | #N/A | #N/A | #N/A |
| 0.33 | 1.16 | 0.57 | 1.33 | 0.85 |
| 0.90 | 0.81 | 0.19 | 0.77 | 0.22 |
| 0.33 | 1.16 | 0.57 | 1.33 | 0.85 |
| #N/A | 1.15 | 0.57 | #N/A | #N/A |
| 0.90 | 0.81 | 0.19 | 0.77 | 0.22 |
| #N/A | #N/A | #N/A | #N/A | #N/A |
| #N/A | #N/A | #N/A | #N/A | #N/A |
| #N/A | 1.33 | 0.79 | 0.93 | 0.40 |
| #N/A | 1.02 | 0.42 | #N/A | #N/A |
| #N/A | 1.46 | 0.84 | 1.19 | 0.67 |
| #N/A | #N/A | #N/A | #N/A | #N/A |

|      |      |      |      |      |
|------|------|------|------|------|
| #N/A | 1.07 | 0.49 | 0.79 | 0.26 |
| 0.70 | #N/A | #N/A | 1.01 | 0.50 |
| 0.88 | 0.97 | 0.34 | 0.86 | 0.33 |
| 0.88 | 0.97 | 0.34 | 0.86 | 0.33 |
| #N/A | #N/A | #N/A | #N/A | #N/A |
| #N/A | #N/A | #N/A | #N/A | #N/A |
| #N/A | 0.17 | 0.00 | #N/A | #N/A |
| #N/A | #N/A | #N/A | #N/A | #N/A |
| 0.64 | 1.02 | 0.42 | 1.23 | 0.73 |
| 0.77 | 0.95 | 0.32 | 1.15 | 0.69 |
| 0.64 | 1.02 | 0.42 | 1.23 | 0.73 |
| 0.77 | 0.95 | 0.32 | 1.15 | 0.69 |
| #N/A | #N/A | #N/A | #N/A | #N/A |
| #N/A | #N/A | #N/A | #N/A | #N/A |
| #N/A | #N/A | #N/A | #N/A | #N/A |
| #N/A | #N/A | #N/A | #N/A | #N/A |
| #N/A | #N/A | #N/A | #N/A | #N/A |
| #N/A | #N/A | #N/A | #N/A | #N/A |
| 0.67 | 1.56 | 0.94 | 1.00 | 0.50 |
| #N/A | #N/A | #N/A | #N/A | #N/A |
| #N/A | #N/A | #N/A | #N/A | #N/A |
| #N/A | #N/A | #N/A | 0.77 | 0.20 |
| 0.63 | 1.09 | 0.52 | 0.76 | 0.23 |
| 0.66 | #N/A | #N/A | 1.43 | 0.78 |
| 0.71 | 1.10 | 0.53 | 1.30 | 0.81 |
| 0.71 | 1.10 | 0.53 | 1.30 | 0.81 |
| 0.88 | 1.25 | 0.69 | 1.33 | 0.84 |
| 0.12 | 0.43 | 0.02 | 0.54 | 0.05 |
| #N/A | 0.79 | 0.17 | #N/A | #N/A |
| 0.39 | 1.33 | 0.82 | 1.37 | 0.79 |
| 0.54 | 1.44 | 0.87 | 1.26 | 0.76 |
| 0.54 | 1.44 | 0.87 | 1.26 | 0.76 |
| 0.74 | 1.16 | 0.62 | 1.00 | 0.50 |
| 0.57 | 1.28 | 0.77 | 1.15 | 0.69 |
| #N/A | 1.14 | 0.58 | 1.26 | 0.78 |
| #N/A | 1.14 | 0.58 | 1.26 | 0.78 |
| #N/A | 1.41 | 0.87 | 1.55 | 0.94 |
| #N/A | #N/A | #N/A | #N/A | #N/A |
| 0.51 | #N/A | #N/A | 0.94 | 0.42 |
| 0.71 | 1.31 | 0.61 | 2.37 | 0.87 |
| 0.71 | 1.31 | 0.61 | 2.37 | 0.87 |
| #N/A | 1.10 | 0.53 | 0.72 | 0.16 |
| 0.82 | 0.93 | 0.30 | 1.24 | 0.74 |
| 0.82 | 0.93 | 0.30 | 1.24 | 0.74 |
| 0.78 | 1.10 | 0.53 | 1.04 | 0.56 |
| 0.58 | 1.09 | 0.52 | 0.83 | 0.30 |
| 0.81 | 1.27 | 0.73 | 1.19 | 0.72 |
| 0.81 | 1.27 | 0.73 | 1.19 | 0.72 |
| 0.81 | 1.27 | 0.73 | 1.19 | 0.72 |
| #N/A | 1.27 | 0.76 | 0.98 | 0.46 |
| 0.66 | 1.15 | 0.55 | 1.15 | 0.68 |

|      |      |      |      |      |
|------|------|------|------|------|
| 0.11 | 1.12 | 0.55 | 0.84 | 0.30 |
| 0.65 | #N/A | #N/A | 1.00 | 0.49 |
| 0.65 | #N/A | #N/A | 1.00 | 0.49 |
| 0.70 | 1.23 | 0.69 | 0.91 | 0.37 |
| 0.65 | 1.86 | 0.98 | 1.31 | 0.80 |
| 0.65 | 1.86 | 0.98 | 1.31 | 0.80 |
| 0.53 | 1.01 | 0.40 | 0.97 | 0.45 |
| 0.53 | 1.01 | 0.40 | 0.97 | 0.45 |
| 0.36 | 1.11 | 0.55 | 1.10 | 0.63 |
| 0.62 | 1.04 | 0.44 | 0.91 | 0.40 |
| 0.46 | 0.89 | 0.25 | 1.14 | 0.67 |
| #N/A | #N/A | #N/A | #N/A | #N/A |
| #N/A | #N/A | #N/A | #N/A | #N/A |
| 0.14 | 0.80 | 0.17 | 0.80 | 0.24 |
| #N/A | 1.06 | 0.47 | 1.14 | 0.67 |
| 0.81 | 1.63 | 0.95 | 1.29 | 0.80 |
| #N/A | 0.94 | 0.33 | 0.58 | 0.07 |
| #N/A | 0.94 | 0.33 | 0.58 | 0.07 |
| 0.48 | 0.76 | 0.13 | 0.90 | 0.37 |
| #N/A | 0.43 | 0.02 | 0.59 | 0.07 |
| #N/A | 0.43 | 0.02 | 0.59 | 0.07 |
| 0.07 | 0.79 | 0.18 | 0.52 | 0.05 |
| 0.56 | 1.21 | 0.68 | 1.20 | 0.72 |
| 0.60 | 1.28 | 0.77 | 1.34 | 0.80 |
| 0.60 | 1.28 | 0.77 | 1.34 | 0.80 |
| #N/A | #N/A | #N/A | #N/A | #N/A |
| #N/A | #N/A | #N/A | #N/A | #N/A |
| 0.14 | 1.01 | 0.40 | 1.08 | 0.61 |
| 0.89 | 1.15 | 0.60 | 1.21 | 0.75 |
| #N/A | #N/A | #N/A | #N/A | #N/A |
| 0.79 | 1.15 | 0.59 | 1.05 | 0.56 |
| 0.79 | 1.15 | 0.59 | 1.05 | 0.56 |
| 0.79 | 1.15 | 0.59 | 1.05 | 0.56 |
| 0.77 | 0.71 | 0.10 | 1.03 | 0.54 |
| 0.77 | 0.71 | 0.10 | 1.03 | 0.54 |
| #N/A | 1.08 | 0.50 | 0.98 | 0.48 |
| 0.19 | 0.58 | 0.05 | 0.33 | 0.02 |
| #N/A | 1.26 | 0.75 | 1.04 | 0.56 |
| #N/A | 1.26 | 0.75 | 1.04 | 0.56 |
| 0.89 | 0.95 | 0.34 | 1.22 | 0.68 |
| 0.89 | 0.95 | 0.34 | 1.22 | 0.68 |
| 0.05 | 0.73 | 0.15 | 0.79 | 0.28 |
| 0.46 | 0.95 | 0.32 | 0.88 | 0.34 |
| 0.63 | 1.20 | 0.64 | 1.10 | 0.63 |
| 0.63 | 1.20 | 0.64 | 1.10 | 0.63 |
| 0.46 | 1.36 | 0.84 | 0.76 | 0.19 |
| 0.01 | 0.29 | 0.00 | 0.26 | 0.00 |
| 0.36 | 0.67 | 0.08 | 0.86 | 0.31 |
| #N/A | 1.19 | 0.62 | 2.66 | 0.99 |
| #N/A | #N/A | #N/A | #N/A | #N/A |
| #N/A | 1.19 | 0.62 | 2.66 | 0.99 |



|      |      |      |      |      |
|------|------|------|------|------|
| 0.93 | 1.15 | 0.61 | 1.07 | 0.58 |
| 0.89 | 1.28 | 0.73 | 1.76 | 0.81 |
| 0.17 | 1.34 | 0.82 | 0.80 | 0.29 |
| 0.63 | 0.90 | 0.30 | 0.93 | 0.40 |
| 0.17 | 1.34 | 0.82 | 0.80 | 0.29 |
| 0.63 | 0.90 | 0.30 | 0.93 | 0.40 |
| #N/A | 1.27 | 0.68 | 1.07 | 0.60 |
| #N/A | 1.27 | 0.68 | 1.07 | 0.60 |
| 0.95 | #N/A | #N/A | 0.71 | 0.15 |
| #N/A | #N/A | #N/A | #N/A | #N/A |
| 0.95 | #N/A | #N/A | 0.71 | 0.15 |
| #N/A | #N/A | #N/A | #N/A | #N/A |
| 0.67 | 1.09 | 0.52 | 0.89 | 0.35 |
| 0.17 | 0.50 | 0.03 | 0.63 | 0.10 |
| 0.17 | 0.50 | 0.03 | 0.63 | 0.10 |
| #N/A | #N/A | #N/A | #N/A | #N/A |
| 0.74 | 1.10 | 0.52 | 1.02 | 0.53 |
| 0.74 | 1.10 | 0.52 | 1.02 | 0.53 |
| #N/A | 1.01 | 0.40 | 1.00 | 0.49 |
| #N/A | #N/A | #N/A | #N/A | #N/A |
| 0.08 | 0.77 | 0.14 | 0.83 | 0.27 |
| 0.10 | 0.86 | 0.22 | 0.54 | 0.05 |
| 0.79 | 1.17 | 0.61 | 1.04 | 0.55 |
| 0.83 | 1.36 | 0.83 | 1.42 | 0.89 |
| 0.95 | 1.05 | 0.47 | 0.73 | 0.17 |
| 0.14 | 1.11 | 0.55 | 1.00 | 0.50 |
| #N/A | 1.10 | 0.53 | 2.26 | 0.99 |
| 0.26 | 0.75 | 0.15 | 0.87 | 0.32 |
| 0.60 | 0.98 | 0.35 | 0.61 | 0.08 |
| #N/A | #N/A | #N/A | #N/A | #N/A |
| 0.23 | 1.00 | 0.40 | 1.45 | 0.66 |
| 0.23 | 1.00 | 0.40 | 1.45 | 0.66 |
| 0.08 | 1.02 | 0.42 | 0.60 | 0.08 |
| 0.89 | 1.15 | 0.58 | 0.89 | 0.35 |
| 0.89 | 1.15 | 0.58 | 0.89 | 0.35 |
| 0.64 | 0.83 | 0.19 | 1.14 | 0.65 |
| #N/A | #N/A | #N/A | #N/A | #N/A |
| 0.76 | 0.75 | 0.13 | 1.15 | 0.68 |
| 0.76 | 0.75 | 0.13 | 1.15 | 0.68 |
| #N/A | 1.09 | 0.51 | 1.05 | 0.56 |
| #N/A | 1.09 | 0.51 | 1.05 | 0.56 |
| 0.57 | 0.80 | 0.19 | 0.91 | 0.38 |
| 0.43 | 0.84 | 0.20 | 0.80 | 0.28 |
| 0.31 | 0.86 | 0.22 | 0.61 | 0.08 |
| 0.40 | 1.03 | 0.43 | 0.73 | 0.22 |
| 0.68 | 0.82 | 0.19 | 1.03 | 0.52 |
| 0.59 | 1.04 | 0.45 | 1.10 | 0.62 |
| 0.69 | 1.48 | 0.86 | 1.13 | 0.64 |
| 0.70 | 1.59 | 0.91 | 1.26 | 0.70 |
| #N/A | 1.95 | 0.96 | 0.81 | 0.25 |
| #N/A | 1.95 | 0.96 | 0.81 | 0.25 |

|      |      |      |      |      |
|------|------|------|------|------|
| 0.58 | 1.16 | 0.58 | 1.09 | 0.62 |
| 0.03 | 0.32 | 0.01 | 0.36 | 0.01 |
| 0.03 | 0.32 | 0.01 | 0.36 | 0.01 |
| 0.60 | 0.72 | 0.15 | 0.79 | 0.23 |
| #N/A | 0.52 | 0.03 | #N/A | #N/A |
| 0.62 | 0.86 | 0.21 | 0.93 | 0.41 |
| 0.62 | 0.86 | 0.21 | 0.93 | 0.41 |
| 0.41 | 0.87 | 0.23 | 0.73 | 0.17 |
| 0.34 | 0.95 | 0.32 | 0.91 | 0.38 |
| 0.67 | 1.17 | 0.61 | 1.00 | 0.50 |
| 0.77 | 1.21 | 0.61 | 1.07 | 0.59 |
| #N/A | 1.10 | 0.53 | 1.02 | 0.52 |
| #N/A | 1.04 | 0.46 | 0.77 | 0.21 |
| #N/A | 1.04 | 0.46 | 0.77 | 0.21 |
| 0.87 | 1.09 | 0.52 | 1.19 | 0.68 |
| 0.87 | 1.09 | 0.52 | 1.19 | 0.68 |
| 0.86 | 1.24 | 0.72 | 1.27 | 0.78 |
| 0.86 | 1.24 | 0.72 | 1.27 | 0.78 |
| 0.76 | 1.02 | 0.44 | 1.06 | 0.55 |
| 0.87 | 0.60 | 0.27 | 0.84 | 0.29 |
| #N/A | 1.08 | 0.50 | 1.01 | 0.50 |
| #N/A | 1.08 | 0.50 | 1.01 | 0.50 |
| #N/A | 0.52 | 0.03 | #N/A | #N/A |
| #N/A | 0.52 | 0.03 | #N/A | #N/A |
| 0.31 | 0.85 | 0.27 | 0.83 | 0.27 |
| 0.68 | #N/A | #N/A | 0.98 | 0.47 |
| 0.54 | 0.94 | 0.36 | 0.54 | 0.05 |
| 0.40 | 0.96 | 0.33 | 1.10 | 0.63 |
| 0.50 | 0.78 | 0.16 | 0.80 | 0.23 |
| #N/A | 1.18 | 0.64 | 0.75 | 0.19 |
| 0.16 | 0.85 | 0.21 | 0.64 | 0.10 |
| 0.88 | 0.86 | 0.22 | 1.16 | 0.69 |
| #N/A | #N/A | #N/A | #N/A | #N/A |
| #N/A | #N/A | #N/A | #N/A | #N/A |
| 0.76 | 0.67 | 0.08 | 0.97 | 0.45 |
| 0.66 | 1.07 | 0.48 | 0.97 | 0.46 |
| 0.66 | 1.07 | 0.48 | 0.97 | 0.46 |
| 0.66 | 1.07 | 0.48 | 0.97 | 0.46 |
| 0.26 | 1.02 | 0.41 | 1.46 | 0.77 |
| 0.26 | 1.02 | 0.41 | 1.46 | 0.77 |
| 0.76 | 0.85 | 0.21 | 0.90 | 0.37 |
| 0.02 | 0.79 | 0.16 | 0.70 | 0.14 |
| 0.69 | 0.94 | 0.31 | 1.18 | 0.72 |
| 0.42 | 1.12 | 0.56 | #N/A | #N/A |
| 0.69 | 0.94 | 0.31 | 1.18 | 0.72 |
| 0.30 | 0.92 | 0.29 | 0.55 | 0.06 |
| 0.08 | 0.55 | 0.03 | 0.48 | 0.03 |
| 0.79 | 1.09 | 0.52 | 1.01 | 0.51 |
| 0.79 | 1.09 | 0.52 | 1.01 | 0.51 |
| 0.45 | 0.73 | 0.12 | 0.66 | 0.15 |
| 0.92 | 1.01 | 0.45 | 1.01 | 0.50 |

|      |      |      |      |      |
|------|------|------|------|------|
| 0.81 | 1.34 | 0.78 | 0.94 | 0.42 |
| #N/A | #N/A | #N/A | #N/A | #N/A |
| 0.30 | 0.97 | 0.35 | 1.20 | 0.64 |
| 0.30 | 0.97 | 0.35 | 1.20 | 0.64 |
| #N/A | 1.17 | 0.62 | 1.07 | 0.57 |
| 0.31 | 0.82 | 0.29 | 1.26 | 0.59 |
| 0.31 | 0.82 | 0.29 | 1.26 | 0.59 |
| 0.72 | 1.07 | 0.48 | #N/A | #N/A |
| #N/A | 0.76 | 0.15 | 1.07 | 0.58 |
| #N/A | 0.76 | 0.15 | 1.07 | 0.58 |
| 0.25 | 0.96 | 0.33 | 0.94 | 0.41 |
| 0.65 | 0.95 | 0.31 | 0.71 | 0.15 |
| 0.94 | 1.07 | 0.49 | #N/A | #N/A |
| 0.05 | 0.51 | 0.03 | 0.58 | 0.08 |
| 0.66 | 1.02 | 0.41 | 0.96 | 0.44 |
| 0.33 | 1.31 | 0.80 | 1.01 | 0.50 |
| 0.39 | 1.38 | 0.69 | 0.61 | 0.09 |
| 0.61 | 1.07 | 0.48 | 1.14 | 0.67 |
| 0.90 | 1.40 | 0.79 | 0.95 | 0.43 |
| 0.90 | 1.40 | 0.79 | 0.95 | 0.43 |
| 0.45 | 1.07 | 0.48 | 0.87 | 0.32 |
| 0.90 | 0.99 | 0.37 | 0.78 | 0.22 |
| #N/A | 0.70 | 0.10 | 0.58 | 0.07 |
| 0.22 | 0.94 | 0.31 | 0.89 | 0.35 |
| 0.41 | 1.19 | 0.65 | 0.88 | 0.34 |
| 0.11 | 0.26 | 0.00 | 0.15 | 0.00 |
| #N/A | 1.10 | 0.53 | #N/A | #N/A |
| 0.54 | 1.11 | 0.54 | 0.91 | 0.38 |
| 0.54 | 1.11 | 0.54 | 0.91 | 0.38 |
| 0.91 | 1.56 | 0.90 | 0.98 | 0.47 |
| 0.75 | 1.21 | 0.64 | 1.65 | 0.67 |
| 0.75 | 1.21 | 0.64 | 1.65 | 0.67 |
| #N/A | 1.09 | 0.51 | 1.06 | 0.49 |
| 0.46 | 1.27 | 0.74 | 1.13 | 0.62 |
| 0.33 | 1.22 | 0.70 | 1.23 | 0.77 |
| 0.26 | 0.71 | 0.10 | 0.53 | 0.05 |
| 0.26 | 0.71 | 0.10 | 0.53 | 0.05 |
| #N/A | #N/A | #N/A | #N/A | #N/A |
| 0.59 | 1.21 | 0.68 | 0.86 | 0.32 |
| #N/A | 1.03 | 0.43 | 0.92 | 0.40 |
| #N/A | 0.81 | 0.18 | 0.76 | 0.20 |
| #N/A | 0.81 | 0.18 | 0.76 | 0.20 |
| #N/A | 1.75 | 0.96 | 0.80 | 0.23 |
| 0.54 | 1.07 | 0.48 | 0.82 | 0.28 |
| 0.54 | 1.07 | 0.48 | 0.82 | 0.28 |
| 0.17 | 1.37 | 0.84 | 1.20 | 0.74 |
| #N/A | 0.68 | 0.08 | 0.95 | 0.43 |
| #N/A | 0.68 | 0.08 | 0.95 | 0.43 |
| 0.94 | 1.49 | 0.79 | 1.03 | 0.52 |
| 0.83 | 1.16 | 0.61 | 1.26 | 0.76 |
| 0.83 | 1.16 | 0.61 | 1.26 | 0.76 |

|      |      |      |      |      |
|------|------|------|------|------|
| 0.77 | 1.13 | 0.57 | 0.88 | 0.34 |
| #N/A | #N/A | #N/A | #N/A | #N/A |
| 0.87 | 0.94 | 0.37 | 1.10 | 0.62 |
| 0.32 | 1.11 | 0.53 | 1.00 | 0.49 |
| 0.78 | 0.92 | 0.28 | #N/A | #N/A |
| 0.63 | 1.24 | 0.72 | #N/A | #N/A |
| 0.63 | 1.24 | 0.72 | #N/A | #N/A |
| 0.94 | 1.07 | 0.49 | 0.86 | 0.32 |
| 0.88 | 0.93 | 0.30 | 0.93 | 0.40 |
| 0.88 | 0.93 | 0.30 | 0.93 | 0.40 |
| #N/A | 1.51 | 0.79 | 1.14 | 0.62 |
| 0.53 | 0.78 | 0.16 | 0.75 | 0.19 |
| 0.53 | 0.78 | 0.16 | 0.75 | 0.19 |
| 0.98 | 1.10 | 0.51 | 1.10 | 0.62 |
| 0.98 | 1.10 | 0.51 | 1.10 | 0.62 |
| 0.32 | 0.90 | 0.28 | 0.81 | 0.26 |
| #N/A | #N/A | #N/A | #N/A | #N/A |
| #N/A | 0.89 | 0.25 | 1.05 | 0.57 |
| 0.53 | 1.47 | 0.86 | 1.21 | 0.75 |
| 0.84 | 1.04 | 0.44 | 1.18 | 0.61 |
| 0.71 | 1.53 | 0.93 | #N/A | #N/A |
| 0.56 | 0.93 | 0.30 | 1.15 | 0.63 |
| #N/A | #N/A | #N/A | #N/A | #N/A |
| #N/A | #N/A | #N/A | #N/A | #N/A |
| #N/A | #N/A | #N/A | #N/A | #N/A |
| #N/A | #N/A | #N/A | #N/A | #N/A |
| 0.23 | 1.30 | 0.77 | 1.33 | 0.85 |
| 0.62 | 1.13 | 0.56 | #N/A | #N/A |
| 0.96 | 1.19 | 0.65 | 1.35 | 0.85 |
| 0.96 | 1.19 | 0.65 | 1.35 | 0.85 |
| 0.73 | 1.31 | 0.79 | 0.73 | 0.17 |
| 0.51 | 0.43 | 0.01 | 0.44 | 0.02 |
| 0.87 | 0.91 | 0.28 | 0.90 | 0.36 |
| 0.80 | 1.25 | 0.73 | 0.83 | 0.27 |
| 0.62 | 1.13 | 0.57 | 1.24 | 0.77 |
| 0.83 | 0.97 | 0.36 | 0.85 | 0.34 |
| #N/A | #N/A | #N/A | #N/A | #N/A |
| 0.52 | 0.91 | 0.29 | 0.83 | 0.29 |
| 0.69 | 0.97 | 0.41 | 1.98 | 0.98 |
| 0.79 | 1.39 | 0.84 | 1.46 | 0.89 |
| 0.34 | 0.61 | 0.05 | 0.66 | 0.12 |
| #N/A | 0.88 | 0.27 | #N/A | #N/A |
| 0.38 | 1.04 | 0.44 | 0.89 | 0.35 |
| #N/A | 1.13 | 0.57 | 1.03 | 0.54 |
| 0.93 | 1.33 | 0.66 | 1.22 | 0.71 |
| 0.67 | 1.19 | 0.66 | 0.77 | 0.23 |
| 0.88 | 0.97 | 0.34 | 0.91 | 0.37 |
| 0.67 | 1.19 | 0.66 | 0.77 | 0.23 |
| 0.88 | 0.97 | 0.34 | 0.91 | 0.37 |
| 0.69 | 1.11 | 0.55 | 1.18 | 0.66 |
| 0.78 | 1.07 | 0.50 | 0.72 | 0.16 |

|      |      |      |      |      |
|------|------|------|------|------|
| 0.69 | 1.11 | 0.55 | 1.18 | 0.66 |
| 0.78 | 1.07 | 0.50 | 0.72 | 0.16 |
| #N/A | 0.99 | 0.37 | 0.79 | 0.23 |
| 0.46 | 0.88 | 0.25 | 0.72 | 0.16 |
| 0.17 | 1.55 | 0.92 | 0.96 | 0.45 |
| #N/A | #N/A | #N/A | #N/A | #N/A |
| #N/A | #N/A | #N/A | #N/A | #N/A |
| 0.82 | 1.16 | 0.62 | 0.97 | 0.46 |
| 0.93 | 1.31 | 0.63 | 1.35 | 0.83 |
| 0.93 | 1.31 | 0.63 | 1.35 | 0.83 |
| 0.09 | 0.61 | 0.05 | 0.73 | 0.18 |
| 0.56 | 0.75 | 0.13 | 0.87 | 0.32 |
| 0.56 | 0.75 | 0.13 | 0.87 | 0.32 |
| #N/A | 1.20 | 0.60 | 0.99 | 0.48 |
| 0.35 | 1.07 | 0.48 | 1.17 | 0.65 |
| #N/A | 1.25 | 0.65 | 1.26 | 0.79 |
| #N/A | 0.85 | 0.21 | 1.47 | 0.92 |
| 0.91 | 1.27 | 0.75 | 1.29 | 0.78 |
| 0.81 | 1.06 | 0.48 | 1.21 | 0.76 |
| 0.81 | 1.06 | 0.48 | 1.21 | 0.76 |
| 0.94 | 1.15 | 0.57 | 1.13 | 0.61 |
| 0.92 | 0.81 | 0.17 | 1.11 | 0.64 |
| #N/A | #N/A | #N/A | #N/A | #N/A |
| #N/A | #N/A | #N/A | #N/A | #N/A |
| 0.82 | 0.94 | 0.31 | 1.05 | 0.56 |
| 0.44 | 1.14 | 0.59 | 1.03 | 0.53 |
| #N/A | #N/A | #N/A | #N/A | #N/A |
| #N/A | #N/A | #N/A | #N/A | #N/A |
| 0.31 | 0.95 | 0.37 | #N/A | #N/A |
| 0.63 | 1.38 | 0.85 | 0.97 | 0.46 |
| 0.63 | 1.38 | 0.85 | 0.97 | 0.46 |
| 0.35 | 1.24 | 0.68 | 1.06 | 0.54 |
| #N/A | 1.31 | 0.74 | 1.13 | 0.65 |
| #N/A | 1.31 | 0.74 | 1.13 | 0.65 |
| 0.35 | 1.24 | 0.68 | 1.06 | 0.54 |
| 0.35 | 1.28 | 0.76 | 0.99 | 0.48 |
| #N/A | #N/A | #N/A | #N/A | #N/A |
| 0.69 | 1.30 | 0.79 | 0.93 | 0.41 |
| 0.36 | 1.24 | 0.70 | 1.10 | 0.61 |
| 0.56 | 0.96 | 0.37 | 0.78 | 0.21 |
| 0.56 | 0.96 | 0.37 | 0.78 | 0.21 |
| #N/A | #N/A | #N/A | 1.28 | 0.51 |
| 0.56 | 1.17 | 0.59 | 1.17 | 0.69 |
| 0.56 | 1.17 | 0.59 | 1.17 | 0.69 |
| #N/A | #N/A | #N/A | #N/A | #N/A |
| 0.79 | 1.17 | 0.62 | 1.41 | 0.89 |
| 0.79 | 1.17 | 0.62 | 1.41 | 0.89 |
| 0.44 | 1.15 | 0.59 | 1.16 | 0.66 |
| 0.31 | 1.31 | 0.76 | 1.04 | 0.55 |
| #N/A | 1.83 | 0.98 | #N/A | #N/A |
| 0.80 | 0.63 | 0.06 | 0.95 | 0.43 |

|      |      |      |      |      |
|------|------|------|------|------|
| 0.26 | 0.78 | 0.15 | 0.64 | 0.12 |
| 0.34 | 0.99 | 0.37 | 1.06 | 0.56 |
| 0.34 | 0.99 | 0.37 | 1.06 | 0.56 |
| 0.63 | 0.90 | 0.26 | 0.91 | 0.38 |
| 0.37 | 0.39 | 0.01 | 0.63 | 0.15 |
| 0.37 | 0.39 | 0.01 | 0.63 | 0.15 |
| 0.75 | 1.16 | 0.59 | 0.97 | 0.45 |
| 0.75 | 1.16 | 0.59 | 0.97 | 0.45 |
| 0.96 | 1.39 | 0.86 | 1.44 | 0.85 |
| #N/A | 0.71 | 0.12 | 0.77 | 0.29 |
| #N/A | #N/A | #N/A | #N/A | #N/A |
| 0.19 | 1.87 | 0.74 | 0.97 | 0.46 |
| #N/A | 1.20 | 0.59 | 1.23 | 0.59 |
| #N/A | 1.20 | 0.59 | 1.23 | 0.59 |
| #N/A | 0.95 | 0.31 | 0.91 | 0.39 |
| 0.71 | 1.08 | 0.51 | 1.40 | 0.87 |
| 0.71 | 1.08 | 0.51 | 1.40 | 0.87 |
| 0.57 | 1.03 | 0.42 | 1.16 | 0.68 |
| #N/A | #N/A | #N/A | 1.36 | 0.87 |
| 0.42 | 1.12 | 0.56 | 1.20 | 0.73 |
| 0.81 | 0.82 | 0.19 | 0.91 | 0.37 |
| #N/A | 1.55 | 0.93 | #N/A | #N/A |
| #N/A | 1.55 | 0.93 | #N/A | #N/A |
| 0.58 | 1.01 | 0.39 | 1.09 | 0.62 |
| 0.32 | 0.87 | 0.23 | 0.91 | 0.38 |
| 0.23 | 0.72 | 0.11 | 0.78 | 0.24 |
| #N/A | #N/A | #N/A | #N/A | #N/A |
| 0.33 | 1.36 | 0.60 | 0.57 | 0.08 |
| 0.70 | 1.09 | 0.52 | 0.85 | 0.31 |
| #N/A | #N/A | #N/A | #N/A | #N/A |
| #N/A | 1.14 | 0.58 | 0.90 | 0.38 |
| 0.41 | 0.99 | 0.37 | 1.10 | 0.63 |
| 0.14 | 0.59 | 0.05 | 0.63 | 0.09 |
| 0.55 | 0.99 | 0.38 | 1.17 | 0.70 |
| #N/A | #N/A | #N/A | #N/A | #N/A |
| 0.38 | 0.87 | 0.23 | 1.03 | 0.53 |
| #N/A | #N/A | #N/A | #N/A | #N/A |
| #N/A | #N/A | #N/A | #N/A | #N/A |
| #N/A | #N/A | #N/A | #N/A | #N/A |
| 0.75 | 1.28 | 0.73 | 1.09 | 0.61 |
| 0.78 | 1.08 | 0.51 | 0.85 | 0.33 |
| 0.78 | 1.08 | 0.51 | 0.85 | 0.33 |
| #N/A | 1.03 | 0.47 | 0.52 | 0.04 |
| 0.80 | 1.01 | 0.40 | 1.14 | 0.63 |
| 0.80 | 1.01 | 0.40 | 1.14 | 0.63 |
| 0.36 | 1.13 | 0.58 | 1.12 | 0.66 |
| 0.40 | 1.00 | 0.40 | 1.18 | 0.63 |
| 0.40 | 1.00 | 0.40 | 1.18 | 0.63 |
| 0.03 | 0.35 | 0.01 | 0.35 | 0.01 |
| #N/A | #N/A | #N/A | #N/A | #N/A |
| #N/A | #N/A | #N/A | #N/A | #N/A |

|      |      |      |      |      |
|------|------|------|------|------|
| 0.54 | 1.26 | 0.69 | 1.16 | 0.66 |
| 0.54 | 1.26 | 0.69 | 1.16 | 0.66 |
| 0.88 | 1.43 | 0.88 | #N/A | #N/A |
| #N/A | 1.08 | 0.50 | 0.55 | 0.06 |
| #N/A | #N/A | #N/A | 1.11 | 0.64 |
| 0.17 | 1.38 | 0.72 | 1.19 | 0.69 |
| #N/A | #N/A | #N/A | #N/A | #N/A |
| #N/A | #N/A | #N/A | #N/A | #N/A |
| #N/A | #N/A | #N/A | #N/A | #N/A |
| #N/A | 1.12 | 0.56 | #N/A | #N/A |
| #N/A | 1.20 | 0.67 | 1.05 | 0.55 |
| #N/A | 1.20 | 0.67 | 1.05 | 0.55 |
| #N/A | 1.00 | 0.41 | #N/A | #N/A |
| #N/A | #N/A | #N/A | #N/A | #N/A |
| #N/A | #N/A | #N/A | #N/A | #N/A |
| #N/A | #N/A | #N/A | #N/A | #N/A |
| #N/A | 0.79 | 0.20 | #N/A | #N/A |
| 0.92 | 0.99 | 0.38 | 1.09 | 0.60 |
| 0.82 | 0.94 | 0.30 | 1.04 | 0.55 |
| 0.82 | 0.94 | 0.30 | 1.04 | 0.55 |
| 0.66 | 1.41 | 0.77 | 1.14 | 0.67 |
| #N/A | #N/A | #N/A | #N/A | #N/A |
| #N/A | #N/A | #N/A | #N/A | #N/A |
| 0.45 | 0.96 | 0.33 | 0.95 | 0.43 |
| #N/A | #N/A | #N/A | #N/A | #N/A |
| #N/A | #N/A | #N/A | #N/A | #N/A |
| #N/A | 1.29 | 0.75 | 1.44 | 0.86 |
| 0.67 | 0.74 | 0.12 | 0.82 | 0.25 |
| #N/A | 1.29 | 0.75 | 1.44 | 0.86 |
| 0.59 | 1.40 | 0.83 | 0.73 | 0.16 |
| #N/A | #N/A | #N/A | #N/A | #N/A |
| 0.95 | 1.12 | 0.56 | 1.10 | 0.63 |
| #N/A | 0.94 | 0.30 | 0.82 | 0.27 |
| 0.95 | 1.07 | 0.49 | 1.11 | 0.64 |
| 0.94 | 1.47 | 0.91 | 1.39 | 0.71 |
| #N/A | #N/A | #N/A | #N/A | #N/A |
| #N/A | 1.07 | 0.49 | 0.86 | 0.31 |
| #N/A | 1.07 | 0.49 | 0.86 | 0.31 |
| 0.65 | 1.22 | 0.67 | 1.13 | 0.66 |
| #N/A | 0.81 | 0.19 | 0.79 | 0.23 |
| #N/A | 1.31 | 0.76 | 1.08 | 0.56 |
| #N/A | 1.13 | 0.55 | 1.12 | 0.65 |
| 0.26 | 0.99 | 0.38 | 0.93 | 0.41 |
| 0.81 | 0.58 | 0.04 | 0.71 | 0.16 |
| 0.81 | 0.58 | 0.04 | 0.71 | 0.16 |
| 0.27 | 1.28 | 0.76 | 1.33 | 0.85 |
| #N/A | 1.14 | 0.58 | 0.91 | 0.37 |
| #N/A | 1.81 | 0.98 | 1.79 | 0.88 |
| #N/A | 1.81 | 0.98 | 1.79 | 0.88 |
| 0.04 | 0.71 | 0.10 | #N/A | #N/A |
| #N/A | #N/A | #N/A | #N/A | #N/A |

|      |      |      |      |      |
|------|------|------|------|------|
| #N/A | #N/A | #N/A | #N/A | #N/A |
| 0.70 | 1.26 | 0.74 | 1.05 | 0.57 |
| #N/A | #N/A | #N/A | #N/A | #N/A |
| #N/A | #N/A | #N/A | #N/A | #N/A |
| 0.87 | 1.09 | 0.51 | 0.81 | 0.26 |
| 0.87 | 1.09 | 0.51 | 0.81 | 0.26 |
| #N/A | #N/A | #N/A | #N/A | #N/A |
| #N/A | #N/A | #N/A | #N/A | #N/A |
| 0.87 | 1.22 | 0.62 | 1.35 | 0.63 |
| 0.87 | 1.22 | 0.62 | 1.35 | 0.63 |
| #N/A | #N/A | #N/A | #N/A | #N/A |
| #N/A | #N/A | #N/A | #N/A | #N/A |
| 0.80 | 0.92 | 0.29 | 0.84 | 0.30 |
| #N/A | #N/A | #N/A | #N/A | #N/A |
| 0.81 | 1.09 | 0.52 | 1.16 | 0.70 |
| #N/A | #N/A | #N/A | #N/A | #N/A |
| 0.95 | 1.16 | 0.59 | 0.86 | 0.31 |
| 0.26 | 1.04 | 0.44 | 0.91 | 0.38 |
| #N/A | 0.94 | 0.34 | 1.63 | 0.74 |
| #N/A | #N/A | #N/A | #N/A | #N/A |
| #N/A | 1.08 | 0.51 | 0.94 | 0.42 |
| #N/A | 1.08 | 0.51 | 0.94 | 0.42 |
| #N/A | 1.57 | 0.86 | 0.75 | 0.21 |
| #N/A | 1.57 | 0.86 | 0.75 | 0.21 |
| #N/A | #N/A | #N/A | #N/A | #N/A |
| 0.56 | 1.17 | 0.63 | 0.96 | 0.44 |
| #N/A | #N/A | #N/A | #N/A | #N/A |
| #N/A | #N/A | #N/A | #N/A | #N/A |
| #N/A | 1.15 | 0.53 | 0.83 | 0.32 |
| 0.93 | 1.59 | 0.94 | 1.17 | 0.71 |
| 0.93 | 1.59 | 0.94 | 1.17 | 0.71 |
| 0.30 | 1.16 | 0.62 | 0.99 | 0.49 |
| 0.66 | 1.22 | 0.65 | 0.90 | 0.37 |
| #N/A | 1.27 | 0.75 | 1.01 | 0.50 |
| 0.77 | 1.31 | 0.79 | 1.71 | 0.96 |
| #N/A | 1.27 | 0.75 | 1.58 | 0.95 |
| #N/A | 1.27 | 0.75 | 1.58 | 0.95 |
| #N/A | #N/A | #N/A | #N/A | #N/A |
| #N/A | #N/A | #N/A | 1.63 | 0.95 |
| 0.54 | 1.24 | 0.59 | 1.34 | 0.73 |
| 0.91 | 1.28 | 0.77 | 1.26 | 0.74 |
| 0.91 | 1.28 | 0.77 | 1.26 | 0.74 |
| #N/A | #N/A | #N/A | #N/A | #N/A |
| 0.98 | 1.34 | 0.82 | 1.27 | 0.70 |
| 0.98 | 1.34 | 0.82 | 1.27 | 0.70 |
| 0.97 | 1.46 | 0.63 | 1.30 | 0.82 |
| 0.93 | 1.21 | 0.69 | 1.37 | 0.86 |
| 0.93 | 1.21 | 0.69 | 1.37 | 0.86 |
| 0.56 | 1.05 | 0.46 | 1.01 | 0.51 |
| 0.74 | 1.19 | 0.64 | 0.76 | 0.19 |
| #N/A | 1.14 | 0.56 | 1.49 | 0.77 |



|      |      |      |      |      |
|------|------|------|------|------|
| #N/A | 0.92 | 0.28 | 0.77 | 0.21 |
| #N/A | 1.17 | 0.62 | 0.83 | 0.30 |
| #N/A | #N/A | #N/A | #N/A | #N/A |
| #N/A | #N/A | #N/A | #N/A | #N/A |
| #N/A | #N/A | #N/A | #N/A | #N/A |
| #N/A | #N/A | #N/A | #N/A | #N/A |
| #N/A | #N/A | #N/A | #N/A | #N/A |
| 0.93 | 1.28 | 0.77 | 1.20 | 0.73 |
| 0.93 | 1.28 | 0.77 | 1.20 | 0.73 |
| #N/A | #N/A | #N/A | #N/A | #N/A |
| #N/A | #N/A | #N/A | 0.83 | 0.27 |
| #N/A | #N/A | #N/A | 0.83 | 0.27 |
| 0.92 | 0.97 | 0.34 | 1.21 | 0.73 |
| 0.37 | 0.53 | 0.03 | 0.55 | 0.06 |
| 0.37 | 0.53 | 0.03 | 0.55 | 0.06 |
| #N/A | #N/A | #N/A | #N/A | #N/A |
| 0.55 | 1.25 | 0.73 | 0.99 | 0.48 |
| #N/A | #N/A | #N/A | #N/A | #N/A |
| #N/A | #N/A | #N/A | #N/A | #N/A |
| #N/A | 0.69 | 0.10 | 0.84 | 0.29 |
| #N/A | 0.69 | 0.10 | 0.84 | 0.29 |
| 0.78 | 1.35 | 0.81 | 1.02 | 0.53 |
| #N/A | #N/A | #N/A | #N/A | #N/A |
| 0.27 | 0.65 | 0.07 | 0.55 | 0.06 |
| #N/A | #N/A | #N/A | #N/A | #N/A |
| 0.66 | 0.93 | 0.29 | 0.94 | 0.42 |
| 0.84 | 1.08 | 0.50 | 0.96 | 0.45 |
| 0.84 | 1.08 | 0.50 | 0.96 | 0.45 |
| 0.54 | 0.68 | 0.09 | 0.62 | 0.08 |
| 0.54 | 0.68 | 0.09 | 0.62 | 0.08 |
| 0.83 | 1.14 | 0.58 | 0.81 | 0.28 |
| 0.83 | 1.14 | 0.58 | 0.81 | 0.28 |
| 0.85 | 1.02 | 0.42 | 0.83 | 0.33 |
| 0.85 | 1.02 | 0.42 | 0.83 | 0.33 |
| #N/A | #N/A | #N/A | #N/A | #N/A |
| 0.69 | 1.13 | 0.55 | 1.15 | 0.67 |
| 0.69 | 1.13 | 0.55 | 1.15 | 0.67 |
| 0.98 | 1.11 | 0.54 | 1.17 | 0.69 |
| 0.98 | 1.11 | 0.54 | 1.17 | 0.69 |
| 0.15 | 1.24 | 0.66 | 1.13 | 0.67 |
| #N/A | #N/A | #N/A | #N/A | #N/A |
| #N/A | #N/A | #N/A | #N/A | #N/A |
| 0.75 | 1.04 | 0.45 | 0.80 | 0.24 |
| 0.71 | 1.24 | 0.67 | 1.03 | 0.53 |
| 0.91 | 1.00 | 0.38 | 1.07 | 0.59 |
| 0.74 | 1.25 | 0.72 | 0.72 | 0.18 |
| 0.74 | 1.25 | 0.72 | 0.72 | 0.18 |
| #N/A | 1.49 | 0.77 | 1.80 | 0.82 |
| #N/A | 1.20 | 0.67 | #N/A | #N/A |
| 0.56 | 1.16 | 0.62 | #N/A | #N/A |
| 0.43 | 0.98 | 0.41 | 1.08 | 0.60 |

|      |      |      |      |      |
|------|------|------|------|------|
| 0.95 | 1.10 | 0.53 | 0.73 | 0.17 |
| #N/A | #N/A | #N/A | #N/A | #N/A |
| #N/A | #N/A | #N/A | #N/A | #N/A |
| 0.29 | 0.95 | 0.44 | 1.10 | 0.60 |
| #N/A | #N/A | #N/A | #N/A | #N/A |
| #N/A | #N/A | #N/A | #N/A | #N/A |
| 0.34 | 1.23 | 0.67 | 1.22 | 0.72 |
| 0.31 | 0.74 | 0.12 | 0.79 | 0.22 |
| 0.73 | 1.20 | 0.67 | 1.21 | 0.74 |
| #N/A | #N/A | #N/A | #N/A | #N/A |
| #N/A | 1.04 | 0.45 | 1.05 | 0.53 |
| 0.45 | 1.30 | 0.78 | 1.27 | 0.81 |
| #N/A | 0.96 | 0.33 | 1.03 | 0.54 |
| 0.24 | 0.88 | 0.24 | #N/A | #N/A |
| 0.96 | 1.35 | 0.83 | 0.97 | 0.45 |
| 0.96 | 1.35 | 0.83 | 0.97 | 0.45 |
| 0.98 | 1.55 | 0.83 | 0.96 | 0.45 |
| 0.98 | 1.55 | 0.83 | 0.96 | 0.45 |
| 0.71 | 1.33 | 0.81 | 1.81 | 0.91 |
| 0.75 | 1.07 | 0.48 | 1.01 | 0.50 |
| 0.75 | 1.07 | 0.48 | 1.01 | 0.50 |
| 0.88 | 1.06 | 0.48 | 0.63 | 0.10 |
| 0.88 | 1.06 | 0.48 | 0.63 | 0.10 |
| 0.84 | 1.54 | 0.89 | 1.20 | 0.75 |
| #N/A | 1.13 | 0.57 | 1.11 | 0.63 |
| #N/A | #N/A | #N/A | #N/A | #N/A |
| 0.37 | 1.12 | 0.56 | #N/A | #N/A |
| 0.68 | 1.15 | 0.60 | 1.05 | 0.54 |
| 0.68 | 1.15 | 0.60 | 1.05 | 0.54 |
| #N/A | #N/A | #N/A | #N/A | #N/A |
| #N/A | #N/A | #N/A | #N/A | #N/A |
| 0.11 | 0.61 | 0.05 | 0.85 | 0.32 |
| 0.11 | 0.61 | 0.05 | 0.85 | 0.32 |
| 0.69 | 1.00 | 0.38 | 0.88 | 0.33 |
| 0.49 | 1.10 | 0.52 | 0.93 | 0.41 |
| 0.61 | 1.13 | 0.57 | 1.02 | 0.52 |
| 0.61 | 1.13 | 0.57 | 1.02 | 0.52 |
| 0.43 | 1.28 | 0.74 | 1.39 | 0.87 |
| 0.82 | 1.27 | 0.72 | 1.03 | 0.54 |
| 0.82 | 1.27 | 0.72 | 1.03 | 0.54 |
| 0.35 | 1.33 | 0.81 | 1.56 | 0.94 |
| 0.60 | 0.87 | 0.23 | 0.88 | 0.33 |
| 0.60 | 0.97 | 0.35 | 1.13 | 0.66 |
| 0.35 | 1.33 | 0.81 | 1.56 | 0.94 |
| 0.35 | 1.33 | 0.81 | 1.56 | 0.94 |
| 0.60 | 0.97 | 0.35 | 1.13 | 0.66 |
| 0.60 | 0.97 | 0.35 | 1.13 | 0.66 |
| #N/A | #N/A | #N/A | #N/A | #N/A |
| 0.60 | 0.97 | 0.35 | 1.13 | 0.66 |
| 0.60 | 0.97 | 0.35 | 1.13 | 0.66 |
| 0.61 | 1.43 | 0.86 | 1.07 | 0.59 |

|      |      |      |      |      |
|------|------|------|------|------|
| 0.61 | 1.43 | 0.86 | 1.07 | 0.59 |
| 0.80 | 1.12 | 0.56 | 0.96 | 0.44 |
| 0.80 | 1.12 | 0.56 | 0.96 | 0.44 |
| 0.70 | 1.25 | 0.73 | 1.15 | 0.67 |
| 0.89 | 1.28 | 0.73 | 1.44 | 0.56 |
| 0.89 | 1.28 | 0.73 | 1.44 | 0.56 |
| 0.66 | 1.23 | 0.69 | 1.01 | 0.51 |
| 0.32 | 0.97 | 0.34 | 0.82 | 0.26 |
| #N/A | #N/A | #N/A | #N/A | #N/A |
| 0.35 | 0.99 | 0.37 | 0.98 | 0.46 |
| 0.12 | 0.55 | 0.03 | 0.50 | 0.04 |
| 0.12 | 0.55 | 0.03 | 0.50 | 0.04 |
| #N/A | 1.37 | 0.68 | #N/A | #N/A |
| 0.41 | 1.33 | 0.74 | 0.94 | 0.42 |
| 0.29 | 0.92 | 0.29 | 1.09 | 0.56 |
| 0.93 | 1.05 | 0.46 | 1.00 | 0.50 |
| #N/A | #N/A | #N/A | #N/A | #N/A |
| 0.03 | 0.71 | 0.10 | 0.75 | 0.18 |
| 0.83 | 1.33 | 0.81 | 1.10 | 0.60 |
| 0.83 | 1.33 | 0.81 | 1.10 | 0.60 |
| 0.58 | 1.03 | 0.43 | 1.37 | 0.85 |
| 0.73 | 0.89 | 0.32 | 1.07 | 0.59 |
| 0.73 | 0.89 | 0.32 | 1.07 | 0.59 |
| 0.40 | 1.73 | 0.96 | 1.21 | 0.74 |
| 0.40 | 1.73 | 0.96 | 1.21 | 0.74 |
| 0.66 | 0.86 | 0.22 | 0.95 | 0.44 |
| 0.69 | 1.11 | 0.55 | 1.12 | 0.63 |
| #N/A | #N/A | #N/A | #N/A | #N/A |
| #N/A | #N/A | #N/A | #N/A | #N/A |
| #N/A | 1.05 | 0.46 | 1.11 | 0.57 |
| 0.63 | 1.29 | 0.74 | 1.49 | 0.92 |
| 0.63 | 1.29 | 0.74 | 1.49 | 0.92 |
| 0.67 | 0.76 | 0.14 | 1.22 | 0.73 |
| 0.88 | 1.19 | 0.66 | 1.05 | 0.57 |
| 0.80 | 0.97 | 0.40 | 1.18 | 0.67 |
| 0.72 | 1.31 | 0.80 | 1.25 | 0.64 |
| 0.72 | 1.31 | 0.80 | 1.25 | 0.64 |
| 0.96 | 1.01 | 0.40 | 1.16 | 0.59 |
| #N/A | #N/A | #N/A | #N/A | #N/A |
| #N/A | 0.58 | 0.05 | 0.65 | 0.11 |
| 0.94 | 1.26 | 0.71 | 1.15 | 0.68 |
| 0.94 | 1.26 | 0.71 | 1.15 | 0.68 |
| #N/A | #N/A | #N/A | #N/A | #N/A |
| #N/A | 1.34 | 0.76 | 1.25 | 0.79 |
| 0.66 | 1.18 | 0.65 | 0.94 | 0.41 |
| 0.60 | 0.93 | 0.30 | 1.02 | 0.52 |
| 0.60 | 0.93 | 0.30 | 1.02 | 0.52 |
| 0.72 | 0.99 | 0.36 | 1.11 | 0.64 |
| #N/A | 1.05 | 0.48 | 0.79 | 0.24 |
| 0.37 | 0.96 | 0.41 | 0.78 | 0.23 |
| 0.37 | 0.96 | 0.41 | 0.78 | 0.23 |

|      |      |      |      |      |
|------|------|------|------|------|
| 0.05 | 0.44 | 0.02 | 0.38 | 0.01 |
| 0.07 | 0.50 | 0.03 | #N/A | #N/A |
| 0.31 | 0.75 | 0.14 | 0.82 | 0.27 |
| 0.31 | 0.75 | 0.14 | 0.82 | 0.27 |
| 0.13 | 0.50 | 0.03 | 0.35 | 0.01 |
| #N/A | #N/A | #N/A | #N/A | #N/A |
| 0.80 | 1.16 | 0.61 | 1.36 | 0.87 |
| 0.72 | 1.21 | 0.68 | 1.18 | 0.72 |
| 0.80 | 1.16 | 0.61 | 1.36 | 0.87 |
| 0.80 | 1.16 | 0.61 | 1.36 | 0.87 |
| 0.78 | 0.86 | 0.23 | 1.09 | 0.59 |
| #N/A | 1.05 | 0.48 | 1.57 | 0.95 |
| 0.81 | 1.14 | 0.55 | 1.36 | 0.83 |
| 0.81 | 1.14 | 0.55 | 1.36 | 0.83 |
| 0.68 | 0.88 | 0.27 | 1.25 | 0.77 |
| 0.89 | 1.03 | 0.43 | 1.00 | 0.49 |
| 0.89 | 0.99 | 0.39 | 1.19 | 0.62 |
| 0.04 | 0.44 | 0.02 | 0.88 | 0.37 |
| 0.36 | 0.97 | 0.35 | 0.82 | 0.27 |
| #N/A | #N/A | #N/A | #N/A | #N/A |
| 0.59 | 1.10 | 0.53 | 1.01 | 0.51 |
| 0.59 | 1.10 | 0.53 | 1.01 | 0.51 |
| 0.52 | 1.23 | 0.65 | 1.20 | 0.70 |
| 0.69 | 0.89 | 0.27 | 0.55 | 0.06 |
| 0.86 | 0.96 | 0.35 | 0.83 | 0.29 |
| 0.86 | 0.96 | 0.35 | 0.83 | 0.29 |
| 0.85 | 0.95 | 0.33 | 0.89 | 0.35 |
| 0.85 | 0.95 | 0.33 | 0.89 | 0.35 |
| 0.17 | 1.52 | 0.92 | 1.60 | 0.95 |
| 0.78 | 1.11 | 0.54 | 1.01 | 0.51 |
| 0.17 | 1.52 | 0.92 | 1.60 | 0.95 |
| 0.78 | 1.11 | 0.54 | 1.01 | 0.51 |
| #N/A | 1.28 | 0.76 | 1.10 | 0.55 |
| #N/A | 0.98 | 0.37 | 0.65 | 0.14 |
| #N/A | 0.98 | 0.37 | 0.65 | 0.14 |
| #N/A | 0.98 | 0.37 | 0.65 | 0.14 |
| 0.82 | 1.51 | 0.82 | 1.17 | 0.70 |
| 0.26 | 1.31 | 0.77 | 0.94 | 0.42 |
| 0.97 | 1.21 | 0.69 | 1.25 | 0.71 |
| 0.97 | 1.21 | 0.69 | 1.25 | 0.71 |
| 0.86 | 1.03 | 0.43 | 1.08 | 0.59 |
| 0.86 | 1.03 | 0.43 | 1.08 | 0.59 |
| 0.42 | 0.91 | 0.27 | 0.85 | 0.31 |
| 0.83 | 0.91 | 0.27 | 1.00 | 0.49 |
| 0.56 | 0.83 | 0.18 | 0.85 | 0.33 |
| 0.96 | 1.21 | 0.67 | 1.20 | 0.57 |
| 0.96 | 1.21 | 0.67 | 1.20 | 0.57 |
| 0.39 | 1.02 | 0.41 | 0.70 | 0.14 |
| #N/A | 1.37 | 0.85 | 1.57 | 0.93 |
| #N/A | 1.37 | 0.85 | 1.57 | 0.93 |
| #N/A | 0.65 | 0.07 | 0.98 | 0.47 |

|      |      |      |      |      |
|------|------|------|------|------|
| #N/A | 1.54 | 0.69 | 0.99 | 0.48 |
| #N/A | 1.54 | 0.69 | 0.99 | 0.48 |
| 0.73 | 1.40 | 0.86 | 1.25 | 0.76 |
| 0.42 | 1.14 | 0.59 | 1.21 | 0.74 |
| 0.42 | 1.14 | 0.59 | 1.21 | 0.74 |
| #N/A | #N/A | #N/A | #N/A | #N/A |
| #N/A | #N/A | #N/A | #N/A | #N/A |
| 0.69 | 0.89 | 0.26 | 1.26 | 0.80 |
| 0.52 | 1.33 | 0.81 | 0.89 | 0.36 |
| 0.59 | 1.06 | 0.46 | 0.89 | 0.37 |
| 0.65 | 0.96 | 0.33 | 1.33 | 0.70 |
| 0.65 | 0.96 | 0.33 | 1.33 | 0.70 |
| 0.91 | 1.22 | 0.60 | 0.84 | 0.38 |
| 0.22 | 0.75 | 0.13 | 0.93 | 0.41 |
| 0.22 | 0.75 | 0.13 | 0.93 | 0.41 |
| #N/A | #N/A | #N/A | #N/A | #N/A |
| 0.04 | 0.47 | 0.02 | 0.49 | 0.05 |
| 0.26 | 1.28 | 0.67 | 1.03 | 0.52 |
| 0.22 | 0.76 | 0.13 | 0.88 | 0.33 |
| 0.11 | 0.88 | 0.24 | 0.72 | 0.16 |
| 0.28 | 1.03 | 0.43 | 0.73 | 0.17 |
| 0.85 | 1.82 | 0.88 | 0.70 | 0.14 |
| 0.89 | 1.14 | 0.59 | 1.08 | 0.61 |
| 0.93 | 0.93 | 0.34 | 1.08 | 0.58 |
| 0.93 | 0.93 | 0.34 | 1.08 | 0.58 |
| 0.98 | 1.20 | 0.66 | 1.06 | 0.58 |
| 0.98 | 1.20 | 0.66 | 1.06 | 0.58 |
| 0.83 | 0.95 | 0.32 | 0.93 | 0.40 |
| 0.83 | 0.95 | 0.32 | 0.93 | 0.40 |
| 0.48 | 1.19 | 0.65 | 1.06 | 0.57 |
| 0.03 | 0.55 | 0.05 | 1.34 | 0.53 |
| #N/A | 1.34 | 0.57 | 1.39 | 0.87 |
| 0.40 | 1.20 | 0.58 | 0.82 | 0.31 |
| 0.92 | 1.42 | 0.86 | 1.47 | 0.92 |
| 0.92 | 1.42 | 0.86 | 1.47 | 0.92 |
| #N/A | 1.24 | 0.67 | 1.21 | 0.70 |
| 0.42 | 1.47 | 0.88 | 0.99 | 0.49 |
| 0.28 | 0.88 | 0.24 | #N/A | #N/A |
| 0.28 | 0.88 | 0.24 | #N/A | #N/A |
| 0.96 | 1.26 | 0.74 | 1.22 | 0.65 |
| 0.96 | 1.26 | 0.74 | 1.22 | 0.65 |
| 0.60 | 0.93 | 0.31 | 1.00 | 0.49 |
| 0.60 | 0.93 | 0.31 | 1.00 | 0.49 |
| 0.63 | 1.37 | 0.83 | 1.12 | 0.66 |
| 0.65 | 1.10 | 0.53 | 0.94 | 0.42 |
| 0.67 | 0.72 | 0.14 | 0.76 | 0.28 |
| 0.67 | 0.72 | 0.14 | 0.76 | 0.28 |
| 0.50 | 1.26 | 0.71 | 0.99 | 0.48 |
| 0.94 | 1.36 | 0.84 | 1.21 | 0.71 |
| #N/A | 1.20 | 0.63 | 0.99 | 0.48 |
| 0.91 | 1.20 | 0.61 | 1.08 | 0.60 |

|      |      |      |      |      |
|------|------|------|------|------|
| 0.91 | 1.20 | 0.61 | 1.08 | 0.60 |
| #N/A | 1.35 | 0.82 | 1.53 | 0.85 |
| 0.91 | 1.36 | 0.76 | 1.29 | 0.82 |
| 0.91 | 1.36 | 0.76 | 1.29 | 0.82 |
| #N/A | 1.11 | 0.53 | 0.84 | 0.28 |
| 0.60 | 1.18 | 0.65 | 1.41 | 0.90 |
| 0.60 | 1.18 | 0.65 | 1.41 | 0.90 |
| 0.59 | 1.19 | 0.66 | 0.88 | 0.35 |
| #N/A | #N/A | #N/A | #N/A | #N/A |
| #N/A | #N/A | #N/A | #N/A | #N/A |
| 0.76 | 1.11 | 0.55 | 1.11 | 0.61 |
| 0.76 | 1.11 | 0.55 | 1.11 | 0.61 |
| 0.64 | 1.10 | 0.52 | 1.24 | 0.75 |
| 0.41 | 1.15 | 0.58 | 1.29 | 0.82 |
| 0.41 | 1.15 | 0.58 | 1.29 | 0.82 |
| 0.13 | 1.71 | 0.92 | 1.43 | 0.87 |
| 0.60 | 1.17 | 0.63 | 1.05 | 0.56 |
| 0.60 | 1.17 | 0.63 | 1.05 | 0.56 |
| 0.60 | 1.17 | 0.63 | 1.05 | 0.56 |
| 0.85 | 1.51 | 0.93 | 1.46 | 0.89 |
| #N/A | 0.72 | 0.11 | 0.84 | 0.30 |
| #N/A | 0.72 | 0.11 | 0.84 | 0.30 |
| 0.64 | 1.37 | 0.85 | 1.54 | 0.94 |
| #N/A | #N/A | #N/A | #N/A | #N/A |
| #N/A | 1.19 | 0.58 | 1.33 | 0.72 |
| 0.74 | 1.12 | 0.55 | 1.50 | 0.87 |
| 0.74 | 1.12 | 0.55 | 1.50 | 0.87 |
| #N/A | #N/A | #N/A | #N/A | #N/A |
| #N/A | #N/A | #N/A | 1.04 | 0.54 |
| 0.72 | 1.02 | 0.42 | 1.07 | 0.59 |
| #N/A | #N/A | #N/A | #N/A | #N/A |
| 0.87 | 1.13 | 0.58 | 0.96 | 0.45 |
| 0.87 | 1.13 | 0.58 | 0.96 | 0.45 |
| #N/A | #N/A | #N/A | #N/A | #N/A |
| #N/A | 1.20 | 0.66 | 1.01 | 0.51 |
| #N/A | 1.20 | 0.66 | 1.01 | 0.51 |
| 0.54 | 0.88 | 0.27 | 0.87 | 0.32 |
| 0.54 | 0.88 | 0.27 | 0.87 | 0.32 |
| #N/A | 0.68 | 0.09 | 0.70 | 0.15 |
| 0.16 | 1.17 | 0.61 | #N/A | #N/A |
| 0.32 | 0.73 | 0.15 | 0.60 | 0.10 |
| 0.32 | 0.73 | 0.15 | 0.60 | 0.10 |
| #N/A | #N/A | #N/A | #N/A | #N/A |
| 0.09 | 1.09 | 0.51 | 1.12 | 0.65 |
| 0.83 | 1.30 | 0.78 | 1.17 | 0.65 |
| 0.91 | 1.11 | 0.55 | 1.39 | 0.76 |
| 0.93 | 1.09 | 0.52 | 1.47 | 0.89 |
| 0.67 | 0.99 | 0.39 | 0.87 | 0.35 |
| 0.67 | 0.99 | 0.39 | 0.87 | 0.35 |
| 0.90 | 1.13 | 0.58 | 0.94 | 0.42 |
| 0.60 | 0.99 | 0.41 | 0.92 | 0.39 |

|      |      |      |      |      |
|------|------|------|------|------|
| 0.60 | 0.99 | 0.41 | 0.92 | 0.39 |
| 0.90 | 1.24 | 0.70 | 1.20 | 0.74 |
| 0.54 | #N/A | #N/A | 1.38 | 0.87 |
| 0.68 | 1.41 | 0.85 | 1.15 | 0.57 |
| 0.96 | 0.65 | 0.07 | 0.73 | 0.17 |
| 0.96 | 0.65 | 0.07 | 0.73 | 0.17 |
| #N/A | 0.93 | 0.31 | 0.81 | 0.30 |
| 0.69 | 1.30 | 0.71 | 0.90 | 0.35 |
| 0.95 | 1.07 | 0.49 | 1.11 | 0.62 |
| 0.95 | 1.07 | 0.49 | 1.11 | 0.62 |
| 0.98 | 1.06 | 0.48 | 1.15 | 0.63 |
| 0.63 | 1.32 | 0.80 | 1.11 | 0.64 |
| 0.32 | 1.15 | 0.60 | 1.28 | 0.78 |
| 0.32 | 1.15 | 0.60 | 1.28 | 0.78 |
| 0.64 | 1.05 | 0.45 | 1.16 | 0.66 |
| 0.74 | 1.21 | 0.68 | 1.28 | 0.81 |
| #N/A | #N/A | #N/A | #N/A | #N/A |
| 0.87 | 0.96 | 0.32 | 0.87 | 0.37 |
| 0.87 | 0.96 | 0.32 | 0.87 | 0.37 |
| 0.75 | 1.06 | 0.47 | 0.97 | 0.46 |
| 0.75 | 1.06 | 0.47 | 0.97 | 0.46 |
| 0.82 | 1.09 | 0.51 | 1.06 | 0.58 |
| 0.38 | 0.76 | 0.14 | 0.92 | 0.45 |
| #N/A | #N/A | #N/A | #N/A | #N/A |
| #N/A | 0.91 | 0.29 | 0.76 | 0.23 |
| #N/A | #N/A | #N/A | #N/A | #N/A |
| #N/A | #N/A | #N/A | #N/A | #N/A |
| #N/A | 0.90 | 0.28 | 0.85 | 0.30 |
| 0.53 | 0.98 | 0.36 | 1.19 | 0.73 |
| 0.41 | 1.34 | 0.82 | 1.55 | 0.94 |
| 0.35 | 1.26 | 0.74 | 1.27 | 0.80 |
| #N/A | 1.34 | 0.82 | 1.35 | 0.86 |
| 0.35 | 1.26 | 0.74 | 1.27 | 0.80 |
| 0.61 | 1.38 | 0.85 | #N/A | #N/A |
| 0.96 | 1.06 | 0.48 | 1.05 | 0.55 |
| 0.96 | 1.06 | 0.48 | 1.05 | 0.55 |
| 0.96 | 1.06 | 0.48 | 1.05 | 0.55 |
| 0.96 | 1.06 | 0.48 | 1.05 | 0.55 |
| 0.37 | 1.25 | 0.71 | 1.10 | 0.59 |
| 0.73 | 1.42 | 0.88 | 1.08 | 0.60 |
| #N/A | #N/A | #N/A | #N/A | #N/A |
| #N/A | #N/A | #N/A | #N/A | #N/A |
| 0.67 | 1.00 | 0.38 | 0.79 | 0.22 |
| 0.67 | 1.00 | 0.38 | 0.79 | 0.22 |
| 0.24 | 0.80 | 0.16 | 0.81 | 0.27 |
| #N/A | 0.95 | 0.32 | 1.01 | 0.51 |
| 0.80 | 1.01 | 0.41 | 0.92 | 0.39 |
| 0.80 | 1.01 | 0.41 | 0.92 | 0.39 |
| #N/A | #N/A | #N/A | #N/A | #N/A |
| 0.59 | 1.10 | 0.53 | 1.11 | 0.64 |
| 0.72 | 1.04 | 0.44 | 0.63 | 0.09 |

|      |      |      |      |      |
|------|------|------|------|------|
| 0.72 | 1.04 | 0.44 | 0.63 | 0.09 |
| 0.64 | 1.00 | 0.38 | 1.06 | 0.57 |
| 0.76 | 0.85 | 0.26 | 1.10 | 0.58 |
| 0.76 | 0.85 | 0.26 | 1.10 | 0.58 |
| 0.64 | 0.98 | 0.36 | 0.86 | 0.32 |
| #N/A | #N/A | #N/A | #N/A | #N/A |
| #N/A | #N/A | #N/A | #N/A | #N/A |
| 0.64 | 0.99 | 0.37 | 0.95 | 0.42 |
| 0.64 | 0.99 | 0.37 | 0.95 | 0.42 |
| 0.27 | 1.08 | 0.50 | 0.66 | 0.11 |
| 0.64 | 1.24 | 0.72 | 1.39 | 0.87 |
| 0.64 | 1.24 | 0.72 | 1.39 | 0.87 |
| 0.46 | 1.27 | 0.57 | 0.74 | 0.17 |
| 0.46 | 0.94 | 0.34 | 0.76 | 0.20 |
| #N/A | #N/A | #N/A | #N/A | #N/A |
| 0.24 | 0.96 | 0.37 | 0.67 | 0.14 |
| 0.89 | 1.26 | 0.74 | 1.08 | 0.53 |
| 0.43 | 1.20 | 0.67 | 0.75 | 0.24 |
| #N/A | 1.25 | 0.69 | 1.19 | 0.73 |
| #N/A | 1.47 | 0.79 | 1.47 | 0.90 |
| #N/A | 1.47 | 0.79 | 1.47 | 0.90 |
| 0.61 | 1.27 | 0.75 | 1.17 | 0.70 |
| 0.75 | 1.12 | 0.56 | 0.99 | 0.48 |
| #N/A | #N/A | #N/A | #N/A | #N/A |
| 0.49 | 1.43 | 0.85 | 1.04 | 0.55 |
| #N/A | #N/A | #N/A | #N/A | #N/A |
| 0.97 | 1.47 | 0.91 | 1.26 | 0.79 |
| 0.97 | 1.47 | 0.91 | 1.26 | 0.79 |
| 0.76 | 1.26 | 0.75 | 1.00 | 0.49 |
| #N/A | 1.19 | 0.63 | 0.92 | 0.38 |
| 0.76 | 1.26 | 0.75 | 1.00 | 0.49 |
| 0.88 | 1.51 | 0.92 | 0.86 | 0.32 |
| 0.88 | 1.51 | 0.92 | 0.86 | 0.32 |
| 0.72 | 0.92 | 0.31 | #N/A | #N/A |
| #N/A | 1.28 | 0.71 | 1.03 | 0.51 |
| #N/A | 1.34 | 0.74 | 1.01 | 0.49 |
| #N/A | 1.34 | 0.74 | 1.01 | 0.49 |
| 0.86 | 1.06 | 0.48 | 1.09 | 0.62 |
| 0.86 | 1.06 | 0.48 | 1.09 | 0.62 |
| #N/A | #N/A | #N/A | #N/A | #N/A |
| 0.84 | 1.11 | 0.55 | 0.94 | 0.43 |
| 0.84 | 1.11 | 0.55 | 0.94 | 0.43 |
| 0.11 | 0.41 | 0.01 | 0.69 | 0.14 |
| 0.28 | 0.97 | 0.37 | 1.06 | 0.54 |
| 0.60 | 1.30 | 0.73 | 1.10 | 0.63 |
| 0.94 | 1.32 | 0.67 | 0.94 | 0.41 |
| 0.40 | 0.95 | 0.32 | 0.74 | 0.18 |
| 0.82 | 1.03 | 0.42 | 1.13 | 0.65 |
| 0.82 | 1.03 | 0.42 | 1.13 | 0.65 |
| #N/A | #N/A | #N/A | 1.01 | 0.50 |
| #N/A | #N/A | #N/A | 0.83 | 0.29 |



|      |      |      |      |      |
|------|------|------|------|------|
| #N/A | #N/A | #N/A | 0.83 | 0.29 |
| 0.39 | 0.57 | 0.05 | 0.56 | 0.07 |
| 0.49 | 0.90 | 0.26 | 0.80 | 0.23 |
| 0.49 | 0.90 | 0.26 | 0.80 | 0.23 |
| 0.91 | #N/A | #N/A | #N/A | #N/A |
| 0.99 | 1.22 | 0.69 | 1.14 | 0.68 |
| 0.99 | 1.22 | 0.69 | 1.14 | 0.68 |
| 0.59 | 1.18 | 0.56 | 1.14 | 0.60 |
| 0.76 | 1.13 | 0.56 | 1.09 | 0.59 |
| 0.53 | 1.53 | 0.68 | 2.29 | 0.98 |
| 0.53 | 1.53 | 0.68 | 2.29 | 0.98 |
| 0.40 | 0.87 | 0.23 | 0.85 | 0.29 |
| #N/A | 1.46 | 0.86 | 0.92 | 0.39 |
| 0.50 | 0.94 | 0.30 | 0.75 | 0.21 |
| 0.50 | 0.94 | 0.30 | 0.75 | 0.21 |
| 0.88 | 1.10 | 0.54 | 1.21 | 0.75 |
| 0.88 | 1.10 | 0.54 | 1.21 | 0.75 |
| #N/A | #N/A | #N/A | #N/A | #N/A |
| 0.21 | 0.79 | 0.16 | 0.84 | 0.28 |
| 0.25 | 1.01 | 0.40 | 0.95 | 0.44 |
| 0.25 | 1.01 | 0.40 | 0.95 | 0.44 |
| 0.25 | 1.01 | 0.40 | 0.95 | 0.44 |
| 0.31 | #N/A | #N/A | 0.93 | 0.41 |
| #N/A | 0.93 | 0.30 | 0.94 | 0.42 |
| 0.45 | 0.91 | 0.29 | 0.74 | 0.18 |
| 0.66 | #N/A | #N/A | 0.72 | 0.16 |
| #N/A | 1.24 | 0.72 | 1.33 | 0.81 |
| #N/A | 1.24 | 0.72 | 1.33 | 0.81 |
| 0.23 | 0.84 | 0.20 | 0.55 | 0.06 |
| 0.23 | 0.84 | 0.20 | 0.55 | 0.06 |
| #N/A | 1.31 | 0.79 | 1.23 | 0.77 |
| 0.32 | 1.23 | 0.71 | 1.11 | 0.64 |
| #N/A | 1.31 | 0.79 | 1.23 | 0.77 |
| #N/A | 1.36 | 0.79 | 1.55 | 0.90 |
| 0.32 | 1.23 | 0.71 | 1.11 | 0.64 |
| 0.47 | 0.98 | 0.35 | 0.95 | 0.43 |
| 0.47 | 0.98 | 0.35 | 0.95 | 0.43 |
| 0.68 | 1.32 | 0.75 | 1.37 | 0.82 |
| 0.52 | 1.13 | 0.57 | 0.83 | 0.27 |
| 0.88 | 1.35 | 0.83 | 1.36 | 0.84 |
| 0.88 | 1.35 | 0.83 | 1.36 | 0.84 |
| 0.71 | 1.17 | 0.62 | 0.93 | 0.40 |
| 0.53 | 1.02 | 0.43 | 0.89 | 0.36 |
| 0.17 | 0.79 | 0.16 | 0.99 | 0.48 |
| 0.84 | 1.20 | 0.66 | 0.87 | 0.36 |
| #N/A | 1.13 | 0.55 | 0.76 | 0.20 |
| 0.05 | 0.55 | 0.05 | 0.46 | 0.03 |
| 0.08 | 0.47 | 0.02 | 0.81 | 0.30 |
| 0.08 | 0.47 | 0.02 | 0.81 | 0.30 |
| 0.08 | 0.47 | 0.02 | 0.81 | 0.30 |
| 0.60 | 1.21 | 0.66 | 1.15 | 0.67 |

|      |      |      |      |      |
|------|------|------|------|------|
| 0.44 | 1.02 | 0.42 | 1.03 | 0.53 |
| 0.10 | 1.16 | 0.62 | 0.95 | 0.43 |
| 0.85 | 0.96 | 0.34 | 0.85 | 0.34 |
| 0.85 | 0.96 | 0.34 | 0.85 | 0.34 |
| 0.85 | 0.96 | 0.34 | 0.85 | 0.34 |
| 0.87 | 1.16 | 0.61 | 0.86 | 0.33 |
| 0.39 | 1.09 | 0.51 | 0.80 | 0.24 |
| 0.49 | 1.27 | 0.75 | 1.16 | 0.63 |
| 0.66 | 1.33 | 0.78 | 0.96 | 0.45 |
| 0.66 | 1.33 | 0.78 | 0.96 | 0.45 |
| 0.21 | 0.91 | 0.27 | 0.97 | 0.46 |
| 0.23 | 0.78 | 0.15 | 0.72 | 0.18 |
| 0.23 | 0.78 | 0.15 | 0.72 | 0.18 |
| 0.23 | 0.78 | 0.15 | 0.72 | 0.18 |
| 0.27 | 1.09 | 0.51 | 0.85 | 0.31 |
| 0.27 | 1.09 | 0.51 | 0.85 | 0.31 |
| 0.75 | 1.03 | 0.45 | 1.04 | 0.54 |
| 0.52 | 1.22 | 0.70 | 1.09 | 0.61 |
| #N/A | 1.28 | 0.60 | 1.69 | 0.55 |
| 0.21 | 0.98 | 0.35 | 1.00 | 0.49 |
| 0.14 | 0.44 | 0.02 | 0.54 | 0.06 |
| 0.40 | 0.77 | 0.18 | 0.60 | 0.08 |
| 0.81 | 1.23 | 0.62 | 0.89 | 0.35 |
| 0.60 | 1.11 | 0.54 | #N/A | #N/A |
| #N/A | #N/A | #N/A | #N/A | #N/A |
| 0.67 | 1.34 | 0.77 | 1.16 | 0.71 |
| 0.90 | 1.24 | 0.72 | 0.98 | 0.46 |
| 0.66 | 0.80 | 0.19 | 1.03 | 0.54 |
| 0.50 | 1.12 | 0.56 | 0.81 | 0.24 |
| 0.74 | 0.98 | 0.36 | 0.98 | 0.47 |
| 0.74 | 0.98 | 0.36 | 0.98 | 0.47 |
| 0.46 | 1.46 | 0.90 | 1.10 | 0.57 |
| 0.46 | 1.46 | 0.90 | 1.10 | 0.57 |
| #N/A | #N/A | #N/A | 0.56 | 0.13 |
| 0.82 | 1.27 | 0.74 | 1.39 | 0.82 |
| 0.82 | 1.27 | 0.74 | 1.39 | 0.82 |
| 0.88 | 1.19 | 0.66 | 1.31 | 0.78 |
| #N/A | 0.85 | 0.20 | #N/A | #N/A |
| 0.88 | 1.19 | 0.66 | 1.31 | 0.78 |
| 0.13 | 0.71 | 0.10 | 0.69 | 0.14 |
| 0.13 | 0.71 | 0.10 | 0.69 | 0.14 |
| #N/A | 1.59 | 0.92 | #N/A | #N/A |
| #N/A | 1.59 | 0.92 | #N/A | #N/A |
| #N/A | #N/A | #N/A | #N/A | #N/A |
| #N/A | #N/A | #N/A | #N/A | #N/A |
| 0.97 | 1.06 | 0.47 | 1.48 | 0.91 |
| 0.79 | 0.90 | 0.26 | 1.20 | 0.72 |
| 0.79 | 0.90 | 0.26 | 1.20 | 0.72 |
| 0.39 | 0.92 | 0.31 | 0.92 | 0.39 |
| 0.39 | 0.92 | 0.31 | 0.92 | 0.39 |
| #N/A | #N/A | #N/A | #N/A | #N/A |

|      |      |      |      |      |
|------|------|------|------|------|
| 0.01 | 0.39 | 0.01 | #N/A | #N/A |
| 0.01 | 0.39 | 0.01 | #N/A | #N/A |
| 0.18 | 0.92 | 0.28 | 0.73 | 0.22 |
| 0.18 | 0.92 | 0.28 | 0.73 | 0.22 |
| 0.87 | 1.02 | 0.42 | 0.96 | 0.44 |
| 0.22 | 0.91 | 0.28 | 1.03 | 0.54 |
| 0.87 | 1.02 | 0.42 | 0.96 | 0.44 |
| 0.22 | 0.91 | 0.28 | 1.03 | 0.54 |
| 0.71 | 1.23 | 0.71 | 1.14 | 0.65 |
| 0.87 | 0.88 | 0.24 | 1.05 | 0.54 |
| 0.87 | 0.88 | 0.24 | 1.05 | 0.54 |
| #N/A | #N/A | #N/A | #N/A | #N/A |
| #N/A | 1.13 | 0.52 | 1.20 | 0.60 |
| #N/A | 1.13 | 0.52 | 1.20 | 0.60 |
| #N/A | 1.08 | 0.50 | 0.84 | 0.28 |
| #N/A | 1.08 | 0.50 | 0.84 | 0.28 |
| 0.85 | 0.94 | 0.31 | 1.08 | 0.61 |
| #N/A | #N/A | #N/A | #N/A | #N/A |
| 0.48 | 1.10 | 0.52 | 1.09 | 0.61 |
| #N/A | 1.59 | 0.95 | 1.19 | 0.65 |
| #N/A | #N/A | #N/A | #N/A | #N/A |
| 0.65 | 1.00 | 0.38 | 1.28 | 0.67 |
| #N/A | #N/A | #N/A | #N/A | #N/A |
| 0.65 | 1.00 | 0.38 | 1.28 | 0.67 |
| #N/A | #N/A | #N/A | #N/A | #N/A |
| #N/A | 1.42 | 0.87 | 1.23 | 0.67 |
| #N/A | 1.42 | 0.87 | 1.23 | 0.67 |
| 0.36 | 1.36 | 0.84 | 1.28 | 0.82 |
| 0.80 | 1.21 | 0.66 | 1.22 | 0.68 |
| 0.84 | 1.23 | 0.70 | 1.08 | 0.61 |
| 0.62 | 1.20 | 0.67 | 1.08 | 0.61 |
| 0.49 | 1.11 | 0.54 | 1.33 | 0.82 |
| 0.62 | 1.20 | 0.67 | 1.08 | 0.61 |
| #N/A | #N/A | #N/A | #N/A | #N/A |
| 0.43 | 1.25 | 0.73 | 1.20 | 0.74 |
| #N/A | #N/A | #N/A | #N/A | #N/A |
| #N/A | 1.34 | 0.82 | 0.74 | 0.26 |
| #N/A | #N/A | #N/A | #N/A | #N/A |
| 0.25 | 1.16 | 0.62 | #N/A | #N/A |
| 0.51 | 1.58 | 0.94 | 1.31 | 0.84 |
| 0.51 | 1.58 | 0.94 | 1.31 | 0.84 |
| 0.47 | 1.11 | 0.55 | 0.85 | 0.30 |
| 0.42 | 0.91 | 0.27 | 0.94 | 0.41 |
| 0.32 | 1.14 | 0.58 | 1.12 | 0.64 |
| 0.14 | 0.56 | 0.04 | 0.69 | 0.28 |
| 0.73 | 1.05 | 0.46 | 0.85 | 0.31 |
| #N/A | #N/A | #N/A | #N/A | #N/A |
| 0.84 | 1.38 | 0.84 | 0.91 | 0.38 |
| 0.58 | 1.32 | 0.80 | 1.08 | 0.60 |
| 0.58 | 1.32 | 0.80 | 1.08 | 0.60 |
| #N/A | #N/A | #N/A | #N/A | #N/A |

|      |      |      |      |      |
|------|------|------|------|------|
| 0.21 | 1.20 | 0.67 | 1.53 | 0.94 |
| 0.07 | 1.30 | 0.70 | 0.82 | 0.25 |
| #N/A | #N/A | #N/A | #N/A | #N/A |
| 0.07 | 1.30 | 0.70 | 0.82 | 0.25 |
| 0.64 | 1.56 | 0.93 | 1.44 | 0.91 |
| #N/A | #N/A | #N/A | #N/A | #N/A |
| 0.44 | 1.03 | 0.43 | 0.94 | 0.43 |
| 0.44 | 1.03 | 0.43 | 0.94 | 0.43 |
| 0.50 | 1.51 | 0.89 | 1.36 | 0.80 |
| 0.50 | 1.51 | 0.89 | 1.36 | 0.80 |
| 0.47 | 1.21 | 0.67 | 0.83 | 0.27 |
| 0.47 | 1.21 | 0.67 | 0.83 | 0.27 |
| 0.47 | 1.21 | 0.67 | 0.83 | 0.27 |
| 0.47 | 1.21 | 0.67 | 0.83 | 0.27 |
| 0.47 | 1.21 | 0.67 | 0.83 | 0.27 |
| #N/A | 1.84 | 0.96 | 0.86 | 0.34 |
| 0.71 | 1.35 | 0.83 | 1.13 | 0.66 |
| 0.71 | 1.35 | 0.83 | 1.13 | 0.66 |
| #N/A | #N/A | #N/A | #N/A | #N/A |
| #N/A | #N/A | #N/A | #N/A | #N/A |
| #N/A | #N/A | #N/A | #N/A | #N/A |
| 0.99 | 1.39 | 0.86 | 1.35 | 0.82 |
| #N/A | 0.80 | 0.17 | 0.77 | 0.27 |
| 0.78 | 1.07 | 0.48 | 1.36 | 0.86 |
| 0.99 | 1.39 | 0.86 | 1.35 | 0.82 |
| 0.78 | 1.07 | 0.48 | 1.36 | 0.86 |
| #N/A | #N/A | #N/A | 1.34 | 0.77 |
| #N/A | #N/A | #N/A | 1.34 | 0.77 |
| #N/A | 1.24 | 0.68 | 1.04 | 0.55 |
| 0.84 | 1.05 | 0.45 | 0.91 | 0.37 |
| 0.57 | 1.18 | 0.59 | 0.95 | 0.43 |
| 0.57 | 1.18 | 0.59 | 0.95 | 0.43 |
| 0.14 | 0.52 | 0.03 | 0.48 | 0.04 |
| 0.14 | 0.52 | 0.03 | 0.48 | 0.04 |
| 0.54 | 1.22 | 0.70 | 0.96 | 0.45 |
| 0.54 | 1.22 | 0.70 | 0.96 | 0.45 |
| 0.52 | 1.18 | 0.64 | 0.95 | 0.43 |
| 0.21 | 1.01 | 0.43 | 0.88 | 0.36 |
| #N/A | #N/A | #N/A | #N/A | #N/A |
| #N/A | 1.56 | 0.91 | 1.05 | 0.57 |
| #N/A | 0.47 | 0.03 | 0.61 | 0.14 |
| 0.79 | 0.90 | 0.26 | 1.01 | 0.49 |
| 0.63 | 1.23 | 0.70 | 1.03 | 0.52 |
| 0.80 | 1.15 | 0.57 | 1.09 | 0.60 |
| 0.80 | 1.15 | 0.57 | 1.09 | 0.60 |
| 0.40 | 1.02 | 0.42 | 1.06 | 0.57 |
| 0.43 | 1.02 | 0.42 | 1.54 | 0.94 |
| 0.91 | 0.83 | 0.23 | 0.77 | 0.23 |
| 0.91 | 0.83 | 0.23 | 0.77 | 0.23 |
| 0.79 | 1.15 | 0.59 | 1.38 | 0.79 |
| 0.92 | 1.09 | 0.52 | 1.23 | 0.74 |

|      |      |      |      |      |
|------|------|------|------|------|
| 0.92 | 1.09 | 0.52 | 1.23 | 0.74 |
| 0.83 | 0.78 | 0.23 | 1.08 | 0.54 |
| 0.83 | 0.78 | 0.23 | 1.08 | 0.54 |
| 0.26 | 1.14 | 0.58 | 1.04 | 0.56 |
| 0.23 | 1.23 | 0.71 | 1.22 | 0.76 |
| 0.26 | 1.14 | 0.58 | 1.04 | 0.56 |
| #N/A | 0.90 | 0.25 | 1.04 | 0.53 |
| 0.74 | 1.38 | 0.86 | 1.70 | 0.96 |
| 0.74 | 1.38 | 0.86 | 1.70 | 0.96 |
| #N/A | 0.82 | 0.18 | #N/A | #N/A |
| #N/A | #N/A | #N/A | #N/A | #N/A |
| 0.30 | 1.01 | 0.41 | 1.66 | 0.92 |
| 0.30 | 1.01 | 0.41 | 1.66 | 0.92 |
| 0.30 | 1.01 | 0.41 | 1.66 | 0.92 |
| 0.85 | 1.19 | 0.66 | 1.45 | 0.91 |
| 0.65 | 1.13 | 0.57 | 1.12 | 0.65 |
| 0.92 | 1.06 | 0.48 | #N/A | #N/A |
| 0.92 | 1.06 | 0.48 | #N/A | #N/A |
| #N/A | #N/A | #N/A | #N/A | #N/A |
| #N/A | #N/A | #N/A | #N/A | #N/A |
| #N/A | #N/A | #N/A | #N/A | #N/A |
| 0.94 | 1.14 | 0.58 | 1.30 | 0.83 |
| 0.94 | 1.14 | 0.58 | 1.30 | 0.83 |
| 0.39 | 1.30 | 0.78 | 1.28 | 0.79 |
| 0.42 | 1.37 | 0.82 | 1.16 | 0.70 |
| 0.42 | 1.37 | 0.82 | 1.16 | 0.70 |
| 0.97 | 1.33 | 0.79 | 0.94 | 0.42 |
| 0.60 | 0.95 | 0.32 | 1.12 | 0.65 |
| #N/A | #N/A | #N/A | #N/A | #N/A |
| 0.54 | 0.71 | 0.10 | 0.80 | 0.29 |
| 0.78 | 0.94 | 0.32 | 0.96 | 0.44 |
| 0.75 | 1.29 | 0.77 | 1.08 | 0.54 |
| 0.82 | 1.39 | 0.86 | 0.94 | 0.42 |
| 0.82 | 1.39 | 0.86 | 0.94 | 0.42 |
| 0.60 | 0.92 | 0.31 | 0.78 | 0.21 |
| 0.66 | #N/A | #N/A | #N/A | #N/A |
| #N/A | 1.13 | 0.56 | 0.85 | 0.29 |
| #N/A | 1.13 | 0.56 | 0.85 | 0.29 |
| #N/A | 0.80 | 0.17 | 0.69 | 0.15 |
| #N/A | 0.80 | 0.17 | 0.69 | 0.15 |
| 0.55 | 1.46 | 0.86 | 0.97 | 0.45 |
| 0.10 | 1.27 | 0.75 | 0.89 | 0.36 |
| 0.67 | 1.24 | 0.69 | 1.04 | 0.56 |
| 0.93 | 0.90 | 0.29 | 0.96 | 0.44 |
| 0.93 | 0.90 | 0.29 | 0.96 | 0.44 |
| 0.55 | 1.05 | 0.45 | 0.96 | 0.44 |
| 0.55 | 1.05 | 0.45 | 0.96 | 0.44 |
| 0.21 | 0.82 | 0.18 | 0.55 | 0.05 |
| 0.81 | 1.76 | 0.98 | 1.45 | 0.88 |
| 0.21 | 0.82 | 0.18 | 0.55 | 0.05 |
| 0.70 | 0.93 | 0.29 | 1.09 | 0.61 |

|      |      |      |      |      |
|------|------|------|------|------|
| 0.72 | 1.09 | 0.51 | 0.81 | 0.25 |
| #N/A | #N/A | #N/A | #N/A | #N/A |
| 0.63 | 0.81 | 0.17 | #N/A | #N/A |
| 0.63 | 0.81 | 0.17 | #N/A | #N/A |
| #N/A | 1.28 | 0.73 | 0.97 | 0.46 |
| #N/A | #N/A | #N/A | #N/A | #N/A |
| 0.03 | 0.30 | 0.00 | 0.34 | 0.01 |
| 0.36 | 1.37 | 0.84 | 0.73 | 0.16 |
| 0.88 | 1.34 | 0.80 | 1.25 | 0.79 |
| 0.78 | 1.19 | 0.65 | 1.12 | 0.56 |
| 0.13 | 0.67 | 0.10 | 0.56 | 0.06 |
| 0.78 | 1.19 | 0.65 | 1.12 | 0.56 |
| 0.67 | 0.99 | 0.41 | 0.95 | 0.43 |
| #N/A | 1.53 | 0.89 | 1.20 | 0.74 |
| #N/A | 1.53 | 0.89 | 1.20 | 0.74 |
| 0.46 | 1.01 | 0.39 | 1.01 | 0.51 |
| #N/A | 1.13 | 0.57 | 1.35 | 0.81 |
| #N/A | #N/A | #N/A | #N/A | #N/A |
| 0.86 | 1.48 | 0.83 | 1.31 | 0.83 |
| #N/A | #N/A | #N/A | #N/A | #N/A |
| 0.35 | 0.83 | 0.19 | 0.91 | 0.37 |
| 0.35 | 0.83 | 0.19 | 0.91 | 0.37 |
| 0.44 | 0.88 | 0.24 | 0.87 | 0.32 |
| #N/A | 1.26 | 0.73 | 1.25 | 0.78 |
| #N/A | 1.26 | 0.73 | 1.25 | 0.78 |
| #N/A | #N/A | #N/A | #N/A | #N/A |
| #N/A | 1.45 | 0.70 | 1.36 | 0.84 |
| #N/A | 1.45 | 0.70 | 1.36 | 0.84 |
| 0.02 | 0.36 | 0.01 | 0.61 | 0.09 |
| 0.02 | 0.36 | 0.01 | 0.61 | 0.09 |
| 0.02 | 0.36 | 0.01 | 0.61 | 0.09 |
| #N/A | #N/A | #N/A | #N/A | #N/A |
| #N/A | 1.41 | 0.80 | 1.42 | 0.76 |
| 0.66 | 0.95 | 0.31 | 0.94 | 0.43 |
| 0.46 | 1.33 | 0.81 | 1.06 | 0.57 |
| 0.58 | 1.41 | 0.78 | 1.23 | 0.68 |
| 0.68 | 1.18 | 0.62 | 1.41 | 0.87 |
| 0.90 | 1.22 | 0.63 | 1.17 | 0.70 |
| 0.36 | 1.44 | 0.89 | 1.46 | 0.91 |
| 0.97 | 1.14 | 0.58 | 1.22 | 0.75 |
| 0.97 | 1.14 | 0.58 | 1.22 | 0.75 |
| 0.19 | 0.87 | 0.23 | 1.01 | 0.51 |
| 0.57 | 0.88 | 0.24 | 0.88 | 0.33 |
| 0.51 | 1.14 | 0.59 | 1.16 | 0.70 |
| 0.31 | 0.91 | 0.27 | 0.92 | 0.40 |
| #N/A | #N/A | #N/A | #N/A | #N/A |
| 0.43 | 0.84 | 0.24 | 0.53 | 0.05 |
| 0.81 | 1.24 | 0.72 | 1.08 | 0.60 |
| 0.81 | 1.24 | 0.72 | 1.08 | 0.60 |
| 0.89 | 1.03 | 0.44 | 1.07 | 0.58 |
| 0.89 | 1.03 | 0.44 | 1.07 | 0.58 |

|      |      |      |      |      |
|------|------|------|------|------|
| 0.04 | 0.62 | 0.05 | 0.75 | 0.22 |
| 0.04 | 0.62 | 0.05 | 0.75 | 0.22 |
| 0.07 | 0.45 | 0.02 | 0.52 | 0.05 |
| 0.07 | 0.45 | 0.02 | 0.52 | 0.05 |
| 0.59 | 0.94 | 0.30 | 1.19 | 0.73 |
| 0.59 | 0.94 | 0.30 | 1.19 | 0.73 |
| #N/A | #N/A | #N/A | #N/A | #N/A |
| 0.95 | 1.29 | 0.77 | 1.25 | 0.78 |
| 0.95 | 1.29 | 0.77 | 1.25 | 0.78 |
| 0.67 | 1.24 | 0.70 | 1.11 | 0.62 |
| 0.61 | 1.10 | 0.52 | 0.98 | 0.46 |
| 0.61 | 1.10 | 0.52 | 0.98 | 0.46 |
| #N/A | 1.94 | 0.86 | 1.25 | 0.74 |
| 0.99 | 1.32 | 0.79 | 1.36 | 0.85 |
| 0.87 | 1.35 | 0.83 | 0.96 | 0.45 |
| 0.87 | 1.35 | 0.83 | 0.96 | 0.45 |
| #N/A | #N/A | #N/A | #N/A | #N/A |
| #N/A | #N/A | #N/A | #N/A | #N/A |
| 0.78 | 0.99 | 0.38 | 0.85 | 0.30 |
| 0.78 | 0.99 | 0.38 | 0.85 | 0.30 |
| #N/A | #N/A | #N/A | #N/A | #N/A |
| 0.43 | 1.11 | 0.54 | 0.88 | 0.34 |
| #N/A | 1.68 | 0.94 | 1.44 | 0.86 |
| 0.20 | 0.52 | 0.03 | 0.57 | 0.07 |
| 0.20 | 0.52 | 0.03 | 0.57 | 0.07 |
| 0.13 | 1.01 | 0.40 | 0.95 | 0.43 |
| 0.13 | 1.01 | 0.40 | 0.95 | 0.43 |
| 0.13 | 1.01 | 0.40 | 0.95 | 0.43 |
| 0.60 | 1.28 | 0.76 | 1.08 | 0.60 |
| 0.83 | 1.12 | 0.56 | 1.23 | 0.67 |
| 0.41 | 1.23 | 0.69 | 0.73 | 0.16 |
| 0.83 | 1.12 | 0.56 | 1.23 | 0.67 |
| 0.41 | 1.23 | 0.69 | 0.73 | 0.16 |
| 0.51 | 1.29 | 0.76 | 1.11 | 0.63 |
| 0.70 | 0.97 | 0.36 | 1.07 | 0.56 |
| 0.70 | 0.97 | 0.36 | 1.07 | 0.56 |
| 0.66 | 1.19 | 0.61 | 1.10 | 0.63 |
| 0.43 | 0.97 | 0.34 | 1.01 | 0.51 |
| #N/A | 0.89 | 0.25 | 0.77 | 0.27 |
| 0.06 | 0.49 | 0.02 | 0.45 | 0.03 |
| 0.92 | 1.20 | 0.61 | 1.20 | 0.72 |
| 0.92 | 1.20 | 0.61 | 1.20 | 0.72 |
| #N/A | 1.28 | 0.76 | 1.14 | 0.67 |
| #N/A | 1.28 | 0.76 | 1.14 | 0.67 |
| 0.55 | 1.21 | 0.67 | 1.00 | 0.50 |
| 0.20 | 1.23 | 0.66 | 0.97 | 0.46 |
| 0.29 | 0.66 | 0.07 | 0.81 | 0.33 |
| 0.29 | 0.66 | 0.07 | 0.81 | 0.33 |
| #N/A | 1.27 | 0.70 | 1.29 | 0.75 |
| #N/A | 0.87 | 0.23 | 0.68 | 0.14 |
| 0.33 | 1.11 | 0.54 | 1.20 | 0.73 |

|      |      |      |      |      |
|------|------|------|------|------|
| #N/A | 0.51 | 0.03 | 0.70 | 0.19 |
| 0.62 | 0.76 | 0.13 | 0.85 | 0.32 |
| 0.93 | 1.10 | 0.53 | 0.96 | 0.45 |
| 0.93 | 1.10 | 0.53 | 0.96 | 0.45 |
| 0.05 | 0.52 | 0.03 | 0.44 | 0.02 |
| 0.42 | 0.94 | 0.31 | 0.90 | 0.35 |
| 0.19 | 0.56 | 0.04 | 0.52 | 0.05 |
| 0.37 | 0.71 | 0.12 | 0.76 | 0.20 |
| 0.81 | 0.92 | 0.31 | 1.02 | 0.53 |
| 0.81 | 0.92 | 0.31 | 1.02 | 0.53 |
| 0.90 | 1.09 | 0.51 | 1.18 | 0.57 |
| 0.90 | 1.09 | 0.51 | 1.18 | 0.57 |
| #N/A | #N/A | #N/A | #N/A | #N/A |
| 0.49 | 1.07 | 0.49 | 1.23 | 0.65 |
| 0.15 | 1.08 | 0.49 | #N/A | #N/A |
| 0.24 | 1.06 | 0.47 | 0.88 | 0.34 |
| 0.77 | 1.00 | 0.39 | 1.00 | 0.48 |
| 0.74 | 1.25 | 0.67 | 0.93 | 0.40 |
| 0.74 | 1.25 | 0.67 | 0.93 | 0.40 |
| 0.70 | 0.93 | 0.29 | 0.84 | 0.31 |
| 0.70 | 0.93 | 0.29 | 0.84 | 0.31 |
| 0.59 | 1.07 | 0.49 | 1.10 | 0.61 |
| #N/A | 1.01 | 0.41 | 0.84 | 0.28 |
| #N/A | #N/A | #N/A | #N/A | #N/A |
| 0.58 | 1.04 | 0.44 | 0.84 | 0.31 |
| 0.23 | 1.02 | 0.41 | 1.09 | 0.62 |
| 0.23 | 1.02 | 0.41 | 1.09 | 0.62 |
| #N/A | 1.63 | 0.58 | 1.51 | 0.92 |
| 0.24 | 1.06 | 0.47 | 1.03 | 0.53 |
| 0.58 | 0.98 | 0.39 | 0.99 | 0.48 |
| 0.82 | 0.94 | 0.32 | 0.91 | 0.37 |
| 0.82 | 0.94 | 0.32 | 0.91 | 0.37 |
| #N/A | 1.28 | 0.77 | 0.93 | 0.40 |
| #N/A | 1.37 | 0.85 | 0.93 | 0.42 |
| 0.44 | 1.14 | 0.58 | 1.09 | 0.60 |
| 0.44 | 1.14 | 0.58 | 1.09 | 0.60 |
| #N/A | 1.57 | 0.90 | 0.96 | 0.46 |
| 0.31 | 1.03 | 0.44 | 0.87 | 0.33 |
| 0.48 | 1.70 | 0.95 | 1.19 | 0.73 |
| 0.60 | 1.23 | 0.67 | 0.96 | 0.44 |
| 0.04 | 0.50 | 0.02 | 0.24 | 0.00 |
| 0.03 | 0.62 | 0.06 | 0.37 | 0.02 |
| #N/A | #N/A | #N/A | #N/A | #N/A |
| 0.76 | 1.27 | 0.73 | 1.45 | 0.91 |
| 0.76 | 1.27 | 0.73 | 1.45 | 0.91 |
| 0.25 | 0.94 | 0.32 | 0.95 | 0.44 |
| 0.34 | 0.98 | 0.36 | 0.95 | 0.44 |
| 0.34 | 0.98 | 0.36 | 0.95 | 0.44 |
| 0.14 | 0.81 | 0.20 | 0.82 | 0.25 |
| 0.17 | 0.64 | 0.07 | 0.63 | 0.10 |
| 0.68 | 1.14 | 0.59 | 0.94 | 0.42 |



|      |      |      |      |      |
|------|------|------|------|------|
| 0.82 | 1.30 | 0.77 | 0.98 | 0.48 |
| 0.20 | 1.18 | 0.64 | 1.04 | 0.55 |
| 0.70 | 1.03 | 0.43 | 0.70 | 0.15 |
| #N/A | 0.73 | 0.12 | 0.47 | 0.03 |
| 0.12 | 0.64 | 0.06 | 0.55 | 0.06 |
| #N/A | #N/A | #N/A | #N/A | #N/A |
| 0.37 | 1.10 | 0.53 | 0.92 | 0.39 |
| 0.37 | 1.10 | 0.53 | 0.92 | 0.39 |
| 0.70 | 1.32 | 0.80 | 1.27 | 0.75 |
| #N/A | #N/A | #N/A | #N/A | #N/A |
| #N/A | #N/A | #N/A | #N/A | #N/A |
| 0.87 | 1.05 | 0.47 | 0.88 | 0.33 |
| 0.17 | 1.25 | 0.72 | 0.96 | 0.45 |
| #N/A | 0.90 | 0.28 | 0.83 | 0.27 |
| 0.10 | 0.87 | 0.22 | 0.64 | 0.13 |
| #N/A | #N/A | #N/A | #N/A | #N/A |
| #N/A | #N/A | #N/A | #N/A | #N/A |
| 0.63 | 1.08 | 0.50 | 1.09 | 0.61 |
| 0.63 | 1.08 | 0.50 | 1.09 | 0.61 |
| #N/A | 1.25 | 0.73 | 1.05 | 0.57 |
| 0.79 | 1.17 | 0.60 | 1.01 | 0.50 |
| 0.48 | 0.87 | 0.24 | 0.87 | 0.33 |
| 0.48 | 1.00 | 0.39 | 1.27 | 0.69 |
| #N/A | #N/A | #N/A | #N/A | #N/A |
| #N/A | 1.39 | 0.82 | 1.01 | 0.51 |
| 0.98 | 1.05 | 0.46 | 0.84 | 0.29 |
| 0.83 | 0.96 | 0.35 | 0.76 | 0.19 |
| 0.98 | 1.05 | 0.46 | 0.84 | 0.29 |
| 0.85 | 0.98 | 0.37 | 0.64 | 0.14 |
| #N/A | 0.96 | 0.33 | 1.03 | 0.51 |
| #N/A | #N/A | #N/A | #N/A | #N/A |
| #N/A | 1.30 | 0.74 | #N/A | #N/A |
| #N/A | 1.30 | 0.74 | #N/A | #N/A |
| #N/A | 1.39 | 0.73 | 1.06 | 0.57 |
| 0.61 | 1.01 | 0.41 | 0.95 | 0.44 |
| 0.72 | 1.08 | 0.51 | 1.08 | 0.61 |
| 0.27 | 0.87 | 0.23 | 1.11 | 0.64 |
| #N/A | 0.97 | 0.38 | 0.91 | 0.38 |
| #N/A | 0.97 | 0.38 | 0.91 | 0.38 |
| 0.75 | 1.06 | 0.47 | 0.70 | 0.14 |
| 0.63 | 1.21 | 0.66 | 1.25 | 0.63 |
| 0.75 | 1.06 | 0.47 | 0.70 | 0.14 |
| 0.63 | 1.21 | 0.66 | 1.25 | 0.63 |
| #N/A | 1.32 | 0.78 | 0.93 | 0.40 |
| 0.88 | 1.35 | 0.82 | 1.13 | 0.67 |
| 0.88 | 1.35 | 0.82 | 1.13 | 0.67 |
| 0.11 | 0.59 | 0.05 | 0.48 | 0.04 |
| 0.59 | 0.97 | 0.38 | 1.26 | 0.78 |
| #N/A | 1.04 | 0.47 | 1.20 | 0.70 |
| #N/A | 1.04 | 0.47 | 1.20 | 0.70 |
| 0.17 | 0.92 | 0.28 | 0.82 | 0.28 |

|      |      |      |      |      |
|------|------|------|------|------|
| 0.62 | 1.36 | 0.83 | 1.13 | 0.65 |
| #N/A | #N/A | #N/A | #N/A | #N/A |
| 0.91 | 1.17 | 0.60 | #N/A | #N/A |
| #N/A | #N/A | #N/A | #N/A | #N/A |
| 0.40 | 1.12 | 0.55 | 1.10 | 0.61 |
| 0.59 | 1.19 | 0.65 | 1.07 | 0.59 |
| 0.41 | 1.02 | 0.41 | 0.90 | 0.39 |
| 0.56 | 1.06 | 0.47 | 0.78 | 0.24 |
| #N/A | 1.51 | 0.73 | 1.27 | 0.72 |
| #N/A | #N/A | #N/A | #N/A | #N/A |
| 0.98 | 1.06 | 0.47 | 0.95 | 0.43 |
| #N/A | 1.56 | 0.94 | 1.22 | 0.50 |
| #N/A | 1.57 | 0.94 | 1.18 | 0.67 |
| 0.94 | 1.14 | 0.56 | 1.00 | 0.51 |
| 0.86 | 1.08 | 0.49 | 1.20 | 0.68 |
| #N/A | 0.73 | 0.12 | 0.82 | 0.27 |
| 0.72 | 1.29 | 0.74 | 1.13 | 0.61 |
| 0.72 | 1.29 | 0.74 | 1.13 | 0.61 |
| 0.77 | 1.03 | 0.44 | 1.00 | 0.50 |
| 0.77 | 1.03 | 0.44 | 1.00 | 0.50 |
| 0.77 | 0.93 | 0.29 | 0.69 | 0.16 |
| 0.52 | 0.94 | 0.32 | 0.82 | 0.27 |
| 0.77 | 0.93 | 0.29 | 0.69 | 0.16 |
| #N/A | 1.05 | 0.47 | #N/A | #N/A |
| 0.16 | 1.31 | 0.80 | 1.20 | 0.74 |
| 0.02 | 0.57 | 0.04 | 0.60 | 0.08 |
| 0.23 | 1.11 | 0.54 | 0.84 | 0.29 |
| 0.17 | 1.23 | 0.57 | 0.97 | 0.45 |
| 0.59 | 0.93 | 0.30 | 0.86 | 0.30 |
| 0.59 | 0.93 | 0.30 | 0.86 | 0.30 |
| 0.61 | 1.47 | 0.89 | 1.18 | 0.72 |
| #N/A | 1.50 | 0.69 | 1.11 | 0.62 |
| 0.49 | 1.10 | 0.53 | 1.09 | 0.61 |
| 0.36 | 1.11 | 0.55 | 1.23 | 0.70 |
| 0.86 | 1.41 | 0.69 | 0.82 | 0.25 |
| 0.86 | 1.41 | 0.69 | 0.82 | 0.25 |
| 0.77 | 1.20 | 0.61 | 0.91 | 0.37 |
| 0.52 | 1.52 | 0.93 | 1.04 | 0.51 |
| 0.89 | #N/A | #N/A | 1.57 | 0.82 |
| 0.89 | #N/A | #N/A | 1.57 | 0.82 |
| #N/A | 0.94 | 0.31 | 0.93 | 0.41 |
| 0.41 | 0.93 | 0.31 | 1.06 | 0.55 |
| 0.41 | 0.93 | 0.31 | 1.06 | 0.55 |
| #N/A | #N/A | #N/A | #N/A | #N/A |
| 0.22 | 1.64 | 0.96 | 0.98 | 0.47 |
| #N/A | 1.14 | 0.56 | 1.08 | 0.60 |
| #N/A | 1.14 | 0.56 | 1.08 | 0.60 |
| #N/A | 0.85 | 0.22 | 0.91 | 0.37 |
| #N/A | 1.16 | 0.59 | 1.08 | 0.61 |
| #N/A | 1.16 | 0.59 | 1.08 | 0.61 |
| 0.62 | 1.36 | 0.74 | 1.20 | 0.74 |

|      |      |      |      |      |
|------|------|------|------|------|
| 0.40 | 0.79 | 0.16 | 0.78 | 0.24 |
| #N/A | 0.89 | 0.25 | 1.11 | 0.63 |
| 0.78 | 0.96 | 0.34 | 0.76 | 0.21 |
| 0.38 | 0.94 | 0.31 | 0.99 | 0.48 |
| 0.66 | 1.32 | 0.79 | 1.14 | 0.66 |
| 0.66 | 1.32 | 0.79 | 1.14 | 0.66 |
| #N/A | 1.09 | 0.52 | 1.32 | 0.84 |
| 0.79 | 1.09 | 0.51 | 1.35 | 0.85 |
| 0.32 | 1.16 | 0.62 | 1.13 | 0.67 |
| 0.29 | 1.13 | 0.58 | 1.02 | 0.53 |
| 0.57 | 1.27 | 0.74 | 1.11 | 0.64 |
| 0.60 | 1.02 | 0.41 | 1.06 | 0.57 |
| 0.49 | #N/A | #N/A | 1.13 | 0.67 |
| 0.82 | 1.01 | 0.41 | 1.11 | 0.64 |
| 0.82 | 1.01 | 0.41 | 1.11 | 0.64 |
| #N/A | 1.25 | 0.73 | #N/A | #N/A |
| #N/A | 1.25 | 0.73 | #N/A | #N/A |
| #N/A | #N/A | #N/A | #N/A | #N/A |
| 0.85 | 1.06 | 0.49 | 1.10 | 0.63 |
| 0.85 | 1.06 | 0.49 | 1.10 | 0.63 |
| 0.40 | 1.01 | 0.41 | 1.11 | 0.62 |
| 0.49 | 0.82 | 0.19 | 0.82 | 0.30 |
| 0.40 | 1.36 | 0.72 | 1.33 | 0.75 |
| 0.95 | 1.16 | 0.61 | 1.26 | 0.79 |
| 0.95 | 1.16 | 0.61 | 1.26 | 0.79 |
| 0.94 | 0.87 | 0.23 | 1.06 | 0.56 |
| 0.51 | 1.22 | 0.69 | 1.17 | 0.70 |
| 0.86 | 1.53 | 0.84 | 0.90 | 0.37 |
| 0.61 | 1.06 | 0.48 | 1.04 | 0.55 |
| 0.35 | 1.26 | 0.70 | 0.98 | 0.47 |
| 0.61 | 1.06 | 0.48 | 1.04 | 0.55 |
| 0.83 | 1.46 | 0.89 | 1.34 | 0.80 |
| 0.36 | 1.10 | 0.53 | 1.14 | 0.67 |
| 0.36 | 1.10 | 0.53 | 1.14 | 0.67 |
| 0.71 | 1.04 | 0.44 | 1.10 | 0.59 |
| 0.84 | 1.59 | 0.95 | 1.23 | 0.77 |
| 0.82 | 1.52 | 0.93 | 1.22 | 0.76 |
| 0.82 | 1.52 | 0.93 | 1.22 | 0.76 |
| 0.76 | 1.27 | 0.76 | 1.28 | 0.74 |
| 0.94 | 0.96 | 0.37 | 0.82 | 0.28 |
| 0.94 | 0.96 | 0.37 | 0.82 | 0.28 |
| 0.99 | 0.87 | 0.25 | 0.74 | 0.17 |
| 0.99 | 0.87 | 0.25 | 0.74 | 0.17 |
| 0.93 | 1.38 | 0.83 | 0.95 | 0.46 |
| 0.66 | 1.25 | 0.57 | 1.17 | 0.65 |
| 0.86 | 1.28 | 0.63 | 1.20 | 0.67 |
| 0.60 | 1.14 | 0.59 | 1.14 | 0.67 |
| 0.60 | 1.14 | 0.59 | 1.14 | 0.67 |
| 0.97 | 1.32 | 0.80 | 1.46 | 0.91 |
| 0.97 | 1.32 | 0.80 | 1.46 | 0.91 |
| 0.84 | 1.08 | 0.50 | 0.89 | 0.36 |

|      |      |      |      |      |
|------|------|------|------|------|
| 0.97 | 1.32 | 0.80 | 1.46 | 0.91 |
| 0.31 | 1.52 | 0.89 | 1.13 | 0.66 |
| 0.89 | 1.27 | 0.73 | 1.04 | 0.51 |
| #N/A | 1.14 | 0.57 | 0.71 | 0.36 |
| #N/A | #N/A | #N/A | #N/A | #N/A |
| 0.79 | 0.99 | 0.37 | 1.11 | 0.55 |
| 0.01 | 0.31 | 0.01 | 0.45 | 0.04 |
| #N/A | 0.69 | 0.10 | 0.47 | 0.03 |
| 0.01 | 0.31 | 0.01 | 0.45 | 0.04 |
| 0.64 | 1.18 | 0.62 | 0.97 | 0.46 |
| 0.64 | 1.18 | 0.62 | 0.97 | 0.46 |
| 0.56 | 1.48 | 0.89 | 1.00 | 0.48 |
| #N/A | 1.59 | 0.94 | 1.01 | 0.51 |
| #N/A | 1.59 | 0.94 | 1.01 | 0.51 |
| 0.92 | 1.23 | 0.66 | 1.08 | 0.52 |
| 0.83 | 1.46 | 0.90 | 1.33 | 0.78 |
| 0.83 | 1.46 | 0.90 | 1.33 | 0.78 |
| 0.65 | 1.36 | 0.82 | 1.00 | 0.50 |
| 0.53 | 1.13 | 0.58 | 1.07 | 0.59 |
| 0.30 | 0.78 | 0.15 | 1.47 | 0.91 |
| 0.89 | 1.31 | 0.79 | 1.16 | 0.62 |
| 0.89 | 1.31 | 0.79 | 1.16 | 0.62 |
| 0.35 | 1.46 | 0.80 | 1.43 | 0.90 |
| 0.12 | 0.97 | 0.37 | 1.14 | 0.64 |
| 0.69 | 1.18 | 0.64 | 1.35 | 0.85 |
| 0.58 | 1.19 | 0.65 | 1.31 | 0.70 |
| #N/A | 1.06 | 0.47 | 0.92 | 0.39 |
| #N/A | 1.44 | 0.73 | 0.82 | 0.38 |
| 0.66 | 0.83 | 0.22 | 0.95 | 0.43 |
| #N/A | 1.65 | 0.95 | 1.20 | 0.67 |
| #N/A | 1.65 | 0.95 | 1.20 | 0.67 |
| #N/A | 1.36 | 0.76 | #N/A | #N/A |
| 0.96 | 1.37 | 0.73 | #N/A | #N/A |
| 0.96 | 1.37 | 0.73 | #N/A | #N/A |
| 0.69 | 0.88 | 0.26 | 0.63 | 0.09 |
| 0.69 | 0.88 | 0.26 | 0.63 | 0.09 |
| #N/A | 0.76 | 0.13 | 0.99 | 0.49 |
| 0.43 | 1.77 | 0.98 | 1.28 | 0.76 |
| #N/A | #N/A | #N/A | #N/A | #N/A |
| 0.53 | 1.25 | 0.63 | 1.06 | 0.57 |
| #N/A | 1.29 | 0.56 | 0.71 | 0.17 |
| 0.16 | 0.58 | 0.04 | 0.63 | 0.12 |
| 0.62 | 0.98 | 0.36 | 1.13 | 0.66 |
| 0.43 | 1.25 | 0.73 | 1.38 | 0.87 |
| #N/A | 1.38 | 0.83 | 1.62 | 0.95 |
| 0.71 | 1.06 | 0.47 | 1.10 | 0.60 |
| 0.71 | 1.06 | 0.47 | 1.10 | 0.60 |
| 0.91 | 0.93 | 0.30 | 0.95 | 0.43 |
| 0.91 | 0.93 | 0.30 | 0.95 | 0.43 |
| #N/A | 1.34 | 0.78 | #N/A | #N/A |
| 0.75 | 1.28 | 0.73 | 1.11 | 0.64 |

|      |      |      |      |      |
|------|------|------|------|------|
| 0.98 | 1.47 | 0.91 | 1.22 | 0.76 |
| 0.98 | 1.47 | 0.91 | 1.22 | 0.76 |
| 0.79 | 1.23 | 0.65 | 0.87 | 0.34 |
| #N/A | 1.42 | 0.88 | #N/A | #N/A |
| #N/A | 1.24 | 0.71 | 0.85 | 0.29 |
| #N/A | 1.24 | 0.71 | 0.85 | 0.29 |
| 0.30 | 1.07 | 0.49 | 1.40 | 0.88 |
| 0.07 | 0.78 | 0.16 | 0.95 | 0.43 |
| 0.01 | 0.42 | 0.01 | #N/A | #N/A |
| 0.60 | 1.19 | 0.64 | 0.83 | 0.28 |
| 0.60 | 1.19 | 0.64 | 0.83 | 0.28 |
| 0.53 | 1.16 | 0.62 | 1.26 | 0.79 |
| 0.75 | 0.77 | 0.15 | 0.84 | 0.32 |
| 0.90 | 0.90 | 0.26 | 0.91 | 0.38 |
| 0.90 | 0.90 | 0.26 | 0.91 | 0.38 |
| 0.92 | 1.18 | 0.64 | 1.39 | 0.76 |
| 0.92 | 1.18 | 0.64 | 1.39 | 0.76 |
| 0.21 | 1.18 | 0.64 | 1.41 | 0.89 |
| 0.10 | 1.06 | 0.48 | 1.27 | 0.73 |
| #N/A | #N/A | #N/A | #N/A | #N/A |
| #N/A | 1.07 | 0.49 | 1.01 | 0.52 |
| #N/A | 1.07 | 0.49 | 1.01 | 0.52 |
| 0.65 | 1.45 | 0.87 | 1.91 | 0.96 |
| #N/A | #N/A | #N/A | #N/A | #N/A |
| #N/A | #N/A | #N/A | 1.60 | 0.65 |
| 0.58 | 1.17 | 0.56 | 1.12 | 0.62 |
| 0.58 | 1.17 | 0.56 | 1.12 | 0.62 |
| 0.76 | 1.32 | 0.79 | 1.12 | 0.65 |
| 0.76 | 1.32 | 0.79 | 1.12 | 0.65 |
| 0.78 | 1.02 | 0.42 | 0.86 | 0.32 |
| 0.78 | 1.02 | 0.42 | 0.86 | 0.32 |
| 0.84 | 1.16 | 0.62 | 1.11 | 0.63 |
| #N/A | 1.00 | 0.39 | 1.59 | 0.93 |
| #N/A | #N/A | #N/A | #N/A | #N/A |
| #N/A | #N/A | #N/A | #N/A | #N/A |
| 0.91 | 0.95 | 0.34 | 0.89 | 0.35 |
| 0.73 | 1.19 | 0.65 | 1.10 | 0.62 |
| 0.25 | 1.67 | 0.95 | 1.50 | 0.92 |
| 0.95 | 1.03 | 0.44 | 0.96 | 0.45 |
| 0.95 | 1.03 | 0.44 | 0.96 | 0.45 |
| 0.13 | 1.00 | 0.39 | 0.70 | 0.15 |
| 0.13 | 1.00 | 0.39 | 0.70 | 0.15 |
| #N/A | #N/A | #N/A | #N/A | #N/A |
| #N/A | #N/A | #N/A | #N/A | #N/A |
| #N/A | #N/A | #N/A | #N/A | #N/A |
| 0.55 | 0.89 | 0.28 | 0.44 | 0.03 |
| #N/A | #N/A | #N/A | #N/A | #N/A |
| 0.81 | 1.38 | 0.66 | 0.76 | 0.23 |
| 0.38 | 0.86 | 0.22 | 0.67 | 0.12 |
| #N/A | #N/A | #N/A | #N/A | #N/A |
| 0.52 | 0.79 | 0.16 | 0.90 | 0.37 |

|      |      |      |      |      |
|------|------|------|------|------|
| 0.52 | 0.79 | 0.16 | 0.90 | 0.37 |
| #N/A | 1.19 | 0.64 | #N/A | #N/A |
| 0.45 | 0.91 | 0.28 | 1.42 | 0.78 |
| 0.92 | 1.37 | 0.84 | 1.11 | 0.65 |
| 0.92 | 1.37 | 0.84 | 1.11 | 0.65 |
| 0.89 | 1.33 | 0.82 | 1.07 | 0.57 |
| 0.89 | 1.33 | 0.82 | 1.07 | 0.57 |
| 0.47 | 0.99 | 0.44 | 0.70 | 0.18 |
| 0.89 | 1.33 | 0.82 | 1.07 | 0.57 |
| 0.47 | 0.99 | 0.44 | 0.70 | 0.18 |
| 0.87 | 1.36 | 0.74 | 1.11 | 0.63 |
| 0.63 | 1.03 | 0.44 | 0.84 | 0.29 |
| 0.45 | 1.22 | 0.70 | 0.93 | 0.41 |
| 0.67 | 1.14 | 0.59 | #N/A | #N/A |
| 0.37 | 0.64 | 0.07 | 0.95 | 0.43 |
| 0.67 | 1.14 | 0.59 | #N/A | #N/A |
| 0.37 | 0.64 | 0.07 | 0.95 | 0.43 |
| #N/A | 1.05 | 0.47 | 1.28 | 0.72 |
| #N/A | 1.05 | 0.47 | 1.28 | 0.72 |
| #N/A | 0.82 | 0.25 | 0.81 | 0.31 |
| #N/A | 0.82 | 0.25 | 0.81 | 0.31 |
| 0.57 | 1.07 | 0.49 | 1.12 | 0.65 |
| 0.24 | 0.91 | 0.27 | 1.03 | 0.54 |
| 0.24 | 0.91 | 0.27 | 1.03 | 0.54 |
| #N/A | 1.81 | 0.96 | 1.32 | 0.84 |
| 0.94 | 1.28 | 0.75 | 1.17 | 0.67 |
| 0.80 | 1.03 | 0.43 | 0.92 | 0.39 |
| 0.57 | 0.90 | 0.29 | 1.19 | 0.72 |
| 0.93 | 1.31 | 0.78 | 1.43 | 0.86 |
| 0.93 | 1.31 | 0.78 | 1.43 | 0.86 |
| 0.55 | 1.54 | 0.91 | 1.54 | 0.93 |
| 0.75 | 1.48 | 0.91 | 1.50 | 0.92 |
| 0.75 | 1.48 | 0.91 | 1.50 | 0.92 |
| 0.84 | 1.21 | 0.69 | 1.25 | 0.75 |
| 0.46 | 1.20 | 0.67 | 1.16 | 0.69 |
| 0.05 | 0.54 | 0.03 | 0.64 | 0.12 |
| 0.32 | 0.99 | 0.37 | 0.99 | 0.48 |
| 0.33 | 1.00 | 0.38 | 1.05 | 0.57 |
| 0.33 | 1.03 | 0.44 | 1.07 | 0.58 |
| #N/A | #N/A | #N/A | #N/A | #N/A |
| #N/A | 1.23 | 0.68 | 1.01 | 0.51 |
| 0.78 | 1.23 | 0.70 | 1.11 | 0.62 |
| 0.78 | 1.23 | 0.70 | 1.11 | 0.62 |
| 0.76 | 0.89 | 0.26 | 0.76 | 0.19 |
| 0.76 | 0.89 | 0.26 | 0.76 | 0.19 |
| 0.62 | 1.22 | 0.69 | 1.22 | 0.67 |
| 0.62 | 1.22 | 0.69 | 1.22 | 0.67 |
| #N/A | #N/A | #N/A | #N/A | #N/A |
| 0.94 | 0.84 | 0.24 | 0.96 | 0.44 |
| #N/A | #N/A | #N/A | #N/A | #N/A |
| #N/A | #N/A | #N/A | #N/A | #N/A |

|      |      |      |      |      |
|------|------|------|------|------|
| #N/A | #N/A | #N/A | 1.19 | 0.71 |
| #N/A | #N/A | #N/A | 1.19 | 0.71 |
| #N/A | 1.28 | 0.59 | 2.04 | 0.98 |
| #N/A | 1.28 | 0.59 | 2.04 | 0.98 |
| 0.72 | 1.23 | 0.69 | 1.26 | 0.79 |
| 0.72 | 1.23 | 0.69 | 1.26 | 0.79 |
| 0.81 | 1.21 | 0.68 | 1.16 | 0.66 |
| 0.81 | 1.21 | 0.68 | 1.16 | 0.66 |
| 0.34 | 1.26 | 0.69 | 1.19 | 0.64 |
| 0.14 | 0.84 | 0.20 | 0.77 | 0.27 |
| #N/A | #N/A | #N/A | #N/A | #N/A |
| #N/A | #N/A | #N/A | #N/A | #N/A |
| 0.61 | 1.07 | 0.49 | 0.88 | 0.33 |
| 0.21 | 0.93 | 0.29 | 1.12 | 0.65 |
| 0.27 | 1.03 | 0.43 | 0.73 | 0.19 |
| 0.83 | 0.85 | 0.28 | 0.76 | 0.19 |
| 0.83 | 0.85 | 0.28 | 0.76 | 0.19 |
| #N/A | 1.19 | 0.64 | 1.22 | 0.60 |
| 0.71 | 1.14 | 0.56 | 1.17 | 0.71 |
| 0.78 | 1.10 | 0.53 | 0.89 | 0.35 |
| 0.60 | 1.35 | 0.81 | 1.01 | 0.50 |
| 0.73 | 0.86 | 0.25 | 1.01 | 0.51 |
| 0.72 | 0.99 | 0.37 | 1.11 | 0.62 |
| 0.57 | 1.26 | 0.75 | 1.57 | 0.94 |
| 0.37 | 1.16 | 0.61 | 1.04 | 0.52 |
| 0.49 | 1.27 | 0.75 | 1.40 | 0.86 |
| #N/A | 1.24 | 0.73 | 1.15 | 0.69 |
| 0.49 | 1.27 | 0.75 | 1.40 | 0.86 |
| #N/A | #N/A | #N/A | #N/A | #N/A |
| 0.62 | 1.04 | 0.48 | 1.21 | 0.72 |
| 0.02 | 0.39 | 0.01 | 0.36 | 0.01 |
| #N/A | 0.95 | 0.34 | 1.06 | 0.53 |
| 0.28 | 1.20 | 0.67 | 1.10 | 0.58 |
| 0.15 | 0.59 | 0.04 | 0.74 | 0.17 |
| 0.15 | 0.59 | 0.04 | 0.74 | 0.17 |
| 0.48 | 1.15 | 0.58 | 0.81 | 0.24 |
| 0.61 | 1.28 | 0.73 | 1.12 | 0.63 |
| 0.57 | 1.04 | 0.44 | 1.07 | 0.58 |
| 0.57 | 1.04 | 0.44 | 1.07 | 0.58 |
| 0.58 | 1.32 | 0.76 | 0.97 | 0.46 |
| 0.27 | 0.94 | 0.31 | 1.01 | 0.49 |
| 0.26 | 0.75 | 0.15 | 0.58 | 0.07 |
| 0.26 | 0.75 | 0.15 | 0.58 | 0.07 |
| 0.32 | 0.90 | 0.30 | 1.31 | 0.75 |
| 0.21 | 0.80 | 0.18 | 0.78 | 0.24 |
| 0.75 | 1.11 | 0.55 | 1.19 | 0.68 |
| 0.75 | 1.11 | 0.55 | 1.19 | 0.68 |
| #N/A | 0.77 | 0.19 | 0.60 | 0.07 |
| #N/A | 1.01 | 0.40 | 1.01 | 0.49 |
| #N/A | 1.01 | 0.40 | 1.01 | 0.49 |
| #N/A | #N/A | #N/A | #N/A | #N/A |

|      |      |      |      |      |
|------|------|------|------|------|
| 0.77 | 1.46 | 0.83 | 1.30 | 0.75 |
| 0.77 | 1.46 | 0.83 | 1.30 | 0.75 |
| 0.94 | 0.99 | 0.39 | 0.93 | 0.41 |
| 0.94 | 0.99 | 0.39 | 0.93 | 0.41 |
| #N/A | #N/A | #N/A | #N/A | #N/A |
| #N/A | 1.49 | 0.67 | 0.89 | 0.36 |
| #N/A | 0.75 | 0.14 | 2.26 | 0.99 |
| #N/A | 0.75 | 0.14 | 2.26 | 0.99 |
| 0.18 | 1.00 | 0.42 | 1.06 | 0.58 |
| 0.01 | 0.80 | 0.17 | 0.64 | 0.10 |
| 0.01 | 0.80 | 0.17 | 0.64 | 0.10 |
| #N/A | 1.45 | 0.73 | 1.10 | 0.57 |
| #N/A | 1.45 | 0.73 | 1.10 | 0.57 |
| #N/A | 1.17 | 0.62 | 0.96 | 0.44 |
| #N/A | 1.17 | 0.62 | 0.96 | 0.44 |
| #N/A | 1.37 | 0.75 | 0.89 | 0.41 |
| 0.55 | 1.34 | 0.81 | 1.10 | 0.61 |
| #N/A | 1.11 | 0.53 | 1.08 | 0.60 |
| 0.75 | 0.93 | 0.29 | 0.89 | 0.37 |
| 0.17 | 0.85 | 0.21 | 1.06 | 0.57 |
| 0.86 | 1.53 | 0.93 | 1.41 | 0.89 |
| 0.86 | 1.53 | 0.93 | 1.41 | 0.89 |
| 0.93 | 1.48 | 0.71 | 1.38 | 0.88 |
| 0.93 | 1.48 | 0.71 | 1.38 | 0.88 |
| 0.54 | 1.10 | 0.54 | 1.17 | 0.71 |
| 0.54 | 1.10 | 0.54 | 1.17 | 0.71 |
| #N/A | #N/A | #N/A | 1.43 | 0.87 |
| 0.61 | 1.06 | 0.47 | 1.00 | 0.50 |
| 0.26 | 0.86 | 0.21 | 0.78 | 0.22 |
| 0.32 | 0.78 | 0.16 | 0.82 | 0.26 |
| 0.98 | 1.16 | 0.60 | 1.07 | 0.58 |
| 0.98 | 1.16 | 0.60 | 1.07 | 0.58 |
| 0.91 | 1.30 | 0.78 | 1.07 | 0.54 |
| 0.60 | 1.20 | 0.67 | 1.11 | 0.64 |
| 0.43 | 1.31 | 0.80 | 1.59 | 0.94 |
| 0.43 | 1.31 | 0.80 | 1.59 | 0.94 |
| #N/A | 0.96 | 0.34 | 0.71 | 0.15 |
| #N/A | 0.96 | 0.34 | 0.71 | 0.15 |
| 0.70 | 0.96 | 0.34 | 1.24 | 0.67 |
| 0.70 | 0.96 | 0.34 | 1.24 | 0.67 |
| 0.25 | 1.06 | 0.47 | 0.88 | 0.34 |
| 0.82 | 1.42 | 0.62 | 1.43 | 0.90 |
| 0.82 | 1.42 | 0.62 | 1.43 | 0.90 |
| 0.34 | 0.90 | 0.26 | 0.62 | 0.26 |
| 0.34 | 0.90 | 0.26 | 0.62 | 0.26 |
| 0.01 | 0.20 | 0.00 | 0.13 | 0.00 |
| 0.01 | 0.20 | 0.00 | 0.13 | 0.00 |
| #N/A | 0.14 | 0.00 | 0.20 | 0.00 |
| #N/A | 0.64 | 0.07 | 0.73 | 0.29 |
| 0.73 | 1.09 | 0.51 | 1.20 | 0.74 |
| 0.73 | 1.09 | 0.51 | 1.20 | 0.74 |



|      |      |      |      |      |
|------|------|------|------|------|
| 0.20 | 1.11 | 0.53 | 1.67 | 0.65 |
| 0.76 | 1.17 | 0.62 | 0.85 | 0.30 |
| #N/A | 1.34 | 0.77 | 0.98 | 0.47 |
| #N/A | 1.34 | 0.77 | 0.98 | 0.47 |
| 0.49 | 1.20 | 0.66 | 1.09 | 0.59 |
| 0.46 | 0.88 | 0.24 | 1.11 | 0.57 |
| #N/A | 1.52 | 0.88 | #N/A | #N/A |
| #N/A | 1.52 | 0.88 | #N/A | #N/A |
| #N/A | 1.52 | 0.88 | #N/A | #N/A |
| #N/A | #N/A | #N/A | #N/A | #N/A |
| 0.34 | 1.01 | 0.41 | 1.22 | 0.56 |
| 0.50 | 1.42 | 0.76 | 1.49 | 0.92 |
| 0.50 | 1.42 | 0.76 | 1.49 | 0.92 |
| 0.79 | 1.13 | 0.58 | 1.05 | 0.56 |
| 0.16 | 0.92 | 0.28 | 0.88 | 0.33 |
| 0.37 | 1.01 | 0.39 | 1.09 | 0.58 |
| 0.97 | 1.50 | 0.87 | 1.01 | 0.51 |
| 0.97 | 1.50 | 0.87 | 1.01 | 0.51 |
| 0.42 | 1.26 | 0.72 | 1.24 | 0.69 |
| 0.69 | 1.09 | 0.51 | 1.16 | 0.70 |
| 0.94 | 0.94 | 0.32 | 1.31 | 0.72 |
| 0.94 | 0.94 | 0.32 | 1.31 | 0.72 |
| 0.44 | 1.24 | 0.73 | 1.06 | 0.57 |
| 0.11 | 0.92 | 0.28 | 0.88 | 0.35 |
| 0.01 | 1.14 | 0.59 | 1.17 | 0.71 |
| 0.01 | 1.14 | 0.59 | 1.17 | 0.71 |
| 0.11 | 0.92 | 0.28 | 0.88 | 0.35 |
| #N/A | 0.78 | 0.15 | 0.78 | 0.30 |
| #N/A | 1.18 | 0.63 | #N/A | #N/A |
| #N/A | 1.18 | 0.63 | #N/A | #N/A |
| 0.82 | 1.43 | 0.87 | #N/A | #N/A |
| 0.68 | 1.31 | 0.73 | 0.83 | 0.33 |
| 0.68 | 1.31 | 0.73 | 0.83 | 0.33 |
| 0.19 | 0.75 | 0.15 | 0.59 | 0.07 |
| 0.19 | 0.75 | 0.15 | 0.59 | 0.07 |
| #N/A | #N/A | #N/A | #N/A | #N/A |
| 0.70 | 1.38 | 0.82 | 1.38 | 0.84 |
| 0.12 | 0.77 | 0.15 | 0.89 | 0.35 |
| 0.17 | 0.94 | 0.32 | 0.82 | 0.26 |
| #N/A | 1.16 | 0.62 | 1.16 | 0.68 |
| #N/A | 1.16 | 0.62 | 1.16 | 0.68 |
| #N/A | #N/A | #N/A | #N/A | #N/A |
| #N/A | 1.16 | 0.62 | 1.25 | 0.79 |
| #N/A | #N/A | #N/A | #N/A | #N/A |
| #N/A | 1.23 | 0.71 | 1.28 | 0.81 |
| #N/A | #N/A | #N/A | #N/A | #N/A |
| #N/A | #N/A | #N/A | #N/A | #N/A |
| 0.90 | 1.33 | 0.81 | 0.86 | 0.31 |
| 0.90 | 1.33 | 0.81 | 0.86 | 0.31 |
| #N/A | 1.60 | 0.87 | 1.28 | 0.78 |
| #N/A | #N/A | #N/A | #N/A | #N/A |

|      |      |      |      |      |
|------|------|------|------|------|
| #N/A | #N/A | #N/A | #N/A | #N/A |
| #N/A | #N/A | #N/A | #N/A | #N/A |
| #N/A | #N/A | #N/A | #N/A | #N/A |
| #N/A | 1.03 | 0.43 | 0.78 | 0.21 |
| #N/A | #N/A | #N/A | #N/A | #N/A |
| #N/A | 0.90 | 0.26 | 1.34 | 0.77 |
| #N/A | 0.90 | 0.26 | 1.34 | 0.77 |
| 0.83 | 1.12 | 0.56 | #N/A | #N/A |
| #N/A | #N/A | #N/A | #N/A | #N/A |
| 0.86 | 1.25 | 0.70 | 1.43 | 0.90 |
| 0.86 | 1.25 | 0.70 | 1.43 | 0.90 |
| 0.33 | 1.04 | 0.46 | 0.96 | 0.45 |
| #N/A | 0.68 | 0.09 | 0.55 | 0.06 |
| #N/A | 0.68 | 0.09 | 0.55 | 0.06 |
| 0.62 | 1.06 | 0.47 | 1.02 | 0.51 |
| 0.62 | 1.06 | 0.47 | 1.02 | 0.51 |
| #N/A | #N/A | #N/A | 1.04 | 0.54 |
| #N/A | #N/A | #N/A | 1.04 | 0.54 |
| #N/A | #N/A | #N/A | #N/A | #N/A |
| #N/A | #N/A | #N/A | #N/A | #N/A |
| 0.76 | 1.11 | 0.54 | 1.49 | 0.88 |
| #N/A | 1.07 | 0.49 | 1.09 | 0.60 |
| #N/A | #N/A | #N/A | #N/A | #N/A |
| #N/A | #N/A | #N/A | #N/A | #N/A |
| #N/A | #N/A | #N/A | #N/A | #N/A |
| #N/A | #N/A | #N/A | #N/A | #N/A |
| #N/A | #N/A | #N/A | #N/A | #N/A |
| #N/A | 1.26 | 0.74 | 1.00 | 0.49 |
| #N/A | #N/A | #N/A | #N/A | #N/A |
| #N/A | #N/A | #N/A | #N/A | #N/A |
| #N/A | 0.82 | 0.21 | 1.01 | 0.49 |
| #N/A | #N/A | #N/A | #N/A | #N/A |
| 0.83 | 1.40 | 0.83 | 1.15 | 0.69 |
| 0.83 | 1.40 | 0.83 | 1.15 | 0.69 |
| 0.98 | 1.25 | 0.68 | 1.07 | 0.51 |
| 0.98 | 1.25 | 0.68 | 1.07 | 0.51 |
| 0.98 | 1.25 | 0.68 | 1.07 | 0.51 |
| 0.98 | 1.25 | 0.68 | 1.07 | 0.51 |
| 0.91 | 1.49 | 0.90 | 1.34 | 0.73 |
| 0.91 | 1.49 | 0.90 | 1.34 | 0.73 |
| #N/A | #N/A | #N/A | #N/A | #N/A |
| 0.83 | 1.27 | 0.75 | 0.88 | 0.34 |
| 0.60 | 1.11 | 0.54 | 1.11 | 0.61 |
| 0.60 | 1.11 | 0.54 | 1.11 | 0.61 |
| 0.57 | 1.20 | 0.67 | 1.05 | 0.56 |
| #N/A | 0.94 | 0.32 | 1.04 | 0.54 |
| 0.49 | 1.25 | 0.67 | 0.96 | 0.44 |
| 0.49 | 1.25 | 0.67 | 0.96 | 0.44 |
| #N/A | 0.86 | 0.22 | 0.88 | 0.34 |
| 0.75 | 1.13 | 0.57 | 1.27 | 0.73 |
| #N/A | 0.86 | 0.22 | 0.88 | 0.34 |

|      |      |      |      |      |
|------|------|------|------|------|
| 0.98 | 1.61 | 0.89 | 1.53 | 0.93 |
| 0.98 | 1.61 | 0.89 | 1.53 | 0.93 |
| 0.29 | 0.85 | 0.22 | 1.04 | 0.53 |
| 0.19 | 0.92 | 0.28 | 0.84 | 0.28 |
| #N/A | #N/A | #N/A | #N/A | #N/A |
| #N/A | #N/A | #N/A | #N/A | #N/A |
| #N/A | #N/A | #N/A | #N/A | #N/A |
| #N/A | 0.89 | 0.39 | 0.54 | 0.06 |
| #N/A | 0.89 | 0.39 | 0.54 | 0.06 |
| 0.41 | 0.93 | 0.31 | 0.97 | 0.46 |
| 0.37 | 0.91 | 0.27 | #N/A | #N/A |
| #N/A | 0.93 | 0.37 | 0.94 | 0.44 |
| #N/A | 0.79 | 0.16 | 0.88 | 0.34 |
| 0.32 | 0.96 | 0.35 | 1.21 | 0.75 |
| #N/A | 1.12 | 0.54 | 1.22 | 0.73 |
| 0.87 | 1.21 | 0.65 | 1.65 | 0.92 |
| 0.87 | 1.21 | 0.65 | 1.65 | 0.92 |
| #N/A | 1.02 | 0.42 | 1.09 | 0.61 |
| #N/A | 1.02 | 0.42 | 1.09 | 0.61 |
| #N/A | 1.02 | 0.42 | 1.09 | 0.61 |
| 0.69 | #N/A | #N/A | 0.90 | 0.39 |
| #N/A | 1.61 | 0.86 | 0.99 | 0.48 |
| #N/A | 1.61 | 0.86 | 0.99 | 0.48 |
| 0.62 | 1.47 | 0.80 | 1.32 | 0.77 |
| #N/A | #N/A | #N/A | #N/A | #N/A |
| #N/A | #N/A | #N/A | #N/A | #N/A |
| #N/A | #N/A | #N/A | 0.48 | 0.03 |
| 0.23 | 1.16 | 0.60 | 0.92 | 0.39 |
| 0.23 | 1.16 | 0.60 | 0.92 | 0.39 |
| 0.82 | 1.06 | 0.47 | 0.85 | 0.32 |
| 0.82 | 1.06 | 0.47 | 0.85 | 0.32 |
| 0.02 | 0.64 | 0.06 | 0.52 | 0.05 |
| #N/A | 1.48 | 0.80 | 1.17 | 0.70 |
| 0.36 | 1.01 | 0.39 | 0.99 | 0.49 |
| 0.36 | 1.01 | 0.39 | 0.99 | 0.49 |
| 0.69 | 1.15 | 0.61 | 1.17 | 0.71 |
| 0.55 | 0.85 | 0.21 | 0.99 | 0.48 |
| 0.03 | 0.71 | 0.10 | 0.81 | 0.30 |
| 0.03 | 0.71 | 0.10 | 0.81 | 0.30 |
| 0.08 | 0.68 | 0.08 | 0.54 | 0.05 |
| 0.90 | 1.31 | 0.77 | 1.00 | 0.49 |
| #N/A | 1.57 | 0.93 | 1.10 | 0.61 |
| #N/A | 1.57 | 0.93 | 1.10 | 0.61 |
| 0.67 | 0.99 | 0.37 | 1.05 | 0.57 |
| 0.67 | 0.99 | 0.37 | 1.05 | 0.57 |
| 0.54 | 1.14 | 0.59 | 0.97 | 0.45 |
| 0.08 | 0.78 | 0.15 | 0.84 | 0.29 |
| 0.72 | 1.06 | 0.49 | 1.30 | 0.83 |
| 0.82 | 1.07 | 0.49 | 1.03 | 0.53 |
| 0.82 | 1.07 | 0.49 | 1.03 | 0.53 |
| 0.79 | 1.21 | 0.68 | 1.04 | 0.54 |

|      |      |      |      |      |
|------|------|------|------|------|
| 0.54 | 1.21 | 0.68 | 0.99 | 0.48 |
| 0.79 | 1.21 | 0.68 | 1.04 | 0.54 |
| 0.54 | 1.21 | 0.68 | 0.99 | 0.48 |
| #N/A | #N/A | #N/A | #N/A | #N/A |
| 0.66 | 1.01 | 0.43 | 1.16 | 0.69 |
| 0.66 | 1.01 | 0.43 | 1.16 | 0.69 |
| 0.93 | 1.07 | 0.48 | 1.00 | 0.50 |
| #N/A | 1.13 | 0.56 | #N/A | #N/A |
| #N/A | 1.38 | 0.85 | 1.30 | 0.72 |
| 0.15 | 0.75 | 0.13 | 0.88 | 0.35 |
| 0.15 | 0.75 | 0.13 | 0.88 | 0.35 |
| #N/A | 1.01 | 0.46 | 0.61 | 0.10 |
| #N/A | 1.01 | 0.46 | 0.61 | 0.10 |
| #N/A | 1.30 | 0.67 | 1.31 | 0.83 |
| #N/A | 1.01 | 0.46 | 0.61 | 0.10 |
| #N/A | 0.99 | 0.37 | 1.14 | 0.59 |
| #N/A | 0.99 | 0.37 | 1.14 | 0.59 |
| #N/A | 0.91 | 0.27 | 0.97 | 0.47 |
| #N/A | 0.92 | 0.30 | 0.94 | 0.45 |
| #N/A | 0.93 | 0.35 | 0.74 | 0.18 |
| 0.46 | 1.56 | 0.85 | 1.47 | 0.89 |
| 0.46 | 1.56 | 0.85 | 1.47 | 0.89 |
| #N/A | #N/A | #N/A | #N/A | #N/A |
| 0.64 | 1.07 | 0.48 | 0.98 | 0.47 |
| 0.53 | 0.94 | 0.30 | 0.81 | 0.25 |
| #N/A | 0.85 | 0.21 | 0.92 | 0.40 |
| 0.36 | 1.02 | 0.42 | 0.69 | 0.14 |
| 0.36 | 1.02 | 0.42 | 0.69 | 0.14 |
| 0.36 | 1.02 | 0.42 | 0.69 | 0.14 |
| 0.13 | 0.83 | 0.23 | 0.60 | 0.10 |
| 0.02 | 0.54 | 0.05 | #N/A | #N/A |
| 0.02 | 0.54 | 0.05 | #N/A | #N/A |
| 0.01 | 0.57 | 0.06 | #N/A | #N/A |
| #N/A | #N/A | #N/A | #N/A | #N/A |
| 0.51 | #N/A | #N/A | #N/A | #N/A |
| #N/A | #N/A | #N/A | #N/A | #N/A |
| 0.18 | 1.04 | 0.46 | 0.68 | 0.12 |
| #N/A | 1.24 | 0.72 | #N/A | #N/A |
| #N/A | 1.24 | 0.72 | #N/A | #N/A |
| #N/A | #N/A | #N/A | #N/A | #N/A |
| #N/A | #N/A | #N/A | #N/A | #N/A |
| #N/A | 1.01 | 0.40 | 1.01 | 0.50 |
| 0.90 | 1.36 | 0.83 | 1.20 | 0.74 |
| 0.84 | 0.91 | 0.27 | 0.74 | 0.21 |
| 0.84 | 0.91 | 0.27 | 0.74 | 0.21 |
| #N/A | #N/A | #N/A | #N/A | #N/A |
| 0.51 | 1.22 | 0.67 | 1.35 | 0.75 |
| 0.51 | 1.22 | 0.67 | 1.35 | 0.75 |
| #N/A | 1.33 | 0.82 | 1.03 | 0.53 |
| 0.51 | 1.22 | 0.67 | 1.35 | 0.75 |
| #N/A | 1.33 | 0.82 | 1.03 | 0.53 |

|      |      |      |      |      |
|------|------|------|------|------|
| #N/A | 1.24 | 0.66 | 1.02 | 0.52 |
| #N/A | 1.24 | 0.66 | 1.02 | 0.52 |
| #N/A | 1.78 | 0.97 | #N/A | #N/A |
| #N/A | 0.89 | 0.32 | 1.15 | 0.59 |
| 0.09 | 1.04 | 0.46 | 0.80 | 0.24 |
| 0.09 | 1.04 | 0.46 | 0.80 | 0.24 |
| 0.47 | 0.90 | 0.27 | 0.99 | 0.49 |
| 0.47 | 0.90 | 0.27 | 0.99 | 0.49 |
| 0.47 | 0.94 | 0.31 | 0.60 | 0.10 |
| #N/A | 0.64 | 0.08 | 0.59 | 0.07 |
| 0.40 | 0.93 | 0.30 | 0.98 | 0.47 |
| 0.73 | 0.85 | 0.29 | 0.90 | 0.37 |
| #N/A | #N/A | #N/A | #N/A | #N/A |
| #N/A | 0.86 | 0.22 | 0.73 | 0.18 |
| 0.07 | 0.87 | 0.22 | 0.80 | 0.27 |
| #N/A | 0.65 | 0.16 | 0.61 | 0.09 |
| #N/A | 1.05 | 0.46 | 0.84 | 0.36 |
| 0.49 | 1.03 | 0.43 | 0.99 | 0.48 |
| #N/A | #N/A | #N/A | #N/A | #N/A |
| 0.49 | 1.03 | 0.43 | 0.99 | 0.48 |
| #N/A | 1.00 | 0.39 | 0.81 | 0.25 |
| 0.48 | 0.92 | 0.33 | 0.84 | 0.29 |
| #N/A | 1.00 | 0.39 | 0.81 | 0.25 |
| #N/A | #N/A | #N/A | #N/A | #N/A |
| 0.07 | 1.07 | 0.49 | 0.98 | 0.47 |
| 0.06 | 0.51 | 0.03 | 0.42 | 0.02 |
| #N/A | 0.82 | 0.19 | 0.86 | 0.31 |
| #N/A | #N/A | #N/A | #N/A | #N/A |
| 0.47 | 1.12 | 0.56 | 0.69 | 0.13 |
| 0.36 | 1.10 | 0.53 | 1.24 | 0.67 |
| 0.47 | 1.12 | 0.56 | 0.69 | 0.13 |
| 0.36 | 1.10 | 0.53 | 1.24 | 0.67 |
| 0.87 | 1.03 | 0.45 | 1.01 | 0.51 |
| 0.87 | 1.03 | 0.45 | 1.01 | 0.51 |
| 0.76 | 1.09 | 0.51 | 1.09 | 0.62 |
| #N/A | #N/A | #N/A | #N/A | #N/A |
| 0.36 | 0.79 | 0.17 | 1.18 | 0.70 |
| 0.36 | 0.79 | 0.17 | 1.18 | 0.70 |
| 0.80 | 1.03 | 0.44 | 0.90 | 0.38 |
| #N/A | 0.99 | 0.37 | 0.67 | 0.12 |
| #N/A | 0.99 | 0.37 | 0.67 | 0.12 |
| #N/A | #N/A | #N/A | #N/A | #N/A |
| 0.85 | 1.22 | 0.69 | 1.33 | 0.76 |
| 0.85 | 1.22 | 0.69 | 1.33 | 0.76 |
| 0.58 | 1.01 | 0.41 | 1.04 | 0.55 |
| 0.58 | 1.01 | 0.41 | 1.04 | 0.55 |
| #N/A | #N/A | #N/A | #N/A | #N/A |
| #N/A | #N/A | #N/A | #N/A | #N/A |
| 0.07 | 0.98 | 0.36 | 0.92 | 0.39 |
| 0.11 | 1.08 | 0.50 | 0.80 | 0.24 |
| #N/A | 1.48 | 0.73 | #N/A | #N/A |

|      |      |      |      |      |
|------|------|------|------|------|
| 0.93 | 1.16 | 0.60 | 0.96 | 0.45 |
| 0.93 | 1.16 | 0.60 | 0.96 | 0.45 |
| #N/A | #N/A | #N/A | #N/A | #N/A |
| 0.91 | 1.55 | 0.94 | 1.53 | 0.88 |
| 0.00 | 1.36 | 0.71 | #N/A | #N/A |
| 0.91 | 1.55 | 0.94 | 1.53 | 0.88 |
| #N/A | #N/A | #N/A | #N/A | #N/A |
| 0.70 | 1.23 | 0.69 | 1.10 | 0.63 |
| 0.65 | 0.93 | 0.31 | 1.11 | 0.57 |
| #N/A | 1.00 | 0.44 | 0.74 | 0.32 |
| 0.65 | 0.93 | 0.31 | 1.11 | 0.57 |
| #N/A | 1.42 | 0.88 | 1.45 | 0.90 |
| 0.77 | 1.10 | 0.52 | 0.93 | 0.39 |
| 0.77 | 1.10 | 0.52 | 0.93 | 0.39 |
| #N/A | 0.83 | 0.20 | #N/A | #N/A |
| 0.89 | 1.86 | 0.98 | 1.09 | 0.62 |
| 0.89 | 1.86 | 0.98 | 1.09 | 0.62 |
| 0.14 | 0.81 | 0.20 | 1.07 | 0.59 |
| 0.14 | 0.81 | 0.20 | 1.07 | 0.59 |
| 0.62 | 1.17 | 0.63 | 0.72 | 0.17 |
| 0.62 | 1.17 | 0.63 | 0.72 | 0.17 |
| #N/A | #N/A | #N/A | #N/A | #N/A |
| 0.91 | 1.30 | 0.70 | 1.06 | 0.57 |
| 0.91 | 1.30 | 0.70 | 1.06 | 0.57 |
| 0.91 | 1.30 | 0.70 | 1.06 | 0.57 |
| #N/A | #N/A | #N/A | #N/A | #N/A |
| #N/A | #N/A | #N/A | 1.23 | 0.54 |
| 0.33 | 1.13 | 0.57 | 1.00 | 0.50 |
| #N/A | 1.17 | 0.61 | 1.12 | 0.58 |
| 0.01 | 0.52 | 0.03 | 0.59 | 0.08 |
| 0.01 | 0.52 | 0.03 | 0.59 | 0.08 |
| #N/A | #N/A | #N/A | #N/A | #N/A |
| #N/A | #N/A | #N/A | #N/A | #N/A |
| 0.43 | 1.08 | 0.50 | 0.99 | 0.48 |
| #N/A | #N/A | #N/A | #N/A | #N/A |
| #N/A | #N/A | #N/A | 0.95 | 0.44 |
| 0.12 | 0.91 | 0.33 | 0.90 | 0.38 |
| 0.12 | 0.91 | 0.33 | 0.90 | 0.38 |
| #N/A | 1.07 | 0.48 | 0.81 | 0.25 |
| #N/A | 1.23 | 0.64 | 1.20 | 0.58 |
| #N/A | 1.23 | 0.64 | 1.20 | 0.58 |
| #N/A | 1.34 | 0.81 | #N/A | #N/A |
| #N/A | #N/A | #N/A | #N/A | #N/A |
| #N/A | #N/A | #N/A | #N/A | #N/A |
| #N/A | #N/A | #N/A | #N/A | #N/A |
| #N/A | #N/A | #N/A | 0.76 | 0.22 |
| 0.92 | 1.47 | 0.83 | 0.99 | 0.48 |
| 0.92 | 1.47 | 0.83 | 0.99 | 0.48 |
| 0.92 | 1.47 | 0.83 | 0.99 | 0.48 |
| 0.62 | 1.33 | 0.80 | #N/A | #N/A |
| 0.62 | 1.33 | 0.80 | #N/A | #N/A |
| #N/A | 0.98 | 0.43 | 0.98 | 0.47 |

|      |      |      |      |      |
|------|------|------|------|------|
| 0.95 | 1.12 | 0.52 | 1.01 | 0.51 |
| 0.95 | 1.12 | 0.52 | 1.01 | 0.51 |
| #N/A | 1.38 | 0.77 | 0.80 | 0.26 |
| #N/A | 1.38 | 0.77 | 0.80 | 0.26 |
| 0.75 | 1.20 | 0.66 | 1.25 | 0.77 |
| #N/A | 1.23 | 0.62 | 1.06 | 0.58 |
| 0.96 | 1.03 | 0.44 | 1.09 | 0.60 |
| #N/A | #N/A | #N/A | #N/A | #N/A |
| 0.53 | 1.46 | 0.90 | 0.99 | 0.48 |
| #N/A | #N/A | #N/A | #N/A | #N/A |
| 0.21 | 0.81 | 0.17 | 1.09 | 0.60 |
| 0.21 | 0.81 | 0.17 | 1.09 | 0.60 |
| #N/A | 1.33 | 0.79 | 1.26 | 0.69 |
| #N/A | 1.33 | 0.79 | 1.26 | 0.69 |
| #N/A | #N/A | #N/A | #N/A | #N/A |
| 0.32 | 0.93 | 0.32 | 0.87 | 0.31 |
| 0.17 | 0.84 | 0.21 | 1.01 | 0.48 |
| 0.17 | 0.84 | 0.21 | 1.01 | 0.48 |
| 0.82 | 1.06 | 0.48 | 0.86 | 0.30 |
| #N/A | 1.08 | 0.49 | 1.01 | 0.51 |
| 0.05 | 0.76 | 0.14 | 0.77 | 0.21 |
| 0.61 | 1.53 | 0.91 | 1.32 | 0.80 |
| 0.61 | 1.53 | 0.91 | 1.32 | 0.80 |
| #N/A | #N/A | #N/A | #N/A | #N/A |
| #N/A | #N/A | #N/A | #N/A | #N/A |
| 0.62 | 1.20 | 0.65 | 1.04 | 0.55 |
| 0.15 | 0.78 | 0.15 | 0.86 | 0.31 |
| 0.15 | 0.78 | 0.15 | 0.86 | 0.31 |
| #N/A | #N/A | #N/A | #N/A | #N/A |
| 0.90 | 1.19 | 0.60 | 1.15 | 0.67 |
| 0.87 | 1.35 | 0.83 | 1.14 | 0.67 |
| 0.29 | 0.68 | 0.09 | 0.78 | 0.25 |
| 0.77 | 0.96 | 0.34 | 0.86 | 0.31 |
| 0.77 | 0.96 | 0.34 | 0.86 | 0.31 |
| #N/A | #N/A | #N/A | #N/A | #N/A |
| 0.31 | 1.19 | 0.64 | 0.93 | 0.41 |
| 0.63 | 1.10 | 0.53 | 0.90 | 0.37 |
| #N/A | 1.23 | 0.65 | 2.12 | 0.99 |
| 0.63 | 1.10 | 0.53 | 0.90 | 0.37 |
| #N/A | #N/A | #N/A | #N/A | #N/A |
| 0.35 | 1.12 | 0.56 | 1.11 | 0.65 |
| 0.25 | 0.71 | 0.10 | 0.84 | 0.28 |
| 0.12 | 0.57 | 0.04 | 0.63 | 0.09 |
| 0.25 | 0.71 | 0.10 | 0.84 | 0.28 |
| 0.12 | 0.57 | 0.04 | 0.63 | 0.09 |
| 0.25 | 0.71 | 0.10 | 0.84 | 0.28 |
| 0.12 | 0.57 | 0.04 | 0.63 | 0.09 |
| 0.82 | 0.96 | 0.35 | 0.93 | 0.40 |
| 0.09 | 1.19 | 0.62 | 0.94 | 0.42 |
| 0.70 | 1.27 | 0.75 | 1.11 | 0.58 |
| 0.70 | 1.27 | 0.75 | 1.11 | 0.58 |

|      |      |      |      |      |
|------|------|------|------|------|
| 0.61 | 1.05 | 0.46 | 1.36 | 0.79 |
| 0.32 | 0.84 | 0.21 | 0.87 | 0.32 |
| 0.17 | 0.60 | 0.06 | 0.68 | 0.13 |
| 0.17 | 0.60 | 0.06 | 0.68 | 0.13 |
| 0.74 | 1.02 | 0.42 | 0.85 | 0.30 |
| 0.62 | 1.20 | 0.65 | 1.29 | 0.77 |
| 0.62 | 1.20 | 0.65 | 1.29 | 0.77 |
| #N/A | #N/A | #N/A | #N/A | #N/A |
| 0.62 | 1.20 | 0.65 | 1.29 | 0.77 |
| #N/A | #N/A | #N/A | #N/A | #N/A |
| #N/A | #N/A | #N/A | #N/A | #N/A |
| #N/A | 1.29 | 0.76 | 1.09 | 0.60 |
| 0.79 | 0.95 | 0.33 | 1.03 | 0.54 |
| 0.79 | 0.95 | 0.33 | 1.03 | 0.54 |
| #N/A | 1.51 | 0.81 | 1.36 | 0.82 |
| 0.78 | 1.02 | 0.41 | 0.81 | 0.25 |
| 0.78 | 1.02 | 0.41 | 0.81 | 0.25 |
| 0.60 | 1.53 | 0.74 | 0.89 | 0.35 |
| 0.72 | 1.47 | 0.90 | 1.13 | 0.58 |
| 0.72 | 1.47 | 0.90 | 1.13 | 0.58 |
| 0.70 | 1.07 | 0.49 | 1.44 | 0.90 |
| 0.70 | 1.07 | 0.49 | 1.44 | 0.90 |
| 0.16 | 0.34 | 0.01 | 0.46 | 0.03 |
| 0.16 | 0.34 | 0.01 | 0.46 | 0.03 |
| 0.04 | 0.48 | 0.02 | 0.52 | 0.06 |
| 0.21 | 1.14 | 0.57 | 0.98 | 0.47 |
| 0.41 | 0.97 | 0.37 | 1.09 | 0.61 |
| 0.71 | 1.10 | 0.52 | 1.41 | 0.89 |
| 0.79 | 1.40 | 0.86 | 1.27 | 0.77 |
| #N/A | 1.48 | 0.91 | 1.58 | 0.94 |
| 0.79 | 1.40 | 0.86 | 1.27 | 0.77 |
| #N/A | #N/A | #N/A | #N/A | #N/A |
| #N/A | #N/A | #N/A | #N/A | #N/A |
| #N/A | #N/A | #N/A | 0.61 | 0.11 |
| 0.31 | 0.98 | 0.37 | 0.69 | 0.14 |
| #N/A | #N/A | #N/A | 0.61 | 0.11 |
| #N/A | 1.16 | 0.62 | 1.12 | 0.64 |
| #N/A | 1.16 | 0.62 | 1.12 | 0.64 |
| #N/A | #N/A | #N/A | #N/A | #N/A |
| #N/A | #N/A | #N/A | #N/A | #N/A |
| #N/A | #N/A | #N/A | #N/A | #N/A |
| 0.91 | 0.99 | 0.37 | 0.90 | 0.37 |
| 0.57 | 0.91 | 0.27 | 0.87 | 0.32 |
| 0.57 | 0.91 | 0.27 | 0.87 | 0.32 |
| #N/A | 0.95 | 0.32 | 0.66 | 0.14 |
| 0.76 | 0.96 | 0.34 | 1.10 | 0.63 |
| 0.76 | 0.96 | 0.34 | 1.10 | 0.63 |
| 0.78 | 1.19 | 0.66 | 1.32 | 0.52 |
| #N/A | 1.09 | 0.52 | 1.23 | 0.67 |
| 0.78 | 1.19 | 0.66 | 1.32 | 0.52 |
| 0.59 | 0.93 | 0.31 | 1.16 | 0.70 |



|      |      |      |      |      |
|------|------|------|------|------|
| 0.48 | 1.27 | 0.75 | 1.32 | 0.75 |
| 0.29 | 0.63 | 0.08 | 0.76 | 0.22 |
| 0.29 | 0.63 | 0.08 | 0.76 | 0.22 |
| 0.34 | 1.26 | 0.71 | 1.03 | 0.53 |
| 0.22 | 1.08 | 0.50 | 1.23 | 0.76 |
| 0.22 | 1.08 | 0.50 | 1.23 | 0.76 |
| 0.53 | 1.00 | 0.41 | #N/A | #N/A |
| #N/A | 0.93 | 0.30 | 0.91 | 0.37 |
| #N/A | #N/A | #N/A | #N/A | #N/A |
| #N/A | #N/A | #N/A | #N/A | #N/A |
| #N/A | 1.18 | 0.63 | 1.09 | 0.53 |
| #N/A | 1.18 | 0.63 | 1.09 | 0.53 |
| #N/A | 1.12 | 0.55 | 1.21 | 0.68 |
| 0.02 | 0.58 | 0.04 | 0.57 | 0.08 |
| 0.02 | 0.58 | 0.04 | 0.57 | 0.08 |
| 0.89 | 1.05 | 0.45 | 1.13 | 0.66 |
| 0.89 | 1.05 | 0.45 | 1.13 | 0.66 |
| #N/A | #N/A | #N/A | #N/A | #N/A |
| #N/A | 1.60 | 0.95 | 0.78 | 0.33 |
| 0.76 | 1.02 | 0.42 | 1.04 | 0.56 |
| 0.86 | 1.24 | 0.72 | 1.32 | 0.79 |
| #N/A | #N/A | #N/A | #N/A | #N/A |
| 0.36 | 1.04 | 0.44 | 0.90 | 0.38 |
| #N/A | #N/A | #N/A | #N/A | #N/A |
| 0.33 | 1.30 | 0.75 | 1.62 | 0.95 |
| 0.25 | 0.97 | 0.35 | 1.00 | 0.49 |
| 0.36 | 0.88 | 0.25 | 0.83 | 0.28 |
| #N/A | 1.64 | 0.96 | 1.13 | 0.64 |
| 0.03 | #N/A | #N/A | 0.70 | 0.24 |
| 0.33 | 1.01 | 0.45 | 1.31 | 0.62 |
| 0.98 | 1.31 | 0.80 | 0.79 | 0.23 |
| 0.92 | 1.06 | 0.47 | 1.11 | 0.63 |
| 0.57 | 1.06 | 0.47 | 0.93 | 0.43 |
| 0.57 | 1.06 | 0.47 | 0.93 | 0.43 |
| 0.83 | #N/A | #N/A | 0.81 | 0.35 |
| 0.83 | #N/A | #N/A | 0.81 | 0.35 |
| 0.61 | 1.15 | 0.60 | #N/A | #N/A |
| 0.37 | 1.24 | 0.61 | #N/A | #N/A |
| 0.09 | 0.62 | 0.05 | 0.71 | 0.28 |
| 0.09 | 0.62 | 0.05 | 0.71 | 0.28 |
| #N/A | #N/A | #N/A | #N/A | #N/A |
| 0.09 | 0.62 | 0.05 | 0.71 | 0.28 |
| #N/A | #N/A | #N/A | #N/A | #N/A |
| #N/A | 1.79 | 0.72 | 0.95 | 0.43 |
| 0.51 | 0.85 | 0.21 | 0.79 | 0.27 |
| 0.51 | 0.85 | 0.21 | 0.79 | 0.27 |
| #N/A | 1.79 | 0.72 | 0.95 | 0.43 |
| 0.59 | 0.97 | 0.38 | 1.33 | 0.85 |
| 0.59 | 0.97 | 0.38 | 1.33 | 0.85 |
| 0.54 | 1.02 | 0.41 | 1.12 | 0.65 |
| 0.54 | 1.02 | 0.41 | 1.12 | 0.65 |

|      |      |      |      |      |
|------|------|------|------|------|
| 0.61 | 0.95 | 0.32 | 0.74 | 0.22 |
| #N/A | 1.22 | 0.60 | 2.12 | 0.81 |
| 0.61 | 0.95 | 0.32 | 0.74 | 0.22 |
| 0.61 | 0.95 | 0.32 | 0.74 | 0.22 |
| 0.47 | 1.08 | 0.50 | 1.13 | 0.65 |
| 0.47 | 1.08 | 0.50 | 1.13 | 0.65 |
| 0.65 | 1.03 | 0.44 | 0.96 | 0.45 |
| #N/A | 1.20 | 0.57 | 1.34 | 0.76 |
| #N/A | #N/A | #N/A | 1.17 | 0.59 |
| #N/A | #N/A | #N/A | 1.17 | 0.59 |
| #N/A | #N/A | #N/A | #N/A | #N/A |
| 0.71 | 1.30 | 0.74 | 1.01 | 0.49 |
| 0.71 | 1.30 | 0.74 | 1.01 | 0.49 |
| 0.32 | 1.01 | 0.40 | 0.86 | 0.33 |
| #N/A | #N/A | #N/A | #N/A | #N/A |
| 0.71 | 0.89 | 0.26 | 0.95 | 0.44 |
| 0.71 | 0.89 | 0.26 | 0.95 | 0.44 |
| #N/A | 1.30 | 0.78 | 0.91 | 0.38 |
| 0.47 | 0.98 | 0.39 | 0.94 | 0.42 |
| 0.83 | 0.98 | 0.35 | 1.12 | 0.64 |
| 0.83 | 0.98 | 0.35 | 1.12 | 0.64 |
| 0.51 | 1.27 | 0.67 | 1.22 | 0.76 |
| 0.59 | 1.15 | 0.60 | 1.01 | 0.49 |
| 0.59 | 1.15 | 0.60 | 1.01 | 0.49 |
| #N/A | 0.64 | 0.07 | 0.59 | 0.08 |
| #N/A | 0.64 | 0.07 | 0.59 | 0.08 |
| #N/A | 0.57 | 0.06 | 0.78 | 0.22 |
| 0.85 | 0.98 | 0.36 | 1.30 | 0.78 |
| #N/A | 0.82 | 0.21 | 0.98 | 0.47 |
| #N/A | 1.05 | 0.45 | 1.25 | 0.76 |
| 0.98 | 1.16 | 0.62 | 1.56 | 0.94 |
| 0.98 | 1.16 | 0.62 | 1.56 | 0.94 |
| 0.99 | 1.06 | 0.47 | 0.92 | 0.39 |
| #N/A | #N/A | #N/A | #N/A | #N/A |
| 0.74 | 1.39 | 0.86 | #N/A | #N/A |
| #N/A | #N/A | #N/A | #N/A | #N/A |
| 0.31 | 0.78 | 0.15 | 0.86 | 0.32 |
| 0.33 | 0.89 | 0.29 | 0.82 | 0.27 |
| 0.33 | 0.89 | 0.29 | 0.82 | 0.27 |
| 0.80 | 1.59 | 0.73 | 1.29 | 0.68 |
| #N/A | 1.36 | 0.66 | 1.28 | 0.79 |
| 0.94 | 1.15 | 0.56 | 0.97 | 0.46 |
| #N/A | 0.90 | 0.26 | 1.29 | 0.72 |
| #N/A | 0.90 | 0.26 | 1.29 | 0.72 |
| 0.42 | 1.19 | 0.65 | 0.96 | 0.45 |
| 0.42 | 1.19 | 0.65 | 0.96 | 0.45 |
| 0.46 | 1.39 | 0.84 | 0.85 | 0.30 |
| 0.02 | 0.76 | 0.14 | 0.63 | 0.09 |
| #N/A | 1.15 | 0.60 | 0.69 | 0.15 |
| 0.18 | 0.78 | 0.16 | 1.14 | 0.67 |
| 0.18 | 0.82 | 0.19 | 1.15 | 0.68 |

|      |      |      |      |      |
|------|------|------|------|------|
| 0.30 | 0.72 | 0.11 | 0.77 | 0.24 |
| 0.06 | 0.45 | 0.02 | 0.57 | 0.06 |
| #N/A | #N/A | #N/A | #N/A | #N/A |
| 0.29 | 1.06 | 0.47 | 1.19 | 0.73 |
| 0.96 | 1.56 | 0.94 | 0.87 | 0.34 |
| 0.51 | 1.29 | 0.77 | 0.99 | 0.49 |
| 0.89 | 1.28 | 0.69 | 1.12 | 0.59 |
| 0.89 | 1.28 | 0.69 | 1.12 | 0.59 |
| #N/A | #N/A | #N/A | #N/A | #N/A |
| 0.85 | 1.03 | 0.44 | 0.89 | 0.36 |
| #N/A | 1.24 | 0.71 | 1.41 | 0.88 |
| 0.85 | 1.45 | 0.89 | 1.33 | 0.85 |
| 0.85 | 1.45 | 0.89 | 1.33 | 0.85 |
| 0.72 | 0.78 | 0.23 | 0.90 | 0.38 |
| 0.95 | 1.25 | 0.73 | 1.25 | 0.78 |
| 0.95 | 1.25 | 0.73 | 1.25 | 0.78 |
| 0.35 | 1.06 | 0.49 | 1.10 | 0.60 |
| #N/A | 1.25 | 0.72 | 0.80 | 0.24 |
| 0.35 | 1.06 | 0.49 | 1.10 | 0.60 |
| 0.73 | 0.94 | 0.32 | 1.00 | 0.49 |
| 0.73 | 1.10 | 0.53 | 0.88 | 0.34 |
| 0.73 | 1.10 | 0.53 | 0.88 | 0.34 |
| #N/A | #N/A | #N/A | #N/A | #N/A |
| #N/A | #N/A | #N/A | #N/A | #N/A |
| 0.41 | 1.01 | 0.41 | 0.97 | 0.45 |
| 0.91 | 1.00 | 0.38 | 0.94 | 0.42 |
| 0.91 | 1.00 | 0.38 | 0.94 | 0.42 |
| 0.17 | 0.81 | 0.18 | 0.63 | 0.12 |
| 0.16 | 0.71 | 0.11 | 0.65 | 0.13 |
| 0.06 | 0.77 | 0.14 | 0.73 | 0.21 |
| 0.20 | 1.11 | 0.55 | 1.21 | 0.70 |
| #N/A | 1.09 | 0.52 | 0.45 | 0.03 |
| #N/A | 1.09 | 0.52 | 0.45 | 0.03 |
| 0.95 | 1.10 | 0.53 | 0.99 | 0.48 |
| 0.95 | 1.10 | 0.53 | 0.99 | 0.48 |
| 0.67 | 1.14 | 0.57 | 0.91 | 0.38 |
| #N/A | #N/A | #N/A | #N/A | #N/A |
| #N/A | #N/A | #N/A | #N/A | #N/A |
| 0.42 | 0.83 | 0.19 | 0.58 | 0.08 |
| 0.38 | 0.72 | 0.11 | 0.50 | 0.04 |
| 0.42 | 0.83 | 0.19 | 0.58 | 0.08 |
| 0.42 | 0.83 | 0.19 | 0.58 | 0.08 |
| #N/A | 0.87 | 0.23 | 0.90 | 0.36 |
| 0.19 | 0.42 | 0.01 | 2.12 | 0.66 |
| #N/A | 1.08 | 0.50 | 1.19 | 0.70 |
| #N/A | 1.08 | 0.50 | 1.19 | 0.70 |
| 0.86 | 1.16 | 0.61 | 0.97 | 0.46 |
| 0.80 | 1.18 | 0.64 | 1.03 | 0.53 |
| 0.80 | 1.18 | 0.64 | 1.03 | 0.53 |
| 0.93 | 1.06 | 0.47 | 1.10 | 0.62 |
| 0.93 | 1.06 | 0.47 | 1.10 | 0.62 |

|      |      |      |      |      |
|------|------|------|------|------|
| 0.40 | 1.07 | 0.49 | 1.17 | 0.69 |
| 0.53 | 0.71 | 0.10 | 1.62 | 0.66 |
| 0.59 | 1.42 | 0.88 | 1.04 | 0.56 |
| 0.80 | 1.22 | 0.69 | 1.03 | 0.54 |
| 0.80 | 1.22 | 0.69 | 1.03 | 0.54 |
| 0.45 | 1.17 | 0.60 | 0.98 | 0.47 |
| 0.03 | 0.74 | 0.14 | 0.61 | 0.09 |
| 0.77 | 0.74 | 0.12 | 0.70 | 0.15 |
| 0.77 | 0.74 | 0.12 | 0.70 | 0.15 |
| 0.82 | 1.02 | 0.42 | #N/A | #N/A |
| 0.56 | 0.80 | 0.16 | 0.82 | 0.27 |
| 0.48 | 1.23 | 0.67 | 1.61 | 0.91 |
| 0.56 | 0.80 | 0.16 | 0.82 | 0.27 |
| 0.58 | 0.69 | 0.09 | 0.68 | 0.13 |
| 0.78 | 1.13 | 0.56 | #N/A | #N/A |
| 0.67 | 1.01 | 0.41 | 1.11 | 0.54 |
| 0.67 | 1.01 | 0.41 | 1.11 | 0.54 |
| 0.84 | 1.10 | 0.53 | 1.45 | 0.89 |
| 0.30 | 1.00 | 0.38 | 1.09 | 0.62 |
| 0.50 | 1.01 | 0.40 | 0.97 | 0.46 |
| 0.28 | 0.80 | 0.16 | 0.68 | 0.14 |
| 0.67 | 0.98 | 0.36 | 0.93 | 0.42 |
| #N/A | #N/A | #N/A | #N/A | #N/A |
| 0.52 | 1.03 | 0.43 | 0.88 | 0.34 |
| 0.46 | 0.95 | 0.35 | 1.20 | 0.74 |
| 0.52 | 1.03 | 0.43 | 0.88 | 0.34 |
| 0.62 | 1.11 | 0.54 | 1.28 | 0.63 |
| 0.50 | 1.30 | 0.77 | 1.32 | 0.77 |
| 0.50 | 1.30 | 0.77 | 1.32 | 0.77 |
| #N/A | #N/A | #N/A | 1.06 | 0.58 |
| 0.64 | 1.19 | 0.66 | 1.06 | 0.54 |
| 0.64 | 1.19 | 0.66 | 1.06 | 0.54 |
| 0.52 | 1.09 | 0.51 | 0.87 | 0.32 |
| 0.25 | 1.50 | 0.92 | 1.33 | 0.84 |
| 0.25 | 1.50 | 0.92 | 1.33 | 0.84 |
| 0.68 | 1.09 | 0.51 | 1.10 | 0.61 |
| 0.68 | 1.19 | 0.65 | 0.98 | 0.47 |
| 0.68 | 1.02 | 0.41 | 0.85 | 0.30 |
| 0.68 | 1.02 | 0.41 | 0.85 | 0.30 |
| 0.30 | 1.46 | 0.89 | 1.07 | 0.59 |
| 0.25 | 1.11 | 0.54 | 1.09 | 0.62 |
| 0.33 | 1.02 | 0.44 | 0.84 | 0.31 |
| 0.56 | 1.50 | 0.92 | 1.24 | 0.74 |
| 0.69 | 1.47 | 0.90 | 1.35 | 0.70 |
| 0.63 | 1.17 | 0.61 | 1.08 | 0.61 |
| 0.84 | 1.12 | 0.55 | 1.16 | 0.60 |
| 0.13 | 0.78 | 0.15 | 0.80 | 0.23 |
| 0.63 | 1.15 | 0.59 | 0.82 | 0.26 |
| 0.50 | 1.15 | 0.60 | 0.87 | 0.37 |
| 0.77 | 1.27 | 0.72 | 1.53 | 0.93 |
| #N/A | 1.30 | 0.76 | 1.11 | 0.58 |

|      |      |      |      |      |
|------|------|------|------|------|
| #N/A | 1.30 | 0.76 | 1.11 | 0.58 |
| 0.91 | 1.37 | 0.81 | 1.32 | 0.83 |
| 0.91 | 1.37 | 0.81 | 1.32 | 0.83 |
| #N/A | 1.12 | 0.57 | 0.75 | 0.18 |
| 0.81 | 1.21 | 0.67 | 1.12 | 0.57 |
| 0.25 | 1.58 | 0.95 | 1.59 | 0.91 |
| 0.41 | 1.05 | 0.46 | 0.85 | 0.30 |
| 0.41 | 1.05 | 0.46 | 0.85 | 0.30 |
| 0.57 | 1.37 | 0.84 | 1.12 | 0.58 |
| #N/A | #N/A | #N/A | #N/A | #N/A |
| #N/A | #N/A | #N/A | #N/A | #N/A |
| 0.88 | 1.26 | 0.73 | 1.45 | 0.88 |
| 0.51 | 1.07 | 0.49 | 0.89 | 0.35 |
| 0.85 | 1.05 | 0.46 | 0.90 | 0.36 |
| 0.65 | 1.01 | 0.42 | 1.10 | 0.63 |
| 0.67 | 1.12 | 0.56 | 1.01 | 0.51 |
| 0.67 | 1.12 | 0.56 | 1.01 | 0.51 |
| 0.65 | 0.99 | 0.40 | 0.81 | 0.25 |
| 0.63 | 1.82 | 0.97 | 1.83 | 0.90 |
| #N/A | 1.31 | 0.79 | 1.15 | 0.67 |
| #N/A | 1.11 | 0.55 | 0.99 | 0.48 |
| #N/A | 1.11 | 0.55 | 0.99 | 0.48 |
| #N/A | #N/A | #N/A | 0.80 | 0.33 |
| 0.08 | 0.56 | 0.04 | 0.49 | 0.03 |
| #N/A | 1.05 | 0.46 | 1.04 | 0.54 |
| 0.08 | 0.56 | 0.04 | 0.49 | 0.03 |
| #N/A | 1.10 | 0.53 | 1.12 | 0.65 |
| #N/A | 1.10 | 0.53 | 1.12 | 0.65 |
| 0.96 | 1.34 | 0.81 | 1.27 | 0.69 |
| #N/A | #N/A | #N/A | #N/A | #N/A |
| #N/A | #N/A | #N/A | #N/A | #N/A |
| 0.03 | 0.77 | 0.15 | 0.84 | 0.29 |
| 0.03 | 0.77 | 0.15 | 0.84 | 0.29 |
| 0.41 | 0.83 | 0.19 | 1.03 | 0.53 |
| 0.08 | 0.58 | 0.04 | 0.42 | 0.03 |
| 0.30 | 0.89 | 0.25 | 0.94 | 0.41 |
| 0.30 | 0.89 | 0.25 | 0.94 | 0.41 |
| 0.43 | 1.03 | 0.43 | 1.02 | 0.52 |
| 0.58 | 0.97 | 0.35 | 1.13 | 0.60 |
| 0.64 | 1.06 | 0.48 | 1.13 | 0.55 |
| 0.29 | 1.01 | 0.40 | 0.99 | 0.48 |
| 0.64 | 1.06 | 0.48 | 1.13 | 0.55 |
| #N/A | 1.43 | 0.86 | 1.68 | 0.97 |
| 0.92 | 1.16 | 0.61 | 0.90 | 0.40 |
| 0.35 | 1.03 | 0.44 | 1.04 | 0.55 |
| 0.35 | 1.03 | 0.44 | 1.04 | 0.55 |
| 0.72 | 1.10 | 0.52 | 0.79 | 0.22 |
| 0.85 | 0.84 | 0.21 | 1.14 | 0.65 |
| 0.85 | 0.84 | 0.21 | 1.14 | 0.65 |
| 0.31 | 1.27 | 0.74 | 1.16 | 0.69 |
| 0.88 | 0.95 | 0.33 | 0.95 | 0.42 |

|      |      |      |      |      |
|------|------|------|------|------|
| 0.88 | 0.95 | 0.33 | 0.95 | 0.42 |
| #N/A | 1.16 | 0.62 | 1.10 | 0.63 |
| #N/A | 1.05 | 0.45 | #N/A | #N/A |
| 0.51 | 1.63 | 0.88 | 1.15 | 0.69 |
| #N/A | #N/A | #N/A | #N/A | #N/A |
| #N/A | #N/A | #N/A | #N/A | #N/A |
| 0.58 | 1.28 | 0.75 | 1.36 | 0.80 |
| 0.58 | 1.28 | 0.75 | 1.36 | 0.80 |
| 0.65 | 0.95 | 0.32 | 1.15 | 0.66 |
| 0.97 | 1.25 | 0.72 | 1.03 | 0.53 |
| 0.63 | 1.40 | 0.83 | 0.95 | 0.42 |
| 0.28 | 0.70 | 0.10 | 0.53 | 0.05 |
| 0.67 | 1.17 | 0.63 | 1.22 | 0.72 |
| 0.28 | 0.70 | 0.10 | 0.53 | 0.05 |
| 0.67 | 1.17 | 0.63 | 1.22 | 0.72 |
| 0.67 | 1.17 | 0.63 | 1.22 | 0.72 |
| 0.73 | 1.22 | 0.68 | 1.34 | 0.84 |
| 0.73 | 1.22 | 0.68 | 1.34 | 0.84 |
| 0.76 | 1.55 | 0.81 | 1.29 | 0.82 |
| 0.40 | 0.92 | 0.28 | 1.02 | 0.53 |
| 0.77 | 1.18 | 0.64 | 0.82 | 0.29 |
| 0.61 | 0.92 | 0.29 | 0.91 | 0.40 |
| 0.44 | 1.11 | 0.54 | 0.90 | 0.37 |
| 0.19 | 1.23 | 0.69 | 1.33 | 0.84 |
| 0.16 | 1.02 | 0.41 | 0.90 | 0.37 |
| 0.86 | 1.30 | 0.68 | 0.66 | 0.13 |
| 0.86 | 1.30 | 0.68 | 0.66 | 0.13 |
| #N/A | #N/A | #N/A | #N/A | #N/A |
| 0.38 | 1.03 | 0.47 | 0.54 | 0.05 |
| 0.47 | 1.32 | 0.81 | 1.55 | 0.94 |
| 0.50 | 0.92 | 0.28 | 0.90 | 0.38 |
| 0.50 | 0.92 | 0.28 | 0.90 | 0.38 |
| 0.85 | 1.18 | 0.64 | 0.89 | 0.35 |
| 0.85 | 1.18 | 0.64 | 0.89 | 0.35 |
| #N/A | 1.24 | 0.73 | #N/A | #N/A |
| 0.20 | 0.82 | 0.20 | 0.86 | 0.31 |
| 0.52 | 1.21 | 0.62 | 1.10 | 0.63 |
| #N/A | 0.89 | 0.25 | 0.72 | 0.17 |
| 0.12 | 0.40 | 0.01 | 0.35 | 0.01 |
| 0.71 | 1.05 | 0.46 | 1.06 | 0.58 |
| 0.81 | 1.12 | 0.56 | 1.10 | 0.63 |
| 0.81 | 1.12 | 0.56 | 1.10 | 0.63 |
| 0.03 | 0.64 | 0.06 | 0.53 | 0.05 |
| 0.69 | 1.07 | 0.48 | 1.02 | 0.51 |
| 0.36 | 1.00 | 0.38 | 1.10 | 0.56 |
| 0.36 | 1.00 | 0.38 | 1.10 | 0.56 |
| 0.91 | 1.23 | 0.69 | #N/A | #N/A |
| #N/A | 0.93 | 0.29 | 1.06 | 0.58 |
| 0.75 | 0.70 | 0.10 | 0.67 | 0.12 |
| 0.75 | 0.70 | 0.10 | 0.67 | 0.12 |
| 0.97 | 1.00 | 0.38 | 1.34 | 0.85 |

|      |      |      |      |      |
|------|------|------|------|------|
| 0.97 | 1.00 | 0.38 | 1.34 | 0.85 |
| #N/A | 1.19 | 0.66 | 1.01 | 0.51 |
| #N/A | 1.19 | 0.66 | 1.01 | 0.51 |
| #N/A | 1.28 | 0.69 | 1.30 | 0.73 |
| 0.54 | 1.83 | 0.97 | 1.47 | 0.91 |
| 0.54 | 1.83 | 0.97 | 1.47 | 0.91 |
| 0.51 | 1.12 | 0.53 | 0.95 | 0.42 |
| 0.73 | 1.33 | 0.82 | 1.15 | 0.68 |
| 0.26 | 1.01 | 0.41 | 0.88 | 0.34 |
| 0.26 | 1.01 | 0.41 | 0.88 | 0.34 |
| #N/A | 1.21 | 0.69 | 1.03 | 0.54 |
| #N/A | 1.21 | 0.69 | 1.03 | 0.54 |
| #N/A | 1.11 | 0.54 | 1.12 | 0.63 |
| #N/A | 1.23 | 0.70 | 1.59 | 0.95 |
| 0.63 | 1.36 | 0.70 | 0.92 | 0.38 |
| 0.63 | 1.36 | 0.70 | 0.92 | 0.38 |
| 0.57 | 1.31 | 0.79 | 1.12 | 0.64 |
| #N/A | 1.04 | 0.44 | #N/A | #N/A |
| 0.36 | 1.41 | 0.84 | 1.34 | 0.85 |
| 0.84 | 1.20 | 0.62 | 0.91 | 0.38 |
| 0.84 | 1.20 | 0.62 | 0.91 | 0.38 |
| #N/A | #N/A | #N/A | #N/A | #N/A |
| #N/A | #N/A | #N/A | #N/A | #N/A |
| 0.23 | 0.88 | 0.29 | 0.65 | 0.10 |
| 0.17 | 1.27 | 0.74 | 0.95 | 0.43 |
| #N/A | 0.92 | 0.30 | #N/A | #N/A |
| 0.81 | 1.21 | 0.68 | 1.19 | 0.73 |
| 0.95 | 1.23 | 0.68 | 1.07 | 0.56 |
| 0.95 | 1.23 | 0.68 | 1.07 | 0.56 |
| 0.84 | 1.40 | 0.86 | 1.05 | 0.54 |
| 0.75 | 1.09 | 0.52 | 0.87 | 0.32 |
| #N/A | 1.14 | 0.59 | 0.91 | 0.37 |
| 0.58 | 0.84 | 0.21 | 0.78 | 0.22 |
| 0.58 | 0.84 | 0.21 | 0.78 | 0.22 |
| 0.04 | 0.77 | 0.14 | 0.94 | 0.42 |
| 0.22 | 0.89 | 0.25 | 0.90 | 0.37 |
| 0.02 | 0.62 | 0.05 | 0.95 | 0.44 |
| 0.22 | 0.89 | 0.25 | 0.90 | 0.37 |
| 0.14 | 0.82 | 0.18 | 1.01 | 0.51 |
| 0.02 | 0.62 | 0.05 | 0.95 | 0.44 |
| 0.67 | 0.84 | 0.20 | 0.63 | 0.15 |
| #N/A | #N/A | #N/A | #N/A | #N/A |
| 0.60 | 1.10 | 0.52 | 1.27 | 0.80 |
| 0.41 | 0.88 | 0.25 | 0.44 | 0.03 |
| #N/A | #N/A | #N/A | #N/A | #N/A |
| 0.70 | 0.99 | 0.37 | 1.18 | 0.71 |
| #N/A | #N/A | #N/A | #N/A | #N/A |
| #N/A | #N/A | #N/A | #N/A | #N/A |
| 0.34 | 1.03 | 0.42 | 1.02 | 0.51 |
| 0.94 | 1.13 | 0.55 | 1.01 | 0.52 |
| #N/A | 2.24 | 1.00 | 1.06 | 0.56 |

|      |      |      |      |      |
|------|------|------|------|------|
| 0.57 | 1.07 | 0.50 | 0.96 | 0.44 |
| #N/A | 1.21 | 0.69 | 0.81 | 0.26 |
| 0.83 | 1.41 | 0.85 | 1.65 | 0.92 |
| 0.83 | 1.41 | 0.85 | 1.65 | 0.92 |
| 0.77 | 1.86 | 0.98 | 1.24 | 0.73 |
| 0.84 | 1.30 | 0.75 | 1.10 | 0.60 |
| 0.24 | 0.71 | 0.10 | 0.73 | 0.20 |
| 0.24 | 0.71 | 0.10 | 0.73 | 0.20 |
| 0.49 | 1.13 | 0.57 | 0.94 | 0.41 |
| 0.35 | 1.27 | 0.76 | 0.96 | 0.45 |
| 0.35 | 1.27 | 0.76 | 0.96 | 0.45 |
| #N/A | 1.23 | 0.61 | 1.02 | 0.53 |
| 0.66 | 1.02 | 0.42 | 0.95 | 0.43 |
| 0.20 | 1.06 | 0.47 | 1.38 | 0.86 |
| 0.64 | 1.11 | 0.54 | 1.07 | 0.59 |
| #N/A | 1.13 | 0.57 | 1.00 | 0.50 |
| 0.88 | 1.20 | 0.66 | 1.08 | 0.60 |
| 0.88 | 1.20 | 0.66 | 1.08 | 0.60 |
| #N/A | 1.31 | 0.77 | 1.16 | 0.64 |
| #N/A | 1.24 | 0.72 | 0.95 | 0.43 |
| 0.09 | 1.17 | 0.62 | 0.92 | 0.38 |
| 0.67 | 0.88 | 0.25 | 0.87 | 0.32 |
| 0.67 | 0.88 | 0.25 | 0.87 | 0.32 |
| #N/A | 1.81 | 0.97 | 1.11 | 0.64 |
| 0.98 | 1.40 | 0.87 | 1.03 | 0.54 |
| 0.48 | #N/A | #N/A | #N/A | #N/A |
| #N/A | 1.12 | 0.56 | 1.63 | 0.96 |
| #N/A | 1.12 | 0.56 | 1.63 | 0.96 |
| 0.87 | 1.33 | 0.77 | 0.89 | 0.37 |
| 0.87 | 1.33 | 0.77 | 0.89 | 0.37 |
| #N/A | 1.14 | 0.59 | 1.08 | 0.61 |
| 0.05 | 0.63 | 0.06 | 0.58 | 0.07 |
| 0.14 | 1.47 | 0.91 | 1.43 | 0.90 |
| 0.05 | 0.63 | 0.06 | 0.58 | 0.07 |
| 0.82 | 0.92 | 0.28 | 1.04 | 0.54 |
| 0.46 | 0.94 | 0.31 | 1.14 | 0.66 |
| 0.46 | 0.94 | 0.31 | 1.14 | 0.66 |
| #N/A | 1.28 | 0.62 | #N/A | #N/A |
| #N/A | #N/A | #N/A | #N/A | #N/A |
| 0.76 | 0.79 | 0.15 | 0.90 | 0.37 |
| 0.76 | 0.79 | 0.15 | 0.90 | 0.37 |
| #N/A | 1.02 | 0.42 | #N/A | #N/A |
| #N/A | #N/A | #N/A | #N/A | #N/A |
| #N/A | 1.08 | 0.50 | 1.11 | 0.63 |
| 0.49 | 1.29 | 0.71 | 1.19 | 0.70 |
| 0.94 | 1.08 | 0.49 | 1.49 | 0.86 |
| 0.87 | 1.22 | 0.69 | 1.44 | 0.88 |
| 0.41 | 0.94 | 0.31 | 0.99 | 0.49 |
| 0.87 | 1.22 | 0.69 | 1.44 | 0.88 |
| 0.41 | 0.94 | 0.31 | 0.99 | 0.49 |
| 0.05 | 0.55 | 0.04 | 0.74 | 0.27 |



|      |      |      |      |      |
|------|------|------|------|------|
| 0.41 | 0.94 | 0.31 | 0.99 | 0.49 |
| 0.38 | 1.14 | 0.59 | 0.87 | 0.34 |
| 0.24 | 1.21 | 0.61 | 1.67 | 0.87 |
| 0.93 | 1.41 | 0.85 | 1.39 | 0.86 |
| 0.76 | 0.97 | 0.34 | 1.01 | 0.51 |
| 0.76 | 0.97 | 0.34 | 1.01 | 0.51 |
| 0.90 | 0.88 | 0.24 | 0.62 | 0.17 |
| 0.90 | 0.88 | 0.24 | 0.62 | 0.17 |
| 0.39 | 1.25 | 0.70 | 0.79 | 0.23 |
| 0.30 | 1.23 | 0.70 | 1.10 | 0.61 |
| #N/A | 1.45 | 0.89 | 1.09 | 0.55 |
| 0.68 | 0.97 | 0.34 | 1.19 | 0.73 |
| 0.30 | 1.23 | 0.70 | 1.10 | 0.61 |
| 0.50 | 1.31 | 0.78 | 1.42 | 0.86 |
| 0.29 | 0.67 | 0.08 | 0.61 | 0.11 |
| 0.14 | 1.34 | 0.82 | 1.13 | 0.66 |
| 0.44 | 1.35 | 0.83 | 1.33 | 0.85 |
| 0.81 | 1.48 | 0.91 | 1.51 | 0.91 |
| 0.81 | 1.48 | 0.91 | 1.51 | 0.91 |
| 0.40 | 1.15 | 0.60 | 1.35 | 0.82 |
| 0.40 | 1.15 | 0.60 | 1.35 | 0.82 |
| #N/A | #N/A | #N/A | #N/A | #N/A |
| #N/A | 0.98 | 0.36 | 0.78 | 0.22 |
| #N/A | 0.98 | 0.36 | 0.78 | 0.22 |
| 0.17 | 1.13 | 0.57 | 1.27 | 0.75 |
| 0.58 | 1.10 | 0.53 | 1.08 | 0.60 |
| 0.58 | 1.10 | 0.53 | 1.08 | 0.60 |
| 0.76 | 0.93 | 0.34 | 0.97 | 0.45 |
| 0.76 | 0.93 | 0.34 | 0.97 | 0.45 |
| 0.54 | 0.95 | 0.34 | 0.66 | 0.12 |
| #N/A | #N/A | #N/A | #N/A | #N/A |
| 0.59 | 1.04 | 0.44 | 0.81 | 0.25 |
| 0.59 | 1.04 | 0.44 | 0.81 | 0.25 |
| 0.26 | 0.83 | 0.20 | 1.01 | 0.49 |
| 0.26 | 0.83 | 0.20 | 1.01 | 0.49 |
| #N/A | #N/A | #N/A | #N/A | #N/A |
| 0.41 | 0.94 | 0.32 | 0.71 | 0.15 |
| #N/A | 0.73 | 0.12 | 0.62 | 0.10 |
| #N/A | 0.73 | 0.12 | 0.62 | 0.10 |
| 0.15 | 1.11 | 0.55 | 1.09 | 0.60 |
| 0.17 | 1.42 | 0.88 | 1.46 | 0.91 |
| 0.54 | 1.23 | 0.67 | 1.46 | 0.87 |
| 0.65 | 1.15 | 0.56 | 1.07 | 0.59 |
| 0.65 | 1.15 | 0.56 | 1.07 | 0.59 |
| 0.58 | 1.32 | 0.81 | 1.02 | 0.52 |
| 0.38 | 1.20 | 0.67 | 1.14 | 0.66 |
| 0.29 | 1.05 | 0.47 | 1.39 | 0.88 |
| 0.80 | 1.18 | 0.61 | 0.73 | 0.20 |
| 0.93 | 1.20 | 0.66 | 1.16 | 0.70 |
| #N/A | #N/A | #N/A | #N/A | #N/A |
| 0.93 | 1.20 | 0.66 | 1.16 | 0.70 |

|      |      |      |      |      |
|------|------|------|------|------|
| 0.09 | 0.66 | 0.07 | 0.60 | 0.09 |
| 0.09 | 0.66 | 0.07 | 0.60 | 0.09 |
| 0.56 | 1.23 | 0.71 | 1.52 | 0.80 |
| 0.18 | 1.36 | 0.84 | 1.42 | 0.90 |
| 0.14 | 1.03 | 0.43 | 1.00 | 0.49 |
| 0.64 | 1.28 | 0.60 | 1.06 | 0.52 |
| 0.35 | 0.93 | 0.30 | 0.60 | 0.08 |
| 0.35 | 0.93 | 0.30 | 0.60 | 0.08 |
| 0.51 | 1.13 | 0.57 | 1.11 | 0.64 |
| 0.42 | 1.10 | 0.52 | 1.08 | 0.55 |
| 0.65 | 1.18 | 0.64 | 1.20 | 0.70 |
| 0.65 | 1.18 | 0.64 | 1.20 | 0.70 |
| 0.36 | 0.85 | 0.21 | 0.90 | 0.37 |
| 0.50 | 0.94 | 0.32 | 0.83 | 0.29 |
| 0.79 | 0.99 | 0.37 | 0.91 | 0.38 |
| 0.57 | #N/A | #N/A | 1.22 | 0.69 |
| 0.95 | 1.24 | 0.73 | 1.43 | 0.89 |
| 0.95 | 1.24 | 0.73 | 1.43 | 0.89 |
| 0.85 | 1.46 | 0.86 | 1.22 | 0.71 |
| 0.85 | 1.46 | 0.86 | 1.22 | 0.71 |
| #N/A | 0.91 | 0.29 | 1.31 | 0.66 |
| 0.73 | 1.25 | 0.73 | 1.14 | 0.63 |
| 0.58 | 1.85 | 0.98 | 1.14 | 0.68 |
| #N/A | 1.14 | 0.59 | 0.93 | 0.40 |
| 0.95 | 1.31 | 0.77 | 1.25 | 0.78 |
| 0.41 | 1.12 | 0.54 | 1.37 | 0.81 |
| 0.69 | 1.10 | 0.52 | 0.89 | 0.34 |
| 0.67 | 1.05 | 0.46 | 1.40 | 0.88 |
| 0.69 | 1.10 | 0.52 | 0.89 | 0.34 |
| 0.67 | 1.05 | 0.46 | 1.40 | 0.88 |
| 0.72 | 0.96 | 0.36 | 1.11 | 0.63 |
| 0.72 | 0.96 | 0.36 | 1.11 | 0.63 |
| 0.66 | 0.95 | 0.32 | 0.81 | 0.26 |
| 0.66 | 0.95 | 0.32 | 0.81 | 0.26 |
| 0.01 | 0.53 | 0.03 | 0.66 | 0.12 |
| #N/A | 0.88 | 0.26 | 0.80 | 0.31 |
| 0.11 | 0.87 | 0.23 | 0.92 | 0.39 |
| 0.11 | 0.87 | 0.23 | 0.92 | 0.39 |
| 0.09 | 0.74 | 0.12 | 0.78 | 0.27 |
| 0.68 | 0.99 | 0.37 | 0.97 | 0.47 |
| 0.87 | 1.45 | 0.85 | 1.04 | 0.53 |
| 0.57 | 1.11 | 0.54 | 1.47 | 0.63 |
| 0.60 | 1.05 | 0.46 | 1.40 | 0.88 |
| 0.60 | 1.05 | 0.46 | 1.40 | 0.88 |
| 0.83 | 1.18 | 0.64 | 1.24 | 0.73 |
| 0.90 | 1.20 | 0.65 | 1.03 | 0.54 |
| 0.77 | 1.07 | 0.49 | 0.74 | 0.19 |
| 0.38 | 0.73 | 0.11 | 0.70 | 0.20 |
| 0.38 | 0.73 | 0.11 | 0.70 | 0.20 |
| 0.62 | 1.10 | 0.53 | 1.24 | 0.76 |
| 0.98 | 0.85 | 0.21 | 1.33 | 0.75 |

|      |      |      |      |      |
|------|------|------|------|------|
| 0.42 | 1.05 | 0.47 | 1.37 | 0.85 |
| 0.95 | 1.02 | 0.41 | 0.97 | 0.46 |
| 0.95 | 1.02 | 0.41 | 0.97 | 0.46 |
| 0.79 | 1.23 | 0.69 | 1.30 | 0.61 |
| #N/A | #N/A | #N/A | #N/A | #N/A |
| #N/A | #N/A | #N/A | #N/A | #N/A |
| 0.49 | 1.16 | 0.61 | 1.35 | 0.86 |
| 0.49 | 1.16 | 0.61 | 1.35 | 0.86 |
| 0.91 | 1.23 | 0.70 | 0.97 | 0.46 |
| 0.75 | 1.09 | 0.51 | 0.85 | 0.29 |
| 0.93 | 1.18 | 0.63 | 1.13 | 0.66 |
| 0.32 | 1.10 | 0.53 | 1.20 | 0.74 |
| 0.88 | 1.25 | 0.70 | 1.13 | 0.67 |
| 0.88 | 1.25 | 0.70 | 1.13 | 0.67 |
| 0.04 | 0.66 | 0.08 | 0.81 | 0.28 |
| 0.64 | 0.84 | 0.19 | 0.82 | 0.28 |
| 0.38 | 0.97 | 0.35 | 0.42 | 0.02 |
| 0.65 | 1.34 | 0.79 | 1.15 | 0.59 |
| 0.80 | 1.25 | 0.68 | 1.41 | 0.88 |
| 0.82 | 0.96 | 0.39 | 1.03 | 0.52 |
| #N/A | 1.16 | 0.54 | #N/A | #N/A |
| 0.34 | 0.78 | 0.15 | 0.97 | 0.45 |
| 0.34 | 0.78 | 0.15 | 0.97 | 0.45 |
| 0.20 | 1.20 | 0.67 | 1.56 | 0.89 |
| 0.95 | 0.80 | 0.20 | 1.05 | 0.56 |
| #N/A | 1.28 | 0.75 | 1.30 | 0.79 |
| #N/A | 1.28 | 0.75 | 1.30 | 0.79 |
| #N/A | #N/A | #N/A | #N/A | #N/A |
| #N/A | #N/A | #N/A | #N/A | #N/A |
| 0.28 | 0.68 | 0.09 | 0.62 | 0.09 |
| 0.26 | 1.02 | 0.43 | 0.93 | 0.40 |
| 0.76 | 0.89 | 0.25 | 1.20 | 0.74 |
| 0.26 | 1.02 | 0.43 | 0.93 | 0.40 |
| 0.76 | 0.89 | 0.25 | 1.20 | 0.74 |
| 0.97 | 1.12 | 0.55 | 1.01 | 0.50 |
| 0.72 | 0.95 | 0.32 | 0.82 | 0.25 |
| 0.72 | 0.95 | 0.32 | 0.82 | 0.25 |
| #N/A | 0.88 | 0.25 | 1.05 | 0.52 |
| #N/A | 1.01 | 0.40 | 0.91 | 0.46 |
| #N/A | 0.88 | 0.25 | 1.05 | 0.52 |
| #N/A | #N/A | #N/A | #N/A | #N/A |
| 0.15 | 0.89 | 0.28 | 0.80 | 0.24 |
| 0.81 | 0.90 | 0.27 | 1.10 | 0.62 |
| 0.81 | 0.90 | 0.27 | 1.10 | 0.62 |
| 0.72 | 1.23 | 0.67 | 1.34 | 0.84 |
| 0.80 | 1.28 | 0.73 | 1.01 | 0.51 |
| #N/A | 1.00 | 0.38 | 1.06 | 0.57 |
| 0.66 | 1.01 | 0.40 | 1.17 | 0.69 |
| 0.66 | 1.01 | 0.40 | 1.17 | 0.69 |
| 0.74 | 1.10 | 0.53 | 0.99 | 0.49 |
| 0.63 | 0.79 | 0.16 | 0.87 | 0.31 |

|      |      |      |      |      |
|------|------|------|------|------|
| 0.79 | 0.60 | 0.06 | 0.88 | 0.35 |
| 0.79 | 1.17 | 0.59 | 1.37 | 0.80 |
| 0.95 | 0.86 | 0.23 | 1.05 | 0.57 |
| 0.84 | 1.15 | 0.60 | 1.00 | 0.50 |
| 0.84 | 1.15 | 0.60 | 1.00 | 0.50 |
| 0.81 | 1.11 | 0.54 | 1.09 | 0.61 |
| 0.81 | 1.11 | 0.54 | 1.09 | 0.61 |
| 0.81 | 1.11 | 0.54 | 1.09 | 0.61 |
| 0.78 | 0.83 | 0.29 | 0.76 | 0.24 |
| 0.47 | 1.37 | 0.81 | 0.91 | 0.39 |
| 0.47 | 1.37 | 0.81 | 0.91 | 0.39 |
| 0.29 | 0.71 | 0.10 | 0.60 | 0.08 |
| 0.38 | 0.86 | 0.23 | 0.86 | 0.36 |
| 0.96 | 1.14 | 0.59 | 1.05 | 0.54 |
| 0.83 | 0.91 | 0.29 | 0.93 | 0.41 |
| 0.83 | 0.91 | 0.29 | 0.93 | 0.41 |
| 0.44 | 0.93 | 0.32 | 1.06 | 0.54 |
| 0.94 | 1.23 | 0.70 | 1.35 | 0.85 |
| 0.94 | 1.23 | 0.70 | 1.35 | 0.85 |
| 0.89 | 1.33 | 0.81 | 1.84 | 0.92 |
| 0.89 | 1.33 | 0.81 | 1.84 | 0.92 |
| 0.36 | 1.14 | 0.59 | 1.04 | 0.55 |
| 0.71 | 0.97 | 0.38 | 0.98 | 0.46 |
| 0.71 | 0.97 | 0.38 | 0.98 | 0.46 |
| 0.65 | 1.19 | 0.66 | 1.18 | 0.72 |
| 0.97 | 1.08 | 0.51 | 1.26 | 0.72 |
| 0.97 | 1.08 | 0.51 | 1.26 | 0.72 |
| 0.32 | 0.79 | 0.17 | 0.64 | 0.12 |
| 0.59 | 1.27 | 0.72 | 1.27 | 0.73 |
| #N/A | #N/A | #N/A | #N/A | #N/A |
| #N/A | #N/A | #N/A | #N/A | #N/A |
| 0.82 | 1.46 | 0.85 | 1.21 | 0.73 |
| 0.78 | 1.21 | 0.62 | 1.37 | 0.80 |
| 0.78 | 1.21 | 0.62 | 1.37 | 0.80 |
| 0.80 | 1.15 | 0.60 | 1.12 | 0.65 |
| 0.75 | 1.07 | 0.48 | 1.06 | 0.58 |
| 0.52 | 1.28 | 0.65 | 1.09 | 0.61 |
| 0.75 | 0.94 | 0.31 | 0.81 | 0.25 |
| 0.52 | 1.28 | 0.65 | 1.09 | 0.61 |
| 0.75 | 0.94 | 0.31 | 0.81 | 0.25 |
| 0.75 | 0.94 | 0.31 | 0.81 | 0.25 |
| 0.52 | 1.15 | 0.60 | 0.93 | 0.40 |
| 0.66 | 0.98 | 0.36 | 0.90 | 0.36 |
| 0.52 | 1.15 | 0.60 | 0.93 | 0.40 |
| 0.50 | 1.14 | 0.59 | 0.97 | 0.45 |
| 0.29 | 0.83 | 0.20 | 0.66 | 0.13 |
| #N/A | #N/A | #N/A | #N/A | #N/A |
| #N/A | #N/A | #N/A | #N/A | #N/A |
| 0.79 | 1.02 | 0.41 | 1.31 | 0.81 |
| 0.79 | 1.02 | 0.41 | 1.31 | 0.81 |
| 0.94 | 1.03 | 0.44 | 0.96 | 0.45 |

|      |      |      |      |      |
|------|------|------|------|------|
| #N/A | 0.85 | 0.26 | 0.61 | 0.08 |
| #N/A | 0.85 | 0.26 | 0.61 | 0.08 |
| 0.08 | 0.92 | 0.34 | 0.92 | 0.40 |
| 0.76 | 1.22 | 0.70 | 1.26 | 0.80 |
| 0.12 | 1.24 | 0.69 | 0.80 | 0.25 |
| #N/A | #N/A | #N/A | #N/A | #N/A |
| 0.04 | 0.58 | 0.04 | 0.47 | 0.04 |
| 0.53 | 0.77 | 0.14 | 0.93 | 0.40 |
| 0.26 | 0.80 | 0.16 | 0.82 | 0.27 |
| 0.88 | 1.25 | 0.74 | 1.01 | 0.51 |
| 0.88 | 1.25 | 0.74 | 1.01 | 0.51 |
| 0.52 | 1.30 | 0.78 | 1.10 | 0.60 |
| 0.30 | 0.89 | 0.26 | 1.16 | 0.59 |
| 0.77 | 1.29 | 0.75 | 1.31 | 0.80 |
| 0.22 | 1.34 | 0.80 | 1.04 | 0.52 |
| 0.22 | 1.34 | 0.80 | 1.04 | 0.52 |
| #N/A | 1.20 | 0.63 | 1.35 | 0.86 |
| 0.62 | 1.07 | 0.48 | 1.02 | 0.51 |
| 0.36 | 1.19 | 0.63 | 1.34 | 0.82 |
| #N/A | 2.33 | 0.99 | 1.05 | 0.53 |
| 0.36 | 1.19 | 0.63 | 1.34 | 0.82 |
| 0.36 | 1.19 | 0.63 | 1.34 | 0.82 |
| 0.36 | 1.19 | 0.63 | 1.34 | 0.82 |
| #N/A | 1.49 | 0.90 | 1.30 | 0.76 |
| 0.24 | 1.01 | 0.39 | 0.82 | 0.25 |
| #N/A | 1.00 | 0.39 | 0.79 | 0.25 |
| #N/A | 1.08 | 0.51 | 1.06 | 0.56 |
| #N/A | 1.08 | 0.51 | 1.06 | 0.56 |
| 0.99 | 1.17 | 0.62 | 1.11 | 0.64 |
| 0.99 | 1.17 | 0.62 | 1.11 | 0.64 |
| #N/A | 1.14 | 0.58 | 1.47 | 0.85 |
| 0.69 | 1.34 | 0.82 | 1.05 | 0.56 |
| 0.74 | 1.05 | 0.46 | 0.78 | 0.23 |
| 0.33 | 0.85 | 0.23 | 1.20 | 0.74 |
| 0.86 | 1.27 | 0.76 | 0.83 | 0.27 |
| 0.86 | 1.27 | 0.76 | 0.83 | 0.27 |
| 0.31 | 0.77 | 0.15 | 0.72 | 0.17 |
| 0.31 | 0.77 | 0.15 | 0.72 | 0.17 |
| 0.99 | 0.88 | 0.24 | 0.87 | 0.35 |
| 0.91 | 1.17 | 0.63 | 1.06 | 0.58 |
| 0.91 | 1.17 | 0.63 | 1.06 | 0.58 |
| #N/A | 1.35 | 0.68 | 1.07 | 0.59 |
| 0.58 | 1.13 | 0.53 | 1.20 | 0.71 |
| #N/A | 0.95 | 0.34 | 0.68 | 0.13 |
| 0.58 | 1.13 | 0.53 | 1.20 | 0.71 |
| 0.58 | 1.13 | 0.53 | 1.20 | 0.71 |
| 0.55 | 1.13 | 0.55 | 0.97 | 0.45 |
| 0.11 | 0.61 | 0.05 | 0.41 | 0.02 |
| 0.71 | 1.14 | 0.54 | 1.01 | 0.51 |
| 0.43 | 1.16 | 0.62 | 1.02 | 0.53 |
| 0.59 | 0.97 | 0.35 | 1.01 | 0.51 |

|      |      |      |      |      |
|------|------|------|------|------|
| 0.59 | 0.97 | 0.35 | 1.01 | 0.51 |
| 0.47 | 1.20 | 0.62 | 0.94 | 0.42 |
| 0.15 | 1.44 | 0.89 | 1.10 | 0.57 |
| 0.59 | 1.01 | 0.40 | 1.36 | 0.84 |
| 0.98 | 1.05 | 0.46 | 1.09 | 0.60 |
| 0.98 | 1.05 | 0.46 | 1.09 | 0.60 |
| 0.41 | 0.94 | 0.30 | 0.65 | 0.11 |
| 0.93 | 1.17 | 0.63 | 0.87 | 0.33 |
| 0.29 | 0.65 | 0.07 | 0.72 | 0.16 |
| 0.29 | 0.65 | 0.07 | 0.72 | 0.16 |
| 0.28 | 1.18 | 0.64 | 1.05 | 0.52 |
| 0.77 | 1.02 | 0.42 | 1.29 | 0.82 |
| #N/A | 1.13 | 0.54 | 1.18 | 0.72 |
| #N/A | 1.13 | 0.54 | 1.18 | 0.72 |
| #N/A | 1.01 | 0.45 | 0.67 | 0.13 |
| 0.77 | 0.99 | 0.38 | 0.70 | 0.15 |
| 0.77 | 0.99 | 0.38 | 0.70 | 0.15 |
| #N/A | #N/A | #N/A | #N/A | #N/A |
| 0.37 | 0.99 | 0.37 | 1.09 | 0.59 |
| 0.37 | 0.99 | 0.37 | 1.09 | 0.59 |
| #N/A | 0.89 | 0.26 | 0.80 | 0.26 |
| 0.95 | 1.07 | 0.48 | 1.02 | 0.49 |
| 0.95 | 1.07 | 0.48 | 1.02 | 0.49 |
| #N/A | 1.15 | 0.58 | 1.39 | 0.80 |
| 0.46 | 0.98 | 0.39 | 0.98 | 0.48 |
| #N/A | 1.29 | 0.61 | 0.88 | 0.36 |
| #N/A | 1.33 | 0.71 | 1.14 | 0.62 |
| 0.95 | 1.28 | 0.74 | 1.22 | 0.73 |
| 0.95 | 1.28 | 0.74 | 1.22 | 0.73 |
| #N/A | #N/A | #N/A | 1.43 | 0.75 |
| 0.70 | 1.27 | 0.75 | 1.86 | 0.98 |
| 0.18 | 1.03 | 0.43 | 1.28 | 0.81 |
| 0.48 | 1.13 | 0.57 | 1.06 | 0.58 |
| 0.24 | 0.83 | 0.19 | 0.81 | 0.26 |
| 0.88 | 0.97 | 0.37 | 1.16 | 0.69 |
| 0.24 | 0.83 | 0.19 | 0.81 | 0.26 |
| 0.88 | 0.97 | 0.37 | 1.16 | 0.69 |
| 0.77 | 1.08 | 0.51 | 0.89 | 0.35 |
| 0.96 | 1.69 | 0.95 | 1.21 | 0.75 |
| 0.96 | 1.69 | 0.95 | 1.21 | 0.75 |
| #N/A | #N/A | #N/A | #N/A | #N/A |
| #N/A | #N/A | #N/A | #N/A | #N/A |
| 0.28 | 1.23 | 0.69 | 1.08 | 0.60 |
| 0.86 | 1.02 | 0.41 | 1.08 | 0.59 |
| 0.29 | 0.83 | 0.19 | 0.72 | 0.16 |
| 0.29 | 0.83 | 0.19 | 0.72 | 0.16 |
| 0.35 | 1.10 | 0.53 | 1.10 | 0.53 |
| 0.24 | 0.84 | 0.20 | 0.77 | 0.21 |
| 0.24 | 0.84 | 0.20 | 0.77 | 0.21 |
| 0.84 | 0.96 | 0.33 | 0.73 | 0.19 |
| 0.44 | 0.79 | 0.16 | 0.72 | 0.17 |

|      |      |      |      |      |
|------|------|------|------|------|
| 0.40 | 0.94 | 0.32 | 0.87 | 0.33 |
| 0.61 | 0.98 | 0.35 | 1.07 | 0.53 |
| 0.78 | 0.98 | 0.36 | 0.89 | 0.35 |
| 0.41 | 0.94 | 0.32 | #N/A | #N/A |
| 0.71 | 1.00 | 0.38 | 1.15 | 0.69 |
| 0.71 | 1.00 | 0.38 | 1.15 | 0.69 |
| 0.41 | 1.24 | 0.73 | 0.99 | 0.49 |
| 0.58 | 1.39 | 0.86 | 1.37 | 0.87 |
| 0.58 | 1.39 | 0.86 | 1.37 | 0.87 |
| 0.96 | 1.45 | 0.83 | 1.68 | 0.87 |
| #N/A | 0.67 | 0.36 | #N/A | #N/A |
| 0.96 | 1.45 | 0.83 | 1.68 | 0.87 |
| 0.33 | 1.24 | 0.68 | 1.06 | 0.56 |
| 0.82 | 1.13 | 0.57 | 1.06 | 0.58 |
| #N/A | #N/A | #N/A | #N/A | #N/A |
| #N/A | #N/A | #N/A | #N/A | #N/A |
| #N/A | 0.44 | 0.02 | 0.45 | 0.02 |
| 0.95 | 1.53 | 0.83 | 1.82 | 0.98 |
| 0.95 | 1.53 | 0.83 | 1.82 | 0.98 |
| 0.95 | 1.53 | 0.83 | 1.82 | 0.98 |
| 0.93 | 1.15 | 0.60 | 1.12 | 0.65 |
| 0.93 | 1.15 | 0.60 | 1.12 | 0.65 |
| #N/A | 1.27 | 0.76 | #N/A | #N/A |
| 0.81 | 1.35 | 0.78 | 1.28 | 0.69 |
| 0.12 | 1.41 | 0.86 | 1.45 | 0.90 |
| 0.81 | 1.35 | 0.78 | 1.28 | 0.69 |
| #N/A | 1.03 | 0.44 | #N/A | #N/A |
| #N/A | 1.03 | 0.44 | #N/A | #N/A |
| #N/A | 1.66 | 0.92 | 1.25 | 0.72 |
| #N/A | 1.66 | 0.92 | 1.25 | 0.72 |
| #N/A | #N/A | #N/A | #N/A | #N/A |
| 0.81 | 1.16 | 0.61 | #N/A | #N/A |
| 0.81 | 1.16 | 0.61 | #N/A | #N/A |
| #N/A | #N/A | #N/A | #N/A | #N/A |
| #N/A | #N/A | #N/A | #N/A | #N/A |
| 0.83 | 1.20 | 0.68 | 1.27 | 0.77 |
| 0.88 | 1.20 | 0.67 | 1.00 | 0.50 |
| 0.88 | 1.20 | 0.67 | 1.00 | 0.50 |
| 0.93 | 1.18 | 0.65 | 1.26 | 0.80 |
| #N/A | 1.59 | 0.72 | 1.51 | 0.93 |
| 0.93 | 1.18 | 0.65 | 1.26 | 0.80 |
| #N/A | 1.59 | 0.72 | 1.51 | 0.93 |
| 0.48 | 1.00 | 0.39 | 1.02 | 0.52 |
| 0.48 | 1.00 | 0.39 | 1.02 | 0.52 |
| 0.54 | 1.50 | 0.92 | 0.75 | 0.19 |
| #N/A | 1.47 | 0.79 | 0.78 | 0.22 |
| #N/A | 1.20 | 0.66 | 1.14 | 0.67 |
| 0.95 | 1.27 | 0.76 | 1.28 | 0.80 |
| 0.85 | 1.15 | 0.60 | 1.33 | 0.84 |
| 0.85 | 1.15 | 0.60 | 1.33 | 0.84 |
| 0.65 | 1.18 | 0.64 | 1.32 | 0.84 |

|      |      |      |      |      |
|------|------|------|------|------|
| 0.40 | 0.91 | 0.27 | 0.97 | 0.45 |
| 0.07 | 0.56 | 0.04 | 0.78 | 0.25 |
| 0.14 | 0.57 | 0.04 | 0.71 | 0.15 |
| 0.14 | 0.57 | 0.04 | 0.71 | 0.15 |
| 0.45 | 0.74 | 0.13 | 0.62 | 0.11 |
| 0.36 | 1.03 | 0.44 | 1.06 | 0.57 |
| 0.84 | 1.09 | 0.52 | 1.08 | 0.56 |
| 0.84 | 1.09 | 0.52 | 1.08 | 0.56 |
| 0.24 | 1.31 | 0.76 | 1.95 | 0.96 |
| 0.47 | 0.81 | 0.20 | 1.21 | 0.69 |
| 0.81 | 1.12 | 0.55 | 1.29 | 0.77 |
| 0.81 | 1.12 | 0.55 | 1.29 | 0.77 |
| 0.21 | 0.75 | 0.14 | 1.01 | 0.51 |
| 0.62 | 0.93 | 0.31 | 0.85 | 0.29 |
| 0.73 | 0.82 | 0.19 | 0.78 | 0.22 |
| 0.73 | 0.82 | 0.19 | 0.78 | 0.22 |
| 0.07 | 0.61 | 0.06 | 0.53 | 0.06 |
| 0.07 | 0.61 | 0.06 | 0.53 | 0.06 |
| 0.84 | 1.23 | 0.68 | 1.46 | 0.75 |
| 0.03 | 1.07 | 0.48 | 1.09 | 0.62 |
| 0.03 | 0.88 | 0.24 | 0.89 | 0.34 |
| 0.10 | 0.71 | 0.11 | 0.94 | 0.43 |
| #N/A | #N/A | #N/A | #N/A | #N/A |
| #N/A | 0.84 | 0.19 | 1.12 | 0.60 |
| #N/A | 0.84 | 0.19 | 1.12 | 0.60 |
| #N/A | 1.08 | 0.50 | 1.61 | 0.93 |
| #N/A | 1.08 | 0.50 | 1.61 | 0.93 |
| 0.69 | 1.28 | 0.74 | 1.06 | 0.58 |
| 0.15 | 1.30 | 0.66 | 1.43 | 0.85 |
| 0.91 | 1.38 | 0.84 | 1.34 | 0.86 |
| 0.91 | 1.38 | 0.84 | 1.34 | 0.86 |
| #N/A | 1.50 | 0.86 | 0.90 | 0.42 |
| 0.86 | 1.05 | 0.46 | 0.99 | 0.48 |
| 0.86 | 1.05 | 0.46 | 0.99 | 0.48 |
| 0.97 | 1.40 | 0.86 | 1.08 | 0.60 |
| 0.97 | 1.40 | 0.86 | 1.08 | 0.60 |
| 0.82 | 1.30 | 0.77 | 1.45 | 0.90 |
| 0.42 | 0.96 | 0.35 | 1.18 | 0.70 |
| #N/A | #N/A | #N/A | #N/A | #N/A |
| 0.99 | 1.50 | 0.69 | 1.92 | 0.85 |
| 0.97 | 0.86 | 0.23 | 1.24 | 0.78 |
| 0.97 | 0.86 | 0.23 | 1.24 | 0.78 |
| 0.99 | 1.66 | 0.82 | 2.12 | 0.86 |
| 0.99 | 1.66 | 0.82 | 2.12 | 0.86 |
| 0.51 | 1.57 | 0.94 | 1.19 | 0.68 |
| #N/A | 1.00 | 0.38 | #N/A | #N/A |
| 0.51 | 1.57 | 0.94 | 1.19 | 0.68 |
| 0.38 | 1.19 | 0.66 | 1.13 | 0.66 |
| #N/A | #N/A | #N/A | #N/A | #N/A |
| #N/A | 1.28 | 0.76 | 1.20 | 0.67 |
| 0.95 | 1.27 | 0.72 | 1.20 | 0.73 |



|      |      |      |      |      |
|------|------|------|------|------|
| 0.58 | 1.03 | 0.43 | 0.85 | 0.30 |
| 0.74 | 1.24 | 0.72 | 0.86 | 0.31 |
| 0.16 | 0.78 | 0.15 | 0.85 | 0.29 |
| 0.66 | 1.16 | 0.55 | 1.12 | 0.60 |
| 0.47 | 1.05 | 0.46 | 1.16 | 0.68 |
| 0.15 | 0.80 | 0.16 | 1.10 | 0.60 |
| 0.65 | 1.50 | 0.92 | 1.10 | 0.59 |
| 0.83 | 1.35 | 0.80 | #N/A | #N/A |
| 0.80 | 1.23 | 0.70 | 1.24 | 0.78 |
| 0.80 | 1.23 | 0.70 | 1.24 | 0.78 |
| 0.80 | 1.23 | 0.70 | 1.24 | 0.78 |
| 0.83 | 1.28 | 0.71 | 1.28 | 0.81 |
| 0.45 | 0.92 | 0.28 | 0.97 | 0.45 |
| 0.44 | 1.07 | 0.48 | 1.11 | 0.63 |
| 0.16 | 1.34 | 0.82 | 1.32 | 0.84 |
| 0.90 | 1.17 | 0.58 | 0.91 | 0.37 |
| 0.14 | 1.44 | 0.89 | 1.09 | 0.61 |
| 0.78 | 1.09 | 0.52 | 1.34 | 0.85 |
| 0.78 | 1.09 | 0.52 | 1.34 | 0.85 |
| 0.81 | 0.88 | 0.25 | 0.80 | 0.24 |
| #N/A | #N/A | #N/A | #N/A | #N/A |
| 0.70 | 1.17 | 0.63 | 1.11 | 0.59 |
| #N/A | #N/A | #N/A | #N/A | #N/A |
| 0.18 | 1.02 | 0.41 | 0.97 | 0.46 |
| 0.18 | 1.02 | 0.41 | 0.97 | 0.46 |
| #N/A | 1.10 | 0.54 | 1.21 | 0.75 |
| 0.65 | 1.10 | 0.53 | 1.19 | 0.73 |
| 0.65 | 1.10 | 0.53 | 1.19 | 0.73 |
| 0.34 | 1.18 | 0.65 | 1.22 | 0.71 |
| #N/A | #N/A | #N/A | #N/A | #N/A |
| 0.37 | 1.02 | 0.41 | 1.09 | 0.62 |
| 0.37 | 1.02 | 0.41 | 1.09 | 0.62 |
| 0.69 | 1.08 | 0.50 | 1.19 | 0.70 |
| 0.65 | 0.98 | 0.37 | 1.21 | 0.75 |
| 0.65 | 0.98 | 0.37 | 1.21 | 0.75 |
| 0.24 | 0.89 | 0.28 | 0.74 | 0.18 |
| 0.25 | 1.21 | 0.61 | 0.80 | 0.24 |
| 0.39 | 1.34 | 0.79 | 1.11 | 0.64 |
| 0.39 | 1.34 | 0.79 | 1.11 | 0.64 |
| 0.72 | 0.95 | 0.34 | 1.17 | 0.69 |
| 0.25 | 0.71 | 0.10 | 0.75 | 0.20 |
| 0.25 | 0.71 | 0.10 | 0.75 | 0.20 |
| #N/A | #N/A | #N/A | #N/A | #N/A |
| 0.30 | 1.00 | 0.42 | 1.18 | 0.66 |
| 0.76 | 1.16 | 0.59 | 0.93 | 0.41 |
| 0.76 | 1.16 | 0.59 | 0.93 | 0.41 |
| 0.91 | 1.22 | 0.69 | 0.95 | 0.44 |
| 0.91 | 1.22 | 0.69 | 0.95 | 0.44 |
| 0.30 | 0.79 | 0.17 | 0.86 | 0.40 |
| 0.08 | 0.75 | 0.13 | 0.92 | 0.39 |
| 0.08 | 0.75 | 0.13 | 0.92 | 0.39 |

|      |      |      |      |      |
|------|------|------|------|------|
| 0.46 | 1.21 | 0.66 | 0.86 | 0.34 |
| 0.60 | 1.28 | 0.75 | 0.91 | 0.38 |
| 0.27 | 0.92 | 0.34 | 0.90 | 0.37 |
| 0.62 | 1.02 | 0.42 | 1.07 | 0.58 |
| 0.67 | 0.69 | 0.10 | 0.90 | 0.39 |
| 0.86 | 0.90 | 0.26 | 1.25 | 0.77 |
| 0.29 | 0.98 | 0.35 | 1.25 | 0.79 |
| 0.09 | 1.18 | 0.63 | 0.98 | 0.47 |
| 0.51 | 0.95 | 0.31 | 0.86 | 0.35 |
| 0.51 | 0.95 | 0.31 | 0.86 | 0.35 |
| 0.66 | 1.12 | 0.56 | 0.85 | 0.32 |
| #N/A | #N/A | #N/A | #N/A | #N/A |
| 0.50 | 1.22 | 0.58 | 0.89 | 0.34 |
| 0.53 | 1.01 | 0.39 | 1.25 | 0.79 |
| 0.40 | 1.13 | 0.58 | 0.95 | 0.43 |
| 0.53 | 1.01 | 0.39 | 1.25 | 0.79 |
| #N/A | #N/A | #N/A | #N/A | #N/A |
| 0.01 | 0.38 | 0.01 | 0.43 | 0.02 |
| 0.01 | 0.38 | 0.01 | 0.43 | 0.02 |
| #N/A | 1.11 | 0.54 | 0.88 | 0.33 |
| 0.56 | 1.46 | 0.89 | 1.05 | 0.57 |
| 0.56 | 1.46 | 0.89 | 1.05 | 0.57 |
| 0.88 | 1.23 | 0.67 | 1.43 | 0.57 |
| 0.44 | 1.23 | 0.71 | 1.25 | 0.77 |
| 0.88 | 1.23 | 0.67 | 1.43 | 0.57 |
| 0.44 | 1.23 | 0.71 | 1.25 | 0.77 |
| #N/A | #N/A | #N/A | #N/A | #N/A |
| 0.88 | 1.76 | 0.97 | 1.41 | 0.76 |
| 0.88 | 1.76 | 0.97 | 1.41 | 0.76 |
| 0.37 | 0.85 | 0.21 | 1.01 | 0.52 |
| 0.37 | 0.85 | 0.21 | 1.01 | 0.52 |
| #N/A | #N/A | #N/A | #N/A | #N/A |
| 0.49 | 1.23 | 0.69 | 1.15 | 0.67 |
| 0.26 | 1.06 | 0.48 | 0.87 | 0.39 |
| 0.78 | 0.80 | 0.16 | 1.05 | 0.56 |
| 0.70 | 0.99 | 0.36 | 1.01 | 0.51 |
| 0.64 | 1.01 | 0.39 | 0.85 | 0.29 |
| 0.36 | 0.99 | 0.37 | 1.01 | 0.52 |
| 0.38 | 0.68 | 0.09 | 0.44 | 0.02 |
| 0.38 | 0.68 | 0.09 | 0.44 | 0.02 |
| 0.98 | 1.18 | 0.64 | #N/A | #N/A |
| 0.98 | 1.18 | 0.64 | #N/A | #N/A |
| 0.92 | 1.16 | 0.53 | 1.46 | 0.73 |
| #N/A | 1.49 | 0.86 | 0.84 | 0.31 |
| 0.79 | 1.35 | 0.82 | 1.40 | 0.87 |
| #N/A | 1.21 | 0.68 | 1.14 | 0.66 |
| 0.41 | 1.04 | 0.44 | 0.98 | 0.47 |
| #N/A | 1.35 | 0.80 | 1.59 | 0.89 |
| #N/A | #N/A | #N/A | 1.30 | 0.75 |
| #N/A | #N/A | #N/A | 1.30 | 0.75 |
| 0.63 | 1.36 | 0.84 | 1.36 | 0.86 |

|      |      |      |      |      |
|------|------|------|------|------|
| 0.90 | 1.82 | 0.91 | 1.08 | 0.56 |
| 0.90 | 1.82 | 0.91 | 1.08 | 0.56 |
| 0.89 | 1.67 | 0.96 | 1.32 | 0.84 |
| 0.90 | 1.16 | 0.61 | 1.16 | 0.70 |
| 0.90 | 1.16 | 0.61 | 1.16 | 0.70 |
| 0.18 | 0.98 | 0.36 | #N/A | #N/A |
| #N/A | 1.22 | 0.61 | 0.75 | 0.20 |
| 0.18 | 0.98 | 0.36 | #N/A | #N/A |
| 0.68 | 1.36 | 0.84 | 1.21 | 0.72 |
| 0.54 | 1.01 | 0.45 | 0.94 | 0.42 |
| 0.81 | 1.04 | 0.45 | 1.08 | 0.59 |
| 0.66 | 0.88 | 0.26 | 0.83 | 0.27 |
| 0.66 | 0.88 | 0.26 | 0.83 | 0.27 |
| 0.24 | 0.54 | 0.03 | 0.58 | 0.07 |
| 0.83 | 1.09 | 0.52 | 1.04 | 0.55 |
| #N/A | #N/A | #N/A | #N/A | #N/A |
| 0.71 | 1.31 | 0.79 | 1.42 | 0.89 |
| #N/A | 1.36 | 0.84 | 0.99 | 0.49 |
| #N/A | #N/A | #N/A | #N/A | #N/A |
| 0.62 | 1.37 | 0.83 | 1.30 | 0.79 |
| 0.51 | 1.25 | 0.71 | 0.98 | 0.48 |
| 0.51 | 1.25 | 0.71 | 0.98 | 0.48 |
| #N/A | 1.56 | 0.90 | 0.92 | 0.40 |
| 0.90 | 1.16 | 0.62 | 1.52 | 0.92 |
| #N/A | 1.21 | 0.53 | 1.43 | 0.68 |
| 0.47 | 1.15 | 0.61 | 1.09 | 0.61 |
| #N/A | 1.56 | 0.90 | 1.40 | 0.89 |
| 0.50 | 1.10 | 0.54 | 1.01 | 0.50 |
| 0.50 | 1.10 | 0.54 | 1.01 | 0.50 |
| 0.44 | 0.82 | 0.19 | 0.97 | 0.46 |
| 0.58 | 0.97 | 0.34 | 0.85 | 0.30 |
| #N/A | 0.91 | 0.27 | #N/A | #N/A |
| 0.32 | 1.07 | 0.49 | 0.79 | 0.22 |
| #N/A | 1.03 | 0.42 | 0.74 | 0.18 |
| #N/A | 1.31 | 0.80 | 0.94 | 0.42 |
| #N/A | 1.31 | 0.80 | 0.94 | 0.42 |
| 0.00 | 0.18 | 0.00 | 0.14 | 0.00 |
| 0.58 | 1.15 | 0.59 | #N/A | #N/A |
| 0.58 | 1.15 | 0.59 | #N/A | #N/A |
| 0.87 | 1.34 | 0.77 | 0.84 | 0.28 |
| 0.72 | 1.33 | 0.74 | 1.10 | 0.63 |
| 0.72 | 1.33 | 0.74 | 1.10 | 0.63 |
| 0.69 | 1.27 | 0.70 | 0.96 | 0.44 |
| 0.94 | 1.10 | 0.53 | 1.17 | 0.71 |
| 0.49 | 1.20 | 0.67 | 1.17 | 0.69 |
| 0.49 | 1.20 | 0.67 | 1.17 | 0.69 |
| #N/A | 1.55 | 0.89 | 0.76 | 0.20 |
| 0.01 | 0.65 | 0.07 | 0.92 | 0.39 |
| 0.01 | 0.59 | 0.05 | 0.62 | 0.08 |
| 0.59 | 0.85 | 0.21 | 1.10 | 0.60 |
| #N/A | 0.87 | 0.23 | 0.74 | 0.19 |

|      |      |      |      |      |
|------|------|------|------|------|
| #N/A | 0.87 | 0.23 | 0.74 | 0.19 |
| 0.33 | 0.61 | 0.06 | 0.66 | 0.11 |
| 0.33 | 0.61 | 0.06 | 0.66 | 0.11 |
| 0.13 | 0.65 | 0.07 | 0.70 | 0.14 |
| 0.13 | 0.65 | 0.07 | 0.70 | 0.14 |
| 0.66 | 1.26 | 0.72 | 1.09 | 0.61 |
| 0.74 | 1.44 | 0.88 | 0.90 | 0.39 |
| 0.31 | 1.26 | 0.74 | 1.26 | 0.78 |
| 0.42 | 1.52 | 0.92 | 1.02 | 0.53 |
| 0.97 | 1.25 | 0.73 | 0.99 | 0.47 |
| 0.42 | 1.52 | 0.92 | 1.02 | 0.53 |
| 0.97 | 1.25 | 0.73 | 0.99 | 0.47 |
| 0.19 | 0.90 | 0.26 | 0.88 | 0.33 |
| #N/A | 1.15 | 0.60 | 1.01 | 0.50 |
| #N/A | 1.15 | 0.60 | 1.01 | 0.50 |
| 0.53 | 1.05 | 0.45 | 0.97 | 0.45 |
| 0.06 | 0.51 | 0.04 | #N/A | #N/A |
| #N/A | 1.17 | 0.55 | 1.03 | 0.51 |
| 0.91 | 1.02 | 0.43 | 1.29 | 0.82 |
| 0.91 | 1.02 | 0.43 | 1.29 | 0.82 |
| 0.90 | 1.05 | 0.48 | 0.66 | 0.11 |
| 0.90 | 1.05 | 0.48 | 0.66 | 0.11 |
| 0.00 | #N/A | #N/A | #N/A | #N/A |
| 0.00 | #N/A | #N/A | #N/A | #N/A |
| 0.94 | 1.31 | 0.78 | 1.34 | 0.85 |
| #N/A | 0.89 | 0.26 | 1.31 | 0.77 |
| #N/A | 0.89 | 0.26 | 1.31 | 0.77 |
| 0.66 | 1.33 | 0.81 | 1.14 | 0.67 |
| 0.69 | 1.42 | 0.86 | 1.03 | 0.52 |
| 0.72 | 1.40 | 0.87 | 1.07 | 0.57 |
| 0.65 | 1.17 | 0.63 | 1.16 | 0.67 |
| 0.19 | 1.25 | 0.73 | 0.94 | 0.41 |
| 0.50 | 1.19 | 0.65 | 1.04 | 0.55 |
| 0.50 | 1.19 | 0.65 | 1.04 | 0.55 |
| 0.75 | 1.01 | 0.41 | 0.72 | 0.16 |
| 0.58 | 1.19 | 0.61 | 0.85 | 0.29 |
| 0.45 | 1.22 | 0.69 | 1.19 | 0.66 |
| 0.32 | 1.16 | 0.61 | 1.43 | 0.88 |
| 0.45 | 1.40 | 0.86 | 1.34 | 0.82 |
| 0.45 | 1.40 | 0.86 | 1.34 | 0.82 |
| #N/A | #N/A | #N/A | #N/A | #N/A |
| 0.64 | 1.29 | 0.76 | 1.27 | 0.80 |
| 0.11 | 1.06 | 0.48 | 0.83 | 0.27 |
| #N/A | #N/A | #N/A | #N/A | #N/A |
| 0.57 | 1.15 | 0.60 | 0.89 | 0.35 |
| 0.58 | 1.06 | 0.47 | 0.78 | 0.27 |
| 0.70 | 1.24 | 0.69 | 1.00 | 0.49 |
| 0.47 | 1.08 | 0.51 | 0.65 | 0.13 |
| 0.61 | 1.02 | 0.42 | 1.04 | 0.54 |
| 0.43 | 0.93 | 0.30 | 0.75 | 0.18 |
| 0.56 | 1.08 | 0.51 | #N/A | #N/A |

|      |      |      |      |      |
|------|------|------|------|------|
| 0.32 | 1.10 | 0.53 | 1.18 | 0.69 |
| #N/A | #N/A | #N/A | #N/A | #N/A |
| 0.62 | 0.87 | 0.23 | 1.00 | 0.49 |
| 0.83 | 1.12 | 0.55 | 1.00 | 0.50 |
| 0.83 | 1.12 | 0.55 | 1.00 | 0.50 |
| 0.93 | 1.29 | 0.70 | 1.50 | 0.91 |
| 0.93 | 1.29 | 0.70 | 1.50 | 0.91 |
| 0.71 | 1.08 | 0.50 | 1.36 | 0.86 |
| 0.71 | 1.08 | 0.50 | 1.36 | 0.86 |
| 0.66 | 0.98 | 0.40 | 1.03 | 0.53 |
| 0.61 | 1.19 | 0.65 | 1.04 | 0.55 |
| 0.76 | 0.96 | 0.36 | 0.76 | 0.20 |
| #N/A | 1.05 | 0.46 | 0.85 | 0.32 |
| #N/A | #N/A | #N/A | #N/A | #N/A |
| 0.78 | 1.16 | 0.62 | 1.31 | 0.83 |
| 0.78 | 1.16 | 0.62 | 1.31 | 0.83 |
| 0.78 | 1.16 | 0.62 | 1.31 | 0.83 |
| 0.51 | 1.10 | 0.53 | 1.01 | 0.51 |
| 0.53 | 1.05 | 0.47 | 0.66 | 0.12 |
| #N/A | 1.44 | 0.88 | #N/A | #N/A |
| #N/A | 1.44 | 0.88 | #N/A | #N/A |
| 0.87 | 1.07 | 0.49 | 0.99 | 0.48 |
| 0.25 | 1.53 | 0.93 | 0.98 | 0.48 |
| 0.21 | 0.80 | 0.17 | 0.97 | 0.45 |
| 0.32 | 1.14 | 0.57 | 1.03 | 0.53 |
| 0.62 | 0.94 | 0.32 | 1.48 | 0.85 |
| 0.87 | 1.17 | 0.63 | 0.91 | 0.38 |
| 0.87 | 1.17 | 0.63 | 0.91 | 0.38 |
| 0.50 | 1.08 | 0.50 | 1.30 | 0.82 |
| 0.61 | 1.13 | 0.56 | 1.13 | 0.64 |
| 0.61 | 1.13 | 0.56 | 1.13 | 0.64 |
| 0.35 | 1.11 | 0.55 | 1.14 | 0.67 |
| 0.11 | 1.28 | 0.63 | 0.96 | 0.45 |
| 0.48 | 0.93 | 0.30 | 0.90 | 0.36 |
| 0.30 | 0.85 | 0.23 | 1.06 | 0.57 |
| 0.49 | 0.96 | 0.34 | 0.81 | 0.24 |
| 0.27 | 1.05 | 0.48 | 1.25 | 0.74 |
| 0.33 | 1.06 | 0.48 | 0.72 | 0.16 |
| 0.18 | 0.81 | 0.17 | 0.71 | 0.16 |
| 0.81 | 1.17 | 0.61 | 0.85 | 0.29 |
| 0.10 | 0.83 | 0.19 | 0.83 | 0.29 |
| 0.08 | #N/A | #N/A | 0.63 | 0.10 |
| 0.14 | 0.94 | 0.31 | 0.72 | 0.16 |
| 0.77 | 1.16 | 0.60 | 0.84 | 0.28 |
| 0.77 | 1.16 | 0.60 | 0.84 | 0.28 |
| 0.49 | 0.94 | 0.30 | 0.82 | 0.27 |
| 0.77 | 1.16 | 0.60 | 0.84 | 0.28 |
| 0.57 | 1.18 | 0.58 | 1.05 | 0.51 |
| 0.57 | 1.18 | 0.58 | 1.05 | 0.51 |
| #N/A | #N/A | #N/A | #N/A | #N/A |
| #N/A | 1.09 | 0.52 | 0.93 | 0.41 |

|      |      |      |      |      |
|------|------|------|------|------|
| 0.44 | 1.03 | 0.43 | 1.06 | 0.55 |
| 0.44 | 1.03 | 0.43 | 1.06 | 0.55 |
| #N/A | #N/A | #N/A | #N/A | #N/A |
| #N/A | #N/A | #N/A | #N/A | #N/A |
| 0.32 | 0.81 | 0.17 | 0.89 | 0.36 |
| 0.32 | 0.81 | 0.17 | 0.89 | 0.36 |
| #N/A | #N/A | #N/A | #N/A | #N/A |
| #N/A | #N/A | #N/A | #N/A | #N/A |
| 0.22 | 1.44 | 0.86 | 1.79 | 0.98 |
| 0.22 | 1.44 | 0.86 | 1.79 | 0.98 |
| 0.80 | 1.12 | 0.56 | 0.90 | 0.36 |
| #N/A | 1.67 | 0.96 | #N/A | #N/A |
| #N/A | 1.67 | 0.96 | #N/A | #N/A |
| 0.70 | 1.15 | 0.58 | #N/A | #N/A |
| 0.75 | 1.25 | 0.73 | 1.23 | 0.77 |
| 0.75 | 1.25 | 0.73 | 1.23 | 0.77 |
| 0.82 | 0.84 | 0.23 | 1.16 | 0.70 |
| 0.82 | 0.84 | 0.23 | 1.16 | 0.70 |
| #N/A | 0.95 | 0.33 | 1.40 | 0.86 |
| #N/A | 1.06 | 0.46 | 1.04 | 0.53 |
| #N/A | 1.06 | 0.46 | 1.04 | 0.53 |
| #N/A | 0.74 | 0.12 | 0.88 | 0.34 |
| #N/A | #N/A | #N/A | #N/A | #N/A |
| #N/A | 0.74 | 0.12 | 0.88 | 0.34 |
| #N/A | #N/A | #N/A | #N/A | #N/A |
| 0.95 | 1.06 | 0.47 | 1.88 | 0.98 |
| 0.88 | 0.70 | 0.10 | 0.67 | 0.12 |
| #N/A | 0.75 | 0.15 | 0.46 | 0.03 |
| #N/A | 0.75 | 0.15 | 0.46 | 0.03 |
| 0.67 | 0.95 | 0.31 | 0.88 | 0.35 |
| 0.69 | 1.18 | 0.60 | 0.95 | 0.43 |
| 0.69 | 1.18 | 0.60 | 0.95 | 0.43 |
| #N/A | #N/A | #N/A | #N/A | #N/A |
| #N/A | #N/A | #N/A | #N/A | #N/A |
| #N/A | #N/A | #N/A | #N/A | #N/A |
| 0.15 | 0.68 | 0.08 | 0.83 | 0.30 |
| 0.15 | 0.68 | 0.08 | 0.83 | 0.30 |
| 0.53 | 1.33 | 0.80 | 1.12 | 0.60 |
| 0.50 | 0.62 | 0.06 | 0.80 | 0.24 |
| 0.50 | 0.62 | 0.06 | 0.80 | 0.24 |
| 0.27 | 0.68 | 0.09 | 0.87 | 0.36 |
| 0.27 | 0.68 | 0.09 | 0.87 | 0.36 |
| #N/A | 0.94 | 0.33 | 1.08 | 0.58 |
| 0.31 | 1.22 | 0.66 | 1.37 | 0.72 |
| 0.31 | 1.22 | 0.66 | 1.37 | 0.72 |
| 0.31 | 1.22 | 0.66 | 1.37 | 0.72 |
| #N/A | #N/A | #N/A | #N/A | #N/A |
| #N/A | #N/A | #N/A | #N/A | #N/A |
| #N/A | #N/A | #N/A | #N/A | #N/A |
| 0.59 | 1.33 | 0.82 | 1.16 | 0.64 |
| #N/A | #N/A | #N/A | #N/A | #N/A |

|      |      |      |      |      |
|------|------|------|------|------|
| 0.77 | 1.12 | 0.56 | 1.27 | 0.64 |
| #N/A | #N/A | #N/A | #N/A | #N/A |
| 0.66 | 1.30 | 0.78 | 1.22 | 0.75 |
| #N/A | #N/A | #N/A | #N/A | #N/A |
| #N/A | #N/A | #N/A | #N/A | #N/A |
| 0.82 | 1.17 | 0.63 | 0.80 | 0.24 |
| 0.82 | 1.17 | 0.63 | 0.80 | 0.24 |
| 0.79 | 0.97 | 0.37 | 1.14 | 0.64 |
| 0.56 | 1.03 | 0.43 | 0.68 | 0.16 |
| 0.56 | 1.03 | 0.43 | 0.68 | 0.16 |
| 0.19 | 0.99 | 0.38 | #N/A | #N/A |
| #N/A | #N/A | #N/A | #N/A | #N/A |
| 0.93 | 0.99 | 0.36 | 0.88 | 0.33 |
| #N/A | #N/A | #N/A | #N/A | #N/A |
| #N/A | #N/A | #N/A | #N/A | #N/A |
| 0.50 | 1.06 | 0.49 | 1.02 | 0.51 |
| 0.50 | 1.06 | 0.49 | 1.02 | 0.51 |
| 0.37 | 0.96 | 0.33 | 0.86 | 0.31 |
| 0.90 | 1.18 | 0.58 | 1.33 | 0.85 |
| 0.95 | 1.43 | 0.80 | 1.16 | 0.69 |
| 0.88 | 1.04 | 0.45 | 0.91 | 0.37 |
| 0.88 | 1.04 | 0.45 | 0.91 | 0.37 |
| 0.48 | 1.00 | 0.40 | 0.93 | 0.40 |
| 0.37 | 1.10 | 0.52 | 0.88 | 0.35 |
| 0.14 | 1.16 | 0.59 | 0.74 | 0.18 |
| 0.72 | 1.80 | 0.58 | 0.59 | 0.14 |
| 0.36 | 1.20 | 0.65 | 1.06 | 0.58 |
| 0.79 | 1.37 | 0.84 | 1.16 | 0.63 |
| 0.06 | 1.24 | 0.72 | 1.05 | 0.57 |
| 0.79 | 1.37 | 0.84 | 1.16 | 0.63 |
| 0.87 | 1.07 | 0.48 | 0.98 | 0.48 |
| 0.87 | 1.07 | 0.48 | 0.98 | 0.48 |
| 0.72 | 1.15 | 0.58 | 0.93 | 0.39 |
| 0.49 | 1.22 | 0.61 | 1.28 | 0.75 |
| 0.51 | 0.70 | 0.10 | 0.71 | 0.21 |
| 0.49 | 1.22 | 0.61 | 1.28 | 0.75 |
| 0.51 | 0.70 | 0.10 | 0.71 | 0.21 |
| 0.95 | 1.19 | 0.65 | 1.08 | 0.60 |
| 0.84 | 1.21 | 0.63 | 0.97 | 0.45 |
| 0.84 | 1.21 | 0.63 | 0.97 | 0.45 |
| 0.84 | 1.21 | 0.68 | 0.76 | 0.25 |
| 0.54 | 0.70 | 0.12 | 0.64 | 0.11 |
| 0.06 | 0.39 | 0.01 | 0.46 | 0.03 |
| #N/A | 1.58 | 0.54 | 1.10 | 0.52 |
| 0.62 | 1.09 | 0.52 | 0.97 | 0.46 |
| 0.66 | 0.92 | 0.31 | 0.89 | 0.36 |
| 0.82 | 0.84 | 0.20 | 0.88 | 0.38 |
| 0.82 | 0.84 | 0.20 | 0.88 | 0.38 |
| 0.88 | 1.06 | 0.47 | 0.89 | 0.34 |
| 0.88 | 1.06 | 0.47 | 0.89 | 0.34 |
| 0.14 | 0.90 | 0.33 | 0.89 | 0.35 |

|      |      |      |      |      |
|------|------|------|------|------|
| 0.83 | 1.35 | 0.81 | 1.43 | 0.90 |
| 0.83 | 1.35 | 0.81 | 1.43 | 0.90 |
| 0.69 | 1.27 | 0.75 | 0.61 | 0.08 |
| 0.69 | 1.27 | 0.75 | 0.61 | 0.08 |
| 0.36 | 1.15 | 0.59 | #N/A | #N/A |
| 0.09 | 0.79 | 0.16 | 0.85 | 0.31 |
| 0.09 | 0.79 | 0.16 | 0.85 | 0.31 |
| 0.96 | 1.09 | 0.51 | 0.94 | 0.43 |
| 0.09 | 0.79 | 0.16 | 0.85 | 0.31 |
| 0.96 | 1.09 | 0.51 | 0.94 | 0.43 |
| 0.96 | 1.09 | 0.51 | 0.94 | 0.43 |
| 0.21 | 1.35 | 0.78 | 0.96 | 0.44 |
| 0.74 | 1.68 | 0.86 | 1.83 | 0.98 |
| 0.68 | 1.17 | 0.61 | 1.12 | 0.66 |
| 0.68 | 1.17 | 0.61 | 1.12 | 0.66 |
| #N/A | #N/A | #N/A | #N/A | #N/A |
| 0.41 | 0.85 | 0.21 | 0.49 | 0.03 |
| 0.74 | 0.97 | 0.35 | 1.08 | 0.57 |
| 0.80 | 1.11 | 0.54 | 1.12 | 0.62 |
| 0.80 | 1.11 | 0.54 | 1.12 | 0.62 |
| #N/A | #N/A | #N/A | #N/A | #N/A |
| #N/A | #N/A | #N/A | #N/A | #N/A |
| #N/A | #N/A | #N/A | #N/A | #N/A |
| 0.94 | 1.12 | 0.56 | 1.09 | 0.60 |
| 0.94 | 1.12 | 0.56 | 1.09 | 0.60 |
| 0.33 | 1.00 | 0.39 | 0.76 | 0.19 |
| 0.44 | 0.89 | 0.26 | 0.73 | 0.16 |
| 0.71 | 1.23 | 0.68 | 1.08 | 0.59 |
| 0.68 | 1.13 | 0.57 | 1.17 | 0.70 |
| 0.61 | 1.18 | 0.64 | 0.97 | 0.46 |
| 0.84 | 1.50 | 0.92 | 1.45 | 0.90 |
| #N/A | 0.82 | 0.20 | 0.82 | 0.28 |
| 0.95 | 1.10 | 0.53 | 1.13 | 0.64 |
| 0.95 | 1.10 | 0.53 | 1.13 | 0.64 |
| 0.89 | 1.53 | 0.92 | 1.51 | 0.89 |
| 0.89 | 1.53 | 0.92 | 1.51 | 0.89 |
| #N/A | 1.21 | 0.64 | 0.90 | 0.37 |
| #N/A | 1.21 | 0.64 | 0.90 | 0.37 |
| #N/A | 1.21 | 0.64 | 0.90 | 0.37 |
| #N/A | 0.84 | 0.20 | 0.84 | 0.29 |
| #N/A | 0.84 | 0.20 | 0.84 | 0.29 |
| #N/A | 0.84 | 0.20 | 0.84 | 0.29 |
| #N/A | 0.84 | 0.20 | 0.84 | 0.29 |
| #N/A | 1.14 | 0.59 | 1.68 | 0.96 |
| #N/A | 1.14 | 0.59 | 1.68 | 0.96 |
| 0.87 | 1.07 | 0.49 | 1.08 | 0.59 |
| 0.87 | 1.07 | 0.49 | 1.08 | 0.59 |
| 0.69 | 1.09 | 0.51 | 0.85 | 0.30 |
| 0.69 | 1.09 | 0.51 | 0.85 | 0.30 |
| 0.26 | 0.80 | 0.16 | 0.80 | 0.23 |
| 0.26 | 0.80 | 0.16 | 0.80 | 0.23 |



|      |      |      |      |      |
|------|------|------|------|------|
| 0.79 | 1.21 | 0.67 | 1.38 | 0.74 |
| 0.29 | 1.07 | 0.49 | 1.02 | 0.51 |
| 0.50 | 1.09 | 0.51 | 1.29 | 0.82 |
| #N/A | 1.29 | 0.74 | 1.36 | 0.62 |
| #N/A | 1.29 | 0.74 | 1.36 | 0.62 |
| 0.02 | 1.11 | 0.54 | 1.04 | 0.54 |
| 0.73 | 1.28 | 0.74 | 0.80 | 0.25 |
| 0.73 | 1.28 | 0.74 | 0.80 | 0.25 |
| 0.38 | 1.08 | 0.50 | 0.90 | 0.38 |
| 0.38 | 1.08 | 0.50 | 0.90 | 0.38 |
| 0.42 | 1.22 | 0.67 | 0.83 | 0.28 |
| 0.76 | 1.20 | 0.67 | 1.15 | 0.59 |
| 0.76 | 1.20 | 0.67 | 1.15 | 0.59 |
| 0.76 | 1.01 | 0.42 | 1.17 | 0.70 |
| 0.76 | 1.01 | 0.42 | 1.17 | 0.70 |
| 0.97 | 1.14 | 0.58 | 1.31 | 0.72 |
| 0.97 | 1.14 | 0.58 | 1.31 | 0.72 |
| 0.09 | 0.53 | 0.03 | 0.49 | 0.04 |
| 0.94 | 1.18 | 0.64 | 1.25 | 0.76 |
| 0.93 | 1.28 | 0.76 | 0.82 | 0.26 |
| 0.64 | 1.19 | 0.66 | 1.12 | 0.65 |
| 0.02 | 0.33 | 0.01 | 0.39 | 0.02 |
| 0.02 | 0.33 | 0.01 | 0.39 | 0.02 |
| 0.14 | 0.70 | 0.11 | 0.79 | 0.23 |
| 0.96 | 1.15 | 0.59 | 1.51 | 0.78 |
| #N/A | 1.67 | 0.60 | 1.20 | 0.75 |
| 0.36 | 1.06 | 0.47 | 1.05 | 0.56 |
| 0.36 | 1.06 | 0.47 | 1.05 | 0.56 |
| 0.54 | 1.18 | 0.57 | 1.68 | 0.92 |
| 0.16 | 1.22 | 0.68 | 1.17 | 0.67 |
| 0.96 | 1.15 | 0.59 | 1.06 | 0.52 |
| 0.96 | 1.15 | 0.59 | 1.06 | 0.52 |
| 0.85 | 1.28 | 0.73 | 1.19 | 0.64 |
| 0.39 | 1.02 | 0.43 | 0.77 | 0.22 |
| 0.39 | 1.02 | 0.43 | 0.77 | 0.22 |
| 0.39 | 1.02 | 0.43 | 0.77 | 0.22 |
| #N/A | 0.97 | 0.36 | 0.96 | 0.46 |
| 0.70 | 1.30 | 0.75 | 1.26 | 0.76 |
| #N/A | #N/A | #N/A | #N/A | #N/A |
| #N/A | #N/A | #N/A | #N/A | #N/A |
| #N/A | #N/A | #N/A | #N/A | #N/A |
| #N/A | 0.97 | 0.37 | 1.06 | 0.58 |
| #N/A | 0.97 | 0.37 | 1.06 | 0.58 |
| 0.76 | 1.34 | 0.78 | 1.84 | 0.96 |
| 0.76 | 1.34 | 0.78 | 1.84 | 0.96 |
| 0.54 | 1.13 | 0.57 | 0.80 | 0.29 |
| #N/A | #N/A | #N/A | #N/A | #N/A |
| #N/A | #N/A | #N/A | #N/A | #N/A |
| 0.78 | 1.49 | 0.78 | 1.36 | 0.77 |
| 0.78 | 1.49 | 0.78 | 1.36 | 0.77 |
| 0.82 | 1.27 | 0.71 | 1.01 | 0.51 |

|      |      |      |      |      |
|------|------|------|------|------|
| 0.84 | 1.16 | 0.61 | 0.84 | 0.32 |
| 0.82 | 1.27 | 0.71 | 1.01 | 0.51 |
| 0.74 | 1.22 | 0.64 | 0.99 | 0.48 |
| 0.41 | 0.97 | 0.35 | 0.91 | 0.39 |
| 0.45 | 0.74 | 0.13 | 0.74 | 0.21 |
| 0.45 | 0.74 | 0.13 | 0.74 | 0.21 |
| 0.61 | 0.97 | 0.35 | 0.78 | 0.21 |
| 0.11 | 0.66 | 0.08 | 0.94 | 0.43 |
| 0.64 | 0.84 | 0.20 | 0.84 | 0.29 |
| 0.30 | 0.76 | 0.13 | #N/A | #N/A |
| 0.30 | 0.76 | 0.13 | #N/A | #N/A |
| 0.78 | 0.99 | 0.38 | 0.99 | 0.48 |
| 0.78 | 0.99 | 0.38 | 0.99 | 0.48 |
| 0.24 | 0.97 | 0.35 | 1.06 | 0.57 |
| 0.24 | 0.97 | 0.35 | 1.06 | 0.57 |
| 0.77 | 1.16 | 0.58 | 1.66 | 0.88 |
| 0.45 | 1.16 | 0.59 | 0.83 | 0.27 |
| 0.63 | 1.12 | 0.55 | 1.08 | 0.60 |
| 0.45 | 1.16 | 0.59 | 0.83 | 0.27 |
| 0.63 | 1.12 | 0.55 | 1.08 | 0.60 |
| 0.78 | 1.30 | 0.76 | 0.83 | 0.27 |
| 0.85 | 1.10 | 0.53 | 0.99 | 0.49 |
| #N/A | #N/A | #N/A | #N/A | #N/A |
| 0.41 | 1.16 | 0.62 | 0.77 | 0.21 |
| #N/A | 1.01 | 0.41 | 1.20 | 0.58 |
| #N/A | 1.01 | 0.41 | 1.20 | 0.58 |
| 0.78 | 1.06 | 0.47 | 0.86 | 0.31 |
| 0.78 | 1.06 | 0.47 | 0.86 | 0.31 |
| 0.24 | 0.80 | 0.19 | 0.78 | 0.27 |
| 0.24 | 0.80 | 0.19 | 0.78 | 0.27 |
| 0.48 | 1.02 | 0.42 | 1.16 | 0.69 |
| 0.26 | 1.23 | 0.66 | 1.20 | 0.70 |
| 0.54 | 1.31 | 0.77 | 1.09 | 0.59 |
| #N/A | 1.01 | 0.40 | 0.71 | 0.15 |
| #N/A | 1.01 | 0.40 | 0.71 | 0.15 |
| 0.51 | 0.78 | 0.15 | 0.82 | 0.29 |
| 0.51 | 0.78 | 0.15 | 0.82 | 0.29 |
| #N/A | 1.24 | 0.68 | 1.72 | 0.73 |
| 0.11 | 1.01 | 0.41 | 0.88 | 0.33 |
| 0.11 | 1.01 | 0.41 | 0.88 | 0.33 |
| 0.78 | 0.83 | 0.21 | 0.72 | 0.16 |
| 0.41 | 1.29 | 0.78 | 1.21 | 0.75 |
| 0.78 | 0.83 | 0.21 | 0.72 | 0.16 |
| 0.06 | 1.22 | 0.66 | 0.80 | 0.24 |
| 0.40 | 1.19 | 0.65 | 1.20 | 0.75 |
| #N/A | #N/A | #N/A | #N/A | #N/A |
| 0.62 | 0.93 | 0.36 | 1.09 | 0.62 |
| 0.62 | 0.93 | 0.36 | 1.09 | 0.62 |
| 0.69 | 0.97 | 0.40 | 0.78 | 0.22 |
| 0.02 | 0.58 | 0.04 | 0.62 | 0.08 |
| 0.06 | 1.03 | 0.46 | 0.82 | 0.39 |

|      |      |      |      |      |
|------|------|------|------|------|
| 0.06 | 1.03 | 0.46 | 0.82 | 0.39 |
| 0.29 | 0.54 | 0.04 | 0.70 | 0.21 |
| 0.56 | 1.26 | 0.74 | 1.08 | 0.61 |
| 0.03 | 0.54 | 0.03 | 0.40 | 0.02 |
| 0.68 | 0.81 | 0.19 | 0.88 | 0.34 |
| 0.68 | 0.81 | 0.19 | 0.88 | 0.34 |
| 0.85 | 0.83 | 0.20 | 0.93 | 0.40 |
| 0.85 | 0.83 | 0.20 | 0.93 | 0.40 |
| 0.71 | 1.61 | 0.92 | 1.24 | 0.76 |
| 0.92 | 1.18 | 0.61 | 1.16 | 0.69 |
| 0.71 | 0.79 | 0.17 | 0.99 | 0.48 |
| 0.92 | 1.18 | 0.61 | 1.16 | 0.69 |
| 0.71 | 0.79 | 0.17 | 0.99 | 0.48 |
| 0.34 | 0.87 | 0.23 | 1.08 | 0.59 |
| 0.34 | 0.87 | 0.23 | 1.08 | 0.59 |
| #N/A | 0.84 | 0.20 | 0.69 | 0.14 |
| 0.92 | 0.97 | 0.37 | 1.41 | 0.65 |
| 0.82 | 0.74 | 0.13 | 0.91 | 0.37 |
| 0.92 | 0.97 | 0.37 | 1.41 | 0.65 |
| #N/A | #N/A | #N/A | 1.16 | 0.57 |
| 0.82 | 0.74 | 0.13 | 0.91 | 0.37 |
| 0.72 | 1.27 | 0.75 | 1.02 | 0.52 |
| 0.72 | 1.27 | 0.75 | 1.02 | 0.52 |
| 0.50 | 0.74 | 0.12 | 0.79 | 0.22 |
| 0.12 | 0.98 | 0.36 | 1.09 | 0.58 |
| 0.16 | 1.38 | 0.84 | 1.11 | 0.57 |
| 0.49 | 1.07 | 0.49 | 1.09 | 0.59 |
| 0.49 | 1.07 | 0.49 | 1.09 | 0.59 |
| 0.01 | 0.82 | 0.18 | 0.66 | 0.11 |
| 0.58 | 0.84 | 0.20 | 0.83 | 0.27 |
| #N/A | #N/A | #N/A | #N/A | #N/A |
| #N/A | #N/A | #N/A | #N/A | #N/A |
| #N/A | #N/A | #N/A | #N/A | #N/A |
| 0.61 | 1.18 | 0.55 | 1.32 | 0.64 |
| 0.10 | 0.68 | 0.09 | 0.68 | 0.19 |
| 0.10 | 0.68 | 0.09 | 0.68 | 0.19 |
| #N/A | 1.53 | 0.93 | 0.82 | 0.31 |
| 0.62 | 1.29 | 0.77 | 1.04 | 0.54 |
| 0.62 | 1.29 | 0.77 | 1.04 | 0.54 |
| 0.83 | 0.77 | 0.16 | 0.77 | 0.23 |
| 0.27 | 0.76 | 0.14 | 0.77 | 0.21 |
| 0.13 | 0.75 | 0.12 | 0.83 | 0.28 |
| 0.34 | 1.10 | 0.53 | 0.96 | 0.44 |
| 0.95 | 1.15 | 0.60 | 1.19 | 0.73 |
| 0.95 | 1.15 | 0.60 | 1.19 | 0.73 |
| 0.47 | 1.28 | 0.75 | 1.17 | 0.69 |
| 0.22 | #N/A | #N/A | 1.08 | 0.59 |
| 0.39 | #N/A | #N/A | 1.14 | 0.65 |
| #N/A | #N/A | #N/A | #N/A | #N/A |
| #N/A | 1.24 | 0.72 | 0.99 | 0.48 |
| #N/A | 1.24 | 0.72 | 0.99 | 0.48 |

|      |      |      |      |      |
|------|------|------|------|------|
| 0.37 | 1.04 | 0.46 | 1.24 | 0.70 |
| #N/A | 1.24 | 0.72 | 0.99 | 0.48 |
| 0.37 | 1.04 | 0.46 | 1.24 | 0.70 |
| 0.24 | 1.18 | 0.65 | 1.28 | 0.81 |
| 0.16 | 0.90 | 0.34 | #N/A | #N/A |
| 0.57 | 1.10 | 0.53 | 0.83 | 0.28 |
| 0.79 | 1.23 | 0.70 | 1.32 | 0.65 |
| 0.93 | 1.15 | 0.57 | 1.08 | 0.60 |
| 0.93 | 1.15 | 0.57 | 1.08 | 0.60 |
| 0.66 | 1.18 | 0.64 | 1.19 | 0.69 |
| #N/A | 1.22 | 0.69 | 1.42 | 0.89 |
| #N/A | 1.22 | 0.69 | 1.42 | 0.89 |
| 0.52 | 1.13 | 0.55 | 1.41 | 0.89 |
| 0.33 | 1.02 | 0.41 | 1.55 | 0.94 |
| #N/A | #N/A | #N/A | #N/A | #N/A |
| #N/A | #N/A | #N/A | #N/A | #N/A |
| 0.69 | 1.08 | 0.50 | 1.10 | 0.62 |
| 0.87 | 1.26 | 0.73 | 1.16 | 0.63 |
| 0.20 | #N/A | #N/A | 1.35 | 0.80 |
| 0.20 | #N/A | #N/A | 1.35 | 0.80 |
| 0.65 | 1.21 | 0.67 | 1.13 | 0.67 |
| 0.52 | 1.32 | 0.80 | 1.32 | 0.73 |
| 0.49 | 1.24 | 0.70 | 0.82 | 0.26 |
| 0.43 | 1.08 | 0.50 | 1.11 | 0.61 |
| 0.43 | 1.08 | 0.50 | 1.11 | 0.61 |
| #N/A | #N/A | #N/A | #N/A | #N/A |
| 0.82 | 1.45 | 0.90 | 1.68 | 0.96 |
| 0.49 | 1.25 | 0.74 | 1.26 | 0.80 |
| 0.82 | 1.45 | 0.90 | 1.68 | 0.96 |
| 0.30 | 1.15 | 0.61 | 1.36 | 0.87 |
| 0.83 | 1.04 | 0.46 | 0.82 | 0.30 |
| 0.83 | 1.04 | 0.46 | 0.82 | 0.30 |
| 0.37 | 1.04 | 0.44 | 0.90 | 0.41 |
| 0.37 | 1.04 | 0.44 | 0.90 | 0.41 |
| 0.78 | 1.41 | 0.86 | 1.16 | 0.70 |
| 0.95 | 1.48 | 0.90 | 1.35 | 0.86 |
| 0.95 | 1.48 | 0.90 | 1.35 | 0.86 |
| 0.56 | 1.41 | 0.88 | 1.26 | 0.72 |
| 0.56 | 1.41 | 0.88 | 1.26 | 0.72 |
| 0.90 | 0.96 | 0.42 | 1.19 | 0.66 |
| 0.90 | 0.96 | 0.42 | 1.19 | 0.66 |
| 0.66 | 1.06 | 0.47 | 1.19 | 0.65 |
| 0.66 | 1.06 | 0.47 | 1.19 | 0.65 |
| 0.40 | 0.85 | 0.21 | 0.74 | 0.21 |
| 0.40 | 0.85 | 0.21 | 0.74 | 0.21 |
| #N/A | #N/A | #N/A | #N/A | #N/A |
| #N/A | #N/A | #N/A | #N/A | #N/A |
| 0.55 | 0.99 | 0.38 | #N/A | #N/A |
| 0.55 | 0.99 | 0.38 | #N/A | #N/A |
| #N/A | 0.83 | 0.19 | 1.02 | 0.53 |
| #N/A | #N/A | #N/A | #N/A | #N/A |

|      |      |      |      |      |
|------|------|------|------|------|
| 0.76 | 1.19 | 0.64 | 1.30 | 0.80 |
| 0.76 | 1.19 | 0.64 | 1.30 | 0.80 |
| 0.31 | 1.04 | 0.46 | 0.81 | 0.26 |
| 0.31 | 1.04 | 0.46 | 0.81 | 0.26 |
| #N/A | 0.51 | 0.03 | 0.54 | 0.06 |
| 0.55 | 1.16 | 0.59 | 0.84 | 0.29 |
| 0.81 | 1.19 | 0.53 | 0.75 | 0.18 |
| 0.67 | 1.11 | 0.54 | 0.99 | 0.49 |
| 0.92 | 1.24 | 0.71 | 1.17 | 0.71 |
| 0.92 | 1.24 | 0.71 | 1.17 | 0.71 |
| #N/A | #N/A | #N/A | #N/A | #N/A |
| #N/A | #N/A | #N/A | #N/A | #N/A |
| #N/A | #N/A | #N/A | #N/A | #N/A |
| #N/A | #N/A | #N/A | #N/A | #N/A |
| #N/A | #N/A | #N/A | #N/A | #N/A |
| #N/A | #N/A | #N/A | #N/A | #N/A |
| 0.60 | 1.20 | 0.66 | 1.14 | 0.68 |
| 0.80 | 1.06 | 0.47 | 1.48 | 0.92 |
| 0.80 | 1.06 | 0.47 | 1.48 | 0.92 |
| 0.58 | 1.80 | 0.96 | 0.98 | 0.47 |
| 0.26 | 1.30 | 0.79 | 1.23 | 0.75 |
| 0.25 | 1.04 | 0.46 | 0.89 | 0.36 |
| #N/A | #N/A | #N/A | #N/A | #N/A |
| 0.82 | 1.24 | 0.68 | 1.34 | 0.83 |
| 0.82 | 1.24 | 0.68 | 1.34 | 0.83 |
| 0.56 | 1.30 | 0.75 | 0.87 | 0.34 |
| 0.12 | 0.74 | 0.12 | 0.68 | 0.12 |
| 0.12 | 0.74 | 0.12 | 0.68 | 0.12 |
| 0.20 | 0.91 | 0.27 | 0.88 | 0.34 |
| #N/A | 1.07 | 0.49 | #N/A | #N/A |
| 0.58 | 1.33 | 0.81 | #N/A | #N/A |
| 0.58 | 1.33 | 0.81 | #N/A | #N/A |
| #N/A | #N/A | #N/A | #N/A | #N/A |
| #N/A | #N/A | #N/A | #N/A | #N/A |
| 0.01 | 0.80 | 0.17 | 0.53 | 0.05 |
| 0.03 | 0.66 | 0.08 | 0.63 | 0.10 |
| 0.05 | 0.53 | 0.03 | 0.82 | 0.25 |
| 0.69 | 1.22 | 0.68 | 1.21 | 0.73 |
| 0.65 | 1.19 | 0.67 | 1.22 | 0.73 |
| 0.50 | 0.81 | 0.18 | 0.92 | 0.45 |
| 0.29 | 0.49 | 0.02 | 0.68 | 0.18 |
| 0.59 | 1.05 | 0.46 | 1.13 | 0.64 |
| 0.59 | 1.05 | 0.46 | 1.13 | 0.64 |
| 0.65 | 1.03 | 0.47 | 0.88 | 0.34 |
| 0.37 | 1.01 | 0.39 | 1.10 | 0.59 |
| 0.37 | 1.01 | 0.39 | 1.10 | 0.59 |
| #N/A | #N/A | #N/A | 0.76 | 0.20 |
| 0.30 | 1.16 | 0.61 | 0.79 | 0.24 |
| 0.49 | 1.37 | 0.70 | 1.19 | 0.72 |
| 0.49 | 1.37 | 0.70 | 1.19 | 0.72 |
| #N/A | #N/A | #N/A | #N/A | #N/A |

|      |      |      |      |      |
|------|------|------|------|------|
| 0.49 | 1.37 | 0.70 | 1.19 | 0.72 |
| 0.33 | 1.16 | 0.61 | 1.03 | 0.54 |
| 0.19 | 0.99 | 0.40 | 0.94 | 0.43 |
| 0.94 | 1.63 | 0.88 | 0.94 | 0.44 |
| 0.94 | 1.63 | 0.88 | 0.94 | 0.44 |
| #N/A | #N/A | #N/A | #N/A | #N/A |
| #N/A | 0.65 | 0.08 | 0.74 | 0.20 |
| #N/A | 0.65 | 0.08 | 0.74 | 0.20 |
| 0.08 | 0.80 | 0.16 | 1.00 | 0.50 |
| 0.08 | 0.80 | 0.16 | 1.00 | 0.50 |
| 0.50 | 1.32 | 0.63 | 0.91 | 0.38 |
| 0.64 | 1.24 | 0.71 | 1.07 | 0.59 |
| 0.92 | 0.89 | 0.27 | #N/A | #N/A |
| 0.92 | 0.89 | 0.27 | #N/A | #N/A |
| 0.66 | 1.20 | 0.68 | 1.27 | 0.75 |
| #N/A | #N/A | #N/A | #N/A | #N/A |
| #N/A | #N/A | #N/A | #N/A | #N/A |
| #N/A | #N/A | #N/A | #N/A | #N/A |
| 0.59 | 1.04 | 0.45 | 0.81 | 0.25 |
| #N/A | 0.84 | 0.21 | #N/A | #N/A |
| 0.49 | 1.11 | 0.54 | 0.91 | 0.38 |
| 0.49 | 1.11 | 0.54 | 0.91 | 0.38 |
| 0.38 | 1.14 | 0.59 | 1.07 | 0.58 |
| 0.77 | 1.20 | 0.68 | 1.19 | 0.72 |
| 0.79 | 1.14 | 0.59 | 0.98 | 0.47 |
| 0.79 | 1.14 | 0.59 | 0.98 | 0.47 |
| 0.59 | 1.01 | 0.40 | 1.14 | 0.66 |
| 0.32 | #N/A | #N/A | 1.58 | 0.91 |
| 0.86 | 1.16 | 0.61 | 1.00 | 0.50 |
| 0.32 | #N/A | #N/A | 1.58 | 0.91 |
| 0.86 | 1.16 | 0.61 | 1.00 | 0.50 |
| 0.74 | 0.80 | 0.26 | 1.44 | 0.89 |
| 0.74 | 0.80 | 0.26 | 1.44 | 0.89 |
| 0.42 | 1.26 | 0.64 | 0.84 | 0.28 |
| #N/A | #N/A | #N/A | #N/A | #N/A |
| 0.70 | 1.37 | 0.85 | 1.45 | 0.89 |
| 0.70 | 1.37 | 0.85 | 1.45 | 0.89 |
| 0.70 | 1.37 | 0.85 | 1.45 | 0.89 |
| 0.29 | 1.04 | 0.44 | 1.15 | 0.64 |
| 0.13 | 0.47 | 0.02 | 0.50 | 0.04 |
| #N/A | 0.67 | 0.08 | 0.81 | 0.25 |
| #N/A | #N/A | #N/A | #N/A | #N/A |
| 0.83 | 1.02 | 0.43 | 0.95 | 0.43 |
| 0.83 | 1.02 | 0.43 | 0.95 | 0.43 |
| #N/A | #N/A | #N/A | #N/A | #N/A |
| #N/A | #N/A | #N/A | #N/A | #N/A |
| 0.97 | 1.09 | 0.51 | 1.55 | 0.63 |
| 0.97 | 1.09 | 0.51 | 1.55 | 0.63 |
| 0.74 | 1.17 | 0.61 | 1.14 | 0.63 |
| 0.74 | 1.17 | 0.61 | 1.14 | 0.63 |
| #N/A | 1.03 | 0.43 | 1.02 | 0.51 |

|      |      |      |      |      |
|------|------|------|------|------|
| #N/A | 1.71 | 0.80 | 0.58 | 0.08 |
| #N/A | 1.30 | 0.77 | 0.93 | 0.40 |
| 0.51 | 1.24 | 0.66 | 0.87 | 0.32 |
| 0.15 | 0.70 | 0.10 | 0.73 | 0.17 |
| 0.15 | 0.70 | 0.10 | 0.73 | 0.17 |
| 0.65 | 1.19 | 0.65 | 0.99 | 0.48 |
| #N/A | #N/A | #N/A | #N/A | #N/A |
| #N/A | 0.98 | 0.38 | 1.04 | 0.53 |
| 0.10 | 0.95 | 0.31 | 0.88 | 0.35 |
| 0.58 | 1.30 | 0.73 | 1.34 | 0.85 |
| 0.58 | 1.30 | 0.73 | 1.34 | 0.85 |
| 0.36 | 1.07 | 0.49 | 1.21 | 0.65 |
| 0.41 | 0.69 | 0.09 | 0.56 | 0.06 |
| 0.58 | 1.56 | 0.94 | 0.97 | 0.46 |
| 0.41 | 0.69 | 0.09 | 0.56 | 0.06 |
| 0.58 | 1.56 | 0.94 | 0.97 | 0.46 |
| 0.49 | 1.39 | 0.83 | 0.84 | 0.31 |
| 0.86 | 1.26 | 0.62 | 1.06 | 0.57 |
| 0.29 | 1.04 | 0.44 | 1.08 | 0.60 |
| #N/A | #N/A | #N/A | #N/A | #N/A |
| #N/A | #N/A | #N/A | #N/A | #N/A |
| 0.33 | 0.72 | 0.11 | 0.63 | 0.12 |
| 0.33 | 0.72 | 0.11 | 0.63 | 0.12 |
| 0.40 | 1.34 | 0.81 | 1.33 | 0.85 |
| 0.81 | 1.14 | 0.58 | 0.97 | 0.45 |
| 0.81 | 1.14 | 0.58 | 0.97 | 0.45 |
| 0.76 | 0.91 | 0.28 | 0.83 | 0.27 |
| 0.90 | 1.14 | 0.59 | 1.08 | 0.57 |
| 0.90 | 1.14 | 0.59 | 1.08 | 0.57 |
| 0.53 | 0.99 | 0.40 | 1.06 | 0.56 |
| 0.53 | 0.99 | 0.40 | 1.06 | 0.56 |
| 0.46 | 1.12 | 0.57 | 1.05 | 0.54 |
| 0.62 | 1.06 | 0.47 | 0.87 | 0.32 |
| 0.31 | 0.66 | 0.10 | 0.60 | 0.08 |
| 0.66 | 1.16 | 0.60 | 0.93 | 0.40 |
| 0.66 | 1.16 | 0.60 | 0.93 | 0.40 |
| 0.79 | 1.02 | 0.45 | 0.93 | 0.42 |
| 0.73 | 0.89 | 0.31 | 1.15 | 0.61 |
| 0.73 | 0.89 | 0.31 | 1.15 | 0.61 |
| 0.68 | 1.32 | 0.80 | 1.12 | 0.65 |
| 0.26 | 0.98 | 0.38 | 1.10 | 0.62 |
| 0.75 | 1.20 | 0.66 | 1.16 | 0.70 |
| #N/A | 1.42 | 0.84 | 1.37 | 0.84 |
| 0.77 | 1.17 | 0.63 | 1.54 | 0.83 |
| 0.77 | 1.17 | 0.63 | 1.54 | 0.83 |
| 0.71 | 1.34 | 0.65 | 1.18 | 0.66 |
| 0.71 | 1.34 | 0.65 | 1.18 | 0.66 |
| 0.40 | 1.00 | 0.41 | 0.88 | 0.38 |
| 0.40 | 1.00 | 0.41 | 0.88 | 0.38 |
| 0.65 | 1.04 | 0.46 | 0.81 | 0.25 |
| 0.88 | 1.28 | 0.71 | 1.12 | 0.65 |

|      |      |      |      |      |
|------|------|------|------|------|
| 0.88 | 1.28 | 0.71 | 1.12 | 0.65 |
| 0.74 | 1.27 | 0.58 | 0.59 | 0.08 |
| 0.74 | 1.27 | 0.58 | 0.59 | 0.08 |
| 0.01 | 0.35 | 0.01 | 0.41 | 0.02 |
| #N/A | #N/A | #N/A | #N/A | #N/A |
| 0.43 | 1.08 | 0.50 | 1.16 | 0.65 |
| #N/A | #N/A | #N/A | #N/A | #N/A |
| 0.36 | 0.85 | 0.21 | 1.10 | 0.63 |
| #N/A | #N/A | #N/A | #N/A | #N/A |
| 0.36 | 0.85 | 0.21 | 1.10 | 0.63 |
| 0.60 | 0.97 | 0.35 | 1.05 | 0.54 |
| 0.42 | 1.01 | 0.41 | 1.05 | 0.56 |
| 0.45 | 1.19 | 0.55 | 1.03 | 0.53 |
| #N/A | 1.10 | 0.53 | 1.25 | 0.78 |
| #N/A | #N/A | #N/A | #N/A | #N/A |
| 0.42 | 0.87 | 0.22 | 0.83 | 0.27 |
| 0.42 | 0.87 | 0.22 | 0.83 | 0.27 |
| 0.16 | 1.19 | 0.64 | 1.09 | 0.59 |
| 0.82 | 1.20 | 0.59 | 1.13 | 0.63 |
| 0.32 | 0.92 | 0.31 | 0.89 | 0.35 |
| 0.83 | 1.08 | 0.51 | 1.21 | 0.75 |
| 0.71 | 1.37 | 0.83 | 1.05 | 0.56 |
| 0.50 | 0.96 | 0.34 | 1.31 | 0.83 |
| 0.50 | 0.96 | 0.34 | 1.31 | 0.83 |
| 0.09 | 1.16 | 0.62 | 1.20 | 0.73 |
| 0.35 | 0.91 | 0.34 | 0.71 | 0.15 |
| 0.17 | 1.01 | 0.39 | 0.99 | 0.48 |
| 0.17 | 1.01 | 0.39 | 0.99 | 0.48 |
| 0.20 | 0.87 | 0.30 | 0.76 | 0.20 |
| 0.87 | 1.10 | 0.52 | 1.23 | 0.76 |
| 0.60 | 0.98 | 0.37 | 0.95 | 0.42 |
| 0.87 | 1.10 | 0.52 | 1.23 | 0.76 |
| 0.60 | 0.98 | 0.37 | 0.95 | 0.42 |
| 0.45 | 0.80 | 0.16 | 1.03 | 0.52 |
| 0.69 | 1.57 | 0.84 | 1.18 | 0.61 |
| 0.69 | 1.57 | 0.84 | 1.18 | 0.61 |
| #N/A | 1.55 | 0.93 | 1.27 | 0.74 |
| #N/A | 0.75 | 0.12 | 0.73 | 0.19 |
| #N/A | 0.75 | 0.12 | 0.73 | 0.19 |
| 0.93 | 0.81 | 0.20 | 0.92 | 0.39 |
| 0.93 | 0.81 | 0.20 | 0.92 | 0.39 |
| 0.84 | 1.27 | 0.72 | 1.21 | 0.74 |
| 0.68 | 1.24 | 0.71 | 1.15 | 0.58 |
| 0.68 | 1.24 | 0.71 | 1.15 | 0.58 |
| 0.72 | 0.88 | 0.23 | 0.92 | 0.39 |
| 0.41 | 1.19 | 0.64 | 0.92 | 0.41 |
| 0.05 | 0.95 | 0.34 | 0.82 | 0.31 |
| 0.04 | 0.76 | 0.13 | 0.74 | 0.18 |
| #N/A | #N/A | #N/A | #N/A | #N/A |
| #N/A | #N/A | #N/A | #N/A | #N/A |
| 0.87 | 1.22 | 0.70 | 1.32 | 0.77 |



|      |      |      |      |      |
|------|------|------|------|------|
| 0.76 | 1.23 | 0.70 | 0.86 | 0.31 |
| 0.73 | 1.22 | 0.65 | 0.97 | 0.45 |
| 0.73 | 1.22 | 0.65 | 0.97 | 0.45 |
| 0.72 | 1.21 | 0.69 | 1.06 | 0.56 |
| 0.88 | 1.13 | 0.56 | 1.24 | 0.72 |
| 0.38 | 1.20 | 0.58 | 0.75 | 0.25 |
| 0.12 | 0.97 | 0.35 | 1.14 | 0.66 |
| 0.07 | 0.94 | 0.31 | 0.91 | 0.37 |
| 0.42 | 1.14 | 0.58 | 1.05 | 0.53 |
| 0.42 | 1.14 | 0.58 | 1.05 | 0.53 |
| 0.74 | 1.38 | 0.84 | 1.63 | 0.94 |
| 0.74 | 1.38 | 0.84 | 1.63 | 0.94 |
| 0.46 | 0.76 | 0.13 | 0.96 | 0.45 |
| 0.15 | 1.18 | 0.62 | 1.34 | 0.86 |
| #N/A | #N/A | #N/A | #N/A | #N/A |
| #N/A | #N/A | #N/A | #N/A | #N/A |
| #N/A | 1.28 | 0.71 | 0.62 | 0.09 |
| 0.42 | #N/A | #N/A | 0.63 | 0.12 |
| 0.94 | 1.36 | 0.74 | 1.23 | 0.76 |
| 0.94 | 1.36 | 0.74 | 1.23 | 0.76 |
| 0.63 | 1.02 | 0.42 | 0.99 | 0.48 |
| 0.63 | 1.02 | 0.42 | 0.99 | 0.48 |
| 0.89 | 1.41 | 0.87 | 1.07 | 0.54 |
| 0.67 | 1.30 | 0.74 | 1.43 | 0.90 |
| 0.55 | 1.23 | 0.71 | 1.19 | 0.74 |
| #N/A | #N/A | #N/A | #N/A | #N/A |
| 0.56 | 0.99 | 0.38 | 0.95 | 0.43 |
| 0.27 | 0.94 | 0.31 | 0.97 | 0.45 |
| 0.56 | 0.99 | 0.38 | 0.95 | 0.43 |
| 0.92 | 1.22 | 0.67 | 1.22 | 0.73 |
| 0.37 | 0.84 | 0.20 | 1.02 | 0.52 |
| 0.37 | 0.84 | 0.20 | 1.02 | 0.52 |
| 0.71 | 0.97 | 0.34 | 0.80 | 0.25 |
| 0.46 | 1.18 | 0.65 | 1.15 | 0.64 |
| 0.59 | 1.17 | 0.61 | 1.24 | 0.77 |
| 0.63 | 1.47 | 0.74 | 1.17 | 0.54 |
| 0.09 | 1.25 | 0.74 | 1.30 | 0.75 |
| 0.85 | 1.30 | 0.66 | 1.41 | 0.85 |
| 0.85 | 1.30 | 0.66 | 1.41 | 0.85 |
| #N/A | 1.20 | 0.66 | 1.37 | 0.75 |
| 0.15 | 0.78 | 0.14 | 0.79 | 0.24 |
| 0.86 | 0.97 | 0.35 | 0.79 | 0.23 |
| 0.46 | 1.33 | 0.80 | 0.79 | 0.29 |
| 0.71 | 1.06 | 0.47 | 1.00 | 0.49 |
| 0.83 | 1.11 | 0.54 | 0.96 | 0.45 |
| #N/A | 1.16 | 0.59 | 1.21 | 0.74 |
| #N/A | #N/A | #N/A | #N/A | #N/A |
| #N/A | #N/A | #N/A | #N/A | #N/A |
| 0.47 | 0.86 | 0.25 | 1.16 | 0.65 |
| 0.39 | 0.94 | 0.31 | 0.97 | 0.45 |
| 0.46 | 1.17 | 0.62 | 1.13 | 0.66 |

|      |      |      |      |      |
|------|------|------|------|------|
| 0.46 | 1.17 | 0.62 | 1.13 | 0.66 |
| 0.46 | 1.17 | 0.62 | 1.13 | 0.66 |
| 0.46 | 1.17 | 0.62 | 1.13 | 0.66 |
| 0.98 | 1.20 | 0.67 | 1.19 | 0.72 |
| 0.83 | 1.44 | 0.89 | 1.40 | 0.89 |
| 0.83 | 1.44 | 0.89 | 1.40 | 0.89 |
| 0.30 | 1.20 | 0.66 | 1.35 | 0.86 |
| 0.19 | 0.61 | 0.05 | 0.84 | 0.30 |
| #N/A | 0.71 | 0.10 | 1.59 | 0.92 |
| 0.53 | 0.67 | 0.08 | 0.68 | 0.13 |
| #N/A | 0.98 | 0.40 | 0.75 | 0.20 |
| 0.60 | 1.18 | 0.65 | 1.01 | 0.50 |
| 0.30 | 0.82 | 0.18 | 0.74 | 0.18 |
| 0.60 | 0.94 | 0.31 | 0.85 | 0.33 |
| 0.36 | 0.96 | 0.33 | 0.87 | 0.32 |
| #N/A | #N/A | #N/A | #N/A | #N/A |
| #N/A | #N/A | #N/A | #N/A | #N/A |
| #N/A | #N/A | #N/A | #N/A | #N/A |
| 0.76 | 1.68 | 0.93 | 1.41 | 0.89 |
| 0.76 | 1.68 | 0.93 | 1.41 | 0.89 |
| 0.31 | 0.87 | 0.22 | 1.21 | 0.62 |
| #N/A | #N/A | #N/A | #N/A | #N/A |
| #N/A | #N/A | #N/A | #N/A | #N/A |
| #N/A | #N/A | #N/A | #N/A | #N/A |
| 0.85 | 0.97 | 0.34 | 1.15 | 0.69 |
| 0.85 | 0.97 | 0.34 | 1.15 | 0.69 |
| 0.51 | 1.35 | 0.82 | 0.86 | 0.31 |
| 0.56 | 1.06 | 0.48 | 0.78 | 0.23 |
| 0.42 | 1.79 | 0.90 | 1.02 | 0.49 |
| #N/A | #N/A | #N/A | #N/A | #N/A |
| 0.97 | 1.09 | 0.52 | 0.76 | 0.19 |
| 0.97 | 1.09 | 0.52 | 0.76 | 0.19 |
| #N/A | #N/A | #N/A | #N/A | #N/A |
| #N/A | #N/A | #N/A | #N/A | #N/A |
| #N/A | #N/A | #N/A | #N/A | #N/A |
| #N/A | #N/A | #N/A | #N/A | #N/A |
| 0.64 | 0.93 | 0.29 | 0.94 | 0.42 |
| 0.64 | 0.93 | 0.29 | 0.94 | 0.42 |
| #N/A | 1.75 | 0.96 | 1.02 | 0.53 |
| #N/A | 1.29 | 0.64 | 0.89 | 0.44 |
| 0.69 | 0.82 | 0.18 | 0.94 | 0.42 |
| 0.69 | 0.82 | 0.18 | 0.94 | 0.42 |
| #N/A | #N/A | #N/A | #N/A | #N/A |
| #N/A | #N/A | #N/A | #N/A | #N/A |
| 0.52 | 0.97 | 0.34 | 1.15 | 0.69 |
| #N/A | #N/A | #N/A | #N/A | #N/A |
| #N/A | #N/A | #N/A | #N/A | #N/A |
| #N/A | #N/A | #N/A | #N/A | #N/A |
| 0.52 | 0.97 | 0.34 | 1.15 | 0.69 |
| 0.86 | 0.88 | 0.29 | 0.81 | 0.25 |
| 0.86 | 0.88 | 0.29 | 0.81 | 0.25 |

|      |      |      |      |      |
|------|------|------|------|------|
| #N/A | #N/A | #N/A | #N/A | #N/A |
| 0.87 | 1.63 | 0.63 | 1.10 | 0.60 |
| 0.87 | 1.63 | 0.63 | 1.10 | 0.60 |
| #N/A | #N/A | #N/A | #N/A | #N/A |
| 0.73 | 1.19 | 0.66 | 1.04 | 0.53 |
| 0.61 | #N/A | #N/A | 0.98 | 0.46 |
| #N/A | #N/A | #N/A | #N/A | #N/A |
| 0.61 | #N/A | #N/A | 0.98 | 0.46 |
| 0.84 | 1.30 | 0.59 | 2.22 | 0.73 |
| 0.84 | 1.30 | 0.59 | 2.22 | 0.73 |
| #N/A | #N/A | #N/A | #N/A | #N/A |
| 0.84 | 1.30 | 0.59 | 2.22 | 0.73 |
| #N/A | 1.57 | 0.93 | 1.09 | 0.58 |
| 0.48 | 0.91 | 0.27 | 0.85 | 0.33 |
| 0.77 | 1.61 | 0.89 | 1.78 | 0.91 |
| 0.19 | 1.14 | 0.57 | 1.31 | 0.82 |
| #N/A | #N/A | #N/A | #N/A | #N/A |
| 0.86 | 1.01 | 0.41 | 0.90 | 0.39 |
| 0.86 | 1.01 | 0.41 | 0.90 | 0.39 |
| 0.78 | 1.21 | 0.68 | 1.08 | 0.61 |
| 0.78 | 1.21 | 0.68 | 1.08 | 0.61 |
| #N/A | 0.74 | 0.13 | 1.14 | 0.60 |
| 0.25 | #N/A | #N/A | 0.81 | 0.28 |
| 0.95 | 1.35 | 0.72 | 1.51 | 0.68 |
| #N/A | #N/A | #N/A | #N/A | #N/A |
| 0.64 | 0.70 | 0.10 | 0.63 | 0.14 |
| 0.64 | 0.70 | 0.10 | 0.63 | 0.14 |
| 0.24 | 1.12 | 0.56 | 1.14 | 0.67 |
| 0.43 | 0.92 | 0.28 | 0.68 | 0.12 |
| #N/A | 0.87 | 0.23 | 1.13 | 0.64 |
| #N/A | 0.74 | 0.12 | 0.76 | 0.19 |
| 0.58 | 1.43 | 0.75 | 0.77 | 0.21 |
| #N/A | 0.74 | 0.12 | 0.76 | 0.19 |
| #N/A | #N/A | #N/A | #N/A | #N/A |
| #N/A | #N/A | #N/A | #N/A | #N/A |
| #N/A | #N/A | #N/A | #N/A | #N/A |
| 0.12 | 0.43 | 0.01 | 0.43 | 0.03 |
| #N/A | 1.27 | 0.74 | 1.15 | 0.56 |
| 0.97 | 1.31 | 0.78 | 1.07 | 0.56 |
| 0.97 | 1.31 | 0.78 | 1.07 | 0.56 |
| 0.91 | 1.26 | 0.74 | 1.51 | 0.90 |
| 0.87 | 1.21 | 0.68 | 1.38 | 0.87 |
| 0.87 | 1.21 | 0.68 | 1.38 | 0.87 |
| #N/A | 1.09 | 0.52 | 1.55 | 0.94 |
| 0.98 | 1.22 | 0.70 | 1.16 | 0.67 |
| 0.98 | 1.22 | 0.70 | 1.16 | 0.67 |
| 0.98 | 1.22 | 0.70 | 1.16 | 0.67 |
| #N/A | #N/A | #N/A | #N/A | #N/A |
| #N/A | 1.53 | 0.79 | 1.56 | 0.60 |
| #N/A | 1.00 | 0.39 | 0.99 | 0.48 |
| #N/A | 1.00 | 0.39 | 0.99 | 0.48 |

|      |      |      |      |      |
|------|------|------|------|------|
| 0.75 | 1.42 | 0.86 | 1.55 | 0.94 |
| 0.71 | 1.30 | 0.74 | 0.97 | 0.46 |
| 0.71 | 1.30 | 0.74 | 0.97 | 0.46 |
| 0.62 | 0.95 | 0.31 | 0.84 | 0.28 |
| #N/A | 0.59 | 0.12 | 0.73 | 0.21 |
| 0.62 | 0.95 | 0.31 | 0.84 | 0.28 |
| #N/A | 0.59 | 0.12 | 0.73 | 0.21 |
| #N/A | #N/A | #N/A | #N/A | #N/A |
| #N/A | #N/A | #N/A | #N/A | #N/A |
| 0.74 | 1.29 | 0.74 | 1.14 | 0.62 |
| 0.70 | 0.84 | 0.21 | 0.80 | 0.24 |
| 0.70 | 0.84 | 0.21 | 0.80 | 0.24 |
| 0.76 | 0.94 | 0.34 | 0.94 | 0.42 |
| 0.76 | 0.94 | 0.34 | 0.94 | 0.42 |
| 0.41 | 0.81 | 0.18 | 0.89 | 0.35 |
| 0.60 | 0.90 | 0.26 | 0.89 | 0.36 |
| 0.60 | 0.90 | 0.26 | 0.89 | 0.36 |
| 0.39 | 1.11 | 0.54 | 1.44 | 0.91 |
| 0.39 | 1.11 | 0.54 | 1.44 | 0.91 |
| 0.46 | 1.20 | 0.66 | 1.70 | 0.97 |
| 0.52 | 1.52 | 0.86 | 1.56 | 0.94 |
| 0.40 | 1.03 | 0.43 | 1.15 | 0.61 |
| 0.53 | 1.17 | 0.59 | 1.10 | 0.58 |
| 0.46 | #N/A | #N/A | 1.45 | 0.86 |
| #N/A | #N/A | #N/A | #N/A | #N/A |
| 0.13 | 1.01 | 0.39 | 1.07 | 0.53 |
| 0.30 | 1.13 | 0.56 | 0.88 | 0.34 |
| #N/A | #N/A | #N/A | #N/A | #N/A |
| 0.55 | 1.17 | 0.61 | 0.94 | 0.41 |
| 0.27 | 1.28 | 0.76 | 0.88 | 0.37 |
| 0.55 | 1.17 | 0.61 | 0.94 | 0.41 |
| 0.25 | 0.95 | 0.32 | 0.82 | 0.27 |
| 0.25 | 0.95 | 0.32 | 0.82 | 0.27 |
| 0.97 | 1.29 | 0.69 | 1.25 | 0.75 |
| 0.97 | 1.29 | 0.69 | 1.25 | 0.75 |
| #N/A | 0.87 | 0.26 | 1.06 | 0.58 |
| 0.05 | 0.54 | 0.04 | 0.56 | 0.07 |
| 0.05 | 0.54 | 0.04 | 0.56 | 0.07 |
| 0.84 | 1.26 | 0.74 | 1.23 | 0.77 |
| 0.55 | 1.18 | 0.62 | 1.15 | 0.64 |
| #N/A | 1.02 | 0.42 | 1.10 | 0.62 |
| #N/A | #N/A | #N/A | #N/A | #N/A |
| 0.49 | 0.76 | 0.13 | #N/A | #N/A |
| #N/A | #N/A | #N/A | #N/A | #N/A |
| 0.63 | #N/A | #N/A | 1.09 | 0.62 |
| 0.63 | #N/A | #N/A | 1.09 | 0.62 |
| #N/A | #N/A | #N/A | 1.17 | 0.70 |
| #N/A | #N/A | #N/A | #N/A | #N/A |
| #N/A | #N/A | #N/A | 1.17 | 0.70 |
| 0.44 | 0.74 | 0.17 | 0.68 | 0.13 |
| #N/A | #N/A | #N/A | #N/A | #N/A |

|      |      |      |      |      |
|------|------|------|------|------|
| 0.84 | 1.49 | 0.75 | 1.55 | 0.94 |
| 0.84 | 1.49 | 0.75 | 1.55 | 0.94 |
| 0.29 | 0.78 | 0.14 | 0.67 | 0.12 |
| #N/A | #N/A | #N/A | #N/A | #N/A |
| 0.11 | 0.80 | 0.16 | 0.61 | 0.18 |
| 0.36 | 1.42 | 0.86 | 1.22 | 0.73 |
| #N/A | #N/A | #N/A | #N/A | #N/A |
| #N/A | #N/A | #N/A | #N/A | #N/A |
| 0.67 | 0.98 | 0.41 | 1.25 | 0.79 |
| 0.62 | 1.19 | 0.65 | 1.08 | 0.57 |
| 0.22 | 0.70 | 0.09 | 0.69 | 0.14 |
| 0.22 | 0.70 | 0.09 | 0.69 | 0.14 |
| 0.48 | 0.87 | 0.23 | 1.03 | 0.52 |
| 0.05 | 0.79 | 0.18 | 0.67 | 0.14 |
| 0.68 | 0.99 | 0.37 | 0.71 | 0.16 |
| 0.63 | 1.07 | 0.48 | 1.00 | 0.50 |
| #N/A | #N/A | #N/A | #N/A | #N/A |
| 0.96 | 0.90 | 0.27 | 0.88 | 0.33 |
| 0.96 | 0.90 | 0.27 | 0.88 | 0.33 |
| 0.86 | 1.29 | 0.78 | 0.89 | 0.36 |
| 0.83 | 0.95 | 0.33 | 0.90 | 0.37 |
| 0.74 | 1.23 | 0.66 | 1.02 | 0.53 |
| 0.74 | 1.23 | 0.66 | 1.02 | 0.53 |
| #N/A | #N/A | #N/A | #N/A | #N/A |
| 0.72 | 1.15 | 0.60 | 1.12 | 0.65 |
| 0.72 | 1.15 | 0.60 | 1.12 | 0.65 |
| 0.52 | 0.97 | 0.38 | 1.13 | 0.66 |
| 0.80 | 1.43 | 0.79 | 1.27 | 0.77 |
| 0.65 | #N/A | #N/A | 1.19 | 0.68 |
| 0.65 | #N/A | #N/A | 1.19 | 0.68 |
| 0.81 | 1.04 | 0.45 | 1.01 | 0.52 |
| #N/A | #N/A | #N/A | #N/A | #N/A |
| 0.81 | 1.04 | 0.45 | 1.01 | 0.52 |
| #N/A | 1.32 | 0.81 | 1.35 | 0.81 |
| #N/A | 1.32 | 0.81 | 1.35 | 0.81 |
| 0.63 | 1.05 | 0.47 | 1.46 | 0.76 |
| 0.63 | 1.05 | 0.47 | 1.46 | 0.76 |
| 0.49 | 1.19 | 0.65 | 1.21 | 0.70 |
| 0.23 | 0.95 | 0.33 | 0.93 | 0.41 |
| 0.94 | 1.46 | 0.85 | 1.07 | 0.54 |
| #N/A | 1.18 | 0.64 | #N/A | #N/A |
| #N/A | 1.18 | 0.64 | #N/A | #N/A |
| #N/A | 1.10 | 0.53 | 1.26 | 0.78 |
| #N/A | 1.10 | 0.53 | 1.26 | 0.78 |
| 0.46 | 1.17 | 0.63 | 1.00 | 0.49 |
| 0.46 | 1.17 | 0.63 | 1.00 | 0.49 |
| #N/A | #N/A | #N/A | #N/A | #N/A |
| 0.63 | 1.22 | 0.67 | 1.29 | 0.81 |
| #N/A | #N/A | #N/A | #N/A | #N/A |
| #N/A | 0.94 | 0.31 | 0.81 | 0.25 |
| #N/A | #N/A | #N/A | #N/A | #N/A |

|      |      |      |      |      |
|------|------|------|------|------|
| #N/A | #N/A | #N/A | #N/A | #N/A |
| 0.47 | 2.14 | 0.97 | 1.10 | 0.63 |
| #N/A | 0.99 | 0.42 | 0.85 | 0.32 |
| #N/A | 1.32 | 0.74 | 1.45 | 0.91 |
| #N/A | 1.32 | 0.74 | 1.45 | 0.91 |
| 0.24 | 0.69 | 0.09 | 0.84 | 0.29 |
| 0.24 | 0.69 | 0.09 | 0.84 | 0.29 |
| 0.67 | 1.25 | 0.74 | 1.31 | 0.81 |

Recovery 30 min: H2A-TAP | Recovery 30 min: H2A-TAP CHIP (percentile rank, MPR) - Intergenic, 2!

|      |      |
|------|------|
| 0.83 | 0.22 |
| 0.87 | 0.26 |
| 0.81 | 0.18 |
| 1.09 | 0.52 |
| 0.81 | 0.18 |
| 1.24 | 0.74 |
| 1.16 | 0.62 |
| 1.05 | 0.49 |
| 1.05 | 0.49 |
| #N/A | #N/A |
| 1.67 | 0.97 |
| 1.43 | 0.89 |
| 1.43 | 0.89 |
| 1.50 | 0.93 |
| 0.94 | 0.34 |
| 1.06 | 0.51 |
| 1.34 | 0.84 |
| 1.34 | 0.84 |
| 1.18 | 0.66 |
| 1.00 | 0.41 |
| #N/A | #N/A |
| 1.21 | 0.65 |
| 1.21 | 0.65 |
| 1.24 | 0.72 |
| 1.70 | 0.94 |
| 1.70 | 0.94 |
| 1.18 | 0.67 |
| 1.01 | 0.45 |
| 0.92 | 0.34 |
| 0.84 | 0.24 |
| 0.81 | 0.18 |
| 1.09 | 0.53 |
| 1.37 | 0.77 |
| 1.37 | 0.77 |
| 1.09 | 0.53 |
| #N/A | #N/A |
| #N/A | #N/A |
| 1.20 | 0.68 |
| 0.94 | 0.39 |
| 0.78 | 0.21 |
| 0.92 | 0.30 |
| #N/A | #N/A |
| 0.51 | 0.03 |
| 0.89 | 0.29 |
| 0.95 | 0.35 |
| 1.70 | 0.87 |
| 0.74 | 0.13 |
| 1.24 | 0.69 |
| 1.09 | 0.52 |
| #N/A | #N/A |

|      |      |
|------|------|
| 1.00 | 0.41 |
| 0.68 | 0.09 |
| 1.11 | 0.58 |
| #N/A | #N/A |
| #N/A | #N/A |
| 1.11 | 0.58 |
| 1.11 | 0.58 |
| #N/A | #N/A |
| #N/A | #N/A |
| 0.93 | 0.33 |
| 0.94 | 0.34 |
| 1.24 | 0.73 |
| 1.24 | 0.73 |
| #N/A | #N/A |
| 1.31 | 0.81 |
| 1.20 | 0.69 |
| 1.12 | 0.59 |
| 1.04 | 0.47 |
| 1.10 | 0.57 |
| 1.05 | 0.49 |
| 1.49 | 0.92 |
| 1.05 | 0.49 |
| 1.49 | 0.92 |
| 1.22 | 0.72 |
| #N/A | #N/A |
| #N/A | #N/A |
| 1.02 | 0.45 |
| #N/A | #N/A |
| 1.62 | 0.92 |
| 1.60 | 0.95 |
| #N/A | #N/A |
| 1.50 | 0.92 |
| 1.06 | 0.51 |
| 1.06 | 0.51 |
| 1.31 | 0.79 |
| 1.34 | 0.83 |
| 1.31 | 0.80 |
| 1.54 | 0.94 |
| 1.33 | 0.83 |
| 1.43 | 0.86 |
| 1.43 | 0.86 |
| 1.14 | 0.59 |
| #N/A | #N/A |
| 1.14 | 0.59 |
| 1.15 | 0.58 |
| 0.46 | 0.02 |
| 0.46 | 0.02 |
| 0.74 | 0.14 |
| 0.96 | 0.44 |
| 1.20 | 0.63 |
| 1.37 | 0.85 |



|      |      |
|------|------|
| #N/A | #N/A |
| 0.91 | 0.29 |
| 0.87 | 0.24 |
| 0.87 | 0.24 |
| 1.24 | 0.69 |
| 1.03 | 0.45 |
| 1.03 | 0.45 |
| 1.05 | 0.50 |
| 0.99 | 0.46 |
| #N/A | #N/A |
| #N/A | #N/A |
| 1.38 | 0.86 |
| 1.71 | 0.91 |
| 1.33 | 0.67 |
| 1.19 | 0.65 |
| 0.29 | 0.00 |
| 0.43 | 0.02 |
| 0.97 | 0.39 |
| 0.92 | 0.31 |
| 1.08 | 0.52 |
| 1.08 | 0.52 |
| 1.04 | 0.48 |
| 0.90 | 0.29 |
| 0.90 | 0.29 |
| 1.16 | 0.65 |
| 0.37 | 0.01 |
| 0.37 | 0.01 |
| 0.90 | 0.35 |
| 0.79 | 0.17 |
| 1.26 | 0.74 |
| 1.32 | 0.80 |
| 1.32 | 0.80 |
| 1.17 | 0.64 |
| 1.17 | 0.64 |
| 1.00 | 0.42 |
| 0.91 | 0.35 |
| 0.91 | 0.35 |
| 1.09 | 0.51 |
| 1.09 | 0.51 |
| 1.05 | 0.49 |
| 0.91 | 0.34 |
| 1.55 | 0.89 |
| 1.55 | 0.89 |
| #N/A | #N/A |
| 1.15 | 0.63 |
| 1.15 | 0.63 |
| 1.25 | 0.76 |
| 1.25 | 0.76 |
| 1.09 | 0.54 |
| #N/A | #N/A |
| 1.09 | 0.54 |

|      |      |
|------|------|
| #N/A | #N/A |
| 0.75 | 0.13 |
| 1.26 | 0.74 |
| 0.49 | 0.03 |
| 1.26 | 0.74 |
| #N/A | #N/A |
| #N/A | #N/A |
| 1.27 | 0.77 |
| 1.28 | 0.74 |
| 1.28 | 0.74 |
| 1.28 | 0.74 |
| 1.03 | 0.46 |
| #N/A | #N/A |
| #N/A | #N/A |
| #N/A | #N/A |
| 1.08 | 0.54 |
| 1.08 | 0.54 |
| 0.66 | 0.08 |
| 0.66 | 0.08 |
| 1.19 | 0.66 |
| #N/A | #N/A |
| 1.19 | 0.66 |
| 1.75 | 0.97 |
| 0.57 | 0.07 |
| 0.89 | 0.29 |
| 0.57 | 0.07 |
| 1.24 | 0.74 |
| 1.24 | 0.74 |
| 0.99 | 0.41 |
| 0.99 | 0.41 |
| #N/A | #N/A |
| 0.71 | 0.11 |
| 0.71 | 0.11 |
| 0.71 | 0.11 |
| 0.71 | 0.11 |
| #N/A | #N/A |
| 1.16 | 0.62 |
| 0.96 | 0.42 |
| 0.96 | 0.42 |
| 1.35 | 0.85 |
| 1.35 | 0.85 |
| 1.26 | 0.68 |
| 0.73 | 0.23 |
| 0.73 | 0.23 |
| 1.40 | 0.87 |
| 1.47 | 0.89 |
| #N/A | #N/A |
| 1.47 | 0.89 |
| 1.25 | 0.74 |
| 1.09 | 0.54 |
| 0.92 | 0.37 |

|      |      |
|------|------|
| 1.09 | 0.55 |
| 1.09 | 0.55 |
| 1.37 | 0.79 |
| #N/A | #N/A |
| 1.29 | 0.80 |
| #N/A | #N/A |
| 1.18 | 0.66 |
| 1.12 | 0.55 |
| 1.12 | 0.55 |
| #N/A | #N/A |
| #N/A | #N/A |
| 0.99 | 0.41 |
| 1.14 | 0.59 |
| 1.13 | 0.57 |
| 1.26 | 0.76 |
| 0.88 | 0.25 |
| 1.04 | 0.47 |
| 0.75 | 0.13 |
| 1.24 | 0.73 |
| 0.76 | 0.14 |
| 1.17 | 0.63 |
| 1.01 | 0.42 |
| 0.99 | 0.41 |
| 1.09 | 0.53 |
| 1.24 | 0.56 |
| 0.98 | 0.39 |
| 1.25 | 0.73 |
| #N/A | #N/A |
| 1.32 | 0.82 |
| 1.15 | 0.57 |
| 1.32 | 0.82 |
| 0.87 | 0.26 |
| 0.69 | 0.10 |
| 0.74 | 0.13 |
| 0.39 | 0.01 |
| 0.66 | 0.15 |
| 1.04 | 0.46 |
| 1.04 | 0.46 |
| 1.24 | 0.74 |
| #N/A | #N/A |
| 1.17 | 0.65 |
| #N/A | #N/A |
| 0.34 | 0.01 |
| 0.74 | 0.13 |
| 0.71 | 0.11 |
| 0.50 | 0.02 |
| 0.50 | 0.02 |
| 0.90 | 0.36 |
| 0.81 | 0.18 |
| #N/A | #N/A |
| 1.13 | 0.61 |

|      |      |
|------|------|
| #N/A | #N/A |
| 1.13 | 0.60 |
| 0.92 | 0.30 |
| #N/A | #N/A |
| #N/A | #N/A |
| #N/A | #N/A |
| #N/A | #N/A |
| 1.44 | 0.66 |
| #N/A | #N/A |
| 0.90 | 0.27 |
| 1.01 | 0.42 |
| 1.51 | 0.90 |
| 0.73 | 0.18 |
| 0.73 | 0.18 |
| #N/A | #N/A |
| #N/A | #N/A |
| 1.13 | 0.60 |
| 1.13 | 0.60 |
| #N/A | #N/A |
| 0.70 | 0.10 |
| #N/A | #N/A |
| 0.94 | 0.33 |
| 0.94 | 0.33 |
| 0.94 | 0.33 |
| #N/A | #N/A |
| 1.35 | 0.84 |
| 1.04 | 0.48 |
| 1.21 | 0.71 |
| 1.04 | 0.48 |
| #N/A | #N/A |
| #N/A | #N/A |
| 1.11 | 0.57 |
| 0.82 | 0.22 |
| 1.04 | 0.48 |
| 1.23 | 0.73 |
| 1.23 | 0.73 |
| 1.33 | 0.83 |
| 0.94 | 0.39 |
| 0.94 | 0.39 |
| #N/A | #N/A |
| 0.96 | 0.37 |
| 1.20 | 0.62 |
| 1.28 | 0.78 |
| 1.04 | 0.47 |
| 1.04 | 0.47 |
| 1.20 | 0.65 |
| 1.01 | 0.46 |
| 1.03 | 0.47 |
| 0.92 | 0.31 |
| 0.92 | 0.31 |
| 0.95 | 0.35 |

|      |      |
|------|------|
| 1.15 | 0.63 |
| 0.96 | 0.38 |
| 0.96 | 0.38 |
| 1.03 | 0.46 |
| 0.37 | 0.01 |
| 1.12 | 0.59 |
| 0.83 | 0.21 |
| 0.86 | 0.22 |
| 0.63 | 0.06 |
| 0.63 | 0.06 |
| 1.13 | 0.60 |
| 1.13 | 0.60 |
| 1.09 | 0.53 |
| 1.17 | 0.63 |
| 1.17 | 0.63 |
| 1.08 | 0.51 |
| 1.70 | 0.83 |
| 1.70 | 0.83 |
| 1.13 | 0.59 |
| 1.28 | 0.74 |
| 0.97 | 0.39 |
| 1.28 | 0.74 |
| 0.97 | 0.39 |
| #N/A | #N/A |
| 0.61 | 0.06 |
| 1.06 | 0.50 |
| 0.65 | 0.07 |
| 0.93 | 0.32 |
| 0.93 | 0.32 |
| 0.55 | 0.04 |
| 1.03 | 0.46 |
| 1.16 | 0.63 |
| 0.89 | 0.28 |
| 0.89 | 0.28 |
| 0.56 | 0.04 |
| 0.56 | 0.04 |
| 1.40 | 0.88 |
| 1.18 | 0.66 |
| 1.18 | 0.66 |
| 0.99 | 0.40 |
| 0.58 | 0.05 |
| 1.11 | 0.56 |
| 1.52 | 0.84 |
| 1.33 | 0.81 |
| 0.95 | 0.36 |
| #N/A | #N/A |
| 1.33 | 0.82 |
| 1.33 | 0.82 |
| 1.33 | 0.82 |
| 0.82 | 0.19 |
| 0.87 | 0.24 |

|      |      |
|------|------|
| 1.03 | 0.46 |
| 1.14 | 0.62 |
| 1.10 | 0.55 |
| 1.20 | 0.69 |
| 0.85 | 0.23 |
| 0.85 | 0.23 |
| 1.12 | 0.59 |
| 1.12 | 0.59 |
| 1.38 | 0.87 |
| 0.80 | 0.19 |
| 0.97 | 0.37 |
| 0.80 | 0.19 |
| 0.97 | 0.37 |
| 0.97 | 0.37 |
| 0.77 | 0.15 |
| 0.72 | 0.12 |
| 1.31 | 0.82 |
| 1.06 | 0.49 |
| 1.31 | 0.82 |
| 1.16 | 0.64 |
| 0.90 | 0.27 |
| 0.57 | 0.04 |
| 1.20 | 0.66 |
| 1.12 | 0.59 |
| 1.12 | 0.59 |
| 1.14 | 0.59 |
| 1.14 | 0.59 |
| #N/A | #N/A |
| 0.96 | 0.38 |
| 1.03 | 0.47 |
| 1.04 | 0.48 |
| 1.04 | 0.48 |
| 1.21 | 0.69 |
| 1.05 | 0.48 |
| 1.62 | 0.84 |
| 1.03 | 0.46 |
| 1.03 | 0.46 |
| 0.98 | 0.38 |
| 0.98 | 0.38 |
| 1.10 | 0.56 |
| 1.10 | 0.56 |
| 1.31 | 0.81 |
| 1.28 | 0.78 |
| 1.22 | 0.56 |
| 1.28 | 0.78 |
| 1.22 | 0.56 |
| 1.22 | 0.56 |
| 0.98 | 0.39 |
| 1.23 | 0.71 |
| 0.98 | 0.39 |
| 0.91 | 0.29 |

|      |      |
|------|------|
| 1.27 | 0.78 |
| 1.27 | 0.78 |
| 0.98 | 0.41 |
| 1.86 | 0.90 |
| 1.86 | 0.90 |
| 1.09 | 0.53 |
| #N/A | #N/A |
| 0.84 | 0.21 |
| #N/A | #N/A |
| 0.84 | 0.21 |
| #N/A | #N/A |
| 0.95 | 0.38 |
| 0.95 | 0.38 |
| 1.17 | 0.63 |
| 1.17 | 0.63 |
| 0.98 | 0.40 |
| 1.25 | 0.56 |
| 1.04 | 0.48 |
| 1.02 | 0.44 |
| 1.02 | 0.44 |
| 1.00 | 0.42 |
| 0.94 | 0.33 |
| 1.28 | 0.79 |
| 1.03 | 0.47 |
| 1.00 | 0.46 |
| 1.21 | 0.67 |
| 0.81 | 0.19 |
| 1.17 | 0.66 |
| 1.19 | 0.67 |
| 1.19 | 0.67 |
| 1.15 | 0.63 |
| 1.29 | 0.79 |
| #N/A | #N/A |
| 1.36 | 0.69 |
| 0.79 | 0.19 |
| #N/A | #N/A |
| 1.36 | 0.69 |
| 1.36 | 0.69 |
| 0.79 | 0.19 |
| 0.79 | 0.19 |
| 0.79 | 0.19 |
| 0.79 | 0.19 |
| 0.79 | 0.19 |
| 0.79 | 0.19 |
| 1.36 | 0.69 |
| #N/A | #N/A |
| #N/A | #N/A |
| #N/A | #N/A |
| 1.36 | 0.69 |
| 1.36 | 0.69 |
| #N/A | #N/A |
| 0.91 | 0.29 |

|      |      |
|------|------|
| 0.91 | 0.29 |
| #N/A | #N/A |
| 0.91 | 0.29 |
| 0.91 | 0.29 |
| 0.65 | 0.07 |
| 0.65 | 0.07 |
| #N/A | #N/A |
| 1.25 | 0.76 |
| 1.34 | 0.83 |
| 1.34 | 0.83 |
| 0.87 | 0.25 |
| 1.07 | 0.51 |
| 1.65 | 0.92 |
| 1.65 | 0.92 |
| 1.62 | 0.93 |
| 1.62 | 0.93 |
| 1.20 | 0.70 |
| 1.20 | 0.70 |
| 0.87 | 0.24 |
| 1.31 | 0.80 |
| 1.14 | 0.62 |
| 1.31 | 0.80 |
| 1.14 | 0.62 |
| 1.31 | 0.80 |
| 1.14 | 0.62 |
| 1.04 | 0.46 |
| #N/A | #N/A |
| #N/A | #N/A |
| 0.99 | 0.39 |
| 0.99 | 0.39 |
| 1.22 | 0.72 |
| 1.17 | 0.65 |
| 1.17 | 0.65 |
| #N/A | #N/A |
| 0.88 | 0.26 |
| 1.13 | 0.61 |
| 1.13 | 0.61 |
| #N/A | #N/A |
| #N/A | #N/A |
| 0.82 | 0.19 |
| #N/A | #N/A |
| 1.46 | 0.90 |
| #N/A | #N/A |
| 1.01 | 0.44 |
| 1.01 | 0.44 |
| #N/A | #N/A |
| #N/A | #N/A |
| #N/A | #N/A |
| 1.54 | 0.94 |
| 1.40 | 0.83 |
| 1.40 | 0.83 |



|      |      |
|------|------|
| 1.41 | 0.89 |
| #N/A | #N/A |
| #N/A | #N/A |
| #N/A | #N/A |
| #N/A | #N/A |
| #N/A | #N/A |
| #N/A | #N/A |
| #N/A | #N/A |
| #N/A | #N/A |
| #N/A | #N/A |
| #N/A | #N/A |
| #N/A | #N/A |
| #N/A | #N/A |
| 1.36 | 0.69 |
| 0.79 | 0.19 |
| 1.36 | 0.69 |
| 0.79 | 0.19 |
| 0.79 | 0.19 |
| 0.79 | 0.19 |
| #N/A | #N/A |
| 0.79 | 0.19 |
| #N/A | #N/A |
| #N/A | #N/A |
| #N/A | #N/A |
| 0.79 | 0.19 |
| #N/A | #N/A |
| #N/A | #N/A |
| #N/A | #N/A |
| 1.12 | 0.56 |
| #N/A | #N/A |
| 1.38 | 0.79 |
| 0.98 | 0.42 |
| 1.23 | 0.74 |
| 1.04 | 0.46 |
| 1.24 | 0.74 |
| 1.23 | 0.73 |
| 0.83 | 0.20 |
| 0.61 | 0.06 |
| 0.73 | 0.18 |
| 1.09 | 0.54 |
| 1.03 | 0.45 |
| 1.25 | 0.75 |
| #N/A | #N/A |
| #N/A | #N/A |
| 1.08 | 0.52 |
| 0.87 | 0.24 |
| 1.08 | 0.51 |
| 1.09 | 0.53 |

|      |      |
|------|------|
| 1.20 | 0.69 |
| 0.80 | 0.17 |
| 0.80 | 0.17 |
| 0.70 | 0.13 |
| 1.55 | 0.94 |
| #N/A | #N/A |
| #N/A | #N/A |
| #N/A | #N/A |
| 1.00 | 0.42 |
| 1.44 | 0.84 |
| 1.45 | 0.91 |
| 1.23 | 0.69 |
| 1.56 | 0.94 |
| 1.42 | 0.89 |
| 1.42 | 0.89 |
| 1.66 | 0.84 |
| 1.66 | 0.84 |
| 1.66 | 0.84 |
| 1.51 | 0.72 |
| 1.43 | 0.90 |
| 1.15 | 0.61 |
| #N/A | #N/A |
| #N/A | #N/A |
| 1.18 | 0.66 |
| #N/A | #N/A |
| 1.78 | 0.97 |
| 1.78 | 0.97 |
| 1.00 | 0.41 |
| 1.00 | 0.41 |
| 0.94 | 0.36 |
| 0.52 | 0.03 |
| 0.52 | 0.03 |
| 1.24 | 0.73 |
| 1.11 | 0.55 |
| 1.11 | 0.55 |
| 1.49 | 0.85 |
| #N/A | #N/A |
| 0.93 | 0.34 |
| 1.31 | 0.70 |
| 1.05 | 0.50 |
| #N/A | #N/A |
| 1.20 | 0.70 |
| #N/A | #N/A |
| 1.38 | 0.61 |
| 1.38 | 0.61 |
| #N/A | #N/A |
| 0.89 | 0.28 |
| 0.86 | 0.25 |
| 1.02 | 0.44 |
| 0.96 | 0.38 |
| 0.96 | 0.38 |

|      |      |
|------|------|
| 1.36 | 0.68 |
| 1.36 | 0.68 |
| 1.54 | 0.85 |
| 1.34 | 0.79 |
| #N/A | #N/A |
| 1.32 | 0.77 |
| 0.80 | 0.17 |
| 0.80 | 0.17 |
| 0.72 | 0.12 |
| 1.55 | 0.94 |
| 1.35 | 0.83 |
| #N/A | #N/A |
| #N/A | #N/A |
| 1.30 | 0.76 |
| #N/A | #N/A |
| #N/A | #N/A |
| 1.21 | 0.71 |
| 1.00 | 0.43 |
| 1.16 | 0.65 |
| 1.16 | 0.65 |
| 1.27 | 0.77 |
| 1.53 | 0.81 |
| 1.41 | 0.87 |
| #N/A | #N/A |
| #N/A | #N/A |
| #N/A | #N/A |
| #N/A | #N/A |
| #N/A | #N/A |
| #N/A | #N/A |
| #N/A | #N/A |
| #N/A | #N/A |
| #N/A | #N/A |
| #N/A | #N/A |
| #N/A | #N/A |
| #N/A | #N/A |
| #N/A | #N/A |
| #N/A | #N/A |
| #N/A | #N/A |
| #N/A | #N/A |
| #N/A | #N/A |
| #N/A | #N/A |
| #N/A | #N/A |
| #N/A | #N/A |
| #N/A | #N/A |
| 0.88 | 0.29 |
| 0.88 | 0.29 |
| 0.89 | 0.27 |
| 1.19 | 0.61 |
| 1.19 | 0.61 |
| 0.86 | 0.23 |
| #N/A | #N/A |

|      |      |
|------|------|
| 1.00 | 0.41 |
| 1.00 | 0.41 |
| 1.10 | 0.56 |
| 1.00 | 0.41 |
| 1.10 | 0.56 |
| 1.14 | 0.59 |
| 1.42 | 0.87 |
| 1.42 | 0.87 |
| 0.99 | 0.43 |
| 1.26 | 0.76 |
| 1.26 | 0.76 |
| #N/A | #N/A |
| 1.07 | 0.52 |
| 1.29 | 0.74 |
| 0.61 | 0.05 |
| 1.29 | 0.74 |
| 1.01 | 0.42 |
| 1.09 | 0.53 |
| 0.99 | 0.40 |
| 1.19 | 0.56 |
| 0.99 | 0.40 |
| #N/A | #N/A |
| 1.00 | 0.43 |
| #N/A | #N/A |
| 1.04 | 0.47 |
| #N/A | #N/A |
| 1.47 | 0.92 |
| 1.04 | 0.47 |
| 1.47 | 0.92 |
| 0.72 | 0.12 |
| #N/A | #N/A |
| #N/A | #N/A |
| 1.08 | 0.51 |
| #N/A | #N/A |
| 0.96 | 0.37 |
| #N/A | #N/A |
| 0.95 | 0.35 |
| 1.07 | 0.51 |
| #N/A | #N/A |
| 0.74 | 0.13 |
| 0.81 | 0.19 |
| #N/A | #N/A |
| #N/A | #N/A |
| 0.90 | 0.28 |
| 0.90 | 0.28 |
| 1.09 | 0.54 |
| 1.18 | 0.64 |
| 0.62 | 0.06 |
| 1.24 | 0.74 |
| 1.12 | 0.59 |
| 1.70 | 0.97 |

|      |      |
|------|------|
| 1.70 | 0.97 |
| 0.80 | 0.18 |
| 0.80 | 0.18 |
| #N/A | #N/A |
| 0.81 | 0.20 |
| 1.06 | 0.51 |
| 1.06 | 0.51 |
| 1.41 | 0.88 |
| 1.41 | 0.88 |
| #N/A | #N/A |
| 1.29 | 0.70 |
| #N/A | #N/A |
| #N/A | #N/A |
| #N/A | #N/A |
| 1.23 | 0.72 |
| 1.23 | 0.72 |
| 0.54 | 0.03 |
| 0.54 | 0.03 |
| 1.18 | 0.67 |
| 1.41 | 0.84 |
| 1.57 | 0.94 |
| 1.38 | 0.81 |
| 1.36 | 0.82 |
| 0.41 | 0.01 |
| 0.41 | 0.01 |
| 1.35 | 0.83 |
| 1.13 | 0.60 |
| 1.17 | 0.64 |
| 1.17 | 0.64 |
| 0.92 | 0.32 |
| 1.13 | 0.60 |
| 1.13 | 0.60 |
| 1.30 | 0.63 |
| 1.09 | 0.55 |
| #N/A | #N/A |
| 1.09 | 0.55 |
| 0.91 | 0.31 |
| #N/A | #N/A |
| 0.91 | 0.31 |
| 0.58 | 0.04 |
| 0.96 | 0.38 |
| 0.96 | 0.38 |
| #N/A | #N/A |
| 0.92 | 0.31 |
| 0.92 | 0.31 |
| 0.91 | 0.38 |
| 1.09 | 0.54 |
| 1.09 | 0.54 |
| 1.01 | 0.48 |
| 1.36 | 0.74 |
| 1.36 | 0.74 |

|      |      |
|------|------|
| 1.80 | 0.97 |
| 1.22 | 0.63 |
| 0.96 | 0.37 |
| 0.96 | 0.37 |
| 1.28 | 0.74 |
| 1.28 | 0.74 |
| 1.00 | 0.43 |
| 1.12 | 0.56 |
| 1.14 | 0.61 |
| 1.12 | 0.56 |
| 0.87 | 0.24 |
| 0.87 | 0.24 |
| 1.32 | 0.82 |
| 1.07 | 0.52 |
| 0.89 | 0.28 |
| 0.89 | 0.28 |
| 1.22 | 0.72 |
| 0.71 | 0.10 |
| 1.30 | 0.75 |
| 0.88 | 0.26 |
| 0.69 | 0.11 |
| #N/A | #N/A |
| 1.39 | 0.87 |
| 0.47 | 0.02 |
| 1.05 | 0.48 |
| #N/A | #N/A |
| 0.91 | 0.32 |
| 0.67 | 0.09 |
| 1.39 | 0.84 |
| 0.91 | 0.38 |
| 0.91 | 0.38 |
| 1.10 | 0.56 |
| 1.27 | 0.76 |
| 1.27 | 0.76 |
| 1.29 | 0.79 |
| 1.29 | 0.79 |
| 1.18 | 0.66 |
| 1.12 | 0.59 |
| 0.98 | 0.39 |
| 0.98 | 0.39 |
| 1.34 | 0.84 |
| 0.81 | 0.18 |
| 1.34 | 0.84 |
| #N/A | #N/A |
| 0.81 | 0.18 |
| 1.23 | 0.72 |
| 1.17 | 0.65 |
| #N/A | #N/A |
| #N/A | #N/A |
| #N/A | #N/A |
| 1.28 | 0.79 |

|      |      |
|------|------|
| 1.28 | 0.79 |
| #N/A | #N/A |
| #N/A | #N/A |
| #N/A | #N/A |
| #N/A | #N/A |
| 0.22 | 0.00 |
| 0.22 | 0.00 |
| 1.10 | 0.55 |
| 0.87 | 0.25 |
| 0.87 | 0.25 |
| 0.74 | 0.14 |
| 0.74 | 0.14 |
| #N/A | #N/A |
| #N/A | #N/A |
| #N/A | #N/A |
| 0.96 | 0.36 |
| 0.95 | 0.35 |
| 0.95 | 0.35 |
| 1.16 | 0.65 |
| 0.89 | 0.27 |
| 1.22 | 0.69 |
| 1.01 | 0.42 |
| 0.57 | 0.04 |
| 1.04 | 0.47 |
| 0.43 | 0.01 |
| 1.16 | 0.65 |
| 1.07 | 0.51 |
| 1.16 | 0.65 |
| 1.07 | 0.51 |
| 1.59 | 0.89 |
| 1.59 | 0.89 |
| 0.80 | 0.19 |
| 1.26 | 0.56 |
| 0.83 | 0.21 |
| 1.13 | 0.55 |
| 1.23 | 0.73 |
| 1.46 | 0.82 |
| 1.46 | 0.82 |
| 1.20 | 0.62 |
| 1.09 | 0.55 |
| #N/A | #N/A |
| 1.08 | 0.54 |
| 0.87 | 0.25 |
| 0.87 | 0.25 |
| 1.26 | 0.73 |
| 1.26 | 0.73 |
| 1.29 | 0.79 |
| #N/A | #N/A |
| 0.97 | 0.39 |
| 0.97 | 0.39 |
| 0.92 | 0.31 |

|      |      |
|------|------|
| 1.12 | 0.59 |
| 1.34 | 0.69 |
| 1.34 | 0.69 |
| 0.86 | 0.27 |
| 1.11 | 0.56 |
| 0.97 | 0.43 |
| 1.09 | 0.56 |
| 0.85 | 0.22 |
| 0.87 | 0.35 |
| 0.87 | 0.35 |
| 1.05 | 0.49 |
| 1.05 | 0.49 |
| 1.15 | 0.62 |
| 1.18 | 0.67 |
| 1.38 | 0.84 |
| 1.38 | 0.84 |
| 1.33 | 0.83 |
| 0.85 | 0.26 |
| #N/A | #N/A |
| 0.81 | 0.18 |
| 0.81 | 0.18 |
| 1.12 | 0.59 |
| 1.42 | 0.71 |
| 1.42 | 0.71 |
| 1.24 | 0.73 |
| 1.19 | 0.62 |
| 1.80 | 0.89 |
| 1.80 | 0.89 |
| 1.44 | 0.89 |
| 1.17 | 0.65 |
| 0.98 | 0.39 |
| 1.10 | 0.56 |
| 1.10 | 0.56 |
| 0.98 | 0.40 |
| 0.78 | 0.15 |
| 0.92 | 0.30 |
| 1.24 | 0.75 |
| #N/A | #N/A |
| 0.91 | 0.29 |
| 0.91 | 0.29 |
| 0.87 | 0.25 |
| 1.26 | 0.75 |
| 0.84 | 0.23 |
| 1.47 | 0.89 |
| 1.47 | 0.89 |
| 1.05 | 0.48 |
| 1.05 | 0.48 |
| 0.90 | 0.31 |
| 0.90 | 0.31 |
| 1.17 | 0.66 |
| #N/A | #N/A |



|      |      |
|------|------|
| 1.29 | 0.78 |
| #N/A | #N/A |
| 0.99 | 0.41 |
| 0.96 | 0.35 |
| 1.95 | 0.59 |
| 1.05 | 0.48 |
| 1.24 | 0.61 |
| 1.24 | 0.61 |
| 1.14 | 0.60 |
| 1.04 | 0.46 |
| #N/A | #N/A |
| #N/A | #N/A |
| 1.12 | 0.59 |
| 1.40 | 0.88 |
| #N/A | #N/A |
| #N/A | #N/A |
| 1.41 | 0.88 |
| 1.41 | 0.88 |
| 0.93 | 0.32 |
| 0.92 | 0.35 |
| 1.12 | 0.59 |
| 1.08 | 0.53 |
| 0.75 | 0.14 |
| 0.75 | 0.14 |
| 1.02 | 0.44 |
| #N/A | #N/A |
| 0.89 | 0.26 |
| 0.89 | 0.26 |
| 0.86 | 0.23 |
| 0.90 | 0.30 |
| 0.86 | 0.23 |
| 0.80 | 0.17 |
| #N/A | #N/A |
| #N/A | #N/A |
| 1.25 | 0.73 |
| 0.87 | 0.24 |
| 1.07 | 0.50 |
| 1.21 | 0.68 |
| 1.20 | 0.68 |
| 1.21 | 0.68 |
| 0.94 | 0.37 |
| 0.94 | 0.37 |
| 1.26 | 0.75 |
| 1.26 | 0.75 |
| 0.65 | 0.08 |
| #N/A | #N/A |
| #N/A | #N/A |
| 0.95 | 0.35 |
| 0.92 | 0.30 |
| 1.24 | 0.68 |
| 0.52 | 0.05 |

|      |      |
|------|------|
| #N/A | #N/A |
| 1.26 | 0.76 |
| 1.08 | 0.51 |
| 1.08 | 0.51 |
| 1.00 | 0.42 |
| 1.04 | 0.47 |
| 1.11 | 0.57 |
| #N/A | #N/A |
| #N/A | #N/A |
| 1.07 | 0.52 |
| 1.20 | 0.68 |
| 1.10 | 0.55 |
| 0.61 | 0.05 |
| 1.31 | 0.71 |
| 1.31 | 0.71 |
| 0.90 | 0.27 |
| 1.18 | 0.67 |
| 1.18 | 0.67 |
| #N/A | #N/A |
| 1.21 | 0.69 |
| 0.84 | 0.22 |
| 0.95 | 0.34 |
| 0.85 | 0.23 |
| 1.02 | 0.46 |
| 0.80 | 0.18 |
| 0.97 | 0.37 |
| 0.88 | 0.26 |
| 0.88 | 0.26 |
| 1.16 | 0.64 |
| 1.16 | 0.64 |
| 1.10 | 0.56 |
| 1.10 | 0.56 |
| 0.84 | 0.22 |
| #N/A | #N/A |
| #N/A | #N/A |
| 1.30 | 0.81 |
| 0.91 | 0.28 |
| 1.05 | 0.48 |
| 1.05 | 0.48 |
| 1.04 | 0.47 |
| #N/A | #N/A |
| #N/A | #N/A |
| 1.30 | 0.73 |
| 1.30 | 0.73 |
| 1.15 | 0.64 |
| 1.15 | 0.64 |
| 1.25 | 0.64 |
| 0.92 | 0.31 |
| 1.22 | 0.72 |
| #N/A | #N/A |
| 1.22 | 0.72 |

|      |      |
|------|------|
| 1.01 | 0.43 |
| 1.53 | 0.92 |
| 1.53 | 0.92 |
| 0.99 | 0.42 |
| 1.06 | 0.49 |
| 1.06 | 0.49 |
| 1.03 | 0.46 |
| 1.15 | 0.63 |
| 1.15 | 0.63 |
| #N/A | #N/A |
| #N/A | #N/A |
| 0.98 | 0.39 |
| #N/A | #N/A |
| 0.86 | 0.23 |
| 1.24 | 0.73 |
| 1.14 | 0.61 |
| #N/A | #N/A |
| 0.55 | 0.04 |
| 0.55 | 0.04 |
| 1.15 | 0.58 |
| 1.17 | 0.57 |
| 1.15 | 0.58 |
| 1.17 | 0.57 |
| 1.01 | 0.44 |
| 1.01 | 0.44 |
| #N/A | #N/A |
| 1.28 | 0.78 |
| 1.05 | 0.48 |
| 1.06 | 0.50 |
| 1.06 | 0.50 |
| 0.71 | 0.11 |
| 0.71 | 0.11 |
| 1.06 | 0.51 |
| 1.26 | 0.70 |
| 1.06 | 0.51 |
| 0.99 | 0.40 |
| 0.99 | 0.40 |
| 0.85 | 0.22 |
| 0.75 | 0.13 |
| 0.75 | 0.13 |
| 0.75 | 0.13 |
| 0.75 | 0.13 |
| 0.75 | 0.13 |
| 0.97 | 0.39 |
| 1.01 | 0.46 |
| 0.84 | 0.22 |
| 1.02 | 0.45 |
| 1.02 | 0.45 |
| 1.14 | 0.61 |
| 1.14 | 0.61 |
| 1.21 | 0.68 |

|      |      |
|------|------|
| 1.21 | 0.68 |
| 1.29 | 0.71 |
| 1.42 | 0.78 |
| 0.95 | 0.34 |
| #N/A | #N/A |
| 0.90 | 0.30 |
| 0.70 | 0.10 |
| 0.70 | 0.10 |
| 1.13 | 0.56 |
| 1.13 | 0.56 |
| 0.89 | 0.27 |
| 1.33 | 0.83 |
| 0.92 | 0.33 |
| 0.92 | 0.33 |
| 1.11 | 0.56 |
| 1.09 | 0.55 |
| 1.09 | 0.55 |
| 1.18 | 0.61 |
| 0.97 | 0.38 |
| 0.95 | 0.37 |
| 0.76 | 0.14 |
| #N/A | #N/A |
| 0.76 | 0.14 |
| #N/A | #N/A |
| 1.15 | 0.64 |
| 1.15 | 0.64 |
| 0.99 | 0.39 |
| #N/A | #N/A |
| #N/A | #N/A |
| #N/A | #N/A |
| 1.07 | 0.50 |
| 1.07 | 0.50 |
| #N/A | #N/A |
| #N/A | #N/A |
| 1.29 | 0.79 |
| 1.29 | 0.79 |
| 1.40 | 0.88 |
| #N/A | #N/A |
| 1.40 | 0.88 |
| #N/A | #N/A |
| 0.96 | 0.36 |
| 1.16 | 0.63 |
| 1.16 | 0.63 |
| 0.99 | 0.40 |
| #N/A | #N/A |
| 0.76 | 0.14 |
| 1.53 | 0.73 |
| 0.92 | 0.31 |
| 0.83 | 0.26 |
| 1.24 | 0.75 |
| 1.24 | 0.75 |

|      |      |
|------|------|
| 1.03 | 0.46 |
| 1.01 | 0.45 |
| 1.34 | 0.79 |
| 0.76 | 0.14 |
| 1.34 | 0.79 |
| 0.76 | 0.14 |
| 0.92 | 0.30 |
| 0.56 | 0.04 |
| 0.56 | 0.04 |
| 0.80 | 0.17 |
| 1.36 | 0.82 |
| 1.24 | 0.74 |
| 1.24 | 0.74 |
| #N/A | #N/A |
| 1.03 | 0.45 |
| 1.03 | 0.45 |
| 0.61 | 0.07 |
| 0.61 | 0.07 |
| 1.35 | 0.60 |
| 1.47 | 0.81 |
| 1.47 | 0.81 |
| 1.18 | 0.66 |
| 1.02 | 0.44 |
| #N/A | #N/A |
| 1.02 | 0.44 |
| 0.80 | 0.20 |
| 0.99 | 0.40 |
| 0.99 | 0.40 |
| 1.19 | 0.56 |
| 1.15 | 0.55 |
| 1.13 | 0.61 |
| 1.05 | 0.50 |
| 1.04 | 0.46 |
| 1.20 | 0.70 |
| 1.20 | 0.70 |
| #N/A | #N/A |
| 0.82 | 0.20 |
| 0.82 | 0.20 |
| 1.12 | 0.55 |
| 1.19 | 0.68 |
| 1.15 | 0.60 |
| 0.59 | 0.06 |
| 0.48 | 0.02 |
| 0.83 | 0.20 |
| 1.27 | 0.68 |
| #N/A | #N/A |
| 1.10 | 0.57 |
| 1.08 | 0.53 |
| 1.08 | 0.53 |
| #N/A | #N/A |
| 0.99 | 0.39 |

|      |      |
|------|------|
| 0.99 | 0.39 |
| #N/A | #N/A |
| 1.17 | 0.65 |
| #N/A | #N/A |
| #N/A | #N/A |
| 1.03 | 0.45 |
| 1.08 | 0.53 |
| 1.08 | 0.53 |
| 0.64 | 0.07 |
| 0.90 | 0.30 |
| 1.06 | 0.52 |
| 1.15 | 0.63 |
| 1.04 | 0.46 |
| 0.90 | 0.28 |
| 1.73 | 0.96 |
| 1.23 | 0.74 |
| 1.07 | 0.50 |
| 1.07 | 0.50 |
| 1.33 | 0.68 |
| 1.33 | 0.68 |
| 1.27 | 0.78 |
| #N/A | #N/A |
| 1.27 | 0.71 |
| 1.27 | 0.71 |
| #N/A | #N/A |
| #N/A | #N/A |
| 0.92 | 0.33 |
| 1.15 | 0.61 |
| 1.15 | 0.61 |
| 0.73 | 0.15 |
| 1.06 | 0.51 |
| 1.06 | 0.51 |
| 0.97 | 0.37 |
| 0.97 | 0.37 |
| 1.00 | 0.41 |
| 1.47 | 0.91 |
| 1.20 | 0.70 |
| #N/A | #N/A |
| 1.02 | 0.44 |
| 0.81 | 0.19 |
| 1.06 | 0.50 |
| 0.59 | 0.05 |
| 0.89 | 0.29 |
| 0.89 | 0.29 |
| 0.88 | 0.25 |
| 0.94 | 0.32 |
| 1.03 | 0.45 |
| #N/A | #N/A |
| #N/A | #N/A |
| 1.36 | 0.64 |
| 1.14 | 0.60 |

|      |      |
|------|------|
| 1.16 | 0.64 |
| 1.19 | 0.68 |
| 1.19 | 0.68 |
| 0.97 | 0.38 |
| 0.99 | 0.41 |
| 1.23 | 0.67 |
| 1.23 | 0.67 |
| 1.54 | 0.83 |
| 1.54 | 0.83 |
| 1.13 | 0.60 |
| 1.26 | 0.76 |
| 1.26 | 0.76 |
| 1.19 | 0.64 |
| #N/A | #N/A |
| 0.89 | 0.27 |
| 0.89 | 0.27 |
| #N/A | #N/A |
| 1.51 | 0.77 |
| 1.03 | 0.46 |
| 0.88 | 0.30 |
| 0.69 | 0.11 |
| 0.69 | 0.11 |
| 1.05 | 0.49 |
| 0.69 | 0.10 |
| 0.91 | 0.35 |
| 1.09 | 0.54 |
| 0.46 | 0.02 |
| 0.76 | 0.17 |
| 0.76 | 0.17 |
| 0.91 | 0.29 |
| 1.07 | 0.52 |
| 1.12 | 0.59 |
| 1.12 | 0.59 |
| 1.26 | 0.76 |
| 1.12 | 0.59 |
| 1.37 | 0.85 |
| 1.45 | 0.86 |
| #N/A | #N/A |
| #N/A | #N/A |
| #N/A | #N/A |
| 0.79 | 0.20 |
| 1.28 | 0.76 |
| 0.88 | 0.31 |
| 1.35 | 0.82 |
| 1.35 | 0.82 |
| 1.09 | 0.55 |
| 1.08 | 0.53 |
| 1.27 | 0.78 |
| 1.08 | 0.53 |
| 1.27 | 0.78 |
| 0.70 | 0.18 |

|      |      |
|------|------|
| 0.89 | 0.26 |
| 0.89 | 0.26 |
| 0.83 | 0.20 |
| 0.83 | 0.20 |
| 1.11 | 0.58 |
| 1.07 | 0.51 |
| 1.07 | 0.51 |
| 1.25 | 0.75 |
| 1.07 | 0.52 |
| 1.07 | 0.52 |
| 1.19 | 0.67 |
| 0.66 | 0.10 |
| #N/A | #N/A |
| 1.09 | 0.54 |
| 0.39 | 0.01 |
| 0.39 | 0.01 |
| 1.02 | 0.45 |
| 1.01 | 0.42 |
| 1.01 | 0.42 |
| 1.07 | 0.52 |
| 1.02 | 0.43 |
| 1.32 | 0.82 |
| 1.32 | 0.82 |
| 0.96 | 0.40 |
| 1.07 | 0.52 |
| 0.96 | 0.35 |
| #N/A | #N/A |
| 0.87 | 0.25 |
| 0.87 | 0.25 |
| 0.58 | 0.05 |
| 0.99 | 0.44 |
| 1.01 | 0.43 |
| 0.97 | 0.39 |
| 0.97 | 0.39 |
| 0.97 | 0.39 |
| 0.97 | 0.39 |
| 1.06 | 0.51 |
| 1.02 | 0.44 |
| 1.11 | 0.57 |
| 1.11 | 0.57 |
| 0.97 | 0.42 |
| 1.43 | 0.80 |
| 1.43 | 0.80 |
| #N/A | #N/A |
| 1.47 | 0.90 |
| 1.11 | 0.57 |
| 1.11 | 0.57 |
| 0.86 | 0.23 |
| 0.45 | 0.02 |
| 0.86 | 0.23 |
| #N/A | #N/A |



|      |      |
|------|------|
| 1.08 | 0.53 |
| 2.03 | 0.99 |
| #N/A | #N/A |
| 1.31 | 0.80 |
| 1.31 | 0.80 |
| 1.07 | 0.53 |
| 1.07 | 0.53 |
| #N/A | #N/A |
| 1.06 | 0.49 |
| #N/A | #N/A |
| 1.06 | 0.49 |
| #N/A | #N/A |
| #N/A | #N/A |
| 1.32 | 0.79 |
| 1.64 | 0.94 |
| 1.64 | 0.94 |
| 0.99 | 0.40 |
| 1.36 | 0.84 |
| 1.47 | 0.91 |
| 1.27 | 0.75 |
| 0.40 | 0.01 |
| 0.40 | 0.01 |
| 1.43 | 0.88 |
| 1.43 | 0.88 |
| #N/A | #N/A |
| 0.97 | 0.38 |
| 0.68 | 0.09 |
| 0.68 | 0.09 |
| 0.76 | 0.15 |
| 0.76 | 0.15 |
| #N/A | #N/A |
| #N/A | #N/A |
| 1.13 | 0.56 |
| 1.19 | 0.65 |
| 0.88 | 0.25 |
| 1.19 | 0.65 |
| 0.88 | 0.25 |
| 1.09 | 0.55 |
| 1.39 | 0.82 |
| 1.39 | 0.82 |
| #N/A | #N/A |
| #N/A | #N/A |
| #N/A | #N/A |
| #N/A | #N/A |
| 1.03 | 0.46 |
| 1.03 | 0.46 |
| 1.15 | 0.61 |
| 1.11 | 0.58 |
| 1.11 | 0.58 |
| 0.60 | 0.05 |
| 0.60 | 0.05 |

|      |      |
|------|------|
| 0.87 | 0.28 |
| 1.10 | 0.56 |
| 1.40 | 0.84 |
| 1.42 | 0.86 |
| 1.15 | 0.63 |
| 1.15 | 0.63 |
| 1.04 | 0.48 |
| 1.57 | 0.91 |
| 1.57 | 0.91 |
| 1.07 | 0.50 |
| 1.18 | 0.57 |
| 1.18 | 0.57 |
| #N/A | #N/A |
| 1.08 | 0.52 |
| #N/A | #N/A |
| 0.94 | 0.40 |
| 1.04 | 0.47 |
| 1.04 | 0.47 |
| 0.92 | 0.35 |
| 1.57 | 0.85 |
| 0.92 | 0.35 |
| 1.57 | 0.85 |
| 1.27 | 0.71 |
| 1.12 | 0.56 |
| 0.98 | 0.38 |
| 0.97 | 0.37 |
| 1.10 | 0.54 |
| 1.10 | 0.54 |
| 0.68 | 0.10 |
| 0.68 | 0.10 |
| #N/A | #N/A |
| 1.15 | 0.63 |
| 1.02 | 0.46 |
| 1.02 | 0.46 |
| 0.46 | 0.02 |
| 1.10 | 0.56 |
| 0.47 | 0.02 |
| 1.10 | 0.56 |
| 0.47 | 0.02 |
| 1.07 | 0.52 |
| #N/A | #N/A |
| #N/A | #N/A |
| 0.89 | 0.29 |
| 0.89 | 0.29 |
| 1.23 | 0.65 |
| 1.23 | 0.65 |
| 1.28 | 0.58 |
| 0.89 | 0.27 |
| #N/A | #N/A |
| #N/A | #N/A |
| 1.13 | 0.61 |

|      |      |
|------|------|
| 1.14 | 0.61 |
| 0.53 | 0.03 |
| 0.53 | 0.03 |
| 0.93 | 0.32 |
| 0.64 | 0.08 |
| 1.02 | 0.44 |
| 1.01 | 0.43 |
| 1.09 | 0.53 |
| 1.09 | 0.53 |
| 1.17 | 0.59 |
| 1.10 | 0.57 |
| 1.03 | 0.47 |
| 0.99 | 0.39 |
| 0.99 | 0.39 |
| 1.21 | 0.71 |
| 1.13 | 0.58 |
| 1.21 | 0.71 |
| 1.33 | 0.72 |
| 1.07 | 0.51 |
| 1.23 | 0.74 |
| 0.67 | 0.08 |
| 0.72 | 0.11 |
| 0.72 | 0.11 |
| 0.92 | 0.30 |
| #N/A | #N/A |
| 0.93 | 0.34 |
| 1.57 | 0.72 |
| 1.57 | 0.72 |
| 1.03 | 0.47 |
| 0.39 | 0.01 |
| 0.51 | 0.03 |
| 0.51 | 0.03 |
| 1.10 | 0.54 |
| 1.14 | 0.58 |
| 0.96 | 0.35 |
| 1.13 | 0.55 |
| 1.13 | 0.55 |
| 1.68 | 0.96 |
| 1.68 | 0.96 |
| 0.60 | 0.06 |
| 0.60 | 0.06 |
| 1.12 | 0.59 |
| 1.12 | 0.59 |
| 1.20 | 0.56 |
| #N/A | #N/A |
| 1.13 | 0.59 |
| 1.13 | 0.59 |
| 1.02 | 0.44 |
| 1.02 | 0.44 |
| 1.20 | 0.70 |
| 0.85 | 0.22 |

|      |      |
|------|------|
| 1.13 | 0.59 |
| 1.13 | 0.59 |
| 1.23 | 0.67 |
| 1.43 | 0.83 |
| 0.87 | 0.24 |
| 0.79 | 0.17 |
| 0.79 | 0.17 |
| 0.79 | 0.17 |
| #N/A | #N/A |
| 1.12 | 0.59 |
| 1.06 | 0.49 |
| 1.06 | 0.49 |
| 1.07 | 0.51 |
| 1.17 | 0.63 |
| 1.08 | 0.53 |
| 1.10 | 0.56 |
| 0.34 | 0.01 |
| 0.34 | 0.01 |
| 0.34 | 0.01 |
| 1.25 | 0.71 |
| #N/A | #N/A |
| 1.11 | 0.57 |
| 1.21 | 0.66 |
| 0.96 | 0.36 |
| 1.68 | 0.93 |
| 1.68 | 0.93 |
| 0.62 | 0.07 |
| 1.03 | 0.45 |
| 0.87 | 0.24 |
| 0.87 | 0.24 |
| #N/A | #N/A |
| #N/A | #N/A |
| 0.96 | 0.35 |
| 0.96 | 0.35 |
| 0.88 | 0.26 |
| 0.81 | 0.19 |
| 0.81 | 0.19 |
| #N/A | #N/A |
| #N/A | #N/A |
| 0.81 | 0.18 |
| #N/A | #N/A |
| 0.81 | 0.18 |
| #N/A | #N/A |
| #N/A | #N/A |
| #N/A | #N/A |
| 0.97 | 0.38 |
| 1.14 | 0.61 |
| 0.95 | 0.35 |
| 0.95 | 0.35 |
| 0.95 | 0.35 |
| 0.95 | 0.35 |

|      |      |
|------|------|
| 1.31 | 0.81 |
| 1.31 | 0.81 |
| 0.59 | 0.05 |
| #N/A | #N/A |
| 0.90 | 0.28 |
| 0.90 | 0.28 |
| 1.12 | 0.59 |
| 1.13 | 0.60 |
| 1.23 | 0.72 |
| 1.49 | 0.90 |
| 1.06 | 0.50 |
| 1.06 | 0.50 |
| 1.09 | 0.54 |
| 0.59 | 0.05 |
| 1.28 | 0.67 |
| 1.89 | 0.96 |
| #N/A | #N/A |
| 1.19 | 0.67 |
| 1.22 | 0.70 |
| 0.98 | 0.44 |
| 0.98 | 0.38 |
| 0.90 | 0.28 |
| 0.98 | 0.38 |
| 0.90 | 0.28 |
| 1.01 | 0.44 |
| 1.94 | 0.69 |
| 1.19 | 0.68 |
| 1.34 | 0.83 |
| 1.60 | 0.92 |
| 0.92 | 0.33 |
| 1.37 | 0.86 |
| 0.95 | 0.36 |
| #N/A | #N/A |
| #N/A | #N/A |
| #N/A | #N/A |
| #N/A | #N/A |
| 0.71 | 0.10 |
| 0.71 | 0.10 |
| 0.74 | 0.12 |
| 0.64 | 0.07 |
| 0.64 | 0.07 |
| #N/A | #N/A |
| 1.48 | 0.91 |
| 1.48 | 0.91 |
| 1.04 | 0.47 |
| 0.94 | 0.33 |
| 0.87 | 0.28 |
| 0.61 | 0.06 |
| 1.08 | 0.51 |
| 0.65 | 0.07 |
| 0.88 | 0.25 |

|      |      |
|------|------|
| 0.90 | 0.28 |
| 1.23 | 0.73 |
| 1.20 | 0.64 |
| #N/A | #N/A |
| #N/A | #N/A |
| 1.05 | 0.48 |
| 0.69 | 0.09 |
| 1.00 | 0.41 |
| 0.80 | 0.20 |
| 0.40 | 0.01 |
| 0.89 | 0.27 |
| 1.11 | 0.58 |
| 1.11 | 0.58 |
| 1.16 | 0.63 |
| 1.16 | 0.62 |
| 1.33 | 0.83 |
| 1.02 | 0.45 |
| 0.92 | 0.37 |
| 0.92 | 0.37 |
| #N/A | #N/A |
| #N/A | #N/A |
| 1.37 | 0.60 |
| 1.33 | 0.84 |
| 0.96 | 0.36 |
| 1.37 | 0.60 |
| 0.65 | 0.08 |
| 1.07 | 0.52 |
| 1.05 | 0.49 |
| 1.05 | 0.49 |
| 0.50 | 0.03 |
| 0.65 | 0.08 |
| 0.78 | 0.16 |
| 1.04 | 0.48 |
| 1.67 | 0.80 |
| 1.13 | 0.60 |
| 1.13 | 0.60 |
| 1.19 | 0.68 |
| #N/A | #N/A |
| 1.48 | 0.82 |
| 1.07 | 0.51 |
| 1.48 | 0.82 |
| 1.11 | 0.57 |
| 1.11 | 0.57 |
| 0.95 | 0.35 |
| 1.28 | 0.77 |
| 0.87 | 0.25 |
| 1.40 | 0.87 |
| 1.40 | 0.87 |
| #N/A | #N/A |
| 0.49 | 0.03 |
| 1.55 | 0.92 |

|      |      |
|------|------|
| 1.04 | 0.47 |
| 1.20 | 0.64 |
| 1.20 | 0.64 |
| 1.06 | 0.50 |
| 2.02 | 0.70 |
| 2.02 | 0.70 |
| 1.11 | 0.57 |
| 1.11 | 0.57 |
| 0.93 | 0.33 |
| 0.93 | 0.33 |
| 1.13 | 0.60 |
| 1.14 | 0.61 |
| 0.95 | 0.40 |
| 0.95 | 0.40 |
| 1.01 | 0.45 |
| #N/A | #N/A |
| 1.23 | 0.69 |
| #N/A | #N/A |
| 0.83 | 0.21 |
| 0.83 | 0.21 |
| 1.12 | 0.59 |
| 0.91 | 0.32 |
| 1.21 | 0.70 |
| 0.74 | 0.14 |
| 0.74 | 0.14 |
| 1.13 | 0.60 |
| 1.09 | 0.55 |
| 1.09 | 0.55 |
| 1.13 | 0.60 |
| 1.09 | 0.55 |
| 1.14 | 0.57 |
| 1.14 | 0.57 |
| 0.87 | 0.24 |
| 0.87 | 0.24 |
| 0.89 | 0.28 |
| 0.89 | 0.28 |
| 1.05 | 0.50 |
| 1.33 | 0.83 |
| 0.60 | 0.05 |
| 0.60 | 0.05 |
| 0.97 | 0.38 |
| 1.26 | 0.76 |
| #N/A | #N/A |
| 1.18 | 0.56 |
| 0.77 | 0.15 |
| 0.70 | 0.14 |
| 1.15 | 0.63 |
| 1.21 | 0.71 |
| 1.21 | 0.71 |
| 1.15 | 0.61 |
| 1.21 | 0.67 |

|      |      |
|------|------|
| 1.21 | 0.67 |
| 0.86 | 0.29 |
| 1.03 | 0.47 |
| 1.03 | 0.47 |
| 1.19 | 0.67 |
| 1.19 | 0.67 |
| 1.13 | 0.59 |
| 1.13 | 0.59 |
| 1.18 | 0.66 |
| 1.38 | 0.86 |
| 1.38 | 0.86 |
| 1.38 | 0.86 |
| 1.06 | 0.51 |
| 1.04 | 0.46 |
| 1.04 | 0.46 |
| 0.89 | 0.27 |
| 0.88 | 0.25 |
| 1.16 | 0.63 |
| 1.45 | 0.86 |
| 1.21 | 0.71 |
| 0.99 | 0.40 |
| 1.33 | 0.82 |
| 0.61 | 0.07 |
| 1.17 | 0.60 |
| 1.07 | 0.51 |
| 0.74 | 0.14 |
| 0.74 | 0.14 |
| 1.65 | 0.95 |
| 0.96 | 0.37 |
| 1.37 | 0.63 |
| 1.37 | 0.63 |
| 1.05 | 0.48 |
| 1.00 | 0.40 |
| 1.00 | 0.40 |
| 0.68 | 0.09 |
| 1.03 | 0.45 |
| 1.35 | 0.73 |
| 1.16 | 0.64 |
| 1.25 | 0.74 |
| 1.15 | 0.56 |
| 1.39 | 0.88 |
| 1.03 | 0.47 |
| 1.03 | 0.47 |
| 1.04 | 0.49 |
| 1.31 | 0.82 |
| 1.06 | 0.50 |
| #N/A | #N/A |
| #N/A | #N/A |
| #N/A | #N/A |
| #N/A | #N/A |
| 0.73 | 0.12 |



|      |      |
|------|------|
| 1.11 | 0.58 |
| 1.20 | 0.70 |
| 1.50 | 0.87 |
| 1.62 | 0.92 |
| 0.83 | 0.21 |
| 1.43 | 0.89 |
| 1.43 | 0.89 |
| #N/A | #N/A |
| #N/A | #N/A |
| 1.25 | 0.75 |
| 1.25 | 0.75 |
| 1.02 | 0.43 |
| 0.91 | 0.29 |
| 0.91 | 0.29 |
| 0.68 | 0.13 |
| 1.46 | 0.88 |
| 0.89 | 0.31 |
| #N/A | #N/A |
| 1.55 | 0.87 |
| 1.04 | 0.46 |
| #N/A | #N/A |
| #N/A | #N/A |
| 0.81 | 0.19 |
| 0.81 | 0.19 |
| 1.09 | 0.53 |
| 1.05 | 0.48 |
| 1.05 | 0.48 |
| #N/A | #N/A |
| #N/A | #N/A |
| #N/A | #N/A |
| 0.68 | 0.09 |
| 0.68 | 0.09 |
| 0.68 | 0.09 |
| 0.66 | 0.08 |
| #N/A | #N/A |
| #N/A | #N/A |
| #N/A | #N/A |
| #N/A | #N/A |
| 1.22 | 0.65 |
| 1.22 | 0.65 |
| 0.45 | 0.02 |
| 1.10 | 0.54 |
| 1.55 | 0.93 |
| 1.55 | 0.93 |
| 1.55 | 0.93 |
| 1.23 | 0.58 |
| 1.05 | 0.48 |
| 1.06 | 0.50 |
| 1.01 | 0.45 |
| 1.01 | 0.45 |
| 1.22 | 0.69 |

|      |      |
|------|------|
| 1.22 | 0.69 |
| 0.96 | 0.36 |
| 1.17 | 0.64 |
| 1.14 | 0.54 |
| 1.14 | 0.54 |
| 1.01 | 0.46 |
| 1.33 | 0.82 |
| 1.33 | 0.82 |
| 1.19 | 0.69 |
| 1.02 | 0.46 |
| 1.02 | 0.46 |
| 1.22 | 0.72 |
| 0.93 | 0.31 |
| #N/A | #N/A |
| #N/A | #N/A |
| #N/A | #N/A |
| 1.39 | 0.86 |
| 1.57 | 0.94 |
| #N/A | #N/A |
| #N/A | #N/A |
| #N/A | #N/A |
| 0.64 | 0.09 |
| 0.93 | 0.33 |
| 1.38 | 0.87 |
| 1.38 | 0.87 |
| 0.81 | 0.19 |
| 0.81 | 0.19 |
| 0.97 | 0.38 |
| 1.31 | 0.73 |
| #N/A | #N/A |
| 0.89 | 0.30 |
| #N/A | #N/A |
| 0.83 | 0.27 |
| 1.14 | 0.61 |
| 0.85 | 0.23 |
| 0.93 | 0.32 |
| #N/A | #N/A |
| 1.13 | 0.60 |
| 1.20 | 0.67 |
| 1.20 | 0.67 |
| 1.33 | 0.81 |
| 1.17 | 0.66 |
| 1.13 | 0.61 |
| 0.87 | 0.25 |
| 1.20 | 0.67 |
| 1.20 | 0.67 |
| #N/A | #N/A |
| 1.11 | 0.58 |
| 1.02 | 0.44 |
| #N/A | #N/A |
| 1.05 | 0.50 |

|      |      |
|------|------|
| 1.23 | 0.72 |
| 1.06 | 0.51 |
| 0.54 | 0.05 |
| 0.86 | 0.26 |
| 1.02 | 0.44 |
| 0.80 | 0.19 |
| 0.72 | 0.15 |
| #N/A | #N/A |
| 1.50 | 0.88 |
| 1.50 | 0.88 |
| 1.12 | 0.59 |
| 1.12 | 0.59 |
| 0.91 | 0.29 |
| 0.91 | 0.29 |
| 1.03 | 0.46 |
| 1.06 | 0.50 |
| 1.06 | 0.50 |
| #N/A | #N/A |
| 1.43 | 0.90 |
| 1.43 | 0.90 |
| 1.41 | 0.84 |
| 1.30 | 0.80 |
| 1.07 | 0.52 |
| 1.07 | 0.52 |
| 0.93 | 0.33 |
| 1.30 | 0.78 |
| 1.18 | 0.63 |
| 1.42 | 0.89 |
| #N/A | #N/A |
| 0.85 | 0.32 |
| 1.24 | 0.74 |
| 1.24 | 0.74 |
| 1.34 | 0.84 |
| 1.27 | 0.73 |
| 0.94 | 0.36 |
| 0.21 | 0.00 |
| 0.21 | 0.00 |
| 0.85 | 0.24 |
| 1.17 | 0.61 |
| 1.17 | 0.61 |
| 0.93 | 0.32 |
| 0.93 | 0.32 |
| 1.07 | 0.51 |
| 1.07 | 0.51 |
| 1.84 | 0.97 |
| 1.12 | 0.57 |
| 1.12 | 0.57 |
| 1.52 | 0.92 |
| 1.52 | 0.92 |
| 0.97 | 0.38 |
| 1.23 | 0.67 |

|      |      |
|------|------|
| 1.23 | 0.67 |
| 1.19 | 0.68 |
| 2.23 | 0.99 |
| 1.19 | 0.68 |
| 1.17 | 0.66 |
| 1.22 | 0.69 |
| 0.95 | 0.34 |
| 0.73 | 0.12 |
| 0.73 | 0.12 |
| 0.84 | 0.24 |
| 0.95 | 0.34 |
| 0.80 | 0.17 |
| 1.18 | 0.58 |
| 0.67 | 0.08 |
| 0.67 | 0.08 |
| 1.15 | 0.58 |
| 0.85 | 0.22 |
| 0.99 | 0.40 |
| 0.97 | 0.37 |
| #N/A | #N/A |
| 1.35 | 0.81 |
| 1.35 | 0.81 |
| 1.38 | 0.81 |
| 0.97 | 0.37 |
| 1.27 | 0.78 |
| 1.27 | 0.78 |
| 1.27 | 0.78 |
| 0.80 | 0.19 |
| 1.43 | 0.89 |
| 1.43 | 0.89 |
| 1.10 | 0.56 |
| 0.85 | 0.23 |
| 0.52 | 0.03 |
| 0.52 | 0.03 |
| 0.90 | 0.27 |
| 1.02 | 0.44 |
| 1.19 | 0.64 |
| 1.38 | 0.85 |
| 1.38 | 0.85 |
| #N/A | #N/A |
| #N/A | #N/A |
| 1.15 | 0.62 |
| 1.15 | 0.62 |
| 0.97 | 0.38 |
| 1.21 | 0.63 |
| 1.22 | 0.71 |
| 1.09 | 0.54 |
| 1.22 | 0.71 |
| 1.09 | 0.54 |
| 1.00 | 0.42 |
| 1.00 | 0.42 |

|      |      |
|------|------|
| 0.92 | 0.32 |
| 1.00 | 0.42 |
| 0.92 | 0.32 |
| 0.96 | 0.36 |
| 0.93 | 0.31 |
| 0.80 | 0.18 |
| 1.18 | 0.67 |
| 1.07 | 0.50 |
| 1.10 | 0.56 |
| 1.04 | 0.47 |
| 1.05 | 0.49 |
| 1.05 | 0.49 |
| #N/A | #N/A |
| 0.91 | 0.28 |
| 0.91 | 0.28 |
| 0.88 | 0.27 |
| 0.88 | 0.27 |
| #N/A | #N/A |
| #N/A | #N/A |
| 1.21 | 0.65 |
| 1.44 | 0.90 |
| 1.44 | 0.90 |
| 1.02 | 0.45 |
| 0.75 | 0.13 |
| #N/A | #N/A |
| 0.80 | 0.18 |
| 0.80 | 0.22 |
| 1.34 | 0.63 |
| 0.65 | 0.08 |
| 0.65 | 0.08 |
| 0.71 | 0.11 |
| 0.71 | 0.11 |
| 0.98 | 0.39 |
| 1.69 | 0.97 |
| 1.69 | 0.97 |
| #N/A | #N/A |
| #N/A | #N/A |
| #N/A | #N/A |
| 1.05 | 0.49 |
| 1.05 | 0.49 |
| 0.94 | 0.32 |
| 1.02 | 0.44 |
| 0.84 | 0.22 |
| 1.09 | 0.53 |
| #N/A | #N/A |
| #N/A | #N/A |
| 1.25 | 0.70 |
| 1.25 | 0.70 |
| 1.18 | 0.67 |
| 0.97 | 0.36 |
| 0.65 | 0.08 |

|      |      |
|------|------|
| 0.65 | 0.08 |
| 0.83 | 0.20 |
| 1.29 | 0.79 |
| 1.29 | 0.79 |
| 1.29 | 0.79 |
| #N/A | #N/A |
| #N/A | #N/A |
| #N/A | #N/A |
| #N/A | #N/A |
| 1.41 | 0.88 |
| 1.04 | 0.46 |
| 0.93 | 0.32 |
| 0.93 | 0.32 |
| 1.08 | 0.53 |
| 1.08 | 0.53 |
| 1.17 | 0.66 |
| 1.17 | 0.66 |
| 1.63 | 0.86 |
| 1.63 | 0.86 |
| 1.05 | 0.48 |
| 1.34 | 0.54 |
| 0.90 | 0.31 |
| 0.90 | 0.31 |
| 0.83 | 0.21 |
| #N/A | #N/A |
| #N/A | #N/A |
| #N/A | #N/A |
| 1.00 | 0.41 |
| 1.00 | 0.41 |
| #N/A | #N/A |
| #N/A | #N/A |
| 1.42 | 0.88 |
| 1.16 | 0.64 |
| 0.81 | 0.20 |
| #N/A | #N/A |
| #N/A | #N/A |
| 0.99 | 0.40 |
| 0.99 | 0.40 |
| 0.86 | 0.23 |
| 1.10 | 0.55 |
| 1.12 | 0.59 |
| 1.12 | 0.59 |
| 1.32 | 0.70 |
| 1.32 | 0.70 |
| #N/A | #N/A |
| #N/A | #N/A |
| 0.86 | 0.26 |
| 1.11 | 0.57 |
| #N/A | #N/A |
| #N/A | #N/A |
| 1.36 | 0.83 |

|      |      |
|------|------|
| 1.36 | 0.83 |
| #N/A | #N/A |
| #N/A | #N/A |
| 1.55 | 0.94 |
| #N/A | #N/A |
| 1.18 | 0.67 |
| #N/A | #N/A |
| #N/A | #N/A |
| #N/A | #N/A |
| #N/A | #N/A |
| 1.41 | 0.85 |
| 1.16 | 0.59 |
| 1.08 | 0.54 |
| #N/A | #N/A |
| 0.67 | 0.08 |
| 0.94 | 0.34 |
| 1.08 | 0.53 |
| #N/A | #N/A |
| 1.08 | 0.53 |
| #N/A | #N/A |
| 1.50 | 0.69 |
| 1.30 | 0.81 |
| 1.61 | 0.81 |
| 1.17 | 0.63 |
| 1.61 | 0.81 |
| 1.17 | 0.63 |
| 1.09 | 0.54 |
| 0.87 | 0.24 |
| 0.91 | 0.29 |
| 1.04 | 0.47 |
| 0.97 | 0.37 |
| 0.97 | 0.37 |
| #N/A | #N/A |
| 1.03 | 0.46 |
| 0.89 | 0.26 |
| #N/A | #N/A |
| #N/A | #N/A |
| #N/A | #N/A |
| #N/A | #N/A |
| #N/A | #N/A |
| 1.13 | 0.59 |
| 0.75 | 0.16 |
| 1.13 | 0.59 |
| 1.29 | 0.69 |
| 0.75 | 0.16 |
| #N/A | #N/A |
| #N/A | #N/A |
| 1.20 | 0.70 |
| 1.08 | 0.53 |
| #N/A | #N/A |
| #N/A | #N/A |

|      |      |
|------|------|
| 0.83 | 0.23 |
| 1.17 | 0.56 |
| 0.85 | 0.22 |
| 0.85 | 0.22 |
| #N/A | #N/A |
| #N/A | #N/A |
| #N/A | #N/A |
| #N/A | #N/A |
| 1.06 | 0.50 |
| 0.95 | 0.35 |
| 1.06 | 0.50 |
| 0.95 | 0.35 |
| #N/A | #N/A |
| #N/A | #N/A |
| #N/A | #N/A |
| #N/A | #N/A |
| #N/A | #N/A |
| #N/A | #N/A |
| 1.11 | 0.52 |
| 1.24 | 0.53 |
| 1.24 | 0.53 |
| 1.00 | 0.42 |
| 1.25 | 0.75 |
| 1.28 | 0.77 |
| 1.12 | 0.59 |
| 1.12 | 0.59 |
| 1.25 | 0.75 |
| 0.48 | 0.02 |
| 1.18 | 0.66 |
| 1.51 | 0.91 |
| 1.21 | 0.70 |
| 1.21 | 0.70 |
| 0.95 | 0.36 |
| 1.21 | 0.69 |
| 1.13 | 0.59 |
| 1.13 | 0.59 |
| 1.26 | 0.72 |
| #N/A | #N/A |
| 1.25 | 0.69 |
| 1.30 | 0.79 |
| 1.30 | 0.79 |
| 1.20 | 0.65 |
| 0.91 | 0.30 |
| 0.91 | 0.30 |
| #N/A | #N/A |
| 1.18 | 0.65 |
| 1.32 | 0.82 |
| 1.32 | 0.82 |
| 1.32 | 0.82 |
| 1.12 | 0.55 |
| 1.13 | 0.60 |



|      |      |
|------|------|
| 0.85 | 0.25 |
| 0.86 | 0.24 |
| 0.86 | 0.24 |
| 0.87 | 0.27 |
| 1.27 | 0.78 |
| 1.27 | 0.78 |
| 0.85 | 0.23 |
| 0.85 | 0.23 |
| 1.14 | 0.61 |
| 1.06 | 0.49 |
| 1.01 | 0.43 |
| #N/A | #N/A |
| #N/A | #N/A |
| 0.94 | 0.36 |
| #N/A | #N/A |
| 1.32 | 0.80 |
| #N/A | #N/A |
| #N/A | #N/A |
| 0.86 | 0.25 |
| 0.50 | 0.03 |
| 0.50 | 0.03 |
| 0.74 | 0.13 |
| 1.27 | 0.76 |
| 1.02 | 0.44 |
| 1.02 | 0.44 |
| #N/A | #N/A |
| #N/A | #N/A |
| 0.94 | 0.34 |
| 1.06 | 0.51 |
| #N/A | #N/A |
| 1.24 | 0.63 |
| 1.24 | 0.63 |
| 1.24 | 0.63 |
| 0.86 | 0.24 |
| 0.86 | 0.24 |
| #N/A | #N/A |
| 0.53 | 0.03 |
| 1.10 | 0.56 |
| 1.10 | 0.56 |
| 0.92 | 0.31 |
| 0.92 | 0.31 |
| 0.69 | 0.11 |
| 0.82 | 0.20 |
| 1.12 | 0.60 |
| 1.12 | 0.60 |
| 0.91 | 0.29 |
| 0.30 | 0.00 |
| 0.83 | 0.20 |
| 1.24 | 0.73 |
| #N/A | #N/A |
| 1.24 | 0.73 |

|      |      |
|------|------|
| 1.22 | 0.71 |
| 0.92 | 0.32 |
| 1.09 | 0.54 |
| 0.94 | 0.33 |
| 1.09 | 0.54 |
| 0.94 | 0.33 |
| 0.94 | 0.33 |
| 0.94 | 0.33 |
| 1.11 | 0.53 |
| #N/A | #N/A |
| 1.11 | 0.53 |
| #N/A | #N/A |
| 1.14 | 0.60 |
| 0.53 | 0.04 |
| 0.53 | 0.04 |
| 0.83 | 0.23 |
| #N/A | #N/A |
| #N/A | #N/A |
| 0.79 | 0.18 |
| #N/A | #N/A |
| 0.86 | 0.23 |
| 0.76 | 0.14 |
| 1.26 | 0.77 |
| 1.53 | 0.89 |
| 1.10 | 0.56 |
| 0.91 | 0.32 |
| 1.06 | 0.50 |
| 0.92 | 0.30 |
| 0.73 | 0.21 |
| #N/A | #N/A |
| 0.95 | 0.34 |
| 0.95 | 0.34 |
| 0.95 | 0.35 |
| 1.20 | 0.69 |
| 1.20 | 0.69 |
| 0.95 | 0.34 |
| #N/A | #N/A |
| 0.97 | 0.38 |
| 0.97 | 0.38 |
| 1.07 | 0.52 |
| 1.07 | 0.52 |
| 0.96 | 0.36 |
| 0.91 | 0.28 |
| 0.70 | 0.10 |
| 0.70 | 0.13 |
| 1.11 | 0.55 |
| 1.09 | 0.56 |
| 1.26 | 0.73 |
| 1.15 | 0.62 |
| 1.56 | 0.93 |
| 1.56 | 0.93 |

|      |      |
|------|------|
| 1.14 | 0.62 |
| 0.36 | 0.01 |
| 0.36 | 0.01 |
| 0.86 | 0.26 |
| 0.72 | 0.14 |
| 0.90 | 0.30 |
| 0.90 | 0.30 |
| 0.98 | 0.39 |
| 0.85 | 0.22 |
| 0.99 | 0.39 |
| 1.45 | 0.91 |
| 0.89 | 0.28 |
| 1.21 | 0.54 |
| 1.21 | 0.54 |
| 1.37 | 0.85 |
| 1.37 | 0.85 |
| 1.11 | 0.57 |
| 1.11 | 0.57 |
| 1.16 | 0.65 |
| 1.10 | 0.55 |
| 1.35 | 0.81 |
| 1.35 | 0.81 |
| #N/A | #N/A |
| #N/A | #N/A |
| 0.86 | 0.26 |
| 1.55 | 0.72 |
| 1.01 | 0.43 |
| 1.04 | 0.46 |
| 0.75 | 0.17 |
| 0.97 | 0.37 |
| 0.81 | 0.20 |
| 1.10 | 0.56 |
| #N/A | #N/A |
| #N/A | #N/A |
| 1.16 | 0.64 |
| 1.02 | 0.44 |
| 1.02 | 0.44 |
| 1.02 | 0.44 |
| 1.29 | 0.76 |
| 1.29 | 0.76 |
| 0.90 | 0.39 |
| 0.74 | 0.13 |
| #N/A | #N/A |
| 1.12 | 0.58 |
| #N/A | #N/A |
| 1.02 | 0.43 |
| 0.54 | 0.03 |
| 1.09 | 0.55 |
| 1.09 | 0.55 |
| 0.72 | 0.12 |
| 1.16 | 0.57 |

|      |      |
|------|------|
| 1.06 | 0.49 |
| 1.26 | 0.76 |
| 1.13 | 0.60 |
| 1.13 | 0.60 |
| #N/A | #N/A |
| 0.92 | 0.35 |
| 0.92 | 0.35 |
| 1.03 | 0.46 |
| 1.01 | 0.47 |
| 1.01 | 0.47 |
| 0.99 | 0.40 |
| 0.81 | 0.18 |
| 0.91 | 0.31 |
| 0.72 | 0.12 |
| 1.05 | 0.48 |
| #N/A | #N/A |
| 0.97 | 0.38 |
| 1.39 | 0.88 |
| 1.45 | 0.90 |
| 1.45 | 0.90 |
| 0.99 | 0.41 |
| 1.32 | 0.71 |
| 0.71 | 0.11 |
| 1.07 | 0.52 |
| 1.09 | 0.53 |
| 0.45 | 0.02 |
| #N/A | #N/A |
| 1.17 | 0.63 |
| 1.17 | 0.63 |
| 1.12 | 0.56 |
| 1.24 | 0.59 |
| 1.24 | 0.59 |
| 1.10 | 0.56 |
| 1.03 | 0.45 |
| #N/A | #N/A |
| 0.75 | 0.15 |
| 0.75 | 0.15 |
| #N/A | #N/A |
| 1.08 | 0.52 |
| 1.20 | 0.63 |
| 0.88 | 0.26 |
| 0.88 | 0.26 |
| 1.14 | 0.60 |
| 0.97 | 0.37 |
| 0.97 | 0.37 |
| 1.29 | 0.74 |
| 0.65 | 0.08 |
| 0.65 | 0.08 |
| 1.08 | 0.50 |
| 1.28 | 0.79 |
| 1.28 | 0.79 |

|      |      |
|------|------|
| 0.95 | 0.37 |
| #N/A | #N/A |
| 1.08 | 0.50 |
| 0.99 | 0.39 |
| 1.07 | 0.51 |
| 1.17 | 0.66 |
| 1.17 | 0.66 |
| 0.96 | 0.36 |
| #N/A | #N/A |
| #N/A | #N/A |
| 1.53 | 0.71 |
| 0.94 | 0.33 |
| 0.94 | 0.33 |
| 0.76 | 0.14 |
| 0.76 | 0.14 |
| 0.71 | 0.13 |
| #N/A | #N/A |
| 1.06 | 0.51 |
| 1.22 | 0.70 |
| 1.08 | 0.53 |
| 1.12 | 0.58 |
| 1.15 | 0.61 |
| #N/A | #N/A |
| #N/A | #N/A |
| #N/A | #N/A |
| #N/A | #N/A |
| 0.85 | 0.22 |
| 1.28 | 0.68 |
| 1.05 | 0.48 |
| 1.05 | 0.48 |
| 0.79 | 0.17 |
| 0.60 | 0.05 |
| 1.11 | 0.56 |
| 1.37 | 0.80 |
| 1.22 | 0.69 |
| 0.89 | 0.26 |
| #N/A | #N/A |
| 0.72 | 0.11 |
| 0.73 | 0.12 |
| 0.96 | 0.39 |
| 0.53 | 0.03 |
| 1.17 | 0.64 |
| 0.86 | 0.23 |
| 1.02 | 0.44 |
| 0.96 | 0.39 |
| 0.95 | 0.34 |
| 0.82 | 0.19 |
| 0.95 | 0.34 |
| 0.82 | 0.19 |
| 1.03 | 0.47 |
| 0.94 | 0.38 |

|      |      |
|------|------|
| 1.03 | 0.47 |
| 0.94 | 0.38 |
| 1.32 | 0.62 |
| 0.98 | 0.42 |
| 1.34 | 0.78 |
| #N/A | #N/A |
| #N/A | #N/A |
| 1.08 | 0.53 |
| 1.03 | 0.46 |
| 1.03 | 0.46 |
| 0.60 | 0.05 |
| 0.84 | 0.24 |
| 0.84 | 0.24 |
| 1.25 | 0.74 |
| 1.19 | 0.68 |
| 0.93 | 0.35 |
| 1.13 | 0.60 |
| 1.19 | 0.62 |
| 1.08 | 0.52 |
| 1.08 | 0.52 |
| 1.05 | 0.50 |
| 1.01 | 0.43 |
| #N/A | #N/A |
| #N/A | #N/A |
| 1.09 | 0.54 |
| 1.25 | 0.74 |
| #N/A | #N/A |
| #N/A | #N/A |
| 0.95 | 0.35 |
| 1.24 | 0.72 |
| 1.24 | 0.72 |
| 1.12 | 0.56 |
| 1.35 | 0.82 |
| 1.35 | 0.82 |
| 1.12 | 0.56 |
| 1.46 | 0.90 |
| #N/A | #N/A |
| 1.25 | 0.75 |
| 0.95 | 0.34 |
| 1.08 | 0.50 |
| 1.08 | 0.50 |
| 1.15 | 0.63 |
| 1.31 | 0.61 |
| 1.31 | 0.61 |
| #N/A | #N/A |
| 1.71 | 0.95 |
| 1.71 | 0.95 |
| 1.07 | 0.51 |
| 1.15 | 0.62 |
| 1.51 | 0.89 |
| 0.67 | 0.09 |

|      |      |
|------|------|
| 0.90 | 0.28 |
| 1.08 | 0.53 |
| 1.08 | 0.53 |
| 0.78 | 0.17 |
| 0.58 | 0.05 |
| 0.58 | 0.05 |
| 1.11 | 0.56 |
| 1.11 | 0.56 |
| 1.30 | 0.81 |
| 0.99 | 0.44 |
| #N/A | #N/A |
| 1.24 | 0.74 |
| 0.96 | 0.36 |
| 0.96 | 0.36 |
| 0.96 | 0.37 |
| 1.11 | 0.57 |
| 1.11 | 0.57 |
| 1.10 | 0.57 |
| #N/A | #N/A |
| 0.98 | 0.41 |
| 0.89 | 0.28 |
| 1.11 | 0.56 |
| 1.11 | 0.56 |
| 1.59 | 0.95 |
| 0.99 | 0.39 |
| 0.77 | 0.15 |
| #N/A | #N/A |
| 1.17 | 0.66 |
| 0.88 | 0.26 |
| #N/A | #N/A |
| 1.04 | 0.49 |
| 1.59 | 0.94 |
| 0.68 | 0.09 |
| 1.13 | 0.57 |
| #N/A | #N/A |
| 1.11 | 0.57 |
| #N/A | #N/A |
| #N/A | #N/A |
| #N/A | #N/A |
| 1.36 | 0.81 |
| 0.94 | 0.39 |
| 0.94 | 0.39 |
| 0.73 | 0.12 |
| 1.03 | 0.46 |
| 1.03 | 0.46 |
| 1.21 | 0.69 |
| 1.09 | 0.53 |
| 1.09 | 0.53 |
| 0.38 | 0.01 |
| #N/A | #N/A |
| #N/A | #N/A |

|      |      |
|------|------|
| 0.98 | 0.39 |
| 0.98 | 0.39 |
| 1.58 | 0.91 |
| 0.93 | 0.37 |
| 1.65 | 0.77 |
| #N/A | #N/A |
| #N/A | #N/A |
| #N/A | #N/A |
| #N/A | #N/A |
| #N/A | #N/A |
| 1.29 | 0.80 |
| 1.29 | 0.80 |
| #N/A | #N/A |
| #N/A | #N/A |
| #N/A | #N/A |
| #N/A | #N/A |
| #N/A | #N/A |
| 1.07 | 0.50 |
| 1.17 | 0.58 |
| 1.17 | 0.58 |
| 1.22 | 0.68 |
| #N/A | #N/A |
| #N/A | #N/A |
| 0.97 | 0.39 |
| #N/A | #N/A |
| #N/A | #N/A |
| 1.00 | 0.42 |
| 1.01 | 0.43 |
| 1.00 | 0.42 |
| 1.03 | 0.46 |
| #N/A | #N/A |
| 0.99 | 0.40 |
| 0.91 | 0.29 |
| 0.95 | 0.35 |
| 1.41 | 0.79 |
| #N/A | #N/A |
| 1.03 | 0.45 |
| 1.03 | 0.45 |
| 1.26 | 0.76 |
| 0.88 | 0.26 |
| 1.48 | 0.73 |
| 1.26 | 0.76 |
| 1.00 | 0.41 |
| 0.65 | 0.07 |
| 0.65 | 0.07 |
| 1.07 | 0.52 |
| 0.99 | 0.40 |
| #N/A | #N/A |
| #N/A | #N/A |
| 0.86 | 0.33 |
| #N/A | #N/A |



|      |      |
|------|------|
| #N/A | #N/A |
| 1.23 | 0.73 |
| #N/A | #N/A |
| #N/A | #N/A |
| 1.01 | 0.43 |
| 1.01 | 0.43 |
| #N/A | #N/A |
| #N/A | #N/A |
| 1.01 | 0.44 |
| 1.01 | 0.44 |
| #N/A | #N/A |
| #N/A | #N/A |
| 1.41 | 0.89 |
| #N/A | #N/A |
| 1.26 | 0.65 |
| #N/A | #N/A |
| 1.12 | 0.57 |
| 1.04 | 0.46 |
| 1.66 | 0.96 |
| #N/A | #N/A |
| 0.91 | 0.30 |
| 0.91 | 0.30 |
| 0.67 | 0.12 |
| 0.67 | 0.12 |
| #N/A | #N/A |
| 0.98 | 0.42 |
| #N/A | #N/A |
| #N/A | #N/A |
| 1.08 | 0.51 |
| 1.16 | 0.64 |
| 1.16 | 0.64 |
| 1.13 | 0.61 |
| 1.03 | 0.46 |
| 1.32 | 0.82 |
| 1.30 | 0.80 |
| 1.41 | 0.89 |
| 1.41 | 0.89 |
| #N/A | #N/A |
| #N/A | #N/A |
| 0.89 | 0.33 |
| 1.26 | 0.77 |
| 1.26 | 0.77 |
| 0.94 | 0.36 |
| 1.21 | 0.65 |
| 1.21 | 0.65 |
| 0.99 | 0.40 |
| 1.96 | 0.98 |
| 1.96 | 0.98 |
| 1.25 | 0.70 |
| 1.20 | 0.69 |
| 1.41 | 0.70 |

|      |      |
|------|------|
| 1.20 | 0.64 |
| 1.76 | 0.85 |
| #N/A | #N/A |
| #N/A | #N/A |
| #N/A | #N/A |
| #N/A | #N/A |
| #N/A | #N/A |
| 1.87 | 0.98 |
| 1.87 | 0.98 |
| #N/A | #N/A |
| #N/A | #N/A |
| #N/A | #N/A |
| 0.96 | 0.36 |
| 0.57 | 0.04 |
| 0.57 | 0.04 |
| #N/A | #N/A |
| 1.19 | 0.68 |
| #N/A | #N/A |
| #N/A | #N/A |
| 0.62 | 0.07 |
| 0.62 | 0.07 |
| 1.46 | 0.91 |
| #N/A | #N/A |
| 0.57 | 0.04 |
| 0.46 | 0.03 |
| 0.89 | 0.26 |
| 1.23 | 0.71 |
| 1.23 | 0.71 |
| 0.67 | 0.10 |
| 0.67 | 0.10 |
| 1.01 | 0.42 |
| 1.01 | 0.42 |
| 0.86 | 0.23 |
| 0.86 | 0.23 |
| #N/A | #N/A |
| 1.42 | 0.80 |
| 1.42 | 0.80 |
| 0.99 | 0.44 |
| 0.99 | 0.44 |
| 1.03 | 0.46 |
| #N/A | #N/A |
| #N/A | #N/A |
| 0.90 | 0.28 |
| 1.34 | 0.82 |
| 1.31 | 0.78 |
| 1.10 | 0.56 |
| 1.10 | 0.56 |
| #N/A | #N/A |
| 1.10 | 0.56 |
| 1.12 | 0.59 |
| 0.96 | 0.35 |

|      |      |
|------|------|
| 1.03 | 0.46 |
| 0.78 | 0.16 |
| 0.78 | 0.16 |
| 1.01 | 0.44 |
| #N/A | #N/A |
| #N/A | #N/A |
| 1.00 | 0.43 |
| 0.74 | 0.13 |
| 1.24 | 0.74 |
| #N/A | #N/A |
| 1.10 | 0.54 |
| 1.33 | 0.64 |
| 1.03 | 0.46 |
| 0.74 | 0.13 |
| 1.22 | 0.60 |
| 1.22 | 0.60 |
| #N/A | #N/A |
| #N/A | #N/A |
| 1.15 | 0.61 |
| 1.32 | 0.75 |
| 1.32 | 0.75 |
| 0.82 | 0.19 |
| 0.82 | 0.19 |
| 1.18 | 0.67 |
| 1.52 | 0.69 |
| #N/A | #N/A |
| 1.47 | 0.76 |
| 1.23 | 0.73 |
| 1.23 | 0.73 |
| #N/A | #N/A |
| #N/A | #N/A |
| 0.58 | 0.04 |
| 0.58 | 0.04 |
| 0.87 | 0.24 |
| 0.76 | 0.14 |
| 1.02 | 0.45 |
| 1.02 | 0.45 |
| 1.22 | 0.72 |
| 1.04 | 0.48 |
| 1.04 | 0.48 |
| 1.38 | 0.87 |
| 0.90 | 0.28 |
| 1.11 | 0.57 |
| 1.38 | 0.87 |
| 1.38 | 0.87 |
| 1.11 | 0.57 |
| 1.11 | 0.57 |
| #N/A | #N/A |
| 1.11 | 0.57 |
| 1.11 | 0.57 |
| 1.35 | 0.77 |

|      |      |
|------|------|
| 1.35 | 0.77 |
| 1.15 | 0.62 |
| 1.15 | 0.62 |
| 1.28 | 0.77 |
| 1.30 | 0.81 |
| 1.30 | 0.81 |
| 1.24 | 0.74 |
| 1.00 | 0.41 |
| #N/A | #N/A |
| 0.84 | 0.23 |
| 0.43 | 0.01 |
| 0.43 | 0.01 |
| 0.94 | 0.38 |
| 0.81 | 0.20 |
| 1.04 | 0.47 |
| 1.21 | 0.70 |
| #N/A | #N/A |
| 0.63 | 0.07 |
| 1.19 | 0.61 |
| 1.19 | 0.61 |
| 1.16 | 0.64 |
| 1.31 | 0.79 |
| 1.31 | 0.79 |
| 1.31 | 0.74 |
| 1.31 | 0.74 |
| 1.20 | 0.70 |
| 0.99 | 0.40 |
| #N/A | #N/A |
| #N/A | #N/A |
| 1.14 | 0.61 |
| 1.50 | 0.86 |
| 1.50 | 0.86 |
| 1.00 | 0.41 |
| 1.36 | 0.83 |
| 0.87 | 0.24 |
| 1.04 | 0.47 |
| 1.04 | 0.47 |
| 0.97 | 0.38 |
| #N/A | #N/A |
| #N/A | #N/A |
| 1.32 | 0.80 |
| 1.32 | 0.80 |
| #N/A | #N/A |
| 1.27 | 0.75 |
| 1.31 | 0.69 |
| 1.02 | 0.43 |
| 1.02 | 0.43 |
| 1.05 | 0.50 |
| 1.18 | 0.58 |
| 0.75 | 0.14 |
| 0.75 | 0.14 |

|      |      |
|------|------|
| 0.47 | 0.02 |
| 0.78 | 0.16 |
| 0.80 | 0.18 |
| 0.80 | 0.18 |
| 0.51 | 0.03 |
| #N/A | #N/A |
| 1.39 | 0.87 |
| 1.13 | 0.60 |
| 1.39 | 0.87 |
| 1.39 | 0.87 |
| 0.97 | 0.36 |
| 1.15 | 0.60 |
| 1.22 | 0.73 |
| 1.22 | 0.73 |
| 0.93 | 0.35 |
| 1.12 | 0.56 |
| 1.10 | 0.55 |
| 0.57 | 0.05 |
| 0.81 | 0.18 |
| #N/A | #N/A |
| 0.97 | 0.44 |
| 0.97 | 0.44 |
| 1.12 | 0.58 |
| 0.71 | 0.11 |
| 1.03 | 0.47 |
| 1.03 | 0.47 |
| 1.12 | 0.58 |
| 1.12 | 0.58 |
| 1.53 | 0.94 |
| 1.08 | 0.53 |
| 1.53 | 0.94 |
| 1.08 | 0.53 |
| 1.24 | 0.69 |
| 1.47 | 0.85 |
| 1.47 | 0.85 |
| 1.47 | 0.85 |
| 1.13 | 0.61 |
| 1.06 | 0.50 |
| 1.10 | 0.55 |
| 1.10 | 0.55 |
| 1.22 | 0.71 |
| 1.22 | 0.71 |
| 1.01 | 0.43 |
| 1.05 | 0.50 |
| 0.69 | 0.10 |
| 1.37 | 0.84 |
| 1.37 | 0.84 |
| 0.90 | 0.28 |
| 1.58 | 0.91 |
| 1.58 | 0.91 |
| 0.81 | 0.22 |

|      |      |
|------|------|
| 1.16 | 0.64 |
| 1.16 | 0.64 |
| 1.38 | 0.87 |
| 1.30 | 0.81 |
| 1.30 | 0.81 |
| #N/A | #N/A |
| #N/A | #N/A |
| 1.10 | 0.55 |
| 1.14 | 0.61 |
| 1.11 | 0.56 |
| 1.52 | 0.62 |
| 1.52 | 0.62 |
| 1.00 | 0.42 |
| 0.74 | 0.14 |
| 0.74 | 0.14 |
| #N/A | #N/A |
| 0.42 | 0.02 |
| 1.34 | 0.82 |
| 0.80 | 0.19 |
| 0.82 | 0.19 |
| 0.85 | 0.22 |
| 1.05 | 0.49 |
| 1.04 | 0.46 |
| 1.31 | 0.81 |
| 1.31 | 0.81 |
| 1.01 | 0.43 |
| 1.01 | 0.43 |
| 0.99 | 0.42 |
| 0.99 | 0.42 |
| 1.30 | 0.81 |
| 0.60 | 0.07 |
| 1.51 | 0.76 |
| 0.83 | 0.22 |
| 1.33 | 0.83 |
| 1.33 | 0.83 |
| 1.36 | 0.85 |
| 1.02 | 0.46 |
| 0.81 | 0.22 |
| 0.81 | 0.22 |
| 1.08 | 0.52 |
| 1.08 | 0.52 |
| 0.94 | 0.33 |
| 0.94 | 0.33 |
| 1.45 | 0.91 |
| 1.45 | 0.76 |
| 0.70 | 0.10 |
| 0.70 | 0.10 |
| 0.93 | 0.36 |
| 1.11 | 0.56 |
| 1.04 | 0.49 |
| 1.00 | 0.41 |

|      |      |
|------|------|
| 1.00 | 0.41 |
| 1.15 | 0.62 |
| 1.49 | 0.84 |
| 1.49 | 0.84 |
| 1.16 | 0.60 |
| 1.26 | 0.76 |
| 1.26 | 0.76 |
| 0.84 | 0.21 |
| #N/A | #N/A |
| #N/A | #N/A |
| 1.13 | 0.58 |
| 1.13 | 0.58 |
| 0.95 | 0.35 |
| 1.26 | 0.77 |
| 1.26 | 0.77 |
| 1.06 | 0.50 |
| 1.05 | 0.47 |
| 1.05 | 0.47 |
| 1.05 | 0.47 |
| 1.28 | 0.79 |
| 0.86 | 0.23 |
| 0.86 | 0.23 |
| 1.31 | 0.82 |
| #N/A | #N/A |
| 1.09 | 0.52 |
| 1.18 | 0.66 |
| 1.18 | 0.66 |
| #N/A | #N/A |
| 1.70 | 0.97 |
| 1.17 | 0.65 |
| #N/A | #N/A |
| #N/A | #N/A |
| #N/A | #N/A |
| #N/A | #N/A |
| 1.15 | 0.64 |
| 1.15 | 0.64 |
| 0.95 | 0.35 |
| 0.95 | 0.35 |
| 0.85 | 0.22 |
| 0.88 | 0.25 |
| 0.89 | 0.29 |
| 0.89 | 0.29 |
| #N/A | #N/A |
| 0.93 | 0.32 |
| 1.18 | 0.67 |
| 1.14 | 0.58 |
| 1.24 | 0.64 |
| 0.93 | 0.34 |
| 0.93 | 0.34 |
| 1.17 | 0.65 |
| 0.96 | 0.39 |

|      |      |
|------|------|
| 0.96 | 0.39 |
| 1.19 | 0.68 |
| 0.97 | 0.38 |
| 2.53 | 0.87 |
| 0.66 | 0.08 |
| 0.66 | 0.08 |
| 1.01 | 0.42 |
| #N/A | #N/A |
| 1.08 | 0.53 |
| 1.08 | 0.53 |
| 1.01 | 0.44 |
| 1.22 | 0.72 |
| 1.27 | 0.77 |
| 1.27 | 0.77 |
| 1.26 | 0.75 |
| 1.26 | 0.76 |
| #N/A | #N/A |
| 0.95 | 0.38 |
| 0.95 | 0.38 |
| 0.99 | 0.41 |
| 0.99 | 0.41 |
| 1.30 | 0.81 |
| 0.73 | 0.12 |
| 0.79 | 0.17 |
| 1.25 | 0.60 |
| #N/A | #N/A |
| #N/A | #N/A |
| 0.93 | 0.41 |
| 0.79 | 0.18 |
| 1.21 | 0.71 |
| 1.06 | 0.51 |
| 0.98 | 0.38 |
| 1.06 | 0.51 |
| 1.68 | 0.95 |
| 0.92 | 0.30 |
| 0.92 | 0.30 |
| 0.92 | 0.30 |
| 0.92 | 0.30 |
| 1.27 | 0.76 |
| 1.41 | 0.88 |
| #N/A | #N/A |
| #N/A | #N/A |
| 1.02 | 0.45 |
| 1.02 | 0.45 |
| 0.69 | 0.13 |
| 1.05 | 0.48 |
| 1.08 | 0.53 |
| 1.08 | 0.53 |
| #N/A | #N/A |
| 1.20 | 0.70 |
| 1.07 | 0.51 |



|      |      |
|------|------|
| 1.07 | 0.51 |
| 1.39 | 0.84 |
| 0.85 | 0.23 |
| 0.85 | 0.23 |
| 0.89 | 0.27 |
| #N/A | #N/A |
| #N/A | #N/A |
| 0.94 | 0.35 |
| 0.94 | 0.35 |
| 0.81 | 0.20 |
| 1.15 | 0.61 |
| 1.15 | 0.61 |
| 0.89 | 0.27 |
| 1.33 | 0.82 |
| #N/A | #N/A |
| 1.10 | 0.56 |
| 1.34 | 0.80 |
| 1.03 | 0.46 |
| 1.19 | 0.62 |
| 1.37 | 0.86 |
| 1.37 | 0.86 |
| 1.01 | 0.43 |
| 1.02 | 0.44 |
| #N/A | #N/A |
| 1.21 | 0.71 |
| #N/A | #N/A |
| 1.21 | 0.70 |
| 1.21 | 0.70 |
| 1.19 | 0.67 |
| 1.13 | 0.60 |
| 1.19 | 0.67 |
| 1.71 | 0.97 |
| 1.71 | 0.97 |
| 0.98 | 0.38 |
| 1.11 | 0.58 |
| 1.28 | 0.75 |
| 1.28 | 0.75 |
| 0.90 | 0.29 |
| 0.90 | 0.29 |
| #N/A | #N/A |
| 0.97 | 0.37 |
| 0.97 | 0.37 |
| 0.77 | 0.24 |
| 0.78 | 0.22 |
| 1.16 | 0.63 |
| 0.85 | 0.21 |
| 0.71 | 0.11 |
| 1.03 | 0.46 |
| 1.03 | 0.46 |
| #N/A | #N/A |
| 0.92 | 0.32 |

|      |      |
|------|------|
| 0.92 | 0.32 |
| 0.58 | 0.04 |
| 0.88 | 0.33 |
| 0.88 | 0.33 |
| #N/A | #N/A |
| 1.30 | 0.80 |
| 1.30 | 0.80 |
| 0.73 | 0.12 |
| 1.05 | 0.48 |
| 1.49 | 0.66 |
| 1.49 | 0.66 |
| 0.88 | 0.26 |
| 1.01 | 0.43 |
| 0.98 | 0.38 |
| 0.98 | 0.38 |
| 1.10 | 0.56 |
| 1.10 | 0.56 |
| #N/A | #N/A |
| 0.80 | 0.19 |
| 0.92 | 0.32 |
| 0.92 | 0.32 |
| 0.92 | 0.32 |
| 0.99 | 0.39 |
| 1.10 | 0.54 |
| 0.69 | 0.10 |
| 0.87 | 0.26 |
| 1.25 | 0.66 |
| 1.25 | 0.66 |
| 0.70 | 0.10 |
| 0.70 | 0.10 |
| 1.40 | 0.63 |
| 1.25 | 0.72 |
| 1.40 | 0.63 |
| 1.01 | 0.42 |
| 1.25 | 0.72 |
| 0.88 | 0.25 |
| 0.88 | 0.25 |
| 1.46 | 0.78 |
| 1.21 | 0.68 |
| 1.23 | 0.73 |
| 1.23 | 0.73 |
| 1.09 | 0.54 |
| 1.18 | 0.66 |
| 0.99 | 0.40 |
| 1.38 | 0.60 |
| 1.06 | 0.51 |
| 0.63 | 0.06 |
| 0.69 | 0.11 |
| 0.69 | 0.11 |
| 0.69 | 0.11 |
| 1.19 | 0.59 |

|      |      |
|------|------|
| 1.04 | 0.47 |
| 1.16 | 0.57 |
| 1.27 | 0.73 |
| 1.27 | 0.73 |
| 1.27 | 0.73 |
| 1.11 | 0.54 |
| 1.07 | 0.52 |
| 1.11 | 0.53 |
| 0.93 | 0.32 |
| 0.93 | 0.32 |
| 0.65 | 0.07 |
| 0.77 | 0.15 |
| 0.77 | 0.15 |
| 0.77 | 0.15 |
| 0.96 | 0.36 |
| 0.96 | 0.36 |
| 1.01 | 0.43 |
| 1.26 | 0.76 |
| 0.99 | 0.43 |
| 1.19 | 0.69 |
| 0.56 | 0.04 |
| 0.85 | 0.24 |
| 1.04 | 0.47 |
| 0.93 | 0.31 |
| #N/A | #N/A |
| 1.08 | 0.53 |
| 1.19 | 0.66 |
| 0.83 | 0.24 |
| 0.88 | 0.26 |
| 1.40 | 0.84 |
| 1.40 | 0.84 |
| 0.96 | 0.40 |
| 0.96 | 0.40 |
| #N/A | #N/A |
| 1.32 | 0.78 |
| 1.32 | 0.78 |
| 1.33 | 0.81 |
| 1.02 | 0.45 |
| 1.33 | 0.81 |
| 0.69 | 0.10 |
| 0.69 | 0.10 |
| 1.10 | 0.57 |
| 1.10 | 0.57 |
| #N/A | #N/A |
| #N/A | #N/A |
| 1.30 | 0.81 |
| 1.02 | 0.45 |
| 1.02 | 0.45 |
| 0.99 | 0.41 |
| 0.99 | 0.41 |
| #N/A | #N/A |

|      |      |
|------|------|
| 0.34 | 0.01 |
| 0.34 | 0.01 |
| 0.81 | 0.24 |
| 0.81 | 0.24 |
| 1.16 | 0.62 |
| 0.96 | 0.37 |
| 1.16 | 0.62 |
| 0.96 | 0.37 |
| 1.48 | 0.91 |
| 1.07 | 0.51 |
| 1.07 | 0.51 |
| #N/A | #N/A |
| 1.20 | 0.70 |
| 1.20 | 0.70 |
| 1.12 | 0.56 |
| 1.12 | 0.56 |
| 0.98 | 0.39 |
| #N/A | #N/A |
| 1.05 | 0.48 |
| 1.00 | 0.42 |
| #N/A | #N/A |
| 0.91 | 0.32 |
| #N/A | #N/A |
| 0.91 | 0.32 |
| #N/A | #N/A |
| 2.04 | 0.99 |
| 2.04 | 0.99 |
| 1.26 | 0.76 |
| 1.17 | 0.59 |
| 0.85 | 0.23 |
| 1.04 | 0.47 |
| 1.21 | 0.71 |
| 1.04 | 0.47 |
| #N/A | #N/A |
| 1.22 | 0.72 |
| #N/A | #N/A |
| 1.00 | 0.42 |
| #N/A | #N/A |
| 1.18 | 0.64 |
| 1.59 | 0.95 |
| 1.59 | 0.95 |
| 1.00 | 0.42 |
| 1.09 | 0.54 |
| 1.15 | 0.62 |
| 0.77 | 0.23 |
| 1.57 | 0.93 |
| #N/A | #N/A |
| 1.11 | 0.55 |
| 1.34 | 0.84 |
| 1.34 | 0.84 |
| #N/A | #N/A |

|      |      |
|------|------|
| 1.16 | 0.65 |
| 1.80 | 0.54 |
| #N/A | #N/A |
| 1.80 | 0.54 |
| 1.41 | 0.89 |
| #N/A | #N/A |
| 1.33 | 0.81 |
| 1.33 | 0.81 |
| #N/A | #N/A |
| #N/A | #N/A |
| 0.96 | 0.35 |
| 0.96 | 0.35 |
| 0.96 | 0.35 |
| 0.96 | 0.35 |
| 0.96 | 0.35 |
| 0.88 | 0.25 |
| 0.97 | 0.37 |
| 0.97 | 0.37 |
| #N/A | #N/A |
| #N/A | #N/A |
| 1.05 | 0.48 |
| 1.05 | 0.49 |
| #N/A | #N/A |
| 1.02 | 0.46 |
| 1.05 | 0.49 |
| 1.02 | 0.46 |
| #N/A | #N/A |
| #N/A | #N/A |
| 1.03 | 0.45 |
| 1.09 | 0.54 |
| 1.41 | 0.86 |
| 1.41 | 0.86 |
| 0.59 | 0.05 |
| 0.59 | 0.05 |
| 1.03 | 0.47 |
| 1.03 | 0.47 |
| 1.63 | 0.94 |
| 0.90 | 0.28 |
| #N/A | #N/A |
| 1.03 | 0.47 |
| #N/A | #N/A |
| 1.17 | 0.65 |
| 0.95 | 0.34 |
| 1.00 | 0.41 |
| 1.00 | 0.41 |
| 1.02 | 0.45 |
| 1.37 | 0.87 |
| 0.86 | 0.26 |
| 0.86 | 0.26 |
| 1.11 | 0.57 |
| 1.08 | 0.52 |

|      |      |
|------|------|
| 1.08 | 0.52 |
| 1.23 | 0.74 |
| 1.23 | 0.74 |
| 1.07 | 0.53 |
| 1.12 | 0.58 |
| 1.07 | 0.53 |
| 1.44 | 0.81 |
| 1.42 | 0.89 |
| 1.42 | 0.89 |
| 1.41 | 0.87 |
| #N/A | #N/A |
| 1.11 | 0.54 |
| 1.11 | 0.54 |
| 1.11 | 0.54 |
| 1.11 | 0.58 |
| 1.27 | 0.70 |
| 1.15 | 0.58 |
| 1.15 | 0.58 |
| #N/A | #N/A |
| #N/A | #N/A |
| #N/A | #N/A |
| 1.02 | 0.46 |
| 1.02 | 0.46 |
| 1.28 | 0.79 |
| 1.17 | 0.66 |
| 1.17 | 0.66 |
| 1.18 | 0.57 |
| 1.05 | 0.48 |
| #N/A | #N/A |
| 0.72 | 0.12 |
| 1.27 | 0.78 |
| 0.71 | 0.11 |
| 1.08 | 0.53 |
| 1.08 | 0.53 |
| 0.85 | 0.22 |
| 0.71 | 0.13 |
| 1.12 | 0.58 |
| 1.12 | 0.58 |
| 0.89 | 0.28 |
| 0.89 | 0.28 |
| 1.21 | 0.63 |
| 1.31 | 0.73 |
| 1.27 | 0.78 |
| 1.01 | 0.43 |
| 1.01 | 0.43 |
| 0.86 | 0.23 |
| 0.86 | 0.23 |
| 0.65 | 0.07 |
| 1.78 | 0.98 |
| 0.65 | 0.07 |
| 1.04 | 0.47 |

|      |      |
|------|------|
| 1.05 | 0.49 |
| #N/A | #N/A |
| 0.91 | 0.29 |
| 0.91 | 0.29 |
| #N/A | #N/A |
| #N/A | #N/A |
| 0.29 | 0.00 |
| 1.15 | 0.56 |
| 1.22 | 0.69 |
| 0.86 | 0.24 |
| 0.52 | 0.03 |
| 0.86 | 0.24 |
| 0.86 | 0.23 |
| 0.95 | 0.34 |
| 0.95 | 0.34 |
| 0.98 | 0.38 |
| 1.07 | 0.52 |
| #N/A | #N/A |
| 1.22 | 0.72 |
| #N/A | #N/A |
| 0.77 | 0.14 |
| 0.77 | 0.14 |
| 0.96 | 0.35 |
| 0.95 | 0.40 |
| 0.95 | 0.40 |
| #N/A | #N/A |
| 1.19 | 0.68 |
| 1.19 | 0.68 |
| 0.33 | 0.01 |
| 0.33 | 0.01 |
| 0.33 | 0.01 |
| #N/A | #N/A |
| 1.20 | 0.68 |
| 1.09 | 0.52 |
| 1.11 | 0.57 |
| 1.52 | 0.93 |
| 1.20 | 0.70 |
| 1.30 | 0.73 |
| 1.37 | 0.82 |
| 1.00 | 0.44 |
| 1.00 | 0.44 |
| 0.78 | 0.16 |
| 0.86 | 0.24 |
| 1.22 | 0.72 |
| 0.99 | 0.41 |
| #N/A | #N/A |
| 0.71 | 0.11 |
| 1.34 | 0.76 |
| 1.34 | 0.76 |
| 0.96 | 0.35 |
| 0.96 | 0.35 |

|      |      |
|------|------|
| 0.51 | 0.03 |
| 0.51 | 0.03 |
| 0.43 | 0.01 |
| 0.43 | 0.01 |
| 0.99 | 0.40 |
| 0.99 | 0.40 |
| #N/A | #N/A |
| 1.11 | 0.55 |
| 1.11 | 0.55 |
| 1.08 | 0.52 |
| 1.08 | 0.50 |
| 1.08 | 0.50 |
| #N/A | #N/A |
| 1.25 | 0.75 |
| 1.05 | 0.49 |
| 1.05 | 0.49 |
| #N/A | #N/A |
| #N/A | #N/A |
| 1.25 | 0.75 |
| 1.25 | 0.75 |
| #N/A | #N/A |
| 0.98 | 0.38 |
| 1.72 | 0.80 |
| 0.48 | 0.02 |
| 0.48 | 0.02 |
| 0.86 | 0.23 |
| 0.86 | 0.23 |
| 0.86 | 0.23 |
| 1.58 | 0.89 |
| 1.24 | 0.75 |
| 1.22 | 0.72 |
| 1.24 | 0.75 |
| 1.22 | 0.72 |
| 1.13 | 0.60 |
| 1.02 | 0.47 |
| 1.02 | 0.47 |
| 1.15 | 0.61 |
| 1.01 | 0.42 |
| 0.70 | 0.10 |
| 0.63 | 0.07 |
| 1.11 | 0.58 |
| 1.11 | 0.58 |
| 1.19 | 0.67 |
| 1.19 | 0.67 |
| 1.24 | 0.74 |
| 1.39 | 0.87 |
| 0.83 | 0.24 |
| 0.83 | 0.24 |
| 1.12 | 0.59 |
| 1.14 | 0.61 |
| 1.42 | 0.89 |



|      |      |
|------|------|
| 0.77 | 0.15 |
| 1.04 | 0.47 |
| 1.10 | 0.55 |
| 1.10 | 0.55 |
| 0.53 | 0.03 |
| 1.11 | 0.58 |
| 0.49 | 0.02 |
| 0.70 | 0.12 |
| 1.02 | 0.44 |
| 1.02 | 0.44 |
| 0.85 | 0.25 |
| 0.85 | 0.25 |
| #N/A | #N/A |
| 1.34 | 0.84 |
| 1.50 | 0.92 |
| 1.19 | 0.62 |
| 0.73 | 0.12 |
| 1.05 | 0.47 |
| 1.05 | 0.47 |
| 1.09 | 0.54 |
| 1.09 | 0.54 |
| 1.20 | 0.65 |
| 1.22 | 0.67 |
| #N/A | #N/A |
| 0.67 | 0.09 |
| 0.93 | 0.32 |
| 0.93 | 0.32 |
| #N/A | #N/A |
| 0.78 | 0.16 |
| 1.08 | 0.51 |
| 1.03 | 0.46 |
| 1.03 | 0.46 |
| 1.22 | 0.67 |
| #N/A | #N/A |
| 1.28 | 0.77 |
| 1.28 | 0.77 |
| 1.56 | 0.95 |
| 1.04 | 0.47 |
| 1.29 | 0.72 |
| 1.21 | 0.71 |
| 0.60 | 0.06 |
| 0.43 | 0.01 |
| #N/A | #N/A |
| 1.42 | 0.87 |
| 1.42 | 0.87 |
| 1.28 | 0.75 |
| 1.00 | 0.43 |
| 1.00 | 0.43 |
| 0.81 | 0.23 |
| 0.60 | 0.05 |
| 1.12 | 0.58 |

|      |      |
|------|------|
| 0.93 | 0.34 |
| 1.21 | 0.70 |
| 0.98 | 0.38 |
| 0.62 | 0.06 |
| 0.74 | 0.14 |
| #N/A | #N/A |
| 1.04 | 0.46 |
| 1.04 | 0.46 |
| 1.45 | 0.88 |
| #N/A | #N/A |
| #N/A | #N/A |
| 1.02 | 0.45 |
| 1.20 | 0.64 |
| 0.88 | 0.26 |
| 0.79 | 0.16 |
| #N/A | #N/A |
| #N/A | #N/A |
| 1.16 | 0.62 |
| 1.16 | 0.62 |
| 1.21 | 0.70 |
| 0.86 | 0.26 |
| 1.00 | 0.41 |
| 1.80 | 0.85 |
| #N/A | #N/A |
| 1.21 | 0.68 |
| 0.84 | 0.22 |
| 1.14 | 0.57 |
| 0.84 | 0.22 |
| 0.80 | 0.17 |
| 1.13 | 0.61 |
| #N/A | #N/A |
| 0.91 | 0.37 |
| 0.91 | 0.37 |
| 1.19 | 0.69 |
| 1.22 | 0.72 |
| 1.06 | 0.51 |
| 0.91 | 0.32 |
| 1.46 | 0.73 |
| 1.46 | 0.73 |
| 0.96 | 0.38 |
| 1.37 | 0.81 |
| 0.96 | 0.38 |
| 1.37 | 0.81 |
| 1.41 | 0.88 |
| 1.35 | 0.84 |
| 1.35 | 0.84 |
| 0.80 | 0.25 |
| 1.05 | 0.48 |
| 1.04 | 0.47 |
| 1.04 | 0.47 |
| 1.29 | 0.55 |

|      |      |
|------|------|
| 1.01 | 0.42 |
| #N/A | #N/A |
| 1.35 | 0.80 |
| #N/A | #N/A |
| 1.10 | 0.56 |
| 1.21 | 0.71 |
| 1.26 | 0.76 |
| 0.97 | 0.40 |
| 0.91 | 0.31 |
| #N/A | #N/A |
| 0.97 | 0.37 |
| 1.65 | 0.94 |
| 1.57 | 0.95 |
| 1.43 | 0.72 |
| 1.02 | 0.45 |
| 0.89 | 0.27 |
| 1.23 | 0.73 |
| 1.23 | 0.73 |
| 1.01 | 0.42 |
| 1.01 | 0.42 |
| 0.91 | 0.35 |
| 0.93 | 0.33 |
| 0.91 | 0.35 |
| 0.77 | 0.17 |
| 1.25 | 0.71 |
| 0.56 | 0.06 |
| 1.20 | 0.70 |
| 1.01 | 0.44 |
| 0.81 | 0.19 |
| 0.81 | 0.19 |
| 1.21 | 0.70 |
| 0.76 | 0.14 |
| 0.96 | 0.36 |
| 0.78 | 0.16 |
| 1.15 | 0.60 |
| 1.15 | 0.60 |
| 1.41 | 0.73 |
| 1.37 | 0.77 |
| 1.20 | 0.59 |
| 1.20 | 0.59 |
| 1.11 | 0.56 |
| 1.24 | 0.62 |
| 1.24 | 0.62 |
| #N/A | #N/A |
| 1.32 | 0.79 |
| 1.28 | 0.77 |
| 1.28 | 0.77 |
| 1.20 | 0.69 |
| 1.14 | 0.61 |
| 1.14 | 0.61 |
| 1.40 | 0.86 |

|      |      |
|------|------|
| 0.89 | 0.26 |
| 0.84 | 0.20 |
| 0.81 | 0.18 |
| 0.80 | 0.17 |
| 1.22 | 0.72 |
| 1.22 | 0.72 |
| 1.18 | 0.66 |
| 1.15 | 0.63 |
| 0.81 | 0.20 |
| 1.34 | 0.77 |
| 1.21 | 0.70 |
| 0.95 | 0.33 |
| 1.13 | 0.60 |
| 1.16 | 0.63 |
| 1.16 | 0.63 |
| 1.14 | 0.63 |
| 1.14 | 0.63 |
| #N/A | #N/A |
| 0.99 | 0.40 |
| 0.99 | 0.40 |
| 1.00 | 0.41 |
| 0.84 | 0.21 |
| 1.13 | 0.60 |
| 1.29 | 0.80 |
| 1.29 | 0.80 |
| 0.96 | 0.36 |
| 0.88 | 0.26 |
| 1.19 | 0.57 |
| 0.90 | 0.28 |
| 1.10 | 0.56 |
| 0.90 | 0.28 |
| 1.42 | 0.85 |
| 1.11 | 0.58 |
| 1.11 | 0.58 |
| 1.04 | 0.47 |
| 1.59 | 0.95 |
| 1.27 | 0.76 |
| 1.27 | 0.76 |
| 1.69 | 0.97 |
| 1.28 | 0.68 |
| 1.28 | 0.68 |
| 0.98 | 0.41 |
| 0.98 | 0.41 |
| 1.15 | 0.63 |
| 1.32 | 0.64 |
| 1.31 | 0.71 |
| 1.01 | 0.44 |
| 1.01 | 0.44 |
| 1.36 | 0.82 |
| 1.36 | 0.82 |
| 0.96 | 0.36 |

|      |      |
|------|------|
| 1.36 | 0.82 |
| 1.53 | 0.92 |
| 1.37 | 0.74 |
| 1.01 | 0.43 |
| #N/A | #N/A |
| 0.83 | 0.23 |
| 0.31 | 0.00 |
| 0.77 | 0.16 |
| 0.31 | 0.00 |
| 1.08 | 0.53 |
| 1.08 | 0.53 |
| 1.38 | 0.86 |
| 1.28 | 0.69 |
| 1.28 | 0.69 |
| 1.59 | 0.94 |
| 1.65 | 0.96 |
| 1.65 | 0.96 |
| 1.32 | 0.82 |
| 1.12 | 0.56 |
| 1.15 | 0.53 |
| 1.08 | 0.53 |
| 1.08 | 0.53 |
| 1.48 | 0.92 |
| 1.11 | 0.57 |
| 1.22 | 0.64 |
| 0.91 | 0.29 |
| 0.88 | 0.26 |
| 0.95 | 0.36 |
| 1.12 | 0.57 |
| 1.31 | 0.82 |
| 1.31 | 0.82 |
| 1.12 | 0.57 |
| 1.08 | 0.54 |
| 1.08 | 0.54 |
| 0.88 | 0.28 |
| 0.88 | 0.28 |
| 1.11 | 0.57 |
| 1.42 | 0.83 |
| #N/A | #N/A |
| 1.15 | 0.59 |
| 0.90 | 0.28 |
| 0.62 | 0.09 |
| 1.07 | 0.52 |
| 1.10 | 0.56 |
| 1.35 | 0.82 |
| 1.03 | 0.45 |
| 1.03 | 0.45 |
| 1.08 | 0.52 |
| 1.08 | 0.52 |
| #N/A | #N/A |
| 1.32 | 0.68 |

|      |      |
|------|------|
| 1.15 | 0.64 |
| 1.15 | 0.64 |
| 1.27 | 0.74 |
| 1.24 | 0.71 |
| 0.69 | 0.09 |
| 0.69 | 0.09 |
| 1.33 | 0.80 |
| 0.98 | 0.39 |
| 0.66 | 0.08 |
| 0.86 | 0.23 |
| 0.86 | 0.23 |
| 1.17 | 0.66 |
| 0.98 | 0.39 |
| 0.99 | 0.41 |
| 0.99 | 0.41 |
| 0.94 | 0.38 |
| 0.94 | 0.38 |
| 1.22 | 0.70 |
| 1.25 | 0.74 |
| #N/A | #N/A |
| 1.23 | 0.66 |
| 1.23 | 0.66 |
| 1.30 | 0.71 |
| #N/A | #N/A |
| 0.94 | 0.33 |
| 0.94 | 0.33 |
| 0.94 | 0.33 |
| 1.16 | 0.65 |
| 1.16 | 0.65 |
| 1.07 | 0.52 |
| 1.07 | 0.52 |
| 1.06 | 0.51 |
| 1.37 | 0.86 |
| #N/A | #N/A |
| #N/A | #N/A |
| 1.20 | 0.55 |
| 1.12 | 0.59 |
| 1.32 | 0.78 |
| 1.00 | 0.42 |
| 1.00 | 0.42 |
| 1.21 | 0.69 |
| 1.21 | 0.69 |
| #N/A | #N/A |
| #N/A | #N/A |
| #N/A | #N/A |
| 1.31 | 0.74 |
| #N/A | #N/A |
| 1.17 | 0.65 |
| 0.78 | 0.17 |
| #N/A | #N/A |
| 0.87 | 0.25 |

|      |      |
|------|------|
| 0.87 | 0.25 |
| 1.08 | 0.51 |
| 0.85 | 0.24 |
| 0.99 | 0.40 |
| 0.99 | 0.40 |
| 1.24 | 0.67 |
| 1.24 | 0.67 |
| 1.01 | 0.43 |
| 1.24 | 0.67 |
| 1.01 | 0.43 |
| 1.03 | 0.45 |
| 0.89 | 0.26 |
| 1.00 | 0.42 |
| 0.84 | 0.21 |
| #N/A | #N/A |
| 0.84 | 0.21 |
| #N/A | #N/A |
| 1.11 | 0.58 |
| 1.11 | 0.58 |
| 0.80 | 0.18 |
| 0.80 | 0.18 |
| 0.83 | 0.20 |
| 0.87 | 0.24 |
| 0.87 | 0.24 |
| 1.57 | 0.94 |
| 1.02 | 0.44 |
| 1.01 | 0.42 |
| 1.24 | 0.74 |
| 1.15 | 0.63 |
| 1.15 | 0.63 |
| 1.48 | 0.92 |
| 1.23 | 0.72 |
| 1.23 | 0.72 |
| 1.12 | 0.59 |
| 1.19 | 0.69 |
| 0.61 | 0.05 |
| 1.09 | 0.55 |
| 1.07 | 0.52 |
| 0.85 | 0.23 |
| #N/A | #N/A |
| #N/A | #N/A |
| 1.13 | 0.56 |
| 1.13 | 0.56 |
| 0.78 | 0.15 |
| 0.78 | 0.15 |
| 1.24 | 0.74 |
| 1.24 | 0.74 |
| #N/A | #N/A |
| 0.97 | 0.37 |
| #N/A | #N/A |
| #N/A | #N/A |

|      |      |
|------|------|
| #N/A | #N/A |
| #N/A | #N/A |
| 0.96 | 0.35 |
| 0.96 | 0.35 |
| 1.37 | 0.68 |
| 1.37 | 0.68 |
| 1.04 | 0.47 |
| 1.04 | 0.47 |
| 1.28 | 0.79 |
| 0.61 | 0.06 |
| #N/A | #N/A |
| #N/A | #N/A |
| 0.95 | 0.35 |
| 0.83 | 0.22 |
| 1.12 | 0.58 |
| 0.71 | 0.15 |
| 0.71 | 0.15 |
| 1.07 | 0.51 |
| 1.32 | 0.79 |
| 0.99 | 0.41 |
| 0.95 | 0.35 |
| 1.13 | 0.60 |
| 1.02 | 0.45 |
| 1.32 | 0.81 |
| 0.96 | 0.37 |
| 1.34 | 0.84 |
| 1.26 | 0.63 |
| 1.34 | 0.84 |
| #N/A | #N/A |
| 0.98 | 0.39 |
| 0.44 | 0.01 |
| 0.83 | 0.20 |
| 1.04 | 0.48 |
| 0.68 | 0.09 |
| 0.68 | 0.09 |
| 1.26 | 0.76 |
| 1.35 | 0.84 |
| 1.23 | 0.65 |
| 1.23 | 0.65 |
| 0.91 | 0.29 |
| 1.11 | 0.58 |
| 0.78 | 0.15 |
| 0.78 | 0.15 |
| #N/A | #N/A |
| 0.79 | 0.17 |
| 1.14 | 0.59 |
| 1.14 | 0.59 |
| 0.82 | 0.28 |
| 0.97 | 0.38 |
| 0.97 | 0.38 |
| #N/A | #N/A |



|      |      |
|------|------|
| 1.08 | 0.53 |
| 1.08 | 0.53 |
| 0.97 | 0.36 |
| 0.97 | 0.36 |
| #N/A | #N/A |
| 1.26 | 0.69 |
| 1.41 | 0.78 |
| 1.41 | 0.78 |
| 1.01 | 0.45 |
| 0.70 | 0.10 |
| 0.70 | 0.10 |
| #N/A | #N/A |
| #N/A | #N/A |
| 1.13 | 0.59 |
| 1.13 | 0.59 |
| 1.16 | 0.65 |
| 0.94 | 0.33 |
| 1.09 | 0.55 |
| 0.92 | 0.35 |
| 0.98 | 0.39 |
| 1.40 | 0.87 |
| 1.40 | 0.87 |
| 1.54 | 0.93 |
| 1.54 | 0.93 |
| 1.08 | 0.54 |
| 1.08 | 0.54 |
| 1.11 | 0.58 |
| 1.12 | 0.58 |
| 1.01 | 0.43 |
| 0.77 | 0.15 |
| 0.94 | 0.34 |
| 0.94 | 0.34 |
| 1.06 | 0.51 |
| 1.51 | 0.88 |
| 1.36 | 0.82 |
| 1.36 | 0.82 |
| 0.99 | 0.41 |
| 0.99 | 0.41 |
| 1.41 | 0.88 |
| 1.41 | 0.88 |
| 0.83 | 0.20 |
| 1.08 | 0.54 |
| 1.08 | 0.54 |
| 1.10 | 0.55 |
| 1.10 | 0.55 |
| 0.14 | 0.00 |
| 0.14 | 0.00 |
| 0.23 | 0.00 |
| 0.58 | 0.05 |
| 1.46 | 0.90 |
| 1.46 | 0.90 |

|      |      |
|------|------|
| 1.14 | 0.62 |
| 1.05 | 0.48 |
| 1.19 | 0.68 |
| 1.19 | 0.68 |
| 1.16 | 0.62 |
| 0.83 | 0.23 |
| 1.28 | 0.78 |
| 1.28 | 0.78 |
| 1.28 | 0.78 |
| #N/A | #N/A |
| #N/A | #N/A |
| 1.39 | 0.73 |
| 1.39 | 0.73 |
| 0.62 | 0.06 |
| 1.23 | 0.69 |
| 1.20 | 0.68 |
| 1.00 | 0.41 |
| 1.00 | 0.41 |
| 1.31 | 0.81 |
| 1.18 | 0.66 |
| 1.20 | 0.70 |
| 1.20 | 0.70 |
| 0.92 | 0.31 |
| 1.10 | 0.53 |
| 1.30 | 0.74 |
| 1.30 | 0.74 |
| 1.10 | 0.53 |
| 0.59 | 0.05 |
| 1.86 | 0.83 |
| 1.86 | 0.83 |
| 1.38 | 0.58 |
| #N/A | #N/A |
| #N/A | #N/A |
| 0.49 | 0.02 |
| 0.49 | 0.02 |
| #N/A | #N/A |
| 1.32 | 0.68 |
| 0.79 | 0.16 |
| 0.94 | 0.33 |
| 1.18 | 0.67 |
| 1.18 | 0.67 |
| #N/A | #N/A |
| 1.25 | 0.75 |
| #N/A | #N/A |
| 1.24 | 0.73 |
| #N/A | #N/A |
| #N/A | #N/A |
| 1.20 | 0.68 |
| 1.20 | 0.68 |
| 1.49 | 0.92 |
| #N/A | #N/A |

|      |      |
|------|------|
| #N/A | #N/A |
| #N/A | #N/A |
| #N/A | #N/A |
| 0.98 | 0.38 |
| #N/A | #N/A |
| 1.41 | 0.70 |
| 1.41 | 0.70 |
| 1.13 | 0.61 |
| #N/A | #N/A |
| 1.18 | 0.68 |
| 1.18 | 0.68 |
| 1.35 | 0.74 |
| 0.68 | 0.09 |
| 0.68 | 0.09 |
| #N/A | #N/A |
| #N/A | #N/A |
| 0.90 | 0.28 |
| 0.90 | 0.28 |
| #N/A | #N/A |
| #N/A | #N/A |
| 1.09 | 0.54 |
| 1.05 | 0.50 |
| #N/A | #N/A |
| #N/A | #N/A |
| #N/A | #N/A |
| #N/A | #N/A |
| #N/A | #N/A |
| 1.23 | 0.73 |
| #N/A | #N/A |
| #N/A | #N/A |
| 0.90 | 0.31 |
| #N/A | #N/A |
| 1.21 | 0.67 |
| 1.21 | 0.67 |
| 1.48 | 0.85 |
| 1.48 | 0.85 |
| 1.48 | 0.85 |
| 1.48 | 0.85 |
| 1.08 | 0.54 |
| 1.08 | 0.54 |
| #N/A | #N/A |
| 0.92 | 0.33 |
| 1.04 | 0.48 |
| 1.04 | 0.48 |
| 1.05 | 0.49 |
| 0.97 | 0.36 |
| 1.00 | 0.42 |
| 1.00 | 0.42 |
| 1.12 | 0.58 |
| 1.14 | 0.60 |
| 1.12 | 0.58 |

|      |      |
|------|------|
| 1.64 | 0.93 |
| 1.64 | 0.93 |
| 0.92 | 0.30 |
| 1.22 | 0.71 |
| #N/A | #N/A |
| #N/A | #N/A |
| #N/A | #N/A |
| 0.57 | 0.04 |
| 0.57 | 0.04 |
| 0.88 | 0.27 |
| 1.06 | 0.49 |
| 0.68 | 0.09 |
| 1.27 | 0.73 |
| 1.15 | 0.62 |
| 1.24 | 0.68 |
| 1.14 | 0.62 |
| 1.14 | 0.62 |
| 1.01 | 0.44 |
| 1.01 | 0.44 |
| 1.01 | 0.44 |
| 1.39 | 0.87 |
| 1.43 | 0.83 |
| 1.43 | 0.83 |
| 1.05 | 0.49 |
| #N/A | #N/A |
| #N/A | #N/A |
| 1.05 | 0.48 |
| 2.14 | 0.80 |
| 2.14 | 0.80 |
| 1.19 | 0.68 |
| 1.19 | 0.68 |
| 0.57 | 0.04 |
| 1.30 | 0.81 |
| 1.22 | 0.67 |
| 1.22 | 0.67 |
| 1.48 | 0.72 |
| 0.86 | 0.23 |
| 0.63 | 0.07 |
| 0.63 | 0.07 |
| 0.77 | 0.14 |
| 1.22 | 0.68 |
| 1.19 | 0.64 |
| 1.19 | 0.64 |
| 0.82 | 0.19 |
| 0.82 | 0.19 |
| 1.11 | 0.58 |
| 0.64 | 0.07 |
| 0.90 | 0.28 |
| 1.05 | 0.49 |
| 1.05 | 0.49 |
| 1.11 | 0.57 |

|      |      |
|------|------|
| 1.25 | 0.76 |
| 1.11 | 0.57 |
| 1.25 | 0.76 |
| #N/A | #N/A |
| 0.98 | 0.40 |
| 0.98 | 0.40 |
| 1.05 | 0.48 |
| 1.08 | 0.52 |
| 0.59 | 0.06 |
| 0.94 | 0.36 |
| 0.94 | 0.36 |
| 1.22 | 0.55 |
| 1.22 | 0.55 |
| 1.65 | 0.87 |
| 1.22 | 0.55 |
| 1.29 | 0.75 |
| 1.29 | 0.75 |
| 0.98 | 0.40 |
| 0.94 | 0.35 |
| 0.95 | 0.36 |
| 1.43 | 0.89 |
| 1.43 | 0.89 |
| #N/A | #N/A |
| 1.08 | 0.51 |
| 0.97 | 0.37 |
| 0.90 | 0.33 |
| 1.04 | 0.46 |
| 1.04 | 0.46 |
| 1.04 | 0.46 |
| 0.64 | 0.07 |
| 0.66 | 0.11 |
| 0.66 | 0.11 |
| 0.62 | 0.09 |
| #N/A | #N/A |
| #N/A | #N/A |
| #N/A | #N/A |
| 0.84 | 0.23 |
| 1.29 | 0.72 |
| 1.29 | 0.72 |
| #N/A | #N/A |
| #N/A | #N/A |
| 1.02 | 0.44 |
| 1.16 | 0.64 |
| 0.66 | 0.09 |
| 0.66 | 0.09 |
| #N/A | #N/A |
| 0.99 | 0.42 |
| 0.99 | 0.42 |
| 1.07 | 0.53 |
| 0.99 | 0.42 |
| 1.07 | 0.53 |

|      |      |
|------|------|
| 1.05 | 0.48 |
| 1.05 | 0.48 |
| 1.05 | 0.50 |
| 1.34 | 0.63 |
| 0.87 | 0.25 |
| 0.87 | 0.25 |
| 0.81 | 0.18 |
| 0.81 | 0.18 |
| 1.12 | 0.58 |
| 0.59 | 0.05 |
| 1.07 | 0.52 |
| 0.83 | 0.20 |
| #N/A | #N/A |
| 0.70 | 0.10 |
| 0.61 | 0.06 |
| #N/A | #N/A |
| 1.04 | 0.47 |
| 0.89 | 0.30 |
| #N/A | #N/A |
| 0.89 | 0.30 |
| 0.81 | 0.25 |
| 0.87 | 0.25 |
| 0.81 | 0.25 |
| #N/A | #N/A |
| 1.06 | 0.49 |
| 0.60 | 0.05 |
| 0.92 | 0.34 |
| #N/A | #N/A |
| #N/A | #N/A |
| 1.18 | 0.68 |
| #N/A | #N/A |
| 1.18 | 0.68 |
| 1.08 | 0.52 |
| 1.08 | 0.52 |
| 0.90 | 0.29 |
| #N/A | #N/A |
| 0.87 | 0.27 |
| 0.87 | 0.27 |
| 0.94 | 0.33 |
| 1.05 | 0.48 |
| 1.05 | 0.48 |
| #N/A | #N/A |
| 1.13 | 0.59 |
| 1.13 | 0.59 |
| 1.28 | 0.79 |
| 1.28 | 0.79 |
| #N/A | #N/A |
| #N/A | #N/A |
| 0.88 | 0.27 |
| 0.95 | 0.35 |
| 2.17 | 0.94 |

|      |      |
|------|------|
| 1.01 | 0.43 |
| 1.01 | 0.43 |
| #N/A | #N/A |
| 1.32 | 0.82 |
| #N/A | #N/A |
| 1.32 | 0.82 |
| #N/A | #N/A |
| 1.11 | 0.56 |
| 0.92 | 0.34 |
| 0.61 | 0.06 |
| 0.92 | 0.34 |
| 1.16 | 0.64 |
| 1.05 | 0.49 |
| 1.05 | 0.49 |
| 1.02 | 0.45 |
| 1.41 | 0.88 |
| 1.41 | 0.88 |
| 0.90 | 0.28 |
| 0.90 | 0.28 |
| 0.89 | 0.27 |
| 0.89 | 0.27 |
| #N/A | #N/A |
| 1.16 | 0.65 |
| 1.16 | 0.65 |
| 1.16 | 0.65 |
| #N/A | #N/A |
| 1.21 | 0.57 |
| 1.10 | 0.57 |
| 1.08 | 0.53 |
| 0.50 | 0.03 |
| 0.50 | 0.03 |
| #N/A | #N/A |
| #N/A | #N/A |
| 1.21 | 0.62 |
| #N/A | #N/A |
| 1.04 | 0.50 |
| 0.65 | 0.08 |
| 0.65 | 0.08 |
| 1.29 | 0.62 |
| 1.19 | 0.56 |
| 1.19 | 0.56 |
| 1.50 | 0.87 |
| #N/A | #N/A |
| #N/A | #N/A |
| 1.00 | 0.41 |
| 1.33 | 0.67 |
| 1.33 | 0.67 |
| 1.33 | 0.67 |
| 1.27 | 0.78 |
| 1.27 | 0.78 |
| 1.12 | 0.59 |

|      |      |
|------|------|
| 0.93 | 0.34 |
| 0.93 | 0.34 |
| 1.11 | 0.54 |
| 1.11 | 0.54 |
| 1.13 | 0.60 |
| 1.30 | 0.74 |
| 1.19 | 0.68 |
| #N/A | #N/A |
| 1.17 | 0.63 |
| #N/A | #N/A |
| 0.77 | 0.15 |
| 0.77 | 0.15 |
| 1.12 | 0.55 |
| 1.12 | 0.55 |
| 1.27 | 0.77 |
| 1.03 | 0.45 |
| 1.24 | 0.74 |
| 1.24 | 0.74 |
| 1.03 | 0.45 |
| 1.09 | 0.54 |
| 0.84 | 0.26 |
| 1.31 | 0.80 |
| 1.31 | 0.80 |
| #N/A | #N/A |
| #N/A | #N/A |
| 1.13 | 0.60 |
| 0.65 | 0.07 |
| 0.65 | 0.07 |
| #N/A | #N/A |
| 1.60 | 0.95 |
| 1.26 | 0.60 |
| 0.89 | 0.28 |
| 0.99 | 0.40 |
| 0.99 | 0.40 |
| #N/A | #N/A |
| 1.01 | 0.43 |
| 1.12 | 0.59 |
| #N/A | #N/A |
| 1.12 | 0.59 |
| #N/A | #N/A |
| 1.16 | 0.65 |
| 0.81 | 0.18 |
| 0.61 | 0.06 |
| 0.81 | 0.18 |
| 0.61 | 0.06 |
| 0.81 | 0.18 |
| 0.61 | 0.06 |
| 0.89 | 0.29 |
| 0.87 | 0.26 |
| 1.15 | 0.63 |
| 1.15 | 0.63 |



|      |      |
|------|------|
| 1.22 | 0.69 |
| 1.09 | 0.55 |
| 0.68 | 0.10 |
| 0.68 | 0.10 |
| 0.89 | 0.28 |
| #N/A | #N/A |
| #N/A | #N/A |
| #N/A | #N/A |
| #N/A | #N/A |
| #N/A | #N/A |
| #N/A | #N/A |
| 1.66 | 0.86 |
| 1.17 | 0.56 |
| 1.17 | 0.56 |
| 1.47 | 0.78 |
| 1.02 | 0.44 |
| 1.02 | 0.44 |
| 1.08 | 0.52 |
| 1.50 | 0.91 |
| 1.50 | 0.91 |
| 1.22 | 0.66 |
| 1.22 | 0.66 |
| 0.40 | 0.01 |
| 0.40 | 0.01 |
| 0.53 | 0.04 |
| 0.76 | 0.14 |
| 1.06 | 0.49 |
| 0.94 | 0.34 |
| 1.21 | 0.70 |
| 1.54 | 0.94 |
| 1.21 | 0.70 |
| #N/A | #N/A |
| #N/A | #N/A |
| #N/A | #N/A |
| 0.76 | 0.14 |
| #N/A | #N/A |
| 0.87 | 0.27 |
| 0.87 | 0.27 |
| #N/A | #N/A |
| #N/A | #N/A |
| #N/A | #N/A |
| 0.83 | 0.20 |
| 1.02 | 0.44 |
| 1.02 | 0.44 |
| 1.30 | 0.79 |
| 0.93 | 0.32 |
| 0.93 | 0.32 |
| 1.52 | 0.72 |
| 1.28 | 0.77 |
| 1.52 | 0.72 |
| 0.97 | 0.38 |

|      |      |
|------|------|
| 0.90 | 0.28 |
| 0.59 | 0.05 |
| 0.59 | 0.05 |
| 1.19 | 0.66 |
| 1.04 | 0.49 |
| 1.04 | 0.49 |
| 1.31 | 0.73 |
| 0.76 | 0.15 |
| #N/A | #N/A |
| #N/A | #N/A |
| 1.32 | 0.83 |
| 1.32 | 0.83 |
| 0.92 | 0.31 |
| 0.54 | 0.04 |
| 0.54 | 0.04 |
| 1.09 | 0.54 |
| 1.09 | 0.54 |
| #N/A | #N/A |
| 1.26 | 0.76 |
| 1.17 | 0.60 |
| 1.30 | 0.80 |
| #N/A | #N/A |
| 0.93 | 0.32 |
| #N/A | #N/A |
| 1.13 | 0.58 |
| 1.27 | 0.66 |
| 1.05 | 0.49 |
| 1.10 | 0.55 |
| 1.02 | 0.44 |
| #N/A | #N/A |
| 1.23 | 0.70 |
| 1.07 | 0.50 |
| 1.19 | 0.65 |
| 1.19 | 0.65 |
| #N/A | #N/A |
| #N/A | #N/A |
| 1.22 | 0.67 |
| 1.06 | 0.50 |
| 0.63 | 0.07 |
| 0.63 | 0.07 |
| #N/A | #N/A |
| 0.63 | 0.07 |
| #N/A | #N/A |
| 1.31 | 0.81 |
| 1.03 | 0.49 |
| 1.03 | 0.49 |
| 1.31 | 0.81 |
| 1.25 | 0.74 |
| 1.25 | 0.74 |
| 1.12 | 0.60 |
| 1.12 | 0.60 |

|      |      |
|------|------|
| 0.98 | 0.38 |
| 1.10 | 0.56 |
| 0.98 | 0.38 |
| 0.98 | 0.38 |
| 1.10 | 0.56 |
| 1.10 | 0.56 |
| 1.17 | 0.66 |
| #N/A | #N/A |
| #N/A | #N/A |
| #N/A | #N/A |
| #N/A | #N/A |
| 1.07 | 0.51 |
| 1.07 | 0.51 |
| 1.04 | 0.47 |
| #N/A | #N/A |
| 0.84 | 0.23 |
| 0.84 | 0.23 |
| 1.26 | 0.75 |
| 1.25 | 0.64 |
| 1.23 | 0.71 |
| 1.23 | 0.71 |
| 0.94 | 0.39 |
| 0.96 | 0.35 |
| 0.96 | 0.35 |
| 0.64 | 0.09 |
| 0.64 | 0.09 |
| #N/A | #N/A |
| 1.12 | 0.56 |
| 0.88 | 0.26 |
| 1.16 | 0.65 |
| 1.29 | 0.77 |
| 1.29 | 0.77 |
| 0.96 | 0.36 |
| #N/A | #N/A |
| 1.11 | 0.56 |
| #N/A | #N/A |
| 0.82 | 0.19 |
| 0.84 | 0.21 |
| 0.84 | 0.21 |
| 1.30 | 0.71 |
| 1.35 | 0.83 |
| 0.92 | 0.30 |
| 1.36 | 0.83 |
| 1.36 | 0.83 |
| 1.12 | 0.59 |
| 1.12 | 0.59 |
| 0.93 | 0.35 |
| 0.51 | 0.03 |
| 0.90 | 0.28 |
| 0.83 | 0.20 |
| 0.71 | 0.11 |

|      |      |
|------|------|
| 0.78 | 0.15 |
| 0.48 | 0.02 |
| #N/A | #N/A |
| 1.13 | 0.59 |
| 1.41 | 0.68 |
| 1.06 | 0.49 |
| 1.00 | 0.41 |
| 1.00 | 0.41 |
| 1.38 | 0.55 |
| 0.96 | 0.37 |
| 1.16 | 0.64 |
| 1.52 | 0.84 |
| 1.52 | 0.84 |
| 0.86 | 0.23 |
| 1.33 | 0.73 |
| 1.33 | 0.73 |
| 0.84 | 0.25 |
| #N/A | #N/A |
| 0.84 | 0.25 |
| 0.64 | 0.08 |
| 1.22 | 0.68 |
| 1.22 | 0.68 |
| #N/A | #N/A |
| #N/A | #N/A |
| 1.06 | 0.50 |
| 0.92 | 0.32 |
| 0.92 | 0.32 |
| 0.74 | 0.14 |
| 0.86 | 0.29 |
| 0.66 | 0.08 |
| 1.27 | 0.77 |
| 1.12 | 0.55 |
| 1.12 | 0.55 |
| 1.29 | 0.79 |
| 1.29 | 0.79 |
| 1.09 | 0.53 |
| 1.23 | 0.73 |
| 1.23 | 0.73 |
| 0.80 | 0.18 |
| #N/A | #N/A |
| 0.80 | 0.18 |
| 0.80 | 0.18 |
| 1.16 | 0.63 |
| 0.82 | 0.20 |
| 1.10 | 0.56 |
| 1.10 | 0.56 |
| 1.26 | 0.75 |
| 0.94 | 0.33 |
| 0.94 | 0.33 |
| 1.03 | 0.46 |
| 1.03 | 0.46 |

|      |      |
|------|------|
| 0.83 | 0.21 |
| 0.86 | 0.28 |
| 1.23 | 0.65 |
| 1.22 | 0.64 |
| 1.22 | 0.64 |
| 0.83 | 0.24 |
| 0.62 | 0.06 |
| 0.82 | 0.19 |
| 0.82 | 0.19 |
| 0.74 | 0.13 |
| 1.06 | 0.49 |
| 1.23 | 0.68 |
| 1.06 | 0.49 |
| 0.83 | 0.20 |
| 1.04 | 0.48 |
| 0.95 | 0.38 |
| 0.95 | 0.38 |
| 1.16 | 0.64 |
| 0.93 | 0.31 |
| 0.95 | 0.35 |
| 0.64 | 0.07 |
| 1.17 | 0.55 |
| 1.27 | 0.77 |
| 1.36 | 0.82 |
| 1.09 | 0.53 |
| 1.36 | 0.82 |
| 1.29 | 0.79 |
| 1.34 | 0.84 |
| 1.34 | 0.84 |
| 1.05 | 0.48 |
| 0.95 | 0.34 |
| 0.95 | 0.34 |
| 1.08 | 0.51 |
| 1.34 | 0.81 |
| 1.34 | 0.81 |
| 1.50 | 0.86 |
| 1.20 | 0.66 |
| 1.14 | 0.61 |
| 1.14 | 0.61 |
| 1.09 | 0.53 |
| 1.13 | 0.58 |
| 1.10 | 0.54 |
| 1.27 | 0.76 |
| 1.50 | 0.92 |
| 1.22 | 0.58 |
| 1.20 | 0.66 |
| 0.88 | 0.25 |
| 1.21 | 0.71 |
| 1.12 | 0.59 |
| 1.44 | 0.90 |
| 1.50 | 0.92 |

|      |      |
|------|------|
| 1.50 | 0.92 |
| 1.26 | 0.71 |
| 1.26 | 0.71 |
| 0.75 | 0.15 |
| 1.13 | 0.61 |
| 1.53 | 0.93 |
| 0.90 | 0.28 |
| 0.90 | 0.28 |
| 0.99 | 0.40 |
| #N/A | #N/A |
| #N/A | #N/A |
| 1.06 | 0.51 |
| 1.02 | 0.46 |
| 1.13 | 0.58 |
| 1.03 | 0.46 |
| 1.04 | 0.47 |
| 1.04 | 0.47 |
| 1.05 | 0.49 |
| 1.04 | 0.47 |
| 1.08 | 0.54 |
| 1.01 | 0.42 |
| 1.01 | 0.42 |
| #N/A | #N/A |
| 0.52 | 0.03 |
| 1.13 | 0.59 |
| 0.52 | 0.03 |
| 1.10 | 0.56 |
| 1.10 | 0.56 |
| 1.59 | 0.88 |
| #N/A | #N/A |
| #N/A | #N/A |
| 0.77 | 0.18 |
| 0.77 | 0.18 |
| 1.07 | 0.50 |
| 0.58 | 0.04 |
| 0.85 | 0.22 |
| 0.85 | 0.22 |
| 1.07 | 0.52 |
| 0.86 | 0.25 |
| 1.55 | 0.84 |
| 1.01 | 0.43 |
| 1.55 | 0.84 |
| 1.33 | 0.81 |
| 0.96 | 0.38 |
| 1.27 | 0.75 |
| 1.27 | 0.75 |
| 1.24 | 0.71 |
| 0.96 | 0.40 |
| 0.96 | 0.40 |
| 1.30 | 0.79 |
| 1.40 | 0.84 |

|      |      |
|------|------|
| 1.40 | 0.84 |
| 1.20 | 0.67 |
| #N/A | #N/A |
| 1.06 | 0.49 |
| #N/A | #N/A |
| #N/A | #N/A |
| 1.27 | 0.77 |
| 1.27 | 0.77 |
| 0.88 | 0.25 |
| 1.33 | 0.71 |
| 1.00 | 0.42 |
| 0.72 | 0.12 |
| 1.20 | 0.69 |
| 0.72 | 0.12 |
| 1.20 | 0.69 |
| 1.20 | 0.69 |
| 1.23 | 0.67 |
| 1.23 | 0.67 |
| 0.93 | 0.31 |
| 0.98 | 0.39 |
| 0.92 | 0.32 |
| 1.04 | 0.49 |
| 1.23 | 0.73 |
| 1.31 | 0.78 |
| 0.89 | 0.27 |
| 1.11 | 0.52 |
| 1.11 | 0.52 |
| #N/A | #N/A |
| #N/A | #N/A |
| 1.25 | 0.76 |
| 0.90 | 0.28 |
| 0.90 | 0.28 |
| 1.23 | 0.73 |
| 1.23 | 0.73 |
| 1.28 | 0.78 |
| 0.91 | 0.29 |
| 1.03 | 0.46 |
| 0.66 | 0.09 |
| 0.47 | 0.02 |
| 1.06 | 0.50 |
| 1.20 | 0.68 |
| 1.20 | 0.68 |
| 0.68 | 0.11 |
| 1.14 | 0.62 |
| 0.84 | 0.24 |
| 0.84 | 0.24 |
| 1.35 | 0.83 |
| 1.31 | 0.71 |
| 0.69 | 0.09 |
| 0.69 | 0.09 |
| 1.02 | 0.46 |

|      |      |
|------|------|
| 1.02 | 0.46 |
| 1.26 | 0.77 |
| 1.26 | 0.77 |
| 0.99 | 0.41 |
| 1.19 | 0.68 |
| 1.19 | 0.68 |
| 1.06 | 0.50 |
| 1.03 | 0.46 |
| 0.76 | 0.15 |
| 0.76 | 0.15 |
| 1.24 | 0.71 |
| 1.24 | 0.71 |
| 1.19 | 0.69 |
| 1.37 | 0.72 |
| 1.11 | 0.57 |
| 1.11 | 0.57 |
| 1.01 | 0.45 |
| #N/A | #N/A |
| 1.40 | 0.77 |
| 1.06 | 0.50 |
| 1.06 | 0.50 |
| #N/A | #N/A |
| #N/A | #N/A |
| 0.84 | 0.21 |
| 1.10 | 0.56 |
| 1.09 | 0.53 |
| 1.20 | 0.69 |
| 1.63 | 0.84 |
| 1.63 | 0.84 |
| 1.37 | 0.86 |
| 1.09 | 0.55 |
| 1.11 | 0.55 |
| 0.82 | 0.19 |
| 0.82 | 0.19 |
| 0.70 | 0.11 |
| 0.82 | 0.20 |
| 0.63 | 0.07 |
| 0.82 | 0.20 |
| 1.07 | 0.51 |
| 0.63 | 0.07 |
| 0.99 | 0.43 |
| #N/A | #N/A |
| 1.12 | 0.59 |
| 0.86 | 0.27 |
| #N/A | #N/A |
| 1.18 | 0.64 |
| #N/A | #N/A |
| #N/A | #N/A |
| 0.86 | 0.23 |
| #N/A | #N/A |
| 1.34 | 0.84 |



|      |      |
|------|------|
| 1.02 | 0.43 |
| 1.03 | 0.45 |
| 1.34 | 0.76 |
| 1.34 | 0.76 |
| 1.30 | 0.79 |
| 1.13 | 0.58 |
| 0.70 | 0.10 |
| 0.70 | 0.10 |
| 1.03 | 0.47 |
| 1.37 | 0.82 |
| 1.37 | 0.82 |
| 1.04 | 0.48 |
| 0.93 | 0.32 |
| 1.14 | 0.61 |
| 1.16 | 0.65 |
| 0.88 | 0.26 |
| 1.27 | 0.78 |
| 1.27 | 0.78 |
| 1.13 | 0.60 |
| 0.90 | 0.28 |
| #N/A | #N/A |
| 0.90 | 0.28 |
| 0.90 | 0.28 |
| 1.70 | 0.95 |
| 1.27 | 0.77 |
| #N/A | #N/A |
| 1.02 | 0.44 |
| 1.02 | 0.44 |
| 1.25 | 0.76 |
| 1.25 | 0.76 |
| 1.27 | 0.77 |
| 0.64 | 0.07 |
| 1.20 | 0.68 |
| 0.64 | 0.07 |
| 1.01 | 0.42 |
| 1.18 | 0.67 |
| 1.18 | 0.67 |
| 1.10 | 0.54 |
| #N/A | #N/A |
| 1.03 | 0.46 |
| 1.03 | 0.46 |
| 1.02 | 0.43 |
| #N/A | #N/A |
| 1.09 | 0.55 |
| 1.28 | 0.77 |
| 1.25 | 0.75 |
| 1.02 | 0.44 |
| 0.95 | 0.34 |
| 1.02 | 0.44 |
| 0.95 | 0.34 |
| 0.65 | 0.16 |

|      |      |
|------|------|
| 0.95 | 0.34 |
| 1.08 | 0.52 |
| 1.17 | 0.65 |
| 1.35 | 0.85 |
| 1.05 | 0.48 |
| 1.05 | 0.48 |
| 0.78 | 0.15 |
| 0.78 | 0.15 |
| 1.24 | 0.68 |
| 1.20 | 0.68 |
| 1.23 | 0.73 |
| 0.93 | 0.31 |
| 1.20 | 0.68 |
| 1.34 | 0.82 |
| 0.89 | 0.29 |
| 1.35 | 0.80 |
| 1.44 | 0.90 |
| 1.38 | 0.87 |
| 1.38 | 0.87 |
| 1.22 | 0.72 |
| 1.22 | 0.72 |
| #N/A | #N/A |
| 1.20 | 0.69 |
| 1.20 | 0.69 |
| 1.16 | 0.59 |
| 1.22 | 0.71 |
| 1.22 | 0.71 |
| 1.03 | 0.45 |
| 1.03 | 0.45 |
| 0.84 | 0.21 |
| #N/A | #N/A |
| 0.95 | 0.35 |
| 0.95 | 0.35 |
| 1.03 | 0.46 |
| 1.03 | 0.46 |
| #N/A | #N/A |
| 0.85 | 0.23 |
| 0.81 | 0.18 |
| 0.81 | 0.18 |
| 1.18 | 0.68 |
| 1.52 | 0.93 |
| 1.50 | 0.91 |
| 1.05 | 0.50 |
| 1.05 | 0.50 |
| #N/A | #N/A |
| 1.17 | 0.65 |
| 1.20 | 0.69 |
| 1.09 | 0.53 |
| 1.20 | 0.70 |
| #N/A | #N/A |
| 1.20 | 0.70 |

|      |      |
|------|------|
| 0.51 | 0.03 |
| 0.51 | 0.03 |
| 1.08 | 0.53 |
| 1.45 | 0.91 |
| 1.06 | 0.50 |
| 0.86 | 0.24 |
| 0.77 | 0.16 |
| 0.77 | 0.16 |
| 0.98 | 0.39 |
| 1.29 | 0.78 |
| 1.40 | 0.86 |
| 1.40 | 0.86 |
| 0.91 | 0.34 |
| 1.11 | 0.58 |
| 0.90 | 0.32 |
| 1.28 | 0.78 |
| 1.21 | 0.71 |
| 1.21 | 0.71 |
| 1.24 | 0.72 |
| 1.24 | 0.72 |
| 1.48 | 0.87 |
| 1.29 | 0.73 |
| 1.64 | 0.84 |
| 0.87 | 0.26 |
| 1.14 | 0.61 |
| 1.38 | 0.70 |
| 0.77 | 0.17 |
| 1.05 | 0.50 |
| 0.77 | 0.17 |
| 1.05 | 0.50 |
| 1.24 | 0.68 |
| 1.24 | 0.68 |
| 1.32 | 0.73 |
| 1.32 | 0.73 |
| 0.46 | 0.02 |
| 0.71 | 0.11 |
| 0.83 | 0.20 |
| 0.83 | 0.20 |
| 0.67 | 0.08 |
| 0.93 | 0.32 |
| 1.39 | 0.88 |
| 1.34 | 0.84 |
| 1.40 | 0.85 |
| 1.40 | 0.85 |
| 1.11 | 0.56 |
| 1.13 | 0.61 |
| 1.64 | 0.96 |
| 0.81 | 0.18 |
| 0.81 | 0.18 |
| 1.11 | 0.56 |
| 1.39 | 0.72 |

|      |      |
|------|------|
| 1.34 | 0.82 |
| 1.08 | 0.53 |
| 1.08 | 0.53 |
| 1.20 | 0.68 |
| #N/A | #N/A |
| #N/A | #N/A |
| 1.27 | 0.78 |
| 1.27 | 0.78 |
| 1.26 | 0.76 |
| 1.07 | 0.52 |
| 1.10 | 0.56 |
| 1.10 | 0.56 |
| 1.18 | 0.67 |
| 1.18 | 0.67 |
| 0.78 | 0.15 |
| 1.15 | 0.61 |
| 1.05 | 0.48 |
| 1.06 | 0.49 |
| 1.27 | 0.77 |
| 1.10 | 0.55 |
| #N/A | #N/A |
| 0.88 | 0.26 |
| 0.88 | 0.26 |
| 1.25 | 0.72 |
| 1.02 | 0.45 |
| 1.15 | 0.59 |
| 1.15 | 0.59 |
| #N/A | #N/A |
| #N/A | #N/A |
| 0.89 | 0.28 |
| 0.84 | 0.21 |
| 1.14 | 0.61 |
| 0.84 | 0.21 |
| 1.14 | 0.61 |
| 1.13 | 0.57 |
| 1.17 | 0.60 |
| 1.17 | 0.60 |
| 0.85 | 0.25 |
| 1.47 | 0.91 |
| 0.85 | 0.25 |
| #N/A | #N/A |
| 0.87 | 0.24 |
| 1.04 | 0.47 |
| 1.04 | 0.47 |
| 1.09 | 0.53 |
| 1.34 | 0.84 |
| 1.29 | 0.59 |
| 1.00 | 0.41 |
| 1.00 | 0.41 |
| 1.26 | 0.69 |
| 0.74 | 0.13 |

|      |      |
|------|------|
| 0.70 | 0.10 |
| 0.86 | 0.24 |
| 1.08 | 0.54 |
| 1.21 | 0.71 |
| 1.21 | 0.71 |
| 1.30 | 0.80 |
| 1.30 | 0.80 |
| 1.30 | 0.80 |
| 0.82 | 0.20 |
| 0.99 | 0.40 |
| 0.99 | 0.40 |
| 0.77 | 0.16 |
| 0.76 | 0.23 |
| 0.82 | 0.20 |
| 1.03 | 0.45 |
| 1.03 | 0.45 |
| 1.02 | 0.44 |
| 1.19 | 0.63 |
| 1.19 | 0.63 |
| 1.59 | 0.90 |
| 1.59 | 0.90 |
| 1.13 | 0.60 |
| 0.92 | 0.30 |
| 0.92 | 0.30 |
| 1.01 | 0.46 |
| 1.08 | 0.52 |
| 1.08 | 0.52 |
| 0.93 | 0.36 |
| 1.13 | 0.60 |
| #N/A | #N/A |
| #N/A | #N/A |
| 1.12 | 0.59 |
| 1.06 | 0.49 |
| 1.06 | 0.49 |
| 0.94 | 0.33 |
| 1.04 | 0.47 |
| 1.33 | 0.82 |
| 1.03 | 0.48 |
| 1.33 | 0.82 |
| 1.03 | 0.48 |
| 1.03 | 0.48 |
| 1.30 | 0.78 |
| 0.98 | 0.39 |
| 1.30 | 0.78 |
| 1.03 | 0.45 |
| 0.75 | 0.16 |
| #N/A | #N/A |
| #N/A | #N/A |
| 1.09 | 0.55 |
| 1.09 | 0.55 |
| 1.30 | 0.77 |

|      |      |
|------|------|
| 0.94 | 0.33 |
| 0.94 | 0.33 |
| 1.09 | 0.53 |
| 1.26 | 0.76 |
| 1.33 | 0.83 |
| #N/A | #N/A |
| 0.58 | 0.04 |
| 0.85 | 0.22 |
| 0.98 | 0.38 |
| 0.89 | 0.28 |
| 0.89 | 0.28 |
| 1.22 | 0.70 |
| 1.17 | 0.65 |
| 1.31 | 0.80 |
| 1.12 | 0.58 |
| 1.12 | 0.58 |
| 1.24 | 0.74 |
| 0.97 | 0.38 |
| 1.05 | 0.49 |
| 1.67 | 0.73 |
| 1.05 | 0.49 |
| 1.05 | 0.49 |
| 1.05 | 0.49 |
| 1.12 | 0.58 |
| 1.23 | 0.59 |
| 0.95 | 0.34 |
| 1.12 | 0.57 |
| 1.12 | 0.57 |
| 1.29 | 0.79 |
| 1.29 | 0.79 |
| 1.26 | 0.77 |
| 1.35 | 0.85 |
| 0.82 | 0.20 |
| 0.96 | 0.35 |
| 1.01 | 0.44 |
| 1.01 | 0.44 |
| 0.62 | 0.06 |
| 0.62 | 0.06 |
| 1.13 | 0.60 |
| 1.13 | 0.60 |
| 1.13 | 0.60 |
| 1.12 | 0.58 |
| 1.24 | 0.74 |
| 0.95 | 0.35 |
| 1.24 | 0.74 |
| 1.24 | 0.74 |
| #N/A | #N/A |
| 0.72 | 0.14 |
| 1.10 | 0.56 |
| 0.92 | 0.32 |
| 1.14 | 0.56 |

|      |      |
|------|------|
| 1.14 | 0.56 |
| 1.05 | 0.47 |
| 1.29 | 0.78 |
| 1.41 | 0.88 |
| 1.24 | 0.74 |
| 1.24 | 0.74 |
| 1.22 | 0.65 |
| 1.07 | 0.51 |
| 0.93 | 0.35 |
| 0.93 | 0.35 |
| 1.17 | 0.57 |
| 1.30 | 0.76 |
| 1.22 | 0.72 |
| 1.22 | 0.72 |
| 1.04 | 0.47 |
| 1.03 | 0.46 |
| 1.03 | 0.46 |
| #N/A | #N/A |
| 0.95 | 0.34 |
| 0.95 | 0.34 |
| 1.14 | 0.59 |
| 1.67 | 0.96 |
| 1.67 | 0.96 |
| 1.84 | 0.53 |
| 1.03 | 0.44 |
| 0.84 | 0.21 |
| 0.93 | 0.36 |
| 1.29 | 0.80 |
| 1.29 | 0.80 |
| 1.31 | 0.78 |
| 1.06 | 0.51 |
| 1.02 | 0.43 |
| 0.99 | 0.40 |
| 0.84 | 0.22 |
| 1.03 | 0.46 |
| 0.84 | 0.22 |
| 1.03 | 0.46 |
| 1.08 | 0.54 |
| 1.43 | 0.83 |
| 1.43 | 0.83 |
| #N/A | #N/A |
| #N/A | #N/A |
| 1.28 | 0.78 |
| 1.35 | 0.83 |
| 0.94 | 0.33 |
| 0.94 | 0.33 |
| 1.06 | 0.50 |
| 0.84 | 0.22 |
| 0.84 | 0.22 |
| 0.97 | 0.37 |
| 0.62 | 0.06 |

|      |      |
|------|------|
| 1.10 | 0.56 |
| 0.85 | 0.22 |
| 0.98 | 0.39 |
| 0.82 | 0.24 |
| #N/A | #N/A |
| #N/A | #N/A |
| 1.24 | 0.73 |
| 1.24 | 0.70 |
| 1.24 | 0.70 |
| 1.14 | 0.61 |
| #N/A | #N/A |
| 1.14 | 0.61 |
| 1.16 | 0.64 |
| 1.23 | 0.71 |
| #N/A | #N/A |
| #N/A | #N/A |
| 0.49 | 0.03 |
| 1.48 | 0.90 |
| 1.48 | 0.90 |
| 1.48 | 0.90 |
| 1.22 | 0.62 |
| 1.22 | 0.62 |
| 1.11 | 0.53 |
| 1.40 | 0.88 |
| 1.30 | 0.79 |
| 1.40 | 0.88 |
| #N/A | #N/A |
| #N/A | #N/A |
| 1.33 | 0.76 |
| 1.33 | 0.76 |
| #N/A | #N/A |
| 1.11 | 0.56 |
| 1.11 | 0.56 |
| #N/A | #N/A |
| #N/A | #N/A |
| 1.12 | 0.59 |
| 1.18 | 0.66 |
| 1.18 | 0.66 |
| 1.24 | 0.64 |
| 1.35 | 0.74 |
| 1.24 | 0.64 |
| 1.35 | 0.74 |
| 0.95 | 0.38 |
| 0.95 | 0.38 |
| 0.94 | 0.33 |
| 1.01 | 0.44 |
| 1.00 | 0.40 |
| 1.23 | 0.73 |
| 1.01 | 0.44 |
| 1.01 | 0.44 |
| 1.22 | 0.73 |



|      |      |
|------|------|
| 1.01 | 0.43 |
| 0.69 | 0.10 |
| 0.64 | 0.07 |
| 0.64 | 0.07 |
| 1.04 | 0.48 |
| 1.19 | 0.68 |
| 1.21 | 0.69 |
| 1.21 | 0.69 |
| 1.30 | 0.78 |
| 1.20 | 0.57 |
| #N/A | #N/A |
| #N/A | #N/A |
| 0.84 | 0.21 |
| 0.92 | 0.31 |
| 1.06 | 0.51 |
| 1.06 | 0.51 |
| 0.69 | 0.10 |
| 0.69 | 0.10 |
| 1.19 | 0.67 |
| 0.92 | 0.31 |
| 0.74 | 0.13 |
| 0.72 | 0.11 |
| #N/A | #N/A |
| 0.89 | 0.27 |
| 0.89 | 0.27 |
| #N/A | #N/A |
| #N/A | #N/A |
| 1.26 | 0.72 |
| 1.50 | 0.89 |
| 1.48 | 0.90 |
| 1.48 | 0.90 |
| 1.06 | 0.48 |
| 1.23 | 0.59 |
| 1.23 | 0.59 |
| 1.35 | 0.84 |
| 1.35 | 0.84 |
| 1.38 | 0.85 |
| 0.85 | 0.29 |
| #N/A | #N/A |
| 1.18 | 0.66 |
| 0.82 | 0.22 |
| 0.82 | 0.22 |
| 1.28 | 0.78 |
| 1.28 | 0.78 |
| 1.45 | 0.90 |
| 1.37 | 0.57 |
| 1.45 | 0.90 |
| 1.21 | 0.71 |
| #N/A | #N/A |
| 1.29 | 0.79 |
| 1.31 | 0.80 |

|      |      |
|------|------|
| 1.17 | 0.66 |
| 1.18 | 0.66 |
| 0.77 | 0.15 |
| 1.23 | 0.71 |
| 0.99 | 0.41 |
| 0.81 | 0.18 |
| 1.08 | 0.52 |
| 1.19 | 0.69 |
| 1.02 | 0.46 |
| 1.02 | 0.46 |
| 1.02 | 0.46 |
| 0.98 | 0.38 |
| 1.25 | 0.75 |
| 1.07 | 0.52 |
| 1.04 | 0.49 |
| 1.07 | 0.52 |
| 1.24 | 0.74 |
| 1.08 | 0.53 |
| 1.08 | 0.53 |
| 1.03 | 0.47 |
| 1.45 | 0.90 |
| 1.27 | 0.74 |
| #N/A | #N/A |
| 1.02 | 0.44 |
| 1.02 | 0.44 |
| 0.98 | 0.39 |
| 1.09 | 0.55 |
| 1.09 | 0.55 |
| 1.12 | 0.59 |
| #N/A | #N/A |
| 1.03 | 0.47 |
| 1.03 | 0.47 |
| 0.63 | 0.07 |
| 1.19 | 0.61 |
| 1.19 | 0.61 |
| 0.94 | 0.34 |
| 1.25 | 0.58 |
| 1.13 | 0.59 |
| 1.13 | 0.59 |
| 0.92 | 0.31 |
| 0.82 | 0.20 |
| 0.82 | 0.20 |
| #N/A | #N/A |
| 1.13 | 0.61 |
| 1.10 | 0.56 |
| 1.10 | 0.56 |
| #N/A | #N/A |
| #N/A | #N/A |
| 0.71 | 0.11 |
| 0.76 | 0.15 |
| 0.76 | 0.15 |

|      |      |
|------|------|
| 1.15 | 0.64 |
| 1.00 | 0.41 |
| 0.78 | 0.28 |
| 1.13 | 0.55 |
| 0.79 | 0.17 |
| 0.95 | 0.35 |
| 1.13 | 0.61 |
| 1.34 | 0.84 |
| 1.34 | 0.75 |
| 1.34 | 0.75 |
| 0.89 | 0.27 |
| #N/A | #N/A |
| 1.34 | 0.72 |
| 1.08 | 0.52 |
| 1.02 | 0.44 |
| 1.08 | 0.52 |
| #N/A | #N/A |
| 0.31 | 0.00 |
| 0.31 | 0.00 |
| 0.94 | 0.35 |
| #N/A | #N/A |
| #N/A | #N/A |
| 0.90 | 0.34 |
| 1.13 | 0.61 |
| 0.90 | 0.34 |
| 1.13 | 0.61 |
| #N/A | #N/A |
| 1.52 | 0.93 |
| 1.52 | 0.93 |
| 0.87 | 0.25 |
| 0.87 | 0.25 |
| #N/A | #N/A |
| 1.13 | 0.60 |
| 1.11 | 0.53 |
| 1.36 | 0.85 |
| 1.03 | 0.46 |
| 1.25 | 0.75 |
| 0.99 | 0.39 |
| 0.71 | 0.11 |
| 0.71 | 0.11 |
| 1.15 | 0.62 |
| 1.15 | 0.62 |
| 1.27 | 0.77 |
| 0.99 | 0.43 |
| 1.27 | 0.77 |
| 1.18 | 0.68 |
| 1.13 | 0.59 |
| 1.44 | 0.88 |
| 1.27 | 0.77 |
| 1.27 | 0.77 |
| 1.46 | 0.82 |

|      |      |
|------|------|
| 1.48 | 0.92 |
| 1.48 | 0.92 |
| 1.65 | 0.96 |
| 1.23 | 0.54 |
| 1.23 | 0.54 |
| 1.37 | 0.59 |
| 1.27 | 0.77 |
| 1.37 | 0.59 |
| 1.21 | 0.69 |
| 0.88 | 0.25 |
| 1.04 | 0.47 |
| 1.05 | 0.50 |
| 1.05 | 0.50 |
| 0.66 | 0.08 |
| 1.14 | 0.61 |
| #N/A | #N/A |
| 1.36 | 0.84 |
| 1.14 | 0.55 |
| #N/A | #N/A |
| 1.51 | 0.75 |
| 1.28 | 0.78 |
| 1.28 | 0.78 |
| 1.55 | 0.94 |
| 1.27 | 0.74 |
| 1.49 | 0.86 |
| 1.04 | 0.48 |
| 1.05 | 0.48 |
| 1.07 | 0.51 |
| 1.07 | 0.51 |
| 1.17 | 0.65 |
| 1.01 | 0.42 |
| #N/A | #N/A |
| 1.11 | 0.57 |
| 0.81 | 0.19 |
| 0.89 | 0.27 |
| 0.89 | 0.27 |
| 0.15 | 0.00 |
| 1.13 | 0.60 |
| 1.13 | 0.60 |
| 1.35 | 0.85 |
| 1.25 | 0.75 |
| 1.25 | 0.75 |
| 0.97 | 0.38 |
| 1.11 | 0.57 |
| 1.19 | 0.67 |
| 1.19 | 0.67 |
| 1.27 | 0.78 |
| 0.81 | 0.18 |
| 0.55 | 0.05 |
| 0.85 | 0.23 |
| 0.76 | 0.16 |

|      |      |
|------|------|
| 0.76 | 0.16 |
| 0.60 | 0.05 |
| 0.60 | 0.05 |
| 0.61 | 0.06 |
| 0.61 | 0.06 |
| 1.36 | 0.79 |
| 1.04 | 0.46 |
| 1.21 | 0.70 |
| 1.06 | 0.50 |
| 1.45 | 0.90 |
| 1.06 | 0.50 |
| 1.45 | 0.90 |
| 1.12 | 0.58 |
| 1.05 | 0.48 |
| 1.05 | 0.48 |
| 1.00 | 0.42 |
| #N/A | #N/A |
| 0.79 | 0.21 |
| 0.99 | 0.40 |
| 0.99 | 0.40 |
| 1.49 | 0.92 |
| 1.49 | 0.92 |
| #N/A | #N/A |
| #N/A | #N/A |
| 1.28 | 0.78 |
| 1.18 | 0.60 |
| 1.18 | 0.60 |
| 0.96 | 0.37 |
| 1.17 | 0.65 |
| 1.18 | 0.67 |
| 1.24 | 0.75 |
| 1.19 | 0.65 |
| 1.06 | 0.49 |
| 1.06 | 0.49 |
| 1.14 | 0.55 |
| 1.06 | 0.51 |
| 1.22 | 0.71 |
| 1.34 | 0.84 |
| 1.34 | 0.84 |
| 1.34 | 0.84 |
| #N/A | #N/A |
| 1.53 | 0.94 |
| 1.08 | 0.53 |
| 0.96 | 0.38 |
| 1.12 | 0.54 |
| 1.19 | 0.57 |
| 1.14 | 0.61 |
| 1.21 | 0.64 |
| 1.08 | 0.53 |
| 0.86 | 0.26 |
| 1.17 | 0.59 |

|      |      |
|------|------|
| 0.96 | 0.36 |
| #N/A | #N/A |
| 0.91 | 0.29 |
| 1.24 | 0.74 |
| 1.24 | 0.74 |
| 1.25 | 0.75 |
| 1.25 | 0.75 |
| 1.17 | 0.65 |
| 1.17 | 0.65 |
| 1.31 | 0.81 |
| 0.96 | 0.36 |
| 0.86 | 0.24 |
| 0.79 | 0.16 |
| #N/A | #N/A |
| 1.16 | 0.65 |
| 1.16 | 0.65 |
| 1.16 | 0.65 |
| 1.21 | 0.71 |
| 0.99 | 0.46 |
| 1.37 | 0.67 |
| 1.37 | 0.67 |
| 0.97 | 0.41 |
| 1.22 | 0.72 |
| 0.81 | 0.19 |
| 1.06 | 0.50 |
| 1.27 | 0.77 |
| 1.08 | 0.54 |
| 1.08 | 0.54 |
| 1.18 | 0.66 |
| 1.43 | 0.86 |
| 1.43 | 0.86 |
| 1.38 | 0.77 |
| 0.90 | 0.30 |
| 1.03 | 0.45 |
| 0.80 | 0.18 |
| 0.86 | 0.26 |
| 0.86 | 0.24 |
| 0.81 | 0.18 |
| 0.86 | 0.24 |
| 1.08 | 0.53 |
| 1.19 | 0.68 |
| 0.90 | 0.30 |
| #N/A | #N/A |
| 1.41 | 0.89 |
| 1.41 | 0.89 |
| 0.89 | 0.27 |
| 1.41 | 0.89 |
| 1.19 | 0.61 |
| 1.19 | 0.61 |
| #N/A | #N/A |
| 1.08 | 0.53 |

|      |      |
|------|------|
| 1.32 | 0.81 |
| 1.32 | 0.81 |
| #N/A | #N/A |
| #N/A | #N/A |
| 1.04 | 0.46 |
| 1.04 | 0.46 |
| #N/A | #N/A |
| #N/A | #N/A |
| 1.50 | 0.92 |
| 1.50 | 0.92 |
| 1.09 | 0.54 |
| #N/A | #N/A |
| #N/A | #N/A |
| 0.89 | 0.27 |
| 0.99 | 0.40 |
| 0.99 | 0.40 |
| 1.10 | 0.53 |
| 1.10 | 0.53 |
| 1.01 | 0.43 |
| 1.03 | 0.47 |
| 1.03 | 0.47 |
| 0.95 | 0.34 |
| #N/A | #N/A |
| 0.95 | 0.34 |
| #N/A | #N/A |
| 1.36 | 0.85 |
| 0.78 | 0.17 |
| #N/A | #N/A |
| #N/A | #N/A |
| 1.00 | 0.44 |
| 1.24 | 0.75 |
| 1.24 | 0.75 |
| #N/A | #N/A |
| #N/A | #N/A |
| #N/A | #N/A |
| 0.63 | 0.06 |
| 0.63 | 0.06 |
| 1.04 | 0.47 |
| 0.71 | 0.19 |
| 0.71 | 0.19 |
| 0.72 | 0.11 |
| 0.72 | 0.11 |
| 1.40 | 0.78 |
| 1.19 | 0.67 |
| 1.19 | 0.67 |
| 1.19 | 0.67 |
| #N/A | #N/A |
| #N/A | #N/A |
| #N/A | #N/A |
| 1.37 | 0.77 |
| #N/A | #N/A |

|      |      |
|------|------|
| 1.36 | 0.86 |
| #N/A | #N/A |
| 1.17 | 0.62 |
| #N/A | #N/A |
| #N/A | #N/A |
| 0.98 | 0.38 |
| 0.98 | 0.38 |
| 1.12 | 0.59 |
| 0.96 | 0.36 |
| 0.96 | 0.36 |
| 0.98 | 0.39 |
| #N/A | #N/A |
| 1.13 | 0.59 |
| #N/A | #N/A |
| #N/A | #N/A |
| 1.02 | 0.45 |
| 1.02 | 0.45 |
| 1.03 | 0.46 |
| 1.52 | 0.93 |
| 1.08 | 0.53 |
| 0.93 | 0.34 |
| 0.93 | 0.34 |
| 0.92 | 0.31 |
| 1.14 | 0.60 |
| 1.19 | 0.68 |
| 0.87 | 0.24 |
| 1.07 | 0.51 |
| 1.21 | 0.70 |
| 1.04 | 0.47 |
| 1.21 | 0.70 |
| 1.09 | 0.54 |
| 1.09 | 0.54 |
| 1.00 | 0.41 |
| 1.04 | 0.47 |
| 0.66 | 0.08 |
| 1.04 | 0.47 |
| 0.66 | 0.08 |
| 0.99 | 0.42 |
| 0.97 | 0.40 |
| 0.97 | 0.40 |
| 0.94 | 0.34 |
| 0.91 | 0.28 |
| 0.58 | 0.05 |
| 0.79 | 0.17 |
| 1.28 | 0.77 |
| 1.27 | 0.76 |
| 0.98 | 0.40 |
| 0.98 | 0.40 |
| 1.09 | 0.55 |
| 1.09 | 0.55 |
| 0.82 | 0.21 |



|      |      |
|------|------|
| 1.49 | 0.87 |
| 1.49 | 0.87 |
| 1.03 | 0.45 |
| 1.03 | 0.45 |
| 0.98 | 0.41 |
| 1.14 | 0.62 |
| 1.14 | 0.62 |
| 1.32 | 0.81 |
| 1.14 | 0.62 |
| 1.32 | 0.81 |
| 1.32 | 0.81 |
| 1.36 | 0.85 |
| 1.10 | 0.56 |
| 1.20 | 0.68 |
| 1.20 | 0.68 |
| #N/A | #N/A |
| 0.73 | 0.12 |
| 1.12 | 0.58 |
| 1.10 | 0.52 |
| 1.10 | 0.52 |
| #N/A | #N/A |
| #N/A | #N/A |
| 1.06 | 0.49 |
| 0.99 | 0.41 |
| 0.99 | 0.41 |
| 1.11 | 0.57 |
| 1.09 | 0.54 |
| 1.23 | 0.67 |
| 1.22 | 0.68 |
| 1.20 | 0.62 |
| 1.48 | 0.88 |
| 0.93 | 0.38 |
| 0.78 | 0.18 |
| 0.78 | 0.18 |
| 1.27 | 0.78 |
| 1.27 | 0.78 |
| 1.07 | 0.51 |
| 1.07 | 0.51 |
| 1.07 | 0.51 |
| 0.86 | 0.23 |
| 0.86 | 0.23 |
| 0.86 | 0.23 |
| 0.86 | 0.23 |
| 0.95 | 0.38 |
| 0.95 | 0.38 |
| 1.19 | 0.68 |
| 1.19 | 0.68 |
| 0.80 | 0.19 |
| 0.80 | 0.19 |
| 1.05 | 0.48 |
| 1.05 | 0.48 |

|      |      |
|------|------|
| 0.94 | 0.33 |
| 1.16 | 0.64 |
| 1.24 | 0.74 |
| #N/A | #N/A |
| #N/A | #N/A |
| 0.90 | 0.34 |
| 1.21 | 0.68 |
| 1.21 | 0.68 |
| 0.98 | 0.39 |
| 0.98 | 0.39 |
| 0.96 | 0.36 |
| 1.06 | 0.51 |
| 1.06 | 0.51 |
| 1.25 | 0.72 |
| 1.25 | 0.72 |
| 1.03 | 0.46 |
| 1.03 | 0.46 |
| 0.59 | 0.05 |
| 1.01 | 0.44 |
| 1.37 | 0.84 |
| 1.36 | 0.84 |
| 0.28 | 0.00 |
| 0.28 | 0.00 |
| 0.57 | 0.04 |
| 1.65 | 0.70 |
| 1.60 | 0.94 |
| 1.06 | 0.51 |
| 1.06 | 0.51 |
| 1.26 | 0.67 |
| 1.73 | 0.97 |
| 1.24 | 0.65 |
| 1.24 | 0.65 |
| 1.49 | 0.92 |
| 0.82 | 0.20 |
| 0.82 | 0.20 |
| 0.82 | 0.20 |
| 1.22 | 0.68 |
| 1.39 | 0.88 |
| #N/A | #N/A |
| #N/A | #N/A |
| 1.21 | 0.71 |
| 0.94 | 0.34 |
| 0.94 | 0.34 |
| 1.70 | 0.94 |
| 1.70 | 0.94 |
| 1.15 | 0.60 |
| #N/A | #N/A |
| #N/A | #N/A |
| 1.00 | 0.41 |
| 1.00 | 0.41 |
| 1.15 | 0.64 |

|      |      |
|------|------|
| 1.24 | 0.67 |
| 1.15 | 0.64 |
| 1.05 | 0.48 |
| 1.02 | 0.44 |
| 0.65 | 0.08 |
| 0.65 | 0.08 |
| 0.87 | 0.24 |
| 0.74 | 0.13 |
| 0.78 | 0.27 |
| 0.92 | 0.31 |
| 0.92 | 0.31 |
| 0.89 | 0.31 |
| 0.89 | 0.31 |
| 0.95 | 0.35 |
| 0.95 | 0.35 |
| 1.08 | 0.53 |
| 0.85 | 0.23 |
| 0.99 | 0.41 |
| 0.85 | 0.23 |
| 0.99 | 0.41 |
| 1.43 | 0.71 |
| 1.22 | 0.71 |
| #N/A | #N/A |
| 1.06 | 0.50 |
| 0.83 | 0.20 |
| 0.83 | 0.20 |
| 1.12 | 0.59 |
| 1.12 | 0.59 |
| 0.60 | 0.05 |
| 0.60 | 0.05 |
| 1.12 | 0.55 |
| 1.09 | 0.55 |
| 1.40 | 0.79 |
| 1.11 | 0.57 |
| 1.11 | 0.57 |
| 0.97 | 0.37 |
| 0.97 | 0.37 |
| 1.55 | 0.94 |
| 0.66 | 0.09 |
| 0.66 | 0.09 |
| 0.99 | 0.40 |
| 1.01 | 0.43 |
| 0.99 | 0.40 |
| 0.85 | 0.22 |
| 1.18 | 0.66 |
| #N/A | #N/A |
| 0.93 | 0.33 |
| 0.93 | 0.33 |
| 0.96 | 0.38 |
| 0.52 | 0.03 |
| 1.02 | 0.44 |

|      |      |
|------|------|
| 1.02 | 0.44 |
| 0.53 | 0.03 |
| 1.12 | 0.58 |
| 0.46 | 0.02 |
| 0.69 | 0.09 |
| 0.69 | 0.09 |
| 1.06 | 0.50 |
| 1.06 | 0.50 |
| 1.04 | 0.48 |
| 1.17 | 0.65 |
| 0.85 | 0.22 |
| 1.17 | 0.65 |
| 0.85 | 0.22 |
| 1.02 | 0.47 |
| 1.02 | 0.47 |
| #N/A | #N/A |
| 1.24 | 0.73 |
| 1.18 | 0.67 |
| 1.24 | 0.73 |
| #N/A | #N/A |
| 1.18 | 0.67 |
| 0.93 | 0.32 |
| 0.93 | 0.32 |
| 0.81 | 0.21 |
| 1.55 | 0.92 |
| 1.27 | 0.75 |
| 1.06 | 0.49 |
| 1.06 | 0.49 |
| 0.59 | 0.05 |
| 0.94 | 0.34 |
| #N/A | #N/A |
| #N/A | #N/A |
| #N/A | #N/A |
| 0.81 | 0.21 |
| 0.83 | 0.20 |
| 0.83 | 0.20 |
| 0.89 | 0.28 |
| 1.18 | 0.64 |
| 1.18 | 0.64 |
| 0.77 | 0.15 |
| 0.83 | 0.27 |
| 0.75 | 0.14 |
| 1.02 | 0.45 |
| 1.40 | 0.84 |
| 1.40 | 0.84 |
| 1.23 | 0.65 |
| 1.09 | 0.52 |
| 1.19 | 0.60 |
| #N/A | #N/A |
| 1.07 | 0.53 |
| 1.07 | 0.53 |

|      |      |
|------|------|
| 1.29 | 0.79 |
| 1.07 | 0.53 |
| 1.29 | 0.79 |
| 1.23 | 0.66 |
| 0.78 | 0.18 |
| 1.08 | 0.51 |
| 1.30 | 0.80 |
| 0.88 | 0.26 |
| 0.88 | 0.26 |
| 1.40 | 0.88 |
| 0.91 | 0.32 |
| 0.91 | 0.32 |
| 1.27 | 0.78 |
| 1.14 | 0.62 |
| #N/A | #N/A |
| #N/A | #N/A |
| 1.08 | 0.53 |
| 1.18 | 0.67 |
| 1.27 | 0.64 |
| 1.27 | 0.64 |
| 1.06 | 0.51 |
| 1.31 | 0.80 |
| 1.01 | 0.45 |
| 0.87 | 0.24 |
| 0.87 | 0.24 |
| #N/A | #N/A |
| 1.38 | 0.86 |
| 1.36 | 0.86 |
| 1.38 | 0.86 |
| 1.23 | 0.73 |
| 1.37 | 0.84 |
| 1.37 | 0.84 |
| 1.11 | 0.54 |
| 1.11 | 0.54 |
| 1.11 | 0.56 |
| 1.35 | 0.81 |
| 1.35 | 0.81 |
| 1.20 | 0.69 |
| 1.20 | 0.69 |
| 1.08 | 0.53 |
| 1.08 | 0.53 |
| 0.95 | 0.35 |
| 0.95 | 0.35 |
| 1.26 | 0.75 |
| 1.26 | 0.75 |
| #N/A | #N/A |
| #N/A | #N/A |
| 1.13 | 0.59 |
| 1.13 | 0.59 |
| 1.14 | 0.62 |
| #N/A | #N/A |

|      |      |
|------|------|
| 1.45 | 0.91 |
| 1.45 | 0.91 |
| 0.75 | 0.13 |
| 0.75 | 0.13 |
| 0.58 | 0.05 |
| #N/A | #N/A |
| 1.47 | 0.60 |
| 1.09 | 0.54 |
| 1.36 | 0.86 |
| 1.36 | 0.86 |
| #N/A | #N/A |
| #N/A | #N/A |
| #N/A | #N/A |
| #N/A | #N/A |
| #N/A | #N/A |
| #N/A | #N/A |
| 1.07 | 0.53 |
| 1.16 | 0.65 |
| 1.16 | 0.65 |
| 1.25 | 0.70 |
| 1.27 | 0.78 |
| 0.93 | 0.32 |
| #N/A | #N/A |
| 1.21 | 0.67 |
| 1.21 | 0.67 |
| 1.33 | 0.75 |
| 0.77 | 0.15 |
| 0.77 | 0.15 |
| 0.93 | 0.32 |
| 1.04 | 0.47 |
| 1.28 | 0.75 |
| 1.28 | 0.75 |
| #N/A | #N/A |
| #N/A | #N/A |
| 0.71 | 0.12 |
| 0.91 | 0.32 |
| 0.72 | 0.11 |
| 1.04 | 0.47 |
| 0.98 | 0.40 |
| 1.06 | 0.49 |
| 0.72 | 0.14 |
| 0.85 | 0.28 |
| 0.85 | 0.28 |
| 0.96 | 0.37 |
| 1.46 | 0.83 |
| 1.46 | 0.83 |
| 1.07 | 0.50 |
| 0.96 | 0.39 |
| 1.14 | 0.62 |
| 1.14 | 0.62 |
| #N/A | #N/A |

|      |      |
|------|------|
| 1.14 | 0.62 |
| 1.14 | 0.61 |
| 0.99 | 0.39 |
| 1.39 | 0.87 |
| 1.39 | 0.87 |
| #N/A | #N/A |
| 0.69 | 0.09 |
| 0.69 | 0.09 |
| 0.99 | 0.42 |
| 0.99 | 0.42 |
| 0.97 | 0.37 |
| 1.10 | 0.56 |
| 1.13 | 0.60 |
| 1.13 | 0.60 |
| 1.59 | 0.88 |
| #N/A | #N/A |
| #N/A | #N/A |
| #N/A | #N/A |
| 0.90 | 0.28 |
| 1.04 | 0.47 |
| 0.89 | 0.26 |
| 0.89 | 0.26 |
| 1.40 | 0.77 |
| 1.20 | 0.70 |
| 1.25 | 0.75 |
| 1.25 | 0.75 |
| 1.21 | 0.70 |
| 1.08 | 0.52 |
| 1.44 | 0.89 |
| 1.08 | 0.52 |
| 1.44 | 0.89 |
| 1.01 | 0.46 |
| 1.01 | 0.46 |
| 1.08 | 0.52 |
| #N/A | #N/A |
| 1.60 | 0.95 |
| 1.60 | 0.95 |
| 1.60 | 0.95 |
| 1.10 | 0.55 |
| 0.55 | 0.04 |
| 1.08 | 0.53 |
| #N/A | #N/A |
| 1.07 | 0.51 |
| 1.07 | 0.51 |
| #N/A | #N/A |
| #N/A | #N/A |
| 0.81 | 0.21 |
| 0.81 | 0.21 |
| 1.14 | 0.59 |
| 1.14 | 0.59 |
| 1.01 | 0.43 |

|      |      |
|------|------|
| 0.76 | 0.14 |
| 0.83 | 0.24 |
| 1.04 | 0.47 |
| 0.82 | 0.20 |
| 0.82 | 0.20 |
| 1.07 | 0.52 |
| #N/A | #N/A |
| 0.97 | 0.37 |
| 0.86 | 0.25 |
| 1.65 | 0.77 |
| 1.65 | 0.77 |
| 1.16 | 0.63 |
| 0.79 | 0.16 |
| 1.10 | 0.54 |
| 0.79 | 0.16 |
| 1.10 | 0.54 |
| 1.86 | 0.93 |
| 0.92 | 0.34 |
| 0.97 | 0.38 |
| #N/A | #N/A |
| #N/A | #N/A |
| 0.74 | 0.16 |
| 0.74 | 0.16 |
| 1.08 | 0.53 |
| 1.05 | 0.49 |
| 1.05 | 0.49 |
| 0.99 | 0.40 |
| 1.17 | 0.64 |
| 1.17 | 0.64 |
| 1.06 | 0.49 |
| 1.06 | 0.49 |
| 1.12 | 0.59 |
| 1.30 | 0.80 |
| 0.81 | 0.25 |
| 1.09 | 0.54 |
| 1.09 | 0.54 |
| 1.00 | 0.44 |
| 1.08 | 0.53 |
| 1.08 | 0.53 |
| 1.18 | 0.67 |
| 1.42 | 0.83 |
| 1.17 | 0.66 |
| 2.25 | 1.00 |
| 1.21 | 0.63 |
| 1.21 | 0.63 |
| 1.65 | 0.90 |
| 1.65 | 0.90 |
| 0.74 | 0.15 |
| 0.74 | 0.15 |
| 1.39 | 0.83 |
| 1.41 | 0.89 |



|      |      |
|------|------|
| 1.41 | 0.89 |
| 1.68 | 0.88 |
| 1.68 | 0.88 |
| 0.34 | 0.01 |
| 1.33 | 0.78 |
| 1.36 | 0.83 |
| #N/A | #N/A |
| 0.92 | 0.35 |
| #N/A | #N/A |
| 0.92 | 0.35 |
| 1.23 | 0.72 |
| 1.12 | 0.59 |
| 0.94 | 0.37 |
| 1.05 | 0.48 |
| #N/A | #N/A |
| 0.85 | 0.22 |
| 0.85 | 0.22 |
| 1.13 | 0.60 |
| 1.21 | 0.70 |
| 0.91 | 0.30 |
| #N/A | #N/A |
| 1.43 | 0.90 |
| 1.26 | 0.76 |
| 1.26 | 0.76 |
| 1.19 | 0.68 |
| 1.05 | 0.48 |
| 1.13 | 0.59 |
| 1.13 | 0.59 |
| 0.76 | 0.14 |
| 0.96 | 0.36 |
| 0.92 | 0.31 |
| 0.96 | 0.36 |
| 0.92 | 0.31 |
| 1.12 | 0.55 |
| 1.17 | 0.64 |
| 1.17 | 0.64 |
| 1.11 | 0.56 |
| 0.96 | 0.36 |
| 0.96 | 0.36 |
| 1.10 | 0.56 |
| 1.10 | 0.56 |
| 1.16 | 0.60 |
| 1.49 | 0.89 |
| 1.49 | 0.89 |
| 1.00 | 0.41 |
| 1.09 | 0.53 |
| 1.15 | 0.59 |
| 0.88 | 0.26 |
| #N/A | #N/A |
| #N/A | #N/A |
| 1.42 | 0.87 |

|      |      |
|------|------|
| 1.04 | 0.48 |
| 1.09 | 0.54 |
| 1.09 | 0.54 |
| 1.17 | 0.64 |
| 1.02 | 0.43 |
| 0.98 | 0.39 |
| 1.10 | 0.55 |
| 0.93 | 0.32 |
| 1.18 | 0.67 |
| 1.18 | 0.67 |
| 1.09 | 0.54 |
| 1.09 | 0.54 |
| 0.88 | 0.34 |
| 1.20 | 0.68 |
| #N/A | #N/A |
| #N/A | #N/A |
| #N/A | #N/A |
| 1.89 | 0.82 |
| 1.74 | 0.96 |
| 1.74 | 0.96 |
| 1.29 | 0.79 |
| 1.29 | 0.79 |
| 1.45 | 0.79 |
| 1.29 | 0.74 |
| 1.37 | 0.81 |
| #N/A | #N/A |
| 0.99 | 0.40 |
| 1.31 | 0.77 |
| 0.99 | 0.40 |
| 1.43 | 0.87 |
| 0.79 | 0.16 |
| 0.79 | 0.16 |
| 1.01 | 0.48 |
| 1.18 | 0.63 |
| 1.15 | 0.62 |
| 1.10 | 0.56 |
| 1.20 | 0.65 |
| 1.30 | 0.77 |
| 1.30 | 0.77 |
| 1.24 | 0.74 |
| 0.73 | 0.12 |
| 1.06 | 0.50 |
| 1.45 | 0.89 |
| 1.05 | 0.49 |
| 1.15 | 0.63 |
| 1.25 | 0.70 |
| #N/A | #N/A |
| #N/A | #N/A |
| 1.21 | 0.66 |
| 0.98 | 0.39 |
| 0.90 | 0.34 |

|      |      |
|------|------|
| 0.90 | 0.34 |
| 0.90 | 0.34 |
| 0.90 | 0.34 |
| 1.05 | 0.48 |
| 1.27 | 0.77 |
| 1.27 | 0.77 |
| 1.28 | 0.79 |
| 0.70 | 0.10 |
| #N/A | #N/A |
| 0.80 | 0.19 |
| #N/A | #N/A |
| 1.17 | 0.62 |
| 0.79 | 0.16 |
| 0.84 | 0.23 |
| 0.87 | 0.24 |
| #N/A | #N/A |
| #N/A | #N/A |
| #N/A | #N/A |
| 1.04 | 0.48 |
| 1.04 | 0.48 |
| 1.03 | 0.45 |
| #N/A | #N/A |
| #N/A | #N/A |
| #N/A | #N/A |
| 1.02 | 0.44 |
| 1.02 | 0.44 |
| 1.70 | 0.96 |
| 1.07 | 0.52 |
| 0.95 | 0.34 |
| #N/A | #N/A |
| 1.02 | 0.44 |
| 1.02 | 0.44 |
| #N/A | #N/A |
| #N/A | #N/A |
| #N/A | #N/A |
| #N/A | #N/A |
| 0.85 | 0.23 |
| 0.85 | 0.23 |
| 1.10 | 0.56 |
| 1.48 | 0.68 |
| 0.92 | 0.31 |
| 0.92 | 0.31 |
| #N/A | #N/A |
| #N/A | #N/A |
| 1.12 | 0.59 |
| #N/A | #N/A |
| #N/A | #N/A |
| #N/A | #N/A |
| 1.12 | 0.59 |
| 0.91 | 0.31 |
| 0.91 | 0.31 |

|      |      |
|------|------|
| #N/A | #N/A |
| 1.06 | 0.50 |
| 1.06 | 0.50 |
| #N/A | #N/A |
| 1.20 | 0.63 |
| #N/A | #N/A |
| #N/A | #N/A |
| #N/A | #N/A |
| 0.78 | 0.16 |
| 0.78 | 0.16 |
| #N/A | #N/A |
| 0.78 | 0.16 |
| 1.38 | 0.87 |
| 1.35 | 0.81 |
| 0.72 | 0.14 |
| 1.13 | 0.58 |
| #N/A | #N/A |
| 1.17 | 0.60 |
| 1.17 | 0.60 |
| 1.15 | 0.54 |
| 1.15 | 0.54 |
| 0.90 | 0.27 |
| 0.89 | 0.29 |
| 1.37 | 0.53 |
| #N/A | #N/A |
| 0.86 | 0.27 |
| 0.86 | 0.27 |
| 1.21 | 0.71 |
| 0.70 | 0.11 |
| 1.31 | 0.77 |
| #N/A | #N/A |
| 1.12 | 0.57 |
| #N/A | #N/A |
| #N/A | #N/A |
| #N/A | #N/A |
| #N/A | #N/A |
| 0.39 | 0.01 |
| 1.25 | 0.75 |
| 1.38 | 0.83 |
| 1.38 | 0.83 |
| 1.18 | 0.66 |
| 1.29 | 0.79 |
| 1.29 | 0.79 |
| 1.14 | 0.62 |
| 1.18 | 0.65 |
| 1.18 | 0.65 |
| 1.18 | 0.65 |
| 1.18 | 0.65 |
| #N/A | #N/A |
| 1.58 | 0.95 |
| 1.08 | 0.50 |
| 1.08 | 0.50 |

|      |      |
|------|------|
| 1.42 | 0.88 |
| 1.22 | 0.63 |
| 1.22 | 0.63 |
| 0.92 | 0.34 |
| 1.03 | 0.47 |
| 0.92 | 0.34 |
| 1.03 | 0.47 |
| #N/A | #N/A |
| #N/A | #N/A |
| 1.26 | 0.63 |
| 1.02 | 0.46 |
| 1.02 | 0.46 |
| 1.04 | 0.48 |
| 1.04 | 0.48 |
| 0.86 | 0.24 |
| 1.17 | 0.67 |
| 1.17 | 0.67 |
| 1.00 | 0.41 |
| 1.00 | 0.41 |
| 1.50 | 0.87 |
| 1.54 | 0.94 |
| 1.24 | 0.74 |
| 1.40 | 0.86 |
| 1.18 | 0.65 |
| #N/A | #N/A |
| 0.90 | 0.28 |
| 1.18 | 0.64 |
| #N/A | #N/A |
| 0.96 | 0.36 |
| 1.11 | 0.57 |
| 0.96 | 0.36 |
| 0.79 | 0.16 |
| 0.79 | 0.16 |
| 1.26 | 0.70 |
| 1.26 | 0.70 |
| 1.23 | 0.72 |
| 0.51 | 0.03 |
| 0.51 | 0.03 |
| 1.40 | 0.87 |
| 1.35 | 0.67 |
| 1.38 | 0.85 |
| #N/A | #N/A |
| 0.93 | 0.40 |
| #N/A | #N/A |
| 1.14 | 0.61 |
| 1.14 | 0.61 |
| #N/A | #N/A |
| #N/A | #N/A |
| #N/A | #N/A |
| 0.71 | 0.11 |
| #N/A | #N/A |

|      |      |
|------|------|
| 1.10 | 0.55 |
| 1.10 | 0.55 |
| 1.06 | 0.50 |
| #N/A | #N/A |
| 0.83 | 0.22 |
| 1.25 | 0.66 |
| #N/A | #N/A |
| #N/A | #N/A |
| 0.95 | 0.37 |
| 1.17 | 0.66 |
| 0.60 | 0.05 |
| 0.60 | 0.05 |
| 1.08 | 0.51 |
| 0.87 | 0.24 |
| 0.87 | 0.25 |
| 0.97 | 0.41 |
| 1.45 | 0.85 |
| 0.94 | 0.33 |
| 0.94 | 0.33 |
| 0.96 | 0.38 |
| 0.95 | 0.40 |
| 1.60 | 0.94 |
| 1.60 | 0.94 |
| #N/A | #N/A |
| 1.15 | 0.59 |
| 1.15 | 0.59 |
| 1.15 | 0.58 |
| 1.22 | 0.72 |
| 0.94 | 0.33 |
| 0.94 | 0.33 |
| 1.23 | 0.71 |
| #N/A | #N/A |
| 1.23 | 0.71 |
| 0.99 | 0.42 |
| 0.99 | 0.42 |
| 1.03 | 0.45 |
| 1.03 | 0.45 |
| 1.03 | 0.47 |
| 1.09 | 0.51 |
| 1.38 | 0.85 |
| 1.13 | 0.56 |
| 1.13 | 0.56 |
| #N/A | #N/A |
| #N/A | #N/A |
| 1.13 | 0.56 |
| 1.13 | 0.56 |
| #N/A | #N/A |
| 1.22 | 0.67 |
| #N/A | #N/A |
| 0.92 | 0.32 |
| #N/A | #N/A |

|      |      |
|------|------|
| #N/A | #N/A |
| 0.91 | 0.40 |
| 0.96 | 0.36 |
| 1.64 | 0.93 |
| 1.64 | 0.93 |
| 0.84 | 0.21 |
| 0.84 | 0.21 |
| 1.41 | 0.88 |

5°C



| UniGeneID | Name  | Other Names     | Promoter     | Change in gene expr | HA-Htz1 CHIP | HA-Htz1 CHIP |
|-----------|-------|-----------------|--------------|---------------------|--------------|--------------|
| YAL001C   | TFC3  | FUN24 TSV115    | iYAL001C     | 0.23                | 1.44         | 0.64         |
| YAL002W   | VPS8  | FUN15 VPT8      | iYAL003W     | 0.83                | 1.40         | 0.62         |
| YAL003W   | EFB1  | EF-1 beta TEF5  | iYAL004W     | -1.22               | 0.56         | 0.23         |
| YAL004W   | 0     | #N/A            | itP(UGG)A    | #N/A                | 0.45         | 0.16         |
| YAL005C   | SSA1  | YG100           | iYAL004W     | 0.25                | 0.56         | 0.23         |
| YAL007C   | ERP2  |                 | 0 iYAL007C   | #N/A                | 2.61         | 0.92         |
| YAL008W   | FUN14 |                 | 0 iYAL009W   | 1.07                | 1.89         | 0.79         |
| YAL009W   | SPO7  |                 | 0 iYAL010C   | -0.29               | 2.75         | 0.94         |
| YAL010C   | MDM10 | FUN37           | iYAL010C     | -3.86               | 2.75         | 0.94         |
| YAL011W   | 0     | SWC1            | iYAL012W     | 0.04                | #N/A         | #N/A         |
| YAL012W   | CYS3  | CY11 FUN35 STR1 | iYAL013W     | -0.90               | 0.56         | 0.23         |
| YAL013W   | DEP1  | FUN54           | iYAL014C     | -2.82               | 2.26         | 0.86         |
| YAL014C   | UIP2  | SLT2 UIP2       | iYAL014C     | 0.51                | 2.26         | 0.86         |
| YAL015C   | NTG1  | FUN33 SCR1      | iYAL015C     | 0.31                | 0.45         | 0.21         |
| YAL016W   | TPD3  | FUN32           | iYAL017W     | -0.33               | 2.51         | 0.92         |
| YAL018C   | 0     | #N/A            | iYAL018C     | #N/A                | 3.06         | 0.96         |
| YAL019W   | FUN30 |                 | 0 iYAL020C   | #N/A                | 3.45         | 0.98         |
| YAL020C   | ATS1  | FUN28 KT113     | iYAL020C     | #N/A                | 3.45         | 0.98         |
| YAL023C   | PMT2  | FUN25           | iYAL023C     | -2.50               | 2.07         | 0.84         |
| YAL025C   | MAK16 |                 | 0 iYAL025C   | -0.62               | 1.81         | 0.76         |
| YAL027W   | 0     | #N/A            | iYAL028W     | #N/A                | #N/A         | #N/A         |
| YAL030W   | SNC1  |                 | 0 iYAL031C   | 0.10                | 4.38         | 1.00         |
| YAL031C   | FUN21 |                 | 0 iYAL031C   | #N/A                | 4.38         | 1.00         |
| YAL032C   | PRP45 | FUN20           | iYAL032C     | #N/A                | 2.82         | 0.95         |
| YAL033W   | POP5  | FUN53           | iYAL034C     | -1.21               | 1.87         | 0.77         |
| YAL034C   | FUN19 |                 | 0 iYAL034C   | 0.70                | 1.87         | 0.77         |
| YAL034W-A | MTW1  | DSN3 NSL2       | iYAL036C     | 0.84                | 3.43         | 0.98         |
| YAL035C-A | #N/A  | #N/A            | iYAL034W-A   | #N/A                | #N/A         | #N/A         |
| YAL037W   | 0     | #N/A            | iYAL038W     | 2.34                | #N/A         | #N/A         |
| YAL039C   | CYC3  |                 | 0 iYAL039C-0 | 0.62                | 0.72         | 0.34         |
| YAL040C   | CLN3  | DAF1 FUN10 WHI1 | iYAL040C     | -0.34               | 0.34         | 0.09         |
| YAL041W   | CDC24 | CLS4            | iYAL042W     | #N/A                | 3.19         | 0.97         |
| YAL042W   | ERV46 | FUN9            | iYAL043C     | -0.16               | #N/A         | #N/A         |
| YAL043C   | PTA1  | FUN39           | iYAL043C     | -2.16               | #N/A         | #N/A         |
| YAL043C-A | #N/A  | #N/A            | iYAL042W     | 0.20                | 3.19         | 0.97         |
| YAL044C   | GCV3  |                 | 0 iYAL044C   | 1.24                | 0.54         | 0.22         |
| YAL045C   | 0     | #N/A            | iYAL045C     | #N/A                | #N/A         | #N/A         |
| YAL046C   | 0     | #N/A            | iYAL046C     | -0.78               | 0.32         | 0.08         |
| YAL047C   | SPC72 | LDB4            | iYAL047C     | #N/A                | 0.25         | 0.04         |
| YAL048C   | 0     |                 | 0 iYAL048C   | #N/A                | #N/A         | #N/A         |
| YAL049C   | 0     | #N/A            | iYAL049C     | 0.97                | 1.39         | 0.63         |
| YAL051W   | OAF1  | YAF1            | iYAL053W     | #N/A                | 1.14         | 0.52         |
| YAL054C   | ACS1  | FUN44           | iYAL054C     | #N/A                | 1.56         | 0.67         |
| YAL055W   | PEX22 | YAF5            | iYAL056W     | 0.77                | 1.36         | 0.61         |
| YAL058C-A | #N/A  | #N/A            | iYAL058C-A   | -1.30               | 1.03         | 0.47         |
| YAL058W   | CNE1  | FUN48           | iYAL059W     | -1.62               | 2.14         | 0.85         |
| YAL059W   | ECM1  |                 | 0 iYAL060W   | -0.51               | 0.82         | 0.39         |
| YAL060W   | BDH1  |                 | 0 iYAL061W   | 1.13                | 0.81         | 0.37         |
| YAL061W   | 0     | #N/A            | iYAL062W     | 0.50                | 1.41         | 0.62         |
| YAL062W   | GDH3  | FUN51           | iYAL063C-2   | -0.39               | #N/A         | #N/A         |

|           |       |                |      |            |       |      |      |
|-----------|-------|----------------|------|------------|-------|------|------|
| YAL063C   | FLO9  |                | 0    | iYAL063C-0 | #N/A  | 0.85 | 0.40 |
| YAL064W   |       | 0              | #N/A | iYAL064C-A | #N/A  | 1.00 | 0.46 |
| YAL065C   |       | 0              | #N/A | iYAL064C-A | #N/A  | 1.15 | 0.53 |
| YAL065C-A | #N/A  | #N/A           | #N/A | #N/A       | #N/A  | #N/A | #N/A |
| YAL066W   |       | 0              | #N/A | #N/A       | -4.14 | #N/A | #N/A |
| YAL067C   | SEO1  |                | 0    | iYAL064C-A | #N/A  | 1.15 | 0.53 |
| YAL068C   |       | 0              | #N/A | iYAL064C-A | 1.74  | 1.15 | 0.53 |
| YAL069W   |       | 0              | #N/A | #N/A       | #N/A  | #N/A | #N/A |
| YAR002AC  | #N/A  | #N/A           | #N/A | #N/A       | 0.98  | #N/A | #N/A |
| YAR002W   | NUP60 |                | 0    | iCEN1      | 0.93  | 1.14 | 0.51 |
| YAR003W   | SWD1  | CPS50 SAF49    |      | iYAR002C-A | 0.71  | 3.01 | 0.96 |
| YAR007C   | RFA1  | BUF2 FUN3 RPA1 |      | iYAR007C   | -0.82 | 2.83 | 0.95 |
| YAR008W   | SEN34 | FUN4           |      | iYAR007C   | -0.37 | 2.83 | 0.95 |
| YAR010C   | #N/A  | #N/A           |      | iYARCdelta | -0.22 | 0.58 | 0.25 |
| YAR015W   | ADE1  |                | 0    | iYAR014C   | -0.12 | 3.00 | 0.95 |
| YAR020C   | PAU7  |                | 0    | iYAR020C-C | #N/A  | 0.66 | 0.32 |
| YAR023C   |       | 0              | #N/A | iYAR023C   | #N/A  | 1.36 | 0.62 |
| YAR027W   | UIP3  |                | 0    | iYARWdelta | 2.37  | 1.55 | 0.68 |
| YAR028W   |       | 0              | #N/A | iYAR027W   | 0.44  | 2.02 | 0.83 |
| YAR029W   |       | 0              | #N/A | iYAR028W   | #N/A  | 1.23 | 0.55 |
| YAR030C   |       | 0              | #N/A | iYAR031W   | #N/A  | 2.02 | 0.81 |
| YAR031W   | PRM9  |                | 0    | iYAR028W   | -0.03 | 1.23 | 0.55 |
| YAR033W   |       | 0              |      | 0 iYAR031W | 0.60  | 2.02 | 0.81 |
| YAR035W   | YAT1  |                | 0    | iYARWdelta | #N/A  | 0.64 | 0.31 |
| YAR037W   | #N/A  | #N/A           |      | #N/A       | #N/A  | #N/A | #N/A |
| YAR040C   | #N/A  | #N/A           |      | #N/A       | #N/A  | #N/A | #N/A |
| YAR042W   | SWH1  | OSH1           |      | iYAR035W   | #N/A  | 1.49 | 0.66 |
| YAR043C   | #N/A  | #N/A           |      | #N/A       | #N/A  | #N/A | #N/A |
| YAR044W   | OSH1  |                | 0    | iYAR042W   | -0.62 | 0.24 | 0.05 |
| YAR047C   |       | 0              | #N/A | iYAR047C-C | #N/A  | #N/A | #N/A |
| YAR052C   | #N/A  | #N/A           |      | #N/A       | #N/A  | #N/A | #N/A |
| YAR053W   |       | 0              | #N/A | iYAR050W   | -1.24 | 1.40 | 0.62 |
| YAR060C   |       | 0              | #N/A | iYAR060C   | #N/A  | 1.03 | 0.47 |
| YAR061W   |       | 0              | #N/A | iYAR060C   | #N/A  | 1.03 | 0.47 |
| YAR062W   |       | 0              | #N/A | iYAR061W   | #N/A  | 0.44 | 0.18 |
| YAR064W   |       | 0              | #N/A | iYAR062W   | #N/A  | 0.92 | 0.42 |
| YAR066W   |       | 0              | #N/A | iYAR064W   | #N/A  | 1.21 | 0.54 |
| YAR068W   |       | 0              | #N/A | iYAR066W   | -2.38 | 0.42 | 0.17 |
| YAR069C   |       | 0              | #N/A | iYAR069C   | #N/A  | 1.44 | 0.65 |
| YAR070C   |       | 0              | #N/A | iYAR070C   | -2.46 | 2.45 | 0.90 |
| YAR071W   | PHO11 |                | 0    | iYAR070C   | #N/A  | 2.45 | 0.90 |
| YAR073W   | IMD1  |                | 0    | iYAR071W   | 1.29  | 1.14 | 0.52 |
| YAR074C   | #N/A  | #N/A           |      | #N/A       | 0.83  | #N/A | #N/A |
| YAR075W   |       | 0              | #N/A | iYAR071W   | 0.59  | 1.14 | 0.52 |
| YBL001C   | ECM15 |                | 0    | iYBL001C   | 0.88  | 0.93 | 0.43 |
| YBL002W   | HTB2  |                | 0    | iYBL003C   | 0.55  | 0.33 | 0.13 |
| YBL003C   | HTA2  | H2A2           |      | iYBL003C   | -0.43 | 0.33 | 0.13 |
| YBL004W   | UTP20 |                | 0    | itS(AGA)B  | #N/A  | 2.61 | 0.93 |
| YBL005W-A | #N/A  | #N/A           |      | iYBL005W   | -0.23 | 0.40 | 0.18 |
| YBL006C   |       | 0              |      | 0 iYBL006C | -1.31 | #N/A | #N/A |
| YBL007C   | SLA1  |                | 0    | iYBL007C   | -1.50 | 1.37 | 0.62 |

|         |        |                |      |            |       |      |      |
|---------|--------|----------------|------|------------|-------|------|------|
| YBL010C |        | 0              | #N/A | iYBL010C   | #N/A  | 2.47 | 0.91 |
| YBL011W | SCT1   | GAT2           |      | iYBL013W   | -1.51 | 0.98 | 0.47 |
| YBL013W | FMT1   |                |      | 0 iYBL014C | #N/A  | 4.15 | 0.99 |
| YBL014C | RRN6   |                |      | 0 iYBL014C | -0.57 | 4.15 | 0.99 |
| YBL015W | ACH1   |                |      | 0 iYBL016W | -0.26 | 1.70 | 0.74 |
| YBL016W | FUS3   | DAC2           |      | iYBL017C   | #N/A  | 1.27 | 0.58 |
| YBL017C | PEP1   | VPS10 VPT1     |      | iYBL017C   | #N/A  | 1.27 | 0.58 |
| YBL018C | POP8   |                |      | 0 iYBL018C | #N/A  | 1.71 | 0.74 |
| YBL019W | APN2   | ETH1           |      | iYBL020W   | 0.40  | 0.80 | 0.36 |
| YBL020W | RFT1   |                |      | 0 iYBL021C | 0.18  | #N/A | #N/A |
| YBL021C | HAP3   |                |      | 0 iYBL021C | #N/A  | #N/A | #N/A |
| YBL022C | PIM1   | LON1 Lon       |      | iYBL022C   | -0.28 | 1.53 | 0.67 |
| YBL023C | MCM2   |                |      | 0 iYBL023C | -0.99 | 1.20 | 0.54 |
| YBL024W | NCL1   | TRM4           |      | iYBL025W   | -0.66 | 1.10 | 0.50 |
| YBL025W | RRN10  |                |      | 0 iYBL026W | #N/A  | #N/A | #N/A |
| YBL028C |        | 0              | #N/A | iYBL028C   | #N/A  | 0.11 | 0.01 |
| YBL029W |        | 0              | #N/A | iYBL030C-1 | 0.80  | 0.30 | 0.08 |
| YBL030C | PET9   | AAC2 ANC2 OP1  |      | iYBL030C-0 | 1.49  | 0.83 | 0.40 |
| YBL031W | SHE1   |                |      | 0 iYBL032W | #N/A  | 1.70 | 0.72 |
| YBL032W | HEK2   | KHD1           |      | iYBL033C   | #N/A  | 2.14 | 0.85 |
| YBL033C | RIB1   |                |      | 0 iYBL033C | -0.25 | 2.14 | 0.85 |
| YBL036C |        | 0              | #N/A | iYBL036C   | 0.62  | #N/A | #N/A |
| YBL038W | MRPL16 |                |      | 0 iYBL039C | #N/A  | 1.50 | 0.66 |
| YBL039C | URA7   |                |      | 0 iYBL039C | -1.04 | 1.50 | 0.66 |
| YBL040C | ERD2   |                |      | 0 iYBL040C | 1.34  | 1.65 | 0.71 |
| YBL041W | PRE7   | PRS3           |      | iYBL042C   | 0.64  | 0.44 | 0.19 |
| YBL042C | FUI1   |                |      | 0 iYBL042C | -0.78 | 0.44 | 0.19 |
| YBL043W | ECM13  |                |      | 0 iYBL044W | 0.29  | 1.80 | 0.75 |
| YBL044W |        | 0              | #N/A | iYBL045C   | #N/A  | 1.03 | 0.47 |
| YBL046W |        | 0              | #N/A | iYBL047C   | -1.30 | 2.95 | 0.96 |
| YBL048W |        | 0              | #N/A | iYBL050W   | #N/A  | 0.66 | 0.30 |
| YBL049W |        | 0              |      | 0 iYBL050W | #N/A  | 0.66 | 0.30 |
| YBL050W | SEC17  |                |      | 0 iYBL051C | #N/A  | 3.44 | 0.98 |
| YBL051C | PIN4   | MDT1           |      | iYBL051C   | -0.99 | 3.44 | 0.98 |
| YBL053W |        | 0              | #N/A | iYBL054W   | #N/A  | 0.46 | 0.21 |
| YBL054W |        | 0              | #N/A | iYBL055C   | #N/A  | 1.67 | 0.71 |
| YBL055C |        | 0              | #N/A | iYBL055C   | 0.06  | 1.67 | 0.71 |
| YBL056W | PTC3   |                |      | 0 iYBL057C | 0.33  | 2.67 | 0.94 |
| YBL057C |        | 0              |      | 0 iYBL057C | #N/A  | 2.67 | 0.94 |
| YBL058W | SHP1   |                |      | 0 iYBL059W | 0.32  | 1.81 | 0.75 |
| YBL059W |        | 0              | #N/A | iYBL060W   | 0.13  | 1.37 | 0.63 |
| YBL060W |        | 0              | #N/A | iYBL061C   | 0.75  | 1.75 | 0.76 |
| YBL061C | SKT5   | CAL2 CHS4 CSD4 |      | iYBL061C   | 0.12  | 1.75 | 0.76 |
| YBL062W |        | 0              | #N/A | iYBL063W   | -0.02 | 0.26 | 0.05 |
| YBL063W | KIP1   | CIN9           |      | iYBL064C   | 0.90  | 2.14 | 0.85 |
| YBL064C |        | 0 mTPx         |      | iYBL064C   | 1.35  | 2.14 | 0.85 |
| YBL065W |        | 0              | #N/A | iYBL067C   | #N/A  | 0.75 | 0.34 |
| YBL067C | UBP13  |                |      | 0 iYBL067C | #N/A  | 0.75 | 0.34 |
| YBL068W | PRS4   |                |      | 0 iYBL069W | -0.94 | 1.71 | 0.74 |
| YBL069W | AST1   |                |      | 0 iYBL071C | -0.90 | 0.91 | 0.41 |
| YBL070C |        | 0              | #N/A | iYBL069W   | #N/A  | 1.71 | 0.74 |

|           |        |                |             |       |      |      |
|-----------|--------|----------------|-------------|-------|------|------|
| YBL071C   | 0      | #N/A           | iYBL071C    | 0.45  | 0.91 | 0.41 |
| YBL072C   | RPS8A  |                | 0 iYBL072C  | -1.34 | 0.85 | 0.40 |
| YBL073W   | 0      | #N/A           | iYBL075C    | #N/A  | 0.19 | 0.04 |
| YBL074C   | AAR2   |                | 0 iYBL073W  | #N/A  | #N/A | #N/A |
| YBL075C   | SSA3   | HSP70          | iYBL075C    | #N/A  | 0.19 | 0.04 |
| YBL077W   | 0      | #N/A           | iYBL078C    | -0.21 | #N/A | #N/A |
| YBL078C   | AUT7   | APG8 AUT7 CVT5 | iYBL078C    | #N/A  | #N/A | #N/A |
| YBL080C   | PET112 |                | 0 iYBL080C  | -0.21 | 2.37 | 0.89 |
| YBL081W   | 0      | #N/A           | iYBL082C    | -0.46 | 2.59 | 0.92 |
| YBL082C   | RHK1   | ALG3           | iYBL082C    | -1.11 | 2.59 | 0.92 |
| YBL083C   | 0      | #N/A           | iYBL082C    | -0.87 | 2.59 | 0.92 |
| YBL086C   | 0      | #N/A           | iYBL086C    | -0.60 | 0.90 | 0.41 |
| YBL087C   | RPL23A |                | 0 iYBL087C  | -0.62 | 0.28 | 0.09 |
| YBL088C   | TEL1   |                | 0 iYBL088C  | #N/A  | 0.93 | 0.43 |
| YBL089W   | 0      |                | 0 iYBL090W  | #N/A  | #N/A | #N/A |
| YBL090W   | MRP21  | MRP50          | iYBL091C    | #N/A  | #N/A | #N/A |
| YBL091C   | MAP2   |                | 0 iYBL091C  | -0.64 | #N/A | #N/A |
| YBL092W   | RPL32  |                | 0 iYBL093C  | -1.54 | 0.49 | 0.19 |
| YBL093C   | ROX3   | NUT3 SSN7      | iYBL093C    | #N/A  | 0.49 | 0.19 |
| YBL094C   | 0      | #N/A           | iYBL094C    | 0.29  | 0.36 | 0.11 |
| YBL095W   | 0      | #N/A           | iYBL097W    | 0.43  | #N/A | #N/A |
| YBL096C   | 0      | #N/A           | iYBL094C    | -0.31 | 0.36 | 0.11 |
| YBL097W   | BRN1   |                | 0 iYBL098W  | #N/A  | 1.90 | 0.78 |
| YBL098W   | BNA4   |                | 0 iYBL099W  | 1.10  | 0.86 | 0.41 |
| YBL099W   | ATP1   |                | 0 itF(GAA)B | 1.10  | 0.45 | 0.18 |
| YBL100C   | 0      | #N/A           | iYBL099W    | 1.17  | 0.86 | 0.41 |
| YBL101C   | ECM21  |                | 0 iYBL101C  | 0.63  | 1.06 | 0.48 |
| YBL101W-A | #N/A   | #N/A           | iYBL101C    | 0.31  | 1.06 | 0.48 |
| YBL102W   | SFT2   |                | 0 iYBL103C  | 0.23  | 2.01 | 0.81 |
| YBL103C   | RTG3   |                | 0 iYBL103C  | #N/A  | 2.01 | 0.81 |
| YBL107C   | 0      | #N/A           | iYBL107C    | #N/A  | #N/A | #N/A |
| YBL109W   | 0      | #N/A           | iYBL111C    | -0.70 | 0.61 | 0.27 |
| YBL111C   | 0      | #N/A           | iYBL111C    | -0.61 | 0.61 | 0.27 |
| YBL112C   | 0      | #N/A           | iYBL111C    | #N/A  | 0.61 | 0.27 |
| YBL113C   | 0      | #N/A           | iYBL111C    | 0.12  | 0.61 | 0.27 |
| YBLOO5W   | #N/A   | #N/A           | #N/A        | 0.89  | #N/A | #N/A |
| YBR001C   | NTH2   |                | 0 iYBR001C  | 1.05  | 0.81 | 0.37 |
| YBR002C   | RER2   |                | 0 iYBR002C  | -0.05 | #N/A | #N/A |
| YBR003W   | COQ1   |                | 0 iYBR002C  | 0.86  | #N/A | #N/A |
| YBR004C   | 0      |                | 0 iYBR004C  | 2.27  | 1.52 | 0.66 |
| YBR005W   | 0      |                | 0 iYBR004C  | 1.65  | 1.52 | 0.66 |
| YBR006W   | UGA2   | UGA5           | iYBR005W    | #N/A  | 1.52 | 0.66 |
| YBR009C   | HHF1   |                | 0 iYBR009C  | 0.47  | 0.32 | 0.13 |
| YBR010W   | HHT1   | BUR5 SIN2      | iYBR009C    | -0.05 | 0.32 | 0.13 |
| YBR011C   | IPP1   | PPA1           | iYBR011C    | -0.30 | 1.42 | 0.63 |
| YBR012C   | 0      | #N/A           | iYBR013C    | #N/A  | #N/A | #N/A |
| YBR012W-A | #N/A   | #N/A           | iYBR013C    | -0.09 | #N/A | #N/A |
| YBR013C   | 0      | #N/A           | iYBR013C    | #N/A  | #N/A | #N/A |
| YBR014C   | 0      | #N/A           | iYBR014C    | -0.33 | 0.50 | 0.20 |
| YBR016W   | 0      | #N/A           | iYBR015C    | 0.75  | 1.67 | 0.71 |
| YBR018C   | GAL7   |                | 0 iYBR018C  | 2.20  | 2.04 | 0.82 |

|           |        |                |      |            |       |      |      |
|-----------|--------|----------------|------|------------|-------|------|------|
| YBR019C   | GAL10  |                | 0    | iYBR019C   | #N/A  | 2.37 | 0.89 |
| YBR020W   | GAL1   |                | 0    | iYBR019C   | 0.31  | 2.37 | 0.89 |
| YBR022W   |        | 0              | #N/A | iYBR021W   | 0.09  | 1.77 | 0.75 |
| YBR024W   | SCO2   |                | 0    | iYBR023C   | #N/A  | #N/A | #N/A |
| YBR025C   |        | 0              | #N/A | iYBR025C   | 0.66  | 1.72 | 0.74 |
| YBR026C   | MRF1'  | MRF1 MRF1'     |      | iYBR027C   | 0.78  | #N/A | #N/A |
| YBR028C   |        | 0              | #N/A | iYBR028C   | #N/A  | 1.05 | 0.49 |
| YBR029C   | CDS1   | CDG1           |      | iYBR029C   | 0.30  | 2.13 | 0.84 |
| YBR030W   |        | 0              | #N/A | iYBR029C   | 0.48  | 2.13 | 0.84 |
| YBR031W   | RPL4A  |                | 0    | iYBR030W   | -0.79 | #N/A | #N/A |
| YBR032W   |        | 0              | #N/A | iYBR031W   | 0.71  | #N/A | #N/A |
| YBR033W   | EDS1   |                | 0    | iYBR032W   | -0.57 | 1.31 | 0.59 |
| YBR034C   | HMT1   | HCP1 ODP1 RMT1 |      | iYBR034C   | -0.24 | 1.25 | 0.56 |
| YBR035C   | PDX3   |                | 0    | iYBR035C   | 0.79  | 1.38 | 0.63 |
| YBR036C   | CSG2   | CLS2           |      | iYBR036C   | 1.15  | 2.39 | 0.89 |
| YBR037C   | SCO1   | PET161         |      | iYBR037C   | -0.94 | #N/A | #N/A |
| YBR039W   | ATP3   |                | 0    | iYBR038W   | 0.81  | 1.21 | 0.55 |
| YBR040W   | FIG1   |                | 0    | iYBR039W   | #N/A  | 1.01 | 0.48 |
| YBR044C   | TCM62  |                | 0    | iYBR044C   | 1.10  | 1.29 | 0.58 |
| YBR045C   | GIP1   |                | 0    | iYBR045C   | #N/A  | 0.81 | 0.38 |
| YBR047W   |        | 0              |      | iYBR046C   | #N/A  | 1.26 | 0.56 |
| YBR050C   | REG2   |                | 0    | iYBR051W   | 2.01  | 2.40 | 0.89 |
| YBR051W   |        | 0              | #N/A | iYBR049C   | #N/A  | 1.66 | 0.72 |
| YBR053C   |        | 0              | #N/A | iYBR053C-C | 1.39  | 0.97 | 0.44 |
| YBR054W   | YRO2   |                | 0    | iYBR053C-1 | 2.68  | 1.11 | 0.50 |
| YBR057C   | MUM2   | SPOT8          |      | iYBR057C   | #N/A  | 1.03 | 0.48 |
| YBR060C   | ORC2   | RRR1 SIR5      |      | iYBR060C-C | -0.97 | 1.17 | 0.54 |
| YBR061C   | TRM7   |                | 0    | iYBR061C   | #N/A  | #N/A | #N/A |
| YBR062C   |        | 0              | #N/A | iYBR062C   | 0.91  | 1.23 | 0.57 |
| YBR063C   |        | 0              | #N/A | iYBR064W   | 0.50  | #N/A | #N/A |
| YBR064W   |        | 0              | #N/A | iYBR062C   | #N/A  | 1.23 | 0.57 |
| YBR065C   | ECM2   | SLT11          |      | iYBR065C   | -1.46 | 2.20 | 0.87 |
| YBR066C   | NRG2   |                | 0    | iYBR066C   | -0.51 | 0.57 | 0.24 |
| YBR067C   | TIP1   |                | 0    | iYBR067C   | #N/A  | 0.41 | 0.14 |
| YBR068C   | BAP2   |                | 0    | iYBR068C   | 1.58  | 0.17 | 0.03 |
| YBR069C   | TAT1   | VAP1           |      | iYBR069C   | -0.85 | 0.35 | 0.10 |
| YBR070C   |        | 0              | #N/A | iYBR070C   | 0.74  | #N/A | #N/A |
| YBR071W   |        | 0              | #N/A | iYBR070C   | 1.62  | #N/A | #N/A |
| YBR072W   | HSP26  |                | 0    | iYBR071W   | 3.12  | 1.22 | 0.56 |
| YBR074W   |        | 0              | #N/A | iYBR073W   | #N/A  | 1.40 | 0.62 |
| YBR075W   |        | 0              | #N/A | iYBR074W   | 0.25  | 0.25 | 0.04 |
| YBR076W   | ECM8   |                | 0    | iYBR075W   | 4.19  | 0.84 | 0.39 |
| YBR077C   |        | 0              | #N/A | iYBR077C   | #N/A  | 0.18 | 0.03 |
| YBR082C   | UBC4   |                | 0    | iYBR082C-C | 0.24  | 0.75 | 0.35 |
| YBR083W   | TEC1   | ROC1           |      | iYBR082C-1 | -1.62 | 0.21 | 0.03 |
| YBR084C-A | RPL19A |                | 0    | iYBR084C-A | -0.69 | 0.64 | 0.28 |
| YBR085W   | AAC3   | ANC3           |      | iYBR084C-A | -0.32 | 0.64 | 0.28 |
| YBR087W   | RFC5   |                | 0    | iYBR086C   | -0.93 | 1.05 | 0.48 |
| YBR088C   | POL30  | PCNA           |      | iYBR089W   | -2.40 | 1.16 | 0.53 |
| YBR089W   |        | 0              | #N/A | iYBR087W   | -1.94 | #N/A | #N/A |
| YBR090C   |        | 0              | #N/A | iYBR090C   | #N/A  | #N/A | #N/A |

|           |        |                  |            |       |      |      |
|-----------|--------|------------------|------------|-------|------|------|
| YBR090C-A | #N/A   | #N/A             | #N/A       | 0.79  | #N/A | #N/A |
| YBR091C   | MRS5   | TIM12            | iYBR091C   | -1.25 | #N/A | #N/A |
| YBR092C   | PHO3   |                  | 0 iYBR092C | -1.70 | 0.73 | 0.34 |
| YBR093C   | PHO5   |                  | 0 iYBR093C | #N/A  | #N/A | #N/A |
| YBR095C   | 0      |                  | 0 iYBR095C | 0.46  | 1.71 | 0.74 |
| YBR096W   | 0      | #N/A             | iYBR095C   | 1.64  | 1.71 | 0.74 |
| YBR098W   | MMS4   | SLX2             | iYBR097W   | #N/A  | 1.01 | 0.46 |
| YBR099C   | 0      | #N/A             | iYBR100W   | 1.81  | 0.36 | 0.11 |
| YBR100W   | 0      | #N/A             | iYBR097W   | #N/A  | 1.01 | 0.46 |
| YBR101C   | 0      |                  | 0 iYBR101C | #N/A  | #N/A | #N/A |
| YBR103W   | SIF2   | EMB1             | iYBR102C   | -0.66 | #N/A | #N/A |
| YBR104W   | YMC2   |                  | 0 iYBR103W | 0.04  | 1.43 | 0.64 |
| YBR105C   | VID24  | GID4             | iYBR105C   | 0.35  | 0.27 | 0.07 |
| YBR106W   | PHO88  |                  | 0 iYBR105C | #N/A  | 0.27 | 0.07 |
| YBR107C   | IML3   | MCM19            | iYBR107C   | #N/A  | #N/A | #N/A |
| YBR108W   | 0      | #N/A             | iYBR107C   | #N/A  | #N/A | #N/A |
| YBR109C   | CMD1   |                  | 0 iYBR109C | 0.48  | 1.46 | 0.66 |
| YBR110W   | ALG1   |                  | 0 iYBR109C | -1.15 | 1.46 | 0.66 |
| YBR111C   | YSA1   | RMA2             | iYBR111C   | 0.00  | #N/A | #N/A |
| YBR112C   | CYC8   | CRT8 SSN6        | iYBR113W   | -1.18 | 0.53 | 0.22 |
| YBR113W   | 0      | #N/A             | iYBR111C   | #N/A  | #N/A | #N/A |
| YBR116C   | 0      | #N/A             | iYBR117C   | #N/A  | 0.59 | 0.25 |
| YBR117C   | TKL2   |                  | 0 iYBR117C | #N/A  | 0.59 | 0.25 |
| YBR118W   | TEF2   | EF-1 alpha       | iYBR117C   | -0.70 | 0.59 | 0.25 |
| YBR119W   | MUD1   |                  | 0 iYBR118W | #N/A  | #N/A | #N/A |
| YBR120C   | CBP6   |                  | 0 iYBR120C | #N/A  | 1.21 | 0.56 |
| YBR122C   | MRPL36 |                  | 0 iYBR122C | 0.14  | 1.87 | 0.78 |
| YBR123C   | TFC1   |                  | 0 iYBR124W | -0.55 | 0.49 | 0.19 |
| YBR124W   | 0      | #N/A             | iYBR122C   | #N/A  | 1.87 | 0.78 |
| YBR125C   | PTC4   | GCT1             | iYBR125C   | #N/A  | #N/A | #N/A |
| YBR126C   | TPS1   | BYP1 CIF1 FDP1 G | iYBR126C   | 1.27  | 1.35 | 0.62 |
| YBR127C   | VMA2   | ATPSV VAT2       | iYBR127C   | 0.09  | 1.94 | 0.79 |
| YBR128C   | APG14  | APG14 CVT12      | iYBR128C   | -0.16 | 2.34 | 0.88 |
| YBR129C   | OPY1   |                  | 0 iYBR129C | 2.55  | 2.73 | 0.93 |
| YBR130C   | SHE3   |                  | 0 iYBR130C | -0.68 | #N/A | #N/A |
| YBR131W   | CCZ1   | CVT16            | iYBR130C   | #N/A  | #N/A | #N/A |
| YBR132C   | AGP2   |                  | 0 iYBR132C | 3.15  | 0.41 | 0.15 |
| YBR133C   | HSL7   |                  | 0 iYBR134W | #N/A  | #N/A | #N/A |
| YBR135W   | CKS1   |                  | 0 iYBR134W | -1.33 | #N/A | #N/A |
| YBR136W   | MEC1   | ESR1 SAD3        | iYBR135W   | #N/A  | #N/A | #N/A |
| YBR137W   | 0      | #N/A             | iYBR136W   | -0.46 | 2.15 | 0.85 |
| YBR139W   | 0      | #N/A             | iYBR138C   | 1.46  | 1.45 | 0.64 |
| YBR141C   | 0      | #N/A             | iYBR141C   | -0.80 | 1.63 | 0.70 |
| YBR144C   | 0      | #N/A             | iYBR144C   | #N/A  | 1.19 | 0.55 |
| YBR145W   | ADH5   |                  | 0 iYBR144C | 2.55  | 1.19 | 0.55 |
| YBR146W   | MRPS9  |                  | 0 iYBR145W | -0.24 | 2.22 | 0.87 |
| YBR148W   | YSW1   |                  | 0 iYBR147W | #N/A  | #N/A | #N/A |
| YBR149W   | ARA1   |                  | 0 iYBR148W | 0.64  | #N/A | #N/A |
| YBR150C   | TBS1   |                  | 0 iYBR150C | #N/A  | 1.46 | 0.65 |
| YBR151W   | APD1   |                  | 0 iYBR150C | 0.72  | 1.46 | 0.65 |
| YBR152W   | SPP381 |                  | 0 iYBR151W | #N/A  | 1.00 | 0.46 |



|           |        |                     |   |            |       |      |      |
|-----------|--------|---------------------|---|------------|-------|------|------|
| YBR153W   | RIB7   |                     | 0 | iYBR152W   | 0.63  | #N/A | #N/A |
| YBR154C   | RPB5   |                     | 0 | iYBR154C   | -0.49 | #N/A | #N/A |
| YBR155W   | CNS1   |                     | 0 | iYBR154C   | -1.28 | #N/A | #N/A |
| YBR157C   | ICS2   |                     | 0 | iYBR157C-0 | 0.62  | 0.41 | 0.14 |
| YBR158W   | CST13  | CST13 ICS4          |   | iYBR157C-1 | -0.66 | 0.22 | 0.04 |
| YBR159W   | 0      | #N/A                |   | iYBR158W   | -0.27 | 2.07 | 0.83 |
| YBR160W   | CDC28  | CDK1 HSL5 SRM5      |   | iYBR159W   | -0.87 | #N/A | #N/A |
| YBR161W   | 0      |                     | 0 | iYBR160W   | 0.43  | 0.93 | 0.44 |
| YBR162C   | TOS1   |                     | 0 | iYBR162C   | 0.27  | 0.41 | 0.17 |
| YBR162W-A | YSY6   |                     | 0 | iYBR162C   | 0.31  | 0.41 | 0.17 |
| YBR164C   | ARL1   | DLP2                |   | iYBR164C   | -0.50 | 1.57 | 0.68 |
| YBR165W   | UBS1   |                     | 0 | iYBR164C   | #N/A  | 1.57 | 0.68 |
| YBR166C   | TYR1   |                     | 0 | iYBR166C   | -0.07 | 2.13 | 0.84 |
| YBR167C   | POP7   | RPP2                |   | iYBR167C   | 1.48  | 1.22 | 0.54 |
| YBR168W   | 0      |                     | 0 | iYBR167C   | 0.82  | 1.22 | 0.54 |
| YBR169C   | SSE2   |                     | 0 | iYBR169C   | 1.59  | 1.04 | 0.47 |
| YBR170C   | NPL4   | HRD4                |   | iYBR170C   | #N/A  | #N/A | #N/A |
| YBR171W   | SEC66  | HSS1 SEC71          |   | iYBR170C   | -0.86 | #N/A | #N/A |
| YBR172C   | SMY2   |                     | 0 | iYBR172C   | #N/A  | 0.88 | 0.41 |
| YBR173C   | UMP1   |                     | 0 | iYBR173C   | -0.28 | 1.95 | 0.81 |
| YBR174C   | 0      | #N/A                |   | iYBR175W   | #N/A  | 1.49 | 0.65 |
| YBR175W   | SWD3   | CPS30 SAF35         |   | iYBR173C   | 1.36  | 1.95 | 0.81 |
| YBR176W   | ECM31  |                     | 0 | iYBR175W   | -0.24 | 1.49 | 0.65 |
| YBR177C   | EHT1   |                     | 0 | iYBR178W   | 1.09  | #N/A | #N/A |
| YBR178W   | 0      | #N/A                |   | iYBR176W   | #N/A  | 0.35 | 0.14 |
| YBR180W   | DTR1   |                     | 0 | iYBR179C   | #N/A  | 2.12 | 0.85 |
| YBR181C   | RPS6B  | LPG18 RPS101 RPS102 |   | iYBR181C   | -1.49 | 0.72 | 0.33 |
| YBR182C   | SMP1   |                     | 0 | iYBR182C   | #N/A  | 0.77 | 0.36 |
| YBR183W   | YPC1   |                     | 0 | iYBR182C   | 3.10  | 0.77 | 0.36 |
| YBR184W   | 0      | #N/A                |   | iYBR183W   | #N/A  | 0.51 | 0.21 |
| YBR185C   | MBA1   |                     | 0 | iYBR185C   | -0.41 | 2.99 | 0.95 |
| YBR187W   | 0      | #N/A                |   | iYBR186W   | -0.24 | 0.74 | 0.34 |
| YBR188C   | NTC20  |                     | 0 | iYBR188C   | -0.32 | 2.14 | 0.85 |
| YBR189W   | RPS9B  | RPS13A SUP46        |   | iYBR188C   | -1.00 | 2.14 | 0.85 |
| YBR190W   | 0      | #N/A                |   | iYBR189W   | #N/A  | 0.65 | 0.29 |
| YBR191W   | RPL21A | URP1                |   | iYBR189W   | -0.92 | 0.65 | 0.29 |
| YBR192W   | RIM2   |                     | 0 | iYBR191W   | #N/A  | 0.96 | 0.46 |
| YBR193C   | MED8   |                     | 0 | iYBR193C   | -1.99 | 0.98 | 0.44 |
| YBR194W   | 0      |                     | 0 | iYBR193C   | #N/A  | 0.98 | 0.44 |
| YBR195C   | MSI1   | CAC3                |   | iYBR195C   | -0.26 | 1.78 | 0.75 |
| YBR196C   | PGI1   | CDC30               |   | iYBR196C   | -0.70 | 0.20 | 0.04 |
| YBR197C   | 0      | #N/A                |   | iYBR197C   | -2.22 | #N/A | #N/A |
| YBR199W   | KTR4   |                     | 0 | iYBR198C   | 0.80  | 2.40 | 0.89 |
| YBR200W   | BEM1   | SRO1                |   | iYBR199W   | 0.08  | 1.05 | 0.48 |
| YBR201W   | DER1   |                     | 0 | iYBR200W   | -0.81 | 1.77 | 0.74 |
| YBR202W   | CDC47  | MCM7                |   | iYBR201W-  | -1.42 | #N/A | #N/A |
| YBR204C   | 0      | #N/A                |   | iYBR204C   | 1.04  | 2.93 | 0.96 |
| YBR205W   | KTR3   |                     | 0 | iYBR204C   | -1.46 | 2.93 | 0.96 |
| YBR206W   | 0      | #N/A                |   | iYBR204C   | -1.52 | 2.93 | 0.96 |
| YBR209W   | 0      | #N/A                |   | iYBR208C   | #N/A  | 1.58 | 0.69 |
| YBR210W   | 0      |                     | 0 | itE(UUC)B  | 1.07  | 2.12 | 0.84 |

|         |        |            |            |       |      |      |
|---------|--------|------------|------------|-------|------|------|
| YBR211C | AME1   | ARP100     | iYBR211C   | -0.24 | 1.65 | 0.71 |
| YBR213W | MET8   |            | 0 iYBR212W | #N/A  | 0.97 | 0.46 |
| YBR214W | SDS24  |            | 0 iYBR213W | 0.61  | 2.60 | 0.92 |
| YBR215W | HPC2   |            | 0 iYBR214W | 1.49  | 3.25 | 0.98 |
| YBR216C | 0      |            | 0 iYBR216C | #N/A  | 2.08 | 0.84 |
| YBR217W | APG12  | APG12      | iYBR216C   | #N/A  | 2.08 | 0.84 |
| YBR219C | 0      | #N/A       | iYBR220C   | -1.90 | 1.85 | 0.78 |
| YBR220C | 0      | #N/A       | iYBR220C   | -1.06 | 1.85 | 0.78 |
| YBR221C | PDB1   |            | 0 iYBR221C | 0.51  | 1.42 | 0.63 |
| YBR222C | FAT2   | FAT2       | iYBR222C   | 0.20  | 1.11 | 0.51 |
| YBR223C | TDP1   |            | 0 iYBR227C | -2.11 | 1.05 | 0.48 |
| YBR225W | 0      | #N/A       | iYBR222C   | -0.47 | 1.11 | 0.51 |
| YBR226C | 0      | #N/A       | iYBR227C   | #N/A  | 1.05 | 0.48 |
| YBR228W | SLX1   |            | 0 iYBR227C | 1.26  | 1.05 | 0.48 |
| YBR229C | ROT2   | GLS2       | iYBR229C   | -0.79 | 3.25 | 0.98 |
| YBR230C | 0      | #N/A       | iYBR230C   | 0.85  | 0.91 | 0.44 |
| YBR231C | AOR1   | AOR1       | iYBR231C   | -0.55 | 1.39 | 0.62 |
| YBR232C | 0      | #N/A       | iYBR233W   | #N/A  | 2.56 | 0.92 |
| YBR233W | PBP2   | HEK1       | iYBR231C   | -1.86 | 1.39 | 0.62 |
| YBR234C | ARC40  |            | 0 iYBR234C | 0.50  | 2.44 | 0.90 |
| YBR236C | ABD1   |            | 0 iYBR236C | 0.13  | #N/A | #N/A |
| YBR238C | 0      | #N/A       | iYBR238C   | #N/A  | 0.94 | 0.45 |
| YBR240C | THI2   | PHO6       | iYBR240C   | #N/A  | 1.86 | 0.77 |
| YBR241C | 0      | #N/A       | iYBR241C   | 0.30  | 1.53 | 0.69 |
| YBR242W | 0      | #N/A       | iYBR241C   | -0.17 | 1.53 | 0.69 |
| YBR243C | ALG7   | TUR1       | iYBR243C   | -0.56 | 1.69 | 0.73 |
| YBR244W | GPX2   | AMI1       | iYBR243C   | -1.19 | 1.69 | 0.73 |
| YBR246W | 0      | #N/A       | iYBR244W   | 0.40  | #N/A | #N/A |
| YBR247C | ENP1   | MEG1       | iYBR247C   | -1.62 | 1.68 | 0.72 |
| YBR248C | HIS7   |            | 0 iYBR248C | 0.87  | 0.71 | 0.33 |
| YBR249C | ARO4   |            | 0 iYBR249C | -0.34 | 0.70 | 0.32 |
| YBR250W | 0      | #N/A       | iYBR249C   | #N/A  | 0.70 | 0.32 |
| YBR251W | MRPS5  |            | 0 iYBR250W | 0.71  | 2.80 | 0.95 |
| YBR252W | DUT1   |            | 0 iYBR251W | #N/A  | 1.36 | 0.62 |
| YBR253W | SRB6   |            | 0 iYBR252W | 1.74  | #N/A | #N/A |
| YBR254C | TRS20  |            | 0 iYBR254C | #N/A  | 2.96 | 0.96 |
| YBR255W | 0      | #N/A       | iYBR254C   | 1.75  | 2.96 | 0.96 |
| YBR256C | RIB5   |            | 0 iYBR256C | 1.85  | 1.56 | 0.70 |
| YBR257W | POP4   |            | 0 iYBR256C | 1.09  | 1.56 | 0.70 |
| YBR258C | SHG1   | CPS15      | iYBR258C   | #N/A  | 1.66 | 0.71 |
| YBR259W | 0      | #N/A       | iYBR258C   | #N/A  | 1.66 | 0.71 |
| YBR260C | RGD1   |            | 0 iYBR260C | #N/A  | 4.05 | 0.99 |
| YBR261C | 0      | #N/A       | iYBR261C   | -0.72 | 1.97 | 0.81 |
| YBR262C | 0      |            | 0 iYBR264C | 0.60  | 1.71 | 0.73 |
| YBR263W | SHM1   | SHMT1 TMP3 | iYBR261C   | -0.81 | 1.97 | 0.81 |
| YBR264C | YPT10  |            | 0 iYBR264C | -1.49 | 1.71 | 0.73 |
| YBR265W | TSC10  |            | 0 iYBR264C | -0.20 | 1.71 | 0.73 |
| YBR266C | 0      | #N/A       | iYBR267W   | #N/A  | #N/A | #N/A |
| YBR267W | 0      |            | 0 iYBR265W | -1.37 | 1.27 | 0.57 |
| YBR268W | MRPL37 |            | 0 iYBR267W | 0.01  | #N/A | #N/A |
| YBR269C | 0      |            | 0 iYBR269C | #N/A  | 0.72 | 0.33 |



|         |                      |      |              |       |      |      |
|---------|----------------------|------|--------------|-------|------|------|
| YBR270C | 0                    | #N/A | iYBR270C     | #N/A  | 2.73 | 0.93 |
| YBR271W | 0                    | #N/A | iYBR270C     | -0.50 | 2.73 | 0.93 |
| YBR272C | HSM3                 |      | 0 iYBR272C   | 0.19  | #N/A | #N/A |
| YBR273C | 0                    |      | 0 iYBR273C   | -0.08 | 3.43 | 0.98 |
| YBR274W | CHK1                 |      | 0 iYBR273C   | 1.40  | 3.43 | 0.98 |
| YBR275C | RIF1                 |      | 0 iYBR275C   | #N/A  | 1.49 | 0.66 |
| YBR276C | PPS1                 |      | 0 iYBR276C   | #N/A  | 1.59 | 0.71 |
| YBR277C | 0                    | #N/A | iYBR278W     | #N/A  | 1.98 | 0.80 |
| YBR278W | DPB3                 |      | 0 iYBR276C   | #N/A  | 1.59 | 0.71 |
| YBR279W | PAF1                 |      | 0 iYBR278W   | 0.67  | 1.98 | 0.80 |
| YBR280C | 0                    | #N/A | iYBR280C     | 0.42  | #N/A | #N/A |
| YBR281C | 0                    | #N/A | iYBR281C     | #N/A  | #N/A | #N/A |
| YBR282W | MRPL27               |      | 0 iYBR281C   | #N/A  | #N/A | #N/A |
| YBR283C | SSH1                 |      | 0 iYBR283C   | 0.12  | 2.11 | 0.83 |
| YBR284W | 0                    | #N/A | iYBR283C     | #N/A  | 2.11 | 0.83 |
| YBR285W | 0                    | #N/A | iYBR284W     | #N/A  | 1.19 | 0.55 |
| YBR286W | APE3 APY1            |      | iYBR285W     | 0.01  | 1.79 | 0.76 |
| YBR287W | 0                    |      | 0 iYBR286W   | 2.71  | 1.35 | 0.62 |
| YBR288C | APM3 YKS6            |      | iYBR288C     | 0.53  | 2.57 | 0.92 |
| YBR289W | SNF5 HAF4 SWI10 TYE4 |      | iYBR288C     | #N/A  | 2.57 | 0.92 |
| YBR290W | BSD2                 |      | 0 iYBR289W   | #N/A  | 1.15 | 0.52 |
| YBR291C | CTP1                 |      | 0 iYBR291C   | 1.01  | 0.80 | 0.37 |
| YBR292C | 0                    | #N/A | iYBR292C-0   | #N/A  | 1.48 | 0.65 |
| YBR293W | 0                    | #N/A | iYBR292C-1   | #N/A  | 2.26 | 0.88 |
| YBR294W | SUL1 SFP2            |      | iYBR293W     | #N/A  | 1.15 | 0.52 |
| YBR295W | PCA1 CAD2 PAY2       |      | iYBR294W     | 1.42  | 1.68 | 0.72 |
| YBR296C | PHO89 ITN1           |      | iYBR296C-0   | 3.62  | #N/A | #N/A |
| YBR297W | MAL33 MAL3R          |      | iYBR296C-1   | 2.52  | 1.68 | 0.73 |
| YBR298C | MAL31 MAL3T          |      | iYBR298C     | 3.21  | 2.38 | 0.89 |
| YBR299W | MAL32 MAL3S          |      | iYBR298C     | #N/A  | 2.38 | 0.89 |
| YBR300C | 0                    | #N/A | iYBR301W     | #N/A  | 1.87 | 0.79 |
| YBR301W | DAN3                 |      | 0 iYBR299W   | #N/A  | 1.23 | 0.56 |
| YBR302C | COS2                 |      | 0 #N/A       | #N/A  | #N/A | #N/A |
| YCL001W | RER1                 |      | 0 iYCL011C   | #N/A  | 2.67 | 0.93 |
| YCL002C | 0                    | #N/A | iYCRCdelta   | #N/A  | 0.78 | 0.36 |
| YCL003W | #N/A                 | #N/A | #N/A         | #N/A  | #N/A | #N/A |
| YCL004W | PGS1 PEL1            |      | iYCL011C     | #N/A  | 2.67 | 0.93 |
| YCL005W | 0                    | #N/A | iYCL011C     | 0.01  | 2.67 | 0.93 |
| YCL006C | #N/A                 | #N/A | iYCRCdelta   | #N/A  | 0.78 | 0.36 |
| YCL007C | CWH36                | #N/A | iYCRCdelta   | #N/A  | 0.78 | 0.36 |
| YCL008C | STP22 VPS23          |      | iYCRCdelta   | #N/A  | 0.78 | 0.36 |
| YCL009C | ILV6                 |      | 0 iYCRCdelta | -0.13 | 0.78 | 0.36 |
| YCL010C | SGF29                |      | 0 iYCRCdelta | #N/A  | 0.78 | 0.36 |
| YCL011C | GBP2 RLF6            |      | iYCL011C     | -0.13 | 2.67 | 0.93 |
| YCL012W | #N/A                 | #N/A | iYCLWdelta   | #N/A  | 0.38 | 0.16 |
| YCL013W | #N/A                 | #N/A | #N/A         | #N/A  | #N/A | #N/A |
| YCL014W | BUD3                 |      | 0 iYCLWdelta | #N/A  | 0.38 | 0.16 |
| YCL016C | DCC1                 |      | 0 iYCL011C   | #N/A  | 2.67 | 0.93 |
| YCL017C | NFS1 SPL1            |      | iYCL011C     | -0.02 | 2.67 | 0.93 |
| YCL018W | LEU2                 |      | 0 iYCLWdelta | 0.94  | 0.38 | 0.16 |
| YCL019W | #N/A                 | #N/A | iYCL022C     | -3.19 | #N/A | #N/A |

|         |                |            |             |       |      |      |
|---------|----------------|------------|-------------|-------|------|------|
| YCL020W | #N/A           | #N/A       | iYCL022C    | 0.15  | #N/A | #N/A |
| YCL021W | #N/A           | #N/A       | #N/A        | #N/A  | #N/A | #N/A |
| YCL022C | 0              | #N/A       | iYCL022C    | #N/A  | #N/A | #N/A |
| YCL023C | 0              | #N/A       | iYCL022C    | #N/A  | #N/A | #N/A |
| YCL024W | KCC4           |            | 0 iYCL025C  | #N/A  | 0.26 | 0.07 |
| YCL025C | AGP1           | YCC5       | iYCL025C    | 2.07  | 0.26 | 0.07 |
| YCL026C | #N/A           | #N/A       | #N/A        | #N/A  | #N/A | #N/A |
| YCL027W | FUS1           |            | 0 iYCL028W  | #N/A  | 1.30 | 0.60 |
| YCL028W | RNQ1           | [PIN(+)]   | iYCL029C    | #N/A  | 2.08 | 0.83 |
| YCL029C | BIK1           | ARM5 PAC14 | iYCL029C    | #N/A  | 2.08 | 0.83 |
| YCL030C | HIS4           |            | 0 iYCL030C  | -0.04 | 0.31 | 0.09 |
| YCL031C | RRP7           |            | 0 iYCL031C  | #N/A  | 1.64 | 0.70 |
| YCL032W | STE50          |            | 0 iYCL033C  | 0.68  | #N/A | #N/A |
| YCL033C | 0              | #N/A       | iYCL033C    | -0.30 | #N/A | #N/A |
| YCL034W | LSB5           |            | 0 iYCL035C  | -0.05 | 2.65 | 0.93 |
| YCL035C | GRX1           |            | 0 iYCL035C  | 4.11  | 2.65 | 0.93 |
| YCL036W | GFD2           |            | 0 iYCL037C  | -1.40 | 1.40 | 0.63 |
| YCL037C | SRO9           |            | 0 iYCL037C  | -3.31 | 1.40 | 0.63 |
| YCL038C | AUT4           | AUT4       | iYCL038C    | 1.97  | 0.84 | 0.38 |
| YCL039W | 0              | MOH2       | iYCL040W    | #N/A  | 3.61 | 0.99 |
| YCL040W | GLK1           | HOR3       | iYCL044C    | 0.76  | 2.07 | 0.84 |
| YCL041C | 0              | #N/A       | iYCL040W    | #N/A  | 3.61 | 0.99 |
| YCL042W | 0              | #N/A       | iYCL044C    | #N/A  | 2.07 | 0.84 |
| YCL043C | PDI1           | MFP1 TRG1  | iYCL040W    | -0.34 | 3.61 | 0.99 |
| YCL044C | 0              | #N/A       | iYCL044C    | -0.01 | 2.07 | 0.84 |
| YCL045C | 0              | #N/A       | iYCL046W    | -0.39 | #N/A | #N/A |
| YCL046W | 0              | #N/A       | iYCL047C    | #N/A  | 1.09 | 0.50 |
| YCL047C | 0              | #N/A       | iYCL047C    | #N/A  | 1.09 | 0.50 |
| YCL048W | 0              | #N/A       | iYCL049C    | #N/A  | 1.67 | 0.71 |
| YCL049C | 0              | #N/A       | iYCL049C    | 0.45  | 1.67 | 0.71 |
| YCL050C | APA1           | DTP1       | iYCL050C    | -0.55 | 2.09 | 0.83 |
| YCL051W | LRE1           |            | 0 iYCL052C  | 0.10  | 2.29 | 0.87 |
| YCL052C | PBN1           |            | 0 iYCL052C  | 1.17  | 2.29 | 0.87 |
| YCL053C | #N/A           | #N/A       | #N/A        | -1.76 | #N/A | #N/A |
| YCL054W | SPB1           |            | 0 iYCL055W- | -1.77 | #N/A | #N/A |
| YCL055W | KAR4           |            | 0 iYCL056C  | #N/A  | 1.25 | 0.56 |
| YCL056C | 0              | #N/A       | iYCL056C    | 0.83  | 1.25 | 0.56 |
| YCL057W | PRD1           |            | 0 iYCL058C  | 0.29  | 1.37 | 0.61 |
| YCL058C | FYV5           |            | 0 iYCL058C  | -0.61 | 1.37 | 0.61 |
| YCL059C | KRR1           |            | 0 iYCL059C  | #N/A  | 2.76 | 0.93 |
| YCL060C | #N/A           | #N/A       | #N/A        | #N/A  | #N/A | #N/A |
| YCL061C | MRC1           |            | 0 iYCL061C  | #N/A  | 0.88 | 0.40 |
| YCL062W | #N/A           | #N/A       | #N/A        | -1.25 | #N/A | #N/A |
| YCL063W | 0              |            | 0 iYCL064C  | #N/A  | 1.63 | 0.71 |
| YCL064C | CHA1           |            | 0 iYCL064C  | 0.06  | 1.63 | 0.71 |
| YCL065W | 0              | #N/A       | iYCL067C    | -0.95 | #N/A | #N/A |
| YCL066W | HMLALPI ALPHA1 | MATALPH#   | iYCL067C    | -0.62 | #N/A | #N/A |
| YCL067C | HMLALPI ALPHA2 | MATALPH#   | iYCL067C    | #N/A  | #N/A | #N/A |
| YCL068C | 0              | #N/A       | iYCL068C    | #N/A  | 0.64 | 0.29 |
| YCL069W | 0              | #N/A       | iYCL073C    | #N/A  | 0.48 | 0.18 |
| YCL073C | 0              | #N/A       | iYCL073C    | 0.27  | 0.48 | 0.18 |

|           |        |                 |              |       |      |      |
|-----------|--------|-----------------|--------------|-------|------|------|
| YCL074W   | #N/A   | #N/A            | iYCL075W     | #N/A  | 0.20 | 0.02 |
| YCL075W   | #N/A   | #N/A            | #N/A         | #N/A  | #N/A | #N/A |
| YCL076W   | 0      | #N/A            | #N/A         | #N/A  | #N/A | #N/A |
| YCLX01W   | #N/A   | #N/A            | #N/A         | -0.78 | #N/A | #N/A |
| YCLX02C   | #N/A   | #N/A            | #N/A         | #N/A  | #N/A | #N/A |
| YCLX03C   | #N/A   | #N/A            | #N/A         | #N/A  | #N/A | #N/A |
| YCLX04W   | #N/A   | #N/A            | #N/A         | -0.16 | #N/A | #N/A |
| YCLX05C   | #N/A   | #N/A            | #N/A         | -0.23 | #N/A | #N/A |
| YCLX06C   | #N/A   | #N/A            | #N/A         | -1.48 | #N/A | #N/A |
| YCLX07W   | #N/A   | #N/A            | #N/A         | #N/A  | #N/A | #N/A |
| YCLX08C   | #N/A   | #N/A            | #N/A         | 2.57  | #N/A | #N/A |
| YCLX09W   | #N/A   | #N/A            | #N/A         | 1.62  | #N/A | #N/A |
| YCLX10C   | #N/A   | #N/A            | #N/A         | 0.66  | #N/A | #N/A |
| YCLX11W   | #N/A   | #N/A            | #N/A         | 0.01  | #N/A | #N/A |
| YCLX12W   | #N/A   | #N/A            | #N/A         | 0.00  | #N/A | #N/A |
| YCR001W   | 0      | #N/A            | iYCL011C     | #N/A  | 2.67 | 0.93 |
| YCR002C   | CDC10  |                 | 0 iYCRCdelta | #N/A  | 0.78 | 0.36 |
| YCR003W   | MRPL32 |                 | 0 iYCL011C   | -0.33 | 2.67 | 0.93 |
| YCR004C   | YCP4   |                 | 0 iYCRCdelta | 0.19  | 0.78 | 0.36 |
| YCR005C   | CIT2   |                 | 0 iYCRCdelta | 1.42  | 0.78 | 0.36 |
| YCR006C   | 0      | #N/A            | iYCRCdelta   | #N/A  | 0.78 | 0.36 |
| YCR007C   | 0      | #N/A            | itG(GCC)C    | 0.93  | #N/A | #N/A |
| YCR008W   | SAT4   | HAL4            | iYCRCdelta   | 0.12  | 0.78 | 0.36 |
| YCR009C   | RVS161 | END6 FUS7 SPE16 | itG(GCC)C    | 0.55  | #N/A | #N/A |
| YCR010C   | ADY2   | ATO1            | itG(GCC)C    | 2.20  | #N/A | #N/A |
| YCR011C   | ADP1   |                 | 0 itG(GCC)C  | -0.58 | #N/A | #N/A |
| YCR012W   | PGK1   |                 | 0 iYCRCdelta | -0.68 | 0.78 | 0.36 |
| YCR013C   | 0      | #N/A            | itG(GCC)C    | -0.65 | #N/A | #N/A |
| YCR014C   | POL4   | POLX            | itG(GCC)C    | 0.72  | #N/A | #N/A |
| YCR015C   | 0      | #N/A            | itG(GCC)C    | 0.05  | #N/A | #N/A |
| YCR016W   | 0      | #N/A            | itG(GCC)C    | 0.22  | #N/A | #N/A |
| YCR017C   | CWH43  |                 | 0 iYCR017C   | 0.69  | 2.10 | 0.84 |
| YCR018C   | SRD1   |                 | 0 iYCR018C   | #N/A  | #N/A | #N/A |
| YCR019W   | MAK32  |                 | 0 iYCR018C-A | 0.68  | 1.32 | 0.61 |
| YCR020C   | PET18  | HIT2            | iYCR020C     | 3.42  | 1.30 | 0.58 |
| YCR020C-A | MAK31  | LSM9 SMX1       | iYCR020C-A   | 1.00  | 2.31 | 0.88 |
| YCR021C   | HSP30  | YRO1            | iYCR021C     | 5.21  | 1.90 | 0.78 |
| YCR022C   | 0      | #N/A            | iYCR022C     | 1.91  | 1.13 | 0.52 |
| YCR023C   | 0      | #N/A            | iYCR023C     | 1.73  | 1.37 | 0.61 |
| YCR024C   | 0      | #N/A            | iYCR024C     | 0.62  | 0.28 | 0.06 |
| YCR024C-A | PMP1   |                 | 0 iYCR024C-A | -0.36 | 0.33 | 0.09 |
| YCR025C   | 0      | #N/A            | iYCR025C     | 1.24  | 0.93 | 0.42 |
| YCR026C   | 0      | #N/A            | iYCR026C     | #N/A  | 0.96 | 0.44 |
| YCR027C   | RHB1   |                 | 0 iYCR027C   | -0.10 | 1.56 | 0.70 |
| YCR028C   | FEN2   |                 | 0 iYCR028C   | -0.01 | 2.67 | 0.93 |
| YCR029C   | #N/A   | #N/A            | #N/A         | 0.65  | #N/A | #N/A |
| YCR029C-A | #N/A   | #N/A            | #N/A         | 0.02  | #N/A | #N/A |
| YCR030C   | SYP1   |                 | 0 iYCR030C   | -1.01 | 1.15 | 0.52 |
| YCR031C   | RPS14A | CRY1 RPL59      | iYCR031C     | -0.80 | 0.38 | 0.12 |
| YCR032W   | BPH1   |                 | 0 iSNR189    | -0.18 | 1.28 | 0.58 |
| YCR033W   | SNT1   |                 | 0 iYCR032W   | -0.76 | 2.09 | 0.84 |

|         |                        |                    |            |       |      |      |
|---------|------------------------|--------------------|------------|-------|------|------|
| YCR034W | FEN1                   | ELO2 GNS1 VBM2     | iYCR033W   | -0.31 | 1.12 | 0.50 |
| YCR035C | RRP43                  |                    | 0 iYCR035C | -0.52 | 2.81 | 0.94 |
| YCR036W | RBK1                   |                    | 0 iYCR035C | 1.04  | 2.81 | 0.94 |
| YCR037C | PHO87                  |                    | 0 iYCR037C | 0.80  | 1.09 | 0.49 |
| YCR038C | BUD5                   |                    | 0 iYCR038C | #N/A  | 0.66 | 0.30 |
| YCR039C | MATALPIALPHA2 HMLALPH# |                    | iYCR039C   | -0.65 | 0.68 | 0.30 |
| YCR040W | MATALPIALPHA1 HMLALPH# |                    | iYCR039C   | -0.20 | 0.68 | 0.30 |
| YCR041W | 0                      | #N/A               | iYCR039C   | -0.84 | 0.68 | 0.30 |
| YCR042C | TAF2                   | TAF150 TSM1 TafII1 | iYCR042C   | -0.49 | 1.48 | 0.67 |
| YCR043C | 0                      | #N/A               | iYCR043C   | -0.16 | 2.10 | 0.84 |
| YCR044C | PER1                   | COS16              | iYCR044C   | 0.44  | 2.50 | 0.91 |
| YCR045C | 0                      | #N/A               | iYCR045C   | 0.60  | 1.58 | 0.68 |
| YCR046C | IMG1                   |                    | 0 iYCR046C | -0.81 | 2.36 | 0.90 |
| YCR047C | BUD23                  |                    | 0 iYCR047C | -1.30 | 2.94 | 0.96 |
| YCR048W | ARE1                   | SAT2               | iYCR047C   | -0.36 | 2.94 | 0.96 |
| YCR049C | 0                      | #N/A               | iYCR050C   | -2.01 | 3.25 | 0.97 |
| YCR050C | 0                      | #N/A               | iYCR050C   | #N/A  | 3.25 | 0.97 |
| YCR051W | 0                      | #N/A               | iYCR050C   | -1.26 | 3.25 | 0.97 |
| YCR052W | RSC6                   |                    | 0 iYCR051W | -1.69 | 2.35 | 0.89 |
| YCR053W | THR4                   |                    | 0 iYCR052W | -0.26 | 1.70 | 0.72 |
| YCR054C | CTR86                  |                    | 0 iYCR054C | 0.01  | 0.85 | 0.39 |
| YCR055C | #N/A                   | #N/A               | #N/A       | -0.79 | #N/A | #N/A |
| YCR056W | #N/A                   | #N/A               | #N/A       | 0.86  | #N/A | #N/A |
| YCR057C | PWP2                   | UTP1               | iYCR057C   | -0.34 | 2.92 | 0.96 |
| YCR058C | #N/A                   | #N/A               | #N/A       | #N/A  | #N/A | #N/A |
| YCR059C | YIH1                   |                    | 0 iYCR059C | -1.75 | 1.73 | 0.75 |
| YCR060W | 0                      |                    | 0 iYCR059C | #N/A  | 1.73 | 0.75 |
| YCR061W | 0                      | #N/A               | iYCR060W   | 0.95  | 0.46 | 0.21 |
| YCR062W | #N/A                   | #N/A               | iYCR060W   | 1.16  | 0.46 | 0.21 |
| YCR063W | BUD31                  | CWC14              | iYCR062W   | 0.34  | 0.58 | 0.26 |
| YCR064C | 0                      | #N/A               | iYCR063W   | 0.07  | 0.31 | 0.07 |
| YCR065W | HCM1                   |                    | 0 iYCR063W | #N/A  | 0.31 | 0.07 |
| YCR066W | RAD18                  |                    | 0 iYCR065W | 0.32  | #N/A | #N/A |
| YCR067C | SED4                   |                    | 0 iYCR067C | -0.32 | 1.43 | 0.63 |
| YCR068W | CVT17                  | AUT5 CVT17         | iYCR067C   | -0.71 | 1.43 | 0.63 |
| YCR069W | CPR4                   | CYP4 SCC3          | iYCR068W   | 0.11  | 3.21 | 0.97 |
| YCR070W | #N/A                   | #N/A               | #N/A       | 0.48  | #N/A | #N/A |
| YCR071C | IMG2                   |                    | 0 iYCR071C | #N/A  | 3.92 | 0.99 |
| YCR072C | 0                      | #N/A               | iYCR072C   | -1.12 | 2.69 | 0.94 |
| YCR073C | SSK22                  |                    | 0 iYCR073C | 0.70  | 4.11 | 1.00 |
| YCR074C | #N/A                   | #N/A               | #N/A       | -1.45 | #N/A | #N/A |
| YCR075C | ERS1                   |                    | 0 iYCR075C | 0.62  | 3.07 | 0.96 |
| YCR076C | 0                      | #N/A               | iYCR076C   | -0.97 | #N/A | #N/A |
| YCR077C | PAT1                   | MRT1               | iYCR077C   | -1.27 | 3.71 | 0.99 |
| YCR079W | 0                      | #N/A               | iYCR077C   | -0.17 | 3.71 | 0.99 |
| YCR080W | #N/A                   | #N/A               | #N/A       | #N/A  | #N/A | #N/A |
| YCR081W | SRB8                   | GIG1 NUT6 SSN5     | iYCR079W   | -4.51 | 1.24 | 0.55 |
| YCR082W | 0                      |                    | 0 iYCR081W | -0.80 | 2.11 | 0.84 |
| YCR083W | TRX3                   |                    | 0 iYCR082W | 2.22  | 1.83 | 0.76 |
| YCR084C | TUP1                   | AAR1 AER2 AMM1     | iYCR084C   | -0.74 | 2.03 | 0.82 |
| YCR085W | 0                      | #N/A               | iYCR084C   | #N/A  | 2.03 | 0.82 |

|          |       |                 |        |              |       |      |      |
|----------|-------|-----------------|--------|--------------|-------|------|------|
| YCR086W  | CSM1  |                 | 0      | iYCR085W     | -2.26 | 1.37 | 0.61 |
| YCR087W  |       | 0               | #N/A   | iYCR085W     | -0.48 | 1.37 | 0.61 |
| YCR088W  | ABP1  |                 |        | 0 iYCR087C-A | -0.87 | 2.57 | 0.92 |
| YCR089W  | FIG2  |                 |        | 0 iYCR088W   | #N/A  | 1.15 | 0.52 |
| YCR090C  |       | 0               | #N/A   | iYCR090C-C   | #N/A  | #N/A | #N/A |
| YCR091W  | KIN82 |                 |        | 0 iYCR090C-1 | -0.40 | 1.69 | 0.73 |
| YCR092C  | MSH3  |                 |        | 0 iYCR092C   | 0.77  | 1.82 | 0.77 |
| YCR093W  | CDC39 | NOT1 ROS1 SMD6  |        | iYCR092C     | -0.85 | 1.82 | 0.77 |
| YCR094W  | CDC50 |                 |        | 0 iYCR093W   | -0.09 | 2.31 | 0.88 |
| YCR095C  |       | 0               | #N/A   | iYCR095C-C   | 0.55  | 1.54 | 0.67 |
| YCR096C  | HMRA2 | A2 MATA2        |        | iYCR096C     | 0.53  | #N/A | #N/A |
| YCR097WA | #N/A  | #N/A            | #N/A   | #N/A         | #N/A  | #N/A | #N/A |
| YCR097WB | #N/A  | #N/A            | #N/A   | #N/A         | #N/A  | #N/A | #N/A |
| YCR098C  | GIT1  |                 |        | 0 iYCR098C-C | 2.46  | 2.50 | 0.91 |
| YCR099C  |       | 0               | #N/A   | iYCR100C     | 1.56  | 0.64 | 0.28 |
| YCR100C  |       | 0               | #N/A   | iYCR100C     | 1.26  | 0.64 | 0.28 |
| YCR101C  |       | 0               | #N/A   | iYCR101C     | #N/A  | 1.92 | 0.80 |
| YCR102C  |       | 0               | #N/A   | iYCR102C     | 0.94  | 1.72 | 0.73 |
| YCR103C  | #N/A  | #N/A            | #N/A   | iYCR103C     | #N/A  | 0.65 | 0.29 |
| YCR104W  | PAU3  |                 |        | 0 iYCR103C   | 1.22  | 0.65 | 0.29 |
| YCR105W  |       | 0               | ADHVII | iYCR104W     | -0.88 | 0.48 | 0.18 |
| YCR106W  | RDS1  |                 |        | 0 iYCR105W   | -0.90 | 2.26 | 0.88 |
| YCR107W  | AAD3  |                 |        | 0 iYCR106W   | #N/A  | 0.40 | 0.13 |
| YCRX01W  | #N/A  | #N/A            | #N/A   | #N/A         | #N/A  | #N/A | #N/A |
| YCRX02C  | #N/A  | #N/A            | #N/A   | #N/A         | 0.90  | #N/A | #N/A |
| YCRX03C  | #N/A  | #N/A            | #N/A   | #N/A         | #N/A  | #N/A | #N/A |
| YCRX04W  | #N/A  | #N/A            | #N/A   | #N/A         | #N/A  | #N/A | #N/A |
| YCRX05W  | #N/A  | #N/A            | #N/A   | #N/A         | #N/A  | #N/A | #N/A |
| YCRX06W  | #N/A  | #N/A            | #N/A   | #N/A         | #N/A  | #N/A | #N/A |
| YCRX07W  | #N/A  | #N/A            | #N/A   | #N/A         | 0.71  | #N/A | #N/A |
| YCRX08W  | #N/A  | #N/A            | #N/A   | #N/A         | -0.08 | #N/A | #N/A |
| YCRX09C  | #N/A  | #N/A            | #N/A   | #N/A         | #N/A  | #N/A | #N/A |
| YCRX10W  | #N/A  | #N/A            | #N/A   | #N/A         | #N/A  | #N/A | #N/A |
| YCRX11W  | #N/A  | #N/A            | #N/A   | #N/A         | #N/A  | #N/A | #N/A |
| YCRX12W  | #N/A  | #N/A            | #N/A   | #N/A         | #N/A  | #N/A | #N/A |
| YCRX13W  | #N/A  | #N/A            | #N/A   | #N/A         | -1.22 | #N/A | #N/A |
| YCRX14W  | #N/A  | #N/A            | #N/A   | #N/A         | -2.18 | #N/A | #N/A |
| YCRX15W  | #N/A  | #N/A            | #N/A   | #N/A         | #N/A  | #N/A | #N/A |
| YCRX16C  | #N/A  | #N/A            | #N/A   | #N/A         | -0.56 | #N/A | #N/A |
| YCRX17W  | #N/A  | #N/A            | #N/A   | #N/A         | -0.95 | #N/A | #N/A |
| YCRX18C  | #N/A  | #N/A            | #N/A   | #N/A         | #N/A  | #N/A | #N/A |
| YCRX19W  | #N/A  | #N/A            | #N/A   | #N/A         | #N/A  | #N/A | #N/A |
| YCRX20C  | #N/A  | #N/A            | #N/A   | #N/A         | #N/A  | #N/A | #N/A |
| YCRX21C  | #N/A  | #N/A            | #N/A   | #N/A         | 0.37  | #N/A | #N/A |
| YDL001W  |       | 0               |        | 0 iYDL002C   | 0.30  | 0.99 | 0.45 |
| YDL002C  | NHP10 | HMO2            |        | iYDL002C     | -0.63 | 0.99 | 0.45 |
| YDL003W  | MCD1  | PDS3 RHC21 SCC1 |        | iYDL004W     | -1.32 | 1.20 | 0.56 |
| YDL004W  | ATP16 |                 |        | 0 iYDL005C   | 0.85  | 1.81 | 0.76 |
| YDL005C  | MED2  |                 |        | 0 iYDL005C   | -1.78 | 1.81 | 0.76 |
| YDL006W  | PTC1  | CWH47 KCS2 TPD1 |        | iYDL007W     | 0.29  | 0.81 | 0.37 |
| YDL007W  | RPT2  | YHS4 YTA5       |        | itS(AGA)D1   | 0.43  | 1.23 | 0.57 |

|         |       |                          |       |            |       |      |      |
|---------|-------|--------------------------|-------|------------|-------|------|------|
| YDL008W | APC11 |                          | 0     | iYDL009C   | 1.81  | 1.65 | 0.72 |
| YDL009C |       | 0                        | #N/A  | iYDL009C   | 1.84  | 1.65 | 0.72 |
| YDL010W |       | 0                        | #N/A  | iYDL012C   | 1.76  | 1.84 | 0.78 |
| YDL011C |       | 0                        | #N/A  | iYDL009C   | 0.48  | 1.65 | 0.72 |
| YDL012C |       | 0                        | #N/A  | iYDL012C   | 0.82  | 1.84 | 0.78 |
| YDL013W | HEX3  | SLX5                     |       | iYDL014W   | 0.28  | 2.35 | 0.89 |
| YDL014W | NOP1  | LOT3                     |       | iYDL015C   | -0.60 | 1.15 | 0.52 |
| YDL015C | TSC13 |                          | 0     | iYDL015C   | 1.18  | 1.15 | 0.52 |
| YDL016C |       | 0                        | #N/A  | iYDL016C   | 0.00  | 0.55 | 0.23 |
| YDL017W | CDC7  | LSD6 SAS1                |       | iYDL018C   | 0.04  | 2.34 | 0.89 |
| YDL018C | ERP3  |                          | 0     | iYDL018C   | -0.15 | 2.34 | 0.89 |
| YDL019C | OSH2  |                          | 0     | iYDL019C   | 0.11  | #N/A | #N/A |
| YDL020C | RPN4  | SON1 UFD5                |       | iYDL020C   | 1.04  | 1.36 | 0.62 |
| YDL021W | GPM2  |                          | 0     | iYDL022W   | #N/A  | 1.23 | 0.57 |
| YDL022W | GPD1  | DAR1 HOR1 OSG1 itA(AGC)D |       |            | 0.01  | 0.48 | 0.19 |
| YDL023C |       | 0                        | 0     | iYDL022W   | #N/A  | 1.23 | 0.57 |
| YDL024C | DIA3  |                          | 0     | iYDL024C   | #N/A  | 0.99 | 0.45 |
| YDL025C |       | 0                        | #N/A  | iYDL025C   | 0.71  | 1.84 | 0.76 |
| YDL026W |       | 0                        | #N/A  | iYDL028C   | #N/A  | 2.88 | 0.95 |
| YDL027C |       | 0                        | #N/A  | iYDL026W   | 1.04  | 1.05 | 0.49 |
| YDL028C | MPS1  | RPK1                     |       | iYDL028C   | 0.71  | 2.88 | 0.95 |
| YDL029W | ARP2  | ACT2                     |       | iYDL030W   | 0.68  | 1.81 | 0.76 |
| YDL030W | PRP9  |                          | 0     | iYDL031W   | 0.16  | 2.06 | 0.82 |
| YDL031W | DBP10 |                          | 0     | iYDL032W   | -1.11 | 2.78 | 0.95 |
| YDL032W |       | 0                        | #N/A  | iYDL034W   | #N/A  | 1.44 | 0.64 |
| YDL033C |       | 0                        |       | iYDL032W   | #N/A  | 2.78 | 0.95 |
| YDL034W |       | 0                        | #N/A  | iYDL036C   | #N/A  | 0.86 | 0.39 |
| YDL035C | GPR1  |                          | 0     | iYDL034W   | #N/A  | 1.44 | 0.64 |
| YDL036C |       | 0                        | #N/A  | iYDL036C   | -0.36 | 0.86 | 0.39 |
| YDL037C |       | 0                        |       | iYDL037C-0 | #N/A  | 1.11 | 0.50 |
| YDL038C |       | 0                        | #N/A  | iYDL038C   | #N/A  | #N/A | #N/A |
| YDL039C | PRM7  |                          | 0     | iYDL038C   | #N/A  | #N/A | #N/A |
| YDL040C | NAT1  | AAA1                     |       | iYDL040C   | -0.54 | 2.17 | 0.86 |
| YDL041W | KRE26 |                          | #N/A  | iYDL043C   | #N/A  | #N/A | #N/A |
| YDL042C | SIR2  |                          | 38047 | iYDL041W   | #N/A  | 1.15 | 0.53 |
| YDL043C | PRP11 | RNA11                    |       | iYDL043C   | #N/A  | #N/A | #N/A |
| YDL044C | MTF2  | NAM1                     |       | iYDL044C   | 0.44  | 1.22 | 0.57 |
| YDL045C | FAD1  |                          | 0     | iYDL045C   | -0.43 | 1.99 | 0.81 |
| YDL046W |       | 0                        |       | iYDL047W   | #N/A  | #N/A | #N/A |
| YDL047W | SIT4  | LGN4                     |       | iYDL048C-1 | -0.46 | 0.47 | 0.22 |
| YDL048C | STP4  |                          | 0     | iYDL048C-0 | 0.55  | 0.63 | 0.30 |
| YDL049C | KNH1  |                          | 0     | iYDL049C   | #N/A  | #N/A | #N/A |
| YDL050C |       | 0                        | #N/A  | iYDL050C   | #N/A  | 0.81 | 0.37 |
| YDL051W | LHP1  | LAH1 YLA1                |       | iYDL052C   | -0.63 | #N/A | #N/A |
| YDL052C | SLC1  |                          | 0     | iYDL052C   | -0.15 | #N/A | #N/A |
| YDL053C |       | 0                        |       | iYDL053C   | -1.15 | 1.26 | 0.57 |
| YDL054C | MCH1  |                          | 0     | iYDL054C   | 1.56  | 1.31 | 0.59 |
| YDL055C | PSA1  | MPG1 SRB1 VIG9           |       | iYDL055C-0 | -0.81 | 0.77 | 0.37 |
| YDL056W | MBP1  |                          | 0     | iYDL057W   | -3.37 | 2.70 | 0.94 |
| YDL057W |       | 0                        | #N/A  | iYDL058W   | #N/A  | 1.01 | 0.46 |
| YDL058W | USO1  | INT1                     |       | iYDL059C   | #N/A  | 2.03 | 0.82 |



|         |        |                  |   |          |       |      |      |
|---------|--------|------------------|---|----------|-------|------|------|
| YDL059C | RAD59  |                  | 0 | iYDL059C | #N/A  | 2.03 | 0.82 |
| YDL060W | TSR1   |                  | 0 | iYDL061C | -1.15 | #N/A | #N/A |
| YDL061C | RPS29B | YS29B            |   | iYDL061C | -0.26 | #N/A | #N/A |
| YDL062W | 0      | #N/A             |   | iYDL064W | #N/A  | #N/A | #N/A |
| YDL063C | 0      | #N/A             |   | iYDL062W | -0.67 | 0.69 | 0.31 |
| YDL064W | UBC9   |                  | 0 | iYDL065C | -1.11 | 1.80 | 0.76 |
| YDL065C | PEX19  | PAS12            |   | iYDL065C | 0.83  | 1.80 | 0.76 |
| YDL066W | IDP1   |                  | 0 | iYDL067C | 0.67  | 1.69 | 0.73 |
| YDL067C | COX9   |                  | 0 | iYDL067C | 2.08  | 1.69 | 0.73 |
| YDL068W | 0      | #N/A             |   | iYDL070W | #N/A  | #N/A | #N/A |
| YDL069C | CBS1   |                  | 0 | iYDL068W | #N/A  | #N/A | #N/A |
| YDL070W | BDF2   |                  | 0 | iYDL072C | 0.43  | #N/A | #N/A |
| YDL071C | 0      | #N/A             |   | iYDL070W | #N/A  | #N/A | #N/A |
| YDL072C | 0      |                  | 0 | iYDL072C | 1.31  | #N/A | #N/A |
| YDL073W | 0      | #N/A             |   | iYDL074C | 0.28  | 2.47 | 0.91 |
| YDL074C | BRE1   |                  | 0 | iYDL074C | #N/A  | 2.47 | 0.91 |
| YDL075W | RPL31A | RPL34            |   | iYDL076C | -0.64 | 0.42 | 0.16 |
| YDL076C | 0      |                  | 0 | iYDL076C | 0.68  | 0.42 | 0.16 |
| YDL077C | VAM6   | CVT4 VPL18 VPL22 |   | iYDL077C | #N/A  | 1.58 | 0.70 |
| YDL078C | MDH3   |                  | 0 | iYDL078C | 0.14  | 1.80 | 0.75 |
| YDL079C | MRK1   |                  | 0 | iYDL079C | 1.19  | 3.56 | 0.99 |
| YDL080C | THI3   | KID1             |   | iYDL080C | 0.43  | 1.41 | 0.63 |
| YDL081C | RPP1A  | RPLA1            |   | iYDL081C | 0.13  | 0.97 | 0.44 |
| YDL082W | RPL13A |                  | 0 | iYDL083C | -1.24 | 0.14 | 0.01 |
| YDL083C | RPS16B |                  | 0 | iYDL083C | -0.73 | 0.14 | 0.01 |
| YDL084W | SUB2   |                  | 0 | iYDL085W | -0.77 | 1.81 | 0.77 |
| YDL085W | NDE2   | NDH2             |   | iYDL086W | #N/A  | 1.85 | 0.78 |
| YDL086W | 0      | #N/A             |   | iYDL087C | 1.28  | 3.28 | 0.98 |
| YDL087C | LUC7   | EPE1 EXM2        |   | iYDL087C | #N/A  | 3.28 | 0.98 |
| YDL088C | ASM4   | NUP59            |   | iYDL088C | #N/A  | #N/A | #N/A |
| YDL089W | 0      | #N/A             |   | iYDL090C | 0.35  | 1.61 | 0.71 |
| YDL090C | RAM1   | DPR1 FUS8 SCG2   |   | iYDL090C | -1.20 | 1.61 | 0.71 |
| YDL091C | 0      |                  | 0 | iYDL091C | 1.18  | #N/A | #N/A |
| YDL092W | SRP14  |                  | 0 | iYDL093W | #N/A  | 3.43 | 0.98 |
| YDL093W | PMT5   |                  | 0 | iYDL095W | -0.02 | #N/A | #N/A |
| YDL094C | 0      | #N/A             |   | iYDL093W | -0.65 | 3.43 | 0.98 |
| YDL095W | PMT1   |                  | 0 | iYDL097C | -0.98 | 1.58 | 0.68 |
| YDL096C | 0      | #N/A             |   | iYDL095W | #N/A  | #N/A | #N/A |
| YDL097C | RPN6   | NAS4             |   | iYDL097C | 0.34  | 1.58 | 0.68 |
| YDL098C | SNU23  |                  | 0 | iYDL098C | -0.06 | 1.46 | 0.64 |
| YDL099W | 0      | #N/A             |   | iYDL100C | #N/A  | #N/A | #N/A |
| YDL100C | ARR4   |                  | 0 | iYDL100C | -0.30 | #N/A | #N/A |
| YDL101C | DUN1   |                  | 0 | iYDL101C | -0.60 | #N/A | #N/A |
| YDL102W | CDC2   | HPR6 POL3 TEX1   |   | iYDL103C | -1.52 | 1.95 | 0.81 |
| YDL103C | QRI1   | UAP1             |   | iYDL103C | -0.41 | 1.95 | 0.81 |
| YDL104C | QRI7   |                  | 0 | iYDL104C | 0.59  | 1.23 | 0.55 |
| YDL105W | QRI2   |                  | 0 | iYDL106C | #N/A  | 3.17 | 0.97 |
| YDL106C | PHO2   | BAS2 GRF10       |   | iYDL106C | -0.42 | 3.17 | 0.97 |
| YDL107W | MSS2   |                  | 0 | iYDL108W | 0.92  | 0.91 | 0.43 |
| YDL108W | KIN28  |                  | 0 | iYDL109C | -1.17 | 1.07 | 0.48 |
| YDL109C | 0      | #N/A             |   | iYDL109C | #N/A  | 1.07 | 0.48 |

|           |        |                 |            |       |      |      |
|-----------|--------|-----------------|------------|-------|------|------|
| YDL110C   | 0      | #N/A            | iYDL110C   | 2.05  | 1.22 | 0.55 |
| YDL111C   | RRP42  |                 | 0 iYDL111C | -0.83 | 1.98 | 0.81 |
| YDL112W   | TRM3   |                 | 0 iYDL113C | -0.41 | 2.38 | 0.89 |
| YDL113C   | CVT20  | CVT20 SNX42     | iYDL113C   | #N/A  | 2.38 | 0.89 |
| YDL114W   | 0      | #N/A            | iYDL115C   | #N/A  | 1.81 | 0.76 |
| YDL115C   | IWR1   |                 | 0 iYDL115C | 1.14  | 1.81 | 0.76 |
| YDL116W   | NUP84  |                 | 0 iYDL117W | #N/A  | 2.62 | 0.92 |
| YDL117W   | CYK3   |                 | 0 iYDL118W | -0.53 | 1.26 | 0.57 |
| YDL118W   | 0      | #N/A            | iYDL120W   | #N/A  | #N/A | #N/A |
| YDL119C   | 0      | #N/A            | iYDL118W   | -0.59 | 1.26 | 0.57 |
| YDL120W   | YFH1   |                 | 0 iYDL121C | #N/A  | 3.22 | 0.97 |
| YDL121C   | 0      | #N/A            | iYDL121C   | -2.00 | 3.22 | 0.97 |
| YDL122W   | UBP1   |                 | 0 iYDL123W | 0.15  | 1.12 | 0.51 |
| YDL123W   | SNA4   |                 | 0 iYDL124W | 1.42  | 2.45 | 0.90 |
| YDL124W   | 0      | #N/A            | iYDL125C   | 0.55  | 0.82 | 0.38 |
| YDL125C   | HNT1   |                 | 0 iYDL125C | 0.88  | 0.82 | 0.38 |
| YDL126C   | CDC48  |                 | 0 iYDL126C | 0.28  | 1.14 | 0.53 |
| YDL127W   | PCL2   | CLN4            | iYDL128W   | -0.55 | 0.70 | 0.33 |
| YDL128W   | VCX1   | HUM1 MNR1       | iYDL129W   | -0.34 | 0.80 | 0.37 |
| YDL129W   | 0      | #N/A            | iYDL130W   | #N/A  | 1.56 | 0.70 |
| YDL130W   | RPP1B  | RPL44 RPLA3     | iYDL130W-  | -0.29 | 0.74 | 0.33 |
| YDL131W   | LYS21  |                 | 0 iYDL132W | -1.05 | #N/A | #N/A |
| YDL132W   | CDC53  |                 | 0 iYDL133W | 0.19  | 2.07 | 0.83 |
| YDL133W   | 0      | #N/A            | iYDL133C-A | 1.19  | #N/A | #N/A |
| YDL134C   | PPH21  | PPH1            | iYDL134C   | 0.29  | 1.15 | 0.54 |
| YDL134C-A | #N/A   | #N/A            | #N/A       | 0.55  | #N/A | #N/A |
| YDL135C   | RDI1   |                 | 0 iYDL135C | -0.18 | 1.11 | 0.52 |
| YDL136W   | RPL35B | SOS2            | iYDL137W   | -0.12 | 0.31 | 0.07 |
| YDL137W   | ARF2   |                 | 0 iYDL138W | 0.43  | 0.95 | 0.45 |
| YDL138W   | RGT2   |                 | 0 iYDL139C | 0.12  | 0.78 | 0.36 |
| YDL139C   | SCM3   |                 | 0 iYDL139C | #N/A  | 0.78 | 0.36 |
| YDL140C   | RPO21  | RPB1 RPB220 SUA | iYDL140C   | -0.97 | 1.22 | 0.55 |
| YDL141W   | BPL1   | ACC2            | iYDL142C   | -1.75 | 1.90 | 0.80 |
| YDL142C   | CRD1   | CLS1            | iYDL142C   | 1.10  | 1.90 | 0.80 |
| YDL143W   | CCT4   | TCP4            | iYDL144C   | -0.75 | 3.04 | 0.96 |
| YDL144C   | 0      | #N/A            | iYDL144C   | #N/A  | 3.04 | 0.96 |
| YDL145C   | COP1   | RET1 SEC33      | iYDL145C   | -1.16 | 3.28 | 0.98 |
| YDL146W   | 0      | #N/A            | iYDL147W   | 1.47  | 0.99 | 0.47 |
| YDL147W   | RPN5   | NAS5            | iYDL148C   | 0.46  | 1.95 | 0.81 |
| YDL148C   | NOP14  | UTP2            | iYDL148C   | -0.49 | 1.95 | 0.81 |
| YDL149W   | APG9   | APG9 AUT9 CVT7  | iYDL150W   | 0.43  | 1.95 | 0.80 |
| YDL150W   | RPC53  | RPC4            | iYDL152W   | -0.89 | 1.41 | 0.62 |
| YDL151C   | FYV3   |                 | 0 iYDL150W | -1.22 | 1.95 | 0.80 |
| YDL152W   | 0      | #N/A            | iYDL154W   | #N/A  | #N/A | #N/A |
| YDL153C   | SAS10  | UTP3            | iYDL152W   | -0.59 | 1.41 | 0.62 |
| YDL154W   | MSH5   |                 | 0 iYDL155W | #N/A  | 0.29 | 0.07 |
| YDL155W   | CLB3   |                 | 0 iYDL156W | -1.03 | 1.16 | 0.52 |
| YDL156W   | 0      | #N/A            | iYDL157C   | -3.03 | #N/A | #N/A |
| YDL157C   | 0      | #N/A            | iYDL157C   | -1.43 | #N/A | #N/A |
| YDL158C   | 0      | #N/A            | iYDL157C   | -0.18 | #N/A | #N/A |
| YDL159W   | STE7   |                 | 0 iYDL160C | 0.75  | 0.61 | 0.28 |



|         |        |            |      |          |            |       |      |      |
|---------|--------|------------|------|----------|------------|-------|------|------|
| YDL160C | DHH1   |            | 0    | iYDL160C | -1.34      | 0.61  | 0.28 |      |
| YDL161W | ENT1   |            |      | 0        | iYDL163W   | 0.18  | 1.66 | 0.72 |
| YDL162C |        | 0          | #N/A |          | iYDL161W   | #N/A  | #N/A | #N/A |
| YDL163W |        | 0          | #N/A |          | iYDL165W   | #N/A  | 0.40 | 0.17 |
| YDL164C | CDC9   | MMS8       |      |          | iYDL163W   | -0.26 | 1.66 | 0.72 |
| YDL165W | CDC36  | DNA19 NOT2 |      |          | iYDL166C   | -0.78 | 1.14 | 0.52 |
| YDL166C | FAP7   |            |      | 0        | iYDL166C   | 0.69  | 1.14 | 0.52 |
| YDL167C | NRP1   |            |      | 0        | iYDL167C   | -0.51 | 1.53 | 0.67 |
| YDL168W | SFA1   | ADH5       |      |          | iYDL169C   | -0.93 | 1.65 | 0.73 |
| YDL169C | UGX2   |            |      | 0        | iYDL169C   | 1.88  | 1.65 | 0.73 |
| YDL170W | UGA3   |            |      | 0        | iYDL171C   | 1.43  | 1.16 | 0.54 |
| YDL171C | GLT1   |            |      | 0        | iYDL171C   | -0.17 | 1.16 | 0.54 |
| YDL172C |        | 0          | #N/A |          | iYDL172C   | 0.68  | #N/A | #N/A |
| YDL173W |        | 0          | #N/A |          | iYDL174C   | 0.74  | #N/A | #N/A |
| YDL174C | DLD1   |            |      | 0        | iYDL174C   | 0.92  | #N/A | #N/A |
| YDL175C | AIR2   |            |      | 0        | iYDL175C   | 0.35  | #N/A | #N/A |
| YDL176W |        | 0          | #N/A |          | iYDL177C   | 0.93  | 2.35 | 0.88 |
| YDL177C |        | 0          | #N/A |          | iYDL177C   | 0.60  | 2.35 | 0.88 |
| YDL178W | DLD2   | AIP2       |      |          | iYDL179W   | 0.78  | 1.21 | 0.54 |
| YDL179W | PCL9   |            |      | 0        | iYDL180W   | #N/A  | 2.38 | 0.89 |
| YDL180W |        | 0          | #N/A |          | iYDL181W   | 1.16  | #N/A | #N/A |
| YDL181W | INH1   |            |      | 0        | iYDL182W   | 1.15  | 1.05 | 0.48 |
| YDL182W | LYS20  |            |      | 0        | iYDL183C-1 | -1.42 | 0.48 | 0.19 |
| YDL183C |        | 0          | #N/A |          | iYDL183C-0 | #N/A  | 1.27 | 0.57 |
| YDL184C | RPL41A | RPL47A     |      |          | iYDL184C   | #N/A  | 0.29 | 0.07 |
| YDL185W | TFP1   | CLS8 VMA1  |      |          | iYDL186W   | -0.13 | 2.78 | 0.94 |
| YDL186W |        | 0          | #N/A |          | iYDL188C   | 1.30  | 2.97 | 0.95 |
| YDL187C |        | 0          | #N/A |          | iYDL186W   | 0.69  | 2.78 | 0.94 |
| YDL188C | PPH22  | PPH2       |      |          | iYDL188C   | 0.42  | 2.97 | 0.95 |
| YDL189W |        | 0          |      | 0        | iYDL190C   | -1.03 | 2.78 | 0.94 |
| YDL190C | UFD2   |            |      | 0        | iYDL190C   | -0.70 | 2.78 | 0.94 |
| YDL191W | RPL35A | SOS1       |      |          | iYDL192W   | -0.47 | 0.35 | 0.10 |
| YDL192W | ARF1   |            |      | 0        | iYDL193W   | -0.39 | 1.12 | 0.51 |
| YDL193W |        | 0          | #N/A |          | iYDL194W   | 0.60  | 1.55 | 0.69 |
| YDL194W | SNF3   |            |      | 0        | iYDL195W   | 0.76  | 2.51 | 0.92 |
| YDL195W | SEC31  | WEB1       |      |          | iYDL196W   | 0.00  | 2.76 | 0.93 |
| YDL196W |        | 0          | #N/A |          | iYDL197C   | #N/A  | #N/A | #N/A |
| YDL197C | ASF2   |            |      | 0        | iYDL197C   | 0.78  | #N/A | #N/A |
| YDL198C | YHM1   | YHM1       |      |          | iYDL198C   | 0.77  | 0.88 | 0.40 |
| YDL199C |        | 0          | #N/A |          | iYDL199C   | 0.64  | 2.05 | 0.83 |
| YDL200C | MGT1   | MGMT       |      |          | iYDL200C   | 0.75  | #N/A | #N/A |
| YDL201W | TRM8   |            |      | 0        | iYDL202W   | -0.49 | 2.15 | 0.85 |
| YDL202W | MRPL11 |            |      | 0        | iYDL203C   | -1.04 | #N/A | #N/A |
| YDL203C |        | 0          | #N/A |          | iYDL203C   | -0.17 | #N/A | #N/A |
| YDL204W |        | 0          |      | 0        | iYDL205C   | 2.55  | 2.46 | 0.90 |
| YDL205C | HEM3   |            |      | 0        | iYDL205C   | #N/A  | 2.46 | 0.90 |
| YDL206W |        | 0          | #N/A |          | iYDL207W   | 1.12  | 1.60 | 0.71 |
| YDL207W | GLE1   | BRR3 RSS1  |      |          | iYDL208W   | -0.33 | 1.88 | 0.78 |
| YDL208W | NHP2   |            |      | 0        | iYDL209C   | -0.96 | 1.85 | 0.78 |
| YDL209C | CWC2   | NTC40      |      |          | iYDL209C   | -0.65 | 1.85 | 0.78 |
| YDL210W | UGA4   |            |      | 0        | itG(GCC)D1 | #N/A  | 1.98 | 0.80 |

|         |       |                 |        |              |       |      |      |
|---------|-------|-----------------|--------|--------------|-------|------|------|
| YDL211C |       | 0               | #N/A   | iYDL211C-0   | 0.40  | 1.33 | 0.59 |
| YDL212W | SHR3  | APF1            |        | iYDL213C     | 1.28  | 2.19 | 0.85 |
| YDL213C | FYV14 |                 |        | 0 iYDL213C   | #N/A  | 2.19 | 0.85 |
| YDL214C | PRR2  |                 |        | 0 iYDL214C   | 1.15  | 0.50 | 0.20 |
| YDL215C | GDH2  | GDH-B GDHB      |        | iYDL215C     | 0.81  | 3.11 | 0.97 |
| YDL216C | RRI1  | CSN5 JAB1       |        | iYDL216C     | 0.25  | 0.68 | 0.31 |
| YDL217C | TIM22 |                 |        | 0 iYDL217C   | -0.18 | 2.29 | 0.88 |
| YDL218W |       | 0               | #N/A   | iYDL219W     | 0.55  | 3.95 | 0.99 |
| YDL219W | DTD1  |                 |        | 0 iYDL220C   | 0.02  | 2.73 | 0.94 |
| YDL220C | CDC13 | EST4            |        | iYDL220C     | -1.43 | 2.73 | 0.94 |
| YDL221W |       | 0               | #N/A   | iYDL222C     | -0.27 | 2.49 | 0.90 |
| YDL222C |       | 0               |        | 0 iYDL222C   | #N/A  | 2.49 | 0.90 |
| YDL223C | HBT1  |                 |        | 0 iYDL223C   | -0.22 | 1.19 | 0.55 |
| YDL224C | WHI4  |                 |        | 0 iYDL224C   | 0.10  | 1.33 | 0.61 |
| YDL225W | SHS1  |                 | 38237  | iYDL226C     | -1.00 | 5.38 | 1.00 |
| YDL226C | GCS1  |                 |        | 0 iYDL226C   | -0.63 | 5.38 | 1.00 |
| YDL227C | HO    |                 |        | 0 iYDL227C-0 | -2.47 | 0.70 | 0.32 |
| YDL228C |       | 0               | #N/A   | iYDL228C     | -1.36 | 0.64 | 0.28 |
| YDL229W | SSB1  | YG101           |        | iYDL230W     | -1.10 | 0.41 | 0.14 |
| YDL230W | PTP1  |                 |        | 0 iYDL231C   | 0.58  | 3.15 | 0.97 |
| YDL231C | BRE4  |                 |        | 0 iYDL231C   | 1.00  | 3.15 | 0.97 |
| YDL232W | OST4  |                 |        | 0 iYDL233W   | 1.68  | 2.17 | 0.85 |
| YDL233W |       | 0               | #N/A   | iYDL234C     | 0.91  | 3.41 | 0.98 |
| YDL234C | GYP7  |                 |        | 0 iYDL234C   | 2.65  | 3.41 | 0.98 |
| YDL235C | YPD1  |                 |        | 0 iYDL235C   | -0.01 | 1.95 | 0.81 |
| YDL236W | PHO13 |                 |        | 0 iYDL237W   | -0.04 | 2.46 | 0.91 |
| YDL237W |       | 0               | #N/A   | iYDL238C     | 0.57  | #N/A | #N/A |
| YDL238C |       | 0               |        | 0 iYDL238C   | #N/A  | #N/A | #N/A |
| YDL239C | ADY3  |                 |        | 0 iYDL239C   | #N/A  | 0.38 | 0.12 |
| YDL240W | LRG1  |                 |        | 0 iYDL241W-  | -2.00 | 2.07 | 0.84 |
| YDL241W |       | 0               | #N/A   | iYDL242W     | -0.02 | 0.93 | 0.43 |
| YDL242W |       | 0               | #N/A   | iYDL243C     | #N/A  | 1.11 | 0.50 |
| YDL243C | AAD4  |                 |        | 0 iYDL243C   | 1.67  | 1.11 | 0.50 |
| YDL244W | THI13 |                 |        | 0 iYDL245C-1 | #N/A  | 2.20 | 0.87 |
| YDL245C | HXT15 |                 |        | 0 iYDL245C-0 | #N/A  | 0.66 | 0.30 |
| YDL246C |       | 0               |        | 0 iYDL246C-0 | 1.31  | 1.77 | 0.74 |
| YDL247W |       | 0               |        | 0 iYDL248W-  | 1.67  | 1.23 | 0.57 |
| YDL248W | COS7  |                 |        | 0 #N/A       | 2.24  | #N/A | #N/A |
| YDR001C | NTH1  |                 |        | 0 iYDR001C   | 1.38  | 1.00 | 0.46 |
| YDR002W | YRB1  | CST20 HTN1 SFO1 |        | iYDR001C     | 0.26  | 1.00 | 0.46 |
| YDR003W |       | 0               |        | 0 iYDR002W   | 0.37  | #N/A | #N/A |
| YDR004W | RAD57 |                 |        | 0 iYDR003W   | 1.48  | 0.99 | 0.46 |
| YDR005C | MAF1  |                 |        | 0 iYDR005C   | 1.09  | 1.53 | 0.69 |
| YDR006C | SOK1  |                 |        | 0 iYDR006C   | -0.14 | 1.44 | 0.64 |
| YDR007W | TRP1  |                 |        | 0 iYDR006C   | 0.21  | 1.44 | 0.64 |
| YDR008C |       | 0               | #N/A   | iYDR008C     | 0.41  | 1.48 | 0.65 |
| YDR009W | GAL3  |                 |        | 0 iYDR008C   | #N/A  | 1.48 | 0.65 |
| YDR010C |       | 0               | #N/A   | iYDR010C     | #N/A  | 0.37 | 0.14 |
| YDR011W | SNQ2  |                 |        | 0 iYDR010C   | -0.85 | 0.37 | 0.14 |
| YDR012W | RPL4B |                 |        | 0 iYDR011W   | -0.64 | 0.85 | 0.41 |
| YDR013W |       | 0               | CDC101 | iYDR012W     | 0.30  | 0.38 | 0.12 |

|         |        |                  |   |            |       |      |      |
|---------|--------|------------------|---|------------|-------|------|------|
| YDR014W | RAD61  |                  | 0 | iYDR013W   | #N/A  | 1.35 | 0.61 |
| YDR015C | 0      | #N/A             |   | iYDR015C   | #N/A  | #N/A | #N/A |
| YDR016C | DAD1   |                  | 0 | iYDR016C   | #N/A  | 3.13 | 0.96 |
| YDR017C | KCS1   |                  | 0 | iYDR017C   | 0.41  | 0.73 | 0.35 |
| YDR018C | 0      | #N/A             |   | iYDR018C   | #N/A  | 0.87 | 0.40 |
| YDR019C | GCV1   | GSD1             |   | iYDR019C   | 1.43  | 0.60 | 0.27 |
| YDR020C | 0      | #N/A             |   | iYDR020C   | 1.51  | 1.85 | 0.77 |
| YDR021W | FAL1   |                  | 0 | iYDR020C   | -0.83 | 1.85 | 0.77 |
| YDR022C | CIS1   |                  | 0 | iYDR022C   | #N/A  | #N/A | #N/A |
| YDR023W | SES1   | SerRS            |   | itV(UAC)D  | -0.45 | 0.59 | 0.25 |
| YDR024W | FYV1   |                  | 0 | iYDR023W   | -1.43 | #N/A | #N/A |
| YDR025W | RPS11A |                  | 0 | iYDR023W   | -1.55 | #N/A | #N/A |
| YDR026C | 0      | #N/A             |   | iYDR026C   | -0.71 | 2.10 | 0.84 |
| YDR027C | LUV1   | CGP1 LUV1 TCS3   |   | iYDR027C   | 0.30  | 1.55 | 0.68 |
| YDR028C | REG1   | HEX2 PZF240 SPP4 |   | iYDR028C   | -0.65 | #N/A | #N/A |
| YDR029W | 0      | #N/A             |   | iYDR028C   | #N/A  | #N/A | #N/A |
| YDR030C | RAD28  |                  | 0 | iYDR030C   | 1.53  | 2.54 | 0.92 |
| YDR031W | 0      | #N/A             |   | iYDR030C   | #N/A  | 2.54 | 0.92 |
| YDR032C | PST2   |                  | 0 | iYDR032C-0 | 1.08  | 1.70 | 0.74 |
| YDR033W | MRH1   |                  | 0 | iYDR032C-2 | -0.65 | 0.51 | 0.21 |
| YDR034C | LYS14  |                  | 0 | iYDR034C   | -1.41 | 1.38 | 0.63 |
| YDR035W | ARO3   |                  | 0 | iYDR034W-  | #N/A  | 1.16 | 0.52 |
| YDR036C | 0      | MRP5             |   | iYDR036C   | -1.48 | 1.86 | 0.77 |
| YDR037W | KRS1   | GCD5             |   | iYDR036C   | -0.11 | 1.86 | 0.77 |
| YDR038C | ENA5   |                  | 0 | iYDR038C   | 1.60  | 1.73 | 0.74 |
| YDR039C | ENA2   |                  | 0 | iYDR039C   | 1.61  | #N/A | #N/A |
| YDR040C | ENA1   | HOR6 PMR2        |   | iYDR040C   | 1.63  | 1.27 | 0.57 |
| YDR041W | RSM10  |                  | 0 | iYDR040C   | 0.96  | 1.27 | 0.57 |
| YDR042C | 0      | #N/A             |   | iYDR042C   | 3.38  | 0.36 | 0.14 |
| YDR043C | NRG1   |                  | 0 | iYDR043C-0 | 1.14  | 0.61 | 0.28 |
| YDR044W | HEM13  |                  | 0 | iYDR043C-2 | -0.20 | 2.12 | 0.85 |
| YDR045C | RPC11  |                  | 0 | iYDR045C   | -0.03 | 1.35 | 0.60 |
| YDR046C | BAP3   | PAP1             |   | iYDR046C   | 1.08  | #N/A | #N/A |
| YDR047W | HEM12  | HEM6             |   | iYDR046C   | 1.02  | #N/A | #N/A |
| YDR048C | 0      | #N/A             |   | iYDR049W   | -0.92 | 0.42 | 0.15 |
| YDR049W | 0      | #N/A             |   | iYDR047W   | -0.20 | 0.52 | 0.21 |
| YDR050C | TPI1   |                  | 0 | iYDR050C   | -0.25 | 0.44 | 0.17 |
| YDR051C | 0      | #N/A             |   | iYDR051C   | 0.82  | 0.99 | 0.45 |
| YDR052C | DBF4   | LSD7             |   | iYDR053W   | 1.45  | 1.10 | 0.50 |
| YDR053W | 0      | #N/A             |   | iYDR051C   | #N/A  | 0.99 | 0.45 |
| YDR054C | CDC34  | DNA6 UBC3        |   | iYDR054C   | -0.22 | 1.20 | 0.54 |
| YDR055W | PST1   |                  | 0 | iYDR054C   | 0.29  | 1.20 | 0.54 |
| YDR056C | 0      | #N/A             |   | iYDR056C   | #N/A  | 2.39 | 0.89 |
| YDR057W | 0      |                  | 0 | iYDR056C   | 0.39  | 2.39 | 0.89 |
| YDR058C | TGL2   |                  | 0 | iYDR058C   | #N/A  | 0.83 | 0.38 |
| YDR059C | UBC5   |                  | 0 | iYDR059C   | 1.16  | #N/A | #N/A |
| YDR060W | MAK21  | NOC1             |   | iYDR059C   | -1.27 | #N/A | #N/A |
| YDR061W | 0      | #N/A             |   | iYDR060W   | 0.34  | 0.46 | 0.19 |
| YDR062W | LCB2   | SCS1 TSC1        |   | iYDR061W   | -0.14 | 1.39 | 0.63 |
| YDR063W | 0      | #N/A             |   | iYDR062W   | 1.62  | 0.95 | 0.43 |
| YDR064W | RPS13  | RPS13B RPS13C    |   | iYDR063W   | 0.22  | 0.47 | 0.22 |

|         |        |                  |            |       |      |      |
|---------|--------|------------------|------------|-------|------|------|
| YDR065W | 0      | #N/A             | iYDR064W   | #N/A  | 0.77 | 0.35 |
| YDR066C | 0      | #N/A             | iYDR066C   | -1.14 | 1.21 | 0.55 |
| YDR067C | 0      | #N/A             | iYDR067C   | #N/A  | 2.40 | 0.90 |
| YDR068W | DOS2   |                  | 0 iYDR067C | -0.26 | 2.40 | 0.90 |
| YDR069C | DOA4   | DOS1 MUT4 NPI2 S | iYDR069C   | 1.35  | 3.48 | 0.98 |
| YDR070C | 0      |                  | 0 iYDR070C | #N/A  | 1.17 | 0.54 |
| YDR071C | 0      |                  | 0 iYDR071C | #N/A  | 1.06 | 0.49 |
| YDR072C | IPT1   | SYR4             | iYDR072C   | 0.98  | #N/A | #N/A |
| YDR073W | SNF11  |                  | 0 iYDR072C | -0.19 | #N/A | #N/A |
| YDR074W | TPS2   | HOG2 PFK3        | iYDR073W   | 1.01  | 1.18 | 0.55 |
| YDR075W | PPH3   |                  | 0 iYDR074W | -1.25 | 1.83 | 0.76 |
| YDR076W | RAD55  |                  | 0 iYDR075W | #N/A  | 0.83 | 0.38 |
| YDR077W | SED1   |                  | 0 iYDR076W | 0.61  | 0.22 | 0.03 |
| YDR078C | SHU2   |                  | 0 iYDR078C | 1.65  | 0.80 | 0.37 |
| YDR079W | PET100 |                  | 0 iYDR078C | #N/A  | 0.80 | 0.37 |
| YDR080W | VPS41  | CVT8 FET2 SVL2 V | iYDR079W   | #N/A  | 2.02 | 0.82 |
| YDR081C | PDC2   |                  | 0 iYDR081C | -0.94 | 2.84 | 0.95 |
| YDR082W | STN1   |                  | 0 iYDR081C | 1.68  | 2.84 | 0.95 |
| YDR083W | RRP8   |                  | 0 iYDR082W | 0.12  | 0.88 | 0.42 |
| YDR084C | 0      |                  | 0 iYDR084C | 0.64  | 1.83 | 0.77 |
| YDR085C | AFR1   |                  | 0 iYDR085C | 1.04  | 1.12 | 0.50 |
| YDR086C | SSS1   |                  | 0 iYDR086C | -0.03 | 0.75 | 0.34 |
| YDR087C | RRP1   |                  | 0 iYDR087C | -0.57 | 1.30 | 0.58 |
| YDR088C | SLU7   | SLT17            | iYDR088C   | 0.01  | 1.37 | 0.61 |
| YDR089W | 0      | #N/A             | itR(ACG)D- | -0.31 | 0.66 | 0.30 |
| YDR090C | 0      | #N/A             | iYDR090C   | 1.32  | 1.13 | 0.52 |
| YDR091C | RLI1   |                  | 0 iYDR091C | 0.00  | 1.56 | 0.69 |
| YDR092W | UBC13  |                  | 0 iYDR091C | 0.55  | 1.56 | 0.69 |
| YDR093W | DNF2   |                  | 0 iYDR092W | -0.14 | 0.67 | 0.30 |
| YDR094W | 0      | #N/A             | iYDR092W   | -1.43 | 0.67 | 0.30 |
| YDR095C | 0      | #N/A             | iYDR095C   | -1.84 | 1.11 | 0.51 |
| YDR096W | GIS1   |                  | 0 iYDR095C | #N/A  | 1.11 | 0.51 |
| YDR097C | MSH6   | PMS3             | iYDR097C   | -1.48 | 1.78 | 0.74 |
| YDR098C | GRX3   |                  | 0 iYDR098C | -0.20 | 0.70 | 0.32 |
| YDR099W | BMH2   | SCD3             | iYDRCdelta | 0.39  | #N/A | #N/A |
| YDR100W | 0      |                  | 0 iYDR099W | 0.94  | 0.76 | 0.35 |
| YDR101C | ARX1   |                  | 0 iYDR101C | -1.54 | 0.94 | 0.43 |
| YDR102C | 0      | #N/A             | iYDR102C   | #N/A  | 1.04 | 0.47 |
| YDR103W | STE5   | HMD3 NUL3        | iYDR102C   | 0.26  | 1.04 | 0.47 |
| YDR104C | SPO71  |                  | 0 iYDR104C | -0.98 | 1.52 | 0.66 |
| YDR105C | 0      |                  | 0 iYDR105C | 0.82  | 3.23 | 0.98 |
| YDR106W | ARP10  |                  | 0 iYDR105C | #N/A  | 3.23 | 0.98 |
| YDR107C | 0      | #N/A             | iYDR107C   | 0.73  | 2.44 | 0.91 |
| YDR108W | GSG1   | TRS85            | iYDR107C   | 0.40  | 2.44 | 0.91 |
| YDR109C | 0      | #N/A             | iYDR109C   | -0.13 | 2.37 | 0.90 |
| YDR110W | FOB1   | HRM1             | iYDR109C   | 0.02  | 2.37 | 0.90 |
| YDR111C | 0      |                  | 0 iYDR112W | #N/A  | 1.22 | 0.55 |
| YDR112W | 0      | #N/A             | iYDR110W   | #N/A  | 0.72 | 0.32 |
| YDR113C | PDS1   |                  | 0 iYDR113C | -0.62 | #N/A | #N/A |
| YDR114C | 0      | #N/A             | iYDR115W   | #N/A  | #N/A | #N/A |
| YDR115W | 0      | #N/A             | iYDR113C   | -3.30 | #N/A | #N/A |

|         |       |                    |            |       |      |      |
|---------|-------|--------------------|------------|-------|------|------|
| YDR116C | 0     |                    | 0 iYDR116C | 0.71  | 1.86 | 0.77 |
| YDR117C | 0     | #N/A               | iYDR117C   | #N/A  | 2.37 | 0.90 |
| YDR118W | APC4  |                    | 0 iYDR117C | #N/A  | 2.37 | 0.90 |
| YDR119W | 0     | #N/A               | iYDR118W   | 0.33  | 1.04 | 0.47 |
| YDR120C | TRM1  |                    | 0 iYDR120C | #N/A  | 1.80 | 0.75 |
| YDR121W | DPB4  |                    | 0 iYDR120C | #N/A  | 1.80 | 0.75 |
| YDR122W | KIN1  |                    | 0 iYDR121W | 0.71  | 2.00 | 0.82 |
| YDR123C | INO2  | DIE1 SCS1          | iYDR123C   | #N/A  | 1.00 | 0.46 |
| YDR124W | 0     | #N/A               | iYDR123C   | 1.82  | 1.00 | 0.46 |
| YDR125C | ECM18 |                    | 0 iYDR125C | 1.43  | 1.27 | 0.57 |
| YDR126W | PSL10 | PSL10              | iYDR125C   | 1.31  | 1.27 | 0.57 |
| YDR127W | ARO1  |                    | 0 iYDR126W | 0.48  | 0.60 | 0.29 |
| YDR128W | 0     | #N/A               | iYDR127W   | #N/A  | 0.60 | 0.26 |
| YDR129C | SAC6  | ABP67              | iYDR129C   | 0.47  | 1.20 | 0.55 |
| YDR130C | FIN1  |                    | 0 iYDR130C | #N/A  | 3.60 | 0.99 |
| YDR131C | 0     | #N/A               | iYDR131C   | 0.51  | #N/A | #N/A |
| YDR132C | 0     | #N/A               | iYDR132C   | 0.22  | #N/A | #N/A |
| YDR133C | 0     | #N/A               | iYDR134C   | 1.53  | 0.26 | 0.06 |
| YDR134C | 0     | #N/A               | iYDR134C   | 1.54  | 0.26 | 0.06 |
| YDR135C | YCF1  |                    | 0 iYDR135C | -0.32 | 2.16 | 0.84 |
| YDR136C | VPS61 |                    | 0 iYDR137W | #N/A  | 2.68 | 0.93 |
| YDR137W | RGP1  |                    | 0 iYDR135C | #N/A  | 2.16 | 0.84 |
| YDR138W | HPR1  |                    | 0 iYDR137W | #N/A  | 2.68 | 0.93 |
| YDR139C | RUB1  |                    | 0 iYDR139C | #N/A  | 1.68 | 0.72 |
| YDR140W | FYV9  | #N/A               | iYDR139C   | #N/A  | 1.68 | 0.72 |
| YDR141C | DOP1  |                    | 0 iYDR141C | #N/A  | 1.91 | 0.80 |
| YDR142C | PEX7  | PAS7 PEB1          | iYDR142C   | -0.99 | 1.02 | 0.48 |
| YDR143C | SAN1  |                    | 0 iYDR143C | -0.53 | 1.59 | 0.71 |
| YDR144C | MKC7  | YPS2               | iYDR144C   | -1.96 | 2.50 | 0.91 |
| YDR145W | TAF12 | TAF61 TAF68 TafII6 | iYDR144C   | -0.10 | 2.50 | 0.91 |
| YDR146C | SWI5  |                    | 0 iYDR146C | -2.01 | 1.07 | 0.49 |
| YDR147W | EKI1  |                    | 0 iYDR146C | 0.06  | 1.07 | 0.49 |
| YDR148C | KGD2  |                    | 0 iYDR148C | 0.68  | 2.54 | 0.91 |
| YDR149C | 0     | #N/A               | iYDR150W   | #N/A  | 0.61 | 0.28 |
| YDR150W | NUM1  | PAC12              | iYDR148C   | #N/A  | 2.54 | 0.91 |
| YDR151C | CTH1  |                    | 0 iYDR151C | 1.32  | 1.14 | 0.53 |
| YDR152W | 0     |                    | 0 iYDR151C | -0.25 | 1.14 | 0.53 |
| YDR153C | 0     |                    | 0 iYDR153C | -0.35 | 0.38 | 0.13 |
| YDR154C | 0     | #N/A               | iYDR155C   | 0.03  | 0.33 | 0.11 |
| YDR155C | CPR1  | CPH1 CYP1          | iYDR155C   | -0.10 | 0.33 | 0.11 |
| YDR156W | RPA14 |                    | 0 iYDR155C | -1.39 | 0.33 | 0.11 |
| YDR157W | 0     | #N/A               | iYDR155C   | -0.98 | 0.33 | 0.11 |
| YDR158W | HOM2  |                    | 0 iYDR155C | 0.75  | 0.33 | 0.11 |
| YDR159W | SAC3  | LEP1               | iYDR158W   | #N/A  | 2.78 | 0.95 |
| YDR160W | SSY1  | SHR10              | iYDR159W   | 0.87  | 2.21 | 0.86 |
| YDR161W | TCI1  | #N/A               | iYDR160W   | -1.62 | 1.82 | 0.78 |
| YDR162C | NBP2  |                    | 0 iYDR162C | -0.44 | 1.95 | 0.80 |
| YDR163W | CWC15 |                    | 0 iYDR162C | -0.09 | 1.95 | 0.80 |
| YDR164C | SEC1  |                    | 0 iYDR164C | -2.84 | 2.75 | 0.94 |
| YDR165W | TRM82 |                    | 0 iYDR164C | -0.48 | 2.75 | 0.94 |
| YDR166C | SEC5  |                    | 0 iYDR166C | -0.26 | 2.31 | 0.89 |

|           |        |                    |             |       |      |      |
|-----------|--------|--------------------|-------------|-------|------|------|
| YDR167W   | TAF10  | TAF23 TAF25 TafII2 | iYDR166C    | -0.67 | 2.31 | 0.89 |
| YDR168W   | CDC37  | SMO1               | iYDR167W    | -0.12 | 1.93 | 0.80 |
| YDR169C   | STB3   |                    | 0 iYDR169C- | -0.38 | 1.91 | 0.80 |
| YDR170C   | SEC7   |                    | 0 iYDR170C  | -0.60 | 1.34 | 0.60 |
| YDR171W   | HSP42  |                    | 0 iYDR170W- | 2.72  | #N/A | #N/A |
| YDR172W   | SUP35  | GST1 PNM2 SAL3 S   | iYDR171W    | -0.84 | 1.80 | 0.76 |
| YDR173C   | ARG82  | ARGR3 IPK2         | iYDR173C    | 0.73  | 0.89 | 0.41 |
| YDR174W   | HMO1   | HSM2               | iYDR173C    | -0.16 | 0.89 | 0.41 |
| YDR175C   | RSM24  |                    | 0 iYDR175C  | -0.12 | 1.52 | 0.67 |
| YDR176W   | NGG1   | ADA3 SWI7          | iYDR175C    | -0.55 | 1.52 | 0.67 |
| YDR177W   | UBC1   |                    | 0 iYDR176W  | -0.21 | #N/A | #N/A |
| YDR178W   | SDH4   | ACN18              | iYDR177W    | 2.14  | 2.23 | 0.87 |
| YDR179C   | 0      |                    | 0 iYDR179C  | #N/A  | 1.24 | 0.57 |
| YDR179W-A | 0      | #N/A               | iYDR179C    | #N/A  | 1.24 | 0.57 |
| YDR180W   | SCC2   |                    | 0 iYDR179W- | -1.40 | 2.87 | 0.95 |
| YDR181C   | SAS4   |                    | 0 iYDR181C  | 0.17  | 3.07 | 0.96 |
| YDR182W   | CDC1   | DSC1 DSR1 ESP2     | iYDR181C    | -0.12 | 3.07 | 0.96 |
| YDR183W   | PLP1   |                    | 0 iYDR182W  | #N/A  | 1.55 | 0.68 |
| YDR184C   | ATC1   | LIC4               | iYDR184C    | -1.03 | 1.43 | 0.65 |
| YDR185C   | 0      | #N/A               | iYDR185C    | 1.01  | 1.03 | 0.48 |
| YDR186C   | 0      | #N/A               | iYDR186C    | 0.22  | 0.57 | 0.26 |
| YDR187C   | 0      | #N/A               | iYDR188W    | -0.34 | 1.57 | 0.70 |
| YDR188W   | CCT6   | HTR3 TCP20 TCP6    | iYDR186C    | -0.23 | 0.57 | 0.26 |
| YDR189W   | SLY1   |                    | 0 iYDR188W  | -0.18 | 1.57 | 0.70 |
| YDR190C   | RVB1   | TIH1 TIP49A        | iYDR190C    | -0.63 | 1.80 | 0.76 |
| YDR191W   | HST4   |                    | 0 iYDR190C  | -0.01 | 1.80 | 0.76 |
| YDR192C   | NUP42  | RIP1 UIP1          | iYDR193W    | -0.46 | 1.36 | 0.62 |
| YDR193W   | 0      | #N/A               | iYDR191W    | #N/A  | #N/A | #N/A |
| YDR194C   | MSS116 |                    | 0 iYDR194C  | -0.44 | #N/A | #N/A |
| YDR195W   | REF2   |                    | 0 iYDR194C  | 0.35  | #N/A | #N/A |
| YDR196C   | 0      | #N/A               | iYDR196C    | 0.00  | 2.02 | 0.81 |
| YDR197W   | CBS2   | CBP7               | iYDR196C    | 1.55  | 2.02 | 0.81 |
| YDR198C   | 0      | #N/A               | iYDR198C    | -0.28 | 1.08 | 0.49 |
| YDR199W   | 0      | #N/A               | iYDR198C    | #N/A  | 1.08 | 0.49 |
| YDR200C   | VPS64  | FAR9               | iYDR200C    | -0.09 | 2.31 | 0.88 |
| YDR201W   | SPC19  |                    | 0 iYDR200C  | -0.96 | 2.31 | 0.88 |
| YDR202C   | RAV2   |                    | 0 iYDR203W  | 0.10  | #N/A | #N/A |
| YDR203W   | 0      | #N/A               | iYDR201W    | #N/A  | #N/A | #N/A |
| YDR204W   | COQ4   |                    | 0 iYDR203W  | 0.50  | #N/A | #N/A |
| YDR205W   | MSC2   |                    | 0 iYDR204W  | 0.17  | 2.54 | 0.92 |
| YDR206W   | EBS1   |                    | 0 iYDR205W  | 0.30  | 2.06 | 0.84 |
| YDR207C   | UME6   | CAR80 NIM2 RIM16   | iYDR207C    | -0.80 | 2.16 | 0.86 |
| YDR208W   | MSS4   |                    | 0 iYDR207C  | 0.28  | 2.16 | 0.86 |
| YDR209C   | 0      | #N/A               | iYDR210W    | #N/A  | 0.94 | 0.45 |
| YDR210W   | 0      | #N/A               | iYDR208W    | #N/A  | #N/A | #N/A |
| YDR211W   | GCD6   |                    | 0 itl(UAU)D | 0.10  | 1.33 | 0.59 |
| YDR212W   | TCP1   | CCT1               | iYDR211W    | -0.67 | 2.18 | 0.86 |
| YDR213W   | UPC2   | MOX4               | iYDR212W    | -0.83 | 1.60 | 0.71 |
| YDR214W   | AHA1   |                    | 0 iYDR213W  | -0.13 | 1.03 | 0.47 |
| YDR215C   | 0      | #N/A               | iYDR215C    | 2.67  | #N/A | #N/A |
| YDR216W   | ADR1   |                    | 0 iYDR215C  | 1.34  | #N/A | #N/A |



|         |       |                 |      |            |            |       |      |      |
|---------|-------|-----------------|------|------------|------------|-------|------|------|
| YDR217C | RAD9  |                 | 0    | iYDR217C   | -1.64      | #N/A  | #N/A |      |
| YDR218C | SPR28 |                 | 0    | iYDR218C   | #N/A       | 0.67  | 0.32 |      |
| YDR219C |       | 0               | #N/A | iYDR219C   | -0.05      | #N/A  | #N/A |      |
| YDR220C |       | 0               | #N/A | iYDR221W   | #N/A       | 0.57  | 0.24 |      |
| YDR221W |       | 0               | #N/A | iYDR219C   | -0.56      | #N/A  | #N/A |      |
| YDR222W |       | 0               | #N/A | iYDR221W   | 0.99       | 0.57  | 0.24 |      |
| YDR223W |       | 0               | #N/A | iYDR222W   | 0.96       | 1.65  | 0.71 |      |
| YDR224C | HTB1  | SPT12           |      | iYDR224C   | -0.69      | 0.60  | 0.26 |      |
| YDR225W | HTA1  | H2A1 SPT11      |      | iYDR224C   | 0.39       | 0.60  | 0.26 |      |
| YDR226W | ADK1  | AKY1 AKY2       |      | iYDR225W   | -0.58      | 0.64  | 0.29 |      |
| YDR227W | SIR4  | ASD1 STE9 UTH2  |      | iYDR226W   | -3.64      | 1.26  | 0.58 |      |
| YDR228C | PCF11 |                 | 0    | iYDR228C   | 0.79       | 1.86  | 0.77 |      |
| YDR229W |       |                 | 0    | iYDR228C   | 0.53       | 1.86  | 0.77 |      |
| YDR230W |       |                 | 0    | #N/A       | iYDR229W   | #N/A  | 0.53 | 0.21 |
| YDR231C | COX20 |                 |      | 0          | iYDR231C   | #N/A  | 1.14 | 0.52 |
| YDR232W | HEM1  | CYD1            |      | iYDR231C   | -0.43      | 1.14  | 0.52 |      |
| YDR233C |       |                 | 0    | 0          | iYDR233C   | 0.66  | 0.41 | 0.14 |
| YDR234W | LYS4  | LYS3            |      | iYDR233C   | -3.92      | 0.41  | 0.14 |      |
| YDR235W | PRP42 | MUD16 SNU65     |      | iYDR234W   | -0.15      | 1.73  | 0.75 |      |
| YDR236C | FMN1  |                 | 0    | iYDR236C   | 1.26       | 2.69  | 0.93 |      |
| YDR237W | MRPL7 | YmL5/7          |      | iYDR236C   | -0.28      | 2.69  | 0.93 |      |
| YDR238C | SEC26 |                 | 0    | iYDR238C   | -0.05      | 2.01  | 0.82 |      |
| YDR239C |       |                 | 0    | #N/A       | iYDR239C   | -0.14 | 2.35 | 0.89 |
| YDR240C | SNU56 | MUD10           |      | YDRWdelta  | #N/A       | #N/A  | #N/A |      |
| YDR241W | BUD26 |                 | 0    | iYDR239C   | #N/A       | 2.35  | 0.89 |      |
| YDR242W | AMD2  |                 | 0    | itY(GUA)D  | 0.09       | 0.83  | 0.38 |      |
| YDR243C | PRP28 |                 | 0    | iYDR243C   | #N/A       | 1.45  | 0.64 |      |
| YDR244W | PEX5  | PAS10           |      | iYDR243C   | 0.94       | 1.45  | 0.64 |      |
| YDR245W | MNN10 | BED1 REC41 SLC2 |      | iYDR244W   | -0.15      | 1.10  | 0.50 |      |
| YDR246W | TRS23 |                 | 0    | iYDR245W   | 0.82       | 1.20  | 0.54 |      |
| YDR247W |       |                 | 0    | 0          | iYDR246W   | #N/A  | 1.03 | 0.48 |
| YDR248C |       |                 | 0    | #N/A       | iYDR248C   | #N/A  | 1.05 | 0.48 |
| YDR249C |       |                 | 0    | #N/A       | iYDR249C   | 1.33  | 1.57 | 0.69 |
| YDR250C |       |                 | 0    | #N/A       | iYDR250C   | #N/A  | 1.04 | 0.47 |
| YDR251W | PAM1  |                 | 0    | iYDR250C   | 0.09       | 1.04  | 0.47 |      |
| YDR252W | BTT1  |                 | 0    | iYDR251W   | #N/A       | #N/A  | #N/A |      |
| YDR253C | MET32 |                 | 0    | iYDR253C   | 1.11       | 1.95  | 0.80 |      |
| YDR254W | CHL4  | CTF17 MCM17     |      | iYDR253C   | #N/A       | 1.95  | 0.80 |      |
| YDR255C |       |                 | 0    | GID2       | iYDR255C   | 0.81  | #N/A | #N/A |
| YDR256C | CTA1  |                 | 0    | iYDR256C   | 1.31       | 0.31  | 0.08 |      |
| YDR257C | RMS1  | RMS1            |      | iYDR257C   | #N/A       | 1.24  | 0.57 |      |
| YDR258C | HSP78 |                 | 0    | iYDR258C   | 3.04       | 1.15  | 0.54 |      |
| YDR259C | YAP6  | HAL7            |      | iYDR259C   | #N/A       | 0.39  | 0.16 |      |
| YDR260C | SWM1  |                 | 0    | iYDR260C   | #N/A       | 2.54  | 0.91 |      |
| YDR261C | EXG2  |                 | 0    | iYDR261C-C | -0.06      | 1.52  | 0.68 |      |
| YDR262W |       |                 | 0    | #N/A       | itG(GCC)D2 | 0.94  | 1.37 | 0.62 |
| YDR263C | DIN7  | DIN3            |      | iYDR263C   | 1.09       | 0.56  | 0.26 |      |
| YDR264C | AKR1  |                 | 0    | iYDR264C   | #N/A       | 1.97  | 0.80 |      |
| YDR265W | PEX10 | PAS4            |      | iYDR264C   | #N/A       | 1.97  | 0.80 |      |
| YDR266C |       |                 | 0    | #N/A       | iYDR266C   | -0.83 | #N/A | #N/A |
| YDR267C |       |                 | 0    | #N/A       | iYDR267C   | 0.25  | 2.11 | 0.83 |

|         |        |                  |   |            |       |      |      |
|---------|--------|------------------|---|------------|-------|------|------|
| YDR268W | MSW1   |                  | 0 | iYDR267C   | -0.72 | 2.11 | 0.83 |
| YDR269C | 0      | #N/A             |   | iYDR271C   | #N/A  | #N/A | #N/A |
| YDR270W | CCC2   |                  | 0 | iYDR268W   | 0.02  | 1.16 | 0.53 |
| YDR271C | 0      | #N/A             |   | iYDR271C   | -0.06 | #N/A | #N/A |
| YDR272W | GLO2   |                  | 0 | iYDR271C   | #N/A  | #N/A | #N/A |
| YDR273W | DON1   |                  | 0 | iYDR272W   | 2.55  | 1.08 | 0.50 |
| YDR274C | 0      | #N/A             |   | iYDR274C   | 2.14  | 0.55 | 0.23 |
| YDR275W | 0      |                  | 0 | iYDR274C   | #N/A  | 0.55 | 0.23 |
| YDR276C | PMP3   | SNA1             |   | iYDR276C   | 0.95  | 0.44 | 0.19 |
| YDR277C | MTH1   | BPC1 DGT1 HTR1   |   | iYDR277C   | 0.18  | 0.58 | 0.24 |
| YDR278C | 0      | #N/A             |   | itE(CUC)D- | #N/A  | #N/A | #N/A |
| YDR279W | 0      | Rnh2B            |   | itE(CUC)D- | -1.31 | 1.52 | 0.66 |
| YDR280W | RRP45  |                  | 0 | iYDR279W   | 0.05  | 2.53 | 0.91 |
| YDR281C | PHM6   |                  | 0 | iYDR281C   | #N/A  | 1.49 | 0.65 |
| YDR282C | 0      | #N/A             |   | iYDR282C   | 0.88  | 1.94 | 0.80 |
| YDR283C | GCN2   | AAS1             |   | iYDR283C   | 0.23  | 2.54 | 0.92 |
| YDR284C | DPP1   | ZRG1             |   | iYDR284C   | 1.14  | 1.16 | 0.52 |
| YDR285W | ZIP1   |                  | 0 | iYDR284C   | #N/A  | 1.16 | 0.52 |
| YDR286C | 0      | #N/A             |   | iYDR286C   | #N/A  | 2.65 | 0.93 |
| YDR287W | 0      | #N/A             |   | iYDR286C   | 0.66  | 2.65 | 0.93 |
| YDR288W | 0      |                  | 0 | iYDR287W   | 2.06  | 1.96 | 0.81 |
| YDR289C | RTT103 |                  | 0 | iYDR291W   | #N/A  | #N/A | #N/A |
| YDR290W | 0      | #N/A             |   | iYDR288W   | #N/A  | 0.34 | 0.10 |
| YDR291W | 0      | #N/A             |   | iYDR288W   | 0.18  | 0.34 | 0.10 |
| YDR292C | SRP101 |                  | 0 | iYDR292C   | -0.40 | 0.74 | 0.34 |
| YDR293C | SSD1   | CLA1 MCS1 RLT1 S |   | iYDR293C   | 0.85  | #N/A | #N/A |
| YDR294C | DPL1   | BST1             |   | iYDR294C   | 0.26  | 1.39 | 0.63 |
| YDR295C | PLO2   | PLO2             |   | iYDR295C   | 0.20  | 1.45 | 0.64 |
| YDR296W | MHR1   | XTC1             |   | iYDR295C   | -0.17 | 1.45 | 0.64 |
| YDR297W | SUR2   | SYR2             |   | iYDR296W   | -0.22 | 0.74 | 0.34 |
| YDR298C | ATP5   | OSC1             |   | iYDR298C   | 1.30  | 2.04 | 0.83 |
| YDR299W | BFR2   |                  | 0 | iYDR298C   | #N/A  | 2.04 | 0.83 |
| YDR300C | PRO1   |                  | 0 | iYDR300C   | 0.19  | 3.32 | 0.97 |
| YDR301W | CFT1   | YHH1             |   | iYDR300C   | -1.10 | 3.32 | 0.97 |
| YDR302W | GPI11  |                  | 0 | iYDR301W   | 0.35  | 1.88 | 0.78 |
| YDR303C | RSC3   |                  | 0 | iYDR303C   | #N/A  | 2.52 | 0.91 |
| YDR304C | CPR5   | CYP5             |   | iYDR304C   | 0.45  | 1.26 | 0.57 |
| YDR305C | HNT2   | APH1             |   | iYDR305C   | 2.27  | #N/A | #N/A |
| YDR306C | 0      | #N/A             |   | iYDR306C   | 1.22  | 1.81 | 0.76 |
| YDR307W | 0      | #N/A             |   | itV(CAC)D  | 0.65  | 1.12 | 0.51 |
| YDR308C | SRB7   |                  | 0 | iYDR308C   | #N/A  | #N/A | #N/A |
| YDR309C | GIC2   |                  | 0 | iYDR309C   | -0.34 | 0.34 | 0.10 |
| YDR310C | SUM1   |                  | 0 | iYDR310C   | #N/A  | 1.59 | 0.69 |
| YDR311W | TFB1   |                  | 0 | iYDR310C   | -0.09 | 1.59 | 0.69 |
| YDR312W | SSF2   |                  | 0 | iYDR311W   | #N/A  | 2.56 | 0.92 |
| YDR313C | PIB1   |                  | 0 | iYDR313C   | #N/A  | 1.59 | 0.69 |
| YDR314C | 0      | #N/A             |   | iYDR314C   | #N/A  | 2.19 | 0.86 |
| YDR315C | IPK1   | GSL1             |   | iYDR315C   | #N/A  | 1.76 | 0.76 |
| YDR316W | 0      |                  | 0 | iYDR315C   | 0.06  | 1.76 | 0.76 |
| YDR317W | 0      | #N/A             |   | iYDRWdelta | 1.42  | 0.82 | 0.39 |
| YDR318W | MCM21  | CTF5             |   | iYDR317W   | #N/A  | 1.33 | 0.61 |



|         |        |                  |              |       |      |      |
|---------|--------|------------------|--------------|-------|------|------|
| YDR319C | 0      | #N/A             | iYDR319C     | 1.48  | 0.84 | 0.40 |
| YDR320C | SWA2   | AUX1 BUD24       | iYDR320C     | -0.12 | 2.02 | 0.81 |
| YDR321W | ASP1   |                  | 0 iYDR320C   | -0.61 | 2.02 | 0.81 |
| YDR322W | MRPL35 | YmL35            | iYDR321W     | 0.76  | 1.65 | 0.71 |
| YDR323C | PEP7   | VAC1 VPL21 VPS19 | iYDR323C     | 0.04  | 1.57 | 0.70 |
| YDR324C | UTP4   |                  | 0 iYDR324C   | -1.22 | #N/A | #N/A |
| YDR325W | YCG1   | TIE1 YCS5        | iYDR324C     | -1.44 | #N/A | #N/A |
| YDR326C | 0      | #N/A             | iYDR326C     | -1.20 | 3.75 | 0.99 |
| YDR327W | 0      | #N/A             | iYDR326C     | 0.00  | 3.75 | 0.99 |
| YDR328C | SKP1   | CBF3D MGO1       | iYDR328C     | -0.46 | 3.06 | 0.97 |
| YDR329C | PEX3   | PAS3             | iYDR329C     | 0.36  | 3.05 | 0.96 |
| YDR330W | 0      |                  | 0 iYDR329C   | -0.35 | 3.05 | 0.96 |
| YDR331W | GPI8   |                  | 0 iYDR330W   | 0.24  | 2.23 | 0.86 |
| YDR332W | 0      | #N/A             | iYDR331W     | 0.13  | #N/A | #N/A |
| YDR333C | 0      | #N/A             | iYDR333C     | 0.30  | 1.03 | 0.47 |
| YDR334W | SWR1   |                  | 0 iYDR333C   | -0.34 | 1.03 | 0.47 |
| YDR335W | MSN5   | KAP142 STE21     | iYDR334W     | -0.29 | #N/A | #N/A |
| YDR336W | 0      | #N/A             | iYDR335W     | 0.19  | 1.18 | 0.54 |
| YDR337W | MRPS28 |                  | 0 iYDR336W   | 0.53  | 2.55 | 0.91 |
| YDR338C | 0      | #N/A             | iYDR338C     | 1.04  | 2.22 | 0.86 |
| YDR339C | 0      | #N/A             | iYDR339C     | #N/A  | 0.84 | 0.38 |
| YDR340W | 0      | #N/A             | iYDR339C     | -1.34 | 0.84 | 0.38 |
| YDR341C | 0      | #N/A             | iYDR341C     | -0.13 | 1.35 | 0.61 |
| YDR342C | HXT7   |                  | 0 iYDR342C-C | 1.92  | #N/A | #N/A |
| YDR343C | HXT6   |                  | 0 iYDR343C   | 2.03  | 1.16 | 0.53 |
| YDR344C | 0      | #N/A             | iYDR344C     | 2.90  | 1.99 | 0.82 |
| YDR345C | HXT3   |                  | 0 iYDR345C-C | 2.00  | 0.37 | 0.11 |
| YDR346C | SGI1   |                  | 0 iYDR346C   | -0.53 | 1.96 | 0.81 |
| YDR347W | MRP1   |                  | 0 iYDR346C   | -0.16 | 1.96 | 0.81 |
| YDR348C | 0      | #N/A             | iYDR348C     | -0.18 | 1.06 | 0.48 |
| YDR349C | YPS7   |                  | 0 iYDR349C   | 0.28  | 1.99 | 0.82 |
| YDR350C | TCM10  | ATP22            | iYDR350C     | 1.47  | 2.18 | 0.86 |
| YDR351W | SBE2   |                  | 0 iYDR350C   | 0.19  | 2.18 | 0.86 |
| YDR352W | 0      | #N/A             | iYDR351W     | -0.89 | 1.00 | 0.46 |
| YDR353W | TRR1   |                  | 0 iYDR352W   | -0.48 | #N/A | #N/A |
| YDR354W | TRP4   |                  | 0 iYDR353W   | 0.78  | 0.79 | 0.38 |
| YDR355C | 0      | #N/A             | iYDR356W     | #N/A  | 0.52 | 0.21 |
| YDR356W | SPC110 | NUF1 XCM1        | iYDR354W     | -0.65 | 1.62 | 0.70 |
| YDR357C | 0      | #N/A             | iYDR357C     | #N/A  | #N/A | #N/A |
| YDR358W | GGA1   |                  | 0 iYDR357C   | 0.24  | #N/A | #N/A |
| YDR359C | VID21  | EAF1             | iYDR360W     | -0.45 | 1.00 | 0.46 |
| YDR360W | 0      | #N/A             | iYDR358W     | #N/A  | 0.30 | 0.07 |
| YDR361C | BCP1   |                  | 0 iYDR361C   | #N/A  | 1.31 | 0.60 |
| YDR362C | TFC6   |                  | 0 iYDR362C   | -0.03 | 2.53 | 0.92 |
| YDR363W | ESC2   |                  | 0 iYDR362C   | -1.23 | 2.53 | 0.92 |
| YDR364C | CDC40  | PRP17 SLT15 SLU4 | iYDR364C     | #N/A  | 1.47 | 0.66 |
| YDR365C | 0      |                  | 0 iYDR365C   | -1.25 | #N/A | #N/A |
| YDR366C | 0      | #N/A             | iYDR367W     | #N/A  | 1.89 | 0.79 |
| YDR367W | 0      | #N/A             | iYDR365C     | -0.08 | #N/A | #N/A |
| YDR368W | YPR1   |                  | 0 iYDR367W   | 0.52  | 1.89 | 0.79 |
| YDR369C | XRS2   |                  | 0 iYDR369C   | 0.17  | 0.53 | 0.25 |

|         |        |            |              |       |      |      |
|---------|--------|------------|--------------|-------|------|------|
| YDR370C | 0      | #N/A       | iYDR370C     | 0.50  | 2.35 | 0.89 |
| YDR371W | CTS2   |            | 0 iYDR370C   | 0.06  | 2.35 | 0.89 |
| YDR372C | VPS74  | API1       | iYDR372C     | #N/A  | 2.08 | 0.84 |
| YDR373W | FRQ1   |            | 0 iYDR372C   | 0.50  | 2.08 | 0.84 |
| YDR374C | 0      | #N/A       | iYDR374C     | #N/A  | 2.79 | 0.95 |
| YDR375C | BCS1   |            | 0 iYDR375C   | 0.19  | #N/A | #N/A |
| YDR376W | ARH1   |            | 0 iYDR375C   | -0.06 | #N/A | #N/A |
| YDR377W | ATP17  |            | 0 iYDR376W   | -1.03 | 1.00 | 0.45 |
| YDR378C | LSM6   |            | 0 iYDR378C   | -0.24 | 1.63 | 0.72 |
| YDR379W | RGA2   |            | 0 iYDR378C   | #N/A  | 1.63 | 0.72 |
| YDR380W | ARO10  |            | 0 iYDR379W   | 1.19  | 0.96 | 0.46 |
| YDR381W | YRA1   | SHE11      | iYDR380W     | 0.05  | 0.53 | 0.22 |
| YDR382W | RPP2B  | RPL45 YPA1 | iYDR381W     | -0.45 | #N/A | #N/A |
| YDR383C | NKP1   |            | 0 iYDR383C   | #N/A  | 0.70 | 0.32 |
| YDR384C | 0      |            | 0 iYDR384C   | -2.09 | 0.16 | 0.02 |
| YDR385W | EFT2   |            | 0 iYDR384C   | -0.82 | 0.16 | 0.02 |
| YDR386W | MUS81  | SLX3       | iYDR385W     | 0.02  | 0.68 | 0.33 |
| YDR387C | 0      | #N/A       | iYDR387C     | 1.89  | 2.13 | 0.85 |
| YDR388W | RVS167 |            | 0 iYDR387C   | -1.02 | 2.13 | 0.85 |
| YDR389W | SAC7   |            | 0 iYDR388W   | 0.34  | 0.60 | 0.28 |
| YDR390C | UBA2   | UAL1       | iYDR390C     | 0.17  | 1.96 | 0.81 |
| YDR391C | 0      | #N/A       | iYDR391C     | 2.22  | 2.29 | 0.88 |
| YDR392W | SPT3   |            | 0 iYDR391C   | #N/A  | 2.29 | 0.88 |
| YDR393W | SHE9   | MDM33      | iYDR392W     | -0.76 | #N/A | #N/A |
| YDR394W | RPT3   | YNT1 YTA2  | iYDR393W     | -0.59 | 1.84 | 0.77 |
| YDR395W | SXM1   | KAP108     | iYDR394W     | -1.02 | #N/A | #N/A |
| YDR396W | 0      | #N/A       | iYDR395W     | #N/A  | #N/A | #N/A |
| YDR397C | NCB2   | YDR1       | iYDR397C     | -0.08 | 1.41 | 0.63 |
| YDR398W | UTP5   |            | 0 iYDR397C   | -1.42 | 1.41 | 0.63 |
| YDR399W | HPT1   | BRA6       | iYDR398W     | -0.99 | 0.48 | 0.21 |
| YDR400W | URH1   |            | 0 iYDR399W   | -0.48 | #N/A | #N/A |
| YDR401W | 0      | #N/A       | iYDR400W     | #N/A  | #N/A | #N/A |
| YDR402C | DIT2   | CYP56      | iYDR402C     | #N/A  | 1.22 | 0.55 |
| YDR403W | DIT1   |            | 0 iYDR402C   | #N/A  | 1.22 | 0.55 |
| YDR404C | RPB7   |            | 0 iYDR404C   | #N/A  | 3.05 | 0.96 |
| YDR405W | MRP20  | MRPL41     | iYDR404C     | 0.62  | 3.05 | 0.96 |
| YDR406W | PDR15  |            | 0 iYDR405W   | 1.27  | 1.11 | 0.51 |
| YDR407C | TRS120 |            | 0 iYDR407C   | 0.33  | 2.35 | 0.89 |
| YDR408C | ADE8   |            | 0 iYDR408C   | -0.19 | 1.39 | 0.61 |
| YDR409W | SIZ1   | ULL1       | iYDR408C     | 1.31  | 1.39 | 0.61 |
| YDR410C | STE14  |            | 0 iYDR410C   | -0.21 | 1.91 | 0.80 |
| YDR411C | 0      |            | 0 iYDR411C   | #N/A  | 3.75 | 0.99 |
| YDR412W | 0      | #N/A       | iYDR411C     | -0.85 | 3.75 | 0.99 |
| YDR413C | 0      | #N/A       | iYDR413C     | -1.36 | 0.42 | 0.15 |
| YDR414C | ERD1   | LDB2       | iYDR414C     | 0.45  | 1.59 | 0.69 |
| YDR415C | 0      | #N/A       | iYDR415C     | -0.35 | 1.06 | 0.48 |
| YDR416W | SYF1   | NTC90      | iYDR415C     | -1.35 | 1.06 | 0.48 |
| YDR417C | 0      | #N/A       | iYDR418W     | -1.48 | 0.75 | 0.35 |
| YDR418W | RPL12B |            | 0 iYDR416W   | -1.45 | 0.40 | 0.15 |
| YDR419W | RAD30  | DBH1       | iYDR418W     | #N/A  | 0.75 | 0.35 |
| YDR420W | HKR1   |            | 0 itS(AGA)D3 | #N/A  | 0.43 | 0.19 |

|         |        |                  |      |          |            |       |      |      |
|---------|--------|------------------|------|----------|------------|-------|------|------|
| YDR421W | ARO80  |                  | 0    | iYDR420W | -1.08      | 1.47  | 0.66 |      |
| YDR422C | SIP1   |                  | 0    | iYDR422C | 0.22       | 1.81  | 0.77 |      |
| YDR423C | CAD1   | YAP2             |      | iYDR423C | -2.32      | 0.82  | 0.39 |      |
| YDR424C | DYN2   | SLC1             |      | iYDR424C | 0.68       | 1.93  | 0.79 |      |
| YDR425W |        | 0                |      | 0        | iYDR424C   | 1.28  | 1.93 | 0.79 |
| YDR426C |        | 0                | #N/A |          | iYDR426C   | #N/A  | 2.59 | 0.92 |
| YDR427W | RPN9   |                  |      | 0        | iYDR426C   | -0.14 | 2.59 | 0.92 |
| YDR428C |        | 0                | #N/A |          | iYDR428C   | 0.62  | #N/A | #N/A |
| YDR429C | TIF35  |                  |      | 0        | iYDR429C   | -0.58 | #N/A | #N/A |
| YDR430C | CYM1   |                  |      | 0        | iYDR431W   | #N/A  | #N/A | #N/A |
| YDR431W |        | 0                | #N/A |          | iYDR429C   | #N/A  | #N/A | #N/A |
| YDR432W | NPL3   | MTR13 MTS1 NAB1  |      |          | iYDR431W   | -0.91 | #N/A | #N/A |
| YDR433W | KRE22  |                  | #N/A |          | iYDR431W   | -0.94 | #N/A | #N/A |
| YDR434W | GPI17  |                  |      | 0        | iYDR433W   | -0.65 | 0.60 | 0.27 |
| YDR435C | PPM1   |                  |      | 0        | iYDR435C   | 1.12  | 2.15 | 0.85 |
| YDR436W | PPZ2   |                  |      | 0        | iYDR435C   | 1.15  | 2.15 | 0.85 |
| YDR437W |        | 0                | #N/A |          | iYDR436W   | #N/A  | 1.27 | 0.58 |
| YDR438W |        | 0                | #N/A |          | iYDR437W   | 1.34  | 1.03 | 0.47 |
| YDR439W | LRS4   |                  |      | 0        | iYDR438W   | 1.26  | 1.30 | 0.58 |
| YDR440W | DOT1   | PCH1             |      |          | iYDR439W   | -0.52 | 1.38 | 0.61 |
| YDR441C | APT2   |                  |      | 0        | iYDR441C   | 0.26  | 0.44 | 0.16 |
| YDR442W |        | 0                | #N/A |          | iYDR441C   | -0.94 | 0.44 | 0.16 |
| YDR443C | SSN2   | NUT8 RYE3 SCA1 S |      |          | iYDR443C   | #N/A  | 1.63 | 0.71 |
| YDR444W |        | 0                | #N/A |          | iYDR443C   | -1.11 | 1.63 | 0.71 |
| YDR445C |        | 0                | #N/A |          | itK(CUU)D2 | #N/A  | 0.23 | 0.04 |
| YDR446W | ECM11  |                  |      | 0        | iYDRWdelta | #N/A  | 2.75 | 0.94 |
| YDR447C | RPS17B | RP51B RPL51B     |      |          | iYDR447C   | -0.92 | #N/A | #N/A |
| YDR448W | ADA2   | SWI8             |      |          | iYDR447C   | -1.40 | #N/A | #N/A |
| YDR449C | UTP6   |                  |      | 0        | iYDR449C   | -0.74 | 0.82 | 0.37 |
| YDR450W | RPS18A |                  |      | 0        | iYDR449C   | -1.30 | 0.82 | 0.37 |
| YDR451C | YHP1   |                  |      | 0        | iYDR451C   | -0.46 | #N/A | #N/A |
| YDR452W | PPN1   | PHM5             |      |          | iYDR451C   | -0.35 | #N/A | #N/A |
| YDR453C | TSA2   | cTPxII           |      |          | iYDR453C   | 0.58  | 2.29 | 0.88 |
| YDR454C | GUK1   | PUR5             |      |          | iYDR454C   | #N/A  | 2.11 | 0.85 |
| YDR455C |        | 0                | #N/A |          | iYDR456W   | #N/A  | 1.71 | 0.74 |
| YDR456W | NHX1   | NHA2 VPS44       |      |          | iYDR454C   | 1.35  | 2.11 | 0.85 |
| YDR457W | TOM1   |                  |      | 0        | iYDR456W   | -0.70 | 1.71 | 0.74 |
| YDR458C |        | 0                | #N/A |          | iYDR458C   | 0.90  | 1.63 | 0.71 |
| YDR459C |        | 0                | #N/A |          | iYDR459C   | #N/A  | 1.93 | 0.80 |
| YDR460W | TFB3   | RIG2             |      |          | iYDR459C   | -1.07 | 1.93 | 0.80 |
| YDR461W | MFA1   |                  |      | 0        | iYDR460W   | #N/A  | #N/A | #N/A |
| YDR462W | MRPL28 |                  |      | 0        | iYDR461W   | #N/A  | #N/A | #N/A |
| YDR463W | STP1   | BAP1 SSY2        |      |          | iYDR462W   | -0.01 | #N/A | #N/A |
| YDR464W | SPP41  |                  |      | 0        | iYDR463W   | #N/A  | #N/A | #N/A |
| YDR465C | RMT2   |                  |      | 0        | iYDR465C   | -1.01 | 3.83 | 0.99 |
| YDR466W |        | 0                |      | 0        | iYDR465C   | 0.69  | 3.83 | 0.99 |
| YDR467C |        | 0                | #N/A |          | iYDR467C   | #N/A  | 0.26 | 0.05 |
| YDR468C | TLG1   |                  |      | 0        | iYDR468C   | -0.11 | 1.43 | 0.63 |
| YDR469W | SDC1   | CPS25 SAF19      |      |          | iYDR468C   | #N/A  | 1.43 | 0.63 |
| YDR470C | UGO1   |                  |      | 0        | iYDR470C   | -0.19 | 0.74 | 0.34 |
| YDR471W | RPL27B |                  |      | 0        | iYDR470C   | -1.12 | 0.74 | 0.34 |

|         |        |                  |   |            |          |       |      |
|---------|--------|------------------|---|------------|----------|-------|------|
| YDR472W | TRS31  |                  | 0 | iSNR13     | #N/A     | 1.01  | 0.46 |
| YDR473C | PRP3   | RNA3             |   | iYDR473C-C | #N/A     | 1.23  | 0.57 |
| YDR474C |        |                  | 0 | #N/A       | iYDR474C | 0.74  | 0.52 |
| YDR475C | JIP4   |                  |   | 0          | iYDR475C | #N/A  | 1.19 |
| YDR476C |        |                  | 0 | #N/A       | iYDR476C | -0.58 | 1.78 |
| YDR477W | SNF1   | CAT1 CCR1 GLC2 H |   | iYDR476C   | -0.69    | 1.78  | 0.76 |
| YDR478W | SNM1   |                  |   | 0          | iYDR477W | -0.67 | 1.71 |
| YDR479C |        |                  | 0 |            | iYDR479C | 0.88  | 1.91 |
| YDR480W | DIG2   | RST2             |   |            | iYDR479C | 0.51  | 1.91 |
| YDR481C | PHO8   |                  |   | 0          | iYDR481C | 0.52  | 1.32 |
| YDR482C | CWC21  |                  |   | 0          | iYDR482C | -0.56 | 1.55 |
| YDR483W | KRE2   | MNT1             |   |            | iYDR482C | 0.56  | 1.55 |
| YDR484W | SAC2   | SAC2             |   |            | iYDR483W | 0.09  | #N/A |
| YDR485C | VPS72  | SWC2             |   |            | iYDR485C | -0.24 | 1.37 |
| YDR486C | VPS60  | CHM5 MOS10       |   |            | iYDR486C | 0.53  | 0.93 |
| YDR487C | RIB3   |                  |   | 0          | iYDR487C | 0.10  | #N/A |
| YDR488C | PAC11  |                  |   | 0          | iYDR488C | -2.04 | #N/A |
| YDR489W |        |                  | 0 | CDC105     | iYDR488C | #N/A  | #N/A |
| YDR490C | PKH1   |                  |   | 0          | iYDR490C | 0.24  | 1.86 |
| YDR491C |        |                  | 0 | #N/A       | iYDR492W | #N/A  | 1.55 |
| YDR492W |        |                  | 0 |            | iYDR490C | 0.59  | 1.86 |
| YDR493W |        |                  | 0 |            | iYDR492W | #N/A  | 1.55 |
| YDR494W | RSM28  |                  |   | 0          | iYDR493W | 0.07  | 2.48 |
| YDR495C | VPS3   | PEP6 VPL3 VPT17  |   |            | iYDR495C | -0.29 | 0.80 |
| YDR496C | PUF6   |                  |   | 0          | iYDR496C | -0.76 | 1.40 |
| YDR497C | ITR1   |                  |   | 0          | iYDR497C | 0.87  | 1.32 |
| YDR498C | SEC20  |                  |   | 0          | iYDR498C | 0.75  | 1.71 |
| YDR499W | LCD1   | DDC2 PIE1        |   |            | iYDR498C | #N/A  | 1.71 |
| YDR500C | RPL37B |                  |   | 0          | iYDR500C | -0.67 | 0.38 |
| YDR501W | PLM2   |                  |   | 0          | iYDR500C | 0.15  | 0.38 |
| YDR502C | SAM2   | ETH2             |   |            | iYDR502C | -0.08 | #N/A |
| YDR503C | LPP1   |                  |   | 0          | iYDR503C | -0.18 | #N/A |
| YDR504C |        |                  | 0 |            | iYDR505C | 1.55  | 0.94 |
| YDR505C | PSP1   | GIN5             |   |            | iYDR505C | 0.87  | 0.94 |
| YDR506C |        |                  | 0 | #N/A       | iYDR506C | #N/A  | 1.73 |
| YDR507C | GIN4   | ERC47            |   |            | iYDR507C | #N/A  | 0.48 |
| YDR508C | GNP1   |                  |   | 0          | iYDR509W | 0.72  | 0.47 |
| YDR509W |        |                  | 0 | #N/A       | iYDR507C | #N/A  | 0.48 |
| YDR510W | SMT3   |                  |   | 0          | iYDR509W | 0.27  | 0.47 |
| YDR511W | ACN9   |                  |   | 0          | iYDR510W | #N/A  | 1.07 |
| YDR512C |        |                  | 0 |            | iYDR513W | 0.81  | #N/A |
| YDR513W | TTR1   | GRX2             |   |            | iYDR511W | #N/A  | #N/A |
| YDR514C |        |                  | 0 | #N/A       | iYDR514C | -0.08 | 1.69 |
| YDR515W | SLF1   | SRO99            |   |            | iYDR514C | #N/A  | 1.69 |
| YDR516C |        |                  | 0 |            | iYDR516C | 0.11  | 2.30 |
| YDR517W | GRH1   |                  |   | 0          | iYDR516C | -1.18 | 2.30 |
| YDR518W | EUG1   |                  |   | 0          | iYDR517W | -0.20 | 1.77 |
| YDR519W | FPR2   | FKB2             |   |            | iYDR518W | -0.08 | 1.94 |
| YDR520C |        |                  | 0 | #N/A       | iYDR521W | 1.39  | 3.75 |
| YDR521W |        |                  | 0 | #N/A       | iYDR519W | #N/A  | #N/A |
| YDR522C | SPS2   |                  |   | 0          | iYDR522C | #N/A  | #N/A |

|           |        |                |      |              |       |      |      |
|-----------|--------|----------------|------|--------------|-------|------|------|
| YDR523C   | SPS1   |                | 0    | iYDR523C     | #N/A  | #N/A | #N/A |
| YDR524C   | AGE1   | SAT1           |      | iYDR524C     | -0.47 | 0.44 | 0.19 |
| YDR525W   | API2   |                | 0    | iYDR524C     | #N/A  | 0.44 | 0.19 |
| YDR526C   |        | 0              | #N/A | iYDR527W-    | #N/A  | 1.36 | 0.62 |
| YDR527W   |        | 0              |      | 0 iYDR525W-  | -0.50 | 0.36 | 0.15 |
| YDR528W   | HLR1   |                |      | 0 iYDR527W-  | #N/A  | 1.34 | 0.60 |
| YDR529C   | QCR7   | COR4 CRO1 UCR7 |      | iYDR529C     | 2.60  | 1.41 | 0.62 |
| YDR530C   | APA2   |                | 0    | iYDR530C     | 1.78  | #N/A | #N/A |
| YDR531W   |        | 0              | #N/A | iYDR530C     | 1.21  | #N/A | #N/A |
| YDR532C   | KRE28  |                | #N/A | iYDR532C     | #N/A  | 1.24 | 0.56 |
| YDR533C   |        | 0              |      | 0 iYDR533C   | #N/A  | 0.90 | 0.41 |
| YDR534C   | FIT1   |                |      | 0 iYDR534C-  | #N/A  | 0.57 | 0.24 |
| YDR535C   |        | 0              | #N/A | iYDR535C     | #N/A  | 1.04 | 0.47 |
| YDR536W   | STL1   |                |      | 0 iYDR535C   | #N/A  | 1.04 | 0.47 |
| YDR537C   |        | 0              | #N/A | iYDR538W     | 1.10  | 1.04 | 0.49 |
| YDR538W   | PAD1   | POF1           |      | iYDR536W     | #N/A  | 1.43 | 0.63 |
| YDR539W   |        | 0              | #N/A | iYDR538W     | 0.19  | 1.04 | 0.49 |
| YDR540C   |        | 0              | #N/A | iYDR540C     | 0.57  | 1.80 | 0.76 |
| YDR541C   |        | 0              | #N/A | iYDR541C-    | 0.13  | 1.79 | 0.75 |
| YDR542W   |        | 0              | #N/A | iYDR541C-    | 1.56  | 0.87 | 0.41 |
| YDR543C   |        | 0              | #N/A | iYDR543C     | 0.69  | 0.35 | 0.12 |
| YDR544C   |        | 0              | #N/A | iYDR544C     | #N/A  | 0.58 | 0.25 |
| YDR545W   | YRF1-1 | YRF1           |      | iYDR544C     | 0.16  | 0.58 | 0.25 |
| YEL001C   |        | 0              | #N/A | iYEL001C     | 0.18  | 2.05 | 0.82 |
| YEL002C   | WBP1   |                |      | 0 iYEL002C   | 0.13  | #N/A | #N/A |
| YEL003W   | GIM4   | PFD2           |      | iYEL004W     | #N/A  | 1.90 | 0.79 |
| YEL004W   | YEA4   |                | 0    | iYEL005C     | 0.59  | 1.52 | 0.68 |
| YEL005C   | VAB2   | VAB31          |      | iYEL005C     | #N/A  | 1.52 | 0.68 |
| YEL006W   |        | 0              | #N/A | iYEL007W     | #N/A  | 0.75 | 0.34 |
| YEL007W   | TOS9   |                | #N/A | iYEL008W     | #N/A  | 0.11 | 0.01 |
| YEL008W   |        | 0              | #N/A | iYEL009C     | #N/A  | 0.42 | 0.15 |
| YEL009C   | GCN4   | AAS3 ARG9      |      | iYEL009C     | 0.70  | 0.42 | 0.15 |
| YEL010W   |        | 0              | #N/A | iYELCdelta4  | #N/A  | 1.33 | 0.59 |
| YEL011W   | GLC3   | GHA1           |      | iYEL012W     | 2.19  | 1.83 | 0.78 |
| YEL012W   | UBC8   | GID3           |      | itQ(UUG)E2   | 0.63  | 1.89 | 0.78 |
| YEL013W   | VAC8   | YEB3           |      | iYEL014C     | 0.77  | 2.00 | 0.81 |
| YEL014C   |        | 0              | #N/A | iYEL014C     | #N/A  | 2.00 | 0.81 |
| YEL015W   |        | 0              | DCP3 | iYEL016C     | -0.31 | #N/A | #N/A |
| YEL016C   |        | 0              | #N/A | iYEL016C     | 0.34  | #N/A | #N/A |
| YEL017C-A | PMP2   |                |      | 0 iYEL017C-A | 0.60  | 0.69 | 0.31 |
| YEL017W   |        | 0              |      | 0 iYEL017C-A | -0.24 | 0.69 | 0.31 |
| YEL018W   | EAF5   |                |      | 0 iYEL019C   | 0.11  | 1.80 | 0.75 |
| YEL019C   | MMS21  |                |      | 0 iYEL019C   | #N/A  | 1.80 | 0.75 |
| YEL020C   |        | 0              | #N/A | iYEL020C     | -0.08 | #N/A | #N/A |
| YEL021W   | URA3   |                |      | 0 iYEL022W   | 0.43  | 1.04 | 0.47 |
| YEL022W   | GEA2   |                |      | 0 iYEL023C   | #N/A  | 2.15 | 0.86 |
| YEL023C   |        | 0              | #N/A | iYEL023C     | #N/A  | 2.15 | 0.86 |
| YEL024W   | RIP1   |                |      | 0 iYEL025C   | 2.98  | 1.51 | 0.66 |
| YEL025C   | SRI1   |                | #N/A | iYEL025C     | 1.86  | 1.51 | 0.66 |
| YEL026W   | SNU13  |                |      | 0 iYEL027W   | -0.54 | 0.70 | 0.33 |
| YEL027W   | CUP5   | CLS7 GEF2 VMA3 |      | itM(CAU)E    | 1.35  | 0.54 | 0.24 |

|           |        |                |              |       |      |      |
|-----------|--------|----------------|--------------|-------|------|------|
| YEL028W   | 0      | #N/A           | iYEL029C     | 0.61  | 1.55 | 0.67 |
| YEL029C   | BUD16  |                | 0 iYEL029C   | 0.02  | 1.55 | 0.67 |
| YEL030W   | ECM10  | SSC3           | iYEL031W     | -0.26 | 1.29 | 0.58 |
| YEL031W   | SPF1   | COD1 PER9 PIO1 | iYEL032W     | -0.02 | 2.27 | 0.88 |
| YEL032W   | MCM3   |                | 0 itS(AGA)E  | #N/A  | #N/A | #N/A |
| YEL033W   | 0      | #N/A           | iYEL035C     | 0.98  | 0.27 | 0.07 |
| YEL034W   | HYP2   | TIF51A         | iYEL035C     | 0.83  | 0.27 | 0.07 |
| YEL035C   | UTR5   |                | 0 iYEL035C   | #N/A  | 0.27 | 0.07 |
| YEL036C   | ANP1   | GEM3 MNN8      | iYEL036C     | -0.92 | #N/A | #N/A |
| YEL037C   | RAD23  |                | 0 iYEL037C   | -0.14 | 0.99 | 0.45 |
| YEL038W   | UTR4   |                | 0 iYEL039C   | -0.42 | 2.64 | 0.93 |
| YEL039C   | CYC7   |                | 0 iYEL039C   | 4.65  | 2.64 | 0.93 |
| YEL040W   | UTR2   | CRH2           | iYEL041W     | -0.33 | 0.76 | 0.36 |
| YEL041W   | 0      | #N/A           | iYEL042W     | 0.58  | 1.17 | 0.54 |
| YEL042W   | GDA1   | GDPase         | iYEL043W     | -0.79 | #N/A | #N/A |
| YEL043W   | 0      | #N/A           | iYEL044W     | -0.59 | 2.81 | 0.94 |
| YEL044W   | IES6   |                | 0 iYEL045C   | -0.46 | 0.17 | 0.02 |
| YEL045C   | 0      | #N/A           | iYEL045C     | #N/A  | 0.17 | 0.02 |
| YEL046C   | GLY1   |                | 0 iYEL045C   | -1.19 | 0.17 | 0.02 |
| YEL047C   | 0      | #N/A           | iYEL047C     | 0.64  | 0.66 | 0.30 |
| YEL048C   | 0      | #N/A           | iYEL048C     | #N/A  | 1.03 | 0.48 |
| YEL049W   | PAU2   |                | 0 iYELWdelta | 1.73  | 1.16 | 0.53 |
| YEL050C   | RML2   |                | 0 iYEL050C   | #N/A  | 1.36 | 0.61 |
| YEL051W   | VMA8   |                | 0 iYEL052W   | 0.28  | 1.72 | 0.75 |
| YEL052W   | AFG1   |                | 0 iYEL053C   | 1.20  | #N/A | #N/A |
| YEL053C   | MAK10  |                | 0 iYEL053C   | -0.39 | #N/A | #N/A |
| YEL054C   | RPL12A |                | 0 iYEL054C   | -1.24 | 0.29 | 0.06 |
| YEL055C   | POL5   |                | 0 iYEL055C   | -0.73 | #N/A | #N/A |
| YEL056W   | HAT2   |                | 0 iYEL057C   | -0.84 | 1.55 | 0.69 |
| YEL057C   | 0      | #N/A           | iYEL057C     | 1.20  | 1.55 | 0.69 |
| YEL058W   | PCM1   | AGM1           | iYEL059W     | -0.13 | #N/A | #N/A |
| YEL059C-A | SOM1   |                | 0 iYEL059W   | #N/A  | #N/A | #N/A |
| YEL059W   | 0      | #N/A           | iYEL060C     | #N/A  | 1.33 | 0.60 |
| YEL060C   | PRB1   | CVT1 yscB      | iYEL060C     | 1.70  | 1.33 | 0.60 |
| YEL061C   | CIN8   | KSL2 SDS15     | iYEL061C     | #N/A  | 1.93 | 0.80 |
| YEL062W   | NPR2   |                | 0 iYEL063C   | 0.31  | 1.51 | 0.66 |
| YEL063C   | CAN1   |                | 0 iYEL063C   | 0.87  | 1.51 | 0.66 |
| YEL064C   | 0      |                | 0 iYEL064C   | 0.44  | #N/A | #N/A |
| YEL065W   | SIT1   | ARN3           | iYEL066W     | -1.38 | #N/A | #N/A |
| YEL066W   | HPA3   |                | 0 iYEL068C   | -2.50 | 0.98 | 0.44 |
| YEL067C   | 0      | #N/A           | iYEL066W     | #N/A  | #N/A | #N/A |
| YEL068C   | 0      | #N/A           | iYEL068C     | -0.74 | 0.98 | 0.44 |
| YEL069C   | HXT13  |                | 0 iYEL069C-0 | #N/A  | #N/A | #N/A |
| YEL070W   | 0      | #N/A           | iYEL071W-    | 0.25  | #N/A | #N/A |
| YEL071W   | DLD3   |                | 0 iYEL072W-  | 0.81  | #N/A | #N/A |
| YEL072W   | 0      |                | 0 iYEL073C-4 | 1.49  | 1.78 | 0.75 |
| YEL073C   | 0      | #N/A           | iYEL073C-0   | 3.46  | 0.94 | 0.43 |
| YEL074W   | 0      | #N/A           | iYEL075C     | 2.48  | 1.00 | 0.46 |
| YEL075C   | 0      | #N/A           | iYEL075C     | 0.85  | 1.00 | 0.46 |
| YEL076C   | 0      | #N/A           | iYEL075C     | -0.28 | 1.00 | 0.46 |
| YEL076C-A | 0      | #N/A           | iYEL075C     | -0.12 | 1.00 | 0.46 |



|           |       |          |              |       |      |      |
|-----------|-------|----------|--------------|-------|------|------|
| YEL076W-C | #N/A  | #N/A     | iYEL077C     | #N/A  | 0.79 | 0.36 |
| YEL077C   | 0     | #N/A     | iYEL077C     | 0.06  | 0.79 | 0.36 |
| YER001W   | MNN1  |          | 0 iCEN5      | -0.04 | 0.79 | 0.36 |
| YER002W   | NOP16 |          | 0 iYER001W   | -2.05 | #N/A | #N/A |
| YER003C   | PMI40 | PMI      | iYER003C     | -0.08 | 2.75 | 0.93 |
| YER004W   | 0     |          | 0 iYER003C   | 0.14  | 2.75 | 0.93 |
| YER005W   | YND1  | YEJ5     | iYER004W     | 0.33  | 1.38 | 0.63 |
| YER006W   | NUG1  |          | 0 iYER005W   | -1.11 | 1.58 | 0.69 |
| YER007C-A | 0     | #N/A     | iYER007C-A   | -1.02 | 0.99 | 0.45 |
| YER007W   | PAC2  |          | 0 iYER006W   | 0.04  | 0.87 | 0.40 |
| YER008C   | SEC3  | PSL1     | iYER008C     | -1.66 | 2.78 | 0.95 |
| YER009W   | NTF2  |          | 0 iYER008C   | -0.43 | 2.78 | 0.95 |
| YER010C   | 0     | #N/A     | iYER010C-C   | 0.62  | 1.43 | 0.65 |
| YER011W   | TIR1  | SRP1     | iYER010C-1   | #N/A  | 1.38 | 0.62 |
| YER012W   | PRE1  |          | 0 itE(UUC)E1 | 0.49  | 1.59 | 0.71 |
| YER013W   | PRP22 |          | 0 iYER012W   | #N/A  | 3.03 | 0.96 |
| YER014W   | HEM14 |          | 0 iYER013W   | 0.03  | #N/A | #N/A |
| YER015W   | FAA2  | FAM1     | iYER014W     | 0.68  | 2.48 | 0.91 |
| YER016W   | BIM1  | EB1 YEB1 | iYER015W     | 0.43  | 1.30 | 0.58 |
| YER017C   | AFG3  | YTA10    | iYER017C     | #N/A  | 1.93 | 0.79 |
| YER018C   | SPC25 |          | 0 iYER018C   | -1.69 | 1.78 | 0.77 |
| YER019C-A | SBH2  | SEB2     | iYER019C-A   | 0.02  | 1.84 | 0.76 |
| YER019W   | ISC1  |          | 0 iYER018C   | -0.29 | 1.78 | 0.77 |
| YER020W   | GPA2  | SSP101   | iYER019C-A   | 4.56  | 1.84 | 0.76 |
| YER021W   | RPN3  | SUN2     | iYER020W     | 0.31  | 0.93 | 0.42 |
| YER022W   | SRB4  |          | 0 iYER021W   | 0.35  | 1.72 | 0.73 |
| YER023W   | PRO3  | ORE2     | iYER022W     | -0.19 | 2.00 | 0.81 |
| YER024W   | YAT2  |          | 0 iYER023W   | 1.06  | 1.58 | 0.71 |
| YER025W   | GCD11 | SUI4     | iYER024W     | -0.33 | 2.58 | 0.92 |
| YER026C   | CHO1  | PSS1     | iYER026C     | 0.59  | 1.36 | 0.60 |
| YER027C   | GAL83 | SPM1     | iYER027C     | -0.22 | 2.37 | 0.89 |
| YER028C   | 0     |          | 0 iYER028C   | -0.08 | 0.53 | 0.22 |
| YER029C   | SMB1  | Sm B     | iYER029C     | -0.50 | #N/A | #N/A |
| YER030W   | 0     | #N/A     | iYER029C     | -0.66 | #N/A | #N/A |
| YER031C   | YPT31 | YPT8     | iYER031C     | -0.81 | 2.63 | 0.93 |
| YER032W   | FIR1  | PIP1     | iYER031C     | 0.53  | 2.63 | 0.93 |
| YER033C   | ZRG8  |          | 0 iYER033C   | 0.22  | 1.04 | 0.47 |
| YER034W   | 0     | #N/A     | iYER033C     | #N/A  | 1.04 | 0.47 |
| YER035W   | EDC2  |          | 0 iYER034W   | 1.17  | #N/A | #N/A |
| YER036C   | KRE30 | #N/A     | iYER036C     | -0.44 | 0.28 | 0.09 |
| YER037W   | PHM8  |          | 0 iYER036C   | 1.24  | 0.28 | 0.09 |
| YER038C   | KRE29 |          | 0 iYER038C   | 0.30  | #N/A | #N/A |
| YER039C   | HVG1  | YEM9     | iYER039C-A   | 3.03  | 3.14 | 0.97 |
| YER040W   | GLN3  |          | 0 iYER039C-A | 0.25  | 3.14 | 0.97 |
| YER041W   | YEN1  |          | 0 iYER040W   | 0.92  | 0.85 | 0.39 |
| YER042W   | MXR1  | MSRA     | iYER041W     | 0.11  | 1.23 | 0.57 |
| YER043C   | SAH1  |          | 0 iYER043C   | -0.24 | #N/A | #N/A |
| YER044C   | ERG28 | BUD18    | iYER044C     | 1.94  | 0.48 | 0.19 |
| YER044C-A | MEI4  |          | 0 iYER044C-A | #N/A  | #N/A | #N/A |
| YER045C   | ACA1  |          | 0 iYER045C-C | #N/A  | 0.61 | 0.29 |
| YER046W   | SPO73 |          | 0 iYER045C-1 | 3.16  | 1.06 | 0.50 |

|           |        |                 |      |              |       |      |      |
|-----------|--------|-----------------|------|--------------|-------|------|------|
| YER047C   | SAP1   |                 | 0    | iYER047C     | 0.18  | 1.75 | 0.76 |
| YER048C   | CAJ1   |                 | 0    | iYER048C     | 0.30  | 1.29 | 0.58 |
| YER049W   |        | 0               | #N/A | iYER048W-    | -0.23 | 1.03 | 0.47 |
| YER050C   | RSM18  |                 | 0    | iYER050C     | #N/A  | #N/A | #N/A |
| YER051W   |        | 0               | #N/A | iYER050C     | 0.48  | #N/A | #N/A |
| YER052C   | HOM3   | BOR1 SIL4       |      | iYER052C     | 1.82  | 0.65 | 0.30 |
| YER053C   |        | 0               |      | 0 iYER053C-C | 3.56  | 0.62 | 0.27 |
| YER054C   | GIP2   |                 | 0    | iYER054C     | 0.77  | 1.06 | 0.48 |
| YER055C   | HIS1   |                 | 0    | iYER055C     | 0.73  | 0.27 | 0.07 |
| YER056C   | FCY2   | BRA7            |      | iYER056C     | -0.34 | 0.20 | 0.03 |
| YER056C-A | RPL34A |                 | 0    | iYER056C-A   | -1.12 | 0.35 | 0.10 |
| YER057C   | HMF1   | HIG1            |      | iYER057C     | -0.40 | 1.92 | 0.79 |
| YER058W   | PET117 |                 | 0    | iYER057C     | -1.28 | 1.92 | 0.79 |
| YER059W   | PCL6   |                 | 0    | iYER058W     | 0.47  | 1.41 | 0.63 |
| YER060W   | FCY21  |                 | 0    | iYER059W     | -0.53 | 1.24 | 0.56 |
| YER060W-A | FCY22  |                 | 0    | iYER060W     | -1.30 | 0.45 | 0.16 |
| YER061C   | CEM1   |                 | 0    | iYER061C     | -1.01 | 1.12 | 0.51 |
| YER062C   | HOR2   | GPP2            |      | iYER062C     | #N/A  | 0.96 | 0.44 |
| YER063W   | THO1   |                 | 0    | iYER062C     | 0.47  | 0.96 | 0.44 |
| YER064C   |        | 0               | #N/A | iYER064C     | #N/A  | #N/A | #N/A |
| YER065C   | ICL1   |                 | 0    | iYER065C     | 1.21  | #N/A | #N/A |
| YER066C-A |        | 0               | #N/A | iYER067W     | 6.75  | 1.96 | 0.81 |
| YER066W   |        | 0               | #N/A | itS(UGA)E-   | 1.81  | 0.57 | 0.24 |
| YER067W   |        | 0               | #N/A | iYER066W     | #N/A  | 2.20 | 0.86 |
| YER068W   | MOT2   | NOT4 SIG1       |      | iYER067W     | 0.68  | 1.96 | 0.81 |
| YER069W   | ARG5,6 |                 | 0    | iYER068W     | 2.10  | 0.27 | 0.09 |
| YER070W   | RNR1   | CRT7 RIR1 SDS12 |      | iYER069W     | -1.70 | 1.52 | 0.68 |
| YER071C   |        | 0               | #N/A | iYER071C     | #N/A  | 1.28 | 0.57 |
| YER072W   | VTC1   | NRF1 PHM4       |      | iYER071C     | -0.10 | 1.28 | 0.57 |
| YER073W   | ALD5   |                 | 0    | iYER072W     | 0.73  | 0.19 | 0.04 |
| YER074W   | RPS24A | RPS24EA         |      | iYER073W     | -0.20 | 0.20 | 0.03 |
| YER075C   | PTP3   |                 | 0    | iYER075C     | -1.00 | 0.52 | 0.25 |
| YER076C   |        | 0               | #N/A | iYER076C     | 1.21  | 1.48 | 0.66 |
| YER077C   |        | 0               | #N/A | iYER077C     | 0.87  | #N/A | #N/A |
| YER078C   |        | 0               | #N/A | iYER078C     | 0.71  | 1.72 | 0.74 |
| YER079W   |        | 0               | #N/A | iYER078C     | -0.55 | 1.72 | 0.74 |
| YER080W   |        | 0               |      | 0 iYER079W   | -0.13 | 1.66 | 0.73 |
| YER081W   | SER3   |                 | 0    | iYER080W     | 0.55  | #N/A | #N/A |
| YER082C   | UTP7   | KRE31           |      | iYER082C     | -0.89 | 1.33 | 0.59 |
| YER083C   |        | 0               |      | 0 iYER084W   | -0.35 | 1.08 | 0.50 |
| YER084W   |        | 0               | #N/A | iYER082C     | #N/A  | 1.33 | 0.59 |
| YER085C   |        | 0               | #N/A | iYER085C     | #N/A  | #N/A | #N/A |
| YER086W   | ILV1   | ISO1            |      | iYER085C     | 0.47  | #N/A | #N/A |
| YER087C-A | #N/A   | #N/A            |      | iYER087C-A   | -0.14 | 2.43 | 0.90 |
| YER087W   |        | 0               | #N/A | iYER086W     | -0.16 | 1.27 | 0.59 |
| YER088C   | DOT6   |                 | 0    | iYER088C     | -0.34 | 0.52 | 0.21 |
| YER089C   | PTC2   |                 | 0    | iYER089C     | -1.28 | 1.13 | 0.51 |
| YER090W   | TRP2   |                 | 0    | iYER089C     | 1.13  | 1.13 | 0.51 |
| YER091C   | MET6   |                 | 0    | iYER091C     | -0.67 | #N/A | #N/A |
| YER092W   | IES5   |                 | 0    | iYER091C-A   | -0.34 | 0.61 | 0.27 |
| YER093C   |        | 0               | AVO3 | iYER093C     | 0.16  | 3.21 | 0.97 |



|           |        |                    |              |       |      |      |
|-----------|--------|--------------------|--------------|-------|------|------|
| YER093C-A | 0      | #N/A               | iYER093C-A   | 2.83  | #N/A | #N/A |
| YER094C   | PUP3   | SCS32              | iYER094C     | 0.11  | 1.43 | 0.65 |
| YER095W   | RAD51  | MUT5               | iYER094C     | 0.06  | 1.43 | 0.65 |
| YER096W   | SHC1   |                    | 0 iYER095W   | 2.90  | 0.51 | 0.21 |
| YER097W   | 0      | #N/A               | itE(UUC)E2   | #N/A  | 0.38 | 0.16 |
| YER098W   | UBP9   |                    | 0 itE(UUC)E2 | 1.86  | 0.38 | 0.16 |
| YER099C   | PRS2   |                    | 0 iYER099C   | -0.03 | 3.11 | 0.96 |
| YER100W   | UBC6   | DOA2               | iYER099C     | 0.17  | 3.11 | 0.96 |
| YER101C   | AST2   |                    | 0 iYER101C   | 1.42  | 1.07 | 0.49 |
| YER102W   | RPS8B  |                    | 0 iYER101C   | -1.17 | 1.07 | 0.49 |
| YER103W   | SSA4   |                    | 0 iYER102W   | 1.67  | 1.33 | 0.60 |
| YER104W   | RTT105 |                    | 0 iYER103W   | 1.35  | 3.01 | 0.96 |
| YER105C   | NUP157 |                    | 0 iYER105C   | -0.82 | 2.05 | 0.82 |
| YER106W   | MAM1   |                    | 0 iYER105C   | #N/A  | 2.05 | 0.82 |
| YER107C   | GLE2   | RAE1               | iYER107C     | 0.12  | 1.55 | 0.68 |
| YER108C   | #N/A   | #N/A               | #N/A         | -5.93 | #N/A | #N/A |
| YER109C   | FLO8   | PHD5               | iYER108C     | -0.78 | 0.37 | 0.11 |
| YER110C   | KAP123 | YRB4               | iYER110C     | -1.03 | #N/A | #N/A |
| YER111C   | SWI4   | ART1               | iYER111C     | #N/A  | #N/A | #N/A |
| YER112W   | LSM4   | SDB23 USS1         | iYER111C     | -0.03 | #N/A | #N/A |
| YER113C   | 0      | #N/A               | iYER113C     | 0.11  | 1.24 | 0.56 |
| YER114C   | BOI2   | BEB1               | iYER114C     | -2.07 | 1.55 | 0.69 |
| YER115C   | SPR6   |                    | 0 iYER115C   | #N/A  | 1.59 | 0.71 |
| YER116C   | SLX8   |                    | 0 iYER116C   | #N/A  | 1.09 | 0.49 |
| YER117W   | RPL23B |                    | 0 iYER116C   | -0.50 | 1.09 | 0.49 |
| YER118C   | SHO1   | SSU81              | iYER118C     | -0.49 | 1.91 | 0.80 |
| YER119C   | 0      |                    | 0 iYER120W   | 0.33  | 1.76 | 0.76 |
| YER119C-A | 0      | #N/A               | iYER120W     | #N/A  | 1.76 | 0.76 |
| YER120W   | SCS2   |                    | 0 iYER118C   | -0.50 | 1.91 | 0.80 |
| YER121W   | 0      | #N/A               | iYER120W     | #N/A  | 1.76 | 0.76 |
| YER122C   | GLO3   |                    | 0 iYER122C   | 0.11  | 2.46 | 0.91 |
| YER123W   | YCK3   | CKI3               | iYER122C     | -0.02 | 2.46 | 0.91 |
| YER124C   | DSE1   |                    | 0 iYER124C   | #N/A  | 2.19 | 0.86 |
| YER125W   | RSP5   | MDP1 MUT2 NPI1 S   | iYER124C     | 0.18  | 2.19 | 0.86 |
| YER126C   | NSA2   |                    | 0 iYER126C   | -0.66 | 1.59 | 0.69 |
| YER127W   | LCP5   |                    | 0 iYER126C   | -0.89 | 1.59 | 0.69 |
| YER128W   | 0      | #N/A               | iYER127W     | #N/A  | 1.83 | 0.76 |
| YER129W   | PAK1   |                    | 0 iYER128W   | #N/A  | 1.97 | 0.80 |
| YER130C   | 0      | #N/A               | iYER130C     | 0.94  | 0.58 | 0.26 |
| YER131W   | RPS26B |                    | 0 iYER130C   | #N/A  | 0.58 | 0.26 |
| YER132C   | PMD1   |                    | 0 iYER132C   | -3.25 | 0.80 | 0.36 |
| YER133W   | GLC7   | CID1 DIS2 DIS2S1 F | iYERCdelta   | 0.40  | 2.22 | 0.85 |
| YER134C   | 0      | #N/A               | iYER134C     | #N/A  | #N/A | #N/A |
| YER135C   | 0      | #N/A               | iYER135C     | #N/A  | 0.88 | 0.40 |
| YER136W   | GDI1   | SEC19              | itV(AAC)E1   | 0.46  | 0.69 | 0.31 |
| YER137C   | 0      | #N/A               | iSCR1        | -0.07 | 1.58 | 0.68 |
| YER138C   | #N/A   | #N/A               | YERWdelta    | -1.00 | 0.20 | 0.03 |
| YER139C   | 0      | #N/A               | iYER139C     | #N/A  | 1.75 | 0.74 |
| YER140W   | 0      | #N/A               | iYER139C     | 0.85  | 1.75 | 0.74 |
| YER141W   | COX15  |                    | 0 iYER140W   | 2.33  | 1.25 | 0.56 |
| YER142C   | MAG1   | MMS5               | iYER142C     | 2.20  | 1.81 | 0.76 |

|         |        |                  |                |       |      |      |
|---------|--------|------------------|----------------|-------|------|------|
| YER143W | DDI1   | VSM1             | iYER142C       | 1.52  | 1.81 | 0.76 |
| YER144C | UBP5   |                  | 0 iYER144C     | 1.45  | 1.68 | 0.72 |
| YER145C | FTR1   |                  | 0 iYER145C     | -1.89 | 0.82 | 0.37 |
| YER146W | LSM5   |                  | 0 iYER145C     | -1.35 | 0.82 | 0.37 |
| YER147C | SCC4   |                  | 0 iYER147C     | -0.54 | #N/A | #N/A |
| YER148W | SPT15  | BTF1 TBP TBP1    | iYER147C       | -0.23 | #N/A | #N/A |
| YER149C | PEA2   | DFG9 PPF2        | iYER149C       | -0.31 | 1.70 | 0.72 |
| YER150W | SPI1   |                  | 0 iYER149C     | 1.19  | 1.70 | 0.72 |
| YER151C | UBP3   |                  | 0 iYER151C     | -0.68 | 2.15 | 0.86 |
| YER152C | 0      | #N/A             | iYER153C       | -1.17 | 2.22 | 0.85 |
| YER153C | PET122 |                  | 0 iYER153C     | #N/A  | 2.22 | 0.85 |
| YER154W | OXA1   | PET1402          | iYER153C       | -1.72 | 2.22 | 0.85 |
| YER155C | BEM2   | IPL2 SUP9 TSL1   | iYER155C       | -0.24 | 0.76 | 0.34 |
| YER156C | 0      | #N/A             | iYER156C       | -0.78 | 2.63 | 0.93 |
| YER157W | SEC34  | GRD20 SEC34      | iYER156C       | 0.34  | 2.63 | 0.93 |
| YER158C | 0      | #N/A             | iYER158C       | 0.87  | 0.89 | 0.42 |
| YER159C | BUR6   | NCB1             | iYER159C       | 0.80  | 0.30 | 0.09 |
| YER160C | #N/A   | #N/A             | iYERCdelta     | -1.18 | 0.56 | 0.26 |
| YER161C | SPT2   | EXA1 SIN1        | iYER161C       | #N/A  | 2.36 | 0.88 |
| YER162C | RAD4   |                  | 0 iYER162C     | 1.26  | 1.95 | 0.80 |
| YER163C | 0      | #N/A             | iYER163C-C     | 0.14  | 0.91 | 0.43 |
| YER164W | CHD1   |                  | 0 iYER163C-1   | -1.85 | 0.65 | 0.29 |
| YER165W | PAB1   |                  | 0 iYER164W     | -1.20 | 0.66 | 0.30 |
| YER166W | DNF1   |                  | 0 iYER165W     | -0.45 | 1.37 | 0.61 |
| YER167W | BCK2   | CTR7             | iYER166W       | #N/A  | 0.75 | 0.34 |
| YER168C | CCA1   | TNT1             | iYER168C       | -0.94 | 1.45 | 0.64 |
| YER169W | RPH1   |                  | 0 iYER168C     | #N/A  | 1.45 | 0.64 |
| YER170W | ADK2   | AKY3 PAK3        | iYER169W       | -0.03 | 1.39 | 0.63 |
| YER171W | RAD3   | REM1             | iYER170W       | -0.24 | 1.93 | 0.80 |
| YER172C | BRR2   | PRP44 RSS1 SLT22 | iYER172C       | -1.16 | 3.28 | 0.98 |
| YER173W | RAD24  | RS1              | iYER172C       | 0.61  | 3.28 | 0.98 |
| YER174C | GRX4   |                  | 0 iYER174C     | #N/A  | 1.20 | 0.54 |
| YER175C | TMT1   | TAM1             | iYER175C       | #N/A  | 1.88 | 0.79 |
| YER176W | ECM32  | HEL1 MTT1        | iYER175C       | -0.43 | 1.88 | 0.79 |
| YER177W | BMH1   |                  | 38083 iYER176W | -0.28 | 0.20 | 0.03 |
| YER178W | PDA1   |                  | 0 iYER177W     | -0.09 | #N/A | #N/A |
| YER179W | DMC1   | ISC2             | iYER178W       | #N/A  | 0.41 | 0.14 |
| YER180C | ISC10  |                  | 0 iYER180C     | 1.34  | 1.02 | 0.47 |
| YER181C | 0      | #N/A             | iYER181C       | #N/A  | 0.51 | 0.20 |
| YER182W | 0      |                  | 0 iYERCdelta   | 0.78  | 2.36 | 0.90 |
| YER183C | FAU1   |                  | 0 iYER183C-C   | 0.72  | 0.88 | 0.41 |
| YER184C | 0      | #N/A             | iYER184C       | #N/A  | 2.61 | 0.93 |
| YER185W | 0      | #N/A             | iYER184C       | #N/A  | 2.61 | 0.93 |
| YER186C | 0      | #N/A             | iYER186C       | 0.92  | 2.33 | 0.89 |
| YER187W | 0      | #N/A             | iYERComeg      | 2.50  | 1.51 | 0.66 |
| YER188W | 0      | #N/A             | iYER187W       | 2.83  | 1.83 | 0.78 |
| YER189W | 0      | #N/A             | iYERWome       | 0.75  | #N/A | #N/A |
| YER190W | YRF1-2 | YRF1             | iYERWome       | 0.04  | #N/A | #N/A |
| YFL001W | DEG1   | PUS3             | iYFL002C       | 0.00  | 2.05 | 0.83 |
| YFL002C | SPB4   |                  | 0 iYFL002C     | -0.44 | 2.05 | 0.83 |
| YFL003C | MSH4   |                  | 0 iYFL003C     | #N/A  | #N/A | #N/A |

|           |       |                 |              |       |      |      |
|-----------|-------|-----------------|--------------|-------|------|------|
| YFL004W   | VTC2  | PHM1            | iYFL005W     | -0.45 | 1.13 | 0.52 |
| YFL005W   | SEC4  | SRO6            | iYFL006W     | 0.15  | 1.98 | 0.81 |
| YFL006W   | 0     | #N/A            | iYFL007W     | -0.76 | #N/A | #N/A |
| YFL007W   | BLM3  |                 | 0 iYFL008W   | -0.78 | 2.10 | 0.84 |
| YFL008W   | SMC1  | CHL10           | iYFL009W     | -1.47 | 2.88 | 0.95 |
| YFL009W   | CDC4  |                 | 0 iYFL010C   | 0.44  | 2.22 | 0.86 |
| YFL010C   | WWM1  |                 | 0 iYFL010C   | 0.71  | 2.22 | 0.86 |
| YFL011W   | HXT10 |                 | 0 iYFL012W   | 2.34  | #N/A | #N/A |
| YFL011W-A | #N/A  | #N/A            | #N/A         | 0.79  | #N/A | #N/A |
| YFL012W   | 0     | #N/A            | iYFL013W-A   | #N/A  | 2.91 | 0.95 |
| YFL013C   | IES1  |                 | 0 iYFL013W-A | -2.46 | 2.91 | 0.95 |
| YFL013W-A | #N/A  | #N/A            | iYFL014W     | #N/A  | 0.54 | 0.25 |
| YFL014W   | HSP12 | GLP1 HOR5       | iYFL015C     | 3.90  | 1.09 | 0.49 |
| YFL015C   | 0     | #N/A            | iYFL015C     | #N/A  | 1.09 | 0.49 |
| YFL016C   | MDJ1  |                 | 0 iYFL016C   | 0.94  | 0.50 | 0.24 |
| YFL017C   | GNA1  | PAT1            | iYFL017C     | -0.85 | 1.07 | 0.48 |
| YFL018C   | LPD1  | HPD1            | iYFL018C     | -0.10 | 1.17 | 0.53 |
| YFL018W-A | #N/A  | #N/A            | #N/A         | -0.67 | #N/A | #N/A |
| YFL019C   | 0     | #N/A            | YFLWdelta1   | #N/A  | 1.79 | 0.75 |
| YFL020C   | PAU5  |                 | 0 iYFL020C   | 1.61  | 1.87 | 0.78 |
| YFL021W   | GAT1  | MEP80 NIL1      | iYFL022C     | #N/A  | #N/A | #N/A |
| YFL022C   | FRS2  |                 | 0 iYFL022C   | -1.07 | #N/A | #N/A |
| YFL023W   | FYV11 |                 | 0 iYFL024C   | -1.00 | 0.58 | 0.24 |
| YFL024C   | EPL1  |                 | 0 iYFL024C   | 0.79  | 0.58 | 0.24 |
| YFL025C   | BST1  |                 | 0 iYFL025C   | 0.12  | 0.90 | 0.42 |
| YFL026W   | STE2  |                 | 0 iYFL027C   | 4.74  | 3.06 | 0.96 |
| YFL027C   | GYP8  |                 | 0 iYFL027C   | #N/A  | 3.06 | 0.96 |
| YFL028C   | CAF16 |                 | 0 iYFL028C   | #N/A  | 1.60 | 0.69 |
| YFL029C   | CAK1  | CIV1            | iYFL029C     | 0.76  | 2.48 | 0.90 |
| YFL030W   | 0     |                 | 0 iYFL031W   | #N/A  | #N/A | #N/A |
| YFL031W   | HAC1  | ERN4 IRE15      | iYFL033C     | 0.44  | 0.82 | 0.38 |
| YFL032W   | 0     | #N/A            | iYFL033C     | #N/A  | 0.82 | 0.38 |
| YFL033C   | RIM15 | TAK1            | iYFL033C     | #N/A  | 0.82 | 0.38 |
| YFL034W   | 0     | #N/A            | iYFL034C-A   | #N/A  | 1.22 | 0.55 |
| YFL035C   | #N/A  | #N/A            | #N/A         | -1.27 | #N/A | #N/A |
| YFL035C-A | #N/A  | #N/A            | #N/A         | -0.91 | #N/A | #N/A |
| YFL035C-B | #N/A  | #N/A            | #N/A         | -0.69 | #N/A | #N/A |
| YFL036W   | RPO41 |                 | 0 iYFL037W   | #N/A  | #N/A | #N/A |
| YFL037W   | TUB2  | ARM10 SHE8      | iYFL038C     | -0.65 | 2.64 | 0.93 |
| YFL038C   | YPT1  | YP2             | iYFL038C     | -0.30 | 2.64 | 0.93 |
| YFL039C   | ACT1  | ABY1 END7 actin | iYFL039C     | 0.00  | 0.24 | 0.04 |
| YFL040W   | 0     | #N/A            | iYFL041W     | #N/A  | 0.48 | 0.19 |
| YFL041W   | FET5  |                 | 0 iYFL042C   | -0.03 | 1.48 | 0.66 |
| YFL042C   | 0     | #N/A            | iYFL042C     | 0.47  | 1.48 | 0.66 |
| YFL043C   | #N/A  | #N/A            | iYFL042C     | #N/A  | 1.48 | 0.66 |
| YFL044C   | 0     |                 | 0 iYFL044C   | -0.41 | 1.02 | 0.46 |
| YFL045C   | SEC53 | ALG4            | iYFL045C     | 0.15  | 1.41 | 0.63 |
| YFL046W   | 0     |                 | 0 iYFL047W   | 0.20  | 1.33 | 0.59 |
| YFL047W   | RGD2  |                 | 0 iYFL048C   | -1.70 | 2.93 | 0.96 |
| YFL048C   | EMP47 |                 | 0 iYFL048C   | #N/A  | 2.93 | 0.96 |
| YFL049W   | 0     | #N/A            | iYFL050C     | 0.03  | 1.83 | 0.78 |

|           |       |                 |      |              |       |      |      |
|-----------|-------|-----------------|------|--------------|-------|------|------|
| YFL050C   | ALR2  |                 | 0    | iYFL050C     | 1.58  | 1.83 | 0.78 |
| YFL051C   |       | 0               | #N/A | iYFL051C-0   | 2.54  | 0.68 | 0.30 |
| YFL052W   |       | 0               | #N/A | iYFL053W-    | #N/A  | 2.12 | 0.85 |
| YFL053W   | DAK2  |                 | 0    | iYFL054C     | #N/A  | 2.46 | 0.91 |
| YFL054C   |       | 0               | #N/A | iYFL054C     | 1.28  | 2.46 | 0.91 |
| YFL055W   | AGP3  |                 | 0    | iYFL056C-1   | 0.72  | 1.75 | 0.75 |
| YFL056C   | AAD6  |                 | 0    | iYFL056C-0   | 1.38  | 0.52 | 0.21 |
| YFL057C   |       | 0               |      | 0 iYFL056C-0 | 1.57  | 0.52 | 0.21 |
| YFL058W   | THI5  |                 | 0    | iYFL059W     | 0.65  | 2.85 | 0.95 |
| YFL059W   | SNZ3  |                 | 0    | iYFL060C     | 0.15  | 2.65 | 0.93 |
| YFL060C   | SNO3  |                 | 0    | iYFL060C     | -2.34 | 2.65 | 0.93 |
| YFL061W   |       | 0               | #N/A | iYFL062W-    | 1.87  | 1.75 | 0.74 |
| YFL062W   | COS4  |                 | 0    | iYFL063W     | 2.20  | 0.79 | 0.36 |
| YFL063W   |       | 0               | #N/A | iYFL064C     | #N/A  | #N/A | #N/A |
| YFL064C   |       | 0               | #N/A | iYFL064C     | 0.69  | #N/A | #N/A |
| YFL065C   |       | 0               | #N/A | iYFL064C     | #N/A  | #N/A | #N/A |
| YFL066C   |       | 0               | #N/A | iYFL066C     | -0.46 | 1.27 | 0.57 |
| YFL067W   |       | 0               | #N/A | iYFL068W     | 0.06  | 0.23 | 0.04 |
| YFL068W   |       | 0               | #N/A | #N/A         | 0.14  | #N/A | #N/A |
| YFL-TYA   | #N/A  | #N/A            | #N/A | #N/A         | 0.31  | #N/A | #N/A |
| YFL-TYB   | #N/A  | #N/A            | #N/A | #N/A         | -1.61 | #N/A | #N/A |
| YFR001W   | LOC1  |                 | 0    | iCEN6        | -2.14 | 1.09 | 0.50 |
| YFR002W   | NIC96 |                 | 0    | iYFR001W     | 0.16  | 1.75 | 0.75 |
| YFR003C   |       | 0               |      | 0 iYFR003C   | -0.81 | 2.03 | 0.83 |
| YFR004W   | RPN11 | MPR1            |      | iYFR003C     | 0.76  | 2.03 | 0.83 |
| YFR005C   | SAD1  |                 | 0    | iYFR005C     | 0.23  | #N/A | #N/A |
| YFR006W   |       | 0               | #N/A | iYFR005C     | 0.93  | #N/A | #N/A |
| YFR007W   |       | 0               | #N/A | iYFRWdelta   | #N/A  | 1.21 | 0.56 |
| YFR008W   |       | 0               |      | 0 iYFR007W   | #N/A  | 1.65 | 0.71 |
| YFR009W   | GCN20 |                 | 0    | itG(GCC)F1   | -0.14 | 0.74 | 0.35 |
| YFR010W   | UBP6  |                 | 0    | iYFR009W     | #N/A  | 0.83 | 0.39 |
| YFR011C   |       | 0               | #N/A | iYFR011C     | 0.96  | 1.54 | 0.68 |
| YFR012W   |       | 0               | #N/A | itY(GUA)F1   | #N/A  | #N/A | #N/A |
| YFR013W   | IOC3  |                 | 0    | iYFR012W     | -0.66 | 1.91 | 0.78 |
| YFR014C   | CMK1  |                 | 0    | iYFR014C     | 1.26  | 1.73 | 0.74 |
| YFR015C   | GSY1  |                 | 0    | iYFR015C     | 1.51  | 1.24 | 0.56 |
| YFR016C   |       | 0               | #N/A | iYFR016C     | -1.81 | #N/A | #N/A |
| YFR017C   |       | 0               | #N/A | iYFR017C     | -2.55 | 1.88 | 0.79 |
| YFR018C   |       | 0               | #N/A | iYFR018C     | -2.39 | 2.06 | 0.82 |
| YFR019W   | FAB1  | SVL7            |      | iYFR018C     | -0.20 | 2.06 | 0.82 |
| YFR020W   |       | 0               | #N/A | iYFRCdelta   | #N/A  | 1.11 | 0.50 |
| YFR021W   | AUT10 | AUT10 CVT18 NMR |      | iYFR020W     | #N/A  | 1.92 | 0.80 |
| YFR022W   |       | 0               | #N/A | iYFR021W     | -0.36 | 1.88 | 0.79 |
| YFR023W   | PES4  |                 | 0    | iYFR022W     | #N/A  | #N/A | #N/A |
| YFR024C   |       | 0               | #N/A | iYFR024C-A   | -0.06 | 1.72 | 0.74 |
| YFR024C-A | LSB3  | YFR024C         |      | iYFR024C-A   | 0.03  | 1.72 | 0.74 |
| YFR025C   | HIS2  |                 | 0    | iYFR025C     | 0.79  | #N/A | #N/A |
| YFR026C   |       | 0               | #N/A | iYFR026C     | 1.32  | 1.00 | 0.45 |
| YFR027W   | ECO1  | CTF7            |      | iYFRWdelta   | #N/A  | 2.31 | 0.88 |
| YFR028C   | CDC14 | OAF3            |      | iYFR028C     | -0.88 | #N/A | #N/A |
| YFR029W   | PTR3  | SSY3            |      | itY(GUA)F2   | 0.08  | 2.55 | 0.91 |

|           |        |                  |   |            |       |      |      |
|-----------|--------|------------------|---|------------|-------|------|------|
| YFR030W   | MET10  |                  | 0 | iYFR029W   | 0.94  | 1.45 | 0.64 |
| YFR031C   | SMC2   |                  | 0 | iYFR031C   | -0.75 | 1.29 | 0.58 |
| YFR031C-A | RPL2A  | RPL5B            |   | iYFR031C-A | -0.92 | 0.33 | 0.09 |
| YFR032C   | 0      | #N/A             |   | iYFR032C   | #N/A  | 0.68 | 0.32 |
| YFR033C   | QCR6   | COR3 UCR6        |   | iYFR033C   | 0.83  | 0.31 | 0.07 |
| YFR034C   | PHO4   |                  | 0 | iYFR034C   | 0.24  | #N/A | #N/A |
| YFR035C   | 0      | #N/A             |   | iYFR035C   | 0.61  | 0.53 | 0.22 |
| YFR036W   | CDC26  | HIT3 SCD26       |   | itK(CUU)F  | 0.67  | #N/A | #N/A |
| YFR037C   | RSC8   | SWH3             |   | iYFR037C   | -0.39 | #N/A | #N/A |
| YFR038W   | 0      | #N/A             |   | iYFR037C   | -0.31 | #N/A | #N/A |
| YFR039C   | 0      | #N/A             |   | iYFR039C   | #N/A  | 2.10 | 0.83 |
| YFR040W   | SAP155 |                  | 0 | iYFR039C   | 0.10  | 2.10 | 0.83 |
| YFR041C   | 0      |                  | 0 | iYFR041C   | 0.93  | 2.45 | 0.90 |
| YFR042W   | 0      | #N/A             |   | iYFR041C   | 0.30  | 2.45 | 0.90 |
| YFR043C   | 0      | #N/A             |   | iYFR043C   | 3.30  | #N/A | #N/A |
| YFR044C   | 0      | #N/A             |   | iYFR044C   | 0.49  | 2.09 | 0.84 |
| YFR045W   | 0      | #N/A             |   | iYFR044C   | #N/A  | 2.09 | 0.84 |
| YFR046C   | 0      |                  | 0 | iYFR046C   | 0.99  | #N/A | #N/A |
| YFR047C   | BNA6   | QPT1             |   | iYFR047C   | 1.01  | 1.62 | 0.71 |
| YFR048W   | 0      |                  | 0 | iYFR047C   | 0.26  | 1.62 | 0.71 |
| YFR049W   | YMR31  |                  | 0 | iYFR048W   | 1.19  | 2.23 | 0.87 |
| YFR050C   | PRE4   |                  | 0 | iYFR050C   | -0.03 | 2.06 | 0.83 |
| YFR051C   | RET2   |                  | 0 | iYFR051C   | -0.92 | 3.50 | 0.99 |
| YFR052W   | RPN12  | NIN1             |   | iYFR051C   | #N/A  | 3.50 | 0.99 |
| YFR053C   | HXK1   |                  | 0 | iYFR053C-C | 2.04  | 1.69 | 0.72 |
| YFR054C   | 0      | #N/A             |   | iYFR054C-C | #N/A  | 1.40 | 0.64 |
| YFR055W   | 0      | #N/A             |   | iYFR054C-3 | 0.72  | 1.09 | 0.50 |
| YFR056C   | 0      | #N/A             |   | iYFR055W-4 | #N/A  | 0.69 | 0.31 |
| YFR057W   | 0      | #N/A             |   | iYFR055W-5 | #N/A  | #N/A | #N/A |
| YGL001C   | ERG26  |                  | 0 | iYGL001C   | 1.35  | 0.88 | 0.40 |
| YGL002W   | ERP6   |                  | 0 | iYGL003C   | 0.96  | 2.00 | 0.81 |
| YGL003C   | CDH1   | HCT1             |   | iYGL003C   | 0.03  | 2.00 | 0.81 |
| YGL004C   | 0      |                  | 0 | iYGL004C   | #N/A  | 1.23 | 0.55 |
| YGL005C   | COD5   | COD5             |   | iYGL005C   | 0.58  | 1.15 | 0.52 |
| YGL006W   | PMC1   |                  | 0 | iYGL007W-  | 1.76  | 1.35 | 0.60 |
| YGL007W   | 0      | #N/A             |   | iYGL008C   | #N/A  | 0.12 | 0.01 |
| YGL008C   | PMA1   |                  | 0 | iYGL008C   | -0.29 | 0.12 | 0.01 |
| YGL009C   | LEU1   |                  | 0 | iYGL009C   | -0.26 | 0.43 | 0.16 |
| YGL010W   | 0      | #N/A             |   | iYGL011C   | 1.67  | 2.73 | 0.94 |
| YGL011C   | SCL1   | PRC2             |   | iYGL011C   | 0.25  | 2.73 | 0.94 |
| YGL012W   | ERG4   |                  | 0 | iYGL013C   | -0.32 | 1.84 | 0.77 |
| YGL013C   | PDR1   | AMY1 ANT1 BOR2 C |   | iYGL013C   | -0.24 | 1.84 | 0.77 |
| YGL014W   | PUF4   | YGL023           |   | iYGL015C   | -0.60 | 0.78 | 0.37 |
| YGL015C   | 0      | #N/A             |   | iYGL015C   | #N/A  | 0.78 | 0.37 |
| YGL016W   | KAP122 | PDR6             |   | iYGL017W   | #N/A  | #N/A | #N/A |
| YGL017W   | ATE1   |                  | 0 | iYGL018C   | -0.46 | #N/A | #N/A |
| YGL018C   | JAC1   |                  | 0 | iYGL018C   | -0.55 | #N/A | #N/A |
| YGL019W   | CKB1   |                  | 0 | iYGL020C   | 0.03  | 2.22 | 0.87 |
| YGL020C   | 0      |                  | 0 | iYGL020C   | 0.53  | 2.22 | 0.87 |
| YGL021W   | ALK1   |                  | 0 | iYGL022W   | -0.67 | 0.44 | 0.20 |
| YGL022W   | STT3   |                  | 0 | iYGL023C   | -0.66 | 4.19 | 0.99 |

|         |         |                       |      |          |            |          |       |      |      |
|---------|---------|-----------------------|------|----------|------------|----------|-------|------|------|
| YGL023C | PIB2    |                       | 0    | iYGL023C | 0.01       | 4.19     | 0.99  |      |      |
| YGL024W |         | 0                     |      | 0        | iYGL026C   | 3.80     | 1.05  | 0.48 |      |
| YGL025C | PGD1    | HRS1 MED3             |      |          | iYGL024W   | 1.83     | 0.37  | 0.11 |      |
| YGL026C | TRP5    |                       |      | 0        | iYGL026C   | 0.30     | 1.05  | 0.48 |      |
| YGL027C | CWH41   | GLS1                  |      |          | iYGL027C   | 0.25     | 1.32  | 0.61 |      |
| YGL028C | SCW11   |                       |      | 0        | iYGL028C   | -0.48    | 1.71  | 0.73 |      |
| YGL029W | CGR1    |                       |      | 0        | iYGL030W   | #N/A     | 0.74  | 0.34 |      |
| YGL030W | RPL30   |                       |      | 0        | iYGL031C   | -1.35    | 0.20  | 0.05 |      |
| YGL031C | RPL24A  | RPL30A                |      |          | iYGL031C   | -0.23    | 0.20  | 0.05 |      |
| YGL032C | AGA2    |                       |      | 0        | iYGL032C   | #N/A     | 0.94  | 0.43 |      |
| YGL033W | HOP2    |                       |      | 0        | iYGL034C-1 | #N/A     | 1.08  | 0.50 |      |
| YGL034C |         | 0                     | #N/A |          | iYGL034C-0 | #N/A     | 2.17  | 0.86 |      |
| YGL035C | MIG1    | CAT4 SSN1 TDS22       |      |          | iYGL035C   | -1.71    | 0.88  | 0.40 |      |
| YGL036W |         | 0                     | #N/A |          | iYGL037C   | -1.21    | 1.10  | 0.50 |      |
| YGL037C | PNC1    |                       |      | 0        | iYGL037C   | 1.10     | 1.10  | 0.50 |      |
| YGL038C | OCH1    | LDB12 NGD29           |      |          | iYGL038C   | #N/A     | 0.94  | 0.43 |      |
| YGL039W |         | 0                     | #N/A |          | itL(CAA)G2 | 0.05     | 1.14  | 0.52 |      |
| YGL040C | HEM2    | SLU1                  |      |          | iYGL040C-0 | 0.64     | 1.24  | 0.56 |      |
| YGL041C |         | 0                     | #N/A |          | iYGL041C   | #N/A     | #N/A  | #N/A |      |
| YGL042C |         | 0                     | #N/A |          | iYGL042C   | #N/A     | 1.17  | 0.53 |      |
| YGL043W | DST1    | P37 PPR2 S-III SII TI |      |          | iYGL044C   | -0.77    | 2.28  | 0.87 |      |
| YGL044C | RNA15   |                       |      | 0        | iYGL044C   | #N/A     | 2.28  | 0.87 |      |
| YGL045W |         | 0                     | PAL3 |          | iYGL046W   | 1.18     | #N/A  | #N/A |      |
| YGL046W |         | 0                     | #N/A |          | iYGLWdelta | #N/A     | 1.61  | 0.72 |      |
| YGL047W |         | 0                     | #N/A |          | iYGL048C   | -0.71    | #N/A  | #N/A |      |
| YGL048C | RPT6    | CIM3 CRL3 SCB68 S     |      |          | iYGL048C   | 0.68     | #N/A  | #N/A |      |
| YGL049C | TIF4632 |                       |      | 0        | iYGL049C   | 0.29     | 1.28  | 0.59 |      |
| YGL050W |         | 0                     | #N/A |          | itR(UJU)G1 | -0.21    | #N/A  | #N/A |      |
| YGL051W |         | 0                     |      |          | 0          | iYGL053W | 0.34  | 1.01 | 0.46 |
| YGL052W |         | 0                     | #N/A |          |            | iYGL053W | -0.44 | 1.01 | 0.46 |
| YGL053W | PRM8    |                       |      | 0        | iYGLWdelta | -0.11    | #N/A  | #N/A |      |
| YGL054C | ERV14   |                       |      | 0        | iYGL054C   | 1.47     | #N/A  | #N/A |      |
| YGL055W | OLE1    | MDM2                  |      |          | iYGL056C   | -0.05    | 0.50  | 0.20 |      |
| YGL056C | SDS23   |                       |      | 0        | iYGL056C   | -0.27    | 0.50  | 0.20 |      |
| YGL057C |         | 0                     | #N/A |          | iYGL057C   | 0.35     | 0.15  | 0.02 |      |
| YGL058W | RAD6    | UBC2                  |      |          | iYGL059W   | 0.60     | 2.06  | 0.83 |      |
| YGL059W |         | 0                     | #N/A |          | iYGL060W   | 2.17     | 1.71  | 0.74 |      |
| YGL060W |         | 0                     |      |          | 0          | iYGL061C | -2.10 | 2.17 | 0.86 |
| YGL061C | DUO1    |                       |      | 0        | iYGL061C   | -1.19    | 2.17  | 0.86 |      |
| YGL061L | #N/A    | #N/A                  | #N/A |          | #N/A       | -1.03    | #N/A  | #N/A |      |
| YGL062W | PYC1    |                       |      | 0        | iYGL063W   | -0.69    | #N/A  | #N/A |      |
| YGL063W | PUS2    |                       |      | 0        | iYGL064C   | -0.47    | 2.83  | 0.95 |      |
| YGL064C | MRH4    |                       |      | 0        | iYGL064C   | #N/A     | 2.83  | 0.95 |      |
| YGL065C | ALG2    |                       |      | 0        | iYGL065C   | #N/A     | 0.79  | 0.36 |      |
| YGL066W | SGF73   |                       |      | 0        | iYGL067W   | -0.11    | 2.39  | 0.89 |      |
| YGL067W | NPY1    |                       |      | 0        | iYGL068W   | 0.06     | 1.39  | 0.64 |      |
| YGL068W |         | 0                     |      |          | 0          | iYGL070C | -0.27 | 3.55 | 0.98 |
| YGL069C |         | 0                     |      |          | 0          | iYGL068W | -0.41 | 1.39 | 0.64 |
| YGL070C | RPB9    | SHI1 SSU73            |      |          | iYGL070C   | -0.72    | 3.55  | 0.98 |      |
| YGL071W | RCS1    | AFT1                  |      |          | iYGL072C   | #N/A     | 0.63  | 0.27 |      |
| YGL072C |         | 0                     | #N/A |          | iYGL072C   | -0.71    | 0.63  | 0.27 |      |



|         |         |                  |             |       |      |      |
|---------|---------|------------------|-------------|-------|------|------|
| YGL073W | HSF1    | EXA3 MAS3        | iYGL075C    | #N/A  | 1.84 | 0.77 |
| YGL074C | 0       | #N/A             | iYGL072C    | #N/A  | 0.63 | 0.27 |
| YGL075C | MPS2    | MMC1             | iYGL075C    | #N/A  | 1.84 | 0.77 |
| YGL076C | RPL7A   |                  | 0 iYGL076C  | -1.23 | 1.12 | 0.51 |
| YGL077C | HNM1    |                  | 0 iYGL077C  | 0.67  | 0.70 | 0.34 |
| YGL078C | DBP3    |                  | 0 iYGL078C  | -1.12 | 1.11 | 0.50 |
| YGL079W | 0       | #N/A             | iYGL080W    | -1.95 | 1.58 | 0.69 |
| YGL080W | 0       |                  | 0 iYGL081W  | #N/A  | 1.87 | 0.77 |
| YGL081W | 0       | #N/A             | iYGL082W    | #N/A  | 1.13 | 0.52 |
| YGL082W | 0       | #N/A             | iYGL083W    | 0.24  | 1.75 | 0.74 |
| YGL083W | SCY1    |                  | 0 iYGL084C  | 0.33  | 1.77 | 0.75 |
| YGL084C | GUP1    |                  | 0 iYGL084C  | 0.31  | 1.77 | 0.75 |
| YGL085W | 0       | #N/A             | iYGL086W    | #N/A  | #N/A | #N/A |
| YGL086W | MAD1    |                  | 0 iYGL087C  | -1.01 | 1.93 | 0.80 |
| YGL087C | MMS2    |                  | 0 iYGL087C  | #N/A  | 1.93 | 0.80 |
| YGL088W | 0       | #N/A             | iYGL089C    | -0.59 | 0.73 | 0.33 |
| YGL089C | MF(ALP- |                  | 0 iYGL089C  | -3.48 | 0.73 | 0.33 |
| YGL090W | LIF1    |                  | 0 iYGL091C  | #N/A  | #N/A | #N/A |
| YGL091C | NBP35   |                  | 0 iYGL091C  | -0.08 | #N/A | #N/A |
| YGL092W | NUP145  | RAT10            | iYGL093W    | -0.31 | #N/A | #N/A |
| YGL093W | SPC105  |                  | 0 iYGL094C  | -0.11 | 2.72 | 0.94 |
| YGL094C | PAN2    |                  | 0 iYGL094C  | #N/A  | 2.72 | 0.94 |
| YGL095C | VPS45   | STT10 VPL28      | iYGL095C    | 1.17  | 1.59 | 0.70 |
| YGL096W | TOS8    |                  | 0 iYGL097W- | 1.02  | 0.57 | 0.24 |
| YGL097W | SRM1    | MTR1 PRP20       | iYGLCtau3   | -0.77 | #N/A | #N/A |
| YGL098W | 0       | SLT1             | iYGL099W    | 0.67  | 0.81 | 0.38 |
| YGL099W | LSG1    | KRE35            | iYGL100W    | -1.16 | 2.35 | 0.89 |
| YGL100W | SEH1    |                  | 0 iYGL101W  | #N/A  | 1.49 | 0.65 |
| YGL101W | 0       | #N/A             | iYGL102C    | 1.21  | #N/A | #N/A |
| YGL102C | 0       | #N/A             | iYGL102C    | -1.81 | #N/A | #N/A |
| YGL103W | RPL28   | CYH2             | iYGL104C    | -1.31 | 1.14 | 0.51 |
| YGL104C | VPS73   |                  | 0 iYGL104C  | 1.72  | 1.14 | 0.51 |
| YGL105W | ARC1    |                  | 0 iYGL106W  | 0.10  | 1.20 | 0.54 |
| YGL106W | MLC1    |                  | 0 iYGL107C  | -0.45 | 2.48 | 0.91 |
| YGL107C | 0       |                  | 0 iYGL107C  | 0.04  | 2.48 | 0.91 |
| YGL108C | 0       | #N/A             | iYGL108C    | #N/A  | 1.14 | 0.52 |
| YGL109W | 0       | #N/A             | iYGL110C    | -0.78 | #N/A | #N/A |
| YGL110C | 0       |                  | 0 iYGL110C  | #N/A  | #N/A | #N/A |
| YGL111W | NSA1    |                  | 0 iYGL112C  | -0.53 | 3.31 | 0.97 |
| YGL112C | TAF6    | TAF60 TafII60    | iYGL112C    | 0.09  | 3.31 | 0.97 |
| YGL113W | SLD3    |                  | 0 iYGL114W  | 0.75  | 1.51 | 0.66 |
| YGL114W | 0       | #N/A             | iYGL115W    | 1.07  | 1.63 | 0.72 |
| YGL115W | SNF4    | CAT3 SCI1        | iYGL116W    | 0.55  | #N/A | #N/A |
| YGL116W | CDC20   | PAC5             | iYGL117W    | 1.14  | 1.13 | 0.51 |
| YGL117W | 0       | #N/A             | iYGL118C    | 1.94  | #N/A | #N/A |
| YGL118C | 0       | #N/A             | iYGL118C    | #N/A  | #N/A | #N/A |
| YGL119W | ABC1    | COQ8             | iYGL120C    | 0.87  | 1.88 | 0.79 |
| YGL120C | PRP43   | JA1              | iYGL120C    | -1.21 | 1.88 | 0.79 |
| YGL121C | 0       |                  | 0 iYGL121C  | #N/A  | 1.23 | 0.56 |
| YGL122C | NAB2    |                  | 0 iYGL122C  | 0.22  | 1.55 | 0.68 |
| YGL123W | RPS2    | RPS4 SUP138 SUP1 | iYGL124C    | -1.47 | 0.68 | 0.31 |

|         |       |                  |          |            |       |      |      |
|---------|-------|------------------|----------|------------|-------|------|------|
| YGL124C | MON1  |                  | 0        | iYGL124C   | 0.74  | 0.68 | 0.31 |
| YGL125W | MET13 | MET11 MRPL45     |          | iYGL126W   | -0.47 | 0.28 | 0.06 |
| YGL126W | SCS3  |                  | 0        | iYGL127C   | 0.39  | 2.56 | 0.92 |
| YGL127C | SOH1  |                  | 0        | iYGL127C   | -0.11 | 2.56 | 0.92 |
| YGL128C | CWC23 |                  | 0        | iYGL127C   | 0.23  | 2.56 | 0.92 |
| YGL129C | RSM23 |                  | 0        | iYGL129C   | -0.02 | #N/A | #N/A |
| YGL130W | CEG1  |                  | 0        | iYGL131C   | #N/A  | #N/A | #N/A |
| YGL131C | SNT2  |                  | 0        | iYGL131C   | #N/A  | #N/A | #N/A |
| YGL132W |       | 0 #N/A           |          | iYGL133W   | #N/A  | #N/A | #N/A |
| YGL133W | ITC1  |                  | 0        | iYGL134W   | -0.43 | 1.07 | 0.50 |
| YGL134W | PCL10 |                  | 0        | iYGL135W   | 1.36  | 0.63 | 0.27 |
| YGL135W | RPL1B | SSM2             |          | iYGL136C   | -0.87 | 0.91 | 0.42 |
| YGL136C | MRM2  |                  | 0        | iYGL136C   | 0.39  | 0.91 | 0.42 |
| YGL137W | SEC27 |                  | 0        | iYGL138C   | -0.51 | 2.20 | 0.86 |
| YGL138C |       | 0 #N/A           |          | iYGL138C   | #N/A  | 2.20 | 0.86 |
| YGL139W |       | 0 #N/A           |          | iYGL140C   | -1.08 | 1.83 | 0.77 |
| YGL140C |       | 0 #N/A           |          | iYGL140C   | 0.04  | 1.83 | 0.77 |
| YGL141W | HUL5  |                  | 0        | iYGL142C   | 0.04  | 1.55 | 0.69 |
| YGL142C | GPI10 |                  | 0        | iYGL142C   | 1.05  | 1.55 | 0.69 |
| YGL143C | MRF1  |                  | 0        | iYGL143C   | -0.99 | #N/A | #N/A |
| YGL144C |       | 0                |          | iYGL144C   | 1.58  | #N/A | #N/A |
| YGL145W | TIP20 | TIP1             |          | iYGL146C   | #N/A  | 2.18 | 0.86 |
| YGL146C |       | 0 #N/A           |          | iYGL146C   | 1.57  | 2.18 | 0.86 |
| YGL147C | RPL9A |                  | 0        | iYGL147C   | -1.30 | 0.21 | 0.05 |
| YGL148W | ARO2  |                  | 0        | iYGL149W   | -0.55 | #N/A | #N/A |
| YGL149W |       | 0 #N/A           |          | iYGL151W   | #N/A  | #N/A | #N/A |
| YGL150C | INO80 |                  | 0        | iYGL149W   | -0.53 | #N/A | #N/A |
| YGL151W | NUT1  |                  | 0        | iYGL152C   | -0.03 | 1.86 | 0.79 |
| YGL152C |       | 0 #N/A           |          | iYGL152C   | -0.13 | 1.86 | 0.79 |
| YGL153W | PEX14 |                  | 0        | iYGL154C   | 0.00  | #N/A | #N/A |
| YGL154C | LYS5  |                  | 0        | iYGL154C   | 1.25  | #N/A | #N/A |
| YGL155W | CDC43 | CAL1             |          | iYGL156W   | 0.28  | 1.91 | 0.78 |
| YGL156W | AMS1  |                  | 0        | iYGL157W   | 1.84  | 1.07 | 0.50 |
| YGL157W |       | 0 #N/A           |          | iYGL158W   | 1.21  | 1.66 | 0.73 |
| YGL158W | RCK1  |                  | 0        | itL(CAA)G1 | #N/A  | #N/A | #N/A |
| YGL159W |       | 0 #N/A           |          | iYGL160W   | #N/A  | #N/A | #N/A |
| YGL160W |       | 0 #N/A           |          | iYGL161C   | 1.44  | 3.32 | 0.98 |
| YGL161C |       | 0                |          | iYGL161C   | 1.32  | 3.32 | 0.98 |
| YGL162W | SUT1  |                  | 0        | iYGL163C-1 | #N/A  | 0.34 | 0.11 |
| YGL163C | RAD54 | XRS1             |          | iYGL163C-0 | 0.52  | 1.53 | 0.67 |
| YGL164C |       | 0                |          | iYGL164C   | 0.24  | #N/A | #N/A |
| YGL165C |       | 0 #N/A           |          | iYGL164C   | 1.83  | #N/A | #N/A |
| YGL166W | CUP2  | ACE1             |          | iYGL167C   | 2.82  | 1.68 | 0.72 |
| YGL167C | PMR1  | BSD1 LDB1        |          | iYGL167C   | 0.56  | 1.68 | 0.72 |
| YGL168W |       | 0                |          | iYGL169W   | 0.72  | #N/A | #N/A |
| YGL169W | SUA5  |                  | 0        | itK(CUU)G2 | -0.56 | #N/A | #N/A |
| YGL170C | SPO74 |                  | 0        | iYGL170C   | 1.87  | 1.15 | 0.53 |
| YGL171W | ROK1  |                  | 0        | iYGL172W   | -1.62 | 2.19 | 0.86 |
| YGL172W | NUP49 | NSP49            |          | iYGL173C   | -0.61 | #N/A | #N/A |
| YGL173C | KEM1  | DST2 RAR5 SEP1 S | iYGL173C |            | -1.10 | #N/A | #N/A |
| YGL174W | BUD13 | CWC26            |          | iYGL175C   | 0.38  | 1.81 | 0.76 |



|         |        |                 |            |       |      |      |
|---------|--------|-----------------|------------|-------|------|------|
| YGL175C | SAE2   | COM1            | iYGL175C   | #N/A  | 1.81 | 0.76 |
| YGL176C | 0      | #N/A            | iYGL176C   | -0.30 | #N/A | #N/A |
| YGL177W | 0      | #N/A            | iYGL179C-1 | #N/A  | #N/A | #N/A |
| YGL178W | MPT5   | HTR1 PUF5 UTH4  | iYGL177W-  | #N/A  | 0.27 | 0.06 |
| YGL179C | TOS3   | 0               | iYGL179C-C | -0.27 | #N/A | #N/A |
| YGL180W | APG1   | APG1 AUT3 CVT10 | iYGL181W   | #N/A  | 1.59 | 0.71 |
| YGL181W | GTS1   | FHT1            | iYGL182C   | 0.09  | 2.23 | 0.87 |
| YGL182C | 0      | #N/A            | iYGL182C   | #N/A  | 2.23 | 0.87 |
| YGL183C | MND1   | 0               | iYGL183C   | #N/A  | #N/A | #N/A |
| YGL184C | STR3   | 0               | iYGL184C   | -0.18 | #N/A | #N/A |
| YGL185C | 0      | #N/A            | iYGL185C   | 0.69  | 1.87 | 0.79 |
| YGL186C | 0      | 0               | iYGL186C   | 0.39  | 2.50 | 0.91 |
| YGL187C | COX4   | 0               | iYGL187C   | #N/A  | 0.43 | 0.16 |
| YGL188C | 0      | #N/A            | iYGL188C   | #N/A  | #N/A | #N/A |
| YGL189C | RPS26A | RPS26           | iYGL189C   | -0.66 | 0.20 | 0.03 |
| YGL190C | CDC55  | 0               | iYGL190C   | #N/A  | 0.58 | 0.24 |
| YGL191W | COX13  | 0               | iYGL192W   | 2.70  | 0.80 | 0.39 |
| YGL192W | IME4   | SPO8            | iYGL194C   | 3.00  | #N/A | #N/A |
| YGL193C | 0      | #N/A            | iYGL192W   | 2.79  | 0.80 | 0.39 |
| YGL194C | HOS2   | RTL1            | iYGL194C   | 1.77  | #N/A | #N/A |
| YGL195W | GCN1   | 0               | iYGL196W   | #N/A  | 3.49 | 0.99 |
| YGL196W | 0      | #N/A            | iYGL197W   | 0.72  | 0.71 | 0.32 |
| YGL197W | MDS3   | 0               | iYGL198W   | -1.04 | 1.61 | 0.71 |
| YGL198W | 0      | 0               | iYGL200C   | -0.01 | 2.65 | 0.93 |
| YGL199C | 0      | #N/A            | iYGL198W   | -0.02 | 1.61 | 0.71 |
| YGL200C | EMP24  | BST2            | iYGL200C   | 0.06  | 2.65 | 0.93 |
| YGL201C | MCM6   | 0               | iYGL201C   | -0.50 | 1.35 | 0.60 |
| YGL202W | ARO8   | 0               | itK(UUU)G1 | 0.45  | 0.48 | 0.19 |
| YGL203C | KEX1   | 0               | iYGL203C   | -0.42 | 1.47 | 0.64 |
| YGL204C | 0      | #N/A            | iYGL204C   | #N/A  | #N/A | #N/A |
| YGL205W | POX1   | FOX1            | iYGL206C   | -1.76 | 2.45 | 0.90 |
| YGL206C | CHC1   | SWA5            | iYGL206C   | 0.37  | 2.45 | 0.90 |
| YGL207W | SPT16  | CDC68 SSF1      | iYGL208W   | 0.18  | #N/A | #N/A |
| YGL208W | SIP2   | SPM2            | iYGL209W   | -0.39 | 1.19 | 0.54 |
| YGL209W | MIG2   | MLZ1            | iYGL210W   | #N/A  | 0.50 | 0.22 |
| YGL210W | YPT32  | 0               | iYGL211W   | 0.45  | #N/A | #N/A |
| YGL211W | 0      | 0               | iYGL212W   | -1.04 | #N/A | #N/A |
| YGL212W | VAM7   | VPS43           | iYGL213C   | -1.40 | #N/A | #N/A |
| YGL213C | SKI8   | REC103          | iYGL213C   | 0.11  | #N/A | #N/A |
| YGL214W | 0      | #N/A            | iYGL215W   | 0.15  | #N/A | #N/A |
| YGL215W | CLG1   | 0               | iYGL216W   | -0.71 | #N/A | #N/A |
| YGL216W | KIP3   | 0               | iYGL218W   | -1.32 | 2.21 | 0.87 |
| YGL217C | 0      | #N/A            | iYGL216W   | #N/A  | #N/A | #N/A |
| YGL218W | 0      | 0               | iYGL220W   | 2.23  | 0.88 | 0.42 |
| YGL219C | MMM2   | MMM2            | iYGL218W   | 0.48  | 2.21 | 0.87 |
| YGL220W | 0      | #N/A            | iYGL221C   | -0.03 | #N/A | #N/A |
| YGL221C | NIF3   | 0               | iYGL221C   | -1.39 | #N/A | #N/A |
| YGL222C | EDC1   | 0               | iYGL222C   | #N/A  | 1.94 | 0.81 |
| YGL223C | COD3   | COD3 LDB11      | iYGL223C   | -0.31 | 0.88 | 0.40 |
| YGL224C | SDT1   | SSM1            | iYGL224C   | 1.71  | 1.33 | 0.59 |
| YGL225W | VRG4   | GOG5 LDB3 VAN2  | itV(AAC)G3 | 0.60  | #N/A | #N/A |

|         |        |                 |             |       |      |      |
|---------|--------|-----------------|-------------|-------|------|------|
| YGL226W | 0      | #N/A            | iYGL226C-A  | #N/A  | #N/A | #N/A |
| YGL227W | VID30  | GID1            | iYGL228W    | 2.11  | 1.68 | 0.72 |
| YGL228W | SHE10  |                 | 0 iYGL229C  | 0.22  | 2.62 | 0.93 |
| YGL229C | SAP4   |                 | 0 iYGL229C  | 1.09  | 2.62 | 0.93 |
| YGL230C | 0      | #N/A            | iYGL230C    | #N/A  | #N/A | #N/A |
| YGL231C | 0      | #N/A            | iYGL231C    | 0.01  | #N/A | #N/A |
| YGL232W | 0      |                 | 0 iYGL233W  | 0.13  | #N/A | #N/A |
| YGL233W | SEC15  |                 | 0 iYGL234W  | -0.42 | 1.77 | 0.75 |
| YGL234W | ADE5,7 |                 | 0 iYGL235W  | -0.92 | 1.55 | 0.68 |
| YGL235W | 0      | #N/A            | iYGL237C    | #N/A  | #N/A | #N/A |
| YGL236C | MTO1   | IPS1            | iYGL235W    | #N/A  | 1.55 | 0.68 |
| YGL237C | HAP2   |                 | 0 iYGL237C  | #N/A  | #N/A | #N/A |
| YGL238W | CSE1   | KAP109          | iYGL240W    | -0.37 | #N/A | #N/A |
| YGL239C | 0      | #N/A            | iYGL238W    | #N/A  | #N/A | #N/A |
| YGL240W | DOC1   | APC10           | iYGL242C    | #N/A  | #N/A | #N/A |
| YGL241W | KAP114 |                 | 0 iYGL242C  | 0.15  | #N/A | #N/A |
| YGL242C | 0      | #N/A            | iYGL242C    | 0.63  | #N/A | #N/A |
| YGL243W | TAD1   |                 | 0 iYGL244W  | 0.83  | #N/A | #N/A |
| YGL244W | RTF1   | CSL3            | iYGL245W    | 0.06  | #N/A | #N/A |
| YGL245W | 0      |                 | 0 iYGL246C  | -0.31 | 1.34 | 0.60 |
| YGL246C | RAI1   |                 | 0 iYGL246C  | 1.07  | 1.34 | 0.60 |
| YGL247W | BRR6   |                 | 0 iYGL248W  | 1.32  | 2.09 | 0.84 |
| YGL248W | PDE1   |                 | 0 iYGL249W  | 1.08  | 1.13 | 0.51 |
| YGL249W | ZIP2   |                 | 0 iYGL250W  | 6.84  | 1.22 | 0.55 |
| YGL250W | 0      | #N/A            | iYGL251C    | 1.53  | 1.05 | 0.49 |
| YGL251C | HFM1   | MER3            | iYGL251C    | 0.96  | 1.05 | 0.49 |
| YGL252C | RTG2   |                 | 0 iYGL252C  | 0.15  | 2.72 | 0.94 |
| YGL253W | HXK2   | HEX1 HKB SCI2   | iYGL254W    | -0.35 | 0.55 | 0.23 |
| YGL254W | FZF1   | NRC299 RSU1 SUL | iYGL255W    | 0.80  | 1.55 | 0.67 |
| YGL255W | ZRT1   |                 | 0 iYGL256W- | 0.45  | 1.15 | 0.52 |
| YGL256W | ADH4   | NRC465 ZRG5     | iYGL257C    | 0.88  | 1.41 | 0.63 |
| YGL257C | MNT2   |                 | 0 iYGL257C  | 0.43  | 1.41 | 0.63 |
| YGL258W | 0      | #N/A            | iYGL259W-   | 2.04  | 2.15 | 0.85 |
| YGL259W | YPS5   |                 | 0 iYGL260W  | #N/A  | 1.32 | 0.59 |
| YGL260W | 0      | #N/A            | iYGL261C    | #N/A  | 0.70 | 0.32 |
| YGL261C | 0      | #N/A            | iYGL261C    | #N/A  | 0.70 | 0.32 |
| YGL262W | 0      | #N/A            | iYGL263W    | #N/A  | #N/A | #N/A |
| YGL263W | COS12  |                 | 0 iYGLWome  | #N/A  | #N/A | #N/A |
| YGR001C | 0      | #N/A            | iYGR001C    | 0.21  | 1.08 | 0.50 |
| YGR002C | 0      | EAF2 GOD1       | iYGR002C    | 0.52  | 2.22 | 0.87 |
| YGR003W | 0      | CULB CULLIN B   | iYGR002C    | 0.24  | 2.22 | 0.87 |
| YGR004W | 0      |                 | 0 iYGR003W  | 0.90  | 1.17 | 0.53 |
| YGR005C | TFG2   |                 | 0 iYGR005C  | -0.09 | 2.60 | 0.92 |
| YGR006W | PRP18  |                 | 0 iYGR005C  | #N/A  | 2.60 | 0.92 |
| YGR007W | MUQ1   | ECT1            | iYGR006W    | 0.05  | 1.96 | 0.80 |
| YGR008C | STF2   |                 | 0 iYGR008C  | 1.88  | 1.13 | 0.52 |
| YGR009C | SEC9   | HSS7            | iYGR009C    | 0.10  | 2.08 | 0.83 |
| YGR010W | NMA2   |                 | 0 iYGR009C  | -0.13 | 2.08 | 0.83 |
| YGR011W | 0      | #N/A            | iYGR009C    | -0.56 | 2.08 | 0.83 |
| YGR012W | 0      | #N/A            | iYGR011W    | -0.07 | 2.61 | 0.93 |
| YGR013W | SNU71  |                 | 0 iYGR012W  | -0.82 | 1.42 | 0.64 |

|         |        |        |      |            |       |      |      |
|---------|--------|--------|------|------------|-------|------|------|
| YGR014W | MSB2   |        | 0    | iYGR013W   | -1.67 | 0.30 | 0.08 |
| YGR015C |        | 0      | #N/A | iYGR015C   | 0.37  | #N/A | #N/A |
| YGR016W |        | 0      | #N/A | iYGR015C   | 0.01  | #N/A | #N/A |
| YGR017W |        | 0      | #N/A | iYGR016W   | 0.28  | 1.45 | 0.65 |
| YGR018C |        | 0      | #N/A | iYGR018C   | 0.29  | #N/A | #N/A |
| YGR019W | UGA1   |        | 0    | iYGR018C   | 1.24  | #N/A | #N/A |
| YGR020C | VMA7   |        | 0    | iYGR020C   | 0.24  | #N/A | #N/A |
| YGR021W |        | 0      | #N/A | iYGR020C   | 0.29  | #N/A | #N/A |
| YGR022C |        | 0      | #N/A | iYGR023W   | #N/A  | 0.71 | 0.34 |
| YGR023W | MTL1   |        | 0    | iYGR021W   | 1.43  | 1.48 | 0.67 |
| YGR024C |        | 0      |      | 0 iYGR026W | 0.72  | 0.50 | 0.23 |
| YGR025W |        | 0      | #N/A | itD(GUC)G1 | #N/A  | #N/A | #N/A |
| YGR026W |        | 0      | #N/A | itD(GUC)G1 | 0.38  | #N/A | #N/A |
| YGR027C | RPS25A | RPS31A |      | iYGR027C   | -1.34 | 0.30 | 0.09 |
| YGR028W | MSP1   | YTA4   |      | itE(UUC)G3 | 1.68  | 2.64 | 0.93 |
| YGR029W | ERV1   |        | 0    | iYGR028W   | #N/A  | 1.62 | 0.70 |
| YGR030C | POP6   |        | 0    | iYGR030C   | 1.06  | 1.00 | 0.47 |
| YGR031W |        | 0      | #N/A | iYGR030C   | -0.24 | 1.00 | 0.47 |
| YGR032W | GSC2   | FKS2   |      | iYGR031W   | 3.55  | 0.84 | 0.39 |
| YGR033C |        | 0      |      | 0 iYGR033C | 0.75  | 0.31 | 0.07 |
| YGR034W | RPL26B |        | 0    | iYGR033C   | -1.02 | 0.31 | 0.07 |
| YGR035C |        | 0      | #N/A | iYGR035C   | #N/A  | 0.30 | 0.08 |
| YGR036C | CAX4   | CWH8   |      | iYGR036C   | 0.78  | 1.39 | 0.62 |
| YGR037C | ACB1   |        | 0    | iYGR037C   | 1.09  | 1.20 | 0.55 |
| YGR038W | ORM1   |        | 0    | iYGR037C   | 0.47  | 1.20 | 0.55 |
| YGR039W |        | 0      | #N/A | iYGR039W   | #N/A  | #N/A | #N/A |
| YGR040W | KSS1   |        | 0    | iYGR039W   | 0.73  | #N/A | #N/A |
| YGR041W | BUD9   |        | 0    | iYGR040W   | 0.07  | 0.33 | 0.10 |
| YGR042W |        | 0      | #N/A | iYGR041W   | 0.35  | #N/A | #N/A |
| YGR043C |        | 0      | #N/A | iYGR043C-  | 0.74  | #N/A | #N/A |
| YGR044C | RME1   | CSP1   |      | iYGR045C   | #N/A  | 1.48 | 0.66 |
| YGR045C |        | 0      | #N/A | iYGR045C   | #N/A  | 1.48 | 0.66 |
| YGR046W |        | 0      | #N/A | iYGR045C   | 1.85  | 1.48 | 0.66 |
| YGR047C | TFC4   | PCF1   |      | iYGR047C   | -0.75 | #N/A | #N/A |
| YGR048W | UFD1   |        | 0    | iYGR047C   | 0.09  | #N/A | #N/A |
| YGR049W | SCM4   |        | 0    | iYGR048W   | 1.09  | 0.74 | 0.34 |
| YGR050C |        | 0      | #N/A | iYGR050C   | #N/A  | 0.44 | 0.18 |
| YGR051C |        | 0      | #N/A | iYGR051C   | 5.68  | 1.45 | 0.65 |
| YGR052W |        | 0      |      | 0 iYGR051C | #N/A  | 1.45 | 0.65 |
| YGR053C |        | 0      | #N/A | iYGR053C   | 0.98  | 2.29 | 0.88 |
| YGR054W |        | 0      | #N/A | iYGR053C   | #N/A  | 2.29 | 0.88 |
| YGR055W | MUP1   |        | 0    | iYGR054W   | 0.46  | 0.22 | 0.03 |
| YGR056W | RSC1   |        | 0    | iYGR055W   | 0.86  | 0.92 | 0.42 |
| YGR057C | LST7   |        | 0    | iYGR057C   | 1.22  | 1.83 | 0.76 |
| YGR058W |        | 0      | #N/A | iYGR057C   | 0.13  | 1.83 | 0.76 |
| YGR059W | SPR3   |        | 0    | iYGR058W   | #N/A  | 1.36 | 0.61 |
| YGR060W | ERG25  |        | 0    | iSNR48     | 0.93  | 0.13 | 0.01 |
| YGR061C | ADE6   |        | 0    | iYGR061C   | #N/A  | 0.92 | 0.44 |
| YGR062C | COX18  | OXA2   |      | iYGR062C   | 0.93  | 1.23 | 0.55 |
| YGR063C | SPT4   |        | 0    | iYGR064W   | -0.33 | 0.08 | 0.01 |
| YGR064W |        | 0      | #N/A | iYGR062C   | -0.30 | 1.23 | 0.55 |

|         |        |                |      |            |       |      |      |
|---------|--------|----------------|------|------------|-------|------|------|
| YGR065C | VHT1   |                | 0    | iYGR065C   | #N/A  | 1.90 | 0.79 |
| YGR066C |        | 0              | #N/A | iYGR066C   | 1.70  | 1.86 | 0.78 |
| YGR067C |        | 0              | #N/A | iYGR067C   | #N/A  | 0.55 | 0.23 |
| YGR068C |        | 0              | #N/A | iYGR069W   | 0.05  | 0.98 | 0.45 |
| YGR069W |        | 0              | #N/A | iYGR067C   | #N/A  | 0.55 | 0.23 |
| YGR070W | ROM1   | SKC1           |      | iYGR069W   | #N/A  | 0.98 | 0.45 |
| YGR071C |        | 0              | #N/A | iYGR071C   | 0.42  | #N/A | #N/A |
| YGR072W | UPF3   | SUA6           |      | iYGR071C   | 0.10  | #N/A | #N/A |
| YGR073C |        | 0              | #N/A | iYGR075C   | 0.37  | 1.34 | 0.60 |
| YGR074W | SMD1   | SPP92 Sm D1    |      | iYGR072W   | 0.52  | #N/A | #N/A |
| YGR075C | PRP38  |                | 0    | iYGR075C   | 0.33  | 1.34 | 0.60 |
| YGR076C | MRPL25 | YMR26          |      | iYGR076C   | 0.96  | 0.94 | 0.43 |
| YGR077C | PEX8   | PAS6           |      | iYGR077C   | 0.83  | 1.72 | 0.74 |
| YGR078C | PAC10  | GIM2 PFD3 RKS2 |      | iYGR078C   | -0.76 | 0.59 | 0.28 |
| YGR079W |        | 0              | #N/A | iYGR078C   | -0.66 | 0.59 | 0.28 |
| YGR080W | TWF1   |                | 0    | iYGR079W   | 0.63  | 1.28 | 0.57 |
| YGR081C |        | 0              |      | iYGR081C   | -0.72 | 1.99 | 0.82 |
| YGR082W | TOM20  | MAS20 MOM19    |      | iYGR081C   | 0.02  | 1.99 | 0.82 |
| YGR083C | GCD2   | GCD12          |      | iYGR083C   | -0.68 | 1.58 | 0.68 |
| YGR084C | MRP13  |                | 0    | iYGR084C   | 0.16  | #N/A | #N/A |
| YGR085C | RPL11B |                | 0    | iYGR085C   | #N/A  | #N/A | #N/A |
| YGR086C |        | 0              |      | iYGR086C   | 1.16  | 0.38 | 0.12 |
| YGR087C | PDC6   |                | 0    | iYGR087C-  | #N/A  | 1.80 | 0.75 |
| YGR088W | CTT1   |                | 0    | iYGR087C-  | #N/A  | 1.41 | 0.64 |
| YGR089W |        | 0              |      | iYGR088W   | #N/A  | 2.00 | 0.82 |
| YGR090W |        | 0              |      | itT(UGU)G1 | #N/A  | 0.64 | 0.30 |
| YGR091W | PRP31  |                | 0    | iYGR090W   | #N/A  | #N/A | #N/A |
| YGR092W | DBF2   |                | 0    | iYGR091W   | -1.20 | 0.51 | 0.20 |
| YGR093W |        | 0              | #N/A | iYGR092W   | #N/A  | 1.53 | 0.66 |
| YGR094W | VAS1   |                | 0    | iYGR093W   | #N/A  | #N/A | #N/A |
| YGR095C | RRP46  |                | 0    | iYGR095C   | #N/A  | 1.81 | 0.76 |
| YGR096W |        | 0              |      | iYGR095C   | #N/A  | 1.81 | 0.76 |
| YGR097W | ASK10  |                | 0    | iYGR096W   | #N/A  | 0.40 | 0.14 |
| YGR098C | ESP1   |                | 0    | iYGR098C   | #N/A  | 2.81 | 0.94 |
| YGR099W | TEL2   |                | 0    | iYGR098C   | #N/A  | 2.81 | 0.94 |
| YGR100W | MDR1   | GYP2 MIC1      |      | iYGR099W   | 0.06  | 2.19 | 0.86 |
| YGR101W | PCP1   | MDM37 RBD1     |      | iYGR100W   | 0.66  | #N/A | #N/A |
| YGR102C |        | 0              | #N/A | iYGR102C   | 0.64  | 2.05 | 0.83 |
| YGR103W | NOP7   | YPH1           |      | iYGR102C   | -1.38 | 2.05 | 0.83 |
| YGR104C | SRB5   |                | 0    | iYGR104C   | 0.14  | 2.10 | 0.83 |
| YGR105W | VMA21  |                | 0    | iYGR104C   | -0.11 | 2.10 | 0.83 |
| YGR106C |        | 0              | #N/A | iYGR106C   | 0.88  | #N/A | #N/A |
| YGR107W |        | 0              | #N/A | iYGRWdelta | #N/A  | 0.93 | 0.44 |
| YGR108W | CLB1   | SCB1           |      | iYGR107W   | -1.15 | 0.45 | 0.20 |
| YGR109C | CLB6   |                | 0    | iYGR109C   | #N/A  | 1.72 | 0.73 |
| YGR110W |        | 0              | #N/A | iYGRdelta  | 3.78  | 2.33 | 0.89 |
| YGR111W |        | 0              | #N/A | iYGR110W   | 1.17  | 1.42 | 0.64 |
| YGR112W | SHY1   |                | 0    | iYGR111W   | -0.93 | 1.75 | 0.74 |
| YGR113W | DAM1   |                | 0    | iYGR112W   | #N/A  | 3.22 | 0.97 |
| YGR114C |        | 0              | #N/A | iYGR116W   | #N/A  | #N/A | #N/A |
| YGR115C |        | 0              | #N/A | iYGR116W   | #N/A  | #N/A | #N/A |

|         |         |                 |              |       |      |      |
|---------|---------|-----------------|--------------|-------|------|------|
| YGR116W | SPT6    | CRE2 SSN20      | iYGR113W     | -0.76 | 1.15 | 0.54 |
| YGR117C | 0       | #N/A            | iYGR117C     | 0.00  | 0.28 | 0.06 |
| YGR118W | RPS23A  |                 | 0 iYGR117C   | -0.69 | 0.28 | 0.06 |
| YGR119C | NUP57   |                 | 0 iYGR119C   | #N/A  | 2.19 | 0.86 |
| YGR120C | SEC35   | SEC35           | iYGR120C     | 0.54  | 0.52 | 0.21 |
| YGR121C | MEP1    | AMT1            | iYGR121C     | 1.56  | 1.20 | 0.54 |
| YGR122W | 0       | #N/A            | iYGR121C     | 0.21  | 1.20 | 0.54 |
| YGR123C | PPT1    |                 | 0 iYGR123C   | -0.59 | 1.33 | 0.60 |
| YGR124W | ASN2    |                 | 0 itl(AAU)G  | -0.20 | 0.78 | 0.37 |
| YGR125W | 0       | #N/A            | iYGR124W     | 0.44  | #N/A | #N/A |
| YGR126W | 0       | #N/A            | iYGR125W     | #N/A  | 1.55 | 0.67 |
| YGR127W | 0       | #N/A            | iYGR126W     | 1.31  | 1.26 | 0.57 |
| YGR128C | UTP8    |                 | 0 iYGR128C   | #N/A  | 1.79 | 0.75 |
| YGR129W | SYF2    | NTC31           | iYGR128C     | -1.33 | 1.79 | 0.75 |
| YGR130C | 0       | #N/A            | iYGR130C     | 0.11  | 2.20 | 0.87 |
| YGR131W | 0       | #N/A            | iYGR130C     | 2.73  | 2.20 | 0.87 |
| YGR132C | PHB1    |                 | 0 iYGR132C   | 0.92  | 2.13 | 0.85 |
| YGR133W | PEX4    | PAS2 UBC10      | iYGR132C     | 0.31  | 2.13 | 0.85 |
| YGR134W | CAF130  |                 | 0 iYGR133W   | -0.28 | 2.60 | 0.92 |
| YGR135W | PRE9    |                 | 0 iYGR134W   | -0.08 | 2.38 | 0.90 |
| YGR136W | LSB1    |                 | 0 iYGR135W   | 1.23  | 0.65 | 0.29 |
| YGR137W | 0       | #N/A            | iYGR135W     | 1.19  | 0.65 | 0.29 |
| YGR138C | TPO2    |                 | 0 iYGR138C   | 0.91  | 0.11 | 0.01 |
| YGR139W | 0       | #N/A            | iYGR138C     | #N/A  | 0.11 | 0.01 |
| YGR140W | CBF2    | CBF3A CEP2 CSL5 | iYGR139W     | #N/A  | 0.98 | 0.44 |
| YGR141W | VPS62   |                 | 0 iYGR140W   | 0.19  | 2.77 | 0.94 |
| YGR142W | BTN2    |                 | 0 iYGR141W   | 2.65  | 1.06 | 0.48 |
| YGR143W | SKN1    |                 | 0 itA(AGC)G  | 0.94  | 0.87 | 0.40 |
| YGR144W | THI4    | ESP35 MOL1      | itG(UCC)G    | 2.29  | 1.51 | 0.66 |
| YGR145W | 0       |                 | 0 iYGR144W   | -0.48 | 3.92 | 0.99 |
| YGR146C | 0       | #N/A            | iYGR146C     | 1.31  | 0.56 | 0.24 |
| YGR147C | NAT2    |                 | 0 iYGR147C   | -0.09 | 3.28 | 0.98 |
| YGR148C | RPL24B  | RPL30B          | iYGR148C     | -0.86 | #N/A | #N/A |
| YGR149W | 0       | #N/A            | iYGR148C     | 2.15  | #N/A | #N/A |
| YGR150C | 0       | #N/A            | iYGR150C     | 1.74  | 1.65 | 0.71 |
| YGR151C | 0       | #N/A            | iYGR152C     | -1.97 | 2.14 | 0.85 |
| YGR152C | RSR1    | BUD1            | iYGR152C     | -0.70 | 2.14 | 0.85 |
| YGR153W | TOS10   | #N/A            | iYGR152C     | #N/A  | 2.14 | 0.85 |
| YGR154C | 0       | #N/A            | iYGR154C     | #N/A  | 0.49 | 0.20 |
| YGR155W | CYS4    | NHS5 STR4 VMA41 | iYGR154C     | -0.87 | 0.49 | 0.20 |
| YGR156W | PTI1    |                 | 0 iYGR155W   | -1.17 | 2.24 | 0.87 |
| YGR157W | CHO2    | PEM1            | iYGR156W     | -0.06 | 0.35 | 0.11 |
| YGR158C | MTR3    |                 | 0 iYGR158C   | 0.48  | 2.49 | 0.91 |
| YGR159C | NSR1    | SHE5            | iYGR160W     | -1.51 | 1.23 | 0.55 |
| YGR160W | FYV13   | #N/A            | iYGR158C     | -6.55 | 2.49 | 0.91 |
| YGR161C | 0       |                 | 0 iYGR161C-( | 1.44  | 0.39 | 0.16 |
| YGR162W | TIF4631 |                 | 0 itV(AAC)G2 | -0.73 | 0.29 | 0.08 |
| YGR163W | GTR2    |                 | 0 iYGR162W   | 0.35  | 1.40 | 0.62 |
| YGR164W | 0       | #N/A            | iYGR162W     | #N/A  | 1.40 | 0.62 |
| YGR165W | 0       |                 | 0 itR(UCU)G2 | -0.72 | 1.14 | 0.52 |
| YGR166W | KRE11   | TRS65           | iYGR165W     | 0.22  | 2.06 | 0.83 |

|         |       |                  |              |       |      |      |
|---------|-------|------------------|--------------|-------|------|------|
| YGR167W | CLC1  | SCD4             | iYGR166W     | 0.26  | 2.82 | 0.95 |
| YGR168C | 0     | #N/A             | iYGR168C     | 1.50  | 1.42 | 0.64 |
| YGR169C | PUS6  |                  | 0 iYGR169C   | 0.15  | 0.49 | 0.23 |
| YGR170W | PSD2  |                  | 0 iYGR169C   | -0.09 | 0.49 | 0.23 |
| YGR171C | MSM1  |                  | 0 iYGR171C   | 0.39  | 1.96 | 0.81 |
| YGR172C | YIP1  |                  | 0 iYGR172C   | -0.86 | 1.74 | 0.75 |
| YGR173W | 0     | GIR1             | iYGR172C     | -0.07 | 1.74 | 0.75 |
| YGR174C | CBP4  |                  | 0 iYGR174C   | 1.59  | 1.35 | 0.60 |
| YGR175C | ERG1  |                  | 0 iYGR175C   | 1.11  | 0.39 | 0.17 |
| YGR176W | 0     | #N/A             | iYGR175C     | -0.61 | 0.39 | 0.17 |
| YGR177C | ATF2  |                  | 0 iYGR177C   | -0.42 | 0.76 | 0.35 |
| YGR178C | PBP1  | MRS16            | iYGR178C     | -0.39 | 1.23 | 0.57 |
| YGR179C | OKP1  |                  | 0 iYGR179C   | -0.98 | 2.68 | 0.94 |
| YGR180C | RNR4  | CRT3             | iYGR180C     | -0.79 | 0.55 | 0.23 |
| YGR181W | TIM13 |                  | 0 itL(CAA)G3 | 2.59  | 1.75 | 0.75 |
| YGR182C | 0     | #N/A             | iYGR182C     | 2.54  | 0.58 | 0.26 |
| YGR183C | QCR9  | UCR9             | iYGR183C     | 2.82  | 1.56 | 0.68 |
| YGR184C | UBR1  | PTR1             | iYGR184C     | -0.23 | 1.72 | 0.75 |
| YGR185C | TYS1  | TTS1 TYRRS       | iYGR185C     | -0.25 | 3.67 | 0.99 |
| YGR186W | TFG1  | RAP74 SSU71      | iYGR185C     | -0.02 | 3.67 | 0.99 |
| YGR187C | HGH1  |                  | 0 iYGR187C   | #N/A  | 2.45 | 0.91 |
| YGR188C | BUB1  |                  | 0 iYGR188C   | -1.25 | 2.43 | 0.90 |
| YGR189C | CRH1  |                  | 0 iYGR189C   | 0.18  | 0.67 | 0.32 |
| YGR190C | 0     | #N/A             | iYGR191W     | #N/A  | #N/A | #N/A |
| YGR191W | HIP1  |                  | 0 itW(CCA)G2 | -0.27 | 1.02 | 0.46 |
| YGR192C | TDH3  | GLD1 HSP35 HSP36 | iYGR192C     | -1.10 | 0.14 | 0.01 |
| YGR193C | PDX1  |                  | 0 iYGR193C   | 0.10  | 2.01 | 0.81 |
| YGR194C | XKS1  |                  | 0 iYGR194C   | 1.02  | 1.19 | 0.53 |
| YGR195W | SKI6  | ECM20 RRP41      | iYGR194C     | 1.00  | 1.19 | 0.53 |
| YGR196C | FYV8  |                  | 0 iYGR196C   | 1.39  | 3.50 | 0.98 |
| YGR197C | SNG1  |                  | 0 iYGR197C   | 0.96  | 1.56 | 0.69 |
| YGR198W | 0     | #N/A             | iYGR197C     | #N/A  | 1.56 | 0.69 |
| YGR199W | PMT6  |                  | 0 iYGR198W   | 0.58  | 1.25 | 0.56 |
| YGR200C | ELP2  | TOT2             | iYGR200C     | -0.34 | 1.63 | 0.71 |
| YGR201C | 0     | #N/A             | iYGR201C     | 0.79  | 0.54 | 0.22 |
| YGR202C | PCT1  | BSR2 CCT1        | iYGR202C     | #N/A  | 0.55 | 0.25 |
| YGR203W | 0     | #N/A             | iYGR202C     | -0.39 | 0.55 | 0.25 |
| YGR204W | ADE3  |                  | 0 iYGR203W   | -0.28 | #N/A | #N/A |
| YGR205W | 0     | #N/A             | iYGR204W     | 0.39  | 1.38 | 0.62 |
| YGR206W | 0     | #N/A             | iYGR205W     | #N/A  | 1.52 | 0.66 |
| YGR207C | 0     | #N/A             | iYGR207C     | 0.91  | 1.48 | 0.67 |
| YGR208W | SER2  |                  | 0 iYGR207C   | -0.94 | 1.48 | 0.67 |
| YGR209C | TRX2  | LMA1             | iYGR209C     | 0.03  | 1.50 | 0.65 |
| YGR210C | 0     | #N/A             | iYGR210C     | -0.52 | #N/A | #N/A |
| YGR211W | ZPR1  |                  | 0 iYGR210C   | -0.54 | #N/A | #N/A |
| YGR212W | 0     | #N/A             | iYGR211W     | 3.84  | 0.51 | 0.23 |
| YGR213C | RTA1  |                  | 0 iYGR213C   | 2.17  | 0.58 | 0.25 |
| YGR214W | RPS0A | NAB1 NAB1A YST1  | iYGR213C     | -1.45 | 0.58 | 0.25 |
| YGR215W | RSM27 |                  | 0 iYGR214W   | 0.39  | 4.28 | 1.00 |
| YGR216C | GPI1  |                  | 0 iYGR216C   | 0.68  | 2.27 | 0.88 |
| YGR217W | CCH1  |                  | 0 iYGR216C   | #N/A  | 2.27 | 0.88 |



|         |         |             |             |       |      |      |
|---------|---------|-------------|-------------|-------|------|------|
| YGR218W | CRM1    | KAP124 XPO1 | iYGRWdelta  | 0.09  | 1.47 | 0.65 |
| YGR219W | 0       | #N/A        | iYGR218W    | -0.09 | #N/A | #N/A |
| YGR220C | MRPL9   |             | 0 iYGR220C  | 0.01  | 2.65 | 0.93 |
| YGR221C | TOS2    |             | 0 iYGR221C  | 0.36  | 0.93 | 0.43 |
| YGR222W | PET54   |             | 0 iSNR7-S   | 0.50  | 1.75 | 0.75 |
| YGR223C | 0       |             | 0 iYGR223C  | 1.20  | 1.48 | 0.65 |
| YGR224W | AZR1    |             | 0 iYGR223C  | 0.39  | 1.48 | 0.65 |
| YGR225W | AMA1    | SPO70       | iYGR224W    | #N/A  | 2.84 | 0.95 |
| YGR226C | 0       | #N/A        | iYGR226C    | #N/A  | #N/A | #N/A |
| YGR227W | DIE2    | ALG10       | iYGR226C    | 0.08  | #N/A | #N/A |
| YGR228W | 0       | #N/A        | iYGR227W    | -1.42 | #N/A | #N/A |
| YGR229C | SMI1    | KNR4        | iYGR229C    | -0.79 | 1.38 | 0.61 |
| YGR230W | BNS1    |             | 0 iYGR229C  | 1.49  | 1.38 | 0.61 |
| YGR231C | PHB2    |             | 0 iYGR231C  | 0.51  | 3.17 | 0.97 |
| YGR232W | NAS6    |             | 0 iYGR231C  | 0.38  | 3.17 | 0.97 |
| YGR233C | PHO81   |             | 0 iYGR233C- | -0.27 | 0.89 | 0.43 |
| YGR234W | YHB1    | YHB4        | iYGR233C-   | 0.13  | #N/A | #N/A |
| YGR235C | 0       | #N/A        | iYGR235C    | 0.17  | 3.20 | 0.97 |
| YGR236C | SPG1    |             | 0 iYGR236C  | 6.23  | 1.53 | 0.67 |
| YGR237C | 0       | #N/A        | iYGR237C    | 1.06  | 1.96 | 0.81 |
| YGR238C | KEL2    |             | 0 iYGR238C  | 0.18  | 1.65 | 0.72 |
| YGR239C | PEX21   |             | 0 iYGR239C  | 1.02  | 1.21 | 0.54 |
| YGR240C | PFK1    |             | 0 iYGR240C  | #N/A  | #N/A | #N/A |
| YGR241C | YAP1802 |             | 0 iYGR242W  | -1.23 | #N/A | #N/A |
| YGR242W | 0       | #N/A        | iYGR240C    | #N/A  | #N/A | #N/A |
| YGR243W | 0       |             | 0 iYGR242W  | #N/A  | #N/A | #N/A |
| YGR244C | LSC2    |             | 0 iYGR244C  | 0.35  | 1.15 | 0.53 |
| YGR245C | SDA1    |             | 0 iYGR245C  | -0.96 | #N/A | #N/A |
| YGR246C | BRF1    | PCF4 TDS4   | iYGR246C    | 0.39  | 2.71 | 0.94 |
| YGR247W | CPD1    |             | 0 iYGR246C  | 1.96  | 2.71 | 0.94 |
| YGR248W | SOL4    |             | 0 iYGR247W  | 2.97  | 1.73 | 0.74 |
| YGR249W | MGA1    |             | 0 iYGR248W  | #N/A  | 0.97 | 0.44 |
| YGR250C | 0       | #N/A        | iYGR250C-   | 1.27  | 1.20 | 0.54 |
| YGR251W | 0       | #N/A        | iYGR250C-   | #N/A  | 1.62 | 0.70 |
| YGR252W | GCN5    | ADA4 SWI9   | iYGR251W    | 0.77  | 2.13 | 0.85 |
| YGR253C | PUP2    | DOA5        | iYGR253C-   | 0.52  | 1.24 | 0.56 |
| YGR254W | ENO1    | HSP48       | iYGR253C-   | -1.12 | #N/A | #N/A |
| YGR255C | COQ6    |             | 0 iYGR255C  | 0.78  | 1.13 | 0.52 |
| YGR256W | GND2    |             | 0 iT(UGU)G2 | 0.60  | 1.54 | 0.69 |
| YGR257C | 0       |             | 0 iYGR257C  | -0.75 | 2.14 | 0.84 |
| YGR258C | RAD2    |             | 0 iYGR258C- | 0.89  | 0.97 | 0.44 |
| YGR259C | 0       | #N/A        | iYGR260W    | #N/A  | #N/A | #N/A |
| YGR260W | TNA1    |             | 0 iYGR258C- | 0.25  | 0.80 | 0.37 |
| YGR261C | APL6    | YKS5        | iYGR261C    | 0.10  | 2.28 | 0.87 |
| YGR262C | BUD32   | LDB14       | iYGR262C    | -0.07 | #N/A | #N/A |
| YGR263C | 0       | #N/A        | iYGR263C    | 1.16  | 1.12 | 0.51 |
| YGR264C | MES1    | MESI MetRS  | iYGR265W    | -0.13 | 2.26 | 0.88 |
| YGR265W | 0       | #N/A        | iYGR263C    | #N/A  | 1.12 | 0.51 |
| YGR266W | 0       | #N/A        | iYGR265W    | 1.08  | 2.26 | 0.88 |
| YGR267C | FOL2    |             | 0 iYGR267C  | 0.80  | 1.42 | 0.65 |
| YGR268C | 0       |             | 0 iYGR269W  | -0.23 | 2.14 | 0.84 |

|         |        |                   |             |       |      |      |
|---------|--------|-------------------|-------------|-------|------|------|
| YGR269W | 0      | #N/A              | iYGR267C    | #N/A  | 1.42 | 0.65 |
| YGR270W | YTA7   |                   | 0 iYGR269W  | 0.17  | 2.14 | 0.84 |
| YGR271W | SLH1   |                   | 0 iYGR270W  | -0.27 | 1.95 | 0.80 |
| YGR272C | 0      | #N/A              | iYGR272C    | #N/A  | 1.09 | 0.50 |
| YGR273C | 0      | #N/A              | iYGR273C    | #N/A  | 0.42 | 0.19 |
| YGR274C | TAF1   | TAF130 TAF145 Taf | iYGR274C    | -0.77 | 1.52 | 0.68 |
| YGR275W | RTT102 |                   | 0 iYGR274C  | -1.11 | 1.52 | 0.68 |
| YGR276C | RNH70  | REX1              | iYGR276C    | 0.19  | 1.83 | 0.77 |
| YGR277C | 0      | #N/A              | iYGR277C    | -0.23 | 1.82 | 0.78 |
| YGR278W | CWC22  |                   | 0 iYGR277C  | 0.61  | 1.82 | 0.78 |
| YGR279C | SCW4   |                   | 0 iYGR279C  | 0.07  | 0.36 | 0.13 |
| YGR280C | PXR1   | GNO1              | iYGR280C    | -0.34 | 1.33 | 0.60 |
| YGR281W | YOR1   | YRS1              | iYGR280C    | 0.80  | 1.33 | 0.60 |
| YGR282C | BGL2   |                   | 0 iYGR282C  | 0.58  | 0.47 | 0.18 |
| YGR283C | 0      | #N/A              | iYGR283C    | -0.29 | 1.25 | 0.56 |
| YGR284C | ERV29  |                   | 0 iYGR284C  | 0.79  | 1.21 | 0.56 |
| YGR285C | ZUO1   |                   | 0 iYGR285C  | -0.82 | 1.35 | 0.61 |
| YGR286C | BIO2   |                   | 0 iYGR286C- | -0.20 | 2.17 | 0.84 |
| YGR287C | 0      | #N/A              | iYGR287C    | 1.80  | 2.01 | 0.82 |
| YGR288W | MAL13  |                   | 0 iYGR287C  | #N/A  | 2.01 | 0.82 |
| YGR289C | MAL11  | AGT1              | iYGR290W    | 3.11  | 3.51 | 0.98 |
| YGR290W | 0      | #N/A              | iYGR288W-   | #N/A  | 2.57 | 0.92 |
| YGR291C | 0      | #N/A              | iYGR291C    | #N/A  | 1.13 | 0.53 |
| YGR292W | MAL12  |                   | 0 iYGR291C  | 0.73  | 1.13 | 0.53 |
| YGR293C | 0      | #N/A              | iYGR294W    | 2.07  | 2.13 | 0.85 |
| YGR294W | 0      | #N/A              | iYGR292W-   | 1.71  | 1.27 | 0.57 |
| YGR295C | COS6   |                   | 0 iYGR295C- | 2.22  | #N/A | #N/A |
| YGR296W | YRF1-3 | YRF1              | iYGR295C-   | -0.07 | #N/A | #N/A |
| YHL001W | RPL14B |                   | 0 iYHL002W  | -0.64 | 0.83 | 0.38 |
| YHL002W | HSE1   |                   | 0 iYHL003C  | 0.14  | 1.51 | 0.66 |
| YHL003C | LAG1   |                   | 0 iYHL003C  | 0.93  | 1.51 | 0.66 |
| YHL004W | MRP4   |                   | 0 iYHL007C  | -0.36 | 0.91 | 0.43 |
| YHL005C | 0      | #N/A              | iYHL004W    | #N/A  | #N/A | #N/A |
| YHL006C | SHU1   |                   | 0 iYHL004W  | #N/A  | #N/A | #N/A |
| YHL007C | STE20  |                   | 0 iYHL007C  | -0.41 | 0.91 | 0.43 |
| YHL008C | 0      | #N/A              | iYHL008C    | -0.13 | 0.75 | 0.34 |
| YHL009C | YAP3   |                   | 0 iYHL009C  | #N/A  | #N/A | #N/A |
| YHL010C | 0      | #N/A              | iYHL010C    | #N/A  | #N/A | #N/A |
| YHL011C | PRS3   |                   | 0 iYHL011C  | -0.72 | 1.15 | 0.52 |
| YHL012W | 0      | #N/A              | iYHL013C    | 2.25  | 1.34 | 0.60 |
| YHL013C | 0      | #N/A              | iYHL013C    | -0.63 | 1.34 | 0.60 |
| YHL014C | YLF2   | YLF1              | iYHL014C    | -0.91 | 1.66 | 0.73 |
| YHL015W | RPS20  | URP2              | iYHL016C    | -1.98 | 1.22 | 0.54 |
| YHL016C | DUR3   |                   | 0 iYHL016C  | 3.72  | 1.22 | 0.54 |
| YHL017W | 0      | #N/A              | iYHL018W    | #N/A  | #N/A | #N/A |
| YHL018W | 0      | #N/A              | iYHL019C    | #N/A  | 1.83 | 0.77 |
| YHL019C | APM2   |                   | 0 iYHL019C  | #N/A  | 1.83 | 0.77 |
| YHL020C | OPI1   |                   | 0 iYHL020C  | -0.06 | #N/A | #N/A |
| YHL021C | 0      |                   | 0 iYHL021C  | 2.42  | 0.72 | 0.32 |
| YHL022C | SPO11  |                   | 0 iYHL022C  | #N/A  | 1.41 | 0.62 |
| YHL023C | 0      |                   | 0 iYHL023C  | 0.54  | 2.44 | 0.90 |



|           |        |                 |      |              |       |      |      |
|-----------|--------|-----------------|------|--------------|-------|------|------|
| YHL024W   | RIM4   |                 | 0    | iYHL025W     | 0.97  | 0.89 | 0.41 |
| YHL025W   | SNF6   |                 |      | 0 iYHL026C   | -0.46 | 0.94 | 0.44 |
| YHL026C   |        | 0               | #N/A | iYHL026C     | -0.42 | 0.94 | 0.44 |
| YHL027W   | RIM101 | RIM1            |      | iYHL028W     | 1.13  | 1.13 | 0.52 |
| YHL028W   | WSC4   | YHC8            |      | iYHL029C     | #N/A  | 0.35 | 0.10 |
| YHL029C   |        | 0               | #N/A | iYHL029C     | 0.03  | 0.35 | 0.10 |
| YHL030W   | ECM29  |                 |      | 0 iYHL031C   | -0.07 | 1.54 | 0.67 |
| YHL031C   | GOS1   |                 |      | 0 iYHL031C   | -0.50 | 1.54 | 0.67 |
| YHL032C   | GUT1   |                 |      | 0 iYHL032C   | 0.11  | 2.63 | 0.93 |
| YHL033C   | RPL8A  | MAK7            |      | iYHL033C     | -1.58 | #N/A | #N/A |
| YHL034C   | SBP1   | SSB1 SSBR1      |      | iYHL034C     | 0.53  | #N/A | #N/A |
| YHL035C   |        | 0               |      | 0 iYHL035C   | -0.32 | 0.91 | 0.42 |
| YHL036W   | MUP3   |                 |      | 0 iYHL037C   | 0.56  | 1.53 | 0.67 |
| YHL037C   |        | 0               | #N/A | iYHL037C     | #N/A  | 1.53 | 0.67 |
| YHL038C   | CBP2   |                 |      | 0 iYHL038C   | -0.05 | 1.86 | 0.77 |
| YHL039W   |        | 0               | #N/A | iYHL040C     | 0.08  | 2.13 | 0.85 |
| YHL040C   | ARN1   |                 |      | 0 iYHL040C   | -0.41 | 2.13 | 0.85 |
| YHL041W   |        | 0               | #N/A | iYHL042W     | #N/A  | 1.25 | 0.56 |
| YHL042W   |        | 0               | #N/A | iYHL043W     | #N/A  | #N/A | #N/A |
| YHL043W   | ECM34  |                 |      | 0 iYHL044W   | 2.69  | 0.77 | 0.36 |
| YHL044W   |        | 0               | #N/A | iYHL045W     | 1.21  | 1.77 | 0.75 |
| YHL045W   |        | 0               | #N/A | iYHL046C     | #N/A  | #N/A | #N/A |
| YHL046C   |        | 0               | #N/A | iYHL046C     | 1.53  | #N/A | #N/A |
| YHL047C   | ARN2   | TAF1            |      | iYHL047C-0   | 0.28  | #N/A | #N/A |
| YHL048W   | COS8   |                 |      | 0 iYHL049C-1 | 1.98  | 0.85 | 0.40 |
| YHL049C   |        | 0               | #N/A | iYHL049C-0   | 0.62  | 0.53 | 0.23 |
| YHL050C   |        | 0               | #N/A | iYHL050C     | 0.02  | #N/A | #N/A |
| YHR001W   | OSH7   |                 |      | 0 iCEN8      | 0.73  | 1.24 | 0.57 |
| YHR001W-A | QCR10  |                 |      | 0 iYHR001W   | 0.09  | 1.38 | 0.63 |
| YHR002W   | LEU5   |                 |      | 0 iYHR001W-  | 1.12  | #N/A | #N/A |
| YHR003C   |        | 0               | #N/A | iYHR003C     | -0.37 | 1.08 | 0.49 |
| YHR004C   | NEM1   |                 |      | 0 iYHR004C   | #N/A  | 0.90 | 0.41 |
| YHR005C   | GPA1   | CDC70 DAC1 SCG1 |      | iYHR005C     | -0.21 | 0.44 | 0.16 |
| YHR006W   | STP2   |                 |      | 0 iYHRCdelta | 0.08  | 1.35 | 0.60 |
| YHR007C   | ERG11  | CYP51           |      | iYHR007C     | 0.28  | #N/A | #N/A |
| YHR008C   | SOD2   |                 |      | 0 iYHR008C   | 0.45  | 0.67 | 0.31 |
| YHR009C   |        | 0               | #N/A | iYHR009C     | 0.77  | #N/A | #N/A |
| YHR010W   | RPL27A | RPL27           |      | iYHR009C     | -1.02 | #N/A | #N/A |
| YHR011W   | DIA4   |                 |      | 0 iYHR010W   | -0.31 | #N/A | #N/A |
| YHR012W   | VPS29  | PEP11           |      | iYHR011W     | 0.90  | 2.09 | 0.84 |
| YHR013C   | ARD1   |                 |      | 0 iYHR013C   | -0.10 | 1.51 | 0.68 |
| YHR014W   | SPO13  |                 |      | 0 iYHR013C   | 0.21  | 1.51 | 0.68 |
| YHR015W   | MIP6   |                 |      | 0 itQ(UUG)H  | 0.23  | 0.52 | 0.21 |
| YHR016C   | YSC84  | LSB4            |      | iYHR016C     | 0.58  | 2.00 | 0.82 |
| YHR017W   | YSC83  |                 |      | 0 iYHR016C   | 2.23  | 2.00 | 0.82 |
| YHR018C   | ARG4   |                 |      | 0 iYHR018C   | 2.47  | 0.56 | 0.25 |
| YHR019C   | DED81  |                 |      | 0 iYHR019C   | -0.23 | 1.09 | 0.51 |
| YHR020W   |        | 0               | #N/A | iYHR019C     | -0.23 | 1.09 | 0.51 |
| YHR021C   | RPS27B |                 |      | 0 iYHR021C   | -0.46 | 0.18 | 0.02 |
| YHR022C   |        | 0               | #N/A | iYHR022C     | #N/A  | #N/A | #N/A |
| YHR023W   | MYO1   |                 |      | 0 iYHR022C   | #N/A  | #N/A | #N/A |

|           |        |                |              |       |      |      |
|-----------|--------|----------------|--------------|-------|------|------|
| YHR024C   | MAS2   | MIF2           | iYHR024C     | -0.04 | 2.21 | 0.87 |
| YHR025W   | THR1   |                | 0 iYHR024C   | -0.24 | 2.21 | 0.87 |
| YHR026W   | PPA1   | VMA16          | iYHR025W     | 1.11  | 2.07 | 0.84 |
| YHR027C   | RPN1   | HRD2 NAS1      | iYHR027C     | -0.19 | 3.52 | 0.98 |
| YHR028C   | DAP2   | DPP2           | iYHR028C     | 0.33  | 0.99 | 0.47 |
| YHR029C   | 0      | #N/A           | iYHR029C     | #N/A  | 0.91 | 0.43 |
| YHR030C   | SLT2   | BYC2 MPK1 SLK2 | iYHR030C     | 0.53  | #N/A | #N/A |
| YHR031C   | RRM3   | RTT104         | iYHR031C     | 0.32  | #N/A | #N/A |
| YHR032W   | 0      | #N/A           | iYHR031C     | -0.40 | #N/A | #N/A |
| YHR033W   | 0      | #N/A           | iYHR032W     | #N/A  | 0.22 | 0.06 |
| YHR034C   | 0      |                | 0 iYHR034C   | -0.20 | 2.51 | 0.91 |
| YHR035W   | 0      | #N/A           | iYHR034C     | #N/A  | 2.51 | 0.91 |
| YHR036W   | 0      | #N/A           | iYHR035W     | -0.16 | 3.40 | 0.97 |
| YHR037W   | PUT2   |                | 0 iYHR036W   | 0.07  | #N/A | #N/A |
| YHR038W   | FIL1   | FIL1 KIM4      | iYHR037W     | -0.07 | #N/A | #N/A |
| YHR039BC  | #N/A   | #N/A           | #N/A         | #N/A  | #N/A | #N/A |
| YHR039C   | MSC7   |                | 0 iYHR039C   | 0.44  | #N/A | #N/A |
| YHR040W   | 0      |                | 0 iYHR039C-E | -0.12 | 2.31 | 0.89 |
| YHR041C   | SRB2   | HRS2           | iYHR041C     | -0.33 | 2.76 | 0.94 |
| YHR042W   | NCP1   | CPR1           | iYHR041C     | -0.50 | 2.76 | 0.94 |
| YHR043C   | DOG2   |                | 0 iYHR043C   | 1.38  | 1.87 | 0.79 |
| YHR044C   | DOG1   |                | 0 iYHR044C   | 1.32  | #N/A | #N/A |
| YHR045W   | 0      | #N/A           | iYHR044C     | -0.04 | #N/A | #N/A |
| YHR046C   | INM1   |                | 0 iYHR046C   | -0.02 | 1.40 | 0.63 |
| YHR047C   | AAP1'  | AAP1           | iYHR047C-C   | -0.26 | #N/A | #N/A |
| YHR048W   | 0      | #N/A           | iYHR047C-2   | 0.82  | #N/A | #N/A |
| YHR049C-A | 0      | #N/A           | iYHR049C-A   | 0.24  | 0.69 | 0.31 |
| YHR049W   | FSH1   |                | 0 iYHR048W   | -0.02 | 1.09 | 0.50 |
| YHR050W   | SMF2   |                | 0 iYHR049C-A | 0.87  | 0.69 | 0.31 |
| YHR051W   | COX6   |                | 0 iYHR050W   | #N/A  | 1.17 | 0.53 |
| YHR052W   | CIC1   | NSA3           | iYHR051W     | -0.85 | #N/A | #N/A |
| YHR053C   | CUP1-1 | CUP1           | iYHR053C     | 2.01  | 2.31 | 0.89 |
| YHR054C   | 0      | #N/A           | iYHR054C     | 2.09  | 1.07 | 0.48 |
| YHR055C   | CUP1-2 | CUP1           | iYHR055C     | 2.99  | 2.65 | 0.93 |
| YHR056C   | RSC30  |                | 0 iYHR056C   | 2.20  | 2.33 | 0.88 |
| YHR057C   | CPR2   | CYP2           | iYHR057C     | 0.10  | #N/A | #N/A |
| YHR058C   | MED6   |                | 0 iYHR058C   | #N/A  | 1.54 | 0.68 |
| YHR059W   | FYV4   |                | 0 iYHR058C   | #N/A  | 1.54 | 0.68 |
| YHR060W   | VMA22  | CEV1 VPH6      | iYHR059W     | 0.03  | 1.82 | 0.77 |
| YHR061C   | GIC1   |                | 0 iYHR061C   | 1.62  | 1.23 | 0.55 |
| YHR062C   | RPP1   |                | 0 iYHR062C   | #N/A  | #N/A | #N/A |
| YHR063C   | PAN5   |                | 0 iYHR063C   | -0.02 | 0.77 | 0.35 |
| YHR064C   | SSZ1   | PDR13          | iYHR064C     | -1.24 | #N/A | #N/A |
| YHR065C   | RRP3   |                | 0 iYHR065C   | -0.31 | 2.48 | 0.91 |
| YHR066W   | SSF1   |                | 0 iYHR065C   | -0.69 | 2.48 | 0.91 |
| YHR067W   | 0      | HTD2           | iYHR066W     | 0.61  | 0.79 | 0.37 |
| YHR068W   | DYS1   |                | 0 iYHR067W   | -0.31 | 1.28 | 0.59 |
| YHR069C   | RRP4   |                | 0 iYHR069C   | -0.58 | 1.66 | 0.71 |
| YHR070W   | TRM5   |                | 0 iYHR069C   | #N/A  | 1.66 | 0.71 |
| YHR071W   | PCL5   |                | 0 iYHR070W   | 1.25  | 0.36 | 0.11 |
| YHR072W   | ERG7   |                | 0 itF(GAA)H1 | 0.52  | #N/A | #N/A |

|          |       |                |       |          |       |      |      |
|----------|-------|----------------|-------|----------|-------|------|------|
| YHR073W  | OSH3  |                | 0     | iYHR072W | -0.03 | #N/A | #N/A |
| YHR074W  | QNS1  |                | 0     | iYHR073W | 0.02  | 1.93 | 0.80 |
| YHR075C  | PPE1  | MRPS2          |       | iYHR075C | 1.63  | #N/A | #N/A |
| YHR076W  |       | 0              | 0     | iYHR075C | -0.22 | #N/A | #N/A |
| YHR077C  | NMD2  | IFS1 SUA1 UPF2 |       | iYHR077C | 0.21  | 2.45 | 0.91 |
| YHR078W  |       | 0              | #N/A  | iYHR077C | #N/A  | 2.45 | 0.91 |
| YHR079BC | #N/A  | #N/A           |       | #N/A     | #N/A  | #N/A | #N/A |
| YHR079C  | IRE1  | ERN1           |       | iYHR079C | 0.77  | #N/A | #N/A |
| YHR080C  |       | 0              | #N/A  | iYHR080C | #N/A  | 1.77 | 0.76 |
| YHR081W  |       | 0              | YC1D  | iYHR080C | #N/A  | 1.77 | 0.76 |
| YHR082C  | KSP1  |                | 0     | iYHR082C | -0.12 | #N/A | #N/A |
| YHR083W  |       | 0              | FMP20 | iYHR082C | -0.48 | #N/A | #N/A |
| YHR084W  | STE12 |                | 0     | iYHR083W | -1.88 | 1.87 | 0.79 |
| YHR085W  |       | 0              |       | iYHR084W | -3.31 | #N/A | #N/A |
| YHR086W  | NAM8  | MRE2 MUD15     |       | iYHR085W | -0.45 | 2.83 | 0.94 |
| YHR087W  |       | 0              | #N/A  | iYHR086W | 4.68  | #N/A | #N/A |
| YHR088W  | RPF1  |                | 0     | iYHR087W | #N/A  | 2.62 | 0.93 |
| YHR089C  | GAR1  |                | 0     | iYHR089C | -0.34 | 1.34 | 0.60 |
| YHR090C  | YNG2  | EAF4 NBN1      |       | iYHR090C | 0.78  | 2.48 | 0.90 |
| YHR091C  | MSR1  |                | 0     | iYHR091C | 0.13  | #N/A | #N/A |
| YHR092C  | HXT4  | LGT1 RAG1      |       | iYHR092C | 2.12  | 0.94 | 0.43 |
| YHR093W  | AHT1  |                | 0     | iYHR092C | #N/A  | 0.94 | 0.43 |
| YHR094C  | HXT1  | HOR4           |       | iYHR094C | -0.50 | 0.64 | 0.28 |
| YHR095W  |       | 0              | #N/A  | iYHR094C | #N/A  | 0.64 | 0.28 |
| YHR096C  | HXT5  |                | 0     | iYHR096C | 0.83  | #N/A | #N/A |
| YHR097C  |       | 0              | #N/A  | iYHR097C | 0.98  | 0.85 | 0.39 |
| YHR098C  | SFB3  | LST1           |       | iYHR098C | -0.96 | #N/A | #N/A |
| YHR099W  | TRA1  |                | 0     | iYHR098C | #N/A  | #N/A | #N/A |
| YHR100C  |       | 0              | #N/A  | iYHR100C | -0.57 | 1.67 | 0.72 |
| YHR101C  | BIG1  |                | 0     | iYHR101C | 0.79  | 3.46 | 0.98 |
| YHR102W  | KIC1  | NRK1           |       | iYHR101C | 1.57  | 3.46 | 0.98 |
| YHR103W  | SBE22 |                | 0     | iYHR102W | 0.18  | 0.95 | 0.45 |
| YHR104W  | GRE3  |                | 0     | iYHR103W | 1.21  | 1.13 | 0.52 |
| YHR105W  |       | 0              |       | iYHR104W | #N/A  | 2.15 | 0.84 |
| YHR106W  | TRR2  |                | 0     | iYHR105W | 0.72  | 1.59 | 0.69 |
| YHR107C  | CDC12 | CLA10 PSL7     |       | iYHR107C | 0.03  | #N/A | #N/A |
| YHR108W  | GGA2  |                | 0     | iYHR107C | -0.94 | #N/A | #N/A |
| YHR109W  | CTM1  |                | 0     | iYHR108W | -1.08 | #N/A | #N/A |
| YHR110W  | ERP5  |                | 0     | iYHR109W | -0.30 | 1.56 | 0.70 |
| YHR111W  |       | 0              | YHR1  | iYHR110W | #N/A  | 2.12 | 0.84 |
| YHR112C  |       | 0              | #N/A  | iYHR112C | 0.09  | 2.12 | 0.85 |
| YHR113W  |       | 0              | #N/A  | iYHR112C | 0.49  | 2.12 | 0.85 |
| YHR114W  | BZZ1  | LSB7           |       | iYHR113W | 0.08  | 1.46 | 0.66 |
| YHR115C  |       | 0              |       | iYHR115C | -0.04 | 3.88 | 0.99 |
| YHR116W  |       | 0              |       | iYHR115C | #N/A  | 3.88 | 0.99 |
| YHR117W  | TOM71 | TOM72          |       | iYHR116W | -0.07 | 2.01 | 0.83 |
| YHR118C  | ORC6  |                | 0     | iYHR118C | -0.53 | 3.55 | 0.98 |
| YHR119W  | SET1  | YTX1           |       | iYHR118C | 0.00  | 3.55 | 0.98 |
| YHR120W  | MSH1  |                | 0     | iYHR119W | -0.57 | 1.42 | 0.63 |
| YHR121W  |       | 0              |       | iYHR120W | 0.15  | 1.79 | 0.76 |
| YHR122W  |       | 0              | #N/A  | iYHR121W | 0.32  | 1.85 | 0.77 |

|           |         |                 |      |            |            |       |      |
|-----------|---------|-----------------|------|------------|------------|-------|------|
| YHR123W   | EPT1    |                 | 0    | iYHR122W   | 1.11       | 1.31  | 0.59 |
| YHR124W   | NDT80   |                 |      | 0          | iYHR123W   | 0.85  | 0.06 |
| YHR125W   |         | 0               | #N/A | itF(GAA)H2 | #N/A       | #N/A  | #N/A |
| YHR126C   |         | 0               | #N/A | iYHR126C   | #N/A       | #N/A  | #N/A |
| YHR127W   |         | 0               | #N/A | iYHR126C   | -0.73      | #N/A  | #N/A |
| YHR128W   | FUR1    |                 |      | 0          | iYHR127W   | -0.19 | #N/A |
| YHR129C   | ARP1    | ACT5            |      |            | iYHR129C   | 0.87  | #N/A |
| YHR130C   |         | 0               | #N/A |            | iYHR131C   | 0.17  | 3.10 |
| YHR131C   |         | 0               | #N/A |            | iYHR131C   | -0.11 | 3.10 |
| YHR132C   | ECM14   |                 |      | 0          | iYHR132C   | 0.22  | #N/A |
| YHR133C   |         | 0               |      | 0          | iYHR133C   | #N/A  | 1.25 |
| YHR134W   | WSS1    |                 |      | 0          | iYHR133C   | -0.41 | 1.25 |
| YHR135C   | YCK1    | CKI2            |      |            | iYHR135C   | 0.34  | 3.03 |
| YHR136C   | SPL2    |                 |      | 0          | iYHR136C   | -2.19 | 1.12 |
| YHR137W   | ARO9    |                 |      | 0          | iYHR136C   | 1.07  | 1.12 |
| YHR138C   |         | 0               | #N/A |            | iYHR138C   | 3.47  | #N/A |
| YHR139C   | SPS100  |                 |      | 0          | iYHR139C   | 5.46  | 1.96 |
| YHR139C-A |         | 0               | #N/A |            | iYHR139C-A | 0.88  | #N/A |
| YHR140W   |         | 0               | #N/A |            | iYHR139C-A | 2.40  | #N/A |
| YHR141C   | RPL42B  | MAK18           |      |            | iYHR141C   | -0.50 | #N/A |
| YHR142W   | CHS7    |                 |      | 0          | iYHR141C   | 0.66  | #N/A |
| YHR143W   | DSE2    |                 |      | 0          | iYHR142W   | -0.12 | 1.50 |
| YHR143W-A | RPC10   | RPB12           |      |            | iYHR143W   | -0.40 | #N/A |
| YHR144C   | DCD1    |                 |      | 0          | iYHR144C   | -0.59 | 0.68 |
| YHR145C   |         | 0               | #N/A |            | iYHRCdelta | -1.22 | #N/A |
| YHR146W   | CRP1    |                 |      | 0          | iYHRCdelta | -0.30 | 3.93 |
| YHR147C   | MRPL6   |                 |      | 0          | iYHR147C   | 0.27  | 2.26 |
| YHR148W   | IMP3    |                 |      | 0          | iYHR147C   | -0.17 | 2.26 |
| YHR149C   |         | 0               |      | 0          | iYHR149C   | #N/A  | #N/A |
| YHR150W   |         | 0               |      | 0          | iYHR149C   | 0.54  | #N/A |
| YHR151C   |         | 0               | #N/A |            | iYHR151C   | 0.48  | 2.07 |
| YHR152W   | SPO12   |                 |      | 0          | iYHR151C   | 1.77  | 2.07 |
| YHR153C   | SPO16   |                 |      | 0          | iYHR153C   | #N/A  | 1.73 |
| YHR154W   | RTT107  | ESC4            |      |            | iYHR153C   | -1.10 | 1.73 |
| YHR155W   |         | 0               | #N/A |            | iYHR154W   | 0.11  | #N/A |
| YHR156C   | LIN1    |                 |      | 0          | iYHR156C   | -0.18 | 1.41 |
| YHR157W   | REC104  |                 |      | 0          | iYHR156C   | 2.02  | 1.41 |
| YHR158C   | KEL1    |                 |      | 0          | iYHR158C   | -1.22 | 2.93 |
| YHR159W   |         | 0               | #N/A |            | iYHR158C   | #N/A  | 2.93 |
| YHR160C   | PEX18   |                 |      | 0          | iYHR160C   | 1.10  | 0.40 |
| YHR161C   | YAP1801 |                 |      | 0          | iYHR161C   | 0.85  | #N/A |
| YHR162W   |         | 0               | #N/A |            | iYHR161C   | 1.05  | #N/A |
| YHR163W   | SOL3    |                 |      | 0          | iYHR162W   | -0.62 | 1.68 |
| YHR164C   | DNA2    | WEB2            |      |            | iYHR164C   | -0.27 | 1.52 |
| YHR165C   | PRP8    | DBF3 DNA39 RNA8 |      |            | iYHR165C   | -0.55 | 2.66 |
| YHR166C   | CDC23   |                 |      | 0          | iYHR166C   | -0.19 | 2.06 |
| YHR167W   | THP2    |                 |      | 0          | iYHR166C   | -1.39 | 2.06 |
| YHR168W   |         | 0               |      | 0          | iYHR167W   | -0.11 | 1.18 |
| YHR169W   | DBP8    |                 |      | 0          | iYHR168W   | -1.79 | #N/A |
| YHR170W   | NMD3    | SRC5            |      |            | iYHR169W   | -0.33 | 1.72 |
| YHR171W   | APG7    | APG7 CVT2       |      |            | iYHR170W   | 1.10  | 1.64 |

|           |       |                   |   |            |       |      |      |
|-----------|-------|-------------------|---|------------|-------|------|------|
| YHR172W   | SPC97 |                   | 0 | iYHR171W   | -2.23 | #N/A | #N/A |
| YHR173C   | 0     | #N/A              |   | iYHR173C   | -0.70 | #N/A | #N/A |
| YHR174W   | ENO2  |                   | 0 | iYHR173C   | -1.31 | #N/A | #N/A |
| YHR175W   | CTR2  |                   | 0 | iYHR174W   | 1.06  | 0.68 | 0.30 |
| YHR176W   | 0     | FMO               |   | iYHR175W   | #N/A  | #N/A | #N/A |
| YHR177W   | 0     | #N/A              |   | iYHR176W   | 0.27  | #N/A | #N/A |
| YHR178W   | STB5  |                   | 0 | iYHR177W   | -0.75 | 0.62 | 0.29 |
| YHR179W   | OYE2  | Old Yellow Enzyme |   | iYHR178W   | -0.49 | 0.92 | 0.42 |
| YHR180W   | 0     | #N/A              |   | iYHRCdelta | 1.26  | 1.86 | 0.78 |
| YHR181W   | 0     |                   | 0 | itT(UGU)H  | 0.69  | 0.49 | 0.23 |
| YHR182W   | 0     | #N/A              |   | iYHR181W   | -0.35 | 1.41 | 0.63 |
| YHR183W   | GND1  |                   | 0 | iYHR182W   | -0.06 | 1.17 | 0.53 |
| YHR184W   | SSP1  | SPO3              |   | iYHR183W   | #N/A  | 0.57 | 0.24 |
| YHR185C   | PFS1  | ADY1              |   | iYHR185C   | #N/A  | 0.35 | 0.10 |
| YHR186C   | COG1  |                   | 0 | iYHR186C   | -0.07 | 2.61 | 0.92 |
| YHR187W   | IKI1  | ELP5 HAP2 TOT5    |   | iYHR186C   | 1.45  | 2.61 | 0.92 |
| YHR188C   | GPI16 |                   | 0 | iYHR188C   | -0.45 | 2.57 | 0.92 |
| YHR189W   | 0     | PTH               |   | iYHR188C   | #N/A  | 2.57 | 0.92 |
| YHR190W   | ERG9  |                   | 0 | iYHR189W   | 0.49  | 0.91 | 0.43 |
| YHR191C   | CTF8  |                   | 0 | iYHR191C   | -0.85 | 1.56 | 0.68 |
| YHR192W   | 0     | #N/A              |   | iYHR191C   | 0.06  | 1.56 | 0.68 |
| YHR193C   | EGD2  |                   | 0 | iYHR193C   | -0.69 | 2.17 | 0.86 |
| YHR194W   | 0     |                   | 0 | iYHR193C   | 0.65  | 2.17 | 0.86 |
| YHR195W   | NVJ1  | VAB36             |   | iYHR194W   | 0.21  | 2.30 | 0.88 |
| YHR196W   | UTP9  |                   | 0 | iYHR195W   | -0.25 | 2.91 | 0.95 |
| YHR197W   | 0     |                   | 0 | iYHR196W   | -1.42 | #N/A | #N/A |
| YHR198C   | 0     |                   | 0 | iYHR198C   | 0.96  | 1.66 | 0.72 |
| YHR199C   | 0     |                   | 0 | iYHR199C   | 0.67  | 1.27 | 0.57 |
| YHR200W   | RPN10 | MCB1 SUN1         |   | iYHR199C   | -0.42 | 1.27 | 0.57 |
| YHR201C   | PPX1  |                   | 0 | iYHR201C   | -0.12 | #N/A | #N/A |
| YHR202W   | 0     | #N/A              |   | iYHR201C   | -0.50 | #N/A | #N/A |
| YHR203C   | RPS4B |                   | 0 | iYHR203C   | -1.11 | 0.54 | 0.24 |
| YHR204W   | MNL1  | HTM1              |   | iYHR203C   | 0.23  | 0.54 | 0.24 |
| YHR205W   | SCH9  | KOM1              |   | iYHR204W   | -0.41 | 1.76 | 0.74 |
| YHR206W   | SKN7  | BRY1 POS9         |   | iYHR205W   | -0.94 | 1.23 | 0.55 |
| YHR207C   | SET5  |                   | 0 | iYHR207C   | 0.51  | 0.72 | 0.33 |
| YHR208W   | BAT1  | ECA39 TWT1        |   | iYHR207C   | 0.01  | 0.72 | 0.33 |
| YHR209W   | 0     | #N/A              |   | iYHR208W   | 1.64  | 0.94 | 0.43 |
| YHR210C   | 0     | #N/A              |   | iYHR210C-C | 2.08  | 2.29 | 0.88 |
| YHR211W   | FLO5  |                   | 0 | iYHR210C-C | 0.95  | 2.29 | 0.88 |
| YHR212C   | 0     | #N/A              |   | iYHR213W-  | #N/A  | 0.87 | 0.40 |
| YHR213W   | 0     | #N/A              |   | iYHRCdelta | 0.45  | 1.09 | 0.50 |
| YHR214C-B | #N/A  | #N/A              |   | iYHRCdelta | -0.83 | 1.42 | 0.64 |
| YHR214W   | 0     | #N/A              |   | iYHR213W-  | -1.49 | 0.87 | 0.40 |
| YHR214W-A | 0     | #N/A              |   | iYHR213W-  | -1.14 | 0.87 | 0.40 |
| YHR215W   | PHO12 | PHO10             |   | iYHRCdelta | -0.67 | 1.42 | 0.64 |
| YHR216W   | IMD2  | PUR5              |   | iYHRCdelta | 0.01  | 1.42 | 0.64 |
| YHR217C   | 0     | #N/A              |   | #N/A       | 0.18  | #N/A | #N/A |
| YHR218W   | 0     | #N/A              |   | iYHRCdelta | -0.35 | 1.42 | 0.64 |
| YHR219W   | 0     | #N/A              |   | iYHRCdelta | 0.09  | 1.42 | 0.64 |
| YIL001W   | 0     | #N/A              |   | iYIL002C   | 0.14  | 1.22 | 0.56 |

|           |       |                  |               |       |      |      |
|-----------|-------|------------------|---------------|-------|------|------|
| YIL002C   | INP51 | SJL1             | iYIL002C      | 0.23  | 1.22 | 0.56 |
| YIL003W   | DRE3  | DRE3             | iYIL004C      | #N/A  | 1.87 | 0.78 |
| YIL004C   | BET1  | SLY12            | iYIL004C      | -1.00 | 1.87 | 0.78 |
| YIL005W   | EPS1  |                  | 0 iYIL006W    | -1.22 | 1.30 | 0.58 |
| YIL006W   |       | 0 #N/A           | iYIL007C      | #N/A  | 2.36 | 0.90 |
| YIL007C   |       | 0                | 0 iYIL007C    | #N/A  | 2.36 | 0.90 |
| YIL008W   | URM1  |                  | 0 iYIL009W    | -1.15 | 1.50 | 0.67 |
| YIL009W   | FAA3  |                  | 0 iYILCdelta5 | -1.01 | 0.72 | 0.33 |
| YIL010W   | DOT5  | nTPx             | iYIL011W      | 0.20  | 0.74 | 0.33 |
| YIL011W   | TIR3  | YIB1             | iYIL012W      | 0.79  | 0.97 | 0.44 |
| YIL012W   |       | 0 #N/A           | iYIL013C      | 0.19  | 0.46 | 0.19 |
| YIL013C   | PDR11 |                  | 0 iYIL013C    | -0.06 | 0.46 | 0.19 |
| YIL014W   | MNT3  |                  | 0 iT(AGU)I2   | 0.07  | 1.40 | 0.62 |
| YIL015C-A | #N/A  | #N/A             | iYIL015C-A    | #N/A  | 1.49 | 0.66 |
| YIL015W   | BAR1  | SST1             | iYIL016W      | #N/A  | 0.80 | 0.36 |
| YIL016W   | SNL1  |                  | 0 iYIL017C    | -0.59 | 4.01 | 0.99 |
| YIL017W   | #N/A  | #N/A             | #N/A          | #N/A  | #N/A | #N/A |
| YIL018W   | RPL2B | LOT2 RPL5A       | iYIL019W      | -0.86 | 0.29 | 0.07 |
| YIL019W   |       | 0                | 0 iYIL020C    | -1.24 | 2.44 | 0.90 |
| YIL020C   | HIS6  |                  | 0 iYIL020C    | -0.28 | 2.44 | 0.90 |
| YIL021W   | RPB3  |                  | 0 iYIL022W    | -0.16 | 0.91 | 0.42 |
| YIL022W   | TIM44 | ISP45 MIM44 MPI1 | iYIL023C      | 0.15  | 1.91 | 0.80 |
| YIL023C   |       | 0 #N/A           | iYIL023C      | -0.51 | 1.91 | 0.80 |
| YIL024C   |       | 0 #N/A           | iYIL024C      | 0.98  | 0.80 | 0.38 |
| YIL025C   |       | 0 #N/A           | iYIL024C      | #N/A  | 0.80 | 0.38 |
| YIL026C   | IRR1  | SCC3             | iYIL026C      | #N/A  | #N/A | #N/A |
| YIL027C   | KRE27 |                  | 0 iYIL027C    | #N/A  | 1.87 | 0.78 |
| YIL028W   |       | 0 #N/A           | iYIL029C      | 1.79  | #N/A | #N/A |
| YIL029C   |       | 0 #N/A           | iYIL029C      | 3.91  | #N/A | #N/A |
| YIL030C   | SSM4  | DOA10            | iYIL030C      | 0.47  | 3.18 | 0.97 |
| YIL031W   | ULP2  | SMT4             | iYIL032C      | -0.50 | 1.90 | 0.79 |
| YIL032C   |       | 0 #N/A           | iYIL032C      | -0.38 | 1.90 | 0.79 |
| YIL033C   | BCY1  | SRA1             | iYIL033C      | 0.42  | 1.31 | 0.59 |
| YIL034C   | CAP2  |                  | 0 iYIL034C    | -0.20 | 1.70 | 0.72 |
| YIL035C   | CKA1  |                  | 0 iYIL035C    | 0.68  | 2.55 | 0.92 |
| YIL036W   | CST6  | ACA2 SHF1        | iYIL037C      | 0.02  | 2.08 | 0.84 |
| YIL037C   | PRM2  |                  | 0 iYIL037C    | 0.49  | 2.08 | 0.84 |
| YIL038C   | NOT3  |                  | 0 iYIL038C    | -0.07 | 3.77 | 0.99 |
| YIL039W   |       | 0 #N/A           | iYIL040W      | 0.08  | #N/A | #N/A |
| YIL040W   |       | 0                | 0 iYIL041W    | 0.80  | 0.51 | 0.21 |
| YIL041W   |       | 0                | 0 iYIL042C    | 0.12  | 3.42 | 0.98 |
| YIL042C   |       | 0 #N/A           | iYIL042C      | -0.37 | 3.42 | 0.98 |
| YIL043C   | CBR1  | CBR5             | iYIL043C      | 0.29  | #N/A | #N/A |
| YIL044C   | AGE2  | SAT2             | iYIL044C      | -0.56 | 2.31 | 0.89 |
| YIL045W   | PIG2  |                  | 0 iYIL046W    | 2.22  | 1.51 | 0.67 |
| YIL046W   | MET30 | ZRG11            | iYIL047C      | -0.36 | 1.43 | 0.65 |
| YIL047C   | SYG1  |                  | 0 iYIL047C    | -0.17 | 1.43 | 0.65 |
| YIL048W   | NEO1  |                  | 0 iYIL049W    | 0.39  | 1.72 | 0.74 |
| YIL049W   | DFG10 |                  | 0 iYIL050W    | #N/A  | 1.32 | 0.60 |
| YIL050W   | PCL7  |                  | 0 iYIL051C    | 0.16  | #N/A | #N/A |
| YIL051C   | MMF1  | IBM1             | iYIL051C      | 0.02  | #N/A | #N/A |



|           |        |             |      |            |       |      |      |
|-----------|--------|-------------|------|------------|-------|------|------|
| YIL052C   | RPL34B |             | 0    | iYIL052C   | -1.07 | 0.19 | 0.03 |
| YIL053W   | RHR2   | GPP1        |      | iYIL054W   | -2.62 | 0.20 | 0.05 |
| YIL054W   | FYV2   | #N/A        |      | iYIL055C   | #N/A  | 1.02 | 0.47 |
| YIL055C   |        | 0           | #N/A | iYIL055C   | 0.27  | 1.02 | 0.47 |
| YIL056W   |        | 0           | #N/A | itS(UGA)I  | 1.11  | 0.29 | 0.06 |
| YIL057C   |        | 0           | #N/A | iYIL057C   | -0.62 | #N/A | #N/A |
| YIL058W   |        | 0           | #N/A | iYIL061C   | #N/A  | 1.86 | 0.77 |
| YIL059C   |        | 0           | #N/A | iYIL058W   | #N/A  | #N/A | #N/A |
| YIL060W   |        | 0           | #N/A | iYIL061C   | -0.70 | 1.86 | 0.77 |
| YIL061C   | SNP1   |             |      | 0 iYIL061C | #N/A  | 1.86 | 0.77 |
| YIL062C   | ARC15  |             |      | 0 iYIL062C | -0.17 | 1.46 | 0.66 |
| YIL063C   | YRB2   |             |      | 0 iYIL063C | #N/A  | 1.03 | 0.47 |
| YIL064W   |        | 0           | #N/A | iYIL065C   | -1.08 | 2.81 | 0.94 |
| YIL065C   | FIS1   | MDV2        |      | iYIL065C   | -0.17 | 2.81 | 0.94 |
| YIL066C   | RNR3   | DIN1 RIR3   |      | iYIL066C   | 1.12  | 2.06 | 0.84 |
| YIL067C   |        | 0           | #N/A | iYIL067C   | 0.48  | 3.15 | 0.97 |
| YIL068C   | SEC6   |             |      | 0 iYIL068C | 0.07  | 2.12 | 0.84 |
| YIL069C   | RPS24B | RPS24EB     |      | iYIL069C   | -0.29 | #N/A | #N/A |
| YIL070C   | MAM33  |             |      | 0 iYIL070C | 0.05  | 0.94 | 0.43 |
| YIL071W   | #N/A   | #N/A        |      | #N/A       | 1.00  | #N/A | #N/A |
| YIL072W   | HOP1   |             |      | 0 iYIL073C | 1.58  | 1.21 | 0.54 |
| YIL073C   | SPO22  |             |      | 0 iYIL073C | 1.26  | 1.21 | 0.54 |
| YIL074C   | SER33  |             |      | 0 iYIL074C | 0.01  | 1.07 | 0.48 |
| YIL075C   | RPN2   | SEN3        |      | iYIL075C   | -0.81 | 1.92 | 0.80 |
| YIL076W   | SEC28  | ANU2        |      | iYIL077C   | -0.16 | 1.88 | 0.79 |
| YIL077C   |        | 0           | #N/A | iYIL077C   | 1.53  | 1.88 | 0.79 |
| YIL078W   | THS1   |             |      | 0 iYIL079C | -0.63 | 2.38 | 0.89 |
| YIL079C   | AIR1   |             |      | 0 iYIL079C | -0.24 | 2.38 | 0.89 |
| YIL080W   | #N/A   | #N/A        |      | YILWTy3-10 | #N/A  | 0.33 | 0.10 |
| YIL082W   |        | 0           | #N/A | iYIL083C   | 1.78  | 2.13 | 0.84 |
| YIL082W-A |        | 0           | #N/A | YILWTy3-10 | -0.97 | 0.33 | 0.10 |
| YIL083C   |        | 0           | #N/A | iYIL083C   | 0.10  | 2.13 | 0.84 |
| YIL084C   | SDS3   |             |      | 0 iYIL084C | -0.10 | 1.94 | 0.80 |
| YIL085C   | KTR7   |             |      | 0 iYIL085C | 0.40  | 1.54 | 0.67 |
| YIL086C   |        | 0           | #N/A | iYIL085C   | 0.67  | 1.54 | 0.67 |
| YIL087C   |        | 0           | #N/A | iYIL085C   | 1.87  | 1.54 | 0.67 |
| YIL088C   |        | 0           |      | 0 iYIL088C | 0.78  | 2.46 | 0.91 |
| YIL089W   |        | 0           | #N/A | iYIL090W   | 2.07  | 0.66 | 0.31 |
| YIL090W   |        | 0           | #N/A | iYIL091C   | 0.22  | 3.76 | 0.99 |
| YIL091C   |        | 0           | #N/A | iYIL091C   | -0.76 | 3.76 | 0.99 |
| YIL092W   |        | 0           | #N/A | iYIL093C   | -0.29 | 2.23 | 0.86 |
| YIL093C   | RSM25  |             |      | 0 iYIL093C | -0.39 | 2.23 | 0.86 |
| YIL094C   | LYS12  | LYS10 LYS11 |      | iYIL094C   | -0.08 | 1.09 | 0.51 |
| YIL095W   | PRK1   | PAK1        |      | itl(AAU)I1 | 2.07  | 2.09 | 0.84 |
| YIL096C   |        | 0           | #N/A | iYIL096C   | 0.17  | 1.99 | 0.82 |
| YIL097W   | FYV10  | GID9        |      | iYIL098C   | 0.76  | 2.63 | 0.93 |
| YIL098C   | FMC1   |             |      | 0 iYIL098C | -0.17 | 2.63 | 0.93 |
| YIL099W   | SGA1   |             |      | 0 iYIL100W | #N/A  | 0.80 | 0.37 |
| YIL100W   |        | 0           | #N/A | iYIL101C   | #N/A  | 1.85 | 0.77 |
| YIL101C   | XBP1   |             |      | 0 iYIL101C | 1.45  | 1.85 | 0.77 |
| YIL102C   |        | 0           | #N/A | iYIL102C   | -0.02 | 0.40 | 0.13 |

|         |        |                  |              |       |      |      |
|---------|--------|------------------|--------------|-------|------|------|
| YIL103W | 0      | #N/A             | iYIL104C     | 0.28  | 2.20 | 0.87 |
| YIL104C | SHQ1   |                  | 0 iYIL104C   | 0.56  | 2.20 | 0.87 |
| YIL105C | 0 LIT2 |                  | iYIL105C     | #N/A  | 2.01 | 0.82 |
| YIL106W | MOB1   |                  | 0 iYIL107C   | -0.52 | 0.96 | 0.44 |
| YIL107C | PFK26  | PFK-2            | iYIL107C     | 2.10  | 0.96 | 0.44 |
| YIL108W | 0      | #N/A             | iYIL109C     | 0.70  | #N/A | #N/A |
| YIL109C | SEC24  | ANU1             | iYIL109C     | -0.70 | #N/A | #N/A |
| YIL110W | 0      | #N/A             | iYIL111W     | 0.05  | 2.22 | 0.85 |
| YIL111W | COX5B  |                  | 0 iYIL112W   | 0.55  | 1.09 | 0.50 |
| YIL112W | 0      |                  | 0 iYIL113W   | -0.03 | 1.83 | 0.77 |
| YIL113W | 0      |                  | 0 iYIL114C   | #N/A  | 1.71 | 0.73 |
| YIL114C | POR2   | YVDAC2           | iYIL114C     | 0.44  | 1.71 | 0.73 |
| YIL115C | NUP159 | NUP158 RAT7      | iYIL115C     | -1.01 | 4.21 | 1.00 |
| YIL116W | HIS5   |                  | 0 iYIL117C   | 1.15  | 0.48 | 0.21 |
| YIL117C | PRM5   |                  | 0 iYIL117C   | 0.08  | 0.48 | 0.21 |
| YIL118W | RHO3   |                  | 0 iYIL119C-1 | -0.46 | #N/A | #N/A |
| YIL119C | RPI1   |                  | 0 iYIL119C-0 | -0.18 | 0.34 | 0.09 |
| YIL120W | QDR1   |                  | 0 iYIL121W   | 1.98  | 0.56 | 0.24 |
| YIL121W | 0      |                  | 0 iYIL122W   | 0.25  | 1.06 | 0.48 |
| YIL122W | POG1   |                  | 0 iYIL123W   | #N/A  | 0.37 | 0.13 |
| YIL123W | SIM1   |                  | 0 iYIL124W   | 0.24  | 0.65 | 0.31 |
| YIL124W | AYR1   |                  | 0 iYIL125W   | 1.31  | 1.81 | 0.76 |
| YIL125W | KGD1   | OGD1             | iYIL126W     | 0.73  | 1.93 | 0.80 |
| YIL126W | STH1   | NPS1             | iYIL127C     | -1.97 | 3.09 | 0.97 |
| YIL127C | 0      | #N/A             | iYIL127C     | -2.12 | 3.09 | 0.97 |
| YIL128W | MET18  | MMS19            | iYIL129C     | 0.27  | 3.03 | 0.96 |
| YIL129C | TAO3   | PAG1             | iYIL129C     | -2.25 | 3.03 | 0.96 |
| YIL130W | GIN1   | #N/A             | iYIL131C     | #N/A  | #N/A | #N/A |
| YIL131C | FKH1   |                  | 0 iYIL131C   | -2.31 | #N/A | #N/A |
| YIL132C | CSM2   |                  | 0 iYIL132C   | -1.99 | 1.06 | 0.48 |
| YIL133C | RPL16A | RPL13            | iYIL133C     | -0.95 | 0.21 | 0.03 |
| YIL134W | FLX1   |                  | 0 iSNR68     | -1.52 | #N/A | #N/A |
| YIL135C | 0      |                  | 0 iYIL135C   | -0.52 | 0.88 | 0.41 |
| YIL136W | OM45   |                  | 0 iYIL137C   | 1.10  | 2.10 | 0.84 |
| YIL137C | 0      | #N/A             | iYIL137C     | -0.69 | 2.10 | 0.84 |
| YIL138C | TPM2   | tropomyosin      | iYIL138C     | -0.32 | 1.46 | 0.66 |
| YIL139C | REV7   |                  | 0 iYIL139C   | 1.04  | 0.84 | 0.38 |
| YIL140W | AXL2   | BUD10 SRO4       | iYIL142W     | #N/A  | 0.56 | 0.23 |
| YIL141W | 0      | #N/A             | iYIL142W     | #N/A  | 0.56 | 0.23 |
| YIL142W | CCT2   | BIN3 TCP2        | iYIL143C     | -0.64 | 3.05 | 0.96 |
| YIL143C | SSL2   | LOM3 RAD25       | iYIL143C     | -0.35 | 3.05 | 0.96 |
| YIL144W | TID3   | HEC1 NDC80       | iYIL145C     | -1.72 | 1.64 | 0.71 |
| YIL145C | PAN6   |                  | 0 iYIL145C   | 0.09  | 1.64 | 0.71 |
| YIL146C | ECM37  |                  | 0 iYIL146C   | 0.47  | 1.30 | 0.59 |
| YIL147C | SLN1   | YPD2             | iYIL147C     | -1.32 | 1.58 | 0.69 |
| YIL148W | RPL40A | CEP52A UB11 UBI1 | iYIL149C     | -1.63 | 1.33 | 0.59 |
| YIL149C | MLP2   |                  | 0 iYIL149C   | -1.15 | 1.33 | 0.59 |
| YIL150C | DNA43  | DNA43            | iYIL150C     | #N/A  | 1.65 | 0.73 |
| YIL151C | 0      | #N/A             | iYIL151C     | 0.78  | 3.23 | 0.97 |
| YIL152W | 0      | #N/A             | iYIL153W     | 0.02  | 1.34 | 0.60 |
| YIL153W | RRD1   | YPA1             | iYIL154C     | -0.22 | 3.02 | 0.96 |



|         |       |                |              |       |      |      |
|---------|-------|----------------|--------------|-------|------|------|
| YIL154C | IMP2' | IMP2           | iYIL154C     | -1.84 | 3.02 | 0.96 |
| YIL155C | GUT2  |                | 0 iYIL155C   | 1.77  | #N/A | #N/A |
| YIL156W | UBP7  |                | 0 iYIL157C   | 0.05  | 2.47 | 0.91 |
| YIL157C |       | 0              | 0 iYIL157C   | #N/A  | 2.47 | 0.91 |
| YIL158W |       | 0 #N/A         | iYIL159W     | -1.01 | 1.24 | 0.56 |
| YIL159W | BNR1  |                | 0 iYIL160C   | #N/A  | 1.60 | 0.69 |
| YIL160C | POT1  | FOX3 POX3      | iYIL160C     | 0.17  | 1.60 | 0.69 |
| YIL161W |       | 0 #N/A         | iYIL162W     | #N/A  | 1.58 | 0.68 |
| YIL162W | SUC2  |                | 0 iYIL163C   | -0.35 | 0.57 | 0.24 |
| YIL163C |       | 0 #N/A         | iYIL163C     | 1.62  | 0.57 | 0.24 |
| YIL164C | NIT1  |                | 0 iYIL164C-0 | #N/A  | 1.43 | 0.65 |
| YIL165C |       | 0 #N/A         | iYIL164C-0   | 1.94  | 1.43 | 0.65 |
| YIL166C |       | 0 #N/A         | iYIL166C     | 0.55  | 1.50 | 0.68 |
| YIL167W |       | 0              | 0 iYIL169C-1 | 1.25  | 0.72 | 0.32 |
| YIL168W | SDL1  | #N/A           | iYIL169C-1   | -1.62 | 0.72 | 0.32 |
| YIL169C |       | 0 #N/A         | iYIL169C-0   | #N/A  | 0.40 | 0.14 |
| YIL170W | HXT12 |                | 0 iYIL172C   | 0.64  | 1.86 | 0.79 |
| YIL171W | HXT12 | #N/A           | iYIL172C     | #N/A  | 1.86 | 0.79 |
| YIL172C |       | 0 #N/A         | iYIL172C     | 1.73  | 1.86 | 0.79 |
| YIL173W | VTH1  |                | 0 iYIL174W-1 | 0.89  | 1.95 | 0.81 |
| YIL174W |       | 0 #N/A         | iYIL177C-1   | #N/A  | 0.36 | 0.12 |
| YIL175W |       | 0 #N/A         | iYIL177C-1   | #N/A  | 0.36 | 0.12 |
| YIL176C |       | 0 #N/A         | iYIL174W-0   | #N/A  | 0.82 | 0.37 |
| YIL177C |       | 0 #N/A         | iYIL177C-0   | -0.07 | #N/A | #N/A |
| YIR001C | SGN1  | RBP1 RBP29     | iYIR001C     | 0.15  | 1.28 | 0.58 |
| YIR002C | MPH1  |                | 0 iYIR002C   | -0.59 | 1.87 | 0.79 |
| YIR003W |       | 0 #N/A         | iYIR002C     | -0.02 | 1.87 | 0.79 |
| YIR004W | DJP1  | ICS1 PAS22     | iYIR003W     | -0.41 | #N/A | #N/A |
| YIR005W | IST3  | SNU17          | iYIR004W     | -0.31 | 1.54 | 0.68 |
| YIR006C | PAN1  | DIM2 MDP3 MIP3 | iYIR006C     | -1.02 | 1.81 | 0.76 |
| YIR007W |       | 0 #N/A         | itE(UUC)I    | 0.87  | 0.92 | 0.42 |
| YIR008C | PRI1  |                | 0 iYIR008C   | -0.37 | 2.50 | 0.91 |
| YIR009W | MSL1  | YIB9w          | iYIR008C     | #N/A  | 2.50 | 0.91 |
| YIR010W | DSN1  |                | 0 iYIR009W   | -0.67 | #N/A | #N/A |
| YIR011C | STS1  | DBF8 SSM5      | iYIR011C     | 0.05  | 2.96 | 0.96 |
| YIR012W | SQT1  |                | 0 iYIR011C   | -0.95 | 2.96 | 0.96 |
| YIR013C | GAT4  |                | 0 iYIR013C   | 0.55  | 2.02 | 0.82 |
| YIR014W |       | 0 #N/A         | iYIR013C     | #N/A  | 2.02 | 0.82 |
| YIR015W | RPR2  |                | 0 iYIR014W   | #N/A  | 0.88 | 0.42 |
| YIR016W |       | 0 #N/A         | iYIR015W     | 0.20  | 0.42 | 0.17 |
| YIR017C | MET28 |                | 0 iYIR017C   | 0.68  | 0.75 | 0.34 |
| YIR018W | YAP5  |                | 0 iYIR017C   | #N/A  | 0.75 | 0.34 |
| YIR019C | MUC1  | FLO11 STA4     | iYIR019C     | #N/A  | #N/A | #N/A |
| YIR020C |       | 0 #N/A         | iYIR020C     | 0.51  | 0.28 | 0.09 |
| YIR021W | MRS1  | PET157         | iYIR020W-E   | -0.02 | 1.95 | 0.80 |
| YIR022W | SEC11 |                | 0 iYIR021W   | 0.34  | 2.78 | 0.94 |
| YIR023W | DAL81 | UGA35          | iYIR022W     | #N/A  | 2.26 | 0.88 |
| YIR024C | GIF1  | #N/A           | iYIR024C     | 1.21  | 2.35 | 0.89 |
| YIR025W | MND2  |                | 0 iYIR024C   | -0.09 | 2.35 | 0.89 |
| YIR026C | YVH1  |                | 0 iYIR026C   | -0.64 | #N/A | #N/A |
| YIR027C | DAL1  |                | 0 iYIR027C   | -0.65 | 1.46 | 0.66 |

|         |        |                            |   |            |       |      |      |
|---------|--------|----------------------------|---|------------|-------|------|------|
| YIR028W | DAL4   |                            | 0 | iYIR027C   | -0.05 | 1.46 | 0.66 |
| YIR029W | DAL2   | ALC1                       |   | iYIR028W   | 1.50  | 2.17 | 0.86 |
| YIR030C | DCG1   |                            | 0 | iYIR030C   | 1.15  | 0.96 | 0.45 |
| YIR031C | DAL7   | MLS2 MSL2                  |   | iYIR031C   | 2.38  | 2.20 | 0.86 |
| YIR032C | DAL3   |                            | 0 | iYIR032C   | #N/A  | 3.76 | 0.99 |
| YIR033W | MGA2   |                            | 0 | iYIR032C   | -1.64 | 3.76 | 0.99 |
| YIR034C | LYS1   |                            | 0 | iYIR034C   | 1.73  | 0.98 | 0.46 |
| YIR035C |        | 0 #N/A                     |   | iYIR035C   | 0.06  | 1.52 | 0.68 |
| YIR036C |        | 0 #N/A                     |   | iYIR036C   | 0.20  | 3.82 | 0.99 |
| YIR037W | HYR1   | GPX3 ORP1                  |   | iYIR036C   | 0.88  | 3.82 | 0.99 |
| YIR038C | GTT1   |                            | 0 | iYIR038C-0 | 1.57  | 4.53 | 1.00 |
| YIR039C | YPS6   |                            | 0 | iYIR039C   | 3.69  | 1.44 | 0.64 |
| YIR040C |        | 0 #N/A                     |   | iYIR040C   | #N/A  | 0.65 | 0.29 |
| YIR041W |        | 0 #N/A                     |   | iYIR040C   | 2.37  | 0.65 | 0.29 |
| YIR042C |        | 0 #N/A                     |   | iYIR042C   | 2.17  | 1.73 | 0.74 |
| YIR043C |        | 0 #N/A                     |   | iYIR043C   | 2.23  | 1.38 | 0.63 |
| YIR044C |        | 0 #N/A                     |   | #N/A       | #N/A  | #N/A | #N/A |
| YJL001W | PRE3   | CRL21                      |   | iYJL002C   | 0.41  | 2.03 | 0.83 |
| YJL002C | OST1   | NLT1                       |   | iYJL002C   | -0.03 | 2.03 | 0.83 |
| YJL003W |        | 0                          | 0 | iYJL004C   | 1.21  | 2.28 | 0.87 |
| YJL004C | SYS1   |                            | 0 | iYJL004C   | 1.37  | 2.28 | 0.87 |
| YJL005W | CYR1   | CDC35 FIL1 HSR1 SitL(UAA)J |   | iYJL006C   | 0.26  | 1.36 | 0.62 |
| YJL006C | CTK2   |                            | 0 | iYJL006C   | 0.09  | 0.87 | 0.41 |
| YJL007C |        | 0 #N/A                     |   | itM(CAU)J2 | #N/A  | #N/A | #N/A |
| YJL008C | CCT8   |                            | 0 | iYJL008C   | 0.03  | 1.97 | 0.80 |
| YJL009W |        | 0 #N/A                     |   | iYJL010C   | -0.54 | #N/A | #N/A |
| YJL010C |        | 0 #N/A                     |   | iYJL010C   | -0.76 | #N/A | #N/A |
| YJL011C |        | 0                          | 0 | iYJL011C   | -0.56 | #N/A | #N/A |
| YJL012C | VTC4   | PHM3                       |   | iYJL012C   | -0.30 | 1.47 | 0.64 |
| YJL013C | MAD3   |                            | 0 | iYJL013C   | -0.81 | 0.80 | 0.38 |
| YJL014W | CCT3   | BIN2 TCP3                  |   | iYJL017W   | -0.32 | 0.75 | 0.35 |
| YJL015C |        | 0 #N/A                     |   | iYJL014W   | 2.14  | 0.36 | 0.15 |
| YJL016W |        | 0 #N/A                     |   | iYJL017W   | 2.21  | 0.75 | 0.35 |
| YJL017W |        | 0 #N/A                     |   | iYJL018W   | 2.46  | 1.78 | 0.76 |
| YJL018W |        | 0 #N/A                     |   | iYJL020C   | -1.46 | 2.82 | 0.95 |
| YJL019W |        | 0 NEP98                    |   | iYJL020C   | #N/A  | 2.82 | 0.95 |
| YJL020C | BBC1   | MT11                       |   | iYJL020C   | 0.21  | 2.82 | 0.95 |
| YJL021C | #N/A   | #N/A                       |   | iYJL020C   | #N/A  | 2.82 | 0.95 |
| YJL022W |        | 0 #N/A                     |   | itG(GCC)J1 | #N/A  | 0.99 | 0.45 |
| YJL023C | PET130 |                            | 0 | iYJL022W   | #N/A  | 1.79 | 0.76 |
| YJL024C | APS3   | YKS7                       |   | iYJL024C   | 0.38  | 0.80 | 0.38 |
| YJL025W | RRN7   |                            | 0 | iYJL026W   | #N/A  | #N/A | #N/A |
| YJL026W | RNR2   | CRT6                       |   | iYJL027C   | 0.61  | 1.75 | 0.74 |
| YJL027C |        | 0 #N/A                     |   | iYJL027C   | #N/A  | 1.75 | 0.74 |
| YJL028W |        | 0 #N/A                     |   | itM(CAU)J1 | #N/A  | 1.17 | 0.54 |
| YJL029C | VPS53  |                            | 0 | iYJL029C   | #N/A  | 2.10 | 0.83 |
| YJL030W | MAD2   |                            | 0 | iYJL031C   | 0.28  | #N/A | #N/A |
| YJL031C | BET4   |                            | 0 | iYJL031C   | 1.25  | #N/A | #N/A |
| YJL032W |        | 0 #N/A                     |   | iYJL033W   | 1.35  | #N/A | #N/A |
| YJL033W | HCA4   | DBP4 ECM24                 |   | iYJL034W   | -0.74 | 1.82 | 0.78 |
| YJL034W | KAR2   | BIP GRP78                  |   | iYJL035C   | 0.43  | 1.96 | 0.80 |

|         |        |                  |        |            |          |       |      |      |
|---------|--------|------------------|--------|------------|----------|-------|------|------|
| YJL035C | TAD2   |                  | 0      | iYJL035C   | -0.36    | 1.96  | 0.80 |      |
| YJL036W | SNX4   | ATG24 CVT13      |        | itV(AAC)J  | 0.67     | 1.59  | 0.69 |      |
| YJL037W |        | 0                | #N/A   | iYJL038C   | #N/A     | 1.67  | 0.72 |      |
| YJL038C |        | 0                | #N/A   | iYJL038C   | 2.54     | 1.67  | 0.72 |      |
| YJL039C | NUP192 |                  |        | 0          | iYJL039C | -0.79 | 1.63 | 0.71 |
| YJL041W | NSP1   |                  |        | 0          | iYJL042W | -1.04 | #N/A | #N/A |
| YJL042W | MHP1   |                  |        | 0          | iYJL043W | -0.61 | #N/A | #N/A |
| YJL043W |        | 0                | #N/A   | iYJL044C   | #N/A     | 1.56  | 0.69 |      |
| YJL044C | GYP6   |                  |        | 0          | iYJL044C | 0.76  | 1.56 | 0.69 |
| YJL045W |        | 0                | #N/A   | itD(GUC)J2 | #N/A     | 0.90  | 0.43 |      |
| YJL046W |        | 0                | #N/A   | iYJL047C   | -0.53    | 1.12  | 0.51 |      |
| YJL047C | RTT101 | CUL8 CULC CULLIN |        | iYJL047C   | 0.01     | 1.12  | 0.51 |      |
| YJL048C |        | 0                |        | 0          | iYJL048C | 2.31  | 0.70 | 0.33 |
| YJL049W |        | 0                | #N/A   | iYJL050W   | 3.37     | 1.33  | 0.60 |      |
| YJL050W | MTR4   | DOB1             |        | iYJL051W   | -0.67    | #N/A  | #N/A |      |
| YJL051W |        | 0                | #N/A   | iYJL052W   | 0.45     | 1.08  | 0.49 |      |
| YJL052W | TDH1   | GLD3             |        | iYJL053W   | -0.61    | 1.49  | 0.66 |      |
| YJL053W | PEP8   | GRD6 VPS26 VPT4  |        | iYJL054W   | 1.90     | #N/A  | #N/A |      |
| YJL054W | TIM54  |                  |        | 0          | iYJL055W | -0.12 | #N/A | #N/A |
| YJL055W |        | 0                | #N/A   | iYJL056C   | 0.67     | 2.52  | 0.92 |      |
| YJL056C | ZAP1   | ZRG10            |        | iYJL056C   | #N/A     | 2.52  | 0.92 |      |
| YJL057C | IKS1   |                  | #N/A   | iYJL057C   | 0.78     | 1.40  | 0.64 |      |
| YJL058C |        | 0                |        | 0          | iYJL058C | 0.57  | 1.42 | 0.64 |
| YJL059W | YHC3   | BTN1             |        | iYJL060W   | 1.73     | #N/A  | #N/A |      |
| YJL060W | BNA3   |                  |        | 0          | iYJL061W | 1.30  | 0.99 | 0.45 |
| YJL061W | NUP82  | HRB187           |        | iYJL062W   | -0.61    | 1.18  | 0.55 |      |
| YJL062W | LAS21  | GPI7             |        | iYJL063C   | 0.64     | 3.41  | 0.98 |      |
| YJL063C | MRPL8  | HRD238           |        | iYJL063C   | -1.32    | 3.41  | 0.98 |      |
| YJL064W |        | 0                | #N/A   | iYJL066C   | 0.43     | 1.65  | 0.71 |      |
| YJL065C |        | 0                |        | 0          | iYJL064W | -0.65 | 2.17 | 0.86 |
| YJL066C | MPM1   |                  |        | 0          | iYJL066C | 1.29  | 1.65 | 0.71 |
| YJL067W |        | 0                | #N/A   | iYJL068C   | 1.12     | #N/A  | #N/A |      |
| YJL068C |        | 0                | #N/A   | iYJL068C   | 0.39     | #N/A  | #N/A |      |
| YJL069C | UTP18  |                  |        | 0          | iYJL069C | -0.75 | 2.06 | 0.84 |
| YJL070C |        | 0                | #N/A   | iYJL070C   | 1.24     | 1.49  | 0.66 |      |
| YJL071W | ARG2   | HRB574           |        | iYJL072C   | 1.78     | 2.26  | 0.86 |      |
| YJL072C |        | 0                | CDC102 | iYJL072C   | 0.27     | 2.26  | 0.86 |      |
| YJL073W | JEM1   | KAR8             |        | iYJL074C   | 1.83     | 2.84  | 0.95 |      |
| YJL074C | SMC3   |                  |        | 0          | iYJL074C | -1.06 | 2.84 | 0.95 |
| YJL075C |        | 0                |        | 0          | iYJL075C | -0.93 | #N/A | #N/A |
| YJL076W | NET1   | CFI1 ESC5        |        | iYJL077C   | #N/A     | #N/A  | #N/A |      |
| YJL077C | ICS3   |                  |        | 0          | iYJL077C | 0.70  | #N/A | #N/A |
| YJL078C | PRY3   |                  |        | 0          | iYJL078C | #N/A  | 0.48 | 0.19 |
| YJL079C | PRY1   |                  |        | 0          | iYJL079C | 0.92  | 0.63 | 0.30 |
| YJL080C | SCP160 |                  |        | 0          | iYJL080C | -0.85 | 1.27 | 0.57 |
| YJL081C | ARP4   | ACT3             |        | iYJL081C   | 0.06     | 2.50  | 0.91 |      |
| YJL082W | IML2   |                  |        | 0          | iYJL083W | 0.69  | 0.87 | 0.41 |
| YJL083W |        | 0                | #N/A   | iYJL084C   | 1.26     | 1.75  | 0.75 |      |
| YJL084C |        | 0                | #N/A   | iYJL084C   | #N/A     | 1.75  | 0.75 |      |
| YJL085W | EXO70  |                  |        | 0          | iYJL088W | #N/A  | #N/A | #N/A |
| YJL086C |        | 0                | #N/A   | iYJL085W   | #N/A     | #N/A  | #N/A |      |

|         |        |                  |              |       |      |      |
|---------|--------|------------------|--------------|-------|------|------|
| YJL087C | TRL1   | LIG1 RLG1        | iYJL085W     | 0.04  | #N/A | #N/A |
| YJL088W | ARG3   |                  | 0 iYJL089W   | 1.90  | 0.17 | 0.02 |
| YJL089W | SIP4   |                  | 0 iYJL090C   | 6.70  | 0.69 | 0.31 |
| YJL090C | DPB11  |                  | 0 iYJL090C   | -0.40 | 0.69 | 0.31 |
| YJL091C | 0      |                  | 0 iYJL091C   | 0.57  | 1.11 | 0.51 |
| YJL092W | HPR5   | RADH RADH1 SRS2  | iYJL093C     | 0.47  | 4.46 | 1.00 |
| YJL093C | TOK1   | DUK1 YKC1 YORK1  | iYJL093C     | 0.28  | 4.46 | 1.00 |
| YJL094C | KHA1   |                  | 0 iYJL094C   | 2.51  | 1.46 | 0.66 |
| YJL095W | BCK1   | LAS3 SAP3 SLK1 S | iYJL096W     | #N/A  | 1.83 | 0.78 |
| YJL096W | MRPL49 |                  | 0 iYJL098W   | 0.37  | 1.45 | 0.65 |
| YJL097W | 0      | #N/A             | iYJL098W     | -0.22 | 1.45 | 0.65 |
| YJL098W | SAP185 |                  | 0 iYJL099W   | -1.81 | 1.11 | 0.51 |
| YJL099W | CHS6   | CSD3             | iYJL100W     | 0.99  | 1.33 | 0.59 |
| YJL100W | LSB6   |                  | 0 iYJL101C   | 1.19  | 1.04 | 0.49 |
| YJL101C | GSH1   |                  | 0 iYJL101C   | 0.55  | 1.04 | 0.49 |
| YJL102W | MEF2   |                  | 0 iYJL103C   | #N/A  | 2.43 | 0.90 |
| YJL103C | 0      | #N/A             | iYJL103C     | 2.26  | 2.43 | 0.90 |
| YJL104W | MIA1   | MIA1 TIM16       | iYJL105W     | #N/A  | #N/A | #N/A |
| YJL105W | SET4   |                  | 0 iYJL106W-1 | 1.48  | 0.65 | 0.29 |
| YJL106W | IME2   | SME1             | iYJL107C     | 1.57  | 1.25 | 0.56 |
| YJL107C | 0      | #N/A             | iYJL107C     | #N/A  | 1.25 | 0.56 |
| YJL108C | PRM10  |                  | 0 iYJL107C   | 0.00  | 1.25 | 0.56 |
| YJL109C | UTP10  |                  | 0 iYJL109C   | -1.02 | 1.26 | 0.58 |
| YJL110C | GZF3   | DEH1 NIL2        | iYJL110C     | 0.66  | 1.14 | 0.52 |
| YJL111W | CCT7   | TCP7             | iYJL112W     | 0.08  | 1.57 | 0.70 |
| YJL112W | MDV1   | FIS2 GAG3        | itD(GUC)J1   | 0.80  | 1.39 | 0.61 |
| YJL113W | #N/A   | #N/A             | iYJL115W     | #N/A  | 0.76 | 0.35 |
| YJL114W | #N/A   | #N/A             | iYJL115W     | #N/A  | 0.76 | 0.35 |
| YJL115W | ASF1   |                  | 0 iYJL116C   | -1.28 | 0.98 | 0.45 |
| YJL116C | NCA3   |                  | 0 iYJL116C   | -0.15 | 0.98 | 0.45 |
| YJL117W | PHO86  |                  | 0 iYJL118W   | 0.14  | #N/A | #N/A |
| YJL118W | 0      | #N/A             | iYJL120W     | -0.75 | 1.60 | 0.70 |
| YJL119C | 0      | #N/A             | iYJL118W     | -1.30 | #N/A | #N/A |
| YJL120W | 0      | #N/A             | iYJL122W     | -1.69 | 0.70 | 0.33 |
| YJL121C | RPE1   | EPI1 POS18       | iYJL120W     | -0.38 | 1.60 | 0.70 |
| YJL122W | 0      | #N/A             | iYJL123C     | -0.53 | 1.81 | 0.76 |
| YJL123C | 0      | #N/A             | iYJL123C     | -1.53 | 1.81 | 0.76 |
| YJL124C | LSM1   | SPB8             | iYJL124C     | 0.29  | 1.51 | 0.68 |
| YJL125C | GCD14  |                  | 0 iYJL125C   | -1.83 | 1.30 | 0.59 |
| YJL126W | NIT2   |                  | 0 iYJL127C   | 0.97  | 1.91 | 0.78 |
| YJL127C | SPT10  | CRE1 SUD1        | iYJL127C     | #N/A  | 1.91 | 0.78 |
| YJL128C | PBS2   | HOG4 SFS4 SSK4   | iYJL128C-0   | -1.15 | 1.49 | 0.67 |
| YJL129C | TRK1   |                  | 0 iYJL129C   | 0.09  | 1.23 | 0.56 |
| YJL130C | URA2   |                  | 0 iYJL130C   | -0.44 | 0.60 | 0.25 |
| YJL131C | 0      | #N/A             | iYJL131C     | 0.38  | 2.28 | 0.87 |
| YJL132W | 0      | #N/A             | iYJL133W     | #N/A  | 0.87 | 0.40 |
| YJL133W | MRS3   |                  | 0 iYJL134W   | 1.12  | 0.32 | 0.08 |
| YJL134W | LCB3   | LBP1 YSR2        | iYJL136C     | -0.51 | 0.33 | 0.10 |
| YJL135W | 0      | #N/A             | iYJL136C     | #N/A  | 0.33 | 0.10 |
| YJL136C | RPS21B |                  | 0 iYJL136C   | #N/A  | 0.33 | 0.10 |
| YJL137C | GLG2   |                  | 0 iYJL137C   | -0.45 | 1.29 | 0.59 |

|         |        |                 |       |            |       |      |      |
|---------|--------|-----------------|-------|------------|-------|------|------|
| YJL138C | TIF2   |                 | 0     | iYJL138C   | -0.41 | 1.03 | 0.47 |
| YJL139C | YUR1   |                 | 0     | iYJL139C   | 0.40  | 0.71 | 0.32 |
| YJL140W | RPB4   | CTF15           |       | iYJL141C   | 0.36  | 1.92 | 0.80 |
| YJL141C | YAK1   |                 | 0     | iYJL141C   | 1.55  | 1.92 | 0.80 |
| YJL142C |        | 0               | #N/A  | iYJL141C   | 1.40  | 1.92 | 0.80 |
| YJL143W | TIM17  | MIM17 MPI2 SMS1 |       | iYJL144W   | 0.40  | 3.01 | 0.96 |
| YJL144W |        | 0               | #N/A  | iYJL145W   | 2.26  | 0.76 | 0.35 |
| YJL145W | SFH5   |                 | 0     | iYJL146W   | -0.51 | 1.01 | 0.47 |
| YJL146W | IDS2   |                 | 0     | iYJL147C   | #N/A  | 2.29 | 0.87 |
| YJL147C |        | 0               | #N/A  | iYJL147C   | 1.20  | 2.29 | 0.87 |
| YJL148W | RPA34  |                 | 0     | iSNR190    | -1.01 | 0.65 | 0.30 |
| YJL149W |        | 0               | #N/A  | iYJL151C   | 0.50  | 0.60 | 0.26 |
| YJL150W |        | 0               | #N/A  | iYJL151C   | #N/A  | 0.60 | 0.26 |
| YJL151C | SNA3   |                 | 0     | iYJL151C   | 0.20  | 0.60 | 0.26 |
| YJL152W |        | 0               | #N/A  | iYJL153C   | 0.24  | #N/A | #N/A |
| YJL153C | INO1   |                 | 38078 | iYJL153C   | 2.52  | #N/A | #N/A |
| YJL154C | VPS35  | GRD9 VPT7       |       | iYJL154C   | #N/A  | 1.36 | 0.60 |
| YJL155C | FBP26  | FBPase-2        |       | iYJL155C   | 1.54  | 1.14 | 0.53 |
| YJL156C | SSY5   |                 | 0     | iYJL156C   | 0.55  | 1.89 | 0.78 |
| YJL157C | FAR1   |                 | 0     | iYJL157C   | -0.83 | 0.75 | 0.35 |
| YJL158C | CIS3   | CCW11 CCW5 PIR4 |       | iYJL158C   | 0.04  | 0.68 | 0.32 |
| YJL159W | HSP150 | CCW7 ORE1 PIR2  |       | iYJL160C-1 | -0.42 | 0.96 | 0.44 |
| YJL160C |        | 0               | #N/A  | iYJL160C-0 | 3.05  | 1.83 | 0.77 |
| YJL161W |        | 0               |       | itE(UUC)J  | 1.83  | 1.71 | 0.73 |
| YJL162C |        | 0               |       | iYJL162C   | #N/A  | #N/A | #N/A |
| YJL163C |        | 0               | #N/A  | iYJL163C   | 0.59  | 1.49 | 0.66 |
| YJL164C | TPK1   | PKA1 SRA3       |       | iYJL164C   | 1.30  | 1.86 | 0.77 |
| YJL165C | HAL5   |                 | 0     | iYJL165C   | 1.53  | 2.41 | 0.89 |
| YJL166W | QCR8   | COR5            |       | iYJL167W   | 2.62  | 1.07 | 0.48 |
| YJL167W | ERG20  | BOT3 FDS1 FPP1  |       | iYJL168C   | 0.88  | 2.23 | 0.87 |
| YJL168C | SET2   | EZL1            |       | iYJL168C   | -0.47 | 2.23 | 0.87 |
| YJL169W |        | 0               | #N/A  | iYJL170C   | -0.10 | 0.88 | 0.42 |
| YJL170C | ASG7   |                 | 0     | iYJL170C   | 2.79  | 0.88 | 0.42 |
| YJL171C |        | 0               | #N/A  | iYJL171C   | 2.28  | #N/A | #N/A |
| YJL172W | CPS1   |                 | 0     | iYJL173C   | 0.72  | 2.53 | 0.92 |
| YJL173C | RFA3   |                 | 0     | iYJL173C   | #N/A  | 2.53 | 0.92 |
| YJL174W | KRE9   |                 | 0     | iYJL175W   | 0.24  | 3.39 | 0.98 |
| YJL175W |        | 0               | #N/A  | iYJL177W   | #N/A  | 0.46 | 0.17 |
| YJL176C | SWI3   | TYE2            |       | iYJL175W   | -1.18 | 3.39 | 0.98 |
| YJL177W | RPL17B |                 | 0     | iYJL178C   | -1.45 | 0.53 | 0.22 |
| YJL178C |        | 0               | ETF1  | iYJL178C   | 0.47  | 0.53 | 0.22 |
| YJL179W | PFD1   | GIM6            |       | iYJL180C   | #N/A  | #N/A | #N/A |
| YJL180C | ATP12  |                 | 0     | iYJL180C   | -0.04 | #N/A | #N/A |
| YJL181W |        | 0               | #N/A  | iYJL183W   | #N/A  | #N/A | #N/A |
| YJL182C |        | 0               | #N/A  | iYJL181W   | #N/A  | #N/A | #N/A |
| YJL183W | MNN11  |                 | 0     | iYJL184W   | -0.38 | 2.88 | 0.95 |
| YJL184W |        | 0               | LDB6  | iYJL185C   | -0.54 | 1.87 | 0.79 |
| YJL185C |        | 0               | #N/A  | iYJL185C   | -0.86 | 1.87 | 0.79 |
| YJL186W | MNN5   |                 | 0     | iYJL187C   | -0.10 | 0.90 | 0.41 |
| YJL187C | SWE1   | WEE1            |       | iYJL187C   | #N/A  | 0.90 | 0.41 |
| YJL188C | BUD19  |                 | 0     | iYJL188C   | 0.18  | #N/A | #N/A |

|           |        |                 |              |       |      |      |
|-----------|--------|-----------------|--------------|-------|------|------|
| YJL189W   | RPL39  | PUB2 RPL46 SPB2 | iYJL190C     | -1.22 | 0.15 | 0.01 |
| YJL190C   | RPS22A | RPS24           | iYJL190C     | -1.11 | 0.15 | 0.01 |
| YJL191W   | RPS14B | CRY2            | iYJL192C     | -1.26 | 0.68 | 0.30 |
| YJL192C   | 0      |                 | 0 iYJL192C   | 0.31  | 0.68 | 0.30 |
| YJL193W   | 0      | #N/A            | iYJL194W     | 0.43  | 2.98 | 0.96 |
| YJL194W   | CDC6   |                 | 0 iYJL196C   | -1.53 | 0.53 | 0.25 |
| YJL195C   | 0      | #N/A            | iYJL194W     | #N/A  | 2.98 | 0.96 |
| YJL196C   | ELO1   |                 | 0 iYJL196C   | 0.92  | 0.53 | 0.25 |
| YJL197W   | UBP12  |                 | 0 iYJL198W   | 0.11  | 1.82 | 0.78 |
| YJL198W   | PHO90  |                 | 0 iYJL199C   | -0.56 | 2.95 | 0.96 |
| YJL199C   | 0      |                 | 0 iYJL199C   | 0.56  | 2.95 | 0.96 |
| YJL200C   | 0      | #N/A            | iYJL200C     | 0.47  | #N/A | #N/A |
| YJL201W   | ECM25  |                 | 0 iYJL202C   | 0.25  | 1.51 | 0.66 |
| YJL202C   | 0      | #N/A            | iYJL202C     | 0.13  | 1.51 | 0.66 |
| YJL203W   | PRP21  | SPP91           | iYJL204C     | -0.28 | 1.60 | 0.69 |
| YJL204C   | RCY1   |                 | 0 iYJL204C   | 0.80  | 1.60 | 0.69 |
| YJL206C   | 0      | #N/A            | iYJL206C     | 0.42  | 1.99 | 0.82 |
| YJL206C-A | #N/A   | #N/A            | #N/A         | #N/A  | #N/A | #N/A |
| YJL207C   | 0      | #N/A            | iYJL207C     | -0.66 | 1.29 | 0.59 |
| YJL208C   | NUC1   |                 | 0 iYJL208C   | #N/A  | 1.50 | 0.66 |
| YJL209W   | CBP1   |                 | 0 iYJL210W   | 0.45  | #N/A | #N/A |
| YJL210W   | PEX2   | CRT1 PAS5       | iYJL212C     | 0.11  | 1.15 | 0.53 |
| YJL211C   | 0      | #N/A            | iYJL210W     | 0.71  | #N/A | #N/A |
| YJL212C   | OPT1   | GSH11 HGT1      | iYJL212C     | -1.85 | 1.15 | 0.53 |
| YJL213W   | 0      | #N/A            | iYJL214W-2   | 1.75  | #N/A | #N/A |
| YJL214W   | HXT8   |                 | 0 iYJL215C   | #N/A  | 0.65 | 0.29 |
| YJL215C   | 0      | #N/A            | iYJL215C     | #N/A  | 0.65 | 0.29 |
| YJL216C   | 0      | #N/A            | iYJL216C     | 0.15  | 1.12 | 0.51 |
| YJL217W   | 0      | #N/A            | iYJL218W     | 0.70  | #N/A | #N/A |
| YJL218W   | 0      | #N/A            | iYJL219W     | -0.19 | 1.45 | 0.64 |
| YJL219W   | HXT9   |                 | 0 iYJL220W   | 0.80  | 1.79 | 0.75 |
| YJL220W   | 0      | #N/A            | iYJL222W     | #N/A  | 1.20 | 0.54 |
| YJL221C   | FSP2   |                 | 0 iYJL220W   | 1.89  | 1.79 | 0.75 |
| YJL222W   | VTH2   |                 | 0 iYJL223C-1 | 0.48  | #N/A | #N/A |
| YJL223C   | PAU1   |                 | 0 iYJL223C-0 | 1.31  | 0.75 | 0.34 |
| YJL225C   | 0      | #N/A            | iYJL225C-0   | -0.06 | #N/A | #N/A |
| YJR001W   | 0      |                 | 0 iCEN10     | 0.80  | 1.55 | 0.67 |
| YJR002W   | MPP10  |                 | 0 iYJR001W   | -0.94 | #N/A | #N/A |
| YJR003C   | 0      | #N/A            | iYJR003C     | #N/A  | #N/A | #N/A |
| YJR004C   | SAG1   | AG(ALPHA)1      | iYJR004C     | -2.51 | 1.18 | 0.54 |
| YJR005W   | APL1   | YAP80           | iYJR004C     | 0.22  | 1.18 | 0.54 |
| YJR006W   | HYS2   | HUS2 POL31 SDP5 | iYJR005W     | -0.38 | 0.86 | 0.39 |
| YJR007W   | SUI2   |                 | 0 iYJR006W   | -0.47 | 1.73 | 0.74 |
| YJR008W   | 0      | #N/A            | iYJR007W     | 1.99  | 0.91 | 0.43 |
| YJR009C   | TDH2   | GLD2            | iYJR009C-0   | -0.75 | 0.61 | 0.26 |
| YJR010C-A | SPC1   |                 | 0 iYJR010C-A | 0.79  | 2.09 | 0.84 |
| YJR010W   | MET3   |                 | 0 iYJR009C-1 | 0.87  | #N/A | #N/A |
| YJR011C   | 0      | #N/A            | iYJR011C     | 0.53  | 1.88 | 0.78 |
| YJR012C   | 0      | #N/A            | iYJR012C     | 0.26  | 1.40 | 0.62 |
| YJR013W   | 0      |                 | 0 iYJR012C   | -0.10 | 1.40 | 0.62 |
| YJR014W   | 0      | #N/A            | iYJR013W     | -0.41 | #N/A | #N/A |



|         |        |              |              |       |      |      |
|---------|--------|--------------|--------------|-------|------|------|
| YJR015W | 0      | #N/A         | iYJR014W     | 0.06  | #N/A | #N/A |
| YJR016C | ILV3   |              | 0 iYJR016C   | 0.71  | 0.50 | 0.20 |
| YJR017C | ESS1   | PIN1 PTF1    | iYJR018W     | -0.46 | 0.69 | 0.31 |
| YJR018W | 0      | #N/A         | iYJR016C     | 0.87  | 0.50 | 0.20 |
| YJR019C | TES1   | PTE1         | iYJR020W     | 0.16  | 1.09 | 0.49 |
| YJR020W | 0      | #N/A         | iYJR018W     | #N/A  | 0.69 | 0.31 |
| YJR021C | REC107 | MER2         | iYJR021C     | -1.38 | 1.27 | 0.57 |
| YJR022W | LSM8   |              | 0 iYJR021C   | #N/A  | 1.27 | 0.57 |
| YJR023C | 0      | #N/A         | iYJR024C     | #N/A  | 1.26 | 0.57 |
| YJR024C | 0      | #N/A         | iYJR024C     | 0.13  | 1.26 | 0.57 |
| YJR025C | BNA1   | HAD1         | iYJR025C     | 1.76  | 0.92 | 0.44 |
| YJR026W | #N/A   | #N/A         | iYJR025C     | -0.02 | 0.92 | 0.44 |
| YJR027W | #N/A   | #N/A         | iYJR025C     | -1.37 | 0.92 | 0.44 |
| YJR028W | #N/A   | #N/A         | iYJR025C     | 0.01  | 0.92 | 0.44 |
| YJR029W | #N/A   | #N/A         | iYJR025C     | -1.42 | 0.92 | 0.44 |
| YJR030C | 0      | #N/A         | iYJR030C     | -1.39 | 1.37 | 0.62 |
| YJR031C | GEA1   |              | 0 iYJR031C   | -2.03 | 2.34 | 0.89 |
| YJR032W | CPR7   |              | 0 iYJR031C   | -0.48 | 2.34 | 0.89 |
| YJR033C | RAV1   |              | 0 iYJR033C   | 0.09  | #N/A | #N/A |
| YJR034W | PET191 |              | 0 iYJR033C   | #N/A  | #N/A | #N/A |
| YJR035W | RAD26  |              | 0 iYJR034W   | 0.45  | #N/A | #N/A |
| YJR036C | HUL4   |              | 0 iYJR037W   | 1.61  | 3.00 | 0.96 |
| YJR037W | 0      | #N/A         | iYJR035W     | #N/A  | 0.23 | 0.05 |
| YJR038C | 0      | #N/A         | iYJR039W     | #N/A  | 2.22 | 0.85 |
| YJR039W | 0      | #N/A         | iYJR037W     | 1.03  | 3.00 | 0.96 |
| YJR040W | GEF1   | CLC          | iYJR039W     | 0.48  | 2.22 | 0.85 |
| YJR041C | 0      |              | 0 iYJR041C   | -0.45 | 2.51 | 0.92 |
| YJR042W | NUP85  | RAT9         | iYJR041C     | -0.42 | 2.51 | 0.92 |
| YJR043C | POL32  |              | 0 iYJR043C   | -2.42 | 2.13 | 0.85 |
| YJR044C | VPS55  |              | 0 iYJR044C   | #N/A  | #N/A | #N/A |
| YJR045C | SSC1   | ENS1 mtHSP70 | iYJR045C     | -0.46 | 1.55 | 0.68 |
| YJR046W | TAH11  | CDT1 SID2    | iYJR045C     | -0.48 | 1.55 | 0.68 |
| YJR047C | ANB1   | HYP1 TIF51B  | iYJR047C     | 0.39  | 0.41 | 0.17 |
| YJR048W | CYC1   |              | 0 iYJR047C   | 2.46  | 0.41 | 0.17 |
| YJR049C | UTR1   |              | 0 iYJR049C   | -0.60 | 1.96 | 0.81 |
| YJR050W | ISY1   | NTC30 UTR3   | iYJR049C     | 0.68  | 1.96 | 0.81 |
| YJR051W | OSM1   |              | 0 iYJR050W   | 0.03  | 1.15 | 0.53 |
| YJR052W | RAD7   |              | 0 itG(GCC)J2 | 1.18  | 0.76 | 0.36 |
| YJR053W | BFA1   | IBD1         | iYJR052W     | #N/A  | #N/A | #N/A |
| YJR054W | 0      | #N/A         | iYJR053W     | -0.08 | 1.12 | 0.51 |
| YJR055W | HIT1   |              | 0 itR(CCU)J  | #N/A  | 1.66 | 0.71 |
| YJR056C | 0      | #N/A         | iYJR056C     | 0.04  | 1.62 | 0.70 |
| YJR057W | CDC8   |              | 0 iYJRWdelta | 0.02  | 1.26 | 0.58 |
| YJR058C | APS2   | YAP17        | iYJR058C     | 0.70  | 1.65 | 0.73 |
| YJR059W | PTK2   | STK2         | iYJR058C     | -0.38 | 1.65 | 0.73 |
| YJR060W | CBF1   | CEP1 CPF1    | iYJR059W     | #N/A  | 0.76 | 0.36 |
| YJR061W | 0      | #N/A         | iYJR060W     | 1.22  | #N/A | #N/A |
| YJR062C | NTA1   | DEA1         | iYJR062C     | -0.65 | 2.59 | 0.92 |
| YJR063W | RPA12  | RRN4         | iYJR062C     | -0.45 | 2.59 | 0.92 |
| YJR064W | CCT5   | TCP5         | iYJR063W     | -0.17 | 2.19 | 0.85 |
| YJR065C | ARP3   | ACT4         | iYJR065C     | 0.04  | 2.67 | 0.93 |

|           |        |                 |              |       |      |      |
|-----------|--------|-----------------|--------------|-------|------|------|
| YJR066W   | TOR1   | DRR1            | iYJR065C     | 0.02  | 2.67 | 0.93 |
| YJR067C   | YAE1   |                 | 0 iYJR067C   | #N/A  | 2.32 | 0.89 |
| YJR068W   | RFC2   |                 | 0 iYJR067C   | -0.13 | 2.32 | 0.89 |
| YJR069C   | HAM1   |                 | 0 iYJR069C   | -0.14 | 0.78 | 0.36 |
| YJR070C   |        | 0               | 0 iYJR071W   | -1.65 | 0.82 | 0.38 |
| YJR071W   |        | 0 #N/A          | iYJR069C     | #N/A  | 0.78 | 0.36 |
| YJR072C   |        | 0 #N/A          | iYJR072C     | -1.34 | 2.60 | 0.92 |
| YJR073C   | OPI3   | PEM2            | iYJR073C     | 1.79  | #N/A | #N/A |
| YJR074W   | MOG1   |                 | 0 iYJR073C   | #N/A  | #N/A | #N/A |
| YJR075W   | HOC1   |                 | 0 iYJR074W   | 0.20  | 1.45 | 0.64 |
| YJR076C   | CDC11  | PSL9            | iYJR076C     | -0.54 | #N/A | #N/A |
| YJR077C   | MIR1   |                 | 0 iYJR077C   | 0.84  | 1.11 | 0.50 |
| YJR078W   | BNA2   |                 | 0 iYJR077C   | 0.62  | 1.11 | 0.50 |
| YJR079W   |        | 0 #N/A          | iYJR077C     | 0.10  | 1.11 | 0.50 |
| YJR080C   |        | 0               | 0 iYJR080C   | 0.06  | 1.65 | 0.72 |
| YJR082C   | EAF6   |                 | 0 iYJR082C   | #N/A  | 1.86 | 0.77 |
| YJR083C   |        | 0               | 0 iYJR083C   | 0.97  | #N/A | #N/A |
| YJR084W   |        | 0               | 0 iYJR083C   | 0.89  | #N/A | #N/A |
| YJR085C   |        | 0 #N/A          | iYJR085C     | 0.98  | #N/A | #N/A |
| YJR086W   | STE18  |                 | 0 iYJR085C   | #N/A  | #N/A | #N/A |
| YJR087W   |        | 0 #N/A          | iYJR085C     | 0.35  | #N/A | #N/A |
| YJR088C   |        | 0 #N/A          | iYJR088C     | 0.18  | 2.77 | 0.95 |
| YJR089W   | BIR1   |                 | 0 iYJR088C   | -0.40 | 2.77 | 0.95 |
| YJR090C   | GRR1   | CAT80 COT2 SSU2 | iYJR090C     | 0.44  | 0.75 | 0.34 |
| YJR091C   | JSN1   | PUF1            | iYJR091C     | 0.61  | 1.13 | 0.52 |
| YJR092W   | BUD4   |                 | 0 iYJR091C   | #N/A  | 1.13 | 0.52 |
| YJR093C   | FIP1   |                 | 0 iYJR093C   | #N/A  | 3.58 | 0.99 |
| YJR094C   | IME1   |                 | 0 iYJR094C-0 | #N/A  | 0.73 | 0.33 |
| YJR094W-A | RPL43B |                 | 0 iYJR094C-1 | 0.04  | #N/A | #N/A |
| YJR095W   | SFC1   | ACR1            | iYJR094W-1   | 0.63  | 1.01 | 0.46 |
| YJR096W   |        | 0 #N/A          | iYJR095W     | 0.51  | 1.82 | 0.78 |
| YJR097W   |        | 0               | 0 iYJR096W   | -0.77 | 2.76 | 0.94 |
| YJR098C   |        | 0 #N/A          | iYJR098C     | -0.02 | 2.76 | 0.94 |
| YJR099W   | YUH1   |                 | 0 iYJR098C   | 0.05  | 2.76 | 0.94 |
| YJR100C   |        | 0 #N/A          | iYJR100C     | 1.73  | 1.39 | 0.62 |
| YJR101W   | RSM26  |                 | 0 itL(UAG)J  | #N/A  | 1.47 | 0.65 |
| YJR102C   | VPS25  | VPT25           | iYJR102C     | 0.58  | 1.09 | 0.50 |
| YJR103W   | URA8   |                 | 0 iYJR102C   | -0.23 | 1.09 | 0.50 |
| YJR104C   | SOD1   | CRS4            | iYJR104C     | 0.23  | 0.70 | 0.32 |
| YJR105W   | ADO1   |                 | 0 iYJR104C   | -0.08 | 0.70 | 0.32 |
| YJR106W   | ECM27  |                 | 0 iYJR105W   | 0.44  | 1.68 | 0.73 |
| YJR107W   |        | 0 #N/A          | iYJR106W     | 1.85  | #N/A | #N/A |
| YJR108W   | ABM1   |                 | 0 iYJR107W   | #N/A  | 1.34 | 0.60 |
| YJR109C   | CPA2   |                 | 0 iYJR109C   | 1.80  | 1.98 | 0.81 |
| YJR110W   |        | 0               | 0 iYJR109C   | 1.42  | 1.98 | 0.81 |
| YJR111C   |        | 0 #N/A          | iYJR111C     | 0.80  | 1.46 | 0.66 |
| YJR112W   | NNF1   |                 | 0 iYJR111C   | -1.08 | 1.46 | 0.66 |
| YJR113C   | RSM7   |                 | 0 iYJR114W   | -0.28 | 0.96 | 0.46 |
| YJR114W   |        | 0               | 0 iYJR112W   | -0.68 | 1.87 | 0.78 |
| YJR115W   |        | 0 #N/A          | iYJR114W     | 1.31  | 0.96 | 0.46 |
| YJR116W   |        | 0 #N/A          | iYJR115W     | 0.08  | 2.15 | 0.86 |



|         |        |                |              |       |      |      |
|---------|--------|----------------|--------------|-------|------|------|
| YJR117W | STE24  | AFC1 PIO2      | iYJR116W     | 0.36  | 1.82 | 0.77 |
| YJR118C | ILM1   |                | 0 iYJR118C   | 1.32  | #N/A | #N/A |
| YJR119C | 0      | #N/A           | iYJR119C     | 2.28  | 1.73 | 0.75 |
| YJR120W | 0      | #N/A           | iYJR119C     | #N/A  | 1.73 | 0.75 |
| YJR121W | ATP2   |                | 0 iYJR120W   | 0.72  | 0.49 | 0.23 |
| YJR122W | CAF17  |                | 0 iYJR121W   | 0.39  | #N/A | #N/A |
| YJR123W | RPS5   |                | 0 iYJR122W   | -0.48 | 0.26 | 0.05 |
| YJR124C | 0      | #N/A           | iYJR124C     | -0.08 | 0.92 | 0.44 |
| YJR125C | ENT3   |                | 0 iYJR125C   | -0.14 | 2.43 | 0.90 |
| YJR126C | VPS70  |                | 0 iYJR126C   | -0.50 | 1.41 | 0.62 |
| YJR127C | ZMS1   |                | 0 iYJR128W   | 1.29  | 0.44 | 0.20 |
| YJR128W | 0      | #N/A           | iYJR126C     | #N/A  | 1.41 | 0.62 |
| YJR129C | 0      | #N/A           | iYJR129C     | -0.44 | 0.96 | 0.44 |
| YJR130C | STR2   |                | 0 iYJR130C   | 1.28  | 2.03 | 0.83 |
| YJR131W | MNS1   |                | 0 iYJR130C   | -1.04 | 2.03 | 0.83 |
| YJR132W | NMD5   | KAP119         | iYJR131W     | -1.41 | 1.33 | 0.59 |
| YJR133W | XPT1   |                | 0 iYJR132W   | 0.51  | 1.93 | 0.80 |
| YJR134C | SGM1   |                | 0 iYJR134C   | -1.33 | #N/A | #N/A |
| YJR135C | MCM22  |                | 0 iYJR135C   | #N/A  | 1.82 | 0.78 |
| YJR136C | 0      | #N/A           | iYJR136C     | #N/A  | #N/A | #N/A |
| YJR137C | ECM17  | MET5           | iYJR137C     | 0.17  | 0.96 | 0.44 |
| YJR138W | IML1   |                | 0 iYJR137C   | #N/A  | 0.96 | 0.44 |
| YJR139C | HOM6   |                | 0 iYJR139C   | 0.11  | #N/A | #N/A |
| YJR140C | HIR3   | HPC1           | iYJR140C     | -1.25 | 2.49 | 0.91 |
| YJR141W | 0      | #N/A           | iYJR140C     | #N/A  | 2.49 | 0.91 |
| YJR142W | 0      | #N/A           | iYJR141W     | 0.63  | #N/A | #N/A |
| YJR143C | PMT4   |                | 0 iYJR143C   | -0.13 | #N/A | #N/A |
| YJR144W | MGM101 | MGM9           | iYJR143C     | 0.01  | #N/A | #N/A |
| YJR145C | RPS4A  |                | 0 iYJR145C   | -1.06 | 0.19 | 0.03 |
| YJR146W | 0      | #N/A           | iYJR145C     | -0.83 | 0.19 | 0.03 |
| YJR147W | HMS2   |                | 0 iYJR145C   | -1.04 | 0.19 | 0.03 |
| YJR148W | BAT2   | ECA40 TWT2     | iYJR147W     | -2.21 | #N/A | #N/A |
| YJR149W | 0      | #N/A           | iYJR148W     | 0.44  | 0.34 | 0.10 |
| YJR150C | DAN1   | CCW13          | iYJR150C-0   | #N/A  | 1.45 | 0.63 |
| YJR151C | DAN4   |                | 0 iYJR151C-0 | 1.05  | 1.18 | 0.55 |
| YJR152W | DAL5   | UREP1          | iYJR151C-2   | #N/A  | 1.13 | 0.51 |
| YJR153W | PGU1   | PGL1 PSM1      | iYJR152W     | -1.11 | 1.21 | 0.56 |
| YJR154W | 0      | #N/A           | iYJR153W-    | #N/A  | 1.66 | 0.72 |
| YJR155W | AAD10  |                | 0 iYJR154W   | 2.27  | 0.54 | 0.22 |
| YJR156C | THI11  |                | 0 iYJR156C   | 0.69  | 2.93 | 0.95 |
| YJR157W | 0      | #N/A           | iYJR156C     | #N/A  | 2.93 | 0.95 |
| YJR158W | HXT16  |                | 0 iYJR157W-  | -0.36 | 0.60 | 0.26 |
| YJR159W | SOR1   | SDH1           | iYJR158W-    | 1.47  | 1.79 | 0.75 |
| YJR160C | 0      |                | 0 iYJR160C-0 | 1.72  | 1.36 | 0.62 |
| YJR161C | COS5   |                | 0 iYJR161C   | 2.13  | 0.84 | 0.38 |
| YJR162C | 0      | #N/A           | #N/A         | 1.37  | #N/A | #N/A |
| YKL001C | MET14  |                | 0 iYKL001C   | 1.90  | #N/A | #N/A |
| YKL002W | DID4   | CHM2 GRD7 REN1 | iYKL003C     | 0.48  | 1.62 | 0.70 |
| YKL003C | MRP17  |                | 0 iYKL003C   | #N/A  | 1.62 | 0.70 |
| YKL004W | AUR1   |                | 0 iYKL005C   | -0.23 | 2.47 | 0.90 |
| YKL005C | 0      |                | 0 iYKL005C   | 0.57  | 2.47 | 0.90 |

|           |        |             |   |            |       |      |      |
|-----------|--------|-------------|---|------------|-------|------|------|
| YKL006C-A | SFT1   |             | 0 | iYKL006C-A | -0.34 | 0.26 | 0.06 |
| YKL006W   | RPL14A |             | 0 | iYKL006C-A | -0.44 | 0.26 | 0.06 |
| YKL007W   | CAP1   |             | 0 | iYKL008C   | -0.04 | 0.48 | 0.19 |
| YKL008C   | LAC1   | DGT1        |   | iYKL008C   | 0.32  | 0.48 | 0.19 |
| YKL009W   | MRT4   |             | 0 | iYKL010C   | -0.67 | #N/A | #N/A |
| YKL010C   | UFD4   |             | 0 | iYKL010C   | 0.03  | #N/A | #N/A |
| YKL011C   | CCE1   | MGT1        |   | iYKL011C   | 0.52  | 0.65 | 0.31 |
| YKL012W   | PRP40  |             | 0 | iYKL013C   | 0.27  | 2.53 | 0.92 |
| YKL013C   | ARC19  |             | 0 | iYKL013C   | 1.42  | 2.53 | 0.92 |
| YKL014C   | 0      |             | 0 | iYKL014C   | #N/A  | 1.58 | 0.69 |
| YKL015W   | PUT3   |             | 0 | iYKL016C   | 0.38  | #N/A | #N/A |
| YKL016C   | ATP7   |             | 0 | iYKL016C   | #N/A  | #N/A | #N/A |
| YKL017C   | HCS1   | DIP1        |   | iYKL017C   | 1.29  | 0.79 | 0.36 |
| YKL018W   | SWD2   | CPS35 SAF37 |   | iYKL019W   | #N/A  | 3.47 | 0.98 |
| YKL019W   | RAM2   |             | 0 | iYKL020C   | 0.23  | 2.50 | 0.91 |
| YKL020C   | SPT23  |             | 0 | iYKL020C   | -0.03 | 2.50 | 0.91 |
| YKL021C   | MAK11  |             | 0 | iYKL021C   | -0.48 | 0.28 | 0.06 |
| YKL022C   | CDC16  |             | 0 | iYKL022C   | 0.62  | 0.58 | 0.25 |
| YKL023W   | 0      | #N/A        |   | iYKL024C   | -0.04 | 2.06 | 0.84 |
| YKL024C   | URA6   | SOC8        |   | iYKL024C   | -0.41 | 2.06 | 0.84 |
| YKL025C   | PAN3   | ECM35       |   | iYKL025C   | 0.52  | #N/A | #N/A |
| YKL026C   | GPX1   |             | 0 | iYKL026C   | 1.47  | 1.01 | 0.47 |
| YKL027W   | 0      | #N/A        |   | iYKL028W   | -0.06 | 1.06 | 0.48 |
| YKL028W   | TFA1   |             | 0 | iYKL029C   | 0.15  | 0.85 | 0.39 |
| YKL029C   | MAE1   |             | 0 | iYKL029C   | -2.25 | 0.85 | 0.39 |
| YKL030W   | 0      | #N/A        |   | iYKL032C   | -2.59 | 0.30 | 0.08 |
| YKL031W   | 0      | #N/A        |   | iYKL032C   | -1.45 | 0.30 | 0.08 |
| YKL032C   | IXR1   | ORD1        |   | iYKL032C   | -0.29 | 0.30 | 0.08 |
| YKL033W   | 0      |             | 0 | iYKL033W-A | -0.65 | 1.07 | 0.49 |
| YKL034W   | TUL1   |             | 0 | iYKL035W   | 1.15  | 1.57 | 0.69 |
| YKL035W   | UGP1   |             | 0 | iYKL038W   | 0.40  | 1.19 | 0.55 |
| YKL036C   | 0      | #N/A        |   | iYKL035W   | #N/A  | 1.57 | 0.69 |
| YKL037W   | 0      | #N/A        |   | iYKL038W   | -0.20 | 1.19 | 0.55 |
| YKL038W   | RGT1   |             | 0 | iSNR69     | 0.18  | 0.99 | 0.46 |
| YKL039W   | PTM1   |             | 0 | iYKL040C   | 0.78  | 1.73 | 0.74 |
| YKL040C   | NFU1   | NUB1        |   | iYKL040C   | 0.73  | 1.73 | 0.74 |
| YKL041W   | VPS24  | DID3        |   | iYKL042W   | 1.37  | 1.62 | 0.72 |
| YKL042W   | SPC42  |             | 0 | iYKL043W   | #N/A  | 0.93 | 0.43 |
| YKL043W   | PHD1   |             | 0 | iYKL044W   | -1.74 | 0.43 | 0.16 |
| YKL044W   | 0      | #N/A        |   | iYKL045W   | #N/A  | 0.20 | 0.04 |
| YKL045W   | PRI2   |             | 0 | iYKL046C   | 0.19  | 2.47 | 0.91 |
| YKL046C   | 0      |             | 0 | iYKL046C   | 0.46  | 2.47 | 0.91 |
| YKL047W   | 0      | #N/A        |   | iYKL048C   | 0.51  | 3.09 | 0.97 |
| YKL048C   | ELM1   | LDB9        |   | iYKL048C   | -0.84 | 3.09 | 0.97 |
| YKL049C   | CSE4   | CSL2        |   | iYKL049C   | -1.21 | 1.60 | 0.70 |
| YKL050C   | 0      | #N/A        |   | iYKL050C   | #N/A  | 0.61 | 0.29 |
| YKL051W   | 0      |             | 0 | iYKL052C   | 1.26  | 0.37 | 0.13 |
| YKL052C   | ASK1   |             | 0 | iYKL052C   | -0.19 | 0.37 | 0.13 |
| YKL053W   | 0      | #N/A        |   | iYKL053C-A | #N/A  | 0.59 | 0.28 |
| YKL054C   | VID31  | VID31       |   | iYKL054C   | -1.28 | #N/A | #N/A |
| YKL055C   | OAR1   |             | 0 | iYKL055C   | 1.06  | 0.84 | 0.38 |

|           |        |               |              |       |      |      |
|-----------|--------|---------------|--------------|-------|------|------|
| YKL056C   | 0      | #N/A          | iYKL056C     | -0.53 | 0.84 | 0.40 |
| YKL057C   | NUP120 | RAT2          | iYKL057C     | 0.55  | #N/A | #N/A |
| YKL058W   | TOA2   |               | 0 iYKL059C   | -0.35 | 2.41 | 0.90 |
| YKL059C   | MPE1   |               | 0 iYKL059C   | -0.72 | 2.41 | 0.90 |
| YKL060C   | FBA1   | LOT1          | iYKL060C     | -1.07 | 0.30 | 0.07 |
| YKL061W   | 0      | #N/A          | iYKL062W     | #N/A  | 1.00 | 0.46 |
| YKL062W   | MSN4   |               | 0 iYKL063C-1 | -0.02 | 0.58 | 0.25 |
| YKL063C   | 0      | #N/A          | iYKL063C-0   | 1.91  | 1.07 | 0.49 |
| YKL064W   | MNR2   |               | 0 iYKL065C   | 1.08  | 1.84 | 0.78 |
| YKL065C   | YET1   |               | 0 iYKL065C   | 1.32  | 1.84 | 0.78 |
| YKL066W   | 0      | #N/A          | iYKLWdelta   | 1.15  | 2.20 | 0.86 |
| YKL067W   | YNK1   | NDK1          | iYKLWdelta   | 1.60  | 2.20 | 0.86 |
| YKL068W   | NUP100 | NSP100        | itV(AAC)K1-  | -0.78 | #N/A | #N/A |
| YKL069W   | 0      | #N/A          | iYKL070W     | -0.92 | 1.34 | 0.60 |
| YKL070W   | 0      | #N/A          | iYKL071W     | -0.96 | 0.31 | 0.12 |
| YKL071W   | 0      | #N/A          | itW(CCA)K-   | 0.58  | 0.51 | 0.21 |
| YKL072W   | STB6   |               | 0 iYKL073W   | -0.24 | 2.38 | 0.90 |
| YKL073W   | LHS1   | CER1 SSI1     | iYKL074C     | -0.57 | #N/A | #N/A |
| YKL074C   | MUD2   |               | 0 iYKL074C   | 0.03  | #N/A | #N/A |
| YKL075C   | 0      | #N/A          | iYKL075C     | 0.23  | 2.62 | 0.92 |
| YKL076C   | 0      |               | 0 iYKL075C   | 0.33  | 2.62 | 0.92 |
| YKL077W   | 0      | #N/A          | iYKL078W     | 0.42  | 2.45 | 0.90 |
| YKL078W   | DHR2   |               | 0 iYKL079W   | -0.85 | 1.99 | 0.82 |
| YKL079W   | SMY1   |               | 0 iYKL080W   | #N/A  | #N/A | #N/A |
| YKL080W   | VMA5   | CSL5 VAT3     | iYKL081W     | 0.32  | 1.17 | 0.54 |
| YKL081W   | TEF4   | EFC1          | iYKL082C     | -0.55 | 0.94 | 0.43 |
| YKL082C   | 0      |               | 0 iYKL082C   | -0.78 | 0.94 | 0.43 |
| YKL083W   | 0      | #N/A          | iYKL084W     | #N/A  | #N/A | #N/A |
| YKL084W   | 0      | #N/A          | iYKL085W     | 1.73  | 0.57 | 0.24 |
| YKL085W   | MDH1   |               | 0 iYKL086W   | 0.43  | 1.47 | 0.65 |
| YKL086W   | 0      |               | 0 iYKL087C   | #N/A  | 2.15 | 0.84 |
| YKL087C   | CYT2   |               | 0 iYKL087C   | 0.48  | 2.15 | 0.84 |
| YKL088W   | 0      | #N/A          | iYKL089W     | 0.18  | 1.85 | 0.78 |
| YKL089W   | MIF2   |               | 0 iYKL090W   | 0.15  | 1.46 | 0.66 |
| YKL090W   | 0      |               | 0 iYKL091C   | #N/A  | 1.20 | 0.54 |
| YKL091C   | 0      | #N/A          | iYKL091C     | 1.57  | 1.20 | 0.54 |
| YKL092C   | BUD2   | CLA2 ERC25    | iYKL092C     | -1.10 | 2.48 | 0.91 |
| YKL093W   | MBR1   |               | 0 iYKL094W   | 1.56  | 0.66 | 0.30 |
| YKL094W   | YJU3   |               | 0 iYKL095W   | 0.95  | 1.36 | 0.61 |
| YKL095W   | YJU2   | CWC16         | iYKL096W     | #N/A  | 1.61 | 0.70 |
| YKL096W   | CWP1   | YJU1          | iYKL097W-    | -1.80 | 0.19 | 0.03 |
| YKL097C   | 0      | #N/A          | iYKL097C     | #N/A  | 0.23 | 0.04 |
| YKL097W-A | #N/A   | #N/A          | #N/A         | #N/A  | #N/A | #N/A |
| YKL098W   | 0      | #N/A          | iYKL099C     | 0.59  | 3.15 | 0.97 |
| YKL099C   | UTP11  |               | 0 iYKL099C   | -1.40 | 3.15 | 0.97 |
| YKL100C   | 0      | #N/A          | iYKL100C     | 1.56  | 1.09 | 0.50 |
| YKL101W   | HSL1   | NIK1          | iYKL102C     | -0.30 | 2.18 | 0.86 |
| YKL102C   | 0      | #N/A          | iYKL102C     | #N/A  | 2.18 | 0.86 |
| YKL103C   | LAP4   | APE1 API YSC1 | iYKL103C     | 1.69  | 0.93 | 0.43 |
| YKL104C   | GFA1   |               | 0 iYKL104C   | -0.58 | 0.78 | 0.38 |
| YKL105C   | 0      | #N/A          | iYKL105C     | -0.94 | 1.50 | 0.66 |

|         |        |                  |      |            |       |      |      |
|---------|--------|------------------|------|------------|-------|------|------|
| YKL106W | AAT1   |                  | 0    | iYKL107W   | -0.23 | #N/A | #N/A |
| YKL107W |        | 0                | #N/A | iYKL108W   | #N/A  | 0.64 | 0.28 |
| YKL108W | SLD2   | DRC1             |      | iYKL109W   | -0.01 | 1.34 | 0.60 |
| YKL109W | HAP4   |                  | 0    | iYKL110C-1 | 0.14  | 0.23 | 0.06 |
| YKL110C | KTI12  | TOT4             |      | iYKL110C-0 | 0.28  | 0.61 | 0.27 |
| YKL111C |        | 0                | #N/A | iYKL111C   | -0.26 | #N/A | #N/A |
| YKL112W | ABF1   | BAF1 OBF1 REB2 S |      | iYKL113C   | -0.04 | 0.95 | 0.45 |
| YKL113C | RAD27  | ERC11 RTH1       |      | iYKL113C   | -1.06 | 0.95 | 0.45 |
| YKL114C | APN1   |                  | 0    | iYKL114C   | -0.17 | 1.58 | 0.68 |
| YKL115C |        | 0                | #N/A | iYKL115C   | -1.37 | 1.22 | 0.55 |
| YKL116C | PRR1   |                  | 0    | iYKL115C   | -0.26 | 1.22 | 0.55 |
| YKL117W | SBA1   |                  | 0    | itA(AGC)K1 | 0.75  | 1.83 | 0.77 |
| YKL118W |        | 0                | #N/A | iYKL120W   | #N/A  | 0.53 | 0.22 |
| YKL119C | VPH2   | CLS10 VMA12      |      | iYKLdelta4 | 0.72  | 0.41 | 0.16 |
| YKL120W | OAC1   |                  | 0    | iYKL121W   | -0.22 | 0.29 | 0.06 |
| YKL121W |        | 0                | #N/A | iYKL122C   | 2.01  | #N/A | #N/A |
| YKL122C | SRP21  |                  | 0    | iYKL122C   | -1.56 | #N/A | #N/A |
| YKL123W |        | 0                | #N/A | iYKL125W   | 1.18  | 1.51 | 0.65 |
| YKL124W | SSH4   | MLF4             |      | iYKL125W   | 1.94  | 1.51 | 0.65 |
| YKL125W | RRN3   |                  | 0    | iYKL126W   | 0.23  | 1.11 | 0.52 |
| YKL126W | YPK1   | SLI2             |      | iYKL127W   | 0.61  | 1.98 | 0.81 |
| YKL127W | PGM1   |                  | 0    | itK(CUU)K  | -0.41 | 1.13 | 0.51 |
| YKL128C | PMU1   |                  | 0    | iYKL128C   | -0.80 | 1.10 | 0.50 |
| YKL129C | MYO3   |                  | 0    | iYKL129C   | 0.59  | #N/A | #N/A |
| YKL130C | SHE2   |                  | 0    | iYKL130C   | -1.17 | 1.65 | 0.70 |
| YKL131W |        | 0                | #N/A | iYKL133C   | #N/A  | 1.73 | 0.74 |
| YKL132C | RMA1   |                  | 0    | iYKL131W   | 1.08  | #N/A | #N/A |
| YKL133C |        | 0                | #N/A | iYKL133C   | 2.43  | 1.73 | 0.74 |
| YKL134C | 37530  |                  | 0    | iYKL134C   | -0.44 | 0.98 | 0.45 |
| YKL135C | APL2   |                  | 0    | iYKL135C   | 0.35  | 2.37 | 0.89 |
| YKL136W |        | 0                | #N/A | iYKL137W   | 0.48  | #N/A | #N/A |
| YKL137W |        | 0                | #N/A | iYKL138C   | #N/A  | 1.21 | 0.55 |
| YKL138C | MRPL31 |                  | 0    | iYKL138C   | 0.04  | 1.21 | 0.55 |
| YKL139W | CTK1   |                  | 0    | iYKL140W   | 0.05  | 1.45 | 0.64 |
| YKL140W | TGL1   | YKL5             |      | iYKL141W   | 0.33  | 1.58 | 0.70 |
| YKL141W | SDH3   | CYB3 YKL4        |      | iYKL142W   | 1.71  | 1.14 | 0.52 |
| YKL142W | MRP8   | YKL3             |      | iYKL143W   | 1.46  | 0.61 | 0.28 |
| YKL143W | LTV1   | YKL2             |      | iYKL144C   | -1.30 | 2.53 | 0.91 |
| YKL144C | RPC25  | YKL1             |      | iYKL144C   | 1.82  | 2.53 | 0.91 |
| YKL145W | RPT1   | CIM5 YTA3        |      | iYKL146W   | 0.47  | 1.64 | 0.70 |
| YKL146W |        | 0                | 0    | iYKL148C   | 0.28  | 1.17 | 0.54 |
| YKL147C |        | 0                | #N/A | iYKL146W   | #N/A  | 1.64 | 0.70 |
| YKL148C | SDH1   |                  | 0    | iYKL148C   | 1.53  | 1.17 | 0.54 |
| YKL149C | DBR1   | PRP26            |      | iYKL149C   | #N/A  | #N/A | #N/A |
| YKL150W | MCR1   |                  | 0    | iYKL151C   | 2.32  | 1.34 | 0.61 |
| YKL151C |        | 0                | #N/A | iYKL151C   | 0.98  | 1.34 | 0.61 |
| YKL152C | GPM1   |                  | 0    | iYKL152C   | -0.98 | 0.25 | 0.05 |
| YKL153W |        | 0                | #N/A | iYKLWdelta | -1.10 | 1.61 | 0.69 |
| YKL154W | SRP102 |                  | 0    | iYKL155C   | -0.27 | 2.82 | 0.94 |
| YKL155C | RSM22  |                  | 0    | iYKL155C   | 0.02  | 2.82 | 0.94 |
| YKL156W | RPS27A |                  | 0    | iYKL157W   | -0.49 | 0.61 | 0.28 |

|         |        |                  |              |       |      |      |
|---------|--------|------------------|--------------|-------|------|------|
| YKL157W | APE2   | LAP1             | iYKL158W     | -0.14 | 1.35 | 0.62 |
| YKL158W | #N/A   | #N/A             | #N/A         | #N/A  | #N/A | #N/A |
| YKL159C | RCN1   |                  | 0 iYKL159C   | -0.09 | 3.22 | 0.97 |
| YKL160W | 0      |                  | 0 iYKL161C-1 | #N/A  | #N/A | #N/A |
| YKL161C | 0      | #N/A             | iYKL161C-0   | -0.35 | 0.83 | 0.38 |
| YKL162C | 0      | #N/A             | iYKL162C     | #N/A  | 1.64 | 0.71 |
| YKL163W | PIR3   | CCW8             | iYKL164C-1   | 0.24  | 0.91 | 0.41 |
| YKL164C | PIR1   | CCW6             | iYKL164C-0   | -0.78 | 0.77 | 0.37 |
| YKL165C | MCD4   | FSR2 SSU21 ZRG1  | iYKL165C     | -0.11 | 1.22 | 0.55 |
| YKL166C | TPK3   |                  | 0 iYKL166C-0 | -1.11 | #N/A | #N/A |
| YKL167C | MRP49  |                  | 0 iYKL167C   | #N/A  | 1.98 | 0.81 |
| YKL168C | KKQ8   |                  | 0 iYKL168C   | 0.88  | #N/A | #N/A |
| YKL169C | 0      | #N/A             | iYKL169C     | #N/A  | 0.59 | 0.25 |
| YKL170W | MRPL38 | MRPL34           | iYKL171W     | 0.66  | 2.32 | 0.89 |
| YKL171W | 0      | #N/A             | iYKL172W     | 0.06  | 2.05 | 0.82 |
| YKL172W | EBP2   |                  | 0 iYKL173W   | -0.37 | #N/A | #N/A |
| YKL173W | SNU114 | GIN10            | iYKL174C     | 0.54  | 2.00 | 0.82 |
| YKL174C | 0      | #N/A             | iYKL174C     | 1.70  | 2.00 | 0.82 |
| YKL175W | ZRT3   |                  | 0 iYKL176C   | 0.93  | 2.07 | 0.82 |
| YKL176C | LST4   |                  | 0 iYKL176C   | 0.64  | 2.07 | 0.82 |
| YKL177W | 0      | #N/A             | iYKL179C     | #N/A  | 2.09 | 0.84 |
| YKL178C | STE3   | DAF2             | iYKL177W     | -3.74 | 0.94 | 0.44 |
| YKL179C | COY1   |                  | 0 iYKL179C   | -0.14 | 2.09 | 0.84 |
| YKL180W | RPL17A | RPL17            | iYKL181W     | -1.20 | #N/A | #N/A |
| YKL181W | PRS1   | PRP1             | iYKL182W     | -0.81 | 0.87 | 0.42 |
| YKL182W | FAS1   |                  | 0 iYKL183W   | #N/A  | 0.17 | 0.02 |
| YKL183W | LOT5   |                  | 0 iYKL184W   | -1.90 | 0.75 | 0.34 |
| YKL184W | SPE1   | ORD1 SPE10       | iYKL185W     | 0.57  | 1.11 | 0.50 |
| YKL185W | ASH1   |                  | 0 iYKL186C   | -1.63 | 1.13 | 0.51 |
| YKL186C | MTR2   |                  | 0 iYKL186C   | 0.14  | 1.13 | 0.51 |
| YKL187C | 0      | #N/A             | iYKL187C     | 0.73  | 1.48 | 0.64 |
| YKL188C | PXA2   | PAT1             | iYKL188C     | 3.02  | 1.73 | 0.75 |
| YKL189W | HYM1   |                  | 0 itL(UAA)K  | -0.08 | #N/A | #N/A |
| YKL190W | CNB1   | CRV1 YCN2        | iYKL191W     | 0.28  | 1.56 | 0.67 |
| YKL191W | DPH2   |                  | 0 iYKL192C   | -1.10 | 3.06 | 0.97 |
| YKL192C | ACP1   |                  | 0 iYKL192C   | 0.47  | 3.06 | 0.97 |
| YKL193C | SDS22  | EGP1             | iYKL193C     | -1.51 | 1.50 | 0.67 |
| YKL194C | MST1   |                  | 0 iYKL194C   | 0.19  | 5.72 | 1.00 |
| YKL195W | 0      |                  | 0 iYKL196C   | #N/A  | 2.90 | 0.96 |
| YKL196C | YKT6   |                  | 0 iYKL196C   | -0.20 | 2.90 | 0.96 |
| YKL197C | PEX1   | PAS1             | iYKL197C     | #N/A  | 2.12 | 0.85 |
| YKL198C | PTK1   | KKT8 POT1 STK1 Y | iYKL198C     | -0.51 | 0.93 | 0.44 |
| YKL199C | YKT9   |                  | 0 iYKL198C   | -1.37 | 0.93 | 0.44 |
| YKL200C | #N/A   | #N/A             | #N/A         | -0.18 | #N/A | #N/A |
| YKL201C | MNN4   |                  | 0 iYKL201C   | -0.86 | 0.54 | 0.25 |
| YKL202W | 0      | #N/A             | iYKL203C     | #N/A  | 1.69 | 0.73 |
| YKL203C | TOR2   | DRR2             | iYKL203C     | -0.47 | 1.69 | 0.73 |
| YKL204W | EAP1   |                  | 0 iYKL205W   | -1.28 | 2.73 | 0.94 |
| YKL205W | LOS1   |                  | 0 iYKL206C   | 0.12  | 2.22 | 0.86 |
| YKL206C | 0      | #N/A             | iYKL206C     | 0.56  | 2.22 | 0.86 |
| YKL207W | 0      | #N/A             | iYKL208W     | 0.43  | 1.98 | 0.81 |

|         |        |                 |              |       |      |      |
|---------|--------|-----------------|--------------|-------|------|------|
| YKL208W | CBT1   |                 | 0 itT(CGU)K  | -1.35 | 1.18 | 0.54 |
| YKL209C | STE6   |                 | 0 iYKL209C   | 0.91  | 0.67 | 0.30 |
| YKL210W | UBA1   |                 | 0 iSNR64     | -0.54 | 2.06 | 0.84 |
| YKL211C | TRP3   |                 | 0 iYKL211C   | -0.17 | 0.88 | 0.40 |
| YKL212W | SAC1   | RSD1            | iYKL213C     | -0.26 | 1.93 | 0.80 |
| YKL213C | DOA1   | UFD3 ZZZ4       | iYKL213C     | 0.70  | 1.93 | 0.80 |
| YKL214C | YRA2   |                 | 0 iYKL214C   | #N/A  | #N/A | #N/A |
| YKL215C |        | 0 #N/A          | iYKL215C     | -0.45 | 1.80 | 0.76 |
| YKL216W | URA1   |                 | 0 iYKL217W   | 0.07  | 1.29 | 0.58 |
| YKL217W | JEN1   |                 | 0 iYKL218C-2 | 2.97  | 0.72 | 0.33 |
| YKL218C | SRY1   |                 | 0 iYKL218C-0 | 2.04  | 1.12 | 0.51 |
| YKL219W | COS9   |                 | 0 iYKL220C-2 | 1.25  | 1.26 | 0.57 |
| YKL220C | FRE2   |                 | 0 iYKL220C-0 | 1.51  | 1.11 | 0.51 |
| YKL221W | MCH2   |                 | 0 iYKL222C   | 4.99  | 1.82 | 0.76 |
| YKL222C |        | 0 #N/A          | iYKL222C     | 1.50  | 1.82 | 0.76 |
| YKL223W |        | 0 #N/A          | iYKL224C     | #N/A  | 0.60 | 0.27 |
| YKL224C |        | 0 #N/A          | iYKL224C     | #N/A  | 0.60 | 0.27 |
| YKL225W |        | 0 #N/A          | #N/A         | -0.31 | #N/A | #N/A |
| YKR001C | VPS1   | GRD1 LAM1 SPO15 | iYKR001C     | -0.36 | 3.19 | 0.97 |
| YKR002W | PAP1   |                 | 0 iYKR001C   | -0.19 | 3.19 | 0.97 |
| YKR003W | OSH6   |                 | 0 iYKR002W   | 0.67  | 0.95 | 0.44 |
| YKR004C | ECM9   |                 | 0 iYKR004C   | 1.72  | 1.21 | 0.56 |
| YKR005C |        | 0 #N/A          | iYKR005C     | 2.37  | 0.84 | 0.38 |
| YKR006C | MRPL13 | YK105           | iYKR006C     | -0.23 | 2.78 | 0.95 |
| YKR007W |        | 0               | 0 iYKR006C   | -1.93 | 2.78 | 0.95 |
| YKR008W | RSC4   |                 | 0 iYKR007W   | -0.32 | #N/A | #N/A |
| YKR009C | FOX2   | POX2            | iYKR009C     | 1.60  | 1.12 | 0.51 |
| YKR010C | TOF2   |                 | 0 iYKR010C   | -0.36 | 2.35 | 0.88 |
| YKR011C | TOS5   | #N/A            | iYKR011C     | 1.01  | 2.00 | 0.82 |
| YKR012C |        | 0 #N/A          | iYKR013W     | -0.24 | 0.97 | 0.44 |
| YKR013W | PRY2   |                 | 0 iYKR011C   | 0.32  | 2.00 | 0.82 |
| YKR014C | YPT52  |                 | 0 iYKR014C   | 0.28  | 1.68 | 0.73 |
| YKR015C |        | 0 #N/A          | iYKR015C     | 0.88  | 0.82 | 0.38 |
| YKR016W |        | 0               | 0 iYKR015C   | 0.91  | 0.82 | 0.38 |
| YKR017C |        | 0 #N/A          | iYKR017C     | 1.48  | 1.81 | 0.76 |
| YKR018C |        | 0 #N/A          | iYKR018C     | 0.00  | 2.11 | 0.84 |
| YKR019C | IRS4   |                 | 0 iYKR019C   | #N/A  | 2.22 | 0.87 |
| YKR020W | VPS67  | API3 VPS67 WHI6 | iYKR019C     | 0.44  | 2.22 | 0.87 |
| YKR021W |        | 0 #N/A          | iYKR020W     | -0.14 | 1.65 | 0.71 |
| YKR022C |        | 0 #N/A          | iYKR022C     | 1.40  | 3.75 | 0.99 |
| YKR023W |        | 0 #N/A          | iYKR022C     | 0.50  | 3.75 | 0.99 |
| YKR024C | DBP7   |                 | 0 iYKR024C   | -1.56 | 4.35 | 1.00 |
| YKR025W | RPC37  |                 | 0 iYKR024C   | -1.15 | 4.35 | 1.00 |
| YKR026C | GCN3   | AAS2            | iYKR026C     | 0.09  | 2.57 | 0.92 |
| YKR027W |        | 0               | 0 itR(ACG)K  | -0.11 | 1.34 | 0.61 |
| YKR028W | SAP190 |                 | 0 iYKR027W   | 0.14  | 1.71 | 0.74 |
| YKR029C | SET3   |                 | 0 iYKR029C   | 0.31  | #N/A | #N/A |
| YKR030W |        | 0 MSG1          | iYKR029C     | 1.61  | #N/A | #N/A |
| YKR031C | SPO14  | PLD1            | iYKR031C     | -0.29 | 3.04 | 0.96 |
| YKR032W |        | 0 #N/A          | iYKR031C     | #N/A  | 3.04 | 0.96 |
| YKR033C |        | 0 #N/A          | iYKR034W     | #N/A  | 2.10 | 0.84 |



|         |        |                |              |       |      |      |
|---------|--------|----------------|--------------|-------|------|------|
| YKR034W | DAL80  | UGA43          | iYKR031C     | #N/A  | 3.04 | 0.96 |
| YKR035C | 0      | #N/A           | iYKR035W-    | 0.51  | 0.41 | 0.14 |
| YKR036C | CAF4   |                | 0 iYKR036C   | 0.57  | #N/A | #N/A |
| YKR037C | SPC34  |                | 0 iYKR037C   | 0.36  | #N/A | #N/A |
| YKR038C | 0      |                | 0 iYKR038C   | -0.66 | #N/A | #N/A |
| YKR039W | GAP1   |                | 0 iYKRCdelta | 1.65  | 2.13 | 0.84 |
| YKR040C | 0      | #N/A           | iYKR041W     | 1.09  | 0.11 | 0.01 |
| YKR041W | 0      | #N/A           | iYKRCdelta   | 1.03  | 0.57 | 0.24 |
| YKR042W | UTH1   |                | 0 iYKR041W   | -1.26 | 0.11 | 0.01 |
| YKR043C | 0      | #N/A           | iYKR043C     | -0.83 | 2.04 | 0.83 |
| YKR044W | UIP5   |                | 0 iYKR043C   | -0.13 | 2.04 | 0.83 |
| YKR045C | 0      | #N/A           | iYKR045C     | 0.78  | 2.04 | 0.83 |
| YKR046C | 0      |                | 0 iYKR046C   | 1.48  | 1.31 | 0.59 |
| YKR047W | 0      | #N/A           | iYKR046C     | -1.16 | 1.31 | 0.59 |
| YKR048C | NAP1   |                | 0 iYKR048C   | -0.84 | 2.62 | 0.93 |
| YKR049C | 0      |                | 0 iYKR049C   | 0.89  | 2.34 | 0.88 |
| YKR050W | TRK2   | RPD2           | iYKR049C     | -1.44 | 2.34 | 0.88 |
| YKR051W | 0      | #N/A           | iYKR050W     | 1.31  | 1.89 | 0.78 |
| YKR052C | MRS4   |                | 0 iYKR052C   | -0.52 | 1.44 | 0.63 |
| YKR053C | YSR3   | LBP2           | iYKR053C     | -0.03 | 0.78 | 0.36 |
| YKR054C | DYN1   | DHC1 PAC6      | iYKR054C     | 0.32  | 3.57 | 0.99 |
| YKR055W | RHO4   |                | 0 iYKR054C   | #N/A  | 3.57 | 0.99 |
| YKR056W | TRM2   | NUC2 NUD1 RNC1 | iYKR055W     | -1.57 | 1.11 | 0.50 |
| YKR057W | RPS21A | RPS25          | iYKR056W     | -0.66 | 0.65 | 0.29 |
| YKR058W | GLG1   |                | 0 iYKR057W   | 2.04  | 1.39 | 0.64 |
| YKR059W | TIF1   |                | 0 iYKR058W   | -0.35 | 1.02 | 0.46 |
| YKR060W | 0      |                | 0 iYKR059W   | -0.54 | 1.24 | 0.56 |
| YKR061W | KTR2   |                | 0 iYKR060W   | 1.58  | 1.65 | 0.72 |
| YKR062W | TFA2   |                | 0 iSNR42     | -0.19 | 1.88 | 0.79 |
| YKR063C | LAS1   |                | 0 iYKR063C   | 0.44  | 2.39 | 0.90 |
| YKR064W | 0      | #N/A           | iYKR063C     | 1.15  | 2.39 | 0.90 |
| YKR065C | 0      |                | 0 iYKR065C   | -0.01 | 3.09 | 0.96 |
| YKR066C | CCP1   |                | 0 iYKR066C   | 0.27  | 3.00 | 0.96 |
| YKR067W | GPT2   | GAT1           | iYKR066C     | 0.68  | 3.00 | 0.96 |
| YKR068C | BET3   |                | 0 iYKR068C   | 0.14  | 2.32 | 0.88 |
| YKR069W | MET1   | MET20          | iYKR068C     | 1.60  | 2.32 | 0.88 |
| YKR070W | 0      | #N/A           | iYKR069W     | 0.23  | 0.81 | 0.39 |
| YKR071C | DRE2   |                | 0 iYKR071C   | 0.85  | 0.90 | 0.41 |
| YKR072C | SIS2   | HAL3           | iYKR072C     | -0.63 | #N/A | #N/A |
| YKR073C | 0      | #N/A           | iYKR073C     | #N/A  | 0.97 | 0.45 |
| YKR074W | 0      | #N/A           | itK(UUU)K    | 0.06  | 2.03 | 0.81 |
| YKR075C | 0      | #N/A           | iYKR075C-C   | 0.42  | 0.48 | 0.19 |
| YKR076W | ECM4   |                | 0 iYKR075C-1 | 0.87  | 1.50 | 0.67 |
| YKR077W | 0      | #N/A           | iYKR076W     | -0.15 | #N/A | #N/A |
| YKR078W | 0      | #N/A           | iYKR077W     | 0.26  | #N/A | #N/A |
| YKR079C | 0      |                | 0 iYKR079C   | 0.27  | 1.31 | 0.60 |
| YKR080W | MTD1   |                | 0 iYKR079C   | 0.02  | 1.31 | 0.60 |
| YKR081C | RPF2   |                | 0 iYKR081C   | -1.26 | 3.03 | 0.96 |
| YKR082W | NUP133 | RAT3           | iYKR081C     | -0.28 | 3.03 | 0.96 |
| YKR083C | DAD2   | HSK1           | iYKR083C     | 0.05  | 1.01 | 0.46 |
| YKR084C | HBS1   |                | 0 iYKR084C   | 0.16  | 2.36 | 0.88 |

|         |        |                  |   |          |            |       |      |
|---------|--------|------------------|---|----------|------------|-------|------|
| YKR085C | MRPL20 |                  | 0 | iYKR085C | -0.84      | 2.49  | 0.91 |
| YKR086W | PRP16  |                  |   | 0        | iYKR085C   | #N/A  | 0.91 |
| YKR087C |        |                  | 0 | iYKR087C | 1.40       | 2.28  | 0.87 |
| YKR088C |        |                  | 0 | iYKR088C | 0.88       | 1.13  | 0.52 |
| YKR089C |        |                  | 0 | iYKR089C | 0.22       | #N/A  | #N/A |
| YKR090W | PXL1   |                  |   | 0        | iYKR089C   | 0.42  | #N/A |
| YKR091W | SRL3   |                  |   | 0        | iYKR090W   | #N/A  | 0.41 |
| YKR092C | SRP40  |                  |   | 0        | iYKR092C-0 | #N/A  | 0.10 |
| YKR093W | PTR2   |                  |   | 0        | iYKR092C-1 | 0.14  | 0.01 |
| YKR094C | RPL40B | CEP52B UB12 UBI2 |   | iYKR094C | -1.36      | 1.46  | 0.65 |
| YKR095W | MLP1   | MPL1             |   | iYKR094C | #N/A       | 1.46  | 0.65 |
| YKR096W |        |                  | 0 | #N/A     | iYKR095W   | -0.18 | 0.60 |
| YKR097W | PCK1   | JPM2 PPC1        |   |          | iYKR096W   | #N/A  | 0.89 |
| YKR098C | UBP11  |                  |   | 0        | iYKR098C   | -0.39 | 0.94 |
| YKR099W | BAS1   |                  |   | 0        | iYKR098C   | #N/A  | 0.94 |
| YKR100C |        |                  | 0 |          | iYKR100C   | 0.00  | 0.94 |
| YKR101W | SIR1   |                  |   | 0        | iYKR100C   | 0.99  | 0.94 |
| YKR102W | FLO10  |                  |   | 0        | iYKR101W-  | #N/A  | 0.37 |
| YKR103W |        |                  | 0 |          | iYKR102W-  | 1.19  | 0.08 |
| YKR104W |        |                  | 0 | #N/A     | iYKR103W   | 1.29  | #N/A |
| YKR105C |        |                  | 0 | #N/A     | iYKR105C   | 1.69  | 0.41 |
| YKR106W |        |                  | 0 | #N/A     | iYKR105C   | 1.42  | 0.41 |
| YLL001W | DNM1   |                  |   | 0        | iYLL002W   | -0.73 | 0.80 |
| YLL002W | RTT109 | KIM2 REM50       |   |          | iYLL003W   | 0.21  | #N/A |
| YLL003W | SFI1   |                  |   | 0        | iYLL004W   | #N/A  | #N/A |
| YLL004W | ORC3   |                  |   | 0        | iYLL005C   | -0.53 | 0.65 |
| YLL005C | SPO75  |                  |   | 0        | iYLL005C   | 1.45  | 0.65 |
| YLL006W | MMM1   | YME6             |   |          | iYLL007C   | -0.27 | 0.83 |
| YLL007C |        |                  | 0 | #N/A     | iYLL007C   | #N/A  | 0.83 |
| YLL008W | DRS1   |                  |   | 0        | iYLL009C   | -1.17 | #N/A |
| YLL009C | COX17  |                  |   | 0        | iYLL009C   | #N/A  | #N/A |
| YLL010C | PSR1   |                  |   | 0        | iYLL010C   | -0.34 | 0.89 |
| YLL011W | SOF1   |                  |   | 0        | iYLL012W   | -0.37 | 0.95 |
| YLL012W |        |                  | 0 | #N/A     | iYLL013C   | 0.77  | #N/A |
| YLL013C | PUF3   |                  |   | 0        | iYLL013C   | #N/A  | #N/A |
| YLL014W |        |                  | 0 | #N/A     | iYLL015W   | -0.02 | 0.82 |
| YLL015W | BPT1   |                  |   | 0        | iYLL016W   | 0.48  | 0.80 |
| YLL016W | SDC25  |                  |   | 0        | iYLL017W   | 0.36  | 0.14 |
| YLL017W | SDC25  |                  |   | #N/A     | iYLL018C   | 0.95  | 0.97 |
| YLL018C | DPS1   | AspRS            |   |          | iYLL018C   | -0.53 | 0.97 |
| YLL019C | KNS1   | L124             |   |          | iYLL019C   | 1.52  | 0.13 |
| YLL020C |        |                  | 0 | #N/A     | iYLL019C   | 1.75  | 0.13 |
| YLL021W | SPA2   | FUS6 PEA1        |   |          | iYLL022C   | #N/A  | #N/A |
| YLL022C | HIF1   |                  |   | 0        | iYLL022C   | -0.53 | #N/A |
| YLL023C |        |                  | 0 | #N/A     | iYLL023C   | 1.13  | #N/A |
| YLL024C | SSA2   |                  |   | 0        | iYLL024C   | 0.09  | #N/A |
| YLL025W |        |                  | 0 | #N/A     | itP(UGG)L- | 1.53  | #N/A |
| YLL026W | HSP104 |                  |   | 0        | iYLL027W   | 3.10  | 0.61 |
| YLL027W | ISA1   |                  |   | 0        | iYLL028W   | 0.73  | 0.38 |
| YLL028W | TPO1   |                  |   | 0        | iYLL029W   | 1.63  | #N/A |
| YLL029W |        |                  | 0 | #N/A     | iYLL030C   | 0.51  | 0.43 |



|         |       |            |            |       |      |      |
|---------|-------|------------|------------|-------|------|------|
| YLL030C | 0     | #N/A       | iYLL030C   | #N/A  | 0.95 | 0.43 |
| YLL031C | GPI13 | MPC1       | iYLL031C   | -0.59 | 1.72 | 0.74 |
| YLL032C | 0     | #N/A       | iYLL032C   | 1.64  | 1.73 | 0.75 |
| YLL033W | 0     | #N/A       | iYLL034C   | #N/A  | 3.86 | 0.99 |
| YLL034C | 0     |            | 0 iYLL034C | -1.34 | 3.86 | 0.99 |
| YLL035W | GRC3  |            | 0 iYLL036C | -0.92 | 2.34 | 0.89 |
| YLL036C | PRP19 | PSO4       | iYLL036C   | -0.14 | 2.34 | 0.89 |
| YLL037W | 0     | #N/A       | iYLL039C   | 0.16  | 0.91 | 0.43 |
| YLL038C | ENT4  |            | 0 iYLL036C | -4.15 | 2.34 | 0.89 |
| YLL039C | UBI4  | SCD2 UB14  | iYLL039C   | 2.35  | 0.91 | 0.43 |
| YLL040C | VPS13 | SOI1 VPT2  | iYLL040C   | -0.67 | 2.54 | 0.92 |
| YLL041C | SDH2  | ACN17      | iYLL041C   | #N/A  | 1.42 | 0.63 |
| YLL042C | APG10 | APG10      | iYLL042C   | #N/A  | 0.87 | 0.42 |
| YLL043W | FPS1  |            | 0 iYLL044W | -0.19 | 1.73 | 0.75 |
| YLL044W | 0     | #N/A       | iYLL046C   | -1.19 | 0.49 | 0.19 |
| YLL045C | RPL8B | KRB1 SCL41 | iYLL044W   | -1.33 | 1.73 | 0.75 |
| YLL046C | RNP1  |            | 0 iYLL046C | -1.81 | 0.49 | 0.19 |
| YLL047W | 0     | #N/A       | iYLL048C   | #N/A  | 2.36 | 0.88 |
| YLL048C | YBT1  | BAT1       | iYLL048C   | -0.04 | 2.36 | 0.88 |
| YLL049W | 0     | #N/A       | iYLL050C   | 0.17  | 2.98 | 0.96 |
| YLL050C | COF1  |            | 0 iYLL050C | 1.31  | 2.98 | 0.96 |
| YLL051C | FRE6  |            | 0 iYLL051C | -0.67 | 1.42 | 0.64 |
| YLL052C | AQY2  |            | 0 iYLL052C | 1.59  | 0.73 | 0.35 |
| YLL053C | 0     | #N/A       | iYLL052C   | 1.49  | 0.73 | 0.35 |
| YLL054C | 0     | #N/A       | iYLL054C   | -1.83 | 2.05 | 0.83 |
| YLL055W | 0     | #N/A       | iYLL056C-1 | 2.59  | 2.42 | 0.90 |
| YLL056C | 0     | #N/A       | iYLL056C-0 | 1.89  | 1.78 | 0.76 |
| YLL057C | 0     |            | 0 iYLL057C | 0.36  | 1.08 | 0.49 |
| YLL058W | 0     | #N/A       | iYLL059C   | 0.90  | 1.98 | 0.80 |
| YLL059C | 0     | #N/A       | iYLL059C   | #N/A  | 1.98 | 0.80 |
| YLL060C | GTT2  |            | 0 iYLL060C | 1.62  | 0.84 | 0.40 |
| YLL061W | MMP1  |            | 0 iYLL062C | -0.82 | 1.30 | 0.59 |
| YLL062C | MHT1  |            | 0 iYLL062C | -0.70 | 1.30 | 0.59 |
| YLL063C | AYT1  |            | 0 iYLL063C | 2.70  | 1.82 | 0.78 |
| YLL064C | 0     | #N/A       | iYLL064C   | 1.64  | 0.89 | 0.42 |
| YLL065W | 0     | #N/A       | iYLL066C-1 | #N/A  | 0.27 | 0.07 |
| YLL066C | 0     | #N/A       | iYLL066C-0 | 0.09  | 0.70 | 0.32 |
| YLL067C | 0     | #N/A       | iYLL067C-0 | -0.03 | 0.68 | 0.32 |
| YLR001C | 0     | #N/A       | iYLR001C   | 0.59  | 0.89 | 0.42 |
| YLR002C | NOC3  |            | 0 iYLR002C | -0.99 | #N/A | #N/A |
| YLR003C | 0     | #N/A       | iYLR003C   | -1.19 | 1.64 | 0.70 |
| YLR004C | 0     | #N/A       | iYLR004C   | 0.94  | 2.27 | 0.88 |
| YLR005W | SSL1  |            | 0 iYLR004C | -0.35 | 2.27 | 0.88 |
| YLR006C | SSK1  |            | 0 iYLR006C | 0.31  | 2.52 | 0.92 |
| YLR007W | NSE1  |            | 0 iYLR006C | -0.25 | 2.52 | 0.92 |
| YLR008C | 0     | TIM14      | iYLR008C   | -0.61 | 1.64 | 0.70 |
| YLR009W | RLP24 |            | 0 iYLR008C | -0.24 | 1.64 | 0.70 |
| YLR010C | TEN1  |            | 0 iYLR010C | 3.05  | 1.43 | 0.63 |
| YLR011W | LOT6  |            | 0 iYLR011C | #N/A  | 2.63 | 0.92 |
| YLR012C | 0     | #N/A       | iYLR012C   | #N/A  | #N/A | #N/A |
| YLR013W | GAT3  |            | 0 iYLR012C | #N/A  | #N/A | #N/A |

|         |        |            |      |              |       |      |      |
|---------|--------|------------|------|--------------|-------|------|------|
| YLR014C | PPR1   |            | 0    | iYLR014C     | -1.60 | 1.29 | 0.57 |
| YLR015W | BRE2   | CPS60      |      | iYLR014C     | -0.75 | 1.29 | 0.57 |
| YLR016C |        | 0          | #N/A | iYLR016C     | -0.57 | 2.43 | 0.91 |
| YLR017W | MEU1   |            |      | 0 iYLR016C   | #N/A  | 2.43 | 0.91 |
| YLR018C | POM34  |            |      | 0 iYLR018C   | -0.53 | 1.85 | 0.78 |
| YLR019W | PSR2   |            |      | 0 iYLR018C   | 0.30  | 1.85 | 0.78 |
| YLR020C |        | 0          | #N/A | iYLR020C     | 0.19  | #N/A | #N/A |
| YLR021W |        | 0          | #N/A | iYLR020C     | 0.23  | #N/A | #N/A |
| YLR022C |        | 0          | #N/A | iYLR022C     | 0.63  | 0.68 | 0.30 |
| YLR023C |        | 0          |      | 0 iYLR023C   | 0.52  | 0.65 | 0.29 |
| YLR024C | UBR2   |            |      | 0 iYLR024C   | #N/A  | #N/A | #N/A |
| YLR025W | SNF7   | DID1 VPS32 |      | iYLR024C     | 0.29  | #N/A | #N/A |
| YLR026C | SED5   |            |      | 0 iYLR026C   | #N/A  | 1.69 | 0.72 |
| YLR027C | AAT2   | ASP5       |      | iYLR027C     | 0.17  | 0.57 | 0.24 |
| YLR028C | ADE16  |            |      | 0 iYLR028C   | -0.04 | 0.77 | 0.35 |
| YLR029C | RPL15A | RPL10A     |      | iYLR029C     | -1.76 | 2.17 | 0.86 |
| YLR030W |        | 0          | #N/A | iYLR029C     | 1.90  | 2.17 | 0.86 |
| YLR031W |        | 0          | #N/A | iYLR030W     | 1.19  | 0.48 | 0.18 |
| YLR032W | RAD5   | REV2 SNM2  |      | iYLR031W     | -0.37 | #N/A | #N/A |
| YLR033W | RSC58  |            |      | 0 iYLR032W   | 0.95  | #N/A | #N/A |
| YLR034C | SMF3   |            |      | 0 iYLR034C   | 0.10  | 1.75 | 0.74 |
| YLR035C | MLH2   |            |      | 0 iYLR035C   | -0.89 | 1.69 | 0.74 |
| YLR036C |        | 0          | #N/A | iYLR036C     | #N/A  | 1.61 | 0.70 |
| YLR037C | DAN2   |            |      | 0 iYLR037C-0 | 1.42  | 1.39 | 0.62 |
| YLR038C | COX12  |            |      | 0 iYLR038C   | 0.43  | 1.31 | 0.59 |
| YLR039C | RIC1   |            |      | 0 iYLR039C   | -0.35 | 1.02 | 0.47 |
| YLR040C |        | 0          | #N/A | iYLR041W     | -1.88 | #N/A | #N/A |
| YLR041W |        | 0          | #N/A | iYLR039C     | -2.03 | 1.02 | 0.47 |
| YLR042C |        | 0          | #N/A | iYLR042C     | #N/A  | #N/A | #N/A |
| YLR043C | TRX1   | LMA1       |      | iYLR043C     | -0.13 | 1.09 | 0.49 |
| YLR044C | PDC1   |            |      | 0 iYLR044C   | -2.74 | 0.29 | 0.06 |
| YLR045C | STU2   |            |      | 0 iYLR045C   | -1.52 | 1.75 | 0.74 |
| YLR046C |        | 0          | #N/A | iYLR046C     | 1.32  | 0.80 | 0.38 |
| YLR047C |        | 0          | #N/A | iYLR047C     | -0.58 | 0.41 | 0.14 |
| YLR048W | RPS0B  | NAB1B YST2 |      | iYLR047C     | -1.28 | 0.41 | 0.14 |
| YLR049C |        | 0          | #N/A | iYLR049C     | -1.27 | 1.88 | 0.78 |
| YLR050C |        | 0          | #N/A | iYLR050C     | 0.82  | 1.25 | 0.56 |
| YLR051C |        | 0          | #N/A | iYLR051C     | -0.97 | #N/A | #N/A |
| YLR052W | IES3   |            |      | 0 iYLR051C   | #N/A  | #N/A | #N/A |
| YLR053C |        | 0          | #N/A | iYLR053C     | #N/A  | 2.01 | 0.82 |
| YLR054C |        | 0          |      | 0 iYLR054C   | 1.85  | 0.71 | 0.32 |
| YLR055C | SPT8   |            |      | 0 iYLR055C   | -0.45 | 0.75 | 0.34 |
| YLR056W | ERG3   | PSO6 SYR1  |      | iYLR055C     | -0.38 | 0.75 | 0.34 |
| YLR057W |        | 0          | #N/A | iYLR056W     | 0.32  | 2.51 | 0.92 |
| YLR058C | SHM2   | SHMT2      |      | iYLR058C     | 0.75  | 0.52 | 0.21 |
| YLR059C | REX2   | YNT20      |      | iYLR059C     | -0.62 | 1.68 | 0.73 |
| YLR060W | FRS1   |            |      | 0 iYLR059C   | -0.34 | 1.68 | 0.73 |
| YLR061W | RPL22A |            |      | 0 iYLR060W   | -0.74 | #N/A | #N/A |
| YLR062C | BUD28  |            |      | 0 iYLR062C   | -0.71 | 0.88 | 0.42 |
| YLR063W |        | 0          | #N/A | iYLR062C     | #N/A  | 0.88 | 0.42 |
| YLR064W |        | 0          | #N/A | iYLR063W     | 1.77  | #N/A | #N/A |

|         |        |           |            |       |      |      |
|---------|--------|-----------|------------|-------|------|------|
| YLR065C | 0      | #N/A      | iYLR065C   | -0.24 | 3.58 | 0.99 |
| YLR066W | SPC3   |           | 0 iYLR065C | 0.34  | 3.58 | 0.99 |
| YLR067C | PET309 |           | 0 iYLR067C | -0.70 | 3.64 | 0.98 |
| YLR068W | FYV7   |           | 0 iYLR067C | #N/A  | 3.64 | 0.98 |
| YLR069C | MEF1   |           | 0 iYLR069C | 0.37  | 1.69 | 0.74 |
| YLR070C | XYL2   |           | 0 iYLR070C | 2.62  | 0.67 | 0.30 |
| YLR071C | RGR1   |           | 0 iYLR071C | -1.07 | 4.49 | 1.00 |
| YLR072W | 0      | #N/A      | iYLR071C   | #N/A  | 4.49 | 1.00 |
| YLR073C | 0      | #N/A      | iYLR073C   | -1.43 | 1.10 | 0.50 |
| YLR074C | BUD20  |           | 0 iYLR074C | -1.57 | 0.56 | 0.27 |
| YLR075W | RPL10  | GRC5 QSR1 | iYLR074C   | -0.84 | 0.56 | 0.27 |
| YLR076C | 0      | #N/A      | iYLR076C   | -0.84 | 0.58 | 0.27 |
| YLR077W | 0      |           | 0 iYLR076C | -0.11 | 0.58 | 0.27 |
| YLR078C | BOS1   | SEC32     | iYLR078C   | -0.38 | 1.72 | 0.74 |
| YLR079W | SIC1   | SDB25     | iYLR078C   | -1.18 | 1.72 | 0.74 |
| YLR080W | EMP46  |           | 0 iYLR079W | 1.38  | #N/A | #N/A |
| YLR081W | GAL2   |           | 0 iYLR080W | 0.75  | 2.12 | 0.84 |
| YLR082C | SRL2   |           | 0 iYLR082C | 0.92  | 1.24 | 0.56 |
| YLR083C | EMP70  |           | 0 iYLR083C | 0.14  | 1.68 | 0.72 |
| YLR084C | RAX2   |           | 0 iYLR084C | -1.87 | 0.71 | 0.32 |
| YLR085C | ARP6   |           | 0 iYLR085C | -0.14 | 3.56 | 0.98 |
| YLR086W | SMC4   |           | 0 iYLR085C | -0.58 | 3.56 | 0.98 |
| YLR087C | CSF1   |           | 0 iYLR087C | #N/A  | 3.19 | 0.97 |
| YLR088W | GAA1   | END2      | iYLR087C   | 0.03  | 3.19 | 0.97 |
| YLR089C | 0      |           | 0 iYLR089C | 0.31  | 1.23 | 0.56 |
| YLR090W | XDJ1   |           | 0 iYLR089C | -0.37 | 1.23 | 0.56 |
| YLR091W | 0      | #N/A      | iYLR090W   | 1.13  | 1.22 | 0.55 |
| YLR092W | SUL2   |           | 0 iYLR091W | 0.15  | 1.81 | 0.76 |
| YLR093C | NYV1   | MAM2      | iYLR093C   | 1.09  | 1.14 | 0.53 |
| YLR094C | GIS3   |           | 0 iYLR094C | -0.36 | 1.17 | 0.53 |
| YLR095C | IOC2   |           | 0 iYLR095C | -0.93 | 5.01 | 1.00 |
| YLR096W | KIN2   |           | 0 iYLR095C | -1.42 | 5.01 | 1.00 |
| YLR097C | 0      |           | 0 iYLR097C | 1.86  | 3.22 | 0.97 |
| YLR098C | CHA4   | SIL2 SIL3 | iYLR098C   | -0.02 | 1.72 | 0.75 |
| YLR099C | ICT1   |           | 0 iYLR099C | 0.18  | 0.90 | 0.43 |
| YLR100W | ERG27  |           | 0 iYLR099C | 0.07  | 0.90 | 0.43 |
| YLR101C | 0      | #N/A      | iYLR102C   | -0.17 | 1.57 | 0.69 |
| YLR102C | APC9   |           | 0 iYLR102C | 0.66  | 1.57 | 0.69 |
| YLR103C | CDC45  | SLD4      | iYLR103C   | -0.42 | 2.45 | 0.91 |
| YLR104W | 0      | #N/A      | iYLR103C   | #N/A  | 2.45 | 0.91 |
| YLR105C | SEN2   |           | 0 iYLR105C | -0.26 | 0.73 | 0.33 |
| YLR106C | MDN1   | REA1      | iYLR106C   | -1.42 | 2.32 | 0.88 |
| YLR107W | REX3   |           | 0 iYLR106C | 1.06  | 2.32 | 0.88 |
| YLR108C | 0      | #N/A      | iYLR108C   | -0.97 | 0.58 | 0.27 |
| YLR109W | AHP1   | cTPxIII   | iYLR108C   | -1.04 | 0.58 | 0.27 |
| YLR110C | CCW12  |           | 0 iYLR110C | -0.02 | 0.12 | 0.02 |
| YLR111W | 0      | #N/A      | iYLR110C   | #N/A  | 0.12 | 0.02 |
| YLR112W | 0      | #N/A      | iYLR111W   | 0.07  | 0.16 | 0.02 |
| YLR113W | HOG1   | SSK3      | iYLR112W   | -0.04 | 0.36 | 0.13 |
| YLR114C | 0      | #N/A      | iYLR114C   | -0.40 | 2.46 | 0.90 |
| YLR115W | CFT2   | YDH1      | iYLR114C   | #N/A  | 2.46 | 0.90 |

|         |        |                 |            |       |      |      |
|---------|--------|-----------------|------------|-------|------|------|
| YLR116W | MSL5   | BBP             | iYLR115W   | -0.55 | #N/A | #N/A |
| YLR117C | CLF1   | NTC77 SYF3      | iYLR117C   | #N/A  | 2.47 | 0.90 |
| YLR118C | 0      | #N/A            | iYLR118C   | 0.12  | 1.65 | 0.70 |
| YLR119W | SRN2   | SRN10 VPS37     | iYLR118C   | 3.76  | 1.65 | 0.70 |
| YLR120C | YPS1   | YAP3            | iYLR120C   | 2.60  | 1.36 | 0.61 |
| YLR121C | YPS3   | YPS4            | iYLR121C   | 1.73  | 1.24 | 0.57 |
| YLR122C | 0      | #N/A            | iYLR123C   | #N/A  | #N/A | #N/A |
| YLR123C | 0      | #N/A            | iYLR123C   | #N/A  | #N/A | #N/A |
| YLR124W | 0      | #N/A            | iYLR123C   | #N/A  | #N/A | #N/A |
| YLR125W | 0      | #N/A            | iYLR124W-  | -0.31 | #N/A | #N/A |
| YLR126C | 0      | #N/A            | iYLR126C   | #N/A  | 1.09 | 0.49 |
| YLR127C | APC2   | RSI1            | iYLR127C   | 0.18  | 1.85 | 0.77 |
| YLR128W | 0      |                 | 0 iYLR127C | -0.15 | 1.85 | 0.77 |
| YLR129W | DIP2   | UTP12           | iYLR128W   | -0.33 | #N/A | #N/A |
| YLR130C | ZRT2   |                 | 0 iYLR130C | 1.04  | 0.93 | 0.44 |
| YLR131C | ACE2   |                 | 0 iYLR131C | -1.03 | 1.23 | 0.55 |
| YLR132C | 0      | #N/A            | iYLR132C   | 0.74  | 2.92 | 0.96 |
| YLR133W | CKI1   |                 | 0 iYLR132C | -0.55 | 2.92 | 0.96 |
| YLR134W | PDC5   |                 | 0 iYLR133W | -2.46 | #N/A | #N/A |
| YLR135W | SLX4   |                 | 0 iYLR134W | -0.37 | 1.81 | 0.76 |
| YLR136C | TIS11  | CTH2            | iYLR136C   | -2.36 | 3.29 | 0.97 |
| YLR137W | 0      | #N/A            | iYLR136C   | 0.04  | 3.29 | 0.97 |
| YLR138W | NHA1   |                 | 0 iYLR137W | -0.19 | #N/A | #N/A |
| YLR139C | SLS1   |                 | 0 iYLR141W | #N/A  | 0.97 | 0.45 |
| YLR140W | 0      | #N/A            | iYLR138W   | -1.13 | 0.44 | 0.16 |
| YLR141W | RRN5   |                 | 0 iYLR138W | -2.54 | 0.44 | 0.16 |
| YLR142W | PUT1   |                 | 0 iYLR141W | #N/A  | 0.97 | 0.45 |
| YLR143W | 0      | #N/A            | itD(GUC)L1 | -0.96 | #N/A | #N/A |
| YLR144C | ACF2   | ENG2            | iYLR144C   | #N/A  | 1.76 | 0.75 |
| YLR145W | 0      | #N/A            | iYLR144C   | 1.05  | 1.76 | 0.75 |
| YLR146C | SPE4   |                 | 0 iYLR146C | -0.51 | 2.69 | 0.93 |
| YLR147C | SMD3   | SLT16 Sm D3     | iYLR147C   | -0.06 | 1.60 | 0.70 |
| YLR148W | PEP3   | VAM8 VPS18 VPT1 | iYLR147C   | -1.19 | 1.60 | 0.70 |
| YLR149C | 0      | #N/A            | iYLR149C   | 1.00  | 1.08 | 0.49 |
| YLR150W | STM1   | MPT4            | iYLR149C   | -1.52 | 1.08 | 0.49 |
| YLR151C | PCD1   |                 | 0 iYLR151C | 1.42  | #N/A | #N/A |
| YLR152C | 0      | #N/A            | iYLR152C   | 2.62  | 1.11 | 0.51 |
| YLR153C | ACS2   |                 | 0 iYLR153C | 0.22  | 0.26 | 0.08 |
| YLR154C | 0      | Rnh2C           | iYLRWdelta | -0.94 | 0.38 | 0.13 |
| YLR155C | ASP3-1 | ASP3            | iYLR155C-0 | #N/A  | 0.85 | 0.39 |
| YLR156W | 0      | #N/A            | iYLR155C-0 | #N/A  | 0.85 | 0.39 |
| YLR157C | ASP3-2 | ASP3            | iYLR157C-0 | #N/A  | #N/A | #N/A |
| YLR158C | ASP3-3 | ASP3            | iYLR158C-0 | #N/A  | #N/A | #N/A |
| YLR159W | 0      | #N/A            | iYLR158C-1 | #N/A  | #N/A | #N/A |
| YLR160C | ASP3-4 | ASP3            | iYLR160C-0 | #N/A  | #N/A | #N/A |
| YLR161W | 0      | #N/A            | iYLR160C-1 | #N/A  | #N/A | #N/A |
| YLR162W | 0      | #N/A            | iYLR160C-1 | 0.87  | #N/A | #N/A |
| YLR163C | MAS1   | MIF1            | iYLR163C   | 0.20  | 2.30 | 0.89 |
| YLR164W | 0      | #N/A            | iYLR163C   | 2.03  | 2.30 | 0.89 |
| YLR165C | PUS5   |                 | 0 iYLR165C | #N/A  | 0.91 | 0.42 |
| YLR166C | SEC10  |                 | 0 iYLR166C | 0.73  | #N/A | #N/A |

|         |        |            |            |       |      |      |
|---------|--------|------------|------------|-------|------|------|
| YLR167W | RPS31  | RPS37 UBI3 | iYLR166C   | -1.33 | #N/A | #N/A |
| YLR168C | 0      | #N/A       | iYLR168C   | #N/A  | #N/A | #N/A |
| YLR169W | 0      | #N/A       | iYLR168C   | #N/A  | #N/A | #N/A |
| YLR170C | APS1   | YAP19      | iYLR171W   | -0.46 | 1.40 | 0.62 |
| YLR171W | 0      | #N/A       | iYLR168C   | #N/A  | #N/A | #N/A |
| YLR172C | DPH5   |            | 0 iYLR172C | -0.76 | 2.32 | 0.88 |
| YLR173W | 0      | #N/A       | iYLR172C   | #N/A  | 2.32 | 0.88 |
| YLR174W | IDP2   |            | 0 iYLR173W | 2.42  | 2.65 | 0.93 |
| YLR175W | CBF5   |            | 0 iYLR174W | -0.96 | #N/A | #N/A |
| YLR176C | RFX1   | CRT1       | iYLR176C   | 0.12  | 3.05 | 0.96 |
| YLR177W | 0      | #N/A       | iYLR176C   | 1.02  | 3.05 | 0.96 |
| YLR178C | TFS1   | DKA1       | iYLR178C   | 1.76  | 1.16 | 0.54 |
| YLR179C | 0      | #N/A       | iYLR179C   | -0.37 | 0.48 | 0.18 |
| YLR180W | SAM1   | ETH10      | iYLR179C   | -0.52 | 0.48 | 0.18 |
| YLR181C | VTA1   |            | 0 iYLR181C | 0.39  | 2.89 | 0.96 |
| YLR182W | SWI6   | PSL8 SDS11 | iYLR181C   | 0.02  | 2.89 | 0.96 |
| YLR183C | TOS4   |            | 0 iYLR183C | -0.70 | 1.69 | 0.72 |
| YLR184W | 0      | #N/A       | iYLR183C   | #N/A  | 1.69 | 0.72 |
| YLR185W | RPL37A |            | 0 iYLR184W | -0.83 | #N/A | #N/A |
| YLR186W | EMG1   | NEP1       | iYLR185W   | #N/A  | #N/A | #N/A |
| YLR187W | 0      |            | 0 iYLR186W | -0.65 | 1.58 | 0.68 |
| YLR188W | MDL1   |            | 0 iYLR187W | -0.18 | 1.36 | 0.62 |
| YLR189C | UGT51  | UGT51      | iYLR189C   | 0.69  | #N/A | #N/A |
| YLR190W | 0      |            | 0 iYLR189C | -2.13 | #N/A | #N/A |
| YLR191W | PEX13  | PAS20      | iYLR190W   | #N/A  | #N/A | #N/A |
| YLR192C | HCR1   |            | 0 iYLR192C | 0.15  | #N/A | #N/A |
| YLR193C | 0      | #N/A       | iYLR193C   | 1.12  | #N/A | #N/A |
| YLR194C | 0      | #N/A       | iYLR194C   | 1.57  | 1.68 | 0.73 |
| YLR195C | NMT1   | CDC72      | iYLR195C   | 0.39  | #N/A | #N/A |
| YLR196W | PWP1   |            | 0 iYLR195C | -1.11 | #N/A | #N/A |
| YLR197W | SIK1   | NOP56      | iYLR196W   | -1.26 | 1.32 | 0.60 |
| YLR198C | 0      | #N/A       | iYLR198C   | -0.95 | #N/A | #N/A |
| YLR199C | 0      | #N/A       | iYLR199C   | 0.79  | 1.97 | 0.81 |
| YLR200W | YKE2   | GIM1 PFD6  | iYLR199C   | #N/A  | 1.97 | 0.81 |
| YLR201C | 0      |            | 0 iYLR203C | 1.51  | #N/A | #N/A |
| YLR202C | 0      | #N/A       | iYLR203C   | 0.39  | #N/A | #N/A |
| YLR203C | MSS51  |            | 0 iYLR203C | -0.41 | #N/A | #N/A |
| YLR204W | QRI5   |            | 0 iYLR203C | -0.41 | #N/A | #N/A |
| YLR205C | HMX1   |            | 0 iYLR205C | 1.36  | 2.04 | 0.82 |
| YLR206W | ENT2   |            | 0 iYLR205C | -0.14 | 2.04 | 0.82 |
| YLR207W | HRD3   |            | 0 iYLR206W | -0.79 | #N/A | #N/A |
| YLR208W | SEC13  | ANU3       | iYLR207W   | 0.26  | 2.20 | 0.85 |
| YLR209C | PNP1   |            | 0 iYLR209C | 0.33  | 1.99 | 0.82 |
| YLR210W | CLB4   |            | 0 iYLR209C | -1.67 | 1.99 | 0.82 |
| YLR211C | 0      | #N/A       | iYLR211C   | #N/A  | #N/A | #N/A |
| YLR212C | TUB4   |            | 0 iYLR212C | 0.05  | 1.66 | 0.71 |
| YLR213C | CRR1   |            | 0 iYLR213C | 0.18  | 1.45 | 0.65 |
| YLR214W | FRE1   |            | 0 iYLR213C | -0.44 | 1.45 | 0.65 |
| YLR215C | CDC123 |            | 0 iYLR215C | 0.31  | 1.42 | 0.64 |
| YLR216C | CPR6   |            | 0 iYLR217W | 0.42  | 1.64 | 0.72 |
| YLR217W | 0      | #N/A       | iYLR215C   | 0.77  | 1.42 | 0.64 |

|         |        |                  |              |       |      |      |
|---------|--------|------------------|--------------|-------|------|------|
| YLR218C | 0      | #N/A             | iYLR218C     | #N/A  | #N/A | #N/A |
| YLR219W | MSC3   |                  | 0 iYLR218C   | #N/A  | #N/A | #N/A |
| YLR220W | CCC1   |                  | 0 iYLR219W   | 1.62  | 0.68 | 0.31 |
| YLR221C | RSA3   |                  | 0 iYLR221C   | -0.37 | 1.45 | 0.64 |
| YLR222C | UTP13  |                  | 0 iYLR222C   | #N/A  | #N/A | #N/A |
| YLR223C | IFH1   |                  | 0 iYLR223C   | -0.42 | #N/A | #N/A |
| YLR224W | 0      | #N/A             | iYLR223C     | 0.96  | #N/A | #N/A |
| YLR225C | 0      | #N/A             | iYLR225C     | 1.02  | 1.50 | 0.66 |
| YLR226W | BUR2   | CST4             | iYLR225C     | -0.03 | 1.50 | 0.66 |
| YLR227C | ADY4   |                  | 0 iYLR227C   | 0.33  | 1.21 | 0.54 |
| YLR228C | ECM22  |                  | 0 iYLR228C-0 | #N/A  | 0.95 | 0.44 |
| YLR229C | CDC42  |                  | 0 iYLR230W   | -0.31 | 1.56 | 0.70 |
| YLR230W | 0      | #N/A             | iYLR228C-1   | #N/A  | 1.20 | 0.54 |
| YLR231C | BNA5   |                  | 0 iYLR232W   | 0.67  | 0.98 | 0.46 |
| YLR232W | 0      | #N/A             | itl(UAU)L    | #N/A  | 1.34 | 0.60 |
| YLR233C | EST1   |                  | 0 iYLR233C   | -1.25 | #N/A | #N/A |
| YLR234W | TOP3   | EDR1             | iYLR233C     | -1.60 | #N/A | #N/A |
| YLR235C | 0      | #N/A             | iYLR236C     | #N/A  | 0.86 | 0.39 |
| YLR236C | 0      | #N/A             | iYLR236C     | 0.19  | 0.86 | 0.39 |
| YLR237W | THI7   | THI10            | iYLR236C     | 0.36  | 0.86 | 0.39 |
| YLR238W | 0      |                  | 0 iYLR237W   | 0.10  | 1.82 | 0.77 |
| YLR239C | LIP2   |                  | 0 iYLR239C   | 0.51  | 2.56 | 0.92 |
| YLR240W | VPS34  | END12 PEP15 VPL7 | iYLR239C     | -0.13 | 2.56 | 0.92 |
| YLR241W | 0      | #N/A             | iYLR240W     | 1.39  | 2.02 | 0.82 |
| YLR242C | ARV1   |                  | 0 iYLR242C   | -0.46 | #N/A | #N/A |
| YLR243W | 0      | #N/A             | iYLR242C     | -1.10 | #N/A | #N/A |
| YLR244C | MAP1   |                  | 0 iYLR244C   | -0.28 | 0.28 | 0.06 |
| YLR245C | CDD1   |                  | 0 iYLR245C   | -0.17 | 1.45 | 0.64 |
| YLR246W | ERF2   |                  | 0 iYLR245C   | 0.09  | 1.45 | 0.64 |
| YLR247C | 0      | #N/A             | iYLR247C     | 0.70  | 2.13 | 0.85 |
| YLR248W | RCK2   | CLK1 CMK3        | iYLR247C     | 0.36  | 2.13 | 0.85 |
| YLR249W | YEF3   | EF-3 TEF3        | iYLR248W     | -0.63 | 0.39 | 0.13 |
| YLR250W | SSP120 |                  | 0 iYLR249W   | 0.42  | 1.51 | 0.67 |
| YLR251W | SYM1   |                  | 0 iYLR250W   | 3.20  | 1.04 | 0.47 |
| YLR252W | 0      | #N/A             | iYLR250W     | #N/A  | 1.04 | 0.47 |
| YLR253W | 0      | #N/A             | iYLR252W     | 0.45  | 1.57 | 0.70 |
| YLR254C | 0      | #N/A             | iYLR254C     | 1.06  | 2.26 | 0.88 |
| YLR255C | 0      | #N/A             | iYLR255C     | #N/A  | 0.31 | 0.08 |
| YLR256W | HAP1   | CYP1             | iYLR255C     | -0.03 | 0.31 | 0.08 |
| YLR257W | 0      | #N/A             | iYLRWdelta   | 1.62  | 0.41 | 0.16 |
| YLR258W | GSY2   |                  | 0 iYLR257W   | 1.04  | 1.58 | 0.68 |
| YLR259C | HSP60  | CPN60 MIF4       | iYLR259C     | 0.26  | 0.43 | 0.15 |
| YLR260W | LCB5   |                  | 0 iYLR259C   | 0.85  | 0.43 | 0.15 |
| YLR261C | VPS63  |                  | 0 iYLR262C   | -0.60 | 1.52 | 0.67 |
| YLR262C | YPT6   |                  | 0 iYLR262C   | -0.83 | 1.52 | 0.67 |
| YLR263W | RED1   |                  | 0 iYLR262C-A | -1.27 | 0.91 | 0.43 |
| YLR264W | RPS28B | RPS33B           | iYLR263W     | -0.41 | 0.81 | 0.37 |
| YLR265C | NEJ1   | LIF2             | iYLR265C     | 1.46  | 1.40 | 0.62 |
| YLR266C | 0      |                  | 0 iYLR266C   | #N/A  | 2.37 | 0.89 |
| YLR267W | BOP2   |                  | 0 iYLR266C   | 1.65  | 2.37 | 0.89 |
| YLR268W | SEC22  | SLY2 TSL26       | iYLR267W     | #N/A  | 2.28 | 0.87 |



|           |        |             |              |       |      |      |
|-----------|--------|-------------|--------------|-------|------|------|
| YLR269C   | 0      | #N/A        | iYLR270W     | 0.21  | 1.12 | 0.51 |
| YLR270W   | 0      | DcpS        | iYLR267W     | #N/A  | 2.28 | 0.87 |
| YLR271W   | 0      | #N/A        | iYLR270W     | #N/A  | 1.12 | 0.51 |
| YLR272C   | YCS4   | LOC7        | iYLR272C     | -0.25 | #N/A | #N/A |
| YLR273C   | PIG1   |             | 0 iYLR273C   | -1.56 | 1.93 | 0.79 |
| YLR274W   | CDC46  | BOB1 MCM5   | iYLR273C     | -0.38 | 1.93 | 0.79 |
| YLR275W   | SMD2   | Sm D2       | iYLR274W     | -0.60 | 1.91 | 0.79 |
| YLR276C   | DBP9   |             | 0 iYLR276C   | -0.19 | 2.74 | 0.94 |
| YLR277C   | YSH1   | BRR5        | iYLR277C     | 0.95  | 1.69 | 0.72 |
| YLR278C   | 0      | #N/A        | iYLR278C     | #N/A  | 0.48 | 0.19 |
| YLR279W   | 0      | #N/A        | iYLR278C     | #N/A  | 0.48 | 0.19 |
| YLR280C   | 0      | #N/A        | iYLR281C     | #N/A  | 1.85 | 0.78 |
| YLR281C   | 0      | #N/A        | iYLR281C     | #N/A  | 1.85 | 0.78 |
| YLR282C   | 0      | #N/A        | iYLR283W     | #N/A  | 0.56 | 0.24 |
| YLR283W   | 0      | #N/A        | iYLR281C     | 0.60  | 1.85 | 0.78 |
| YLR284C   | ECI1   |             | 0 iYLR284C   | 0.67  | #N/A | #N/A |
| YLR285W   | 0      |             | 0 iYLR284C   | -0.33 | #N/A | #N/A |
| YLR286C   | CTS1   |             | 0 iYLR286C   | 0.35  | 0.70 | 0.34 |
| YLR287C   | 0      | #N/A        | iYLR287C     | 1.40  | 0.41 | 0.18 |
| YLR287C-A | RPS30A |             | 0 iYLR287C-A | 0.32  | 0.92 | 0.42 |
| YLR288C   | MEC3   | PIP3        | iYLR288C     | 0.18  | 2.50 | 0.91 |
| YLR289W   | GUF1   |             | 0 iYLR288C   | 0.39  | 2.50 | 0.91 |
| YLR290C   | 0      | #N/A        | iYLR290C     | 1.03  | #N/A | #N/A |
| YLR291C   | GCD7   |             | 0 iYLR291C   | -0.11 | #N/A | #N/A |
| YLR292C   | SEC72  | SEC67 SIM2  | iYLR292C     | -0.64 | 1.22 | 0.54 |
| YLR293C   | GSP1   | CNR1 CST17  | iYLR293C     | -0.21 | #N/A | #N/A |
| YLR294C   | 0      | #N/A        | iYLR295C     | 1.41  | 1.26 | 0.57 |
| YLR295C   | ATP14  |             | 0 iYLR295C   | #N/A  | 1.26 | 0.57 |
| YLR296W   | 0      | #N/A        | iYLR295C     | #N/A  | 1.26 | 0.57 |
| YLR297W   | 0      | #N/A        | iYLR296W     | 1.92  | 0.77 | 0.36 |
| YLR298C   | YHC1   |             | 0 iYLR298C   | 0.66  | 0.33 | 0.09 |
| YLR299W   | ECM38  | CIS2        | iYLR298C     | 0.69  | 0.33 | 0.09 |
| YLR300W   | EXG1   | BGL1        | iYLR299W     | -0.57 | 0.34 | 0.10 |
| YLR301W   | 0      | #N/A        | iYLR300W     | 0.68  | #N/A | #N/A |
| YLR302C   | 0      | #N/A        | iYLR303W     | #N/A  | 0.91 | 0.42 |
| YLR303W   | MET17  | MET15 MET25 | iYLRdelta    | -0.61 | #N/A | #N/A |
| YLR304C   | ACO1   | GLU1        | iYLR304C     | 0.10  | 0.43 | 0.17 |
| YLR305C   | STT4   | BLM1        | iYLR305C     | -0.39 | 1.85 | 0.78 |
| YLR306W   | UBC12  |             | 0 iYLR305C   | 0.76  | 1.85 | 0.78 |
| YLR307W   | CDA1   |             | 0 iYLR306W   | #N/A  | #N/A | #N/A |
| YLR308W   | CDA2   |             | 0 iYLR307W   | #N/A  | #N/A | #N/A |
| YLR309C   | IMH1   | SYS3        | iYLR309C     | -0.48 | 2.04 | 0.83 |
| YLR310C   | CDC25  | CDC25 CTN1  | iYLR310C     | 0.48  | 2.28 | 0.87 |
| YLR311C   | 0      | #N/A        | iYLR312C     | 4.28  | 2.13 | 0.84 |
| YLR312C   | 0      | #N/A        | iYLR312C     | 5.60  | 2.13 | 0.84 |
| YLR313C   | SPH1   |             | 0 iYLR313C   | 0.58  | #N/A | #N/A |
| YLR314C   | CDC3   |             | 0 iYLR314C   | -0.14 | 1.40 | 0.63 |
| YLR315W   | NKP2   |             | 0 iYLR314C   | 1.52  | 1.40 | 0.63 |
| YLR316C   | TAD3   |             | 0 iYLR317W   | -0.25 | 1.92 | 0.79 |
| YLR317W   | KRE34  | #N/A        | iYLR314C     | #N/A  | 1.40 | 0.63 |
| YLR318W   | EST2   | TERT        | iYLR317W     | #N/A  | 1.92 | 0.79 |

|         |        |                |             |       |      |      |
|---------|--------|----------------|-------------|-------|------|------|
| YLR319C | BUD6   | AIP3           | iYLR319C    | 0.02  | 2.50 | 0.92 |
| YLR320W | MMS22  | SLM2           | iYLR319C    | 0.61  | 2.50 | 0.92 |
| YLR321C | SFH1   |                | 0 iYLR322W  | -0.64 | 2.59 | 0.93 |
| YLR322W | VPS65  |                | 0 iYLR320W  | #N/A  | #N/A | #N/A |
| YLR323C | CWC24  |                | 0 iYLR323C  | -0.53 | 0.49 | 0.20 |
| YLR324W | 0      |                | 0 iYLR323C  | -0.12 | 0.49 | 0.20 |
| YLR325C | RPL38  |                | 0 iYLR325C  | #N/A  | 1.39 | 0.62 |
| YLR326W | 0      | #N/A           | iYLR325C    | #N/A  | 1.39 | 0.62 |
| YLR327C | 0      | #N/A           | iYLR327C    | 4.73  | 1.41 | 0.64 |
| YLR328W | NMA1   |                | 0 itS(GCU)L | -0.61 | 0.40 | 0.13 |
| YLR329W | REC102 |                | 0 iYLR328W  | 0.74  | 0.65 | 0.29 |
| YLR330W | CHS5   | CAL3           | iYLR329W    | -0.21 | 1.90 | 0.80 |
| YLR331C | JIP3   |                | 0 iYLR332W- | 1.61  | #N/A | #N/A |
| YLR332W | MID2   | KAI1           | iYLR330W    | 1.15  | 0.28 | 0.08 |
| YLR333C | RPS25B |                | 0 iYLR333C  | -1.30 | 0.25 | 0.04 |
| YLR334C | 0      | #N/A           | iYLRWdelta  | #N/A  | #N/A | #N/A |
| YLR335W | NUP2   |                | 0 itE(UUC)L | -0.66 | 0.81 | 0.39 |
| YLR336C | SGD1   |                | 0 iYLR336C  | #N/A  | 1.62 | 0.70 |
| YLR337W | #N/A   | #N/A           | #N/A        | -0.66 | #N/A | #N/A |
| YLR338W | KRE21  | #N/A           | iYLR336C    | #N/A  | 1.62 | 0.70 |
| YLR339C | 0      | #N/A           | iYLR340W    | -0.87 | #N/A | #N/A |
| YLR340W | RPP0   | RPL10E         | iYLR338W    | -1.17 | #N/A | #N/A |
| YLR341W | SPO77  |                | 0 iYLR340W  | 1.76  | #N/A | #N/A |
| YLR342W | FKS1   | CND1 CWH53 ETG | iYLR341W    | 0.27  | #N/A | #N/A |
| YLR343W | 0      |                | 0 iYLR342W  | 0.39  | 0.27 | 0.07 |
| YLR344W | RPL26A |                | 0 itR(CCG)L | -0.98 | 0.39 | 0.13 |
| YLR345W | 0      | #N/A           | iYLR344W    | 2.68  | 1.08 | 0.49 |
| YLR346C | 0      | #N/A           | iYLR346C    | #N/A  | #N/A | #N/A |
| YLR347C | KAP95  | RSL1           | iYLR347C    | -0.59 | 0.87 | 0.40 |
| YLR348C | DIC1   |                | 0 iYLR349W  | -1.21 | 0.85 | 0.40 |
| YLR349W | 0      | #N/A           | iYLR347C    | -0.20 | 0.87 | 0.40 |
| YLR350W | ORM2   |                | 0 iYLR349W  | 1.45  | 0.85 | 0.40 |
| YLR351C | NIT3   |                | 0 iYLR351C  | -0.24 | 2.72 | 0.94 |
| YLR352W | 0      | #N/A           | iYLR351C    | 0.68  | 2.72 | 0.94 |
| YLR353W | BUD8   |                | 0 iYLR352W  | 0.05  | 1.39 | 0.63 |
| YLR354C | TAL1   |                | 0 iYLR354C  | 0.11  | #N/A | #N/A |
| YLR355C | ILV5   |                | 0 iYLR355C  | -0.25 | 0.60 | 0.25 |
| YLR356W | 0      | #N/A           | iYLR355C    | 1.13  | 0.60 | 0.25 |
| YLR357W | RSC2   |                | 0 iYLR356W  | -1.12 | 2.13 | 0.85 |
| YLR358C | 0      | #N/A           | iYLR358C    | -0.50 | 1.47 | 0.66 |
| YLR359W | ADE13  | BRA1 BRA8      | iYLR358C    | -0.31 | 1.47 | 0.66 |
| YLR360W | VPS38  | VPL17          | iYLR359W    | 0.77  | #N/A | #N/A |
| YLR361C | 0      |                | 0 iYLR361C  | 0.77  | #N/A | #N/A |
| YLR362W | STE11  |                | 0 iYLR361C  | 0.92  | #N/A | #N/A |
| YLR363C | NMD4   |                | 0 iYLR363C  | 1.87  | 1.56 | 0.68 |
| YLR364W | 0      | #N/A           | iYLR363C    | #N/A  | 1.56 | 0.68 |
| YLR365W | 0      | #N/A           | iYLR364W    | #N/A  | #N/A | #N/A |
| YLR366W | 0      | #N/A           | iYLR364W    | #N/A  | #N/A | #N/A |
| YLR367W | RPS22B |                | 0 iYLR366W  | -1.02 | 0.41 | 0.14 |
| YLR368W | FLM1   |                | 0 iSNR44    | 0.41  | 0.73 | 0.33 |
| YLR369W | SSQ1   | SSC2           | iYLR368W    | -0.19 | #N/A | #N/A |



|         |        |                  |   |            |       |      |      |
|---------|--------|------------------|---|------------|-------|------|------|
| YLR370C | ARC18  |                  | 0 | iYLR370C   | #N/A  | 2.27 | 0.88 |
| YLR371W | ROM2   |                  | 0 | iYLR370C   | 0.04  | 2.27 | 0.88 |
| YLR372W | SUR4   | APA1 ELO3 SRE1 V | 0 | iYLR371W   | 0.27  | #N/A | #N/A |
| YLR373C | VID22  |                  | 0 | iYLR373C   | 0.14  | 2.92 | 0.95 |
| YLR374C | 0      | #N/A             |   | iYLR375W   | 0.48  | #N/A | #N/A |
| YLR375W | STP3   |                  | 0 | iYLR373C   | 0.65  | 2.92 | 0.95 |
| YLR376C | 0      |                  | 0 | iYLR376C   | -0.63 | #N/A | #N/A |
| YLR377C | FBP1   | ACN8 FBPase      |   | iYLR377C   | 0.44  | 1.32 | 0.59 |
| YLR378C | SEC61  |                  | 0 | iYLR379W   | -0.29 | 1.53 | 0.68 |
| YLR379W | 0      | #N/A             |   | itK(UUU)L  | -1.32 | #N/A | #N/A |
| YLR380W | CSR1   | SFH2             |   | iYLR379W   | #N/A  | 1.53 | 0.68 |
| YLR381W | CTF3   | CHL3             |   | iYLR380W   | 0.98  | 1.69 | 0.72 |
| YLR382C | NAM2   | MSL1             |   | iYLR382C   | -0.41 | 2.15 | 0.85 |
| YLR383W | RHC18  | SMC6             |   | iYLR382C   | -0.19 | 2.15 | 0.85 |
| YLR384C | IKI3   | ELP1 TOT1        |   | iYLR384C   | -0.37 | 1.44 | 0.64 |
| YLR385C | 0      | AWS1             |   | iYLR385C   | -0.61 | 3.83 | 0.99 |
| YLR386W | VAC14  |                  | 0 | iYLR385C   | 0.00  | 3.83 | 0.99 |
| YLR387C | 0      |                  | 0 | iYLR387C   | 0.61  | #N/A | #N/A |
| YLR388W | RPS29A |                  | 0 | iYLR387C   | -0.44 | #N/A | #N/A |
| YLR389C | STE23  |                  | 0 | iYLR389C   | 0.26  | 1.83 | 0.76 |
| YLR390W | ECM19  |                  | 0 | iYLR389C   | 0.48  | 1.83 | 0.76 |
| YLR391W | #N/A   | #N/A             |   | #N/A       | -0.21 | #N/A | #N/A |
| YLR392C | 0      | #N/A             |   | iYLR392C   | 1.36  | 2.09 | 0.84 |
| YLR393W | ATP10  |                  | 0 | iYLR392C   | #N/A  | 2.09 | 0.84 |
| YLR394W | CST9   | ZIP3             |   | iYLR392C   | 0.53  | 2.09 | 0.84 |
| YLR395C | COX8   |                  | 0 | iYLR395C   | 2.44  | #N/A | #N/A |
| YLR396C | VPS33  | CLS14 MET27 PEP1 | 0 | iYLR396C   | 1.16  | 1.27 | 0.57 |
| YLR397C | AFG2   | DRG1             |   | iYLR397C   | -1.33 | 1.14 | 0.52 |
| YLR398C | SKI2   |                  | 0 | iYLR398C   | #N/A  | 0.96 | 0.44 |
| YLR399C | BDF1   |                  | 0 | iYLR399C   | 0.09  | 0.34 | 0.10 |
| YLR400W | 0      | #N/A             |   | iYLR399C   | -0.74 | 0.34 | 0.10 |
| YLR401C | 0      |                  | 0 | iYLR401C   | -0.87 | 0.60 | 0.26 |
| YLR402W | 0      | #N/A             |   | iYLR401C   | #N/A  | 0.60 | 0.26 |
| YLR403W | SFP1   |                  | 0 | iYLR402W   | 0.44  | 0.90 | 0.43 |
| YLR404W | 0      | #N/A             |   | iYLR403W   | -0.65 | #N/A | #N/A |
| YLR405W | 0      |                  | 0 | iYLR404W   | 0.73  | 0.77 | 0.35 |
| YLR406C | RPL31B |                  | 0 | iYLR406C   | -1.01 | 0.56 | 0.23 |
| YLR407W | 0      | #N/A             |   | iYLR406C   | #N/A  | 0.56 | 0.23 |
| YLR408C | 0      | #N/A             |   | iYLR408C   | #N/A  | 1.52 | 0.67 |
| YLR409C | UTP21  |                  | 0 | iYLR409C   | -0.67 | 1.44 | 0.65 |
| YLR410W | VIP1   |                  | 0 | iYLR409C   | -0.45 | 1.44 | 0.65 |
| YLR411W | CTR3   |                  | 0 | iYLRWdelta | 0.49  | #N/A | #N/A |
| YLR412W | 0      | #N/A             |   | iYLR411W   | -0.78 | #N/A | #N/A |
| YLR413W | 0      | #N/A             |   | iYLR412W-  | -1.33 | #N/A | #N/A |
| YLR414C | 0      | #N/A             |   | iYLR414C   | 1.65  | 0.34 | 0.09 |
| YLR415C | 0      | #N/A             |   | iYLR416C   | #N/A  | #N/A | #N/A |
| YLR416C | 0      | #N/A             |   | iYLR416C   | #N/A  | #N/A | #N/A |
| YLR417W | VPS36  | GRD12 VAC3 VPL1  | 0 | iYLR416C   | 1.35  | #N/A | #N/A |
| YLR418C | CDC73  |                  | 0 | iYLR418C   | 0.11  | 2.29 | 0.88 |
| YLR419W | 0      | #N/A             |   | iYLR418C   | -1.11 | 2.29 | 0.88 |
| YLR420W | URA4   |                  | 0 | iYLRdelta2 | -0.92 | 0.99 | 0.45 |

|         |        |                |   |             |       |      |      |
|---------|--------|----------------|---|-------------|-------|------|------|
| YLR421C | RPN13  |                | 0 | iYLR421C    | 1.06  | 2.69 | 0.93 |
| YLR422W | 0      | #N/A           |   | iYLR421C    | #N/A  | 2.69 | 0.93 |
| YLR423C | APG17  | APG17          |   | iYLR423C    | 1.14  | 2.82 | 0.95 |
| YLR424W | 0      |                | 0 | iYLR423C    | -0.01 | 2.82 | 0.95 |
| YLR425W | TUS1   | SOP10          |   | iYLRcdelta2 | 0.18  | #N/A | #N/A |
| YLR426W | 0      | #N/A           |   | iYLR425W    | -0.34 | 1.80 | 0.76 |
| YLR427W | 0      |                | 0 | iYLR426W    | -0.32 | #N/A | #N/A |
| YLR428C | 0      | #N/A           |   | iYLR429W    | #N/A  | #N/A | #N/A |
| YLR429W | CRN1   |                | 0 | iYLR427W    | -1.02 | 1.12 | 0.52 |
| YLR430W | SEN1   | CIK3 NRD2      |   | iYLR429W    | #N/A  | #N/A | #N/A |
| YLR431C | 0      | CVT23          |   | iYLR431C    | #N/A  | #N/A | #N/A |
| YLR432W | IMD3   |                | 0 | iYLR431C    | 0.51  | #N/A | #N/A |
| YLR433C | CNA1   | CMP1           |   | iYLR435W    | 0.18  | 0.59 | 0.28 |
| YLR434C | 0      | #N/A           |   | iYLR435W    | #N/A  | 0.59 | 0.28 |
| YLR435W | 0      |                | 0 | iYLR432W    | -0.91 | #N/A | #N/A |
| YLR436C | ECM30  |                | 0 | iYLR436C    | 0.21  | 0.81 | 0.37 |
| YLR437C | 0      | #N/A           |   | iYLR437C    | -0.71 | 0.38 | 0.12 |
| YLR438W | CAR2   |                | 0 | iYLR437C    | -2.67 | 0.38 | 0.12 |
| YLR439W | MRPL4  |                | 0 | iYLR438C-A  | -0.13 | 2.31 | 0.88 |
| YLR440C | 0      |                | 0 | iYLR440C    | -0.85 | 0.98 | 0.44 |
| YLR441C | RPS1A  | RP10A          |   | iYLR441C    | -1.03 | 0.36 | 0.11 |
| YLR442C | SIR3   | CMT1 MAR2 STE8 |   | iYLR442C    | -0.21 | #N/A | #N/A |
| YLR443W | ECM7   | ZRG15          |   | iYLR442C    | 0.55  | #N/A | #N/A |
| YLR444C | 0      | #N/A           |   | iYLR444C    | #N/A  | #N/A | #N/A |
| YLR445W | 0      | #N/A           |   | iYLR444C    | #N/A  | #N/A | #N/A |
| YLR446W | 0      | #N/A           |   | iYLR445W    | -0.36 | 1.29 | 0.59 |
| YLR447C | VMA6   |                | 0 | iYLR447C    | -0.02 | 0.75 | 0.34 |
| YLR448W | RPL6B  |                | 0 | iYLR447C    | -1.34 | 0.75 | 0.34 |
| YLR449W | FPR4   |                | 0 | iYLR448W    | -0.78 | #N/A | #N/A |
| YLR450W | HMG2   |                | 0 | iYLR449W    | -0.38 | 2.78 | 0.94 |
| YLR451W | LEU3   |                | 0 | iYLR450W    | 0.41  | #N/A | #N/A |
| YLR452C | SST2   |                | 0 | iYLR452C    | -1.61 | #N/A | #N/A |
| YLR453C | RIF2   |                | 0 | iYLR453C    | #N/A  | #N/A | #N/A |
| YLR454W | 0      |                | 0 | iYLR453C    | 0.73  | #N/A | #N/A |
| YLR455W | 0      | #N/A           |   | iYLRcdelta2 | 0.53  | #N/A | #N/A |
| YLR456W | 0      | #N/A           |   | iYLR455W    | #N/A  | 1.01 | 0.46 |
| YLR457C | NBP1   |                | 0 | iYLR458W    | #N/A  | 1.78 | 0.74 |
| YLR458W | 0      | #N/A           |   | iYLR456W    | #N/A  | 0.39 | 0.13 |
| YLR459W | CDC91  |                | 0 | iYLR458W    | #N/A  | 1.78 | 0.74 |
| YLR460C | 0      | #N/A           |   | iYLR460C-0  | 1.06  | #N/A | #N/A |
| YLR461W | PAU4   |                | 0 | iYLR460C-1  | 1.84  | 0.78 | 0.37 |
| YLR462W | 0      | #N/A           |   | iYLR461W-   | 0.71  | 0.63 | 0.28 |
| YLR463C | 0      | #N/A           |   | iYLR466W    | 0.17  | 0.39 | 0.15 |
| YLR464W | 0      | #N/A           |   | iYLR461W-   | 0.03  | 0.63 | 0.28 |
| YLR465C | 0      |                | 0 | iYLR466W    | -0.24 | 0.39 | 0.15 |
| YLR466W | YRF1-4 | YRF1           |   | iYLR461W-   | 0.04  | 0.63 | 0.28 |
| YLR467W | YRF1-5 | YRF1           |   | iYLR466W    | #N/A  | 0.39 | 0.15 |
| YML001W | YPT7   | AST4 VAM4      |   | iYML002W    | 0.63  | 2.20 | 0.87 |
| YML002W | 0      | #N/A           |   | iYML003W    | 1.38  | 0.43 | 0.19 |
| YML003W | 0      | #N/A           |   | iYML004C    | #N/A  | 1.84 | 0.77 |
| YML004C | GLO1   |                | 0 | iYML004C    | 0.54  | 1.84 | 0.77 |

|           |        |                  |      |            |       |      |      |
|-----------|--------|------------------|------|------------|-------|------|------|
| YML005W   |        | 0                | 0    | itS(AGA)M  | 2.55  | 1.18 | 0.54 |
| YML006C   | GIS4   |                  | 0    | iYML006C   | -0.83 | 0.70 | 0.32 |
| YML007W   | YAP1   | PAR1 SNQ3        |      | iYML008C   | 0.45  | 0.49 | 0.22 |
| YML008C   | ERG6   | ISE1 LIS1 SED6   |      | iYML008C   | -0.05 | 0.49 | 0.22 |
| YML009C   | MRPL39 |                  | 0    | iYML009C   | -0.37 | 2.13 | 0.85 |
| YML010W   | SPT5   |                  | 0    | iYML011C   | -0.80 | 2.82 | 0.95 |
| YML010W-A | #N/A   | #N/A             |      | iYML011C   | -0.87 | 2.82 | 0.95 |
| YML010W-B | #N/A   | #N/A             |      | #N/A       | -0.54 | #N/A | #N/A |
| YML011C   |        | 0                | #N/A | iYML011C   | 1.16  | 2.82 | 0.95 |
| YML012W   | ERV25  |                  | 0    | iYML013C-A | 0.52  | #N/A | #N/A |
| YML013C-A | #N/A   | #N/A             |      | iYML013C-A | -2.23 | #N/A | #N/A |
| YML013W   | SEL1   |                  | 0    | iYML014W   | #N/A  | 1.95 | 0.81 |
| YML014W   |        | 0                |      | iYML015C   | -0.39 | 3.09 | 0.97 |
| YML015C   | TAF11  | TAF40 TafII40    |      | iYML015C   | 0.00  | 3.09 | 0.97 |
| YML016C   | PPZ1   |                  | 0    | iYML016C   | 1.04  | 1.15 | 0.54 |
| YML017W   | PSP2   | MRS15            |      | iYML018C   | #N/A  | 1.62 | 0.70 |
| YML018C   |        | 0                | #N/A | iYML018C   | -0.39 | 1.62 | 0.70 |
| YML019W   | OST6   |                  | 0    | iYML020W   | 0.37  | 2.16 | 0.86 |
| YML020W   |        | 0                | #N/A | iYML021C   | 1.13  | 1.91 | 0.79 |
| YML021C   | UNG1   |                  | 0    | iYML021C   | -0.27 | 1.91 | 0.79 |
| YML022W   | APT1   |                  | 0    | iYML023C   | -0.77 | 1.43 | 0.63 |
| YML023C   |        | 0                | #N/A | iYML023C   | 0.58  | 1.43 | 0.63 |
| YML024W   | RPS17A | RP51A RPL51A     |      | iYML025C   | -0.72 | 0.79 | 0.36 |
| YML025C   |        | 0                |      | iYML025C   | -0.52 | 0.79 | 0.36 |
| YML026C   | RPS18B |                  | 0    | iYML026C   | -1.25 | 0.34 | 0.11 |
| YML027W   | YOX1   |                  | 0    | iYML028W   | -1.28 | 0.68 | 0.31 |
| YML028W   | TSA1   | TPX1 ZRG14 cTPxi |      | iYML029W   | 0.44  | 1.19 | 0.54 |
| YML029W   | USA1   |                  | 0    | iYML030W   | #N/A  | 1.62 | 0.70 |
| YML030W   |        | 0                | #N/A | iYML031W   | 1.15  | 2.27 | 0.88 |
| YML031W   | NDC1   |                  | 0    | iYML033W   | -0.65 | 0.30 | 0.08 |
| YML032C   | RAD52  |                  | 0    | iYML031W   | -0.49 | 2.27 | 0.88 |
| YML032C-A | #N/A   | #N/A             |      | #N/A       | #N/A  | #N/A | #N/A |
| YML033W   | #N/A   | #N/A             |      | #N/A       | -1.44 | #N/A | #N/A |
| YML034W   | SRC1   |                  | 0    | iYML034W   | -1.30 | 0.04 | 0.00 |
| YML035C   | AMD1   | AMD3             |      | iYML035C   | 0.33  | 0.83 | 0.38 |
| YML035C-A | #N/A   | #N/A             |      | iYML034W   | #N/A  | 0.04 | 0.00 |
| YML036W   |        | 0                | #N/A | iYML037C   | 0.83  | 1.80 | 0.75 |
| YML037C   |        | 0                | #N/A | iYML037C   | #N/A  | 1.80 | 0.75 |
| YML038C   | YMD8   |                  | 0    | iYML038C   | 0.75  | #N/A | #N/A |
| YML039W   | #N/A   | #N/A             |      | itP(UGG)M  | -1.01 | 0.61 | 0.27 |
| YML040W   | #N/A   | #N/A             |      | itP(UGG)M  | -0.12 | 0.61 | 0.27 |
| YML041C   | VPS71  | SWC6             |      | iYML041C   | 0.87  | 2.19 | 0.85 |
| YML042W   | CAT2   | YCAT             |      | iYML043C   | 1.42  | 1.55 | 0.67 |
| YML043C   | RRN11  |                  | 0    | iYML043C   | -0.48 | 1.55 | 0.67 |
| YML045W   | #N/A   | #N/A             |      | itG(GCC)M  | -0.07 | #N/A | #N/A |
| YML046W   | PRP39  |                  | 0    | iYML047C   | #N/A  | 1.57 | 0.70 |
| YML047C   | PRM6   |                  | 0    | iYML047C   | #N/A  | 1.57 | 0.70 |
| YML048W   | GSF2   | ECM6             |      | iYML049C   | 0.04  | #N/A | #N/A |
| YML048W-A | #N/A   | #N/A             |      | iYML048W   | #N/A  | 0.41 | 0.18 |
| YML049C   | RSE1   |                  | 0    | iYML049C   | 0.07  | #N/A | #N/A |
| YML050W   |        | 0                | #N/A | iYML051W   | 0.85  | 1.52 | 0.66 |

|           |       |                     |      |              |       |      |      |
|-----------|-------|---------------------|------|--------------|-------|------|------|
| YML051W   | GAL80 |                     | 0    | iYML052W     | -0.40 | 1.47 | 0.64 |
| YML052W   | SUR7  |                     |      | 0 iYML053C   | -0.17 | 0.66 | 0.30 |
| YML053C   |       | 0                   | #N/A | iYML053C     | #N/A  | 0.66 | 0.30 |
| YML054C   | CYB2  |                     |      | 0 iYML054C   | 5.25  | 0.91 | 0.42 |
| YML055W   | SPC2  | SPY1                |      | iSNR54       | 0.80  | 0.69 | 0.31 |
| YML056C   | IMD4  |                     |      | 0 iSNR54     | -0.50 | 0.69 | 0.31 |
| YML057W   | CMP2  | CNA2                |      | iYML058W     | 0.45  | 0.60 | 0.26 |
| YML058C-A | #N/A  |                     | #N/A | iYML057W     | -1.01 | #N/A | #N/A |
| YML058W   | SML1  |                     |      | 0 iYML059C   | -0.19 | #N/A | #N/A |
| YML059C   |       | 0                   | #N/A | iYML059C     | 0.95  | #N/A | #N/A |
| YML060W   | OGG1  |                     |      | 0 iYML061C   | -2.73 | 2.44 | 0.91 |
| YML061C   | PIF1  | TST1                |      | iYML061C     | -0.64 | 2.44 | 0.91 |
| YML062C   | MFT1  | MFT52               |      | iYML062C     | -0.37 | 1.97 | 0.81 |
| YML063W   | RPS1B | PLC2 RP10B          |      | iYML064C     | -1.32 | 0.27 | 0.05 |
| YML064C   | TEM1  |                     |      | 0 iYML064C   | #N/A  | 0.27 | 0.05 |
| YML065W   | ORC1  |                     |      | 0 iYML066C   | -0.73 | 2.51 | 0.91 |
| YML066C   | SMA2  |                     |      | 0 iYML066C   | 2.98  | 2.51 | 0.91 |
| YML067C   | ERV41 |                     |      | 0 iYML067C   | -0.05 | 1.92 | 0.80 |
| YML068W   |       | 0                   |      | 0 iYML069W   | #N/A  | 1.05 | 0.48 |
| YML069W   | POB3  |                     |      | 0 iYML070W   | 0.36  | 2.28 | 0.88 |
| YML070W   | DAK1  |                     |      | 0 iYMLCdelta | 0.35  | 2.23 | 0.86 |
| YML071C   | DOR1  | DOR1                |      | iYML071C     | -0.44 | #N/A | #N/A |
| YML072C   |       | 0                   |      | 0 iYML072C   | -0.08 | 0.73 | 0.34 |
| YML073C   | RPL6A | YL16A               |      | iYML073C     | -1.25 | #N/A | #N/A |
| YML074C   | FPR3  | NPI46               |      | iYML074C-C   | -0.72 | 1.20 | 0.54 |
| YML075C   | HMG1  |                     |      | 0 iYML075C   | 1.03  | 0.92 | 0.42 |
| YML076C   | WAR1  |                     |      | 0 iYML076C   | 0.53  | #N/A | #N/A |
| YML077W   | BET5  |                     |      | 0 iYML078W   | #N/A  | #N/A | #N/A |
| YML078W   | CPR3  | CYP3                |      | iYML079W     | -0.06 | 0.19 | 0.02 |
| YML079W   |       | 0                   | #N/A | iYML080W     | -0.59 | 1.05 | 0.48 |
| YML080W   | DUS1  |                     |      | 0 iYML081W   | #N/A  | 3.43 | 0.98 |
| YML081W   |       | 0                   | #N/A | iYML081C-A   | 0.62  | 2.79 | 0.94 |
| YML082W   |       | 0                   | #N/A | iYML083C     | 0.03  | 1.96 | 0.81 |
| YML083C   |       | 0                   | #N/A | iYML083C     | 2.61  | 1.96 | 0.81 |
| YML084W   |       | 0                   | #N/A | iYML085C     | #N/A  | 2.14 | 0.85 |
| YML085C   | TUB1  |                     |      | 0 iYML085C   | -0.12 | 2.14 | 0.85 |
| YML086C   | ALO1  |                     |      | 0 iYML086C   | -0.06 | 1.52 | 0.66 |
| YML087C   |       | 0                   | #N/A | iYML087C     | 0.68  | 1.73 | 0.74 |
| YML088W   | UFO1  |                     |      | 0 iYML089C   | 0.82  | 0.74 | 0.33 |
| YML089C   |       | 0                   | #N/A | iYML089C     | #N/A  | 0.74 | 0.33 |
| YML090W   |       | 0                   | #N/A | iYML092C     | #N/A  | #N/A | #N/A |
| YML091C   | RPM2  |                     |      | 0 iYML089C   | #N/A  | 0.74 | 0.33 |
| YML092C   | PRE8  |                     |      | 0 iYML092C   | 0.45  | #N/A | #N/A |
| YML093W   | UTP14 |                     |      | 0 iYML094W   | -0.81 | 2.07 | 0.83 |
| YML094W   | GIM5  | PFD5                |      | iYML095C     | #N/A  | 0.45 | 0.20 |
| YML095C   | RAD10 |                     |      | 0 iYML095C   | 1.06  | 0.45 | 0.20 |
| YML095C-A | #N/A  |                     | #N/A | iYML094W     | #N/A  | 2.07 | 0.83 |
| YML096W   |       | 0                   | #N/A | iYML097C     | #N/A  | #N/A | #N/A |
| YML097C   | VPS9  | VPL31 VPT9          |      | iYML097C     | 0.17  | #N/A | #N/A |
| YML098W   | TAF13 | FUN81 TAF19 TafII11 |      | iYML099C     | -0.70 | 1.07 | 0.49 |
| YML099C   | ARG81 | ARGR2               |      | iYML099C     | #N/A  | 1.07 | 0.49 |

|           |        |                 |   |            |       |      |      |
|-----------|--------|-----------------|---|------------|-------|------|------|
| YML100W   | TSL1   |                 | 0 | iYML101C   | 1.73  | 1.25 | 0.58 |
| YML100W-A | #N/A   | #N/A            |   | iYML100W   | 0.51  | #N/A | #N/A |
| YML101C   | 0      |                 | 0 | iYML101C   | -0.48 | 1.25 | 0.58 |
| YML102C-A | #N/A   | #N/A            |   | iYML101C   | -0.69 | 1.25 | 0.58 |
| YML102W   | CAC2   |                 | 0 | iYML103C   | -0.57 | 1.10 | 0.50 |
| YML103C   | NUP188 |                 | 0 | iYML103C   | -0.30 | 1.10 | 0.50 |
| YML104C   | MDM1   |                 | 0 | iYML104C   | -0.41 | 2.27 | 0.88 |
| YML105C   | SEC65  |                 | 0 | iYML105C   | -0.14 | 1.65 | 0.71 |
| YML106W   | URA5   | PYR5            |   | iYML107C   | -0.23 | 0.83 | 0.40 |
| YML107C   | 0      | #N/A            |   | iYML107C   | 0.64  | 0.83 | 0.40 |
| YML108W   | 0      | #N/A            |   | iYML109W   | 0.78  | #N/A | #N/A |
| YML109W   | ZDS2   | CES4            |   | iYML110C   | -2.39 | 1.76 | 0.76 |
| YML110C   | COQ5   | DBI56           |   | iYML110C   | 0.08  | 1.76 | 0.76 |
| YML111W   | BUL2   |                 | 0 | iYML112W   | 0.36  | 1.04 | 0.47 |
| YML112W   | CTK3   |                 | 0 | iYML113W   | -0.22 | #N/A | #N/A |
| YML113W   | DAT1   |                 | 0 | iYML114C   | -1.21 | 1.65 | 0.72 |
| YML114C   | TAF8   | TAF65 TafII65   |   | iYML114C   | -1.17 | 1.65 | 0.72 |
| YML115C   | VAN1   | LDB13 VRG7 VRG8 |   | iYML115C   | 0.93  | 2.40 | 0.89 |
| YML116W   | ATR1   | SNQ1            |   | iYML117W-  | 2.05  | 0.71 | 0.34 |
| YML117W   | 0      |                 | 0 | iYML118W   | 0.51  | 2.17 | 0.86 |
| YML117W-A | #N/A   | #N/A            |   | iYML118W   | -0.20 | 2.17 | 0.86 |
| YML118W   | NGL3   |                 | 0 | iYML119W   | 2.30  | #N/A | #N/A |
| YML119W   | 0      | #N/A            |   | iYML120C   | 0.07  | 1.04 | 0.49 |
| YML120C   | NDI1   |                 | 0 | iYML120C   | 1.19  | 1.04 | 0.49 |
| YML121W   | GTR1   |                 | 0 | iYML122C   | 0.48  | 0.92 | 0.44 |
| YML122C   | 0      | #N/A            |   | iYML122C   | #N/A  | 0.92 | 0.44 |
| YML123C   | PHO84  |                 | 0 | iYML123C   | -0.75 | 0.97 | 0.44 |
| YML124C   | TUB3   |                 | 0 | iYML124C   | -0.89 | 2.30 | 0.87 |
| YML125C   | 0      | #N/A            |   | iYML125C   | -0.83 | 1.53 | 0.66 |
| YML126C   | ERG13  | HMGS            |   | iYML126C   | 0.87  | 0.81 | 0.37 |
| YML127W   | RSC9   |                 | 0 | iYML128C   | -0.31 | 2.46 | 0.91 |
| YML128C   | MSC1   |                 | 0 | iYML128C   | 2.44  | 2.46 | 0.91 |
| YML129C   | COX14  |                 | 0 | iYML129C   | #N/A  | 3.68 | 0.99 |
| YML130C   | ERO1   |                 | 0 | iYML130C   | 0.82  | #N/A | #N/A |
| YML131W   | 0      | #N/A            |   | iYML132W-  | -0.24 | 1.46 | 0.64 |
| YML132W   | COS3   |                 | 0 | iYML133C-1 | 2.48  | #N/A | #N/A |
| YML133C   | 0      | #N/A            |   | iYML133C-0 | -0.01 | 0.74 | 0.33 |
| YMR001C   | CDC5   | MSD2 PKX2       |   | iYMR001C   | -1.29 | 0.77 | 0.35 |
| YMR002W   | 0      | #N/A            |   | iYMR001C   | 1.35  | 0.77 | 0.35 |
| YMR003W   | 0      | #N/A            |   | iYMR002W   | -0.35 | 1.52 | 0.68 |
| YMR004W   | MVP1   |                 | 0 | iYMR003W   | #N/A  | 2.49 | 0.91 |
| YMR005W   | TAF4   | MPT1 TAF48 TSG2 |   | iYMR004W   | 0.52  | 2.95 | 0.96 |
| YMR006C   | PLB2   |                 | 0 | iYMR006C   | -0.78 | #N/A | #N/A |
| YMR007W   | 0      | #N/A            |   | iYMR006C   | 3.24  | #N/A | #N/A |
| YMR008C   | PLB1   |                 | 0 | iYMR008C   | 2.20  | 1.19 | 0.53 |
| YMR009W   | 0      | #N/A            |   | iYMR008C   | 1.50  | 1.19 | 0.53 |
| YMR010W   | 0      | #N/A            |   | iYMR009W   | 1.16  | 1.51 | 0.66 |
| YMR011W   | HXT2   |                 | 0 | iYMR010W-  | -0.19 | 0.63 | 0.28 |
| YMR012W   | CLU1   | TIF31           |   | itE(UUC)M  | -0.96 | 0.68 | 0.30 |
| YMR013C   | SEC59  |                 | 0 | iYMR013C-  | 0.50  | 0.57 | 0.25 |
| YMR014W   | BUD22  |                 | 0 | iYMR013C-  | -1.12 | #N/A | #N/A |

|           |        |               |      |              |       |      |      |
|-----------|--------|---------------|------|--------------|-------|------|------|
| YMR015C   | ERG5   |               | 0    | iYMR015C     | 1.48  | 0.75 | 0.36 |
| YMR016C   | SOK2   |               |      | 0 iYMR016C-  | -0.06 | 0.30 | 0.10 |
| YMR017W   | SPO20  | DBI9          |      | iYMR016C-    | #N/A  | #N/A | #N/A |
| YMR018W   |        | 0             | #N/A | iYMR017W     | #N/A  | 0.72 | 0.33 |
| YMR019W   | STB4   |               |      | 0 iYMR018W   | #N/A  | 3.42 | 0.98 |
| YMR020W   | FMS1   |               |      | 0 iYMR019W   | 0.33  | 1.25 | 0.56 |
| YMR021C   | MAC1   | CUA1          |      | iYMR021C     | 1.02  | 3.18 | 0.97 |
| YMR022W   | QRI8   | UBC7          |      | iYMR021C     | 0.19  | 3.18 | 0.97 |
| YMR023C   | MSS1   | PET53         |      | iYMR023C     | 3.06  | 1.07 | 0.49 |
| YMR024W   | MRPL3  |               |      | 0 itA(AGC)M1 | 0.56  | 2.13 | 0.85 |
| YMR025W   |        | 0             |      | 0 iYMR024W   | #N/A  | 1.42 | 0.63 |
| YMR026C   | PEX12  | PAS11         |      | iYMR026C     | 0.05  | 1.64 | 0.70 |
| YMR027W   | HRT2   |               | #N/A | iYMR026C     | -0.13 | 1.64 | 0.70 |
| YMR028W   | TAP42  |               |      | 0 iYMR027W   | 0.62  | 0.85 | 0.40 |
| YMR029C   |        | 0             |      | 0 iYMR029C   | #N/A  | 2.68 | 0.94 |
| YMR030W   |        | 0             |      | 0 iYMR029C   | #N/A  | 2.68 | 0.94 |
| YMR031C   |        | 0             | #N/A | iYMR031W-    | 0.51  | 0.77 | 0.37 |
| YMR031W-A |        | 0             | #N/A | iYMR030W     | #N/A  | #N/A | #N/A |
| YMR032W   | HOF1   | CYK2          |      | iYMR031W-    | #N/A  | 0.77 | 0.37 |
| YMR033W   | ARP9   | SWP59         |      | iYMR032W     | -0.29 | 2.45 | 0.90 |
| YMR034C   |        | 0             | #N/A | iYMR034C     | 2.24  | 2.36 | 0.89 |
| YMR035W   | IMP2   |               |      | 0 iYMR034C   | 2.06  | 2.36 | 0.89 |
| YMR036C   | MIH1   |               |      | 0 iYMR036C   | -0.47 | #N/A | #N/A |
| YMR037C   | MSN2   |               |      | 0 iYMR037C   | -0.19 | #N/A | #N/A |
| YMR038C   | LYS7   | CCS           |      | iYMR038C     | -1.03 | #N/A | #N/A |
| YMR039C   | SUB1   | TSP1          |      | iYMR039C     | #N/A  | 2.51 | 0.91 |
| YMR040W   |        | 0             |      | 0 iYMR039C   | 3.95  | 2.51 | 0.91 |
| YMR041C   |        | 0             | #N/A | iYMR041C     | 1.64  | 0.84 | 0.38 |
| YMR042W   | ARG80  | ARGR1         |      | itF(GAA)M    | 0.79  | 0.92 | 0.43 |
| YMR043W   | MCM1   | FUN80         |      | iYMR042W     | -0.64 | 0.38 | 0.12 |
| YMR044W   | IOC4   |               |      | 0 iYMR043W   | #N/A  | 0.59 | 0.26 |
| YMR045C   | #N/A   | #N/A          |      | iYMR046W-    | -1.15 | #N/A | #N/A |
| YMR046C   | #N/A   | #N/A          |      | iYMR046W-    | 0.05  | #N/A | #N/A |
| YMR047C   | NUP116 | NSP116        |      | iYMR047C     | -0.13 | 3.52 | 0.98 |
| YMR048W   | CSM3   |               |      | 0 iYMR047C   | -0.03 | 3.52 | 0.98 |
| YMR049C   | ERB1   |               |      | 0 iYMR049C-  | -1.32 | 1.65 | 0.73 |
| YMR050C   | #N/A   | #N/A          |      | iYMRcdelta   | -1.02 | #N/A | #N/A |
| YMR051C   | #N/A   | #N/A          |      | iYMRcdelta   | -0.32 | #N/A | #N/A |
| YMR052C-A |        | 0             | #N/A | iYMR053C     | 2.48  | 1.29 | 0.58 |
| YMR052W   | FAR3   |               |      | 0 itW(CCA)M  | 1.60  | 1.82 | 0.76 |
| YMR053C   | STB2   |               |      | 0 iYMR053C   | 1.51  | 1.29 | 0.58 |
| YMR054W   | STV1   |               |      | 0 iYMR053C   | 0.82  | 1.29 | 0.58 |
| YMR055C   | BUB2   | PAC7          |      | iYMR055C     | 0.49  | 1.55 | 0.69 |
| YMR056C   | AAC1   |               |      | 0 iYMR056C   | 1.38  | 0.42 | 0.15 |
| YMR057C   |        | 0             | #N/A | iYMR057C     | #N/A  | 0.76 | 0.34 |
| YMR058W   | FET3   |               |      | 0 iYMR057C   | -1.87 | 0.76 | 0.34 |
| YMR059W   | SEN15  |               |      | 0 iYMR058W   | -0.97 | 1.60 | 0.71 |
| YMR060C   | TOM37  | MAS37 PET3027 |      | iYMR060C     | 0.70  | #N/A | #N/A |
| YMR061W   | RNA14  |               |      | 0 iYMR060C   | 0.50  | #N/A | #N/A |
| YMR062C   | ECM40  | ARG7          |      | iYMR062C     | 2.66  | 2.09 | 0.83 |
| YMR063W   | RIM9   |               |      | 0 iYMR062C   | #N/A  | 2.09 | 0.83 |



|           |       |                |              |       |      |      |
|-----------|-------|----------------|--------------|-------|------|------|
| YMR064W   | AEP1  | NCA1           | iYMR063W     | 0.45  | 1.22 | 0.55 |
| YMR065W   | KAR5  | FIG3           | iYMR064W     | 1.21  | 1.34 | 0.60 |
| YMR066W   | SOV1  |                | 0 iYMR065W   | 0.85  | 2.50 | 0.91 |
| YMR067C   | 0     |                | 0 iYMR067C   | 0.50  | 1.64 | 0.72 |
| YMR068W   | AVO2  |                | 0 iYMR067C   | 1.52  | 1.64 | 0.72 |
| YMR069W   | 0     |                | 0 iYMR068W   | #N/A  | 0.51 | 0.24 |
| YMR070W   | MOT3  | ROX7           | iYMR069W     | -0.24 | 0.22 | 0.03 |
| YMR071C   | 0     |                | 0 iYMR071C   | 0.40  | 1.12 | 0.52 |
| YMR072W   | ABF2  |                | 0 iYMR071C   | 0.55  | 1.12 | 0.52 |
| YMR073C   | 0     | #N/A           | iYMR073C     | -0.80 | 2.18 | 0.85 |
| YMR074C   | 0     | #N/A           | iYMR074C     | -0.32 | 1.13 | 0.51 |
| YMR075C-A | 0     | #N/A           | iYMR075C-    | -0.68 | 0.65 | 0.29 |
| YMR075W   | 0     |                | 0 iYMR074C   | 0.55  | 1.13 | 0.51 |
| YMR076C   | PDS5  |                | 0 iYMR076C   | -1.37 | 1.51 | 0.66 |
| YMR077C   | VPS20 | CHM6           | iYMR077C     | 0.63  | 2.21 | 0.87 |
| YMR078C   | CTF18 | CHL12          | iYMR078C     | 0.10  | 2.73 | 0.94 |
| YMR079W   | SEC14 | PIT1           | iYMR078C     | -0.39 | 2.73 | 0.94 |
| YMR080C   | NAM7  | IFS2 MOF4 UPF1 | iYMR080C     | -0.22 | 2.17 | 0.86 |
| YMR081C   | ISF1  | MBR3           | iYMR081C     | 1.05  | 0.89 | 0.42 |
| YMR082C   | 0     | #N/A           | iYMR082C-    | #N/A  | 1.03 | 0.47 |
| YMR083W   | ADH3  |                | 0 iYMR082C-  | 0.09  | 0.76 | 0.34 |
| YMR084W   | 0     | #N/A           | iYMR083W     | #N/A  | 2.02 | 0.83 |
| YMR085W   | 0     | #N/A           | iYMR084W     | 3.98  | #N/A | #N/A |
| YMR086C-A | 0     | #N/A           | iYMR086C-    | #N/A  | 0.73 | 0.33 |
| YMR086W   | 0     | #N/A           | iYMR085W     | -0.16 | 0.98 | 0.45 |
| YMR087W   | 0     | #N/A           | iYMR086C-    | 1.95  | 0.73 | 0.33 |
| YMR088C   | 0     | #N/A           | iYMR088C     | 0.29  | 1.47 | 0.66 |
| YMR089C   | YTA12 | RCA1           | iYMR089C     | 0.19  | 1.17 | 0.54 |
| YMR090W   | 0     | #N/A           | iYMR089C     | 2.76  | 1.17 | 0.54 |
| YMR091C   | NPL6  |                | 0 iYMR091C   | -0.24 | 1.61 | 0.70 |
| YMR092C   | AIP1  |                | 0 iYMR092C   | 0.18  | 1.90 | 0.78 |
| YMR093W   | UTP15 |                | 0 iYMR092C   | -0.46 | 1.90 | 0.78 |
| YMR094W   | CTF13 | CBF3C          | iYMR093W     | 9.42  | 1.68 | 0.73 |
| YMR095C   | SNO1  |                | 0 iYMR095C   | 3.99  | 0.79 | 0.37 |
| YMR096W   | SNZ1  |                | 0 iYMR095C   | 2.52  | 0.79 | 0.37 |
| YMR097C   | 0     |                | 0 iYMR097C   | 1.18  | 1.82 | 0.76 |
| YMR098C   | 0     | #N/A           | iYMR098C     | 0.48  | #N/A | #N/A |
| YMR099C   | 0     | #N/A           | iYMR099C     | -0.31 | 1.27 | 0.58 |
| YMR100W   | MUB1  |                | 0 iYMR099C   | 0.48  | 1.27 | 0.58 |
| YMR101C   | SRT1  |                | 0 iYMR101C   | 0.83  | 0.35 | 0.14 |
| YMR102C   | 0     | #N/A           | iYMR102C     | 0.94  | 0.52 | 0.22 |
| YMR103C   | 0     | #N/A           | iYMR103C     | 1.69  | #N/A | #N/A |
| YMR104C   | YPK2  | YKR2           | iYMR104C     | 2.08  | 1.81 | 0.76 |
| YMR105C   | PGM2  | GAL5           | iYMR105C     | 1.44  | 1.78 | 0.76 |
| YMR106C   | YKU80 | HDF2           | iYMR106C     | -1.15 | 1.66 | 0.73 |
| YMR107W   | 0     |                | 0 iYMRWdelta | #N/A  | 2.11 | 0.83 |
| YMR108W   | ILV2  | SMR1 THI1      | iYMR107W     | -0.10 | 0.30 | 0.08 |
| YMR109W   | MYO5  |                | 0 iYMR108W   | -0.32 | 1.56 | 0.68 |
| YMR110C   | 0     | #N/A           | iYMR110C     | 1.54  | 1.16 | 0.53 |
| YMR111C   | 0     | #N/A           | iYMR111C     | 0.11  | 1.34 | 0.60 |
| YMR112C   | MED11 |                | 0 iYMR112C   | #N/A  | #N/A | #N/A |

|           |        |                 |      |            |       |      |      |
|-----------|--------|-----------------|------|------------|-------|------|------|
| YMR113W   | FOL3   |                 | 0    | iYMR112C   | 0.15  | #N/A | #N/A |
| YMR114C   |        | 0               | #N/A | iYMR114C   | 2.30  | 3.20 | 0.97 |
| YMR115W   |        | 0               |      | 0 iYMR114C | 0.41  | 3.20 | 0.97 |
| YMR116C   | ASC1   | CPC2            |      | iYMR116C   | -1.48 | 0.54 | 0.23 |
| YMR117C   | SPC24  |                 | 0    | iYMR117C   | #N/A  | 2.83 | 0.95 |
| YMR118C   |        | 0               | #N/A | iYMR118C   | -0.08 | 0.58 | 0.25 |
| YMR119W   | ASI1   |                 | 0    | itL(CAA)M  | 0.71  | #N/A | #N/A |
| YMR119W-A |        | 0               | #N/A | itL(CAA)M  | 0.83  | #N/A | #N/A |
| YMR120C   | ADE17  |                 | 0    | iYMR120C   | -0.11 | 1.04 | 0.49 |
| YMR121C   | RPL15B |                 | 0    | iYMR121C   | -1.57 | #N/A | #N/A |
| YMR122C   |        | 0               | #N/A | iYMR122C-  | #N/A  | #N/A | #N/A |
| YMR123W   | PKR1   |                 | 0    | iYMR122C-  | -1.84 | 1.69 | 0.74 |
| YMR124W   |        | 0               | #N/A | iYMR123W   | -0.29 | 1.08 | 0.49 |
| YMR125W   | STO1   | CBC1 CBP80 GCR3 | 0    | iYMR124W   | -0.60 | 2.23 | 0.86 |
| YMR126C   |        | 0               |      | 0 iYMR126C | 0.23  | 1.88 | 0.79 |
| YMR127C   | SAS2   |                 | 0    | iYMR127C   | -1.73 | #N/A | #N/A |
| YMR128W   | ECM16  | DHR1            |      | iYMR127C   | -1.96 | #N/A | #N/A |
| YMR129W   | POM152 |                 | 0    | iYMR128W   | -0.50 | 3.85 | 0.99 |
| YMR130W   |        | 0               | #N/A | iYMR129W   | 0.60  | 1.87 | 0.79 |
| YMR131C   | RRB1   |                 | 0    | iYMR131C   | -0.81 | 1.48 | 0.67 |
| YMR132C   |        | 0               |      | 0 iYMR132C | #N/A  | #N/A | #N/A |
| YMR133W   | REC114 |                 | 0    | iYMR132C   | 3.60  | #N/A | #N/A |
| YMR134W   |        | 0               | #N/A | iYMR133W   | 1.56  | #N/A | #N/A |
| YMR135C   |        | 0               | DCR1 | iYMR135W-  | 1.32  | 0.23 | 0.04 |
| YMR135W-A |        | 0               | #N/A | iYMR134W   | -0.50 | #N/A | #N/A |
| YMR136W   | GAT2   |                 | 0    | iYMR135W-  | 1.05  | 0.23 | 0.04 |
| YMR137C   | PSO2   | SNM1            |      | iYMR137C   | 1.54  | #N/A | #N/A |
| YMR138W   | CIN4   | GTP1 UGX1       |      | iYMR137C   | -0.70 | #N/A | #N/A |
| YMR139W   | RIM11  | GSK3 MDS1       |      | iYMR138W   | #N/A  | 3.52 | 0.98 |
| YMR140W   |        | 0               |      | 0 iYMR139W | 0.96  | #N/A | #N/A |
| YMR141C   |        | 0               | #N/A | iYMR141C   | 1.14  | 0.25 | 0.08 |
| YMR142C   | RPL13B |                 | 0    | iYMR142C   | -1.13 | 0.18 | 0.03 |
| YMR143W   | RPS16A |                 | 0    | iYMR142C   | -0.43 | 0.18 | 0.03 |
| YMR144W   |        | 0               | #N/A | iYMR143W   | #N/A  | 1.76 | 0.75 |
| YMR145C   | NDE1   | NDH1            |      | iYMR145C   | 0.64  | 0.16 | 0.03 |
| YMR146C   | TIF34  |                 | 0    | iYMR146C   | -0.76 | 0.76 | 0.35 |
| YMR147W   |        | 0               | #N/A | iYMR146C   | #N/A  | 0.76 | 0.35 |
| YMR148W   |        | 0               | #N/A | iYMR147W   | 0.65  | 1.08 | 0.49 |
| YMR149W   | SWP1   |                 | 0    | iYMR148W   | 0.39  | 1.25 | 0.56 |
| YMR150C   | IMP1   | PET-TS2858      |      | iYMR151W   | 0.43  | 0.99 | 0.45 |
| YMR151W   | YIM2   |                 | 0    | iYMR149W   | #N/A  | 0.86 | 0.40 |
| YMR152W   | YIM1   |                 | 0    | iYMR151W   | 1.05  | 0.99 | 0.45 |
| YMR153C-A |        | 0               | #N/A | iYMR153C-  | -0.58 | 0.34 | 0.13 |
| YMR153W   | NUP53  |                 | 0    | iYMR152W   | #N/A  | #N/A | #N/A |
| YMR154C   | RIM13  | CPL1            |      | iYMR154C   | 0.66  | 1.89 | 0.78 |
| YMR155W   |        | 0               | #N/A | iYMR154C   | 1.20  | 1.89 | 0.78 |
| YMR156C   | TPP1   |                 | 0    | iYMR156C   | 1.91  | 1.88 | 0.78 |
| YMR157C   |        | 0               |      | 0 iYMR157C | 1.12  | 2.98 | 0.95 |
| YMR158W   |        | 0               |      | 0 iYMR157C | #N/A  | 2.98 | 0.95 |
| YMR158W-A |        | 0               | #N/A | iYMR158C-  | #N/A  | 0.56 | 0.24 |
| YMR159C   | APG16  | APG16 CVT11 SAP | 0    | iYMR159C   | #N/A  | #N/A | #N/A |



|           |        |                 |      |             |       |      |      |
|-----------|--------|-----------------|------|-------------|-------|------|------|
| YMR160W   |        | 0               | #N/A | iYMR159C    | 0.25  | #N/A | #N/A |
| YMR161W   | HLJ1   |                 |      | 0 iYMR160W  | 0.19  | 1.99 | 0.82 |
| YMR162C   | DNF3   |                 |      | 0 iYMR162C  | #N/A  | 2.03 | 0.81 |
| YMR163C   |        | 0               | #N/A | iYMR163C    | -0.66 | 1.94 | 0.79 |
| YMR164C   | MSS11  |                 |      | 0 iYMR164C  | #N/A  | #N/A | #N/A |
| YMR165C   | SMP2   |                 |      | 0 iYMR165C  | #N/A  | #N/A | #N/A |
| YMR166C   |        | 0               | #N/A | iYMR166C    | 0.09  | 1.51 | 0.65 |
| YMR167W   | MLH1   | PMS2            |      | iYMR166C    | 0.19  | 1.51 | 0.65 |
| YMR168C   | CEP3   | CBF3 CBF3B CSL1 |      | iYMR168C    | #N/A  | 1.61 | 0.70 |
| YMR169C   | ALD3   |                 |      | 0 iYMR169C  | 2.14  | 2.07 | 0.84 |
| YMR170C   | ALD2   |                 |      | 0 iYMR170C  | 1.53  | 1.47 | 0.66 |
| YMR171C   |        | 0               | #N/A | iYMR171C    | #N/A  | 0.84 | 0.39 |
| YMR172C-A |        | 0               | #N/A | iYMR172C-   | -0.17 | 0.91 | 0.42 |
| YMR172W   | HOT1   |                 |      | 0 iYMR171C  | #N/A  | 0.84 | 0.39 |
| YMR173W   | DDR48  | FSP             |      | iYMR172C-   | 0.67  | 0.91 | 0.42 |
| YMR173W-A |        | 0               | #N/A | iYMR172C-   | 0.66  | 0.91 | 0.42 |
| YMR174C   | PAI3   |                 |      | 0 iYMR174C  | 2.19  | 1.50 | 0.65 |
| YMR175W   | SIP18  |                 |      | 0 iYMR174C  | #N/A  | 1.50 | 0.65 |
| YMR176W   | ECM5   |                 |      | 0 iYMR175W  | #N/A  | #N/A | #N/A |
| YMR177W   | MMT1   |                 |      | 0 iYMR176W  | 0.39  | 1.77 | 0.74 |
| YMR178W   |        | 0               | #N/A | iYMR177W    | -0.02 | 2.09 | 0.84 |
| YMR179W   | SPT21  |                 |      | 0 iYMR178W  | #N/A  | 1.81 | 0.77 |
| YMR180C   | CTL1   | CTH1            |      | iYMR180C    | 1.81  | 0.68 | 0.30 |
| YMR181C   |        | 0               | #N/A | iYMR181C    | 0.76  | 0.59 | 0.28 |
| YMR182C   | RGM1   |                 |      | 0 iYMR182C- | -0.28 | 0.65 | 0.29 |
| YMR183C   | SSO2   |                 |      | 0 iYMR183C  | #N/A  | 3.20 | 0.97 |
| YMR184W   |        | 0               | #N/A | iYMR183C    | -0.52 | 3.20 | 0.97 |
| YMR185W   |        | 0               | #N/A | iYMR184W    | 0.44  | #N/A | #N/A |
| YMR186W   | HSC82  |                 |      | 0 iYMR185W  | -0.05 | 0.31 | 0.12 |
| YMR187C   |        | 0               | #N/A | iYMR187C    | 1.09  | 0.95 | 0.43 |
| YMR188C   |        | 0               |      | 0 iYMR188C  | 0.42  | 1.28 | 0.59 |
| YMR189W   | GCV2   | GSD2            |      | iYMR188C    | 0.89  | 1.28 | 0.59 |
| YMR190C   | SGS1   |                 |      | 0 iYMR190C  | -1.71 | #N/A | #N/A |
| YMR191W   |        | 0               |      | 0 iYMR190C  | 0.09  | #N/A | #N/A |
| YMR192W   |        | 0               |      | 0 iYMR191W  | 0.32  | #N/A | #N/A |
| YMR193C-A |        | 0               | #N/A | iYMR194W    | -0.95 | 0.53 | 0.22 |
| YMR193W   | MRPL24 | MRPL14          |      | iYMR192W    | 0.05  | 1.22 | 0.54 |
| YMR194W   | RPL36A | RPL39B          |      | iYMR193W    | -0.84 | 0.58 | 0.24 |
| YMR195W   | ICY1   |                 |      | 0 iYMR194C- | -1.30 | 0.32 | 0.09 |
| YMR196W   |        | 0               | #N/A | iYMR195W    | #N/A  | 1.27 | 0.57 |
| YMR197C   | VTI1   |                 |      | 0 iYMR197C  | 0.98  | 2.63 | 0.92 |
| YMR198W   | CIK1   |                 |      | 0 iYMR197C  | -5.17 | 2.63 | 0.92 |
| YMR199W   | CLN1   |                 |      | 0 iYMR198W  | -0.49 | 0.48 | 0.19 |
| YMR200W   | ROT1   |                 |      | 0 iYMR199W  | #N/A  | 1.59 | 0.68 |
| YMR201C   | RAD14  |                 |      | 0 iYMR201C  | 1.49  | 0.94 | 0.43 |
| YMR202W   | ERG2   | END11           |      | iYMR201C    | 0.34  | 0.94 | 0.43 |
| YMR203W   | TOM40  | ISP42 MOM38     |      | iYMR202W    | 0.33  | 2.14 | 0.85 |
| YMR204C   |        | 0               | #N/A | iYMR204C    | 5.00  | 1.35 | 0.60 |
| YMR205C   | PFK2   |                 |      | 0 iYMR205C  | -0.89 | 1.52 | 0.68 |
| YMR206W   |        | 0               | #N/A | iYMR205C    | 1.67  | 1.52 | 0.68 |
| YMR207C   | HFA1   |                 |      | 0 iYMR207C  | #N/A  | 3.21 | 0.97 |

|           |        |                   |              |       |      |      |
|-----------|--------|-------------------|--------------|-------|------|------|
| YMR208W   | ERG12  | RAR1              | iYMR207C     | 1.58  | 3.21 | 0.97 |
| YMR209C   | 0      | #N/A              | iYMR209C     | 0.47  | 2.10 | 0.84 |
| YMR210W   | 0      | #N/A              | iYMR209C     | 1.11  | 2.10 | 0.84 |
| YMR211W   | DML1   |                   | 0 iYMR210W   | 0.39  | 1.59 | 0.69 |
| YMR212C   | EFR3   |                   | 0 iYMR212C   | -0.74 | 2.71 | 0.93 |
| YMR213W   | CEF1   |                   | 0 iYMR212C   | -0.79 | 2.71 | 0.93 |
| YMR214W   | SCJ1   |                   | 0 iYMR213W   | -0.84 | 2.28 | 0.88 |
| YMR215W   | GAS3   |                   | 0 iYMR214W   | -0.65 | 2.34 | 0.89 |
| YMR216C   | SKY1   |                   | 0 iYMR216C   | -0.19 | 0.97 | 0.46 |
| YMR217W   | GUA1   |                   | 0 iYMR216C   | -0.93 | 0.97 | 0.46 |
| YMR218C   | TRS130 |                   | 0 iYMR218C   | #N/A  | 2.28 | 0.88 |
| YMR219W   | ESC1   |                   | 0 iYMR218C   | -0.91 | 2.28 | 0.88 |
| YMR220W   | ERG8   |                   | 0 iYMR219W   | 0.66  | 0.90 | 0.41 |
| YMR221C   | 0      |                   | 0 iYMR221C   | 0.91  | 2.22 | 0.85 |
| YMR222C   | FSH2   |                   | 0 iYMR222C   | -0.74 | 2.01 | 0.81 |
| YMR223W   | UBP8   |                   | 0 iYMR222C   | 0.34  | 2.01 | 0.81 |
| YMR224C   | MRE11  | NGS1 RAD58 XRS4   | iYMR224C     | -0.16 | 1.52 | 0.66 |
| YMR225C   | MRPL44 | YMR44             | iYMR225C     | #N/A  | 1.27 | 0.59 |
| YMR226C   | 0      | #N/A              | iYMR226C     | 0.01  | 1.10 | 0.50 |
| YMR227C   | TAF7   | TAF67 TafII67     | iYMR227C     | #N/A  | 2.04 | 0.82 |
| YMR228W   | MTF1   |                   | 0 iYMR227C   | #N/A  | 2.04 | 0.82 |
| YMR229C   | RRP5   |                   | 0 iYMR229C   | -1.54 | #N/A | #N/A |
| YMR230W   | RPS10B |                   | 0 iYMR229C   | -0.96 | #N/A | #N/A |
| YMR231W   | PEP5   | END1 VAM1 VPL9 vi | iYMR230W     | -0.12 | 0.81 | 0.37 |
| YMR232W   | FUS2   |                   | 0 iYMR231W   | #N/A  | 0.61 | 0.26 |
| YMR233W   | TRI1   | #N/A              | iYMR232W     | -0.43 | 0.71 | 0.32 |
| YMR234W   | RNH1   |                   | 0 iYMR233W   | 1.16  | 1.83 | 0.77 |
| YMR235C   | RNA1   |                   | 0 iYMR235C   | 0.09  | 3.26 | 0.97 |
| YMR236W   | TAF9   | TAF17 TafII17     | iYMR235C     | -1.43 | 3.26 | 0.97 |
| YMR237W   | 0      |                   | 0 iYMR236W   | 0.01  | 2.17 | 0.86 |
| YMR238W   | DFG5   |                   | 0 iYMR237W   | 1.16  | 2.16 | 0.86 |
| YMR239C   | RNT1   |                   | 0 iYMR239C   | -0.30 | 1.92 | 0.79 |
| YMR240C   | CUS1   |                   | 0 iYMR240C   | 0.85  | 1.50 | 0.65 |
| YMR241W   | YHM2   |                   | 0 iYMR240C   | -0.76 | 1.50 | 0.65 |
| YMR242C   | RPL20A | RPL18A2           | iYMR242C     | -1.15 | 0.25 | 0.07 |
| YMR243C   | ZRC1   | OSR1              | iYMR243C     | -0.78 | 0.83 | 0.38 |
| YMR244C-A | 0      | #N/A              | iYMR245W     | -0.21 | 0.67 | 0.30 |
| YMR244W   | 0      | #N/A              | iYMR243C     | #N/A  | 0.83 | 0.38 |
| YMR245W   | 0      | #N/A              | iYMR244W     | -0.75 | 0.73 | 0.35 |
| YMR246W   | FAA4   |                   | 0 iYMR245W   | -2.40 | 0.67 | 0.30 |
| YMR247C   | 0      | #N/A              | iYMR247C     | -0.07 | 1.13 | 0.53 |
| YMR250W   | GAD1   |                   | 0 iYMRWdelta | 1.94  | #N/A | #N/A |
| YMR251W   | 0      | #N/A              | iYMR250W     | 4.67  | 1.15 | 0.53 |
| YMR251W-A | HOR7   |                   | 0 iYMR251W   | 3.39  | 0.62 | 0.27 |
| YMR252C   | 0      | #N/A              | iYMR252C     | #N/A  | #N/A | #N/A |
| YMR253C   | 0      | #N/A              | iYMR253C     | 1.20  | 1.20 | 0.55 |
| YMR254C   | 0      | #N/A              | iYMR254C     | #N/A  | 0.65 | 0.29 |
| YMR255W   | GFD1   |                   | 0 iYMR254C   | 1.77  | 0.65 | 0.29 |
| YMR256C   | COX7   |                   | 0 iYMR256C   | #N/A  | 0.60 | 0.26 |
| YMR257C   | PET111 |                   | 0 iYMR257C   | #N/A  | #N/A | #N/A |
| YMR258C   | 0      | #N/A              | iYMR258C     | 0.68  | 1.75 | 0.74 |

|           |        |                |             |       |      |      |
|-----------|--------|----------------|-------------|-------|------|------|
| YMR259C   | 0      | #N/A           | iYMR259C    | -1.08 | 1.71 | 0.73 |
| YMR260C   | TIF11  |                | 0 iYMR260C  | 0.15  | #N/A | #N/A |
| YMR261C   | TPS3   |                | 0 iYMR261C  | 0.78  | 2.42 | 0.89 |
| YMR262W   | 0      | #N/A           | iYMR261C    | 1.71  | 2.42 | 0.89 |
| YMR263W   | SAP30  |                | 0 iYMR262W  | 0.60  | 2.41 | 0.90 |
| YMR264W   | CUE1   |                | 0 iYMR263W  | -0.30 | 1.87 | 0.79 |
| YMR265C   | 0      | #N/A           | iYMR265C    | 0.66  | 1.06 | 0.48 |
| YMR266W   | RSN1   |                | 0 iYMR265C  | -0.33 | 1.06 | 0.48 |
| YMR267W   | PPA2   | IPP2           | iYMR266W    | -0.44 | 1.48 | 0.64 |
| YMR268C   | PRP24  |                | 0 iYMR268C  | 0.86  | 1.65 | 0.72 |
| YMR269W   | 0      | #N/A           | iYMR268C    | -0.34 | 1.65 | 0.72 |
| YMR270C   | RRN9   |                | 0 iYMR270C  | #N/A  | 1.70 | 0.73 |
| YMR271C   | URA10  |                | 0 iYMR271C  | 3.42  | 1.27 | 0.58 |
| YMR272C   | SCS7   | FAH1           | iYMR272C    | 1.26  | 0.75 | 0.34 |
| YMR273C   | ZDS1   | CES1 CKM1 NRC1 | iYMR273C    | -0.99 | 1.31 | 0.58 |
| YMR274C   | RCE1   |                | 0 iYMR274C  | #N/A  | 0.98 | 0.44 |
| YMR275C   | BUL1   | DAG1 RDS1 SMM2 | iYMR275C    | 0.64  | 2.88 | 0.95 |
| YMR276W   | DSK2   |                | 0 iYMR275C  | -1.25 | 2.88 | 0.95 |
| YMR277W   | FCP1   |                | 0 iYMR276W  | -0.51 | 2.15 | 0.86 |
| YMR278W   | 0      | #N/A           | iYMR277W    | 0.17  | 0.95 | 0.45 |
| YMR279C   | 0      | #N/A           | iYMR279C    | 0.90  | 0.42 | 0.18 |
| YMR280C   | CAT8   | DIL1 MSP8      | iYMR280C    | #N/A  | 1.14 | 0.51 |
| YMR281W   | GPI12  |                | 0 iYMR280C  | 0.46  | 1.14 | 0.51 |
| YMR282C   | AEP2   | ATP13          | iYMR282C    | 1.45  | 3.16 | 0.97 |
| YMR283C   | RIT1   |                | 0 iYMR283C  | #N/A  | 2.66 | 0.93 |
| YMR284W   | YKU70  | HDF1 NES24     | itY(GUA)M2  | #N/A  | 1.59 | 0.69 |
| YMR285C   | NGL2   |                | 0 iYMR285C  | 0.80  | 3.43 | 0.98 |
| YMR286W   | MRPL33 |                | 0 iYMR285C  | 0.37  | 3.43 | 0.98 |
| YMR287C   | MSU1   | DSS1           | iYMR287C    | 0.33  | 2.31 | 0.89 |
| YMR288W   | HSH155 |                | 0 iYMR287C  | -1.24 | 2.31 | 0.89 |
| YMR289W   | 0      |                | 0 iYMR288W  | #N/A  | #N/A | #N/A |
| YMR290C   | HAS1   |                | 0 iYMR290W- | -0.40 | 0.51 | 0.22 |
| YMR290W-A | 0      | #N/A           | iYMR289W    | #N/A  | 0.25 | 0.06 |
| YMR291W   | 0      | #N/A           | iYMR290W-   | 0.43  | 0.51 | 0.22 |
| YMR292W   | GOT1   |                | 0 iYMR291W  | 0.56  | 2.47 | 0.90 |
| YMR293C   | 0      | #N/A           | iYMR293C    | #N/A  | #N/A | #N/A |
| YMR294W   | JNM1   | INS1 PAC3      | iYMR293C    | 1.21  | #N/A | #N/A |
| YMR294W-A | 0      | #N/A           | iYMR294W    | 0.37  | #N/A | #N/A |
| YMR295C   | 0      | #N/A           | iYMR295C    | 0.13  | #N/A | #N/A |
| YMR296C   | LCB1   | END8 TSC2      | iYMR296C    | -1.30 | 1.31 | 0.59 |
| YMR297W   | PRC1   | LBC1           | iYMR296C    | 0.67  | 1.31 | 0.59 |
| YMR298W   | 0      | #N/A           | iYMR297W    | 0.15  | 2.09 | 0.84 |
| YMR299C   | 0      |                | 0 iYMR299C  | 2.53  | #N/A | #N/A |
| YMR300C   | ADE4   |                | 0 iYMR300C  | -0.44 | 1.41 | 0.62 |
| YMR301C   | ATM1   |                | 0 iYMR301C  | -1.01 | #N/A | #N/A |
| YMR302C   | PRP12  | RNA12 YME2     | iYMR302C    | 1.01  | 3.50 | 0.98 |
| YMR303C   | ADH2   | ADR2           | iYMR303C    | -1.65 | 2.23 | 0.86 |
| YMR304C-A | 0      | #N/A           | iYMR305C    | 0.85  | 0.79 | 0.36 |
| YMR304W   | UBP15  |                | 0 iYMR303C  | 0.55  | 2.23 | 0.86 |
| YMR305C   | SCW10  |                | 0 iYMR305C  | 0.44  | 0.79 | 0.36 |
| YMR306C-A | 0      | #N/A           | iYMR306C-   | #N/A  | 0.55 | 0.26 |

|           |       |                  |             |            |       |      |      |
|-----------|-------|------------------|-------------|------------|-------|------|------|
| YMR306W   | FKS3  |                  | 0           | iYMR305C   | #N/A  | 0.79 | 0.36 |
| YMR308C   | PSE1  | KAP121           |             | iYMR308C   | -1.07 | 1.10 | 0.51 |
| YMR309C   | NIP1  |                  | 0           | iYMR309C   | #N/A  | #N/A | #N/A |
| YMR310C   |       | 0                | #N/A        | iYMR310C   | 0.37  | 3.24 | 0.98 |
| YMR311C   | GLC8  |                  | 0           | iYMR311C   | 0.45  | 1.81 | 0.77 |
| YMR312W   | ELP6  | HAP3 TOT6        |             | iYMR311C   | 1.50  | 1.81 | 0.77 |
| YMR313C   |       | 0                |             | 0 iYMR313C | 0.63  | 2.50 | 0.91 |
| YMR314W   | PRE5  |                  | 0           | iYMR313C   | 0.02  | 2.50 | 0.91 |
| YMR315W   |       | 0                | #N/A        | iYMR314W   | 1.62  | 1.13 | 0.51 |
| YMR316C-A |       | 0                | #N/A        | iYMR316C-  | 4.35  | 0.99 | 0.45 |
| YMR316C-B |       | 0                | #N/A        | iYMR317W   | 0.84  | 1.30 | 0.58 |
| YMR316W   | DIA1  |                  | 0           | iYMR315W   | 2.91  | 1.92 | 0.79 |
| YMR317W   |       | 0                | #N/A        | iYMR316C-  | 0.00  | 0.99 | 0.45 |
| YMR318C   | ADH6  | ADHVI            |             | iYMR318C   | -0.26 | 0.93 | 0.43 |
| YMR319C   | FET4  |                  | 0           | iYMR319C-  | 0.61  | 0.94 | 0.43 |
| YMR320W   |       | 0                | #N/A        | iYMR319C-  | #N/A  | 0.43 | 0.19 |
| YMR321C   |       | 0                | #N/A        | iYMR321C   | 0.20  | 1.24 | 0.56 |
| YMR322C   |       | 0                | HSP34       | iYMR322C   | #N/A  | 2.40 | 0.89 |
| YMR323W   |       | 0                | #N/A        | iYMR322C   | #N/A  | 2.40 | 0.89 |
| YMR324C   |       | 0                | #N/A        | iYMR324C   | #N/A  | 0.57 | 0.24 |
| YMR325W   |       | 0                | #N/A        | iYMR324C   | 2.93  | 0.57 | 0.24 |
| YMR326C   |       | 0                | #N/A        | #N/A       | -1.99 | #N/A | #N/A |
| YNL001W   | DOM34 |                  | 0           | iYNL002C   | -0.64 | 1.25 | 0.58 |
| YNL002C   | RLP7  | RPL7             |             | iYNL002C   | -0.75 | 1.25 | 0.58 |
| YNL003C   | PET8  | SAM5             |             | iYNL003C   | 0.90  | 0.89 | 0.42 |
| YNL004W   | HRB1  | TOM34            |             | iYNL005C   | 1.01  | 1.24 | 0.56 |
| YNL005C   | MRP7  | MRPL2            |             | iYNL005C   | 0.16  | 1.24 | 0.56 |
| YNL006W   | LST8  |                  | 0           | iYNL007C   | 0.32  | 1.71 | 0.74 |
| YNL007C   | SIS1  |                  | 0           | iYNL007C   | 0.98  | 1.71 | 0.74 |
| YNL008C   | ASI3  |                  | 0           | iYNL008C   | 2.69  | 1.77 | 0.75 |
| YNL009W   | IDP3  |                  | 0           | iYNL010W   | 2.36  | #N/A | #N/A |
| YNL010W   |       | 0                | #N/A        | iYNL011C   | -0.05 | 1.52 | 0.67 |
| YNL011C   |       | 0                | #N/A        | iYNL011C   | #N/A  | 1.52 | 0.67 |
| YNL012W   | SPO1  |                  | 0           | iYNL013C   | 1.78  | 0.85 | 0.39 |
| YNL013C   |       | 0                | #N/A        | iYNL013C   | 0.76  | 0.85 | 0.39 |
| YNL014W   | HEF3  | EF-3 ZRG7        |             | iYNL015W   | 0.12  | #N/A | #N/A |
| YNL015W   | PBI2  | I2B IB2 LMA1     |             | iYNL016W   | 1.55  | 1.09 | 0.49 |
| YNL016W   | PUB1  | RNP1             |             | itl(AAU)N2 | -0.46 | 0.59 | 0.26 |
| YNL017C   |       | 0                | #N/A        | itl(AAU)N2 | #N/A  | 0.59 | 0.26 |
| YNL018C   |       | 0                | #N/A        | iYNL018C   | 1.05  | 0.41 | 0.14 |
| YNL019C   |       | 0                | #N/A        | iYNL019C   | -0.72 | 0.53 | 0.24 |
| YNL020C   | ARK1  |                  | 0           | iYNL020C   | -0.19 | 1.79 | 0.77 |
| YNL021W   | HDA1  |                  | 0           | iYNL022C   | -1.46 | 1.76 | 0.76 |
| YNL022C   |       | 0                | #N/A        | iYNL022C   | 0.49  | 1.76 | 0.76 |
| YNL023C   | FAP1  |                  | 0           | iYNL023C   | -1.64 | 2.09 | 0.84 |
| YNL024C   |       | 0                | #N/A        | iYNL024C   | -0.43 | 1.07 | 0.48 |
| YNL025C   | SSN8  | GIG3 NUT9 RYE2 S |             | iYNL025C   | #N/A  | 0.59 | 0.27 |
| YNL026W   |       | 0                | OMP85 TOB55 | iYNL027W   | 0.81  | 2.30 | 0.88 |
| YNL027W   | CRZ1  | HAL8 TCN1        |             | iYNL028W   | #N/A  | 2.69 | 0.94 |
| YNL028W   |       | 0                | #N/A        | iYNL030W   | #N/A  | #N/A | #N/A |
| YNL029C   | KTR5  |                  | 0           | iYNL028W   | 0.91  | 2.69 | 0.94 |

|         |        |             |   |            |       |      |      |
|---------|--------|-------------|---|------------|-------|------|------|
| YNL030W | HHF2   |             | 0 | iYNL031C   | 0.56  | #N/A | #N/A |
| YNL031C | HHT2   |             | 0 | iYNL031C   | 0.30  | #N/A | #N/A |
| YNL032W | SIW14  |             | 0 | iYNL033W   | 0.50  | 1.58 | 0.71 |
| YNL033W | 0      | #N/A        |   | iYNL034W   | 0.38  | 0.53 | 0.25 |
| YNL034W | 0      | #N/A        |   | itl(AAU)N1 | 0.90  | 0.38 | 0.12 |
| YNL035C | 0      | #N/A        |   | iYNL035C   | 0.53  | #N/A | #N/A |
| YNL036W | NCE103 | NCE3        |   | iYNL037C   | -1.35 | 0.65 | 0.29 |
| YNL037C | IDH1   |             | 0 | iYNL037C   | -0.01 | 0.65 | 0.29 |
| YNL038W | GPI15  |             | 0 | iYNL039W   | 0.97  | 0.19 | 0.02 |
| YNL039W | BDP1   | TFC5        |   | iYNL040W   | 0.19  | 2.51 | 0.91 |
| YNL040W | 0      | #N/A        |   | iYNL041C   | -0.29 | 2.13 | 0.85 |
| YNL041C | COD2   | COD2        |   | iYNL041C   | 0.46  | 2.13 | 0.85 |
| YNL042W | BOP3   |             | 0 | itP(UGG)N1 | 0.63  | 1.09 | 0.50 |
| YNL043C | 0      | #N/A        |   | iYNL043C   | 0.71  | 1.15 | 0.53 |
| YNL044W | YIP3   |             | 0 | iYNL045W   | 0.83  | 2.12 | 0.85 |
| YNL045W | 0      | #N/A        |   | iYNL046W   | 0.00  | 1.36 | 0.62 |
| YNL046W | 0      | #N/A        |   | iYNL047C   | 0.68  | 3.04 | 0.96 |
| YNL047C | 0      | LIT1        |   | iYNL047C   | -0.31 | 3.04 | 0.96 |
| YNL048W | ALG11  |             | 0 | iYNL049C   | 0.13  | 3.05 | 0.97 |
| YNL049C | SFB2   |             | 0 | iYNL049C   | -0.44 | 3.05 | 0.97 |
| YNL050C | 0      | #N/A        |   | iYNL050C   | -0.12 | 1.47 | 0.66 |
| YNL051W | COD4   | API4 COD4   |   | iYNL052W   | -1.64 | 1.19 | 0.55 |
| YNL052W | COX5A  |             | 0 | iYNL053W   | 2.41  | 1.54 | 0.69 |
| YNL053W | MSG5   |             | 0 | iYNL054W   | 1.13  | 1.16 | 0.53 |
| YNL054W | VAC7   |             | 0 | iYNLWdelta | 0.33  | 3.43 | 0.98 |
| YNL055C | POR1   | OMP2 YVDAC1 |   | iYNL055C   | 0.17  | 0.77 | 0.37 |
| YNL056W | 0      | #N/A        |   | iYNL057W   | -0.14 | 1.65 | 0.71 |
| YNL057W | 0      | #N/A        |   | iYNL059C   | #N/A  | 1.63 | 0.70 |
| YNL058C | 0      | #N/A        |   | iYNL057W   | 0.87  | 1.65 | 0.71 |
| YNL059C | ARP5   |             | 0 | iYNL059C   | -0.05 | 1.63 | 0.70 |
| YNL061W | NOP2   | YNA1        |   | iYNL062C   | -1.49 | 3.44 | 0.98 |
| YNL062C | GCD10  |             | 0 | iYNL062C   | -0.90 | 3.44 | 0.98 |
| YNL063W | 0      | #N/A        |   | iYNL064C   | 0.05  | 1.55 | 0.68 |
| YNL064C | YDJ1   | HSP40 MAS5  |   | iYNL064C   | 0.73  | 1.55 | 0.68 |
| YNL065W | AQR1   |             | 0 | iYNL066W   | -1.52 | 0.22 | 0.03 |
| YNL066W | SUN4   | SCW3        |   | iYNL067W   | -0.71 | 0.27 | 0.08 |
| YNL067W | RPL9B  |             | 0 | iYNL068C   | -1.40 | 0.43 | 0.16 |
| YNL068C | FKH2   |             | 0 | iYNL068C   | #N/A  | 0.43 | 0.16 |
| YNL069C | RPL16B | RP23        |   | iYNL069C   | -0.64 | 0.44 | 0.16 |
| YNL070W | TOM7   | MOM7 YOK22  |   | iYNL071W   | #N/A  | 1.31 | 0.59 |
| YNL071W | LAT1   | ODP2 PDA2   |   | iYNL072W   | -0.31 | 1.60 | 0.70 |
| YNL072W | RNH35  | RNH35 Rnh2A |   | iYNL073W   | 0.76  | 1.17 | 0.53 |
| YNL073W | MSK1   |             | 0 | iYNL074C   | 0.45  | 1.60 | 0.69 |
| YNL074C | MLF3   | YMK1        |   | iYNL074C   | 0.05  | 1.60 | 0.69 |
| YNL075W | IMP4   |             | 0 | iYNL076W   | -0.33 | #N/A | #N/A |
| YNL076W | MKS1   | LYS80       |   | iYNL077W   | -0.01 | 2.28 | 0.87 |
| YNL077W | 0      |             | 0 | iYNL078W   | 1.78  | 1.45 | 0.64 |
| YNL078W | NIS1   | JIP1        |   | iYNL079C   | -0.77 | 0.89 | 0.41 |
| YNL079C | TPM1   | tropomyosin |   | iYNL079C   | -0.18 | 0.89 | 0.41 |
| YNL080C | 0      | #N/A        |   | iYNL080C   | 0.24  | 1.31 | 0.60 |
| YNL081C | 0      |             | 0 | iYNL081C   | -0.52 | 3.20 | 0.97 |

|         |       |                  |      |             |       |      |      |
|---------|-------|------------------|------|-------------|-------|------|------|
| YNL082W | PMS1  |                  | 0    | iYNL083W    | 0.61  | 0.81 | 0.39 |
| YNL083W |       | 0                | #N/A | iYNL084C    | 0.22  | 2.85 | 0.95 |
| YNL084C | END3  |                  |      | 0 iYNL084C  | 0.07  | 2.85 | 0.95 |
| YNL085W | MKT1  |                  |      | 0 iYNL086W  | -0.64 | 2.96 | 0.95 |
| YNL086W |       | 0                | #N/A | iYNL087W    | #N/A  | #N/A | #N/A |
| YNL087W |       | 0                |      | 0 iYNL088W  | -0.83 | #N/A | #N/A |
| YNL088W | TOP2  | TOR3 TRF3        |      | iYNL089C    | -1.91 | 1.64 | 0.71 |
| YNL089C |       | 0                | #N/A | iYNL089C    | 0.40  | 1.64 | 0.71 |
| YNL090W | RHO2  |                  |      | 0 iYNL091W  | 0.50  | 2.45 | 0.91 |
| YNL091W | NST1  |                  |      | 0 iYNL092W  | -1.05 | 2.47 | 0.91 |
| YNL092W |       | 0                | #N/A | iYNL093W    | 2.77  | 3.60 | 0.99 |
| YNL093W | YPT53 |                  |      | 0 iYNL094W  | #N/A  | 0.81 | 0.39 |
| YNL094W | APP1  |                  |      | 0 iYNL095C  | 0.70  | 2.46 | 0.91 |
| YNL095C |       | 0                | #N/A | iYNL095C    | 0.12  | 2.46 | 0.91 |
| YNL096C | RPS7B |                  |      | 0 iYNL096C  | -1.16 | 0.30 | 0.06 |
| YNL097C | PHO23 |                  |      | 0 iYNL097C  | 0.27  | 1.22 | 0.56 |
| YNL098C | RAS2  | CTN5 CYR3 GLC5 T |      | iYNL098C    | -0.19 | 0.58 | 0.24 |
| YNL099C | OCA1  |                  |      | 0 iYNL099C  | #N/A  | 1.64 | 0.72 |
| YNL100W |       | 0                | #N/A | iYNL101W    | 1.40  | 1.59 | 0.68 |
| YNL101W |       | 0                |      | 0 iYNL102W  | 1.32  | 1.90 | 0.79 |
| YNL102W | POL1  | CDC17 CRT5 HPR3  |      | iYNL103W    | -0.54 | 1.57 | 0.69 |
| YNL103W | MET4  |                  |      | 0 iYNL104C  | 0.07  | 0.67 | 0.30 |
| YNL104C | LEU4  |                  |      | 0 iYNL104C  | 1.04  | 0.67 | 0.30 |
| YNL105W |       | 0                | #N/A | iYNL107W    | #N/A  | #N/A | #N/A |
| YNL106C | INP52 | SJL2             |      | iYNL105W    | -0.72 | 1.89 | 0.80 |
| YNL107W | YAF9  |                  |      | 0 iYNL108C  | 0.21  | 2.81 | 0.94 |
| YNL108C |       | 0                | #N/A | iYNL108C    | 0.57  | 2.81 | 0.94 |
| YNL109W |       | 0                | #N/A | iYNL110C    | 0.23  | #N/A | #N/A |
| YNL110C | NOP15 |                  |      | 0 iYNL110C  | -0.62 | #N/A | #N/A |
| YNL111C | CYB5  |                  |      | 0 iYNL111C  | 1.74  | 0.63 | 0.28 |
| YNL112W | DBP2  |                  |      | 0 iYNL113W  | -0.71 | 1.03 | 0.48 |
| YNL113W | RPC19 |                  |      | 0 iYNL115C  | -0.87 | 1.88 | 0.79 |
| YNL114C |       | 0                | #N/A | iYNL113W    | -0.82 | 1.03 | 0.48 |
| YNL115C |       | 0                | #N/A | iYNL115C    | 0.97  | 1.88 | 0.79 |
| YNL116W |       | 0                |      | 0 iYNL117W  | 0.52  | 5.05 | 1.00 |
| YNL117W | MLS1  |                  |      | 0 iYNL118C  | -0.56 | 2.43 | 0.90 |
| YNL118C | DCP2  | PSU1             |      | iYNL118C    | 0.15  | 2.43 | 0.90 |
| YNL119W |       | 0                |      | 0 iYNL121C  | 1.42  | 2.06 | 0.82 |
| YNL120C |       | 0                | #N/A | iYNL119W    | #N/A  | 0.15 | 0.01 |
| YNL121C | TOM70 | MAS70 MOM72 OMI  |      | iYNL121C    | -0.20 | 2.06 | 0.82 |
| YNL122C |       | 0                | #N/A | iYNL122C    | 0.27  | #N/A | #N/A |
| YNL123W |       | 0                | #N/A | iYNL124W    | -0.53 | 0.77 | 0.36 |
| YNL124W | NAF1  |                  |      | 0 iYNL125C  | -0.60 | 2.07 | 0.82 |
| YNL125C | ESBP6 | MCH3             |      | iYNL125C    | 1.70  | 2.07 | 0.82 |
| YNL126W | SPC98 |                  |      | 0 iYNL127W  | #N/A  | 1.59 | 0.69 |
| YNL127W |       | 0                |      | 0 iYNL128W  | -0.34 | #N/A | #N/A |
| YNL128W | TEP1  |                  |      | 0 iYNL129W  | #N/A  | 0.67 | 0.30 |
| YNL129W |       | 0                |      | 0 iYNL130C  | 0.80  | 1.02 | 0.46 |
| YNL130C | CPT1  |                  |      | 0 iYNL130C  | 0.72  | 1.02 | 0.46 |
| YNL131W | TOM22 | MAS17 MAS22 MON  |      | iYNL132W    | 0.36  | 1.99 | 0.82 |
| YNL132W | KRE33 |                  |      | 0 itF(GAA)N | -0.19 | 2.70 | 0.93 |



|         |        |                 |      |              |       |      |      |
|---------|--------|-----------------|------|--------------|-------|------|------|
| YNL133C | FYV6   |                 | 0    | iYNL133C     | 1.23  | #N/A | #N/A |
| YNL134C |        | 0               | #N/A | iYNL134C     | 1.17  | 1.24 | 0.55 |
| YNL135C | FPR1   | FKB1 RBP1       |      | iYNL135C     | -0.20 | 1.71 | 0.72 |
| YNL136W |        | 0               |      | 0 iYNL137C   | 0.15  | 2.13 | 0.84 |
| YNL137C | NAM9   | MNA6            |      | iYNL137C     | 0.26  | 2.13 | 0.84 |
| YNL138W | SRV2   | CAP             |      | iYNL139C     | -0.45 | 2.04 | 0.83 |
| YNL139C | RLR1   | LDB5 THO2 ZRG13 |      | iYNL139C     | #N/A  | 2.04 | 0.83 |
| YNL140C |        | 0               | #N/A | iYNL139C     | #N/A  | 2.04 | 0.83 |
| YNL141W | AAH1   |                 |      | 0 iYNL142W   | -0.86 | 2.84 | 0.94 |
| YNL142W | MEP2   |                 |      | 0 iYNL143C   | 3.20  | 1.05 | 0.47 |
| YNL143C |        | 0               | #N/A | iYNL143C     | #N/A  | 1.05 | 0.47 |
| YNL144C |        | 0               | #N/A | iYNL144C-0   | 0.13  | 0.72 | 0.34 |
| YNL145W | MFA2   |                 |      | 0 iYNL146W   | 0.98  | 0.92 | 0.44 |
| YNL146W |        | 0               | #N/A | iYNL147W     | #N/A  | 3.04 | 0.96 |
| YNL147W | LSM7   |                 |      | 0 iYNL148C   | #N/A  | #N/A | #N/A |
| YNL148C | ALF1   |                 |      | 0 iYNL148C   | #N/A  | #N/A | #N/A |
| YNL149C |        | 0               | #N/A | iYNL149C     | -0.39 | 1.13 | 0.52 |
| YNL150W |        | 0               | #N/A | iYNL151C     | -0.57 | 2.91 | 0.95 |
| YNL151C | RPC31  | ACP2 RPC8       |      | iYNL151C     | -0.57 | 2.91 | 0.95 |
| YNL152W |        | 0               | #N/A | iYNL153C     | -0.39 | 2.09 | 0.84 |
| YNL153C | GIM3   | PFD4            |      | iYNL153C     | -0.17 | 2.09 | 0.84 |
| YNL154C | YCK2   |                 |      | 0 iYNL154C   | 0.18  | #N/A | #N/A |
| YNL155W |        | 0               | #N/A | iYNL156C     | 0.58  | 1.48 | 0.67 |
| YNL156C |        | 0               |      | 0 iYNL156C   | 1.43  | 1.48 | 0.67 |
| YNL157W |        | 0               | #N/A | iYNL158W     | 0.86  | #N/A | #N/A |
| YNL158W |        | 0               | #N/A | iYNL159C     | 2.65  | 3.63 | 0.99 |
| YNL159C | ASI2   |                 |      | 0 iYNL159C   | 0.75  | 3.63 | 0.99 |
| YNL160W | YGP1   |                 |      | 0 iYNL161W-  | 2.89  | 0.78 | 0.37 |
| YNL161W | CBK1   |                 |      | 0 iYNL162W   | -0.29 | 1.85 | 0.78 |
| YNL162W | RPL42A |                 |      | 0 iYNL163C   | -0.38 | #N/A | #N/A |
| YNL163C | RIA1   | EFL1            |      | iYNL163C     | -0.73 | #N/A | #N/A |
| YNL164C | IBD2   |                 |      | 0 iYNL164C   | -0.69 | 2.62 | 0.93 |
| YNL165W |        | 0               | #N/A | iYNL166C     | -0.25 | 2.73 | 0.94 |
| YNL166C | BNI5   |                 |      | 0 iYNL166C   | -0.42 | 2.73 | 0.94 |
| YNL167C | SKO1   | ACR1            |      | iYNL167C     | 0.63  | 1.50 | 0.66 |
| YNL168C |        | 0               |      | 0 iYNL168C   | -1.01 | 1.60 | 0.70 |
| YNL169C | PSD1   |                 |      | 0 iYNL169C   | 0.70  | 1.53 | 0.68 |
| YNL170W |        | 0               | #N/A | iYNL173C     | 0.85  | 1.69 | 0.74 |
| YNL171C |        | 0               | #N/A | iYNL169C     | #N/A  | 1.53 | 0.68 |
| YNL172W | APC1   |                 |      | 0 iYNL173C   | 0.26  | 1.69 | 0.74 |
| YNL173C | MDG1   |                 |      | 0 iYNL173C   | 0.65  | 1.69 | 0.74 |
| YNL174W |        | 0               | #N/A | iYNL176C     | -1.43 | 1.90 | 0.79 |
| YNL175C | NOP13  |                 |      | 0 iYNL174W   | -0.61 | 1.78 | 0.76 |
| YNL176C |        | 0               | #N/A | iYNL176C     | #N/A  | 1.90 | 0.79 |
| YNL177C |        | 0               |      | 0 iYNL177C   | 0.44  | 1.47 | 0.66 |
| YNL178W | RPS3   | SUF14           |      | iYNL179C-1   | -1.30 | 0.80 | 0.38 |
| YNL179C |        | 0               |      | 0 iYNL179C-0 | #N/A  | #N/A | #N/A |
| YNL180C | RHO5   |                 |      | 0 iYNL179C-0 | -0.17 | #N/A | #N/A |
| YNL181W |        | 0               | #N/A | iYNL182C     | -0.44 | 2.83 | 0.95 |
| YNL182C |        | 0               |      | 0 iYNL182C   | -0.93 | 2.83 | 0.95 |
| YNL183C | NPR1   |                 |      | 0 iYNL183C   | -0.58 | 2.17 | 0.84 |

|         |        |                |            |       |      |      |
|---------|--------|----------------|------------|-------|------|------|
| YNL184C | 0      | #N/A           | iYNL184C   | #N/A  | 1.06 | 0.48 |
| YNL185C | MRPL19 |                | 0 iYNL184C | -0.33 | 1.06 | 0.48 |
| YNL186W | UBP10  | DOT4           | iYNL187W   | -0.66 | 0.46 | 0.17 |
| YNL187W | 0      | #N/A           | iYNL188W   | -0.66 | 1.84 | 0.78 |
| YNL188W | KAR1   |                | 0 iYNL189W | -0.48 | 1.33 | 0.60 |
| YNL189W | SRP1   | KAP60 SCM1     | iYNL190W   | 0.01  | #N/A | #N/A |
| YNL190W | 0      | #N/A           | iYNL191W   | -0.35 | 0.39 | 0.15 |
| YNL191W | 0      | #N/A           | iYNL192W   | -0.97 | 1.16 | 0.52 |
| YNL192W | CHS1   | USA4           | iYNL193W   | 1.41  | 1.08 | 0.50 |
| YNL193W | 0      | #N/A           | iYNL194C   | 0.75  | 2.18 | 0.86 |
| YNL194C | 0      | #N/A           | iYNL194C   | -0.26 | 2.18 | 0.86 |
| YNL195C | 0      | #N/A           | iYNL195C   | #N/A  | 1.25 | 0.58 |
| YNL196C | SLZ1   | #N/A           | iYNL196C   | 1.70  | 0.79 | 0.36 |
| YNL197C | WHI3   |                | 0 iYNL197C | -0.87 | 1.62 | 0.72 |
| YNL198C | 0      | #N/A           | iYNL198C   | #N/A  | 0.48 | 0.22 |
| YNL199C | GCR2   |                | 0 iYNL198C | #N/A  | 0.48 | 0.22 |
| YNL200C | 0      | #N/A           | iYNL200C   | 1.71  | 1.46 | 0.65 |
| YNL201C | 0      |                | 0 iYNL201C | -2.50 | 1.32 | 0.59 |
| YNL202W | SPS19  | SPX19          | iYNL204C   | 0.13  | 1.02 | 0.47 |
| YNL203C | 0      | #N/A           | iYNL202W   | #N/A  | 0.49 | 0.19 |
| YNL204C | SPS18  | SPX18          | iYNL204C   | 0.10  | 1.02 | 0.47 |
| YNL205C | 0      | #N/A           | iYNL204C   | #N/A  | 1.02 | 0.47 |
| YNL206C | RTT106 |                | 0 iYNL204C | #N/A  | 1.02 | 0.47 |
| YNL207W | RIO2   |                | 0 iYNL208W | -0.42 | 2.64 | 0.92 |
| YNL208W | 0      | #N/A           | iYNL209W   | 0.90  | 0.97 | 0.44 |
| YNL209W | SSB2   |                | 0 iYNL210W | -0.81 | 1.26 | 0.58 |
| YNL210W | MER1   |                | 0 iYNL211C | 2.19  | 0.93 | 0.42 |
| YNL211C | 0      | #N/A           | iYNL211C   | #N/A  | 0.93 | 0.42 |
| YNL212W | VID27  |                | 0 iYNL213C | 0.58  | 3.20 | 0.97 |
| YNL213C | 0      | #N/A           | iYNL213C   | -1.04 | 3.20 | 0.97 |
| YNL214W | PEX17  | PAS9           | iYNL215W   | 1.41  | #N/A | #N/A |
| YNL215W | IES2   |                | 0 iYNL216W | -0.73 | 2.05 | 0.83 |
| YNL216W | RAP1   | GRF1 TBA1 TUF1 | iYNL217W   | -0.53 | 1.78 | 0.76 |
| YNL217W | 0      | #N/A           | iYNL218W   | 0.57  | 1.27 | 0.58 |
| YNL218W | MGS1   |                | 0 iYNL219C | -0.93 | 2.25 | 0.87 |
| YNL219C | ALG9   |                | 0 iYNL219C | 0.00  | 2.25 | 0.87 |
| YNL220W | ADE12  | BRA9           | iYNL221C   | -0.79 | 0.79 | 0.36 |
| YNL221C | POP1   |                | 0 iYNL221C | -0.42 | 0.79 | 0.36 |
| YNL222W | SSU72  |                | 0 iYNL223W | -0.07 | 3.09 | 0.96 |
| YNL223W | AUT2   | APG4 AUT2      | iYNL224C   | 0.54  | 1.98 | 0.82 |
| YNL224C | 0      | #N/A           | iYNL224C   | -0.48 | 1.98 | 0.82 |
| YNL225C | CNM67  |                | 0 iYNL225C | 0.24  | 1.47 | 0.65 |
| YNL226W | 0      | #N/A           | iYNL229C   | #N/A  | 1.58 | 0.69 |
| YNL227C | 0      |                | 0 iYNL226W | -1.22 | 0.69 | 0.31 |
| YNL228W | 0      | #N/A           | iYNL229C   | #N/A  | 1.58 | 0.69 |
| YNL229C | URE2   | [URE3]         | iYNL229C   | 0.56  | 1.58 | 0.69 |
| YNL230C | ELA1   |                | 0 iYNL230C | 0.96  | 1.06 | 0.48 |
| YNL231C | PDR16  | SFH3           | iYNL231C   | 0.84  | 0.38 | 0.13 |
| YNL232W | CSL4   | SKI4           | iYNL233W   | -0.03 | 1.82 | 0.77 |
| YNL233W | BNI4   |                | 0 iYNL234W | -1.22 | 1.30 | 0.60 |
| YNL234W | 0      | #N/A           | iYNL235C   | -0.14 | 2.36 | 0.89 |



|         |        |   |                 |            |       |      |      |
|---------|--------|---|-----------------|------------|-------|------|------|
| YNL235C |        | 0 | #N/A            | iYNL235C   | 0.21  | 2.36 | 0.89 |
| YNL236W | SIN4   |   | BEL2 GAL22 RYE1 | iYNL237W   | 0.37  | 1.39 | 0.62 |
| YNL237W | YTP1   |   |                 | 0 iYNL238W | 2.28  | 0.60 | 0.26 |
| YNL238W | KEX2   |   | QDS1 SRB1 VMA45 | iYNL239W   | -0.08 | 1.50 | 0.66 |
| YNL239W | LAP3   |   | BLH1 GAL6 YCP1  | iYNL240C   | -0.38 | 2.72 | 0.93 |
| YNL240C | NAR1   |   |                 | 0 iYNL240C | -1.09 | 2.72 | 0.93 |
| YNL241C | ZWF1   |   | MET19 POS10     | iYNL241C   | -0.17 | 0.57 | 0.26 |
| YNL242W | APG2   |   | APG2 AUT8 SPO72 | iYNL243W   | -0.24 | 2.42 | 0.89 |
| YNL243W | SLA2   |   | END4 MOP2       | iYNL244C   | -1.70 | 0.92 | 0.44 |
| YNL244C | SUI1   |   | MOF2 RFR1       | iYNL244C   | -1.07 | 0.92 | 0.44 |
| YNL245C | CWC25  |   |                 | 0 iYNL245C | -0.53 | 1.17 | 0.53 |
| YNL246W | VPS75  |   |                 | 0 iYNL247W | -0.51 | 1.25 | 0.56 |
| YNL247W |        | 0 | #N/A            | iYNL248C   | -0.74 | 2.51 | 0.91 |
| YNL248C | RPA49  |   |                 | 0 iYNL248C | -0.68 | 2.51 | 0.91 |
| YNL249C | MPA43  |   |                 | 0 iYNL249C | #N/A  | 1.05 | 0.48 |
| YNL250W | RAD50  |   |                 | 0 iYNL251C | -0.55 | 1.72 | 0.74 |
| YNL251C | NRD1   |   |                 | 0 iYNL251C | -0.25 | 1.72 | 0.74 |
| YNL252C | MRPL17 |   | MRPL30          | iYNL252C   | 0.20  | #N/A | #N/A |
| YNL253W |        | 0 |                 | 0 iYNL254C | 0.09  | 1.28 | 0.57 |
| YNL254C |        | 0 | #N/A            | iYNL254C   | 0.32  | 1.28 | 0.57 |
| YNL255C | GIS2   |   |                 | 0 iYNL255C | #N/A  | 1.26 | 0.56 |
| YNL256W | FOL1   |   |                 | 0 iYNL257C | -0.53 | #N/A | #N/A |
| YNL257C | SIP3   |   |                 | 0 iYNL257C | 0.47  | #N/A | #N/A |
| YNL258C | DSL1   |   |                 | 0 iYNL258C | 0.29  | 2.88 | 0.95 |
| YNL259C | ATX1   |   |                 | 0 iYNL259C | 1.07  | 0.84 | 0.38 |
| YNL260C |        | 0 | #N/A            | iYNL260C   | 1.25  | 1.08 | 0.49 |
| YNL261W | ORC5   |   |                 | 0 iYNL262W | 0.28  | 1.60 | 0.70 |
| YNL262W | POL2   |   | DUN2            | iYNL263C   | #N/A  | 3.86 | 0.99 |
| YNL263C | YIF1   |   |                 | 0 iYNL263C | 0.36  | 3.86 | 0.99 |
| YNL264C | PDR17  |   | ISS1 SFH4       | iYNL264C   | 0.13  | 2.27 | 0.88 |
| YNL265C | IST1   |   |                 | 0 iYNL265C | 1.56  | 1.94 | 0.81 |
| YNL266W |        | 0 | #N/A            | iYNL267W   | 1.55  | #N/A | #N/A |
| YNL267W | PIK1   |   | PIK120 PIK41    | iYNL268W   | -0.57 | 1.07 | 0.48 |
| YNL268W | LYP1   |   |                 | 0 iYNL269W | -0.11 | 0.63 | 0.28 |
| YNL269W |        | 0 |                 | 0 iYNL271C | #N/A  | 2.47 | 0.90 |
| YNL270C | ALP1   |   | APL1            | iYNL269W   | 0.34  | 0.63 | 0.28 |
| YNL271C | BNI1   |   | PPF3 SHE5       | iYNL271C   | -1.50 | 2.47 | 0.90 |
| YNL272C | SEC2   |   |                 | 0 iYNL272C | -0.74 | 2.07 | 0.83 |
| YNL273W | TOF1   |   |                 | 0 iYNL274C | -0.33 | 2.78 | 0.95 |
| YNL274C |        | 0 | #N/A            | iYNL274C   | 1.86  | 2.78 | 0.95 |
| YNL275W |        | 0 | #N/A            | iYNL276C   | 0.24  | #N/A | #N/A |
| YNL276C |        | 0 | #N/A            | iYNL276C   | -0.94 | #N/A | #N/A |
| YNL277W | MET2   |   |                 | 0 iYNL278W | -0.77 | 0.91 | 0.42 |
| YNL278W | CAF120 |   |                 | 0 iYNL279W | -0.57 | 2.08 | 0.84 |
| YNL279W | PRM1   |   |                 | 0 iYNL280C | 0.39  | 0.68 | 0.32 |
| YNL280C | ERG24  |   |                 | 0 iYNL280C | 0.63  | 0.68 | 0.32 |
| YNL281W | HCH1   |   |                 | 0 iYNL282W | 0.35  | 0.80 | 0.37 |
| YNL282W | POP3   |   |                 | 0 iYNL283C | 0.96  | 0.85 | 0.39 |
| YNL283C | WSC2   |   | STA3            | iYNL283C   | -0.23 | 0.85 | 0.39 |
| YNL284C | MRPL10 |   | MRPL18          | iYNL284C   | -0.11 | 2.08 | 0.84 |
| YNL285W |        | 0 | #N/A            | itG(UCC)N  | #N/A  | 0.99 | 0.45 |

|         |        |                  |      |            |       |      |      |
|---------|--------|------------------|------|------------|-------|------|------|
| YNL286W | CUS2   |                  | 0    | iYNL287W   | 0.18  | #N/A | #N/A |
| YNL287W | SEC21  |                  | 0    | iYNL288W   | -0.74 | 1.33 | 0.61 |
| YNL288W | CAF40  |                  | 0    | iYNL289W   | 0.30  | 1.77 | 0.75 |
| YNL289W | PCL1   | HCS26            |      | iYNL290W   | -0.26 | 1.13 | 0.52 |
| YNL290W | RFC3   |                  | 0    | iYNL291C   | -0.85 | 1.77 | 0.75 |
| YNL291C | MID1   |                  | 0    | iYNL291C   | -0.51 | 1.77 | 0.75 |
| YNL292W | PUS4   |                  | 0    | iYNL293W   | -0.20 | 1.86 | 0.79 |
| YNL293W | MSB3   | GYP3             |      | iYNL294C   | 0.20  | 2.65 | 0.93 |
| YNL294C | RIM21  | PAL2             |      | iYNL294C   | 0.73  | 2.65 | 0.93 |
| YNL295W |        | 0                | #N/A | iYNL296W   | 1.38  | 3.01 | 0.96 |
| YNL296W | KRE25  |                  | #N/A | iYNL298W   | #N/A  | #N/A | #N/A |
| YNL297C | MON2   | YSL2             |      | iYNL296W   | 0.11  | 3.01 | 0.96 |
| YNL298W | CLA4   | ERC10            |      | iYNL299W   | -0.38 | 0.90 | 0.41 |
| YNL299W | TRF5   |                  | 0    | iYNL300W   | -0.57 | 2.52 | 0.92 |
| YNL300W | TOS6   |                  | #N/A | iYNL301C   | -0.35 | #N/A | #N/A |
| YNL301C | RPL18B | RP28B            |      | iYNL301C   | -0.46 | #N/A | #N/A |
| YNL302C | RPS19B | RP55B            |      | iYNL302C   | -0.91 | 0.21 | 0.03 |
| YNL303W |        | 0                | #N/A | iYNL305C   | 0.27  | 2.55 | 0.92 |
| YNL304W | YPT11  |                  | 0    | iYNL305C   | 1.09  | 2.55 | 0.92 |
| YNL305C |        | 0                | #N/A | iYNL305C   | 1.33  | 2.55 | 0.92 |
| YNL306W | MRPS18 |                  | 0    | iYNL307C   | 0.41  | 3.01 | 0.96 |
| YNL307C | MCK1   | YPK1             |      | iYNL307C   | -0.48 | 3.01 | 0.96 |
| YNL308C | KRI1   |                  | 0    | iYNL308C   | -0.67 | 1.45 | 0.64 |
| YNL309W | STB1   |                  | 0    | iYNL311C   | -1.01 | 1.12 | 0.50 |
| YNL310C |        | 0                |      | 0 iYNL309W | -0.52 | 0.36 | 0.15 |
| YNL311C |        | 0                | #N/A | iYNL311C   | 1.56  | 1.12 | 0.50 |
| YNL312W | RFA2   | BUF1 RPA2        |      | iYNL313C   | -0.40 | 2.76 | 0.93 |
| YNL313C |        | 0                | #N/A | iYNL313C   | -0.71 | 2.76 | 0.93 |
| YNL314W | DAL82  |                  | 0    | iYNL315C   | 0.28  | 1.92 | 0.79 |
| YNL315C | ATP11  |                  | 0    | iYNL315C   | -0.39 | 1.92 | 0.79 |
| YNL316C | PHA2   |                  | 0    | iYNL316C   | #N/A  | 0.78 | 0.36 |
| YNL317W | PFS2   |                  | 0    | iYNL318C   | -0.80 | 1.41 | 0.62 |
| YNL318C | HXT14  |                  | 0    | iYNL318C   | #N/A  | 1.41 | 0.62 |
| YNL318L | #N/A   | #N/A             | #N/A | #N/A       | #N/A  | #N/A | #N/A |
| YNL319W |        | 0                | #N/A | iYNL320W   | #N/A  | #N/A | #N/A |
| YNL320W |        | 0                | #N/A | iYNL321W   | 0.53  | 2.45 | 0.91 |
| YNL321W |        | 0                | #N/A | iYNL322C   | 0.75  | 2.48 | 0.90 |
| YNL322C | KRE1   |                  | 0    | iYNL322C   | 0.68  | 2.48 | 0.90 |
| YNL323W | LEM3   | BRE3 ROS3        |      | iYNL324W   | 0.40  | 3.45 | 0.98 |
| YNL324W |        | 0                | #N/A | iYNL326C   | #N/A  | 1.42 | 0.63 |
| YNL325C | FIG4   |                  | 0    | iYNL324W   | 0.33  | 3.45 | 0.98 |
| YNL326C |        | 0                | #N/A | iYNL326C   | 0.52  | 1.42 | 0.63 |
| YNL327W | EGT2   |                  | 0    | iYNL328C   | -0.86 | 1.00 | 0.47 |
| YNL328C | MDJ2   |                  | 0    | iYNL328C   | #N/A  | 1.00 | 0.47 |
| YNL329C | PEX6   | PAS8             |      | iYNL329C   | -0.22 | 1.25 | 0.56 |
| YNL330C | RPD3   | MOF6 REC3 SDI2 S |      | iYNL330C   | 0.23  | 3.92 | 0.99 |
| YNL331C | AAD14  |                  | 0    | iYNL331C   | 1.45  | 1.23 | 0.57 |
| YNL332W | THI12  |                  | 0    | iYNL333W   | 2.28  | 2.86 | 0.94 |
| YNL333W | SNZ2   |                  | 0    | iYNL334C   | 0.17  | 2.54 | 0.92 |
| YNL334C | SNO2   |                  | 0    | iYNL334C   | -0.70 | 2.54 | 0.92 |
| YNL335W |        | 0                | #N/A | iYNL336W   | 1.51  | 1.76 | 0.74 |

|         |        |                  |      |          |       |      |      |
|---------|--------|------------------|------|----------|-------|------|------|
| YNL336W | COS1   |                  | 0    | iYNL337W | 2.36  | 0.94 | 0.43 |
| YNL337W |        | 0                | #N/A | iYNL338W | 2.18  | 0.31 | 0.07 |
| YNL338W |        | 0                | #N/A | iYNL339C | #N/A  | 0.47 | 0.18 |
| YNL339C | YRF1-6 | YRF1             |      | iYNL339C | -0.07 | 0.47 | 0.18 |
| YNR001C | CIT1   | CS1 LYS6         |      | iYNR001C | 1.75  | 1.17 | 0.53 |
| YNR002C | FUN34  | ATO2             |      | iYNR002C | 1.32  | 0.94 | 0.44 |
| YNR003C | RPC34  |                  | 0    | iYNR003C | -2.39 | 2.22 | 0.85 |
| YNR004W |        | 0                | #N/A | iYNR003C | 2.95  | 2.22 | 0.85 |
| YNR005C |        | 0                | #N/A | iYNR006W | #N/A  | 0.61 | 0.27 |
| YNR006W | VPS27  | DID7 GRD11 SSV17 |      | iYNR004W | 0.21  | 1.58 | 0.70 |
| YNR007C | AUT1   | APG3 AUT1        |      | iYNR007C | 1.43  | 2.29 | 0.88 |
| YNR008W | LRO1   |                  | 0    | iYNR007C | -0.12 | 2.29 | 0.88 |
| YNR009W |        | 0                | #N/A | iYNR008W | 0.80  | 0.76 | 0.35 |
| YNR010W | CSE2   | MED9             |      | iYNR009W | -0.14 | 1.43 | 0.64 |
| YNR011C | PRP2   | RNA2             |      | iYNR011C | 0.39  | #N/A | #N/A |
| YNR012W | URK1   |                  | 0    | iYNR011C | 0.29  | #N/A | #N/A |
| YNR013C | PHO91  |                  | 0    | iYNR013C | 0.66  | 0.38 | 0.12 |
| YNR014W |        | 0                | #N/A | iYNR013C | -0.56 | 0.38 | 0.12 |
| YNR015W | SMM1   | DUS2             |      | iYNR014W | -0.43 | 2.64 | 0.93 |
| YNR016C | ACC1   | ABP2 FAS3 MTR7   |      | iYNR016C | -0.91 | 0.31 | 0.09 |
| YNR017W | MAS6   | MIM23 MPI3 TIM23 |      | iYNR016C | -0.29 | 0.39 | 0.13 |
| YNR018W |        | 0                | #N/A | iYNR017W | -0.81 | 0.30 | 0.07 |
| YNR019W | ARE2   | SAT1             |      | iYNR018W | 1.52  | #N/A | #N/A |
| YNR020C |        | 0                | #N/A | iYNR020C | -0.17 | 2.18 | 0.86 |
| YNR021W |        | 0                | #N/A | iYNR020C | 0.17  | 2.18 | 0.86 |
| YNR022C |        | 0                |      | iYNR022C | 1.73  | 2.96 | 0.95 |
| YNR023W | SNF12  | SWP73            |      | iYNR022C | 0.39  | 2.96 | 0.95 |
| YNR024W |        | 0                | #N/A | iYNR023W | #N/A  | 1.89 | 0.78 |
| YNR025C |        | 0                | #N/A | iYNR025C | 0.49  | 0.38 | 0.16 |
| YNR026C | SEC12  | SED2             |      | iYNR026C | -0.83 | #N/A | #N/A |
| YNR027W | BUD17  |                  | 0    | iYNR026C | -0.37 | #N/A | #N/A |
| YNR028W | CPR8   |                  | 0    | iYNR027W | 0.07  | 0.74 | 0.34 |
| YNR029C |        | 0                | #N/A | iYNR029C | 0.84  | 1.98 | 0.81 |
| YNR030W | ECM39  | ALG12            |      | iYNR029C | 0.43  | 1.98 | 0.81 |
| YNR031C | SSK2   |                  | 0    | iYNR031C | 0.10  | 3.22 | 0.97 |
| YNR032W | PPG1   |                  | 0    | iYNR031C | 0.65  | 3.22 | 0.97 |
| YNR033W | ABZ1   |                  | 0    | iYNR032C | 0.05  | 1.91 | 0.80 |
| YNR034W | SOL1   |                  | 0    | iYNR033W | 0.54  | #N/A | #N/A |
| YNR035C | ARC35  | END9             |      | iYNR035C | 0.47  | #N/A | #N/A |
| YNR036C |        | 0                | #N/A | iYNR036C | -0.18 | 2.95 | 0.95 |
| YNR037C | RSM19  |                  | 0    | iYNR037C | #N/A  | 3.92 | 0.99 |
| YNR038W | DBP6   |                  | 0    | iYNR037C | -0.28 | 3.92 | 0.99 |
| YNR039C | ZRG17  |                  | 0    | iYNR039C | 0.43  | 3.62 | 0.98 |
| YNR040W |        | 0                | #N/A | iYNR039C | -1.63 | 3.62 | 0.98 |
| YNR041C | COQ2   |                  | 0    | iYNR042W | 0.98  | 1.37 | 0.61 |
| YNR042W |        | 0                | #N/A | iYNR040W | 1.47  | #N/A | #N/A |
| YNR043W | MVD1   | ERG19            |      | iYNR042W | 0.55  | 1.37 | 0.61 |
| YNR044W | AGA1   |                  | 0    | iYNR043W | #N/A  | 0.93 | 0.44 |
| YNR045W | PET494 |                  | 0    | iYNR044W | -0.67 | #N/A | #N/A |
| YNR046W |        | 0                | #N/A | iYNR045W | #N/A  | #N/A | #N/A |
| YNR047W |        | 0                | #N/A | iYNR046W | 0.83  | 3.10 | 0.96 |

|         |       |                  |      |              |       |      |      |
|---------|-------|------------------|------|--------------|-------|------|------|
| YNR048W |       | 0                | #N/A | iYNR047W     | 0.89  | 1.78 | 0.75 |
| YNR049C | MSO1  |                  |      | 0 iYNR049C   | 0.65  | 1.32 | 0.59 |
| YNR050C | LYS9  | LYS13            |      | iYNR050C     | -0.94 | 0.65 | 0.29 |
| YNR051C | BRE5  |                  |      | 0 iYNR051C   | -0.42 | 1.08 | 0.49 |
| YNR052C | POP2  | CAF1             |      | iYNR052C     | -0.60 | 1.09 | 0.50 |
| YNR053C | NOG2  |                  |      | 0 iYNR053C   | -1.37 | 0.79 | 0.38 |
| YNR054C |       | 0                | #N/A | iYNR054C-C   | #N/A  | 1.15 | 0.54 |
| YNR055C | HOL1  |                  |      | 0 iYNR055C   | 1.36  | 1.30 | 0.58 |
| YNR056C | BIO5  |                  |      | 0 iYNR057C   | 1.67  | 2.17 | 0.86 |
| YNR057C | BIO4  |                  |      | 0 iYNR057C   | 0.14  | 2.17 | 0.86 |
| YNR058W | BIO3  |                  |      | 0 iYNR057C   | 2.39  | 2.17 | 0.86 |
| YNR059W | MNT4  |                  |      | 0 iYNR058W   | 2.82  | 2.16 | 0.84 |
| YNR060W | FRE4  |                  |      | 0 iYNR059W   | -1.60 | 1.19 | 0.55 |
| YNR061C |       | 0                | #N/A | iYNR061C     | 0.91  | #N/A | #N/A |
| YNR062C |       | 0                | #N/A | iYNR062C-C   | #N/A  | 0.30 | 0.08 |
| YNR063W |       | 0                | #N/A | iYNR062C-C   | 2.72  | 1.92 | 0.80 |
| YNR064C |       | 0                | #N/A | iYNR064C     | 0.26  | 0.58 | 0.25 |
| YNR065C | YSN1  |                  |      | 0 iYNR066C   | 1.06  | 1.92 | 0.80 |
| YNR066C |       | 0                | #N/A | iYNR066C     | #N/A  | 1.92 | 0.80 |
| YNR067C | DSE4  | ENG1             |      | iYNR067C     | -0.22 | 1.97 | 0.81 |
| YNR068C |       | 0                | #N/A | iYNR068C     | 4.15  | #N/A | #N/A |
| YNR069C |       | 0                |      | 0 iYNR069C-C | #N/A  | 0.99 | 0.47 |
| YNR070W | PDR18 |                  | #N/A | iYNR069C-C   | #N/A  | #N/A | #N/A |
| YNR071C |       | 0                | #N/A | iYNR071C     | 3.92  | 0.49 | 0.19 |
| YNR072W | HXT17 |                  |      | 0 iYNR071C   | 4.62  | 0.49 | 0.19 |
| YNR073C |       | 0                | #N/A | iYNR073C     | 1.95  | 0.77 | 0.35 |
| YNR074C |       | 0                | #N/A | iYNR074C     | 1.21  | 1.39 | 0.63 |
| YNR075W | COS10 |                  |      | 0 iYNR074C   | 1.72  | 1.39 | 0.63 |
| YNR076W | PAU6  |                  |      | 0 iYNR075W   | 1.78  | 0.69 | 0.31 |
| YNR077C |       | 0                | #N/A | #N/A         | #N/A  | #N/A | #N/A |
| YOL001W | PHO80 | AGS3 TUP7 VAC5   |      | iYOL002C     | 1.26  | 1.22 | 0.55 |
| YOL002C |       | 0                |      | 0 iYOL002C   | 0.89  | 1.22 | 0.55 |
| YOL003C |       | 0                | #N/A | iYOL003C     | 0.98  | 2.06 | 0.84 |
| YOL004W | SIN3  | CPE1 GAM2 RPD1   |      | iYOL005C     | #N/A  | 2.13 | 0.85 |
| YOL005C | RPB11 |                  |      | 0 iYOL005C   | -0.82 | 2.13 | 0.85 |
| YOL006C | TOP1  | MAK1 MAK17       |      | iYOL006C     | 0.10  | 0.69 | 0.31 |
| YOL007C |       | 0                | #N/A | iYOL007C     | 0.13  | 1.08 | 0.50 |
| YOL008W |       | 0                | #N/A | iYOL009C     | 0.06  | 1.46 | 0.66 |
| YOL009C | MDM12 |                  |      | 0 iYOL009C   | 1.56  | 1.46 | 0.66 |
| YOL010W | RCL1  |                  |      | 0 iYOL011W   | 0.10  | 2.49 | 0.90 |
| YOL011W | PLB3  |                  |      | 0 iYOL012C   | 1.07  | 1.00 | 0.45 |
| YOL012C | HTZ1  | H2A.F/Z H2AZ HTA |      | iYOL012C     | -0.01 | 1.00 | 0.45 |
| YOL013C | HRD1  | DER3             |      | iYOL013C     | 0.46  | #N/A | #N/A |
| YOL014W |       | 0                | #N/A | iYOL015W     | -0.46 | 1.00 | 0.46 |
| YOL015W |       | 0                | #N/A | iYOL016C     | 5.18  | 2.27 | 0.88 |
| YOL016C | CMK2  |                  |      | 0 iYOL016C   | 4.39  | 2.27 | 0.88 |
| YOL017W | ESC8  |                  |      | 0 iYOL018C   | 0.73  | 2.10 | 0.84 |
| YOL018C | TLG2  |                  |      | 0 iYOL018C   | 0.31  | 2.10 | 0.84 |
| YOL019W | TOS7  |                  | #N/A | itY(GUA)O    | -0.06 | 0.83 | 0.38 |
| YOL020W | TAT2  | LTG3 SAB2 SCM2 T |      | iYOL021C     | 0.65  | 0.43 | 0.19 |
| YOL021C | DIS3  | RRP44            |      | iYOL021C     | -0.75 | 0.43 | 0.19 |

|           |       |                  |      |              |       |      |      |
|-----------|-------|------------------|------|--------------|-------|------|------|
| YOL022C   |       | 0                | #N/A | iYOL022C     | -0.31 | 1.49 | 0.67 |
| YOL023W   | IFM1  |                  |      | 0 iYOL024W   | -0.48 | 2.24 | 0.87 |
| YOL024W   |       | 0                | #N/A | iYOL025W     | 3.28  | 0.58 | 0.25 |
| YOL025W   | LAG2  | ECM36            |      | its(GCU)O    | 0.21  | 1.08 | 0.49 |
| YOL026C   |       | 0                |      | 0 iYOL026C   | -1.63 | 1.15 | 0.53 |
| YOL027C   |       | 0                |      | 0 iYOL027C   | 0.01  | 2.85 | 0.94 |
| YOL028C   | YAP7  |                  |      | 0 iYOL028C   | 1.46  | 0.73 | 0.35 |
| YOL029C   |       | 0                | #N/A | iYOL029C     | 0.58  | #N/A | #N/A |
| YOL030W   | GAS5  |                  |      | 0 iYOL031C   | 0.45  | 1.42 | 0.63 |
| YOL031C   |       | 0                | SLS1 | iYOL031C     | 0.38  | 1.42 | 0.63 |
| YOL032W   |       | 0                | #N/A | iYOL033W     | #N/A  | 1.26 | 0.58 |
| YOL033W   | MSE1  |                  |      | 0 iYOL034W   | -0.04 | #N/A | #N/A |
| YOL034W   | SMC5  |                  |      | 0 iSNR50     | 0.07  | 1.39 | 0.63 |
| YOL035C   |       | 0                | #N/A | iYOL035C     | #N/A  | 0.85 | 0.39 |
| YOL036W   |       | 0                | #N/A | iYOL038W     | 0.00  | 1.06 | 0.48 |
| YOL037C   |       | 0                | #N/A | iYOL035C     | #N/A  | 0.85 | 0.39 |
| YOL038W   | PRE6  |                  |      | 0 iYOL039W   | 0.30  | #N/A | #N/A |
| YOL039W   | RPP2A | RPL44 RPLA2      |      | iYOL040C     | -0.36 | 0.12 | 0.01 |
| YOL040C   | RPS15 | RPS21            |      | iYOL040C     | -1.22 | 0.12 | 0.01 |
| YOL041C   | NOP12 |                  |      | 0 iYOL041C   | -1.16 | 1.16 | 0.52 |
| YOL042W   | NGL1  |                  |      | 0 iYOL043C   | 0.27  | 1.82 | 0.76 |
| YOL043C   | NTG2  | SCR2             |      | iYOL043C     | 0.71  | 1.82 | 0.76 |
| YOL044W   | PEX15 | PAS21            |      | iYOL045W     | -0.39 | 2.76 | 0.94 |
| YOL045W   |       | 0                |      | 0 iYOL047C   | -0.19 | 1.30 | 0.58 |
| YOL046C   |       | 0                | #N/A | iYOL045W     | #N/A  | 2.76 | 0.94 |
| YOL047C   |       | 0                | #N/A | iYOL047C     | #N/A  | 1.30 | 0.58 |
| YOL048C   |       | 0                | #N/A | iYOL048C     | #N/A  | #N/A | #N/A |
| YOL049W   | GSH2  |                  |      | 0 iYOL050C   | 0.01  | 2.40 | 0.90 |
| YOL050C   |       | 0                | #N/A | iYOL050C     | -0.30 | 2.40 | 0.90 |
| YOL051W   | GAL11 | ABE1 RAR3 SDS4 S |      | iYOL052C     | -0.24 | 1.46 | 0.65 |
| YOL052C   | SPE2  |                  |      | 0 iYOL052C   | -1.55 | 1.46 | 0.65 |
| YOL053C-A | #N/A  | #N/A             | #N/A | #N/A         | 3.31  | #N/A | #N/A |
| YOL053W   |       | 0                | #N/A | iYOL054W     | 1.18  | 0.76 | 0.35 |
| YOL054W   |       | 0                |      | 0 itN(GUU)O1 | 0.30  | 0.95 | 0.45 |
| YOL055C   | THI20 |                  |      | 0 iYOL055C   | 1.46  | 1.96 | 0.81 |
| YOL056W   | GPM3  |                  |      | 0 iYOL057W   | -0.07 | 1.78 | 0.75 |
| YOL057W   |       | 0                | #N/A | iYOL058W     | 0.39  | #N/A | #N/A |
| YOL058W   | ARG1  | ARG10            |      | iYOL059W     | 2.09  | 0.66 | 0.30 |
| YOL059W   | GPD2  | GPD3             |      | iYOL060C     | #N/A  | 0.71 | 0.32 |
| YOL060C   | MAM3  |                  |      | 0 iYOL060C   | -0.05 | 0.71 | 0.32 |
| YOL061W   | PRS5  |                  |      | 0 iYOL062C   | -0.44 | 4.01 | 0.99 |
| YOL062C   | APM4  | AMP1             |      | iYOL062C     | -0.30 | 4.01 | 0.99 |
| YOL063C   |       | 0                |      | 0 iYOL063C   | 0.20  | 2.84 | 0.95 |
| YOL064C   | MET22 | HAL2             |      | iYOL064C     | 0.39  | 1.58 | 0.68 |
| YOL065C   | INP54 |                  |      | 0 iYOL065C   | 0.33  | 2.55 | 0.91 |
| YOL066C   | RIB2  |                  |      | 0 iYOL066C   | -0.13 | 2.53 | 0.91 |
| YOL067C   | RTG1  |                  |      | 0 iYOL067C   | #N/A  | 0.86 | 0.41 |
| YOL068C   | HST1  |                  |      | 0 iYOL068C   | 0.65  | 1.06 | 0.48 |
| YOL069W   | NUF2  |                  |      | 0 iYOL070C   | -0.84 | 2.07 | 0.83 |
| YOL070C   |       | 0                | #N/A | iYOL070C     | -1.38 | 2.07 | 0.83 |
| YOL071W   |       | 0                |      | 0 iYOL072W   | 1.22  | #N/A | #N/A |

|         |        |                 |            |       |      |      |
|---------|--------|-----------------|------------|-------|------|------|
| YOL072W | THP1   | BUD29           | iYOL073C   | #N/A  | 3.65 | 0.98 |
| YOL073C | 0      | #N/A            | iYOL073C   | 0.43  | 3.65 | 0.98 |
| YOL075C | 0      | #N/A            | iYOL075C   | -0.09 | #N/A | #N/A |
| YOL076W | MDM20  | 38322           | iYOL077C   | -0.07 | 3.12 | 0.97 |
| YOL077C | BRX1   | 0               | iYOL077C   | -0.94 | 3.12 | 0.97 |
| YOL078W | AVO1   | 0               | iYOL079W   | -0.51 | 3.54 | 0.98 |
| YOL079W | 0      | #N/A            | iYOL081W   | #N/A  | 0.51 | 0.21 |
| YOL080C | REX4   | 0               | iYOL079W   | -1.56 | 3.54 | 0.98 |
| YOL081W | IRA2   | CCS1 GLC4       | iYOL082W   | -0.07 | 1.45 | 0.65 |
| YOL082W | CVT19  | CVT19           | iYOL083W-  | 1.16  | 1.32 | 0.59 |
| YOL083W | 0      | #N/A            | iYOL084W   | 2.21  | 1.65 | 0.73 |
| YOL084W | PHM7   | 0               | iYOL085C   | #N/A  | 1.61 | 0.70 |
| YOL085C | 0      | #N/A            | iYOL085C   | #N/A  | 1.61 | 0.70 |
| YOL086C | ADH1   | ADC1            | iYOL086C   | -1.53 | 0.56 | 0.24 |
| YOL087C | 0      | #N/A            | iYOL087C   | 0.58  | 2.07 | 0.84 |
| YOL088C | MPD2   | 0               | iYOL088C   | -0.45 | #N/A | #N/A |
| YOL089C | HAL9   | 0               | iYOL089C   | -0.19 | 1.52 | 0.67 |
| YOL090W | MSH2   | PMS5            | iYOL091W   | 0.08  | 3.22 | 0.97 |
| YOL091W | SPO21  | MPC70           | iYOL092W   | 3.51  | #N/A | #N/A |
| YOL092W | 0      | #N/A            | iYOL093W   | 0.02  | 1.69 | 0.72 |
| YOL093W | 0      | 0               | iYOL094C   | -0.89 | 1.43 | 0.63 |
| YOL094C | RFC4   | 0               | iYOL094C   | -0.48 | 1.43 | 0.63 |
| YOL095C | HMI1   | 0               | iYOL095C   | #N/A  | 1.56 | 0.69 |
| YOL096C | COQ3   | 0               | iYOL096C   | 0.53  | 1.92 | 0.80 |
| YOL097C | WRS1   | HRE342          | iYOL097C   | -0.66 | 1.76 | 0.76 |
| YOL098C | 0      | #N/A            | iYOL098C   | -0.32 | 1.41 | 0.63 |
| YOL099C | 0      | #N/A            | iYOL099C   | 0.94  | 0.29 | 0.07 |
| YOL100W | PKH2   | 0               | iYOL101C   | 0.65  | 1.43 | 0.63 |
| YOL101C | 0      | 0               | iYOL101C   | -0.21 | 1.43 | 0.63 |
| YOL102C | TPT1   | 0               | iYOL102C   | #N/A  | 1.78 | 0.74 |
| YOL103W | ITR2   | HRB612          | iYOLWdelta | 0.40  | 1.37 | 0.61 |
| YOL104C | NDJ1   | TAM1            | iYOL104C   | #N/A  | 1.42 | 0.64 |
| YOL105C | WSC3   | 0               | iYOL105C   | 0.99  | 0.76 | 0.35 |
| YOL106W | 0      | #N/A            | iYOL107W   | -1.22 | 0.29 | 0.06 |
| YOL107W | 0      | #N/A            | iYOL108C   | 1.07  | 1.56 | 0.69 |
| YOL108C | INO4   | 0               | iYOL108C   | 2.00  | 1.56 | 0.69 |
| YOL109W | 0      | 0               | iYOL110W   | 0.57  | 0.09 | 0.01 |
| YOL110W | SHR5   | ERF4            | iYOL111C   | -0.11 | 1.17 | 0.53 |
| YOL111C | 0      | #N/A            | iYOL111C   | 0.54  | 1.17 | 0.53 |
| YOL112W | MSB4   | 0               | iYOL113W   | 0.52  | 1.92 | 0.79 |
| YOL113W | SKM1   | 0               | iYOL114C   | 1.23  | 1.57 | 0.68 |
| YOL114C | 0      | #N/A            | iYOL114C   | #N/A  | 1.57 | 0.68 |
| YOL115W | TRF4   | 0               | iYOL116W   | #N/A  | 1.73 | 0.74 |
| YOL116W | MSN1   | FUP1 HRB382 MSS | iYOL117W   | 0.25  | 2.66 | 0.93 |
| YOL117W | 0      | CSN10           | iYOL118C   | -0.53 | 1.03 | 0.47 |
| YOL118C | 0      | #N/A            | iYOL118C   | #N/A  | 1.03 | 0.47 |
| YOL119C | MCH4   | 0               | iYOL119C   | 0.71  | 0.70 | 0.33 |
| YOL120C | RPL18A | RP28A           | iYOL120C   | -0.53 | 0.25 | 0.08 |
| YOL121C | RPS19A | 0               | iYOL121C   | -0.99 | 0.16 | 0.04 |
| YOL122C | SMF1   | SBS1            | iYOL122C   | 1.15  | 1.30 | 0.58 |
| YOL123W | HRP1   | NAB4 NAB5       | iYOL124C   | 0.56  | 0.84 | 0.38 |



|         |       |                |              |       |      |      |
|---------|-------|----------------|--------------|-------|------|------|
| YOL124C | 0     | #N/A           | iYOL124C     | -1.28 | 0.84 | 0.38 |
| YOL125W | 0     | #N/A           | iYOL126C     | -0.70 | 1.39 | 0.62 |
| YOL126C | MDH2  |                | 0 iYOL126C   | -0.69 | 1.39 | 0.62 |
| YOL127W | RPL25 |                | 0 iYOL128C   | -0.83 | 0.87 | 0.40 |
| YOL128C | 0     |                | 0 iYOL128C   | #N/A  | 0.87 | 0.40 |
| YOL129W | VPS68 |                | 0 iYOL130W   | 1.74  | 1.39 | 0.62 |
| YOL130W | ALR1  | SWC3           | iYOL131W     | 0.81  | 1.78 | 0.76 |
| YOL131W | 0     | #N/A           | iYOL132W     | #N/A  | 0.74 | 0.34 |
| YOL132W | GAS4  |                | 0 iYOL133W   | 1.31  | 0.85 | 0.39 |
| YOL133W | HRT1  | HRT2 RBX1 ROC1 | iYOL135C     | 0.19  | 1.66 | 0.72 |
| YOL134C | 0     | #N/A           | iYOL133W     | 0.04  | 0.85 | 0.39 |
| YOL135C | MED7  |                | 0 iYOL135C   | -0.91 | 1.66 | 0.72 |
| YOL136C | PFK27 | PFK-2          | iYOL136C     | 0.57  | 0.45 | 0.17 |
| YOL137W | 0     |                | 0 iYOL138C   | 1.10  | 3.14 | 0.97 |
| YOL138C | 0     | #N/A           | iYOL138C     | -1.01 | 3.14 | 0.97 |
| YOL139C | CDC33 | TIF45 eIF-4E   | iYOL139C     | -0.09 | 1.36 | 0.61 |
| YOL140W | ARG8  |                | 0 iYOL141W   | 1.30  | 0.42 | 0.15 |
| YOL141W | PPM2  |                | 0 iYOL142W   | #N/A  | 1.61 | 0.71 |
| YOL142W | RRP40 |                | 0 iYOL143C   | 0.05  | 3.38 | 0.98 |
| YOL143C | RIB4  |                | 0 iYOL143C   | -0.08 | 3.38 | 0.98 |
| YOL144W | NOP8  |                | 0 iYOL145C   | 0.17  | 3.37 | 0.98 |
| YOL145C | CTR9  | CDP1           | iYOL145C     | -0.90 | 3.37 | 0.98 |
| YOL146W | 0     |                | 0 iYOL147C   | #N/A  | 0.57 | 0.27 |
| YOL147C | PEX11 | PMP24 PMP27    | iYOL147C     | 0.54  | 0.57 | 0.27 |
| YOL148C | SPT20 | ADA5           | iYOL148C     | 0.05  | #N/A | #N/A |
| YOL149W | DCP1  |                | 0 iYOL150C   | -0.84 | 3.14 | 0.96 |
| YOL150C | 0     | #N/A           | iYOL150C     | -0.14 | 3.14 | 0.96 |
| YOL151W | GRE2  |                | 0 iYOL152W   | -0.27 | 1.20 | 0.55 |
| YOL152W | FRE7  |                | 0 iYOL153C-1 | #N/A  | 1.72 | 0.73 |
| YOL153C | 0     | #N/A           | iYOL153C-0   | 1.98  | 1.28 | 0.58 |
| YOL154W | 0     |                | 0 iYOL155C-1 | 1.10  | 1.37 | 0.61 |
| YOL155C | 0     | #N/A           | iYOL155C-0   | -0.98 | 0.42 | 0.15 |
| YOL156W | HXT11 | LGT3           | iYOL157C     | 0.82  | 1.43 | 0.65 |
| YOL157C | 0     | #N/A           | iYOL157C     | 1.80  | 1.43 | 0.65 |
| YOL158C | ENB1  | ARN4           | iYOL158C     | -0.13 | 1.17 | 0.53 |
| YOL159C | 0     | #N/A           | iYOL159C     | 1.16  | 2.22 | 0.86 |
| YOL160W | 0     | #N/A           | iYOL161C-1   | 3.05  | 1.00 | 0.45 |
| YOL161C | 0     | #N/A           | iYOL161C-0   | 1.72  | 0.64 | 0.29 |
| YOL162W | 0     | #N/A           | iYOL164W     | 4.59  | 1.29 | 0.59 |
| YOL163W | 0     | #N/A           | iYOL164W     | 2.99  | 1.29 | 0.59 |
| YOL164W | 0     | #N/A           | iYOLWtau1-   | 0.52  | #N/A | #N/A |
| YOL165C | AAD15 |                | 0 iYOL165C   | 0.78  | 1.41 | 0.64 |
| YOL166C | 0     | #N/A           | iYOL166C     | #N/A  | 0.58 | 0.25 |
| YOR001W | RRP6  |                | 0 iCEN15     | -0.31 | #N/A | #N/A |
| YOR002W | ALG6  |                | 0 iYOR001W   | 0.53  | 1.34 | 0.61 |
| YOR003W | YSP3  |                | 0 iYOR002W   | #N/A  | 1.00 | 0.45 |
| YOR004W | 0     | #N/A           | iYOR003W     | -1.16 | 2.04 | 0.82 |
| YOR005C | DNL4  | LIG4           | iYOR005C     | 1.48  | 1.03 | 0.47 |
| YOR006C | 0     | #N/A           | iYOR006C     | -0.31 | 1.44 | 0.63 |
| YOR007C | SGT2  |                | 0 iYOR007C   | 0.53  | 0.81 | 0.37 |
| YOR008C | SLG1  | HCS77 WSC1     | iYOR008C     | 1.19  | 1.01 | 0.47 |

|         |        |                 |      |            |          |       |      |      |
|---------|--------|-----------------|------|------------|----------|-------|------|------|
| YOR009W | TIR4   |                 | 0    | iYOR008C-  | 0.78     | 0.71  | 0.33 |      |
| YOR010C | TIR2   | SRP2            |      | iYOR010C-  | 1.25     | #N/A  | #N/A |      |
| YOR011W | AUS1   |                 | 0    | iYOR010C-  | 0.60     | 2.21  | 0.85 |      |
| YOR012W |        | 0               | #N/A | iYOLWdelta | 0.16     | 1.68  | 0.72 |      |
| YOR013W |        | 0               | #N/A | iYOLWdelta | -0.86    | 1.68  | 0.72 |      |
| YOR014W | RTS1   | SCS1            |      | iYOR013W   | 0.24     | 2.38  | 0.89 |      |
| YOR015W |        | 0               | #N/A | iYOR013W   | 0.17     | 2.38  | 0.89 |      |
| YOR016C | ERP4   |                 | 0    | iYOR016C   | -0.45    | 1.93  | 0.79 |      |
| YOR017W | PET127 |                 | 0    | iYOR016C   | 0.13     | 1.93  | 0.79 |      |
| YOR018W | ROD1   |                 | 0    | iYOR017W   | #N/A     | 2.01  | 0.82 |      |
| YOR019W |        | 0               | #N/A | iYOR018W   | 1.85     | 1.20  | 0.55 |      |
| YOR020C | HSP10  | CPN10           |      | iYOR020C-  | 0.28     | 1.54  | 0.69 |      |
| YOR021C |        | 0               | #N/A | iYOR021C   | -0.34    | 1.98  | 0.80 |      |
| YOR022C |        | 0               | #N/A | iYOR022C   | 0.14     | #N/A  | #N/A |      |
| YOR023C | AHC1   |                 | 0    | iYOR023C   | 0.12     | 1.76  | 0.74 |      |
| YOR024W |        | 0               | #N/A | iYOR023C   | #N/A     | 1.76  | 0.74 |      |
| YOR025W | HST3   |                 | 0    | iYOR023C   | -2.19    | 1.76  | 0.74 |      |
| YOR026W | BUB3   |                 | 0    | iYOR025W   | 0.54     | 1.08  | 0.49 |      |
| YOR027W | STI1   |                 | 0    | iYOR026W   | 0.18     | 0.83  | 0.38 |      |
| YOR028C | CIN5   | HAL6 YAP4       |      | iYOR028C   | #N/A     | #N/A  | #N/A |      |
| YOR029W |        | 0               | #N/A | iYOR028C   | #N/A     | #N/A  | #N/A |      |
| YOR030W | DFG16  | ECM41 ZRG11     |      | iYOR029W-  | 0.97     | 1.99  | 0.81 |      |
| YOR031W | CRS5   |                 | 0    | iYOR030W   | 0.63     | 0.46  | 0.19 |      |
| YOR032C | HMS1   |                 | 0    | iYOR032C   | 1.11     | 0.63  | 0.29 |      |
| YOR033C | EXO1   | DHS1            |      | iYOR033C   | -0.12    | 1.38  | 0.61 |      |
| YOR034C | AKR2   |                 | 0    | iYOR034C   | 0.10     | 1.30  | 0.58 |      |
| YOR035C | SHE4   | DIM1            |      | iYOR035C   | 0.07     | 2.81  | 0.94 |      |
| YOR036W | PEP12  | VPL6 VPS6 VPT13 |      | iYOR035C   | 0.85     | 2.81  | 0.94 |      |
| YOR037W | CYC2   |                 | 0    | iYOR036W   | #N/A     | 1.48  | 0.65 |      |
| YOR038C | HIR2   | SPT1            |      | iYOR038C   | -0.23    | #N/A  | #N/A |      |
| YOR039W | CKB2   |                 | 0    | iYOR038C   | 0.75     | #N/A  | #N/A |      |
| YOR040W | GLO4   |                 | 0    | iYOR039W   | 1.57     | 0.76  | 0.35 |      |
| YOR041C |        | 0               |      | 0          | iYOR042W | 0.49  | 0.12 |      |
| YOR042W |        | 0               |      | 0          | iYOR040W | -0.22 | 1.07 | 0.49 |
| YOR043W | WHI2   |                 | 0    | iSNR62     | 1.17     | 0.68  | 0.33 |      |
| YOR044W |        | 0               | #N/A | iYOR043W   | 1.87     | 1.32  | 0.60 |      |
| YOR045W | TOM6   | ISP6 MOM8B      |      | iYOR044W   | -0.17    | 1.37  | 0.61 |      |
| YOR046C | DBP5   | RAT8            |      | iYOR046C   | -0.22    | 1.31  | 0.59 |      |
| YOR047C | STD1   | MSN3 SFS3       |      | iYOR047C   | 0.25     | 0.94  | 0.45 |      |
| YOR048C | RAT1   | HKE1 TAP1 XRN2  |      | iYOR048C   | -1.14    | 2.14  | 0.85 |      |
| YOR049C |        | 0               |      | 0          | iYOR049C | 2.65  | 0.32 | 0.12 |
| YOR050C |        | 0               | #N/A | iYOR050C   | -0.01    | 0.45  | 0.20 |      |
| YOR051C |        | 0               | #N/A | iYOR051C   | -0.61    | 0.45  | 0.17 |      |
| YOR052C |        | 0               | #N/A | iYOR052C   | 1.18     | 1.47  | 0.66 |      |
| YOR053W |        | 0               | #N/A | iYOR052C   | 0.20     | 1.47  | 0.66 |      |
| YOR054C |        | 0               |      | 0          | iYOR055W | 0.20  | 1.26 | 0.57 |
| YOR055W |        | 0               | #N/A | iYOR052C   | #N/A     | 1.47  | 0.66 |      |
| YOR056C | NOB1   | YOR29-07        |      | iYOR056C   | -1.45    | 1.92  | 0.79 |      |
| YOR057W | SGT1   | YOR29-08        |      | iYOR056C   | 0.41     | 1.92  | 0.79 |      |
| YOR058C | ASE1   | YOR29-09        |      | iYOR058C-  | -0.73    | #N/A  | #N/A |      |
| YOR059C |        | 0               | #N/A | iYOR059C   | 1.19     | 0.24  | 0.04 |      |



|         |       |                           |          |              |       |      |      |
|---------|-------|---------------------------|----------|--------------|-------|------|------|
| YOR060C |       | 0                         | #N/A     | iYOR060C     | -1.40 | 1.16 | 0.54 |
| YOR061W | CKA2  | YOR29-12                  |          | iYOR060C     | 0.20  | 1.16 | 0.54 |
| YOR062C |       | 0                         | #N/A     | iYOR062C     | 2.03  | #N/A | #N/A |
| YOR063W | RPL3  | MAK8 TCM1 YOR29-12        |          | iYOR062C     | -1.59 | #N/A | #N/A |
| YOR064C | YNG1  | YOR29-15                  |          | iYOR064C     | 1.52  | 0.77 | 0.35 |
| YOR065W | CYT1  | CTC1 YOR29-16             |          | iYOR064C     | 1.61  | 0.77 | 0.35 |
| YOR066W |       | 0                         | #N/A     | iYOR065W     | -3.07 | #N/A | #N/A |
| YOR067C | ALG8  | YOR29-18                  |          | iYOR067C     | 0.53  | #N/A | #N/A |
| YOR068C |       | 0                         | YOR29-19 | iYOR068C     | 1.39  | 0.36 | 0.10 |
| YOR069W | VPS5  | GRD2 PEP10 VPT5 YOR29-19  |          | iYOR068C     | 0.73  | 0.36 | 0.10 |
| YOR070C | GYP1  | YOR29-21                  |          | iYOR070C     | 0.22  | 2.08 | 0.84 |
| YOR071C |       | 0                         | #N/A     | iYOR071C     | -0.23 | 0.93 | 0.44 |
| YOR072W |       | 0                         | #N/A     | iYOR071C     | #N/A  | 0.93 | 0.44 |
| YOR073W |       | 0                         |          | 0 itP(UGG)O2 | -1.22 | 2.72 | 0.94 |
| YOR074C | CDC21 | CRT9 TMP1 YOR29-21        |          | iYOR074C     | -0.43 | 2.26 | 0.86 |
| YOR075W | UFE1  | YOR29-26                  |          | iYOR074C     | 0.14  | 2.26 | 0.86 |
| YOR076C | SKI7  | YOR29-27                  |          | iYOR076C     | 0.18  | #N/A | #N/A |
| YOR077W | RTS2  | YOR29-28                  |          | iYOR076C     | #N/A  | #N/A | #N/A |
| YOR078W | BUD21 | UTP16 YOR29-29            |          | iYOR077W     | 0.11  | #N/A | #N/A |
| YOR079C | ATX2  | YOR29-30                  |          | iYOR079C     | 0.37  | 1.16 | 0.53 |
| YOR080W | DIA2  | YOR29-31                  |          | iYOR079C     | -0.44 | 1.16 | 0.53 |
| YOR081C |       | 0                         |          | 0 iYOR081C   | 0.35  | #N/A | #N/A |
| YOR082C |       | 0                         | #N/A     | iYOR083W     | #N/A  | #N/A | #N/A |
| YOR083W | WHI5  |                           |          | 0 iYOR081C   | #N/A  | #N/A | #N/A |
| YOR084W |       | 0                         | #N/A     | iYOR083W     | -0.12 | #N/A | #N/A |
| YOR085W | OST3  |                           |          | 0 iYOR084W   | -0.02 | 3.37 | 0.98 |
| YOR086C |       | 0                         |          | 0 iYOR086C   | 0.75  | 2.25 | 0.87 |
| YOR087W | YVC1  |                           |          | 0 itN(GUU)O2 | -0.38 | #N/A | #N/A |
| YOR088W |       | 0                         | #N/A     | itN(GUU)O2   | 0.96  | #N/A | #N/A |
| YOR089C | VPS21 | VPS12 VPT12 YPT2 YOR29-31 |          | iYOR089C     | 1.29  | 0.95 | 0.43 |
| YOR090C | PTC5  |                           |          | 0 iYOR090C   | 0.30  | 1.63 | 0.70 |
| YOR091W |       | 0                         | #N/A     | iYOR090C     | -1.56 | 1.63 | 0.70 |
| YOR092W | ECM3  | YOR3165W                  |          | iYOR091W     | 0.51  | #N/A | #N/A |
| YOR093C |       | 0                         | #N/A     | iYOR093C     | 0.07  | #N/A | #N/A |
| YOR094W | ARF3  | ARL2                      |          | iYOR093C     | 0.12  | #N/A | #N/A |
| YOR095C | RKI1  |                           |          | 0 iYOR095C   | -0.85 | 0.66 | 0.30 |
| YOR096W | RPS7A | RPS30                     |          | iYOR095C     | -0.85 | 0.66 | 0.30 |
| YOR097C |       | 0                         | #N/A     | iYOR097C     | 0.44  | 1.18 | 0.53 |
| YOR098C | NUP1  |                           |          | 0 iYOR098C   | -0.82 | 1.84 | 0.78 |
| YOR099W | KTR1  |                           |          | 0 iYOR098C   | 0.20  | 1.84 | 0.78 |
| YOR100C | CRC1  |                           |          | 0 iYOR100C   | 3.65  | 1.01 | 0.46 |
| YOR101W | RAS1  |                           |          | 0 iYOR100C   | -1.81 | 1.01 | 0.46 |
| YOR102W |       | 0                         | #N/A     | iYOR101W     | 0.90  | #N/A | #N/A |
| YOR103C | OST2  |                           |          | 0 iYOR103C   | 0.88  | 1.25 | 0.58 |
| YOR104W | PIN2  |                           |          | 0 iYOR103C   | 0.40  | 1.25 | 0.58 |
| YOR105W |       | 0                         | #N/A     | iYOR103C     | -1.00 | 1.25 | 0.58 |
| YOR106W | VAM3  | PTH1                      |          | iYOR105W     | 0.06  | #N/A | #N/A |
| YOR107W | RGS2  |                           |          | 0 iYOR106W   | 1.83  | #N/A | #N/A |
| YOR108W |       | 0                         |          | 0 iYOR107W   | 0.84  | #N/A | #N/A |
| YOR109W | INP53 | SJL3 SOP2                 |          | iYOR108W     | -1.03 | 1.14 | 0.51 |
| YOR110W | TFC7  |                           |          | 0 iYOR109W   | -0.17 | #N/A | #N/A |

|         |        |                  |            |       |      |      |
|---------|--------|------------------|------------|-------|------|------|
| YOR111W | 0      | #N/A             | iYOR110W   | 0.53  | #N/A | #N/A |
| YOR112W | 0      | #N/A             | iYOR111W   | -0.82 | #N/A | #N/A |
| YOR113W | AZF1   |                  | 0 iYOR112W | 0.70  | 1.81 | 0.76 |
| YOR114W | 0      | #N/A             | iYOR113W   | #N/A  | #N/A | #N/A |
| YOR115C | TRS33  |                  | 0 iYOR115C | 0.68  | #N/A | #N/A |
| YOR116C | RPO31  | RPC1 RPC160      | iYOR116C   | -0.71 | 2.02 | 0.82 |
| YOR117W | RPT5   | YTA1             | iYOR116C   | 0.25  | 2.02 | 0.82 |
| YOR118W | 0      | #N/A             | iYOR117W   | 0.00  | 1.98 | 0.80 |
| YOR119C | RIO1   | RRP10            | iYOR119C   | -0.79 | 1.36 | 0.60 |
| YOR120W | GCY1   | GCY              | iYOR119C   | 1.88  | 1.36 | 0.60 |
| YOR121C | 0      | #N/A             | iYOR121C   | 1.67  | 0.12 | 0.02 |
| YOR122C | PFY1   | PRF1             | iYOR122C   | 0.92  | #N/A | #N/A |
| YOR123C | LEO1   |                  | 0 iYOR123C | -0.33 | 2.32 | 0.88 |
| YOR124C | UBP2   |                  | 0 iYOR124C | #N/A  | #N/A | #N/A |
| YOR125C | CAT5   | COQ7             | iYOR125C   | -0.29 | 0.29 | 0.10 |
| YOR126C | IAH1   |                  | 0 iYOR126C | -0.83 | 1.25 | 0.58 |
| YOR127W | RGA1   | DBM1 THE1        | iYOR126C   | 0.05  | 1.25 | 0.58 |
| YOR128C | ADE2   |                  | 0 iYOR128C | -0.40 | 0.96 | 0.45 |
| YOR129C | 0      | #N/A             | iYOR129C   | 0.24  | 2.40 | 0.90 |
| YOR130C | ORT1   | ARG11            | iYOR130C   | 1.77  | 1.41 | 0.63 |
| YOR131C | 0      | #N/A             | iYOR131C   | 0.11  | 1.99 | 0.82 |
| YOR132W | VPS17  | PEP21            | iYOR131C   | 0.55  | 1.99 | 0.82 |
| YOR133W | EFT1   |                  | 0 iYOR132W | -0.68 | 1.31 | 0.59 |
| YOR134W | BAG7   |                  | 0 iYOR133W | 2.04  | 1.03 | 0.47 |
| YOR135C | 0      | #N/A             | iYOR136W   | 0.44  | 0.54 | 0.22 |
| YOR136W | IDH2   |                  | 0 iYOR134W | 0.23  | 1.77 | 0.76 |
| YOR137C | SIA1   |                  | 0 iYOR137C | 1.52  | 0.88 | 0.41 |
| YOR138C | 0      |                  | 0 iYOR138C | -0.04 | 1.89 | 0.78 |
| YOR139C | 0      | #N/A             | iYOR140W   | #N/A  | 0.44 | 0.16 |
| YOR140W | SFL1   |                  | 0 iYOR138C | 0.02  | 1.89 | 0.78 |
| YOR141C | ARP8   |                  | 0 iYOR141C | #N/A  | 2.77 | 0.95 |
| YOR142W | LSC1   |                  | 0 iYOR141C | 0.82  | 2.77 | 0.95 |
| YOR143C | THI80  |                  | 0 iYOR143C | #N/A  | 2.13 | 0.85 |
| YOR144C | ELG1   | RTT110           | iYOR144C   | -0.96 | 1.36 | 0.61 |
| YOR145C | 0      | RRP20            | iYOR146W   | 0.02  | 0.86 | 0.39 |
| YOR146W | 0      | #N/A             | iYOR144C   | 0.29  | 1.36 | 0.61 |
| YOR147W | 0      |                  | 0 iYOR146W | 0.89  | 0.86 | 0.39 |
| YOR148C | SPP2   |                  | 0 iYOR148C | 0.91  | 2.58 | 0.92 |
| YOR149C | SMP3   | LAS2 SAP2        | iYOR149C   | 0.28  | 3.08 | 0.97 |
| YOR150W | MRPL23 |                  | 0 iYOR149C | 0.61  | 3.08 | 0.97 |
| YOR151C | RPB2   | RPB150 RPO22 SIT | iYOR151C   | -0.59 | 1.84 | 0.78 |
| YOR152C | 0      | #N/A             | iYOR152C-  | 1.22  | 0.94 | 0.45 |
| YOR153W | PDR5   | LEM1 STS1 YDR1   | iYOR152C-  | -1.22 | #N/A | #N/A |
| YOR154W | 0      | #N/A             | iYOR153W   | 0.07  | 0.93 | 0.42 |
| YOR155C | 0      |                  | 0 iYOR155C | 0.73  | 1.75 | 0.75 |
| YOR156C | NFI1   | SIZ2             | iYOR156C   | 0.04  | 1.58 | 0.69 |
| YOR157C | PUP1   |                  | 0 iYOR157C | 0.30  | 1.84 | 0.78 |
| YOR158W | PET123 |                  | 0 iYOR157C | 0.80  | 1.84 | 0.78 |
| YOR159C | SME1   | Sm E             | iYOR159C   | -0.93 | 2.90 | 0.95 |
| YOR160W | MTR10  | KAP111           | iYOR159C   | 0.37  | 2.90 | 0.95 |
| YOR161C | 0      |                  | 0 iYOR161C | 0.49  | 0.55 | 0.25 |

|         |        |                 |      |          |            |       |      |
|---------|--------|-----------------|------|----------|------------|-------|------|
| YOR162C | YRR1   |                 | 0    | iYOR162C | #N/A       | 2.26  | 0.88 |
| YOR163W | DDP1   |                 |      | 0        | iYOR162C   | 0.63  | 0.88 |
| YOR164C |        | 0               | #N/A |          | iYOR164C   | 0.96  | 0.88 |
| YOR165W |        | 0               |      | 0        | iYOR164C   | -0.48 | 0.88 |
| YOR166C |        | 0               | #N/A |          | iYOR166C   | 0.48  | 0.50 |
| YOR167C | RPS28A | RPS33A          |      |          | iYOR167C   | -0.09 | 0.51 |
| YOR168W | GLN4   |                 |      | 0        | iYOR167C   | -0.59 | 0.51 |
| YOR169C |        | 0               | #N/A |          | iYOR171C   | -0.40 | 0.98 |
| YOR170W |        | 0               | #N/A |          | iYOR167C   | 0.83  | 0.51 |
| YOR171C | LCB4   |                 |      | 0        | iYOR171C   | 0.66  | 0.98 |
| YOR172W |        | 0               |      | 0        | iYOR171C   | 0.18  | 0.98 |
| YOR173W |        | 0               |      | 0        | iYOR172W   | 3.26  | 0.40 |
| YOR174W | MED4   |                 |      | 0        | iYOR173W   | 0.03  | 0.90 |
| YOR175C |        | 0               | #N/A |          | iYOR175C   | -0.33 | 0.94 |
| YOR176W | HEM15  |                 |      | 0        | iYOR175C   | 0.09  | 0.94 |
| YOR177C | MPC54  |                 |      | 0        | iYOR177C   | #N/A  | #N/A |
| YOR178C | GAC1   |                 |      | 0        | iYOR178C-  | #N/A  | 0.40 |
| YOR179C |        | 0               |      | 0        | iYOR179C-  | -0.66 | 0.77 |
| YOR180C | DCI1   | ECI2            |      |          | iYOR180C   | 1.05  | #N/A |
| YOR181W | LAS17  | BEE1            |      |          | iYOR180C   | -1.09 | #N/A |
| YOR182C | RPS30B |                 |      | 0        | iYOR182C   | -0.06 | 0.02 |
| YOR183W | FYV12  |                 |      | 0        | iYOR182C   | #N/A  | 0.02 |
| YOR184W | SER1   | ADE9            |      |          | iYOR183W   | -0.10 | #N/A |
| YOR185C | GSP2   | CNR2            |      |          | iYOR185C   | 1.80  | 0.91 |
| YOR186W |        | 0               | #N/A |          | iYOR185C   | 4.75  | 0.91 |
| YOR187W | TUF1   |                 |      | 0        | iYOR186W   | 0.48  | 0.40 |
| YOR188W | MSB1   |                 |      | 0        | iYOR187W   | -1.65 | 0.67 |
| YOR189W | IES4   |                 |      | 0        | iYOR188W   | #N/A  | 0.67 |
| YOR190W | SPR1   | SSG1            |      |          | iYOR189W   | 2.61  | 0.73 |
| YOR191W | RIS1   | DIS1            |      |          | iYOR190W   | -1.26 | 0.83 |
| YOR192C |        | 0               | #N/A |          | iYOR192C-  | 0.39  | 0.82 |
| YOR193W |        | 0               |      | 0        | itM(CAU)O1 | 0.64  | 0.38 |
| YOR194C | TOA1   |                 |      | 0        | iYOR194C   | -0.53 | 0.98 |
| YOR195W | SLK19  |                 |      | 0        | iYOR194C   | -1.04 | 0.98 |
| YOR196C | LIP5   |                 |      | 0        | iYOR196C   | 0.81  | 0.94 |
| YOR197W | MCA1   | YCA1            |      |          | iYOR196C   | 0.33  | 0.94 |
| YOR198C | BFR1   |                 |      | 0        | iYOR198C   | -0.94 | 0.44 |
| YOR199W |        | 0               | #N/A |          | iYOR198C   | 1.02  | 0.44 |
| YOR200W |        | 0               | #N/A |          | iYOR198C   | 0.47  | 0.44 |
| YOR201C | PET56  |                 |      | 0        | iYOR201C   | 0.38  | 0.30 |
| YOR202W | HIS3   | HIS10           |      |          | iYOR201C   | 0.18  | 0.30 |
| YOR203W |        | 0               | #N/A |          | iYOR201C   | 0.38  | 0.30 |
| YOR204W | DED1   | SPP81           |      |          | iYOR201C   | -0.04 | 0.30 |
| YOR205C |        | 0               |      | 0        | iYOR205C   | 0.01  | #N/A |
| YOR206W | NOC2   |                 |      | 0        | iYOR205C   | -1.03 | #N/A |
| YOR207C | RET1   | PDS2 RPC128 RPC |      |          | iYOR207C   | 0.23  | 0.97 |
| YOR208W | PTP2   |                 |      | 0        | iYOR207C   | 1.39  | 0.97 |
| YOR209C | NPT1   |                 |      | 0        | iYOR209C   | 0.60  | 0.74 |
| YOR210W | RPB10  |                 |      | 0        | iYOR209C   | 0.47  | 0.74 |
| YOR211C | MGM1   | MNA1            |      |          | iYOR211C   | 0.11  | 0.37 |
| YOR212W | STE4   | HMD2            |      |          | iYOR211C   | -0.54 | 0.37 |

|         |        |                 |      |            |       |      |      |
|---------|--------|-----------------|------|------------|-------|------|------|
| YOR213C | SAS5   |                 | 0    | iYOR213C   | 1.23  | 2.31 | 0.88 |
| YOR214C |        | 0               | #N/A | iYOR214C   | 9.95  | 0.52 | 0.23 |
| YOR215C |        | 0               | #N/A | iYOR215C   | 1.12  | 0.93 | 0.43 |
| YOR216C | RUD3   | GRP1            |      | iYOR216C   | -1.62 | 2.08 | 0.83 |
| YOR217W | RFC1   | CDC44           |      | iYOR216C   | -0.96 | 2.08 | 0.83 |
| YOR218C |        | 0               | #N/A | iYOR218C   | -1.01 | 0.23 | 0.03 |
| YOR219C | STE13  | YCI1            |      | iYOR219C   | 1.93  | 1.78 | 0.76 |
| YOR220W |        | 0               | #N/A | iYOR219C   | 2.42  | 1.78 | 0.76 |
| YOR221C | MCT1   |                 |      | 0 iYOR221C | 0.01  | 0.65 | 0.29 |
| YOR222W | ODC2   |                 |      | 0 iYOR221C | 2.08  | 0.65 | 0.29 |
| YOR223W |        | 0               | #N/A | iYOR222W   | 0.43  | 1.34 | 0.60 |
| YOR224C | RPB8   |                 |      | 0 iYOR224C | -0.63 | #N/A | #N/A |
| YOR225W |        | 0               | #N/A | iYOR224C   | -0.12 | #N/A | #N/A |
| YOR226C | ISU2   | NUA2            |      | iYOR226C   | -0.23 | 1.20 | 0.55 |
| YOR227W |        | 0               | #N/A | iYOR226C   | 0.97  | 1.20 | 0.55 |
| YOR228C |        | 0               | #N/A | iYOR228C   | 2.96  | 2.26 | 0.88 |
| YOR229W | WTM2   |                 |      | 0 iYOR228C | -0.21 | 2.26 | 0.88 |
| YOR230W | WTM1   |                 |      | 0 iYOR229W | 1.69  | 0.42 | 0.16 |
| YOR231W | MKK1   | SSP32           |      | iYOR230W   | 0.19  | 2.62 | 0.93 |
| YOR232W | MGE1   | YGE1            |      | iYOR231W   | -1.07 | 2.86 | 0.95 |
| YOR233W | KIN4   | KIN3 KIN31      |      | iYOR232W   | -0.48 | 1.40 | 0.64 |
| YOR234C | RPL33B | RPL37B          |      | iYOR234C   | -0.60 | 0.13 | 0.01 |
| YOR235W |        | 0               | #N/A | iYOR234C   | #N/A  | 0.13 | 0.01 |
| YOR236W | DFR1   |                 |      | 0 iYOR235W | -2.21 | 0.64 | 0.28 |
| YOR237W | HES1   | OSH5            |      | iYOR236W   | 1.18  | 3.34 | 0.98 |
| YOR238W |        | 0               | #N/A | iYOR237W   | 0.49  | 0.80 | 0.37 |
| YOR239W | ABP140 |                 |      | 0 iYOR238W | 0.29  | 1.25 | 0.57 |
| YOR240W | #N/A   |                 | #N/A | iYOR238W   | -0.64 | 1.25 | 0.57 |
| YOR241W | MET7   | MET23           |      | iYOR240W   | #N/A  | 1.42 | 0.64 |
| YOR242C | SSP2   |                 |      | 0 iYOR242C | 0.95  | 0.40 | 0.18 |
| YOR243C |        | 0               |      | 0 iYOR243C | -0.73 | 2.74 | 0.93 |
| YOR244W | ESA1   | TAS1            |      | iYOR243C   | 0.19  | 2.74 | 0.93 |
| YOR245C | DGA1   |                 |      | 0 iYOR245C | 1.44  | 1.70 | 0.72 |
| YOR246C |        | 0               | #N/A | iYOR246C   | -0.22 | 1.15 | 0.53 |
| YOR247W | SRL1   |                 |      | 0 iYOR246C | -0.10 | 1.15 | 0.53 |
| YOR248W | TOS11  |                 | #N/A | iYOR246C   | -0.04 | 1.15 | 0.53 |
| YOR249C | APC5   | RMC1            |      | iYOR249C   | 0.74  | 1.79 | 0.75 |
| YOR250C | CLP1   |                 |      | 0 iYOR250C | 0.15  | 2.10 | 0.84 |
| YOR251C |        | 0               | #N/A | iYOR251C   | 0.58  | #N/A | #N/A |
| YOR252W |        | 0               | #N/A | iYOR251C   | -0.55 | #N/A | #N/A |
| YOR253W | ARD2   | ARD2 ROG2       |      | iYOR252W   | 0.02  | 2.24 | 0.86 |
| YOR254C | SEC63  | PTL1            |      | iYOR254C   | 0.75  | 2.44 | 0.91 |
| YOR255W |        | 0               |      | 0 iYOR254C | #N/A  | 2.44 | 0.91 |
| YOR256C |        | 0               | #N/A | iYOR256C   | 1.21  | 1.91 | 0.79 |
| YOR257W | CDC31  | DSK1            |      | iYOR256C   | 0.80  | 1.91 | 0.79 |
| YOR258W | HNT3   |                 |      | 0 iYOR257W | 1.67  | 1.43 | 0.64 |
| YOR259C | RPT4   | CRL13 PCS1 SUG2 |      | iYOR259C   | 0.42  | #N/A | #N/A |
| YOR260W | GCD1   | TRA3            |      | iYOR259C   | -0.19 | #N/A | #N/A |
| YOR261C | RPN8   |                 |      | 0 iYOR261C | 0.64  | 2.14 | 0.84 |
| YOR262W |        | 0               | #N/A | iYOR261C   | 0.00  | 2.14 | 0.84 |
| YOR263C |        | 0               | #N/A | iYOR264W   | #N/A  | 1.87 | 0.79 |

|           |        |                  |      |            |       |      |      |
|-----------|--------|------------------|------|------------|-------|------|------|
| YOR264W   | DSE3   |                  | 0    | iYOR262W   | -0.88 | 2.02 | 0.81 |
| YOR265W   | RBL2   |                  | 0    | iYOR264W   | 0.63  | 1.87 | 0.79 |
| YOR266W   | PNT1   |                  | 0    | iYOR265W   | 1.23  | 1.44 | 0.64 |
| YOR267C   |        | 0                | 0    | iYOR267C   | 0.23  | 0.99 | 0.45 |
| YOR268C   |        | 0                | #N/A | iYOR268C   | #N/A  | 1.73 | 0.73 |
| YOR269W   | PAC1   |                  | 0    | iYOR268C   | 0.79  | 1.73 | 0.73 |
| YOR270C   | VPH1   |                  | 0    | iYOR270C   | 0.60  | 1.53 | 0.67 |
| YOR271C   |        | 0                | #N/A | iYOR271C   | -1.16 | 0.42 | 0.19 |
| YOR272W   | YTM1   |                  | 0    | iSNR8      | -1.19 | 2.83 | 0.95 |
| YOR273C   | TPO4   |                  | 0    | iYOR273C   | 3.22  | 0.89 | 0.43 |
| YOR274W   | MOD5   |                  | 0    | iYOR273C   | 0.26  | 0.89 | 0.43 |
| YOR275C   | RIM20  |                  | 0    | iYOR275C   | 0.73  | 2.17 | 0.86 |
| YOR276W   | CAF20  | CAF2 CAP20       |      | iYOR275C   | 0.30  | 2.17 | 0.86 |
| YOR277C   |        | 0                | #N/A | iYOR277C   | 0.34  | 0.59 | 0.25 |
| YOR278W   | HEM4   | SLU2             |      | iYOR277C   | -0.08 | 0.59 | 0.25 |
| YOR279C   | RFM1   |                  | 0    | iYOR279C   | -0.09 | 2.13 | 0.85 |
| YOR280C   | FSH3   |                  | 0    | iYOR280C   | -0.04 | 1.17 | 0.53 |
| YOR281C   | PLP2   |                  | 0    | iYOR282W   | -0.14 | 1.35 | 0.62 |
| YOR282W   |        | 0                | #N/A | iYOR280C   | #N/A  | 1.17 | 0.53 |
| YOR283W   |        | 0                | #N/A | iYOR282W   | 0.53  | 1.35 | 0.62 |
| YOR284W   |        | 0                |      | iYOR283W   | -0.18 | 1.36 | 0.62 |
| YOR285W   |        | 0                | #N/A | iYOR284W   | 0.95  | 2.68 | 0.94 |
| YOR286W   |        | 0                |      | iYOR285W   | 0.50  | #N/A | #N/A |
| YOR287C   |        | 0                | #N/A | iYOR287C   | -0.02 | 1.70 | 0.72 |
| YOR288C   | MPD1   |                  | 0    | iYOR288C   | 1.39  | 2.50 | 0.91 |
| YOR289W   |        | 0                | #N/A | iYOR288C   | 2.79  | 2.50 | 0.91 |
| YOR290C   | SNF2   | GAM1 HAF1 SWI2 T |      | iYOR290C   | -1.81 | 2.08 | 0.84 |
| YOR291W   |        | 0                | #N/A | iYOR290C   | #N/A  | 2.08 | 0.84 |
| YOR292C   |        | 0                | #N/A | iYOR292C   | 1.99  | 0.65 | 0.30 |
| YOR293W   | RPS10A |                  | 0    | iYOR292C   | -1.02 | 0.65 | 0.30 |
| YOR294W   | RRS1   |                  | 0    | iYOR293W   | -1.49 | 1.92 | 0.80 |
| YOR295W   | UAF30  |                  | 0    | iYOR294W   | -0.32 | 0.82 | 0.38 |
| YOR296W   |        | 0                | #N/A | iYOR295W   | -0.80 | 1.58 | 0.70 |
| YOR297C   | TIM18  |                  | 0    | iYOR297C   | 0.25  | 2.04 | 0.83 |
| YOR298W   |        | 0                | #N/A | iYOR297C   | 3.08  | 2.04 | 0.83 |
| YOR299W   | BUD7   |                  | 0    | iYOR298C-1 | 0.19  | 0.62 | 0.28 |
| YOR300W   |        | 0                | #N/A | iYOR298C-1 | -0.10 | 0.62 | 0.28 |
| YOR301W   | RAX1   |                  | 0    | iYOR300W   | -1.04 | 1.50 | 0.66 |
| YOR302W   |        | 0                | #N/A | iYOR301W   | #N/A  | 0.18 | 0.02 |
| YOR303W   | CPA1   |                  | 0    | iYOR301W   | 1.01  | 0.18 | 0.02 |
| YOR304C-A |        | 0                | #N/A | iYOR304C-1 | #N/A  | #N/A | #N/A |
| YOR304W   | ISW2   |                  | 0    | iYOR303W   | -0.58 | #N/A | #N/A |
| YOR305W   |        | 0                | #N/A | iYOR304C-1 | 0.78  | #N/A | #N/A |
| YOR306C   | MCH5   |                  | 0    | iYOR306C   | -0.67 | 0.53 | 0.23 |
| YOR307C   | SLY41  |                  | 0    | iYOR307C   | 0.44  | 1.32 | 0.59 |
| YOR308C   | SNU66  |                  | 0    | iYOR308C   | -1.04 | #N/A | #N/A |
| YOR309C   |        | 0                | #N/A | iYOR310C   | -0.58 | 1.35 | 0.60 |
| YOR310C   | NOP58  | NOP5             |      | iYOR310C   | -0.93 | 1.35 | 0.60 |
| YOR311C   | HSD1   |                  | 0    | iYOR311C   | 1.13  | 1.87 | 0.77 |
| YOR312C   | RPL20B | RPL18A1          |      | iYOR312C   | -0.80 | 0.31 | 0.08 |
| YOR313C   | SPS4   |                  | 0    | iYOR313C   | #N/A  | 0.17 | 0.04 |



|         |        |             |              |       |      |      |
|---------|--------|-------------|--------------|-------|------|------|
| YOR314W | 0      | #N/A        | iYOR313C     | #N/A  | 0.17 | 0.04 |
| YOR315W | 0      | #N/A        | iYOR314W     | -4.32 | 0.60 | 0.28 |
| YOR316C | COT1   |             | 0 iYOR316C-  | 0.13  | 1.17 | 0.53 |
| YOR317W | FAA1   |             | 0 iYOR316C-  | 1.50  | 0.27 | 0.06 |
| YOR318C | 0      | #N/A        | iYOR318C     | 3.06  | 2.54 | 0.92 |
| YOR319W | HSH49  |             | 0 iYOR318C   | 0.56  | 2.54 | 0.92 |
| YOR320C | 0      |             | 0 iYOR320C   | -0.63 | 2.15 | 0.84 |
| YOR321W | PMT3   |             | 0 iYOR320C   | 0.11  | 2.15 | 0.84 |
| YOR322C | 0      | #N/A        | iYOR322C     | -0.24 | 2.43 | 0.90 |
| YOR323C | PRO2   |             | 0 iYOR323C   | 0.06  | 1.58 | 0.70 |
| YOR324C | 0      |             | 0 iYOR325W   | -1.19 | 2.01 | 0.81 |
| YOR325W | 0      | #N/A        | iYOR323C     | #N/A  | 1.58 | 0.70 |
| YOR326W | MYO2   | CDC66       | iYOR325W     | -0.86 | 2.01 | 0.81 |
| YOR327C | SNC2   |             | 0 iYOR327C   | 0.13  | 1.02 | 0.48 |
| YOR328W | PDR10  |             | 0 iYOR327C   | 1.13  | 1.02 | 0.48 |
| YOR329C | SCD5   | FTB1        | iYOR329C     | 0.40  | 2.73 | 0.93 |
| YOR330C | MIP1   |             | 0 iYOR330C   | -0.07 | 3.34 | 0.98 |
| YOR331C | 0      | #N/A        | iYOR332W     | -0.48 | #N/A | #N/A |
| YOR332W | VMA4   |             | 0 iYOR330C   | -0.46 | 3.34 | 0.98 |
| YOR333C | 0      | #N/A        | iYOR334W     | #N/A  | 0.50 | 0.20 |
| YOR334W | MRS2   |             | 0 iYOR332W   | #N/A  | #N/A | #N/A |
| YOR335C | ALA1   | CDC64       | iYOR335C     | -0.92 | 2.03 | 0.82 |
| YOR336W | KRE5   |             | 0 iYOR335C   | -0.24 | 2.03 | 0.82 |
| YOR337W | TEA1   |             | 0 iYOR336W   | -0.55 | 1.37 | 0.61 |
| YOR338W | 0      | #N/A        | iYOR337W     | 0.46  | 0.36 | 0.15 |
| YOR339C | UBC11  |             | 0 iYOR339C   | 2.46  | 0.93 | 0.43 |
| YOR340C | RPA43  |             | 0 iYOR340C   | -1.06 | 1.16 | 0.54 |
| YOR341W | RPA190 | RRN1        | iYOR340C     | -0.92 | 1.16 | 0.54 |
| YOR342C | 0      | #N/A        | iYOR342C     | #N/A  | 0.28 | 0.06 |
| YOR343C | 0      | #N/A        | iYOR343C     | #N/A  | 1.14 | 0.53 |
| YOR344C | TYE7   | SGC1        | iYOR344C-    | -2.61 | #N/A | #N/A |
| YOR345C | 0      | #N/A        | iYOR346W     | #N/A  | #N/A | #N/A |
| YOR346W | REV1   |             | 0 itP(UGG)O3 | 0.68  | #N/A | #N/A |
| YOR347C | PYK2   |             | 0 iYOR347C   | #N/A  | 1.96 | 0.80 |
| YOR348C | PUT4   |             | 0 iYOR348C   | 3.85  | 0.45 | 0.17 |
| YOR349W | CIN1   |             | 0 iYOR348C   | 0.43  | 0.45 | 0.17 |
| YOR350C | MNE1   |             | 0 iYOR350C   | 0.12  | 2.14 | 0.85 |
| YOR351C | MEK1   | MRE4        | iYOR351C     | #N/A  | 1.75 | 0.74 |
| YOR352W | 0      | #N/A        | iYOR351C     | 0.35  | 1.75 | 0.74 |
| YOR353C | 0      |             | 0 iYOR353C   | 0.49  | 2.03 | 0.83 |
| YOR354C | MSC6   |             | 0 iYOR354C-  | 0.29  | #N/A | #N/A |
| YOR355W | GDS1   |             | 0 iYOR354C-  | -1.39 | 0.40 | 0.14 |
| YOR356W | 0      | #N/A        | iYOR355W     | 1.00  | 0.62 | 0.27 |
| YOR357C | GRD19  | SNX3        | iYOR357C     | 0.61  | 2.73 | 0.93 |
| YOR358W | HAP5   |             | 0 iYOR357C   | -0.08 | 2.73 | 0.93 |
| YOR359W | VTS1   |             | 0 iYOR358W   | -1.10 | 1.54 | 0.69 |
| YOR360C | PDE2   | SRA5        | iYOR360C     | 0.55  | 0.89 | 0.41 |
| YOR361C | PRT1   | CDC63 DNA26 | iYOR361C     | -0.53 | 0.70 | 0.32 |
| YOR362C | PRE10  |             | 0 iYOR362C   | -0.04 | #N/A | #N/A |
| YOR363C | PIP2   | OAF2        | iYOR363C     | 0.51  | #N/A | #N/A |
| YOR364W | 0      | #N/A        | iYOR363C     | #N/A  | #N/A | #N/A |

|         |       |                  |             |       |      |      |
|---------|-------|------------------|-------------|-------|------|------|
| YOR365C | 0     | #N/A             | iYOR366W    | 2.00  | 0.86 | 0.41 |
| YOR366W | 0     | #N/A             | iYOR363C    | 2.37  | #N/A | #N/A |
| YOR367W | SCP1  |                  | 0 iYOR366W  | -0.22 | 0.86 | 0.41 |
| YOR368W | RAD17 |                  | 0 iYOR367W  | #N/A  | #N/A | #N/A |
| YOR369C | RPS12 |                  | 0 iYOR369C  | -0.59 | 0.30 | 0.10 |
| YOR370C | MRS6  | MSI4             | iYOR370C    | 0.20  | 0.62 | 0.27 |
| YOR371C | KRH2  | KRH2             | iYOR371C    | 0.20  | 2.25 | 0.87 |
| YOR372C | NDD1  |                  | 0 iYOR372C  | -1.57 | 3.26 | 0.98 |
| YOR373W | NUD1  |                  | 0 iYOR372C  | -0.19 | 3.26 | 0.98 |
| YOR374W | ALD4  | ALD7             | iYOR373W    | -0.83 | 1.84 | 0.77 |
| YOR375C | GDH1  | GDH-A GDH-A URE1 | iYOR375C    | -0.06 | 0.24 | 0.04 |
| YOR376W | 0     | #N/A             | iYOR375C    | #N/A  | 0.24 | 0.04 |
| YOR377W | ATF1  |                  | 0 iYOR376W- | 1.16  | 0.90 | 0.42 |
| YOR378W | 0     | #N/A             | iYOR377W-   | -0.23 | 1.26 | 0.57 |
| YOR379C | 0     | #N/A             | iYOR379C    | #N/A  | #N/A | #N/A |
| YOR380W | RDR1  |                  | 0 iYOR379C  | #N/A  | #N/A | #N/A |
| YOR381W | FRE3  |                  | 0 iYOR380W- | 0.70  | 1.43 | 0.65 |
| YOR382W | FIT2  |                  | 0 iYOR381W- | -1.25 | 2.50 | 0.91 |
| YOR383C | FIT3  |                  | 0 iYOR383C  | -0.65 | 0.37 | 0.12 |
| YOR384W | FRE5  |                  | 0 iYOR383C  | 0.36  | 0.37 | 0.12 |
| YOR385W | 0     | #N/A             | iYOR384W    | 2.29  | 1.39 | 0.63 |
| YOR386W | PHR1  |                  | 0 iYOR385W  | 3.01  | 1.15 | 0.52 |
| YOR387C | 0     | #N/A             | iYOR387C-   | 2.00  | 1.93 | 0.80 |
| YOR388C | FDH1  |                  | 0 iYOR388C  | 0.73  | 1.09 | 0.50 |
| YOR389W | 0     | #N/A             | iYOR388C    | 0.95  | 1.09 | 0.50 |
| YOR390W | 0     | #N/A             | iYOR389W    | 0.82  | #N/A | #N/A |
| YOR391C | 0     |                  | 0 iYOR392W  | 3.26  | 1.79 | 0.77 |
| YOR392W | 0     | #N/A             | iYOR390W    | #N/A  | 1.26 | 0.57 |
| YOR393W | ERR1  |                  | 0 iYOR392W  | #N/A  | 1.79 | 0.77 |
| YOR394W | 0     | #N/A             | iYOR393W    | 1.68  | 0.72 | 0.33 |
| YPL001W | HAT1  |                  | 0 iYPL002C  | 0.70  | 2.57 | 0.92 |
| YPL002C | SNF8  | VPS22            | iYPL002C    | 0.05  | 2.57 | 0.92 |
| YPL003W | ULA1  | ENR2             | iYPL004C    | 1.36  | 0.89 | 0.42 |
| YPL004C | 0     |                  | 0 iYPL004C  | 1.29  | 0.89 | 0.42 |
| YPL005W | 0     |                  | 0 iYPL006W  | 1.68  | 1.71 | 0.73 |
| YPL006W | NCR1  |                  | 0 iYPL007C  | 0.64  | 2.20 | 0.87 |
| YPL007C | TFC8  |                  | 0 iYPL007C  | #N/A  | 2.20 | 0.87 |
| YPL008W | CHL1  | CTF1 LPA9        | iYPL009C    | 0.88  | 1.76 | 0.74 |
| YPL009C | 0     | #N/A             | iYPL009C    | -0.39 | 1.76 | 0.74 |
| YPL010W | RET3  |                  | 0 iYPL011C  | -0.29 | 3.61 | 0.98 |
| YPL011C | TAF3  | TAF47 TafII47    | iYPL011C    | #N/A  | 3.61 | 0.98 |
| YPL012W | RRP12 |                  | 0 iYPL013C  | -1.11 | 1.59 | 0.70 |
| YPL013C | 0     |                  | 0 iYPL013C  | 0.61  | 1.59 | 0.70 |
| YPL014W | 0     | #N/A             | iYPL015C    | 0.53  | 0.88 | 0.40 |
| YPL015C | HST2  |                  | 0 iYPL015C  | 1.11  | 0.88 | 0.40 |
| YPL016W | SWI1  | ADR6 GAM3 LPA1   | iYPL017C    | #N/A  | #N/A | #N/A |
| YPL017C | 0     | #N/A             | iYPL017C    | 0.05  | #N/A | #N/A |
| YPL018W | CTF19 | MCM18            | iYPL019C    | 2.66  | 2.05 | 0.82 |
| YPL019C | VTC3  | PHM2             | iYPL019C    | -0.72 | 2.05 | 0.82 |
| YPL020C | ULP1  |                  | 0 iYPL020C  | 0.66  | 2.40 | 0.90 |
| YPL021W | ECM23 | SRD2             | iYPL022W    | #N/A  | #N/A | #N/A |

|         |       |                  |              |       |      |      |
|---------|-------|------------------|--------------|-------|------|------|
| YPL022W | RAD1  | LPB9             | iYPL023C     | 0.90  | 2.30 | 0.87 |
| YPL023C | MET12 |                  | 0 iYPL023C   | -0.69 | 2.30 | 0.87 |
| YPL024W | NCE4  |                  | 0 iYPL025C   | 0.78  | 1.17 | 0.54 |
| YPL025C | 0     | #N/A             | iYPL025C     | #N/A  | 1.17 | 0.54 |
| YPL026C | SKS1  | SHA3             | iYPL026C     | 0.72  | 0.30 | 0.07 |
| YPL027W | SMA1  |                  | 0 iYPL028W   | 2.27  | 1.02 | 0.48 |
| YPL028W | ERG10 | LPB3 TSM0115     | iYPL029W     | 0.32  | 1.98 | 0.82 |
| YPL029W | SUV3  | LPB2             | iYPL030W     | 0.04  | 2.25 | 0.87 |
| YPL030W | 0     | #N/A             | iYPL031C     | -0.50 | 2.91 | 0.96 |
| YPL031C | PHO85 | LDB15            | iYPL031C     | -0.97 | 2.91 | 0.96 |
| YPL032C | SVL3  |                  | 0 iYPL032C   | -1.12 | #N/A | #N/A |
| YPL033C | 0     | #N/A             | iYPL033C     | #N/A  | #N/A | #N/A |
| YPL034W | 0     | #N/A             | iYPL036W     | 1.65  | #N/A | #N/A |
| YPL035C | 0     | #N/A             | iYPL033C     | #N/A  | #N/A | #N/A |
| YPL036W | PMA2  |                  | 0 iYPL037C   | -0.46 | #N/A | #N/A |
| YPL037C | EGD1  |                  | 0 iYPL037C   | -0.63 | #N/A | #N/A |
| YPL038W | MET31 |                  | 0 iYPL039W   | 0.00  | 1.47 | 0.65 |
| YPL039W | 0     | #N/A             | iYPL040C     | -0.65 | 3.48 | 0.98 |
| YPL040C | ISM1  |                  | 0 iYPL040C   | -2.14 | 3.48 | 0.98 |
| YPL041C | 0     | #N/A             | iYPL041C     | 0.60  | 1.08 | 0.50 |
| YPL042C | SSN3  | GIG2 NUT7 RYE5 S | iYPL042C     | -0.11 | 0.67 | 0.30 |
| YPL043W | NOP4  | NOP77            | iYPL045W     | -0.61 | 1.27 | 0.57 |
| YPL044C | 0     | #N/A             | iYPL043W     | #N/A  | #N/A | #N/A |
| YPL045W | VPS16 | SVL6 VAM9 VPT16  | iYPL046C     | 0.06  | 1.97 | 0.80 |
| YPL046C | ELC1  |                  | 0 iYPL046C   | 0.63  | 1.97 | 0.80 |
| YPL047W | 0     |                  | 0 iYPL048W   | -1.56 | 1.30 | 0.58 |
| YPL048W | CAM1  | EF-1 gamma TEF3  | iYPL049C     | -0.81 | 0.75 | 0.34 |
| YPL049C | DIG1  | RST1             | iYPL049C     | -1.26 | 0.75 | 0.34 |
| YPL050C | MNN9  |                  | 0 iYPL050C   | 0.43  | 0.52 | 0.24 |
| YPL051W | ARL3  |                  | 0 iYPL052W   | 1.21  | 2.13 | 0.85 |
| YPL052W | 0     | #N/A             | iYPL053C     | 0.24  | 2.08 | 0.84 |
| YPL053C | KTR6  | MNN6             | iYPL053C     | 0.15  | 2.08 | 0.84 |
| YPL054W | LEE1  |                  | 0 iYPL055C   | 2.73  | #N/A | #N/A |
| YPL055C | LGE1  |                  | 0 iYPL055C   | 0.85  | #N/A | #N/A |
| YPL056C | 0     | #N/A             | iYPL056C     | 0.81  | 0.24 | 0.07 |
| YPL057C | SUR1  | BCL21 CSG1 LPE15 | iYPL057C     | 1.89  | 0.29 | 0.07 |
| YPL058C | PDR12 |                  | 0 iYPL058C-0 | 1.46  | 0.23 | 0.04 |
| YPL059W | GRX5  |                  | 0 iYPL059W   | 0.56  | 1.63 | 0.72 |
| YPL060W | LPE10 |                  | 0 iYPL061W   | 1.10  | 1.29 | 0.58 |
| YPL061W | ALD6  |                  | 0 iYPL062W   | -3.74 | 0.28 | 0.10 |
| YPL062W | 0     | #N/A             | iYPL063W     | #N/A  | 0.65 | 0.29 |
| YPL063W | 0     |                  | 0 iYPL064C   | #N/A  | 1.47 | 0.64 |
| YPL064C | CWC27 |                  | 0 iYPL064C   | 1.28  | 1.47 | 0.64 |
| YPL065W | VPS28 | VPT28            | iYPL066W     | #N/A  | 1.93 | 0.80 |
| YPL066W | 0     | #N/A             | iYPL067C     | #N/A  | 0.86 | 0.39 |
| YPL067C | 0     | #N/A             | iYPL067C     | 0.68  | 0.86 | 0.39 |
| YPL068C | 0     | #N/A             | iYPL068C     | -0.19 | 1.03 | 0.47 |
| YPL069C | BTS1  |                  | 0 iYPL069C   | 1.33  | 1.68 | 0.72 |
| YPL070W | 0     |                  | 0 iYPL071C   | 0.55  | 1.44 | 0.64 |
| YPL071C | 0     | #N/A             | iYPL071C     | #N/A  | 1.44 | 0.64 |
| YPL072W | UBP16 |                  | 0 iYPL074W   | 1.66  | #N/A | #N/A |



|         |        |                     |      |            |       |      |      |
|---------|--------|---------------------|------|------------|-------|------|------|
| YPL073C |        | 0                   | #N/A | iYPL071C   | #N/A  | 1.44 | 0.64 |
| YPL074W | YTA6   |                     |      | 0 iYPL075W | 1.01  | 1.15 | 0.53 |
| YPL075W | GCR1   | LPF10               |      | iYPL076W   | -0.60 | 0.41 | 0.15 |
| YPL076W | GPI2   | GCR4                |      | iYPL077C   | -0.01 | 2.11 | 0.85 |
| YPL077C |        | 0                   | #N/A | iYPL077C   | #N/A  | 2.11 | 0.85 |
| YPL078C | ATP4   | LPF7                |      | iYPL078C   | 1.27  | #N/A | #N/A |
| YPL079W | RPL21B |                     |      | 0 iYPL080C | -1.34 | 0.27 | 0.08 |
| YPL080C |        | 0                   | #N/A | iYPL080C   | 0.46  | 0.27 | 0.08 |
| YPL081W | RPS9A  |                     |      | 0 iYPL082C | -1.32 | 0.50 | 0.20 |
| YPL082C | MOT1   | BTAF1 BUR3 LPF4     |      | iYPL082C   | -1.25 | 0.50 | 0.20 |
| YPL083C | SEN54  |                     |      | 0 iYPL083C | -0.85 | 1.09 | 0.50 |
| YPL084W | BRO1   | ASI6 LPF2 NPI3 VPS1 |      | iYPL085W   | -0.26 | 1.61 | 0.70 |
| YPL085W | SEC16  | LPF1                |      | iYPL086C   | -1.56 | 2.65 | 0.92 |
| YPL086C | ELP3   | HPA1 TOT3           |      | iYPL086C   | -0.62 | 2.65 | 0.92 |
| YPL087W | YDC1   |                     |      | 0 iYPL088W | 3.16  | #N/A | #N/A |
| YPL088W |        | 0                   | #N/A | iYPL089C   | 0.94  | #N/A | #N/A |
| YPL089C | RLM1   |                     |      | 0 iYPL089C | -0.80 | #N/A | #N/A |
| YPL090C | RPS6A  |                     |      | 0 iYPL090C | -1.41 | #N/A | #N/A |
| YPL091W | GLR1   | LPG17               |      | iYPL092W   | 0.35  | 1.74 | 0.74 |
| YPL092W | SSU1   | LPG16               |      | iYPL093W   | 0.54  | 1.11 | 0.51 |
| YPL093W | NOG1   |                     |      | 0 iYPL094C | -1.14 | 1.94 | 0.79 |
| YPL094C | SEC62  | LPG14               |      | iYPL094C   | -0.69 | 1.94 | 0.79 |
| YPL095C |        | 0                   | #N/A | iYPL095C   | 2.29  | 0.92 | 0.42 |
| YPL096W | PNG1   |                     |      | 0 iYPL097W | -0.14 | 2.24 | 0.86 |
| YPL097W | MSY1   |                     |      | 0 iYPL098C | 0.75  | 1.91 | 0.80 |
| YPL098C |        | 0                   | #N/A | iYPL098C   | -0.36 | 1.91 | 0.80 |
| YPL099C |        | 0                   |      | 0 iYPL099C | 2.19  | 1.13 | 0.51 |
| YPL100W | MAI1   | HSV1 MAI1           |      | iYPL101W   | 0.91  | 3.24 | 0.97 |
| YPL101W | ELP4   | HAP1 TOT7           |      | iYPL103C   | -1.51 | 2.55 | 0.91 |
| YPL102C | KRE24  |                     | #N/A | iYPL101W   | #N/A  | 3.24 | 0.97 |
| YPL103C |        | 0                   |      | 0 iYPL103C | 0.13  | 2.55 | 0.91 |
| YPL104W | MSD1   | LPG5                |      | iYPL105C   | 0.59  | #N/A | #N/A |
| YPL105C |        | 0                   | #N/A | iYPL105C   | -0.73 | #N/A | #N/A |
| YPL106C | SSE1   | LPG3 MSI3           |      | iYPL106C   | -0.08 | 1.02 | 0.46 |
| YPL106W | #N/A   | #N/A                | #N/A | #N/A       | #N/A  | #N/A | #N/A |
| YPL107W |        | 0                   | #N/A | iYPL109C   | #N/A  | 1.28 | 0.59 |
| YPL108W |        | 0                   | #N/A | iYPL109C   | -1.21 | 1.28 | 0.59 |
| YPL109C |        | 0                   | #N/A | iYPL109C   | 0.45  | 1.28 | 0.59 |
| YPL110C |        | 0                   | #N/A | iYPL110C   | -0.21 | #N/A | #N/A |
| YPL111W | CAR1   | LPH15               |      | itM(CAU)P  | -1.43 | 0.22 | 0.06 |
| YPL112C |        | 0                   |      | 0 iYPL112C | 0.02  | 1.36 | 0.61 |
| YPL113C |        | 0                   | #N/A | iYPL113C   | 0.98  | #N/A | #N/A |
| YPL114W |        | 0                   | #N/A | iYPL115C   | -0.40 | 2.22 | 0.86 |
| YPL115C | BEM3   |                     |      | 0 iYPL115C | 0.15  | 2.22 | 0.86 |
| YPL116W | HOS3   |                     |      | 0 iYPL117C | #N/A  | #N/A | #N/A |
| YPL117C | IDI1   | BOT2 LPH10          |      | iYPL117C   | -0.28 | #N/A | #N/A |
| YPL118W | MRP51  |                     |      | 0 iYPL119C | 0.45  | 3.55 | 0.98 |
| YPL119C | DBP1   | LPH8                |      | iYPL119C   | 0.19  | 3.55 | 0.98 |
| YPL120W | VPS30  | APG6 ATG6 VPT30     |      | iYPL121C   | -1.69 | 1.60 | 0.71 |
| YPL121C | MEI5   | LPH6                |      | iYPL121C   | #N/A  | 1.60 | 0.71 |
| YPL122C | TFB2   |                     |      | 0 iYPL122C | -0.62 | 1.36 | 0.60 |

|         |        |                   |   |          |       |      |      |
|---------|--------|-------------------|---|----------|-------|------|------|
| YPL123C | ARNY1  |                   | 0 | iYPL123C | 3.26  | 2.73 | 0.93 |
| YPL124W | SPC29  | LPH3 NIP29        |   | iYPL125W | 0.97  | 1.56 | 0.67 |
| YPL125W | KAP120 |                   | 0 | iYPL126W | 0.11  | 1.92 | 0.80 |
| YPL126W | NAN1   | UTP17             |   | iYPL127C | #N/A  | 0.70 | 0.32 |
| YPL127C | HHO1   |                   | 0 | iYPL127C | -1.25 | 0.70 | 0.32 |
| YPL128C | TBF1   | LPI16             |   | iYPL128C | -0.58 | 1.38 | 0.63 |
| YPL129W | TAF14  | ANC1 SWP29 TAF3   |   | iYPL130W | 0.07  | #N/A | #N/A |
| YPL130W | SPO19  |                   | 0 | iYPL131W | #N/A  | 0.40 | 0.17 |
| YPL131W | RPL5   | LPI14 RPL1        |   | iYPL132W | -1.28 | 0.56 | 0.24 |
| YPL132W | COX11  | LPI13 PSO7        |   | iYPL133C | -0.27 | 1.14 | 0.52 |
| YPL133C | RDS2   |                   | 0 | iYPL133C | -1.29 | 1.14 | 0.52 |
| YPL134C | ODC1   |                   | 0 | iYPL134C | 1.25  | 0.92 | 0.42 |
| YPL135W | ISU1   | NUA1              |   | iYPL136W | 1.35  | 0.49 | 0.20 |
| YPL136W |        | 0 #N/A            |   | iYPL138C | #N/A  | 2.41 | 0.90 |
| YPL137C |        | 0 #N/A            |   | iYPL136W | -0.73 | 0.49 | 0.20 |
| YPL138C | SPP1   | CPS40 SAF41       |   | iYPL138C | 0.81  | 2.41 | 0.90 |
| YPL139C | UME1   | WTM3              |   | iYPL139C | 0.35  | 2.03 | 0.83 |
| YPL140C | MKK2   | LPI6 SSP33        |   | iYPL140C | 0.62  | 2.43 | 0.90 |
| YPL141C |        | 0 #N/A            |   | iYPL141C | -0.34 | 1.02 | 0.46 |
| YPL142C |        | 0 #N/A            |   | iYPL142C | -0.59 | #N/A | #N/A |
| YPL143W | RPL33A | RPL37A            |   | iYPL144W | -0.69 | #N/A | #N/A |
| YPL144W |        | 0 #N/A            |   | iYPL145C | -0.97 | 0.90 | 0.41 |
| YPL145C | KES1   | LPI3 OSH4         |   | iYPL145C | -0.40 | 0.90 | 0.41 |
| YPL146C |        | 0 #N/A            |   | iYPL146C | -0.60 | 0.89 | 0.42 |
| YPL147W | PXA1   | LPI1 PAL1 PAT2 SS |   | iYPL148C | 3.04  | 1.53 | 0.68 |
| YPL148C | PPT2   |                   | 0 | iYPL148C | 2.30  | 1.53 | 0.68 |
| YPL149W | APG5   | APG5              |   | iYPL150W | 0.65  | 1.86 | 0.77 |
| YPL150W |        | 0 #N/A            |   | iYPL151C | 1.25  | 3.32 | 0.98 |
| YPL151C | PRP46  | NTC50             |   | iYPL151C | 0.31  | 3.32 | 0.98 |
| YPL152W | RRD2   | YPA2              |   | iYPL153C | 1.19  | 1.62 | 0.72 |
| YPL153C | RAD53  | LSD1 MEC2 SPK1    |   | iYPL153C | -1.19 | 1.62 | 0.72 |
| YPL154C | PEP4   | PHO9 PRA1 yscA    |   | iYPL154C | 1.75  | 1.10 | 0.50 |
| YPL155C | KIP2   |                   | 0 | iYPL155C | -0.41 | 1.99 | 0.81 |
| YPL156C | PRM4   |                   | 0 | iYPL156C | #N/A  | 0.67 | 0.32 |
| YPL157W |        | 0                 | 0 | iYPL158C | -0.65 | 1.99 | 0.80 |
| YPL158C |        | 0 #N/A            |   | iYPL158C | #N/A  | 1.99 | 0.80 |
| YPL159C |        | 0                 | 0 | iYPL159C | 1.10  | #N/A | #N/A |
| YPL160W | CDC60  | LeuRS             |   | iYPL161C | -0.64 | 2.12 | 0.84 |
| YPL161C | BEM4   | ROM7              |   | iYPL161C | #N/A  | 2.12 | 0.84 |
| YPL162C |        | 0 #N/A            |   | iYPL162C | 0.08  | 1.72 | 0.74 |
| YPL163C | SVS1   |                   | 0 | iYPL163C | 0.87  | 0.63 | 0.28 |
| YPL164C | MLH3   |                   | 0 | iYPL164C | 0.46  | 1.93 | 0.80 |
| YPL165C | SET6   |                   | 0 | iYPL165C | 2.90  | 1.43 | 0.63 |
| YPL166W |        | 0 #N/A            |   | iYPL167C | #N/A  | 2.39 | 0.90 |
| YPL167C | REV3   | PSO1              |   | iYPL167C | 0.22  | 2.39 | 0.90 |
| YPL168W |        | 0 #N/A            |   | iYPL169C | #N/A  | #N/A | #N/A |
| YPL169C | MEX67  |                   | 0 | iYPL169C | 0.07  | #N/A | #N/A |
| YPL170W |        | 0                 | 0 | iYPL171C | 0.01  | 1.25 | 0.58 |
| YPL171C | OYE3   | Old Yellow Enzyme |   | iYPL171C | 0.31  | 1.25 | 0.58 |
| YPL172C | COX10  |                   | 0 | iYPL172C | 0.02  | 1.56 | 0.68 |
| YPL173W | MRPL40 |                   | 0 | iYPL174C | 0.08  | 2.40 | 0.90 |

|         |         |                 |              |       |      |      |
|---------|---------|-----------------|--------------|-------|------|------|
| YPL174C | NIP100  | PAC13           | iYPL174C     | 1.53  | 2.40 | 0.90 |
| YPL175W | SPT14   | CWH6 GPI3       | iYPL176C     | #N/A  | 3.47 | 0.98 |
| YPL176C | 0       | #N/A            | iYPL176C     | 0.41  | 3.47 | 0.98 |
| YPL177C | CUP9    |                 | 0 iYPL177C-0 | -0.18 | 0.16 | 0.02 |
| YPL178W | CBC2    | CBP20 MUD13 SAE | iYPLWdelta   | -0.07 | 2.52 | 0.92 |
| YPL179W | PPQ1    | SAL6            | iYPL180W     | 0.83  | 1.37 | 0.62 |
| YPL180W | 0       |                 | 0 iYPL181W   | -0.37 | #N/A | #N/A |
| YPL181W | 0       | RXT1            | iYPL183C     | 0.14  | 1.17 | 0.54 |
| YPL182C | 0       | #N/A            | iYPL181W     | #N/A  | #N/A | #N/A |
| YPL183C | 0       | #N/A            | iYPL183C     | -0.42 | 1.17 | 0.54 |
| YPL184C | 0       | #N/A            | iYPL184C     | -0.19 | 1.31 | 0.58 |
| YPL185W | 0       | #N/A            | iYPL187W     | #N/A  | 0.73 | 0.35 |
| YPL186C | UIP4    |                 | 0 iYPL185W   | 1.73  | 1.07 | 0.49 |
| YPL187W | MF(ALP- |                 | 0 iYPL188W   | -3.33 | 0.55 | 0.26 |
| YPL188W | POS5    |                 | 0 iYPL189W   | 1.37  | #N/A | #N/A |
| YPL189W | GUP2    |                 | 0 iYPL190C   | 1.76  | 1.07 | 0.50 |
| YPL190C | NAB3    | HMD1            | iYPL190C     | -0.65 | 1.07 | 0.50 |
| YPL191C | 0       | #N/A            | iYPL191C     | 1.77  | 0.42 | 0.15 |
| YPL192C | PRM3    |                 | 0 iYPL192C   | 1.03  | 2.11 | 0.83 |
| YPL193W | RSA1    |                 | 0 iYPL194W   | -0.03 | 1.80 | 0.75 |
| YPL194W | DDC1    |                 | 0 iYPL195W   | -0.18 | 2.30 | 0.88 |
| YPL195W | APL5    | YKS4            | iYPL196W     | 0.07  | #N/A | #N/A |
| YPL196W | OXR1    |                 | 0 iYPL197C   | 1.46  | 1.23 | 0.56 |
| YPL197C | 0       | #N/A            | iYPL197C     | -1.67 | 1.23 | 0.56 |
| YPL198W | RPL7B   |                 | 0 iSNR59     | -1.40 | 0.42 | 0.16 |
| YPL199C | 0       | #N/A            | iYPL199C     | -0.97 | 1.15 | 0.53 |
| YPL200W | CSM4    |                 | 0 iYPL201C   | #N/A  | 0.35 | 0.11 |
| YPL201C | 0       | #N/A            | iYPL201C     | 3.29  | 0.35 | 0.11 |
| YPL202C | AFT2    |                 | 0 iYPL202C   | 1.87  | 0.70 | 0.32 |
| YPL203W | TPK2    | PKA2 PKA3 YKR1  | iYPL204W     | 0.61  | 1.91 | 0.79 |
| YPL204W | HRR25   |                 | 0 iYPL206C   | -0.23 | 1.66 | 0.72 |
| YPL205C | 0       | #N/A            | iYPL204W     | #N/A  | 1.91 | 0.79 |
| YPL206C | 0       | #N/A            | iYPL206C     | 0.75  | 1.66 | 0.72 |
| YPL207W | 0       | #N/A            | iYPL208W     | 0.08  | 1.67 | 0.72 |
| YPL208W | 0       | #N/A            | iYPL209C     | 0.15  | 2.64 | 0.93 |
| YPL209C | IPL1    | PAC15           | iYPL209C     | #N/A  | 2.64 | 0.93 |
| YPL210C | SRP72   |                 | 0 iYPL210C   | -0.48 | 1.48 | 0.67 |
| YPL211W | NIP7    |                 | 0 iYPL212C   | -0.79 | 3.56 | 0.98 |
| YPL212C | PUS1    |                 | 0 iYPL212C   | -0.20 | 3.56 | 0.98 |
| YPL213W | LEA1    |                 | 0 iYPL214C   | 1.09  | 2.69 | 0.94 |
| YPL214C | THI6    |                 | 0 iYPL214C   | 0.74  | 2.69 | 0.94 |
| YPL215W | CBP3    |                 | 0 iYPL216W   | 0.70  | 2.81 | 0.94 |
| YPL216W | 0       | #N/A            | iYPL217C     | 0.31  | 1.84 | 0.78 |
| YPL217C | BMS1    |                 | 0 iYPL217C   | -1.40 | 1.84 | 0.78 |
| YPL218W | SAR1    |                 | 0 iYPL219W   | 0.53  | 2.02 | 0.81 |
| YPL219W | PCL8    |                 | 0 iYPL220W   | -0.30 | 1.30 | 0.58 |
| YPL220W | RPL1A   | SSM1            | iYPL221W     | -0.69 | #N/A | #N/A |
| YPL221W | BOP1    |                 | 0 iYPL222W   | 0.27  | 0.48 | 0.19 |
| YPL222W | 0       |                 | 0 iYPL223C   | #N/A  | #N/A | #N/A |
| YPL223C | GRE1    |                 | 0 iYPL223C   | #N/A  | #N/A | #N/A |
| YPL224C | MMT2    | MFT2            | iYPL224C     | 1.01  | 1.81 | 0.76 |

|         |       |             |      |              |       |      |      |
|---------|-------|-------------|------|--------------|-------|------|------|
| YPL225W |       | 0           | #N/A | iYPL226W     | 0.59  | 1.87 | 0.78 |
| YPL226W | NEW1  |             |      | 0 iYPL227C   | -0.80 | 2.31 | 0.89 |
| YPL227C | ALG5  |             |      | 0 iYPL227C   | -0.76 | 2.31 | 0.89 |
| YPL228W | CET1  | CES5        |      | iYPL229W     | -0.30 | 1.78 | 0.76 |
| YPL229W |       | 0           | #N/A | iYPL230W     | 1.66  | 1.79 | 0.77 |
| YPL230W |       | 0           | #N/A | iYPL231W     | 1.30  | 1.30 | 0.58 |
| YPL231W | FAS2  |             |      | 0 iYPL232W   | #N/A  | 0.52 | 0.21 |
| YPL232W | SSO1  |             |      | 0 iYPL233W   | 0.73  | 0.51 | 0.22 |
| YPL233W | NSL1  |             |      | 0 iYPL234C   | 0.07  | 1.44 | 0.64 |
| YPL234C | TFP3  | CLS9 VMA11  |      | iYPL234C     | 0.14  | 1.44 | 0.64 |
| YPL235W | RVB2  | TIH2 TIP49B |      | iYPL236C     | -0.42 | 2.28 | 0.87 |
| YPL236C |       | 0           | #N/A | iYPL236C     | 1.07  | 2.28 | 0.87 |
| YPL237W | SUI3  |             |      | 0 iYPL239W   | -0.34 | 1.10 | 0.50 |
| YPL238C |       | 0           | #N/A | iYPL237W     | -0.29 | 0.63 | 0.28 |
| YPL239W | YAR1  |             |      | 0 iYPL240C   | 0.27  | #N/A | #N/A |
| YPL240C | HSP82 | HSP83 HSP90 |      | iYPL240C     | 0.89  | #N/A | #N/A |
| YPL241C | CIN2  |             |      | 0 iYPL241C   | 0.89  | 1.50 | 0.67 |
| YPL242C | IQG1  | CYK1        |      | iYPL242C     | -1.10 | 1.64 | 0.71 |
| YPL243W | SRP68 |             |      | 0 iYPL244C   | 0.03  | 2.44 | 0.90 |
| YPL244C | HUT1  |             |      | 0 iYPL244C   | 0.11  | 2.44 | 0.90 |
| YPL245W |       | 0           | #N/A | iYPL246C     | 1.83  | 1.75 | 0.75 |
| YPL246C |       | 0           |      | 0 iYPL246C   | 0.71  | 1.75 | 0.75 |
| YPL247C |       | 0           | #N/A | iYPL247C     | 1.24  | 2.40 | 0.90 |
| YPL248C | GAL4  | GAL81       |      | iYPL248C     | 0.92  | 1.46 | 0.66 |
| YPL249C | GYP5  |             |      | 0 iYPL249C   | #N/A  | 1.44 | 0.65 |
| YPL250C | ICY2  |             |      | 0 iYPL250C   | 2.21  | #N/A | #N/A |
| YPL251W |       | 0           | #N/A | iYPL253C     | 0.94  | 1.45 | 0.64 |
| YPL252C | YAH1  |             |      | 0 iYPL251W   | -0.66 | 0.68 | 0.33 |
| YPL253C | VIK1  |             |      | 0 iYPL253C   | 0.95  | 1.45 | 0.64 |
| YPL254W | HFI1  | ADA1 SUP110 |      | iYPL255W     | -0.85 | 2.65 | 0.93 |
| YPL255W | BBP1  |             |      | 0 iYPL256C   | -0.44 | 1.14 | 0.52 |
| YPL256C | CLN2  |             |      | 0 iYPL256C   | -0.40 | 1.14 | 0.52 |
| YPL257W |       | 0           | #N/A | iYPLWdelta   | 1.85  | 2.00 | 0.82 |
| YPL258C | THI21 |             |      | 0 iYPL258C   | 1.16  | 1.17 | 0.54 |
| YPL259C | APM1  | YAP54       |      | iYPL259C     | #N/A  | 1.43 | 0.63 |
| YPL260W |       | 0           | #N/A | iYPL262W     | 0.71  | 1.88 | 0.78 |
| YPL261C |       | 0           | #N/A | iYPL260W     | #N/A  | 0.44 | 0.16 |
| YPL262W | FUM1  |             |      | 0 iYPL263C   | 0.09  | 1.51 | 0.66 |
| YPL263C | KEL3  |             |      | 0 iYPL263C   | 0.04  | 1.51 | 0.66 |
| YPL264C |       | 0           | #N/A | iYPL264C     | 2.88  | 1.12 | 0.51 |
| YPL265W | DIP5  |             |      | 0 iYPL266W   | 0.11  | 0.31 | 0.07 |
| YPL266W | DIM1  | CDH1        |      | iYPL267W     | -1.00 | 2.65 | 0.93 |
| YPL267W |       | 0           | #N/A | iYPL268W     | -0.79 | 1.36 | 0.62 |
| YPL268W | PLC1  |             |      | 0 iYPL269W   | 0.37  | 2.07 | 0.82 |
| YPL269W | KAR9  |             |      | 0 iYPL270W   | 0.99  | 3.56 | 0.99 |
| YPL270W | MDL2  |             |      | 0 iYPL271W   | 0.17  | 1.02 | 0.46 |
| YPL271W | ATP15 | ATPEPSILON  |      | iYPL272C-1   | 0.80  | #N/A | #N/A |
| YPL272C |       | 0           | #N/A | iYPL272C-0   | 2.26  | #N/A | #N/A |
| YPL273W | SAM4  |             |      | 0 iYPL274W   | 0.09  | 0.68 | 0.31 |
| YPL274W | SAM3  |             |      | 0 iYPL275W-5 | -1.14 | 0.90 | 0.43 |
| YPL275W | FDH2  |             |      | 0 iYPL277C   | 1.23  | 1.28 | 0.58 |

|         |        |                |              |       |      |      |
|---------|--------|----------------|--------------|-------|------|------|
| YPL276W | FDH2   | #N/A           | iYPL277C     | 1.03  | 1.28 | 0.58 |
| YPL277C | 0      | #N/A           | iYPL277C     | 1.31  | 1.28 | 0.58 |
| YPL278C | 0      | #N/A           | iYPL277C     | 0.74  | 1.28 | 0.58 |
| YPL279C | 0      | #N/A           | iYPL279C     | 0.88  | 3.25 | 0.98 |
| YPL280W | 0      |                | 0 iYPL281C   | 2.96  | 2.37 | 0.89 |
| YPL281C | ERR2   |                | 0 iYPL281C   | -1.25 | 2.37 | 0.89 |
| YPL282C | 0      | #N/A           | iYPL282C     | 1.83  | 0.74 | 0.34 |
| YPL283C | YRF1-7 | YRF1           | iYPL283C-0   | 0.01  | 0.44 | 0.16 |
| YPR001W | CIT3   |                | 0 iCEN16     | 0.15  | 2.70 | 0.93 |
| YPR002W | PDH1   |                | 0 iYPR001W   | -0.72 | 1.50 | 0.66 |
| YPR003C | 0      | #N/A           | iYPR003C     | 1.01  | 1.01 | 0.46 |
| YPR004C | 0      | #N/A           | iYPR004C     | 0.32  | 1.46 | 0.64 |
| YPR005C | HAL1   |                | 0 iYPR005C   | 1.47  | 0.98 | 0.45 |
| YPR006C | ICL2   |                | 0 iYPR006C   | -0.31 | 1.40 | 0.64 |
| YPR007C | SPO69  | SPO69          | iYPR007C     | #N/A  | 0.78 | 0.37 |
| YPR008W | HAA1   |                | 0 itG(GCC)P1 | 1.62  | #N/A | #N/A |
| YPR009W | SUT2   |                | 0 iYPR008W   | 0.28  | #N/A | #N/A |
| YPR010C | RPA135 | RPA2 RRN2 SRP3 | iYPR010C     | -0.36 | #N/A | #N/A |
| YPR011C | 0      | #N/A           | iYPR011C     | 0.36  | 1.56 | 0.67 |
| YPR012W | 0      | #N/A           | iYPR011C     | 2.31  | 1.56 | 0.67 |
| YPR013C | 0      | #N/A           | iYPR013C-0   | 1.45  | 0.66 | 0.30 |
| YPR014C | 0      | #N/A           | iYPR014C-0   | -0.08 | #N/A | #N/A |
| YPR015C | 0      | #N/A           | iYPR015C     | #N/A  | #N/A | #N/A |
| YPR016C | TIF6   | CDC95          | iYPR016C     | 0.11  | #N/A | #N/A |
| YPR017C | DSS4   |                | 0 iYPR017C   | 0.08  | 2.27 | 0.87 |
| YPR018W | RLF2   | CAC1           | iYPR017C     | -2.48 | 2.27 | 0.87 |
| YPR019W | CDC54  | HCD21 MCM4     | iYPR018W     | -0.67 | 1.74 | 0.74 |
| YPR020W | ATP20  |                | 0 iYPR019W   | 1.79  | 1.04 | 0.49 |
| YPR021C | 0      |                | 0 iYPR021C   | 0.74  | 1.29 | 0.59 |
| YPR022C | 0      | #N/A           | iYPR022C     | 0.12  | #N/A | #N/A |
| YPR023C | EAF3   |                | 0 iYPR023C   | -0.56 | 2.99 | 0.96 |
| YPR024W | YME1   | OSD1 YTA11     | iYPR023C     | 0.63  | 2.99 | 0.96 |
| YPR025C | CCL1   |                | 0 iYPR025C   | 0.45  | #N/A | #N/A |
| YPR026W | ATH1   |                | 0 iYPR025C   | 1.39  | #N/A | #N/A |
| YPR027C | 0      | #N/A           | iYPR027C     | 1.29  | #N/A | #N/A |
| YPR028W | YOP1   | YIP2           | itF(GAA)P2   | 1.13  | #N/A | #N/A |
| YPR029C | APL4   |                | 0 iYPR029C   | 0.67  | 2.30 | 0.88 |
| YPR030W | CSR2   | MRG19          | iYPR029C     | 0.69  | 2.30 | 0.88 |
| YPR031W | 0      |                | 0 iYPR030W   | 0.88  | #N/A | #N/A |
| YPR032W | SRO7   | SNI1 SOP1      | iYPR031W     | 0.30  | 0.91 | 0.44 |
| YPR033C | HTS1   | TSM4572        | iYPR033C     | -0.04 | 1.60 | 0.69 |
| YPR034W | ARP7   | SWP61          | iYPR033C     | -0.33 | 1.60 | 0.69 |
| YPR035W | GLN1   |                | 0 iYPR034W   | 0.56  | #N/A | #N/A |
| YPR036W | VMA13  | CLS11          | iYPR035W     | 0.18  | #N/A | #N/A |
| YPR037C | ERV2   |                | 0 iYPR040W   | -0.77 | 1.51 | 0.66 |
| YPR038W | 0      | #N/A           | iYPR036W     | -0.51 | #N/A | #N/A |
| YPR039W | 0      | #N/A           | iYPR036W     | -0.52 | #N/A | #N/A |
| YPR040W | SDF1   |                | 0 iYPR036W   | -0.44 | #N/A | #N/A |
| YPR041W | TIF5   |                | 0 iYPR040W   | -0.26 | 1.51 | 0.66 |
| YPR042C | PUF2   |                | 0 iYPR042C   | #N/A  | 1.59 | 0.69 |
| YPR043W | RPL43A |                | 0 iYPR042C   | -1.05 | 1.59 | 0.69 |

|         |       |                |             |       |      |      |
|---------|-------|----------------|-------------|-------|------|------|
| YPR044C | 0     | #N/A           | iYPR044C    | -1.11 | #N/A | #N/A |
| YPR045C | 0     | #N/A           | iYPR045C    | #N/A  | 1.99 | 0.81 |
| YPR046W | MCM16 |                | 0 iYPR045C  | -0.67 | 1.99 | 0.81 |
| YPR047W | MSF1  |                | 0 iYPR046W  | 0.67  | #N/A | #N/A |
| YPR048W | TAH18 |                | 0 iYPR047W  | 0.34  | 2.36 | 0.90 |
| YPR049C | CVT9  | CVT9           | iYPR049C    | #N/A  | 1.60 | 0.71 |
| YPR050C | 0     | #N/A           | iYPR051W    | 0.06  | #N/A | #N/A |
| YPR051W | MAK3  |                | 0 iYPR049C  | -0.42 | 1.60 | 0.71 |
| YPR052C | NHP6A |                | 0 iYPR054W  | #N/A  | 2.62 | 0.92 |
| YPR053C | 0     | #N/A           | iYPR054W    | -0.43 | 2.62 | 0.92 |
| YPR054W | SMK1  |                | 0 iYPR051W  | 0.17  | #N/A | #N/A |
| YPR055W | SEC8  |                | 0 iYPR054W  | -0.04 | 2.62 | 0.92 |
| YPR056W | TFB4  |                | 0 iYPR055W  | -0.35 | 1.57 | 0.70 |
| YPR057W | BRR1  |                | 0 iYPR056W  | 1.18  | 0.99 | 0.47 |
| YPR058W | YMC1  |                | 0 iYPR057W  | 0.40  | #N/A | #N/A |
| YPR059C | 0     | #N/A           | iYPR059C    | 0.41  | 0.27 | 0.05 |
| YPR060C | ARO7  | HGS1 OSM2 TYR7 | iYPR060C    | 0.04  | #N/A | #N/A |
| YPR061C | 0     |                | 0 iYPR061C  | 1.67  | 3.85 | 0.99 |
| YPR062W | FCY1  |                | 0 iYPR061C  | -0.59 | 3.85 | 0.99 |
| YPR063C | 0     | #N/A           | iYPR063C    | 0.63  | 2.07 | 0.83 |
| YPR064W | 0     | #N/A           | iYPR063C    | 0.74  | 2.07 | 0.83 |
| YPR065W | ROX1  | REO1           | iYPR064W    | -0.56 | #N/A | #N/A |
| YPR066W | UBA3  |                | 0 iYPR065W  | 0.37  | 0.99 | 0.46 |
| YPR067W | ISA2  |                | 0 iYPR066W  | 0.43  | 3.14 | 0.96 |
| YPR068C | HOS1  |                | 0 iYPR068C  | 1.36  | #N/A | #N/A |
| YPR069C | SPE3  |                | 0 iYPR069C  | -0.52 | 1.27 | 0.57 |
| YPR070W | MED1  |                | 0 iYPR069C  | -0.05 | 1.27 | 0.57 |
| YPR071W | 0     | #N/A           | iYPR070W    | -0.48 | 0.73 | 0.34 |
| YPR072W | NOT5  |                | 0 itS(UGA)P | 1.50  | 1.02 | 0.46 |
| YPR073C | LTP1  |                | 0 iYPR073C  | -0.02 | 1.16 | 0.53 |
| YPR074C | TKL1  |                | 0 iYPR074C  | -1.03 | 0.41 | 0.16 |
| YPR075C | OPY2  |                | 0 iYPR076W  | 0.30  | 2.33 | 0.89 |
| YPR076W | 0     | #N/A           | iYPR074C    | 1.00  | 0.41 | 0.16 |
| YPR077C | 0     | #N/A           | iYPR078C    | #N/A  | #N/A | #N/A |
| YPR078C | 0     | #N/A           | iYPR078C    | 1.60  | #N/A | #N/A |
| YPR079W | MRL1  |                | 0 iYPR078C  | -0.43 | #N/A | #N/A |
| YPR080W | TEF1  | EF-1 alpha     | iYPR079W    | -0.36 | 0.40 | 0.15 |
| YPR081C | 0     |                | 0 iYPR081C  | 1.12  | 1.22 | 0.55 |
| YPR082C | DIB1  | SNU16          | iYPR082C    | -0.27 | #N/A | #N/A |
| YPR083W | 0     |                | 0 iYPR082C  | -0.56 | #N/A | #N/A |
| YPR084W | 0     | #N/A           | iYPR083W    | -0.28 | 2.26 | 0.87 |
| YPR085C | 0     | #N/A           | iYPR085C    | 1.44  | 3.63 | 0.98 |
| YPR086W | SUA7  | SOH4           | iYPR085C    | -0.58 | 3.63 | 0.98 |
| YPR087W | VPS69 |                | 0 iYPR086W  | 0.08  | #N/A | #N/A |
| YPR088C | SRP54 | SRH1           | iYPR088C    | 0.22  | 3.99 | 0.99 |
| YPR089W | 0     | #N/A           | iYPR088C    | #N/A  | 3.99 | 0.99 |
| YPR090W | 0     | #N/A           | iYPR088C    | 0.32  | 3.99 | 0.99 |
| YPR091C | 0     | #N/A           | iSNR51      | -0.35 | 0.24 | 0.04 |
| YPR092W | 0     | #N/A           | iYPR090W    | 1.81  | #N/A | #N/A |
| YPR093C | 0     | #N/A           | iYPR093C    | -0.72 | 0.67 | 0.30 |
| YPR094W | RDS3  |                | 0 iYPR093C  | -1.16 | 0.67 | 0.30 |



|         |        |                |      |              |       |      |      |
|---------|--------|----------------|------|--------------|-------|------|------|
| YPR095C | SYT1   |                | 0    | iYPR095C     | 0.12  | 1.25 | 0.56 |
| YPR096C |        | 0              | #N/A | iYPR096C     | #N/A  | 1.86 | 0.78 |
| YPR097W |        | 0              | #N/A | iYPR096C     | -0.26 | 1.86 | 0.78 |
| YPR098C |        | 0              | #N/A | iYPR098C     | 1.67  | 2.03 | 0.82 |
| YPR099C |        | 0              | #N/A | iYPR100W     | 0.69  | 1.50 | 0.67 |
| YPR100W |        | 0              |      | 0 iYPR098C   | 0.55  | 2.03 | 0.82 |
| YPR101W | SNT309 |                |      | 0 iYPR100W   | 1.20  | 1.50 | 0.67 |
| YPR102C | RPL11A |                |      | 0 iYPR102C   | -1.17 | #N/A | #N/A |
| YPR103W | PRE2   | DOA3 PRG1 SRR2 |      | iYPR102C     | 0.50  | #N/A | #N/A |
| YPR104C | FHL1   |                |      | 0 iYPR104C   | -0.11 | 2.32 | 0.89 |
| YPR105C | COD1   | COD1 SEC38     |      | iYPR105C     | -0.29 | 2.05 | 0.83 |
| YPR106W | ISR1   |                |      | 0 iYPR105C   | -0.40 | 2.05 | 0.83 |
| YPR107C | YTH1   |                |      | 0 iYPR107C   | 1.46  | 1.77 | 0.75 |
| YPR108W | RPN7   |                |      | 0 iYPR107C   | 0.01  | 1.77 | 0.75 |
| YPR109W |        | 0              | #N/A | itT(UGU)P    | 1.09  | 1.06 | 0.48 |
| YPR110C | RPC40  | RPC5           |      | iYPR110C     | -0.40 | #N/A | #N/A |
| YPR111W | DBF20  |                |      | 0 iYPR110C   | 0.89  | #N/A | #N/A |
| YPR112C | MRD1   |                |      | 0 iYPR112C   | -0.76 | 1.35 | 0.60 |
| YPR113W | PIS1   |                |      | 0 iYPR112C   | -0.13 | 1.35 | 0.60 |
| YPR114W |        | 0              | #N/A | iYPR113W     | 0.57  | 1.20 | 0.54 |
| YPR115W |        | 0              | #N/A | iYPR114W     | 0.11  | 0.97 | 0.46 |
| YPR116W |        | 0              | #N/A | iYPR115W     | #N/A  | 1.17 | 0.54 |
| YPR117W |        | 0              | #N/A | iYPR116W     | 0.28  | #N/A | #N/A |
| YPR118W |        | 0              | #N/A | iYPR117W     | -0.65 | 1.48 | 0.65 |
| YPR119W | CLB2   |                |      | 0 iYPRWsigm  | -3.03 | #N/A | #N/A |
| YPR120C | CLB5   |                |      | 0 iYPR120C   | #N/A  | 0.48 | 0.23 |
| YPR121W | THI22  |                |      | 0 iYPRWdelta | 1.23  | 0.68 | 0.30 |
| YPR122W | AXL1   | FUS5 STE22     |      | iYPR121W-    | #N/A  | #N/A | #N/A |
| YPR123C |        | 0              | #N/A | iYPR124W     | #N/A  | 1.34 | 0.61 |
| YPR124W | CTR1   |                |      | 0 iYPR122W   | -1.28 | 0.75 | 0.36 |
| YPR125W |        | 0              | #N/A | iYPR124W     | -0.75 | 1.34 | 0.61 |
| YPR126C |        | 0              | #N/A | iYPR126C     | -1.30 | 1.16 | 0.52 |
| YPR127W |        | 0              | #N/A | iYPR126C     | 0.72  | 1.16 | 0.52 |
| YPR128C | ANT1   |                |      | 0 iYPR128C   | -0.49 | 2.85 | 0.95 |
| YPR129W | SCD6   |                |      | 0 iYPR128C   | -0.07 | 2.85 | 0.95 |
| YPR130C |        | 0              | #N/A | iYPR130C     | -0.22 | 0.48 | 0.19 |
| YPR131C | NAT3   |                |      | 0 iYPR131C   | 0.45  | 0.17 | 0.03 |
| YPR132W | RPS23B |                |      | 0 iYPR131C   | -0.55 | 0.17 | 0.03 |
| YPR133C | IWS1   | SPN1           |      | iYPR133C     | -0.80 | 2.04 | 0.83 |
| YPR134W | MSS18  |                |      | 0 iYPR133W-  | 0.76  | 1.50 | 0.65 |
| YPR135W | CTF4   | CHL15 POB1     |      | iYPR134W     | #N/A  | 1.41 | 0.62 |
| YPR136C | FYV15  | #N/A           |      | iYPR137W     | #N/A  | #N/A | #N/A |
| YPR137W | RRP9   |                |      | 0 iYPR135W   | -0.76 | 1.56 | 0.69 |
| YPR138C | MEP3   |                |      | 0 iYPR138C   | 0.91  | #N/A | #N/A |
| YPR139C | VPS66  |                |      | 0 iYPR139C   | 0.29  | 1.60 | 0.70 |
| YPR140W |        | 0              |      | 0 iYPR139C   | 0.52  | 1.60 | 0.70 |
| YPR141C | KAR3   | OSR11          |      | iYPR141C     | 1.29  | 2.40 | 0.89 |
| YPR142C |        | 0              | #N/A | iYPR143W     | -1.03 | #N/A | #N/A |
| YPR143W |        | 0              | #N/A | iYPR141C     | -0.85 | 2.40 | 0.89 |
| YPR144C | UTP19  | UTP19          |      | iYPR144C     | 0.03  | 1.60 | 0.69 |
| YPR145W | ASN1   |                |      | 0 iSNR45     | -0.03 | #N/A | #N/A |

|         |        |                   |              |       |      |      |
|---------|--------|-------------------|--------------|-------|------|------|
| YPR146C | 0      | #N/A              | iYPR147C     | 0.55  | 1.79 | 0.76 |
| YPR147C | 0      | #N/A              | iYPR147C     | 0.08  | 1.79 | 0.76 |
| YPR148C | 0      | #N/A              | iYPR148C-C   | 0.42  | 0.58 | 0.25 |
| YPR149W | NCE102 | NCE2              | iYPR148C-1   | 1.60  | #N/A | #N/A |
| YPR150W | 0      | #N/A              | iYPR149W     | 3.63  | 0.43 | 0.16 |
| YPR151C | 0      |                   | 0 iYPR151C   | 3.61  | 1.24 | 0.57 |
| YPR152C | 0      | #N/A              | iYPR152C     | 0.22  | #N/A | #N/A |
| YPR153W | 0      | #N/A              | iYPR152C     | #N/A  | #N/A | #N/A |
| YPR154W | PIN3   | LSB2              | iYPR153W     | 1.44  | 2.14 | 0.84 |
| YPR155C | NCA2   |                   | 0 iYPR155C   | 1.20  | 1.30 | 0.58 |
| YPR156C | TPO3   |                   | 0 iYPR156C   | 1.04  | 0.52 | 0.24 |
| YPR157W | 0      | #N/A              | iYPR156C     | 1.09  | 0.52 | 0.24 |
| YPR158W | 0      | #N/A              | iYPR157W     | 1.74  | 0.78 | 0.36 |
| YPR159W | KRE6   | CWH48             | itA(AGC)P    | 1.03  | 0.46 | 0.18 |
| YPR160W | GPH1   |                   | 0 itG(GCC)P2 | 1.89  | 1.45 | 0.65 |
| YPR161C | SGV1   | BUR1              | iYPR161C     | -0.27 | 2.10 | 0.83 |
| YPR162C | ORC4   |                   | 0 iYPR162C   | 0.03  | #N/A | #N/A |
| YPR163C | TIF3   | RBL3 STM1         | iYPR163C     | -0.69 | 3.19 | 0.97 |
| YPR164W | MMS1   | RTT108 SLM6       | iYPR163C     | -0.81 | 3.19 | 0.97 |
| YPR165W | RHO1   |                   | 0 iYPR164W   | 0.66  | 1.85 | 0.78 |
| YPR166C | MRP2   |                   | 0 iYPR166C   | 0.56  | 1.77 | 0.75 |
| YPR167C | MET16  |                   | 0 iYPR167C   | 1.35  | 1.90 | 0.79 |
| YPR168W | NUT2   | MED10             | iYPR167C     | #N/A  | 1.90 | 0.79 |
| YPR169W | JIP5   |                   | 0 iYPR168W   | 0.89  | 0.17 | 0.02 |
| YPR170C | 0      | #N/A              | iYPR170C     | 2.06  | 1.70 | 0.72 |
| YPR171W | 0      |                   | 0 iYPR170C   | 0.78  | 1.70 | 0.72 |
| YPR172W | 0      | #N/A              | iYPR171W     | 0.64  | 1.52 | 0.66 |
| YPR173C | VPS4   | CSC1 DID6 END13 G | iYPR173C     | 0.58  | #N/A | #N/A |
| YPR174C | 0      | #N/A              | iYPR174C     | -0.27 | 2.04 | 0.82 |
| YPR175W | DPB2   |                   | 0 iYPR174C   | 0.44  | 2.04 | 0.82 |
| YPR176C | BET2   |                   | 0 iYPR176C   | 0.55  | 2.35 | 0.89 |
| YPR177C | 0      | #N/A              | iYPR178W     | #N/A  | #N/A | #N/A |
| YPR178W | PRP4   | RNA4              | iYPR176C     | 0.56  | 2.35 | 0.89 |
| YPR179C | PLO1   | PLO1              | iYPR179C     | 0.43  | 1.37 | 0.62 |
| YPR180W | AOS1   |                   | 0 iYPR179C   | 0.89  | 1.37 | 0.62 |
| YPR181C | SEC23  |                   | 0 iYPR181C   | -0.62 | 1.74 | 0.74 |
| YPR182W | SMX3   | Sm F              | iYPR181C     | -1.06 | 1.74 | 0.74 |
| YPR183W | DPM1   | SED3              | iYPR182W     | -0.72 | 1.56 | 0.68 |
| YPR184W | GDB1   |                   | 0 iYPR183W   | 1.03  | 0.78 | 0.35 |
| YPR185W | APG13  | APG13             | iYPR184W     | 0.42  | 3.52 | 0.98 |
| YPR186C | PZF1   | TFC2              | iYPR186C     | 0.59  | 3.30 | 0.97 |
| YPR187W | RPO26  | RPB6              | iYPR186C     | -0.51 | 3.30 | 0.97 |
| YPR188C | MLC2   |                   | 0 iYPR188C   | 0.59  | 1.44 | 0.63 |
| YPR189W | SKI3   | SKI5              | iYPR188C     | -0.47 | 1.44 | 0.63 |
| YPR190C | RPC82  | RPC3              | iYPR190C     | -0.44 | 1.61 | 0.69 |
| YPR191W | QCR2   | COR2 UCR2         | iYPR190C     | 1.14  | 1.61 | 0.69 |
| YPR192W | AQY1   |                   | 0 iYPR191W   | 1.07  | #N/A | #N/A |
| YPR193C | HPA2   |                   | 0 iYPR193C   | 2.00  | 1.17 | 0.53 |
| YPR194C | OPT2   |                   | 0 iYPR194C   | 1.64  | #N/A | #N/A |
| YPR195C | 0      | #N/A              | iYPR195C-C   | #N/A  | 0.43 | 0.15 |
| YPR196W | 0      | #N/A              | iYPR195C-2   | 0.81  | #N/A | #N/A |



|                |      |           |      |           |      |      |      |
|----------------|------|-----------|------|-----------|------|------|------|
| <b>YPR197C</b> |      | 0         | #N/A | iYPR198W- | #N/A | #N/A | #N/A |
| <b>YPR198W</b> | SGE1 | NOR1      |      | iYPRWtau4 | 2.58 | #N/A | #N/A |
| <b>YPR199C</b> | ARR1 | ACR1 YAP8 |      | iYPR199C  | 1.37 | 1.11 | 0.51 |
| <b>YPR200C</b> | ARR2 | ACR2      |      | iYPR200C  | #N/A | #N/A | #N/A |
| <b>YPR201W</b> | ARR3 | ACR3      |      | iYPR200C  | #N/A | #N/A | #N/A |
| <b>YPR202W</b> |      | 0         | #N/A | iYPR201W- | 0.58 | 0.64 | 0.28 |
| <b>YPR203W</b> |      | 0         | #N/A | iYPR201W- | #N/A | 0.64 | 0.28 |
| <b>YPR204W</b> |      | 0         | #N/A | iYPR203W  | 0.14 | 1.24 | 0.57 |

**HA-Htz1 CHIP HA-Htz1 CHIP (percentile rank, MPR) - Intergenic, T=8 hr**

|      |      |
|------|------|
| #N/A | #N/A |
| 1.38 | 0.65 |
| 0.50 | 0.16 |
| #N/A | #N/A |
| 0.50 | 0.16 |
| 2.70 | 0.92 |
| #N/A | #N/A |
| 2.12 | 0.86 |
| 2.12 | 0.86 |
| #N/A | #N/A |
| 0.81 | 0.36 |
| 2.39 | 0.91 |
| 2.39 | 0.91 |
| #N/A | #N/A |
| 2.61 | 0.93 |
| 2.48 | 0.92 |
| 3.30 | 0.97 |
| 3.30 | 0.97 |
| #N/A | #N/A |
| 1.88 | 0.82 |
| #N/A | #N/A |
| 5.12 | 1.00 |
| 5.12 | 1.00 |
| 3.17 | 0.96 |
| 2.02 | 0.84 |
| 2.02 | 0.84 |
| 4.30 | 0.99 |
| #N/A | #N/A |
| 1.01 | 0.48 |
| 0.37 | 0.07 |
| 0.65 | 0.25 |
| 3.39 | 0.98 |
| #N/A | #N/A |
| #N/A | #N/A |
| 3.39 | 0.98 |
| 0.52 | 0.17 |
| 0.35 | 0.06 |
| #N/A | #N/A |
| #N/A | #N/A |
| #N/A | #N/A |
| 0.94 | 0.44 |
| 0.90 | 0.41 |
| 1.28 | 0.61 |
| 1.12 | 0.53 |
| 2.83 | 0.76 |
| 1.14 | 0.54 |
| #N/A | #N/A |
| 0.95 | 0.44 |
| 1.55 | 0.70 |
| #N/A | #N/A |

|      |      |
|------|------|
| 0.86 | 0.39 |
| 0.75 | 0.32 |
| 1.30 | 0.61 |
| #N/A | #N/A |
| #N/A | #N/A |
| 1.30 | 0.61 |
| 1.30 | 0.61 |
| #N/A | #N/A |
| #N/A | #N/A |
| 0.85 | 0.39 |
| 2.52 | 0.93 |
| 2.89 | 0.96 |
| 2.89 | 0.96 |
| #N/A | #N/A |
| #N/A | #N/A |
| 0.68 | 0.28 |
| 1.54 | 0.71 |
| 1.14 | 0.54 |
| 1.41 | 0.66 |
| 0.87 | 0.40 |
| 1.80 | 0.79 |
| 0.87 | 0.40 |
| 1.80 | 0.79 |
| 0.74 | 0.32 |
| #N/A | #N/A |
| #N/A | #N/A |
| 1.43 | 0.67 |
| #N/A | #N/A |
| 0.60 | 0.22 |
| 0.65 | 0.26 |
| #N/A | #N/A |
| #N/A | #N/A |
| 0.82 | 0.36 |
| 0.82 | 0.36 |
| 0.41 | 0.10 |
| 0.72 | 0.30 |
| 0.87 | 0.40 |
| 0.82 | 0.37 |
| #N/A | #N/A |
| 2.14 | 0.87 |
| 2.14 | 0.87 |
| 1.86 | 0.81 |
| #N/A | #N/A |
| 1.86 | 0.81 |
| #N/A | #N/A |
| 0.44 | 0.12 |
| 0.44 | 0.12 |
| 2.60 | 0.92 |
| #N/A | #N/A |
| 1.39 | 0.65 |
| 1.81 | 0.80 |

|      |      |
|------|------|
| 2.99 | 0.92 |
| 0.88 | 0.39 |
| 3.10 | 0.96 |
| 3.10 | 0.96 |
| 1.31 | 0.61 |
| 0.86 | 0.40 |
| 0.86 | 0.40 |
| 1.51 | 0.70 |
| #N/A | #N/A |
| #N/A | #N/A |
| #N/A | #N/A |
| 1.30 | 0.61 |
| #N/A | #N/A |
| 1.19 | 0.56 |
| 2.12 | 0.85 |
| 0.23 | 0.02 |
| 0.34 | 0.06 |
| 0.48 | 0.14 |
| 1.65 | 0.75 |
| 2.34 | 0.91 |
| 2.34 | 0.91 |
| 2.29 | 0.90 |
| 2.13 | 0.88 |
| 2.13 | 0.88 |
| 1.26 | 0.60 |
| 0.39 | 0.09 |
| 0.39 | 0.09 |
| 0.55 | 0.19 |
| 0.46 | 0.13 |
| 2.42 | 0.91 |
| 0.75 | 0.32 |
| 0.75 | 0.32 |
| 3.95 | 0.99 |
| 3.95 | 0.99 |
| #N/A | #N/A |
| 1.23 | 0.59 |
| 1.23 | 0.59 |
| 2.38 | 0.86 |
| 2.38 | 0.86 |
| #N/A | #N/A |
| 1.21 | 0.57 |
| 1.41 | 0.66 |
| 1.41 | 0.66 |
| #N/A | #N/A |
| 1.40 | 0.65 |
| 1.40 | 0.65 |
| 0.74 | 0.32 |
| 0.74 | 0.32 |
| 2.25 | 0.89 |
| #N/A | #N/A |
| 2.25 | 0.89 |

|      |      |
|------|------|
| #N/A | #N/A |
| 0.95 | 0.44 |
| 0.42 | 0.10 |
| 0.88 | 0.40 |
| 0.42 | 0.10 |
| #N/A | #N/A |
| #N/A | #N/A |
| 1.94 | 0.83 |
| 4.04 | 0.99 |
| 4.04 | 0.99 |
| 4.04 | 0.99 |
| 0.73 | 0.31 |
| #N/A | #N/A |
| 1.34 | 0.62 |
| #N/A | #N/A |
| 1.63 | 0.49 |
| 1.63 | 0.49 |
| 0.44 | 0.12 |
| 0.44 | 0.12 |
| 0.35 | 0.06 |
| #N/A | #N/A |
| 0.35 | 0.06 |
| #N/A | #N/A |
| 0.52 | 0.17 |
| 0.42 | 0.10 |
| 0.52 | 0.17 |
| 0.98 | 0.46 |
| 0.98 | 0.46 |
| 1.58 | 0.73 |
| 1.58 | 0.73 |
| #N/A | #N/A |
| 0.71 | 0.30 |
| 0.71 | 0.30 |
| 0.71 | 0.30 |
| 0.71 | 0.30 |
| #N/A | #N/A |
| #N/A | #N/A |
| #N/A | #N/A |
| #N/A | #N/A |
| #N/A | #N/A |
| #N/A | #N/A |
| 0.84 | 0.37 |
| 0.71 | 0.30 |
| 0.71 | 0.30 |
| 1.13 | 0.54 |
| #N/A | #N/A |
| #N/A | #N/A |
| #N/A | #N/A |
| 0.97 | 0.44 |
| 0.83 | 0.37 |
| 1.16 | 0.55 |

|      |      |
|------|------|
| 0.78 | 0.34 |
| 0.78 | 0.34 |
| 1.26 | 0.60 |
| #N/A | #N/A |
| 1.16 | 0.55 |
| #N/A | #N/A |
| #N/A | #N/A |
| 2.30 | 0.90 |
| 2.30 | 0.90 |
| #N/A | #N/A |
| #N/A | #N/A |
| 0.88 | 0.40 |
| 1.13 | 0.52 |
| 1.57 | 0.72 |
| 1.70 | 0.76 |
| 1.45 | 0.68 |
| #N/A | #N/A |
| #N/A | #N/A |
| 1.08 | 0.51 |
| #N/A | #N/A |
| 0.84 | 0.38 |
| 1.55 | 0.71 |
| 1.88 | 0.81 |
| 1.10 | 0.52 |
| 1.04 | 0.49 |
| 0.98 | 0.46 |
| 1.44 | 0.67 |
| #N/A | #N/A |
| 1.32 | 0.62 |
| 0.63 | 0.24 |
| 1.32 | 0.62 |
| 2.67 | 0.94 |
| 0.55 | 0.20 |
| 0.52 | 0.18 |
| 0.12 | 0.01 |
| 0.31 | 0.05 |
| 0.56 | 0.20 |
| 0.56 | 0.20 |
| 0.81 | 0.36 |
| 1.34 | 0.63 |
| 0.36 | 0.07 |
| 0.60 | 0.23 |
| 0.31 | 0.05 |
| 0.73 | 0.31 |
| 0.73 | 0.31 |
| 0.59 | 0.22 |
| 0.59 | 0.22 |
| 1.05 | 0.49 |
| 1.01 | 0.47 |
| #N/A | #N/A |
| #N/A | #N/A |

|      |      |
|------|------|
| #N/A | #N/A |
| #N/A | #N/A |
| 1.05 | 0.50 |
| #N/A | #N/A |
| 1.18 | 0.56 |
| 1.18 | 0.56 |
| #N/A | #N/A |
| #N/A | #N/A |
| #N/A | #N/A |
| 0.98 | 0.46 |
| 1.86 | 0.81 |
| 1.09 | 0.51 |
| 0.47 | 0.14 |
| 0.47 | 0.14 |
| #N/A | #N/A |
| #N/A | #N/A |
| 1.73 | 0.78 |
| 1.73 | 0.78 |
| #N/A | #N/A |
| 0.42 | 0.10 |
| #N/A | #N/A |
| 1.06 | 0.50 |
| 1.06 | 0.50 |
| 1.06 | 0.50 |
| #N/A | #N/A |
| 0.85 | 0.39 |
| 1.88 | 0.79 |
| #N/A | #N/A |
| 1.88 | 0.79 |
| #N/A | #N/A |
| 0.68 | 0.28 |
| 2.13 | 0.86 |
| #N/A | #N/A |
| 2.63 | 0.93 |
| 1.92 | 0.83 |
| 1.92 | 0.83 |
| 0.66 | 0.27 |
| 3.93 | 0.84 |
| 3.93 | 0.84 |
| #N/A | #N/A |
| 1.51 | 0.71 |
| 0.80 | 0.36 |
| #N/A | #N/A |
| 1.05 | 0.49 |
| 1.05 | 0.49 |
| #N/A | #N/A |
| 0.60 | 0.22 |
| 0.91 | 0.42 |
| 1.09 | 0.52 |
| 1.09 | 0.52 |
| 0.97 | 0.43 |

|      |      |
|------|------|
| 3.21 | 0.87 |
| 1.56 | 0.72 |
| 1.56 | 0.72 |
| 0.69 | 0.28 |
| 0.44 | 0.12 |
| 2.87 | 0.93 |
| 1.47 | 0.68 |
| 0.97 | 0.45 |
| 0.46 | 0.13 |
| 0.46 | 0.13 |
| 1.98 | 0.84 |
| 1.98 | 0.84 |
| 1.65 | 0.70 |
| 1.30 | 0.61 |
| 1.30 | 0.61 |
| 1.42 | 0.67 |
| 1.45 | 0.68 |
| 1.45 | 0.68 |
| #N/A | #N/A |
| 2.23 | 0.88 |
| #N/A | #N/A |
| 2.23 | 0.88 |
| #N/A | #N/A |
| #N/A | #N/A |
| #N/A | #N/A |
| 1.47 | 0.69 |
| 0.79 | 0.35 |
| 0.88 | 0.41 |
| 0.88 | 0.41 |
| #N/A | #N/A |
| 2.31 | 0.90 |
| 1.24 | 0.59 |
| 1.32 | 0.62 |
| 1.32 | 0.62 |
| 0.56 | 0.20 |
| 0.56 | 0.20 |
| 1.36 | 0.63 |
| 1.13 | 0.53 |
| 1.13 | 0.53 |
| #N/A | #N/A |
| 0.41 | 0.10 |
| 0.67 | 0.28 |
| 2.26 | 0.90 |
| 0.77 | 0.34 |
| 1.42 | 0.65 |
| #N/A | #N/A |
| 2.39 | 0.91 |
| 2.39 | 0.91 |
| 2.39 | 0.91 |
| 2.09 | 0.77 |
| 2.36 | 0.90 |



|      |      |
|------|------|
| 2.02 | 0.85 |
| 0.86 | 0.39 |
| 1.10 | 0.51 |
| 2.44 | 0.91 |
| 2.30 | 0.88 |
| 2.30 | 0.88 |
| 1.93 | 0.82 |
| 1.93 | 0.82 |
| 0.89 | 0.41 |
| 0.68 | 0.28 |
| 1.57 | 0.72 |
| 0.68 | 0.28 |
| 1.57 | 0.72 |
| 1.57 | 0.72 |
| 2.76 | 0.95 |
| 0.95 | 0.44 |
| 1.82 | 0.80 |
| 2.56 | 0.93 |
| 1.82 | 0.80 |
| 1.84 | 0.74 |
| #N/A | #N/A |
| 1.06 | 0.50 |
| 0.74 | 0.31 |
| 1.51 | 0.69 |
| 1.51 | 0.69 |
| 1.39 | 0.65 |
| 1.39 | 0.65 |
| #N/A | #N/A |
| 1.54 | 0.71 |
| #N/A | #N/A |
| 0.92 | 0.43 |
| 0.92 | 0.43 |
| 2.27 | 0.86 |
| #N/A | #N/A |
| 1.69 | 0.76 |
| 2.29 | 0.79 |
| 2.29 | 0.79 |
| 1.29 | 0.61 |
| 1.29 | 0.61 |
| #N/A | #N/A |
| #N/A | #N/A |
| 3.17 | 0.97 |
| 1.71 | 0.77 |
| 1.72 | 0.77 |
| 1.71 | 0.77 |
| 1.72 | 0.77 |
| 1.72 | 0.77 |
| 1.88 | 0.74 |
| 2.01 | 0.81 |
| 1.88 | 0.74 |
| #N/A | #N/A |

|      |      |
|------|------|
| #N/A | #N/A |
| #N/A | #N/A |
| #N/A | #N/A |
| 1.95 | 0.82 |
| 1.95 | 0.82 |
| 1.35 | 0.61 |
| 1.20 | 0.57 |
| #N/A | #N/A |
| 1.20 | 0.57 |
| #N/A | #N/A |
| #N/A | #N/A |
| 1.28 | 0.61 |
| 1.28 | 0.61 |
| 1.49 | 0.69 |
| 1.49 | 0.69 |
| 1.35 | 0.63 |
| #N/A | #N/A |
| #N/A | #N/A |
| 2.05 | 0.86 |
| 2.05 | 0.86 |
| 0.81 | 0.36 |
| #N/A | #N/A |
| 1.47 | 0.68 |
| 2.43 | 0.91 |
| 0.99 | 0.46 |
| 2.42 | 0.71 |
| 0.89 | 0.41 |
| 1.43 | 0.67 |
| 1.54 | 0.71 |
| 1.54 | 0.71 |
| 1.61 | 0.74 |
| 1.05 | 0.49 |
| #N/A | #N/A |
| 2.24 | 0.87 |
| 0.94 | 0.44 |
| #N/A | #N/A |
| 2.24 | 0.87 |
| 2.24 | 0.87 |
| 0.94 | 0.44 |
| 0.94 | 0.44 |
| 0.94 | 0.44 |
| 0.94 | 0.44 |
| 0.94 | 0.44 |
| 0.94 | 0.44 |
| 2.24 | 0.87 |
| #N/A | #N/A |
| #N/A | #N/A |
| #N/A | #N/A |
| 2.24 | 0.87 |
| 2.24 | 0.87 |
| #N/A | #N/A |
| #N/A | #N/A |

|      |      |
|------|------|
| #N/A | #N/A |
| #N/A | #N/A |
| #N/A | #N/A |
| #N/A | #N/A |
| 0.38 | 0.08 |
| 0.38 | 0.08 |
| #N/A | #N/A |
| 0.99 | 0.46 |
| 1.98 | 0.84 |
| 1.98 | 0.84 |
| 0.97 | 0.45 |
| 1.86 | 0.81 |
| 1.97 | 0.84 |
| 1.97 | 0.84 |
| 1.82 | 0.80 |
| 1.82 | 0.80 |
| #N/A | #N/A |
| #N/A | #N/A |
| 0.46 | 0.13 |
| 1.74 | 0.76 |
| 2.01 | 0.85 |
| 1.74 | 0.76 |
| 2.01 | 0.85 |
| 1.74 | 0.76 |
| 2.01 | 0.85 |
| 2.12 | 0.87 |
| 1.00 | 0.47 |
| 1.00 | 0.47 |
| 1.26 | 0.60 |
| 1.26 | 0.60 |
| 1.96 | 0.82 |
| 2.29 | 0.90 |
| 2.29 | 0.90 |
| #N/A | #N/A |
| 1.20 | 0.57 |
| 2.06 | 0.86 |
| 2.06 | 0.86 |
| #N/A | #N/A |
| #N/A | #N/A |
| 3.13 | 0.97 |
| #N/A | #N/A |
| 1.39 | 0.66 |
| #N/A | #N/A |
| 1.55 | 0.71 |
| 1.55 | 0.71 |
| #N/A | #N/A |
| #N/A | #N/A |
| #N/A | #N/A |
| 0.98 | 0.46 |
| 0.63 | 0.24 |
| 0.63 | 0.24 |

|      |      |
|------|------|
| 0.32 | 0.05 |
| #N/A | #N/A |
| #N/A | #N/A |
| #N/A | #N/A |
| #N/A | #N/A |
| #N/A | #N/A |
| #N/A | #N/A |
| #N/A | #N/A |
| #N/A | #N/A |
| #N/A | #N/A |
| #N/A | #N/A |
| #N/A | #N/A |
| #N/A | #N/A |
| 2.24 | 0.87 |
| 0.94 | 0.44 |
| 2.24 | 0.87 |
| 0.94 | 0.44 |
| 0.94 | 0.44 |
| 0.94 | 0.44 |
| #N/A | #N/A |
| 0.94 | 0.44 |
| #N/A | #N/A |
| #N/A | #N/A |
| #N/A | #N/A |
| 0.94 | 0.44 |
| #N/A | #N/A |
| #N/A | #N/A |
| #N/A | #N/A |
| #N/A | #N/A |
| 2.49 | 0.92 |
| #N/A | #N/A |
| 1.66 | 0.75 |
| #N/A | #N/A |
| #N/A | #N/A |
| #N/A | #N/A |
| 0.68 | 0.28 |
| 1.25 | 0.59 |
| 0.58 | 0.21 |
| 0.57 | 0.21 |
| 1.17 | 0.55 |
| 0.98 | 0.45 |
| 1.38 | 0.61 |
| 2.72 | 0.95 |
| #N/A | #N/A |
| #N/A | #N/A |
| 0.63 | 0.24 |
| 0.39 | 0.09 |
| 1.41 | 0.66 |
| 1.66 | 0.75 |

|      |      |
|------|------|
| 1.35 | 0.63 |
| #N/A | #N/A |
| #N/A | #N/A |
| 1.17 | 0.56 |
| 0.81 | 0.36 |
| #N/A | #N/A |
| #N/A | #N/A |
| #N/A | #N/A |
| 1.49 | 0.69 |
| 2.47 | 0.92 |
| 3.02 | 0.96 |
| 1.21 | 0.58 |
| 2.42 | 0.91 |
| 3.03 | 0.96 |
| 3.03 | 0.96 |
| 0.78 | 0.34 |
| 0.78 | 0.34 |
| 0.78 | 0.34 |
| 2.14 | 0.81 |
| 1.77 | 0.74 |
| 1.23 | 0.59 |
| #N/A | #N/A |
| #N/A | #N/A |
| #N/A | #N/A |
| #N/A | #N/A |
| 1.76 | 0.69 |
| 1.76 | 0.69 |
| 0.50 | 0.16 |
| 0.50 | 0.16 |
| 0.62 | 0.24 |
| 0.70 | 0.29 |
| 0.70 | 0.29 |
| 1.26 | 0.60 |
| #N/A | #N/A |
| #N/A | #N/A |
| 2.90 | 0.94 |
| #N/A | #N/A |
| #N/A | #N/A |
| 2.75 | 0.95 |
| 2.99 | 0.94 |
| #N/A | #N/A |
| 2.52 | 0.93 |
| #N/A | #N/A |
| 4.22 | 0.99 |
| 4.22 | 0.99 |
| #N/A | #N/A |
| #N/A | #N/A |
| #N/A | #N/A |
| 1.11 | 0.53 |
| 2.24 | 0.89 |
| 2.24 | 0.89 |

|      |      |
|------|------|
| 2.03 | 0.85 |
| 2.03 | 0.85 |
| 2.42 | 0.91 |
| 1.50 | 0.70 |
| #N/A | #N/A |
| 1.55 | 0.72 |
| 2.23 | 0.89 |
| 2.23 | 0.89 |
| 1.13 | 0.54 |
| 1.26 | 0.58 |
| 0.70 | 0.29 |
| #N/A | #N/A |
| #N/A | #N/A |
| 1.96 | 0.84 |
| #N/A | #N/A |
| #N/A | #N/A |
| 1.55 | 0.71 |
| 1.68 | 0.76 |
| 0.66 | 0.27 |
| 0.66 | 0.27 |
| 0.52 | 0.17 |
| 1.15 | 0.55 |
| 0.47 | 0.14 |
| #N/A | #N/A |
| #N/A | #N/A |
| #N/A | #N/A |
| #N/A | #N/A |
| #N/A | #N/A |
| #N/A | #N/A |
| #N/A | #N/A |
| #N/A | #N/A |
| #N/A | #N/A |
| #N/A | #N/A |
| #N/A | #N/A |
| #N/A | #N/A |
| #N/A | #N/A |
| #N/A | #N/A |
| #N/A | #N/A |
| #N/A | #N/A |
| #N/A | #N/A |
| #N/A | #N/A |
| #N/A | #N/A |
| #N/A | #N/A |
| #N/A | #N/A |
| #N/A | #N/A |
| #N/A | #N/A |
| 1.01 | 0.47 |
| 1.01 | 0.47 |
| 0.85 | 0.38 |
| 1.68 | 0.75 |
| 1.68 | 0.75 |
| 0.65 | 0.26 |
| #N/A | #N/A |

|      |      |
|------|------|
| 0.89 | 0.41 |
| 0.89 | 0.41 |
| 1.35 | 0.64 |
| 0.89 | 0.41 |
| 1.35 | 0.64 |
| 2.66 | 0.94 |
| 2.85 | 0.82 |
| 2.85 | 0.82 |
| #N/A | #N/A |
| 1.96 | 0.84 |
| 1.96 | 0.84 |
| #N/A | #N/A |
| 1.00 | 0.47 |
| 0.94 | 0.44 |
| 0.54 | 0.18 |
| 0.94 | 0.44 |
| 0.79 | 0.35 |
| 1.41 | 0.66 |
| 3.36 | 0.98 |
| 0.90 | 0.41 |
| 3.36 | 0.98 |
| 1.70 | 0.75 |
| 2.00 | 0.84 |
| #N/A | #N/A |
| 1.45 | 0.67 |
| #N/A | #N/A |
| 0.87 | 0.39 |
| 1.45 | 0.67 |
| 0.87 | 0.39 |
| 0.84 | 0.38 |
| #N/A | #N/A |
| #N/A | #N/A |
| 1.93 | 0.83 |
| #N/A | #N/A |
| 1.00 | 0.47 |
| #N/A | #N/A |
| #N/A | #N/A |
| #N/A | #N/A |
| #N/A | #N/A |
| 0.58 | 0.21 |
| 0.41 | 0.10 |
| #N/A | #N/A |
| #N/A | #N/A |
| 2.21 | 0.89 |
| 2.21 | 0.89 |
| 1.43 | 0.67 |
| #N/A | #N/A |
| 1.09 | 0.52 |
| 2.64 | 0.94 |
| 0.82 | 0.36 |
| 2.10 | 0.87 |

|      |      |
|------|------|
| 2.10 | 0.87 |
| 0.95 | 0.44 |
| 0.95 | 0.44 |
| #N/A | #N/A |
| 1.53 | 0.71 |
| 2.33 | 0.75 |
| 2.33 | 0.75 |
| 1.68 | 0.76 |
| 1.68 | 0.76 |
| #N/A | #N/A |
| #N/A | #N/A |
| #N/A | #N/A |
| #N/A | #N/A |
| #N/A | #N/A |
| 2.25 | 0.89 |
| 2.25 | 0.89 |
| 0.47 | 0.14 |
| 0.47 | 0.14 |
| 1.42 | 0.66 |
| 1.57 | 0.71 |
| 3.31 | 0.97 |
| 1.37 | 0.64 |
| 0.89 | 0.41 |
| 0.39 | 0.12 |
| 0.39 | 0.12 |
| 1.92 | 0.81 |
| 1.32 | 0.62 |
| 2.32 | 0.89 |
| 2.32 | 0.89 |
| #N/A | #N/A |
| 2.03 | 0.86 |
| 2.03 | 0.86 |
| 2.05 | 0.85 |
| 2.58 | 0.93 |
| #N/A | #N/A |
| 2.58 | 0.93 |
| 1.42 | 0.66 |
| #N/A | #N/A |
| 1.42 | 0.66 |
| 1.09 | 0.52 |
| #N/A | #N/A |
| #N/A | #N/A |
| #N/A | #N/A |
| 2.64 | 0.94 |
| 2.64 | 0.94 |
| #N/A | #N/A |
| 2.97 | 0.96 |
| 2.97 | 0.96 |
| 1.02 | 0.47 |
| 1.28 | 0.60 |
| 1.28 | 0.60 |



|      |      |
|------|------|
| 1.69 | 0.74 |
| 1.23 | 0.58 |
| #N/A | #N/A |
| #N/A | #N/A |
| 1.76 | 0.78 |
| 1.76 | 0.78 |
| #N/A | #N/A |
| 1.31 | 0.62 |
| #N/A | #N/A |
| 1.31 | 0.62 |
| 2.79 | 0.92 |
| 2.79 | 0.92 |
| 1.03 | 0.49 |
| #N/A | #N/A |
| 0.42 | 0.11 |
| 0.42 | 0.11 |
| 1.01 | 0.47 |
| 0.60 | 0.24 |
| 1.16 | 0.55 |
| 1.38 | 0.65 |
| #N/A | #N/A |
| #N/A | #N/A |
| 1.87 | 0.80 |
| 0.80 | 0.35 |
| 1.44 | 0.68 |
| #N/A | #N/A |
| 0.86 | 0.39 |
| 0.39 | 0.08 |
| 1.42 | 0.66 |
| 0.67 | 0.27 |
| 0.67 | 0.27 |
| 0.93 | 0.43 |
| 2.09 | 0.86 |
| 2.09 | 0.86 |
| 3.61 | 0.98 |
| 3.61 | 0.98 |
| 2.77 | 0.95 |
| 0.51 | 0.16 |
| 1.79 | 0.80 |
| 1.79 | 0.80 |
| 1.24 | 0.59 |
| #N/A | #N/A |
| 1.24 | 0.59 |
| #N/A | #N/A |
| #N/A | #N/A |
| 0.37 | 0.08 |
| 1.02 | 0.48 |
| #N/A | #N/A |
| #N/A | #N/A |
| #N/A | #N/A |
| 0.64 | 0.25 |

|      |      |
|------|------|
| 0.64 | 0.25 |
| #N/A | #N/A |
| #N/A | #N/A |
| #N/A | #N/A |
| #N/A | #N/A |
| #N/A | #N/A |
| #N/A | #N/A |
| #N/A | #N/A |
| 1.21 | 0.58 |
| 1.21 | 0.58 |
| 1.11 | 0.53 |
| 1.11 | 0.53 |
| #N/A | #N/A |
| #N/A | #N/A |
| #N/A | #N/A |
| 1.89 | 0.82 |
| 2.00 | 0.84 |
| 2.00 | 0.84 |
| 1.38 | 0.65 |
| 2.37 | 0.90 |
| 0.65 | 0.25 |
| 0.66 | 0.27 |
| 0.70 | 0.29 |
| 1.48 | 0.69 |
| 0.45 | 0.12 |
| 3.05 | 0.96 |
| 1.80 | 0.79 |
| 3.05 | 0.96 |
| 1.80 | 0.79 |
| 3.20 | 0.97 |
| 3.20 | 0.97 |
| 0.41 | 0.10 |
| 1.62 | 0.72 |
| 1.14 | 0.54 |
| 2.51 | 0.92 |
| 3.46 | 0.98 |
| 1.03 | 0.48 |
| 1.03 | 0.48 |
| 1.08 | 0.51 |
| #N/A | #N/A |
| #N/A | #N/A |
| #N/A | #N/A |
| 3.40 | 0.98 |
| 3.40 | 0.98 |
| 2.20 | 0.88 |
| 2.20 | 0.88 |
| 1.42 | 0.61 |
| 1.63 | 0.74 |
| 2.45 | 0.92 |
| 2.45 | 0.92 |
| 1.88 | 0.82 |

|      |      |
|------|------|
| 1.15 | 0.55 |
| 1.86 | 0.80 |
| 1.86 | 0.80 |
| 0.59 | 0.22 |
| 3.36 | 0.98 |
| #N/A | #N/A |
| 1.62 | 0.74 |
| 2.17 | 0.86 |
| 1.44 | 0.54 |
| 1.44 | 0.54 |
| 1.91 | 0.83 |
| 1.91 | 0.83 |
| 1.35 | 0.64 |
| 1.26 | 0.59 |
| 2.68 | 0.91 |
| 2.68 | 0.91 |
| 0.69 | 0.28 |
| #N/A | #N/A |
| #N/A | #N/A |
| 3.74 | 0.99 |
| 3.74 | 0.99 |
| 1.46 | 0.68 |
| 1.34 | 0.63 |
| 1.34 | 0.63 |
| #N/A | #N/A |
| 2.24 | 0.89 |
| #N/A | #N/A |
| #N/A | #N/A |
| 0.56 | 0.20 |
| 2.66 | 0.94 |
| 0.94 | 0.44 |
| 1.06 | 0.50 |
| 1.06 | 0.50 |
| 1.91 | 0.83 |
| 0.58 | 0.21 |
| 1.35 | 0.64 |
| 0.83 | 0.37 |
| #N/A | #N/A |
| 0.61 | 0.23 |
| 0.61 | 0.23 |
| 0.50 | 0.16 |
| 0.86 | 0.39 |
| 1.08 | 0.51 |
| 1.36 | 0.64 |
| 1.36 | 0.64 |
| 1.17 | 0.56 |
| 1.17 | 0.56 |
| 0.60 | 0.22 |
| 0.60 | 0.22 |
| 1.12 | 0.53 |
| #N/A | #N/A |

|      |      |
|------|------|
| 0.75 | 0.31 |
| #N/A | #N/A |
| 3.41 | 0.98 |
| 1.21 | 0.56 |
| 1.36 | 0.64 |
| 0.94 | 0.44 |
| 2.34 | 0.89 |
| 2.34 | 0.89 |
| 1.29 | 0.61 |
| 0.23 | 0.02 |
| #N/A | #N/A |
| #N/A | #N/A |
| 2.17 | 0.88 |
| 0.99 | 0.46 |
| #N/A | #N/A |
| #N/A | #N/A |
| 2.06 | 0.85 |
| 2.06 | 0.85 |
| 1.47 | 0.68 |
| 0.96 | 0.45 |
| 1.58 | 0.73 |
| 1.17 | 0.56 |
| 1.83 | 0.81 |
| 1.83 | 0.81 |
| 0.96 | 0.45 |
| #N/A | #N/A |
| 0.35 | 0.07 |
| 0.35 | 0.07 |
| 0.61 | 0.23 |
| 0.58 | 0.21 |
| 2.19 | 0.88 |
| 1.25 | 0.59 |
| #N/A | #N/A |
| #N/A | #N/A |
| 0.42 | 0.11 |
| #N/A | #N/A |
| 0.46 | 0.13 |
| 1.21 | 0.57 |
| 1.08 | 0.51 |
| 1.21 | 0.57 |
| 1.01 | 0.48 |
| 1.01 | 0.48 |
| 1.87 | 0.79 |
| 1.87 | 0.79 |
| #N/A | #N/A |
| #N/A | #N/A |
| #N/A | #N/A |
| 0.52 | 0.17 |
| 1.01 | 0.48 |
| 0.67 | 0.27 |
| #N/A | #N/A |

|      |      |
|------|------|
| #N/A | #N/A |
| #N/A | #N/A |
| #N/A | #N/A |
| #N/A | #N/A |
| 8.88 | 0.98 |
| 0.95 | 0.44 |
| #N/A | #N/A |
| #N/A | #N/A |
| #N/A | #N/A |
| 0.94 | 0.44 |
| 2.04 | 0.85 |
| #N/A | #N/A |
| 0.18 | 0.01 |
| 0.55 | 0.26 |
| 0.55 | 0.26 |
| 1.92 | 0.81 |
| 2.70 | 0.93 |
| 2.70 | 0.93 |
| #N/A | #N/A |
| 1.91 | 0.82 |
| 1.04 | 0.50 |
| 1.40 | 0.66 |
| #N/A | #N/A |
| 1.42 | 0.64 |
| 0.96 | 0.45 |
| 1.10 | 0.52 |
| 1.85 | 0.78 |
| 1.85 | 0.78 |
| 0.77 | 0.34 |
| 0.77 | 0.34 |
| 0.67 | 0.27 |
| 0.67 | 0.27 |
| 1.05 | 0.50 |
| #N/A | #N/A |
| #N/A | #N/A |
| 0.80 | 0.35 |
| 0.62 | 0.24 |
| 1.13 | 0.54 |
| 1.13 | 0.54 |
| 1.45 | 0.68 |
| 4.15 | 0.99 |
| 4.15 | 0.99 |
| 2.35 | 0.91 |
| 2.35 | 0.91 |
| 2.83 | 0.95 |
| 2.83 | 0.95 |
| 2.20 | 0.88 |
| #N/A | #N/A |
| 2.41 | 0.92 |
| #N/A | #N/A |
| 2.41 | 0.92 |

|       |      |
|-------|------|
| 2.47  | 0.91 |
| 20.28 | 1.00 |
| 20.28 | 1.00 |
| 1.19  | 0.57 |
| 1.72  | 0.78 |
| 1.72  | 0.78 |
| 1.74  | 0.78 |
| 1.01  | 0.48 |
| 1.01  | 0.48 |
| 1.14  | 0.53 |
| 1.14  | 0.53 |
| #N/A  | #N/A |
| #N/A  | #N/A |
| 0.83  | 0.37 |
| 2.16  | 0.87 |
| #N/A  | #N/A |
| #N/A  | #N/A |
| 0.36  | 0.07 |
| 0.36  | 0.07 |
| #N/A  | #N/A |
| #N/A  | #N/A |
| #N/A  | #N/A |
| #N/A  | #N/A |
| 1.58  | 0.65 |
| 1.58  | 0.65 |
| 1.83  | 0.79 |
| 0.89  | 0.39 |
| 1.71  | 0.76 |
| 2.70  | 0.94 |
| 2.70  | 0.94 |
| 1.10  | 0.52 |
| 1.10  | 0.52 |
| 1.96  | 0.84 |
| #N/A  | #N/A |
| 1.96  | 0.84 |
| 1.52  | 0.70 |
| 1.52  | 0.70 |
| 0.34  | 0.06 |
| 0.34  | 0.06 |
| 0.34  | 0.06 |
| 0.34  | 0.06 |
| 0.34  | 0.06 |
| 0.34  | 0.06 |
| 0.34  | 0.06 |
| 1.88  | 0.81 |
| 1.78  | 0.78 |
| #N/A  | #N/A |
| 1.16  | 0.49 |
| 1.16  | 0.49 |
| 2.16  | 0.88 |
| 2.16  | 0.88 |
| #N/A  | #N/A |

|      |      |
|------|------|
| #N/A | #N/A |
| 1.76 | 0.77 |
| 1.65 | 0.75 |
| 1.23 | 0.58 |
| #N/A | #N/A |
| 1.44 | 0.67 |
| 0.59 | 0.22 |
| 0.59 | 0.22 |
| 2.08 | 0.86 |
| 2.08 | 0.86 |
| 1.55 | 0.71 |
| 2.04 | 0.86 |
| 1.50 | 0.70 |
| 1.50 | 0.70 |
| 2.34 | 0.90 |
| #N/A | #N/A |
| #N/A | #N/A |
| #N/A | #N/A |
| 1.57 | 0.70 |
| 0.92 | 0.43 |
| 0.96 | 0.45 |
| #N/A | #N/A |
| 0.96 | 0.45 |
| #N/A | #N/A |
| 1.51 | 0.70 |
| 1.51 | 0.70 |
| 1.13 | 0.54 |
| #N/A | #N/A |
| #N/A | #N/A |
| #N/A | #N/A |
| #N/A | #N/A |
| #N/A | #N/A |
| #N/A | #N/A |
| #N/A | #N/A |
| 3.12 | 0.95 |
| 3.12 | 0.95 |
| 0.91 | 0.42 |
| #N/A | #N/A |
| 0.91 | 0.42 |
| 4.93 | 1.00 |
| 1.51 | 0.70 |
| 1.91 | 0.82 |
| 1.91 | 0.82 |
| #N/A | #N/A |
| #N/A | #N/A |
| 0.96 | 0.44 |
| 2.14 | 0.87 |
| 0.96 | 0.45 |
| 0.81 | 0.35 |
| 0.64 | 0.24 |
| 0.64 | 0.24 |

|      |      |
|------|------|
| 1.64 | 0.75 |
| #N/A | #N/A |
| 0.63 | 0.25 |
| 0.53 | 0.18 |
| 0.63 | 0.25 |
| 0.53 | 0.18 |
| 1.23 | 0.57 |
| 0.57 | 0.20 |
| 0.57 | 0.20 |
| 0.36 | 0.10 |
| #N/A | #N/A |
| 1.86 | 0.81 |
| 1.86 | 0.81 |
| #N/A | #N/A |
| 1.15 | 0.54 |
| 1.15 | 0.54 |
| 0.39 | 0.08 |
| 0.39 | 0.08 |
| 1.10 | 0.52 |
| 2.44 | 0.92 |
| 2.44 | 0.92 |
| 2.01 | 0.85 |
| #N/A | #N/A |
| #N/A | #N/A |
| #N/A | #N/A |
| 0.95 | 0.45 |
| #N/A | #N/A |
| #N/A | #N/A |
| #N/A | #N/A |
| 0.70 | 0.29 |
| 0.90 | 0.41 |
| 1.13 | 0.53 |
| 1.06 | 0.50 |
| #N/A | #N/A |
| #N/A | #N/A |
| #N/A | #N/A |
| 1.89 | 0.82 |
| 1.89 | 0.82 |
| 1.17 | 0.56 |
| 0.29 | 0.04 |
| #N/A | #N/A |
| 0.93 | 0.43 |
| 0.35 | 0.06 |
| 1.77 | 0.79 |
| 1.42 | 0.67 |
| 0.93 | 0.41 |
| 0.35 | 0.06 |
| 1.68 | 0.76 |
| 1.68 | 0.76 |
| #N/A | #N/A |
| 1.84 | 0.78 |



|      |      |
|------|------|
| 1.84 | 0.78 |
| #N/A | #N/A |
| 1.03 | 0.47 |
| #N/A | #N/A |
| #N/A | #N/A |
| #N/A | #N/A |
| 0.61 | 0.23 |
| 0.61 | 0.23 |
| 0.31 | 0.05 |
| 0.53 | 0.18 |
| 0.98 | 0.46 |
| 1.55 | 0.71 |
| #N/A | #N/A |
| 0.94 | 0.44 |
| 1.15 | 0.55 |
| 1.92 | 0.80 |
| 1.05 | 0.49 |
| 1.05 | 0.49 |
| 2.28 | 0.90 |
| 2.28 | 0.90 |
| 1.73 | 0.77 |
| #N/A | #N/A |
| 0.36 | 0.07 |
| 0.36 | 0.07 |
| 0.48 | 0.14 |
| #N/A | #N/A |
| 1.19 | 0.56 |
| 1.48 | 0.69 |
| 1.48 | 0.69 |
| 0.96 | 0.45 |
| 1.44 | 0.67 |
| 1.44 | 0.67 |
| 3.17 | 0.97 |
| 3.17 | 0.97 |
| 1.85 | 0.81 |
| 1.75 | 0.78 |
| 1.14 | 0.54 |
| #N/A | #N/A |
| 1.81 | 0.80 |
| 1.03 | 0.48 |
| 0.95 | 0.44 |
| 0.49 | 0.15 |
| 1.52 | 0.70 |
| 1.52 | 0.70 |
| 2.10 | 0.84 |
| 1.50 | 0.70 |
| #N/A | #N/A |
| #N/A | #N/A |
| #N/A | #N/A |
| #N/A | #N/A |
| 1.43 | 0.67 |

|      |      |
|------|------|
| #N/A | #N/A |
| 2.19 | 0.88 |
| 2.19 | 0.88 |
| #N/A | #N/A |
| 1.35 | 0.64 |
| 1.65 | 0.75 |
| 1.65 | 0.75 |
| 1.78 | 0.79 |
| 1.78 | 0.79 |
| 2.46 | 0.92 |
| #N/A | #N/A |
| #N/A | #N/A |
| #N/A | #N/A |
| #N/A | #N/A |
| 0.77 | 0.34 |
| 0.77 | 0.34 |
| #N/A | #N/A |
| #N/A | #N/A |
| 2.24 | 0.84 |
| 1.12 | 0.53 |
| 0.83 | 0.37 |
| 0.83 | 0.37 |
| 1.17 | 0.55 |
| #N/A | #N/A |
| 0.21 | 0.02 |
| 0.85 | 0.39 |
| 0.33 | 0.05 |
| 2.10 | 0.87 |
| 2.10 | 0.87 |
| 1.26 | 0.60 |
| 1.78 | 0.79 |
| 2.05 | 0.86 |
| 2.05 | 0.86 |
| 1.00 | 0.46 |
| 1.15 | 0.55 |
| 1.10 | 0.52 |
| #N/A | #N/A |
| #N/A | #N/A |
| #N/A | #N/A |
| #N/A | #N/A |
| 0.88 | 0.39 |
| #N/A | #N/A |
| #N/A | #N/A |
| 2.75 | 0.95 |
| 2.75 | 0.95 |
| #N/A | #N/A |
| 3.31 | 0.98 |
| #N/A | #N/A |
| 3.31 | 0.98 |
| #N/A | #N/A |
| #N/A | #N/A |

|      |      |
|------|------|
| 1.89 | 0.82 |
| 1.89 | 0.82 |
| 2.14 | 0.87 |
| 2.14 | 0.87 |
| #N/A | #N/A |
| 1.12 | 0.53 |
| 1.12 | 0.53 |
| 0.91 | 0.42 |
| 1.45 | 0.66 |
| 1.45 | 0.66 |
| 0.97 | 0.46 |
| 0.45 | 0.13 |
| #N/A | #N/A |
| 1.18 | 0.56 |
| 0.82 | 0.37 |
| 0.82 | 0.37 |
| 0.80 | 0.35 |
| 0.92 | 0.43 |
| 0.92 | 0.43 |
| 0.57 | 0.20 |
| 2.23 | 0.88 |
| 1.94 | 0.83 |
| 1.94 | 0.83 |
| #N/A | #N/A |
| 1.50 | 0.69 |
| 1.11 | 0.53 |
| #N/A | #N/A |
| 1.26 | 0.60 |
| 1.26 | 0.60 |
| 1.29 | 0.61 |
| 0.93 | 0.43 |
| #N/A | #N/A |
| 0.69 | 0.28 |
| 0.69 | 0.28 |
| 3.83 | 0.99 |
| 3.83 | 0.99 |
| 0.86 | 0.39 |
| 2.97 | 0.95 |
| 1.46 | 0.68 |
| 1.46 | 0.68 |
| #N/A | #N/A |
| 3.04 | 0.97 |
| 3.04 | 0.97 |
| 0.67 | 0.27 |
| 1.92 | 0.74 |
| 2.32 | 0.83 |
| 2.32 | 0.83 |
| 1.05 | 0.49 |
| 0.47 | 0.14 |
| 1.05 | 0.49 |
| 0.32 | 0.05 |

|      |      |
|------|------|
| 0.91 | 0.42 |
| #N/A | #N/A |
| #N/A | #N/A |
| 2.60 | 0.93 |
| 2.60 | 0.93 |
| 2.93 | 0.96 |
| 2.93 | 0.96 |
| #N/A | #N/A |
| #N/A | #N/A |
| #N/A | #N/A |
| #N/A | #N/A |
| #N/A | #N/A |
| #N/A | #N/A |
| 0.50 | 0.16 |
| 2.23 | 0.89 |
| 2.23 | 0.89 |
| 0.80 | 0.35 |
| 1.11 | 0.53 |
| #N/A | #N/A |
| 1.42 | 0.66 |
| 0.27 | 0.03 |
| 0.27 | 0.03 |
| 1.34 | 0.63 |
| 1.34 | 0.63 |
| #N/A | #N/A |
| 2.58 | 0.94 |
| 0.85 | 0.38 |
| 0.85 | 0.38 |
| 0.88 | 0.40 |
| 0.88 | 0.40 |
| #N/A | #N/A |
| #N/A | #N/A |
| 1.81 | 0.80 |
| 2.24 | 0.89 |
| 1.66 | 0.76 |
| 2.24 | 0.89 |
| 1.66 | 0.76 |
| #N/A | #N/A |
| 1.44 | 0.66 |
| 1.44 | 0.66 |
| #N/A | #N/A |
| #N/A | #N/A |
| #N/A | #N/A |
| #N/A | #N/A |
| 3.30 | 0.98 |
| 3.30 | 0.98 |
| #N/A | #N/A |
| 1.24 | 0.58 |
| 1.24 | 0.58 |
| 0.65 | 0.26 |
| 0.65 | 0.26 |

|      |      |
|------|------|
| 1.23 | 0.58 |
| 1.45 | 0.67 |
| 0.53 | 0.18 |
| 1.02 | 0.47 |
| 1.71 | 0.77 |
| 1.71 | 0.77 |
| #N/A | #N/A |
| 2.05 | 0.86 |
| 2.05 | 0.86 |
| 0.91 | 0.42 |
| 0.95 | 0.44 |
| 0.95 | 0.44 |
| #N/A | #N/A |
| 1.43 | 0.67 |
| #N/A | #N/A |
| #N/A | #N/A |
| 1.88 | 0.78 |
| 1.88 | 0.78 |
| 2.46 | 0.92 |
| 0.80 | 0.35 |
| 2.46 | 0.92 |
| 0.80 | 0.35 |
| 2.03 | 0.85 |
| #N/A | #N/A |
| #N/A | #N/A |
| 0.77 | 0.34 |
| 1.63 | 0.74 |
| 1.63 | 0.74 |
| 0.60 | 0.23 |
| 0.60 | 0.23 |
| #N/A | #N/A |
| 1.49 | 0.69 |
| 0.80 | 0.35 |
| 0.80 | 0.35 |
| #N/A | #N/A |
| 0.49 | 0.15 |
| 0.44 | 0.11 |
| 0.49 | 0.15 |
| 0.44 | 0.11 |
| 0.95 | 0.43 |
| #N/A | #N/A |
| #N/A | #N/A |
| 1.70 | 0.76 |
| 1.70 | 0.76 |
| 1.86 | 0.81 |
| 1.86 | 0.81 |
| 1.32 | 0.62 |
| #N/A | #N/A |
| 1.96 | 0.82 |
| #N/A | #N/A |
| #N/A | #N/A |

|      |      |
|------|------|
| 0.54 | 0.19 |
| 0.59 | 0.22 |
| 0.59 | 0.22 |
| 2.04 | 0.86 |
| 0.39 | 0.08 |
| 1.37 | 0.64 |
| 0.68 | 0.26 |
| 0.85 | 0.39 |
| 0.85 | 0.39 |
| 1.17 | 0.56 |
| 0.59 | 0.21 |
| 0.50 | 0.16 |
| 1.32 | 0.62 |
| 1.32 | 0.62 |
| 1.03 | 0.48 |
| #N/A | #N/A |
| 1.03 | 0.48 |
| 1.65 | 0.73 |
| 1.28 | 0.61 |
| 0.55 | 0.19 |
| 0.53 | 0.18 |
| 0.73 | 0.31 |
| 0.73 | 0.31 |
| 1.68 | 0.75 |
| #N/A | #N/A |
| #N/A | #N/A |
| 2.09 | 0.84 |
| 2.09 | 0.84 |
| #N/A | #N/A |
| 0.30 | 0.04 |
| 0.32 | 0.07 |
| 0.32 | 0.07 |
| 0.72 | 0.29 |
| 1.20 | 0.57 |
| 1.36 | 0.63 |
| #N/A | #N/A |
| #N/A | #N/A |
| 1.88 | 0.78 |
| 1.88 | 0.78 |
| 0.48 | 0.15 |
| 0.48 | 0.15 |
| 2.43 | 0.91 |
| 2.43 | 0.91 |
| #N/A | #N/A |
| #N/A | #N/A |
| 1.82 | 0.80 |
| 1.82 | 0.80 |
| 0.92 | 0.42 |
| 0.92 | 0.42 |
| 0.45 | 0.12 |
| #N/A | #N/A |

|      |      |
|------|------|
| 1.40 | 0.65 |
| 1.40 | 0.65 |
| 0.79 | 0.35 |
| 2.22 | 0.88 |
| 1.34 | 0.62 |
| #N/A | #N/A |
| #N/A | #N/A |
| #N/A | #N/A |
| #N/A | #N/A |
| 1.20 | 0.57 |
| 1.69 | 0.76 |
| 1.69 | 0.76 |
| 0.73 | 0.31 |
| 1.88 | 0.82 |
| 1.09 | 0.51 |
| #N/A | #N/A |
| 0.33 | 0.06 |
| 0.33 | 0.06 |
| 0.33 | 0.06 |
| 0.83 | 0.37 |
| #N/A | #N/A |
| 1.14 | 0.55 |
| 1.64 | 0.75 |
| #N/A | #N/A |
| 1.69 | 0.76 |
| 1.69 | 0.76 |
| 0.35 | 0.06 |
| 1.51 | 0.70 |
| 1.28 | 0.61 |
| 1.28 | 0.61 |
| #N/A | #N/A |
| #N/A | #N/A |
| 0.52 | 0.18 |
| 0.52 | 0.18 |
| #N/A | #N/A |
| 1.31 | 0.62 |
| 1.31 | 0.62 |
| #N/A | #N/A |
| #N/A | #N/A |
| 0.78 | 0.34 |
| #N/A | #N/A |
| 0.78 | 0.34 |
| #N/A | #N/A |
| #N/A | #N/A |
| #N/A | #N/A |
| 1.53 | 0.71 |
| 0.78 | 0.34 |
| 1.05 | 0.50 |
| 1.05 | 0.50 |
| 1.05 | 0.50 |
| 1.05 | 0.50 |

|      |      |
|------|------|
| #N/A | #N/A |
| #N/A | #N/A |
| 0.56 | 0.20 |
| #N/A | #N/A |
| 2.20 | 0.89 |
| 2.20 | 0.89 |
| 1.45 | 0.66 |
| 1.95 | 0.83 |
| 0.94 | 0.44 |
| #N/A | #N/A |
| 1.81 | 0.80 |
| 1.81 | 0.80 |
| 1.30 | 0.61 |
| 1.75 | 0.78 |
| 1.70 | 0.76 |
| #N/A | #N/A |
| #N/A | #N/A |
| #N/A | #N/A |
| 1.29 | 0.61 |
| #N/A | #N/A |
| 2.56 | 0.92 |
| 0.63 | 0.24 |
| 2.56 | 0.92 |
| 0.63 | 0.24 |
| 0.65 | 0.26 |
| #N/A | #N/A |
| 1.39 | 0.65 |
| #N/A | #N/A |
| 3.06 | 0.96 |
| 0.95 | 0.44 |
| 1.76 | 0.77 |
| 0.47 | 0.13 |
| #N/A | #N/A |
| #N/A | #N/A |
| #N/A | #N/A |
| #N/A | #N/A |
| 0.65 | 0.26 |
| 0.65 | 0.26 |
| 0.24 | 0.02 |
| 0.20 | 0.01 |
| 0.20 | 0.01 |
| #N/A | #N/A |
| 2.15 | 0.87 |
| 2.15 | 0.87 |
| 0.59 | 0.22 |
| 1.47 | 0.68 |
| 0.55 | 0.18 |
| 0.33 | 0.05 |
| #N/A | #N/A |
| 0.56 | 0.19 |
| 0.74 | 0.32 |



|      |      |
|------|------|
| 1.59 | 0.72 |
| 1.18 | 0.56 |
| 0.98 | 0.45 |
| #N/A | #N/A |
| #N/A | #N/A |
| 0.71 | 0.30 |
| 0.42 | 0.10 |
| 0.68 | 0.28 |
| 0.60 | 0.23 |
| 0.26 | 0.03 |
| 0.26 | 0.03 |
| 1.54 | 0.71 |
| 1.54 | 0.71 |
| 1.67 | 0.76 |
| 0.78 | 0.34 |
| 0.46 | 0.13 |
| #N/A | #N/A |
| 0.61 | 0.24 |
| 0.61 | 0.24 |
| #N/A | #N/A |
| #N/A | #N/A |
| 1.01 | 0.47 |
| 0.66 | 0.26 |
| 1.45 | 0.68 |
| 1.01 | 0.47 |
| 0.32 | 0.06 |
| 1.49 | 0.69 |
| 1.18 | 0.56 |
| 1.18 | 0.56 |
| 0.21 | 0.02 |
| 0.26 | 0.03 |
| 0.87 | 0.40 |
| 1.10 | 0.52 |
| #N/A | #N/A |
| 2.55 | 0.93 |
| 2.55 | 0.93 |
| 1.13 | 0.53 |
| #N/A | #N/A |
| #N/A | #N/A |
| 1.75 | 0.78 |
| #N/A | #N/A |
| 2.28 | 0.89 |
| 2.28 | 0.89 |
| #N/A | #N/A |
| 0.69 | 0.28 |
| 0.55 | 0.19 |
| 1.20 | 0.56 |
| 1.20 | 0.56 |
| #N/A | #N/A |
| #N/A | #N/A |
| 2.20 | 0.87 |

|      |      |
|------|------|
| #N/A | #N/A |
| 1.25 | 0.59 |
| 1.25 | 0.59 |
| 0.66 | 0.26 |
| #N/A | #N/A |
| #N/A | #N/A |
| 2.35 | 0.90 |
| 2.35 | 0.90 |
| 0.72 | 0.30 |
| 0.72 | 0.30 |
| 1.55 | 0.72 |
| 1.91 | 0.82 |
| #N/A | #N/A |
| #N/A | #N/A |
| 1.43 | 0.67 |
| #N/A | #N/A |
| 0.78 | 0.34 |
| #N/A | #N/A |
| 0.77 | 0.33 |
| 0.77 | 0.33 |
| 1.64 | 0.75 |
| 1.46 | 0.68 |
| 1.22 | 0.58 |
| 0.64 | 0.25 |
| 0.64 | 0.25 |
| 1.98 | 0.84 |
| 1.38 | 0.65 |
| 1.38 | 0.65 |
| 1.98 | 0.84 |
| 1.38 | 0.65 |
| 2.41 | 0.91 |
| 2.41 | 0.91 |
| 2.28 | 0.90 |
| 2.28 | 0.90 |
| #N/A | #N/A |
| #N/A | #N/A |
| 1.60 | 0.69 |
| 2.37 | 0.91 |
| 0.62 | 0.24 |
| 0.62 | 0.24 |
| 1.01 | 0.48 |
| 1.58 | 0.73 |
| 1.36 | 0.63 |
| 0.92 | 0.42 |
| 0.95 | 0.45 |
| 1.15 | 0.53 |
| 0.39 | 0.09 |
| 2.94 | 0.95 |
| 2.94 | 0.95 |
| 0.77 | 0.33 |
| 1.51 | 0.69 |

|      |      |
|------|------|
| 1.51 | 0.69 |
| 0.79 | 0.33 |
| 0.90 | 0.41 |
| 0.90 | 0.41 |
| 2.22 | 0.87 |
| 2.22 | 0.87 |
| 1.25 | 0.59 |
| 1.25 | 0.59 |
| 2.58 | 0.92 |
| 2.56 | 0.93 |
| 2.56 | 0.93 |
| 2.56 | 0.93 |
| 1.61 | 0.73 |
| 2.26 | 0.89 |
| 2.26 | 0.89 |
| 0.61 | 0.23 |
| 0.51 | 0.16 |
| 0.75 | 0.32 |
| #N/A | #N/A |
| 1.26 | 0.57 |
| 1.17 | 0.56 |
| 0.69 | 0.28 |
| 0.56 | 0.19 |
| 1.15 | 0.54 |
| 0.82 | 0.37 |
| 1.24 | 0.59 |
| 1.24 | 0.59 |
| #N/A | #N/A |
| #N/A | #N/A |
| #N/A | #N/A |
| #N/A | #N/A |
| 1.08 | 0.49 |
| 1.47 | 0.69 |
| 1.47 | 0.69 |
| 0.22 | 0.02 |
| #N/A | #N/A |
| #N/A | #N/A |
| 1.25 | 0.59 |
| #N/A | #N/A |
| #N/A | #N/A |
| 1.14 | 0.55 |
| 1.37 | 0.64 |
| 1.37 | 0.64 |
| 2.18 | 0.88 |
| 1.43 | 0.67 |
| 1.69 | 0.76 |
| #N/A | #N/A |
| #N/A | #N/A |
| #N/A | #N/A |
| #N/A | #N/A |
| #N/A | #N/A |

|      |      |
|------|------|
| 1.50 | 0.70 |
| 2.34 | 0.90 |
| #N/A | #N/A |
| 2.24 | 0.89 |
| 2.93 | 0.96 |
| 1.49 | 0.69 |
| 1.49 | 0.69 |
| #N/A | #N/A |
| #N/A | #N/A |
| #N/A | #N/A |
| #N/A | #N/A |
| #N/A | #N/A |
| 1.21 | 0.57 |
| 1.21 | 0.57 |
| #N/A | #N/A |
| #N/A | #N/A |
| 1.02 | 0.47 |
| #N/A | #N/A |
| 0.95 | 0.44 |
| 1.78 | 0.79 |
| #N/A | #N/A |
| #N/A | #N/A |
| 0.57 | 0.21 |
| 0.57 | 0.21 |
| 0.96 | 0.45 |
| 2.67 | 0.92 |
| 2.67 | 0.92 |
| 1.27 | 0.60 |
| 3.85 | 0.95 |
| #N/A | #N/A |
| 0.81 | 0.36 |
| 0.81 | 0.36 |
| 0.81 | 0.36 |
| 1.06 | 0.50 |
| #N/A | #N/A |
| #N/A | #N/A |
| #N/A | #N/A |
| #N/A | #N/A |
| 2.97 | 0.96 |
| 2.97 | 0.96 |
| 0.31 | 0.05 |
| #N/A | #N/A |
| 1.57 | 0.72 |
| 1.57 | 0.72 |
| 1.57 | 0.72 |
| #N/A | #N/A |
| 1.49 | 0.69 |
| #N/A | #N/A |
| #N/A | #N/A |
| #N/A | #N/A |
| 2.35 | 0.90 |

|      |      |
|------|------|
| 2.35 | 0.90 |
| 0.58 | 0.21 |
| 1.26 | 0.60 |
| 2.12 | 0.87 |
| 2.12 | 0.87 |
| 1.85 | 0.81 |
| 0.65 | 0.25 |
| 0.65 | 0.25 |
| 2.54 | 0.92 |
| 1.70 | 0.77 |
| 1.70 | 0.77 |
| 1.66 | 0.75 |
| 0.77 | 0.34 |
| #N/A | #N/A |
| #N/A | #N/A |
| #N/A | #N/A |
| 1.67 | 0.75 |
| 0.47 | 0.13 |
| #N/A | #N/A |
| #N/A | #N/A |
| #N/A | #N/A |
| 1.20 | 0.57 |
| 1.95 | 0.82 |
| 1.08 | 0.47 |
| 1.08 | 0.47 |
| 0.77 | 0.34 |
| 0.77 | 0.34 |
| 0.96 | 0.45 |
| #N/A | #N/A |
| #N/A | #N/A |
| 0.90 | 0.41 |
| #N/A | #N/A |
| #N/A | #N/A |
| 2.32 | 0.91 |
| 1.00 | 0.47 |
| 0.85 | 0.38 |
| #N/A | #N/A |
| 1.53 | 0.64 |
| 1.98 | 0.84 |
| 1.98 | 0.84 |
| 1.02 | 0.48 |
| 1.50 | 0.70 |
| 1.48 | 0.69 |
| 0.77 | 0.33 |
| 1.66 | 0.74 |
| 1.66 | 0.74 |
| #N/A | #N/A |
| 0.90 | 0.41 |
| 2.59 | 0.94 |
| #N/A | #N/A |
| 1.69 | 0.76 |

|      |      |
|------|------|
| 1.05 | 0.50 |
| 0.83 | 0.37 |
| 0.47 | 0.14 |
| 0.51 | 0.17 |
| #N/A | #N/A |
| 1.07 | 0.51 |
| #N/A | #N/A |
| #N/A | #N/A |
| 5.12 | 1.00 |
| 5.12 | 1.00 |
| 1.56 | 0.72 |
| 1.56 | 0.72 |
| #N/A | #N/A |
| #N/A | #N/A |
| #N/A | #N/A |
| 1.87 | 0.82 |
| 1.87 | 0.82 |
| #N/A | #N/A |
| 1.75 | 0.78 |
| 1.75 | 0.78 |
| 1.18 | 0.55 |
| #N/A | #N/A |
| 3.23 | 0.97 |
| 3.23 | 0.97 |
| 0.62 | 0.24 |
| 0.90 | 0.42 |
| 0.77 | 0.34 |
| 0.67 | 0.27 |
| #N/A | #N/A |
| 0.60 | 0.22 |
| 2.20 | 0.88 |
| 2.20 | 0.88 |
| 0.99 | 0.47 |
| #N/A | #N/A |
| 0.54 | 0.17 |
| 0.26 | 0.03 |
| 0.26 | 0.03 |
| 0.80 | 0.36 |
| 2.31 | 0.90 |
| 2.31 | 0.90 |
| 1.32 | 0.61 |
| 1.32 | 0.61 |
| #N/A | #N/A |
| #N/A | #N/A |
| 1.58 | 0.73 |
| 2.55 | 0.93 |
| 2.55 | 0.93 |
| 3.17 | 0.96 |
| 3.17 | 0.96 |
| 0.76 | 0.33 |
| 7.92 | 1.00 |

|      |      |
|------|------|
| 7.92 | 1.00 |
| 1.14 | 0.51 |
| #N/A | #N/A |
| 1.14 | 0.51 |
| #N/A | #N/A |
| 2.02 | 0.84 |
| 0.90 | 0.41 |
| 0.50 | 0.16 |
| 0.50 | 0.16 |
| 1.01 | 0.48 |
| 1.12 | 0.53 |
| 1.60 | 0.73 |
| #N/A | #N/A |
| 0.31 | 0.05 |
| 0.31 | 0.05 |
| 1.14 | 0.54 |
| 1.10 | 0.51 |
| 1.38 | 0.65 |
| #N/A | #N/A |
| 1.38 | 0.65 |
| 2.15 | 0.87 |
| 2.15 | 0.87 |
| 0.65 | 0.25 |
| 1.19 | 0.56 |
| 1.92 | 0.82 |
| 1.92 | 0.82 |
| 1.02 | 0.48 |
| 0.73 | 0.31 |
| #N/A | #N/A |
| #N/A | #N/A |
| 1.10 | 0.51 |
| #N/A | #N/A |
| 0.43 | 0.11 |
| 0.43 | 0.11 |
| #N/A | #N/A |
| 1.44 | 0.67 |
| 1.56 | 0.70 |
| 2.19 | 0.89 |
| 2.19 | 0.89 |
| #N/A | #N/A |
| #N/A | #N/A |
| 3.21 | 0.97 |
| 3.21 | 0.97 |
| #N/A | #N/A |
| 2.62 | 0.89 |
| 1.13 | 0.52 |
| 3.23 | 0.97 |
| 1.13 | 0.52 |
| 3.23 | 0.97 |
| 1.45 | 0.68 |
| 1.45 | 0.68 |

|      |      |
|------|------|
| 1.53 | 0.71 |
| 1.45 | 0.68 |
| 1.53 | 0.71 |
| 1.20 | 0.57 |
| #N/A | #N/A |
| 1.00 | 0.47 |
| 0.98 | 0.46 |
| 2.32 | 0.90 |
| 0.62 | 0.24 |
| 1.95 | 0.83 |
| 1.36 | 0.64 |
| 1.36 | 0.64 |
| #N/A | #N/A |
| 2.73 | 0.95 |
| 2.73 | 0.95 |
| 1.01 | 0.47 |
| 1.01 | 0.47 |
| #N/A | #N/A |
| #N/A | #N/A |
| #N/A | #N/A |
| 2.16 | 0.88 |
| 2.16 | 0.88 |
| 1.23 | 0.58 |
| 0.52 | 0.17 |
| #N/A | #N/A |
| 1.04 | 0.49 |
| 2.41 | 0.90 |
| #N/A | #N/A |
| #N/A | #N/A |
| #N/A | #N/A |
| #N/A | #N/A |
| #N/A | #N/A |
| #N/A | #N/A |
| #N/A | #N/A |
| #N/A | #N/A |
| #N/A | #N/A |
| #N/A | #N/A |
| #N/A | #N/A |
| #N/A | #N/A |
| 4.48 | 0.99 |
| 4.48 | 0.99 |
| 2.03 | 0.82 |
| 1.69 | 0.76 |
| 1.42 | 0.66 |
| 0.64 | 0.25 |
| #N/A | #N/A |
| #N/A | #N/A |
| 1.72 | 0.74 |
| 1.72 | 0.74 |
| 1.06 | 0.51 |
| 6.42 | 0.82 |
| 0.95 | 0.45 |





|      |      |
|------|------|
| 2.20 | 0.88 |
| #N/A | #N/A |
| #N/A | #N/A |
| 0.46 | 0.13 |
| #N/A | #N/A |
| 1.27 | 0.60 |
| 1.65 | 0.75 |
| 1.65 | 0.75 |
| #N/A | #N/A |
| #N/A | #N/A |
| 0.80 | 0.35 |
| 1.93 | 0.83 |
| 0.41 | 0.09 |
| #N/A | #N/A |
| 0.25 | 0.03 |
| 0.72 | 0.31 |
| 0.59 | 0.22 |
| #N/A | #N/A |
| 0.59 | 0.22 |
| #N/A | #N/A |
| 3.21 | 0.97 |
| 0.61 | 0.23 |
| 0.93 | 0.42 |
| 1.86 | 0.80 |
| 0.93 | 0.42 |
| 1.86 | 0.80 |
| 1.30 | 0.61 |
| 0.71 | 0.30 |
| 2.29 | 0.90 |
| 0.61 | 0.24 |
| 1.82 | 0.77 |
| 1.82 | 0.77 |
| #N/A | #N/A |
| 1.35 | 0.63 |
| 0.47 | 0.14 |
| #N/A | #N/A |
| #N/A | #N/A |
| #N/A | #N/A |
| #N/A | #N/A |
| #N/A | #N/A |
| 0.90 | 0.41 |
| 2.52 | 0.93 |
| 0.90 | 0.41 |
| #N/A | #N/A |
| 2.52 | 0.93 |
| #N/A | #N/A |
| #N/A | #N/A |
| 1.78 | 0.71 |
| #N/A | #N/A |
| #N/A | #N/A |
| #N/A | #N/A |

|      |      |
|------|------|
| #N/A | #N/A |
| 1.26 | 0.60 |
| 2.33 | 0.91 |
| 2.33 | 0.91 |
| #N/A | #N/A |
| #N/A | #N/A |
| #N/A | #N/A |
| #N/A | #N/A |
| 2.51 | 0.92 |
| 1.45 | 0.67 |
| 2.51 | 0.92 |
| 1.45 | 0.67 |
| #N/A | #N/A |
| #N/A | #N/A |
| #N/A | #N/A |
| #N/A | #N/A |
| #N/A | #N/A |
| #N/A | #N/A |
| 1.74 | 0.78 |
| #N/A | #N/A |
| #N/A | #N/A |
| #N/A | #N/A |
| 0.87 | 0.39 |
| #N/A | #N/A |
| 1.10 | 0.52 |
| 1.10 | 0.52 |
| 2.64 | 0.94 |
| 0.62 | 0.24 |
| #N/A | #N/A |
| 0.88 | 0.39 |
| 1.84 | 0.81 |
| 1.84 | 0.81 |
| 1.41 | 0.66 |
| 1.17 | 0.56 |
| #N/A | #N/A |
| #N/A | #N/A |
| #N/A | #N/A |
| #N/A | #N/A |
| #N/A | #N/A |
| #N/A | #N/A |
| #N/A | #N/A |
| 0.84 | 0.38 |
| 1.80 | 0.80 |
| 1.80 | 0.80 |
| 1.98 | 0.84 |
| 0.74 | 0.32 |
| 1.90 | 0.82 |
| 1.90 | 0.82 |
| 1.90 | 0.82 |
| 3.96 | 0.99 |
| 1.71 | 0.77 |

|      |      |
|------|------|
| 0.58 | 0.22 |
| #N/A | #N/A |
| #N/A | #N/A |
| 1.33 | 0.62 |
| 0.67 | 0.27 |
| 0.67 | 0.27 |
| 0.76 | 0.32 |
| 0.76 | 0.32 |
| 0.67 | 0.28 |
| 0.98 | 0.46 |
| 0.48 | 0.14 |
| #N/A | #N/A |
| #N/A | #N/A |
| 0.87 | 0.40 |
| 1.51 | 0.68 |
| 1.35 | 0.64 |
| #N/A | #N/A |
| #N/A | #N/A |
| 0.43 | 0.11 |
| 0.49 | 0.15 |
| 0.49 | 0.15 |
| 0.42 | 0.10 |
| 1.57 | 0.72 |
| 1.12 | 0.53 |
| 1.12 | 0.53 |
| #N/A | #N/A |
| #N/A | #N/A |
| 0.45 | 0.12 |
| 2.39 | 0.91 |
| #N/A | #N/A |
| 0.89 | 0.41 |
| 0.89 | 0.41 |
| 0.89 | 0.41 |
| 1.32 | 0.61 |
| 1.32 | 0.61 |
| #N/A | #N/A |
| 0.52 | 0.17 |
| 1.23 | 0.58 |
| 1.23 | 0.58 |
| 2.27 | 0.90 |
| 2.27 | 0.90 |
| 0.29 | 0.04 |
| 0.90 | 0.42 |
| 1.78 | 0.79 |
| 1.78 | 0.79 |
| 1.09 | 0.51 |
| 0.15 | 0.01 |
| 1.26 | 0.60 |
| #N/A | #N/A |
| #N/A | #N/A |
| #N/A | #N/A |

|      |      |
|------|------|
| 1.83 | 0.80 |
| 1.31 | 0.62 |
| 1.10 | 0.52 |
| 0.75 | 0.31 |
| 1.10 | 0.52 |
| 0.75 | 0.31 |
| #N/A | #N/A |
| #N/A | #N/A |
| #N/A | #N/A |
| #N/A | #N/A |
| #N/A | #N/A |
| #N/A | #N/A |
| 2.02 | 0.85 |
| 0.64 | 0.25 |
| 0.64 | 0.25 |
| #N/A | #N/A |
| 1.78 | 0.77 |
| 1.78 | 0.77 |
| 2.08 | 0.87 |
| #N/A | #N/A |
| 0.55 | 0.19 |
| 0.30 | 0.04 |
| 0.99 | 0.47 |
| 0.71 | 0.30 |
| 2.49 | 0.91 |
| 0.63 | 0.25 |
| #N/A | #N/A |
| 1.18 | 0.55 |
| 1.52 | 0.68 |
| #N/A | #N/A |
| 2.19 | 0.86 |
| 2.19 | 0.86 |
| 0.56 | 0.20 |
| 2.89 | 0.96 |
| 2.89 | 0.96 |
| 1.61 | 0.73 |
| #N/A | #N/A |
| 1.62 | 0.72 |
| 1.62 | 0.72 |
| #N/A | #N/A |
| #N/A | #N/A |
| 0.70 | 0.29 |
| 1.07 | 0.51 |
| 0.71 | 0.29 |
| 1.36 | 0.62 |
| #N/A | #N/A |
| 0.97 | 0.44 |
| 1.13 | 0.53 |
| 1.74 | 0.76 |
| #N/A | #N/A |
| #N/A | #N/A |

|      |      |
|------|------|
| 1.04 | 0.49 |
| 0.39 | 0.09 |
| 0.39 | 0.09 |
| 2.85 | 0.93 |
| #N/A | #N/A |
| 0.72 | 0.31 |
| 0.72 | 0.31 |
| 2.18 | 0.88 |
| 0.64 | 0.25 |
| 1.00 | 0.46 |
| 1.17 | 0.55 |
| #N/A | #N/A |
| #N/A | #N/A |
| #N/A | #N/A |
| 1.47 | 0.69 |
| 1.47 | 0.69 |
| 1.55 | 0.71 |
| 1.55 | 0.71 |
| 1.88 | 0.82 |
| 2.08 | 0.85 |
| 0.48 | 0.14 |
| 0.48 | 0.14 |
| #N/A | #N/A |
| #N/A | #N/A |
| 0.53 | 0.18 |
| 2.51 | 0.92 |
| 0.64 | 0.25 |
| 1.17 | 0.56 |
| 0.93 | 0.43 |
| 2.81 | 0.90 |
| 0.75 | 0.32 |
| 2.64 | 0.94 |
| #N/A | #N/A |
| #N/A | #N/A |
| #N/A | #N/A |
| 1.50 | 0.69 |
| 1.50 | 0.69 |
| 1.50 | 0.69 |
| 0.82 | 0.37 |
| 0.82 | 0.37 |
| 2.09 | 0.86 |
| 0.41 | 0.11 |
| 1.87 | 0.81 |
| #N/A | #N/A |
| 1.87 | 0.81 |
| 0.55 | 0.20 |
| 0.39 | 0.09 |
| 1.61 | 0.72 |
| 1.61 | 0.72 |
| 1.73 | 0.78 |
| 1.90 | 0.82 |

|      |      |
|------|------|
| 2.69 | 0.92 |
| #N/A | #N/A |
| 0.83 | 0.38 |
| 0.83 | 0.38 |
| #N/A | #N/A |
| #N/A | #N/A |
| #N/A | #N/A |
| 0.81 | 0.35 |
| #N/A | #N/A |
| #N/A | #N/A |
| #N/A | #N/A |
| 1.51 | 0.70 |
| 2.34 | 0.91 |
| 0.45 | 0.12 |
| 1.32 | 0.62 |
| #N/A | #N/A |
| 0.78 | 0.34 |
| 1.07 | 0.50 |
| #N/A | #N/A |
| #N/A | #N/A |
| 1.21 | 0.57 |
| 2.16 | 0.88 |
| 0.30 | 0.04 |
| 0.38 | 0.08 |
| 1.07 | 0.51 |
| 0.81 | 0.36 |
| 2.07 | 0.83 |
| 1.04 | 0.49 |
| 1.04 | 0.49 |
| 2.89 | 0.95 |
| 1.45 | 0.68 |
| 1.45 | 0.68 |
| #N/A | #N/A |
| 1.73 | 0.76 |
| 0.91 | 0.42 |
| 0.39 | 0.08 |
| 0.39 | 0.08 |
| #N/A | #N/A |
| 1.20 | 0.56 |
| #N/A | #N/A |
| #N/A | #N/A |
| #N/A | #N/A |
| #N/A | #N/A |
| 1.48 | 0.69 |
| 1.48 | 0.69 |
| 0.73 | 0.31 |
| 0.52 | 0.17 |
| 0.52 | 0.17 |
| 3.31 | 0.97 |
| #N/A | #N/A |
| #N/A | #N/A |

|      |      |
|------|------|
| 1.54 | 0.70 |
| #N/A | #N/A |
| 2.20 | 0.88 |
| 0.80 | 0.35 |
| #N/A | #N/A |
| 1.38 | 0.65 |
| 1.38 | 0.65 |
| 4.12 | 0.98 |
| 2.13 | 0.87 |
| 2.13 | 0.87 |
| #N/A | #N/A |
| 1.79 | 0.79 |
| 1.79 | 0.79 |
| 2.55 | 0.93 |
| 2.55 | 0.93 |
| 0.61 | 0.23 |
| #N/A | #N/A |
| #N/A | #N/A |
| 1.09 | 0.52 |
| 1.50 | 0.69 |
| 1.77 | 0.78 |
| 1.64 | 0.72 |
| #N/A | #N/A |
| #N/A | #N/A |
| #N/A | #N/A |
| #N/A | #N/A |
| 1.07 | 0.51 |
| 2.46 | 0.91 |
| 1.81 | 0.80 |
| 1.81 | 0.80 |
| 0.85 | 0.38 |
| 0.41 | 0.10 |
| 0.60 | 0.22 |
| 1.57 | 0.72 |
| 1.74 | 0.76 |
| 0.93 | 0.43 |
| #N/A | #N/A |
| #N/A | #N/A |
| 2.11 | 0.87 |
| 1.95 | 0.84 |
| 0.77 | 0.34 |
| #N/A | #N/A |
| 1.05 | 0.50 |
| #N/A | #N/A |
| 3.71 | 0.96 |
| 0.30 | 0.07 |
| 1.72 | 0.77 |
| 0.30 | 0.07 |
| 1.72 | 0.77 |
| 0.97 | 0.45 |
| 1.50 | 0.69 |



|      |      |
|------|------|
| 0.97 | 0.45 |
| 1.50 | 0.69 |
| #N/A | #N/A |
| #N/A | #N/A |
| 0.35 | 0.06 |
| #N/A | #N/A |
| #N/A | #N/A |
| 1.52 | 0.69 |
| 3.55 | 0.98 |
| 3.55 | 0.98 |
| 0.60 | 0.23 |
| 1.23 | 0.58 |
| 1.23 | 0.58 |
| #N/A | #N/A |
| 1.01 | 0.47 |
| #N/A | #N/A |
| #N/A | #N/A |
| 1.92 | 0.83 |
| 1.14 | 0.54 |
| 1.14 | 0.54 |
| 2.14 | 0.87 |
| 1.21 | 0.58 |
| #N/A | #N/A |
| #N/A | #N/A |
| 1.56 | 0.72 |
| 0.88 | 0.40 |
| #N/A | #N/A |
| #N/A | #N/A |
| #N/A | #N/A |
| 1.63 | 0.75 |
| 1.63 | 0.75 |
| 1.42 | 0.66 |
| #N/A | #N/A |
| #N/A | #N/A |
| 1.42 | 0.66 |
| 0.86 | 0.39 |
| #N/A | #N/A |
| 1.53 | 0.71 |
| 1.14 | 0.54 |
| 1.62 | 0.74 |
| 1.62 | 0.74 |
| #N/A | #N/A |
| 0.96 | 0.45 |
| 0.96 | 0.45 |
| #N/A | #N/A |
| 2.37 | 0.90 |
| 2.37 | 0.90 |
| 1.21 | 0.58 |
| 0.74 | 0.32 |
| #N/A | #N/A |
| #N/A | #N/A |

|      |      |
|------|------|
| 0.32 | 0.05 |
| 1.04 | 0.49 |
| 1.04 | 0.49 |
| 0.87 | 0.40 |
| 0.68 | 0.28 |
| 0.68 | 0.28 |
| 1.38 | 0.65 |
| 1.38 | 0.65 |
| 2.21 | 0.89 |
| #N/A | #N/A |
| #N/A | #N/A |
| 0.86 | 0.37 |
| #N/A | #N/A |
| #N/A | #N/A |
| #N/A | #N/A |
| 2.63 | 0.94 |
| 2.63 | 0.94 |
| 1.21 | 0.57 |
| #N/A | #N/A |
| 0.50 | 0.16 |
| 1.45 | 0.68 |
| #N/A | #N/A |
| #N/A | #N/A |
| 1.33 | 0.63 |
| 0.70 | 0.29 |
| 0.80 | 0.35 |
| #N/A | #N/A |
| 1.36 | 0.63 |
| 0.90 | 0.41 |
| #N/A | #N/A |
| #N/A | #N/A |
| 1.07 | 0.51 |
| 0.27 | 0.03 |
| 1.09 | 0.52 |
| #N/A | #N/A |
| 0.50 | 0.16 |
| #N/A | #N/A |
| #N/A | #N/A |
| #N/A | #N/A |
| #N/A | #N/A |
| 1.46 | 0.68 |
| 1.46 | 0.68 |
| #N/A | #N/A |
| 1.20 | 0.57 |
| 1.20 | 0.57 |
| 0.57 | 0.20 |
| 1.35 | 0.64 |
| 1.35 | 0.64 |
| 0.53 | 0.18 |
| #N/A | #N/A |
| #N/A | #N/A |

|      |      |
|------|------|
| 2.12 | 0.87 |
| 2.12 | 0.87 |
| 4.41 | 0.97 |
| #N/A | #N/A |
| #N/A | #N/A |
| #N/A | #N/A |
| #N/A | #N/A |
| #N/A | #N/A |
| #N/A | #N/A |
| 0.30 | 0.06 |
| #N/A | #N/A |
| #N/A | #N/A |
| #N/A | #N/A |
| #N/A | #N/A |
| #N/A | #N/A |
| #N/A | #N/A |
| #N/A | #N/A |
| 2.29 | 0.90 |
| 2.29 | 0.90 |
| 1.36 | 0.61 |
| #N/A | #N/A |
| #N/A | #N/A |
| 1.36 | 0.64 |
| #N/A | #N/A |
| #N/A | #N/A |
| #N/A | #N/A |
| 0.79 | 0.34 |
| #N/A | #N/A |
| 0.61 | 0.23 |
| #N/A | #N/A |
| 1.59 | 0.73 |
| 0.46 | 0.18 |
| 1.77 | 0.79 |
| 2.41 | 0.92 |
| #N/A | #N/A |
| 2.92 | 0.81 |
| 2.92 | 0.81 |
| #N/A | #N/A |
| 0.77 | 0.33 |
| 2.07 | 0.85 |
| 1.02 | 0.48 |
| 0.83 | 0.36 |
| 2.92 | 0.92 |
| 2.92 | 0.92 |
| 1.13 | 0.53 |
| 1.29 | 0.61 |
| #N/A | #N/A |
| #N/A | #N/A |
| 0.36 | 0.08 |
| #N/A | #N/A |

|      |      |
|------|------|
| #N/A | #N/A |
| 1.46 | 0.68 |
| #N/A | #N/A |
| #N/A | #N/A |
| 2.01 | 0.84 |
| 2.01 | 0.84 |
| #N/A | #N/A |
| #N/A | #N/A |
| 1.26 | 0.60 |
| 1.26 | 0.60 |
| #N/A | #N/A |
| #N/A | #N/A |
| 1.57 | 0.72 |
| #N/A | #N/A |
| #N/A | #N/A |
| #N/A | #N/A |
| 2.30 | 0.88 |
| #N/A | #N/A |
| #N/A | #N/A |
| #N/A | #N/A |
| #N/A | #N/A |
| #N/A | #N/A |
| #N/A | #N/A |
| #N/A | #N/A |
| 0.45 | 0.12 |
| #N/A | #N/A |
| #N/A | #N/A |
| #N/A | #N/A |
| 3.03 | 0.96 |
| 3.03 | 0.96 |
| #N/A | #N/A |
| 0.57 | 0.21 |
| 1.56 | 0.72 |
| 1.64 | 0.75 |
| 2.82 | 0.95 |
| 2.82 | 0.95 |
| #N/A | #N/A |
| #N/A | #N/A |
| 1.25 | 0.56 |
| 1.79 | 0.79 |
| 1.79 | 0.79 |
| #N/A | #N/A |
| 2.47 | 0.92 |
| 2.47 | 0.92 |
| 2.74 | 0.94 |
| 3.56 | 0.98 |
| 3.56 | 0.98 |
| 1.73 | 0.74 |
| #N/A | #N/A |
| #N/A | #N/A |

|      |      |
|------|------|
| #N/A | #N/A |
| 0.37 | 0.08 |
| #N/A | #N/A |
| #N/A | #N/A |
| #N/A | #N/A |
| #N/A | #N/A |
| #N/A | #N/A |
| 3.21 | 0.97 |
| 3.21 | 0.97 |
| #N/A | #N/A |
| 1.94 | 0.81 |
| 1.94 | 0.81 |
| 2.86 | 0.95 |
| 0.80 | 0.35 |
| 0.80 | 0.35 |
| #N/A | #N/A |
| 1.06 | 0.50 |
| #N/A | #N/A |
| #N/A | #N/A |
| #N/A | #N/A |
| #N/A | #N/A |
| #N/A | #N/A |
| #N/A | #N/A |
| #N/A | #N/A |
| 1.81 | 0.80 |
| #N/A | #N/A |
| #N/A | #N/A |
| 1.15 | 0.55 |
| 1.15 | 0.55 |
| 2.71 | 0.95 |
| 2.71 | 0.95 |
| 1.90 | 0.78 |
| 1.90 | 0.78 |
| #N/A | #N/A |
| 1.16 | 0.55 |
| 1.16 | 0.55 |
| 2.75 | 0.95 |
| 2.75 | 0.95 |
| 0.42 | 0.11 |
| #N/A | #N/A |
| #N/A | #N/A |
| 1.57 | 0.72 |
| 1.26 | 0.60 |
| 1.82 | 0.80 |
| #N/A | #N/A |
| #N/A | #N/A |
| #N/A | #N/A |
| 1.73 | 0.73 |
| #N/A | #N/A |
| 1.08 | 0.51 |

|      |      |
|------|------|
| 3.29 | 0.97 |
| #N/A | #N/A |
| #N/A | #N/A |
| 0.90 | 0.41 |
| #N/A | #N/A |
| #N/A | #N/A |
| 0.83 | 0.37 |
| 0.86 | 0.39 |
| 1.60 | 0.74 |
| #N/A | #N/A |
| #N/A | #N/A |
| 1.33 | 0.63 |
| #N/A | #N/A |
| 0.53 | 0.17 |
| 2.23 | 0.88 |
| 2.23 | 0.88 |
| 1.77 | 0.79 |
| 1.77 | 0.79 |
| 0.79 | 0.35 |
| 1.70 | 0.76 |
| 1.70 | 0.76 |
| 2.23 | 0.89 |
| 2.23 | 0.89 |
| 1.93 | 0.83 |
| #N/A | #N/A |
| #N/A | #N/A |
| #N/A | #N/A |
| 1.45 | 0.67 |
| 1.45 | 0.67 |
| #N/A | #N/A |
| #N/A | #N/A |
| 0.61 | 0.23 |
| 0.61 | 0.23 |
| 2.12 | 0.87 |
| 0.85 | 0.38 |
| 0.99 | 0.46 |
| 0.99 | 0.46 |
| 0.99 | 0.46 |
| 1.50 | 0.70 |
| 1.50 | 0.70 |
| 0.77 | 0.34 |
| 0.81 | 0.36 |
| 1.49 | 0.69 |
| 0.77 | 0.34 |
| 0.77 | 0.34 |
| 1.49 | 0.69 |
| 1.49 | 0.69 |
| #N/A | #N/A |
| 1.49 | 0.69 |
| 1.49 | 0.69 |
| 1.42 | 0.66 |

|      |      |
|------|------|
| 1.42 | 0.66 |
| 1.75 | 0.77 |
| 1.75 | 0.77 |
| #N/A | #N/A |
| 1.98 | 0.84 |
| 1.98 | 0.84 |
| 1.32 | 0.62 |
| 1.23 | 0.59 |
| #N/A | #N/A |
| 0.99 | 0.46 |
| 0.34 | 0.06 |
| 0.34 | 0.06 |
| #N/A | #N/A |
| 0.74 | 0.32 |
| 0.73 | 0.31 |
| 2.24 | 0.89 |
| #N/A | #N/A |
| 0.39 | 0.09 |
| 2.62 | 0.94 |
| 2.62 | 0.94 |
| 0.94 | 0.44 |
| 1.70 | 0.77 |
| 1.70 | 0.77 |
| 0.67 | 0.28 |
| 0.67 | 0.28 |
| 1.36 | 0.64 |
| 2.71 | 0.93 |
| #N/A | #N/A |
| #N/A | #N/A |
| #N/A | #N/A |
| 2.91 | 0.96 |
| 2.91 | 0.96 |
| 1.10 | 0.52 |
| 1.87 | 0.82 |
| 2.06 | 0.86 |
| 0.93 | 0.43 |
| 0.93 | 0.43 |
| 3.49 | 0.98 |
| #N/A | #N/A |
| #N/A | #N/A |
| 2.42 | 0.92 |
| 2.42 | 0.92 |
| #N/A | #N/A |
| 1.66 | 0.76 |
| 1.43 | 0.63 |
| 1.47 | 0.68 |
| 1.47 | 0.68 |
| 1.28 | 0.60 |
| #N/A | #N/A |
| 1.10 | 0.50 |
| 1.10 | 0.50 |

|      |      |
|------|------|
| 0.33 | 0.05 |
| #N/A | #N/A |
| 0.86 | 0.39 |
| 0.86 | 0.39 |
| 0.31 | 0.05 |
| #N/A | #N/A |
| #N/A | #N/A |
| 2.05 | 0.86 |
| #N/A | #N/A |
| #N/A | #N/A |
| 1.87 | 0.82 |
| #N/A | #N/A |
| 1.74 | 0.75 |
| 1.74 | 0.75 |
| 1.60 | 0.72 |
| #N/A | #N/A |
| 1.17 | 0.54 |
| 0.76 | 0.33 |
| 1.16 | 0.54 |
| #N/A | #N/A |
| 0.59 | 0.22 |
| 0.59 | 0.22 |
| #N/A | #N/A |
| 1.35 | 0.64 |
| 1.93 | 0.83 |
| 1.93 | 0.83 |
| 2.28 | 0.88 |
| 2.28 | 0.88 |
| 0.54 | 0.18 |
| 2.34 | 0.91 |
| 0.54 | 0.18 |
| 2.34 | 0.91 |
| #N/A | #N/A |
| #N/A | #N/A |
| #N/A | #N/A |
| #N/A | #N/A |
| 1.99 | 0.84 |
| 0.55 | 0.19 |
| 4.32 | 0.99 |
| 4.32 | 0.99 |
| 2.90 | 0.94 |
| 2.90 | 0.94 |
| 1.39 | 0.65 |
| 1.26 | 0.60 |
| 2.80 | 0.93 |
| 2.14 | 0.87 |
| 2.14 | 0.87 |
| 0.33 | 0.05 |
| #N/A | #N/A |
| #N/A | #N/A |
| #N/A | #N/A |



|      |      |
|------|------|
| #N/A | #N/A |
| #N/A | #N/A |
| 1.92 | 0.83 |
| 0.94 | 0.43 |
| 0.94 | 0.43 |
| #N/A | #N/A |
| #N/A | #N/A |
| #N/A | #N/A |
| 0.95 | 0.44 |
| 1.44 | 0.67 |
| 0.87 | 0.40 |
| 0.87 | 0.40 |
| 2.82 | 0.95 |
| 0.54 | 0.19 |
| 0.54 | 0.19 |
| #N/A | #N/A |
| 0.35 | 0.07 |
| 0.65 | 0.26 |
| 0.72 | 0.31 |
| 0.43 | 0.11 |
| 0.58 | 0.21 |
| #N/A | #N/A |
| 1.20 | 0.57 |
| 2.47 | 0.86 |
| 2.47 | 0.86 |
| 2.75 | 0.94 |
| 2.75 | 0.94 |
| 2.40 | 0.91 |
| 2.40 | 0.91 |
| 0.87 | 0.40 |
| 0.29 | 0.04 |
| 1.15 | 0.55 |
| 1.04 | 0.49 |
| 1.83 | 0.81 |
| 1.83 | 0.81 |
| #N/A | #N/A |
| 0.98 | 0.46 |
| 0.38 | 0.08 |
| 0.38 | 0.08 |
| 3.61 | 0.89 |
| 3.61 | 0.89 |
| 1.60 | 0.74 |
| 1.60 | 0.74 |
| 1.69 | 0.76 |
| 1.56 | 0.71 |
| 0.71 | 0.30 |
| 0.71 | 0.30 |
| 1.54 | 0.71 |
| 2.87 | 0.95 |
| #N/A | #N/A |
| 2.51 | 0.93 |

|      |      |
|------|------|
| 2.51 | 0.93 |
| #N/A | #N/A |
| 2.85 | 0.96 |
| 2.85 | 0.96 |
| #N/A | #N/A |
| 1.80 | 0.79 |
| 1.80 | 0.79 |
| 1.16 | 0.55 |
| #N/A | #N/A |
| #N/A | #N/A |
| 1.43 | 0.67 |
| 1.43 | 0.67 |
| 1.19 | 0.57 |
| #N/A | #N/A |
| #N/A | #N/A |
| 0.55 | 0.19 |
| 1.53 | 0.71 |
| 1.53 | 0.71 |
| 1.53 | 0.71 |
| 1.78 | 0.79 |
| 0.51 | 0.17 |
| 0.51 | 0.17 |
| 1.18 | 0.56 |
| #N/A | #N/A |
| 1.02 | 0.48 |
| 1.63 | 0.74 |
| 1.63 | 0.74 |
| #N/A | #N/A |
| #N/A | #N/A |
| 1.21 | 0.57 |
| #N/A | #N/A |
| #N/A | #N/A |
| #N/A | #N/A |
| #N/A | #N/A |
| 4.55 | 0.99 |
| 4.55 | 0.99 |
| 0.96 | 0.42 |
| 0.96 | 0.42 |
| #N/A | #N/A |
| #N/A | #N/A |
| 0.60 | 0.23 |
| 0.60 | 0.23 |
| #N/A | #N/A |
| 0.34 | 0.06 |
| 1.72 | 0.77 |
| 2.97 | 0.96 |
| 3.79 | 0.98 |
| 1.14 | 0.54 |
| 1.14 | 0.54 |
| 4.92 | 0.99 |
| 1.01 | 0.48 |

|      |      |
|------|------|
| 1.01 | 0.48 |
| #N/A | #N/A |
| #N/A | #N/A |
| #N/A | #N/A |
| 3.61 | 0.98 |
| 3.61 | 0.98 |
| #N/A | #N/A |
| 0.90 | 0.41 |
| 2.00 | 0.81 |
| 2.00 | 0.81 |
| 2.99 | 0.96 |
| 1.18 | 0.56 |
| #N/A | #N/A |
| #N/A | #N/A |
| 1.86 | 0.81 |
| 1.39 | 0.65 |
| #N/A | #N/A |
| 2.38 | 0.91 |
| 2.38 | 0.91 |
| #N/A | #N/A |
| #N/A | #N/A |
| 0.97 | 0.45 |
| 0.52 | 0.17 |
| #N/A | #N/A |
| 1.63 | 0.71 |
| #N/A | #N/A |
| #N/A | #N/A |
| 1.18 | 0.53 |
| 1.27 | 0.60 |
| 0.73 | 0.31 |
| 0.59 | 0.22 |
| #N/A | #N/A |
| 0.59 | 0.22 |
| 0.86 | 0.39 |
| 2.63 | 0.93 |
| 2.63 | 0.93 |
| 2.63 | 0.93 |
| 2.63 | 0.93 |
| 0.84 | 0.38 |
| 1.73 | 0.76 |
| #N/A | #N/A |
| #N/A | #N/A |
| 1.51 | 0.69 |
| 1.51 | 0.69 |
| #N/A | #N/A |
| #N/A | #N/A |
| 1.43 | 0.65 |
| 1.43 | 0.65 |
| #N/A | #N/A |
| #N/A | #N/A |
| 1.55 | 0.71 |

|      |      |
|------|------|
| 1.55 | 0.71 |
| 1.20 | 0.57 |
| 1.40 | 0.63 |
| 1.40 | 0.63 |
| 1.32 | 0.63 |
| #N/A | #N/A |
| #N/A | #N/A |
| 1.03 | 0.49 |
| 1.03 | 0.49 |
| 0.86 | 0.39 |
| 2.05 | 0.86 |
| 2.05 | 0.86 |
| 0.45 | 0.13 |
| #N/A | #N/A |
| #N/A | #N/A |
| 0.92 | 0.43 |
| 1.05 | 0.50 |
| #N/A | #N/A |
| #N/A | #N/A |
| 1.82 | 0.80 |
| 1.82 | 0.80 |
| #N/A | #N/A |
| 1.43 | 0.67 |
| #N/A | #N/A |
| 0.90 | 0.41 |
| #N/A | #N/A |
| 3.22 | 0.97 |
| 3.22 | 0.97 |
| 1.50 | 0.70 |
| 2.26 | 0.89 |
| 1.50 | 0.70 |
| 1.47 | 0.69 |
| 1.47 | 0.69 |
| 1.75 | 0.78 |
| #N/A | #N/A |
| #N/A | #N/A |
| #N/A | #N/A |
| 2.86 | 0.96 |
| 2.86 | 0.96 |
| #N/A | #N/A |
| 3.48 | 0.97 |
| 3.48 | 0.97 |
| 0.39 | 0.09 |
| 0.99 | 0.47 |
| 1.60 | 0.74 |
| 3.99 | 0.98 |
| 0.76 | 0.32 |
| 1.42 | 0.66 |
| 1.42 | 0.66 |
| #N/A | #N/A |
| #N/A | #N/A |

|       |      |
|-------|------|
| #N/A  | #N/A |
| #N/A  | #N/A |
| 0.64  | 0.25 |
| 0.64  | 0.25 |
| 1.11  | 0.52 |
| 58.11 | 1.00 |
| 58.11 | 1.00 |
| #N/A  | #N/A |
| #N/A  | #N/A |
| #N/A  | #N/A |
| #N/A  | #N/A |
| 1.26  | 0.60 |
| 0.91  | 0.42 |
| 0.69  | 0.29 |
| 0.69  | 0.29 |
| 2.36  | 0.91 |
| 2.36  | 0.91 |
| #N/A  | #N/A |
| 0.72  | 0.30 |
| 0.64  | 0.25 |
| 0.64  | 0.25 |
| 0.64  | 0.25 |
| #N/A  | #N/A |
| 1.31  | 0.58 |
| 1.38  | 0.65 |
| 1.01  | 0.48 |
| #N/A  | #N/A |
| #N/A  | #N/A |
| 0.81  | 0.36 |
| 0.81  | 0.36 |
| 2.10  | 0.86 |
| 1.71  | 0.77 |
| 2.10  | 0.86 |
| #N/A  | #N/A |
| 1.71  | 0.77 |
| 3.45  | 0.98 |
| 3.45  | 0.98 |
| 1.60  | 0.73 |
| 1.24  | 0.59 |
| 1.87  | 0.82 |
| 1.87  | 0.82 |
| 1.42  | 0.66 |
| 1.67  | 0.74 |
| 0.65  | 0.26 |
| 1.16  | 0.55 |
| #N/A  | #N/A |
| 0.31  | 0.05 |
| 0.45  | 0.12 |
| 0.45  | 0.12 |
| 0.45  | 0.12 |
| 0.99  | 0.47 |

|      |      |
|------|------|
| #N/A | #N/A |
| #N/A | #N/A |
| 1.14 | 0.54 |
| 1.14 | 0.54 |
| 1.14 | 0.54 |
| 2.30 | 0.90 |
| #N/A | #N/A |
| 1.03 | 0.48 |
| 2.79 | 0.95 |
| 2.79 | 0.95 |
| 1.41 | 0.66 |
| 0.44 | 0.12 |
| 0.44 | 0.12 |
| 0.44 | 0.12 |
| 0.38 | 0.08 |
| 0.38 | 0.08 |
| 1.28 | 0.61 |
| 0.86 | 0.39 |
| #N/A | #N/A |
| 1.07 | 0.51 |
| 0.79 | 0.35 |
| 0.69 | 0.28 |
| 1.46 | 0.68 |
| 1.17 | 0.56 |
| #N/A | #N/A |
| 1.38 | 0.65 |
| 1.21 | 0.57 |
| 0.60 | 0.22 |
| 0.52 | 0.17 |
| 1.78 | 0.79 |
| 1.78 | 0.79 |
| 0.43 | 0.11 |
| 0.43 | 0.11 |
| #N/A | #N/A |
| 2.08 | 0.86 |
| 2.08 | 0.86 |
| 3.31 | 0.97 |
| #N/A | #N/A |
| 3.31 | 0.97 |
| 0.51 | 0.16 |
| 0.51 | 0.16 |
| #N/A | #N/A |
| #N/A | #N/A |
| #N/A | #N/A |
| #N/A | #N/A |
| 3.80 | 0.99 |
| 1.75 | 0.78 |
| 1.75 | 0.78 |
| 1.03 | 0.49 |
| 1.03 | 0.49 |
| #N/A | #N/A |

|      |      |
|------|------|
| 0.25 | 0.03 |
| 0.25 | 0.03 |
| 0.86 | 0.39 |
| 0.86 | 0.39 |
| 3.24 | 0.95 |
| 0.78 | 0.34 |
| 3.24 | 0.95 |
| 0.78 | 0.34 |
| 2.02 | 0.85 |
| 1.59 | 0.56 |
| 1.59 | 0.56 |
| #N/A | #N/A |
| #N/A | #N/A |
| #N/A | #N/A |
| 1.26 | 0.46 |
| 1.26 | 0.46 |
| 2.59 | 0.82 |
| #N/A | #N/A |
| 1.75 | 0.78 |
| #N/A | #N/A |
| #N/A | #N/A |
| 1.55 | 0.71 |
| #N/A | #N/A |
| 1.55 | 0.71 |
| #N/A | #N/A |
| #N/A | #N/A |
| #N/A | #N/A |
| 0.87 | 0.40 |
| 1.41 | 0.66 |
| 1.23 | 0.58 |
| 1.47 | 0.69 |
| 0.66 | 0.26 |
| 1.47 | 0.69 |
| #N/A | #N/A |
| 0.80 | 0.36 |
| #N/A | #N/A |
| #N/A | #N/A |
| #N/A | #N/A |
| #N/A | #N/A |
| 1.66 | 0.75 |
| 1.66 | 0.75 |
| 0.79 | 0.35 |
| 1.68 | 0.76 |
| 0.70 | 0.30 |
| 0.59 | 0.22 |
| 2.44 | 0.91 |
| #N/A | #N/A |
| 1.28 | 0.60 |
| 1.64 | 0.75 |
| 1.64 | 0.75 |
| #N/A | #N/A |

|      |      |
|------|------|
| 1.11 | 0.53 |
| 0.37 | 0.07 |
| #N/A | #N/A |
| 0.37 | 0.07 |
| 1.45 | 0.68 |
| #N/A | #N/A |
| #N/A | #N/A |
| #N/A | #N/A |
| 1.35 | 0.62 |
| 1.35 | 0.62 |
| 0.86 | 0.39 |
| 0.86 | 0.39 |
| 0.86 | 0.39 |
| 0.86 | 0.39 |
| 0.86 | 0.39 |
| #N/A | #N/A |
| #N/A | #N/A |
| #N/A | #N/A |
| #N/A | #N/A |
| #N/A | #N/A |
| #N/A | #N/A |
| 3.05 | 0.95 |
| #N/A | #N/A |
| 2.07 | 0.84 |
| 3.05 | 0.95 |
| 2.07 | 0.84 |
| #N/A | #N/A |
| #N/A | #N/A |
| 2.26 | 0.88 |
| 1.38 | 0.64 |
| 1.70 | 0.76 |
| 1.70 | 0.76 |
| 0.33 | 0.06 |
| 0.33 | 0.06 |
| 1.85 | 0.78 |
| 1.85 | 0.78 |
| 1.76 | 0.74 |
| 0.96 | 0.44 |
| #N/A | #N/A |
| #N/A | #N/A |
| #N/A | #N/A |
| 2.11 | 0.87 |
| 1.42 | 0.67 |
| 1.27 | 0.60 |
| 1.27 | 0.60 |
| 0.75 | 0.32 |
| 0.88 | 0.40 |
| 3.29 | 0.97 |
| 3.29 | 0.97 |
| 2.89 | 0.96 |
| 2.19 | 0.88 |



|      |      |
|------|------|
| 2.19 | 0.88 |
| 2.12 | 0.87 |
| 2.12 | 0.87 |
| 0.93 | 0.43 |
| 1.18 | 0.56 |
| 0.93 | 0.43 |
| #N/A | #N/A |
| 0.61 | 0.23 |
| 0.61 | 0.23 |
| 1.63 | 0.70 |
| #N/A | #N/A |
| 0.88 | 0.40 |
| 0.88 | 0.40 |
| 0.88 | 0.40 |
| #N/A | #N/A |
| 1.44 | 0.66 |
| 2.13 | 0.80 |
| 2.13 | 0.80 |
| #N/A | #N/A |
| #N/A | #N/A |
| #N/A | #N/A |
| 2.40 | 0.91 |
| 2.40 | 0.91 |
| #N/A | #N/A |
| 1.08 | 0.51 |
| 1.08 | 0.51 |
| 2.98 | 0.96 |
| 0.69 | 0.28 |
| #N/A | #N/A |
| 0.62 | 0.23 |
| #N/A | #N/A |
| 2.30 | 0.89 |
| 2.03 | 0.86 |
| 2.03 | 0.86 |
| 1.24 | 0.59 |
| 0.94 | 0.43 |
| 1.27 | 0.60 |
| 1.27 | 0.60 |
| #N/A | #N/A |
| #N/A | #N/A |
| #N/A | #N/A |
| 0.43 | 0.11 |
| 1.18 | 0.55 |
| 1.46 | 0.68 |
| 1.46 | 0.68 |
| 1.72 | 0.74 |
| 1.72 | 0.74 |
| 0.69 | 0.28 |
| 2.01 | 0.85 |
| 0.69 | 0.28 |
| 2.16 | 0.87 |

|      |      |
|------|------|
| 2.02 | 0.80 |
| #N/A | #N/A |
| 1.15 | 0.53 |
| 1.15 | 0.53 |
| #N/A | #N/A |
| #N/A | #N/A |
| 0.21 | 0.02 |
| 0.94 | 0.44 |
| 1.28 | 0.61 |
| 1.00 | 0.46 |
| 0.59 | 0.22 |
| 1.00 | 0.46 |
| 0.98 | 0.46 |
| #N/A | #N/A |
| #N/A | #N/A |
| #N/A | #N/A |
| #N/A | #N/A |
| #N/A | #N/A |
| 2.06 | 0.86 |
| #N/A | #N/A |
| #N/A | #N/A |
| #N/A | #N/A |
| 0.94 | 0.44 |
| #N/A | #N/A |
| #N/A | #N/A |
| #N/A | #N/A |
| #N/A | #N/A |
| #N/A | #N/A |
| 0.58 | 0.20 |
| 0.58 | 0.20 |
| 0.58 | 0.20 |
| #N/A | #N/A |
| #N/A | #N/A |
| 1.00 | 0.47 |
| 1.00 | 0.47 |
| 1.39 | 0.65 |
| 1.05 | 0.50 |
| 1.58 | 0.72 |
| 0.68 | 0.28 |
| 2.37 | 0.91 |
| 2.37 | 0.91 |
| #N/A | #N/A |
| 1.35 | 0.64 |
| 0.76 | 0.33 |
| 0.69 | 0.29 |
| #N/A | #N/A |
| 0.80 | 0.35 |
| 1.52 | 0.70 |
| 1.52 | 0.70 |
| 2.84 | 0.94 |
| 2.84 | 0.94 |

|      |      |
|------|------|
| 0.51 | 0.17 |
| 0.51 | 0.17 |
| 0.46 | 0.13 |
| 0.46 | 0.13 |
| 1.84 | 0.81 |
| 1.84 | 0.81 |
| #N/A | #N/A |
| 2.88 | 0.95 |
| 2.88 | 0.95 |
| 1.31 | 0.62 |
| 1.10 | 0.52 |
| 1.10 | 0.52 |
| #N/A | #N/A |
| 4.18 | 0.99 |
| 2.28 | 0.90 |
| 2.28 | 0.90 |
| #N/A | #N/A |
| #N/A | #N/A |
| 1.93 | 0.83 |
| 1.93 | 0.83 |
| #N/A | #N/A |
| 0.94 | 0.43 |
| #N/A | #N/A |
| 0.81 | 0.36 |
| 0.81 | 0.36 |
| 0.47 | 0.14 |
| 0.47 | 0.14 |
| 0.47 | 0.14 |
| 1.10 | 0.52 |
| 1.26 | 0.59 |
| 1.07 | 0.51 |
| 1.26 | 0.59 |
| 1.07 | 0.51 |
| 1.04 | 0.49 |
| 1.26 | 0.60 |
| 1.26 | 0.60 |
| 1.27 | 0.60 |
| 1.13 | 0.53 |
| #N/A | #N/A |
| 0.25 | 0.03 |
| 1.53 | 0.71 |
| 1.53 | 0.71 |
| 2.92 | 0.94 |
| 2.92 | 0.94 |
| 1.67 | 0.76 |
| 0.68 | 0.28 |
| 0.42 | 0.10 |
| 0.42 | 0.10 |
| 0.94 | 0.44 |
| 0.40 | 0.10 |
| 0.59 | 0.21 |

|      |      |
|------|------|
| 0.45 | 0.13 |
| 1.64 | 0.75 |
| 2.43 | 0.92 |
| 2.43 | 0.92 |
| #N/A | #N/A |
| 1.06 | 0.49 |
| 0.31 | 0.05 |
| 0.76 | 0.33 |
| 1.24 | 0.59 |
| 1.24 | 0.59 |
| 2.56 | 0.90 |
| 2.56 | 0.90 |
| #N/A | #N/A |
| 1.11 | 0.53 |
| 0.43 | 0.12 |
| 0.54 | 0.19 |
| 1.82 | 0.79 |
| 1.77 | 0.79 |
| 1.77 | 0.79 |
| 1.55 | 0.72 |
| 1.55 | 0.72 |
| 2.18 | 0.66 |
| #N/A | #N/A |
| #N/A | #N/A |
| 1.41 | 0.66 |
| #N/A | #N/A |
| #N/A | #N/A |
| #N/A | #N/A |
| 0.72 | 0.30 |
| 0.81 | 0.36 |
| #N/A | #N/A |
| #N/A | #N/A |
| #N/A | #N/A |
| 1.04 | 0.49 |
| 1.12 | 0.53 |
| 1.12 | 0.53 |
| #N/A | #N/A |
| 0.77 | 0.34 |
| 0.98 | 0.46 |
| 1.84 | 0.81 |
| 0.34 | 0.07 |
| 0.23 | 0.02 |
| #N/A | #N/A |
| 2.61 | 0.94 |
| 2.61 | 0.94 |
| #N/A | #N/A |
| 1.62 | 0.74 |
| 1.62 | 0.74 |
| 0.81 | 0.36 |
| 0.68 | 0.28 |
| 0.86 | 0.39 |

|      |      |
|------|------|
| 2.07 | 0.86 |
| 0.69 | 0.29 |
| 0.66 | 0.27 |
| 0.16 | 0.01 |
| 0.60 | 0.22 |
| #N/A | #N/A |
| 1.10 | 0.53 |
| 1.10 | 0.53 |
| 1.54 | 0.71 |
| #N/A | #N/A |
| #N/A | #N/A |
| #N/A | #N/A |
| #N/A | #N/A |
| #N/A | #N/A |
| 0.47 | 0.14 |
| #N/A | #N/A |
| #N/A | #N/A |
| 0.92 | 0.43 |
| 0.92 | 0.43 |
| 1.35 | 0.63 |
| 1.41 | 0.62 |
| 0.94 | 0.43 |
| 0.66 | 0.26 |
| #N/A | #N/A |
| #N/A | #N/A |
| 0.94 | 0.44 |
| #N/A | #N/A |
| 0.94 | 0.44 |
| #N/A | #N/A |
| 2.24 | 0.88 |
| #N/A | #N/A |
| #N/A | #N/A |
| #N/A | #N/A |
| #N/A | #N/A |
| 1.54 | 0.71 |
| 0.86 | 0.39 |
| #N/A | #N/A |
| #N/A | #N/A |
| #N/A | #N/A |
| 1.43 | 0.65 |
| 0.97 | 0.43 |
| 1.43 | 0.65 |
| 0.97 | 0.43 |
| #N/A | #N/A |
| 1.06 | 0.50 |
| 1.06 | 0.50 |
| 0.72 | 0.31 |
| 1.42 | 0.66 |
| #N/A | #N/A |
| #N/A | #N/A |
| 0.45 | 0.13 |



|      |      |
|------|------|
| 1.13 | 0.53 |
| 0.51 | 0.16 |
| 1.49 | 0.69 |
| 1.29 | 0.61 |
| 1.12 | 0.53 |
| 1.12 | 0.53 |
| 0.70 | 0.28 |
| 1.53 | 0.71 |
| 1.23 | 0.58 |
| 0.64 | 0.25 |
| 0.64 | 0.25 |
| 1.16 | 0.55 |
| 0.60 | 0.23 |
| 1.32 | 0.62 |
| 1.32 | 0.62 |
| #N/A | #N/A |
| #N/A | #N/A |
| #N/A | #N/A |
| 2.87 | 0.96 |
| 2.87 | 0.96 |
| #N/A | #N/A |
| 1.47 | 0.68 |
| 0.79 | 0.35 |
| 3.01 | 0.96 |
| 3.01 | 0.96 |
| 3.26 | 0.96 |
| 0.83 | 0.37 |
| 3.19 | 0.96 |
| 1.38 | 0.65 |
| #N/A | #N/A |
| 1.38 | 0.65 |
| 1.63 | 0.75 |
| 0.69 | 0.29 |
| 0.69 | 0.29 |
| 1.22 | 0.58 |
| 1.00 | 0.41 |
| #N/A | #N/A |
| #N/A | #N/A |
| 1.59 | 0.73 |
| 1.63 | 0.74 |
| 1.63 | 0.74 |
| 5.13 | 1.00 |
| 5.13 | 1.00 |
| 2.64 | 0.94 |
| 1.66 | 0.75 |
| 1.93 | 0.81 |
| #N/A | #N/A |
| #N/A | #N/A |
| 3.47 | 0.98 |
| 3.47 | 0.98 |
| 2.31 | 0.87 |

|      |      |
|------|------|
| 3.47 | 0.98 |
| 0.85 | 0.39 |
| 3.12 | 0.96 |
| #N/A | #N/A |
| #N/A | #N/A |
| 1.79 | 0.80 |
| 0.20 | 0.01 |
| #N/A | #N/A |
| 0.20 | 0.01 |
| 2.12 | 0.87 |
| 2.12 | 0.87 |
| 0.78 | 0.34 |
| 0.67 | 0.26 |
| 0.67 | 0.26 |
| 2.58 | 0.93 |
| 2.35 | 0.90 |
| 2.35 | 0.90 |
| 2.34 | 0.84 |
| 1.43 | 0.67 |
| 0.65 | 0.26 |
| 2.14 | 0.85 |
| 2.14 | 0.85 |
| 1.00 | 0.46 |
| 1.13 | 0.54 |
| 1.08 | 0.51 |
| 1.70 | 0.77 |
| #N/A | #N/A |
| #N/A | #N/A |
| 1.23 | 0.58 |
| 2.24 | 0.89 |
| 2.24 | 0.89 |
| #N/A | #N/A |
| 1.94 | 0.79 |
| 1.94 | 0.79 |
| 1.98 | 0.84 |
| 1.98 | 0.84 |
| 1.52 | 0.69 |
| 0.89 | 0.41 |
| #N/A | #N/A |
| 1.14 | 0.54 |
| #N/A | #N/A |
| #N/A | #N/A |
| 1.18 | 0.56 |
| 1.21 | 0.57 |
| #N/A | #N/A |
| 1.39 | 0.66 |
| 1.39 | 0.66 |
| 2.21 | 0.85 |
| 2.21 | 0.85 |
| 0.16 | 0.01 |
| 2.48 | 0.92 |



|      |      |
|------|------|
| 5.01 | 0.99 |
| 5.01 | 0.99 |
| 1.62 | 0.74 |
| #N/A | #N/A |
| #N/A | #N/A |
| #N/A | #N/A |
| 0.95 | 0.43 |
| 0.71 | 0.30 |
| 0.27 | 0.03 |
| 1.30 | 0.61 |
| 1.30 | 0.61 |
| 1.68 | 0.76 |
| 1.66 | 0.76 |
| 2.03 | 0.86 |
| 2.03 | 0.86 |
| 2.42 | 0.92 |
| 2.42 | 0.92 |
| 0.58 | 0.21 |
| 0.28 | 0.04 |
| #N/A | #N/A |
| 1.06 | 0.50 |
| 1.06 | 0.50 |
| 1.82 | 0.80 |
| #N/A | #N/A |
| #N/A | #N/A |
| 1.14 | 0.54 |
| 1.14 | 0.54 |
| 2.29 | 0.89 |
| 2.29 | 0.89 |
| 2.24 | 0.88 |
| 2.24 | 0.88 |
| 2.00 | 0.85 |
| #N/A | #N/A |
| #N/A | #N/A |
| #N/A | #N/A |
| 1.22 | 0.58 |
| 1.48 | 0.69 |
| 0.61 | 0.24 |
| 2.07 | 0.86 |
| 2.07 | 0.86 |
| 0.31 | 0.04 |
| 0.31 | 0.04 |
| #N/A | #N/A |
| #N/A | #N/A |
| #N/A | #N/A |
| 0.79 | 0.34 |
| #N/A | #N/A |
| 0.53 | 0.18 |
| 0.41 | 0.10 |
| #N/A | #N/A |
| 0.85 | 0.38 |

|      |      |
|------|------|
| 0.85 | 0.38 |
| #N/A | #N/A |
| #N/A | #N/A |
| 3.69 | 0.98 |
| 3.69 | 0.98 |
| 2.38 | 0.90 |
| 2.38 | 0.90 |
| 0.65 | 0.26 |
| 2.38 | 0.90 |
| 0.65 | 0.26 |
| 1.20 | 0.55 |
| 1.02 | 0.48 |
| 0.46 | 0.13 |
| 1.47 | 0.68 |
| 0.37 | 0.08 |
| 1.47 | 0.68 |
| 0.37 | 0.08 |
| 1.39 | 0.65 |
| 1.39 | 0.65 |
| #N/A | #N/A |
| #N/A | #N/A |
| 1.94 | 0.84 |
| 0.56 | 0.19 |
| 0.56 | 0.19 |
| #N/A | #N/A |
| 1.42 | 0.66 |
| 1.55 | 0.71 |
| 0.65 | 0.26 |
| 1.80 | 0.80 |
| 1.80 | 0.80 |
| 0.97 | 0.45 |
| 1.17 | 0.55 |
| 1.17 | 0.55 |
| 1.89 | 0.82 |
| 0.61 | 0.24 |
| 0.47 | 0.14 |
| 0.76 | 0.33 |
| 0.74 | 0.32 |
| 1.13 | 0.52 |
| #N/A | #N/A |
| #N/A | #N/A |
| 1.33 | 0.61 |
| 1.33 | 0.61 |
| 1.82 | 0.80 |
| 1.82 | 0.80 |
| 1.85 | 0.81 |
| 1.85 | 0.81 |
| #N/A | #N/A |
| 2.09 | 0.87 |
| #N/A | #N/A |
| #N/A | #N/A |

|      |      |
|------|------|
| #N/A | #N/A |
| #N/A | #N/A |
| #N/A | #N/A |
| #N/A | #N/A |
| 1.50 | 0.70 |
| 1.50 | 0.70 |
| 2.04 | 0.84 |
| 2.04 | 0.84 |
| 0.54 | 0.18 |
| 0.81 | 0.36 |
| #N/A | #N/A |
| #N/A | #N/A |
| 1.43 | 0.67 |
| 0.87 | 0.40 |
| 0.84 | 0.38 |
| 2.07 | 0.84 |
| 2.07 | 0.84 |
| #N/A | #N/A |
| #N/A | #N/A |
| #N/A | #N/A |
| 1.42 | 0.67 |
| 1.44 | 0.67 |
| 1.68 | 0.74 |
| 0.88 | 0.40 |
| #N/A | #N/A |
| 2.41 | 0.91 |
| #N/A | #N/A |
| 2.41 | 0.91 |
| #N/A | #N/A |
| 1.82 | 0.80 |
| 0.73 | 0.31 |
| #N/A | #N/A |
| 0.81 | 0.36 |
| 0.50 | 0.16 |
| 0.50 | 0.16 |
| 1.42 | 0.66 |
| 1.38 | 0.64 |
| 1.82 | 0.80 |
| 1.82 | 0.80 |
| #N/A | #N/A |
| 0.71 | 0.29 |
| 0.72 | 0.30 |
| 0.72 | 0.30 |
| 2.83 | 0.94 |
| 0.65 | 0.26 |
| 1.73 | 0.78 |
| 1.73 | 0.78 |
| #N/A | #N/A |
| #N/A | #N/A |
| #N/A | #N/A |
| #N/A | #N/A |

|      |      |
|------|------|
| #N/A | #N/A |
| #N/A | #N/A |
| 3.36 | 0.97 |
| 3.36 | 0.97 |
| #N/A | #N/A |
| #N/A | #N/A |
| #N/A | #N/A |
| #N/A | #N/A |
| #N/A | #N/A |
| 0.51 | 0.17 |
| 0.51 | 0.17 |
| #N/A | #N/A |
| #N/A | #N/A |
| 6.07 | 0.96 |
| 6.07 | 0.96 |
| #N/A | #N/A |
| 1.01 | 0.42 |
| 1.03 | 0.48 |
| 1.76 | 0.77 |
| 0.85 | 0.38 |
| 3.69 | 0.98 |
| 3.69 | 0.98 |
| 2.31 | 0.90 |
| 2.31 | 0.90 |
| 1.77 | 0.78 |
| 1.77 | 0.78 |
| #N/A | #N/A |
| 2.13 | 0.87 |
| 0.89 | 0.41 |
| 1.02 | 0.48 |
| 4.57 | 0.99 |
| 4.57 | 0.99 |
| 2.57 | 0.93 |
| 2.04 | 0.85 |
| 0.77 | 0.34 |
| 0.77 | 0.34 |
| #N/A | #N/A |
| #N/A | #N/A |
| 1.97 | 0.84 |
| 1.97 | 0.84 |
| 1.04 | 0.49 |
| 2.86 | 0.89 |
| 2.86 | 0.89 |
| 0.65 | 0.26 |
| 0.65 | 0.26 |
| 0.14 | 0.01 |
| 0.14 | 0.01 |
| #N/A | #N/A |
| 0.41 | 0.10 |
| 1.76 | 0.78 |
| 1.76 | 0.78 |

|      |      |
|------|------|
| #N/A | #N/A |
| #N/A | #N/A |
| 1.24 | 0.50 |
| 1.24 | 0.50 |
| 0.54 | 0.19 |
| 0.73 | 0.31 |
| 1.46 | 0.68 |
| 1.46 | 0.68 |
| 1.46 | 0.68 |
| #N/A | #N/A |
| 3.86 | 0.99 |
| #N/A | #N/A |
| #N/A | #N/A |
| #N/A | #N/A |
| 0.89 | 0.41 |
| 1.17 | 0.54 |
| 2.02 | 0.85 |
| 2.02 | 0.85 |
| 0.50 | 0.16 |
| 1.70 | 0.76 |
| 2.51 | 0.93 |
| 2.51 | 0.93 |
| 0.94 | 0.43 |
| 0.86 | 0.39 |
| #N/A | #N/A |
| #N/A | #N/A |
| 0.86 | 0.39 |
| #N/A | #N/A |
| #N/A | #N/A |
| #N/A | #N/A |
| 3.14 | 0.96 |
| #N/A | #N/A |
| #N/A | #N/A |
| 0.87 | 0.40 |
| 0.87 | 0.40 |
| #N/A | #N/A |
| 0.78 | 0.34 |
| 0.29 | 0.04 |
| 0.29 | 0.04 |
| #N/A | #N/A |
| #N/A | #N/A |
| #N/A | #N/A |
| #N/A | #N/A |
| #N/A | #N/A |
| #N/A | #N/A |
| #N/A | #N/A |
| #N/A | #N/A |
| 1.85 | 0.81 |
| 1.85 | 0.81 |
| #N/A | #N/A |
| #N/A | #N/A |

|       |      |
|-------|------|
| #N/A  | #N/A |
| #N/A  | #N/A |
| #N/A  | #N/A |
| #N/A  | #N/A |
| #N/A  | #N/A |
| #N/A  | #N/A |
| #N/A  | #N/A |
| 1.87  | 0.81 |
| #N/A  | #N/A |
| 1.38  | 0.65 |
| 1.38  | 0.65 |
| #N/A  | #N/A |
| 0.60  | 0.22 |
| 0.60  | 0.22 |
| #N/A  | #N/A |
| #N/A  | #N/A |
| #N/A  | #N/A |
| #N/A  | #N/A |
| #N/A  | #N/A |
| #N/A  | #N/A |
| 0.70  | 0.29 |
| 1.96  | 0.80 |
| #N/A  | #N/A |
| #N/A  | #N/A |
| #N/A  | #N/A |
| #N/A  | #N/A |
| #N/A  | #N/A |
| 1.05  | 0.47 |
| #N/A  | #N/A |
| #N/A  | #N/A |
| #N/A  | #N/A |
| #N/A  | #N/A |
| 2.29  | 0.90 |
| 2.29  | 0.90 |
| 3.13  | 0.97 |
| 3.13  | 0.97 |
| 3.13  | 0.97 |
| 3.13  | 0.97 |
| 0.65  | 0.26 |
| 0.65  | 0.26 |
| #N/A  | #N/A |
| 14.38 | 0.95 |
| 3.42  | 0.96 |
| 3.42  | 0.96 |
| 1.41  | 0.66 |
| #N/A  | #N/A |
| 1.19  | 0.56 |
| 1.19  | 0.56 |
| #N/A  | #N/A |
| 1.28  | 0.60 |
| #N/A  | #N/A |

|      |      |
|------|------|
| 2.68 | 0.92 |
| 2.68 | 0.92 |
| 0.59 | 0.22 |
| #N/A | #N/A |
| #N/A | #N/A |
| #N/A | #N/A |
| #N/A | #N/A |
| #N/A | #N/A |
| #N/A | #N/A |
| 0.79 | 0.35 |
| 0.78 | 0.34 |
| 1.26 | 0.60 |
| 0.83 | 0.37 |
| 0.76 | 0.33 |
| #N/A | #N/A |
| 4.26 | 0.99 |
| 4.26 | 0.99 |
| #N/A | #N/A |
| #N/A | #N/A |
| #N/A | #N/A |
| 1.82 | 0.80 |
| #N/A | #N/A |
| #N/A | #N/A |
| 0.95 | 0.42 |
| #N/A | #N/A |
| #N/A | #N/A |
| #N/A | #N/A |
| #N/A | #N/A |
| #N/A | #N/A |
| 1.14 | 0.55 |
| 1.14 | 0.55 |
| 0.26 | 0.03 |
| #N/A | #N/A |
| 1.06 | 0.46 |
| 1.06 | 0.46 |
| 1.19 | 0.55 |
| 1.44 | 0.67 |
| 0.24 | 0.02 |
| 0.24 | 0.02 |
| 0.65 | 0.26 |
| #N/A | #N/A |
| #N/A | #N/A |
| #N/A | #N/A |
| 1.43 | 0.67 |
| 1.43 | 0.67 |
| 0.99 | 0.46 |
| #N/A | #N/A |
| 1.60 | 0.73 |
| 1.92 | 0.82 |
| 1.92 | 0.82 |
| #N/A | #N/A |

|      |      |
|------|------|
| 1.18 | 0.56 |
| #N/A | #N/A |
| 1.18 | 0.56 |
| #N/A | #N/A |
| 1.45 | 0.68 |
| 1.45 | 0.68 |
| 1.66 | 0.69 |
| #N/A | #N/A |
| #N/A | #N/A |
| 0.40 | 0.09 |
| 0.40 | 0.09 |
| #N/A | #N/A |
| #N/A | #N/A |
| #N/A | #N/A |
| #N/A | #N/A |
| #N/A | #N/A |
| #N/A | #N/A |
| 0.54 | 0.21 |
| 0.55 | 0.19 |
| #N/A | #N/A |
| 2.56 | 0.93 |
| 2.56 | 0.93 |
| #N/A | #N/A |
| 1.51 | 0.69 |
| #N/A | #N/A |
| #N/A | #N/A |
| 1.01 | 0.47 |
| 1.01 | 0.47 |
| 1.01 | 0.47 |
| 0.32 | 0.05 |
| 0.28 | 0.03 |
| 0.28 | 0.03 |
| 0.36 | 0.07 |
| #N/A | #N/A |
| 1.05 | 0.49 |
| #N/A | #N/A |
| 0.46 | 0.13 |
| #N/A | #N/A |
| #N/A | #N/A |
| #N/A | #N/A |
| #N/A | #N/A |
| #N/A | #N/A |
| 2.20 | 0.89 |
| 1.34 | 0.63 |
| 1.34 | 0.63 |
| #N/A | #N/A |
| 1.12 | 0.53 |
| 1.12 | 0.53 |
| 0.93 | 0.37 |
| 1.12 | 0.53 |
| 0.93 | 0.37 |



|      |      |
|------|------|
| #N/A | #N/A |
| #N/A | #N/A |
| #N/A | #N/A |
| #N/A | #N/A |
| #N/A | #N/A |
| #N/A | #N/A |
| 0.88 | 0.40 |
| 0.88 | 0.40 |
| 0.67 | 0.27 |
| 0.61 | 0.23 |
| 0.47 | 0.13 |
| 1.31 | 0.62 |
| #N/A | #N/A |
| 0.23 | 0.02 |
| 0.66 | 0.26 |
| #N/A | #N/A |
| #N/A | #N/A |
| #N/A | #N/A |
| #N/A | #N/A |
| #N/A | #N/A |
| 0.51 | 0.16 |
| 1.01 | 0.48 |
| 0.51 | 0.16 |
| #N/A | #N/A |
| 0.29 | 0.04 |
| 0.48 | 0.14 |
| 0.73 | 0.30 |
| #N/A | #N/A |
| 0.95 | 0.44 |
| 0.81 | 0.36 |
| 0.95 | 0.44 |
| 0.81 | 0.36 |
| 2.02 | 0.85 |
| 2.02 | 0.85 |
| 1.49 | 0.66 |
| #N/A | #N/A |
| 0.68 | 0.28 |
| 0.68 | 0.28 |
| 1.87 | 0.80 |
| 1.19 | 0.55 |
| 1.19 | 0.55 |
| #N/A | #N/A |
| 1.72 | 0.77 |
| 1.72 | 0.77 |
| 1.62 | 0.74 |
| 1.62 | 0.74 |
| #N/A | #N/A |
| #N/A | #N/A |
| 0.77 | 0.33 |
| 0.53 | 0.18 |
| #N/A | #N/A |

|      |      |
|------|------|
| #N/A | #N/A |
| #N/A | #N/A |
| #N/A | #N/A |
| 3.56 | 0.98 |
| #N/A | #N/A |
| 3.56 | 0.98 |
| #N/A | #N/A |
| 1.24 | 0.59 |
| 2.55 | 0.93 |
| #N/A | #N/A |
| 2.55 | 0.93 |
| 1.07 | 0.51 |
| 2.02 | 0.85 |
| 2.02 | 0.85 |
| #N/A | #N/A |
| 3.47 | 0.98 |
| 3.47 | 0.98 |
| 0.65 | 0.26 |
| 0.65 | 0.26 |
| 0.98 | 0.46 |
| 0.98 | 0.46 |
| #N/A | #N/A |
| 1.34 | 0.63 |
| 1.34 | 0.63 |
| 1.34 | 0.63 |
| #N/A | #N/A |
| #N/A | #N/A |
| #N/A | #N/A |
| #N/A | #N/A |
| 0.42 | 0.11 |
| 0.42 | 0.11 |
| #N/A | #N/A |
| #N/A | #N/A |
| 0.95 | 0.45 |
| #N/A | #N/A |
| #N/A | #N/A |
| 0.66 | 0.27 |
| 0.66 | 0.27 |
| #N/A | #N/A |
| #N/A | #N/A |
| #N/A | #N/A |
| #N/A | #N/A |
| #N/A | #N/A |
| #N/A | #N/A |
| #N/A | #N/A |
| #N/A | #N/A |
| 0.68 | 0.27 |
| 0.68 | 0.27 |
| 0.68 | 0.27 |
| 0.93 | 0.43 |
| 0.93 | 0.43 |
| #N/A | #N/A |

|      |      |
|------|------|
| #N/A | #N/A |
| #N/A | #N/A |
| #N/A | #N/A |
| #N/A | #N/A |
| 1.30 | 0.62 |
| #N/A | #N/A |
| 2.21 | 0.89 |
| #N/A | #N/A |
| #N/A | #N/A |
| #N/A | #N/A |
| 0.85 | 0.39 |
| 0.85 | 0.39 |
| #N/A | #N/A |
| #N/A | #N/A |
| #N/A | #N/A |
| #N/A | #N/A |
| 0.62 | 0.24 |
| 0.62 | 0.24 |
| 2.59 | 0.93 |
| #N/A | #N/A |
| 0.78 | 0.31 |
| 2.26 | 0.90 |
| 2.26 | 0.90 |
| #N/A | #N/A |
| #N/A | #N/A |
| 1.10 | 0.49 |
| 0.68 | 0.27 |
| 0.68 | 0.27 |
| #N/A | #N/A |
| 1.87 | 0.78 |
| #N/A | #N/A |
| #N/A | #N/A |
| 1.48 | 0.68 |
| 1.48 | 0.68 |
| #N/A | #N/A |
| 0.91 | 0.42 |
| 1.13 | 0.54 |
| #N/A | #N/A |
| 1.13 | 0.54 |
| #N/A | #N/A |
| #N/A | #N/A |
| 0.76 | 0.33 |
| 0.52 | 0.17 |
| 0.76 | 0.33 |
| 0.52 | 0.17 |
| 0.76 | 0.33 |
| 0.52 | 0.17 |
| #N/A | #N/A |
| #N/A | #N/A |
| 1.81 | 0.80 |
| 1.81 | 0.80 |

|      |      |
|------|------|
| 1.63 | 0.74 |
| 0.81 | 0.36 |
| 0.60 | 0.23 |
| 0.60 | 0.23 |
| 2.43 | 0.92 |
| #N/A | #N/A |
| #N/A | #N/A |
| #N/A | #N/A |
| #N/A | #N/A |
| #N/A | #N/A |
| #N/A | #N/A |
| 0.47 | 0.14 |
| 4.05 | 0.99 |
| 4.05 | 0.99 |
| #N/A | #N/A |
| 1.57 | 0.72 |
| 1.57 | 0.72 |
| 1.90 | 0.80 |
| 1.85 | 0.81 |
| 1.85 | 0.81 |
| 1.26 | 0.58 |
| 1.26 | 0.58 |
| 0.52 | 0.17 |
| 0.52 | 0.17 |
| 0.42 | 0.10 |
| 0.50 | 0.16 |
| 0.77 | 0.34 |
| 1.31 | 0.62 |
| 1.76 | 0.79 |
| #N/A | #N/A |
| 1.76 | 0.79 |
| #N/A | #N/A |
| #N/A | #N/A |
| #N/A | #N/A |
| 0.80 | 0.35 |
| #N/A | #N/A |
| 0.88 | 0.40 |
| 0.88 | 0.40 |
| #N/A | #N/A |
| #N/A | #N/A |
| #N/A | #N/A |
| 1.76 | 0.79 |
| 1.06 | 0.50 |
| 1.06 | 0.50 |
| #N/A | #N/A |
| 1.97 | 0.84 |
| 1.97 | 0.84 |
| 2.31 | 0.90 |
| #N/A | #N/A |
| 2.31 | 0.90 |
| 0.87 | 0.40 |

|      |      |
|------|------|
| 1.21 | 0.56 |
| 0.66 | 0.26 |
| 0.66 | 0.26 |
| 0.55 | 0.19 |
| 0.87 | 0.39 |
| 0.87 | 0.39 |
| #N/A | #N/A |
| #N/A | #N/A |
| #N/A | #N/A |
| #N/A | #N/A |
| 2.29 | 0.86 |
| 2.29 | 0.86 |
| 1.65 | 0.75 |
| 0.36 | 0.07 |
| 0.36 | 0.07 |
| 2.83 | 0.95 |
| 2.83 | 0.95 |
| #N/A | #N/A |
| #N/A | #N/A |
| #N/A | #N/A |
| 1.84 | 0.81 |
| #N/A | #N/A |
| 1.50 | 0.66 |
| #N/A | #N/A |
| 1.14 | 0.54 |
| 0.39 | 0.11 |
| #N/A | #N/A |
| 0.85 | 0.38 |
| #N/A | #N/A |
| #N/A | #N/A |
| 3.07 | 0.97 |
| 2.18 | 0.88 |
| 1.80 | 0.80 |
| 1.80 | 0.80 |
| #N/A | #N/A |
| #N/A | #N/A |
| 1.79 | 0.75 |
| 1.54 | 0.71 |
| 0.55 | 0.20 |
| 0.55 | 0.20 |
| #N/A | #N/A |
| 0.55 | 0.20 |
| #N/A | #N/A |
| #N/A | #N/A |
| #N/A | #N/A |
| #N/A | #N/A |
| #N/A | #N/A |
| 2.12 | 0.80 |
| 2.12 | 0.80 |
| 0.89 | 0.41 |
| 0.89 | 0.41 |

|      |      |
|------|------|
| 0.61 | 0.23 |
| #N/A | #N/A |
| 0.61 | 0.23 |
| 0.61 | 0.23 |
| 0.84 | 0.38 |
| 0.84 | 0.38 |
| 2.30 | 0.86 |
| #N/A | #N/A |
| #N/A | #N/A |
| #N/A | #N/A |
| #N/A | #N/A |
| 0.93 | 0.43 |
| 0.93 | 0.43 |
| 0.85 | 0.38 |
| #N/A | #N/A |
| 2.67 | 0.93 |
| 2.67 | 0.93 |
| #N/A | #N/A |
| 0.41 | 0.10 |
| 1.05 | 0.50 |
| 1.05 | 0.50 |
| 0.85 | 0.37 |
| 0.36 | 0.07 |
| 0.36 | 0.07 |
| #N/A | #N/A |
| #N/A | #N/A |
| #N/A | #N/A |
| 2.27 | 0.90 |
| #N/A | #N/A |
| 0.71 | 0.29 |
| 2.14 | 0.87 |
| 2.14 | 0.87 |
| #N/A | #N/A |
| #N/A | #N/A |
| 1.60 | 0.73 |
| #N/A | #N/A |
| 0.90 | 0.42 |
| 0.76 | 0.33 |
| 0.76 | 0.33 |
| 1.07 | 0.50 |
| #N/A | #N/A |
| 2.80 | 0.95 |
| 0.87 | 0.39 |
| 0.87 | 0.39 |
| 0.41 | 0.10 |
| 0.41 | 0.10 |
| 0.64 | 0.25 |
| 0.40 | 0.09 |
| #N/A | #N/A |
| 0.75 | 0.32 |
| 0.71 | 0.30 |

|      |      |
|------|------|
| 0.84 | 0.38 |
| 0.54 | 0.19 |
| #N/A | #N/A |
| 0.66 | 0.27 |
| 2.52 | 0.93 |
| 1.33 | 0.63 |
| 3.02 | 0.96 |
| 3.02 | 0.96 |
| 0.53 | 0.17 |
| 1.76 | 0.77 |
| #N/A | #N/A |
| 1.67 | 0.76 |
| 1.67 | 0.76 |
| #N/A | #N/A |
| 1.86 | 0.81 |
| 1.86 | 0.81 |
| 0.47 | 0.15 |
| #N/A | #N/A |
| 0.47 | 0.15 |
| 2.08 | 0.82 |
| 1.29 | 0.61 |
| 1.29 | 0.61 |
| #N/A | #N/A |
| #N/A | #N/A |
| 0.78 | 0.34 |
| 1.90 | 0.83 |
| 1.90 | 0.83 |
| #N/A | #N/A |
| 0.63 | 0.24 |
| 0.38 | 0.08 |
| 0.71 | 0.30 |
| 0.78 | 0.33 |
| 0.78 | 0.33 |
| 3.31 | 0.95 |
| 3.31 | 0.95 |
| 1.46 | 0.68 |
| #N/A | #N/A |
| #N/A | #N/A |
| #N/A | #N/A |
| 1.06 | 0.50 |
| #N/A | #N/A |
| #N/A | #N/A |
| 1.30 | 0.55 |
| #N/A | #N/A |
| #N/A | #N/A |
| #N/A | #N/A |
| 1.84 | 0.51 |
| #N/A | #N/A |
| #N/A | #N/A |
| 1.55 | 0.71 |
| 1.55 | 0.71 |

|      |      |
|------|------|
| 0.69 | 0.28 |
| 0.61 | 0.23 |
| 1.85 | 0.81 |
| 1.65 | 0.75 |
| 1.65 | 0.75 |
| 0.86 | 0.39 |
| 0.24 | 0.02 |
| 1.50 | 0.69 |
| 1.50 | 0.69 |
| 1.97 | 0.82 |
| 0.96 | 0.45 |
| 0.57 | 0.21 |
| 0.96 | 0.45 |
| 1.45 | 0.68 |
| 2.42 | 0.92 |
| 3.16 | 0.97 |
| 3.16 | 0.97 |
| 2.10 | 0.86 |
| 0.66 | 0.27 |
| 0.94 | 0.44 |
| 0.64 | 0.25 |
| 1.06 | 0.50 |
| #N/A | #N/A |
| 1.06 | 0.50 |
| 0.66 | 0.27 |
| 1.06 | 0.50 |
| 1.25 | 0.59 |
| 1.31 | 0.62 |
| 1.31 | 0.62 |
| 2.84 | 0.94 |
| 1.82 | 0.80 |
| 1.82 | 0.80 |
| 1.17 | 0.56 |
| 0.61 | 0.23 |
| 0.61 | 0.23 |
| #N/A | #N/A |
| 1.51 | 0.69 |
| 1.08 | 0.51 |
| 1.08 | 0.51 |
| 0.49 | 0.17 |
| 0.55 | 0.20 |
| 0.68 | 0.27 |
| 1.01 | 0.48 |
| 1.39 | 0.65 |
| 1.80 | 0.80 |
| 1.80 | 0.80 |
| 0.35 | 0.07 |
| 1.07 | 0.49 |
| 1.60 | 0.67 |
| 1.74 | 0.78 |
| 2.05 | 0.86 |



|      |      |
|------|------|
| 2.05 | 0.86 |
| 2.34 | 0.91 |
| 2.34 | 0.91 |
| 0.67 | 0.27 |
| 3.39 | 0.98 |
| 0.68 | 0.27 |
| 0.55 | 0.19 |
| 0.55 | 0.19 |
| 1.14 | 0.54 |
| #N/A | #N/A |
| #N/A | #N/A |
| 1.79 | 0.79 |
| 0.80 | 0.35 |
| 2.04 | 0.84 |
| 2.04 | 0.85 |
| 1.41 | 0.65 |
| 1.41 | 0.65 |
| #N/A | #N/A |
| 1.26 | 0.56 |
| #N/A | #N/A |
| #N/A | #N/A |
| #N/A | #N/A |
| #N/A | #N/A |
| 0.25 | 0.03 |
| 0.46 | 0.13 |
| 0.25 | 0.03 |
| 2.08 | 0.85 |
| 2.08 | 0.85 |
| 1.95 | 0.84 |
| #N/A | #N/A |
| #N/A | #N/A |
| 0.35 | 0.06 |
| 0.35 | 0.06 |
| 1.37 | 0.62 |
| 0.19 | 0.01 |
| 0.66 | 0.26 |
| 0.66 | 0.26 |
| 1.21 | 0.57 |
| 2.03 | 0.81 |
| 0.88 | 0.41 |
| #N/A | #N/A |
| 0.88 | 0.41 |
| #N/A | #N/A |
| #N/A | #N/A |
| 1.64 | 0.75 |
| 1.64 | 0.75 |
| 1.54 | 0.68 |
| 3.84 | 0.96 |
| 3.84 | 0.96 |
| 0.51 | 0.17 |
| 2.73 | 0.93 |

|      |      |
|------|------|
| 2.73 | 0.93 |
| #N/A | #N/A |
| 2.03 | 0.80 |
| 1.20 | 0.57 |
| #N/A | #N/A |
| #N/A | #N/A |
| 1.53 | 0.71 |
| 1.53 | 0.71 |
| 1.31 | 0.62 |
| 1.59 | 0.73 |
| 1.12 | 0.53 |
| 1.04 | 0.49 |
| 1.21 | 0.57 |
| 1.04 | 0.49 |
| 1.21 | 0.57 |
| 1.21 | 0.57 |
| 1.21 | 0.57 |
| 1.21 | 0.57 |
| 1.90 | 0.82 |
| 1.18 | 0.56 |
| 2.07 | 0.86 |
| 1.10 | 0.52 |
| #N/A | #N/A |
| 1.13 | 0.54 |
| 0.70 | 0.30 |
| 2.19 | 0.88 |
| 2.19 | 0.88 |
| #N/A | #N/A |
| 0.50 | 0.15 |
| 1.14 | 0.54 |
| 1.34 | 0.64 |
| 1.34 | 0.64 |
| 2.83 | 0.95 |
| 2.83 | 0.95 |
| #N/A | #N/A |
| 0.62 | 0.24 |
| 1.23 | 0.59 |
| 0.64 | 0.25 |
| 0.44 | 0.11 |
| 1.44 | 0.67 |
| 2.19 | 0.88 |
| 2.19 | 0.88 |
| 0.79 | 0.35 |
| 1.60 | 0.70 |
| 0.63 | 0.24 |
| 0.63 | 0.24 |
| 2.66 | 0.84 |
| #N/A | #N/A |
| 1.63 | 0.75 |
| 1.63 | 0.75 |
| 2.04 | 0.84 |

|      |      |
|------|------|
| 2.04 | 0.84 |
| #N/A | #N/A |
| #N/A | #N/A |
| #N/A | #N/A |
| 1.90 | 0.82 |
| 1.90 | 0.82 |
| 1.56 | 0.71 |
| 2.11 | 0.87 |
| 1.40 | 0.65 |
| 1.40 | 0.65 |
| #N/A | #N/A |
| #N/A | #N/A |
| #N/A | #N/A |
| #N/A | #N/A |
| 2.43 | 0.91 |
| 2.43 | 0.91 |
| 1.39 | 0.65 |
| #N/A | #N/A |
| 1.37 | 0.64 |
| #N/A | #N/A |
| #N/A | #N/A |
| #N/A | #N/A |
| #N/A | #N/A |
| 0.72 | 0.30 |
| 0.67 | 0.27 |
| #N/A | #N/A |
| 1.61 | 0.73 |
| 4.03 | 0.98 |
| 4.03 | 0.98 |
| 1.67 | 0.76 |
| 0.94 | 0.44 |
| 1.46 | 0.65 |
| 1.02 | 0.48 |
| 1.02 | 0.48 |
| 0.60 | 0.22 |
| 0.83 | 0.37 |
| 1.08 | 0.51 |
| 0.83 | 0.37 |
| #N/A | #N/A |
| 1.08 | 0.51 |
| 0.89 | 0.36 |
| #N/A | #N/A |
| 0.54 | 0.18 |
| 0.17 | 0.01 |
| #N/A | #N/A |
| 0.83 | 0.37 |
| #N/A | #N/A |
| #N/A | #N/A |
| 0.30 | 0.04 |
| 1.89 | 0.82 |
| #N/A | #N/A |

|      |      |
|------|------|
| 1.53 | 0.71 |
| #N/A | #N/A |
| 1.54 | 0.71 |
| 1.54 | 0.71 |
| #N/A | #N/A |
| 1.89 | 0.82 |
| 0.59 | 0.22 |
| 0.59 | 0.22 |
| 1.29 | 0.61 |
| 1.70 | 0.77 |
| 1.70 | 0.77 |
| 2.04 | 0.85 |
| 0.98 | 0.46 |
| 1.04 | 0.50 |
| 1.41 | 0.66 |
| #N/A | #N/A |
| 2.15 | 0.87 |
| 2.15 | 0.87 |
| 2.20 | 0.88 |
| #N/A | #N/A |
| 0.43 | 0.11 |
| 0.59 | 0.22 |
| 0.59 | 0.22 |
| #N/A | #N/A |
| 2.16 | 0.88 |
| #N/A | #N/A |
| #N/A | #N/A |
| #N/A | #N/A |
| 1.21 | 0.57 |
| 1.21 | 0.57 |
| #N/A | #N/A |
| 0.44 | 0.12 |
| 0.39 | 0.09 |
| 0.44 | 0.12 |
| 2.29 | 0.90 |
| #N/A | #N/A |
| #N/A | #N/A |
| #N/A | #N/A |
| #N/A | #N/A |
| 0.89 | 0.41 |
| 0.89 | 0.41 |
| #N/A | #N/A |
| #N/A | #N/A |
| 1.98 | 0.83 |
| 1.05 | 0.50 |
| 3.48 | 0.98 |
| 1.82 | 0.80 |
| 0.60 | 0.22 |
| 1.82 | 0.80 |
| 0.60 | 0.22 |
| 0.45 | 0.12 |

|      |      |
|------|------|
| 0.60 | 0.22 |
| 1.56 | 0.72 |
| 1.43 | 0.67 |
| 2.49 | 0.93 |
| 1.68 | 0.75 |
| 1.68 | 0.75 |
| 1.16 | 0.49 |
| 1.16 | 0.49 |
| 0.55 | 0.19 |
| 0.65 | 0.26 |
| #N/A | #N/A |
| 0.60 | 0.22 |
| 0.65 | 0.26 |
| 1.13 | 0.54 |
| 0.94 | 0.43 |
| 0.43 | 0.11 |
| 0.96 | 0.45 |
| 2.00 | 0.85 |
| 2.00 | 0.85 |
| #N/A | #N/A |
| #N/A | #N/A |
| #N/A | #N/A |
| #N/A | #N/A |
| #N/A | #N/A |
| 0.51 | 0.17 |
| 1.23 | 0.58 |
| 1.23 | 0.58 |
| 1.60 | 0.68 |
| 1.60 | 0.68 |
| 0.67 | 0.27 |
| #N/A | #N/A |
| 1.45 | 0.68 |
| 1.45 | 0.68 |
| 0.38 | 0.08 |
| 0.38 | 0.08 |
| #N/A | #N/A |
| 0.60 | 0.22 |
| 0.79 | 0.35 |
| 0.79 | 0.35 |
| 0.38 | 0.08 |
| 0.64 | 0.25 |
| 1.14 | 0.54 |
| 2.80 | 0.94 |
| 2.80 | 0.94 |
| #N/A | #N/A |
| 1.25 | 0.59 |
| 0.86 | 0.39 |
| 2.30 | 0.89 |
| 2.07 | 0.86 |
| #N/A | #N/A |
| 2.07 | 0.86 |

|      |      |
|------|------|
| 0.21 | 0.02 |
| 0.21 | 0.02 |
| 1.27 | 0.60 |
| 0.65 | 0.26 |
| 0.49 | 0.15 |
| 1.29 | 0.61 |
| 0.51 | 0.17 |
| 0.51 | 0.17 |
| 0.93 | 0.42 |
| #N/A | #N/A |
| 1.23 | 0.59 |
| 1.23 | 0.59 |
| 0.88 | 0.40 |
| 1.09 | 0.51 |
| 1.48 | 0.69 |
| 1.93 | 0.83 |
| 2.20 | 0.89 |
| 2.20 | 0.89 |
| 2.62 | 0.94 |
| 2.62 | 0.94 |
| #N/A | #N/A |
| 1.08 | 0.49 |
| 1.24 | 0.59 |
| #N/A | #N/A |
| 2.61 | 0.94 |
| 0.68 | 0.27 |
| 2.20 | 0.88 |
| 1.48 | 0.69 |
| 2.20 | 0.88 |
| 1.48 | 0.69 |
| 3.45 | 0.97 |
| 3.45 | 0.97 |
| 1.20 | 0.57 |
| 1.20 | 0.57 |
| 0.20 | 0.02 |
| 0.39 | 0.09 |
| #N/A | #N/A |
| #N/A | #N/A |
| 0.56 | 0.20 |
| 1.71 | 0.76 |
| 1.41 | 0.66 |
| #N/A | #N/A |
| 0.85 | 0.38 |
| 0.85 | 0.38 |
| #N/A | #N/A |
| 2.08 | 0.86 |
| 1.69 | 0.76 |
| 0.92 | 0.42 |
| 0.92 | 0.42 |
| 0.97 | 0.46 |
| #N/A | #N/A |

|      |      |
|------|------|
| 0.81 | 0.35 |
| 3.14 | 0.97 |
| 3.14 | 0.97 |
| 2.76 | 0.94 |
| #N/A | #N/A |
| #N/A | #N/A |
| 1.18 | 0.56 |
| 1.18 | 0.56 |
| 1.57 | 0.72 |
| 1.18 | 0.56 |
| #N/A | #N/A |
| 0.84 | 0.38 |
| 2.04 | 0.85 |
| 2.04 | 0.85 |
| 0.51 | 0.16 |
| 1.41 | 0.66 |
| 0.32 | 0.05 |
| 1.43 | 0.63 |
| 1.47 | 0.69 |
| 1.56 | 0.68 |
| #N/A | #N/A |
| 0.77 | 0.34 |
| 0.77 | 0.34 |
| #N/A | #N/A |
| 2.11 | 0.86 |
| 2.10 | 0.84 |
| 2.10 | 0.84 |
| #N/A | #N/A |
| #N/A | #N/A |
| 0.67 | 0.27 |
| 1.48 | 0.68 |
| 1.75 | 0.77 |
| 1.48 | 0.68 |
| 1.75 | 0.77 |
| 3.95 | 0.99 |
| 2.38 | 0.91 |
| 2.38 | 0.91 |
| #N/A | #N/A |
| #N/A | #N/A |
| #N/A | #N/A |
| #N/A | #N/A |
| #N/A | #N/A |
| 1.92 | 0.83 |
| 1.92 | 0.83 |
| 1.13 | 0.54 |
| 1.00 | 0.47 |
| 0.57 | 0.20 |
| 1.21 | 0.58 |
| 1.21 | 0.58 |
| 1.63 | 0.74 |
| 1.77 | 0.79 |

|      |      |
|------|------|
| 1.56 | 0.71 |
| 1.05 | 0.50 |
| 1.27 | 0.60 |
| 2.02 | 0.85 |
| 2.02 | 0.85 |
| 1.48 | 0.69 |
| 1.48 | 0.69 |
| 1.48 | 0.69 |
| 1.58 | 0.72 |
| 0.76 | 0.33 |
| 0.76 | 0.33 |
| 0.37 | 0.07 |
| 1.00 | 0.47 |
| 1.90 | 0.83 |
| 1.66 | 0.76 |
| 1.66 | 0.76 |
| 1.60 | 0.73 |
| 2.97 | 0.96 |
| 2.97 | 0.96 |
| 1.72 | 0.77 |
| 1.72 | 0.77 |
| 0.65 | 0.26 |
| 0.96 | 0.45 |
| 0.96 | 0.45 |
| 0.77 | 0.34 |
| 2.88 | 0.95 |
| 2.88 | 0.95 |
| 0.90 | 0.41 |
| 1.72 | 0.77 |
| #N/A | #N/A |
| #N/A | #N/A |
| 3.69 | 0.98 |
| 3.17 | 0.97 |
| 3.17 | 0.97 |
| 1.32 | 0.62 |
| 1.44 | 0.67 |
| 1.07 | 0.50 |
| 1.45 | 0.68 |
| 1.07 | 0.50 |
| 1.45 | 0.68 |
| 1.45 | 0.68 |
| 1.87 | 0.81 |
| 1.30 | 0.61 |
| 1.87 | 0.81 |
| 0.84 | 0.35 |
| 0.90 | 0.42 |
| #N/A | #N/A |
| #N/A | #N/A |
| 2.75 | 0.95 |
| 2.75 | 0.95 |
| 1.96 | 0.83 |



|      |      |
|------|------|
| #N/A | #N/A |
| #N/A | #N/A |
| 0.69 | 0.29 |
| 1.92 | 0.82 |
| #N/A | #N/A |
| #N/A | #N/A |
| 0.54 | 0.19 |
| 1.03 | 0.48 |
| 0.39 | 0.09 |
| 1.73 | 0.77 |
| 1.73 | 0.77 |
| 1.42 | 0.67 |
| 0.86 | 0.39 |
| 1.68 | 0.76 |
| 0.27 | 0.04 |
| 0.27 | 0.04 |
| 1.30 | 0.62 |
| 1.24 | 0.59 |
| 0.59 | 0.22 |
| #N/A | #N/A |
| 0.59 | 0.22 |
| 0.59 | 0.22 |
| 0.59 | 0.22 |
| #N/A | #N/A |
| 0.53 | 0.18 |
| #N/A | #N/A |
| 0.76 | 0.33 |
| 0.76 | 0.33 |
| 3.00 | 0.95 |
| 3.00 | 0.95 |
| 1.65 | 0.75 |
| 1.80 | 0.80 |
| 2.35 | 0.89 |
| 0.68 | 0.28 |
| 2.12 | 0.86 |
| 2.12 | 0.86 |
| 1.51 | 0.70 |
| 1.51 | 0.70 |
| 2.89 | 0.96 |
| 1.73 | 0.76 |
| 1.73 | 0.76 |
| #N/A | #N/A |
| 1.78 | 0.79 |
| #N/A | #N/A |
| 1.78 | 0.79 |
| 1.78 | 0.79 |
| 0.72 | 0.29 |
| 0.55 | 0.19 |
| 1.56 | 0.72 |
| 1.03 | 0.49 |
| 2.49 | 0.92 |

|      |      |
|------|------|
| 2.49 | 0.92 |
| 1.60 | 0.73 |
| 0.68 | 0.28 |
| 1.19 | 0.56 |
| 2.14 | 0.87 |
| 2.14 | 0.87 |
| 0.56 | 0.20 |
| #N/A | #N/A |
| 0.84 | 0.38 |
| 0.84 | 0.38 |
| 0.82 | 0.36 |
| 1.46 | 0.68 |
| 2.43 | 0.91 |
| 2.43 | 0.91 |
| #N/A | #N/A |
| 1.81 | 0.80 |
| 1.81 | 0.80 |
| #N/A | #N/A |
| 1.06 | 0.50 |
| 1.06 | 0.50 |
| 1.86 | 0.81 |
| 1.25 | 0.57 |
| 1.25 | 0.57 |
| #N/A | #N/A |
| 0.88 | 0.41 |
| #N/A | #N/A |
| #N/A | #N/A |
| 3.10 | 0.97 |
| 3.10 | 0.97 |
| #N/A | #N/A |
| #N/A | #N/A |
| #N/A | #N/A |
| 1.16 | 0.55 |
| 0.64 | 0.25 |
| 2.23 | 0.89 |
| 0.64 | 0.25 |
| 2.23 | 0.89 |
| 4.20 | 0.82 |
| 2.29 | 0.90 |
| 2.29 | 0.90 |
| #N/A | #N/A |
| #N/A | #N/A |
| 0.70 | 0.29 |
| 0.94 | 0.44 |
| 0.71 | 0.30 |
| 0.71 | 0.30 |
| 0.82 | 0.36 |
| 0.92 | 0.42 |
| 0.92 | 0.42 |
| 1.69 | 0.77 |
| 0.73 | 0.30 |

|      |      |
|------|------|
| 0.98 | 0.46 |
| 1.63 | 0.75 |
| 1.62 | 0.74 |
| 0.71 | 0.29 |
| 1.89 | 0.82 |
| 1.89 | 0.82 |
| 1.04 | 0.49 |
| 1.68 | 0.76 |
| 1.68 | 0.76 |
| 2.49 | 0.91 |
| #N/A | #N/A |
| 2.49 | 0.91 |
| 1.24 | 0.59 |
| 2.01 | 0.84 |
| #N/A | #N/A |
| #N/A | #N/A |
| 0.40 | 0.09 |
| 2.88 | 0.96 |
| 2.88 | 0.96 |
| 2.88 | 0.96 |
| 2.64 | 0.94 |
| 2.64 | 0.94 |
| #N/A | #N/A |
| 0.83 | 0.37 |
| 0.52 | 0.16 |
| 0.83 | 0.37 |
| #N/A | #N/A |
| #N/A | #N/A |
| #N/A | #N/A |
| #N/A | #N/A |
| #N/A | #N/A |
| 1.73 | 0.76 |
| 1.73 | 0.76 |
| #N/A | #N/A |
| #N/A | #N/A |
| #N/A | #N/A |
| 2.93 | 0.90 |
| 2.93 | 0.90 |
| 3.33 | 0.98 |
| #N/A | #N/A |
| 3.33 | 0.98 |
| #N/A | #N/A |
| 1.39 | 0.65 |
| 1.39 | 0.65 |
| #N/A | #N/A |
| #N/A | #N/A |
| 1.47 | 0.68 |
| 2.23 | 0.89 |
| 1.65 | 0.75 |
| 1.65 | 0.75 |
| 1.74 | 0.78 |

|      |      |
|------|------|
| 0.68 | 0.28 |
| 0.53 | 0.18 |
| 0.56 | 0.20 |
| 0.56 | 0.20 |
| 0.36 | 0.07 |
| 0.82 | 0.37 |
| 1.80 | 0.79 |
| 1.80 | 0.79 |
| #N/A | #N/A |
| 0.81 | 0.36 |
| 1.70 | 0.74 |
| 1.70 | 0.74 |
| 0.88 | 0.40 |
| 1.27 | 0.60 |
| 1.70 | 0.76 |
| 1.70 | 0.76 |
| 0.40 | 0.09 |
| 0.40 | 0.09 |
| 2.35 | 0.91 |
| 0.68 | 0.27 |
| 0.77 | 0.34 |
| 0.43 | 0.12 |
| #N/A | #N/A |
| #N/A | #N/A |
| #N/A | #N/A |
| #N/A | #N/A |
| #N/A | #N/A |
| 1.75 | 0.76 |
| #N/A | #N/A |
| 3.08 | 0.97 |
| 3.08 | 0.97 |
| 0.63 | 0.25 |
| 1.45 | 0.65 |
| 1.45 | 0.65 |
| 3.51 | 0.98 |
| 3.51 | 0.98 |
| 1.99 | 0.84 |
| 0.91 | 0.42 |
| #N/A | #N/A |
| 3.53 | 0.92 |
| 2.91 | 0.96 |
| 2.91 | 0.96 |
| 2.38 | 0.91 |
| 2.38 | 0.91 |
| 1.39 | 0.65 |
| #N/A | #N/A |
| 1.39 | 0.65 |
| 0.86 | 0.39 |
| #N/A | #N/A |
| #N/A | #N/A |
| 2.42 | 0.91 |

|      |      |
|------|------|
| 0.88 | 0.40 |
| 1.13 | 0.54 |
| 0.76 | 0.32 |
| 1.24 | 0.59 |
| #N/A | #N/A |
| #N/A | #N/A |
| 1.45 | 0.67 |
| 1.02 | 0.48 |
| 2.47 | 0.80 |
| 2.47 | 0.80 |
| 2.47 | 0.80 |
| 1.40 | 0.66 |
| 1.00 | 0.47 |
| 1.93 | 0.83 |
| 0.44 | 0.11 |
| 1.21 | 0.58 |
| 0.68 | 0.28 |
| 1.11 | 0.52 |
| 1.11 | 0.52 |
| 1.17 | 0.55 |
| #N/A | #N/A |
| 0.80 | 0.36 |
| #N/A | #N/A |
| 0.60 | 0.23 |
| 0.60 | 0.23 |
| 0.85 | 0.38 |
| 1.37 | 0.64 |
| 1.37 | 0.64 |
| 0.59 | 0.22 |
| #N/A | #N/A |
| 1.21 | 0.57 |
| 1.21 | 0.57 |
| 1.92 | 0.81 |
| 1.81 | 0.80 |
| 1.81 | 0.80 |
| 0.67 | 0.27 |
| 0.91 | 0.42 |
| #N/A | #N/A |
| #N/A | #N/A |
| 1.51 | 0.70 |
| 0.69 | 0.28 |
| 0.69 | 0.28 |
| #N/A | #N/A |
| 0.50 | 0.16 |
| 0.64 | 0.25 |
| 0.64 | 0.25 |
| 1.87 | 0.79 |
| 1.87 | 0.79 |
| 0.66 | 0.27 |
| 0.65 | 0.26 |
| 0.65 | 0.26 |

|      |      |
|------|------|
| 1.40 | 0.66 |
| 1.55 | 0.66 |
| 0.41 | 0.12 |
| 1.49 | 0.69 |
| 0.97 | 0.46 |
| 2.03 | 0.85 |
| 0.71 | 0.30 |
| #N/A | #N/A |
| 1.57 | 0.72 |
| 1.57 | 0.72 |
| 1.09 | 0.51 |
| #N/A | #N/A |
| 0.92 | 0.42 |
| 1.24 | 0.59 |
| 1.02 | 0.48 |
| 1.24 | 0.59 |
| #N/A | #N/A |
| 0.24 | 0.03 |
| 0.24 | 0.03 |
| 1.26 | 0.60 |
| 1.52 | 0.70 |
| 1.52 | 0.70 |
| 1.56 | 0.72 |
| 1.34 | 0.63 |
| 1.56 | 0.72 |
| 1.34 | 0.63 |
| #N/A | #N/A |
| 2.53 | 0.78 |
| 2.53 | 0.78 |
| 1.61 | 0.73 |
| 1.61 | 0.73 |
| #N/A | #N/A |
| 0.89 | 0.41 |
| #N/A | #N/A |
| 1.03 | 0.48 |
| 0.99 | 0.46 |
| 1.28 | 0.61 |
| 0.72 | 0.31 |
| 1.11 | 0.53 |
| 1.11 | 0.53 |
| 4.27 | 0.99 |
| 4.27 | 0.99 |
| 1.97 | 0.83 |
| 1.11 | 0.51 |
| 0.78 | 0.31 |
| #N/A | #N/A |
| 1.41 | 0.66 |
| 1.53 | 0.69 |
| #N/A | #N/A |
| #N/A | #N/A |
| #N/A | #N/A |

|      |      |
|------|------|
| 4.04 | 0.97 |
| 4.04 | 0.97 |
| 1.43 | 0.67 |
| 2.57 | 0.63 |
| 2.57 | 0.63 |
| #N/A | #N/A |
| #N/A | #N/A |
| #N/A | #N/A |
| 1.37 | 0.64 |
| 0.72 | 0.31 |
| 1.78 | 0.79 |
| 1.17 | 0.56 |
| 1.17 | 0.56 |
| 0.65 | 0.26 |
| 1.71 | 0.77 |
| #N/A | #N/A |
| 1.28 | 0.61 |
| #N/A | #N/A |
| #N/A | #N/A |
| 1.53 | 0.71 |
| 1.37 | 0.64 |
| 1.37 | 0.64 |
| #N/A | #N/A |
| 2.24 | 0.89 |
| #N/A | #N/A |
| 1.75 | 0.76 |
| #N/A | #N/A |
| 0.96 | 0.45 |
| 0.96 | 0.45 |
| 1.55 | 0.72 |
| 1.81 | 0.80 |
| #N/A | #N/A |
| 1.02 | 0.48 |
| #N/A | #N/A |
| #N/A | #N/A |
| #N/A | #N/A |
| 0.11 | 0.01 |
| 0.92 | 0.43 |
| 0.92 | 0.43 |
| 1.64 | 0.70 |
| 0.94 | 0.44 |
| 0.94 | 0.44 |
| 1.74 | 0.78 |
| #N/A | #N/A |
| 1.38 | 0.65 |
| 1.38 | 0.65 |
| 1.14 | 0.54 |
| 0.50 | 0.15 |
| 0.33 | 0.05 |
| 1.21 | 0.57 |
| 0.69 | 0.29 |

|      |      |
|------|------|
| 0.69 | 0.29 |
| 1.16 | 0.55 |
| 1.16 | 0.55 |
| 0.46 | 0.13 |
| 0.46 | 0.13 |
| 0.86 | 0.39 |
| 1.07 | 0.51 |
| 0.62 | 0.24 |
| 0.58 | 0.20 |
| #N/A | #N/A |
| 0.58 | 0.20 |
| #N/A | #N/A |
| 0.58 | 0.21 |
| 2.89 | 0.95 |
| 2.89 | 0.95 |
| 2.69 | 0.81 |
| #N/A | #N/A |
| #N/A | #N/A |
| 3.09 | 0.97 |
| 3.09 | 0.97 |
| #N/A | #N/A |
| #N/A | #N/A |
| #N/A | #N/A |
| #N/A | #N/A |
| #N/A | #N/A |
| #N/A | #N/A |
| #N/A | #N/A |
| 1.14 | 0.55 |
| 1.39 | 0.66 |
| 0.87 | 0.39 |
| 1.45 | 0.68 |
| 0.60 | 0.23 |
| 1.12 | 0.53 |
| 1.12 | 0.53 |
| 1.28 | 0.61 |
| 0.88 | 0.40 |
| 0.73 | 0.31 |
| 0.62 | 0.24 |
| 1.01 | 0.46 |
| 1.01 | 0.46 |
| #N/A | #N/A |
| 0.96 | 0.45 |
| 0.69 | 0.28 |
| #N/A | #N/A |
| 1.25 | 0.59 |
| 0.65 | 0.26 |
| 1.98 | 0.84 |
| 1.14 | 0.53 |
| #N/A | #N/A |
| 0.79 | 0.35 |
| 0.72 | 0.30 |



|      |      |
|------|------|
| 1.13 | 0.54 |
| #N/A | #N/A |
| 1.66 | 0.75 |
| 1.05 | 0.50 |
| 1.05 | 0.50 |
| 2.58 | 0.94 |
| 2.58 | 0.94 |
| 1.93 | 0.83 |
| 1.93 | 0.83 |
| 0.98 | 0.44 |
| 1.42 | 0.66 |
| 1.28 | 0.60 |
| 2.55 | 0.89 |
| #N/A | #N/A |
| 1.63 | 0.75 |
| 1.63 | 0.75 |
| 1.63 | 0.75 |
| 1.90 | 0.79 |
| #N/A | #N/A |
| #N/A | #N/A |
| #N/A | #N/A |
| 1.67 | 0.76 |
| 0.64 | 0.25 |
| 0.49 | 0.15 |
| 0.72 | 0.30 |
| 0.78 | 0.34 |
| 1.77 | 0.79 |
| 1.77 | 0.79 |
| 0.82 | 0.35 |
| 1.80 | 0.80 |
| 1.80 | 0.80 |
| 0.79 | 0.35 |
| #N/A | #N/A |
| 1.38 | 0.65 |
| 0.87 | 0.40 |
| 0.80 | 0.35 |
| 0.79 | 0.35 |
| #N/A | #N/A |
| 0.78 | 0.35 |
| 2.09 | 0.87 |
| 0.39 | 0.08 |
| #N/A | #N/A |
| #N/A | #N/A |
| 1.01 | 0.47 |
| 1.01 | 0.47 |
| 1.51 | 0.70 |
| 1.01 | 0.47 |
| 1.67 | 0.75 |
| 1.67 | 0.75 |
| #N/A | #N/A |
| 0.77 | 0.33 |

|      |      |
|------|------|
| 1.28 | 0.61 |
| 1.28 | 0.61 |
| #N/A | #N/A |
| #N/A | #N/A |
| 0.69 | 0.29 |
| 0.69 | 0.29 |
| #N/A | #N/A |
| #N/A | #N/A |
| 0.51 | 0.16 |
| 0.51 | 0.16 |
| 1.91 | 0.81 |
| #N/A | #N/A |
| #N/A | #N/A |
| 2.09 | 0.85 |
| 2.44 | 0.92 |
| 2.44 | 0.92 |
| 3.30 | 0.97 |
| 3.30 | 0.97 |
| 1.32 | 0.62 |
| #N/A | #N/A |
| #N/A | #N/A |
| #N/A | #N/A |
| #N/A | #N/A |
| #N/A | #N/A |
| #N/A | #N/A |
| 2.04 | 0.85 |
| 1.59 | 0.73 |
| #N/A | #N/A |
| #N/A | #N/A |
| 0.81 | 0.36 |
| 1.57 | 0.73 |
| 1.57 | 0.73 |
| #N/A | #N/A |
| #N/A | #N/A |
| #N/A | #N/A |
| 0.68 | 0.28 |
| 0.68 | 0.28 |
| 1.37 | 0.65 |
| 1.40 | 0.66 |
| 1.40 | 0.66 |
| 1.07 | 0.50 |
| 1.07 | 0.50 |
| #N/A | #N/A |
| 1.17 | 0.56 |
| 1.17 | 0.56 |
| 1.17 | 0.56 |
| #N/A | #N/A |
| #N/A | #N/A |
| #N/A | #N/A |
| 1.28 | 0.61 |
| #N/A | #N/A |

|      |      |
|------|------|
| 1.27 | 0.58 |
| #N/A | #N/A |
| 1.39 | 0.64 |
| #N/A | #N/A |
| #N/A | #N/A |
| 1.67 | 0.76 |
| 1.67 | 0.76 |
| 1.54 | 0.71 |
| 0.94 | 0.43 |
| 0.94 | 0.43 |
| #N/A | #N/A |
| #N/A | #N/A |
| #N/A | #N/A |
| #N/A | #N/A |
| #N/A | #N/A |
| 1.31 | 0.62 |
| 1.31 | 0.62 |
| 0.83 | 0.37 |
| 1.95 | 0.83 |
| 1.56 | 0.72 |
| 1.84 | 0.81 |
| 1.84 | 0.81 |
| 0.75 | 0.32 |
| 0.72 | 0.31 |
| #N/A | #N/A |
| 1.06 | 0.50 |
| 0.73 | 0.31 |
| 1.36 | 0.64 |
| 0.39 | 0.08 |
| 1.36 | 0.64 |
| 1.90 | 0.82 |
| 1.90 | 0.82 |
| 2.34 | 0.89 |
| 0.89 | 0.41 |
| 1.19 | 0.55 |
| 0.89 | 0.41 |
| 1.19 | 0.55 |
| 2.26 | 0.89 |
| 2.55 | 0.93 |
| 2.55 | 0.93 |
| 1.61 | 0.74 |
| 1.12 | 0.54 |
| 0.45 | 0.12 |
| #N/A | #N/A |
| 1.69 | 0.75 |
| 1.81 | 0.78 |
| 1.72 | 0.77 |
| 1.72 | 0.77 |
| 1.94 | 0.83 |
| 1.94 | 0.83 |
| 0.66 | 0.27 |

|      |      |
|------|------|
| 1.81 | 0.78 |
| 1.81 | 0.78 |
| 2.18 | 0.88 |
| 2.18 | 0.88 |
| 1.12 | 0.53 |
| 0.96 | 0.45 |
| 0.96 | 0.45 |
| 2.15 | 0.87 |
| 0.96 | 0.45 |
| 2.15 | 0.87 |
| 2.15 | 0.87 |
| 0.64 | 0.25 |
| #N/A | #N/A |
| 1.30 | 0.61 |
| 1.30 | 0.61 |
| #N/A | #N/A |
| 0.40 | 0.09 |
| 1.57 | 0.71 |
| 1.63 | 0.75 |
| 1.63 | 0.75 |
| #N/A | #N/A |
| #N/A | #N/A |
| #N/A | #N/A |
| 1.51 | 0.70 |
| 1.51 | 0.70 |
| 0.76 | 0.33 |
| 1.35 | 0.63 |
| 1.47 | 0.68 |
| 1.62 | 0.73 |
| 1.56 | 0.72 |
| 1.97 | 0.82 |
| #N/A | #N/A |
| 3.42 | 0.98 |
| 3.42 | 0.98 |
| #N/A | #N/A |
| #N/A | #N/A |
| 0.38 | 0.08 |
| 0.38 | 0.08 |
| 0.38 | 0.08 |
| #N/A | #N/A |
| #N/A | #N/A |
| #N/A | #N/A |
| #N/A | #N/A |
| 1.51 | 0.68 |
| 1.51 | 0.68 |
| 1.47 | 0.68 |
| 1.47 | 0.68 |
| 1.19 | 0.56 |
| 1.19 | 0.56 |
| 1.07 | 0.51 |
| 1.07 | 0.51 |

|      |      |
|------|------|
| 1.57 | 0.72 |
| 0.41 | 0.09 |
| 0.88 | 0.38 |
| 2.64 | 0.89 |
| 2.64 | 0.89 |
| #N/A | #N/A |
| 0.41 | 0.10 |
| 0.41 | 0.10 |
| 1.03 | 0.48 |
| 1.03 | 0.48 |
| 0.99 | 0.45 |
| 2.73 | 0.95 |
| 2.73 | 0.95 |
| 1.65 | 0.75 |
| 1.65 | 0.75 |
| 1.91 | 0.83 |
| 1.91 | 0.83 |
| 0.51 | 0.16 |
| 1.98 | 0.85 |
| 1.71 | 0.77 |
| 2.35 | 0.91 |
| 0.24 | 0.03 |
| 0.24 | 0.03 |
| 0.73 | 0.31 |
| 2.46 | 0.91 |
| #N/A | #N/A |
| 1.25 | 0.59 |
| 1.25 | 0.59 |
| #N/A | #N/A |
| 0.39 | 0.09 |
| 2.40 | 0.92 |
| 2.40 | 0.92 |
| 1.40 | 0.66 |
| 1.02 | 0.48 |
| 1.02 | 0.48 |
| 1.02 | 0.48 |
| #N/A | #N/A |
| 2.54 | 0.92 |
| #N/A | #N/A |
| #N/A | #N/A |
| #N/A | #N/A |
| 2.69 | 0.94 |
| 2.69 | 0.94 |
| 1.73 | 0.77 |
| 1.73 | 0.77 |
| 0.88 | 0.40 |
| #N/A | #N/A |
| #N/A | #N/A |
| 1.85 | 0.81 |
| 1.85 | 0.81 |
| 1.45 | 0.68 |

|      |      |
|------|------|
| 2.40 | 0.91 |
| 1.45 | 0.68 |
| 2.67 | 0.89 |
| 0.81 | 0.36 |
| 1.46 | 0.68 |
| 1.46 | 0.68 |
| #N/A | #N/A |
| 0.53 | 0.18 |
| 1.71 | 0.77 |
| 0.64 | 0.25 |
| 0.64 | 0.25 |
| #N/A | #N/A |
| #N/A | #N/A |
| 0.77 | 0.34 |
| 0.77 | 0.34 |
| #N/A | #N/A |
| 0.91 | 0.42 |
| 1.71 | 0.74 |
| 0.91 | 0.42 |
| 1.71 | 0.74 |
| #N/A | #N/A |
| 1.85 | 0.81 |
| #N/A | #N/A |
| #N/A | #N/A |
| 0.63 | 0.25 |
| 0.63 | 0.25 |
| 1.76 | 0.78 |
| 1.76 | 0.78 |
| 0.50 | 0.16 |
| 0.50 | 0.16 |
| 2.23 | 0.87 |
| 1.44 | 0.65 |
| 1.63 | 0.75 |
| 1.35 | 0.60 |
| 1.35 | 0.60 |
| 0.66 | 0.27 |
| 0.66 | 0.27 |
| #N/A | #N/A |
| 0.49 | 0.16 |
| 0.49 | 0.16 |
| 2.42 | 0.90 |
| 0.96 | 0.45 |
| 2.42 | 0.90 |
| 0.59 | 0.22 |
| 1.23 | 0.58 |
| #N/A | #N/A |
| 0.95 | 0.44 |
| 0.95 | 0.44 |
| 1.83 | 0.80 |
| 0.41 | 0.09 |
| #N/A | #N/A |

|      |      |
|------|------|
| #N/A | #N/A |
| 0.92 | 0.42 |
| 0.96 | 0.44 |
| 0.14 | 0.01 |
| 1.80 | 0.79 |
| 1.80 | 0.79 |
| 2.20 | 0.89 |
| 2.20 | 0.89 |
| 1.90 | 0.81 |
| 2.44 | 0.92 |
| 2.17 | 0.88 |
| 2.44 | 0.92 |
| 2.17 | 0.88 |
| 0.65 | 0.26 |
| 0.65 | 0.26 |
| #N/A | #N/A |
| 2.70 | 0.94 |
| 1.13 | 0.54 |
| 2.70 | 0.94 |
| #N/A | #N/A |
| 1.13 | 0.54 |
| 1.94 | 0.83 |
| 1.94 | 0.83 |
| 1.55 | 0.72 |
| 0.43 | 0.12 |
| 0.69 | 0.28 |
| 1.23 | 0.58 |
| 1.23 | 0.58 |
| 0.26 | 0.03 |
| 0.68 | 0.28 |
| #N/A | #N/A |
| #N/A | #N/A |
| #N/A | #N/A |
| 0.84 | 0.38 |
| 0.31 | 0.05 |
| 0.31 | 0.05 |
| #N/A | #N/A |
| 1.41 | 0.66 |
| 1.41 | 0.66 |
| 2.08 | 0.86 |
| 0.91 | 0.42 |
| 0.36 | 0.07 |
| 0.50 | 0.16 |
| 2.16 | 0.88 |
| 2.16 | 0.88 |
| 1.67 | 0.74 |
| 0.68 | 0.28 |
| #N/A | #N/A |
| #N/A | #N/A |
| #N/A | #N/A |
| #N/A | #N/A |

|      |      |
|------|------|
| 0.85 | 0.36 |
| #N/A | #N/A |
| 0.85 | 0.36 |
| #N/A | #N/A |
| 0.52 | 0.16 |
| 0.72 | 0.30 |
| 1.90 | 0.81 |
| 4.47 | 0.99 |
| 4.47 | 0.99 |
| 2.44 | 0.91 |
| #N/A | #N/A |
| #N/A | #N/A |
| 0.50 | 0.15 |
| 0.83 | 0.37 |
| #N/A | #N/A |
| #N/A | #N/A |
| 0.91 | 0.42 |
| 2.17 | 0.88 |
| 0.40 | 0.09 |
| 0.40 | 0.09 |
| 1.05 | 0.50 |
| 0.56 | 0.20 |
| 1.15 | 0.54 |
| 0.76 | 0.33 |
| 0.76 | 0.33 |
| #N/A | #N/A |
| 2.30 | 0.90 |
| 1.13 | 0.53 |
| 2.30 | 0.90 |
| 0.64 | 0.25 |
| 1.86 | 0.81 |
| 1.86 | 0.81 |
| 0.66 | 0.26 |
| 0.66 | 0.26 |
| 1.22 | 0.57 |
| 1.99 | 0.85 |
| 1.99 | 0.85 |
| 1.66 | 0.75 |
| 1.66 | 0.75 |
| 2.35 | 0.90 |
| 2.35 | 0.90 |
| 2.04 | 0.85 |
| 2.04 | 0.85 |
| 0.40 | 0.09 |
| 0.40 | 0.09 |
| #N/A | #N/A |
| #N/A | #N/A |
| 1.62 | 0.74 |
| 1.62 | 0.74 |
| 1.66 | 0.75 |
| #N/A | #N/A |



|      |      |
|------|------|
| 1.53 | 0.70 |
| 1.53 | 0.70 |
| 0.68 | 0.28 |
| 0.68 | 0.28 |
| 0.28 | 0.03 |
| 0.54 | 0.19 |
| 1.03 | 0.48 |
| 2.25 | 0.89 |
| 3.37 | 0.98 |
| 3.37 | 0.98 |
| #N/A | #N/A |
| #N/A | #N/A |
| #N/A | #N/A |
| #N/A | #N/A |
| #N/A | #N/A |
| #N/A | #N/A |
| 1.90 | 0.82 |
| 3.27 | 0.97 |
| 3.27 | 0.97 |
| 1.31 | 0.62 |
| 0.97 | 0.46 |
| #N/A | #N/A |
| #N/A | #N/A |
| 1.94 | 0.81 |
| 1.94 | 0.81 |
| #N/A | #N/A |
| 0.85 | 0.38 |
| 0.85 | 0.38 |
| 0.76 | 0.33 |
| #N/A | #N/A |
| 1.82 | 0.80 |
| 1.82 | 0.80 |
| #N/A | #N/A |
| #N/A | #N/A |
| 0.22 | 0.02 |
| 0.20 | 0.02 |
| 0.25 | 0.03 |
| 1.36 | 0.63 |
| 1.71 | 0.76 |
| 1.66 | 0.76 |
| 1.00 | 0.47 |
| 2.17 | 0.88 |
| 2.17 | 0.88 |
| #N/A | #N/A |
| #N/A | #N/A |
| #N/A | #N/A |
| #N/A | #N/A |
| #N/A | #N/A |
| 1.57 | 0.72 |
| 1.57 | 0.72 |
| #N/A | #N/A |

|      |      |
|------|------|
| 1.57 | 0.72 |
| 0.95 | 0.42 |
| 0.72 | 0.31 |
| 1.67 | 0.76 |
| 1.67 | 0.76 |
| #N/A | #N/A |
| #N/A | #N/A |
| #N/A | #N/A |
| 0.84 | 0.38 |
| 0.84 | 0.38 |
| 1.30 | 0.61 |
| 1.70 | 0.76 |
| 2.06 | 0.86 |
| 2.06 | 0.86 |
| 0.88 | 0.40 |
| #N/A | #N/A |
| #N/A | #N/A |
| #N/A | #N/A |
| 1.47 | 0.65 |
| 1.38 | 0.65 |
| 1.47 | 0.69 |
| 1.47 | 0.69 |
| 0.69 | 0.29 |
| 1.69 | 0.77 |
| 1.96 | 0.84 |
| 1.96 | 0.84 |
| #N/A | #N/A |
| #N/A | #N/A |
| 1.78 | 0.79 |
| #N/A | #N/A |
| 1.78 | 0.79 |
| 1.80 | 0.80 |
| 1.80 | 0.80 |
| 1.06 | 0.50 |
| #N/A | #N/A |
| 1.24 | 0.59 |
| 1.24 | 0.59 |
| 1.24 | 0.59 |
| 0.91 | 0.42 |
| 0.54 | 0.19 |
| #N/A | #N/A |
| #N/A | #N/A |
| 1.97 | 0.84 |
| 1.97 | 0.84 |
| #N/A | #N/A |
| #N/A | #N/A |
| 2.58 | 0.93 |
| 2.58 | 0.93 |
| 1.10 | 0.52 |
| 1.10 | 0.52 |
| #N/A | #N/A |

|      |      |
|------|------|
| #N/A | #N/A |
| #N/A | #N/A |
| 1.69 | 0.71 |
| 0.76 | 0.33 |
| 0.76 | 0.33 |
| 1.59 | 0.73 |
| #N/A | #N/A |
| #N/A | #N/A |
| #N/A | #N/A |
| 1.30 | 0.62 |
| 1.30 | 0.62 |
| 0.97 | 0.45 |
| 0.64 | 0.25 |
| 1.48 | 0.69 |
| 0.64 | 0.25 |
| 1.48 | 0.69 |
| 1.66 | 0.75 |
| 2.56 | 0.91 |
| 0.91 | 0.42 |
| #N/A | #N/A |
| #N/A | #N/A |
| 1.20 | 0.56 |
| 1.20 | 0.56 |
| 1.01 | 0.48 |
| 0.83 | 0.37 |
| 0.83 | 0.37 |
| 0.70 | 0.29 |
| 2.97 | 0.96 |
| 2.97 | 0.96 |
| 0.97 | 0.45 |
| 0.97 | 0.45 |
| 0.88 | 0.40 |
| 1.67 | 0.76 |
| 0.60 | 0.23 |
| 1.89 | 0.82 |
| 1.89 | 0.82 |
| 1.68 | 0.73 |
| 1.99 | 0.83 |
| 1.99 | 0.83 |
| 1.87 | 0.82 |
| 0.61 | 0.23 |
| 1.69 | 0.76 |
| #N/A | #N/A |
| #N/A | #N/A |
| #N/A | #N/A |
| 1.95 | 0.84 |
| 1.95 | 0.84 |
| 0.92 | 0.43 |
| 0.92 | 0.43 |
| 1.98 | 0.84 |
| 2.35 | 0.88 |

|      |      |
|------|------|
| 2.35 | 0.88 |
| #N/A | #N/A |
| #N/A | #N/A |
| 0.28 | 0.04 |
| #N/A | #N/A |
| 0.96 | 0.45 |
| #N/A | #N/A |
| #N/A | #N/A |
| #N/A | #N/A |
| #N/A | #N/A |
| 1.54 | 0.71 |
| 0.96 | 0.45 |
| 1.15 | 0.55 |
| 0.50 | 0.16 |
| #N/A | #N/A |
| 0.52 | 0.17 |
| 0.52 | 0.17 |
| 0.70 | 0.29 |
| 2.01 | 0.81 |
| #N/A | #N/A |
| 1.98 | 0.84 |
| 1.89 | 0.79 |
| 1.95 | 0.82 |
| 1.95 | 0.82 |
| 0.62 | 0.23 |
| 1.35 | 0.63 |
| 0.47 | 0.14 |
| 0.47 | 0.14 |
| 0.71 | 0.29 |
| 1.53 | 0.70 |
| 1.68 | 0.76 |
| 1.53 | 0.70 |
| 1.68 | 0.76 |
| 1.57 | 0.73 |
| 1.74 | 0.78 |
| 1.74 | 0.78 |
| #N/A | #N/A |
| #N/A | #N/A |
| #N/A | #N/A |
| #N/A | #N/A |
| #N/A | #N/A |
| 2.81 | 0.95 |
| 1.70 | 0.77 |
| 1.70 | 0.77 |
| 1.36 | 0.64 |
| 1.00 | 0.47 |
| 0.82 | 0.37 |
| 0.33 | 0.05 |
| #N/A | #N/A |
| #N/A | #N/A |
| 2.24 | 0.89 |

|      |      |
|------|------|
| 1.21 | 0.58 |
| 3.25 | 0.97 |
| 3.25 | 0.97 |
| 1.52 | 0.71 |
| 1.69 | 0.76 |
| 0.55 | 0.20 |
| 0.46 | 0.13 |
| 0.56 | 0.20 |
| 1.19 | 0.56 |
| 1.19 | 0.56 |
| 1.81 | 0.78 |
| 1.81 | 0.78 |
| 1.26 | 0.60 |
| 0.58 | 0.21 |
| #N/A | #N/A |
| #N/A | #N/A |
| #N/A | #N/A |
| #N/A | #N/A |
| 3.36 | 0.98 |
| 3.36 | 0.98 |
| 1.45 | 0.67 |
| 1.45 | 0.67 |
| 1.88 | 0.78 |
| 1.12 | 0.53 |
| 1.29 | 0.61 |
| #N/A | #N/A |
| 1.69 | 0.76 |
| 1.11 | 0.51 |
| 1.69 | 0.76 |
| 2.91 | 0.96 |
| 1.04 | 0.49 |
| 1.04 | 0.49 |
| 1.29 | 0.61 |
| 1.12 | 0.53 |
| 1.05 | 0.50 |
| 1.03 | 0.46 |
| 0.68 | 0.27 |
| 1.61 | 0.73 |
| 1.61 | 0.73 |
| #N/A | #N/A |
| 0.40 | 0.10 |
| 2.21 | 0.84 |
| #N/A | #N/A |
| 2.68 | 0.93 |
| #N/A | #N/A |
| 1.69 | 0.76 |
| #N/A | #N/A |
| #N/A | #N/A |
| 0.77 | 0.33 |
| 0.76 | 0.32 |
| 1.11 | 0.53 |

|      |      |
|------|------|
| 1.11 | 0.53 |
| 1.11 | 0.53 |
| 1.11 | 0.53 |
| 3.23 | 0.97 |
| 2.32 | 0.91 |
| 2.32 | 0.91 |
| 0.63 | 0.25 |
| 0.71 | 0.30 |
| 1.65 | 0.75 |
| 1.86 | 0.81 |
| #N/A | #N/A |
| 1.23 | 0.58 |
| 0.81 | 0.36 |
| 1.26 | 0.59 |
| 0.63 | 0.24 |
| #N/A | #N/A |
| #N/A | #N/A |
| #N/A | #N/A |
| 1.07 | 0.51 |
| 1.07 | 0.51 |
| 0.74 | 0.31 |
| #N/A | #N/A |
| #N/A | #N/A |
| #N/A | #N/A |
| 1.94 | 0.84 |
| 1.94 | 0.84 |
| 1.58 | 0.72 |
| 0.71 | 0.30 |
| #N/A | #N/A |
| #N/A | #N/A |
| 2.90 | 0.96 |
| 2.90 | 0.96 |
| #N/A | #N/A |
| #N/A | #N/A |
| #N/A | #N/A |
| #N/A | #N/A |
| 1.01 | 0.48 |
| 1.01 | 0.48 |
| 1.92 | 0.80 |
| #N/A | #N/A |
| 1.91 | 0.83 |
| 1.91 | 0.83 |
| #N/A | #N/A |
| #N/A | #N/A |
| 1.78 | 0.79 |
| #N/A | #N/A |
| #N/A | #N/A |
| #N/A | #N/A |
| 1.78 | 0.79 |
| 1.92 | 0.81 |
| 1.92 | 0.81 |

|      |      |
|------|------|
| #N/A | #N/A |
| 2.61 | 0.91 |
| 2.61 | 0.91 |
| #N/A | #N/A |
| 2.91 | 0.94 |
| 1.24 | 0.57 |
| #N/A | #N/A |
| 1.24 | 0.57 |
| #N/A | #N/A |
| #N/A | #N/A |
| #N/A | #N/A |
| #N/A | #N/A |
| 0.77 | 0.34 |
| 2.50 | 0.90 |
| 0.42 | 0.12 |
| #N/A | #N/A |
| 2.24 | 0.89 |
| 2.24 | 0.89 |
| 0.86 | 0.39 |
| 0.86 | 0.39 |
| 0.34 | 0.06 |
| #N/A | #N/A |
| 0.60 | 0.24 |
| #N/A | #N/A |
| 1.17 | 0.52 |
| 1.17 | 0.52 |
| 0.69 | 0.28 |
| 0.73 | 0.31 |
| #N/A | #N/A |
| 0.61 | 0.23 |
| 2.07 | 0.86 |
| 0.61 | 0.23 |
| #N/A | #N/A |
| #N/A | #N/A |
| #N/A | #N/A |
| 0.50 | 0.16 |
| #N/A | #N/A |
| 1.92 | 0.83 |
| 1.92 | 0.83 |
| 1.55 | 0.71 |
| 3.68 | 0.98 |
| 3.68 | 0.98 |
| #N/A | #N/A |
| 4.76 | 1.00 |
| 4.76 | 1.00 |
| 4.76 | 1.00 |
| #N/A | #N/A |
| #N/A | #N/A |
| #N/A | #N/A |
| #N/A | #N/A |

|      |      |
|------|------|
| #N/A | #N/A |
| 3.18 | 0.96 |
| 3.18 | 0.96 |
| #N/A | #N/A |
| 1.05 | 0.50 |
| #N/A | #N/A |
| 1.05 | 0.50 |
| #N/A | #N/A |
| #N/A | #N/A |
| 1.72 | 0.77 |
| 1.71 | 0.77 |
| 1.71 | 0.77 |
| 1.48 | 0.69 |
| 1.48 | 0.69 |
| 1.04 | 0.47 |
| 1.91 | 0.83 |
| 1.91 | 0.83 |
| 1.19 | 0.56 |
| 1.19 | 0.56 |
| 1.69 | 0.75 |
| 1.14 | 0.54 |
| 0.77 | 0.34 |
| 1.14 | 0.54 |
| 1.44 | 0.67 |
| #N/A | #N/A |
| 0.69 | 0.28 |
| 0.59 | 0.22 |
| #N/A | #N/A |
| 1.40 | 0.65 |
| 0.87 | 0.40 |
| 1.40 | 0.65 |
| 1.02 | 0.48 |
| 1.02 | 0.48 |
| 2.56 | 0.93 |
| 2.56 | 0.93 |
| #N/A | #N/A |
| 0.31 | 0.04 |
| 0.31 | 0.04 |
| 1.84 | 0.80 |
| 1.48 | 0.69 |
| 1.49 | 0.69 |
| #N/A | #N/A |
| 2.45 | 0.87 |
| #N/A | #N/A |
| 1.31 | 0.62 |
| 1.31 | 0.62 |
| #N/A | #N/A |
| #N/A | #N/A |
| #N/A | #N/A |
| 1.99 | 0.75 |
| #N/A | #N/A |



|      |      |
|------|------|
| 1.97 | 0.82 |
| 1.97 | 0.82 |
| 0.41 | 0.10 |
| #N/A | #N/A |
| #N/A | #N/A |
| 0.58 | 0.21 |
| #N/A | #N/A |
| #N/A | #N/A |
| 1.24 | 0.58 |
| #N/A | #N/A |
| 0.44 | 0.12 |
| 0.44 | 0.12 |
| 0.93 | 0.43 |
| 0.35 | 0.06 |
| 0.98 | 0.46 |
| #N/A | #N/A |
| #N/A | #N/A |
| 3.93 | 0.99 |
| 3.93 | 0.99 |
| 1.27 | 0.60 |
| 2.15 | 0.87 |
| 2.10 | 0.86 |
| 2.10 | 0.86 |
| #N/A | #N/A |
| 1.48 | 0.69 |
| 1.48 | 0.69 |
| #N/A | #N/A |
| 2.11 | 0.87 |
| 2.28 | 0.89 |
| 2.28 | 0.89 |
| 2.40 | 0.86 |
| #N/A | #N/A |
| 2.40 | 0.86 |
| #N/A | #N/A |
| #N/A | #N/A |
| 1.68 | 0.76 |
| 1.68 | 0.76 |
| 1.65 | 0.75 |
| 0.99 | 0.47 |
| 2.70 | 0.95 |
| #N/A | #N/A |
| #N/A | #N/A |
| #N/A | #N/A |
| #N/A | #N/A |
| 1.14 | 0.54 |
| 1.14 | 0.54 |
| #N/A | #N/A |
| 1.27 | 0.60 |
| #N/A | #N/A |
| 0.74 | 0.31 |
| #N/A | #N/A |

|      |      |
|------|------|
| #N/A | #N/A |
| #N/A | #N/A |
| #N/A | #N/A |
| #N/A | #N/A |
| #N/A | #N/A |
| 0.75 | 0.33 |
| 0.75 | 0.33 |
| 1.64 | 0.75 |

| UniGeneID | Name  | Other Names     | Promoter -   | No HS: HA-Htz1 CHIP | No HS: HA-Htz1 CHIP |
|-----------|-------|-----------------|--------------|---------------------|---------------------|
| YAL001C   | TFC3  | FUN24 TSV115    | iYAL001C     | 1.48                | 0.66                |
| YAL002W   | VPS8  | FUN15 VPT8      | iYAL003W     | 1.07                | 0.47                |
| YAL003W   | EFB1  | EF-1 beta TEF5  | iYAL004W     | 0.38                | 0.06                |
| YAL004W   | 0     | #N/A            | itP(UGG)A    | #N/A                | #N/A                |
| YAL005C   | SSA1  | YG100           | iYAL004W     | 0.38                | 0.06                |
| YAL007C   | ERP2  |                 | 0 iYAL007C   | 2.15                | 0.88                |
| YAL008W   | FUN14 |                 | 0 iYAL009W   | 1.50                | 0.67                |
| YAL009W   | SPO7  |                 | 0 iYAL010C   | 2.07                | 0.87                |
| YAL010C   | MDM10 | FUN37           | iYAL010C     | 2.07                | 0.87                |
| YAL011W   | 0     | SWC1            | iYAL012W     | #N/A                | #N/A                |
| YAL012W   | CYS3  | CY11 FUN35 STR1 | iYAL013W     | 0.73                | 0.27                |
| YAL013W   | DEP1  | FUN54           | iYAL014C     | 2.28                | 0.91                |
| YAL014C   | UIP2  | SLT2 UIP2       | iYAL014C     | 2.28                | 0.91                |
| YAL015C   | NTG1  | FUN33 SCR1      | iYAL015C     | 0.69                | 0.25                |
| YAL016W   | TPD3  | FUN32           | iYAL017W     | 2.36                | 0.92                |
| YAL018C   | 0     | #N/A            | iYAL018C     | 2.45                | 0.94                |
| YAL019W   | FUN30 |                 | 0 iYAL020C   | 2.94                | 0.97                |
| YAL020C   | ATS1  | FUN28 KTI13     | iYAL020C     | 2.94                | 0.97                |
| YAL023C   | PMT2  | FUN25           | iYAL023C     | 1.59                | 0.71                |
| YAL025C   | MAK16 |                 | 0 iYAL025C   | 1.68                | 0.75                |
| YAL027W   | 0     | #N/A            | iYAL028W     | #N/A                | #N/A                |
| YAL030W   | SNC1  |                 | 0 iYAL031C   | 3.67                | 0.99                |
| YAL031C   | FUN21 |                 | 0 iYAL031C   | 3.67                | 0.99                |
| YAL032C   | PRP45 | FUN20           | iYAL032C     | 2.87                | 0.97                |
| YAL033W   | POP5  | FUN53           | iYAL034C     | 1.89                | 0.81                |
| YAL034C   | FUN19 |                 | 0 iYAL034C   | 1.89                | 0.81                |
| YAL034W-A | MTW1  | DSN3 NSL2       | iYAL036C     | 2.85                | 0.97                |
| YAL035C-A | #N/A  | #N/A            | iYAL034W-A   | 0.19                | 0.01                |
| YAL037W   | 0     | #N/A            | iYAL038W     | 0.96                | 0.41                |
| YAL039C   | CYC3  |                 | 0 iYAL039C-0 | 0.58                | 0.17                |
| YAL040C   | CLN3  | DAF1 FUN10 WHI1 | iYAL040C     | 0.38                | 0.05                |
| YAL041W   | CDC24 | CLS4            | iYAL042W     | 3.47                | 0.99                |
| YAL042W   | ERV46 | FUN9            | iYAL043C     | 1.77                | 0.78                |
| YAL043C   | PTA1  | FUN39           | iYAL043C     | 1.77                | 0.78                |
| YAL043C-A | #N/A  | #N/A            | iYAL042W     | 3.47                | 0.99                |
| YAL044C   | GCV3  |                 | 0 iYAL044C   | #N/A                | #N/A                |
| YAL045C   | 0     | #N/A            | iYAL045C     | 1.00                | 0.42                |
| YAL046C   | 0     | #N/A            | iYAL046C     | #N/A                | #N/A                |
| YAL047C   | SPC72 | LDB4            | iYAL047C     | 1.26                | 0.56                |
| YAL048C   | 0     |                 | 0 iYAL048C   | #N/A                | #N/A                |
| YAL049C   | 0     | #N/A            | iYAL049C     | #N/A                | #N/A                |
| YAL051W   | OAF1  | YAF1            | iYAL053W     | 1.28                | 0.57                |
| YAL054C   | ACS1  | FUN44           | iYAL054C     | 0.87                | 0.36                |
| YAL055W   | PEX22 | YAF5            | iYAL056W     | 1.33                | 0.59                |
| YAL058C-A | #N/A  | #N/A            | iYAL058C-A   | 1.90                | 0.82                |
| YAL058W   | CNE1  | FUN48           | iYAL059W     | 1.50                | 0.66                |
| YAL059W   | ECM1  |                 | 0 iYAL060W   | 0.47                | 0.16                |
| YAL060W   | BDH1  |                 | 0 iYAL061W   | 1.06                | 0.45                |
| YAL061W   | 0     | #N/A            | iYAL062W     | 1.43                | 0.63                |
| YAL062W   | GDH3  | FUN51           | iYAL063C-2   | #N/A                | #N/A                |

|           |       |                |   |             |      |      |
|-----------|-------|----------------|---|-------------|------|------|
| YAL063C   | FLO9  |                | 0 | iYAL063C-0  | 0.77 | 0.29 |
| YAL064W   | 0     | #N/A           |   | iYAL064C-A  | 1.21 | 0.54 |
| YAL065C   | 0     | #N/A           |   | iYAL064C-A  | 1.48 | 0.67 |
| YAL065C-A | #N/A  | #N/A           |   | #N/A        | #N/A | #N/A |
| YAL066W   | 0     | #N/A           |   | #N/A        | #N/A | #N/A |
| YAL067C   | SEO1  |                | 0 | iYAL064C-A  | 1.48 | 0.67 |
| YAL068C   | 0     | #N/A           |   | iYAL064C-A  | 1.48 | 0.67 |
| YAL069W   | 0     | #N/A           |   | #N/A        | #N/A | #N/A |
| YAR002AC  | #N/A  | #N/A           |   | #N/A        | #N/A | #N/A |
| YAR002W   | NUP60 |                | 0 | iCEN1       | 1.24 | 0.54 |
| YAR003W   | SWD1  | CPS50 SAF49    |   | iYAR002C-A  | 2.19 | 0.89 |
| YAR007C   | RFA1  | BUF2 FUN3 RPA1 |   | iYAR007C    | 2.54 | 0.94 |
| YAR008W   | SEN34 | FUN4           |   | iYAR007C    | 2.54 | 0.94 |
| YAR010C   | #N/A  | #N/A           |   | iYARCdelta5 | #N/A | #N/A |
| YAR015W   | ADE1  |                | 0 | iYAR014C    | 3.47 | 0.99 |
| YAR020C   | PAU7  |                | 0 | iYAR020C-0  | 0.89 | 0.37 |
| YAR023C   | 0     | #N/A           |   | iYAR023C    | 1.89 | 0.82 |
| YAR027W   | UIP3  |                | 0 | iYARWdelta  | 1.50 | 0.68 |
| YAR028W   | 0     | #N/A           |   | iYAR027W    | 2.09 | 0.88 |
| YAR029W   | 0     | #N/A           |   | iYAR028W    | 1.58 | 0.71 |
| YAR030C   | 0     | #N/A           |   | iYAR031W    | 1.99 | 0.84 |
| YAR031W   | PRM9  |                | 0 | iYAR028W    | 1.58 | 0.71 |
| YAR033W   | 0     |                | 0 | iYAR031W    | 1.99 | 0.84 |
| YAR035W   | YAT1  |                | 0 | iYARWdelta  | 0.58 | 0.18 |
| YAR037W   | #N/A  | #N/A           |   | #N/A        | #N/A | #N/A |
| YAR040C   | #N/A  | #N/A           |   | #N/A        | #N/A | #N/A |
| YAR042W   | SWH1  | OSH1           |   | iYAR035W    | 1.37 | 0.61 |
| YAR043C   | #N/A  | #N/A           |   | #N/A        | #N/A | #N/A |
| YAR044W   | OSH1  |                | 0 | iYAR042W    | 0.63 | 0.20 |
| YAR047C   | 0     | #N/A           |   | iYAR047C-0  | 1.09 | 0.47 |
| YAR052C   | #N/A  | #N/A           |   | #N/A        | #N/A | #N/A |
| YAR053W   | 0     | #N/A           |   | iYAR050W    | #N/A | #N/A |
| YAR060C   | 0     | #N/A           |   | iYAR060C    | 1.03 | 0.44 |
| YAR061W   | 0     | #N/A           |   | iYAR060C    | 1.03 | 0.44 |
| YAR062W   | 0     | #N/A           |   | iYAR061W    | 0.61 | 0.19 |
| YAR064W   | 0     | #N/A           |   | iYAR062W    | 0.78 | 0.30 |
| YAR066W   | 0     | #N/A           |   | iYAR064W    | 0.88 | 0.36 |
| YAR068W   | 0     | #N/A           |   | iYAR066W    | 0.68 | 0.24 |
| YAR069C   | 0     | #N/A           |   | iYAR069C    | 1.72 | 0.76 |
| YAR070C   | 0     | #N/A           |   | iYAR070C    | 1.94 | 0.83 |
| YAR071W   | PHO11 |                | 0 | iYAR070C    | 1.94 | 0.83 |
| YAR073W   | IMD1  |                | 0 | iYAR071W    | 2.47 | 0.93 |
| YAR074C   | #N/A  | #N/A           |   | #N/A        | #N/A | #N/A |
| YAR075W   | 0     | #N/A           |   | iYAR071W    | 2.47 | 0.93 |
| YBL001C   | ECM15 |                | 0 | iYBL001C    | 0.96 | 0.41 |
| YBL002W   | HTB2  |                | 0 | iYBL003C    | 0.30 | 0.03 |
| YBL003C   | HTA2  | H2A2           |   | iYBL003C    | 0.30 | 0.03 |
| YBL004W   | UTP20 |                | 0 | itS(AGA)B   | 1.56 | 0.69 |
| YBL005W-A | #N/A  | #N/A           |   | iYBL005W    | 0.56 | 0.16 |
| YBL006C   | 0     |                | 0 | iYBL006C    | 1.62 | 0.71 |
| YBL007C   | SLA1  |                | 0 | iYBL007C    | 1.49 | 0.67 |

|         |        |                |            |      |      |
|---------|--------|----------------|------------|------|------|
| YBL010C | 0      | #N/A           | iYBL010C   | 2.67 | 0.89 |
| YBL011W | SCT1   | GAT2           | iYBL013W   | 0.90 | 0.36 |
| YBL013W | FMT1   |                | 0 iYBL014C | 2.64 | 0.94 |
| YBL014C | RRN6   |                | 0 iYBL014C | 2.64 | 0.94 |
| YBL015W | ACH1   |                | 0 iYBL016W | 1.31 | 0.59 |
| YBL016W | FUS3   | DAC2           | iYBL017C   | 0.98 | 0.42 |
| YBL017C | PEP1   | VPS10 VPT1     | iYBL017C   | 0.98 | 0.42 |
| YBL018C | POP8   |                | 0 iYBL018C | 1.93 | 0.83 |
| YBL019W | APN2   | ETH1           | iYBL020W   | #N/A | #N/A |
| YBL020W | RFT1   |                | 0 iYBL021C | #N/A | #N/A |
| YBL021C | HAP3   |                | 0 iYBL021C | #N/A | #N/A |
| YBL022C | PIM1   | LON1 Lon       | iYBL022C   | 1.31 | 0.59 |
| YBL023C | MCM2   |                | 0 iYBL023C | 0.79 | 0.31 |
| YBL024W | NCL1   | TRM4           | iYBL025W   | 1.20 | 0.53 |
| YBL025W | RRN10  |                | 0 iYBL026W | 1.60 | 0.70 |
| YBL028C | 0      | #N/A           | iYBL028C   | 0.25 | 0.02 |
| YBL029W | 0      | #N/A           | iYBL030C-1 | 0.31 | 0.03 |
| YBL030C | PET9   | AAC2 ANC2 OP1  | iYBL030C-0 | 0.74 | 0.28 |
| YBL031W | SHE1   |                | 0 iYBL032W | 1.41 | 0.63 |
| YBL032W | HEK2   | KHD1           | iYBL033C   | 1.99 | 0.85 |
| YBL033C | RIB1   |                | 0 iYBL033C | 1.99 | 0.85 |
| YBL036C | 0      | #N/A           | iYBL036C   | 2.09 | 0.86 |
| YBL038W | MRPL16 |                | 0 iYBL039C | #N/A | #N/A |
| YBL039C | URA7   |                | 0 iYBL039C | #N/A | #N/A |
| YBL040C | ERD2   |                | 0 iYBL040C | 1.61 | 0.71 |
| YBL041W | PRE7   | PRS3           | iYBL042C   | 0.55 | 0.15 |
| YBL042C | FUI1   |                | 0 iYBL042C | 0.55 | 0.15 |
| YBL043W | ECM13  |                | 0 iYBL044W | 1.64 | 0.73 |
| YBL044W | 0      | #N/A           | iYBL045C   | 0.93 | 0.39 |
| YBL046W | 0      | #N/A           | iYBL047C   | 2.53 | 0.94 |
| YBL048W | 0      | #N/A           | iYBL050W   | 0.88 | 0.36 |
| YBL049W | 0      |                | 0 iYBL050W | 0.88 | 0.36 |
| YBL050W | SEC17  |                | 0 iYBL051C | 3.14 | 0.98 |
| YBL051C | PIN4   | MDT1           | iYBL051C   | 3.14 | 0.98 |
| YBL053W | 0      | #N/A           | iYBL054W   | #N/A | #N/A |
| YBL054W | 0      | #N/A           | iYBL055C   | 1.79 | 0.77 |
| YBL055C | 0      | #N/A           | iYBL055C   | 1.79 | 0.77 |
| YBL056W | PTC3   |                | 0 iYBL057C | 2.18 | 0.88 |
| YBL057C | 0      |                | 0 iYBL057C | 2.18 | 0.88 |
| YBL058W | SHP1   |                | 0 iYBL059W | 1.06 | 0.45 |
| YBL059W | 0      | #N/A           | iYBL060W   | 1.46 | 0.65 |
| YBL060W | 0      | #N/A           | iYBL061C   | 1.32 | 0.59 |
| YBL061C | SKT5   | CAL2 CHS4 CSD4 | iYBL061C   | 1.32 | 0.59 |
| YBL062W | 0      | #N/A           | iYBL063W   | #N/A | #N/A |
| YBL063W | KIP1   | CIN9           | iYBL064C   | 2.01 | 0.86 |
| YBL064C | 0      | mTPx           | iYBL064C   | 2.01 | 0.86 |
| YBL065W | 0      | #N/A           | iYBL067C   | 0.86 | 0.35 |
| YBL067C | UBP13  |                | 0 iYBL067C | 0.86 | 0.35 |
| YBL068W | PRS4   |                | 0 iYBL069W | 1.71 | 0.76 |
| YBL069W | AST1   |                | 0 iYBL071C | #N/A | #N/A |
| YBL070C | 0      | #N/A           | iYBL069W   | 1.71 | 0.76 |

|           |        |                |             |      |      |
|-----------|--------|----------------|-------------|------|------|
| YBL071C   | 0      | #N/A           | iYBL071C    | #N/A | #N/A |
| YBL072C   | RPS8A  |                | 0 iYBL072C  | 0.87 | 0.35 |
| YBL073W   | 0      | #N/A           | iYBL075C    | 0.38 | 0.06 |
| YBL074C   | AAR2   |                | 0 iYBL073W  | 0.42 | 0.07 |
| YBL075C   | SSA3   | HSP70          | iYBL075C    | 0.38 | 0.06 |
| YBL077W   | 0      | #N/A           | iYBL078C    | #N/A | #N/A |
| YBL078C   | AUT7   | APG8 AUT7 CVT5 | iYBL078C    | #N/A | #N/A |
| YBL080C   | PET112 |                | 0 iYBL080C  | 1.97 | 0.84 |
| YBL081W   | 0      | #N/A           | iYBL082C    | 2.42 | 0.93 |
| YBL082C   | RHK1   | ALG3           | iYBL082C    | 2.42 | 0.93 |
| YBL083C   | 0      | #N/A           | iYBL082C    | 2.42 | 0.93 |
| YBL086C   | 0      | #N/A           | iYBL086C    | 0.97 | 0.41 |
| YBL087C   | RPL23A |                | 0 iYBL087C  | 0.42 | 0.08 |
| YBL088C   | TEL1   |                | 0 iYBL088C  | 1.12 | 0.48 |
| YBL089W   | 0      |                | 0 iYBL090W  | #N/A | #N/A |
| YBL090W   | MRP21  | MRP50          | iYBL091C    | 1.36 | 0.61 |
| YBL091C   | MAP2   |                | 0 iYBL091C  | 1.36 | 0.61 |
| YBL092W   | RPL32  |                | 0 iYBL093C  | 0.51 | 0.13 |
| YBL093C   | ROX3   | NUT3 SSN7      | iYBL093C    | 0.51 | 0.13 |
| YBL094C   | 0      | #N/A           | iYBL094C    | 0.55 | 0.16 |
| YBL095W   | 0      | #N/A           | iYBL097W    | #N/A | #N/A |
| YBL096C   | 0      | #N/A           | iYBL094C    | 0.55 | 0.16 |
| YBL097W   | BRN1   |                | 0 iYBL098W  | 2.42 | 0.66 |
| YBL098W   | BNA4   |                | 0 iYBL099W  | 0.68 | 0.24 |
| YBL099W   | ATP1   |                | 0 itF(GAA)B | 0.62 | 0.21 |
| YBL100C   | 0      | #N/A           | iYBL099W    | 0.68 | 0.24 |
| YBL101C   | ECM21  |                | 0 iYBL101C  | 1.14 | 0.50 |
| YBL101W-A | #N/A   | #N/A           | iYBL101C    | 1.14 | 0.50 |
| YBL102W   | SFT2   |                | 0 iYBL103C  | 1.86 | 0.80 |
| YBL103C   | RTG3   |                | 0 iYBL103C  | 1.86 | 0.80 |
| YBL107C   | 0      | #N/A           | iYBL107C    | #N/A | #N/A |
| YBL109W   | 0      | #N/A           | iYBL111C    | 0.56 | 0.17 |
| YBL111C   | 0      | #N/A           | iYBL111C    | 0.56 | 0.17 |
| YBL112C   | 0      | #N/A           | iYBL111C    | 0.56 | 0.17 |
| YBL113C   | 0      | #N/A           | iYBL111C    | 0.56 | 0.17 |
| YBLO05W   | #N/A   | #N/A           | #N/A        | #N/A | #N/A |
| YBR001C   | NTH2   |                | 0 iYBR001C  | 0.71 | 0.26 |
| YBR002C   | RER2   |                | 0 iYBR002C  | 3.05 | 0.97 |
| YBR003W   | COQ1   |                | 0 iYBR002C  | 3.05 | 0.97 |
| YBR004C   | 0      |                | 0 iYBR004C  | 1.82 | 0.80 |
| YBR005W   | 0      |                | 0 iYBR004C  | 1.82 | 0.80 |
| YBR006W   | UGA2   | UGA5           | iYBR005W    | 1.43 | 0.64 |
| YBR009C   | HHF1   |                | 0 iYBR009C  | 0.40 | 0.07 |
| YBR010W   | HHT1   | BUR5 SIN2      | iYBR009C    | 0.40 | 0.07 |
| YBR011C   | IPP1   | PPA1           | iYBR011C    | 1.35 | 0.60 |
| YBR012C   | 0      | #N/A           | iYBR013C    | #N/A | #N/A |
| YBR012W-A | #N/A   | #N/A           | iYBR013C    | #N/A | #N/A |
| YBR013C   | 0      | #N/A           | iYBR013C    | #N/A | #N/A |
| YBR014C   | 0      | #N/A           | iYBR014C    | 0.97 | 0.40 |
| YBR016W   | 0      | #N/A           | iYBR015C    | 1.46 | 0.66 |
| YBR018C   | GAL7   |                | 0 iYBR018C  | 1.74 | 0.74 |

|           |        |                |   |            |      |      |
|-----------|--------|----------------|---|------------|------|------|
| YBR019C   | GAL10  |                | 0 | iYBR019C   | 1.42 | 0.63 |
| YBR020W   | GAL1   |                | 0 | iYBR019C   | 1.42 | 0.63 |
| YBR022W   | 0      | #N/A           |   | iYBR021W   | 1.54 | 0.69 |
| YBR024W   | SCO2   |                | 0 | iYBR023C   | #N/A | #N/A |
| YBR025C   | 0      | #N/A           |   | iYBR025C   | 1.37 | 0.61 |
| YBR026C   | MRF1'  | MRF1 MRF1'     |   | iYBR027C   | #N/A | #N/A |
| YBR028C   | 0      | #N/A           |   | iYBR028C   | 1.05 | 0.45 |
| YBR029C   | CDS1   | CDG1           |   | iYBR029C   | 2.34 | 0.92 |
| YBR030W   | 0      | #N/A           |   | iYBR029C   | 2.34 | 0.92 |
| YBR031W   | RPL4A  |                | 0 | iYBR030W   | #N/A | #N/A |
| YBR032W   | 0      | #N/A           |   | iYBR031W   | #N/A | #N/A |
| YBR033W   | EDS1   |                | 0 | iYBR032W   | 1.05 | 0.45 |
| YBR034C   | HMT1   | HCP1 ODP1 RMT1 |   | iYBR034C   | 1.28 | 0.57 |
| YBR035C   | PDX3   |                | 0 | iYBR035C   | 1.66 | 0.74 |
| YBR036C   | CSG2   | CLS2           |   | iYBR036C   | 2.80 | 0.96 |
| YBR037C   | SCO1   | PET161         |   | iYBR037C   | 1.29 | 0.57 |
| YBR039W   | ATP3   |                | 0 | iYBR038W   | 1.21 | 0.53 |
| YBR040W   | FIG1   |                | 0 | iYBR039W   | 0.68 | 0.24 |
| YBR044C   | TCM62  |                | 0 | iYBR044C   | 1.60 | 0.72 |
| YBR045C   | GIP1   |                | 0 | iYBR045C   | 0.67 | 0.22 |
| YBR047W   | 0      |                | 0 | iYBR046C   | 0.97 | 0.41 |
| YBR050C   | REG2   |                | 0 | iYBR051W   | 1.88 | 0.82 |
| YBR051W   | 0      | #N/A           |   | iYBR049C   | 1.60 | 0.71 |
| YBR053C   | 0      | #N/A           |   | iYBR053C-0 | 1.05 | 0.45 |
| YBR054W   | YRO2   |                | 0 | iYBR053C-1 | 1.24 | 0.55 |
| YBR057C   | MUM2   | SPOT8          |   | iYBR057C   | 1.01 | 0.43 |
| YBR060C   | ORC2   | RRR1 SIR5      |   | iYBR060C-0 | 1.27 | 0.56 |
| YBR061C   | TRM7   |                | 0 | iYBR061C   | #N/A | #N/A |
| YBR062C   | 0      | #N/A           |   | iYBR062C   | 1.33 | 0.59 |
| YBR063C   | 0      | #N/A           |   | iYBR064W   | 0.72 | 0.26 |
| YBR064W   | 0      | #N/A           |   | iYBR062C   | 1.33 | 0.59 |
| YBR065C   | ECM2   | SLT11          |   | iYBR065C   | 1.86 | 0.81 |
| YBR066C   | NRG2   |                | 0 | iYBR066C   | 0.48 | 0.11 |
| YBR067C   | TIP1   |                | 0 | iYBR067C   | 0.41 | 0.07 |
| YBR068C   | BAP2   |                | 0 | iYBR068C   | 0.18 | 0.01 |
| YBR069C   | TAT1   | VAP1           |   | iYBR069C   | 0.31 | 0.03 |
| YBR070C   | 0      | #N/A           |   | iYBR070C   | 0.83 | 0.33 |
| YBR071W   | 0      | #N/A           |   | iYBR070C   | 0.83 | 0.33 |
| YBR072W   | HSP26  |                | 0 | iYBR071W   | 1.11 | 0.49 |
| YBR074W   | 0      | #N/A           |   | iYBR073W   | #N/A | #N/A |
| YBR075W   | 0      | #N/A           |   | iYBR074W   | #N/A | #N/A |
| YBR076W   | ECM8   |                | 0 | iYBR075W   | 0.92 | 0.39 |
| YBR077C   | 0      | #N/A           |   | iYBR077C   | 0.32 | 0.03 |
| YBR082C   | UBC4   |                | 0 | iYBR082C-0 | 0.55 | 0.16 |
| YBR083W   | TEC1   | ROC1           |   | iYBR082C-1 | 0.36 | 0.05 |
| YBR084C-A | RPL19A |                | 0 | iYBR084C-A | 0.57 | 0.17 |
| YBR085W   | AAC3   | ANC3           |   | iYBR084C-A | 0.57 | 0.17 |
| YBR087W   | RFC5   |                | 0 | iYBR086C   | 0.95 | 0.40 |
| YBR088C   | POL30  | PCNA           |   | iYBR089W   | 1.01 | 0.43 |
| YBR089W   | 0      | #N/A           |   | iYBR087W   | #N/A | #N/A |
| YBR090C   | 0      | #N/A           |   | iYBR090C   | 0.88 | 0.35 |

|           |        |                  |      |          |      |      |
|-----------|--------|------------------|------|----------|------|------|
| YBR090C-A | #N/A   | #N/A             | #N/A | #N/A     | #N/A | #N/A |
| YBR091C   | MRS5   | TIM12            |      | iYBR091C | 2.40 | 0.93 |
| YBR092C   | PHO3   |                  | 0    | iYBR092C | 0.67 | 0.23 |
| YBR093C   | PHO5   |                  | 0    | iYBR093C | #N/A | #N/A |
| YBR095C   | 0      |                  | 0    | iYBR095C | 1.66 | 0.70 |
| YBR096W   | 0      | #N/A             |      | iYBR095C | 1.66 | 0.70 |
| YBR098W   | MMS4   | SLX2             |      | iYBR097W | #N/A | #N/A |
| YBR099C   | 0      | #N/A             |      | iYBR100W | 0.53 | 0.15 |
| YBR100W   | 0      | #N/A             |      | iYBR097W | #N/A | #N/A |
| YBR101C   | 0      |                  | 0    | iYBR101C | 1.52 | 0.68 |
| YBR103W   | SIF2   | EMB1             |      | iYBR102C | 1.83 | 0.80 |
| YBR104W   | YMC2   |                  | 0    | iYBR103W | 1.73 | 0.77 |
| YBR105C   | VID24  | GID4             |      | iYBR105C | 0.26 | 0.02 |
| YBR106W   | PHO88  |                  | 0    | iYBR105C | 0.26 | 0.02 |
| YBR107C   | IML3   | MCM19            |      | iYBR107C | #N/A | #N/A |
| YBR108W   | 0      | #N/A             |      | iYBR107C | #N/A | #N/A |
| YBR109C   | CMD1   |                  | 0    | iYBR109C | 1.75 | 0.77 |
| YBR110W   | ALG1   |                  | 0    | iYBR109C | 1.75 | 0.77 |
| YBR111C   | YSA1   | RMA2             |      | iYBR111C | #N/A | #N/A |
| YBR112C   | CYC8   | CRT8 SSN6        |      | iYBR113W | 0.50 | 0.12 |
| YBR113W   | 0      | #N/A             |      | iYBR111C | #N/A | #N/A |
| YBR116C   | 0      | #N/A             |      | iYBR117C | 1.42 | 0.64 |
| YBR117C   | TKL2   |                  | 0    | iYBR117C | 1.42 | 0.64 |
| YBR118W   | TEF2   | EF-1 alpha       |      | iYBR117C | 1.42 | 0.64 |
| YBR119W   | MUD1   |                  | 0    | iYBR118W | #N/A | #N/A |
| YBR120C   | CBP6   |                  | 0    | iYBR120C | 1.12 | 0.49 |
| YBR122C   | MRPL36 |                  | 0    | iYBR122C | 1.91 | 0.83 |
| YBR123C   | TFC1   |                  | 0    | iYBR124W | 0.62 | 0.20 |
| YBR124W   | 0      | #N/A             |      | iYBR122C | 1.91 | 0.83 |
| YBR125C   | PTC4   | GCT1             |      | iYBR125C | #N/A | #N/A |
| YBR126C   | TPS1   | BYP1 CIF1 FDP1 G |      | iYBR126C | #N/A | #N/A |
| YBR127C   | VMA2   | ATPSV VAT2       |      | iYBR127C | 1.95 | 0.84 |
| YBR128C   | APG14  | APG14 CVT12      |      | iYBR128C | 1.68 | 0.75 |
| YBR129C   | OPY1   |                  | 0    | iYBR129C | 2.23 | 0.89 |
| YBR130C   | SHE3   |                  | 0    | iYBR130C | 1.90 | 0.83 |
| YBR131W   | CCZ1   | CVT16            |      | iYBR130C | 1.90 | 0.83 |
| YBR132C   | AGP2   |                  | 0    | iYBR132C | 0.60 | 0.19 |
| YBR133C   | HSL7   |                  | 0    | iYBR134W | 2.68 | 0.91 |
| YBR135W   | CKS1   |                  | 0    | iYBR134W | 2.68 | 0.91 |
| YBR136W   | MEC1   | ESR1 SAD3        |      | iYBR135W | #N/A | #N/A |
| YBR137W   | 0      | #N/A             |      | iYBR136W | 1.47 | 0.65 |
| YBR139W   | 0      | #N/A             |      | iYBR138C | 0.89 | 0.37 |
| YBR141C   | 0      | #N/A             |      | iYBR141C | 1.49 | 0.67 |
| YBR144C   | 0      | #N/A             |      | iYBR144C | #N/A | #N/A |
| YBR145W   | ADH5   |                  | 0    | iYBR144C | #N/A | #N/A |
| YBR146W   | MRPS9  |                  | 0    | iYBR145W | 2.15 | 0.89 |
| YBR148W   | YSW1   |                  | 0    | iYBR147W | #N/A | #N/A |
| YBR149W   | ARA1   |                  | 0    | iYBR148W | 1.19 | 0.53 |
| YBR150C   | TBS1   |                  | 0    | iYBR150C | #N/A | #N/A |
| YBR151W   | APD1   |                  | 0    | iYBR150C | #N/A | #N/A |
| YBR152W   | SPP381 |                  | 0    | iYBR151W | 0.95 | 0.40 |



|           |        |                  |   |            |      |      |
|-----------|--------|------------------|---|------------|------|------|
| YBR153W   | RIB7   |                  | 0 | iYBR152W   | 0.70 | 0.25 |
| YBR154C   | RPB5   |                  | 0 | iYBR154C   | 1.38 | 0.62 |
| YBR155W   | CNS1   |                  | 0 | iYBR154C   | 1.38 | 0.62 |
| YBR157C   | ICS2   |                  | 0 | iYBR157C-0 | 0.55 | 0.16 |
| YBR158W   | CST13  | CST13 ICS4       |   | iYBR157C-1 | 0.27 | 0.02 |
| YBR159W   | 0      | #N/A             |   | iYBR158W   | 1.94 | 0.83 |
| YBR160W   | CDC28  | CDK1 HSL5 SRM5   |   | iYBR159W   | 1.71 | 0.76 |
| YBR161W   | 0      |                  | 0 | iYBR160W   | 1.03 | 0.44 |
| YBR162C   | TOS1   |                  | 0 | iYBR162C   | 0.55 | 0.15 |
| YBR162W-A | YSY6   |                  | 0 | iYBR162C   | 0.55 | 0.15 |
| YBR164C   | ARL1   | DLP2             |   | iYBR164C   | 1.73 | 0.77 |
| YBR165W   | UBS1   |                  | 0 | iYBR164C   | 1.73 | 0.77 |
| YBR166C   | TYR1   |                  | 0 | iYBR166C   | 1.67 | 0.72 |
| YBR167C   | POP7   | RPP2             |   | iYBR167C   | 1.29 | 0.57 |
| YBR168W   | 0      |                  | 0 | iYBR167C   | 1.29 | 0.57 |
| YBR169C   | SSE2   |                  | 0 | iYBR169C   | 1.06 | 0.46 |
| YBR170C   | NPL4   | HRD4             |   | iYBR170C   | 1.89 | 0.79 |
| YBR171W   | SEC66  | HSS1 SEC71       |   | iYBR170C   | 1.89 | 0.79 |
| YBR172C   | SMY2   |                  | 0 | iYBR172C   | 1.32 | 0.58 |
| YBR173C   | UMP1   |                  | 0 | iYBR173C   | 2.19 | 0.90 |
| YBR174C   | 0      | #N/A             |   | iYBR175W   | 0.89 | 0.35 |
| YBR175W   | SWD3   | CPS30 SAF35      |   | iYBR173C   | 2.19 | 0.90 |
| YBR176W   | ECM31  |                  | 0 | iYBR175W   | 0.89 | 0.35 |
| YBR177C   | EHT1   |                  | 0 | iYBR178W   | #N/A | #N/A |
| YBR178W   | 0      | #N/A             |   | iYBR176W   | #N/A | #N/A |
| YBR180W   | DTR1   |                  | 0 | iYBR179C   | 1.93 | 0.82 |
| YBR181C   | RPS6B  | LPG18 RPS101 RPS |   | iYBR181C   | 0.69 | 0.25 |
| YBR182C   | SMP1   |                  | 0 | iYBR182C   | 1.00 | 0.42 |
| YBR183W   | YPC1   |                  | 0 | iYBR182C   | 1.00 | 0.42 |
| YBR184W   | 0      | #N/A             |   | iYBR183W   | 0.97 | 0.41 |
| YBR185C   | MBA1   |                  | 0 | iYBR185C   | 2.36 | 0.92 |
| YBR187W   | 0      | #N/A             |   | iYBR186W   | 0.65 | 0.22 |
| YBR188C   | NTC20  |                  | 0 | iYBR188C   | 1.17 | 0.52 |
| YBR189W   | RPS9B  | RPS13A SUP46     |   | iYBR188C   | 1.17 | 0.52 |
| YBR190W   | 0      | #N/A             |   | iYBR189W   | 0.56 | 0.16 |
| YBR191W   | RPL21A | URP1             |   | iYBR189W   | 0.56 | 0.16 |
| YBR192W   | RIM2   |                  | 0 | iYBR191W   | 1.16 | 0.50 |
| YBR193C   | MED8   |                  | 0 | iYBR193C   | 1.08 | 0.47 |
| YBR194W   | 0      |                  | 0 | iYBR193C   | 1.08 | 0.47 |
| YBR195C   | MSI1   | CAC3             |   | iYBR195C   | 0.56 | 0.18 |
| YBR196C   | PGI1   | CDC30            |   | iYBR196C   | 0.26 | 0.02 |
| YBR197C   | 0      | #N/A             |   | iYBR197C   | 0.65 | 0.23 |
| YBR199W   | KTR4   |                  | 0 | iYBR198C   | #N/A | #N/A |
| YBR200W   | BEM1   | SRO1             |   | iYBR199W   | 1.02 | 0.44 |
| YBR201W   | DER1   |                  | 0 | iYBR200W   | 1.47 | 0.66 |
| YBR202W   | CDC47  | MCM7             |   | iYBR201W-  | #N/A | #N/A |
| YBR204C   | 0      | #N/A             |   | iYBR204C   | 1.99 | 0.84 |
| YBR205W   | KTR3   |                  | 0 | iYBR204C   | 1.99 | 0.84 |
| YBR206W   | 0      | #N/A             |   | iYBR204C   | 1.99 | 0.84 |
| YBR209W   | 0      | #N/A             |   | iYBR208C   | 1.46 | 0.66 |
| YBR210W   | 0      |                  | 0 | itE(UUC)B  | 1.80 | 0.79 |

|         |        |            |   |          |      |      |
|---------|--------|------------|---|----------|------|------|
| YBR211C | AME1   | ARP100     |   | iYBR211C | 1.70 | 0.76 |
| YBR213W | MET8   |            | 0 | iYBR212W | #N/A | #N/A |
| YBR214W | SDS24  |            | 0 | iYBR213W | 2.01 | 0.85 |
| YBR215W | HPC2   |            | 0 | iYBR214W | #N/A | #N/A |
| YBR216C | 0      |            | 0 | iYBR216C | 1.49 | 0.67 |
| YBR217W | APG12  | APG12      |   | iYBR216C | 1.49 | 0.67 |
| YBR219C | 0      | #N/A       |   | iYBR220C | 1.53 | 0.67 |
| YBR220C | 0      | #N/A       |   | iYBR220C | 1.53 | 0.67 |
| YBR221C | PDB1   |            | 0 | iYBR221C | 1.12 | 0.49 |
| YBR222C | FAT2   | FAT2       |   | iYBR222C | 1.07 | 0.45 |
| YBR223C | TDP1   |            | 0 | iYBR227C | 1.33 | 0.59 |
| YBR225W | 0      | #N/A       |   | iYBR222C | 1.07 | 0.45 |
| YBR226C | 0      | #N/A       |   | iYBR227C | 1.33 | 0.59 |
| YBR228W | SLX1   |            | 0 | iYBR227C | 1.33 | 0.59 |
| YBR229C | ROT2   | GLS2       |   | iYBR229C | 3.43 | 0.99 |
| YBR230C | 0      | #N/A       |   | iYBR230C | 0.84 | 0.34 |
| YBR231C | AOR1   | AOR1       |   | iYBR231C | 1.47 | 0.66 |
| YBR232C | 0      | #N/A       |   | iYBR233W | 2.44 | 0.93 |
| YBR233W | PBP2   | HEK1       |   | iYBR231C | 1.47 | 0.66 |
| YBR234C | ARC40  |            | 0 | iYBR234C | 1.97 | 0.84 |
| YBR236C | ABD1   |            | 0 | iYBR236C | #N/A | #N/A |
| YBR238C | 0      | #N/A       |   | iYBR238C | 0.96 | 0.41 |
| YBR240C | THI2   | PHO6       |   | iYBR240C | 1.65 | 0.73 |
| YBR241C | 0      | #N/A       |   | iYBR241C | 1.83 | 0.80 |
| YBR242W | 0      | #N/A       |   | iYBR241C | 1.83 | 0.80 |
| YBR243C | ALG7   | TUR1       |   | iYBR243C | 1.82 | 0.80 |
| YBR244W | GPX2   | AMI1       |   | iYBR243C | 1.82 | 0.80 |
| YBR246W | 0      | #N/A       |   | iYBR244W | #N/A | #N/A |
| YBR247C | ENP1   | MEG1       |   | iYBR247C | 1.63 | 0.73 |
| YBR248C | HIS7   |            | 0 | iYBR248C | #N/A | #N/A |
| YBR249C | ARO4   |            | 0 | iYBR249C | 1.27 | 0.57 |
| YBR250W | 0      | #N/A       |   | iYBR249C | 1.27 | 0.57 |
| YBR251W | MRPS5  |            | 0 | iYBR250W | 2.29 | 0.91 |
| YBR252W | DUT1   |            | 0 | iYBR251W | 1.09 | 0.46 |
| YBR253W | SRB6   |            | 0 | iYBR252W | 1.42 | 0.64 |
| YBR254C | TRS20  |            | 0 | iYBR254C | 2.15 | 0.84 |
| YBR255W | 0      | #N/A       |   | iYBR254C | 2.15 | 0.84 |
| YBR256C | RIB5   |            | 0 | iYBR256C | #N/A | #N/A |
| YBR257W | POP4   |            | 0 | iYBR256C | #N/A | #N/A |
| YBR258C | SHG1   | CPS15      |   | iYBR258C | #N/A | #N/A |
| YBR259W | 0      | #N/A       |   | iYBR258C | #N/A | #N/A |
| YBR260C | RGD1   |            | 0 | iYBR260C | 2.71 | 0.96 |
| YBR261C | 0      | #N/A       |   | iYBR261C | 1.58 | 0.70 |
| YBR262C | 0      |            | 0 | iYBR264C | 1.67 | 0.75 |
| YBR263W | SHM1   | SHMT1 TMP3 |   | iYBR261C | 1.58 | 0.70 |
| YBR264C | YPT10  |            | 0 | iYBR264C | 1.67 | 0.75 |
| YBR265W | TSC10  |            | 0 | iYBR264C | 1.67 | 0.75 |
| YBR266C | 0      | #N/A       |   | iYBR267W | 1.78 | 0.78 |
| YBR267W | 0      |            | 0 | iYBR265W | #N/A | #N/A |
| YBR268W | MRPL37 |            | 0 | iYBR267W | 1.78 | 0.78 |
| YBR269C | 0      |            | 0 | iYBR269C | #N/A | #N/A |

|         |                      |      |               |      |      |
|---------|----------------------|------|---------------|------|------|
| YBR270C | 0                    | #N/A | iYBR270C      | 3.07 | 0.98 |
| YBR271W | 0                    | #N/A | iYBR270C      | 3.07 | 0.98 |
| YBR272C | HSM3                 |      | 0 iYBR272C    | #N/A | #N/A |
| YBR273C | 0                    |      | 0 iYBR273C    | #N/A | #N/A |
| YBR274W | CHK1                 |      | 0 iYBR273C    | #N/A | #N/A |
| YBR275C | RIF1                 |      | 0 iYBR275C    | 1.40 | 0.63 |
| YBR276C | PPS1                 |      | 0 iYBR276C    | 1.59 | 0.70 |
| YBR277C | 0                    | #N/A | iYBR278W      | 1.79 | 0.79 |
| YBR278W | DPB3                 |      | 0 iYBR276C    | 1.59 | 0.70 |
| YBR279W | PAF1                 |      | 0 iYBR278W    | 1.79 | 0.79 |
| YBR280C | 0                    | #N/A | iYBR280C      | #N/A | #N/A |
| YBR281C | 0                    | #N/A | iYBR281C      | 1.47 | 0.66 |
| YBR282W | MRPL27               |      | 0 iYBR281C    | 1.47 | 0.66 |
| YBR283C | SSH1                 |      | 0 iYBR283C    | 1.69 | 0.75 |
| YBR284W | 0                    | #N/A | iYBR283C      | 1.69 | 0.75 |
| YBR285W | 0                    | #N/A | iYBR284W      | 0.99 | 0.42 |
| YBR286W | APE3 APY1            |      | iYBR285W      | #N/A | #N/A |
| YBR287W | 0                    |      | 0 iYBR286W    | 1.38 | 0.61 |
| YBR288C | APM3 YKS6            |      | iYBR288C      | 1.53 | 0.68 |
| YBR289W | SNF5 HAF4 SWI10 TYE4 |      | iYBR288C      | 1.53 | 0.68 |
| YBR290W | BSD2                 |      | 0 iYBR289W    | 1.01 | 0.43 |
| YBR291C | CTP1                 |      | 0 iYBR291C    | 1.09 | 0.48 |
| YBR292C | 0                    | #N/A | iYBR292C-0    | 1.52 | 0.68 |
| YBR293W | 0                    | #N/A | iYBR292C-1    | 2.20 | 0.90 |
| YBR294W | SUL1 SFP2            |      | iYBR293W      | 1.00 | 0.43 |
| YBR295W | PCA1 CAD2 PAY2       |      | iYBR294W      | 1.25 | 0.56 |
| YBR296C | PHO89 ITN1           |      | iYBR296C-0    | 1.22 | 0.54 |
| YBR297W | MAL33 MAL3R          |      | iYBR296C-1    | 1.80 | 0.79 |
| YBR298C | MAL31 MAL3T          |      | iYBR298C      | 2.29 | 0.91 |
| YBR299W | MAL32 MAL3S          |      | iYBR298C      | 2.29 | 0.91 |
| YBR300C | 0                    | #N/A | iYBR301W      | 1.68 | 0.75 |
| YBR301W | DAN3                 |      | 0 iYBR299W    | 1.42 | 0.64 |
| YBR302C | COS2                 |      | 0 #N/A        | #N/A | #N/A |
| YCL001W | RER1                 |      | 0 iYCL011C    | 2.08 | 0.87 |
| YCL002C | 0                    | #N/A | iYCRCdelta6   | 0.74 | 0.27 |
| YCL003W | #N/A                 | #N/A | #N/A          | #N/A | #N/A |
| YCL004W | PGS1 PEL1            |      | iYCL011C      | 2.08 | 0.87 |
| YCL005W | 0                    | #N/A | iYCL011C      | 2.08 | 0.87 |
| YCL006C | #N/A                 | #N/A | iYCRCdelta6   | 0.74 | 0.27 |
| YCL007C | CWH36                | #N/A | iYCRCdelta6   | 0.74 | 0.27 |
| YCL008C | STP22 VPS23          |      | iYCRCdelta6   | 0.74 | 0.27 |
| YCL009C | ILV6                 |      | 0 iYCRCdelta6 | 0.74 | 0.27 |
| YCL010C | SGF29                |      | 0 iYCRCdelta6 | 0.74 | 0.27 |
| YCL011C | GBP2 RLF6            |      | iYCL011C      | 2.08 | 0.87 |
| YCL012W | #N/A                 | #N/A | iYCLWdelta6   | #N/A | #N/A |
| YCL013W | #N/A                 | #N/A | #N/A          | #N/A | #N/A |
| YCL014W | BUD3                 |      | 0 iYCLWdelta6 | #N/A | #N/A |
| YCL016C | DCC1                 |      | 0 iYCL011C    | 2.08 | 0.87 |
| YCL017C | NFS1 SPL1            |      | iYCL011C      | 2.08 | 0.87 |
| YCL018W | LEU2                 |      | 0 iYCLWdelta6 | #N/A | #N/A |
| YCL019W | #N/A                 | #N/A | iYCL022C      | #N/A | #N/A |

|         |        |                 |              |      |      |
|---------|--------|-----------------|--------------|------|------|
| YCL020W | #N/A   | #N/A            | iYCL022C     | #N/A | #N/A |
| YCL021W | #N/A   | #N/A            | #N/A         | #N/A | #N/A |
| YCL022C | 0      | #N/A            | iYCL022C     | #N/A | #N/A |
| YCL023C | 0      | #N/A            | iYCL022C     | #N/A | #N/A |
| YCL024W | KCC4   |                 | 0 iYCL025C   | 0.44 | 0.09 |
| YCL025C | AGP1   | YCC5            | iYCL025C     | 0.44 | 0.09 |
| YCL026C | #N/A   | #N/A            | #N/A         | #N/A | #N/A |
| YCL027W | FUS1   |                 | 0 iYCL028W   | 1.23 | 0.54 |
| YCL028W | RNQ1   | [PIN(+)]        | iYCL029C     | 1.65 | 0.74 |
| YCL029C | BIK1   | ARM5 PAC14      | iYCL029C     | 1.65 | 0.74 |
| YCL030C | HIS4   |                 | 0 iYCL030C   | 0.52 | 0.14 |
| YCL031C | RRP7   |                 | 0 iYCL031C   | 1.71 | 0.76 |
| YCL032W | STE50  |                 | 0 iYCL033C   | #N/A | #N/A |
| YCL033C | 0      | #N/A            | iYCL033C     | #N/A | #N/A |
| YCL034W | LSB5   |                 | 0 iYCL035C   | 2.40 | 0.93 |
| YCL035C | GRX1   |                 | 0 iYCL035C   | 2.40 | 0.93 |
| YCL036W | GFD2   |                 | 0 iYCL037C   | 0.99 | 0.42 |
| YCL037C | SRO9   |                 | 0 iYCL037C   | 0.99 | 0.42 |
| YCL038C | AUT4   | AUT4            | iYCL038C     | 0.77 | 0.29 |
| YCL039W | 0      | MOH2            | iYCL040W     | 3.92 | 0.99 |
| YCL040W | GLK1   | HOR3            | iYCL044C     | 1.46 | 0.65 |
| YCL041C | 0      | #N/A            | iYCL040W     | 3.92 | 0.99 |
| YCL042W | 0      | #N/A            | iYCL044C     | 1.46 | 0.65 |
| YCL043C | PDI1   | MFP1 TRG1       | iYCL040W     | 3.92 | 0.99 |
| YCL044C | 0      | #N/A            | iYCL044C     | 1.46 | 0.65 |
| YCL045C | 0      | #N/A            | iYCL046W     | 1.42 | 0.64 |
| YCL046W | 0      | #N/A            | iYCL047C     | 0.90 | 0.37 |
| YCL047C | 0      | #N/A            | iYCL047C     | 0.90 | 0.37 |
| YCL048W | 0      | #N/A            | iYCL049C     | 1.48 | 0.66 |
| YCL049C | 0      | #N/A            | iYCL049C     | 1.48 | 0.66 |
| YCL050C | APA1   | DTP1            | iYCL050C     | 2.39 | 0.91 |
| YCL051W | LRE1   |                 | 0 iYCL052C   | 2.22 | 0.90 |
| YCL052C | PBN1   |                 | 0 iYCL052C   | 2.22 | 0.90 |
| YCL053C | #N/A   | #N/A            | #N/A         | #N/A | #N/A |
| YCL054W | SPB1   |                 | 0 iYCL055W-1 | 1.49 | 0.67 |
| YCL055W | KAR4   |                 | 0 iYCL056C   | 1.70 | 0.75 |
| YCL056C | 0      | #N/A            | iYCL056C     | 1.70 | 0.75 |
| YCL057W | PRD1   |                 | 0 iYCL058C   | #N/A | #N/A |
| YCL058C | FYV5   |                 | 0 iYCL058C   | #N/A | #N/A |
| YCL059C | KRR1   |                 | 0 iYCL059C   | 2.55 | 0.93 |
| YCL060C | #N/A   | #N/A            | #N/A         | #N/A | #N/A |
| YCL061C | MRC1   |                 | 0 iYCL061C   | 1.12 | 0.49 |
| YCL062W | #N/A   | #N/A            | #N/A         | #N/A | #N/A |
| YCL063W | 0      |                 | 0 iYCL064C   | 1.48 | 0.66 |
| YCL064C | CHA1   |                 | 0 iYCL064C   | 1.48 | 0.66 |
| YCL065W | 0      | #N/A            | iYCL067C     | #N/A | #N/A |
| YCL066W | HMLALP | ALPHA1 MATALPHA | iYCL067C     | #N/A | #N/A |
| YCL067C | HMLALP | ALPHA2 MATALPHA | iYCL067C     | #N/A | #N/A |
| YCL068C | 0      | #N/A            | iYCL068C     | 0.76 | 0.29 |
| YCL069W | 0      | #N/A            | iYCL073C     | 0.60 | 0.19 |
| YCL073C | 0      | #N/A            | iYCL073C     | 0.60 | 0.19 |

|           |                         |      |              |      |      |
|-----------|-------------------------|------|--------------|------|------|
| YCL074W   | #N/A                    | #N/A | iYCL075W     | 0.27 | 0.02 |
| YCL075W   | #N/A                    | #N/A | #N/A         | #N/A | #N/A |
| YCL076W   | 0                       | #N/A | #N/A         | #N/A | #N/A |
| YCLX01W   | #N/A                    | #N/A | #N/A         | #N/A | #N/A |
| YCLX02C   | #N/A                    | #N/A | #N/A         | #N/A | #N/A |
| YCLX03C   | #N/A                    | #N/A | #N/A         | #N/A | #N/A |
| YCLX04W   | #N/A                    | #N/A | #N/A         | #N/A | #N/A |
| YCLX05C   | #N/A                    | #N/A | #N/A         | #N/A | #N/A |
| YCLX06C   | #N/A                    | #N/A | #N/A         | #N/A | #N/A |
| YCLX07W   | #N/A                    | #N/A | #N/A         | #N/A | #N/A |
| YCLX08C   | #N/A                    | #N/A | #N/A         | #N/A | #N/A |
| YCLX09W   | #N/A                    | #N/A | #N/A         | #N/A | #N/A |
| YCLX10C   | #N/A                    | #N/A | #N/A         | #N/A | #N/A |
| YCLX11W   | #N/A                    | #N/A | #N/A         | #N/A | #N/A |
| YCLX12W   | #N/A                    | #N/A | #N/A         | #N/A | #N/A |
| YCR001W   | 0                       | #N/A | iYCL011C     | 2.08 | 0.87 |
| YCR002C   | CDC10                   |      | 0 iYCRdelta6 | 0.74 | 0.27 |
| YCR003W   | MRPL32                  |      | 0 iYCL011C   | 2.08 | 0.87 |
| YCR004C   | YCP4                    |      | 0 iYCRdelta6 | 0.74 | 0.27 |
| YCR005C   | CIT2                    |      | 0 iYCRdelta6 | 0.74 | 0.27 |
| YCR006C   | 0                       | #N/A | iYCRdelta6   | 0.74 | 0.27 |
| YCR007C   | 0                       | #N/A | itG(GCC)C    | #N/A | #N/A |
| YCR008W   | SAT4 HAL4               |      | iYCRdelta6   | 0.74 | 0.27 |
| YCR009C   | RVS161 END6 FUS7 SPE161 |      | itG(GCC)C    | #N/A | #N/A |
| YCR010C   | ADY2 ATO1               |      | itG(GCC)C    | #N/A | #N/A |
| YCR011C   | ADP1                    |      | 0 itG(GCC)C  | #N/A | #N/A |
| YCR012W   | PGK1                    |      | 0 iYCRdelta6 | 0.74 | 0.27 |
| YCR013C   | 0                       | #N/A | itG(GCC)C    | #N/A | #N/A |
| YCR014C   | POL4 POLX               |      | itG(GCC)C    | #N/A | #N/A |
| YCR015C   | 0                       | #N/A | itG(GCC)C    | #N/A | #N/A |
| YCR016W   | 0                       | #N/A | itG(GCC)C    | #N/A | #N/A |
| YCR017C   | CWH43                   |      | 0 iYCR017C   | 1.96 | 0.83 |
| YCR018C   | SRD1                    |      | 0 iYCR018C   | #N/A | #N/A |
| YCR019W   | MAK32                   |      | 0 iYCR018C-A | 1.50 | 0.68 |
| YCR020C   | PET18 HIT2              |      | iYCR020C     | 1.54 | 0.69 |
| YCR020C-A | MAK31 LSM9 SMX1         |      | iYCR020C-A   | 3.52 | 0.98 |
| YCR021C   | HSP30 YRO1              |      | iYCR021C     | 1.45 | 0.65 |
| YCR022C   | 0                       | #N/A | iYCR022C     | 0.97 | 0.41 |
| YCR023C   | 0                       | #N/A | iYCR023C     | 1.43 | 0.64 |
| YCR024C   | 0                       | #N/A | iYCR024C     | 0.40 | 0.07 |
| YCR024C-A | PMP1                    |      | 0 iYCR024C-A | 0.38 | 0.06 |
| YCR025C   | 0                       | #N/A | iYCR025C     | #N/A | #N/A |
| YCR026C   | 0                       | #N/A | iYCR026C     | 1.02 | 0.43 |
| YCR027C   | RHB1                    |      | 0 iYCR027C   | 1.46 | 0.65 |
| YCR028C   | FEN2                    |      | 0 iYCR028C   | 2.19 | 0.89 |
| YCR029C   | #N/A                    | #N/A | #N/A         | #N/A | #N/A |
| YCR029C-A | #N/A                    | #N/A | #N/A         | #N/A | #N/A |
| YCR030C   | SYP1                    |      | 0 iYCR030C   | 1.04 | 0.45 |
| YCR031C   | RPS14A CRY1 RPL59       |      | iYCR031C     | 0.41 | 0.07 |
| YCR032W   | BPH1                    |      | 0 iSNR189    | 1.40 | 0.63 |
| YCR033W   | SNT1                    |      | 0 iYCR032W   | 1.48 | 0.66 |

|         |                        |                    |            |      |      |
|---------|------------------------|--------------------|------------|------|------|
| YCR034W | FEN1                   | ELO2 GNS1 VBM2     | iYCR033W   | 0.96 | 0.40 |
| YCR035C | RRP43                  |                    | 0 iYCR035C | 2.55 | 0.94 |
| YCR036W | RBK1                   |                    | 0 iYCR035C | 2.55 | 0.94 |
| YCR037C | PHO87                  |                    | 0 iYCR037C | 0.80 | 0.31 |
| YCR038C | BUD5                   |                    | 0 iYCR038C | 0.82 | 0.32 |
| YCR039C | MATALP ALPHA2 HMLALPHA |                    | iYCR039C   | #N/A | #N/A |
| YCR040W | MATALP ALPHA1 HMLALPHA |                    | iYCR039C   | #N/A | #N/A |
| YCR041W | 0                      | #N/A               | iYCR039C   | #N/A | #N/A |
| YCR042C | TAF2                   | TAF150 TSM1 TafII1 | iYCR042C   | 1.29 | 0.57 |
| YCR043C | 0                      | #N/A               | iYCR043C   | #N/A | #N/A |
| YCR044C | PER1                   | COS16              | iYCR044C   | 2.19 | 0.90 |
| YCR045C | 0                      | #N/A               | iYCR045C   | #N/A | #N/A |
| YCR046C | IMG1                   |                    | 0 iYCR046C | 2.34 | 0.90 |
| YCR047C | BUD23                  |                    | 0 iYCR047C | 2.37 | 0.91 |
| YCR048W | ARE1                   | SAT2               | iYCR047C   | 2.37 | 0.91 |
| YCR049C | 0                      | #N/A               | iYCR050C   | 1.80 | 0.79 |
| YCR050C | 0                      | #N/A               | iYCR050C   | 1.80 | 0.79 |
| YCR051W | 0                      | #N/A               | iYCR050C   | 1.80 | 0.79 |
| YCR052W | RSC6                   |                    | 0 iYCR051W | 2.18 | 0.88 |
| YCR053W | THR4                   |                    | 0 iYCR052W | 2.09 | 0.87 |
| YCR054C | CTR86                  |                    | 0 iYCR054C | 1.00 | 0.43 |
| YCR055C | #N/A                   | #N/A               | #N/A       | #N/A | #N/A |
| YCR056W | #N/A                   | #N/A               | #N/A       | #N/A | #N/A |
| YCR057C | PWP2                   | UTP1               | iYCR057C   | 2.35 | 0.91 |
| YCR058C | #N/A                   | #N/A               | #N/A       | #N/A | #N/A |
| YCR059C | YIH1                   |                    | 0 iYCR059C | 2.05 | 0.87 |
| YCR060W | 0                      |                    | 0 iYCR059C | 2.05 | 0.87 |
| YCR061W | 0                      | #N/A               | iYCR060W   | 0.59 | 0.18 |
| YCR062W | #N/A                   | #N/A               | iYCR060W   | 0.59 | 0.18 |
| YCR063W | BUD31                  | CWC14              | iYCR062W   | #N/A | #N/A |
| YCR064C | 0                      | #N/A               | iYCR063W   | 0.36 | 0.05 |
| YCR065W | HCM1                   |                    | 0 iYCR063W | 0.36 | 0.05 |
| YCR066W | RAD18                  |                    | 0 iYCR065W | 1.18 | 0.52 |
| YCR067C | SED4                   |                    | 0 iYCR067C | 1.58 | 0.71 |
| YCR068W | CVT17                  | AUT5 CVT17         | iYCR067C   | 1.58 | 0.71 |
| YCR069W | CPR4                   | CYP4 SCC3          | iYCR068W   | 3.14 | 0.97 |
| YCR070W | #N/A                   | #N/A               | #N/A       | #N/A | #N/A |
| YCR071C | IMG2                   |                    | 0 iYCR071C | 2.82 | 0.95 |
| YCR072C | 0                      | #N/A               | iYCR072C   | 1.97 | 0.84 |
| YCR073C | SSK22                  |                    | 0 iYCR073C | 3.37 | 0.99 |
| YCR074C | #N/A                   | #N/A               | #N/A       | #N/A | #N/A |
| YCR075C | ERS1                   |                    | 0 iYCR075C | 2.32 | 0.92 |
| YCR076C | 0                      | #N/A               | iYCR076C   | #N/A | #N/A |
| YCR077C | PAT1                   | MRT1               | iYCR077C   | 4.11 | 1.00 |
| YCR079W | 0                      | #N/A               | iYCR077C   | 4.11 | 1.00 |
| YCR080W | #N/A                   | #N/A               | #N/A       | #N/A | #N/A |
| YCR081W | SRB8                   | GIG1 NUT6 SSN5     | iYCR079W   | 1.19 | 0.51 |
| YCR082W | 0                      |                    | 0 iYCR081W | #N/A | #N/A |
| YCR083W | TRX3                   |                    | 0 iYCR082W | 2.00 | 0.84 |
| YCR084C | TUP1                   | AAR1 AER2 AMM1 C   | iYCR084C   | 1.51 | 0.68 |
| YCR085W | 0                      | #N/A               | iYCR084C   | 1.51 | 0.68 |



|          |       |                 |   |            |      |      |
|----------|-------|-----------------|---|------------|------|------|
| YCR086W  | CSM1  |                 | 0 | iYCR085W   | 1.94 | 0.81 |
| YCR087W  | 0     | #N/A            |   | iYCR085W   | 1.94 | 0.81 |
| YCR088W  | ABP1  |                 | 0 | iYCR087C-A | 2.18 | 0.89 |
| YCR089W  | FIG2  |                 | 0 | iYCR088W   | 1.20 | 0.53 |
| YCR090C  | 0     | #N/A            |   | iYCR090C-0 | #N/A | #N/A |
| YCR091W  | KIN82 |                 | 0 | iYCR090C-1 | 1.58 | 0.71 |
| YCR092C  | MSH3  |                 | 0 | iYCR092C   | 1.80 | 0.79 |
| YCR093W  | CDC39 | NOT1 ROS1 SMD6  |   | iYCR092C   | 1.80 | 0.79 |
| YCR094W  | CDC50 |                 | 0 | iYCR093W   | 1.76 | 0.74 |
| YCR095C  | 0     | #N/A            |   | iYCR095C-0 | 1.63 | 0.73 |
| YCR096C  | HMRA2 | A2 MATA2        |   | iYCR096C   | 0.49 | 0.12 |
| YCR097WA | #N/A  | #N/A            |   | #N/A       | #N/A | #N/A |
| YCR097WB | #N/A  | #N/A            |   | #N/A       | #N/A | #N/A |
| YCR098C  | GIT1  |                 | 0 | iYCR098C-0 | 2.43 | 0.93 |
| YCR099C  | 0     | #N/A            |   | iYCR100C   | 0.73 | 0.26 |
| YCR100C  | 0     | #N/A            |   | iYCR100C   | 0.73 | 0.26 |
| YCR101C  | 0     | #N/A            |   | iYCR101C   | 1.86 | 0.82 |
| YCR102C  | 0     | #N/A            |   | iYCR102C   | 1.41 | 0.64 |
| YCR103C  | #N/A  | #N/A            |   | iYCR103C   | 0.77 | 0.30 |
| YCR104W  | PAU3  |                 | 0 | iYCR103C   | 0.77 | 0.30 |
| YCR105W  | 0     | ADHVII          |   | iYCR104W   | 0.67 | 0.23 |
| YCR106W  | RDS1  |                 | 0 | iYCR105W   | #N/A | #N/A |
| YCR107W  | AAD3  |                 | 0 | iYCR106W   | 0.52 | 0.14 |
| YCRX01W  | #N/A  | #N/A            |   | #N/A       | #N/A | #N/A |
| YCRX02C  | #N/A  | #N/A            |   | #N/A       | #N/A | #N/A |
| YCRX03C  | #N/A  | #N/A            |   | #N/A       | #N/A | #N/A |
| YCRX04W  | #N/A  | #N/A            |   | #N/A       | #N/A | #N/A |
| YCRX05W  | #N/A  | #N/A            |   | #N/A       | #N/A | #N/A |
| YCRX06W  | #N/A  | #N/A            |   | #N/A       | #N/A | #N/A |
| YCRX07W  | #N/A  | #N/A            |   | #N/A       | #N/A | #N/A |
| YCRX08W  | #N/A  | #N/A            |   | #N/A       | #N/A | #N/A |
| YCRX09C  | #N/A  | #N/A            |   | #N/A       | #N/A | #N/A |
| YCRX10W  | #N/A  | #N/A            |   | #N/A       | #N/A | #N/A |
| YCRX11W  | #N/A  | #N/A            |   | #N/A       | #N/A | #N/A |
| YCRX12W  | #N/A  | #N/A            |   | #N/A       | #N/A | #N/A |
| YCRX13W  | #N/A  | #N/A            |   | #N/A       | #N/A | #N/A |
| YCRX14W  | #N/A  | #N/A            |   | #N/A       | #N/A | #N/A |
| YCRX15W  | #N/A  | #N/A            |   | #N/A       | #N/A | #N/A |
| YCRX16C  | #N/A  | #N/A            |   | #N/A       | #N/A | #N/A |
| YCRX17W  | #N/A  | #N/A            |   | #N/A       | #N/A | #N/A |
| YCRX18C  | #N/A  | #N/A            |   | #N/A       | #N/A | #N/A |
| YCRX19W  | #N/A  | #N/A            |   | #N/A       | #N/A | #N/A |
| YCRX20C  | #N/A  | #N/A            |   | #N/A       | #N/A | #N/A |
| YCRX21C  | #N/A  | #N/A            |   | #N/A       | #N/A | #N/A |
| YDL001W  | 0     |                 | 0 | iYDL002C   | 0.92 | 0.38 |
| YDL002C  | NHP10 | HMO2            |   | iYDL002C   | 0.92 | 0.38 |
| YDL003W  | MCD1  | PDS3 RHC21 SCC1 |   | iYDL004W   | 1.15 | 0.51 |
| YDL004W  | ATP16 |                 | 0 | iYDL005C   | 1.76 | 0.78 |
| YDL005C  | MED2  |                 | 0 | iYDL005C   | 1.76 | 0.78 |
| YDL006W  | PTC1  | CWH47 KCS2 TPD1 |   | iYDL007W   | 0.90 | 0.37 |
| YDL007W  | RPT2  | YHS4 YTA5       |   | itS(AGA)D1 | 1.21 | 0.54 |

|         |       |                           |       |              |      |      |
|---------|-------|---------------------------|-------|--------------|------|------|
| YDL008W | APC11 |                           | 0     | iYDL009C     | 0.95 | 0.40 |
| YDL009C |       | 0                         | #N/A  | iYDL009C     | 0.95 | 0.40 |
| YDL010W |       | 0                         | #N/A  | iYDL012C     | 2.03 | 0.86 |
| YDL011C |       | 0                         | #N/A  | iYDL009C     | 0.95 | 0.40 |
| YDL012C |       | 0                         | #N/A  | iYDL012C     | 2.03 | 0.86 |
| YDL013W | HEX3  | SLX5                      |       | iYDL014W     | 1.71 | 0.75 |
| YDL014W | NOP1  | LOT3                      |       | iYDL015C     | 1.04 | 0.45 |
| YDL015C | TSC13 |                           | 0     | iYDL015C     | 1.04 | 0.45 |
| YDL016C |       | 0                         | #N/A  | iYDL016C     | 0.54 | 0.15 |
| YDL017W | CDC7  | LSD6 SAS1                 |       | iYDL018C     | 2.02 | 0.86 |
| YDL018C | ERP3  |                           | 0     | iYDL018C     | 2.02 | 0.86 |
| YDL019C | OSH2  |                           | 0     | iYDL019C     | #N/A | #N/A |
| YDL020C | RPN4  | SON1 UFD5                 |       | iYDL020C     | 1.37 | 0.61 |
| YDL021W | GPM2  |                           | 0     | iYDL022W     | 0.81 | 0.32 |
| YDL022W | GPD1  | DAR1 HOR1 OSG1 CitA(AGC)D |       |              | 0.49 | 0.12 |
| YDL023C |       | 0                         | 0     | iYDL022W     | 0.81 | 0.32 |
| YDL024C | DIA3  |                           | 0     | iYDL024C     | 0.97 | 0.41 |
| YDL025C |       | 0                         | #N/A  | iYDL025C     | 2.00 | 0.85 |
| YDL026W |       | 0                         | #N/A  | iYDL028C     | 2.32 | 0.91 |
| YDL027C |       | 0                         | #N/A  | iYDL026W     | 1.42 | 0.63 |
| YDL028C | MPS1  | RPK1                      |       | iYDL028C     | 2.32 | 0.91 |
| YDL029W | ARP2  | ACT2                      |       | iYDL030W     | 1.65 | 0.72 |
| YDL030W | PRP9  |                           | 0     | iYDL031W     | 1.71 | 0.75 |
| YDL031W | DBP10 |                           | 0     | iYDL032W     | #N/A | #N/A |
| YDL032W |       | 0                         | #N/A  | iYDL034W     | 1.11 | 0.49 |
| YDL033C |       | 0                         |       | 0 iYDL032W   | #N/A | #N/A |
| YDL034W |       | 0                         | #N/A  | iYDL036C     | 1.15 | 0.50 |
| YDL035C | GPR1  |                           | 0     | iYDL034W     | 1.11 | 0.49 |
| YDL036C |       | 0                         | #N/A  | iYDL036C     | 1.15 | 0.50 |
| YDL037C |       | 0                         |       | 0 iYDL037C-0 | 1.22 | 0.54 |
| YDL038C |       | 0                         | #N/A  | iYDL038C     | #N/A | #N/A |
| YDL039C | PRM7  |                           | 0     | iYDL038C     | #N/A | #N/A |
| YDL040C | NAT1  | AAA1                      |       | iYDL040C     | 1.95 | 0.84 |
| YDL041W | KRE26 |                           | #N/A  | iYDL043C     | #N/A | #N/A |
| YDL042C | SIR2  |                           | 38047 | iYDL041W     | #N/A | #N/A |
| YDL043C | PRP11 | RNA11                     |       | iYDL043C     | #N/A | #N/A |
| YDL044C | MTF2  | NAM1                      |       | iYDL044C     | 1.21 | 0.53 |
| YDL045C | FAD1  |                           | 0     | iYDL045C     | 1.86 | 0.77 |
| YDL046W |       | 0                         |       | 0 iYDL047W   | #N/A | #N/A |
| YDL047W | SIT4  | LGN4                      |       | iYDL048C-1   | 0.48 | 0.11 |
| YDL048C | STP4  |                           | 0     | iYDL048C-0   | 0.81 | 0.32 |
| YDL049C | KNH1  |                           | 0     | iYDL049C     | #N/A | #N/A |
| YDL050C |       | 0                         | #N/A  | iYDL050C     | #N/A | #N/A |
| YDL051W | LHP1  | LAH1 YLA1                 |       | iYDL052C     | 1.49 | 0.67 |
| YDL052C | SLC1  |                           | 0     | iYDL052C     | 1.49 | 0.67 |
| YDL053C |       | 0                         |       | 0 iYDL053C   | 1.17 | 0.51 |
| YDL054C | MCH1  |                           | 0     | iYDL054C     | #N/A | #N/A |
| YDL055C | PSA1  | MPG1 SRB1 VIG9            |       | iYDL055C-0   | 0.73 | 0.27 |
| YDL056W | MBP1  |                           | 0     | iYDL057W     | 2.29 | 0.92 |
| YDL057W |       | 0                         | #N/A  | iYDL058W     | 0.84 | 0.34 |
| YDL058W | USO1  | INT1                      |       | iYDL059C     | 2.22 | 0.90 |



|         |        |                  |   |          |      |      |
|---------|--------|------------------|---|----------|------|------|
| YDL059C | RAD59  |                  | 0 | iYDL059C | 2.22 | 0.90 |
| YDL060W | TSR1   |                  | 0 | iYDL061C | 0.46 | 0.10 |
| YDL061C | RPS29B | YS29B            |   | iYDL061C | 0.46 | 0.10 |
| YDL062W | 0      | #N/A             |   | iYDL064W | #N/A | #N/A |
| YDL063C | 0      | #N/A             |   | iYDL062W | 0.80 | 0.31 |
| YDL064W | UBC9   |                  | 0 | iYDL065C | 2.03 | 0.86 |
| YDL065C | PEX19  | PAS12            |   | iYDL065C | 2.03 | 0.86 |
| YDL066W | IDP1   |                  | 0 | iYDL067C | 1.77 | 0.78 |
| YDL067C | COX9   |                  | 0 | iYDL067C | 1.77 | 0.78 |
| YDL068W | 0      | #N/A             |   | iYDL070W | #N/A | #N/A |
| YDL069C | CBS1   |                  | 0 | iYDL068W | 1.38 | 0.61 |
| YDL070W | BDF2   |                  | 0 | iYDL072C | #N/A | #N/A |
| YDL071C | 0      | #N/A             |   | iYDL070W | #N/A | #N/A |
| YDL072C | 0      |                  | 0 | iYDL072C | #N/A | #N/A |
| YDL073W | 0      | #N/A             |   | iYDL074C | 2.36 | 0.92 |
| YDL074C | BRE1   |                  | 0 | iYDL074C | 2.36 | 0.92 |
| YDL075W | RPL31A | RPL34            |   | iYDL076C | 0.37 | 0.05 |
| YDL076C | 0      |                  | 0 | iYDL076C | 0.37 | 0.05 |
| YDL077C | VAM6   | CVT4 VPL18 VPL22 |   | iYDL077C | 1.58 | 0.71 |
| YDL078C | MDH3   |                  | 0 | iYDL078C | 1.53 | 0.69 |
| YDL079C | MRK1   |                  | 0 | iYDL079C | 3.19 | 0.99 |
| YDL080C | THI3   | KID1             |   | iYDL080C | 1.35 | 0.60 |
| YDL081C | RPP1A  | RPLA1            |   | iYDL081C | 1.01 | 0.44 |
| YDL082W | RPL13A |                  | 0 | iYDL083C | 0.21 | 0.01 |
| YDL083C | RPS16B |                  | 0 | iYDL083C | 0.21 | 0.01 |
| YDL084W | SUB2   |                  | 0 | iYDL085W | 1.66 | 0.73 |
| YDL085W | NDE2   | NDH2             |   | iYDL086W | 1.81 | 0.80 |
| YDL086W | 0      | #N/A             |   | iYDL087C | 2.81 | 0.95 |
| YDL087C | LUC7   | EPE1 EXM2        |   | iYDL087C | 2.81 | 0.95 |
| YDL088C | ASM4   | NUP59            |   | iYDL088C | #N/A | #N/A |
| YDL089W | 0      | #N/A             |   | iYDL090C | 1.55 | 0.70 |
| YDL090C | RAM1   | DPR1 FUS8 SCG2 S |   | iYDL090C | 1.55 | 0.70 |
| YDL091C | 0      |                  | 0 | iYDL091C | 1.82 | 0.80 |
| YDL092W | SRP14  |                  | 0 | iYDL093W | 2.58 | 0.95 |
| YDL093W | PMT5   |                  | 0 | iYDL095W | #N/A | #N/A |
| YDL094C | 0      | #N/A             |   | iYDL093W | 2.58 | 0.95 |
| YDL095W | PMT1   |                  | 0 | iYDL097C | 1.38 | 0.62 |
| YDL096C | 0      | #N/A             |   | iYDL095W | #N/A | #N/A |
| YDL097C | RPN6   | NAS4             |   | iYDL097C | 1.38 | 0.62 |
| YDL098C | SNU23  |                  | 0 | iYDL098C | 1.28 | 0.57 |
| YDL099W | 0      | #N/A             |   | iYDL100C | #N/A | #N/A |
| YDL100C | ARR4   |                  | 0 | iYDL100C | #N/A | #N/A |
| YDL101C | DUN1   |                  | 0 | iYDL101C | #N/A | #N/A |
| YDL102W | CDC2   | HPR6 POL3 TEX1   |   | iYDL103C | 1.74 | 0.77 |
| YDL103C | QRI1   | UAP1             |   | iYDL103C | 1.74 | 0.77 |
| YDL104C | QRI7   |                  | 0 | iYDL104C | #N/A | #N/A |
| YDL105W | QRI2   |                  | 0 | iYDL106C | 3.14 | 0.97 |
| YDL106C | PHO2   | BAS2 GRF10       |   | iYDL106C | 3.14 | 0.97 |
| YDL107W | MSS2   |                  | 0 | iYDL108W | 1.01 | 0.43 |
| YDL108W | KIN28  |                  | 0 | iYDL109C | 1.13 | 0.50 |
| YDL109C | 0      | #N/A             |   | iYDL109C | 1.13 | 0.50 |

|           |        |                 |            |      |      |
|-----------|--------|-----------------|------------|------|------|
| YDL110C   | 0      | #N/A            | iYDL110C   | 1.02 | 0.44 |
| YDL111C   | RRP42  |                 | 0 iYDL111C | 1.64 | 0.74 |
| YDL112W   | TRM3   |                 | 0 iYDL113C | #N/A | #N/A |
| YDL113C   | CVT20  | CVT20 SNX42     | iYDL113C   | #N/A | #N/A |
| YDL114W   | 0      | #N/A            | iYDL115C   | 1.72 | 0.76 |
| YDL115C   | IWR1   |                 | 0 iYDL115C | 1.72 | 0.76 |
| YDL116W   | NUP84  |                 | 0 iYDL117W | 1.93 | 0.83 |
| YDL117W   | CYK3   |                 | 0 iYDL118W | 1.31 | 0.58 |
| YDL118W   | 0      | #N/A            | iYDL120W   | 1.34 | 0.58 |
| YDL119C   | 0      | #N/A            | iYDL118W   | 1.31 | 0.58 |
| YDL120W   | YFH1   |                 | 0 iYDL121C | 3.18 | 0.93 |
| YDL121C   | 0      | #N/A            | iYDL121C   | 3.18 | 0.93 |
| YDL122W   | UBP1   |                 | 0 iYDL123W | 1.01 | 0.43 |
| YDL123W   | SNA4   |                 | 0 iYDL124W | 2.31 | 0.91 |
| YDL124W   | 0      | #N/A            | iYDL125C   | 0.78 | 0.30 |
| YDL125C   | HNT1   |                 | 0 iYDL125C | 0.78 | 0.30 |
| YDL126C   | CDC48  |                 | 0 iYDL126C | 1.07 | 0.46 |
| YDL127W   | PCL2   | CLN4            | iYDL128W   | 0.61 | 0.20 |
| YDL128W   | VCX1   | HUM1 MNR1       | iYDL129W   | 0.80 | 0.31 |
| YDL129W   | 0      | #N/A            | iYDL130W   | 1.57 | 0.71 |
| YDL130W   | RPP1B  | RPL44 RPLA3     | iYDL130W-A | #N/A | #N/A |
| YDL131W   | LYS21  |                 | 0 iYDL132W | #N/A | #N/A |
| YDL132W   | CDC53  |                 | 0 iYDL133W | 1.79 | 0.79 |
| YDL133W   | 0      | #N/A            | iYDL133C-A | 0.78 | 0.30 |
| YDL134C   | PPH21  | PPH1            | iYDL134C   | 1.03 | 0.44 |
| YDL134C-A | #N/A   | #N/A            | #N/A       | #N/A | #N/A |
| YDL135C   | RDI1   |                 | 0 iYDL135C | #N/A | #N/A |
| YDL136W   | RPL35B | SOS2            | iYDL137W   | 0.29 | 0.03 |
| YDL137W   | ARF2   |                 | 0 iYDL138W | 1.11 | 0.49 |
| YDL138W   | RGT2   |                 | 0 iYDL139C | 0.76 | 0.29 |
| YDL139C   | SCM3   |                 | 0 iYDL139C | 0.76 | 0.29 |
| YDL140C   | RPO21  | RPB1 RPB220 SUA | iYDL140C   | 1.20 | 0.53 |
| YDL141W   | BPL1   | ACC2            | iYDL142C   | 1.95 | 0.84 |
| YDL142C   | CRD1   | CLS1            | iYDL142C   | 1.95 | 0.84 |
| YDL143W   | CCT4   | TCP4            | iYDL144C   | 2.77 | 0.96 |
| YDL144C   | 0      | #N/A            | iYDL144C   | 2.77 | 0.96 |
| YDL145C   | COP1   | RET1 SEC33      | iYDL145C   | 3.13 | 0.97 |
| YDL146W   | 0      | #N/A            | iYDL147W   | 1.01 | 0.43 |
| YDL147W   | RPN5   | NAS5            | iYDL148C   | 1.84 | 0.80 |
| YDL148C   | NOP14  | UTP2            | iYDL148C   | 1.84 | 0.80 |
| YDL149W   | APG9   | APG9 AUT9 CVT7  | iYDL150W   | 1.62 | 0.72 |
| YDL150W   | RPC53  | RPC4            | iYDL152W   | 1.16 | 0.50 |
| YDL151C   | FYV3   |                 | 0 iYDL150W | 1.62 | 0.72 |
| YDL152W   | 0      | #N/A            | iYDL154W   | #N/A | #N/A |
| YDL153C   | SAS10  | UTP3            | iYDL152W   | 1.16 | 0.50 |
| YDL154W   | MSH5   |                 | 0 iYDL155W | 0.44 | 0.09 |
| YDL155W   | CLB3   |                 | 0 iYDL156W | 1.11 | 0.49 |
| YDL156W   | 0      | #N/A            | iYDL157C   | #N/A | #N/A |
| YDL157C   | 0      | #N/A            | iYDL157C   | #N/A | #N/A |
| YDL158C   | 0      | #N/A            | iYDL157C   | #N/A | #N/A |
| YDL159W   | STE7   |                 | 0 iYDL160C | 0.74 | 0.28 |

|         |        |            |      |              |      |      |
|---------|--------|------------|------|--------------|------|------|
| YDL160C | DHH1   |            | 0    | iYDL160C     | 0.74 | 0.28 |
| YDL161W | ENT1   |            |      | 0 iYDL163W   | #N/A | #N/A |
| YDL162C |        | 0          | #N/A | iYDL161W     | #N/A | #N/A |
| YDL163W |        | 0          | #N/A | iYDL165W     | 0.81 | 0.31 |
| YDL164C | CDC9   | MMS8       |      | iYDL163W     | #N/A | #N/A |
| YDL165W | CDC36  | DNA19 NOT2 |      | iYDL166C     | 1.11 | 0.49 |
| YDL166C | FAP7   |            |      | 0 iYDL166C   | 1.11 | 0.49 |
| YDL167C | NRP1   |            |      | 0 iYDL167C   | 1.89 | 0.82 |
| YDL168W | SFA1   | ADH5       |      | iYDL169C     | 1.45 | 0.65 |
| YDL169C | UGX2   |            |      | 0 iYDL169C   | 1.45 | 0.65 |
| YDL170W | UGA3   |            |      | 0 iYDL171C   | 1.42 | 0.64 |
| YDL171C | GLT1   |            |      | 0 iYDL171C   | 1.42 | 0.64 |
| YDL172C |        | 0          | #N/A | iYDL172C     | #N/A | #N/A |
| YDL173W |        | 0          | #N/A | iYDL174C     | #N/A | #N/A |
| YDL174C | DLD1   |            |      | 0 iYDL174C   | #N/A | #N/A |
| YDL175C | AIR2   |            |      | 0 iYDL175C   | #N/A | #N/A |
| YDL176W |        | 0          | #N/A | iYDL177C     | #N/A | #N/A |
| YDL177C |        | 0          | #N/A | iYDL177C     | #N/A | #N/A |
| YDL178W | DLD2   | AIP2       |      | iYDL179W     | 1.31 | 0.58 |
| YDL179W | PCL9   |            |      | 0 iYDL180W   | 1.91 | 0.82 |
| YDL180W |        | 0          | #N/A | iYDL181W     | 0.91 | 0.38 |
| YDL181W | INH1   |            |      | 0 iYDL182W   | 0.92 | 0.39 |
| YDL182W | LYS20  |            |      | 0 iYDL183C-1 | 0.51 | 0.13 |
| YDL183C |        | 0          | #N/A | iYDL183C-0   | 1.50 | 0.67 |
| YDL184C | RPL41A | RPL47A     |      | iYDL184C     | 0.30 | 0.03 |
| YDL185W | TFP1   | CLS8 VMA1  |      | iYDL186W     | 2.80 | 0.97 |
| YDL186W |        | 0          | #N/A | iYDL188C     | 2.17 | 0.85 |
| YDL187C |        | 0          | #N/A | iYDL186W     | 2.80 | 0.97 |
| YDL188C | PPH22  | PPH2       |      | iYDL188C     | 2.17 | 0.85 |
| YDL189W |        | 0          |      | 0 iYDL190C   | 3.17 | 0.97 |
| YDL190C | UFD2   |            |      | 0 iYDL190C   | 3.17 | 0.97 |
| YDL191W | RPL35A | SOS1       |      | iYDL192W     | 0.38 | 0.06 |
| YDL192W | ARF1   |            |      | 0 iYDL193W   | 0.89 | 0.36 |
| YDL193W |        | 0          | #N/A | iYDL194W     | 1.26 | 0.56 |
| YDL194W | SNF3   |            |      | 0 iYDL195W   | 2.04 | 0.86 |
| YDL195W | SEC31  | WEB1       |      | iYDL196W     | 2.89 | 0.97 |
| YDL196W |        | 0          | #N/A | iYDL197C     | 1.22 | 0.54 |
| YDL197C | ASF2   |            |      | 0 iYDL197C   | 1.22 | 0.54 |
| YDL198C | YHM1   | YHM1       |      | iYDL198C     | 1.24 | 0.55 |
| YDL199C |        | 0          | #N/A | iYDL199C     | 2.22 | 0.90 |
| YDL200C | MGT1   | MGMT       |      | iYDL200C     | 1.17 | 0.51 |
| YDL201W | TRM8   |            |      | 0 iYDL202W   | 1.78 | 0.77 |
| YDL202W | MRPL11 |            |      | 0 iYDL203C   | 3.51 | 0.99 |
| YDL203C |        | 0          | #N/A | iYDL203C     | 3.51 | 0.99 |
| YDL204W |        | 0          |      | 0 iYDL205C   | 1.85 | 0.81 |
| YDL205C | HEM3   |            |      | 0 iYDL205C   | 1.85 | 0.81 |
| YDL206W |        | 0          | #N/A | iYDL207W     | 1.55 | 0.70 |
| YDL207W | GLE1   | BRR3 RSS1  |      | iYDL208W     | 1.55 | 0.70 |
| YDL208W | NHP2   |            |      | 0 iYDL209C   | 2.35 | 0.92 |
| YDL209C | CWC2   | NTC40      |      | iYDL209C     | 2.35 | 0.92 |
| YDL210W | UGA4   |            |      | 0 itG(GCC)D1 | 1.62 | 0.73 |

|         |       |                 |              |      |      |
|---------|-------|-----------------|--------------|------|------|
| YDL211C | 0     | #N/A            | iYDL211C-0   | 1.27 | 0.57 |
| YDL212W | SHR3  | APF1            | iYDL213C     | 2.20 | 0.90 |
| YDL213C | FYV14 |                 | 0 iYDL213C   | 2.20 | 0.90 |
| YDL214C | PRR2  |                 | 0 iYDL214C   | 0.47 | 0.10 |
| YDL215C | GDH2  | GDH-B GDHB      | iYDL215C     | 2.61 | 0.95 |
| YDL216C | RRI1  | CSN5 JAB1       | iYDL216C     | 1.27 | 0.56 |
| YDL217C | TIM22 |                 | 0 iYDL217C   | 1.55 | 0.70 |
| YDL218W | 0     | #N/A            | iYDL219W     | 2.93 | 0.97 |
| YDL219W | DTD1  |                 | 0 iYDL220C   | #N/A | #N/A |
| YDL220C | CDC13 | EST4            | iYDL220C     | #N/A | #N/A |
| YDL221W | 0     | #N/A            | iYDL222C     | 1.63 | 0.73 |
| YDL222C | 0     |                 | 0 iYDL222C   | 1.63 | 0.73 |
| YDL223C | HBT1  |                 | 0 iYDL223C   | 1.13 | 0.49 |
| YDL224C | WHI4  |                 | 0 iYDL224C   | 1.18 | 0.52 |
| YDL225W | SHS1  | 38237           | iYDL226C     | 4.01 | 1.00 |
| YDL226C | GCS1  |                 | 0 iYDL226C   | 4.01 | 1.00 |
| YDL227C | HO    |                 | 0 iYDL227C-0 | 0.87 | 0.36 |
| YDL228C | 0     | #N/A            | iYDL228C     | 0.83 | 0.33 |
| YDL229W | SSB1  | YG101           | iYDL230W     | #N/A | #N/A |
| YDL230W | PTP1  |                 | 0 iYDL231C   | 2.45 | 0.93 |
| YDL231C | BRE4  |                 | 0 iYDL231C   | 2.45 | 0.93 |
| YDL232W | OST4  |                 | 0 iYDL233W   | 1.70 | 0.76 |
| YDL233W | 0     | #N/A            | iYDL234C     | 2.01 | 0.85 |
| YDL234C | GYP7  |                 | 0 iYDL234C   | 2.01 | 0.85 |
| YDL235C | YPD1  |                 | 0 iYDL235C   | 1.50 | 0.68 |
| YDL236W | PHO13 |                 | 0 iYDL237W   | #N/A | #N/A |
| YDL237W | 0     | #N/A            | iYDL238C     | 2.62 | 0.95 |
| YDL238C | 0     |                 | 0 iYDL238C   | 2.62 | 0.95 |
| YDL239C | ADY3  |                 | 0 iYDL239C   | #N/A | #N/A |
| YDL240W | LRG1  |                 | 0 iYDL241W-1 | 2.37 | 0.92 |
| YDL241W | 0     | #N/A            | iYDL242W     | 1.02 | 0.44 |
| YDL242W | 0     | #N/A            | iYDL243C     | 1.34 | 0.60 |
| YDL243C | AAD4  |                 | 0 iYDL243C   | 1.34 | 0.60 |
| YDL244W | THI13 |                 | 0 iYDL245C-1 | 2.05 | 0.86 |
| YDL245C | HXT15 |                 | 0 iYDL245C-0 | 0.84 | 0.34 |
| YDL246C | 0     |                 | 0 iYDL246C-0 | 1.39 | 0.62 |
| YDL247W | 0     |                 | 0 iYDL248W-1 | 1.32 | 0.59 |
| YDL248W | COS7  |                 | 0 #N/A       | #N/A | #N/A |
| YDR001C | NTH1  |                 | 0 iYDR001C   | 1.04 | 0.45 |
| YDR002W | YRB1  | CST20 HTN1 SFO1 | iYDR001C     | 1.04 | 0.45 |
| YDR003W | 0     |                 | 0 iYDR002W   | 0.69 | 0.24 |
| YDR004W | RAD57 |                 | 0 iYDR003W   | 1.01 | 0.43 |
| YDR005C | MAF1  |                 | 0 iYDR005C   | 1.31 | 0.59 |
| YDR006C | SOK1  |                 | 0 iYDR006C   | 1.30 | 0.58 |
| YDR007W | TRP1  |                 | 0 iYDR006C   | 1.30 | 0.58 |
| YDR008C | 0     | #N/A            | iYDR008C     | 1.29 | 0.57 |
| YDR009W | GAL3  |                 | 0 iYDR008C   | 1.29 | 0.57 |
| YDR010C | 0     | #N/A            | iYDR010C     | 0.50 | 0.12 |
| YDR011W | SNQ2  |                 | 0 iYDR010C   | 0.50 | 0.12 |
| YDR012W | RPL4B |                 | 0 iYDR011W   | 0.94 | 0.39 |
| YDR013W | 0     | CDC101          | iYDR012W     | #N/A | #N/A |

|         |        |                  |   |            |      |      |
|---------|--------|------------------|---|------------|------|------|
| YDR014W | RAD61  |                  | 0 | iYDR013W   | #N/A | #N/A |
| YDR015C | 0      | #N/A             |   | iYDR015C   | #N/A | #N/A |
| YDR016C | DAD1   |                  | 0 | iYDR016C   | 2.95 | 0.97 |
| YDR017C | KCS1   |                  | 0 | iYDR017C   | #N/A | #N/A |
| YDR018C | 0      | #N/A             |   | iYDR018C   | 1.04 | 0.45 |
| YDR019C | GCV1   | GSD1             |   | iYDR019C   | 0.88 | 0.36 |
| YDR020C | 0      | #N/A             |   | iYDR020C   | 1.51 | 0.68 |
| YDR021W | FAL1   |                  | 0 | iYDR020C   | 1.51 | 0.68 |
| YDR022C | CIS1   |                  | 0 | iYDR022C   | 0.92 | 0.36 |
| YDR023W | SES1   | SerRS            |   | itV(UAC)D  | 0.54 | 0.15 |
| YDR024W | FYV1   |                  | 0 | iYDR023W   | #N/A | #N/A |
| YDR025W | RPS11A |                  | 0 | iYDR023W   | #N/A | #N/A |
| YDR026C | 0      | #N/A             |   | iYDR026C   | 2.14 | 0.88 |
| YDR027C | LUV1   | CGP1 LUV1 TCS3   |   | iYDR027C   | 1.40 | 0.63 |
| YDR028C | REG1   | HEX2 PZF240 SPP4 |   | iYDR028C   | #N/A | #N/A |
| YDR029W | 0      | #N/A             |   | iYDR028C   | #N/A | #N/A |
| YDR030C | RAD28  |                  | 0 | iYDR030C   | 3.19 | 0.97 |
| YDR031W | 0      | #N/A             |   | iYDR030C   | 3.19 | 0.97 |
| YDR032C | PST2   |                  | 0 | iYDR032C-0 | 1.44 | 0.65 |
| YDR033W | MRH1   |                  | 0 | iYDR032C-2 | 0.62 | 0.20 |
| YDR034C | LYS14  |                  | 0 | iYDR034C   | 1.79 | 0.78 |
| YDR035W | ARO3   |                  | 0 | iYDR034W-E | 1.90 | 0.83 |
| YDR036C | 0      | MRP5             |   | iYDR036C   | 1.65 | 0.73 |
| YDR037W | KRS1   | GCD5             |   | iYDR036C   | 1.65 | 0.73 |
| YDR038C | ENA5   |                  | 0 | iYDR038C   | 1.39 | 0.62 |
| YDR039C | ENA2   |                  | 0 | iYDR039C   | #N/A | #N/A |
| YDR040C | ENA1   | HOR6 PMR2        |   | iYDR040C   | 1.01 | 0.43 |
| YDR041W | RSM10  |                  | 0 | iYDR040C   | 1.01 | 0.43 |
| YDR042C | 0      | #N/A             |   | iYDR042C   | 0.46 | 0.10 |
| YDR043C | NRG1   |                  | 0 | iYDR043C-0 | 0.70 | 0.25 |
| YDR044W | HEM13  |                  | 0 | iYDR043C-2 | 1.71 | 0.76 |
| YDR045C | RPC11  |                  | 0 | iYDR045C   | 1.30 | 0.58 |
| YDR046C | BAP3   | PAP1             |   | iYDR046C   | #N/A | #N/A |
| YDR047W | HEM12  | HEM6             |   | iYDR046C   | #N/A | #N/A |
| YDR048C | 0      | #N/A             |   | iYDR049W   | #N/A | #N/A |
| YDR049W | 0      | #N/A             |   | iYDR047W   | #N/A | #N/A |
| YDR050C | TPI1   |                  | 0 | iYDR050C   | 0.46 | 0.10 |
| YDR051C | 0      | #N/A             |   | iYDR051C   | 1.16 | 0.51 |
| YDR052C | DBF4   | LSD7             |   | iYDR053W   | 0.95 | 0.40 |
| YDR053W | 0      | #N/A             |   | iYDR051C   | 1.16 | 0.51 |
| YDR054C | CDC34  | DNA6 UBC3        |   | iYDR054C   | 0.93 | 0.39 |
| YDR055W | PST1   |                  | 0 | iYDR054C   | 0.93 | 0.39 |
| YDR056C | 0      | #N/A             |   | iYDR056C   | 1.91 | 0.83 |
| YDR057W | 0      |                  | 0 | iYDR056C   | 1.91 | 0.83 |
| YDR058C | TGL2   |                  | 0 | iYDR058C   | 0.74 | 0.28 |
| YDR059C | UBC5   |                  | 0 | iYDR059C   | #N/A | #N/A |
| YDR060W | MAK21  | NOC1             |   | iYDR059C   | #N/A | #N/A |
| YDR061W | 0      | #N/A             |   | iYDR060W   | 0.46 | 0.10 |
| YDR062W | LCB2   | SCS1 TSC1        |   | iYDR061W   | 1.38 | 0.62 |
| YDR063W | 0      | #N/A             |   | iYDR062W   | 0.83 | 0.33 |
| YDR064W | RPS13  | RPS13B RPS13C    |   | iYDR063W   | 0.32 | 0.04 |

|         |        |                  |             |      |      |
|---------|--------|------------------|-------------|------|------|
| YDR065W | 0      | #N/A             | iYDR064W    | #N/A | #N/A |
| YDR066C | 0      | #N/A             | iYDR066C    | 1.20 | 0.53 |
| YDR067C | 0      | #N/A             | iYDR067C    | 2.64 | 0.82 |
| YDR068W | DOS2   |                  | 0 iYDR067C  | 2.64 | 0.82 |
| YDR069C | DOA4   | DOS1 MUT4 NPI2 S | iYDR069C    | 2.54 | 0.94 |
| YDR070C | 0      |                  | 0 iYDR070C  | 1.23 | 0.54 |
| YDR071C | 0      |                  | 0 iYDR071C  | 0.78 | 0.30 |
| YDR072C | IPT1   | SYR4             | iYDR072C    | #N/A | #N/A |
| YDR073W | SNF11  |                  | 0 iYDR072C  | #N/A | #N/A |
| YDR074W | TPS2   | HOG2 PFK3        | iYDR073W    | 1.19 | 0.52 |
| YDR075W | PPH3   |                  | 0 iYDR074W  | 2.05 | 0.83 |
| YDR076W | RAD55  |                  | 0 iYDR075W  | #N/A | #N/A |
| YDR077W | SED1   |                  | 0 iYDR076W  | 0.23 | 0.01 |
| YDR078C | SHU2   |                  | 0 iYDR078C  | 1.69 | 0.75 |
| YDR079W | PET100 |                  | 0 iYDR078C  | 1.69 | 0.75 |
| YDR080W | VPS41  | CVT8 FET2 SVL2 V | iYDR079W    | 1.76 | 0.78 |
| YDR081C | PDC2   |                  | 0 iYDR081C  | 2.58 | 0.95 |
| YDR082W | STN1   |                  | 0 iYDR081C  | 2.58 | 0.95 |
| YDR083W | RRP8   |                  | 0 iYDR082W  | #N/A | #N/A |
| YDR084C | 0      |                  | 0 iYDR084C  | 2.26 | 0.86 |
| YDR085C | AFR1   |                  | 0 iYDR085C  | 0.91 | 0.38 |
| YDR086C | SSS1   |                  | 0 iYDR086C  | 0.93 | 0.39 |
| YDR087C | RRP1   |                  | 0 iYDR087C  | 1.46 | 0.65 |
| YDR088C | SLU7   | SLT17            | iYDR088C    | 1.34 | 0.60 |
| YDR089W | 0      | #N/A             | itR(ACG)D-1 | 0.72 | 0.27 |
| YDR090C | 0      | #N/A             | iYDR090C    | 1.11 | 0.48 |
| YDR091C | RLI1   |                  | 0 iYDR091C  | 1.53 | 0.68 |
| YDR092W | UBC13  |                  | 0 iYDR091C  | 1.53 | 0.68 |
| YDR093W | DNF2   |                  | 0 iYDR092W  | 0.75 | 0.28 |
| YDR094W | 0      | #N/A             | iYDR092W    | 0.75 | 0.28 |
| YDR095C | 0      | #N/A             | iYDR095C    | 0.98 | 0.42 |
| YDR096W | GIS1   |                  | 0 iYDR095C  | 0.98 | 0.42 |
| YDR097C | MSH6   | PMS3             | iYDR097C    | 1.31 | 0.59 |
| YDR098C | GRX3   |                  | 0 iYDR098C  | #N/A | #N/A |
| YDR099W | BMH2   | SCD3             | iYDRcdelta9 | #N/A | #N/A |
| YDR100W | 0      |                  | 0 iYDR099W  | 0.74 | 0.28 |
| YDR101C | ARX1   |                  | 0 iYDR101C  | 0.90 | 0.37 |
| YDR102C | 0      | #N/A             | iYDR102C    | 1.08 | 0.47 |
| YDR103W | STE5   | HMD3 NUL3        | iYDR102C    | 1.08 | 0.47 |
| YDR104C | SPO71  |                  | 0 iYDR104C  | 1.43 | 0.65 |
| YDR105C | 0      |                  | 0 iYDR105C  | 2.81 | 0.96 |
| YDR106W | ARP10  |                  | 0 iYDR105C  | 2.81 | 0.96 |
| YDR107C | 0      | #N/A             | iYDR107C    | 3.21 | 0.97 |
| YDR108W | GSG1   | TRS85            | iYDR107C    | 3.21 | 0.97 |
| YDR109C | 0      | #N/A             | iYDR109C    | 2.11 | 0.88 |
| YDR110W | FOB1   | HRM1             | iYDR109C    | 2.11 | 0.88 |
| YDR111C | 0      |                  | 0 iYDR112W  | 1.28 | 0.57 |
| YDR112W | 0      | #N/A             | iYDR110W    | 0.77 | 0.29 |
| YDR113C | PDS1   |                  | 0 iYDR113C  | 1.75 | 0.76 |
| YDR114C | 0      | #N/A             | iYDR115W    | #N/A | #N/A |
| YDR115W | 0      | #N/A             | iYDR113C    | 1.75 | 0.76 |



|         |       |                    |   |          |      |      |
|---------|-------|--------------------|---|----------|------|------|
| YDR116C | 0     |                    | 0 | iYDR116C | 1.36 | 0.61 |
| YDR117C | 0     | #N/A               |   | iYDR117C | 2.17 | 0.80 |
| YDR118W | APC4  |                    | 0 | iYDR117C | 2.17 | 0.80 |
| YDR119W | 0     | #N/A               |   | iYDR118W | 1.03 | 0.44 |
| YDR120C | TRM1  |                    | 0 | iYDR120C | 2.29 | 0.92 |
| YDR121W | DPB4  |                    | 0 | iYDR120C | 2.29 | 0.92 |
| YDR122W | KIN1  |                    | 0 | iYDR121W | 2.12 | 0.88 |
| YDR123C | INO2  | DIE1 SCS1          |   | iYDR123C | 0.94 | 0.39 |
| YDR124W | 0     | #N/A               |   | iYDR123C | 0.94 | 0.39 |
| YDR125C | ECM18 |                    | 0 | iYDR125C | 1.45 | 0.63 |
| YDR126W | PSL10 | PSL10              |   | iYDR125C | 1.45 | 0.63 |
| YDR127W | ARO1  |                    | 0 | iYDR126W | #N/A | #N/A |
| YDR128W | 0     | #N/A               |   | iYDR127W | #N/A | #N/A |
| YDR129C | SAC6  | ABP67              |   | iYDR129C | 1.31 | 0.59 |
| YDR130C | FIN1  |                    | 0 | iYDR130C | 3.32 | 0.95 |
| YDR131C | 0     | #N/A               |   | iYDR131C | 1.32 | 0.58 |
| YDR132C | 0     | #N/A               |   | iYDR132C | #N/A | #N/A |
| YDR133C | 0     | #N/A               |   | iYDR134C | 0.27 | 0.02 |
| YDR134C | 0     | #N/A               |   | iYDR134C | 0.27 | 0.02 |
| YDR135C | YCF1  |                    | 0 | iYDR135C | 2.95 | 0.95 |
| YDR136C | VPS61 |                    | 0 | iYDR137W | 1.39 | 0.63 |
| YDR137W | RGP1  |                    | 0 | iYDR135C | 2.95 | 0.95 |
| YDR138W | HPR1  |                    | 0 | iYDR137W | 1.39 | 0.63 |
| YDR139C | RUB1  |                    | 0 | iYDR139C | 1.90 | 0.82 |
| YDR140W | FYV9  | #N/A               |   | iYDR139C | 1.90 | 0.82 |
| YDR141C | DOP1  |                    | 0 | iYDR141C | 1.67 | 0.74 |
| YDR142C | PEX7  | PAS7 PEB1          |   | iYDR142C | 1.06 | 0.46 |
| YDR143C | SAN1  |                    | 0 | iYDR143C | 1.58 | 0.71 |
| YDR144C | MKC7  | YPS2               |   | iYDR144C | 2.00 | 0.85 |
| YDR145W | TAF12 | TAF61 TAF68 TafII6 |   | iYDR144C | 2.00 | 0.85 |
| YDR146C | SWI5  |                    | 0 | iYDR146C | 0.97 | 0.41 |
| YDR147W | EKI1  |                    | 0 | iYDR146C | 0.97 | 0.41 |
| YDR148C | KGD2  |                    | 0 | iYDR148C | 2.26 | 0.91 |
| YDR149C | 0     | #N/A               |   | iYDR150W | 0.70 | 0.25 |
| YDR150W | NUM1  | PAC12              |   | iYDR148C | 2.26 | 0.91 |
| YDR151C | CTH1  |                    | 0 | iYDR151C | 1.19 | 0.52 |
| YDR152W | 0     |                    | 0 | iYDR151C | 1.19 | 0.52 |
| YDR153C | 0     |                    | 0 | iYDR153C | 0.38 | 0.06 |
| YDR154C | 0     | #N/A               |   | iYDR155C | 0.42 | 0.08 |
| YDR155C | CPR1  | CPH1 CYP1          |   | iYDR155C | 0.42 | 0.08 |
| YDR156W | RPA14 |                    | 0 | iYDR155C | 0.42 | 0.08 |
| YDR157W | 0     | #N/A               |   | iYDR155C | 0.42 | 0.08 |
| YDR158W | HOM2  |                    | 0 | iYDR155C | 0.42 | 0.08 |
| YDR159W | SAC3  | LEP1               |   | iYDR158W | 1.83 | 0.80 |
| YDR160W | SSY1  | SHR10              |   | iYDR159W | #N/A | #N/A |
| YDR161W | TCI1  | #N/A               |   | iYDR160W | 1.08 | 0.47 |
| YDR162C | NBP2  |                    | 0 | iYDR162C | 1.71 | 0.76 |
| YDR163W | CWC15 |                    | 0 | iYDR162C | 1.71 | 0.76 |
| YDR164C | SEC1  |                    | 0 | iYDR164C | 2.43 | 0.90 |
| YDR165W | TRM82 |                    | 0 | iYDR164C | 2.43 | 0.90 |
| YDR166C | SEC5  |                    | 0 | iYDR166C | 2.85 | 0.97 |

|           |        |                    |              |      |      |
|-----------|--------|--------------------|--------------|------|------|
| YDR167W   | TAF10  | TAF23 TAF25 TafII2 | iYDR166C     | 2.85 | 0.97 |
| YDR168W   | CDC37  | SMO1               | iYDR167W     | 1.58 | 0.70 |
| YDR169C   | STB3   |                    | 0 iYDR169C-0 | 1.84 | 0.80 |
| YDR170C   | SEC7   |                    | 0 iYDR170C   | 0.91 | 0.38 |
| YDR171W   | HSP42  |                    | 0 iYDR170W-/ | #N/A | #N/A |
| YDR172W   | SUP35  | GST1 PNM2 SAL3 S   | iYDR171W     | 1.12 | 0.49 |
| YDR173C   | ARG82  | ARGR3 IPK2         | iYDR173C     | 0.79 | 0.30 |
| YDR174W   | HMO1   | HSM2               | iYDR173C     | 0.79 | 0.30 |
| YDR175C   | RSM24  |                    | 0 iYDR175C   | 1.68 | 0.75 |
| YDR176W   | NGG1   | ADA3 SWI7          | iYDR175C     | 1.68 | 0.75 |
| YDR177W   | UBC1   |                    | 0 iYDR176W   | 1.90 | 0.82 |
| YDR178W   | SDH4   | ACN18              | iYDR177W     | 2.18 | 0.90 |
| YDR179C   | 0      |                    | 0 iYDR179C   | 1.46 | 0.66 |
| YDR179W-A | 0      | #N/A               | iYDR179C     | 1.46 | 0.66 |
| YDR180W   | SCC2   |                    | 0 iYDR179W-/ | 2.06 | 0.86 |
| YDR181C   | SAS4   |                    | 0 iYDR181C   | 1.77 | 0.78 |
| YDR182W   | CDC1   | DSC1 DSR1 ESP2     | iYDR181C     | 1.77 | 0.78 |
| YDR183W   | PLP1   |                    | 0 iYDR182W   | 1.09 | 0.48 |
| YDR184C   | ATC1   | LIC4               | iYDR184C     | #N/A | #N/A |
| YDR185C   | 0      | #N/A               | iYDR185C     | 0.98 | 0.41 |
| YDR186C   | 0      | #N/A               | iYDR186C     | 0.58 | 0.18 |
| YDR187C   | 0      | #N/A               | iYDR188W     | 1.00 | 0.42 |
| YDR188W   | CCT6   | HTR3 TCP20 TCP6    | iYDR186C     | 0.58 | 0.18 |
| YDR189W   | SLY1   |                    | 0 iYDR188W   | 1.00 | 0.42 |
| YDR190C   | RVB1   | TIH1 TIP49A        | iYDR190C     | 1.42 | 0.64 |
| YDR191W   | HST4   |                    | 0 iYDR190C   | 1.42 | 0.64 |
| YDR192C   | NUP42  | RIP1 UIP1          | iYDR193W     | 1.25 | 0.55 |
| YDR193W   | 0      | #N/A               | iYDR191W     | #N/A | #N/A |
| YDR194C   | MSS116 |                    | 0 iYDR194C   | #N/A | #N/A |
| YDR195W   | REF2   |                    | 0 iYDR194C   | #N/A | #N/A |
| YDR196C   | 0      | #N/A               | iYDR196C     | #N/A | #N/A |
| YDR197W   | CBS2   | CBP7               | iYDR196C     | #N/A | #N/A |
| YDR198C   | 0      | #N/A               | iYDR198C     | #N/A | #N/A |
| YDR199W   | 0      | #N/A               | iYDR198C     | #N/A | #N/A |
| YDR200C   | VPS64  | FAR9               | iYDR200C     | 2.46 | 0.92 |
| YDR201W   | SPC19  |                    | 0 iYDR200C   | 2.46 | 0.92 |
| YDR202C   | RAV2   |                    | 0 iYDR203W   | #N/A | #N/A |
| YDR203W   | 0      | #N/A               | iYDR201W     | #N/A | #N/A |
| YDR204W   | COQ4   |                    | 0 iYDR203W   | #N/A | #N/A |
| YDR205W   | MSC2   |                    | 0 iYDR204W   | 2.40 | 0.93 |
| YDR206W   | EBS1   |                    | 0 iYDR205W   | 2.04 | 0.84 |
| YDR207C   | UME6   | CAR80 NIM2 RIM16   | iYDR207C     | 1.91 | 0.83 |
| YDR208W   | MSS4   |                    | 0 iYDR207C   | 1.91 | 0.83 |
| YDR209C   | 0      | #N/A               | iYDR210W     | #N/A | #N/A |
| YDR210W   | 0      | #N/A               | iYDR208W     | #N/A | #N/A |
| YDR211W   | GCD6   |                    | 0 itl(UAU)D  | 1.30 | 0.58 |
| YDR212W   | TCP1   | CCT1               | iYDR211W     | 1.49 | 0.66 |
| YDR213W   | UPC2   | MOX4               | iYDR212W     | 1.25 | 0.56 |
| YDR214W   | AHA1   |                    | 0 iYDR213W   | 0.76 | 0.29 |
| YDR215C   | 0      | #N/A               | iYDR215C     | 0.92 | 0.37 |
| YDR216W   | ADR1   |                    | 0 iYDR215C   | 0.92 | 0.37 |



|         |       |                 |      |            |          |      |      |
|---------|-------|-----------------|------|------------|----------|------|------|
| YDR217C | RAD9  |                 | 0    | iYDR217C   | 1.76     | 0.78 |      |
| YDR218C | SPR28 |                 | 0    | iYDR218C   | 0.67     | 0.24 |      |
| YDR219C |       | 0               | #N/A | iYDR219C   | 1.28     | 0.56 |      |
| YDR220C |       | 0               | #N/A | iYDR221W   | 0.58     | 0.18 |      |
| YDR221W |       | 0               | #N/A | iYDR219C   | 1.28     | 0.56 |      |
| YDR222W |       | 0               | #N/A | iYDR221W   | 0.58     | 0.18 |      |
| YDR223W |       | 0               | #N/A | iYDR222W   | 1.35     | 0.60 |      |
| YDR224C | HTB1  | SPT12           |      | iYDR224C   | 0.54     | 0.15 |      |
| YDR225W | HTA1  | H2A1 SPT11      |      | iYDR224C   | 0.54     | 0.15 |      |
| YDR226W | ADK1  | AKY1 AKY2       |      | iYDR225W   | 0.56     | 0.16 |      |
| YDR227W | SIR4  | ASD1 STE9 UTH2  |      | iYDR226W   | 1.00     | 0.43 |      |
| YDR228C | PCF11 |                 | 0    | iYDR228C   | 2.10     | 0.88 |      |
| YDR229W |       |                 | 0    | iYDR228C   | 2.10     | 0.88 |      |
| YDR230W |       |                 | 0    | #N/A       | #N/A     | #N/A |      |
| YDR231C | COX20 |                 |      | 0          | iYDR231C | 1.20 | 0.53 |
| YDR232W | HEM1  | CYD1            |      | iYDR231C   | 1.20     | 0.53 |      |
| YDR233C |       |                 | 0    | iYDR233C   | 0.45     | 0.09 |      |
| YDR234W | LYS4  | LYS3            |      | iYDR233C   | 0.45     | 0.09 |      |
| YDR235W | PRP42 | MUD16 SNU65     |      | iYDR234W   | 1.64     | 0.73 |      |
| YDR236C | FMN1  |                 | 0    | iYDR236C   | 2.73     | 0.96 |      |
| YDR237W | MRPL7 | YmL5/7          |      | iYDR236C   | 2.73     | 0.96 |      |
| YDR238C | SEC26 |                 | 0    | iYDR238C   | 1.80     | 0.74 |      |
| YDR239C |       |                 | 0    | #N/A       | 1.49     | 0.65 |      |
| YDR240C | SNU56 | MUD10           |      | YDRWdelta  | #N/A     | #N/A |      |
| YDR241W | BUD26 |                 | 0    | iYDR239C   | 1.49     | 0.65 |      |
| YDR242W | AMD2  |                 | 0    | itY(GUA)D  | 0.92     | 0.39 |      |
| YDR243C | PRP28 |                 | 0    | iYDR243C   | 1.67     | 0.74 |      |
| YDR244W | PEX5  | PAS10           |      | iYDR243C   | 1.67     | 0.74 |      |
| YDR245W | MNN10 | BED1 REC41 SLC2 |      | iYDR244W   | 1.62     | 0.59 |      |
| YDR246W | TRS23 |                 | 0    | iYDR245W   | 1.00     | 0.42 |      |
| YDR247W |       |                 | 0    | iYDR246W   | 1.19     | 0.53 |      |
| YDR248C |       |                 | 0    | #N/A       | #N/A     | #N/A |      |
| YDR249C |       |                 | 0    | #N/A       | 1.47     | 0.66 |      |
| YDR250C |       |                 | 0    | #N/A       | 1.22     | 0.54 |      |
| YDR251W | PAM1  |                 | 0    | iYDR250C   | 1.22     | 0.54 |      |
| YDR252W | BTT1  |                 | 0    | iYDR251W   | #N/A     | #N/A |      |
| YDR253C | MET32 |                 | 0    | iYDR253C   | 1.79     | 0.79 |      |
| YDR254W | CHL4  | CTF17 MCM17     |      | iYDR253C   | 1.79     | 0.79 |      |
| YDR255C |       |                 | 0    | GID2       | 1.45     | 0.65 |      |
| YDR256C | CTA1  |                 | 0    | iYDR256C   | 0.31     | 0.03 |      |
| YDR257C | RMS1  | RMS1            |      | iYDR257C   | 1.04     | 0.44 |      |
| YDR258C | HSP78 |                 | 0    | iYDR258C   | 1.20     | 0.53 |      |
| YDR259C | YAP6  | HAL7            |      | iYDR259C   | 0.40     | 0.07 |      |
| YDR260C | SWM1  |                 | 0    | iYDR260C   | 1.51     | 0.68 |      |
| YDR261C | EXG2  |                 | 0    | iYDR261C-0 | 1.56     | 0.70 |      |
| YDR262W |       |                 | 0    | #N/A       | 1.00     | 0.43 |      |
| YDR263C | DIN7  | DIN3            |      | iYDR263C   | 0.55     | 0.15 |      |
| YDR264C | AKR1  |                 | 0    | iYDR264C   | 2.23     | 0.90 |      |
| YDR265W | PEX10 | PAS4            |      | iYDR264C   | 2.23     | 0.90 |      |
| YDR266C |       |                 | 0    | #N/A       | #N/A     | #N/A |      |
| YDR267C |       |                 | 0    | #N/A       | 1.64     | 0.73 |      |

|         |        |                  |   |             |      |      |
|---------|--------|------------------|---|-------------|------|------|
| YDR268W | MSW1   |                  | 0 | iYDR267C    | 1.64 | 0.73 |
| YDR269C | 0      | #N/A             |   | iYDR271C    | #N/A | #N/A |
| YDR270W | CCC2   |                  | 0 | iYDR268W    | 0.56 | 0.16 |
| YDR271C | 0      | #N/A             |   | iYDR271C    | #N/A | #N/A |
| YDR272W | GLO2   |                  | 0 | iYDR271C    | #N/A | #N/A |
| YDR273W | DON1   |                  | 0 | iYDR272W    | 0.84 | 0.34 |
| YDR274C | 0      | #N/A             |   | iYDR274C    | 0.48 | 0.12 |
| YDR275W | 0      |                  | 0 | iYDR274C    | 0.48 | 0.12 |
| YDR276C | PMP3   | SNA1             |   | iYDR276C    | 0.41 | 0.07 |
| YDR277C | MTH1   | BPC1 DGT1 HTR1   |   | iYDR277C    | 0.64 | 0.21 |
| YDR278C | 0      | #N/A             |   | itE(CUC)D-0 | 1.14 | 0.49 |
| YDR279W | 0      | Rnh2B            |   | itE(CUC)D-1 | 1.59 | 0.71 |
| YDR280W | RRP45  |                  | 0 | iYDR279W    | 1.93 | 0.82 |
| YDR281C | PHM6   |                  | 0 | iYDR281C    | 1.08 | 0.46 |
| YDR282C | 0      | #N/A             |   | iYDR282C    | 1.35 | 0.60 |
| YDR283C | GCN2   | AAS1             |   | iYDR283C    | 1.97 | 0.83 |
| YDR284C | DPP1   | ZRG1             |   | iYDR284C    | 1.36 | 0.61 |
| YDR285W | ZIP1   |                  | 0 | iYDR284C    | 1.36 | 0.61 |
| YDR286C | 0      | #N/A             |   | iYDR286C    | 2.67 | 0.96 |
| YDR287W | 0      | #N/A             |   | iYDR286C    | 2.67 | 0.96 |
| YDR288W | 0      |                  | 0 | iYDR287W    | 1.62 | 0.72 |
| YDR289C | RTT103 |                  | 0 | iYDR291W    | #N/A | #N/A |
| YDR290W | 0      | #N/A             |   | iYDR288W    | 0.58 | 0.18 |
| YDR291W | 0      | #N/A             |   | iYDR288W    | 0.58 | 0.18 |
| YDR292C | SRP101 |                  | 0 | iYDR292C    | #N/A | #N/A |
| YDR293C | SSD1   | CLA1 MCS1 RLT1 S |   | iYDR293C    | #N/A | #N/A |
| YDR294C | DPL1   | BST1             |   | iYDR294C    | 1.08 | 0.46 |
| YDR295C | PLO2   | PLO2             |   | iYDR295C    | 1.55 | 0.70 |
| YDR296W | MHR1   | XTC1             |   | iYDR295C    | 1.55 | 0.70 |
| YDR297W | SUR2   | SYR2             |   | iYDR296W    | 0.71 | 0.26 |
| YDR298C | ATP5   | OSC1             |   | iYDR298C    | 1.77 | 0.78 |
| YDR299W | BFR2   |                  | 0 | iYDR298C    | 1.77 | 0.78 |
| YDR300C | PRO1   |                  | 0 | iYDR300C    | 3.23 | 0.99 |
| YDR301W | CFT1   | YHH1             |   | iYDR300C    | 3.23 | 0.99 |
| YDR302W | GPI11  |                  | 0 | iYDR301W    | 1.66 | 0.74 |
| YDR303C | RSC3   |                  | 0 | iYDR303C    | 2.38 | 0.93 |
| YDR304C | CPR5   | CYP5             |   | iYDR304C    | 1.11 | 0.48 |
| YDR305C | HNT2   | APH1             |   | iYDR305C    | #N/A | #N/A |
| YDR306C | 0      | #N/A             |   | iYDR306C    | 1.65 | 0.74 |
| YDR307W | 0      | #N/A             |   | itV(CAC)D   | #N/A | #N/A |
| YDR308C | SRB7   |                  | 0 | iYDR308C    | 0.84 | 0.34 |
| YDR309C | GIC2   |                  | 0 | iYDR309C    | 0.32 | 0.04 |
| YDR310C | SUM1   |                  | 0 | iYDR310C    | 1.42 | 0.64 |
| YDR311W | TFB1   |                  | 0 | iYDR310C    | 1.42 | 0.64 |
| YDR312W | SSF2   |                  | 0 | iYDR311W    | 1.89 | 0.82 |
| YDR313C | PIB1   |                  | 0 | iYDR313C    | 1.49 | 0.67 |
| YDR314C | 0      | #N/A             |   | iYDR314C    | 1.50 | 0.68 |
| YDR315C | IPK1   | GSL1             |   | iYDR315C    | #N/A | #N/A |
| YDR316W | 0      |                  | 0 | iYDR315C    | #N/A | #N/A |
| YDR317W | 0      | #N/A             |   | iYDRWdelta  | 0.51 | 0.14 |
| YDR318W | MCM21  | CTF5             |   | iYDR317W    | 1.50 | 0.68 |

|         |        |                  |              |      |      |
|---------|--------|------------------|--------------|------|------|
| YDR319C | 0      | #N/A             | iYDR319C     | #N/A | #N/A |
| YDR320C | SWA2   | AUX1 BUD24       | iYDR320C     | 2.17 | 0.89 |
| YDR321W | ASP1   |                  | 0 iYDR320C   | 2.17 | 0.89 |
| YDR322W | MRPL35 | YmL35            | iYDR321W     | 1.08 | 0.46 |
| YDR323C | PEP7   | VAC1 VPL21 VPS19 | iYDR323C     | 1.33 | 0.58 |
| YDR324C | UTP4   |                  | 0 iYDR324C   | 1.31 | 0.56 |
| YDR325W | YCG1   | TIE1 YCS5        | iYDR324C     | 1.31 | 0.56 |
| YDR326C | 0      | #N/A             | iYDR326C     | 3.07 | 0.98 |
| YDR327W | 0      | #N/A             | iYDR326C     | 3.07 | 0.98 |
| YDR328C | SKP1   | CBF3D MGO1       | iYDR328C     | 2.26 | 0.89 |
| YDR329C | PEX3   | PAS3             | iYDR329C     | #N/A | #N/A |
| YDR330W | 0      |                  | 0 iYDR329C   | #N/A | #N/A |
| YDR331W | GPI8   |                  | 0 iYDR330W   | 1.38 | 0.62 |
| YDR332W | 0      | #N/A             | iYDR331W     | #N/A | #N/A |
| YDR333C | 0      | #N/A             | iYDR333C     | #N/A | #N/A |
| YDR334W | SWR1   |                  | 0 iYDR333C   | #N/A | #N/A |
| YDR335W | MSN5   | KAP142 STE21     | iYDR334W     | #N/A | #N/A |
| YDR336W | 0      | #N/A             | iYDR335W     | 1.32 | 0.59 |
| YDR337W | MRPS28 |                  | 0 iYDR336W   | 2.12 | 0.85 |
| YDR338C | 0      | #N/A             | iYDR338C     | 1.79 | 0.77 |
| YDR339C | 0      | #N/A             | iYDR339C     | 0.98 | 0.42 |
| YDR340W | 0      | #N/A             | iYDR339C     | 0.98 | 0.42 |
| YDR341C | 0      | #N/A             | iYDR341C     | 2.08 | 0.87 |
| YDR342C | HXT7   |                  | 0 iYDR342C-0 | 0.49 | 0.12 |
| YDR343C | HXT6   |                  | 0 iYDR343C   | 0.98 | 0.42 |
| YDR344C | 0      | #N/A             | iYDR344C     | #N/A | #N/A |
| YDR345C | HXT3   |                  | 0 iYDR345C-0 | 0.42 | 0.08 |
| YDR346C | SGI1   |                  | 0 iYDR346C   | 2.09 | 0.87 |
| YDR347W | MRP1   |                  | 0 iYDR346C   | 2.09 | 0.87 |
| YDR348C | 0      | #N/A             | iYDR348C     | 1.20 | 0.52 |
| YDR349C | YPS7   |                  | 0 iYDR349C   | 2.07 | 0.87 |
| YDR350C | TCM10  | ATP22            | iYDR350C     | 2.27 | 0.90 |
| YDR351W | SBE2   |                  | 0 iYDR350C   | 2.27 | 0.90 |
| YDR352W | 0      | #N/A             | iYDR351W     | 1.00 | 0.42 |
| YDR353W | TRR1   |                  | 0 iYDR352W   | 1.17 | 0.52 |
| YDR354W | TRP4   |                  | 0 iYDR353W   | 1.29 | 0.55 |
| YDR355C | 0      | #N/A             | iYDR356W     | 0.65 | 0.22 |
| YDR356W | SPC110 | NUF1 XCM1        | iYDR354W     | #N/A | #N/A |
| YDR357C | 0      | #N/A             | iYDR357C     | #N/A | #N/A |
| YDR358W | GGA1   |                  | 0 iYDR357C   | #N/A | #N/A |
| YDR359C | VID21  | EAF1             | iYDR360W     | 0.94 | 0.40 |
| YDR360W | 0      | #N/A             | iYDR358W     | 0.45 | 0.09 |
| YDR361C | BCP1   |                  | 0 iYDR361C   | 1.08 | 0.46 |
| YDR362C | TFC6   |                  | 0 iYDR362C   | 1.93 | 0.78 |
| YDR363W | ESC2   |                  | 0 iYDR362C   | 1.93 | 0.78 |
| YDR364C | CDC40  | PRP17 SLT15 SLU4 | iYDR364C     | 1.25 | 0.55 |
| YDR365C | 0      |                  | 0 iYDR365C   | 2.49 | 0.94 |
| YDR366C | 0      | #N/A             | iYDR367W     | 1.67 | 0.73 |
| YDR367W | 0      | #N/A             | iYDR365C     | 2.49 | 0.94 |
| YDR368W | YPR1   |                  | 0 iYDR367W   | 1.67 | 0.73 |
| YDR369C | XRS2   |                  | 0 iYDR369C   | #N/A | #N/A |

|         |        |            |              |      |      |
|---------|--------|------------|--------------|------|------|
| YDR370C | 0      | #N/A       | iYDR370C     | 1.84 | 0.81 |
| YDR371W | CTS2   |            | 0 iYDR370C   | 1.84 | 0.81 |
| YDR372C | VPS74  | API1       | iYDR372C     | 2.10 | 0.88 |
| YDR373W | FRQ1   |            | 0 iYDR372C   | 2.10 | 0.88 |
| YDR374C | 0      | #N/A       | iYDR374C     | 2.00 | 0.85 |
| YDR375C | BCS1   |            | 0 iYDR375C   | 1.82 | 0.80 |
| YDR376W | ARH1   |            | 0 iYDR375C   | 1.82 | 0.80 |
| YDR377W | ATP17  |            | 0 iYDR376W   | 1.03 | 0.44 |
| YDR378C | LSM6   |            | 0 iYDR378C   | 1.79 | 0.78 |
| YDR379W | RGA2   |            | 0 iYDR378C   | 1.79 | 0.78 |
| YDR380W | ARO10  |            | 0 iYDR379W   | 1.11 | 0.49 |
| YDR381W | YRA1   | SHE11      | iYDR380W     | 0.66 | 0.23 |
| YDR382W | RPP2B  | RPL45 YPA1 | iYDR381W     | #N/A | #N/A |
| YDR383C | NKP1   |            | 0 iYDR383C   | 0.87 | 0.36 |
| YDR384C | 0      |            | 0 iYDR384C   | 0.21 | 0.01 |
| YDR385W | EFT2   |            | 0 iYDR384C   | 0.21 | 0.01 |
| YDR386W | MUS81  | SLX3       | iYDR385W     | 0.65 | 0.21 |
| YDR387C | 0      | #N/A       | iYDR387C     | 1.55 | 0.70 |
| YDR388W | RVS167 |            | 0 iYDR387C   | 1.55 | 0.70 |
| YDR389W | SAC7   |            | 0 iYDR388W   | 0.64 | 0.22 |
| YDR390C | UBA2   | UAL1       | iYDR390C     | 1.95 | 0.84 |
| YDR391C | 0      | #N/A       | iYDR391C     | 2.23 | 0.90 |
| YDR392W | SPT3   |            | 0 iYDR391C   | 2.23 | 0.90 |
| YDR393W | SHE9   | MDM33      | iYDR392W     | 1.57 | 0.69 |
| YDR394W | RPT3   | YNT1 YTA2  | iYDR393W     | 1.80 | 0.78 |
| YDR395W | SXM1   | KAP108     | iYDR394W     | 1.16 | 0.50 |
| YDR396W | 0      | #N/A       | iYDR395W     | #N/A | #N/A |
| YDR397C | NCB2   | YDR1       | iYDR397C     | 1.27 | 0.56 |
| YDR398W | UTP5   |            | 0 iYDR397C   | 1.27 | 0.56 |
| YDR399W | HPT1   | BRA6       | iYDR398W     | 0.37 | 0.05 |
| YDR400W | URH1   |            | 0 iYDR399W   | 0.82 | 0.32 |
| YDR401W | 0      | #N/A       | iYDR400W     | #N/A | #N/A |
| YDR402C | DIT2   | CYP56      | iYDR402C     | 0.98 | 0.42 |
| YDR403W | DIT1   |            | 0 iYDR402C   | 0.98 | 0.42 |
| YDR404C | RPB7   |            | 0 iYDR404C   | 2.51 | 0.94 |
| YDR405W | MRP20  | MRPL41     | iYDR404C     | 2.51 | 0.94 |
| YDR406W | PDR15  |            | 0 iYDR405W   | 0.94 | 0.40 |
| YDR407C | TRS120 |            | 0 iYDR407C   | 2.12 | 0.88 |
| YDR408C | ADE8   |            | 0 iYDR408C   | 1.42 | 0.63 |
| YDR409W | SIZ1   | ULL1       | iYDR408C     | 1.42 | 0.63 |
| YDR410C | STE14  |            | 0 iYDR410C   | 1.89 | 0.82 |
| YDR411C | 0      |            | 0 iYDR411C   | 2.85 | 0.97 |
| YDR412W | 0      | #N/A       | iYDR411C     | 2.85 | 0.97 |
| YDR413C | 0      | #N/A       | iYDR413C     | 0.79 | 0.31 |
| YDR414C | ERD1   | LDB2       | iYDR414C     | 1.46 | 0.66 |
| YDR415C | 0      | #N/A       | iYDR415C     | #N/A | #N/A |
| YDR416W | SYF1   | NTC90      | iYDR415C     | #N/A | #N/A |
| YDR417C | 0      | #N/A       | iYDR418W     | 0.76 | 0.29 |
| YDR418W | RPL12B |            | 0 iYDR416W   | 0.38 | 0.06 |
| YDR419W | RAD30  | DBH1       | iYDR418W     | 0.76 | 0.29 |
| YDR420W | HKR1   |            | 0 itS(AGA)D3 | 0.33 | 0.04 |

|         |        |                  |      |            |      |      |
|---------|--------|------------------|------|------------|------|------|
| YDR421W | ARO80  |                  | 0    | iYDR420W   | 1.25 | 0.55 |
| YDR422C | SIP1   |                  | 0    | iYDR422C   | 1.56 | 0.70 |
| YDR423C | CAD1   | YAP2             |      | iYDR423C   | #N/A | #N/A |
| YDR424C | DYN2   | SLC1             |      | iYDR424C   | #N/A | #N/A |
| YDR425W |        | 0                | 0    | iYDR424C   | #N/A | #N/A |
| YDR426C |        | 0                | #N/A | iYDR426C   | 1.99 | 0.85 |
| YDR427W | RPN9   |                  | 0    | iYDR426C   | 1.99 | 0.85 |
| YDR428C |        | 0                | #N/A | iYDR428C   | #N/A | #N/A |
| YDR429C | TIF35  |                  | 0    | iYDR429C   | 1.33 | 0.59 |
| YDR430C | CYM1   |                  | 0    | iYDR431W   | #N/A | #N/A |
| YDR431W |        | 0                | #N/A | iYDR429C   | 1.33 | 0.59 |
| YDR432W | NPL3   | MTR13 MTS1 NAB1  |      | iYDR431W   | #N/A | #N/A |
| YDR433W | KRE22  |                  | #N/A | iYDR431W   | #N/A | #N/A |
| YDR434W | GPI17  |                  | 0    | iYDR433W   | 0.63 | 0.21 |
| YDR435C | PPM1   |                  | 0    | iYDR435C   | 2.16 | 0.89 |
| YDR436W | PPZ2   |                  | 0    | iYDR435C   | 2.16 | 0.89 |
| YDR437W |        | 0                | #N/A | iYDR436W   | 1.24 | 0.55 |
| YDR438W |        | 0                | #N/A | iYDR437W   | 1.08 | 0.47 |
| YDR439W | LRS4   |                  | 0    | iYDR438W   | #N/A | #N/A |
| YDR440W | DOT1   | PCH1             |      | iYDR439W   | 1.12 | 0.48 |
| YDR441C | APT2   |                  | 0    | iYDR441C   | 0.41 | 0.09 |
| YDR442W |        | 0                | #N/A | iYDR441C   | 0.41 | 0.09 |
| YDR443C | SSN2   | NUT8 RYE3 SCA1 S |      | iYDR443C   | 1.50 | 0.67 |
| YDR444W |        | 0                | #N/A | iYDR443C   | 1.50 | 0.67 |
| YDR445C |        | 0                | #N/A | itK(CUU)D2 | #N/A | #N/A |
| YDR446W | ECM11  |                  | 0    | iYDRWdelta | 1.93 | 0.81 |
| YDR447C | RPS17B | RP51B RPL51B     |      | iYDR447C   | 0.49 | 0.12 |
| YDR448W | ADA2   | SWI8             |      | iYDR447C   | 0.49 | 0.12 |
| YDR449C | UTP6   |                  | 0    | iYDR449C   | 0.84 | 0.34 |
| YDR450W | RPS18A |                  | 0    | iYDR449C   | 0.84 | 0.34 |
| YDR451C | YHP1   |                  | 0    | iYDR451C   | #N/A | #N/A |
| YDR452W | PPN1   | PHM5             |      | iYDR451C   | #N/A | #N/A |
| YDR453C | TSA2   | cTPxII           |      | iYDR453C   | 2.35 | 0.90 |
| YDR454C | GUK1   | PUR5             |      | iYDR454C   | 1.78 | 0.77 |
| YDR455C |        | 0                | #N/A | iYDR456W   | 1.27 | 0.56 |
| YDR456W | NHX1   | NHA2 VPS44       |      | iYDR454C   | 1.78 | 0.77 |
| YDR457W | TOM1   |                  | 0    | iYDR456W   | 1.27 | 0.56 |
| YDR458C |        | 0                | #N/A | iYDR458C   | #N/A | #N/A |
| YDR459C |        | 0                | #N/A | iYDR459C   | 1.79 | 0.77 |
| YDR460W | TFB3   | RIG2             |      | iYDR459C   | 1.79 | 0.77 |
| YDR461W | MFA1   |                  | 0    | iYDR460W   | #N/A | #N/A |
| YDR462W | MRPL28 |                  | 0    | iYDR461W   | #N/A | #N/A |
| YDR463W | STP1   | BAP1 SSY2        |      | iYDR462W   | #N/A | #N/A |
| YDR464W | SPP41  |                  | 0    | iYDR463W   | #N/A | #N/A |
| YDR465C | RMT2   |                  | 0    | iYDR465C   | #N/A | #N/A |
| YDR466W |        | 0                | 0    | iYDR465C   | #N/A | #N/A |
| YDR467C |        | 0                | #N/A | iYDR467C   | #N/A | #N/A |
| YDR468C | TLG1   |                  | 0    | iYDR468C   | #N/A | #N/A |
| YDR469W | SDC1   | CPS25 SAF19      |      | iYDR468C   | #N/A | #N/A |
| YDR470C | UGO1   |                  | 0    | iYDR470C   | 0.53 | 0.14 |
| YDR471W | RPL27B |                  | 0    | iYDR470C   | 0.53 | 0.14 |

|         |        |                  |   |            |      |      |
|---------|--------|------------------|---|------------|------|------|
| YDR472W | TRS31  |                  | 0 | iSNR13     | 1.08 | 0.46 |
| YDR473C | PRP3   | RNA3             |   | iYDR473C-0 | 1.67 | 0.75 |
| YDR474C | 0      | #N/A             |   | iYDR474C   | 0.76 | 0.29 |
| YDR475C | JIP4   |                  | 0 | iYDR475C   | 1.17 | 0.52 |
| YDR476C | 0      | #N/A             |   | iYDR476C   | 1.89 | 0.82 |
| YDR477W | SNF1   | CAT1 CCR1 GLC2 H |   | iYDR476C   | 1.89 | 0.82 |
| YDR478W | SNM1   |                  | 0 | iYDR477W   | 1.27 | 0.57 |
| YDR479C | 0      |                  | 0 | iYDR479C   | 2.03 | 0.86 |
| YDR480W | DIG2   | RST2             |   | iYDR479C   | 2.03 | 0.86 |
| YDR481C | PHO8   |                  | 0 | iYDR481C   | 1.23 | 0.54 |
| YDR482C | CWC21  |                  | 0 | iYDR482C   | 1.08 | 0.47 |
| YDR483W | KRE2   | MNT1             |   | iYDR482C   | 1.08 | 0.47 |
| YDR484W | SAC2   | SAC2             |   | iYDR483W   | #N/A | #N/A |
| YDR485C | VPS72  | SWC2             |   | iYDR485C   | #N/A | #N/A |
| YDR486C | VPS60  | CHM5 MOS10       |   | iYDR486C   | 0.87 | 0.36 |
| YDR487C | RIB3   |                  | 0 | iYDR487C   | #N/A | #N/A |
| YDR488C | PAC11  |                  | 0 | iYDR488C   | 2.10 | 0.86 |
| YDR489W | 0      | CDC105           |   | iYDR488C   | 2.10 | 0.86 |
| YDR490C | PKH1   |                  | 0 | iYDR490C   | 2.84 | 0.97 |
| YDR491C | 0      | #N/A             |   | iYDR492W   | 2.14 | 0.78 |
| YDR492W | 0      |                  | 0 | iYDR490C   | 2.84 | 0.97 |
| YDR493W | 0      |                  | 0 | iYDR492W   | 2.14 | 0.78 |
| YDR494W | RSM28  |                  | 0 | iYDR493W   | 2.23 | 0.90 |
| YDR495C | VPS3   | PEP6 VPL3 VPT17  |   | iYDR495C   | 0.81 | 0.32 |
| YDR496C | PUF6   |                  | 0 | iYDR496C   | 1.03 | 0.45 |
| YDR497C | ITR1   |                  | 0 | iYDR497C   | 1.05 | 0.45 |
| YDR498C | SEC20  |                  | 0 | iYDR498C   | 1.59 | 0.71 |
| YDR499W | LCD1   | DDC2 PIE1        |   | iYDR498C   | 1.59 | 0.71 |
| YDR500C | RPL37B |                  | 0 | iYDR500C   | 0.38 | 0.05 |
| YDR501W | PLM2   |                  | 0 | iYDR500C   | 0.38 | 0.05 |
| YDR502C | SAM2   | ETH2             |   | iYDR502C   | #N/A | #N/A |
| YDR503C | LPP1   |                  | 0 | iYDR503C   | 1.85 | 0.81 |
| YDR504C | 0      |                  | 0 | iYDR505C   | 1.21 | 0.53 |
| YDR505C | PSP1   | GIN5             |   | iYDR505C   | 1.21 | 0.53 |
| YDR506C | 0      | #N/A             |   | iYDR506C   | 1.55 | 0.69 |
| YDR507C | GIN4   | ERC47            |   | iYDR507C   | 0.52 | 0.13 |
| YDR508C | GNP1   |                  | 0 | iYDR509W   | 0.44 | 0.08 |
| YDR509W | 0      | #N/A             |   | iYDR507C   | 0.52 | 0.13 |
| YDR510W | SMT3   |                  | 0 | iYDR509W   | 0.44 | 0.08 |
| YDR511W | ACN9   |                  | 0 | iYDR510W   | 1.17 | 0.51 |
| YDR512C | 0      |                  | 0 | iYDR513W   | #N/A | #N/A |
| YDR513W | TTR1   | GRX2             |   | iYDR511W   | #N/A | #N/A |
| YDR514C | 0      | #N/A             |   | iYDR514C   | 1.21 | 0.53 |
| YDR515W | SLF1   | SRO99            |   | iYDR514C   | 1.21 | 0.53 |
| YDR516C | 0      |                  | 0 | iYDR516C   | 2.36 | 0.92 |
| YDR517W | GRH1   |                  | 0 | iYDR516C   | 2.36 | 0.92 |
| YDR518W | EUG1   |                  | 0 | iYDR517W   | #N/A | #N/A |
| YDR519W | FPR2   | FKB2             |   | iYDR518W   | 1.30 | 0.58 |
| YDR520C | 0      | #N/A             |   | iYDR521W   | 2.58 | 0.94 |
| YDR521W | 0      | #N/A             |   | iYDR519W   | #N/A | #N/A |
| YDR522C | SPS2   |                  | 0 | iYDR522C   | #N/A | #N/A |



|           |        |                |      |              |      |      |
|-----------|--------|----------------|------|--------------|------|------|
| YDR523C   | SPS1   |                | 0    | iYDR523C     | 0.49 | 0.12 |
| YDR524C   | AGE1   | SAT1           |      | iYDR524C     | 0.49 | 0.12 |
| YDR525W   | API2   |                | 0    | iYDR524C     | 0.49 | 0.12 |
| YDR526C   |        | 0              | #N/A | iYDR527W-0   | 1.28 | 0.57 |
| YDR527W   |        | 0              |      | 0 iYDR525W-7 | 0.32 | 0.03 |
| YDR528W   | HLR1   |                | 0    | iYDR527W-7   | 1.33 | 0.60 |
| YDR529C   | QCR7   | COR4 CRO1 UCR7 |      | iYDR529C     | 1.68 | 0.74 |
| YDR530C   | APA2   |                | 0    | iYDR530C     | 1.42 | 0.64 |
| YDR531W   |        | 0              | #N/A | iYDR530C     | 1.42 | 0.64 |
| YDR532C   | KRE28  |                | #N/A | iYDR532C     | 1.22 | 0.54 |
| YDR533C   |        | 0              |      | 0 iYDR533C   | 0.88 | 0.36 |
| YDR534C   | FIT1   |                | 0    | iYDR534C-0   | 0.85 | 0.34 |
| YDR535C   |        | 0              | #N/A | iYDR535C     | 0.94 | 0.40 |
| YDR536W   | STL1   |                | 0    | iYDR535C     | 0.94 | 0.40 |
| YDR537C   |        | 0              | #N/A | iYDR538W     | 0.87 | 0.35 |
| YDR538W   | PAD1   | POF1           |      | iYDR536W     | 1.34 | 0.60 |
| YDR539W   |        | 0              | #N/A | iYDR538W     | 0.87 | 0.35 |
| YDR540C   |        | 0              | #N/A | iYDR540C     | 1.72 | 0.77 |
| YDR541C   |        | 0              | #N/A | iYDR541C-0   | #N/A | #N/A |
| YDR542W   |        | 0              | #N/A | iYDR541C-1   | 0.82 | 0.33 |
| YDR543C   |        | 0              | #N/A | iYDR543C     | 0.35 | 0.05 |
| YDR544C   |        | 0              | #N/A | iYDR544C     | 0.61 | 0.20 |
| YDR545W   | YRF1-1 | YRF1           |      | iYDR544C     | 0.61 | 0.20 |
| YEL001C   |        | 0              | #N/A | iYEL001C     | 1.78 | 0.79 |
| YEL002C   | WBP1   |                | 0    | iYEL002C     | #N/A | #N/A |
| YEL003W   | GIM4   | PFD2           |      | iYEL004W     | 1.72 | 0.74 |
| YEL004W   | YEA4   |                | 0    | iYEL005C     | 1.59 | 0.68 |
| YEL005C   | VAB2   | VAB31          |      | iYEL005C     | 1.59 | 0.68 |
| YEL006W   |        | 0              | #N/A | iYEL007W     | 0.57 | 0.16 |
| YEL007W   | TOS9   |                | #N/A | iYEL008W     | 0.14 | 0.00 |
| YEL008W   |        | 0              | #N/A | iYEL009C     | 0.35 | 0.04 |
| YEL009C   | GCN4   | AAS3 ARG9      |      | iYEL009C     | 0.35 | 0.04 |
| YEL010W   |        | 0              | #N/A | iYELCdelta4  | 0.74 | 0.28 |
| YEL011W   | GLC3   | GHA1           |      | iYEL012W     | 1.37 | 0.61 |
| YEL012W   | UBC8   | GID3           |      | itQ(UUG)E2   | 1.56 | 0.69 |
| YEL013W   | VAC8   | YEB3           |      | iYEL014C     | #N/A | #N/A |
| YEL014C   |        | 0              | #N/A | iYEL014C     | #N/A | #N/A |
| YEL015W   |        | 0              | DCP3 | iYEL016C     | 2.12 | 0.88 |
| YEL016C   |        | 0              | #N/A | iYEL016C     | 2.12 | 0.88 |
| YEL017C-A | PMP2   |                | 0    | iYEL017C-A   | 0.69 | 0.25 |
| YEL017W   |        | 0              |      | 0 iYEL017C-A | 0.69 | 0.25 |
| YEL018W   | EAF5   |                | 0    | iYEL019C     | 1.57 | 0.70 |
| YEL019C   | MMS21  |                | 0    | iYEL019C     | 1.57 | 0.70 |
| YEL020C   |        | 0              | #N/A | iYEL020C     | #N/A | #N/A |
| YEL021W   | URA3   |                | 0    | iYEL022W     | 0.74 | 0.28 |
| YEL022W   | GEA2   |                | 0    | iYEL023C     | 1.64 | 0.73 |
| YEL023C   |        | 0              | #N/A | iYEL023C     | 1.64 | 0.73 |
| YEL024W   | RIP1   |                | 0    | iYEL025C     | 1.41 | 0.63 |
| YEL025C   | SRI1   |                | #N/A | iYEL025C     | 1.41 | 0.63 |
| YEL026W   | SNU13  |                | 0    | iYEL027W     | #N/A | #N/A |
| YEL027W   | CUP5   | CLS7 GEF2 VMA3 |      | itM(CAU)E    | 0.60 | 0.19 |

|           |        |                |               |      |      |
|-----------|--------|----------------|---------------|------|------|
| YEL028W   | 0      | #N/A           | iYEL029C      | 1.43 | 0.64 |
| YEL029C   | BUD16  |                | 0 iYEL029C    | 1.43 | 0.64 |
| YEL030W   | ECM10  | SSC3           | iYEL031W      | 1.14 | 0.49 |
| YEL031W   | SPF1   | COD1 PER9 PIO1 | iYEL032W      | 2.18 | 0.90 |
| YEL032W   | MCM3   |                | 0 itS(AGA)E   | 0.66 | 0.23 |
| YEL033W   | 0      | #N/A           | iYEL035C      | 0.27 | 0.02 |
| YEL034W   | HYP2   | TIF51A         | iYEL035C      | 0.27 | 0.02 |
| YEL035C   | UTR5   |                | 0 iYEL035C    | 0.27 | 0.02 |
| YEL036C   | ANP1   | GEM3 MNN8      | iYEL036C      | #N/A | #N/A |
| YEL037C   | RAD23  |                | 0 iYEL037C    | 1.10 | 0.48 |
| YEL038W   | UTR4   |                | 0 iYEL039C    | 2.17 | 0.89 |
| YEL039C   | CYC7   |                | 0 iYEL039C    | 2.17 | 0.89 |
| YEL040W   | UTR2   | CRH2           | iYEL041W      | 0.82 | 0.32 |
| YEL041W   | 0      | #N/A           | iYEL042W      | 1.10 | 0.48 |
| YEL042W   | GDA1   | GDPase         | iYEL043W      | #N/A | #N/A |
| YEL043W   | 0      | #N/A           | iYEL044W      | 1.86 | 0.79 |
| YEL044W   | IES6   |                | 0 iYEL045C    | 0.16 | 0.01 |
| YEL045C   | 0      | #N/A           | iYEL045C      | 0.16 | 0.01 |
| YEL046C   | GLY1   |                | 0 iYEL045C    | 0.16 | 0.01 |
| YEL047C   | 0      | #N/A           | iYEL047C      | 0.77 | 0.29 |
| YEL048C   | 0      | #N/A           | iYEL048C      | 0.58 | 0.17 |
| YEL049W   | PAU2   |                | 0 iYELWdelta2 | 0.93 | 0.39 |
| YEL050C   | RML2   |                | 0 iYEL050C    | 1.35 | 0.60 |
| YEL051W   | VMA8   |                | 0 iYEL052W    | #N/A | #N/A |
| YEL052W   | AFG1   |                | 0 iYEL053C    | 1.74 | 0.77 |
| YEL053C   | MAK10  |                | 0 iYEL053C    | 1.74 | 0.77 |
| YEL054C   | RPL12A |                | 0 iYEL054C    | 0.36 | 0.05 |
| YEL055C   | POL5   |                | 0 iYEL055C    | 1.09 | 0.47 |
| YEL056W   | HAT2   |                | 0 iYEL057C    | 1.26 | 0.56 |
| YEL057C   | 0      | #N/A           | iYEL057C      | 1.26 | 0.56 |
| YEL058W   | PCM1   | AGM1           | iYEL059W      | 0.43 | 0.10 |
| YEL059C-A | SOM1   |                | 0 iYEL059W    | 0.43 | 0.10 |
| YEL059W   | 0      | #N/A           | iYEL060C      | 1.22 | 0.53 |
| YEL060C   | PRB1   | CVT1 jscB      | iYEL060C      | 1.22 | 0.53 |
| YEL061C   | CIN8   | KSL2 SDS15     | iYEL061C      | #N/A | #N/A |
| YEL062W   | NPR2   |                | 0 iYEL063C    | 1.75 | 0.78 |
| YEL063C   | CAN1   |                | 0 iYEL063C    | 1.75 | 0.78 |
| YEL064C   | 0      |                | 0 iYEL064C    | #N/A | #N/A |
| YEL065W   | SIT1   | ARN3           | iYEL066W      | #N/A | #N/A |
| YEL066W   | HPA3   |                | 0 iYEL068C    | #N/A | #N/A |
| YEL067C   | 0      | #N/A           | iYEL066W      | #N/A | #N/A |
| YEL068C   | 0      | #N/A           | iYEL068C      | #N/A | #N/A |
| YEL069C   | HXT13  |                | 0 iYEL069C-0  | #N/A | #N/A |
| YEL070W   | 0      | #N/A           | iYEL071W-1    | #N/A | #N/A |
| YEL071W   | DLD3   |                | 0 iYEL072W-1  | #N/A | #N/A |
| YEL072W   | 0      |                | 0 iYEL073C-4  | 1.39 | 0.62 |
| YEL073C   | 0      | #N/A           | iYEL073C-0    | 1.00 | 0.43 |
| YEL074W   | 0      | #N/A           | iYEL075C      | 0.91 | 0.38 |
| YEL075C   | 0      | #N/A           | iYEL075C      | 0.91 | 0.38 |
| YEL076C   | 0      | #N/A           | iYEL075C      | 0.91 | 0.38 |
| YEL076C-A | 0      | #N/A           | iYEL075C      | 0.91 | 0.38 |



|           |       |          |              |      |      |
|-----------|-------|----------|--------------|------|------|
| YEL076W-C | #N/A  | #N/A     | iYEL077C     | 0.88 | 0.36 |
| YEL077C   | 0     | #N/A     | iYEL077C     | 0.88 | 0.36 |
| YER001W   | MNN1  |          | 0 iCEN5      | 0.61 | 0.19 |
| YER002W   | NOP16 |          | 0 iYER001W   | #N/A | #N/A |
| YER003C   | PMI40 | PMI      | iYER003C     | 2.02 | 0.84 |
| YER004W   | 0     |          | 0 iYER003C   | 2.02 | 0.84 |
| YER005W   | YND1  | YEJ5     | iYER004W     | 1.41 | 0.63 |
| YER006W   | NUG1  |          | 0 iYER005W   | #N/A | #N/A |
| YER007C-A | 0     | #N/A     | iYER007C-A   | 1.14 | 0.49 |
| YER007W   | PAC2  |          | 0 iYER006W   | #N/A | #N/A |
| YER008C   | SEC3  | PSL1     | iYER008C     | 2.20 | 0.90 |
| YER009W   | NTF2  |          | 0 iYER008C   | 2.20 | 0.90 |
| YER010C   | 0     | #N/A     | iYER010C-0   | 1.49 | 0.66 |
| YER011W   | TIR1  | SRP1     | iYER010C-1   | 0.93 | 0.39 |
| YER012W   | PRE1  |          | 0 itE(UUC)E1 | 1.25 | 0.55 |
| YER013W   | PRP22 |          | 0 iYER012W   | 2.54 | 0.90 |
| YER014W   | HEM14 |          | 0 iYER013W   | #N/A | #N/A |
| YER015W   | FAA2  | FAM1     | iYER014W     | 1.96 | 0.85 |
| YER016W   | BIM1  | EB1 YEB1 | iYER015W     | 1.48 | 0.66 |
| YER017C   | AFG3  | YTA10    | iYER017C     | 1.37 | 0.60 |
| YER018C   | SPC25 |          | 0 iYER018C   | 2.15 | 0.84 |
| YER019C-A | SBH2  | SEB2     | iYER019C-A   | 1.46 | 0.66 |
| YER019W   | ISC1  |          | 0 iYER018C   | 2.15 | 0.84 |
| YER020W   | GPA2  | SSP101   | iYER019C-A   | 1.46 | 0.66 |
| YER021W   | RPN3  | SUN2     | iYER020W     | 1.26 | 0.55 |
| YER022W   | SRB4  |          | 0 iYER021W   | 1.63 | 0.68 |
| YER023W   | PRO3  | ORE2     | iYER022W     | 2.40 | 0.88 |
| YER024W   | YAT2  |          | 0 iYER023W   | #N/A | #N/A |
| YER025W   | GCD11 | SUI4     | iYER024W     | #N/A | #N/A |
| YER026C   | CHO1  | PSS1     | iYER026C     | 1.06 | 0.46 |
| YER027C   | GAL83 | SPM1     | iYER027C     | 1.94 | 0.84 |
| YER028C   | 0     |          | 0 iYER028C   | 0.56 | 0.16 |
| YER029C   | SMB1  | Sm B     | iYER029C     | #N/A | #N/A |
| YER030W   | 0     | #N/A     | iYER029C     | #N/A | #N/A |
| YER031C   | YPT31 | YPT8     | iYER031C     | #N/A | #N/A |
| YER032W   | FIR1  | PIP1     | iYER031C     | #N/A | #N/A |
| YER033C   | ZRG8  |          | 0 iYER033C   | 1.06 | 0.46 |
| YER034W   | 0     | #N/A     | iYER033C     | 1.06 | 0.46 |
| YER035W   | EDC2  |          | 0 iYER034W   | 0.46 | 0.10 |
| YER036C   | KRE30 | #N/A     | iYER036C     | 0.44 | 0.09 |
| YER037W   | PHM8  |          | 0 iYER036C   | 0.44 | 0.09 |
| YER038C   | KRE29 |          | 0 iYER038C   | #N/A | #N/A |
| YER039C   | HVG1  | YEM9     | iYER039C-A   | 2.64 | 0.95 |
| YER040W   | GLN3  |          | 0 iYER039C-A | 2.64 | 0.95 |
| YER041W   | YEN1  |          | 0 iYER040W   | #N/A | #N/A |
| YER042W   | MXR1  | MSRA     | iYER041W     | 0.90 | 0.37 |
| YER043C   | SAH1  |          | 0 iYER043C   | 0.70 | 0.25 |
| YER044C   | ERG28 | BUD18    | iYER044C     | 0.59 | 0.17 |
| YER044C-A | MEI4  |          | 0 iYER044C-A | 0.92 | 0.38 |
| YER045C   | ACA1  |          | 0 iYER045C-0 | 0.64 | 0.22 |
| YER046W   | SPO73 |          | 0 iYER045C-1 | 0.78 | 0.30 |

|           |        |                 |   |             |      |      |
|-----------|--------|-----------------|---|-------------|------|------|
| YER047C   | SAP1   |                 | 0 | iYER047C    | 1.96 | 0.84 |
| YER048C   | CAJ1   |                 | 0 | iYER048C    | 1.35 | 0.60 |
| YER049W   | 0      | #N/A            |   | iYER048W-A  | 1.26 | 0.56 |
| YER050C   | RSM18  |                 | 0 | iYER050C    | #N/A | #N/A |
| YER051W   | 0      | #N/A            |   | iYER050C    | #N/A | #N/A |
| YER052C   | HOM3   | BOR1 SIL4       |   | iYER052C    | 1.46 | 0.65 |
| YER053C   | 0      |                 | 0 | iYER053C-0  | 0.70 | 0.25 |
| YER054C   | GIP2   |                 | 0 | iYER054C    | 1.11 | 0.48 |
| YER055C   | HIS1   |                 | 0 | iYER055C    | 0.47 | 0.10 |
| YER056C   | FCY2   | BRA7            |   | iYER056C    | 0.21 | 0.01 |
| YER056C-A | RPL34A |                 | 0 | iYER056C-A  | 0.41 | 0.07 |
| YER057C   | HMF1   | HIG1            |   | iYER057C    | 2.00 | 0.84 |
| YER058W   | PET117 |                 | 0 | iYER057C    | 2.00 | 0.84 |
| YER059W   | PCL6   |                 | 0 | iYER058W    | 1.64 | 0.73 |
| YER060W   | FCY21  |                 | 0 | iYER059W    | 1.56 | 0.70 |
| YER060W-A | FCY22  |                 | 0 | iYER060W    | 0.47 | 0.11 |
| YER061C   | CEM1   |                 | 0 | iYER061C    | 0.86 | 0.35 |
| YER062C   | HOR2   | GPP2            |   | iYER062C    | 0.74 | 0.28 |
| YER063W   | THO1   |                 | 0 | iYER062C    | 0.74 | 0.28 |
| YER064C   | 0      | #N/A            |   | iYER064C    | #N/A | #N/A |
| YER065C   | ICL1   |                 | 0 | iYER065C    | #N/A | #N/A |
| YER066C-A | 0      | #N/A            |   | iYER067W    | 1.71 | 0.76 |
| YER066W   | 0      | #N/A            |   | itS(UGA)E-1 | 0.75 | 0.28 |
| YER067W   | 0      | #N/A            |   | iYER066W    | 1.83 | 0.79 |
| YER068W   | MOT2   | NOT4 SIG1       |   | iYER067W    | 1.71 | 0.76 |
| YER069W   | ARG5,6 |                 | 0 | iYER068W    | 0.28 | 0.02 |
| YER070W   | RNR1   | CRT7 RIR1 SDS12 |   | iYER069W    | 1.38 | 0.62 |
| YER071C   | 0      | #N/A            |   | iYER071C    | 1.10 | 0.48 |
| YER072W   | VTC1   | NRF1 PHM4       |   | iYER071C    | 1.10 | 0.48 |
| YER073W   | ALD5   |                 | 0 | iYER072W    | 0.25 | 0.02 |
| YER074W   | RPS24A | RPS24EA         |   | iYER073W    | 0.24 | 0.02 |
| YER075C   | PTP3   |                 | 0 | iYER075C    | 0.48 | 0.11 |
| YER076C   | 0      | #N/A            |   | iYER076C    | 1.33 | 0.60 |
| YER077C   | 0      | #N/A            |   | iYER077C    | #N/A | #N/A |
| YER078C   | 0      | #N/A            |   | iYER078C    | 1.90 | 0.82 |
| YER079W   | 0      | #N/A            |   | iYER078C    | 1.90 | 0.82 |
| YER080W   | 0      |                 | 0 | iYER079W    | 1.33 | 0.60 |
| YER081W   | SER3   |                 | 0 | iYER080W    | #N/A | #N/A |
| YER082C   | UTP7   | KRE31           |   | iYER082C    | #N/A | #N/A |
| YER083C   | 0      |                 | 0 | iYER084W    | 1.50 | 0.68 |
| YER084W   | 0      | #N/A            |   | iYER082C    | #N/A | #N/A |
| YER085C   | 0      | #N/A            |   | iYER085C    | 2.48 | 0.92 |
| YER086W   | ILV1   | ISO1            |   | iYER085C    | 2.48 | 0.92 |
| YER087C-A | #N/A   | #N/A            |   | iYER087C-A  | 1.74 | 0.75 |
| YER087W   | 0      | #N/A            |   | iYER086W    | 0.73 | 0.27 |
| YER088C   | DOT6   |                 | 0 | iYER088C    | 0.57 | 0.17 |
| YER089C   | PTC2   |                 | 0 | iYER089C    | 1.62 | 0.73 |
| YER090W   | TRP2   |                 | 0 | iYER089C    | 1.62 | 0.73 |
| YER091C   | MET6   |                 | 0 | iYER091C    | #N/A | #N/A |
| YER092W   | IES5   |                 | 0 | iYER091C-A  | 0.92 | 0.39 |
| YER093C   | 0      | AVO3            |   | iYER093C    | 2.72 | 0.94 |

|           |        |                    |              |      |      |
|-----------|--------|--------------------|--------------|------|------|
| YER093C-A | 0      | #N/A               | iYER093C-A   | 1.13 | 0.50 |
| YER094C   | PUP3   | SCS32              | iYER094C     | 1.59 | 0.71 |
| YER095W   | RAD51  | MUT5               | iYER094C     | 1.59 | 0.71 |
| YER096W   | SHC1   |                    | 0 iYER095W   | 0.65 | 0.22 |
| YER097W   | 0      | #N/A               | itE(UUC)E2   | 0.66 | 0.22 |
| YER098W   | UBP9   |                    | 0 itE(UUC)E2 | 0.66 | 0.22 |
| YER099C   | PRS2   |                    | 0 iYER099C   | 2.61 | 0.92 |
| YER100W   | UBC6   | DOA2               | iYER099C     | 2.61 | 0.92 |
| YER101C   | AST2   |                    | 0 iYER101C   | 0.85 | 0.34 |
| YER102W   | RPS8B  |                    | 0 iYER101C   | 0.85 | 0.34 |
| YER103W   | SSA4   |                    | 0 iYER102W   | 1.62 | 0.72 |
| YER104W   | RTT105 |                    | 0 iYER103W   | 1.92 | 0.83 |
| YER105C   | NUP157 |                    | 0 iYER105C   | 0.63 | 0.20 |
| YER106W   | MAM1   |                    | 0 iYER105C   | 0.63 | 0.20 |
| YER107C   | GLE2   | RAE1               | iYER107C     | 1.27 | 0.56 |
| YER108C   | #N/A   | #N/A               | #N/A         | #N/A | #N/A |
| YER109C   | FLO8   | PHD5               | iYER108C     | 0.78 | 0.30 |
| YER110C   | KAP123 | YRB4               | iYER110C     | #N/A | #N/A |
| YER111C   | SWI4   | ART1               | iYER111C     | 0.68 | 0.24 |
| YER112W   | LSM4   | SDB23 USS1         | iYER111C     | 0.68 | 0.24 |
| YER113C   | 0      | #N/A               | iYER113C     | #N/A | #N/A |
| YER114C   | BOI2   | BEB1               | iYER114C     | 1.35 | 0.61 |
| YER115C   | SPR6   |                    | 0 iYER115C   | 1.68 | 0.75 |
| YER116C   | SLX8   |                    | 0 iYER116C   | 0.91 | 0.38 |
| YER117W   | RPL23B |                    | 0 iYER116C   | 0.91 | 0.38 |
| YER118C   | SHO1   | SSU81              | iYER118C     | 1.55 | 0.70 |
| YER119C   | 0      |                    | 0 iYER120W   | 1.41 | 0.63 |
| YER119C-A | 0      | #N/A               | iYER120W     | 1.41 | 0.63 |
| YER120W   | SCS2   |                    | 0 iYER118C   | 1.55 | 0.70 |
| YER121W   | 0      | #N/A               | iYER120W     | 1.41 | 0.63 |
| YER122C   | GLO3   |                    | 0 iYER122C   | 2.31 | 0.92 |
| YER123W   | YCK3   | CKI3               | iYER122C     | 2.31 | 0.92 |
| YER124C   | DSE1   |                    | 0 iYER124C   | 1.94 | 0.84 |
| YER125W   | RSP5   | MDP1 MUT2 NPI1 S   | iYER124C     | 1.94 | 0.84 |
| YER126C   | NSA2   |                    | 0 iYER126C   | 1.43 | 0.64 |
| YER127W   | LCP5   |                    | 0 iYER126C   | 1.43 | 0.64 |
| YER128W   | 0      | #N/A               | iYER127W     | #N/A | #N/A |
| YER129W   | PAK1   |                    | 0 iYER128W   | 2.02 | 0.86 |
| YER130C   | 0      | #N/A               | iYER130C     | 0.51 | 0.13 |
| YER131W   | RPS26B |                    | 0 iYER130C   | 0.51 | 0.13 |
| YER132C   | PMD1   |                    | 0 iYER132C   | 0.92 | 0.38 |
| YER133W   | GLC7   | CID1 DIS2 DIS2S1 F | iYERCdelta1  | 1.92 | 0.83 |
| YER134C   | 0      | #N/A               | iYER134C     | 1.34 | 0.60 |
| YER135C   | 0      | #N/A               | iYER135C     | 0.96 | 0.40 |
| YER136W   | GDI1   | SEC19              | itV(AAC)E1   | 0.68 | 0.24 |
| YER137C   | 0      | #N/A               | iSCR1        | 1.05 | 0.46 |
| YER138C   | #N/A   | #N/A               | YERWdelta2   | 0.37 | 0.05 |
| YER139C   | 0      | #N/A               | iYER139C     | 1.42 | 0.64 |
| YER140W   | 0      | #N/A               | iYER139C     | 1.42 | 0.64 |
| YER141W   | COX15  |                    | 0 iYER140W   | 1.45 | 0.64 |
| YER142C   | MAG1   | MMS5               | iYER142C     | 1.52 | 0.68 |

|         |        |                  |               |      |      |
|---------|--------|------------------|---------------|------|------|
| YER143W | DDI1   | VSM1             | iYER142C      | 1.52 | 0.68 |
| YER144C | UBP5   |                  | 0 iYER144C    | 1.12 | 0.48 |
| YER145C | FTR1   |                  | 0 iYER145C    | 0.48 | 0.11 |
| YER146W | LSM5   |                  | 0 iYER145C    | 0.48 | 0.11 |
| YER147C | SCC4   |                  | 0 iYER147C    | 2.13 | 0.88 |
| YER148W | SPT15  | BTF1 TBP TBP1    | iYER147C      | 2.13 | 0.88 |
| YER149C | PEA2   | DFG9 PPF2        | iYER149C      | 1.52 | 0.68 |
| YER150W | SPI1   |                  | 0 iYER149C    | 1.52 | 0.68 |
| YER151C | UBP3   |                  | 0 iYER151C    | 1.57 | 0.71 |
| YER152C | 0      | #N/A             | iYER153C      | 2.00 | 0.85 |
| YER153C | PET122 |                  | 0 iYER153C    | 2.00 | 0.85 |
| YER154W | OXA1   | PET1402          | iYER153C      | 2.00 | 0.85 |
| YER155C | BEM2   | IPL2 SUP9 TSL1   | iYER155C      | 0.67 | 0.23 |
| YER156C | 0      | #N/A             | iYER156C      | 1.97 | 0.84 |
| YER157W | SEC34  | GRD20 SEC34      | iYER156C      | 1.97 | 0.84 |
| YER158C | 0      | #N/A             | iYER158C      | 1.05 | 0.45 |
| YER159C | BUR6   | NCB1             | iYER159C      | 0.38 | 0.06 |
| YER160C | #N/A   | #N/A             | iYERCdelta2   | 0.71 | 0.26 |
| YER161C | SPT2   | EXA1 SIN1        | iYER161C      | 2.05 | 0.87 |
| YER162C | RAD4   |                  | 0 iYER162C    | 1.95 | 0.84 |
| YER163C | 0      | #N/A             | iYER163C-0    | 1.24 | 0.55 |
| YER164W | CHD1   |                  | 0 iYER163C-1  | 0.75 | 0.28 |
| YER165W | PAB1   |                  | 0 iYER164W    | 0.50 | 0.12 |
| YER166W | DNF1   |                  | 0 iYER165W    | 1.05 | 0.45 |
| YER167W | BCK2   | CTR7             | iYER166W      | 0.76 | 0.29 |
| YER168C | CCA1   | TNT1             | iYER168C      | 1.09 | 0.47 |
| YER169W | RPH1   |                  | 0 iYER168C    | 1.09 | 0.47 |
| YER170W | ADK2   | AKY3 PAK3        | iYER169W      | #N/A | #N/A |
| YER171W | RAD3   | REM1             | iYER170W      | 2.65 | 0.92 |
| YER172C | BRR2   | PRP44 RSS1 SLT22 | iYER172C      | 2.45 | 0.86 |
| YER173W | RAD24  | RS1              | iYER172C      | 2.45 | 0.86 |
| YER174C | GRX4   |                  | 0 iYER174C    | 0.92 | 0.38 |
| YER175C | TMT1   | TAM1             | iYER175C      | 1.54 | 0.69 |
| YER176W | ECM32  | HEL1 MTT1        | iYER175C      | 1.54 | 0.69 |
| YER177W | BMH1   | 38083            | iYER176W      | 0.22 | 0.01 |
| YER178W | PDA1   |                  | 0 iYER177W    | 0.82 | 0.33 |
| YER179W | DMC1   | ISC2             | iYER178W      | 0.69 | 0.24 |
| YER180C | ISC10  |                  | 0 iYER180C    | 1.26 | 0.56 |
| YER181C | 0      | #N/A             | iYER181C      | 1.13 | 0.50 |
| YER182W | 0      |                  | 0 iYERCdelta2 | 1.37 | 0.61 |
| YER183C | FAU1   |                  | 0 iYER183C-0  | 1.07 | 0.46 |
| YER184C | 0      | #N/A             | iYER184C      | 2.20 | 0.90 |
| YER185W | 0      | #N/A             | iYER184C      | 2.20 | 0.90 |
| YER186C | 0      | #N/A             | iYER186C      | 2.38 | 0.92 |
| YER187W | 0      | #N/A             | iYERComeg     | 1.12 | 0.48 |
| YER188W | 0      | #N/A             | iYER187W      | 1.52 | 0.68 |
| YER189W | 0      | #N/A             | iYERWomeg     | #N/A | #N/A |
| YER190W | YRF1-2 | YRF1             | iYERWomeg     | #N/A | #N/A |
| YFL001W | DEG1   | PUS3             | iYFL002C      | 2.14 | 0.76 |
| YFL002C | SPB4   |                  | 0 iYFL002C    | 2.14 | 0.76 |
| YFL003C | MSH4   |                  | 0 iYFL003C    | 0.67 | 0.23 |

|           |       |                 |              |      |      |
|-----------|-------|-----------------|--------------|------|------|
| YFL004W   | VTC2  | PHM1            | iYFL005W     | 1.39 | 0.62 |
| YFL005W   | SEC4  | SRO6            | iYFL006W     | 2.01 | 0.86 |
| YFL006W   | 0     | #N/A            | iYFL007W     | #N/A | #N/A |
| YFL007W   | BLM3  |                 | 0 iYFL008W   | 1.65 | 0.74 |
| YFL008W   | SMC1  | CHL10           | iYFL009W     | 2.26 | 0.91 |
| YFL009W   | CDC4  |                 | 0 iYFL010C   | 2.31 | 0.90 |
| YFL010C   | WWM1  |                 | 0 iYFL010C   | 2.31 | 0.90 |
| YFL011W   | HXT10 |                 | 0 iYFL012W   | #N/A | #N/A |
| YFL011W-A | #N/A  | #N/A            | #N/A         | #N/A | #N/A |
| YFL012W   | 0     | #N/A            | iYFL013W-A   | 3.23 | 0.98 |
| YFL013C   | IES1  |                 | 0 iYFL013W-A | 3.23 | 0.98 |
| YFL013W-A | #N/A  | #N/A            | iYFL014W     | 0.67 | 0.23 |
| YFL014W   | HSP12 | GLP1 HOR5       | iYFL015C     | 0.82 | 0.33 |
| YFL015C   | 0     | #N/A            | iYFL015C     | 0.82 | 0.33 |
| YFL016C   | MDJ1  |                 | 0 iYFL016C   | 0.43 | 0.09 |
| YFL017C   | GNA1  | PAT1            | iYFL017C     | 0.30 | 0.03 |
| YFL018C   | LPD1  | HPD1            | iYFL018C     | 1.12 | 0.49 |
| YFL018W-A | #N/A  | #N/A            | #N/A         | #N/A | #N/A |
| YFL019C   | 0     | #N/A            | YFLWdelta1   | 1.25 | 0.55 |
| YFL020C   | PAU5  |                 | 0 iYFL020C   | 1.95 | 0.84 |
| YFL021W   | GAT1  | MEP80 NIL1      | iYFL022C     | #N/A | #N/A |
| YFL022C   | FRS2  |                 | 0 iYFL022C   | #N/A | #N/A |
| YFL023W   | FYV11 |                 | 0 iYFL024C   | 0.54 | 0.15 |
| YFL024C   | EPL1  |                 | 0 iYFL024C   | 0.54 | 0.15 |
| YFL025C   | BST1  |                 | 0 iYFL025C   | 0.88 | 0.36 |
| YFL026W   | STE2  |                 | 0 iYFL027C   | 3.10 | 0.98 |
| YFL027C   | GYP8  |                 | 0 iYFL027C   | 3.10 | 0.98 |
| YFL028C   | CAF16 |                 | 0 iYFL028C   | 1.80 | 0.77 |
| YFL029C   | CAK1  | CIV1            | iYFL029C     | 2.10 | 0.84 |
| YFL030W   | 0     |                 | 0 iYFL031W   | #N/A | #N/A |
| YFL031W   | HAC1  | ERN4 IRE15      | iYFL033C     | 0.77 | 0.29 |
| YFL032W   | 0     | #N/A            | iYFL033C     | 0.77 | 0.29 |
| YFL033C   | RIM15 | TAK1            | iYFL033C     | 0.77 | 0.29 |
| YFL034W   | 0     | #N/A            | iYFL034C-A   | 1.03 | 0.44 |
| YFL035C   | #N/A  | #N/A            | #N/A         | #N/A | #N/A |
| YFL035C-A | #N/A  | #N/A            | #N/A         | #N/A | #N/A |
| YFL035C-B | #N/A  | #N/A            | #N/A         | #N/A | #N/A |
| YFL036W   | RPO41 |                 | 0 iYFL037W   | #N/A | #N/A |
| YFL037W   | TUB2  | ARM10 SHE8      | iYFL038C     | 2.65 | 0.95 |
| YFL038C   | YPT1  | YP2             | iYFL038C     | 2.65 | 0.95 |
| YFL039C   | ACT1  | ABY1 END7 actin | iYFL039C     | 0.29 | 0.02 |
| YFL040W   | 0     | #N/A            | iYFL041W     | #N/A | #N/A |
| YFL041W   | FET5  |                 | 0 iYFL042C   | 1.69 | 0.75 |
| YFL042C   | 0     | #N/A            | iYFL042C     | 1.69 | 0.75 |
| YFL043C   | #N/A  | #N/A            | iYFL042C     | 1.69 | 0.75 |
| YFL044C   | 0     |                 | 0 iYFL044C   | #N/A | #N/A |
| YFL045C   | SEC53 | ALG4            | iYFL045C     | 1.01 | 0.43 |
| YFL046W   | 0     |                 | 0 iYFL047W   | 1.06 | 0.46 |
| YFL047W   | RGD2  |                 | 0 iYFL048C   | 2.83 | 0.90 |
| YFL048C   | EMP47 |                 | 0 iYFL048C   | 2.83 | 0.90 |
| YFL049W   | 0     | #N/A            | iYFL050C     | 1.99 | 0.85 |

|           |       |                 |      |              |      |      |
|-----------|-------|-----------------|------|--------------|------|------|
| YFL050C   | ALR2  |                 | 0    | iYFL050C     | 1.99 | 0.85 |
| YFL051C   |       | 0               | #N/A | iYFL051C-0   | 0.86 | 0.35 |
| YFL052W   |       | 0               | #N/A | iYFL053W-1   | 2.08 | 0.87 |
| YFL053W   | DAK2  |                 | 0    | iYFL054C     | 2.16 | 0.89 |
| YFL054C   |       | 0               | #N/A | iYFL054C     | 2.16 | 0.89 |
| YFL055W   | AGP3  |                 | 0    | iYFL056C-1   | 1.86 | 0.81 |
| YFL056C   | AAD6  |                 | 0    | iYFL056C-0   | 0.98 | 0.42 |
| YFL057C   |       | 0               |      | 0 iYFL056C-0 | 0.98 | 0.42 |
| YFL058W   | THI5  |                 | 0    | iYFL059W     | 2.53 | 0.94 |
| YFL059W   | SNZ3  |                 | 0    | iYFL060C     | 2.01 | 0.85 |
| YFL060C   | SNO3  |                 | 0    | iYFL060C     | 2.01 | 0.85 |
| YFL061W   |       | 0               | #N/A | iYFL062W-1   | 1.86 | 0.81 |
| YFL062W   | COS4  |                 | 0    | iYFL063W     | 0.86 | 0.35 |
| YFL063W   |       | 0               | #N/A | iYFL064C     | #N/A | #N/A |
| YFL064C   |       | 0               | #N/A | iYFL064C     | #N/A | #N/A |
| YFL065C   |       | 0               | #N/A | iYFL064C     | #N/A | #N/A |
| YFL066C   |       | 0               | #N/A | iYFL066C     | 1.38 | 0.62 |
| YFL067W   |       | 0               | #N/A | iYFL068W     | 0.43 | 0.08 |
| YFL068W   |       | 0               | #N/A | #N/A         | #N/A | #N/A |
| YFL-TYA   | #N/A  | #N/A            | #N/A | #N/A         | #N/A | #N/A |
| YFL-TYB   | #N/A  | #N/A            | #N/A | #N/A         | #N/A | #N/A |
| YFR001W   | LOC1  |                 | 0    | iCEN6        | 1.11 | 0.49 |
| YFR002W   | NIC96 |                 | 0    | iYFR001W     | 1.69 | 0.72 |
| YFR003C   |       | 0               |      | 0 iYFR003C   | #N/A | #N/A |
| YFR004W   | RPN11 | MPR1            |      | iYFR003C     | #N/A | #N/A |
| YFR005C   | SAD1  |                 | 0    | iYFR005C     | 0.60 | 0.19 |
| YFR006W   |       | 0               | #N/A | iYFR005C     | 0.60 | 0.19 |
| YFR007W   |       | 0               | #N/A | iYFRWdelta   | 1.20 | 0.52 |
| YFR008W   |       | 0               |      | 0 iYFR007W   | 1.65 | 0.70 |
| YFR009W   | GCN20 |                 | 0    | itG(GCC)F1   | #N/A | #N/A |
| YFR010W   | UBP6  |                 | 0    | iYFR009W     | 0.78 | 0.30 |
| YFR011C   |       | 0               | #N/A | iYFR011C     | 0.80 | 0.32 |
| YFR012W   |       | 0               | #N/A | itY(GUA)F1   | #N/A | #N/A |
| YFR013W   | IOC3  |                 | 0    | iYFR012W     | 1.87 | 0.82 |
| YFR014C   | CMK1  |                 | 0    | iYFR014C     | 1.61 | 0.71 |
| YFR015C   | GSY1  |                 | 0    | iYFR015C     | 1.09 | 0.48 |
| YFR016C   |       | 0               | #N/A | iYFR016C     | #N/A | #N/A |
| YFR017C   |       | 0               | #N/A | iYFR017C     | 1.40 | 0.63 |
| YFR018C   |       | 0               | #N/A | iYFR018C     | 1.69 | 0.75 |
| YFR019W   | FAB1  | SVL7            |      | iYFR018C     | 1.69 | 0.75 |
| YFR020W   |       | 0               | #N/A | iYFRCdelta9  | 1.52 | 0.68 |
| YFR021W   | AUT10 | AUT10 CVT18 NMR |      | iYFR020W     | 2.11 | 0.86 |
| YFR022W   |       | 0               | #N/A | iYFR021W     | 2.18 | 0.89 |
| YFR023W   | PES4  |                 | 0    | iYFR022W     | 0.58 | 0.18 |
| YFR024C   |       | 0               | #N/A | iYFR024C-A   | #N/A | #N/A |
| YFR024C-A | LSB3  | YFR024C         |      | iYFR024C-A   | #N/A | #N/A |
| YFR025C   | HIS2  |                 | 0    | iYFR025C     | #N/A | #N/A |
| YFR026C   |       | 0               | #N/A | iYFR026C     | 1.36 | 0.61 |
| YFR027W   | ECO1  | CTF7            |      | iYFRWdelta   | 2.32 | 0.91 |
| YFR028C   | CDC14 | OAF3            |      | iYFR028C     | #N/A | #N/A |
| YFR029W   | PTR3  | SSY3            |      | itY(GUA)F2   | 1.73 | 0.76 |



|           |        |                  |   |            |      |      |
|-----------|--------|------------------|---|------------|------|------|
| YFR030W   | MET10  |                  | 0 | iYFR029W   | 1.69 | 0.75 |
| YFR031C   | SMC2   |                  | 0 | iYFR031C   | 0.88 | 0.36 |
| YFR031C-A | RPL2A  | RPL5B            |   | iYFR031C-A | 0.27 | 0.02 |
| YFR032C   | 0      | #N/A             |   | iYFR032C   | 0.70 | 0.25 |
| YFR033C   | QCR6   | COR3 UCR6        |   | iYFR033C   | 0.43 | 0.09 |
| YFR034C   | PHO4   |                  | 0 | iYFR034C   | 0.62 | 0.20 |
| YFR035C   | 0      | #N/A             |   | iYFR035C   | 0.51 | 0.13 |
| YFR036W   | CDC26  | HIT3 SCD26       |   | iYFR036W   | #N/A | #N/A |
| YFR037C   | RSC8   | SWH3             |   | iYFR037C   | #N/A | #N/A |
| YFR038W   | 0      | #N/A             |   | iYFR037C   | #N/A | #N/A |
| YFR039C   | 0      | #N/A             |   | iYFR039C   | 1.85 | 0.81 |
| YFR040W   | SAP155 |                  | 0 | iYFR039C   | 1.85 | 0.81 |
| YFR041C   | 0      |                  | 0 | iYFR041C   | #N/A | #N/A |
| YFR042W   | 0      | #N/A             |   | iYFR041C   | #N/A | #N/A |
| YFR043C   | 0      | #N/A             |   | iYFR043C   | #N/A | #N/A |
| YFR044C   | 0      | #N/A             |   | iYFR044C   | 2.01 | 0.83 |
| YFR045W   | 0      | #N/A             |   | iYFR044C   | 2.01 | 0.83 |
| YFR046C   | 0      |                  | 0 | iYFR046C   | #N/A | #N/A |
| YFR047C   | BNA6   | QPT1             |   | iYFR047C   | 1.71 | 0.76 |
| YFR048W   | 0      |                  | 0 | iYFR047C   | 1.71 | 0.76 |
| YFR049W   | YMR31  |                  | 0 | iYFR048W   | 1.92 | 0.83 |
| YFR050C   | PRE4   |                  | 0 | iYFR050C   | #N/A | #N/A |
| YFR051C   | RET2   |                  | 0 | iYFR051C   | 3.29 | 0.99 |
| YFR052W   | RPN12  | NIN1             |   | iYFR051C   | 3.29 | 0.99 |
| YFR053C   | HXK1   |                  | 0 | iYFR053C-0 | 1.99 | 0.85 |
| YFR054C   | 0      | #N/A             |   | iYFR054C-0 | 1.64 | 0.73 |
| YFR055W   | 0      | #N/A             |   | iYFR054C-3 | 1.11 | 0.49 |
| YFR056C   | 0      | #N/A             |   | iYFR055W-0 | 0.77 | 0.30 |
| YFR057W   | 0      | #N/A             |   | iYFR055W-2 | #N/A | #N/A |
| YGL001C   | ERG26  |                  | 0 | iYGL001C   | 0.75 | 0.28 |
| YGL002W   | ERP6   |                  | 0 | iYGL003C   | 1.59 | 0.71 |
| YGL003C   | CDH1   | HCT1             |   | iYGL003C   | 1.59 | 0.71 |
| YGL004C   | 0      |                  | 0 | iYGL004C   | 1.11 | 0.49 |
| YGL005C   | COD5   | COD5             |   | iYGL005C   | 1.08 | 0.47 |
| YGL006W   | PMC1   |                  | 0 | iYGL007W-1 | 0.99 | 0.42 |
| YGL007W   | 0      | #N/A             |   | iYGL008C   | 0.13 | 0.00 |
| YGL008C   | PMA1   |                  | 0 | iYGL008C   | 0.13 | 0.00 |
| YGL009C   | LEU1   |                  | 0 | iYGL009C   | 0.54 | 0.15 |
| YGL010W   | 0      | #N/A             |   | iYGL011C   | #N/A | #N/A |
| YGL011C   | SCL1   | PRC2             |   | iYGL011C   | #N/A | #N/A |
| YGL012W   | ERG4   |                  | 0 | iYGL013C   | #N/A | #N/A |
| YGL013C   | PDR1   | AMY1 ANT1 BOR2 C |   | iYGL013C   | #N/A | #N/A |
| YGL014W   | PUF4   | YGL023           |   | iYGL015C   | 0.86 | 0.35 |
| YGL015C   | 0      | #N/A             |   | iYGL015C   | 0.86 | 0.35 |
| YGL016W   | KAP122 | PDR6             |   | iYGL017W   | 2.12 | 0.86 |
| YGL017W   | ATE1   |                  | 0 | iYGL018C   | 2.67 | 0.95 |
| YGL018C   | JAC1   |                  | 0 | iYGL018C   | 2.67 | 0.95 |
| YGL019W   | CKB1   |                  | 0 | iYGL020C   | 1.93 | 0.84 |
| YGL020C   | 0      |                  | 0 | iYGL020C   | 1.93 | 0.84 |
| YGL021W   | ALK1   |                  | 0 | iYGL022W   | 0.56 | 0.16 |
| YGL022W   | STT3   |                  | 0 | iYGL023C   | 4.07 | 1.00 |

|         |         |                      |   |            |      |      |
|---------|---------|----------------------|---|------------|------|------|
| YGL023C | PIB2    |                      | 0 | iYGL023C   | 4.07 | 1.00 |
| YGL024W |         |                      | 0 | iYGL026C   | 1.43 | 0.64 |
| YGL025C | PGD1    | HRS1 MED3            |   | iYGL024W   | #N/A | #N/A |
| YGL026C | TRP5    |                      | 0 | iYGL026C   | 1.43 | 0.64 |
| YGL027C | CWH41   | GLS1                 |   | iYGL027C   | #N/A | #N/A |
| YGL028C | SCW11   |                      | 0 | iYGL028C   | 1.54 | 0.69 |
| YGL029W | CGR1    |                      | 0 | iYGL030W   | 0.66 | 0.22 |
| YGL030W | RPL30   |                      | 0 | iYGL031C   | 0.30 | 0.03 |
| YGL031C | RPL24A  | RPL30A               |   | iYGL031C   | 0.30 | 0.03 |
| YGL032C | AGA2    |                      | 0 | iYGL032C   | 0.72 | 0.26 |
| YGL033W | HOP2    |                      | 0 | iYGL034C-1 | 1.23 | 0.55 |
| YGL034C |         | #N/A                 | 0 | iYGL034C-0 | 1.61 | 0.72 |
| YGL035C | MIG1    | CAT4 SSN1 TDS22      |   | iYGL035C   | 0.67 | 0.22 |
| YGL036W |         | #N/A                 | 0 | iYGL037C   | #N/A | #N/A |
| YGL037C | PNC1    |                      | 0 | iYGL037C   | #N/A | #N/A |
| YGL038C | OCH1    | LDB12 NGD29          |   | iYGL038C   | 0.84 | 0.33 |
| YGL039W |         | #N/A                 | 0 | itL(CAA)G2 | 1.08 | 0.47 |
| YGL040C | HEM2    | SLU1                 |   | iYGL040C-0 | 1.11 | 0.49 |
| YGL041C |         | #N/A                 | 0 | iYGL041C   | #N/A | #N/A |
| YGL042C |         | #N/A                 | 0 | iYGL042C   | 1.34 | 0.60 |
| YGL043W | DST1    | P37 PPR2 S-II SII TF |   | iYGL044C   | 2.26 | 0.91 |
| YGL044C | RNA15   |                      | 0 | iYGL044C   | 2.26 | 0.91 |
| YGL045W |         | PAL3                 | 0 | iYGL046W   | 0.99 | 0.42 |
| YGL046W |         | #N/A                 | 0 | iYGLWdelta | 1.66 | 0.74 |
| YGL047W |         | #N/A                 | 0 | iYGL048C   | 1.21 | 0.54 |
| YGL048C | RPT6    | CIM3 CRL3 SCB68 S    |   | iYGL048C   | 1.21 | 0.54 |
| YGL049C | TIF4632 |                      | 0 | iYGL049C   | 1.05 | 0.46 |
| YGL050W |         | #N/A                 | 0 | itR(UCU)G1 | 1.61 | 0.63 |
| YGL051W |         |                      | 0 | iYGL053W   | 1.02 | 0.44 |
| YGL052W |         | #N/A                 | 0 | iYGL053W   | 1.02 | 0.44 |
| YGL053W | PRM8    |                      | 0 | iYGLWdelta | 1.62 | 0.73 |
| YGL054C | ERV14   |                      | 0 | iYGL054C   | #N/A | #N/A |
| YGL055W | OLE1    | MDM2                 |   | iYGL056C   | 0.45 | 0.10 |
| YGL056C | SDS23   |                      | 0 | iYGL056C   | 0.45 | 0.10 |
| YGL057C |         | #N/A                 | 0 | iYGL057C   | 0.49 | 0.15 |
| YGL058W | RAD6    | UBC2                 |   | iYGL059W   | 2.26 | 0.90 |
| YGL059W |         | #N/A                 | 0 | iYGL060W   | 1.89 | 0.82 |
| YGL060W |         |                      | 0 | iYGL061C   | 1.74 | 0.77 |
| YGL061C | DUO1    |                      | 0 | iYGL061C   | 1.74 | 0.77 |
| YGL061L | #N/A    | #N/A                 |   | #N/A       | #N/A | #N/A |
| YGL062W | PYC1    |                      | 0 | iYGL063W   | #N/A | #N/A |
| YGL063W | PUS2    |                      | 0 | iYGL064C   | 2.01 | 0.84 |
| YGL064C | MRH4    |                      | 0 | iYGL064C   | 2.01 | 0.84 |
| YGL065C | ALG2    |                      | 0 | iYGL065C   | 1.44 | 0.65 |
| YGL066W | SGF73   |                      | 0 | iYGL067W   | 2.61 | 0.94 |
| YGL067W | NPY1    |                      | 0 | iYGL068W   | 1.56 | 0.70 |
| YGL068W |         |                      | 0 | iYGL070C   | 2.89 | 0.97 |
| YGL069C |         |                      | 0 | iYGL068W   | 1.56 | 0.70 |
| YGL070C | RPB9    | SHI1 SSU73           |   | iYGL070C   | 2.89 | 0.97 |
| YGL071W | RCS1    | AFT1                 |   | iYGL072C   | 0.43 | 0.08 |
| YGL072C |         | #N/A                 | 0 | iYGL072C   | 0.43 | 0.08 |



|         |         |                   |              |      |      |
|---------|---------|-------------------|--------------|------|------|
| YGL073W | HSF1    | EXA3 MAS3         | iYGL075C     | 1.54 | 0.69 |
| YGL074C | 0       | #N/A              | iYGL072C     | 0.43 | 0.08 |
| YGL075C | MPS2    | MMC1              | iYGL075C     | 1.54 | 0.69 |
| YGL076C | RPL7A   |                   | 0 iYGL076C   | 1.03 | 0.44 |
| YGL077C | HNM1    |                   | 0 iYGL077C   | 1.17 | 0.52 |
| YGL078C | DBP3    |                   | 0 iYGL078C   | 0.84 | 0.34 |
| YGL079W | 0       | #N/A              | iYGL080W     | 1.74 | 0.76 |
| YGL080W | 0       |                   | 0 iYGL081W   | 1.56 | 0.70 |
| YGL081W | 0       | #N/A              | iYGL082W     | 1.05 | 0.44 |
| YGL082W | 0       | #N/A              | iYGL083W     | 1.56 | 0.70 |
| YGL083W | SCY1    |                   | 0 iYGL084C   | 1.66 | 0.74 |
| YGL084C | GUP1    |                   | 0 iYGL084C   | 1.66 | 0.74 |
| YGL085W | 0       | #N/A              | iYGL086W     | #N/A | #N/A |
| YGL086W | MAD1    |                   | 0 iYGL087C   | 1.94 | 0.82 |
| YGL087C | MMS2    |                   | 0 iYGL087C   | 1.94 | 0.82 |
| YGL088W | 0       | #N/A              | iYGL089C     | 0.52 | 0.14 |
| YGL089C | MF(ALP) |                   | 0 iYGL089C   | 0.52 | 0.14 |
| YGL090W | LIF1    |                   | 0 iYGL091C   | #N/A | #N/A |
| YGL091C | NBP35   |                   | 0 iYGL091C   | #N/A | #N/A |
| YGL092W | NUP145  | RAT10             | iYGL093W     | 1.86 | 0.81 |
| YGL093W | SPC105  |                   | 0 iYGL094C   | 2.24 | 0.90 |
| YGL094C | PAN2    |                   | 0 iYGL094C   | 2.24 | 0.90 |
| YGL095C | VPS45   | STT10 VPL28       | iYGL095C     | 1.39 | 0.62 |
| YGL096W | TOS8    |                   | 0 iYGL097W-1 | 0.46 | 0.10 |
| YGL097W | SRM1    | MTR1 PRP20        | iYGLCtau3    | #N/A | #N/A |
| YGL098W | 0       | SLT1              | iYGL099W     | 0.67 | 0.24 |
| YGL099W | LSG1    | KRE35             | iYGL100W     | 1.37 | 0.60 |
| YGL100W | SEH1    |                   | 0 iYGL101W   | 1.45 | 0.65 |
| YGL101W | 0       | #N/A              | iYGL102C     | 0.55 | 0.16 |
| YGL102C | 0       | #N/A              | iYGL102C     | 0.55 | 0.16 |
| YGL103W | RPL28   | CYH2              | iYGL104C     | 0.87 | 0.35 |
| YGL104C | VPS73   |                   | 0 iYGL104C   | 0.87 | 0.35 |
| YGL105W | ARC1    |                   | 0 iYGL106W   | 1.36 | 0.61 |
| YGL106W | MLC1    |                   | 0 iYGL107C   | 2.39 | 0.91 |
| YGL107C | 0       |                   | 0 iYGL107C   | 2.39 | 0.91 |
| YGL108C | 0       | #N/A              | iYGL108C     | #N/A | #N/A |
| YGL109W | 0       | #N/A              | iYGL110C     | #N/A | #N/A |
| YGL110C | 0       |                   | 0 iYGL110C   | #N/A | #N/A |
| YGL111W | NSA1    |                   | 0 iYGL112C   | #N/A | #N/A |
| YGL112C | TAF6    | TAF60 TafII60     | iYGL112C     | #N/A | #N/A |
| YGL113W | SLD3    |                   | 0 iYGL114W   | 1.55 | 0.68 |
| YGL114W | 0       | #N/A              | iYGL115W     | 1.40 | 0.63 |
| YGL115W | SNF4    | CAT3 SCI1         | iYGL116W     | 1.21 | 0.54 |
| YGL116W | CDC20   | PAC5              | iYGL117W     | 1.34 | 0.60 |
| YGL117W | 0       | #N/A              | iYGL118C     | #N/A | #N/A |
| YGL118C | 0       | #N/A              | iYGL118C     | #N/A | #N/A |
| YGL119W | ABC1    | COQ8              | iYGL120C     | 1.89 | 0.82 |
| YGL120C | PRP43   | JA1               | iYGL120C     | 1.89 | 0.82 |
| YGL121C | 0       |                   | 0 iYGL121C   | 1.20 | 0.53 |
| YGL122C | NAB2    |                   | 0 iYGL122C   | 1.19 | 0.53 |
| YGL123W | RPS2    | RPS4 SUP138 SUP35 | iYGL124C     | 0.68 | 0.24 |

|         |       |                  |   |            |      |      |
|---------|-------|------------------|---|------------|------|------|
| YGL124C | MON1  |                  | 0 | iYGL124C   | 0.68 | 0.24 |
| YGL125W | MET13 | MET11 MRPL45     |   | iYGL126W   | 0.49 | 0.12 |
| YGL126W | SCS3  |                  | 0 | iYGL127C   | 2.18 | 0.89 |
| YGL127C | SOH1  |                  | 0 | iYGL127C   | 2.18 | 0.89 |
| YGL128C | CWC23 |                  | 0 | iYGL127C   | 2.18 | 0.89 |
| YGL129C | RSM23 |                  | 0 | iYGL129C   | #N/A | #N/A |
| YGL130W | CEG1  |                  | 0 | iYGL131C   | #N/A | #N/A |
| YGL131C | SNT2  |                  | 0 | iYGL131C   | #N/A | #N/A |
| YGL132W | 0     | #N/A             |   | iYGL133W   | #N/A | #N/A |
| YGL133W | ITC1  |                  | 0 | iYGL134W   | #N/A | #N/A |
| YGL134W | PCL10 |                  | 0 | iYGL135W   | 1.07 | 0.44 |
| YGL135W | RPL1B | SSM2             |   | iYGL136C   | 0.86 | 0.35 |
| YGL136C | MRM2  |                  | 0 | iYGL136C   | 0.86 | 0.35 |
| YGL137W | SEC27 |                  | 0 | iYGL138C   | 1.47 | 0.66 |
| YGL138C | 0     | #N/A             |   | iYGL138C   | 1.47 | 0.66 |
| YGL139W | 0     | #N/A             |   | iYGL140C   | 1.53 | 0.69 |
| YGL140C | 0     | #N/A             |   | iYGL140C   | 1.53 | 0.69 |
| YGL141W | HUL5  |                  | 0 | iYGL142C   | #N/A | #N/A |
| YGL142C | GPI10 |                  | 0 | iYGL142C   | #N/A | #N/A |
| YGL143C | MRF1  |                  | 0 | iYGL143C   | 1.15 | 0.50 |
| YGL144C | 0     |                  | 0 | iYGL144C   | 1.93 | 0.82 |
| YGL145W | TIP20 | TIP1             |   | iYGL146C   | 1.96 | 0.84 |
| YGL146C | 0     | #N/A             |   | iYGL146C   | 1.96 | 0.84 |
| YGL147C | RPL9A |                  | 0 | iYGL147C   | 0.36 | 0.05 |
| YGL148W | ARO2  |                  | 0 | iYGL149W   | #N/A | #N/A |
| YGL149W | 0     | #N/A             |   | iYGL151W   | #N/A | #N/A |
| YGL150C | INO80 |                  | 0 | iYGL149W   | #N/A | #N/A |
| YGL151W | NUT1  |                  | 0 | iYGL152C   | #N/A | #N/A |
| YGL152C | 0     | #N/A             |   | iYGL152C   | #N/A | #N/A |
| YGL153W | PEX14 |                  | 0 | iYGL154C   | #N/A | #N/A |
| YGL154C | LYS5  |                  | 0 | iYGL154C   | #N/A | #N/A |
| YGL155W | CDC43 | CAL1             |   | iYGL156W   | 2.30 | 0.90 |
| YGL156W | AMS1  |                  | 0 | iYGL157W   | 1.15 | 0.50 |
| YGL157W | 0     | #N/A             |   | iYGL158W   | 1.55 | 0.68 |
| YGL158W | RCK1  |                  | 0 | itL(CAA)G1 | #N/A | #N/A |
| YGL159W | 0     | #N/A             |   | iYGL160W   | #N/A | #N/A |
| YGL160W | 0     | #N/A             |   | iYGL161C   | 2.58 | 0.95 |
| YGL161C | 0     |                  | 0 | iYGL161C   | 2.58 | 0.95 |
| YGL162W | SUT1  |                  | 0 | iYGL163C-1 | 0.45 | 0.09 |
| YGL163C | RAD54 | XRS1             |   | iYGL163C-0 | 1.43 | 0.64 |
| YGL164C | 0     |                  | 0 | iYGL164C   | 1.12 | 0.49 |
| YGL165C | 0     | #N/A             |   | iYGL164C   | 1.12 | 0.49 |
| YGL166W | CUP2  | ACE1             |   | iYGL167C   | 1.77 | 0.78 |
| YGL167C | PMR1  | BSD1 LDB1        |   | iYGL167C   | 1.77 | 0.78 |
| YGL168W | 0     |                  | 0 | iYGL169W   | #N/A | #N/A |
| YGL169W | SUA5  |                  | 0 | itK(CUU)G2 | #N/A | #N/A |
| YGL170C | SPO74 |                  | 0 | iYGL170C   | 0.94 | 0.40 |
| YGL171W | ROK1  |                  | 0 | iYGL172W   | 1.78 | 0.79 |
| YGL172W | NUP49 | NSP49            |   | iYGL173C   | #N/A | #N/A |
| YGL173C | KEM1  | DST2 RAR5 SEP1 S |   | iYGL173C   | #N/A | #N/A |
| YGL174W | BUD13 | CWC26            |   | iYGL175C   | 1.84 | 0.79 |

|         |        |                 |              |      |      |
|---------|--------|-----------------|--------------|------|------|
| YGL175C | SAE2   | COM1            | iYGL175C     | 1.84 | 0.79 |
| YGL176C | 0      | #N/A            | iYGL176C     | #N/A | #N/A |
| YGL177W | 0      | #N/A            | iYGL179C-1   | #N/A | #N/A |
| YGL178W | MPT5   | HTR1 PUF5 UTH4  | iYGL177W-1   | 0.50 | 0.13 |
| YGL179C | TOS3   |                 | 0 iYGL179C-0 | #N/A | #N/A |
| YGL180W | APG1   | APG1 AUT3 CVT10 | iYGL181W     | 1.81 | 0.80 |
| YGL181W | GTS1   | FHT1            | iYGL182C     | 2.14 | 0.89 |
| YGL182C | 0      | #N/A            | iYGL182C     | 2.14 | 0.89 |
| YGL183C | MND1   |                 | 0 iYGL183C   | #N/A | #N/A |
| YGL184C | STR3   |                 | 0 iYGL184C   | #N/A | #N/A |
| YGL185C | 0      | #N/A            | iYGL185C     | #N/A | #N/A |
| YGL186C | 0      |                 | 0 iYGL186C   | 2.28 | 0.91 |
| YGL187C | COX4   |                 | 0 iYGL187C   | 0.70 | 0.25 |
| YGL188C | 0      | #N/A            | iYGL188C     | #N/A | #N/A |
| YGL189C | RPS26A | RPS26           | iYGL189C     | 0.29 | 0.03 |
| YGL190C | CDC55  |                 | 0 iYGL190C   | 0.56 | 0.16 |
| YGL191W | COX13  |                 | 0 iYGL192W   | 0.97 | 0.41 |
| YGL192W | IME4   | SPO8            | iYGL194C     | #N/A | #N/A |
| YGL193C | 0      | #N/A            | iYGL192W     | 0.97 | 0.41 |
| YGL194C | HOS2   | RTL1            | iYGL194C     | #N/A | #N/A |
| YGL195W | GCN1   |                 | 0 iYGL196W   | 2.83 | 0.97 |
| YGL196W | 0      | #N/A            | iYGL197W     | 1.06 | 0.46 |
| YGL197W | MDS3   |                 | 0 iYGL198W   | 1.46 | 0.65 |
| YGL198W | 0      |                 | 0 iYGL200C   | 2.05 | 0.86 |
| YGL199C | 0      | #N/A            | iYGL198W     | 1.46 | 0.65 |
| YGL200C | EMP24  | BST2            | iYGL200C     | 2.05 | 0.86 |
| YGL201C | MCM6   |                 | 0 iYGL201C   | 1.42 | 0.63 |
| YGL202W | ARO8   |                 | 0 itK(UUU)G1 | 0.77 | 0.29 |
| YGL203C | KEX1   |                 | 0 iYGL203C   | 1.69 | 0.75 |
| YGL204C | 0      | #N/A            | iYGL204C     | 0.95 | 0.39 |
| YGL205W | POX1   | FOX1            | iYGL206C     | 1.87 | 0.81 |
| YGL206C | CHC1   | SWA5            | iYGL206C     | 1.87 | 0.81 |
| YGL207W | SPT16  | CDC68 SSF1      | iYGL208W     | #N/A | #N/A |
| YGL208W | SIP2   | SPM2            | iYGL209W     | 1.16 | 0.51 |
| YGL209W | MIG2   | MLZ1            | iYGL210W     | 0.40 | 0.07 |
| YGL210W | YPT32  |                 | 0 iYGL211W   | #N/A | #N/A |
| YGL211W | 0      |                 | 0 iYGL212W   | #N/A | #N/A |
| YGL212W | VAM7   | VPS43           | iYGL213C     | #N/A | #N/A |
| YGL213C | SKI8   | REC103          | iYGL213C     | #N/A | #N/A |
| YGL214W | 0      | #N/A            | iYGL215W     | #N/A | #N/A |
| YGL215W | CLG1   |                 | 0 iYGL216W   | 1.04 | 0.45 |
| YGL216W | KIP3   |                 | 0 iYGL218W   | 1.72 | 0.76 |
| YGL217C | 0      | #N/A            | iYGL216W     | 1.04 | 0.45 |
| YGL218W | 0      |                 | 0 iYGL220W   | #N/A | #N/A |
| YGL219C | MMM2   | MMM2            | iYGL218W     | 1.72 | 0.76 |
| YGL220W | 0      | #N/A            | iYGL221C     | #N/A | #N/A |
| YGL221C | NIF3   |                 | 0 iYGL221C   | #N/A | #N/A |
| YGL222C | EDC1   |                 | 0 iYGL222C   | 1.87 | 0.82 |
| YGL223C | COD3   | COD3 LDB11      | iYGL223C     | #N/A | #N/A |
| YGL224C | SDT1   | SSM1            | iYGL224C     | 1.09 | 0.47 |
| YGL225W | VRG4   | GOG5 LDB3 VAN2  | itV(AAC)G3-  | #N/A | #N/A |

|         |        |                  |              |      |      |
|---------|--------|------------------|--------------|------|------|
| YGL226W | 0      | #N/A             | iYGL226C-A   | #N/A | #N/A |
| YGL227W | VID30  | GID1             | iYGL228W     | #N/A | #N/A |
| YGL228W | SHE10  |                  | 0 iYGL229C   | 2.40 | 0.93 |
| YGL229C | SAP4   |                  | 0 iYGL229C   | 2.40 | 0.93 |
| YGL230C | 0      | #N/A             | iYGL230C     | #N/A | #N/A |
| YGL231C | 0      | #N/A             | iYGL231C     | #N/A | #N/A |
| YGL232W | 0      |                  | 0 iYGL233W   | #N/A | #N/A |
| YGL233W | SEC15  |                  | 0 iYGL234W   | 0.75 | 0.26 |
| YGL234W | ADE5,7 |                  | 0 iYGL235W   | 2.04 | 0.87 |
| YGL235W | 0      | #N/A             | iYGL237C     | 1.69 | 0.75 |
| YGL236C | MTO1   | IPS1             | iYGL235W     | 2.04 | 0.87 |
| YGL237C | HAP2   |                  | 0 iYGL237C   | 1.69 | 0.75 |
| YGL238W | CSE1   | KAP109           | iYGL240W     | #N/A | #N/A |
| YGL239C | 0      | #N/A             | iYGL238W     | #N/A | #N/A |
| YGL240W | DOC1   | APC10            | iYGL242C     | #N/A | #N/A |
| YGL241W | KAP114 |                  | 0 iYGL242C   | #N/A | #N/A |
| YGL242C | 0      | #N/A             | iYGL242C     | #N/A | #N/A |
| YGL243W | TAD1   |                  | 0 iYGL244W   | #N/A | #N/A |
| YGL244W | RTF1   | CSL3             | iYGL245W     | 1.53 | 0.65 |
| YGL245W | 0      |                  | 0 iYGL246C   | #N/A | #N/A |
| YGL246C | RAI1   |                  | 0 iYGL246C   | #N/A | #N/A |
| YGL247W | BRR6   |                  | 0 iYGL248W   | #N/A | #N/A |
| YGL248W | PDE1   |                  | 0 iYGL249W   | 1.38 | 0.62 |
| YGL249W | ZIP2   |                  | 0 iYGL250W   | 1.57 | 0.69 |
| YGL250W | 0      | #N/A             | iYGL251C     | 1.19 | 0.52 |
| YGL251C | HFM1   | MER3             | iYGL251C     | 1.19 | 0.52 |
| YGL252C | RTG2   |                  | 0 iYGL252C   | 2.26 | 0.90 |
| YGL253W | HXK2   | HEX1 HKB SCI2    | iYGL254W     | 0.36 | 0.05 |
| YGL254W | FZF1   | NRC299 RSU1 SUL1 | iYGL255W     | #N/A | #N/A |
| YGL255W | ZRT1   |                  | 0 iYGL256W-3 | 0.87 | 0.36 |
| YGL256W | ADH4   | NRC465 ZRG5      | iYGL257C     | 1.41 | 0.63 |
| YGL257C | MNT2   |                  | 0 iYGL257C   | 1.41 | 0.63 |
| YGL258W | 0      | #N/A             | iYGL259W-1   | 1.54 | 0.69 |
| YGL259W | YPS5   |                  | 0 iYGL260W   | 1.17 | 0.52 |
| YGL260W | 0      | #N/A             | iYGL261C     | 0.86 | 0.35 |
| YGL261C | 0      | #N/A             | iYGL261C     | 0.86 | 0.35 |
| YGL262W | 0      | #N/A             | iYGL263W     | #N/A | #N/A |
| YGL263W | COS12  |                  | 0 iYGLWomeg  | #N/A | #N/A |
| YGR001C | 0      | #N/A             | iYGR001C     | 1.24 | 0.55 |
| YGR002C | 0      | EAF2 GOD1        | iYGR002C     | 2.12 | 0.85 |
| YGR003W | 0      | CULB CULLIN B    | iYGR002C     | 2.12 | 0.85 |
| YGR004W | 0      |                  | 0 iYGR003W   | 1.09 | 0.48 |
| YGR005C | TFG2   |                  | 0 iYGR005C   | 1.79 | 0.79 |
| YGR006W | PRP18  |                  | 0 iYGR005C   | 1.79 | 0.79 |
| YGR007W | MUQ1   | ECT1             | iYGR006W     | 2.13 | 0.88 |
| YGR008C | STF2   |                  | 0 iYGR008C   | 1.19 | 0.53 |
| YGR009C | SEC9   | HSS7             | iYGR009C     | 1.55 | 0.67 |
| YGR010W | NMA2   |                  | 0 iYGR009C   | 1.55 | 0.67 |
| YGR011W | 0      | #N/A             | iYGR009C     | 1.55 | 0.67 |
| YGR012W | 0      | #N/A             | iYGR011W     | 2.10 | 0.86 |
| YGR013W | SNU71  |                  | 0 iYGR012W   | 1.35 | 0.61 |

|         |        |        |      |            |      |      |
|---------|--------|--------|------|------------|------|------|
| YGR014W | MSB2   |        | 0    | iYGR013W   | 0.48 | 0.11 |
| YGR015C |        | 0      | #N/A | iYGR015C   | 1.40 | 0.63 |
| YGR016W |        | 0      | #N/A | iYGR015C   | 1.40 | 0.63 |
| YGR017W |        | 0      | #N/A | iYGR016W   | 1.53 | 0.68 |
| YGR018C |        | 0      | #N/A | iYGR018C   | 1.09 | 0.48 |
| YGR019W | UGA1   |        | 0    | iYGR018C   | 1.09 | 0.48 |
| YGR020C | VMA7   |        | 0    | iYGR020C   | 1.38 | 0.62 |
| YGR021W |        | 0      | #N/A | iYGR020C   | 1.38 | 0.62 |
| YGR022C |        | 0      | #N/A | iYGR023W   | 0.80 | 0.31 |
| YGR023W | MTL1   |        | 0    | iYGR021W   | 1.69 | 0.75 |
| YGR024C |        | 0      |      | iYGR026W   | 0.56 | 0.16 |
| YGR025W |        | 0      | #N/A | itD(GUC)G1 | 0.22 | 0.01 |
| YGR026W |        | 0      | #N/A | itD(GUC)G1 | 0.22 | 0.01 |
| YGR027C | RPS25A | RPS31A |      | iYGR027C   | 0.33 | 0.04 |
| YGR028W | MSP1   | YTA4   |      | itE(UUC)G3 | 2.46 | 0.71 |
| YGR029W | ERV1   |        | 0    | iYGR028W   | 1.83 | 0.80 |
| YGR030C | POP6   |        | 0    | iYGR030C   | #N/A | #N/A |
| YGR031W |        | 0      | #N/A | iYGR030C   | #N/A | #N/A |
| YGR032W | GSC2   | FKS2   |      | iYGR031W   | 0.98 | 0.42 |
| YGR033C |        | 0      |      | iYGR033C   | 0.37 | 0.05 |
| YGR034W | RPL26B |        | 0    | iYGR033C   | 0.37 | 0.05 |
| YGR035C |        | 0      | #N/A | iYGR035C   | 0.36 | 0.05 |
| YGR036C | CAX4   | CWH8   |      | iYGR036C   | 1.61 | 0.72 |
| YGR037C | ACB1   |        | 0    | iYGR037C   | 1.20 | 0.53 |
| YGR038W | ORM1   |        | 0    | iYGR037C   | 1.20 | 0.53 |
| YGR039W |        | 0      | #N/A | iYGRcdelta | #N/A | #N/A |
| YGR040W | KSS1   |        | 0    | iYGR039W   | #N/A | #N/A |
| YGR041W | BUD9   |        | 0    | iYGR040W   | 0.39 | 0.06 |
| YGR042W |        | 0      | #N/A | iYGR041W   | 2.43 | 0.93 |
| YGR043C |        | 0      | #N/A | iYGR043C-0 | #N/A | #N/A |
| YGR044C | RME1   | CSP1   |      | iYGR045C   | 1.61 | 0.72 |
| YGR045C |        | 0      | #N/A | iYGR045C   | 1.61 | 0.72 |
| YGR046W |        | 0      | #N/A | iYGR045C   | 1.61 | 0.72 |
| YGR047C | TFC4   | PCF1   |      | iYGR047C   | 1.10 | 0.48 |
| YGR048W | UFD1   |        | 0    | iYGR047C   | 1.10 | 0.48 |
| YGR049W | SCM4   |        | 0    | iYGR048W   | 0.83 | 0.33 |
| YGR050C |        | 0      | #N/A | iYGR050C   | 0.60 | 0.19 |
| YGR051C |        | 0      | #N/A | iYGR051C   | 1.34 | 0.60 |
| YGR052W |        | 0      |      | iYGR051C   | 1.34 | 0.60 |
| YGR053C |        | 0      | #N/A | iYGR053C   | 1.82 | 0.80 |
| YGR054W |        | 0      | #N/A | iYGR053C   | 1.82 | 0.80 |
| YGR055W | MUP1   |        | 0    | iYGR054W   | 0.25 | 0.02 |
| YGR056W | RSC1   |        | 0    | iYGR055W   | 0.85 | 0.34 |
| YGR057C | LST7   |        | 0    | iYGR057C   | 1.68 | 0.71 |
| YGR058W |        | 0      | #N/A | iYGR057C   | 1.68 | 0.71 |
| YGR059W | SPR3   |        | 0    | iYGR058W   | 1.42 | 0.63 |
| YGR060W | ERG25  |        | 0    | iSNR48     | 0.18 | 0.01 |
| YGR061C | ADE6   |        | 0    | iYGR061C   | 0.88 | 0.36 |
| YGR062C | COX18  | OXA2   |      | iYGR062C   | 1.23 | 0.55 |
| YGR063C | SPT4   |        | 0    | iYGR064W   | #N/A | #N/A |
| YGR064W |        | 0      | #N/A | iYGR062C   | 1.23 | 0.55 |

|         |        |                |      |            |      |      |
|---------|--------|----------------|------|------------|------|------|
| YGR065C | VHT1   |                | 0    | iYGR065C   | 2.07 | 0.87 |
| YGR066C |        | 0              | #N/A | iYGR066C   | 2.13 | 0.86 |
| YGR067C |        | 0              | #N/A | iYGR067C   | 0.61 | 0.19 |
| YGR068C |        | 0              | #N/A | iYGR069W   | 1.03 | 0.44 |
| YGR069W |        | 0              | #N/A | iYGR067C   | 0.61 | 0.19 |
| YGR070W | ROM1   | SKC1           |      | iYGR069W   | 1.03 | 0.44 |
| YGR071C |        | 0              | #N/A | iYGR071C   | 1.50 | 0.67 |
| YGR072W | UPF3   | SUA6           |      | iYGR071C   | 1.50 | 0.67 |
| YGR073C |        | 0              | #N/A | iYGR075C   | 1.34 | 0.60 |
| YGR074W | SMD1   | SPP92 Sm D1    |      | iYGR072W   | #N/A | #N/A |
| YGR075C | PRP38  |                | 0    | iYGR075C   | 1.34 | 0.60 |
| YGR076C | MRPL25 | YMR26          |      | iYGR076C   | #N/A | #N/A |
| YGR077C | PEX8   | PAS6           |      | iYGR077C   | 1.43 | 0.64 |
| YGR078C | PAC10  | GIM2 PFD3 RKS2 |      | iYGR078C   | #N/A | #N/A |
| YGR079W |        | 0              | #N/A | iYGR078C   | #N/A | #N/A |
| YGR080W | TWF1   |                | 0    | iYGR079W   | #N/A | #N/A |
| YGR081C |        | 0              |      | iYGR081C   | 1.71 | 0.75 |
| YGR082W | TOM20  | MAS20 MOM19    |      | iYGR081C   | 1.71 | 0.75 |
| YGR083C | GCD2   | GCD12          |      | iYGR083C   | 1.17 | 0.51 |
| YGR084C | MRP13  |                | 0    | iYGR084C   | #N/A | #N/A |
| YGR085C | RPL11B |                | 0    | iYGR085C   | 0.35 | 0.04 |
| YGR086C |        | 0              |      | iYGR086C   | 0.38 | 0.06 |
| YGR087C | PDC6   |                | 0    | iYGR087C-0 | 1.62 | 0.72 |
| YGR088W | CTT1   |                | 0    | iYGR087C-1 | 1.41 | 0.63 |
| YGR089W |        | 0              |      | iYGR088W   | 2.14 | 0.88 |
| YGR090W |        | 0              |      | itT(UGU)G1 | 0.56 | 0.16 |
| YGR091W | PRP31  |                | 0    | iYGR090W   | 0.90 | 0.37 |
| YGR092W | DBF2   |                | 0    | iYGR091W   | 0.67 | 0.24 |
| YGR093W |        | 0              | #N/A | iYGR092W   | 1.09 | 0.47 |
| YGR094W | VAS1   |                | 0    | iYGR093W   | #N/A | #N/A |
| YGR095C | RRP46  |                | 0    | iYGR095C   | #N/A | #N/A |
| YGR096W |        | 0              |      | iYGR095C   | #N/A | #N/A |
| YGR097W | ASK10  |                | 0    | iYGR096W   | 0.48 | 0.11 |
| YGR098C | ESP1   |                | 0    | iYGR098C   | 2.24 | 0.90 |
| YGR099W | TEL2   |                | 0    | iYGR098C   | 2.24 | 0.90 |
| YGR100W | MDR1   | GYP2 MIC1      |      | iYGR099W   | 1.87 | 0.82 |
| YGR101W | PCP1   | MDM37 RBD1     |      | iYGR100W   | #N/A | #N/A |
| YGR102C |        | 0              | #N/A | iYGR102C   | 1.87 | 0.82 |
| YGR103W | NOP7   | YPH1           |      | iYGR102C   | 1.87 | 0.82 |
| YGR104C | SRB5   |                | 0    | iYGR104C   | 1.65 | 0.72 |
| YGR105W | VMA21  |                | 0    | iYGR104C   | 1.65 | 0.72 |
| YGR106C |        | 0              | #N/A | iYGR106C   | 1.04 | 0.45 |
| YGR107W |        | 0              | #N/A | iYGRWdelta | 1.07 | 0.47 |
| YGR108W | CLB1   | SCB1           |      | iYGR107W   | #N/A | #N/A |
| YGR109C | CLB6   |                | 0    | iYGR109C   | 1.06 | 0.45 |
| YGR110W |        | 0              | #N/A | iYGRdelta2 | 1.70 | 0.76 |
| YGR111W |        | 0              | #N/A | iYGR110W   | 1.44 | 0.64 |
| YGR112W | SHY1   |                | 0    | iYGR111W   | 1.53 | 0.68 |
| YGR113W | DAM1   |                | 0    | iYGR112W   | 2.39 | 0.92 |
| YGR114C |        | 0              | #N/A | iYGR116W   | #N/A | #N/A |
| YGR115C |        | 0              | #N/A | iYGR116W   | #N/A | #N/A |



|         |         |                 |              |      |      |
|---------|---------|-----------------|--------------|------|------|
| YGR116W | SPT6    | CRE2 SSN20      | iYGR113W     | 1.13 | 0.50 |
| YGR117C | 0       | #N/A            | iYGR117C     | 0.27 | 0.02 |
| YGR118W | RPS23A  |                 | 0 iYGR117C   | 0.27 | 0.02 |
| YGR119C | NUP57   |                 | 0 iYGR119C   | 1.87 | 0.81 |
| YGR120C | SEC35   | SEC35           | iYGR120C     | #N/A | #N/A |
| YGR121C | MEP1    | AMT1            | iYGR121C     | 1.27 | 0.57 |
| YGR122W | 0       | #N/A            | iYGR121C     | 1.27 | 0.57 |
| YGR123C | PPT1    |                 | 0 iYGR123C   | 1.33 | 0.59 |
| YGR124W | ASN2    |                 | 0 itI(AAU)G  | 1.04 | 0.45 |
| YGR125W | 0       | #N/A            | iYGR124W     | 1.27 | 0.56 |
| YGR126W | 0       | #N/A            | iYGR125W     | 1.31 | 0.59 |
| YGR127W | 0       | #N/A            | iYGR126W     | #N/A | #N/A |
| YGR128C | UTP8    |                 | 0 iYGR128C   | 1.38 | 0.59 |
| YGR129W | SYF2    | NTC31           | iYGR128C     | 1.38 | 0.59 |
| YGR130C | 0       | #N/A            | iYGR130C     | 2.06 | 0.85 |
| YGR131W | 0       | #N/A            | iYGR130C     | 2.06 | 0.85 |
| YGR132C | PHB1    |                 | 0 iYGR132C   | 1.97 | 0.85 |
| YGR133W | PEX4    | PAS2 UBC10      | iYGR132C     | 1.97 | 0.85 |
| YGR134W | CAF130  |                 | 0 iYGR133W   | 2.03 | 0.86 |
| YGR135W | PRE9    |                 | 0 iYGR134W   | 1.54 | 0.69 |
| YGR136W | LSB1    |                 | 0 iYGR135W   | 0.66 | 0.22 |
| YGR137W | 0       | #N/A            | iYGR135W     | 0.66 | 0.22 |
| YGR138C | TPO2    |                 | 0 iYGR138C   | #N/A | #N/A |
| YGR139W | 0       | #N/A            | iYGR138C     | #N/A | #N/A |
| YGR140W | CBF2    | CBF3A CEP2 CSL5 | iYGR139W     | 1.07 | 0.46 |
| YGR141W | VPS62   |                 | 0 iYGR140W   | 1.86 | 0.82 |
| YGR142W | BTN2    |                 | 0 iYGR141W   | 0.56 | 0.16 |
| YGR143W | SKN1    |                 | 0 itA(AGC)G  | 0.76 | 0.29 |
| YGR144W | THI4    | ESP35 MOL1      | itG(UCC)G    | 1.22 | 0.54 |
| YGR145W | 0       |                 | 0 iYGR144W   | 2.28 | 0.84 |
| YGR146C | 0       | #N/A            | iYGR146C     | 0.52 | 0.14 |
| YGR147C | NAT2    |                 | 0 iYGR147C   | 3.38 | 0.98 |
| YGR148C | RPL24B  | RPL30B          | iYGR148C     | #N/A | #N/A |
| YGR149W | 0       | #N/A            | iYGR148C     | #N/A | #N/A |
| YGR150C | 0       | #N/A            | iYGR150C     | 1.97 | 0.84 |
| YGR151C | 0       | #N/A            | iYGR152C     | 1.81 | 0.80 |
| YGR152C | RSR1    | BUD1            | iYGR152C     | 1.81 | 0.80 |
| YGR153W | TOS10   | #N/A            | iYGR152C     | 1.81 | 0.80 |
| YGR154C | 0       | #N/A            | iYGR154C     | 0.62 | 0.20 |
| YGR155W | CYS4    | NHS5 STR4 VMA41 | iYGR154C     | 0.62 | 0.20 |
| YGR156W | PTI1    |                 | 0 iYGR155W   | 1.63 | 0.73 |
| YGR157W | CHO2    | PEM1            | iYGR156W     | #N/A | #N/A |
| YGR158C | MTR3    |                 | 0 iYGR158C   | 1.61 | 0.72 |
| YGR159C | NSR1    | SHE5            | iYGR160W     | 1.04 | 0.45 |
| YGR160W | FYV13   | #N/A            | iYGR158C     | 1.61 | 0.72 |
| YGR161C | 0       |                 | 0 iYGR161C-0 | 0.47 | 0.11 |
| YGR162W | TIF4631 |                 | 0 itV(AAC)G2 | 0.34 | 0.04 |
| YGR163W | GTR2    |                 | 0 iYGR162W   | 1.44 | 0.65 |
| YGR164W | 0       | #N/A            | iYGR162W     | 1.44 | 0.65 |
| YGR165W | 0       |                 | 0 itR(UCU)G2 | 1.14 | 0.50 |
| YGR166W | KRE11   | TRS65           | iYGR165W     | 1.63 | 0.73 |

|         |       |                  |              |      |      |
|---------|-------|------------------|--------------|------|------|
| YGR167W | CLC1  | SCD4             | iYGR166W     | 2.33 | 0.90 |
| YGR168C | 0     | #N/A             | iYGR168C     | #N/A | #N/A |
| YGR169C | PUS6  |                  | 0 iYGR169C   | 0.77 | 0.29 |
| YGR170W | PSD2  |                  | 0 iYGR169C   | 0.77 | 0.29 |
| YGR171C | MSM1  |                  | 0 iYGR171C   | #N/A | #N/A |
| YGR172C | YIP1  |                  | 0 iYGR172C   | 1.20 | 0.52 |
| YGR173W | 0     | GIR1             | iYGR172C     | 1.20 | 0.52 |
| YGR174C | CBP4  |                  | 0 iYGR174C   | 1.83 | 0.80 |
| YGR175C | ERG1  |                  | 0 iYGR175C   | 0.36 | 0.05 |
| YGR176W | 0     | #N/A             | iYGR175C     | 0.36 | 0.05 |
| YGR177C | ATF2  |                  | 0 iYGR177C   | 0.85 | 0.34 |
| YGR178C | PBP1  | MRS16            | iYGR178C     | 1.18 | 0.52 |
| YGR179C | OKP1  |                  | 0 iYGR179C   | 2.77 | 0.93 |
| YGR180C | RNR4  | CRT3             | iYGR180C     | 0.41 | 0.07 |
| YGR181W | TIM13 |                  | 0 itL(CAA)G3 | 1.95 | 0.83 |
| YGR182C | 0     | #N/A             | iYGR182C     | 0.95 | 0.40 |
| YGR183C | QCR9  | UCR9             | iYGR183C     | 1.38 | 0.61 |
| YGR184C | UBR1  | PTR1             | iYGR184C     | 1.43 | 0.63 |
| YGR185C | TYS1  | TTS1 TYRRS       | iYGR185C     | 2.33 | 0.89 |
| YGR186W | TFG1  | RAP74 SSU71      | iYGR185C     | 2.33 | 0.89 |
| YGR187C | HGH1  |                  | 0 iYGR187C   | 1.56 | 0.70 |
| YGR188C | BUB1  |                  | 0 iYGR188C   | 2.19 | 0.90 |
| YGR189C | CRH1  |                  | 0 iYGR189C   | 0.67 | 0.23 |
| YGR190C | 0     | #N/A             | iYGR191W     | 0.54 | 0.15 |
| YGR191W | HIP1  |                  | 0 itW(CCA)G2 | 1.03 | 0.44 |
| YGR192C | TDH3  | GLD1 HSP35 HSP36 | iYGR192C     | 0.16 | 0.00 |
| YGR193C | PDX1  |                  | 0 iYGR193C   | #N/A | #N/A |
| YGR194C | XKS1  |                  | 0 iYGR194C   | 1.29 | 0.57 |
| YGR195W | SKI6  | ECM20 RRP41      | iYGR194C     | 1.29 | 0.57 |
| YGR196C | FYV8  |                  | 0 iYGR196C   | 2.16 | 0.83 |
| YGR197C | SNG1  |                  | 0 iYGR197C   | 1.55 | 0.70 |
| YGR198W | 0     | #N/A             | iYGR197C     | 1.55 | 0.70 |
| YGR199W | PMT6  |                  | 0 iYGR198W   | #N/A | #N/A |
| YGR200C | ELP2  | TOT2             | iYGR200C     | 1.66 | 0.73 |
| YGR201C | 0     | #N/A             | iYGR201C     | #N/A | #N/A |
| YGR202C | PCT1  | BSR2 CCT1        | iYGR202C     | 0.58 | 0.17 |
| YGR203W | 0     | #N/A             | iYGR202C     | 0.58 | 0.17 |
| YGR204W | ADE3  |                  | 0 iYGR203W   | #N/A | #N/A |
| YGR205W | 0     | #N/A             | iYGR204W     | #N/A | #N/A |
| YGR206W | 0     | #N/A             | iYGR205W     | #N/A | #N/A |
| YGR207C | 0     | #N/A             | iYGR207C     | 0.97 | 0.38 |
| YGR208W | SER2  |                  | 0 iYGR207C   | 0.97 | 0.38 |
| YGR209C | TRX2  | LMA1             | iYGR209C     | 1.01 | 0.43 |
| YGR210C | 0     | #N/A             | iYGR210C     | 1.30 | 0.58 |
| YGR211W | ZPR1  |                  | 0 iYGR210C   | 1.30 | 0.58 |
| YGR212W | 0     | #N/A             | iYGR211W     | 0.61 | 0.19 |
| YGR213C | RTA1  |                  | 0 iYGR213C   | 0.47 | 0.11 |
| YGR214W | RPS0A | NAB1 NAB1A YST1  | iYGR213C     | 0.47 | 0.11 |
| YGR215W | RSM27 |                  | 0 iYGR214W   | 2.86 | 0.95 |
| YGR216C | GPI1  |                  | 0 iYGR216C   | 2.37 | 0.91 |
| YGR217W | CCH1  |                  | 0 iYGR216C   | 2.37 | 0.91 |



|         |         |             |              |      |      |
|---------|---------|-------------|--------------|------|------|
| YGR218W | CRM1    | KAP124 XPO1 | iYGRWdelta   | 1.45 | 0.65 |
| YGR219W | 0       | #N/A        | iYGR218W     | #N/A | #N/A |
| YGR220C | MRPL9   |             | 0 iYGR220C   | 2.04 | 0.79 |
| YGR221C | TOS2    |             | 0 iYGR221C   | 0.97 | 0.40 |
| YGR222W | PET54   |             | 0 iSNR7-S    | 1.84 | 0.80 |
| YGR223C | 0       |             | 0 iYGR223C   | 1.23 | 0.54 |
| YGR224W | AZR1    |             | 0 iYGR223C   | 1.23 | 0.54 |
| YGR225W | AMA1    | SPO70       | iYGR224W     | 2.42 | 0.92 |
| YGR226C | 0       | #N/A        | iYGR226C     | 1.95 | 0.84 |
| YGR227W | DIE2    | ALG10       | iYGR226C     | 1.95 | 0.84 |
| YGR228W | 0       | #N/A        | iYGR227W     | #N/A | #N/A |
| YGR229C | SMI1    | KNR4        | iYGR229C     | 1.16 | 0.50 |
| YGR230W | BNS1    |             | 0 iYGR229C   | 1.16 | 0.50 |
| YGR231C | PHB2    |             | 0 iYGR231C   | 2.45 | 0.93 |
| YGR232W | NAS6    |             | 0 iYGR231C   | 2.45 | 0.93 |
| YGR233C | PHO81   |             | 0 iYGR233C-0 | 0.65 | 0.22 |
| YGR234W | YHB1    | YHB4        | iYGR233C-1   | #N/A | #N/A |
| YGR235C | 0       | #N/A        | iYGR235C     | 2.30 | 0.91 |
| YGR236C | SPG1    |             | 0 iYGR236C   | 1.51 | 0.68 |
| YGR237C | 0       | #N/A        | iYGR237C     | 1.91 | 0.83 |
| YGR238C | KEL2    |             | 0 iYGR238C   | 1.63 | 0.73 |
| YGR239C | PEX21   |             | 0 iYGR239C   | 1.35 | 0.60 |
| YGR240C | PFK1    |             | 0 iYGR240C   | #N/A | #N/A |
| YGR241C | YAP1802 |             | 0 iYGR242W   | #N/A | #N/A |
| YGR242W | 0       | #N/A        | iYGR240C     | #N/A | #N/A |
| YGR243W | 0       |             | 0 iYGR242W   | #N/A | #N/A |
| YGR244C | LSC2    |             | 0 iYGR244C   | 0.96 | 0.40 |
| YGR245C | SDA1    |             | 0 iYGR245C   | 1.99 | 0.85 |
| YGR246C | BRF1    | PCF4 TDS4   | iYGR246C     | 2.22 | 0.90 |
| YGR247W | CPD1    |             | 0 iYGR246C   | 2.22 | 0.90 |
| YGR248W | SOL4    |             | 0 iYGR247W   | 1.46 | 0.65 |
| YGR249W | MGA1    |             | 0 iYGR248W   | 0.91 | 0.38 |
| YGR250C | 0       | #N/A        | iYGR250C-0   | 1.74 | 0.77 |
| YGR251W | 0       | #N/A        | iYGR250C-1   | 1.98 | 0.85 |
| YGR252W | GCN5    | ADA4 SWI9   | iYGR251W     | 1.86 | 0.81 |
| YGR253C | PUP2    | DOA5        | iYGR253C-0   | #N/A | #N/A |
| YGR254W | ENO1    | HSP48       | iYGR253C-1   | #N/A | #N/A |
| YGR255C | COQ6    |             | 0 iYGR255C   | 1.02 | 0.44 |
| YGR256W | GND2    |             | 0 iT(UGU)G2  | 1.33 | 0.59 |
| YGR257C | 0       |             | 0 iYGR257C   | 1.68 | 0.75 |
| YGR258C | RAD2    |             | 0 iYGR258C-0 | 0.84 | 0.34 |
| YGR259C | 0       | #N/A        | iYGR260W     | 0.44 | 0.09 |
| YGR260W | TNA1    |             | 0 iYGR258C-1 | 1.01 | 0.44 |
| YGR261C | APL6    | YKS5        | iYGR261C     | #N/A | #N/A |
| YGR262C | BUD32   | LDB14       | iYGR262C     | 3.56 | 0.98 |
| YGR263C | 0       | #N/A        | iYGR263C     | 1.13 | 0.48 |
| YGR264C | MES1    | MESI MetRS  | iYGR265W     | 2.05 | 0.87 |
| YGR265W | 0       | #N/A        | iYGR263C     | 1.13 | 0.48 |
| YGR266W | 0       | #N/A        | iYGR265W     | 2.05 | 0.87 |
| YGR267C | FOL2    |             | 0 iYGR267C   | 1.58 | 0.70 |
| YGR268C | 0       |             | 0 iYGR269W   | 1.66 | 0.74 |

|         |        |                   |              |      |      |
|---------|--------|-------------------|--------------|------|------|
| YGR269W | 0      | #N/A              | iYGR267C     | 1.58 | 0.70 |
| YGR270W | YTA7   |                   | 0 iYGR269W   | 1.66 | 0.74 |
| YGR271W | SLH1   |                   | 0 iYGR270W   | 1.34 | 0.60 |
| YGR272C | 0      | #N/A              | iYGR272C     | #N/A | #N/A |
| YGR273C | 0      | #N/A              | iYGR273C     | 0.52 | 0.14 |
| YGR274C | TAF1   | TAF130 TAF145 Taf | iYGR274C     | #N/A | #N/A |
| YGR275W | RTT102 |                   | 0 iYGR274C   | #N/A | #N/A |
| YGR276C | RNH70  | REX1              | iYGR276C     | 1.51 | 0.68 |
| YGR277C | 0      | #N/A              | iYGR277C     | 2.17 | 0.88 |
| YGR278W | CWC22  |                   | 0 iYGR277C   | 2.17 | 0.88 |
| YGR279C | SCW4   |                   | 0 iYGR279C   | 0.40 | 0.07 |
| YGR280C | PXR1   | GNO1              | iYGR280C     | 1.32 | 0.59 |
| YGR281W | YOR1   | YRS1              | iYGR280C     | 1.32 | 0.59 |
| YGR282C | BGL2   |                   | 0 iYGR282C   | #N/A | #N/A |
| YGR283C | 0      | #N/A              | iYGR283C     | 1.00 | 0.43 |
| YGR284C | ERV29  |                   | 0 iYGR284C   | 4.05 | 0.72 |
| YGR285C | ZUO1   |                   | 0 iYGR285C   | 1.26 | 0.56 |
| YGR286C | BIO2   |                   | 0 iYGR286C-0 | 2.77 | 0.96 |
| YGR287C | 0      | #N/A              | iYGR287C     | 1.89 | 0.82 |
| YGR288W | MAL13  |                   | 0 iYGR287C   | 1.89 | 0.82 |
| YGR289C | MAL11  | AGT1              | iYGR290W     | 3.33 | 0.99 |
| YGR290W | 0      | #N/A              | iYGR288W-    | 1.82 | 0.80 |
| YGR291C | 0      | #N/A              | iYGR291C     | #N/A | #N/A |
| YGR292W | MAL12  |                   | 0 iYGR291C   | #N/A | #N/A |
| YGR293C | 0      | #N/A              | iYGR294W     | 1.74 | 0.77 |
| YGR294W | 0      | #N/A              | iYGR292W-    | 1.13 | 0.49 |
| YGR295C | COS6   |                   | 0 iYGR295C-0 | #N/A | #N/A |
| YGR296W | YRF1-3 | YRF1              | iYGR295C-1   | #N/A | #N/A |
| YHL001W | RPL14B |                   | 0 iYHL002W   | 0.71 | 0.26 |
| YHL002W | HSE1   |                   | 0 iYHL003C   | 1.34 | 0.60 |
| YHL003C | LAG1   |                   | 0 iYHL003C   | 1.34 | 0.60 |
| YHL004W | MRP4   |                   | 0 iYHL007C   | 1.02 | 0.44 |
| YHL005C | 0      | #N/A              | iYHL004W     | #N/A | #N/A |
| YHL006C | SHU1   |                   | 0 iYHL004W   | #N/A | #N/A |
| YHL007C | STE20  |                   | 0 iYHL007C   | 1.02 | 0.44 |
| YHL008C | 0      | #N/A              | iYHL008C     | 0.86 | 0.35 |
| YHL009C | YAP3   |                   | 0 iYHL009C   | #N/A | #N/A |
| YHL010C | 0      | #N/A              | iYHL010C     | 1.33 | 0.59 |
| YHL011C | PRS3   |                   | 0 iYHL011C   | 1.05 | 0.45 |
| YHL012W | 0      | #N/A              | iYHL013C     | 0.89 | 0.36 |
| YHL013C | 0      | #N/A              | iYHL013C     | 0.89 | 0.36 |
| YHL014C | YLF2   | YLF1              | iYHL014C     | #N/A | #N/A |
| YHL015W | RPS20  | URP2              | iYHL016C     | 1.23 | 0.55 |
| YHL016C | DUR3   |                   | 0 iYHL016C   | 1.23 | 0.55 |
| YHL017W | 0      | #N/A              | iYHL018W     | #N/A | #N/A |
| YHL018W | 0      | #N/A              | iYHL019C     | 1.68 | 0.75 |
| YHL019C | APM2   |                   | 0 iYHL019C   | 1.68 | 0.75 |
| YHL020C | OPI1   |                   | 0 iYHL020C   | 1.75 | 0.77 |
| YHL021C | 0      |                   | 0 iYHL021C   | 0.90 | 0.37 |
| YHL022C | SPO11  |                   | 0 iYHL022C   | #N/A | #N/A |
| YHL023C | 0      |                   | 0 iYHL023C   | 1.28 | 0.57 |

|           |        |                 |   |               |      |      |
|-----------|--------|-----------------|---|---------------|------|------|
| YHL024W   | RIM4   |                 | 0 | iYHL025W      | 0.71 | 0.26 |
| YHL025W   | SNF6   |                 |   | 0 iYHL026C    | 0.97 | 0.41 |
| YHL026C   | 0      | #N/A            |   | iYHL026C      | 0.97 | 0.41 |
| YHL027W   | RIM101 | RIM1            |   | iYHL028W      | 1.10 | 0.48 |
| YHL028W   | WSC4   | YHC8            |   | iYHL029C      | 0.47 | 0.11 |
| YHL029C   | 0      | #N/A            |   | iYHL029C      | 0.47 | 0.11 |
| YHL030W   | ECM29  |                 |   | 0 iYHL031C    | 1.59 | 0.71 |
| YHL031C   | GOS1   |                 |   | 0 iYHL031C    | 1.59 | 0.71 |
| YHL032C   | GUT1   |                 |   | 0 iYHL032C    | 2.13 | 0.88 |
| YHL033C   | RPL8A  | MAK7            |   | iYHL033C      | #N/A | #N/A |
| YHL034C   | SBP1   | SSB1 SSBR1      |   | iYHL034C      | #N/A | #N/A |
| YHL035C   | 0      |                 |   | 0 iYHL035C    | 0.71 | 0.25 |
| YHL036W   | MUP3   |                 |   | 0 iYHL037C    | 1.73 | 0.77 |
| YHL037C   | 0      | #N/A            |   | iYHL037C      | 1.73 | 0.77 |
| YHL038C   | CBP2   |                 |   | 0 iYHL038C    | 1.89 | 0.82 |
| YHL039W   | 0      | #N/A            |   | iYHL040C      | 1.59 | 0.71 |
| YHL040C   | ARN1   |                 |   | 0 iYHL040C    | 1.59 | 0.71 |
| YHL041W   | 0      | #N/A            |   | iYHL042W      | 1.17 | 0.51 |
| YHL042W   | 0      | #N/A            |   | iYHL043W      | #N/A | #N/A |
| YHL043W   | ECM34  |                 |   | 0 iYHL044W    | 0.81 | 0.32 |
| YHL044W   | 0      | #N/A            |   | iYHL045W      | 1.73 | 0.77 |
| YHL045W   | 0      | #N/A            |   | iYHL046C      | #N/A | #N/A |
| YHL046C   | 0      | #N/A            |   | iYHL046C      | #N/A | #N/A |
| YHL047C   | ARN2   | TAF1            |   | iYHL047C-0    | 1.17 | 0.52 |
| YHL048W   | COS8   |                 |   | 0 iYHL049C-1  | 0.77 | 0.30 |
| YHL049C   | 0      | #N/A            |   | iYHL049C-0    | 0.57 | 0.17 |
| YHL050C   | 0      | #N/A            |   | iYHL050C      | #N/A | #N/A |
| YHR001W   | OSH7   |                 |   | 0 iCEN8       | 1.49 | 0.66 |
| YHR001W-A | QCR10  |                 |   | 0 iYHR001W    | 1.06 | 0.46 |
| YHR002W   | LEU5   |                 |   | 0 iYHR001W-7  | #N/A | #N/A |
| YHR003C   | 0      | #N/A            |   | iYHR003C      | 1.02 | 0.44 |
| YHR004C   | NEM1   |                 |   | 0 iYHR004C    | 0.75 | 0.28 |
| YHR005C   | GPA1   | CDC70 DAC1 SCG1 |   | iYHR005C      | 0.39 | 0.07 |
| YHR006W   | STP2   |                 |   | 0 iYHRCdelta4 | 1.33 | 0.60 |
| YHR007C   | ERG11  | CYP51           |   | iYHR007C      | #N/A | #N/A |
| YHR008C   | SOD2   |                 |   | 0 iYHR008C    | 0.74 | 0.28 |
| YHR009C   | 0      | #N/A            |   | iYHR009C      | #N/A | #N/A |
| YHR010W   | RPL27A | RPL27           |   | iYHR009C      | #N/A | #N/A |
| YHR011W   | DIA4   |                 |   | 0 iYHR010W    | #N/A | #N/A |
| YHR012W   | VPS29  | PEP11           |   | iYHR011W      | #N/A | #N/A |
| YHR013C   | ARD1   |                 |   | 0 iYHR013C    | 1.64 | 0.72 |
| YHR014W   | SPO13  |                 |   | 0 iYHR013C    | 1.64 | 0.72 |
| YHR015W   | MIP6   |                 |   | 0 itQ(UUG)H   | #N/A | #N/A |
| YHR016C   | YSC84  | LSB4            |   | iYHR016C      | 1.97 | 0.83 |
| YHR017W   | YSC83  |                 |   | 0 iYHR016C    | 1.97 | 0.83 |
| YHR018C   | ARG4   |                 |   | 0 iYHR018C    | 0.81 | 0.32 |
| YHR019C   | DED81  |                 |   | 0 iYHR019C    | 1.48 | 0.66 |
| YHR020W   | 0      | #N/A            |   | iYHR019C      | 1.48 | 0.66 |
| YHR021C   | RPS27B |                 |   | 0 iYHR021C    | 0.23 | 0.01 |
| YHR022C   | 0      | #N/A            |   | iYHR022C      | #N/A | #N/A |
| YHR023W   | MYO1   |                 |   | 0 iYHR022C    | #N/A | #N/A |

|           |        |                |              |      |      |
|-----------|--------|----------------|--------------|------|------|
| YHR024C   | MAS2   | MIF2           | iYHR024C     | 1.86 | 0.81 |
| YHR025W   | THR1   |                | 0 iYHR024C   | 1.86 | 0.81 |
| YHR026W   | PPA1   | VMA16          | iYHR025W     | 2.17 | 0.88 |
| YHR027C   | RPN1   | HRD2 NAS1      | iYHR027C     | #N/A | #N/A |
| YHR028C   | DAP2   | DPP2           | iYHR028C     | #N/A | #N/A |
| YHR029C   | 0      | #N/A           | iYHR029C     | 0.69 | 0.24 |
| YHR030C   | SLT2   | BYC2 MPK1 SLK2 | iYHR030C     | #N/A | #N/A |
| YHR031C   | RRM3   | RTT104         | iYHR031C     | #N/A | #N/A |
| YHR032W   | 0      | #N/A           | iYHR031C     | #N/A | #N/A |
| YHR033W   | 0      | #N/A           | iYHR032W     | 0.30 | 0.03 |
| YHR034C   | 0      |                | 0 iYHR034C   | #N/A | #N/A |
| YHR035W   | 0      | #N/A           | iYHR034C     | #N/A | #N/A |
| YHR036W   | 0      | #N/A           | iYHR035W     | #N/A | #N/A |
| YHR037W   | PUT2   |                | 0 iYHR036W   | #N/A | #N/A |
| YHR038W   | FIL1   | FIL1 KIM4      | iYHR037W     | #N/A | #N/A |
| YHR039BC  | #N/A   | #N/A           | #N/A         | #N/A | #N/A |
| YHR039C   | MSC7   |                | 0 iYHR039C   | #N/A | #N/A |
| YHR040W   | 0      |                | 0 iYHR039C-B | 2.81 | 0.97 |
| YHR041C   | SRB2   | HRS2           | iYHR041C     | 2.65 | 0.95 |
| YHR042W   | NCP1   | CPR1           | iYHR041C     | 2.65 | 0.95 |
| YHR043C   | DOG2   |                | 0 iYHR043C   | 1.82 | 0.80 |
| YHR044C   | DOG1   |                | 0 iYHR044C   | #N/A | #N/A |
| YHR045W   | 0      | #N/A           | iYHR044C     | #N/A | #N/A |
| YHR046C   | INM1   |                | 0 iYHR046C   | 1.30 | 0.58 |
| YHR047C   | AAP1'  | AAP1           | iYHR047C-0   | #N/A | #N/A |
| YHR048W   | 0      | #N/A           | iYHR047C-2   | #N/A | #N/A |
| YHR049C-A | 0      | #N/A           | iYHR049C-A   | #N/A | #N/A |
| YHR049W   | FSH1   |                | 0 iYHR048W   | 1.39 | 0.60 |
| YHR050W   | SMF2   |                | 0 iYHR049C-A | #N/A | #N/A |
| YHR051W   | COX6   |                | 0 iYHR050W   | 1.22 | 0.54 |
| YHR052W   | CIC1   | NSA3           | iYHR051W     | #N/A | #N/A |
| YHR053C   | CUP1-1 | CUP1           | iYHR053C     | 2.68 | 0.96 |
| YHR054C   | 0      | #N/A           | iYHR054C     | 1.20 | 0.52 |
| YHR055C   | CUP1-2 | CUP1           | iYHR055C     | 2.45 | 0.94 |
| YHR056C   | RSC30  |                | 0 iYHR056C   | 2.74 | 0.96 |
| YHR057C   | CPR2   | CYP2           | iYHR057C     | #N/A | #N/A |
| YHR058C   | MED6   |                | 0 iYHR058C   | 1.71 | 0.76 |
| YHR059W   | FYV4   |                | 0 iYHR058C   | 1.71 | 0.76 |
| YHR060W   | VMA22  | CEV1 VPH6      | iYHR059W     | 1.45 | 0.64 |
| YHR061C   | GIC1   |                | 0 iYHR061C   | 1.07 | 0.45 |
| YHR062C   | RPP1   |                | 0 iYHR062C   | 2.79 | 0.95 |
| YHR063C   | PAN5   |                | 0 iYHR063C   | 0.84 | 0.33 |
| YHR064C   | SSZ1   | PDR13          | iYHR064C     | 0.81 | 0.32 |
| YHR065C   | RRP3   |                | 0 iYHR065C   | 1.70 | 0.74 |
| YHR066W   | SSF1   |                | 0 iYHR065C   | 1.70 | 0.74 |
| YHR067W   | 0      | HTD2           | iYHR066W     | #N/A | #N/A |
| YHR068W   | DYS1   |                | 0 iYHR067W   | 1.04 | 0.45 |
| YHR069C   | RRP4   |                | 0 iYHR069C   | #N/A | #N/A |
| YHR070W   | TRM5   |                | 0 iYHR069C   | #N/A | #N/A |
| YHR071W   | PCL5   |                | 0 iYHR070W   | 0.38 | 0.06 |
| YHR072W   | ERG7   |                | 0 itF(GAA)H1 | #N/A | #N/A |

|          |       |                |   |          |      |      |
|----------|-------|----------------|---|----------|------|------|
| YHR073W  | OSH3  |                | 0 | iYHR072W | #N/A | #N/A |
| YHR074W  | QNS1  |                | 0 | iYHR073W | 1.87 | 0.82 |
| YHR075C  | PPE1  | MRPS2          |   | iYHR075C | #N/A | #N/A |
| YHR076W  | 0     |                | 0 | iYHR075C | #N/A | #N/A |
| YHR077C  | NMD2  | IFS1 SUA1 UPF2 |   | iYHR077C | 2.22 | 0.90 |
| YHR078W  | 0     | #N/A           |   | iYHR077C | 2.22 | 0.90 |
| YHR079BC | #N/A  | #N/A           |   | #N/A     | #N/A | #N/A |
| YHR079C  | IRE1  | ERN1           |   | iYHR079C | #N/A | #N/A |
| YHR080C  | 0     | #N/A           |   | iYHR080C | 1.97 | 0.85 |
| YHR081W  | 0     | YC1D           |   | iYHR080C | 1.97 | 0.85 |
| YHR082C  | KSP1  |                | 0 | iYHR082C | #N/A | #N/A |
| YHR083W  | 0     | FMP20          |   | iYHR082C | #N/A | #N/A |
| YHR084W  | STE12 |                | 0 | iYHR083W | 1.56 | 0.69 |
| YHR085W  | 0     |                | 0 | iYHR084W | #N/A | #N/A |
| YHR086W  | NAM8  | MRE2 MUD15     |   | iYHR085W | 2.30 | 0.90 |
| YHR087W  | 0     | #N/A           |   | iYHR086W | #N/A | #N/A |
| YHR088W  | RPF1  |                | 0 | iYHR087W | 2.15 | 0.87 |
| YHR089C  | GAR1  |                | 0 | iYHR089C | 1.41 | 0.62 |
| YHR090C  | YNG2  | EAF4 NBN1      |   | iYHR090C | #N/A | #N/A |
| YHR091C  | MSR1  |                | 0 | iYHR091C | #N/A | #N/A |
| YHR092C  | HXT4  | LGT1 RAG1      |   | iYHR092C | #N/A | #N/A |
| YHR093W  | AHT1  |                | 0 | iYHR092C | #N/A | #N/A |
| YHR094C  | HXT1  | HOR4           |   | iYHR094C | 0.88 | 0.36 |
| YHR095W  | 0     | #N/A           |   | iYHR094C | 0.88 | 0.36 |
| YHR096C  | HXT5  |                | 0 | iYHR096C | #N/A | #N/A |
| YHR097C  | 0     | #N/A           |   | iYHR097C | 0.82 | 0.33 |
| YHR098C  | SFB3  | LST1           |   | iYHR098C | #N/A | #N/A |
| YHR099W  | TRA1  |                | 0 | iYHR098C | #N/A | #N/A |
| YHR100C  | 0     | #N/A           |   | iYHR100C | 2.37 | 0.92 |
| YHR101C  | BIG1  |                | 0 | iYHR101C | 2.75 | 0.96 |
| YHR102W  | KIC1  | NRK1           |   | iYHR101C | 2.75 | 0.96 |
| YHR103W  | SBE22 |                | 0 | iYHR102W | 0.87 | 0.35 |
| YHR104W  | GRE3  |                | 0 | iYHR103W | #N/A | #N/A |
| YHR105W  | 0     |                | 0 | iYHR104W | #N/A | #N/A |
| YHR106W  | TRR2  |                | 0 | iYHR105W | 1.57 | 0.69 |
| YHR107C  | CDC12 | CLA10 PSL7     |   | iYHR107C | 1.98 | 0.82 |
| YHR108W  | GGA2  |                | 0 | iYHR107C | 1.98 | 0.82 |
| YHR109W  | CTM1  |                | 0 | iYHR108W | #N/A | #N/A |
| YHR110W  | ERP5  |                | 0 | iYHR109W | #N/A | #N/A |
| YHR111W  | 0     | YHR1           |   | iYHR110W | 2.17 | 0.89 |
| YHR112C  | 0     | #N/A           |   | iYHR112C | 2.01 | 0.86 |
| YHR113W  | 0     | #N/A           |   | iYHR112C | 2.01 | 0.86 |
| YHR114W  | BZZ1  | LSB7           |   | iYHR113W | #N/A | #N/A |
| YHR115C  | 0     |                | 0 | iYHR115C | 3.00 | 0.96 |
| YHR116W  | 0     |                | 0 | iYHR115C | 3.00 | 0.96 |
| YHR117W  | TOM71 | TOM72          |   | iYHR116W | 2.24 | 0.89 |
| YHR118C  | ORC6  |                | 0 | iYHR118C | 3.49 | 0.99 |
| YHR119W  | SET1  | YTX1           |   | iYHR118C | 3.49 | 0.99 |
| YHR120W  | MSH1  |                | 0 | iYHR119W | 2.12 | 0.87 |
| YHR121W  | 0     |                | 0 | iYHR120W | 1.50 | 0.67 |
| YHR122W  | 0     | #N/A           |   | iYHR121W | 1.47 | 0.64 |

|           |         |                  |   |             |      |      |
|-----------|---------|------------------|---|-------------|------|------|
| YHR123W   | EPT1    |                  | 0 | iYHR122W    | 1.44 | 0.65 |
| YHR124W   | NDT80   |                  | 0 | iYHR123W    | 0.52 | 0.14 |
| YHR125W   | 0       | #N/A             |   | itF(GAA)H2  | #N/A | #N/A |
| YHR126C   | 0       | #N/A             |   | iYHR126C    | #N/A | #N/A |
| YHR127W   | 0       | #N/A             |   | iYHR126C    | #N/A | #N/A |
| YHR128W   | FUR1    |                  | 0 | iYHR127W    | #N/A | #N/A |
| YHR129C   | ARP1    | ACT5             |   | iYHR129C    | #N/A | #N/A |
| YHR130C   | 0       | #N/A             |   | iYHR131C    | 3.38 | 0.99 |
| YHR131C   | 0       | #N/A             |   | iYHR131C    | 3.38 | 0.99 |
| YHR132C   | ECM14   |                  | 0 | iYHR132C    | #N/A | #N/A |
| YHR133C   | 0       |                  | 0 | iYHR133C    | #N/A | #N/A |
| YHR134W   | WSS1    |                  | 0 | iYHR133C    | #N/A | #N/A |
| YHR135C   | YCK1    | CKI2             |   | iYHR135C    | 2.73 | 0.96 |
| YHR136C   | SPL2    |                  | 0 | iYHR136C    | 1.07 | 0.46 |
| YHR137W   | ARO9    |                  | 0 | iYHR136C    | 1.07 | 0.46 |
| YHR138C   | 0       | #N/A             |   | iYHR138C    | #N/A | #N/A |
| YHR139C   | SPS100  |                  | 0 | iYHR139C    | 1.57 | 0.70 |
| YHR139C-A | 0       | #N/A             |   | iYHR139C-A  | #N/A | #N/A |
| YHR140W   | 0       | #N/A             |   | iYHR139C-A  | #N/A | #N/A |
| YHR141C   | RPL42B  | MAK18            |   | iYHR141C    | #N/A | #N/A |
| YHR142W   | CHS7    |                  | 0 | iYHR141C    | #N/A | #N/A |
| YHR143W   | DSE2    |                  | 0 | iYHR142W    | 1.73 | 0.77 |
| YHR143W-A | RPC10   | RPB12            |   | iYHR143W    | #N/A | #N/A |
| YHR144C   | DCD1    |                  | 0 | iYHR144C    | 0.78 | 0.29 |
| YHR145C   | 0       | #N/A             |   | iYHRCdelta1 | #N/A | #N/A |
| YHR146W   | CRP1    |                  | 0 | iYHRCdelta1 | 1.72 | 0.74 |
| YHR147C   | MRPL6   |                  | 0 | iYHR147C    | 2.85 | 0.96 |
| YHR148W   | IMP3    |                  | 0 | iYHR147C    | 2.85 | 0.96 |
| YHR149C   | 0       |                  | 0 | iYHR149C    | 1.32 | 0.59 |
| YHR150W   | 0       |                  | 0 | iYHR149C    | 1.32 | 0.59 |
| YHR151C   | 0       | #N/A             |   | iYHR151C    | 1.97 | 0.82 |
| YHR152W   | SPO12   |                  | 0 | iYHR151C    | 1.97 | 0.82 |
| YHR153C   | SPO16   |                  | 0 | iYHR153C    | 1.65 | 0.71 |
| YHR154W   | RTT107  | ESC4             |   | iYHR153C    | 1.65 | 0.71 |
| YHR155W   | 0       | #N/A             |   | iYHR154W    | #N/A | #N/A |
| YHR156C   | LIN1    |                  | 0 | iYHR156C    | 1.44 | 0.64 |
| YHR157W   | REC104  |                  | 0 | iYHR156C    | 1.44 | 0.64 |
| YHR158C   | KEL1    |                  | 0 | iYHR158C    | 2.57 | 0.95 |
| YHR159W   | 0       | #N/A             |   | iYHR158C    | 2.57 | 0.95 |
| YHR160C   | PEX18   |                  | 0 | iYHR160C    | 0.54 | 0.15 |
| YHR161C   | YAP1801 |                  | 0 | iYHR161C    | #N/A | #N/A |
| YHR162W   | 0       | #N/A             |   | iYHR161C    | #N/A | #N/A |
| YHR163W   | SOL3    |                  | 0 | iYHR162W    | 1.97 | 0.82 |
| YHR164C   | DNA2    | WEB2             |   | iYHR164C    | 1.30 | 0.58 |
| YHR165C   | PRP8    | DBF3 DNA39 RNA8] |   | iYHR165C    | 2.37 | 0.92 |
| YHR166C   | CDC23   |                  | 0 | iYHR166C    | 2.56 | 0.95 |
| YHR167W   | THP2    |                  | 0 | iYHR166C    | 2.56 | 0.95 |
| YHR168W   | 0       |                  | 0 | iYHR167W    | 1.40 | 0.62 |
| YHR169W   | DBP8    |                  | 0 | iYHR168W    | 1.50 | 0.67 |
| YHR170W   | NMD3    | SRC5             |   | iYHR169W    | #N/A | #N/A |
| YHR171W   | APG7    | APG7 CVT2        |   | iYHR170W    | 1.13 | 0.48 |



|           |       |                   |   |             |      |      |
|-----------|-------|-------------------|---|-------------|------|------|
| YHR172W   | SPC97 |                   | 0 | iYHR171W    | 2.00 | 0.86 |
| YHR173C   | 0     | #N/A              |   | iYHR173C    | #N/A | #N/A |
| YHR174W   | ENO2  |                   | 0 | iYHR173C    | #N/A | #N/A |
| YHR175W   | CTR2  |                   | 0 | iYHR174W    | 0.90 | 0.38 |
| YHR176W   | 0     | FMO               |   | iYHR175W    | #N/A | #N/A |
| YHR177W   | 0     | #N/A              |   | iYHR176W    | #N/A | #N/A |
| YHR178W   | STB5  |                   | 0 | iYHR177W    | 0.76 | 0.29 |
| YHR179W   | OYE2  | Old Yellow Enzyme |   | iYHR178W    | 0.99 | 0.42 |
| YHR180W   | 0     | #N/A              |   | iYHRCdelta1 | 1.79 | 0.79 |
| YHR181W   | 0     |                   | 0 | itT(UGU)H   | 0.27 | 0.02 |
| YHR182W   | 0     | #N/A              |   | iYHR181W    | #N/A | #N/A |
| YHR183W   | GND1  |                   | 0 | iYHR182W    | 0.98 | 0.42 |
| YHR184W   | SSP1  | SPO3              |   | iYHR183W    | 0.60 | 0.19 |
| YHR185C   | PFS1  | ADY1              |   | iYHR185C    | 0.59 | 0.18 |
| YHR186C   | COG1  |                   | 0 | iYHR186C    | 2.07 | 0.86 |
| YHR187W   | IKI1  | ELP5 HAP2 TOT5    |   | iYHR186C    | 2.07 | 0.86 |
| YHR188C   | GPI16 |                   | 0 | iYHR188C    | 1.86 | 0.80 |
| YHR189W   | 0     | PTH               |   | iYHR188C    | 1.86 | 0.80 |
| YHR190W   | ERG9  |                   | 0 | iYHR189W    | 1.10 | 0.48 |
| YHR191C   | CTF8  |                   | 0 | iYHR191C    | #N/A | #N/A |
| YHR192W   | 0     | #N/A              |   | iYHR191C    | #N/A | #N/A |
| YHR193C   | EGD2  |                   | 0 | iYHR193C    | 1.86 | 0.80 |
| YHR194W   | 0     |                   | 0 | iYHR193C    | 1.86 | 0.80 |
| YHR195W   | NVJ1  | VAB36             |   | iYHR194W    | 1.82 | 0.80 |
| YHR196W   | UTP9  |                   | 0 | iYHR195W    | 3.00 | 0.97 |
| YHR197W   | 0     |                   | 0 | iYHR196W    | #N/A | #N/A |
| YHR198C   | 0     |                   | 0 | iYHR198C    | #N/A | #N/A |
| YHR199C   | 0     |                   | 0 | iYHR199C    | 1.35 | 0.60 |
| YHR200W   | RPN10 | MCB1 SUN1         |   | iYHR199C    | 1.35 | 0.60 |
| YHR201C   | PPX1  |                   | 0 | iYHR201C    | #N/A | #N/A |
| YHR202W   | 0     | #N/A              |   | iYHR201C    | #N/A | #N/A |
| YHR203C   | RPS4B |                   | 0 | iYHR203C    | 0.50 | 0.12 |
| YHR204W   | MNL1  | HTM1              |   | iYHR203C    | 0.50 | 0.12 |
| YHR205W   | SCH9  | KOM1              |   | iYHR204W    | 1.62 | 0.72 |
| YHR206W   | SKN7  | BRY1 POS9         |   | iYHR205W    | 1.23 | 0.55 |
| YHR207C   | SET5  |                   | 0 | iYHR207C    | 1.37 | 0.61 |
| YHR208W   | BAT1  | ECA39 TWT1        |   | iYHR207C    | 1.37 | 0.61 |
| YHR209W   | 0     | #N/A              |   | iYHR208W    | 1.06 | 0.46 |
| YHR210C   | 0     | #N/A              |   | iYHR210C-0  | 2.80 | 0.96 |
| YHR211W   | FLO5  |                   | 0 | iYHR210C-0  | 2.80 | 0.96 |
| YHR212C   | 0     | #N/A              |   | iYHR213W-0  | 0.90 | 0.37 |
| YHR213W   | 0     | #N/A              |   | iYHRCdelta1 | 1.42 | 0.64 |
| YHR214C-B | #N/A  | #N/A              |   | iYHRCdelta1 | 1.39 | 0.62 |
| YHR214W   | 0     | #N/A              |   | iYHR213W-0  | 0.90 | 0.37 |
| YHR214W-A | 0     | #N/A              |   | iYHR213W-0  | 0.90 | 0.37 |
| YHR215W   | PHO12 | PHO10             |   | iYHRCdelta1 | 1.39 | 0.62 |
| YHR216W   | IMD2  | PUR5              |   | iYHRCdelta1 | 1.39 | 0.62 |
| YHR217C   | 0     | #N/A              |   | #N/A        | #N/A | #N/A |
| YHR218W   | 0     | #N/A              |   | iYHRCdelta1 | 1.39 | 0.62 |
| YHR219W   | 0     | #N/A              |   | iYHRCdelta1 | 1.39 | 0.62 |
| YIL001W   | 0     | #N/A              |   | iYIL002C    | 1.44 | 0.64 |

|           |       |                  |                |      |      |
|-----------|-------|------------------|----------------|------|------|
| YIL002C   | INP51 | SJL1             | iYIL002C       | 1.44 | 0.64 |
| YIL003W   | DRE3  | DRE3             | iYIL004C       | 1.92 | 0.83 |
| YIL004C   | BET1  | SLY12            | iYIL004C       | 1.92 | 0.83 |
| YIL005W   | EPS1  |                  | 0 iYIL006W     | 1.38 | 0.62 |
| YIL006W   | 0     | #N/A             | iYIL007C       | 2.32 | 0.92 |
| YIL007C   | 0     |                  | 0 iYIL007C     | 2.32 | 0.92 |
| YIL008W   | URM1  |                  | 0 iYIL009W     | #N/A | #N/A |
| YIL009W   | FAA3  |                  | 0 iYILCdelta5- | 0.68 | 0.24 |
| YIL010W   | DOT5  | nTPx             | iYIL011W       | 0.87 | 0.35 |
| YIL011W   | TIR3  | YIB1             | iYIL012W       | 0.81 | 0.32 |
| YIL012W   | 0     | #N/A             | iYIL013C       | 0.50 | 0.13 |
| YIL013C   | PDR11 |                  | 0 iYIL013C     | 0.50 | 0.13 |
| YIL014W   | MNT3  |                  | 0 itT(AGU)I2   | #N/A | #N/A |
| YIL015C-A | #N/A  | #N/A             | iYIL015C-A     | 1.04 | 0.45 |
| YIL015W   | BAR1  | SST1             | iYIL016W       | 1.12 | 0.48 |
| YIL016W   | SNL1  |                  | 0 iYIL017C     | 3.06 | 0.98 |
| YIL017W   | #N/A  | #N/A             | #N/A           | #N/A | #N/A |
| YIL018W   | RPL2B | LOT2 RPL5A       | iYIL019W       | 0.36 | 0.05 |
| YIL019W   | 0     |                  | 0 iYIL020C     | 2.14 | 0.88 |
| YIL020C   | HIS6  |                  | 0 iYIL020C     | 2.14 | 0.88 |
| YIL021W   | RPB3  |                  | 0 iYIL022W     | 1.05 | 0.45 |
| YIL022W   | TIM44 | ISP45 MIM44 MPI1 | iYIL023C       | #N/A | #N/A |
| YIL023C   | 0     | #N/A             | iYIL023C       | #N/A | #N/A |
| YIL024C   | 0     | #N/A             | iYIL024C       | 0.95 | 0.39 |
| YIL025C   | 0     | #N/A             | iYIL024C       | 0.95 | 0.39 |
| YIL026C   | IRR1  | SCC3             | iYIL026C       | 1.34 | 0.60 |
| YIL027C   | KRE27 |                  | 0 iYIL027C     | 1.84 | 0.80 |
| YIL028W   | 0     | #N/A             | iYIL029C       | #N/A | #N/A |
| YIL029C   | 0     | #N/A             | iYIL029C       | #N/A | #N/A |
| YIL030C   | SSM4  | DOA10            | iYIL030C       | 2.43 | 0.87 |
| YIL031W   | ULP2  | SMT4             | iYIL032C       | 1.90 | 0.82 |
| YIL032C   | 0     | #N/A             | iYIL032C       | 1.90 | 0.82 |
| YIL033C   | BCY1  | SRA1             | iYIL033C       | 0.99 | 0.42 |
| YIL034C   | CAP2  |                  | 0 iYIL034C     | 1.94 | 0.84 |
| YIL035C   | CKA1  |                  | 0 iYIL035C     | 2.01 | 0.85 |
| YIL036W   | CST6  | ACA2 SHF1        | iYIL037C       | 1.39 | 0.62 |
| YIL037C   | PRM2  |                  | 0 iYIL037C     | 1.39 | 0.62 |
| YIL038C   | NOT3  |                  | 0 iYIL038C     | 2.45 | 0.93 |
| YIL039W   | 0     | #N/A             | iYIL040W       | #N/A | #N/A |
| YIL040W   | 0     |                  | 0 iYIL041W     | #N/A | #N/A |
| YIL041W   | 0     |                  | 0 iYIL042C     | 3.42 | 0.99 |
| YIL042C   | 0     | #N/A             | iYIL042C       | 3.42 | 0.99 |
| YIL043C   | CBR1  | CBR5             | iYIL043C       | #N/A | #N/A |
| YIL044C   | AGE2  | SAT2             | iYIL044C       | 2.32 | 0.92 |
| YIL045W   | PIG2  |                  | 0 iYIL046W     | 1.47 | 0.66 |
| YIL046W   | MET30 | ZRG11            | iYIL047C       | 1.52 | 0.68 |
| YIL047C   | SYG1  |                  | 0 iYIL047C     | 1.52 | 0.68 |
| YIL048W   | NEO1  |                  | 0 iYIL049W     | 1.80 | 0.80 |
| YIL049W   | DFG10 |                  | 0 iYIL050W     | 0.95 | 0.39 |
| YIL050W   | PCL7  |                  | 0 iYIL051C     | 0.79 | 0.31 |
| YIL051C   | MMF1  | IBM1             | iYIL051C       | 0.79 | 0.31 |



|           |        |             |      |            |      |      |
|-----------|--------|-------------|------|------------|------|------|
| YIL052C   | RPL34B |             | 0    | iYIL052C   | 0.31 | 0.03 |
| YIL053W   | RHR2   | GPP1        |      | iYIL054W   | 0.27 | 0.03 |
| YIL054W   | FYV2   | #N/A        |      | iYIL055C   | 0.95 | 0.40 |
| YIL055C   |        | 0           | #N/A | iYIL055C   | 0.95 | 0.40 |
| YIL056W   |        | 0           | #N/A | itS(UGA)I  | 0.33 | 0.04 |
| YIL057C   |        | 0           | #N/A | iYIL057C   | #N/A | #N/A |
| YIL058W   |        | 0           | #N/A | iYIL061C   | #N/A | #N/A |
| YIL059C   |        | 0           | #N/A | iYIL058W   | 1.68 | 0.75 |
| YIL060W   |        | 0           | #N/A | iYIL061C   | #N/A | #N/A |
| YIL061C   | SNP1   |             | 0    | iYIL061C   | #N/A | #N/A |
| YIL062C   | ARC15  |             | 0    | iYIL062C   | 1.92 | 0.83 |
| YIL063C   | YRB2   |             | 0    | iYIL063C   | #N/A | #N/A |
| YIL064W   |        | 0           | #N/A | iYIL065C   | 2.85 | 0.97 |
| YIL065C   | FIS1   | MDV2        |      | iYIL065C   | 2.85 | 0.97 |
| YIL066C   | RNR3   | DIN1 RIR3   |      | iYIL066C   | 1.60 | 0.72 |
| YIL067C   |        | 0           | #N/A | iYIL067C   | 1.62 | 0.73 |
| YIL068C   | SEC6   |             | 0    | iYIL068C   | 1.41 | 0.63 |
| YIL069C   | RPS24B | RPS24EB     |      | iYIL069C   | 0.24 | 0.02 |
| YIL070C   | MAM33  |             | 0    | iYIL070C   | 0.81 | 0.32 |
| YIL071W   | #N/A   | #N/A        |      | #N/A       | #N/A | #N/A |
| YIL072W   | HOP1   |             | 0    | iYIL073C   | #N/A | #N/A |
| YIL073C   | SPO22  |             | 0    | iYIL073C   | #N/A | #N/A |
| YIL074C   | SER33  |             | 0    | iYIL074C   | 1.18 | 0.52 |
| YIL075C   | RPN2   | SEN3        |      | iYIL075C   | 1.29 | 0.57 |
| YIL076W   | SEC28  | ANU2        |      | iYIL077C   | 2.02 | 0.86 |
| YIL077C   |        | 0           | #N/A | iYIL077C   | 2.02 | 0.86 |
| YIL078W   | THS1   |             | 0    | iYIL079C   | 1.93 | 0.83 |
| YIL079C   | AIR1   |             | 0    | iYIL079C   | 1.93 | 0.83 |
| YIL080W   | #N/A   | #N/A        |      | YILWTy3-1C | 0.58 | 0.18 |
| YIL082W   |        | 0           | #N/A | iYIL083C   | 1.72 | 0.76 |
| YIL082W-A |        | 0           | #N/A | YILWTy3-1C | 0.58 | 0.18 |
| YIL083C   |        | 0           | #N/A | iYIL083C   | 1.72 | 0.76 |
| YIL084C   | SDS3   |             | 0    | iYIL084C   | #N/A | #N/A |
| YIL085C   | KTR7   |             | 0    | iYIL085C   | #N/A | #N/A |
| YIL086C   |        | 0           | #N/A | iYIL085C   | #N/A | #N/A |
| YIL087C   |        | 0           | #N/A | iYIL085C   | #N/A | #N/A |
| YIL088C   |        | 0           |      | 0 iYIL088C | 1.87 | 0.82 |
| YIL089W   |        | 0           | #N/A | iYIL090W   | 0.67 | 0.23 |
| YIL090W   |        | 0           | #N/A | iYIL091C   | 3.07 | 0.97 |
| YIL091C   |        | 0           | #N/A | iYIL091C   | 3.07 | 0.97 |
| YIL092W   |        | 0           | #N/A | iYIL093C   | 2.35 | 0.92 |
| YIL093C   | RSM25  |             | 0    | iYIL093C   | 2.35 | 0.92 |
| YIL094C   | LYS12  | LYS10 LYS11 |      | iYIL094C   | 0.90 | 0.37 |
| YIL095W   | PRK1   | PAK1        |      | itl(AAU)I1 | 1.63 | 0.72 |
| YIL096C   |        | 0           | #N/A | iYIL096C   | 1.37 | 0.61 |
| YIL097W   | FYV10  | GID9        |      | iYIL098C   | 2.68 | 0.95 |
| YIL098C   | FMC1   |             | 0    | iYIL098C   | 2.68 | 0.95 |
| YIL099W   | SGA1   |             | 0    | iYIL100W   | 0.95 | 0.40 |
| YIL100W   |        | 0           | #N/A | iYIL101C   | 1.86 | 0.81 |
| YIL101C   | XBP1   |             | 0    | iYIL101C   | 1.86 | 0.81 |
| YIL102C   |        | 0           | #N/A | iYIL102C   | 0.59 | 0.18 |

|         |                         |      |              |      |      |
|---------|-------------------------|------|--------------|------|------|
| YIL103W | 0                       | #N/A | iYIL104C     | 1.15 | 0.50 |
| YIL104C | SHQ1                    |      | 0 iYIL104C   | 1.15 | 0.50 |
| YIL105C | 0 LIT2                  |      | iYIL105C     | 2.02 | 0.85 |
| YIL106W | MOB1                    |      | 0 iYIL107C   | 1.10 | 0.48 |
| YIL107C | PFK26 PFK-2             |      | iYIL107C     | 1.10 | 0.48 |
| YIL108W | 0                       | #N/A | iYIL109C     | #N/A | #N/A |
| YIL109C | SEC24 ANU1              |      | iYIL109C     | #N/A | #N/A |
| YIL110W | 0                       | #N/A | iYIL111W     | 2.10 | 0.87 |
| YIL111W | COX5B                   |      | 0 iYIL112W   | 1.05 | 0.44 |
| YIL112W | 0                       |      | 0 iYIL113W   | 2.07 | 0.86 |
| YIL113W | 0                       |      | 0 iYIL114C   | 1.45 | 0.63 |
| YIL114C | POR2 YVDAC2             |      | iYIL114C     | 1.45 | 0.63 |
| YIL115C | NUP159 NUP158 RAT7      |      | iYIL115C     | 2.80 | 0.97 |
| YIL116W | HIS5                    |      | 0 iYIL117C   | 0.50 | 0.13 |
| YIL117C | PRM5                    |      | 0 iYIL117C   | 0.50 | 0.13 |
| YIL118W | RHO3                    |      | 0 iYIL119C-1 | #N/A | #N/A |
| YIL119C | RPI1                    |      | 0 iYIL119C-0 | 0.30 | 0.03 |
| YIL120W | QDR1                    |      | 0 iYIL121W   | 0.69 | 0.25 |
| YIL121W | 0                       |      | 0 iYIL122W   | 0.84 | 0.34 |
| YIL122W | POG1                    |      | 0 iYIL123W   | 0.37 | 0.05 |
| YIL123W | SIM1                    |      | 0 iYIL124W   | 0.81 | 0.32 |
| YIL124W | AYR1                    |      | 0 iYIL125W   | 1.86 | 0.82 |
| YIL125W | KGD1 OGD1               |      | iYIL126W     | 1.92 | 0.83 |
| YIL126W | STH1 NPS1               |      | iYIL127C     | 2.52 | 0.94 |
| YIL127C | 0                       | #N/A | iYIL127C     | 2.52 | 0.94 |
| YIL128W | MET18 MMS19             |      | iYIL129C     | 2.76 | 0.96 |
| YIL129C | TAO3 PAG1               |      | iYIL129C     | 2.76 | 0.96 |
| YIL130W | GIN1                    | #N/A | iYIL131C     | 2.02 | 0.86 |
| YIL131C | FKH1                    |      | 0 iYIL131C   | 2.02 | 0.86 |
| YIL132C | CSM2                    |      | 0 iYIL132C   | 1.05 | 0.46 |
| YIL133C | RPL16A RPL13            |      | iYIL133C     | 0.24 | 0.01 |
| YIL134W | FLX1                    |      | 0 iSNR68     | 1.50 | 0.68 |
| YIL135C | 0                       |      | 0 iYIL135C   | 0.56 | 0.20 |
| YIL136W | OM45                    |      | 0 iYIL137C   | 2.21 | 0.90 |
| YIL137C | 0                       | #N/A | iYIL137C     | 2.21 | 0.90 |
| YIL138C | TPM2 tropomyosin        |      | iYIL138C     | #N/A | #N/A |
| YIL139C | REV7                    |      | 0 iYIL139C   | 1.16 | 0.51 |
| YIL140W | AXL2 BUD10 SRO4         |      | iYIL142W     | 0.65 | 0.21 |
| YIL141W | 0                       | #N/A | iYIL142W     | 0.65 | 0.21 |
| YIL142W | CCT2 BIN3 TCP2          |      | iYIL143C     | 2.84 | 0.97 |
| YIL143C | SSL2 LOM3 RAD25         |      | iYIL143C     | 2.84 | 0.97 |
| YIL144W | TID3 HEC1 NDC80         |      | iYIL145C     | #N/A | #N/A |
| YIL145C | PAN6                    |      | 0 iYIL145C   | #N/A | #N/A |
| YIL146C | ECM37                   |      | 0 iYIL146C   | 1.35 | 0.60 |
| YIL147C | SLN1 YPD2               |      | iYIL147C     | 1.52 | 0.68 |
| YIL148W | RPL40A CEP52A UB11 UBI1 |      | iYIL149C     | 0.99 | 0.42 |
| YIL149C | MLP2                    |      | 0 iYIL149C   | 0.99 | 0.42 |
| YIL150C | DNA43 DNA43             |      | iYIL150C     | #N/A | #N/A |
| YIL151C | 0                       | #N/A | iYIL151C     | 2.43 | 0.93 |
| YIL152W | 0                       | #N/A | iYIL153W     | 1.47 | 0.66 |
| YIL153W | RRD1 YPA1               |      | iYIL154C     | 2.83 | 0.96 |

|         |       |                |              |      |      |
|---------|-------|----------------|--------------|------|------|
| YIL154C | IMP2' | IMP2           | iYIL154C     | 2.83 | 0.96 |
| YIL155C | GUT2  |                | 0 iYIL155C   | #N/A | #N/A |
| YIL156W | UBP7  |                | 0 iYIL157C   | 3.04 | 0.98 |
| YIL157C | 0     |                | 0 iYIL157C   | 3.04 | 0.98 |
| YIL158W | 0     | #N/A           | iYIL159W     | 1.00 | 0.42 |
| YIL159W | BNR1  |                | 0 iYIL160C   | 1.29 | 0.57 |
| YIL160C | POT1  | FOX3 POX3      | iYIL160C     | 1.29 | 0.57 |
| YIL161W | 0     | #N/A           | iYIL162W     | 1.44 | 0.63 |
| YIL162W | SUC2  |                | 0 iYIL163C   | #N/A | #N/A |
| YIL163C | 0     | #N/A           | iYIL163C     | #N/A | #N/A |
| YIL164C | NIT1  |                | 0 iYIL164C-0 | 1.62 | 0.72 |
| YIL165C | 0     | #N/A           | iYIL164C-0   | 1.62 | 0.72 |
| YIL166C | 0     | #N/A           | iYIL166C     | #N/A | #N/A |
| YIL167W | 0     |                | 0 iYIL169C-1 | 0.81 | 0.32 |
| YIL168W | SDL1  | #N/A           | iYIL169C-1   | 0.81 | 0.32 |
| YIL169C | 0     | #N/A           | iYIL169C-0   | 0.51 | 0.13 |
| YIL170W | HXT12 |                | 0 iYIL172C   | 1.55 | 0.70 |
| YIL171W | HXT12 | #N/A           | iYIL172C     | 1.55 | 0.70 |
| YIL172C | 0     | #N/A           | iYIL172C     | 1.55 | 0.70 |
| YIL173W | VTH1  |                | 0 iYIL174W-1 | 1.93 | 0.83 |
| YIL174W | 0     | #N/A           | iYIL177C-1   | 0.42 | 0.08 |
| YIL175W | 0     | #N/A           | iYIL177C-1   | 0.42 | 0.08 |
| YIL176C | 0     | #N/A           | iYIL174W-0   | 0.94 | 0.40 |
| YIL177C | 0     | #N/A           | iYIL177C-0   | #N/A | #N/A |
| YIR001C | SGN1  | RBP1 RBP29     | iYIR001C     | 1.16 | 0.51 |
| YIR002C | MPH1  |                | 0 iYIR002C   | 1.74 | 0.77 |
| YIR003W | 0     | #N/A           | iYIR002C     | 1.74 | 0.77 |
| YIR004W | DJP1  | ICS1 PAS22     | iYIR003W     | #N/A | #N/A |
| YIR005W | IST3  | SNU17          | iYIR004W     | #N/A | #N/A |
| YIR006C | PAN1  | DIM2 MDP3 MIP3 | iYIR006C     | 1.49 | 0.67 |
| YIR007W | 0     | #N/A           | iE(UUC)I     | #N/A | #N/A |
| YIR008C | PRI1  |                | 0 iYIR008C   | 2.23 | 0.87 |
| YIR009W | MSL1  | YIB9w          | iYIR008C     | 2.23 | 0.87 |
| YIR010W | DSN1  |                | 0 iYIR009W   | #N/A | #N/A |
| YIR011C | STS1  | DBF8 SSM5      | iYIR011C     | 3.14 | 0.98 |
| YIR012W | SQT1  |                | 0 iYIR011C   | 3.14 | 0.98 |
| YIR013C | GAT4  |                | 0 iYIR013C   | 1.30 | 0.58 |
| YIR014W | 0     | #N/A           | iYIR013C     | 1.30 | 0.58 |
| YIR015W | RPR2  |                | 0 iYIR014W   | 0.91 | 0.37 |
| YIR016W | 0     | #N/A           | iYIR015W     | #N/A | #N/A |
| YIR017C | MET28 |                | 0 iYIR017C   | 0.73 | 0.27 |
| YIR018W | YAP5  |                | 0 iYIR017C   | 0.73 | 0.27 |
| YIR019C | MUC1  | FLO11 STA4     | iYIR019C     | #N/A | #N/A |
| YIR020C | 0     | #N/A           | iYIR020C     | 0.40 | 0.07 |
| YIR021W | MRS1  | PET157         | iYIR020W-B   | 1.93 | 0.84 |
| YIR022W | SEC11 |                | 0 iYIR021W   | 2.65 | 0.94 |
| YIR023W | DAL81 | UGA35          | iYIR022W     | 2.77 | 0.95 |
| YIR024C | GIF1  | #N/A           | iYIR024C     | 1.81 | 0.80 |
| YIR025W | MND2  |                | 0 iYIR024C   | 1.81 | 0.80 |
| YIR026C | YVH1  |                | 0 iYIR026C   | 2.84 | 0.95 |
| YIR027C | DAL1  |                | 0 iYIR027C   | 1.20 | 0.52 |

|         |        |                 |             |            |      |      |
|---------|--------|-----------------|-------------|------------|------|------|
| YIR028W | DAL4   |                 | 0           | iYIR027C   | 1.20 | 0.52 |
| YIR029W | DAL2   | ALC1            |             | iYIR028W   | #N/A | #N/A |
| YIR030C | DCG1   |                 | 0           | iYIR030C   | 0.86 | 0.35 |
| YIR031C | DAL7   | MLS2 MSL2       |             | iYIR031C   | 2.26 | 0.85 |
| YIR032C | DAL3   |                 | 0           | iYIR032C   | 3.52 | 0.99 |
| YIR033W | MGA2   |                 | 0           | iYIR032C   | 3.52 | 0.99 |
| YIR034C | LYS1   |                 | 0           | iYIR034C   | #N/A | #N/A |
| YIR035C |        | 0               | #N/A        | iYIR035C   | 1.88 | 0.80 |
| YIR036C |        | 0               | #N/A        | iYIR036C   | 3.51 | 0.99 |
| YIR037W | HYR1   | GPX3 ORP1       |             | iYIR036C   | 3.51 | 0.99 |
| YIR038C | GTT1   |                 | 0           | iYIR038C-0 | 3.12 | 0.98 |
| YIR039C | YPS6   |                 | 0           | iYIR039C   | 1.28 | 0.57 |
| YIR040C |        | 0               | #N/A        | iYIR040C   | #N/A | #N/A |
| YIR041W |        | 0               | #N/A        | iYIR040C   | #N/A | #N/A |
| YIR042C |        | 0               | #N/A        | iYIR042C   | 2.13 | 0.88 |
| YIR043C |        | 0               | #N/A        | iYIR043C   | 1.58 | 0.71 |
| YIR044C |        | 0               | #N/A        | #N/A       | #N/A | #N/A |
| YJL001W | PRE3   | CRL21           |             | iYJL002C   | 1.71 | 0.76 |
| YJL002C | OST1   | NLT1            |             | iYJL002C   | 1.71 | 0.76 |
| YJL003W |        | 0               |             | 0 iYJL004C | 1.80 | 0.79 |
| YJL004C | SYS1   |                 |             | 0 iYJL004C | 1.80 | 0.79 |
| YJL005W | CYR1   | CDC35 FIL1 HSR1 | SiteL(UAA)J |            | 1.27 | 0.56 |
| YJL006C | CTK2   |                 | 0           | iYJL006C   | 0.60 | 0.19 |
| YJL007C |        | 0               | #N/A        | itM(CAU)J2 | #N/A | #N/A |
| YJL008C | CCT8   |                 | 0           | iYJL008C   | 1.80 | 0.79 |
| YJL009W |        | 0               | #N/A        | iYJL010C   | #N/A | #N/A |
| YJL010C |        | 0               | #N/A        | iYJL010C   | #N/A | #N/A |
| YJL011C |        | 0               |             | 0 iYJL011C | 2.41 | 0.86 |
| YJL012C | VTC4   | PHM3            |             | iYJL012C   | 1.26 | 0.56 |
| YJL013C | MAD3   |                 | 0           | iYJL013C   | 0.85 | 0.34 |
| YJL014W | CCT3   | BIN2 TCP3       |             | iYJL017W   | #N/A | #N/A |
| YJL015C |        | 0               | #N/A        | iYJL014W   | 0.67 | 0.23 |
| YJL016W |        | 0               | #N/A        | iYJL017W   | #N/A | #N/A |
| YJL017W |        | 0               | #N/A        | iYJL018W   | 1.90 | 0.83 |
| YJL018W |        | 0               | #N/A        | iYJL020C   | 2.46 | 0.93 |
| YJL019W |        | 0               | NEP98       | iYJL020C   | 2.46 | 0.93 |
| YJL020C | BBC1   | MTI1            |             | iYJL020C   | 2.46 | 0.93 |
| YJL021C | #N/A   | #N/A            |             | iYJL020C   | 2.46 | 0.93 |
| YJL022W |        | 0               | #N/A        | itG(GCC)J1 | 0.95 | 0.40 |
| YJL023C | PET130 |                 | 0           | iYJL022W   | 1.57 | 0.70 |
| YJL024C | APS3   | YKS7            |             | iYJL024C   | #N/A | #N/A |
| YJL025W | RRN7   |                 | 0           | iYJL026W   | #N/A | #N/A |
| YJL026W | RNR2   | CRT6            |             | iYJL027C   | 2.14 | 0.87 |
| YJL027C |        | 0               | #N/A        | iYJL027C   | 2.14 | 0.87 |
| YJL028W |        | 0               | #N/A        | itM(CAU)J1 | 1.06 | 0.44 |
| YJL029C | VPS53  |                 | 0           | iYJL029C   | 1.52 | 0.67 |
| YJL030W | MAD2   |                 | 0           | iYJL031C   | 2.81 | 0.88 |
| YJL031C | BET4   |                 | 0           | iYJL031C   | 2.81 | 0.88 |
| YJL032W |        | 0               | #N/A        | iYJL033W   | #N/A | #N/A |
| YJL033W | HCA4   | DBP4 ECM24      |             | iYJL034W   | 1.26 | 0.56 |
| YJL034W | KAR2   | BIP GRP78       |             | iYJL035C   | 1.33 | 0.59 |

|         |        |                  |        |            |          |      |      |
|---------|--------|------------------|--------|------------|----------|------|------|
| YJL035C | TAD2   |                  | 0      | iYJL035C   | 1.33     | 0.59 |      |
| YJL036W | SNX4   | ATG24 CVT13      |        | itV(AAC)J  | 1.27     | 0.56 |      |
| YJL037W |        | 0                | #N/A   | iYJL038C   | 1.36     | 0.61 |      |
| YJL038C |        | 0                | #N/A   | iYJL038C   | 1.36     | 0.61 |      |
| YJL039C | NUP192 |                  | 0      | iYJL039C   | 1.55     | 0.70 |      |
| YJL041W | NSP1   |                  | 0      | iYJL042W   | #N/A     | #N/A |      |
| YJL042W | MHP1   |                  | 0      | iYJL043W   | #N/A     | #N/A |      |
| YJL043W |        | 0                | #N/A   | iYJL044C   | 1.43     | 0.64 |      |
| YJL044C | GYP6   |                  | 0      | iYJL044C   | 1.43     | 0.64 |      |
| YJL045W |        | 0                | #N/A   | itD(GUC)J2 | 0.89     | 0.36 |      |
| YJL046W |        | 0                | #N/A   | iYJL047C   | 1.45     | 0.65 |      |
| YJL047C | RTT101 | CUL8 CULC CULLIN |        | iYJL047C   | 1.45     | 0.65 |      |
| YJL048C |        | 0                |        | 0          | iYJL048C | 1.02 | 0.44 |
| YJL049W |        | 0                | #N/A   | iYJL050W   | 1.84     | 0.77 |      |
| YJL050W | MTR4   | DOB1             |        | iYJL051W   | #N/A     | #N/A |      |
| YJL051W |        | 0                | #N/A   | iYJL052W   | 0.99     | 0.42 |      |
| YJL052W | TDH1   | GLD3             |        | iYJL053W   | 1.50     | 0.67 |      |
| YJL053W | PEP8   | GRD6 VPS26 VPT4  |        | iYJL054W   | 0.69     | 0.24 |      |
| YJL054W | TIM54  |                  | 0      | iYJL055W   | #N/A     | #N/A |      |
| YJL055W |        | 0                | #N/A   | iYJL056C   | 2.49     | 0.92 |      |
| YJL056C | ZAP1   | ZRG10            |        | iYJL056C   | 2.49     | 0.92 |      |
| YJL057C | IKS1   |                  | #N/A   | iYJL057C   | 1.64     | 0.69 |      |
| YJL058C |        | 0                |        | 0          | iYJL058C | 1.01 | 0.40 |
| YJL059W | YHC3   | BTN1             |        | iYJL060W   | #N/A     | #N/A |      |
| YJL060W | BNA3   |                  | 0      | iYJL061W   | 1.22     | 0.54 |      |
| YJL061W | NUP82  | HRB187           |        | iYJL062W   | #N/A     | #N/A |      |
| YJL062W | LAS21  | GPI7             |        | iYJL063C   | 3.67     | 0.99 |      |
| YJL063C | MRPL8  | HRD238           |        | iYJL063C   | 3.67     | 0.99 |      |
| YJL064W |        | 0                | #N/A   | iYJL066C   | 1.54     | 0.69 |      |
| YJL065C |        | 0                |        | 0          | iYJL064W | 2.28 | 0.86 |
| YJL066C | MPM1   |                  | 0      | iYJL066C   | 1.54     | 0.69 |      |
| YJL067W |        | 0                | #N/A   | iYJL068C   | 1.88     | 0.81 |      |
| YJL068C |        | 0                | #N/A   | iYJL068C   | 1.88     | 0.81 |      |
| YJL069C | UTP18  |                  | 0      | iYJL069C   | #N/A     | #N/A |      |
| YJL070C |        | 0                | #N/A   | iYJL070C   | #N/A     | #N/A |      |
| YJL071W | ARG2   | HRB574           |        | iYJL072C   | #N/A     | #N/A |      |
| YJL072C |        | 0                | CDC102 | iYJL072C   | #N/A     | #N/A |      |
| YJL073W | JEM1   | KAR8             |        | iYJL074C   | 1.79     | 0.78 |      |
| YJL074C | SMC3   |                  | 0      | iYJL074C   | 1.79     | 0.78 |      |
| YJL075C |        | 0                |        | 0          | iYJL075C | #N/A | #N/A |
| YJL076W | NET1   | CFI1 ESC5        |        | iYJL077C   | 2.17     | 0.88 |      |
| YJL077C | ICS3   |                  | 0      | iYJL077C   | 2.17     | 0.88 |      |
| YJL078C | PRY3   |                  | 0      | iYJL078C   | 0.46     | 0.10 |      |
| YJL079C | PRY1   |                  | 0      | iYJL079C   | 0.69     | 0.24 |      |
| YJL080C | SCP160 |                  | 0      | iYJL080C   | 1.19     | 0.53 |      |
| YJL081C | ARP4   | ACT3             |        | iYJL081C   | 2.14     | 0.87 |      |
| YJL082W | IML2   |                  | 0      | iYJL083W   | 0.78     | 0.30 |      |
| YJL083W |        | 0                | #N/A   | iYJL084C   | 1.88     | 0.82 |      |
| YJL084C |        | 0                | #N/A   | iYJL084C   | 1.88     | 0.82 |      |
| YJL085W | EXO70  |                  | 0      | iYJL088W   | #N/A     | #N/A |      |
| YJL086C |        | 0                | #N/A   | iYJL085W   | #N/A     | #N/A |      |

|         |        |                  |              |      |      |
|---------|--------|------------------|--------------|------|------|
| YJL087C | TRL1   | LIG1 RLG1        | iYJL085W     | #N/A | #N/A |
| YJL088W | ARG3   |                  | 0 iYJL089W   | 0.45 | 0.09 |
| YJL089W | SIP4   |                  | 0 iYJL090C   | #N/A | #N/A |
| YJL090C | DPB11  |                  | 0 iYJL090C   | #N/A | #N/A |
| YJL091C | 0      |                  | 0 iYJL091C   | 1.58 | 0.71 |
| YJL092W | HPR5   | RADH RADH1 SRS2  | iYJL093C     | 3.95 | 1.00 |
| YJL093C | TOK1   | DUK1 YKC1 YORK   | iYJL093C     | 3.95 | 1.00 |
| YJL094C | KHA1   |                  | 0 iYJL094C   | 1.22 | 0.54 |
| YJL095W | BCK1   | LAS3 SAP3 SLK1 S | iYJL096W     | 1.53 | 0.67 |
| YJL096W | MRPL49 |                  | 0 iYJL098W   | #N/A | #N/A |
| YJL097W | 0      | #N/A             | iYJL098W     | #N/A | #N/A |
| YJL098W | SAP185 |                  | 0 iYJL099W   | 1.02 | 0.44 |
| YJL099W | CHS6   | CSD3             | iYJL100W     | #N/A | #N/A |
| YJL100W | LSB6   |                  | 0 iYJL101C   | 1.07 | 0.47 |
| YJL101C | GSH1   |                  | 0 iYJL101C   | 1.07 | 0.47 |
| YJL102W | MEF2   |                  | 0 iYJL103C   | 2.03 | 0.86 |
| YJL103C | 0      | #N/A             | iYJL103C     | 2.03 | 0.86 |
| YJL104W | MIA1   | MIA1 TIM16       | iYJL105W     | #N/A | #N/A |
| YJL105W | SET4   |                  | 0 iYJL106W-1 | 0.55 | 0.15 |
| YJL106W | IME2   | SME1             | iYJL107C     | 1.02 | 0.44 |
| YJL107C | 0      | #N/A             | iYJL107C     | 1.02 | 0.44 |
| YJL108C | PRM10  |                  | 0 iYJL107C   | 1.02 | 0.44 |
| YJL109C | UTP10  |                  | 0 iYJL109C   | #N/A | #N/A |
| YJL110C | GZF3   | DEH1 NIL2        | iYJL110C     | 1.10 | 0.48 |
| YJL111W | CCT7   | TCP7             | iYJL112W     | #N/A | #N/A |
| YJL112W | MDV1   | FIS2 GAG3        | itD(GUC)J1   | 1.44 | 0.64 |
| YJL113W | #N/A   | #N/A             | iYJL115W     | #N/A | #N/A |
| YJL114W | #N/A   | #N/A             | iYJL115W     | #N/A | #N/A |
| YJL115W | ASF1   |                  | 0 iYJL116C   | 0.88 | 0.36 |
| YJL116C | NCA3   |                  | 0 iYJL116C   | 0.88 | 0.36 |
| YJL117W | PHO86  |                  | 0 iYJL118W   | 1.66 | 0.73 |
| YJL118W | 0      | #N/A             | iYJL120W     | 1.90 | 0.83 |
| YJL119C | 0      | #N/A             | iYJL118W     | 1.66 | 0.73 |
| YJL120W | 0      | #N/A             | iYJL122W     | 1.38 | 0.59 |
| YJL121C | RPE1   | EPI1 POS18       | iYJL120W     | 1.90 | 0.83 |
| YJL122W | 0      | #N/A             | iYJL123C     | 1.67 | 0.74 |
| YJL123C | 0      | #N/A             | iYJL123C     | 1.67 | 0.74 |
| YJL124C | LSM1   | SPB8             | iYJL124C     | 1.40 | 0.63 |
| YJL125C | GCD14  |                  | 0 iYJL125C   | 1.22 | 0.53 |
| YJL126W | NIT2   |                  | 0 iYJL127C   | 1.08 | 0.43 |
| YJL127C | SPT10  | CRE1 SUD1        | iYJL127C     | 1.08 | 0.43 |
| YJL128C | PBS2   | HOG4 SFS4 SSK4   | iYJL128C-0   | 1.41 | 0.64 |
| YJL129C | TRK1   |                  | 0 iYJL129C   | 1.04 | 0.45 |
| YJL130C | URA2   |                  | 0 iYJL130C   | 0.64 | 0.22 |
| YJL131C | 0      | #N/A             | iYJL131C     | 1.06 | 0.44 |
| YJL132W | 0      | #N/A             | iYJL133W     | 1.14 | 0.50 |
| YJL133W | MRS3   |                  | 0 iYJL134W   | 0.32 | 0.03 |
| YJL134W | LCB3   | LBP1 YSR2        | iYJL136C     | 0.52 | 0.14 |
| YJL135W | 0      | #N/A             | iYJL136C     | 0.52 | 0.14 |
| YJL136C | RPS21B |                  | 0 iYJL136C   | 0.52 | 0.14 |
| YJL137C | GLG2   |                  | 0 iYJL137C   | 0.99 | 0.43 |

|         |        |                 |       |            |      |      |
|---------|--------|-----------------|-------|------------|------|------|
| YJL138C | TIF2   |                 | 0     | iYJL138C   | 1.26 | 0.55 |
| YJL139C | YUR1   |                 | 0     | iYJL139C   | 0.72 | 0.27 |
| YJL140W | RPB4   | CTF15           |       | iYJL141C   | 1.57 | 0.71 |
| YJL141C | YAK1   |                 | 0     | iYJL141C   | 1.57 | 0.71 |
| YJL142C |        | 0 #N/A          |       | iYJL141C   | 1.57 | 0.71 |
| YJL143W | TIM17  | MIM17 MPI2 SMS1 |       | iYJL144W   | 2.33 | 0.92 |
| YJL144W |        | 0 #N/A          |       | iYJL145W   | 0.85 | 0.35 |
| YJL145W | SFH5   |                 | 0     | iYJL146W   | 1.05 | 0.45 |
| YJL146W | IDS2   |                 | 0     | iYJL147C   | 2.12 | 0.87 |
| YJL147C |        | 0 #N/A          |       | iYJL147C   | 2.12 | 0.87 |
| YJL148W | RPA34  |                 | 0     | iSNR190    | 0.59 | 0.17 |
| YJL149W |        | 0 #N/A          |       | iYJL151C   | 0.83 | 0.33 |
| YJL150W |        | 0 #N/A          |       | iYJL151C   | 0.83 | 0.33 |
| YJL151C | SNA3   |                 | 0     | iYJL151C   | 0.83 | 0.33 |
| YJL152W |        | 0 #N/A          |       | iYJL153C   | 0.50 | 0.12 |
| YJL153C | INO1   |                 | 38078 | iYJL153C   | 0.50 | 0.12 |
| YJL154C | VPS35  | GRD9 VPT7       |       | iYJL154C   | 1.52 | 0.67 |
| YJL155C | FBP26  | FBPase-2        |       | iYJL155C   | 0.76 | 0.29 |
| YJL156C | SSY5   |                 | 0     | iYJL156C   | #N/A | #N/A |
| YJL157C | FAR1   |                 | 0     | iYJL157C   | 0.65 | 0.22 |
| YJL158C | CIS3   | CCW11 CCW5 PIR4 |       | iYJL158C   | 0.52 | 0.14 |
| YJL159W | HSP150 | CCW7 ORE1 PIR2  |       | iYJL160C-1 | 0.94 | 0.39 |
| YJL160C |        | 0 #N/A          |       | iYJL160C-0 | 1.43 | 0.64 |
| YJL161W |        | 0               |       | itE(UUC)J  | 1.83 | 0.80 |
| YJL162C |        | 0               |       | iYJL162C   | #N/A | #N/A |
| YJL163C |        | 0 #N/A          |       | iYJL163C   | 1.36 | 0.61 |
| YJL164C | TPK1   | PKA1 SRA3       |       | iYJL164C   | 1.80 | 0.79 |
| YJL165C | HAL5   |                 | 0     | iYJL165C   | 1.65 | 0.74 |
| YJL166W | QCR8   | COR5            |       | iYJL167W   | 0.91 | 0.37 |
| YJL167W | ERG20  | BOT3 FDS1 FPP1  |       | iYJL168C   | 2.16 | 0.89 |
| YJL168C | SET2   | EZL1            |       | iYJL168C   | 2.16 | 0.89 |
| YJL169W |        | 0 #N/A          |       | iYJL170C   | 0.96 | 0.39 |
| YJL170C | ASG7   |                 | 0     | iYJL170C   | 0.96 | 0.39 |
| YJL171C |        | 0 #N/A          |       | iYJL171C   | #N/A | #N/A |
| YJL172W | CPS1   |                 | 0     | iYJL173C   | 2.38 | 0.93 |
| YJL173C | RFA3   |                 | 0     | iYJL173C   | 2.38 | 0.93 |
| YJL174W | KRE9   |                 | 0     | iYJL175W   | 3.00 | 0.98 |
| YJL175W |        | 0 #N/A          |       | iYJL177W   | #N/A | #N/A |
| YJL176C | SWI3   | TYE2            |       | iYJL175W   | 3.00 | 0.98 |
| YJL177W | RPL17B |                 | 0     | iYJL178C   | 0.46 | 0.10 |
| YJL178C |        | 0 ETF1          |       | iYJL178C   | 0.46 | 0.10 |
| YJL179W | PFD1   | GIM6            |       | iYJL180C   | #N/A | #N/A |
| YJL180C | ATP12  |                 | 0     | iYJL180C   | #N/A | #N/A |
| YJL181W |        | 0 #N/A          |       | iYJL183W   | #N/A | #N/A |
| YJL182C |        | 0 #N/A          |       | iYJL181W   | #N/A | #N/A |
| YJL183W | MNN11  |                 | 0     | iYJL184W   | 2.84 | 0.97 |
| YJL184W |        | 0 LDB6          |       | iYJL185C   | 1.92 | 0.82 |
| YJL185C |        | 0 #N/A          |       | iYJL185C   | 1.92 | 0.82 |
| YJL186W | MNN5   |                 | 0     | iYJL187C   | 0.93 | 0.39 |
| YJL187C | SWE1   | WEE1            |       | iYJL187C   | 0.93 | 0.39 |
| YJL188C | BUD19  |                 | 0     | iYJL188C   | #N/A | #N/A |



|           |        |                 |              |      |      |
|-----------|--------|-----------------|--------------|------|------|
| YJL189W   | RPL39  | PUB2 RPL46 SPB2 | iYJL190C     | 0.16 | 0.00 |
| YJL190C   | RPS22A | RPS24           | iYJL190C     | 0.16 | 0.00 |
| YJL191W   | RPS14B | CRY2            | iYJL192C     | #N/A | #N/A |
| YJL192C   | 0      |                 | 0 iYJL192C   | #N/A | #N/A |
| YJL193W   | 0      | #N/A            | iYJL194W     | 2.02 | 0.85 |
| YJL194W   | CDC6   |                 | 0 iYJL196C   | 0.69 | 0.24 |
| YJL195C   | 0      | #N/A            | iYJL194W     | 2.02 | 0.85 |
| YJL196C   | ELO1   |                 | 0 iYJL196C   | 0.69 | 0.24 |
| YJL197W   | UBP12  |                 | 0 iYJL198W   | 1.71 | 0.76 |
| YJL198W   | PHO90  |                 | 0 iYJL199C   | 2.75 | 0.96 |
| YJL199C   | 0      |                 | 0 iYJL199C   | 2.75 | 0.96 |
| YJL200C   | 0      | #N/A            | iYJL200C     | 0.53 | 0.14 |
| YJL201W   | ECM25  |                 | 0 iYJL202C   | 2.27 | 0.89 |
| YJL202C   | 0      | #N/A            | iYJL202C     | 2.27 | 0.89 |
| YJL203W   | PRP21  | SPP91           | iYJL204C     | 1.84 | 0.79 |
| YJL204C   | RCY1   |                 | 0 iYJL204C   | 1.84 | 0.79 |
| YJL206C   | 0      | #N/A            | iYJL206C     | 1.76 | 0.78 |
| YJL206C-A | #N/A   | #N/A            | #N/A         | #N/A | #N/A |
| YJL207C   | 0      | #N/A            | iYJL207C     | 1.52 | 0.69 |
| YJL208C   | NUC1   |                 | 0 iYJL208C   | #N/A | #N/A |
| YJL209W   | CBP1   |                 | 0 iYJL210W   | #N/A | #N/A |
| YJL210W   | PEX2   | CRT1 PAS5       | iYJL212C     | 0.93 | 0.39 |
| YJL211C   | 0      | #N/A            | iYJL210W     | #N/A | #N/A |
| YJL212C   | OPT1   | GSH11 HGT1      | iYJL212C     | 0.93 | 0.39 |
| YJL213W   | 0      | #N/A            | iYJL214W-2   | #N/A | #N/A |
| YJL214W   | HXT8   |                 | 0 iYJL215C   | #N/A | #N/A |
| YJL215C   | 0      | #N/A            | iYJL215C     | #N/A | #N/A |
| YJL216C   | 0      | #N/A            | iYJL216C     | 0.88 | 0.36 |
| YJL217W   | 0      | #N/A            | iYJL218W     | 1.96 | 0.84 |
| YJL218W   | 0      | #N/A            | iYJL219W     | 1.34 | 0.60 |
| YJL219W   | HXT9   |                 | 0 iYJL220W   | 1.59 | 0.71 |
| YJL220W   | 0      | #N/A            | iYJL222W     | 1.34 | 0.60 |
| YJL221C   | FSP2   |                 | 0 iYJL220W   | 1.59 | 0.71 |
| YJL222W   | VTH2   |                 | 0 iYJL223C-1 | #N/A | #N/A |
| YJL223C   | PAU1   |                 | 0 iYJL223C-0 | 0.80 | 0.32 |
| YJL225C   | 0      | #N/A            | iYJL225C-0   | #N/A | #N/A |
| YJR001W   | 0      |                 | 0 iCEN10     | 0.90 | 0.35 |
| YJR002W   | MPP10  |                 | 0 iYJR001W   | #N/A | #N/A |
| YJR003C   | 0      | #N/A            | iYJR003C     | 0.68 | 0.24 |
| YJR004C   | SAG1   | AG(ALPHA)1      | iYJR004C     | 1.12 | 0.49 |
| YJR005W   | APL1   | YAP80           | iYJR004C     | 1.12 | 0.49 |
| YJR006W   | HYS2   | HUS2 POL31 SDP5 | iYJR005W     | 0.81 | 0.32 |
| YJR007W   | SUI2   |                 | 0 iYJR006W   | 1.40 | 0.62 |
| YJR008W   | 0      | #N/A            | iYJR007W     | 0.98 | 0.42 |
| YJR009C   | TDH2   | GLD2            | iYJR009C-0   | 0.48 | 0.12 |
| YJR010C-A | SPC1   |                 | 0 iYJR010C-A | 1.80 | 0.78 |
| YJR010W   | MET3   |                 | 0 iYJR009C-1 | #N/A | #N/A |
| YJR011C   | 0      | #N/A            | iYJR011C     | 1.72 | 0.76 |
| YJR012C   | 0      | #N/A            | iYJR012C     | 1.50 | 0.68 |
| YJR013W   | 0      |                 | 0 iYJR012C   | 1.50 | 0.68 |
| YJR014W   | 0      | #N/A            | iYJR013W     | #N/A | #N/A |



|         |        |              |              |      |      |
|---------|--------|--------------|--------------|------|------|
| YJR015W | 0      | #N/A         | iYJR014W     | 0.54 | 0.16 |
| YJR016C | ILV3   |              | 0 iYJR016C   | #N/A | #N/A |
| YJR017C | ESS1   | PIN1 PTF1    | iYJR018W     | #N/A | #N/A |
| YJR018W | 0      | #N/A         | iYJR016C     | #N/A | #N/A |
| YJR019C | TES1   | PTE1         | iYJR020W     | 1.05 | 0.46 |
| YJR020W | 0      | #N/A         | iYJR018W     | #N/A | #N/A |
| YJR021C | REC107 | MER2         | iYJR021C     | 1.80 | 0.77 |
| YJR022W | LSM8   |              | 0 iYJR021C   | 1.80 | 0.77 |
| YJR023C | 0      | #N/A         | iYJR024C     | 1.25 | 0.55 |
| YJR024C | 0      | #N/A         | iYJR024C     | 1.25 | 0.55 |
| YJR025C | BNA1   | HAD1         | iYJR025C     | 0.98 | 0.42 |
| YJR026W | #N/A   | #N/A         | iYJR025C     | 0.98 | 0.42 |
| YJR027W | #N/A   | #N/A         | iYJR025C     | 0.98 | 0.42 |
| YJR028W | #N/A   | #N/A         | iYJR025C     | 0.98 | 0.42 |
| YJR029W | #N/A   | #N/A         | iYJR025C     | 0.98 | 0.42 |
| YJR030C | 0      | #N/A         | iYJR030C     | 0.70 | 0.25 |
| YJR031C | GEA1   |              | 0 iYJR031C   | 2.42 | 0.91 |
| YJR032W | CPR7   |              | 0 iYJR031C   | 2.42 | 0.91 |
| YJR033C | RAV1   |              | 0 iYJR033C   | #N/A | #N/A |
| YJR034W | PET191 |              | 0 iYJR033C   | #N/A | #N/A |
| YJR035W | RAD26  |              | 0 iYJR034W   | #N/A | #N/A |
| YJR036C | HUL4   |              | 0 iYJR037W   | 3.34 | 0.99 |
| YJR037W | 0      | #N/A         | iYJR035W     | #N/A | #N/A |
| YJR038C | 0      | #N/A         | iYJR039W     | 1.81 | 0.80 |
| YJR039W | 0      | #N/A         | iYJR037W     | 3.34 | 0.99 |
| YJR040W | GEF1   | CLC          | iYJR039W     | 1.81 | 0.80 |
| YJR041C | 0      |              | 0 iYJR041C   | #N/A | #N/A |
| YJR042W | NUP85  | RAT9         | iYJR041C     | #N/A | #N/A |
| YJR043C | POL32  |              | 0 iYJR043C   | 1.88 | 0.81 |
| YJR044C | VPS55  |              | 0 iYJR044C   | 1.25 | 0.55 |
| YJR045C | SSC1   | ENS1 mtHSP70 | iYJR045C     | 1.28 | 0.57 |
| YJR046W | TAH11  | CDT1 SID2    | iYJR045C     | 1.28 | 0.57 |
| YJR047C | ANB1   | HYP1 TIF51B  | iYJR047C     | 0.51 | 0.13 |
| YJR048W | CYC1   |              | 0 iYJR047C   | 0.51 | 0.13 |
| YJR049C | UTR1   |              | 0 iYJR049C   | 2.01 | 0.83 |
| YJR050W | ISY1   | NTC30 UTR3   | iYJR049C     | 2.01 | 0.83 |
| YJR051W | OSM1   |              | 0 iYJR050W   | 1.52 | 0.68 |
| YJR052W | RAD7   |              | 0 itG(GCC)J2 | 0.63 | 0.20 |
| YJR053W | BFA1   | IBD1         | iYJR052W     | #N/A | #N/A |
| YJR054W | 0      | #N/A         | iYJR053W     | 1.22 | 0.53 |
| YJR055W | HIT1   |              | 0 itR(CCU)J  | 1.23 | 0.50 |
| YJR056C | 0      | #N/A         | iYJR056C     | 1.65 | 0.74 |
| YJR057W | CDC8   |              | 0 iYJRdelta2 | 1.30 | 0.58 |
| YJR058C | APS2   | YAP17        | iYJR058C     | 1.85 | 0.81 |
| YJR059W | PTK2   | STK2         | iYJR058C     | 1.85 | 0.81 |
| YJR060W | CBF1   | CEP1 CPF1    | iYJR059W     | 0.82 | 0.32 |
| YJR061W | 0      | #N/A         | iYJR060W     | 1.01 | 0.44 |
| YJR062C | NTA1   | DEA1         | iYJR062C     | 2.51 | 0.93 |
| YJR063W | RPA12  | RRN4         | iYJR062C     | 2.51 | 0.93 |
| YJR064W | CCT5   | TCP5         | iYJR063W     | 2.21 | 0.90 |
| YJR065C | ARP3   | ACT4         | iYJR065C     | 2.90 | 0.97 |

|           |        |                 |              |      |      |
|-----------|--------|-----------------|--------------|------|------|
| YJR066W   | TOR1   | DRR1            | iYJR065C     | 2.90 | 0.97 |
| YJR067C   | YAE1   |                 | 0 iYJR067C   | 1.78 | 0.79 |
| YJR068W   | RFC2   |                 | 0 iYJR067C   | 1.78 | 0.79 |
| YJR069C   | HAM1   |                 | 0 iYJR069C   | 0.76 | 0.29 |
| YJR070C   | 0      |                 | 0 iYJR071W   | 0.75 | 0.28 |
| YJR071W   | 0      | #N/A            | iYJR069C     | 0.76 | 0.29 |
| YJR072C   | 0      | #N/A            | iYJR072C     | 1.57 | 0.70 |
| YJR073C   | OPI3   | PEM2            | iYJR073C     | 1.69 | 0.74 |
| YJR074W   | MOG1   |                 | 0 iYJR073C   | 1.69 | 0.74 |
| YJR075W   | HOC1   |                 | 0 iYJR074W   | 1.80 | 0.77 |
| YJR076C   | CDC11  | PSL9            | iYJR076C     | #N/A | #N/A |
| YJR077C   | MIR1   |                 | 0 iYJR077C   | 1.02 | 0.44 |
| YJR078W   | BNA2   |                 | 0 iYJR077C   | 1.02 | 0.44 |
| YJR079W   | 0      | #N/A            | iYJR077C     | 1.02 | 0.44 |
| YJR080C   | 0      |                 | 0 iYJR080C   | 2.00 | 0.84 |
| YJR082C   | EAF6   |                 | 0 iYJR082C   | 1.99 | 0.85 |
| YJR083C   | 0      |                 | 0 iYJR083C   | 1.30 | 0.57 |
| YJR084W   | 0      |                 | 0 iYJR083C   | 1.30 | 0.57 |
| YJR085C   | 0      | #N/A            | iYJR085C     | #N/A | #N/A |
| YJR086W   | STE18  |                 | 0 iYJR085C   | #N/A | #N/A |
| YJR087W   | 0      | #N/A            | iYJR085C     | #N/A | #N/A |
| YJR088C   | 0      | #N/A            | iYJR088C     | 2.62 | 0.95 |
| YJR089W   | BIR1   |                 | 0 iYJR088C   | 2.62 | 0.95 |
| YJR090C   | GRR1   | CAT80 COT2 SSU2 | iYJR090C     | 0.79 | 0.30 |
| YJR091C   | JSN1   | PUF1            | iYJR091C     | 0.98 | 0.42 |
| YJR092W   | BUD4   |                 | 0 iYJR091C   | 0.98 | 0.42 |
| YJR093C   | FIP1   |                 | 0 iYJR093C   | 2.32 | 0.92 |
| YJR094C   | IME1   |                 | 0 iYJR094C-0 | 0.98 | 0.41 |
| YJR094W-A | RPL43B |                 | 0 iYJR094C-1 | #N/A | #N/A |
| YJR095W   | SFC1   | ACR1            | iYJR094W-A   | 0.69 | 0.25 |
| YJR096W   | 0      | #N/A            | iYJR095W     | 1.78 | 0.79 |
| YJR097W   | 0      |                 | 0 iYJR096W   | 2.28 | 0.89 |
| YJR098C   | 0      | #N/A            | iYJR098C     | 2.09 | 0.87 |
| YJR099W   | YUH1   |                 | 0 iYJR098C   | 2.09 | 0.87 |
| YJR100C   | 0      | #N/A            | iYJR100C     | 1.14 | 0.50 |
| YJR101W   | RSM26  |                 | 0 itL(UAG)J  | 1.09 | 0.47 |
| YJR102C   | VPS25  | VPT25           | iYJR102C     | #N/A | #N/A |
| YJR103W   | URA8   |                 | 0 iYJR102C   | #N/A | #N/A |
| YJR104C   | SOD1   | CRS4            | iYJR104C     | 0.70 | 0.25 |
| YJR105W   | ADO1   |                 | 0 iYJR104C   | 0.70 | 0.25 |
| YJR106W   | ECM27  |                 | 0 iYJR105W   | 1.40 | 0.63 |
| YJR107W   | 0      | #N/A            | iYJR106W     | 0.56 | 0.16 |
| YJR108W   | ABM1   |                 | 0 iYJR107W   | 1.58 | 0.71 |
| YJR109C   | CPA2   |                 | 0 iYJR109C   | 2.12 | 0.88 |
| YJR110W   | 0      |                 | 0 iYJR109C   | 2.12 | 0.88 |
| YJR111C   | 0      | #N/A            | iYJR111C     | 1.56 | 0.70 |
| YJR112W   | NNF1   |                 | 0 iYJR111C   | 1.56 | 0.70 |
| YJR113C   | RSM7   |                 | 0 iYJR114W   | 1.03 | 0.44 |
| YJR114W   | 0      |                 | 0 iYJR112W   | 2.45 | 0.92 |
| YJR115W   | 0      | #N/A            | iYJR114W     | 1.03 | 0.44 |
| YJR116W   | 0      | #N/A            | iYJR115W     | 2.10 | 0.88 |

|         |        |                |              |      |      |
|---------|--------|----------------|--------------|------|------|
| YJR117W | STE24  | AFC1 PIO2      | iYJR116W     | 1.67 | 0.74 |
| YJR118C | ILM1   |                | 0 iYJR118C   | #N/A | #N/A |
| YJR119C | 0      | #N/A           | iYJR119C     | 1.53 | 0.69 |
| YJR120W | 0      | #N/A           | iYJR119C     | 1.53 | 0.69 |
| YJR121W | ATP2   |                | 0 iYJR120W   | 0.41 | 0.07 |
| YJR122W | CAF17  |                | 0 iYJR121W   | #N/A | #N/A |
| YJR123W | RPS5   |                | 0 iYJR122W   | 0.27 | 0.02 |
| YJR124C | 0      | #N/A           | iYJR124C     | #N/A | #N/A |
| YJR125C | ENT3   |                | 0 iYJR125C   | 2.13 | 0.88 |
| YJR126C | VPS70  |                | 0 iYJR126C   | #N/A | #N/A |
| YJR127C | ZMS1   |                | 0 iYJR128W   | 0.44 | 0.09 |
| YJR128W | 0      | #N/A           | iYJR126C     | #N/A | #N/A |
| YJR129C | 0      | #N/A           | iYJR129C     | 1.35 | 0.60 |
| YJR130C | STR2   |                | 0 iYJR130C   | 1.75 | 0.78 |
| YJR131W | MNS1   |                | 0 iYJR130C   | 1.75 | 0.78 |
| YJR132W | NMD5   | KAP119         | iYJR131W     | 1.77 | 0.77 |
| YJR133W | XPT1   |                | 0 iYJR132W   | 1.32 | 0.58 |
| YJR134C | SGM1   |                | 0 iYJR134C   | #N/A | #N/A |
| YJR135C | MCM22  |                | 0 iYJR135C   | 2.19 | 0.89 |
| YJR136C | 0      | #N/A           | iYJR136C     | #N/A | #N/A |
| YJR137C | ECM17  | MET5           | iYJR137C     | 1.03 | 0.44 |
| YJR138W | IML1   |                | 0 iYJR137C   | 1.03 | 0.44 |
| YJR139C | HOM6   |                | 0 iYJR139C   | 1.01 | 0.42 |
| YJR140C | HIR3   | HPC1           | iYJR140C     | #N/A | #N/A |
| YJR141W | 0      | #N/A           | iYJR140C     | #N/A | #N/A |
| YJR142W | 0      | #N/A           | iYJR141W     | #N/A | #N/A |
| YJR143C | PMT4   |                | 0 iYJR143C   | 2.04 | 0.86 |
| YJR144W | MGM101 | MGM9           | iYJR143C     | 2.04 | 0.86 |
| YJR145C | RPS4A  |                | 0 iYJR145C   | #N/A | #N/A |
| YJR146W | 0      | #N/A           | iYJR145C     | #N/A | #N/A |
| YJR147W | HMS2   |                | 0 iYJR145C   | #N/A | #N/A |
| YJR148W | BAT2   | ECA40 TWT2     | iYJR147W     | #N/A | #N/A |
| YJR149W | 0      | #N/A           | iYJR148W     | 0.57 | 0.16 |
| YJR150C | DAN1   | CCW13          | iYJR150C-0   | 1.51 | 0.68 |
| YJR151C | DAN4   |                | 0 iYJR151C-0 | 1.30 | 0.58 |
| YJR152W | DAL5   | UREP1          | iYJR151C-2   | 1.16 | 0.51 |
| YJR153W | PGU1   | PGL1 PSM1      | iYJR152W     | 1.52 | 0.68 |
| YJR154W | 0      | #N/A           | iYJR153W-1   | 2.10 | 0.88 |
| YJR155W | AAD10  |                | 0 iYJR154W   | 0.93 | 0.39 |
| YJR156C | THI11  |                | 0 iYJR156C   | 2.51 | 0.94 |
| YJR157W | 0      | #N/A           | iYJR156C     | 2.51 | 0.94 |
| YJR158W | HXT16  |                | 0 iYJR157W-1 | 0.73 | 0.27 |
| YJR159W | SOR1   | SDH1           | iYJR158W-1   | 1.46 | 0.66 |
| YJR160C | 0      |                | 0 iYJR160C-0 | 1.31 | 0.58 |
| YJR161C | COS5   |                | 0 iYJR161C   | 0.78 | 0.30 |
| YJR162C | 0      | #N/A           | #N/A         | #N/A | #N/A |
| YKL001C | MET14  |                | 0 iYKL001C   | 1.22 | 0.54 |
| YKL002W | DID4   | CHM2 GRD7 REN1 | iYKL003C     | 1.88 | 0.82 |
| YKL003C | MRP17  |                | 0 iYKL003C   | 1.88 | 0.82 |
| YKL004W | AUR1   |                | 0 iYKL005C   | 2.36 | 0.92 |
| YKL005C | 0      |                | 0 iYKL005C   | 2.36 | 0.92 |

|           |        |             |   |            |            |      |      |
|-----------|--------|-------------|---|------------|------------|------|------|
| YKL006C-A | SFT1   |             | 0 | iYKL006C-A | 0.34       | 0.04 |      |
| YKL006W   | RPL14A |             | 0 | iYKL006C-A | 0.34       | 0.04 |      |
| YKL007W   | CAP1   |             | 0 | iYKL008C   | 0.50       | 0.12 |      |
| YKL008C   | LAC1   | DGT1        |   | iYKL008C   | 0.50       | 0.12 |      |
| YKL009W   | MRT4   |             | 0 | iYKL010C   | 1.64       | 0.73 |      |
| YKL010C   | UFD4   |             | 0 | iYKL010C   | 1.64       | 0.73 |      |
| YKL011C   | CCE1   | MGT1        |   | iYKL011C   | #N/A       | #N/A |      |
| YKL012W   | PRP40  |             | 0 | iYKL013C   | 2.32       | 0.91 |      |
| YKL013C   | ARC19  |             | 0 | iYKL013C   | 2.32       | 0.91 |      |
| YKL014C   |        |             | 0 | iYKL014C   | 1.20       | 0.52 |      |
| YKL015W   | PUT3   |             | 0 | iYKL016C   | 1.62       | 0.72 |      |
| YKL016C   | ATP7   |             | 0 | iYKL016C   | 1.62       | 0.72 |      |
| YKL017C   | HCS1   | DIP1        |   | iYKL017C   | #N/A       | #N/A |      |
| YKL018W   | SWD2   | CPS35 SAF37 |   | iYKL019W   | 3.04       | 0.97 |      |
| YKL019W   | RAM2   |             | 0 | iYKL020C   | 2.75       | 0.96 |      |
| YKL020C   | SPT23  |             | 0 | iYKL020C   | 2.75       | 0.96 |      |
| YKL021C   | MAK11  |             | 0 | iYKL021C   | #N/A       | #N/A |      |
| YKL022C   | CDC16  |             | 0 | iYKL022C   | #N/A       | #N/A |      |
| YKL023W   |        |             | 0 | #N/A       | iYKL024C   | 2.13 | 0.87 |
| YKL024C   | URA6   | SOC8        |   | iYKL024C   | 2.13       | 0.87 |      |
| YKL025C   | PAN3   | ECM35       |   | iYKL025C   | #N/A       | #N/A |      |
| YKL026C   | GPX1   |             | 0 | iYKL026C   | 1.25       | 0.55 |      |
| YKL027W   |        |             | 0 | #N/A       | iYKL028W   | 0.90 | 0.38 |
| YKL028W   | TFA1   |             | 0 | iYKL029C   | 0.73       | 0.27 |      |
| YKL029C   | MAE1   |             | 0 | iYKL029C   | 0.73       | 0.27 |      |
| YKL030W   |        |             | 0 | #N/A       | iYKL032C   | 0.40 | 0.07 |
| YKL031W   |        |             | 0 | #N/A       | iYKL032C   | 0.40 | 0.07 |
| YKL032C   | IXR1   | ORD1        |   | iYKL032C   | 0.40       | 0.07 |      |
| YKL033W   |        |             | 0 | 0          | iYKL033W-A | 1.36 | 0.60 |
| YKL034W   | TUL1   |             | 0 | iYKL035W   | 1.54       | 0.69 |      |
| YKL035W   | UGP1   |             | 0 | iYKL038W   | 0.98       | 0.41 |      |
| YKL036C   |        |             | 0 | #N/A       | iYKL035W   | 1.54 | 0.69 |
| YKL037W   |        |             | 0 | #N/A       | iYKL038W   | 0.98 | 0.41 |
| YKL038W   | RGT1   |             | 0 | iSNR69     | 1.22       | 0.54 |      |
| YKL039W   | PTM1   |             | 0 | iYKL040C   | 1.50       | 0.68 |      |
| YKL040C   | NFU1   | NUB1        |   | iYKL040C   | 1.50       | 0.68 |      |
| YKL041W   | VPS24  | DID3        |   | iYKL042W   | 1.56       | 0.70 |      |
| YKL042W   | SPC42  |             | 0 | iYKL043W   | 0.96       | 0.40 |      |
| YKL043W   | PHD1   |             | 0 | iYKL044W   | #N/A       | #N/A |      |
| YKL044W   |        |             | 0 | #N/A       | iYKL045W   | 0.30 | 0.03 |
| YKL045W   | PRI2   |             | 0 | iYKL046C   | 2.52       | 0.94 |      |
| YKL046C   |        |             | 0 | 0          | iYKL046C   | 2.52 | 0.94 |
| YKL047W   |        |             | 0 | #N/A       | iYKL048C   | 2.29 | 0.92 |
| YKL048C   | ELM1   | LDB9        |   | iYKL048C   | 2.29       | 0.92 |      |
| YKL049C   | CSE4   | CSL2        |   | iYKL049C   | 1.57       | 0.70 |      |
| YKL050C   |        |             | 0 | #N/A       | iYKL050C   | 0.73 | 0.27 |
| YKL051W   |        |             | 0 | 0          | iYKL052C   | 0.52 | 0.13 |
| YKL052C   | ASK1   |             | 0 | iYKL052C   | 0.52       | 0.13 |      |
| YKL053W   |        |             | 0 | #N/A       | iYKL053C-A | 0.92 | 0.38 |
| YKL054C   | VID31  | VID31       |   | iYKL054C   | 0.91       | 0.35 |      |
| YKL055C   | OAR1   |             | 0 | iYKL055C   | 0.63       | 0.21 |      |

|           |        |               |              |      |      |
|-----------|--------|---------------|--------------|------|------|
| YKL056C   | 0      | #N/A          | iYKL056C     | #N/A | #N/A |
| YKL057C   | NUP120 | RAT2          | iYKL057C     | 1.41 | 0.63 |
| YKL058W   | TOA2   |               | 0 iYKL059C   | 2.25 | 0.91 |
| YKL059C   | MPE1   |               | 0 iYKL059C   | 2.25 | 0.91 |
| YKL060C   | FBA1   | LOT1          | iYKL060C     | 0.28 | 0.02 |
| YKL061W   | 0      | #N/A          | iYKL062W     | #N/A | #N/A |
| YKL062W   | MSN4   |               | 0 iYKL063C-1 | 0.63 | 0.21 |
| YKL063C   | 0      | #N/A          | iYKL063C-0   | 0.97 | 0.41 |
| YKL064W   | MNR2   |               | 0 iYKL065C   | 1.89 | 0.82 |
| YKL065C   | YET1   |               | 0 iYKL065C   | 1.89 | 0.82 |
| YKL066W   | 0      | #N/A          | iYKLWdelta7  | 1.77 | 0.74 |
| YKL067W   | YNK1   | NDK1          | iYKLWdelta7  | 1.77 | 0.74 |
| YKL068W   | NUP100 | NSP100        | itV(AAC)K1-  | #N/A | #N/A |
| YKL069W   | 0      | #N/A          | iYKL070W     | 1.06 | 0.46 |
| YKL070W   | 0      | #N/A          | iYKL071W     | 0.42 | 0.08 |
| YKL071W   | 0      | #N/A          | itW(CCA)K-   | 0.73 | 0.27 |
| YKL072W   | STB6   |               | 0 iYKL073W   | 2.22 | 0.90 |
| YKL073W   | LHS1   | CER1 SSI1     | iYKL074C     | 2.44 | 0.91 |
| YKL074C   | MUD2   |               | 0 iYKL074C   | 2.44 | 0.91 |
| YKL075C   | 0      | #N/A          | iYKL075C     | 1.95 | 0.80 |
| YKL076C   | 0      |               | 0 iYKL075C   | 1.95 | 0.80 |
| YKL077W   | 0      | #N/A          | iYKL078W     | 1.43 | 0.63 |
| YKL078W   | DHR2   |               | 0 iYKL079W   | 1.90 | 0.81 |
| YKL079W   | SMY1   |               | 0 iYKL080W   | #N/A | #N/A |
| YKL080W   | VMA5   | CSL5 VAT3     | iYKL081W     | 1.05 | 0.46 |
| YKL081W   | TEF4   | EFC1          | iYKL082C     | 0.77 | 0.29 |
| YKL082C   | 0      |               | 0 iYKL082C   | 0.77 | 0.29 |
| YKL083W   | 0      | #N/A          | iYKL084W     | #N/A | #N/A |
| YKL084W   | 0      | #N/A          | iYKL085W     | 0.65 | 0.21 |
| YKL085W   | MDH1   |               | 0 iYKL086W   | 0.96 | 0.41 |
| YKL086W   | 0      |               | 0 iYKL087C   | 2.21 | 0.88 |
| YKL087C   | CYT2   |               | 0 iYKL087C   | 2.21 | 0.88 |
| YKL088W   | 0      | #N/A          | iYKL089W     | 2.07 | 0.87 |
| YKL089W   | MIF2   |               | 0 iYKL090W   | 0.99 | 0.39 |
| YKL090W   | 0      |               | 0 iYKL091C   | 1.22 | 0.54 |
| YKL091C   | 0      | #N/A          | iYKL091C     | 1.22 | 0.54 |
| YKL092C   | BUD2   | CLA2 ERC25    | iYKL092C     | #N/A | #N/A |
| YKL093W   | MBR1   |               | 0 iYKL094W   | 0.73 | 0.27 |
| YKL094W   | YJU3   |               | 0 iYKL095W   | 1.19 | 0.53 |
| YKL095W   | YJU2   | CWC16         | iYKL096W     | 1.60 | 0.69 |
| YKL096W   | CWP1   | YJU1          | iYKL097W-A   | 0.24 | 0.01 |
| YKL097C   | 0      | #N/A          | iYKL097C     | 0.25 | 0.02 |
| YKL097W-A | #N/A   | #N/A          | #N/A         | #N/A | #N/A |
| YKL098W   | 0      | #N/A          | iYKL099C     | 2.37 | 0.91 |
| YKL099C   | UTP11  |               | 0 iYKL099C   | 2.37 | 0.91 |
| YKL100C   | 0      | #N/A          | iYKL100C     | 1.09 | 0.47 |
| YKL101W   | HSL1   | NIK1          | iYKL102C     | 1.81 | 0.80 |
| YKL102C   | 0      | #N/A          | iYKL102C     | 1.81 | 0.80 |
| YKL103C   | LAP4   | APE1 API YSC1 | iYKL103C     | 0.80 | 0.31 |
| YKL104C   | GFA1   |               | 0 iYKL104C   | 0.61 | 0.19 |
| YKL105C   | 0      | #N/A          | iYKL105C     | 1.51 | 0.68 |

|         |        |                  |      |             |      |      |
|---------|--------|------------------|------|-------------|------|------|
| YKL106W | AAT1   |                  | 0    | iYKL107W    | #N/A | #N/A |
| YKL107W |        | 0                | #N/A | iYKL108W    | 0.63 | 0.21 |
| YKL108W | SLD2   | DRC1             |      | iYKL109W    | 1.02 | 0.44 |
| YKL109W | HAP4   |                  | 0    | iYKL110C-1  | 0.25 | 0.02 |
| YKL110C | KTI12  | TOT4             |      | iYKL110C-0  | 0.55 | 0.16 |
| YKL111C |        | 0                | #N/A | iYKL111C    | #N/A | #N/A |
| YKL112W | ABF1   | BAF1 OBF1 REB2 S |      | iYKL113C    | 0.86 | 0.35 |
| YKL113C | RAD27  | ERC11 RTH1       |      | iYKL113C    | 0.86 | 0.35 |
| YKL114C | APN1   |                  | 0    | iYKL114C    | 1.36 | 0.61 |
| YKL115C |        | 0                | #N/A | iYKL115C    | #N/A | #N/A |
| YKL116C | PRR1   |                  | 0    | iYKL115C    | #N/A | #N/A |
| YKL117W | SBA1   |                  | 0    | itA(AGC)K1  | #N/A | #N/A |
| YKL118W |        | 0                | #N/A | iYKL120W    | 0.56 | 0.17 |
| YKL119C | VPH2   | CLS10 VMA12      |      | iYKLCdelta4 | 0.78 | 0.30 |
| YKL120W | OAC1   |                  | 0    | iYKL121W    | 0.42 | 0.07 |
| YKL121W |        | 0                | #N/A | iYKL122C    | #N/A | #N/A |
| YKL122C | SRP21  |                  | 0    | iYKL122C    | #N/A | #N/A |
| YKL123W |        | 0                | #N/A | iYKL125W    | 1.40 | 0.63 |
| YKL124W | SSH4   | MLF4             |      | iYKL125W    | 1.40 | 0.63 |
| YKL125W | RRN3   |                  | 0    | iYKL126W    | 1.12 | 0.49 |
| YKL126W | YPK1   | SLI2             |      | iYKL127W    | 1.55 | 0.70 |
| YKL127W | PGM1   |                  | 0    | itK(CUU)K   | #N/A | #N/A |
| YKL128C | PMU1   |                  | 0    | iYKL128C    | 1.03 | 0.44 |
| YKL129C | MYO3   |                  | 0    | iYKL129C    | #N/A | #N/A |
| YKL130C | SHE2   |                  | 0    | iYKL130C    | 1.25 | 0.55 |
| YKL131W |        | 0                | #N/A | iYKL133C    | 1.72 | 0.72 |
| YKL132C | RMA1   |                  | 0    | iYKL131W    | 1.81 | 0.79 |
| YKL133C |        | 0                | #N/A | iYKL133C    | 1.72 | 0.72 |
| YKL134C |        | 37530            | 0    | iYKL134C    | 2.22 | 0.86 |
| YKL135C | APL2   |                  | 0    | iYKL135C    | 2.06 | 0.87 |
| YKL136W |        | 0                | #N/A | iYKL137W    | #N/A | #N/A |
| YKL137W |        | 0                | #N/A | iYKL138C    | #N/A | #N/A |
| YKL138C | MRPL31 |                  | 0    | iYKL138C    | #N/A | #N/A |
| YKL139W | CTK1   |                  | 0    | iYKL140W    | 1.40 | 0.60 |
| YKL140W | TGL1   | YKL5             |      | iYKL141W    | 1.28 | 0.57 |
| YKL141W | SDH3   | CYB3 YKL4        |      | iYKL142W    | 1.80 | 0.79 |
| YKL142W | MRP8   | YKL3             |      | iYKL143W    | 0.67 | 0.23 |
| YKL143W | LTV1   | YKL2             |      | iYKL144C    | 3.65 | 0.98 |
| YKL144C | RPC25  | YKL1             |      | iYKL144C    | 3.65 | 0.98 |
| YKL145W | RPT1   | CIM5 YTA3        |      | iYKL146W    | 1.05 | 0.45 |
| YKL146W |        | 0                | 0    | iYKL148C    | 1.29 | 0.58 |
| YKL147C |        | 0                | #N/A | iYKL146W    | 1.05 | 0.45 |
| YKL148C | SDH1   |                  | 0    | iYKL148C    | 1.29 | 0.58 |
| YKL149C | DBR1   | PRP26            |      | iYKL149C    | 0.97 | 0.41 |
| YKL150W | MCR1   |                  | 0    | iYKL151C    | 1.61 | 0.72 |
| YKL151C |        | 0                | #N/A | iYKL151C    | 1.61 | 0.72 |
| YKL152C | GPM1   |                  | 0    | iYKL152C    | 0.31 | 0.03 |
| YKL153W |        | 0                | #N/A | iYKLWdelta3 | 1.38 | 0.62 |
| YKL154W | SRP102 |                  | 0    | iYKL155C    | 3.07 | 0.91 |
| YKL155C | RSM22  |                  | 0    | iYKL155C    | 3.07 | 0.91 |
| YKL156W | RPS27A |                  | 0    | iYKL157W    | 0.60 | 0.18 |



|         |        |                   |              |      |      |
|---------|--------|-------------------|--------------|------|------|
| YKL157W | APE2   | LAP1              | iYKL158W     | 1.77 | 0.78 |
| YKL158W | #N/A   | #N/A              | #N/A         | #N/A | #N/A |
| YKL159C | RCN1   |                   | 0 iYKL159C   | 2.54 | 0.92 |
| YKL160W | 0      |                   | 0 iYKL161C-1 | #N/A | #N/A |
| YKL161C | 0      | #N/A              | iYKL161C-0   | 0.98 | 0.41 |
| YKL162C | 0      | #N/A              | iYKL162C     | 1.59 | 0.71 |
| YKL163W | PIR3   | CCW8              | iYKL164C-1   | 0.77 | 0.29 |
| YKL164C | PIR1   | CCW6              | iYKL164C-0   | 0.79 | 0.30 |
| YKL165C | MCD4   | FSR2 SSU21 ZRG1   | iYKL165C     | 1.23 | 0.54 |
| YKL166C | TPK3   |                   | 0 iYKL166C-0 | #N/A | #N/A |
| YKL167C | MRP49  |                   | 0 iYKL167C   | 2.91 | 0.97 |
| YKL168C | KKQ8   |                   | 0 iYKL168C   | #N/A | #N/A |
| YKL169C | 0      | #N/A              | iYKL169C     | #N/A | #N/A |
| YKL170W | MRPL38 | MRPL34            | iYKL171W     | 2.43 | 0.89 |
| YKL171W | 0      | #N/A              | iYKL172W     | 1.76 | 0.78 |
| YKL172W | EBP2   |                   | 0 iYKL173W   | #N/A | #N/A |
| YKL173W | SNU114 | GIN10             | iYKL174C     | 1.87 | 0.81 |
| YKL174C | 0      | #N/A              | iYKL174C     | 1.87 | 0.81 |
| YKL175W | ZRT3   |                   | 0 iYKL176C   | 1.92 | 0.83 |
| YKL176C | LST4   |                   | 0 iYKL176C   | 1.92 | 0.83 |
| YKL177W | 0      | #N/A              | iYKL179C     | 1.86 | 0.78 |
| YKL178C | STE3   | DAF2              | iYKL177W     | 0.99 | 0.42 |
| YKL179C | COY1   |                   | 0 iYKL179C   | 1.86 | 0.78 |
| YKL180W | RPL17A | RPL17             | iYKL181W     | #N/A | #N/A |
| YKL181W | PRS1   | PRP1              | iYKL182W     | 0.86 | 0.34 |
| YKL182W | FAS1   |                   | 0 iYKL183W   | 0.15 | 0.00 |
| YKL183W | LOT5   |                   | 0 iYKL184W   | 0.73 | 0.27 |
| YKL184W | SPE1   | ORD1 SPE10        | iYKL185W     | 0.59 | 0.18 |
| YKL185W | ASH1   |                   | 0 iYKL186C   | 1.30 | 0.58 |
| YKL186C | MTR2   |                   | 0 iYKL186C   | 1.30 | 0.58 |
| YKL187C | 0      | #N/A              | iYKL187C     | 1.56 | 0.70 |
| YKL188C | PXA2   | PAT1              | iYKL188C     | 1.65 | 0.73 |
| YKL189W | HYM1   |                   | 0 iL(UAA)K   | 1.21 | 0.53 |
| YKL190W | CNB1   | CRV1 YCN2         | iYKL191W     | 1.04 | 0.45 |
| YKL191W | DPH2   |                   | 0 iYKL192C   | 2.91 | 0.97 |
| YKL192C | ACP1   |                   | 0 iYKL192C   | 2.91 | 0.97 |
| YKL193C | SDS22  | EGP1              | iYKL193C     | 1.53 | 0.69 |
| YKL194C | MST1   |                   | 0 iYKL194C   | 2.39 | 0.91 |
| YKL195W | 0      |                   | 0 iYKL196C   | 2.60 | 0.94 |
| YKL196C | YKT6   |                   | 0 iYKL196C   | 2.60 | 0.94 |
| YKL197C | PEX1   | PAS1              | iYKL197C     | 1.35 | 0.60 |
| YKL198C | PTK1   | KKT8 POT1 STK1 YI | iYKL198C     | 0.85 | 0.34 |
| YKL199C | YKT9   |                   | 0 iYKL198C   | 0.85 | 0.34 |
| YKL200C | #N/A   | #N/A              | #N/A         | #N/A | #N/A |
| YKL201C | MNN4   |                   | 0 iYKL201C   | 0.68 | 0.23 |
| YKL202W | 0      | #N/A              | iYKL203C     | 1.63 | 0.73 |
| YKL203C | TOR2   | DRR2              | iYKL203C     | 1.63 | 0.73 |
| YKL204W | EAP1   |                   | 0 iYKL205W   | 1.80 | 0.79 |
| YKL205W | LOS1   |                   | 0 iYKL206C   | 1.91 | 0.81 |
| YKL206C | 0      | #N/A              | iYKL206C     | 1.91 | 0.81 |
| YKL207W | 0      | #N/A              | iYKL208W     | 2.04 | 0.86 |

|         |        |                 |   |            |      |      |
|---------|--------|-----------------|---|------------|------|------|
| YKL208W | CBT1   |                 | 0 | it(CGU)K   | 0.91 | 0.38 |
| YKL209C | STE6   |                 | 0 | iYKL209C   | 0.64 | 0.22 |
| YKL210W | UBA1   |                 | 0 | iSNR64     | 1.39 | 0.61 |
| YKL211C | TRP3   |                 | 0 | iYKL211C   | 1.04 | 0.45 |
| YKL212W | SAC1   | RSD1            |   | iYKL213C   | 1.78 | 0.77 |
| YKL213C | DOA1   | UFD3 ZZZ4       |   | iYKL213C   | 1.78 | 0.77 |
| YKL214C | YRA2   |                 | 0 | iYKL214C   | 1.47 | 0.65 |
| YKL215C |        | 0 #N/A          |   | iYKL215C   | 1.51 | 0.68 |
| YKL216W | URA1   |                 | 0 | iYKL217W   | 1.27 | 0.56 |
| YKL217W | JEN1   |                 | 0 | iYKL218C-2 | 0.57 | 0.17 |
| YKL218C | SRY1   |                 | 0 | iYKL218C-0 | 1.53 | 0.69 |
| YKL219W | COS9   |                 | 0 | iYKL220C-2 | 1.14 | 0.50 |
| YKL220C | FRE2   |                 | 0 | iYKL220C-0 | 1.48 | 0.66 |
| YKL221W | MCH2   |                 | 0 | iYKL222C   | 1.43 | 0.64 |
| YKL222C |        | 0 #N/A          |   | iYKL222C   | 1.43 | 0.64 |
| YKL223W |        | 0 #N/A          |   | iYKL224C   | #N/A | #N/A |
| YKL224C |        | 0 #N/A          |   | iYKL224C   | #N/A | #N/A |
| YKL225W |        | 0 #N/A          |   | #N/A       | #N/A | #N/A |
| YKR001C | VPS1   | GRD1 LAM1 SPO15 |   | iYKR001C   | 2.16 | 0.89 |
| YKR002W | PAP1   |                 | 0 | iYKR001C   | 2.16 | 0.89 |
| YKR003W | OSH6   |                 | 0 | iYKR002W   | 0.82 | 0.32 |
| YKR004C | ECM9   |                 | 0 | iYKR004C   | 1.11 | 0.49 |
| YKR005C |        | 0 #N/A          |   | iYKR005C   | 0.91 | 0.38 |
| YKR006C | MRPL13 | YK105           |   | iYKR006C   | 3.13 | 0.98 |
| YKR007W |        | 0               | 0 | iYKR006C   | 3.13 | 0.98 |
| YKR008W | RSC4   |                 | 0 | iYKR007W   | #N/A | #N/A |
| YKR009C | FOX2   | POX2            |   | iYKR009C   | 0.96 | 0.40 |
| YKR010C | TOF2   |                 | 0 | iYKR010C   | 1.72 | 0.75 |
| YKR011C | TOS5   | #N/A            |   | iYKR011C   | 1.76 | 0.78 |
| YKR012C |        | 0 #N/A          |   | iYKR013W   | 0.88 | 0.36 |
| YKR013W | PRY2   |                 | 0 | iYKR011C   | 1.76 | 0.78 |
| YKR014C | YPT52  |                 | 0 | iYKR014C   | 2.13 | 0.88 |
| YKR015C |        | 0 #N/A          |   | iYKR015C   | 0.82 | 0.33 |
| YKR016W |        | 0               | 0 | iYKR015C   | 0.82 | 0.33 |
| YKR017C |        | 0 #N/A          |   | iYKR017C   | 1.70 | 0.76 |
| YKR018C |        | 0 #N/A          |   | iYKR018C   | 1.80 | 0.79 |
| YKR019C | IRS4   |                 | 0 | iYKR019C   | 2.20 | 0.90 |
| YKR020W | VPS67  | API3 VPS67 WHI6 |   | iYKR019C   | 2.20 | 0.90 |
| YKR021W |        | 0 #N/A          |   | iYKR020W   | 1.58 | 0.71 |
| YKR022C |        | 0 #N/A          |   | iYKR022C   | 1.93 | 0.78 |
| YKR023W |        | 0 #N/A          |   | iYKR022C   | 1.93 | 0.78 |
| YKR024C | DBP7   |                 | 0 | iYKR024C   | #N/A | #N/A |
| YKR025W | RPC37  |                 | 0 | iYKR024C   | #N/A | #N/A |
| YKR026C | GCN3   | AAS2            |   | iYKR026C   | 2.77 | 0.96 |
| YKR027W |        | 0               | 0 | itR(ACG)K  | 1.27 | 0.56 |
| YKR028W | SAP190 |                 | 0 | iYKR027W   | 1.66 | 0.74 |
| YKR029C | SET3   |                 | 0 | iYKR029C   | 1.40 | 0.63 |
| YKR030W |        | 0 MSG1          |   | iYKR029C   | 1.40 | 0.63 |
| YKR031C | SPO14  | PLD1            |   | iYKR031C   | 2.96 | 0.97 |
| YKR032W |        | 0 #N/A          |   | iYKR031C   | 2.96 | 0.97 |
| YKR033C |        | 0 #N/A          |   | iYKR034W   | 1.63 | 0.73 |



|         |        |                |               |      |      |
|---------|--------|----------------|---------------|------|------|
| YKR034W | DAL80  | UGA43          | iYKR031C      | 2.96 | 0.97 |
| YKR035C | 0      | #N/A           | iYKR035W-7    | 0.87 | 0.35 |
| YKR036C | CAF4   |                | 0 iYKR036C    | 2.81 | 0.95 |
| YKR037C | SPC34  |                | 0 iYKR037C    | #N/A | #N/A |
| YKR038C | 0      |                | 0 iYKR038C    | #N/A | #N/A |
| YKR039W | GAP1   |                | 0 iYKRCdelta1 | 1.85 | 0.81 |
| YKR040C | 0      | #N/A           | iYKR041W      | 0.18 | 0.01 |
| YKR041W | 0      | #N/A           | iYKRCdelta1   | 0.55 | 0.16 |
| YKR042W | UTH1   |                | 0 iYKR041W    | 0.18 | 0.01 |
| YKR043C | 0      | #N/A           | iYKR043C      | #N/A | #N/A |
| YKR044W | UIP5   |                | 0 iYKR043C    | #N/A | #N/A |
| YKR045C | 0      | #N/A           | iYKR045C      | 1.55 | 0.69 |
| YKR046C | 0      |                | 0 iYKR046C    | 1.64 | 0.73 |
| YKR047W | 0      | #N/A           | iYKR046C      | 1.64 | 0.73 |
| YKR048C | NAP1   |                | 0 iYKR048C    | 2.91 | 0.97 |
| YKR049C | 0      |                | 0 iYKR049C    | 2.42 | 0.93 |
| YKR050W | TRK2   | RPD2           | iYKR049C      | 2.42 | 0.93 |
| YKR051W | 0      | #N/A           | iYKR050W      | 1.45 | 0.65 |
| YKR052C | MRS4   |                | 0 iYKR052C    | 1.06 | 0.46 |
| YKR053C | YSR3   | LBP2           | iYKR053C      | 0.73 | 0.27 |
| YKR054C | DYN1   | DHC1 PAC6      | iYKR054C      | 2.94 | 0.97 |
| YKR055W | RHO4   |                | 0 iYKR054C    | 2.94 | 0.97 |
| YKR056W | TRM2   | NUC2 NUD1 RNC1 | iYKR055W      | 0.84 | 0.34 |
| YKR057W | RPS21A | RPS25          | iYKR056W      | 0.45 | 0.09 |
| YKR058W | GLG1   |                | 0 iYKR057W    | #N/A | #N/A |
| YKR059W | TIF1   |                | 0 iYKR058W    | #N/A | #N/A |
| YKR060W | 0      |                | 0 iYKR059W    | 1.38 | 0.62 |
| YKR061W | KTR2   |                | 0 iYKR060W    | 1.41 | 0.63 |
| YKR062W | TFA2   |                | 0 iSNR42      | 1.61 | 0.72 |
| YKR063C | LAS1   |                | 0 iYKR063C    | 2.04 | 0.86 |
| YKR064W | 0      | #N/A           | iYKR063C      | 2.04 | 0.86 |
| YKR065C | 0      |                | 0 iYKR065C    | 3.19 | 0.97 |
| YKR066C | CCP1   |                | 0 iYKR066C    | 2.54 | 0.94 |
| YKR067W | GPT2   | GAT1           | iYKR066C      | 2.54 | 0.94 |
| YKR068C | BET3   |                | 0 iYKR068C    | 1.63 | 0.73 |
| YKR069W | MET1   | MET20          | iYKR068C      | 1.63 | 0.73 |
| YKR070W | 0      | #N/A           | iYKR069W      | 1.23 | 0.54 |
| YKR071C | DRE2   |                | 0 iYKR071C    | 0.88 | 0.36 |
| YKR072C | SIS2   | HAL3           | iYKR072C      | #N/A | #N/A |
| YKR073C | 0      | #N/A           | iYKR073C      | 1.45 | 0.65 |
| YKR074W | 0      | #N/A           | itK(UUU)K     | 1.91 | 0.80 |
| YKR075C | 0      | #N/A           | iYKR075C-0    | 0.55 | 0.16 |
| YKR076W | ECM4   |                | 0 iYKR075C-1  | 1.69 | 0.75 |
| YKR077W | 0      | #N/A           | iYKR076W      | 1.56 | 0.70 |
| YKR078W | 0      | #N/A           | iYKR077W      | 2.25 | 0.89 |
| YKR079C | 0      |                | 0 iYKR079C    | 1.36 | 0.61 |
| YKR080W | MTD1   |                | 0 iYKR079C    | 1.36 | 0.61 |
| YKR081C | RPF2   |                | 0 iYKR081C    | 3.20 | 0.95 |
| YKR082W | NUP133 | RAT3           | iYKR081C      | 3.20 | 0.95 |
| YKR083C | DAD2   | HSK1           | iYKR083C      | #N/A | #N/A |
| YKR084C | HBS1   |                | 0 iYKR084C    | #N/A | #N/A |

|         |        |                  |   |             |      |      |
|---------|--------|------------------|---|-------------|------|------|
| YKR085C | MRPL20 |                  | 0 | iYKR085C    | 2.17 | 0.89 |
| YKR086W | PRP16  |                  | 0 | iYKR085C    | 2.17 | 0.89 |
| YKR087C | 0      |                  | 0 | iYKR087C    | 1.84 | 0.80 |
| YKR088C | 0      |                  | 0 | iYKR088C    | #N/A | #N/A |
| YKR089C | 0      |                  | 0 | iYKR089C    | 0.94 | 0.39 |
| YKR090W | PXL1   |                  | 0 | iYKR089C    | 0.94 | 0.39 |
| YKR091W | SRL3   |                  | 0 | iYKR090W    | 1.03 | 0.45 |
| YKR092C | SRP40  |                  | 0 | iYKR092C-0  | 0.36 | 0.05 |
| YKR093W | PTR2   |                  | 0 | iYKR092C-1  | 0.16 | 0.00 |
| YKR094C | RPL40B | CEP52B UB12 UBI2 |   | iYKR094C    | 1.08 | 0.47 |
| YKR095W | MLP1   | MPL1             |   | iYKR094C    | 1.08 | 0.47 |
| YKR096W | 0      | #N/A             |   | iYKR095W    | 1.38 | 0.62 |
| YKR097W | PCK1   | JPM2 PPC1        |   | iYKR096W    | 1.45 | 0.65 |
| YKR098C | UBP11  |                  | 0 | iYKR098C    | 2.68 | 0.95 |
| YKR099W | BAS1   |                  | 0 | iYKR098C    | 2.68 | 0.95 |
| YKR100C | 0      |                  | 0 | iYKR100C    | 2.82 | 0.97 |
| YKR101W | SIR1   |                  | 0 | iYKR100C    | 2.82 | 0.97 |
| YKR102W | FLO10  |                  | 0 | iYKR101W-2  | 0.70 | 0.25 |
| YKR103W | 0      |                  | 0 | iYKR102W-2  | 0.53 | 0.14 |
| YKR104W | 0      | #N/A             |   | iYKR103W    | #N/A | #N/A |
| YKR105C | 0      | #N/A             |   | iYKR105C    | 0.91 | 0.38 |
| YKR106W | 0      | #N/A             |   | iYKR105C    | 0.91 | 0.38 |
| YLL001W | DNM1   |                  | 0 | iYLL002W    | 1.44 | 0.65 |
| YLL002W | RTT109 | KIM2 REM50       |   | iYLL003W    | #N/A | #N/A |
| YLL003W | SFI1   |                  | 0 | iYLL004W    | 1.93 | 0.84 |
| YLL004W | ORC3   |                  | 0 | iYLL005C    | 1.73 | 0.74 |
| YLL005C | SPO75  |                  | 0 | iYLL005C    | 1.73 | 0.74 |
| YLL006W | MMM1   | YME6             |   | iYLL007C    | 1.02 | 0.42 |
| YLL007C | 0      | #N/A             |   | iYLL007C    | 1.02 | 0.42 |
| YLL008W | DRS1   |                  | 0 | iYLL009C    | 1.75 | 0.77 |
| YLL009C | COX17  |                  | 0 | iYLL009C    | 1.75 | 0.77 |
| YLL010C | PSR1   |                  | 0 | iYLL010C    | 2.27 | 0.91 |
| YLL011W | SOF1   |                  | 0 | iYLL012W    | 2.47 | 0.94 |
| YLL012W | 0      | #N/A             |   | iYLL013C    | #N/A | #N/A |
| YLL013C | PUF3   |                  | 0 | iYLL013C    | #N/A | #N/A |
| YLL014W | 0      | #N/A             |   | iYLL015W    | #N/A | #N/A |
| YLL015W | BPT1   |                  | 0 | iYLL016W    | 1.36 | 0.61 |
| YLL016W | SDC25  |                  | 0 | iYLL017W    | 0.69 | 0.24 |
| YLL017W | SDC25  | #N/A             |   | iYLL018C    | 2.26 | 0.84 |
| YLL018C | DPS1   | AspRS            |   | iYLL018C    | 2.26 | 0.84 |
| YLL019C | KNS1   | L124             |   | iYLL019C    | 0.50 | 0.13 |
| YLL020C | 0      | #N/A             |   | iYLL019C    | 0.50 | 0.13 |
| YLL021W | SPA2   | FUS6 PEA1        |   | iYLL022C    | #N/A | #N/A |
| YLL022C | HIF1   |                  | 0 | iYLL022C    | #N/A | #N/A |
| YLL023C | 0      | #N/A             |   | iYLL023C    | #N/A | #N/A |
| YLL024C | SSA2   |                  | 0 | iYLL024C    | 0.48 | 0.11 |
| YLL025W | 0      | #N/A             |   | itP(UGG)L-1 | #N/A | #N/A |
| YLL026W | HSP104 |                  | 0 | iYLL027W    | 1.30 | 0.57 |
| YLL027W | ISA1   |                  | 0 | iYLL028W    | 0.91 | 0.38 |
| YLL028W | TPO1   |                  | 0 | iYLL029W    | #N/A | #N/A |
| YLL029W | 0      | #N/A             |   | iYLL030C    | 0.89 | 0.37 |

|         |       |            |            |      |      |
|---------|-------|------------|------------|------|------|
| YLL030C | 0     | #N/A       | iYLL030C   | 0.89 | 0.37 |
| YLL031C | GPI13 | MPC1       | iYLL031C   | 1.78 | 0.78 |
| YLL032C | 0     | #N/A       | iYLL032C   | 1.39 | 0.62 |
| YLL033W | 0     | #N/A       | iYLL034C   | 3.54 | 0.99 |
| YLL034C | 0     |            | 0 iYLL034C | 3.54 | 0.99 |
| YLL035W | GRC3  |            | 0 iYLL036C | #N/A | #N/A |
| YLL036C | PRP19 | PSO4       | iYLL036C   | #N/A | #N/A |
| YLL037W | 0     | #N/A       | iYLL039C   | 1.05 | 0.45 |
| YLL038C | ENT4  |            | 0 iYLL036C | #N/A | #N/A |
| YLL039C | UBI4  | SCD2 UB14  | iYLL039C   | 1.05 | 0.45 |
| YLL040C | VPS13 | SOI1 VPT2  | iYLL040C   | 1.84 | 0.79 |
| YLL041C | SDH2  | ACN17      | iYLL041C   | 1.23 | 0.55 |
| YLL042C | APG10 | APG10      | iYLL042C   | 0.98 | 0.41 |
| YLL043W | FPS1  |            | 0 iYLL044W | 1.65 | 0.74 |
| YLL044W | 0     | #N/A       | iYLL046C   | 0.58 | 0.18 |
| YLL045C | RPL8B | KRB1 SCL41 | iYLL044W   | 1.65 | 0.74 |
| YLL046C | RNP1  |            | 0 iYLL046C | 0.58 | 0.18 |
| YLL047W | 0     | #N/A       | iYLL048C   | 2.27 | 0.91 |
| YLL048C | YBT1  | BAT1       | iYLL048C   | 2.27 | 0.91 |
| YLL049W | 0     | #N/A       | iYLL050C   | #N/A | #N/A |
| YLL050C | COF1  |            | 0 iYLL050C | #N/A | #N/A |
| YLL051C | FRE6  |            | 0 iYLL051C | 1.04 | 0.45 |
| YLL052C | AQY2  |            | 0 iYLL052C | 0.51 | 0.13 |
| YLL053C | 0     | #N/A       | iYLL052C   | 0.51 | 0.13 |
| YLL054C | 0     | #N/A       | iYLL054C   | 1.61 | 0.66 |
| YLL055W | 0     | #N/A       | iYLL056C-1 | 2.06 | 0.87 |
| YLL056C | 0     | #N/A       | iYLL056C-0 | 1.46 | 0.65 |
| YLL057C | 0     |            | 0 iYLL057C | 1.03 | 0.45 |
| YLL058W | 0     | #N/A       | iYLL059C   | 2.07 | 0.86 |
| YLL059C | 0     | #N/A       | iYLL059C   | 2.07 | 0.86 |
| YLL060C | GTT2  |            | 0 iYLL060C | 1.25 | 0.55 |
| YLL061W | MMP1  |            | 0 iYLL062C | 1.10 | 0.48 |
| YLL062C | MHT1  |            | 0 iYLL062C | 1.10 | 0.48 |
| YLL063C | AYT1  |            | 0 iYLL063C | 2.02 | 0.85 |
| YLL064C | 0     | #N/A       | iYLL064C   | 0.98 | 0.42 |
| YLL065W | 0     | #N/A       | iYLL066C-1 | 0.30 | 0.03 |
| YLL066C | 0     | #N/A       | iYLL066C-0 | 0.79 | 0.31 |
| YLL067C | 0     | #N/A       | iYLL067C-0 | 0.80 | 0.32 |
| YLR001C | 0     | #N/A       | iYLR001C   | 0.87 | 0.35 |
| YLR002C | NOC3  |            | 0 iYLR002C | #N/A | #N/A |
| YLR003C | 0     | #N/A       | iYLR003C   | 1.18 | 0.50 |
| YLR004C | 0     | #N/A       | iYLR004C   | 2.08 | 0.87 |
| YLR005W | SSL1  |            | 0 iYLR004C | 2.08 | 0.87 |
| YLR006C | SSK1  |            | 0 iYLR006C | 2.52 | 0.94 |
| YLR007W | NSE1  |            | 0 iYLR006C | 2.52 | 0.94 |
| YLR008C | 0     | TIM14      | iYLR008C   | 1.60 | 0.71 |
| YLR009W | RLP24 |            | 0 iYLR008C | 1.60 | 0.71 |
| YLR010C | TEN1  |            | 0 iYLR010C | #N/A | #N/A |
| YLR011W | LOT6  |            | 0 iYLR011C | 2.19 | 0.90 |
| YLR012C | 0     | #N/A       | iYLR012C   | #N/A | #N/A |
| YLR013W | GAT3  |            | 0 iYLR012C | #N/A | #N/A |

|         |        |            |   |              |      |      |
|---------|--------|------------|---|--------------|------|------|
| YLR014C | PPR1   |            | 0 | iYLR014C     | #N/A | #N/A |
| YLR015W | BRE2   | CPS60      |   | iYLR014C     | #N/A | #N/A |
| YLR016C |        |            | 0 | iYLR016C     | 2.19 | 0.89 |
| YLR017W | MEU1   |            |   | 0 iYLR016C   | 2.19 | 0.89 |
| YLR018C | POM34  |            |   | 0 iYLR018C   | 1.81 | 0.79 |
| YLR019W | PSR2   |            |   | 0 iYLR018C   | 1.81 | 0.79 |
| YLR020C |        |            | 0 | iYLR020C     | 1.81 | 0.79 |
| YLR021W |        |            | 0 | iYLR020C     | 1.81 | 0.79 |
| YLR022C |        |            | 0 | iYLR022C     | 0.71 | 0.26 |
| YLR023C |        |            | 0 | 0 iYLR023C   | 0.80 | 0.31 |
| YLR024C | UBR2   |            |   | 0 iYLR024C   | #N/A | #N/A |
| YLR025W | SNF7   | DID1 VPS32 |   | iYLR024C     | #N/A | #N/A |
| YLR026C | SED5   |            |   | 0 iYLR026C   | 1.66 | 0.72 |
| YLR027C | AAT2   | ASP5       |   | iYLR027C     | 0.68 | 0.23 |
| YLR028C | ADE16  |            |   | 0 iYLR028C   | #N/A | #N/A |
| YLR029C | RPL15A | RPL10A     |   | iYLR029C     | 1.44 | 0.65 |
| YLR030W |        |            | 0 | iYLR029C     | 1.44 | 0.65 |
| YLR031W |        |            | 0 | iYLR030W     | #N/A | #N/A |
| YLR032W | RAD5   | REV2 SNM2  |   | iYLR031W     | 2.18 | 0.84 |
| YLR033W | RSC58  |            |   | 0 iYLR032W   | 1.24 | 0.55 |
| YLR034C | SMF3   |            |   | 0 iYLR034C   | 1.03 | 0.44 |
| YLR035C | MLH2   |            |   | 0 iYLR035C   | 1.74 | 0.74 |
| YLR036C |        |            | 0 | iYLR036C     | 1.58 | 0.71 |
| YLR037C | DAN2   |            |   | 0 iYLR037C-0 | 1.39 | 0.62 |
| YLR038C | COX12  |            |   | 0 iYLR038C   | 1.26 | 0.56 |
| YLR039C | RIC1   |            |   | 0 iYLR039C   | 0.82 | 0.32 |
| YLR040C |        |            | 0 | iYLR041W     | #N/A | #N/A |
| YLR041W |        |            | 0 | iYLR039C     | 0.82 | 0.32 |
| YLR042C |        |            | 0 | iYLR042C     | #N/A | #N/A |
| YLR043C | TRX1   | LMA1       |   | iYLR043C     | #N/A | #N/A |
| YLR044C | PDC1   |            |   | 0 iYLR044C   | 0.27 | 0.02 |
| YLR045C | STU2   |            |   | 0 iYLR045C   | 1.26 | 0.56 |
| YLR046C |        |            | 0 | iYLR046C     | #N/A | #N/A |
| YLR047C |        |            | 0 | iYLR047C     | 0.39 | 0.06 |
| YLR048W | RPS0B  | NAB1B YST2 |   | iYLR047C     | 0.39 | 0.06 |
| YLR049C |        |            | 0 | iYLR049C     | #N/A | #N/A |
| YLR050C |        |            | 0 | iYLR050C     | 1.49 | 0.67 |
| YLR051C |        |            | 0 | iYLR051C     | 1.78 | 0.78 |
| YLR052W | IES3   |            |   | 0 iYLR051C   | 1.78 | 0.78 |
| YLR053C |        |            | 0 | iYLR053C     | 2.12 | 0.88 |
| YLR054C |        |            | 0 | 0 iYLR054C   | 0.74 | 0.28 |
| YLR055C | SPT8   |            |   | 0 iYLR055C   | 0.78 | 0.30 |
| YLR056W | ERG3   | PSO6 SYR1  |   | iYLR055C     | 0.78 | 0.30 |
| YLR057W |        |            | 0 | iYLR056W     | #N/A | #N/A |
| YLR058C | SHM2   | SHMT2      |   | iYLR058C     | 0.65 | 0.22 |
| YLR059C | REX2   | YNT20      |   | iYLR059C     | 2.02 | 0.85 |
| YLR060W | FRS1   |            |   | 0 iYLR059C   | 2.02 | 0.85 |
| YLR061W | RPL22A |            |   | 0 iYLR060W   | #N/A | #N/A |
| YLR062C | BUD28  |            |   | 0 iYLR062C   | #N/A | #N/A |
| YLR063W |        |            | 0 | iYLR062C     | #N/A | #N/A |
| YLR064W |        |            | 0 | iYLR063W     | #N/A | #N/A |

|         |        |           |            |      |      |
|---------|--------|-----------|------------|------|------|
| YLR065C | 0      | #N/A      | iYLR065C   | #N/A | #N/A |
| YLR066W | SPC3   |           | 0 iYLR065C | #N/A | #N/A |
| YLR067C | PET309 |           | 0 iYLR067C | 2.72 | 0.95 |
| YLR068W | FYV7   |           | 0 iYLR067C | 2.72 | 0.95 |
| YLR069C | MEF1   |           | 0 iYLR069C | #N/A | #N/A |
| YLR070C | XYL2   |           | 0 iYLR070C | #N/A | #N/A |
| YLR071C | RGR1   |           | 0 iYLR071C | 2.49 | 0.94 |
| YLR072W | 0      | #N/A      | iYLR071C   | 2.49 | 0.94 |
| YLR073C | 0      | #N/A      | iYLR073C   | 1.17 | 0.51 |
| YLR074C | BUD20  |           | 0 iYLR074C | 0.42 | 0.07 |
| YLR075W | RPL10  | GRC5 QSR1 | iYLR074C   | 0.42 | 0.07 |
| YLR076C | 0      | #N/A      | iYLR076C   | #N/A | #N/A |
| YLR077W | 0      |           | 0 iYLR076C | #N/A | #N/A |
| YLR078C | BOS1   | SEC32     | iYLR078C   | 1.85 | 0.81 |
| YLR079W | SIC1   | SDB25     | iYLR078C   | 1.85 | 0.81 |
| YLR080W | EMP46  |           | 0 iYLR079W | #N/A | #N/A |
| YLR081W | GAL2   |           | 0 iYLR080W | 1.70 | 0.76 |
| YLR082C | SRL2   |           | 0 iYLR082C | 0.88 | 0.36 |
| YLR083C | EMP70  |           | 0 iYLR083C | 1.60 | 0.66 |
| YLR084C | RAX2   |           | 0 iYLR084C | 0.55 | 0.15 |
| YLR085C | ARP6   |           | 0 iYLR085C | 2.37 | 0.92 |
| YLR086W | SMC4   |           | 0 iYLR085C | 2.37 | 0.92 |
| YLR087C | CSF1   |           | 0 iYLR087C | 2.64 | 0.95 |
| YLR088W | GAA1   | END2      | iYLR087C   | 2.64 | 0.95 |
| YLR089C | 0      |           | 0 iYLR089C | 1.56 | 0.70 |
| YLR090W | XDJ1   |           | 0 iYLR089C | 1.56 | 0.70 |
| YLR091W | 0      | #N/A      | iYLR090W   | #N/A | #N/A |
| YLR092W | SUL2   |           | 0 iYLR091W | 1.49 | 0.66 |
| YLR093C | NYV1   | MAM2      | iYLR093C   | 0.73 | 0.27 |
| YLR094C | GIS3   |           | 0 iYLR094C | 0.86 | 0.35 |
| YLR095C | IOC2   |           | 0 iYLR095C | 3.44 | 0.99 |
| YLR096W | KIN2   |           | 0 iYLR095C | 3.44 | 0.99 |
| YLR097C | 0      |           | 0 iYLR097C | 2.21 | 0.88 |
| YLR098C | CHA4   | SIL2 SIL3 | iYLR098C   | 1.46 | 0.65 |
| YLR099C | ICT1   |           | 0 iYLR099C | 0.93 | 0.39 |
| YLR100W | ERG27  |           | 0 iYLR099C | 0.93 | 0.39 |
| YLR101C | 0      | #N/A      | iYLR102C   | #N/A | #N/A |
| YLR102C | APC9   |           | 0 iYLR102C | #N/A | #N/A |
| YLR103C | CDC45  | SLD4      | iYLR103C   | 1.61 | 0.72 |
| YLR104W | 0      | #N/A      | iYLR103C   | 1.61 | 0.72 |
| YLR105C | SEN2   |           | 0 iYLR105C | 0.75 | 0.28 |
| YLR106C | MDN1   | REA1      | iYLR106C   | 1.94 | 0.84 |
| YLR107W | REX3   |           | 0 iYLR106C | 1.94 | 0.84 |
| YLR108C | 0      | #N/A      | iYLR108C   | 0.40 | 0.07 |
| YLR109W | AHP1   | cTPxIII   | iYLR108C   | 0.40 | 0.07 |
| YLR110C | CCW12  |           | 0 iYLR110C | 0.13 | 0.00 |
| YLR111W | 0      | #N/A      | iYLR110C   | 0.13 | 0.00 |
| YLR112W | 0      | #N/A      | iYLR111W   | #N/A | #N/A |
| YLR113W | HOG1   | SSK3      | iYLR112W   | 0.36 | 0.05 |
| YLR114C | 0      | #N/A      | iYLR114C   | 1.93 | 0.83 |
| YLR115W | CFT2   | YDH1      | iYLR114C   | 1.93 | 0.83 |

|         |        |                 |            |      |      |
|---------|--------|-----------------|------------|------|------|
| YLR116W | MSL5   | BBP             | iYLR115W   | 0.57 | 0.17 |
| YLR117C | CLF1   | NTC77 SYF3      | iYLR117C   | 2.08 | 0.87 |
| YLR118C | 0      | #N/A            | iYLR118C   | 2.11 | 0.84 |
| YLR119W | SRN2   | SRN10 VPS37     | iYLR118C   | 2.11 | 0.84 |
| YLR120C | YPS1   | YAP3            | iYLR120C   | 1.28 | 0.57 |
| YLR121C | YPS3   | YPS4            | iYLR121C   | 1.05 | 0.45 |
| YLR122C | 0      | #N/A            | iYLR123C   | #N/A | #N/A |
| YLR123C | 0      | #N/A            | iYLR123C   | #N/A | #N/A |
| YLR124W | 0      | #N/A            | iYLR123C   | #N/A | #N/A |
| YLR125W | 0      | #N/A            | iYLR124W-1 | #N/A | #N/A |
| YLR126C | 0      | #N/A            | iYLR126C   | 1.60 | 0.70 |
| YLR127C | APC2   | RSI1            | iYLR127C   | 1.40 | 0.61 |
| YLR128W | 0      |                 | 0 iYLR127C | 1.40 | 0.61 |
| YLR129W | DIP2   | UTP12           | iYLR128W   | #N/A | #N/A |
| YLR130C | ZRT2   |                 | 0 iYLR130C | 0.83 | 0.33 |
| YLR131C | ACE2   |                 | 0 iYLR131C | 1.01 | 0.43 |
| YLR132C | 0      | #N/A            | iYLR132C   | 2.11 | 0.83 |
| YLR133W | CKI1   |                 | 0 iYLR132C | 2.11 | 0.83 |
| YLR134W | PDC5   |                 | 0 iYLR133W | 1.41 | 0.63 |
| YLR135W | SLX4   |                 | 0 iYLR134W | 1.19 | 0.52 |
| YLR136C | TIS11  | CTH2            | iYLR136C   | 2.05 | 0.87 |
| YLR137W | 0      | #N/A            | iYLR136C   | 2.05 | 0.87 |
| YLR138W | NHA1   |                 | 0 iYLR137W | #N/A | #N/A |
| YLR139C | SLS1   |                 | 0 iYLR141W | 0.77 | 0.29 |
| YLR140W | 0      | #N/A            | iYLR138W   | 0.52 | 0.15 |
| YLR141W | RRN5   |                 | 0 iYLR138W | 0.52 | 0.15 |
| YLR142W | PUT1   |                 | 0 iYLR141W | 0.77 | 0.29 |
| YLR143W | 0      | #N/A            | itD(GUC)L1 | #N/A | #N/A |
| YLR144C | ACF2   | ENG2            | iYLR144C   | #N/A | #N/A |
| YLR145W | 0      | #N/A            | iYLR144C   | #N/A | #N/A |
| YLR146C | SPE4   |                 | 0 iYLR146C | 3.19 | 0.98 |
| YLR147C | SMD3   | SLT16 Sm D3     | iYLR147C   | #N/A | #N/A |
| YLR148W | PEP3   | VAM8 VPS18 VPT1 | iYLR147C   | #N/A | #N/A |
| YLR149C | 0      | #N/A            | iYLR149C   | 0.71 | 0.26 |
| YLR150W | STM1   | MPT4            | iYLR149C   | 0.71 | 0.26 |
| YLR151C | PCD1   |                 | 0 iYLR151C | #N/A | #N/A |
| YLR152C | 0      | #N/A            | iYLR152C   | 1.31 | 0.58 |
| YLR153C | ACS2   |                 | 0 iYLR153C | 0.49 | 0.11 |
| YLR154C | 0      | Rnh2C           | iYLRWdelta | 0.47 | 0.11 |
| YLR155C | ASP3-1 | ASP3            | iYLR155C-0 | #N/A | #N/A |
| YLR156W | 0      | #N/A            | iYLR155C-0 | #N/A | #N/A |
| YLR157C | ASP3-2 | ASP3            | iYLR157C-0 | #N/A | #N/A |
| YLR158C | ASP3-3 | ASP3            | iYLR158C-0 | #N/A | #N/A |
| YLR159W | 0      | #N/A            | iYLR158C-1 | #N/A | #N/A |
| YLR160C | ASP3-4 | ASP3            | iYLR160C-0 | #N/A | #N/A |
| YLR161W | 0      | #N/A            | iYLR160C-1 | #N/A | #N/A |
| YLR162W | 0      | #N/A            | iYLR160C-1 | #N/A | #N/A |
| YLR163C | MAS1   | MIF1            | iYLR163C   | 2.37 | 0.93 |
| YLR164W | 0      | #N/A            | iYLR163C   | 2.37 | 0.93 |
| YLR165C | PUS5   |                 | 0 iYLR165C | 1.11 | 0.49 |
| YLR166C | SEC10  |                 | 0 iYLR166C | #N/A | #N/A |



|         |        |            |            |      |      |
|---------|--------|------------|------------|------|------|
| YLR167W | RPS31  | RPS37 UBI3 | iYLR166C   | #N/A | #N/A |
| YLR168C | 0      | #N/A       | iYLR168C   | #N/A | #N/A |
| YLR169W | 0      | #N/A       | iYLR168C   | #N/A | #N/A |
| YLR170C | APS1   | YAP19      | iYLR171W   | 1.70 | 0.76 |
| YLR171W | 0      | #N/A       | iYLR168C   | #N/A | #N/A |
| YLR172C | DPH5   |            | 0 iYLR172C | 2.11 | 0.88 |
| YLR173W | 0      | #N/A       | iYLR172C   | 2.11 | 0.88 |
| YLR174W | IDP2   |            | 0 iYLR173W | 2.57 | 0.91 |
| YLR175W | CBF5   |            | 0 iYLR174W | #N/A | #N/A |
| YLR176C | RFX1   | CRT1       | iYLR176C   | 2.72 | 0.96 |
| YLR177W | 0      | #N/A       | iYLR176C   | 2.72 | 0.96 |
| YLR178C | TFS1   | DKA1       | iYLR178C   | 1.63 | 0.70 |
| YLR179C | 0      | #N/A       | iYLR179C   | 0.50 | 0.12 |
| YLR180W | SAM1   | ETH10      | iYLR179C   | 0.50 | 0.12 |
| YLR181C | VTA1   |            | 0 iYLR181C | 1.64 | 0.73 |
| YLR182W | SWI6   | PSL8 SDS11 | iYLR181C   | 1.64 | 0.73 |
| YLR183C | TOS4   |            | 0 iYLR183C | #N/A | #N/A |
| YLR184W | 0      | #N/A       | iYLR183C   | #N/A | #N/A |
| YLR185W | RPL37A |            | 0 iYLR184W | #N/A | #N/A |
| YLR186W | EMG1   | NEP1       | iYLR185W   | #N/A | #N/A |
| YLR187W | 0      |            | 0 iYLR186W | 1.65 | 0.73 |
| YLR188W | MDL1   |            | 0 iYLR187W | 1.29 | 0.58 |
| YLR189C | UGT51  | UGT51      | iYLR189C   | #N/A | #N/A |
| YLR190W | 0      |            | 0 iYLR189C | #N/A | #N/A |
| YLR191W | PEX13  | PAS20      | iYLR190W   | #N/A | #N/A |
| YLR192C | HCR1   |            | 0 iYLR192C | #N/A | #N/A |
| YLR193C | 0      | #N/A       | iYLR193C   | #N/A | #N/A |
| YLR194C | 0      | #N/A       | iYLR194C   | 1.31 | 0.58 |
| YLR195C | NMT1   | CDC72      | iYLR195C   | #N/A | #N/A |
| YLR196W | PWP1   |            | 0 iYLR195C | #N/A | #N/A |
| YLR197W | SIK1   | NOP56      | iYLR196W   | 1.39 | 0.61 |
| YLR198C | 0      | #N/A       | iYLR198C   | #N/A | #N/A |
| YLR199C | 0      | #N/A       | iYLR199C   | 2.13 | 0.88 |
| YLR200W | YKE2   | GIM1 PFD6  | iYLR199C   | 2.13 | 0.88 |
| YLR201C | 0      |            | 0 iYLR203C | 4.21 | 1.00 |
| YLR202C | 0      | #N/A       | iYLR203C   | 4.21 | 1.00 |
| YLR203C | MSS51  |            | 0 iYLR203C | 4.21 | 1.00 |
| YLR204W | QRI5   |            | 0 iYLR203C | 4.21 | 1.00 |
| YLR205C | HMX1   |            | 0 iYLR205C | 1.74 | 0.77 |
| YLR206W | ENT2   |            | 0 iYLR205C | 1.74 | 0.77 |
| YLR207W | HRD3   |            | 0 iYLR206W | #N/A | #N/A |
| YLR208W | SEC13  | ANU3       | iYLR207W   | 1.88 | 0.79 |
| YLR209C | PNP1   |            | 0 iYLR209C | 2.12 | 0.88 |
| YLR210W | CLB4   |            | 0 iYLR209C | 2.12 | 0.88 |
| YLR211C | 0      | #N/A       | iYLR211C   | 1.20 | 0.53 |
| YLR212C | TUB4   |            | 0 iYLR212C | 1.49 | 0.66 |
| YLR213C | CRR1   |            | 0 iYLR213C | 1.15 | 0.51 |
| YLR214W | FRE1   |            | 0 iYLR213C | 1.15 | 0.51 |
| YLR215C | CDC123 |            | 0 iYLR215C | 1.57 | 0.69 |
| YLR216C | CPR6   |            | 0 iYLR217W | 1.88 | 0.82 |
| YLR217W | 0      | #N/A       | iYLR215C   | 1.57 | 0.69 |

|         |        |                  |              |      |      |
|---------|--------|------------------|--------------|------|------|
| YLR218C | 0      | #N/A             | iYLR218C     | 2.92 | 0.97 |
| YLR219W | MSC3   |                  | 0 iYLR218C   | 2.92 | 0.97 |
| YLR220W | CCC1   |                  | 0 iYLR219W   | 0.74 | 0.28 |
| YLR221C | RSA3   |                  | 0 iYLR221C   | 1.02 | 0.44 |
| YLR222C | UTP13  |                  | 0 iYLR222C   | #N/A | #N/A |
| YLR223C | IFH1   |                  | 0 iYLR223C   | #N/A | #N/A |
| YLR224W | 0      | #N/A             | iYLR223C     | #N/A | #N/A |
| YLR225C | 0      | #N/A             | iYLR225C     | #N/A | #N/A |
| YLR226W | BUR2   | CST4             | iYLR225C     | #N/A | #N/A |
| YLR227C | ADY4   |                  | 0 iYLR227C   | 1.21 | 0.54 |
| YLR228C | ECM22  |                  | 0 iYLR228C-0 | 0.99 | 0.42 |
| YLR229C | CDC42  |                  | 0 iYLR230W   | 1.57 | 0.70 |
| YLR230W | 0      | #N/A             | iYLR228C-1   | 0.70 | 0.25 |
| YLR231C | BNA5   |                  | 0 iYLR232W   | 0.95 | 0.40 |
| YLR232W | 0      | #N/A             | itl(UAU)L    | 2.45 | 0.92 |
| YLR233C | EST1   |                  | 0 iYLR233C   | 3.80 | 0.99 |
| YLR234W | TOP3   | EDR1             | iYLR233C     | 3.80 | 0.99 |
| YLR235C | 0      | #N/A             | iYLR236C     | #N/A | #N/A |
| YLR236C | 0      | #N/A             | iYLR236C     | #N/A | #N/A |
| YLR237W | THI7   | THI10            | iYLR236C     | #N/A | #N/A |
| YLR238W | 0      |                  | 0 iYLR237W   | 1.71 | 0.72 |
| YLR239C | LIP2   |                  | 0 iYLR239C   | 2.04 | 0.85 |
| YLR240W | VPS34  | END12 PEP15 VPL7 | iYLR239C     | 2.04 | 0.85 |
| YLR241W | 0      | #N/A             | iYLR240W     | 1.97 | 0.85 |
| YLR242C | ARV1   |                  | 0 iYLR242C   | #N/A | #N/A |
| YLR243W | 0      | #N/A             | iYLR242C     | #N/A | #N/A |
| YLR244C | MAP1   |                  | 0 iYLR244C   | #N/A | #N/A |
| YLR245C | CDD1   |                  | 0 iYLR245C   | 1.32 | 0.59 |
| YLR246W | ERF2   |                  | 0 iYLR245C   | 1.32 | 0.59 |
| YLR247C | 0      | #N/A             | iYLR247C     | 2.04 | 0.85 |
| YLR248W | RCK2   | CLK1 CMK3        | iYLR247C     | 2.04 | 0.85 |
| YLR249W | YEF3   | EF-3 TEF3        | iYLR248W     | 0.34 | 0.04 |
| YLR250W | SSP120 |                  | 0 iYLR249W   | 1.04 | 0.44 |
| YLR251W | SYM1   |                  | 0 iYLR250W   | 0.94 | 0.39 |
| YLR252W | 0      | #N/A             | iYLR250W     | 0.94 | 0.39 |
| YLR253W | 0      | #N/A             | iYLR252W     | 1.69 | 0.74 |
| YLR254C | 0      | #N/A             | iYLR254C     | 1.94 | 0.84 |
| YLR255C | 0      | #N/A             | iYLR255C     | 0.37 | 0.05 |
| YLR256W | HAP1   | CYP1             | iYLR255C     | 0.37 | 0.05 |
| YLR257W | 0      | #N/A             | iYLRWdelta   | 0.62 | 0.21 |
| YLR258W | GSY2   |                  | 0 iYLR257W   | 1.76 | 0.77 |
| YLR259C | HSP60  | CPN60 MIF4       | iYLR259C     | #N/A | #N/A |
| YLR260W | LCB5   |                  | 0 iYLR259C   | #N/A | #N/A |
| YLR261C | VPS63  |                  | 0 iYLR262C   | 1.27 | 0.55 |
| YLR262C | YPT6   |                  | 0 iYLR262C   | 1.27 | 0.55 |
| YLR263W | RED1   |                  | 0 iYLR262C-A | 0.84 | 0.34 |
| YLR264W | RPS28B | RPS33B           | iYLR263W     | 0.91 | 0.38 |
| YLR265C | NEJ1   | LIF2             | iYLR265C     | 2.02 | 0.86 |
| YLR266C | 0      |                  | 0 iYLR266C   | 1.53 | 0.68 |
| YLR267W | BOP2   |                  | 0 iYLR266C   | 1.53 | 0.68 |
| YLR268W | SEC22  | SLY2 TSL26       | iYLR267W     | #N/A | #N/A |



|           |        |             |              |      |      |
|-----------|--------|-------------|--------------|------|------|
| YLR269C   | 0      | #N/A        | iYLR270W     | 1.07 | 0.46 |
| YLR270W   | 0      | DcpS        | iYLR267W     | #N/A | #N/A |
| YLR271W   | 0      | #N/A        | iYLR270W     | 1.07 | 0.46 |
| YLR272C   | YCS4   | LOC7        | iYLR272C     | #N/A | #N/A |
| YLR273C   | PIG1   |             | 0 iYLR273C   | 1.66 | 0.74 |
| YLR274W   | CDC46  | BOB1 MCM5   | iYLR273C     | 1.66 | 0.74 |
| YLR275W   | SMD2   | Sm D2       | iYLR274W     | 1.74 | 0.77 |
| YLR276C   | DBP9   |             | 0 iYLR276C   | 1.89 | 0.77 |
| YLR277C   | YSH1   | BRR5        | iYLR277C     | 1.24 | 0.55 |
| YLR278C   | 0      | #N/A        | iYLR278C     | 0.38 | 0.06 |
| YLR279W   | 0      | #N/A        | iYLR278C     | 0.38 | 0.06 |
| YLR280C   | 0      | #N/A        | iYLR281C     | #N/A | #N/A |
| YLR281C   | 0      | #N/A        | iYLR281C     | #N/A | #N/A |
| YLR282C   | 0      | #N/A        | iYLR283W     | #N/A | #N/A |
| YLR283W   | 0      | #N/A        | iYLR281C     | #N/A | #N/A |
| YLR284C   | ECI1   |             | 0 iYLR284C   | 2.25 | 0.90 |
| YLR285W   | 0      |             | 0 iYLR284C   | 2.25 | 0.90 |
| YLR286C   | CTS1   |             | 0 iYLR286C   | 0.68 | 0.23 |
| YLR287C   | 0      | #N/A        | iYLR287C     | 0.70 | 0.25 |
| YLR287C-A | RPS30A |             | 0 iYLR287C-A | 0.73 | 0.27 |
| YLR288C   | MEC3   | PIP3        | iYLR288C     | 2.06 | 0.82 |
| YLR289W   | GUF1   |             | 0 iYLR288C   | 2.06 | 0.82 |
| YLR290C   | 0      | #N/A        | iYLR290C     | #N/A | #N/A |
| YLR291C   | GCD7   |             | 0 iYLR291C   | 1.55 | 0.69 |
| YLR292C   | SEC72  | SEC67 SIM2  | iYLR292C     | 1.72 | 0.73 |
| YLR293C   | GSP1   | CNR1 CST17  | iYLR293C     | 0.46 | 0.10 |
| YLR294C   | 0      | #N/A        | iYLR295C     | 1.17 | 0.52 |
| YLR295C   | ATP14  |             | 0 iYLR295C   | 1.17 | 0.52 |
| YLR296W   | 0      | #N/A        | iYLR295C     | 1.17 | 0.52 |
| YLR297W   | 0      | #N/A        | iYLR296W     | 0.70 | 0.25 |
| YLR298C   | YHC1   |             | 0 iYLR298C   | 0.30 | 0.03 |
| YLR299W   | ECM38  | CIS2        | iYLR298C     | 0.30 | 0.03 |
| YLR300W   | EXG1   | BGL1        | iYLR299W     | 0.30 | 0.03 |
| YLR301W   | 0      | #N/A        | iYLR300W     | #N/A | #N/A |
| YLR302C   | 0      | #N/A        | iYLR303W     | 1.03 | 0.44 |
| YLR303W   | MET17  | MET15 MET25 | iYLRcdelta1  | #N/A | #N/A |
| YLR304C   | ACO1   | GLU1        | iYLR304C     | 0.53 | 0.14 |
| YLR305C   | STT4   | BLM1        | iYLR305C     | 1.98 | 0.78 |
| YLR306W   | UBC12  |             | 0 iYLR305C   | 1.98 | 0.78 |
| YLR307W   | CDA1   |             | 0 iYLR306W   | #N/A | #N/A |
| YLR308W   | CDA2   |             | 0 iYLR307W   | #N/A | #N/A |
| YLR309C   | IMH1   | SYS3        | iYLR309C     | 1.85 | 0.81 |
| YLR310C   | CDC25  | CDC25 CTN1  | iYLR310C     | #N/A | #N/A |
| YLR311C   | 0      | #N/A        | iYLR312C     | 1.68 | 0.73 |
| YLR312C   | 0      | #N/A        | iYLR312C     | 1.68 | 0.73 |
| YLR313C   | SPH1   |             | 0 iYLR313C   | #N/A | #N/A |
| YLR314C   | CDC3   |             | 0 iYLR314C   | 1.44 | 0.65 |
| YLR315W   | NKP2   |             | 0 iYLR314C   | 1.44 | 0.65 |
| YLR316C   | TAD3   |             | 0 iYLR317W   | 1.41 | 0.63 |
| YLR317W   | KRE34  | #N/A        | iYLR314C     | 1.44 | 0.65 |
| YLR318W   | EST2   | TERT        | iYLR317W     | 1.41 | 0.63 |

|         |        |                 |              |      |      |
|---------|--------|-----------------|--------------|------|------|
| YLR319C | BUD6   | AIP3            | iYLR319C     | 1.30 | 0.58 |
| YLR320W | MMS22  | SLM2            | iYLR319C     | 1.30 | 0.58 |
| YLR321C | SFH1   |                 | 0 iYLR322W   | 2.83 | 0.97 |
| YLR322W | VPS65  |                 | 0 iYLR320W   | #N/A | #N/A |
| YLR323C | CWC24  |                 | 0 iYLR323C   | #N/A | #N/A |
| YLR324W | 0      |                 | 0 iYLR323C   | #N/A | #N/A |
| YLR325C | RPL38  |                 | 0 iYLR325C   | 1.07 | 0.47 |
| YLR326W | 0      | #N/A            | iYLR325C     | 1.07 | 0.47 |
| YLR327C | 0      | #N/A            | iYLR327C     | 1.05 | 0.46 |
| YLR328W | NMA1   |                 | 0 itS(GCU)L  | 0.46 | 0.12 |
| YLR329W | REC102 |                 | 0 iYLR328W   | 0.84 | 0.34 |
| YLR330W | CHS5   | CAL3            | iYLR329W     | 1.70 | 0.74 |
| YLR331C | JIP3   |                 | 0 iYLR332W-C | #N/A | #N/A |
| YLR332W | MID2   | KAI1            | iYLR330W     | 0.35 | 0.05 |
| YLR333C | RPS25B |                 | 0 iYLR333C   | 0.35 | 0.05 |
| YLR334C | 0      | #N/A            | iYLRWdelta2  | #N/A | #N/A |
| YLR335W | NUP2   |                 | 0 itE(UUC)L  | #N/A | #N/A |
| YLR336C | SGD1   |                 | 0 iYLR336C   | 1.34 | 0.60 |
| YLR337W | #N/A   | #N/A            | #N/A         | #N/A | #N/A |
| YLR338W | KRE21  | #N/A            | iYLR336C     | 1.34 | 0.60 |
| YLR339C | 0      | #N/A            | iYLR340W     | 0.60 | 0.18 |
| YLR340W | RPP0   | RPL10E          | iYLR338W     | 0.93 | 0.39 |
| YLR341W | SPO77  |                 | 0 iYLR340W   | 0.60 | 0.18 |
| YLR342W | FKS1   | CND1 CWH53 ETG1 | iYLR341W     | #N/A | #N/A |
| YLR343W | 0      |                 | 0 iYLR342W   | 0.36 | 0.05 |
| YLR344W | RPL26A |                 | 0 itR(CCG)L  | 0.31 | 0.03 |
| YLR345W | 0      | #N/A            | iYLR344W     | #N/A | #N/A |
| YLR346C | 0      | #N/A            | iYLR346C     | #N/A | #N/A |
| YLR347C | KAP95  | RSL1            | iYLR347C     | 0.95 | 0.40 |
| YLR348C | DIC1   |                 | 0 iYLR349W   | 0.67 | 0.23 |
| YLR349W | 0      | #N/A            | iYLR347C     | 0.95 | 0.40 |
| YLR350W | ORM2   |                 | 0 iYLR349W   | 0.67 | 0.23 |
| YLR351C | NIT3   |                 | 0 iYLR351C   | 2.01 | 0.86 |
| YLR352W | 0      | #N/A            | iYLR351C     | 2.01 | 0.86 |
| YLR353W | BUD8   |                 | 0 iYLR352W   | 1.39 | 0.63 |
| YLR354C | TAL1   |                 | 0 iYLR354C   | #N/A | #N/A |
| YLR355C | ILV5   |                 | 0 iYLR355C   | 0.76 | 0.29 |
| YLR356W | 0      | #N/A            | iYLR355C     | 0.76 | 0.29 |
| YLR357W | RSC2   |                 | 0 iYLR356W   | 1.87 | 0.82 |
| YLR358C | 0      | #N/A            | iYLR358C     | 1.19 | 0.53 |
| YLR359W | ADE13  | BRA1 BRA8       | iYLR358C     | 1.19 | 0.53 |
| YLR360W | VPS38  | VPL17           | iYLR359W     | #N/A | #N/A |
| YLR361C | 0      |                 | 0 iYLR361C   | #N/A | #N/A |
| YLR362W | STE11  |                 | 0 iYLR361C   | #N/A | #N/A |
| YLR363C | NMD4   |                 | 0 iYLR363C   | 1.56 | 0.70 |
| YLR364W | 0      | #N/A            | iYLR363C     | 1.56 | 0.70 |
| YLR365W | 0      | #N/A            | iYLR364W     | #N/A | #N/A |
| YLR366W | 0      | #N/A            | iYLR364W     | #N/A | #N/A |
| YLR367W | RPS22B |                 | 0 iYLR366W   | 0.55 | 0.15 |
| YLR368W | FLM1   |                 | 0 iSNR44     | 0.55 | 0.15 |
| YLR369W | SSQ1   | SSC2            | iYLR368W     | #N/A | #N/A |

|         |        |                  |   |               |      |      |
|---------|--------|------------------|---|---------------|------|------|
| YLR370C | ARC18  |                  | 0 | iYLR370C      | 2.22 | 0.90 |
| YLR371W | ROM2   |                  |   | 0 iYLR370C    | 2.22 | 0.90 |
| YLR372W | SUR4   | APA1 ELO3 SRE1 V |   | iYLR371W      | #N/A | #N/A |
| YLR373C | VID22  |                  |   | 0 iYLR373C    | #N/A | #N/A |
| YLR374C | 0      | #N/A             |   | iYLR375W      | #N/A | #N/A |
| YLR375W | STP3   |                  |   | 0 iYLR373C    | #N/A | #N/A |
| YLR376C | 0      |                  |   | 0 iYLR376C    | #N/A | #N/A |
| YLR377C | FBP1   | ACN8 FBPase      |   | iYLR377C      | 1.55 | 0.69 |
| YLR378C | SEC61  |                  |   | 0 iYLR379W    | 1.26 | 0.56 |
| YLR379W | 0      | #N/A             |   | itK(UUU)L     | #N/A | #N/A |
| YLR380W | CSR1   | SFH2             |   | iYLR379W      | 1.26 | 0.56 |
| YLR381W | CTF3   | CHL3             |   | iYLR380W      | 1.74 | 0.77 |
| YLR382C | NAM2   | MSL1             |   | iYLR382C      | 2.16 | 0.89 |
| YLR383W | RHC18  | SMC6             |   | iYLR382C      | 2.16 | 0.89 |
| YLR384C | IKI3   | ELP1 TOT1        |   | iYLR384C      | 1.40 | 0.62 |
| YLR385C | 0      | AWS1             |   | iYLR385C      | 2.89 | 0.97 |
| YLR386W | VAC14  |                  |   | 0 iYLR385C    | 2.89 | 0.97 |
| YLR387C | 0      |                  |   | 0 iYLR387C    | 0.49 | 0.12 |
| YLR388W | RPS29A |                  |   | 0 iYLR387C    | 0.49 | 0.12 |
| YLR389C | STE23  |                  |   | 0 iYLR389C    | 1.07 | 0.46 |
| YLR390W | ECM19  |                  |   | 0 iYLR389C    | 1.07 | 0.46 |
| YLR391W | #N/A   | #N/A             |   | #N/A          | #N/A | #N/A |
| YLR392C | 0      | #N/A             |   | iYLR392C      | 1.95 | 0.84 |
| YLR393W | ATP10  |                  |   | 0 iYLR392C    | 1.95 | 0.84 |
| YLR394W | CST9   | ZIP3             |   | iYLR392C      | 1.95 | 0.84 |
| YLR395C | COX8   |                  |   | 0 iYLR395C    | #N/A | #N/A |
| YLR396C | VPS33  | CLS14 MET27 PEP1 |   | iYLR396C      | #N/A | #N/A |
| YLR397C | AFG2   | DRG1             |   | iYLR397C      | 0.99 | 0.43 |
| YLR398C | SKI2   |                  |   | 0 iYLR398C    | #N/A | #N/A |
| YLR399C | BDF1   |                  |   | 0 iYLR399C    | 0.39 | 0.09 |
| YLR400W | 0      | #N/A             |   | iYLR399C      | 0.39 | 0.09 |
| YLR401C | 0      |                  |   | 0 iYLR401C    | #N/A | #N/A |
| YLR402W | 0      | #N/A             |   | iYLR401C      | #N/A | #N/A |
| YLR403W | SFP1   |                  |   | 0 iYLR402W    | 0.85 | 0.34 |
| YLR404W | 0      | #N/A             |   | iYLR403W      | #N/A | #N/A |
| YLR405W | 0      |                  |   | 0 iYLR404W    | #N/A | #N/A |
| YLR406C | RPL31B |                  |   | 0 iYLR406C    | 0.55 | 0.15 |
| YLR407W | 0      | #N/A             |   | iYLR406C      | 0.55 | 0.15 |
| YLR408C | 0      | #N/A             |   | iYLR408C      | 1.72 | 0.73 |
| YLR409C | UTP21  |                  |   | 0 iYLR409C    | #N/A | #N/A |
| YLR410W | VIP1   |                  |   | 0 iYLR409C    | #N/A | #N/A |
| YLR411W | CTR3   |                  |   | 0 iYLRWdelta2 | 1.42 | 0.64 |
| YLR412W | 0      | #N/A             |   | iYLR411W      | #N/A | #N/A |
| YLR413W | 0      | #N/A             |   | iYLR412W-1    | #N/A | #N/A |
| YLR414C | 0      | #N/A             |   | iYLR414C      | #N/A | #N/A |
| YLR415C | 0      | #N/A             |   | iYLR416C      | 1.44 | 0.65 |
| YLR416C | 0      | #N/A             |   | iYLR416C      | 1.44 | 0.65 |
| YLR417W | VPS36  | GRD12 VAC3 VPL11 |   | iYLR416C      | 1.44 | 0.65 |
| YLR418C | CDC73  |                  |   | 0 iYLR418C    | 1.85 | 0.79 |
| YLR419W | 0      | #N/A             |   | iYLR418C      | 1.85 | 0.79 |
| YLR420W | URA4   |                  |   | 0 iYLRdelta2  | #N/A | #N/A |

|         |        |                |   |             |      |      |
|---------|--------|----------------|---|-------------|------|------|
| YLR421C | RPN13  |                | 0 | iYLR421C    | #N/A | #N/A |
| YLR422W | 0      | #N/A           |   | iYLR421C    | #N/A | #N/A |
| YLR423C | APG17  | APG17          |   | iYLR423C    | 2.17 | 0.82 |
| YLR424W | 0      |                | 0 | iYLR423C    | 2.17 | 0.82 |
| YLR425W | TUS1   | SOP10          |   | iYLRcdelta2 | 1.57 | 0.70 |
| YLR426W | 0      | #N/A           |   | iYLR425W    | 2.00 | 0.85 |
| YLR427W | 0      |                | 0 | iYLR426W    | 2.54 | 0.94 |
| YLR428C | 0      | #N/A           |   | iYLR429W    | #N/A | #N/A |
| YLR429W | CRN1   |                | 0 | iYLR427W    | 1.12 | 0.49 |
| YLR430W | SEN1   | CIK3 NRD2      |   | iYLR429W    | #N/A | #N/A |
| YLR431C | 0      | CVT23          |   | iYLR431C    | 0.79 | 0.30 |
| YLR432W | IMD3   |                | 0 | iYLR431C    | 0.79 | 0.30 |
| YLR433C | CNA1   | CMP1           |   | iYLR435W    | 0.51 | 0.14 |
| YLR434C | 0      | #N/A           |   | iYLR435W    | 0.51 | 0.14 |
| YLR435W | 0      |                | 0 | iYLR432W    | #N/A | #N/A |
| YLR436C | ECM30  |                | 0 | iYLR436C    | 0.90 | 0.38 |
| YLR437C | 0      | #N/A           |   | iYLR437C    | 0.41 | 0.08 |
| YLR438W | CAR2   |                | 0 | iYLR437C    | 0.41 | 0.08 |
| YLR439W | MRPL4  |                | 0 | iYLR438C-A  | 2.05 | 0.86 |
| YLR440C | 0      |                | 0 | iYLR440C    | 0.78 | 0.28 |
| YLR441C | RPS1A  | RP10A          |   | iYLR441C    | 0.42 | 0.09 |
| YLR442C | SIR3   | CMT1 MAR2 STE8 |   | iYLR442C    | 1.70 | 0.75 |
| YLR443W | ECM7   | ZRG15          |   | iYLR442C    | 1.70 | 0.75 |
| YLR444C | 0      | #N/A           |   | iYLR444C    | #N/A | #N/A |
| YLR445W | 0      | #N/A           |   | iYLR444C    | #N/A | #N/A |
| YLR446W | 0      | #N/A           |   | iYLR445W    | 1.41 | 0.63 |
| YLR447C | VMA6   |                | 0 | iYLR447C    | 0.73 | 0.27 |
| YLR448W | RPL6B  |                | 0 | iYLR447C    | 0.73 | 0.27 |
| YLR449W | FPR4   |                | 0 | iYLR448W    | #N/A | #N/A |
| YLR450W | HMG2   |                | 0 | iYLR449W    | 2.23 | 0.90 |
| YLR451W | LEU3   |                | 0 | iYLR450W    | 1.92 | 0.83 |
| YLR452C | SST2   |                | 0 | iYLR452C    | 0.93 | 0.39 |
| YLR453C | RIF2   |                | 0 | iYLR453C    | 1.37 | 0.61 |
| YLR454W | 0      |                | 0 | iYLR453C    | 1.37 | 0.61 |
| YLR455W | 0      | #N/A           |   | iYLRcdelta2 | #N/A | #N/A |
| YLR456W | 0      | #N/A           |   | iYLR455W    | 0.88 | 0.36 |
| YLR457C | NBP1   |                | 0 | iYLR458W    | 1.61 | 0.72 |
| YLR458W | 0      | #N/A           |   | iYLR456W    | #N/A | #N/A |
| YLR459W | CDC91  |                | 0 | iYLR458W    | 1.61 | 0.72 |
| YLR460C | 0      | #N/A           |   | iYLR460C-0  | #N/A | #N/A |
| YLR461W | PAU4   |                | 0 | iYLR460C-1  | 0.80 | 0.31 |
| YLR462W | 0      | #N/A           |   | iYLR461W-1  | 0.61 | 0.20 |
| YLR463C | 0      | #N/A           |   | iYLR466W    | 0.45 | 0.09 |
| YLR464W | 0      | #N/A           |   | iYLR461W-1  | 0.61 | 0.20 |
| YLR465C | 0      |                | 0 | iYLR466W    | 0.45 | 0.09 |
| YLR466W | YRF1-4 | YRF1           |   | iYLR461W-1  | 0.61 | 0.20 |
| YLR467W | YRF1-5 | YRF1           |   | iYLR466W    | 0.45 | 0.09 |
| YML001W | YPT7   | AST4 VAM4      |   | iYML002W    | 1.79 | 0.79 |
| YML002W | 0      | #N/A           |   | iYML003W    | 0.66 | 0.22 |
| YML003W | 0      | #N/A           |   | iYML004C    | 1.93 | 0.84 |
| YML004C | GLO1   |                | 0 | iYML004C    | 1.93 | 0.84 |

|           |        |                  |   |            |      |      |
|-----------|--------|------------------|---|------------|------|------|
| YML005W   | 0      |                  | 0 | itS(AGA)M  | 1.42 | 0.64 |
| YML006C   | GIS4   |                  | 0 | iYML006C   | 0.65 | 0.22 |
| YML007W   | YAP1   | PAR1 SNQ3        |   | iYML008C   | 0.60 | 0.19 |
| YML008C   | ERG6   | ISE1 LIS1 SED6   |   | iYML008C   | 0.60 | 0.19 |
| YML009C   | MRPL39 |                  | 0 | iYML009C   | 1.81 | 0.79 |
| YML010W   | SPT5   |                  | 0 | iYML011C   | 2.79 | 0.94 |
| YML010W-A | #N/A   | #N/A             |   | iYML011C   | 2.79 | 0.94 |
| YML010W-B | #N/A   | #N/A             |   | #N/A       | #N/A | #N/A |
| YML011C   | 0      | #N/A             |   | iYML011C   | 2.79 | 0.94 |
| YML012W   | ERV25  |                  | 0 | iYML013C-A | #N/A | #N/A |
| YML013C-A | #N/A   | #N/A             |   | iYML013C-A | #N/A | #N/A |
| YML013W   | SEL1   |                  | 0 | iYML014W   | 1.73 | 0.74 |
| YML014W   | 0      |                  | 0 | iYML015C   | 2.36 | 0.92 |
| YML015C   | TAF11  | TAF40 TafII40    |   | iYML015C   | 2.36 | 0.92 |
| YML016C   | PPZ1   |                  | 0 | iYML016C   | 1.08 | 0.46 |
| YML017W   | PSP2   | MRS15            |   | iYML018C   | 1.45 | 0.65 |
| YML018C   | 0      | #N/A             |   | iYML018C   | 1.45 | 0.65 |
| YML019W   | OST6   |                  | 0 | iYML020W   | 1.40 | 0.62 |
| YML020W   | 0      | #N/A             |   | iYML021C   | 1.90 | 0.82 |
| YML021C   | UNG1   |                  | 0 | iYML021C   | 1.90 | 0.82 |
| YML022W   | APT1   |                  | 0 | iYML023C   | 1.33 | 0.59 |
| YML023C   | 0      | #N/A             |   | iYML023C   | 1.33 | 0.59 |
| YML024W   | RPS17A | RP51A RPL51A     |   | iYML025C   | 0.68 | 0.24 |
| YML025C   | 0      |                  | 0 | iYML025C   | 0.68 | 0.24 |
| YML026C   | RPS18B |                  | 0 | iYML026C   | 0.29 | 0.03 |
| YML027W   | YOX1   |                  | 0 | iYML028W   | 0.65 | 0.22 |
| YML028W   | TSA1   | TPX1 ZRG14 cTPxl |   | iYML029W   | 0.96 | 0.41 |
| YML029W   | USA1   |                  | 0 | iYML030W   | 1.39 | 0.62 |
| YML030W   | 0      | #N/A             |   | iYML031W   | 2.01 | 0.82 |
| YML031W   | NDC1   |                  | 0 | iYML033W   | 0.34 | 0.05 |
| YML032C   | RAD52  |                  | 0 | iYML031W   | 2.01 | 0.82 |
| YML032C-A | #N/A   | #N/A             |   | #N/A       | #N/A | #N/A |
| YML033W   | #N/A   | #N/A             |   | #N/A       | #N/A | #N/A |
| YML034W   | SRC1   |                  | 0 | iYML034W   | #N/A | #N/A |
| YML035C   | AMD1   | AMD3             |   | iYML035C   | 0.71 | 0.26 |
| YML035C-A | #N/A   | #N/A             |   | iYML034W   | #N/A | #N/A |
| YML036W   | 0      | #N/A             |   | iYML037C   | 1.71 | 0.76 |
| YML037C   | 0      | #N/A             |   | iYML037C   | 1.71 | 0.76 |
| YML038C   | YMD8   |                  | 0 | iYML038C   | #N/A | #N/A |
| YML039W   | #N/A   | #N/A             |   | itP(UGG)M  | #N/A | #N/A |
| YML040W   | #N/A   | #N/A             |   | itP(UGG)M  | #N/A | #N/A |
| YML041C   | VPS71  | SWC6             |   | iYML041C   | 1.71 | 0.75 |
| YML042W   | CAT2   | YCAT             |   | iYML043C   | 1.28 | 0.57 |
| YML043C   | RRN11  |                  | 0 | iYML043C   | 1.28 | 0.57 |
| YML045W   | #N/A   | #N/A             |   | itG(GCC)M  | #N/A | #N/A |
| YML046W   | PRP39  |                  | 0 | iYML047C   | 1.17 | 0.51 |
| YML047C   | PRM6   |                  | 0 | iYML047C   | 1.17 | 0.51 |
| YML048W   | GSF2   | ECM6             |   | iYML049C   | 1.72 | 0.72 |
| YML048W-A | #N/A   | #N/A             |   | iYML048W   | 0.78 | 0.30 |
| YML049C   | RSE1   |                  | 0 | iYML049C   | 1.72 | 0.72 |
| YML050W   | 0      | #N/A             |   | iYML051W   | 1.01 | 0.43 |

|           |       |                   |      |               |      |      |
|-----------|-------|-------------------|------|---------------|------|------|
| YML051W   | GAL80 |                   | 0    | iYML052W      | 1.11 | 0.49 |
| YML052W   | SUR7  |                   |      | 0 iYML053C    | 0.56 | 0.16 |
| YML053C   |       | 0                 | #N/A | iYML053C      | 0.56 | 0.16 |
| YML054C   | CYB2  |                   |      | 0 iYML054C    | 0.82 | 0.33 |
| YML055W   | SPC2  | SPY1              |      | iSNR54        | 0.63 | 0.20 |
| YML056C   | IMD4  |                   |      | 0 iSNR54      | 0.63 | 0.20 |
| YML057W   | CMP2  | CNA2              |      | iYML058W      | 1.09 | 0.47 |
| YML058C-A | #N/A  |                   | #N/A | iYML057W      | #N/A | #N/A |
| YML058W   | SML1  |                   |      | 0 iYML059C    | #N/A | #N/A |
| YML059C   |       | 0                 | #N/A | iYML059C      | #N/A | #N/A |
| YML060W   | OGG1  |                   |      | 0 iYML061C    | 1.64 | 0.73 |
| YML061C   | PIF1  | TST1              |      | iYML061C      | 1.64 | 0.73 |
| YML062C   | MFT1  | MFT52             |      | iYML062C      | 1.74 | 0.77 |
| YML063W   | RPS1B | PLC2 RP10B        |      | iYML064C      | 0.31 | 0.03 |
| YML064C   | TEM1  |                   |      | 0 iYML064C    | 0.31 | 0.03 |
| YML065W   | ORC1  |                   |      | 0 iYML066C    | 2.27 | 0.91 |
| YML066C   | SMA2  |                   |      | 0 iYML066C    | 2.27 | 0.91 |
| YML067C   | ERV41 |                   |      | 0 iYML067C    | #N/A | #N/A |
| YML068W   |       | 0                 |      | 0 iYML069W    | #N/A | #N/A |
| YML069W   | POB3  |                   |      | 0 iYML070W    | 2.81 | 0.96 |
| YML070W   | DAK1  |                   |      | 0 iYMLCdelta1 | 2.20 | 0.89 |
| YML071C   | DOR1  | DOR1              |      | iYML071C      | #N/A | #N/A |
| YML072C   |       | 0                 |      | 0 iYML072C    | 0.68 | 0.24 |
| YML073C   | RPL6A | YL16A             |      | iYML073C      | #N/A | #N/A |
| YML074C   | FPR3  | NPI46             |      | iYML074C-0    | 1.20 | 0.53 |
| YML075C   | HMG1  |                   |      | 0 iYML075C    | 0.65 | 0.22 |
| YML076C   | WAR1  |                   |      | 0 iYML076C    | #N/A | #N/A |
| YML077W   | BET5  |                   |      | 0 iYML078W    | 1.46 | 0.66 |
| YML078W   | CPR3  | CYP3              |      | iYML079W      | #N/A | #N/A |
| YML079W   |       | 0                 | #N/A | iYML080W      | 1.15 | 0.48 |
| YML080W   | DUS1  |                   |      | 0 iYML081W    | 3.23 | 0.97 |
| YML081W   |       | 0                 | #N/A | iYML081C-A    | 2.50 | 0.93 |
| YML082W   |       | 0                 | #N/A | iYML083C      | 1.78 | 0.78 |
| YML083C   |       | 0                 | #N/A | iYML083C      | 1.78 | 0.78 |
| YML084W   |       | 0                 | #N/A | iYML085C      | 2.97 | 0.95 |
| YML085C   | TUB1  |                   |      | 0 iYML085C    | 2.97 | 0.95 |
| YML086C   | ALO1  |                   |      | 0 iYML086C    | 1.36 | 0.61 |
| YML087C   |       | 0                 | #N/A | iYML087C      | 1.23 | 0.55 |
| YML088W   | UFO1  |                   |      | 0 iYML089C    | 0.58 | 0.18 |
| YML089C   |       | 0                 | #N/A | iYML089C      | 0.58 | 0.18 |
| YML090W   |       | 0                 | #N/A | iYML092C      | #N/A | #N/A |
| YML091C   | RPM2  |                   |      | 0 iYML089C    | 0.58 | 0.18 |
| YML092C   | PRE8  |                   |      | 0 iYML092C    | #N/A | #N/A |
| YML093W   | UTP14 |                   |      | 0 iYML094W    | #N/A | #N/A |
| YML094W   | GIM5  | PFD5              |      | iYML095C      | 1.46 | 0.66 |
| YML095C   | RAD10 |                   |      | 0 iYML095C    | 1.46 | 0.66 |
| YML095C-A | #N/A  |                   | #N/A | iYML094W      | #N/A | #N/A |
| YML096W   |       | 0                 | #N/A | iYML097C      | 1.70 | 0.73 |
| YML097C   | VPS9  | VPL31 VPT9        |      | iYML097C      | 1.70 | 0.73 |
| YML098W   | TAF13 | FUN81 TAF19 Taf11 |      | iYML099C      | 1.33 | 0.59 |
| YML099C   | ARG81 | ARGR2             |      | iYML099C      | 1.33 | 0.59 |



|           |        |                 |   |            |      |      |
|-----------|--------|-----------------|---|------------|------|------|
| YML100W   | TSL1   |                 | 0 | iYML101C   | 1.18 | 0.52 |
| YML100W-A | #N/A   | #N/A            |   | iYML100W   | #N/A | #N/A |
| YML101C   | 0      |                 | 0 | iYML101C   | 1.18 | 0.52 |
| YML102C-A | #N/A   | #N/A            |   | iYML101C   | 1.18 | 0.52 |
| YML102W   | CAC2   |                 | 0 | iYML103C   | 0.96 | 0.40 |
| YML103C   | NUP188 |                 | 0 | iYML103C   | 0.96 | 0.40 |
| YML104C   | MDM1   |                 | 0 | iYML104C   | 2.05 | 0.87 |
| YML105C   | SEC65  |                 | 0 | iYML105C   | #N/A | #N/A |
| YML106W   | URA5   | PYR5            |   | iYML107C   | #N/A | #N/A |
| YML107C   | 0      | #N/A            |   | iYML107C   | #N/A | #N/A |
| YML108W   | 0      | #N/A            |   | iYML109W   | #N/A | #N/A |
| YML109W   | ZDS2   | CES4            |   | iYML110C   | 1.41 | 0.63 |
| YML110C   | COQ5   | DBI56           |   | iYML110C   | 1.41 | 0.63 |
| YML111W   | BUL2   |                 | 0 | iYML112W   | 0.93 | 0.39 |
| YML112W   | CTK3   |                 | 0 | iYML113W   | #N/A | #N/A |
| YML113W   | DAT1   |                 | 0 | iYML114C   | 1.92 | 0.83 |
| YML114C   | TAF8   | TAF65 TafII65   |   | iYML114C   | 1.92 | 0.83 |
| YML115C   | VAN1   | LDB13 VRG7 VRG8 |   | iYML115C   | 1.70 | 0.75 |
| YML116W   | ATR1   | SNQ1            |   | iYML117W-4 | 0.58 | 0.18 |
| YML117W   | 0      |                 | 0 | iYML118W   | 2.10 | 0.88 |
| YML117W-A | #N/A   | #N/A            |   | iYML118W   | 2.10 | 0.88 |
| YML118W   | NGL3   |                 | 0 | iYML119W   | 1.24 | 0.55 |
| YML119W   | 0      | #N/A            |   | iYML120C   | 1.15 | 0.51 |
| YML120C   | NDI1   |                 | 0 | iYML120C   | 1.15 | 0.51 |
| YML121W   | GTR1   |                 | 0 | iYML122C   | 0.84 | 0.34 |
| YML122C   | 0      | #N/A            |   | iYML122C   | 0.84 | 0.34 |
| YML123C   | PHO84  |                 | 0 | iYML123C   | 0.78 | 0.30 |
| YML124C   | TUB3   |                 | 0 | iYML124C   | 1.82 | 0.79 |
| YML125C   | 0      | #N/A            |   | iYML125C   | 1.43 | 0.64 |
| YML126C   | ERG13  | HMGS            |   | iYML126C   | 0.73 | 0.27 |
| YML127W   | RSC9   |                 | 0 | iYML128C   | 2.34 | 0.92 |
| YML128C   | MSC1   |                 | 0 | iYML128C   | 2.34 | 0.92 |
| YML129C   | COX14  |                 | 0 | iYML129C   | #N/A | #N/A |
| YML130C   | ERO1   |                 | 0 | iYML130C   | #N/A | #N/A |
| YML131W   | 0      | #N/A            |   | iYML132W-1 | 1.60 | 0.72 |
| YML132W   | COS3   |                 | 0 | iYML133C-1 | #N/A | #N/A |
| YML133C   | 0      | #N/A            |   | iYML133C-0 | 0.66 | 0.23 |
| YMR001C   | CDC5   | MSD2 PKX2       |   | iYMR001C   | 0.69 | 0.24 |
| YMR002W   | 0      | #N/A            |   | iYMR001C   | 0.69 | 0.24 |
| YMR003W   | 0      | #N/A            |   | iYMR002W   | 1.59 | 0.70 |
| YMR004W   | MVP1   |                 | 0 | iYMR003W   | #N/A | #N/A |
| YMR005W   | TAF4   | MPT1 TAF48 TSG2 |   | iYMR004W   | 2.60 | 0.95 |
| YMR006C   | PLB2   |                 | 0 | iYMR006C   | 1.39 | 0.61 |
| YMR007W   | 0      | #N/A            |   | iYMR006C   | 1.39 | 0.61 |
| YMR008C   | PLB1   |                 | 0 | iYMR008C   | 1.48 | 0.67 |
| YMR009W   | 0      | #N/A            |   | iYMR008C   | 1.48 | 0.67 |
| YMR010W   | 0      | #N/A            |   | iYMR009W   | 1.24 | 0.55 |
| YMR011W   | HXT2   |                 | 0 | iYMR010W-  | 0.48 | 0.11 |
| YMR012W   | CLU1   | TIF31           |   | itE(UUC)M  | #N/A | #N/A |
| YMR013C   | SEC59  |                 | 0 | iYMR013C-C | 0.49 | 0.12 |
| YMR014W   | BUD22  |                 | 0 | iYMR013C-1 | 0.70 | 0.25 |

|           |        |               |   |            |      |      |
|-----------|--------|---------------|---|------------|------|------|
| YMR015C   | ERG5   |               | 0 | iYMR015C   | 0.73 | 0.27 |
| YMR016C   | SOK2   |               | 0 | iYMR016C-C | 0.30 | 0.03 |
| YMR017W   | SPO20  | DBI9          |   | iYMR016C-1 | #N/A | #N/A |
| YMR018W   | 0      | #N/A          |   | iYMR017W   | 0.83 | 0.33 |
| YMR019W   | STB4   |               | 0 | iYMR018W   | 2.46 | 0.93 |
| YMR020W   | FMS1   |               | 0 | iYMR019W   | 1.37 | 0.61 |
| YMR021C   | MAC1   | CUA1          |   | iYMR021C   | 2.77 | 0.96 |
| YMR022W   | QRI8   | UBC7          |   | iYMR021C   | 2.77 | 0.96 |
| YMR023C   | MSS1   | PET53         |   | iYMR023C   | 0.67 | 0.22 |
| YMR024W   | MRPL3  |               | 0 | itA(AGC)M1 | 2.23 | 0.89 |
| YMR025W   | 0      |               | 0 | iYMR024W   | #N/A | #N/A |
| YMR026C   | PEX12  | PAS11         |   | iYMR026C   | 1.59 | 0.71 |
| YMR027W   | HRT2   | #N/A          |   | iYMR026C   | 1.59 | 0.71 |
| YMR028W   | TAP42  |               | 0 | iYMR027W   | 1.18 | 0.51 |
| YMR029C   | 0      |               | 0 | iYMR029C   | 2.05 | 0.86 |
| YMR030W   | 0      |               | 0 | iYMR029C   | 2.05 | 0.86 |
| YMR031C   | 0      | #N/A          |   | iYMR031W-  | 0.59 | 0.18 |
| YMR031W-A | 0      | #N/A          |   | iYMR030W   | #N/A | #N/A |
| YMR032W   | HOF1   | CYK2          |   | iYMR031W-  | 0.59 | 0.18 |
| YMR033W   | ARP9   | SWP59         |   | iYMR032W   | #N/A | #N/A |
| YMR034C   | 0      | #N/A          |   | iYMR034C   | 1.79 | 0.79 |
| YMR035W   | IMP2   |               | 0 | iYMR034C   | 1.79 | 0.79 |
| YMR036C   | MIH1   |               | 0 | iYMR036C   | #N/A | #N/A |
| YMR037C   | MSN2   |               | 0 | iYMR037C   | #N/A | #N/A |
| YMR038C   | LYS7   | CCS           |   | iYMR038C   | 0.68 | 0.23 |
| YMR039C   | SUB1   | TSP1          |   | iYMR039C   | 2.11 | 0.88 |
| YMR040W   | 0      |               | 0 | iYMR039C   | 2.11 | 0.88 |
| YMR041C   | 0      | #N/A          |   | iYMR041C   | 0.71 | 0.26 |
| YMR042W   | ARG80  | ARGR1         |   | itF(GAA)M  | 0.61 | 0.20 |
| YMR043W   | MCM1   | FUN80         |   | iYMR042W   | 0.32 | 0.04 |
| YMR044W   | IOC4   |               | 0 | iYMR043W   | 0.61 | 0.20 |
| YMR045C   | #N/A   | #N/A          |   | iYMR046W-  | 0.80 | 0.31 |
| YMR046C   | #N/A   | #N/A          |   | iYMR046W-  | 0.80 | 0.31 |
| YMR047C   | NUP116 | NSP116        |   | iYMR047C   | 2.85 | 0.97 |
| YMR048W   | CSM3   |               | 0 | iYMR047C   | 2.85 | 0.97 |
| YMR049C   | ERB1   |               | 0 | iYMR049C-C | #N/A | #N/A |
| YMR050C   | #N/A   | #N/A          |   | iYMRCdelta | #N/A | #N/A |
| YMR051C   | #N/A   | #N/A          |   | iYMRCdelta | #N/A | #N/A |
| YMR052C-A | 0      | #N/A          |   | iYMR053C   | 1.34 | 0.60 |
| YMR052W   | FAR3   |               | 0 | itW(CCA)M  | 1.26 | 0.56 |
| YMR053C   | STB2   |               | 0 | iYMR053C   | 1.34 | 0.60 |
| YMR054W   | STV1   |               | 0 | iYMR053C   | 1.34 | 0.60 |
| YMR055C   | BUB2   | PAC7          |   | iYMR055C   | 1.33 | 0.59 |
| YMR056C   | AAC1   |               | 0 | iYMR056C   | #N/A | #N/A |
| YMR057C   | 0      | #N/A          |   | iYMR057C   | #N/A | #N/A |
| YMR058W   | FET3   |               | 0 | iYMR057C   | #N/A | #N/A |
| YMR059W   | SEN15  |               | 0 | iYMR058W   | 1.31 | 0.59 |
| YMR060C   | TOM37  | MAS37 PET3027 |   | iYMR060C   | 4.02 | 0.99 |
| YMR061W   | RNA14  |               | 0 | iYMR060C   | 4.02 | 0.99 |
| YMR062C   | ECM40  | ARG7          |   | iYMR062C   | 2.69 | 0.96 |
| YMR063W   | RIM9   |               | 0 | iYMR062C   | 2.69 | 0.96 |



|           |       |                |  |              |      |      |
|-----------|-------|----------------|--|--------------|------|------|
| YMR064W   | AEP1  | NCA1           |  | iYMR063W     | 1.55 | 0.68 |
| YMR065W   | KAR5  | FIG3           |  | iYMR064W     | 1.31 | 0.58 |
| YMR066W   | SOV1  |                |  | 0 iYMR065W   | 1.93 | 0.82 |
| YMR067C   | 0     |                |  | 0 iYMR067C   | 1.69 | 0.74 |
| YMR068W   | AVO2  |                |  | 0 iYMR067C   | 1.69 | 0.74 |
| YMR069W   | 0     |                |  | 0 iYMR068W   | 1.19 | 0.51 |
| YMR070W   | MOT3  | ROX7           |  | iYMR069W     | 0.22 | 0.01 |
| YMR071C   | 0     |                |  | 0 iYMR071C   | 1.12 | 0.49 |
| YMR072W   | ABF2  |                |  | 0 iYMR071C   | 1.12 | 0.49 |
| YMR073C   | 0     | #N/A           |  | iYMR073C     | 1.58 | 0.67 |
| YMR074C   | 0     | #N/A           |  | iYMR074C     | 1.17 | 0.52 |
| YMR075C-A | 0     | #N/A           |  | iYMR075C-A   | 0.65 | 0.21 |
| YMR075W   | 0     |                |  | 0 iYMR074C   | 1.17 | 0.52 |
| YMR076C   | PDS5  |                |  | 0 iYMR076C   | 1.26 | 0.56 |
| YMR077C   | VPS20 | CHM6           |  | iYMR077C     | 1.86 | 0.81 |
| YMR078C   | CTF18 | CHL12          |  | iYMR078C     | 2.07 | 0.87 |
| YMR079W   | SEC14 | PIT1           |  | iYMR078C     | 2.07 | 0.87 |
| YMR080C   | NAM7  | IFS2 MOF4 UPF1 |  | iYMR080C     | 2.06 | 0.87 |
| YMR081C   | ISF1  | MBR3           |  | iYMR081C     | 0.96 | 0.41 |
| YMR082C   | 0     | #N/A           |  | iYMR082C-C   | 1.32 | 0.59 |
| YMR083W   | ADH3  |                |  | 0 iYMR082C-1 | 0.63 | 0.21 |
| YMR084W   | 0     | #N/A           |  | iYMR083W     | 1.71 | 0.76 |
| YMR085W   | 0     | #N/A           |  | iYMR084W     | #N/A | #N/A |
| YMR086C-A | 0     | #N/A           |  | iYMR086C-A   | 0.99 | 0.42 |
| YMR086W   | 0     | #N/A           |  | iYMR085W     | 0.89 | 0.36 |
| YMR087W   | 0     | #N/A           |  | iYMR086C-A   | 0.99 | 0.42 |
| YMR088C   | 0     | #N/A           |  | iYMR088C     | 1.34 | 0.60 |
| YMR089C   | YTA12 | RCA1           |  | iYMR089C     | 1.41 | 0.63 |
| YMR090W   | 0     | #N/A           |  | iYMR089C     | 1.41 | 0.63 |
| YMR091C   | NPL6  |                |  | 0 iYMR091C   | 1.33 | 0.59 |
| YMR092C   | AIP1  |                |  | 0 iYMR092C   | 1.75 | 0.78 |
| YMR093W   | UTP15 |                |  | 0 iYMR092C   | 1.75 | 0.78 |
| YMR094W   | CTF13 | CBF3C          |  | iYMR093W     | 1.48 | 0.66 |
| YMR095C   | SNO1  |                |  | 0 iYMR095C   | 0.67 | 0.23 |
| YMR096W   | SNZ1  |                |  | 0 iYMR095C   | 0.67 | 0.23 |
| YMR097C   | 0     |                |  | 0 iYMR097C   | #N/A | #N/A |
| YMR098C   | 0     | #N/A           |  | iYMR098C     | 1.55 | 0.69 |
| YMR099C   | 0     | #N/A           |  | iYMR099C     | 1.41 | 0.63 |
| YMR100W   | MUB1  |                |  | 0 iYMR099C   | 1.41 | 0.63 |
| YMR101C   | SRT1  |                |  | 0 iYMR101C   | 0.50 | 0.12 |
| YMR102C   | 0     | #N/A           |  | iYMR102C     | 0.58 | 0.17 |
| YMR103C   | 0     | #N/A           |  | iYMR103C     | 0.67 | 0.22 |
| YMR104C   | YPK2  | YKR2           |  | iYMR104C     | 1.45 | 0.65 |
| YMR105C   | PGM2  | GAL5           |  | iYMR105C     | 1.87 | 0.81 |
| YMR106C   | YKU80 | HDF2           |  | iYMR106C     | 1.19 | 0.52 |
| YMR107W   | 0     |                |  | 0 iYMRWdelta | 1.90 | 0.80 |
| YMR108W   | ILV2  | SMR1 THI1      |  | iYMR107W     | 0.43 | 0.08 |
| YMR109W   | MYO5  |                |  | 0 iYMR108W   | 1.50 | 0.67 |
| YMR110C   | 0     | #N/A           |  | iYMR110C     | 1.11 | 0.49 |
| YMR111C   | 0     | #N/A           |  | iYMR111C     | 1.52 | 0.68 |
| YMR112C   | MED11 |                |  | 0 iYMR112C   | 2.04 | 0.87 |

|           |        |                  |      |            |      |      |
|-----------|--------|------------------|------|------------|------|------|
| YMR113W   | FOL3   |                  | 0    | iYMR112C   | 2.04 | 0.87 |
| YMR114C   |        | 0                | #N/A | iYMR114C   | 2.84 | 0.96 |
| YMR115W   |        | 0                |      | 0 iYMR114C | 2.84 | 0.96 |
| YMR116C   | ASC1   | CPC2             |      | iYMR116C   | 0.62 | 0.19 |
| YMR117C   | SPC24  |                  | 0    | iYMR117C   | 2.27 | 0.91 |
| YMR118C   |        | 0                | #N/A | iYMR118C   | 0.90 | 0.37 |
| YMR119W   | ASI1   |                  | 0    | itL(CAA)M  | 0.80 | 0.31 |
| YMR119W-A |        | 0                | #N/A | itL(CAA)M  | 0.80 | 0.31 |
| YMR120C   | ADE17  |                  | 0    | iYMR120C   | 1.08 | 0.47 |
| YMR121C   | RPL15B |                  | 0    | iYMR121C   | #N/A | #N/A |
| YMR122C   |        | 0                | #N/A | iYMR122C-C | #N/A | #N/A |
| YMR123W   | PKR1   |                  | 0    | iYMR122C-1 | 2.15 | 0.89 |
| YMR124W   |        | 0                | #N/A | iYMR123W   | 0.97 | 0.41 |
| YMR125W   | STO1   | CBC1 CBP80 GCR3  |      | iYMR124W   | 1.79 | 0.79 |
| YMR126C   |        | 0                | 0    | iYMR126C   | 1.62 | 0.71 |
| YMR127C   | SAS2   |                  | 0    | iYMR127C   | 1.72 | 0.73 |
| YMR128W   | ECM16  | DHR1             |      | iYMR127C   | 1.72 | 0.73 |
| YMR129W   | POM152 |                  | 0    | iYMR128W   | 2.91 | 0.96 |
| YMR130W   |        | 0                | #N/A | iYMR129W   | 1.40 | 0.61 |
| YMR131C   | RRB1   |                  | 0    | iYMR131C   | 1.61 | 0.72 |
| YMR132C   |        | 0                |      | 0 iYMR132C | #N/A | #N/A |
| YMR133W   | REC114 |                  | 0    | iYMR132C   | #N/A | #N/A |
| YMR134W   |        | 0                | #N/A | iYMR133W   | 0.83 | 0.33 |
| YMR135C   |        | 0                | DCR1 | iYMR135W-  | 0.43 | 0.08 |
| YMR135W-A |        | 0                | #N/A | iYMR134W   | 0.73 | 0.27 |
| YMR136W   | GAT2   |                  | 0    | iYMR135W-  | 0.43 | 0.08 |
| YMR137C   | PSO2   | SNM1             |      | iYMR137C   | 1.72 | 0.76 |
| YMR138W   | CIN4   | GTP1 UGX1        |      | iYMR137C   | 1.72 | 0.76 |
| YMR139W   | RIM11  | GSK3 MDS1        |      | iYMR138W   | 2.73 | 0.96 |
| YMR140W   |        | 0                |      | 0 iYMR139W | #N/A | #N/A |
| YMR141C   |        | 0                | #N/A | iYMR141C   | #N/A | #N/A |
| YMR142C   | RPL13B |                  | 0    | iYMR142C   | 0.27 | 0.02 |
| YMR143W   | RPS16A |                  | 0    | iYMR142C   | 0.27 | 0.02 |
| YMR144W   |        | 0                | #N/A | iYMR143W   | 1.26 | 0.54 |
| YMR145C   | NDE1   | NDH1             |      | iYMR145C   | 0.29 | 0.03 |
| YMR146C   | TIF34  |                  | 0    | iYMR146C   | 0.75 | 0.28 |
| YMR147W   |        | 0                | #N/A | iYMR146C   | 0.75 | 0.28 |
| YMR148W   |        | 0                | #N/A | iYMR147W   | 1.12 | 0.49 |
| YMR149W   | SWP1   |                  | 0    | iYMR148W   | 1.22 | 0.54 |
| YMR150C   | IMP1   | PET-TS2858       |      | iYMR151W   | 1.15 | 0.50 |
| YMR151W   | YIM2   |                  | 0    | iYMR149W   | 0.98 | 0.42 |
| YMR152W   | YIM1   |                  | 0    | iYMR151W   | 1.15 | 0.50 |
| YMR153C-A |        | 0                | #N/A | iYMR153C-A | 0.59 | 0.18 |
| YMR153W   | NUP53  |                  | 0    | iYMR152W   | #N/A | #N/A |
| YMR154C   | RIM13  | CPL1             |      | iYMR154C   | 0.75 | 0.28 |
| YMR155W   |        | 0                | #N/A | iYMR154C   | 0.75 | 0.28 |
| YMR156C   | TPP1   |                  | 0    | iYMR156C   | 1.34 | 0.60 |
| YMR157C   |        | 0                |      | 0 iYMR157C | 3.18 | 0.98 |
| YMR158W   |        | 0                |      | 0 iYMR157C | 3.18 | 0.98 |
| YMR158W-A |        | 0                | #N/A | iYMR158C-E | 0.85 | 0.35 |
| YMR159C   | APG16  | APG16 CVT11 SAP1 |      | iYMR159C   | 1.76 | 0.78 |

|           |        |                 |              |      |      |
|-----------|--------|-----------------|--------------|------|------|
| YMR160W   | 0      | #N/A            | iYMR159C     | 1.76 | 0.78 |
| YMR161W   | HLJ1   |                 | 0 iYMR160W   | 1.71 | 0.76 |
| YMR162C   | DNF3   |                 | 0 iYMR162C   | 2.38 | 0.93 |
| YMR163C   | 0      | #N/A            | iYMR163C     | #N/A | #N/A |
| YMR164C   | MSS11  |                 | 0 iYMR164C   | #N/A | #N/A |
| YMR165C   | SMP2   |                 | 0 iYMR165C   | #N/A | #N/A |
| YMR166C   | 0      | #N/A            | iYMR166C     | 1.63 | 0.73 |
| YMR167W   | MLH1   | PMS2            | iYMR166C     | 1.63 | 0.73 |
| YMR168C   | CEP3   | CBF3 CBF3B CSL1 | iYMR168C     | 1.68 | 0.75 |
| YMR169C   | ALD3   |                 | 0 iYMR169C   | 2.08 | 0.86 |
| YMR170C   | ALD2   |                 | 0 iYMR170C   | 1.63 | 0.73 |
| YMR171C   | 0      | #N/A            | iYMR171C     | 0.78 | 0.30 |
| YMR172C-A | 0      | #N/A            | iYMR172C-A   | 0.85 | 0.34 |
| YMR172W   | HOT1   |                 | 0 iYMR171C   | 0.78 | 0.30 |
| YMR173W   | DDR48  | FSP             | iYMR172C-A   | 0.85 | 0.34 |
| YMR173W-A | 0      | #N/A            | iYMR172C-A   | 0.85 | 0.34 |
| YMR174C   | PAI3   |                 | 0 iYMR174C   | 1.73 | 0.75 |
| YMR175W   | SIP18  |                 | 0 iYMR174C   | 1.73 | 0.75 |
| YMR176W   | ECM5   |                 | 0 iYMR175W   | 2.05 | 0.87 |
| YMR177W   | MMT1   |                 | 0 iYMR176W   | 1.43 | 0.64 |
| YMR178W   | 0      | #N/A            | iYMR177W     | 1.85 | 0.81 |
| YMR179W   | SPT21  |                 | 0 iYMR178W   | 1.35 | 0.60 |
| YMR180C   | CTL1   | CTH1            | iYMR180C     | 0.99 | 0.42 |
| YMR181C   | 0      | #N/A            | iYMR181C     | 0.62 | 0.20 |
| YMR182C   | RGM1   |                 | 0 iYMR182C-C | 0.58 | 0.17 |
| YMR183C   | SSO2   |                 | 0 iYMR183C   | 2.35 | 0.92 |
| YMR184W   | 0      | #N/A            | iYMR183C     | 2.35 | 0.92 |
| YMR185W   | 0      | #N/A            | iYMR184W     | #N/A | #N/A |
| YMR186W   | HSC82  |                 | 0 iYMR185W   | #N/A | #N/A |
| YMR187C   | 0      | #N/A            | iYMR187C     | 0.98 | 0.42 |
| YMR188C   | 0      |                 | 0 iYMR188C   | 1.43 | 0.64 |
| YMR189W   | GCV2   | GSD2            | iYMR188C     | 1.43 | 0.64 |
| YMR190C   | SGS1   |                 | 0 iYMR190C   | 3.00 | 0.98 |
| YMR191W   | 0      |                 | 0 iYMR190C   | 3.00 | 0.98 |
| YMR192W   | 0      |                 | 0 iYMR191W   | 1.86 | 0.80 |
| YMR193C-A | 0      | #N/A            | iYMR194W     | 0.57 | 0.18 |
| YMR193W   | MRPL24 | MRPL14          | iYMR192W     | 1.04 | 0.44 |
| YMR194W   | RPL36A | RPL39B          | iYMR193W     | 0.51 | 0.13 |
| YMR195W   | ICY1   |                 | 0 iYMR194C-A | 0.21 | 0.01 |
| YMR196W   | 0      | #N/A            | iYMR195W     | 1.29 | 0.57 |
| YMR197C   | VTI1   |                 | 0 iYMR197C   | 2.23 | 0.90 |
| YMR198W   | CIK1   |                 | 0 iYMR197C   | 2.23 | 0.90 |
| YMR199W   | CLN1   |                 | 0 iYMR198W   | 0.42 | 0.08 |
| YMR200W   | ROT1   |                 | 0 iYMR199W   | 1.47 | 0.64 |
| YMR201C   | RAD14  |                 | 0 iYMR201C   | 0.86 | 0.35 |
| YMR202W   | ERG2   | END11           | iYMR201C     | 0.86 | 0.35 |
| YMR203W   | TOM40  | ISP42 MOM38     | iYMR202W     | 2.42 | 0.93 |
| YMR204C   | 0      | #N/A            | iYMR204C     | 1.75 | 0.71 |
| YMR205C   | PFK2   |                 | 0 iYMR205C   | 1.30 | 0.58 |
| YMR206W   | 0      | #N/A            | iYMR205C     | 1.30 | 0.58 |
| YMR207C   | HFA1   |                 | 0 iYMR207C   | 2.42 | 0.93 |

|           |        |                  |              |      |      |
|-----------|--------|------------------|--------------|------|------|
| YMR208W   | ERG12  | RAR1             | iYMR207C     | 2.42 | 0.93 |
| YMR209C   | 0      | #N/A             | iYMR209C     | 1.12 | 0.48 |
| YMR210W   | 0      | #N/A             | iYMR209C     | 1.12 | 0.48 |
| YMR211W   | DML1   |                  | 0 iYMR210W   | #N/A | #N/A |
| YMR212C   | EFR3   |                  | 0 iYMR212C   | 2.16 | 0.88 |
| YMR213W   | CEF1   |                  | 0 iYMR212C   | 2.16 | 0.88 |
| YMR214W   | SCJ1   |                  | 0 iYMR213W   | 1.65 | 0.74 |
| YMR215W   | GAS3   |                  | 0 iYMR214W   | 1.13 | 0.50 |
| YMR216C   | SKY1   |                  | 0 iYMR216C   | 0.98 | 0.42 |
| YMR217W   | GUA1   |                  | 0 iYMR216C   | 0.98 | 0.42 |
| YMR218C   | TRS130 |                  | 0 iYMR218C   | 1.90 | 0.82 |
| YMR219W   | ESC1   |                  | 0 iYMR218C   | 1.90 | 0.82 |
| YMR220W   | ERG8   |                  | 0 iYMR219W   | 1.01 | 0.43 |
| YMR221C   | 0      |                  | 0 iYMR221C   | 1.18 | 0.51 |
| YMR222C   | FSH2   |                  | 0 iYMR222C   | 1.44 | 0.65 |
| YMR223W   | UBP8   |                  | 0 iYMR222C   | 1.44 | 0.65 |
| YMR224C   | MRE11  | NGS1 RAD58 XRS4  | iYMR224C     | 1.75 | 0.77 |
| YMR225C   | MRPL44 | YMR44            | iYMR225C     | 1.40 | 0.63 |
| YMR226C   | 0      | #N/A             | iYMR226C     | 1.24 | 0.54 |
| YMR227C   | TAF7   | TAF67 TafII67    | iYMR227C     | #N/A | #N/A |
| YMR228W   | MTF1   |                  | 0 iYMR227C   | #N/A | #N/A |
| YMR229C   | RRP5   |                  | 0 iYMR229C   | #N/A | #N/A |
| YMR230W   | RPS10B |                  | 0 iYMR229C   | #N/A | #N/A |
| YMR231W   | PEP5   | END1 VAM1 VPL9 V | iYMR230W     | 0.68 | 0.24 |
| YMR232W   | FUS2   |                  | 0 iYMR231W   | 0.77 | 0.29 |
| YMR233W   | TRI1   | #N/A             | iYMR232W     | 1.36 | 0.60 |
| YMR234W   | RNH1   |                  | 0 iYMR233W   | 1.70 | 0.75 |
| YMR235C   | RNA1   |                  | 0 iYMR235C   | 2.65 | 0.95 |
| YMR236W   | TAF9   | TAF17 TafII17    | iYMR235C     | 2.65 | 0.95 |
| YMR237W   | 0      |                  | 0 iYMR236W   | 2.53 | 0.93 |
| YMR238W   | DFG5   |                  | 0 iYMR237W   | 2.16 | 0.89 |
| YMR239C   | RNT1   |                  | 0 iYMR239C   | 1.83 | 0.74 |
| YMR240C   | CUS1   |                  | 0 iYMR240C   | 1.37 | 0.61 |
| YMR241W   | YHM2   |                  | 0 iYMR240C   | 1.37 | 0.61 |
| YMR242C   | RPL20A | RPL18A2          | iYMR242C     | 0.31 | 0.03 |
| YMR243C   | ZRC1   | OSR1             | iYMR243C     | 0.83 | 0.33 |
| YMR244C-A | 0      | #N/A             | iYMR245W     | 0.58 | 0.17 |
| YMR244W   | 0      | #N/A             | iYMR243C     | 0.83 | 0.33 |
| YMR245W   | 0      | #N/A             | iYMR244W     | 0.71 | 0.26 |
| YMR246W   | FAA4   |                  | 0 iYMR245W   | 0.58 | 0.17 |
| YMR247C   | 0      | #N/A             | iYMR247C     | 1.21 | 0.54 |
| YMR250W   | GAD1   |                  | 0 iYMRWdelta | #N/A | #N/A |
| YMR251W   | 0      | #N/A             | iYMR250W     | 0.89 | 0.37 |
| YMR251W-A | HOR7   |                  | 0 iYMR251W   | 0.85 | 0.34 |
| YMR252C   | 0      | #N/A             | iYMR252C     | #N/A | #N/A |
| YMR253C   | 0      | #N/A             | iYMR253C     | 1.57 | 0.69 |
| YMR254C   | 0      | #N/A             | iYMR254C     | #N/A | #N/A |
| YMR255W   | GFD1   |                  | 0 iYMR254C   | #N/A | #N/A |
| YMR256C   | COX7   |                  | 0 iYMR256C   | #N/A | #N/A |
| YMR257C   | PET111 |                  | 0 iYMR257C   | 2.17 | 0.89 |
| YMR258C   | 0      | #N/A             | iYMR258C     | 1.78 | 0.78 |

|           |        |                |             |      |      |
|-----------|--------|----------------|-------------|------|------|
| YMR259C   | 0      | #N/A           | iYMR259C    | 1.86 | 0.74 |
| YMR260C   | TIF11  |                | 0 iYMR260C  | 1.08 | 0.46 |
| YMR261C   | TPS3   |                | 0 iYMR261C  | #N/A | #N/A |
| YMR262W   | 0      | #N/A           | iYMR261C    | #N/A | #N/A |
| YMR263W   | SAP30  |                | 0 iYMR262W  | #N/A | #N/A |
| YMR264W   | CUE1   |                | 0 iYMR263W  | 2.12 | 0.87 |
| YMR265C   | 0      | #N/A           | iYMR265C    | 1.09 | 0.47 |
| YMR266W   | RSN1   |                | 0 iYMR265C  | 1.09 | 0.47 |
| YMR267W   | PPA2   | IPP2           | iYMR266W    | 1.53 | 0.69 |
| YMR268C   | PRP24  |                | 0 iYMR268C  | 1.42 | 0.64 |
| YMR269W   | 0      | #N/A           | iYMR268C    | 1.42 | 0.64 |
| YMR270C   | RRN9   |                | 0 iYMR270C  | 1.69 | 0.75 |
| YMR271C   | URA10  |                | 0 iYMR271C  | 1.24 | 0.55 |
| YMR272C   | SCS7   | FAH1           | iYMR272C    | 0.93 | 0.39 |
| YMR273C   | ZDS1   | CES1 CKM1 NRC1 | iYMR273C    | 1.35 | 0.60 |
| YMR274C   | RCE1   |                | 0 iYMR274C  | #N/A | #N/A |
| YMR275C   | BUL1   | DAG1 RDS1 SMM2 | iYMR275C    | 2.49 | 0.94 |
| YMR276W   | DSK2   |                | 0 iYMR275C  | 2.49 | 0.94 |
| YMR277W   | FCP1   |                | 0 iYMR276W  | #N/A | #N/A |
| YMR278W   | 0      | #N/A           | iYMR277W    | 1.25 | 0.56 |
| YMR279C   | 0      | #N/A           | iYMR279C    | 0.38 | 0.05 |
| YMR280C   | CAT8   | DIL1 MSP8      | iYMR280C    | 1.43 | 0.65 |
| YMR281W   | GPI12  |                | 0 iYMR280C  | 1.43 | 0.65 |
| YMR282C   | AEP2   | ATP13          | iYMR282C    | 2.88 | 0.96 |
| YMR283C   | RIT1   |                | 0 iYMR283C  | 2.57 | 0.95 |
| YMR284W   | YKU70  | HDF1 NES24     | itY(GUA)M2  | 1.09 | 0.47 |
| YMR285C   | NGL2   |                | 0 iYMR285C  | 3.48 | 0.99 |
| YMR286W   | MRPL33 |                | 0 iYMR285C  | 3.48 | 0.99 |
| YMR287C   | MSU1   | DSS1           | iYMR287C    | 1.90 | 0.83 |
| YMR288W   | HSH155 |                | 0 iYMR287C  | 1.90 | 0.83 |
| YMR289W   | 0      |                | 0 iYMR288W  | 1.35 | 0.60 |
| YMR290C   | HAS1   |                | 0 iYMR290W- | 0.39 | 0.06 |
| YMR290W-A | 0      | #N/A           | iYMR289W    | 0.58 | 0.17 |
| YMR291W   | 0      | #N/A           | iYMR290W-   | 0.39 | 0.06 |
| YMR292W   | GOT1   |                | 0 iYMR291W  | 2.34 | 0.92 |
| YMR293C   | 0      | #N/A           | iYMR293C    | 1.23 | 0.55 |
| YMR294W   | JNM1   | INS1 PAC3      | iYMR293C    | 1.23 | 0.55 |
| YMR294W-A | 0      | #N/A           | iYMR294W    | #N/A | #N/A |
| YMR295C   | 0      | #N/A           | iYMR295C    | #N/A | #N/A |
| YMR296C   | LCB1   | END8 TSC2      | iYMR296C    | 1.16 | 0.51 |
| YMR297W   | PRC1   | LBC1           | iYMR296C    | 1.16 | 0.51 |
| YMR298W   | 0      | #N/A           | iYMR297W    | 1.92 | 0.81 |
| YMR299C   | 0      |                | 0 iYMR299C  | #N/A | #N/A |
| YMR300C   | ADE4   |                | 0 iYMR300C  | 1.24 | 0.55 |
| YMR301C   | ATM1   |                | 0 iYMR301C  | 1.30 | 0.58 |
| YMR302C   | PRP12  | RNA12 YME2     | iYMR302C    | 2.80 | 0.97 |
| YMR303C   | ADH2   | ADR2           | iYMR303C    | 2.26 | 0.91 |
| YMR304C-A | 0      | #N/A           | iYMR305C    | 0.75 | 0.28 |
| YMR304W   | UBP15  |                | 0 iYMR303C  | 2.26 | 0.91 |
| YMR305C   | SCW10  |                | 0 iYMR305C  | 0.75 | 0.28 |
| YMR306C-A | 0      | #N/A           | iYMR306C-A  | 0.47 | 0.11 |

|           |       |                    |   |            |      |      |
|-----------|-------|--------------------|---|------------|------|------|
| YMR306W   | FKS3  |                    | 0 | iYMR305C   | 0.75 | 0.28 |
| YMR308C   | PSE1  | KAP121             |   | iYMR308C   | 1.23 | 0.54 |
| YMR309C   | NIP1  |                    | 0 | iYMR309C   | 1.07 | 0.47 |
| YMR310C   |       | #N/A               | 0 | iYMR310C   | 2.88 | 0.95 |
| YMR311C   | GLC8  |                    | 0 | iYMR311C   | 1.60 | 0.72 |
| YMR312W   | ELP6  | HAP3 TOT6          |   | iYMR311C   | 1.60 | 0.72 |
| YMR313C   |       |                    | 0 | iYMR313C   | 2.48 | 0.91 |
| YMR314W   | PRE5  |                    | 0 | iYMR313C   | 2.48 | 0.91 |
| YMR315W   |       | #N/A               | 0 | iYMR314W   | 1.03 | 0.44 |
| YMR316C-A |       | #N/A               | 0 | iYMR316C-A | 1.05 | 0.45 |
| YMR316C-B |       | #N/A               | 0 | iYMR317W   | 1.39 | 0.62 |
| YMR316W   | DIA1  |                    | 0 | iYMR315W   | 1.71 | 0.76 |
| YMR317W   |       | #N/A               | 0 | iYMR316C-A | 1.05 | 0.45 |
| YMR318C   | ADH6  | ADHVI              |   | iYMR318C   | 1.07 | 0.46 |
| YMR319C   | FET4  |                    | 0 | iYMR319C-C | 0.68 | 0.24 |
| YMR320W   |       | #N/A               | 0 | iYMR319C-1 | 0.58 | 0.18 |
| YMR321C   |       | #N/A               | 0 | iYMR321C   | 1.19 | 0.52 |
| YMR322C   |       | HSP34              | 0 | iYMR322C   | 1.66 | 0.74 |
| YMR323W   |       | #N/A               | 0 | iYMR322C   | 1.66 | 0.74 |
| YMR324C   |       | #N/A               | 0 | iYMR324C   | 0.76 | 0.29 |
| YMR325W   |       | #N/A               | 0 | iYMR324C   | 0.76 | 0.29 |
| YMR326C   |       | #N/A               | 0 | #N/A       | #N/A | #N/A |
| YNL001W   | DOM34 |                    | 0 | iYNL002C   | 0.97 | 0.41 |
| YNL002C   | RLP7  | RPL7               |   | iYNL002C   | 0.97 | 0.41 |
| YNL003C   | PET8  | SAM5               |   | iYNL003C   | 0.84 | 0.34 |
| YNL004W   | HRB1  | TOM34              |   | iYNL005C   | 1.47 | 0.67 |
| YNL005C   | MRP7  | MRPL2              |   | iYNL005C   | 1.47 | 0.67 |
| YNL006W   | LST8  |                    | 0 | iYNL007C   | 1.42 | 0.63 |
| YNL007C   | SIS1  |                    | 0 | iYNL007C   | 1.42 | 0.63 |
| YNL008C   | ASI3  |                    | 0 | iYNL008C   | #N/A | #N/A |
| YNL009W   | IDP3  |                    | 0 | iYNL010W   | #N/A | #N/A |
| YNL010W   |       | #N/A               | 0 | iYNL011C   | 1.66 | 0.74 |
| YNL011C   |       | #N/A               | 0 | iYNL011C   | 1.66 | 0.74 |
| YNL012W   | SPO1  |                    | 0 | iYNL013C   | 0.71 | 0.26 |
| YNL013C   |       | #N/A               | 0 | iYNL013C   | 0.71 | 0.26 |
| YNL014W   | HEF3  | EF-3 ZRG7          |   | iYNL015W   | #N/A | #N/A |
| YNL015W   | PBI2  | I2B IB2 LMA1       |   | iYNL016W   | 0.82 | 0.33 |
| YNL016W   | PUB1  | RNP1               |   | iti(AAU)N2 | 0.65 | 0.22 |
| YNL017C   |       | #N/A               | 0 | iti(AAU)N2 | 0.65 | 0.22 |
| YNL018C   |       | #N/A               | 0 | iYNL018C   | 0.52 | 0.13 |
| YNL019C   |       | #N/A               | 0 | iYNL019C   | 0.64 | 0.21 |
| YNL020C   | ARK1  |                    | 0 | iYNL020C   | 1.72 | 0.76 |
| YNL021W   | HDA1  |                    | 0 | iYNL022C   | 1.33 | 0.59 |
| YNL022C   |       | #N/A               | 0 | iYNL022C   | 1.33 | 0.59 |
| YNL023C   | FAP1  |                    | 0 | iYNL023C   | 1.40 | 0.63 |
| YNL024C   |       | #N/A               | 0 | iYNL024C   | #N/A | #N/A |
| YNL025C   | SSN8  | GIG3 NUT9 RYE2 Sli | 0 | iYNL025C   | 0.64 | 0.21 |
| YNL026W   |       | OMP85 TOB55        | 0 | iYNL027W   | 1.86 | 0.82 |
| YNL027W   | CRZ1  | HAL8 TCN1          |   | iYNL028W   | 2.72 | 0.96 |
| YNL028W   |       | #N/A               | 0 | iYNL030W   | #N/A | #N/A |
| YNL029C   | KTR5  |                    | 0 | iYNL028W   | 2.72 | 0.96 |



|         |        |             |   |            |      |      |
|---------|--------|-------------|---|------------|------|------|
| YNL030W | HHF2   |             | 0 | iYNL031C   | 0.48 | 0.11 |
| YNL031C | HHT2   |             | 0 | iYNL031C   | 0.48 | 0.11 |
| YNL032W | SIW14  |             | 0 | iYNL033W   | 1.37 | 0.62 |
| YNL033W | 0      | #N/A        |   | iYNL034W   | 0.62 | 0.20 |
| YNL034W | 0      | #N/A        |   | itl(AAU)N1 | 0.53 | 0.14 |
| YNL035C | 0      | #N/A        |   | iYNL035C   | 1.05 | 0.45 |
| YNL036W | NCE103 | NCE3        |   | iYNL037C   | 0.66 | 0.22 |
| YNL037C | IDH1   |             | 0 | iYNL037C   | 0.66 | 0.22 |
| YNL038W | GPI15  |             | 0 | iYNL039W   | #N/A | #N/A |
| YNL039W | BDP1   | TFC5        |   | iYNL040W   | 1.97 | 0.83 |
| YNL040W | 0      | #N/A        |   | iYNL041C   | 1.53 | 0.68 |
| YNL041C | COD2   | COD2        |   | iYNL041C   | 1.53 | 0.68 |
| YNL042W | BOP3   |             | 0 | itP(UGG)N1 | 0.88 | 0.36 |
| YNL043C | 0      | #N/A        |   | iYNL043C   | 1.38 | 0.62 |
| YNL044W | YIP3   |             | 0 | iYNL045W   | 1.87 | 0.80 |
| YNL045W | 0      | #N/A        |   | iYNL046W   | 1.50 | 0.67 |
| YNL046W | 0      | #N/A        |   | iYNL047C   | 2.30 | 0.91 |
| YNL047C | 0      | LIT1        |   | iYNL047C   | 2.30 | 0.91 |
| YNL048W | ALG11  |             | 0 | iYNL049C   | 2.40 | 0.92 |
| YNL049C | SFB2   |             | 0 | iYNL049C   | 2.40 | 0.92 |
| YNL050C | 0      | #N/A        |   | iYNL050C   | #N/A | #N/A |
| YNL051W | COD4   | API4 COD4   |   | iYNL052W   | 1.41 | 0.63 |
| YNL052W | COX5A  |             | 0 | iYNL053W   | 1.39 | 0.61 |
| YNL053W | MSG5   |             | 0 | iYNL054W   | #N/A | #N/A |
| YNL054W | VAC7   |             | 0 | iYNLWdelta | 2.89 | 0.97 |
| YNL055C | POR1   | OMP2 YVDAC1 |   | iYNL055C   | 0.86 | 0.35 |
| YNL056W | 0      | #N/A        |   | iYNL057W   | 1.04 | 0.41 |
| YNL057W | 0      | #N/A        |   | iYNL059C   | 1.91 | 0.82 |
| YNL058C | 0      | #N/A        |   | iYNL057W   | 1.04 | 0.41 |
| YNL059C | ARP5   |             | 0 | iYNL059C   | 1.91 | 0.82 |
| YNL061W | NOP2   | YNA1        |   | iYNL062C   | 2.28 | 0.91 |
| YNL062C | GCD10  |             | 0 | iYNL062C   | 2.28 | 0.91 |
| YNL063W | 0      | #N/A        |   | iYNL064C   | 1.12 | 0.49 |
| YNL064C | YDJ1   | HSP40 MAS5  |   | iYNL064C   | 1.12 | 0.49 |
| YNL065W | AQR1   |             | 0 | iYNL066W   | 0.29 | 0.03 |
| YNL066W | SUN4   | SCW3        |   | iYNL067W   | 0.32 | 0.03 |
| YNL067W | RPL9B  |             | 0 | iYNL068C   | 0.44 | 0.09 |
| YNL068C | FKH2   |             | 0 | iYNL068C   | 0.44 | 0.09 |
| YNL069C | RPL16B | RP23        |   | iYNL069C   | 0.45 | 0.09 |
| YNL070W | TOM7   | MOM7 YOK22  |   | iYNL071W   | #N/A | #N/A |
| YNL071W | LAT1   | ODP2 PDA2   |   | iYNL072W   | 1.65 | 0.71 |
| YNL072W | RNH35  | RNH35 Rnh2A |   | iYNL073W   | 1.74 | 0.77 |
| YNL073W | MSK1   |             | 0 | iYNL074C   | 1.31 | 0.58 |
| YNL074C | MLF3   | YMK1        |   | iYNL074C   | 1.31 | 0.58 |
| YNL075W | IMP4   |             | 0 | iYNL076W   | 2.05 | 0.86 |
| YNL076W | MKS1   | LYS80       |   | iYNL077W   | 2.44 | 0.93 |
| YNL077W | 0      |             | 0 | iYNL078W   | 1.31 | 0.59 |
| YNL078W | NIS1   | JIP1        |   | iYNL079C   | 0.87 | 0.36 |
| YNL079C | TPM1   | tropomyosin |   | iYNL079C   | 0.87 | 0.36 |
| YNL080C | 0      | #N/A        |   | iYNL080C   | 1.16 | 0.52 |
| YNL081C | 0      |             | 0 | iYNL081C   | 3.21 | 0.98 |

|         |       |                  |      |             |      |      |
|---------|-------|------------------|------|-------------|------|------|
| YNL082W | PMS1  |                  | 0    | iYNL083W    | 0.74 | 0.28 |
| YNL083W |       | 0                | #N/A | iYNL084C    | 2.23 | 0.90 |
| YNL084C | END3  |                  |      | 0 iYNL084C  | 2.23 | 0.90 |
| YNL085W | MKT1  |                  |      | 0 iYNL086W  | 2.86 | 0.95 |
| YNL086W |       | 0                | #N/A | iYNL087W    | #N/A | #N/A |
| YNL087W |       | 0                |      | 0 iYNL088W  | #N/A | #N/A |
| YNL088W | TOP2  | TOR3 TRF3        |      | iYNL089C    | 1.42 | 0.64 |
| YNL089C |       | 0                | #N/A | iYNL089C    | 1.42 | 0.64 |
| YNL090W | RHO2  |                  |      | 0 iYNL091W  | 1.84 | 0.80 |
| YNL091W | NST1  |                  |      | 0 iYNL092W  | 2.16 | 0.89 |
| YNL092W |       | 0                | #N/A | iYNL093W    | 2.77 | 0.96 |
| YNL093W | YPT53 |                  |      | 0 iYNL094W  | 0.95 | 0.40 |
| YNL094W | APP1  |                  |      | 0 iYNL095C  | 2.02 | 0.86 |
| YNL095C |       | 0                | #N/A | iYNL095C    | 2.02 | 0.86 |
| YNL096C | RPS7B |                  |      | 0 iYNL096C  | 0.32 | 0.03 |
| YNL097C | PHO23 |                  |      | 0 iYNL097C  | 1.20 | 0.53 |
| YNL098C | RAS2  | CTN5 CYR3 GLC5 T |      | iYNL098C    | 0.54 | 0.15 |
| YNL099C | OCA1  |                  |      | 0 iYNL099C  | 1.55 | 0.70 |
| YNL100W |       | 0                | #N/A | iYNL101W    | 1.55 | 0.70 |
| YNL101W |       | 0                |      | 0 iYNL102W  | 1.93 | 0.82 |
| YNL102W | POL1  | CDC17 CRT5 HPR3  |      | iYNL103W    | #N/A | #N/A |
| YNL103W | MET4  |                  |      | 0 iYNL104C  | 0.99 | 0.42 |
| YNL104C | LEU4  |                  |      | 0 iYNL104C  | 0.99 | 0.42 |
| YNL105W |       | 0                | #N/A | iYNL107W    | 0.64 | 0.21 |
| YNL106C | INP52 | SJL2             |      | iYNL105W    | 2.07 | 0.84 |
| YNL107W | YAF9  |                  |      | 0 iYNL108C  | 2.05 | 0.86 |
| YNL108C |       | 0                | #N/A | iYNL108C    | 2.05 | 0.86 |
| YNL109W |       | 0                | #N/A | iYNL110C    | #N/A | #N/A |
| YNL110C | NOP15 |                  |      | 0 iYNL110C  | #N/A | #N/A |
| YNL111C | CYB5  |                  |      | 0 iYNL111C  | 0.86 | 0.35 |
| YNL112W | DBP2  |                  |      | 0 iYNL113W  | 1.24 | 0.54 |
| YNL113W | RPC19 |                  |      | 0 iYNL115C  | 2.07 | 0.86 |
| YNL114C |       | 0                | #N/A | iYNL113W    | 1.24 | 0.54 |
| YNL115C |       | 0                | #N/A | iYNL115C    | 2.07 | 0.86 |
| YNL116W |       | 0                |      | 0 iYNL117W  | 3.79 | 0.99 |
| YNL117W | MLS1  |                  |      | 0 iYNL118C  | 2.05 | 0.86 |
| YNL118C | DCP2  | PSU1             |      | iYNL118C    | 2.05 | 0.86 |
| YNL119W |       | 0                |      | 0 iYNL121C  | 2.12 | 0.88 |
| YNL120C |       | 0                | #N/A | iYNL119W    | #N/A | #N/A |
| YNL121C | TOM70 | MAS70 MOM72 OMF  |      | iYNL121C    | 2.12 | 0.88 |
| YNL122C |       | 0                | #N/A | iYNL122C    | #N/A | #N/A |
| YNL123W |       | 0                | #N/A | iYNL124W    | 0.86 | 0.35 |
| YNL124W | NAF1  |                  |      | 0 iYNL125C  | 2.01 | 0.84 |
| YNL125C | ESBP6 | MCH3             |      | iYNL125C    | 2.01 | 0.84 |
| YNL126W | SPC98 |                  |      | 0 iYNL127W  | 1.57 | 0.70 |
| YNL127W |       | 0                |      | 0 iYNL128W  | 1.61 | 0.71 |
| YNL128W | TEP1  |                  |      | 0 iYNL129W  | #N/A | #N/A |
| YNL129W |       | 0                |      | 0 iYNL130C  | 1.56 | 0.70 |
| YNL130C | CPT1  |                  |      | 0 iYNL130C  | 1.56 | 0.70 |
| YNL131W | TOM22 | MAS17 MAS22 MON  |      | iYNL132W    | 2.15 | 0.89 |
| YNL132W | KRE33 |                  |      | 0 itF(GAA)N | 2.21 | 0.89 |



|         |        |                 |   |            |      |      |
|---------|--------|-----------------|---|------------|------|------|
| YNL133C | FYV6   |                 | 0 | iYNL133C   | 2.01 | 0.84 |
| YNL134C | 0      | #N/A            |   | iYNL134C   | 1.31 | 0.59 |
| YNL135C | FPR1   | FKB1 RBP1       |   | iYNL135C   | 1.37 | 0.62 |
| YNL136W | 0      |                 | 0 | iYNL137C   | 2.09 | 0.87 |
| YNL137C | NAM9   | MNA6            |   | iYNL137C   | 2.09 | 0.87 |
| YNL138W | SRV2   | CAP             |   | iYNL139C   | 2.17 | 0.89 |
| YNL139C | RLR1   | LDB5 THO2 ZRG13 |   | iYNL139C   | 2.17 | 0.89 |
| YNL140C | 0      | #N/A            |   | iYNL139C   | 2.17 | 0.89 |
| YNL141W | AAH1   |                 | 0 | iYNL142W   | 1.69 | 0.75 |
| YNL142W | MEP2   |                 | 0 | iYNL143C   | 1.21 | 0.54 |
| YNL143C | 0      | #N/A            |   | iYNL143C   | 1.21 | 0.54 |
| YNL144C | 0      | #N/A            |   | iYNL144C-0 | 0.73 | 0.27 |
| YNL145W | MFA2   |                 | 0 | iYNL146W   | 1.13 | 0.49 |
| YNL146W | 0      | #N/A            |   | iYNL147W   | 2.42 | 0.93 |
| YNL147W | LSM7   |                 | 0 | iYNL148C   | 2.29 | 0.92 |
| YNL148C | ALF1   |                 | 0 | iYNL148C   | 2.29 | 0.92 |
| YNL149C | 0      | #N/A            |   | iYNL149C   | 1.09 | 0.47 |
| YNL150W | 0      | #N/A            |   | iYNL151C   | 2.70 | 0.96 |
| YNL151C | RPC31  | ACP2 RPC8       |   | iYNL151C   | 2.70 | 0.96 |
| YNL152W | 0      | #N/A            |   | iYNL153C   | 2.28 | 0.88 |
| YNL153C | GIM3   | PFD4            |   | iYNL153C   | 2.28 | 0.88 |
| YNL154C | YCK2   |                 | 0 | iYNL154C   | 0.87 | 0.36 |
| YNL155W | 0      | #N/A            |   | iYNL156C   | 1.45 | 0.65 |
| YNL156C | 0      |                 | 0 | iYNL156C   | 1.45 | 0.65 |
| YNL157W | 0      | #N/A            |   | iYNL158W   | 1.58 | 0.70 |
| YNL158W | 0      | #N/A            |   | iYNL159C   | 3.01 | 0.98 |
| YNL159C | ASI2   |                 | 0 | iYNL159C   | 3.01 | 0.98 |
| YNL160W | YGP1   |                 | 0 | iYNL161W-1 | 0.75 | 0.28 |
| YNL161W | CBK1   |                 | 0 | iYNL162W   | 1.80 | 0.79 |
| YNL162W | RPL42A |                 | 0 | iYNL163C   | #N/A | #N/A |
| YNL163C | RIA1   | EFL1            |   | iYNL163C   | #N/A | #N/A |
| YNL164C | IBD2   |                 | 0 | iYNL164C   | 3.31 | 0.99 |
| YNL165W | 0      | #N/A            |   | iYNL166C   | 1.77 | 0.78 |
| YNL166C | BNI5   |                 | 0 | iYNL166C   | 1.77 | 0.78 |
| YNL167C | SKO1   | ACR1            |   | iYNL167C   | 1.67 | 0.75 |
| YNL168C | 0      |                 | 0 | iYNL168C   | 1.61 | 0.72 |
| YNL169C | PSD1   |                 | 0 | iYNL169C   | 1.29 | 0.58 |
| YNL170W | 0      | #N/A            |   | iYNL173C   | 1.57 | 0.70 |
| YNL171C | 0      | #N/A            |   | iYNL169C   | 1.29 | 0.58 |
| YNL172W | APC1   |                 | 0 | iYNL173C   | 1.57 | 0.70 |
| YNL173C | MDG1   |                 | 0 | iYNL173C   | 1.57 | 0.70 |
| YNL174W | 0      | #N/A            |   | iYNL176C   | 1.40 | 0.63 |
| YNL175C | NOP13  |                 | 0 | iYNL174W   | 1.31 | 0.58 |
| YNL176C | 0      | #N/A            |   | iYNL176C   | 1.40 | 0.63 |
| YNL177C | 0      |                 | 0 | iYNL177C   | 1.16 | 0.51 |
| YNL178W | RPS3   | SUF14           |   | iYNL179C-1 | 0.56 | 0.16 |
| YNL179C | 0      |                 | 0 | iYNL179C-0 | #N/A | #N/A |
| YNL180C | RHO5   |                 | 0 | iYNL179C-0 | #N/A | #N/A |
| YNL181W | 0      | #N/A            |   | iYNL182C   | 2.77 | 0.96 |
| YNL182C | 0      |                 | 0 | iYNL182C   | 2.77 | 0.96 |
| YNL183C | NPR1   |                 | 0 | iYNL183C   | 1.81 | 0.79 |

|         |        |                |            |      |      |
|---------|--------|----------------|------------|------|------|
| YNL184C | 0      | #N/A           | iYNL184C   | #N/A | #N/A |
| YNL185C | MRPL19 |                | 0 iYNL184C | #N/A | #N/A |
| YNL186W | UBP10  | DOT4           | iYNL187W   | 0.52 | 0.14 |
| YNL187W | 0      | #N/A           | iYNL188W   | 1.82 | 0.79 |
| YNL188W | KAR1   |                | 0 iYNL189W | 0.69 | 0.25 |
| YNL189W | SRP1   | KAP60 SCM1     | iYNL190W   | #N/A | #N/A |
| YNL190W | 0      | #N/A           | iYNL191W   | 0.37 | 0.05 |
| YNL191W | 0      | #N/A           | iYNL192W   | 1.01 | 0.43 |
| YNL192W | CHS1   | USA4           | iYNL193W   | #N/A | #N/A |
| YNL193W | 0      | #N/A           | iYNL194C   | 1.87 | 0.81 |
| YNL194C | 0      | #N/A           | iYNL194C   | 1.87 | 0.81 |
| YNL195C | 0      | #N/A           | iYNL195C   | 1.43 | 0.64 |
| YNL196C | SLZ1   | #N/A           | iYNL196C   | 1.04 | 0.44 |
| YNL197C | WHI3   |                | 0 iYNL197C | 1.85 | 0.81 |
| YNL198C | 0      | #N/A           | iYNL198C   | 0.53 | 0.14 |
| YNL199C | GCR2   |                | 0 iYNL198C | 0.53 | 0.14 |
| YNL200C | 0      | #N/A           | iYNL200C   | 1.45 | 0.65 |
| YNL201C | 0      |                | 0 iYNL201C | 1.07 | 0.46 |
| YNL202W | SPS19  | SPX19          | iYNL204C   | 0.71 | 0.26 |
| YNL203C | 0      | #N/A           | iYNL202W   | #N/A | #N/A |
| YNL204C | SPS18  | SPX18          | iYNL204C   | 0.71 | 0.26 |
| YNL205C | 0      | #N/A           | iYNL204C   | 0.71 | 0.26 |
| YNL206C | RTT106 |                | 0 iYNL204C | 0.71 | 0.26 |
| YNL207W | RIO2   |                | 0 iYNL208W | #N/A | #N/A |
| YNL208W | 0      | #N/A           | iYNL209W   | 0.78 | 0.30 |
| YNL209W | SSB2   |                | 0 iYNL210W | 1.22 | 0.54 |
| YNL210W | MER1   |                | 0 iYNL211C | 0.81 | 0.32 |
| YNL211C | 0      | #N/A           | iYNL211C   | 0.81 | 0.32 |
| YNL212W | VID27  |                | 0 iYNL213C | 3.02 | 0.98 |
| YNL213C | 0      | #N/A           | iYNL213C   | 3.02 | 0.98 |
| YNL214W | PEX17  | PAS9           | iYNL215W   | 1.67 | 0.74 |
| YNL215W | IES2   |                | 0 iYNL216W | 1.55 | 0.68 |
| YNL216W | RAP1   | GRF1 TBA1 TUF1 | iYNL217W   | #N/A | #N/A |
| YNL217W | 0      | #N/A           | iYNL218W   | #N/A | #N/A |
| YNL218W | MGS1   |                | 0 iYNL219C | 1.79 | 0.79 |
| YNL219C | ALG9   |                | 0 iYNL219C | 1.79 | 0.79 |
| YNL220W | ADE12  | BRA9           | iYNL221C   | 0.83 | 0.33 |
| YNL221C | POP1   |                | 0 iYNL221C | 0.83 | 0.33 |
| YNL222W | SSU72  |                | 0 iYNL223W | 1.95 | 0.84 |
| YNL223W | AUT2   | APG4 AUT2      | iYNL224C   | 2.09 | 0.86 |
| YNL224C | 0      | #N/A           | iYNL224C   | 2.09 | 0.86 |
| YNL225C | CNM67  |                | 0 iYNL225C | #N/A | #N/A |
| YNL226W | 0      | #N/A           | iYNL229C   | 1.80 | 0.78 |
| YNL227C | 0      |                | 0 iYNL226W | 0.70 | 0.25 |
| YNL228W | 0      | #N/A           | iYNL229C   | 1.80 | 0.78 |
| YNL229C | URE2   | [URE3]         | iYNL229C   | 1.80 | 0.78 |
| YNL230C | ELA1   |                | 0 iYNL230C | 1.06 | 0.46 |
| YNL231C | PDR16  | SFH3           | iYNL231C   | 0.43 | 0.08 |
| YNL232W | CSL4   | SKI4           | iYNL233W   | 1.42 | 0.64 |
| YNL233W | BNI4   |                | 0 iYNL234W | 1.21 | 0.53 |
| YNL234W | 0      | #N/A           | iYNL235C   | 2.95 | 0.97 |

|         |        |                 |            |      |      |
|---------|--------|-----------------|------------|------|------|
| YNL235C | 0      | #N/A            | iYNL235C   | 2.95 | 0.97 |
| YNL236W | SIN4   | BEL2 GAL22 RYE1 | iYNL237W   | 1.38 | 0.62 |
| YNL237W | YTP1   |                 | 0 iYNL238W | 0.76 | 0.29 |
| YNL238W | KEX2   | QDS1 SRB1 VMA45 | iYNL239W   | 1.70 | 0.75 |
| YNL239W | LAP3   | BLH1 GAL6 YCP1  | iYNL240C   | 2.68 | 0.95 |
| YNL240C | NAR1   |                 | 0 iYNL240C | 2.68 | 0.95 |
| YNL241C | ZWF1   | MET19 POS10     | iYNL241C   | 0.63 | 0.21 |
| YNL242W | APG2   | APG2 AUT8 SPO72 | iYNL243W   | 2.03 | 0.86 |
| YNL243W | SLA2   | END4 MOP2       | iYNL244C   | 0.85 | 0.34 |
| YNL244C | SUI1   | MOF2 RFR1       | iYNL244C   | 0.85 | 0.34 |
| YNL245C | CWC25  |                 | 0 iYNL245C | 0.75 | 0.28 |
| YNL246W | VPS75  |                 | 0 iYNL247W | 1.51 | 0.66 |
| YNL247W | 0      | #N/A            | iYNL248C   | 1.98 | 0.85 |
| YNL248C | RPA49  |                 | 0 iYNL248C | 1.98 | 0.85 |
| YNL249C | MPA43  |                 | 0 iYNL249C | 1.16 | 0.50 |
| YNL250W | RAD50  |                 | 0 iYNL251C | 1.56 | 0.70 |
| YNL251C | NRD1   |                 | 0 iYNL251C | 1.56 | 0.70 |
| YNL252C | MRPL17 | MRPL30          | iYNL252C   | #N/A | #N/A |
| YNL253W | 0      |                 | 0 iYNL254C | 1.16 | 0.51 |
| YNL254C | 0      | #N/A            | iYNL254C   | 1.16 | 0.51 |
| YNL255C | GIS2   |                 | 0 iYNL255C | 1.38 | 0.62 |
| YNL256W | FOL1   |                 | 0 iYNL257C | 2.19 | 0.86 |
| YNL257C | SIP3   |                 | 0 iYNL257C | 2.19 | 0.86 |
| YNL258C | DSL1   |                 | 0 iYNL258C | 2.82 | 0.76 |
| YNL259C | ATX1   |                 | 0 iYNL259C | 0.85 | 0.34 |
| YNL260C | 0      | #N/A            | iYNL260C   | 0.49 | 0.13 |
| YNL261W | ORC5   |                 | 0 iYNL262W | 0.83 | 0.33 |
| YNL262W | POL2   | DUN2            | iYNL263C   | 3.27 | 0.98 |
| YNL263C | YIF1   |                 | 0 iYNL263C | 3.27 | 0.98 |
| YNL264C | PDR17  | ISS1 SFH4       | iYNL264C   | 1.71 | 0.73 |
| YNL265C | IST1   |                 | 0 iYNL265C | 1.33 | 0.59 |
| YNL266W | 0      | #N/A            | iYNL267W   | 0.79 | 0.31 |
| YNL267W | PIK1   | PIK120 PIK41    | iYNL268W   | 1.21 | 0.54 |
| YNL268W | LYP1   |                 | 0 iYNL269W | 0.56 | 0.17 |
| YNL269W | 0      |                 | 0 iYNL271C | 2.16 | 0.89 |
| YNL270C | ALP1   | APL1            | iYNL269W   | 0.56 | 0.17 |
| YNL271C | BNI1   | PPF3 SHE5       | iYNL271C   | 2.16 | 0.89 |
| YNL272C | SEC2   |                 | 0 iYNL272C | 1.35 | 0.60 |
| YNL273W | TOF1   |                 | 0 iYNL274C | 3.06 | 0.97 |
| YNL274C | 0      | #N/A            | iYNL274C   | 3.06 | 0.97 |
| YNL275W | 0      | #N/A            | iYNL276C   | #N/A | #N/A |
| YNL276C | 0      | #N/A            | iYNL276C   | #N/A | #N/A |
| YNL277W | MET2   |                 | 0 iYNL278W | 0.74 | 0.28 |
| YNL278W | CAF120 |                 | 0 iYNL279W | 2.29 | 0.91 |
| YNL279W | PRM1   |                 | 0 iYNL280C | 0.79 | 0.30 |
| YNL280C | ERG24  |                 | 0 iYNL280C | 0.79 | 0.30 |
| YNL281W | HCH1   |                 | 0 iYNL282W | 0.84 | 0.33 |
| YNL282W | POP3   |                 | 0 iYNL283C | 0.75 | 0.28 |
| YNL283C | WSC2   | STA3            | iYNL283C   | 0.75 | 0.28 |
| YNL284C | MRPL10 | MRPL18          | iYNL284C   | 1.82 | 0.80 |
| YNL285W | 0      | #N/A            | itG(UCC)N  | 0.68 | 0.24 |

|         |        |                  |   |            |      |      |
|---------|--------|------------------|---|------------|------|------|
| YNL286W | CUS2   |                  | 0 | iYNL287W   | 1.04 | 0.45 |
| YNL287W | SEC21  |                  | 0 | iYNL288W   | 1.34 | 0.60 |
| YNL288W | CAF40  |                  | 0 | iYNL289W-1 | 1.62 | 0.71 |
| YNL289W | PCL1   | HCS26            |   | iYNL290W   | 1.03 | 0.44 |
| YNL290W | RFC3   |                  | 0 | iYNL291C   | #N/A | #N/A |
| YNL291C | MID1   |                  | 0 | iYNL291C   | #N/A | #N/A |
| YNL292W | PUS4   |                  | 0 | iYNL293W   | 1.28 | 0.57 |
| YNL293W | MSB3   | GYP3             |   | iYNL294C   | 1.99 | 0.83 |
| YNL294C | RIM21  | PAL2             |   | iYNL294C   | 1.99 | 0.83 |
| YNL295W | 0      | #N/A             |   | iYNL296W   | 2.53 | 0.94 |
| YNL296W | KRE25  | #N/A             |   | iYNL298W   | #N/A | #N/A |
| YNL297C | MON2   | YSL2             |   | iYNL296W   | 2.53 | 0.94 |
| YNL298W | CLA4   | ERC10            |   | iYNL299W   | 0.83 | 0.33 |
| YNL299W | TRF5   |                  | 0 | iYNL300W   | 1.87 | 0.82 |
| YNL300W | TOS6   | #N/A             |   | iYNL301C   | #N/A | #N/A |
| YNL301C | RPL18B | RP28B            |   | iYNL301C   | #N/A | #N/A |
| YNL302C | RPS19B | RP55B            |   | iYNL302C   | 0.23 | 0.01 |
| YNL303W | 0      | #N/A             |   | iYNL305C   | 2.40 | 0.93 |
| YNL304W | YPT11  |                  | 0 | iYNL305C   | 2.40 | 0.93 |
| YNL305C | 0      | #N/A             |   | iYNL305C   | 2.40 | 0.93 |
| YNL306W | MRPS18 |                  | 0 | iYNL307C   | 2.74 | 0.96 |
| YNL307C | MCK1   | YPK1             |   | iYNL307C   | 2.74 | 0.96 |
| YNL308C | KRI1   |                  | 0 | iYNL308C   | #N/A | #N/A |
| YNL309W | STB1   |                  | 0 | iYNL311C   | 1.50 | 0.67 |
| YNL310C | 0      |                  | 0 | iYNL309W   | 0.52 | 0.14 |
| YNL311C | 0      | #N/A             |   | iYNL311C   | 1.50 | 0.67 |
| YNL312W | RFA2   | BUF1 RPA2        |   | iYNL313C   | #N/A | #N/A |
| YNL313C | 0      | #N/A             |   | iYNL313C   | #N/A | #N/A |
| YNL314W | DAL82  |                  | 0 | iYNL315C   | #N/A | #N/A |
| YNL315C | ATP11  |                  | 0 | iYNL315C   | #N/A | #N/A |
| YNL316C | PHA2   |                  | 0 | iYNL316C   | #N/A | #N/A |
| YNL317W | PFS2   |                  | 0 | iYNL318C   | 1.32 | 0.59 |
| YNL318C | HXT14  |                  | 0 | iYNL318C   | 1.32 | 0.59 |
| YNL318L | #N/A   | #N/A             |   | #N/A       | #N/A | #N/A |
| YNL319W | 0      | #N/A             |   | iYNL320W   | #N/A | #N/A |
| YNL320W | 0      | #N/A             |   | iYNL321W   | 1.82 | 0.80 |
| YNL321W | 0      | #N/A             |   | iYNL322C   | 2.16 | 0.83 |
| YNL322C | KRE1   |                  | 0 | iYNL322C   | 2.16 | 0.83 |
| YNL323W | LEM3   | BRE3 ROS3        |   | iYNL324W   | 2.49 | 0.93 |
| YNL324W | 0      | #N/A             |   | iYNL326C   | 1.02 | 0.44 |
| YNL325C | FIG4   |                  | 0 | iYNL324W   | 2.49 | 0.93 |
| YNL326C | 0      | #N/A             |   | iYNL326C   | 1.02 | 0.44 |
| YNL327W | EGT2   |                  | 0 | iYNL328C   | 1.08 | 0.47 |
| YNL328C | MDJ2   |                  | 0 | iYNL328C   | 1.08 | 0.47 |
| YNL329C | PEX6   | PAS8             |   | iYNL329C   | 1.62 | 0.72 |
| YNL330C | RPD3   | MOF6 REC3 SDI2 S |   | iYNL330C   | 3.30 | 0.99 |
| YNL331C | AAD14  |                  | 0 | iYNL331C   | 1.42 | 0.64 |
| YNL332W | THI12  |                  | 0 | iYNL333W   | 2.67 | 0.95 |
| YNL333W | SNZ2   |                  | 0 | iYNL334C   | 2.13 | 0.89 |
| YNL334C | SNO2   |                  | 0 | iYNL334C   | 2.13 | 0.89 |
| YNL335W | 0      | #N/A             |   | iYNL336W-1 | 1.79 | 0.79 |

|         |        |                  |      |            |      |      |
|---------|--------|------------------|------|------------|------|------|
| YNL336W | COS1   |                  | 0    | iYNL337W   | 0.87 | 0.36 |
| YNL337W |        | 0                | #N/A | iYNL338W   | 0.33 | 0.04 |
| YNL338W |        | 0                | #N/A | iYNL339C   | 0.45 | 0.10 |
| YNL339C | YRF1-6 | YRF1             |      | iYNL339C   | 0.45 | 0.10 |
| YNR001C | CIT1   | CS1 LYS6         |      | iYNR001C   | 0.95 | 0.39 |
| YNR002C | FUN34  | ATO2             |      | iYNR002C   | 0.80 | 0.31 |
| YNR003C | RPC34  |                  | 0    | iYNR003C   | 2.05 | 0.82 |
| YNR004W |        | 0                | #N/A | iYNR003C   | 2.05 | 0.82 |
| YNR005C |        | 0                | #N/A | iYNR006W   | 0.57 | 0.18 |
| YNR006W | VPS27  | DID7 GRD11 SSV17 |      | iYNR004W   | 1.40 | 0.63 |
| YNR007C | AUT1   | APG3 AUT1        |      | iYNR007C   | 1.70 | 0.73 |
| YNR008W | LRO1   |                  | 0    | iYNR007C   | 1.70 | 0.73 |
| YNR009W |        | 0                | #N/A | iYNR008W   | 0.74 | 0.27 |
| YNR010W | CSE2   | MED9             |      | iYNR009W   | 1.36 | 0.61 |
| YNR011C | PRP2   | RNA2             |      | iYNR011C   | 1.87 | 0.81 |
| YNR012W | URK1   |                  | 0    | iYNR011C   | 1.87 | 0.81 |
| YNR013C | PHO91  |                  | 0    | iYNR013C   | 0.47 | 0.11 |
| YNR014W |        | 0                | #N/A | iYNR013C   | 0.47 | 0.11 |
| YNR015W | SMM1   | DUS2             |      | iYNR014W   | 2.28 | 0.91 |
| YNR016C | ACC1   | ABP2 FAS3 MTR7   |      | iYNR016C-0 | 0.36 | 0.05 |
| YNR017W | MAS6   | MIM23 MPI3 TIM23 |      | iYNR016C-1 | 0.37 | 0.06 |
| YNR018W |        | 0                | #N/A | iYNR017W   | 0.31 | 0.03 |
| YNR019W | ARE2   | SAT1             |      | iYNR018W   | #N/A | #N/A |
| YNR020C |        | 0                | #N/A | iYNR020C   | 1.57 | 0.71 |
| YNR021W |        | 0                | #N/A | iYNR020C   | 1.57 | 0.71 |
| YNR022C |        | 0                |      | 0 iYNR022C | 3.06 | 0.98 |
| YNR023W | SNF12  | SWP73            |      | iYNR022C   | 3.06 | 0.98 |
| YNR024W |        | 0                | #N/A | iYNR023W   | 1.74 | 0.77 |
| YNR025C |        | 0                | #N/A | iYNR025C   | 0.71 | 0.26 |
| YNR026C | SEC12  | SED2             |      | iYNR026C   | 2.25 | 0.91 |
| YNR027W | BUD17  |                  | 0    | iYNR026C   | 2.25 | 0.91 |
| YNR028W | CPR8   |                  | 0    | iYNR027W   | 0.56 | 0.16 |
| YNR029C |        | 0                | #N/A | iYNR029C   | 2.28 | 0.90 |
| YNR030W | ECM39  | ALG12            |      | iYNR029C   | 2.28 | 0.90 |
| YNR031C | SSK2   |                  | 0    | iYNR031C   | 3.16 | 0.98 |
| YNR032W | PPG1   |                  | 0    | iYNR031C   | 3.16 | 0.98 |
| YNR033W | ABZ1   |                  | 0    | iYNR032C-A | 1.99 | 0.85 |
| YNR034W | SOL1   |                  | 0    | iYNR033W   | 1.99 | 0.83 |
| YNR035C | ARC35  | END9             |      | iYNR035C   | #N/A | #N/A |
| YNR036C |        | 0                | #N/A | iYNR036C   | 2.39 | 0.93 |
| YNR037C | RSM19  |                  | 0    | iYNR037C   | 2.96 | 0.96 |
| YNR038W | DBP6   |                  | 0    | iYNR037C   | 2.96 | 0.96 |
| YNR039C | ZRG17  |                  | 0    | iYNR039C   | 2.38 | 0.93 |
| YNR040W |        | 0                | #N/A | iYNR039C   | 2.38 | 0.93 |
| YNR041C | COQ2   |                  | 0    | iYNR042W   | 1.35 | 0.60 |
| YNR042W |        | 0                | #N/A | iYNR040W   | 0.47 | 0.10 |
| YNR043W | MVD1   | ERG19            |      | iYNR042W   | 1.35 | 0.60 |
| YNR044W | AGA1   |                  | 0    | iYNR043W   | 1.12 | 0.49 |
| YNR045W | PET494 |                  | 0    | iYNR044W   | #N/A | #N/A |
| YNR046W |        | 0                | #N/A | iYNR045W   | 2.17 | 0.88 |
| YNR047W |        | 0                | #N/A | iYNR046W   | 2.82 | 0.97 |

|         |       |                   |              |      |      |
|---------|-------|-------------------|--------------|------|------|
| YNR048W | 0     | #N/A              | iYNR047W     | 1.32 | 0.58 |
| YNR049C | MSO1  |                   | 0 iYNR049C   | 1.24 | 0.55 |
| YNR050C | LYS9  | LYS13             | iYNR050C     | 0.68 | 0.24 |
| YNR051C | BRE5  |                   | 0 iYNR051C   | 1.22 | 0.54 |
| YNR052C | POP2  | CAF1              | iYNR052C     | #N/A | #N/A |
| YNR053C | NOG2  |                   | 0 iYNR053C   | 0.69 | 0.25 |
| YNR054C | 0     | #N/A              | iYNR054C-0   | 1.36 | 0.61 |
| YNR055C | HOL1  |                   | 0 iYNR055C   | 1.69 | 0.75 |
| YNR056C | BIO5  |                   | 0 iYNR057C   | 2.32 | 0.92 |
| YNR057C | BIO4  |                   | 0 iYNR057C   | 2.32 | 0.92 |
| YNR058W | BIO3  |                   | 0 iYNR057C   | 2.32 | 0.92 |
| YNR059W | MNT4  |                   | 0 iYNR058W   | 2.00 | 0.85 |
| YNR060W | FRE4  |                   | 0 iYNR059W   | 0.76 | 0.29 |
| YNR061C | 0     | #N/A              | iYNR061C     | 1.37 | 0.61 |
| YNR062C | 0     | #N/A              | iYNR062C-0   | 0.58 | 0.18 |
| YNR063W | 0     | #N/A              | iYNR062C-1   | 1.80 | 0.79 |
| YNR064C | 0     | #N/A              | iYNR064C     | 0.67 | 0.23 |
| YNR065C | YSN1  |                   | 0 iYNR066C   | 1.82 | 0.80 |
| YNR066C | 0     | #N/A              | iYNR066C     | 1.82 | 0.80 |
| YNR067C | DSE4  | ENG1              | iYNR067C     | 1.84 | 0.80 |
| YNR068C | 0     | #N/A              | iYNR068C     | #N/A | #N/A |
| YNR069C | 0     |                   | 0 iYNR069C-0 | 1.58 | 0.71 |
| YNR070W | PDR18 | #N/A              | iYNR069C-1   | #N/A | #N/A |
| YNR071C | 0     | #N/A              | iYNR071C     | 0.49 | 0.12 |
| YNR072W | HXT17 |                   | 0 iYNR071C   | 0.49 | 0.12 |
| YNR073C | 0     | #N/A              | iYNR073C     | #N/A | #N/A |
| YNR074C | 0     | #N/A              | iYNR074C     | 1.74 | 0.77 |
| YNR075W | COS10 |                   | 0 iYNR074C   | 1.74 | 0.77 |
| YNR076W | PAU6  |                   | 0 iYNR075W   | 0.78 | 0.30 |
| YNR077C | 0     | #N/A              | #N/A         | #N/A | #N/A |
| YOL001W | PHO80 | AGS3 TUP7 VAC5    | iYOL002C     | 1.26 | 0.56 |
| YOL002C | 0     |                   | 0 iYOL002C   | 1.26 | 0.56 |
| YOL003C | 0     | #N/A              | iYOL003C     | 1.70 | 0.73 |
| YOL004W | SIN3  | CPE1 GAM2 RPD1    | iYOL005C     | 1.53 | 0.69 |
| YOL005C | RPB11 |                   | 0 iYOL005C   | 1.53 | 0.69 |
| YOL006C | TOP1  | MAK1 MAK17        | iYOL006C     | 0.64 | 0.21 |
| YOL007C | 0     | #N/A              | iYOL007C     | 0.83 | 0.34 |
| YOL008W | 0     | #N/A              | iYOL009C     | 1.74 | 0.77 |
| YOL009C | MDM12 |                   | 0 iYOL009C   | 1.74 | 0.77 |
| YOL010W | RCL1  |                   | 0 iYOL011W   | 2.05 | 0.86 |
| YOL011W | PLB3  |                   | 0 iYOL012C   | 0.83 | 0.33 |
| YOL012C | HTZ1  | H2A.F/Z H2AZ HTA3 | iYOL012C     | 0.83 | 0.33 |
| YOL013C | HRD1  | DER3              | iYOL013C     | #N/A | #N/A |
| YOL014W | 0     | #N/A              | iYOL015W     | 0.81 | 0.32 |
| YOL015W | 0     | #N/A              | iYOL016C     | 1.57 | 0.71 |
| YOL016C | CMK2  |                   | 0 iYOL016C   | 1.57 | 0.71 |
| YOL017W | ESC8  |                   | 0 iYOL018C   | 2.06 | 0.85 |
| YOL018C | TLG2  |                   | 0 iYOL018C   | 2.06 | 0.85 |
| YOL019W | TOS7  | #N/A              | itY(GUA)O    | 0.69 | 0.25 |
| YOL020W | TAT2  | LTG3 SAB2 SCM2 T  | iYOL021C     | 0.42 | 0.08 |
| YOL021C | DIS3  | RRP44             | iYOL021C     | 0.42 | 0.08 |



|           |       |                  |              |      |      |
|-----------|-------|------------------|--------------|------|------|
| YOL022C   | 0     | #N/A             | iYOL022C     | 1.32 | 0.59 |
| YOL023W   | IFM1  |                  | 0 iYOL024W   | 2.09 | 0.86 |
| YOL024W   | 0     | #N/A             | iYOL025W     | 0.47 | 0.11 |
| YOL025W   | LAG2  | ECM36            | itS(GCU)O    | 1.17 | 0.52 |
| YOL026C   | 0     |                  | 0 iYOL026C   | 1.34 | 0.60 |
| YOL027C   | 0     |                  | 0 iYOL027C   | 2.36 | 0.93 |
| YOL028C   | YAP7  |                  | 0 iYOL028C   | 0.88 | 0.36 |
| YOL029C   | 0     | #N/A             | iYOL029C     | 0.38 | 0.07 |
| YOL030W   | GAS5  |                  | 0 iYOL031C   | 1.26 | 0.56 |
| YOL031C   | 0     | SLS1             | iYOL031C     | 1.26 | 0.56 |
| YOL032W   | 0     | #N/A             | iYOL033W     | 1.03 | 0.44 |
| YOL033W   | MSE1  |                  | 0 iYOL034W   | #N/A | #N/A |
| YOL034W   | SMC5  |                  | 0 iSNR50     | #N/A | #N/A |
| YOL035C   | 0     | #N/A             | iYOL035C     | 0.78 | 0.29 |
| YOL036W   | 0     | #N/A             | iYOL038W     | 0.90 | 0.37 |
| YOL037C   | 0     | #N/A             | iYOL035C     | 0.78 | 0.29 |
| YOL038W   | PRE6  |                  | 0 iYOL039W   | #N/A | #N/A |
| YOL039W   | RPP2A | RPL44 RPLA2      | iYOL040C     | 0.15 | 0.00 |
| YOL040C   | RPS15 | RPS21            | iYOL040C     | 0.15 | 0.00 |
| YOL041C   | NOP12 |                  | 0 iYOL041C   | 1.02 | 0.43 |
| YOL042W   | NGL1  |                  | 0 iYOL043C   | 1.37 | 0.61 |
| YOL043C   | NTG2  | SCR2             | iYOL043C     | 1.37 | 0.61 |
| YOL044W   | PEX15 | PAS21            | iYOL045W     | 2.09 | 0.82 |
| YOL045W   | 0     |                  | 0 iYOL047C   | 1.32 | 0.59 |
| YOL046C   | 0     | #N/A             | iYOL045W     | 2.09 | 0.82 |
| YOL047C   | 0     | #N/A             | iYOL047C     | 1.32 | 0.59 |
| YOL048C   | 0     | #N/A             | iYOL048C     | #N/A | #N/A |
| YOL049W   | GSH2  |                  | 0 iYOL050C   | 1.97 | 0.80 |
| YOL050C   | 0     | #N/A             | iYOL050C     | 1.97 | 0.80 |
| YOL051W   | GAL11 | ABE1 RAR3 SDS4 S | iYOL052C     | 1.39 | 0.63 |
| YOL052C   | SPE2  |                  | 0 iYOL052C   | 1.39 | 0.63 |
| YOL053C-A | #N/A  | #N/A             | #N/A         | #N/A | #N/A |
| YOL053W   | 0     | #N/A             | iYOL054W     | 0.74 | 0.28 |
| YOL054W   | 0     |                  | 0 itN(GUU)O1 | #N/A | #N/A |
| YOL055C   | THI20 |                  | 0 iYOL055C   | 1.23 | 0.53 |
| YOL056W   | GPM3  |                  | 0 iYOL057W   | 1.74 | 0.77 |
| YOL057W   | 0     | #N/A             | iYOL058W     | 1.62 | 0.72 |
| YOL058W   | ARG1  | ARG10            | iYOL059W     | 0.75 | 0.28 |
| YOL059W   | GPD2  | GPD3             | iYOL060C     | 0.71 | 0.26 |
| YOL060C   | MAM3  |                  | 0 iYOL060C   | 0.71 | 0.26 |
| YOL061W   | PRS5  |                  | 0 iYOL062C   | 3.43 | 0.99 |
| YOL062C   | APM4  | AMP1             | iYOL062C     | 3.43 | 0.99 |
| YOL063C   | 0     |                  | 0 iYOL063C   | 2.60 | 0.88 |
| YOL064C   | MET22 | HAL2             | iYOL064C     | #N/A | #N/A |
| YOL065C   | INP54 |                  | 0 iYOL065C   | 2.61 | 0.95 |
| YOL066C   | RIB2  |                  | 0 iYOL066C   | 2.37 | 0.85 |
| YOL067C   | RTG1  |                  | 0 iYOL067C   | 1.04 | 0.45 |
| YOL068C   | HST1  |                  | 0 iYOL068C   | 1.89 | 0.82 |
| YOL069W   | NUF2  |                  | 0 iYOL070C   | #N/A | #N/A |
| YOL070C   | 0     | #N/A             | iYOL070C     | #N/A | #N/A |
| YOL071W   | 0     |                  | 0 iYOL072W   | #N/A | #N/A |

|         |        |                 |            |      |      |
|---------|--------|-----------------|------------|------|------|
| YOL072W | THP1   | BUD29           | iYOL073C   | 3.84 | 1.00 |
| YOL073C | 0      | #N/A            | iYOL073C   | 3.84 | 1.00 |
| YOL075C | 0      | #N/A            | iYOL075C   | 2.60 | 0.94 |
| YOL076W | MDM20  | 38322           | iYOL077C   | 2.86 | 0.97 |
| YOL077C | BRX1   | 0               | iYOL077C   | 2.86 | 0.97 |
| YOL078W | AVO1   | 0               | iYOL079W   | 1.80 | 0.78 |
| YOL079W | 0      | #N/A            | iYOL081W   | 0.57 | 0.17 |
| YOL080C | REX4   | 0               | iYOL079W   | 1.80 | 0.78 |
| YOL081W | IRA2   | CCS1 GLC4       | iYOL082W   | 1.70 | 0.76 |
| YOL082W | CVT19  | CVT19           | iYOL083W-1 | 1.38 | 0.62 |
| YOL083W | 0      | #N/A            | iYOL084W   | 1.56 | 0.70 |
| YOL084W | PHM7   | 0               | iYOL085C   | 1.32 | 0.59 |
| YOL085C | 0      | #N/A            | iYOL085C   | 1.32 | 0.59 |
| YOL086C | ADH1   | ADC1            | iYOL086C   | 0.52 | 0.13 |
| YOL087C | 0      | #N/A            | iYOL087C   | 1.76 | 0.78 |
| YOL088C | MPD2   | 0               | iYOL088C   | #N/A | #N/A |
| YOL089C | HAL9   | 0               | iYOL089C   | 1.65 | 0.74 |
| YOL090W | MSH2   | PMS5            | iYOL091W   | #N/A | #N/A |
| YOL091W | SPO21  | MPC70           | iYOL092W   | #N/A | #N/A |
| YOL092W | 0      | #N/A            | iYOL093W   | 1.68 | 0.75 |
| YOL093W | 0      | 0               | iYOL094C   | 1.51 | 0.66 |
| YOL094C | RFC4   | 0               | iYOL094C   | 1.51 | 0.66 |
| YOL095C | HMI1   | 0               | iYOL095C   | 1.54 | 0.69 |
| YOL096C | COQ3   | 0               | iYOL096C   | 3.61 | 0.99 |
| YOL097C | WRS1   | HRE342          | iYOL097C   | 1.68 | 0.75 |
| YOL098C | 0      | #N/A            | iYOL098C   | 1.70 | 0.75 |
| YOL099C | 0      | #N/A            | iYOL099C   | 0.44 | 0.09 |
| YOL100W | PKH2   | 0               | iYOL101C   | 1.40 | 0.63 |
| YOL101C | 0      | 0               | iYOL101C   | 1.40 | 0.63 |
| YOL102C | TPT1   | 0               | iYOL102C   | 1.18 | 0.52 |
| YOL103W | ITR2   | HRB612          | iYOLWdelta | #N/A | #N/A |
| YOL104C | NDJ1   | TAM1            | iYOL104C   | #N/A | #N/A |
| YOL105C | WSC3   | 0               | iYOL105C   | 1.07 | 0.46 |
| YOL106W | 0      | #N/A            | iYOL107W   | 0.54 | 0.15 |
| YOL107W | 0      | #N/A            | iYOL108C   | 1.47 | 0.64 |
| YOL108C | INO4   | 0               | iYOL108C   | 1.47 | 0.64 |
| YOL109W | 0      | 0               | iYOL110W   | 0.12 | 0.00 |
| YOL110W | SHR5   | ERF4            | iYOL111C   | 0.96 | 0.41 |
| YOL111C | 0      | #N/A            | iYOL111C   | 0.96 | 0.41 |
| YOL112W | MSB4   | 0               | iYOL113W   | 1.54 | 0.69 |
| YOL113W | SKM1   | 0               | iYOL114C   | 1.49 | 0.67 |
| YOL114C | 0      | #N/A            | iYOL114C   | 1.49 | 0.67 |
| YOL115W | TRF4   | 0               | iYOL116W   | 2.00 | 0.85 |
| YOL116W | MSN1   | FUP1 HRB382 MSS | iYOL117W   | 1.90 | 0.83 |
| YOL117W | 0      | CSN10           | iYOL118C   | 1.30 | 0.58 |
| YOL118C | 0      | #N/A            | iYOL118C   | 1.30 | 0.58 |
| YOL119C | MCH4   | 0               | iYOL119C   | #N/A | #N/A |
| YOL120C | RPL18A | RP28A           | iYOL120C   | 0.40 | 0.07 |
| YOL121C | RPS19A | 0               | iYOL121C   | 0.26 | 0.02 |
| YOL122C | SMF1   | SBS1            | iYOL122C   | 1.07 | 0.47 |
| YOL123W | HRP1   | NAB4 NAB5       | iYOL124C   | 0.56 | 0.16 |



|         |       |                |              |      |      |
|---------|-------|----------------|--------------|------|------|
| YOL124C | 0     | #N/A           | iYOL124C     | 0.56 | 0.16 |
| YOL125W | 0     | #N/A           | iYOL126C     | 1.12 | 0.49 |
| YOL126C | MDH2  |                | 0 iYOL126C   | 1.12 | 0.49 |
| YOL127W | RPL25 |                | 0 iYOL128C   | 0.62 | 0.21 |
| YOL128C | 0     |                | 0 iYOL128C   | 0.62 | 0.21 |
| YOL129W | VPS68 |                | 0 iYOL130W   | 1.31 | 0.58 |
| YOL130W | ALR1  | SWC3           | iYOL131W     | 1.53 | 0.69 |
| YOL131W | 0     | #N/A           | iYOL132W     | 0.89 | 0.37 |
| YOL132W | GAS4  |                | 0 iYOL133W   | 0.86 | 0.35 |
| YOL133W | HRT1  | HRT2 RBX1 ROC1 | iYOL135C     | 2.67 | 0.95 |
| YOL134C | 0     | #N/A           | iYOL133W     | 0.86 | 0.35 |
| YOL135C | MED7  |                | 0 iYOL135C   | 2.67 | 0.95 |
| YOL136C | PFK27 | PFK-2          | iYOL136C     | 0.57 | 0.17 |
| YOL137W | 0     |                | 0 iYOL138C   | 1.93 | 0.83 |
| YOL138C | 0     | #N/A           | iYOL138C     | 1.93 | 0.83 |
| YOL139C | CDC33 | TIF45 eIF-4E   | iYOL139C     | 1.12 | 0.49 |
| YOL140W | ARG8  |                | 0 iYOL141W   | 0.48 | 0.11 |
| YOL141W | PPM2  |                | 0 iYOL142W   | 1.16 | 0.50 |
| YOL142W | RRP40 |                | 0 iYOL143C   | 3.08 | 0.98 |
| YOL143C | RIB4  |                | 0 iYOL143C   | 3.08 | 0.98 |
| YOL144W | NOP8  |                | 0 iYOL145C   | 2.51 | 0.93 |
| YOL145C | CTR9  | CDP1           | iYOL145C     | 2.51 | 0.93 |
| YOL146W | 0     |                | 0 iYOL147C   | #N/A | #N/A |
| YOL147C | PEX11 | PMP24 PMP27    | iYOL147C     | #N/A | #N/A |
| YOL148C | SPT20 | ADA5           | iYOL148C     | 2.43 | 0.93 |
| YOL149W | DCP1  |                | 0 iYOL150C   | 4.11 | 1.00 |
| YOL150C | 0     | #N/A           | iYOL150C     | 4.11 | 1.00 |
| YOL151W | GRE2  |                | 0 iYOL152W   | 1.18 | 0.52 |
| YOL152W | FRE7  |                | 0 iYOL153C-1 | 1.79 | 0.79 |
| YOL153C | 0     | #N/A           | iYOL153C-0   | 1.50 | 0.67 |
| YOL154W | 0     |                | 0 iYOL155C-1 | 1.33 | 0.60 |
| YOL155C | 0     | #N/A           | iYOL155C-0   | 0.48 | 0.11 |
| YOL156W | HXT11 | LGT3           | iYOL157C     | 1.47 | 0.66 |
| YOL157C | 0     | #N/A           | iYOL157C     | 1.47 | 0.66 |
| YOL158C | ENB1  | ARN4           | iYOL158C     | 1.25 | 0.55 |
| YOL159C | 0     | #N/A           | iYOL159C     | 1.83 | 0.80 |
| YOL160W | 0     | #N/A           | iYOL161C-1   | 1.11 | 0.49 |
| YOL161C | 0     | #N/A           | iYOL161C-0   | 0.68 | 0.24 |
| YOL162W | 0     | #N/A           | iYOL164W     | 1.34 | 0.60 |
| YOL163W | 0     | #N/A           | iYOL164W     | 1.34 | 0.60 |
| YOL164W | 0     | #N/A           | iYOLWtau1-   | #N/A | #N/A |
| YOL165C | AAD15 |                | 0 iYOL165C   | 1.35 | 0.60 |
| YOL166C | 0     | #N/A           | iYOL166C     | 0.82 | 0.33 |
| YOR001W | RRP6  |                | 0 iCEN15     | #N/A | #N/A |
| YOR002W | ALG6  |                | 0 iYOR001W   | 1.24 | 0.55 |
| YOR003W | YSP3  |                | 0 iYOR002W   | 0.75 | 0.28 |
| YOR004W | 0     | #N/A           | iYOR003W     | 2.00 | 0.85 |
| YOR005C | DNL4  | LIG4           | iYOR005C     | 0.86 | 0.33 |
| YOR006C | 0     | #N/A           | iYOR006C     | 1.32 | 0.59 |
| YOR007C | SGT2  |                | 0 iYOR007C   | 0.74 | 0.27 |
| YOR008C | SLG1  | HCS77 WSC1     | iYOR008C     | 1.26 | 0.55 |

|         |        |                 |      |            |      |      |
|---------|--------|-----------------|------|------------|------|------|
| YOR009W | TIR4   |                 | 0    | iYOR008C-A | 0.78 | 0.30 |
| YOR010C | TIR2   | SRP2            |      | iYOR010C-0 | #N/A | #N/A |
| YOR011W | AUS1   |                 | 0    | iYOR010C-1 | 1.92 | 0.83 |
| YOR012W |        | 0               | #N/A | iYOLWdelta | 1.67 | 0.75 |
| YOR013W |        | 0               | #N/A | iYOLWdelta | 1.67 | 0.75 |
| YOR014W | RTS1   | SCS1            |      | iYOR013W   | 2.53 | 0.94 |
| YOR015W |        | 0               | #N/A | iYOR013W   | 2.53 | 0.94 |
| YOR016C | ERP4   |                 | 0    | iYOR016C   | 1.87 | 0.82 |
| YOR017W | PET127 |                 | 0    | iYOR016C   | 1.87 | 0.82 |
| YOR018W | ROD1   |                 | 0    | iYOR017W   | 1.21 | 0.53 |
| YOR019W |        | 0               | #N/A | iYOR018W   | 1.29 | 0.57 |
| YOR020C | HSP10  | CPN10           |      | iYOR020C-0 | 1.42 | 0.64 |
| YOR021C |        | 0               | #N/A | iYOR021C   | #N/A | #N/A |
| YOR022C |        | 0               | #N/A | iYOR022C   | #N/A | #N/A |
| YOR023C | AHC1   |                 | 0    | iYOR023C   | 1.41 | 0.63 |
| YOR024W |        | 0               | #N/A | iYOR023C   | 1.41 | 0.63 |
| YOR025W | HST3   |                 | 0    | iYOR023C   | 1.41 | 0.63 |
| YOR026W | BUB3   |                 | 0    | iYOR025W   | 1.15 | 0.50 |
| YOR027W | STI1   |                 | 0    | iYOR026W   | 0.74 | 0.28 |
| YOR028C | CIN5   | HAL6 YAP4       |      | iYOR028C   | #N/A | #N/A |
| YOR029W |        | 0               | #N/A | iYOR028C   | #N/A | #N/A |
| YOR030W | DFG16  | ECM41 ZRG11     |      | iYOR029W-  | 1.72 | 0.75 |
| YOR031W | CRS5   |                 | 0    | iYOR030W   | 0.63 | 0.20 |
| YOR032C | HMS1   |                 | 0    | iYOR032C   | 0.47 | 0.10 |
| YOR033C | EXO1   | DHS1            |      | iYOR033C   | 1.39 | 0.61 |
| YOR034C | AKR2   |                 | 0    | iYOR034C   | 0.90 | 0.37 |
| YOR035C | SHE4   | DIM1            |      | iYOR035C   | 2.35 | 0.92 |
| YOR036W | PEP12  | VPL6 VPS6 VPT13 |      | iYOR035C   | 2.35 | 0.92 |
| YOR037W | CYC2   |                 | 0    | iYOR036W   | 1.30 | 0.58 |
| YOR038C | HIR2   | SPT1            |      | iYOR038C   | 1.77 | 0.78 |
| YOR039W | CKB2   |                 | 0    | iYOR038C   | 1.77 | 0.78 |
| YOR040W | GLO4   |                 | 0    | iYOR039W   | 0.84 | 0.34 |
| YOR041C |        | 0               |      | 0 iYOR042W | 0.55 | 0.15 |
| YOR042W |        | 0               |      | 0 iYOR040W | 1.07 | 0.47 |
| YOR043W | WHI2   |                 | 0    | iSNR62     | 0.83 | 0.33 |
| YOR044W |        | 0               | #N/A | iYOR043W   | 1.17 | 0.51 |
| YOR045W | TOM6   | ISP6 MOM8B      |      | iYOR044W   | 1.54 | 0.68 |
| YOR046C | DBP5   | RAT8            |      | iYOR046C   | 0.80 | 0.31 |
| YOR047C | STD1   | MSN3 SFS3       |      | iYOR047C   | 0.71 | 0.26 |
| YOR048C | RAT1   | HKE1 TAP1 XRN2  |      | iYOR048C   | 1.69 | 0.74 |
| YOR049C |        | 0               |      | 0 iYOR049C | 0.36 | 0.05 |
| YOR050C |        | 0               | #N/A | iYOR050C   | 0.38 | 0.06 |
| YOR051C |        | 0               | #N/A | iYOR051C   | 0.58 | 0.17 |
| YOR052C |        | 0               | #N/A | iYOR052C   | 1.19 | 0.53 |
| YOR053W |        | 0               | #N/A | iYOR052C   | 1.19 | 0.53 |
| YOR054C |        | 0               |      | 0 iYOR055W | 1.07 | 0.47 |
| YOR055W |        | 0               | #N/A | iYOR052C   | 1.19 | 0.53 |
| YOR056C | NOB1   | YOR29-07        |      | iYOR056C   | 1.46 | 0.65 |
| YOR057W | SGT1   | YOR29-08        |      | iYOR056C   | 1.46 | 0.65 |
| YOR058C | ASE1   | YOR29-09        |      | iYOR058C-0 | #N/A | #N/A |
| YOR059C |        | 0               | #N/A | iYOR059C   | 1.01 | 0.44 |

|         |       |                  |              |      |      |
|---------|-------|------------------|--------------|------|------|
| YOR060C | 0     | #N/A             | iYOR060C     | 1.29 | 0.57 |
| YOR061W | CKA2  | YOR29-12         | iYOR060C     | 1.29 | 0.57 |
| YOR062C | 0     | #N/A             | iYOR062C     | #N/A | #N/A |
| YOR063W | RPL3  | MAK8 TCM1 YOR29  | iYOR062C     | #N/A | #N/A |
| YOR064C | YNG1  | YOR29-15         | iYOR064C     | 0.93 | 0.39 |
| YOR065W | CYT1  | CTC1 YOR29-16    | iYOR064C     | 0.93 | 0.39 |
| YOR066W | 0     | #N/A             | iYOR065W     | #N/A | #N/A |
| YOR067C | ALG8  | YOR29-18         | iYOR067C     | #N/A | #N/A |
| YOR068C | 0     | YOR29-19         | iYOR068C     | 0.70 | 0.25 |
| YOR069W | VPS5  | GRD2 PEP10 VPT5  | iYOR068C     | 0.70 | 0.25 |
| YOR070C | GYP1  | YOR29-21         | iYOR070C-0   | 1.86 | 0.82 |
| YOR071C | 0     | #N/A             | iYOR071C     | #N/A | #N/A |
| YOR072W | 0     | #N/A             | iYOR071C     | #N/A | #N/A |
| YOR073W | 0     |                  | 0 itP(UGG)O2 | 2.68 | 0.95 |
| YOR074C | CDC21 | CRT9 TMP1 YOR29  | iYOR074C     | 1.89 | 0.82 |
| YOR075W | UFE1  | YOR29-26         | iYOR074C     | 1.89 | 0.82 |
| YOR076C | SKI7  | YOR29-27         | iYOR076C     | 1.98 | 0.84 |
| YOR077W | RTS2  | YOR29-28         | iYOR076C     | 1.98 | 0.84 |
| YOR078W | BUD21 | UTP16 YOR29-29   | iYOR077W     | 1.23 | 0.54 |
| YOR079C | ATX2  | YOR29-30         | iYOR079C     | 1.13 | 0.47 |
| YOR080W | DIA2  | YOR29-31         | iYOR079C     | 1.13 | 0.47 |
| YOR081C | 0     |                  | 0 iYOR081C   | 0.95 | 0.40 |
| YOR082C | 0     | #N/A             | iYOR083W     | #N/A | #N/A |
| YOR083W | WHI5  |                  | 0 iYOR081C   | 0.95 | 0.40 |
| YOR084W | 0     | #N/A             | iYOR083W     | #N/A | #N/A |
| YOR085W | OST3  |                  | 0 iYOR084W   | 2.77 | 0.96 |
| YOR086C | 0     |                  | 0 iYOR086C   | 1.85 | 0.81 |
| YOR087W | YVC1  |                  | 0 itN(GUU)O2 | #N/A | #N/A |
| YOR088W | 0     | #N/A             | itN(GUU)O2   | #N/A | #N/A |
| YOR089C | VPS21 | VPS12 VPT12 YPT2 | iYOR089C     | 1.48 | 0.66 |
| YOR090C | PTC5  |                  | 0 iYOR090C   | 1.89 | 0.82 |
| YOR091W | 0     | #N/A             | iYOR090C     | 1.89 | 0.82 |
| YOR092W | ECM3  | YOR3165W         | iYOR091W     | #N/A | #N/A |
| YOR093C | 0     | #N/A             | iYOR093C     | #N/A | #N/A |
| YOR094W | ARF3  | ARL2             | iYOR093C     | #N/A | #N/A |
| YOR095C | RKI1  |                  | 0 iYOR095C   | 0.72 | 0.26 |
| YOR096W | RPS7A | RPS30            | iYOR095C     | 0.72 | 0.26 |
| YOR097C | 0     | #N/A             | iYOR097C     | 1.32 | 0.59 |
| YOR098C | NUP1  |                  | 0 iYOR098C   | 1.38 | 0.61 |
| YOR099W | KTR1  |                  | 0 iYOR098C   | 1.38 | 0.61 |
| YOR100C | CRC1  |                  | 0 iYOR100C   | 0.78 | 0.30 |
| YOR101W | RAS1  |                  | 0 iYOR100C   | 0.78 | 0.30 |
| YOR102W | 0     | #N/A             | iYOR101W     | #N/A | #N/A |
| YOR103C | OST2  |                  | 0 iYOR103C   | 1.26 | 0.56 |
| YOR104W | PIN2  |                  | 0 iYOR103C   | 1.26 | 0.56 |
| YOR105W | 0     | #N/A             | iYOR103C     | 1.26 | 0.56 |
| YOR106W | VAM3  | PTH1             | iYOR105W     | #N/A | #N/A |
| YOR107W | RGS2  |                  | 0 iYOR106W   | #N/A | #N/A |
| YOR108W | 0     |                  | 0 iYOR107W   | #N/A | #N/A |
| YOR109W | INP53 | SJL3 SOP2        | iYOR108W     | 1.34 | 0.60 |
| YOR110W | TFC7  |                  | 0 iYOR109W   | #N/A | #N/A |

|         |        |                   |            |      |      |
|---------|--------|-------------------|------------|------|------|
| YOR111W | 0      | #N/A              | iYOR110W   | 1.22 | 0.54 |
| YOR112W | 0      | #N/A              | iYOR111W   | #N/A | #N/A |
| YOR113W | AZF1   |                   | 0 iYOR112W | 1.64 | 0.73 |
| YOR114W | 0      | #N/A              | iYOR113W   | #N/A | #N/A |
| YOR115C | TRS33  |                   | 0 iYOR115C | #N/A | #N/A |
| YOR116C | RPO31  | RPC1 RPC160       | iYOR116C   | 2.06 | 0.86 |
| YOR117W | RPT5   | YTA1              | iYOR116C   | 2.06 | 0.86 |
| YOR118W | 0      | #N/A              | iYOR117W   | 1.53 | 0.67 |
| YOR119C | RIO1   | RRP10             | iYOR119C   | 1.37 | 0.61 |
| YOR120W | GCY1   | GCY               | iYOR119C   | 1.37 | 0.61 |
| YOR121C | 0      | #N/A              | iYOR121C   | #N/A | #N/A |
| YOR122C | PFY1   | PRF1              | iYOR122C   | #N/A | #N/A |
| YOR123C | LEO1   |                   | 0 iYOR123C | 2.54 | 0.95 |
| YOR124C | UBP2   |                   | 0 iYOR124C | #N/A | #N/A |
| YOR125C | CAT5   | COQ7              | iYOR125C   | #N/A | #N/A |
| YOR126C | IAH1   |                   | 0 iYOR126C | 1.35 | 0.60 |
| YOR127W | RGA1   | DBM1 THE1         | iYOR126C   | 1.35 | 0.60 |
| YOR128C | ADE2   |                   | 0 iYOR128C | 0.88 | 0.37 |
| YOR129C | 0      | #N/A              | iYOR129C   | 2.00 | 0.84 |
| YOR130C | ORT1   | ARG11             | iYOR130C   | 2.43 | 0.93 |
| YOR131C | 0      | #N/A              | iYOR131C   | 2.02 | 0.86 |
| YOR132W | VPS17  | PEP21             | iYOR131C   | 2.02 | 0.86 |
| YOR133W | EFT1   |                   | 0 iYOR132W | 1.26 | 0.55 |
| YOR134W | BAG7   |                   | 0 iYOR133W | 0.75 | 0.29 |
| YOR135C | 0      | #N/A              | iYOR136W   | 0.63 | 0.21 |
| YOR136W | IDH2   |                   | 0 iYOR134W | 2.14 | 0.86 |
| YOR137C | SIA1   |                   | 0 iYOR137C | 1.17 | 0.52 |
| YOR138C | 0      |                   | 0 iYOR138C | 1.47 | 0.66 |
| YOR139C | 0      | #N/A              | iYOR140W   | 0.60 | 0.19 |
| YOR140W | SFL1   |                   | 0 iYOR138C | 1.47 | 0.66 |
| YOR141C | ARP8   |                   | 0 iYOR141C | 2.04 | 0.82 |
| YOR142W | LSC1   |                   | 0 iYOR141C | 2.04 | 0.82 |
| YOR143C | THI80  |                   | 0 iYOR143C | 1.74 | 0.77 |
| YOR144C | ELG1   | RTT110            | iYOR144C   | 1.41 | 0.63 |
| YOR145C | 0      | RRP20             | iYOR146W   | #N/A | #N/A |
| YOR146W | 0      | #N/A              | iYOR144C   | 1.41 | 0.63 |
| YOR147W | 0      |                   | 0 iYOR146W | #N/A | #N/A |
| YOR148C | SPP2   |                   | 0 iYOR148C | 2.59 | 0.95 |
| YOR149C | SMP3   | LAS2 SAP2         | iYOR149C   | 2.72 | 0.96 |
| YOR150W | MRPL23 |                   | 0 iYOR149C | 2.72 | 0.96 |
| YOR151C | RPB2   | RPB150 RPO22 SIT: | iYOR151C   | 1.63 | 0.73 |
| YOR152C | 0      | #N/A              | iYOR152C-0 | 0.86 | 0.35 |
| YOR153W | PDR5   | LEM1 STS1 YDR1    | iYOR152C-1 | 0.25 | 0.02 |
| YOR154W | 0      | #N/A              | iYOR153W   | #N/A | #N/A |
| YOR155C | 0      |                   | 0 iYOR155C | 1.62 | 0.73 |
| YOR156C | NFI1   | SIZ2              | iYOR156C   | 1.11 | 0.48 |
| YOR157C | PUP1   |                   | 0 iYOR157C | 1.41 | 0.63 |
| YOR158W | PET123 |                   | 0 iYOR157C | 1.41 | 0.63 |
| YOR159C | SME1   | Sm E              | iYOR159C   | 2.49 | 0.94 |
| YOR160W | MTR10  | KAP111            | iYOR159C   | 2.49 | 0.94 |
| YOR161C | 0      |                   | 0 iYOR161C | 0.46 | 0.10 |

|         |        |                  |      |          |            |      |
|---------|--------|------------------|------|----------|------------|------|
| YOR162C | YRR1   |                  | 0    | iYOR162C | 1.80       | 0.79 |
| YOR163W | DDP1   |                  |      | 0        | iYOR162C   | 0.79 |
| YOR164C |        | 0                | #N/A |          | iYOR164C   | 0.81 |
| YOR165W |        | 0                |      | 0        | iYOR164C   | 0.81 |
| YOR166C |        | 0                | #N/A |          | iYOR166C   | 0.50 |
| YOR167C | RPS28A | RPS33A           |      |          | iYOR167C   | 0.42 |
| YOR168W | GLN4   |                  |      | 0        | iYOR167C   | 0.42 |
| YOR169C |        | 0                | #N/A |          | iYOR171C   | 0.92 |
| YOR170W |        | 0                | #N/A |          | iYOR167C   | 0.42 |
| YOR171C | LCB4   |                  |      | 0        | iYOR171C   | 0.92 |
| YOR172W |        | 0                |      | 0        | iYOR171C   | 0.92 |
| YOR173W |        | 0                |      | 0        | iYOR172W   | 0.32 |
| YOR174W | MED4   |                  |      | 0        | iYOR173W   | 0.90 |
| YOR175C |        | 0                | #N/A |          | iYOR175C   | 0.81 |
| YOR176W | HEM15  |                  |      | 0        | iYOR175C   | 0.81 |
| YOR177C | MPC54  |                  |      | 0        | iYOR177C   | #N/A |
| YOR178C | GAC1   |                  |      | 0        | iYOR178C-0 | #N/A |
| YOR179C |        | 0                |      | 0        | iYOR179C-0 | 0.28 |
| YOR180C | DCI1   | ECI2             |      |          | iYOR180C   | 0.86 |
| YOR181W | LAS17  | BEE1             |      |          | iYOR180C   | 0.80 |
| YOR182C | RPS30B |                  |      | 0        | iYOR182C   | 0.80 |
| YOR183W | FYV12  |                  |      | 0        | iYOR182C   | #N/A |
| YOR184W | SER1   | ADE9             |      |          | iYOR183W   | #N/A |
| YOR185C | GSP2   | CNR2             |      |          | iYOR185C   | #N/A |
| YOR186W |        | 0                | #N/A |          | iYOR185C   | 0.92 |
| YOR187W | TUF1   |                  |      | 0        | iYOR186W   | 0.92 |
| YOR188W | MSB1   |                  |      | 0        | iYOR187W   | 0.30 |
| YOR189W | IES4   |                  |      | 0        | iYOR188W   | 0.49 |
| YOR190W | SPR1   | SSG1             |      |          | iYOR189W   | 0.56 |
| YOR191W | RIS1   | DIS1             |      |          | iYOR190W   | 0.64 |
| YOR192C |        | 0                | #N/A |          | iYOR192C-0 | 0.74 |
| YOR193W |        | 0                |      | 0        | itM(CAU)O1 | 2.01 |
| YOR194C | TOA1   |                  |      | 0        | iYOR194C   | 0.86 |
| YOR195W | SLK19  |                  |      | 0        | iYOR194C   | #N/A |
| YOR196C | LIP5   |                  |      | 0        | iYOR196C   | #N/A |
| YOR197W | MCA1   | YCA1             |      |          | iYOR196C   | #N/A |
| YOR198C | BFR1   |                  |      | 0        | iYOR198C   | 2.43 |
| YOR199W |        | 0                | #N/A |          | iYOR198C   | 0.92 |
| YOR200W |        | 0                | #N/A |          | iYOR198C   | 0.92 |
| YOR201C | PET56  |                  |      | 0        | iYOR201C   | 2.43 |
| YOR202W | HIS3   | HIS10            |      |          | iYOR201C   | 0.79 |
| YOR203W |        | 0                | #N/A |          | iYOR201C   | 0.79 |
| YOR204W | DED1   | SPP81            |      |          | iYOR201C   | 0.79 |
| YOR205C |        | 0                |      | 0        | iYOR205C   | 1.21 |
| YOR206W | NOC2   |                  |      | 0        | iYOR205C   | 1.21 |
| YOR207C | RET1   | PDS2 RPC128 RPC2 |      |          | iYOR207C   | 1.21 |
| YOR208W | PTP2   |                  |      | 0        | iYOR207C   | 1.21 |
| YOR209C | NPT1   |                  |      | 0        | iYOR209C   | 1.21 |
| YOR210W | RPB10  |                  |      | 0        | iYOR209C   | 1.91 |
| YOR211C | MGM1   | MNA1             |      |          | iYOR211C   | 1.91 |
| YOR212W | STE4   | HMD2             |      |          | iYOR211C   | 1.91 |

|         |        |                 |      |          |      |      |
|---------|--------|-----------------|------|----------|------|------|
| YOR213C | SAS5   |                 | 0    | iYOR213C | 1.97 | 0.85 |
| YOR214C |        | 0               | #N/A | iYOR214C | #N/A | #N/A |
| YOR215C |        | 0               | #N/A | iYOR215C | 0.95 | 0.40 |
| YOR216C | RUD3   | GRP1            |      | iYOR216C | 2.42 | 0.92 |
| YOR217W | RFC1   | CDC44           |      | iYOR216C | 2.42 | 0.92 |
| YOR218C |        | 0               | #N/A | iYOR218C | 0.48 | 0.11 |
| YOR219C | STE13  | YCI1            |      | iYOR219C | #N/A | #N/A |
| YOR220W |        | 0               | #N/A | iYOR219C | #N/A | #N/A |
| YOR221C | MCT1   |                 | 0    | iYOR221C | 0.99 | 0.42 |
| YOR222W | ODC2   |                 | 0    | iYOR221C | 0.99 | 0.42 |
| YOR223W |        | 0               | #N/A | iYOR222W | 1.13 | 0.50 |
| YOR224C | RPB8   |                 | 0    | iYOR224C | 2.67 | 0.94 |
| YOR225W |        | 0               | #N/A | iYOR224C | 2.67 | 0.94 |
| YOR226C | ISU2   | NUA2            |      | iYOR226C | 1.23 | 0.55 |
| YOR227W |        | 0               | #N/A | iYOR226C | 1.23 | 0.55 |
| YOR228C |        | 0               | #N/A | iYOR228C | 2.01 | 0.85 |
| YOR229W | WTM2   |                 | 0    | iYOR228C | 2.01 | 0.85 |
| YOR230W | WTM1   |                 | 0    | iYOR229W | 0.55 | 0.16 |
| YOR231W | MKK1   | SSP32           |      | iYOR230W | 2.34 | 0.92 |
| YOR232W | MGE1   | YGE1            |      | iYOR231W | 1.83 | 0.76 |
| YOR233W | KIN4   | KIN3 KIN31      |      | iYOR232W | 1.16 | 0.51 |
| YOR234C | RPL33B | RPL37B          |      | iYOR234C | 0.21 | 0.01 |
| YOR235W |        | 0               | #N/A | iYOR234C | 0.21 | 0.01 |
| YOR236W | DFR1   |                 | 0    | iYOR235W | 0.52 | 0.14 |
| YOR237W | HES1   | OSH5            |      | iYOR236W | 2.63 | 0.95 |
| YOR238W |        | 0               | #N/A | iYOR237W | 1.48 | 0.67 |
| YOR239W | ABP140 |                 | 0    | iYOR238W | 1.32 | 0.59 |
| YOR240W | #N/A   | #N/A            |      | iYOR238W | 1.32 | 0.59 |
| YOR241W | MET7   | MET23           |      | iYOR240W | 1.08 | 0.47 |
| YOR242C | SSP2   |                 | 0    | iYOR242C | 0.58 | 0.18 |
| YOR243C |        | 0               |      | iYOR243C | 2.48 | 0.92 |
| YOR244W | ESA1   | TAS1            |      | iYOR243C | 2.48 | 0.92 |
| YOR245C | DGA1   |                 | 0    | iYOR245C | 1.46 | 0.65 |
| YOR246C |        | 0               | #N/A | iYOR246C | 0.87 | 0.35 |
| YOR247W | SRL1   |                 | 0    | iYOR246C | 0.87 | 0.35 |
| YOR248W | TOS11  | #N/A            |      | iYOR246C | 0.87 | 0.35 |
| YOR249C | APC5   | RMC1            |      | iYOR249C | 1.26 | 0.54 |
| YOR250C | CLP1   |                 | 0    | iYOR250C | 2.19 | 0.89 |
| YOR251C |        | 0               | #N/A | iYOR251C | #N/A | #N/A |
| YOR252W |        | 0               | #N/A | iYOR251C | #N/A | #N/A |
| YOR253W | ARD2   | ARD2 ROG2       |      | iYOR252W | #N/A | #N/A |
| YOR254C | SEC63  | PTL1            |      | iYOR254C | 1.71 | 0.76 |
| YOR255W |        | 0               |      | iYOR254C | 1.71 | 0.76 |
| YOR256C |        | 0               | #N/A | iYOR256C | 1.43 | 0.65 |
| YOR257W | CDC31  | DSK1            |      | iYOR256C | 1.43 | 0.65 |
| YOR258W | HNT3   |                 | 0    | iYOR257W | 1.07 | 0.43 |
| YOR259C | RPT4   | CRL13 PCS1 SUG2 |      | iYOR259C | #N/A | #N/A |
| YOR260W | GCD1   | TRA3            |      | iYOR259C | #N/A | #N/A |
| YOR261C | RPN8   |                 | 0    | iYOR261C | 2.03 | 0.86 |
| YOR262W |        | 0               | #N/A | iYOR261C | 2.03 | 0.86 |
| YOR263C |        | 0               | #N/A | iYOR264W | 1.95 | 0.84 |



|           |        |                  |      |            |      |      |
|-----------|--------|------------------|------|------------|------|------|
| YOR264W   | DSE3   |                  | 0    | iYOR262W   | 1.43 | 0.63 |
| YOR265W   | RBL2   |                  | 0    | iYOR264W   | 1.95 | 0.84 |
| YOR266W   | PNT1   |                  | 0    | iYOR265W   | 1.69 | 0.75 |
| YOR267C   |        | 0                | 0    | iYOR267C   | 1.01 | 0.43 |
| YOR268C   |        | 0                | #N/A | iYOR268C   | 1.47 | 0.64 |
| YOR269W   | PAC1   |                  | 0    | iYOR268C   | 1.47 | 0.64 |
| YOR270C   | VPH1   |                  | 0    | iYOR270C   | 1.24 | 0.56 |
| YOR271C   |        | 0                | #N/A | iYOR271C   | 0.55 | 0.16 |
| YOR272W   | YTM1   |                  | 0    | iSNR8      | 1.51 | 0.67 |
| YOR273C   | TPO4   |                  | 0    | iYOR273C   | 0.77 | 0.30 |
| YOR274W   | MOD5   |                  | 0    | iYOR273C   | 0.77 | 0.30 |
| YOR275C   | RIM20  |                  | 0    | iYOR275C   | 1.79 | 0.79 |
| YOR276W   | CAF20  | CAF2 CAP20       |      | iYOR275C   | 1.79 | 0.79 |
| YOR277C   |        | 0                | #N/A | iYOR277C   | 0.64 | 0.21 |
| YOR278W   | HEM4   | SLU2             |      | iYOR277C   | 0.64 | 0.21 |
| YOR279C   | RFM1   |                  | 0    | iYOR279C   | 1.73 | 0.77 |
| YOR280C   | FSH3   |                  | 0    | iYOR280C   | 1.04 | 0.44 |
| YOR281C   | PLP2   |                  | 0    | iYOR282W   | 1.30 | 0.58 |
| YOR282W   |        | 0                | #N/A | iYOR280C   | 1.04 | 0.44 |
| YOR283W   |        | 0                | #N/A | iYOR282W   | 1.30 | 0.58 |
| YOR284W   |        | 0                | 0    | iYOR283W   | 1.70 | 0.76 |
| YOR285W   |        | 0                | #N/A | iYOR284W   | 2.65 | 0.95 |
| YOR286W   |        | 0                | 0    | iYOR285W   | #N/A | #N/A |
| YOR287C   |        | 0                | #N/A | iYOR287C   | 1.46 | 0.66 |
| YOR288C   | MPD1   |                  | 0    | iYOR288C   | 1.90 | 0.82 |
| YOR289W   |        | 0                | #N/A | iYOR288C   | 1.90 | 0.82 |
| YOR290C   | SNF2   | GAM1 HAF1 SWI2 T |      | iYOR290C   | 2.12 | 0.88 |
| YOR291W   |        | 0                | #N/A | iYOR290C   | 2.12 | 0.88 |
| YOR292C   |        | 0                | #N/A | iYOR292C   | 0.54 | 0.15 |
| YOR293W   | RPS10A |                  | 0    | iYOR292C   | 0.54 | 0.15 |
| YOR294W   | RRS1   |                  | 0    | iYOR293W   | 1.24 | 0.55 |
| YOR295W   | UAF30  |                  | 0    | iYOR294W   | 0.95 | 0.40 |
| YOR296W   |        | 0                | #N/A | iYOR295W   | 1.39 | 0.62 |
| YOR297C   | TIM18  |                  | 0    | iYOR297C   | 1.36 | 0.61 |
| YOR298W   |        | 0                | #N/A | iYOR297C   | 1.36 | 0.61 |
| YOR299W   | BUD7   |                  | 0    | iYOR298C-A | 0.52 | 0.13 |
| YOR300W   |        | 0                | #N/A | iYOR298C-A | 0.52 | 0.13 |
| YOR301W   | RAX1   |                  | 0    | iYOR300W   | 1.19 | 0.52 |
| YOR302W   |        | 0                | #N/A | iYOR301W   | 0.49 | 0.12 |
| YOR303W   | CPA1   |                  | 0    | iYOR301W   | 0.49 | 0.12 |
| YOR304C-A |        | 0                | #N/A | iYOR304C-A | 1.80 | 0.79 |
| YOR304W   | ISW2   |                  | 0    | iYOR303W   | 1.17 | 0.50 |
| YOR305W   |        | 0                | #N/A | iYOR304C-A | 1.80 | 0.79 |
| YOR306C   | MCH5   |                  | 0    | iYOR306C   | 0.49 | 0.12 |
| YOR307C   | SLY41  |                  | 0    | iYOR307C   | 1.13 | 0.50 |
| YOR308C   | SNU66  |                  | 0    | iYOR308C   | #N/A | #N/A |
| YOR309C   |        | 0                | #N/A | iYOR310C   | 1.28 | 0.57 |
| YOR310C   | NOP58  | NOP5             |      | iYOR310C   | 1.28 | 0.57 |
| YOR311C   | HSD1   |                  | 0    | iYOR311C   | 1.21 | 0.53 |
| YOR312C   | RPL20B | RPL18A1          |      | iYOR312C   | 0.32 | 0.04 |
| YOR313C   | SPS4   |                  | 0    | iYOR313C   | #N/A | #N/A |

|         |        |             |              |      |      |
|---------|--------|-------------|--------------|------|------|
| YOR314W | 0      | #N/A        | iYOR313C     | #N/A | #N/A |
| YOR315W | 0      | #N/A        | iYOR314W     | 0.63 | 0.21 |
| YOR316C | COT1   |             | 0 iYOR316C-0 | 1.28 | 0.57 |
| YOR317W | FAA1   |             | 0 iYOR316C-1 | 0.30 | 0.03 |
| YOR318C | 0      | #N/A        | iYOR318C     | 2.07 | 0.86 |
| YOR319W | HSH49  |             | 0 iYOR318C   | 2.07 | 0.86 |
| YOR320C | 0      |             | 0 iYOR320C   | 1.95 | 0.81 |
| YOR321W | PMT3   |             | 0 iYOR320C   | 1.95 | 0.81 |
| YOR322C | 0      | #N/A        | iYOR322C     | 2.10 | 0.87 |
| YOR323C | PRO2   |             | 0 iYOR323C   | 2.13 | 0.85 |
| YOR324C | 0      |             | 0 iYOR325W   | 1.64 | 0.73 |
| YOR325W | 0      | #N/A        | iYOR323C     | 2.13 | 0.85 |
| YOR326W | MYO2   | CDC66       | iYOR325W     | 1.64 | 0.73 |
| YOR327C | SNC2   |             | 0 iYOR327C   | 1.02 | 0.44 |
| YOR328W | PDR10  |             | 0 iYOR327C   | 1.02 | 0.44 |
| YOR329C | SCD5   | FTB1        | iYOR329C     | 1.70 | 0.75 |
| YOR330C | MIP1   |             | 0 iYOR330C   | 2.48 | 0.92 |
| YOR331C | 0      | #N/A        | iYOR332W     | 1.71 | 0.75 |
| YOR332W | VMA4   |             | 0 iYOR330C   | 2.48 | 0.92 |
| YOR333C | 0      | #N/A        | iYOR334W     | #N/A | #N/A |
| YOR334W | MRS2   |             | 0 iYOR332W   | 1.71 | 0.75 |
| YOR335C | ALA1   | CDC64       | iYOR335C     | 1.90 | 0.83 |
| YOR336W | KRE5   |             | 0 iYOR335C   | 1.90 | 0.83 |
| YOR337W | TEA1   |             | 0 iYOR336W   | 1.39 | 0.62 |
| YOR338W | 0      | #N/A        | iYOR337W     | 0.63 | 0.21 |
| YOR339C | UBC11  |             | 0 iYOR339C   | 0.82 | 0.33 |
| YOR340C | RPA43  |             | 0 iYOR340C   | 0.96 | 0.41 |
| YOR341W | RPA190 | RRN1        | iYOR340C     | 0.96 | 0.41 |
| YOR342C | 0      | #N/A        | iYOR342C     | 0.30 | 0.03 |
| YOR343C | 0      | #N/A        | iYOR343C     | 0.87 | 0.36 |
| YOR344C | TYE7   | SGC1        | iYOR344C-0   | #N/A | #N/A |
| YOR345C | 0      | #N/A        | iYOR346W     | #N/A | #N/A |
| YOR346W | REV1   |             | 0 itP(UGG)O3 | #N/A | #N/A |
| YOR347C | PYK2   |             | 0 iYOR347C   | 1.14 | 0.50 |
| YOR348C | PUT4   |             | 0 iYOR348C   | 0.54 | 0.16 |
| YOR349W | CIN1   |             | 0 iYOR348C   | 0.54 | 0.16 |
| YOR350C | MNE1   |             | 0 iYOR350C   | 1.69 | 0.74 |
| YOR351C | MEK1   | MRE4        | iYOR351C     | 1.30 | 0.58 |
| YOR352W | 0      | #N/A        | iYOR351C     | 1.30 | 0.58 |
| YOR353C | 0      |             | 0 iYOR353C   | 1.76 | 0.78 |
| YOR354C | MSC6   |             | 0 iYOR354C-0 | 0.75 | 0.28 |
| YOR355W | GDS1   |             | 0 iYOR354C-1 | 0.53 | 0.14 |
| YOR356W | 0      | #N/A        | iYOR355W     | 0.68 | 0.23 |
| YOR357C | GRD19  | SNX3        | iYOR357C     | 2.48 | 0.94 |
| YOR358W | HAP5   |             | 0 iYOR357C   | 2.48 | 0.94 |
| YOR359W | VTS1   |             | 0 iYOR358W   | 0.92 | 0.38 |
| YOR360C | PDE2   | SRA5        | iYOR360C     | 0.96 | 0.41 |
| YOR361C | PRT1   | CDC63 DNA26 | iYOR361C     | 0.83 | 0.33 |
| YOR362C | PRE10  |             | 0 iYOR362C   | #N/A | #N/A |
| YOR363C | PIP2   | OAF2        | iYOR363C     | 1.18 | 0.52 |
| YOR364W | 0      | #N/A        | iYOR363C     | 1.18 | 0.52 |



|         |       |                  |             |      |      |
|---------|-------|------------------|-------------|------|------|
| YOR365C | 0     | #N/A             | iYOR366W    | 1.00 | 0.43 |
| YOR366W | 0     | #N/A             | iYOR363C    | 1.18 | 0.52 |
| YOR367W | SCP1  |                  | 0 iYOR366W  | 1.00 | 0.43 |
| YOR368W | RAD17 |                  | 0 iYOR367W  | 0.95 | 0.39 |
| YOR369C | RPS12 |                  | 0 iYOR369C  | 0.40 | 0.07 |
| YOR370C | MRS6  | MSI4             | iYOR370C    | 1.05 | 0.45 |
| YOR371C | KRH2  | KRH2             | iYOR371C    | 1.71 | 0.76 |
| YOR372C | NDD1  |                  | 0 iYOR372C  | 2.72 | 0.96 |
| YOR373W | NUD1  |                  | 0 iYOR372C  | 2.72 | 0.96 |
| YOR374W | ALD4  | ALD7             | iYOR373W    | 1.45 | 0.65 |
| YOR375C | GDH1  | GDH-A GDH-A URE1 | iYOR375C    | #N/A | #N/A |
| YOR376W | 0     | #N/A             | iYOR375C    | #N/A | #N/A |
| YOR377W | ATF1  |                  | 0 iYOR376W- | 1.06 | 0.46 |
| YOR378W | 0     | #N/A             | iYOR377W-   | 0.85 | 0.34 |
| YOR379C | 0     | #N/A             | iYOR379C    | #N/A | #N/A |
| YOR380W | RDR1  |                  | 0 iYOR379C  | #N/A | #N/A |
| YOR381W | FRE3  |                  | 0 iYOR380W- | 1.15 | 0.51 |
| YOR382W | FIT2  |                  | 0 iYOR381W- | 1.99 | 0.84 |
| YOR383C | FIT3  |                  | 0 iYOR383C  | 0.61 | 0.19 |
| YOR384W | FRE5  |                  | 0 iYOR383C  | 0.61 | 0.19 |
| YOR385W | 0     | #N/A             | iYOR384W    | 1.36 | 0.61 |
| YOR386W | PHR1  |                  | 0 iYOR385W  | 1.15 | 0.50 |
| YOR387C | 0     | #N/A             | iYOR387C-0  | 1.31 | 0.58 |
| YOR388C | FDH1  |                  | 0 iYOR388C  | 1.16 | 0.51 |
| YOR389W | 0     | #N/A             | iYOR388C    | 1.16 | 0.51 |
| YOR390W | 0     | #N/A             | iYOR389W    | #N/A | #N/A |
| YOR391C | 0     |                  | 0 iYOR392W  | 1.61 | 0.72 |
| YOR392W | 0     | #N/A             | iYOR390W    | 1.21 | 0.53 |
| YOR393W | ERR1  |                  | 0 iYOR392W  | 1.61 | 0.72 |
| YOR394W | 0     | #N/A             | iYOR393W    | 0.85 | 0.34 |
| YPL001W | HAT1  |                  | 0 iYPL002C  | 2.19 | 0.89 |
| YPL002C | SNF8  | VPS22            | iYPL002C    | 2.19 | 0.89 |
| YPL003W | ULA1  | ENR2             | iYPL004C    | 0.92 | 0.38 |
| YPL004C | 0     |                  | 0 iYPL004C  | 0.92 | 0.38 |
| YPL005W | 0     |                  | 0 iYPL006W  | 1.46 | 0.65 |
| YPL006W | NCR1  |                  | 0 iYPL007C  | 2.47 | 0.93 |
| YPL007C | TFC8  |                  | 0 iYPL007C  | 2.47 | 0.93 |
| YPL008W | CHL1  | CTF1 LPA9        | iYPL009C    | 1.72 | 0.76 |
| YPL009C | 0     | #N/A             | iYPL009C    | 1.72 | 0.76 |
| YPL010W | RET3  |                  | 0 iYPL011C  | 2.90 | 0.97 |
| YPL011C | TAF3  | TAF47 TafII47    | iYPL011C    | 2.90 | 0.97 |
| YPL012W | RRP12 |                  | 0 iYPL013C  | 1.40 | 0.63 |
| YPL013C | 0     |                  | 0 iYPL013C  | 1.40 | 0.63 |
| YPL014W | 0     | #N/A             | iYPL015C    | 1.07 | 0.46 |
| YPL015C | HST2  |                  | 0 iYPL015C  | 1.07 | 0.46 |
| YPL016W | SWI1  | ADR6 GAM3 LPA1   | iYPL017C    | #N/A | #N/A |
| YPL017C | 0     | #N/A             | iYPL017C    | #N/A | #N/A |
| YPL018W | CTF19 | MCM18            | iYPL019C    | 1.57 | 0.70 |
| YPL019C | VTC3  | PHM2             | iYPL019C    | 1.57 | 0.70 |
| YPL020C | ULP1  |                  | 0 iYPL020C  | 1.83 | 0.80 |
| YPL021W | ECM23 | SRD2             | iYPL022W    | #N/A | #N/A |

|         |       |                   |              |      |      |
|---------|-------|-------------------|--------------|------|------|
| YPL022W | RAD1  | LPB9              | iYPL023C     | 1.67 | 0.75 |
| YPL023C | MET12 |                   | 0 iYPL023C   | 1.67 | 0.75 |
| YPL024W | NCE4  |                   | 0 iYPL025C   | 0.92 | 0.38 |
| YPL025C | 0     | #N/A              | iYPL025C     | 0.92 | 0.38 |
| YPL026C | SKS1  | SHA3              | iYPL026C     | 0.28 | 0.03 |
| YPL027W | SMA1  |                   | 0 iYPL028W   | 1.01 | 0.43 |
| YPL028W | ERG10 | LPB3 TSM0115      | iYPL029W     | 1.66 | 0.74 |
| YPL029W | SUV3  | LPB2              | iYPL030W     | 1.81 | 0.80 |
| YPL030W | 0     | #N/A              | iYPL031C     | 2.72 | 0.96 |
| YPL031C | PHO85 | LDB15             | iYPL031C     | 2.72 | 0.96 |
| YPL032C | SVL3  |                   | 0 iYPL032C   | #N/A | #N/A |
| YPL033C | 0     | #N/A              | iYPL033C     | #N/A | #N/A |
| YPL034W | 0     | #N/A              | iYPL036W     | #N/A | #N/A |
| YPL035C | 0     | #N/A              | iYPL033C     | #N/A | #N/A |
| YPL036W | PMA2  |                   | 0 iYPL037C   | #N/A | #N/A |
| YPL037C | EGD1  |                   | 0 iYPL037C   | #N/A | #N/A |
| YPL038W | MET31 |                   | 0 iYPL039W   | 1.77 | 0.77 |
| YPL039W | 0     | #N/A              | iYPL040C     | 2.38 | 0.92 |
| YPL040C | ISM1  |                   | 0 iYPL040C   | 2.38 | 0.92 |
| YPL041C | 0     | #N/A              | iYPL041C     | 1.67 | 0.74 |
| YPL042C | SSN3  | GIG2 NUT7 RYE5 Si | iYPL042C     | 0.79 | 0.30 |
| YPL043W | NOP4  | NOP77             | iYPL045W     | #N/A | #N/A |
| YPL044C | 0     | #N/A              | iYPL043W     | #N/A | #N/A |
| YPL045W | VPS16 | SVL6 VAM9 VPT16   | iYPL046C     | 1.91 | 0.82 |
| YPL046C | ELC1  |                   | 0 iYPL046C   | 1.91 | 0.82 |
| YPL047W | 0     |                   | 0 iYPL048W   | 1.38 | 0.62 |
| YPL048W | CAM1  | EF-1 gamma TEF3   | iYPL049C     | 0.46 | 0.10 |
| YPL049C | DIG1  | RST1              | iYPL049C     | 0.46 | 0.10 |
| YPL050C | MNN9  |                   | 0 iYPL050C   | 0.75 | 0.28 |
| YPL051W | ARL3  |                   | 0 iYPL052W   | 2.34 | 0.88 |
| YPL052W | 0     | #N/A              | iYPL053C     | 2.27 | 0.90 |
| YPL053C | KTR6  | MNN6              | iYPL053C     | 2.27 | 0.90 |
| YPL054W | LEE1  |                   | 0 iYPL055C   | #N/A | #N/A |
| YPL055C | LGE1  |                   | 0 iYPL055C   | #N/A | #N/A |
| YPL056C | 0     | #N/A              | iYPL056C     | 0.28 | 0.02 |
| YPL057C | SUR1  | BCL21 CSG1 LPE15  | iYPL057C     | 0.32 | 0.04 |
| YPL058C | PDR12 |                   | 0 iYPL058C-0 | 0.31 | 0.03 |
| YPL059W | GRX5  |                   | 0 iYPLCtau2  | 1.35 | 0.61 |
| YPL060W | LPE10 |                   | 0 iYPL061W   | 1.26 | 0.56 |
| YPL061W | ALD6  |                   | 0 iYPL062W   | 0.29 | 0.03 |
| YPL062W | 0     | #N/A              | iYPL063W     | 0.49 | 0.12 |
| YPL063W | 0     |                   | 0 iYPL064C   | 1.41 | 0.61 |
| YPL064C | CWC27 |                   | 0 iYPL064C   | 1.41 | 0.61 |
| YPL065W | VPS28 | VPT28             | iYPL066W     | 1.62 | 0.72 |
| YPL066W | 0     | #N/A              | iYPL067C     | 0.63 | 0.21 |
| YPL067C | 0     | #N/A              | iYPL067C     | 0.63 | 0.21 |
| YPL068C | 0     | #N/A              | iYPL068C     | #N/A | #N/A |
| YPL069C | BTS1  |                   | 0 iYPL069C   | 1.22 | 0.54 |
| YPL070W | 0     |                   | 0 iYPL071C   | 1.18 | 0.52 |
| YPL071C | 0     | #N/A              | iYPL071C     | 1.18 | 0.52 |
| YPL072W | UBP16 |                   | 0 iYPL074W   | #N/A | #N/A |

|         |        |                    |            |      |      |
|---------|--------|--------------------|------------|------|------|
| YPL073C | 0      | #N/A               | iYPL071C   | 1.18 | 0.52 |
| YPL074W | YTA6   |                    | 0 iYPL075W | 0.89 | 0.37 |
| YPL075W | GCR1   | LPF10              | iYPL076W-1 | 0.49 | 0.12 |
| YPL076W | GPI2   | GCR4               | iYPL077C   | 2.13 | 0.86 |
| YPL077C | 0      | #N/A               | iYPL077C   | 2.13 | 0.86 |
| YPL078C | ATP4   | LPF7               | iYPL078C   | #N/A | #N/A |
| YPL079W | RPL21B |                    | 0 iYPL080C | 0.52 | 0.15 |
| YPL080C | 0      | #N/A               | iYPL080C   | 0.52 | 0.15 |
| YPL081W | RPS9A  |                    | 0 iYPL082C | 0.43 | 0.08 |
| YPL082C | MOT1   | BTAF1 BUR3 LPF4    | iYPL082C   | 0.43 | 0.08 |
| YPL083C | SEN54  |                    | 0 iYPL083C | 1.35 | 0.60 |
| YPL084W | BRO1   | ASI6 LPF2 NPI3 VP5 | iYPL085W   | 1.44 | 0.64 |
| YPL085W | SEC16  | LPF1               | iYPL086C   | 1.67 | 0.75 |
| YPL086C | ELP3   | HPA1 TOT3          | iYPL086C   | 1.67 | 0.75 |
| YPL087W | YDC1   |                    | 0 iYPL088W | 1.86 | 0.81 |
| YPL088W | 0      | #N/A               | iYPL089C   | #N/A | #N/A |
| YPL089C | RLM1   |                    | 0 iYPL089C | #N/A | #N/A |
| YPL090C | RPS6A  |                    | 0 iYPL090C | #N/A | #N/A |
| YPL091W | GLR1   | LPG17              | iYPL092W   | #N/A | #N/A |
| YPL092W | SSU1   | LPG16              | iYPL093W   | 0.96 | 0.41 |
| YPL093W | NOG1   |                    | 0 iYPL094C | 1.46 | 0.66 |
| YPL094C | SEC62  | LPG14              | iYPL094C   | 1.46 | 0.66 |
| YPL095C | 0      | #N/A               | iYPL095C   | 0.77 | 0.29 |
| YPL096W | PNG1   |                    | 0 iYPL097W | 2.04 | 0.87 |
| YPL097W | MSY1   |                    | 0 iYPL098C | 1.46 | 0.66 |
| YPL098C | 0      | #N/A               | iYPL098C   | 1.46 | 0.66 |
| YPL099C | 0      |                    | 0 iYPL099C | 1.11 | 0.48 |
| YPL100W | MAI1   | HSV1 MAI1          | iYPL101W   | 2.34 | 0.87 |
| YPL101W | ELP4   | HAP1 TOT7          | iYPL103C   | 1.94 | 0.84 |
| YPL102C | KRE24  | #N/A               | iYPL101W   | 2.34 | 0.87 |
| YPL103C | 0      |                    | 0 iYPL103C | 1.94 | 0.84 |
| YPL104W | MSD1   | LPG5               | iYPL105C   | 1.65 | 0.74 |
| YPL105C | 0      | #N/A               | iYPL105C   | 1.65 | 0.74 |
| YPL106C | SSE1   | LPG3 MSI3          | iYPL106C   | 0.94 | 0.39 |
| YPL106W | #N/A   | #N/A               | #N/A       | #N/A | #N/A |
| YPL107W | 0      | #N/A               | iYPL109C   | 1.38 | 0.62 |
| YPL108W | 0      | #N/A               | iYPL109C   | 1.38 | 0.62 |
| YPL109C | 0      | #N/A               | iYPL109C   | 1.38 | 0.62 |
| YPL110C | 0      | #N/A               | iYPL110C   | 1.04 | 0.45 |
| YPL111W | CAR1   | LPH15              | itM(CAU)P  | 0.34 | 0.04 |
| YPL112C | 0      |                    | 0 iYPL112C | 0.94 | 0.39 |
| YPL113C | 0      | #N/A               | iYPL113C   | #N/A | #N/A |
| YPL114W | 0      | #N/A               | iYPL115C   | 2.24 | 0.89 |
| YPL115C | BEM3   |                    | 0 iYPL115C | 2.24 | 0.89 |
| YPL116W | HOS3   |                    | 0 iYPL117C | #N/A | #N/A |
| YPL117C | IDI1   | BOT2 LPH10         | iYPL117C   | #N/A | #N/A |
| YPL118W | MRP51  |                    | 0 iYPL119C | 2.51 | 0.94 |
| YPL119C | DBP1   | LPH8               | iYPL119C   | 2.51 | 0.94 |
| YPL120W | VPS30  | APG6 ATG6 VPT30    | iYPL121C   | 1.54 | 0.69 |
| YPL121C | MEI5   | LPH6               | iYPL121C   | 1.54 | 0.69 |
| YPL122C | TFB2   |                    | 0 iYPL122C | 2.60 | 0.85 |

|         |        |                   |   |          |      |      |
|---------|--------|-------------------|---|----------|------|------|
| YPL123C | RNY1   |                   | 0 | iYPL123C | 2.67 | 0.80 |
| YPL124W | SPC29  | LPH3 NIP29        |   | iYPL125W | 1.37 | 0.61 |
| YPL125W | KAP120 |                   | 0 | iYPL126W | 1.80 | 0.77 |
| YPL126W | NAN1   | UTP17             |   | iYPL127C | 0.71 | 0.26 |
| YPL127C | HHO1   |                   | 0 | iYPL127C | 0.71 | 0.26 |
| YPL128C | TBF1   | LPI16             |   | iYPL128C | 1.54 | 0.69 |
| YPL129W | TAF14  | ANC1 SWP29 TAF3   |   | iYPL130W | #N/A | #N/A |
| YPL130W | SPO19  |                   | 0 | iYPL131W | #N/A | #N/A |
| YPL131W | RPL5   | LPI14 RPL1        |   | iYPL132W | 0.46 | 0.10 |
| YPL132W | COX11  | LPI13 PSO7        |   | iYPL133C | 1.27 | 0.57 |
| YPL133C | RDS2   |                   | 0 | iYPL133C | 1.27 | 0.57 |
| YPL134C | ODC1   |                   | 0 | iYPL134C | 0.95 | 0.39 |
| YPL135W | ISU1   | NUA1              |   | iYPL136W | 0.51 | 0.13 |
| YPL136W | 0      | #N/A              |   | iYPL138C | 1.78 | 0.78 |
| YPL137C | 0      | #N/A              |   | iYPL136W | 0.51 | 0.13 |
| YPL138C | SPP1   | CPS40 SAF41       |   | iYPL138C | 1.78 | 0.78 |
| YPL139C | UME1   | WTM3              |   | iYPL139C | 1.38 | 0.62 |
| YPL140C | MKK2   | LPI6 SSP33        |   | iYPL140C | 2.24 | 0.90 |
| YPL141C | 0      | #N/A              |   | iYPL141C | 0.76 | 0.29 |
| YPL142C | 0      | #N/A              |   | iYPL142C | #N/A | #N/A |
| YPL143W | RPL33A | RPL37A            |   | iYPL144W | #N/A | #N/A |
| YPL144W | 0      | #N/A              |   | iYPL145C | 0.82 | 0.32 |
| YPL145C | KES1   | LPI3 OSH4         |   | iYPL145C | 0.82 | 0.32 |
| YPL146C | 0      | #N/A              |   | iYPL146C | 0.93 | 0.39 |
| YPL147W | PXA1   | LPI1 PAL1 PAT2 SS |   | iYPL148C | 1.52 | 0.69 |
| YPL148C | PPT2   |                   | 0 | iYPL148C | 1.52 | 0.69 |
| YPL149W | APG5   | APG5              |   | iYPL150W | 1.49 | 0.67 |
| YPL150W | 0      | #N/A              |   | iYPL151C | 3.16 | 0.98 |
| YPL151C | PRP46  | NTC50             |   | iYPL151C | 3.16 | 0.98 |
| YPL152W | RRD2   | YPA2              |   | iYPL153C | 1.39 | 0.62 |
| YPL153C | RAD53  | LSD1 MEC2 SPK1    |   | iYPL153C | 1.39 | 0.62 |
| YPL154C | PEP4   | PHO9 PRA1 yscA    |   | iYPL154C | 1.11 | 0.49 |
| YPL155C | KIP2   |                   | 0 | iYPL155C | 1.85 | 0.81 |
| YPL156C | PRM4   |                   | 0 | iYPL156C | 0.53 | 0.14 |
| YPL157W | 0      |                   | 0 | iYPL158C | 1.95 | 0.84 |
| YPL158C | 0      | #N/A              |   | iYPL158C | 1.95 | 0.84 |
| YPL159C | 0      |                   | 0 | iYPL159C | 1.99 | 0.85 |
| YPL160W | CDC60  | LeuRS             |   | iYPL161C | 1.70 | 0.76 |
| YPL161C | BEM4   | ROM7              |   | iYPL161C | 1.70 | 0.76 |
| YPL162C | 0      | #N/A              |   | iYPL162C | 1.91 | 0.82 |
| YPL163C | SVS1   |                   | 0 | iYPL163C | 0.67 | 0.23 |
| YPL164C | MLH3   |                   | 0 | iYPL164C | 1.78 | 0.75 |
| YPL165C | SET6   |                   | 0 | iYPL165C | 2.03 | 0.85 |
| YPL166W | 0      | #N/A              |   | iYPL167C | 2.59 | 0.94 |
| YPL167C | REV3   | PSO1              |   | iYPL167C | 2.59 | 0.94 |
| YPL168W | 0      | #N/A              |   | iYPL169C | 1.18 | 0.52 |
| YPL169C | MEX67  |                   | 0 | iYPL169C | 1.18 | 0.52 |
| YPL170W | 0      |                   | 0 | iYPL171C | 1.20 | 0.53 |
| YPL171C | OYE3   | Old Yellow Enzyme |   | iYPL171C | 1.20 | 0.53 |
| YPL172C | COX10  |                   | 0 | iYPL172C | 1.33 | 0.60 |
| YPL173W | MRPL40 |                   | 0 | iYPL174C | 1.98 | 0.82 |

|         |         |                 |              |      |      |
|---------|---------|-----------------|--------------|------|------|
| YPL174C | NIP100  | PAC13           | iYPL174C     | 1.98 | 0.82 |
| YPL175W | SPT14   | CWH6 GPI3       | iYPL176C     | 2.21 | 0.90 |
| YPL176C | 0       | #N/A            | iYPL176C     | 2.21 | 0.90 |
| YPL177C | CUP9    |                 | 0 iYPL177C-0 | 0.18 | 0.01 |
| YPL178W | CBC2    | CBP20 MUD13 SAE | iYPLWdelta8  | 1.11 | 0.49 |
| YPL179W | PPQ1    | SAL6            | iYPL180W     | 1.68 | 0.75 |
| YPL180W | 0       |                 | 0 iYPL181W   | #N/A | #N/A |
| YPL181W | 0       | RXT1            | iYPL183C     | 0.93 | 0.39 |
| YPL182C | 0       | #N/A            | iYPL181W     | #N/A | #N/A |
| YPL183C | 0       | #N/A            | iYPL183C     | 0.93 | 0.39 |
| YPL184C | 0       | #N/A            | iYPL184C     | 1.39 | 0.62 |
| YPL185W | 0       | #N/A            | iYPL187W     | 0.92 | 0.38 |
| YPL186C | UIP4    |                 | 0 iYPL185W   | 0.93 | 0.39 |
| YPL187W | MF(ALP) |                 | 0 iYPL188W   | 0.84 | 0.33 |
| YPL188W | POS5    |                 | 0 iYPL189W   | #N/A | #N/A |
| YPL189W | GUP2    |                 | 0 iYPL190C   | 0.98 | 0.41 |
| YPL190C | NAB3    | HMD1            | iYPL190C     | 0.98 | 0.41 |
| YPL191C | 0       | #N/A            | iYPL191C     | 0.61 | 0.19 |
| YPL192C | PRM3    |                 | 0 iYPL192C   | 1.82 | 0.79 |
| YPL193W | RSA1    |                 | 0 iYPL194W   | #N/A | #N/A |
| YPL194W | DDC1    |                 | 0 iYPL195W   | 2.04 | 0.86 |
| YPL195W | APL5    | YKS4            | iYPL196W     | 1.68 | 0.75 |
| YPL196W | OXR1    |                 | 0 iYPL197C   | 1.21 | 0.53 |
| YPL197C | 0       | #N/A            | iYPL197C     | 1.21 | 0.53 |
| YPL198W | RPL7B   |                 | 0 iSNR59     | #N/A | #N/A |
| YPL199C | 0       | #N/A            | iYPL199C     | 1.09 | 0.46 |
| YPL200W | CSM4    |                 | 0 iYPL201C   | 0.44 | 0.09 |
| YPL201C | 0       | #N/A            | iYPL201C     | 0.44 | 0.09 |
| YPL202C | AFT2    |                 | 0 iYPL202C   | 0.77 | 0.30 |
| YPL203W | TPK2    | PKA2 PKA3 YKR1  | iYPL204W     | 1.68 | 0.75 |
| YPL204W | HRR25   |                 | 0 iYPL206C   | 1.53 | 0.68 |
| YPL205C | 0       | #N/A            | iYPL204W     | 1.68 | 0.75 |
| YPL206C | 0       | #N/A            | iYPL206C     | 1.53 | 0.68 |
| YPL207W | 0       | #N/A            | iYPL208W     | 1.35 | 0.61 |
| YPL208W | 0       | #N/A            | iYPL209C     | 1.65 | 0.70 |
| YPL209C | IPL1    | PAC15           | iYPL209C     | 1.65 | 0.70 |
| YPL210C | SRP72   |                 | 0 iYPL210C   | 1.42 | 0.61 |
| YPL211W | NIP7    |                 | 0 iYPL212C   | 1.77 | 0.77 |
| YPL212C | PUS1    |                 | 0 iYPL212C   | 1.77 | 0.77 |
| YPL213W | LEA1    |                 | 0 iYPL214C   | 2.55 | 0.93 |
| YPL214C | THI6    |                 | 0 iYPL214C   | 2.55 | 0.93 |
| YPL215W | CBP3    |                 | 0 iYPL216W   | 2.19 | 0.86 |
| YPL216W | 0       | #N/A            | iYPL217C     | 1.68 | 0.75 |
| YPL217C | BMS1    |                 | 0 iYPL217C   | 1.68 | 0.75 |
| YPL218W | SAR1    |                 | 0 iYPL219W   | 1.77 | 0.78 |
| YPL219W | PCL8    |                 | 0 iYPL220W   | 1.12 | 0.49 |
| YPL220W | RPL1A   | SSM1            | iYPL221W     | 0.42 | 0.08 |
| YPL221W | BOP1    |                 | 0 iYPL222W   | 0.41 | 0.07 |
| YPL222W | 0       |                 | 0 iYPL223C   | #N/A | #N/A |
| YPL223C | GRE1    |                 | 0 iYPL223C   | #N/A | #N/A |
| YPL224C | MMT2    | MFT2            | iYPL224C     | 2.52 | 0.93 |

|         |       |             |              |      |      |
|---------|-------|-------------|--------------|------|------|
| YPL225W | 0     | #N/A        | iYPL226W     | 1.74 | 0.76 |
| YPL226W | NEW1  |             | 0 iYPL227C   | 1.72 | 0.76 |
| YPL227C | ALG5  |             | 0 iYPL227C   | 1.72 | 0.76 |
| YPL228W | CET1  | CES5        | iYPL229W     | 1.96 | 0.84 |
| YPL229W | 0     | #N/A        | iYPL230W     | 2.22 | 0.90 |
| YPL230W | 0     | #N/A        | iYPL231W     | 0.85 | 0.34 |
| YPL231W | FAS2  |             | 0 iYPL232W   | 0.45 | 0.09 |
| YPL232W | SSO1  |             | 0 iYPL233W   | 0.58 | 0.17 |
| YPL233W | NSL1  |             | 0 iYPL234C   | 1.24 | 0.55 |
| YPL234C | TFP3  | CLS9 VMA11  | iYPL234C     | 1.24 | 0.55 |
| YPL235W | RVB2  | TIH2 TIP49B | iYPL236C     | 2.33 | 0.92 |
| YPL236C | 0     | #N/A        | iYPL236C     | 2.33 | 0.92 |
| YPL237W | SUI3  |             | 0 iYPL239W   | 1.02 | 0.44 |
| YPL238C | 0     | #N/A        | iYPL237W     | 0.97 | 0.39 |
| YPL239W | YAR1  |             | 0 iYPL240C   | #N/A | #N/A |
| YPL240C | HSP82 | HSP83 HSP90 | iYPL240C     | #N/A | #N/A |
| YPL241C | CIN2  |             | 0 iYPL241C   | 1.59 | 0.71 |
| YPL242C | IQG1  | CYK1        | iYPL242C     | 1.34 | 0.60 |
| YPL243W | SRP68 |             | 0 iYPL244C   | 3.05 | 0.98 |
| YPL244C | HUT1  |             | 0 iYPL244C   | 3.05 | 0.98 |
| YPL245W | 0     | #N/A        | iYPL246C     | 1.74 | 0.77 |
| YPL246C | 0     |             | 0 iYPL246C   | 1.74 | 0.77 |
| YPL247C | 0     | #N/A        | iYPL247C     | 1.60 | 0.72 |
| YPL248C | GAL4  | GAL81       | iYPL248C     | 1.17 | 0.51 |
| YPL249C | GYP5  |             | 0 iYPL249C   | 1.28 | 0.57 |
| YPL250C | ICY2  |             | 0 iYPL250C   | #N/A | #N/A |
| YPL251W | 0     | #N/A        | iYPL253C     | 1.59 | 0.71 |
| YPL252C | YAH1  |             | 0 iYPL251W   | 0.80 | 0.31 |
| YPL253C | VIK1  |             | 0 iYPL253C   | 1.59 | 0.71 |
| YPL254W | HFI1  | ADA1 SUP110 | iYPL255W     | 2.81 | 0.97 |
| YPL255W | BBP1  |             | 0 iYPL256C   | 1.01 | 0.43 |
| YPL256C | CLN2  |             | 0 iYPL256C   | 1.01 | 0.43 |
| YPL257W | 0     | #N/A        | iYPLWdelta   | 2.19 | 0.88 |
| YPL258C | THI21 |             | 0 iYPL258C   | 1.08 | 0.47 |
| YPL259C | APM1  | YAP54       | iYPL259C     | 1.40 | 0.63 |
| YPL260W | 0     | #N/A        | iYPL262W     | 1.22 | 0.53 |
| YPL261C | 0     | #N/A        | iYPL260W     | 0.53 | 0.14 |
| YPL262W | FUM1  |             | 0 iYPL263C   | 1.65 | 0.74 |
| YPL263C | KEL3  |             | 0 iYPL263C   | 1.65 | 0.74 |
| YPL264C | 0     | #N/A        | iYPL264C     | 1.14 | 0.50 |
| YPL265W | DIP5  |             | 0 iYPL266W   | 0.37 | 0.05 |
| YPL266W | DIM1  | CDH1        | iYPL267W     | 2.75 | 0.95 |
| YPL267W | 0     | #N/A        | iYPL268W     | 0.90 | 0.37 |
| YPL268W | PLC1  |             | 0 iYPL269W   | 1.60 | 0.71 |
| YPL269W | KAR9  |             | 0 iYPL270W   | 2.78 | 0.96 |
| YPL270W | MDL2  |             | 0 iYPL271W   | 1.68 | 0.75 |
| YPL271W | ATP15 | ATPEPSILON  | iYPL272C-1   | #N/A | #N/A |
| YPL272C | 0     | #N/A        | iYPL272C-0   | #N/A | #N/A |
| YPL273W | SAM4  |             | 0 iYPL274W   | 0.84 | 0.32 |
| YPL274W | SAM3  |             | 0 iYPL275W-2 | 0.78 | 0.30 |
| YPL275W | FDH2  |             | 0 iYPL277C   | 1.06 | 0.46 |



|         |        |                |              |      |      |
|---------|--------|----------------|--------------|------|------|
| YPL276W | FDH2   | #N/A           | iYPL277C     | 1.06 | 0.46 |
| YPL277C | 0      | #N/A           | iYPL277C     | 1.06 | 0.46 |
| YPL278C | 0      | #N/A           | iYPL277C     | 1.06 | 0.46 |
| YPL279C | 0      | #N/A           | iYPL279C     | 2.93 | 0.97 |
| YPL280W | 0      |                | 0 iYPL281C   | 1.53 | 0.69 |
| YPL281C | ERR2   |                | 0 iYPL281C   | 1.53 | 0.69 |
| YPL282C | 0      | #N/A           | iYPL282C     | 0.85 | 0.34 |
| YPL283C | YRF1-7 | YRF1           | iYPL283C-0   | 0.48 | 0.12 |
| YPR001W | CIT3   |                | 0 iCEN16     | 1.75 | 0.77 |
| YPR002W | PDH1   |                | 0 iYPR001W   | 1.16 | 0.50 |
| YPR003C | 0      | #N/A           | iYPR003C     | 1.75 | 0.62 |
| YPR004C | 0      | #N/A           | iYPR004C     | 1.86 | 0.81 |
| YPR005C | HAL1   |                | 0 iYPR005C   | #N/A | #N/A |
| YPR006C | ICL2   |                | 0 iYPR006C   | 1.04 | 0.45 |
| YPR007C | SPO69  | SPO69          | iYPR007C     | 0.88 | 0.36 |
| YPR008W | HAA1   |                | 0 itG(GCC)P1 | #N/A | #N/A |
| YPR009W | SUT2   |                | 0 iYPR008W   | #N/A | #N/A |
| YPR010C | RPA135 | RPA2 RRN2 SRP3 | iYPR010C     | #N/A | #N/A |
| YPR011C | 0      | #N/A           | iYPR011C     | 1.71 | 0.76 |
| YPR012W | 0      | #N/A           | iYPR011C     | 1.71 | 0.76 |
| YPR013C | 0      | #N/A           | iYPR013C-0   | 0.86 | 0.35 |
| YPR014C | 0      | #N/A           | iYPR014C-0   | #N/A | #N/A |
| YPR015C | 0      | #N/A           | iYPR015C     | #N/A | #N/A |
| YPR016C | TIF6   | CDC95          | iYPR016C     | #N/A | #N/A |
| YPR017C | DSS4   |                | 0 iYPR017C   | 1.99 | 0.85 |
| YPR018W | RLF2   | CAC1           | iYPR017C     | 1.99 | 0.85 |
| YPR019W | CDC54  | HCD21 MCM4     | iYPR018W     | 1.58 | 0.71 |
| YPR020W | ATP20  |                | 0 iYPR019W   | 0.88 | 0.37 |
| YPR021C | 0      |                | 0 iYPR021C   | 0.82 | 0.33 |
| YPR022C | 0      | #N/A           | iYPR022C     | #N/A | #N/A |
| YPR023C | EAF3   |                | 0 iYPR023C   | 2.76 | 0.96 |
| YPR024W | YME1   | OSD1 YTA11     | iYPR023C     | 2.76 | 0.96 |
| YPR025C | CCL1   |                | 0 iYPR025C   | #N/A | #N/A |
| YPR026W | ATH1   |                | 0 iYPR025C   | #N/A | #N/A |
| YPR027C | 0      | #N/A           | iYPR027C     | #N/A | #N/A |
| YPR028W | YOP1   | YIP2           | itF(GAA)P2   | #N/A | #N/A |
| YPR029C | APL4   |                | 0 iYPR029C   | 1.40 | 0.63 |
| YPR030W | CSR2   | MRG19          | iYPR029C     | 1.40 | 0.63 |
| YPR031W | 0      |                | 0 iYPR030W   | 1.62 | 0.73 |
| YPR032W | SRO7   | SNI1 SOP1      | iYPR031W     | #N/A | #N/A |
| YPR033C | HTS1   | TSM4572        | iYPR033C     | 1.92 | 0.83 |
| YPR034W | ARP7   | SWP61          | iYPR033C     | 1.92 | 0.83 |
| YPR035W | GLN1   |                | 0 iYPR034W   | #N/A | #N/A |
| YPR036W | VMA13  | CLS11          | iYPR035W     | #N/A | #N/A |
| YPR037C | ERV2   |                | 0 iYPR040W   | 1.89 | 0.81 |
| YPR038W | 0      | #N/A           | iYPR036W     | #N/A | #N/A |
| YPR039W | 0      | #N/A           | iYPR036W     | #N/A | #N/A |
| YPR040W | SDF1   |                | 0 iYPR036W   | #N/A | #N/A |
| YPR041W | TIF5   |                | 0 iYPR040W   | 1.89 | 0.81 |
| YPR042C | PUF2   |                | 0 iYPR042C   | 2.03 | 0.86 |
| YPR043W | RPL43A |                | 0 iYPR042C   | 2.03 | 0.86 |

|         |       |                |             |      |      |
|---------|-------|----------------|-------------|------|------|
| YPR044C | 0     | #N/A           | iYPR044C    | #N/A | #N/A |
| YPR045C | 0     | #N/A           | iYPR045C    | 3.04 | 0.98 |
| YPR046W | MCM16 |                | 0 iYPR045C  | 3.04 | 0.98 |
| YPR047W | MSF1  |                | 0 iYPR046W  | #N/A | #N/A |
| YPR048W | TAH18 |                | 0 iYPR047W  | #N/A | #N/A |
| YPR049C | CVT9  | CVT9           | iYPR049C    | #N/A | #N/A |
| YPR050C | 0     | #N/A           | iYPR051W    | #N/A | #N/A |
| YPR051W | MAK3  |                | 0 iYPR049C  | #N/A | #N/A |
| YPR052C | NHP6A |                | 0 iYPR054W  | 1.88 | 0.81 |
| YPR053C | 0     | #N/A           | iYPR054W    | 1.88 | 0.81 |
| YPR054W | SMK1  |                | 0 iYPR051W  | #N/A | #N/A |
| YPR055W | SEC8  |                | 0 iYPR054W  | 1.88 | 0.81 |
| YPR056W | TFB4  |                | 0 iYPR055W  | 1.11 | 0.47 |
| YPR057W | BRR1  |                | 0 iYPR056W  | 1.09 | 0.48 |
| YPR058W | YMC1  |                | 0 iYPR057W  | #N/A | #N/A |
| YPR059C | 0     | #N/A           | iYPR059C    | 0.66 | 0.23 |
| YPR060C | ARO7  | HGS1 OSM2 TYR7 | iYPR060C    | #N/A | #N/A |
| YPR061C | 0     |                | 0 iYPR061C  | 2.82 | 0.94 |
| YPR062W | FCY1  |                | 0 iYPR061C  | 2.82 | 0.94 |
| YPR063C | 0     | #N/A           | iYPR063C    | 1.21 | 0.53 |
| YPR064W | 0     | #N/A           | iYPR063C    | 1.21 | 0.53 |
| YPR065W | ROX1  | REO1           | iYPR064W    | 0.44 | 0.09 |
| YPR066W | UBA3  |                | 0 iYPR065W  | 0.98 | 0.41 |
| YPR067W | ISA2  |                | 0 iYPR066W  | 2.28 | 0.89 |
| YPR068C | HOS1  |                | 0 iYPR068C  | #N/A | #N/A |
| YPR069C | SPE3  |                | 0 iYPR069C  | 0.96 | 0.40 |
| YPR070W | MED1  |                | 0 iYPR069C  | 0.96 | 0.40 |
| YPR071W | 0     | #N/A           | iYPR070W    | 0.77 | 0.29 |
| YPR072W | NOT5  |                | 0 itS(UGA)P | 1.09 | 0.48 |
| YPR073C | LTP1  |                | 0 iYPR073C  | 1.16 | 0.51 |
| YPR074C | TKL1  |                | 0 iYPR074C  | 0.35 | 0.05 |
| YPR075C | OPY2  |                | 0 iYPR076W  | 2.46 | 0.92 |
| YPR076W | 0     | #N/A           | iYPR074C    | 0.35 | 0.05 |
| YPR077C | 0     | #N/A           | iYPR078C    | #N/A | #N/A |
| YPR078C | 0     | #N/A           | iYPR078C    | #N/A | #N/A |
| YPR079W | MRL1  |                | 0 iYPR078C  | #N/A | #N/A |
| YPR080W | TEF1  | EF-1 alpha     | iYPR079W    | 0.42 | 0.09 |
| YPR081C | 0     |                | 0 iYPR081C  | 1.60 | 0.71 |
| YPR082C | DIB1  | SNU16          | iYPR082C    | 2.11 | 0.88 |
| YPR083W | 0     |                | 0 iYPR082C  | 2.11 | 0.88 |
| YPR084W | 0     | #N/A           | iYPR083W    | 3.04 | 0.98 |
| YPR085C | 0     | #N/A           | iYPR085C    | 2.85 | 0.96 |
| YPR086W | SUA7  | SOH4           | iYPR085C    | 2.85 | 0.96 |
| YPR087W | VPS69 |                | 0 iYPR086W  | #N/A | #N/A |
| YPR088C | SRP54 | SRH1           | iYPR088C    | 3.85 | 1.00 |
| YPR089W | 0     | #N/A           | iYPR088C    | 3.85 | 1.00 |
| YPR090W | 0     | #N/A           | iYPR088C    | 3.85 | 1.00 |
| YPR091C | 0     | #N/A           | iSNR51      | 0.33 | 0.04 |
| YPR092W | 0     | #N/A           | iYPR090W    | #N/A | #N/A |
| YPR093C | 0     | #N/A           | iYPR093C    | 1.23 | 0.53 |
| YPR094W | RDS3  |                | 0 iYPR093C  | 1.23 | 0.53 |



|         |        |                |      |              |      |      |
|---------|--------|----------------|------|--------------|------|------|
| YPR095C | SYT1   |                | 0    | iYPR095C     | 1.56 | 0.70 |
| YPR096C |        | 0              | #N/A | iYPR096C     | #N/A | #N/A |
| YPR097W |        | 0              | #N/A | iYPR096C     | #N/A | #N/A |
| YPR098C |        | 0              | #N/A | iYPR098C     | #N/A | #N/A |
| YPR099C |        | 0              | #N/A | iYPR100W     | 1.08 | 0.47 |
| YPR100W |        | 0              |      | 0 iYPR098C   | #N/A | #N/A |
| YPR101W | SNT309 |                |      | 0 iYPR100W   | 1.08 | 0.47 |
| YPR102C | RPL11A |                |      | 0 iYPR102C   | #N/A | #N/A |
| YPR103W | PRE2   | DOA3 PRG1 SRR2 |      | iYPR102C     | #N/A | #N/A |
| YPR104C | FHL1   |                |      | 0 iYPR104C   | 1.62 | 0.73 |
| YPR105C | COD1   | COD1 SEC38     |      | iYPR105C     | 1.89 | 0.82 |
| YPR106W | ISR1   |                |      | 0 iYPR105C   | 1.89 | 0.82 |
| YPR107C | YTH1   |                |      | 0 iYPR107C   | 1.76 | 0.78 |
| YPR108W | RPN7   |                |      | 0 iYPR107C   | 1.76 | 0.78 |
| YPR109W |        | 0              | #N/A | iT(UGU)P     | 1.12 | 0.49 |
| YPR110C | RPC40  | RPC5           |      | iYPR110C     | 1.52 | 0.68 |
| YPR111W | DBF20  |                |      | 0 iYPR110C   | 1.52 | 0.68 |
| YPR112C | MRD1   |                |      | 0 iYPR112C   | 1.06 | 0.46 |
| YPR113W | PIS1   |                |      | 0 iYPR112C   | 1.06 | 0.46 |
| YPR114W |        | 0              | #N/A | iYPR113W     | #N/A | #N/A |
| YPR115W |        | 0              | #N/A | iYPR114W     | 1.08 | 0.47 |
| YPR116W |        | 0              | #N/A | iYPR115W     | 0.90 | 0.37 |
| YPR117W |        | 0              | #N/A | iYPR116W     | 1.63 | 0.73 |
| YPR118W |        | 0              | #N/A | iYPR117W     | 1.49 | 0.65 |
| YPR119W | CLB2   |                |      | 0 iYPRWsigma | #N/A | #N/A |
| YPR120C | CLB5   |                |      | 0 iYPR120C   | 0.57 | 0.17 |
| YPR121W | THI22  |                |      | 0 iYPRWdelta | 0.68 | 0.24 |
| YPR122W | AXL1   | FUS5 STE22     |      | iYPR121W-    | #N/A | #N/A |
| YPR123C |        | 0              | #N/A | iYPR124W     | 1.30 | 0.58 |
| YPR124W | CTR1   |                |      | 0 iYPR122W   | 0.75 | 0.28 |
| YPR125W |        | 0              | #N/A | iYPR124W     | 1.30 | 0.58 |
| YPR126C |        | 0              | #N/A | iYPR126C     | 0.88 | 0.36 |
| YPR127W |        | 0              | #N/A | iYPR126C     | 0.88 | 0.36 |
| YPR128C | ANT1   |                |      | 0 iYPR128C   | 2.68 | 0.96 |
| YPR129W | SCD6   |                |      | 0 iYPR128C   | 2.68 | 0.96 |
| YPR130C |        | 0              | #N/A | iYPR130C     | 0.52 | 0.14 |
| YPR131C | NAT3   |                |      | 0 iYPR131C   | 0.23 | 0.01 |
| YPR132W | RPS23B |                |      | 0 iYPR131C   | 0.23 | 0.01 |
| YPR133C | IWS1   | SPN1           |      | iYPR133C     | 1.62 | 0.72 |
| YPR134W | MSS18  |                |      | 0 iYPR133W-  | 1.40 | 0.62 |
| YPR135W | CTF4   | CHL15 POB1     |      | iYPR134W     | 1.40 | 0.63 |
| YPR136C | FYV15  | #N/A           |      | iYPR137W     | #N/A | #N/A |
| YPR137W | RRP9   |                |      | 0 iYPR135W   | 1.45 | 0.65 |
| YPR138C | MEP3   |                |      | 0 iYPR138C   | #N/A | #N/A |
| YPR139C | VPS66  |                |      | 0 iYPR139C   | 1.51 | 0.68 |
| YPR140W |        | 0              |      | 0 iYPR139C   | 1.51 | 0.68 |
| YPR141C | KAR3   | OSR11          |      | iYPR141C     | 1.88 | 0.80 |
| YPR142C |        | 0              | #N/A | iYPR143W     | #N/A | #N/A |
| YPR143W |        | 0              | #N/A | iYPR141C     | 1.88 | 0.80 |
| YPR144C | UTP19  | UTP19          |      | iYPR144C     | 1.19 | 0.52 |
| YPR145W | ASN1   |                |      | 0 iSNR45     | #N/A | #N/A |

|         |        |                 |              |      |      |
|---------|--------|-----------------|--------------|------|------|
| YPR146C | 0      | #N/A            | iYPR147C     | 1.89 | 0.82 |
| YPR147C | 0      | #N/A            | iYPR147C     | 1.89 | 0.82 |
| YPR148C | 0      | #N/A            | iYPR148C-0   | 0.56 | 0.17 |
| YPR149W | NCE102 | NCE2            | iYPR148C-1   | #N/A | #N/A |
| YPR150W | 0      | #N/A            | iYPR149W     | 0.76 | 0.29 |
| YPR151C | 0      |                 | 0 iYPR151C   | 1.03 | 0.44 |
| YPR152C | 0      | #N/A            | iYPR152C     | #N/A | #N/A |
| YPR153W | 0      | #N/A            | iYPR152C     | #N/A | #N/A |
| YPR154W | PIN3   | LSB2            | iYPR153W     | 2.87 | 0.97 |
| YPR155C | NCA2   |                 | 0 iYPR155C   | 0.95 | 0.39 |
| YPR156C | TPO3   |                 | 0 iYPR156C   | 0.56 | 0.16 |
| YPR157W | 0      | #N/A            | iYPR156C     | 0.56 | 0.16 |
| YPR158W | 0      | #N/A            | iYPR157W     | 0.62 | 0.20 |
| YPR159W | KRE6   | CWH48           | itA(AGC)P    | 0.47 | 0.11 |
| YPR160W | GPH1   |                 | 0 itG(GCC)P2 | 1.18 | 0.52 |
| YPR161C | SGV1   | BUR1            | iYPR161C     | 1.71 | 0.75 |
| YPR162C | ORC4   |                 | 0 iYPR162C   | #N/A | #N/A |
| YPR163C | TIF3   | RBL3 STM1       | iYPR163C     | 2.96 | 0.97 |
| YPR164W | MMS1   | RTT108 SLM6     | iYPR163C     | 2.96 | 0.97 |
| YPR165W | RHO1   |                 | 0 iYPR164W   | 1.88 | 0.82 |
| YPR166C | MRP2   |                 | 0 iYPR166C   | 1.71 | 0.75 |
| YPR167C | MET16  |                 | 0 iYPR167C   | 1.81 | 0.79 |
| YPR168W | NUT2   | MED10           | iYPR167C     | 1.81 | 0.79 |
| YPR169W | JIP5   |                 | 0 iYPR168W   | #N/A | #N/A |
| YPR170C | 0      | #N/A            | iYPR170C     | 1.65 | 0.73 |
| YPR171W | 0      |                 | 0 iYPR170C   | 1.65 | 0.73 |
| YPR172W | 0      | #N/A            | iYPR171W     | 1.46 | 0.65 |
| YPR173C | VPS4   | CSC1 DID6 END13 | iYPR173C     | 2.13 | 0.88 |
| YPR174C | 0      | #N/A            | iYPR174C     | 1.79 | 0.79 |
| YPR175W | DPB2   |                 | 0 iYPR174C   | 1.79 | 0.79 |
| YPR176C | BET2   |                 | 0 iYPR176C   | 2.35 | 0.92 |
| YPR177C | 0      | #N/A            | iYPR178W     | #N/A | #N/A |
| YPR178W | PRP4   | RNA4            | iYPR176C     | 2.35 | 0.92 |
| YPR179C | PLO1   | PLO1            | iYPR179C     | 1.62 | 0.60 |
| YPR180W | AOS1   |                 | 0 iYPR179C   | 1.62 | 0.60 |
| YPR181C | SEC23  |                 | 0 iYPR181C   | 1.63 | 0.73 |
| YPR182W | SMX3   | Sm F            | iYPR181C     | 1.63 | 0.73 |
| YPR183W | DPM1   | SED3            | iYPR182W     | 1.48 | 0.66 |
| YPR184W | GDB1   |                 | 0 iYPR183W   | 0.76 | 0.29 |
| YPR185W | APG13  | APG13           | iYPR184W     | 3.16 | 0.96 |
| YPR186C | PZF1   | TFC2            | iYPR186C     | 2.34 | 0.71 |
| YPR187W | RPO26  | RPB6            | iYPR186C     | 2.34 | 0.71 |
| YPR188C | MLC2   |                 | 0 iYPR188C   | 1.74 | 0.77 |
| YPR189W | SKI3   | SKI5            | iYPR188C     | 1.74 | 0.77 |
| YPR190C | RPC82  | RPC3            | iYPR190C     | 1.59 | 0.71 |
| YPR191W | QCR2   | COR2 UCR2       | iYPR190C     | 1.59 | 0.71 |
| YPR192W | AQY1   |                 | 0 iYPR191W   | #N/A | #N/A |
| YPR193C | HPA2   |                 | 0 iYPR193C   | 1.49 | 0.67 |
| YPR194C | OPT2   |                 | 0 iYPR194C   | #N/A | #N/A |
| YPR195C | 0      | #N/A            | iYPR195C-0   | 0.41 | 0.07 |
| YPR196W | 0      | #N/A            | iYPR195C-2   | #N/A | #N/A |

|                |      |           |            |      |      |
|----------------|------|-----------|------------|------|------|
| <b>YPR197C</b> | 0    | #N/A      | iYPR198W-C | #N/A | #N/A |
| <b>YPR198W</b> | SGE1 | NOR1      | iYPRWtau4  | 1.54 | 0.69 |
| <b>YPR199C</b> | ARR1 | ACR1 YAP8 | iYPR199C   | #N/A | #N/A |
| <b>YPR200C</b> | ARR2 | ACR2      | iYPR200C   | #N/A | #N/A |
| <b>YPR201W</b> | ARR3 | ACR3      | iYPR200C   | #N/A | #N/A |
| <b>YPR202W</b> | 0    | #N/A      | iYPR201W-1 | 0.59 | 0.19 |
| <b>YPR203W</b> | 0    | #N/A      | iYPR201W-1 | 0.59 | 0.19 |
| <b>YPR204W</b> | 0    | #N/A      | iYPR203W   | 1.35 | 0.60 |

| HS 30 min: HA-Htz1 CHIP | HS 30 min: HA-Htz1 CHIP | <i>htz1</i> Δ : Change in gene expr |
|-------------------------|-------------------------|-------------------------------------|
| #N/A                    | #N/A                    | #N/A                                |
| 1.63                    | 0.71                    | 0.68                                |
| 0.25                    | 0.02                    | -0.78                               |
| #N/A                    | #N/A                    | #N/A                                |
| 0.25                    | 0.02                    | 1.13                                |
| 1.88                    | 0.81                    | -0.35                               |
| 1.72                    | 0.76                    | 2.07                                |
| #N/A                    | #N/A                    | 0.58                                |
| #N/A                    | #N/A                    | 0.53                                |
| #N/A                    | #N/A                    | -0.02                               |
| 0.70                    | 0.25                    | -0.70                               |
| 2.22                    | 0.89                    | -0.64                               |
| 2.22                    | 0.89                    | 0.10                                |
| 0.86                    | 0.34                    | 0.83                                |
| #N/A                    | #N/A                    | 0.71                                |
| 1.98                    | 0.83                    | #N/A                                |
| 3.30                    | 0.98                    | #N/A                                |
| 3.30                    | 0.98                    | -0.08                               |
| 1.34                    | 0.60                    | -0.82                               |
| 2.04                    | 0.81                    | -2.02                               |
| #N/A                    | #N/A                    | #N/A                                |
| 4.23                    | 0.99                    | 1.56                                |
| 4.23                    | 0.99                    | #N/A                                |
| 1.94                    | 0.82                    | 0.00                                |
| 1.66                    | 0.73                    | #N/A                                |
| 1.66                    | 0.73                    | 0.75                                |
| 3.27                    | 0.97                    | -0.06                               |
| #N/A                    | #N/A                    | #N/A                                |
| 1.36                    | 0.61                    | #N/A                                |
| 0.49                    | 0.13                    | 0.35                                |
| 0.50                    | 0.13                    | -0.46                               |
| 3.02                    | 0.94                    | 0.08                                |
| #N/A                    | #N/A                    | -0.41                               |
| #N/A                    | #N/A                    | -0.10                               |
| 3.02                    | 0.94                    | -0.23                               |
| #N/A                    | #N/A                    | 1.43                                |
| 0.37                    | 0.06                    | 0.35                                |
| 0.95                    | 0.39                    | 0.15                                |
| 0.53                    | 0.15                    | #N/A                                |
| #N/A                    | #N/A                    | #N/A                                |
| 1.39                    | 0.62                    | 1.04                                |
| #N/A                    | #N/A                    | #N/A                                |
| 0.65                    | 0.21                    | #N/A                                |
| 1.07                    | 0.46                    | 1.15                                |
| 1.85                    | 0.78                    | 0.41                                |
| 2.25                    | 0.85                    | 0.42                                |
| 1.38                    | 0.61                    | -2.43                               |
| 0.63                    | 0.21                    | 3.05                                |
| 0.59                    | 0.18                    | 2.12                                |
| #N/A                    | #N/A                    | 0.59                                |

|      |      |       |
|------|------|-------|
| 1.07 | 0.46 | #N/A  |
| 1.01 | 0.43 | #N/A  |
| 1.71 | 0.76 | #N/A  |
| #N/A | #N/A | #N/A  |
| #N/A | #N/A | #N/A  |
| 1.71 | 0.76 | #N/A  |
| 1.71 | 0.76 | #N/A  |
| #N/A | #N/A | #N/A  |
| #N/A | #N/A | 0.97  |
| 1.18 | 0.52 | -0.32 |
| 2.71 | 0.95 | 0.19  |
| 3.10 | 0.98 | 0.30  |
| 3.10 | 0.98 | -1.44 |
| #N/A | #N/A | 0.54  |
| 2.63 | 0.95 | -0.78 |
| 0.81 | 0.32 | #N/A  |
| 1.69 | 0.75 | #N/A  |
| 1.46 | 0.65 | 1.88  |
| 1.74 | 0.76 | -0.22 |
| 2.59 | 0.94 | #N/A  |
| 2.05 | 0.85 | #N/A  |
| 2.59 | 0.94 | 0.69  |
| 2.05 | 0.85 | -0.03 |
| 0.55 | 0.16 | 0.05  |
| #N/A | #N/A | #N/A  |
| #N/A | #N/A | #N/A  |
| 1.24 | 0.55 | #N/A  |
| #N/A | #N/A | #N/A  |
| #N/A | #N/A | 0.29  |
| 1.17 | 0.51 | #N/A  |
| #N/A | #N/A | -0.34 |
| 1.18 | 0.51 | -0.78 |
| 1.06 | 0.46 | #N/A  |
| 1.06 | 0.46 | #N/A  |
| 0.49 | 0.12 | #N/A  |
| 0.88 | 0.36 | #N/A  |
| 1.06 | 0.46 | #N/A  |
| 0.82 | 0.32 | -0.91 |
| 1.34 | 0.60 | #N/A  |
| 2.18 | 0.88 | #N/A  |
| 2.18 | 0.88 | #N/A  |
| 2.16 | 0.88 | -1.84 |
| #N/A | #N/A | -1.73 |
| 2.16 | 0.88 | -1.80 |
| 0.90 | 0.37 | 1.36  |
| 0.45 | 0.10 | -1.31 |
| 0.45 | 0.10 | -1.79 |
| 2.74 | 0.96 | #N/A  |
| 0.68 | 0.23 | 0.67  |
| 1.56 | 0.67 | -0.15 |
| 1.30 | 0.58 | 0.62  |

|      |      |       |
|------|------|-------|
| 2.05 | 0.85 | -0.78 |
| 1.07 | 0.44 | -0.21 |
| 2.50 | 0.91 | #N/A  |
| 2.50 | 0.91 | #N/A  |
| 1.19 | 0.53 | 1.33  |
| 1.03 | 0.44 | -0.44 |
| 1.03 | 0.44 | #N/A  |
| 1.83 | 0.79 | #N/A  |
| #N/A | #N/A | 0.28  |
| #N/A | #N/A | -0.47 |
| #N/A | #N/A | -0.14 |
| 1.55 | 0.68 | 0.60  |
| 1.23 | 0.55 | -0.17 |
| 1.15 | 0.51 | -1.40 |
| 1.44 | 0.65 | #N/A  |
| 0.42 | 0.09 | #N/A  |
| 0.68 | 0.24 | 0.99  |
| 0.74 | 0.27 | 0.56  |
| 2.09 | 0.85 | -1.02 |
| 1.55 | 0.69 | -1.05 |
| 1.55 | 0.69 | 0.45  |
| 1.94 | 0.83 | -0.19 |
| 2.07 | 0.86 | 0.32  |
| 2.07 | 0.86 | -3.12 |
| 1.80 | 0.78 | 0.68  |
| 0.65 | 0.22 | 0.79  |
| 0.65 | 0.22 | -0.84 |
| 1.71 | 0.75 | #N/A  |
| 0.89 | 0.35 | #N/A  |
| 2.06 | 0.85 | -1.01 |
| 1.13 | 0.49 | 2.67  |
| 1.13 | 0.49 | 1.22  |
| 3.35 | 0.99 | 0.87  |
| 3.35 | 0.99 | -0.07 |
| #N/A | #N/A | -1.01 |
| 1.31 | 0.59 | #N/A  |
| 1.31 | 0.59 | -0.22 |
| #N/A | #N/A | 0.19  |
| #N/A | #N/A | -0.14 |
| #N/A | #N/A | 0.45  |
| 1.87 | 0.80 | -0.07 |
| #N/A | #N/A | 0.54  |
| #N/A | #N/A | 0.48  |
| #N/A | #N/A | 0.56  |
| 1.43 | 0.64 | -0.14 |
| 1.43 | 0.64 | 2.21  |
| 1.04 | 0.45 | #N/A  |
| 1.04 | 0.45 | #N/A  |
| 1.89 | 0.81 | -0.89 |
| #N/A | #N/A | -0.39 |
| 1.89 | 0.81 | #N/A  |

|      |      |       |
|------|------|-------|
| #N/A | #N/A | 0.23  |
| 1.40 | 0.63 | -2.00 |
| 0.40 | 0.07 | #N/A  |
| 0.82 | 0.32 | #N/A  |
| 0.40 | 0.07 | 4.65  |
| #N/A | #N/A | -1.22 |
| #N/A | #N/A | 1.98  |
| 2.15 | 0.87 | 0.48  |
| 3.71 | 0.99 | -1.14 |
| 3.71 | 0.99 | -1.59 |
| 3.71 | 0.99 | -1.37 |
| 0.86 | 0.34 | -1.64 |
| 0.43 | 0.08 | -1.75 |
| #N/A | #N/A | #N/A  |
| #N/A | #N/A | #N/A  |
| 1.32 | 0.57 | -0.05 |
| 1.32 | 0.57 | -0.08 |
| 0.64 | 0.21 | -1.91 |
| 0.64 | 0.21 | 0.19  |
| 0.78 | 0.29 | 0.81  |
| #N/A | #N/A | 0.55  |
| 0.78 | 0.29 | -0.13 |
| 1.02 | 0.43 | -1.21 |
| 0.65 | 0.22 | 0.07  |
| 0.64 | 0.21 | 0.20  |
| 0.65 | 0.22 | -0.32 |
| 0.84 | 0.33 | 0.55  |
| 0.84 | 0.33 | 0.70  |
| 1.88 | 0.81 | 0.52  |
| 1.88 | 0.81 | #N/A  |
| #N/A | #N/A | 0.31  |
| 0.79 | 0.30 | -0.09 |
| 0.79 | 0.30 | #N/A  |
| 0.79 | 0.30 | 0.44  |
| 0.79 | 0.30 | 0.12  |
| #N/A | #N/A | 0.07  |
| 0.55 | 0.16 | 2.11  |
| 1.86 | 0.78 | -0.24 |
| 1.86 | 0.78 | 0.78  |
| 1.23 | 0.54 | 0.36  |
| 1.23 | 0.54 | 0.98  |
| 1.41 | 0.64 | #N/A  |
| 0.47 | 0.11 | -0.79 |
| 0.47 | 0.11 | -0.65 |
| 1.11 | 0.48 | -0.14 |
| #N/A | #N/A | #N/A  |
| #N/A | #N/A | 0.67  |
| #N/A | #N/A | #N/A  |
| 0.87 | 0.35 | 0.92  |
| 1.12 | 0.49 | 0.20  |
| 1.97 | 0.83 | 0.24  |

|      |      |       |
|------|------|-------|
| 1.07 | 0.46 | #N/A  |
| 1.07 | 0.46 | 0.11  |
| 1.88 | 0.81 | 0.64  |
| #N/A | #N/A | 0.52  |
| 1.02 | 0.43 | -0.27 |
| #N/A | #N/A | 2.12  |
| 1.06 | 0.46 | #N/A  |
| 2.30 | 0.90 | 0.26  |
| 2.30 | 0.90 | -0.95 |
| #N/A | #N/A | -1.73 |
| #N/A | #N/A | -0.93 |
| 1.54 | 0.69 | -0.63 |
| 1.98 | 0.83 | -0.05 |
| 1.62 | 0.72 | 0.92  |
| 2.30 | 0.91 | 0.51  |
| 1.41 | 0.63 | 0.81  |
| 1.43 | 0.63 | 0.26  |
| 0.76 | 0.28 | #N/A  |
| 1.35 | 0.60 | 0.36  |
| 0.65 | 0.22 | #N/A  |
| 1.51 | 0.63 | #N/A  |
| 1.27 | 0.57 | -0.45 |
| 1.30 | 0.58 | #N/A  |
| 0.80 | 0.30 | 2.28  |
| 0.91 | 0.37 | 1.76  |
| 1.09 | 0.48 | -0.47 |
| 1.48 | 0.66 | #N/A  |
| #N/A | #N/A | -1.48 |
| 1.42 | 0.64 | 1.02  |
| 0.96 | 0.40 | 0.55  |
| 1.42 | 0.64 | #N/A  |
| 2.08 | 0.86 | -0.15 |
| 0.53 | 0.15 | 0.24  |
| 0.51 | 0.13 | 0.33  |
| #N/A | #N/A | 0.27  |
| 0.39 | 0.08 | -1.17 |
| 0.80 | 0.30 | -0.23 |
| 0.80 | 0.30 | 0.81  |
| 0.78 | 0.30 | 5.35  |
| 1.23 | 0.54 | #N/A  |
| 0.47 | 0.11 | 0.06  |
| 1.25 | 0.56 | 0.19  |
| 0.39 | 0.06 | 0.19  |
| 0.56 | 0.17 | 0.65  |
| 0.25 | 0.02 | 0.09  |
| 0.75 | 0.28 | -1.72 |
| 0.75 | 0.28 | 0.27  |
| 1.31 | 0.58 | -0.64 |
| 1.16 | 0.50 | -1.72 |
| #N/A | #N/A | -1.77 |
| #N/A | #N/A | -0.20 |



|      |      |       |
|------|------|-------|
| #N/A | #N/A | 1.03  |
| #N/A | #N/A | -0.07 |
| 1.01 | 0.42 | -1.80 |
| #N/A | #N/A | -1.54 |
| 2.01 | 0.82 | #N/A  |
| 2.01 | 0.82 | 0.84  |
| #N/A | #N/A | #N/A  |
| 0.37 | 0.06 | -0.31 |
| #N/A | #N/A | -0.41 |
| 1.26 | 0.56 | 0.37  |
| 2.05 | 0.85 | 0.22  |
| 1.96 | 0.83 | -1.22 |
| 0.34 | 0.05 | 1.76  |
| 0.34 | 0.05 | -0.47 |
| #N/A | #N/A | -0.59 |
| #N/A | #N/A | -0.01 |
| 1.75 | 0.77 | 0.50  |
| 1.75 | 0.77 | -0.08 |
| #N/A | #N/A | 1.20  |
| 0.44 | 0.09 | -0.26 |
| #N/A | #N/A | -0.22 |
| 1.07 | 0.45 | 5.71  |
| 1.07 | 0.45 | 3.07  |
| 1.07 | 0.45 | -0.66 |
| #N/A | #N/A | -0.41 |
| 1.14 | 0.49 | -0.29 |
| 2.31 | 0.90 | 0.40  |
| 0.63 | 0.21 | -0.18 |
| 2.31 | 0.90 | #N/A  |
| #N/A | #N/A | 0.44  |
| 0.66 | 0.22 | 2.90  |
| 1.60 | 0.71 | -0.29 |
| 0.91 | 0.37 | -0.01 |
| 1.72 | 0.76 | -0.03 |
| 1.80 | 0.79 | -0.34 |
| 1.80 | 0.79 | #N/A  |
| 0.42 | 0.08 | 1.86  |
| 2.54 | 0.86 | 0.05  |
| 2.54 | 0.86 | -0.27 |
| #N/A | #N/A | #N/A  |
| 1.51 | 0.68 | 0.82  |
| 1.05 | 0.44 | 2.28  |
| #N/A | #N/A | -0.62 |
| 1.27 | 0.56 | #N/A  |
| 1.27 | 0.56 | 0.35  |
| 1.66 | 0.73 | 0.22  |
| 0.77 | 0.29 | 1.48  |
| 0.86 | 0.34 | 1.54  |
| 1.12 | 0.49 | #N/A  |
| 1.12 | 0.49 | 0.78  |
| 0.92 | 0.37 | #N/A  |

|      |      |       |
|------|------|-------|
| 1.11 | 0.48 | 0.63  |
| 2.04 | 0.85 | -0.66 |
| 2.04 | 0.85 | -1.76 |
| 0.28 | 0.02 | #N/A  |
| 0.23 | 0.02 | 0.38  |
| 2.22 | 0.89 | 0.00  |
| #N/A | #N/A | 0.27  |
| 1.08 | 0.47 | 0.55  |
| 0.73 | 0.26 | -1.39 |
| 0.73 | 0.26 | -0.65 |
| 1.79 | 0.78 | -0.18 |
| 1.79 | 0.78 | 0.00  |
| 1.63 | 0.71 | 0.07  |
| 1.69 | 0.74 | -0.52 |
| 1.69 | 0.74 | 0.47  |
| 0.59 | 0.18 | 3.54  |
| 2.45 | 0.93 | 0.80  |
| 2.45 | 0.93 | 0.08  |
| 1.50 | 0.63 | #N/A  |
| 1.85 | 0.79 | 0.27  |
| 1.75 | 0.75 | #N/A  |
| 1.85 | 0.79 | 0.37  |
| 1.75 | 0.75 | 0.21  |
| #N/A | #N/A | 0.97  |
| #N/A | #N/A | #N/A  |
| 1.84 | 0.80 | -1.27 |
| 0.84 | 0.33 | -2.05 |
| 0.78 | 0.29 | -0.05 |
| 0.78 | 0.29 | 2.19  |
| 1.05 | 0.45 | -0.49 |
| 2.58 | 0.94 | 0.48  |
| 1.32 | 0.59 | -0.73 |
| 1.48 | 0.66 | -0.10 |
| 1.48 | 0.66 | -2.40 |
| 0.57 | 0.17 | #N/A  |
| 0.57 | 0.17 | -1.92 |
| 1.55 | 0.69 | 0.07  |
| 1.25 | 0.55 | 0.49  |
| 1.25 | 0.55 | #N/A  |
| #N/A | #N/A | 0.02  |
| 0.29 | 0.03 | -0.26 |
| 0.71 | 0.25 | -0.45 |
| #N/A | #N/A | 0.83  |
| 1.03 | 0.44 | #N/A  |
| 1.27 | 0.56 | 0.50  |
| #N/A | #N/A | -1.25 |
| 2.05 | 0.85 | 1.24  |
| 2.05 | 0.85 | -0.54 |
| 2.05 | 0.85 | -0.48 |
| 1.32 | 0.59 | #N/A  |
| 1.50 | 0.67 | -0.35 |

|      |      |       |
|------|------|-------|
| 1.70 | 0.75 | -0.35 |
| #N/A | #N/A | 0.04  |
| 0.85 | 0.33 | 1.21  |
| 1.81 | 0.79 | -0.43 |
| 1.93 | 0.82 | 0.29  |
| 1.93 | 0.82 | -0.76 |
| 1.46 | 0.66 | -1.09 |
| 1.46 | 0.66 | -0.92 |
| 1.33 | 0.58 | -0.26 |
| 0.70 | 0.25 | 0.71  |
| 1.67 | 0.74 | 0.26  |
| 0.70 | 0.25 | 0.37  |
| 1.67 | 0.74 | 1.04  |
| 1.67 | 0.74 | 0.64  |
| #N/A | #N/A | 0.31  |
| 0.62 | 0.20 | 2.30  |
| 1.75 | 0.75 | 0.29  |
| 2.56 | 0.94 | #N/A  |
| 1.75 | 0.75 | -0.22 |
| 2.46 | 0.92 | 0.75  |
| #N/A | #N/A | 0.43  |
| 1.38 | 0.58 | -0.45 |
| 1.20 | 0.53 | #N/A  |
| 1.42 | 0.64 | 1.28  |
| 1.42 | 0.64 | -0.65 |
| 1.74 | 0.76 | -0.40 |
| 1.74 | 0.76 | -0.97 |
| #N/A | #N/A | 0.32  |
| 2.25 | 0.90 | -2.26 |
| #N/A | #N/A | -0.31 |
| 1.18 | 0.52 | -2.22 |
| 1.18 | 0.52 | #N/A  |
| 2.78 | 0.96 | 0.43  |
| 1.28 | 0.57 | #N/A  |
| 1.83 | 0.79 | 0.44  |
| 3.12 | 0.96 | #N/A  |
| 3.12 | 0.96 | 0.53  |
| 1.36 | 0.61 | 0.66  |
| 1.36 | 0.61 | -0.14 |
| #N/A | #N/A | #N/A  |
| #N/A | #N/A | #N/A  |
| 2.61 | 0.94 | #N/A  |
| 2.03 | 0.85 | -0.25 |
| 1.81 | 0.79 | 0.46  |
| 2.03 | 0.85 | -0.91 |
| 1.81 | 0.79 | 0.24  |
| 1.81 | 0.79 | -0.86 |
| 1.38 | 0.61 | #N/A  |
| 1.51 | 0.68 | -1.20 |
| 1.38 | 0.61 | #N/A  |
| 0.80 | 0.30 | 1.63  |

|      |      |       |
|------|------|-------|
| 2.77 | 0.96 | #N/A  |
| 2.77 | 0.96 | -1.31 |
| #N/A | #N/A | 0.92  |
| 2.10 | 0.87 | 0.76  |
| 2.10 | 0.87 | 0.28  |
| 1.35 | 0.60 | #N/A  |
| 1.90 | 0.82 | -0.03 |
| 1.90 | 0.78 | #N/A  |
| 1.90 | 0.82 | #N/A  |
| 1.90 | 0.78 | 0.44  |
| #N/A | #N/A | 2.27  |
| 1.75 | 0.76 | 0.10  |
| 1.75 | 0.76 | 0.32  |
| 1.34 | 0.60 | -0.58 |
| 1.34 | 0.60 | #N/A  |
| 0.97 | 0.40 | 2.19  |
| #N/A | #N/A | 0.82  |
| 0.75 | 0.27 | 1.51  |
| 2.25 | 0.87 | -0.38 |
| 2.25 | 0.87 | #N/A  |
| 0.90 | 0.37 | 1.06  |
| #N/A | #N/A | -0.01 |
| 1.81 | 0.79 | #N/A  |
| 2.21 | 0.89 | 0.26  |
| 1.01 | 0.43 | 0.18  |
| 1.22 | 0.54 | #N/A  |
| 1.16 | 0.51 | 0.39  |
| 1.25 | 0.56 | 0.41  |
| 1.49 | 0.67 | -0.22 |
| 1.49 | 0.67 | #N/A  |
| 2.17 | 0.88 | #N/A  |
| 1.64 | 0.73 | #N/A  |
| #N/A | #N/A | #N/A  |
| 1.66 | 0.69 | #N/A  |
| 1.14 | 0.50 | #N/A  |
| #N/A | #N/A | #N/A  |
| 1.66 | 0.69 | #N/A  |
| 1.66 | 0.69 | -0.42 |
| 1.14 | 0.50 | #N/A  |
| 1.14 | 0.50 | #N/A  |
| 1.14 | 0.50 | #N/A  |
| 1.14 | 0.50 | -0.54 |
| 1.14 | 0.50 | #N/A  |
| 1.66 | 0.69 | -0.03 |
| #N/A | #N/A | #N/A  |
| #N/A | #N/A | #N/A  |
| #N/A | #N/A | #N/A  |
| 1.66 | 0.69 | #N/A  |
| 1.66 | 0.69 | 0.24  |
| #N/A | #N/A | #N/A  |
| #N/A | #N/A | #N/A  |

|      |      |       |
|------|------|-------|
| #N/A | #N/A | 0.67  |
| #N/A | #N/A | #N/A  |
| #N/A | #N/A | #N/A  |
| #N/A | #N/A | #N/A  |
| 0.42 | 0.08 | #N/A  |
| 0.42 | 0.08 | 0.32  |
| #N/A | #N/A | #N/A  |
| 1.14 | 0.50 | 0.08  |
| 1.71 | 0.75 | #N/A  |
| 1.71 | 0.75 | #N/A  |
| 1.06 | 0.46 | -0.98 |
| 2.24 | 0.89 | 0.78  |
| 1.92 | 0.82 | -0.44 |
| 1.92 | 0.82 | 0.71  |
| 1.56 | 0.70 | 0.41  |
| 1.56 | 0.70 | 1.80  |
| 1.63 | 0.73 | -1.08 |
| 1.63 | 0.73 | -1.45 |
| 0.71 | 0.25 | 0.90  |
| 1.85 | 0.80 | 0.88  |
| 1.26 | 0.56 | 2.36  |
| 1.85 | 0.80 | #N/A  |
| 1.26 | 0.56 | #N/A  |
| 1.85 | 0.80 | 0.39  |
| 1.26 | 0.56 | 0.38  |
| #N/A | #N/A | 0.01  |
| 1.39 | 0.63 | #N/A  |
| 1.39 | 0.63 | #N/A  |
| 1.52 | 0.68 | #N/A  |
| 1.52 | 0.68 | 0.39  |
| 1.58 | 0.71 | 0.66  |
| 1.81 | 0.79 | 0.31  |
| 1.81 | 0.79 | 0.68  |
| #N/A | #N/A | -2.70 |
| 1.54 | 0.69 | -2.41 |
| 1.61 | 0.72 | -0.18 |
| 1.61 | 0.72 | 0.88  |
| #N/A | #N/A | 1.01  |
| #N/A | #N/A | -0.77 |
| 1.77 | 0.61 | -1.39 |
| #N/A | #N/A | #N/A  |
| 1.26 | 0.56 | 3.01  |
| #N/A | #N/A | -0.96 |
| 1.66 | 0.73 | 2.99  |
| 1.66 | 0.73 | 3.56  |
| #N/A | #N/A | 0.16  |
| #N/A | #N/A | #N/A  |
| #N/A | #N/A | #N/A  |
| 0.84 | 0.33 | -0.57 |
| 0.77 | 0.29 | #N/A  |
| 0.77 | 0.29 | -0.18 |

|      |      |       |
|------|------|-------|
| 0.27 | 0.02 | -1.35 |
| #N/A | #N/A | #N/A  |
| #N/A | #N/A | #N/A  |
| #N/A | #N/A | -1.12 |
| #N/A | #N/A | #N/A  |
| #N/A | #N/A | #N/A  |
| #N/A | #N/A | 0.81  |
| #N/A | #N/A | 0.09  |
| #N/A | #N/A | #N/A  |
| #N/A | #N/A | #N/A  |
| #N/A | #N/A | 0.43  |
| #N/A | #N/A | 0.60  |
| #N/A | #N/A | #N/A  |
| #N/A | #N/A | -0.58 |
| #N/A | #N/A | -0.03 |
| 1.66 | 0.69 | #N/A  |
| 1.14 | 0.50 | -0.10 |
| 1.66 | 0.69 | 0.35  |
| 1.14 | 0.50 | 0.94  |
| 1.14 | 0.50 | 2.62  |
| 1.14 | 0.50 | #N/A  |
| #N/A | #N/A | 0.62  |
| 1.14 | 0.50 | 0.74  |
| #N/A | #N/A | 0.38  |
| #N/A | #N/A | 2.09  |
| #N/A | #N/A | 0.57  |
| 1.14 | 0.50 | 0.61  |
| #N/A | #N/A | 0.56  |
| #N/A | #N/A | 0.17  |
| #N/A | #N/A | -0.33 |
| #N/A | #N/A | #N/A  |
| 1.59 | 0.71 | -0.14 |
| #N/A | #N/A | #N/A  |
| 1.86 | 0.80 | 0.04  |
| 2.03 | 0.85 | -0.01 |
| 2.93 | 0.90 | -0.58 |
| 1.46 | 0.65 | 2.03  |
| 1.03 | 0.44 | -0.30 |
| 1.22 | 0.54 | 0.04  |
| 0.53 | 0.15 | 0.05  |
| 0.43 | 0.09 | -0.54 |
| #N/A | #N/A | 0.71  |
| 1.03 | 0.44 | 0.27  |
| 1.39 | 0.62 | 0.17  |
| 2.20 | 0.80 | 0.19  |
| #N/A | #N/A | 0.80  |
| #N/A | #N/A | 0.18  |
| 0.90 | 0.36 | -1.44 |
| 0.38 | 0.07 | -1.53 |
| 1.71 | 0.75 | -1.32 |
| 1.85 | 0.80 | -0.72 |

|      |      |       |
|------|------|-------|
| 1.18 | 0.52 | -1.66 |
| 1.10 | 0.48 | 0.23  |
| 1.10 | 0.48 | 1.06  |
| 1.12 | 0.49 | 0.88  |
| 0.93 | 0.38 | 0.22  |
| #N/A | #N/A | #N/A  |
| #N/A | #N/A | -0.86 |
| #N/A | #N/A | 0.07  |
| 1.53 | 0.68 | 0.01  |
| 4.37 | 0.96 | -0.41 |
| 2.81 | 0.95 | -0.23 |
| 1.25 | 0.55 | -0.14 |
| 2.59 | 0.94 | -0.09 |
| 2.87 | 0.97 | -0.51 |
| 2.87 | 0.97 | -0.03 |
| 2.70 | 0.93 | -0.68 |
| 2.70 | 0.93 | 0.07  |
| 2.70 | 0.93 | -1.50 |
| 2.48 | 0.93 | -0.46 |
| 2.03 | 0.85 | -0.72 |
| 2.00 | 0.84 | #N/A  |
| #N/A | #N/A | -2.74 |
| #N/A | #N/A | 0.34  |
| 3.39 | 0.98 | #N/A  |
| #N/A | #N/A | #N/A  |
| #N/A | #N/A | -2.06 |
| #N/A | #N/A | #N/A  |
| 0.51 | 0.14 | 0.72  |
| 0.51 | 0.14 | 1.59  |
| 0.64 | 0.21 | -0.77 |
| 0.62 | 0.20 | -0.56 |
| 0.62 | 0.20 | #N/A  |
| 1.33 | 0.60 | -0.35 |
| 1.65 | 0.73 | 0.67  |
| 1.65 | 0.73 | 0.72  |
| 2.19 | 0.88 | 0.63  |
| #N/A | #N/A | 0.58  |
| 2.91 | 0.96 | 0.32  |
| 3.52 | 0.99 | -1.97 |
| 3.22 | 0.98 | #N/A  |
| #N/A | #N/A | 0.71  |
| 2.39 | 0.92 | 0.11  |
| #N/A | #N/A | 0.60  |
| 2.30 | 0.89 | -0.95 |
| 2.30 | 0.89 | 0.51  |
| #N/A | #N/A | #N/A  |
| 1.15 | 0.50 | -0.55 |
| #N/A | #N/A | 1.00  |
| #N/A | #N/A | #N/A  |
| 1.69 | 0.75 | -0.37 |
| 1.69 | 0.75 | #N/A  |

|      |      |       |
|------|------|-------|
| 1.82 | 0.79 | -0.87 |
| 1.82 | 0.79 | -1.87 |
| 2.31 | 0.91 | 0.41  |
| 1.38 | 0.62 | -1.29 |
| #N/A | #N/A | -0.26 |
| 1.75 | 0.76 | 0.79  |
| 1.40 | 0.63 | 0.00  |
| 1.40 | 0.63 | 0.07  |
| 1.95 | 0.83 | -0.62 |
| 1.74 | 0.77 | -0.25 |
| 0.50 | 0.13 | -0.14 |
| #N/A | #N/A | #N/A  |
| #N/A | #N/A | -0.04 |
| 1.53 | 0.69 | 1.04  |
| #N/A | #N/A | 0.24  |
| #N/A | #N/A | #N/A  |
| 1.94 | 0.83 | -1.38 |
| 1.59 | 0.71 | -1.62 |
| 1.01 | 0.43 | #N/A  |
| 1.01 | 0.43 | -0.43 |
| 1.10 | 0.48 | 0.34  |
| 1.53 | 0.68 | -0.14 |
| #N/A | #N/A | 0.10  |
| #N/A | #N/A | #N/A  |
| #N/A | #N/A | 0.77  |
| #N/A | #N/A | #N/A  |
| #N/A | #N/A | -0.41 |
| #N/A | #N/A | -1.68 |
| #N/A | #N/A | #N/A  |
| #N/A | #N/A | -0.69 |
| #N/A | #N/A | -0.05 |
| #N/A | #N/A | #N/A  |
| #N/A | #N/A | 0.75  |
| #N/A | #N/A | #N/A  |
| #N/A | #N/A | #N/A  |
| #N/A | #N/A | 0.76  |
| #N/A | #N/A | -1.10 |
| #N/A | #N/A | #N/A  |
| #N/A | #N/A | -1.88 |
| #N/A | #N/A | 0.33  |
| #N/A | #N/A | -0.43 |
| #N/A | #N/A | #N/A  |
| #N/A | #N/A | -1.08 |
| #N/A | #N/A | 0.23  |
| 1.14 | 0.49 | 0.02  |
| 1.14 | 0.49 | -0.21 |
| 1.07 | 0.46 | -1.87 |
| 1.78 | 0.78 | 0.16  |
| 1.78 | 0.78 | -0.22 |
| 0.74 | 0.27 | 0.29  |
| 0.78 | 0.29 | 0.74  |



|      |      |       |
|------|------|-------|
| #N/A | #N/A | -0.45 |
| #N/A | #N/A | 0.82  |
| 1.54 | 0.69 | 0.48  |
| #N/A | #N/A | -0.64 |
| 1.54 | 0.69 | -0.29 |
| 2.34 | 0.91 | 0.22  |
| 2.07 | 0.86 | -2.50 |
| 2.07 | 0.86 | 0.40  |
| 0.50 | 0.14 | 0.43  |
| 2.24 | 0.89 | 0.37  |
| 2.24 | 0.89 | 0.58  |
| #N/A | #N/A | 0.62  |
| 0.92 | 0.37 | 0.21  |
| 0.83 | 0.33 | 2.14  |
| 0.24 | 0.02 | 1.85  |
| 0.83 | 0.33 | 1.30  |
| 1.19 | 0.53 | 2.80  |
| 1.55 | 0.69 | 1.16  |
| 2.19 | 0.89 | #N/A  |
| 0.91 | 0.37 | 1.25  |
| 2.19 | 0.89 | -0.46 |
| 1.98 | 0.84 | 0.62  |
| 2.17 | 0.87 | -0.29 |
| 1.41 | 0.63 | -2.34 |
| 1.04 | 0.45 | #N/A  |
| 1.41 | 0.63 | -0.21 |
| 0.96 | 0.40 | #N/A  |
| 1.04 | 0.45 | #N/A  |
| 0.96 | 0.40 | -0.34 |
| 1.18 | 0.52 | #N/A  |
| #N/A | #N/A | #N/A  |
| #N/A | #N/A | #N/A  |
| 1.99 | 0.84 | -0.68 |
| #N/A | #N/A | #N/A  |
| 1.00 | 0.42 | -0.55 |
| #N/A | #N/A | -0.55 |
| 1.45 | 0.65 | 0.00  |
| 2.10 | 0.87 | 0.39  |
| #N/A | #N/A | 0.76  |
| 0.67 | 0.23 | -0.24 |
| 0.52 | 0.14 | 0.39  |
| #N/A | #N/A | #N/A  |
| #N/A | #N/A | -1.56 |
| 1.56 | 0.70 | -1.81 |
| 1.56 | 0.70 | 0.18  |
| 1.17 | 0.52 | -0.06 |
| 1.22 | 0.54 | 0.90  |
| 0.56 | 0.17 | -1.15 |
| 2.32 | 0.90 | -0.41 |
| 0.91 | 0.37 | 1.01  |
| 2.41 | 0.92 | -0.53 |

|      |      |       |
|------|------|-------|
| 2.41 | 0.92 | 1.13  |
| 0.99 | 0.41 | -2.08 |
| 0.99 | 0.41 | -1.24 |
| #N/A | #N/A | #N/A  |
| 1.17 | 0.51 | -2.81 |
| 1.80 | 0.75 | -0.45 |
| 1.80 | 0.75 | 0.43  |
| 1.59 | 0.71 | 0.48  |
| 1.59 | 0.71 | 0.28  |
| #N/A | #N/A | #N/A  |
| 1.11 | 0.48 | #N/A  |
| #N/A | #N/A | 0.16  |
| #N/A | #N/A | #N/A  |
| #N/A | #N/A | 1.09  |
| 2.80 | 0.96 | 0.08  |
| 2.80 | 0.96 | -0.57 |
| 0.53 | 0.15 | -1.62 |
| 0.53 | 0.15 | 0.54  |
| 1.43 | 0.64 | 0.31  |
| 1.54 | 0.68 | 0.13  |
| 1.36 | 0.60 | 0.50  |
| 1.62 | 0.72 | -0.11 |
| 1.29 | 0.57 | -1.88 |
| 0.26 | 0.02 | -2.06 |
| 0.26 | 0.02 | -1.63 |
| 1.54 | 0.69 | -0.88 |
| 1.35 | 0.61 | 2.45  |
| 3.17 | 0.98 | 0.59  |
| 3.17 | 0.98 | -0.31 |
| #N/A | #N/A | 0.11  |
| 1.81 | 0.79 | 0.33  |
| 1.81 | 0.79 | 0.12  |
| 2.10 | 0.84 | 0.46  |
| 2.50 | 0.93 | -0.20 |
| #N/A | #N/A | -0.47 |
| 2.50 | 0.93 | 0.37  |
| 1.00 | 0.42 | -0.31 |
| #N/A | #N/A | #N/A  |
| 1.00 | 0.42 | 0.65  |
| 1.41 | 0.62 | 0.49  |
| #N/A | #N/A | 0.02  |
| #N/A | #N/A | 0.14  |
| #N/A | #N/A | -0.14 |
| 1.92 | 0.82 | -0.88 |
| 1.92 | 0.82 | 0.33  |
| #N/A | #N/A | 0.01  |
| 3.12 | 0.97 | #N/A  |
| 3.12 | 0.97 | 0.15  |
| #N/A | #N/A | 0.87  |
| 1.26 | 0.56 | 0.22  |
| 1.26 | 0.56 | 0.36  |

|      |      |       |
|------|------|-------|
| 0.99 | 0.42 | 2.08  |
| 1.33 | 0.60 | -0.26 |
| 2.34 | 0.91 | -1.62 |
| 2.34 | 0.91 | #N/A  |
| 2.01 | 0.84 | #N/A  |
| 2.01 | 0.84 | 0.59  |
| 2.41 | 0.83 | 0.04  |
| 1.47 | 0.66 | 0.11  |
| 0.74 | 0.27 | 0.46  |
| 1.47 | 0.66 | -0.62 |
| 3.05 | 0.96 | -0.05 |
| 3.05 | 0.96 | -2.32 |
| 1.11 | 0.48 | #N/A  |
| 3.12 | 0.65 | 0.61  |
| 0.40 | 0.08 | 1.95  |
| 0.40 | 0.08 | 0.40  |
| 0.59 | 0.19 | 0.76  |
| 0.47 | 0.11 | #N/A  |
| 0.89 | 0.36 | 0.07  |
| 1.07 | 0.46 | #N/A  |
| #N/A | #N/A | -1.86 |
| #N/A | #N/A | -0.38 |
| #N/A | #N/A | #N/A  |
| 0.78 | 0.29 | 0.07  |
| 0.95 | 0.39 | 0.36  |
| #N/A | #N/A | 0.34  |
| 0.96 | 0.40 | 0.32  |
| 0.39 | 0.07 | -1.01 |
| 0.86 | 0.34 | 0.01  |
| 0.62 | 0.20 | 0.63  |
| 0.62 | 0.20 | #N/A  |
| 1.14 | 0.50 | -0.90 |
| 2.19 | 0.89 | -0.05 |
| 2.19 | 0.89 | 0.57  |
| 2.33 | 0.90 | -0.16 |
| 2.33 | 0.90 | 0.63  |
| 2.49 | 0.93 | -0.41 |
| 0.79 | 0.30 | 0.31  |
| 2.10 | 0.86 | 0.54  |
| 2.10 | 0.86 | -1.70 |
| 1.90 | 0.81 | 1.02  |
| 1.57 | 0.69 | -1.19 |
| 1.90 | 0.81 | -0.87 |
| #N/A | #N/A | #N/A  |
| 1.57 | 0.69 | -2.50 |
| 0.46 | 0.11 | -0.87 |
| 1.27 | 0.56 | -0.42 |
| #N/A | #N/A | -0.83 |
| #N/A | #N/A | -0.99 |
| #N/A | #N/A | -1.12 |
| 0.75 | 0.28 | -0.21 |

|      |      |       |
|------|------|-------|
| 0.75 | 0.28 | 0.46  |
| 1.25 | 0.55 | 0.01  |
| #N/A | #N/A | #N/A  |
| 0.71 | 0.25 | #N/A  |
| 1.25 | 0.55 | -0.24 |
| 2.00 | 0.84 | -0.24 |
| 2.00 | 0.84 | -0.97 |
| 2.66 | 0.95 | -1.55 |
| 1.45 | 0.65 | 0.56  |
| 1.45 | 0.65 | 1.38  |
| 1.61 | 0.71 | #N/A  |
| 1.61 | 0.71 | -0.49 |
| #N/A | #N/A | 0.59  |
| #N/A | #N/A | 0.55  |
| #N/A | #N/A | 1.45  |
| 2.20 | 0.87 | -0.23 |
| 1.98 | 0.81 | -0.17 |
| 1.98 | 0.81 | -0.34 |
| 1.75 | 0.75 | 0.14  |
| 1.98 | 0.84 | 0.03  |
| 1.06 | 0.46 | 0.92  |
| 1.04 | 0.45 | 1.49  |
| 0.54 | 0.16 | -0.35 |
| 1.41 | 0.63 | 0.23  |
| #N/A | #N/A | -1.12 |
| 2.53 | 0.94 | 0.13  |
| 1.68 | 0.73 | 0.28  |
| 2.53 | 0.94 | #N/A  |
| 1.68 | 0.73 | 0.37  |
| #N/A | #N/A | -0.66 |
| #N/A | #N/A | 0.31  |
| 0.59 | 0.18 | -1.28 |
| 1.01 | 0.42 | -0.59 |
| #N/A | #N/A | 0.64  |
| 2.05 | 0.86 | 0.35  |
| 2.14 | 0.87 | 0.15  |
| 1.07 | 0.45 | #N/A  |
| 1.07 | 0.45 | -0.52 |
| 0.90 | 0.36 | -0.81 |
| 2.61 | 0.92 | 0.84  |
| 1.07 | 0.46 | 0.06  |
| 2.30 | 0.90 | -1.31 |
| 3.36 | 0.99 | -0.19 |
| 3.36 | 0.99 | -0.29 |
| 2.27 | 0.90 | 3.60  |
| 2.27 | 0.90 | -0.54 |
| #N/A | #N/A | 1.21  |
| 2.00 | 0.84 | -0.93 |
| 4.52 | 0.98 | -2.00 |
| 4.52 | 0.98 | -0.57 |
| 1.81 | 0.78 | #N/A  |

|      |      |       |
|------|------|-------|
| 1.37 | 0.62 | -0.94 |
| 2.57 | 0.94 | -0.59 |
| 2.57 | 0.94 | -3.11 |
| 0.64 | 0.22 | 0.91  |
| #N/A | #N/A | 1.28  |
| #N/A | #N/A | 0.17  |
| 1.96 | 0.83 | 0.15  |
| 3.28 | 0.98 | #N/A  |
| 3.03 | 0.98 | -0.27 |
| 3.03 | 0.98 | -0.02 |
| 0.96 | 0.40 | 0.50  |
| 0.96 | 0.40 | #N/A  |
| #N/A | #N/A | 1.68  |
| 1.14 | 0.50 | -0.14 |
| 4.08 | 0.99 | -0.35 |
| 4.08 | 0.99 | -0.77 |
| 1.11 | 0.48 | -1.23 |
| 1.00 | 0.42 | -3.16 |
| 0.53 | 0.15 | -2.93 |
| #N/A | #N/A | 0.75  |
| #N/A | #N/A | -0.17 |
| 1.32 | 0.59 | #N/A  |
| #N/A | #N/A | 0.95  |
| #N/A | #N/A | 1.67  |
| #N/A | #N/A | 0.17  |
| 1.88 | 0.81 | -0.38 |
| #N/A | #N/A | 0.74  |
| #N/A | #N/A | 1.52  |
| #N/A | #N/A | #N/A  |
| 2.95 | 0.97 | -0.76 |
| 1.10 | 0.48 | #N/A  |
| 1.27 | 0.56 | #N/A  |
| 1.27 | 0.56 | 0.67  |
| 2.18 | 0.88 | #N/A  |
| 0.97 | 0.40 | #N/A  |
| 2.17 | 0.88 | #N/A  |
| 1.01 | 0.43 | 0.34  |
| #N/A | #N/A | 0.89  |
| 0.45 | 0.10 | 2.66  |
| 0.45 | 0.10 | -0.21 |
| #N/A | #N/A | 0.70  |
| 0.85 | 0.34 | 0.24  |
| 1.12 | 0.49 | 0.17  |
| 1.36 | 0.61 | 0.24  |
| 1.36 | 0.61 | 0.73  |
| 1.18 | 0.52 | 0.83  |
| 1.18 | 0.52 | 0.11  |
| 0.37 | 0.06 | #N/A  |
| 0.37 | 0.06 | 0.44  |
| 1.18 | 0.52 | -1.71 |
| 0.51 | 0.13 | -0.13 |

|      |      |       |
|------|------|-------|
| #N/A | #N/A | #N/A  |
| #N/A | #N/A | #N/A  |
| 2.26 | 0.90 | -0.18 |
| 1.45 | 0.64 | -0.30 |
| 1.25 | 0.55 | 1.12  |
| 1.02 | 0.44 | 2.31  |
| 1.79 | 0.77 | -0.01 |
| 1.79 | 0.77 | -1.73 |
| 1.30 | 0.56 | 0.92  |
| 0.66 | 0.22 | -1.58 |
| #N/A | #N/A | -1.72 |
| #N/A | #N/A | -1.91 |
| 1.67 | 0.74 | -0.24 |
| 1.25 | 0.56 | 0.52  |
| #N/A | #N/A | 0.30  |
| #N/A | #N/A | #N/A  |
| 3.21 | 0.98 | -0.06 |
| 3.21 | 0.98 | #N/A  |
| 0.97 | 0.40 | 1.78  |
| 0.59 | 0.18 | -0.12 |
| 1.65 | 0.73 | -0.08 |
| 1.12 | 0.49 | #N/A  |
| 1.59 | 0.71 | -0.25 |
| 1.59 | 0.71 | -1.38 |
| 1.71 | 0.75 | 1.83  |
| #N/A | #N/A | 1.89  |
| 0.30 | 0.03 | 1.91  |
| 0.30 | 0.03 | 0.45  |
| 0.69 | 0.24 | -0.69 |
| 0.43 | 0.09 | 1.58  |
| 2.27 | 0.89 | -1.56 |
| 1.56 | 0.70 | -1.49 |
| #N/A | #N/A | 0.07  |
| #N/A | #N/A | -0.09 |
| 0.56 | 0.16 | #N/A  |
| #N/A | #N/A | -0.46 |
| 0.70 | 0.25 | -0.07 |
| 1.35 | 0.60 | 0.18  |
| 1.12 | 0.49 | #N/A  |
| 1.35 | 0.60 | #N/A  |
| 0.66 | 0.23 | 0.21  |
| 0.66 | 0.23 | 1.93  |
| 1.83 | 0.79 | 0.53  |
| 1.83 | 0.79 | 0.37  |
| 0.66 | 0.22 | 0.58  |
| #N/A | #N/A | 1.33  |
| #N/A | #N/A | -3.28 |
| 0.70 | 0.25 | 0.44  |
| 1.36 | 0.58 | -0.15 |
| 1.06 | 0.46 | 0.33  |
| 0.60 | 0.19 | -1.73 |

|      |      |       |
|------|------|-------|
| #N/A | #N/A | -0.44 |
| 1.14 | 0.48 | 0.30  |
| #N/A | #N/A | 0.24  |
| #N/A | #N/A | 0.38  |
| 1.71 | 0.75 | 1.10  |
| 1.10 | 0.46 | 2.96  |
| #N/A | #N/A | 0.06  |
| #N/A | #N/A | -0.68 |
| #N/A | #N/A | -0.57 |
| 0.44 | 0.10 | 2.13  |
| 2.12 | 0.84 | #N/A  |
| #N/A | #N/A | 1.15  |
| 0.12 | 0.00 | 1.43  |
| 1.12 | 0.48 | -0.17 |
| 1.12 | 0.48 | 0.58  |
| 2.19 | 0.88 | 0.00  |
| 2.93 | 0.97 | -0.49 |
| 2.93 | 0.97 | -0.45 |
| #N/A | #N/A | -2.00 |
| 1.31 | 0.57 | 0.50  |
| 0.46 | 0.11 | 0.99  |
| 1.07 | 0.46 | -0.46 |
| 1.56 | 0.70 | -2.02 |
| 0.95 | 0.39 | -0.20 |
| 0.50 | 0.13 | 0.00  |
| 1.92 | 0.82 | 0.42  |
| 1.80 | 0.79 | -1.60 |
| 1.80 | 0.79 | -0.08 |
| 0.83 | 0.33 | -0.35 |
| 0.83 | 0.33 | -0.33 |
| 0.50 | 0.13 | -0.47 |
| 0.50 | 0.13 | 0.76  |
| 1.79 | 0.75 | -2.00 |
| 0.79 | 0.30 | 0.04  |
| #N/A | #N/A | 0.56  |
| 0.66 | 0.23 | 1.17  |
| 0.61 | 0.19 | -2.63 |
| 1.07 | 0.46 | #N/A  |
| 1.07 | 0.46 | 0.35  |
| 1.59 | 0.71 | 0.52  |
| 2.01 | 0.83 | 0.75  |
| 2.01 | 0.83 | #N/A  |
| 2.00 | 0.84 | 0.54  |
| 2.00 | 0.84 | -0.03 |
| 2.75 | 0.96 | 0.42  |
| 2.75 | 0.96 | -0.95 |
| 0.92 | 0.37 | -1.47 |
| #N/A | #N/A | #N/A  |
| 2.38 | 0.92 | -0.80 |
| #N/A | #N/A | #N/A  |
| 2.38 | 0.92 | 0.63  |

|      |      |       |
|------|------|-------|
| #N/A | #N/A | 0.47  |
| 2.16 | 0.82 | -0.33 |
| 2.16 | 0.82 | -0.28 |
| 0.98 | 0.41 | -0.30 |
| 2.03 | 0.84 | -2.53 |
| 2.03 | 0.84 | -1.23 |
| 2.02 | 0.85 | 0.98  |
| 1.08 | 0.47 | #N/A  |
| 1.08 | 0.47 | 1.24  |
| #N/A | #N/A | -0.12 |
| #N/A | #N/A | -0.87 |
| 1.14 | 0.50 | -0.32 |
| #N/A | #N/A | 0.18  |
| 1.05 | 0.45 | 1.07  |
| 2.33 | 0.91 | -0.58 |
| 1.93 | 0.82 | 0.59  |
| #N/A | #N/A | -0.83 |
| 0.22 | 0.01 | -0.45 |
| 0.22 | 0.01 | -0.72 |
| #N/A | #N/A | -0.04 |
| 1.72 | 0.76 | #N/A  |
| #N/A | #N/A | -0.46 |
| 1.72 | 0.76 | #N/A  |
| 2.70 | 0.95 | #N/A  |
| 2.70 | 0.95 | 0.13  |
| 1.55 | 0.69 | 0.67  |
| 1.22 | 0.54 | 0.25  |
| 2.04 | 0.84 | -0.02 |
| 2.56 | 0.94 | -1.54 |
| 2.56 | 0.94 | -0.33 |
| 1.05 | 0.45 | -0.76 |
| 1.05 | 0.45 | -0.45 |
| 1.68 | 0.75 | 0.55  |
| 0.72 | 0.26 | #N/A  |
| 1.68 | 0.75 | -0.10 |
| 1.09 | 0.47 | 0.06  |
| 1.09 | 0.47 | -0.76 |
| 0.44 | 0.09 | -0.27 |
| 0.37 | 0.06 | 0.73  |
| 0.37 | 0.06 | 0.78  |
| 0.37 | 0.06 | -1.31 |
| 0.37 | 0.06 | -1.26 |
| 0.37 | 0.06 | -0.54 |
| 0.94 | 0.39 | #N/A  |
| 1.73 | 0.76 | 0.28  |
| 0.95 | 0.39 | -2.32 |
| 2.04 | 0.85 | #N/A  |
| 2.04 | 0.85 | -0.04 |
| 3.28 | 0.98 | 0.05  |
| 3.28 | 0.98 | -1.93 |
| 2.80 | 0.96 | 0.37  |



|      |      |       |
|------|------|-------|
| 2.80 | 0.96 | -0.35 |
| 1.62 | 0.72 | 0.52  |
| 1.22 | 0.54 | 0.56  |
| 1.15 | 0.50 | -0.37 |
| #N/A | #N/A | 2.70  |
| 1.16 | 0.51 | -0.74 |
| 0.76 | 0.28 | 0.66  |
| 0.76 | 0.28 | 0.17  |
| 2.05 | 0.85 | -0.12 |
| 2.05 | 0.85 | #N/A  |
| 1.66 | 0.74 | -0.03 |
| 1.42 | 0.64 | 1.88  |
| 1.73 | 0.76 | #N/A  |
| 1.73 | 0.76 | #N/A  |
| #N/A | #N/A | 0.26  |
| 2.05 | 0.86 | -0.68 |
| 2.05 | 0.86 | 0.44  |
| #N/A | #N/A | -0.14 |
| 1.86 | 0.77 | -1.35 |
| 1.29 | 0.57 | -0.81 |
| 0.64 | 0.21 | 0.62  |
| 1.33 | 0.59 | #N/A  |
| 0.64 | 0.21 | -0.38 |
| 1.33 | 0.59 | -0.29 |
| 2.16 | 0.88 | -0.90 |
| 2.16 | 0.88 | 0.13  |
| 1.21 | 0.54 | 0.13  |
| #N/A | #N/A | #N/A  |
| #N/A | #N/A | -0.11 |
| #N/A | #N/A | -0.45 |
| 1.72 | 0.75 | -0.08 |
| 1.72 | 0.75 | 0.62  |
| 1.34 | 0.60 | -0.57 |
| 1.34 | 0.60 | 0.47  |
| 2.44 | 0.92 | 0.29  |
| 2.44 | 0.92 | 0.08  |
| 1.44 | 0.65 | 1.11  |
| #N/A | #N/A | #N/A  |
| 1.44 | 0.65 | 1.47  |
| #N/A | #N/A | 0.43  |
| 1.71 | 0.75 | -0.81 |
| 1.52 | 0.68 | 0.33  |
| 1.52 | 0.68 | 0.52  |
| 0.92 | 0.37 | 0.00  |
| #N/A | #N/A | #N/A  |
| 1.49 | 0.66 | -0.76 |
| 4.06 | 0.99 | -0.20 |
| 1.62 | 0.72 | 0.29  |
| #N/A | #N/A | 2.14  |
| 0.64 | 0.21 | -1.67 |
| 0.64 | 0.21 | 0.73  |

|      |      |       |
|------|------|-------|
| #N/A | #N/A | -0.65 |
| 0.79 | 0.30 | -0.65 |
| 1.58 | 0.71 | -0.57 |
| 0.70 | 0.25 | #N/A  |
| 1.58 | 0.71 | 0.60  |
| 0.70 | 0.25 | -0.52 |
| 1.33 | 0.59 | 0.72  |
| 0.84 | 0.33 | -0.79 |
| 0.84 | 0.33 | -1.14 |
| 0.63 | 0.21 | -0.43 |
| 1.37 | 0.62 | -0.60 |
| 1.92 | 0.82 | -0.15 |
| 1.92 | 0.82 | 0.25  |
| #N/A | #N/A | #N/A  |
| 1.38 | 0.61 | 0.78  |
| 1.38 | 0.61 | -0.55 |
| 0.75 | 0.28 | -0.38 |
| 0.75 | 0.28 | #N/A  |
| 1.41 | 0.63 | 0.70  |
| 2.46 | 0.93 | 1.05  |
| 2.46 | 0.93 | 0.19  |
| 1.70 | 0.73 | 0.03  |
| 2.59 | 0.94 | -0.37 |
| #N/A | #N/A | -0.97 |
| 2.59 | 0.94 | #N/A  |
| 0.76 | 0.29 | -0.27 |
| 1.38 | 0.62 | #N/A  |
| 1.38 | 0.62 | 0.17  |
| 1.43 | 0.64 | -0.94 |
| 1.84 | 0.79 | -0.08 |
| 0.51 | 0.14 | 0.17  |
| #N/A | #N/A | 0.64  |
| 1.57 | 0.70 | -0.60 |
| #N/A | #N/A | #N/A  |
| #N/A | #N/A | -0.02 |
| #N/A | #N/A | #N/A  |
| 1.72 | 0.75 | -0.10 |
| 1.72 | 0.75 | 1.18  |
| 1.38 | 0.62 | 0.35  |
| 0.49 | 0.12 | -0.48 |
| #N/A | #N/A | -0.27 |
| 0.43 | 0.10 | 2.77  |
| 0.25 | 0.02 | 0.00  |
| 0.76 | 0.29 | -0.06 |
| 1.04 | 0.44 | 0.50  |
| 1.01 | 0.43 | 0.81  |
| #N/A | #N/A | -0.44 |
| 2.20 | 0.89 | 0.38  |
| 2.20 | 0.89 | 0.15  |
| #N/A | #N/A | 0.06  |
| 1.66 | 0.73 | -0.44 |

|      |      |       |
|------|------|-------|
| 1.66 | 0.73 | -0.21 |
| #N/A | #N/A | #N/A  |
| 1.03 | 0.44 | 0.71  |
| #N/A | #N/A | 0.89  |
| #N/A | #N/A | 1.53  |
| 0.89 | 0.36 | 0.26  |
| 0.53 | 0.15 | 1.08  |
| 0.53 | 0.15 | 0.10  |
| 0.33 | 0.04 | 0.89  |
| 0.46 | 0.11 | -0.43 |
| 1.39 | 0.62 | #N/A  |
| 1.93 | 0.82 | -1.04 |
| 2.11 | 0.86 | -0.43 |
| 1.28 | 0.57 | -1.30 |
| 1.49 | 0.67 | 0.82  |
| 2.34 | 0.88 | 0.10  |
| 1.24 | 0.55 | 0.36  |
| 1.24 | 0.55 | #N/A  |
| 2.10 | 0.86 | #N/A  |
| 2.10 | 0.86 | 1.69  |
| 1.44 | 0.64 | 0.28  |
| #N/A | #N/A | 0.53  |
| 0.61 | 0.20 | 0.90  |
| 0.61 | 0.20 | 0.19  |
| #N/A | #N/A | -0.35 |
| #N/A | #N/A | 0.80  |
| 1.02 | 0.43 | 0.89  |
| 1.27 | 0.55 | 0.10  |
| 1.27 | 0.55 | 0.15  |
| 0.81 | 0.31 | -0.92 |
| 2.14 | 0.87 | -0.20 |
| 2.14 | 0.87 | -1.64 |
| 3.00 | 0.96 | -2.10 |
| 3.00 | 0.96 | 0.20  |
| 1.69 | 0.75 | 0.14  |
| 2.51 | 0.93 | 0.19  |
| 1.47 | 0.66 | 0.72  |
| #N/A | #N/A | 0.08  |
| 1.27 | 0.55 | 0.78  |
| 0.72 | 0.26 | 0.77  |
| 1.09 | 0.47 | #N/A  |
| 0.48 | 0.12 | -0.96 |
| 1.46 | 0.65 | -0.31 |
| 1.46 | 0.65 | 0.14  |
| 2.28 | 0.90 | -1.69 |
| 1.07 | 0.46 | 0.84  |
| 1.88 | 0.80 | 0.03  |
| #N/A | #N/A | 0.04  |
| #N/A | #N/A | 0.64  |
| 1.60 | 0.71 | -0.31 |
| 1.62 | 0.72 | 0.38  |

|      |      |       |
|------|------|-------|
| 0.70 | 0.25 | 1.03  |
| 2.35 | 0.91 | 0.21  |
| 2.35 | 0.91 | -2.46 |
| 1.25 | 0.55 | 0.27  |
| 2.27 | 0.90 | -0.51 |
| 1.72 | 0.74 | -2.46 |
| 1.72 | 0.74 | -0.50 |
| 2.89 | 0.96 | -0.31 |
| 2.89 | 0.96 | 0.64  |
| 2.57 | 0.94 | 0.39  |
| #N/A | #N/A | 0.68  |
| #N/A | #N/A | 0.83  |
| 0.74 | 0.27 | -0.07 |
| #N/A | #N/A | 0.07  |
| 1.02 | 0.43 | -0.20 |
| 1.02 | 0.43 | 0.30  |
| #N/A | #N/A | 0.74  |
| #N/A | #N/A | -0.33 |
| 1.63 | 0.73 | 0.38  |
| 1.62 | 0.71 | 0.19  |
| 1.53 | 0.66 | -0.70 |
| 1.53 | 0.66 | 0.24  |
| 2.16 | 0.87 | -1.42 |
| #N/A | #N/A | 1.03  |
| 0.50 | 0.13 | 1.19  |
| 1.32 | 0.59 | -0.93 |
| 0.48 | 0.12 | -0.41 |
| 1.99 | 0.83 | -0.97 |
| 1.99 | 0.83 | 0.35  |
| 1.33 | 0.60 | -0.13 |
| 2.45 | 0.93 | -0.04 |
| 1.82 | 0.79 | 0.55  |
| 1.82 | 0.79 | 0.31  |
| 1.28 | 0.57 | -0.29 |
| 1.20 | 0.53 | 0.29  |
| 1.13 | 0.50 | -0.26 |
| 0.78 | 0.29 | #N/A  |
| 1.12 | 0.47 | -0.31 |
| #N/A | #N/A | -0.09 |
| #N/A | #N/A | 0.49  |
| 1.42 | 0.64 | 0.16  |
| #N/A | #N/A | #N/A  |
| 1.55 | 0.69 | -2.65 |
| 2.23 | 0.89 | -0.17 |
| 2.23 | 0.89 | -0.47 |
| 2.42 | 0.92 | -0.56 |
| 4.48 | 1.00 | #N/A  |
| 1.42 | 0.63 | 0.18  |
| 4.48 | 1.00 | -0.51 |
| 1.42 | 0.63 | 0.86  |
| #N/A | #N/A | 0.41  |

|      |      |       |
|------|------|-------|
| 1.87 | 0.78 | -0.28 |
| 1.87 | 0.78 | 0.52  |
| 1.99 | 0.84 | 0.02  |
| 1.99 | 0.84 | 0.80  |
| 1.69 | 0.74 | 0.76  |
| 1.15 | 0.50 | 0.16  |
| 1.15 | 0.50 | #N/A  |
| 0.95 | 0.39 | 0.38  |
| 1.73 | 0.76 | -0.23 |
| 1.73 | 0.76 | 0.24  |
| 0.61 | 0.20 | 3.40  |
| 0.42 | 0.08 | -0.47 |
| #N/A | #N/A | -2.47 |
| 1.16 | 0.51 | -0.85 |
| 0.20 | 0.01 | 0.26  |
| 0.20 | 0.01 | -1.91 |
| 1.02 | 0.43 | -0.09 |
| #N/A | #N/A | 0.38  |
| #N/A | #N/A | -0.29 |
| 0.71 | 0.25 | -0.26 |
| #N/A | #N/A | -0.39 |
| 1.97 | 0.83 | 1.44  |
| 1.97 | 0.83 | #N/A  |
| 1.36 | 0.61 | -0.06 |
| 1.15 | 0.51 | 0.49  |
| 1.69 | 0.74 | -1.32 |
| #N/A | #N/A | 0.11  |
| 1.56 | 0.69 | 0.23  |
| 1.56 | 0.69 | -1.71 |
| 1.27 | 0.56 | -2.38 |
| 1.38 | 0.62 | -0.24 |
| #N/A | #N/A | #N/A  |
| 1.28 | 0.57 | #N/A  |
| 1.28 | 0.57 | #N/A  |
| 2.20 | 0.89 | 0.13  |
| 2.20 | 0.89 | -0.41 |
| 0.78 | 0.30 | 0.50  |
| #N/A | #N/A | #N/A  |
| 1.23 | 0.55 | -0.58 |
| 1.23 | 0.55 | -0.34 |
| 2.21 | 0.89 | 0.01  |
| 3.27 | 0.98 | 0.10  |
| 3.27 | 0.98 | -2.63 |
| 1.11 | 0.48 | -2.46 |
| 1.45 | 0.65 | -0.03 |
| 1.63 | 0.72 | 1.02  |
| 1.63 | 0.72 | -0.39 |
| 0.90 | 0.37 | -1.60 |
| 0.60 | 0.19 | -1.62 |
| 0.90 | 0.37 | #N/A  |
| 0.36 | 0.05 | #N/A  |

|      |      |       |
|------|------|-------|
| #N/A | #N/A | 0.52  |
| #N/A | #N/A | 0.05  |
| #N/A | #N/A | 0.39  |
| 2.14 | 0.85 | 0.38  |
| 2.14 | 0.85 | 0.17  |
| 1.96 | 0.78 | #N/A  |
| 1.96 | 0.78 | 0.08  |
| #N/A | #N/A | -0.84 |
| 1.96 | 0.83 | -1.46 |
| #N/A | #N/A | #N/A  |
| 1.96 | 0.83 | #N/A  |
| #N/A | #N/A | 0.89  |
| #N/A | #N/A | 0.89  |
| 0.66 | 0.22 | 0.58  |
| 2.30 | 0.90 | 0.96  |
| 2.30 | 0.90 | 1.13  |
| #N/A | #N/A | #N/A  |
| 1.35 | 0.60 | 1.14  |
| #N/A | #N/A | -0.93 |
| 1.52 | 0.68 | -0.30 |
| 0.55 | 0.16 | -0.96 |
| 0.55 | 0.16 | 0.51  |
| 1.56 | 0.68 | 0.31  |
| 1.56 | 0.68 | #N/A  |
| #N/A | #N/A | -0.95 |
| 1.97 | 0.82 | #N/A  |
| 0.72 | 0.26 | -1.91 |
| 0.72 | 0.26 | -0.66 |
| 1.17 | 0.51 | -2.68 |
| 1.17 | 0.51 | -1.61 |
| #N/A | #N/A | -0.26 |
| #N/A | #N/A | 0.09  |
| 2.09 | 0.86 | 2.59  |
| 2.21 | 0.85 | -0.86 |
| 1.92 | 0.82 | #N/A  |
| 2.21 | 0.85 | 0.30  |
| 1.92 | 0.82 | 0.24  |
| #N/A | #N/A | #N/A  |
| 2.18 | 0.88 | 0.03  |
| 2.18 | 0.88 | 0.04  |
| #N/A | #N/A | -1.11 |
| #N/A | #N/A | 0.55  |
| #N/A | #N/A | 0.15  |
| #N/A | #N/A | #N/A  |
| 3.37 | 0.98 | -3.01 |
| 3.37 | 0.98 | -0.46 |
| #N/A | #N/A | 0.15  |
| 1.45 | 0.64 | 0.71  |
| 1.45 | 0.64 | #N/A  |
| 0.65 | 0.22 | 0.20  |
| 0.65 | 0.22 | -1.16 |

|      |      |       |
|------|------|-------|
| 1.50 | 0.67 | -0.18 |
| 1.79 | 0.78 | -0.16 |
| 0.48 | 0.12 | 1.13  |
| 0.74 | 0.27 | #N/A  |
| 1.40 | 0.63 | -0.36 |
| 1.40 | 0.63 | 0.07  |
| #N/A | #N/A | -0.60 |
| 1.80 | 0.78 | 1.11  |
| 1.80 | 0.78 | -0.47 |
| 1.10 | 0.48 | 0.70  |
| 1.46 | 0.65 | -0.19 |
| 1.46 | 0.65 | 0.24  |
| #N/A | #N/A | -0.58 |
| 1.52 | 0.68 | 0.28  |
| 1.27 | 0.56 | -0.08 |
| #N/A | #N/A | -0.36 |
| 2.15 | 0.87 | -1.21 |
| 2.15 | 0.87 | 0.66  |
| 2.30 | 0.86 | 0.28  |
| 1.78 | 0.78 | #N/A  |
| 2.30 | 0.86 | -1.42 |
| 1.78 | 0.78 | 0.19  |
| 2.62 | 0.93 | -0.03 |
| 0.81 | 0.31 | -0.20 |
| 1.52 | 0.67 | -2.05 |
| 1.04 | 0.45 | 1.05  |
| 1.78 | 0.78 | 0.20  |
| 1.78 | 0.78 | #N/A  |
| 0.55 | 0.16 | #N/A  |
| 0.55 | 0.16 | -1.01 |
| #N/A | #N/A | -0.07 |
| 1.34 | 0.60 | 0.92  |
| 1.14 | 0.50 | 1.22  |
| 1.14 | 0.50 | 0.45  |
| 1.02 | 0.43 | -0.14 |
| 0.64 | 0.22 | -0.57 |
| 0.42 | 0.08 | 0.88  |
| 0.64 | 0.22 | #N/A  |
| 0.42 | 0.08 | 0.08  |
| 0.93 | 0.38 | 0.79  |
| #N/A | #N/A | 0.89  |
| #N/A | #N/A | 1.58  |
| 1.11 | 0.48 | -0.50 |
| 1.11 | 0.48 | #N/A  |
| 1.28 | 0.57 | 1.14  |
| 1.28 | 0.57 | -0.22 |
| 1.81 | 0.77 | -0.29 |
| 1.64 | 0.71 | -0.01 |
| 2.51 | 0.93 | -0.01 |
| #N/A | #N/A | #N/A  |
| #N/A | #N/A | #N/A  |

|      |      |       |
|------|------|-------|
| 0.79 | 0.30 | #N/A  |
| 0.44 | 0.09 | -0.28 |
| 0.44 | 0.09 | #N/A  |
| 2.06 | 0.86 | #N/A  |
| 0.36 | 0.05 | -0.90 |
| 1.30 | 0.58 | -0.46 |
| 0.85 | 0.33 | 1.08  |
| 1.01 | 0.43 | 0.65  |
| 1.01 | 0.43 | 0.05  |
| 1.38 | 0.62 | -0.75 |
| 0.90 | 0.37 | 2.93  |
| 0.64 | 0.22 | -0.94 |
| 1.15 | 0.50 | #N/A  |
| 1.15 | 0.50 | #N/A  |
| 1.00 | 0.42 | -0.10 |
| 1.02 | 0.43 | -0.20 |
| 1.00 | 0.42 | 0.06  |
| 1.14 | 0.50 | -0.54 |
| 1.45 | 0.65 | #N/A  |
| 0.85 | 0.34 | -0.28 |
| 0.44 | 0.10 | #N/A  |
| 0.83 | 0.33 | -0.29 |
| 0.83 | 0.33 | 0.16  |
| 1.39 | 0.63 | -0.62 |
| #N/A | #N/A | -0.14 |
| 2.03 | 0.85 | -0.60 |
| 1.59 | 0.71 | 0.70  |
| 1.59 | 0.71 | 0.45  |
| 0.76 | 0.28 | 1.63  |
| 0.16 | 0.01 | 0.26  |
| #N/A | #N/A | #N/A  |
| #N/A | #N/A | -0.33 |
| 1.57 | 0.70 | #N/A  |
| 1.36 | 0.59 | 1.70  |
| 1.27 | 0.56 | 0.72  |
| #N/A | #N/A | 0.65  |
| #N/A | #N/A | -0.44 |
| 2.31 | 0.90 | -0.27 |
| 2.31 | 0.90 | -0.26 |
| 0.69 | 0.24 | -0.71 |
| 0.69 | 0.24 | 0.01  |
| 2.74 | 0.90 | -0.40 |
| 2.74 | 0.90 | #N/A  |
| #N/A | #N/A | 0.76  |
| 0.99 | 0.39 | 0.33  |
| 1.73 | 0.75 | -0.60 |
| 1.73 | 0.75 | #N/A  |
| 1.40 | 0.63 | 1.34  |
| 1.40 | 0.63 | 0.37  |
| 1.01 | 0.43 | -1.64 |
| 0.72 | 0.26 | -0.23 |



|      |      |       |
|------|------|-------|
| 1.87 | 0.81 | -0.29 |
| 1.87 | 0.81 | 0.10  |
| 1.10 | 0.47 | 0.30  |
| 1.88 | 0.80 | -0.19 |
| #N/A | #N/A | -0.47 |
| 0.30 | 0.03 | 0.07  |
| 0.30 | 0.03 | 0.00  |
| 0.30 | 0.03 | #N/A  |
| #N/A | #N/A | -0.51 |
| 1.02 | 0.43 | 0.33  |
| 1.99 | 0.83 | 0.93  |
| 1.99 | 0.83 | 1.85  |
| 0.71 | 0.25 | -1.02 |
| 2.00 | 0.84 | -0.08 |
| 1.51 | 0.67 | -1.23 |
| 1.29 | 0.57 | -0.19 |
| 0.31 | 0.03 | -0.51 |
| 0.31 | 0.03 | #N/A  |
| 0.31 | 0.03 | -0.98 |
| 0.78 | 0.29 | 0.60  |
| 0.57 | 0.25 | #N/A  |
| 1.67 | 0.74 | -0.17 |
| 1.64 | 0.73 | 0.25  |
| 2.50 | 0.93 | -0.02 |
| 2.21 | 0.88 | 0.61  |
| 2.21 | 0.88 | -1.12 |
| 0.56 | 0.16 | -1.79 |
| 1.89 | 0.81 | -0.95 |
| 1.06 | 0.46 | -0.15 |
| 1.06 | 0.46 | -0.31 |
| 0.36 | 0.06 | 0.01  |
| 0.36 | 0.06 | #N/A  |
| 0.62 | 0.20 | #N/A  |
| 0.62 | 0.20 | 1.87  |
| 1.33 | 0.60 | -1.53 |
| 1.51 | 0.68 | 0.56  |
| 1.51 | 0.68 | 0.04  |
| #N/A | #N/A | -0.34 |
| #N/A | #N/A | -0.48 |
| 0.57 | 0.17 | 0.67  |
| #N/A | #N/A | #N/A  |
| 0.57 | 0.17 | -0.39 |
| #N/A | #N/A | #N/A  |
| #N/A | #N/A | #N/A  |
| #N/A | #N/A | 2.14  |
| 1.41 | 0.63 | -0.12 |
| 0.95 | 0.39 | 0.11  |
| 1.11 | 0.48 | 0.40  |
| 1.11 | 0.48 | -0.09 |
| 1.11 | 0.48 | -0.33 |
| 1.11 | 0.48 | -0.32 |

|      |      |       |
|------|------|-------|
| 1.14 | 0.50 | 0.11  |
| 1.14 | 0.50 | 0.14  |
| 0.93 | 0.38 | -1.18 |
| #N/A | #N/A | -1.09 |
| 2.19 | 0.88 | -0.65 |
| 2.19 | 0.88 | 0.62  |
| 0.92 | 0.38 | 0.48  |
| 1.78 | 0.77 | -3.20 |
| 1.21 | 0.53 | -0.63 |
| #N/A | #N/A | -0.70 |
| 2.30 | 0.87 | #N/A  |
| 2.30 | 0.87 | -1.17 |
| 1.51 | 0.68 | 0.52  |
| 1.41 | 0.63 | -1.39 |
| 0.91 | 0.37 | 0.49  |
| #N/A | #N/A | 0.03  |
| #N/A | #N/A | 0.44  |
| 1.99 | 0.83 | 0.24  |
| 1.49 | 0.67 | -0.51 |
| #N/A | #N/A | 0.23  |
| 1.68 | 0.73 | -0.09 |
| 1.08 | 0.47 | -0.31 |
| 1.68 | 0.73 | -0.60 |
| 1.08 | 0.47 | 0.82  |
| 0.92 | 0.38 | 0.38  |
| #N/A | #N/A | #N/A  |
| 2.13 | 0.85 | 0.09  |
| #N/A | #N/A | 1.18  |
| 2.05 | 0.85 | -1.19 |
| 0.91 | 0.37 | 0.80  |
| 1.80 | 0.78 | 0.36  |
| 0.58 | 0.18 | -0.03 |
| #N/A | #N/A | -0.86 |
| #N/A | #N/A | -0.01 |
| 3.21 | 0.98 | -0.44 |
| 3.21 | 0.98 | -0.28 |
| 0.94 | 0.39 | 1.04  |
| 0.94 | 0.39 | 0.02  |
| 0.26 | 0.02 | 0.99  |
| 0.29 | 0.03 | -0.85 |
| 0.29 | 0.03 | 1.35  |
| #N/A | #N/A | 1.47  |
| 2.95 | 0.97 | 0.89  |
| 2.95 | 0.97 | -0.14 |
| 1.23 | 0.54 | 0.19  |
| 1.24 | 0.55 | #N/A  |
| 0.73 | 0.26 | -1.10 |
| 0.63 | 0.21 | 0.85  |
| 0.74 | 0.27 | #N/A  |
| 0.41 | 0.08 | #N/A  |
| 0.96 | 0.40 | -0.56 |

|      |      |       |
|------|------|-------|
| 1.48 | 0.66 | 0.17  |
| 1.29 | 0.58 | 0.50  |
| 1.18 | 0.52 | -0.96 |
| #N/A | #N/A | 0.17  |
| #N/A | #N/A | 0.16  |
| 0.94 | 0.39 | 0.12  |
| 0.56 | 0.17 | 1.41  |
| 0.46 | 0.11 | 2.75  |
| 0.49 | 0.12 | -0.81 |
| 0.36 | 0.05 | -0.18 |
| 0.39 | 0.08 | -1.67 |
| 1.13 | 0.44 | -0.19 |
| 1.13 | 0.44 | 1.24  |
| 1.28 | 0.57 | 0.22  |
| 1.48 | 0.66 | -0.23 |
| 0.68 | 0.24 | -0.21 |
| #N/A | #N/A | 0.95  |
| 0.80 | 0.30 | 1.69  |
| 0.80 | 0.30 | -0.04 |
| #N/A | #N/A | #N/A  |
| #N/A | #N/A | 0.24  |
| 1.35 | 0.61 | -0.09 |
| 0.71 | 0.26 | 0.56  |
| 1.47 | 0.66 | 2.33  |
| 1.35 | 0.61 | -0.11 |
| 0.53 | 0.14 | 0.92  |
| 1.42 | 0.64 | -3.02 |
| 1.23 | 0.55 | -0.37 |
| 1.23 | 0.55 | -0.33 |
| #N/A | #N/A | -1.85 |
| #N/A | #N/A | -1.74 |
| 0.64 | 0.22 | -0.29 |
| 1.23 | 0.55 | 0.75  |
| #N/A | #N/A | 0.15  |
| 1.66 | 0.73 | 0.17  |
| 1.66 | 0.73 | 1.37  |
| 1.20 | 0.53 | 0.24  |
| #N/A | #N/A | 0.01  |
| #N/A | #N/A | -1.62 |
| 1.86 | 0.80 | 0.19  |
| #N/A | #N/A | #N/A  |
| 2.40 | 0.91 | -0.63 |
| 2.40 | 0.91 | -1.23 |
| 1.06 | 0.41 | -0.66 |
| 1.18 | 0.52 | 0.82  |
| 0.57 | 0.17 | 0.07  |
| 1.47 | 0.66 | -0.57 |
| 1.47 | 0.66 | -0.22 |
| #N/A | #N/A | 1.44  |
| 0.49 | 0.12 | #N/A  |
| 2.75 | 0.95 | 0.32  |

|      |      |       |
|------|------|-------|
| 0.77 | 0.29 | 0.01  |
| 0.78 | 0.30 | 0.49  |
| 0.78 | 0.30 | 0.76  |
| #N/A | #N/A | 2.28  |
| #N/A | #N/A | #N/A  |
| #N/A | #N/A | 0.60  |
| 3.26 | 0.98 | 0.24  |
| 3.26 | 0.98 | 0.33  |
| 1.18 | 0.51 | 0.23  |
| 1.18 | 0.51 | -2.05 |
| 1.31 | 0.58 | 4.68  |
| 1.95 | 0.83 | -0.82 |
| 1.20 | 0.50 | 0.01  |
| 1.20 | 0.50 | #N/A  |
| 1.59 | 0.71 | -0.08 |
| #N/A | #N/A | -0.96 |
| 0.79 | 0.30 | -0.48 |
| #N/A | #N/A | -3.79 |
| 0.84 | 0.33 | -0.13 |
| 0.84 | 0.33 | -0.45 |
| 1.46 | 0.64 | 0.02  |
| 1.52 | 0.68 | -0.38 |
| 1.38 | 0.62 | -0.12 |
| 1.14 | 0.50 | -0.52 |
| 1.14 | 0.50 | -1.67 |
| 1.57 | 0.70 | -0.56 |
| 1.53 | 0.69 | 1.39  |
| 1.53 | 0.69 | #N/A  |
| 1.57 | 0.70 | -0.41 |
| 1.53 | 0.69 | #N/A  |
| 2.24 | 0.89 | 0.03  |
| 2.24 | 0.89 | -0.08 |
| 2.11 | 0.87 | 0.49  |
| 2.11 | 0.87 | 0.34  |
| 2.41 | 0.92 | -2.21 |
| 2.41 | 0.92 | -1.27 |
| 1.82 | 0.78 | #N/A  |
| 1.93 | 0.82 | #N/A  |
| 0.68 | 0.23 | 0.39  |
| 0.68 | 0.23 | -2.07 |
| 0.99 | 0.42 | -0.04 |
| 1.51 | 0.68 | 0.28  |
| 1.25 | 0.55 | 0.79  |
| #N/A | #N/A | #N/A  |
| 0.80 | 0.31 | 0.32  |
| 1.39 | 0.62 | -0.89 |
| 0.35 | 0.05 | 0.11  |
| 1.70 | 0.74 | #N/A  |
| 1.70 | 0.74 | -0.26 |
| 0.88 | 0.35 | 1.04  |
| #N/A | #N/A | 0.99  |

|      |      |       |
|------|------|-------|
| #N/A | #N/A | 0.42  |
| 1.26 | 0.56 | 0.63  |
| 1.04 | 0.44 | -1.11 |
| 1.04 | 0.44 | -0.21 |
| 1.94 | 0.82 | -0.31 |
| 1.94 | 0.82 | -0.16 |
| 1.39 | 0.62 | -1.43 |
| 1.39 | 0.62 | 2.99  |
| 1.74 | 0.76 | 0.09  |
| 2.43 | 0.92 | 0.25  |
| 2.43 | 0.92 | -0.99 |
| 2.43 | 0.92 | -0.44 |
| 0.99 | 0.41 | 0.12  |
| 2.50 | 0.93 | -1.78 |
| 2.50 | 0.93 | 0.35  |
| 0.64 | 0.22 | 0.68  |
| 0.31 | 0.03 | 0.36  |
| 0.78 | 0.29 | 0.10  |
| 2.20 | 0.89 | -0.04 |
| 1.17 | 0.52 | 0.86  |
| 0.93 | 0.38 | 1.57  |
| 0.62 | 0.20 | -0.64 |
| #N/A | #N/A | -1.85 |
| 1.36 | 0.61 | -0.08 |
| #N/A | #N/A | #N/A  |
| 1.58 | 0.70 | -0.45 |
| 1.58 | 0.70 | #N/A  |
| #N/A | #N/A | -0.36 |
| 1.70 | 0.72 | -0.39 |
| 2.41 | 0.90 | -0.29 |
| 2.41 | 0.90 | -0.37 |
| 1.13 | 0.49 | -0.25 |
| 1.60 | 0.72 | #N/A  |
| 1.60 | 0.72 | 0.77  |
| 0.14 | 0.01 | 0.71  |
| 0.42 | 0.08 | 0.14  |
| 0.67 | 0.23 | 0.93  |
| 1.34 | 0.60 | 0.02  |
| 1.03 | 0.43 | #N/A  |
| 1.37 | 0.62 | 0.56  |
| 1.24 | 0.55 | #N/A  |
| 2.17 | 0.88 | #N/A  |
| 2.17 | 0.88 | #N/A  |
| 2.57 | 0.94 | -0.56 |
| 1.60 | 0.72 | #N/A  |
| 1.44 | 0.64 | -1.08 |
| #N/A | #N/A | 0.02  |
| #N/A | #N/A | 0.18  |
| #N/A | #N/A | -0.52 |
| #N/A | #N/A | -1.24 |
| 0.89 | 0.36 | #N/A  |

|      |      |       |
|------|------|-------|
| 1.70 | 0.74 | -0.92 |
| 2.31 | 0.91 | 0.11  |
| #N/A | #N/A | 0.41  |
| 1.39 | 0.62 | 0.08  |
| 2.36 | 0.92 | -0.21 |
| 2.21 | 0.88 | 0.57  |
| 2.21 | 0.88 | 0.72  |
| #N/A | #N/A | -0.53 |
| #N/A | #N/A | 0.84  |
| 2.44 | 0.91 | #N/A  |
| 2.44 | 0.91 | -0.05 |
| 0.52 | 0.14 | #N/A  |
| 0.31 | 0.04 | 6.44  |
| 0.31 | 0.04 | #N/A  |
| 0.35 | 0.05 | 1.17  |
| #N/A | #N/A | -0.38 |
| 1.28 | 0.57 | 0.71  |
| #N/A | #N/A | -0.32 |
| 1.56 | 0.70 | #N/A  |
| 1.84 | 0.79 | 0.15  |
| #N/A | #N/A | -0.03 |
| #N/A | #N/A | -0.96 |
| 0.58 | 0.18 | -1.94 |
| 0.58 | 0.18 | -0.33 |
| 1.01 | 0.43 | 0.28  |
| 2.83 | 0.96 | -0.24 |
| 2.83 | 0.96 | 0.03  |
| #N/A | #N/A | -0.18 |
| 2.14 | 0.81 | 0.99  |
| #N/A | #N/A | 1.23  |
| 0.68 | 0.23 | 0.03  |
| 0.68 | 0.23 | -0.53 |
| 0.68 | 0.23 | 0.46  |
| 1.26 | 0.56 | 0.05  |
| #N/A | #N/A | -0.01 |
| #N/A | #N/A | 0.04  |
| #N/A | #N/A | -0.21 |
| #N/A | #N/A | 0.46  |
| 2.00 | 0.84 | -0.50 |
| 2.00 | 0.84 | 0.44  |
| 0.27 | 0.02 | -0.04 |
| #N/A | #N/A | -0.72 |
| 1.67 | 0.74 | 0.21  |
| 1.67 | 0.74 | 1.42  |
| 1.67 | 0.74 | 1.49  |
| #N/A | #N/A | 0.59  |
| 0.93 | 0.38 | -1.10 |
| #N/A | #N/A | 0.04  |
| 1.28 | 0.57 | 0.01  |
| 1.28 | 0.57 | 0.41  |
| 1.63 | 0.70 | -0.11 |

|      |      |       |
|------|------|-------|
| 1.63 | 0.70 | 0.47  |
| 0.68 | 0.24 | #N/A  |
| 1.10 | 0.48 | #N/A  |
| 1.50 | 0.67 | 1.08  |
| 1.50 | 0.67 | 2.07  |
| 1.56 | 0.69 | 0.64  |
| 0.83 | 0.33 | -0.33 |
| 0.83 | 0.33 | 0.29  |
| 2.41 | 0.90 | #N/A  |
| 2.13 | 0.87 | 0.48  |
| 2.13 | 0.87 | 0.10  |
| 1.55 | 0.69 | 0.83  |
| 0.75 | 0.28 | 0.85  |
| #N/A | #N/A | -1.21 |
| #N/A | #N/A | -0.02 |
| #N/A | #N/A | -0.14 |
| 1.58 | 0.71 | 0.22  |
| 0.43 | 0.09 | -0.64 |
| #N/A | #N/A | 0.25  |
| #N/A | #N/A | 0.57  |
| #N/A | #N/A | -0.08 |
| 1.72 | 0.76 | -1.68 |
| 2.76 | 0.94 | -0.16 |
| 1.33 | 0.59 | 0.85  |
| 1.33 | 0.59 | 0.65  |
| 0.62 | 0.20 | -0.58 |
| 0.62 | 0.20 | 0.34  |
| 1.03 | 0.44 | -0.35 |
| #N/A | #N/A | #N/A  |
| #N/A | #N/A | -0.28 |
| #N/A | #N/A | 0.62  |
| 2.45 | 0.77 | -0.21 |
| #N/A | #N/A | #N/A  |
| 2.71 | 0.96 | -0.34 |
| 1.23 | 0.55 | 0.52  |
| 1.09 | 0.47 | -0.14 |
| #N/A | #N/A | 0.51  |
| 0.83 | 0.32 | 1.07  |
| 1.66 | 0.74 | -1.55 |
| 1.66 | 0.74 | 0.22  |
| 1.45 | 0.65 | 0.46  |
| 2.16 | 0.87 | 0.62  |
| 1.64 | 0.72 | 0.11  |
| 0.82 | 0.31 | -0.78 |
| 1.26 | 0.56 | 0.73  |
| 1.26 | 0.56 | 0.72  |
| #N/A | #N/A | 0.51  |
| 1.27 | 0.57 | -0.43 |
| 2.64 | 0.95 | -0.64 |
| #N/A | #N/A | -0.44 |
| 1.85 | 0.80 | 0.28  |

|      |      |       |
|------|------|-------|
| 1.47 | 0.66 | 0.28  |
| 0.95 | 0.38 | -0.27 |
| #N/A | #N/A | -1.69 |
| 1.17 | 0.50 | #N/A  |
| #N/A | #N/A | 0.46  |
| #N/A | #N/A | -1.07 |
| #N/A | #N/A | -0.95 |
| #N/A | #N/A | #N/A  |
| 3.99 | 0.99 | -0.12 |
| 3.99 | 0.99 | -1.12 |
| 1.91 | 0.82 | 0.33  |
| 1.91 | 0.82 | 0.58  |
| 1.93 | 0.82 | 0.15  |
| 1.93 | 0.82 | 1.07  |
| #N/A | #N/A | -0.22 |
| 1.96 | 0.83 | 0.35  |
| 1.96 | 0.83 | 0.79  |
| #N/A | #N/A | 0.10  |
| 1.84 | 0.79 | 1.28  |
| 1.84 | 0.79 | 0.32  |
| 1.38 | 0.62 | 1.33  |
| 1.61 | 0.65 | 0.35  |
| 2.85 | 0.97 | -0.40 |
| 2.85 | 0.97 | 0.64  |
| 0.31 | 0.04 | 2.60  |
| 1.17 | 0.51 | #N/A  |
| 1.06 | 0.46 | -0.19 |
| 0.91 | 0.37 | #N/A  |
| #N/A | #N/A | #N/A  |
| 0.68 | 0.24 | 0.13  |
| 2.11 | 0.86 | 0.38  |
| 2.11 | 0.86 | 0.39  |
| 1.38 | 0.62 | 0.85  |
| 1.87 | 0.81 | -0.36 |
| 0.72 | 0.26 | 0.87  |
| 0.25 | 0.02 | #N/A  |
| 0.25 | 0.02 | -1.35 |
| 1.02 | 0.44 | -1.97 |
| 1.21 | 0.54 | 1.19  |
| 1.21 | 0.54 | 0.83  |
| 1.42 | 0.64 | -0.31 |
| 1.42 | 0.64 | 0.07  |
| #N/A | #N/A | -0.35 |
| #N/A | #N/A | #N/A  |
| 2.13 | 0.87 | -1.19 |
| 2.78 | 0.96 | 0.10  |
| 2.78 | 0.96 | -0.50 |
| 2.33 | 0.91 | 0.17  |
| 2.33 | 0.91 | 0.09  |
| 0.68 | 0.24 | -0.33 |
| 3.88 | 0.99 | -0.30 |



|      |      |       |
|------|------|-------|
| 3.88 | 0.99 | 0.40  |
| 1.37 | 0.61 | #N/A  |
| #N/A | #N/A | -0.54 |
| 1.37 | 0.61 | -0.25 |
| 1.27 | 0.57 | -0.09 |
| 2.33 | 0.91 | 0.43  |
| 0.84 | 0.33 | #N/A  |
| 0.39 | 0.07 | -2.23 |
| 0.39 | 0.07 | -1.65 |
| 1.10 | 0.48 | -1.62 |
| 1.64 | 0.73 | #N/A  |
| 1.35 | 0.60 | #N/A  |
| 0.72 | 0.26 | 0.15  |
| 0.32 | 0.04 | 0.79  |
| 0.32 | 0.04 | 2.58  |
| 0.88 | 0.35 | 0.03  |
| 1.06 | 0.46 | -0.26 |
| 1.41 | 0.63 | 0.14  |
| 0.73 | 0.27 | #N/A  |
| 1.39 | 0.62 | #N/A  |
| 2.44 | 0.93 | -0.79 |
| 2.44 | 0.93 | 0.29  |
| 0.98 | 0.40 | 1.09  |
| 1.13 | 0.50 | #N/A  |
| #N/A | #N/A | 1.38  |
| #N/A | #N/A | 0.55  |
| 1.09 | 0.47 | -0.01 |
| 0.79 | 0.30 | 0.00  |
| 0.89 | 0.36 | 0.06  |
| 0.89 | 0.36 | 0.29  |
| 1.50 | 0.67 | 0.86  |
| #N/A | #N/A | -0.06 |
| 0.61 | 0.19 | -1.98 |
| 0.61 | 0.19 | -0.05 |
| 0.65 | 0.22 | -0.03 |
| 2.31 | 0.91 | 0.28  |
| 1.96 | 0.83 | 0.85  |
| 2.33 | 0.88 | -0.54 |
| 2.33 | 0.88 | -1.19 |
| #N/A | #N/A | -0.94 |
| #N/A | #N/A | 2.95  |
| 3.09 | 0.94 | -0.32 |
| 3.09 | 0.94 | #N/A  |
| #N/A | #N/A | -0.10 |
| 1.76 | 0.76 | 0.24  |
| 1.43 | 0.64 | 0.11  |
| 3.57 | 0.99 | 0.20  |
| 1.43 | 0.64 | 0.06  |
| 3.57 | 0.99 | -0.91 |
| 1.21 | 0.53 | -0.24 |
| 1.21 | 0.53 | 0.70  |

|      |      |       |
|------|------|-------|
| 1.48 | 0.66 | 0.51  |
| 1.21 | 0.53 | #N/A  |
| 1.48 | 0.66 | -0.06 |
| 1.00 | 0.42 | -1.89 |
| 0.72 | 0.26 | -0.07 |
| 0.72 | 0.26 | -2.29 |
| #N/A | #N/A | 0.02  |
| 1.31 | 0.58 | #N/A  |
| 1.01 | 0.42 | #N/A  |
| 1.41 | 0.63 | 0.26  |
| 1.92 | 0.82 | 0.36  |
| 1.92 | 0.82 | 0.65  |
| #N/A | #N/A | 0.41  |
| 2.31 | 0.89 | -0.39 |
| 2.31 | 0.89 | -0.01 |
| 0.98 | 0.41 | 0.22  |
| 0.98 | 0.41 | -0.03 |
| #N/A | #N/A | #N/A  |
| #N/A | #N/A | 0.75  |
| 2.03 | 0.85 | 0.34  |
| 1.92 | 0.81 | #N/A  |
| 1.92 | 0.81 | #N/A  |
| 1.43 | 0.64 | 0.39  |
| 0.31 | 0.03 | -0.70 |
| #N/A | #N/A | -1.07 |
| 1.10 | 0.48 | 0.30  |
| 2.03 | 0.83 | -1.98 |
| #N/A | #N/A | -0.16 |
| 0.72 | 0.26 | -1.06 |
| 0.72 | 0.26 | -1.42 |
| 1.10 | 0.47 | -1.54 |
| 1.10 | 0.47 | 1.65  |
| 1.55 | 0.68 | -0.42 |
| 1.92 | 0.79 | -0.15 |
| 1.92 | 0.79 | -0.06 |
| #N/A | #N/A | #N/A  |
| #N/A | #N/A | 0.50  |
| #N/A | #N/A | 0.09  |
| 3.78 | 0.99 | -1.39 |
| 3.78 | 0.99 | -0.19 |
| 1.68 | 0.75 | -0.54 |
| 1.58 | 0.71 | 0.44  |
| 1.58 | 0.71 | 0.70  |
| 1.17 | 0.52 | -0.77 |
| #N/A | #N/A | 0.55  |
| #N/A | #N/A | #N/A  |
| 2.57 | 0.94 | 0.59  |
| 2.57 | 0.94 | -2.52 |
| 1.07 | 0.46 | 2.58  |
| 0.73 | 0.26 | -0.56 |
| 0.86 | 0.34 | -2.34 |

|      |      |       |
|------|------|-------|
| 0.86 | 0.34 | 0.52  |
| #N/A | #N/A | 0.66  |
| 1.62 | 0.72 | -0.38 |
| 1.62 | 0.72 | 0.63  |
| 1.62 | 0.72 | -0.44 |
| #N/A | #N/A | 0.02  |
| #N/A | #N/A | 0.42  |
| #N/A | #N/A | 0.66  |
| #N/A | #N/A | 0.81  |
| #N/A | #N/A | 0.80  |
| 0.84 | 0.33 | 0.53  |
| 1.03 | 0.44 | -2.08 |
| 1.03 | 0.44 | 0.33  |
| 1.55 | 0.69 | -0.21 |
| 1.55 | 0.69 | #N/A  |
| 2.57 | 0.94 | -0.57 |
| 2.57 | 0.94 | 0.12  |
| #N/A | #N/A | 0.61  |
| #N/A | #N/A | 0.20  |
| 1.15 | 0.50 | 0.18  |
| 1.51 | 0.67 | 0.06  |
| 1.64 | 0.72 | -0.79 |
| 1.64 | 0.72 | 0.29  |
| 0.59 | 0.18 | -2.19 |
| #N/A | #N/A | -1.92 |
| #N/A | #N/A | #N/A  |
| #N/A | #N/A | #N/A  |
| #N/A | #N/A | 0.27  |
| #N/A | #N/A | 0.48  |
| #N/A | #N/A | 0.36  |
| #N/A | #N/A | 0.43  |
| 2.36 | 0.91 | -0.13 |
| 1.12 | 0.49 | 2.50  |
| 0.97 | 0.40 | 0.90  |
| #N/A | #N/A | 1.01  |
| 1.05 | 0.45 | 0.17  |
| 2.34 | 0.90 | 0.64  |
| 2.34 | 0.90 | 1.06  |
| 0.22 | 0.01 | -0.01 |
| 0.95 | 0.39 | 0.69  |
| 1.26 | 0.56 | #N/A  |
| 1.26 | 0.56 | 0.64  |
| 1.70 | 0.75 | #N/A  |
| 1.70 | 0.75 | -0.11 |
| #N/A | #N/A | -0.06 |
| #N/A | #N/A | -1.46 |
| 1.64 | 0.66 | #N/A  |
| 2.05 | 0.85 | -3.27 |
| #N/A | #N/A | -0.11 |
| #N/A | #N/A | -0.44 |
| 1.49 | 0.66 | -0.11 |

|      |      |       |
|------|------|-------|
| 1.49 | 0.66 | #N/A  |
| #N/A | #N/A | -0.23 |
| #N/A | #N/A | #N/A  |
| 0.49 | 0.12 | #N/A  |
| #N/A | #N/A | 0.01  |
| 1.26 | 0.56 | 0.95  |
| 2.56 | 0.92 | 0.26  |
| 2.56 | 0.92 | #N/A  |
| #N/A | #N/A | #N/A  |
| #N/A | #N/A | 2.78  |
| 1.15 | 0.50 | 1.11  |
| 1.66 | 0.73 | 0.87  |
| 0.62 | 0.20 | 0.02  |
| #N/A | #N/A | #N/A  |
| 0.28 | 0.03 | -1.59 |
| 0.61 | 0.20 | 0.40  |
| 0.89 | 0.36 | 0.68  |
| 1.59 | 0.67 | 0.04  |
| 0.89 | 0.36 | -0.02 |
| 1.59 | 0.67 | #N/A  |
| 3.05 | 0.98 | #N/A  |
| 0.83 | 0.32 | 0.58  |
| 1.12 | 0.48 | 0.83  |
| 1.93 | 0.82 | 0.49  |
| 1.12 | 0.48 | 0.09  |
| 1.93 | 0.82 | -0.19 |
| 1.50 | 0.67 | -0.04 |
| 0.97 | 0.41 | -0.68 |
| 1.88 | 0.79 | 0.54  |
| #N/A | #N/A | #N/A  |
| 1.49 | 0.67 | 0.96  |
| 1.49 | 0.67 | 0.59  |
| #N/A | #N/A | 0.39  |
| 1.57 | 0.70 | 1.02  |
| 0.43 | 0.09 | -0.99 |
| #N/A | #N/A | -0.90 |
| #N/A | #N/A | -0.42 |
| #N/A | #N/A | #N/A  |
| #N/A | #N/A | -0.33 |
| #N/A | #N/A | -0.18 |
| 1.04 | 0.45 | 0.17  |
| 2.25 | 0.90 | -0.42 |
| 1.04 | 0.45 | #N/A  |
| #N/A | #N/A | #N/A  |
| 2.25 | 0.90 | 0.05  |
| #N/A | #N/A | 0.37  |
| #N/A | #N/A | 0.68  |
| 1.57 | 0.70 | -0.85 |
| 0.93 | 0.38 | -0.23 |
| 1.60 | 0.69 | -0.02 |
| #N/A | #N/A | -1.07 |

|      |      |       |
|------|------|-------|
| #N/A | #N/A | -0.03 |
| 2.18 | 0.87 | 1.01  |
| 1.85 | 0.80 | 0.28  |
| 1.85 | 0.80 | 1.04  |
| #N/A | #N/A | #N/A  |
| #N/A | #N/A | 0.06  |
| #N/A | #N/A | -0.27 |
| 1.04 | 0.44 | 0.25  |
| 2.67 | 0.95 | -1.47 |
| 3.19 | 0.97 | #N/A  |
| 2.67 | 0.95 | -0.73 |
| 3.19 | 0.97 | 0.09  |
| #N/A | #N/A | 0.06  |
| #N/A | #N/A | #N/A  |
| #N/A | #N/A | -0.85 |
| #N/A | #N/A | -0.34 |
| #N/A | #N/A | 0.87  |
| #N/A | #N/A | -0.31 |
| 1.92 | 0.82 | -0.12 |
| #N/A | #N/A | -0.55 |
| #N/A | #N/A | -0.40 |
| 1.14 | 0.49 | 0.41  |
| 0.74 | 0.27 | 1.43  |
| 1.56 | 0.69 | -0.68 |
| 1.86 | 0.80 | 0.51  |
| 1.86 | 0.80 | 0.38  |
| 2.11 | 0.86 | 0.61  |
| 0.64 | 0.22 | -1.07 |
| 1.11 | 0.48 | #N/A  |
| 1.44 | 0.65 | -0.41 |
| 1.87 | 0.80 | -0.31 |
| 1.87 | 0.80 | -0.30 |
| 1.85 | 0.80 | 1.25  |
| 1.24 | 0.55 | #N/A  |
| 0.98 | 0.40 | #N/A  |
| 0.98 | 0.40 | -0.33 |
| #N/A | #N/A | #N/A  |
| #N/A | #N/A | -1.87 |
| 1.79 | 0.78 | -0.57 |
| 2.95 | 0.94 | 0.06  |
| 2.95 | 0.94 | -0.50 |
| #N/A | #N/A | -0.15 |
| 2.07 | 0.81 | 0.12  |
| 2.07 | 0.81 | #N/A  |
| 1.55 | 0.69 | 0.13  |
| 0.61 | 0.19 | 1.93  |
| 1.75 | 0.76 | 0.43  |
| 1.75 | 0.76 | 0.54  |
| 1.75 | 0.76 | 0.52  |
| 2.46 | 0.92 | 0.36  |
| 1.35 | 0.60 | 0.17  |

|      |      |       |
|------|------|-------|
| 0.46 | 0.10 | -0.60 |
| 1.74 | 0.76 | 0.20  |
| 1.74 | 0.76 | -0.01 |
| 1.38 | 0.62 | -0.04 |
| #N/A | #N/A | -0.07 |
| #N/A | #N/A | 1.97  |
| 1.14 | 0.50 | -0.52 |
| 1.14 | 0.50 | 0.69  |
| 0.61 | 0.20 | #N/A  |
| 0.52 | 0.14 | 1.11  |
| 0.53 | 0.15 | -0.18 |
| #N/A | #N/A | #N/A  |
| #N/A | #N/A | 0.49  |
| 0.58 | 0.18 | -1.42 |
| 1.49 | 0.67 | 0.76  |
| 1.72 | 0.76 | #N/A  |
| 1.57 | 0.70 | -1.34 |
| 1.57 | 0.70 | -0.15 |
| 0.74 | 0.27 | 1.27  |
| 0.47 | 0.11 | 0.01  |
| 0.47 | 0.11 | -2.22 |
| 0.44 | 0.09 | -1.46 |
| 1.58 | 0.71 | 0.07  |
| 1.36 | 0.61 | -0.22 |
| 1.36 | 0.61 | -0.09 |
| #N/A | #N/A | #N/A  |
| #N/A | #N/A | 0.23  |
| 0.60 | 0.19 | 0.00  |
| 2.36 | 0.91 | -0.50 |
| #N/A | #N/A | 5.00  |
| 0.88 | 0.35 | 0.76  |
| 0.88 | 0.35 | #N/A  |
| 0.88 | 0.35 | -0.12 |
| 1.33 | 0.59 | -0.49 |
| 1.33 | 0.59 | 0.59  |
| 0.60 | 0.19 | 0.18  |
| 0.17 | 0.01 | #N/A  |
| 1.18 | 0.52 | #N/A  |
| 1.18 | 0.52 | 1.26  |
| 2.01 | 0.84 | #N/A  |
| 2.01 | 0.84 | #N/A  |
| 0.28 | 0.03 | 0.93  |
| 0.81 | 0.31 | -0.29 |
| 2.48 | 0.93 | -1.04 |
| 2.48 | 0.93 | #N/A  |
| 1.55 | 0.69 | #N/A  |
| 0.13 | 0.01 | -0.17 |
| 1.34 | 0.59 | #N/A  |
| 0.98 | 0.41 | 0.56  |
| #N/A | #N/A | 0.15  |
| 0.98 | 0.41 | 0.12  |

|      |      |       |
|------|------|-------|
| 2.43 | 0.92 | #N/A  |
| 2.11 | 0.86 | 2.74  |
| 1.15 | 0.51 | #N/A  |
| 0.71 | 0.25 | -1.15 |
| 1.15 | 0.51 | #N/A  |
| 0.71 | 0.25 | #N/A  |
| 1.98 | 0.82 | #N/A  |
| 1.98 | 0.82 | -0.94 |
| 1.96 | 0.80 | 0.34  |
| #N/A | #N/A | 0.29  |
| 1.96 | 0.80 | -0.63 |
| #N/A | #N/A | #N/A  |
| 2.33 | 0.91 | 0.07  |
| 1.02 | 0.43 | -0.45 |
| 1.02 | 0.43 | -0.37 |
| #N/A | #N/A | 0.60  |
| 2.62 | 0.90 | -0.96 |
| 2.62 | 0.90 | -0.28 |
| 1.59 | 0.71 | -0.70 |
| #N/A | #N/A | -0.22 |
| 0.42 | 0.08 | #N/A  |
| 0.36 | 0.05 | 1.28  |
| 1.57 | 0.69 | #N/A  |
| 1.07 | 0.46 | 4.29  |
| 2.23 | 0.89 | #N/A  |
| 0.92 | 0.37 | #N/A  |
| 0.78 | 0.30 | #N/A  |
| 0.80 | 0.30 | -0.19 |
| 1.18 | 0.52 | #N/A  |
| #N/A | #N/A | #N/A  |
| 0.66 | 0.23 | #N/A  |
| 0.66 | 0.23 | #N/A  |
| 0.31 | 0.04 | #N/A  |
| 2.69 | 0.94 | #N/A  |
| 2.69 | 0.94 | #N/A  |
| 1.70 | 0.73 | 0.59  |
| #N/A | #N/A | 0.93  |
| 2.38 | 0.88 | 0.56  |
| 2.38 | 0.88 | -3.72 |
| 1.65 | 0.72 | -0.15 |
| 1.65 | 0.72 | -0.86 |
| 1.25 | 0.55 | -0.15 |
| 0.83 | 0.32 | #N/A  |
| 0.91 | 0.37 | -0.94 |
| 1.81 | 0.75 | #N/A  |
| 1.92 | 0.82 | 1.49  |
| 1.29 | 0.57 | 1.53  |
| #N/A | #N/A | 0.90  |
| 1.85 | 0.80 | -0.77 |
| #N/A | #N/A | 0.07  |
| #N/A | #N/A | -0.61 |

|      |      |       |
|------|------|-------|
| 1.44 | 0.64 | -0.31 |
| 0.43 | 0.09 | 0.12  |
| 0.43 | 0.09 | -1.38 |
| 1.74 | 0.76 | -0.54 |
| 0.66 | 0.25 | -0.24 |
| 1.02 | 0.43 | 1.79  |
| 1.02 | 0.43 | -0.46 |
| 1.75 | 0.77 | -2.94 |
| 1.04 | 0.45 | -1.03 |
| 1.52 | 0.68 | 0.51  |
| 1.25 | 0.55 | #N/A  |
| 1.11 | 0.48 | 0.97  |
| #N/A | #N/A | -2.20 |
| #N/A | #N/A | -0.70 |
| 1.15 | 0.50 | 0.66  |
| 1.15 | 0.50 | 1.38  |
| 2.10 | 0.87 | 0.57  |
| 2.10 | 0.87 | 0.09  |
| 1.89 | 0.81 | -0.36 |
| 1.69 | 0.74 | 0.60  |
| #N/A | #N/A | 1.09  |
| #N/A | #N/A | 1.28  |
| #N/A | #N/A | 0.09  |
| #N/A | #N/A | #N/A  |
| 0.96 | 0.40 | #N/A  |
| 0.78 | 0.30 | 1.07  |
| 0.35 | 0.05 | 0.87  |
| 0.83 | 0.32 | 0.64  |
| 1.05 | 0.45 | 1.02  |
| 4.35 | 1.00 | -3.99 |
| 0.40 | 0.07 | 0.61  |
| 2.54 | 0.94 | -0.26 |
| #N/A | #N/A | -1.61 |
| #N/A | #N/A | 1.80  |
| 2.12 | 0.84 | 0.25  |
| 2.00 | 0.84 | -1.32 |
| 2.00 | 0.84 | -1.07 |
| 2.00 | 0.84 | 0.02  |
| 0.77 | 0.29 | 0.43  |
| 0.77 | 0.29 | -0.46 |
| 1.68 | 0.75 | 0.11  |
| 0.39 | 0.07 | 0.27  |
| 3.60 | 0.97 | -0.73 |
| 1.26 | 0.56 | -2.13 |
| 3.60 | 0.97 | -2.64 |
| 0.17 | 0.01 | 0.62  |
| 0.43 | 0.09 | -1.93 |
| #N/A | #N/A | 0.40  |
| #N/A | #N/A | 0.01  |
| 1.34 | 0.59 | 0.05  |
| #N/A | #N/A | 0.14  |



|       |      |       |
|-------|------|-------|
| 1.34  | 0.59 | 0.86  |
| #N/A  | #N/A | 0.04  |
| 0.91  | 0.37 | 0.09  |
| 0.91  | 0.37 | 0.10  |
| 1.96  | 0.79 | -0.35 |
| 0.98  | 0.41 | -0.57 |
| 0.98  | 0.41 | -1.67 |
| 1.54  | 0.69 | 1.13  |
| 0.81  | 0.31 | -0.17 |
| 0.81  | 0.31 | -1.66 |
| 1.00  | 0.42 | -1.74 |
| 1.33  | 0.59 | 0.02  |
| 2.24  | 0.89 | -0.88 |
| 0.50  | 0.13 | -0.83 |
| 1.85  | 0.80 | -0.51 |
| 0.82  | 0.32 | 0.56  |
| 1.25  | 0.56 | 0.99  |
| 1.41  | 0.63 | 0.09  |
| 2.55  | 0.94 | -0.71 |
| 2.55  | 0.94 | 0.49  |
| 1.81  | 0.79 | -1.16 |
| 2.56  | 0.94 | -1.07 |
| 0.36  | 0.05 | 0.05  |
| 0.53  | 0.14 | #N/A  |
| 1.16  | 0.51 | -0.31 |
| 0.11  | 0.00 | 0.27  |
| 13.64 | 0.83 | 0.22  |
| 1.23  | 0.55 | 1.38  |
| 1.23  | 0.55 | -0.38 |
| 3.01  | 0.96 | 0.23  |
| 1.34  | 0.59 | 0.32  |
| 1.34  | 0.59 | -0.02 |
| 0.97  | 0.40 | 0.64  |
| 2.07  | 0.86 | -1.42 |
| 0.86  | 0.34 | -0.53 |
| 0.61  | 0.20 | -0.22 |
| 0.61  | 0.20 | -0.11 |
| #N/A  | #N/A | 0.24  |
| 0.83  | 0.33 | 1.31  |
| #N/A  | #N/A | #N/A  |
| 1.14  | 0.50 | 0.44  |
| 1.14  | 0.50 | -0.43 |
| 1.63  | 0.73 | 1.01  |
| 1.34  | 0.60 | -1.08 |
| 1.34  | 0.60 | -1.24 |
| 0.89  | 0.36 | 1.54  |
| 0.58  | 0.18 | 0.78  |
| 0.58  | 0.18 | -2.23 |
| 3.29  | 0.98 | 0.07  |
| 1.83  | 0.79 | -0.03 |
| 1.83  | 0.79 | #N/A  |

|      |      |       |
|------|------|-------|
| 1.35 | 0.60 | 0.20  |
| #N/A | #N/A | 0.61  |
| #N/A | #N/A | 0.36  |
| 0.97 | 0.41 | -1.12 |
| 1.01 | 0.41 | 0.44  |
| 1.35 | 0.61 | 0.32  |
| 1.35 | 0.61 | -0.54 |
| 2.45 | 0.93 | #N/A  |
| 2.09 | 0.86 | 0.71  |
| 2.09 | 0.86 | 0.15  |
| #N/A | #N/A | #N/A  |
| 0.71 | 0.26 | -0.53 |
| 0.71 | 0.26 | -0.74 |
| 1.92 | 0.82 | 0.89  |
| 1.92 | 0.82 | 1.09  |
| 1.18 | 0.52 | 0.00  |
| #N/A | #N/A | -4.20 |
| 1.86 | 0.79 | 0.63  |
| 1.17 | 0.51 | #N/A  |
| 1.90 | 0.76 | 0.58  |
| 1.54 | 0.69 | 0.11  |
| 1.05 | 0.45 | 1.12  |
| #N/A | #N/A | -0.69 |
| #N/A | #N/A | 0.04  |
| #N/A | #N/A | #N/A  |
| #N/A | #N/A | 1.58  |
| 1.41 | 0.63 | 0.96  |
| 2.81 | 0.96 | -3.75 |
| 2.63 | 0.94 | #N/A  |
| 2.63 | 0.94 | 0.17  |
| 1.28 | 0.54 | 5.11  |
| 0.62 | 0.20 | #N/A  |
| 1.33 | 0.59 | #N/A  |
| 2.50 | 0.93 | #N/A  |
| 2.12 | 0.87 | -0.54 |
| 0.76 | 0.29 | 0.86  |
| #N/A | #N/A | -0.27 |
| 1.07 | 0.46 | 0.87  |
| 1.16 | 0.51 | 2.79  |
| 1.83 | 0.79 | -0.09 |
| 0.73 | 0.27 | 0.86  |
| #N/A | #N/A | #N/A  |
| 1.12 | 0.48 | 0.50  |
| 1.07 | 0.46 | 0.10  |
| 2.35 | 0.89 | -0.30 |
| 1.32 | 0.59 | 0.28  |
| 2.74 | 0.96 | -1.45 |
| 1.32 | 0.59 | #N/A  |
| 2.74 | 0.96 | 0.66  |
| 1.32 | 0.59 | 0.47  |
| 1.37 | 0.62 | 0.83  |

|      |      |       |
|------|------|-------|
| 1.32 | 0.59 | #N/A  |
| 1.37 | 0.62 | 0.34  |
| 1.91 | 0.82 | 0.05  |
| 2.40 | 0.92 | #N/A  |
| #N/A | #N/A | #N/A  |
| #N/A | #N/A | -0.10 |
| #N/A | #N/A | -0.34 |
| #N/A | #N/A | -0.42 |
| 2.11 | 0.86 | 0.61  |
| 2.11 | 0.86 | -0.27 |
| 0.88 | 0.35 | -0.95 |
| 1.44 | 0.65 | -1.76 |
| 1.44 | 0.65 | 0.60  |
| #N/A | #N/A | 0.43  |
| 1.33 | 0.59 | -0.41 |
| 1.04 | 0.45 | 1.10  |
| 2.38 | 0.90 | -1.39 |
| 2.10 | 0.87 | -0.01 |
| 1.49 | 0.67 | 0.06  |
| 1.49 | 0.67 | 0.09  |
| 2.12 | 0.87 | 1.07  |
| 2.15 | 0.88 | #N/A  |
| #N/A | #N/A | #N/A  |
| #N/A | #N/A | -0.62 |
| 2.16 | 0.88 | -1.11 |
| 1.27 | 0.57 | -0.39 |
| #N/A | #N/A | 0.93  |
| #N/A | #N/A | 0.15  |
| 0.82 | 0.32 | -1.45 |
| 1.31 | 0.58 | 0.15  |
| 1.31 | 0.58 | 0.07  |
| 1.12 | 0.48 | 0.09  |
| #N/A | #N/A | #N/A  |
| #N/A | #N/A | -0.25 |
| 1.12 | 0.48 | 0.23  |
| #N/A | #N/A | 0.48  |
| #N/A | #N/A | 0.07  |
| 1.50 | 0.67 | -0.41 |
| 1.22 | 0.54 | -0.80 |
| 2.39 | 0.91 | -2.45 |
| 2.39 | 0.91 | -0.50 |
| #N/A | #N/A | -1.17 |
| 0.98 | 0.41 | -1.84 |
| 0.98 | 0.41 | 0.06  |
| #N/A | #N/A | 0.58  |
| 1.43 | 0.63 | #N/A  |
| 1.43 | 0.63 | 0.74  |
| 1.09 | 0.47 | -0.15 |
| 0.63 | 0.21 | 3.03  |
| #N/A | #N/A | #N/A  |
| 1.45 | 0.65 | 0.06  |

|      |      |       |
|------|------|-------|
| 0.31 | 0.04 | 1.62  |
| 1.36 | 0.61 | -0.23 |
| 1.36 | 0.61 | -1.05 |
| 1.32 | 0.58 | 0.53  |
| 0.91 | 0.37 | -2.27 |
| 0.91 | 0.37 | #N/A  |
| 1.45 | 0.65 | 1.35  |
| 1.45 | 0.65 | 0.19  |
| 1.46 | 0.66 | 0.56  |
| #N/A | #N/A | -2.25 |
| #N/A | #N/A | 0.14  |
| 1.13 | 0.50 | 0.87  |
| 1.16 | 0.49 | 1.32  |
| 1.16 | 0.49 | -0.93 |
| 2.54 | 0.93 | -0.68 |
| 2.65 | 0.95 | -1.16 |
| 2.65 | 0.95 | -0.85 |
| 1.02 | 0.43 | #N/A  |
| #N/A | #N/A | #N/A  |
| 0.85 | 0.34 | 0.23  |
| 1.63 | 0.73 | 1.05  |
| #N/A | #N/A | 0.16  |
| #N/A | #N/A | -0.06 |
| 1.39 | 0.62 | -0.92 |
| 0.73 | 0.26 | 1.12  |
| 0.58 | 0.18 | 0.08  |
| #N/A | #N/A | 0.13  |
| 1.09 | 0.47 | 0.44  |
| 0.82 | 0.32 | #N/A  |
| #N/A | #N/A | 0.37  |
| #N/A | #N/A | -0.72 |
| 0.98 | 0.41 | 0.00  |
| 0.39 | 0.06 | -0.11 |
| 1.07 | 0.46 | -0.39 |
| #N/A | #N/A | -0.51 |
| 0.62 | 0.20 | 0.42  |
| #N/A | #N/A | 0.48  |
| #N/A | #N/A | -1.39 |
| #N/A | #N/A | -0.46 |
| 2.20 | 0.88 | -0.05 |
| 2.34 | 0.91 | -1.73 |
| 2.34 | 0.91 | -1.09 |
| #N/A | #N/A | -0.09 |
| 1.66 | 0.73 | 1.02  |
| 1.66 | 0.73 | 0.57  |
| 0.71 | 0.25 | 1.33  |
| 2.45 | 0.92 | -1.67 |
| 2.45 | 0.92 | -2.19 |
| 0.29 | 0.03 | -1.70 |
| #N/A | #N/A | 1.05  |
| #N/A | #N/A | #N/A  |

|      |      |       |
|------|------|-------|
| 2.64 | 0.95 | 0.25  |
| 2.64 | 0.95 | -1.84 |
| 3.35 | 0.98 | -0.39 |
| #N/A | #N/A | 0.41  |
| #N/A | #N/A | 0.85  |
| 0.79 | 0.30 | 0.35  |
| #N/A | #N/A | 1.00  |
| #N/A | #N/A | -0.60 |
| #N/A | #N/A | -0.57 |
| 0.36 | 0.05 | 0.47  |
| 1.80 | 0.78 | 0.87  |
| 1.80 | 0.78 | -1.23 |
| #N/A | #N/A | -0.75 |
| #N/A | #N/A | 0.48  |
| #N/A | #N/A | -0.17 |
| #N/A | #N/A | -0.16 |
| #N/A | #N/A | -0.24 |
| #N/A | #N/A | -1.79 |
| 2.63 | 0.95 | -0.63 |
| 2.63 | 0.95 | -1.05 |
| 1.33 | 0.60 | 0.92  |
| #N/A | #N/A | 0.89  |
| #N/A | #N/A | -0.33 |
| 1.29 | 0.57 | -0.09 |
| #N/A | #N/A | -0.14 |
| #N/A | #N/A | -0.93 |
| 0.66 | 0.22 | 0.36  |
| 0.96 | 0.39 | -0.23 |
| 0.66 | 0.22 | -0.04 |
| #N/A | #N/A | 0.85  |
| #N/A | #N/A | -2.36 |
| 2.69 | 0.95 | -0.14 |
| #N/A | #N/A | 0.10  |
| 2.48 | 0.93 | 0.05  |
| 2.44 | 0.92 | #N/A  |
| #N/A | #N/A | 0.78  |
| 2.23 | 0.89 | -0.47 |
| 2.23 | 0.89 | #N/A  |
| 2.48 | 0.93 | #N/A  |
| 0.99 | 0.42 | 0.07  |
| 1.52 | 0.67 | -2.11 |
| 1.90 | 0.80 | -0.41 |
| 1.37 | 0.60 | -1.63 |
| 2.71 | 0.96 | -1.31 |
| 2.71 | 0.96 | -2.32 |
| #N/A | #N/A | 0.29  |
| 1.27 | 0.56 | -1.29 |
| #N/A | #N/A | -0.63 |
| #N/A | #N/A | -0.88 |
| 0.36 | 0.05 | 1.73  |
| #N/A | #N/A | -0.41 |

|      |      |       |
|------|------|-------|
| #N/A | #N/A | 0.04  |
| 1.99 | 0.83 | 0.10  |
| #N/A | #N/A | 0.88  |
| #N/A | #N/A | -0.28 |
| 2.24 | 0.89 | 0.05  |
| 2.24 | 0.89 | #N/A  |
| #N/A | #N/A | #N/A  |
| #N/A | #N/A | -0.14 |
| 1.25 | 0.55 | 0.65  |
| 1.25 | 0.55 | -2.59 |
| #N/A | #N/A | 0.87  |
| #N/A | #N/A | 0.02  |
| 1.38 | 0.61 | -0.93 |
| #N/A | #N/A | #N/A  |
| 2.20 | 0.89 | 0.37  |
| #N/A | #N/A | 3.39  |
| 2.54 | 0.93 | -2.64 |
| 1.48 | 0.64 | -2.48 |
| #N/A | #N/A | -0.01 |
| #N/A | #N/A | 0.38  |
| 1.09 | 0.47 | 0.45  |
| 1.09 | 0.47 | #N/A  |
| 2.26 | 0.86 | -0.07 |
| 2.26 | 0.86 | #N/A  |
| #N/A | #N/A | 3.66  |
| 0.63 | 0.21 | 1.43  |
| #N/A | #N/A | -0.16 |
| #N/A | #N/A | #N/A  |
| 1.60 | 0.69 | -0.51 |
| 2.85 | 0.96 | 0.43  |
| 2.85 | 0.96 | 0.30  |
| 0.90 | 0.36 | 0.13  |
| 0.57 | 0.17 | 2.78  |
| 1.30 | 0.58 | #N/A  |
| 1.30 | 0.58 | 0.96  |
| 1.76 | 0.77 | -0.44 |
| 1.76 | 0.77 | -0.51 |
| #N/A | #N/A | 0.57  |
| #N/A | #N/A | 0.57  |
| 1.57 | 0.70 | #N/A  |
| 1.78 | 0.78 | 0.80  |
| 1.78 | 0.78 | 1.02  |
| #N/A | #N/A | 0.48  |
| 2.86 | 0.95 | 0.50  |
| 2.86 | 0.95 | 0.15  |
| 1.54 | 0.68 | -0.02 |
| 3.78 | 0.99 | -0.21 |
| 3.78 | 0.99 | -0.48 |
| 2.48 | 0.93 | -0.72 |
| 1.76 | 0.76 | 0.16  |
| 1.99 | 0.82 | 0.06  |

|      |      |       |
|------|------|-------|
| 1.50 | 0.64 | 0.55  |
| 0.48 | 0.12 | 0.17  |
| #N/A | #N/A | #N/A  |
| #N/A | #N/A | #N/A  |
| #N/A | #N/A | -1.41 |
| #N/A | #N/A | -1.11 |
| #N/A | #N/A | -0.49 |
| 3.74 | 0.99 | 0.67  |
| 3.74 | 0.99 | 0.68  |
| #N/A | #N/A | 0.24  |
| 0.96 | 0.40 | #N/A  |
| 0.96 | 0.40 | 0.13  |
| 2.09 | 0.87 | -0.47 |
| 0.76 | 0.28 | 0.36  |
| 0.76 | 0.28 | 3.17  |
| #N/A | #N/A | 2.28  |
| 1.27 | 0.57 | 2.24  |
| #N/A | #N/A | 0.47  |
| #N/A | #N/A | 2.39  |
| #N/A | #N/A | -0.98 |
| #N/A | #N/A | 0.84  |
| #N/A | #N/A | -0.36 |
| #N/A | #N/A | -0.51 |
| 0.85 | 0.33 | -0.92 |
| #N/A | #N/A | 0.08  |
| 1.95 | 0.83 | -0.28 |
| 2.79 | 0.92 | 0.35  |
| 2.79 | 0.92 | -2.51 |
| 1.37 | 0.61 | -1.53 |
| 1.37 | 0.61 | -0.19 |
| 2.61 | 0.95 | 0.28  |
| 2.61 | 0.95 | -0.32 |
| 2.12 | 0.87 | #N/A  |
| 2.12 | 0.87 | -1.05 |
| #N/A | #N/A | 0.44  |
| 1.25 | 0.56 | -0.96 |
| 1.25 | 0.56 | -0.86 |
| 2.46 | 0.93 | -0.39 |
| 2.46 | 0.93 | 0.56  |
| 0.68 | 0.24 | -0.07 |
| #N/A | #N/A | 0.51  |
| #N/A | #N/A | 0.40  |
| 1.56 | 0.69 | 0.92  |
| 1.27 | 0.56 | 0.58  |
| 1.56 | 0.69 | -0.69 |
| #N/A | #N/A | 0.04  |
| #N/A | #N/A | -0.86 |
| 1.49 | 0.67 | -0.30 |
| 1.70 | 0.73 | -1.90 |
| #N/A | #N/A | -2.67 |
| 1.53 | 0.58 | 1.19  |

|      |      |       |
|------|------|-------|
| 2.41 | 0.92 | -1.00 |
| #N/A | #N/A | -1.31 |
| #N/A | #N/A | -0.19 |
| 0.75 | 0.28 | -0.25 |
| #N/A | #N/A | -0.62 |
| #N/A | #N/A | 0.92  |
| 0.73 | 0.27 | -0.03 |
| 0.94 | 0.39 | -0.01 |
| 1.66 | 0.73 | -0.12 |
| #N/A | #N/A | 0.47  |
| 1.76 | 0.77 | -0.65 |
| 1.64 | 0.73 | -0.38 |
| 0.86 | 0.34 | #N/A  |
| 0.66 | 0.23 | #N/A  |
| 2.38 | 0.91 | -0.19 |
| 2.38 | 0.91 | -0.40 |
| 1.38 | 0.62 | -0.07 |
| 1.38 | 0.62 | #N/A  |
| 1.08 | 0.47 | 0.38  |
| 2.20 | 0.83 | #N/A  |
| 2.20 | 0.83 | -0.50 |
| 1.93 | 0.82 | -1.07 |
| 1.93 | 0.82 | 0.88  |
| 1.58 | 0.70 | 0.44  |
| #N/A | #N/A | -1.38 |
| #N/A | #N/A | -2.51 |
| #N/A | #N/A | 0.87  |
| 1.03 | 0.44 | 0.91  |
| 1.03 | 0.44 | 0.10  |
| #N/A | #N/A | 0.08  |
| #N/A | #N/A | -0.64 |
| 0.78 | 0.29 | -1.83 |
| 0.78 | 0.29 | -0.48 |
| 1.83 | 0.79 | -0.24 |
| 1.52 | 0.68 | -0.75 |
| 1.68 | 0.75 | -0.17 |
| 1.68 | 0.75 | -2.38 |
| 0.89 | 0.36 | 1.70  |
| 1.07 | 0.46 | -0.75 |
| 1.07 | 0.46 | -0.29 |
| 1.01 | 0.43 | #N/A  |
| 1.49 | 0.67 | -0.04 |
| 1.39 | 0.62 | 0.14  |
| 1.01 | 0.43 | -0.20 |
| 1.01 | 0.43 | -0.79 |
| 1.39 | 0.62 | -2.08 |
| 1.39 | 0.62 | -1.84 |
| #N/A | #N/A | 0.87  |
| 1.39 | 0.62 | 0.10  |
| 1.39 | 0.62 | 0.21  |
| 1.58 | 0.70 | 0.40  |



|       |      |       |
|-------|------|-------|
| 1.58  | 0.70 | 0.41  |
| 1.86  | 0.80 | -0.62 |
| 1.86  | 0.80 | -0.35 |
| 1.04  | 0.44 | #N/A  |
| 2.24  | 0.90 | #N/A  |
| 2.24  | 0.90 | 1.10  |
| #N/A  | #N/A | -1.56 |
| 0.75  | 0.28 | 0.10  |
| #N/A  | #N/A | 0.76  |
| 1.33  | 0.59 | -2.48 |
| 0.55  | 0.16 | #N/A  |
| 0.55  | 0.16 | #N/A  |
| 1.42  | 0.64 | 0.16  |
| #N/A  | #N/A | #N/A  |
| 1.07  | 0.46 | 0.38  |
| 2.70  | 0.95 | -0.97 |
| #N/A  | #N/A | 1.05  |
| 0.52  | 0.14 | -1.92 |
| 2.85  | 0.97 | -2.66 |
| 2.85  | 0.97 | -0.35 |
| 0.95  | 0.39 | -0.28 |
| 1.08  | 0.47 | 0.18  |
| 1.08  | 0.47 | 0.85  |
| 0.89  | 0.36 | -0.83 |
| 0.89  | 0.36 | #N/A  |
| 1.57  | 0.70 | -0.97 |
| 1.91  | 0.82 | -0.58 |
| #N/A  | #N/A | 0.03  |
| #N/A  | #N/A | #N/A  |
| #N/A  | #N/A | 0.13  |
| 2.06  | 0.86 | -0.58 |
| 2.06  | 0.86 | #N/A  |
| 0.93  | 0.38 | 1.06  |
| #N/A  | #N/A | 0.88  |
| 2.03  | 0.85 | 0.39  |
| 79.71 | 0.85 | 0.48  |
| 79.71 | 0.85 | -0.31 |
| 3.43  | 0.97 | -0.10 |
| #N/A  | #N/A | -0.48 |
| #N/A  | #N/A | 0.32  |
| 2.90  | 0.97 | 0.16  |
| 2.90  | 0.97 | 0.08  |
| #N/A  | #N/A | -0.67 |
| 2.32  | 0.91 | -0.28 |
| 1.47  | 0.66 | 0.46  |
| 1.54  | 0.69 | 0.12  |
| 1.54  | 0.69 | -0.02 |
| 1.28  | 0.57 | 0.54  |
| 1.97  | 0.78 | 0.09  |
| 0.87  | 0.34 | 0.70  |
| 0.87  | 0.34 | 1.41  |

|      |      |       |
|------|------|-------|
| 0.31 | 0.03 | -1.89 |
| 0.38 | 0.06 | 0.14  |
| 0.59 | 0.18 | #N/A  |
| 0.59 | 0.18 | 1.38  |
| 0.26 | 0.02 | -0.10 |
| #N/A | #N/A | -0.79 |
| #N/A | #N/A | #N/A  |
| 2.14 | 0.87 | 0.05  |
| #N/A | #N/A | 0.10  |
| #N/A | #N/A | -1.43 |
| #N/A | #N/A | 0.86  |
| #N/A | #N/A | 0.27  |
| 2.14 | 0.88 | -1.82 |
| 2.14 | 0.88 | 1.26  |
| 1.69 | 0.74 | -0.08 |
| 2.53 | 0.94 | 1.26  |
| 2.37 | 0.91 | 0.36  |
| 0.45 | 0.10 | -1.66 |
| 0.99 | 0.42 | 0.18  |
| #N/A | #N/A | 0.68  |
| 1.46 | 0.65 | 0.49  |
| 1.46 | 0.65 | -0.14 |
| 1.01 | 0.42 | 0.07  |
| 1.08 | 0.47 | 0.63  |
| 1.19 | 0.52 | 0.19  |
| 1.19 | 0.52 | 0.05  |
| 2.71 | 0.95 | -1.97 |
| 2.71 | 0.95 | -1.56 |
| 0.51 | 0.14 | #N/A  |
| 1.93 | 0.82 | 0.47  |
| 0.51 | 0.14 | #N/A  |
| 1.93 | 0.82 | 0.15  |
| #N/A | #N/A | -1.21 |
| #N/A | #N/A | -0.30 |
| #N/A | #N/A | 0.05  |
| #N/A | #N/A | 1.54  |
| 1.86 | 0.78 | 0.21  |
| 0.85 | 0.33 | 0.17  |
| 3.97 | 0.99 | -0.16 |
| 3.97 | 0.99 | -1.91 |
| 2.73 | 0.96 | -0.87 |
| 2.73 | 0.96 | -0.23 |
| 1.08 | 0.46 | -0.29 |
| 1.75 | 0.76 | 0.55  |
| 2.28 | 0.90 | -2.75 |
| 2.27 | 0.90 | 0.34  |
| 2.27 | 0.90 | 0.27  |
| 0.25 | 0.02 | 1.77  |
| 0.68 | 0.24 | #N/A  |
| 0.68 | 0.24 | 1.41  |
| 0.47 | 0.11 | -0.28 |

|      |      |       |
|------|------|-------|
| 2.04 | 0.75 | -0.64 |
| 2.04 | 0.75 | 0.49  |
| 1.61 | 0.71 | 0.32  |
| 1.07 | 0.46 | -0.34 |
| 1.07 | 0.46 | 1.63  |
| #N/A | #N/A | 0.80  |
| #N/A | #N/A | 0.03  |
| 1.90 | 0.81 | -1.25 |
| 0.71 | 0.25 | 0.43  |
| 1.71 | 0.75 | 0.82  |
| 1.45 | 0.65 | 1.66  |
| 1.45 | 0.65 | -0.10 |
| 3.42 | 0.99 | -0.01 |
| 0.52 | 0.14 | 0.33  |
| 0.52 | 0.14 | 1.64  |
| #N/A | #N/A | -0.49 |
| 0.25 | 0.02 | -0.99 |
| 0.89 | 0.36 | 0.34  |
| 1.08 | 0.47 | -1.29 |
| 0.50 | 0.13 | #N/A  |
| 0.53 | 0.15 | -1.02 |
| 1.51 | 0.67 | 1.60  |
| 1.63 | 0.72 | 0.45  |
| 2.77 | 0.96 | -0.49 |
| 2.77 | 0.96 | -2.54 |
| 2.38 | 0.91 | -0.20 |
| 2.38 | 0.91 | -1.65 |
| 2.83 | 0.97 | -0.14 |
| 2.83 | 0.97 | -1.74 |
| 1.48 | 0.63 | -0.36 |
| 0.40 | 0.08 | -1.66 |
| 2.09 | 0.83 | -0.05 |
| 1.02 | 0.43 | 0.20  |
| 1.53 | 0.68 | 2.97  |
| 1.53 | 0.68 | 0.32  |
| #N/A | #N/A | -0.38 |
| 1.12 | 0.49 | -0.16 |
| 0.77 | 0.29 | -0.33 |
| 0.77 | 0.29 | #N/A  |
| 3.03 | 0.97 | -0.38 |
| 3.03 | 0.97 | 0.55  |
| 1.36 | 0.61 | -0.58 |
| 1.36 | 0.61 | -0.11 |
| 1.81 | 0.78 | 0.10  |
| 1.66 | 0.73 | -0.29 |
| 1.28 | 0.57 | -0.77 |
| 1.28 | 0.57 | 0.03  |
| #N/A | #N/A | #N/A  |
| 2.91 | 0.96 | -0.19 |
| 1.05 | 0.44 | -0.54 |
| 1.60 | 0.71 | 0.34  |

|      |      |       |
|------|------|-------|
| 1.60 | 0.71 | 0.06  |
| 0.67 | 0.23 | 1.54  |
| 2.85 | 0.95 | 0.03  |
| 2.85 | 0.95 | 0.89  |
| 1.32 | 0.58 | -0.50 |
| 2.03 | 0.85 | #N/A  |
| 2.03 | 0.85 | 1.31  |
| 1.80 | 0.79 | -0.10 |
| #N/A | #N/A | -0.16 |
| #N/A | #N/A | -0.25 |
| 1.45 | 0.65 | 0.09  |
| 1.45 | 0.65 | 0.41  |
| 1.73 | 0.76 | 0.46  |
| #N/A | #N/A | 0.31  |
| #N/A | #N/A | #N/A  |
| 0.40 | 0.07 | 0.07  |
| 1.04 | 0.45 | -0.08 |
| 1.04 | 0.45 | #N/A  |
| 1.04 | 0.45 | -1.50 |
| 2.10 | 0.86 | 0.44  |
| 0.44 | 0.10 | #N/A  |
| 0.44 | 0.10 | #N/A  |
| 1.58 | 0.71 | -0.54 |
| #N/A | #N/A | 0.25  |
| 1.08 | 0.46 | -0.13 |
| 1.92 | 0.81 | 0.59  |
| 1.92 | 0.81 | 0.57  |
| #N/A | #N/A | -0.08 |
| #N/A | #N/A | -1.23 |
| 1.50 | 0.67 | -0.23 |
| #N/A | #N/A | 0.63  |
| 2.65 | 0.93 | -0.28 |
| 2.65 | 0.93 | #N/A  |
| #N/A | #N/A | 0.04  |
| 3.50 | 0.99 | 0.24  |
| 3.50 | 0.99 | -0.94 |
| 1.19 | 0.52 | #N/A  |
| 1.19 | 0.52 | #N/A  |
| 0.79 | 0.30 | #N/A  |
| 0.61 | 0.19 | 0.63  |
| 0.47 | 0.12 | 0.69  |
| 0.47 | 0.12 | #N/A  |
| #N/A | #N/A | #N/A  |
| 0.32 | 0.04 | #N/A  |
| 1.55 | 0.69 | -0.50 |
| 2.61 | 0.95 | 0.05  |
| 2.18 | 0.88 | -0.21 |
| 1.68 | 0.74 | 0.13  |
| 1.68 | 0.74 | 0.26  |
| 3.02 | 0.97 | -2.62 |
| 1.58 | 0.71 | #N/A  |

|      |      |       |
|------|------|-------|
| 1.58 | 0.71 | 1.32  |
| 2.08 | 0.86 | 1.16  |
| 0.94 | 0.39 | #N/A  |
| 1.51 | 0.68 | 0.26  |
| 2.50 | 0.91 | #N/A  |
| 2.50 | 0.91 | -1.39 |
| 1.15 | 0.51 | 1.44  |
| 0.91 | 0.37 | -0.76 |
| #N/A | #N/A | 1.47  |
| #N/A | #N/A | 1.32  |
| 2.47 | 0.92 | 2.16  |
| 1.37 | 0.61 | 3.04  |
| #N/A | #N/A | #N/A  |
| #N/A | #N/A | -0.88 |
| 2.00 | 0.83 | #N/A  |
| 1.28 | 0.57 | 1.08  |
| #N/A | #N/A | #N/A  |
| 1.47 | 0.66 | 0.85  |
| 1.47 | 0.66 | -0.37 |
| 2.02 | 0.84 | 0.43  |
| 2.02 | 0.84 | 0.36  |
| 1.14 | 0.50 | 1.10  |
| 1.12 | 0.49 | -0.57 |
| #N/A | #N/A | #N/A  |
| #N/A | #N/A | -0.34 |
| #N/A | #N/A | -0.35 |
| #N/A | #N/A | -1.96 |
| 2.33 | 0.91 | -1.13 |
| 1.43 | 0.64 | -0.33 |
| 0.88 | 0.35 | -0.19 |
| #N/A | #N/A | -0.51 |
| #N/A | #N/A | 2.11  |
| #N/A | #N/A | 1.99  |
| 0.80 | 0.31 | 1.59  |
| 2.84 | 0.97 | #N/A  |
| 2.84 | 0.97 | -0.68 |
| 2.84 | 0.97 | 0.95  |
| 2.84 | 0.97 | 1.20  |
| 0.94 | 0.39 | #N/A  |
| 1.68 | 0.75 | 0.27  |
| #N/A | #N/A | 0.14  |
| 0.98 | 0.40 | -0.76 |
| 2.10 | 0.86 | -0.32 |
| 2.10 | 0.86 | -1.01 |
| 0.67 | 0.23 | #N/A  |
| 1.25 | 0.51 | 0.11  |
| 1.86 | 0.80 | 0.56  |
| 1.86 | 0.80 | 0.36  |
| #N/A | #N/A | 0.19  |
| 1.53 | 0.68 | -3.81 |
| #N/A | #N/A | 0.87  |

|      |      |       |
|------|------|-------|
| #N/A | #N/A | -1.09 |
| 1.10 | 0.48 | 0.64  |
| 1.94 | 0.82 | #N/A  |
| 1.94 | 0.82 | #N/A  |
| 1.85 | 0.79 | -0.43 |
| #N/A | #N/A | -0.15 |
| #N/A | #N/A | 0.27  |
| 0.97 | 0.40 | #N/A  |
| 0.97 | 0.40 | 0.00  |
| 0.77 | 0.29 | 2.19  |
| 1.47 | 0.66 | 0.71  |
| 1.47 | 0.66 | #N/A  |
| 0.85 | 0.33 | 1.63  |
| 2.43 | 0.93 | -0.01 |
| #N/A | #N/A | -3.63 |
| 0.81 | 0.31 | -0.91 |
| 0.84 | 0.33 | 0.35  |
| 1.07 | 0.45 | 0.84  |
| 2.66 | 0.78 | -0.34 |
| 1.75 | 0.77 | 1.33  |
| 1.75 | 0.77 | #N/A  |
| 1.97 | 0.84 | 1.49  |
| #N/A | #N/A | -0.03 |
| #N/A | #N/A | 1.03  |
| 1.24 | 0.55 | 0.73  |
| #N/A | #N/A | 0.23  |
| 2.44 | 0.93 | -0.08 |
| 2.44 | 0.93 | 0.00  |
| 1.54 | 0.66 | 0.14  |
| 1.82 | 0.79 | 0.18  |
| 1.54 | 0.66 | 1.81  |
| #N/A | #N/A | 1.82  |
| #N/A | #N/A | 1.39  |
| 2.70 | 0.95 | -1.73 |
| #N/A | #N/A | 1.89  |
| 2.16 | 0.88 | -0.07 |
| 2.16 | 0.88 | #N/A  |
| 1.93 | 0.82 | 0.12  |
| 1.93 | 0.82 | #N/A  |
| #N/A | #N/A | -0.60 |
| 3.24 | 0.98 | -0.80 |
| 3.24 | 0.98 | -0.06 |
| 0.53 | 0.15 | #N/A  |
| 0.81 | 0.31 | -1.41 |
| 1.17 | 0.52 | -1.37 |
| 2.68 | 0.94 | -0.41 |
| 0.65 | 0.22 | 1.39  |
| 1.66 | 0.74 | -0.37 |
| 1.66 | 0.74 | #N/A  |
| #N/A | #N/A | 0.22  |
| 0.41 | 0.08 | #N/A  |

|      |      |       |
|------|------|-------|
| 0.41 | 0.08 | -1.32 |
| 0.29 | 0.03 | 2.58  |
| 0.79 | 0.30 | 1.13  |
| 0.79 | 0.30 | -0.19 |
| 1.51 | 0.65 | 0.95  |
| 4.20 | 1.00 | -0.93 |
| 4.20 | 1.00 | 0.46  |
| #N/A | #N/A | 0.47  |
| 1.85 | 0.80 | -0.13 |
| #N/A | #N/A | 0.63  |
| #N/A | #N/A | -0.41 |
| 1.12 | 0.49 | -1.16 |
| #N/A | #N/A | 0.16  |
| 1.08 | 0.47 | 0.12  |
| 1.08 | 0.47 | -0.38 |
| 2.34 | 0.90 | 0.49  |
| 2.34 | 0.90 | 1.30  |
| #N/A | #N/A | #N/A  |
| 0.77 | 0.29 | -0.05 |
| 0.55 | 0.16 | -0.19 |
| 0.55 | 0.16 | #N/A  |
| 0.55 | 0.16 | 1.69  |
| 1.78 | 0.77 | -2.68 |
| 1.49 | 0.66 | -0.36 |
| 1.52 | 0.68 | -0.39 |
| 1.20 | 0.53 | -0.14 |
| #N/A | #N/A | #N/A  |
| #N/A | #N/A | #N/A  |
| 0.63 | 0.20 | -0.32 |
| 0.63 | 0.20 | 0.26  |
| 1.83 | 0.78 | 0.27  |
| 1.81 | 0.78 | -0.68 |
| 1.83 | 0.78 | -0.37 |
| 1.63 | 0.71 | -1.52 |
| 1.81 | 0.78 | -1.53 |
| 2.88 | 0.96 | -2.26 |
| 2.88 | 0.96 | 0.03  |
| 1.40 | 0.63 | -0.25 |
| 1.53 | 0.68 | -1.17 |
| 1.99 | 0.84 | 0.08  |
| 1.99 | 0.84 | #N/A  |
| 1.01 | 0.43 | 0.14  |
| 1.29 | 0.57 | -0.29 |
| 0.83 | 0.32 | -1.09 |
| 1.82 | 0.79 | 0.69  |
| 0.66 | 0.23 | 1.49  |
| 0.29 | 0.03 | 0.08  |
| 0.63 | 0.21 | -0.02 |
| 0.63 | 0.21 | #N/A  |
| 0.63 | 0.21 | #N/A  |
| 1.19 | 0.52 | 0.70  |

|      |      |       |
|------|------|-------|
| 1.35 | 0.59 | -1.54 |
| 0.94 | 0.39 | 0.57  |
| 1.00 | 0.42 | 0.31  |
| 1.00 | 0.42 | 0.99  |
| 1.00 | 0.42 | 1.00  |
| 1.65 | 0.74 | -0.06 |
| 0.73 | 0.27 | 0.86  |
| 1.43 | 0.64 | -0.93 |
| 2.20 | 0.88 | 0.41  |
| 2.20 | 0.88 | -0.19 |
| 1.53 | 0.69 | -2.00 |
| 0.96 | 0.40 | 0.26  |
| 0.96 | 0.40 | #N/A  |
| 0.96 | 0.40 | 0.83  |
| 0.52 | 0.14 | 0.85  |
| 0.52 | 0.14 | 0.97  |
| 1.13 | 0.48 | 0.62  |
| 0.84 | 0.33 | 1.05  |
| #N/A | #N/A | 0.32  |
| 1.05 | 0.45 | -0.88 |
| 0.83 | 0.32 | 0.29  |
| 0.27 | 0.02 | 1.47  |
| 0.92 | 0.37 | 0.63  |
| 1.19 | 0.53 | 2.41  |
| #N/A | #N/A | -0.77 |
| 1.23 | 0.54 | 1.81  |
| 0.96 | 0.40 | 1.26  |
| 1.27 | 0.56 | 0.66  |
| 0.73 | 0.27 | 0.91  |
| 2.43 | 0.92 | -0.11 |
| 2.43 | 0.92 | -0.23 |
| 0.83 | 0.32 | 0.08  |
| 0.83 | 0.32 | 0.70  |
| #N/A | #N/A | 1.02  |
| 1.50 | 0.67 | 1.32  |
| 1.50 | 0.67 | -0.03 |
| 2.88 | 0.96 | 0.62  |
| 0.51 | 0.13 | #N/A  |
| 2.88 | 0.96 | -0.93 |
| 0.87 | 0.34 | -1.95 |
| 0.87 | 0.34 | 0.32  |
| #N/A | #N/A | #N/A  |
| #N/A | #N/A | 0.13  |
| #N/A | #N/A | -0.20 |
| #N/A | #N/A | #N/A  |
| 3.36 | 0.97 | -0.64 |
| 1.71 | 0.75 | 0.05  |
| 1.71 | 0.75 | 0.73  |
| 0.98 | 0.41 | -0.08 |
| 0.98 | 0.41 | -0.31 |
| #N/A | #N/A | -1.40 |



|      |      |       |
|------|------|-------|
| 0.23 | 0.02 | #N/A  |
| 0.23 | 0.02 | -2.18 |
| 0.75 | 0.28 | -1.48 |
| 0.75 | 0.28 | 0.06  |
| 1.85 | 0.80 | -0.21 |
| 0.81 | 0.31 | -0.58 |
| 1.85 | 0.80 | #N/A  |
| 0.81 | 0.31 | 0.60  |
| #N/A | #N/A | 0.00  |
| 2.20 | 0.89 | -1.76 |
| 2.20 | 0.89 | 1.75  |
| 0.93 | 0.38 | -1.02 |
| 2.21 | 0.85 | -0.66 |
| 2.21 | 0.85 | -0.21 |
| 1.66 | 0.72 | -0.69 |
| 1.66 | 0.72 | 0.42  |
| 1.51 | 0.68 | 0.63  |
| #N/A | #N/A | -0.47 |
| 1.36 | 0.61 | #N/A  |
| #N/A | #N/A | -1.49 |
| #N/A | #N/A | -0.07 |
| 0.86 | 0.34 | 0.10  |
| #N/A | #N/A | 0.21  |
| 0.86 | 0.34 | -0.99 |
| #N/A | #N/A | 1.41  |
| #N/A | #N/A | -0.07 |
| #N/A | #N/A | #N/A  |
| 0.99 | 0.42 | -1.88 |
| 1.23 | 0.54 | 1.71  |
| 1.73 | 0.75 | -1.29 |
| 1.10 | 0.48 | -0.15 |
| 1.26 | 0.56 | #N/A  |
| 1.10 | 0.48 | -1.24 |
| #N/A | #N/A | 0.57  |
| 1.14 | 0.50 | -0.44 |
| #N/A | #N/A | 0.14  |
| 0.73 | 0.26 | -0.12 |
| #N/A | #N/A | -1.73 |
| 1.36 | 0.61 | -0.98 |
| 1.46 | 0.65 | -0.38 |
| 1.46 | 0.65 | 0.28  |
| 1.32 | 0.59 | 0.02  |
| 1.98 | 0.80 | -0.83 |
| 0.80 | 0.30 | 2.10  |
| 0.70 | 0.25 | 0.18  |
| 2.00 | 0.83 | -1.00 |
| #N/A | #N/A | 0.47  |
| 2.05 | 0.85 | -0.65 |
| 1.82 | 0.79 | -0.22 |
| 1.82 | 0.79 | 0.19  |
| #N/A | #N/A | -0.39 |

|       |      |       |
|-------|------|-------|
| 1.32  | 0.58 | -0.06 |
| #N/A  | #N/A | -2.31 |
| #N/A  | #N/A | -0.06 |
| #N/A  | #N/A | -0.77 |
| 1.36  | 0.60 | 0.38  |
| #N/A  | #N/A | 0.99  |
| 1.69  | 0.74 | 0.01  |
| 1.69  | 0.74 | #N/A  |
| 16.38 | 0.82 | #N/A  |
| 16.38 | 0.82 | -0.38 |
| 0.97  | 0.40 | 1.17  |
| 0.97  | 0.40 | 0.66  |
| 0.97  | 0.40 | 0.12  |
| 0.97  | 0.40 | 0.62  |
| 0.97  | 0.40 | 0.08  |
| 0.95  | 0.39 | -0.26 |
| 3.29  | 0.98 | -1.03 |
| 3.29  | 0.98 | -0.44 |
| #N/A  | #N/A | 0.70  |
| #N/A  | #N/A | 0.56  |
| #N/A  | #N/A | 0.48  |
| 2.52  | 0.93 | 1.73  |
| #N/A  | #N/A | #N/A  |
| 2.36  | 0.92 | #N/A  |
| 2.52  | 0.93 | 0.99  |
| 2.36  | 0.92 | 0.51  |
| #N/A  | #N/A | -2.57 |
| #N/A  | #N/A | #N/A  |
| 1.79  | 0.77 | -1.61 |
| 0.90  | 0.36 | 1.01  |
| 1.16  | 0.51 | 0.56  |
| 1.16  | 0.51 | 0.11  |
| 0.59  | 0.18 | -0.18 |
| 0.59  | 0.18 | -0.29 |
| 2.22  | 0.89 | 0.53  |
| 2.22  | 0.89 | -0.24 |
| #N/A  | #N/A | 0.76  |
| 0.72  | 0.26 | 0.78  |
| #N/A  | #N/A | #N/A  |
| 1.02  | 0.43 | -0.40 |
| #N/A  | #N/A | #N/A  |
| 2.13  | 0.87 | 0.24  |
| 1.18  | 0.52 | -0.01 |
| 0.75  | 0.28 | 0.87  |
| 0.75  | 0.28 | 0.74  |
| 0.92  | 0.37 | #N/A  |
| 1.12  | 0.49 | 0.87  |
| 3.40  | 0.99 | #N/A  |
| 3.40  | 0.99 | -2.07 |
| 2.21  | 0.89 | -0.33 |
| 1.94  | 0.83 | 0.67  |

|      |      |       |
|------|------|-------|
| 1.94 | 0.83 | 1.09  |
| 3.10 | 0.98 | -0.75 |
| 3.10 | 0.98 | -0.40 |
| 1.05 | 0.45 | -0.91 |
| 0.97 | 0.40 | -2.39 |
| 1.05 | 0.45 | #N/A  |
| 1.98 | 0.83 | -1.58 |
| 1.42 | 0.64 | 1.96  |
| 1.42 | 0.64 | 1.20  |
| 1.48 | 0.66 | -0.21 |
| #N/A | #N/A | -0.15 |
| 1.03 | 0.44 | -0.17 |
| 1.03 | 0.44 | 1.03  |
| 1.03 | 0.44 | 0.76  |
| 1.38 | 0.61 | 0.64  |
| 1.71 | 0.76 | -0.47 |
| 2.68 | 0.95 | -0.65 |
| 2.68 | 0.95 | -0.06 |
| #N/A | #N/A | 1.56  |
| #N/A | #N/A | 0.28  |
| #N/A | #N/A | -0.12 |
| 2.15 | 0.88 | -0.03 |
| 2.15 | 0.88 | -0.26 |
| 0.78 | 0.29 | 0.31  |
| 1.14 | 0.50 | 0.87  |
| 1.14 | 0.50 | -0.83 |
| 2.04 | 0.84 | -0.29 |
| 1.06 | 0.46 | -1.22 |
| #N/A | #N/A | 0.78  |
| 1.32 | 0.59 | -1.65 |
| 1.61 | 0.71 | 2.14  |
| 1.79 | 0.78 | -1.87 |
| 2.36 | 0.91 | -0.01 |
| 2.36 | 0.91 | 0.69  |
| 1.54 | 0.68 | 1.03  |
| 1.29 | 0.57 | 0.11  |
| 1.55 | 0.69 | 0.09  |
| 1.55 | 0.69 | 1.11  |
| 0.79 | 0.30 | 1.18  |
| 0.79 | 0.30 | -0.58 |
| 1.26 | 0.56 | 1.09  |
| 0.53 | 0.15 | 1.18  |
| 1.38 | 0.61 | #N/A  |
| 1.51 | 0.68 | 0.64  |
| 1.51 | 0.68 | 0.18  |
| 1.94 | 0.83 | -0.24 |
| 1.94 | 0.83 | -1.51 |
| 0.58 | 0.18 | -0.02 |
| 2.42 | 0.93 | -0.04 |
| 0.58 | 0.18 | 0.94  |
| 1.71 | 0.75 | -0.32 |

|      |      |       |
|------|------|-------|
| 1.15 | 0.50 | 0.72  |
| #N/A | #N/A | -0.72 |
| #N/A | #N/A | 0.18  |
| #N/A | #N/A | #N/A  |
| 0.81 | 0.31 | 0.16  |
| #N/A | #N/A | 0.51  |
| 0.36 | 0.06 | -1.97 |
| 1.21 | 0.53 | -0.79 |
| 1.84 | 0.77 | 0.92  |
| 1.22 | 0.53 | 0.32  |
| 0.64 | 0.21 | 0.87  |
| 1.22 | 0.53 | #N/A  |
| 0.89 | 0.36 | -1.00 |
| 2.30 | 0.89 | 0.66  |
| 2.30 | 0.89 | 0.85  |
| 1.61 | 0.70 | -0.96 |
| #N/A | #N/A | 0.10  |
| #N/A | #N/A | -0.58 |
| 2.17 | 0.87 | -0.57 |
| #N/A | #N/A | -0.35 |
| 0.87 | 0.35 | #N/A  |
| 0.87 | 0.35 | 0.30  |
| 1.43 | 0.64 | -0.01 |
| 2.14 | 0.87 | -0.50 |
| 2.14 | 0.87 | 1.07  |
| #N/A | #N/A | 0.53  |
| 2.17 | 0.76 | -1.35 |
| 2.17 | 0.76 | -0.48 |
| 0.29 | 0.03 | -1.89 |
| 0.29 | 0.03 | 1.17  |
| 0.29 | 0.03 | 0.03  |
| #N/A | #N/A | 1.21  |
| #N/A | #N/A | 1.05  |
| 1.58 | 0.71 | -2.35 |
| 1.04 | 0.45 | -0.12 |
| 1.19 | 0.53 | 0.29  |
| 1.61 | 0.71 | 0.84  |
| 2.04 | 0.85 | -1.75 |
| 1.16 | 0.51 | 0.80  |
| 2.37 | 0.92 | #N/A  |
| 2.37 | 0.92 | #N/A  |
| 0.96 | 0.40 | #N/A  |
| 2.25 | 0.89 | -0.67 |
| 1.03 | 0.44 | 0.69  |
| 0.73 | 0.27 | 0.92  |
| #N/A | #N/A | -0.95 |
| 1.12 | 0.49 | 0.22  |
| 1.75 | 0.76 | 0.14  |
| 1.75 | 0.76 | 0.29  |
| 2.41 | 0.92 | -1.35 |
| 2.41 | 0.92 | -0.14 |

|      |      |       |
|------|------|-------|
| 0.69 | 0.24 | -1.60 |
| 0.69 | 0.24 | -1.63 |
| 0.42 | 0.08 | 0.52  |
| 0.42 | 0.08 | 0.04  |
| 1.96 | 0.83 | -2.14 |
| 1.96 | 0.83 | 0.68  |
| #N/A | #N/A | 0.02  |
| 2.08 | 0.86 | -0.04 |
| 2.08 | 0.86 | 0.97  |
| 2.13 | 0.86 | #N/A  |
| 1.31 | 0.58 | 0.19  |
| 1.31 | 0.58 | -0.01 |
| #N/A | #N/A | -0.34 |
| 3.13 | 0.98 | 0.20  |
| 2.06 | 0.85 | -0.26 |
| 2.06 | 0.85 | 0.45  |
| #N/A | #N/A | -1.34 |
| #N/A | #N/A | 0.26  |
| 2.04 | 0.85 | 0.18  |
| 2.04 | 0.85 | -0.86 |
| #N/A | #N/A | 0.53  |
| 0.96 | 0.40 | 2.58  |
| #N/A | #N/A | 0.15  |
| 0.96 | 0.40 | 0.13  |
| 0.96 | 0.40 | -1.74 |
| 0.41 | 0.08 | -1.72 |
| 0.41 | 0.08 | 0.34  |
| 0.41 | 0.08 | -0.56 |
| 1.67 | 0.73 | -0.40 |
| 1.18 | 0.52 | 1.02  |
| 0.33 | 0.04 | 2.41  |
| 1.18 | 0.52 | #N/A  |
| 0.33 | 0.04 | 0.67  |
| 1.62 | 0.72 | 0.27  |
| 1.16 | 0.51 | 0.63  |
| 1.16 | 0.51 | -0.24 |
| 1.37 | 0.61 | 0.08  |
| 1.11 | 0.48 | -1.48 |
| 0.50 | 0.13 | -0.62 |
| 0.32 | 0.04 | #N/A  |
| 2.07 | 0.86 | -0.77 |
| 2.07 | 0.86 | 0.05  |
| 2.53 | 0.93 | -0.68 |
| 2.53 | 0.93 | -0.14 |
| 2.28 | 0.90 | -0.64 |
| 1.14 | 0.49 | -1.12 |
| 0.41 | 0.08 | 0.73  |
| 0.41 | 0.08 | -0.29 |
| 0.85 | 0.33 | -0.23 |
| 0.59 | 0.18 | -0.57 |
| 0.80 | 0.31 | #N/A  |

|      |      |       |
|------|------|-------|
| 0.86 | 0.34 | -1.54 |
| 1.58 | 0.71 | -0.01 |
| 2.30 | 0.91 | 0.17  |
| 2.30 | 0.91 | -0.18 |
| 0.25 | 0.02 | -0.40 |
| #N/A | #N/A | #N/A  |
| 0.46 | 0.10 | -0.55 |
| 0.90 | 0.36 | -0.54 |
| 1.15 | 0.51 | 0.94  |
| 1.15 | 0.51 | 1.19  |
| 1.76 | 0.73 | 1.08  |
| 1.76 | 0.73 | 1.38  |
| #N/A | #N/A | -0.41 |
| #N/A | #N/A | 0.26  |
| 0.69 | 0.24 | 0.85  |
| 0.94 | 0.39 | -0.46 |
| 2.13 | 0.87 | -0.90 |
| 1.90 | 0.81 | -0.42 |
| 1.90 | 0.81 | -0.35 |
| 2.72 | 0.96 | 0.25  |
| 2.72 | 0.96 | 0.30  |
| 1.60 | 0.71 | 0.03  |
| 1.90 | 0.81 | -4.18 |
| #N/A | #N/A | 0.74  |
| 1.41 | 0.63 | -0.49 |
| 2.35 | 0.91 | -1.90 |
| 2.35 | 0.91 | -1.33 |
| 1.04 | 0.42 | #N/A  |
| 0.75 | 0.28 | -0.41 |
| 0.72 | 0.26 | 0.91  |
| 1.52 | 0.68 | #N/A  |
| 1.52 | 0.68 | 0.64  |
| 2.83 | 0.96 | 0.31  |
| 1.43 | 0.64 | -0.32 |
| 1.10 | 0.48 | -0.77 |
| 1.10 | 0.48 | 2.24  |
| 1.86 | 0.80 | -0.73 |
| 0.93 | 0.38 | 0.79  |
| #N/A | #N/A | 0.93  |
| 1.02 | 0.43 | #N/A  |
| 0.14 | 0.01 | 2.52  |
| 0.20 | 0.01 | #N/A  |
| #N/A | #N/A | #N/A  |
| 3.43 | 0.96 | 0.16  |
| 3.43 | 0.96 | -2.93 |
| 1.24 | 0.55 | 1.11  |
| 0.85 | 0.33 | -0.50 |
| 0.85 | 0.33 | #N/A  |
| 0.56 | 0.17 | 2.40  |
| 0.28 | 0.03 | 0.58  |
| 1.19 | 0.52 | 0.17  |

|      |      |       |
|------|------|-------|
| 2.05 | 0.85 | 0.17  |
| #N/A | #N/A | 0.36  |
| 1.71 | 0.69 | -0.78 |
| 0.22 | 0.01 | -0.36 |
| 0.47 | 0.11 | -1.30 |
| #N/A | #N/A | #N/A  |
| 0.94 | 0.38 | -0.06 |
| 0.94 | 0.38 | -1.81 |
| #N/A | #N/A | 0.01  |
| #N/A | #N/A | #N/A  |
| #N/A | #N/A | -0.29 |
| 0.79 | 0.30 | 1.04  |
| 0.40 | 0.08 | #N/A  |
| 0.70 | 0.25 | -0.09 |
| 0.68 | 0.23 | -1.26 |
| #N/A | #N/A | 0.73  |
| #N/A | #N/A | -0.46 |
| 1.37 | 0.61 | 0.54  |
| 1.37 | 0.61 | 0.44  |
| 0.97 | 0.41 | -0.85 |
| 1.18 | 0.52 | 0.62  |
| 0.99 | 0.42 | -0.39 |
| 1.33 | 0.60 | -0.03 |
| #N/A | #N/A | 1.16  |
| 1.54 | 0.69 | -0.40 |
| 1.65 | 0.73 | #N/A  |
| 2.24 | 0.89 | -0.54 |
| 1.65 | 0.73 | 1.24  |
| 0.94 | 0.38 | 0.13  |
| 1.93 | 0.83 | 0.18  |
| #N/A | #N/A | 0.42  |
| 1.03 | 0.43 | -0.35 |
| 1.03 | 0.43 | 0.30  |
| 1.10 | 0.48 | -0.05 |
| 1.33 | 0.59 | 0.31  |
| 1.08 | 0.47 | 1.04  |
| #N/A | #N/A | 1.37  |
| 2.12 | 0.81 | -3.65 |
| 2.12 | 0.81 | -1.72 |
| 1.34 | 0.60 | 0.42  |
| 0.95 | 0.39 | 0.39  |
| 1.34 | 0.60 | #N/A  |
| 0.95 | 0.39 | 1.34  |
| 0.66 | 0.23 | -0.42 |
| 0.83 | 0.33 | 1.89  |
| 0.83 | 0.33 | 2.96  |
| 0.24 | 0.02 | 0.01  |
| 1.22 | 0.54 | -0.07 |
| 2.82 | 0.94 | -0.38 |
| 2.82 | 0.94 | 0.17  |
| 0.56 | 0.16 | -1.43 |

|      |      |       |
|------|------|-------|
| #N/A | #N/A | 1.07  |
| #N/A | #N/A | #N/A  |
| 2.11 | 0.86 | 0.15  |
| #N/A | #N/A | -0.04 |
| 0.75 | 0.27 | 0.39  |
| 1.21 | 0.54 | -0.21 |
| 0.70 | 0.25 | 1.14  |
| 0.43 | 0.09 | 0.61  |
| #N/A | #N/A | -0.30 |
| #N/A | #N/A | -0.47 |
| 2.17 | 0.86 | 0.64  |
| #N/A | #N/A | 1.05  |
| #N/A | #N/A | 0.33  |
| 1.36 | 0.60 | 0.37  |
| 1.97 | 0.82 | 0.43  |
| #N/A | #N/A | -2.01 |
| 2.10 | 0.87 | -0.19 |
| 2.10 | 0.87 | 0.22  |
| 2.31 | 0.91 | 0.09  |
| 2.31 | 0.91 | -0.75 |
| 1.95 | 0.82 | #N/A  |
| 1.62 | 0.71 | -0.35 |
| 1.95 | 0.82 | 0.20  |
| #N/A | #N/A | -1.89 |
| 1.14 | 0.50 | -1.35 |
| 0.39 | 0.07 | #N/A  |
| 0.67 | 0.23 | -1.27 |
| 1.46 | 0.65 | -0.51 |
| 0.88 | 0.35 | -0.66 |
| 0.88 | 0.35 | 0.47  |
| 1.00 | 0.42 | 1.41  |
| 1.55 | 0.67 | 0.47  |
| 1.07 | 0.46 | 0.18  |
| 1.50 | 0.63 | 0.61  |
| 2.83 | 0.94 | -2.30 |
| 2.83 | 0.94 | 0.64  |
| 1.31 | 0.58 | 0.37  |
| 2.01 | 0.79 | 0.43  |
| #N/A | #N/A | 0.60  |
| #N/A | #N/A | 0.12  |
| 2.09 | 0.79 | 0.72  |
| 0.76 | 0.28 | 0.35  |
| 0.76 | 0.28 | -0.92 |
| #N/A | #N/A | -1.25 |
| 0.47 | 0.11 | 0.35  |
| 1.80 | 0.78 | 0.53  |
| 1.80 | 0.78 | 0.23  |
| 1.64 | 0.72 | -0.24 |
| #N/A | #N/A | -0.76 |
| #N/A | #N/A | 0.14  |
| 2.25 | 0.88 | -0.15 |



|      |      |       |
|------|------|-------|
| #N/A | #N/A | 0.02  |
| 0.61 | 0.19 | -0.11 |
| 0.94 | 0.39 | 0.50  |
| 0.88 | 0.35 | -0.12 |
| 2.15 | 0.88 | -0.39 |
| 2.15 | 0.88 | 0.75  |
| #N/A | #N/A | -0.42 |
| 1.80 | 0.78 | 0.83  |
| 1.72 | 0.76 | -3.25 |
| 0.75 | 0.28 | 1.55  |
| 1.36 | 0.61 | 1.13  |
| 1.06 | 0.45 | 0.95  |
| 1.66 | 0.74 | 0.01  |
| 1.82 | 0.79 | 1.35  |
| 1.82 | 0.79 | -0.32 |
| #N/A | #N/A | #N/A  |
| #N/A | #N/A | -0.42 |
| #N/A | #N/A | -1.24 |
| 2.76 | 0.95 | 0.13  |
| 2.76 | 0.95 | 0.39  |
| 1.00 | 0.42 | 0.66  |
| 1.31 | 0.59 | 0.15  |
| 1.20 | 0.53 | -0.47 |
| 2.85 | 0.95 | 0.15  |
| 2.85 | 0.95 | -0.44 |
| 2.44 | 0.92 | -0.18 |
| 1.31 | 0.58 | 1.05  |
| 2.22 | 0.88 | -1.27 |
| 1.35 | 0.60 | 1.14  |
| 1.15 | 0.50 | 1.10  |
| 1.35 | 0.60 | -0.37 |
| 1.42 | 0.63 | 0.73  |
| 0.89 | 0.36 | 0.58  |
| 0.89 | 0.36 | 0.33  |
| 1.28 | 0.57 | 0.54  |
| 2.24 | 0.89 | 0.77  |
| 2.32 | 0.90 | -0.92 |
| 2.32 | 0.90 | -0.15 |
| 2.12 | 0.87 | -0.23 |
| 2.15 | 0.86 | -0.51 |
| 2.15 | 0.86 | 0.34  |
| 4.42 | 1.00 | -2.36 |
| 4.42 | 1.00 | -1.41 |
| 2.93 | 0.97 | -0.97 |
| 1.86 | 0.79 | -0.20 |
| 1.57 | 0.69 | -0.19 |
| 1.89 | 0.80 | -0.50 |
| 1.89 | 0.80 | 0.34  |
| 2.70 | 0.95 | -0.03 |
| 2.70 | 0.95 | #N/A  |
| 1.98 | 0.81 | #N/A  |

|      |      |       |
|------|------|-------|
| 2.70 | 0.95 | #N/A  |
| #N/A | #N/A | 0.36  |
| 2.60 | 0.95 | -0.13 |
| #N/A | #N/A | -0.33 |
| #N/A | #N/A | -0.21 |
| 1.44 | 0.64 | 0.78  |
| 0.27 | 0.02 | #N/A  |
| 0.36 | 0.06 | -1.31 |
| 0.27 | 0.02 | -0.54 |
| #N/A | #N/A | -1.46 |
| #N/A | #N/A | -0.38 |
| 1.05 | 0.45 | -0.51 |
| 1.74 | 0.77 | 1.29  |
| 1.74 | 0.77 | 0.46  |
| 2.63 | 0.93 | 0.31  |
| 2.34 | 0.91 | 1.49  |
| 2.34 | 0.91 | 0.28  |
| 1.50 | 0.67 | 0.28  |
| 1.26 | 0.56 | -0.55 |
| 0.97 | 0.40 | -0.47 |
| 3.06 | 0.97 | -0.54 |
| 3.06 | 0.97 | -0.06 |
| 1.39 | 0.62 | -1.97 |
| 1.01 | 0.42 | -1.41 |
| 1.02 | 0.43 | 0.42  |
| #N/A | #N/A | -1.37 |
| 1.49 | 0.67 | -1.29 |
| 1.38 | 0.61 | 0.50  |
| 1.73 | 0.76 | 0.31  |
| 2.18 | 0.85 | -0.34 |
| 2.18 | 0.85 | 0.17  |
| 2.19 | 0.72 | 0.46  |
| 1.94 | 0.81 | 1.39  |
| 1.94 | 0.81 | 2.36  |
| 1.89 | 0.81 | 0.21  |
| 1.89 | 0.81 | 0.30  |
| 1.16 | 0.51 | 0.36  |
| 0.93 | 0.38 | -0.21 |
| #N/A | #N/A | 0.73  |
| 1.23 | 0.54 | #N/A  |
| #N/A | #N/A | -0.15 |
| 0.45 | 0.10 | -1.22 |
| 1.40 | 0.63 | 1.99  |
| 1.32 | 0.59 | -0.56 |
| 1.45 | 0.65 | -0.47 |
| 1.16 | 0.51 | -1.35 |
| 1.16 | 0.51 | 0.57  |
| 2.78 | 0.96 | -2.74 |
| 2.78 | 0.96 | -0.59 |
| 1.05 | 0.45 | -0.51 |
| 2.25 | 0.88 | 0.17  |

|      |      |       |
|------|------|-------|
| 2.83 | 0.96 | -0.45 |
| 2.83 | 0.96 | #N/A  |
| #N/A | #N/A | 0.22  |
| #N/A | #N/A | 0.23  |
| 0.87 | 0.35 | 0.41  |
| 0.87 | 0.35 | 0.45  |
| 0.52 | 0.14 | 2.12  |
| 0.57 | 0.17 | -1.41 |
| 0.15 | 0.01 | 0.03  |
| 1.26 | 0.56 | -1.08 |
| 1.26 | 0.56 | -0.72 |
| 1.31 | 0.59 | 0.41  |
| 1.72 | 0.76 | #N/A  |
| 2.42 | 0.92 | 0.47  |
| 2.42 | 0.92 | -1.94 |
| 2.45 | 0.92 | 0.50  |
| 2.45 | 0.92 | 0.86  |
| 0.91 | 0.37 | 2.06  |
| 0.44 | 0.09 | 0.54  |
| #N/A | #N/A | -1.03 |
| 0.93 | 0.38 | -0.19 |
| 0.93 | 0.38 | -0.14 |
| 1.73 | 0.76 | 0.38  |
| #N/A | #N/A | -0.41 |
| 2.34 | 0.78 | #N/A  |
| 1.52 | 0.68 | -0.30 |
| 1.52 | 0.68 | 0.62  |
| 2.20 | 0.89 | 0.92  |
| 2.20 | 0.89 | #N/A  |
| 3.18 | 0.97 | -3.50 |
| 3.18 | 0.97 | #N/A  |
| 2.16 | 0.88 | -0.05 |
| 2.92 | 0.96 | -1.74 |
| #N/A | #N/A | -0.25 |
| #N/A | #N/A | -1.08 |
| 1.71 | 0.76 | 0.21  |
| 1.19 | 0.52 | 0.77  |
| 0.67 | 0.23 | -0.05 |
| 2.18 | 0.88 | 0.05  |
| 2.18 | 0.88 | -0.65 |
| 0.30 | 0.03 | 1.10  |
| 0.30 | 0.03 | 1.56  |
| #N/A | #N/A | -0.85 |
| #N/A | #N/A | -1.74 |
| #N/A | #N/A | 1.82  |
| 0.36 | 0.05 | 0.75  |
| #N/A | #N/A | -0.10 |
| 0.57 | 0.17 | 3.39  |
| 0.49 | 0.13 | 0.80  |
| #N/A | #N/A | 0.17  |
| 1.05 | 0.45 | 0.82  |

|      |      |       |
|------|------|-------|
| 1.05 | 0.45 | #N/A  |
| 1.54 | 0.69 | -0.17 |
| 2.13 | 0.86 | -0.59 |
| 3.56 | 0.99 | -1.55 |
| 3.56 | 0.99 | -3.37 |
| 2.85 | 0.95 | -1.40 |
| 2.85 | 0.95 | -0.15 |
| 0.53 | 0.15 | 0.04  |
| 2.85 | 0.95 | 0.76  |
| 0.53 | 0.15 | 3.05  |
| 2.53 | 0.89 | 0.79  |
| 0.88 | 0.35 | 1.50  |
| 0.87 | 0.35 | #N/A  |
| 1.46 | 0.65 | 0.12  |
| 0.85 | 0.33 | -2.34 |
| 1.46 | 0.65 | -2.36 |
| 0.85 | 0.33 | -2.34 |
| 1.90 | 0.81 | #N/A  |
| 1.90 | 0.81 | -0.24 |
| 2.15 | 0.87 | -0.56 |
| 2.15 | 0.87 | 0.39  |
| 1.83 | 0.79 | -0.61 |
| 0.79 | 0.30 | -0.16 |
| 0.79 | 0.30 | 0.03  |
| 1.60 | 0.71 | #N/A  |
| 1.52 | 0.67 | 0.90  |
| 1.82 | 0.79 | 0.47  |
| 0.89 | 0.36 | -0.41 |
| 1.74 | 0.77 | 0.75  |
| 1.74 | 0.77 | #N/A  |
| 1.28 | 0.57 | -0.20 |
| 1.29 | 0.57 | -0.07 |
| 1.29 | 0.57 | -0.01 |
| 2.14 | 0.87 | 0.15  |
| 1.50 | 0.67 | -0.47 |
| 0.38 | 0.06 | #N/A  |
| 0.93 | 0.38 | 0.23  |
| 0.97 | 0.40 | 0.19  |
| 1.43 | 0.64 | 1.03  |
| #N/A | #N/A | -2.34 |
| 2.16 | 0.83 | -2.01 |
| 1.72 | 0.76 | 0.38  |
| 1.72 | 0.76 | 0.37  |
| 1.60 | 0.72 | 0.39  |
| 1.60 | 0.72 | 0.10  |
| 2.63 | 0.95 | -0.27 |
| 2.63 | 0.95 | -1.72 |
| #N/A | #N/A | -0.06 |
| 2.17 | 0.88 | -0.13 |
| #N/A | #N/A | #N/A  |
| #N/A | #N/A | #N/A  |

|      |      |       |
|------|------|-------|
| #N/A | #N/A | -1.08 |
| #N/A | #N/A | -0.96 |
| 2.69 | 0.95 | 0.31  |
| 2.69 | 0.95 | -1.56 |
| 1.29 | 0.58 | -0.35 |
| 1.29 | 0.58 | -0.12 |
| 2.60 | 0.91 | -0.38 |
| 2.60 | 0.91 | -0.16 |
| 0.79 | 0.30 | -0.36 |
| 0.43 | 0.09 | 0.63  |
| #N/A | #N/A | 0.52  |
| #N/A | #N/A | 0.84  |
| 1.93 | 0.80 | -0.41 |
| 0.61 | 0.19 | 0.35  |
| 0.67 | 0.23 | 0.80  |
| 1.55 | 0.67 | -2.07 |
| 1.55 | 0.67 | -0.97 |
| 0.87 | 0.35 | #N/A  |
| 1.14 | 0.47 | -0.35 |
| 1.92 | 0.80 | 0.29  |
| 1.54 | 0.69 | 0.69  |
| 1.74 | 0.76 | 0.04  |
| 1.58 | 0.71 | 0.20  |
| 1.15 | 0.50 | 0.09  |
| 1.07 | 0.45 | #N/A  |
| 1.31 | 0.57 | -0.08 |
| #N/A | #N/A | -0.33 |
| 1.31 | 0.57 | #N/A  |
| #N/A | #N/A | -0.69 |
| 1.01 | 0.43 | -0.60 |
| 0.31 | 0.03 | -0.58 |
| 1.38 | 0.60 | -0.66 |
| 0.70 | 0.25 | 1.11  |
| 0.49 | 0.12 | -0.08 |
| 0.49 | 0.12 | -2.10 |
| #N/A | #N/A | -0.35 |
| 1.12 | 0.49 | 0.26  |
| 1.60 | 0.71 | -1.01 |
| 1.60 | 0.71 | -0.32 |
| 1.01 | 0.43 | -0.16 |
| 1.08 | 0.46 | -0.32 |
| 0.89 | 0.36 | 0.09  |
| 0.89 | 0.36 | -1.20 |
| 2.63 | 0.95 | -0.23 |
| 0.39 | 0.06 | 0.92  |
| 1.69 | 0.75 | 0.06  |
| 1.69 | 0.75 | -0.66 |
| #N/A | #N/A | -1.96 |
| #N/A | #N/A | -1.78 |
| #N/A | #N/A | #N/A  |
| #N/A | #N/A | 1.19  |

|      |      |       |
|------|------|-------|
| 3.25 | 0.98 | -0.51 |
| 3.25 | 0.98 | 0.20  |
| 2.56 | 0.94 | -0.42 |
| 2.56 | 0.94 | #N/A  |
| #N/A | #N/A | 0.78  |
| 0.93 | 0.38 | 1.16  |
| 4.32 | 0.99 | -0.23 |
| 4.32 | 0.99 | 0.62  |
| 2.10 | 0.85 | -0.65 |
| 0.93 | 0.38 | -0.65 |
| 0.93 | 0.38 | -1.68 |
| #N/A | #N/A | -1.67 |
| #N/A | #N/A | 0.34  |
| 1.63 | 0.72 | 0.27  |
| 1.63 | 0.72 | #N/A  |
| #N/A | #N/A | 1.77  |
| 1.75 | 0.77 | 0.30  |
| 1.05 | 0.45 | -0.12 |
| 2.12 | 0.86 | -1.54 |
| 0.84 | 0.33 | -0.26 |
| 3.14 | 0.98 | -0.09 |
| 3.14 | 0.98 | -0.35 |
| 2.49 | 0.93 | #N/A  |
| 2.49 | 0.93 | -0.05 |
| 0.75 | 0.28 | 0.93  |
| 0.75 | 0.28 | 0.40  |
| #N/A | #N/A | 0.53  |
| 1.83 | 0.80 | 0.66  |
| 0.75 | 0.27 | 0.82  |
| 1.00 | 0.42 | -0.02 |
| 3.15 | 0.98 | -0.49 |
| 3.15 | 0.98 | -0.19 |
| 2.29 | 0.90 | 0.50  |
| 1.88 | 0.81 | 0.20  |
| 0.98 | 0.41 | -0.50 |
| 0.98 | 0.41 | -0.34 |
| #N/A | #N/A | -0.44 |
| #N/A | #N/A | 0.74  |
| 1.75 | 0.77 | -1.69 |
| 1.75 | 0.77 | 0.35  |
| 1.25 | 0.55 | -0.34 |
| 2.84 | 0.96 | -3.22 |
| 2.84 | 0.96 | 0.47  |
| 0.38 | 0.07 | 0.17  |
| 0.38 | 0.07 | 1.49  |
| 0.12 | 0.00 | -1.26 |
| 0.12 | 0.00 | #N/A  |
| #N/A | #N/A | 1.12  |
| 0.36 | 0.06 | -0.16 |
| 2.58 | 0.94 | 0.06  |
| 2.58 | 0.94 | -0.19 |

|      |      |       |
|------|------|-------|
| 0.70 | 0.25 | -0.41 |
| 1.46 | 0.65 | #N/A  |
| #N/A | #N/A | 1.02  |
| #N/A | #N/A | -0.72 |
| 0.72 | 0.26 | 1.04  |
| 1.02 | 0.43 | 1.10  |
| 1.87 | 0.80 | #N/A  |
| 1.87 | 0.80 | #N/A  |
| 1.87 | 0.80 | #N/A  |
| #N/A | #N/A | #N/A  |
| 2.08 | 0.85 | -0.71 |
| 1.50 | 0.66 | -0.57 |
| 1.50 | 0.66 | 0.53  |
| 1.31 | 0.59 | -2.02 |
| 1.05 | 0.45 | 0.34  |
| 1.10 | 0.48 | -0.68 |
| 1.77 | 0.78 | 0.99  |
| 1.77 | 0.78 | 0.86  |
| 1.11 | 0.48 | -0.72 |
| 1.51 | 0.68 | -0.08 |
| 1.86 | 0.80 | -0.70 |
| 1.86 | 0.80 | 0.50  |
| 1.36 | 0.60 | 0.13  |
| 0.52 | 0.14 | -0.35 |
| #N/A | #N/A | -0.23 |
| #N/A | #N/A | #N/A  |
| 0.52 | 0.14 | 1.05  |
| #N/A | #N/A | -0.47 |
| #N/A | #N/A | 0.62  |
| #N/A | #N/A | -0.13 |
| 3.32 | 0.97 | -1.71 |
| 2.00 | 0.83 | -0.56 |
| 2.00 | 0.83 | #N/A  |
| 0.70 | 0.25 | 1.02  |
| 0.70 | 0.25 | -1.96 |
| #N/A | #N/A | 1.22  |
| 1.00 | 0.42 | 1.38  |
| 0.67 | 0.23 | -0.36 |
| 0.44 | 0.10 | -0.83 |
| #N/A | #N/A | 0.39  |
| #N/A | #N/A | 0.25  |
| #N/A | #N/A | 0.36  |
| #N/A | #N/A | 0.36  |
| #N/A | #N/A | 0.12  |
| #N/A | #N/A | 0.33  |
| #N/A | #N/A | -0.04 |
| #N/A | #N/A | 0.75  |
| 1.88 | 0.80 | 0.51  |
| 1.88 | 0.80 | 0.96  |
| 1.65 | 0.73 | 0.37  |
| #N/A | #N/A | 0.36  |

|      |      |       |
|------|------|-------|
| #N/A | #N/A | -1.81 |
| #N/A | #N/A | 0.70  |
| #N/A | #N/A | 0.75  |
| 1.54 | 0.68 | 0.74  |
| #N/A | #N/A | 0.28  |
| 2.67 | 0.95 | -1.45 |
| 2.67 | 0.95 | 0.11  |
| 1.27 | 0.56 | 1.82  |
| #N/A | #N/A | -2.16 |
| 1.44 | 0.65 | 0.39  |
| 1.44 | 0.65 | 0.88  |
| 0.82 | 0.32 | 3.56  |
| 0.46 | 0.11 | -0.55 |
| 0.46 | 0.11 | -1.55 |
| 2.57 | 0.89 | -0.38 |
| 2.57 | 0.89 | -0.23 |
| #N/A | #N/A | -1.63 |
| #N/A | #N/A | #N/A  |
| #N/A | #N/A | -1.54 |
| #N/A | #N/A | -1.23 |
| 1.55 | 0.70 | -0.24 |
| 1.20 | 0.53 | -0.41 |
| #N/A | #N/A | 0.62  |
| #N/A | #N/A | -0.52 |
| #N/A | #N/A | 0.43  |
| #N/A | #N/A | -0.19 |
| #N/A | #N/A | 0.38  |
| 1.14 | 0.50 | 0.71  |
| #N/A | #N/A | -0.28 |
| #N/A | #N/A | -2.65 |
| 1.42 | 0.61 | -2.61 |
| #N/A | #N/A | -1.85 |
| 1.44 | 0.64 | 0.85  |
| 1.44 | 0.64 | #N/A  |
| 2.06 | 0.86 | 0.86  |
| 2.06 | 0.86 | 1.01  |
| 2.06 | 0.86 | 0.85  |
| 2.06 | 0.86 | 0.32  |
| 1.22 | 0.54 | 1.41  |
| 1.22 | 0.54 | 0.14  |
| #N/A | #N/A | 0.11  |
| 1.77 | 0.75 | -0.27 |
| 2.35 | 0.91 | -0.10 |
| 2.35 | 0.91 | -0.81 |
| 1.68 | 0.72 | #N/A  |
| 1.80 | 0.77 | -1.06 |
| 1.31 | 0.59 | -0.60 |
| 1.31 | 0.59 | -0.19 |
| #N/A | #N/A | -0.30 |
| 0.60 | 0.19 | 2.24  |
| #N/A | #N/A | 2.07  |



|      |      |       |
|------|------|-------|
| 1.46 | 0.66 | 0.85  |
| 1.46 | 0.66 | -0.21 |
| 0.64 | 0.21 | 0.99  |
| 1.45 | 0.64 | -2.66 |
| #N/A | #N/A | -2.57 |
| #N/A | #N/A | -0.31 |
| #N/A | #N/A | 0.26  |
| #N/A | #N/A | 0.83  |
| #N/A | #N/A | -0.34 |
| 0.95 | 0.39 | 0.12  |
| 0.81 | 0.31 | -0.57 |
| 1.25 | 0.56 | -0.67 |
| 0.80 | 0.30 | -0.67 |
| 1.36 | 0.60 | 0.96  |
| #N/A | #N/A | #N/A  |
| 3.43 | 0.99 | -0.75 |
| 3.43 | 0.99 | #N/A  |
| #N/A | #N/A | #N/A  |
| #N/A | #N/A | -0.88 |
| #N/A | #N/A | -0.51 |
| 1.85 | 0.78 | -0.69 |
| 1.56 | 0.63 | 0.23  |
| 1.56 | 0.63 | 0.83  |
| 1.32 | 0.59 | 1.14  |
| #N/A | #N/A | -0.57 |
| #N/A | #N/A | -0.81 |
| #N/A | #N/A | -0.26 |
| 1.48 | 0.65 | 0.90  |
| 1.48 | 0.65 | 0.09  |
| 1.70 | 0.75 | 0.77  |
| 1.70 | 0.75 | 0.97  |
| 0.39 | 0.07 | -2.95 |
| #N/A | #N/A | 1.29  |
| 0.88 | 0.35 | 2.24  |
| 0.88 | 0.35 | 2.34  |
| 1.20 | 0.52 | 0.12  |
| 1.96 | 0.83 | 0.06  |
| 0.35 | 0.05 | #N/A  |
| 0.35 | 0.05 | 0.23  |
| 0.52 | 0.14 | 0.85  |
| 0.92 | 0.37 | 2.42  |
| #N/A | #N/A | 1.84  |
| #N/A | #N/A | 0.55  |
| #N/A | #N/A | -0.06 |
| #N/A | #N/A | -0.16 |
| 0.96 | 0.40 | -1.09 |
| 1.11 | 0.48 | -1.06 |
| 2.12 | 0.87 | 0.11  |
| 1.30 | 0.58 | 1.06  |
| 1.30 | 0.58 | 1.64  |
| 1.93 | 0.75 | -0.02 |

|      |      |       |
|------|------|-------|
| #N/A | #N/A | -0.14 |
| 1.93 | 0.75 | 2.18  |
| #N/A | #N/A | 0.09  |
| #N/A | #N/A | -0.67 |
| 1.83 | 0.79 | 0.08  |
| 1.83 | 0.79 | -0.21 |
| 2.18 | 0.87 | -0.42 |
| 3.89 | 0.99 | -2.63 |
| 1.86 | 0.80 | -0.18 |
| 0.44 | 0.10 | #N/A  |
| 0.44 | 0.10 | #N/A  |
| #N/A | #N/A | #N/A  |
| #N/A | #N/A | #N/A  |
| #N/A | #N/A | #N/A  |
| #N/A | #N/A | 0.01  |
| 2.15 | 0.87 | 0.91  |
| 2.15 | 0.87 | -0.43 |
| 1.35 | 0.60 | -0.24 |
| 0.96 | 0.40 | -1.03 |
| 1.01 | 0.43 | -0.65 |
| #N/A | #N/A | -0.11 |
| #N/A | #N/A | 0.55  |
| #N/A | #N/A | 0.92  |
| 2.13 | 0.87 | -0.31 |
| 1.04 | 0.44 | -0.07 |
| 0.75 | 0.28 | -0.83 |
| 0.92 | 0.37 | 0.17  |
| 0.92 | 0.37 | -0.20 |
| 0.92 | 0.37 | #N/A  |
| 0.37 | 0.06 | 0.99  |
| 0.20 | 0.01 | 0.74  |
| 0.20 | 0.01 | 0.22  |
| 0.18 | 0.01 | -0.31 |
| #N/A | #N/A | 0.41  |
| 0.82 | 0.32 | #N/A  |
| #N/A | #N/A | #N/A  |
| 0.30 | 0.03 | 1.88  |
| #N/A | #N/A | -0.20 |
| #N/A | #N/A | #N/A  |
| #N/A | #N/A | -0.48 |
| #N/A | #N/A | #N/A  |
| 2.69 | 0.95 | 0.33  |
| 1.73 | 0.76 | -0.60 |
| 1.49 | 0.67 | 1.06  |
| 1.49 | 0.67 | 1.08  |
| #N/A | #N/A | -1.47 |
| 1.42 | 0.64 | -0.18 |
| 1.42 | 0.64 | -0.72 |
| 1.41 | 0.63 | -0.35 |
| 1.42 | 0.64 | -0.06 |
| 1.41 | 0.63 | -0.32 |

|       |      |       |
|-------|------|-------|
| 3.23  | 0.96 | -0.39 |
| 3.23  | 0.96 | -0.07 |
| 30.72 | 1.00 | -0.48 |
| #N/A  | #N/A | #N/A  |
| 0.71  | 0.25 | 0.24  |
| 0.71  | 0.25 | 0.92  |
| 1.02  | 0.43 | -1.60 |
| 1.02  | 0.43 | 0.53  |
| 0.27  | 0.02 | 3.51  |
| #N/A  | #N/A | 0.01  |
| 0.61  | 0.19 | -0.68 |
| 1.33  | 0.59 | -0.09 |
| #N/A  | #N/A | #N/A  |
| 0.26  | 0.02 | 0.30  |
| 0.43  | 0.09 | -1.41 |
| #N/A  | #N/A | 0.00  |
| #N/A  | #N/A | -0.41 |
| 1.01  | 0.43 | -0.72 |
| #N/A  | #N/A | 0.51  |
| 1.01  | 0.43 | #N/A  |
| 0.95  | 0.39 | -2.30 |
| #N/A  | #N/A | -2.47 |
| 0.95  | 0.39 | -0.98 |
| #N/A  | #N/A | -0.66 |
| 0.38  | 0.06 | -0.80 |
| 0.45  | 0.10 | -1.76 |
| 1.33  | 0.55 | 1.12  |
| #N/A  | #N/A | #N/A  |
| 0.70  | 0.24 | 0.52  |
| 0.79  | 0.30 | -0.09 |
| 0.70  | 0.24 | -0.12 |
| 0.79  | 0.30 | 0.79  |
| 1.73  | 0.74 | -0.03 |
| 1.73  | 0.74 | 0.62  |
| 1.50  | 0.67 | -0.17 |
| #N/A  | #N/A | 0.33  |
| 0.95  | 0.39 | -1.70 |
| 0.95  | 0.39 | 1.59  |
| 1.28  | 0.57 | -0.59 |
| 1.16  | 0.51 | -0.49 |
| 1.16  | 0.51 | -1.14 |
| #N/A  | #N/A | 0.98  |
| 2.04  | 0.85 | 0.78  |
| 2.04  | 0.85 | 0.33  |
| 1.94  | 0.83 | -0.08 |
| 1.94  | 0.83 | #N/A  |
| #N/A  | #N/A | #N/A  |
| #N/A  | #N/A | #N/A  |
| 0.95  | 0.39 | -1.54 |
| #N/A  | #N/A | 0.59  |
| #N/A  | #N/A | 0.33  |

|      |      |       |
|------|------|-------|
| 1.91 | 0.81 | 0.85  |
| 1.91 | 0.81 | 0.64  |
| #N/A | #N/A | -1.46 |
| 3.51 | 0.95 | -0.25 |
| #N/A | #N/A | #N/A  |
| 3.51 | 0.95 | 0.16  |
| #N/A | #N/A | -0.25 |
| 1.65 | 0.73 | -0.54 |
| 1.53 | 0.69 | -0.81 |
| #N/A | #N/A | -0.68 |
| 1.53 | 0.69 | -0.34 |
| 1.86 | 0.80 | -0.19 |
| 1.88 | 0.81 | 0.16  |
| 1.88 | 0.81 | -0.68 |
| #N/A | #N/A | -1.71 |
| 2.26 | 0.89 | #N/A  |
| 2.26 | 0.89 | -0.52 |
| 0.60 | 0.19 | 0.64  |
| 0.60 | 0.19 | -1.44 |
| 1.09 | 0.47 | -0.91 |
| 1.09 | 0.47 | -0.52 |
| #N/A | #N/A | -0.13 |
| 1.62 | 0.72 | 0.81  |
| 1.62 | 0.72 | #N/A  |
| 1.62 | 0.72 | 0.57  |
| #N/A | #N/A | 0.62  |
| #N/A | #N/A | 0.18  |
| 1.09 | 0.47 | -0.92 |
| #N/A | #N/A | 0.12  |
| 0.33 | 0.04 | 0.21  |
| 0.33 | 0.04 | -1.49 |
| #N/A | #N/A | -1.61 |
| #N/A | #N/A | #N/A  |
| 0.97 | 0.40 | 0.02  |
| #N/A | #N/A | 0.02  |
| #N/A | #N/A | -0.58 |
| 0.71 | 0.25 | -1.57 |
| 0.71 | 0.25 | 0.25  |
| 2.49 | 0.88 | #N/A  |
| #N/A | #N/A | -2.12 |
| #N/A | #N/A | 0.05  |
| 1.61 | 0.72 | 0.19  |
| #N/A | #N/A | -0.40 |
| #N/A | #N/A | -3.82 |
| #N/A | #N/A | 1.49  |
| 2.07 | 0.68 | #N/A  |
| 2.07 | 0.68 | #N/A  |
| 2.07 | 0.68 | -0.07 |
| #N/A | #N/A | -0.24 |
| #N/A | #N/A | -0.97 |
| #N/A | #N/A | -1.04 |

|      |      |       |
|------|------|-------|
| 2.79 | 0.96 | 0.25  |
| 2.79 | 0.96 | 0.22  |
| 1.76 | 0.77 | -0.09 |
| 1.76 | 0.77 | -0.66 |
| 1.70 | 0.75 | 0.51  |
| 1.95 | 0.80 | 0.31  |
| 1.77 | 0.76 | -0.31 |
| #N/A | #N/A | #N/A  |
| 1.10 | 0.48 | -0.35 |
| #N/A | #N/A | 0.44  |
| 1.38 | 0.62 | -0.02 |
| 1.38 | 0.62 | -1.93 |
| 1.23 | 0.54 | -0.61 |
| 1.23 | 0.54 | #N/A  |
| #N/A | #N/A | -1.71 |
| 0.50 | 0.13 | 0.59  |
| 0.36 | 0.05 | -0.08 |
| 0.36 | 0.05 | 1.53  |
| 2.40 | 0.92 | 0.00  |
| 0.65 | 0.22 | 0.12  |
| 0.50 | 0.13 | -2.08 |
| 1.47 | 0.66 | -0.19 |
| 1.47 | 0.66 | 0.16  |
| #N/A | #N/A | -0.13 |
| #N/A | #N/A | #N/A  |
| 1.14 | 0.49 | 0.28  |
| 0.70 | 0.25 | -0.44 |
| 0.70 | 0.25 | -1.69 |
| #N/A | #N/A | -2.16 |
| 2.48 | 0.93 | 0.11  |
| 2.25 | 0.84 | #N/A  |
| 0.98 | 0.41 | -0.45 |
| 1.15 | 0.51 | -1.38 |
| 1.15 | 0.51 | 0.84  |
| #N/A | #N/A | -0.65 |
| 1.03 | 0.44 | #N/A  |
| 1.33 | 0.60 | -0.40 |
| #N/A | #N/A | #N/A  |
| 1.33 | 0.60 | 0.00  |
| #N/A | #N/A | -1.50 |
| 1.24 | 0.55 | -0.25 |
| 0.80 | 0.31 | -0.10 |
| 0.56 | 0.17 | -0.03 |
| 0.80 | 0.31 | -0.39 |
| 0.56 | 0.17 | #N/A  |
| 0.80 | 0.31 | 0.12  |
| 0.56 | 0.17 | #N/A  |
| 1.56 | 0.70 | 0.06  |
| 0.43 | 0.09 | 0.98  |
| 1.06 | 0.45 | #N/A  |
| 1.06 | 0.45 | 2.08  |

|      |      |       |
|------|------|-------|
| 1.62 | 0.72 | 0.75  |
| 1.00 | 0.42 | -0.35 |
| 0.48 | 0.12 | 0.36  |
| 0.48 | 0.12 | -0.33 |
| 1.47 | 0.65 | #N/A  |
| 1.77 | 0.72 | -0.69 |
| 1.77 | 0.72 | -0.64 |
| #N/A | #N/A | -0.51 |
| 1.77 | 0.72 | -0.51 |
| #N/A | #N/A | 0.43  |
| #N/A | #N/A | 0.29  |
| 1.46 | 0.63 | 0.18  |
| 3.65 | 0.98 | -1.78 |
| 3.65 | 0.98 | -0.25 |
| 1.04 | 0.44 | 0.56  |
| 1.51 | 0.68 | #N/A  |
| 1.51 | 0.68 | -0.38 |
| 1.64 | 0.70 | -0.57 |
| 1.69 | 0.74 | 0.25  |
| 1.69 | 0.74 | -0.21 |
| 1.80 | 0.78 | -1.50 |
| 1.80 | 0.78 | -0.12 |
| 0.77 | 0.29 | -1.94 |
| 0.77 | 0.29 | 0.69  |
| 0.50 | 0.13 | -1.78 |
| 0.71 | 0.26 | 0.01  |
| 0.63 | 0.21 | 0.65  |
| 1.27 | 0.56 | 0.46  |
| 2.25 | 0.88 | 0.00  |
| 0.44 | 0.09 | -0.55 |
| 2.25 | 0.88 | 0.25  |
| #N/A | #N/A | #N/A  |
| #N/A | #N/A | -0.43 |
| #N/A | #N/A | -0.29 |
| 0.93 | 0.38 | 0.30  |
| #N/A | #N/A | #N/A  |
| 5.17 | 0.89 | -0.73 |
| 5.17 | 0.89 | #N/A  |
| #N/A | #N/A | -0.18 |
| #N/A | #N/A | 0.15  |
| #N/A | #N/A | 0.58  |
| 2.06 | 0.85 | 0.37  |
| 1.93 | 0.82 | 2.13  |
| 1.93 | 0.82 | -0.77 |
| #N/A | #N/A | 0.58  |
| 1.95 | 0.81 | -0.48 |
| 1.95 | 0.81 | #N/A  |
| 1.36 | 0.60 | 0.14  |
| 0.56 | 0.17 | -0.37 |
| 1.36 | 0.60 | 0.06  |
| 1.83 | 0.79 | 0.29  |

|      |      |       |
|------|------|-------|
| 1.22 | 0.54 | -0.18 |
| 0.70 | 0.25 | -0.88 |
| 0.70 | 0.25 | 0.21  |
| 0.65 | 0.22 | 2.49  |
| 1.31 | 0.58 | 0.21  |
| 1.31 | 0.58 | -2.15 |
| 0.60 | 0.19 | 0.40  |
| #N/A | #N/A | #N/A  |
| #N/A | #N/A | 0.44  |
| #N/A | #N/A | 0.51  |
| #N/A | #N/A | -2.19 |
| #N/A | #N/A | -0.57 |
| 2.27 | 0.90 | -0.10 |
| 0.45 | 0.10 | -2.17 |
| 0.45 | 0.10 | 0.21  |
| 2.83 | 0.96 | #N/A  |
| 2.83 | 0.96 | 0.19  |
| #N/A | #N/A | 0.44  |
| #N/A | #N/A | 0.45  |
| 2.27 | 0.87 | 0.06  |
| 1.87 | 0.81 | 2.07  |
| #N/A | #N/A | -0.13 |
| 0.74 | 0.27 | -0.18 |
| #N/A | #N/A | -1.93 |
| 1.28 | 0.57 | -0.55 |
| 0.80 | 0.30 | -0.04 |
| #N/A | #N/A | 0.48  |
| 1.64 | 0.69 | 0.16  |
| #N/A | #N/A | 0.17  |
| 1.41 | 0.61 | 0.60  |
| 4.49 | 0.99 | -2.02 |
| 2.79 | 0.96 | -0.30 |
| 2.18 | 0.88 | -1.65 |
| 2.18 | 0.88 | -0.71 |
| 3.69 | 0.99 | #N/A  |
| 3.69 | 0.99 | -0.44 |
| 1.81 | 0.78 | -0.04 |
| 1.22 | 0.54 | -0.15 |
| 0.52 | 0.14 | 0.32  |
| 0.52 | 0.14 | #N/A  |
| #N/A | #N/A | #N/A  |
| 0.52 | 0.14 | 0.29  |
| #N/A | #N/A | 0.58  |
| 2.44 | 0.90 | -2.63 |
| 2.02 | 0.85 | -1.66 |
| 2.02 | 0.85 | -1.65 |
| 2.44 | 0.90 | #N/A  |
| 2.18 | 0.88 | -0.59 |
| 2.18 | 0.88 | #N/A  |
| 1.29 | 0.57 | 0.17  |
| 1.29 | 0.57 | 0.20  |

|      |      |       |
|------|------|-------|
| 0.44 | 0.09 | 3.38  |
| #N/A | #N/A | 0.66  |
| 0.44 | 0.09 | -0.03 |
| 0.44 | 0.09 | -0.36 |
| 1.27 | 0.57 | -0.38 |
| 1.27 | 0.57 | #N/A  |
| 1.94 | 0.82 | -0.24 |
| 2.07 | 0.86 | -0.42 |
| #N/A | #N/A | -1.42 |
| #N/A | #N/A | -0.07 |
| #N/A | #N/A | -0.99 |
| 1.18 | 0.52 | -1.12 |
| 1.18 | 0.52 | 0.94  |
| #N/A | #N/A | 0.31  |
| #N/A | #N/A | -0.11 |
| 2.28 | 0.90 | -0.75 |
| 2.28 | 0.90 | -0.33 |
| 2.24 | 0.89 | 0.05  |
| 0.43 | 0.09 | 0.21  |
| 0.90 | 0.36 | 0.85  |
| 0.90 | 0.36 | 0.76  |
| 1.50 | 0.67 | 1.71  |
| 0.74 | 0.27 | -0.60 |
| 0.74 | 0.27 | 0.82  |
| 0.84 | 0.33 | 0.66  |
| 0.84 | 0.33 | #N/A  |
| 0.75 | 0.28 | -0.40 |
| 2.21 | 0.89 | -0.31 |
| 1.29 | 0.56 | -1.06 |
| 0.92 | 0.37 | -0.47 |
| 1.24 | 0.55 | 0.43  |
| 1.24 | 0.55 | 4.07  |
| 1.63 | 0.71 | #N/A  |
| #N/A | #N/A | 0.94  |
| 1.68 | 0.75 | 0.71  |
| #N/A | #N/A | 0.94  |
| 0.84 | 0.33 | 0.15  |
| 0.86 | 0.34 | -0.99 |
| 0.86 | 0.34 | 0.53  |
| 1.59 | 0.70 | -0.98 |
| 1.33 | 0.59 | 0.00  |
| 2.52 | 0.94 | 0.33  |
| 1.78 | 0.76 | -1.99 |
| 1.78 | 0.76 | 0.69  |
| 0.77 | 0.29 | 0.97  |
| 0.77 | 0.29 | 1.00  |
| 0.80 | 0.31 | 0.11  |
| 0.36 | 0.05 | -0.89 |
| 0.86 | 0.34 | -0.71 |
| 0.71 | 0.26 | 0.18  |
| 0.96 | 0.40 | -1.57 |



|      |      |       |
|------|------|-------|
| 0.88 | 0.35 | 0.62  |
| 0.46 | 0.11 | -0.31 |
| #N/A | #N/A | #N/A  |
| 1.00 | 0.42 | #N/A  |
| 2.77 | 0.96 | #N/A  |
| 1.58 | 0.71 | 1.34  |
| 2.33 | 0.90 | 0.69  |
| 2.33 | 0.90 | 0.93  |
| #N/A | #N/A | 0.19  |
| 1.49 | 0.55 | 0.42  |
| 1.30 | 0.58 | #N/A  |
| 2.05 | 0.85 | -0.20 |
| 2.05 | 0.85 | 0.80  |
| 1.23 | 0.52 | -0.55 |
| 1.81 | 0.79 | #N/A  |
| 1.81 | 0.79 | 0.57  |
| 0.81 | 0.31 | 1.06  |
| #N/A | #N/A | #N/A  |
| 0.81 | 0.31 | #N/A  |
| 2.25 | 0.90 | -0.33 |
| 1.76 | 0.77 | 0.91  |
| 1.76 | 0.77 | 0.41  |
| #N/A | #N/A | -0.09 |
| #N/A | #N/A | 0.34  |
| 0.78 | 0.30 | -0.22 |
| 1.94 | 0.82 | 0.11  |
| 1.94 | 0.82 | 1.48  |
| 0.80 | 0.31 | 1.27  |
| 0.50 | 0.13 | 0.84  |
| 0.41 | 0.07 | -0.29 |
| 1.07 | 0.46 | -0.04 |
| 0.70 | 0.25 | 0.06  |
| 0.70 | 0.25 | 0.62  |
| 3.19 | 0.98 | 0.17  |
| 3.19 | 0.98 | -0.36 |
| 1.77 | 0.77 | -3.16 |
| 0.77 | 0.29 | 0.17  |
| 0.77 | 0.29 | 0.64  |
| 1.33 | 0.60 | 1.70  |
| 1.51 | 0.68 | 0.66  |
| 1.33 | 0.60 | 1.00  |
| 1.33 | 0.60 | 0.34  |
| 1.32 | 0.59 | -0.23 |
| 0.98 | 0.41 | 1.37  |
| 1.10 | 0.47 | #N/A  |
| 1.10 | 0.47 | -1.61 |
| 2.68 | 0.94 | -0.70 |
| 2.56 | 0.93 | 0.26  |
| 2.56 | 0.93 | -0.38 |
| 2.13 | 0.87 | 0.40  |
| 2.13 | 0.87 | #N/A  |

|      |      |       |
|------|------|-------|
| 1.30 | 0.54 | 0.13  |
| 1.28 | 0.57 | -0.57 |
| 1.96 | 0.83 | -0.15 |
| 1.36 | 0.60 | 0.38  |
| 1.36 | 0.60 | 0.57  |
| 0.76 | 0.28 | #N/A  |
| 0.24 | 0.02 | 0.01  |
| 1.33 | 0.59 | 0.66  |
| 1.33 | 0.59 | 0.10  |
| 1.84 | 0.76 | 0.35  |
| 1.24 | 0.55 | 0.38  |
| 1.19 | 0.52 | -1.09 |
| 1.24 | 0.55 | #N/A  |
| 1.83 | 0.79 | -1.86 |
| 2.23 | 0.89 | #N/A  |
| 2.13 | 0.87 | -0.59 |
| 2.13 | 0.87 | -0.69 |
| 2.22 | 0.89 | -0.40 |
| 0.72 | 0.26 | 0.92  |
| 1.16 | 0.51 | #N/A  |
| 0.48 | 0.12 | 0.70  |
| #N/A | #N/A | #N/A  |
| #N/A | #N/A | 1.11  |
| 1.05 | 0.45 | 0.65  |
| 0.93 | 0.38 | 0.53  |
| 1.05 | 0.45 | 0.28  |
| 1.31 | 0.58 | 0.19  |
| 1.29 | 0.58 | 0.26  |
| 1.29 | 0.58 | 2.64  |
| 1.35 | 0.60 | -0.19 |
| 1.87 | 0.81 | 0.95  |
| 1.87 | 0.81 | -0.88 |
| #N/A | #N/A | #N/A  |
| 1.01 | 0.43 | #N/A  |
| 1.01 | 0.43 | 0.64  |
| 1.49 | 0.66 | 0.36  |
| 1.96 | 0.82 | 1.91  |
| 1.25 | 0.55 | 0.84  |
| 1.25 | 0.55 | 0.45  |
| 0.52 | 0.14 | -0.76 |
| 0.54 | 0.15 | -0.13 |
| 0.48 | 0.12 | 2.04  |
| 0.79 | 0.30 | 1.57  |
| 0.87 | 0.34 | 3.70  |
| 1.54 | 0.69 | 0.34  |
| 1.13 | 0.50 | #N/A  |
| 0.51 | 0.14 | -1.25 |
| 1.33 | 0.59 | -0.44 |
| 1.31 | 0.58 | 1.97  |
| 1.99 | 0.83 | 0.31  |
| 2.27 | 0.90 | #N/A  |

|      |      |       |
|------|------|-------|
| 2.27 | 0.90 | 0.29  |
| 2.48 | 0.91 | 1.36  |
| 2.48 | 0.91 | 0.40  |
| 1.11 | 0.48 | -1.86 |
| 2.69 | 0.92 | #N/A  |
| 0.94 | 0.39 | 2.05  |
| 1.03 | 0.44 | 0.87  |
| 1.03 | 0.44 | 0.91  |
| 0.94 | 0.39 | 0.27  |
| #N/A | #N/A | -1.47 |
| #N/A | #N/A | -0.36 |
| 1.93 | 0.81 | -1.01 |
| 0.98 | 0.41 | 0.38  |
| 1.80 | 0.78 | -0.24 |
| 1.67 | 0.73 | -0.34 |
| 1.95 | 0.80 | -1.09 |
| 1.95 | 0.80 | -2.76 |
| 3.12 | 0.97 | -0.70 |
| 2.42 | 0.86 | -0.31 |
| 2.00 | 0.82 | -2.24 |
| #N/A | #N/A | #N/A  |
| #N/A | #N/A | 1.51  |
| #N/A | #N/A | 0.26  |
| 0.20 | 0.01 | 0.63  |
| 0.55 | 0.16 | -1.36 |
| 0.20 | 0.01 | 0.13  |
| 1.86 | 0.79 | -0.10 |
| 1.86 | 0.79 | -0.02 |
| 1.97 | 0.83 | 1.30  |
| #N/A | #N/A | #N/A  |
| #N/A | #N/A | 1.11  |
| 0.49 | 0.12 | -2.02 |
| 0.49 | 0.12 | -1.39 |
| 1.66 | 0.74 | -1.64 |
| 0.17 | 0.01 | 0.16  |
| 0.85 | 0.34 | -1.39 |
| 0.85 | 0.34 | #N/A  |
| 1.23 | 0.54 | 0.99  |
| 0.93 | 0.38 | -0.06 |
| 0.92 | 0.37 | 0.48  |
| 0.88 | 0.35 | #N/A  |
| 0.92 | 0.37 | 1.14  |
| 0.47 | 0.11 | 0.30  |
| 2.25 | 0.89 | 0.66  |
| 0.77 | 0.29 | -0.27 |
| 0.77 | 0.29 | 0.55  |
| 1.41 | 0.63 | 0.14  |
| 2.17 | 0.85 | 0.48  |
| 2.17 | 0.85 | -0.01 |
| 0.69 | 0.24 | #N/A  |
| 1.40 | 0.63 | #N/A  |

|      |      |       |
|------|------|-------|
| 1.40 | 0.63 | 0.75  |
| #N/A | #N/A | 0.02  |
| 2.44 | 0.88 | 0.44  |
| 1.82 | 0.76 | -0.50 |
| #N/A | #N/A | #N/A  |
| #N/A | #N/A | 0.66  |
| 2.11 | 0.87 | 0.17  |
| 2.11 | 0.87 | 0.48  |
| 1.57 | 0.70 | #N/A  |
| 1.20 | 0.52 | 5.20  |
| 1.28 | 0.57 | 4.46  |
| 0.79 | 0.30 | #N/A  |
| 0.86 | 0.34 | -0.01 |
| 0.79 | 0.30 | -0.30 |
| 0.86 | 0.34 | 2.35  |
| 0.86 | 0.34 | 2.34  |
| #N/A | #N/A | 2.99  |
| #N/A | #N/A | #N/A  |
| 1.62 | 0.73 | #N/A  |
| 1.31 | 0.58 | -1.18 |
| 2.56 | 0.94 | -0.03 |
| 1.54 | 0.68 | -1.36 |
| 0.79 | 0.30 | 0.50  |
| 0.57 | 0.17 | 1.40  |
| 0.55 | 0.16 | 1.23  |
| 1.51 | 0.66 | -0.45 |
| 1.51 | 0.66 | 0.52  |
| #N/A | #N/A | #N/A  |
| #N/A | #N/A | 1.35  |
| 1.48 | 0.66 | 0.11  |
| 1.03 | 0.44 | 0.05  |
| 1.03 | 0.44 | 1.69  |
| 2.18 | 0.85 | -0.18 |
| 2.18 | 0.85 | 1.17  |
| 1.37 | 0.62 | 0.06  |
| 0.43 | 0.09 | #N/A  |
| 1.40 | 0.62 | 0.40  |
| 0.71 | 0.25 | -1.51 |
| 0.14 | 0.01 | 1.50  |
| 0.99 | 0.41 | #N/A  |
| 2.51 | 0.93 | 0.85  |
| 2.51 | 0.93 | -0.58 |
| 0.39 | 0.07 | -1.47 |
| 1.30 | 0.57 | 0.65  |
| 1.38 | 0.62 | 0.37  |
| 1.38 | 0.62 | -0.73 |
| 2.11 | 0.77 | 0.15  |
| #N/A | #N/A | #N/A  |
| 0.88 | 0.35 | -0.06 |
| 0.88 | 0.35 | 1.27  |
| 3.30 | 0.98 | 0.19  |

|      |      |       |
|------|------|-------|
| 3.30 | 0.98 | 0.14  |
| 1.34 | 0.60 | -0.27 |
| 1.34 | 0.60 | 0.54  |
| #N/A | #N/A | -0.35 |
| 2.53 | 0.93 | -0.40 |
| 2.53 | 0.93 | -0.32 |
| 1.35 | 0.60 | 0.77  |
| 2.31 | 0.90 | -1.12 |
| 1.46 | 0.66 | 0.09  |
| 1.46 | 0.66 | -3.13 |
| #N/A | #N/A | #N/A  |
| #N/A | #N/A | -2.03 |
| #N/A | #N/A | 0.46  |
| 1.31 | 0.58 | -0.57 |
| 0.63 | 0.20 | 0.35  |
| 0.63 | 0.20 | -0.61 |
| 1.62 | 0.72 | -0.63 |
| 1.23 | 0.54 | #N/A  |
| 1.08 | 0.47 | 0.74  |
| 2.63 | 0.94 | 0.01  |
| 2.63 | 0.94 | 0.00  |
| #N/A | #N/A | -3.51 |
| #N/A | #N/A | -1.43 |
| 1.01 | 0.43 | 0.17  |
| 1.07 | 0.46 | -0.02 |
| 1.67 | 0.74 | #N/A  |
| 1.56 | 0.70 | #N/A  |
| 2.15 | 0.85 | -0.28 |
| 2.15 | 0.85 | 0.46  |
| #N/A | #N/A | 0.92  |
| 1.58 | 0.70 | 0.40  |
| 1.29 | 0.56 | -2.02 |
| 1.26 | 0.56 | #N/A  |
| 1.26 | 0.56 | -0.01 |
| 0.48 | 0.12 | -1.74 |
| 0.75 | 0.28 | -0.63 |
| 1.18 | 0.52 | 0.39  |
| 0.75 | 0.28 | #N/A  |
| 0.94 | 0.39 | -0.35 |
| 1.18 | 0.52 | -2.66 |
| 1.60 | 0.70 | -0.03 |
| #N/A | #N/A | 3.43  |
| 0.67 | 0.23 | 1.27  |
| 0.19 | 0.01 | 2.85  |
| #N/A | #N/A | 0.73  |
| 1.47 | 0.66 | 1.24  |
| #N/A | #N/A | #N/A  |
| #N/A | #N/A | 0.08  |
| 0.65 | 0.22 | #N/A  |
| 2.19 | 0.88 | #N/A  |
| 1.00 | 0.42 | 1.20  |

|      |      |       |
|------|------|-------|
| 2.28 | 0.90 | #N/A  |
| 1.13 | 0.49 | -0.95 |
| 1.50 | 0.67 | 1.21  |
| 1.50 | 0.67 | 0.69  |
| 1.22 | 0.54 | #N/A  |
| 1.81 | 0.79 | 0.32  |
| 1.49 | 0.66 | 0.20  |
| 1.49 | 0.66 | -0.93 |
| 1.82 | 0.78 | 0.25  |
| 2.03 | 0.85 | -0.40 |
| 2.03 | 0.85 | #N/A  |
| 2.16 | 0.88 | #N/A  |
| 1.20 | 0.53 | 1.56  |
| 0.78 | 0.30 | -0.18 |
| 1.54 | 0.68 | -0.02 |
| #N/A | #N/A | -0.31 |
| 1.87 | 0.81 | 0.47  |
| 1.87 | 0.81 | 0.10  |
| #N/A | #N/A | -0.31 |
| 0.95 | 0.39 | 0.86  |
| 0.48 | 0.12 | 1.13  |
| 0.95 | 0.39 | #N/A  |
| 0.95 | 0.39 | 0.57  |
| 2.54 | 0.94 | 0.03  |
| 2.58 | 0.94 | #N/A  |
| 0.82 | 0.32 | 0.95  |
| 1.70 | 0.74 | -0.34 |
| 1.70 | 0.74 | #N/A  |
| 2.15 | 0.88 | -0.16 |
| 2.15 | 0.88 | -0.46 |
| #N/A | #N/A | 0.26  |
| 0.28 | 0.02 | -1.96 |
| 0.53 | 0.15 | #N/A  |
| 0.28 | 0.02 | 1.18  |
| 2.33 | 0.91 | -0.47 |
| 1.63 | 0.71 | -0.07 |
| 1.63 | 0.71 | -0.16 |
| #N/A | #N/A | 0.13  |
| #N/A | #N/A | 0.00  |
| 0.79 | 0.30 | -0.73 |
| 0.79 | 0.30 | 0.92  |
| 1.80 | 0.79 | -0.06 |
| #N/A | #N/A | -0.46 |
| 1.23 | 0.54 | -0.19 |
| 1.52 | 0.67 | -1.58 |
| 2.46 | 0.92 | 0.83  |
| 1.33 | 0.59 | -0.15 |
| 0.93 | 0.38 | -2.12 |
| 1.33 | 0.59 | -1.45 |
| 0.93 | 0.38 | -2.45 |
| 0.49 | 0.13 | #N/A  |

|      |      |       |
|------|------|-------|
| 0.93 | 0.38 | #N/A  |
| 1.53 | 0.69 | -0.75 |
| 1.75 | 0.76 | #N/A  |
| 2.79 | 0.96 | -1.57 |
| 1.52 | 0.68 | 0.67  |
| 1.52 | 0.68 | -1.11 |
| 1.18 | 0.51 | 0.35  |
| 1.18 | 0.51 | 0.45  |
| 0.58 | 0.17 | 1.70  |
| 0.99 | 0.41 | 1.25  |
| 0.92 | 0.37 | 1.26  |
| 1.37 | 0.61 | 1.09  |
| 0.99 | 0.41 | 1.16  |
| 1.09 | 0.47 | -0.14 |
| 0.74 | 0.27 | -0.04 |
| 0.63 | 0.21 | #N/A  |
| 1.39 | 0.62 | -1.58 |
| 2.05 | 0.85 | #N/A  |
| 2.05 | 0.85 | #N/A  |
| 0.94 | 0.39 | #N/A  |
| 0.94 | 0.39 | -0.63 |
| #N/A | #N/A | #N/A  |
| #N/A | #N/A | -0.67 |
| #N/A | #N/A | -2.30 |
| 1.00 | 0.41 | 0.46  |
| 1.58 | 0.71 | 0.09  |
| 1.58 | 0.71 | 0.33  |
| 0.78 | 0.30 | 0.48  |
| 0.78 | 0.30 | 1.24  |
| #N/A | #N/A | 0.55  |
| #N/A | #N/A | 0.73  |
| 1.71 | 0.76 | -1.16 |
| 1.71 | 0.76 | 1.03  |
| 1.05 | 0.45 | 0.05  |
| 1.05 | 0.45 | 0.37  |
| #N/A | #N/A | #N/A  |
| 0.43 | 0.09 | 1.96  |
| 0.92 | 0.38 | -0.59 |
| 0.92 | 0.38 | #N/A  |
| 0.56 | 0.16 | #N/A  |
| 0.82 | 0.32 | 0.94  |
| 1.62 | 0.72 | #N/A  |
| 2.09 | 0.83 | 0.53  |
| 2.09 | 0.83 | -1.45 |
| 2.21 | 0.88 | -0.90 |
| 1.66 | 0.74 | -1.26 |
| 0.90 | 0.36 | 0.51  |
| 1.72 | 0.76 | 0.95  |
| 2.14 | 0.87 | 0.22  |
| #N/A | #N/A | #N/A  |
| 2.14 | 0.87 | #N/A  |

|      |      |       |
|------|------|-------|
| 0.45 | 0.10 | -0.75 |
| 0.45 | 0.10 | -0.37 |
| 1.45 | 0.65 | 0.09  |
| 0.76 | 0.28 | 1.21  |
| 0.61 | 0.20 | #N/A  |
| 1.97 | 0.83 | -1.03 |
| #N/A | #N/A | 4.22  |
| #N/A | #N/A | 2.00  |
| #N/A | #N/A | -0.72 |
| 1.98 | 0.83 | 0.33  |
| 1.85 | 0.79 | 0.52  |
| 1.85 | 0.79 | 0.14  |
| 0.84 | 0.33 | 0.39  |
| 1.61 | 0.72 | 0.24  |
| 1.36 | 0.60 | 0.23  |
| 1.83 | 0.79 | 1.25  |
| 2.29 | 0.90 | -0.12 |
| 2.29 | 0.90 | -0.34 |
| 2.27 | 0.90 | -0.21 |
| 2.27 | 0.90 | 0.06  |
| 0.85 | 0.33 | -1.00 |
| 1.25 | 0.54 | -0.10 |
| 1.09 | 0.47 | 0.06  |
| 0.75 | 0.28 | -0.24 |
| 2.56 | 0.94 | 0.17  |
| 0.65 | 0.22 | 1.33  |
| 1.27 | 0.56 | 0.02  |
| 1.93 | 0.82 | 0.23  |
| 1.27 | 0.56 | 0.62  |
| 1.93 | 0.82 | -0.24 |
| 3.92 | 0.99 | -3.28 |
| 3.92 | 0.99 | -2.03 |
| 1.16 | 0.51 | 0.37  |
| 1.16 | 0.51 | 0.45  |
| 0.47 | 0.11 | 1.11  |
| 0.48 | 0.12 | -0.57 |
| 0.59 | 0.18 | -1.22 |
| 0.59 | 0.18 | -1.00 |
| 0.79 | 0.30 | -1.96 |
| 1.34 | 0.60 | #N/A  |
| 1.05 | 0.45 | 0.32  |
| 0.95 | 0.39 | 0.90  |
| 1.23 | 0.55 | 0.28  |
| 1.23 | 0.55 | 1.03  |
| 3.03 | 0.93 | -1.97 |
| 1.81 | 0.79 | 0.47  |
| 0.45 | 0.10 | 0.76  |
| 0.62 | 0.20 | -0.20 |
| 0.62 | 0.20 | 0.15  |
| 1.16 | 0.51 | 0.07  |
| 1.11 | 0.44 | 0.48  |



|      |      |       |
|------|------|-------|
| 0.63 | 0.21 | -0.60 |
| 2.25 | 0.88 | 0.23  |
| 2.25 | 0.88 | 0.29  |
| 2.03 | 0.85 | -0.40 |
| #N/A | #N/A | #N/A  |
| #N/A | #N/A | -2.06 |
| 1.44 | 0.64 | -1.38 |
| 1.44 | 0.64 | -0.10 |
| 1.73 | 0.76 | #N/A  |
| 1.55 | 0.69 | -0.04 |
| 1.70 | 0.75 | 1.86  |
| 1.04 | 0.44 | #N/A  |
| 1.75 | 0.76 | 0.39  |
| 1.75 | 0.76 | -0.04 |
| 0.54 | 0.15 | -1.21 |
| 1.04 | 0.45 | 0.10  |
| 0.23 | 0.02 | 0.63  |
| 1.40 | 0.63 | 0.20  |
| 1.62 | 0.73 | 0.79  |
| 2.07 | 0.83 | 0.65  |
| #N/A | #N/A | -0.46 |
| 0.65 | 0.22 | 0.33  |
| 0.65 | 0.22 | 0.12  |
| 0.59 | 0.18 | #N/A  |
| 1.56 | 0.70 | -0.15 |
| 1.34 | 0.60 | -0.33 |
| 1.34 | 0.60 | -0.24 |
| #N/A | #N/A | -0.19 |
| #N/A | #N/A | -1.43 |
| 1.28 | 0.57 | -0.82 |
| 1.72 | 0.73 | -4.11 |
| 1.59 | 0.71 | -1.61 |
| 1.72 | 0.73 | -1.59 |
| 1.59 | 0.71 | 2.04  |
| 3.66 | 0.99 | 0.33  |
| 1.69 | 0.75 | 0.63  |
| 1.69 | 0.75 | 0.07  |
| #N/A | #N/A | -1.04 |
| 0.36 | 0.06 | #N/A  |
| #N/A | #N/A | -0.27 |
| #N/A | #N/A | 0.75  |
| #N/A | #N/A | -0.44 |
| 1.41 | 0.63 | -1.58 |
| 1.41 | 0.63 | 1.39  |
| 2.40 | 0.92 | -1.74 |
| 1.95 | 0.82 | 0.59  |
| 0.77 | 0.29 | #N/A  |
| 1.02 | 0.43 | 0.07  |
| 1.02 | 0.43 | 1.03  |
| 2.28 | 0.90 | -0.14 |
| 2.61 | 0.94 | -4.36 |

|      |      |       |
|------|------|-------|
| #N/A | #N/A | -0.04 |
| 1.24 | 0.55 | 1.06  |
| 0.97 | 0.40 | 0.01  |
| 1.89 | 0.81 | -1.01 |
| 1.89 | 0.81 | -0.20 |
| 2.08 | 0.86 | 0.40  |
| 2.08 | 0.86 | -0.26 |
| 2.08 | 0.86 | 0.04  |
| 2.02 | 0.74 | -1.42 |
| 1.32 | 0.59 | 0.41  |
| 1.32 | 0.59 | #N/A  |
| 0.66 | 0.23 | -0.82 |
| 1.00 | 0.42 | -0.17 |
| 1.79 | 0.78 | #N/A  |
| #N/A | #N/A | -0.03 |
| #N/A | #N/A | -1.88 |
| 1.07 | 0.45 | -0.51 |
| 3.20 | 0.98 | -0.53 |
| 3.20 | 0.98 | -2.56 |
| 1.94 | 0.81 | -0.40 |
| 1.94 | 0.81 | -0.44 |
| 0.64 | 0.21 | -0.30 |
| 1.03 | 0.44 | 1.29  |
| 1.03 | 0.44 | 1.25  |
| 1.43 | 0.64 | 0.48  |
| 2.26 | 0.90 | 0.25  |
| 2.26 | 0.90 | 1.18  |
| 0.42 | 0.08 | 3.18  |
| 2.10 | 0.85 | 0.21  |
| #N/A | #N/A | -0.79 |
| #N/A | #N/A | -0.84 |
| 2.69 | 0.95 | -0.13 |
| 2.06 | 0.86 | 0.25  |
| 2.06 | 0.86 | -0.47 |
| 1.39 | 0.62 | 0.20  |
| 1.84 | 0.79 | 0.40  |
| 1.54 | 0.69 | 0.15  |
| 1.37 | 0.61 | 0.33  |
| 1.54 | 0.69 | 0.59  |
| 1.37 | 0.61 | 0.41  |
| 1.37 | 0.61 | 0.35  |
| 1.44 | 0.65 | -3.11 |
| 1.51 | 0.68 | -3.92 |
| 1.44 | 0.65 | -0.16 |
| 1.22 | 0.54 | 0.27  |
| 0.45 | 0.10 | -2.60 |
| #N/A | #N/A | #N/A  |
| #N/A | #N/A | 0.29  |
| 2.41 | 0.92 | -0.24 |
| 2.41 | 0.92 | -2.61 |
| 2.01 | 0.84 | -0.48 |

|      |      |       |
|------|------|-------|
| #N/A | #N/A | #N/A  |
| #N/A | #N/A | 0.46  |
| 0.70 | 0.25 | -0.77 |
| 1.78 | 0.77 | 0.64  |
| 0.98 | 0.41 | -0.52 |
| #N/A | #N/A | 0.06  |
| 0.56 | 0.17 | -0.09 |
| 1.29 | 0.58 | 0.06  |
| 0.51 | 0.14 | 0.59  |
| 0.95 | 0.39 | 0.77  |
| 0.95 | 0.39 | 4.61  |
| 0.58 | 0.18 | 3.52  |
| 0.62 | 0.20 | #N/A  |
| 1.91 | 0.82 | -0.42 |
| 0.66 | 0.23 | #N/A  |
| 0.66 | 0.23 | -0.10 |
| 1.23 | 0.54 | 2.44  |
| 1.36 | 0.61 | -0.09 |
| 1.45 | 0.65 | 2.20  |
| #N/A | #N/A | 0.32  |
| 1.45 | 0.65 | -1.21 |
| 1.45 | 0.65 | #N/A  |
| 1.45 | 0.65 | -0.26 |
| #N/A | #N/A | -1.24 |
| 0.67 | 0.23 | 1.46  |
| 1.35 | 0.60 | -2.91 |
| 1.32 | 0.58 | #N/A  |
| 1.32 | 0.58 | #N/A  |
| 2.76 | 0.96 | 0.24  |
| 2.76 | 0.96 | 0.15  |
| 1.37 | 0.62 | -0.18 |
| 1.65 | 0.73 | 0.56  |
| 2.02 | 0.85 | -0.65 |
| 1.25 | 0.55 | -1.30 |
| 2.31 | 0.91 | -0.71 |
| 2.31 | 0.91 | -0.18 |
| 1.16 | 0.50 | -0.39 |
| 1.16 | 0.50 | -0.78 |
| 2.43 | 0.91 | -0.23 |
| 1.74 | 0.77 | 0.88  |
| 1.74 | 0.77 | -0.05 |
| 1.00 | 0.41 | -0.19 |
| 1.77 | 0.78 | #N/A  |
| #N/A | #N/A | -1.49 |
| 1.77 | 0.78 | #N/A  |
| 1.77 | 0.78 | 0.19  |
| 0.89 | 0.36 | -0.32 |
| 0.38 | 0.06 | 0.22  |
| 2.13 | 0.87 | -0.29 |
| 1.71 | 0.75 | -0.38 |
| 2.10 | 0.85 | 0.27  |

|      |      |       |
|------|------|-------|
| 2.10 | 0.85 | 0.14  |
| 1.39 | 0.62 | 0.05  |
| 0.86 | 0.34 | 2.24  |
| 1.87 | 0.76 | -0.15 |
| 2.17 | 0.87 | 0.89  |
| 2.17 | 0.87 | -1.00 |
| 0.26 | 0.02 | 0.81  |
| #N/A | #N/A | 1.08  |
| 0.90 | 0.37 | 0.18  |
| 0.90 | 0.37 | -0.09 |
| 0.95 | 0.39 | -0.06 |
| 1.80 | 0.78 | -0.01 |
| 3.72 | 0.98 | -2.16 |
| 3.72 | 0.98 | -2.35 |
| 1.18 | 0.51 | -0.01 |
| 1.45 | 0.65 | -0.22 |
| 1.45 | 0.65 | -1.37 |
| #N/A | #N/A | 0.31  |
| 1.38 | 0.62 | -0.33 |
| 1.38 | 0.62 | -0.61 |
| 1.52 | 0.68 | -1.12 |
| 2.13 | 0.86 | -0.31 |
| 2.13 | 0.86 | -0.06 |
| 1.05 | 0.45 | -0.25 |
| 0.92 | 0.37 | -0.48 |
| #N/A | #N/A | -0.49 |
| #N/A | #N/A | 0.07  |
| 3.49 | 0.99 | -0.94 |
| 3.49 | 0.99 | 0.09  |
| #N/A | #N/A | 0.36  |
| 1.45 | 0.65 | 0.12  |
| 0.91 | 0.37 | 0.09  |
| 1.12 | 0.49 | 0.38  |
| 0.74 | 0.27 | 0.07  |
| 2.17 | 0.88 | #N/A  |
| 0.74 | 0.27 | 0.38  |
| 2.17 | 0.88 | #N/A  |
| 1.90 | 0.79 | -0.09 |
| 2.35 | 0.91 | -0.19 |
| 2.35 | 0.91 | 3.11  |
| #N/A | #N/A | -0.26 |
| #N/A | #N/A | 1.36  |
| 0.95 | 0.39 | 0.87  |
| 1.82 | 0.79 | -0.37 |
| 0.92 | 0.38 | 0.04  |
| 0.92 | 0.38 | -0.02 |
| 0.72 | 0.26 | 1.23  |
| 0.76 | 0.28 | -1.29 |
| 0.76 | 0.28 | -0.50 |
| 1.84 | 0.79 | 0.32  |
| 0.65 | 0.22 | #N/A  |

|      |      |       |
|------|------|-------|
| 1.03 | 0.44 | 0.60  |
| 1.38 | 0.62 | -0.13 |
| 1.74 | 0.76 | 0.30  |
| 1.13 | 0.49 | 0.34  |
| 1.88 | 0.81 | -0.11 |
| 1.88 | 0.81 | -0.34 |
| 1.60 | 0.71 | -2.42 |
| 1.07 | 0.46 | -0.44 |
| 1.07 | 0.46 | 0.91  |
| 2.06 | 0.85 | 0.07  |
| #N/A | #N/A | #N/A  |
| 2.06 | 0.85 | 0.44  |
| 1.23 | 0.55 | -0.40 |
| #N/A | #N/A | -1.77 |
| #N/A | #N/A | -2.51 |
| #N/A | #N/A | -1.94 |
| 0.36 | 0.06 | -1.70 |
| 2.50 | 0.93 | -1.22 |
| 2.50 | 0.93 | 0.08  |
| 2.50 | 0.93 | 1.92  |
| 2.00 | 0.84 | 0.78  |
| 2.00 | 0.84 | -0.31 |
| #N/A | #N/A | -1.88 |
| 1.47 | 0.66 | -1.02 |
| 0.60 | 0.19 | 0.20  |
| 1.47 | 0.66 | -0.22 |
| 1.48 | 0.66 | 0.18  |
| 1.48 | 0.66 | -2.23 |
| 1.34 | 0.60 | 0.03  |
| 1.34 | 0.60 | -0.10 |
| #N/A | #N/A | 0.02  |
| #N/A | #N/A | -0.22 |
| #N/A | #N/A | #N/A  |
| #N/A | #N/A | #N/A  |
| #N/A | #N/A | #N/A  |
| 2.14 | 0.88 | 0.55  |
| 2.44 | 0.93 | 1.02  |
| 2.44 | 0.93 | 0.89  |
| 2.30 | 0.91 | 0.22  |
| 1.33 | 0.49 | #N/A  |
| 2.30 | 0.91 | 0.23  |
| 1.33 | 0.49 | 0.56  |
| 1.28 | 0.57 | -0.03 |
| 1.28 | 0.57 | #N/A  |
| 2.12 | 0.84 | 0.07  |
| #N/A | #N/A | 0.66  |
| 1.49 | 0.67 | 0.57  |
| 2.66 | 0.95 | #N/A  |
| 2.24 | 0.90 | 0.44  |
| 2.24 | 0.90 | -0.37 |
| 1.38 | 0.62 | 0.83  |

|      |      |       |
|------|------|-------|
| 0.78 | 0.30 | 0.95  |
| 0.40 | 0.07 | #N/A  |
| 0.60 | 0.19 | #N/A  |
| 0.60 | 0.19 | 0.17  |
| 0.36 | 0.05 | 2.75  |
| 0.92 | 0.38 | 2.85  |
| #N/A | #N/A | -1.65 |
| #N/A | #N/A | -0.10 |
| 0.53 | 0.15 | #N/A  |
| 1.05 | 0.45 | -0.03 |
| 2.31 | 0.85 | 0.73  |
| 2.31 | 0.85 | 0.39  |
| 1.11 | 0.48 | -1.65 |
| 1.70 | 0.75 | -0.51 |
| 2.24 | 0.89 | 0.15  |
| 2.24 | 0.89 | -1.79 |
| 0.27 | 0.02 | 0.16  |
| 0.27 | 0.02 | -0.01 |
| 1.45 | 0.65 | -1.11 |
| 0.72 | 0.26 | -0.27 |
| 0.78 | 0.30 | -0.68 |
| 0.55 | 0.16 | -0.31 |
| #N/A | #N/A | 1.81  |
| #N/A | #N/A | -0.01 |
| #N/A | #N/A | -0.46 |
| 2.82 | 0.96 | -0.98 |
| 2.82 | 0.96 | 0.03  |
| 1.63 | 0.72 | #N/A  |
| 0.72 | 0.26 | -0.31 |
| 2.77 | 0.95 | -0.20 |
| 2.77 | 0.95 | -0.49 |
| 0.89 | 0.36 | -0.22 |
| 1.73 | 0.76 | -0.18 |
| 1.73 | 0.76 | 0.53  |
| 2.75 | 0.96 | 0.25  |
| 2.75 | 0.96 | 0.52  |
| 1.56 | 0.69 | 0.67  |
| #N/A | #N/A | 1.17  |
| #N/A | #N/A | 0.92  |
| 2.33 | 0.89 | 0.68  |
| 3.26 | 0.98 | 0.35  |
| 3.26 | 0.98 | -1.65 |
| 2.30 | 0.89 | #N/A  |
| 2.30 | 0.89 | 0.42  |
| 1.36 | 0.60 | 0.16  |
| #N/A | #N/A | -0.20 |
| 1.36 | 0.60 | -0.59 |
| 1.58 | 0.70 | -1.54 |
| #N/A | #N/A | -0.07 |
| #N/A | #N/A | -0.69 |
| 2.46 | 0.92 | 0.86  |

|      |      |       |
|------|------|-------|
| 1.30 | 0.58 | -0.38 |
| 1.13 | 0.49 | 0.12  |
| 0.88 | 0.35 | -0.27 |
| 1.25 | 0.55 | -0.36 |
| #N/A | #N/A | -0.29 |
| 1.24 | 0.54 | -1.28 |
| 1.65 | 0.73 | -2.16 |
| 1.26 | 0.56 | 0.30  |
| 2.16 | 0.86 | 0.91  |
| 2.16 | 0.86 | 0.62  |
| 2.16 | 0.86 | 0.65  |
| 2.03 | 0.85 | 0.12  |
| 1.11 | 0.48 | -0.14 |
| 1.37 | 0.61 | -0.32 |
| 0.48 | 0.12 | 0.52  |
| 1.72 | 0.75 | #N/A  |
| 0.91 | 0.37 | -0.04 |
| 1.40 | 0.62 | 0.67  |
| 1.40 | 0.62 | #N/A  |
| 1.40 | 0.63 | 0.90  |
| #N/A | #N/A | 0.99  |
| 0.94 | 0.39 | #N/A  |
| #N/A | #N/A | #N/A  |
| 0.62 | 0.20 | #N/A  |
| 0.62 | 0.20 | #N/A  |
| 1.20 | 0.53 | #N/A  |
| 1.86 | 0.80 | -0.68 |
| 1.86 | 0.80 | #N/A  |
| 1.09 | 0.47 | -0.73 |
| #N/A | #N/A | #N/A  |
| 1.31 | 0.58 | -0.14 |
| 1.31 | 0.58 | -0.15 |
| 2.18 | 0.87 | 0.15  |
| 1.76 | 0.77 | 0.17  |
| 1.76 | 0.77 | -0.26 |
| 0.76 | 0.28 | -0.18 |
| 0.85 | 0.34 | -0.76 |
| 1.41 | 0.63 | 0.19  |
| 1.41 | 0.63 | 0.58  |
| 2.29 | 0.90 | -1.01 |
| 0.60 | 0.19 | -0.38 |
| 0.60 | 0.19 | #N/A  |
| #N/A | #N/A | 0.74  |
| 1.04 | 0.45 | #N/A  |
| 1.52 | 0.67 | #N/A  |
| 1.52 | 0.67 | 1.53  |
| 2.05 | 0.85 | -1.18 |
| 2.05 | 0.85 | 0.14  |
| 0.83 | 0.32 | -0.70 |
| 0.58 | 0.18 | 0.23  |
| 0.58 | 0.18 | -0.57 |

|      |      |       |
|------|------|-------|
| 1.73 | 0.76 | -2.14 |
| 1.86 | 0.80 | 0.45  |
| 0.60 | 0.19 | #N/A  |
| 1.14 | 0.50 | 0.58  |
| 0.77 | 0.29 | 0.48  |
| 1.75 | 0.76 | -0.29 |
| 1.02 | 0.43 | #N/A  |
| 0.44 | 0.10 | 0.04  |
| 1.04 | 0.44 | 0.11  |
| 1.04 | 0.44 | 0.26  |
| #N/A | #N/A | 1.44  |
| #N/A | #N/A | 0.31  |
| 1.31 | 0.59 | -0.37 |
| 1.50 | 0.66 | 0.73  |
| 1.16 | 0.51 | 0.68  |
| 1.50 | 0.66 | #N/A  |
| #N/A | #N/A | 0.73  |
| 0.21 | 0.01 | -1.87 |
| 0.21 | 0.01 | -1.81 |
| 1.93 | 0.81 | -1.91 |
| 1.56 | 0.69 | 0.17  |
| 1.56 | 0.69 | 0.48  |
| 2.40 | 0.88 | 0.20  |
| 1.04 | 0.44 | -0.13 |
| 2.40 | 0.88 | #N/A  |
| 1.04 | 0.44 | #N/A  |
| #N/A | #N/A | 0.86  |
| 1.95 | 0.81 | 0.32  |
| 1.95 | 0.81 | 0.22  |
| 1.79 | 0.78 | 0.06  |
| 1.79 | 0.78 | -0.66 |
| #N/A | #N/A | 4.77  |
| 1.58 | 0.70 | 1.11  |
| 1.59 | 0.67 | -0.46 |
| 1.23 | 0.54 | 1.30  |
| 1.62 | 0.72 | -0.51 |
| 1.84 | 0.80 | 0.12  |
| 0.69 | 0.24 | 0.73  |
| 0.39 | 0.07 | 0.73  |
| 0.39 | 0.07 | 0.17  |
| 4.09 | 1.00 | -0.87 |
| 4.09 | 1.00 | 0.09  |
| 2.73 | 0.95 | 0.61  |
| 1.47 | 0.61 | -0.11 |
| 2.87 | 0.96 | 0.34  |
| 2.46 | 0.71 | 0.27  |
| 1.43 | 0.64 | #N/A  |
| 0.92 | 0.38 | 0.07  |
| 2.10 | 0.81 | -0.23 |
| 2.10 | 0.81 | -0.23 |
| 0.99 | 0.40 | 1.39  |



|      |      |       |
|------|------|-------|
| 2.81 | 0.96 | #N/A  |
| 2.81 | 0.96 | 0.96  |
| 2.81 | 0.96 | 0.70  |
| 4.01 | 1.00 | -0.95 |
| 4.01 | 1.00 | -2.95 |
| #N/A | #N/A | -0.22 |
| 0.99 | 0.41 | #N/A  |
| #N/A | #N/A | -1.95 |
| 0.84 | 0.33 | #N/A  |
| 0.86 | 0.34 | 1.29  |
| 1.47 | 0.65 | 2.23  |
| 0.93 | 0.38 | 4.72  |
| 0.93 | 0.38 | #N/A  |
| 0.48 | 0.11 | 0.03  |
| 1.56 | 0.70 | 0.96  |
| #N/A | #N/A | 0.47  |
| 1.10 | 0.47 | 0.43  |
| #N/A | #N/A | 0.60  |
| #N/A | #N/A | #N/A  |
| 2.41 | 0.92 | -1.56 |
| 1.75 | 0.75 | -0.85 |
| 1.75 | 0.75 | -0.11 |
| 2.19 | 0.76 | -0.30 |
| 2.81 | 0.92 | 1.19  |
| 2.12 | 0.73 | -1.04 |
| 1.56 | 0.70 | #N/A  |
| 0.35 | 0.06 | 0.38  |
| 1.51 | 0.67 | 0.06  |
| 1.51 | 0.67 | -1.08 |
| 2.21 | 0.89 | -0.83 |
| 1.55 | 0.69 | -0.30 |
| 0.97 | 0.41 | 0.39  |
| 0.65 | 0.22 | -0.04 |
| #N/A | #N/A | #N/A  |
| #N/A | #N/A | 0.88  |
| #N/A | #N/A | -0.49 |
| #N/A | #N/A | -1.06 |
| 1.36 | 0.61 | -0.05 |
| 1.36 | 0.61 | -0.01 |
| 1.35 | 0.60 | -0.16 |
| 0.87 | 0.34 | -0.24 |
| 0.87 | 0.34 | #N/A  |
| 1.68 | 0.75 | -1.02 |
| 2.10 | 0.85 | 0.16  |
| 0.94 | 0.39 | 1.22  |
| 0.94 | 0.39 | #N/A  |
| 1.10 | 0.44 | 1.53  |
| 0.39 | 0.07 | -1.82 |
| 0.47 | 0.11 | -1.62 |
| 1.30 | 0.55 | 1.18  |
| 0.87 | 0.35 | -1.29 |

|      |      |       |
|------|------|-------|
| 0.87 | 0.35 | -2.74 |
| 1.64 | 0.73 | -1.19 |
| 1.64 | 0.73 | 0.98  |
| 1.43 | 0.64 | -1.81 |
| 1.43 | 0.64 | #N/A  |
| 1.36 | 0.60 | 1.30  |
| 1.19 | 0.52 | -0.79 |
| 1.06 | 0.45 | #N/A  |
| 0.96 | 0.40 | #N/A  |
| 3.21 | 0.91 | 1.04  |
| 0.96 | 0.40 | 0.65  |
| 3.21 | 0.91 | 0.12  |
| 0.48 | 0.12 | 0.52  |
| 2.27 | 0.87 | -0.03 |
| 2.27 | 0.87 | 0.08  |
| 1.93 | 0.79 | -1.03 |
| 0.79 | 0.30 | -0.64 |
| #N/A | #N/A | #N/A  |
| 3.29 | 0.98 | -1.09 |
| 3.29 | 0.98 | -0.02 |
| 2.49 | 0.91 | -1.49 |
| 2.49 | 0.91 | -0.41 |
| #N/A | #N/A | -0.41 |
| #N/A | #N/A | 0.02  |
| 2.98 | 0.97 | -0.21 |
| #N/A | #N/A | -1.30 |
| #N/A | #N/A | 0.66  |
| 1.36 | 0.61 | 0.67  |
| 1.92 | 0.82 | #N/A  |
| 1.43 | 0.64 | 2.06  |
| 1.34 | 0.60 | 0.49  |
| 0.42 | 0.08 | -0.01 |
| 0.99 | 0.42 | -0.13 |
| 0.99 | 0.42 | -1.24 |
| 1.73 | 0.76 | 0.71  |
| 1.35 | 0.60 | 0.24  |
| 1.29 | 0.58 | #N/A  |
| 1.05 | 0.45 | -0.52 |
| 1.34 | 0.60 | #N/A  |
| 1.34 | 0.60 | #N/A  |
| #N/A | #N/A | -0.29 |
| 1.24 | 0.55 | 0.02  |
| 0.70 | 0.24 | #N/A  |
| #N/A | #N/A | -1.21 |
| 1.46 | 0.66 | 0.16  |
| 0.82 | 0.32 | 1.77  |
| 2.27 | 0.89 | -2.68 |
| 1.27 | 0.56 | 0.54  |
| 0.86 | 0.34 | -0.03 |
| 0.48 | 0.12 | 1.17  |
| 0.96 | 0.40 | 0.45  |

|      |      |       |
|------|------|-------|
| 0.94 | 0.39 | -0.93 |
| #N/A | #N/A | -0.12 |
| 1.45 | 0.65 | 0.42  |
| 1.43 | 0.64 | 0.46  |
| 1.43 | 0.64 | 0.37  |
| 1.54 | 0.69 | 0.21  |
| 1.54 | 0.69 | 0.45  |
| 2.07 | 0.85 | -0.02 |
| 2.07 | 0.85 | -0.01 |
| 0.84 | 0.33 | 0.70  |
| 1.75 | 0.77 | 0.92  |
| 0.86 | 0.34 | 2.13  |
| 3.10 | 0.96 | -1.81 |
| #N/A | #N/A | 0.61  |
| 1.45 | 0.65 | 0.59  |
| 1.45 | 0.65 | #N/A  |
| 1.45 | 0.65 | -0.47 |
| 2.06 | 0.82 | -1.21 |
| 0.64 | 0.21 | 1.69  |
| 0.98 | 0.41 | -1.00 |
| 0.98 | 0.41 | #N/A  |
| 1.53 | 0.69 | -0.29 |
| 0.65 | 0.22 | 0.06  |
| 0.48 | 0.12 | 1.55  |
| 1.66 | 0.67 | -0.21 |
| 1.14 | 0.49 | -0.07 |
| 1.79 | 0.75 | 0.78  |
| 1.79 | 0.75 | 0.56  |
| 1.09 | 0.47 | #N/A  |
| 1.82 | 0.79 | -0.16 |
| 1.82 | 0.79 | -0.08 |
| 1.00 | 0.42 | 1.22  |
| #N/A | #N/A | #N/A  |
| 0.91 | 0.37 | 0.67  |
| 0.85 | 0.34 | -0.17 |
| 1.17 | 0.51 | 0.07  |
| 1.30 | 0.58 | -0.78 |
| 1.34 | 0.59 | -0.60 |
| 1.05 | 0.45 | -0.78 |
| 2.12 | 0.87 | -1.67 |
| 0.47 | 0.11 | -1.58 |
| 0.64 | 0.22 | -0.67 |
| #N/A | #N/A | -1.43 |
| 0.55 | 0.16 | 2.14  |
| 0.55 | 0.16 | 1.24  |
| #N/A | #N/A | 1.11  |
| 0.55 | 0.16 | #N/A  |
| 1.62 | 0.72 | -1.68 |
| 1.62 | 0.72 | 0.19  |
| #N/A | #N/A | -0.87 |
| 0.75 | 0.28 | 0.61  |

|      |      |       |
|------|------|-------|
| 1.34 | 0.60 | -0.86 |
| 1.34 | 0.60 | -0.55 |
| #N/A | #N/A | 0.92  |
| #N/A | #N/A | -1.64 |
| 0.85 | 0.33 | 0.18  |
| 0.85 | 0.33 | 0.59  |
| #N/A | #N/A | -0.53 |
| #N/A | #N/A | -0.08 |
| 0.65 | 0.22 | #N/A  |
| 0.65 | 0.22 | 0.56  |
| 1.89 | 0.81 | 0.08  |
| #N/A | #N/A | 0.06  |
| #N/A | #N/A | #N/A  |
| 2.51 | 0.92 | -1.51 |
| 2.12 | 0.87 | -0.91 |
| 2.12 | 0.87 | -0.14 |
| 2.16 | 0.87 | -0.22 |
| 2.16 | 0.87 | #N/A  |
| 1.23 | 0.54 | -0.47 |
| #N/A | #N/A | 0.11  |
| #N/A | #N/A | -1.03 |
| 0.51 | 0.19 | 0.22  |
| #N/A | #N/A | #N/A  |
| 0.51 | 0.19 | #N/A  |
| #N/A | #N/A | -0.33 |
| 2.70 | 0.95 | -0.17 |
| 1.15 | 0.51 | 0.79  |
| #N/A | #N/A | -0.99 |
| #N/A | #N/A | 0.39  |
| 1.22 | 0.54 | 0.71  |
| 1.97 | 0.83 | 0.80  |
| 1.97 | 0.83 | -1.71 |
| #N/A | #N/A | 1.11  |
| #N/A | #N/A | -0.14 |
| #N/A | #N/A | -0.44 |
| 0.97 | 0.40 | -3.00 |
| 0.97 | 0.40 | -1.77 |
| #N/A | #N/A | 1.24  |
| 1.14 | 0.50 | -0.44 |
| 1.14 | 0.50 | -0.52 |
| 0.77 | 0.29 | 4.07  |
| 0.77 | 0.29 | -1.70 |
| #N/A | #N/A | 0.08  |
| 1.16 | 0.51 | 0.07  |
| 1.16 | 0.51 | 0.13  |
| 1.16 | 0.51 | #N/A  |
| #N/A | #N/A | -1.01 |
| #N/A | #N/A | -1.45 |
| #N/A | #N/A | -1.42 |
| 1.24 | 0.55 | 0.16  |
| #N/A | #N/A | 0.35  |

|      |      |       |
|------|------|-------|
| 1.45 | 0.65 | 0.17  |
| #N/A | #N/A | -0.01 |
| 1.66 | 0.73 | 0.38  |
| #N/A | #N/A | #N/A  |
| #N/A | #N/A | -0.08 |
| 2.50 | 0.93 | -0.56 |
| 2.50 | 0.93 | 0.35  |
| #N/A | #N/A | -0.05 |
| 0.88 | 0.35 | -0.44 |
| 0.88 | 0.35 | 2.86  |
| 0.47 | 0.12 | 2.87  |
| #N/A | #N/A | 0.45  |
| 2.60 | 0.94 | -0.39 |
| #N/A | #N/A | #N/A  |
| #N/A | #N/A | 0.37  |
| 1.19 | 0.52 | 0.06  |
| 1.19 | 0.52 | -0.47 |
| 0.90 | 0.36 | 0.71  |
| 2.53 | 0.94 | -0.58 |
| 2.26 | 0.90 | 0.38  |
| 1.52 | 0.68 | 0.19  |
| 1.52 | 0.68 | 0.41  |
| 0.96 | 0.40 | -1.86 |
| 0.40 | 0.07 | 1.53  |
| 0.51 | 0.14 | 1.65  |
| 0.42 | 0.10 | 2.05  |
| 1.10 | 0.47 | 1.03  |
| 1.51 | 0.68 | 0.07  |
| 0.42 | 0.08 | #N/A  |
| 1.51 | 0.68 | -0.17 |
| 1.96 | 0.83 | -0.35 |
| 1.96 | 0.83 | 0.65  |
| 2.30 | 0.90 | -0.85 |
| 2.29 | 0.90 | -0.96 |
| 1.35 | 0.61 | -1.31 |
| 2.29 | 0.90 | #N/A  |
| 1.35 | 0.61 | -0.02 |
| 2.75 | 0.96 | -0.09 |
| 3.14 | 0.98 | -0.35 |
| 3.14 | 0.98 | 0.30  |
| 1.32 | 0.59 | 0.04  |
| 0.74 | 0.27 | 0.38  |
| 0.24 | 0.02 | -0.06 |
| 1.22 | 0.54 | -0.59 |
| 1.68 | 0.74 | 1.10  |
| 1.53 | 0.68 | 0.21  |
| 1.39 | 0.62 | 0.35  |
| 1.39 | 0.62 | 0.06  |
| 2.54 | 0.94 | -0.74 |
| 2.54 | 0.94 | 0.39  |
| 0.44 | 0.10 | 2.75  |

|      |      |       |
|------|------|-------|
| 1.50 | 0.67 | 0.47  |
| 1.50 | 0.67 | 0.26  |
| 3.06 | 0.98 | -0.26 |
| 3.06 | 0.98 | -0.61 |
| 1.62 | 0.72 | -0.09 |
| 1.23 | 0.53 | -1.41 |
| 1.23 | 0.53 | -0.64 |
| 2.24 | 0.89 | -0.51 |
| 1.23 | 0.53 | 0.39  |
| 2.24 | 0.89 | 0.18  |
| 2.24 | 0.89 | 0.22  |
| 0.84 | 0.33 | 3.66  |
| 1.40 | 0.63 | -0.44 |
| 1.52 | 0.68 | -0.37 |
| 1.52 | 0.68 | 0.28  |
| #N/A | #N/A | #N/A  |
| 0.32 | 0.04 | -0.49 |
| 1.75 | 0.77 | #N/A  |
| 1.29 | 0.57 | #N/A  |
| 1.29 | 0.57 | 0.27  |
| #N/A | #N/A | -1.25 |
| #N/A | #N/A | #N/A  |
| #N/A | #N/A | 0.11  |
| 1.48 | 0.67 | 2.20  |
| 1.48 | 0.67 | #N/A  |
| 0.91 | 0.37 | 0.45  |
| 1.33 | 0.60 | -1.53 |
| 1.45 | 0.65 | #N/A  |
| 1.55 | 0.68 | -0.45 |
| 1.66 | 0.72 | 0.25  |
| 1.69 | 0.75 | -0.35 |
| #N/A | #N/A | -0.16 |
| 3.43 | 0.99 | 0.20  |
| 3.43 | 0.99 | -1.25 |
| 3.92 | 0.94 | -0.21 |
| 3.92 | 0.94 | -0.07 |
| 1.05 | 0.45 | -0.50 |
| 1.05 | 0.45 | -0.27 |
| 1.05 | 0.45 | 0.23  |
| 1.03 | 0.43 | 0.04  |
| 1.03 | 0.43 | -0.10 |
| 1.03 | 0.43 | -0.44 |
| 1.03 | 0.43 | -0.57 |
| 2.86 | 0.97 | -0.02 |
| 2.86 | 0.97 | -3.07 |
| 1.56 | 0.70 | -1.09 |
| 1.56 | 0.70 | 1.10  |
| 1.66 | 0.73 | -0.10 |
| 1.66 | 0.73 | #N/A  |
| 0.87 | 0.35 | -0.24 |
| 0.87 | 0.35 | -0.62 |

|      |      |       |
|------|------|-------|
| 2.27 | 0.88 | -0.93 |
| 0.56 | 0.17 | #N/A  |
| 0.85 | 0.34 | 0.97  |
| 2.63 | 0.95 | -0.56 |
| 2.63 | 0.95 | -0.58 |
| 0.35 | 0.06 | -0.54 |
| 0.86 | 0.34 | 0.14  |
| 0.86 | 0.34 | 1.38  |
| 0.69 | 0.24 | 0.97  |
| 0.69 | 0.24 | -0.74 |
| 1.23 | 0.54 | 0.89  |
| 3.65 | 0.99 | -1.32 |
| 3.65 | 0.99 | -0.80 |
| 1.58 | 0.70 | -0.91 |
| 1.58 | 0.70 | 1.08  |
| 1.91 | 0.81 | 1.55  |
| 1.91 | 0.81 | -0.13 |
| 0.43 | 0.09 | 0.80  |
| 1.91 | 0.82 | 0.09  |
| 1.49 | 0.66 | -0.58 |
| 1.55 | 0.70 | -1.45 |
| 0.23 | 0.01 | -1.16 |
| 0.23 | 0.01 | #N/A  |
| 0.85 | 0.34 | -1.94 |
| 3.11 | 0.98 | #N/A  |
| #N/A | #N/A | 0.08  |
| 1.45 | 0.65 | -0.25 |
| 1.45 | 0.65 | -0.57 |
| 0.73 | 0.26 | 0.04  |
| 0.54 | 0.15 | -1.31 |
| 2.49 | 0.92 | -2.12 |
| 2.49 | 0.92 | 0.03  |
| 2.07 | 0.86 | 1.12  |
| 1.09 | 0.47 | -1.30 |
| 1.09 | 0.47 | -2.08 |
| 1.09 | 0.47 | -1.97 |
| 1.58 | 0.70 | 0.27  |
| 1.83 | 0.79 | 0.42  |
| #N/A | #N/A | -0.54 |
| #N/A | #N/A | -2.02 |
| 2.18 | 0.62 | -0.53 |
| 2.12 | 0.86 | -0.62 |
| 2.12 | 0.86 | #N/A  |
| 1.49 | 0.67 | 0.60  |
| 1.49 | 0.67 | 0.48  |
| 1.41 | 0.63 | -0.17 |
| #N/A | #N/A | 0.70  |
| #N/A | #N/A | -0.50 |
| 1.87 | 0.80 | 0.47  |
| 1.87 | 0.80 | -0.46 |
| #N/A | #N/A | #N/A  |

|      |      |       |
|------|------|-------|
| 2.29 | 0.90 | 0.20  |
| #N/A | #N/A | 0.32  |
| 1.81 | 0.76 | -0.47 |
| 0.57 | 0.17 | 0.73  |
| 1.74 | 0.77 | #N/A  |
| 1.74 | 0.77 | -0.65 |
| 1.82 | 0.79 | 0.22  |
| 0.96 | 0.40 | -1.78 |
| 3.03 | 0.97 | -3.67 |
| 0.53 | 0.15 | 1.10  |
| 0.53 | 0.15 | -0.47 |
| 2.29 | 0.86 | #N/A  |
| 2.29 | 0.86 | -1.30 |
| 0.89 | 0.36 | -1.32 |
| 0.89 | 0.36 | -0.19 |
| 1.84 | 0.80 | -0.23 |
| 1.16 | 0.51 | 0.30  |
| 1.69 | 0.75 | -0.31 |
| 1.16 | 0.51 | #N/A  |
| 1.69 | 0.75 | 0.08  |
| 1.82 | 0.79 | -1.40 |
| 1.77 | 0.78 | 2.15  |
| #N/A | #N/A | 0.17  |
| 1.18 | 0.52 | #N/A  |
| 0.74 | 0.27 | 1.14  |
| 0.74 | 0.27 | 1.95  |
| 1.77 | 0.76 | -0.47 |
| 1.77 | 0.76 | 0.71  |
| 0.63 | 0.21 | 1.83  |
| 0.63 | 0.21 | -1.23 |
| #N/A | #N/A | -2.43 |
| 1.51 | 0.68 | #N/A  |
| 1.34 | 0.59 | 0.24  |
| 1.87 | 0.81 | -0.03 |
| 1.87 | 0.81 | -0.69 |
| 0.52 | 0.14 | 0.29  |
| 0.52 | 0.14 | 0.23  |
| 1.28 | 0.57 | 0.74  |
| 0.42 | 0.08 | #N/A  |
| 0.42 | 0.08 | 1.24  |
| 3.22 | 0.98 | #N/A  |
| 1.39 | 0.62 | -0.06 |
| 3.22 | 0.98 | -0.20 |
| 0.63 | 0.21 | -0.51 |
| 1.96 | 0.83 | 0.20  |
| #N/A | #N/A | -0.87 |
| 1.51 | 0.68 | -2.16 |
| 1.51 | 0.68 | -2.31 |
| 1.80 | 0.77 | 0.22  |
| 0.44 | 0.09 | -1.77 |
| #N/A | #N/A | #N/A  |



|      |      |       |
|------|------|-------|
| #N/A | #N/A | #N/A  |
| 1.04 | 0.44 | -2.95 |
| 1.14 | 0.49 | 0.42  |
| 0.15 | 0.01 | 2.14  |
| 2.83 | 0.97 | -0.67 |
| 2.83 | 0.97 | -0.78 |
| 2.12 | 0.87 | -0.32 |
| 2.12 | 0.87 | -0.03 |
| #N/A | #N/A | 0.20  |
| #N/A | #N/A | -0.39 |
| 2.07 | 0.86 | -0.58 |
| #N/A | #N/A | #N/A  |
| 2.07 | 0.86 | -0.35 |
| 1.12 | 0.49 | 1.14  |
| 1.12 | 0.49 | 1.55  |
| #N/A | #N/A | 0.42  |
| 2.78 | 0.96 | -0.38 |
| 1.51 | 0.68 | 0.05  |
| 2.78 | 0.96 | 0.03  |
| #N/A | #N/A | #N/A  |
| 1.51 | 0.68 | 0.14  |
| 2.23 | 0.89 | -1.63 |
| 2.23 | 0.89 | 0.40  |
| 1.33 | 0.59 | -0.16 |
| 0.47 | 0.11 | 0.70  |
| 1.07 | 0.46 | #N/A  |
| 1.38 | 0.62 | -2.64 |
| 1.38 | 0.62 | -2.42 |
| 0.43 | 0.09 | -0.99 |
| 0.71 | 0.25 | #N/A  |
| #N/A | #N/A | -0.29 |
| #N/A | #N/A | #N/A  |
| #N/A | #N/A | 1.76  |
| 0.77 | 0.29 | 2.34  |
| 0.35 | 0.05 | 0.88  |
| 0.35 | 0.05 | 0.16  |
| 1.65 | 0.74 | -0.24 |
| 1.46 | 0.65 | #N/A  |
| 1.46 | 0.65 | 0.65  |
| 2.12 | 0.86 | -0.29 |
| 0.88 | 0.35 | -0.03 |
| 0.57 | 0.17 | -0.39 |
| 0.52 | 0.14 | 0.62  |
| 1.89 | 0.81 | 0.89  |
| 1.89 | 0.81 | 0.64  |
| 2.03 | 0.84 | -0.69 |
| 1.13 | 0.49 | 0.50  |
| 0.73 | 0.27 | -1.17 |
| #N/A | #N/A | 0.88  |
| 0.80 | 0.31 | 0.06  |
| 0.80 | 0.31 | #N/A  |

|      |      |       |
|------|------|-------|
| 0.96 | 0.40 | -0.36 |
| 0.80 | 0.31 | #N/A  |
| 0.96 | 0.40 | 0.66  |
| 1.44 | 0.64 | -0.48 |
| 0.57 | 0.17 | -2.19 |
| 0.88 | 0.35 | 0.01  |
| 1.75 | 0.77 | 0.13  |
| 3.21 | 0.98 | -0.34 |
| 3.21 | 0.98 | 0.36  |
| 0.35 | 0.05 | 3.94  |
| 0.53 | 0.16 | -1.81 |
| 0.53 | 0.16 | #N/A  |
| 0.52 | 0.14 | 0.28  |
| 1.47 | 0.65 | 0.19  |
| #N/A | #N/A | 0.65  |
| #N/A | #N/A | -0.14 |
| 1.26 | 0.56 | 0.62  |
| 1.98 | 0.83 | 2.02  |
| 0.66 | 0.22 | 0.19  |
| 0.66 | 0.22 | 0.16  |
| 1.35 | 0.60 | 0.54  |
| 1.21 | 0.53 | 1.19  |
| 1.24 | 0.55 | 0.94  |
| 1.81 | 0.78 | -0.31 |
| 1.81 | 0.78 | 0.23  |
| #N/A | #N/A | -0.47 |
| 2.16 | 0.88 | #N/A  |
| 1.23 | 0.54 | #N/A  |
| 2.16 | 0.88 | #N/A  |
| 0.83 | 0.32 | -0.56 |
| 5.10 | 0.97 | -0.08 |
| 5.10 | 0.97 | 0.62  |
| 0.55 | 0.16 | 1.17  |
| 0.55 | 0.16 | 1.45  |
| 1.24 | 0.55 | 0.23  |
| 1.84 | 0.80 | 1.20  |
| 1.84 | 0.80 | #N/A  |
| 2.07 | 0.86 | -0.45 |
| 2.07 | 0.86 | 0.29  |
| 2.62 | 0.95 | -0.28 |
| 2.62 | 0.95 | -0.21 |
| 1.84 | 0.79 | -2.91 |
| 1.84 | 0.79 | 0.27  |
| 0.68 | 0.24 | -0.10 |
| 0.68 | 0.24 | -0.14 |
| #N/A | #N/A | #N/A  |
| #N/A | #N/A | 0.78  |
| 1.68 | 0.75 | 3.14  |
| 1.68 | 0.75 | -0.54 |
| 2.29 | 0.88 | 0.01  |
| #N/A | #N/A | #N/A  |

|      |      |       |
|------|------|-------|
| 1.69 | 0.74 | -0.28 |
| 1.69 | 0.74 | 0.19  |
| 0.69 | 0.24 | 0.97  |
| 0.69 | 0.24 | #N/A  |
| 0.26 | 0.04 | 0.98  |
| 1.36 | 0.61 | #N/A  |
| 1.47 | 0.65 | 0.05  |
| 2.28 | 0.90 | -0.17 |
| 3.26 | 0.98 | -1.13 |
| 3.26 | 0.98 | 0.26  |
| #N/A | #N/A | -0.70 |
| #N/A | #N/A | #N/A  |
| #N/A | #N/A | 0.98  |
| #N/A | #N/A | #N/A  |
| #N/A | #N/A | -1.37 |
| #N/A | #N/A | -0.83 |
| 1.87 | 0.81 | -0.36 |
| 3.05 | 0.98 | -0.34 |
| 3.05 | 0.98 | -0.50 |
| 1.64 | 0.72 | 0.20  |
| 1.03 | 0.44 | 0.41  |
| 1.19 | 0.51 | -2.42 |
| #N/A | #N/A | #N/A  |
| 1.88 | 0.81 | 0.12  |
| 1.88 | 0.81 | 0.91  |
| 1.90 | 0.81 | -1.09 |
| 0.61 | 0.19 | -0.17 |
| 0.61 | 0.19 | -0.06 |
| 0.67 | 0.23 | -0.28 |
| 1.82 | 0.79 | #N/A  |
| 1.69 | 0.75 | 0.01  |
| 1.69 | 0.75 | 0.32  |
| #N/A | #N/A | 0.68  |
| #N/A | #N/A | -0.21 |
| 0.22 | 0.01 | #N/A  |
| 0.27 | 0.02 | -0.01 |
| 0.43 | 0.09 | -0.06 |
| 1.48 | 0.67 | 0.63  |
| 1.12 | 0.48 | 0.11  |
| 0.33 | 0.04 | 0.77  |
| 0.66 | 0.22 | #N/A  |
| 2.11 | 0.86 | -0.57 |
| 2.11 | 0.86 | #N/A  |
| 1.32 | 0.59 | 0.22  |
| 0.75 | 0.28 | 0.02  |
| 0.75 | 0.28 | 0.58  |
| 1.51 | 0.66 | -1.77 |
| 2.24 | 0.89 | -0.05 |
| 1.16 | 0.50 | -0.16 |
| 1.16 | 0.50 | -0.30 |
| #N/A | #N/A | -0.19 |

|      |      |       |
|------|------|-------|
| 1.16 | 0.50 | #N/A  |
| 0.98 | 0.41 | 0.11  |
| 0.68 | 0.24 | -0.12 |
| 2.09 | 0.86 | 0.93  |
| 2.09 | 0.86 | #N/A  |
| #N/A | #N/A | 0.31  |
| #N/A | #N/A | -1.82 |
| #N/A | #N/A | #N/A  |
| 0.51 | 0.13 | -1.51 |
| 0.51 | 0.13 | -0.16 |
| 1.63 | 0.72 | -0.26 |
| 1.49 | 0.66 | 0.27  |
| 1.94 | 0.82 | -0.60 |
| 1.94 | 0.82 | -2.23 |
| 0.85 | 0.33 | 1.94  |
| #N/A | #N/A | 0.95  |
| #N/A | #N/A | 0.56  |
| #N/A | #N/A | -2.07 |
| 1.15 | 0.50 | 0.67  |
| 1.33 | 0.59 | 1.80  |
| 1.74 | 0.76 | -2.22 |
| 1.74 | 0.76 | -0.55 |
| 0.94 | 0.39 | 0.36  |
| 2.17 | 0.87 | 0.61  |
| 1.67 | 0.74 | 0.81  |
| 1.67 | 0.74 | 0.43  |
| 1.70 | 0.75 | 0.18  |
| 2.06 | 0.77 | 0.74  |
| 2.37 | 0.86 | -1.10 |
| 2.06 | 0.77 | #N/A  |
| 2.37 | 0.86 | 0.64  |
| 1.30 | 0.58 | 0.75  |
| 1.30 | 0.58 | -0.58 |
| 0.86 | 0.34 | 0.98  |
| #N/A | #N/A | -0.40 |
| 1.63 | 0.73 | 0.43  |
| 1.63 | 0.73 | -1.47 |
| 1.63 | 0.73 | 0.90  |
| 0.96 | 0.40 | 0.95  |
| 0.33 | 0.04 | 1.85  |
| 0.89 | 0.36 | -0.18 |
| #N/A | #N/A | 0.67  |
| 2.18 | 0.88 | 1.04  |
| 2.18 | 0.88 | 0.33  |
| #N/A | #N/A | #N/A  |
| #N/A | #N/A | -0.09 |
| 1.84 | 0.80 | 0.40  |
| 1.84 | 0.80 | 0.32  |
| 1.68 | 0.74 | -0.12 |
| 1.68 | 0.74 | #N/A  |
| 2.08 | 0.86 | -0.77 |

|      |      |       |
|------|------|-------|
| 2.59 | 0.89 | 2.64  |
| 1.05 | 0.43 | -0.60 |
| 2.46 | 0.91 | -0.09 |
| 1.22 | 0.54 | -2.78 |
| 1.22 | 0.54 | -0.59 |
| 1.90 | 0.81 | -0.62 |
| #N/A | #N/A | 0.03  |
| 0.71 | 0.26 | -1.38 |
| 0.63 | 0.21 | -2.43 |
| 1.42 | 0.64 | 0.15  |
| 1.42 | 0.64 | 0.14  |
| 1.17 | 0.51 | 0.82  |
| 0.27 | 0.02 | 1.91  |
| 1.10 | 0.47 | #N/A  |
| 0.27 | 0.02 | 0.43  |
| 1.10 | 0.47 | 0.14  |
| 1.37 | 0.62 | 0.30  |
| 2.12 | 0.87 | 0.03  |
| 1.33 | 0.59 | -1.21 |
| #N/A | #N/A | -1.47 |
| #N/A | #N/A | -1.46 |
| 1.10 | 0.48 | 0.25  |
| 1.10 | 0.48 | -0.33 |
| 1.49 | 0.67 | -1.23 |
| 1.92 | 0.81 | 1.24  |
| 1.92 | 0.81 | 0.24  |
| 1.87 | 0.80 | -0.02 |
| 2.62 | 0.94 | 0.77  |
| 2.62 | 0.94 | 0.36  |
| 1.31 | 0.59 | 1.29  |
| 1.31 | 0.59 | #N/A  |
| 0.88 | 0.35 | 1.34  |
| 2.06 | 0.84 | -0.09 |
| 0.76 | 0.28 | #N/A  |
| 2.29 | 0.90 | -0.65 |
| 2.29 | 0.90 | 0.01  |
| 2.11 | 0.87 | 0.39  |
| 2.08 | 0.86 | -1.45 |
| 2.08 | 0.86 | #N/A  |
| 1.67 | 0.74 | 0.26  |
| 0.88 | 0.35 | #N/A  |
| 2.17 | 0.86 | 0.40  |
| 0.86 | 0.34 | 1.72  |
| 2.25 | 0.89 | #N/A  |
| 2.25 | 0.89 | #N/A  |
| 1.57 | 0.70 | #N/A  |
| 1.57 | 0.70 | -0.29 |
| 1.10 | 0.48 | 0.83  |
| 1.10 | 0.48 | -0.13 |
| 2.03 | 0.85 | 0.09  |
| 2.40 | 0.92 | 0.11  |

|      |      |       |
|------|------|-------|
| 2.40 | 0.92 | -0.91 |
| 1.49 | 0.65 | -0.51 |
| 1.49 | 0.65 | 0.70  |
| 0.22 | 0.01 | 0.26  |
| 1.08 | 0.47 | -0.10 |
| 1.67 | 0.74 | 0.17  |
| #N/A | #N/A | -0.27 |
| 1.45 | 0.65 | -0.21 |
| #N/A | #N/A | #N/A  |
| 1.45 | 0.65 | -1.80 |
| 1.37 | 0.61 | -0.37 |
| 0.93 | 0.38 | #N/A  |
| 1.09 | 0.47 | 2.46  |
| 0.92 | 0.38 | #N/A  |
| #N/A | #N/A | 0.26  |
| 0.86 | 0.34 | -0.21 |
| 0.86 | 0.34 | #N/A  |
| 0.64 | 0.21 | #N/A  |
| #N/A | #N/A | -0.14 |
| 1.76 | 0.71 | -0.41 |
| 2.65 | 0.94 | -0.27 |
| #N/A | #N/A | 0.33  |
| 1.16 | 0.50 | 1.53  |
| 1.16 | 0.50 | -1.81 |
| 0.56 | 0.16 | -1.89 |
| 1.25 | 0.55 | -1.03 |
| 0.79 | 0.30 | #N/A  |
| 0.79 | 0.30 | #N/A  |
| 1.03 | 0.44 | 0.70  |
| 1.19 | 0.52 | 1.02  |
| 1.53 | 0.68 | -0.10 |
| 1.19 | 0.52 | #N/A  |
| 1.53 | 0.68 | 0.95  |
| 1.64 | 0.73 | -1.43 |
| #N/A | #N/A | -0.23 |
| #N/A | #N/A | -0.37 |
| 1.49 | 0.66 | -0.52 |
| 1.98 | 0.81 | -2.82 |
| 1.98 | 0.81 | -1.63 |
| 1.91 | 0.81 | 0.30  |
| 1.91 | 0.81 | 0.47  |
| 2.03 | 0.82 | 0.21  |
| 2.93 | 0.97 | -0.02 |
| 2.93 | 0.97 | -2.51 |
| 1.65 | 0.73 | -0.26 |
| 1.57 | 0.69 | -1.07 |
| 0.87 | 0.34 | -2.16 |
| 0.43 | 0.09 | 0.70  |
| #N/A | #N/A | 2.62  |
| #N/A | #N/A | 2.72  |
| 2.13 | 0.87 | 0.90  |

|      |      |       |
|------|------|-------|
| 2.10 | 0.86 | 0.67  |
| #N/A | #N/A | -1.50 |
| #N/A | #N/A | -0.92 |
| 1.71 | 0.75 | -0.11 |
| 1.64 | 0.73 | 0.22  |
| 0.33 | 0.04 | 2.23  |
| 0.70 | 0.25 | #N/A  |
| 0.53 | 0.15 | 0.24  |
| 1.33 | 0.60 | #N/A  |
| 1.33 | 0.60 | -0.19 |
| 2.14 | 0.86 | -0.13 |
| 2.14 | 0.86 | -0.08 |
| 1.22 | 0.54 | -1.09 |
| 0.76 | 0.28 | -1.01 |
| #N/A | #N/A | -0.41 |
| #N/A | #N/A | 2.23  |
| #N/A | #N/A | 0.19  |
| #N/A | #N/A | -0.50 |
| 2.60 | 0.94 | -0.61 |
| 2.60 | 0.94 | -0.09 |
| 2.19 | 0.87 | -0.82 |
| 2.19 | 0.87 | -0.22 |
| 1.31 | 0.58 | 1.08  |
| 1.41 | 0.63 | 0.56  |
| 1.68 | 0.74 | 0.71  |
| #N/A | #N/A | 0.96  |
| 1.78 | 0.78 | 0.54  |
| 0.77 | 0.29 | -0.58 |
| 1.78 | 0.78 | 0.27  |
| 2.78 | 0.96 | -0.27 |
| 1.13 | 0.49 | -1.58 |
| 1.13 | 0.49 | -0.99 |
| 1.69 | 0.74 | 0.09  |
| 1.13 | 0.50 | -0.94 |
| 1.53 | 0.69 | -0.07 |
| 0.95 | 0.39 | 0.76  |
| 0.64 | 0.21 | #N/A  |
| 1.50 | 0.66 | 0.94  |
| 1.50 | 0.66 | -1.79 |
| 1.46 | 0.66 | 1.55  |
| 0.38 | 0.06 | 2.12  |
| 2.75 | 0.96 | -3.28 |
| 1.13 | 0.49 | #N/A  |
| 1.34 | 0.60 | 0.09  |
| 2.79 | 0.92 | -1.03 |
| 1.01 | 0.43 | 0.79  |
| #N/A | #N/A | 0.82  |
| #N/A | #N/A | -1.05 |
| 0.89 | 0.36 | -1.55 |
| 0.97 | 0.40 | 0.38  |
| 1.19 | 0.52 | #N/A  |

|      |      |       |
|------|------|-------|
| 1.19 | 0.52 | #N/A  |
| 1.19 | 0.52 | 0.48  |
| 1.19 | 0.52 | #N/A  |
| 3.13 | 0.98 | -0.44 |
| 1.97 | 0.83 | 0.37  |
| 1.97 | 0.83 | 0.12  |
| 0.83 | 0.32 | -0.87 |
| 0.58 | 0.18 | 0.17  |
| 1.66 | 0.73 | 1.73  |
| 0.82 | 0.32 | 2.20  |
| #N/A | #N/A | 0.97  |
| 1.41 | 0.63 | 0.32  |
| 0.56 | 0.17 | -0.10 |
| 1.14 | 0.50 | 1.53  |
| 0.79 | 0.30 | #N/A  |
| #N/A | #N/A | 0.43  |
| #N/A | #N/A | -0.52 |
| #N/A | #N/A | -2.91 |
| 2.07 | 0.86 | 0.64  |
| 2.07 | 0.86 | 0.28  |
| 0.99 | 0.42 | 0.25  |
| #N/A | #N/A | #N/A  |
| #N/A | #N/A | #N/A  |
| #N/A | #N/A | -1.08 |
| 2.57 | 0.94 | -0.66 |
| 2.57 | 0.94 | -0.64 |
| 2.00 | 0.84 | -0.07 |
| 1.56 | 0.68 | #N/A  |
| 1.27 | 0.56 | 0.02  |
| #N/A | #N/A | -0.17 |
| 2.67 | 0.95 | 0.38  |
| 2.67 | 0.95 | 0.61  |
| #N/A | #N/A | -0.23 |
| #N/A | #N/A | 2.11  |
| #N/A | #N/A | -0.11 |
| #N/A | #N/A | 0.95  |
| 1.06 | 0.45 | 0.23  |
| 1.06 | 0.45 | 0.97  |
| 1.16 | 0.51 | -0.76 |
| 1.05 | 0.44 | -0.23 |
| 2.15 | 0.86 | -0.97 |
| 2.15 | 0.86 | -0.54 |
| #N/A | #N/A | 0.71  |
| #N/A | #N/A | 0.02  |
| 1.65 | 0.73 | -0.83 |
| #N/A | #N/A | -0.84 |
| #N/A | #N/A | #N/A  |
| #N/A | #N/A | -0.06 |
| 1.65 | 0.73 | -0.66 |
| 1.99 | 0.83 | #N/A  |
| 1.99 | 0.83 | -1.94 |



|      |      |       |
|------|------|-------|
| #N/A | #N/A | -1.83 |
| 2.83 | 0.96 | 0.82  |
| 2.83 | 0.96 | -0.47 |
| #N/A | #N/A | 0.90  |
| 2.04 | 0.85 | -0.68 |
| 1.86 | 0.75 | 0.68  |
| #N/A | #N/A | -0.80 |
| 1.86 | 0.75 | -0.69 |
| 1.99 | 0.83 | -0.48 |
| 1.99 | 0.83 | 0.00  |
| #N/A | #N/A | -0.09 |
| 1.99 | 0.83 | 0.42  |
| 1.18 | 0.51 | -0.50 |
| 0.92 | 0.37 | -0.51 |
| 1.96 | 0.83 | -1.51 |
| 0.74 | 0.27 | -1.40 |
| #N/A | #N/A | -0.29 |
| 3.52 | 0.97 | 0.40  |
| 3.52 | 0.97 | -0.12 |
| 1.12 | 0.49 | 0.31  |
| 1.12 | 0.49 | 0.33  |
| 0.68 | 0.24 | -0.02 |
| 1.17 | 0.51 | 0.00  |
| 1.82 | 0.75 | 0.53  |
| #N/A | #N/A | 0.23  |
| 1.42 | 0.63 | -0.21 |
| 1.42 | 0.63 | -0.62 |
| 0.84 | 0.33 | 0.67  |
| 1.09 | 0.47 | -0.05 |
| 0.72 | 0.26 | 0.20  |
| 0.55 | 0.16 | -0.54 |
| 1.72 | 0.76 | 0.63  |
| 0.55 | 0.16 | #N/A  |
| #N/A | #N/A | #N/A  |
| #N/A | #N/A | 1.61  |
| #N/A | #N/A | 0.83  |
| 0.40 | 0.07 | -0.64 |
| 1.36 | 0.61 | 1.21  |
| 2.69 | 0.95 | 0.28  |
| 2.69 | 0.95 | -0.68 |
| 2.60 | 0.93 | 0.23  |
| 3.58 | 0.99 | -0.04 |
| 3.58 | 0.99 | -0.17 |
| #N/A | #N/A | -0.27 |
| 4.70 | 1.00 | -0.39 |
| 4.70 | 1.00 | #N/A  |
| 4.70 | 1.00 | 0.60  |
| #N/A | #N/A | 0.41  |
| #N/A | #N/A | 1.58  |
| 1.68 | 0.74 | 0.70  |
| 1.68 | 0.74 | 0.11  |

|      |      |       |
|------|------|-------|
| 1.50 | 0.68 | 0.03  |
| 2.06 | 0.85 | -0.08 |
| 2.06 | 0.85 | 0.16  |
| 1.02 | 0.43 | 1.64  |
| 1.23 | 0.55 | 0.74  |
| 1.02 | 0.43 | 0.83  |
| 1.23 | 0.55 | -0.24 |
| #N/A | #N/A | -1.71 |
| #N/A | #N/A | 0.65  |
| 2.30 | 0.91 | -0.90 |
| 1.92 | 0.82 | -0.10 |
| 1.92 | 0.82 | -0.14 |
| 1.13 | 0.49 | 0.38  |
| 1.13 | 0.49 | 0.79  |
| 1.43 | 0.63 | 0.42  |
| 2.08 | 0.86 | -2.15 |
| 2.08 | 0.86 | 0.17  |
| 1.26 | 0.56 | -2.53 |
| 1.26 | 0.56 | -0.10 |
| 1.01 | 0.43 | 0.05  |
| 1.01 | 0.42 | 0.30  |
| 0.88 | 0.35 | #N/A  |
| 1.41 | 0.63 | 0.62  |
| 2.35 | 0.82 | -1.32 |
| #N/A | #N/A | -1.11 |
| 1.00 | 0.41 | #N/A  |
| 0.68 | 0.24 | 0.35  |
| #N/A | #N/A | #N/A  |
| 1.39 | 0.62 | #N/A  |
| 0.85 | 0.33 | 0.93  |
| 1.39 | 0.62 | -0.11 |
| 1.16 | 0.51 | 0.04  |
| 1.16 | 0.51 | 1.02  |
| 2.77 | 0.96 | -0.03 |
| 2.77 | 0.96 | -0.06 |
| #N/A | #N/A | 0.14  |
| 0.41 | 0.08 | 0.59  |
| 0.41 | 0.08 | -1.29 |
| #N/A | #N/A | -0.27 |
| 1.40 | 0.62 | 0.45  |
| 1.40 | 0.63 | -0.15 |
| #N/A | #N/A | #N/A  |
| 1.73 | 0.74 | -0.90 |
| #N/A | #N/A | 1.18  |
| 1.43 | 0.62 | -0.46 |
| 1.43 | 0.62 | 0.73  |
| 1.96 | 0.82 | -0.86 |
| #N/A | #N/A | #N/A  |
| 1.96 | 0.82 | -2.44 |
| 1.35 | 0.60 | -1.99 |
| #N/A | #N/A | -0.69 |

|      |      |       |
|------|------|-------|
| 1.87 | 0.81 | 0.45  |
| 1.87 | 0.81 | 0.28  |
| 0.58 | 0.17 | 0.34  |
| #N/A | #N/A | 1.75  |
| 0.53 | 0.14 | 2.11  |
| 0.76 | 0.28 | 1.91  |
| #N/A | #N/A | #N/A  |
| #N/A | #N/A | #N/A  |
| 1.96 | 0.83 | 1.41  |
| 1.20 | 0.53 | 0.61  |
| 0.59 | 0.19 | 0.09  |
| 0.59 | 0.19 | 0.77  |
| 0.46 | 0.11 | 0.56  |
| 0.55 | 0.16 | 0.29  |
| 0.59 | 0.19 | 3.31  |
| 1.88 | 0.81 | 0.13  |
| #N/A | #N/A | 0.29  |
| 3.55 | 0.99 | -2.06 |
| 3.55 | 0.99 | #N/A  |
| 1.40 | 0.63 | 0.28  |
| 2.10 | 0.81 | -0.47 |
| 1.63 | 0.72 | -0.19 |
| 1.63 | 0.72 | #N/A  |
| #N/A | #N/A | -0.35 |
| 1.51 | 0.68 | -0.61 |
| 1.51 | 0.68 | 0.00  |
| 1.01 | 0.43 | 1.41  |
| 1.79 | 0.78 | 0.11  |
| 1.67 | 0.74 | -0.65 |
| 1.67 | 0.74 | -0.55 |
| 2.01 | 0.84 | 0.27  |
| #N/A | #N/A | #N/A  |
| 2.01 | 0.84 | 0.60  |
| #N/A | #N/A | -0.06 |
| #N/A | #N/A | 0.54  |
| 1.30 | 0.58 | 0.12  |
| 1.30 | 0.58 | -0.18 |
| 1.13 | 0.50 | -0.64 |
| 0.71 | 0.26 | 2.54  |
| 2.29 | 0.90 | 0.46  |
| 5.09 | 0.97 | #N/A  |
| 5.09 | 0.97 | -1.15 |
| 3.20 | 0.97 | 0.30  |
| 3.20 | 0.97 | -0.86 |
| 1.50 | 0.67 | -2.44 |
| 1.50 | 0.67 | 0.82  |
| #N/A | #N/A | 0.74  |
| 1.63 | 0.71 | #N/A  |
| #N/A | #N/A | 0.60  |
| 0.59 | 0.18 | -0.05 |
| #N/A | #N/A | 0.05  |

|      |      |      |
|------|------|------|
| #N/A | #N/A | #N/A |
| 1.94 | 0.82 | 0.65 |
| #N/A | #N/A | 0.59 |
| #N/A | #N/A | #N/A |
| #N/A | #N/A | #N/A |
| 0.69 | 0.24 | #N/A |
| 0.69 | 0.24 | 0.18 |
| 1.68 | 0.75 | 0.18 |

**WT: Change in gene expression (log<sub>2</sub> ratio, HS/no HS)**

#N/A  
0.82  
-0.77  
#N/A  
1.08  
-0.14  
2.08  
0.54  
0.54  
-0.06  
-0.31  
-0.30  
0.20  
1.11  
0.57  
#N/A  
#N/A  
-0.08  
-0.82  
#N/A  
#N/A  
1.24  
#N/A  
-0.04  
#N/A  
1.01  
#N/A  
#N/A  
#N/A  
0.86  
-0.37  
0.10  
-0.50  
-0.32  
#N/A  
1.34  
#N/A  
0.47  
#N/A  
#N/A  
1.04  
#N/A  
#N/A  
1.39  
0.20  
0.06  
-2.22  
3.09  
2.60  
0.14

#N/A  
#N/A  
#N/A  
#N/A  
#N/A  
#N/A  
-0.10  
#N/A  
0.89  
-0.25  
-0.08  
0.54  
-1.65  
0.30  
-1.46  
#N/A  
#N/A  
2.01  
#N/A  
#N/A  
#N/A  
0.48  
0.02  
0.02  
#N/A  
#N/A  
#N/A  
#N/A  
0.52  
#N/A  
#N/A  
-0.40  
#N/A  
#N/A  
#N/A  
#N/A  
#N/A  
-0.32  
#N/A  
#N/A  
#N/A  
-2.06  
-1.90  
-1.93  
#N/A  
-1.27  
-1.56  
#N/A  
0.47  
0.15  
0.28

#N/A  
-0.16  
#N/A  
#N/A  
0.79  
#N/A  
#N/A  
#N/A  
0.28  
-0.67  
-0.16  
0.65  
0.13  
-1.35  
#N/A  
#N/A  
#N/A  
0.78  
#N/A  
-0.89  
0.92  
-0.21  
0.95  
-3.25  
0.81  
1.18  
-1.19  
#N/A  
#N/A  
-0.33  
3.37  
#N/A  
0.69  
-0.22  
-1.56  
#N/A  
-0.35  
0.14  
#N/A  
0.69  
0.33  
0.52  
0.84  
0.90  
-0.35  
2.78  
#N/A  
#N/A  
-0.66  
-0.67  
#N/A

-0.43  
-1.99  
#N/A  
#N/A  
4.60  
-1.40  
3.44  
0.65  
-0.75  
-1.58  
-1.48  
-1.81  
-1.83  
#N/A  
#N/A  
0.40  
0.05  
-1.61  
-0.06  
0.35  
0.37  
-0.10  
#N/A  
-0.11  
0.43  
-0.06  
0.84  
0.63  
0.80  
#N/A  
1.07  
0.36  
#N/A  
0.21  
-0.07  
0.52  
2.89  
-0.13  
0.72  
-0.30  
0.51  
#N/A  
-0.59  
-0.69  
-0.09  
#N/A  
0.52  
#N/A  
0.91  
0.23  
0.94



0.20  
-0.49  
0.42  
0.19  
-0.20  
2.22  
#N/A  
0.37  
-1.13  
-1.61  
0.08  
-0.72  
-0.01  
1.06  
0.69  
0.70  
0.39  
#N/A  
0.38  
#N/A  
#N/A  
0.44  
#N/A  
2.66  
1.55  
-0.07  
-0.24  
-1.63  
1.68  
0.58  
#N/A  
-0.05  
-0.40  
#N/A  
0.52  
-0.95  
0.21  
1.26  
7.07  
#N/A  
#N/A  
0.47  
0.78  
1.34  
0.60  
-2.08  
0.23  
-0.67  
-1.41  
-1.45  
0.05

1.20  
0.00  
-1.72  
-1.20  
#N/A  
1.20  
#N/A  
0.47  
0.47  
1.02  
0.32  
-1.17  
1.65  
-0.53  
-0.14  
-0.13  
0.73  
#N/A  
1.20  
-0.22  
-0.13  
6.60  
2.30  
-0.66  
-0.04  
#N/A  
#N/A  
-0.19  
#N/A  
0.40  
3.08  
-0.45  
0.34  
#N/A  
-0.18  
#N/A  
2.68  
-0.35  
-0.31  
#N/A  
1.48  
2.67  
-0.40  
#N/A  
0.43  
0.34  
2.08  
2.20  
#N/A  
0.64  
#N/A

0.06  
-0.29  
#N/A  
#N/A  
-0.16  
0.26  
0.77  
0.87  
-0.53  
-0.53  
0.11  
0.17  
0.15  
-0.11  
0.65  
3.71  
1.15  
0.25  
-0.12  
0.61  
#N/A  
0.31  
0.34  
1.02  
#N/A  
#N/A  
-1.93  
0.83  
2.15  
-0.02  
0.82  
-0.76  
-1.57  
-2.10  
#N/A  
-2.21  
0.07  
0.68  
#N/A  
0.18  
-0.34  
-0.28  
0.78  
0.23  
0.98  
-0.85  
1.30  
-0.82  
-0.79  
#N/A  
-0.07

-0.51  
-0.02  
1.46  
-0.18  
0.26  
-0.78  
-0.88  
-0.76  
-0.03  
0.72  
0.14  
0.34  
1.25  
0.24  
-0.05  
3.08  
0.45  
#N/A  
0.05  
0.55  
0.33  
#N/A  
#N/A  
1.25  
-0.66  
-0.19  
-1.27  
0.36  
-1.58  
0.11  
-1.26  
#N/A  
0.79  
-0.97  
#N/A  
#N/A  
0.87  
1.11  
#N/A  
#N/A  
#N/A  
#N/A  
-0.71  
0.52  
-1.24  
0.36  
-0.62  
#N/A  
-1.48  
#N/A  
1.79

#N/A  
-1.67  
0.66  
0.67  
-0.17  
#N/A  
-0.52  
#N/A  
#N/A  
0.51  
2.33  
0.22  
0.81  
-0.49  
#N/A  
4.85  
1.06  
1.75  
-0.36  
-0.01  
1.20  
0.02  
#N/A  
0.24  
#N/A  
#N/A  
#N/A  
1.83  
0.30  
#N/A  
#N/A  
#N/A  
#N/A  
#N/A  
#N/A  
#N/A  
#N/A  
#N/A  
0.32  
#N/A  
#N/A  
#N/A  
-0.47  
#N/A  
-0.31  
#N/A  
#N/A  
#N/A  
#N/A  
0.07  
-1.30  
#N/A

0.63  
#N/A  
#N/A  
#N/A  
#N/A  
-0.04  
#N/A  
0.14  
#N/A  
#N/A  
-0.71  
#N/A  
0.17  
0.94  
-0.07  
2.14  
-1.48  
-1.35  
1.52  
1.37  
3.48  
#N/A  
#N/A  
0.71  
1.02  
-0.17  
#N/A  
#N/A  
#N/A  
1.19  
0.94  
#N/A  
0.57  
-1.86  
-2.00  
0.01  
0.89  
0.96  
-0.53  
-3.28  
#N/A  
2.82  
-1.30  
2.77  
2.84  
0.51  
0.34  
#N/A  
#N/A  
#N/A  
-0.20

-2.19  
#N/A  
#N/A  
#N/A  
#N/A  
#N/A  
1.53  
-0.35  
-0.29  
#N/A  
0.48  
-0.55  
-1.64  
-0.47  
0.26  
#N/A  
-0.05  
0.63  
1.31  
3.03  
#N/A  
0.47  
0.52  
0.48  
1.59  
0.76  
0.75  
0.76  
#N/A  
-0.11  
-1.99  
-0.12  
#N/A  
-0.07  
0.25  
#N/A  
2.23  
-0.04  
0.34  
0.37  
-1.05  
2.15  
0.28  
-0.10  
-0.12  
1.03  
0.51  
-1.53  
-1.67  
-0.91  
-0.39

-1.14  
0.18  
1.14  
0.43  
0.33  
0.21  
0.26  
0.37  
-0.05  
-0.55  
-0.21  
0.02  
0.10  
-1.01  
-0.38  
#N/A  
-0.72  
-1.56  
-0.44  
-0.52  
#N/A  
-2.87  
0.44  
#N/A  
#N/A  
-1.86  
#N/A  
0.75  
1.89  
#N/A  
#N/A  
#N/A  
-0.27  
0.72  
0.34  
0.54  
0.49  
0.39  
-1.65  
#N/A  
0.15  
0.51  
0.56  
-1.02  
0.42  
#N/A  
-1.20  
1.03  
#N/A  
-0.52  
#N/A



-0.81  
-2.09  
0.75  
-1.49  
-0.16  
1.07  
0.19  
0.19  
-0.38  
-0.43  
1.07  
#N/A  
#N/A  
1.25  
0.51  
#N/A  
#N/A  
-1.21  
#N/A  
-0.47  
0.31  
-0.07  
-0.07  
#N/A  
0.93  
#N/A  
-0.35  
-1.80  
#N/A  
-0.58  
-0.88  
#N/A  
0.92  
#N/A  
#N/A  
0.34  
-1.30  
#N/A  
-1.98  
0.69  
-0.24  
#N/A  
#N/A  
0.15  
0.06  
-0.03  
-1.62  
0.50  
0.30  
0.50  
1.14

-0.14  
1.05  
0.99  
#N/A  
-0.49  
0.17  
-2.25  
0.50  
0.45  
0.27  
0.95  
0.78  
0.64  
3.40  
2.16  
1.95  
2.94  
1.52  
#N/A  
1.47  
-0.14  
0.67  
-0.27  
-2.09  
#N/A  
-0.18  
#N/A  
#N/A  
-0.22  
#N/A  
#N/A  
#N/A  
#N/A  
-0.74  
#N/A  
-0.44  
#N/A  
0.35  
0.70  
1.46  
-0.18  
0.50  
#N/A  
-1.49  
-1.82  
0.57  
0.22  
1.23  
-0.96  
-0.20  
1.21  
-0.45

1.26  
-2.86  
-1.34  
#N/A  
-3.59  
-0.48  
0.53  
0.41  
0.63  
#N/A  
#N/A  
0.25  
#N/A  
1.65  
0.00  
-0.40  
-1.65  
0.61  
0.18  
0.30  
0.95  
-0.08  
-1.73  
-2.17  
-1.79  
-1.15  
3.13  
0.52  
#N/A  
0.08  
0.36  
-0.16  
0.64  
#N/A  
-0.34  
0.41  
-0.34  
#N/A  
0.83  
0.62  
0.62  
0.41  
0.26  
-0.81  
0.21  
-0.12  
#N/A  
0.45  
#N/A  
0.19  
1.06

2.89  
-0.51  
-1.99  
#N/A  
#N/A  
1.03  
0.07  
0.19  
1.01  
-0.53  
0.15  
#N/A  
-0.44  
0.75  
2.27  
0.61  
0.74  
0.51  
0.32  
-0.02  
-1.94  
-0.53  
0.14  
-0.10  
0.31  
0.30  
0.69  
-1.03  
0.43  
0.62  
#N/A  
-0.50  
-0.11  
0.61  
-0.30  
0.76  
-0.55  
0.65  
0.96  
-1.84  
0.76  
-1.06  
-0.58  
#N/A  
-2.37  
-0.74  
-0.22  
-0.82  
-0.85  
-1.16  
-0.17

0.74  
0.38  
#N/A  
#N/A  
-0.22  
-0.20  
-0.65  
-1.25  
0.61  
2.11  
#N/A  
-0.94  
0.54  
0.47  
1.63  
0.11  
-0.18  
-0.38  
-0.05  
-0.20  
1.52  
1.71  
-0.57  
-0.07  
-1.15  
0.21  
0.20  
#N/A  
0.33  
-0.88  
0.05  
-1.18  
-0.55  
0.79  
0.50  
0.00  
#N/A  
-0.08  
0.33  
0.83  
0.40  
-1.20  
-0.05  
-0.59  
4.18  
-0.72  
0.97  
-0.69  
-1.52  
-0.68  
0.61

#N/A  
-0.50  
-2.15  
1.32  
1.33  
0.53  
-0.17  
#N/A  
#N/A  
0.23  
0.49  
5.94  
1.95  
0.13  
-0.28  
-1.11  
-1.66  
-3.08  
-2.96  
0.74  
-0.60  
#N/A  
1.51  
2.05  
0.36  
-0.38  
0.88  
1.50  
#N/A  
-0.71  
-1.20  
#N/A  
0.88  
1.37  
0.72  
1.23  
0.90  
0.95  
2.94  
0.20  
1.32  
#N/A  
0.12  
0.37  
0.45  
0.47  
#N/A  
#N/A  
0.89  
-1.58  
-0.09

#N/A  
#N/A  
-0.13  
-0.24  
2.41  
2.54  
0.28  
-1.95  
1.08  
-1.38  
-1.59  
-1.88  
-0.18  
0.64  
0.58  
#N/A  
-0.08  
#N/A  
2.21  
-0.82  
0.03  
#N/A  
-0.29  
-1.22  
2.06  
2.20  
2.18  
0.75  
#N/A  
1.10  
-0.58  
-1.03  
-0.12  
-0.32  
#N/A  
-0.47  
0.02  
0.20  
#N/A  
#N/A  
0.81  
3.01  
0.84  
0.61  
0.88  
1.87  
-2.85  
0.38  
-0.29  
0.36  
-1.51

-0.13  
0.49  
0.44  
0.56  
0.84  
#N/A  
0.23  
-0.45  
-0.25  
1.99  
#N/A  
2.23  
1.80  
-0.34  
#N/A  
#N/A  
-0.41  
-0.41  
-1.82  
0.78  
1.72  
-0.32  
-1.75  
0.16  
-0.01  
0.74  
-1.45  
0.19  
-0.45  
-0.53  
-0.87  
1.02  
-2.10  
0.28  
0.75  
1.69  
-3.03  
#N/A  
0.49  
0.46  
0.77  
#N/A  
0.87  
-0.11  
0.25  
#N/A  
-2.53  
#N/A  
-0.97  
#N/A  
0.58



0.69  
-0.29  
0.77  
-0.46  
-2.48  
-1.24  
1.18  
#N/A  
1.33  
0.08  
-0.28  
0.05  
0.23  
1.30  
-0.49  
1.01  
-0.16  
0.02  
-0.25  
-0.19  
#N/A  
#N/A  
#N/A  
#N/A  
0.13  
0.37  
#N/A  
-0.20  
-1.08  
-0.41  
-0.85  
-0.64  
0.70  
#N/A  
0.03  
0.43  
-0.59  
0.16  
0.91  
0.99  
-1.10  
-0.66  
-0.22  
#N/A  
0.31  
-2.24  
0.72  
0.12  
#N/A  
-1.90  
#N/A

0.01  
0.82  
0.94  
-0.69  
3.45  
-0.87  
0.80  
0.38  
0.09  
-0.34  
0.39  
2.38  
#N/A  
#N/A  
0.25  
-0.03  
0.53  
#N/A  
-0.84  
-0.12  
0.88  
#N/A  
-0.38  
-0.19  
-0.49  
0.11  
0.28  
#N/A  
-0.18  
-0.39  
0.32  
1.06  
-0.34  
0.41  
0.33  
0.10  
0.95  
#N/A  
1.73  
0.48  
-1.20  
0.52  
0.53  
-0.15  
#N/A  
-0.70  
-0.02  
0.54  
2.52  
-0.91  
1.18

-0.73  
-0.38  
-0.32  
#N/A  
0.39  
-0.94  
1.11  
-1.26  
-1.26  
-0.58  
-0.77  
-0.26  
0.64  
#N/A  
1.50  
-0.43  
-0.14  
#N/A  
0.70  
0.98  
0.23  
-0.09  
-0.12  
-1.00  
#N/A  
0.24  
#N/A  
0.61  
-0.67  
0.68  
0.66  
#N/A  
-0.48  
#N/A  
0.03  
#N/A  
0.12  
1.26  
0.46  
-0.34  
-0.07  
3.65  
0.64  
0.55  
0.99  
0.95  
-0.43  
0.42  
0.10  
0.05  
-0.37

0.16  
#N/A  
0.48  
0.51  
1.78  
0.53  
1.86  
0.18  
1.17  
0.44  
#N/A  
-1.38  
-0.48  
#N/A  
1.10  
#N/A  
0.61  
#N/A  
#N/A  
1.61  
0.55  
0.55  
1.71  
0.09  
-0.44  
0.77  
1.13  
0.47  
0.58  
-0.48  
0.24  
-1.62  
-2.47  
-0.13  
0.37  
-0.16  
1.09  
0.63  
0.87  
1.01  
#N/A  
-0.47  
#N/A  
0.20  
-1.53  
0.84  
0.19  
0.60  
0.87  
-0.17  
0.35

1.08  
0.59  
-2.12  
0.45  
-0.74  
-1.99  
-0.31  
-0.49  
0.73  
0.48  
0.81  
1.04  
-0.30  
-0.27  
-0.17  
0.42  
0.68  
-0.34  
0.66  
-0.07  
-0.53  
-0.23  
-1.27  
-0.90  
-0.71  
#N/A  
-1.85  
-0.77  
0.43  
-0.06  
0.01  
0.65  
0.51  
-0.14  
0.14  
0.37  
#N/A  
-0.28  
-0.12  
0.65  
0.35  
#N/A  
-3.74  
-0.09  
-0.15  
-0.28  
-2.29  
-0.05  
-1.63  
0.76  
0.68

-0.19  
0.83  
#N/A  
#N/A  
-0.39  
0.14  
#N/A  
0.30  
-0.10  
0.46  
3.15  
#N/A  
-2.40  
#N/A  
-0.04  
-2.08  
0.10  
0.59  
-0.15  
-0.46  
-0.26  
1.54  
#N/A  
-0.21  
0.73  
-1.28  
-0.18  
-0.08  
-2.05  
-2.19  
-0.46  
#N/A  
#N/A  
#N/A  
0.15  
0.27  
1.63  
0.08  
-0.97  
-0.07  
0.45  
0.90  
-2.32  
-1.65  
-0.35  
1.07  
-0.27  
-1.57  
-1.75  
-0.27  
#N/A

0.75  
0.39  
0.67  
0.67  
0.71  
#N/A  
0.29  
-0.64  
-1.03  
#N/A  
#N/A  
1.02  
1.02  
0.52  
0.98  
1.30  
#N/A  
1.23  
-0.75  
-0.22  
-0.68  
0.66  
0.46  
-1.55  
-1.08  
#N/A  
-1.79  
-0.93  
-1.73  
-1.50  
0.15  
0.13  
2.29  
-0.87  
#N/A  
0.13  
0.31  
-0.12  
-0.30  
0.31  
#N/A  
#N/A  
0.13  
#N/A  
-3.59  
0.07  
0.05  
0.77  
#N/A  
0.05  
-1.16

-0.37  
-0.02  
1.34  
#N/A  
-0.20  
0.12  
#N/A  
0.94  
-0.58  
1.23  
0.01  
-0.05  
-0.14  
#N/A  
0.23  
-0.22  
#N/A  
0.63  
0.13  
#N/A  
-1.56  
0.72  
0.17  
0.18  
-1.86  
1.11  
0.46  
#N/A  
-1.14  
#N/A  
-0.65  
1.37  
1.29  
1.11  
0.33  
#N/A  
1.20  
#N/A  
0.37  
0.94  
#N/A  
1.66  
#N/A  
0.63  
1.17  
0.01  
0.03  
0.21  
0.02  
#N/A  
#N/A



#N/A  
-0.13  
#N/A  
#N/A  
-0.87  
-0.08  
1.33  
1.50  
0.64  
#N/A  
3.38  
-0.55  
#N/A  
#N/A  
-0.10  
-0.26  
0.15  
1.21  
0.81  
-0.29  
-1.05  
0.03  
0.10  
-0.40  
-0.11  
-0.61  
0.74  
0.62  
1.27  
0.30  
#N/A  
-0.19  
#N/A  
3.14  
1.10  
0.43  
-0.63  
-0.45  
-0.47  
#N/A  
0.03  
-0.11  
#N/A  
0.74  
0.70  
-0.53  
#N/A  
1.18  
-0.04  
-1.63  
-0.12

-0.34  
-0.28  
0.41  
-0.01  
#N/A  
-0.35  
-0.13  
#N/A  
-0.08  
0.26  
0.80  
2.36  
-0.59  
0.22  
-1.34  
-0.05  
-0.72  
#N/A  
-0.87  
0.91  
#N/A  
-0.16  
0.41  
#N/A  
0.49  
-1.69  
-1.89  
-1.07  
-0.25  
-0.01  
-0.13  
#N/A  
#N/A  
2.89  
-1.22  
0.67  
0.46  
#N/A  
-1.18  
0.47  
#N/A  
#N/A  
#N/A  
1.73  
1.84  
0.37  
0.07  
0.54  
0.17  
-0.12  
-0.25

0.18  
-0.04  
-1.56  
-2.31  
-0.48  
1.02  
0.16  
-3.38  
-0.60  
-1.08  
0.33  
-0.73  
0.53  
0.22  
0.83  
-0.01  
0.50  
0.49  
-0.45  
0.09  
-0.38  
-0.06  
-0.39  
0.92  
0.67  
#N/A  
-0.02  
1.24  
-1.46  
0.94  
0.40  
0.16  
-0.49  
0.07  
-0.30  
-0.42  
1.02  
-0.54  
0.99  
-1.19  
1.47  
1.65  
0.64  
0.14  
-0.02  
#N/A  
-1.33  
1.00  
#N/A  
#N/A  
0.06

0.34  
0.67  
-1.41  
0.73  
-0.04  
0.74  
1.73  
3.37  
-0.76  
-0.30  
-1.87  
0.20  
1.23  
0.34  
-0.43  
-0.28  
0.74  
2.35  
0.10  
#N/A  
0.27  
#N/A  
0.25  
2.92  
0.08  
1.30  
-2.30  
-0.05  
0.15  
-1.34  
-1.79  
-0.36  
0.75  
0.89  
0.16  
0.97  
0.33  
-0.35  
-1.28  
0.31  
#N/A  
#N/A  
-1.17  
-0.40  
0.85  
0.13  
-0.15  
0.20  
1.03  
0.35  
0.25

0.62  
0.82  
1.35  
2.16  
#N/A  
1.12  
-0.04  
0.33  
0.19  
-2.02  
5.56  
-0.83  
-0.07  
#N/A  
-0.21  
-0.94  
-0.97  
-4.16  
0.02  
-0.47  
0.04  
-0.30  
-0.23  
-0.11  
-1.93  
-0.34  
1.83  
#N/A  
-0.28  
#N/A  
-0.05  
-0.10  
-0.41  
-0.05  
-2.32  
-1.17  
#N/A  
#N/A  
0.30  
-1.93  
-0.11  
0.52  
0.68  
#N/A  
0.37  
#N/A  
-0.19  
#N/A  
-0.38  
1.02  
1.50

1.58  
0.92  
-2.15  
-0.44  
-0.62  
-0.32  
-1.32  
3.39  
-0.07  
0.09  
#N/A  
-0.32  
0.24  
-1.54  
0.14  
1.01  
0.43  
-0.19  
0.39  
1.01  
2.06  
#N/A  
-2.05  
0.27  
#N/A  
#N/A  
#N/A  
0.14  
-0.59  
-0.08  
-0.48  
-0.16  
#N/A  
0.75  
0.73  
0.32  
1.28  
-0.25  
#N/A  
#N/A  
#N/A  
#N/A  
#N/A  
-0.75  
0.20  
-0.48  
0.31  
0.00  
-0.82  
-1.28  
#N/A

-1.11  
0.13  
0.27  
0.09  
-0.50  
0.29  
0.68  
-0.54  
0.73  
#N/A  
0.35  
#N/A  
7.58  
#N/A  
1.88  
-0.46  
0.60  
-0.64  
#N/A  
-0.16  
-0.17  
-0.94  
-1.51  
-0.18  
0.33  
0.53  
0.37  
0.89  
0.93  
1.66  
0.58  
#N/A  
0.26  
0.06  
0.32  
0.27  
-0.35  
0.59  
-0.45  
0.52  
0.14  
-0.36  
0.01  
1.65  
1.39  
1.25  
-0.88  
0.07  
0.05  
0.75  
0.41

-0.18  
1.88  
#N/A  
2.03  
2.22  
1.02  
-0.08  
0.37  
1.13  
0.30  
0.17  
1.29  
1.12  
#N/A  
0.22  
0.00  
0.05  
-0.15  
0.01  
0.60  
-0.38  
-1.43  
#N/A  
#N/A  
0.83  
-0.65  
0.44  
0.00  
#N/A  
-0.39  
0.86  
#N/A  
#N/A  
-0.45  
1.06  
0.90  
1.14  
1.91  
-1.48  
0.19  
0.54  
0.60  
0.19  
#N/A  
0.86  
0.83  
0.76  
-0.17  
0.07  
-0.74  
0.35



0.48  
-0.17  
-1.75  
#N/A  
0.64  
#N/A  
-1.09  
#N/A  
-0.26  
-1.26  
-0.27  
0.53  
0.67  
1.54  
0.02  
0.44  
1.08  
-0.02  
1.06  
0.19  
1.39  
0.83  
-0.08  
1.02  
3.86  
#N/A  
0.20  
#N/A  
#N/A  
-0.07  
0.36  
0.38  
1.13  
-0.21  
1.12  
#N/A  
-1.39  
-2.40  
2.17  
1.27  
-0.19  
0.30  
-0.49  
#N/A  
-0.88  
0.07  
#N/A  
0.32  
0.26  
-0.25  
-0.41

-0.08  
#N/A  
-0.36  
0.26  
-0.13  
0.21  
#N/A  
-2.22  
-1.50  
#N/A  
#N/A  
#N/A  
0.84  
0.87  
3.32  
0.35  
-0.15  
0.52  
#N/A  
0.45  
-0.33  
0.02  
1.22  
#N/A  
2.04  
0.66  
-0.13  
-0.05  
-0.04  
-0.29  
0.82  
0.19  
-2.58  
0.23  
-0.06  
0.48  
1.54  
-0.61  
-0.74  
-0.89  
2.71  
-0.54  
#N/A  
0.13  
0.26  
-0.05  
0.22  
0.21  
-1.00  
-0.78  
0.68

0.38  
#N/A  
-0.53  
-2.16  
0.15  
-1.98  
-0.09  
#N/A  
#N/A  
0.33  
0.44  
0.48  
0.67  
-0.34  
0.21  
-0.96  
-3.79  
-4.02  
0.97  
0.36  
#N/A  
#N/A  
0.43  
0.73  
-0.84  
0.13  
-1.70  
-0.24  
-0.99  
-1.47  
-1.48  
1.87  
-0.47  
-0.10  
-0.05  
0.57  
0.73  
0.07  
-1.45  
-0.31  
-0.60  
0.59  
0.43  
-0.79  
2.35  
#N/A  
#N/A  
-2.32  
2.93  
-0.44  
-2.33

0.19  
1.14  
0.07  
0.67  
-0.80  
0.27  
0.51  
1.03  
1.25  
1.04  
0.63  
-2.25  
0.50  
-0.15  
#N/A  
-0.76  
0.03  
0.37  
0.31  
0.16  
#N/A  
#N/A  
1.66  
-2.22  
-1.70  
#N/A  
-0.65  
0.25  
0.80  
0.64  
0.51  
-0.13  
3.21  
1.35  
2.38  
-0.07  
0.73  
0.93  
0.75  
1.19  
-0.04  
0.44  
#N/A  
0.05  
0.05  
-1.58  
#N/A  
-2.94  
-0.20  
-0.43  
-0.05

#N/A  
-0.27  
#N/A  
#N/A  
0.58  
1.37  
0.32  
#N/A  
#N/A  
2.09  
0.79  
1.13  
0.33  
#N/A  
-1.64  
0.41  
1.11  
0.13  
-0.01  
#N/A  
-0.77  
0.80  
0.72  
0.71  
0.27  
-0.18  
-0.02  
-0.41  
0.48  
#N/A  
0.69  
0.49  
0.18  
1.16  
-0.56  
-0.10  
-0.32  
#N/A  
-0.27  
-0.20  
-0.01  
-0.54  
#N/A  
#N/A  
0.25  
0.58  
0.68  
#N/A  
-0.27  
-0.14  
-0.81

0.15  
1.31  
0.21  
0.68  
#N/A  
0.11  
-0.10  
0.33  
-2.08  
#N/A  
-0.13  
-0.18  
-0.12  
#N/A  
#N/A  
-0.36  
1.00  
-0.41  
0.03  
-0.68  
-0.29  
0.67  
2.23  
#N/A  
0.71  
0.39  
0.39  
-0.69  
#N/A  
0.04  
-0.45  
-0.67  
2.21  
#N/A  
#N/A  
-0.20  
#N/A  
#N/A  
-0.41  
0.14  
-0.82  
0.17  
0.09  
#N/A  
0.06  
2.72  
0.47  
0.49  
0.41  
0.29  
0.48

-0.11  
0.24  
0.35  
0.29  
0.38  
2.38  
-0.31  
1.54  
#N/A  
1.32  
-0.21  
#N/A  
0.95  
-1.39  
1.08  
#N/A  
-1.56  
0.61  
1.52  
-0.02  
-2.14  
#N/A  
0.55  
0.38  
0.36  
#N/A  
3.44  
-0.43  
-0.24  
5.97  
0.95  
#N/A  
0.17  
-0.26  
1.03  
0.04  
#N/A  
#N/A  
1.62  
#N/A  
#N/A  
0.74  
-0.20  
#N/A  
-0.40  
#N/A  
-0.41  
#N/A  
0.69  
0.33  
0.24

#N/A  
3.01  
#N/A  
-0.32  
#N/A  
#N/A  
#N/A  
-0.03  
0.38  
0.37  
-0.30  
#N/A  
0.50  
-0.04  
-0.56  
0.89  
-0.78  
0.06  
-0.70  
0.19  
#N/A  
1.37  
#N/A  
4.56  
#N/A  
#N/A  
#N/A  
0.54  
#N/A  
#N/A  
#N/A  
#N/A  
#N/A  
#N/A  
#N/A  
#N/A  
0.48  
1.39  
0.89  
-3.92  
-0.15  
-0.55  
-0.27  
#N/A  
-0.99  
#N/A  
1.40  
1.66  
1.01  
-0.50  
#N/A  
#N/A



-0.65  
-0.75  
-1.52  
-0.48  
0.09  
1.14  
-0.70  
-2.77  
-0.74  
0.54  
#N/A  
1.15  
-2.17  
-0.44  
1.07  
1.48  
0.76  
0.07  
-0.39  
0.74  
1.48  
1.54  
-0.13  
#N/A  
#N/A  
0.46  
1.85  
0.76  
#N/A  
-3.79  
1.41  
-0.14  
-1.58  
2.36  
0.39  
-0.94  
-0.83  
0.75  
0.35  
-0.36  
0.18  
-0.13  
-0.90  
-3.10  
-2.87  
1.64  
-1.92  
0.23  
#N/A  
0.60  
0.65

0.92  
0.19  
-0.56  
-0.06  
-0.61  
-0.17  
-1.04  
1.74  
-0.70  
-2.39  
-2.66  
-0.03  
-0.49  
-0.60  
#N/A  
0.64  
0.97  
0.06  
-0.71  
0.44  
-1.19  
-0.75  
1.04  
#N/A  
-0.13  
0.40  
0.41  
1.86  
0.01  
-0.01  
0.82  
0.21  
0.84  
-1.38  
0.06  
0.14  
0.68  
-0.13  
2.01  
#N/A  
1.08  
-0.37  
1.33  
-1.07  
-1.15  
1.65  
0.83  
-2.11  
0.32  
0.08  
#N/A

-0.16  
0.39  
0.43  
-0.28  
0.74  
0.70  
-0.50  
#N/A  
1.48  
0.19  
-0.79  
-0.50  
#N/A  
0.81  
0.81  
-0.02  
-4.25  
0.54  
#N/A  
0.63  
0.19  
1.54  
-0.87  
0.41  
#N/A  
2.10  
1.49  
-3.64  
-0.15  
0.15  
6.02  
#N/A  
1.24  
#N/A  
-0.54  
1.16  
0.07  
1.21  
3.06  
0.01  
0.99  
#N/A  
0.60  
0.06  
-0.16  
-0.02  
-1.50  
#N/A  
0.85  
0.42  
0.45

#N/A  
0.36  
0.10  
#N/A  
#N/A  
-0.14  
-0.74  
-0.48  
0.67  
-0.49  
0.09  
-1.89  
1.13  
0.91  
0.13  
1.62  
-1.30  
0.43  
1.39  
0.41  
1.16  
#N/A  
#N/A  
1.21  
-0.57  
-0.26  
1.20  
-0.01  
-1.57  
0.33  
0.03  
0.22  
#N/A  
#N/A  
0.34  
0.63  
0.44  
0.38  
-0.85  
-2.52  
-1.17  
-0.89  
-1.84  
0.49  
0.19  
#N/A  
0.90  
-0.32  
3.91  
#N/A  
0.03

2.57  
-0.17  
-1.34  
0.54  
-2.01  
0.26  
1.09  
0.64  
0.63  
-2.12  
0.56  
0.94  
0.85  
#N/A  
-0.53  
-1.48  
-0.61  
#N/A  
#N/A  
0.16  
1.49  
#N/A  
0.08  
-0.42  
1.21  
0.24  
-0.16  
0.74  
0.47  
0.48  
-0.73  
0.19  
0.21  
-0.44  
-0.99  
0.30  
0.30  
-1.44  
-0.31  
0.14  
-1.95  
-1.20  
0.06  
1.02  
0.38  
2.17  
-1.33  
-2.20  
-1.71  
1.65  
#N/A

0.35  
-1.11  
-0.50  
0.62  
0.87  
0.74  
1.36  
-0.59  
-0.22  
0.80  
0.97  
#N/A  
-0.47  
1.13  
0.09  
#N/A  
-0.33  
-1.93  
-0.86  
-1.28  
1.86  
1.69  
-0.39  
0.11  
-0.17  
-0.52  
0.88  
0.66  
0.85  
0.99  
-1.91  
0.31  
-0.10  
0.46  
-0.30  
0.93  
-0.24  
#N/A  
#N/A  
0.54  
-1.53  
-0.57  
-1.58  
-0.79  
-2.21  
0.43  
-1.47  
-0.63  
-1.05  
1.96  
-0.78

-0.19  
-0.09  
0.49  
-0.22  
-0.14  
#N/A  
#N/A  
-0.01  
0.84  
-2.41  
0.88  
-0.05  
-0.61  
#N/A  
0.37  
4.50  
-2.75  
-2.38  
0.37  
0.42  
-1.21  
#N/A  
-1.42  
#N/A  
2.70  
1.68  
-0.25  
#N/A  
-0.69  
0.73  
0.48  
-0.13  
3.29  
#N/A  
0.75  
-0.12  
-0.51  
0.78  
0.63  
#N/A  
0.83  
1.15  
0.35  
0.33  
#N/A  
0.03  
-0.19  
-0.39  
-0.77  
0.34  
0.20

0.86  
0.32  
#N/A  
#N/A  
-0.94  
-1.04  
-0.66  
0.42  
0.67  
0.52  
#N/A  
0.22  
-0.75  
#N/A  
3.33  
2.31  
1.39  
#N/A  
3.46  
-1.26  
1.14  
-0.35  
#N/A  
-0.98  
0.09  
-0.01  
0.46  
-1.89  
-1.61  
-0.53  
0.22  
0.04  
#N/A  
-1.05  
0.24  
-0.38  
#N/A  
-0.31  
1.17  
0.13  
0.64  
0.91  
0.19  
0.92  
-0.50  
0.30  
-0.33  
-0.40  
-1.90  
-2.81  
1.29



-0.87  
-1.15  
0.06  
-0.29  
-0.03  
1.14  
-0.32  
-0.42  
#N/A  
0.89  
-0.30  
-0.06  
#N/A  
#N/A  
-0.52  
-0.90  
-0.14  
#N/A  
0.36  
0.03  
-0.25  
-0.79  
0.67  
0.64  
-1.25  
-2.39  
1.24  
0.85  
0.33  
-0.11  
-0.73  
-2.03  
-0.53  
-0.06  
-1.12  
0.06  
-1.71  
2.73  
0.04  
-0.35  
#N/A  
-0.07  
0.04  
0.14  
-0.30  
-0.83  
-1.90  
0.75  
-0.01  
0.06  
0.31

0.45  
-0.77  
-0.36  
-0.11  
#N/A  
1.36  
#N/A  
-0.17  
0.99  
-1.23  
#N/A  
0.71  
0.06  
#N/A  
#N/A  
-0.68  
1.30  
-1.91  
-2.96  
-0.95  
-0.04  
0.00  
1.65  
-0.25  
#N/A  
-0.87  
-0.13  
#N/A  
#N/A  
0.08  
-0.23  
#N/A  
1.33  
0.99  
0.37  
0.59  
-0.36  
-0.29  
-0.44  
0.42  
0.26  
0.14  
-0.87  
-0.45  
-0.10  
-0.24  
-0.90  
0.58  
0.77  
0.40  
1.47

-1.89  
-0.40  
#N/A  
1.67  
0.35  
-0.33  
#N/A  
0.17  
0.14  
#N/A  
1.52  
0.48  
-1.92  
1.54  
-0.21  
0.67  
0.55  
-1.70  
0.77  
0.80  
0.86  
-0.05  
0.19  
0.74  
0.59  
0.16  
-1.82  
-1.42  
#N/A  
0.33  
#N/A  
0.00  
-0.67  
-0.35  
#N/A  
2.30  
0.80  
0.50  
-0.20  
-1.84  
-1.26  
0.29  
-0.35  
0.64  
-2.97  
0.45  
0.56  
#N/A  
#N/A  
2.15  
-0.35

-0.67  
0.60  
0.36  
-0.16  
2.01  
1.20  
0.22  
-1.35  
0.27  
#N/A  
1.81  
-0.30  
-0.84  
0.62  
2.14  
-0.52  
-0.74  
0.25  
-1.29  
#N/A  
-0.20  
1.94  
0.27  
#N/A  
-1.93  
-0.26  
-1.53  
0.23  
-1.42  
#N/A  
-1.72  
0.23  
0.35  
3.57  
0.20  
#N/A  
0.11  
0.34  
#N/A  
-0.26  
0.48  
-0.28  
-0.30  
0.28  
-0.42  
-0.77  
0.07  
-0.20  
-0.29  
-0.87  
0.38

0.21  
2.32  
-0.08  
1.19  
#N/A  
#N/A  
1.66  
0.49  
1.30  
-0.09  
0.36  
0.72  
0.52  
0.20  
#N/A  
0.44  
-0.93  
#N/A  
-0.19  
0.40  
#N/A  
#N/A  
-0.35  
0.24  
-0.04  
0.47  
0.61  
0.18  
#N/A  
-0.14  
0.97  
0.11  
#N/A  
-0.04  
0.58  
-0.86  
#N/A  
#N/A  
#N/A  
0.81  
1.55  
#N/A  
#N/A  
#N/A  
-0.12  
0.30  
-0.15  
0.32  
#N/A  
-2.59  
0.79

2.41  
0.82  
#N/A  
-0.04  
#N/A  
-1.27  
1.83  
-0.82  
1.11  
1.37  
2.50  
3.22  
#N/A  
-0.82  
#N/A  
1.23  
#N/A  
1.45  
-0.37  
0.52  
0.76  
1.00  
-0.69  
#N/A  
-0.51  
-0.59  
-2.12  
#N/A  
0.05  
0.15  
-0.55  
1.71  
1.72  
1.41  
#N/A  
-0.80  
0.97  
1.28  
#N/A  
#N/A  
0.51  
-0.38  
-0.11  
#N/A  
#N/A  
#N/A  
1.00  
0.64  
#N/A  
-3.81  
1.34

-0.36  
0.67  
#N/A  
#N/A  
-0.64  
-0.44  
0.32  
#N/A  
0.09  
2.34  
0.82  
0.36  
1.23  
0.20  
-3.32  
#N/A  
0.52  
1.55  
-0.87  
1.06  
#N/A  
1.99  
0.13  
1.37  
1.11  
0.12  
0.07  
-0.10  
#N/A  
-0.33  
2.16  
2.40  
1.68  
-1.40  
1.71  
0.44  
#N/A  
0.57  
-1.41  
-1.07  
-1.26  
-0.17  
#N/A  
0.02  
-1.29  
-0.32  
1.98  
0.42  
0.02  
0.41  
#N/A

-1.27  
3.08  
1.28  
-0.43  
1.50  
-0.56  
0.38  
0.75  
0.03  
0.78  
0.11  
-1.30  
0.93  
0.06  
-0.92  
0.85  
1.10  
0.27  
0.14  
#N/A  
#N/A  
1.54  
-1.88  
-0.10  
-0.50  
0.15  
#N/A  
#N/A  
-0.13  
0.41  
0.43  
-0.53  
-0.29  
-1.66  
-1.21  
-1.83  
0.54  
-0.17  
-1.31  
0.37  
#N/A  
0.24  
-0.22  
-1.01  
0.70  
1.71  
0.00  
-0.02  
#N/A  
#N/A  
1.21



-1.57  
0.42  
0.32  
0.61  
0.70  
0.02  
1.33  
-0.92  
0.65  
-0.30  
-1.75  
0.60  
#N/A  
1.26  
1.33  
0.18  
0.44  
1.43  
0.45  
-0.69  
0.85  
1.88  
1.04  
2.69  
-0.38  
1.94  
1.68  
0.74  
1.16  
-0.01  
-0.18  
0.09  
-0.20  
1.80  
1.28  
0.02  
1.12  
#N/A  
-0.66  
-1.89  
0.07  
#N/A  
0.37  
-0.10  
#N/A  
-0.55  
0.13  
0.70  
0.34  
-0.28  
#N/A

#N/A  
-2.18  
-1.46  
0.14  
-0.12  
-0.36  
#N/A  
0.87  
-0.10  
-1.05  
1.92  
-0.84  
-0.35  
-0.21  
-0.34  
0.59  
0.92  
-0.50  
#N/A  
-1.12  
-0.25  
0.44  
0.31  
-1.61  
1.65  
-1.48  
#N/A  
-0.83  
2.47  
-0.22  
-0.85  
#N/A  
-0.08  
#N/A  
-0.32  
0.07  
0.16  
-1.86  
-1.21  
-2.27  
0.12  
0.09  
-0.77  
2.41  
0.36  
-0.81  
0.61  
-1.05  
-0.39  
0.51  
0.00

-0.19  
-1.90  
-0.01  
-0.70  
0.66  
1.16  
-0.29  
#N/A  
#N/A  
-0.47  
1.34  
0.56  
-0.08  
0.60  
-0.12  
-0.29  
-1.42  
-0.43  
0.27  
#N/A  
0.58  
1.72  
#N/A  
#N/A  
0.79  
0.57  
-2.07  
#N/A  
-1.56  
1.26  
0.77  
0.09  
-0.16  
0.34  
0.63  
#N/A  
0.39  
1.09  
#N/A  
-0.06  
#N/A  
-0.15  
-0.12  
0.57  
0.78  
-0.08  
1.06  
#N/A  
-1.54  
-0.50  
0.57

0.59  
#N/A  
-0.30  
-0.72  
-2.51  
#N/A  
-1.08  
1.95  
1.13  
-0.26  
-0.04  
0.20  
1.34  
0.75  
0.62  
0.16  
-0.36  
0.31  
1.66  
0.86  
0.52  
0.48  
-0.14  
0.47  
1.06  
-0.76  
-0.20  
#N/A  
0.34  
#N/A  
2.50  
-1.58  
0.10  
#N/A  
0.90  
0.23  
-0.18  
1.10  
0.95  
-0.59  
1.01  
1.27  
#N/A  
1.15  
-0.06  
0.30  
-1.15  
-0.02  
#N/A  
0.86  
0.29

1.34  
-0.27  
0.58  
#N/A  
0.36  
0.65  
-1.91  
-0.78  
1.04  
0.23  
0.69  
#N/A  
-1.30  
1.14  
0.95  
-0.90  
0.43  
-0.17  
#N/A  
-0.22  
0.25  
0.35  
0.23  
-0.65  
#N/A  
0.92  
-1.04  
-0.23  
-2.00  
1.52  
0.17  
1.26  
1.40  
#N/A  
0.40  
0.32  
0.77  
#N/A  
0.74  
1.05  
#N/A  
0.06  
1.18  
0.93  
0.98  
-0.61  
#N/A  
0.21  
0.43  
-1.32  
0.02

-1.68  
-1.74  
0.88  
0.35  
-1.94  
0.97  
0.12  
0.01  
1.06  
#N/A  
0.38  
0.39  
-0.40  
0.15  
-0.37  
0.36  
-1.33  
0.23  
0.17  
-0.88  
0.17  
2.83  
0.29  
-0.07  
-2.57  
-2.37  
0.30  
-0.21  
-0.15  
1.42  
2.69  
#N/A  
0.46  
0.13  
0.83  
-0.16  
0.14  
#N/A  
-1.07  
#N/A  
-0.63  
-0.27  
-0.48  
-0.23  
-0.48  
#N/A  
1.32  
-0.05  
-0.15  
-0.21  
#N/A

-1.30  
0.01  
0.18  
-0.06  
-0.23  
#N/A  
0.12  
-0.41  
0.62  
1.66  
1.23  
1.72  
-0.43  
0.45  
0.53  
-0.57  
-1.28  
-0.18  
-0.17  
0.20  
0.14  
0.18  
-4.14  
#N/A  
-0.48  
-1.70  
-1.40  
#N/A  
#N/A  
1.29  
#N/A  
1.04  
0.43  
-0.20  
-0.79  
2.98  
-0.79  
#N/A  
1.05  
#N/A  
2.58  
#N/A  
#N/A  
0.23  
#N/A  
1.65  
-0.24  
#N/A  
3.25  
1.03  
0.16

0.07  
0.27  
-0.57  
0.83  
-0.76  
0.24  
-0.06  
-1.59  
0.04  
#N/A  
-0.27  
1.07  
#N/A  
0.33  
-1.01  
0.79  
-0.64  
#N/A  
1.03  
#N/A  
0.61  
-0.19  
0.11  
1.33  
-0.11  
#N/A  
-1.97  
1.01  
-0.02  
0.14  
0.21  
#N/A  
0.52  
0.20  
0.58  
1.49  
1.59  
-4.00  
-1.41  
0.87  
0.39  
#N/A  
1.16  
-0.53  
1.78  
3.36  
0.17  
-0.05  
-0.20  
0.40  
-1.04



0.59  
#N/A  
0.19  
0.23  
1.05  
0.05  
2.19  
1.29  
0.12  
-0.55  
0.57  
1.00  
0.22  
0.39  
0.10  
-2.05  
-0.02  
0.39  
0.11  
-0.93  
#N/A  
-1.87  
0.20  
-1.78  
-1.27  
#N/A  
-0.95  
-0.14  
-0.42  
1.67  
3.38  
0.75  
0.84  
0.61  
-2.77  
0.91  
0.57  
0.60  
1.11  
0.31  
0.60  
0.78  
-0.64  
-1.10  
0.27  
0.32  
0.21  
0.16  
-0.34  
0.78  
-0.02

0.47  
0.52  
0.67  
0.00  
-0.51  
0.78  
-0.68  
0.86  
-2.82  
3.28  
1.49  
1.11  
0.00  
1.00  
-0.20  
#N/A  
-0.29  
#N/A  
0.02  
0.09  
0.86  
-0.49  
-0.13  
0.42  
-0.30  
-0.04  
1.09  
-0.87  
2.00  
1.31  
-0.24  
0.93  
0.62  
0.68  
0.39  
0.99  
-0.90  
0.15  
-0.24  
-0.48  
#N/A  
-1.90  
-0.90  
-0.57  
-0.12  
-0.30  
-0.26  
0.51  
#N/A  
#N/A  
#N/A

#N/A  
0.62  
-0.28  
-0.32  
-0.44  
1.48  
#N/A  
#N/A  
0.40  
-1.36  
-0.37  
-0.83  
1.65  
0.17  
0.16  
2.05  
-0.21  
0.66  
-0.50  
-0.52  
-0.32  
-0.01  
-1.90  
-1.74  
0.81  
-1.55  
-1.09  
0.85  
0.35  
-0.09  
0.45  
0.37  
1.05  
2.56  
0.31  
0.20  
0.12  
-0.16  
0.56  
#N/A  
#N/A  
-1.28  
2.55  
-0.23  
-0.45  
-0.94  
0.73  
-2.62  
-0.47  
-0.10  
-0.03

-0.13  
#N/A  
0.26  
0.48  
0.60  
0.55  
2.97  
-1.69  
0.16  
-0.91  
#N/A  
0.73  
#N/A  
0.80  
-0.73  
0.41  
#N/A  
#N/A  
0.14  
-0.38  
-0.07  
0.77  
0.55  
-0.67  
#N/A  
-0.54  
0.67  
0.85  
-1.07  
-2.82  
#N/A  
-0.11  
-1.35  
0.22  
#N/A  
0.19  
0.62  
-0.13  
0.06  
-0.70  
1.32  
1.74  
-0.84  
-1.85  
2.38  
0.92  
0.21  
4.04  
0.80  
1.14  
1.02

#N/A  
-0.19  
-0.56  
#N/A  
-2.72  
-1.45  
-0.25  
-0.17  
0.86  
4.03  
0.80  
1.78  
#N/A  
0.51  
-2.24  
-2.17  
-2.28  
#N/A  
-0.36  
-0.96  
0.24  
-0.56  
-0.61  
-0.05  
#N/A  
0.43  
-0.03  
-0.13  
0.81  
#N/A  
0.09  
-0.06  
0.47  
0.05  
-0.33  
#N/A  
0.07  
-0.04  
1.05  
-2.30  
-1.69  
0.28  
0.40  
0.30  
-0.27  
-0.16  
-2.01  
#N/A  
-0.02  
#N/A  
#N/A

-1.21  
-0.75  
0.03  
-1.38  
0.04  
0.09  
-0.55  
0.04  
-0.26  
0.66  
0.71  
1.32  
-0.07  
0.16  
0.70  
-1.90  
-1.07  
#N/A  
-0.31  
0.12  
0.65  
-0.18  
0.29  
-0.20  
#N/A  
0.02  
-0.61  
#N/A  
-0.37  
-0.34  
-0.51  
-0.33  
0.81  
#N/A  
-1.95  
-0.13  
0.61  
-0.98  
-0.12  
-0.04  
#N/A  
-0.16  
-1.63  
-0.17  
0.80  
0.06  
-0.69  
-2.05  
-1.90  
#N/A  
1.65

-0.29  
0.25  
-0.52  
#N/A  
1.34  
2.20  
-0.21  
-0.23  
-0.81  
-1.51  
-1.73  
-1.71  
0.22  
0.28  
#N/A  
2.20  
-0.27  
0.04  
-1.54  
-0.19  
-0.30  
-0.26  
#N/A  
0.12  
1.30  
0.75  
0.41  
1.05  
0.99  
0.15  
-0.18  
-0.18  
0.38  
0.15  
-0.52  
-0.38  
-0.50  
0.97  
-1.31  
0.68  
-0.44  
-3.40  
0.14  
-0.36  
1.70  
-0.62  
#N/A  
0.83  
-0.18  
-0.37  
#N/A





-1.70  
0.97  
#N/A  
0.70  
0.46  
-1.16  
0.47  
1.81  
-2.01  
0.39  
1.07  
4.15  
-0.26  
-1.48  
-0.20  
0.18  
-2.05  
#N/A  
-1.52  
-0.97  
-0.18  
-0.52  
0.46  
-1.00  
0.75  
0.01  
1.00  
1.29  
-0.21  
-2.66  
-2.65  
#N/A  
1.25  
#N/A  
1.07  
0.78  
0.80  
0.42  
1.61  
0.49  
0.73  
-0.10  
0.14  
-0.68  
#N/A  
-0.72  
-0.27  
-1.24  
-0.33  
2.77  
2.61

1.04  
0.12  
1.49  
-2.37  
-1.80  
-0.10  
0.33  
1.20  
-0.20  
-0.14  
-0.51  
-0.69  
-1.07  
0.40  
#N/A  
-0.82  
#N/A  
#N/A  
-0.91  
-0.74  
-0.77  
0.45  
0.69  
1.66  
-0.48  
-0.55  
-0.50  
#N/A  
-0.15  
0.97  
1.00  
-2.96  
1.46  
3.22  
3.61  
0.00  
0.52  
#N/A  
0.06  
0.48  
3.01  
1.80  
0.70  
0.08  
0.04  
-0.43  
-1.29  
-0.18  
1.04  
1.30  
0.00

-0.57  
2.64  
0.08  
-0.47  
0.61  
0.29  
-0.36  
-2.37  
-0.16  
#N/A  
#N/A  
#N/A  
#N/A  
#N/A  
0.09  
1.39  
-0.30  
-0.05  
-0.62  
-0.74  
-0.24  
0.41  
0.94  
-0.29  
0.03  
-0.68  
0.42  
0.19  
#N/A  
0.57  
#N/A  
0.60  
0.17  
0.47  
#N/A  
0.68  
1.71  
-0.20  
-0.06  
0.52  
#N/A  
0.54  
-0.59  
#N/A  
1.09  
-0.74  
0.45  
#N/A  
-0.07  
0.26  
-0.05

-0.35  
0.05  
-0.48  
#N/A  
0.60  
1.43  
-1.54  
0.50  
4.40  
-0.04  
#N/A  
0.01  
#N/A  
0.92  
-1.29  
#N/A  
-0.55  
-1.00  
0.87  
#N/A  
-1.97  
-1.95  
-0.74  
-0.30  
-0.06  
-1.96  
1.62  
#N/A  
0.67  
0.61  
0.51  
1.03  
-0.42  
0.60  
-0.36  
0.52  
-0.97  
2.19  
-0.59  
-0.43  
-1.73  
0.87  
0.81  
0.42  
0.04  
#N/A  
#N/A  
#N/A  
-1.49  
0.44  
0.58

1.10  
0.61  
-0.68  
-0.42  
#N/A  
-0.10  
0.33  
#N/A  
-0.31  
-0.17  
-0.57  
-0.07  
0.06  
-0.59  
-1.66  
#N/A  
-0.61  
0.72  
-1.66  
-0.72  
#N/A  
0.40  
1.03  
#N/A  
0.34  
0.64  
0.29  
-1.27  
0.19  
0.20  
-1.83  
-1.74  
#N/A  
-0.11  
0.32  
-0.68  
-1.51  
0.27  
#N/A  
-2.08  
0.19  
0.56  
-0.28  
-3.70  
1.43  
#N/A  
#N/A  
0.20  
0.03  
-1.05  
-1.19

0.73  
#N/A  
0.32  
-0.41  
0.57  
0.36  
-0.29  
#N/A  
-0.19  
0.47  
#N/A  
-1.90  
-0.54  
#N/A  
-1.57  
0.53  
-0.48  
1.05  
0.07  
0.03  
-2.11  
0.22  
0.45  
0.45  
#N/A  
0.59  
-0.65  
-1.82  
-1.92  
-0.05  
-0.38  
-0.36  
#N/A  
0.81  
0.06  
#N/A  
-0.52  
#N/A  
0.10  
-1.46  
-0.22  
0.25  
-0.06  
-0.19  
#N/A  
0.04  
#N/A  
0.17  
0.73  
#N/A  
2.58

0.74  
-0.46  
0.49  
-0.10  
#N/A  
-0.35  
-0.45  
-0.25  
-0.07  
0.65  
0.14  
0.18  
-1.38  
0.86  
0.70  
#N/A  
-0.59  
-0.43  
0.14  
-0.56  
-1.33  
-0.17  
-2.02  
0.68  
-1.87  
-0.10  
0.87  
0.64  
0.23  
-0.60  
0.63  
#N/A  
#N/A  
-0.28  
0.14  
#N/A  
-0.39  
#N/A  
-0.50  
-0.07  
0.58  
0.35  
2.80  
-0.57  
0.74  
-0.60  
#N/A  
0.49  
0.45  
0.11  
0.27

-0.32  
-0.65  
0.25  
4.44  
0.34  
-2.59  
1.11  
#N/A  
0.47  
0.88  
-1.75  
-0.34  
0.28  
-2.11  
0.08  
#N/A  
0.15  
0.65  
#N/A  
0.18  
2.25  
0.37  
-0.27  
-2.05  
-0.23  
-0.05  
0.49  
-0.03  
0.55  
0.84  
-1.65  
-0.66  
-1.17  
0.06  
#N/A  
-0.06  
-0.12  
0.48  
0.70  
#N/A  
#N/A  
#N/A  
1.15  
#N/A  
-1.07  
-1.41  
#N/A  
-0.39  
-0.43  
0.04  
-0.08



3.55  
0.10  
-0.23  
-0.41  
-0.56  
-0.54  
-0.27  
-0.34  
-1.74  
0.16  
#N/A  
-0.75  
1.17  
0.47  
-0.21  
-0.87  
-0.15  
0.02  
-0.06  
1.01  
0.86  
1.99  
-0.54  
1.01  
0.74  
#N/A  
0.52  
-0.50  
-0.53  
-0.42  
0.44  
4.92  
#N/A  
1.52  
0.90  
1.20  
-0.02  
-0.94  
0.87  
-0.83  
0.30  
#N/A  
-1.38  
1.76  
1.58  
0.88  
0.40  
0.36  
-0.78  
0.11  
-1.27

0.48  
-0.23  
#N/A  
#N/A  
#N/A  
1.40  
1.10  
0.76  
0.40  
0.61  
#N/A  
-0.32  
0.72  
0.31  
#N/A  
0.64  
1.22  
#N/A  
-1.37  
-0.47  
0.79  
#N/A  
0.14  
0.42  
-0.23  
0.32  
1.68  
1.48  
0.79  
-0.39  
-0.04  
-0.18  
0.51  
0.16  
-0.04  
-2.59  
-0.01  
0.52  
2.19  
1.14  
1.35  
0.30  
0.18  
1.75  
#N/A  
-2.95  
#N/A  
0.46  
-0.39  
0.88  
#N/A

0.07  
-0.48  
-0.04  
0.91  
0.97  
#N/A  
0.20  
0.74  
0.29  
0.22  
0.43  
-1.20  
-0.29  
-1.25  
#N/A  
-0.18  
-0.57  
-0.74  
1.40  
#N/A  
0.20  
#N/A  
1.00  
0.53  
0.71  
0.61  
0.22  
0.33  
2.94  
-0.09  
1.02  
-1.18  
1.15  
#N/A  
1.37  
0.55  
1.82  
0.67  
0.45  
-0.84  
0.29  
3.01  
2.38  
4.52  
0.28  
3.02  
-0.96  
-0.55  
2.05  
0.63  
#N/A

0.14  
1.16  
0.60  
-1.95  
#N/A  
1.55  
1.16  
0.91  
0.09  
-1.68  
#N/A  
-0.51  
0.72  
-0.54  
-0.47  
-1.37  
-2.46  
-0.89  
-0.29  
-2.62  
#N/A  
1.91  
0.39  
0.62  
#N/A  
0.76  
0.26  
-0.23  
1.55  
#N/A  
1.06  
-2.16  
-1.57  
-1.29  
0.45  
-1.29  
#N/A  
1.28  
-0.02  
0.32  
#N/A  
1.80  
0.17  
0.66  
-0.45  
0.68  
0.49  
0.49  
#N/A  
#N/A  
#N/A

0.92  
0.21  
0.52  
-0.16  
#N/A  
#N/A  
0.37  
0.31  
#N/A  
5.83  
4.44  
#N/A  
-0.43  
-0.60  
3.21  
3.30  
2.66  
#N/A  
#N/A  
-1.44  
0.11  
-1.19  
0.92  
1.79  
0.65  
-0.43  
1.34  
-2.33  
1.26  
-0.21  
0.45  
2.37  
0.09  
1.51  
0.53  
#N/A  
0.98  
-1.23  
1.69  
#N/A  
1.19  
-0.67  
-1.30  
0.94  
0.82  
-0.81  
0.15  
#N/A  
-0.12  
1.69  
#N/A

0.02  
#N/A  
0.76  
-0.37  
-0.28  
0.20  
0.91  
-1.11  
-0.07  
-3.43  
0.24  
-2.01  
0.24  
-0.30  
0.53  
-0.47  
-0.53  
#N/A  
0.85  
-0.21  
#N/A  
-3.28  
#N/A  
0.18  
#N/A  
#N/A  
-0.32  
-0.48  
0.40  
0.52  
0.63  
-1.73  
0.07  
-0.58  
-1.77  
-1.02  
#N/A  
#N/A  
-0.10  
-2.67  
-0.25  
3.92  
#N/A  
2.82  
1.05  
1.37  
#N/A  
0.60  
#N/A  
0.28  
1.48

-1.89  
-0.96  
1.16  
0.66  
-0.21  
0.38  
-0.18  
-1.03  
0.40  
#N/A  
#N/A  
-0.29  
1.02  
0.36  
0.22  
-0.02  
0.29  
0.50  
-0.13  
0.96  
1.42  
#N/A  
0.70  
-0.14  
#N/A  
0.79  
-0.32  
#N/A  
0.08  
-0.38  
0.35  
-1.84  
#N/A  
1.57  
-0.52  
0.06  
#N/A  
0.43  
0.32  
-0.57  
1.40  
-0.29  
-0.11  
-0.15  
-1.73  
0.33  
-0.22  
-1.22  
-0.71  
-1.44  
#N/A

#N/A  
-0.88  
#N/A  
-0.26  
#N/A  
-1.22  
0.14  
0.78  
2.69  
1.10  
0.50  
1.22  
#N/A  
-0.05  
#N/A  
#N/A  
-1.39  
#N/A  
#N/A  
#N/A  
-0.22  
#N/A  
-0.81  
-2.37  
0.56  
0.28  
0.45  
0.89  
1.57  
0.64  
1.84  
-1.00  
1.17  
1.16  
#N/A  
-1.55  
2.61  
-0.53  
#N/A  
#N/A  
0.57  
0.32  
0.48  
-1.52  
-1.23  
-1.34  
#N/A  
0.93  
0.00  
#N/A  
-0.58



-0.73  
-0.32  
0.04  
0.82  
#N/A  
#N/A  
4.46  
2.07  
-0.44  
0.52  
0.45  
-0.15  
0.06  
0.39  
0.33  
1.78  
-0.05  
-0.79  
-0.01  
-0.55  
-0.48  
-0.24  
0.50  
0.06  
0.35  
1.80  
0.34  
0.84  
1.25  
-0.27  
-2.78  
-1.41  
0.22  
0.93  
-0.40  
-0.81  
-1.57  
-0.87  
-2.02  
#N/A  
0.28  
1.15  
0.30  
1.06  
-2.02  
0.31  
1.19  
0.09  
0.44  
-0.07  
0.66

-0.47  
0.23  
0.64  
-0.46  
#N/A  
-2.39  
-1.18  
-0.16  
-0.29  
0.15  
3.89  
#N/A  
0.36  
-0.46  
-1.33  
0.62  
0.76  
-0.05  
1.40  
0.38  
-0.40  
0.53  
0.56  
#N/A  
0.43  
-0.18  
-0.37  
-0.39  
-2.37  
-0.09  
-5.07  
-0.77  
-1.10  
2.17  
-0.04  
0.61  
0.17  
-1.06  
#N/A  
-0.31  
1.17  
-0.20  
-1.78  
1.92  
-1.19  
0.62  
#N/A  
0.09  
1.09  
0.16  
-2.75

#N/A  
1.69  
0.16  
-1.05  
0.07  
0.40  
-0.26  
-0.30  
-1.95  
0.66  
#N/A  
#N/A  
#N/A  
#N/A  
#N/A  
-1.72  
-0.19  
0.12  
-1.96  
-0.46  
0.04  
-0.15  
1.51  
1.44  
0.41  
0.15  
1.34  
4.10  
0.43  
-1.22  
-0.90  
-0.37  
0.12  
-0.52  
0.23  
0.56  
0.03  
-0.17  
0.32  
0.17  
0.91  
#N/A  
-2.77  
0.45  
0.39  
-2.34  
#N/A  
#N/A  
-0.13  
-2.41  
-0.41

#N/A  
0.63  
-0.70  
0.66  
-0.76  
-0.10  
-0.68  
0.01  
0.77  
0.89  
5.18  
3.52  
#N/A  
-0.19  
#N/A  
#N/A  
2.99  
-0.43  
2.86  
1.53  
#N/A  
#N/A  
-0.40  
-1.12  
2.13  
-2.77  
#N/A  
#N/A  
0.09  
0.23  
0.25  
0.81  
#N/A  
-1.42  
-0.76  
-0.44  
-1.01  
-0.70  
0.15  
0.99  
0.34  
0.01  
#N/A  
-1.07  
#N/A  
0.36  
-0.28  
0.05  
-0.28  
-0.57  
0.05

0.11  
0.12  
2.54  
-0.04  
0.91  
-1.09  
1.06  
1.24  
0.18  
-0.34  
0.11  
0.07  
-1.75  
-2.37  
0.11  
-0.01  
-0.81  
0.60  
-0.63  
-0.78  
-1.11  
-0.55  
-0.47  
-0.22  
#N/A  
-0.29  
0.33  
-0.91  
0.39  
0.08  
0.46  
0.02  
0.22  
0.26  
#N/A  
0.42  
#N/A  
-0.48  
-0.42  
4.47  
0.19  
1.88  
1.19  
-0.52  
0.28  
0.01  
1.34  
#N/A  
-0.07  
0.34  
#N/A

0.30  
-0.45  
0.38  
0.31  
0.11  
-0.31  
-1.70  
-0.27  
1.28  
0.26  
#N/A  
0.10  
#N/A  
-1.82  
-1.51  
-1.85  
-1.56  
#N/A  
-0.03  
2.60  
0.92  
-0.42  
-1.56  
-1.09  
0.51  
-0.17  
0.49  
-1.53  
0.16  
0.01  
0.16  
-0.11  
#N/A  
#N/A  
#N/A  
1.03  
0.63  
1.05  
0.14  
#N/A  
0.24  
0.66  
0.12  
#N/A  
0.01  
0.41  
0.53  
1.23  
0.35  
0.30  
1.73

1.22  
#N/A  
#N/A  
-0.06  
2.71  
4.61  
-2.03  
0.35  
#N/A  
0.49  
0.96  
0.52  
-1.38  
-0.35  
0.37  
-1.72  
0.49  
-0.18  
-1.29  
-0.90  
-0.19  
-0.72  
1.55  
0.22  
-0.33  
-0.62  
0.17  
-1.03  
-0.09  
0.02  
-0.21  
0.27  
-0.11  
0.81  
0.05  
0.67  
0.64  
1.38  
1.27  
0.84  
-0.18  
-1.70  
0.44  
0.58  
1.03  
0.76  
-0.36  
-1.75  
-0.13  
-0.55  
#N/A

-0.21  
0.07  
-0.72  
-0.03  
-0.36  
-1.32  
-1.65  
0.77  
0.54  
0.95  
0.58  
0.03  
-1.37  
0.09  
#N/A  
#N/A  
0.32  
0.84  
#N/A  
0.75  
1.45  
#N/A  
#N/A  
#N/A  
#N/A  
3.44  
-0.18  
#N/A  
-0.37  
#N/A  
-0.21  
0.15  
0.34  
#N/A  
-0.40  
0.15  
-0.22  
0.59  
0.79  
-1.14  
-0.26  
-0.75  
0.81  
-0.96  
#N/A  
1.55  
-0.38  
0.01  
-0.34  
0.18  
-0.85



-1.90  
0.41  
#N/A  
0.73  
0.25  
-0.05  
#N/A  
0.08  
0.62  
0.77  
1.87  
0.14  
-0.41  
0.89  
0.86  
#N/A  
1.08  
-1.78  
-1.86  
-1.30  
0.05  
0.49  
0.06  
-0.05  
#N/A  
#N/A  
0.70  
0.02  
#N/A  
-0.01  
0.01  
5.23  
1.29  
-0.30  
1.46  
-0.40  
0.13  
1.45  
1.27  
0.74  
-1.26  
-0.01  
0.42  
0.38  
-0.06  
0.28  
#N/A  
0.20  
-0.35  
-0.18  
1.96

#N/A  
1.04  
0.41  
-1.01  
-2.92  
#N/A  
#N/A  
#N/A  
#N/A  
1.70  
2.27  
5.29  
#N/A  
-0.05  
0.94  
1.27  
-0.03  
0.78  
#N/A  
-1.29  
-0.58  
0.07  
0.03  
1.23  
-0.93  
-0.02  
0.20  
0.17  
#N/A  
-0.75  
-0.56  
#N/A  
0.99  
-0.14  
1.41  
-0.14  
-1.00  
0.44  
0.21  
0.06  
0.55  
#N/A  
-0.65  
0.10  
1.33  
#N/A  
2.00  
-1.79  
-1.43  
1.53  
-1.04

-2.87  
-1.40  
0.75  
-1.86  
#N/A  
1.56  
-1.01  
#N/A  
#N/A  
1.38  
#N/A  
0.34  
0.76  
0.38  
0.07  
-0.96  
-0.64  
#N/A  
-0.69  
0.37  
-1.14  
-0.26  
-0.32  
0.36  
0.09  
-0.92  
0.76  
0.74  
#N/A  
2.70  
0.39  
0.97  
-0.82  
-0.25  
-0.58  
1.07  
#N/A  
-0.37  
#N/A  
#N/A  
-0.35  
-0.11  
#N/A  
-1.37  
0.37  
1.81  
-3.04  
0.77  
-0.03  
1.20  
0.42

-0.73  
0.67  
-0.85  
0.23  
#N/A  
0.29  
0.29  
-0.14  
-0.10  
0.83  
0.79  
2.24  
-1.63  
0.45  
0.71  
#N/A  
-0.71  
-1.20  
2.15  
0.17  
#N/A  
0.84  
0.14  
1.17  
-0.05  
0.01  
0.72  
0.90  
#N/A  
-0.19  
-0.18  
1.76  
#N/A  
0.84  
-0.17  
0.42  
-0.80  
-0.37  
-0.68  
-1.49  
-0.90  
-0.67  
-1.37  
2.79  
1.18  
1.22  
#N/A  
-1.55  
0.16  
-0.54  
0.66

#N/A  
-0.37  
1.29  
-1.44  
-0.10  
0.82  
-0.57  
0.02  
#N/A  
0.69  
-0.07  
-0.27  
#N/A  
-1.33  
-0.44  
-0.08  
0.01  
#N/A  
-0.44  
0.45  
-1.04  
0.44  
#N/A  
#N/A  
-0.02  
-0.09  
0.58  
-0.77  
0.38  
0.88  
0.78  
-1.21  
0.97  
-0.16  
-0.19  
-2.94  
-1.84  
1.27  
-0.56  
-0.35  
4.84  
-1.16  
0.33  
0.26  
0.35  
#N/A  
-0.47  
-1.23  
-1.19  
0.33  
0.43

0.41  
0.04  
0.24  
#N/A  
-0.06  
-1.11  
0.62  
-0.42  
-0.78  
3.39  
3.31  
0.58  
-0.09  
#N/A  
0.62  
0.32  
-0.10  
0.41  
-0.54  
0.71  
0.61  
0.45  
-2.28  
1.67  
1.95  
2.25  
1.26  
0.20  
#N/A  
0.20  
-0.12  
1.12  
-0.50  
-0.92  
-1.84  
#N/A  
-0.01  
0.10  
-0.67  
0.73  
-0.05  
0.78  
0.18  
-0.81  
1.26  
0.49  
0.82  
0.46  
#N/A  
0.55  
2.98

0.49  
0.42  
0.02  
-0.69  
0.05  
-1.40  
-1.35  
-1.34  
-0.05  
-0.15  
0.15  
4.32  
-0.56  
-0.39  
0.62  
#N/A  
0.22  
#N/A  
#N/A  
0.52  
-1.00  
#N/A  
-0.25  
2.61  
#N/A  
0.57  
-1.45  
#N/A  
-0.35  
0.09  
-0.60  
0.53  
0.23  
#N/A  
-0.27  
-0.16  
-0.17  
-0.14  
0.48  
0.35  
0.22  
-0.22  
-0.45  
0.03  
-3.15  
-1.12  
1.48  
-0.36  
#N/A  
-0.26  
-0.49

-0.67  
#N/A  
1.18  
-0.03  
-0.37  
-0.42  
0.20  
1.80  
1.39  
-0.97  
1.12  
-1.14  
-1.24  
-1.25  
1.12  
1.41  
-0.19  
1.00  
-0.07  
-0.57  
-0.71  
-1.47  
#N/A  
-1.80  
#N/A  
#N/A  
0.13  
-0.35  
-0.01  
-1.15  
-2.08  
0.17  
1.19  
-1.25  
-0.72  
-0.60  
0.00  
0.50  
-0.80  
-2.20  
-0.33  
-0.45  
#N/A  
0.70  
0.69  
-0.05  
1.12  
-0.58  
0.69  
-0.69  
#N/A



0.21  
0.11  
-0.74  
1.30  
#N/A  
-0.32  
0.12  
-1.90  
-3.18  
1.71  
-0.26  
0.02  
-1.16  
-1.19  
0.19  
0.28  
0.18  
-0.23  
#N/A  
0.01  
#N/A  
2.47  
0.45  
#N/A  
1.72  
2.67  
-0.22  
0.69  
1.65  
-1.26  
-2.63  
#N/A  
0.16  
0.10  
-0.41  
0.08  
0.17  
0.59  
#N/A  
0.78  
#N/A  
0.07  
-0.08  
0.68  
0.57  
#N/A  
-1.76  
-2.04  
0.43  
-1.81  
#N/A

#N/A  
-2.28  
0.38  
2.17  
#N/A  
-0.62  
-0.34  
0.39  
0.14  
-0.14  
-0.33  
#N/A  
#N/A  
0.79  
0.85  
0.68  
-0.41  
0.28  
0.23  
#N/A  
0.02  
-1.75  
0.15  
0.41  
0.73  
#N/A  
-2.28  
-2.52  
-0.54  
#N/A  
-0.07  
#N/A  
2.13  
3.15  
2.48  
0.39  
-0.28  
#N/A  
1.03  
0.31  
0.08  
-0.26  
0.98  
0.72  
0.97  
-0.48  
0.46  
-1.25  
0.91  
0.41  
#N/A

0.07  
#N/A  
#N/A  
-0.75  
-1.92  
0.35  
0.32  
-0.23  
1.31  
4.50  
-1.73  
#N/A  
-0.09  
-0.01  
#N/A  
-0.02  
0.40  
1.85  
0.82  
#N/A  
0.11  
1.54  
2.19  
0.04  
0.30  
-0.41  
2.72  
#N/A  
#N/A  
-0.43  
0.19  
0.68  
1.44  
1.76  
0.49  
1.29  
#N/A  
-0.35  
0.60  
0.02  
-0.26  
-3.27  
0.62  
0.35  
0.39  
#N/A  
0.85  
3.93  
0.10  
0.14  
#N/A

-0.01  
0.01  
0.79  
#N/A  
0.61  
#N/A  
0.53  
-0.14  
-1.29  
0.24  
-0.28  
#N/A  
0.70  
#N/A  
-1.36  
-0.83  
-0.11  
-0.73  
-0.66  
0.31  
0.32  
-2.53  
#N/A  
#N/A  
1.28  
-0.88  
-0.16  
0.06  
-0.38  
#N/A  
0.65  
0.47  
2.09  
-0.12  
#N/A  
0.85  
-0.10  
0.79  
0.43  
0.83  
#N/A  
-0.66  
#N/A  
#N/A  
-0.28  
1.13  
-1.46  
0.06  
0.56  
-0.19  
-0.15

#N/A  
0.15  
-0.07  
0.93  
#N/A  
0.59  
-2.06  
#N/A  
-1.27  
-0.48  
-0.34  
0.31  
-0.13  
-1.76  
2.43  
2.14  
0.83  
-2.22  
0.78  
2.09  
-2.49  
-0.34  
0.53  
0.67  
1.07  
0.77  
0.42  
0.94  
-1.46  
#N/A  
0.45  
0.78  
-0.44  
1.11  
#N/A  
0.76  
-1.15  
1.38  
1.52  
1.06  
-0.18  
1.56  
2.02  
0.00  
#N/A  
#N/A  
0.42  
0.24  
0.33  
#N/A  
-0.66

3.14  
-0.14  
-0.14  
-3.30  
-0.03  
-0.64  
0.02  
#N/A  
-1.90  
0.10  
0.09  
1.33  
2.06  
#N/A  
0.22  
0.12  
0.31  
-0.05  
-0.60  
-1.67  
-1.78  
0.99  
-0.34  
#N/A  
2.17  
#N/A  
-0.21  
0.87  
0.10  
1.14  
#N/A  
1.94  
-0.23  
#N/A  
-0.66  
-0.21  
#N/A  
-1.84  
#N/A  
0.54  
-1.04  
0.12  
2.01  
#N/A  
#N/A  
#N/A  
-0.20  
1.41  
0.26  
0.11  
0.71

#N/A  
-0.15  
1.05  
-0.17  
0.20  
0.16  
-0.31  
0.08  
#N/A  
-1.92  
0.14  
#N/A  
2.88  
-1.35  
0.27  
#N/A  
0.16  
#N/A  
-0.16  
-0.54  
-0.36  
0.14  
1.51  
-2.06  
-2.04  
-0.68  
#N/A  
#N/A  
0.76  
1.11  
-0.03  
#N/A  
1.16  
-1.07  
-0.46  
-0.12  
-0.31  
-2.36  
-1.30  
-0.11  
0.51  
0.36  
-0.02  
-2.28  
0.30  
-1.47  
-2.20  
0.57  
#N/A  
#N/A  
0.90

0.74  
-1.50  
-0.52  
-0.02  
0.04  
2.83  
#N/A  
0.62  
#N/A  
-0.21  
-0.12  
0.16  
-1.12  
-1.19  
#N/A  
2.40  
0.70  
-0.31  
-0.22  
-0.03  
-1.00  
0.15  
1.08  
0.28  
1.06  
1.88  
0.62  
-0.25  
0.55  
-0.78  
-1.29  
-0.99  
#N/A  
-0.53  
-0.13  
0.91  
#N/A  
0.88  
-1.05  
2.61  
2.55  
-2.38  
#N/A  
0.10  
-0.51  
0.26  
0.92  
-1.08  
-1.20  
0.15  
#N/A



-0.12  
0.45  
0.07  
-0.43  
2.09  
0.77  
-0.54  
0.07  
1.75  
3.36  
1.44  
0.41  
0.49  
1.67  
#N/A  
0.59  
-0.31  
-2.86  
0.40  
#N/A  
0.28  
#N/A  
#N/A  
-1.09  
-1.26  
-0.08  
-0.19  
0.41  
0.03  
-0.27  
-0.16  
0.77  
0.05  
#N/A  
0.24  
1.43  
0.08  
1.36  
-1.08  
-0.14  
-1.00  
-0.22  
0.34  
-0.29  
-0.90  
-1.00  
#N/A  
0.02  
-0.54  
#N/A  
-1.84

-1.76  
1.05  
#N/A  
1.41  
-0.79  
0.46  
-0.78  
-0.43  
-0.15  
0.27  
0.11  
#N/A  
-0.66  
-0.08  
-1.19  
-1.11  
-0.06  
0.35  
-0.64  
0.21  
#N/A  
-0.43  
0.00  
0.59  
0.24  
-0.19  
-0.41  
0.45  
0.28  
0.32  
-0.67  
0.92  
#N/A  
#N/A  
2.93  
1.46  
-0.69  
1.24  
0.31  
-0.53  
-0.21  
-0.36  
-0.16  
-0.46  
-0.36  
#N/A  
0.25  
0.74  
1.89  
0.51  
0.07

-0.25  
#N/A  
-0.16  
1.60  
0.39  
0.49  
#N/A  
-1.63  
0.86  
-0.63  
-0.23  
-0.15  
0.73  
1.09  
0.54  
-1.55  
0.51  
-3.10  
-0.17  
0.06  
0.20  
#N/A  
0.42  
-1.46  
-1.31  
-1.78  
0.34  
#N/A  
#N/A  
0.90  
-0.08  
0.13  
0.66  
0.11  
0.00  
0.42  
0.20  
-1.39  
-0.09  
0.37  
#N/A  
#N/A  
-0.70  
0.46  
-0.11  
1.01  
-0.62  
#N/A  
-1.55  
-1.66  
-0.72

0.30  
0.06  
0.80  
2.08  
3.95  
3.36  
#N/A  
#N/A  
1.41  
0.80  
-0.19  
0.52  
1.09  
0.53  
4.14  
0.33  
0.47  
-1.94  
#N/A  
0.59  
#N/A  
0.76  
#N/A  
-0.73  
0.57  
-0.01  
1.69  
0.24  
-0.42  
-0.30  
0.32  
#N/A  
0.60  
-0.08  
0.51  
0.22  
#N/A  
-0.26  
2.84  
0.04  
#N/A  
-1.26  
0.63  
-0.03  
-2.38  
0.91  
1.73  
#N/A  
0.30  
#N/A  
-0.25

#N/A  
0.46  
0.70  
#N/A  
#N/A  
0.24  
-0.04  
-0.04

The NIHMS has received the file 'Zhang-2005-Cell- Supp1.pdf' as supplementary data. The file will not appear in this PDF Receipt, but it will be linked to the web version of your manuscript.
